# Supplementary material
Source: publisher site journal article supplement (https://www.degruyterbrill.com/publication/isbn/9783110432879/downloadAsset/9783110432879_Elektronischer_Anhang_2.zip)
Supplement: Supplementary file 56 [file HeidelbergCement GB2010.pdf › Korpustexte/Korpustexte pdf/HeidelbergCement/HeidelbergCement GB2010.pdf]

2010

**HEIDELBERG**CEMENT

## Konzern in Zahlen

| Wertangaben in Mio EUR                                      | 2004   | 2005   | 2006   | 2007    | 2008   | 2009   | 2010                      |
|-------------------------------------------------------------|--------|--------|--------|---------|--------|--------|---------------------------|
| <b>Zahl der Mitarbeiter am 31. Dezember</b>                 | 42.062 | 41.260 | 40.983 | 67.916  | 60.841 | 53.302 | <b>53.437</b>             |
| <b>Gesamtabsatz</b>                                         |        |        |        |         |        |        |                           |
| Zement und Klinker in Mio t                                 | 65,2   | 68,4   | 79,7   | 87,9    | 89,0   | 79,3   | <b>78,4</b>               |
| Zuschlagstoffe in Mio t                                     | 69,5   | 77,2   | 85,8   | 179,6   | 299,5  | 239,5  | <b>239,7</b>              |
| Asphalt in Mio t                                            |        |        |        | 4,8     | 12,1   | 10,0   | <b>9,1</b>                |
| Transportbeton in Mio cbm                                   | 19,5   | 21,8   | 24,9   | 32,7    | 44,4   | 35,0   | <b>35,0</b>               |
| <b>Gewinn- und Verlustrechnung</b>                          |        |        |        |         |        |        |                           |
| Konzernumsatz gesamt                                        | 6.929  | 7.803  | 7.997  | 10.862  | 14.187 | 11.117 | <b>11.762</b>             |
| Operatives Ergebnis vor Abschreibungen (OIBD) <sup>1)</sup> | 1.243  | 1.547  | 1.890  | 2.423   | 2.946  | 2.102  | <b>2.239</b>              |
| Operatives Ergebnis <sup>1)</sup>                           | 759    | 1.051  | 1.429  | 1.850   | 2.147  | 1.317  | <b>1.430</b>              |
| Jahresüberschuss/-fehlbetrag                                | -333   | 471    | 1.026  | 2.119   | 1.920  | 168    | <b>511</b>                |
| Anteil der Gruppe                                           | -366   | 415    | 951    | 2.022   | 1.808  | 43     | <b>343</b>                |
| Dividende in EUR je Aktie                                   | 0,55   | 1,15   | 1,25   | 1,30    | 0,12   | 0,12   | <b>0,25 <sup>4)</sup></b> |
| <b>Investitionen</b>                                        |        |        |        |         |        |        |                           |
| Investitionen in Sachanlagen                                | 466    | 548    | 506    | 1.039   | 1.101  | 795    | <b>734</b>                |
| Investitionen in Finanzanlagen                              | 45     | 389    | 315    | 11.735  | 150    | 25     | <b>138</b>                |
| Investitionen gesamt                                        | 511    | 937    | 821    | 12.774  | 1.251  | 820    | <b>872</b>                |
| <b>Freier Cashflow</b>                                      |        |        |        |         |        |        |                           |
| Mittelfluss aus operativer Geschäftstätigkeit               | 937    | 795    | 1.259  | 1.911   | 1.523  | 1.164  | <b>1.144</b>              |
| Mittelfluss aus Investitionstätigkeit <sup>2)</sup>         | -309   | -747   | -665   | -10.677 | 1.113  | -539   | <b>-648</b>               |
| <b>Bilanz</b>                                               |        |        |        |         |        |        |                           |
| Eigenkapital (inkl. Anteile Fremder)                        | 3.936  | 5.058  | 5.828  | 7.519   | 8.261  | 11.003 | <b>12.884</b>             |
| Bilanzsumme                                                 | 10.716 | 11.935 | 12.318 | 29.201  | 26.288 | 25.508 | <b>27.377</b>             |
| Nettofinanzschulden <sup>3)</sup>                           | 3.668  | 3.545  | 3.081  | 14.608  | 11.566 | 8.423  | <b>8.146</b>              |
| <b>Kennzahlen</b>                                           |        |        |        |         |        |        |                           |
| OIBD-Marge                                                  | 17,9%  | 19,8%  | 23,6%  | 22,3%   | 20,8%  | 18,9%  | <b>19,0%</b>              |
| Nettofinanzschulden/Eigenkapital (Gearing) <sup>3)</sup>    | 92,7%  | 70,1%  | 52,5%  | 193,4%  | 139,8% | 76,5%  | <b>62,9%</b>              |
| Nettofinanzschulden/OIBD <sup>3)</sup>                      | 2,95x  | 2,29x  | 1,63x  | 6,03x   | 3,93x  | 4,01x  | <b>3,64x</b>              |
| Ergebnis je Aktie in EUR                                    | -3,64  | 3,74   | 8,22   | 17,11   | 14,55  | 0,30   | <b>1,83</b>               |

1) 2004-2006: Werte wurden angepaßt aufgrund der Umgliederung von Emissionsrechten und Zinsaufwendungen für Pensionen (IAS 19).

2) 2004-2008: einschließlich Minderung/Erhöhung von Anteilen an Tochtergesellschaften

3) Ohne Anpassung an IAS 32.18 b) Put-Optionen von Minderheitsgesellschaften in Höhe von 96 Mio EUR (2010), 37 Mio EUR (2009), 50 Mio EUR (2008), 86 Mio EUR (2007), 106 Mio EUR (2006)

4) Vorstand und Aufsichtsrat werden der Hauptversammlung am 5. Mai 2011 eine Dividende von 0,25 EUR je Aktie vorschlagen.

## Konzerngebiete im Überblick

| Wertangaben in Mio EUR                 | 2008   | 2009   | 2010          |
|----------------------------------------|--------|--------|---------------|
| <b>West- und Nordeuropa</b>            |        |        |               |
| Umsatz                                 | 4.936  | 3.848  | <b>3.811</b>  |
| Operatives Ergebnis vor Abschreibungen | 1.014  | 687    | <b>683</b>    |
| Investitionen in Sachanlagen           | 357    | 248    | <b>178</b>    |
| Mitarbeiter am 31. Dezember            | 15.770 | 14.640 | <b>14.302</b> |
| <b>Osteuropa-Zentralasien</b>          |        |        |               |
| Umsatz                                 | 2.046  | 1.282  | <b>1.138</b>  |
| Operatives Ergebnis vor Abschreibungen | 718    | 361    | <b>299</b>    |
| Investitionen in Sachanlagen           | 321    | 270    | <b>202</b>    |
| Mitarbeiter am 31. Dezember            | 11.556 | 9.481  | <b>9.959</b>  |
| <b>Nordamerika</b>                     |        |        |               |
| Umsatz                                 | 3.958  | 2.892  | <b>3.033</b>  |
| Operatives Ergebnis vor Abschreibungen | 676    | 340    | <b>448</b>    |
| Investitionen in Sachanlagen           | 199    | 152    | <b>146</b>    |
| Mitarbeiter am 31. Dezember            | 15.739 | 12.601 | <b>11.899</b> |
| <b>Asien-Pazifik</b>                   |        |        |               |
| Umsatz                                 | 2.177  | 2.211  | <b>2.609</b>  |
| Operatives Ergebnis vor Abschreibungen | 462    | 612    | <b>718</b>    |
| Investitionen in Sachanlagen           | 161    | 96     | <b>174</b>    |
| Mitarbeiter am 31. Dezember            | 15.044 | 14.030 | <b>13.682</b> |
| <b>Afrika-Mittelmeerraum</b>           |        |        |               |
| Umsatz                                 | 974    | 837    | <b>938</b>    |
| Operatives Ergebnis vor Abschreibungen | 182    | 157    | <b>156</b>    |
| Investitionen in Sachanlagen           | 61     | 28     | <b>34</b>     |
| Mitarbeiter am 31. Dezember            | 2.680  | 2.499  | <b>3.539</b>  |
| <b>Konzernservice</b>                  |        |        |               |
| Umsatz                                 | 701    | 475    | <b>709</b>    |
| Operatives Ergebnis vor Abschreibungen | 22     | 30     | <b>20</b>     |
| Investitionen in Sachanlagen           | 2      |        |               |
| Mitarbeiter am 31. Dezember            | 52     | 51     | <b>55</b>     |



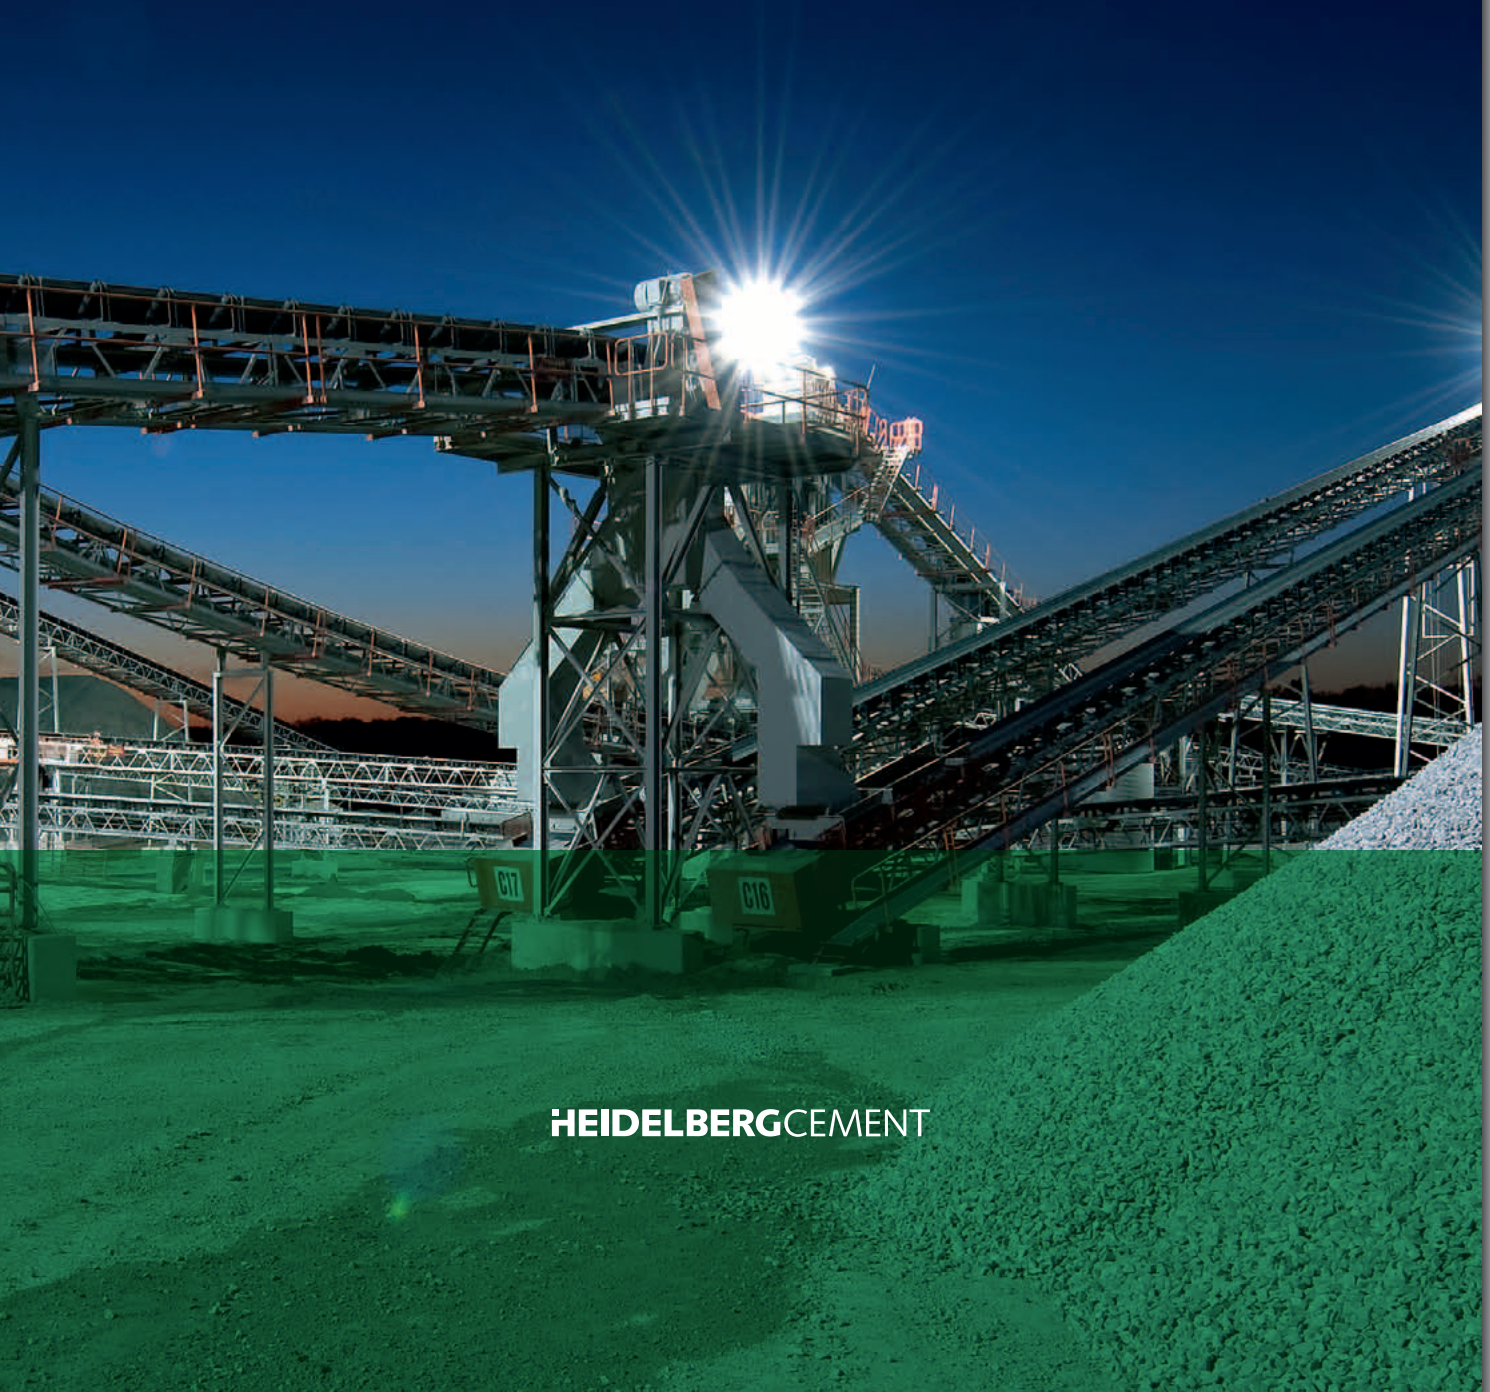

**HEIDELBERG**CEMENT

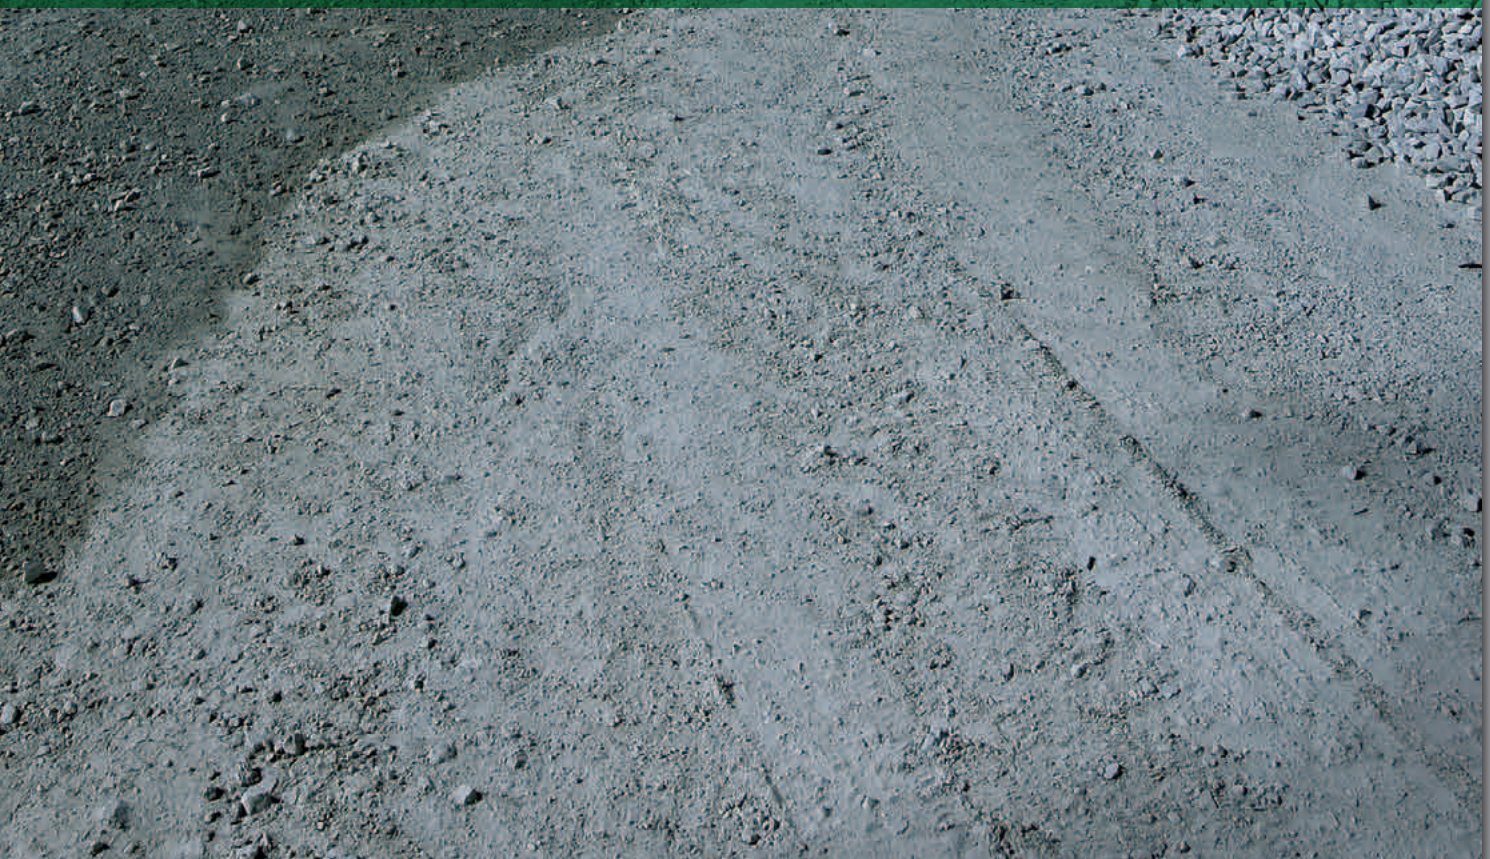



Weltmarktführer bei Sand und Kies, operative Exzellenz, nah am Kunden, erfolgreiche Refinanzierung, leistungsorientierte Mitarbeiter: **HeidelbergCement** ist gut gerüstet für weiteres Wachstum und eine erfolgreiche Zukunft.

# Jahresrückblick 2010

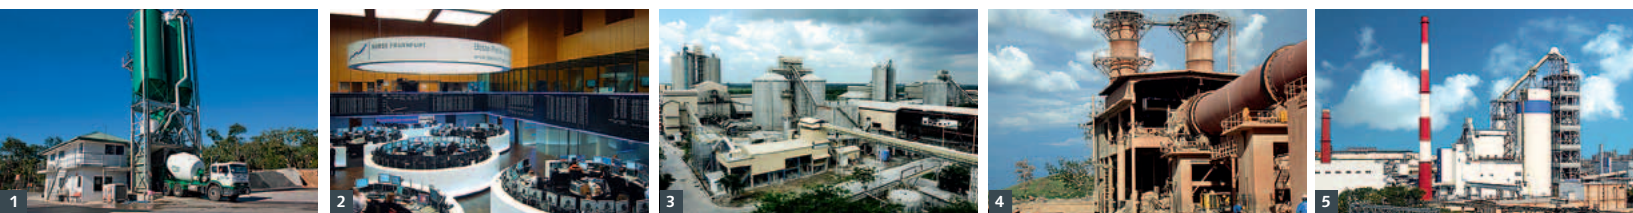

## **HeidelbergCement treibt Rückzahlung des Kredits vom Juni 2009 voran**

Januar – Aus der Emission von zwei Euroanleihen an institutionelle Investoren im In- und Ausland fließen dem Unternehmen insgesamt 1,4 Mrd EUR zu. Die Erlöse werden ausschließlich zur Rückzahlung des syndizierten Kredits verwendet.

## **Sicherung der Liquidität bis Ende 2013**

April – Abschluss einer neuen syndizierten Kreditlinie über 3 Mrd EUR mit 17 Banken und einer Laufzeit bis Ende 2013. Damit werden die verbliebenen Verbindlichkeiten aus der im Juni 2009 mit 60 Banken geschlossenen Kreditvereinbarung abgelöst. Die neue Kreditlinie dient vor allem als Liquiditätsreserve.

## **Pioneer North Queensland in Australien vollständig erworben (1)**

Mai – Mit dem Erwerb der restlichen 50% an Pioneer North Queensland festigt HeidelbergCement seine Marktstellung in Australien. Das Unternehmen betreibt zwei Sandgruben, zwei Hartgesteinsteinsbrüche, ein Asphaltwerk und ein Transportbetonwerk.

## **Ausbau der Zementkapazität in Afrika**

Mai – Vereinbarung mit IFC, einem Mitglied der Weltbank-Gruppe, und deren Finanzpartnern, um die Infrastruktur in den afrikanischen Ländern südlich der Sahara durch Erhöhung der heimischen Zementkapazität auszubauen. IFC erwirbt eine Minderheitsbeteiligung an unserem Afrikageschäft; im Gegenzug bauen wir die Zementkapazitäten in Liberia, Ghana und weiteren Ländern aus.

## **HeidelbergCement im DAX (2)**

Juni – Als erstes deutsches Unternehmen im Bau- und Baustoffsektor wird HeidelbergCement in den DAX aufgenommen. Das Unternehmen liegt zum Zeitpunkt der Aufnahme nach seiner Marktkapitalisierung und nach Börsenumsatz auf Platz 22.

## **Zementmahlkapazität in Indonesien erweitert (3)**

August – Mit der Inbetriebnahme von zwei neuen Zementmühlen im Werk Cirebon steigt die Zementkapazität von Indocement um 1,5 Mio t auf insgesamt 18,6 Mio t. Der Bau einer weiteren Zementmahanlage am Standort Citeureup mit 2 Mio t Kapazität bis Anfang 2013 ist geplant.

## **Afrikageschäft auf Demokratische Republik Kongo ausgedehnt (4)**

September – HeidelbergCement erwirbt die Mehrheit an drei Zementwerken. Eines liegt in der Nähe der Hauptstadt Kinshasa, die beiden anderen im Osten des Landes. Die Zementkapazität von insgesamt über 500.000 t wollen wir in den nächsten Jahren auf über 1,4 Mio t erhöhen.

## **Mehrheit an Zementwerk in der russischen Republik Baschkortostan (5)**

Oktober – Das Unternehmen CJSC "Construction Materials", rund 150 km südlich von Ufa gelegen, betreibt ein Zementwerk mit einer Kapazität von 2 Mio t und 600 Mitarbeitern. Das moderne Werk befindet sich in einer der wichtigsten Investitionsgegenden Russlands.

# Inhalt

1

## An unsere Aktionäre

- 22 Brief an die Aktionäre
- 26 Bericht des Aufsichtsrats
- 32 Vorstand
- 34 HeidelbergCement am Kapitalmarkt

2

## Zusammengefasster Lagebericht des HeidelbergCement Konzerns und der HeidelbergCement AG

- 42 Kernaktivitäten und Organisationsstruktur
- 43 Strategie, Unternehmenssteuerung und Ziele
- 46 Geschäftsverlauf 2010
- 78 Weitere Angaben
- 83 Risikobericht
- 96 Nachhaltigkeit bei HeidelbergCement
- 98 Mitarbeiter und Gesellschaft
- 104 Umweltvorsorge
- 106 Forschung und Technik
- 111 Ausblick

3

## Corporate Governance<sup>1)</sup>

- 122 Erklärung zur Unternehmensführung
- 128 Vergütungsbericht
- 137 Organe der Gesellschaft

4

## HeidelbergCement bilanziert

- 145 Gewinn- und Verlustrechnung des Konzerns
- 146 Gesamtergebnisrechnung des Konzerns
- 147 Kapitalflussrechnung des Konzerns
- 148 Bilanz des Konzerns
- 150 Eigenkapitalveränderungsrechnung des Konzerns
- 152 Segmentberichterstattung
- 154 Anhang des Konzerns
- 228 Bericht des Abschlussprüfers
- 229 Versicherung der gesetzlichen Vertreter

5

## Weitere Informationen

- 232 Leiter Konzernfunktionen und Länderverantwortliche
- 234 Glossar und Stichwortverzeichnis
- 236 Impressum
- Zementkapazitäten und Zuschlagstoffreserven (Umschlag)

<sup>1)</sup> Teil des zusammengefassten Lageberichts des HeidelbergCement Konzerns und der HeidelbergCement AG



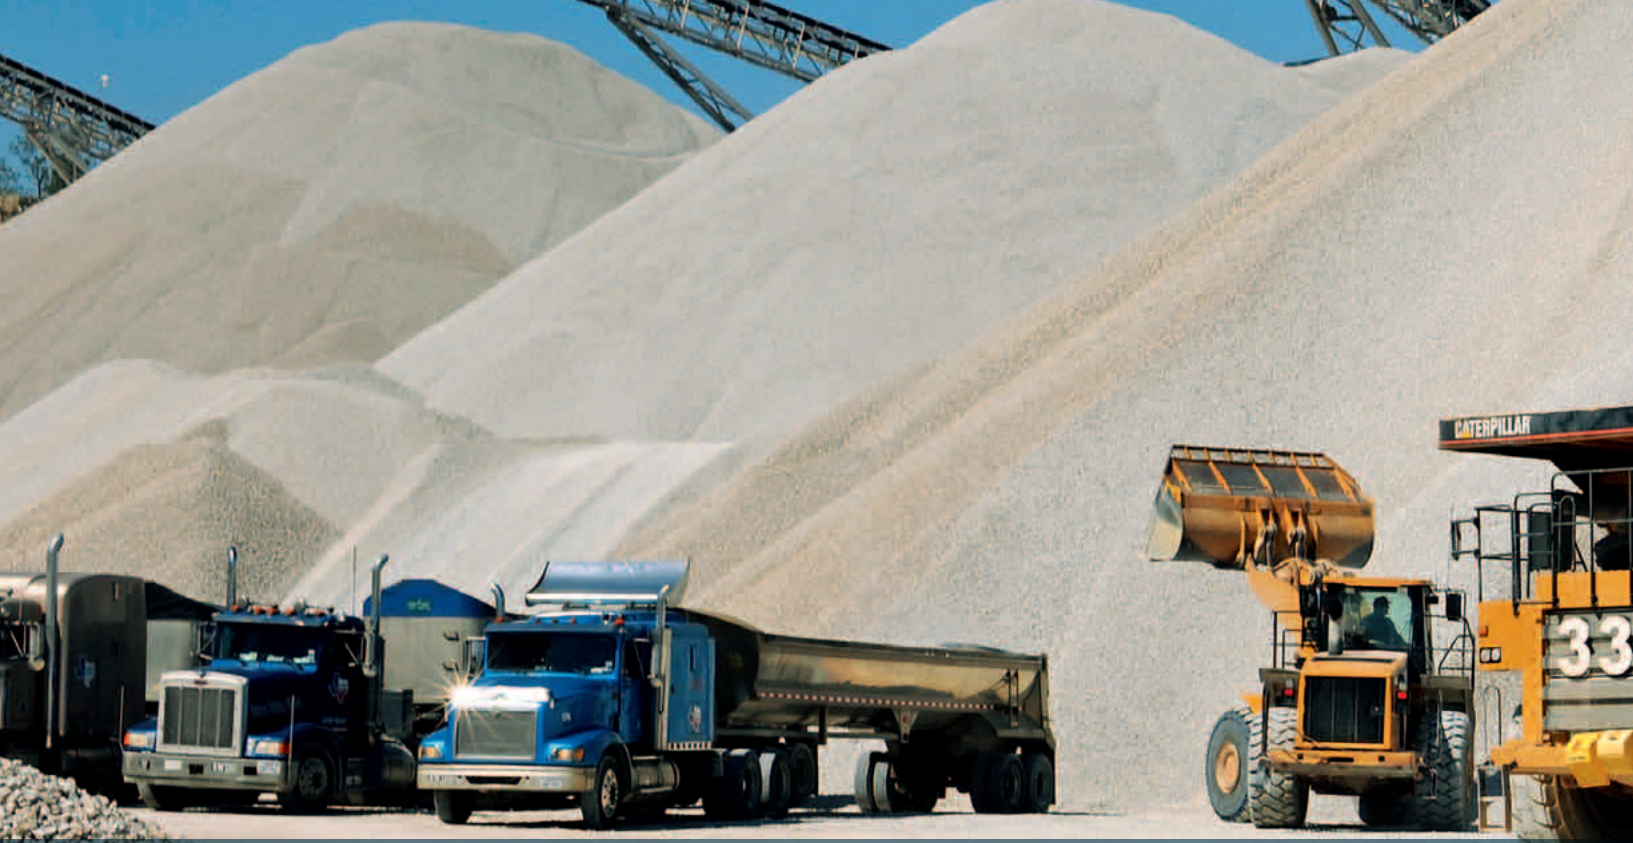

Wir sind die Nr. 1 weltweit  
bei Sand, Kies und  
Hartgestein

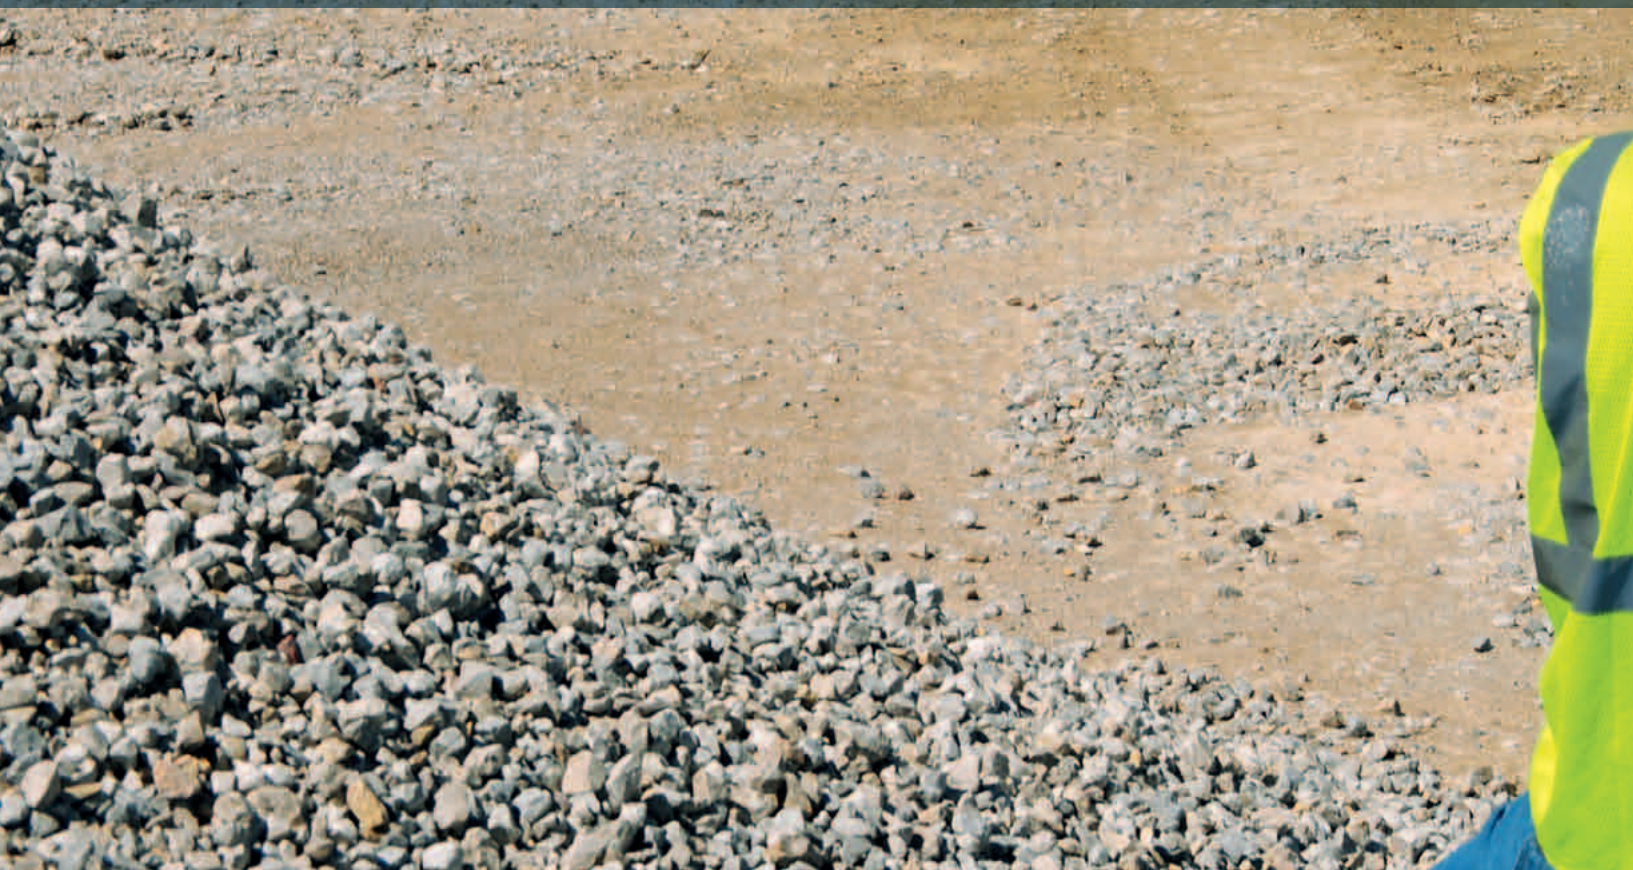



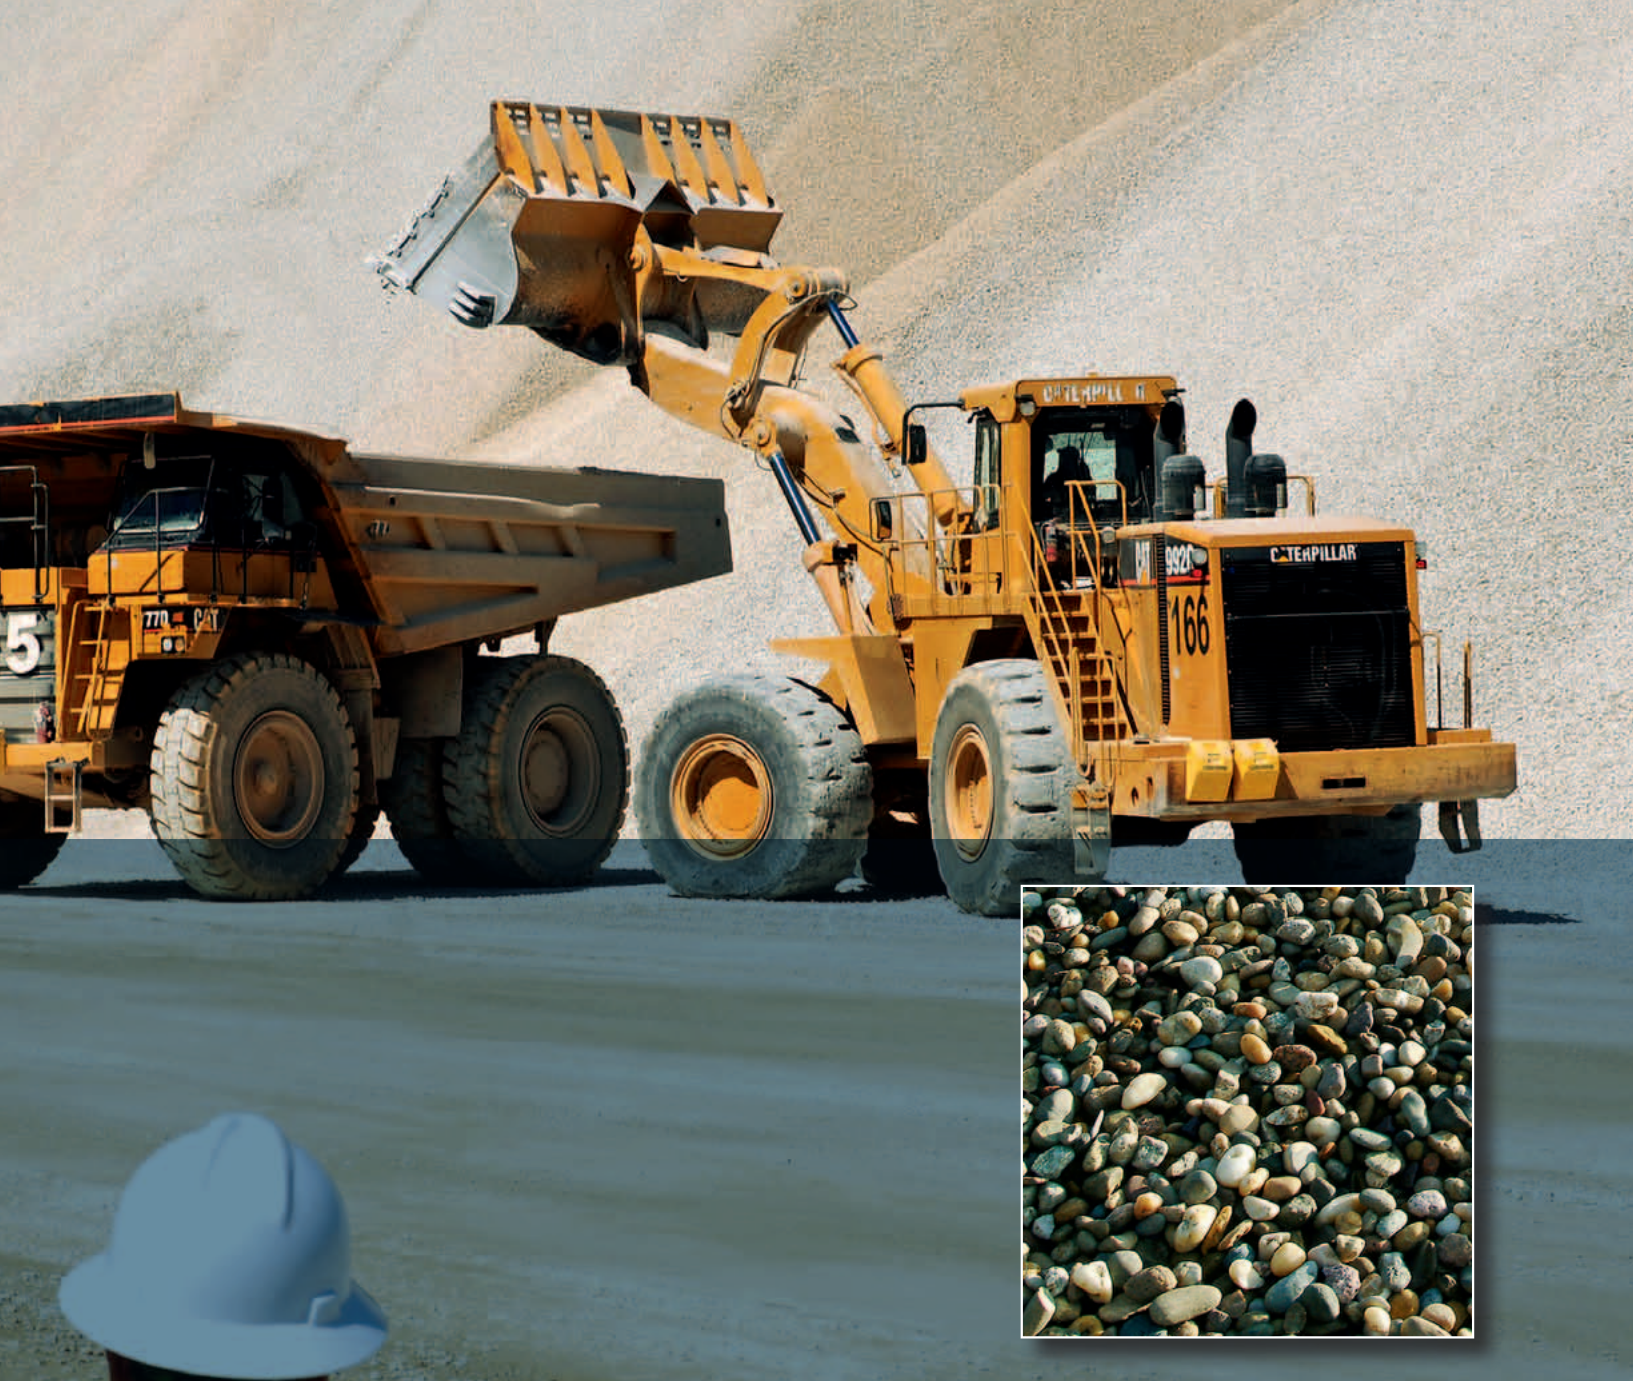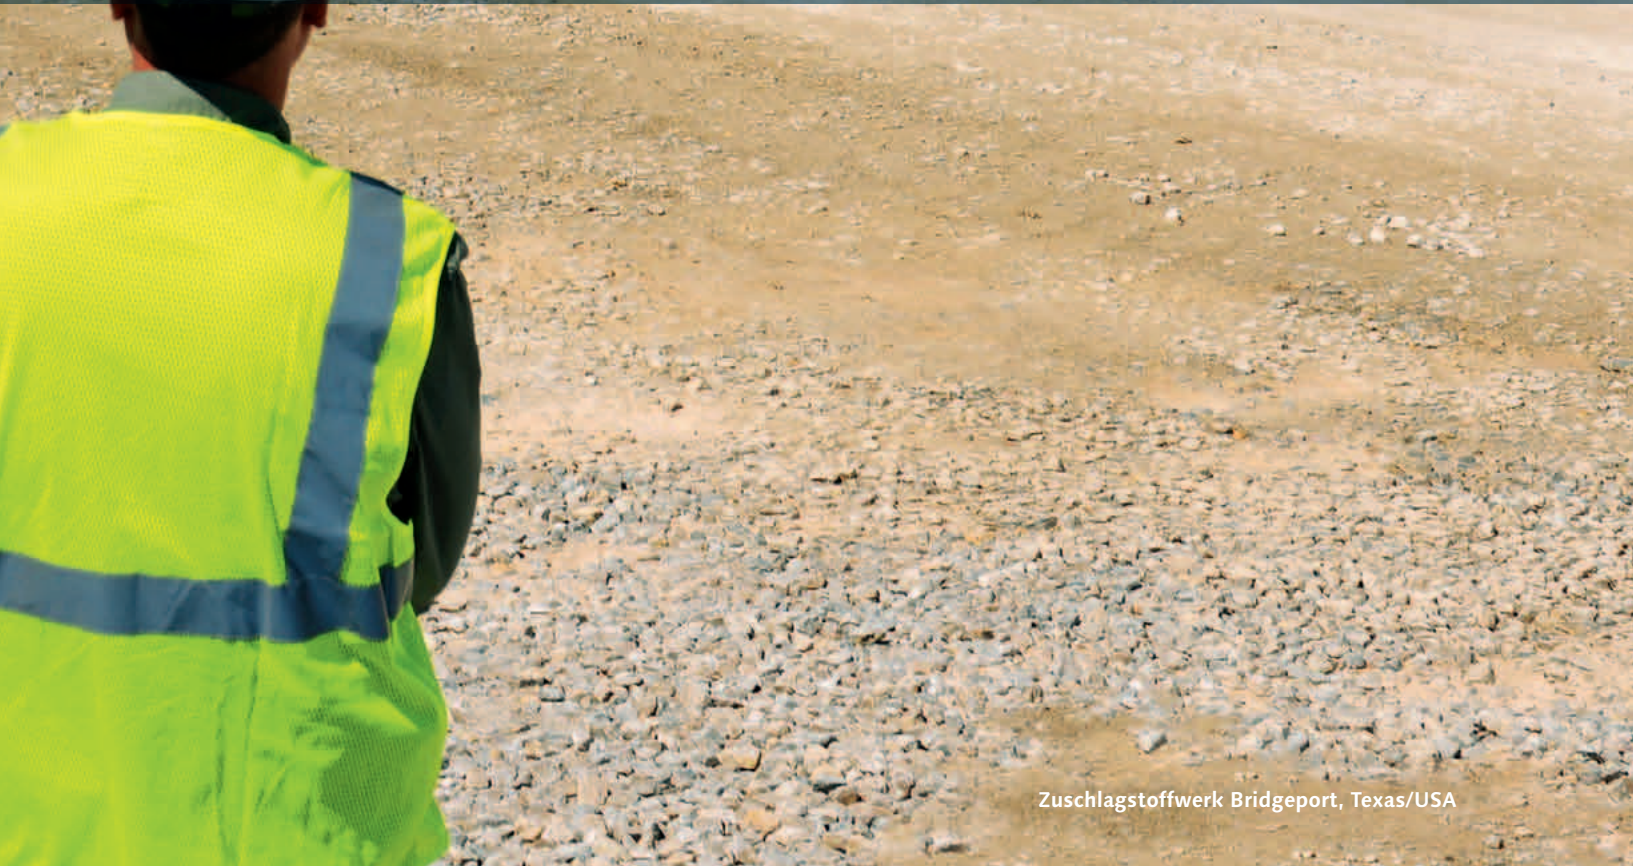





Wir investieren  
in die Zukunft –  
Zement für  
Wachstumsmärkte



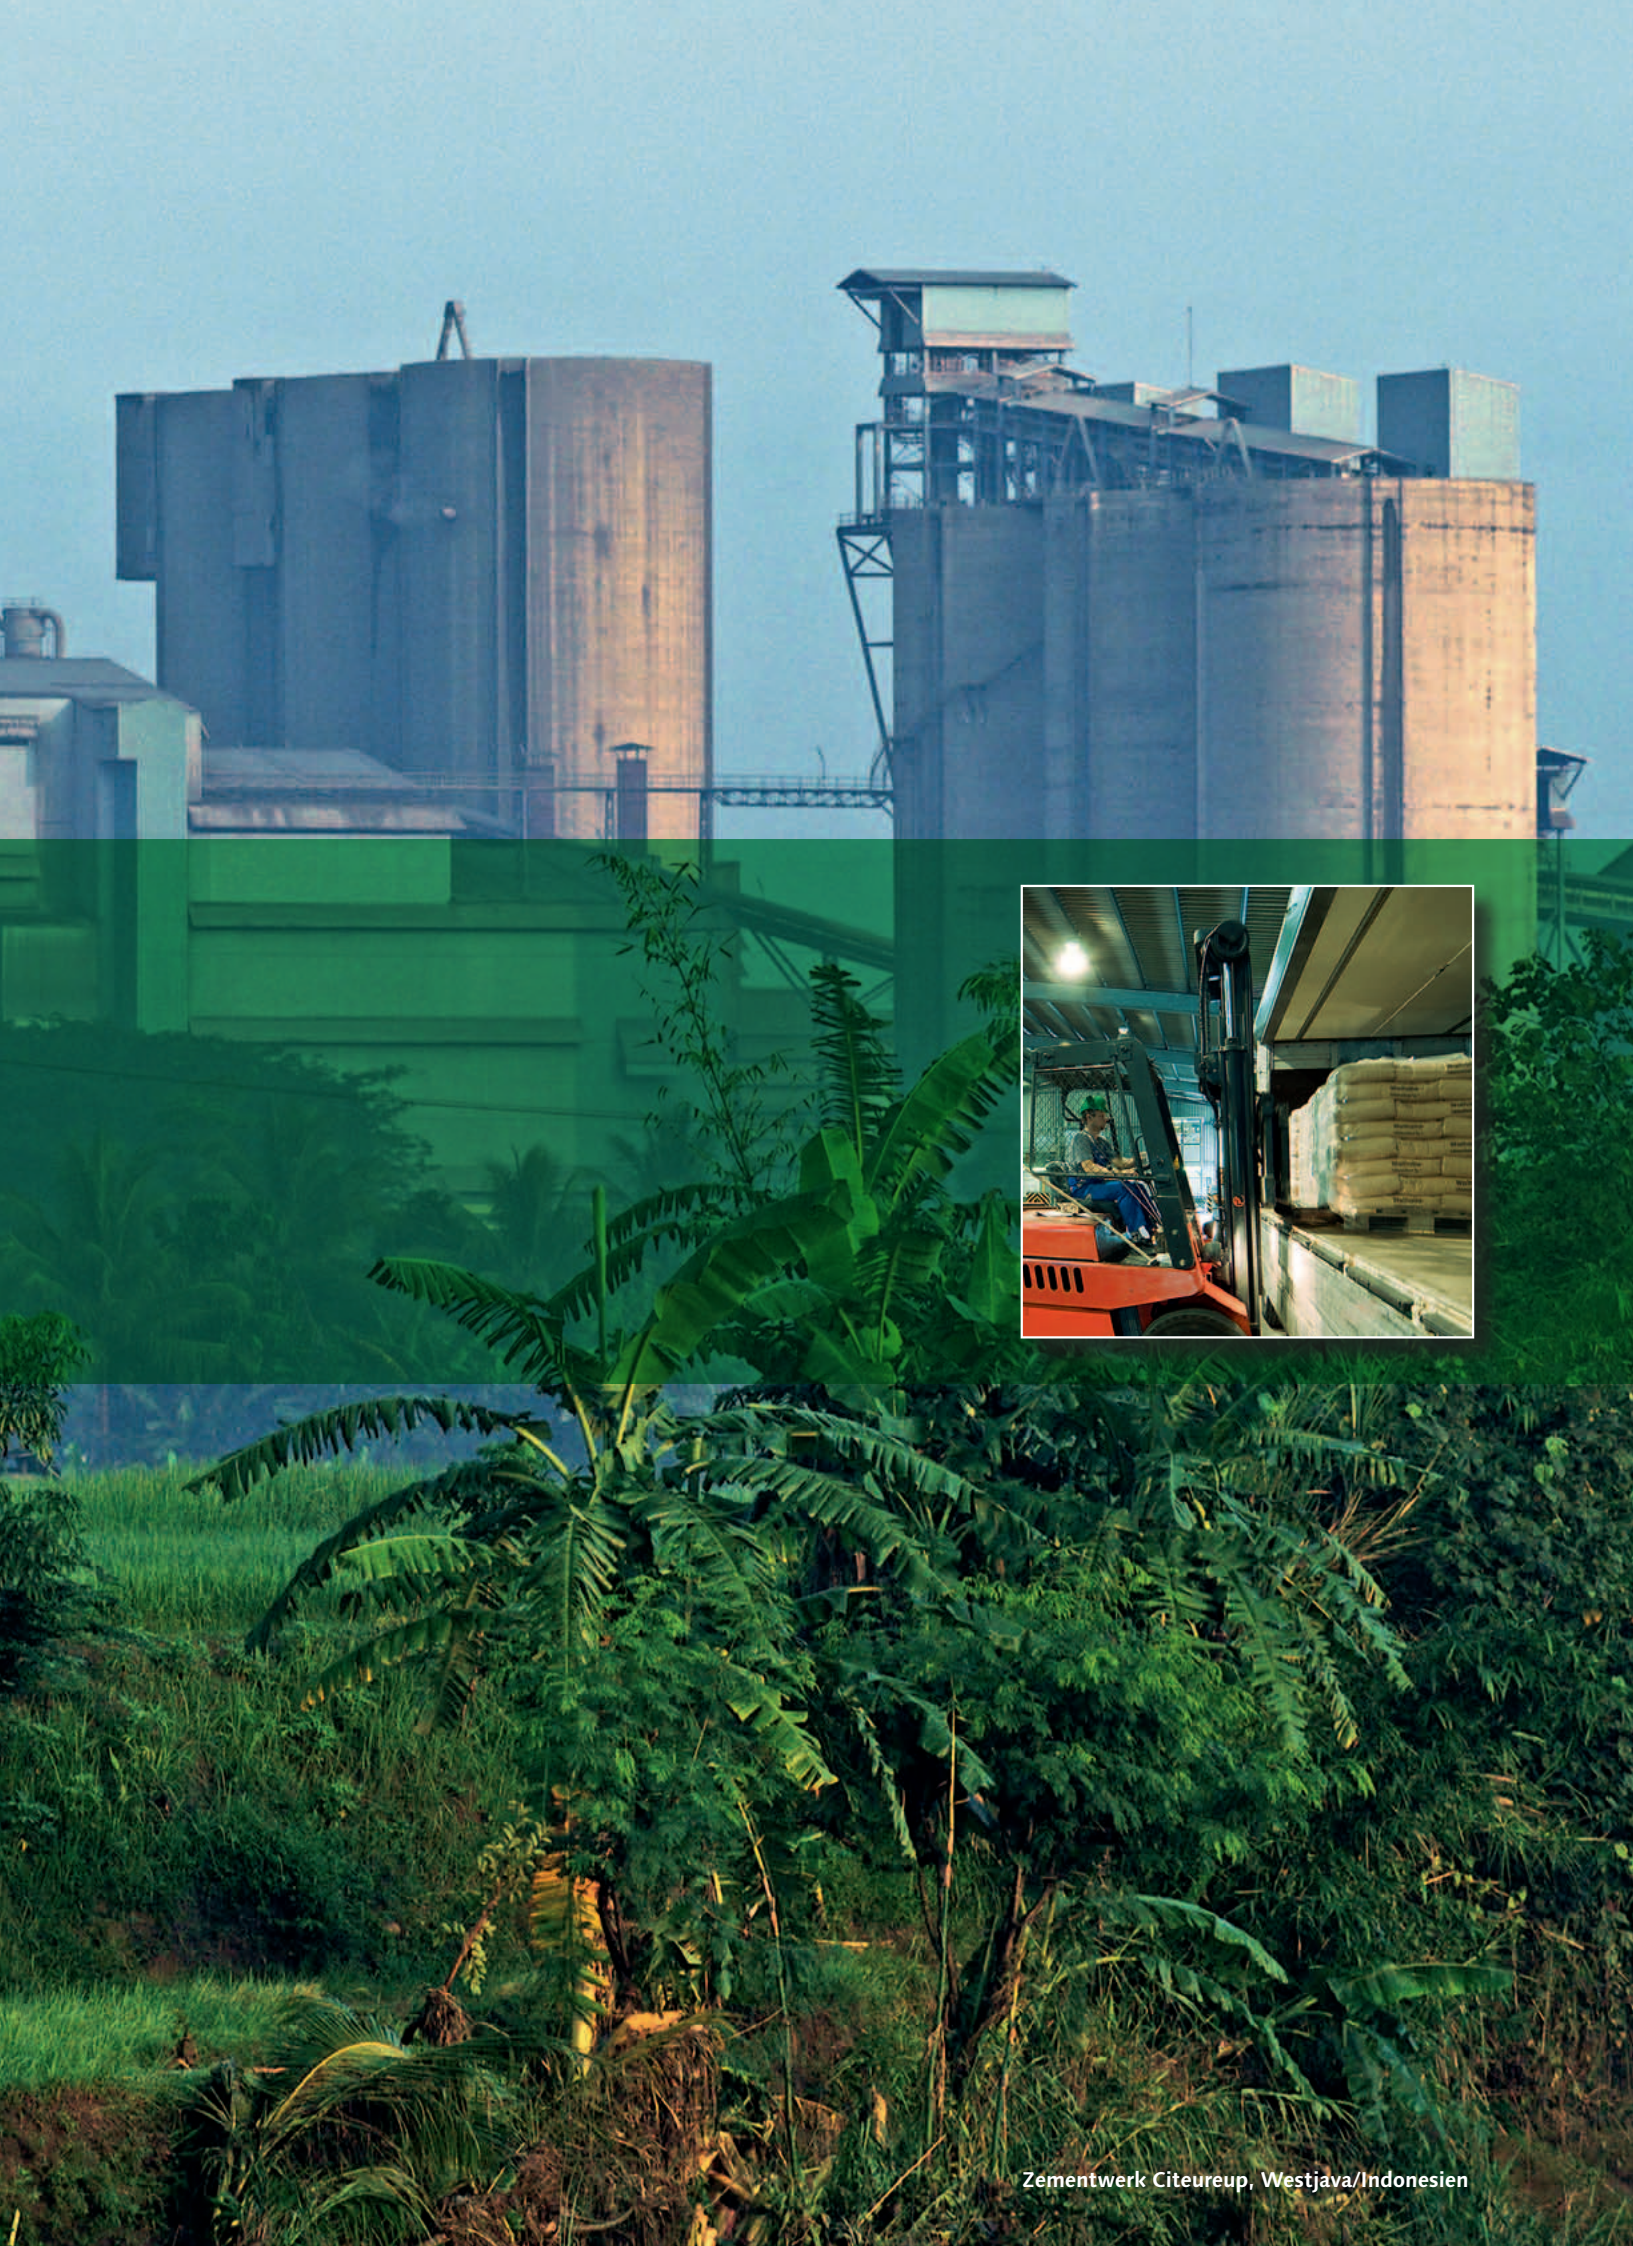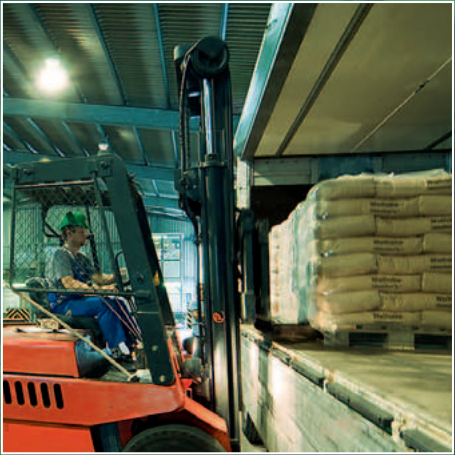

Zementwerk Citeureup, Westjava/Indonesien





Wir sind ein starkes  
Team hervorragender  
Fachleute – regional  
und international



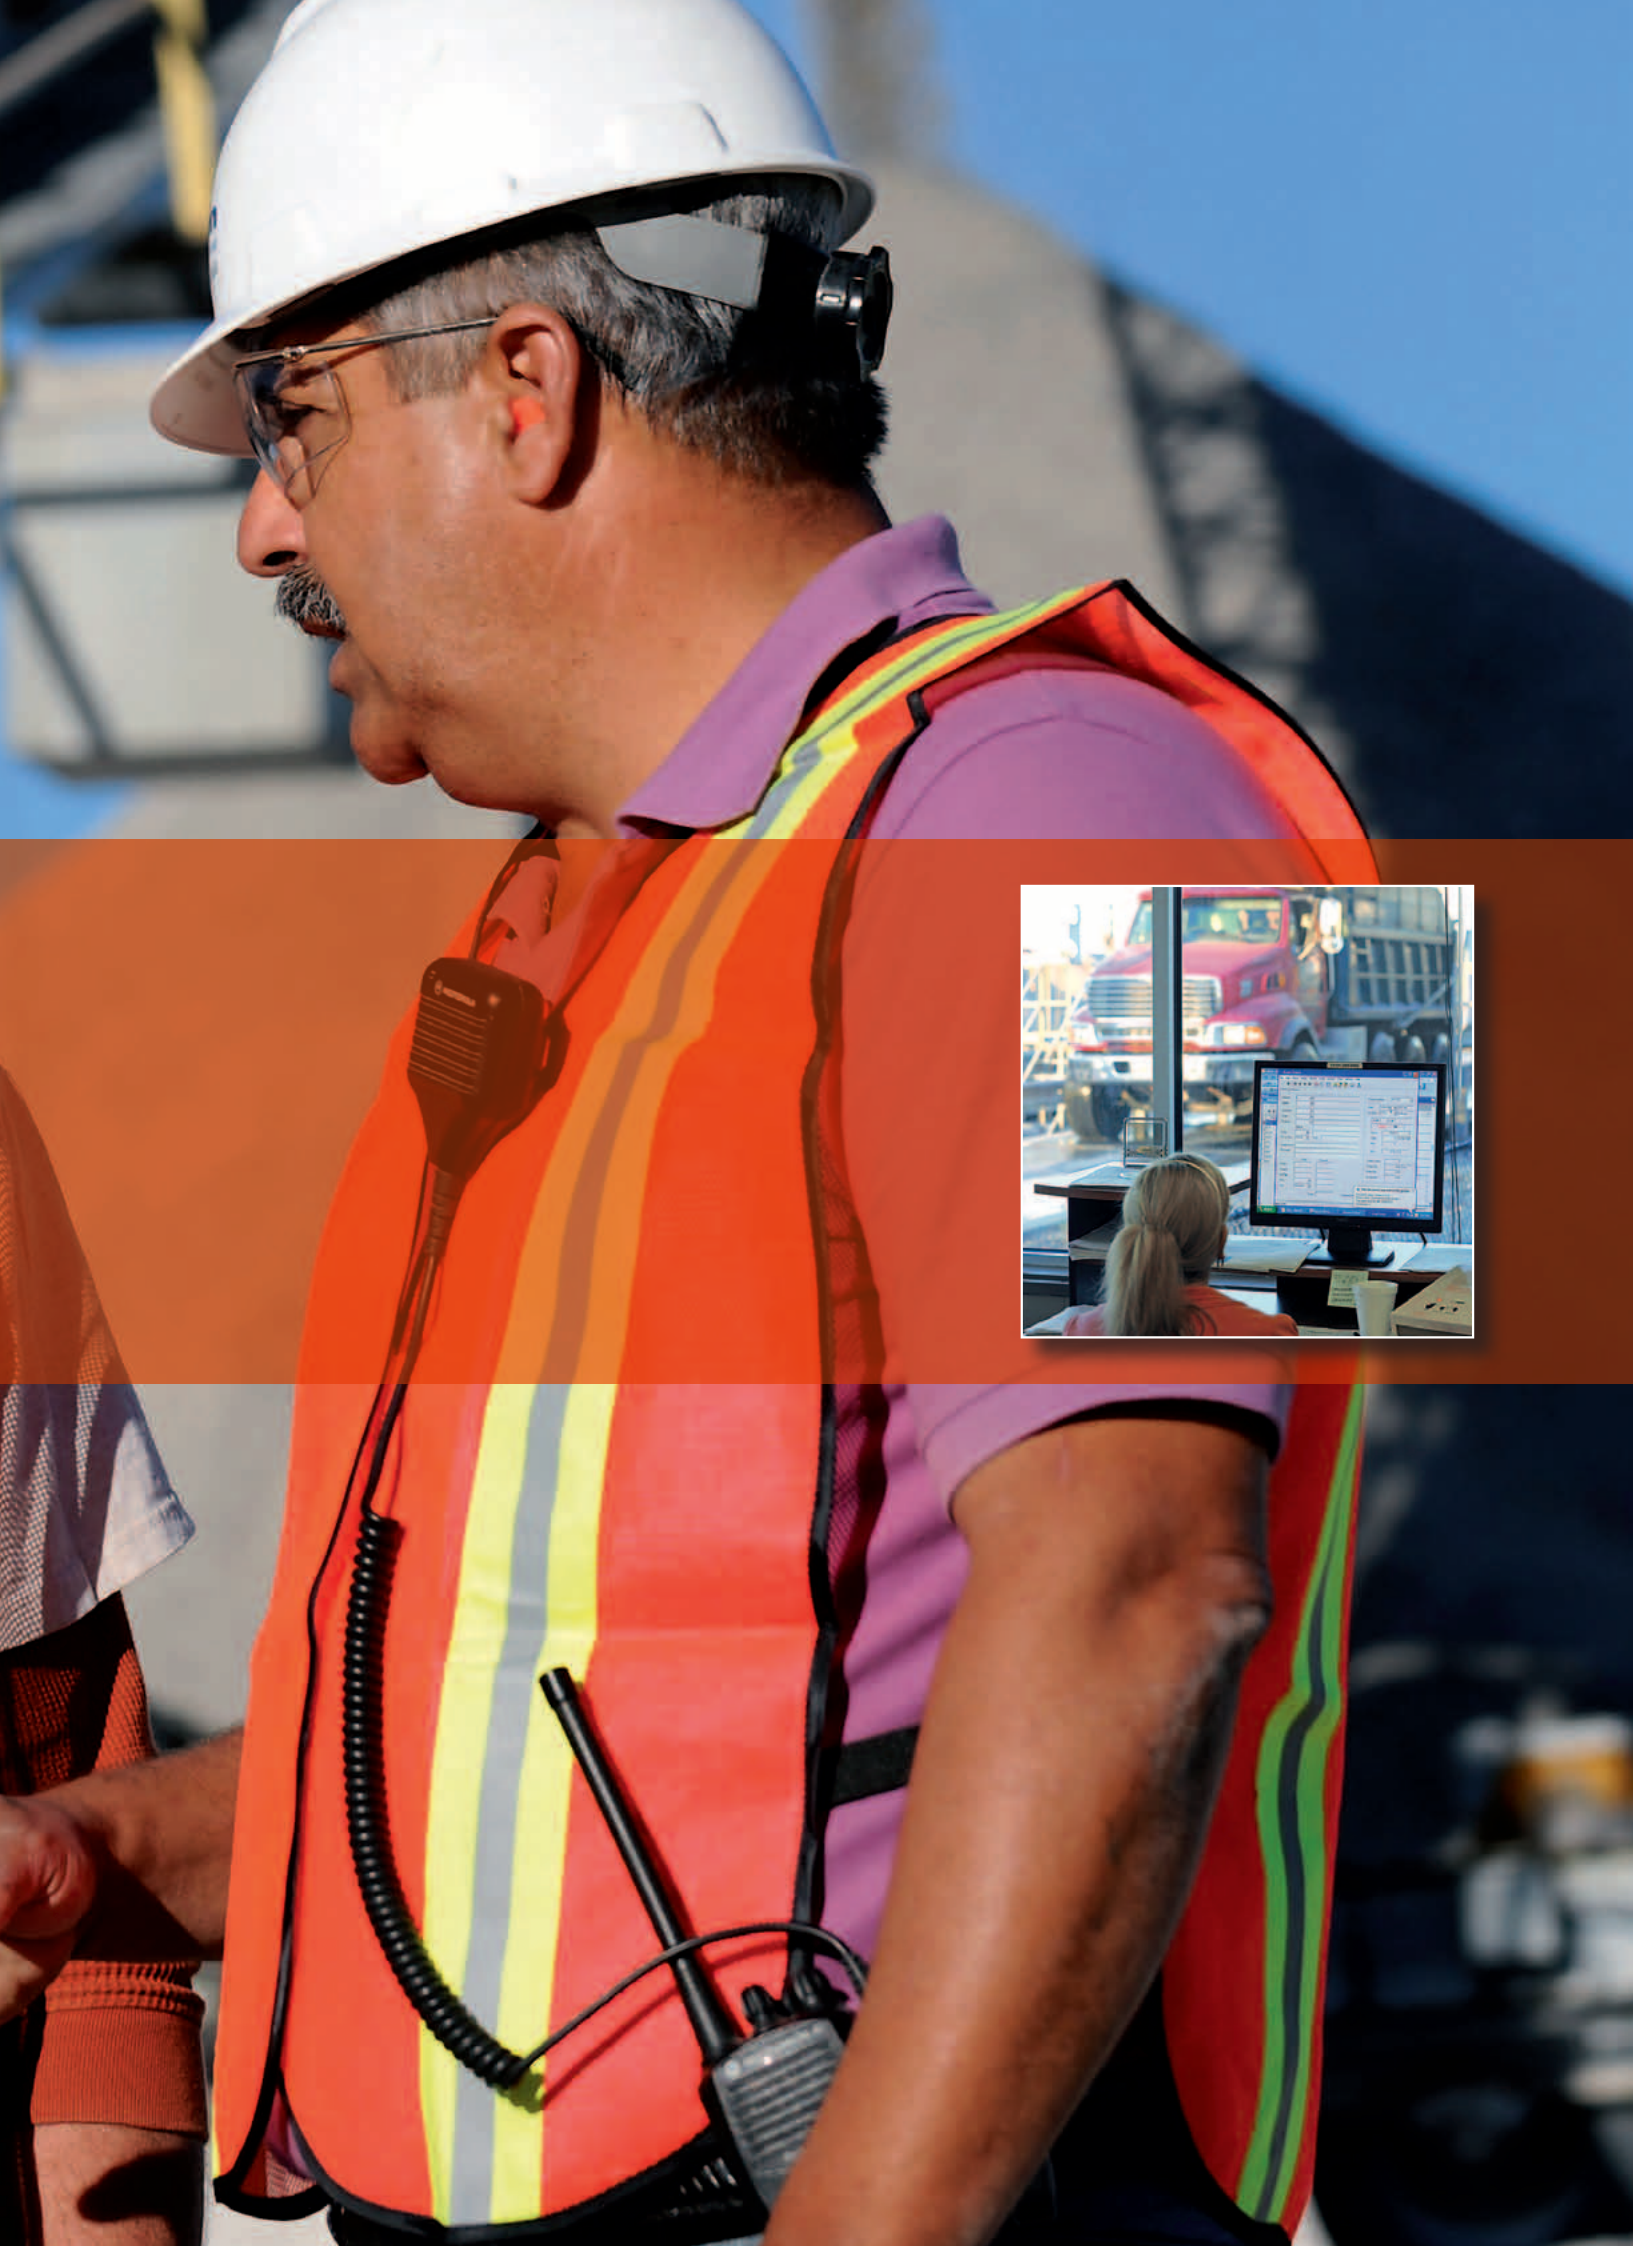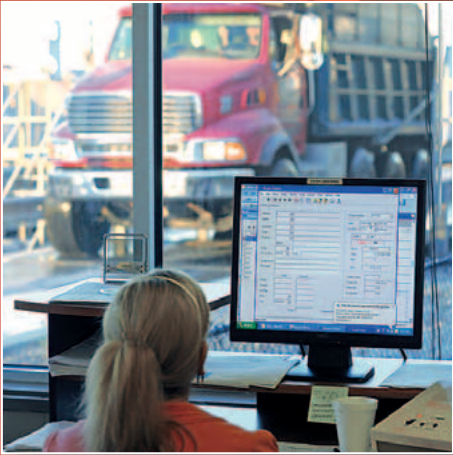

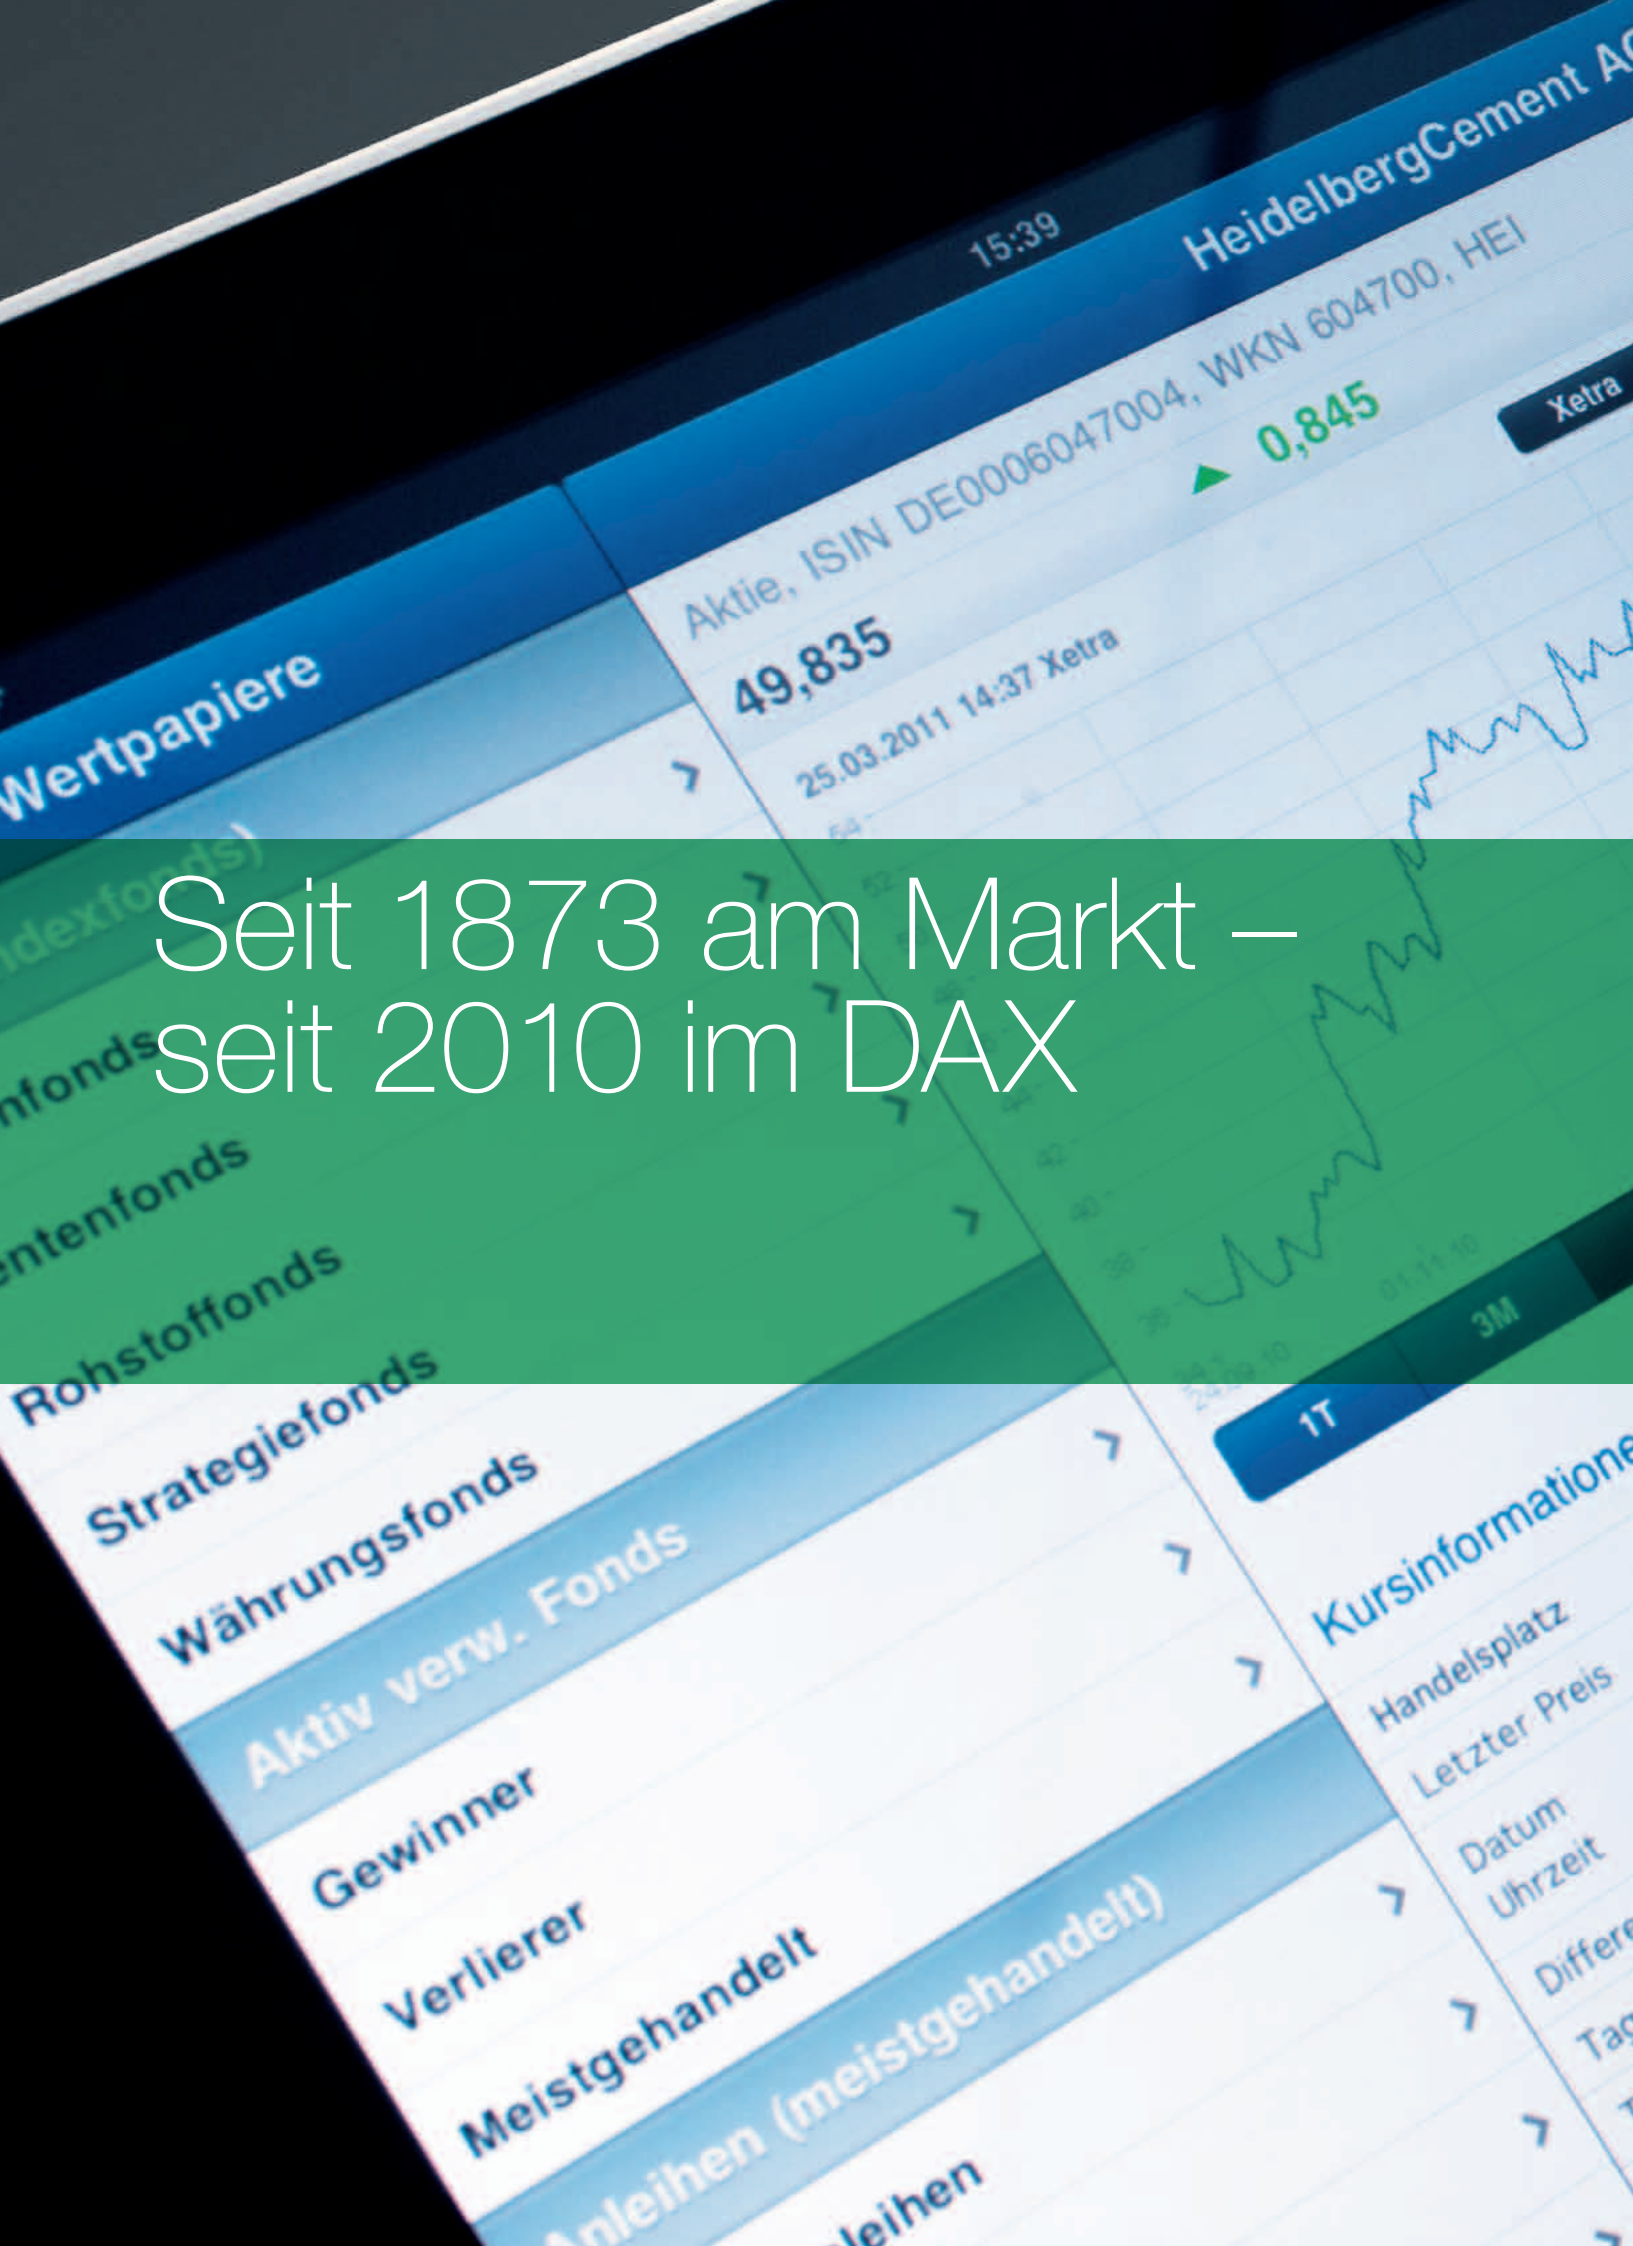

Seit 1873 am Markt –  
seit 2010 im DAX



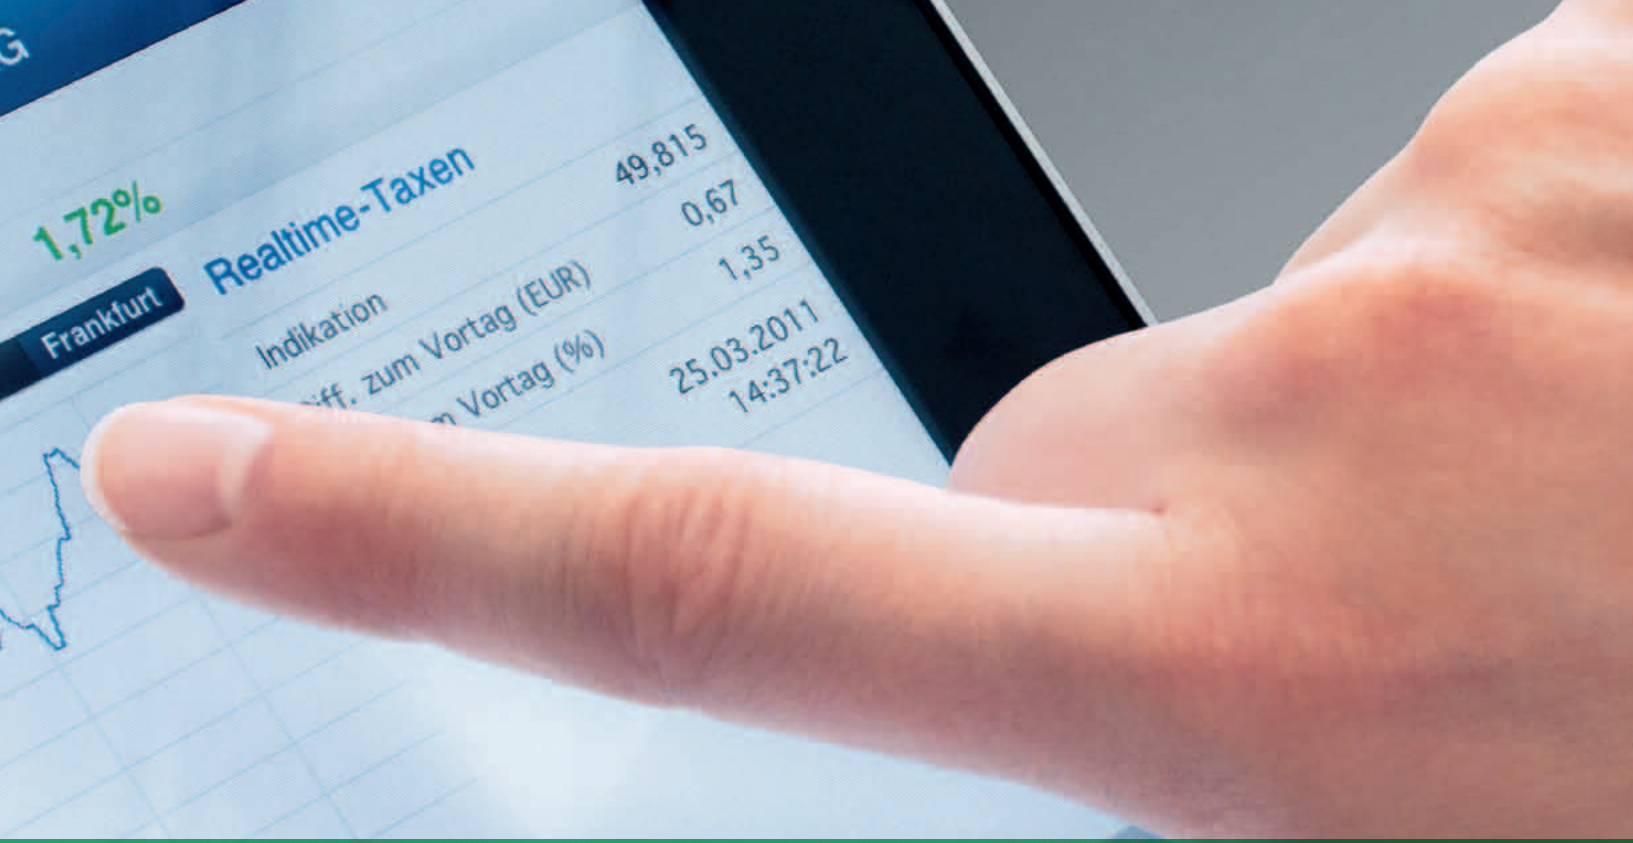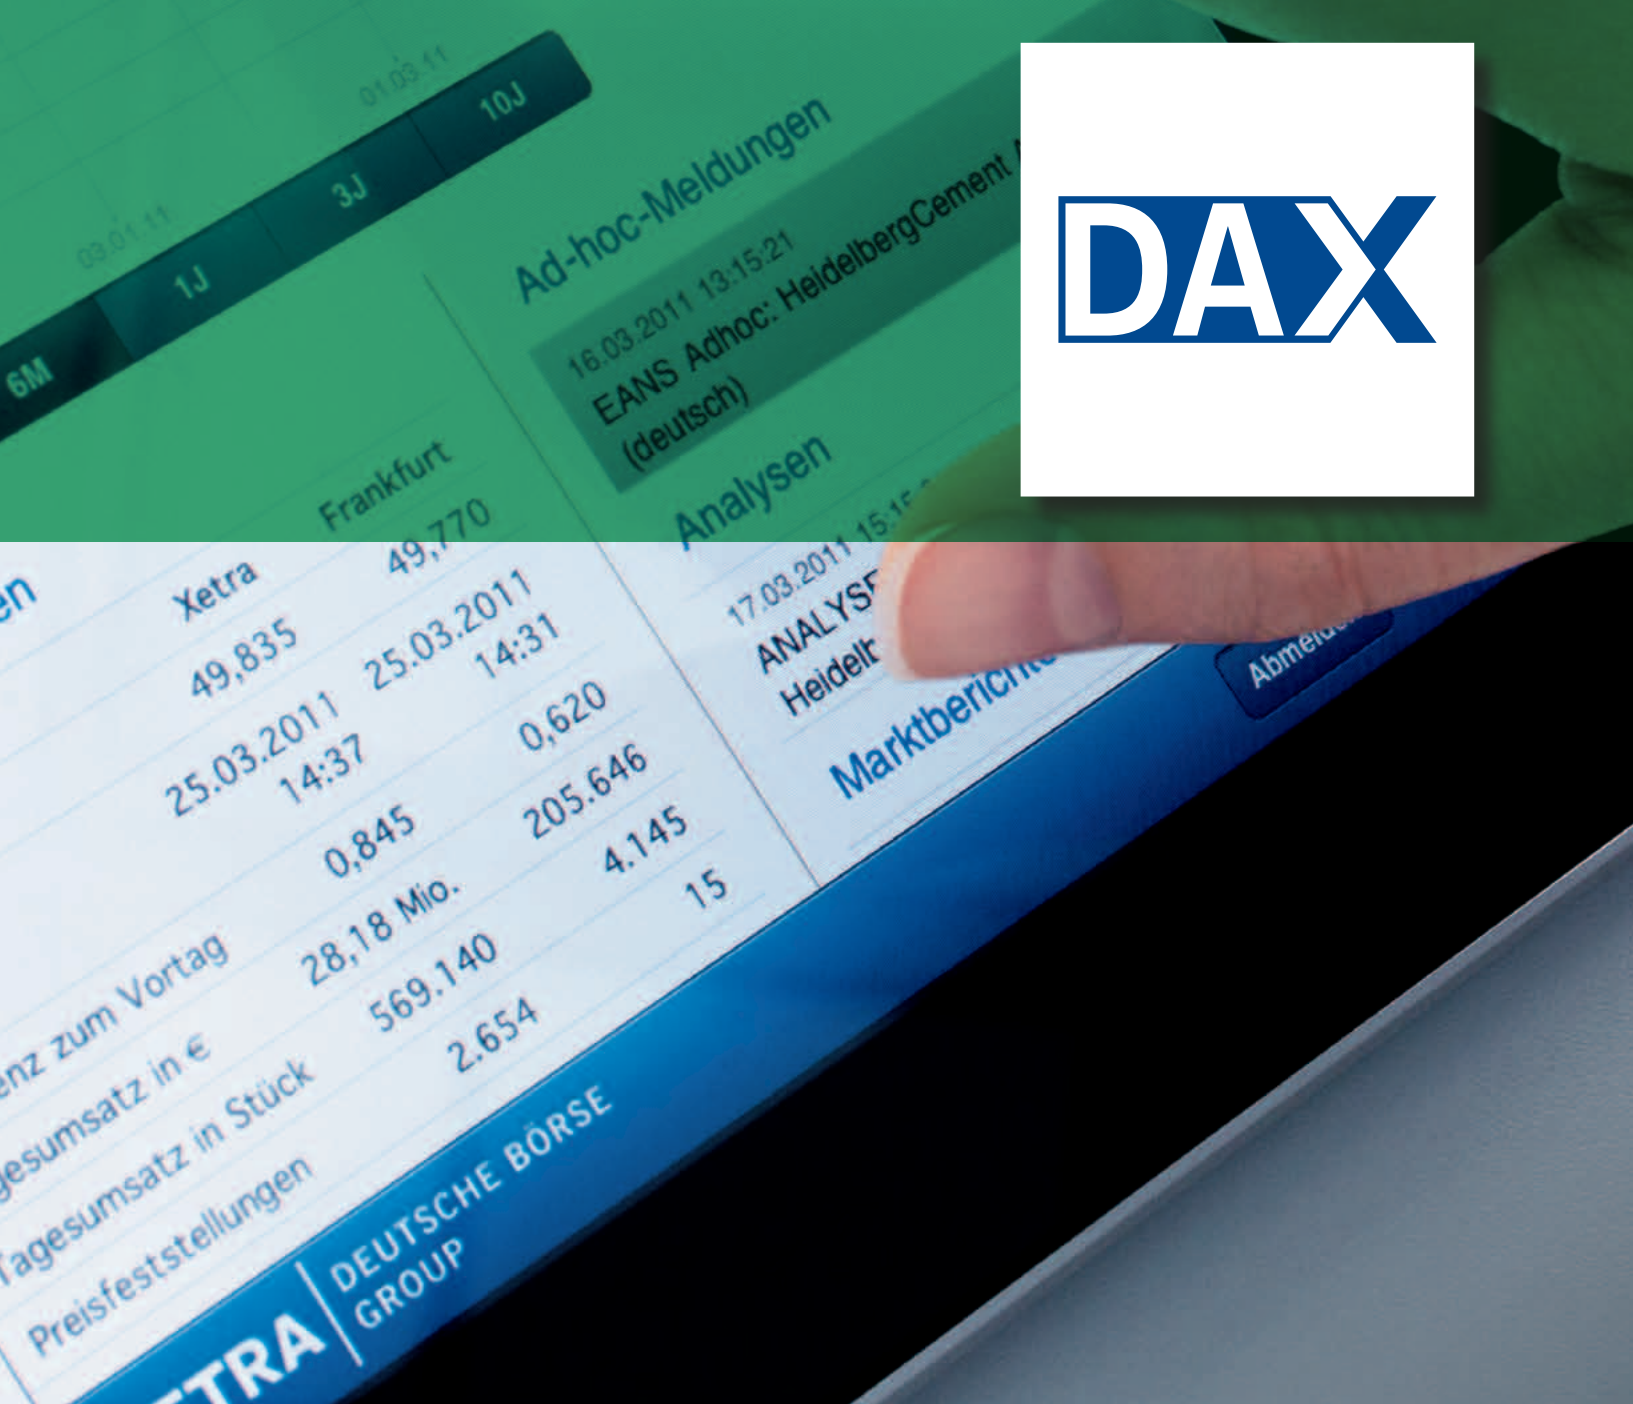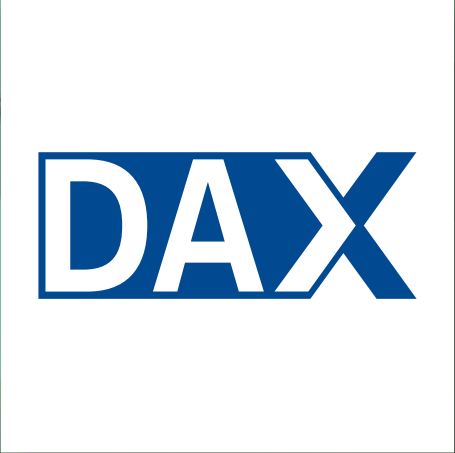



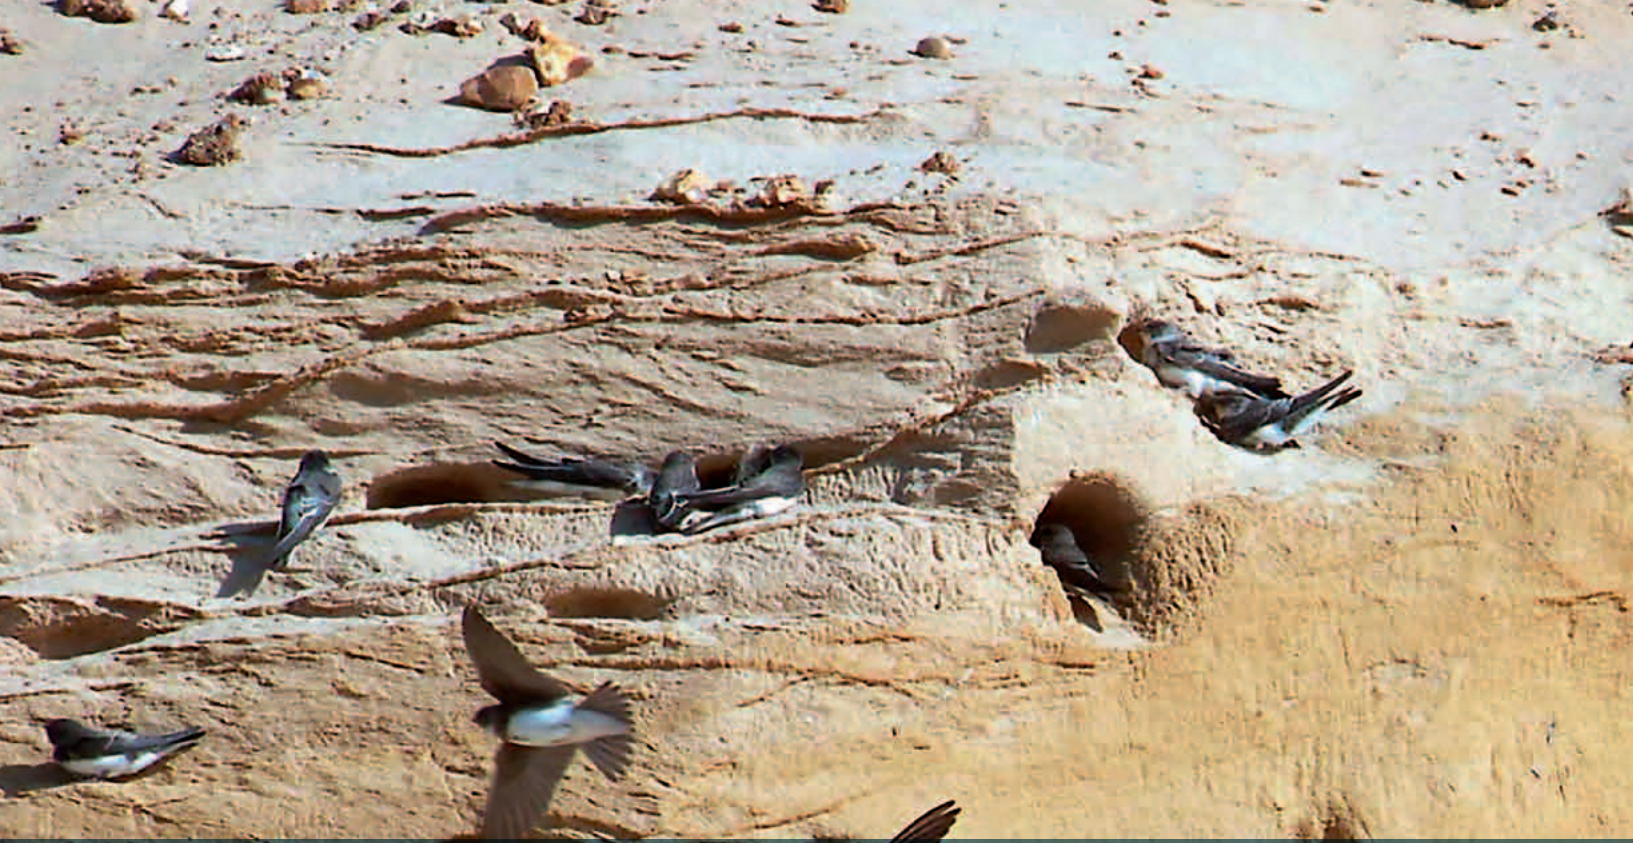

Wir reden nicht nur  
über Biodiversität –  
in unseren Steinbrüchen  
ist sie Alltag

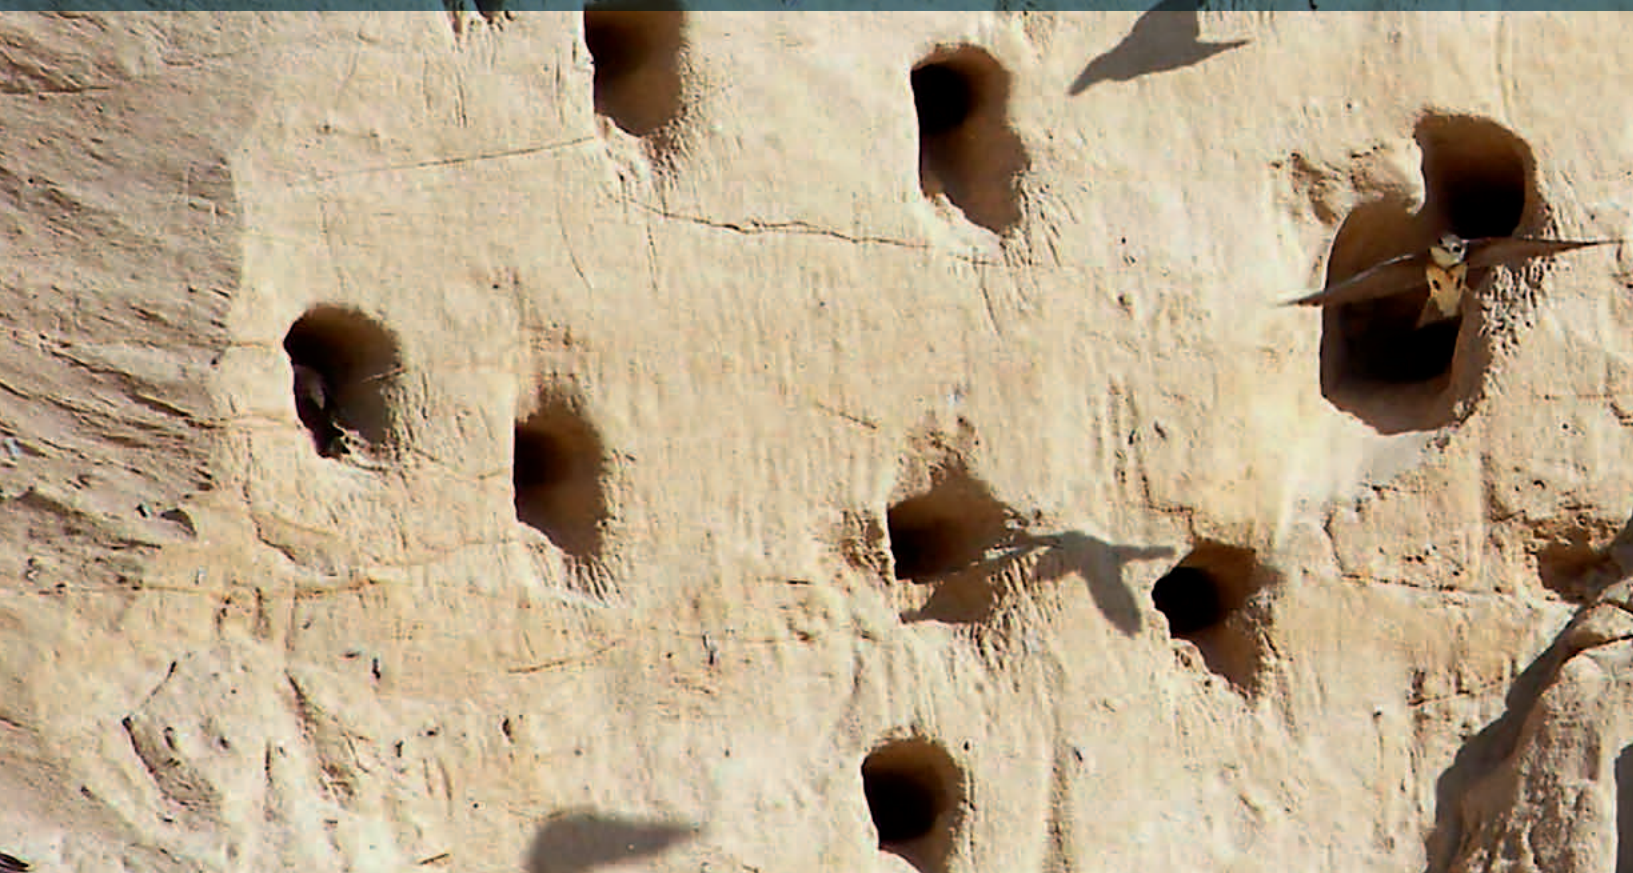



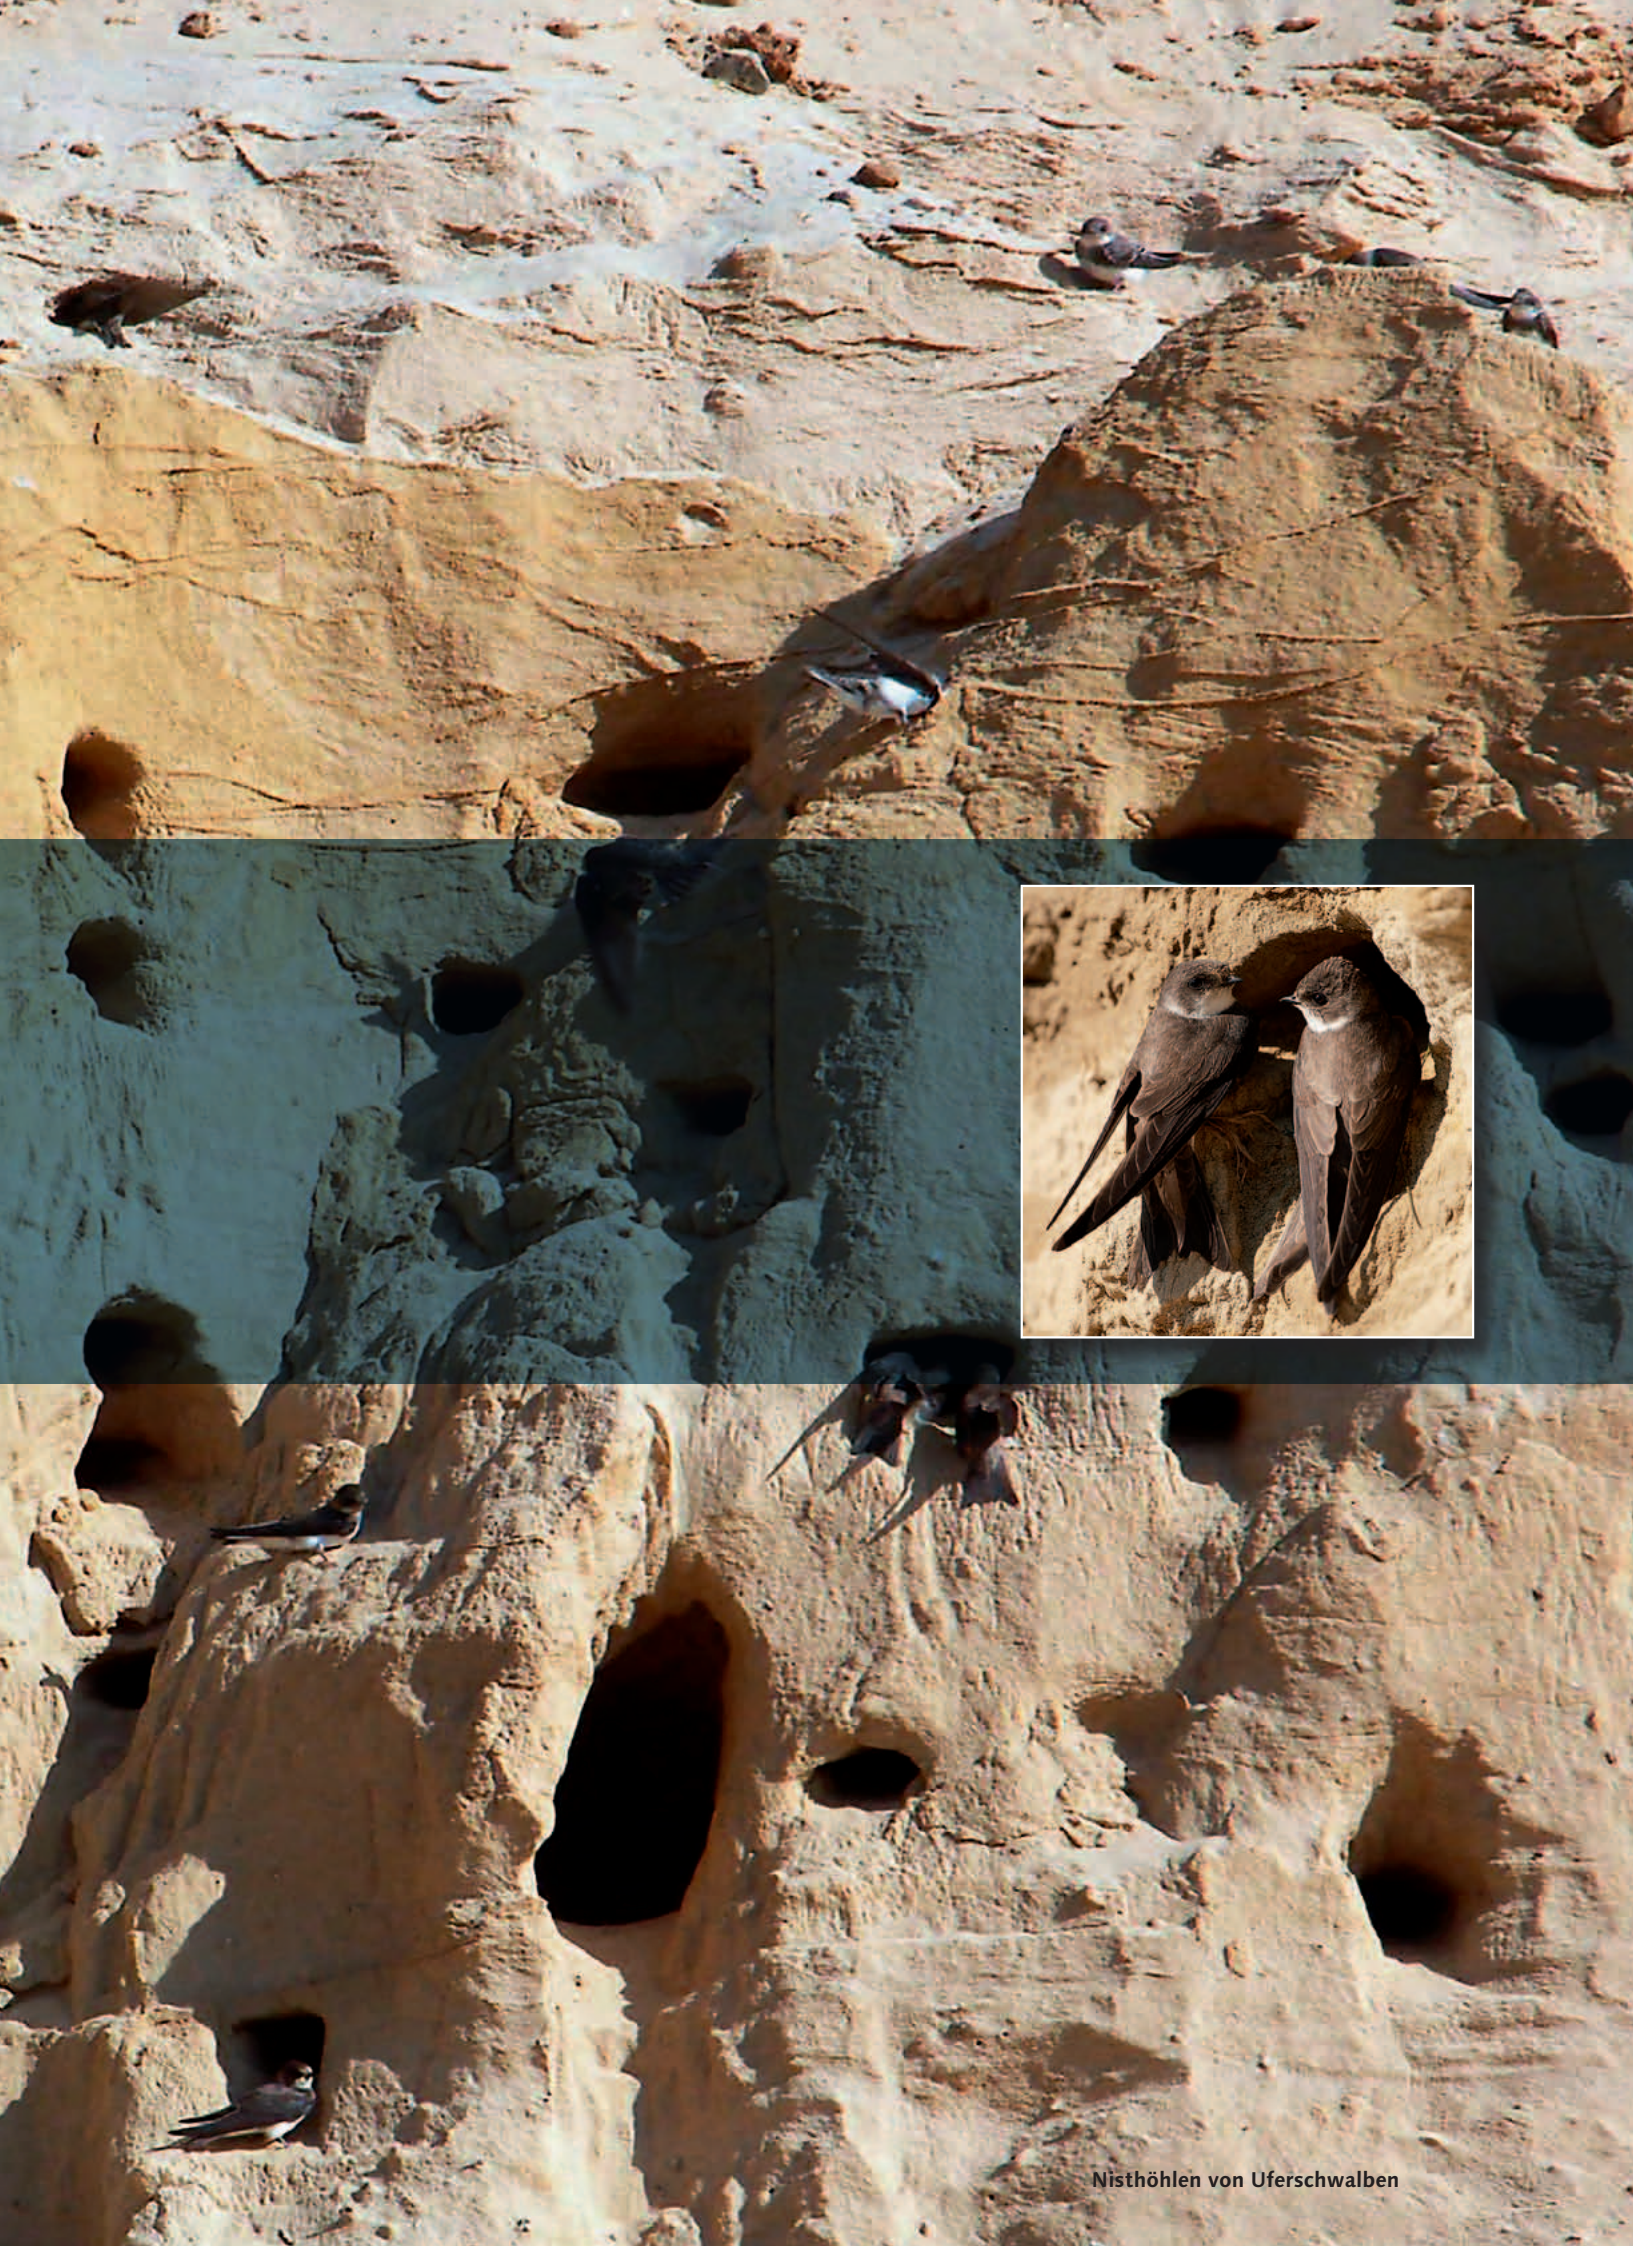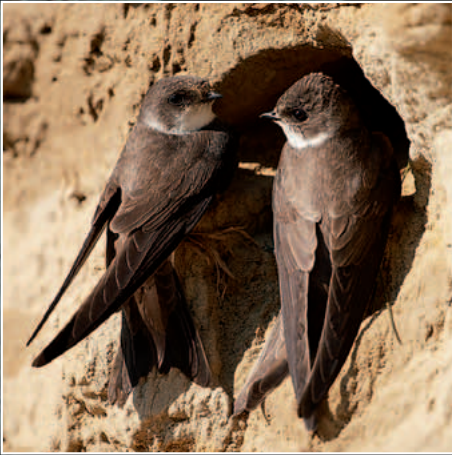

Nisthöhlen von Uferschwalben



A nighttime photograph of a construction site. In the background, a large yellow tower crane stands tall, its lattice structure illuminated. A long horizontal crane arm extends across the upper left portion of the frame. Below these, a multi-story building is under construction, its concrete frame visible. A green semi-truck is parked on the right side of the image. In the foreground, a curved metal guardrail is visible. A triangular warning sign with an exclamation mark and the text 'Schnell fahren' is posted near the road. The scene is lit by various construction lights, creating a mix of blue, yellow, and red tones.

Nah am Kunden –  
zu jeder Zeit,  
an jedem Ort



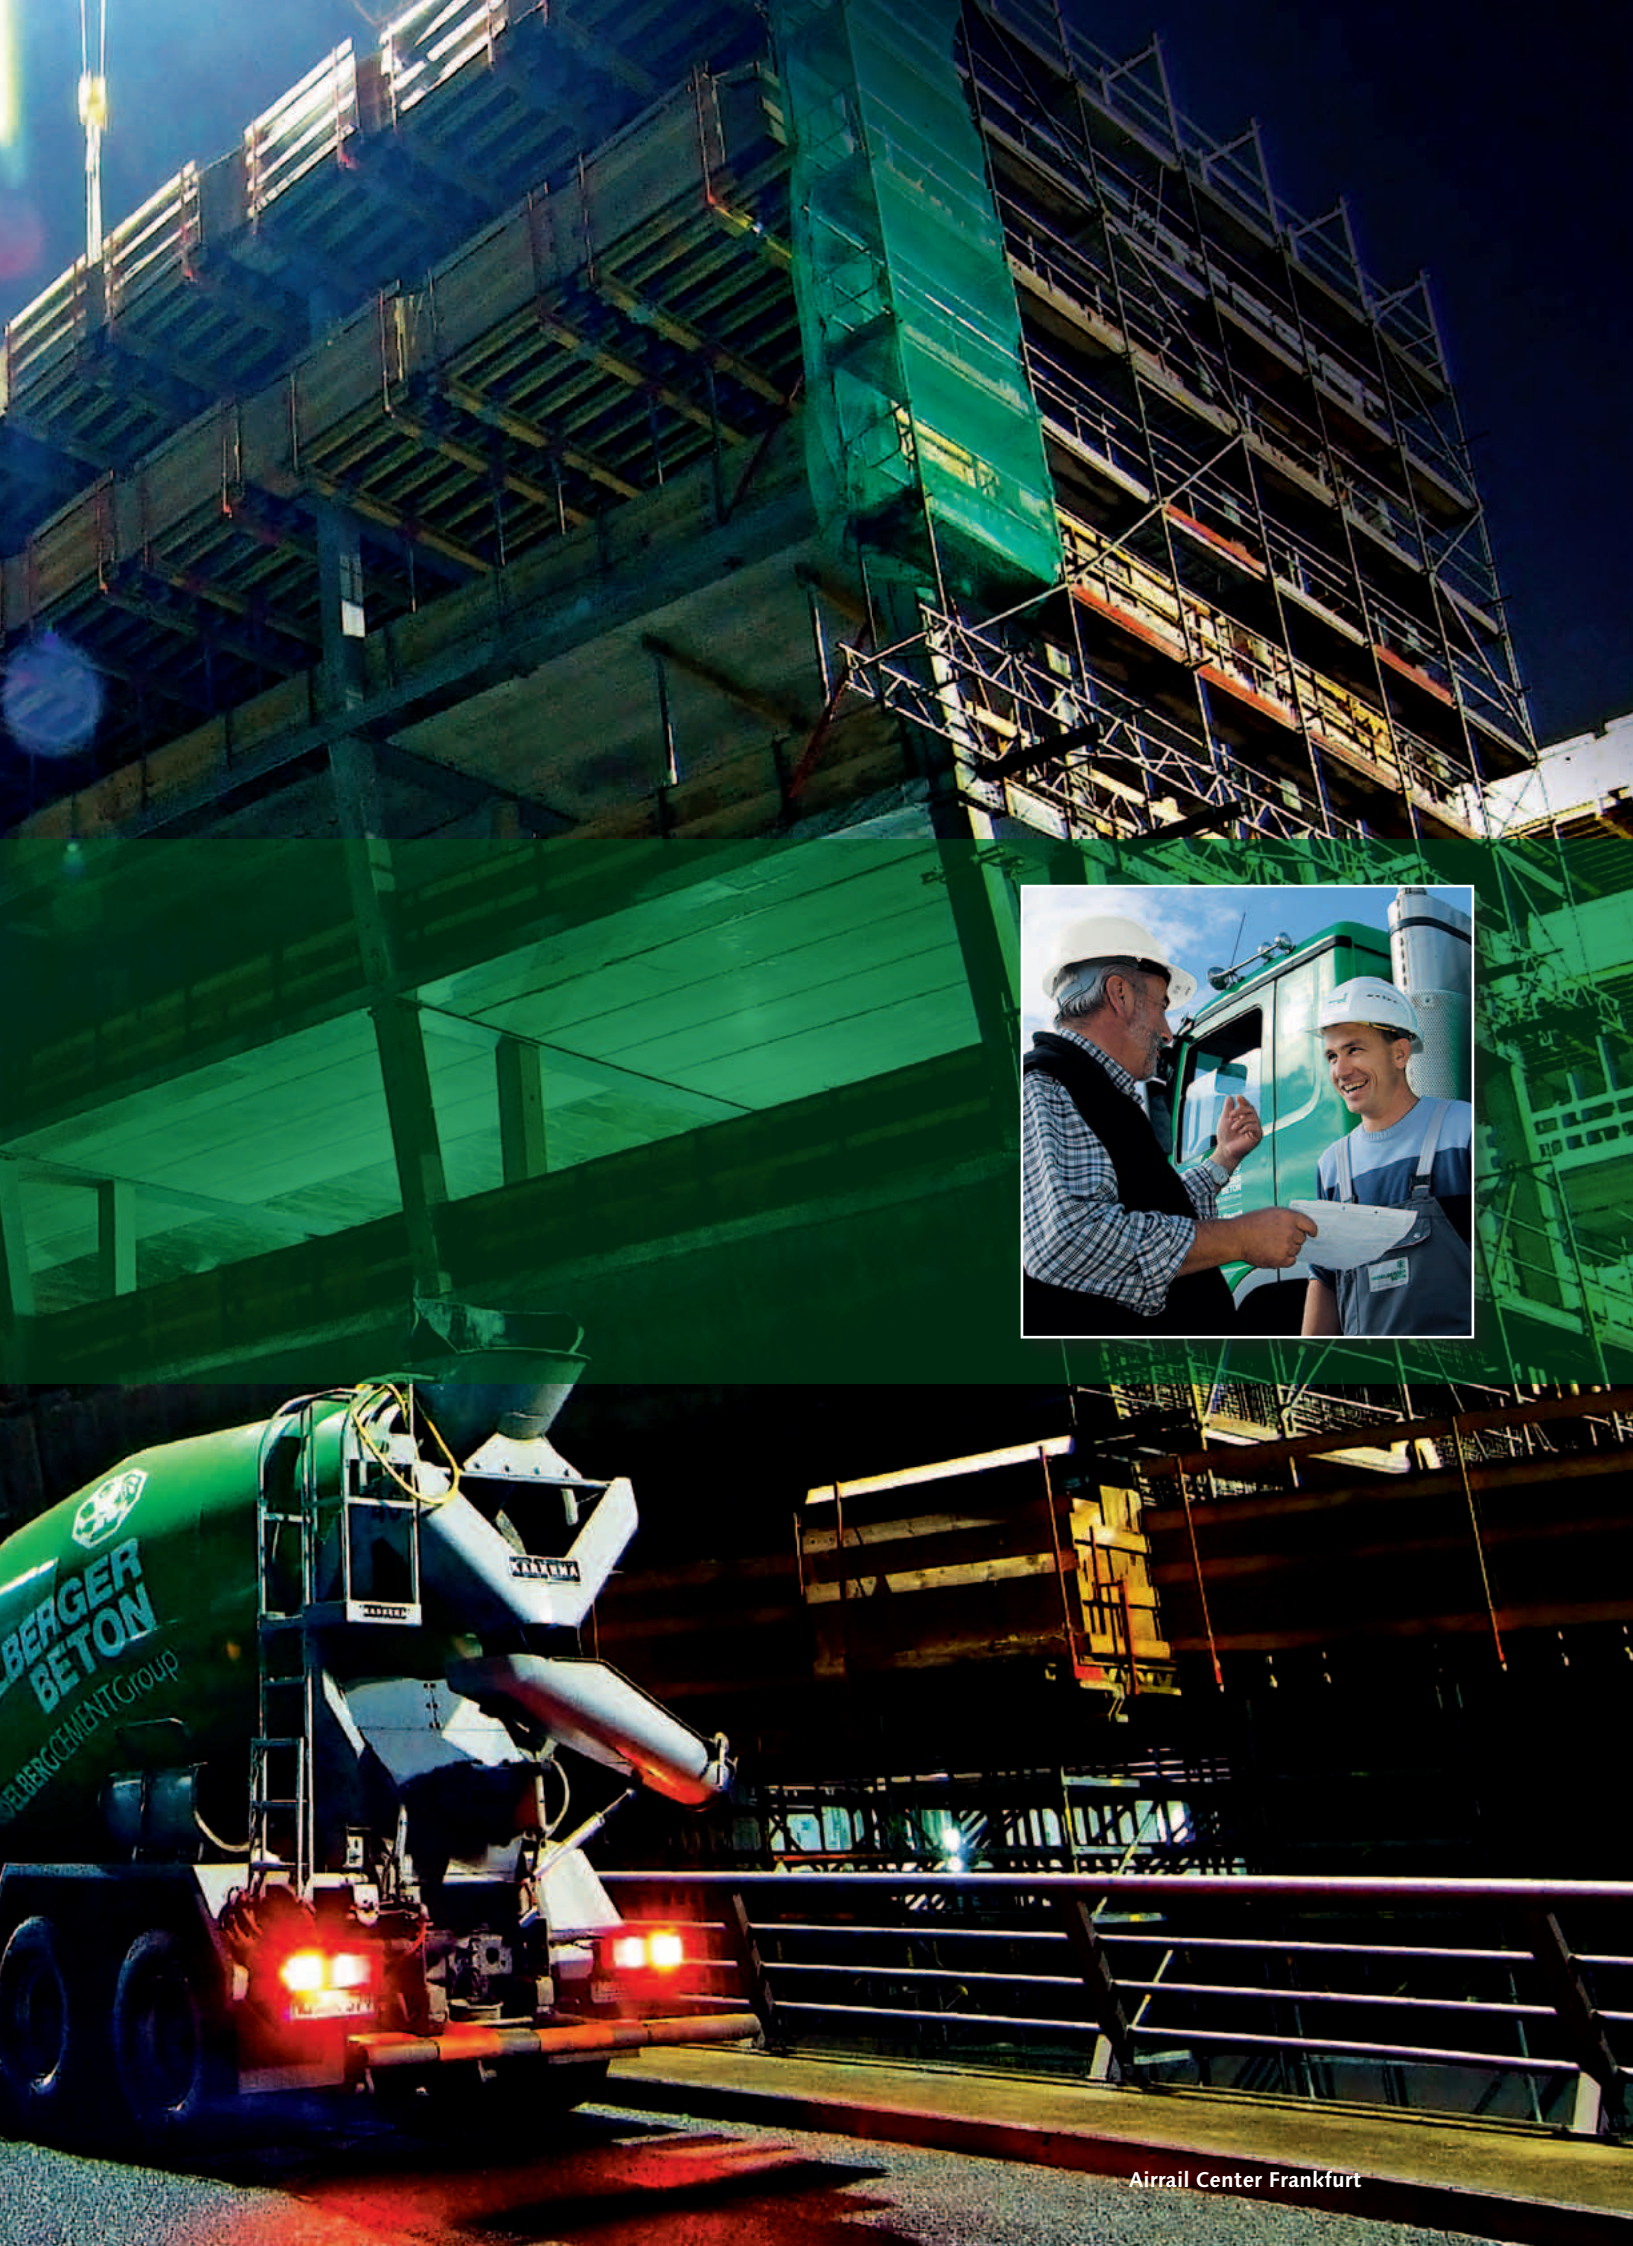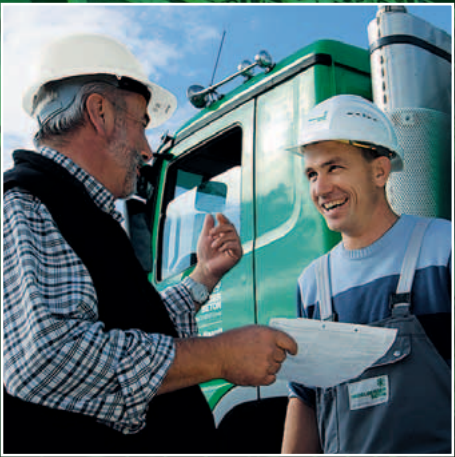

# An unsere Aktionäre



|           |                                         |
|-----------|-----------------------------------------|
| <b>22</b> | <b>Brief an die Aktionäre</b>           |
| <b>26</b> | <b>Bericht des Aufsichtsrats</b>        |
| <b>32</b> | <b>Vorstand</b>                         |
| <b>34</b> | <b>HeidelbergCement am Kapitalmarkt</b> |
| 34        | Überblick                               |
| 34        | Entwicklung der HeidelbergCement-Aktie  |
| 36        | Ergebnis je Aktie                       |
| 36        | Dividende                               |
| 36        | Aktionärsstruktur und Handelsvolumen    |
| 37        | Anleihen und Kreditratings              |
| 38        | Investor Relations                      |

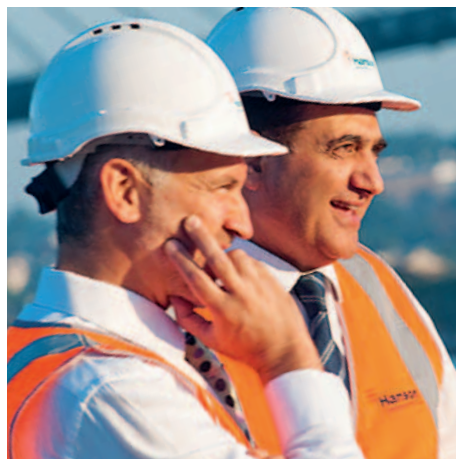



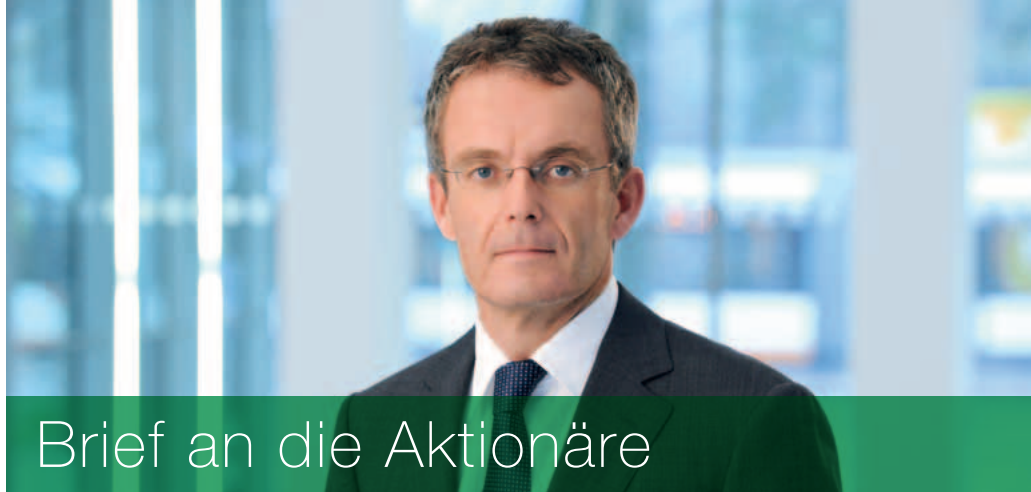

# Brief an die Aktionäre

Dr. Bernd Scheifele, Vorstandsvorsitzender

## **Sehr geehrte Aktionärinnen und Aktionäre, liebe Mitarbeiterinnen, Mitarbeiter und Freunde des Unternehmens,**

HeidelbergCement hat das Geschäftsjahr 2010 in einem herausfordernden weltwirtschaftlichen Umfeld erfolgreich abgeschlossen. Ausschlaggebend dafür waren unsere durch konsequente Führungsarbeit, Umsetzungsstärke, Kosteneffizienz und Schnelligkeit geprägte Unternehmenskultur sowie der außerordentliche Einsatz unserer Mitarbeiterinnen, Mitarbeiter und Führungskräfte.

HeidelbergCement hat sich in den Jahren der weltweiten Wirtschaftskrise 2009 und 2010 im Vergleich zu den wichtigsten Wettbewerbern gut geschlagen. Das verdanken wir in erster Linie unseren Kostensenkungsmaßnahmen, die wir frühzeitig und teilweise noch vor der Krise in die Wege geleitet haben. Nachdem das „Fitnessprogramm 2009“ zu Einsparungen von über 550 Mio EUR geführt hat, haben wir im abgelaufenen Geschäftsjahr mit „FitnessPlus 2010“ ein Einsparvolumen von mehr als 300 Mio EUR erfolgreich realisiert. In den letzten zwei Jahren haben wir Verwaltungs- und Vertriebskosten nachhaltig in erheblichem Umfang reduziert und gleichzeitig den Reparaturaufwand insbesondere im Geschäftsbereich Zement deutlich gesenkt. Wir haben unser Standortportfolio in den Bereichen Zuschlagstoffe, Transportbeton und Betonprodukte gestrafft und zusätzlich erhebliche Ergebnisbeiträge aus unseren Einkaufsinitiativen erzielt.

Der Erfolg dieser vielfältigen Maßnahmen zeigt sich in der verbesserten Ergebnisqualität von HeidelbergCement.

### **2010: Umsatz, operative Marge und Nettoergebnis gesteigert**

Der Konzernumsatz ist getragen von einer anhaltend positiven Entwicklung in unseren Wachstumsmärkten in Asien und Afrika sowie vorteilhaften Wechselkurseffekten um 5,8% auf 11,8 Mrd EUR gestiegen. Konzernweit blieb der Absatz von Zement und Klinker, Zuschlagstoffen und Transportbeton nahezu unverändert.

Das operative Ergebnis vor Abschreibungen (operating income before depreciation - OIBD) stieg um 6,5% auf 2,24 Mrd EUR. Dabei ist es uns als einem der wenigen Unternehmen der Branche gelungen, die OIBD-Marge auf Konzernebene und in den beiden Kerngeschäftsbereichen Zement und Zuschlagstoffe zu verbessern. Unser erfolgreiches Kostensenkungsprogramm „FitnessPlus 2010“ hat zu dieser Margenverbesserung erheblich beigetragen.

Das operative Ergebnis nahm um 8,6% auf 1,43 Mrd EUR zu. Maßgeblich für diesen Anstieg war neben Wechselkurseffekten die spürbare Ergebnisverbesserung in Nordamerika. Dort haben wir das operative Ergebnis mit 188 Mio EUR mehr als verdoppelt. Ausschlaggebend dafür waren erhebliche Margen-Verbesserungen in den Geschäftsbereichen Zement und Zuschlagstoffe. Bei der Zuschlagstoff-Marge ist es uns gelungen, zu den Besten der Branche aufzuschließen.

Den größten Beitrag zum operativen Ergebnis leistete das Konzerngebiet Asien-Pazifik mit 586 Mio EUR. Trotz eines erheblichen Anstiegs der variablen Kosten, insbesondere im zweiten Halbjahr, ist es uns gelungen, die OIBD-Marge nahezu konstant auf dem auch im Branchenvergleich Spitzenwert von 27,5% zu halten.



In Afrika haben wir erneut ein Rekordergebnis erzielt und den Zementabsatz um fast 13 % auf 5,2 Mio t erhöht. Das operative Ergebnis im Konzerngebiet Afrika-Mittelmeerraum ist allerdings wegen der weiterhin sehr schwierigen Marktsituation in Spanien insgesamt leicht zurückgegangen.

Aufgrund niedriger Finanzierungskosten und deutlich geringerer Abschreibungen auf Geschäfts- oder Firmenwerte konnten wir unseren Jahresüberschuss mit 511 Mio EUR mehr als verdreifachen. Das Ergebnis je Aktie erhöhte sich dadurch von 0,30 auf 1,83 EUR.

Angesichts dieser Ergebnisentwicklung werden Vorstand und Aufsichtsrat der Hauptversammlung am 5. Mai 2011 vorschlagen, die Dividende von 0,12 EUR je Aktie auf 0,25 EUR je Aktie zu erhöhen. Mit diesem Dividendenvorschlag liegen wir noch ein gutes Stück unter unserem mittelfristigen Ziel einer Ausschüttungsquote von 30 % bis 35 %. In Anbetracht der weiterhin bestehenden weltwirtschaftlichen Unsicherheiten halten wir ein sparsames Vorgehen mit Vorrang für eine weitere Rückführung unserer Verschuldung für die bessere Wahl im Sinne des Unternehmens und unserer Aktionäre.

### Finanzierungsstruktur weiter verbessert

Mit erfolgreichen Anleiheemissionen und dem Abschluss einer neuen Kreditlinie mit einem Volumen von 3 Mrd EUR haben wir 2010 die Finanzierungsstruktur des Unternehmens spürbar verbessert und unsere Liquidität bis Ende 2013 komfortabel abgesichert. Dabei konnten wir die Kreditmargen um mehr als 50 % senken und die Zahl der beteiligten Finanzinstitute auf 17 Kernbanken reduzieren. Außerdem haben wir unsere Nettoverschuldung dank der erfolgreichen Sparmaßnahmen und des konsequenten Cash-Managements um weitere 0,3 Mrd EUR gegenüber dem Vorjahr gesenkt. Der Erfolg unseres Finanzmanagements wird an einer Zahl deutlich: 3,5 Mrd EUR freie Liquidität zum Bilanzstichtag! Die Ratingagenturen haben auf die erfolgreiche Verbesserung der Finanzierungsstruktur mit einer deutlichen Anhebung der Bonitätsbewertung reagiert.

### Positive Entwicklung der Aktionärsstruktur – Aufnahme in den Leitindex DAX

HeidelbergCement ist im Juni 2010 als erstes Unternehmen der Bau- und Baustoffindustrie in den DAX, die Riege der 30 größten börsennotierten Unternehmen Deutschlands, aufgerückt.

Voraussetzung dafür war der auf ca. 75 % gestiegene Streubesitz nach der Kapitalerhöhung im Herbst 2009. Im Jahr 2010 haben wir intensiv daran gearbeitet, die Kommunikation mit unserem erheblich erweiterten Aktionärskreis professionell zu gestalten. Dabei ist es uns gelungen, die Aktionärsstruktur in geografischer Hinsicht weiter zu diversifizieren und den Anteil langfristig interessierter institutioneller Investoren spürbar zu erhöhen. Eine Ende letzten Jahres durchgeführte Investorenbefragung hat deutlich gezeigt, dass wir auch im Bereich Investor Relations 2010 überdurchschnittlich gute Arbeit geleistet haben.

Eine weitere positive Nachricht war, dass Herr Ludwig Merckle nach erfolgreicher Restrukturierung der Merckle-Gruppe seinen Anteilsbesitz an HeidelbergCement auf über 25 % erhöht und damit sein nachhaltiges Bekenntnis zu unserem Unternehmen unterstrichen hat. Vorstand und Aufsichtsrat begrüßen dieses langfristig angelegte Engagement von Herrn Ludwig Merckle ausdrücklich. Gerade in einer zyklischen Industrie ist ein Ankeraktionär für die Stabilität des Unternehmens und die langfristige Geschäftsausrichtung von großer Bedeutung.



### **Dank an unsere Mitarbeiterinnen und Mitarbeiter**

Das Jahr 2010 hat unseren Mitarbeiterinnen und Mitarbeitern viel abverlangt. Ihr hoher persönlicher Einsatz und ihre uneingeschränkte Loyalität zu unserem Unternehmen haben das gute operative Ergebnis im Geschäftsjahr 2010 möglich gemacht. Dafür möchte ich ihnen – auch im Namen meiner Vorstandskollegen – aufrichtigen Dank und Anerkennung aussprechen. Dieser Dank geht auch an die Arbeitnehmervertreter, die in diesem herausfordernden Umfeld sehr eng, offen und vertrauensvoll mit dem Vorstand zum Wohle des Unternehmens zusammengearbeitet haben.

Ein besonderer Dank und meine persönlich höchste Anerkennung gilt unseren Führungskräften weltweit in den operativen Einheiten und den Stabsfunktionen. Sie haben auf die Wirtschafts- und Finanzkrise frühzeitig, diszipliniert und äußerst konsequent mit drastischen Kostensenkungen reagiert. Die erhebliche Steigerung des Jahresüberschusses, die signifikante Verbesserung der Finanzierungsstruktur sowie letztlich die Aufnahme in den DAX wären ohne sie nicht möglich gewesen. Unser gemeinsamer Anspruch ist klar: Wir wollen das am besten geführte Unternehmen unserer Branche sein!

### **Strategische Schwerpunkte 2011/2012**

Wir gehen für 2011 und 2012 von einer weiteren Erholung der Weltwirtschaft aus. Vor diesem Hintergrund haben wir drei strategische Schwerpunkte definiert:

- Kostenführerschaft durch kontinuierliche Effizienzsteigerung
- weitere Rückführung der Verschuldung mit dem Ziel Investment Grade
- gezielte Investition in Zementkapazitäten in Wachstumsmärkten

Da HeidelbergCement in Märkten mit lokal weitgehend standardisierten Produkten tätig ist, stellt Kostenführerschaft einen entscheidenden Erfolgsfaktor dar. Wir haben deswegen zu Beginn des Geschäftsjahrs 2011 die neue Effizienzsteigerungsinitiative „FOX 2013“ mit dem Ziel gestartet, in den nächsten drei Jahren liquiditätswirksame Einsparungen von insgesamt 600 Mio EUR zu realisieren. Neben der weiteren Optimierung des Working Capitals und der Verbesserung unserer Einkaufskonditionen steht die Effizienzsteigerung unserer rund 600 Förderstätten für Sand, Kies und Hartgestein im Mittelpunkt. Nach einer erfolgreichen Pilotphase in Europa haben wir im März 2011 ein Projekt gestartet, mit dem wir unsere Margen durch Produktoptimierung und weitere Senkung der spezifischen Produktionskosten verbessern werden. Damit wollen wir erreichen, dass HeidelbergCement nicht nur der größte Zuschlagstoffhersteller der Welt ist, sondern auch der rentabelste! Darüber hinaus haben wir im Geschäftsbereich Zement ein Programm zur Energieeffizienzsteigerung gestartet, mit dem wir die Kosten für Strom um 5 % und für Brennstoffe um 3 % senken wollen.

Die weitere Rückführung der Verschuldung mit dem Ziel der Verbesserung der Bonität in den Investment-Grade-Bereich hat nach wie vor höchste Priorität. Wir werden daher auch in Zukunft sehr diszipliniert mit Kosten und Investitionsentscheidungen umgehen. Ferner planen wir, bei einer weiteren Erholung der Weltwirtschaft die Veräußerung von Randaktivitäten voranzutreiben. Dabei handelt es sich um Bereiche, die nicht zur Wertschöpfungskette Zement, Zuschlagstoffe und Beton gehören, sowie um kleinere Länderengagements, die für die globale Marktstellung von



HeidelbergCement von untergeordneter Bedeutung sind. Diese geplanten Veräußerungen stehen jedoch unter dem klaren Vorbehalt, einen akzeptablen Verkaufspreis zu erzielen.

Schließlich werden wir unsere Strategie des gezielten Ausbaus unserer Zementkapazitäten in den Schwellenländern Asiens, Afrikas, Osteuropas und Zentralasiens fortsetzen. Dabei geht es in erster Linie nicht um Zukäufe, sondern um die Erweiterung von Produktionskapazitäten und den Bau neuer Werke in Märkten, in denen wir bereits aktiv sind. Wir werden beispielsweise voraussichtlich Ende Mai 2011 unser neues Zementwerk bei Moskau mit einer Kapazität von ca. 2 Mio t in Betrieb nehmen. Im polnischen Werk Górażdze sind wir dabei, die Zementkapazität um ca. 1,2 Mio t zu erhöhen. Im indonesischen Werk Citeureup und in den indischen Werken Damoh und Jhansi werden wir ebenfalls die Zementkapazitäten um 2 Mio t bzw. 2,9 Mio t erweitern. Große Akquisitionen, die die Verschuldung des Unternehmens spürbar erhöhen würden, sind nicht Teil unserer Strategie.

### Ausblick 2011

Für das laufende Jahr 2011 erwarten wir eine Fortsetzung der weltweiten Wirtschaftserholung, die allerdings schwächer ausfallen wird als 2010. Für unsere wichtigen Schwellenländer in Asien (China, Indonesien, Indien) und Afrika (Ghana, Tansania) gehen wir von einem Wirtschaftswachstum zwischen 5% und 9% aus. Auch unsere reifen Märkte in den USA, Großbritannien, Deutschland, Benelux, Nordeuropa und Australien werden laut Prognose des IWF ihre wirtschaftliche Erholung in den Jahren 2011 und 2012 fortsetzen, allerdings mit einer mittleren Wachstumsrate von lediglich 2% bis 3%.

Auf der Kostenseite erwarten wir steigende Energie- und Rohstoffpreise sowie eine zunehmende Inflation, insbesondere in den Schwellenländern. In den reifen Märkten gehen wir zudem von steigenden Personalkosten aus. Unser Ziel ist, den Anstieg der Kosten durch Kostensenkungsmaßnahmen und durch gezielte Preiserhöhungen sowie Treibstoffkostenzuschläge in den einzelnen Märkten auszugleichen.

Auf Basis dieser Annahmen hat sich der Vorstand das Ziel gesetzt, den Umsatz und das operative Ergebnis weiter zu steigern. Der Geschäftsverlauf in den ersten zwei Monaten des Jahres 2011 bestätigt uns in dieser Einschätzung. Dank der vorteilhaften geografischen Aufstellung in attraktiven Märkten sowohl in Schwellenländern als auch in Industriestaaten und als Weltmarktführer im Bereich Zuschlagstoffe ist HeidelbergCement bestens positioniert, um von einer weiteren Erholung der Weltkonjunktur, unterstützt durch einen sich beschleunigenden Aufschwung in Nordamerika, überproportional zu profitieren.

Mit freundlichen Grüßen

Ihr



Dr. Bernd Scheifele  
Vorstandsvorsitzender



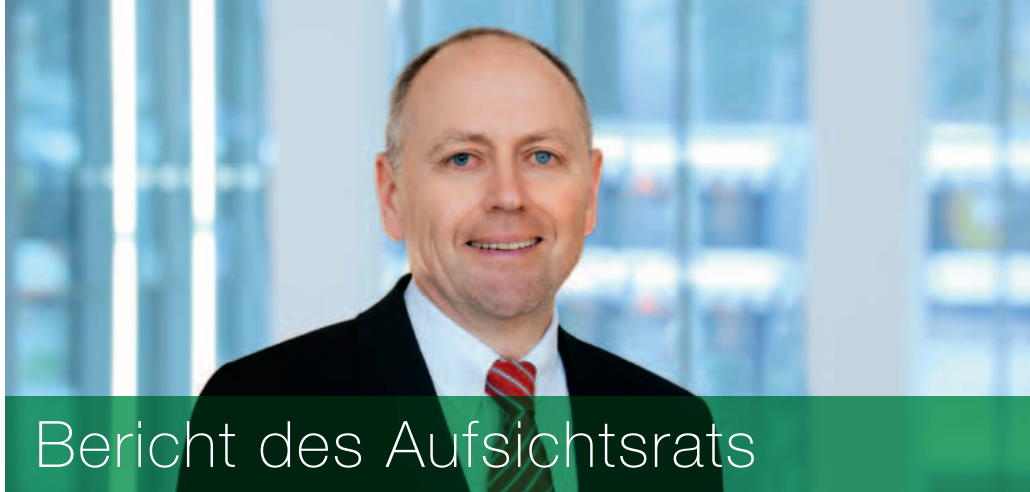

Fritz-Jürgen Heckmann, Aufsichtsratsvorsitzender

### **Sehr geehrte Aktionärinnen und Aktionäre,**

Das Geschäftsjahr 2010 stand für HeidelbergCement operativ im Zeichen der Erholung nahezu aller für das Unternehmen relevanter Märkte von der Wirtschafts- und Finanzkrise, die in ihrer Intensität für die weltweite Baustoffindustrie den Auswirkungen der Weltwirtschaftskrise von 1929 gleichkam und sie in Teilbereichen sogar überstieg. Insbesondere im zweiten Halbjahr des Geschäftsjahres zeigte sich in der für das Gesamtergebnis des Konzerns wichtigen Region Nordamerika eine erfreuliche Trendwende mit wieder kontinuierlich steigenden Absätzen und Ergebnissen. In den noch immer von der Wirtschafts- und Finanzkrise besonders betroffenen Ländern Südeuropas ist HeidelbergCement kaum vertreten, während dem Unternehmen seine bedeutende Präsenz in den wachstumsstarken Regionen Asiens und in den afrikanischen Ländern südlich der Sahara zugute kommt. Es zeigt sich erneut, dass die vorteilhafte geografische Platzierung der Aktivitäten des Konzerns innerhalb der Regionen und die Verteilung der Aktivitäten auf reife Märkte in Europa und Nordamerika sowie auf wachstumsstarke Regionen in Asien und Afrika ein Garant dafür ist, zum einen Absatzrückgänge in Zeiten einer Krise der Baustoffwirtschaft wirksam abzufedern und zum anderen in Zeiten ihrer Erholung wieder zügig und nachhaltig von der Wiederbelebung des Marktumfelds überproportional zu profitieren.

Nach der erfolgreichen Refinanzierung 2009, die mit einer wesentlichen Veränderung der Aktionärsstruktur einherging, ist HeidelbergCement für die kommenden Jahre finanziell komfortabel aufgestellt und auf einem guten Weg, Finanzkennzahlen im Bereich des Investment Grade zu erreichen. Infolge der Veränderungen im Aktionärskreis hat sich der Streubesitz auf fast 75 % erhöht. Zusammen mit den gestiegenen Umsätzen im Börsenhandel mit HeidelbergCement-Aktien hat dies dazu geführt, dass die Aktie in einem beschleunigten Verfahren im Juni 2010 in den DAX aufgenommen wurde und nunmehr zum Kreis der führenden deutschen Börsentitel zählt. Die im Berichtsjahr ebenfalls erfolgreiche Restrukturierung der Merckle-Gruppe bildete die Basis dafür, dass dem Unternehmen mit den von Herrn Ludwig Merckle geführten Familienunternehmen weiterhin ein Ankeraktionär zur Seite steht, der sein nachhaltiges Bekenntnis zu HeidelbergCement Anfang November 2010 mit der Erhöhung seines Anteilsbesitzes auf über 25 % unterstrich.

Der Aufsichtsrat hat die duale Strategie des Vorstands, einerseits sein rigoroses Kostensenkungsprogramm auch 2010 fortzusetzen und Investitionsdisziplin zu wahren, andererseits aber auch, sich bietende Wachstumschancen im Markt wahrzunehmen, tatkräftig begleitet und unterstützt. Die 2010 erfolgten Akquisitionen und Kapazitätserweiterungen in Afrika, Australien und Osteuropa stehen für diese wachstums- und ertragsorientierte Geschäftspolitik.

### **Beratung und Überwachung**

Der Aufsichtsrat hat die vorgenannten Maßnahmen eng begleitet und in zahlreichen ordentlichen und außerordentlichen Sitzungen des Plenums und seiner Ausschüsse sowie in Kontakten außerhalb von Sitzungen mit dem Vorstand abgestimmt. Er hat sich darüber hinaus regelmäßig und ausführlich sowohl schriftlich als auch mündlich über die beabsichtigte Geschäftspolitik, grundsätzliche Fragen der Finanz-, Investitions- und Personalplanung, den Gang der Geschäfte sowie die Rentabilität der



Gesellschaft berichten lassen. Abweichungen des Geschäftsverlaufs von den Plänen wurden ihm vom Vorstand im Einzelnen erläutert. Die strategische Ausrichtung des Unternehmens stimmte der Vorstand mit dem Aufsichtsrat ab. In alle Entscheidungen von grundlegender Bedeutung für das Unternehmen war der Aufsichtsrat unmittelbar eingebunden. Die zustimmungspflichtigen Investitions-, Desinvestitions- und insbesondere Finanzierungsprojekte wurden vor Beschlussfassung vom Vorstand erläutert und mit diesem diskutiert. Der Aufsichtsrat hat sich davon überzeugt, dass der Vorstand ein funktionierendes Risikomanagementsystem installiert hat, das geeignet ist, Entwicklungen, die den Fortbestand der Gesellschaft gefährden könnten, frühzeitig zu erkennen. Dies hat er sich auch vom Abschlussprüfer bestätigen lassen. Er hat sich ferner von der Wirksamkeit des Compliance-Programms überzeugt, das die konzernweite Beachtung von Gesetz, Recht und internen Richtlinien sicherstellt. Im Zuge dessen hat sich der Aufsichtsrat vom Vorstand über das positive Ergebnis einer durch eine renommierte Anwaltskanzlei durchgeführten Auditierung des konzernweit bestehenden Kartellrechts-Compliance-Systems unterrichten lassen. Der Aufsichtsratsvorsitzende stand in regelmäßigem Kontakt mit dem Vorstandsvorsitzenden auch außerhalb von Sitzungen. Zusammenfassend kann festgestellt werden, dass der Aufsichtsrat die ihm nach Gesetz, Satzung, Geschäftsordnung und Deutschem Corporate Governance Kodex obliegenden Aufgaben ordnungsgemäß wahrgenommen hat.

### Themen der Sitzungen des Aufsichtsrats und seiner Ausschüsse

Das Aufsichtsratsplenum sowie der Personalausschuss tagten im Berichtsjahr je fünfmal, der Prüfungsausschuss dreimal und der Nominierungsausschuss trat einmal zu einer Sitzung zusammen; der Vermittlungsausschuss nach § 27 Abs. 3 MitbestG brauchte nicht zusammenzutreten. Sowohl der Aufsichtsrat als auch der Prüfungsausschuss haben im Berichtsjahr darüber hinaus mehrere Telefonsitzungen abgehalten. Über das Ergebnis der Ausschusssitzungen wurde in der jeweils nachfolgenden Plenumsitzung berichtet. Die Mitglieder des Aufsichtsrats sowie seiner Ausschüsse werden im Kapitel Corporate Governance auf Seite 137 ff. aufgeführt.

Die ordentlichen Plenumsitzungen vom März, Mai, September und November hatten unter anderem die Feststellung des Jahresabschlusses 2009 und die Vorbereitung der Hauptversammlung 2010, Berichterstattungen über den Geschäftsverlauf sowie Berichterstattungen und Beschlussfassungen zu Refinanzierungsvorhaben, ferner Beschlussfassungen zu Corporate-Governance-Themen sowie Berichterstattungen über den Verkauf von nicht zum Kerngeschäft zählenden Aktivitäten zum Gegenstand. Der Aufsichtsrat stimmte zudem der Begebung einer fünfjährigen 650 Mio EUR Euroanleihe zur weiteren Verbesserung des Fälligkeitsprofils der Verbindlichkeiten sowie dem Erwerb neuer Aktivitäten und Kapazitätserweiterungen im Rahmen der wachstumsorientierten Unternehmensentwicklung in Nordamerika, Russland, Afrika, Australien und Indien zu.

Nach der Änderung der Zuordnung im Aktienrecht befasste sich das Plenum in mehreren Sitzungen mit der variablen Vergütung für den Vorstand bezogen auf den Jahresbonus 2009 und den Mehrjahresbonus 2008/2009. Die intensive Ausarbeitung des neuen, am 1. Januar 2011 in Kraft getretenen Vorstandsvergütungssystems war Schwerpunkt mehrerer Sitzungen des Plenums und des Personalausschusses im Herbst 2010. Des Weiteren ließ sich der Aufsichtsrat regelmäßig



über Fortschritte des „FitnessPlus 2010“-Programms und über die Entwicklung wichtiger Konzernfinanzkennzahlen unterrichten. Ebenso stand das Thema Energiemanagement im Konzern auf der Tagesordnung einer Aufsichtsratssitzung. Der Aufsichtsrat befasste sich ferner mit den laufenden deutschen Kartellverfahren und informierte sich über den Stand der Aufnahme der Gesellschaft in den DAX.

Im Berichtsjahr fanden drei außerordentliche Sitzungen statt: In der außerordentlichen Sitzung vom Januar wurde die Begebung von Euroanleihen beraten und beschlossen, die außerordentliche Sitzung vom Februar diente insbesondere der Verabschiedung der Planung 2010, der Nachbesetzung der Ausschüsse und der Festlegung der Parameter für die Zieltantieme des Vorstands für das Geschäftsjahr 2010. Im April wurde der neue syndizierte Kreditvertrag dem Aufsichtsrat vorgestellt und von ihm verabschiedet.

Der Prüfungsausschuss befasste sich in seinen Sitzungen mit dem Jahres- und Konzernabschluss 2009 und deren Prüfungsschwerpunkten, dem Compliance-Bericht 2009, den Quartals- und Halbjahresberichten, der Vorbereitung des Vorschlags des Aufsichtsrats an die Hauptversammlung 2010 für die Bestellung des Abschlussprüfers 2010 sowie mit Corporate-Governance-Themen. Der Ausschuss stellte nach Überprüfung fest, dass ihm mindestens ein unabhängiges Mitglied angehört, das als unabhängiger Experte auf den Gebieten Rechnungslegung oder Abschlussprüfung anzusehen ist.

Gegenstand der Sitzungen des Personalausschusses waren unter anderem die Vorberatung und Beschlussempfehlung an den Aufsichtsrat betreffend die Vorstandsvergütungen für 2009 und 2010 sowie die intensive Erörterung und Vorberatung des neuen Vorstandsvergütungssystems 2011.

Der Nominierungsausschuss bereitete Vorschläge für geeignete Kandidaten vor, die der Aufsichtsrat der Hauptversammlung 2010 für die Nachwahl der Anteilseignervertreter zum Aufsichtsrat vorschlug. Die zur Nachwahl vorgeschlagenen Herren Alan Murray und Dr.-Ing. Herbert Lütkestratkötter fanden eine breite Unterstützung aus dem Kreise der Aktionäre.

Die Präsenz in den Sitzungen des Aufsichtsrats und seiner Ausschüsse war wie in der Vergangenheit mit über 95 % erfreulich hoch. Interessenkonflikte eines Aufsichtsrats bei der Behandlung von Themen im Aufsichtsrat sind nicht aufgetreten. Auch bestanden keine Berater- oder sonstigen Dienst- oder Werkverträge zwischen einem Mitglied des Aufsichtsrats und der Gesellschaft.

### **Corporate Governance**

Die gemeinsame Entsprechenserklärung von Vorstand und Aufsichtsrat im Berichtsjahr wurde am 17. März 2010 beschlossen und abgegeben, die des laufenden Jahres wurde am 8. Februar 2011 durch den Vorstand und am 10. Februar 2011 durch den Aufsichtsrat abgegeben. Ihr vollständiger Wortlaut ist im Abschnitt „Entsprechenserklärung gem. § 161 AktG“ im Kapitel Corporate Governance auf Seite 122 f. wiedergegeben. Die Entsprechenserklärungen werden für die Aktionäre auf der Website der Gesellschaft dauerhaft zugänglich gemacht. In seiner Sitzung vom 17. März 2010 hat der Aufsichtsrat unter anderem festgestellt, dass ihm und seinem Prüfungsausschuss eine nach seiner Einschätzung ausreichende Anzahl unabhängiger Mitglieder angehört, ferner, dass mindestens ein unabhängiges Mitglied im Aufsichtsrat und im Prüfungsausschuss über den erforderlichen



Sachverstand auf den Gebieten Rechnungslegung oder Abschlussprüfung verfügt. Er hat in der gleichen Sitzung weiterhin ausführlich die Erfüllung der Empfehlungen des Deutschen Corporate Governance Kodex in der Fassung vom 18. Juni 2009 erörtert. Der Aufsichtsrat beschloss am 17. März 2010 ferner, aus Gründen der Kapitalmarkttransparenz die gesellschaftseigenen Corporate Governance Grundsätze zugunsten eines Gesamtverweises auf die jeweils befolgten Empfehlungen des Deutschen Corporate Governance Kodex aufzugeben. Die Geschäftsordnung für den Aufsichtsrat wurde entsprechend angepasst.

In seiner außerordentlichen Sitzung vom 10. Februar 2011 hat der Aufsichtsrat mit der Umsetzung des Deutschen Corporate Governance Kodex in der Fassung vom 26. Mai 2010 Richtlinien für die Umsetzung der Diversity-Grundsätze im Vorstand und Aufsichtsrat beschlossen. Der Aufsichtsrat folgt hinsichtlich der künftigen Besetzung des Vorstands uneingeschränkt den Vorgaben des Corporate Governance Kodex und hat dieses Bekenntnis durch eine entsprechende Änderung in seiner Geschäftsordnung verankert. Bei seiner eigenen Besetzung begrüßt er die im Deutschen Corporate Governace Kodex niedergelegten Diversity-Ziele und strebt an, einen möglichst breit angelegten Kandidatenpool für die Auswahl künftiger Aufsichtsratsmitglieder zur Verfügung zu haben. Er enthält sich aber bewusst der Festlegung konkreter Diversity-Ziele, das heißt, er gibt sich für seine künftige Zusammensetzung weder eine konkrete Quote für einzelne Kandidatengruppen noch eine konkrete Quote für eine angemessene Beteiligung von Frauen, da er potenzielle Kandidatinnen und Kandidaten allein anhand ihrer Qualifikation und an den Erfolgen ihrer bisherigen beruflichen Tätigkeit bewertet und auswählt. Unabhängig davon begrüßt und unterstützt der Aufsichtsrat die im Kodex genannten Auswahlkriterien bei seiner Zusammensetzung, nämlich eine Besetzung mit einer ausreichenden Anzahl an unabhängigen Mitgliedern, die eine oder mehrere der nachge- nannten Qualifikationen aufweisen: erfolgreiche Tätigkeit in Führungsverantwortung außerhalb des Unternehmens, Internationalität, Branchennähe und besondere Kenntnisse auf den Gebieten der Rechnungslegung oder Finanzierung.

Hinsichtlich der Vergütungsstruktur für die Vorstandsmitglieder für das vergangene Geschäftsjahr wird zur Vermeidung von Wiederholungen auf die Ausführungen zur Vorstandsvergütung im Kapitel Corporate Governance auf Seite 128 ff. verwiesen. Dort ist auch in einem weiteren Abschnitt das im September und November erörterte und verabschiedete neue Vorstandsvergütungssystem im Einzelnen beschrieben, das am 1. Januar 2011 in Kraft trat. Der Aufsichtsrat ist der Überzeugung, dass das neue Vergütungssystem eine ausgewogene Umsetzung der gesetzlichen Vorgaben, der Interessen des Unternehmens und seiner Stakeholder und der Interessen des Vorstands an einer angemessenen, leistungsgerechten und marktüblichen Vergütung darstellt. Der Aufsichtsrat hat sich bei der Ausarbeitung des neuen Systems durch einen renommierten Vergütungsexperten beraten lassen. Das neue System wurde anschließend im Auftrag des Aufsichtsrats von einem namhaften unabhängigen Sachverständigen überprüft und als gesetzeskonform und marktangemessen beurteilt. Das neue Vorstandsvergütungssystem soll unseren Aktionären auf der Hauptversammlung am 5. Mai 2011 unter dem Tagesordnungspunkt „Say on Pay“ vorgestellt und zur Billigung gemäß § 120 AktG vorgeschlagen werden.



Zur Umsetzung des neuen Vergütungssystems wurden sämtliche Vorstandsverträge geändert und angepasst und damit eine einheitliche Handhabung der Verträge im Aufsichtsrat sicher gestellt. Im Zuge der gesetzlichen Erhöhung der Selbstbehalte für die D&O-Versicherung der Vorstandsmitglieder in den neuen Vorstandsverträgen ab 1. Januar 2011 wurden auch die Selbstbehalte für die D&O-Versicherung der Aufsichtsratsmitglieder kodexkonform angehoben.

In seiner Mai-Sitzung ließ sich der Aufsichtsrat über die Ergebnisse der Corporate-Governance-Umfrage unter den HeidelbergCement-Führungskräften unterrichten. In seiner November-Sitzung befasste er sich mit der zum ersten Mal durchgeführten externen Überprüfung des bestehenden Kartellrechts-Compliance-Systems. Ferner wurde im Aufsichtsrat – den letztjährigen Neuerungen im Kodex folgend – im Februar 2011 eine interne Fortbildungsveranstaltung über aktuelle Entwicklungen der nationalen und internationalen Rechnungslegungsvorschriften sowie über die für die Aufsichtsrats Tätigkeit relevanten Themen aus den Bereichen Corporate Governance und Compliance durchgeführt. Der Aufsichtsrat bekräftigt damit erneut sein Bekenntnis zu guter Corporate Governance und Compliance im Unternehmen.

### **Prüfung und Feststellung des Jahresabschlusses**

Vor Vergabe des Auftrags zur Prüfung des Jahresabschlusses der Gesellschaft und des Konzerns wurden mit dem Abschlussprüfer, der Ernst & Young GmbH, Wirtschaftsprüfungsgesellschaft, Stuttgart, Prüfungsschwerpunkte, Prüfungsinhalte und Prüfungskosten diskutiert. Der Vorstand hat den Aufsichtsrat im Februar 2011 über die vorläufigen und noch nicht testierten Kennzahlen für das Geschäftsjahr 2010 und über den Stand der Abschlussarbeiten informiert. Der vom Vorstand aufgestellte Jahresabschluss der HeidelbergCement AG und der Konzernabschluss zum 31. Dezember 2010 sowie der zusammengefasste Lagebericht der Gesellschaft und des Konzerns wurden vom Abschlussprüfer geprüft und mit dem uneingeschränkten Bestätigungsvermerk versehen. Abschlussunterlagen und Prüfungsberichte wurden den Aufsichtsratsmitgliedern zugesandt. Zunächst hat sich der Prüfungsausschuss in Gegenwart der Abschlussprüfer intensiv mit dem Abschluss befasst. Der Abschlussprüfer hat über die wesentlichen Ergebnisse seiner Prüfung berichtet. Sodann hat der Aufsichtsrat den Abschluss, wiederum in Anwesenheit der Abschlussprüfer, ausführlich erörtert. Der Aufsichtsrat nahm die Prüfungsergebnisse zustimmend zur Kenntnis. Er prüfte den Jahres- und Konzernabschluss, den zusammengefassten Lagebericht sowie den Vorschlag des Vorstands zur Verwendung des Bilanzgewinns. Das Ergebnis der Vorprüfung durch den Prüfungsausschuss und das Ergebnis seiner eigenen Prüfung entsprechen vollständig dem Ergebnis der Abschlussprüfung. Nach dem abschließenden Ergebnis dieser Prüfung sind auch vom Aufsichtsrat keine Einwendungen zu erheben. Der Aufsichtsrat hat daher den Jahresabschluss und den Konzernabschluss gebilligt. Der Jahresabschluss ist damit festgestellt.

Ein Abhängigkeitsbericht musste im Berichtsjahr aufgrund der Veränderungen im Aktionärskreis nicht mehr aufgestellt werden.

Der Aufsichtsrat hat sich dem Vorschlag des Vorstands zur Verwendung des Bilanzgewinns, einschließlich der Ausschüttung einer Dividende in Höhe von 0,25 EUR je Aktie, angeschlossen.

## Personalia

2010 wurden die durch das Ausscheiden der Schwenk-Gruppe aus dem Aktionärskreis frei gewordenen Mandate neu besetzt. Mit Herrn Alan Murray und Herrn Dr.-Ing. Herbert Lütkestratkötter konnte HeidelbergCement zwei internationale und branchennahe Führungspersönlichkeiten gewinnen, die sich fachkundig und engagiert in die Tätigkeit des Aufsichtsrats einbringen. Die frei gewordenen Mandate in den Ausschüssen wurden aus dem Kreis der amtierenden Aufsichtsratsmitglieder in der ersten Präsenzsitzung des Aufsichtsrats im Berichtsjahr nachbesetzt. In seiner außerordentlichen Sitzung vom 10. Februar 2011 ist der Aufsichtsrat der Empfehlung seines Personalausschusses gefolgt und hat die Vorstandsmandate der Herren Daniel Gauthier und Andreas Kern jeweils um fünf Jahre bis zum 30. Juni 2016 verlängert. Der Aufsichtsrat verbindet diese Verlängerung mit Dank und Anerkennung für die sehr erfolgreiche Tätigkeit von Herrn Gauthier in den Regionen Nord- und Westeuropa, Afrika, Mittelmeer und Konzernservice und von Herrn Kern in der Region Zentraleuropa-Zentralasien.

Der Aufsichtsrat dankt schließlich der Unternehmensleitung sowie allen Mitarbeiterinnen und Mitarbeitern des Unternehmens für ihren hohen persönlichen Einsatz im Jahr 2010. Sie haben unter den immer noch schwierigen wirtschaftlichen Rahmenbedingungen in der Baustoffbranche ganz Hervorragendes zur Konsolidierung und zur weiteren Entwicklung des Unternehmens geleistet.

Heidelberg, 16. März 2011

Für den Aufsichtsrat

Mit freundlichen Grüßen



Fritz-Jürgen Heckmann  
Vorsitzender



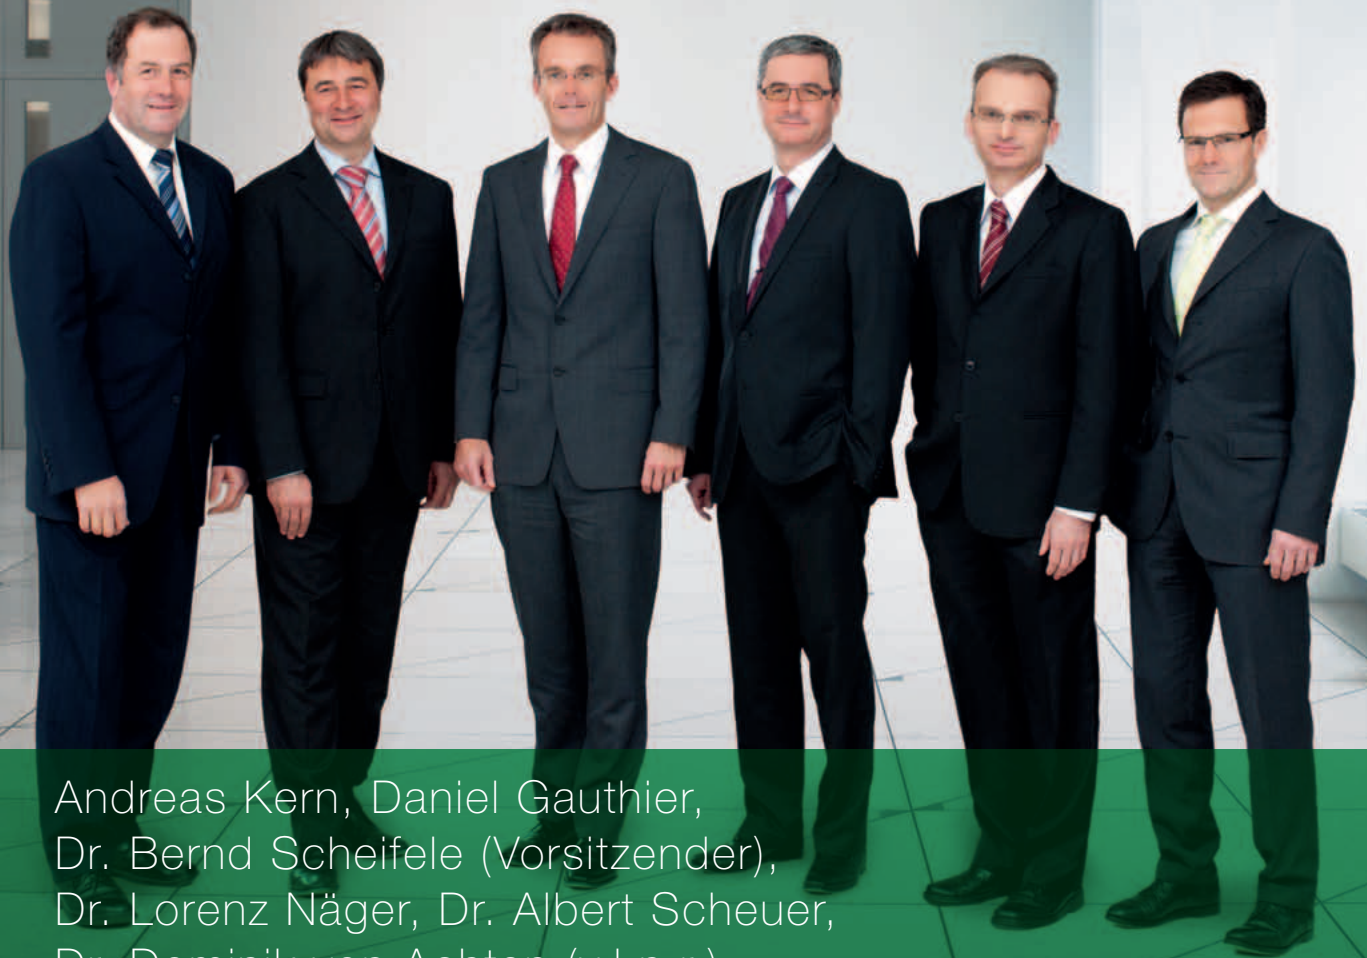

Andreas Kern, Daniel Gauthier,  
Dr. Bernd Scheifele (Vorsitzender),  
Dr. Lorenz Näger, Dr. Albert Scheuer,  
Dr. Dominik von Achten (v.l.n.r.)

### Dr. Bernd Scheifele

Geboren in Freiburg, 52 Jahre. Studium der Rechtswissenschaften an den Universitäten Freiburg und Dijon (Frankreich) sowie an der Universität von Illinois (USA). Seit 2005 Vorstandsvorsitzender, zuständig für Strategie und Entwicklung, Kommunikation & Investor Relations, Personal, Recht, Compliance und Konzernrevision.

### Dr. Dominik von Achten

Geboren in München, 45 Jahre. Studium der Rechtswissenschaften und Volkswirtschaftslehre an den Universitäten Freiburg und München. Seit 2007 im Vorstand; verantwortlich für das Konzerngebiet Nordamerika, den Einkauf und die konzernweite Koordinierung des Competence Center Materials.

### Daniel Gauthier

Geboren in Charleroi (Belgien), 54 Jahre. Studium des Bergbauwesens in Mons (Belgien). Kam 1982 zur CBR, dem belgischen Tochterunternehmen von HeidelbergCement. Seit 2000 im Vorstand; verantwortlich für die Konzerngebiete West- und Nordeuropa (ohne Deutschland), Afrika-Mittelmeerraum und Konzernservice sowie Umweltnachhaltigkeit.

### Andreas Kern

Geboren in Neckarsteinach, 52 Jahre. Studium der Betriebswirtschaftslehre in Mannheim. Kam 1983 zu HeidelbergCement. Im Vorstand seit 2000; zuständig für das Konzerngebiet Osteuropa-Zentralasien und Deutschland, Verkauf und Marketing sowie die konzernweite Koordinierung zementähnlicher Sekundärstoffe.

### Dr. Lorenz Näger

Geboren in Ravensburg, 50 Jahre. Studium der Betriebswirtschaftslehre an den Universitäten Regensburg, Mannheim und Swansea (Großbritannien). Seit 2004 im Vorstand; verantwortlich für Finanzen, Konzernrechnungslegung, Controlling, Steuern, Versicherungen & Risikomanagement, IT, Shared Service Center und Logistik.

### Dr. Albert Scheuer

Geboren in Alsfeld, 53 Jahre. Ingenieurstudium im Fachbereich Maschinenbau/Verfahrenstechnik in Clausthal. Seit 1992 bei HeidelbergCement. Im Vorstand seit 2007; verantwortlich für das Konzerngebiet Asien-Pazifik sowie die konzernweite Koordinierung des Heidelberg Technology Center.



# HeidelbergCement am Kapitalmarkt

## Überblick

Die HeidelbergCement-Aktie ist in Deutschland zum Handel im Börsensegment Prime Standard an der Frankfurter Wertpapierbörse zugelassen und im Regulierten Markt an den Börsen Stuttgart, Düsseldorf und München notiert. Am 21. Juni 2010 stieg die HeidelbergCement-Aktie in den deutschen Leitindex DAX auf. HeidelbergCement konnte damit als erstes Unternehmen der Bau- und Baustoffindustrie in die Riege der 30 größten börsennotierten Unternehmen Deutschlands aufrücken.

Unsere Aktie gehört zu den wichtigsten Baustoffwerten in Europa: Enthalten ist sie außer im DAX auch in weiteren Indizes, unter anderem dem DAXsector All Construction Index, dem MSCI World Construction Materials Index und dem Dow Jones Sector Titans Construction & Materials Index, der die 30 größten Bau- und Baunebenwerte der Welt umfasst.

## Entwicklung der HeidelbergCement-Aktie

Getrieben von der Erwartung einer raschen Konjunkturerholung der Weltwirtschaft, insbesondere auch durch die Konjunktur- und Infrastrukturprogramme in den USA, erreichte der Kurs der HeidelbergCement-Aktie im Börsenjahr 2010 am 11. Januar mit 51,36 EUR seinen Höchststand.

Eine langsamer als erwartete wirtschaftliche Erholung in den USA und ein langer und schneereicher Winter in Nordamerika und Europa führten in den folgenden Monaten zu Kursabschlägen und einem uneinheitlichen Kursverlauf.

Nach enttäuschenden US-Wirtschaftsdaten im Sommer erreichte der Kurs unserer Aktie am 25. August mit 31,40 EUR seinen Tiefststand. In der Folgezeit verbesserten sich die wirtschaftlichen Indikatoren insbesondere auch in den USA und der Kurs unserer Aktie erholte sich daraufhin deutlich. Zu einem größeren Kursanstieg und einer Fortsetzung des positiven Trends kam es insbesondere nach der Veröffentlichung unserer Ergebnisse für das dritte Quartal im November, die positiv von den Kapitalmärkten aufgenommen wurden. Die HeidelbergCement-Aktie schloss zum Jahresende 2010 mit 46,90 EUR.

Insgesamt konnte der Kurs unserer Aktie im Jahresverlauf die Verluste der ersten Jahreshälfte nicht aufholen und fiel um 2,5%, während der DAX unterstützt durch starke Exportzahlen der Automobilindustrie um 16,1% stieg. Besser entwickelte sich die HeidelbergCement-Aktie im Vergleich zum weltweiten Branchenindex MSCI World Construction Materials Index, der sich um 4,5% abschwächte. Die Marktkapitalisierung von HeidelbergCement lag zum Jahresende 2010 bei 8,8 Mrd EUR und damit leicht unter dem Vorjahreswert (9,0 Mrd EUR).

**Entwicklung der HeidelbergCement-Aktie** (ISIN DE0006047004, WKN 604700) <sup>1)</sup>

| EUR                                     | 2010      |
|-----------------------------------------|-----------|
| Vorjahresendkurs                        | 48,10     |
| Höchstkurs                              | 51,36     |
| Tiefstkurs                              | 31,40     |
| Jahresendkurs                           | 46,90     |
| Eigenkapital je Aktie 31.12.2010        | 68,72     |
| Börsenwert 31.12.2010 (1.000 EUR)       | 8.793.750 |
| <b>Veränderung gegenüber 31.12.2009</b> |           |
| HeidelbergCement-Aktie                  | -2,5 %    |
| DAX                                     | +16,1 %   |
| MSCI World Construction Materials Index | -4,5 %    |

1) Kurse bereinigt um Dividenden und Kapitalmaßnahmen

**HeidelbergCement-Aktie 2010<sup>1)</sup>**

Index (Basis: 31. Dezember 2009 = 100)

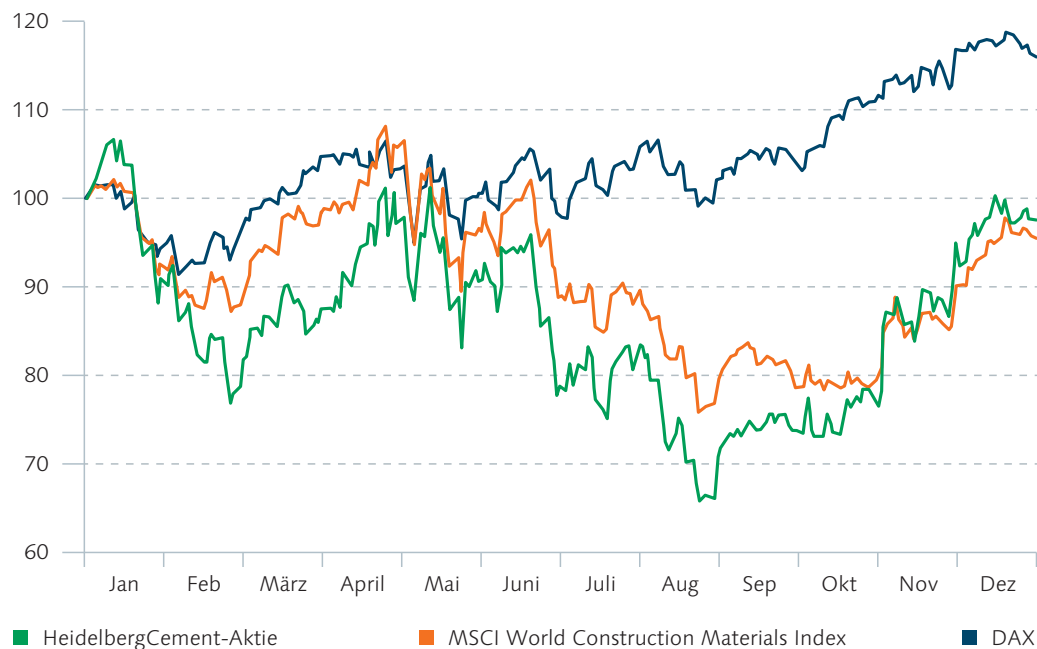

1) Kurse bereinigt um Dividenden und Kapitalmaßnahmen



## Ergebnis je Aktie

Das Ergebnis je Aktie nach IAS 33 für das Geschäftsjahr 2010 beträgt 1,83 (i.V.: 0,30) EUR. Für die fortzuführenden Geschäftsbereiche beläuft sich das Ergebnis je Aktie auf 1,98 (i.V.: 0,36) EUR.

Die Berechnung des Ergebnisses je Aktie gemäß IAS 33 wird aus der nachstehenden Tabelle ersichtlich. Bei der Ermittlung der durchschnittlichen Aktienzahl wurden die Zugänge zeitanteilig gewichtet. Weitere Erläuterungen sind im Anhang unter Punkt 13 dargestellt.

| <b>Ergebnis je Aktie gemäß International Financial Reporting Standards (IAS 33)</b>                  |         |         |
|------------------------------------------------------------------------------------------------------|---------|---------|
| Mio EUR                                                                                              | 2009    | 2010    |
| Anteil der Gruppe am Jahresüberschuss                                                                | 42,6    | 342,7   |
| Aktienzahl in Tsd. (gew. Durchschnitt)                                                               | 142.170 | 187.500 |
| Ergebnis je Aktie in EUR                                                                             | 0,30    | 1,83    |
| Ergebnis aus fortzuführenden Geschäftsbereichen – den Aktionären der HeidelbergCement AG zuzurechnen | 50,6    | 371,1   |
| Ergebnis je Aktie in EUR – fortzuführende Geschäftsbereiche                                          | 0,36    | 1,98    |
| Ergebnis aus aufgegebenen Geschäftsbereichen – den Aktionären der HeidelbergCement AG zuzurechnen    | -8,0    | -28,4   |
| Ergebnis je Aktie in EUR – aufgegebene Geschäftsbereiche                                             | -0,06   | -0,15   |

## Dividende

Angesichts der Ergebnisentwicklung werden Vorstand und Aufsichtsrat der Hauptversammlung am 5. Mai 2011 die Ausschüttung einer Dividende von 0,25 EUR je HeidelbergCement-Aktie vorschlagen.

## Aktionärsstruktur und Handelsvolumen

Im Rahmen einer im Dezember 2010 durchgeführten Anteilseignerstudie zeigte sich eine deutliche Veränderung in der Aktionärsstruktur von HeidelbergCement im Vergleich zum Stand nach der Kapitalerhöhung im Herbst 2009. Wir konnten den Anteil institutioneller Investoren aus Deutschland und Kontinentaleuropa deutlich erhöhen; im Gegenzug nahm der Anteil britischer Investoren, insbesondere von Hedgefonds, ab.

Anfang Dezember 2010 bildeten somit Investoren aus Deutschland mit 32 % die größte Anlegergruppe, gefolgt von Investoren aus Nordamerika mit 24 %, aus Großbritannien und der Republik Irland mit 18 % und aus Kontinentaleuropa ohne Deutschland mit 17 %.

Der Streubesitz belief sich zum 31. Dezember 2010 auf 74,89 %. Herr Ludwig Merckle hält nach den der Gesellschaft vorliegenden Mitteilungen nunmehr einen Anteil von 25,11 %.

Im Durchschnitt werden im XETRA-Handel der Frankfurter Börse etwa 1,1 Mio HeidelbergCement-Aktien pro Tag gehandelt. In der von der Deutschen Börse veröffentlichten „Rangliste Aktienindizes“ belegte unsere Aktie zum Jahresende 2010 beim Kriterium Free-Float-Marktkapitalisierung Platz 26 und beim Börsenumsatz Platz 22.

**Geografische Aufteilung der Aktionärsstruktur** (Stand Dezember 2010)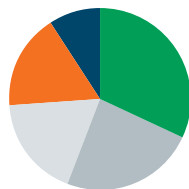

- 32 % Deutschland
- 24 % Nordamerika
- 18 % Großbritannien & Republik Irland
- 17 % Kontinentaleuropa (ohne Deutschland)
- 9 % Rest der Welt, Privatanleger und unbekannt

**Aktionärsstruktur**

|                                                                                                                                                    | 31. 12. 2010 |
|----------------------------------------------------------------------------------------------------------------------------------------------------|--------------|
| Ludwig Merckle, Ulm/Deutschland (04.11.2010)                                                                                                       | 25,11 %      |
| Streubesitz                                                                                                                                        | 74,89 %      |
| darin enthalten:                                                                                                                                   |              |
| BlackRock, Inc., New York/USA <sup>1)</sup> (06.09.2010)                                                                                           | 5,48 %       |
| FMR LLC, Boston/USA <sup>1)</sup> (24.08.2010)                                                                                                     | 4,86 %       |
| Arnhold and S. Bleichroeder Holdings, Inc., New York/USA<br>(über First Eagle Investment Management, LLC, New York/USA) <sup>1)</sup> (20.05.2010) | 3,12 %       |

1) Zurechnung nach § 22 Abs. 1 Satz 1 Nr. 6 WpHG

In Klammern: Datum des Über- oder Unterschreitens einer meldepflichtigen Schwelle

**Grundkapital der HeidelbergCement AG**

|                   | Grundkapital<br>1.000 EUR | Anzahl<br>Aktien   |
|-------------------|---------------------------|--------------------|
| 1. Januar 2010    | 562.500                   | 187.500.000        |
| 31. Dezember 2010 | <b>562.500</b>            | <b>187.500.000</b> |

## Anleihen und Kreditratings

Im Geschäftsjahr 2010 hat HeidelbergCement Euroanleihen in Höhe von insgesamt 2,05 Mrd EUR an institutionelle Investoren im In- und Ausland begeben. Bereits im Januar konnten wir zwei Euroanleihen mit einem Gesamtnominalvolumen von 1,4 Mrd EUR platzieren: eine Anleihe im Volumen von 650 Mio EUR und fünf Jahren Laufzeit und eine weitere über 750 Mio EUR und zehn Jahren Laufzeit. Die Emissionserlöse wurden ausschließlich zur teilweisen Rückzahlung des syndizierten Kredits vom Juni 2009 verwendet.

Für längerfristige Kapitalaufnahmen im Kapitalmarkt verfügt HeidelbergCement über ein 10 Mrd EUR EMTN-Programm. Unter diesem Programm haben wir am 1. Juli eine weitere Euroanleihe mit einem Emissionsvolumen von 650 Mio EUR und einer Laufzeit bis 15. Dezember 2015 begeben.



Der Emissionserlös der Anleihe wurde zur weiteren Verbesserung des Fälligkeitsprofils verwendet. Die Anleihen sind unbesichert und stehen im Rang gleichberechtigt zu allen anderen Kapitalmarktverbindlichkeiten. Weitergehende Informationen zu den von HeidelbergCement begebenen Anleihen finden Sie im Abschnitt Konzern-Finanzmanagement auf Seite 71 ff.

HeidelbergCement lässt seine Kreditqualität von den international führenden Ratingagenturen Standard & Poor's, Moody's Investors Service und Fitch Ratings bewerten. Die erfolgreichen Refinanzierungsmaßnahmen im Geschäftsjahr 2010 führten zu einer weiteren Anhebung der Kreditratings durch die Ratingagenturen. Die Ratings lauten „BB-/B/Ausblick positiv“ bei Standard & Poor's, „Ba2/Not Prime/Ausblick positiv“ bei Moody's Investors Service und „BB/B/Ausblick stabil“ bei Fitch Ratings.

## Investor Relations

Im Jahr 2010 haben wir unser Investor-Relations-Team durch einen zusätzlichen IR-Manager verstärkt und konnten dadurch unsere Investor-Relations-Arbeit weiter intensivieren und insbesondere nach regionalen Schwerpunkten ausrichten.

Im Mittelpunkt der Investor-Relations-Arbeit stand die Stabilisierung der Aktionärsstruktur nach der Kapitalerhöhung unter Mitplatzierung von Altaktien im Jahr 2009. Durch gezieltes Ansprechen institutioneller Investoren im Rahmen von Besuchen und Konferenzen, insbesondere in Deutschland und Kontinentaleuropa, aber auch in den Kapitalmarktzentren in den USA und in London, ist es uns gelungen, die Aktionärsbasis weiter zu diversifizieren und renommierte institutionelle Investoren als Aktionäre zu gewinnen.

Im Mai 2010 sind insgesamt etwa 50 Analysten und Investoren einer Einladung in unsere Konzernzentrale in Heidelberg zu einem Analysten- und Investorentag gefolgt. Diese Veranstaltung haben wir genutzt, um das Unternehmen und seine Strategie im Detail vorzustellen und die Beziehungen zu unseren Analysten und Investoren weiter zu vertiefen. Die während dieser Veranstaltung und auf Besuchen und Konferenzen gezeigten Präsentationen haben wir im Internet veröffentlicht. Durch Gespräche mit Analysten haben wir die Aufnahme der Berichterstattung durch weitere Banken unterstützt. Die Zahl der Analysten, die regelmäßig über HeidelbergCement berichten, hat sich seit Veröffentlichung des letzten Geschäftsberichts auf derzeit 27 erhöht.

Wie bereits im Vorjahr haben wir auch Ende 2010 ausgewählte internationale Investoren und Analysten nach ihren Einschätzungen und Erwartungen an unser Unternehmen befragt und zusätzlich um eine Bewertung der Leistung des Investor-Relations-Teams gebeten. Die Ergebnisse fließen auch dieses Jahr wieder in die Weiterentwicklung unserer Investor-Relations-Arbeit ein, mit dem Ziel, den offenen Dialog und die transparente Kommunikation mit dem Kapitalmarkt erfolgreich fortzuführen und das Vertrauen in unser Unternehmen und unsere Aktie weiter zu stärken.

### Ihr Kontakt zu uns:

HeidelbergCement AG  
 Group Communication & Investor Relations  
 Berliner Straße 6  
 69120 Heidelberg

Telefon:

|                                                                        |                              |
|------------------------------------------------------------------------|------------------------------|
| Institutionelle Anleger USA und UK (Herr Ozan Kacar):                  | +49 (0) 6221 481-925         |
| Institutionelle Anleger EU und Rest der Welt (Herr Steffen Schebesta): | +49 (0) 6221 481-9568        |
| Privatanleger (Herr Günter Wesch):                                     | +49 (0) 6221 481-256         |
| Abteilungsleitung (Herr Andreas Schaller):                             | +49 (0) 6221 481-249         |
| Fax:                                                                   | +49 (0) 6221 481-217         |
| E-Mail:                                                                | ir-info@heidelbergcement.com |



# Zusammengefasster Lagebericht des Heidelberg-Cement Konzerns und der HeidelbergCement AG

|            |                                                                        |
|------------|------------------------------------------------------------------------|
| <b>42</b>  | <b>Kernaktivitäten und Organisationsstruktur</b>                       |
| <b>43</b>  | <b>Strategie, Unternehmenssteuerung und Ziele</b>                      |
| <b>46</b>  | <b>Geschäftsverlauf 2010</b>                                           |
| 46         | Wirtschaftliches Umfeld                                                |
| 48         | Umsatz- und Absatzentwicklung                                          |
| 49         | Ertragslage                                                            |
| 51         | Geschäftsverlauf in den Konzerngebieten                                |
| 66         | Aufgegebene Geschäftsbereiche                                          |
| 66         | Kapitalflussrechnung                                                   |
| 68         | Investitionen                                                          |
| 69         | Konzernbilanz                                                          |
| 70         | Konzern-Finanzmanagement                                               |
| 75         | Ertrags-, Vermögens- und Finanzlage<br>der HeidelbergCement AG         |
| 77         | Beurteilung der wirtschaftlichen Lage durch die<br>Unternehmensleitung |
| <b>78</b>  | <b>Weitere Angaben</b>                                                 |
| <b>83</b>  | <b>Risikobericht</b>                                                   |
| <b>96</b>  | <b>Nachhaltigkeit bei HeidelbergCement</b>                             |
| <b>98</b>  | <b>Mitarbeiter und Gesellschaft</b>                                    |
| <b>104</b> | <b>Umweltvorsorge</b>                                                  |
| <b>106</b> | <b>Forschung und Technik</b>                                           |
| <b>111</b> | <b>Ausblick</b>                                                        |
| <b>120</b> | <b>Corporate Governance</b>                                            |

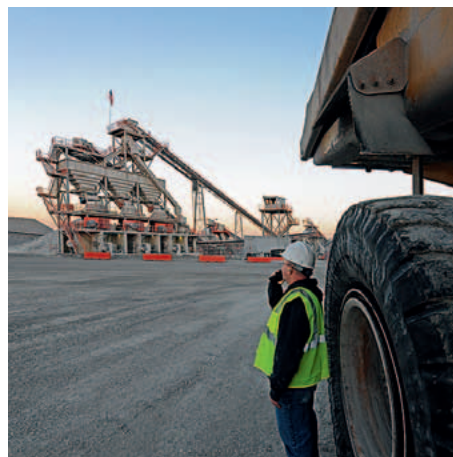



## Kernaktivitäten und Organisationsstruktur

HeidelbergCement ist als voll integriertes Baustoffunternehmen auf fünf Kontinenten tätig. Unsere Kernaktivitäten umfassen die Herstellung und den Vertrieb von Zement und Zuschlagstoffen, die beiden wesentlichen Rohstoffe für die Herstellung von Beton. Mit nachgelagerten Aktivitäten wie Transportbeton, Betonprodukten und Betonelementen sowie weiteren verwandten Produkten und Serviceleistungen ergänzen wir unsere Produktpalette.

### Organisationsstruktur der Konzerngebiete und Geschäftsbereiche

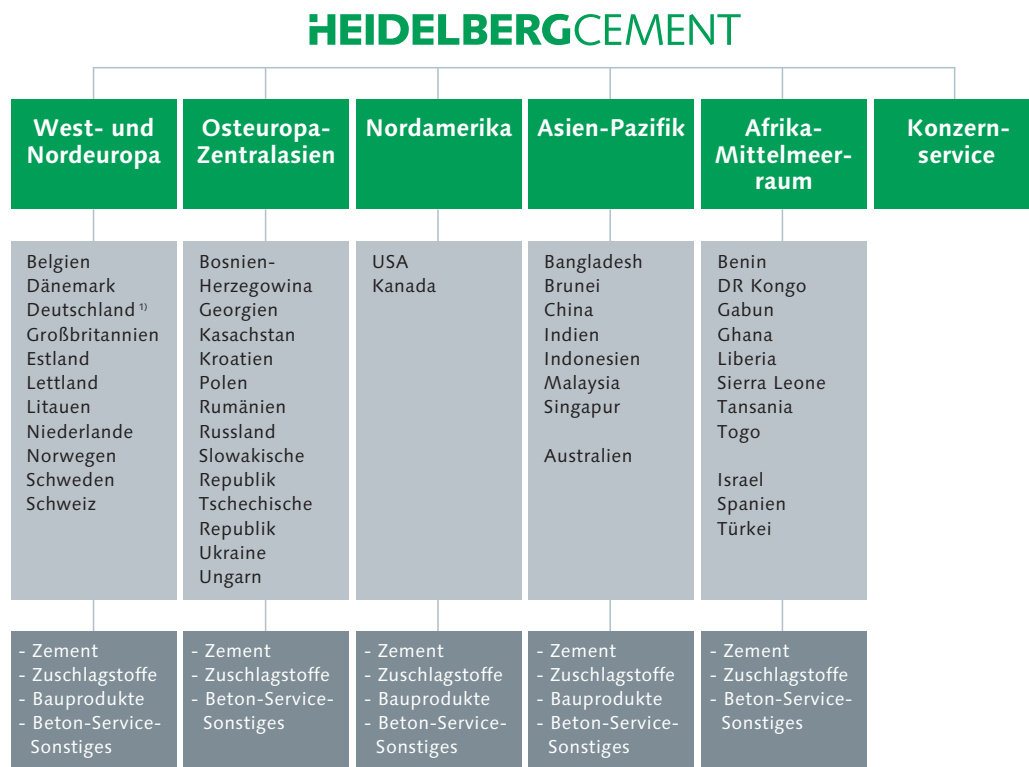

1) Deutschland wird als reifer Markt unter West- und Nordeuropa berichtet, aber aus unternehmerischen Gründen von dem gleichen Vorstandsmitglied verantwortet, das auch für Osteuropa-Zentralasien verantwortlich ist.

HeidelbergCement hat mit Beginn des Geschäftsjahres 2010 seine Organisationsstruktur neu gegliedert. Die Unterteilung erfolgt jetzt in die fünf geografischen Konzerngebiete West- und Nordeuropa, Osteuropa-Zentralasien, Nordamerika, Asien-Pazifik und Afrika-Mittelmeerraum (Zuordnung der Länder siehe Organigramm). Im sechsten Konzerngebiet Konzernservice sind unsere weltumspannenden Handelstätigkeiten zusammengefasst. Innerhalb der geografischen Konzerngebiete haben wir unsere Aktivitäten in vier Geschäftsbereiche untergliedert: Zement, Zuschlagstoffe, Bauprodukte, Beton-Service-Sonstiges. Allerdings sind die Bauprodukte in Asien-Pazifik nur unterdurchschnittlich und in Osteuropa-Zentralasien sowie Afrika-Mittelmeerraum gar nicht vertreten.

| Zusammengefasster Lagebericht              |                                     |
|--------------------------------------------|-------------------------------------|
| Kernaktivitäten und Organisationsstruktur  | Nachhaltigkeit bei HeidelbergCement |
| Strategie, Unternehmenssteuerung und Ziele | Mitarbeiter und Gesellschaft        |
| Geschäftsverlauf 2010                      | Umweltvorsorge                      |
| Weitere Angaben                            | Forschung und Technik               |
| Risikobericht                              | Ausblick                            |

# Strategie, Unternehmenssteuerung und Ziele

## Unternehmensstrategie

### Duale Wachstumsstrategie

Zement und Zuschlagstoffe bilden die Basis unserer dualen Rohstoff- und Wachstumsstrategie. Bei Zement liegt der Schwerpunkt auf Wachstumsmärkten, während wir uns in reifen Märkten auf den Ausbau der vertikalen Integration und die Rohstoffsicherung bei den Zuschlagstoffen konzentrieren. Der Fokus liegt dabei auf Mikromärkten, die sich durch höhere Wachstumsraten auszeichnen als die umliegenden Regionen. Das Wachstum kann dabei organisch, durch Partnerschaften oder Akquisitionen erfolgen.

### Leistungskultur und lokale Verantwortung

Ein exzellentes Management-Team und engagierte, qualifizierte Mitarbeiter sind die Grundlage erfolgreichen Wirtschaftens. Als leistungs- und ergebnisorientiertes Unternehmen legen wir großen Wert auf die Kompetenz unserer Mitarbeiter und Führungskräfte. Ganzheitliche Effizienz und ausgeprägte Kundenorientierung stehen dabei im Fokus. HeidelbergCement setzt auf einen integrierten Managementansatz. Dessen Erfolg beruht auf einer ausgewogenen Balance zwischen lokaler Geschäftsverantwortung, konzernweiten Standards und globaler Führung. Unsere operativen Einheiten vor Ort sind entscheidend für den Geschäftserfolg. Das lokale Management hat die volle Verantwortung für die Produktion, Marktbearbeitung und Führungskräfteentwicklung mit dem Ziel der Markt- und Kostenführerschaft. Es wird unterstützt von Shared Service Centern, in denen landesweit die Verwaltungsfunktionen für alle Geschäftsbereiche auf der Basis einer standardisierten IT-Infrastruktur zusammengefasst sind. Um Transparenz, Effizienz und schnelle Umsetzung im Konzern zu gewährleisten, standardisiert HeidelbergCement alle wesentlichen Managementprozesse. Konzernweit einheitliche Leistungskennzahlen ermöglichen einen direkten Vergleich und sind die Voraussetzung für permanentes Benchmarking.

### Kostenführerschaft und Benchmarking

In einem Markt mit weitgehend standardisierten Produkten stellt die Kostenführerschaft einen wesentlichen Erfolgsfaktor dar. Neben der konsequenten Verfolgung von Kostensenkungsprogrammen liegt ein besonderer Schwerpunkt auf der kontinuierlichen Verbesserung der operativen Leistung der einzelnen Produktionsstätten durch intensives Benchmarking. Darüber hinaus streben wir auch bei den Investitionen nach möglichst niedrigen Kosten durch die Kombination der Ingenieurskunst von HeidelbergCement mit weltweit preiswerten Lieferquellen für Maschinen, Anlagen und Dienstleistungen.

### Nachhaltigkeit sichert den langfristigen Unternehmenserfolg

Nachhaltiges Wirtschaften ist die Basis für unseren langfristigen Erfolg. Das beinhaltet die Sicherung von Rohstoffreserven mit ausreichenden Reichweiten und die Einführung innovativer Produktionsverfahren. Zusammen mit der Entwicklung neuartiger Produkte führt dies zur Reduktion von Emissionen und einem schonenden Umgang mit unserer Rohstoffbasis. HeidelbergCement fördert zudem die Artenvielfalt in seinen Rohstoffförderstätten durch den gezielten Einsatz von Biodiversitäts-Managementplänen.



## Finanzierungsstrategie

Informationen zu unserem Finanzmanagement, dessen Zielen und Maßnahmen finden Sie im Abschnitt Konzern-Finanzmanagement auf Seite 70 ff.

## Unternehmensinternes Steuerungssystem und Ziele

Das unternehmensinterne Steuerungssystem von HeidelbergCement besteht im Wesentlichen aus der operativen Jahresplanung, der unterjährigen Kontrolle und Steuerung, den vierteljährlichen Management Meetings, dem zentral koordinierten Investitionsprozess und regelmäßigen Vorstandssitzungen und Berichterstattungen an den Aufsichtsrat.

Die jährliche Planung vollzieht sich im Rahmen des so genannten Gegenstromverfahrens. Der Vorstand definiert zunächst ein Top-Down-Budget und leitet daraus konkrete Zielsetzungen für die einzelnen operativen Einheiten ab. Die Zielvorgaben des Vorstands fließen in die detaillierte Planung der Unternehmenseinheiten und in die Zielvereinbarungen der lokalen Manager ein. Die von den Unternehmenseinheiten erstellten operativen Teilpläne werden schließlich zentral zu einem finalen Gesamtplan konsolidiert.

Die unterjährige Kontrolle und Steuerung des Unternehmens wird anhand eines umfassenden Systems standardisierter Berichte zur Vermögens-, Finanz- und Ertragslage durchgeführt. Die dazu verwendeten Kennzahlen werden konzernweit einheitlich ermittelt und präsentiert. Finanzstatus und ausgewählte Absatz- und Produktionsübersichten werden wöchentlich erstellt, während Berichte zur Ertragslage und zur Entwicklung des Betriebskapitals (Working Capital) monatlich erfolgen. Umfassende Berichte zur Vermögenslage werden jeweils zum Quartalsende vorgelegt. In den vierteljährlichen Management Meetings erörtern Vorstand und Länderverantwortliche die Geschäftsentwicklung einschließlich Zielerreichung sowie den Ausblick auf das Gesamtjahr und eventuell zu ergreifende Maßnahmen.

Wesentliche Investitionen und Akquisitionen werden von zentralen Fachabteilungen aus den Bereichen Strategie, Finanzen und Technik in einem formalisierten Prozess geprüft und bewertet. Damit werden die Vergleichbarkeit zwischen unterschiedlichen Projekten und eine gleichbleibend hohe Qualität bei Investitionsentscheidungen sichergestellt. Zur betriebswirtschaftlichen Beurteilung von Wachstumsinvestitionen wird ein Modell der abgezinnten Kapitalströme (Discounted-Cash-Flow-Modell – DCF-Modell) verwendet. Vorgabe ist, dass die Investitionsprojekte mindestens die gewichteten Kapitalkosten (Weighted Average Cost of Capital – WACC) erwirtschaften. Diese langfristige Betrachtung der Renditeerwartungen wird durch Simulationsrechnungen ergänzt, in denen der Einfluss einer Investition auf die Gewinn- und Verlustrechnung, Kapitalflussrechnung, Bilanz und die steuerliche Position über einen Zeitraum von fünf Jahren berechnet wird.

Da die Märkte innerhalb des Planungszeitraumes erheblich stärkeren Schwankungen ausgesetzt sein können, als für die Berechnung der Finanzmodelle vorherzusehen ist, wird die finanzielle Analyse durch eine strategische Analyse der geplanten Investitionen vervollständigt. Dabei wird der strategische Wert einer Investition unter Berücksichtigung der zu erwartenden Marktposition, des Wachstumspotenzials, der Synergien mit anderen Unternehmensteilen und der Risikostruktur ermittelt. Die Gesamtheit der Bewertungen ist das Kriterium, anhand dessen der Vorstand die Investitionsentscheidungen trifft.

| Zusammengefasster Lagebericht              |                                     |
|--------------------------------------------|-------------------------------------|
| Kernaktivitäten und Organisationsstruktur  | Nachhaltigkeit bei HeidelbergCement |
| Strategie, Unternehmenssteuerung und Ziele | Mitarbeiter und Gesellschaft        |
| Geschäftsverlauf 2010                      | Umweltvorsorge                      |
| Weitere Angaben                            | Forschung und Technik               |
| Risikobericht                              | Ausblick                            |

## Finanzielle Ziele und Steuerungskennzahlen

### Ergebnis, Kapitaleinsatz und Rendite

Wichtigste kurzfristige Zielgröße für die Ertragskraft des Unternehmens ist das operative Ergebnis, das für alle operativen Einheiten detailliert ermittelt und analysiert wird. Als Zielgröße auf Konzern-ebene wird der Anteil der Gruppe am Jahresüberschuss betrachtet. Vermögens- und Finanzlage der operativen Einheiten werden kurzfristig vor allem über die Höhe des Betriebskapitals und der Investitionen überwacht. Mit allen operativen Einheiten sind feste Vorgaben für alle Zielgrößen vereinbart.

Für die mittelfristige Steuerung des Unternehmens und die Kapitalallokation orientiert sich das Unternehmen auf der operativen Ebene am Return on Capital Employed (ROCE) und auf strategischer Ebene am Return on Invested Capital (ROIC). Der ROCE wird berechnet als Betriebsergebnis in Prozent des eingesetzten Kapitals. Steuern und Goodwill sind in der Berechnung nicht berücksichtigt, sondern werden auf strategischer Ebene verantwortet und sind deshalb bei der Berechnung des ROIC mit einbezogen. Die strategische Steuerung und Kapitalallokation erfolgt nach dem ROIC, der definiert ist als Verhältnis von Betriebsergebnis nach Steuern zur Summe aus Eigenkapital und verzinslichem Fremdkapital.

Zielsetzung ist, dass das Unternehmen einen ROCE von 19% bis 20% erwirtschaftet und beim ROIC mindestens die gewichteten Kapitalkosten (WACC) verdient. Der gewichtete WACC von HeidelbergCement betrug Ende des Berichtsjahrs 7,8%, wobei die einzelnen Länder eine Bandbreite von 6,5% bis 18,9% aufweisen. Im Jahr 2010, im Tiefpunkt des Zyklus in der Bauindustrie, wurden die Zielwerte nicht in allen Konzerngebieten erreicht.

### Finanzierungsstruktur

Die Rückkehr zu einer Bonitätsbewertung im Investment-Grade-Bereich ist das erklärte Ziel von HeidelbergCement, um eine günstige Finanzierung der weiteren Geschäftsentwicklung des Konzerns zu gewährleisten. Um dieses Ziel zu erreichen, streben wir finanzielle Kenngrößen an, die von den Ratingagenturen als erforderlich für ein stabiles Investment-Grade-Rating angesehen werden. Eine wesentliche Kenngröße ist der dynamische Verschuldungsgrad, also das Verhältnis von Nettoverschuldung zu operativem Ergebnis vor Abschreibungen, den wir auf einen Wert unter 2,8x senken wollen. Ende 2010 haben wir ein Verhältnis von 3,6x erreicht im Vergleich zu 4,0x Ende 2009.

### Nicht finanzielle Ziele und nachhaltige Performance-Kennzahlen

Weitere Angaben zu nicht finanziellen Performance-Kennzahlen finden Sie in den Kapiteln Nachhaltigkeit, Mitarbeiter und Gesellschaft sowie Umweltvorsorge.



# Geschäftsverlauf 2010

## Wirtschaftliches Umfeld

### Gesamtwirtschaftliche Rahmenbedingungen

Das Jahr 2010 war gekennzeichnet durch die Rückkehr des Wirtschaftswachstums in den meisten Industriestaaten, die weitere Beschleunigung des Wachstums in den Schwellenländern und letztendlich auch durch den beginnenden Anstieg der Inflation und der Rohstoffpreise ab der Jahresmitte.

Die Notenbanken in den USA und Europa haben im Kampf gegen die Wirtschaftskrise ihre Niedrigzinspolitik konsequent fortgesetzt und den Bankensektor durch den Kauf von Schuldtiteln mit hoher Ausfallwahrscheinlichkeit gestützt. Getragen von der weiter steigenden Nachfrage nach Investitions- und Konsumgütern – insbesondere in den Wachstumsregionen Asiens – konnte vor allem die Industrieproduktion in den Exportnationen deutlich zulegen und einen Teil der Verluste des Krisenjahres wieder aufholen. Zudem stieg der private Konsum weltweit aufgrund des niedrigen Zinsniveaus und des besseren wirtschaftlichen Ausblicks. Insgesamt ist die Weltwirtschaft laut Internationalem Währungsfonds im Jahr 2010 um 5,0% gewachsen, nach einem Rückgang um 0,6% im Vorjahr.

| Wachstum des realen Bruttoinlandsprodukts in wichtigen Konzernländern <sup>1)</sup> |       |                    |                              |      |                    |
|-------------------------------------------------------------------------------------|-------|--------------------|------------------------------|------|--------------------|
| in %                                                                                | 2009  | 2010 <sup>2)</sup> | in %                         | 2009 | 2010 <sup>2)</sup> |
| <b>West- und Nordeuropa</b>                                                         |       |                    | <b>Asien-Pazifik</b>         |      |                    |
| Belgien                                                                             | -2,8  | 2                  | Australien                   | 1,3  | 2,7                |
| Deutschland                                                                         | -4,7  | 3,6                | Bangladesh                   | 5,6  | 5,8                |
| Großbritannien                                                                      | -5    | 1,4                | China                        | 9,1  | 10,3               |
| Niederlande                                                                         | -3,9  | 1,7                | Indien                       | 5,8  | 9,8                |
| Norwegen                                                                            | -1,3  | 0,4                | Indonesien                   | 4,6  | 6,1                |
| Schweden                                                                            | -5,3  | 5,2                | Malaysia                     | -1,7 | 7,5                |
| <b>Osteuropa-Zentralasien</b>                                                       |       |                    | <b>Afrika-Mittelmeerraum</b> |      |                    |
| Kasachstan                                                                          | 1,2   | 7                  | Demokratische Republik Kongo | 2,8  | 5,4                |
| Polen                                                                               | 1,7   | 3,8                | Ghana                        | 4,1  | 5                  |
| Rumänien                                                                            | -7,1  | -1,9               | Tansania                     | 6    | 6,5                |
| Russland                                                                            | -7,9  | 4                  | Togo                         | 3,1  | 3,3                |
| Tschechische Republik                                                               | -4    | 2,4                | Israel                       | 0,8  | 3,8                |
| Ukraine                                                                             | -15,1 | 4,4                | Spanien                      | -3,7 | -0,1               |
| Ungarn                                                                              | -6,5  | 0,8                | Türkei                       | -4,7 | 8                  |
| <b>Nordamerika</b>                                                                  |       |                    |                              |      |                    |
| USA                                                                                 | -2,6  | 2,8                |                              |      |                    |
| Kanada                                                                              | -2,5  | 2,9                |                              |      |                    |

1) Quellen: Deutsche Bank Research und Deutsche Bank Global Markets

2) Die Angaben für 2010 basieren auf Schätzungen und Prognosen.

Die steigende Nachfrage nach Rohstoffen und Energie in den Schwellenländern und die Sorge um inflationäre Tendenzen haben ab Mitte 2010 zu einem Anstieg der Preise für Rohstoffe, Edel-

| Zusammengefasster Lagebericht              |                                     |
|--------------------------------------------|-------------------------------------|
| Kernaktivitäten und Organisationsstruktur  | Nachhaltigkeit bei HeidelbergCement |
| Strategie, Unternehmenssteuerung und Ziele | Mitarbeiter und Gesellschaft        |
| Geschäftsverlauf 2010                      | Umweltvorsorge                      |
| Weitere Angaben                            | Forschung und Technik               |
| Risikobericht                              | Ausblick                            |

metalle und Energie geführt. Dieser Trend wurde gegen Ende des Jahres 2010 und Anfang 2011 durch die Überschwemmungen in Australien und die Unruhen in Nordafrika noch verstärkt. Einige Staaten haben bereits 2010 als Reaktion auf das deutlich verbesserte Wirtschaftswachstum mit Zinserhöhungen reagiert.

### Branchenspezifische Rahmenbedingungen

Die gesamtwirtschaftliche Erholung verlief in den einzelnen Wirtschaftsbereichen unterschiedlich. Während die Automobil-, Chemie- und Stahlindustrie von der starken Nachfrage in Asien profitierten, entwickelte sich die Bauwirtschaft in den Industriestaaten nur unterdurchschnittlich. In Deutschland stiegen beispielsweise die Bauinvestitionen 2010 um 2,8% gegenüber dem Vorjahr, verglichen mit einem Anstieg des Bruttoinlandsprodukts um 3,6%. In den USA rechnet der nationale Zementverband PCA für 2010 sogar mit einem Rückgang der Bauinvestitionen um 7,1% verglichen mit einem Anstieg der Wirtschaftsleistung um 2,8%. In Asien hingegen nahm die Bautätigkeit weiter zu. In unserem größten asiatischen Markt Indonesien beispielsweise wuchs die Nachfrage nach Zement mit einem Plus von 6,2% in vergleichbarer Größenordnung wie das Bruttoinlandsprodukt, das um 6,1% stieg.

Die Nachfrage nach Baustoffen hängt von der Entwicklung der Bauinvestitionen ab. Die schwache Bautätigkeit in den meisten Industriestaaten im Jahr 2010 resultiert unter anderem aus dem spätzyklischen Einsetzen von Investitionen im Wirtschaftsbau. Mit der wirtschaftlichen Erholung müssen zunächst die aufgrund der Krise leerstehenden Büro-, Lager- und Verkaufsflächen genutzt werden, bevor Unternehmen zu Neu- und Ausbau bereit sind. In den USA rechnet die PCA mit einem Rückgang im Wirtschaftsbau im Jahr 2010 um mehr als 30%. In Deutschland ging der Wirtschaftsbau trotz der deutlichen Konjunkturerholung um 0,2% zurück.

Darüber hinaus leiden einige Industriestaaten, insbesondere die USA und Spanien, unter einem großen Überhang an Wohnraum, der sich negativ auf die Häuser- und Wohnungspreise auswirkt. Hohe Arbeitslosigkeit beeinträchtigt zusätzlich die Nachfrage nach Häusern und Wohnungen. Im Jahr 2010 haben die Wohnungsbauinvestitionen in vielen Industriestaaten allerdings ihren Tiefpunkt durchschritten und zeigen wieder erste Anzeichen der Erholung. In Deutschland stiegen die Wohnungsbaugenehmigungen in den ersten elf Monaten 2010 um 8% im Vergleich zum Vorjahr. Nach einem starken Einbruch des Wohnungsbaus in den USA im Jahr 2009 um 25% rechnet die PCA für das 2010 mit einem leichten Anstieg um 2,9%.

Im Bereich Hoch- und Tiefbau wurde die Nachfrage nach Baustoffen 2010 in einigen Ländern, wie den USA, Deutschland aber auch China, durch staatlich geförderte Infrastrukturmaßnahmen verbessert. Mit diesen zusätzlichen Projekten konnte ein Teil des Nachfrageeinbruchs ausgeglichen werden.

Wie die Bauwirtschaft entwickelten sich auch die Baustoffmärkte 2010 recht uneinheitlich. Der Weltzementverbrauch nahm zwar schätzungsweise um rund 8% zu, aber ohne China, auf das mehr als die Hälfte des weltweiten Verbrauchs entfällt, belief sich der Anstieg nur auf etwa 3%. Den teilweise hohen Zuwächsen in den Schwellenländern standen weitaus niedrigere Wachstumsraten in den Industriestaaten gegenüber. In China beispielsweise dürfte der Zementverbrauch um deutlich über 10% gestiegen sein; Indonesien und Indien verzeichneten einen Nachfrageanstieg um rund 6%. In den USA hingegen blieb der Zementverbrauch auf dem Vorjahresniveau. Während die Zementnachfrage in Großbritannien nach einem drastischen Einbruch im Vorjahr wieder ein Plus von rund 4% erreichte, ist sie in Deutschland nochmals um 3% zurückgegangen.



## Umsatz- und Absatzentwicklung

Die Geschäftszahlen haben sich 2010 im Vergleich zum Vorjahr kontinuierlich verbessert. Sie spiegeln die anhaltend positive Entwicklung in den Wachstumsmärkten von HeidelbergCement wie Asien und Afrika wider sowie die beginnende Erholung in den Industriestaaten Nordamerikas und Europas nach dem Durchschreiten des Tiefpunkts der Krise im Jahr 2010. Der Konzernumsatz ist insgesamt um 5,8% auf 11.762 (i.V.: 11.117) Mio EUR gestiegen. Positive Wechselkurseffekte in allen Konzerngebieten haben dazu in Höhe von 783 Mio EUR beigetragen. Rund die Hälfte davon stammt aus dem Konzerngebiet Asien-Pazifik, in dem sich alle Währungen – insbesondere die australische, indonesische und indische – stärker als der Euro entwickelt haben. Das gleiche gilt auch für den US-amerikanischen und kanadischen Dollar, für die schwedische und norwegische Krone und das britische Pfund, die maßgeblich zu positiven Wechselkurseffekten in Nordamerika sowie in West- und Nordeuropa beigetragen haben. Ohne Berücksichtigung von Währungs- und Konsolidierungseffekten erreichte der Umsatz in etwa das Vorjahresniveau.

Der Zement- und Klinkerabsatz ging 2010 gegenüber dem Vorjahr leicht um 1,2% auf 78,4 (i.V.: 79,3) Mio t zurück; ohne Konsolidierungseffekte lag der Rückgang bei 0,4%. Während die Zementmengen im Konzerngebiet Asien-Pazifik und insbesondere in Afrika stiegen, mussten wir in Europa und Zentralasien Einbußen hinnehmen. Die Zementlieferungen in Nordamerika lagen nur knapp unter dem Niveau des Vorjahrs.

2010 haben wir mit 239,7 (i.V.: 239,5) Mio t konzernweit etwas mehr Zuschlagstoffe als im Jahr zuvor verkauft. Besonders erfreulich war die Zunahme in Nordamerika. Während die Nachfrage in den Konzerngebieten Asien-Pazifik und West- und Nordeuropa im Berichtsjahr fast genauso hoch wie 2009 war, ist sie im Konzerngebiet Osteuropa-Zentralasien zurückgegangen. Der hohe Mengenverlust in Spanien ließ auch den Zuschlagstoffabsatz des Konzerngebiets Afrika-Mittelmeerraum insgesamt sinken.

Der Asphaltabsatz ging um 9,4% auf 9,1 (i.V.: 10,0) Mio t zurück. Ohne Berücksichtigung der Dekonsolidierungseffekte aus dem Verkauf der Asphaltaktivitäten in Australien 2009 lag der Rückgang bei 6,2%. Mit Ausnahme von Nordamerika gingen die Liefermengen in den anderen Konzerngebieten, in denen wir im Asphaltgeschäft tätig sind, zurück.

Unser Transportbetonabsatz lag mit 35 (i.V.: 35) Mio cbm auf Vorjahresniveau. Ohne Berücksichtigung von Konsolidierungseffekten hat er sich leicht um 0,7% verbessert. Das stärkste Absatzplus erreichten wir im Konzerngebiet Afrika-Mittelmeerraum, gefolgt von Asien-Pazifik. In West- und Nordeuropa, Osteuropa-Zentralasien und in Nordamerika waren die Mengen rückläufig.

| Absatz                      |       |       |
|-----------------------------|-------|-------|
|                             | 2009  | 2010  |
| Zement und Klinker in Mio t | 79,3  | 78,4  |
| Zuschlagstoffe in Mio t     | 239,5 | 239,7 |
| Asphalt in Mio t            | 10,0  | 9,1   |
| Transportbeton in Mio cbm   | 35,0  | 35,0  |

| Zusammengefasster Lagebericht              |                                     |
|--------------------------------------------|-------------------------------------|
| Kernaktivitäten und Organisationsstruktur  | Nachhaltigkeit bei HeidelbergCement |
| Strategie, Unternehmenssteuerung und Ziele | Mitarbeiter und Gesellschaft        |
| Geschäftsverlauf 2010                      | Umweltvorsorge                      |
| Weitere Angaben                            | Forschung und Technik               |
| Risikobericht                              | Ausblick                            |

## Ertragslage

Die Ertragslage von HeidelbergCement hat sich im Geschäftsjahr 2010 im Vergleich zum Vorjahr verbessert. Marktseitig haben hierzu die anhaltend positive Entwicklung in unseren Wachstumsmärkten in Asien und Afrika sowie die beginnende Erholung in Nordamerika und Teilen West- und Nordeuropas beigetragen, die eine weitere Abschwächung der Ertragslage in Osteuropa und im Mittelmeerraum ausgleichen konnten. Die Aufwertung wichtiger Währungen gegenüber dem Euro schlägt sich ebenfalls positiv in den Ertragszahlen nieder, genauso wie die erfolgreiche Umsetzung der konzernweiten Initiativen zur Kostensenkung und Effizienzsteigerung.

Das operative Ergebnis vor Abschreibungen (operating income before depreciation – OIBD) erhöhte sich um 6,5 % auf 2.239 (i.V.: 2.102) Mio EUR. Die OIBD-Marge verbesserte sich leicht auf 19,0 % (i.V.: 18,9 %). Das Kostensparprogramm „FitnessPlus 2010“ wurde erfolgreich abgeschlossen und erreichte ein Einsparvolumen von über 300 Mio EUR. Zusammen mit einem positiven Währungseffekt von 162 Mio EUR konnten die Kostensparmaßnahmen die Auswirkungen steigender Material- und Energiekosten sowie die negativen Folgen des lang anhaltenden Winters im ersten Quartal 2010 und des frühen und extrem starken Wintereinbruchs im vierten Quartal 2010 überkompensieren.

Der Materialaufwand erhöhte sich gegenüber dem Umsatz mit 12,1 % überproportional auf 4.731 (i.V.: 4.220) Mio EUR. Dies ist im Wesentlichen auf den Anstieg der Energiekosten um 122 Mio EUR (+10,9 %) sowie die aufgrund der Ausdehnung der Handelsgeschäfte gestiegenen Aufwendungen für Handelswaren um 181 Mio EUR (+37,9 %) zurückzuführen.

Der Personalaufwand hat sich nur leicht um 45 Mio EUR auf 2.086 (i.V.: 2.041) Mio EUR erhöht. Der Anstieg um 2,2 % gegenüber dem Vorjahr ist im Wesentlichen bedingt durch Wechselkurseffekte. Bereinigt gingen die Personalkosten leicht zurück. Die Mitarbeiterzahl hat zum Jahresende 2010 geringfügig auf 53.437 (i.V.: 53.302) zugenommen. Dies beruht im Wesentlichen auf zwei gegenläufigen Entwicklungen, zum einen auf den mit Personalabbau verbundenen Standortoptimierungen und Kapazitätsanpassungen, vor allem in Nordamerika und Großbritannien, und zum anderen auf der Zunahme der Mitarbeiterzahl in Osteuropa und Afrika aufgrund des Ausbaus der Zementaktivitäten in Russland und der Demokratischen Republik Kongo. Der Anstieg der sonstigen betrieblichen Erträge um 10,3 % auf 454 (i.V.: 412) Mio EUR beruht vor allem auf den in den Buchgewinnen des Anlagevermögens enthaltenen Erträgen aus dem Verkauf nicht benötigter Emissionsrechte in Höhe von 147 (i.V.: 99) Mio EUR.

Das operative Ergebnis nahm um 8,6 % auf 1.430 (i.V.: 1.317) Mio EUR zu. Ohne Berücksichtigung von Währungs- und Konsolidierungseffekten belief sich der Anstieg auf 0,6 %.

Das zusätzliche ordentliche Ergebnis hat sich um 393 Mio EUR auf -102 (i.V.: -495) Mio EUR verbessert. Hauptsächlich dazu beigetragen hat die Abnahme der zusätzlichen ordentlichen Aufwendungen um 505 Mio EUR auf 134 (i.V.: 639) Mio EUR aufgrund niedriger Wertminderungen auf Geschäfts- oder Firmenwerte in Höhe von 24 (i.V.: 421) Mio EUR, die im Wesentlichen Spanien betrafen. Weiterhin enthalten die zusätzlichen ordentlichen Aufwendungen Restrukturierungsaufwendungen in Höhe von 47 Mio EUR, die vor allem Deutschland und Nordamerika betrafen, Wertminderungen von Sachanlagen in Höhe von 27 Mio EUR sowie Verluste aus Verkäufen von Sachanlagen und Rückstellungen in Höhe von 9 Mio EUR. Die zusätzlichen ordentlichen Erträge



verminderten sich um 112 Mio EUR auf 32 (i.V.: 144) Mio EUR. Hierbei haben sich gegenüber dem Vorjahr insbesondere rückläufige Desinvestitionen ausgewirkt. Im Vorjahr waren darin Buchgewinne aus dem Verkauf von 14,1 % der Anteile an der indonesischen Tochtergesellschaft PT Indocement Tunggul Prakarsa (73,8 Mio EUR), aus der Realteilung der belgischen Gralex S.A. (21,2 Mio EUR) sowie der Veräußerung der Anteile an dem australischen Gemeinschaftsunternehmen Pioneer Road Services (3,1 Mio EUR) enthalten.

Der Rückgang des Beteiligungsergebnisses um 32 Mio EUR auf 6 (i.V.: 38) Mio EUR resultiert weitgehend aus Wertminderungen von Beteiligungen in Nordamerika und Polen mit einem Betrag von insgesamt 32 Mio EUR.

Die Verbesserung des Finanzergebnisses um 140 Mio EUR auf -735 (i.V.: -875) Mio EUR ist im Wesentlichen auf Einmaleffekte im sonstigen Finanzergebnis in Höhe von 91 Mio EUR sowie eine Reduzierung des Zinsergebnisses um 52 Mio EUR auf -584 (i.V.: -636) Mio EUR aus der Ablösung des syndizierten Kredits vom Juni 2009 zurückzuführen. Die Einmaleffekte betrafen die Minderung aus der Auflösung aktivierter Finanzierungskosten um 56 Mio EUR auf 75 (i.V.: 131) Mio EUR sowie die Verbesserung der Ergebnisse aus der Bewertung der als „held for trading“ ausgewiesenen Finanzinstrumente um 15 Mio EUR.

Das Ergebnis vor Steuern aus fortzuführenden Geschäftsbereichen beläuft sich auf 599 (i.V.: -14) Mio EUR. Die Steuern vom Einkommen und Ertrag haben sich um 250 Mio EUR auf 60 Mio EUR (i.V.: Ertrag in Höhe von 190 Mio EUR) erhöht. Die Veränderung beruht im Wesentlichen auf positiven Einmaleffekten im Vorjahr aus der Auflösung von Steuerabgrenzungen sowie aus der Aktivierung von Verlustvorträgen. Das Ergebnis nach Steuern aus fortzuführenden Geschäftsbereichen beträgt damit 539 (i.V.: 176) Mio EUR. Das Ergebnis nach Steuern aus aufgegebenen Geschäftsbereichen in Höhe von -28 (i.V.: -8) Mio EUR betrifft Aufwendungen aus der im Geschäftsjahr 2007 übernommenen Hanson-Gruppe und der im Jahr 2008 veräußerten maxit Group.

| <b>Konzern-Gewinn- und Verlustrechnung (Kurzfassung)</b>            |        |               |             |
|---------------------------------------------------------------------|--------|---------------|-------------|
| Mio EUR                                                             | 2009   | 2010          | Veränderung |
| Umsatzerlöse                                                        | 11.117 | <b>11.762</b> | 6 %         |
| <b>Operatives Ergebnis vor Abschreibungen</b>                       | 2.102  | <b>2.239</b>  | 7 %         |
| Abschreibungen auf immaterielle Vermögenswerte und Sachanlagen      | -785   | <b>-809</b>   | 3 %         |
| <b>Operatives Ergebnis</b>                                          | 1.317  | <b>1.430</b>  | 9 %         |
| Zusätzliches ordentliches Ergebnis                                  | -495   | <b>-102</b>   | -79 %       |
| Ergebnis aus Beteiligungen                                          | 38     | <b>6</b>      | -85 %       |
| <b>Betriebsergebnis</b>                                             | 860    | <b>1.334</b>  | 55 %        |
| Finanzergebnis                                                      | -875   | <b>-735</b>   | -16 %       |
| <b>Ergebnis vor Steuern aus fortzuführenden Geschäftsbereichen</b>  | -14    | <b>599</b>    |             |
| Steuern vom Einkommen und vom Ertrag                                | 190    | <b>-60</b>    |             |
| <b>Ergebnis nach Steuern aus fortzuführenden Geschäftsbereichen</b> | 176    | <b>539</b>    | 207 %       |
| Ergebnis nach Steuern aus aufgegebenen Geschäftsbereichen           | -8     | <b>-28</b>    | 257 %       |
| <b>Jahresüberschuss</b>                                             | 168    | <b>511</b>    | 205 %       |
| <b>Anteil der Gruppe am Jahresüberschuss</b>                        | 43     | <b>343</b>    | 704 %       |

| Zusammengefasster Lagebericht              |                                     |
|--------------------------------------------|-------------------------------------|
| Kernaktivitäten und Organisationsstruktur  | Nachhaltigkeit bei HeidelbergCement |
| Strategie, Unternehmenssteuerung und Ziele | Mitarbeiter und Gesellschaft        |
| Geschäftsverlauf 2010                      | Umweltvorsorge                      |
| Weitere Angaben                            | Forschung und Technik               |
| Risikobericht                              | Ausblick                            |

Insgesamt liegt der Jahresüberschuss bei 511 (i.V.: 168) Mio EUR. Der Anstieg des anderen Gesellschaftern zustehenden Ergebnisses um 43 Mio EUR auf 168 (i.V.: 125) Mio EUR ist insbesondere auf die verbesserte Ergebnissituation von Indocement zurückzuführen. Der Anteil der Gruppe beläuft sich demzufolge auf 343 (i.V.: 43) Mio EUR.

Das Ergebnis je Aktie – Anteil der Gruppe – nach IAS 33 erhöhte sich auf 1,83 (i.V.: 0,30) EUR. Für die fortzuführenden Geschäftsbereiche beträgt das Ergebnis je Aktie 1,98 (i.V.: 0,36) EUR.

Angesichts der Ergebnisentwicklung werden Vorstand und Aufsichtsrat der Hauptversammlung am 5. Mai 2011 vorschlagen, eine Dividende von 0,25 (i.V.: 0,12) EUR je Aktie auszuschütten.

## Geschäftsverlauf in den Konzerngebieten

### West- und Nordeuropa

HeidelbergCement ist im Konzerngebiet West- und Nordeuropa in elf Ländern tätig. In diesen reifen Märkten stellen wir als voll integriertes Baustoffunternehmen Zement, Zuschlagstoffe, Asphalt, Transportbeton und verschiedene Bauprodukte her. In den meisten Ländern, in denen wir Zement produzieren, sind wir Marktführer. Wir verfügen außerdem über ein dichtes Netz an Förderstätten für Zuschlagstoffe und Produktionsanlagen für Transportbeton. Großbritannien ist unser größtes Marktgebiet in West- und Nordeuropa und das zweitgrößte innerhalb des Konzerns.

In den Ländern des Konzerngebiets West- und Nordeuropa hat sich die Wirtschaftsaktivität nach dem ungewöhnlich strengen Winter Anfang 2010 zum Teil deutlich belebt. Insbesondere in Deutschland und Schweden ist das Bruttoinlandsprodukt 2010 mit 3,6% bzw. 5,2% wieder stark gewachsen im Vergleich zu einem Rückgang um 4,7% bzw. 5,3% im Vorjahr. In Großbritannien sowie den weiteren Ländern des Konzerngebiets West- und Nordeuropa nahm die Wirtschaftsaktivität 2010 in moderatem Umfang zu.

Die Bautätigkeit in den Ländern des Konzerngebiets zeigte sich nach größtenteils starken Rückgängen 2009 im Jahr 2010 uneinheitlich. Nach wetterbedingten Einbußen im ersten Quartal verbesserten sich die Aktivitäten im Bausektor und die Baustoffabsätze in den Folgemonaten zunehmend. Aufgrund des frühen Wintereinbruchs gegen Ende des Jahres lag jedoch die Baustoffnachfrage trotz erkennbarer wirtschaftlicher Erholung in einigen Märkten unter der des Vorjahres.

In Deutschland erhöhten sich die Bauinvestitionen 2010 im Vorjahresvergleich um 2,8%. Dieser Anstieg ist auf Zuwächse im Wohnungsbau und im öffentlichen Bau zurückzuführen, dem ein leichter Rückgang im gewerblichen Bau gegenüberstand. Großbritannien verzeichnete 2010 ebenfalls wieder eine um über 6% gestiegene Bautätigkeit, die insbesondere durch den Wohnungsbau angetrieben wurde. Dieser wuchs um rund 30% nach einem historischen Tiefstand im Jahr 2009. Während die Infrastrukturinvestitionen ebenfalls Zuwächse durch die wirtschaftlichen Förderprogramme erfuhren, war der Wirtschaftsbau rückläufig. In Schweden und Norwegen hat sich die Bautätigkeit im Geschäftsjahr ebenfalls wieder leicht erholt. Für die Bauwirtschaft in den Niederlanden und Belgien war 2010 hingegen ein weiteres schwieriges Jahr mit einem Rückgang von 8% bzw. 1%. In den baltischen Staaten und in Dänemark ging die Bautätigkeit ebenfalls zurück.



### Geschäftsbereich Zement

Während der Zementverbrauch in Deutschland im Jahr 2010 um rund 3 % unter dem Vorjahresniveau blieb, lagen die Zementverkäufe in Großbritannien rund 4 % über dem Vorjahr. Der Zement- und Klinkerversand des Konzerngebiets nahm insgesamt um 6,3 % auf 19,7 (i.V.: 21,0) Mio t ab. Unsere nordeuropäischen Werke in Estland und Schweden trotzten mit einer deutlichen Steigerung ihres Zementabsatzes im Inland der Krise am besten. Damit gelang es ihnen, den Rückgang des Klinkerabsatzes und im Fall von Schweden der Zementexporte mehr als auszugleichen. Die deutschen Werke hingegen mussten im Vergleich zum Vorjahr Verluste im Inlandsabsatz hinnehmen. Der rückläufige Trend in Deutschland wurde durch eine deutliche Abnahme der Exporte noch etwas verstärkt. Bei geringeren Gesamtmengen im Marktgebiet Benelux war der Zementabsatz im Inland relativ stabil, wohingegen Zementexporte und Klinkerabsatz im Vergleich zum Vorjahr deutlich nachließen. In Großbritannien lag unser Zementabsatz leicht über der allgemeinen Marktentwicklung, allerdings ging der Verkauf von gemahlenem Hüttensand spürbar zurück. Dänemark musste prozentual die signifikantesten Absatzeinbußen im Vergleich zum Vorjahr hinnehmen. Der Umsatz des Geschäftsbereichs Zement nahm leicht um 1,5 % auf 1.618 (i.V.: 1.594) Mio EUR zu.

Im Bereich der Investitionen herrschte strikte Ausgabenkontrolle. So beschränkten wir uns größtenteils auf Verbesserungen der Einsatzmöglichkeiten von Sekundärbrennstoffen. In Belgien haben wir im Sommer eine neue hochleistungsfähige Anlage zur Aufbereitung von Sekundärbrennstoffen in Betrieb genommen. Auch in unseren norwegischen Werken haben wir in die Anlagen zum Verbrennen von Sekundärbrennstoffen investiert. Aufgrund geringer Auslastung und einem erwarteten Anstieg des Reparatur- und Investitionsbedarfs wurde das Zementwerk in Wetzlar zum Jahresende 2010 geschlossen.

### Geschäftsbereich Zuschlagstoffe

Im Konzerngebiet West- und Nordeuropa betreibt HeidelbergCement ein ausgedehntes Netz an Produktionsstätten. Insgesamt lag der Zuschlagstoffabsatz bei einem leichten Minus von 1,1 % mit 68,8 (i.V.: 69,6) Mio t annähernd auf Vorjahresniveau. In unserem größten Marktgebiet Großbritannien verzeichneten wir einen leichten Absatzanstieg gegenüber dem Vorjahr. Während in Deutschland und Schweden die Verkäufe von Zuschlagstoffen annähernd stabil blieben und in den baltischen Ländern sogar im zweistelligen Bereich zunahmen, lagen die Mengen in den Marktgebieten Benelux und Norwegen deutlich unter denen des Vorjahrs. Der Umsatz des Geschäftsbereichs Zuschlagstoffe stieg insgesamt um 5,0 % auf 770 Mio EUR (i.V.: 734).

Auch im Bereich Zuschlagstoffe herrschte Ausgabenkontrolle bei den Investitionen. Im Wesentlichen beschränkten sich die Investitionen auf den Ausbau der Aktivitäten an den Standorten Riksten in Schweden und Jelsa, dem größten Steinbruch in Norwegen, den Erwerb von Grundstücken für eine Sandgrube in Uivermeertjes, Niederlande, und die Erhöhung unserer Beteiligung am Zuschlagstoffunternehmen Carrières d'Antoing in Belgien. In Deutschland haben wir uns von vier Standorten getrennt. Außerdem führte eine strategische Überprüfung unseres Zuschlagstoffgeschäfts in Schottland zum Verkauf von zwei Produktionsstätten.

### Geschäftsbereich Bauprodukte

Der Geschäftsbereich Bauprodukte umfasst im Wesentlichen die Bauprodukte von Hanson in Großbritannien; hinzu kommen noch die hauptsächlich auf Deutschland konzentrierten Sparten Kalk und Kalksandstein. Die Produkte des Geschäftsbereichs Bauprodukte werden vor allem im Wohnungsbau eingesetzt. Hanson ist in Großbritannien der größte Hersteller von Mauerziegeln und Leichtmauerblöcken.

| Zusammengefasster Lagebericht              |                                     |
|--------------------------------------------|-------------------------------------|
| Kernaktivitäten und Organisationsstruktur  | Nachhaltigkeit bei HeidelbergCement |
| Strategie, Unternehmenssteuerung und Ziele | Mitarbeiter und Gesellschaft        |
| <b>Geschäftsverlauf 2010</b>               | Umweltvorsorge                      |
| Weitere Angaben                            | Forschung und Technik               |
| Risikobericht                              | Ausblick                            |

Während der Absatz von Mauerziegeln, Mauerblöcken und Betonpflaster weiterhin unter dem Vorjahr blieb, konnten die Sparten Betonfertigteile und Leichtmauerblöcke Mengenzuwächse erzielen. Insgesamt verringerte sich der Umsatz des Geschäftsbereichs Bauprodukte um 17,1 % auf 433 (i.V.: 523) Mio EUR. Dank frühzeitig eingeleiteter Kapazitätsanpassungen und Kostensenkungsmaßnahmen erzielte der Geschäftsbereich Bauprodukte allerdings einen beachtlichen Ergebnisanstieg.

### Geschäftsbereich Beton-Service-Sonstiges

Zu diesem Geschäftsbereich gehört insbesondere unser Transportbeton- und Asphaltgeschäft. Während wir ein dichtes Netz an Transportbetonwerken in weiten Teilen des Konzerngebiets haben, beschränkt sich das Asphaltgeschäft größtenteils auf Großbritannien. Für das Jahr 2010 lagen die Lieferungen von Transportbeton mit 11,7 (i.V.: 12,2) Mio cbm um 3,4 % hinter dem Vorjahr zurück. Während insbesondere unsere Produktionsstätten in Schweden, den baltischen Ländern, Großbritannien und Norwegen ihre Lieferungen erhöhen konnten, gingen sie in Deutschland und Benelux beträchtlich zurück. Der Absatz der Asphaltsparte blieb mit 3,4 (i.V.: 3,6) Mio t - das entspricht einem Minus von 4,6 % - ebenfalls unter dem Vorjahresniveau. Der Gesamtumsatz des Geschäftsbereichs Beton-Service-Sonstiges stieg 2010 leicht um 0,4 % auf 1.560 (i.V.: 1.554) Mio EUR.

Investitionen erfolgten vor allem im Transportbetongeschäft. Während wir in Norwegen, Belgien und den Niederlanden in einzelne neue Werke investierten, legten wir aufgrund schwacher lokaler Nachfrage einige Werke in Großbritannien vorübergehend still.

### Umsatz und Ergebnis

Der Umsatz im Konzerngebiet West- und Nordeuropa nahm leicht um 1,0 % auf 3.811 (i.V.: 3.848) Mio EUR ab. Operativ, d.h. ohne Berücksichtigung von Konsolidierungs- und Währungseffekten, verringerte er sich um 3,9 %. Das operative Ergebnis vor Abschreibungen erreichte mit 683 (i.V.: 687) Mio EUR annähernd wieder das Vorjahresniveau. Das operative Ergebnis ging um 6,4 % auf 407 (i.V.: 435) Mio EUR zurück.

| Wichtige Kennzahlen West- und Nordeuropa |        |        |
|------------------------------------------|--------|--------|
| Mio EUR                                  | 2009   | 2010   |
| Operatives Ergebnis                      | 435    | 407    |
| Investitionen in Sachanlagen             | 248    | 178    |
| Zement- und Klinkerabsatz in Mio t       | 21,0   | 19,7   |
| Zuschlagstoffabsatz in Mio t             | 69,6   | 68,8   |
| Asphaltabsatz in Mio t                   | 3,6    | 3,4    |
| Transportbetonabsatz in Mio cbm          | 12,2   | 11,7   |
| Mitarbeiter am 31. Dezember              | 14.640 | 14.302 |

### Umsatz West- und Nordeuropa 2010: 3.811 Mio EUR

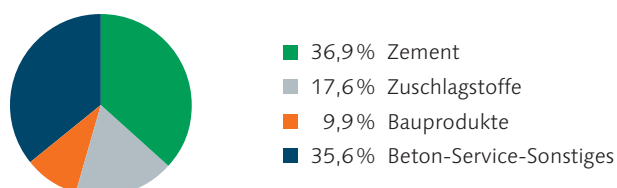



## Osteuropa-Zentralasien

HeidelbergCement ist im Konzerngebiet Osteuropa-Zentralasien in elf Ländern tätig. In den meisten dieser Wachstumsmärkte ist das Unternehmen nicht nur Marktführer im Zementbereich, sondern baut seine Stellung durch Kapazitätserweiterung auch kontinuierlich aus. Steigende Bedeutung haben auch die Förderung von Zuschlagstoffen und die Herstellung von Transportbeton. Polen ist gemessen am Umsatz unser größtes Marktgebiet in Osteuropa-Zentralasien. Dort sind wir sowohl im Zement- als auch im Zuschlagstoff- und Transportbetongeschäft vertreten.

Nach den zum Teil dramatischen Wachstumseinbrüchen 2009 erholen sich die meisten Volkswirtschaften im Konzerngebiet zögerlich. Osteuropa-Zentralasien wurde als letztes Konzerngebiet von der Wirtschaftskrise erfasst und ist nun das letzte Gebiet, das sich davon erholt. Am besten haben Kasachstan und Georgien mit Wachstumsraten von 7 % und 5,5 % der Wirtschaftskrise getrotzt. In Polen wird für 2010 ein Wirtschaftswachstum von 3,8 % erwartet, in der Tschechischen Republik von 2,4 %. Das Schlusslicht bildet Rumänien mit -1,9 %. Auch die Bauaktivitäten sind deutlich beeinträchtigt. Insbesondere in Ungarn und der Tschechischen Republik sind die Märkte noch schwach. Dagegen verzeichnete Polen ein robustes Wachstum. In der zweiten Jahreshälfte 2010 gewann die dortige Bauwirtschaft, vor allem aufgrund von Infrastrukturprojekten im Straßenbau, zunehmend an Fahrt.

## Geschäftsbereich Zement

Abgesehen von Kroatien und der Slowakischen Republik produziert HeidelbergCement in allen anderen Ländern des Konzerngebiets Osteuropa-Zentralasien Klinker und Zement. Insgesamt nahmen die Zement- und Klinkerlieferungen des Konzerngebiets 2010 um 9,8 % auf 14,2 (i.V.: 15,7) Mio t ab. Konsolidierungseffekte ergaben sich maßgeblich aus der Umstellung der Aktivitäten in Ungarn und Bosnien-Herzegowina von der Vollkonsolidierung auf eine quotale Einbeziehung Ende 2009 und den Erwerb der Mehrheitsbeteiligung an einem Zementunternehmen in Russland Ende 2010. Bereinigt um diese Konsolidierungseffekte betrug das Minus im Vergleich zum Vorjahr 5,5 %.

Während der Zementabsatz insbesondere in Ungarn stark zurückging und auch in der Tschechischen Republik und in Bosnien-Herzegowina noch deutlich unter dem Vorjahr blieb, stieg er in der Ukraine, Georgien und Kasachstan spürbar an. Im Gesamtjahr lagen die Zementverkäufe in Polen zwar unter denen von 2009, aber in der zweiten Jahreshälfte war, abgesehen vom witterungsbedingt schwachen Absatz im Dezember, eine Verbesserung im Vergleich zum Vorjahr zu erkennen. Dieser positive Trend ist vor allem auf zahlreiche Infrastrukturprojekte zurückzuführen. In Russland lag der Absatz über dem Vorjahr, während er in Rumänien leicht unter dem Vorjahr blieb. Der Umsatz des Geschäftsbereichs Zement nahm um 13,6 % auf 865 (i.V.: 1.001) Mio EUR ab.

Im Jahr 2010 fand ein Großteil der Investitionen in Russland statt. Wir haben die Mehrheit am Unternehmen CJSC "Construction Materials" erworben, das ein modernes Zementwerk mit einer Kapazität von 2 Mio t in Sterlitamak in der Republik Baschkortostan betreibt. Der Produktionsstandort mit 600 Mitarbeitern befindet sich in einer der wichtigsten Investitionsgegenden Russlands.

Der Neubau des Zementwerks TulaCement schritt 2010 planmäßig voran. Das Werk mit einer Zementkapazität von ca. 2 Mio t wird voraussichtlich Ende Mai 2011 fertig gestellt. Von dort werden wir künftig den Großraum Moskau, den größten Zementmarkt Russlands, mit Zement beliefern.

Die Kapazitätserweiterung im polnischen Zementwerk Górzdzka lag 2010 ebenfalls im Plan. Die erste Phase des Projektes mit einer Erweiterung der Klinkerkapazität des Werks um etwa 30 % auf 12.000 t Klinker pro Tag wird voraussichtlich Mitte 2011 abgeschlossen. Die zweite Phase des

| Zusammengefasster Lagebericht              |                                     |
|--------------------------------------------|-------------------------------------|
| Kernaktivitäten und Organisationsstruktur  | Nachhaltigkeit bei HeidelbergCement |
| Strategie, Unternehmenssteuerung und Ziele | Mitarbeiter und Gesellschaft        |
| Geschäftsverlauf 2010                      | Umweltvorsorge                      |
| Weitere Angaben                            | Forschung und Technik               |
| Risikobericht                              | Ausblick                            |

Projektes umfasst den Bau einer neuen Zementmühle und soll bis 2012 durchgeführt werden. Insgesamt wird damit die Zementkapazität des Werks um 1,2 Mio t auf 5,3 Mio t erhöht.

Abgesehen von Kapazitätserweiterungen haben wir im Konzerngebiet Osteuropa-Zentralasien in mehreren Marktgebieten in die Verbesserung des Umweltschutzes investiert. So haben wir unter anderem in unseren Zementwerken in Kasachstan, Georgien und der Ukraine neue Filteranlagen in Betrieb genommen.

### Geschäftsbereich Zuschlagstoffe

Im Geschäftsbereich Zuschlagstoffe ist HeidelbergCement hauptsächlich in der Tschechischen Republik, in Polen, Russland, Ungarn und Rumänien tätig. Insgesamt lagen die Lieferungen von Zuschlagstoffen im Jahr 2010 im Konzerngebiet mit 20,1 (i.V.: 21,3) Mio t um 5,7 % unter dem Vorjahr. Der Absatzrückgang bei den Zuschlagstoffen hat sich jedoch über das Jahr kontinuierlich verlangsamt.

Unsere polnischen Zuschlagstoffwerke verzeichneten seit dem Frühjahr eine erfreuliche Absatzentwicklung und konnten die Vorjahreslieferungen überschreiten. In Russland stieg unser Zuschlagstoffabsatz aufgrund der starken Nachfrage und der erstmaligen Konsolidierung des Steinbruchs Strelitsa in Woronesch deutlich. Dagegen lag der Absatz von Zuschlagstoffen in der Tschechischen Republik, in Ungarn und Rumänien unter dem des Vorjahrs. Der Umsatz des Geschäftsbereichs Zuschlagstoffe verbesserte sich um 3,0 % auf 125 (i.V.: 121) Mio EUR.

Investitionen im Bereich Zuschlagstoffe beschränkten sich im Wesentlichen auf den Zukauf von Grundstücken zur Sicherung von Reserven in der Tschechischen Republik.

### Geschäftsbereich Beton-Service-Sonstiges

Im Transportbetongeschäft hat HeidelbergCement ein dichtes Netz an Werken. Unsere Hauptmarktgebiete befinden sich allerdings in der Tschechischen Republik und in Polen. Der Transportbetonabsatz in Osteuropa-Zentralasien verringerte sich 2010 gegenüber dem Vorjahr um 4,5 % auf 3,9 (i.V.: 4,0) Mio cbm aufgrund der bereits oben genannten Veränderung in der Konsolidierung von Ungarn und Bosnien-Herzegowina. Ohne Berücksichtigung dieses Effekts wurde ein Zuwachs von 2,3 % erzielt.

Während der Absatz von Transportbeton in der Tschechischen sowie in der Slowakischen Republik und in Ungarn 2010 unter dem Vorjahr blieb, konnte in Polen ein deutlicher Mengenanstieg erzielt werden. Erfreulich haben sich auch die Lieferungen in Rumänien, Georgien und Kasachstan entwickelt. Mit 241 (i.V.: 256) Mio EUR nahm der Umsatz des Geschäftsbereichs Beton-Service-Sonstiges im Jahr 2010 um 5,8 % ab.

Die Investitionen im Jahr 2010 beschränkten sich auf die Übernahme eines Transportbetonwerks in Rumänien sowie den Verkauf unseres Transportbetongeschäftes in St. Petersburg in Russland. Darüber hinaus reagierten wir auf die anhaltend schwache Nachfrage in Ungarn mit der Stilllegung einiger Transportbetonwerke.

### Umsatz und Ergebnis

Der Umsatz im Konzerngebiet Osteuropa-Zentralasien nahm insgesamt um 11,2 % auf 1.138 (i.V.: 1.282) Mio EUR ab. Bereinigt um Währungs- und Konsolidierungseffekte verringerte sich der Umsatz auf Jahresbasis um 11,8 %. Negative Konsolidierungseffekte aus der Umstellung unserer Aktivitäten in Ungarn und Bosnien-Herzegowina von Vollkonsolidierung auf quotalen Einbeziehung

Ende 2009 wurden durch positive Wechselkurseffekte ausgeglichen. Das operative Ergebnis vor Abschreibungen lag mit 299 (i.V.: 361) Mio EUR um 17,3 % unter dem Vorjahr. Ohne Berücksichtigung von Konsolidierungs- und Währungseffekten betrug der Rückgang 16,4 %. Das operative Ergebnis ging um 23,1 % auf 203 (i.V.: 263) Mio EUR zurück.

#### Wichtige Kennzahlen Osteuropa-Zentralasien

| Mio EUR                            | 2009  | 2010         |
|------------------------------------|-------|--------------|
| Operatives Ergebnis                | 263   | <b>203</b>   |
| Investitionen in Sachanlagen       | 270   | <b>202</b>   |
| Zement- und Klinkerabsatz in Mio t | 15,7  | <b>14,2</b>  |
| Zuschlagstoffabsatz in Mio t       | 21,3  | <b>20,1</b>  |
| Transportbetonabsatz in Mio cbm    | 4,0   | <b>3,9</b>   |
| Mitarbeiter am 31. Dezember        | 9.481 | <b>9.959</b> |

#### Umsatz Osteuropa-Zentralasien 2010: 1.138 Mio EUR

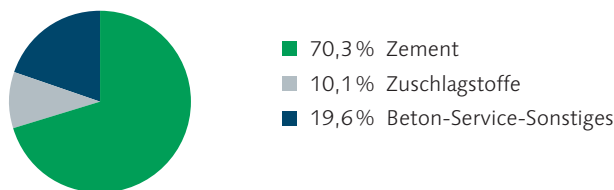

#### Nordamerika

Die Vereinigten Staaten und Kanada bilden das Konzerngebiet Nordamerika. In seinem größten Marktgebiet gehört HeidelbergCement zu den führenden Herstellern von Zuschlagstoffen, Zement, Transportbeton, Asphalt und Bauprodukten.

Die US-Wirtschaft ist 2010 wieder leicht um 2,8 % gewachsen gegenüber einem Rückgang um 2,6 % im Jahr zuvor. Allerdings haben sich der Schwung und Optimismus zu Jahresbeginn gegen Ende 2010 abgeschwächt. Die Auswirkungen der Rezession, die anhaltend hohe Arbeitslosenzahl und die Haushaltsdefizite der US-Bundesstaaten beeinträchtigten insbesondere die Bauwirtschaft. Der Wohnungsbau ist ausgehend von einem niedrigen Niveau nur leicht um 2,9 % gestiegen. Über drei Millionen Zwangsvollstreckungen und ein großer Leerstand belasteten die Preise und Neubautätigkeit. Besonders betroffen war der Westen der USA. Der Nicht-Wohnungsbau ist noch einmal deutlich um 32 % zurückgegangen. Auch der öffentliche Bau, der in der ersten Jahreshälfte maßgeblich durch das staatliche Konjunkturprogramm vorangetrieben wurde, ging in der zweiten Jahreshälfte deutlich zurück und blieb insgesamt auf Vorjahresniveau. Grund dafür waren sinkende Steuereinnahmen und die Nicht-Erneuerung des staatlichen Straßenbauprogramms Federal Highway Bill, die die Planung und Realisierung von Bauvorhaben verzögerten.

Kanadas Bruttoinlandsprodukt stieg im Jahr 2010 um rund 2,9 %. Die Bautätigkeit, die vor allem vom Wohnungsbau und staatlichen Konjunkturprogrammen gefördert wurde, schwächte sich ähnlich wie in den USA in der zweiten Jahreshälfte etwas ab. Allerdings stieg in unseren Hauptmarktgebieten in der Provinz British Columbia sowie in Edmonton in der Provinz Alberta der Wohnungsbau um 40 %; der Wirtschaftsbau verbesserte sich nur leicht.



| Zusammengefasster Lagebericht              |                                     |
|--------------------------------------------|-------------------------------------|
| Kernaktivitäten und Organisationsstruktur  | Nachhaltigkeit bei HeidelbergCement |
| Strategie, Unternehmenssteuerung und Ziele | Mitarbeiter und Gesellschaft        |
| Geschäftsverlauf 2010                      | Umweltvorsorge                      |
| Weitere Angaben                            | Forschung und Technik               |
| Risikobericht                              | Ausblick                            |

## Geschäftsbereich Zement

Während der Zementverbrauch in den USA mit rund 71 Mio t auf dem Vorjahresniveau blieb, nahm er in Kanada insgesamt um 10,3 % auf 8,8 Mio t zu. Für 2011 erwartet der amerikanische Zementverband PCA in den USA und in Kanada einen Anstieg im niedrigen einstelligen Bereich.

Der Zement- und Klinkerabsatz unserer Werke in Nordamerika erreichte mit 10,0 (i.V.: 10,1) Mio t wieder fast das Vorjahresniveau. Während die Produktionsstätten in Kanada erfreuliche Zuwächse erreichten, gingen unsere Lieferungen in den USA, mit Ausnahme der Region Süd, etwas zurück. Der Absatz unserer beiden Weißzementwerke hat sich ebenfalls gegenüber 2009 leicht verringert. Der Umsatz des Geschäftsbereichs Zement nahm leicht um 3,7 % auf 883 (i.V.: 851) Mio EUR zu. In Landeswährung ging er etwas zurück. Trotz sinkender Nachfrage und steigendem Preisdruck konnten wir mit strikter Kostenkontrolle, angepassten Produktionsplänen und dem Fokus auf die Generierung liquider Mittel unser Ergebnis deutlich verbessern.

Strikte Ausgabenkontrolle herrschte auch im Bereich der Investitionen. Im Zementwerk Leeds/Alabama haben wir ein neues Zementsilo mit einem Fassungsvermögen von 20.000 t und einer hochmodernen, schnellen und effizienten Verladeanlage in Betrieb genommen. In unseren Werken in Union Bridge/Maryland, York/Pennsylvania, Mason City/Iowa, Glens Falls/New York und Mitchell/Indiana haben wir Vorbereitungen getroffen, um den Einsatz von Sekundärbrennstoffen auf Klärschlamm und andere aufbereitete Abfallstoffe auszuweiten. Unsere beiden kalifornischen Werke Redding und Tehachapi wurden für ihre exzellente Energieeffizienz mit dem prestigeträchtigen „2010 Energy Star“ der amerikanischen Umweltschutzbehörde EPA ausgezeichnet.

## Geschäftsbereich Zuschlagstoffe

HeidelbergCement verfügt in den USA und im Westen Kanadas über ein dichtes Netz an Produktionsstätten. Insgesamt stieg der Absatz gegenüber dem Vorjahr um 2,9 % auf 105,0 (i.V.: 102,1) Mio t. Das stärkste Plus erreichten unsere Betriebsstätten in Kanada, aber auch die meisten Marktgebiete in den USA konnten Zuwächse verzeichnen. Der Umsatz des Geschäftsbereichs Zuschlagstoffe stieg insgesamt um 11,6 % auf 921 (i.V.: 825) Mio EUR.

Unsere Förderstätte Sechelt in British Columbia ist das erste Zuschlagstoffwerk, das 2010 den angesehenen „British Columbia Jake McDonald Mine Reclamation Award“ erhielt für innovative und umfassende Umweltschutz- und Rekultivierungsmaßnahmen.

## Geschäftsbereich Bauprodukte

Zum Geschäftsbereich Bauprodukte gehört unter anderem die Fertigung von Betonrohren, Betonfertigteilen, Betonpflaster und -dachsteinen sowie Ziegelsteinen.

2010 war ein weiteres schwieriges Jahr für die Bauprodukte aufgrund ihrer hohen Abhängigkeit vom Wohnungsbau. Dabei waren einige Produkte stärker betroffen als andere. Höhere Mengeneinbußen erlitten insbesondere die Bereiche Betonfertigteile und Dachsteine. Der Absatz von Betonrohren und Pflastersteinen war ebenfalls insgesamt schwächer als 2009, wohingegen die Produktbereiche Druckrohre und Ziegelsteine knapp an die Vorjahresmengen heranreichen konnten.

Insgesamt verringerte sich der Umsatz des Geschäftsbereichs Bauprodukte um 2 % auf 707 (i.V.: 721) Mio EUR. In Landeswährung fiel der Rückgang noch höher aus. Dank intensiver Einsparungen bei den Vertriebs- und Verwaltungskosten konnten wir aber unser operatives Ergebnis vor Abschreibungen deutlich verbessern.

### Geschäftsbereich Beton-Service-Sonstiges

Zu diesem Geschäftsbereich gehört insbesondere unser Transportbeton- und Asphaltgeschäft. Während wir in unserem Konzerngebiet über ein ausgedehntes Netz an Transportbetonwerken verfügen, ist unsere Asphaltproduktion hauptsächlich auf New York und Pennsylvania sowie auf Kalifornien konzentriert.

Der vom Wohnungsbau stark abhängige Transportbetonabsatz ist gegenüber 2009 um 4,2 % auf 5,4 (i.V.: 5,7) Mio cbm zurückgegangen. Mit Ausnahme der Region Nord, die ein leichtes Absatzplus erreichte, waren alle anderen Marktgebiete rückläufig.

Der Asphaltabsatz profitierte hingegen von den Konjunkturprogrammen für den Straßenbau. Er stieg im Berichtsjahr in den beiden Marktgebieten, in denen wir tätig sind, um insgesamt 5 % auf 3,7 (i.V.: 3,5) Mio t.

Der Gesamtumsatz des Geschäftsbereichs Beton-Service-Sonstiges nahm 2010 um 7,4 % auf 849 (i.V.: 790) Mio EUR zu.

### Umsatz und Ergebnis

Der Gesamtumsatz im Konzerngebiet Nordamerika stieg um 4,9 % auf 3.033 (i.V.: 2.892) Mio EUR. In der Landeswährung lag er mit 4.023 (i.V.: 4.032) Mio USD in etwa auf Vorjahresniveau. Aufgrund unserer intensiven Kostensparmaßnahmen, insbesondere im Rahmen des erfolgreichen „WIN NAM“-Projekts zur Effizienzsteigerung in Vertrieb und Verwaltung, konnte allerdings das operative Ergebnis vor Abschreibungen um 31,6 % auf 448 (i.V.: 340) Mio EUR erhöht werden; 25,2 % waren es in der Landeswährung. Das operative Ergebnis hat sich mit 188 (i.V.: 86) Mio EUR sogar mehr als verdoppelt. Das Gleiche trifft auch für das operative Ergebnis in Landeswährung zu.

#### Wichtige Kennzahlen Nordamerika

| Mio EUR                            | 2009   | 2010          |
|------------------------------------|--------|---------------|
| Operatives Ergebnis                | 86     | <b>188</b>    |
| Investitionen in Sachanlagen       | 152    | <b>146</b>    |
| Zement- und Klinkerabsatz in Mio t | 10,1   | <b>10,0</b>   |
| Zuschlagstoffabsatz in Mio t       | 102,1  | <b>105,0</b>  |
| Asphaltabsatz in Mio t             | 3,5    | <b>3,7</b>    |
| Transportbetonabsatz in Mio cbm    | 5,7    | <b>5,4</b>    |
| Mitarbeiter am 31. Dezember        | 12.601 | <b>11.899</b> |

#### Umsatz Nordamerika 2010: 3.033 Mio EUR

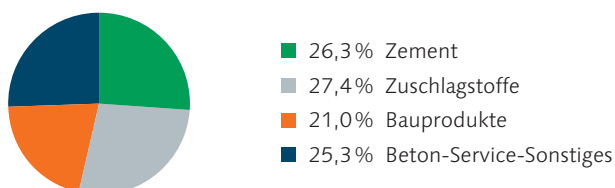

| Zusammengefasster Lagebericht              |                                     |
|--------------------------------------------|-------------------------------------|
| Kernaktivitäten und Organisationsstruktur  | Nachhaltigkeit bei HeidelbergCement |
| Strategie, Unternehmenssteuerung und Ziele | Mitarbeiter und Gesellschaft        |
| Geschäftsverlauf 2010                      | Umweltvorsorge                      |
| Weitere Angaben                            | Forschung und Technik               |
| Risikobericht                              | Ausblick                            |

## Asien-Pazifik

Das Konzerngebiet Asien-Pazifik umfasst sieben asiatische Länder und Australien. In den meisten asiatischen Wachstumsländern liegt der Schwerpunkt auf der Zementproduktion. Insbesondere in Indien, Indonesien und Bangladesh werden die Zementkapazitäten derzeit deutlich ausgebaut. In Malaysia und Hongkong hat HeidelbergCement eine starke Marktstellung bei Zuschlagstoffen und Transportbeton. In Australien verfügt HeidelbergCement mit einem dichten Netz an Produktionsstätten über bedeutende Marktstellungen bei Transportbeton und Zuschlagstoffen. Außerdem halten wir eine Beteiligung an dem größten Zementunternehmen in Australien.

Die Schwellenländer Asiens setzten auch 2010 ihren Wachstumskurs fort. In China nahm das Bruttoinlandsprodukt um 10,3 % zu. Auch in Indien, Indonesien und Bangladesh hielt die wirtschaftliche Dynamik an. So wuchs 2010 die Wirtschaftsleistung in Indien um 9,8 % und in Indonesien und Bangladesh um circa 6 %. Sorgen bereiten allerdings in den asiatischen Volkswirtschaften die merklich gestiegenen Verbraucherpreise. Australien verzeichnete 2010 ein Wirtschaftswachstum von 2,7 %, das von dem staatlichen Konjunkturprogramm und der starken Rohstoffnachfrage aus China angetrieben wurde.

## Geschäftsbereich Zement

Die Zement- und Klinkerlieferungen des Konzerngebiets Asien-Pazifik stiegen 2010 um insgesamt 4,3 % auf 26,6 (i.V.: 25,5) Mio t.

In Indonesien profitierte unsere Tochtergesellschaft Indocement von der anhaltend starken Bautätigkeit insbesondere im Wohnungsbau. Der inländische Zementverbrauch stieg 2010 um 6,2 % gegenüber dem Vorjahr. Der Inlandsabsatz von Indocement erhöhte sich um 8,5 %. Aufgrund der starken Inlandsnachfrage wurden die margenschwächeren Exportlieferungen um 35 % reduziert. Insgesamt nahm der Zement- und Klinkerabsatz um 3,2 % auf 13,9 (i.V.: 13,5) Mio t zu. Im Werk Cirebon haben Ende August 2010 zwei neue Zementmühlen mit einer Gesamtmahlkapazität von 1,5 Mio t die Produktion aufgenommen; Indocement verfügt nun über eine Zementkapazität von 18,6 Mio t. Indocement geht davon aus, dass der indonesische Zementverbrauch auch in Zukunft weiter steigen wird. Deshalb ist die Errichtung einer weiteren Zementmahanlage im Werk Citeureup mit 2 Mio t Kapazität geplant; der Baubeginn ist für 2011 und die Inbetriebnahme für Anfang 2013 vorgesehen.

In China ist HeidelbergCement mit den beiden Gemeinschaftsunternehmen China Century Cement und Jidong Heidelberg Cement Company in den Provinzen Guangdong und Shaanxi vertreten. Trotz des Auslaufens des staatlichen Konjunkturprogramms verzeichneten beide Provinzen im Jahr 2010 eine lebhafte Bautätigkeit. Hierzu trugen die gute wirtschaftliche Entwicklung, die Asienspiele in Guangzhou, der Hauptstadt von Guangdong, und staatliche Wirtschaftsförderungsprogramme in Shaanxi (unter anderem 10-Jahres „Go-West-Plan“) bei. Trotz des starken Wettbewerbs in Guangdong konnte der Rückgang unserer Klinkerproduktion aufgrund der Schließung des unrentablen Werks Huadu im Januar 2010 durch Produktionssteigerungen in den anderen Werken sowie vermehrten Klinkerzukauf mehr als ausgeglichen werden, so dass der Gesamtabatz unserer Gemeinschaftsunternehmen in China um 2,1 % auf 7,3 (i.V.: 7,1) Mio t stieg. Zur weiteren Verbesserung der Energieeffizienz und der Ressourcenschonung wurde der Einsatz von Klärschlamm als Sekundärbrennstoff im Werk Guangzhou weiter erhöht. Bis zu 600 t Klärschlamm pro Tag können nun unter Ausnutzung der Ofenabwärme getrocknet und dem Ofen als Brennstoff zugeführt werden.



In Indien betreibt HeidelbergCement im Süden und Westen sowie in Zentralindien zwei Zement- und drei Mahlwerke. Auch im Jahr 2010 ist das Bauvolumen aufgrund von Infrastrukturprojekten und Zuwächsen im ländlichen Wohnungsbau deutlich gestiegen. Jedoch führte die Inbetriebnahme neuer Zementproduktionskapazitäten im zweiten Halbjahr zu Preisdruck insbesondere im Süden und Westen des Landes. Zusätzlich beeinträchtigten schwere Regenfälle im August und September sowie im November die Bauaktivitäten in einigen unserer Marktgebiete. Der Gesamtabatz unserer indischen Zementwerke ging daher leicht um 1,6% gegenüber dem Vorjahr zurück. Aufgrund der guten Wachstumsperspektiven erweitern wir derzeit unsere Zementkapazitäten in Zentralindien um 2,9 Mio t. Die Inbetriebnahme der neuen Anlagen in den Werken Damoh und Jhansi ist im ersten Quartal 2012 vorgesehen. HeidelbergCement wird dann in Indien über eine Gesamtkapazität von 6 Mio t verfügen.

In Bangladesh erzielten wir einen deutlichen Absatz- und Ergebnisanstieg. Um von dem robusten Wachstum des Zementmarkts in Bangladesh zu profitieren, errichten wir derzeit im Mahlwerk Chittagong eine weitere Zementmühle mit einer Kapazität von 0,8 Mio t; die Inbetriebnahme ist für Ende 2011 vorgesehen. Auch im Sultanat Brunei haben unsere Zementlieferungen das Vorjahresniveau bei weitem übertroffen. Seit der Übernahme von Hanson im Jahr 2007 halten wir in Australien eine 25%ige Beteiligung an dem Zementunternehmen Cement Australia, die quotakonsolidiert wird.

Der Umsatz des Geschäftsbereichs Zement stieg um 20,8% auf 1.547 (i.V.: 1.281) Mio EUR.

#### **Geschäftsbereich Zuschlagstoffe**

Im Geschäftsbereich Zuschlagstoffe ist HeidelbergCement in Australien, Malaysia, Indonesien und Hongkong vertreten. Insgesamt lagen unsere Zuschlagstofflieferungen mit 33,4 (i.V.: 33,5) Mio t annähernd auf dem Vorjahresniveau. In Australien, unserem bei weitem größten Markt in diesem Konzerngebiet, blieb der Absatz trotz der lang anhaltenden Regenfälle im ersten Halbjahr und des Hochwassers in Queensland zum Jahresende stabil. Im Mai 2010 haben wir unsere Marktposition in Australien durch den Kauf des ausstehenden 50%-Anteils an unserem Joint Venture Pioneer North Queensland Pty Ltd weiter gestärkt. Das Unternehmen betreibt im Norden von Queensland zwei Sandgruben, zwei Steinbrüche für Hartgestein, ein Asphaltwerk und ein Transportbetonwerk. In Malaysia waren unsere Zuschlagstofflieferungen aufgrund der staatlichen Ausgabenkürzungen bei Infrastrukturprojekten rückläufig. Da ab 2011 eine Erholung der Aktivitäten im Infrastrukturbereich erwartet wird, haben wir einen strategisch günstig gelegenen Steinbruch im Bundesstaat Penang erworben. Mengenzuwächse konnten wir in Hongkong und besonders deutlich in Indonesien erzielen. Der Umsatz des Geschäftsbereichs Zuschlagstoffe erhöhte sich um 25,6% auf 446 (i.V.: 355) Mio EUR.

#### **Geschäftsbereich Bauprodukte**

HeidelbergCement betreibt drei Fertigteilwerke im Großraum Sydney und ein Fertigteilwerk in Singapur. Der Umsatz des Geschäftsbereichs Bauprodukte wuchs um 18,5% auf 34 (i.V.: 28) Mio EUR.

#### **Geschäftsbereich Beton-Service-Sonstiges**

Im Transportbetongeschäft ist HeidelbergCement in Australien, Malaysia, Indonesien und China tätig. In Malaysia verfügen wir über bedeutende Asphaltaktivitäten. In Australien haben wir nach dem Verkauf der Asphaltsparte im Mai 2009 nur noch ein Asphaltwerk, das von Pioneer North

| Zusammengefasster Lagebericht              |                                     |
|--------------------------------------------|-------------------------------------|
| Kernaktivitäten und Organisationsstruktur  | Nachhaltigkeit bei HeidelbergCement |
| Strategie, Unternehmenssteuerung und Ziele | Mitarbeiter und Gesellschaft        |
| <b>Geschäftsverlauf 2010</b>               | Umweltvorsorge                      |
| Weitere Angaben                            | Forschung und Technik               |
| Risikobericht                              | Ausblick                            |

Queensland Pty Ltd (siehe Geschäftsbereich Zuschlagstoffe) betrieben wird. Unsere Transportbetonlieferungen stiegen insgesamt um 4,9 % auf 8,9 (i.V.: 8,5) Mio cbm. Hierzu trug insbesondere Indonesien mit einer zweistelligen Wachstumsrate bei, aber auch Australien und Malaysia erzielten Mengenzuwächse. Die Lieferungen unserer chinesischen Transportbetonwerke waren insgesamt leicht rückläufig: Während der Absatz in Hongkong zunahm, wurden die Lieferungen in Guangzhou durch die Fertigstellung mehrerer Großprojekte und den von der Regierung während der Asienspiele angeordneten Baustopp beeinträchtigt. Der Rückgang des Asphaltabsatzes um 31,2 % auf 1,6 (i.V.: 2,3) Mio t resultiert aus den verminderten Infrastrukturmaßnahmen in Malaysia und der Veräußerung der Asphaltsparte in Australien im Vorjahr. Der Umsatz des Geschäftsbereichs Beton-Service-Sonstiges nahm um 12,7 % auf 881 (i.V.: 782) Mio EUR zu.

### Umsatz und Ergebnis

Der Umsatz des Konzerngebiets Asien-Pazifik wuchs um 18,0 % auf 2.609 (i.V.: 2.211) Mio EUR. Ohne Berücksichtigung von Konsolidierungs- und Währungseffekten ergab sich ein Anstieg um 1,9 %. Der positive Währungseffekt in Höhe von 389 Mio EUR resultiert im Wesentlichen aus der Abschwächung des Euro gegenüber dem australischen Dollar und der indonesischen Rupiah, aber auch gegenüber der indischen Rupie und dem malaiischen Ringgit. Das operative Ergebnis vor Abschreibungen stieg um 17,4 % auf 718 (i.V.: 612) Mio EUR. Ohne Berücksichtigung von Konsolidierungs- und Währungseffekten lag es auf Vorjahresniveau. Das operative Ergebnis erreichte mit 586 (i.V.: 498) Mio EUR einen Zuwachs um 17,6 %. Ohne Berücksichtigung von Konsolidierungs- und Währungseffekten belief sich der Anstieg auf 0,6 %. Die operative Marge – die höchste im Konzern – konnte auf dem hohen Niveau des Vorjahres gehalten werden.

| Wichtige Kennzahlen Asien-Pazifik  |        |               |
|------------------------------------|--------|---------------|
| Mio EUR                            | 2009   | 2010          |
| Operatives Ergebnis                | 498    | <b>586</b>    |
| Investitionen in Sachanlagen       | 96     | <b>174</b>    |
| Zement- und Klinkerabsatz in Mio t | 25,5   | <b>26,6</b>   |
| Zuschlagstoffabsatz in Mio t       | 33,5   | <b>33,4</b>   |
| Asphaltabsatz in Mio t             | 2,3    | <b>1,6</b>    |
| Transportbetonabsatz in Mio cbm    | 8,5    | <b>8,9</b>    |
| Mitarbeiter am 31. Dezember        | 14.030 | <b>13.682</b> |

### Umsatz Asien-Pazifik 2010: 2.609 Mio EUR

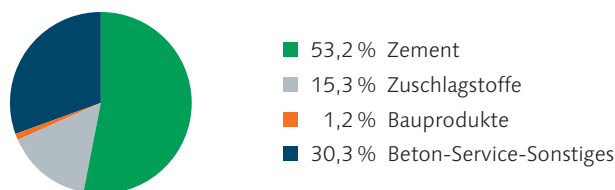

### **Afrika-Mittelmeerraum**

In Afrika ist HeidelbergCement in acht Ländern südlich der Sahara vertreten und produziert dort ausschließlich Zement. Unsere Standorte im Mittelmeerraum befinden sich in Spanien, Israel und der Türkei. In Spanien und Israel stellt HeidelbergCement hauptsächlich Zuschlagstoffe und Transportbeton her. In der Türkei zählt unser Joint Venture Akçansa zu den führenden Zementherstellern des Landes; darüber hinaus ist Akçansa auch im Transportbeton- und Zuschlagstoffgeschäft tätig.

Die meisten afrikanischen Staaten südlich der Sahara verzeichnen eine dynamische Wirtschaftsentwicklung und lebhaftes Bauaktivitäten. Solides Wirtschaftswachstum, steigende Bevölkerungszahlen, Urbanisierung und Infrastrukturmaßnahmen sind in diesen Ländern die Haupttreiber für einen Anstieg der Bautätigkeit und der Zementnachfrage. Auch in der Türkei profitiert die Bauwirtschaft von der überaus positiven Konjunkturentwicklung; 2010 dürfte die türkische Wirtschaft um rund 8% gewachsen sein. In Spanien hingegen sank das Bruttoinlandsprodukt 2010 um 0,1%. Die anhaltende Immobilienkrise, das Sparpaket der Regierung, das die Infrastrukturausgaben empfindlich gekürzt hat, und die Finanzknappheit der kommunalen und regionalen Verwaltungen haben die Baustoffnachfrage nochmals deutlich sinken lassen. Israel verzeichnete ein Wirtschaftswachstum von 3,8% und eine rege Bautätigkeit; der Infrastrukturbereich war allerdings rückläufig.

### **Geschäftsbereich Zement**

In Afrika sind unsere Zementlieferungen in allen Ländern mit Ausnahme von Benin deutlich gestiegen. In unserem Hauptmarkt Ghana trugen neu erschlossene Gas- und Ölfelder zum deutlichen Absatzanstieg bei. Auch unsere Werke in Sierra Leone, Tansania, Liberia und Togo erzielten beachtliche Zuwächse. Der Zementabsatz unserer afrikanischen Tochtergesellschaften erhöhte sich um 12,7% auf 5,2 (i.V.: 4,6) Mio t.

Aufgrund der guten Wachstumsaussichten hat HeidelbergCement seine Aktivitäten in Afrika weiter ausgebaut. Im Mai 2010 haben HeidelbergCement und IFC, ein Mitglied der Weltbank-Gruppe, (gemeinsam mit weiteren Finanzpartnern von IFC) eine Vereinbarung unterzeichnet, um den Ausbau der Infrastruktur in den afrikanischen Ländern südlich der Sahara durch die Erhöhung des örtlichen Zementangebots voranzutreiben. IFC und deren Finanzpartner haben sich verpflichtet, eine Minderheitsbeteiligung am Afrikgeschäft von HeidelbergCement (indirekt) zu erwerben, und werden dafür bis zu 180 Mio USD einbringen. HeidelbergCement wird im Gegenzug diese Mittel in den Ausbau der Zementkapazitäten in den Ländern südlich der Sahara, die von der International Development Association (IDA) unterstützt werden, investieren. Die erste Tranche in Höhe von 60 Mio USD wurde am 5. August 2010 eingebracht. Ein Teil des Anfangskapitals wird derzeit für den Bau einer neuen Zementmühle in Liberia verwendet, deren Inbetriebnahme für das erste Quartal 2012 vorgesehen ist. Geplant ist außerdem der Bau einer neuen Zementmühle in Ghana und wir prüfen die Optionen für Kapazitätserweiterungen in anderen afrikanischen Ländern.

Im September 2010 hat HeidelbergCement eine Vereinbarung mit Forrest Group unterzeichnet, um die Produktionskapazität für Zement in der Demokratischen Republik Kongo auszubauen. Mit der neu vereinbarten Aktionärsstruktur hält HeidelbergCement die Mehrheit am Zementgeschäft von Forrest Group in dem zentralafrikanischen Land. HeidelbergCement hat Mehrheitsanteile von 55% am Zementwerk Cimenterie de Lukala (CILU) in der Nähe der Hauptstadt Kinshasa sowie von 70% an den beiden Werken Interlacs im Osten des Landes erworben. In der neuen Partnerschaft



| Zusammengefasster Lagebericht              |                                     |
|--------------------------------------------|-------------------------------------|
| Kernaktivitäten und Organisationsstruktur  | Nachhaltigkeit bei HeidelbergCement |
| Strategie, Unternehmenssteuerung und Ziele | Mitarbeiter und Gesellschaft        |
| Geschäftsverlauf 2010                      | Umweltvorsorge                      |
| Weitere Angaben                            | Forschung und Technik               |
| Risikobericht                              | Ausblick                            |

behält Forrest Group 30% an den Werken. Die gesamte Zementkapazität aller drei Werke liegt bei über 500.000 t im Jahr und soll in den kommenden Jahren auf über 1,4 Mio t erhöht werden, um von der stark steigenden Inlandsnachfrage nach Zement zu profitieren.

Begünstigt durch die rege Bautätigkeit in der Türkei nahm der Zementinlandsabsatz unseres Joint Ventures Akçansa 2010 um über 20% gegenüber dem Vorjahr zu. Während die Zementexporte aufgrund der starken Nachfrage aus Westafrika ebenfalls deutlich stiegen, wurden die margenschwächeren Klinkerexporte zurückgefahren. Insgesamt erhöhte sich der Zement- und Klinkerabsatz von Akçansa um 14,5% auf 7,6 Mio t (konsolidierte Menge: 3,0 Mio t). Im Werk Çanakkale wurde 2010 mit dem Bau einer Anlage zur Erzeugung von Strom aus Ofenabwärme begonnen, die noch 2011 in Betrieb gehen wird. Die Anlage wird rund 30% des gesamten Strombedarfs des Werkes decken und zu einer Senkung der CO<sub>2</sub>-Emissionen um 60.000 t führen.

Insgesamt stieg der Zement- und Klinkerabsatz im Konzerngebiet Afrika-Mittelmeerraum um 13,3% auf 8,2 (i.V.: 7,3) Mio t; ohne die Berücksichtigung von Konsolidierungseffekten belief sich der Zuwachs auf 11,7%. Der Umsatz des Geschäftsbereichs Zement erhöhte sich um 16,5% auf 647 (i.V.: 555) Mio EUR.

### Geschäftsbereich Zuschlagstoffe

Im Geschäftsbereich Zuschlagstoffe ist HeidelbergCement in Spanien, Israel und der Türkei tätig. Insgesamt lag der Absatz von Zuschlagstoffen mit 14,3 (i.V.: 15,2) Mio t um 5,8% unter dem Vorjahresniveau. Der Rückgang resultiert aus der anhaltend schwachen Bautätigkeit in Spanien, wo unsere Zuschlagstofflieferungen nach dem starken Einbruch im Jahr 2009 abermals deutlich abnahmen. Ende des Jahres haben wir eine neue Förderstätte in der Nähe von Barcelona, unserem wichtigsten Markt in Spanien, erworben. Diese wird die Produktion in einem anderen Steinbruch ersetzen, für den die Abbaugenehmigung Ende 2012 ausläuft. In Israel profitierten unsere Zuschlagstoffaktivitäten von der starken Nachfrage nach Transportbeton. Auch in der Türkei verzeichnete die Zuschlagstoffsparte von Akçansa aufgrund der lebhaften Bautätigkeit einen erfreulichen Mengenzuwachs. Insgesamt ging der Umsatz des Geschäftsbereichs Zuschlagstoffe um 3,6% auf 85 (i.V.: 88) Mio EUR zurück.

### Geschäftsbereich Beton-Service-Sonstiges

HeidelbergCement verfügt in diesem Konzerngebiet über bedeutende Transportbetonaktivitäten in Spanien, Israel und der Türkei. Die Asphaltsparte hingegen ist nur in Israel vertreten. Die Transportbetonlieferungen stiegen 2010 insgesamt um 8,9% auf 5,0 (i.V.: 4,6) Mio cbm; deutliche Zuwächse in Israel und insbesondere in der Türkei konnten die Einbußen in Spanien mehr als ausgleichen. Aufgrund der schwachen Bauaktivitäten in Spanien war eine weitere Anpassung unserer Transportbetonkapazitäten im Raum Barcelona erforderlich. In Israel hingegen verzeichneten unsere Transportbetonlieferungen dank der starken Nachfrage einen zweistelligen Zuwachs. Noch stärker stieg unser Absatz in der Türkei, wo die Transportbetonsparte von Akçansa mittlerweile über 35 Werke verfügt. Unsere Asphaltsparte in Israel musste aufgrund der rückläufigen Bautätigkeit im Infrastrukturbereich deutliche Absatzeinbußen hinnehmen. Der Umsatz des Geschäftsbereichs Beton-Service-Sonstiges stieg insgesamt um 5,9% auf 274 (i.V.: 258) Mio EUR.

## Umsatz und Ergebnis

Insgesamt wuchs der Umsatz des Konzerngebiets Afrika-Mittelmeerraum um 12,0% auf 938 (i.V.: 837) Mio EUR. Operativ, d.h. ohne Berücksichtigung von Konsolidierungs- und Währungseffekten, belief sich der Anstieg auf 4,2%. Das operative Ergebnis vor Abschreibungen erreichte mit 156 (i.V.: 157) Mio EUR annähernd das Vorjahresniveau; ohne Berücksichtigung von Konsolidierungs- und Währungseffekten war ein Rückgang um 4,7% zu verzeichnen. Das operative Ergebnis nahm um 3,9% auf 121 (i.V.: 126) Mio EUR ab; ohne Berücksichtigung von Konsolidierungs- und Währungseffekten ging es um 6,7% zurück. Der Ergebnismrückgang ist im Wesentlichen durch die Mengenverluste und gesunkenen Verkaufspreise in Spanien geprägt.

| Wichtige Kennzahlen Afrika-Mittelmeerraum |       |       |
|-------------------------------------------|-------|-------|
| Mio EUR                                   | 2009  | 2010  |
| Operatives Ergebnis                       | 126   | 121   |
| Investitionen in Sachanlagen              | 28    | 34    |
| Zement- und Klinkerabsatz in Mio t        | 7,3   | 8,2   |
| Zuschlagstoffabsatz in Mio t              | 15,2  | 14,3  |
| Asphaltabsatz in Mio t                    | 0,6   | 0,4   |
| Transportbetonabsatz in Mio cbm           | 4,6   | 5,0   |
| Mitarbeiter am 31. Dezember               | 2.499 | 3.539 |

### Umsatz Afrika-Mittelmeerraum 2010: 938 Mio EUR

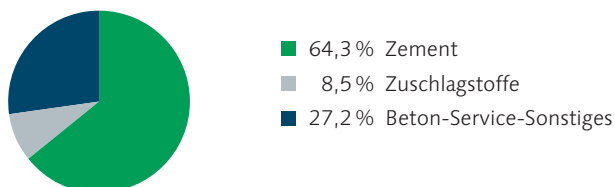

## Konzernservice

Der Konzernservice umfasst die Aktivitäten von HC Trading und HC Fuels. HC Trading ist eine der größten internationalen Handelsgesellschaften für Zement und Klinker. Das Unternehmen ist ebenfalls zuständig für den Kauf und die Lieferung von Kohle und Petrolkoks auf dem Seeweg an eigene Standorte und an andere Zementunternehmen weltweit. Unsere Tochtergesellschaft HC Fuels war 2010 unter anderem zuständig für die Versorgung der konzerneigenen Standorte mit international eingekaufter Kohle und Petrolkoks auf dem Landweg.

## HC Trading

Dank des weltweiten Handelsnetzes von HC Trading mit Niederlassungen in Malta, Istanbul, Singapur, Shanghai und Dubai können wir die Kapazitätsauslastung unserer Werke besser steuern und die Überschussproduktion aus einem Land in ein anderes mit hoher Nachfrage liefern.

| Zusammengefasster Lagebericht              |                                     |
|--------------------------------------------|-------------------------------------|
| Kernaktivitäten und Organisationsstruktur  | Nachhaltigkeit bei HeidelbergCement |
| Strategie, Unternehmenssteuerung und Ziele | Mitarbeiter und Gesellschaft        |
| <b>Geschäftsverlauf 2010</b>               | Umweltvorsorge                      |
| Weitere Angaben                            | Forschung und Technik               |
| Risikobericht                              | Ausblick                            |

Die allmähliche wirtschaftliche Erholung machte sich 2010 auch im internationalen Seehandel mit steigendem Frachtaufkommen bemerkbar. Der Handel von HC Trading mit Zement, Klinker und sonstigen Baustoffen wie Gips und Trockenmörtel stieg im Berichtsjahr um 13,8 % auf 9,6 (i.V.: 8,4) Mio t. Während die Lieferungen von Zement auf dem Vorjahresniveau lagen, hat sich besonders der Klinkertransport 2010 deutlich erhöht. Ein Großteil der eigenen Zement- und Klinkermengen wurde von HC Trading nach Afrika und Bangladesh geliefert. Die wichtigsten Lieferländer waren Indonesien, die Türkei, Schweden und Norwegen. Die Lieferungen von Kohle und Petrolkoks, die HC Trading seit 2009 auf dem Seeweg durchführt, haben sich 2010 mit 2,6 (i.V.: 0,9) Mio t bereits fast verdreifacht.

Insgesamt gelang es HC Trading, 2010 auch außerhalb des Konzerns neue Kunden in Afrika, Südamerika, dem Mittelmeerraum und Asien zu gewinnen. Die Lieferungen an bisherige Kunden in Nordafrika, den Vereinigten Arabischen Emiraten, dem Senegal, Taiwan und Indien haben sich gegenüber dem Vorjahr ebenfalls deutlich erhöht. Mehr als 900 Schiffe unterschiedlichster Größe transportierten die Waren hauptsächlich auf den Hauptseerouten von Asien, dem Mittelmeerraum und Kontinentaleuropa zu ihren Bestimmungsorten in Afrika, dem Mittleren Osten und Südamerika. HC Trading betreibt außerdem zwei Schwimmterminals, die ausgestattet sind, um über 500.000 t Zement zu entladen, zu verpacken, zu lagern und auszuliefern. Auf diese Weise kann HC Trading bei zusätzlichem Zementbedarf seiner Kunden schnell und effizient reagieren.

### HC Fuels

Als energieintensives Unternehmen hat HeidelbergCement einen hohen Bedarf an Brennstoffen wie Kohle, Petrolkoks, Diesel und Gas sowie an elektrischer Energie. Unsere Tochtergesellschaft HC Fuels war bisher mitverantwortlich für die Optimierung der Energiekosten im Konzern. Das Unternehmen beobachtete dafür die Entwicklung auf den internationalen Rohstoffmärkten und deren Auswirkungen auf lokale Märkte und ermittelte den Brennstoffbedarf im Konzern. Um den gesamten Energieeinkauf konzernweit noch besser zu koordinieren, wird der fossile Brennstoff- und Stromeinkauf künftig innerhalb der Abteilung Konzerneinkauf konzentriert. Das Einkaufsteam Group Energy Purchasing übernimmt daher ab Anfang 2011 die bisherigen Aufgaben von HC Fuels. Mit der zentralen Bündelung und Koordination des Energieeinkaufs wird es uns möglich sein, die Entwicklung der Energiemärkte besser zu beobachten, um die Auswirkungen volatiler Preisentwicklungen abzufedern und schnell auf attraktive Marktmöglichkeiten zu reagieren.

### Umsatz und Ergebnis

Der Umsatz im Bereich Konzernservice stieg gegenüber 2009 um 49,3 % auf 709 (i.V.: 475) Mio EUR. Das operative Ergebnis vor Abschreibungen sank hingegen um 31,5 % auf 20 (i.V.: 30) Mio EUR. Das operative Ergebnis ging in gleicher Größenordnung auf 20 (i.V.: 29) Mio EUR zurück. Ursache für diesen Ergebnismrückgang ist ein einmaliger außerordentlicher Ertrag im Jahr 2009. Ohne Berücksichtigung dieses Sondereffekts hat sich das Ergebnis gegenüber dem Vorjahr verbessert.

| Wichtige Kennzahlen Konzernservice |      |      |
|------------------------------------|------|------|
| Mio EUR                            | 2009 | 2010 |
| Umsatz                             | 475  | 709  |
| Operatives Ergebnis                | 29   | 20   |
| Mitarbeiter am 31. Dezember        | 51   | 55   |



## Aufgegebene Geschäftsbereiche

Das Ergebnis aus aufgegebenen Geschäftsbereichen enthält Aufwendungen und Erträge im Zusammenhang mit Schadenersatz- und Umweltverpflichtungen bei US-amerikanischen Tochtergesellschaften der 2007 übernommenen Hanson-Gruppe und im Zusammenhang mit der im Jahr 2008 veräußerten maxit Group. Das Ergebnis nach Steuern aus aufgegebenen Geschäftsbereichen belief sich im Geschäftsjahr auf -28 (i.V.: -8) Mio EUR.

## Kapitalflussrechnung

Die Kapitalflussrechnung des Geschäftsjahres 2010 zeichnet sich durch die Fortsetzung unserer Effizienz- und Kostensparprogramme und den weiteren Abbau der Finanzschulden aus.

Der Cashflow vor Veränderung des Working Capital und Verbrauch von Rückstellungen verbesserte sich um 547 Mio EUR auf 1.461 (i.V.: 914) Mio EUR und liegt damit deutlich über dem Vorjahreswert. Dies ist einerseits auf den Anstieg des operativen Ergebnisses vor Abschreibungen aufgrund einer kontinuierlichen Erholung unserer Märkte zurückzuführen. Andererseits wirkten sich der Anstieg der erhaltenen Zinsen auf 198 (i.V.: 65) Mio EUR – insbesondere aufgrund von Einmaleffekten aus der Ablösung von Zinsswaps – sowie der Rückgang der gezahlten Zinsen auf 798 (i.V.: 1.013) Mio EUR – im Wesentlichen aufgrund gesunkener Refinanzierungskosten im Vergleich zum Vorjahr – positiv aus. Ebenfalls trugen um 67 Mio EUR geringere Steuerzahlungen zu einer Erhöhung des Cashflows bei. Das Working Capital konnte nahezu auf dem niedrigen Vorjahreswert gehalten werden. Während die deutliche Verbesserung des Working Capital 2009 zu einem zusätzlichen Mittelzufluss von 557 Mio EUR geführt hatte, ergab sich 2010 ein geringer Mittelabfluss von 55 Mio EUR. Dadurch sank der Mittelabfluss aus operativer Geschäftstätigkeit im Berichtsjahr geringfügig um 20 Mio EUR auf 1.144 (i.V.: 1.164) Mio EUR.

Die zahlungswirksamen Investitionen erhöhten sich im Geschäftsjahr um 52 Mio EUR auf insgesamt 872 (i.V.: 820) Mio EUR. Dabei resultierten 57 Mio EUR Erhöhung aus Wechselkurseffekten im Vergleich zur ursprünglichen Planung. Die Investitionen teilen sich in kapazitätserhaltende Investitionen von 467 Mio EUR und kapazitätserweiternde Investitionen von 405 Mio EUR auf. Bei den kapazitätserweiternden Maßnahmen sind insbesondere unsere gezielten wachstumsorientierten Investitionen im Zementbereich in den Schwellenländern Asiens, Afrikas und Osteuropas zu nennen. Hervorzuheben ist hauptsächlich die Übernahme der Mehrheitsanteile an den Zementaktivitäten der Forrest Group in der Demokratischen Republik Kongo für 62 Mio EUR (80 Mio USD) und an CJSC "Construction Materials" in Russland für 40 Mio EUR (54 Mio USD). Außerdem haben wir den ausstehenden 50%-Anteil an unserem australischen Joint Venture Pioneer North Queensland Pty Ltd für 11 Mio EUR erworben. Die sonstigen Mittelzuflüsse im Investitionsbereich sind gegenüber dem Vorjahr um 58 Mio EUR auf 223 (i.V.: 281) Mio EUR gesunken. Der Rückgang ist im Wesentlichen auf den Verkauf der Pioneer Road Services im Vorjahr zurückzuführen. Die sonstigen Mittelzuflüsse enthalten unter anderem die Nettozahlungszuflüsse aus dem Verkauf von nicht benötigten Emissionsrechten in Höhe von 106 (i.V.: 99) Mio EUR.

Der Mittelabfluss aus der Finanzierungstätigkeit verringerte sich im Berichtsjahr um 105 Mio EUR auf 543 (i.V.: 648) Mio EUR. Auch im Geschäftsjahr 2010 konnten Finanzschulden durch Tilgung von Anleihen und Krediten in Höhe von 504 (i.V.: 3.046) Mio EUR zurückgezahlt werden. Die Nettoverschuldung hingegen verringerte sich nur um 277 Mio EUR, was im Wesentlichen auf

| Zusammengefasster Lagebericht              |                                     |
|--------------------------------------------|-------------------------------------|
| Kernaktivitäten und Organisationsstruktur  | Nachhaltigkeit bei HeidelbergCement |
| Strategie, Unternehmenssteuerung und Ziele | Mitarbeiter und Gesellschaft        |
| <b>Geschäftsverlauf 2010</b>               | Umweltvorsorge                      |
| Weitere Angaben                            | Forschung und Technik               |
| Risikobericht                              | Ausblick                            |

Wechselkurs- und anderen zahlungsunwirksamen Effekten beruht. Im Vorjahr konnten für die Rückzahlung der Finanzschulden die Geldzuflüsse aus der Kapitalerhöhung in Höhe von 2.233 Mio EUR und der Einzahlungen aus den Verkäufen von 520,5 Mio Aktien des indonesischen Zementherstellers PT Indocement Tunggul Prakarsa für 216 Mio EUR sowie der Beteiligung am australischen Gemeinschaftsunternehmen Pioneer Road Services Pty Ltd. für 99 Mio EUR verwendet werden. Die im Geschäftsjahr 2010 neu dargestellten Berichtslinien für die Mittelzuflüsse aus der „Minderung bzw. Erhöhung von Anteilen an Tochterunternehmen“ aufgrund der Änderungen des IAS 7 (Statement of Cash Flows) im Rahmen der Überarbeitung des IAS 27 (Consolidated and Separate Financial Statements) umfassen Zahlungsströme aus Eigenkapitaltransaktionen mit Eigentümern, die zu keinem Verlust der Beherrschung führen. Die entsprechenden Vorjahreswerte wurden angepasst. Die wesentlichen Mittelzuflüsse stammen aus der Kapitaleinbringung in Höhe von 60 Mio USD (45 Mio EUR) durch IFC und deren Finanzpartner zum Erwerb einer Minderheitsbeteiligung von rund 6,06% an Scancem International DA. Im Vorjahr ergaben sich hierbei unter anderem Zahlungszuflüsse aus dem Verkauf von 14,1% der Anteile an Indocement für 216 Mio EUR. Dividendenzahlungen führten zu einem Mittelabfluss von 79 (i.V.: 50) Mio EUR.

HeidelbergCement war im Geschäftsjahr 2010 jederzeit in der Lage, seinen Zahlungsverpflichtungen nachzukommen.

| Konzern-Kapitalflussrechnung (Kurzfassung)            |              |              |            |
|-------------------------------------------------------|--------------|--------------|------------|
| Mio EUR                                               | 2009         | 2010         | Abweichung |
| Cashflow                                              | 914          | <b>1.461</b> | 547        |
| Veränderung des Working Capital                       | 557          | <b>-55</b>   | -612       |
| Verbrauch von Rückstellungen                          | -307         | <b>-262</b>  | 45         |
| <b>Mittelfluss aus operativer Geschäftstätigkeit</b>  | <b>1.164</b> | <b>1.144</b> | -20        |
| Zahlungswirksame Investitionen                        | -820         | <b>-872</b>  | -52        |
| Sonstige Mittelzuflüsse                               | 281          | <b>223</b>   | -58        |
| <b>Mittelfluss aus Investitionstätigkeit</b>          | <b>-539</b>  | <b>-648</b>  | -109       |
| Kapitalerhöhung                                       | 2.233        |              | -2.233     |
| Dividendenzahlungen                                   | -50          | <b>-79</b>   | -29        |
| Minderung/Erhöhung von Anteilen an Tochterunternehmen | 215          | <b>41</b>    | -174       |
| Nettotilgung von Anleihen und Krediten                | -3.046       | <b>-504</b>  | 2.542      |
| <b>Mittelfluss aus Finanzierungstätigkeit</b>         | <b>-648</b>  | <b>-543</b>  | 105        |
| Wechselkursveränderung der liquiden Mittel            | 35           | <b>64</b>    | 29         |
| <b>Veränderung der liquiden Mittel</b>                | <b>11</b>    | <b>16</b>    | 5          |

## Investitionen

Die strikte Ausgabendisziplin im Investitionsbereich war auch im Geschäftsjahr 2010 ein wesentlicher Eckpfeiler des straffen und konsequenten Cash-Managements. Die zahlungswirksamen Investitionen beliefen sich im Berichtsjahr auf insgesamt 872 (i.V.: 820) Mio EUR. Auf Sachanlageinvestitionen (einschließlich der immateriellen Vermögenswerte) entfielen 734 (i.V.: 795) Mio EUR. Die Finanzanlageinvestitionen betrugen 138 (i.V.: 25) Mio EUR.

Die Investitionen in Sachanlagen betrafen vor allem Erhaltungs-, Optimierungs- und Umweltschutzmaßnahmen in unseren Produktionsstätten. Hier sind insbesondere die Inbetriebnahme eines neuen Zementsilos im amerikanischen Zementwerk Leeds und zahlreiche Projekte zur Ausweitung des Einsatzes von Sekundärbrennstoffen und zur Verbesserung der Energieeffizienz in allen Konzerngebieten zu nennen. HeidelbergCement hat aber auch in Expansionsprojekte in Wachstumsmärkten investiert: Im Rahmen des Zement-Kapazitätserweiterungsplans 2012 wurden gezielt Investitionen in Asien, Afrika und Osteuropa vorgenommen, um den Grundstein für künftiges Wachstum zu legen. Größere Projekte betrafen die Erweiterung unserer Zementkapazitäten in Zentralindien um 2,9 Mio t, den Neubau des Werks TulaCement in Russland mit einer Kapazität von 2 Mio t und die Kapazitätserweiterung des polnischen Werks Górażdze um 1,2 Mio t.

Bei den Investitionen in Finanzanlagen handelt es sich im Wesentlichen um die Übernahme von Mehrheitsanteilen an den Zementaktivitäten von Forrest Group in der Demokratischen Republik Kongo und des Zementunternehmens CJSC "Construction Materials" in Russland sowie den Erwerb des ausstehenden 50%-Anteils am australischen Joint Venture Pioneer North Queensland Pty Ltd.

| Investitionen          |      |      |
|------------------------|------|------|
| Mio EUR                | 2009 | 2010 |
| West- und Nordeuropa   | 248  | 178  |
| Osteuropa-Zentralasien | 270  | 202  |
| Nordamerika            | 152  | 146  |
| Asien-Pazifik          | 96   | 174  |
| Afrika-Mittelmeerraum  | 28   | 34   |
| Konzernservice         |      |      |
| Finanzanlagen          | 25   | 138  |
| Gesamt                 | 820  | 872  |

Sachanlageinvestitionen nach Geschäftsbereichen 2010

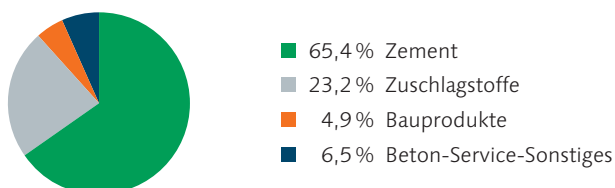



| Zusammengefasster Lagebericht              |                                     |
|--------------------------------------------|-------------------------------------|
| Kernaktivitäten und Organisationsstruktur  | Nachhaltigkeit bei HeidelbergCement |
| Strategie, Unternehmenssteuerung und Ziele | Mitarbeiter und Gesellschaft        |
| <b>Geschäftsverlauf 2010</b>               | Umweltvorsorge                      |
| Weitere Angaben                            | Forschung und Technik               |
| Risikobericht                              | Ausblick                            |

## Konzernbilanz

Die Struktur der Konzernbilanz hat sich im Geschäftsjahr 2010 erneut verbessert. Der Anteil des Eigenkapitals hat sich im Verhältnis zum Gesamtkapital um 4,2 Prozentpunkte auf 47,4% (i.V.: 43,2%) erhöht. Insbesondere konnte im Geschäftsjahr 2010 das Verhältnis von Nettofinanzschulden zu Eigenkapital (Gearing) um 13,7 Prozentpunkte auf 62,9% (i.V.: 76,5%) reduziert werden. Dazu beigetragen hat die Reduzierung der Nettoverschuldung um 0,3 Mrd EUR auf 8,1 (i.V.: 8,4) Mrd EUR, trotz geringfügig gestiegener Nettoinvestitionen um 0,1 Mrd EUR.

Die Bilanzsumme erhöhte sich zum 31. Dezember 2010 um 1,9 Mrd EUR auf 27,4 (i.V.: 25,5) Mrd EUR. Davon sind 1,4 Mrd EUR auf Wechselkurseffekte zurückzuführen.

Die langfristigen Aktiva sind um 1,8 Mrd EUR auf 23,1 (i.V.: 21,3) Mrd EUR angestiegen. Die Zunahme des Anlagevermögens um 1,6 Mrd EUR auf 22,4 (i.V.: 20,8) Mrd EUR ist hauptsächlich auf Wechselkurseffekte in Höhe von 1,4 Mrd EUR und Veränderungen des Konsolidierungskreises zurückzuführen.

Die kurzfristigen Aktiva haben sich nur marginal um 0,1 Mrd EUR erhöht. Von den Veränderungen im Umlaufvermögen sind die Zunahme des Vorratsvermögens um 0,1 Mrd EUR und der Forderungen aus Lieferungen und Leistungen um 0,1 Mrd EUR sowie eine Abnahme der Steuererstattungsansprüche um 0,2 Mrd EUR zu nennen.

Auf der Passivseite der Konzernbilanz ist das Eigenkapital um 1,9 Mrd EUR auf 12,9 (i.V.: 11,0) Mrd EUR angestiegen. Dies ist überwiegend auf die Wechselkurseffekte von 1,4 Mrd EUR sowie auf das Jahresergebnis von 0,5 Mrd EUR zurückzuführen. Die Stärke des australischen, amerikanischen und kanadischen Dollars, des britischen Pfunds, der schwedischen Krone und der indonesischen Rupiah wirkten sich hier insbesondere aus.

Der Zuwachs des langfristigen Fremdkapitals um 0,2 Mrd EUR auf 11,3 (i.V.: 11,1) Mrd EUR beruht hauptsächlich auf einer Erhöhung der Pensionsrückstellungen um 0,1 Mrd EUR sowie der langfristigen verzinslichen Verbindlichkeiten um 0,1 Mrd EUR aufgrund von Wechselkurseffekten. Das kurzfristige Fremdkapital hat sich um 0,2 Mrd EUR auf 3,2 (i.V.: 3,4) Mrd EUR reduziert. Hierzu haben insbesondere die Tilgung der kurzfristigen Finanzschulden in Höhe von 0,3 Mrd EUR sowie ein Anstieg der Verbindlichkeiten aus Lieferungen und Leistungen um 0,2 Mrd EUR beigetragen.

| Konzern-Bilanz (Kurzfassung)                |               |               |                        |
|---------------------------------------------|---------------|---------------|------------------------|
| Mio EUR                                     | 31.12.2009    | 31.12.2010    | Anteil am Kapital 2010 |
| Immaterielle Vermögenswerte und Sachanlagen | 20.289        | <b>21.837</b> | 80 %                   |
| Finanzanlagen                               | 493           | <b>520</b>    | 2 %                    |
| Sonstige langfristige Aktiva                | 469           | <b>683</b>    | 2 %                    |
| Kurzfristige Aktiva                         | 4.257         | <b>4.333</b>  | 16 %                   |
| Zur Veräußerung gehaltene Vermögenswerte    |               | <b>3</b>      | 0 %                    |
| Eigenkapital und Anteile Fremder            | 11.003        | <b>12.884</b> | 47 %                   |
| Langfristiges Fremdkapital                  | 11.138        | <b>11.337</b> | 41 %                   |
| Kurzfristiges Fremdkapital                  | 3.367         | <b>3.151</b>  | 12 %                   |
| Zur Veräußerung gehaltene Schulden          |               | <b>4</b>      | 0 %                    |
| <b>Bilanzsumme</b>                          | <b>25.508</b> | <b>27.377</b> | 100 %                  |

| Finanzkennzahlen <sup>1)</sup>             |         |         |                |
|--------------------------------------------|---------|---------|----------------|
|                                            | 2008    | 2009    | 2010           |
| <b>Vermögens- und Kapitalstruktur</b>      |         |         |                |
| Eigenkapital/Gesamtkapital                 | 31,5 %  | 43,2 %  | <b>47,4 %</b>  |
| Nettofinanzschulden/Bilanzsumme            | 44,0 %  | 33,0 %  | <b>29,8 %</b>  |
| Langfristiges Kapital/Anlagevermögen       | 107,2 % | 106,6 % | <b>108,4 %</b> |
| Nettofinanzschulden/Eigenkapital (Gearing) | 139,8 % | 76,5 %  | <b>62,9 %</b>  |
| <b>Aktienrendite</b>                       |         |         |                |
| Ergebnis je Aktie (EUR)                    | 14,55   | 0,30    | <b>1,83</b>    |
| <b>Rentabilität</b>                        |         |         |                |
| Gesamtkapitalrentabilität vor Steuern      | 6,9 %   | 2,8 %   | <b>4,7 %</b>   |
| Eigenkapitalrentabilität                   | 8,1 %   | 1,6 %   | <b>4,2 %</b>   |
| Umsatzrendite                              | 4,7 %   | 1,6 %   | <b>4,6 %</b>   |

1) Ohne Anpassung IAS 32.18 b) Put-Optionen von Minderheitsgesellschaftern in Höhe von 96 Mio EUR (2010), 37 Mio EUR (2009), 50 Mio EUR (2008)

## Konzern-Finanzmanagement

### Finanzierungsgrundsätze und -ziele

Ziel der externen Finanzierung und Liquiditätssicherung ist es, eine ausreichende Liquidität des Konzerns zu jeder Zeit sicherzustellen. Die Krise an den internationalen Kapitalmärkten hat deutlich gemacht, wie wichtig die Liquiditätsorientierung für unser Unternehmen ist.

Unser externer Finanzierungsspielraum wird primär durch die Kapitalmärkte und eine bedeutende internationale Bankengruppe gewährleistet. Innerhalb des Konzerns gilt der Grundsatz der internen Finanzierung. Das heißt: Der Finanzierungsbedarf von Tochtergesellschaften wird – soweit möglich – über interne Darlehensbeziehungen abgedeckt. Diesem Leitgedanken entsprechend erfolgte die Finanzierung der Tochtergesellschaften auch im Jahr 2010 hauptsächlich über unsere niederländische Finanzierungsgesellschaft HeidelbergCement Finance B.V. (HC Finance B.V.) und die HeidelbergCement AG. Diese zentrale Finanzierung gewährleistet ein einheitliches Auftreten an den Kapitalmärkten und gegenüber Ratingagenturen, beseitigt strukturelle Vorteile für einzelne Gläubigergruppen und stärkt unsere Verhandlungsposition gegenüber Kreditinstituten und anderen Marktteilnehmern. Darüber hinaus ermöglicht sie uns die effizienteste Allokation von Liquidität und die konzernweite Überwachung und Eliminierung von finanziellen Risikopositionen (Währungen und Zinsen) auf Basis von Nettopositionen.

Die Konzerngesellschaften nutzen entweder Liquiditätsüberschüsse anderer Unternehmenseinheiten in so genannten Cash Pools (Deutschland, Skandinavien/Baltikum, USA, Benelux-Länder, Australien, Großbritannien, Kanada, Tschechische Republik, Russland, Spanien und weitere Länder) oder werden mit Konzerndarlehen von der HeidelbergCement Finance B.V. oder der HeidelbergCement AG ausgestattet. Daneben vereinbart das Konzern-Treasury vereinzelt auch Kreditlinien für Tochtergesellschaften mit lokalen Banken, um rechtlichen, steuerlichen oder sonstigen Gegebenheiten Rechnung zu tragen. Lokale Finanzierungen werden vor allem für sehr geringe Volumina eingesetzt.

| Zusammengefasster Lagebericht              |                                     |
|--------------------------------------------|-------------------------------------|
| Kernaktivitäten und Organisationsstruktur  | Nachhaltigkeit bei HeidelbergCement |
| Strategie, Unternehmenssteuerung und Ziele | Mitarbeiter und Gesellschaft        |
| Geschäftsverlauf 2010                      | Umweltvorsorge                      |
| Weitere Angaben                            | Forschung und Technik               |
| Risikobericht                              | Ausblick                            |

## Finanzierungsmaßnahmen – Anleiheemissionen und neuer syndizierter Kredit

Das Jahr 2010 wurde durch drei erfolgreiche Anleiheemissionen und den Abschluss einer selbst syndizierten und arrangierten Kreditlinie für Bar- und Avalziehungen über ein Volumen von 3 Mrd EUR geprägt.

Bereits am 19. Januar haben wir als erstes Unternehmen in Europa zwei Euroanleihen mit einem Gesamtemissionsvolumen von 1,4 Mrd EUR an institutionelle Investoren im In- und Ausland begeben: eine Anleihe im Volumen von 650 Mio EUR und 5 Jahren Laufzeit und eine weitere über 750 Mio EUR und 10 Jahren Laufzeit. Die Emissionserlöse wurden ausschließlich zur teilweisen Rückzahlung des syndizierten Kredits über 8,7 Mrd EUR vom Juni 2009 verwendet. Diese Emission senkte die Bankverbindlichkeiten des Unternehmens signifikant und untermauerte das Vertrauen des Kapitalmarkts in HeidelbergCement. Die Anleihen wiesen einen Festzins von 6,5 % p.a. für die fünfjährige Laufzeit und 7,5 % für die zehnjährige Laufzeit auf. Die Ausgabekurse waren 98,8561 % und 98,2192 %, womit sich Emissionsrenditen von 6,75 % bzw. 7,75 % ergaben.

Auf Basis dieser erfolgreichen Anleiheemissionen und der damit reduzierten Inanspruchnahme der Bankfinanzierung konnten wir im April eine selbst arrangierte und syndizierte Kreditlinie über ein Volumen von 3 Mrd EUR mit einer Gruppe von lediglich 17 Banken abschließen. Dies ermöglichte uns die Ablösung der noch verbliebenen Verbindlichkeiten aus dem im Juni 2009 mit 60 Banken abgeschlossenen syndizierten Kredit über 8,7 Mrd EUR und dessen anschließende Kündigung. Die Konditionen der neuen Kreditlinie sind wesentlich günstiger, und die Laufzeit bis zum Jahresende 2013 verbesserte die finanzielle und operative Flexibilität erheblich. Die Sicherheiten wurden ebenfalls deutlich verringert, was einerseits den Anleihegläubigern zugute kommt und andererseits die Sicherheitenadministration und deren Implikationen für das operative Geschäft spürbar reduziert. Die neue Kreditlinie, die für Barziehungen und Avale genutzt werden kann, ist vor allem als Liquiditätsreserve gedacht und war zum 31. Dezember 2010 mit lediglich 396 Mio EUR in Anspruch genommen. Die freie Kreditlinie belief sich somit zum Jahresende 2010 auf 2.604 Mio EUR (siehe hierzu folgende Tabelle). Insgesamt ist damit sichergestellt, dass sämtliche Konzernunternehmen über ausreichende und langfristige Bar- und Avalkreditkapazitäten verfügen, um das operative Geschäft und neue Investitionen erfolgreich finanzieren zu können.

| Kreditlinie                               |                |
|-------------------------------------------|----------------|
| Mio EUR                                   | 31.12.2010     |
| Gesamte Syndizierte Kreditfazilität (SFA) | 3.000,0        |
| Inanspruchnahme (Bar)                     | 131,8          |
| Inanspruchnahme (Aval)                    | 264,2          |
| <b>Freie Kreditlinie</b>                  | <b>2.604,0</b> |

Die Reduktion der Anzahl der Kreditgläubiger von ehemals 60 auf nunmehr 17 Kernbanken ist ein Beleg für die Stärke unserer Bankbeziehungen und vereinfacht notwendige Abstimmungsprozesse mit den Bankgläubigern. Ferner konnten wir die Konditionen im Vergleich zu der 8,7 Mrd EUR Kreditlinie aus dem Vorjahr signifikant verbessern: Von ehemals 425 Basispunkten wurde die anfängliche Kreditmarge auf 300 Basispunkte reduziert. Um unsere weiteren Entschuldungsfortschritte zu honorieren, haben wir uns mit den Banken auf ein Margengitter geeinigt, das eine quartalsweise Messung des Verhältnisses von Konzern-Nettoverschuldung zu EBITDA als Basis für



die Kreditmargenberechnung (siehe folgende Tabelle) vorsieht. Im November 2010 konnten wir auf der Grundlage unserer verbesserten Bonität und der sehr guten operativen Leistung mit den Banken eine Anpassung des Margengitters verhandeln, so dass die ursprüngliche Kreditmarge aus April 2010 weiter um 100 Basispunkte reduziert werden konnte. Im Ergebnis wurden somit die Kosten der Kreditinanspruchnahme von Januar 2010 von 425 Basispunkten auf 200 Basispunkte im Dezember des Jahres gesenkt.

Die folgenden Banken sind Gläubiger der Kreditlinie und damit auch unsere Kernbanken: Bank of America/Merrill Lynch, BayernLB, BNP/Fortis, Citigroup, Commerzbank, Deutsche Bank, Svenska Handelsbanken, Helaba, ING, Intesa, LBBW, Mediobanca, Morgan Stanley, Nordea, RBS, RZB und SEB.

| <b>Syndizierte Kreditfazilität (SFA) vom 27. April 2010 mit Anpassungen vom 19. November 2010</b> |                                                                                                                                    |                        |
|---------------------------------------------------------------------------------------------------|------------------------------------------------------------------------------------------------------------------------------------|------------------------|
| <b>Betrag:</b>                                                                                    | 3.000.000.000 EUR                                                                                                                  |                        |
| <b>Fazilität:</b>                                                                                 | Syndizierte Bar- und Avalfazilität mit Währungsoption<br>500.000.000 EUR Avalfazilität (im Gesamtbetrag enthaltenes Limit)         |                        |
| <b>Endfälligkeit:</b>                                                                             | 31. Dezember 2013                                                                                                                  |                        |
| <b>Margen:</b>                                                                                    |                                                                                                                                    |                        |
| <b>- Barziehungen</b>                                                                             | Anfängliche Marge in % p.a.                                                                                                        | 3,00                   |
|                                                                                                   | Marge hängt in der Folgezeit vom Verhältniss<br>Konzern-Nettoverschuldung zu EBITDA ab:                                            |                        |
|                                                                                                   | <b>Konzern-Nettoverschuldung : EBITDA</b>                                                                                          | <b>Marge in % p.a.</b> |
|                                                                                                   | Größer oder gleich 4,50 : 1                                                                                                        | 3,00                   |
|                                                                                                   | Kleiner 4,50 : 1 aber größer oder gleich 4,00 : 1                                                                                  | <b>2,00</b>            |
|                                                                                                   | Kleiner 4,00 : 1 aber größer oder gleich 3,50 : 1                                                                                  | 1,75                   |
|                                                                                                   | Kleiner 3,50 : 1 aber größer oder gleich 3,00 : 1                                                                                  | 1,50                   |
|                                                                                                   | Kleiner 3,00 : 1 aber größer oder gleich 2,50 : 1                                                                                  | 1,25                   |
|                                                                                                   | Kleiner 2,50 : 1                                                                                                                   | 1,00                   |
| <b>- Avale</b>                                                                                    | 75,00% p.a. der anwendbaren Marge                                                                                                  |                        |
| <b>Abschluss- und Teilnahmegebühren:</b>                                                          | 1,00 % des Gesamtbetrags                                                                                                           |                        |
| <b>Bereitstellungsgebühren:</b>                                                                   | 35,00 % p.a. der anwendbaren Marge                                                                                                 |                        |
| <b>Inanspruchgebühr:</b>                                                                          | In Abhängigkeit von der Inanspruchnahme der Kreditlinie ab Oktober 2010:                                                           |                        |
|                                                                                                   | > 33,33 % ausstehend                                                                                                               | 0,25 %                 |
|                                                                                                   | > 66,66 % ausstehend                                                                                                               | 0,50 %                 |
| <b>Sicherheiten:</b>                                                                              | Den Gläubigern wurden folgende Sicherheiten gewährt:                                                                               |                        |
|                                                                                                   | (i) Upstream-Garantien von Konzernunternehmen, auf die zusammen<br>ca. 70 % des Konzernumsatzes und des Konzernvermögens entfallen |                        |
|                                                                                                   | (ii) Verpfändung aller Anteile an 100%igen Tochterunternehmen,<br>die von der HeidelbergCement AG direkt gehalten werden           |                        |

Am 1. Juli konnten wir unter Ausnutzung der exzellenten Kapitalmarktverhältnisse unter unserem 10 Mrd EUR EMTN-Programm eine weitere Euroanleihe mit einem Emissionsvolumen von 650 Mio EUR und einer Laufzeit bis 15. Dezember 2015 begeben. Die Emissionserlöse wurden vollständig

| Zusammengefasster Lagebericht              |                                     |
|--------------------------------------------|-------------------------------------|
| Kernaktivitäten und Organisationsstruktur  | Nachhaltigkeit bei HeidelbergCement |
| Strategie, Unternehmenssteuerung und Ziele | Mitarbeiter und Gesellschaft        |
| Geschäftsverlauf 2010                      | Umweltvorsorge                      |
| Weitere Angaben                            | Forschung und Technik               |
| Risikobericht                              | Ausblick                            |

zur Rückzahlung der Bankverschuldung genutzt. Damit konnte einerseits das Fälligkeitsprofil (siehe hierzu die Grafik im Kapitel Ausblick auf Seite 116) weiter verbessert und andererseits die Abhängigkeit von den Banken nochmals deutlich reduziert werden. Die Anleihe wies einen Festzins von 6,75 % p.a. auf. Der Ausgabekurs lag bei 99,444 %, womit sich eine Rendite von 6,875 % ergab.

Die im Jahr 2010 begebenen Anleihen sind unbesichert und stehen im Rang gleichberechtigt zu allen anderen Kapitalmarktverbindlichkeiten. Gemäß den Anleihebedingungen besteht – wie bei den drei bereits im Oktober 2009 begebenen Euroanleihen – eine Beschränkung bezüglich der Neuaufnahme zusätzlicher Verschuldung, wenn der konsolidierte Deckungsgrad (d.h. das Verhältnis des Gesamtbetrages des konsolidierten EBITDA zu dem Gesamtbetrag des konsolidierten Zinsergebnisses) des HeidelbergCement Konzerns unter 2 ist. Das konsolidierte EBITDA in Höhe von 2.124 Mio EUR und das konsolidierte Zinsergebnis in Höhe von 599 Mio EUR werden auf einer pro Forma Basis gemäß den Anleihebedingungen berechnet. Zum Jahresende 2010 betrug der konsolidierte Deckungsgrad 3,55. Die Nettofinanzschulden gingen im Berichtsjahr um 0,3 Mrd EUR zurück und beliefen sich zum 31. Dezember 2010 auf 8,1 (i.V.: 8,4) Mrd EUR.

Die folgende Tabellen zeigt die Neuemissionen und Rückzahlungen des HeidelbergCement Konzerns im Jahr 2010:

| Neuemissionen und Rückzahlungen des HeidelbergCement Konzerns |                |           |               |                |            |
|---------------------------------------------------------------|----------------|-----------|---------------|----------------|------------|
| Transaktionsart                                               | Emissionsdatum | Laufzeit  | Endfälligkeit | Nominalvolumen | Verzinsung |
| Neuemission                                                   | 19.01.10       | 5 Jahre   | 03.08.15      | 650 Mio EUR    | 6,500%     |
| Neuemission                                                   | 19.01.10       | 10 Jahre  | 03.04.20      | 750 Mio EUR    | 7,500%     |
| Neuemission                                                   | 01.07.10       | 5 Jahre   | 15.12.15      | 650 Mio EUR    | 6,750%     |
| Rückzahlung                                                   | 27.09.00       | 10 Jahre  | 27.09.10      | 750 Mio USD    | 7,875%     |
| Vorzeitige SFA Rückzahlung                                    | 18.06.09       | 3 Jahre   | 27.04.10      | 8.744 Mio EUR  | variabel   |
| SFA Refinanzierung                                            | 27.04.10       | 3 ½ Jahre | 31.12.13      | 3.000 Mio EUR  | variabel   |

Die folgenden Tabellen zeigen die Finanzverbindlichkeiten des HeidelbergCement Konzerns am 31. Dezember 2010:

| Anleihen                                        |                |                |                  |                |               |              |
|-------------------------------------------------|----------------|----------------|------------------|----------------|---------------|--------------|
| Emittent<br>Mio EUR                             | Nominalvolumen | Buchwert       | Kupon in Prozent | Emissionsdatum | Endfälligkeit | ISIN         |
| HC Finance B.V.                                 | 480,0          | 469,0          | 5,625            | 22.10.07       | 04.01.18      | DE000A0TKUU3 |
| HC Finance B.V.                                 | 1.000,0        | 1.080,6        | 7,625            | 25.01.08       | 25.01.12      | XS0342136313 |
| HC Finance B.V.                                 | 1.000,0        | 1.007,4        | 7,500            | 21.10.09       | 31.10.14      | XS0458230082 |
| HC Finance B.V.                                 | 1.000,0        | 1.017,8        | 8,000            | 21.10.09       | 31.01.17      | XS0458230322 |
| HC Finance B.V.                                 | 500,0          | 485,5          | 8,500            | 21.10.09       | 31.10.19      | XS0458685913 |
| HC Finance B.V.                                 | 650,0          | 653,7          | 6,500            | 19.01.10       | 03.08.15      | XS0478802548 |
| HC Finance B.V.                                 | 750,0          | 742,1          | 7,500            | 19.01.10       | 03.04.20      | XS0478803355 |
| HC Finance B.V.                                 | 650,0          | 629,8          | 6,750            | 01.07.10       | 15.12.15      | XS0520759803 |
| Hanson Australia Funding Limited<br>750 Mio USD | 560,6          | 563,2          | 5,250            | 18.03.03       | 15.03.13      | US411336AA85 |
| Hanson Limited 750 Mio USD                      | 560,6          | 579,6          | 6,125            | 16.08.06       | 15.08.16      | US411349AA15 |
| <b>Gesamt</b>                                   |                | <b>7.228,8</b> |                  |                |               |              |

**Verbindlichkeiten gegenüber Kreditinstituten**

| Emittent<br>Mio EUR          | Nominal-<br>volumen | Buchwert       | Kupon in Prozent    | Emissions-<br>datum | Endfällig-<br>keit |
|------------------------------|---------------------|----------------|---------------------|---------------------|--------------------|
| <b>Schuldscheindarlehen</b>  |                     |                |                     |                     |                    |
| HeidelbergCement AG          | 5,0                 | 5,0            | 6-M-Euribor + 1,600 | 27.09.02            | 27.03.13           |
| HC Finance B.V.              | 200,0               | 202,3          | 5,710               | 16.10.07            | 16.10.12           |
| HC Finance B.V.              | 100,0               | 101,2          | 6,000               | 16.10.07            | 16.10.14           |
| HC Finance B.V.              | 40,0                | 40,2           | 3-M-Euribor + 1,900 | 18.04.08            | 18.04.13           |
| HC Finance B.V.              | 100,0               | 100,5          | 3-M-Euribor + 2,100 | 05.05.08            | 05.05.13           |
| HC Finance B.V.              | 73,5                | 74,3           | 3-M-Euribor + 1,950 | 07.05.08            | 07.05.12           |
| HC Finance B.V.              | 33,5                | 35,4           | 6,360               | 07.05.08            | 07.05.12           |
| HC Finance B.V.              | 8,5                 | 9,0            | 3-M-Euribor + 1,950 | 07.05.08            | 07.05.12           |
| HC Finance B.V.              | 25,0                | 26,1           | 6,570               | 07.05.08            | 07.05.14           |
| HC Finance B.V.              | 18,0                | 18,1           | 3-M-Euribor + 2,150 | 07.05.08            | 07.05.14           |
| HC Finance B.V.              | 50,0                | 50,1           | 6-M-Euribor + 2,050 | 09.06.08            | 10.06.13           |
| <b>Syndizierte Fazilität</b> |                     |                |                     |                     |                    |
| HeidelbergCement AG          | 131,8               | 95,9           |                     | 27.04.10            | 31.12.13           |
| <b>Sonstige</b>              |                     |                |                     |                     |                    |
| Konzern                      |                     | 380,7          |                     |                     |                    |
| <b>Gesamt</b>                |                     | <b>1.139,0</b> |                     |                     |                    |

**Sonstige verzinsliche Verbindlichkeiten**

| Emittent<br>Mio EUR                | Nominal-<br>volumen | Buch-<br>wert | Kupon in Prozent    | Emissions-<br>datum | Endfällig-<br>keit | ISIN         |
|------------------------------------|---------------------|---------------|---------------------|---------------------|--------------------|--------------|
| <b>European Medium Term Note</b>   |                     |               |                     |                     |                    |              |
| HC Finance B.V.                    | 50,0                | 50,5          | 3-M-Euribor + 2,900 | 08.04.04            | 08.04.11           | XS0190041391 |
| HC Finance B.V.                    | 10,0                | 10,0          | 6-M-Euribor + 2,500 | 26.03.04            | 20.05.11           | XS0189520256 |
| HeidelbergCement AG                | 10,0                | 10,0          | 6-M-Euribor + 2,500 | 01.04.04            | 20.05.11           | XS0189795353 |
| HC Finance B.V. 150 Mio SEK        | 16,7                | 16,8          | 4,400               | 07.11.06            | 07.11.11           | XS0274376564 |
| HC Finance B.V. 150 Mio SEK        | 16,7                | 16,7          | 3-M-Stibor + 0,400  | 07.11.06            | 07.11.11           | XS0274376481 |
| HC Finance B.V.                    | 6,0                 | 6,0           | 6-M-Euribor + 0,200 | 20.01.05            | 20.01.12           | XS0210446448 |
| HC Finance B.V.                    | 50,0                | 50,1          | 3-M-Euribor + 0,200 | 23.01.07            | 23.01.12           | XS0283649621 |
| HeidelbergCement AG<br>290 Mio SEK | 32,3                | 32,4          | 3-M-Stibor + 1,050  | 25.10.07            | 25.10.12           | XS0327475744 |
| HC Finance B.V.                    | 30,0                | 29,8          | 3-M-Euribor + 1,450 | 09.06.05            | 09.06.15           | XS0221489155 |
| <b>Commercial Paper</b>            |                     |               |                     |                     |                    |              |
| HeidelbergCement AG                | 173,8               | 173,8         |                     |                     |                    |              |
| <b>Sonstige</b>                    |                     |               |                     |                     |                    |              |
| Konzern                            |                     | 287,8         |                     |                     |                    |              |
| <b>Gesamt</b>                      |                     | <b>683,9</b>  |                     |                     |                    |              |

**Put-Optionen**

| Mio EUR                                     | Buchwert    |
|---------------------------------------------|-------------|
| Put-Optionen von Minderheitsgesellschaftern | 95,6        |
| <b>Gesamt</b>                               | <b>95,6</b> |



| Zusammengefasster Lagebericht              |                                     |
|--------------------------------------------|-------------------------------------|
| Kernaktivitäten und Organisationsstruktur  | Nachhaltigkeit bei HeidelbergCement |
| Strategie, Unternehmenssteuerung und Ziele | Mitarbeiter und Gesellschaft        |
| <b>Geschäftsverlauf 2010</b>               | Umweltvorsorge                      |
| Weitere Angaben                            | Forschung und Technik               |
| Risikobericht                              | Ausblick                            |

Die folgende Tabelle zeigt die wesentlichen Liquiditätsinstrumente am 31. Dezember 2010:

| Liquiditätsinstrumente                                            |                |
|-------------------------------------------------------------------|----------------|
| Mio EUR                                                           | 31.12.2010     |
| Liquide Mittel                                                    | 869,7          |
| Veräußerbare Finanzinvestitionen und derivative Finanzinstrumente | 36,0           |
| Freie Kreditlinie                                                 | 2.604,0        |
| <b>Freie Liquidität</b>                                           | <b>3.509,7</b> |

## Rating

Die erfolgreichen Refinanzierungsmaßnahmen führten gepaart mit der operativen Leistung weiter zu einer signifikanten Anhebung der Bonitätsbewertung durch die Ratingagenturen Standard & Poor's, Moody's und Fitch Ratings (BB-/B, Ba2/NP, BB/B). Vor diesem Hintergrund konnten wir die Emissionstätigkeit im Geldmarkt wiederbeleben und über unser 1 Mrd EUR Euro Commercial Paper Programm im Jahresverlauf 2010 ein Volumen von insgesamt 7,0 Mrd EUR begeben. Zum Jahresende 2010 waren rund 174 Mio EUR von den von der HeidelbergCement AG begebenen Commercial Paper ausstehend. Die oben angeführte 3 Mrd EUR syndizierte Kreditlinie dient dabei als Back-Up Linie.

| Ratingagenturen   |                    |          |                    |
|-------------------|--------------------|----------|--------------------|
|                   | Langfristig-Rating | Ausblick | Kurzfristig-Rating |
| Standard & Poor's | BB-                | Positiv  | B                  |
| Moody's           | Ba2                | Positiv  | Not Prime          |
| Fitch             | BB                 | Stabil   | B                  |

## Ertrags-, Vermögens- und Finanzlage der HeidelbergCement AG

Ergänzend zur Konzernberichterstattung erläutern wir im Folgenden die Entwicklung der Muttergesellschaft: Der Jahresabschluss der HeidelbergCement AG wird – anders als der Konzernabschluss – nach den deutschen handelsrechtlichen Vorschriften aufgestellt. Die Vorschriften des Bilanzrechtsmodernisierungsgesetzes (BilMoG) werden seit dem 1. Januar 2010 angewendet. Aus der Umstellung auf die Vorschriften des BilMoG ergaben sich außerordentliche Erträge in Höhe von 16,6 Mio EUR. Des Weiteren wurden 21,9 Mio EUR als erfolgsneutrale BilMoG-Umstellungs-differenzen in den Gewinnrücklagen erfasst.

Der Lagebericht der HeidelbergCement AG wird gemäß § 315 Abs. 3 HGB mit dem des HeidelbergCement Konzerns zusammengefasst, da der Geschäftsverlauf, die wirtschaftliche Lage und die künftigen Chancen und Risiken der Muttergesellschaft aufgrund der gemeinsamen Tätigkeit im Baustoffgeschäft eng mit dem Konzern verbunden sind.

Die HeidelbergCement AG übt als Obergesellschaft die Leitungsfunktion im HeidelbergCement Konzern aus. Daneben ist sie in Deutschland operativ in den Geschäftsbereichen Zement und Bauprodukte tätig. Die Gesellschaft betreibt nach der Verschmelzung der HC Zementwerk Hannover GmbH zum 1. Januar 2010 und der Schließung des Zementwerks Wetzlar zum Jahresende 2010 zehn Zement- und Mahlwerke sowie ein Kalkwerk.

Im Jahr 2010 waren die Auswirkungen der weltweiten Wirtschaftskrise in der deutschen Bauwirtschaft noch deutlich zu spüren. Die harten Wintermonate zu Jahresbeginn und der frühe Wintereinbruch im Dezember beeinträchtigten den Zement- und Klinkerabsatz zusätzlich. Auch die Exportlieferungen waren spürbar rückläufig. Das Zementwerk Wetzlar wurde zum Jahresende 2010 aufgrund geringer Auslastung und einem erwarteten Anstieg von Reparatur- und Investitionsbedarf geschlossen.

Der Umsatz der HeidelbergCement AG verminderte sich im Geschäftsjahr 2010 um 3,6% auf 477 (i.V.: 495) Mio EUR. Hierbei ist zu berücksichtigen, dass im Vorjahreswert Umsatzerlöse aus Transportbetonverkäufen aufgrund der Anwachsung der Heidelberger Beton Nordwest GmbH & Co. KG enthalten waren. Das operative Geschäft dieser Gesellschaft wurde Ende 2009 in die Heidelberger Beton GmbH eingebracht. Ohne Berücksichtigung des Konsolidierungseffekts aus der Verschmelzung der HC Zementwerk Hannover GmbH zum 1. Januar 2010 nahm der Umsatz um 11,6% ab. Der negative Effekt aus der Verschmelzung der HC Zementwerk Hannover GmbH in Höhe von 99,6 Mio EUR sowie Restrukturierungsaufwendungen im Rahmen der Schließung des Zementwerks Wetzlar konnten durch Einsparungen aus dem „FitnessPlus 2010“-Programm teilweise ausgeglichen werden. Insgesamt verringerte sich das Betriebsergebnis um 19 Mio EUR auf -61 (i.V.: -42) Mio EUR. Das Ergebnis aus Beteiligungen sank infolge geringerer Ausschüttungen von direkt gehaltenen Tochtergesellschaften auf -7 (i.V.: 89) Mio EUR. Die Zinserträge aus Ausleihungen stiegen insbesondere aufgrund der Weiterreichung der zugeflossenen finanziellen Mittel aus den drei im Oktober 2009 sowie der zwei im Januar 2010 begebenen Euroanleihen an die HeidelbergCement UK Holding Limited/Großbritannien auf 257 (i.V.: 145) Mio EUR. Die Zunahme der sonstigen Zinsen und ähnlichen Erträge auf 539 (i.V.: 289) Mio EUR resultiert im Wesentlichen aus Erträgen aus Zinsswaps inklusive des Ertrags aus der Glattstellung der Zinsswaps mit positivem Marktwert. Der Anstieg der Zinsen und ähnlichen Aufwendungen auf 633 (i.V.: 445) Mio EUR beruht auf den Zinsaufwendungen für die im Oktober 2009 sowie Januar 2010 emittierten Euroanleihen, der Amortisation der Transaktionskosten für die syndizierten Kreditlinien vom Juni 2009 und April 2010 und der Amortisation der Transaktionskosten und des Disagios der im Januar 2010 begebenen Euroanleihen sowie Aufwendungen aus Zinsswaps inklusive des Verlustes aus der Übertragung zu negativen Marktwerten auf die HeidelbergCement Finance B.V. Insgesamt ergab sich ein Jahresüberschuss in Höhe von 47 (i.V.: 123) Mio EUR und ein Bilanzgewinn von 63 (i.V.: 64) Mio EUR.

Die Bilanzsumme sank gegenüber dem Vorjahr um 2,4 Mrd EUR auf 16,3 (i.V.: 18,7) Mrd EUR. Der Rückgang resultiert im Wesentlichen aus der Übertragung der drei im Oktober 2009 begebenen Euroanleihen mit einem Gesamtemissionsvolumen von 2,5 Mrd EUR auf die 100%ige niederländische Tochtergesellschaft HeidelbergCement Finance B.V. sowie aus der gleichzeitigen Übertragung von Ausleihungen in derselben Höhe an die HeidelbergCement UK Holding Limited/Großbritannien auf die HeidelbergCement Finance B.V. Im Juli 2010 wurde die HeidelbergCement AG als Emittentin dieser Anleihen sowie der zwei im Januar 2010 begebenen Euroanleihen mit einem Gesamtvolumen von 1,4 Mrd EUR durch die HeidelbergCement Finance B.V. ersetzt. Auf der Aktivseite verminderten sich die Ausleihungen an verbundene Unternehmen um 2,4 Mrd EUR auf 3,5 (i.V.: 5,9) Mrd EUR. Der Rückgang ist im Wesentlichen auf die Übertragung von Ausleihungen auf die HeidelbergCement Finance B.V. zurückzuführen. Diese Ausleihungen stammten aus der Weiterreichung der im Oktober 2009 sowie der im Januar 2010 begebenen Euroanleihen an die HeidelbergCement UK Holding Limited/Großbritannien. Das Finanzanlagevermögen nahm um 2,6 Mrd EUR auf 11,2 (i.V.: 13,8) Mrd EUR ab; in vergleichbarer Größenordnung ging das gesamte Anlagevermögen auf 11,5 (i.V.: 14,0) Mrd EUR zurück. Im Umlaufvermögen erhöhten sich die

| Zusammengefasster Lagebericht              |                                     |
|--------------------------------------------|-------------------------------------|
| Kernaktivitäten und Organisationsstruktur  | Nachhaltigkeit bei HeidelbergCement |
| Strategie, Unternehmenssteuerung und Ziele | Mitarbeiter und Gesellschaft        |
| Geschäftsverlauf 2010                      | Umweltvorsorge                      |
| Weitere Angaben                            | Forschung und Technik               |
| Risikobericht                              | Ausblick                            |

Forderungen und sonstigen Vermögensgegenstände auf 4,8 (i.V.: 4,4) Mrd EUR. Diese Zunahme ist auf den Anstieg der Forderungen gegen verbundene Unternehmen auf 4,7 (i.V.: 4,3) Mrd EUR zurückzuführen.

Auf der Passivseite blieben das Eigenkapital mit 11,6 (i.V.: 11,6) Mrd EUR und die Rückstellungen mit 0,6 (i.V.: 0,6) Mrd EUR weitgehend unverändert. Die Verbindlichkeiten hingegen verringerten sich um 2,4 Mrd EUR auf 4,0 (i.V.: 6,4) Mrd EUR. In dieser Minderung spiegelt sich die Ersetzung der HeidelbergCement AG als Anleiheemittentin durch die HeidelbergCement Finance B.V. im Juli 2010 wider. Der im Vorjahr unter Anleihen ausgewiesene Betrag von 2,5 Mrd EUR ging aufgrund der Übertragung der im Oktober 2009 begebenen Anleihen und der im Januar 2010 neu hinzugekommenen Anleihen auf null zurück.

## Beurteilung der wirtschaftlichen Lage durch die Unternehmensleitung

Das Jahr 2010 war von einer deutlich zweigeteilten geografischen Entwicklung der Baustoffnachfrage geprägt. In den Schwellenländern Asiens und Afrikas nahm der Verbrauch angetrieben durch das anhaltende Wirtschaftswachstum weiter zu. In Europa und den USA hingegen sank insgesamt die Baustoffnachfrage im Jahresvergleich aufgrund der negativen Auswirkungen der Finanz- und Wirtschaftskrise auf den Bausektor und wegen der winterlichen Wetterverhältnisse am Anfang und Ende des Jahres. Allerdings wurde der Tiefpunkt im Verlauf des Jahres in diesen Märkten durchschritten und die Nachfrage begann wieder anzusteigen, zuerst in Nordamerika und zuletzt auch in Osteuropa.

Als Marktführer bei Zuschlagstoffen und als einer der führenden Produzenten von Zement mit vertikal integrierter Aufstellung konnte HeidelbergCement von den Infrastrukturprogrammen, insbesondere in Nordamerika, profitieren. Dank der vorteilhaften geografischen Positionierung in lokalen Wachstumsmärkten in Schwellenländern und in den reifen Märkten Nordamerikas und Europas sowie der erfolgreich durchgeführten Kostensenkungs- und Effizienzsteigerungsmaßnahmen im Rahmen des „FitnessPlus 2010“-Programms konnten wir unsere operative Marge im Vergleich zum Vorjahr leicht steigern. Das Nettoergebnis profitierte darüber hinaus von gesunkenen Finanzierungskosten.

Die Finanzierungsstruktur von HeidelbergCement hat sich 2010 weiter verbessert. Dank eines anhaltend hohen Mittelzuflusses aus der operativen Geschäftstätigkeit konnten wir die Nettoverschuldung von 8,4 Mrd EUR Ende 2009 auf 8,1 Mrd EUR Ende 2010 reduzieren. Gleichzeitig haben wir unsere disziplinierten und fokussierten Investitionen in den Ausbau der Zementkapazität in attraktiven Wachstumsmärkten fortgesetzt. Durch die erfolgreiche Platzierung mehrerer Euroanleihen haben wir darüber hinaus das Fälligkeitsprofil weiter verbessert. Des Weiteren hat HeidelbergCement eine neue Kreditlinie zu deutlich günstigeren Konditionen verhandelt und damit die verfügbare Liquidität auf 3,5 Mrd EUR Ende 2010 erhöht.



## Weitere Angaben

### Angaben nach §§ 289 Abs. 4, 315 Abs. 4 HGB

Zum 31. Dezember 2010 belief sich das Grundkapital der HeidelbergCement AG auf 562.500.000 EUR. Es ist in 187.500.000 auf den Inhaber lautende Stückaktien eingeteilt, auf die ein anteiliger Betrag von 3 EUR je Aktie entfällt. Jede Aktie gewährt in der Hauptversammlung eine Stimme. Mit allen Aktien sind die gleichen Rechte und Pflichten verbunden; verschiedene Aktiengattungen bestehen nicht. Beschränkungen, die Stimmrechte oder die Übertragung von Aktien betreffen, sind dem Vorstand nicht bekannt. Nach den der Gesellschaft vorliegenden Mitteilungen gemäß Wertpapierhandelsgesetz (WpHG) zum 31. Dezember 2010 hält Herr Ludwig Merckle, Ulm, mehr als 10% der Stimmrechte der Gesellschaft, nämlich indirekt und vermittelt über diverse Gesellschaften, darunter die SC Vermögensverwaltung GmbH (ehemals Spohn Cement GmbH), Zossen, 25,11 % der Stimmrechte. Keinem Inhaber von Aktien wurden Sonderrechte eingeräumt, die Kontrollbefugnisse verleihen.

Der Vorstand der Gesellschaft wird durch den Aufsichtsrat bestellt und abberufen. Die Satzung kann von der Hauptversammlung mit einfacher Mehrheit des bei der Beschlussfassung vertretenen Grundkapitals geändert werden, sofern gesetzliche Vorschriften keine größere Mehrheit zwingend vorschreiben; Änderungen, die nur die Fassung der Satzung betreffen, kann der Aufsichtsrat vornehmen.

Es bestehen zum 31. Dezember 2010 zwei Genehmigte Kapitalia, und zwar zum einen eine Ermächtigung des Vorstands und Aufsichtsrats zur Erhöhung des Kapitals durch Ausgabe neuer Aktien gegen Bareinlagen (Genehmigtes Kapital I) und zum anderen eine Ermächtigung des Vorstands und Aufsichtsrats zur Erhöhung des Kapitals durch Ausgabe neuer Aktien gegen Sacheinlagen (Genehmigtes Kapital II). Diese Genehmigten Kapitalia werden nachfolgend beschrieben:

Der Vorstand ist ermächtigt, das Grundkapital der Gesellschaft mit Zustimmung des Aufsichtsrats bis zum 5. Mai 2015 einmalig oder mehrmals um bis zu insgesamt 225.000.000 EUR gegen Bareinlagen durch Ausgabe neuer, auf den Inhaber lautender Stückaktien zu erhöhen (Genehmigtes Kapital I). Dabei ist den Aktionären ein Bezugsrecht einzuräumen. Der Vorstand ist jedoch ermächtigt,

- das Bezugsrecht der Aktionäre auszuschließen, um etwaige Spitzenbeträge zu verwerten, und
- für einen Teilbetrag von bis zu 10% des zum Zeitpunkt der Ausübung der Ermächtigung vorhandenen Grundkapitals das Bezugsrecht ganz oder teilweise auszuschließen, um neue Aktien zu einem Ausgabepreis zu begeben, der den Börsenpreis der alten Aktien nicht wesentlich unterschreitet; auf die betragsmäßige Begrenzung sind diejenigen Aktien anzurechnen, die während der Laufzeit dieser Ermächtigung anderweitig in Anwendung von § 186 Abs. 3 Satz 4 AktG ausgegeben oder veräußert werden. Auf die vorgenannte 10%-Grenze werden auch neue Aktien angerechnet, die zur Bedienung von Bezugsrechten aus Options- bzw. Wandlungsrechten oder -pflichten aus Schuldverschreibungen ausgegeben werden oder auszugeben sind. Auf diese Begrenzung sind außerdem eigene Aktien anzurechnen, die aufgrund einer Ermächtigung gemäß §§ 71 Abs. 1 Nr. 8, 186 Abs. 3 Satz 4 AktG unter Ausschluss des Bezugsrechts veräußert werden.

Der Vorstand ist ferner ermächtigt, das Grundkapital der Gesellschaft bis zum 5. Mai 2015 mit Zustimmung des Aufsichtsrats durch Ausgabe neuer, auf den Inhaber lautender Stückaktien gegen Sacheinlagen einmalig oder mehrmals um bis zu insgesamt 56.100.000 EUR zu erhöhen (Genehmigtes Kapital II). Darüber hinaus ist der Vorstand ermächtigt, mit Zustimmung des Aufsichtsrats

| Zusammengefasster Lagebericht              |                                     |
|--------------------------------------------|-------------------------------------|
| Kernaktivitäten und Organisationsstruktur  | Nachhaltigkeit bei HeidelbergCement |
| Strategie, Unternehmenssteuerung und Ziele | Mitarbeiter und Gesellschaft        |
| Geschäftsverlauf 2010                      | Umweltvorsorge                      |
| Weitere Angaben                            | Forschung und Technik               |
| Risikobericht                              | Ausblick                            |

das Bezugsrecht auszuschließen, sofern die Kapitalerhöhung gegen Sacheinlagen zum Zwecke des Erwerbs von Unternehmen, Unternehmensteilen oder von Beteiligungen an Unternehmen oder von sonstigen Vermögensgegenständen erfolgt. Außerdem ist der Vorstand ermächtigt, mit Zustimmung des Aufsichtsrats das Bezugsrecht der Aktionäre insoweit auszuschließen, wie es erforderlich ist, um Inhabern der von der Gesellschaft oder ihren Tochtergesellschaften ausgegebenen Optionscheine und Wandelschuldverschreibungen ein Bezugsrecht auf neue Aktien in dem Umfang zu gewähren, wie es ihnen nach Ausübung des Options- bzw. Wandlungsrechts bzw. nach Erfüllung der Options- bzw. Wandlungspflicht zustehen würde. Der Vorstand ist ermächtigt, mit Zustimmung des Aufsichtsrats die weiteren Einzelheiten der Kapitalerhöhung und ihrer Durchführung, insbesondere den Inhalt der Aktienrechte und die Bedingungen der Aktienaussgabe, festzulegen.

Die den Genehmigten Kapitalia I und II zugrunde liegenden Ermächtigungen zur Ausgabe von neuen Aktien gegen Bar- oder Sacheinlagen sind zum 31. Dezember 2010 nicht ausgenutzt worden.

Es besteht schließlich zum 31. Dezember 2010 das nachfolgend beschriebene Bedingte Kapital: Das Grundkapital ist um weitere bis zu 187.500.000 EUR, eingeteilt in bis zu Stück 62.500.000 neue, auf den Inhaber lautende Stückaktien bedingt erhöht (Bedingtes Kapital 2009). Die bedingte Kapitalerhöhung wird nur insoweit durchgeführt, wie die Inhaber von Options- oder Wandlungsrechten bzw. die zur Wandlung bzw. Optionsausübung Verpflichteten aus Options- oder Wandelanleihen, Genussrechten oder Gewinnschuldverschreibungen, die von der HeidelbergCement AG oder einer Konzerngesellschaft der HeidelbergCement AG im Sinne von § 18 AktG, an der die HeidelbergCement AG unmittelbar oder mittelbar zu mindestens 90% beteiligt ist, aufgrund der von der Hauptversammlung vom 7. Mai 2009 unter Tagesordnungspunkt 7 beschlossenen Ermächtigung ausgegeben bzw. garantiert werden, von ihren Options- bzw. Wandlungsrechten Gebrauch machen oder, soweit sie zur Wandlung bzw. Optionsausübung verpflichtet sind, ihre Verpflichtung zur Wandlung bzw. Optionsausübung erfüllen bzw. soweit die HeidelbergCement AG ein Wahlrecht ausübt, ganz oder teilweise anstelle der Zahlung des fälligen Geldbetrages Aktien der HeidelbergCement AG zu gewähren, soweit nicht ein Barausgleich gewährt oder eigene Aktien oder Aktien einer anderen börsennotierten Gesellschaft zur Bedienung eingesetzt werden. Die dem Bedingten Kapital 2009 zugrunde liegende Ermächtigung zur Ausgabe von Options- oder Wandelanleihen ist zum 31. Dezember 2010 nicht ausgenutzt worden. Die Gesellschaft hat sich im Rahmen der Barkapitalerhöhung im September 2009 im Rahmen einer Kooperationsvereinbarung vorbehaltlich der Zustimmung der Vertragspartner verpflichtet, vor April 2011 keine Wandelschuldverschreibungen mit dem Recht auf Umwandlung in neue Aktien aus dem Bedingten Kapital 2009 zu begeben.

Die Gesellschaft hält keine eigenen Aktien und es besteht keine Ermächtigung zum Erwerb eigener Aktien.

Im Folgenden listen wir gemäß §§ 289 Abs. 4 Nr. 8, 315 Abs. 4 Nr. 8 HGB die wesentlichen Vereinbarungen der Gesellschaft auf, die unter der Bedingung eines Kontrollwechsels infolge eines Übernahmeangebots stehen, und fassen die hieraus folgenden Wirkungen zusammen. Wir weisen darauf hin, dass wir Vereinbarungen außer Betracht lassen, deren unter Umständen eintretende Folgen für die Gesellschaft die Schwellen von 50 Mio EUR im Einzelfall oder 100 Mio EUR bei gleich gelagerten Vereinbarungen unterschreiten, da sie für einen potenziellen Bieter regelmäßig nicht entscheidungserheblich sein werden. Die existenten so genannten Change-of-Control-Klauseln sind branchen- und transaktionsüblich und wurden nicht in der Absicht vereinbart, etwaige Übernahmeangebote zu behindern. Folgende wesentliche Vereinbarungen der HeidelbergCement AG stehen unter der Bedingung eines Kontrollwechsels bei der HeidelbergCement AG infolge eines Übernahmeangebots:

| Bezeichnung der Vereinbarung / Datum                                                                      | Art der Vereinbarung                                                                                                              | Nominalbetrag Mio EUR | Rückzahlung                                  | Art der Klausel |
|-----------------------------------------------------------------------------------------------------------|-----------------------------------------------------------------------------------------------------------------------------------|-----------------------|----------------------------------------------|-----------------|
| <b>Syndizierte Kredit- und Avalvereinbarungen</b>                                                         |                                                                                                                                   |                       |                                              |                 |
| Syndizierter Kreditrahmen- und Avalkreditrahmenvertrag vom 27. April 2010                                 | Kreditrahmen- und Avalkreditrahmenvertrag                                                                                         | 3.000 <sup>1)</sup>   | soweit noch ausstehend bis 31. Dezember 2013 | (1)             |
| <b>Anleihen, begeben von HeidelbergCement Finance B.V. unter der Garantie von HeidelbergCement AG</b>     |                                                                                                                                   |                       |                                              |                 |
| 5,625 % Anleihe 2007/2018                                                                                 | Schuldverschreibung                                                                                                               | 480                   | soweit noch ausstehend bis 4. Januar 2018    | (2)             |
| 6,375 % Anleihe 2008/2012                                                                                 | Schuldverschreibung                                                                                                               | 1.000                 | soweit noch ausstehend bis 25. Januar 2012   | (2)             |
| 7,5 % Anleihe 2009/2014                                                                                   | Schuldverschreibung                                                                                                               | 1.000                 | soweit noch ausstehend bis 31. Oktober 2014  | (3)             |
| 8,0 % Anleihe 2009/2017                                                                                   | Schuldverschreibung                                                                                                               | 1.000                 | soweit noch ausstehend bis 31. Januar 2017   | (3)             |
| 8,5 % Anleihe 2009/2019                                                                                   | Schuldverschreibung                                                                                                               | 500                   | soweit noch ausstehend bis 31. Oktober 2019  | (3)             |
| 6,5 % Anleihe 2010/2015                                                                                   | Schuldverschreibung                                                                                                               | 650                   | soweit noch ausstehend bis 3. August 2015    | (3)             |
| 7,5 % Anleihe 2010/2020                                                                                   | Schuldverschreibung                                                                                                               | 750                   | soweit noch ausstehend bis 3. April 2020     | (3)             |
| 6,75 % Anleihe 2010/2015                                                                                  | Schuldverschreibung                                                                                                               | 650                   | soweit noch ausstehend bis 15. Dezember 2015 | (3)             |
| <b>Schuldscheindarlehen begeben von HeidelbergCement Finance B.V., garantiert von HeidelbergCement AG</b> |                                                                                                                                   |                       |                                              |                 |
| vom 16. Oktober 2007                                                                                      | Schuldscheindarlehen                                                                                                              | 200<br>100            | bis 16. Oktober 2012<br>bis 16. Oktober 2014 | (2)             |
| vom 18. April 2008                                                                                        | Schuldscheindarlehen                                                                                                              | 40                    | bis 18. April 2013                           | (2)             |
| vom 5. Mai 2008                                                                                           | Schuldscheindarlehen                                                                                                              | 100                   | bis 5. Mai 2013                              | (2)             |
| vom 7. Mai 2008                                                                                           | Schuldscheindarlehen                                                                                                              | 115,5<br>43           | bis 7. Mai 2012<br>bis 7. Mai 2014           | (2)             |
| vom 9. Juni 2008                                                                                          | Schuldscheindarlehen                                                                                                              | 50                    | bis 10. Juni 2013                            | (2)             |
| <b>Grundsatzvereinbarung zwischen Gesellschaftern</b>                                                     |                                                                                                                                   |                       |                                              |                 |
| zwischen HeidelbergCement AG und IFC vom 19. Mai 2010                                                     | Vereinbarung zwischen HeidelbergCement AG und IFC sowie ihnen jeweils zugehörigen Gesellschaftern in der Scancem International DA | noch zu bestimmen     | noch zu bestimmen                            | (4)             |

1) Hierunter standen zum 31. Dezember 2010 396 Mio EUR aus.

Die jeweiligen Change-of-Control-Klauseln geben dem Vertragspartner bzw. Inhaber der Anleihen oder der Schuldscheindarlehen das Recht, die ausstehenden Darlehen, Schuldverschreibungen oder Schuldscheine im Falle einer im Einzelnen unterschiedlich definierten Veränderung in der Anteilseignerstruktur der Gesellschaft sofort fällig zu stellen und Rückzahlung zu verlangen bzw. die gemeinsame Beteiligung an der Scancem International DA zu beenden.

Der in der Spalte „Art der Klausel“ mit (1) gekennzeichnete syndizierte Kreditrahmen- und Avalkreditrahmenvertrag vom 27. April 2010 gibt jedem Gläubiger des Bankensyndikats das Recht, im Fall eines Kontrollwechsels den von ihm zur Verfügung gestellten Darlehensbetrag nebst aufgelaufener Zinsen vorzeitig fällig zu stellen und eine entsprechende Rückzahlung zu verlangen. Ein Kontrollwechsel liegt vor, wenn eine Person oder eine gemeinsam handelnde Gruppe von Personen im Sinne von § 2 Absatz 5 Wertpapiererwerbs- und Übernahmegesetz mehr als 30 % der Aktien der Gesellschaft erworben hat.



| Zusammengefasster Lagebericht              |                                     |
|--------------------------------------------|-------------------------------------|
| Kernaktivitäten und Organisationsstruktur  | Nachhaltigkeit bei HeidelbergCement |
| Strategie, Unternehmenssteuerung und Ziele | Mitarbeiter und Gesellschaft        |
| Geschäftsverlauf 2010                      | Umweltvorsorge                      |
| Weitere Angaben                            | Forschung und Technik               |
| Risikobericht                              | Ausblick                            |

Die in der Spalte „Art der Klausel“ mit (2) gekennzeichneten Anleihen und Schuldscheindarlehen geben dem jeweiligen Inhaber der Schuldverschreibung bzw. des Schuldscheindarlebens ein vorzeitiges Kündigungsrecht bei Veränderungen in der Anteilseignerstruktur nur dann, wenn sie zu einem Wechsel in der Kontrolle der Gesellschaft führen. Kontrolle liegt dabei vor, wenn mehr als 50 % des gezeichneten Kapitals oder mehr als 50 % der Stimmrechte vertraglich oder auf andere Weise kontrolliert werden, wobei im Rahmen eines Konzepts „zugelassener Gesellschafter“ der Kontrollwechsel auf die (i) Spohn Cement GmbH oder (ii) jeden Gesellschafter der Spohn Cement GmbH einschließlich Erben und Vermächtnisnehmern von Gesellschaftern der Spohn Cement GmbH und Personen, die wirtschaftliche Eigentümer von Anteilen an der Spohn Cement GmbH sind, oder (iii) jede juristische Person oder Stiftung oder vergleichbare Einrichtung, die von solchen Personen geführt wird, an die Aktien der HeidelbergCement AG von unter (i) bis (iii) genannten Personen übertragen wurden, von der Regelung eines vorzeitigen Kündigungsrechts ausgenommen ist.

Die Anleihebedingungen der im Oktober 2009 sowie der im Januar und Juli 2010 begebenen, in der Spalte „Art der Klausel“ mit (3) gekennzeichneten sechs Euroanleihen geben bei Eintritt des nachfolgend beschriebenen Kontrollwechsels jedem Anleihegläubiger das Recht, von der Gesellschaft die Rückzahlung oder, nach Wahl der Gesellschaft, den Ankauf seiner Schuldverschreibungen durch die Gesellschaft (oder auf ihre Veranlassung durch einen Dritten) zum Vorzeitigen Rückzahlungsbetrag (Put) insgesamt oder teilweise zu verlangen, wobei Vorzeitiger Rückzahlungsbetrag (Put) für jede Schuldverschreibung 101 % des Nennbetrags der Schuldverschreibung zuzüglich aufgelaufener und nicht gezahlter Zinsen bis zum in den Anleihebedingungen definierten Rückzahlungstag (ausschließlich) meint.

Ein Kontrollwechsel liegt vor, wenn eines der folgenden Ereignisse eintritt:

- die Gesellschaft erlangt Kenntnis davon, dass eine Person oder gemeinsam handelnde Gruppe von Personen im Sinne von § 2 Absatz 5 Wertpapiererwerbs- und Übernahmegesetz der rechtliche oder wirtschaftliche Eigentümer von mehr als 30 % der Stimmrechte der Gesellschaft geworden ist; oder
- die Verschmelzung der Gesellschaft mit einer oder auf eine dritte Person oder die Verschmelzung einer dritten Person mit oder auf die Gesellschaft, oder der Verkauf aller oder im Wesentlichen aller Vermögensgegenstände (konsolidiert betrachtet) der Gesellschaft an eine dritte Person, außer im Zusammenhang mit Rechtsgeschäften, infolge von denen (A) im Falle einer Verschmelzung die Inhaber von 100 % der Stimmrechte der Gesellschaft wenigstens die Mehrheit der Stimmrechte an dem überlebenden Rechtsträger unmittelbar nach einer solchen Verschmelzung halten und (B) im Fall des Verkaufs von allen oder im Wesentlichen allen Vermögensgegenständen der erwerbende Rechtsträger ein Tochterunternehmen der Gesellschaft ist oder wird und Garantin bezüglich der Schuldverschreibungen wird.

Die 750 Mio USD 6,125 % Anleihe der Hanson Limited, begeben am 16. August 2006, fällig am 15. August 2016 und mittlerweile garantiert von der HeidelbergCement AG, enthält eine Regelung, nach der möglicherweise nicht nur der direkte, sondern auch der indirekte Erwerb von mehr als 50 % der Anteile oder der Stimmrechte an Hanson Limited einen Kontrollwechsel darstellt. Als indirekter Erwerb könnte dabei schon der Erwerb von 30 % der Stimmrechte an der HeidelbergCement AG anzusehen sein, die mittelbar 100 % der Anteile an Hanson Limited hält. Ein Kontrollwechsel würde den Inhabern dieser Anleihe dann eine Verkaufsoption zu 101 % des Nominalwerts zuzüglich Zinsen gegenüber der Hanson Limited gewähren, wenn es im Zusammenhang mit diesem Kontrollwechsel zu einer Herabstufung der Anleihe unterhalb des so genannten „Investment Grade“ durch Moody's und Standard & Poor's käme. Da die Anleihe bereits unterhalb des Investment Grade eingestuft ist, kommt diese Change-of-Control-Regelung derzeit nicht zur Anwendung.

Im Mai 2010 hat die Gesellschaft unter anderem mit der zur Weltbank gehörenden International Finance Corporation (IFC) die in der Spalte „Art der Klausel“ mit (4) gekennzeichnete Grundsatzvereinbarung zwischen Gesellschaftern geschlossen (siehe Abschnitt Afrika-Mittelmeerraum auf Seite 62). Dieser Vertrag regelt die Rechte der Partner in der gemeinsam gehaltenen norwegischen Holdinggesellschaft Scancem International DA, die die wesentlichen afrikanischen Aktivitäten des HeidelbergCement Konzerns in den Ländern südlich der Sahara bündelt. Der Vertrag sieht die Möglichkeit für IFC und ihre Finanzpartner vor, ihre indirekte Beteiligung an der Scancem International DA an HeidelbergCement zu einem Preis zu verkaufen, der einem im Vertrag genannten Referenzpreis entspricht oder durch ein Sachverständigengutachten zu ermitteln ist, wenn ein „Adverse Sponsor Change in Control“ eintritt. Dieser ist als Kontrollwechsel bei der HeidelbergCement AG definiert, der zu einem Pflichtangebot nach dem Wertpapiererwerbs- und Übernahmegesetz an die außen stehenden Aktionäre der HeidelbergCement AG führt, wenn der Erwerber der Kontrolle entweder in einer im Vertrag näher definierten Sanktionsliste der UN, der EU, Frankreichs, der USA oder der Weltbank aufgeführt ist, oder wenn der Erwerber der Kontrolle Maßnahmen oder Entscheidungen trifft, mit denen die mit der Beteiligung der IFC an Scancem International DA beabsichtigten Zwecke, nämlich die gemeinsam geführten Aktivitäten in den Ländern südlich der Sahara zu modernisieren und auszubauen, beendet oder wesentlich beeinträchtigt würden.

Daneben existieren Vereinbarungen bezüglich der Pensionsregelungen in Großbritannien („pension schemes“), nach denen unter anderem ein (nicht näher vertraglich definierter) Kontrollwechsel bei der HeidelbergCement AG den Treuhändern dieser „pension schemes“ mitgeteilt werden muss. Wenn der Kontrollwechsel zudem nach den entsprechenden regulatorischen Vorgaben zu einer wesentlichen Gefährdung der Erfüllung der Pensionsverpflichtungen führt (sog. „Type A Event“), können die Treuhänder Verhandlungen über die Angemessenheit der Absicherung der Pensionsdeckung verlangen und diese durch ein so genanntes „clearance“-Verfahren vor der Aufsichtsbehörde überprüfen lassen, das zur Anpassung der Sicherheiten führen kann.

Der Aufsichtsrat der HeidelbergCement AG hat im Rahmen der Einführung des neuen Vorstandsvergütungssystems im November 2010 beschlossen, bei Neuabschluss und bei Verlängerung von Vorstandsverträgen dem Deutschen Corporate Governance Kodex (Ziffer 4.2.3) folgend zu vereinbaren, dass eine etwaige Abfindungszahlung aus Anlass der vorzeitigen Beendigung der Vorstandstätigkeit auf 150% des Abfindungs-Caps, höchstens jedoch auf die Vergütung für die Restlaufzeit des Anstellungsvertrags begrenzt ist.

Die übrigen nach §§ 289 Abs. 4, 315 Abs. 4 HGB geforderten Angaben betreffen Umstände, die bei der HeidelbergCement AG nicht vorliegen.

## Zweigniederlassungen

Die HeidelbergCement AG hat weder im In- noch im Ausland Zweigniederlassungen.

## Abhängigkeitsbericht

Im Zuge der im September 2009 durchgeführten Kapitalerhöhung hat sich der Aktionärskreis der HeidelbergCement AG durchgreifend geändert. Der Anteil von Herrn Ludwig Merckle an der Gesellschaft ging am 25. September 2009 von einem Mehrheitsbesitz auf 24,42% zurück. Nach einer uns vorliegenden Mitteilung belief sich der Anteil von Herrn Ludwig Merckle zum Jahresende 2010 auf 25,11%. Die Gesellschaft ist daher kein abhängiges Unternehmen mehr, eine Pflicht zur Erstellung eines Abhängigkeitsberichts für das vergangene Geschäftsjahr bestand daher nicht.

| Zusammengefasster Lagebericht              |                                     |
|--------------------------------------------|-------------------------------------|
| Kernaktivitäten und Organisationsstruktur  | Nachhaltigkeit bei HeidelbergCement |
| Strategie, Unternehmenssteuerung und Ziele | Mitarbeiter und Gesellschaft        |
| Geschäftsverlauf 2010                      | Umweltvorsorge                      |
| Weitere Angaben                            | Forschung und Technik               |
| Risikobericht                              | Ausblick                            |

## Ereignisse nach dem Ablauf des Geschäftsjahres 2010

Nach dem Bilanzstichtag 31. Dezember 2010 haben sich keine berichtspflichtigen Ereignisse ergeben.

## Risikobericht

### Risiken und Chancen

Die Risikopolitik von HeidelbergCement orientiert sich an der Unternehmensstrategie, die auf die Bestandssicherung und die nachhaltige Steigerung des Unternehmenswertes ausgerichtet ist. Unternehmerisches Handeln ist stets zukunftsorientiert und daher mit Risiken behaftet. Risiken zu identifizieren, sie zu verstehen und systematisch einzugrenzen, unterliegt der Verantwortung des Vorstands und ist eine Hauptaufgabe aller Führungskräfte.

HeidelbergCement ist einer Vielzahl von Risiken ausgesetzt, die nicht grundsätzlich vermieden, sondern akzeptiert werden, wenn die damit verbundenen Chancen in einem ausgewogenen Verhältnis dazu stehen. Das Chancen- und Risikomanagement von HeidelbergCement ist über konzernweite Planungs- und Steuerungssysteme eng miteinander verbunden. Die Chancen werden in der jährlich erstellten operativen Planung erfasst und im Rahmen der monatlichen Finanzberichterstattung verfolgt. Die unmittelbare Verantwortung, Chancen frühzeitig zu erkennen und wahrzunehmen, obliegt dem operativen Management in den Ländern sowie zentralen Konzernabteilungen.

Konkrete Erläuterungen zu den Chancenpotenzialen sind im Kapitel Ausblick auf Seite 119 aufgeführt.

### Risikomanagement

Der Vorstand der HeidelbergCement AG ist verpflichtet, ein internes Kontroll- und Risikomanagementsystem einzurichten und dieses zu überwachen. Darüber hinaus obliegt dem Vorstand die Gesamtverantwortung für den Umfang und die Ausrichtung der eingerichteten Systeme.

HeidelbergCement sieht für das Risikomanagement klare Regelungen der Zuständigkeiten und Verantwortlichkeiten vor, die sich an der Unternehmensstruktur orientieren.

Konzernweit gelten Verhaltensregeln, Richtlinien und Grundsätze zur Umsetzung eines systematischen und effektiven Risikomanagements. Das standardisierte interne Kontroll- und Risikomanagementsystem von HeidelbergCement orientiert sich an den finanziellen Ressourcen, der operativen Planung und der vom Vorstand festgelegten Risikomanagementstrategie. Es umfasst mehrere Bausteine, die aufeinander abgestimmt und methodisch in die Aufbau- und Ablauforganisation eingebettet sind.

Die wesentlichen Elemente des Risikomanagementsystems sind:

- Dokumentation der Rahmenbedingungen für ein ordnungsgemäßes und effizientes Risikomanagement in einer Konzernrichtlinie. Neben dieser Risk Management Policy befasst sich der Verhaltenskodex des Konzerns mit den zu beachtenden Verhaltensregeln und Compliance-Vorgaben.
- Koordination des Risikomanagements in der Konzernabteilung Group Insurance & Corporate Risk;
- Corporate-Risk-Verantwortliche auf Länderebene;
- direkte Information und offene Kommunikation von quantifizierten Risiken zwischen Vorstand und Ländermanagement;
- einheitliche und regelmäßige Berichterstattung auf Konzern- und Länderebene.



### Organisation des Risikomanagements bei HeidelbergCement

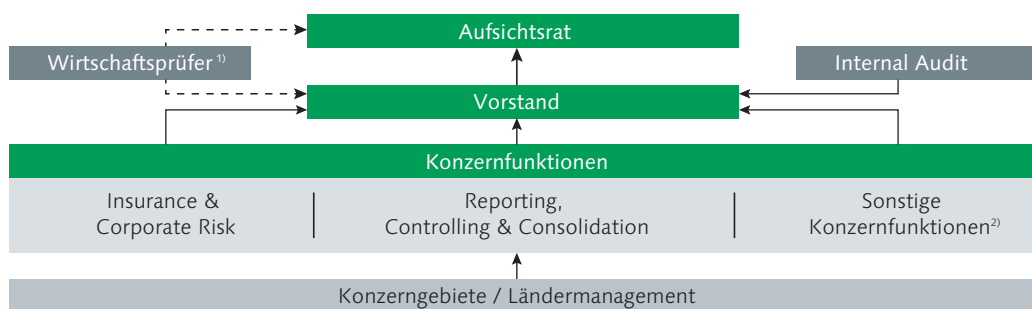

1) Im Rahmen der Jahresabschlussprüfung

2) Legal, Compliance, Tax, IT, Treasury, Corporate Finance, Human Resources, Strategy & Development, Marketing & Sales

## Risikomanagementprozess

### Identifikation von Risiken und deren Beurteilung

Die Identifikation der Risiken findet zum einen regelmäßig dezentral durch das Ländermanagement und zum anderen durch die weltweit verantwortlichen Konzernfunktionen statt. Als Hilfsparameter für den Identifikationsprozess dienen allgemeine makroökonomische Daten sowie sonstige branchenspezifische Faktoren und Risikoinformationsquellen.

Unter Berücksichtigung individueller Rahmenbedingungen werden für die einzelnen Länder angemessene Wertgrenzen für die Berichterstattung über relevante Risiken festgelegt. Auf Basis des Risikomodells unseres Konzerns und entsprechend der definierten Risikokategorien werden die Risiken bezüglich einer Mindesteintrittswahrscheinlichkeit von 10% und ihrer Schadenhöhe bewertet. Die Minderung der für den Unternehmenserfolg wichtigen Kenngröße operatives Ergebnis stellt den Orientierungsmaßstab für die Schadenhöhe dar.

In die Risikobetrachtung fließen auch solche Risiken ein, die nicht unmittelbaren Einfluss auf die Finanzlage nehmen, sondern Auswirkungen auf nicht monetäre Größen wie Reputation oder Strategie haben können. Für nicht direkt kalkulierbare Risiken wird eine Bewertung der möglichen Schadenhöhe nach qualitativen Kriterien wie z.B. niedrig oder bestandsgefährdend vorgenommen.

Die regelmäßige Identifikation wird bei plötzlich auftretenden, schwerwiegenden Risiken oder eingetretenen Schäden durch einen ad-hoc-Risikobericht ergänzt. Dieser Fall kann insbesondere im Zusammenhang mit politischen Ereignissen, Entwicklungen auf den Finanzmärkten oder Naturkatastrophen eintreten.

### Aggregation, Berichterstattung, Steuerung und Kontrolle der Risiken

Die quantitativen, aktualisierten Risikoberichte für alle Geschäftsbereiche unserer Konzernländer fließen vierteljährlich in die zentrale Managementberichterstattung an den Vorstand ein, so dass eine strukturierte und kontinuierliche Verfolgung der Risiken möglich ist. Korrelationen zwischen einzelnen Risiken und Ereignissen werden auf lokaler Ebene soweit wie möglich berücksichtigt. Bei den ebenfalls vierteljährlich stattfindenden Management Meetings kann der Vorstand zusammen mit den verantwortlichen Ländermanagern zeitnah angemessene Risikosteuerungsmaßnahmen erörtern und festlegen. Dabei wird entschieden, welche Risiken bewusst eigenverantwortlich getragen oder auf andere Risikoträger transferiert werden und welche Maßnahmen sich zur Reduzierung bzw. Vermeidung potenzieller Risiken eignen.

| Zusammengefasster Lagebericht              |                                     |
|--------------------------------------------|-------------------------------------|
| Kernaktivitäten und Organisationsstruktur  | Nachhaltigkeit bei HeidelbergCement |
| Strategie, Unternehmenssteuerung und Ziele | Mitarbeiter und Gesellschaft        |
| Geschäftsverlauf 2010                      | Umweltvorsorge                      |
| Weitere Angaben                            | Forschung und Technik               |
| Risikobericht                              | Ausblick                            |

Die Konzernabteilung Group Insurance & Corporate Risk ist für die Koordination der Risikomanagementprozesse zuständig. Sie führt außerdem einmal jährlich eine Befragung zur Erfassung der Risiken bei den Konzernfunktionen durch. Ebenfalls einmal im Jahr werden alle wesentlichen quantitativen und qualitativen Risiken der Länder und Konzernfunktionen in einer zentralen Risikolandkarte zusammengefasst und dem Vorstand präsentiert.

### Überwachung und Anpassungen

Die Abteilung Group Internal Audit untersucht und bewertet das Risikomanagement systematisch, um zu einer Erhöhung des Risikobewusstseins beizutragen. Darüber hinaus führt der Wirtschaftsprüfer im Rahmen der Jahresabschlussprüfung gemäß den gesetzlichen Vorschriften eine Überprüfung des Risikomanagementsystems dahingehend durch, ob das Überwachungssystem geeignet ist, bestandsgefährdende Tatsachen rechtzeitig zu erkennen. Der Aufsichtsrat wird ebenfalls durch den Vorstand regelmäßig zur Risikosituation informiert.

## Das interne Kontrollsystem im Hinblick auf den Konzernrechnungslegungsprozess

Das interne Kontrollsystem im HeidelbergCement Konzern beinhaltet alle Grundsätze, Verfahren und Maßnahmen zur Sicherung der Wirksamkeit, Wirtschaftlichkeit und Ordnungsmäßigkeit der Rechnungslegung sowie zur Sicherung der Einhaltung der maßgeblichen rechtlichen Vorschriften.

Das interne Überwachungssystem im HeidelbergCement Konzern besteht aus prozessunabhängigen und prozessintegrierten Kontrollmaßnahmen. Zu den prozessintegrierten Prüfungstätigkeiten zählen Kontrollen, die in den Prozess eingebunden sind (z.B. das Vier-Augen-Prinzip). Prozessunabhängige Maßnahmen sind Kontrollen, die von Personen durchgeführt werden, die nicht unmittelbar am Rechnungslegungsprozess beteiligt sind (z.B. Group Internal Audit).

### Strukturen und Prozesse

Die Organisations- und Führungsstruktur der HeidelbergCement AG und ihrer Konzernunternehmen ist klar definiert. Die Verantwortlichkeiten und Funktionen im Rechnungslegungsprozess (z.B. Buchhaltung der HeidelbergCement AG und ihrer Konzernunternehmen, Controlling, Treasury sowie Konzernrechnungswesen) sind zudem eindeutig getrennt und festgelegt. Die Organisations- und Führungsstruktur des Konzerns, die Anwendung von geeigneter Software sowie unternehmensinterne Vorgaben bilden die Basis für einen einheitlichen, zeitnahen und effizienten Rechnungslegungsprozess.

### Wesentliche Merkmale der Rechnungslegungsprozesse und der Konsolidierung

Die Konzernunternehmen erstellen ihre Abschlüsse lokal im Wesentlichen mit Buchhaltungssystemen von SAP und Oracle und übermitteln diese über ein konzernweit einheitliches Datenmodell, das der Konzernrichtlinie zur Rechnungslegung unterliegt.

Zum Erstellen des Konzernabschlusses werden die Einzelabschlüsse der Konzernunternehmen durch weitere Informationen ergänzt und in ein standardisiertes Konsolidierungsprogramm von SAP eingegeben. Anschließend werden sämtliche Konsolidierungsvorgänge wie beispielsweise die Kapital- oder Schuldenkonsolidierung, die Aufwands- und Ertragskonsolidierung sowie die at Equity-Bewertung im Konsolidierungssystem vorgenommen und dokumentiert. Die Bestandteile des Konzernabschlusses einschließlich der Anhangangaben werden vollständig aus dem Konsolidierungsprogramm entwickelt.

### **Sicherstellung der Regelkonformität des Konzernabschlusses und des Konzernlageberichts**

Alle Abteilungen, die in den Rechnungslegungsprozess einbezogen sind, verfügen über die erforderlichen Qualifikationen und sind gemäß den Erfordernissen ausgestattet. Bei komplexen oder ermessensbehafteten Bilanzierungsfragen werden auch externe Dienstleister wie z.B. Wert- oder Pensionsgutachter eingesetzt. Die einheitliche Bilanzierung und Bewertung wird durch konzernweite Richtlinien sichergestellt, die ständig an aktuelle Entwicklungen (z.B. aus dem wirtschaftlichen oder rechtlichen Umfeld des Konzerns) und geänderte Rechnungslegungsvorschriften angepasst werden.

Die Daten aus dem Bereich des Rechnungswesens werden bei HeidelbergCement regelmäßig durch Stichproben und Plausibilitätsprüfungen auf Vollständigkeit und Richtigkeit überprüft, wobei sowohl manuelle als auch IT-Kontrollen eingesetzt werden. Der Rechnungslegungsprozess wird außerdem durch integrierte Kontrollen (z.B. Vier-Augen-Prinzip, Datenanalyse) überprüft.

Prozessunabhängige Prüfungen werden sowohl durch den Prüfungsausschuss des Aufsichtsrats als auch durch die interne Revision durchgeführt. Letztere prüft dabei systematisch das interne Kontrollsystem für die beschriebenen Strukturen und Prozesse. Weitere prozessunabhängige Überwachungstätigkeiten erfolgen auch durch den Konzernabschlussprüfer und andere Prüforgane, wie beispielsweise den steuerlichen Außenprüfer.

Die zahlenmäßig ausreichende Ausstattung mit qualifiziertem Personal, geeignete Kontroll- und Überprüfungsmechanismen sowie die klare Abgrenzung der Verantwortungsbereiche und der Funktionen gewährleisten eine vollständige und richtige Rechnungslegung.

### **Maßnahmen zur Identifizierung und Bewertung sowie zur Begrenzung von Risiken**

Um Risiken zu identifizieren und zu bewerten, werden bei HeidelbergCement die einzelnen Geschäftsvorfälle anhand der Kriterien Risikopotenzial und Eintrittswahrscheinlichkeit analysiert. Auf Basis dieser Analyse werden anschließend geeignete Kontrollmaßnahmen festgelegt.

Zur Begrenzung von Risiken unterliegen Transaktionen ab einem bestimmten Volumen oder mit einer gewissen Komplexität einem festgelegten Genehmigungsprozess. Außerdem werden organisatorische Maßnahmen (z.B. Funktionstrennung in sensiblen Bereichen) sowie laufende Soll-Ist-Vergleiche für wesentliche Kennzahlen der Rechnungslegung durchgeführt. Die EDV-Systeme, die für die Rechnungslegung verwendet werden, sind durch entsprechende Sicherheitsvorkehrungen gegen unbefugte Zugriffe geschützt.

Die eingerichteten Kontroll- und Risikomanagementsysteme können eine richtige und vollständige Rechnungslegung nicht mit absoluter Sicherheit gewährleisten. Insbesondere individuell falsche Annahmen, ineffiziente Kontrollen und illegale Aktivitäten können zu einer eingeschränkten Effektivität der eingesetzten internen Kontroll- und Risikomanagementsysteme führen. Auch ungewöhnliche oder komplexe Sachverhalte, die nicht routinemäßig verarbeitet werden, sind mit einem latenten Risiko behaftet.

Die hier getroffenen Aussagen gelten nur für die in den Konzernabschluss der HeidelbergCement AG einbezogenen Konzernunternehmen, bei denen die HeidelbergCement AG mittelbar oder unmittelbar über die Möglichkeit verfügt, deren Finanz- und Geschäftspolitik zu bestimmen, um aus der Tätigkeit dieser Unternehmen Nutzen zu ziehen.



| Zusammengefasster Lagebericht              |                                     |
|--------------------------------------------|-------------------------------------|
| Kernaktivitäten und Organisationsstruktur  | Nachhaltigkeit bei HeidelbergCement |
| Strategie, Unternehmenssteuerung und Ziele | Mitarbeiter und Gesellschaft        |
| Geschäftsverlauf 2010                      | Umweltvorsorge                      |
| Weitere Angaben                            | Forschung und Technik               |
| Risikobericht                              | Ausblick                            |

## Risikofelder

Risiken, die sich im Geschäftsjahr 2011 und auf absehbare Zeit danach auf unsere Vermögens-, Finanz- und Ertragslage maßgeblich auswirken könnten, sind entsprechend dem im Unternehmen festgelegten Risikokatalog in drei Kategorien eingeteilt: finanzielle Risiken, Markt- und strategische Risiken sowie operative Risiken.

## Finanzielle Risiken

Unsere wesentlichen finanziellen Risiken sind Währungs- und Zinsänderungsrisiken sowie Refinanzierungs- und Kreditrisiken. Wir steuern diese Risiken vorwiegend im Rahmen unserer laufenden Geschäfts- und Finanzierungsaktivitäten und bei Bedarf durch den Einsatz derivativer Finanzinstrumente. Diese Risikofelder werden von der Konzernabteilung Group Treasury laufend auf der Grundlage konzerninterner Richtlinien überwacht. Alle Konzerngesellschaften müssen auf Basis dieser Richtlinien ihre Risiken identifizieren und in Zusammenarbeit mit Group Treasury absichern. Die Arbeit und die Prozesse von Group Treasury werden durch umfassende Richtlinien geregelt, die unter anderem die Trennung von Handel und Abwicklung der Finanzgeschäfte vorschreiben. Im Rahmen des laufenden Risikomanagements steuern wir das Transaktionsrisiko, d.h. das Risiko schwankender Preise (z.B. Währungskurse, Zinssätze, Rohstoffpreise), die sich auf die Ertragslage des Konzerns auswirken können.

### Währungsrisiken

Währungsrisiken, die durch Geschäftsvorgänge mit Dritten in Fremdwährung entstehen (Transaktionsrisiken), sichern wir in bestimmten Fällen durch derivative Finanzinstrumente mit einem Sicherungshorizont von bis zu zwölf Monaten ab. Dafür setzen wir vor allem Devisenswaps und Devisentermingeschäfte ein; im Einzelfall auch Devisenoptionen. Auf die Absicherung von Währungsrisiken aus konzerninternen Gütertransaktionen wird verzichtet, da sich die Mittelzu- und -abflüsse in den verschiedenen Währungspaaren auf Konzernebene weitgehend neutralisieren. Im Rahmen unserer Inhouse-Banking-Aktivität ergeben sich durch Aufnahme und Anlage von Liquidität der Tochtergesellschaften Währungspositionen, die durch entsprechende fristen- und betragskongruente externe Devisenswapgeschäfte abgesichert werden. Währungsrisiken, die aus der Währungsumrechnung ausländischer Einzel- oder Teilkonzernabschlüsse entstehen (Translationsrisiken), sichern wir in der Regel nicht ab. Die damit verbundenen Auswirkungen sind nicht zahlungswirksam und Einflüsse auf Konzernbilanz und Gewinn- und Verlustrechnung werden laufend überwacht. Mehr zu den Währungsrisiken im Anhang auf Seite 203 f.

### Zinsänderungsrisiken

Zinsänderungsrisiken bestehen aufgrund potenzieller Änderungen des Marktzinses und können bei festverzinslichen Finanzinstrumenten zu einer Änderung des beizulegenden Zeitwertes und bei variabel verzinslichen Finanzinstrumenten zu Zinszahlungsschwankungen führen. Zinsänderungsrisiken werden im Rahmen der vom Finanzvorstand vorgegebenen Grenzen gehalten. Durch den Einsatz von Finanzinstrumenten, d.h. im Wesentlichen Zinsswaps, ist es uns möglich, sowohl das Risiko schwankender Zahlungsströme als auch das Risiko von Wertschwankungen zu sichern. Außerdem könnte eine Herabstufung unserer Bonitätsbewertung durch die Ratingagenturen (siehe Rating auf Seite 75) die Zinsmargen im Falle einer Refinanzierungsmaßnahme erhöhen. Aufgrund der ausgeglichenen Fristenstruktur der Finanzschulden (siehe Grafik im Kapitel Ausblick auf Seite 116) und

des erwarteten Mittelzuflusses aus operativer Geschäftstätigkeit besteht kurz- und mittelfristig kein wesentlicher Refinanzierungsbedarf, so dass keine signifikanten Auswirkungen auf das Zinsergebnis zu erwarten sind. Mehr zu den Zinsänderungsrisiken im Anhang auf Seite 203.

### **Refinanzierungs- bzw. Liquiditätsrisiken**

Refinanzierungs- bzw. Liquiditätsrisiken entstehen, wenn ein Unternehmen nicht in der Lage ist, die Finanzmittel zu beschaffen, die es zur Begleichung der operativen oder im Zusammenhang mit Finanzinstrumenten eingegangenen Verpflichtungen benötigt.

Mögliche Risiken aus Schwankungen der Zahlungsströme berücksichtigen wir im Rahmen der Konzernliquiditätsplanung. Annahmen über den weiteren Konjunkturverlauf bergen gewisse Unsicherheiten bei der Liquiditätsplanung, die wir aus diesem Grund rollierend aktualisieren und mit so genannten Stresstests simulieren. Auf dieser Basis können wir im Bedarfsfall entsprechende Maßnahmen, wie beispielsweise die Emission zusätzlicher Geld- und Kapitalmarktpapiere oder die Aufnahme frischer Mittel im Bankenmarkt einleiten. Durch unsere umfangreichen Refinanzierungsmaßnahmen in den letzten 24 Monaten, einschließlich der Etablierung einer syndizierten Kreditlinie mit einem Volumen von 3 Mrd EUR, haben wir jedoch Zugang zu umfangreichen liquiden Mitteln und das Refinanzierungsrisiko deutlich reduziert. Ferner fließen uns ständig Zahlungsmittel aus dem operativen Geschäft zu. Als weitere Vorsichtsmaßnahme wurde auf den Hauptversammlungen 2009 und 2010 ein angemessener Rahmen zur Erhöhung des Eigenkapitals beschlossen.

Zur Finanzierung bestehender Zahlungsverpflichtungen steht die oben genannte revolvingende, syndizierte Kreditlinie in Höhe von 3 Mrd EUR mit einer Laufzeit bis Dezember 2013 zur Verfügung, die zum Bilanzstichtag lediglich mit 396 Mio EUR in Anspruch genommen war. Insgesamt haben wir konzernweit 3,5 Mrd EUR liquide Mittel und Wertpapiere im Bestand (siehe Tabelle Liquiditätsinstrumente im Abschnitt Konzern-Finanzmanagement auf Seite 75). Mehr zu Liquiditätsrisiken im Anhang auf Seite 201 f.

### **Kreditrisiken**

Kreditrisiken bestehen darin, dass ein Vertragspartner bei einem Geschäft seinen Verpflichtungen nicht oder nicht fristgerecht nachkommen kann. Wir minimieren die daraus entstehende Risikoposition durch Diversifizierung sowie laufende Bonitätsbeurteilung der Vertragspartner.

Kreditrisiken aus dem operativen Geschäft werden fortlaufend im Rahmen des Forderungsmanagements überwacht. Hinsichtlich der Bonität unserer Geschäftspartner legen wir strenge Maßstäbe an. Dadurch sowie durch die Vermeidung von Positionskonzentrationen werden die Kreditrisiken des Konzerns minimiert. Kreditrisiken für unsere Geldanlagen mindern wir, indem wir nur Transaktionen mit Banken guter Bonität tätigen. Analog erfolgt die Auswahl der Banken für den Zahlungsverkehr und die Etablierung von Cash Pools.

Im Rahmen von Kreditverträgen wurde die Einhaltung verschiedener Finanzrelationen (Financial Covenants) vereinbart, die alle in der Berichtsperiode erfüllt wurden. Die wichtigsten Finanzkennzahlen sind das Verhältnis der Nettoverschuldung zu EBITDA und der Zinsdeckungsfaktor. Im Rahmen der Konzernplanung wird die Einhaltung der Kreditvereinbarungen konsequent überwacht und vierteljährlich den Gläubigern gemeldet. Im Falle einer Verletzung der Covenants könnten die Gläubiger unter bestimmten Voraussetzungen entsprechende Kredite ungeachtet der vertraglich vereinbarten Laufzeiten fällig stellen. Je nach Volumen des betreffenden Kredits und der dann vorherrschenden Refinanzierungsmöglichkeiten auf dem Finanzmarkt könnte dies zu einem Refinanzierungsrisiko für den Konzern führen.

| Zusammengefasster Lagebericht              |                                     |
|--------------------------------------------|-------------------------------------|
| Kernaktivitäten und Organisationsstruktur  | Nachhaltigkeit bei HeidelbergCement |
| Strategie, Unternehmenssteuerung und Ziele | Mitarbeiter und Gesellschaft        |
| Geschäftsverlauf 2010                      | Umweltvorsorge                      |
| Weitere Angaben                            | Forschung und Technik               |
| Risikobericht                              | Ausblick                            |

Die Gesellschaft hat am 27. April 2010 eine neue syndizierte Kreditlinie in Höhe von 3 Mrd EUR mit einer Laufzeit bis zum 31. Dezember 2013 abgeschlossen (siehe Abschnitt Konzern-Finanzmanagement auf Seite 71 ff.). Dieser Vertrag beinhaltet Covenants, die an ein Niveau angepasst wurden, das dem veränderten wirtschaftlichen Umfeld entsprach. Mehr zu Kreditrisiken im Anhang auf Seite 201.

## Markt- und strategische Risiken

### Entwicklung der Absatzmärkte

Für HeidelbergCement stellen Veränderungen der Nachfrage naturgemäß Chancen bzw. Risiken dar. Wir rechnen damit, dass sich die Erholung der Weltwirtschaft 2011 insgesamt fortsetzt, das Wirtschaftswachstum in den einzelnen Regionen jedoch weiterhin deutlich unterschiedlich bezüglich Ausmaß und zeitlichem Ablauf ausfallen wird. Daher erwarten wir, dass in einigen Ländern und Regionen weiterhin hohe Risiken bei Nachfrage- und Preisentwicklung bestehen werden. Durch die deutlich schneller als erwartete Erholung der Weltwirtschaft im Jahr 2010 haben sich die Preise für Energie und Nahrungsmittel in einigen Ländern bereits merklich verteuert. Spekulationen mit Rohstoffen, schlechte Ernten und Naturkatastrophen haben den Aufwärtstrend der Preise verschärft. In Ländern wie Indonesien, Indien und China wird nach Meinung von Analysten infolge einer Marktüberhitzung die Inflation als ein Schlüsselerisiko angesehen. Des Weiteren besteht das Risiko eines Übergriffs der Inflation von den Schwellenländern auf Europa, die USA und Japan.

Die Nachfrage nach Baustoffen wird durch einige grundlegende Entwicklungen angetrieben. Aufgrund des weltweiten Bevölkerungswachstums und der Zunahme des Wohlstands steigt der Bedarf an Wohnraum. Wirtschaftliches Wachstum führt zu einem Ausbau von Produktionskapazitäten, Lager- und Büroflächen. Die zunehmende Industrialisierung zieht Urbanisierung und erhöhten Bedarf an Infrastruktur wie Straßen, Eisenbahnen und Häfen nach sich. Dementsprechend lässt sich die Baustoffnachfrage im Wesentlichen in drei Sektoren aufteilen: privater Wohnungsbau, Wirtschaftsbau und öffentlicher Bau. Die Gesamtnachfrage hängt von der Entwicklung der Nachfrage in den einzelnen Sektoren ab, wobei sich Trends gegenseitig verstärken oder abschwächen können.

Die Nachfrage im privaten Wohnungsbau hängt von Faktoren wie etwa dem Zugang zu günstigen Krediten, der Entwicklung der Häuserpreise und dem zur Verfügung stehenden Haushaltseinkommen ab, das wiederum von weiteren Parametern wie Arbeitslosenquote oder Inflation beeinflusst wird. Die Entwicklung dieser Faktoren und damit der Nachfrage in diesem Sektor unterliegt zumeist landesspezifischen Risiken und Unsicherheiten. In den USA hat das Platzen der Immobilienblase zu einem großen Überhang an Häusern und Wohnungen und einem entsprechenden Preisverfall geführt. Wie schnell dieser Überhang abgebaut werden kann und wann die Häuserpreise wieder ansteigen werden, ist mit Unsicherheiten behaftet und hängt zum Beispiel auch von der weiteren Zinsentwicklung ab. In Asien besteht das Risiko, dass steigende Lebensmittelpreise sich negativ auf das für Bauvorhaben zur Verfügung stehende Einkommen und damit auch negativ auf Investitionen in den privaten Wohnungsbau auswirken. In China ergeben sich Risiken aus Spekulationen mit städtischen Wohnimmobilien. Um einer Überhitzung des boomenden Immobilienmarktes entgegenzutreten, haben Regierung und Notenbank bereits Gegenmaßnahmen ergriffen, unter anderem durch eine Straffung der Geldpolitik.

Für die Nachfrage beim Wirtschaftsbau ist in erster Linie die Auslastung von Produktionsanlagen, Büro- und Lagerflächen ausschlaggebend, die wiederum von der allgemeinen Auftragslage im In- und Ausland abhängt. Als Folge der Wirtschaftskrise herrscht in einigen Ländern, zum Beispiel in den USA, noch signifikanter Leerstand bei Büro- und Gewerbeflächen. Der zeitliche Ablauf der



Erholung in diesem Sektor ist weiterhin mit Risiken und Unsicherheiten behaftet. Vor allem steigende Zinsen aufgrund erhöhten Inflationsdrucks könnten sich negativ auf das Wirtschaftswachstum und die Nachfrageentwicklung nach Baustoffen auswirken.

Investitionen in Infrastruktur wie Straßen, Eisenbahnen, Flughäfen und Wasserstraßen gehören zum Sektor des öffentlichen Baus. Die Nachfrage hängt hier insbesondere von der Haushaltslage der Länder und der Durchführung spezieller Infrastrukturförderungsprogramme ab. Risiken bestehen insofern als Länder ihre Infrastrukturinvestitionen kürzen könnten, um etwa Schulden zurückzuführen. Im Rahmen der Haushaltskonsolidierung in einigen Ländern Europas aber auch in den USA wurden Ausgabenkürzungen unter anderem auch für den Bereich öffentlicher Bau bekannt gegeben. In Ungarn ist fraglich, in welchem Umfang in Infrastruktur investiert wird. Erwartet wird eher die Umsetzung von Projekten zur Wasser- und Energieversorgung als Investitionen im Bereich des Straßenbaus. Die neue tschechische Regierung hat ebenfalls geplante Investitionsvorhaben in der Vorbereitungsphase eingefroren und einer Revision unterzogen. Spürbare Ergebniszuwächse aus den staatlich geförderten Projekten werden sich erst mit einer weiteren zeitlichen Verzögerung einstellen. In Deutschland läuft das Infrastrukturförderprogramm im Jahr 2011 aus. Der Umfang der Einsparungen und ihre Auswirkungen auf die Nachfrage nach Baustoffen lassen sich nicht mit absoluter Sicherheit voraussagen.

Baustoffe zeichnen sich durch ein hohes Gewicht im Verhältnis zum Verkaufspreis aus und werden daher auf dem Landweg nicht über weite Strecken transportiert. Auf dem Seeweg werden überschüssige Zementmengen regional aber auch zwischen einzelnen Kontinenten gehandelt. Sollte der Unterschied des Preisniveaus zwischen zwei Ländern mit Anbindung an den Seehandel so groß werden, dass dieser die Transportkosten übersteigt, besteht die Gefahr eines erhöhten Importdrucks und damit eines Preisverfalls in dem importierenden Markt.

Risiken aus der Entwicklung der Absatzmärkte begegnen wir mit regionaler Diversifizierung, verstärkter Kundenorientierung, der Entwicklung von Spezial- und Sonderprodukten und soweit möglich mit operativen Maßnahmen. Wir passen zum Beispiel das Produktionsniveau an die Nachfragesituation an und nutzen flexible Arbeitszeitmodelle. Um die Beziehungen zu unseren Kunden weiter zu verbessern und auf länderspezifische Bedürfnisse einzugehen, führt HeidelbergCement konzernweite Kundenbefragungen durch und baut die Forschungs- und Entwicklungstätigkeiten auf Konzernebene aus.

### **Saisonale Nachfrageschwankungen**

Ein signifikantes Absatzrisiko für Baustoffe resultiert insbesondere aus der Saisonalität der Nachfrage, speziell aufgrund der Witterungsabhängigkeit. Wetterbedingte Absatzschwankungen können dabei innerhalb eines Jahres variieren, aber auch den Gesamtjahresabsatz beeinträchtigen. Strenge Winter mit extrem niedrigen Temperaturen oder hohe Niederschläge in Form von Regen oder Schnee beeinträchtigen die Bautätigkeit oder bringen diese sogar zum Erliegen und wirken sich damit negativ auf die Nachfrage nach Baustoffen aus. Diesem Risiko begegnen wir mit regionaler Diversifizierung, bedarfsorientierter Produktionssteuerung und flexiblen Arbeitszeitmodellen. Im Jahr 2010 hat strenges Winterwetter im ersten Quartal und ein früher und extrem starker Winterbeginn in Europa im Dezember das Absatzvolumen unserer Baustoffe negativ beeinflusst. Neben Winterwetter gehört der in einigen Konzernländern, wie beispielsweise Indien, auftretende Monsun zu den saisonalen Wetterlagen, die einen Einfluss auf den Absatz unserer Produkte haben.

| Zusammengefasster Lagebericht              |                                     |
|--------------------------------------------|-------------------------------------|
| Kernaktivitäten und Organisationsstruktur  | Nachhaltigkeit bei HeidelbergCement |
| Strategie, Unternehmenssteuerung und Ziele | Mitarbeiter und Gesellschaft        |
| Geschäftsverlauf 2010                      | Umweltvorsorge                      |
| Weitere Angaben                            | Forschung und Technik               |
| Risikobericht                              | Ausblick                            |

## Risiken aus Akquisitionen und Investitionen

Aus Kapazitätserweiterungen durch Akquisitionen und Investitionen ergeben sich Chancen, aber auch Risiken. HeidelbergCement beobachtet ständig das Marktumfeld hinsichtlich geeigneter Akquisitionsprojekte bzw. Kooperationen. Zusätzlich werden Marktpotenziale und Rohstoffvorkommen systematisch analysiert und in Vorschläge für Investitionsprojekte umgesetzt. An jede Akquisitions- oder Investitionsentscheidung stellen wir konzernweit hohe Renditeforderungen, die im Kapitel Strategie, Unternehmenssteuerung und Ziele auf Seite 43 ff. erläutert werden. Zusätzlich erfolgen bei bedeutsamen Investitions- und Akquisitionsprojekten Nachkontrollen.

Bei Akquisitionen können sich Risiken aus der Integration von Mitarbeitern, Prozessen, Technologien und Produkten ergeben sowie Risiken, die zum Akquisitionszeitpunkt noch unbekannt sind. Zudem können Akquisitionen den Verschuldungsgrad und die Finanzierungsstruktur nachteilig beeinflussen sowie zu einem Anstieg des Anlagevermögens einschließlich der Geschäfts- oder Firmenwerte führen. Insbesondere aus Wertminderungen von Geschäfts- oder Firmenwerten aufgrund unvorhergesehener Geschäftsentwicklungen können Belastungen resultieren.

Investitionsprojekte können sich vom Planungsbeginn bis zum Abschluss über mehrere Jahre erstrecken. Dabei bestehen insbesondere Risiken bei der Erteilung notwendiger Genehmigungen für den Abbau von Rohstoffen oder den Ausbau der Infrastruktur inklusive Anschluss an Energie- und Straßennetze sowie bei den Anforderungen an Folgenutzungspläne für Rohstoffabbaustätten.

Bei zukünftigen Akquisitionen, Kooperationen und Investitionen besteht das Risiko, dass diese durch politische Restriktionen nur unter erschwerten Bedingungen oder überhaupt nicht getätigt werden können. Ein daraus resultierender Mangel an Kapazitätserweiterungsprojekten könnte die Wachstumsaussichten von HeidelbergCement beeinträchtigen. Vor diesem Hintergrund schauen wir uns insbesondere in politisch instabilen Regionen nach geeigneten Partnern um, um finanzielle Belastungen und Risiken zu mindern und Chancen besser nutzen zu können.

## Externe Risiken

Wie für alle Unternehmen stellen potenzielle Umbrüche im politischen, rechtlichen und gesellschaftlichen Umfeld ein grundsätzliches Risiko dar. Ebenso besteht in Form von Naturkatastrophen, Pandemien oder terroristischen Handlungen eine theoretische Gefahr für die Finanz- und Ertragslage des Unternehmens. Gegenüber Naturkatastrophen, einschließlich Erdbeben, gewährleisten angemessene Entschädigungsobergrenzen unseres konzernweiten Sachversicherungsprogramms eine umfassende Absicherung unserer Aktivitäten in den stark gefährdeten Regionen Nordamerikas und Asiens. Das Erdbeben in Indonesien im Oktober 2010, auf das der Ausbruch des Vulkans Mount Merapi und ein Tsunami folgten, hatte glücklicherweise keinerlei Auswirkungen auf unsere lokalen Mitarbeiter und die Produktionsstandorte. Auch im Geschäftsjahr 2010 hat sich, abgesehen von kleineren Hochwasserschäden in Polen und Australien, der Schadenverlauf in allen Bereichen konzernweit positiv entwickelt.

## Politische Risiken

HeidelbergCement ist als weltweit operierender Konzern in mehr als 40 Ländern tätig und daher auch politischen Risiken wie Verstaatlichung, Verbot von Kapitaltransfer, Terrorismus, Krieg oder sonstigen Unruhen ausgesetzt. Auch in Ländern mit gutem Wachstumspotenzial wie Russland, Indien und China könnten durch geopolitischen Wettbewerb Konflikte ausgelöst werden. An verschiedenen Standorten von HeidelbergCement kann unser Management gewisse Sicherheits-

risiken aufgrund der innenpolitischen Verhältnisse nicht ausschließen. Vereinzelt, wie z.B. in Ghana, unterliegen die Zementpreise einer staatlichen Reglementierung.

### **Risiken aus dem Aufbau von Überkapazitäten**

Die Zementindustrie baut ihre Kapazitäten in den Märkten Osteuropas, Asiens und Afrikas aus, um von der zunehmenden Inlandsnachfrage zu profitieren, die durch Wirtschaftswachstum und steigenden Wohlstand angetrieben wird. Auch HeidelbergCement verfolgt ein Kapazitätserweiterungsprogramm im Bereich Zement und konzentriert sich dabei auf lokale Märkte mit überdurchschnittlichem Wachstumspotenzial. 2011 planen wir die Inbetriebnahme unseres neuen Zementwerks in Tula, das den Großraum Moskau mit Zement beliefern wird. Wettbewerber bauen in der gleichen Region ebenfalls neue Kapazitäten auf. Sollten die Kapazitätssteigerungen in den Märkten, in denen wir tätig sind, das Nachfragewachstum übersteigen, besteht das Risiko eines Preisverfalls mit negativen Auswirkungen auf Umsatz und operatives Ergebnis.

HeidelbergCement prüft im Vorfeld von Kapazitätserweiterungsprojekten sowohl Marktumfeld als auch Marktpotenzial und reagiert auf Überkapazitäten mit Kosteneinsparungs- und Effizienzverbesserungsprogrammen, Kapazitätsanpassungen sowie Standortoptimierungen.

## **Operative Risiken**

### **Volatilität von Strom- und Brennstoffpreisen**

Für ein energieintensives Unternehmen wie HeidelbergCement resultiert ein merkliches Risiko aus der Kostenentwicklung auf den Energiemärkten, die extrem volatil und kaum beeinflussbar sind. Die Preise für Energie und Strom haben sich weltweit durch die konjunkturelle Erholung wieder deutlich erhöht.

Aufgrund der hochwasserbedingten Produktionsausfälle in der australischen Bergbauindustrie werden Preissteigerungen bei der Kohle erwartet. Neben dem Anstieg der Energiepreise stellen infrastrukturelle Engpässe bei der Stromversorgung insbesondere in Afrika ein typisches Risiko dar. In einigen Ländern bestehen zudem Risiken aus der Kürzung staatlicher Subventionen für Strom oder aus der staatlichen Regulierung der Öl- und Gaspreise.

Die Energiepreisrisiken werden konzernweit über gebündelte und strukturierte Beschaffungsprozesse unserer Einkaufsorganisation gemindert. Außerdem setzen wir auf den steigenden Einsatz von sekundären Brenn- und Rohstoffen. Damit minimieren wir Preisrisiken und senken gleichzeitig die CO<sub>2</sub>-Emissionen sowie den Anteil des energieintensiven Klinkers im Endprodukt Zement. Das im Sommer 2010 gestartete konzernweite Projekt „Operational Excellence“ hat die nachhaltige Steigerung der Effizienz des Zementherstellungsprozesses zum Ziel. Über einen reduzierten und optimierten Verbrauch von Strom, Brenn- und Rohstoffen wirken wir gezielt auf die Energiekosten ein.

### **Verfügbarkeit von Roh- und Zusatzstoffen**

HeidelbergCement benötigt für die Zement- und Zuschlagstoffproduktion eine bedeutende Menge von Rohstoffen, die durch hohe eigene Vorkommen sichergestellt ist. Um die Schlüsselrolle der Rohstoffe für unser Unternehmen zu unterstreichen und um einen Know-how-Transfer über die Ländergrenzen hinweg zu ermöglichen, haben wir im letztem Jahr den Bereich Geologie konzernweit im HTC Global gebündelt (siehe Kapitel Forschung und Technik auf Seite 107). Dennoch besteht an einzelnen Standorten ein gewisses Risikopotenzial im Zusammenhang mit der Erteilung von Abbaugenehmigungen. In Malaysia verhindert z.B. die Ausweitung der Urbanisierung mög-

| Zusammengefasster Lagebericht              |                                     |
|--------------------------------------------|-------------------------------------|
| Kernaktivitäten und Organisationsstruktur  | Nachhaltigkeit bei HeidelbergCement |
| Strategie, Unternehmenssteuerung und Ziele | Mitarbeiter und Gesellschaft        |
| Geschäftsverlauf 2010                      | Umweltvorsorge                      |
| Weitere Angaben                            | Forschung und Technik               |
| Risikobericht                              | Ausblick                            |

licherweise das weitere Betreiben eines Steinbruchs und notwendige Genehmigungen könnten kurzfristig verweigert werden. Darüber hinaus spielen ökologische Faktoren und die Erfüllung von Umweltauflagen für den Zugriff auf die Rohstoffvorkommen eine Rolle.

Verfügbarkeit und Preise des in der Zementherstellung eingesetzten Zusatzstoffs Hüttensand, der als Nebenprodukt bei der Stahlherstellung anfällt, unterliegen konjunkturellen Schwankungen. Infolge der guten Auftragslage in der Stahlindustrie ist die Versorgung mit Hüttensand für 2011 gesichert. Als Vorsorgemaßnahme gegen künftige rückläufige Mengen optimieren wir unsere Lagerhaltung und die Angebotspalette der Zementsorten.

### Produktionstechnische Risiken

Die Zementindustrie ist eine sehr anlagenintensive Branche mit komplexer Technologie zur Lagerung und Verarbeitung von Roh-, Zusatz- und Brennstoffen. Aufgrund von Unfall- und Betriebsrisiken können sich Sach- und Personenschäden ereignen, Betriebsunterbrechungen eintreten oder Umweltbelastungen entstehen. Um mögliche Schadenereignisse und deren Folgen zu vermeiden, setzen wir in unseren Werken verschiedene Überwachungs- und Sicherheitssysteme sowie integrierte Managementsysteme ein. Um drohende Gefahrenpotenziale zu erkennen, gilt es, das Risikobewusstsein jedes Mitarbeiters zu sensibilisieren und dazu regelmäßig Schulungen durchzuführen.

Die Risikotransferstrategie von HeidelbergCement legt den wesentlichen Versicherungsprogrammen Selbstbehalte zugrunde, die an die Größenordnung des Konzerns angepasst sind und auf langjährigen Schadenanalysen beruhen. Das internationale Haftpflichtversicherungsprogramm sieht ab dem Jahr 2011 eine Optimierung der Deckung und des Haftungslimits insbesondere für Risiken aus Umweltschäden vor.

### Regulatorische Risiken

Im Rahmen des im Dezember 2008 verabschiedeten europäischen Klimapakets zur Herabsetzung des Treibhausgasausstoßes wurden vom Europäischen Parlament und der Europäischen Kommission ambitionierte Ziele für den Klimaschutz festgelegt. Die Zementindustrie wird neben anderen CO<sub>2</sub>-intensiven Industriesektoren nicht von der Vollversteigerung der Emissionsrechte ab dem Jahr 2013 betroffen sein. Die Emissionsrechte werden damit weiterhin kostenlos – allerdings bis 2020 in einer um 21 % verminderten Menge gegenüber 2005 – zugeteilt. Die Zuteilung der Emissionszertifikate soll auf Basis anspruchsvoller produktspezifischer Benchmarks erfolgen. Es ist von einer Verteuerung des Klimaschutzes über die kontinuierliche Verknappung der Gesamtmenge der Zertifikate auszugehen. Langfristig können sich somit im europäischen Raum Zusatzbelastungen aufgrund höherer Herstellungskosten ergeben und damit klare Wettbewerbsnachteile gegenüber Produzenten aus Ländern, die nicht in den Emissionshandel einbezogen sind.

Auch im US-Bundesstaat Kalifornien ist die Einführung des Emissionshandels nach europäischem Vorbild ab 2012 geplant. Ein „Cap-and-Trade“-Programm regelt hierbei die Höchstgrenzen des CO<sub>2</sub>-Ausstoßes und erlaubt Unternehmen den Handel mit den Emissionsrechten.

Die im September 2010 in den USA erlassenen Emissionsnormen für gefährliche Luftschadstoffe (National Standards for Hazardous Air Pollutants, NESHAP) könnten sich nachteilig auf die Wettbewerbsfähigkeit unserer amerikanischen Werke auswirken, sollte keine Harmonisierung beispielsweise mit EU-Regelungen erfolgen.

Klimaschutz und die Senkung der CO<sub>2</sub>-Emissionen sind ein Schwerpunkt der Nachhaltigkeitsstrategie von HeidelbergCement. Durch die Erhöhung der Energieeffizienz, die Entwicklung von Zementsorten mit einem geringeren Klinkeranteil sowie den Einsatz von Sekundärbrennstoffen wie



Biomasse konnten wir unsere spezifischen Netto-CO<sub>2</sub>-Emissionen bis 2009 gegenüber 1990 um mehr als 19 % senken. Weitere Maßnahmen zu Klima- und Umweltschutz werden in den Kapiteln Umweltvorsorge auf Seite 104 ff. sowie Forschung und Technik auf Seite 106 ff. beschrieben.

### **Personalrisiken**

Personalrisiken unterscheiden wir nach vier Bereichen: Fluktuation von Fach- und Führungskräften in Schlüsselpositionen, Schwierigkeiten bei der Besetzung von Schlüsselpositionen, Sicherstellung der erforderlichen Qualifikationen und Fähigkeiten in der Belegschaft sowie Probleme bei der Personalfreisetzung. Die genannten Risiken schätzen wir als gering ein. Ein Eintritt hätte mittel- und langfristig einen negativen Einfluss auf Umsatz und Ergebnis.

Bei der Reduzierung dieser Risiken setzen wir auf:

- unsere ausgeprägte Unternehmens- und Führungskultur,
- attraktive leistungs- und ergebnisorientierte variable Vergütungsbestandteile,
- durchgängige Stellvertretungsregelungen,
- Hochschulpartnerschaften im In- und Ausland und internationale Rekrutierung,
- zielgerichtete und bedarfsgerechte Kompetenzentwicklung,
- strategische Nachfolgeplanung,
- nachhaltige Personalpolitik durch Einbindung aller relevanten Interessengruppen und
- professionelles integriertes Personal-Management.

### **Nachhaltigkeits- und Compliance-Risiken**

Im Rahmen der nachhaltigen Unternehmensführung bekennt sich HeidelbergCement insbesondere zum Schutz der Umwelt, zur Ressourcenschonung, zur Erhaltung der Biodiversität und darüber hinaus zu gesellschaftlich verantwortungsvollem Handeln. Die Einhaltung von geltendem Recht und Unternehmensrichtlinien (Compliance) ist integrierter Bestandteil unserer Unternehmenskultur und damit Aufgabe und Verpflichtung eines jeden Mitarbeiters. Verstöße gegen unsere Selbstverpflichtungen im Rahmen der Nachhaltigkeit oder gegen Gesetze und Unternehmensrichtlinien bergen neben unmittelbaren Sanktionsrisiken auch ein erhebliches Reputationsrisiko in sich und können wesentliche Auswirkungen auf die Ertrags-, Finanz- und Vermögenslage haben. Zur Sicherstellung gesetzesgemäßen und regelkonformen Verhaltens haben wir ein konzernweites integriertes Compliance-Programm etabliert. Dieses umfasst unter anderem Informationsbroschüren, eine Compliance Hotline sowie Mitarbeiterschulungen, die mit modernen Techniken und Medien wie elektronischen Lernplattformen durchgeführt werden und einen Schwerpunkt auf die Aufklärung in den Risikofeldern Kartell- und Wettbewerbsrecht sowie Anti-Korruptionsregeln legen.

### **IT-Risiken**

Die Geschäftsprozesse (Verwaltung, Vertrieb etc.) von HeidelbergCement werden immer stärker durch Informationssysteme unterstützt. Risiken entstehen vor allem aus der Nichtverfügbarkeit von IT-Systemen, der verzögerten Bereitstellung wichtiger Daten sowie dem Verlust oder der Manipulation von Daten. Um derartige Risiken zu minimieren, sind in unserem Unternehmen umfangreiche IT-Systeme, Back-up-Verfahren sowie integrierte und standardisierte IT-Infrastrukturen und Anwendungen im Einsatz. Die eingesetzten Systeme zur Informationssicherheit werden fortlaufend geprüft.

Alle wichtigen Serversysteme (E-Mail, Anwendungsserver, Datenbanken) und alle PCs werden durch ständig aktualisierte Antivirensoftware vor möglichen Bedrohungen geschützt. Zusätzlich werden die Betriebssystemplattformen und die kritischen Geschäftsanwendungen regelmäßig aktualisiert.

| Zusammengefasster Lagebericht              |                                     |
|--------------------------------------------|-------------------------------------|
| Kernaktivitäten und Organisationsstruktur  | Nachhaltigkeit bei HeidelbergCement |
| Strategie, Unternehmenssteuerung und Ziele | Mitarbeiter und Gesellschaft        |
| Geschäftsverlauf 2010                      | Umweltvorsorge                      |
| Weitere Angaben                            | Forschung und Technik               |
| Risikobericht                              | Ausblick                            |

Die Informationssicherheit ist ein zentraler Bestandteil der unternehmensweiten IT-Strategie und wird umfassend betrachtet: Wir erarbeiten, implementieren und überprüfen Maßnahmen zum Schutz von Daten, Anwendungen, Systemen und Netzen. Ein besonderer Schwerpunkt liegt dabei auf dem Zugriffsschutz sowie der Kontrolle und Filterung des Datenverkehrs. Der IT-Sicherheitsprozess ist strukturiert und durch eine Reihe von Richtlinien, Standards und Empfehlungen gegliedert.

Ein ständiger Verbesserungsprozess sorgt für Korrekturen, Nachbesserungen und eine nachhaltige Effizienzsteigerung der Schutzmaßnahmen. Darüber hinaus ergreifen wir Maßnahmen, um dem Überalterungsprozess der Geräte- und Systemtechnik entgegenzuwirken. Bei den bestehenden Anwendungen gilt unser besonderes Augenmerk den geschäftskritischen Ressourcen (z. B. ERP-Anwendungen, WAN-Infrastruktur), die in einem Konsolidierungsprogramm aktualisiert bzw. erneuert werden.

## Rechtliche Risiken

### Hanson Asbestklagen und Umweltschadenfälle

Einige unserer Hanson-Beteiligungen in den USA sind aufgrund früherer Aktivitäten besonderen rechtlichen Risiken und Prozessen ausgesetzt. Hierbei handelt es sich insbesondere um zahlreiche Asbestklagen, die u.a. vom Vorwurf der Körperverletzung ausgehen und mehrere amerikanische Tochtergesellschaften betreffen. Die Herstellung der asbesthaltigen Produkte fand im Zeitraum von 1973 bis 1984 statt und demnach vor der Zugehörigkeit dieser Gesellschaften zur Hanson-Gruppe und zu HeidelbergCement. In den USA erfolgen die Abwicklung und intensive Betreuung dieser Schadenfälle durch ein Team eigener Juristen in Zusammenarbeit mit Versicherern sowie externen Beratern. Diese Bearbeitung wird sich aufgrund der Komplexität der Fälle und den Besonderheiten des amerikanischen Rechtssystems voraussichtlich noch einige Jahre hinziehen. Ausgehend von einer Extrapolation der Schadenfälle, dem vorhandenen Deckungsschutz durch Haftpflichtversicherungen und zuverlässigen Schätzungen der Kostenentwicklung wurden angemessene Rückstellungen gebildet.

Darüber hinaus liegen in den USA eine beachtliche Anzahl an Umwelt- und Produkthaftungsansprüchen gegenüber ehemaligen und noch existierenden Hanson-Beteiligungen vor, die ebenfalls auf längst aufgegebene Geschäftstätigkeiten zurückgehen. Diese Prozesse und Haftpflichtschadenfälle im Zusammenhang mit giftigen Stoffen wie Kohlenebenprodukten oder Holzschutzmitteln sind teilweise nicht durch entsprechenden Versicherungsschutz abgesichert. Unsere Tochtergesellschaften können über den Sanierungsaufwand und den Schadenersatz hinaus durch zusätzliche gerichtlich festgesetzte Strafzahlungen belastet werden; es besteht aber auch die Möglichkeit, über berechnete Schadenersatzforderungen außergerichtliche Vergleichsabkommen abzuschließen. Hierfür wurde ausreichend bilanzielle Vorsorge getroffen.

### Kartellverfahren

In dem im Jahr 2002 eingeleiteten Kartellverfahren gegen Unternehmen der deutschen Zementindustrie hat das Oberlandesgericht Düsseldorf im Juni 2009 gegen HeidelbergCement ein Bußgeld in Höhe von rund 170 Mio EUR verhängt, gegen das wegen Verletzung diverser verfahrensrechtlicher und materieller Regelungen Rechtsbeschwerde zum Bundesgerichtshof eingelegt worden ist. Darüber ist bislang noch nicht entschieden. Eine Erhöhung des Bußgelds im Verfahren vor dem Bundesgerichtshof ist nicht möglich. Über die in diesem Zusammenhang von der belgischen Gesellschaft Cartel Damage Claims SA vor dem Landgericht Düsseldorf erhobene Schadenersatzklage, die damit begründet wird, zwischen 1993 und 2002 seien kartellbedingt überhöhte Zementpreise gefordert worden, ist ebenfalls noch nicht entschieden. HeidelbergCement sieht auch nach der Ent-

scheidung des OLG Düsseldorf weiterhin Chancen, sich erfolgreich gegen die Klage zu verteidigen. Für beide Verfahren ist angemessene bilanzielle Vorsorge getroffen worden. Im November 2008 wurde HeidelbergCement durch Nachprüfungen der EU-Kommission an Standorten in Deutschland, Belgien, den Niederlanden und Großbritannien mit weiteren Kartellvorwürfen konfrontiert. Eigene Überprüfungen des Sachverhalts durch HeidelbergCement und ihre externen Rechtsanwälte haben die vorgeworfenen Kartellverstöße nicht bestätigt. Das Verfahren wurde durch die Übermittlung von Fragebögen Ende September 2009 und weitere Nachfragen im Jahr 2010 fortgesetzt, die von HeidelbergCement jeweils fristgemäß beantwortet wurden. Im Dezember 2010 hat die EU-Kommission HeidelbergCement benachrichtigt, dass sie in diesem Zusammenhang Verfahren wegen des Verdachts des Verstoßes gegen EU-Wettbewerbsrecht in einigen Ländern des EWR eingeleitet hat. In der Benachrichtigung der Kommission heißt es u.a. wörtlich: „Die Tatsache, dass die Kommission das Verfahren einleitet, bedeutet nicht, dass ihr schlüssige Beweise für die Zuwiderhandlungen vorliegen, sondern nur, dass sie die Sache vorrangig behandeln wird.“

Diese und weitere Verfahren veranlassen uns, die intensiven internen Vorkehrungen zur Vermeidung von Kartellverstößen, insbesondere regelmäßige Schulungsmaßnahmen u.a. unter Einsatz moderner IT-Medien, ständig zu prüfen und fortzuentwickeln.

## Beurteilung der Gesamtrisikosituation

Aufgrund der Stabilisierung der Weltwirtschaft gehen wir für den HeidelbergCement Konzern im Jahr 2011 von einer weiteren Reduzierung des Gesamtrisikos aus. Auch wenn die Prognosen für das globale Wirtschaftswachstum angehoben wurden, ist die künftige Entwicklung jedoch mit Risiken und Unsicherheiten verbunden.

Die Risiken aus volatilen Energie- und Rohstoffpreisen sowie Wechselkursen könnten sich auch 2011 auf einem hohen Niveau bewegen. Außerdem könnte ein deutlich engerer Kapitalmarkt infolge eines weltweiten Investitionsbooms die Realzinsen und damit die Kapitalkosten ansteigen lassen. Generell gesehen ist die Stabilität des globalen Finanzsystems derzeit noch von vielen Unsicherheiten geprägt.

In der ganzheitlichen Betrachtung von Einzelrisiken sowie der Gesamtrisikoposition sind aus heutiger Sicht keine bestandsgefährdenden oder andere bedeutende Risiken erkennbar. Unser konzerntweit standardisiertes Kontroll- und Risikomanagementsystem stellt sicher, dass wesentliche Risiken, deren Eintritt die wirtschaftliche Lage des Konzerns erheblich verschlechtern würde, frühzeitig identifiziert werden.

## Nachhaltigkeit bei HeidelbergCement

Die Verpflichtung zur nachhaltigen Entwicklung ist ein Pfeiler der Unternehmensstrategie von HeidelbergCement. Ökonomische Wertschöpfung, ökologische Kompetenz und soziale Verantwortung sichern die Zukunftsfähigkeit des Unternehmens. Nachhaltige Unternehmensführung bedeutet für uns, die Ausgewogenheit zwischen Gewinnerzielung und Sicherung der Zukunftsfähigkeit zu gewährleisten. Es ist unser Anliegen, dabei sozial und ökologisch verantwortlich zu handeln. Wir beachten die Auswirkungen unseres unternehmerischen Handelns auf Umwelt und Gesellschaft und mindern damit die Risiken für unser Geschäft. Unsere Nachhaltigkeitsstrategie leitet sich deshalb aus unserem Unternehmensprofil ab.

| Zusammengefasster Lagebericht              |                                     |
|--------------------------------------------|-------------------------------------|
| Kernaktivitäten und Organisationsstruktur  | Nachhaltigkeit bei HeidelbergCement |
| Strategie, Unternehmenssteuerung und Ziele | Mitarbeiter und Gesellschaft        |
| Geschäftsverlauf 2010                      | Umweltvorsorge                      |
| Weitere Angaben                            | Forschung und Technik               |
| Risikobericht                              | Ausblick                            |

## Nachhaltigkeitsstrategie und -management

Als Rohstoffunternehmen stehen für uns Mensch, Natur und Gesellschaft im Zentrum unserer Nachhaltigkeitsstrategie. Wir erachten Umweltvorsorge, Klimaschutz und nachhaltige Ressourcensicherung als Fundament für unsere künftige Entwicklung. In gleicher Weise ist die Verpflichtung, Mitarbeiter vor arbeitsbedingten Gefahren zu bewahren und ihre Gesundheit zu schützen, seit langem fester Bestandteil unserer Aktivitäten. Nicht zuletzt bedeutet nachhaltiges Handeln für uns auch, soziale Verantwortung an unseren Standorten zu übernehmen.

Um insbesondere die Leistungen in den Bereichen Umweltschutz und Arbeitssicherheit zu verbessern und den Informationsaustausch zwischen den Regionen und Geschäftsbereichen zu fördern, wurde 2008 das Group Environmental Sustainability Committee gegründet. Unter Federführung der Abteilung Global Environmental Sustainability legen 16 Experten aus den verschiedenen Geschäftsbereichen und Konzerngebieten Leitlinien, Ziele und Maßnahmen fest und koordinieren deren Implementierung.

Das zentrale Instrument unseres Nachhaltigkeitsmanagements ist das Nachhaltigkeitsprogramm 2020. Es beschreibt unsere Verpflichtung sowie Ziele und Maßnahmen zu sechs Schwerpunktthemen, die ein nachhaltiges Unternehmenswachstum sichern sollen.

| HeidelbergCement Nachhaltigkeitsprogramm 2020 <sup>1)</sup>              |                                                                                                                                                                                                                                                                                                                                                                                                           |
|--------------------------------------------------------------------------|-----------------------------------------------------------------------------------------------------------------------------------------------------------------------------------------------------------------------------------------------------------------------------------------------------------------------------------------------------------------------------------------------------------|
| Verpflichtung                                                            | Beispiele für die Umsetzung bis 2020                                                                                                                                                                                                                                                                                                                                                                      |
| Arbeitssicherheit und Gesundheitsschutz haben bei uns höchste Priorität. | HeidelbergCement ist bestrebt, Unfälle, Verletzungen und Berufskrankheiten auf null zu senken.                                                                                                                                                                                                                                                                                                            |
| Klimaschutz ist ein zentrales Thema für uns.                             | HeidelbergCement arbeitet kontinuierlich daran, seine Emissionen von Treibhausgasen zu verringern und liefert Lösungen zur Anpassung an die Auswirkungen des Klimawandels.                                                                                                                                                                                                                                |
| Wir tragen maßgeblich zum Erhalt der Biodiversität bei.                  | HeidelbergCement strebt nach einer Führungsrolle bei der Förderung der Biodiversität in Abbaustätten. Alle aktiven Abbaustätten werden Folgenutzungspläne erhalten; die Hälfte davon Pläne für Biodiversitätsmanagement.                                                                                                                                                                                  |
| Wir fördern nachhaltiges Bauen.                                          | HeidelbergCement fördert nachhaltiges Bauen durch aktive Mitgliedschaft in allen bestehenden Green Building Councils in den Konzernländern. Wir arbeiten daran, nachhaltige Baustoffe zu liefern, die sich während und nach ihrer Lebensdauer positiv auf Gesellschaft und Umwelt auswirken. Wir wollen Baustoffe wiederverwerten und z. B. den Anteil von Recyclingmaterial in Asphalt auf 10 % erhöhen. |
| Wir nutzen Abfallstoffe als Rohstoffe.                                   | Indem wir Abfallstoffe und Nebenprodukte als sekundäre Roh- und Brennstoffe einsetzen, reduzieren wir die Verwendung natürlicher Ressourcen und bieten Lösungen für nachhaltiges Abfallmanagement. Im Zementbereich wollen wir den Anteil sekundärer Brennstoffe auf 30 % erhöhen und 30 % des Klinkeranteils im Zement durch sekundäre Rohstoffe ersetzen.                                               |
| Wir reduzieren Umweltauswirkungen.                                       | HeidelbergCement strebt eine führende Position bei der Steuerung und Minimierung von Umweltauswirkungen an. Wir wollen gegenüber 2008 die Staubemissionen um 35 % und die Stickoxid- und Schwefeldioxidemissionen um je 10 % reduzieren.<br><br>Alle Produktionsstätten sollen einer regelmäßigen Überprüfung unterzogen werden.                                                                          |

1) Das vollständige Nachhaltigkeitsprogramm „Sustainability Ambitions 2020“ finden Sie unter [www.heidelbergcement.com/Nachhaltigkeit/Nachhaltigkeitsstrategie](http://www.heidelbergcement.com/Nachhaltigkeit/Nachhaltigkeitsstrategie).



## Mitarbeiter und Gesellschaft

### Mitarbeiterentwicklung

#### Mitarbeiter weltweit

Die Mitarbeiterzahl von HeidelbergCement lag am Jahresende 2010 bei 53.437 (i.V.: 53.302). Die Zunahme um 135 Mitarbeiter resultiert im Wesentlichen aus zwei gegenläufigen Entwicklungen: aus den mit Personalabbau verbundenen Standortoptimierungen und Kapazitätsanpassungen, vor allem in Nordamerika sowie Großbritannien, und aus der Zunahme der Mitarbeiterzahl in Afrika und Russland aufgrund der Erstkonsolidierung der Zementaktivitäten in der Demokratischen Republik Kongo und des Zementwerks CJSC "Construction Materials" in der Republik Baschkortostan.

| Mitarbeiter nach Konzerngebieten |        |        |             |
|----------------------------------|--------|--------|-------------|
| 31. Dezember                     | 2009   | 2010   | Veränderung |
| West- und Nordeuropa             | 14.640 | 14.302 | -2,3 %      |
| Osteuropa-Zentralasien           | 9.481  | 9.959  | 5,0 %       |
| Nordamerika                      | 12.601 | 11.899 | -5,6 %      |
| Asien-Pazifik                    | 14.030 | 13.682 | -2,5 %      |
| Afrika-Mittelmeerraum            | 2.499  | 3.539  | 41,6 %      |
| Konzernservice                   | 51     | 55     | 7,8 %       |
| Gesamt                           | 53.302 | 53.437 | 0,3 %       |

#### Personalaufwand und Sozialleistungen

Der Aufwand für Gehälter, soziale Abgaben sowie Beiträge zur Altersversorgung und sozialen Unterstützung ist gegenüber dem Vorjahr um 2,2 % auf 2.086 (i.V.: 2.042) Mio EUR gestiegen. Das entspricht einem Anteil am Umsatz von 17,7 % (i.V.: 18,4 %).

| Personalaufwand                   |         |         |             |
|-----------------------------------|---------|---------|-------------|
| Mio EUR                           | 2009    | 2010    | Veränderung |
| Löhne, Gehälter, soziale Abgaben  | 1.891,9 | 1.991,3 | 5,3 %       |
| Aufwendungen für Altersversorgung | 94,5    | 71,4    | -24,4 %     |
| Andere Personalaufwendungen       | 55,1    | 23,5    | -57,4 %     |
| Gesamt                            | 2.041,5 | 2.086,2 | 2,2 %       |

#### Im Dialog mit Mitarbeitern

Qualifizierte und motivierte Mitarbeiter sind eine wichtige Voraussetzung für den nachhaltigen Erfolg von HeidelbergCement. Die Talente der Mitarbeiter zu erkennen, sie zu entwickeln und im Wettbewerb mit anderen Unternehmen an uns zu binden, ist daher Kern der konzernweiten Personalpolitik. Dazu dient das HeidelbergCement Kompetenzmodell, in dem die Anforderungen an die Mitarbeiter definiert sind. Es erlaubt eine systematische, konzernweit nach einheitlichen Regeln durchgeführte Leistungs- und Potenzialbewertung durch die jeweiligen Vorgesetzten und dient als Basis für die strategische Führungskräfteentwicklung und Nachfolgeplanung. In strukturierten

| Zusammengefasster Lagebericht              |                                     |
|--------------------------------------------|-------------------------------------|
| Kernaktivitäten und Organisationsstruktur  | Nachhaltigkeit bei HeidelbergCement |
| Strategie, Unternehmenssteuerung und Ziele | Mitarbeiter und Gesellschaft        |
| Geschäftsverlauf 2010                      | Umweltvorsorge                      |
| Weitere Angaben                            | Forschung und Technik               |
| Risikobericht                              | Ausblick                            |

Mitarbeitergesprächen diskutieren Vorgesetzter und Mitarbeiter Entwicklungsmöglichkeiten und Perspektiven. Der Dialog zielt vor allem auf das obere und mittlere Management, Expertenfunktionen und Nachwuchsführungskräfte. Damit wollen wir drei Ziele erreichen:

- Schlüsselpositionen werden weltweit mit erstklassigen Kandidaten intern besetzt,
- Top-Talente werden bei HeidelbergCement gezielt entwickelt,
- Mitarbeiter werden durch eine individuelle Entwicklungsplanung langfristig an den Konzern gebunden.

### Kontinuierliche Ausbildung

Nachhaltige Personalarbeit bedeutet, auch in schwierigen Zeiten in Ausbildung zu investieren, d.h. qualifizierten Nachwuchs einzustellen und auszubilden. In Deutschland liegt die Ausbildungsquote unverändert bei 6,5%. Damit bilden wir traditionell über den eigenen Bedarf aus. Die Übernahmequote liegt bei 76%.

Technisch-handwerkliche Fähigkeiten sind für fachlich einwandfreie Betriebsführung in der Prozesstechnik und Wartung in unseren Werken unerlässlich. Dazu bieten wir neben fachlichen Trainings auch jedes Jahr Meisterkurse beim Verein Deutscher Zementwerke e.V. an.

Unsere umfangreichen Ausbildungsprogramme in nahezu allen Arbeitsbereichen zeichnen sich durch praxisnahes Lernen aus und bieten daher die beste Voraussetzung für eine kontinuierliche Weiterentwicklung im fachlichen und persönlichen Bereich.

### Managementausbildung

Die Motivation und Kompetenzen unserer Führungskräfte sind entscheidend dafür, wie gut sich HeidelbergCement im globalen Wettbewerb positioniert und auf die Herausforderungen der Zukunft vorbereitet ist. Um unsere Führungskräfte auf ihre künftigen Aufgaben vorzubereiten, bieten wir speziell auf die Bedürfnisse unseres Unternehmens zugeschnittene Ausbildungsprogramme. Das gilt sowohl für die klassischen Themen wie Strategie, Führung und Management oder Methodik der Investitionsrechnung als auch für spezielle Trainings im Bereich Technik. Einheitliche Ausbildungsinhalte stellen sicher, dass überall ein gemeinsames Verständnis von Strategie, integriertem Managementansatz und Führung entwickelt wird.

Als strategische Konzerninitiative werden wir die Kompetenzen unserer oberen Führungskräfte weiter stärken. Dazu haben wir die bestehenden Programme in Zusammenarbeit mit Duke Corporate Education, einer der führenden Business Schools für maßgeschneiderte Fortbildungsprogramme für Führungskräfte, inhaltlich und konzeptionell weiterentwickelt. Zwischen 2011 und 2014 werden 500 Führungskräfte aus dem ganzen Konzern ein dreistufiges Curriculum mit Schwerpunkt General Management und Führung unter Einbeziehung globaler, regionaler und lokaler Fragestellungen durchlaufen. Vorstandsmitglieder nehmen an allen Modulen in Diskussionsrunden und mit eigenen Präsentationsbeiträgen aktiv teil.

### Sicherung und Förderung von Nachwuchsführungskräften

Die Förderung des Führungskräftenachwuchses wurde trotz der schwierigen Wirtschaftslage 2010 konsequent fortgesetzt. Wir bieten hoch motivierten und qualifizierten Hochschulabsolventen internationale Trainee-Programme mit Schwerpunkten in den Bereichen Technik, Vertrieb, Finanzen, Personal, Einkauf und IT. Insgesamt nehmen 122 Personen an diesen Programmen teil. Neu ist ein spezielles Curriculum für hochqualifizierte Ingenieure: Nach Abschluss des Engineer-in-Training-Programms durchlaufen sie mehrere Jahre lang genau definierte technische Ausbildungsabschnitte

in verschiedenen Werken im In- und Ausland, ergänzt um Fortbildung in General Management und Führung, um auf höhere Ingenieurspositionen vorbereitet zu werden.

### **Demografische Entwicklung**

Unser Unternehmen sieht sich zunehmend mit den Folgen des demografischen Wandels konfrontiert. Die Kapazitäts- und Alterungseffekte aus der demografischen Entwicklung haben wir für das mittlere und obere Management weltweit analysiert. Die Analyse zeigt, dass über zwei Drittel unserer Belegschaft jünger als 50 Jahre sind. Im Einzelnen betrachtet sind ca. 14 % unserer Arbeitnehmer jünger als 30 Jahre. Der überwiegende Anteil befindet sich in der Altersgruppe der 30- bis 49-Jährigen; dies macht etwa 55 % der Gesamtbelegschaft im Konzern aus. 31 % unserer Mitarbeiter sind über 50 Jahre alt.

In den Bereichen Gesundheitsmanagement und Weiterbildung haben wir bereits erste Maßnahmen ergriffen, um die Leistungsfähigkeit unserer Mitarbeiter zu erhalten. Als Pilotprojekt haben wir eine Gesundheitsinitiative in Deutschland gestartet, die ein Präventionsprogramm zur Früherkennung von Erkrankungen und Risikofaktoren enthält, vor allem aber auf die Eigeninitiative zu einer gesunden Lebensweise setzt.

### **Diversity**

Diversity verstehen wir als ein Managementkonzept, das durch Teamwork und Einbringung verschiedener Kulturen, Talente und Erfahrungshorizonte auf eine Zusammensetzung der Belegschaft abzielt, die unsere Präsenz auf den internationalen Märkten, unsere Kundenstruktur und unser Geschäftsumfeld widerspiegelt. Ziel ist es, weltweit hoch qualifizierte und leistungsbereite Mitarbeiter zu fördern und zu gewinnen, die sich mit unterschiedlicher sozialer und fachlicher Kompetenz für unser Unternehmen einsetzen und so zum Geschäftserfolg beitragen. Ein gutes Beispiel ist die internationale Zusammensetzung unserer Belegschaft an den Standorten unserer Hauptverwaltung und der technischen Zentren Competence Center Materials und Heidelberg Technology Center in Heidelberg und Leimen. Von den knapp 700 Mitarbeitern dort stammen mehr als 130 aus 35 Ländern.

Auch bei der Besetzung von Führungspositionen im Unternehmen achten wir auf Vielfalt. Durch die internationale Zusammensetzung unseres Führungsteams profitieren wir von unterschiedlichen Erfahrungshorizonten aus verschiedenen Kulturkreisen und sind somit in der Lage, sowohl auf globale Herausforderungen als auch auf lokale Marktbedürfnisse flexibel zu reagieren. Der Anteil von lokalen Managern an den oberen Führungskräften liegt bei 80 %. Diese ausgeprägte internationale Zusammensetzung stellen wir nachhaltig durch die konsequente weltweite Rekrutierung von talentierten Hochschulabsolventen und ihre Ausbildung im Konzern sicher.

Zur Vielfalt zählt für uns auch eine Besetzung der Führungspositionen mit Frauen und Männern, die unsere Mitarbeiterstruktur repräsentativ abbildet. Im Konzern lag 2010 der Anteil der Frauen bei insgesamt etwa 15 % an der Gesamtbelegschaft und bei den oberen Führungspositionen bei ca. 8 %. In Deutschland lag der Frauenanteil an der Gesamtbelegschaft bei insgesamt etwa 17 % und bei den oberen Führungspositionen bei ca. 5 %. Zur Erhöhung des Anteils von Frauen in Führungspositionen setzen wir verstärkt auf die Förderung von Frauen in unseren Nachwuchsförderprogrammen. Der Frauenanteil in diesen Förderprogrammen liegt konzernweit mittlerweile bei etwa 15 % und in Deutschland bei ca. 28 %.

| Zusammengefasster Lagebericht              |                                     |
|--------------------------------------------|-------------------------------------|
| Kernaktivitäten und Organisationsstruktur  | Nachhaltigkeit bei HeidelbergCement |
| Strategie, Unternehmenssteuerung und Ziele | Mitarbeiter und Gesellschaft        |
| Geschäftsverlauf 2010                      | Umweltvorsorge                      |
| Weitere Angaben                            | Forschung und Technik               |
| Risikobericht                              | Ausblick                            |

Die Vielfalt bei der Zusammensetzung unseres Führungsteams und der Fokus auf Leistungsbereitschaft, fachliche Kompetenz und Übereinstimmung mit unseren Unternehmenswerten sehen wir als entscheidende Vorteile im globalen Wettbewerb.

### Beruf und Familie vereinbaren

Im Wettbewerb um die besten Mitarbeiter stellen wir uns weltweit auf sich wandelnde Lebensformen ein. Bei unseren Angeboten, mit denen wir die Vereinbarkeit von Beruf und Familie fördern, setzen wir auf Modelle wie Gleitzeit, Teilzeit und Freistellungen. Die Teilzeitquote der HeidelbergCement AG liegt bei 9,3 %. Aufgrund der geringen Größe unserer Standorte hat sich bei der Kindertagespflege, der Pflege von hilfsbedürftigen Angehörigen oder z.B. Feriencamps für Kinder die Zusammenarbeit mit externen Netzwerken bewährt. Die Mitarbeiter profitieren vom einfachen Zugang zu einem professionellen und flexiblen Netzwerk zu angemessenen Kosten.

Für unsere zahlreichen ausländischen Mitarbeiter am Standort Heidelberg/Leimen haben wir mit einem „Expatriate Network Day“ eine Initiative gestartet, die Hilfe zur Selbsthilfe bietet. Das Unternehmen unterstützt ein zu diesem Zweck gegründetes Netzwerk aus Mitarbeitern, Angehörigen und Freunden, um die Integration in der Metropolregion Rhein-Neckar zu unterstützen, z.B. bei der Wohnungssuche, Behördengängen oder Kindergarten- und Schulangelegenheiten.

### Globale Führungskräftebefragung

In einer Führungskräftebefragung haben wir 2010 erstmals weltweit 1.200 Führungskräfte zu den Themen Unternehmensstrategie, Management- und Führungsverständnis, Unternehmenswerte und rund um den Arbeitsplatz befragt. Positiv fielen insbesondere die Antworten auf die Fragen zur Strategie, Unternehmenskultur, Unternehmensführung und Führungsverhalten aus. Nach Analyse der Antworten (Rücklaufquote: 87 %) haben wir weltweit über 200 Einzelmaßnahmen eingeleitet, die zu einem besseren Arbeitsumfeld beitragen sollen. Im Mittelpunkt stehen Aktionen zur Optimierung der Personalentwicklung und der geschäftsbereichs- und funktionsübergreifenden Zusammenarbeit. In der Folgebefragung 2012 sollen die Führungskräfte die Umsetzung dieser Maßnahmen bewerten.

Die Führungskräftebefragung haben wir auch gezielt genutzt, um den Erfolg der Hanson-Integration zu messen. Das Ergebnis zeigt, dass wir große Fortschritte erzielt und mittlerweile ein gemeinsames Verständnis in allen wesentlichen Fragestellungen entwickelt haben.

### Erfolgsorientierte Vergütungssysteme

Wer Leistung erwartet, muss auch ein entsprechendes Umfeld schaffen. Dazu gehört auch eine attraktive Vergütung. Neben Festgehältern, die durch Tarif- oder individuellen Arbeitsvertrag geregelt werden, erhalten die Mitarbeiter der HeidelbergCement AG zusätzlich variable Vergütungsbestandteile, die von der individuellen Leistung und dem Unternehmenserfolg abhängen. Bei den Führungskräften wird ein hoher variabler Anteil an der Gesamtvergütung bewusst angestrebt, um die gemeinsame und persönliche Leistung sowie den Unternehmenserfolg deutlich und unmittelbar zu berücksichtigen. Die Mitarbeiter unserer ausländischen Tochtergesellschaften profitieren von attraktiv gestalteten Vergütungssystemen, die den jeweiligen lokalen Marktgegebenheiten entsprechen.



## Arbeits- und Gesundheitsschutz

### Konzernleitlinien

Nachdem wir uns in den vergangenen Jahren mit Konzernleitlinien zum Arbeiten in Höhen und zur Maschinensicherheit verstärkt auf den Produktionsbereich konzentriert haben, haben wir 2010 einen Schwerpunkt auf Verkehrssicherheit und Sicherheit bei Bauprojekten gelegt. Mit der Leitlinie „Sicheres Fahren“ haben wir die Empfehlungen der Nachhaltigkeitsinitiative der Zementindustrie umgesetzt, an deren Erstellung HeidelbergCement beteiligt war. Die Analysen der Arbeitsgruppe, deren Leitung HeidelbergCement seit Anfang 2010 zusammen mit einem anderen Mitgliedsunternehmen der Nachhaltigkeitsinitiative inne hat, haben ergeben, dass prozentual die meisten Todesfälle der Branche bei Verkehrsunfällen auf dem Werksgelände oder im öffentlichen Straßenverkehr zu beklagen sind. Dies traf in den letzten Jahren leider auch verstärkt auf HeidelbergCement zu. Die Konzernleitlinie setzt nun weltweit einheitliche Standards für Fahrer und Management, mit denen wir präventiv solche Unfälle vermeiden wollen. Unser Ziel ist es, die notwendigen Maßnahmen sukzessive bis Ende 2014 umzusetzen.

Bereits seit längerem gibt es bei HeidelbergCement verbindliche Mindestanforderungen für den Arbeits- und Gesundheitsschutz bei unseren weltweiten Bauvorhaben. Um diese Projekte, bei denen oft mehrere Hundert Mitarbeiter fremder Firmen und verschiedenster Nationalitäten gleichzeitig über einen längeren Zeitraum hinweg auf einer Baustelle zusammenarbeiten, unfallfrei durchführen zu können, sind umfangreiche Maßnahmen sowohl vom Auftragnehmer als auch vom Auftraggeber notwendig. Wir haben die Erfahrungen, die wir bei früheren Projekten gesammelt haben, analysiert und unsere Dokumente überarbeitet und ergänzt. Die aktualisierten Anforderungen sollen sicherstellen, dass auch künftige Bauprojekte weltweit unseren Sicherheitsstandards entsprechen.

### Sicherheitsfilm und Posterkampagne

Im Frühjahr 2010 haben wir einen Sicherheitsfilm fertig gestellt, der Bezug auf tatsächliche Unfälle im Unternehmen nimmt. Der Film, der in 18 Sprachversionen vorliegt, wird zu Schulungszwecken im ganzen Konzern genutzt. Wir wollen damit insbesondere das Bewusstsein für die Gefährlichkeit von Alltagssituationen im Berufsleben wecken. Die gleiche Absicht verfolgen wir auch mit einer Posterkampagne. Zu allen Konzernleitlinien haben wir einheitlich aufgebaute Poster erstellt, die, in die einzelnen Landessprachen übersetzt, konzernweit für Schulungen verwendet werden.

### Unfallentwicklung

Im Jahr 2010 konnten wir die Unfallohäufigkeits- und Unfallschwererate zwar weiter absenken, aber bei weitem nicht so sehr wie erhofft. Leider mussten wir den Tod von fünf eigenen Mitarbeitern sowie von zehn Mitarbeitern fremder Firmen beklagen. Wir haben alle Unfälle untersucht, um die Ursachen herauszufinden und durch geeignete Gegenmaßnahmen, sowohl am Unfallort als auch auf Konzernebene weitere Unfälle zu vermeiden. Dazu nutzen wir konsequent unser internes Sicherheitsnetzwerk. Um unser ambitioniertes Ziel eines unfallfreien Unternehmens zu erreichen, werden wir auch künftig weitere Maßnahmen, sowohl lokal als auch auf Konzernebene ergreifen. Da unsere Unfallanalysen zeigen, dass oft menschliches Versagen eine wesentliche Rolle im Unfallgeschehen spielt, werden wir weiterhin verstärkt auf verhaltensändernde Maßnahmen setzen.

| Zusammengefasster Lagebericht              |                                     |
|--------------------------------------------|-------------------------------------|
| Kernaktivitäten und Organisationsstruktur  | Nachhaltigkeit bei HeidelbergCement |
| Strategie, Unternehmenssteuerung und Ziele | Mitarbeiter und Gesellschaft        |
| Geschäftsverlauf 2010                      | Umweltvorsorge                      |
| Weitere Angaben                            | Forschung und Technik               |
| Risikobericht                              | Ausblick                            |

| Arbeits- und Gesundheitsschutz       |      |      |      |      |      |
|--------------------------------------|------|------|------|------|------|
|                                      | 2006 | 2007 | 2008 | 2009 | 2010 |
| Unfallhäufigkeitsrate <sup>1)</sup>  | 7,4  | 5,8  | 4,8  | 4,6  | 4,3  |
| Unfallschwereindikator <sup>2)</sup> | 191  | 154  | 132  | 167  | 146  |
| Todesfallrate <sup>3)</sup>          | 0,3  | 0,6  | 0,9  | 1,7  | 1,1  |

1) Anzahl der Unfälle von eigenen Mitarbeitern mit mindestens einem Ausfalltag pro 1.000.000 gearbeiteter Stunden

2) Anzahl der durch Unfälle ausgefallenen Arbeitstage von eigenen Mitarbeitern pro 1.000.000 gearbeiteter Stunden

3) Anzahl der Todesfälle von eigenen Mitarbeitern pro 10.000 eigenen Mitarbeitern

## Gesellschaftliche Verantwortung

Mit der Beschäftigung lokaler Mitarbeiter und der Beauftragung lokaler Lieferanten und Dienstleister trägt HeidelbergCement zur Wertschöpfung an den Standorten bei. Durch Löhne, Investitionen, Einkäufe und Steuern fördern wir dort die wirtschaftliche Entwicklung.

Unsere gesellschaftliche Verantwortung spiegelt sich aber nicht nur in unseren Geschäftsprozessen wider. Wir sind vielmehr davon überzeugt, dass Unternehmen auch eine immer wichtigere Rolle bei der Lösung gesellschaftlicher Aufgaben übernehmen.

HeidelbergCement setzt bei seinem Engagement auf die Nähe zum Kerngeschäft. Wir engagieren uns dort am stärksten, wo wir das größte Know-how haben und die besten Ergebnisse für die Gesellschaft erreichen können. Deshalb unterstützen wir vor Ort Projekte mit den Schwerpunkten Bildung - Bauen - Umwelt und haben entsprechende Leitlinien in unserer Corporate Citizenship Guideline festgelegt.

Unabhängig von diesen Leitlinien haben wir im Januar 2010 die Hilfsaktionen für die Erdbebenopfer in Haiti mit einer Spende von 100.000 EUR an das Rote Kreuz unterstützt. Die bereitgestellten Mittel waren für den Aufbau und Betrieb eines mobilen Krankenhauses sowie dessen Versorgung mit Trinkwasser bestimmt.

In Górzdz/Polen, unterstützen wir seit Jahren gesundheitsfördernde Maßnahmen. Dazu zählen beispielsweise Sportveranstaltungen im Steinbruch. Im April 2010 wurde dort ein Nordic-Walking-Wettbewerb durchgeführt, mit dem die neu gebaute professionelle Nordic-Walking-Strecke eingeweiht wurde, die teilweise über den Naturlehrpfad des Steinbruchs führt. In Ungarn haben wir in Pécs, der Europäischen Kulturhauptstadt 2010, die Sanierung des historischen Kalvarienbergs finanziert und gemeinsam mit der Stadt im Einklang mit dem Biodiversitäts- und Naturschutz durchgeführt.

In Afrika unterstützen wir seit Jahren den Bau von Schulen und Krankenhäusern oder tragen zu deren Unterhalt bei. 2010 haben wir beispielsweise in Tansania den Bau zusätzlicher Klassenzimmer in einer Grundschule in der Nähe unseres Werksstandorts Dar es Salaam finanziert. Wir unterstützen außerdem in einigen Ländern Schüler und Studenten mit Stipendien oder Zahlung der Studiengebühren.

## Umweltvorsorge

Als aktives Mitglied der Cement Sustainability Initiative des World Business Council for Sustainable Development nimmt HeidelbergCement seine Verantwortung für die nachhaltige Entwicklung seiner Geschäftstätigkeit ernst. In den vergangenen Jahren haben wir bemerkenswerte Fortschritte erzielt, unter anderem bei der Reduktion unserer CO<sub>2</sub>-Emissionen und Umwelteinflüsse, der Weiterverwertung von Abfallstoffen als Brennstoffe und der Förderung der biologischen Vielfalt in unseren Abbaustätten. Diese Verbesserungen werden durch das HeidelbergCement Nachhaltigkeitsprogramm 2020 vorangetrieben, das die zentralen Nachhaltigkeitsthemen und -ziele des Unternehmens beschreibt (siehe Seite 97).

### Biologische Vielfalt

HeidelbergCement will seine Führungsrolle bei der Förderung der Biodiversität in Abbaustätten weltweit stärken. In Europa haben wir bereits 2009 eine verbindliche Richtlinie zum Biodiversitätsmanagement erlassen. Daraufhin wurden 2010 zahlreiche Pilotprojekte gestartet. Ziel ist es, für alle Abbaustätten, die zum EU Natura 2000 Netzwerk gehören, einen Biodiversitäts-Managementplan zu erstellen. So können wir die Rohstoffversorgung und -produktion langfristig und im Rahmen einer strikten Umweltgesetzgebung sicherstellen. Im Berichtsjahr wurden für insgesamt 50 Standorte Biodiversitäts-Managementpläne entwickelt.

Unser Public-Private-Partnership-Projekt in Georgien, das wir gemeinsam mit dem Bundesministerium für wirtschaftliche Zusammenarbeit und Entwicklung sowie der Deutschen Gesellschaft für Technische Zusammenarbeit (GTZ) durchführen, konzentriert sich auf die Wiederherstellung und den Erhalt der biologischen Vielfalt mittels moderner Renaturierungsmethoden. Das Projekt entwickelt sich erfolgreich mit aktiver Einbindung aller Stakeholder und insbesondere der lokalen Gemeinden.

Im Konzerngebiet Asien-Pazifik haben wir eine Anleitung zum Thema Biodiversität und Renaturierung unter besonderer Berücksichtigung der biodiversitätsspezifischen Besonderheiten der Region veröffentlicht. Sie soll der nachhaltigen Wiederherstellung von Abbaustätten unter Berücksichtigung der biologischen Vielfalt dienen.

In Afrika hat HeidelbergCement im Berichtsjahr ein weiteres Public-Private-Partnership-Projekt mit der GTZ initiiert, um die Aufforstung und nachhaltige Landnutzung im Umkreis der Steinbrüche unserer Tochtergesellschaft Tanzania Portland Cement Company, deren Produktionsstätte in der Nähe der Hafenstadt Dar es Salaam gelegen ist, zu fördern.

Auch in Nordamerika führen wir einige Biodiversitätsprojekte durch. Eines davon beispielsweise in unserem Steinbruch in Romeoville/Illinois, wo wir mit Unterstützung der dortigen Behörden einen Plan zum Schutz des Lebensraumes der gefährdeten Smaragdlibelle entwickeln und umsetzen.

Unsere Förderstätte Sechelt in British Columbia ist das erste Zuschlagstoffwerk, das 2010 den angesehenen „British Columbia Jake McDonald Mine Reclamation Award“ für innovative und umfassende Umweltschutz- und Rekultivierungsmaßnahmen erhielt.

| Zusammengefasster Lagebericht              |                                     |
|--------------------------------------------|-------------------------------------|
| Kernaktivitäten und Organisationsstruktur  | Nachhaltigkeit bei HeidelbergCement |
| Strategie, Unternehmenssteuerung und Ziele | Mitarbeiter und Gesellschaft        |
| Geschäftsverlauf 2010                      | <b>Umweltvorsorge</b>               |
| Weitere Angaben                            | Forschung und Technik               |
| Risikobericht                              | Ausblick                            |

## Nachhaltiges Bauen

HeidelbergCement und seine Tochterunternehmen arbeiten mit den Green Building Councils weltweit zusammen, um Zertifizierungssysteme für nachhaltiges Bauen zu entwickeln und das Design, den Bau und die Bewirtschaftung von Gebäuden nachhaltiger zu gestalten. Im Berichtsjahr trat HeidelbergCement dem rumänischen, schwedischen und polnischen Green Building Council bei und war Mitbegründer des norwegischen Green Building Council.

Das Recycling von Beton- und Asphaltschutt zählt bereits zur guten Praxis des nachhaltigen Bauens. HeidelbergCement bemüht sich auch, die Wiederverwertung von Zuschlagstoffen auszuweiten, wo immer dies ökologisch und ökonomisch sinnvoll ist.

HeidelbergCement investiert auch erheblich in Produktinnovationen. Die Forschungs- und Entwicklungsabteilung des HTC Global (siehe Seite 108) wurde personell verstärkt, um künftig weitere innovative und nachhaltige Lösungen für den Bausektor anbieten zu können. Konzernweit gibt es bereits zahlreiche Produktinnovationen für nachhaltiges Bauen, wie beispielsweise die wasserdurchlässigen Betonpflastersteine AquaFlow®, die etwa beim Hochwasserschutz eingesetzt werden können, oder den photokatalytisch aktiven Zement TioCem®, der bei Lichteinwirkung Stickoxide und andere Luftschadstoffe zersetzt.

Nicht zuletzt hat sich unser Unternehmen mit der Unterzeichnung des „Manifesto for Energy Efficiency in Buildings“ des World Business Council for Sustainable Development dazu verpflichtet, die Energieeffizienz in seinen Bürogebäuden zu verbessern.

## Einsatz von alternativen Roh- und Brennstoffen

Für HeidelbergCement sind Abfallstoffe und Nebenprodukte anderer Industrien wertvolle Roh- und Brennstoffe für die Herstellung von Zement. Der Anteil der Sekundärbrennstoffe am Brennstoffmix erreichte 21,5% im Jahr 2010 und macht HeidelbergCement auch weiterhin zum Spitzenreiter unter den großen internationalen Zementherstellern.

Wir haben ebenfalls die Aufbereitung und den Einsatz überwachungsbedürftiger Abfälle weiter erhöht. Dies wurde unter anderem auch durch die Inbetriebnahme einer hochmodernen Aufbereitungsanlage für Abfallstoffe in Belgien im Sommer 2010 ermöglicht. Überwachungsbedürftige Abfälle kamen auch vermehrt in deutschen und indonesischen Zementwerken zum Einsatz, hauptsächlich Altfarben und -lacke, gebrauchte ÖlfILTER und Dachpappe. Auf einer internen Konferenz konnten Experten aus verschiedenen Konzerngebieten im letzten Jahr ihre Erfahrungen und Praxisbeispiele austauschen.

Den Einsatz von Klärschlamm haben wir in Nordamerika, China und der Türkei erhöht. Erfolgreiche Testversuche mit Klärschlamm gab es in verschiedenen Werken in Belgien und Deutschland. In Ungarn und Nordeuropa haben wir die Nutzung von Kunststoffabfällen beträchtlich gesteigert.

## Klimaschutz

Klimaschutz steht im Zentrum der Umweltpolitik von HeidelbergCement. Als energieintensives Unternehmen sind wir seit vielen Jahren bestrebt, unsere CO<sub>2</sub>-Emissionen zu minimieren. Von 1990 bis 2009 haben wir unsere spezifischen Netto-CO<sub>2</sub>-Emissionen um mehr als 19% auf 631 kg CO<sub>2</sub>/t Zement gesenkt. Bis 2015 wollen wir unsere spezifischen Netto-CO<sub>2</sub>-Emissionen bezogen auf 1990 um 23% reduzieren.



Wir arbeiten intensiv an der Entwicklung und Umsetzung innovativer Lösungen zur Reduktion der CO<sub>2</sub>-Emissionen. In vielen Ländern sind wir führend beim Einsatz von Biomasse als Brennstoff und fördern zukunftsorientierte Forschungsprojekte zur Abscheidung und Speicherung von CO<sub>2</sub> – unter anderem an unserem Standort im norwegischen Brevik. Unser „Joint Implementation“-Projekt, mit dem wir CO<sub>2</sub>-Emissionen durch den Einsatz von Sekundärbrennstoffen in unserem ukrainischen Werk Kryvyi Rih reduzieren, wurde im Oktober 2010 von den Vereinten Nationen offiziell anerkannt.

## Reduktion anderer Umwelteinflüsse

Entsprechend den Zielen in unserem Nachhaltigkeitsprogramm 2020 implementieren wir nach ISO 14001 zertifizierte Umweltmanagementsysteme in all unseren Zementwerken.

Kontinuierliche Investitionen in den Umweltschutz bleiben ein Schwerpunkt unserer Umweltpolitik. Wir haben in unserem norwegischen Zementwerk Brevik einen Wäscher zur Reduktion von Schwefeldioxid installiert, und in Nordamerika massiv in neue Technologien zur Emissionsreduktion investiert. Im polnischen Zementwerk Górzdzke modernisieren wir derzeit die zweite Ofenlinie, so dass künftig bis zu 70 % des Energiebedarfs durch Sekundärbrennstoffe gedeckt werden können. Mit einer modernisierten Wasseraufbereitungsanlage im Zementwerk Kakanj in Bosnien-Herzegowina haben wir den Wasserverbrauch erheblich reduziert. Für unsere Werke in Afrika haben wir einen Wasserschutzplan entwickelt, der zurzeit mittels Wassermanagementplänen standortspezifisch umgesetzt wird. Auch in unseren Transportbetonwerken und Zuschlagstoffbetrieben achten wir auf energieeffiziente Prozesse und die Reduktion von Emissionen.

## Forschung und Technik

### Ausrichtung der Forschungs- und Entwicklungsaktivitäten

Die Innovationstätigkeit bei HeidelbergCement lässt sich im Wesentlichen in drei Bereiche gliedern:

- Produkte und Anwendungen: Unsere Forschungs- und Entwicklungsaktivitäten sind sehr markt- und kundenorientiert. Im Mittelpunkt stehen die Entwicklung und Verbesserung von Bindemitteln und Betonen mit optimierten Eigenschaften und innovativen Funktionalitäten. Unsere Arbeit hört dabei nicht beim Produkt auf, sondern beinhaltet auch die kompetente und fachgerechte Beratung unserer Kunden bei der Anwendung und Optimierung ihrer Produkte.
- Produktion: Der Schwerpunkt liegt auf der ständigen Verbesserung der Prozesse und Kostenstruktur. Dazu gehören die kosteneffiziente Substitution fossiler Brennstoffe und natürlicher Rohstoffe ebenso wie die Reduzierung des Energiebedarfs in der Produktion. Diese Ziele werden in der konzernweiten Initiative „Operational Excellence“ verfolgt und Potenziale systematisch erschlossen.
- Entwicklung von Zementen und Betonen mit verbesserter CO<sub>2</sub>-Bilanz: Die Weiterentwicklung von Kompositzementen mit reduziertem Klinkeranteil, auch über heute bestehende Normengrenzen hinaus, bildet hierbei einen Schwerpunkt. Die Reduzierung des Klinkeranteils ist der bedeutendste Hebel zur Minimierung des Energieverbrauchs und der CO<sub>2</sub>-Emissionen sowie zur

| Zusammengefasster Lagebericht              |                                     |
|--------------------------------------------|-------------------------------------|
| Kernaktivitäten und Organisationsstruktur  | Nachhaltigkeit bei HeidelbergCement |
| Strategie, Unternehmenssteuerung und Ziele | Mitarbeiter und Gesellschaft        |
| Geschäftsverlauf 2010                      | Umweltvorsorge                      |
| Weitere Angaben                            | <b>Forschung und Technik</b>        |
| Risikobericht                              | Ausblick                            |

Schonung natürlicher Rohstoffe. Schließlich erforschen wir auch völlig neuartige Bindemittelsysteme, die vollständig auf Klinker verzichten. Derartige innovative Alternativprodukte befinden sich in einem frühen Forschungsstadium und werden noch etliche Jahre bis zur Marktreife und breiten Anwendbarkeit benötigen.

## Organisation und Aufwendungen im Bereich Forschung und Technik

Im Berichtsjahr haben wir das globale Kompetenzzentrum HTC Global (Heidelberg Technology Center Global) in Leimen eingerichtet. Mit seinen zahlreichen internationalen Mitarbeitern ist es in die vier Bereiche Forschung & Entwicklung, Projekte, Geologie sowie Training & Reporting untergliedert. In diesem Kompetenzzentrum werden das Wissen und die Fachkenntnisse in unserem Unternehmen gebündelt und den operativen Einheiten schnell und umfassend zur Verfügung gestellt.

### Zentrale Forschung und Entwicklung

Da ein besonderer Schwerpunkt auf Forschung und Entwicklung liegt, haben wir im HTC Global die konzernübergreifenden Forschungs- und Entwicklungsaktivitäten in den Bereichen Zement und Beton konzentriert. Entsprechend der hohen Bedeutung der Entwicklung von CO<sub>2</sub>-minimierten Produkten bauen wir diesen Bereich derzeit personell und finanziell weiter aus. Die Projekte werden in enger Abstimmung mit den operativen Gesellschaften definiert und durchgeführt. Diese enge Kooperation von Projektbeginn an ermöglicht eine effiziente Umsetzung der Entwicklungsergebnisse und eine schnelle Markteinführung.

### Technik und Innovation

Die Ländergesellschaften in den Konzerngebieten werden durch technische Zentren unterstützt. Im Geschäftsbereich Zement ist dies das Heidelberg Technology Center (HTC) mit zwei Niederlassungen in Europa, die zusätzlich den Mittelmeerraum, Afrika und Zentralasien betreuen, einer Niederlassung in Nordamerika und einer weiteren in Asien mit Stützpunkten in China, Indien und Indonesien. Sie unterstützen die Zementwerke in allen technischen Fragen von der Rohstoffsicherung über Betriebsoptimierung bis hin zur Prozesssteuerung und Qualitätssicherung. Bei Investitionsprojekten der Werke sind die Niederlassungen des HTC teilweise bis zur Inbetriebnahme der neuen Anlage oder des neuen Werks in das Projektmanagement einbezogen. In ähnlicher Weise unterstützt das Competence Center Materials (CCM) die Konzerngesellschaften in den Bereichen Zuschlagstoffe, Transportbeton und Asphalt. Der enge Dialog zwischen HTC bzw. CCM und den Werken sorgt für eine effiziente Erschließung von Optimierungspotenzialen und einen kontinuierlichen Verbesserungsprozess.

### Kundenbezogene Entwicklung und Beratung

Die große Marktnähe unserer Aktivitäten erfordert eine intensive kundenorientierte Entwicklung und Beratung, die sich auch in hohen finanziellen Aufwendungen widerspiegelt (siehe folgende Tabelle). Die entsprechenden Abteilungen und Mitarbeiter, die unmittelbar in die Organisation der jeweiligen Landesgesellschaften eingebunden sind, entwickeln und optimieren die an die lokalen Bedürfnisse angepassten Zemente und Betone oftmals in direkter Zusammenarbeit mit den Kunden.

### Aufwendungen für Forschung und Technik

Die Gesamtaufwendungen im Bereich Forschung und Technik beliefen sich im Berichtsjahr auf 67,6 (i.V.: 63,6) Mio EUR. Die folgende Tabelle zeigt die Aufteilung der Aufwendungen nach den drei oben genannten Bereichen in den letzten fünf Jahren:

| Aufwendungen für Forschung und Technik           |      |      |      |      |      |
|--------------------------------------------------|------|------|------|------|------|
| Mio EUR                                          | 2006 | 2007 | 2008 | 2009 | 2010 |
| Zentrale Forschung und Entwicklung <sup>1)</sup> | 3,6  | 3,6  | 4,1  | 4,3  | 4,9  |
| Technik und Innovation                           | 19,4 | 22,4 | 26,9 | 29,4 | 32,2 |
| Kundenbezogene Entwicklung und Beratung          | 43,9 | 32,6 | 32,2 | 29,9 | 30,5 |
| Gesamt                                           | 66,9 | 58,6 | 63,2 | 63,6 | 67,6 |

1) inklusive aktivierte Beträge

Durch die erstmalige Einbeziehung der Mitarbeiter und Aufwendungen für Forschung und Technik im Bereich Beton sind die Angaben gegenüber früheren Geschäftsberichten gestiegen. Zur besseren Vergleichbarkeit wurden die Beträge rückwirkend bis 2006 angepasst.

Zu den Entwicklungsprojekten, die als Investitionen aktiviert wurden, gehören unter anderem unsere innovativen Spezialzemente ChronoCem® und TioCem® (siehe Seite 110 f.). Da diese insgesamt in einer Größenordnung von rund 1 Mio EUR liegen, werden sie nicht separat ausgewiesen.

### Mitarbeiter in Forschung und Technik

Im Geschäftsjahr 2010 waren insgesamt 748 Mitarbeiter (i.V.: 736) im Bereich Forschung und Technik beschäftigt. Die Personalaufteilung und -entwicklung in den letzten fünf Jahren ist in der folgenden Tabelle dargestellt:

| Mitarbeiter in Forschung und Technik    |      |      |      |      |      |
|-----------------------------------------|------|------|------|------|------|
|                                         | 2006 | 2007 | 2008 | 2009 | 2010 |
| Zentrale Forschung und Entwicklung      | 27   | 32   | 37   | 38   | 42   |
| Technik und Innovation                  | 146  | 198  | 243  | 260  | 262  |
| Kundenbezogene Entwicklung und Beratung | 512  | 476  | 474  | 438  | 444  |
| Gesamt                                  | 685  | 706  | 754  | 736  | 748  |

Die hohe Bedeutung der Bereiche kundenbezogene Entwicklung und Beratung sowie Technik und Innovation spiegelt sich nicht nur in den Kosten, sondern auch in der Zahl der Mitarbeiter wider.

Die große Kompetenz unserer Mitarbeiter in der Forschung und Technik ist ein entscheidender Wettbewerbsfaktor. Dementsprechend hoch sind die Anforderungen an die Qualifikation. Rund 70% der Mitarbeiter in unseren technischen Kompetenzzentren verfügen über einen Hochschulabschluss; 8% haben promoviert (siehe folgende Tabelle). Intensive Weiterbildung und systematischer Wissensaustausch in konzernweiten Expertennetzwerken stellen ein hohes Qualifikationsniveau sicher.

| Zusammengefasster Lagebericht              |                                     |
|--------------------------------------------|-------------------------------------|
| Kernaktivitäten und Organisationsstruktur  | Nachhaltigkeit bei HeidelbergCement |
| Strategie, Unternehmenssteuerung und Ziele | Mitarbeiter und Gesellschaft        |
| Geschäftsverlauf 2010                      | Umweltvorsorge                      |
| Weitere Angaben                            | <b>Forschung und Technik</b>        |
| Risikobericht                              | Ausblick                            |

#### Qualifikationsprofil der Mitarbeiter im Bereich Forschung und Technik

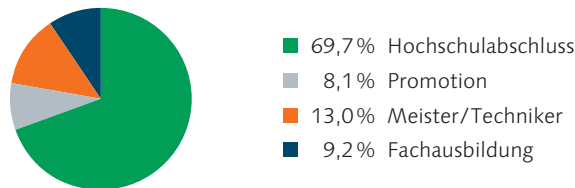

## Forschungskooperationen

Intensive Kooperationen mit Instituten und Universitäten auf lokaler und globaler Ebene ergänzen die eigenen Forschungs- und Entwicklungsaktivitäten. Auf globaler Ebene ist dies insbesondere die Beteiligung an dem weltweit bedeutendsten Forschungsverbund im Zementsektor „Nanocem“. In ihm sind Unternehmen aus dem Zement- und Zusatzmittelbereich und 24 führende Universitäten in Europa beteiligt, die gemeinsam Grundlagenforschung betreiben, die durch öffentliche Fördermittel unterstützt wird. Bei der Produktentwicklung bevorzugen wir bilaterale Kooperationen mit einzelnen Universitäten, um unsere eigenen Kompetenzen zielgerichtet zu ergänzen. Die Gesamtaufwendungen für die Auftragsforschung liegen deutlich unter 1 Mio EUR im Jahr und werden daher nicht separat ausgewiesen; sie sind in der Rubrik „Zentrale Forschung und Entwicklung“ in der Tabelle auf Seite 108 enthalten. Abgesehen von den genannten Forschungskooperationen hat 2010 kein Zukauf von Forschungs- und Entwicklungs-Know-how stattgefunden.

## Wesentliche Projekte sowie Forschungs- und Entwicklungsergebnisse

### Verbesserung der Kosteneffizienz und des gebundenen Kapitals

Im Berichtsjahr haben unsere Werke weltweit gemeinsam mit den technischen Zentren Einsparpotenziale systematisch genutzt. Neben der kontinuierlichen Optimierung des Strom- und Brennstoffverbrauchs der Produktionsanlagen und der Substitution von Primär- durch Sekundärroh- und -brennstoffe lag ein weiterer Schwerpunkt auf der Verringerung der Instandhaltungsaufwendungen und der Reduzierung des gebundenen Kapitals durch gezielte, auf Langfristigkeit ausgerichtete Projekte.

Insbesondere in den Wachstumsmärkten konnten wir die Primärbrennstoffsubstitution steigern. Auch die Einführung neuer Produkte, darunter neue Kompositzemente, half, abgesehen von der Reduzierung von CO<sub>2</sub>-Emissionen, Kostenvorteile konsequent zu nutzen. 2010 haben wir erfolgreich das Programm „Operational Excellence“ eingeführt, mit dem wir durch die Optimierung der Produktionsanlagen die Energieeffizienz und Produktion unserer Zementwerke bis Ende 2013 nachhaltig verbessern werden.

Das bereits 2008 gestartete Programm „Maintenance Improvement Project“ zur Standardisierung der Instandhaltungsorganisationen und Reduzierung der Instandhaltungskosten unserer Produktionsanlagen war 2010 erneut über die internen Erwartungen hinaus erfolgreich. Begleitet wurde das Programm im Berichtsjahr von einem Zusatzprojekt, das sich auf die Reduzierung des gebundenen Kapitals für Ersatzteile konzentriert. Innerhalb nur eines Jahres konnte das gebundene Kapital in diesem Bereich um mehr als 10% gesenkt werden. Die damit einhergehende Steigerung der Wirt-



schaftlichkeit unserer Betriebsstätten ist gerade aufgrund der hohen Kapitalbindung in unserem Industriesektor von großer Bedeutung und ein wesentlicher Wettbewerbsvorteil.

### **Neue, erweiterte und modernisierte Produktionsstätten**

Trotz des weltweit wirtschaftlich schwierigen Umfelds im Berichtsjahr haben wir neben zahlreichen Optimierungs- und Erweiterungsinvestitionen in bestehenden Anlagen auch einige strategische Investitionen in Wachstumsmärkten begonnen oder abgeschlossen. Detaillierte Angaben dazu befinden sich im Abschnitt Investitionen auf Seite 68.

Ein Investitionsschwerpunkt lag im Berichtsjahr auf der Luftreinhaltung und Energierückgewinnung. Nach erfolgreicher Inbetriebnahme von Kraftwerken in China, die auf Abwärmenutzungstechnologie beruhen, haben wir ein vergleichbares Projekt in unserem Werk Çanakkale in der Türkei gestartet.

Auch 2010 wurde die Einkaufsstrategie des „low cost country sourcing“ bei allen Investitionen in Produktionsanlagen konsequent umgesetzt. Diese Strategie zeigt nicht nur deutlich positive Effekte bei den Anfangsinvestitionen, sondern durch möglichst weitgehende Standardisierung auch bei den Folgekosten für Instandhaltung.

### **Zemente mit reduziertem Klinkeranteil**

Bei der Entwicklung von Zementen mit reduziertem Klinkeranteil haben wir weitere Fortschritte erzielt und damit CO<sub>2</sub>-Emissionen gesenkt und letztlich Kosten gespart. Vorreiter sind hier insbesondere unsere Werke in den Niederlanden und Polen. In beiden Ländern wurde der Klinkeranteil auf alle Zementsorten bezogen mittlerweile auf unter 65 % gesenkt – ein Spitzenwert im internationalen Vergleich. Diese Leistung ist insbesondere in Polen bemerkenswert, da Hüttensand, ein Nebenprodukt der Stahlindustrie und früher das Hauptsubstitut für Klinker, nur in begrenzten Mengen zur Verfügung steht. Durch die Entwicklung und erfolgreiche Markteinführung von zwei neuen Zementsorten unter Verwendung von Flugaschen, die 2010 auf Anhieb ein Absatzvolumen von rund 1 Mio t erreichten, konnten wir diesen Engpass mehr als ausgleichen.

In Belgien und den Niederlanden werden im Rahmen der „Eco-Responsibility Campaign 2010“ in enger Kooperation mit Kunden sehr klinkerarme CEM II/B und CEM III Zemente auch für hochwertige Anwendungen wie die Fertigteilproduktion optimiert.

Für unsere Werke in Ghana haben wir einen völlig neuen Kompositzement auf Basis von Dolomit entwickelt. Aufgrund der zur Neige gehenden Vorräte an eigenem Kalkstein hätten wir künftig den Rohstoff für die Herstellung des Portlandkalksteinzements importieren müssen. Nach umfangreichen Untersuchungen und Optimierungen stellen wir nun auf Basis des lokal verfügbaren Dolomits einen gleichwertigen Zement her, so dass auf den kostenintensiven Import von Kalkstein verzichtet werden kann.

### **Innovative Bindemittel und Betone**

Bei der Entwicklung und Markteinführung von Spezialbindemitteln haben wir ebenfalls Erfolge erzielt. Wir haben in verschiedenen europäischen Märkten Zemente speziell für die Herstellung von Spritzbeton für den Tunnelbau optimiert, der bei großen Infrastrukturprojekten zum Einsatz kommt. Wir haben bereits erste Projekte im Rahmen von ICE-Neubaustrecken in Deutschland akquiriert. Der Spezialzement ChronoCem® IR ist schon erfolgreich im Markt eingeführt. Er ermöglicht die schnelle Reparatur von Lande- und Startbahnen, Straßen und Autobahnen oder Logistikzentren über Nacht. Trotz oftmals hoher Anforderungen an die Bauausführung und schwieriger Rahmenbedingungen hat sich das System als sehr robust erwiesen.

| Zusammengefasster Lagebericht              |                                     |
|--------------------------------------------|-------------------------------------|
| Kernaktivitäten und Organisationsstruktur  | Nachhaltigkeit bei HeidelbergCement |
| Strategie, Unternehmenssteuerung und Ziele | Mitarbeiter und Gesellschaft        |
| Geschäftsverlauf 2010                      | Umweltvorsorge                      |
| Weitere Angaben                            | Forschung und Technik               |
| Risikobericht                              | Ausblick                            |

2010 wurden zahlreiche Projekte mit weißem und grauem TioCem® realisiert. Betonprodukte, wie beispielsweise Pflastersteine, die mit diesem photokatalytisch aktiven Zement hergestellt werden, reduzieren Luftschadstoffe wie Stickoxide und weisen eine geringere Oberflächenverschmutzung und damit bessere Ästhetik auf. In den USA und in vielen europäischen Ländern gibt es mittlerweile verschiedene Anwendungen, die auch die Aufmerksamkeit des Europäischen Parlaments erregt haben, das sich die Funktionen vorstellen ließ.

Mit Powercrete® wurde ein hochwärmeleitfähiger Beton als Bettungs- und Verfüllmaterial für erdverlegte Hoch- und Höchstspannungskabel entwickelt. Die hohen Temperaturen der Kabeloberfläche können Schäden und damit kostenintensive Reklamationen verursachen. Durch die Verwendung des hochwärmeleitfähigen Spezialbetons wird die entstehende Wärme wesentlich besser abgeleitet. Damit kann die maximale Strombelastbarkeit der Kabel um bis zu 40% gesteigert werden.

In verschiedenen Ländern beteiligen wir uns auch an der Entwicklung von Sanierungskonzepten für kontaminierte Böden und Hafensedimente. Unterstützt durch öffentliche Fördermittel, beispielsweise in Skandinavien und Großbritannien, werden Systeme auf Zementbasis entwickelt, die die dauerhafte Einbindung von Schadstoffen in den Boden sicherstellen. Damit erschließen wir neue Absatzmärkte für unsere Baustoffe.

## Ausblick

Im Folgenden gehen wir auf die erwartete zukünftige Entwicklung von HeidelbergCement und des unternehmerischen Umfelds in den Jahren 2011 und 2012 ein. In diesem Zusammenhang weisen wir darauf hin, dass dieser Geschäftsbericht zukunftsgerichtete Aussagen enthält, die auf den derzeit verfügbaren Informationen sowie den gegenwärtigen Annahmen und Prognosen der Unternehmensleitung von HeidelbergCement beruhen. Solche Aussagen sind naturgemäß mit Risiken und Unsicherheiten behaftet und können daher deutlich von der tatsächlich eintretenden Entwicklung abweichen. HeidelbergCement übernimmt keine Verpflichtung und beabsichtigt auch nicht, die in diesem Geschäftsbericht gemachten zukunftsgerichteten Aussagen zu aktualisieren.

## Wirtschaftliches Umfeld

### Gesamtwirtschaftliche Entwicklung

Nachdem das Jahr 2010 im Zeichen der Rückkehr der meisten Industriestaaten zu einem zum Teil deutlich positiven Wirtschaftswachstum stand, wird für das laufende Jahr 2011 insgesamt mit einer Verlangsamung der Erholung gerechnet. Der internationale Währungsfonds (IWF) prognostiziert für die Jahre 2011 und 2012 ein weltweites Wirtschaftswachstum von 4,4% bzw. 4,5% im Vergleich zu 5,0% im Jahr 2010. Dabei erwartet der IWF, dass die Unterschiede bei den Wachstumsraten, insbesondere zwischen den Schwellenländern in Asien und Afrika auf der einen Seite und den Industrienationen in Nordamerika und Europa auf der anderen Seite, weiterhin bestehen bleiben. Auch für die Preissteigerungsraten für Konsumgüter werden unterschiedliche Entwicklungen erwartet. Während sich die Teuerungsrate in den reifen Märkten nach 1,5% im Jahr 2010 bei 1,6% für die Jahre 2011 und 2012 stabilisieren soll, wird für die Schwellenländer eine Rate von 6,0% für 2011 und ein Rückgang auf 4,8% für 2012 vorhergesagt. Bei den Rohstoffpreisen rechnet der IWF für das Jahr 2011 mit einem weiteren Anstieg, insbesondere für Öl, und einer Stabilisierung im Jahr 2012.

In Asien wird China weiterhin der Motor der industriellen Entwicklung bleiben. Der IWF erwartet für die Schwellenländer in Asien einen leichten Rückgang des Wachstums von 9,3 % im Jahr 2010 auf 8,4 % in den Jahren 2011 und 2012, wobei das Wirtschaftswachstum in China ebenfalls leicht von 10,3 % auf 9,6 % und 9,5 % zurückgehen soll. Positiv wird auch die weitere Entwicklung in Afrika gesehen, insbesondere in den Ländern südlich der Sahara, für die mit einer weiteren Steigerung der Wachstumsraten von 5,0 % 2010 auf 5,5 % im Jahr 2011 und auf 5,8 % im Jahr 2012 gerechnet wird.

Im Gegensatz dazu wird für die reifen Märkte eine Verlangsamung der wirtschaftlichen Erholung erwartet. Nach einem deutlichen Anstieg, von niedriger Basis aus, um 3,0 % im Jahr 2010 prognostiziert der IWF für die Jahre 2011 und 2012 ein jährliches Wachstum von 2,5 %. Die für HeidelbergCement wichtigen Märkte in den USA, Großbritannien, Deutschland und Kanada werden ihre wirtschaftliche Erholung laut Prognose des IWF in den Jahren 2011 und 2012 fortsetzen. Im Jahr 2011 sollen demnach die USA von diesen Ländern das höchste Wirtschaftswachstum mit einer Rate von 3,0 % aufweisen, gefolgt von Kanada mit 2,3 %, Deutschland mit 2,2 % und Großbritannien mit 2,0 %.

Das Eintreten der wirtschaftlichen Prognosen für die kommenden zwei Jahre ist mit einigen Unsicherheiten behaftet. Die reifen Märkte stehen vor der Herausforderung, die Arbeitslosigkeit nach der Krise zu bekämpfen, aber gleichzeitig auch, die öffentliche Verschuldung durch konsequentes Sparen zu entlasten. Die Wachstumsmärkte der Schwellenländer sind steigendem Inflationsdruck ausgesetzt. Die Preise für Energie wurden Anfang 2011 durch Naturkatastrophen und Konflikte in erdölproduzierenden Ländern zusätzlich angetrieben. Für das weitere wirtschaftliche Wachstum wird insbesondere die Entwicklung der Rohstoffpreise, der Preise für Nahrungsmittel, der Arbeitslosigkeit in den reifen Märkten und der Zinsen ausschlaggebend sein.

### **Branchenentwicklung**

Die unterschiedliche Entwicklung des Wirtschaftswachstums spiegelt sich in den regional sehr verschiedenen Erwartungen für die Nachfrage nach Baustoffen wider. Der amerikanische Zementverband PCA rechnet in seiner Prognose von November 2010 für die Jahre 2011 und 2012 mit einer Zunahme des weltweiten Zementabsatzes um 5,8 % bzw. 5,1 %. Getragen wird diese Nachfrageentwicklung von den Schwellenländern mit Wachstumsraten von 6,5 % und 5,2 %. Laut PCA sollen 55 % des weltweit produzierten Zements im Jahr 2012 in China verbraucht werden, weitere 8 % im zweitgrößten Markt Indien. Für Nordamerika wird nur mit einer langsamen Zunahme der Nachfrage nach Zement von einem zudem niedrigen Niveau mit Wachstumsraten von 2,4 % im Jahr 2011 und 4,0 % im Jahr 2012 gerechnet. In Europa wird eine regional sehr unterschiedliche Entwicklung der Nachfrage nach Baustoffen erwartet. Für die von der Immobilienkrise besonders betroffenen Länder Spanien, Portugal und Irland rechnet Euroconstruct in der Prognose von Dezember 2010 mit einem weiteren Rückgang des Zementverbrauchs im Jahr 2011 und einer Stabilisierung 2012. Für die Länder Nordeuropas, wie Schweden und Norwegen, die sich bereits im Jahr 2010 durch ein besonders starkes Wirtschaftswachstum auszeichneten, werden hingegen hohe Zement-Wachstumsraten von 6,0 % und mehr erwartet. Der Verbrauch in den Benelux-Staaten und Großbritannien soll im gleichen Zeitraum stagnieren. Für Deutschland prognostiziert der Bundesverband der Deutschen Zementindustrie (BDZ) einen leichten Anstieg der Zementlieferungen für 2011, insbesondere auch aufgrund der Erholung des privaten Wohnungsbaus.

Ebenso wie die gesamtwirtschaftlichen Prognosen ist auch die Entwicklung der Nachfrage nach Baustoffen in den Jahren 2011 und 2012 mit Unsicherheiten behaftet. Der zeitliche Ablauf und die Stärke der weiteren Erholung in den reifen Märkten wird mit Auslaufen der Infrastrukturförder-

| Zusammengefasster Lagebericht              |                                     |
|--------------------------------------------|-------------------------------------|
| Kernaktivitäten und Organisationsstruktur  | Nachhaltigkeit bei HeidelbergCement |
| Strategie, Unternehmenssteuerung und Ziele | Mitarbeiter und Gesellschaft        |
| Geschäftsverlauf 2010                      | Umweltvorsorge                      |
| Weitere Angaben                            | Forschung und Technik               |
| Risikobericht                              | Ausblick                            |

programme und den sich intensivierenden Bemühungen zur Haushaltskonsolidierung zunehmend von der Erholung im privaten Wohnungsbau und im Wirtschaftsbau abhängen. Diese wiederum setzt eine weiter positive Wirtschaftsentwicklung, sinkende Arbeitslosenzahlen und erschwingliche Immobilienfinanzierungen voraus. In den Wachstumsmärkten der Schwellenländer spielt ebenfalls die Fortsetzung eines soliden Wirtschaftswachstums eine große Rolle sowie das für den privaten Wohnungsbau verfügbare Einkommen, das insbesondere auch von der Entwicklung der lokalen Lebensmittelpreise und damit von der Inflation abhängt.

## Erwartete Ertragslage

### Umsatz

Auf der Basis des gesamtwirtschaftlichen und branchenspezifischen Ausblicks für die Baustoffindustrie und der speziellen Wachstumsaussichten für die Märkte, in denen HeidelbergCement tätig ist, wird ein moderater Anstieg des Umsatzes im Jahr 2011 gegenüber dem Vorjahr erwartet. Dazu tragen auch die Kapazitätserweiterungen bei, die 2010 bereits durchgeführt wurden und für 2011 geplant sind. Dazu gehören insbesondere der Kauf der Anteilmehrheit an den Zementwerken in der Demokratischen Republik Kongo und in der russischen Republik Baschkortostan, die seit dem Herbst 2010 in den Konsolidierungskreis einbezogen sind, sowie das neue Zementwerk TulaCement in Russland, das Ende Mai 2011 den Betrieb aufnehmen soll. Für Zement, Zuschlagstoffe und Transportbeton rechnen wir mit steigenden Absatzzahlen, während der Absatz von Asphalt aufgrund des Auslaufens staatlicher Infrastrukturprogramme voraussichtlich rückläufig sein wird. Einen Teil des prognostizierten Kostenanstiegs planen wir, über Preiserhöhungen an unsere Kunden weiter zu geben. Der Umsatzprognose für 2011 wurden im Vergleich zu 2010 nahezu stabile Wechselkurse gegenüber dem Euro zugrunde gelegt.

### Konzerngebiete

Im Konzerngebiet West- und Nordeuropa erwarten wir insgesamt eine weitere Erholung der Nachfrage und damit steigende Absatzmengen für Zement und Zuschlagstoffe, die vor allem von der starken Entwicklung in Skandinavien und Deutschland angetrieben wird. In Großbritannien gehen wir aufgrund der Sparmaßnahmen der Regierung von einer eher stabilen Entwicklung aus, während wir in den Benelux-Staaten infolge der schwachen Bauwirtschaft mit weiterem Preisdruck rechnen.

In unserem Konzerngebiet Osteuropa-Zentralasien gehen wir von einer uneinheitlichen Entwicklung aus. Aufgrund der schwierigen wirtschaftlichen Rahmenbedingungen in Ungarn und Rumänien rechnen wir in diesen Ländern mit einer schwachen Entwicklung des Absatzes. In der Tschechischen Republik erwarten wir, dass sich die Nachfrage stabilisiert und in der zweiten Jahreshälfte 2011 zum Wachstum zurückkehrt. Für Polen gehen wir von einer weiteren Erholung und steigenden Absatzmengen aus. In den östlichen Ländern Osteuropas und in Zentralasien erwarten wir ebenfalls steigende Zementlieferungen und eine Preiserholung.

In Nordamerika rechnen wir aufgrund der anhaltenden Investitionen in den Straßenbau in den USA mit einer leichten Mengenzunahme bei Zement und Zuschlagstoffen. Für diese beiden Kernprodukte planen wir Preiserhöhungen, um die Margenerosion im Jahr 2010, die gestiegenen Kosten und die Aufwendungen im Zusammenhang mit dem Gesetz über Emissionsnormen für gefährliche Luftschadstoffe (NESHAP) auszugleichen. In Kanada gehen wir davon aus, dass sich die Baustoffnachfrage, die von der Rohstoffindustrie in Alberta, Saskatchewan und Manitoba gefördert wird, weiter gut entwickelt.



In den Konzerngebieten Asien-Pazifik und Afrika-Mittelmeerraum erwarten wir eine anhaltend positive Nachfrageentwicklung mit starkem Wachstum in China, Indonesien, Indien und Bangladesch und einer stabilen Entwicklung in Australien. In unseren afrikanischen Kernmärkten in Tansania, Gabun, Ghana und der Demokratischen Republik Kongo rechnen wir mit einer im Vergleich zum allgemeinen Wirtschaftswachstum in der Region überdurchschnittlichen Nachfragesteigerung. In Spanien hingegen erwarten wir eine weitere Abschwächung der Nachfrage nach Baustoffen. Insgesamt gehen wir für beide Konzerngebiete von einem Anstieg der Absatzmengen von Zement und Zuschlagstoffen aus. Für Indien gehen wir von einer Fortsetzung des Preis- und Margendrucks aus, aufgrund des kontinuierlichen Aufbaus neuer Kapazitäten, insbesondere im Süden des Landes, sowie steigender Energiekosten.

### **Kosten**

Angesichts der steigenden Energie- und Rohstoffpreise sowie der zunehmenden Inflationstendenzen weltweit erwartet HeidelbergCement für das Jahr 2011 eine Erhöhung der Kostenbasis für Elektrizität, Brenn- und Rohstoffe sowie Personal. Nicht zuletzt um diesem Kostenanstieg zu begegnen, haben wir mehrere Maßnahmen zur weiteren Optimierung der Kosten und Steigerung des Cashflows in unserem neuen Programm für „Financial and Operational Excellence – FOX 2013“ gebündelt. Schwerpunkt des Programms ist die Effizienzsteigerung in den Kernaktivitäten Zuschlagstoffe und Zement konzernweit. Bei der Zementherstellung ist insbesondere eine nachhaltige Reduktion der Energiekosten im Rahmen des Programms „Operational Excellence“ geplant. Bei den Zuschlagstoffen wollen wir mit einem umfassenden, weltweiten Benchmarking und Portfoliooptimierungen eine nachhaltige Verbesserung der Margen und „Best Practice“ erreichen. Für die nächsten drei Jahre planen wir mit „FOX 2013“ Maßnahmen zur Steigerung des Cashflows um insgesamt 600 Mio EUR. Davon wollen wir 200 Mio EUR 2011, 160 Mio EUR 2012 und 240 Mio EUR 2013 erreichen. In diesen Beträgen enthalten sind ergebniswirksame Einsparungen bei Finanzierungs- und operativen Kosten in Höhe von 35 Mio EUR 2011, 110 Mio EUR 2012 und 200 Mio EUR 2013.

Für das Jahr 2011 erwarten wir aufgrund der im Vergleich zum Vorjahr geringeren Verschuldung und der Verbesserung der Margen für unsere syndizierte Kreditlinie einen entsprechenden Rückgang der Finanzierungskosten.

### **Ergebnis**

Im Jahr 2011 rechnet HeidelbergCement mit einer moderaten Steigerung des operativen Ergebnisses basierend auf der Annahme, dass die prognostizierten Kostensteigerungen durch Sparmaßnahmen und Preiserhöhungen kompensiert werden können. Aufgrund der erwarteten Verbesserung des operativen Ergebnisses und der niedrigeren Finanzierungskosten wird auch mit einer Steigerung des Ergebnisses vor Steuern gerechnet.

### **Prognose 2012**

Für das Jahr 2012 geht HeidelbergCement von einer weiteren Erhöhung von Umsatz und Ergebnis aus, basierend auf einem anhaltenden weltweiten Wirtschaftswachstum und einem damit verbundenen Anstieg der Nachfrage nach Baustoffen.

### **Dividende**

Wie im Jahr 2010 werden wir auch für die kommenden beiden Jahre die Höhe der Dividende an der Entwicklung des Verschuldungsgrads und des operativen Ergebnisses des HeidelbergCement Konzerns ausrichten und dabei die weitere gesamtwirtschaftliche Entwicklung berücksichtigen.

| Zusammengefasster Lagebericht              |                                     |
|--------------------------------------------|-------------------------------------|
| Kernaktivitäten und Organisationsstruktur  | Nachhaltigkeit bei HeidelbergCement |
| Strategie, Unternehmenssteuerung und Ziele | Mitarbeiter und Gesellschaft        |
| Geschäftsverlauf 2010                      | Umweltvorsorge                      |
| Weitere Angaben                            | Forschung und Technik               |
| Risikobericht                              | Ausblick                            |

Mittelfristig streben wir eine branchentypische Ausschüttungsquote von 30 % bis 35 % bezogen auf den Anteil der Gruppe am Jahresüberschuss an.

## Investitionen

Wie bereits 2010 wird HeidelbergCement auch künftig strikte Ausgabendisziplin bei den Investitionen wahren. Die Reduzierung der Verschuldung steht weiterhin im Vordergrund. Gleichzeitig setzt das Unternehmen seine gezielten Investitionen in zukünftiges Wachstum insbesondere im Bereich Zement in den Schwellenländern Asiens, Afrikas und Osteuropas fort. HeidelbergCement strebt an, den Anteil seiner Zementkapazitäten in diesen Märkten von derzeit 59 % langfristig auf 67 % der Gesamtkapazität zu steigern.

Den Neubau des russischen Zementwerks TulaCement mit einer Zementkapazität von 2 Mio t werden wir voraussichtlich Ende Mai 2011 fertig stellen und von dort künftig den Großraum Moskau beliefern. Die Kapazitätserweiterung im polnischen Zementwerk Górażdze schreitet planmäßig voran. Die Erweiterung der Klinkerkapazität des Werks um etwa 30 % auf 12.000 t Klinker pro Tag wird voraussichtlich Mitte 2011 abgeschlossen. Darüber hinaus umfasst das Projekt den Bau einer neuen Zementmühle bis 2012. Insgesamt wird damit die Zementkapazität des Werks um 1,2 Mio t auf 5,3 Mio t steigen.

In Indonesien planen wir nach der 2010 erfolgten Erweiterung der Zementmahlkapazität im Werk Cirebon die Errichtung einer weiteren Zementmahanlage im Werk Citeureup mit einer Kapazität von 2 Mio t; der Baubeginn ist für 2011 und die Inbetriebnahme für Anfang 2013 vorgesehen. Aufgrund der guten Wachstumsperspektiven erweitern wir derzeit auch in Zentralindien unsere Zementkapazitäten um 2,9 Mio t. Die Inbetriebnahme der neuen Anlagen in den Werken Damoh und Jhansi ist im ersten Quartal 2012 vorgesehen. HeidelbergCement wird dann in Indien über eine Gesamtkapazität von 6 Mio t verfügen. Ebenso ist die Inbetriebnahme einer weiteren Zementmühle mit 0,8 Mio t Kapazität im Mahlwerk Chittagong für Ende 2011 vorgesehen, um von dem rasch wachsenden Zementmarkt in Bangladesh zu profitieren.

Ein weiterer Investitionsschwerpunkt liegt auf dem Ausbau unserer Zementkapazitäten in Afrika. Ein wichtiger Meilenstein hierzu war die im Mai 2010 eingegangene Partnerschaft mit IFC, einem Mitglied der Weltbank-Gruppe, und deren Finanzpartnern. Diese haben sich verpflichtet, eine mittelbare Minderheitsbeteiligung am Afrikageschäft von HeidelbergCement zu erwerben, und werden dafür bis zu 180 Mio USD einbringen. HeidelbergCement wird im Gegenzug diese Mittel in den Ausbau der Zementkapazitäten in den Ländern südlich der Sahara investieren. In Liberia wurde bereits mit dem Bau einer neuen Zementmühle begonnen, deren Inbetriebnahme für das erste Quartal 2012 vorgesehen ist. Geplant ist außerdem der Bau einer neuen Zementmühle in Ghana und wir prüfen die Optionen für Kapazitätserweiterungen in anderen afrikanischen Ländern. Auch in der Demokratischen Republik Kongo, wo wir im September 2010 die Mehrheit am Zementgeschäft von Forrest Group erworben haben, wollen wir weiter wachsen. Daher beabsichtigen wir, die Kapazität der drei Zementwerke, die derzeit bei rund 500.000 t Zement liegt, in den kommenden Jahren auf über 1,4 Mio t zu erhöhen.

## Erwartete Finanzierung

Dank der erfolgreichen Refinanzierungsmaßnahmen im Bank- und Kapitalmarkt im Jahr 2010 verfügt HeidelbergCement über eine stabile, langfristige Finanzierungsstruktur und ein ausgewogenes Fälligkeitenprofil (siehe nachfolgende Grafik). HeidelbergCement hat im Jahr 2011 keine

signifikanten Fälligkeiten im Bank- oder Kapitalmarkt, so dass sich die Refinanzierungserfordernisse auf kleinere Geldmarktfälligkeiten beschränken werden, die wir entweder durch Prolongation der entsprechenden Papiere oder durch Inanspruchnahme freier Banklinien refinanzieren. Die im Januar 2012 fällige Euroanleihe über 1 Mrd EUR werden wir je nach Situation an den Kapitalmärkten opportunistisch durch vorhandene Liquidität, Inanspruchnahme von Kreditlinien oder Erlösen aus Neuemissionen am Bank-, Geld- oder Kapitalmarkt refinanzieren.

Die folgende Grafik zeigt das Fälligkeitsprofil von HeidelbergCement am 31. Dezember 2010:

**Fälligkeitsprofil zum 31. Dezember 2010 (Mio EUR)**

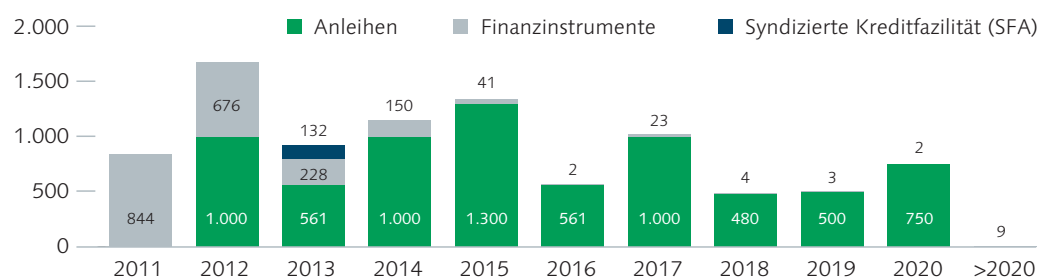

Zum Jahresende 2010 verfügen wir über eine Liquiditätsreserve, bestehend aus liquiden Mitteln, Wertpapierbeständen und vertraglich zugesicherten Kreditlinien, von 3,5 Mrd EUR (siehe Kapitel Konzern-Finanzmanagement auf Seite 75). Ferner stehen uns Rahmenprogramme im Geld- und Kapitalmarkt zur Verfügung (Commercial Paper Programm über 1 Mrd EUR und EMTN-Programm über 10 Mrd EUR), die die Emission entsprechender Papiere ohne größeren zeitlichen Vorlauf ermöglichen.

Es ist unser Ziel, die Finanzrelationen in den kommenden Geschäftsjahren weiter zu verbessern, um die Voraussetzungen für weitere Anhebungen der Bonitätseinschätzung der Ratingagenturen zu schaffen. Insbesondere wollen wir die Relation von Nettoverschuldung zu operativem Ergebnis vor Abschreibungen auf ein Verhältnis von unter 2,8x absenken (31. Dezember 2010: 3,6x). Eine Bewertung im Investment Grade bleibt unser erklärtes Ziel, da günstige Refinanzierungsmöglichkeiten im Bank-, Geld- und Kapitalmarkt bei der Kapitalintensität unseres Geschäftes einen komparativen Wettbewerbsvorteil schaffen.

## Mitarbeiter und Gesellschaft

Die konsequente Ausdehnung unserer konzernweiten Kernprozesse im Personalbereich wie beispielsweise Performance-Management, Zielvereinbarung, Mitarbeiterdialog oder individueller Entwicklungsplan auf die mittlere und untere Führungsebene und auf die Nachwuchsführungskräfte bleibt ein Schwerpunkt in den kommenden Jahren. Bei unserem IT-Optimierungsprojekt HR GLOBE haben wir mit der Implementierungsphase begonnen. Bis April 2012 sollen die Prozesse Leistungsmanagement, Vergütung und Nachfolgeplanung komplett IT-unterstützt durchgeführt werden.

Das neue Management Ausbildungsprogramm in Zusammenarbeit mit Duke Corporate Education bildet den Schwerpunkt unserer Trainingsmaßnahmen auf Konzernebene in den Jahren 2011 bis 2014. Unsere Nachwuchsförderprogramme wie z.B. das Traineeprogramm für neue Mitarbeiter aus den GUS-Ländern werden wir in den kommenden Jahren weiter ausbauen. Das bestehende

| Zusammengefasster Lagebericht              |                                     |
|--------------------------------------------|-------------------------------------|
| Kernaktivitäten und Organisationsstruktur  | Nachhaltigkeit bei HeidelbergCement |
| Strategie, Unternehmenssteuerung und Ziele | Mitarbeiter und Gesellschaft        |
| Geschäftsverlauf 2010                      | Umweltvorsorge                      |
| Weitere Angaben                            | Forschung und Technik               |
| Risikobericht                              | Ausblick                            |

Engineer-in-Training-Programm haben wir um ein Anschlussprogramm ergänzt: in einem Zeitraum von vier bis fünf Jahren werden unsere Talente gezielt auf leitende Positionen im technischen Bereich im In- und Ausland vorbereitet.

Die Ergebnisse einer weltweiten Führungskräftebefragung 2010 zum Arbeits- und Gesundheitsschutz haben ein deutliches Bekenntnis der Linienmanager zu diesen Themen gezeigt. Dies ist ein wichtiger Erfolg in unserem Bemühen, Unfälle und Gesundheitsschäden zu vermeiden, auf dem wir auch künftig weiter aufbauen werden. Obwohl wir uns in den letzten Jahren verbessern konnten, ereignen sich immer noch viel zu viele Unfälle mit Verletzten und zum Teil auch Toten. Für uns ist daher der Arbeits- und Gesundheitsschutz im Jahr 2011 weiter ein zentrales Thema. Unsere Ziele für 2012 sind: keine Todesfälle und Reduzierung der Unfälle mit Ausfallzeiten um 50% bezogen auf das Jahr 2008. Den Schwerpunkt legen wir auf die gewissenhafte Umsetzung unserer Konzernleitlinien sowie auf verhaltensändernde Maßnahmen, um insbesondere Unfälle auf Grund menschlichen Fehlverhaltens zu verhindern.

In den nächsten beiden Jahren werden wir neue Konzernleitlinien entwickeln. Bis Ende 2014 wollen wir die notwendigen Maßnahmen für die Umsetzung der 2010 eingeführten Konzernleitlinie „Sicheres Fahren“ durchführen. Im Jahr 2011 planen wir die Einführung einer konzernweiten Sicherheitswoche und die Ausarbeitung von „Golden Rules“.

HeidelbergCement ist sich seiner gesellschaftlichen Verantwortung bewusst. Wir werden auch in Zukunft die Beziehungen zu den Menschen im Umfeld unserer Standorte pflegen und Projekte entsprechend unserer Corporate Citizenship Richtlinie unterstützen. All unsere Maßnahmen sollen positive Ergebnisse zum Wohle der Gesellschaft erzielen. Darüber hinaus wollen wir durch Transparenz, offene Kommunikation und Kooperation gegenseitiges Vertrauen und partnerschaftliche Zusammenarbeit fördern.

## Umweltvorsorge

In den kommenden beiden Jahren werden wir die Umsetzung des Nachhaltigkeitsprogramms 2020 weiter vorantreiben. Bis zum Jahr 2012 haben wir uns dafür Zwischenziele in sechs strategischen Themenbereichen gesetzt (siehe Kapitel Nachhaltigkeit auf Seite 97), deren Einhaltung wir kontrollieren werden.

Wir werden das systematische Biodiversitätsmanagement weiter ausbauen und mit Hilfe einer speziellen Leitlinie auch auf die Abbaustätten unserer nordamerikanischen Standorte ausdehnen.

Unsere Verpflichtung zu nachhaltigem Bauen und nachhaltigen Produktinnovationen ist für uns auch weiterhin ein wichtiges Thema. Darüber hinaus werden wir das Recycling von Zuschlagstoffen fördern. Als Mitglied der Cement Sustainability Initiative (CSI) beteiligt sich HeidelbergCement an der Entwicklung eines globalen Zertifizierungssystems für nachhaltig produzierten Beton. Es ist auch unser Ziel, den Einsatz von Abfallstoffen als Brennstoffe kontinuierlich zu erhöhen und gleichzeitig in energieeffiziente Prozesse und erneuerbare Energien zu investieren. Die nachhaltige Nutzung überwachungsbedürftiger Abfälle in unseren Zementöfen werden wir Dank eines neuen Aufbereitungswerks in Belgien und einer Zerkleinerungsanlage in Indonesien erhöhen. Neue oder modernisierte Anlagen in unseren Zementwerken in Europa, der Türkei, in China, USA und Afrika sorgen dafür, dass wir auch weiterhin vermehrt Biomasse und Reststoffe aus der Landwirtschaft ohne Rückstände verwerten können.

Unsere bestehende Strategie zur Reduktion von CO<sub>2</sub>-Emissionen werden wir anlässlich der bevorstehenden dritten Phase des EU-Emissionshandelssystems (EU ETS), die 2013 beginnt, überarbeiten.



## Forschung und Technik

Für die kommenden Jahre planen wir einen noch stärkeren Ausbau der Forschungs- und Entwicklungsaktivitäten, um unsere Innovationskraft weiter zu erhöhen. Im Mittelpunkt wird dabei die Entwicklung von Zementsorten mit reduziertem Klinkeranteil und damit geringem CO<sub>2</sub>-Ausstoß stehen. Durch die dabei verwendeten alternativen Roh- und Brennstoffe entlasten wir nicht nur die Umwelt, sondern senken auch die Kosten.

Ein zweiter Schwerpunkt wird auf der Entwicklung hochwertiger Bindemittel und Betonanwendungen liegen, um einen höheren Nutzen für unsere Kunden und einen Mehrwert für unser Unternehmen zu erzielen.

Im Bereich Produktion werden wir das Programm „Operational Excellence“, das 2010 eingeführt wurde, weiter fortsetzen. Bis Ende 2013 werden wir durch Optimierung der Produktionsanlagen in all unseren Zementwerken Einsparpotenziale bei Energie- und Brennstoffkosten systematisch ermitteln und nutzen.

## Einschätzungen für 2011 und 2012 – Risiken und Chancen

Nach der weltweiten Rezession des Jahres 2009 ist die Weltwirtschaft 2010 wieder auf den Wachstumspfad zurückgekehrt. Die Bauindustrie in den reifen Märkten Nordamerikas und Europas hatte in der ersten Jahreshälfte 2010 noch mit den Auswirkungen der Krise in Form einer rückläufigen Nachfrage im privaten Wohnungsbau und insbesondere im Wirtschaftsbau sowie mit einem schweren und lang anhaltenden Winter zu kämpfen. Im Laufe des Jahres 2010 hat auch die Bauwirtschaft in den reifen Märkten den Tiefpunkt durchschritten und es zeichnet sich eine steigende Nachfrage aus dem privaten Wohnungsbau und eine Stabilisierung im Wirtschaftsbau ab. Gleichzeitig laufen die während der Krise begonnenen Infrastrukturprogramme im Jahr 2011 aus und führen zeitverzögert in den entsprechenden Ländern zu einem Rückgang der Aktivitäten im öffentlichen Bau, insbesondere im Jahr 2012.

### Risiken

Risiken für die weitere Entwicklung bestehen in erster Linie darin, dass sich der wirtschaftliche Aufschwung in Europa und den USA verlangsamt oder es zu einem Rückfall in eine Rezession kommt (so genanntes „double-dip“ Szenario). Die bereits getroffenen und möglichen künftigen Maßnahmen zum Schuldenabbau einzelner Staatshaushalte, zum Beispiel in den USA und Großbritannien, können sich negativ auf das Wirtschaftswachstum und damit auf die Nachfrage im Wirtschaftsbau sowie auf den Rückgang der Arbeitslosenzahlen und damit auf die Nachfrage im privaten Wohnungsbau auswirken.

Insbesondere in den USA gibt es nach dem Platzen der Immobilienblase noch eine große Zahl relativ neuer Häuser in Zwangsvollstreckung, die vom Immobilienmarkt aufgenommen werden müssen. Das Überangebot an Häusern und Wohnungen drückt auf die Preise und senkt die Nachfrage nach neuem Wohnraum. Sollte dieser Überhang nur langsam oder verzögert abgebaut werden, besteht das Risiko einer schwächer als erwarteten Erholung im privaten Wohnungsbau.

Ein weiteres Risiko für Absatz, Umsatz und Ertragslage besteht in einem stärker als erwarteten Anstieg der Inflation und eine dadurch ausgelöste Erhöhung des weltweiten Zinsniveaus. Als Folge daraus könnten sich das verfügbare Haushaltseinkommen und damit die Nachfrage im Wohnungsbau abschwächen und die Finanzierungskosten von HeidelbergCement steigen.

| Zusammengefasster Lagebericht              |                                     |
|--------------------------------------------|-------------------------------------|
| Kernaktivitäten und Organisationsstruktur  | Nachhaltigkeit bei HeidelbergCement |
| Strategie, Unternehmenssteuerung und Ziele | Mitarbeiter und Gesellschaft        |
| Geschäftsverlauf 2010                      | Umweltvorsorge                      |
| Weitere Angaben                            | Forschung und Technik               |
| Risikobericht                              | Ausblick                            |

Der Anstieg der Energie- und Brennstoffpreise seit Mitte Mai 2010 stellt ein Risiko für die Entwicklung der Ertragslage in den Jahren 2011 und 2012 dar, sofern dieser Anstieg, zum Beispiel aufgrund von regionalen Unruhen in den Ländern Nordafrikas, stärker als erwartet ausfällt oder HeidelbergCement nicht in der Lage ist, den Anstieg durch Preiserhöhungen und Effizienzsteigerungen zu kompensieren.

Schwankungen der Wechselkurse von Fremdwährungen gegenüber dem Euro stellen sowohl Risiken als auch Chancen dar. So führt beispielsweise ein Wertzuwachs des US-Dollars gegenüber dem Euro einerseits zu einer Erhöhung von Umsatz und operativem Ergebnis; andererseits steigt auch der US-Dollar-basierte Anteil der Verschuldung gemessen in Euro.

### Chancen aus der Entwicklung der Rahmenbedingungen

Im Jahr 2011 könnten sich Chancen aus einer schneller als erwarteten Erholung der Wirtschaftsräume Europas und Nordamerikas und der dadurch ausgelösten Belebung des Wirtschafts- und privaten Wohnungsbaus ergeben. Der öffentliche Bau könnte als Folge höherer Steuereinnahmen ebenfalls profitieren. Mittel- und langfristig sehen wir insbesondere Chancen für den Anstieg der Nachfrage nach Baustoffen für den Wohnungs-, Wirtschafts- und öffentlichen Bau in den Wachstumsmärkten der Schwellenländer aufgrund der steigenden Bevölkerungszahlen, einer Zunahme des Wohlstands und des anhaltenden Trends der Urbanisierung.

### Unternehmensstrategische Chancen

Auch während der Krise haben wir den Ausbau von Kapazitäten in attraktiven Wachstumsregionen fokussiert und sehr diszipliniert fortgesetzt. So haben wir etwa unsere Zementkapazität in den Wachstumsmärkten Asiens, Afrikas und Osteuropas kontinuierlich erhöht. In Indonesien haben wir 2010 zwei neue Zementmühlen in Betrieb genommen und unsere Zementaktivitäten auf die Demokratische Republik Kongo ausgedehnt. In Russland bauen wir unsere Marktposition durch die Ende 2010 erworbene Mehrheitsbeteiligung in der Republik Baschkortostan und die für Ende Mai 2011 vorgesehene Inbetriebnahme des neuen Zementwerks in Tula weiter aus. Dadurch eröffnen wir uns Chancen, von dem erwarteten Wachstum in diesen Regionen zu profitieren. Diese Wachstumsstrategie beabsichtigen wir, auch in den kommenden Jahren fortzusetzen.

### Leistungswirtschaftliche Chancen

Die konsequente und kontinuierliche Durchführung von Maßnahmen zur Effizienzsteigerung und Kostensenkung in der Produktion und die damit verbundene Realisierung von Chancen ist ein wesentlicher Bestandteil unserer Strategie. Im Rahmen des Anfang 2011 neu gestarteten Programms „FOX 2013“ arbeiten wir unter anderem an Einsparungen beim Energieverbrauch in der Zementherstellung und an einer umfassenden Verbesserung unserer Margen im Bereich der Zuschlagstoffe. Darüber hinaus sehen wir Chancen für eine Verbesserung der Kostenstruktur durch den steigenden Einsatz von sekundären Brenn- und Rohstoffen, mit dem wir gleichzeitig unsere CO<sub>2</sub>-Emissionen reduzieren.

HeidelbergCement sieht sich mit seinem integrierten Produktportfolio, seinen starken Positionen in Wachstumsmärkten und seiner effizienten Kostenstruktur gut gerüstet, um von einer Erholung der Weltwirtschaft und den sich dadurch bietenden Chancen zu profitieren.

# Corporate Governance

Teil des zusammengefassten Lageberichts des HeidelbergCement Konzerns  
und der HeidelbergCement AG

**122 Erklärung zur Unternehmensführung**

- 122 Entsprechenserklärung gem. § 161 AktG
- 123 Unternehmensführungspraktiken, die über die gesetzlichen Anforderungen hinaus angewandt werden
- 124 Arbeitsweise von Vorstand und Aufsichtsrat sowie Zusammensetzung und Arbeitsweise von deren Ausschüssen
- 127 Compliance

**128 Vergütungsbericht**

- 128 Vorstandsvergütung 2010
- 129 Neues Vergütungssystem ab 1. Januar 2011
- 135 Aufsichtsratsvergütung

**137 Organe der Gesellschaft**

- 137 Aufsichtsrat
- 139 Ausschüsse des Aufsichtsrats
- 139 Vorstand

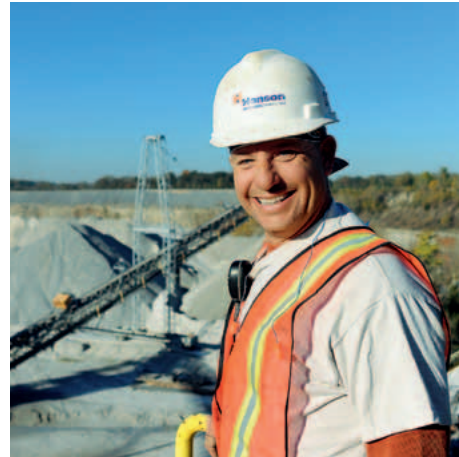



## Erklärung zur Unternehmensführung <sup>1)</sup>

### Entsprechenserklärung gem. § 161 AktG

Am 8. Februar 2011 hat der Vorstand und am 10. Februar 2011 hat der Aufsichtsrat beschlossen, die folgende Entsprechenserklärung gemäß § 161 Abs. 1 AktG abzugeben: Vorstand und Aufsichtsrat der HeidelbergCement AG erklären gemäß § 161 Abs. 1 AktG, dass den Empfehlungen der „Regierungskommission Deutscher Corporate Governance Kodex“ (im Folgenden „Kodex“) mit folgenden Ausnahmen entsprochen wurde und entsprochen wird:

- Die Erhöhung des Selbstbehalts der D&O Versicherung für Vorstands- und Aufsichtsratsmitglieder auf mindestens 10 % des Schadens bis mindestens des 1,5-Fachen der Jahresfestvergütung tritt am 1. Januar 2011 in Kraft (Abweichung von Ziff. 3.8).  
Begründung: Der vereinbarte Selbstbehalt der D&O-Versicherung, der bislang unterhalb des Limits des Kodex lag, wurde für angemessen im Sinne der bis zum 5. August 2009 geltenden Kodexfassung erachtet. Für die Vorstandsmitglieder, deren Verträge aus der Zeit vor Inkrafttreten des Gesetzes zur Angemessenheit der Vorstandsvergütung (VorstAG) und vor Inkrafttreten der Änderung der Fassung des Kodex stammen, galt bis zur Anpassung ihrer Verträge zur Umsetzung des neuen Vorstandsvergütungssystems (1. Januar 2011) ein entsprechender gesetzlicher Bestandsschutz. Ab 1. Januar 2011 wird der Selbstbehalt der D&O-Versicherung für sämtliche Mitglieder des Vorstands und des Aufsichtsrats kodexkonform angepasst.
- Die Vorstandsverträge sehen keine Begrenzung für Abfindungszahlungen (Abfindungs-Cap) für den Fall der vorzeitigen Beendigung der Vorstandstätigkeit ohne wichtigen Grund bzw. infolge eines Kontrollwechsels vor (Abweichung von Ziff. 4.2.3).  
Begründung: Der Aufsichtsrat respektiert den Bestandsschutz der bestehenden Vorstandsverträge, die keine entsprechende Begrenzung für Abfindungszahlungen vorsehen. Künftige Neuabschlüsse und Verlängerungen von Vorstandsverträgen werden jedoch eine kodexkonforme Begrenzung von Abfindungszahlungen enthalten.
- Die mehrjährige Bemessungsgrundlage für variable Vorstandsvergütungsbestandteile wird erst mit dem neuen Vorstandsvergütungssystem ab 1. Januar 2011 wieder eingeführt (Abweichung von Ziff. 4.2.3).  
Begründung: Die bisherige, an mehrjährige Erfolgsziele geknüpfte variable Komponente der Vorstandsvergütung war ausgelaufen und wurde bewusst nicht vor der im Herbst 2010 beabsichtigten durchgreifenden Neustrukturierung des Vorstandsvergütungssystems ersetzt. Ab dem 1. Januar 2011 wird mit der Einführung des neuen Vorstandsvergütungssystems der Kodex-Empfehlung vollständig entsprochen.
- Den Vorsitz im Personalausschuss hat nicht der Aufsichtsratsvorsitzende inne (Abweichung von Ziff. 5.2).  
Begründung: Der Aufsichtsrat hält diese Besetzung aufgrund der Aktionärsstruktur der Gesellschaft für sachgerecht.
- Der Aufsichtsrat benennt keine konkreten Zielsetzungen und Quoten für seine Zusammensetzung (Abweichung von Ziff. 5.4.1).

Begründung: Der Aufsichtsrat sieht die Qualifikation des Aufsichtsratsmitglieds und eines Aufsichtsratskandidaten als entscheidendes Kriterium für die Übernahme eines Aufsichtsratsmandats und seiner Zusammensetzung an. Dabei unterstützt und berücksichtigt er die in Ziff. 5.4.1 genannten Kriterien, lässt sich aber in seinem Auswahlmessen nicht durch konkrete Zielvorgaben oder Quoten einengen.

- Der Anteilsbesitz von Aufsichtsratsmitgliedern wird nicht offengelegt (Abweichung von Ziff. 6.6).  
Begründung: Aufsichtsratsmitglieder unterliegen den Veröffentlichungspflichten zum Anteilsbesitz nach § 21 WpHG und zu „Director's Dealings“ nach § 15a WpHG. Dadurch erscheint ausreichende Transparenz hinsichtlich des Anteilsbesitzes von Aufsichtsratsmitgliedern gewährleistet.

Die vorstehende Erklärung bezieht sich für den Zeitraum vom 17. März 2010 (Abgabe der letzten Entsprechenserklärung) bis zum 2. Juli 2010 auf die am 5. August 2009 im elektronischen Bundesanzeiger bekanntgemachte Kodexfassung vom 18. Juni 2009. Für den Zeitraum seit dem 3. Juli 2010 bezieht sie sich auf die am 2. Juli 2010 bekanntgemachte Kodexfassung vom 26. Mai 2010.

## Unternehmensführungspraktiken, die über die gesetzlichen Anforderungen hinaus angewandt werden

Ein konzernweit geltender Verhaltenskodex fordert von allen Mitarbeitern die Beachtung der Grundregeln des geschäftlichen Anstands ein – unabhängig davon, ob diese ihren Niederschlag in gesetzlichen Vorschriften gefunden haben oder nicht. Eingefordert werden insbesondere:

- ein integriertes und professionelles Verhalten gegenüber Kunden, Lieferanten, Behörden und Geschäftspartnern;
- die konsequente Vermeidung von Interessenkonflikten;
- der sorgsame und verantwortungsvolle Umgang mit Sach- und Vermögenswerten des Unternehmens;
- der sorgsame und verantwortungsvolle Umgang mit Betriebs- und Geschäftsgeheimnissen sowie mit personenbezogenen Daten;
- die Sicherstellung fairer, diskriminierungsfreier Beschäftigungsbedingungen und eines fairen Dialogs mit den Arbeitnehmervertretern;
- die Bereitstellung gesunder und sicherer Arbeitsplätze;
- der schonende Umgang mit den natürlichen Ressourcen.

Der Verhaltenskodex, der auf unserer Internetseite [www.heidelbergcement.com](http://www.heidelbergcement.com) unter „Über uns/Corporate Governance/Verhaltenskodex“ öffentlich zugänglich ist, ist Teil des umfassenden Compliance-Programms. Dessen Beachtung wird im Rahmen der darin enthaltenen Kontrollmechanismen überwacht.

## Arbeitsweise von Vorstand und Aufsichtsrat sowie Zusammensetzung und Arbeitsweise von deren Ausschüssen

Ein duales Führungssystem ist HeidelbergCement als deutscher Aktiengesellschaft gesetzlich vorgegeben: Der Vorstand leitet das Unternehmen in eigener Verantwortung; die Mitglieder des Vorstands tragen gemeinsam die Verantwortung für die Unternehmensleitung; der Vorstandsvorsitzende koordiniert die Arbeit der Vorstandsmitglieder. Der Aufsichtsrat bestellt, überwacht und berät den Vorstand und ist in Entscheidungen, die von grundlegender Bedeutung für das Unternehmen sind, unmittelbar eingebunden; der Aufsichtsratsvorsitzende koordiniert die Arbeit im Aufsichtsrat.

### Geschäftsführung durch den Vorstand

Bei der Leitung des Unternehmens ist der Vorstand an das Unternehmensinteresse gebunden und der Steigerung des nachhaltigen Unternehmenswertes verpflichtet. Er entwickelt die strategische Ausrichtung des Unternehmens, stimmt sie mit dem Aufsichtsrat ab und sorgt für ihre Umsetzung. Er hat für die Einhaltung der gesetzlichen Bestimmungen und der unternehmensinternen Richtlinien zu sorgen und wirkt auf deren Beachtung durch die Konzernunternehmen hin (Compliance). Er sorgt für ein angemessenes Risikomanagement und Risikocontrolling im Unternehmen. Der Vorstand achtet bei der Besetzung von Führungsfunktionen im Unternehmen auf Vielfalt (Diversity) und strebt dabei eine angemessene Berücksichtigung von Frauen an; eine feste Frauenquote lehnt der Vorstand hingegen ab. Die von Vorstand und Aufsichtsrat erlassene Geschäftsordnung für den Vorstand regelt in Verbindung mit dem vom Aufsichtsrat gebilligten Geschäftsverteilungsplan die Arbeit des Vorstands, insbesondere die Ressortzuständigkeiten einzelner Vorstandsmitglieder, die dem Gesamtvorstand vorbehaltenen Angelegenheiten sowie die erforderlichen Beschlussmehrheiten. Danach führt jedes Vorstandsmitglied sein Ressort selbstständig und in eigener Verantwortung, jedoch mit der Maßgabe, dass alle Angelegenheiten von näher definierter wesentlicher Bedeutung vom Gesamtvorstand zu entscheiden sind. Dies geschieht in den regelmäßig stattfindenden und vom Vorstandsvorsitzenden geleiteten Vorstandssitzungen auf der Grundlage vorbereiteter Sitzungsunterlagen. Die Sitzungsergebnisse werden in einem Protokoll festgehalten, das alle Vorstandsmitglieder erhalten. Vorstands-ausschüsse bestehen nicht.

### Beratung und Überwachung durch den Aufsichtsrat

Aufgabe des Aufsichtsrats ist es, den Vorstand bei der Leitung des Unternehmens regelmäßig zu beraten und zu überwachen. In Entscheidungen von grundlegender Bedeutung für das Unternehmen hat der Vorstand ihn einzubinden. Die vom Aufsichtsrat erlassene Geschäftsordnung für den Aufsichtsrat regelt die Arbeit des Aufsichtsrats, insbesondere die erforderlichen Beschlussmehrheiten, die seiner Zustimmung bedürftigen Rechtsgeschäfte und Maßnahmen, die Regelaltersgrenze für Vorstands- und Aufsichtsratsmitglieder sowie die Aufgaben der eingerichteten Ausschüsse.

Der Aufsichtsrat tritt wenigstens zweimal im Halbjahr zu Sitzungen zusammen, in denen er – in der Regel auf der Grundlage vom Vorstand erstatteter Berichte und zur Sitzungsvorbereitung vorab erhaltener Unterlagen – die anstehenden Themen erörtert und die erforderlichen Beschlüsse fasst. Bei Bedarf finden zusätzliche Sitzungen statt. Über die Sitzungen wird ein Protokoll erstellt, das alle Aufsichtsratsmitglieder erhalten. Dem Aufsichtsrat gehört eine nach seiner Ansicht ausreichende Zahl an unabhängigen Mitgliedern und mindestens ein unabhängiges Mitglied an, das über Sachverstand auf den Gebieten Rechnungslegung oder Abschlussprüfung verfügt. Der Aufsichtsrat hat satzungsgemäß insgesamt vier Ausschüsse gebildet, deren Aufgaben und Arbeitsweise nachfolgend

beschrieben werden. Über die Ergebnisse der Ausschusstätigkeit wird in der jeweils nachfolgenden Aufsichtsratssitzung dem Plenum berichtet.

Dem Personalausschuss obliegt die Vorbereitung der Entscheidung des Aufsichtsrats über die Bestellung von Vorstandsmitgliedern, der Wahl des Vorstandsvorsitzenden und der Festlegung der Vergütungsstruktur des Vorstands sowie der Bezüge der einzelnen Vorstandsmitglieder. Ferner obliegt ihm die Entscheidung über die Ausgestaltung der nicht vergütungsbezogenen rechtlichen Beziehungen zwischen der Gesellschaft und den Vorstandsmitgliedern. Dem Personalausschuss gehören die Herren Fritz-Jürgen Heckmann, Josef Heumann, Hans Georg Kraut, Ludwig Merckle, Tobias Merckle und Heinz Schmitt an; Vorsitzender ist Herr Ludwig Merckle.

Dem Prüfungsausschuss obliegt die Vorbereitung der Entscheidung des Aufsichtsrats über die Feststellung des Jahresabschlusses und die Billigung des Konzernabschlusses. Ihm obliegt außerdem die Überwachung des Rechnungslegungsprozesses, der Wirksamkeit des internen Kontrollsystems, des Risikomanagementsystems, des internen Revisionssystems, des Compliance-Programms und der Abschlussprüfung; ferner obliegen ihm die Vorbereitung des Vorschlags des Aufsichtsrats an die Hauptversammlung für die Bestellung des Abschlussprüfers, die Erteilung des Prüfungsauftrags, die Festlegung der Prüfungsschwerpunkte, der Abschluss der Honorarvereinbarung mit dem Abschlussprüfer, die Einholung der Unabhängigkeitserklärung des Abschlussprüfers und die Entscheidung über Maßnahmen wegen während der Prüfung auftretender Gründe für einen möglichen Ausschluss oder eine Befangenheit des Abschlussprüfers. Ferner erörtert der Prüfungsausschuss mit dem Vorstand Halbjahres- und Quartalsberichte vor deren Veröffentlichung. Über die Sitzungen wird ein Protokoll erstellt, das alle Ausschussmitglieder erhalten. Dem Prüfungsausschuss gehört neben dem Vorsitzenden mindestens ein unabhängiges Mitglied an, das über Sachverstand auf den Gebieten Rechnungslegung oder Abschlussprüfung verfügt. Dem Prüfungsausschuss gehören die Herren Robert Feiger, Fritz-Jürgen Heckmann, Max Dietrich Kley, Ludwig Merckle, Heinz Schmitt und Werner Schraeder an; Vorsitzender ist Herr Ludwig Merckle.

Dem Nominierungsausschuss obliegt es, dem Aufsichtsrat für dessen Wahlvorschläge an die Hauptversammlung geeignete Kandidaten vorzuschlagen. Ihm gehören als Vertreter der Anteilseigner die Herren Fritz-Jürgen Heckmann, Ludwig Merckle und Tobias Merckle an; Vorsitzender ist Herr Fritz-Jürgen Heckmann.

Dem Vermittlungsausschuss gem. §§ 27 Abs. 3, 31 Abs. 3 des Mitbestimmungsgesetzes obliegt es, dem Aufsichtsrat einen Vorschlag für die Bestellung von Vorstandsmitgliedern zu machen, wenn die dazu notwendige Zweidrittelmehrheit zunächst nicht zustande gekommen ist. Ihm gehören die Herren Fritz-Jürgen Heckmann, Hans Georg Kraut, Tobias Merckle und Heinz Schmitt an; Vorsitzender ist Herr Fritz-Jürgen Heckmann.

### Diversity

Der Aufsichtsrat hat in seiner Sitzung vom 10. Februar 2011 beschlossen, bei seiner Zusammensetzung die in Ziffer 5.4.1 des Deutschen Corporate Governance Kodex („Kodex“) erwähnten Grundsätze zu unterstützen und die Vielfalt (Diversity) bei der Auswahl der zur Verfügung stehenden Kandidaten zu berücksichtigen. In Abweichung von Ziffer 5.4.1 des Kodex lehnt er jedoch die Festsetzung konkreter Ziele in Form von Quoten oder absoluten Zahlen ab, da er die Qualifikation eines Aufsichtsratsmitglieds und eines Kandidaten als das entscheidende Kriterium für seine Zusammensetzung bzw. die Übernahme eines Aufsichtsratsmandats ansieht. In der Geschäftsordnung für den Aufsichtsrat ist eine Regelaltersgrenze von 65 Jahren für die Mitglieder des Vorstands und von 75 Jahren für die Mitglieder des Aufsichtsrats verankert.



### **Zusammenarbeit von Vorstand und Aufsichtsrat**

Vorstand und Aufsichtsrat arbeiten zum Wohle des Unternehmens eng zusammen. Dazu stimmt der Vorstand die strategische Ausrichtung des Unternehmens mit dem Aufsichtsrat ab und erörtert mit ihm in regelmäßigen Abständen den Stand der Strategieumsetzung. Für näher definierte Geschäfte von wesentlicher Bedeutung hat der Aufsichtsrat in der Geschäftsordnung des Vorstands Zustimmungsvorbehalte festgelegt.

Der Vorstand informiert den Aufsichtsrat regelmäßig, zeitnah und umfassend über alle für das Unternehmen relevanten Fragen der Planung, der Geschäftsentwicklung, der Risikolage, des Risikomanagements und der Compliance. Er geht auf Abweichungen des Geschäftsverlaufs von aufgestellten Plänen und Zielen unter Angabe von Gründen ein. Der Aufsichtsrat hat die Informations- und Berichtspflichten des Vorstands in der Geschäftsordnung des Vorstands näher festgelegt. Entscheidungsnotwendige Unterlagen, insbesondere der Jahresabschluss, der Konzernabschluss und der Prüfungsbericht werden den Mitgliedern des Aufsichtsrats rechtzeitig vor der Sitzung zugeleitet.

### **Anteilsbesitz von Vorstands- und Aufsichtsratsmitgliedern**

Der direkte oder indirekte Besitz von Aktien oder von sich auf Aktien beziehenden Derivaten von Vorstandsmitgliedern hat in keinem Einzelfall und auch nicht in Summe den Schwellenwert von 1 % der ausgegebenen Aktien überschritten.

Das Aufsichtsratsmitglied Ludwig Merckle hält nach den vorliegenden Meldungen indirekt 25,11 % der ausgegebenen Aktien. Hinsichtlich der weiteren Aufsichtsratsmitglieder hat der Besitz von Aktien oder von sich auf Aktien beziehenden Derivaten nach den vorliegenden Meldungen in keinem Einzelfall und auch nicht in Summe den Schwellenwert von 1 % der ausgegebenen Aktien überschritten.

### **Beziehungen zu den Aktionären**

Die Aktionäre nehmen im Rahmen der gesetzlichen oder satzungsmäßig vorgesehenen Möglichkeiten ihre Rechte vor oder während der Hauptversammlung wahr und üben dabei ihr Stimmrecht aus. Jede Aktie gewährt in der Hauptversammlung eine Stimme (one-share-one-vote-Prinzip). Die jährliche ordentliche Hauptversammlung findet in der Regel in den ersten fünf Monaten des Geschäftsjahres statt. Alle für die Wahrnehmung der Aktionärsrechte wichtigen Unterlagen sowie die Beschlussgegenstände und –unterlagen stehen den Aktionären auch rechtzeitig auf unserer Internetseite zum Abruf zur Verfügung. In der Bekanntmachung der Tagesordnung für die Hauptversammlung sowie auf unserer Internetseite werden den Aktionären die zur Wahrnehmung ihrer Rechte, insbesondere ihrer Stimmrechte auf der Hauptversammlung, auch im Wege der Bevollmächtigung, erforderlichen Informationen gegeben. Der Bericht des Vorstandsvorsitzenden an die Hauptversammlung wird zeitgleich in das Internet eingestellt. Nach dem Ende der Hauptversammlung werden die Präsenz sowie die Abstimmungsergebnisse zu den einzelnen Tagesordnungspunkten auf unsere Internetseite gestellt.

Im Rahmen unserer Investor-Relations-Arbeit informieren wir Aktionäre und andere Investoren umfassend und regelmäßig quartalsweise über die Geschäftsentwicklung sowie über die Finanz- und Ertragslage, aber auch über Mitteilungen nach dem Wertpapierhandelsgesetz, Analystenpräsentationen, Pressemitteilungen und über den jährlichen Finanzkalender. Einzelheiten zu unserer Investor Relations-Arbeit sind auf der Seite 38 f. dargestellt.

## Compliance

Das in den konzernweiten Management- und Überwachungsstrukturen inzwischen fest verankerte Compliance-Programm hat unverändert einen hohen Stellenwert in der Führungskultur von HeidelbergCement.

Ein inhaltlicher Schwerpunkt liegt auf den Bestimmungen des Wettbewerbsrechts. In diesem Zusammenhang wurde das kartellrechtliche Compliance-System einer Prüfung durch externe Berater unterzogen. Diese kamen zu dem Ergebnis, dass alle wesentlichen Elemente eines ordnungsgemäßen und wirksamen Kartellrechts-Compliance-Systems vorhanden sind. Neben dem Wettbewerbsrecht stehen unverändert das Arbeitssicherheitsrecht und das Umweltrecht im Fokus. Hier spiegeln sich die Merkmale und Besonderheiten einer rohstoffgewinnenden und -verarbeitenden und homogene Massengüter vertreibenden Schwerindustrie wider. Besondere Anstrengungen gelten darüber hinaus der Einhaltung der Antikorruptionsregeln, der Kapitalmarktregeln, der Datenschutzregeln sowie der Regeln zum diskriminierungsfreien Umgang mit Mitarbeitern.

Moderne Techniken und Medien wie elektronische Lernplattformen und Lernprogramme sowie internet- und telefonbasierte Meldesysteme unterstützen die für alle geografischen und funktionalen Einheiten des Konzerns bestellten Compliance-Verantwortlichen. Diese Instrumente werden im Zuge einer fortlaufenden Überprüfung des gesamten Compliance-Programms kontinuierlich verbessert und weiterentwickelt.

Die Überwachung der konzernweiten Umsetzung des Compliance-Programms geschieht mittels eines speziell eingerichteten halbjährlichen Compliance-Reportings sowie durch Regel- und Sonderprüfungen der internen Revision. Auf den Compliance-Reports baut der Bericht des Vorstands an den Aufsichtsrat auf, dessen Prüfungsausschuss prüft, ob das Compliance-Programm den gesetzlichen Anforderungen sowie anerkannten „best practices“ genügt.

## Vergütungsbericht <sup>1)</sup>

Der Vergütungsbericht besteht aus drei Teilen. Im ersten Teil wird die bis 31. Dezember 2010 geltende Vergütungssystematik und die auf das Jahr 2010 entfallende Vergütung der Mitglieder des Vorstands dargestellt. Im zweiten Teil wird das ab 1. Januar 2011 geltende neue Vergütungssystem sowie ein Ausblick auf die Vorstandsvergütung im Jahr 2011 vorgestellt. Im dritten Teil wird die für das Geschäftsjahr 2010 gezahlte Aufsichtsratsvergütung dargestellt.

### Vorstandsvergütung 2010

#### Grundsätze

Die Systematik und die Höhe der Vergütung des Vorstands werden auf Vorschlag des Personalausschusses durch den Aufsichtsrat festgelegt. Diese Festlegung orientiert sich an der Größe und der internationalen Tätigkeit des Unternehmens, seiner wirtschaftlichen und finanziellen Lage, seinen Zukunftsaussichten, der Höhe und Struktur der Vorstandsvergütung vergleichbarer Unternehmen sowie der Vergütungsstruktur, die ansonsten in der Gesellschaft gilt. Zusätzlich werden die Aufgaben und Leistungen des jeweiligen Vorstandsmitglieds und des Gesamtvorstands berücksichtigt. Die Vergütung ist so bemessen, dass sie am Markt für hochqualifizierte Führungskräfte wettbewerbsfähig ist und Anreiz für erfolgreiche Arbeit in einer Unternehmenskultur mit eindeutiger Leistungs- und Ergebnisorientierung bietet.

#### Vergütungsbestandteile

Die Vergütung setzt sich aus festen und variablen Bestandteilen zusammen. Dabei wird ein hoher variabler Anteil an der Gesamtvergütung bewusst angestrebt, um die gemeinsame und persönliche Leistung der Vorstandsmitglieder sowie den Unternehmenserfolg deutlich und unmittelbar zu berücksichtigen. Die variable Tantieme mit Einjahresbezug hängt vom Erreichen eines bestimmten, zu Beginn des Geschäftsjahres vom Aufsichtsratsplenum fixierten finanziellen Ziels (Anteil der Gruppe am Jahresüberschuss) ab. Der in der Vergangenheit gewährte Mehrjahresbonus, zuletzt für 2008/2009, wurde 2010 wegen der geplanten Einführung des Langfristbonus ab 2011 nicht mehr gewährt.

#### Höhe der Vergütung

Die Hauptversammlung 2006 hat gemäß § 286 Abs. 5, § 314 Abs. 2 Satz 2 HGB von der Möglichkeit Gebrauch gemacht, von der Verpflichtung zur Veröffentlichung der Vergütung jedes einzelnen Vorstandsmitglieds im Jahres- und Konzernabschluss abzusehen. Dieser Beschluss der Hauptversammlung aus dem Jahr 2006 gilt noch für das Geschäftsjahr 2010 und endet danach durch Zeitablauf. Mit Einführung des neuen Vergütungssystems im Geschäftsjahr 2011 werden die Gesamtbezüge aller Vorstandsmitglieder individualisiert ausgewiesen werden.

Die Festvergütung des Vorstands erhöhte sich gegenüber dem Vorjahr auf 4,3 (i.V.: 3,9) Mio EUR.

Dagegen verringerte sich die Summe der variablen Vergütungsbestandteile, die in diesem Jahr nur aus einer Jahrestantieme mit Einjahresbezug bestanden, auf 8,1 (i.V.: 11,7) Mio EUR. Die Verringerung der Summe der variablen Vergütungsbestandteile ist im Wesentlichen auf den Wegfall zweier Sondereffekte zurückzuführen: Zum einen wurde dem Vorstand im Vorjahr eine Sondertantieme im Zusammenhang mit der erfolgreichen Neuordnung der Kapital- und Finanzierungsstruktur in Höhe von 5,0 Mio EUR gewährt. Zum anderen wurde der erdiente Teil des Mehrjahresbonus 2008/2009 im Vorjahr in Höhe von 2,9 Mio EUR erfasst.

<sup>1)</sup> Gemäß Ziff. 4.2.5 und 5.4.6 deutscher Corporate Governance Kodex Bestandteil des Corporate Governance Berichts

Die sonstigen Vergütungsbestandteile betrugen 1,2 (i.V.: 1,0) Mio EUR. Die sonstigen Vergütungsbestandteile bestanden in Zahlungen für Gremientätigkeiten bei Tochterunternehmen der HeidelbergCement AG, Aufwandsentschädigungen sowie geldwerten Vorteilen aus der Zurverfügungstellung von Dienstwagen.

Die Gesamtvergütung des Vorstands belief sich im Jahr 2010 auf 13,6 (i.V.: 16,6) Mio EUR. Außerdem ist gemäß § 314 Abs. 1 Ziffer 6. lit. a) Satz 3 HGB noch ein Betrag in Höhe von 1,7 Mio EUR anzugeben, der im Wesentlichen auf die Abweichung der finalen Zielerreichung des Mehrjahresbonus 2008/2009 gegenüber den zum Zeitpunkt der Erstellung des Konzernabschlusses 2009 getroffenen Annahmen zurückzuführen ist.

Für die aktuellen Mitglieder des Vorstands wurden 1,3 (i.V.: 1,3) Mio EUR den Rückstellungen für Pensionsverpflichtungen (laufender Dienstzeitaufwand) zugeführt. An frühere Mitglieder des Vorstands und deren Hinterbliebene wurden im Berichtsjahr 3,0 (i.V.: 2,3) Mio EUR gezahlt. Die Rückstellungen für Pensionsverpflichtungen gegenüber früheren Vorstandsmitgliedern beliefen sich auf 28,1 (i.V.: 26,1) Mio EUR.

#### **Darlehen an Vorstandsmitglieder**

Im Jahr 2010 wurden keine Kredite und keine Vorschüsse an Vorstandsmitglieder der HeidelbergCement AG gewährt.

## Neues Vergütungssystem ab 1. Januar 2011

#### **Umsetzung des Gesetzes zur Angemessenheit der Vorstandsvergütung (VorstAG)**

Vor dem Hintergrund des am 5. August 2009 in Kraft getretenen Gesetzes zur Angemessenheit der Vorstandsvergütung hat der Aufsichtsrat ein neues Vorstandsvergütungssystem beschlossen. Das neue Vergütungssystem trat mit Wirkung ab dem 1. Januar 2011 einheitlich für alle Vorstandsmitglieder in Kraft und wird gemäß § 120 Abs. 4 AktG der Hauptversammlung im Mai 2011 zur Billigung vorgelegt.

Der Aufsichtsrat hat sich bei der Ausarbeitung des neuen Vergütungssystems durch einen renommierten Vergütungsexperten beraten lassen. Das neue System wurde anschließend im Auftrag des Aufsichtsrats von einem namhaften unabhängigen Sachverständigen überprüft und als gesetzeskonform und marktangemessen beurteilt. Das neue Vergütungssystem besteht aus einem festen Jahresgehalt, einem variablen Jahresbonus sowie einem variablen Langfristbonus und wurde noch stärker als bisher auf eine nachhaltige Unternehmensentwicklung ausgerichtet. Dieser Anspruch wurde erreicht durch die:

- höhere Gewichtung der variablen Vergütung im Vergleich zur fixen Vergütung,
- höhere Gewichtung des Langfristbonus mit mehrjähriger Bemessungsgrundlage im Vergleich zum Jahresbonus,
- Verknüpfung des Langfristbonus mit unterschiedlichen Finanzkennzahlen sowie der relativen Entwicklung der HeidelbergCement-Aktie im Vergleich zum DAX 30-Index und dem MSCI World Construction Materials-Index und der absoluten Entwicklung der HeidelbergCement-Aktie,
- Verpflichtung für alle Vorstandsmitglieder, eine festgelegte Anzahl an HeidelbergCement-Aktien als Eigeninvestment zu halten.

Die folgenden Darstellungen beziehen sich auf die ab dem 1. Januar 2011 geltende Vergütungssystematik und geben einen Ausblick auf die neue Vergütungsstruktur.



### Systematik des neuen Vorstandsvergütungsmodells

Die Bezüge des Vorstandes setzen sich zusammen aus:

1. einem festen Jahresgehalt,
2. einem variablen Jahresbonus,
3. einem variablen Langfristbonus mit langfristiger Anreizwirkung,
4. Nebenleistungen sowie
5. Pensionszusagen.

Das folgende Diagramm zeigt das Verhältnis von fixen zu variablen Vergütungsbestandteilen in der Gesamtvergütung (ohne Nebenleistungen und Pensionszusagen) sowie einen Vergleich der Höhe der einzelnen variablen Anteile bei einer unterstellten 100%-Zielerreichung im Vergleich zum festen Jahresgehalt:

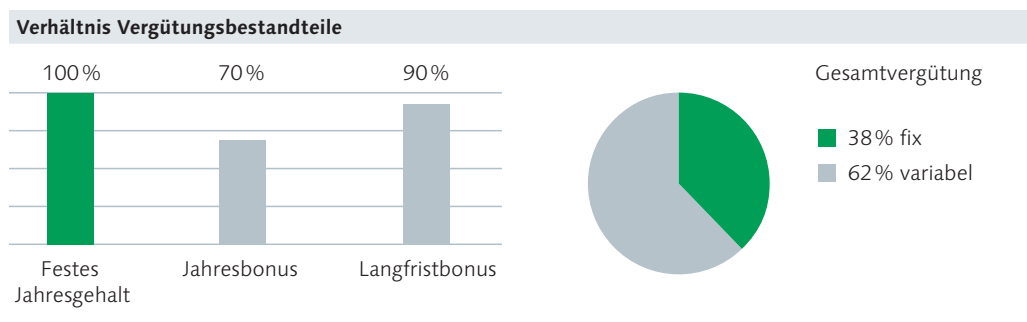

#### 1. Festes Jahresgehalt

Das feste Jahresgehalt ist eine fixe, auf das Geschäftsjahr bezogene Barvergütung, die sich am Verantwortungsbereich des jeweiligen Vorstandsmitglieds orientiert und in zwölf Monatsraten ausbezahlt wird. Sie beträgt etwa 38% der Zielvergütung.

#### 2. Jahresbonus

Der Jahresbonus ist ein variabler Vergütungsbestandteil, der sich auf ein Geschäftsjahr bezieht und 70% des festen Jahresgehalts beträgt bei einer unterstellten 100%-Zielerreichung. Er beträgt etwa 27% der Zielvergütung. Wie bisher wird als Leistungskennzahl der Anteil der Gruppe am Jahresüberschuss verwendet. Zusätzlich werden individuelle Ziele mit dem Vorstandsvorsitzenden und den Vorstandsmitgliedern vereinbart.

Das Aufsichtsratsplenum entscheidet zu Beginn des Geschäftsjahres über die Erfolgsziele und stellt nach Ablauf des Geschäftsjahres den Grad der Zielerreichung fest.

- Zielwert (Wert bei 100%-Zielerreichung)  
70% des festen Jahresgehalts
- Leistungskennzahlen und Gewichtung (Wert bei 100%-Zielerreichung)  
2/3 Anteil der Gruppe am Jahresüberschuss  
1/3 individuelle Ziele
- Bandbreite der Zielerreichung  
0 - 200% (der maximale Wert des Jahresbonus ist auf 140% des festen Jahresgehalts begrenzt und ein Totalausfall des gesamten Jahresbonus ist möglich; die Festlegung der Bandbreite bezieht sich auf jede einzelne Leistungskennzahl).

Im Folgenden ist eine Beispielrechnung für die Ermittlung des Jahresbonus bei einem festen Jahresgehalt von 700.000 EUR wiedergegeben:

| Beispielrechnung Jahresbonus <sup>1)</sup> |                                                                                                                      |
|--------------------------------------------|----------------------------------------------------------------------------------------------------------------------|
| Zielwert                                   | 490.000 EUR (70 % vom festen Jahresgehalt i.H.v. 700.000 EUR)                                                        |
| Laufzeit                                   | 1 Jahr                                                                                                               |
| Leistungskennzahlen                        | 2/3 Anteil der Gruppe am Jahresüberschuss (326.667 EUR)<br>1/3 individuelle Ziele (163.333 EUR)                      |
| Bandbreite                                 | 0 - 200 %                                                                                                            |
| Zielerreichung (Beispiel)                  | Anteil der Gruppe am Jahresüberschuss 200 % (653.334 EUR)<br>individuelle Ziele 100 % (163.333 EUR)                  |
| Beispielergebnis                           | Anteil der Gruppe am Jahresüberschuss 653.334 EUR<br>+ individuelle Ziele 163.333 EUR<br>= Barauszahlung 816.667 EUR |

### 3. Langfristbonus

Der Langfristbonus ist ein langfristig orientierter variabler Vergütungsbestandteil, der in jährlichen Tranchen, beginnend im Jahr 2011, begeben wird. Er beträgt 90 % vom festen Jahresgehalt bei einer unterstellten 100 %-Zielerreichung. Der Langfristbonus beträgt etwa 35 % der Zielvergütung. Der Langfristbonus besteht aus zwei Komponenten. Jede Komponente stellt die Hälfte des Langfristbonus dar.

Die erste Komponente, die so genannte Management-Komponente mit einer Laufzeit von drei Jahren, berücksichtigt die interne Wertschöpfung, gemessen am Ergebnis vor Zinsen und Steuern (EBIT) und Return on Invested Capital (ROIC), und ist in Form eines Bonus mit Barauszahlung gestaltet. Die Auszahlung erfolgt nach der Hauptversammlung im Jahr nach der dreijährigen Performance-Periode. Die zweite Komponente, die so genannte Kapitalmarkt-Komponente mit einer Laufzeit von vier Jahren, berücksichtigt die externe Wertschöpfung, gemessen als Total Shareholder Return (TSR) – angepasst um die reinvestierten Dividendenzahlungen und unter Bereinigung von Kapitalveränderungen – im Vergleich zu relevanten Kapitalmarktindizes, unter Verwendung von Performance Share Units (PSUs). Bei den PSUs handelt es sich um virtuelle Aktien, die allein der Berechnung der Kapitalmarkt-Komponente dienen.

Zu Beginn jeder Tranche werden vom Aufsichtsratsplenum Erfolgsziele für beide Komponenten auf Basis verschiedener Leistungskennzahlen festgelegt, deren Erreichung Einfluss auf die Höhe des Langfristbonus hat. Nach Ablauf der jeweiligen Performance-Periode wird der Grad der Zielerreichung vom Aufsichtsratsplenum festgestellt.

Die Zielsetzung für die Management-Komponente orientiert sich an dem für die Gesellschaft maßgeblichen dreijährigen operativen Plan, den der Vorstand dem Aufsichtsrat vorgestellt hat. Die aktienbasierte Kapitalmarkt-Komponente wird in Anlehnung an § 193 Abs. 2 Nr. 4 AktG über einen Zeitraum von vier Jahren gemessen.

Für die Kapitalmarkt-Komponente wird in einem ersten Schritt die Anzahl der zunächst gewährten Performance Share Units (PSUs) ermittelt: Die Stückzahl der PSUs errechnet sich aus 45 % des festen Jahresgehalts geteilt durch den Referenzkurs<sup>2)</sup> der HeidelbergCement-Aktie zum Begebungszeitpunkt. Nach Ablauf der vierjährigen Performance-Periode werden die endgültig erdienten PSUs in einem zweiten Schritt entsprechend der Zielerreichung ermittelt und zum dann geltenden Referenzkurs der HeidelbergCement-Aktie – angepasst um die reinvestierten Dividendenzahlungen und unter Bereinigung von Kapitalveränderungen – in bar ausgezahlt.

1) Die verwendeten Zielerreichungsgrade sind fiktiv und dienen nur der Veranschaulichung.

2) Der Referenzkurs ist jeweils der Durchschnitt der Tagesschlusskurse der HeidelbergCement-Aktie im XETRA-Handel der Frankfurter Wertpapierbörse von drei Monaten rückwirkend vom Tag des Beginns der Performance-Periode/Ablaufs der Performance-Periode.

- Zielwert (Wert bei 100%-Zielerreichung)  
90% des festen Jahresgehalts (davon 50% Management-Komponente und 50% Kapitalmarkt-Komponente)
- Leistungskennzahlen und Gewichtung (Wert bei 100%-Zielerreichung)  
Management-Komponente:  
1/2 kumulierter Durchschnitt der in der Performance-Periode 2011-2013 erzielten EBITs  
1/2 Zielwert ROIC 2013  
  
Kapitalmarkt-Komponente:  
1/2 Peer TSR; Messung des TSR im Vergleich zum DAX 30-Index  
1/2 Peer TSR; Messung des TSR im Vergleich zum MSCI World Construction Materials-Index
- Bandbreite bei Zielerreichung  
Management-Komponente: Die Bandbreite der Zielerreichung beträgt zwischen 0% und 200%, d.h. der maximale Wert der Management-Komponente des Langfristbonus ist auf 90% des festen Jahresgehalts begrenzt und ein Totalausfall der Management-Komponente ist möglich; die Bandbreite gilt für jede der Leistungskennzahlen EBIT und ROIC separat.  
  
Kapitalmarkt-Komponente: Die Bandbreite der Zielerreichung beträgt zwischen 0% und 200%, d.h. die Zahl der virtuellen Aktien kann sich abhängig von der Zielerreichung maximal verdoppeln oder auf 0 reduzieren (Totalausfall).
- Kappung der Performance der HeidelbergCement-Aktie vor Auszahlung  
Maximal das 2,5-fache des Referenzkurses, der bei Beginn der Performance-Periode zugrunde gelegt wurde.

Im Folgenden ist eine Beispielrechnung für die Ermittlung des Langfristbonus bei einem festen Jahresgehalt von 700.000 EUR wiedergegeben:

#### Beispielrechnung Langfristbonus<sup>1)</sup>

|                              |                                                                                                                                                                                                                                                                                          |                                                                                                                                                                                                       |
|------------------------------|------------------------------------------------------------------------------------------------------------------------------------------------------------------------------------------------------------------------------------------------------------------------------------------|-------------------------------------------------------------------------------------------------------------------------------------------------------------------------------------------------------|
| Zielwert                     | 630.000 EUR (90% vom festen Jahresgehalt i.H.v. 700.000 EUR)                                                                                                                                                                                                                             |                                                                                                                                                                                                       |
| Basis                        | Management-Komponente: 50% von 630.000 EUR = 315.000 EUR<br>Kapitalmarkt-Komponente: 50% (315.000 EUR) werden in virtuelle Aktien umgerechnet;<br>Ø Aktienkurs über die letzten 3 Monate vor Planbeginn 50 EUR:<br>315.000 EUR/50 EUR = 6.300 virtuelle Aktien                           |                                                                                                                                                                                                       |
| Laufzeit                     | 3 Jahre (von 2011 bis 2013) für die Management-Komponente und<br>4 Jahre (von 2011 bis 2014) für die Kapitalmarkt-Komponente                                                                                                                                                             |                                                                                                                                                                                                       |
| Leistungskennzahlen          | Management-Komponente:<br>315.000 EUR<br>1/2 EBIT (157.500 EUR)<br>1/2 ROIC (157.500 EUR)                                                                                                                                                                                                | Kapitalmarkt-Komponente:<br>315.000 EUR (6.300 virtuelle Aktien)<br>Peer TSR:<br>1/2 DAX 30-Index (3.150 virtuelle Aktien)<br>1/2 MSCI World Construction Materials Index<br>(3.150 virtuelle Aktien) |
| Bandbreite                   | 0 - 200%                                                                                                                                                                                                                                                                                 |                                                                                                                                                                                                       |
| Zielerreichung<br>(Beispiel) | EBIT 200% (315.000 EUR)<br>ROIC 100% (157.500 EUR)                                                                                                                                                                                                                                       | Relativer TSR: DAX 30-Index 100% (3.150 virtuelle Aktien)<br>MSCI World Construction Materials Index 150%<br>(4.725 virtuelle Aktien)                                                                 |
| Beispielergebnis             | Management-Komponente: 315.000 EUR + 157.500 EUR = 472.500 EUR<br>Kapitalmarkt-Komponente: 3.150 + 4.725 = 7.875<br>(Ø Aktienkurs über die letzten 3 Monate vor dem Ende des 4. Jahres<br>z.B.: 130 EUR; Cap bei 250% = maximaler Wert 125 EUR)<br>= 7.875 Stück x 125 EUR = 984.375 EUR |                                                                                                                                                                                                       |
|                              | Management-Komponente: 472.500 EUR + Kapitalmarkt-Komponente: 984.375 EUR<br>= 1.456.875 EUR in bar                                                                                                                                                                                      |                                                                                                                                                                                                       |

1) Die verwendeten Zielerreichungsgrade sind fiktiv und dienen nur der Veranschaulichung.

#### 4. Nebenleistungen

Die steuerpflichtigen Nebenleistungen der Vorstandsmitglieder bestehen nach Einführung des neuen Vergütungssystems unverändert aus der Zurverfügungstellung von Dienstwagen, die Gestellung von Fahr- und Sekretariatsdienstleistungen und üblichen Mobilfunk- und Kommunikationsmitteln sowie aus Aufwandsentschädigungen und Versicherungsleistungen.

Es erfolgt mit Ablauf des Beschlusses der Hauptversammlung von 2006 gemäß § 286 Abs. 5, § 314 Abs. 2 Satz 2 HGB ab 2011 eine individualisierte Auflistung der Nebenleistungen pro Vorstandsmitglied.

#### 5. Pensionszusagen

Das neue Vergütungssystem hat keine Auswirkungen auf bestehende Pensionszusagen. Die Pensionsverträge der deutschen Mitglieder des Vorstands beinhalten die Zusage auf ein jährliches Ruhegehalt, das sich als Prozentsatz des pensionsfähigen Einkommens bemisst. Der Prozentsatz ist abhängig von der Dauer der Vorstandstätigkeit. Er beträgt nach fünf Jahren Vorstandstätigkeit mindestens 40 % des pensionsfähigen Einkommens und kann auf maximal 65 % des pensionsfähigen Einkommens steigen. Für den Vorstandsvorsitzenden beträgt der Prozentsatz 4 % des festen Jahresgehalts je angefangenes Dienstjahr, höchstens jedoch 60 %. Das pensionsfähige Einkommen entspricht einem vertraglich vereinbarten Anteil an dem festen Jahresgehalt des Vorstandsmitglieds.

Die Ruhegehaltszahlung erfolgt monatlich entweder

- nach dem pensionsbedingten Ausscheiden aus dem Unternehmen (Eintritt des Versorgungsfalls erfolgt individuell zwischen dem 62. und dem 65. Lebensjahr), oder
- bei vorzeitiger Vertragsbeendigung aus vom betreffenden Vorstandsmitglied nicht zu vertretenden Gründen, sofern er zum Zeitpunkt der Vertragsbeendigung das 60. Lebensjahr vollendet hat, oder
- aufgrund von dauerhafter Dienstunfähigkeit infolge von Krankheit.

Die Pensionsverträge beinhalten eine Hinterbliebenenversorgung. Verstirbt ein Vorstandsmitglied während der Dauer seines Anstellungsvertrags oder nach Eintritt des Versorgungsfalls, erhalten seine Witwe sowie seine unterhaltsberechtigten Kinder Witwen- bzw. Waisengeld. Das Witwengeld beträgt 60 % des Ruhegehalts des Verstorbenen. Das Waisengeld beträgt 10 % des Ruhegehalts des Verstorbenen, solange gleichzeitig Witwengeld gezahlt wird. Sofern gleichzeitig kein Witwengeld gezahlt wird, beträgt das Waisengeld 20 % des Ruhegehalts des Verstorbenen.

Die Pensionsregelung von Herrn Daniel Gauthier richtet sich nach dem Pensionsplan der Cimenteries CBR S.A., einem 100 %igen Tochterunternehmen der HeidelbergCement AG mit Sitz in Brüssel, Belgien. Die Versorgungszusage ist hinsichtlich der Höhe vergleichbar mit der Pensionsregelung für die deutschen Mitglieder des Vorstands und beinhaltet ebenfalls eine Hinterbliebenenversorgung.

Es erfolgt mit Ablauf des Beschlusses der Hauptversammlung von 2006 gemäß § 286 Abs. 5, § 314 Abs. 2 Satz 2 HGB ab 2011 eine individualisierte Auflistung der Pensionszusagen pro Vorstandsmitglied.



### Ausblick auf die Vorstandsvergütung im Jahr 2011

Mit der Einführung des neuen Vergütungssystems wird die Vergütung jedes Vorstandsmitglieds individuell ausgewiesen. Die Festvergütung des Vorstands wird sich 2011 auf insgesamt 4,8 Mio EUR belaufen. Der Wert der variablen Vergütung (Jahresbonus und Langfristbonus) wird bei einer unterstellten 100%-Zielerreichung für den Vorstand insgesamt 7,7 Mio EUR betragen.

Die Vergütung der Vorstandsmitglieder wird sich ab dem 1. Januar 2011 im Einzelnen wie folgt zusammensetzen:

| Vergütung der Vorstandsmitglieder ab 1. Januar 2011 |                     |                                            |                                                |        |
|-----------------------------------------------------|---------------------|--------------------------------------------|------------------------------------------------|--------|
| 1.000 EUR                                           | Fixe Vergütung      | Variable Vergütung bei 100%-Zielerreichung |                                                |        |
|                                                     | Festes Jahresgehalt | Jahresbonus                                | Langfristbonus mit langfristiger Anreizwirkung | Summe  |
| Dr. Bernd Scheifele                                 | 1.320               | 924                                        | 1.188                                          | 3.432  |
| Dr. Dominik von Achten                              | 700                 | 490                                        | 630                                            | 1.820  |
| Daniel Gauthier                                     | 700                 | 490                                        | 630                                            | 1.820  |
| Andreas Kern                                        | 700                 | 490                                        | 630                                            | 1.820  |
| Dr. Lorenz Näger                                    | 700                 | 490                                        | 630                                            | 1.820  |
| Dr. Albert Scheuer                                  | 700                 | 490                                        | 630                                            | 1.820  |
| Summe                                               | 4.820               | 3.374                                      | 4.338                                          | 12.532 |

### Pensionszusagen

Die bestehenden Pensionszusagen bleiben unverändert. Die Werte für die im Jahr 2011 voraussichtlich entstehenden Versorgungsansprüche (Service Costs) betragen für Dr. Bernd Scheifele 780.000 EUR, für Dr. Dominik von Achten 236.000 EUR, für Daniel Gauthier 126.000 EUR, für Andreas Kern 138.000 EUR, für Dr. Lorenz Näger 286.000 EUR und für Dr. Albert Scheuer 141.000 EUR.

### Nebenleistungen

Die Nebenleistungen für 2011 werden voraussichtlich 1,3 Mio EUR betragen. Für Mandate und Ämter bei konzernangehörigen Gesellschaften wird voraussichtlich Dr. Bernd Scheifele 300.000 EUR, Dr. Dominik von Achten 50.000 EUR, Daniel Gauthier 120.000 EUR, Andreas Kern 300.000 EUR und Dr. Lorenz Näger 300.000 EUR erhalten. Diese Leistungen werden in voller Höhe auf die Gesamtvergütung angerechnet werden. Außerdem erhalten Dr. Bernd Scheifele und Dr. Lorenz Näger für die Wahrnehmung von Aufsichtsratsmandaten innerhalb des HeidelbergCement Konzerns und Dr. von Achten für seine Tätigkeit als Vorstand für das Konzerngebiet Nordamerika jeweils eine Aufwandsentschädigung in Höhe von 50.000 EUR jährlich. Weiterhin beziehen sich die Nebenleistungen auf die Versteuerung geldwerter Vorteile, die voraussichtlich bei Dr. Bernd Scheifele 19.000 EUR, bei Dr. Dominik von Achten 11.000 EUR, bei Daniel Gauthier 3.000 EUR, bei Andreas Kern 23.000 EUR, bei Dr. Lorenz Näger 16.000 EUR und bei Dr. Albert Scheuer 23.000 EUR betragen werden.

### Anpassung der Bezüge

Der Aufsichtsrat hat unverändert die Möglichkeit zur diskretionären Anpassung (Ermessensspielraum) um  $\pm 25\%$  des Zielwerts der variablen Vergütungsbestandteile, um die persönliche Leistung des einzelnen Vorstandsmitglieds und/oder außergewöhnliche Umstände zu berücksichtigen.

Unberührt bleiben das Recht und die Pflicht des Aufsichtsrats, gemäß § 87 Abs. 2 AktG die Vorstandsbezüge auf eine angemessene Höhe herabzusetzen, wenn sich die Lage der Gesellschaft nach der Festsetzung so verschlechtert, dass die unveränderte Weitergewährung der Vorstandsbezüge unbillig für die Gesellschaft wäre.

### Eigeninvestment (Share Ownership)

Zur Unterstützung der nachhaltigen Unternehmensentwicklung hat der Aufsichtsrat Vorgaben für den Aktienbesitz der Vorstandsmitglieder beschlossen. Vorstandsmitglieder müssen einen Teil ihres Privatvermögens für den Erwerb einer festgesetzten Anzahl von HeidelbergCement-Aktien einsetzen und diese Aktien während ihrer Zugehörigkeit zum Vorstand halten. Die Zahl der zu haltenden Aktien ist für den Vorstandsvorsitzenden auf 30.000 Stück HeidelbergCement-Aktien und für die anderen Vorstandsmitglieder auf 10.000 Stück HeidelbergCement-Aktien festgelegt. Zur Erfüllung der Vorgaben ist die Hälfte der Auszahlungsbeträge aus dem Langfristbonus zum Erwerb von Aktien der Gesellschaft zu verwenden, bis das vollständige Eigeninvestment erbracht ist; der Aufbau des Eigeninvestments kann dadurch mehrere Jahre in Anspruch nehmen. Auf das Eigeninvestment werden bereits gehaltene Aktien der Gesellschaft angerechnet.

### D&O-Versicherung

Die Mitglieder des Vorstands werden in die bestehende Vermögensschaden-Haftpflichtversicherung („D&O-Versicherung“) der Gesellschaft einbezogen. Der vereinbarte Selbstbehalt entspricht dem Mindest-Selbstbehalt gemäß § 93 Abs. 2 Satz 3 AktG in der jeweils gültigen Fassung.

### Regelungen bei Neuabschlüssen und Verlängerungen von Vorstandsverträgen

#### Abfindungs-Cap

Gemäß dem Deutschen Corporate Governance Kodex wird bei Neuabschluss von Vorstandsverträgen und bei der Verlängerung bestehender Vorstandsverträge darauf geachtet, dass Zahlungen an ein Vorstandsmitglied bei vorzeitiger Beendigung der Vorstandstätigkeit ohne wichtigen Grund einschließlich Nebenleistungen den Wert von zwei Jahresvergütungen nicht überschreiten und nicht mehr als die Restlaufzeit des Anstellungsvertrags vergüten. Die Berechnung des Abfindungs-Caps erfolgt auf Höhe der Gesamtvergütung des abgelaufenen Geschäftsjahres und gegebenenfalls auch auf Höhe der voraussichtlichen Gesamtvergütung für das laufende Geschäftsjahr.

#### Change of Control-Klausel

Gemäß dem Deutschen Corporate Governance Kodex wird bei Neuabschluss von Vorstandsverträgen und bei der Verlängerung bestehender Vorstandsverträge darauf geachtet, dass eine Zusage für Leistungen aus Anlass der vorzeitigen Beendigung der Vorstandstätigkeit infolge eines Kontrollwechsels 150 % des Abfindungs-Caps nicht übersteigt.

## Aufsichtsratsvergütung

Die Aufsichtsratsvergütung wurde von der Hauptversammlung 2010 neu mit Wirkung ab dem Geschäftsjahr 2010 festgesetzt. Sie besteht aus Festbeträgen und Sitzungsgeldern. Jedes Mitglied erhält 40.000 EUR, der Vorsitzende erhält das Zweieinhalbfache, sein Stellvertreter das Eineinhalbfache. Die Mitglieder des Prüfungsausschusses erhalten zusätzlich eine feste Vergütung von 15.000 EUR, die des Personalausschusses erhalten zusätzlich eine feste Vergütung von 7.500 EUR, der Ausschussvorsitzende jeweils das Doppelte. Zusätzlich wird für jede persönliche Teilnahme an einer Präsenzsitzung des Aufsichtsrats und seiner Ausschüsse ein Sitzungsgeld von 1.500 EUR gezahlt. Zusätzlich zu den Festbeträgen erhalten die Mitglieder des Aufsichtsrats eine variable Vergütung, die für jedes Mitglied 58 EUR je 0,01 EUR Ergebnis je Aktie, das über den Sockelbetrag von 2,50 EUR Ergebnis je Aktie hinausgeht, beträgt. Maßgebend ist das entsprechend den International Financial Reporting Standards berechnete und im Konzernabschluss für das Geschäftsjahr, für das die Vergütung gezahlt wird, ausgewiesene Ergebnis je Aktie. Der Vorsitzende des Aufsichtsrats erhält das Zweieinhalbfache, sein Stellvertreter das Eineinhalbfache dieses Betrags. Die so berechnete variable Vergütung ist auf die Höhe der festen Vergütung begrenzt. Die allen Aufsichtsratsmitgliedern gewährte variable Vergütung darf insgesamt den Bilanzgewinn der Gesellschaft, vermindert um 4% der auf den geringsten Ausgabebetrag der Aktien geleisteten Einlagen, nicht übersteigen. Im Geschäftsjahr 2010 wurde keine variable Vergütung ausgezahlt. Die Gesamtvergütung des Aufsichtsrats beläuft sich für das Geschäftsjahr 2010 auf 815.432 (i.V.: 499.895) EUR.

Die Arbeitnehmervertreter im Aufsichtsrat führen einen nennenswerten Teil ihrer Aufsichtsratsvergütung an das Erholungswerk der Belegschaft der HeidelbergCement AG sowie – mit Ausnahme des Vertreters der Leitenden Angestellten – an die gewerkschaftsnahe Hans-Böckler-Stiftung ab.

Die für das Geschäftsjahr 2010 gezahlten Aufsichtsratsvergütungen gliedern sich wie folgt individualisiert auf:

| Für das Geschäftsjahr 2010 gezahlte Aufsichtsratsvergütungen |                 |                                  |                |        |
|--------------------------------------------------------------|-----------------|----------------------------------|----------------|--------|
| 1.000 EUR (gerundet)                                         |                 |                                  |                |        |
|                                                              | Feste Vergütung | Vergütung für Ausschusstätigkeit | Sitzungsgelder | Gesamt |
| Fritz-Jürgen Heckmann (Vorsitzender)                         | 100,00          | 22,50                            | 10,50          | 133,00 |
| Heinz Schmitt (stellv. Vorsitzender)                         | 60,00           | 22,50                            | 10,50          | 93,00  |
| Robert Feiger                                                | 40,00           | 15,00                            | 7,50           | 62,50  |
| Josef Heumann                                                | 40,00           | 7,50                             | 10,50          | 58,00  |
| Max Dietrich Kley                                            | 40,00           | 13,35                            | 7,50           | 60,85  |
| Hans Georg Kraut                                             | 40,00           | 7,50                             | 10,50          | 58,00  |
| Dr.-Ing. Herbert Lütkestratkötter                            | 37,59           | <sup>1)</sup>                    | 6,00           | 43,59  |
| Ludwig Merckle                                               | 40,00           | 45,00                            | 10,50          | 95,50  |
| Tobias Merckle                                               | 40,00           | 6,68                             | 9,00           | 55,68  |
| Alan Murray                                                  | 37,81           | <sup>1)</sup>                    | 7,50           | 45,31  |
| Werner Schraeder                                             | 40,00           | 15,00                            | 7,50           | 62,50  |
| Frank-Dirk Steininger                                        | 40,00           | <sup>1)</sup>                    | 7,50           | 47,50  |
| Summe                                                        | 555,40          | 155,03                           | 105,00         | 815,43 |

1) keine Mitgliedschaft

## Organe der Gesellschaft

### Aufsichtsrat

Der Aufsichtsrat der HeidelbergCement AG besteht nach der Satzung aus zwölf Mitgliedern. Die Mitglieder des Aufsichtsrats werden je zur Hälfte von der Hauptversammlung nach den Bestimmungen des Aktiengesetzes und von den Arbeitnehmern nach den Bestimmungen des Mitbestimmungsgesetzes gewählt. Die Amtszeit des Aufsichtsrats begann mit Ablauf der Hauptversammlung vom 7. Mai 2009 und endet turnusgemäß mit Ablauf der ordentlichen Hauptversammlung 2014.

#### Fritz-Jürgen Heckmann

Vorsitzender des Aufsichtsrats  
Stuttgart; Wirtschaftsjurist  
Mitglied seit: 8. Mai 2003  
Vorsitzender seit: 1. Februar 2005  
Vorsitzender des Vermittlungs- und des  
Nominierungsausschusses sowie Mitglied  
des Personal- und des Prüfungsausschusses

andere Mandate:

- a) Paul Hartmann AG (Vorsitzender)  
schlott gruppe Aktiengesellschaft  
(Vorsitzender)  
Wieland-Werke AG (Vorsitzender)
- b) HERMA Holding GmbH + Co. KG  
(stellv. Vorsitzender)  
Neue Pressegesellschaft mbH & Co. KG  
Süddeutsche Verlag GmbH  
(stellv. Vorsitzender)  
Südwestdeutsche Medien Holding GmbH  
(stellv. Vorsitzender)  
URACA GmbH & Co. KG  
(stellv. Vorsitzender)

#### Heinz Schmitt

stellvertretender Vorsitzender  
Heidelberg; Controller; Vorsitzender des  
Betriebsrats in der Hauptverwaltung,  
HeidelbergCement AG  
Mitglied seit: 6. Mai 2004  
stellv. Vorsitzender seit: 7. Mai 2009  
Mitglied des Prüfungs-, des Vermittlungs-  
und des Personalausschusses

#### Robert Feiger

Frankfurt; stellvertretender Bundesvorsitzen-  
der der IG Bauen-Agrar-Umwelt  
Mitglied seit: 2. Januar 2008  
Mitglied des Prüfungsausschusses

andere Mandate:

- a) BAUER Aktiengesellschaft  
(stellv. Vorsitzender)
- b) Zusatzversorgungskasse des Baugewerbes AG  
Zusatzversorgungskasse des Gerüstbau-  
gewerbes VVaG

#### Josef Heumann

Burglengenfeld; Anlagenwärter Brennerei;  
Vorsitzender des Betriebsrats im Werk Burg-  
lengenfeld der HeidelbergCement AG  
Mitglied seit: 6. Mai 2004  
Mitglied des Personalausschusses

#### Max Dietrich Kley

Heidelberg; Rechtsanwalt  
Mitglied seit: 6. Mai 2004  
Mitglied des Prüfungsausschusses  
(seit 10. Februar 2010)

andere Mandate:

- a) BASF SE  
SGL CARBON SE (Vorsitzender)

#### Hans Georg Kraut

Schelklingen, Leiter des Werks Schelklingen  
der HeidelbergCement AG  
Mitglied seit: 6. Mai 2004  
Mitglied des Personal- und des Vermittlungs-  
ausschusses



**Dr.-Ing. Herbert Lütkestratkötter**

Essen; Vorsitzender des Vorstands der  
HOCHTIEF Aktiengesellschaft  
Mitglied seit: 23. Januar 2010

andere Mandate:

- a) HOCHTIEF Concessions AG  
HOCHTIEF Construction AG  
HOCHTIEF Facility Management GmbH  
TÜV Rheinland Holding AG
- b) Leighton Holdings Limited

**Ludwig Merckle**

Ulm; Geschäftsführer der Merckle Service  
GmbH

Mitglied seit: 2. Juni 1999

Vorsitzender des Personal- und des Prüfungsausschusses sowie Mitglied des Nominierungsausschusses

andere Mandate:

- a) Kässbohrer Geländefahrzeug AG  
(Vorsitzender)  
Württembergische Leinenindustrie AG  
(Vorsitzender)

**Tobias Merckle**

Leonberg; geschäftsführender Vorstand des  
Vereins prisma e.V. – Initiative für Jugendhilfe  
und Kriminalprävention

Mitglied seit: 23. Mai 2006

Mitglied des Personal-, des Nominierungs-  
und des Vermittlungsausschusses  
(seit 10. Februar 2010)

**Alan Murray**

Naples, Florida/USA; ehem. Mitglied des  
Vorstands der HeidelbergCement AG

Mitglied seit: 21. Januar 2010

andere Mandate:

- b) International Power plc  
(Non executive Director)

**Werner Schraeder**

Ennigerloh; Bauschlosser; Vorsitzender des  
Gesamtbetriebsrats der HeidelbergCement AG  
und Vorsitzender des Betriebsrats im Werk  
Ennigerloh der HeidelbergCement AG

Mitglied seit: 7. Mai 2009

Mitglied des Prüfungsausschusses

**Frank-Dirk Steininger**

Frankfurt; Fachreferent für Arbeitsrecht beim  
Bundesvorstand der IG Bauen-Agrar-Umwelt  
Mitglied seit: 11. Juni 2008

Die vorgenannten Kennzeichnungen bei den  
anderen Mandaten bedeuten:

- a) Mitgliedschaft in anderen gesetzlich zu  
bildenden Aufsichtsräten bei inländischen  
Gesellschaften
- b) Mitgliedschaft in vergleichbaren in- und  
ausländischen Kontrollgremien von Wirt-  
schaftsunternehmen.

Alle Angaben beziehen sich auf den  
31. Dezember 2010.

## Ausschüsse des Aufsichtsrats

### Personalausschuss

Ludwig Merckle, Vorsitzender  
 Fritz-Jürgen Heckmann  
 Josef Heumann  
 Hans Georg Kraut  
 Tobias Merckle (seit 10. Februar 2010)  
 Heinz Schmitt

### Prüfungsausschuss

Ludwig Merckle, Vorsitzender  
 Robert Feiger  
 Fritz-Jürgen Heckmann  
 Max Dietrich Kley (seit 10. Februar 2010)  
 Heinz Schmitt  
 Werner Schraeder

### Vermittlungsausschuss nach § 27 Abs. 3 MitbestG

Fritz-Jürgen Heckmann, Vorsitzender  
 Hans Georg Kraut  
 Tobias Merckle (seit 10. Februar 2010)  
 Heinz Schmitt

### Nominierungsausschuss

Fritz-Jürgen Heckmann, Vorsitzender  
 Ludwig Merckle  
 Tobias Merckle (seit 10. Februar 2010)

## Vorstand

Dem Vorstand der HeidelbergCement AG gehören gegenwärtig sechs Mitglieder an: Vorstandsvorsitzender, Finanzvorstand sowie vier Vorstandsmitglieder mit regionaler Verantwortung. Die Vorstandsorganisation zeichnet sich durch eine duale Management-Verantwortung aus: Die operativen Einheiten in den jeweiligen Konzerngebieten fallen unter die Linienverantwortung der einzelnen Vorstandsmitglieder. Zusätzlich übernehmen die Vorstandsmitglieder überregionale Verantwortung für bestimmte Unternehmensbereiche mit hoher strategischer Bedeutung für den Konzern.

### Dr. Bernd Scheifele

Vorsitzender des Vorstands  
 Verantwortungsbereich: Strategie und  
 Entwicklung, Kommunikation & Investor  
 Relations, Personal, Recht, Compliance,  
 Konzernrevision  
 Vorstandsvorsitzender seit: 2005

#### Mandate:

- a) Verlagsgruppe Georg von Holtzbrinck  
 GmbH (stellv. Vorsitzender)  
 Landesbank Hessen-Thüringen Girozentrale  
 (Mitglied des Verwaltungsrats)

- b) Castle Cement Limited <sup>1)</sup>  
 ENCI Holding N.V. <sup>1)</sup>  
 Hanson Limited <sup>1)</sup>  
 Hanson Pioneer España, S.L. <sup>1)</sup>  
 HeidelbergCement Holding S.à.r.l. <sup>1)</sup>  
 HeidelbergCement India Ltd. <sup>1)</sup>  
 HeidelbergCement Netherlands  
 Holding B.V. <sup>1)</sup>  
 PT Indocement Tunggul Prakarsa Tbk. <sup>1)</sup>  
 RECEM S.A. <sup>1)</sup>  
 TAMRO Oyj (Chairman of the  
 Board of Directors)

**Dr. Dominik von Achten**

Verantwortungsbereich: Nordamerika, Einkauf,  
konzernweite Koordinierung des Competence  
Center Materials

Vorstandsmitglied seit: 2007

Mandate:

- b) Castle Cement Limited <sup>1)</sup>
  - HeidelbergCement Canada Holding Limited <sup>1)</sup>
  - HeidelbergCement UK Holding II Limited <sup>1)</sup>
  - Lehigh Hanson, Inc. <sup>1)</sup>
  - Lehigh Hanson Materials Limited <sup>1)</sup>
  - TITAL GmbH
  - Verlag Lensing-Wolff GmbH & Co. KG
  - („Medienhaus Lensing“)

**Daniel Gauthier**

Verantwortungsbereich:  
West- und Nordeuropa (ohne Deutschland),  
Afrika-Mittelmeerraum, Konzernservice,  
Umweltnachhaltigkeit.

Vorstandsmitglied seit: 2000

Mandate:

- b) Akçansa Çimento Sanayi ve Ticaret A.S.  
(stellv. Vorsitzender)
- Carmeuse Holding SA
- Castle Cement Limited <sup>1)</sup>
- CBR Asset Management S.A. <sup>1)</sup>  
(Vorsitzender)
- CBR Asset Management Belgium S.A. <sup>1)</sup>  
(Vorsitzender)
- CBR Finance S.A. <sup>1)</sup> (Vorsitzender)
- CBR International Services S.A. <sup>1)</sup>  
(Vorsitzender)
- Cementum I B.V. <sup>1)</sup>
- Cementum II B.V. <sup>1)</sup>
- Cimenteries CBR S.A. <sup>1)</sup> (Vorsitzender)
- Cimenterie de Lukala "CILU" SARL <sup>1)</sup>
- Civil and Marine Limited <sup>1)</sup>
- ENCI Holding N.V. <sup>1)</sup> (Vorsitzender)
- Genlis Metal
- Hanson Building Products Limited <sup>1)</sup>
- Hanson Pioneer España, S.L. <sup>1)</sup>
- Hanson Quarry Products Europe Limited <sup>1)</sup>
- HC Fuels Ltd. <sup>1)</sup> (Vorsitzender)
- HC Trading International Inc. <sup>1)</sup> (Vorsitzender)
- HC Trading B.V. <sup>1)</sup> (Vorsitzender)

HC Trading Malta Ltd <sup>1)</sup>

HCT Holding Malta Limited <sup>1)</sup>

HeidelbergCement Asia Pte Ltd <sup>1)</sup>

HeidelbergCement Holding HK Limited <sup>1)</sup>

HeidelbergCement Holding S.à.r.l. <sup>1)</sup>

HeidelbergCement Northern Europe AB <sup>1)</sup>

HeidelbergCement UK Holding Limited <sup>1)</sup>

Interlacs SARL <sup>1)</sup>

International Trading and Finance (ITF) B.V. <sup>1)</sup>  
(Vorsitzender)

Lehigh B.V. <sup>1)</sup> (stellv. Vorsitzender)

PT Indocement Tungal Prakarsa Tbk. <sup>1)</sup>

RECEM S.A. <sup>1)</sup>

Scancem International DA <sup>1)</sup> (Vorsitzender)

Scancem International a.s <sup>1)</sup> (Vorsitzender)

Tadir Readymix Concrete (1965) Ltd <sup>1)</sup>

TPCC Tanzania Portland Cement

Company Ltd. <sup>1)</sup>

**Andreas Kern**

Verantwortungsbereich: Osteuropa-Zentral-  
asien, Deutschland, Verkauf und Marketing,  
konzernweite Koordinierung zementähnlicher  
Sekundärstoffe

Vorstandsmitglied seit: 2000

Mandate:

- a) Basalt-Actien-Gesellschaft  
Kronimus AG
- b) Carpatcement Holding S.A. <sup>1)</sup>
  - Castle Cement Limited <sup>1)</sup>
  - CaucasusCement Holding B.V. <sup>1)</sup> (Vorsitzender)
  - Ceskomoravský cement, a.s., nástupnická  
společnost <sup>1)</sup> (Vorsitzender)
  - Duna-Dráva Cement Kft <sup>1)</sup>
  - ENCI Holding N.V. <sup>1)</sup>
  - Górazdze Cement S.A. <sup>1)</sup> (Vorsitzender)
  - Hanson Pioneer España, S.L. <sup>1)</sup>
  - HC Fuels Limited <sup>1)</sup>
  - HeidelbergCement Central Europe East  
Holding B.V. <sup>1)</sup> (Vorsitzender)
  - HeidelbergCement Netherlands Holding B.V. <sup>1)</sup>
  - Joint Stock Company – Bukhtarminskaya  
Cement Company <sup>1)</sup> (Vorsitzender)
  - Limited Liability Company Kartuli Cementi <sup>1)</sup>
  - Limited Liability Company SaqCementi <sup>1)</sup>  
(stellv. Vorsitzender)

Lithonplus GmbH & Co. KG  
 NCD Nederlandse Cement  
 Deelnemingsmaatschappij B.V.<sup>1)</sup>  
 OAO Cesla<sup>1)</sup>  
 Public Joint Stock Company  
 „HeidelbergCement Ukraine“<sup>1)</sup>  
 RECEM S.A.<sup>1)</sup>  
 Tvornica Cementa Kakanj d.d.<sup>1)</sup>

#### Dr. Lorenz Näger

Verantwortungsbereich: Finanzen, Konzern-  
 rechnungslegung, Controlling, Steuern, Ver-  
 sicherungen & Risikomanagement, IT, Shared  
 Service Center, Logistik  
 Vorstandsmitglied seit: 2004

Mandate:

b) Castle Cement Limited<sup>1)</sup>  
 Cimenteries CBR S.A.<sup>1)</sup>  
 ENCI Holding N.V.<sup>1)</sup>  
 Hanson Limited<sup>1)</sup>  
 Hanson Pioneer España, S.L.<sup>1)</sup>  
 HeidelbergCement Canada Holding Limited<sup>1)</sup>  
 HeidelbergCement Holding S.à.r.l.<sup>1)</sup>  
 HeidelbergCement India Ltd.<sup>1)</sup>  
 HeidelbergCement International  
 Holding GmbH<sup>1)</sup>  
 HeidelbergCement Netherlands Holding B.V.<sup>1)</sup>  
 HeidelbergCement UK Holding Limited<sup>1)</sup>  
 HeidelbergCement UK Holding II Limited<sup>1)</sup>  
 Lehigh B.V.<sup>1)</sup> (Vorsitzender)  
 Lehigh Hanson, Inc.<sup>1)</sup>  
 Lehigh Hanson Materials Limited<sup>1)</sup>  
 Lehigh UK Limited<sup>1)</sup>  
 Palatina Insurance Ltd<sup>1)</sup>  
 PT Indocement Tunggal Prakarsa Tbk.<sup>1)</sup>  
 RECEM S.A.<sup>1)</sup>  
 TAMRO Oyj

#### Dr. Albert Scheuer

Verantwortungsbereich: Asien-Pazifik,  
 konzernweite Koordinierung des Heidelberg  
 Technology Center  
 Vorstandsmitglied seit: 2007

Mandate:

b) China Century Cement Limited  
 Cochin Cements Ltd.<sup>1)</sup>  
 Easy Point Industrial Ltd.  
 Guangzhou Heidelberg Yuexiu Enterprise  
 Management Consulting Company Ltd.  
 HeidelbergCement Asia Pte Ltd<sup>1)</sup>  
 (Vorsitzender)  
 HeidelbergCement Bangladesh Ltd.<sup>1)</sup>  
 HeidelbergCement Holding HK Limited<sup>1)</sup>  
 HeidelbergCement India Ltd.<sup>1)</sup>  
 Jidong Heidelberg (Fufeng) Cement  
 Company Limited  
 Jidong Heidelberg (Jingyang) Cement  
 Company Limited  
 PT Indocement Tunggal Prakarsa Tbk.<sup>1)</sup>  
 (Vorsitzender)  
 Squareal Cement Ltd

Die vorgenannten Kennzeichnungen bei den  
 Mandaten bedeuten:

- a) Mitgliedschaft in gesetzlich zu bildenden Auf-  
 sichtsräten bei inländischen Gesellschaften
- b) Mitgliedschaft in vergleichbaren in- und  
 ausländischen Kontrollgremien von Wirt-  
 schaftsunternehmen.

Konzernmandate sind mit 1) gekennzeichnet.

Alle Angaben beziehen sich auf den  
 31. Dezember 2010.



HeidelbergCement  
bilanziert

|            |                                                      |
|------------|------------------------------------------------------|
| <b>145</b> | <b>Gewinn- und Verlustrechnung des Konzerns</b>      |
| <b>146</b> | <b>Gesamtergebnisrechnung des Konzerns</b>           |
| <b>147</b> | <b>Kapitalflussrechnung des Konzerns</b>             |
| <b>148</b> | <b>Bilanz des Konzerns</b>                           |
| <b>150</b> | <b>Eigenkapitalveränderungsrechnung des Konzerns</b> |
| <b>152</b> | <b>Segmentberichterstattung / Teil des Anhangs</b>   |
| <b>154</b> | <b>Anhang des Konzerns</b>                           |
| 154        | Allgemeine Angaben                                   |
| 154        | Bilanzierungs- und Bewertungsgrundsätze              |
| 170        | Erläuterungen zur Segmentberichterstattung           |
| 172        | Erläuterungen zur Gewinn- und Verlustrechnung        |
| 178        | Erläuterungen zur Kapitalflussrechnung               |
| 181        | Erläuterungen zur Bilanz – Aktiva                    |
| 187        | Erläuterungen zur Bilanz – Passiva                   |
| 207        | Anteilsbesitzliste                                   |
| <b>228</b> | <b>Bericht des Abschlussprüfers</b>                  |
| <b>229</b> | <b>Versicherung der gesetzlichen Vertreter</b>       |

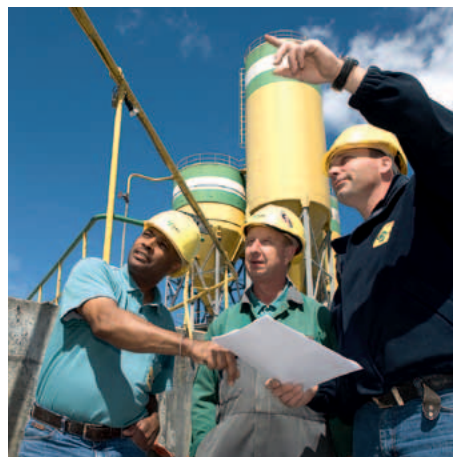

Es ist möglich, dass sich einzelne Zahlen in diesem Konzernabschluss aufgrund von Rundungen nicht genau zur angegebenen Summe aufaddieren.



| HeidelbergCement bilanziert              |                                                                      |
|------------------------------------------|----------------------------------------------------------------------|
| Gewinn- und Verlustrechnung des Konzerns | Eigenkapitalveränderungsrechnung des Konzerns                        |
| Gesamtergebnisrechnung des Konzerns      | Segmentberichterstattung/Teil des Anhangs                            |
| Kapitalflussrechnung des Konzerns        | Anhang des Konzerns                                                  |
| Bilanz des Konzerns                      | Bericht des Abschlussprüfers/Versicherung der gesetzlichen Vertreter |

## Gewinn- und Verlustrechnung des Konzerns

| Mio EUR                                                                | Anhang | 2009            | 2010            |
|------------------------------------------------------------------------|--------|-----------------|-----------------|
| <b>Umsatzerlöse</b>                                                    | 1      | 11.117,0        | <b>11.761,8</b> |
| Bestandsveränderung der Erzeugnisse                                    |        | -244,3          | <b>2,1</b>      |
| Andere aktivierte Eigenleistungen                                      |        | 10,2            | <b>8,0</b>      |
| <b>Gesamtleistung</b>                                                  |        | <b>10.883,0</b> | <b>11.772,0</b> |
| Sonstige betriebliche Erträge                                          | 2      | 411,5           | <b>453,8</b>    |
| Materialaufwand                                                        | 3      | -4.219,5        | <b>-4.731,3</b> |
| Personalaufwand                                                        | 4      | -2.041,5        | <b>-2.086,2</b> |
| Sonstige betriebliche Aufwendungen                                     | 5      | -2.931,5        | <b>-3.168,8</b> |
| <b>Operatives Ergebnis vor Abschreibungen</b>                          |        | <b>2.102,0</b>  | <b>2.239,4</b>  |
| Abschreibungen auf Sachanlagen                                         | 6      | -742,8          | <b>-768,8</b>   |
| Abschreibungen auf immaterielle Vermögenswerte                         | 6      | -42,0           | <b>-40,4</b>    |
| <b>Operatives Ergebnis</b>                                             |        | <b>1.317,3</b>  | <b>1.430,3</b>  |
| Zusätzliche ordentliche Erträge                                        | 7      | 144,1           | <b>32,0</b>     |
| Zusätzliche ordentliche Aufwendungen                                   | 7      | -639,1          | <b>-134,2</b>   |
| <b>Zusätzliches ordentliches Ergebnis</b>                              |        | <b>-494,9</b>   | <b>-102,2</b>   |
| Ergebnis aus assoziierten Unternehmen <sup>1)</sup>                    | 8      | 34,1            | <b>35,3</b>     |
| Ergebnis aus sonstigen Beteiligungen                                   | 8      | 4,0             | <b>-29,5</b>    |
| <b>Betriebsergebnis</b>                                                |        | <b>860,4</b>    | <b>1.333,8</b>  |
| Zinserträge                                                            |        | 86,3            | <b>93,5</b>     |
| Zinsaufwendungen                                                       |        | -722,5          | <b>-677,3</b>   |
| Wechselkursverluste                                                    |        | -9,2            | <b>-12,7</b>    |
| Sonstiges Finanzergebnis                                               | 9      | -229,6          | <b>-138,3</b>   |
| <b>Finanzergebnis</b>                                                  |        | <b>-874,9</b>   | <b>-734,8</b>   |
| <b>Ergebnis vor Steuern aus fortzuführenden Geschäftsbereichen</b>     |        | <b>-14,5</b>    | <b>599,1</b>    |
| Steuern vom Einkommen und vom Ertrag                                   | 10     | 190,1           | <b>-59,7</b>    |
| <b>Ergebnis nach Steuern aus fortzuführenden Geschäftsbereichen</b>    |        | <b>175,6</b>    | <b>539,3</b>    |
| Ergebnis nach Steuern aus aufgegebenen Geschäftsbereichen              | 11     | -8,0            | <b>-28,4</b>    |
| <b>Jahresüberschuss</b>                                                |        | <b>167,7</b>    | <b>510,9</b>    |
| Davon anderen Gesellschaftern zustehendes Ergebnis                     |        | 125,1           | <b>168,2</b>    |
| <b>Davon Anteil der Gruppe</b>                                         |        | <b>42,6</b>     | <b>342,7</b>    |
| Davon zur Dividende vorgesehen                                         | 12     | 22,5            | <b>46,9</b>     |
| <b>Ergebnis je Aktie in EUR (IAS 33)</b>                               | 13     |                 |                 |
| Ergebnis je Aktie – den Aktionären der HeidelbergCement AG zuzurechnen |        | 0,30            | <b>1,83</b>     |
| Ergebnis je Aktie – fortzuführende Geschäftsbereiche                   |        | 0,36            | <b>1,98</b>     |
| Ergebnis je Aktie – aufgegebene Geschäftsbereiche                      |        | -0,06           | <b>-0,15</b>    |

1) Nettoergebnis aus assoziierten Unternehmen

28,0

28,7



## Gesamtergebnisrechnung des Konzerns

| Mio EUR                                                                            | 2009   | 2009   | 2010    | 2010           |
|------------------------------------------------------------------------------------|--------|--------|---------|----------------|
| <b>Jahresüberschuss</b>                                                            |        | 167,7  |         | <b>510,9</b>   |
| Versicherungsmathematische Gewinne und Verluste                                    | -267,5 |        | 14,7    |                |
| Ertragsteuern                                                                      | 85,7   |        | -8,8    |                |
|                                                                                    |        | -181,9 |         | <b>5,9</b>     |
| Cash Flow Hedges – Marktwertveränderung                                            | 1,2    |        | 7,1     |                |
| Umgliederung von in der Gewinn- und Verlustrechnung enthaltenen Gewinnen/Verlusten |        |        | 5,4     |                |
| Ertragsteuern                                                                      | -0,5   |        | -3,4    |                |
|                                                                                    |        | 0,7    |         | <b>9,2</b>     |
| Zur Veräußerung bestimmte Vermögenswerte – Marktwertveränderung                    | 1,4    |        | 5,9     |                |
| Umgliederung von in der Gewinn- und Verlustrechnung enthaltenen Gewinnen/Verlusten |        |        | 8,7     |                |
| Ertragsteuern                                                                      | 2,4    |        | -3,6    |                |
|                                                                                    |        | 3,8    |         | <b>11,0</b>    |
| Unternehmenszusammenschlüsse                                                       | 48,5   |        |         |                |
| Ertragsteuern                                                                      | -13,9  |        | 0,2     |                |
|                                                                                    |        | 34,7   |         | <b>0,2</b>     |
| Sonstige                                                                           | 2,0    |        |         |                |
| Ertragsteuern                                                                      | 0,8    |        |         |                |
|                                                                                    |        | 2,8    |         |                |
| Währungsumrechnung                                                                 | 576,0  |        | 1.394,4 |                |
| Ertragsteuern                                                                      | -9,6   |        | -12,2   |                |
|                                                                                    |        | 566,4  |         | <b>1.382,1</b> |
| <b>Sonstiges Ergebnis</b>                                                          |        | 426,5  |         | <b>1.408,4</b> |
| <b>Gesamtergebnis der Periode</b>                                                  |        | 594,2  |         | <b>1.919,3</b> |
| Anteile anderer Gesellschafter                                                     |        | 154,3  |         | <b>219,6</b>   |
| Anteil der Aktionäre der HeidelbergCement AG                                       |        | 439,9  |         | <b>1.699,6</b> |

| HeidelbergCement bilanziert                |                                                                      |
|--------------------------------------------|----------------------------------------------------------------------|
| Gewinn- und Verlustrechnung des Konzerns   | Eigenkapitalveränderungsrechnung des Konzerns                        |
| <b>Gesamtergebnisrechnung des Konzerns</b> | Segmentberichterstattung/Teil des Anhangs                            |
| <b>Kapitalflussrechnung des Konzerns</b>   | Anhang des Konzerns                                                  |
| Bilanz des Konzerns                        | Bericht des Abschlussprüfers/Versicherung der gesetzlichen Vertreter |

## Kapitalflussrechnung des Konzerns

| Mio EUR                                                   | Anhang | 2009 <sup>1)</sup> | 2010     |
|-----------------------------------------------------------|--------|--------------------|----------|
| Ergebnis nach Steuern aus fortzuführendem Geschäft        |        | 175,6              | 539,3    |
| Steuern vom Einkommen und vom Ertrag                      |        | -190,1             | 59,7     |
| Zinsergebnis                                              |        | 636,2              | 583,8    |
| Erhaltene Dividenden                                      |        | 39,3               | 24,0     |
| Erhaltene Zinsen                                          | 14     | 65,3               | 198,0    |
| Gezahlte Zinsen                                           | 15     | -1.012,7           | -798,4   |
| Gezahlte Steuern                                          |        | -219,4             | -152,9   |
| Abschreibungen und Wertminderungen                        |        | 1.278,9            | 890,2    |
| Eliminierung anderer Non Cash Items                       | 16     | 140,9              | 117,1    |
| <b>Cashflow</b>                                           |        | 914,0              | 1.460,9  |
| Veränderung der betrieblichen Aktiva                      | 17     | 663,9              | -27,5    |
| Veränderung der betrieblichen Passiva                     | 18     | -106,7             | -27,9    |
| <b>Veränderung des Working Capital</b>                    |        | 557,2              | -55,4    |
| Verbrauch von Rückstellungen                              | 19     | -307,3             | -261,5   |
| <b>Mittelfluss aus operativer Geschäftstätigkeit</b>      |        | 1.163,9            | 1.144,0  |
| Immaterielle Vermögenswerte                               |        | -24,8              | -19,2    |
| Sachanlagen                                               |        | -771,0             | -714,8   |
| Tochterunternehmen und sonstige Geschäftseinheiten        |        |                    | -113,9   |
| Finanzanlagen                                             |        | -24,4              | -23,8    |
| <b>Zahlungswirksame Investitionen</b>                     | 20     | -820,2             | -871,6   |
| Tochterunternehmen und sonstige Geschäftseinheiten        |        | 58,5               | 2,0      |
| Sonstiges Anlagevermögen                                  |        | 226,7              | 217,5    |
| <b>Zahlungswirksame Desinvestitionen</b>                  | 21     | 285,2              | 219,4    |
| Abgegebene/übernommene liquide Mittel                     | 22     | -4,5               | 4,0      |
| <b>Mittelfluss aus Investitionstätigkeit</b>              |        | -539,4             | -648,2   |
| Erhöhung des Kapitals nach Einbehaltung                   | 23     | 2.262,9            |          |
| Auszahlung für Kapitalerhöhungskosten                     |        | -30,2              |          |
| Dividende HeidelbergCement AG                             |        | -15,0              | -22,5    |
| Dividende an Fremde                                       | 24     | -34,9              | -56,9    |
| Minderung von Anteilen an Tochterunternehmen              | 25     | 216,0              | 45,4     |
| Erhöhung von Anteilen an Tochterunternehmen               | 26     | -1,3               | -4,8     |
| Aufnahme von Anleihen und Krediten                        | 27     | 11.511,3           | 5.678,4  |
| Tilgung von Anleihen und Krediten                         | 28     | -14.557,0          | -6.182,8 |
| <b>Mittelfluss aus Finanzierungstätigkeit</b>             |        | -648,2             | -543,2   |
| Nettoveränderung der liquiden Mittel                      |        | -23,8              | -47,3    |
| Wechselkursveränderung der liquiden Mittel                |        | 34,5               | 63,5     |
| Stand der liquiden Mittel 1. Januar                       |        | 843,6              | 854,4    |
| Stand der liquiden Mittel 31. Dezember                    |        | 854,4              | 870,5    |
| Reklassifizierung der liquiden Mittel aufgrund von IFRS 5 |        |                    | -0,8     |
| Bilanzausweis der liquiden Mittel 31. Dezember            | 29     | 854,4              | 869,7    |

1) Die Vorjahreszahlen wurden aufgrund einer Änderungen des IAS 7 angepasst. Mittelflüsse, die aus der Veränderung der Beteiligungsquote an Tochterunternehmen resultieren, nicht aber zu einem Verlust der Kontrolle führen, sind als Mittelflüsse aus Finanzierungstätigkeit zu klassifizieren.

# Bilanz des Konzerns

| <b>Aktiva</b>                                               |        |              |              |
|-------------------------------------------------------------|--------|--------------|--------------|
| Mio EUR                                                     | Anhang | 31. 12. 2009 | 31. 12. 2010 |
| <b>Langfristige Aktiva</b>                                  |        |              |              |
| <b>Immaterielle Vermögenswerte</b>                          | 30     |              |              |
| Geschäfts- oder Firmenwerte                                 |        | 9.804,2      | 10.561,3     |
| Sonstige immaterielle Vermögenswerte                        |        | 264,6        | 351,9        |
|                                                             |        | 10.068,8     | 10.913,2     |
| <b>Sachanlagen</b>                                          | 31     |              |              |
| Grundstücke, grundstücksgleiche Rechte und Bauten           |        | 4.904,1      | 5.233,4      |
| Technische Anlagen und Maschinen                            |        | 4.412,4      | 4.584,9      |
| Andere Anlagen, Betriebs- und Geschäftsausstattung          |        | 236,3        | 240,1        |
| Geleistete Anzahlungen und Anlagen im Bau                   |        | 667,3        | 865,4        |
|                                                             |        | 10.220,0     | 10.923,9     |
| <b>Finanzanlagen</b>                                        |        |              |              |
| Anteile an assoziierten Unternehmen                         | 32     | 349,4        | 367,5        |
| Finanzinvestitionen                                         | 33     | 79,3         | 63,8         |
| Ausleihungen an Beteiligungsgesellschaften                  | 34     | 19,0         | 19,1         |
| Sonstige Ausleihungen und derivative Finanzinstrumente      | 34     | 45,8         | 70,0         |
|                                                             |        | 493,5        | 520,4        |
| <b>Anlagevermögen</b>                                       |        | 20.782,4     | 22.357,4     |
| <b>Latente Steuern</b>                                      | 10     | 268,8        | 355,8        |
| <b>Sonstige langfristige Forderungen</b>                    | 34     | 183,3        | 305,3        |
| <b>Langfristige Steuererstattungsansprüche</b>              |        | 16,6         | 22,1         |
| <b>Summe langfristige Aktiva</b>                            |        | 21.251,0     | 23.040,7     |
| <b>Kurzfristige Aktiva</b>                                  |        |              |              |
| <b>Vorräte</b>                                              | 35     |              |              |
| Roh-, Hilfs- und Betriebsstoffe                             |        | 595,3        | 649,1        |
| Unfertige Erzeugnisse                                       |        | 147,3        | 152,3        |
| Fertige Erzeugnisse und Waren                               |        | 601,0        | 659,2        |
| Geleistete Anzahlungen                                      |        | 12,5         | 25,0         |
|                                                             |        | 1.356,1      | 1.485,6      |
| <b>Forderungen und sonstige Vermögenswerte</b>              | 36     |              |              |
| Verzinsliche Forderungen                                    |        | 99,7         | 76,5         |
| Forderungen aus Lieferungen und Leistungen                  |        | 1.298,8      | 1.429,8      |
| Sonstige kurzfristige operative Forderungen                 |        | 361,9        | 374,6        |
| Steuererstattungsansprüche                                  |        | 238,4        | 61,0         |
|                                                             |        | 1.998,7      | 1.941,9      |
| <b>Finanzinvestitionen und derivative Finanzinstrumente</b> | 37     | 47,9         | 36,0         |
| <b>Liquide Mittel</b>                                       | 38     | 854,4        | 869,7        |
| <b>Summe kurzfristige Aktiva</b>                            |        | 4.257,1      | 4.333,2      |
| <b>Zur Veräußerung gehaltene Vermögenswerte</b>             | 39     |              | 2,8          |
| <b>Bilanzsumme</b>                                          |        | 25.508,1     | 27.376,7     |

| HeidelbergCement bilanziert              |  |                                                                      |
|------------------------------------------|--|----------------------------------------------------------------------|
| Gewinn- und Verlustrechnung des Konzerns |  | Eigenkapitalveränderungsrechnung des Konzerns                        |
| Gesamtergebnisrechnung des Konzerns      |  | Segmentberichterstattung/Teil des Anhangs                            |
| Kapitalflussrechnung des Konzerns        |  | Anhang des Konzerns                                                  |
| Bilanz des Konzerns                      |  | Bericht des Abschlussprüfers/Versicherung der gesetzlichen Vertreter |

| Passiva                                                 |        |              |              |
|---------------------------------------------------------|--------|--------------|--------------|
| Mio EUR                                                 | Anhang | 31. 12. 2009 | 31. 12. 2010 |
| <b>Eigenkapital und Anteile Fremder</b>                 |        |              |              |
| Grundkapital (Gezeichnetes Kapital)                     | 40     | 562,5        | 562,5        |
| Kapitalrücklage                                         | 41     | 5.539,4      | 5.539,4      |
| Gewinnrücklagen                                         | 42     | 6.166,5      | 6.481,6      |
| Sonstige Eigenkapitalbestandteile                       | 43     | -1.867,4     | -522,1       |
| <b>Aktionären zustehendes Kapital</b>                   |        | 10.401,0     | 12.061,4     |
| <b>Anteile Fremder</b>                                  | 44     | 602,0        | 822,8        |
| <b>Summe Eigenkapital</b>                               |        | 11.003,0     | 12.884,2     |
| <b>Langfristiges Fremdkapital</b>                       |        |              |              |
|                                                         | 47     |              |              |
| Anleihen                                                |        | 4.898,9      | 7.023,9      |
| Verbindlichkeiten gegenüber Kreditinstituten            |        | 2.981,9      | 935,7        |
| Sonstige langfristige verzinsliche Verbindlichkeiten    |        | 278,4        | 267,3        |
|                                                         |        | 8.159,2      | 8.226,9      |
| Put-Optionen von Minderheitsgesellschaftern             |        | 21,9         | 76,6         |
|                                                         |        | 8.181,1      | 8.303,5      |
| Pensionsrückstellungen                                  | 45     | 756,7        | 844,4        |
| Latente Steuern                                         | 10     | 892,4        | 823,8        |
| Sonstige Rückstellungen                                 | 46     | 1.023,8      | 1.051,3      |
| Sonstige langfristige operative Verbindlichkeiten       |        | 204,4        | 223,6        |
| Langfristige Verbindlichkeiten aus Ertragsteuern        |        | 79,8         | 90,7         |
|                                                         |        | 2.957,1      | 3.033,9      |
| <b>Summe langfristiges Fremdkapital</b>                 |        | 11.138,1     | 11.337,4     |
| <b>Kurzfristiges Fremdkapital</b>                       |        |              |              |
|                                                         | 47     |              |              |
| Anleihen                                                |        | 699,5        | 204,9        |
| Verbindlichkeiten gegenüber Kreditinstituten            |        | 196,2        | 203,3        |
| Sonstige kurzfristige verzinsliche Verbindlichkeiten    |        | 270,6        | 416,6        |
|                                                         |        | 1.166,3      | 824,9        |
| Put-Optionen von Minderheitsgesellschaftern             |        | 15,1         | 18,9         |
|                                                         |        | 1.181,3      | 843,8        |
| Pensionsrückstellungen                                  | 45     | 115,1        | 94,4         |
| Sonstige Rückstellungen                                 | 46     | 176,3        | 209,9        |
| Verbindlichkeiten aus Lieferungen und Leistungen        |        | 931,6        | 1.084,7      |
| Sonstige kurzfristige operative Verbindlichkeiten       |        | 763,1        | 779,7        |
| Kurzfristige Verbindlichkeiten aus Ertragsteuern        |        | 199,5        | 138,9        |
|                                                         |        | 2.185,6      | 2.307,6      |
| <b>Summe kurzfristiges Fremdkapital</b>                 |        | 3.366,9      | 3.151,3      |
| <b>Schulden im Zusammenhang mit Veräußerungsgruppen</b> | 39     |              | 3,8          |
| <b>Fremdkapital</b>                                     |        | 14.505,1     | 14.492,5     |
| <b>Bilanzsumme</b>                                      |        | 25.508,1     | 27.376,7     |



## Eigenkapitalveränderungsrechnung des Konzerns

| Mio EUR                                                | Gezeichnetes Kapital | Kapital-rücklage | Gewinn-rücklagen | Cash Flow Hedge-Rücklage |  |
|--------------------------------------------------------|----------------------|------------------|------------------|--------------------------|--|
| <b>Stand am 1. Januar 2009</b>                         | 375,0                | 3.470,9          | 6.317,0          | -14,2                    |  |
| Jahresüberschuss                                       |                      |                  | 42,6             |                          |  |
| Sonstiges Ergebnis                                     |                      |                  | -178,1           | 0,9                      |  |
| <b>Gesamtergebnis der Periode</b>                      |                      |                  | -135,5           | 0,9                      |  |
| Änderungen Konsolidierungskreis                        |                      |                  |                  |                          |  |
| Kapitalerhöhung aus Ausgabe neuer Aktien <sup>1)</sup> | 187,5                | 2.068,5          |                  |                          |  |
| Dividenden                                             |                      |                  | -15,0            |                          |  |
| <b>Stand am 31. Dezember 2009</b>                      | 562,5                | 5.539,4          | 6.166,5          | -13,3                    |  |
| <b>Stand am 1. Januar 2010</b>                         | 562,5                | 5.539,4          | 6.166,5          | -13,3                    |  |
| Jahresüberschuss                                       |                      |                  | 342,7            |                          |  |
| Sonstiges Ergebnis                                     |                      |                  | 8,9              | 9,2                      |  |
| <b>Gesamtergebnis der Periode</b>                      |                      |                  | 351,6            | 9,2                      |  |
| Änderungen Konsolidierungskreis                        |                      |                  |                  |                          |  |
| Änderungen von Anteilen an Tochterunternehmen          |                      |                  | 23,8             |                          |  |
| Änderung von Minderheitsanteilen mit Put-Optionen      |                      |                  | -39,5            |                          |  |
| Sonstige Änderungen                                    |                      |                  | 1,7              |                          |  |
| Dividenden                                             |                      |                  | -22,5            |                          |  |
| <b>Stand am 31. Dezember 2010</b>                      | 562,5                | 5.539,4          | 6.481,6          | -4,2                     |  |

1) Die Kapitalerhöhung aus der Ausgabe neuer Aktien wurde gem. IAS 32.37 um Nettotransaktionskosten von 56,5 Mio EUR gemindert. Hierin enthalten sind Ertragsteuervorteile in Höhe von 23,2 Mio EUR.

| Sonstige Eigenkapitalbestandteile |                                 |                            |                         |                                                 |                                      |                    |          |
|-----------------------------------|---------------------------------|----------------------------|-------------------------|-------------------------------------------------|--------------------------------------|--------------------|----------|
|                                   | Available for sale-<br>Rücklage | Neubewertungs-<br>rücklage | Währungs-<br>umrechnung | Summe sonstige<br>Eigenkapital-<br>bestandteile | Aktionären<br>zustehendes<br>Kapital | Anteile<br>Fremder | Gesamt   |
|                                   | 9,2                             | 4,9                        | -2.442,5                | -2.442,7                                        | 7.720,1                              | 540,7              | 8.260,8  |
|                                   |                                 |                            |                         |                                                 | 42,6                                 | 125,1              | 167,7    |
|                                   | 3,8                             | 34,7                       | 536,0                   | 575,3                                           | 397,2                                | 29,3               | 426,5    |
|                                   | 3,8                             | 34,7                       | 536,0                   | 575,3                                           | 439,9                                | 154,3              | 594,2    |
|                                   |                                 |                            |                         |                                                 |                                      | -58,1              | -58,1    |
|                                   |                                 |                            |                         |                                                 | 2.256,0                              |                    | 2.256,0  |
|                                   |                                 |                            |                         |                                                 | -15,0                                | -34,9              | -49,9    |
|                                   | 12,9                            | 39,6                       | -1.906,5                | -1.867,4                                        | 10.401,0                             | 602,0              | 11.003,0 |
|                                   | 12,9                            | 39,6                       | -1.906,5                | -1.867,4                                        | 10.401,0                             | 602,0              | 11.003,0 |
|                                   |                                 |                            |                         |                                                 | 342,7                                | 168,2              | 510,9    |
|                                   | 11,0                            | 0,2                        | 1.327,6                 | 1.348,0                                         | 1.356,9                              | 51,5               | 1.408,4  |
|                                   | 11,0                            | 0,2                        | 1.327,6                 | 1.348,0                                         | 1.699,6                              | 219,6              | 1.919,3  |
|                                   |                                 |                            |                         |                                                 |                                      | 59,6               | 59,6     |
|                                   |                                 |                            |                         |                                                 | 23,8                                 | 17,8               | 41,6     |
|                                   |                                 |                            |                         |                                                 | -39,5                                | -19,3              | -58,8    |
|                                   |                                 | -2,7                       |                         | -2,7                                            | -1,0                                 |                    | -1,0     |
|                                   |                                 |                            |                         |                                                 | -22,5                                | -56,9              | -79,4    |
|                                   | 23,9                            | 37,1                       | -578,9                  | -522,1                                          | 12.061,4                             | 822,8              | 12.884,2 |

## Segmentberichterstattung / Anhang

| Konzerngebiete                                                      | West- und Nordeuropa |        | Osteuropa-Zentralasien |         | Nordamerika |        |
|---------------------------------------------------------------------|----------------------|--------|------------------------|---------|-------------|--------|
| Mio EUR                                                             | 2009                 | 2010   | 2009                   | 2010    | 2009        | 2010   |
| Außenumsatz                                                         | 3.786                | 3.761  | 1.277                  | 1.138   | 2.892       | 3.033  |
| Umsatz mit anderen Konzerngebieten                                  | 62                   | 50     | 5                      |         |             |        |
| <b>Umsatz</b>                                                       | 3.848                | 3.811  | 1.282                  | 1.138   | 2.892       | 3.033  |
| Veränderung zum Vorjahr in %                                        |                      | -1,0 % |                        | -11,2 % |             | 4,9 %  |
| <b>Operatives Ergebnis vor Abschreibungen</b>                       | 687                  | 683    | 361                    | 299     | 340         | 448    |
| in % der Umsätze                                                    | 17,9 %               | 17,9 % | 28,2 %                 | 26,3 %  | 11,8 %      | 14,8 % |
| Abschreibungen                                                      | -252                 | -276   | -98                    | -96     | -254        | -260   |
| <b>Operatives Ergebnis</b>                                          | 435                  | 407    | 263                    | 203     | 86          | 188    |
| in % der Umsätze                                                    | 11,3 %               | 10,7 % | 20,5 %                 | 17,8 %  | 3,0 %       | 6,2 %  |
| Beteiligungsergebnis                                                | 18                   | 18     | 1                      | -12     | 5           | -9     |
| Wertminderungen                                                     | -55                  | -25    | -14                    | -1      | -349        | -2     |
| Wertaufholungen                                                     | 2                    |        | 2                      | 4       |             |        |
| Sonstiges zusätzliches Ergebnis                                     |                      |        |                        |         |             |        |
| Zusätzliches ordentliches Ergebnis                                  | -53                  | -25    | -12                    | 3       | -349        | -2     |
| <b>Betriebsergebnis (EBIT)</b>                                      | 400                  | 401    | 252                    | 194     | -259        | 177    |
| <b>Investitionen <sup>1)</sup></b>                                  | 248                  | 178    | 270                    | 202     | 152         | 146    |
| <b>Segmentvermögen <sup>2)</sup></b>                                | 6.883                | 6.902  | 1.722                  | 2.117   | 7.746       | 8.186  |
| Operatives Ergebnis vor Abschreibungen<br>in % des Segmentvermögens | 10,0 %               | 9,9 %  | 21,0 %                 | 14,1 %  | 4,4 %       | 5,5 %  |
| <b>Segmentverbindlichkeiten <sup>3)</sup></b>                       | 2.277                | 2.279  | 307                    | 334     | 1.738       | 1.753  |
| <b>Mitarbeiter am 31. Dezember</b>                                  | 14.640               | 14.302 | 9.481                  | 9.959   | 12.601      | 11.899 |
| <b>Mitarbeiter im Durchschnitt</b>                                  | 15.265               | 14.358 | 10.106                 | 10.283  | 14.391      | 13.230 |

| Geschäftsbereiche                                                   | Zement |        | Zuschlagstoffe |        | Bauprodukte |        |
|---------------------------------------------------------------------|--------|--------|----------------|--------|-------------|--------|
| Mio EUR                                                             | 2009   | 2010   | 2009           | 2010   | 2009        | 2010   |
| Außenumsatz                                                         | 4.570  | 4.831  | 1.526          | 1.683  | 1.267       | 1.169  |
| Umsatz mit anderen Geschäftsbereichen                               | 712    | 728    | 597            | 664    | 6           | 6      |
| <b>Umsatz</b>                                                       | 5.282  | 5.560  | 2.123          | 2.347  | 1.273       | 1.174  |
| Veränderung zum Vorjahr in %                                        |        | 5,3 %  |                | 10,6 % |             | -7,7 % |
| <b>Operatives Ergebnis vor Abschreibungen</b>                       | 1.529  | 1.639  | 468            | 539    | 48          | 102    |
| in % der Umsätze                                                    | 28,9 % | 29,5 % | 22,1 %         | 23,0 % | 3,7 %       | 8,7 %  |
| <b>Investitionen <sup>1)</sup></b>                                  | 453    | 480    | 169            | 170    | 45          | 36     |
| <b>Segmentvermögen <sup>2)</sup></b>                                | 5.927  | 6.838  | 12.061         | 12.549 | 1.214       | 1.239  |
| Operatives Ergebnis vor Abschreibungen<br>in % des Segmentvermögens | 25,8 % | 24,0 % | 3,9 %          | 4,3 %  | 3,9 %       | 8,2 %  |

1) Investitionen = in den Segmenten: Investitionen in Sachanlagen inklusive immaterielle Vermögenswerte, in der Überleitung: Finanzanlageinvestitionen/Anteilskäufe

2) Segmentvermögen = Sachanlagen inklusive immaterielle Vermögenswerte

3) Segmentverbindlichkeiten = Verbindlichkeiten und Rückstellungen; die Finanzschulden werden in der Überleitung gezeigt.

| HeidelbergCement bilanziert              |                                                                      |
|------------------------------------------|----------------------------------------------------------------------|
| Gewinn- und Verlustrechnung des Konzerns | Eigenkapitalveränderungsrechnung des Konzerns                        |
| Gesamtergebnisrechnung des Konzerns      | Segmentberichterstattung/Teil des Anhangs                            |
| Kapitalflussrechnung des Konzerns        | Anhang des Konzerns                                                  |
| Bilanz des Konzerns                      | Bericht des Abschlussprüfers/Versicherung der gesetzlichen Vertreter |

|  | Asien-Pazifik |        | Afrika-Mittelmeerraum |        | Konzernservice |        | Überleitung |       | Fortzuführende Geschäftsbereiche |        |
|--|---------------|--------|-----------------------|--------|----------------|--------|-------------|-------|----------------------------------|--------|
|  | 2009          | 2010   | 2009                  | 2010   | 2009           | 2010   | 2009        | 2010  | 2009                             | 2010   |
|  | 2.171         | 2.582  | 804                   | 901    | 187            | 347    |             |       | 11.117                           | 11.762 |
|  | 40            | 27     | 33                    | 37     | 288            | 362    | -429        | -476  |                                  |        |
|  | 2.211         | 2.609  | 837                   | 938    | 475            | 709    | -429        | -476  | 11.117                           | 11.762 |
|  |               | 18,0 % |                       | 12,0 % |                | 49,3 % |             |       |                                  | 5,8 %  |
|  | 612           | 718    | 157                   | 156    | 30             | 20     | -85         | -84   | 2.102                            | 2.239  |
|  | 27,7 %        | 27,5 % | 18,7 %                | 16,6 % | 6,2 %          | 2,9 %  |             |       | 18,9 %                           | 19,0 % |
|  | -114          | -132   | -31                   | -35    |                |        | -35         | -10   | -785                             | -809   |
|  | 498           | 586    | 126                   | 121    | 29             | 20     | -120        | -94   | 1.317                            | 1.430  |
|  | 22,5 %        | 22,5 % | 15,0 %                | 12,9 % | 6,1 %          | 2,8 %  |             |       | 11,8 %                           | 12,2 % |
|  | 7             | 7      | 2                     | 2      | 5              | 1      |             |       | 38                               | 6      |
|  |               | -3     | -76                   | -23    |                |        |             |       | -495                             | -53    |
|  |               |        |                       |        |                |        |             |       | 4                                | 4      |
|  |               |        |                       |        |                |        | -4          | -53   | -4                               | -53    |
|  |               | -3     | -76                   | -23    |                |        | -4          | -53   | -495                             | -102   |
|  | 506           | 590    | 51                    | 99     | 34             | 21     | -4          | -53   | 860                              | 1.334  |
|  | 96            | 174    | 28                    | 34     |                |        | 25          | 138   | 820                              | 872    |
|  | 3.151         | 3.837  | 751                   | 755    | 36             | 40     |             |       | 20.289                           | 21.837 |
|  |               |        |                       |        |                |        |             |       |                                  |        |
|  | 19,4 %        | 18,7 % | 20,9 %                | 20,6 % | 83,1 %         | 50,9 % |             |       | 10,4 %                           | 10,3 % |
|  | 554           | 606    | 212                   | 305    | 54             | 68     | 9.362       | 9.147 | 14.505                           | 14.493 |
|  | 14.030        | 13.682 | 2.499                 | 3.539  | 51             | 55     |             |       | 53.302                           | 53.437 |
|  | 14.380        | 13.622 | 2.529                 | 3.109  | 51             | 54     |             |       | 56.723                           | 54.655 |

|  | Beton-Service-Sonstiges |       | Überleitung |        | Fortzuführende Geschäftsbereiche |        |
|--|-------------------------|-------|-------------|--------|----------------------------------|--------|
|  | 2009                    | 2010  | 2009        | 2010   | 2009                             | 2010   |
|  | 3.754                   | 4.079 |             |        | 11.117                           | 11.762 |
|  | 362                     | 435   | -1.676      | -1.833 |                                  |        |
|  | 4.115                   | 4.514 | -1.676      | -1.833 | 11.117                           | 11.762 |
|  |                         | 9,7 % |             |        |                                  | 5,8 %  |
|  | 142                     | 46    | -85         | -86    | 2.102                            | 2.239  |
|  | 3,5 %                   | 1,0 % |             |        | 18,9 %                           | 19,0 % |
|  | 128                     | 48    | 25          | 138    | 820                              | 872    |
|  | 1.087                   | 1.211 |             |        | 20.289                           | 21.837 |
|  |                         |       |             |        |                                  |        |
|  | 13,1 %                  | 3,8 % |             |        | 10,4 %                           | 10,3 % |



# Anhang des Konzerns für das Geschäftsjahr 2010

## Allgemeine Angaben

Die HeidelbergCement AG ist eine in Deutschland ansässige Aktiengesellschaft. Sitz der Gesellschaft ist Heidelberg, Deutschland. Die Anschrift lautet: HeidelbergCement AG, Berliner Straße 6, 69120 Heidelberg.

Die Kernaktivitäten von HeidelbergCement umfassen die Herstellung und den Vertrieb von Zement, Zuschlagstoffen, Beton und Bauprodukten. Nähere Erläuterungen werden im Lagebericht gegeben.

## Bilanzierungs- und Bewertungsgrundsätze

### Grundsätze der Rechnungslegung

Der Konzernabschluss der HeidelbergCement AG wurde nach den International Financial Reporting Standards (IFRS), wie sie in der Europäischen Union anzuwenden sind, und den ergänzend nach § 315a Abs. 1 HGB zu beachtenden handelsrechtlichen Vorschriften aufgestellt. Es wurden alle für das Geschäftsjahr 2010 verbindlichen IFRS, die durch die EU-Kommission in europäisches Recht übernommen wurden, sowie die Verlautbarungen des International Financial Reporting Interpretations Committee (IFRIC) angewendet.

Die Vorjahreszahlen wurden nach denselben Grundsätzen ermittelt. Der Konzernabschluss ist in Euro aufgestellt. Der Abschluss vermittelt ein den tatsächlichen Verhältnissen entsprechendes Bild der Vermögens-, Finanz- und Ertragslage des HeidelbergCement Konzerns.

In Übereinstimmung mit IAS 1 (Presentation of Financial Statements) enthält der Konzernabschluss eine Bilanz zum Abschlussstichtag, eine Gewinn- und Verlustrechnung, eine Gesamtergebnisrechnung, eine Eigenkapitalveränderungsrechnung sowie eine Kapitalflussrechnung nach den Grundsätzen des IAS 7 (Cash Flow Statements). Die Segmentberichterstattung wird nach den Regelungen des IFRS 8 (Operating Segments) aufgestellt.

Aus Gründen der Klarheit werden in der Gewinn- und Verlustrechnung sowie in der Bilanz einzelne Posten zusammengefasst und dann im Anhang erläutert. Zur Verbesserung der Aussagekraft weisen wir in der Gewinn- und Verlustrechnung sowie in der Segmentberichterstattung das zusätzliche ordentliche Ergebnis gesondert aus. Die Gewinn- und Verlustrechnung ist nach dem Gesamtkostenverfahren aufgebaut.

### Schätzungsunsicherheiten und Annahmen

Die Darstellung der Vermögens-, Finanz- und Ertragslage im Konzernabschluss ist von Schätzungen und Annahmen des Managements abhängig, die sich auf die Höhe und den Ausweis der bilanzierten Vermögenswerte und Schulden, der Aufwendungen und Erträge sowie der Eventualverbindlichkeiten der Periode auswirken. Die sich tatsächlich ergebenden Werte können von den Schätzungen abweichen. Die Annahmen und Schätzungen beziehen sich insbesondere auf die Notwendigkeit sowie die Bemessung von Wertminderungen der Geschäfts- oder Firmenwerte, den Ansatz von aktiven latenten Steuern und die Bewertung der Pensionsrückstellungen sowie der sonstigen Rückstellungen.

Für die Ermittlung des erzielbaren Betrags von Zahlungsmittel generierenden Einheiten im Rahmen des Wertminderungstests für Geschäfts- oder Firmenwerte wird ein Cashflow-basiertes Verfahren im Sinne von IAS 36 (Impairment of Assets) angewandt. Hierbei sind insbesondere Schätzungen in Bezug auf künftige Cashflows der Zahlungsmittel generierenden Einheiten sowie auf die verwendeten Diskontierungssätze notwendig (Discounted Cash Flow-Methode). Nähere Erläuterungen werden auf Seite 159 ff. gegeben. Eine Veränderung der Einflussfaktoren kann wesentliche Auswirkungen auf die Höhe der Wertminderungen haben.

Zur Beurteilung der zukünftigen Nutzbarkeit von aktiven latenten Steuern sind verschiedene Schätzungen vorzunehmen, wie z.B. die operativen Planungen, Verlustvtragsperioden sowie Steuerplanungsstrategien. Weichen die tatsächlichen Ergebnisse von diesen Schätzungen ab, können sich Auswirkungen auf die Vermögens- und Ertragslage ergeben.

| HeidelbergCement bilanziert              |                                                                      |
|------------------------------------------|----------------------------------------------------------------------|
| Gewinn- und Verlustrechnung des Konzerns | Eigenkapitalveränderungsrechnung des Konzerns                        |
| Gesamtergebnisrechnung des Konzerns      | Segmentberichterstattung/Teil des Anhangs                            |
| Kapitalflussrechnung des Konzerns        | Anhang des Konzerns                                                  |
| Bilanz des Konzerns                      | Bericht des Abschlussprüfers/Versicherung der gesetzlichen Vertreter |

Die Verpflichtungen aus leistungsorientierten Pensionsplänen werden auf Basis versicherungsmathematischer Verfahren ermittelt, die auf Annahmen und Schätzungen hinsichtlich des Abzinsungssatzes, der erwarteten Erträge aus dem Fondsvermögen, der zukünftigen Gehaltsentwicklung, der Entwicklung der Gesundheitskosten sowie auf weiteren Einflussfaktoren beruhen. Eine Veränderung der zugrunde liegenden Parameter kann zu Änderungen des Bilanzansatzes führen. Nähere Erläuterungen werden unter Punkt 45 „Pensionsrückstellungen“ gegeben.

Die Bewertung der Rückstellungen für Schadenersatz- und Umweltverpflichtungen erfolgt auf Basis der Extrapolation der Schadenfälle und Schätzungen der Kostenentwicklungen. Die Veränderung der Einflussparameter kann Auswirkungen auf die Gewinn- und Verlustrechnung sowie den Bilanzansatz haben.

Der Ansatz und die Bewertung der übrigen sonstigen Rückstellungen erfolgt auf Basis von Einschätzungen der Wahrscheinlichkeiten des zukünftigen Nutzenabflusses sowie anhand von Erfahrungswerten und den zum Abschlussstichtag bekannten Umständen. Der tatsächlich eintretende Nutzenabfluss kann von dem am Abschlussstichtag bilanzierten Nutzenabfluss abweichen und Auswirkungen auf den Ansatz und die Bewertung haben.

Der Ausweis von Verbindlichkeiten im Zusammenhang mit Rückerstattungen der Versicherer ist vom Ausgang laufender Gerichtsverfahren abhängig.

### Konsolidierungsgrundsätze

Die Kapitalkonsolidierung erfolgt nach der Erwerbsmethode gemäß IFRS 3 (Business Combinations). Hierbei bewertet der Erwerber die erworbenen identifizierbaren Vermögenswerte und die übernommenen Schulden mit ihren zum Erwerbszeitpunkt beizulegenden Zeitwerten. Danach werden die Anteile, bewertet zum beizulegenden Zeitwert der Gegenleistung, mit dem neu bewerteten Eigenkapital des konsolidierten Tochterunternehmens zum Erwerbszeitpunkt aufgerechnet. Ein aus der Beteiligungsaufrechnung verbleibender positiver Unterschiedsbetrag wird als Geschäfts- oder Firmenwert ausgewiesen. Negative Unterschiedsbeträge werden nach nochmaliger Überprüfung erfolgswirksam erfasst. Minderheitsanteile können entweder mit dem anteiligen auf sie entfallenden Nettovermögen oder zum beizulegenden Zeitwert angesetzt werden. Dieses Wahlrecht kann für jeden Unternehmenszusammenschluss separat angewendet werden. Transaktionskosten im Zusammenhang mit Unternehmenszusammenschlüssen werden als Aufwand erfasst. Geschäfts- oder Firmenwerte werden mindestens einmal jährlich im vierten Quartal nach Vorliegen der aktuellen operativen Planung bzw. beim Eintritt wesentlicher Ereignisse oder veränderter Verhältnisse, die auf einen Wertminderungsbedarf hindeuten, einem Wertminderungstest nach IAS 36 (Impairment of Assets) unterzogen. Sukzessive Anteilerwerbe werden nach den Vorschriften des IFRS 3.41 f. bilanziert. Hiernach werden Unterschiede zwischen dem Buchwert und dem beizulegenden Zeitwert bisher gehaltener Anteile erfolgswirksam erfasst.

Der Konzernabschluss beinhaltet die Tochtergesellschaften, in denen HeidelbergCement die Finanz- und Geschäftspolitik bestimmen kann. Im Regelfall ist dies bei einem Anteilsbesitz von mehr als 50 % anzunehmen. Wenn gesellschaftsrechtliche Regelungen vorsehen, dass trotz eines Anteilsbesitzes von weniger als 50 % Beherrschung über ein Unternehmen ausgeübt werden kann, wird dieses Unternehmen als Tochterunternehmen in den Konzernabschluss einbezogen. Wenn aufgrund vertraglicher Regelungen bei einem Anteilsbesitz von mehr als 50 % keine Beherrschung über ein Unternehmen ausgeübt werden kann, wird dieses Unternehmen nicht als Tochterunternehmen in den Konzernabschluss einbezogen.

Minderheitsanteile am Eigenkapital und am Periodenergebnis konsolidierter Tochterunternehmen werden separat ausgewiesen. Bei Verkaufsoptionen bzw. Andienungsrechten von Minderheitsgesellschaftern sowie Minderheitsanteilen an deutschen Personengesellschaften werden unterjährig die auf die Minderheiten entfallenden Anteile am Gesamtergebnis der Periode sowie die Dividendenzahlungen an Minderheitsgesellschafter als Veränderung des Eigenkapitals dargestellt. Am Abschlussstichtag wird die Verbindlichkeit aus der Verkaufsoption bzw. dem Andienungsrecht mit dem Barwert des Rückzahlungsbetrags als finanzielle Verbindlichkeit ausgewiesen. Der den Buchwert der Minderheitsanteile übersteigende Betrag wird erfolgsneutral im Eigenkapital erfasst. In der Eigenkapitalveränderungsrechnung erfolgt der Ausweis als „Änderung von Minderheitsanteilen mit Put-Optionen“.

Wesentliche Gemeinschaftsunternehmen des HeidelbergCement Konzerns werden im Wege der Quotenkonsolidierung (IAS 31 Interests in Joint Ventures) in den Konzernabschluss einbezogen. Im Rahmen dieser Methode bilanziert

der Konzern seinen Anteil an den Vermögenswerten, Schulden, Erträgen, Aufwendungen und Cashflows in den korrespondierenden Posten im Konzernabschluss.

Die Anteile an assoziierten Unternehmen, bei denen HeidelbergCement durch einen Anteilsbesitz zwischen 20% und 50% einen maßgeblichen Einfluss auf die Geschäfts- und Finanzpolitik der Beteiligungsgesellschaft ausübt, sind im Konzernabschluss nach der Equity-Methode bilanziert (IAS 28 Investments in Associates). Bei erstmaliger Bilanzierung werden die erworbenen Anteile zunächst mit den Anschaffungskosten berücksichtigt und in den Folgejahren die anteiligen Ergebnisse unter den Zugängen an assoziierten Unternehmen erfasst. Die anteiligen Erträge aus assoziierten Unternehmen werden zur Verbesserung der Aussagefähigkeit des Beteiligungsergebnisses vor Ertragsteuern ausgewiesen. Der anteilige Steueraufwand wird unter dem Posten Steuern vom Einkommen und vom Ertrag ausgewiesen. Das Nettoergebnis aus assoziierten Unternehmen wird unterhalb der Gewinn- und Verlustrechnung separat gezeigt.

Aufwendungen und Erträge sowie Forderungen und Verbindlichkeiten zwischen konsolidierten Gesellschaften werden nach IAS 27 (Consolidated and Separate Financial Statements) aufgerechnet. Zwischenergebnisse aus konzerninternen Verkäufen von Vermögenswerten werden eliminiert.

Den ertragsteuerlichen Konsequenzen bei der Konsolidierung wird durch den Ansatz latenter Steuern Rechnung getragen.

### Anwendung von neuen Rechnungslegungsstandards

HeidelbergCement hat die folgenden überarbeiteten Standards und Interpretationen des International Accounting Standards Board (IASB) im Geschäftsjahr 2010 erstmals angewendet.

- Die Änderungen zu IFRS 2 (Group Cash-settled Share-based Payment Transactions) verdeutlichen, wie anteilsbasierte Vergütungen mit Barausgleich in IFRS Einzelabschlüssen von Tochterunternehmen darzustellen sind, wenn die Vergütungen durch das Mutterunternehmen oder ein anderes Gruppenunternehmen beglichen werden. Gleichzeitig mit der Änderung des IFRS 2 wurden IFRIC 8 (Scope of IFRS 2) und IFRIC 11 (IFRS 2 – Group and Treasury Share Transactions) zurückgezogen. Aus den Änderungen ergaben sich keine Auswirkung auf die Vermögens-, Finanz- und Ertragslage des Konzerns, da es im HeidelbergCement Konzern keine Aktienoptionsprogramme gibt.
- Die wesentlichen Änderungen aus der Überarbeitung des IFRS 3 (Business Combinations) betreffen die Bestimmung des Kaufpreises, die Bewertung von Minderheitsanteilen sowie die Bilanzierung sukzessiver Unternehmenserwerbe. Bedingte Kaufpreisbestandteile oder sonstige Gegenleistungen werden zum Erwerbszeitpunkt mit dem beizulegenden Zeitwert bewertet und entweder als Verbindlichkeit oder als Eigenkapital gemäß den Vorschriften des IAS 32 angesetzt. In direktem Zusammenhang mit dem Unternehmenszusammenschluss stehende Transaktionskosten sind nicht in den Kaufpreis einzubeziehen, sondern erfolgswirksam zu erfassen. Bei Minderheitsanteilen besteht das Wahlrecht, diese entweder zum beizulegenden Zeitwert oder zum anteiligen identifizierbaren Nettovermögen anzusetzen. Bei sukzessiven Unternehmenserwerben entstehende Unterschiedsbeträge zwischen dem Buchwert und dem beizulegenden Zeitwert bisher gehaltener Anteile sind nunmehr erfolgswirksam zu erfassen. Effekte aus der Abwicklung von Geschäftsbeziehungen, die bereits vor dem Unternehmenszusammenschluss bestanden, sind nach der neuen Fassung des IFRS 3 nicht in die Ermittlung der Gegenleistung für den Zusammenschluss einzubeziehen. Weiterhin regelt der überarbeitete IFRS 3 jetzt den Ansatz und die Bewertung von zurückerworbenen Rechten. Aus der erstmaligen Anwendung des überarbeiteten IFRS 3 haben sich keine wesentlichen Auswirkungen auf die Vermögens-, Finanz- und Ertragslage des Konzerns ergeben.
- Die wesentlichen Änderungen des IAS 27 (Consolidated and Separate Financial Statements) betreffen die Bilanzierung von Änderungen der Beteiligungsquoten sowie der Minderheitsanteile. Änderungen in der Beteiligungsquote ohne Verlust der Beherrschung werden als Eigenkapitaltransaktionen zwischen Gesellschaftern erfasst und führen nicht zu einer Ergebnisrealisierung bzw. einer Anpassung des Geschäfts- oder Firmenwertes. Bei Verlust der Beherrschung werden die Vermögenswerte und Schulden des Tochterunternehmens erfolgswirksam ausgebucht. Verbleibende Anteile bzw. Vermögenswerte und Schulden bei total einbezogenen Unternehmen werden nunmehr zum beizulegenden Zeitwert angesetzt. Unterschiede zwischen bisherigem Buchwert und beizulegendem Zeitwert werden erfolgswirksam erfasst. Minderheitsgesellschaftern sind nunmehr auch dann Anteile am Verlust zuzurechnen, wenn

| HeidelbergCement bilanziert              |                                                                      |
|------------------------------------------|----------------------------------------------------------------------|
| Gewinn- und Verlustrechnung des Konzerns | Eigenkapitalveränderungsrechnung des Konzerns                        |
| Gesamtergebnisrechnung des Konzerns      | Segmentberichterstattung/Teil des Anhangs                            |
| Kapitalflussrechnung des Konzerns        | Anhang des Konzerns                                                  |
| Bilanz des Konzerns                      | Bericht des Abschlussprüfers/Versicherung der gesetzlichen Vertreter |

dies dazu führt, dass die Minderheitsanteile einen Negativsaldo aufweisen. Aus der erstmaligen Anwendung des überarbeiteten IAS 27 haben sich keine wesentlichen Auswirkungen auf die Vermögens-, Finanz- und Ertragslage des Konzerns ergeben.

Im Rahmen der Überarbeitung des IAS 27 wurde IAS 7 (Statement of Cash Flows) dahingehend geändert, dass sich der Ausweis von Zahlungsströmen daran orientiert, ob dadurch Kontrolle erlangt oder aufgegeben wird bzw. ob es sich um Eigenkapitaltransaktionen zwischen Gesellschaftern handelt. Mittelflüsse, die aus der Erlangung bzw. dem Verlust von Kontrolle resultieren, werden in der Kapitalflussrechnung weiterhin als „Investitionen in bzw. Desinvestitionen von Tochterunternehmen und sonstigen Geschäftseinheiten“ im Mittelfluss aus Investitionstätigkeit gezeigt. Zahlungsströme, die aus Transaktionen mit Gesellschaftern resultieren (kein Verlust der Kontrolle), werden jetzt im Mittelfluss aus Finanzierungstätigkeit als „Erhöhung bzw. Minderung von Anteilen an Tochterunternehmen“ ausgewiesen. Da die Änderung des IAS 7 retrospektiv vorzunehmen war, wurden die Vorjahreswerte entsprechend angepasst.

- Die Änderung des IAS 39 (Financial Instruments - Eligible Hedged Items) konkretisiert, wie die Prinzipien des IAS 39 zur Bilanzierung von Sicherungsbeziehungen im Hinblick auf die Designation von einseitigen Risiken in einem Grundgeschäft sowie auf die Designation von Inflationsrisiken als Grundgeschäft anzuwenden sind. Aus der Änderung des IAS 39 ergaben sich keine Auswirkungen auf die Vermögens-, Finanz- und Ertragslage des Konzerns.
- IFRIC 12 (Service Concession Arrangements) regelt, wie Konzessionsnehmer im Rahmen von Dienstleistungskonzessionsvereinbarungen bestehende IFRS anzuwenden haben, um die im Rahmen dieser Vereinbarungen eingegangenen Verpflichtungen und erhaltenen Rechte zu erfassen. Aus der erstmaligen Anwendung des IFRIC 12 ergaben sich keine Auswirkung auf die Vermögens-, Finanz- und Ertragslage des Konzerns.
- IFRIC 17 (Distributions of Non-cash Assets to Owners) regelt die Bilanzierung einer Verbindlichkeit zur Sachdividendenausschüttung, die zu dem Zeitpunkt anzusetzen ist, ab dem die Ausschüttung nicht mehr im Ermessen des Unternehmens steht. Aus der erstmaligen Anwendung des IFRIC 17 ergaben sich keine Auswirkung auf die Vermögens-, Finanz- und Ertragslage des Konzerns.
- IFRIC 18 (Transfer of Assets from Customers) regelt die bilanzielle Behandlung von Übertragungen von Vermögenswerten und ist insbesondere relevant für Unternehmen des Energiesektors. Aus der erstmaligen Anwendung des IFRIC 18 ergaben sich keine Auswirkung auf die Vermögens-, Finanz- und Ertragslage des Konzerns.
- Im Rahmen des jährlichen Änderungsverfahrens 2009 hat das IASB den zweiten jährlich erscheinenden Sammelstandard zur Vornahme kleinerer Änderungen an den IFRS veröffentlicht. Der Standard enthält 15 verschiedene Änderungen an 12 bestehenden IFRS. Aus den Änderungen ergaben sich keine Auswirkung auf die Vermögens-, Finanz- und Ertragslage des Konzerns.

Das IASB und das IFRIC haben weiterhin die nachfolgend aufgelisteten Standards und Interpretationen verabschiedet, die im Geschäftsjahr 2010 noch nicht verpflichtend anzuwenden waren oder bis zum Abschlussstichtag noch nicht von der EU-Kommission ratifiziert worden sind.

- Nach den Änderungen zu IFRS 7 (Financial Instruments: Disclosures) sind für finanzielle Vermögenswerte, die trotz einer Übertragung der Rechte nicht vollständig ausgebucht wurden, zusätzliche Angaben zu neu entstandenen Verbindlichkeiten zu machen. Die Änderungen sind erstmals für Geschäftsjahre anzuwenden, die am oder nach dem 1. Juli 2011 beginnen (noch nicht in EU-Recht übernommen).
- Die Veröffentlichung von IFRS 9 (Financial Instruments) schließt Phase 1 des dreiteiligen IASB-Projekts zur vollständigen Überarbeitung der Bilanzierung von Finanzinstrumenten ab. IFRS 9 verfolgt einen neuen, weniger komplexen Ansatz für die Kategorisierung und Bewertung von finanziellen Vermögenswerten und finanziellen Verbindlichkeiten. Anstatt der bisherigen vier Bewertungskategorien für aktivische Finanzinstrumente gibt es nun nur noch zwei. Die Kategorisierung basiert zum einen auf dem Geschäftsmodell des Unternehmens, zum anderen auf charakteristischen Eigenschaften der vertraglichen Zahlungsströme des jeweiligen finanziellen Vermögenswerts. Die Bilanzierung finanzieller Verbindlichkeiten nach IFRS 9 erfolgt im Wesentlichen analog der bisherigen Regelungen des IAS 39 (Financial Instruments: Recognition and Measurement). Änderungen wurden lediglich dahingehend vorgenommen, dass im Rahmen der Anwendung der Fair Value Option Währungsänderungen, die auf Änderungen des eigenen Kreditrisikos zurückzuführen sind, erfolgsneutral im sonstigen Konzernergebnis auszuweisen sind. Darüber hinaus

entfällt zukünftig die Möglichkeit zur At-Cost-Bewertung von derivativen Verbindlichkeiten auf nicht notierte Eigenkapitalinstrumente. IFRS 9 ist für Geschäftsjahre anzuwenden, die am oder nach dem 1. Januar 2013 beginnen (noch nicht in EU-Recht übernommen).

- Die Änderung des IAS 12 (Income Taxes) bietet eine praktische Lösung für das Problem der Abgrenzung, ob der Buchwert eines Vermögenswerts durch Nutzung oder Veräußerung realisiert wird. Es wird die widerlegbare Vermutung eingeführt, dass die Realisierung des Buchwerts im Normalfall durch Veräußerung erfolgt. Als Folge hiervon gilt SIC 21 (Income Taxes – Recovery of Revalued Non-Depreciable Assets) nicht mehr für zum beizulegenden Zeitwert bewertete als Finanzinvestitionen gehaltene Immobilien.
- Der überarbeitete IAS 24 (Related Party Disclosures) vereinfacht die Berichtspflichten von Unternehmen, an denen der Staat beteiligt ist (so genannte „state-controlled entities“). Darüber hinaus wurde die Definition der nahe stehenden Unternehmen und Personen grundlegend überarbeitet. Der überarbeitete Standard ist für Geschäftsjahre anzuwenden, die am oder nach dem 1. Januar 2011 beginnen.
- Die Änderung zu IAS 32 (Financial Instruments: Presentation) betrifft die Klassifizierung von Bezugsrechten. Hierin wird geregelt, dass bestimmte Bezugsrechte sowie Optionen und Optionsscheine in Fremdwährung beim Emittenten, auf dessen Eigenkapitalinstrumente sich diese Rechte beziehen, nunmehr als Eigenkapital und nicht mehr als Verbindlichkeit zu bilanzieren sind. Die Änderung ist für Geschäftsjahre anzuwenden, die am oder nach dem 1. Februar 2010 beginnen.
- Die Änderungen zu IFRIC 14 (Prepayments of a Minimum Funding Requirement) sind von Relevanz, wenn ein Unternehmen, das im Zusammenhang mit seinen Pensionsplänen Mindestdotierungsverpflichtungen zu erfüllen hat, Vorauszahlungen auf diese leistet. Die Änderung der Interpretation ermöglicht es den Unternehmen, den Nutzen aus diesen Vorauszahlungen als Vermögenswert anzusetzen. Die Änderungen sind für Geschäftsjahre anzuwenden, die am oder nach dem 1. Januar 2011 beginnen.
- IFRIC 19 (Extinguishing Financial Liabilities with Equity Instruments) enthält Leitlinien zur Behandlung von als „Debt for Equity Swaps“ bezeichneten Transaktionen und verdeutlicht die Anforderungen in den IFRS, wenn ein Unternehmen die Bedingungen einer finanziellen Verbindlichkeit mit dem Gläubiger neu aushandelt und der Gläubiger dabei Aktien oder andere Eigenkapitalinstrumente des Unternehmens zur vollen oder teilweisen Tilgung der finanziellen Verbindlichkeit akzeptiert. IFRIC 19 ist für Geschäftsjahre anzuwenden, die am oder nach dem 1. Juli 2010 beginnen.
- Im Rahmen des jährlichen Änderungsverfahrens 2010 hat das IASB kleinere Änderungen von sechs International Financial Reporting Standards (IFRS) sowie einer Interpretation (IFRIC) vorgenommen. Sofern im Einzelfall nichts anderes bestimmt ist, treten die Änderungen für Geschäftsjahre in Kraft, die am oder nach dem 1. Januar 2011 beginnen.

HeidelbergCement wendet diese Standards und Interpretationen frühestens zum verpflichtenden Erstanwendungszeitpunkt und nach Ratifizierung durch die EU-Kommission an. Die Auswirkungen des IFRS 9 werden derzeit analysiert. Die Erstanwendung der anderen Standards wird nach derzeitiger Einschätzung zu keinen wesentlichen Auswirkungen auf die Vermögens-, Finanz- und Ertragslage des Konzerns führen.

### Ansatz- und Bewertungsgrundsätze

Die Erstellung des Konzernabschlusses erfolgt grundsätzlich unter Anwendung des Anschaffungskostenprinzips. Hiervon ausgeschlossen sind derivative Finanzinstrumente und zur Veräußerung verfügbare Finanzinvestitionen, die zum beizulegenden Zeitwert bewertet werden. Weiterhin werden die Buchwerte der in der Bilanz erfassten Vermögenswerte und Schulden, die Grundgeschäfte im Rahmen von Absicherungen des beizulegenden Zeitwertes (Fair Value Hedges) darstellen und ansonsten zu Anschaffungskosten bilanziert werden, aufgrund von Änderungen der beizulegenden Zeitwerte, die den abgesicherten Risiken zugerechnet werden, angepasst. Die wesentlichen Ansatz- und Bewertungsgrundsätze werden nachfolgend dargestellt.

Nach den Regelungen des IAS 38 (Intangible Assets) ist ein **immaterieller Vermögenswert** ein identifizierbarer, nicht monetärer Vermögenswert ohne physische Substanz. Die Definition eines immateriellen Vermögenswertes verlangt,



| HeidelbergCement bilanziert              |                                                                      |
|------------------------------------------|----------------------------------------------------------------------|
| Gewinn- und Verlustrechnung des Konzerns | Eigenkapitalveränderungsrechnung des Konzerns                        |
| Gesamtergebnisrechnung des Konzerns      | Segmentberichterstattung/Teil des Anhangs                            |
| Kapitalflussrechnung des Konzerns        | Anhang des Konzerns                                                  |
| Bilanz des Konzerns                      | Bericht des Abschlussprüfers/Versicherung der gesetzlichen Vertreter |

dass er identifizierbar ist, um ihn von einem Geschäfts- oder Firmenwert unterscheiden zu können. Das Kriterium der Identifizierbarkeit wird vom Vermögenswert erfüllt, wenn er separierbar ist oder aus vertraglichen oder gesetzlichen Rechten entsteht. Immaterielle Vermögenswerte werden bei Zugang zu Anschaffungs- bzw. Herstellungskosten bilanziert. Die Folgebilanzierung bemisst sich für immaterielle Vermögenswerte mit bestimmter Nutzungsdauer nach Anschaffungs- bzw. Herstellungskosten abzüglich kumulierter planmäßiger Abschreibungen und Wertminderungen sowie für immaterielle Vermögenswerte mit unbestimmter Nutzungsdauer nach Anschaffungs- bzw. Herstellungskosten abzüglich Wertminderungen. Immaterielle Vermögenswerte mit bestimmter Nutzungsdauer werden im Fall von Abbaulizenzen leistungsbezogen oder ansonsten linear abgeschrieben.

**Emissionsrechte** werden nach den Vorschriften der IFRS als immaterielle Vermögenswerte innerhalb des Anlagevermögens ausgewiesen (IAS 38). Unentgeltlich gewährte Emissionsrechte werden bei Zugang zum Nominalwert von „Null“ bilanziert. Entgeltlich erworbene Emissionsrechte werden mit den Anschaffungskosten bilanziert und bei Wertminderung außerplanmäßig abgeschrieben. Der zweite nationale Allokationsplan (NAP II) für die Zuteilung von CO<sub>2</sub>-Emissionsberechtigungen (EUA – „Emission Rights Allowances“) erstreckt sich über eine Periode von fünf Jahren (2008-2012). Diese Periode dient als Grundlage zur Beurteilung der Unter-/Überdeckung. Rückstellungen werden angesetzt, wenn eine Unterdeckung vorliegt. Im Berichtsjahr hat HeidelbergCement überschüssige Emissionsberechtigungen über die für 2010 zugeteilte Emissionsmenge veräußert. Ferner hat sich der Konzern in einer Reihe von Swap-Geschäften zur Lieferung von Emissionsberechtigungen (EUA) im Austausch gegen die zertifizierten Emissionsreduktionseinheiten (CER – „Certified Emission Reductions“) verpflichtet. Die durch Swap-Geschäfte erworbenen CER werden als immaterielle Vermögenswerte bilanziert und zum Abschlussstichtag erfolgswirksam zum beizulegenden Zeitwert bewertet.

**Geschäfts- oder Firmenwerte**, die aus Unternehmenszusammenschlüssen entstanden sind, werden gemäß IFRS 3 (Business Combinations) nicht planmäßig abgeschrieben. Stattdessen wird deren Werthaltigkeit durch einen Wertminderungstest gemäß IAS 36 (Impairment of Assets) überprüft. Im Rahmen dieser Wertminderungsprüfung wird der Buchwert einer Gruppe von Zahlungsmittel generierenden Einheiten (CGU), denen ein Geschäfts- oder Firmenwert zugeordnet ist, mit dem erzielbaren Betrag dieser Gruppe von CGUs verglichen. Ausgehend von der Vertriebs- und Managementstruktur wird eine Gruppe von Zahlungsmittel generierenden Einheiten grundsätzlich als Land oder Region definiert.

Sobald der Buchwert eines Vermögenswertes seinen erzielbaren Betrag übersteigt, wird eine Wertminderung auf den erzielbaren Betrag ergebniswirksam vorgenommen. Der erzielbare Betrag ist der höhere Betrag aus beizulegendem Zeitwert abzüglich Veräußerungskosten und Nutzungswert eines Vermögenswertes. Der beizulegende Zeitwert ist der aus dem Verkauf eines Vermögenswertes zu marktgerechten Konditionen erzielbare Betrag. Der Nutzungswert wird mittels Abzinsung zukünftiger Cashflows nach Steuern mit einem risikoangepassten Diskontierungszinssatz (WACC) nach Steuern ermittelt.

Die Cashflow-Schätzungen umfassen einen Planungshorizont von fünf Jahren, bevor in die ewige Rente übergegangen wird. Die vom Management genehmigte detaillierte operative Planung bildet die Basis für die ersten drei Planjahre. Die Cashflows für die zwei weiteren Jahre werden basierend auf einer adäquaten Wachstumsrate extrapoliert, um einen stabilen Zustand bei der Berechnung der ewigen Rente zu erreichen.

Die Diskontierungszinssätze (WACC) wurden in einem Zwei-Phasen-Modell berechnet. Für Phase 1 wurde ein Diskontierungszinssatz verwendet, mit dem die zukünftigen Zahlungsüberschüsse für die ersten fünf Jahre abgezinst werden. Für die Ermittlung des Endwertes („Terminal Value“) wurde ein Phase 2-Diskontierungszinssatz angewendet. Die Zinssätze unterscheiden sich jedoch nur durch den Ansatz eines Wachstumsabschlags in Phase 2. Der Renditezuschlag für die Fremdkapitalkosten („Credit Spread“) als Aufschlag auf den risikofreien Basiszins wurde aus dem Rating einer Vergleichsgruppe („Peer Group“) abgeleitet. Der so ermittelte Terminal Value wurde dann mit dem für Phase 1 abgeleiteten WACC auf den Bewertungsstichtag diskontiert.

Die folgenden Hauptannahmen gelten für die Berechnung des erzielbaren Betrags auf Basis des Nutzungswerts für jede Gruppe von CGUs, deren Geschäfts- oder Firmenwert entweder wesentlich im Vergleich zum Gesamtkonzern ist, wertgemindert wurde oder, wenn ein Segment aus dem Zusammenschluss von Gruppen von CGUs besteht, deren zuordenbarer Geschäfts- oder Firmenwert unwesentlich im Vergleich zum Gesamtkonzern ist.

| Annahmen zur Berechnung von Wertminderungen von Geschäfts- oder Firmenwerten | Buchwert der Geschäfts- oder Firmenwerte in Mio EUR |                 | Durchschnittliche gewichtete Kapitalkosten nach Steuern <sup>2)</sup> |                       | Wachstumsrate |                      |
|------------------------------------------------------------------------------|-----------------------------------------------------|-----------------|-----------------------------------------------------------------------|-----------------------|---------------|----------------------|
|                                                                              | 31. 12. 2009                                        | 31. 12. 2010    | 31. 12. 2009                                                          | 31. 12. 2010          | 31. 12. 2009  | 31. 12. 2010         |
| Konzerngebiet/CGU <sup>1)</sup>                                              |                                                     |                 |                                                                       |                       |               |                      |
| <b>West- und Nordeuropa</b>                                                  | 3.242,1                                             | <b>3.343,1</b>  | 7,1 % - 11,2 %                                                        | <b>6,5 % - 9,5 %</b>  | 1,5 % - 2,0 % | <b>1,5 % - 2,0 %</b> |
| Großbritannien                                                               | 2.068,3                                             | <b>2.145,3</b>  | 8,0 %                                                                 | <b>6,9 %</b>          | 1,5 %         | <b>1,5 %</b>         |
| <b>Osteuropa-Zentralasien</b>                                                | 585,3                                               | <b>618,0</b>    | 8,1 % - 17,6 %                                                        | <b>7,8 % - 14,1 %</b> | 1,5 % - 2,0 % | <b>1,5 % - 2,0 %</b> |
| <b>Nordamerika</b>                                                           | 4.055,4                                             | <b>4.332,0</b>  | 7,5 %                                                                 | <b>6,6 %</b>          | 2,0 %         | <b>2,0 %</b>         |
| <b>Asien-Pazifik</b>                                                         | 1.599,5                                             | <b>1.913,7</b>  | 6,3 % - 16,0 %                                                        | <b>6,5 % - 13,5 %</b> | 1,5 % - 2,0 % | <b>1,5 % - 2,0 %</b> |
| Australien                                                                   | 1.168,4                                             | <b>1.435,5</b>  | 9,2 %                                                                 | <b>8,7 %</b>          | 1,5 %         | <b>1,5 %</b>         |
| <b>Afrika-Mittelmeerraum</b>                                                 | 290,2                                               | <b>318,5</b>    | 7,9 % - 17,7 %                                                        | <b>9,2 % - 18,9 %</b> | 1,5 % - 2,0 % | <b>1,5 % - 2,0 %</b> |
| Spanien                                                                      | 68,6                                                | <b>45,9</b>     | 7,9 %                                                                 | <b>9,4 %</b>          | 1,5 %         | <b>1,5 %</b>         |
| <b>Konzernservice</b>                                                        | 31,7                                                | <b>36,0</b>     | 7,2 %                                                                 | <b>6,5 %</b>          | 1,5 %         | <b>1,5 %</b>         |
| <b>Gesamt</b>                                                                | 9.804,2                                             | <b>10.561,3</b> |                                                                       |                       |               |                      |

1) CGU = Zahlungsmittel generierende Einheit

2) Die durchschnittlichen gewichteten Kapitalkosten für 2010 entsprechen dem Phase 2-Diskontierungssatz vor Wachstumsanpassungen, um den Restwert („Terminal Value“) abzuzinsen. Die Diskontierungssätze der Phase 1 entsprechen den Diskontierungssätzen der Phase 2 vor Wachstumsanpassungen.

Für die in der Tabelle dargestellten wesentlichen Gruppen von CGUs ist im operativen Plan angenommen worden, dass sich die für HeidelbergCement relevanten Märkte mittelfristig von den Folgen der Finanz- und Wirtschaftskrise wieder erholen und die Nachfrage auf ein stabiles Niveau wie zu Zeiten vor der Krise zurückkehrt. Die daraus abgeleiteten Absatzmengen basieren in der Regel auf der Annahme konstanter Marktanteile. Weiterhin wurde angenommen, dass sich die im Rahmen der Hanson-Integration sowie weiterer Kostensenkungsprogramme („Fitnessprogramm 2009“, „FitnessPlus 2010“, „Fox 2013“) erzielten Einsparungen positiv auf die operative Marge auswirken. Die Annahmen für die geschätzten Wachstumsraten der ewigen Rente basieren auf langfristigen Wachstumsraten mehrerer Wirtschaftszyklen der Bauindustrie, die aus externen historischen Investitionsdaten des Bausektors hervorgehen.

Der Konzern hat im Rahmen der Überprüfung des Wertminderungsbedarfs eine Gesamtminderung des Geschäfts- oder Firmenwertes in Höhe von 23,6 Mio EUR vorgenommen. Diese Wertminderung betrifft vor allem die CGU Spanien, die gemäß der oben beschriebenen Nutzungswertmethode einen niedrigeren erzielbaren Betrag als der zugeordnete Wert des Geschäfts- oder Firmenwerts aufwies. Die Wertminderung resultiert zum einen aus im Vergleich zu den Vorjahren stark angestiegenen Renditezuschlägen für die Fremdkapitalkosten („Credit Spread“), insbesondere ab November 2010. Zum anderen geht das Management aufgrund der Schuldenkrise Spaniens von einer langsameren Erholung der Bauindustrie aus.

Darüber hinaus wurden in West- und Nordeuropa kleinere Wertminderungen in Höhe von insgesamt 1,0 Mio EUR vorgenommen.

Im Vorjahr beliefen sich Wertminderungen des Geschäfts- oder Firmenwerts auf insgesamt 420,5 Mio EUR. Hiervon betroffen waren im Wesentlichen Großbritannien (11,9 Mio EUR), Spanien (59,9 Mio EUR) und Israel (14,0 Mio EUR) sowie Nordamerika (332,1 Mio EUR).

Im Fall der CGU Australien könnten geringfügige Änderungen der wesentlichen Annahmen (WACC, nachhaltige Wachstumsrate) dazu führen, dass der Buchwert den erzielbaren Ertrag übersteigt. Das Management schließt eine derartige Entwicklung nicht aus. Die nachfolgende Übersicht zeigt den Überschuss des erzielbaren Betrags über den Buchwert und die Änderungen der wesentlichen Parameter an, bei denen der erzielbare Betrag dem zugehörigen Buchwert entspricht.

| HeidelbergCement bilanziert              |                                                                      |
|------------------------------------------|----------------------------------------------------------------------|
| Gewinn- und Verlustrechnung des Konzerns | Eigenkapitalveränderungsrechnung des Konzerns                        |
| Gesamtergebnisrechnung des Konzerns      | Segmentberichterstattung/Teil des Anhangs                            |
| Kapitalflussrechnung des Konzerns        | Anhang des Konzerns                                                  |
| Bilanz des Konzerns                      | Bericht des Abschlussprüfers/Versicherung der gesetzlichen Vertreter |

| Änderungen von Annahmen, die dazu führen, dass der erzielbare Betrag dem Buchwert entspricht |                              |
|----------------------------------------------------------------------------------------------|------------------------------|
|                                                                                              | CGU <sup>1)</sup> Australien |
| Überschuss des erzielbaren Betrags über den Buchwert in Mio EUR                              | 55,0                         |
| Sensitivität der durchschnittlichen gewichteten Kapitalkosten <sup>2)</sup>                  | 0,161                        |
| Sensitivität der Wachstumsrate <sup>2)</sup>                                                 | -0,219                       |

1) CGU = Zahlungsmittel generierende Einheit

2) Zunahme oder Abnahme ausgedrückt in Prozentpunkten.

Bei einer Erhöhung der durchschnittlichen gewichteten Kapitalkosten um bis zu 0,497 Prozentpunkte oder bei einer Reduzierung der Wachstumsrate um 0,812 Prozentpunkte sind alle anderen CGUs nicht betroffen.

Gegenstände des **Sachanlagevermögens** werden nach IAS 16 (Property, Plant and Equipment) zu Anschaffungs- oder Herstellungskosten abzüglich der kumulierten planmäßigen Abschreibungen sowie der kumulierten Wertminderungen bewertet. Die Herstellungskosten umfassen alle dem Herstellungsprozess zurechenbaren Kosten sowie angemessene Teile der fertigungsbezogenen Gemeinkosten. Kosten für Reparatur und Wartung von Sachanlagen werden grundsätzlich als Aufwand erfasst. Eine Aktivierung erfolgt, wenn die Maßnahmen zu einer Erweiterung oder wesentlichen Verbesserung des Vermögenswertes führen. Sachanlagen werden nach der linearen Abschreibungsmethode abgeschrieben, sofern nicht eine andere Abschreibungsmethode dem Nutzenverlauf sachgerechter wird. Fremdkapitalkosten, die direkt oder indirekt dem Bau von Großanlagen mit einem Erstellungszeitraum von mehr als 12 Monaten („Qualifying Assets“) zugeordnet werden können, werden in Übereinstimmung mit IAS 23 (Borrowing Costs) als Teil der Anschaffungs- oder Herstellungskosten aktiviert.

Die Bewertung der **Vorräte** erfolgt gemäß IAS 2 (Inventories) zum niedrigeren Wert aus Anschaffungs- bzw. Herstellungskosten und Nettoveräußerungswert. Hierbei wird die Durchschnittskostenmethode angewendet. Für Qualitäts- und Mengenrisiken werden in angemessener Höhe Abschläge vorgenommen. Die Herstellungskosten für unfertige und fertige Erzeugnisse umfassen neben den Einzelkosten fertigungsbedingte Material- und Fertigungsgemeinkosten sowie fertigungsbedingte Abschreibungen. Die Gemeinkostenzuschläge werden auf Basis durchschnittlicher Auslastungen ermittelt. Fremdkapitalkosten werden nicht als Teil der Anschaffungs- oder Herstellungskosten angesetzt, da der Produktionszeitraum weniger als 12 Monate beträgt. Ersatzteile für Anlagen werden in den Vorräten bzw. im Anlagevermögen ausgewiesen, wenn sie im Zusammenhang mit der Anschaffung der Anlage erworben wurden.

**Langfristige Dienstleistungs- und Fertigungsaufträge**, die über einen längeren Zeitraum erstellt werden, sind entsprechend dem Grad der erreichten Fertigstellung zu bilanzieren (Percentage-of-Completion-Methode).

**Rückstellungen für Pensionen und ähnliche Verpflichtungen** werden gemäß IAS 19 (Employee Benefits) ermittelt. Für zahlreiche Mitarbeiter wird für die Zeit nach der Pensionierung durch den Konzern direkt oder durch Beitragszahlungen an Pensionsfonds Vorsorge getroffen. Je nach rechtlichen, wirtschaftlichen und steuerrechtlichen Gegebenheiten des jeweiligen Landes bestehen unterschiedliche Systeme der Alterssicherung, die in der Regel auf der Beschäftigungsdauer und Vergütung der Mitarbeiter basieren. Die Pensionsrückstellungen umfassen sowohl solche aus bereits laufenden Pensionen als auch aus Anwartschaften auf künftig zu zahlende Pensionen.

Die betriebliche Altersversorgung erfolgt bei HeidelbergCement sowohl beitrags- als auch leistungsorientiert. Bei beitragsorientierten Versorgungsplänen (Defined Contribution Plans) zahlt das Unternehmen Beiträge an zweckgebundene Fonds. Mit Zahlung der Beiträge bestehen für das Unternehmen keine weiteren Leistungsverpflichtungen. Bei leistungsorientierten Versorgungsplänen (Defined Benefit Plans) besteht die Verpflichtung des Unternehmens darin, die zugesagten Leistungen an aktive und ehemalige Mitarbeiter zu erfüllen, wobei zwischen rückstellungs- und fondsfinanzierten Versorgungssystemen unterschieden wird.

Die wichtigsten fondsfinanzierten Altersversorgungspläne bestehen in Belgien, den Niederlanden, Großbritannien, den USA, Kanada, Norwegen, Indien und Indonesien. Das Altersversorgungssystem in Indonesien besteht aus einer

gesetzlich geregelten leistungsorientierten Versorgung sowie einem beitragsorientierten firmeninternen, fondsgestützten System, dessen Leistungen gegen die gesetzlichen Leistungen aufgerechnet werden können. In Deutschland und Schweden werden die Altersversorgungspläne über Rückstellungen finanziert. Darüber hinaus verfügt HeidelbergCement über ein rückstellungsfinanziertes Altersversorgungssystem für Krankheitskosten von Pensionären in Belgien, Indonesien, Kanada und den USA sowie Vorruhestandszusagen in Belgien.

Die Pensionsverpflichtungen und die in den Fonds vorhandenen Vermögenswerte werden für alle wesentlichen Konzerngesellschaften jährlich von unabhängigen Gutachtern bewertet. Die Bewertung der Pensionsverpflichtungen und der zur Deckung dieser Verpflichtung notwendigen Aufwendungen erfolgt nach dem international üblichen Anwartschaftsbarwertverfahren.

Die versicherungsmathematischen Annahmen sind von der wirtschaftlichen Situation des jeweiligen Landes abhängig. Der Zinssatz basiert auf dem Zinsniveau, das am Bewertungsstichtag für erstrangige festverzinsliche Wertpapiere/Industrieanleihen mit einer den betreffenden Pensionsplänen entsprechenden Laufzeit (Duration) in dem jeweiligen Land erzielt wird. Die erwarteten Einnahmen aus den Pensionsfonds werden auf Basis einer einheitlichen Methode festgelegt, die auf langfristigen tatsächlichen Renditen der Vergangenheit, der Portfoliostruktur und zukünftig langfristig zu erwartenden Renditen beruht.

Aus Erhöhungen oder Verminderungen des Barwerts der leistungsorientierten Verpflichtungen oder des beizulegenden Zeitwerts des Planvermögens können versicherungsmathematische Gewinne und Verluste entstehen, deren Ursachen unter anderem Änderungen der Berechnungsparameter, Schätzungsänderungen bezüglich des Risikoverlaufs der Pensionsverpflichtungen und Abweichungen zwischen dem tatsächlichen und dem erwarteten Ertrag aus dem Planvermögen sein können. HeidelbergCement erfasst die versicherungsmathematischen Gewinne und Verluste gemäß IAS 19.93A erfolgsneutral in den Gewinnrücklagen und stellt sie in der Gesamtergebnisrechnung dar.

Außerdem können durch Planveränderungen (Kürzungen und aperiodischer Dienstzeitaufwand) und Abfindungen Gewinne und Verluste entstehen, die in der Gewinn- und Verlustrechnung auszuweisen sind. Kürzungen und Abfindungen sind im Jahr des Entstehens zu amortisieren, während aperiodischer Dienstzeitaufwand über den Zeitraum bis zu seiner Unverfallbarkeit verteilt werden darf.

**Sonstige Rückstellungen** werden nach IAS 37 (Provisions, Contingent Liabilities and Contingent Assets) angesetzt, wenn aufgrund vergangener Ereignisse rechtliche oder faktische Verpflichtungen gegenüber Dritten bestehen, die wahrscheinlich zu Vermögensabflüssen führen, die zuverlässig ermittelbar sind. Die Rückstellungen werden auf Basis der bestmöglichen Schätzung unter Berücksichtigung aller erkennbaren Risiken berechnet.

Aktive und passive **latente Steuern** werden entsprechend der bilanzorientierten „Liability Method“ (IAS 12 Income Taxes) gebildet. Dies bedeutet, dass mit Ausnahme der Geschäfts- oder Firmenwerte aus der Kapitalkonsolidierung für alle zeitlichen Bilanzierungs- und Bewertungsunterschiede zwischen IFRS- und Steuerbilanz latente Steuern gebildet werden, unabhängig von dem Zeitraum, in dem sich diese Differenzen ausgleichen. Ferner werden aktive latente Steuern auf noch nicht genutzte steuerliche Verlustvorträge angesetzt, sofern deren Realisierung in Folgejahren mit hinreichender Sicherheit gewährleistet ist. Passive latente Steuern in Verbindung mit nicht ausgeschütteten Gewinnen von Tochtergesellschaften, Gemeinschaftsunternehmen und assoziierten Unternehmen werden berücksichtigt, außer wenn HeidelbergCement in der Lage ist, die Dividendenpolitik der Gesellschaften zu bestimmen und in absehbarer Zeit nicht mit einer Dividendenausschüttung oder einer Veräußerung zu rechnen ist. Die Bewertung der latenten Steuern erfolgt mit den Steuersätzen, die am Bilanzstichtag in den einzelnen Ländern zum Realisationszeitpunkt gelten oder angekündigt sind. Latente Steueransprüche und Steuerschulden werden saldiert, wenn ein einklagbares Recht zur Aufrechnung von tatsächlichen Steueransprüchen und tatsächlichen Steuerschulden vorliegt und wenn sie im Zusammenhang mit Ertragsteuern stehen, die von der gleichen Steuerbehörde erhoben werden, und der Konzern die Absicht hat, seine tatsächlichen Steueransprüche und Steuerschulden auf Nettobasis zu begleichen.

**Finanzinstrumente** sind alle Vertragsverhältnisse, die bei der einen Partei zu einem finanziellen Vermögenswert und bei der anderen Partei zu einer finanziellen Schuld oder zu einem Eigenkapitalinstrument führen. Zu den Finanzinstrumenten gehören originäre und derivative Finanzinstrumente.

| HeidelbergCement bilanziert              |                                                                      |
|------------------------------------------|----------------------------------------------------------------------|
| Gewinn- und Verlustrechnung des Konzerns | Eigenkapitalveränderungsrechnung des Konzerns                        |
| Gesamtergebnisrechnung des Konzerns      | Segmentberichterstattung/Teil des Anhangs                            |
| Kapitalflussrechnung des Konzerns        | Anhang des Konzerns                                                  |
| Bilanz des Konzerns                      | Bericht des Abschlussprüfers/Versicherung der gesetzlichen Vertreter |

**Originäre Finanzinstrumente** werden bei ihrem erstmaligen Ansatz grundsätzlich mit dem beizulegenden Zeitwert bewertet. Hierzu gehören Finanzinvestitionen des Anlage- und Umlaufvermögens, ausgereichte Kredite und Forderungen sowie finanzielle Verbindlichkeiten.

Erfolgswirksam zum beizulegenden Zeitwert bewertete finanzielle Vermögenswerte oder Verbindlichkeiten sind (strukturierte) Finanzinstrumente, die als zu Handelszwecken gehalten klassifiziert werden.

Finanzinvestitionen des Anlage- und Umlaufvermögens, die gemäß IAS 39 (Financial Instruments – Recognition and Measurement) als zur Veräußerung verfügbar („Available for sale“) kategorisiert sind, werden regelmäßig zum beizulegenden Zeitwert bewertet, wenn dieser verlässlich bestimmbar ist. Diese Klasse von Instrumenten wird nachfolgend als Finanzinvestitionen „Available for sale at fair value“ bezeichnet. Die aus der Folgebewertung resultierenden unrealisierten Gewinne und Verluste werden erfolgsneutral im Eigenkapital erfasst. Als beizulegender Zeitwert wird der Börsenkurs zum Bilanzstichtag zugrunde gelegt. Finanzinvestitionen in Eigenkapitaltitel, für die kein auf einem aktiven Markt notierter Preis existiert und deren beizulegende Zeitwerte nicht mit vertretbarem Aufwand verlässlich ermittelbar sind, werden zu Anschaffungskosten bewertet. Diese Klasse von Instrumenten wird nachfolgend als Finanzinvestitionen „Available for sale at cost“ bezeichnet. Hierbei handelt es sich um sonstige Beteiligungen, die nicht börsennotiert sind. Fallen die beizulegenden Zeitwerte von „Available for sale“-Finanzinvestitionen unter die Anschaffungskosten und liegen objektive Hinweise für eine signifikante oder dauerhafte Wertminderung vor, werden die bislang im Eigenkapital erfassten kumulierten Gewinne und Verluste unmittelbar erfolgswirksam erfasst. Für gehaltene Eigenkapitaltitel ist die erfolgswirksame Erfassung von Wertaufholungen nicht zulässig.

Kredite und Forderungen („Loans and receivables“) werden, sofern sie nicht mit Sicherungsinstrumenten im Zusammenhang stehen, zu fortgeführten Anschaffungskosten, ggf. unter Anwendung der Effektivzinsmethode bewertet. Dabei handelt es sich um Ausleihungen des Finanzanlagevermögens, verzinsliche Forderungen, Forderungen aus Lieferungen und Leistungen sowie sonstige kurzfristige operative Forderungen. Bei kurzfristigen Forderungen entsprechen die fortgeführten Anschaffungskosten grundsätzlich dem Nennwert bzw. dem Rückzahlungsbetrag. Bestehen objektive Hinweise darauf, dass bei den Krediten und Forderungen Wertminderungen eingetreten sind, werden diese erfolgswirksam erfasst. Bei Forderungen aus Lieferungen und Leistungen erfolgen die Wertminderungen unter Verwendung eines Wertberichtigungskontos. Wertaufholungen werden vorgenommen, wenn die Gründe für die vorgenommenen Wertminderungen entfallen sind. Finanzielle Vermögenswerte, deren Konditionen geändert wurden, da sie ansonsten überfällig oder wertgemindert wären, lagen (ebenso wie im Vorjahr) im abgelaufenen Geschäftsjahr nicht vor.

Der erstmalige Ansatz von originären finanziellen Verbindlichkeiten („Financial liabilities“) erfolgt zum beizulegenden Zeitwert der erhaltenen Gegenleistung bzw. zum Wert der erhaltenen Zahlungsmittel abzüglich ggf. angefallener Transaktionskosten. Die Folgebewertung bei diesen Instrumenten erfolgt zu fortgeführten Anschaffungskosten unter Anwendung der Effektivzinsmethode. Hierunter fallen Verbindlichkeiten aus Lieferungen und Leistungen, sonstige kurzfristige operative Verbindlichkeiten sowie kurz- und langfristige Finanzschulden. Langfristige finanzielle Verbindlichkeiten werden abgezinst. Bei kurzfristigen finanziellen Verbindlichkeiten entsprechen die fortgeführten Anschaffungskosten grundsätzlich dem Nennwert bzw. dem Rückzahlungsbetrag.

Von der Möglichkeit, originäre Finanzinstrumente bei ihrem erstmaligen Ansatz als erfolgswirksam zum beizulegenden Zeitwert zu bewertende Finanzinstrumente zu designieren, hat der Konzern bislang keinen Gebrauch gemacht. Alle originären Finanzinstrumente werden zum Erfüllungstag („Settlement Date“) bilanziert.

Ein **derivatives Finanzinstrument** ist ein Vertrag, dessen Wert sich in Abhängigkeit von einer Variablen ändert, der in der Regel keine Anschaffungsauszahlung erfordert oder eine, die im Vergleich zu anderen Vertragsformen, von denen zu erwarten ist, dass sie in ähnlicher Weise auf Änderungen der Marktbedingungen reagieren, geringer ist und der zu einem späteren Zeitpunkt beglichen wird. Alle derivativen Finanzinstrumente werden bei ihrer erstmaligen Erfassung am Handelstag mit dem beizulegenden Zeitwert angesetzt. Die beizulegenden Zeitwerte sind auch für die Folgebewertungen relevant. Der beizulegende Zeitwert gehandelter derivativer Finanzinstrumente entspricht dem Marktwert. Dieser Wert kann positiv oder negativ sein. Bei derivativen Finanzinstrumenten entspricht der beizulegende Zeitwert dem Betrag, den die HeidelbergCement AG bei vorzeitiger Beendigung des Finanzinstruments zum Abschlussstichtag



entweder erhalten würde oder zahlen müsste. Dieser wird unter Anwendung der zum Abschlussstichtag relevanten Wechselkurse und Zinssätze berechnet. Für die Berechnungen werden Mittelkurse verwendet.

Derivative Finanzinstrumente, wie z.B. Devisentermin-, Devisenoptionsgeschäfte, Zinsswaps oder Zinsoptionen, werden im HeidelbergCement Konzern grundsätzlich zur Risikoreduzierung eingesetzt. Dabei steht die Absicherung gegen Zins-, Währungs- und andere Marktpreisrisiken im Mittelpunkt. Die Marktbewertungen werden regelmäßig von der Abteilung Group Treasury überwacht. Es werden keine derivativen Finanzinstrumente zu Spekulationszwecken kontrahiert oder gehalten.

Verträge, die für Zwecke des Empfangs oder der Lieferung nicht finanzieller Posten gemäß dem erwarteten Einkaufs-, Verkaufs- oder Nutzungsbedarf des Unternehmens abgeschlossen und in diesem Sinne gehalten werden („Own Use Contracts“), werden nicht als derivative Finanzinstrumente, sondern als schwebende Geschäfte bilanziert. Geschriebene Optionen auf den Kauf oder Verkauf nicht-finanzieller Posten, die durch Barausgleich erfüllt werden können, werden nicht als „Own Use Contracts“ klassifiziert.

**Strukturierte Finanzinstrumente** bestehen aus einem nicht-derivativen Basisvertrag und einem eingebetteten Finanzderivat. Beide Komponenten sind rechtlich nicht separierbar. Es handelt sich hierbei in der Regel um Verträge mit Zusatzklauseln. Eine getrennte Bilanzierung des eingebetteten Derivats und des Basisvertrags wird verlangt, wenn die wirtschaftlichen Merkmale und Risiken nicht eng mit dem Basisvertrag verbunden sind, das eingebettete Derivat die gleichen Definitionskriterien erfüllt wie ein Derivat und das strukturierte Finanzinstrument nicht erfolgswirksam zum beizulegenden Zeitwert bewertet wird. Der Vertrag des strukturierten Finanzinstruments kann auch insgesamt erfolgswirksam zum beizulegenden Zeitwert bewertet werden, es sei denn, das eingebettete Derivat verändert die anfallenden Zahlungsströme nur unerheblich oder eine Abspaltung des eingebetteten Derivates ist unzulässig.

Das **Hedge Accounting** bezeichnet eine spezielle Rechnungslegung, die die Bilanzierung von Grundgeschäft und Sicherungsgeschäft einer Sicherungsbeziehung dahingehend modifiziert, dass die Bewertungsergebnisse aus dem Grund- bzw. Sicherungsgeschäft periodengleich und erfolgsneutral bzw. erfolgswirksam erfasst werden. Entsprechend basiert das Hedge Accounting auf einer wertmäßigen Kompensation von Grund- und Sicherungsgeschäft.

Für bilanzielle Zwecke existieren im Sinne von IAS 39 drei Arten von Hedgegeschäften, sofern die strengen Voraussetzungen für eine Bilanzierung als Sicherungsbeziehung („Hedge Accounting“) im Einzelfall erfüllt sind.

#### – Cash Flow Hedges

HeidelbergCement sichert bei Bedarf das Risiko von Schwankungen zukünftiger Cashflows ab. Das Risiko von Zinsschwankungen bei variabler Verzinsung wird durch Swaps gesichert, die variable Zinszahlungen in Festzinsszahlungen umwandeln. Diese Vorgehensweise wird auch bei der Absicherung von Währungsrisiken von zukünftig in Fremdwährung zu erfüllenden Transaktionen angewendet. Der Marktwert der zur Absicherung eingesetzten Derivate wird in der Bilanz dargestellt. Als Gegenposten werden die sonstigen Eigenkapitalbestandteile unter Berücksichtigung latenter Steuern in Höhe des effektiven Teils erfolgsneutral angepasst und erst bei Realisierung der abgesicherten zukünftigen Zahlungsströme erfolgswirksam erfasst. Der ineffektive Teil wird unmittelbar im Periodenergebnis erfasst.

#### – Fair Value Hedges

Der Konzern sichert Schwankungen des beizulegenden Zeitwerts von Vermögenswerten oder Verbindlichkeiten ab. HeidelbergCement sichert insbesondere das Währungsrisiko, das entsteht, wenn Finanzinstrumente in einer anderen als der funktionalen Währung bilanziert werden. Ferner wird selektiv der beizulegende Zeitwert von festverzinslichen Verbindlichkeiten durch eine Transformation in variable Verzinsung gesichert. Im Falle der Absicherung gegen Schwankungen des beizulegenden Zeitwertes von bestimmten Bilanzpositionen (Fair Value Hedges) wird sowohl das Sicherungsgeschäft als auch der gesicherte Risikoanteil des Grundgeschäfts zum beizulegenden Zeitwert angesetzt. Die Bewertungsänderungen werden ergebniswirksam erfasst.

#### – Absicherung einer Nettoinvestition in einen ausländischen Geschäftsbetrieb

Beim Erwerb ausländischer Gesellschaften kann die Investition beispielsweise mit Darlehen in der funktionalen Währung der ausländischen Gesellschaft abgesichert werden. Als gesichertes Risiko wird in diesen Fällen das Währungsrisiko designiert, welches durch die Wechselkursschwankung des Eigenkapitals der Tochtergesellschaft entsteht (Translationsrisiko). Die Darlehen werden mit dem Wechselkurs des Bilanzstichtags umgerechnet. Als Gegenposten

| HeidelbergCement bilanziert              |                                                                      |
|------------------------------------------|----------------------------------------------------------------------|
| Gewinn- und Verlustrechnung des Konzerns | Eigenkapitalveränderungsrechnung des Konzerns                        |
| Gesamtergebnisrechnung des Konzerns      | Segmentberichterstattung/Teil des Anhangs                            |
| Kapitalflussrechnung des Konzerns        | Anhang des Konzerns                                                  |
| Bilanz des Konzerns                      | Bericht des Abschlussprüfers/Versicherung der gesetzlichen Vertreter |

wird das Eigenkapital im Posten Währungsumrechnung angepasst. Insofern werden Umrechnungsdifferenzen hier bis zur Veräußerung der Nettoinvestition direkt erfolgsneutral im Eigenkapital und erst bei deren Abgang im Periodenergebnis erfasst.

Derivative Finanzinstrumente, für die keine Bilanzierung als Sicherungsbeziehung („Hedge Accounting“) angewendet wird, stellen dennoch betriebswirtschaftlich eine wirksame Absicherung im Rahmen der Konzernstrategie dar. Nach IAS 39 sind diese Instrumente für bilanzielle Zwecke als zu Handelszwecken gehalten („Held for trading“) zu qualifizieren. Den Marktwertveränderungen dieser derivativen Finanzinstrumente, die erfolgswirksam erfasst werden, stehen nahezu kompensierende Marktwertveränderungen der abgesicherten Grundgeschäfte gegenüber.

**Zur Veräußerung gehaltene Vermögenswerte und aufgegebene Geschäftsbereiche** werden in der Bilanz gesondert ausgewiesen, wenn sie in ihrem gegenwärtigen Zustand veräußert werden können und die Veräußerung hochwahrscheinlich ist. Bei der Klassifizierung „als zur Veräußerung gehalten“ werden die entsprechenden Vermögenswerte mit ihrem beizulegenden Zeitwert abzüglich der Veräußerungskosten angesetzt, sofern dieser niedriger als deren Buchwert ist. Entsprechend ihrer Klassifizierung werden direkt mit diesen im Zusammenhang stehende Schulden auf der Passivseite gesondert ausgewiesen.

Für aufgegebene Geschäftsbereiche wird das Ergebnis nach Steuern in der Gewinn- und Verlustrechnung separat in einer Zeile ausgewiesen. In der Kapitalflussrechnung erfolgt eine Aufteilung der Mittelflüsse in „fortzuführendes“ und „aufgegebenes“ Geschäft. Ebenso werden die aufgegebenen Geschäftsbereiche in der Segmentberichterstattung separat ausgewiesen. Für aufgegebene Geschäftsbereiche werden die Vorjahreswerte in der Gewinn- und Verlustrechnung, der Kapitalflussrechnung und in der Segmentberichterstattung entsprechend angepasst. Im Anhang werden zusätzliche Angaben zu den zur Veräußerung gehaltenen Vermögenswerten und aufgegebenen Geschäftsbereichen gemacht.

**Eventualschulden oder -forderungen** sind gegenwärtige oder mögliche Verpflichtungen oder Vermögenswerte, die aus vergangenen Ereignissen resultieren und deren Existenz durch das Eintreten oder Nichteintreten eines oder mehrerer unsicherer künftiger Ereignisse bedingt ist, die nicht unter der Kontrolle des Unternehmens stehen. Eventualschulden werden zu ihrem beizulegenden Zeitwert in der Bilanz angesetzt, wenn sie im Rahmen eines Unternehmenszusammenschlusses übernommen wurden. Eventualforderungen werden nur dann in der Bilanz angesetzt, wenn sie quasi sicher sind. Sofern ein Abfluss bzw. Zufluss von wirtschaftlichem Nutzen nicht unwahrscheinlich ist, werden im Anhang Angaben zu Eventualschulden bzw. Eventualforderungen gemacht.

**Finanzierungs-Leasingverhältnisse**, bei denen im Wesentlichen alle mit dem Eigentum verbundenen Chancen und Risiken am Leasinggegenstand auf den Leasingnehmer übertragen werden, führen zur Aktivierung des Leasinggegenstands zu Beginn der Laufzeit des Leasingverhältnisses. Der Leasinggegenstand wird mit seinem beizulegenden Zeitwert angesetzt oder mit dem Barwert der Mindestleasingzahlungen, sofern dieser Wert niedriger ist. Leasingzahlungen werden derart in Finanzierungsaufwendungen und den Tilgungsanteil der Restschuld aufgeteilt, dass sich über die Laufzeit des Leasingverhältnisses ein konstanter Zinssatz auf die verbliebene Leasingverbindlichkeit ergibt. Finanzierungsaufwendungen werden erfolgswirksam erfasst. Leasinggegenstände werden über die Nutzungsdauer des Gegenstands abgeschrieben. Ist der Eigentumsübergang auf den Konzern am Ende der Laufzeit des Leasingverhältnisses jedoch nicht hinreichend sicher, wird der Leasinggegenstand über den kürzeren der beiden Zeiträume aus erwarteter Nutzungsdauer und Laufzeit des Leasingverhältnisses vollständig abgeschrieben.

Leasingzahlungen für **Operating-Leasingverhältnisse** werden linear über die Laufzeit des Leasingverhältnisses als Aufwand in der Gewinn- und Verlustrechnung erfasst.

**Erträge** werden erfasst, wenn hinreichend wahrscheinlich ist, dass dem Unternehmen ein künftiger wirtschaftlicher Nutzen zufließt und dieser verlässlich bestimmt werden kann. Die Bewertung erfolgt zum beizulegenden Zeitwert der erhaltenen Gegenleistung; Umsatzsteuer und sonstige Abgaben bleiben unberücksichtigt. Umsatzerlöse werden erfasst, sobald die Lieferung der Waren erfolgt ist und die Chancen und Risiken auf den Käufer übergegangen sind. Zinserträge werden unter Anwendung der Effektivzinismethode zeitanteilig erfasst. Dividendenerträge werden mit der Entstehung des Rechtsanspruchs auf Zahlung realisiert.

## Währungsumrechnung

Die Jahresabschlüsse ausländischer Konzerngesellschaften werden gemäß IAS 21 (The Effects of Changes in Foreign Exchange Rates) nach dem Konzept der funktionalen Währung in Euro umgerechnet. Diese ist in der Regel bei den operativen Gesellschaften die jeweilige Landeswährung, da die ausländischen Gesellschaften ihr Geschäft in finanzieller, wirtschaftlicher und organisatorischer Hinsicht selbständig betreiben. Danach werden Aktiv- und Passivposten zum Mittelkurs am Bilanzstichtag umgerechnet, das Eigenkapital hingegen mit den historischen Kursen. Die hieraus resultierenden Umrechnungsdifferenzen finden bis zum Abgang der Tochtergesellschaft ergebnisneutral in den sonstigen Eigenkapitalbestandteilen Berücksichtigung. Die Umrechnung des anteiligen Eigenkapitals der ausländischen assoziierten Unternehmen erfolgt nach der gleichen Vorgehensweise. Die Aufwendungen und Erträge sind zum Jahresdurchschnittskurs umgerechnet.

Fremdwährungsgeschäfte in den Einzelabschlüssen der Gesellschaften werden mit historischen Kursen gebucht. Bis zum Bilanzstichtag eingetretene Kursgewinne oder -verluste aus der Bewertung monetärer Posten in fremder Währung werden ergebniswirksam berücksichtigt. Von der beschriebenen Umrechnung ausgenommen sind Währungsdifferenzen aus Fremdwährungskrediten, soweit sie Teil einer Nettoinvestition in einen ausländischen Geschäftsbetrieb sind. Sie sind Teil einer Nettoinvestition in einen ausländischen Geschäftsbetrieb, wenn die Rückzahlung in einem absehbaren Zeitraum weder geplant noch wahrscheinlich ist. Umrechnungsdifferenzen werden bis zur Veräußerung der Nettoinvestition direkt erfolgsneutral im Eigenkapital und erst bei deren Abgang im Periodenergebnis erfasst.

Nachfolgend die wichtigsten Devisenkurse, die bei der Umrechnung der Einzelabschlüsse in fremder Währung Anwendung fanden.

| Devisenkurse |                       | Stichtagskurs |                  | Durchschnittskurs |                  |
|--------------|-----------------------|---------------|------------------|-------------------|------------------|
| EUR          |                       | 31. 12. 2009  | 31. 12. 2010     | 2009              | 2010             |
| USD          | USA                   | 1,4316        | <b>1,3379</b>    | 1,3945            | <b>1,3265</b>    |
| AUD          | Australien            | 1,5956        | <b>1,3081</b>    | 1,7582            | <b>1,4410</b>    |
| CAD          | Kanada                | 1,5058        | <b>1,3348</b>    | 1,5902            | <b>1,3661</b>    |
| CNY          | China                 | 9,7720        | <b>8,8173</b>    | 9,5252            | <b>8,9774</b>    |
| GBP          | Großbritannien        | 0,8862        | <b>0,8575</b>    | 0,8901            | <b>0,8583</b>    |
| GEL          | Georgien              | 2,3846        | <b>2,3735</b>    | 2,3180            | <b>2,3533</b>    |
| GHC          | Ghana                 | 2,0674        | <b>1,9608</b>    | 1,9844            | <b>1,9098</b>    |
| HKD          | Hongkong              | 11,0995       | <b>10,3918</b>   | 10,8089           | <b>10,3046</b>   |
| IDR          | Indonesien            | 13.457,04     | <b>12.029,06</b> | 14.441,58         | <b>12.041,97</b> |
| INR          | Indien                | 66,4262       | <b>59,8190</b>   | 67,3213           | <b>60,5601</b>   |
| KZT          | Kasachstan            | 212,5497      | <b>197,2200</b>  | 205,8507          | <b>195,4275</b>  |
| MYR          | Malaysia              | 4,8989        | <b>4,1252</b>    | 4,9104            | <b>4,2671</b>    |
| NOK          | Norwegen              | 8,2938        | <b>7,7920</b>    | 8,7607            | <b>8,0138</b>    |
| PLN          | Polen                 | 4,0955        | <b>3,9630</b>    | 4,3377            | <b>3,9971</b>    |
| RON          | Rumänien              | 4,2327        | <b>4,2355</b>    | 4,2437            | <b>4,2160</b>    |
| RUB          | Russland              | 43,3932       | <b>40,9229</b>   | 44,2312           | <b>40,2870</b>   |
| SEK          | Schweden              | 10,2505       | <b>8,9834</b>    | 10,6529           | <b>9,5500</b>    |
| CZK          | Tschechische Republik | 26,3085       | <b>25,0250</b>   | 26,5105           | <b>25,2936</b>   |
| HUF          | Ungarn                | 269,0835      | <b>278,2300</b>  | 280,8815          | <b>275,5712</b>  |
| TZS          | Tansania              | 1.899,49      | <b>1.966,51</b>  | 1.839,68          | <b>1.872,73</b>  |
| TRY          | Türkei                | 2,1402        | <b>2,0612</b>    | 2,1649            | <b>1,9973</b>    |

| HeidelbergCement bilanziert              |  |                                                                      |
|------------------------------------------|--|----------------------------------------------------------------------|
| Gewinn- und Verlustrechnung des Konzerns |  | Eigenkapitalveränderungsrechnung des Konzerns                        |
| Gesamtergebnisrechnung des Konzerns      |  | Segmentberichterstattung/Teil des Anhangs                            |
| Kapitalflussrechnung des Konzerns        |  | Anhang des Konzerns                                                  |
| Bilanz des Konzerns                      |  | Bericht des Abschlussprüfers/Versicherung der gesetzlichen Vertreter |

## Konsolidierungskreis

In den Konzernabschluss sind neben der HeidelbergCement AG 909 Unternehmen – 58 inländische und 851 ausländische – im Wege der Voll- oder Quotenkonsolidierung einbezogen.

Die vollständige Aufstellung des Anteilsbesitzes des HeidelbergCement Konzerns zum 31. Dezember erfolgt auf den Seiten 207 ff. Die Aufstellung enthält die abschließende Nennung aller Tochterunternehmen, die von den Offenlegungserleichterungen gemäß § 264b HGB Gebrauch machen.

Die Beiträge der quotenkonsolidierten Gemeinschaftsunternehmen zur Vermögens-, Finanz- und Ertragslage des HeidelbergCement Konzerns werden in der nachfolgenden Tabelle dargestellt:

| Beiträge quotenkonsolidierter Gesellschaften  |         |         |
|-----------------------------------------------|---------|---------|
| Mio EUR                                       | 2009    | 2010    |
| <b>Bilanz</b>                                 |         |         |
| Langfristige Vermögenswerte                   | 837,8   | 934,1   |
| Kurzfristige Vermögenswerte                   | 313,9   | 335,1   |
|                                               | 1.151,7 | 1.269,2 |
| Langfristige Schulden                         | 237,9   | 290,3   |
| Kurzfristige Schulden                         | 287,1   | 270,1   |
|                                               | 525,0   | 560,4   |
| <b>Gewinn- und Verlustrechnung</b>            |         |         |
| Umsatzerlöse                                  | 861,3   | 967,9   |
| Sonstige Erträge                              | 45,3    | 85,3    |
| Aufwendungen                                  | -764,5  | -903,2  |
| Jahresüberschuss                              | 142,1   | 150,0   |
| <b>Kapitalflussrechnung</b>                   |         |         |
| Mittelfluss aus operativer Geschäftstätigkeit | 166,3   | 149,9   |
| Mittelfluss aus Investitionstätigkeit         | -97,6   | -55,9   |
| Mittelfluss aus Finanzierungstätigkeit        | 1,9     | 13,5    |

## Unternehmenszusammenschlüsse im Berichtsjahr

Am 13. Mai 2010 hat HeidelbergCement den ausstehenden 50%-Anteil am Joint Venture Pioneer North Queensland Pty Ltd erworben und dadurch die Aktivitäten in Australien weiter gestärkt. Der Kaufpreis betrug 11,4 Mio EUR und wurde in bar entrichtet. Bisher wurde die Gesellschaft at Equity bewertet. Der beizulegende Zeitwert der at Equity-Beteiligung betrug 11,4 Mio EUR. Aufgrund der Neubewertung des Anteils entstand ein Verlust in Höhe von 1,1 Mio EUR, der in den zusätzlichen ordentlichen Aufwendungen erfasst wurde. Die Kaufpreisallokation ist noch nicht abgeschlossen. Änderungen können sich im Hinblick auf die Bewertung der Sachanlagen und damit einhergehend, der latenten Steuern ergeben. Der vorläufig erfasste Geschäfts- oder Firmenwert in Höhe von 8,4 Mio EUR, der steuerlich nicht abzugsfähig ist, spiegelt die Synergiepotenziale wider, die sich aus dem Unternehmenszusammenschluss ergeben. Anschaffungsnebenkosten in Höhe von 34 TEUR wurden in den zusätzlichen ordentlichen Aufwendungen erfasst. Im Rahmen des Unternehmenszusammenschlusses wurden Forderungen mit einem beizulegenden Zeitwert von 3,8 Mio EUR erworben. Der Bruttobetrag der Forderungen beträgt 4,3 Mio EUR, von denen 0,5 Mio EUR wahrscheinlich uneinbringlich sind.

Um die Produktionskapazität für Zement in der Demokratischen Republik Kongo auszubauen, hat HeidelbergCement am 15. September 2010 von der Forrest Group 55% an Cimenterie de Lukala S.A.R.L. (CILU), Kinshasa, sowie 70% an Interlacs S.A.R.L., Lubumbashi, erworben. Der Kaufpreis in Höhe von 62,2 Mio EUR wurde in bar entrichtet. Die Kaufpreisallokation ist zum Abschlussstichtag noch nicht abgeschlossen. Änderungen können sich bei der Bewertung der immateriellen Vermögenswerte sowie der latenten Steuern ergeben. Der vorläufig erfasste Geschäfts- oder Firmenwert in Höhe von 34,6 Mio EUR, der steuerlich nicht abzugsfähig ist, repräsentiert insbesondere die zukünf-

tigen Marktpotenziale in der Demokratischen Republik Kongo. Die Bewertung der Minderheitsanteile in Höhe von 21,7 Mio EUR erfolgte zum anteiligen beizulegenden Zeitwert des identifizierbaren Nettovermögens. Im Zuge des Erwerbs wurden Forderungen mit einem beizulegenden Zeitwert von 2,4 Mio EUR erfasst. Der Bruttobetrag beläuft sich auf 2,5 Mio EUR. Hiervon werden 0,1 Mio EUR voraussichtlich uneinbringlich sein. Die Anschaffungsnebenkosten betrugen 0,1 Mio EUR und wurden in den zusätzlichen ordentlichen Aufwendungen erfasst. Der Kaufvertrag sieht ein Andienungsrecht der Forrest Group für ihre verbleibenden Anteile vor, das zu einem definierten Zeitpunkt ausgeübt werden kann. Der für das Andienungsrecht auf Basis von Ergebnisgrößen ermittelte Preis wird mit einer festen Anzahl von HeidelbergCement Aktien sowie einer Barzahlung beglichen.

Im Zuge der Erweiterung der Aktivitäten in Russland hat HeidelbergCement zwischen dem 5. und 14. Oktober 2010 in mehreren Schritten insgesamt 51 % der Anteile an der CJSC "Construction Materials", Sterlitamak/Russland erworben. Der sich aus der Differenz zwischen dem Kaufpreis von 54,2 Mio EUR und dem anteiligen Nettovermögen von 39,4 Mio EUR ergebende steuerlich nicht abzugsfähige Goodwill in Höhe von 14,8 Mio EUR repräsentiert das strategische Potenzial des erworbenen hochmodernen Zementwerks, das sich in einer der wichtigsten Investitionsregionen Russlands befindet. Der Kaufpreis setzt sich aus der Barzahlung in Höhe von 40,0 Mio EUR sowie einer zum Barwert angesetzten Kaufpreisverbindlichkeit in Höhe von 14,2 Mio EUR zusammen. Die USD-Kaufpreisverbindlichkeit beläuft sich nominal auf 15,9 Mio EUR (22,5 Mio USD) und steht der Höhe nach fest. Der Zahlungsmittelabfluss ist an die Registrierung bestimmter Gebäude und Grundstücke im Namen von CJSC "Construction Materials" geknüpft und wird spätestens zu Beginn des Jahres 2013 erwartet. Die in der Berichtsperiode angefallenen Anschaffungsnebenkosten in Höhe von 0,7 Mio EUR wurden in den zusätzlichen ordentlichen Aufwendungen erfasst. Vor dem 1. Januar 2010 entstandene Anschaffungsnebenkosten von 1,1 Mio EUR wurden erfolgsneutral mit den Gewinnrücklagen verrechnet. Die Kaufpreisallokation für die erworbenen Vermögenswerte und übernommenen Schulden ist vorläufig. Anpassungen des beizulegenden Zeitwertes können sich bei den immateriellen Vermögenswerten, den Sachanlagen, den Finanzanlagen sowie den darauf entfallenden latenten Steuern ergeben. Die Minderheitsanteile in Höhe von 37,8 Mio EUR wurden mit dem anteiligen beizulegenden Zeitwert des identifizierbaren Nettovermögens bewertet. Die erworbenen Forderungen beinhalten im Wesentlichen kurzfristige Forderungen aus Lieferungen und Leistungen mit einem beizulegenden Zeitwert in Höhe von 1,1 Mio EUR, der sich aus dem Bruttobetrag von 1,3 Mio EUR nach Abzug der voraussichtlich uneinbringlichen Forderungen von 0,2 Mio EUR ergibt.

Die vorläufigen beizulegenden Zeitwerte der identifizierbaren Vermögenswerte und Schulden der erstkonsolidierten Gesellschaften zum Erwerbszeitpunkt werden in der nachfolgenden Tabelle dargestellt.

| <b>Vorläufige beizulegende Zeitwerte zum Erwerbszeitpunkt</b> |             |              |              |               |
|---------------------------------------------------------------|-------------|--------------|--------------|---------------|
| Mio EUR                                                       | Australien  | DR Kongo     | Russland     | <b>Gesamt</b> |
| Immaterielle Vermögenswerte                                   |             | 37,5         |              | <b>37,5</b>   |
| Sachanlagen                                                   | 15,5        | 43,0         | 115,7        | <b>174,2</b>  |
| Finanzanlagen                                                 |             |              | 7,3          | <b>7,3</b>    |
| Vorräte                                                       | 0,6         | 19,4         | 4,9          | <b>24,9</b>   |
| Forderungen aus Lieferungen und Leistungen                    | 3,8         | 2,4          | 1,1          | <b>7,3</b>    |
| Liquide Mittel                                                | 0,7         | 2,3          | 1,1          | <b>4,1</b>    |
| Übrige Aktiva                                                 | 2,2         | 3,0          | 1,1          | <b>6,3</b>    |
| <b>Summe Vermögenswerte</b>                                   | <b>22,8</b> | <b>107,6</b> | <b>131,2</b> | <b>261,6</b>  |
| Rückstellungen                                                | 0,2         | 4,3          | 4,2          | <b>8,7</b>    |
| Verbindlichkeiten                                             | 8,2         | 29,4         | 49,2         | <b>86,8</b>   |
| Latente Steuern                                               |             | 24,6         | 0,6          | <b>25,2</b>   |
| <b>Summe Schulden</b>                                         | <b>8,4</b>  | <b>58,3</b>  | <b>54,0</b>  | <b>120,7</b>  |
| <b>Nettovermögen</b>                                          | <b>14,4</b> | <b>49,3</b>  | <b>77,2</b>  | <b>140,9</b>  |

Die nachfolgende Tabelle zeigt die Umsatzerlöse und die Ergebnisse der Gesellschaften seit dem Erwerbszeitpunkt sowie die Beträge, die sich ergeben hätten, wenn die Gesellschaften zum 1. Januar 2010 vollkonsolidiert worden wären:



| HeidelbergCement bilanziert              |                                                                      |
|------------------------------------------|----------------------------------------------------------------------|
| Gewinn- und Verlustrechnung des Konzerns | Eigenkapitalveränderungsrechnung des Konzerns                        |
| Gesamtergebnisrechnung des Konzerns      | Segmentberichterstattung/Teil des Anhangs                            |
| Kapitalflussrechnung des Konzerns        | Anhang des Konzerns                                                  |
| Bilanz des Konzerns                      | Bericht des Abschlussprüfers/Versicherung der gesetzlichen Vertreter |

| Umsatzerlöse und Ergebnis    |            |          |          |        |
|------------------------------|------------|----------|----------|--------|
| Mio EUR                      | Australien | DR Kongo | Russland | Gesamt |
| <b>Seit Erwerbszeitpunkt</b> |            |          |          |        |
| Umsatzerlöse                 | 17,9       | 16,7     | 12,9     | 47,5   |
| Ergebnis                     | 1,5        | 0,8      | 0,7      | 3,0    |
| <b>Seit 1. Januar 2010</b>   |            |          |          |        |
| Umsatzerlöse                 | 31,2       | 52,4     | 53,0     | 136,6  |
| Ergebnis                     | 0,4        | 1,9      | -2,4     | -0,1   |

### Änderung der Beteiligungsstruktur im Berichtsjahr

Im Mai 2010 haben HeidelbergCement und IFC, ein Mitglied der Weltbank-Gruppe, und deren Finanzpartner eine Vereinbarung unterzeichnet, um den Ausbau der Infrastruktur in den afrikanischen Ländern südlich der Sahara durch die Erhöhung des örtlichen Zementangebots voranzutreiben. IFC und deren Finanzpartner haben sich verpflichtet, eine Minderheitsbeteiligung am Afrikageschäft von HeidelbergCement zu erwerben, und werden dafür bis zu 180 Mio USD einbringen. HeidelbergCement wird im Gegenzug diese Mittel in den Ausbau der Zementkapazitäten in den Ländern südlich der Sahara, die von der International Development Association (IDA) unterstützt werden, investieren. IFC hat die erste Tranche in Höhe von 60 Mio USD (45,4 Mio EUR) am 5. August 2010 eingebracht und damit rund 6 % der Anteile am Afrika-Geschäft der Scancem International-Gruppe erworben. Aus dieser Transaktion erhöhte sich zunächst das auf die Anteilseigner des HeidelbergCement Konzerns entfallende Eigenkapital um 25,0 Mio EUR. Die vertraglichen Regelungen sehen vor, dass IFC die erworbenen Anteile HeidelbergCement ab einem bestimmten Zeitpunkt andienen kann. Die Verbindlichkeit aus dem Andienungsrecht wurde zum Abschlussstichtag mit dem Barwert des Rückzahlungsbetrags in Höhe von 54,7 Mio EUR als langfristige Verbindlichkeit aus Put-Optionen bilanziert. Hierdurch reduzierte sich das auf die Anteilseigner entfallende Eigenkapital um 36,2 Mio EUR.

### Unternehmenszusammenschlüsse im Vorjahr

Zum 1. Januar 2009 wurde die mit einem Anteilsbesitz von 50 % quotenkonsolidierte Gralex S.A./Belgien, im Rahmen einer Realteilung zwischen den Joint-Venture-Partnern aufgeteilt. Hierbei wurden die Vermögenswerte und Schulden in die neu gegründete Gesellschaft Sagrex S.A. eingebracht. Der Anteil von HeidelbergCement an Sagrex S.A. beträgt 100 %. Die Realteilung wurde als Tauschtransaktion ohne Ausgleichszahlungen in Form eines sukzessiven Unternehmenserwerbs durchgeführt. Der Wert der Gegenleistung für die erworbenen 50 % betrug 48,7 Mio EUR. Aus der Transaktion entstand kein Geschäfts- oder Firmenwert. Für das Geschäftsjahr 2009 hat Sagrex S.A. Umsatzerlöse in Höhe von 61,7 Mio EUR und ein Ergebnis in Höhe von 5,0 Mio EUR erzielt. Die nachfolgende Tabelle zeigt die beizulegenden Zeitwerte der Vermögenswerte und Schulden der Sagrex S.A., die auf Basis endgültiger Zahlen in den Konzernabschluss einbezogen wurden.

| Beizulegende Zeitwerte der Vermögenswerte und Schulden der Sagrex zum Erwerbszeitpunkt |              |
|----------------------------------------------------------------------------------------|--------------|
| Mio EUR                                                                                | 2009         |
| Immaterielle Vermögenswerte                                                            | 2,7          |
| Sachanlagen                                                                            | 144,8        |
| Finanzanlagen                                                                          | 0,3          |
| Vorräte                                                                                | 5,3          |
| Forderungen und sonstige Vermögenswerte                                                | 23,2         |
| Liquide Mittel                                                                         | 0,1          |
| <b>Summe Vermögenswerte</b>                                                            | <b>176,4</b> |
| Rückstellungen                                                                         | 5,2          |
| Verbindlichkeiten                                                                      | 37,4         |
| Latente Steuern                                                                        | 36,1         |
| <b>Summe Schulden</b>                                                                  | <b>78,7</b>  |
| <b>Nettovermögen</b>                                                                   | <b>97,7</b>  |

### Desinvestitionen im Vorjahr

Am 14. Mai 2009 hat HeidelbergCement seine 50 % Beteiligung am australischen Gemeinschaftsunternehmen Pioneer Road Services Pty Ltd, Melbourne, veräußert. Die Vermögenswerte und Schulden sind in der nachfolgenden Tabelle dargestellt.

| <b>Vermögenswerte und Schulden der Pioneer Road Services zum Veräußerungszeitpunkt</b> |             |
|----------------------------------------------------------------------------------------|-------------|
| Mio EUR                                                                                | <b>2009</b> |
| Immaterielle Vermögenswerte                                                            | 2,1         |
| Sachanlagen                                                                            | 25,1        |
| Finanzanlagen                                                                          | 0,7         |
| Latente Steuern                                                                        | 0,7         |
| Vorräte                                                                                | 2,8         |
| Forderungen und sonstige Vermögenswerte                                                | 24,3        |
| Liquide Mittel                                                                         | 3,4         |
| <b>Summe Vermögenswerte</b>                                                            | <b>59,1</b> |
| Rückstellungen                                                                         | 1,9         |
| Verbindlichkeiten                                                                      | 30,3        |
| <b>Summe Schulden</b>                                                                  | <b>32,2</b> |
| <b>Nettovermögen</b>                                                                   | <b>26,9</b> |

Weiterhin wurde im Dezember 2009 die Industry Petrobeton OOO, St. Petersburg/Russland veräußert. Das Nettovermögen zum Veräußerungszeitpunkt betrug 0,9 Mio EUR.

Die Verkaufserlöse wurden entsprechend der überarbeiteten Fassung des IAS 7 als Mittelzufluss aus Desinvestitionen von Tochterunternehmen und sonstigen Geschäftseinheiten im Investitionsbereich ausgewiesen.

### Veränderung der Beteiligungsstruktur im Vorjahr

Am 18. Juni 2009 hat HeidelbergCement 520,5 Mio Aktien des indonesischen Zementherstellers PT Indocement Tunggul Prakarsa verkauft. Hierdurch verminderte sich der Anteil des HeidelbergCement Konzerns um 14,1 % auf 51,0 %. Entsprechend der überarbeiteten Fassung des IAS 7 wurde der Erlös als Minderung von Anteilen an Tochterunternehmen im Mittelfluss aus Finanzierungstätigkeit gezeigt.

## Erläuterungen zur Segmentberichterstattung

Die Segmentberichterstattung von HeidelbergCement basiert auf der konzerninternen Aufteilung in geografische Regionen und zusätzlich in Geschäftsaktivitäten. Entsprechend der Managementorganisation erfolgt die Unterteilung des Konzerns in geografische Regionen. Daneben wird freiwillig zusätzlich eine Aufteilung nach Geschäftsaktivitäten vorgenommen.

Mit Beginn des Geschäftsjahres 2010 wurde die Segmentberichterstattung neu gegliedert. Das im Vorjahr ausgewiesene Konzerngebiet Europa wurde in die Regionen West- und Nordeuropa sowie Osteuropa-Zentralasien aufgeteilt. Deutschland wurde mit West- und Nordeuropa zusammengefasst. Neben Deutschland gehören zu diesem berichtspflichtigen Segment die Benelux-Länder, Dänemark, Großbritannien, Norwegen, Schweden und die baltischen Staaten. Bosnien-Herzegowina, Georgien, Kroatien, Polen, Rumänien, Russland, die Tschechische und die Slowakische Republik, die Ukraine und Ungarn sind Teil des neuen Konzerngebiets Osteuropa-Zentralasien. Auch Kasachstan, das im Vorjahr in der Region Asien-Australien-Afrika ausgewiesen wurde, zählt neu zur Region Osteuropa-Zentralasien.

Die bisherige Region Asien-Australien-Afrika wurde ebenfalls aufgeteilt. Bangladesh, Brunei, China, Indien, Indonesien, Malaysia, Singapur sowie Australien wurden zur Konzernregion Asien-Pazifik zusammengefasst. Afrika und die Türkei wurden dem neuen Konzerngebiet Afrika-Mittelmeerraum zugeordnet. Daneben umfasst diese Region unsere Aktivitäten in Israel und Spanien, die bisher Teil der Konzernregion Europa waren.

| HeidelbergCement bilanziert              |                                                                      |
|------------------------------------------|----------------------------------------------------------------------|
| Gewinn- und Verlustrechnung des Konzerns | Eigenkapitalveränderungsrechnung des Konzerns                        |
| Gesamtergebnisrechnung des Konzerns      | Segmentberichterstattung/Teil des Anhangs                            |
| Kapitalflussrechnung des Konzerns        | Anhang des Konzerns                                                  |
| Bilanz des Konzerns                      | Bericht des Abschlussprüfers/Versicherung der gesetzlichen Vertreter |

Nordamerika umfasst wie im Vorjahr die USA und Kanada. Im Bereich Konzernservice sind wie bisher unsere Handelsaktivitäten zusammengefasst.

Zusammenfassend erfolgt die neue geografische Unterteilung von HeidelbergCement in die folgenden sechs Konzerngebiete:

- West- und Nordeuropa,
- Osteuropa-Zentralasien,
- Nordamerika,
- Asien-Pazifik,
- Afrika-Mittelmeerraum und
- Konzernservice.

HeidelbergCement unterscheidet daneben seit Beginn des Geschäftsjahres 2010 vier Geschäftsbereiche:

- Zement,
- Zuschlagstoffe,
- Bauprodukte und
- Beton-Service-Sonstiges.

Die Hauptaktivitäten Zement und Zuschlagstoffe werden jetzt getrennt ausgewiesen. Der Geschäftsbereich Bauprodukte bleibt unverändert und im Bereich Beton-Service-Sonstiges berichten wir hauptsächlich über die nachgelagerten Aktivitäten wie Transportbeton und Asphalt. Die Vorjahreswerte wurden entsprechend der neuen Berichtsstruktur der Segmente angepasst. Es werden dieselben Rechnungslegungsvorschriften zugrunde gelegt, wie sie für den Konzern im Anhang beschrieben sind. Der Umsatz mit anderen Konzerngebieten bzw. Geschäftsbereichen zeigt die Umsätze, die zwischen den Segmenten getätigt wurden. Die nachfolgende Tabelle zeigt eine Aufteilung der Umsatzerlöse mit Drittkunden sowie der langfristigen Vermögenswerte nach Ländern gemäß IFRS 8.33:

| Informationen nach Ländern | Umsatzerlöse mit Drittkunden |        | Langfristige Vermögenswerte |        |
|----------------------------|------------------------------|--------|-----------------------------|--------|
| Mio EUR                    | 2009                         | 2010   | 2009                        | 2010   |
| USA                        | 2.302                        | 2.255  | 7.271                       | 7.662  |
| Großbritannien             | 1.326                        | 1.345  | 3.697                       | 3.728  |
| Australien                 | 839                          | 967    | 1.815                       | 2.225  |
| Deutschland                | 1.042                        | 970    | 1.134                       | 1.113  |
| Belgien                    | 391                          | 388    | 871                         | 858    |
| Indonesien                 | 692                          | 898    | 711                         | 784    |
| Kanada                     | 590                          | 778    | 472                         | 525    |
| Sonstige Länder            | 3.935                        | 4.162  | 4.318                       | 4.943  |
| <b>Summe</b>               | 11.117                       | 11.762 | 20.289                      | 21.837 |

Die Zuordnung der Umsatzerlöse auf die Länder erfolgt auf Basis des Herkunftslands des Unternehmens.

## Erläuterungen zur Gewinn- und Verlustrechnung

### 1 Umsatzerlöse

| Umsatzentwicklung<br>nach Konzerngebieten<br>und Geschäftsbereichen | Zement |       | Zuschlagstoffe |       | Bauprodukte |       | Beton-Service-<br>Sonstiges |       | Innenumsätze |        | Gesamt |        |
|---------------------------------------------------------------------|--------|-------|----------------|-------|-------------|-------|-----------------------------|-------|--------------|--------|--------|--------|
| Mio EUR                                                             | 2009   | 2010  | 2009           | 2010  | 2009        | 2010  | 2009                        | 2010  | 2009         | 2010   | 2009   | 2010   |
| West- und Nordeuropa                                                | 1.594  | 1.618 | 734            | 770   | 523         | 433   | 1.554                       | 1.560 | -556         | -571   | 3.848  | 3.811  |
| Osteuropa-Zentralasien                                              | 1.001  | 865   | 121            | 125   |             |       | 256                         | 241   | -96          | -92    | 1.282  | 1.138  |
| Nordamerika                                                         | 851    | 883   | 825            | 921   | 721         | 707   | 790                         | 849   | -297         | -327   | 2.892  | 3.033  |
| Asien-Pazifik                                                       | 1.281  | 1.547 | 355            | 446   | 28          | 34    | 782                         | 881   | -235         | -299   | 2.211  | 2.609  |
| Afrika-Mittelmeerraum                                               | 555    | 647   | 88             | 85    |             |       | 258                         | 274   | -65          | -68    | 837    | 938    |
| Summe                                                               | 5.282  | 5.560 | 2.123          | 2.347 | 1.273       | 1.174 | 3.640                       | 3.805 | -1.248       | -1.357 | 11.070 | 11.528 |
| Konzernservice                                                      |        |       |                |       |             |       |                             |       |              |        | 475    | 709    |
| Innenumsätze zwischen<br>den Konzerngebieten                        |        |       |                |       |             |       |                             |       |              |        | -429   | -476   |
| Fortzuführende<br>Geschäftsbereiche                                 |        |       |                |       |             |       |                             |       |              |        | 11.117 | 11.762 |

### 2 Sonstige betriebliche Erträge

| Sonstige betriebliche Erträge        |       |       |
|--------------------------------------|-------|-------|
| Mio EUR                              | 2009  | 2010  |
| Erträge aus Nebengeschäften          | 56,5  | 66,3  |
| Mieterträge                          | 30,5  | 31,6  |
| Erträge aus Einzelwertberichtigungen | 8,0   | 5,6   |
| Buchgewinne aus Anlagenabgängen      | 150,7 | 194,9 |
| Auflösung von Rückstellungen         | 16,1  | 12,1  |
| Sonstige Erträge                     | 149,7 | 143,3 |
|                                      | 411,5 | 453,8 |

In den Buchgewinnen aus Anlagenabgängen sind Erträge aus dem Verkauf nicht benötigter Emissionsrechte in Höhe von 147,1 (i.V.: 98,5) Mio EUR enthalten. Die Wertminderungen in Höhe von 7,9 Mio EUR, die im Zusammenhang mit der Stichtagsbewertung angefallen sind, wurden in den Abschreibungen auf immaterielle Vermögenswerte ausgewiesen. Wesentliche einmalige Geschäftsvorfälle, die im Rahmen der gewöhnlichen Geschäftstätigkeit anfallen, werden in den zusätzlichen ordentlichen Erträgen ausgewiesen.

### 3 Materialaufwand

| Materialaufwand                          |         |         |
|------------------------------------------|---------|---------|
| Mio EUR                                  | 2009    | 2010    |
| Rohstoffe                                | 1.776,5 | 1.908,6 |
| Betriebs-, Reparaturmaterial, Verpackung | 705,5   | 761,5   |
| Aufwendungen für Energie                 | 1.122,0 | 1.244,1 |
| Handelswaren                             | 477,8   | 658,8   |
| Sonstiges                                | 137,7   | 158,3   |
|                                          | 4.219,5 | 4.731,3 |

In Relation zu den Umsatzerlösen betrug der Materialaufwand 40,2% (i.V.: 38,0%).

| HeidelbergCement bilanziert              |  |                                                                      |
|------------------------------------------|--|----------------------------------------------------------------------|
| Gewinn- und Verlustrechnung des Konzerns |  | Eigenkapitalveränderungsrechnung des Konzerns                        |
| Gesamtergebnisrechnung des Konzerns      |  | Segmentberichterstattung/Teil des Anhangs                            |
| Kapitalflussrechnung des Konzerns        |  | Anhang des Konzerns                                                  |
| Bilanz des Konzerns                      |  | Bericht des Abschlussprüfers/Versicherung der gesetzlichen Vertreter |

#### 4 Mitarbeiter und Personalaufwand

| Personalaufwand                   |         |         |
|-----------------------------------|---------|---------|
| Mio EUR                           | 2009    | 2010    |
| Löhne, Gehälter, soziale Abgaben  | 1.891,9 | 1.991,3 |
| Aufwendungen für Altersversorgung | 94,5    | 71,4    |
| Andere Personalaufwendungen       | 55,1    | 23,5    |
|                                   | 2.041,5 | 2.086,2 |

Im Verhältnis zu den Umsatzerlösen betrug der Personalaufwand 17,7 % (i.V.: 18,4 %). Bezüglich der Entwicklung der Aufwendungen für Altersversorgung verweisen wir auf die Erläuterung der Pensionsrückstellungen unter Punkt 45.

| Mitarbeiter im Jahresdurchschnitt  |        |        |
|------------------------------------|--------|--------|
| Aufgliederung nach Personengruppen | 2009   | 2010   |
| Gewerbliche Arbeitnehmer           | 40.519 | 39.156 |
| Angestellte                        | 15.794 | 15.219 |
| Auszubildende                      | 410    | 280    |
|                                    | 56.723 | 54.655 |

Der Rückgang der durchschnittlichen Anzahl der Mitarbeiter ist insbesondere auf Kapazitätsanpassungen zurückzuführen. Die durchschnittliche Anzahl der Mitarbeiter quotale konsolidierter Unternehmen betrug 3.294 (i.V.: 3.301).

#### 5 Sonstige betriebliche Aufwendungen

| Sonstige betriebliche Aufwendungen                |         |         |
|---------------------------------------------------|---------|---------|
| Mio EUR                                           | 2009    | 2010    |
| Verwaltungs- und Vertriebsaufwendungen            | 849,2   | 886,8   |
| Frachtaufwendungen                                | 1.062,6 | 1.182,2 |
| Aufwendungen für Fremdreparaturen und -leistungen | 721,6   | 832,5   |
| Miet- und Leasingaufwendungen                     | 167,5   | 155,1   |
| Übrige Aufwendungen                               | 97,7    | 74,2    |
| Sonstige Steuern                                  | 32,9    | 38,0    |
|                                                   | 2.931,5 | 3.168,8 |

Auf Forschung und Entwicklung entfielen Aufwendungen in Höhe von 67,6 (i.V.: 63,6) Mio EUR, die nach den in IAS 38 (Intangible Assets) gegebenen Voraussetzungen nicht zu aktivieren sind.

Wesentliche einmalige Geschäftsvorfälle, die im Rahmen der gewöhnlichen Geschäftstätigkeit anfallen, werden in den zusätzlichen ordentlichen Aufwendungen ausgewiesen.

#### 6 Abschreibungen auf immaterielle Vermögenswerte und Sachanlagen

Die planmäßigen Abschreibungen auf immaterielle Vermögenswerte und Gegenstände des Sachanlagevermögens werden auf der Grundlage von folgenden konzerneinheitlichen Nutzungsdauern ermittelt:



| Nutzungsdauer                      |           |
|------------------------------------|-----------|
|                                    | Jahre     |
| Standardsoftware                   | 3         |
| SAP-Applikationen                  | 3 bis 5   |
| Bauten                             | 20 bis 40 |
| Technische Anlagen und Maschinen   | 10 bis 20 |
| Betriebs- und Geschäftsausstattung | 5 bis 10  |
| EDV-Hardware                       | 4 bis 5   |

Wertminderungen werden in den zusätzlichen ordentlichen Aufwendungen ausgewiesen.

## 7 Zusätzliches ordentliches Ergebnis

Das zusätzliche ordentliche Ergebnis enthält Geschäftsvorfälle, die zwar im Rahmen der gewöhnlichen Geschäftstätigkeit anfallen, jedoch aufgrund ihrer Einmaligkeit nicht im operativen Ergebnis ausgewiesen werden.

| Zusätzliches ordentliches Ergebnis                                                  |        |        |
|-------------------------------------------------------------------------------------|--------|--------|
| Mio EUR                                                                             | 2009   | 2010   |
| <b>Zusätzliche ordentliche Erträge</b>                                              |        |        |
| Erträge aus dem Abgang von Tochterunternehmen und sonstigen Geschäftseinheiten      | 121,0  | 1,2    |
| Erträge aus dem Abgang von sonstigem Anlagevermögen                                 | 18,3   | 0,3    |
| Wertaufholungen                                                                     | 3,9    | 4,4    |
| Sonstige einmalige Erträge                                                          | 0,9    | 26,1   |
|                                                                                     | 144,1  | 32,0   |
| <b>Zusätzliche ordentliche Aufwendungen</b>                                         |        |        |
| Aufwendungen aus dem Abgang von Tochterunternehmen und sonstigen Geschäftseinheiten | -11,6  | -1,8   |
| Aufwendungen aus dem Abgang von sonstigem Anlagevermögen                            | -6,2   |        |
| Wertminderungen von Geschäfts- oder Firmenwerten                                    | -420,5 | -23,6  |
| Wertminderungen von sonstigem Anlagevermögen                                        | -74,1  | -29,8  |
| Restrukturierungsaufwendungen                                                       | -58,4  | -47,1  |
| Sonstige einmalige Aufwendungen                                                     | -68,3  | -31,9  |
|                                                                                     | -639,1 | -134,2 |
|                                                                                     | -495,0 | -102,2 |

Der Rückgang der zusätzlichen ordentlichen Erträge von 144,1 Mio EUR auf 32,0 Mio EUR ist im Wesentlichen auf den Rückgang der Erträge aus dem Abgang von Tochterunternehmen und sonstigen Geschäftseinheiten zurückzuführen. Im Vorjahr enthielt dieser Posten die Buchgewinne aus der Veräußerung von 14,1 % der Anteile an Indocement/Indonesien (73,8 Mio EUR), aus der Realteilung von Gralex/Belgien (21,2 Mio EUR) sowie der Veräußerung der Anteile an Pioneer Road Services/Australien (3,1 Mio EUR).

Für in Vorjahren wertgeminderte Sachanlagen wurden Wertaufholungen auf den Marktwert abzüglich Veräußerungskosten in Höhe von 2,6 Mio EUR vorgenommen.

Die sonstigen einmaligen Erträge enthalten eine Vielzahl von Einzelposten. Der wesentliche Posten des Geschäftsjahres betrifft die Auflösung abgegrenzter Kaufpreisverbindlichkeiten aus dem Erwerb von Tochterunternehmen in Höhe von 18,0 Mio EUR.

Der Rückgang der zusätzlichen ordentlichen Aufwendungen von 639,1 Mio EUR auf 134,2 Mio EUR ist insbesondere auf die Wertminderungen von Geschäfts- oder Firmenwerten zurückzuführen. Bei der Überprüfung der Werthaltigkeit der Geschäfts- oder Firmenwerte wurden im Berichtsjahr Wertminderungen in Höhe von 23,6 (i.V.: 420,5) Mio EUR vorgenommen. Die Wertminderungen betreffen im Wesentlichen den Geschäfts- oder Firmenwert in Spanien. Im Vorjahr wurden Wertminderungen auf die Geschäfts- oder Firmenwerte in Nordamerika (332,1 Mio EUR), Spanien

| HeidelbergCement bilanziert              |  |                                                                      |
|------------------------------------------|--|----------------------------------------------------------------------|
| Gewinn- und Verlustrechnung des Konzerns |  | Eigenkapitalveränderungsrechnung des Konzerns                        |
| Gesamtergebnisrechnung des Konzerns      |  | Segmentberichterstattung/Teil des Anhangs                            |
| Kapitalflussrechnung des Konzerns        |  | Anhang des Konzerns                                                  |
| Bilanz des Konzerns                      |  | Bericht des Abschlussprüfers/Versicherung der gesetzlichen Vertreter |

(59,9 Mio EUR), Israel (14,0 Mio EUR) und Großbritannien (11,9 Mio EUR) vorgenommen. Detaillierte Erläuterungen zum Wertminderungstest werden auf Seite 159 ff. gegeben.

Es wurden Wertminderungen auf Sachanlagen in Höhe von 27,2 (i.V.: 54,3) Mio EUR vorgenommen; davon auf den Nutzungswert 20,7 Mio EUR und auf den Marktwert abzüglich Veräußerungskosten 6,5 Mio EUR. Wesentliche Posten waren Wertminderungen auf Grundstücke und Gebäude sowie auf technische Anlagen in Deutschland.

Die sonstigen einmaligen Aufwendungen beinhalten eine Vielzahl von Einzelposten. Hierin enthalten sind Kosten in Höhe von 1,1 Mio EUR, die im Zusammenhang mit Unternehmenszusammenschlüssen entstanden sind sowie 1,1 Mio EUR aus der Neubewertung von Anteilen aus sukzessiven Unternehmenszusammenschlüssen.

## 8 Ergebnis aus Beteiligungen

| Ergebnis aus Beteiligungen              |      |       |
|-----------------------------------------|------|-------|
| Mio EUR                                 | 2009 | 2010  |
| Ergebnisse aus assoziierten Unternehmen | 34,1 | 35,3  |
| Erträge aus Finanzinvestitionen         | 7,4  | 2,4   |
| Wertminderungen von Beteiligungen       | -5,0 | -32,4 |
| Wertaufholungen von Ausleihungen        | 1,6  | 0,5   |
|                                         | 38,1 | 5,8   |

Die Ergebnisse aus assoziierten Unternehmen bemessen sich nach den Bruttobeträgen, d.h. der Ausweis erfolgt vor Ertragsteuern. Den anteiligen Steueraufwand berichten wir unter dem Posten Steuern vom Einkommen und Ertrag. Das Nettoergebnis betrug 28,7 (i.V.: 28,0) Mio EUR. Die Erträge aus Finanzinvestitionen umfassen im Wesentlichen Gewinnausschüttungen von Kapital- und Personengesellschaften. Der Anstieg der Wertminderungen von Beteiligungen im Vergleich zum Vorjahr resultiert im Wesentlichen aus der Wertminderung des polnischen assoziierten Unternehmens Podgrodzie Sp.z.o.o. und der Finanzinvestition US Concrete Inc., Delaware, wovon ein Anteil von 8,8 Mio EUR ergebniswirksam aus dem Eigenkapital aufgelöst wurde.

## 9 Sonstiges Finanzergebnis

| Sonstiges Finanzergebnis                                      |        |        |
|---------------------------------------------------------------|--------|--------|
| Mio EUR                                                       | 2009   | 2010   |
| Zinssaldo leistungsorientierter Pensionspläne                 | -42,7  | -42,2  |
| Zinsanteil aus der Bewertung sonstiger Rückstellungen         | -15,0  | -23,6  |
| Ergebnis aus der Bewertung von derivativen Finanzinstrumenten |        | 7,5    |
| Übriges sonstiges Finanzergebnis                              | -171,9 | -80,0  |
|                                                               | -229,6 | -138,3 |

Das übrige sonstige Finanzergebnis enthält Finanzierungsaufwendungen im Zusammenhang mit der syndizierten Kreditfazilität in Höhe von 75,0 (i.V.: 131,1) Mio EUR, Aufwendungen aus der Marktbewertung von Finanzinvestitionen „Held for trading“ in Höhe von 0,0 (i.V.: 7,7) Mio EUR sowie übrige Finanzaufwendungen.

## 10 Steuern vom Einkommen und vom Ertrag

| Steuern vom Einkommen und vom Ertrag fortzuführender Geschäftsbereiche |       |        |
|------------------------------------------------------------------------|-------|--------|
| Mio EUR                                                                | 2009  | 2010   |
| Tatsächliche Steuern                                                   | -6,2  | -288,3 |
| Latente Steuern                                                        | 196,3 | 228,6  |
|                                                                        | 190,1 | -59,7  |

Die Erhöhung der tatsächlichen Steuern um 282,1 Mio EUR ist im Wesentlichen auf die Ergebnisverbesserung in Indonesien sowie Schweden und Ghana zurückzuführen. Zur Erhöhung trugen ebenfalls Einmaleffekte im Vorjahr bei, die aus der Auflösung von Steuerabgrenzungen sowie aus Verlustrückträgen resultierten. Bereinigt um Steuernachzahlungen und -erstattungen für Vorjahre in Höhe von 1,9 (i.V.: 165,8) Mio EUR erhöhten sich die tatsächlichen Steuern um 118,2 Mio EUR. Der anteilige Steueraufwand der assoziierten Unternehmen aus der at Equity-Bewertung in Höhe von 6,6 (i.V.: 6,1) Mio EUR ist in den tatsächlichen Steuern enthalten.

In Vorjahren gebildete Aktivposten für latente Steuern auf Verlustvorträge reduzierten sich im Berichtsjahr um 13,4 (i.V.: 43,3) Mio EUR. Die Minderung des Steueraufwands für latente Steuern aufgrund von in Vorjahren nicht berücksichtigter steuerlicher Verluste betrug im Geschäftsjahr 53,2 (i.V.: 43,3) Mio EUR. Beim erstmaligen Ansatz aktiver latenter Steuern in Höhe von 77,7 Mio EUR in den USA, die nicht durch passive Steuerlatenzen gedeckt sind, wurde die Einschätzung bezüglich der Realisierbarkeit der Verlustvorträge bis 2015 entsprechend der prognostizierten Erträge und anhand der Steuerplanungsstrategie berücksichtigt.

Steuerliche Verlustvorträge und Steuergutschriften, die bei der Ermittlung der latenten Steuern nicht berücksichtigt sind, bestehen in Höhe von 2.194,3 (i.V.: 2.286,9) Mio EUR. Die Verlustvorträge im Inland sowie im Ausland sind im Wesentlichen unverfallbar. Im Berichtsjahr sind nicht gebuchte Aktivposten für latente Steuern in Höhe von 597,4 (i.V.: 666,3) Mio EUR vorhanden.

Im Geschäftsjahr wurden latente Steuern in Höhe von -26,8 (i.V.: 64,9) Mio EUR erfolgsneutral mit dem Eigenkapital verrechnet, die überwiegend aus der Bewertung von Pensionsrückstellungen gemäß IAS 19 sowie der Bewertung von Finanzinstrumenten gemäß IAS 39 resultieren. Die Rückstellung für latente Steuern erhöhte sich erfolgsneutral um 26,1 (i.V.: 13,5) Mio EUR aufgrund von Änderungen des Konsolidierungskreises.

Die langfristigen Verbindlichkeiten aus Ertragsteuern in Höhe von 90,7 (i.V.: 79,8) Mio EUR enthalten Eventualverbindlichkeiten, die im Zusammenhang mit dem Erwerb der Hanson-Gruppe gemäß IFRS 3.37 angesetzt wurden.

Gemäß IAS 12 sind latente Steuern auf den Unterschiedsbetrag zwischen dem in der Konzernbilanz erfassten anteiligen Eigenkapital einer Tochtergesellschaft und dem Beteiligungsbuchwert für diese Tochtergesellschaft in der Steuerbilanz der Muttergesellschaft zu bilden, wenn mit der Realisierung zu rechnen ist (Outside Basis Differenzen). Aufgrund der Anwendungsvorschriften des IAS 12.39 wurden latente Steuern auf zukünftig geplante Dividenden in Höhe von 11,1 (i.V.: 5,4) Mio EUR gebildet. Für Outside Basis Differenzen aus thesaurierten Gewinnen der Tochtergesellschaften der HeidelbergCement AG in Höhe von 3,9 (i.V.: 3,6) Mrd EUR wurden keine passiven latenten Steuern gebildet, da weitere Ausschüttungen nicht geplant sind.

Im Hinblick auf die Bewertung der latenten Steuern kommt für die Inlandsgesellschaften ein durchschnittlicher Ertragsteuersatz von 29,32 % zur Anwendung.

| <b>Überleitungsrechnung fortzuführender Geschäftsbereiche</b>           |              |               |
|-------------------------------------------------------------------------|--------------|---------------|
| Mio EUR                                                                 | 2009         | 2010          |
| Ergebnis vor Steuern                                                    | -14,5        | <b>599,1</b>  |
| Wertminderung von Geschäfts- oder Firmenwerten                          | -420,5       | <b>-23,6</b>  |
| Ergebnis vor Steuern und Wertminderung von Geschäfts- oder Firmenwerten | 406,0        | <b>622,7</b>  |
| Theoretischer Steueraufwand mit 16,3 % (i.V.: 13,7 %) <sup>1)</sup>     | -55,6        | <b>-101,7</b> |
| <b>Veränderung des theoretischen Steueraufwands aufgrund:</b>           |              |               |
| Steuerfreier Erträge (+) bzw. nicht abzugsfähiger Aufwendungen (-)      | 94,7         | <b>4,0</b>    |
| Auswirkungen aus Verlustvorträgen                                       | 1,2          | <b>36,9</b>   |
| Nicht gebuchte Aktivposten für latente Steuern                          | -18,1        | <b>-14,2</b>  |
| Steuererhöhung (-), -minderung (+) Vorjahre                             | 165,8        | <b>1,9</b>    |
| Änderungen des Steuersatzes                                             | 2,1          | <b>13,4</b>   |
| <b>Steuern vom Einkommen und vom Ertrag</b>                             | <b>190,1</b> | <b>-59,7</b>  |

1) Gewichteter durchschnittlicher Steuersatz

| HeidelbergCement bilanziert              |  |                                                                      |
|------------------------------------------|--|----------------------------------------------------------------------|
| Gewinn- und Verlustrechnung des Konzerns |  | Eigenkapitalveränderungsrechnung des Konzerns                        |
| Gesamtergebnisrechnung des Konzerns      |  | Segmentberichterstattung/Teil des Anhangs                            |
| Kapitalflussrechnung des Konzerns        |  | Anhang des Konzerns                                                  |
| Bilanz des Konzerns                      |  | Bericht des Abschlussprüfers/Versicherung der gesetzlichen Vertreter |

| Latente Steuern nach Kategorien von temporären Differenzen |         |         |
|------------------------------------------------------------|---------|---------|
| Mio EUR                                                    | 2009    | 2010    |
| <b>Aktive latente Steuern</b>                              |         |         |
| Anlagevermögen                                             | 62,0    | 72,2    |
| Sonstige Vermögenswerte                                    | 88,9    | 54,2    |
| Rückstellungen und Verbindlichkeiten                       | 626,9   | 658,4   |
| Steuerliche Verlustvorträge und Steuergutschriften         | 311,2   | 535,5   |
| Bruttowert                                                 | 1.089,0 | 1.320,3 |
| Saldierung                                                 | -820,2  | -964,5  |
|                                                            | 268,8   | 355,8   |
| <b>Passive latente Steuern</b>                             |         |         |
| Anlagevermögen                                             | 1.508,5 | 1.576,7 |
| Sonstige Vermögenswerte                                    | 68,6    | 15,0    |
| Rückstellungen und Verbindlichkeiten                       | 135,5   | 196,6   |
| Bruttowert                                                 | 1.712,6 | 1.788,3 |
| Saldierung                                                 | -820,2  | -964,5  |
|                                                            | 892,4   | 823,8   |

## 11 Aufgegebene Geschäftsbereiche

Die folgende Tabelle zeigt die Zusammensetzung des Ergebnisses aus aufgegebenen Geschäftsbereichen.

| Ergebnis nach Steuern aufgebener Geschäftsbereiche |       |       |
|----------------------------------------------------|-------|-------|
| Mio EUR                                            | 2009  | 2010  |
| Aufwendungen                                       | -13,6 | -44,1 |
| Ertragsteuern                                      | 5,6   | 15,6  |
| Ergebnis nach Steuern aufgebener Geschäftsbereiche | -8,0  | -28,4 |

Im Ergebnis aus aufgegebenen Geschäftsbereichen sind Aufwendungen enthalten, die im Zusammenhang mit in Vorjahren aufgegebenen Geschäftsbereichen der Hanson-Gruppe und von maxit Group entstanden sind.

## 12 Vorschlag für die Dividende

Vorstand und Aufsichtsrat schlagen folgende Dividende vor: 0,25 EUR Dividende je Aktie. Auf 187.500.000 für das Geschäftsjahr 2010 dividendenberechtigte Stückaktien ergibt dies einen Betrag von 46.875.000 (i.V.: 22.500.000) EUR.

## 13 Ergebnis je Aktie

| Ergebnis je Aktie                                                                                       |         |         |
|---------------------------------------------------------------------------------------------------------|---------|---------|
| Mio EUR                                                                                                 | 2009    | 2010    |
| Jahresüberschuss                                                                                        | 167,7   | 510,9   |
| Anteile Fremder                                                                                         | 125,1   | 168,2   |
| Anteil der Gruppe am Jahresüberschuss                                                                   | 42,6    | 342,7   |
| Aktienzahl in Tsd. (gewichteter Durchschnitt)                                                           | 142.170 | 187.500 |
| Ergebnis je Aktie in EUR                                                                                | 0,30    | 1,83    |
| Ergebnis aus fortzuführenden Geschäftsbereichen<br>– den Aktionären der HeidelbergCement AG zuzurechnen | 50,6    | 371,1   |
| Ergebnis je Aktie in EUR – fortzuführende Geschäftsbereiche                                             | 0,36    | 1,98    |
| Ergebnis aus aufgegebenen Geschäftsbereichen<br>– den Aktionären der HeidelbergCement AG zuzurechnen    | -8,0    | -28,4   |
| Ergebnis je Aktie in EUR – aufgegebene Geschäftsbereiche                                                | -0,06   | -0,15   |

Die Berechnung des unverwässerten Ergebnisses je Aktie erfolgt gemäß IAS 33 (Earnings per Share) mittels Division des Anteils der Gruppe am Jahresergebnis durch den gewichteten Durchschnitt der Zahl der ausgegebenen Aktien. Die Kenngröße verwässertes Ergebnis je Aktie berücksichtigt nicht nur tatsächlich ausgegebene, sondern auch aufgrund von Optionsrechten potenziell erhältliche Aktien. Eine Verwässerung des Ergebnisses je Aktie gemäß IAS 33.30 ergab sich im Berichtszeitraum nicht.

## Erläuterungen zur Kapitalflussrechnung

Die Kapitalflussrechnung zeigt, wie sich die Zahlungsmittel und Zahlungsmitteläquivalente des Konzerns im Laufe des Berichtsjahres durch Mittelzu- und Mittelabflüsse verändert haben. In Übereinstimmung mit IAS 7 (Statement of Cash Flows) wird zwischen Zahlungsströmen aus der operativen Geschäftstätigkeit sowie aus der Investitions- und Finanzierungstätigkeit unterschieden. Die Veränderungen der betreffenden Bilanzposten lassen sich nicht unmittelbar aus der Konzernbilanz ableiten, da zahlungsunwirksame Vorgänge, wie Effekte aus der Währungsumrechnung und Konsolidierungskreisänderung, bereinigt werden.

Der Cashflow errechnet sich aus dem um Steuern vom Einkommen und vom Ertrag und um das Zinsergebnis bereinigten Ergebnis nach Steuern aus fortzuführendem Geschäft, korrigiert um Abschreibungen, Wertminderungen und andere zahlungsunwirksame Ströme („andere Non Cash Items“). Ferner werden Zahlungsströme aus erhaltenen Dividenden von nicht konsolidierten Unternehmen, aus erhaltenen und gezahlten Zinsen und aus gezahlten Steuern erfasst. Unter Berücksichtigung von Veränderungen des Working Capital und dem Verbrauch von Rückstellungen ergibt sich der Mittelfluss aus operativer Geschäftstätigkeit.

Im Mittelfluss aus der Investitionstätigkeit werden Zahlungsströme aus dem Erwerb oder der Veräußerung von immateriellen Vermögenswerten sowie Sach- und Finanzanlagen erfasst. Sofern es sich um den Erwerb oder die Veräußerung von Tochtergesellschaften oder sonstigen Geschäftseinheiten handelt (Übernahme oder Verlust der Kontrolle), werden die Auswirkungen auf die Kapitalflussrechnung in eigenen Posten dargestellt.

Der Mittelabfluss aus Finanzierungstätigkeit ist durch die Veränderungen im Kapital, durch gezahlte Dividenden sowie durch die Aufnahme und Tilgung von Anleihen und Krediten geprägt. Darüber hinaus werden Zahlungsströme aus Änderungen der Eigentumsanteile an Tochterunternehmen, die nicht zu einem Verlust der Beherrschung führen, als Finanzierungstätigkeit klassifiziert. Durch die geänderte Darstellungsweise ergab sich für den Vorjahresausweis ein um 214,7 Mio EUR höherer Mittelzufluss aus Finanzierungstätigkeit und entsprechend in gleicher Höhe ein verminderter Mittelzufluss aus Investitionstätigkeit.

Die von ausländischen Konzerngesellschaften ausgewiesenen Mittelflüsse werden grundsätzlich zu Jahresdurchschnittskursen in Euro umgerechnet. Im Gegensatz hierzu werden die Zahlungsmittelbestände wie in der Konzernbilanz zum Stichtagskurs umgerechnet. Die Einflüsse von Wechselkursänderungen auf die liquiden Mittel werden gesondert dargestellt.

Im Folgenden werden die wesentlichen Einzelposten der Kapitalflussrechnung erläutert:

### 14 Erhaltene Zinsen

Der Anstieg der erhaltenen Zinsen ist insbesondere auf Einmaleffekte aus der Ablösung von Zinsswaps zurückzuführen.

### 15 Gezahlte Zinsen

Der Rückgang der gezahlten Zinsen im Vergleich zum Vorjahr ist im Wesentlichen auf verminderte Refinanzierungskosten zurückzuführen.

### 16 Eliminierung anderer Non Cash Items

Die anderen Non Cash Items enthalten im Wesentlichen Zuführungen und Auflösungen von Rückstellungen. Ferner wurden die Ergebnisse um die Buchgewinne und -verluste aus Anlagenabgängen korrigiert. Der Gesamtbetrag der erzielten Finanzmittel aus Anlagenabgängen wird unter den Desinvestitionen in der Investitionstätigkeit dargestellt.



| HeidelbergCement bilanziert              |                                                                      |
|------------------------------------------|----------------------------------------------------------------------|
| Gewinn- und Verlustrechnung des Konzerns | Eigenkapitalveränderungsrechnung des Konzerns                        |
| Gesamtergebnisrechnung des Konzerns      | Segmentberichterstattung/Teil des Anhangs                            |
| Kapitalflussrechnung des Konzerns        | Anhang des Konzerns                                                  |
| Bilanz des Konzerns                      | Bericht des Abschlussprüfers/Versicherung der gesetzlichen Vertreter |

## 17 Veränderung der betrieblichen Aktiva

Bei den betrieblichen Aktiva handelt es sich um Vorräte und Forderungen aus Lieferungen und Leistungen sowie um sonstige Vermögenswerte der operativen Geschäftstätigkeit.

## 18 Veränderung der betrieblichen Passiva

Die betrieblichen Passiva beinhalten Verbindlichkeiten aus Lieferungen und Leistungen sowie sonstige Verbindlichkeiten aus der operativen Geschäftstätigkeit.

## 19 Verbrauch von Rückstellungen

Dieser Posten enthält die zahlungswirksame Inanspruchnahme aus Pensionsrückstellungen und sonstigen Rückstellungen.

## 20 Zahlungswirksame Investitionen

Die Auszahlungen für Investitionen unterscheiden sich von den Zugängen im Anlagenspiegel u.a. dadurch, dass im Anlagenspiegel nicht zahlungswirksame Transaktionen („Non Cash Items“) als Zugänge gezeigt werden, wie z.B. Zugänge im Rahmen von Tauschtransaktionen oder Sacheinlagen.

Im Folgenden werden die wesentlichen Auszahlungen für den Erwerb von Tochterunternehmen aufgeführt:

- Weitere 50 % der Anteile an Pioneer North Queensland Pty Ltd/Australien für 11,4 Mio EUR,
- 55 % der Anteile an Cimenterie de Lukala S.A.R.L. und 70 % der Anteile an Interlacs S.A.R.L./Demokratische Republik Kongo für 62,2 Mio EUR,
- 51 % der Anteile an CJSC „Construction Materials“/Russland für 40,0 Mio EUR.

Die Investitionen in Tochterunternehmen abzüglich übernommener Zahlungsmittel und Zahlungsmitteläquivalente betrugen 109,9 Mio EUR. Im Berichtsjahr wurden Investitionen zur Erhaltung der Kapazität in Höhe von 466,7 (i.V.: 505,3) Mio EUR getätigt. Die Auszahlungen für kapazitätserweiternde Maßnahmen betrugen 404,9 (i.V.: 314,9) Mio EUR.

## 21 Zahlungswirksame Desinvestitionen

Die Einzahlungen aus dem Abgang von sonstigem Anlagevermögen beinhalten im Wesentlichen Nettoeinzahlungen aus dem Verkauf nicht benötigter Emissionsrechte in Höhe von 106,0 Mio EUR. Darüber hinaus sind Einzahlungen aus der Veräußerung von Finanzanlagen in Höhe von 14,9 Mio EUR enthalten.

## 22 Abgegebene/übernommene liquide Mittel

Diese Zeile zeigt die erworbenen bzw. veräußerten Zahlungsmittel und Zahlungsmitteläquivalente im Rahmen der Übernahme oder des Verlusts der Beherrschung über Tochterunternehmen und sonstige Geschäftseinheiten.

## 23 Erhöhung des Kapitals nach Einbehaltung

Im Vorjahr beinhalten diese Posten den Bruttoerlös aus der Kapitalerhöhung abzüglich der einbehaltenen Transaktionskosten.

## 24 Dividende an Fremde

Unter der Position Dividende an Fremde werden die für Anteile Fremder im Geschäftsjahr gezahlten Dividenden gezeigt.

## 25 Minderung von Anteilen an Tochterunternehmen

Diese Zeile zeigt den Mittelzufluss in Höhe von 45,4 Mio EUR (60,0 Mio USD) aus der Veräußerung von rund 6 % des Afrika-Geschäfts der Scancem International-Gruppe an die IFC und deren Finanzpartner. Im Vorjahr beinhalten diese Posten im Wesentlichen den Zahlungseingang in Höhe von 216,0 Mio EUR aus dem Verkauf von 14,1 % der Anteile an PT Indocement Tungal Prakarsa/Indonesien.

## 26 Erhöhung von Anteilen an Tochterunternehmen

---

Hier werden Zahlungsströme aus der Aufstockung von Beteiligungsquoten an Tochterunternehmen gezeigt. Als größte Transaktion ist der Erwerb von 26,6% der Anteile an der Carrieres d'Antoing S.A., Antoing/Belgien in Höhe von 3,5 Mio EUR zu nennen.

## 27 Aufnahme von Anleihen und Krediten

---

Dieser Posten umfasst im Wesentlichen die Aufnahmen aus der syndizierten Kreditfazilität über 3 Mrd EUR. Ferner wurden drei neue Anleihen emittiert, deren Emissionserlöse vollständig zur Refinanzierung bestehender Bankschulden eingesetzt wurden. Die drei Anleihen im Gesamtvolumen von 2,05 Mrd EUR wurden im Januar bzw. Juli emittiert und hatten Laufzeiten von fünf Jahren (650 Mio EUR), zehn Jahren (750 Mio EUR) und fünfeinhalb Jahren (650 Mio EUR).

Im Vorjahr beinhaltete dieser Posten im Wesentlichen die Aufnahme der syndizierten Kreditfazilität über 8,7 Mrd EUR im Juni 2009 sowie die drei im Oktober 2009 emittierten Euroanleihen mit einem Gesamtemissionsvolumen von 2,5 Mrd EUR mit Laufzeiten von fünf, sieben und zehn Jahren.

## 28 Tilgung von Anleihen und Krediten

---

Diese Position enthält die planmäßigen Rückzahlungen der Finanzverbindlichkeiten sowie den Saldo aus den Ein- und Auszahlungen für Posten mit großer Umschlagshäufigkeit, großen Beträgen und kurzen Laufzeiten im Finanzierungsbereich.

Darin enthalten sind die vollständige Rückzahlung des ausstehenden Betrags der syndizierten Kreditfazilität über 8,7 Mrd EUR, die Rückzahlung der 750 Mio USD Anleihe sowie die teilweise Rückzahlung der syndizierten Kreditfazilität über 3 Mrd EUR. Außerdem wurden planmäßig Commercial Paper getilgt.

Im Vorjahr enthielt der Posten die Rückzahlung der 300 Mio EUR Anleihe sowie die Rückzahlung der syndizierten Akquisitionsfinanzierung (Hanson) und verschiedener bilateraler Linien. Darüber hinaus wurden planmäßig Schuldscheindarlehen und Commercial Paper getilgt.

## 29 Liquide Mittel

---

Im Finanzmittelfonds (Liquide Mittel) werden Zahlungsmittel und Zahlungsmitteläquivalente mit einer Laufzeit von weniger als drei Monaten erfasst. Von den liquiden Mitteln sind 22,3 (i.V.: 110,0) Mio EUR Verfügungsbeschränkungen unterworfen. Die Verfügungsbeschränkungen betreffen insbesondere Beträge, die zur Besicherung lokaler Garantielinien hinterlegt wurden sowie zweckgebundene Mittel, die ausschließlich für Rekultivierungsleistungen verwendet werden können.

| HeidelbergCement bilanziert              |                                                                      |
|------------------------------------------|----------------------------------------------------------------------|
| Gewinn- und Verlustrechnung des Konzerns | Eigenkapitalveränderungsrechnung des Konzerns                        |
| Gesamtergebnisrechnung des Konzerns      | Segmentberichterstattung/Teil des Anhangs                            |
| Kapitalflussrechnung des Konzerns        | Anhang des Konzerns                                                  |
| Bilanz des Konzerns                      | Bericht des Abschlussprüfers/Versicherung der gesetzlichen Vertreter |

## Erläuterungen zur Bilanz – Aktiva

### 30 Immaterielle Vermögenswerte

| Immaterielle Vermögenswerte                 |                                     |                                                |                 |
|---------------------------------------------|-------------------------------------|------------------------------------------------|-----------------|
| Mio EUR                                     | Geschäfts-<br>oder Firmen-<br>werte | Sonstige im-<br>materielle Ver-<br>mögenswerte | Gesamt          |
| <b>Anschaffungs- und Herstellungskosten</b> |                                     |                                                |                 |
| Stand am 1. Januar 2009                     | 10.530,1                            | 444,2                                          | 10.974,3        |
| Währungsumrechnung                          | 298,5                               | -2,5                                           | 296,0           |
| Veränderung Konsolidierungskreis            | 137,4                               | 4,1                                            | 141,5           |
| Zugänge                                     | 0,6                                 | 43,2                                           | 43,8            |
| Abgänge                                     | -76,4                               | -6,6                                           | -83,0           |
| Umbuchungen                                 | -0,2                                | 15,6                                           | 15,4            |
| Stand am 31. Dezember 2009                  | 10.890,0                            | 498,0                                          | 11.388,0        |
| <b>Abschreibungen</b>                       |                                     |                                                |                 |
| Stand am 1. Januar 2009                     | 649,2                               | 174,1                                          | 823,3           |
| Währungsumrechnung                          | 16,6                                | -0,7                                           | 15,9            |
| Veränderung Konsolidierungskreis            | 0,7                                 | 2,0                                            | 2,7             |
| Zugänge                                     |                                     | 42,0                                           | 42,0            |
| Wertminderungen                             | 420,5                               | 19,8                                           | 440,3           |
| Abgänge                                     | -1,2                                | -4,8                                           | -6,0            |
| Umbuchungen                                 |                                     | 1,0                                            | 1,0             |
| Stand am 31. Dezember 2009                  | 1.085,8                             | 233,4                                          | 1.319,2         |
| <b>Buchwert 31. Dezember 2009</b>           | <b>9.804,2</b>                      | <b>264,6</b>                                   | <b>10.068,8</b> |
| <b>Anschaffungs- und Herstellungskosten</b> |                                     |                                                |                 |
| Stand am 1. Januar 2010                     | 10.890,0                            | 498,0                                          | 11.388,0        |
| Währungsumrechnung                          | 783,9                               | 18,7                                           | 802,6           |
| Veränderung Konsolidierungskreis            | -1,4                                | 51,1                                           | 49,7            |
| Zugänge                                     | 61,4                                | 59,8                                           | 121,2           |
| Abgänge                                     | -7,9                                | -17,7                                          | -25,6           |
| Umbuchungen                                 |                                     | 26,7                                           | 26,7            |
| Stand am 31. Dezember 2010                  | 11.726,0                            | 636,6                                          | 12.362,6        |
| <b>Abschreibungen</b>                       |                                     |                                                |                 |
| Stand am 1. Januar 2010                     | 1.085,8                             | 233,4                                          | 1.319,2         |
| Währungsumrechnung                          | 63,0                                | 10,1                                           | 73,1            |
| Veränderung Konsolidierungskreis            | -1,2                                | -1,4                                           | -2,6            |
| Zugänge                                     |                                     | 40,4                                           | 40,4            |
| Wertminderungen                             | 23,6                                | 2,6                                            | 26,2            |
| Wertaufholungen                             |                                     | -1,8                                           | -1,8            |
| Abgänge                                     | -6,5                                | -5,9                                           | -12,4           |
| Umbuchungen                                 |                                     | 7,3                                            | 7,3             |
| Stand am 31. Dezember 2010                  | 1.164,7                             | 284,7                                          | 1.449,4         |
| <b>Buchwert 31. Dezember 2010</b>           | <b>10.561,3</b>                     | <b>351,9</b>                                   | <b>10.913,2</b> |

Größere Einzelposten der Geschäfts- oder Firmenwerte stammen aus dem Erwerb der Hanson-Gruppe, London/Großbritannien, S.A. Cimenteries CBR, Brüssel/Belgien, Lehigh Hanson, Inc., Wilmington/USA, HeidelbergCement Northern Europe AB, Stockholm/Schweden, Akçansa Cimento Sanayi ve Ticaret A.S., Istanbul/Türkei, und ENCI N.V., 's-Hertogenbosch/Niederlande.

Eine Überprüfung der Werthaltigkeit der Geschäfts- oder Firmenwerte erfolgt gemäß IAS 36 (Impairment of Assets) im Rahmen jährlicher Wertminderungstests. Im Berichtsjahr wurden Wertminderungen in Höhe von 23,6 Mio EUR vorgenommen. Diese Wertminderungen werden in den zusätzlichen ordentlichen Aufwendungen berücksichtigt und unter Punkt 7 näher erläutert.

Im Vorjahr führte die Bewertung der Put-Optionen von Minderheitsgesellschaftern zu einer Verminderung der Geschäfts- oder Firmenwerte um 13,1 Mio EUR. In Folge der Änderung des IAS 27 werden diese Effekte nunmehr erfolgsneutral mit den Gewinnrücklagen verrechnet und in der Eigenkapitalveränderungsrechnung als Änderung von Minderheitsanteilen mit Put-Optionen ausgewiesen.

In den sonstigen immateriellen Vermögenswerten sind Abbaurechte, Konzessionen und Software ausgewiesen. Emissionsrechtszertifikate, die im Rahmen des Emissionshandels erworben wurden, sind mit Anschaffungskosten in Höhe von 78,3 (i.V.: 38,9) Mio EUR bilanziert. Wertminderungen für Abbaurechte wurden in Höhe von 2,6 (i.V.: 17,5) Mio EUR erfasst. Selbst erstellte immaterielle Vermögenswerte wurden in Höhe von 0,1 (i.V.: 2,3) Mio EUR aktiviert. Im Geschäftsjahr wurden Entwicklungskosten von 0,9 Mio EUR (i.V.: 0,0) als immaterielle Vermögenswerte erfasst.

Immaterielle Vermögenswerte mit bestimmter Nutzungsdauer bestehen in Höhe von 337,1 (i.V.: 250,5) Mio EUR und mit unbestimmter Nutzungsdauer (Markenrechte) in Höhe von 14,8 (i.V.: 14,1) Mio EUR. Die Geschäfts- oder Firmenwerte beinhalten erworbene Marktanteile, die keinen anderen bestimm- und separierbaren immateriellen Vermögenswerten zuzuordnen sind.

| HeidelbergCement bilanziert              |                                                                      |
|------------------------------------------|----------------------------------------------------------------------|
| Gewinn- und Verlustrechnung des Konzerns | Eigenkapitalveränderungsrechnung des Konzerns                        |
| Gesamtergebnisrechnung des Konzerns      | Segmentberichterstattung/Teil des Anhangs                            |
| Kapitalflussrechnung des Konzerns        | Anhang des Konzerns                                                  |
| Bilanz des Konzerns                      | Bericht des Abschlussprüfers/Versicherung der gesetzlichen Vertreter |

### 31 Sachanlagen

| Sachanlagen                                 |                                                   |                                  |                                                    |                                           |                 |
|---------------------------------------------|---------------------------------------------------|----------------------------------|----------------------------------------------------|-------------------------------------------|-----------------|
| Mio EUR                                     | Grundstücke, grundstücksgleiche Rechte und Bauten | Technische Anlagen und Maschinen | Andere Anlagen, Betriebs- und Geschäftsausstattung | Geleistete Anzahlungen und Anlagen im Bau | Gesamt          |
| <b>Anschaffungs- und Herstellungskosten</b> |                                                   |                                  |                                                    |                                           |                 |
| Stand am 1. Januar 2009                     | 6.402,2                                           | 8.898,6                          | 742,7                                              | 775,9                                     | 16.819,4        |
| Währungsumrechnung                          | 188,4                                             | 253,0                            | 15,0                                               | 0,8                                       | 457,2           |
| Veränderung Konsolidierungskreis            | 68,4                                              | -32,9                            | -0,3                                               | 7,0                                       | 42,2            |
| Zugänge                                     | 75,0                                              | 160,2                            | 28,5                                               | 541,7                                     | 805,4           |
| Abgänge                                     | -69,4                                             | -173,3                           | -63,7                                              | -4,2                                      | -310,6          |
| Umbuchungen                                 | 165,4                                             | 490,1                            | -17,0                                              | -653,9                                    | -15,4           |
| Stand am 31. Dezember 2009                  | 6.830,0                                           | 9.595,7                          | 705,2                                              | 667,3                                     | 17.798,2        |
| <b>Abschreibungen</b>                       |                                                   |                                  |                                                    |                                           |                 |
| Stand am 1. Januar 2009                     | 1.780,0                                           | 4.598,6                          | 505,3                                              |                                           | 6.883,9         |
| Währungsumrechnung                          | 35,0                                              | 133,7                            | 9,4                                                |                                           | 178,1           |
| Veränderung Konsolidierungskreis            | -20,3                                             | -22,1                            | -2,0                                               |                                           | -44,4           |
| Zugänge                                     | 152,1                                             | 534,2                            | 56,5                                               |                                           | 742,8           |
| Wertminderungen                             | 29,9                                              | 24,3                             | 0,1                                                |                                           | 54,3            |
| Wertaufholungen                             |                                                   | -3,9                             |                                                    |                                           | -3,9            |
| Abgänge                                     | -37,1                                             | -138,2                           | -56,3                                              |                                           | -231,6          |
| Umbuchungen                                 | -13,7                                             | 56,7                             | -44,0                                              |                                           | -1,0            |
| Stand am 31. Dezember 2009                  | 1.925,9                                           | 5.183,3                          | 469,0                                              |                                           | 7.578,2         |
| <b>Buchwert 31. Dezember 2009</b>           | <b>4.904,1</b>                                    | <b>4.412,4</b>                   | <b>236,2</b>                                       | <b>667,3</b>                              | <b>10.220,0</b> |
| <b>Anschaffungs- und Herstellungskosten</b> |                                                   |                                  |                                                    |                                           |                 |
| Stand am 1. Januar 2010                     | 6.830,0                                           | 9.595,7                          | 705,2                                              | 667,3                                     | 17.798,2        |
| Währungsumrechnung                          | 405,4                                             | 589,9                            | 29,0                                               | 46,5                                      | 1.070,8         |
| Veränderung Konsolidierungskreis            | 67,3                                              | 88,0                             | 29,6                                               | 6,1                                       | 191,0           |
| Zugänge                                     | 34,4                                              | 73,5                             | 17,3                                               | 597,5                                     | 722,7           |
| Abgänge                                     | -72,9                                             | -90,2                            | -34,7                                              | -8,3                                      | -206,1          |
| Umbuchungen                                 | 116,1                                             | 273,9                            | 27,0                                               | -443,7                                    | -26,7           |
| Umgliederung in kurzfristiges Vermögen      |                                                   | -14,4                            |                                                    |                                           | -14,4           |
| Stand am 31. Dezember 2010                  | 7.380,3                                           | 10.516,4                         | 773,4                                              | 865,4                                     | 19.535,5        |
| <b>Abschreibungen</b>                       |                                                   |                                  |                                                    |                                           |                 |
| Stand am 1. Januar 2010                     | 1.925,9                                           | 5.183,3                          | 469,0                                              |                                           | 7.578,2         |
| Währungsumrechnung                          | 76,8                                              | 294,7                            | 17,2                                               |                                           | 388,7           |
| Veränderung Konsolidierungskreis            | 1,2                                               | -16,3                            | 25,3                                               |                                           | 10,2            |
| Zugänge                                     | 161,2                                             | 554,6                            | 53,0                                               |                                           | 768,8           |
| Wertminderungen                             | 18,6                                              | 7,7                              | 0,9                                                |                                           | 27,2            |
| Wertaufholungen                             | -0,7                                              | -1,9                             |                                                    |                                           | -2,6            |
| Abgänge                                     | -30,4                                             | -76,9                            | -31,7                                              |                                           | -139,0          |
| Umbuchungen                                 | -5,7                                              | -1,2                             | -0,4                                               |                                           | -7,3            |
| Umgliederung in kurzfristiges Vermögen      |                                                   | -12,5                            |                                                    |                                           | -12,5           |
| Stand am 31. Dezember 2010                  | 2.146,9                                           | 5.931,5                          | 533,3                                              |                                           | 8.611,7         |
| <b>Buchwert 31. Dezember 2010</b>           | <b>5.233,4</b>                                    | <b>4.584,9</b>                   | <b>240,1</b>                                       | <b>865,4</b>                              | <b>10.923,9</b> |

Im Sachanlagevermögen sind Leasinggegenstände in Höhe von 22,9 (i.V.: 31,8) Mio EUR aktiviert, davon entfallen 16,9 Mio EUR auf technische Anlagen und Maschinen, 1,7 Mio EUR auf Betriebs- und Geschäftsausstattung und 4,4 Mio EUR auf Gebäude. Es wurden Fremdkapitalkosten in Höhe von 12,9 (i.V.: 10,0) Mio EUR erfasst, die insbesondere



Investitionen osteuropäischer Gesellschaften betrafen. Der durchschnittliche zugrunde gelegte Finanzierungskostensatz betrug 9 % (i.V.: 12 %). Im Rahmen der von uns gegebenen Sicherheiten bestehen Pfandrechte in Höhe von 1,0 (i.V.: 6,9) Mio EUR. Im Berichtsjahr wurden Wertminderungen in Höhe von 27,2 Mio EUR sowie Wertaufholungen von 2,6 Mio EUR vorgenommen, die im zusätzlichen ordentlichen Ergebnis gezeigt und unter Punkt 7 erläutert werden.

### 32 Anteile an assoziierten Unternehmen

Die folgende Tabelle enthält die zusammengefassten Finanzinformationen über die Anteile an assoziierten Unternehmen des HeidelbergCement Konzerns.

| <b>Anteile an assoziierten Unternehmen</b>                         |              |              |
|--------------------------------------------------------------------|--------------|--------------|
| Mio EUR                                                            | 2009         | 2010         |
| <b>Anteilige Bilanzwerte assoziierter Unternehmen</b>              |              |              |
| Vermögenswerte                                                     | 677,9        | 734,3        |
| Schulden                                                           | -301,1       | -329,6       |
|                                                                    | 376,8        | 404,7        |
| Wertminderungen                                                    | -32,1        | -45,5        |
| Nettovermögen                                                      | 344,7        | 359,2        |
| <b>Anteilige Gewinn- und Verlustwerte assoziierter Unternehmen</b> |              |              |
| Erlöse                                                             | 791,9        | 758,4        |
| Periodenergebnis                                                   | 27,9         | 27,9         |
| Nicht erfasste anteilige Verluste des Anteilseigners               | -2,0         | -1,3         |
| Nicht erfasste anteilige Verluste des Anteilseigners kumuliert     | -4,7         | -8,3         |
| <b>Buchwert an assoziierten Unternehmen</b>                        | <b>349,4</b> | <b>367,5</b> |

### 33 Finanzinvestitionen

Hier sind Finanzinvestitionen in Eigenkapitaltitel, die aufgrund langfristiger Anlageabsicht erworben wurden, enthalten. Der beizulegende Zeitwert der als „Available for sale at fair value“ kategorisierten Finanzinvestitionen beträgt zum Abschlussstichtag 23,4 (i.V.: 19,2) Mio EUR. In der Periode wurden Wertveränderungen von 6,5 (i.V.: 4,2) Mio EUR erfolgsneutral im Eigenkapital erfasst und -8,8 (i.V.: -2,8) Mio EUR aufgrund von Wertberichtigungen erfolgswirksam aus dem Eigenkapital aufgelöst. Eine Reduzierung des beizulegenden Zeitwertes der als „Available for sale at fair value“ kategorisierten Finanzinvestitionen in Höhe von -2,3 (i.V.: -2,9) Mio EUR ist auf Wertberichtigungen zurückzuführen. Der Buchwert der als „Available for sale at cost“ klassifizierten Finanzinvestitionen beträgt 40,4 (i.V.: 60,1) Mio EUR.

### 34 Langfristige Forderungen und derivative Finanzinstrumente

Die folgende Tabelle zeigt die Zusammensetzung der langfristigen Forderungen und derivativen Finanzinstrumente.

| <b>Langfristige Forderungen und derivative Finanzinstrumente</b> |       |       |
|------------------------------------------------------------------|-------|-------|
| Mio EUR                                                          | 2009  | 2010  |
| Ausleihungen an Beteiligungsgesellschaften                       | 19,0  | 19,1  |
| Sonstige Ausleihungen                                            | 45,8  | 65,9  |
| Derivative Finanzinstrumente                                     |       | 4,1   |
| Sonstige langfristige operative Forderungen                      | 157,5 | 158,2 |
| Sonstige langfristige nicht finanzielle Forderungen              | 25,8  | 147,1 |
|                                                                  | 248,1 | 394,4 |

| HeidelbergCement bilanziert              |                                                                      |
|------------------------------------------|----------------------------------------------------------------------|
| Gewinn- und Verlustrechnung des Konzerns | Eigenkapitalveränderungsrechnung des Konzerns                        |
| Gesamtergebnisrechnung des Konzerns      | Segmentberichterstattung/Teil des Anhangs                            |
| Kapitalflussrechnung des Konzerns        | Anhang des Konzerns                                                  |
| Bilanz des Konzerns                      | Bericht des Abschlussprüfers/Versicherung der gesetzlichen Vertreter |

Bei den langfristigen derivativen Finanzinstrumenten handelt es sich um Energiederivate, die die Kriterien für „Own Use Contracts“ nicht erfüllen. Die Energiederivate werden als Sicherungsinstrumente im Rahmen von Cash Flow Hedges bilanziert. Die Veränderung der Marktwerte, die erfolgsneutral im Eigenkapital erfasst wurde, beträgt 4,1 (i.V.: 0,0) Mio EUR und 5,4 (i.V.: 0,0) Mio EUR wurden erfolgswirksam aufgelöst. Weitere Angaben zu den derivativen Finanzinstrumenten erfolgen auf den Seiten 199 ff.

In den sonstigen langfristigen operativen Forderungen sind insbesondere Erstattungsansprüche gegen Versicherungsgesellschaften aus Umwelt- und Haftpflichtschäden enthalten. Die sonstigen langfristigen nicht finanziellen Forderungen enthalten im Wesentlichen überdotierte Pensionsfonds und aktive Rechnungsabgrenzungsposten. Die Zunahme im Vergleich zum Vorjahr betrifft hauptsächlich den Anstieg der überdotierten Pensionsfonds.

Die folgende Tabelle zeigt die Überfälligkeitsstruktur der langfristigen finanziellen Forderungen.

| Überfälligkeiten langfristiger finanzieller Forderungen | Ausleihungen an Beteiligungsgesellschaften |      | Sonstige Ausleihungen |      | Sonstige langfristige operative Forderungen |       | Gesamt |       |
|---------------------------------------------------------|--------------------------------------------|------|-----------------------|------|---------------------------------------------|-------|--------|-------|
|                                                         | 2009                                       | 2010 | 2009                  | 2010 | 2009                                        | 2010  | 2009   | 2010  |
| Mio EUR                                                 |                                            |      |                       |      |                                             |       |        |       |
| nicht wertgemindert, nicht überfällig                   | 18,6                                       | 18,9 | 45,0                  | 64,7 | 154,5                                       | 154,6 | 218,1  | 238,2 |
| nicht wertgemindert, 1 - 60 Tage überfällig             |                                            |      | 0,2                   |      | 0,1                                         | 2,9   | 0,3    | 2,9   |
| nicht wertgemindert, 61 - 360 Tage überfällig           |                                            |      | 0,3                   | 0,2  | 0,7                                         |       | 1,0    | 0,2   |
| nicht wertgemindert, mehr als 360 Tage überfällig       | 0,4                                        | 0,2  | 0,3                   | 0,3  | 0,1                                         | 0,4   | 0,8    | 0,9   |
| wertgemindert                                           |                                            |      |                       | 0,7  | 2,1                                         | 0,3   | 2,1    | 1,0   |
|                                                         | 19,0                                       | 19,1 | 45,8                  | 65,9 | 157,5                                       | 158,2 | 222,3  | 243,2 |

Zum Abschlussstichtag deuten keine Anzeichen darauf hin, dass die Schuldner der nicht wertgeminderten Forderungen ihren Zahlungsverpflichtungen nicht nachkommen werden.

### 35 Vorräte

Im Berichtsjahr wurden Wertminderungen auf Vorräte in Höhe von 19,4 (i.V.: 23,4) Mio EUR und Wertaufholungen in Höhe von 11,4 (i.V.: 8,7) Mio EUR erfasst.

### 36 Forderungen und sonstige Vermögenswerte

In der folgenden Übersicht wird die Zusammensetzung der Forderungen und sonstigen Vermögenswerte dargestellt.

| Forderungen und sonstige Vermögenswerte       |         |         |
|-----------------------------------------------|---------|---------|
| Mio EUR                                       | 2009    | 2010    |
| Sonstige kurzfristige finanzielle Forderungen | 99,7    | 76,5    |
| Forderungen aus Lieferungen und Leistungen    | 1.298,8 | 1.429,8 |
| Sonstige kurzfristige operative Forderungen   | 266,6   | 255,6   |
| Nicht finanzielle sonstige Vermögenswerte     | 95,3    | 119,0   |
| Steuererstattungsansprüche                    | 238,4   | 61,0    |
|                                               | 1.998,7 | 1.941,9 |

In den sonstigen kurzfristigen operativen Forderungen sind insbesondere Schadenersatzansprüche sowie Erstattungsansprüche gegen Versicherungsgesellschaften aus Umwelt- und Haftpflichtschäden enthalten. Die nicht finanziellen sonstigen Vermögenswerte, die nicht in den Anwendungsbereich des IAS 39 fallen, enthalten im Wesentlichen aktive Rechnungsabgrenzungsposten.

Die folgende Tabelle zeigt die Überfälligkeitsstruktur der kurzfristigen finanziellen Forderungen.

| Überfälligkeiten kurzfristiger finanzieller Forderungen | Sonstige kurzfristige finanzielle Forderungen |      | Forderungen aus Lieferungen und Leistungen |         | Sonstige kurzfristige operative Forderungen |       | Gesamt  |         |
|---------------------------------------------------------|-----------------------------------------------|------|--------------------------------------------|---------|---------------------------------------------|-------|---------|---------|
|                                                         | 2009                                          | 2010 | 2009                                       | 2010    | 2009                                        | 2010  | 2009    | 2010    |
| Mio EUR                                                 |                                               |      |                                            |         |                                             |       |         |         |
| nicht wertgemindert, nicht überfällig                   | 95,9                                          | 72,5 | 809,1                                      | 894,5   | 219,4                                       | 232,8 | 1.124,4 | 1.199,8 |
| nicht wertgemindert, 1 - 60 Tage überfällig             | 0,8                                           | 0,4  | 338,2                                      | 411,3   | 21,8                                        | 13,6  | 360,8   | 425,3   |
| nicht wertgemindert, 61 - 360 Tage überfällig           | 0,6                                           | 0,4  | 106,4                                      | 101,9   | 19,5                                        | 4,3   | 126,5   | 106,6   |
| nicht wertgemindert, mehr als 360 Tage überfällig       | 1,6                                           | 0,5  | 14,5                                       | 21,2    | 5,2                                         | 2,8   | 21,3    | 24,5    |
| wertgemindert                                           | 0,8                                           | 2,7  | 30,6                                       | 0,9     | 0,7                                         | 2,1   | 32,1    | 5,7     |
|                                                         | 99,7                                          | 76,5 | 1.298,8                                    | 1.429,8 | 266,6                                       | 255,6 | 1.665,1 | 1.761,9 |

Zum Abschlussstichtag deuten keine Anzeichen darauf hin, dass die Schuldner der nicht wertgeminderten überfälligen und nicht überfälligen Forderungen ihren Zahlungsverpflichtungen nicht nachkommen werden.

Die Wertberichtigungen auf Forderungen aus Lieferungen und Leistungen haben sich wie folgt entwickelt:

| Wertberichtigungen auf Forderungen aus Lieferungen und Leistungen |       |       |
|-------------------------------------------------------------------|-------|-------|
| Mio EUR                                                           | 2009  | 2010  |
| Stand der Wertberichtigungen am 1. Januar                         | 72,6  | 72,2  |
| Zuführung                                                         | 46,2  | 16,9  |
| Auflösung und Verbrauch                                           | -45,0 | -36,7 |
| Währungsumrechnung und sonstiges                                  | -1,6  | -7,2  |
| Stand der Wertberichtigungen am 31. Dezember                      | 72,2  | 45,2  |

Die Wertberichtigungen basieren im Wesentlichen auf historischen Ausfallwahrscheinlichkeiten und Überfälligkeiten. Bei den Wertberichtigungen handelt es sich hauptsächlich um pauschalierte Einzelwertberichtigungen.

### 37 Finanzinvestitionen und derivative Finanzinstrumente

Die kurzfristigen Finanzinvestitionen der Kategorie „Available for sale at fair value“ werden erfolgsneutral zum beizulegenden Zeitwert in Höhe von 0,0 (i.V.: 0,2) Mio EUR bewertet. Es wurden 0,0 (i.V.: 0,1) Mio EUR erfolgsneutral im Eigenkapital erfasst und 0,1 (i.V.: -0,1) Mio EUR erfolgswirksam aufgelöst.

Die kurzfristigen Derivate mit positiven Marktwerten beinhalten Devisenswaps in Höhe von 18,0 (i.V.: 23,4) Mio EUR, Devisentermingeschäfte in Höhe von 0,3 (i.V.: 0,9) Mio EUR, Zinsswaps in Höhe von 17,4 (i.V.: 23,3) Mio EUR und Energiederivate in Höhe von 0,3 (i.V.: 0,3) Mio EUR. Vom effektiven Teil der Marktwertveränderung der derivativen Finanzinstrumente, die als Sicherungsinstrumente von Fair Value Hedges bilanziert werden, wurden -8,4 (i.V.: -7,0) Mio EUR erfolgswirksam im Sicherungsergebnis und Stückzinsen in Höhe von 2,7 (i.V.: 30,1) Mio EUR erfolgswirksam im Zinsergebnis erfasst. Die Marktwertveränderung der als „Held for trading“ bilanzierten Derivate beträgt -6,0 (i.V.: -42,9) Mio EUR und wurde erfolgswirksam erfasst. Weitere Angaben zu den derivativen Finanzinstrumenten erfolgen auf den Seiten 199 ff.

### 38 Liquide Mittel

Bei den liquiden Mitteln handelt es sich um Kassenbestände und Bankguthaben bei Banken erstklassiger Bonität. Verfügungsbeschränkungen der liquiden Mittel werden unter Punkt 29 erläutert.

### 39 Zur Veräußerung gehaltene Vermögenswerte und Schulden

Die Vermögenswerte und Schulden einer quotenkonsolidierten Gesellschaft der Mibau-Gruppe wurden als zur Veräußerung gehalten klassifiziert. Die Mibau-Gruppe ist dem Konzerngebiet West- und Nordeuropa zugeordnet. Die nachfolgende Tabelle zeigt die Hauptgruppen der Vermögenswerte und Schulden.

| HeidelbergCement bilanziert              |                                                                      |
|------------------------------------------|----------------------------------------------------------------------|
| Gewinn- und Verlustrechnung des Konzerns | Eigenkapitalveränderungsrechnung des Konzerns                        |
| Gesamtergebnisrechnung des Konzerns      | Segmentberichterstattung/Teil des Anhangs                            |
| Kapitalflussrechnung des Konzerns        | Anhang des Konzerns                                                  |
| Bilanz des Konzerns                      | Bericht des Abschlussprüfers/Versicherung der gesetzlichen Vertreter |

| Zur Veräußerung gehaltene Vermögenswerte und Schulden |      |
|-------------------------------------------------------|------|
| Mio EUR                                               | 2010 |
| <b>Zur Veräußerung gehaltene Vermögenswerte</b>       |      |
| Langfristige Vermögenswerte                           | 1,9  |
| Liquide Mittel                                        | 0,8  |
| Sonstige kurzfristige Vermögenswerte                  | 0,1  |
|                                                       | 2,8  |
| <b>Zur Veräußerung klassifizierte Schulden</b>        |      |
| Langfristige Schulden                                 | 3,8  |

## Erläuterungen zur Bilanz – Passiva

### 40 Grundkapital

Zum Bilanzstichtag 31. Dezember 2010 beträgt das Grundkapital unverändert zum Vorjahr 562.500.000 EUR und ist in 187.500.000 Aktien eingeteilt; die Aktien sind Stückaktien und lauten auf den Inhaber. Auf jede Aktie entfällt ein anteiliger Betrag am Grundkapital von 3,00 EUR.

#### Genehmigtes und bedingtes Kapital

Es bestehen zum 31. Dezember 2010 zwei Genehmigte Kapitalia, und zwar zum einen eine Ermächtigung des Vorstands und Aufsichtsrats zur Erhöhung des Kapitals durch Ausgabe neuer Aktien gegen Bareinlagen (Genehmigtes Kapital I) und zum anderen eine Ermächtigung des Vorstands und Aufsichtsrats zur Erhöhung des Kapitals durch Ausgabe neuer Aktien gegen Sacheinlagen (Genehmigtes Kapital II). Diese Genehmigten Kapitalia werden nachfolgend beschrieben:

Die Hauptversammlung vom 6. Mai 2010 hat den Vorstand ermächtigt, das Grundkapital der Gesellschaft mit Zustimmung des Aufsichtsrats bis zum 5. Mai 2015 einmalig oder mehrmals um bis zu insgesamt 225.000.000 EUR gegen Bareinlagen durch Ausgabe von bis zu insgesamt 75.000.000 neuen, auf den Inhaber lautenden Stückaktien zu erhöhen (Genehmigtes Kapital I). Dabei ist den Aktionären ein Bezugsrecht einzuräumen. Der Vorstand ist jedoch ermächtigt,

- das Bezugsrecht der Aktionäre auszuschließen, um etwaige Spitzenbeträge zu verwerten, und
- für einen Teilbetrag von bis zu 10 % des zum Zeitpunkt der Ausübung der Ermächtigung vorhandenen Grundkapitals das Bezugsrecht ganz oder teilweise auszuschließen, um neue Aktien zu einem Ausgabepreis zu begeben, der den Börsenpreis der alten Aktien nicht wesentlich unterschreitet; auf die betragsmäßige Begrenzung sind diejenigen Aktien anzurechnen, die während der Laufzeit dieser Ermächtigung anderweitig in Anwendung von § 186 Abs. 3 Satz 4 AktG ausgegeben oder veräußert werden. Auf die vorgenannte 10%-Grenze werden auch neue Aktien angerechnet, die zur Bedienung von Bezugsrechten aus Options- bzw. Wandlungsrechten oder –pflichten aus Schuldverschreibungen ausgegeben werden oder auszugeben sind. Auf diese Begrenzung sind außerdem eigene Aktien anzurechnen, die aufgrund einer Ermächtigung gemäß §§ 71 Abs. 1 Nr. 8, 186 Abs. 3 Satz 4 AktG unter Ausschluss des Bezugsrechts veräußert werden.

Die Hauptversammlung vom 6. Mai 2010 hat den Vorstand ferner ermächtigt, das Grundkapital der Gesellschaft bis zum 5. Mai 2015 mit Zustimmung des Aufsichtsrats einmalig oder mehrmals um bis zu 56.100.000 EUR gegen Sacheinlagen durch Ausgabe von bis zu insgesamt 18.700.000 neuen, auf den Inhaber lautenden Stückaktien zu erhöhen (Genehmigtes Kapital II). Darüber hinaus ist der Vorstand ermächtigt, mit Zustimmung des Aufsichtsrats das Bezugsrecht auszuschließen, sofern die Kapitalerhöhung gegen Sacheinlagen zum Zwecke des Erwerbs von Unternehmen, Unternehmensteilen oder von Beteiligungen an Unternehmen oder von sonstigen Vermögensgegenständen erfolgt. Außerdem ist der Vorstand ermächtigt, mit Zustimmung des Aufsichtsrats das Bezugsrecht der Aktionäre insoweit auszuschließen, wie es erforderlich ist, um Inhabern der von der Gesellschaft oder ihren Tochtergesellschaften ausgegebenen Optionsscheinen und Wandelschuldverschreibungen ein Bezugsrecht auf neue Aktien in dem Umfang zu gewähren, wie es ihnen nach Ausübung des Options- bzw. Wandlungsrechts bzw. nach Erfüllung der

Options- bzw. Wandlungspflicht zustehen würde. Der Vorstand ist ermächtigt, mit Zustimmung des Aufsichtsrats die weiteren Einzelheiten der Kapitalerhöhung und ihrer Durchführung, insbesondere den Inhalt der Aktienrechte und die Bedingungen der Aktienausgabe, festzulegen.

Die den Genehmigten Kapitalia I und II zugrunde liegenden Ermächtigungen zur Ausgabe von neuen Aktien gegen Bar- oder Sacheinlagen sind zum 31. Dezember 2010 nicht ausgenutzt worden.

Es besteht schließlich zum 31. Dezember 2010 das nachfolgend beschriebene Bedingte Kapital: Die Hauptversammlung vom 7. Mai 2009 hat beschlossen, das Grundkapital um weitere bis zu 187.500.000 EUR, eingeteilt in bis zu 62.500.000 neue, auf den Inhaber lautende Stückaktien bedingt zu erhöhen (Bedingtes Kapital 2009). Die bedingte Kapitalerhöhung wird nur insoweit durchgeführt, wie die Inhaber von Options- oder Wandlungsrechten bzw. die zur Wandlung bzw. Optionsausübung Verpflichteten aus Options- oder Wandelanleihen, Genussrechten oder Gewinnschuldverschreibungen, die von der HeidelbergCement AG oder einer Konzerngesellschaft der HeidelbergCement AG im Sinne von § 18 AktG, an der die HeidelbergCement AG unmittelbar oder mittelbar zu mindestens 90% beteiligt ist, aufgrund der von der Hauptversammlung vom 7. Mai 2009 unter Tagesordnungspunkt 7 beschlossenen Ermächtigung ausgegeben bzw. garantiert werden, von ihren Options- bzw. Wandlungsrechten Gebrauch machen oder, soweit sie zur Wandlung bzw. Optionsausübung verpflichtet sind, ihre Verpflichtung zur Wandlung bzw. Optionsausübung erfüllen bzw. soweit die HeidelbergCement AG ein Wahlrecht ausübt, ganz oder teilweise anstelle der Zahlung des fälligen Geldbetrages Aktien der HeidelbergCement AG zu gewähren, soweit nicht ein Barausgleich gewährt oder eigene Aktien oder Aktien einer anderen börsennotierten Gesellschaft zur Bedienung eingesetzt werden. Die dem Bedingten Kapital 2009 zugrunde liegende Ermächtigung zur Ausgabe von Options- oder Wandelanleihen ist zum 31. Dezember 2010 nicht ausgenutzt worden. Die Gesellschaft hat sich im Rahmen der Barkapitalerhöhung im September 2009 im Rahmen einer Kooperationsvereinbarung vorbehaltlich der Zustimmung der Vertragspartner verpflichtet, vor April 2011 keine Wandelschuldverschreibungen mit dem Recht auf Umwandlung in neue Aktien aus dem Bedingten Kapital 2009 zu begeben.

Die Gesellschaft besitzt zum Bilanzstichtag 31. Dezember 2010 keine eigenen Aktien und es besteht keine Ermächtigung zum Erwerb eigener Aktien.

#### 41 Kapitalrücklage

Die Kapitalrücklage wurde im Wesentlichen gebildet durch das aus Kapitalerhöhungen zugeflossene Aufgeld. Die Entwicklung der Kapitalrücklage ist in der folgenden Tabelle dargestellt.

| <b>Kapitalrücklage</b>       |                |                |
|------------------------------|----------------|----------------|
| Mio EUR                      | 2009           | 2010           |
| Stand am 1. Januar           | 3.470,9        | 5.539,4        |
| Barkapitalerhöhung           | 2.068,5        |                |
| <b>Stand am 31. Dezember</b> | <b>5.539,4</b> | <b>5.539,4</b> |

Im Vorjahr wurde die Barkapitalerhöhung gem. IAS 32.37 um Nettotransaktionskosten von 56,5 Mio EUR gemindert. Hierin enthalten waren Ertragsteuervorteile in Höhe von 23,2 Mio EUR.

#### 42 Gewinnrücklagen

Die Gewinnrücklagen enthalten die von der HeidelbergCement AG und den einbezogenen Tochtergesellschaften erwirtschafteten und noch nicht ausgeschütteten Gewinne sowie erfolgsneutrale Veränderungen der Pensionsrückstellungen.



| HeidelbergCement bilanziert              |                                                                      |
|------------------------------------------|----------------------------------------------------------------------|
| Gewinn- und Verlustrechnung des Konzerns | Eigenkapitalveränderungsrechnung des Konzerns                        |
| Gesamtergebnisrechnung des Konzerns      | Segmentberichterstattung/Teil des Anhangs                            |
| Kapitalflussrechnung des Konzerns        | Anhang des Konzerns                                                  |
| Bilanz des Konzerns                      | Bericht des Abschlussprüfers/Versicherung der gesetzlichen Vertreter |

### 43 Sonstige Eigenkapitalbestandteile

In den sonstigen Eigenkapitalbestandteilen sind Währungsumrechnungsdifferenzen, erfolgsneutrale Veränderungen aus Finanzinvestitionen der Kategorie „Available for sale at fair value“, aus Cash Flow Hedges und aus der Neubewertungsrücklage erfasst. Die Veränderungen im Vergleich zum Vorjahr werden in der Gesamtergebnisrechnung sowie in der Eigenkapitalveränderungsrechnung des Konzerns erläutert.

### 44 Anteile Fremder

Durch die Erstkonsolidierung der Cimenterie de Lukala S.A.R.L., der Interlacs S.A.R.L. sowie der CJSC „Construction Materials“ erhöhten sich die Anteile Fremder um 59,5 Mio EUR. Die Währungsumrechnung trug zu einem Anstieg von 54,5 Mio EUR bei.

### 45 Pensionsrückstellungen

#### Beitragsorientierte Pläne

Die Summe aller beitragsorientierten Pensionsaufwendungen betrug 32,4 (i.V.: 28,8) Mio EUR. Im Geschäftsjahr 2010 lagen die Beiträge zur gesetzlichen Rentenversicherung bei 27,6 (i.V.: 19,6) Mio EUR.

#### Versicherungsmathematische Annahmen

Die bei der Berechnung zugrunde gelegten versicherungsmathematischen Annahmen sind in der folgenden Tabelle zusammengefasst (gewichtete Darstellung).

| Versicherungsmathematische Annahmen          |        |        |
|----------------------------------------------|--------|--------|
|                                              | 2009   | 2010   |
| Zinssatz                                     | 5,69 % | 5,32 % |
| Erwartete Einnahmen aus den Pensionsfonds    | 5,84 % | 5,82 % |
| Zukünftige Gehaltsentwicklung                | 4,02 % | 3,88 % |
| Erwartete Steigerungen der Gesundheitskosten | 7,81 % | 8,68 % |

Eine Begrenzung des Pensionsguthabens gemäß IFRIC 14 erfolgt in Großbritannien in Höhe von 17,5 (i.V.: 25,8) Mio EUR und in Belgien in Höhe von 0,2 (i.V.: 0,0) Mio EUR. Die Verpflichtung zur Mindestdeckung der Pensionsfonds in Kanada besteht nicht mehr (i.V.: 0,4 Mio EUR). Die Begrenzung des Pensionsguthabens erfolgte aufgrund von lokalen Mindestdotierungsverpflichtungen, die nicht für Minderungen künftiger Beitragszahlungen genutzt werden können.

#### Überblick über die Pensionsrückstellungen für die verschiedenen Arten der Altersversorgungspläne

Entsprechend IAS 19 (Employee Benefits) werden im Folgenden für die Pensionsrückstellungen der Pensionspläne und Versorgungspläne für Krankheitskosten mit einer Verpflichtung in Höhe von 826,1 (i.V.: 867,7) Mio EUR detaillierte Informationen darüber gegeben, wie die Pläne ausgestattet sind und wie sie in der Bilanz sowie der Gewinn- und Verlustrechnung berücksichtigt werden.

| Arten von Altersversorgungsplänen     |       |       |
|---------------------------------------|-------|-------|
| Mio EUR                               | 2009  | 2010  |
| Pensionspläne                         | 664,6 | 605,4 |
| Versorgungspläne für Krankheitskosten | 203,1 | 220,7 |
|                                       | 867,7 | 826,1 |

| <b>Darstellung in der Bilanz</b>    |       |        |
|-------------------------------------|-------|--------|
| Mio EUR                             | 2009  | 2010   |
| Langfristige Pensionsrückstellungen | 756,7 | 844,4  |
| Kurzfristige Pensionsrückstellungen | 115,1 | 94,4   |
| Überdotierung von Fonds             | -4,1  | -112,7 |
|                                     | 867,7 | 826,1  |

### Pensionsverpflichtungen und Pensionsfonds

Im Konzern existierten im Geschäftsjahr 2010 Pensionsverpflichtungen in Höhe von 3.652,8 (i.V.: 3.397,0) Mio EUR, die im Wesentlichen durch externe Pensionsfonds abgedeckt sind. Zusätzlich bestanden Direktzusagen in Höhe von 553,5 (i.V.: 464,9) Mio EUR. Die in den USA, Indonesien, Belgien und Kanada eingegangenen Verpflichtungen für Krankheitskosten von Pensionären beliefen sich auf 218,9 (i.V.: 201,1) Mio EUR. Die folgende Tabelle zeigt den Finanzierungsstatus dieser Pläne und ihre Abbildung in der Bilanz.

| <b>Pensionsverpflichtungen und Pensionsfonds</b>                       | Pensionspläne |          | Pläne für Krankheitskosten |       | Gesamt   |          |
|------------------------------------------------------------------------|---------------|----------|----------------------------|-------|----------|----------|
|                                                                        | 2009          | 2010     | 2009                       | 2010  | 2009     | 2010     |
| Mio EUR                                                                |               |          |                            |       |          |          |
| Barwert der fondsgedeckten Verpflichtungen                             | 3.397,0       | 3.652,8  |                            |       | 3.397,0  | 3.652,8  |
| Marktwert des Fondsvermögens                                           | -3.224,7      | -3.619,7 |                            |       | -3.224,7 | -3.619,7 |
| Erfasste Begrenzung gem. IAS 19.58 B                                   | 26,1          | 17,7     |                            |       | 26,1     | 17,7     |
| Marktwert des Fondsvermögens nach Begrenzung gem. IAS 19.58 B          | -3.198,6      | -3.602,0 |                            |       | -3.198,6 | -3.602,0 |
| Unter- (+)/ Überdeckung (-) des Fondsvermögens                         | 198,4         | 50,8     |                            |       | 198,4    | 50,8     |
| Barwert der direkten Verpflichtungen                                   | 464,9         | 553,5    | 201,1                      | 218,9 | 666,0    | 772,4    |
| Verpflichtung des Konzerns                                             | 663,3         | 604,3    | 201,1                      | 218,9 | 864,4    | 823,2    |
| Pensionsrückstellungen                                                 | 664,6         | 605,4    | 203,1                      | 220,7 | 867,7    | 826,1    |
| Nichtberücksichtigte Verpflichtung aus aperiodischem Dienstzeitaufwand | -1,3          | -1,1     | -2,0                       | -1,8  | -3,3     | -2,9     |

In den Pensionsplänen und den Plänen für Krankheitskosten sind versicherungsmathematische Verluste sowie aus der Begrenzung des Anlagevermögens gem. IAS 19.58 B resultierende Beträge von insgesamt 486,8 (i.V.: 473,3) Mio EUR enthalten, die erfolgsneutral gegen das Eigenkapital gebucht wurden. Die Erhöhung des versicherungsmathematischen Verlusts und der erfassten Begrenzungen gem. IAS 19.58 B um 13,5 (i.V.: 273,0) Mio EUR resultiert im Wesentlichen aus der positiven Entwicklung des Fondsvermögens, Verlusten aus der Währungsumrechnung sowie aus der Senkung des Zinssatzes, der der versicherungsmathematischen Berechnung zugrunde liegt. Diese Senkung betrug 0,37 (i.V.: 0,31) Prozentpunkte und wurde im Wesentlichen beeinflusst durch die Änderung in den Niederlanden und Deutschland von 1,20 (i.V.: 0,0) bzw. Großbritannien von 0,3 (i.V.: 0,1) Prozentpunkten.

### Versicherungsmathematische Gewinne und Verluste

In der folgenden Tabelle wird die Entwicklung der versicherungsmathematischen Gewinne und Verluste dargestellt.

| <b>Im Konzernabschluss erfasste versicherungsmathematische Gewinne und Verluste</b> |       |       |
|-------------------------------------------------------------------------------------|-------|-------|
| Mio EUR                                                                             | 2009  | 2010  |
| 1. Januar                                                                           | 200,3 | 473,3 |
| Änderungen innerhalb des Jahres                                                     | 267,5 | -14,7 |
| Auswirkungen von Wechselkursänderungen                                              | 5,5   | 28,2  |
| 31. Dezember                                                                        | 473,3 | 486,8 |

| HeidelbergCement bilanziert              |                                                                      |
|------------------------------------------|----------------------------------------------------------------------|
| Gewinn- und Verlustrechnung des Konzerns | Eigenkapitalveränderungsrechnung des Konzerns                        |
| Gesamtergebnisrechnung des Konzerns      | Segmentberichterstattung/Teil des Anhangs                            |
| Kapitalflussrechnung des Konzerns        | Anhang des Konzerns                                                  |
| Bilanz des Konzerns                      | Bericht des Abschlussprüfers/Versicherung der gesetzlichen Vertreter |

Aus erfahrungsbedingten Berichtigungen (d.h. nicht aus der Veränderung der Bewertung zugrunde liegender versicherungsmathematischer Annahmen) erwuchsen 2010 beim Fondsvermögen Gewinne von 166,2 (i.V.: Verlust 8,9) Mio EUR und bei den Verpflichtungen von 85,3 (i.V.: 22,0) Mio EUR.

### Entwicklung in der Gewinn- und Verlustrechnung

Die Aufwendungen für Altersversorgung für die wesentlichen Pensionspläne lassen sich wie folgt darstellen:

| Entwicklung in der Gewinn- und Verlustrechnung      | Pensionspläne |        | Pläne für Krankheitskosten |      | Gesamt |        |
|-----------------------------------------------------|---------------|--------|----------------------------|------|--------|--------|
|                                                     | 2009          | 2010   | 2009                       | 2010 | 2009   | 2010   |
| Mio EUR                                             |               |        |                            |      |        |        |
| Dienstzeitaufwand                                   | 51,0          | 50,8   | 1,6                        | 1,5  | 52,6   | 52,3   |
| Zinsaufwand                                         | 207,3         | 223,8  | 12,3                       | 12,1 | 219,6  | 235,9  |
| Erwarteter Ertrag des Fondsvermögens                | -176,9        | -193,7 |                            |      | -176,9 | -193,7 |
| Realisierter aperiodischer Dienstzeitaufwand        | 2,8           | 1,7    | -1,9                       | -0,4 | 0,9    | 1,3    |
| Effekt von Kürzungen, Übertragungen und Abfindungen | -2,1          | -28,5  | 0,2                        |      | -1,9   | -28,5  |
| Pensionsaufwand in der Gewinn- und Verlustrechnung  | 82,1          | 54,1   | 12,2                       | 13,2 | 94,3   | 67,3   |

Vom Gesamtaufwand von 67,3 (i.V.: 94,3) Mio EUR werden 25,1 (i.V.: 51,7) Mio EUR im Personalaufwand ausgewiesen. Der Zinsaufwand aus der Abzinsung der Pensionsrückstellungen sowie der erwartete Ertrag des Fondsvermögens in Höhe von 42,2 (i.V.: 42,7) Mio EUR wird im sonstigen Finanzergebnis ausgewiesen.

Als Effekt von Kürzungen, Übertragungen und Abfindungen wurden in der Gewinn- und Verlustrechnung Erträge von 28,5 (i.V.: 2,1) Mio EUR realisiert, die im Wesentlichen aus der Schließung von Pensionsplänen in Großbritannien mit 22,4 (i.V.: 2,8) Mio EUR, sowie der Schließung der AFP-Pläne (Vorruhestandspläne) in Norwegen mit 5,7 (i.V.: Verlust von 1,3) Mio EUR resultierten. Trotz der signifikanten Senkung des Rechnungszinssatzes ergibt sich eine Senkung des Dienstzeitaufwands auf 52,3 (i.V.: 52,6) Mio EUR; diese Senkung ist die Folge der Schließung der Pläne und Umwandlung in beitragsorientierte Zusagen in Großbritannien (Effekt von 2,5 Mio EUR in 2010, ab 2011 jährliche Reduktion um etwa 9,4 Mio EUR, Tendenz fallend). Diese Verringerung des Dienstzeitaufwandes wird jedoch zukünftig im Wesentlichen durch Beitragszahlungen in die neuen Pläne zu ersetzen sein.

Der tatsächliche Ertrag des Fondsvermögens betrug 363,9 (i.V.: 118,7) Mio EUR und überschritt damit die erwarteten Vermögenserträge um 170,2 (i.V.: Unterschreitung um 58,2) Mio EUR.

### Sensitivitätsanalyse der erwarteten Gesundheitskosten

Die Entwicklung der Gesundheitskosten hat Einfluss auf die Gewinn- und Verlustrechnung und auf die Pensionsverpflichtungen. In der folgenden Tabelle sind die Auswirkungen einer einprozentigen Erhöhung bzw. Minderung der erwarteten Gesundheitskosten dargestellt.

| Sensitivitätsanalyse der erwarteten Gesundheitskosten | Veränderung der Gesundheitskosten |      |         |       |
|-------------------------------------------------------|-----------------------------------|------|---------|-------|
|                                                       | um +1 %                           |      | um -1 % |       |
| Mio EUR                                               | 2009                              | 2010 | 2009    | 2010  |
| Auswirkung auf den Dienstzeit- und Zinsaufwand        | 1,9                               | 1,0  | -0,2    | -1,0  |
| Auswirkung auf die Pensionsverpflichtung              | 15,3                              | 15,1 | -13,5   | -14,2 |

### Entwicklung der Pensionsverpflichtungen und des Fondsvermögens

In der folgenden Tabelle wird die Entwicklung der Pensionsverpflichtungen in Höhe von 4.425,2 (i.V.: 4.063,0) Mio EUR und des Fondsvermögens in Höhe von 3.619,7 (i.V.: 3.224,7) Mio EUR dargestellt.

| Entwicklung der Pensionsverpflichtungen und des Fondsvermögens             | Pensionspläne  |                | Pläne für Krankheitskosten |              | Gesamt         |                |
|----------------------------------------------------------------------------|----------------|----------------|----------------------------|--------------|----------------|----------------|
|                                                                            | 2009           | 2010           | 2009                       | 2010         | 2009           | 2010           |
| Mio EUR                                                                    |                |                |                            |              |                |                |
| <b>Pensionsverpflichtungen am 1. Januar</b>                                | 3.438,3        | <b>3.861,9</b> | 198,9                      | <b>201,1</b> | 3.637,2        | <b>4.063,0</b> |
| Änderung des Konsolidierungskreises                                        | 2,0            | <b>2,3</b>     |                            |              | 2,0            | <b>2,3</b>     |
| Dienstzeitaufwand                                                          | 51,0           | <b>50,8</b>    | 1,6                        | <b>1,5</b>   | 52,6           | <b>52,3</b>    |
| Zinsaufwand                                                                | 207,3          | <b>223,8</b>   | 12,3                       | <b>12,1</b>  | 219,6          | <b>235,9</b>   |
| Arbeitnehmerbeiträge                                                       | 8,8            | <b>7,4</b>     |                            |              | 8,8            | <b>7,4</b>     |
| Versicherungsmathematische Gewinne/Verluste                                | 255,0          | <b>151,1</b>   | 13,5                       | <b>9,9</b>   | 268,5          | <b>161,0</b>   |
| Gezahlte Versorgungsleistungen durch die Gesellschaften                    | -38,1          | <b>-36,5</b>   | -18,9                      | <b>-19,3</b> | -57,0          | <b>-55,8</b>   |
| Gezahlte Versorgungsleistungen durch den Pensionsfonds                     | -193,2         | <b>-194,1</b>  |                            |              | -193,2         | <b>-194,1</b>  |
| Aufwendungen, Steuern und gezahlte Prämien                                 | -1,1           | <b>-1,0</b>    |                            |              | -1,1           | <b>-1,0</b>    |
| Aperiodischer Dienstzeitaufwand                                            | 2,4            | <b>1,7</b>     | -3,3                       |              | -0,9           | <b>1,7</b>     |
| Kürzungen von Pensionsplänen                                               | -2,1           | <b>-28,5</b>   | 0,2                        |              | -1,9           | <b>-28,5</b>   |
| Auswirkungen von Wechselkursänderungen                                     | 131,6          | <b>167,4</b>   | -3,2                       | <b>13,6</b>  | 128,4          | <b>181,0</b>   |
| <b>Pensionsverpflichtungen am 31. Dezember</b>                             | <b>3.861,9</b> | <b>4.206,3</b> | <b>201,1</b>               | <b>218,9</b> | <b>4.063,0</b> | <b>4.425,2</b> |
| Kapitalgedeckte Verpflichtungen                                            | 3.397,0        | <b>3.652,8</b> |                            |              | 3.397,0        | <b>3.652,8</b> |
| Nicht kapitalgedeckte Verpflichtungen                                      | 464,9          | <b>553,5</b>   | 201,1                      | <b>218,9</b> | 666,0          | <b>772,4</b>   |
| <b>Marktwert Planvermögen am 1. Januar</b>                                 | 3.037,7        | <b>3.224,7</b> |                            |              | 3.037,7        | <b>3.224,7</b> |
| Änderung des Konsolidierungskreises                                        | 5,4            |                |                            |              | 5,4            |                |
| Erwarteter Ertrag des Fondsvermögens                                       | 176,9          | <b>193,7</b>   |                            |              | 176,9          | <b>193,7</b>   |
| Versicherungsmathematische Gewinne/Verluste                                | -7,4           | <b>166,4</b>   |                            |              | -7,4           | <b>166,4</b>   |
| Arbeitgeberbeiträge                                                        | 70,1           | <b>80,5</b>    |                            |              | 70,1           | <b>80,5</b>    |
| Arbeitnehmerbeiträge                                                       | 8,8            | <b>7,4</b>     |                            |              | 8,8            | <b>7,4</b>     |
| Gezahlte Versorgungsleistungen, Aufwendungen, Steuern und Prämienzahlungen | -194,4         | <b>-194,1</b>  |                            |              | -194,4         | <b>-194,1</b>  |
| Auswirkungen von Wechselkursänderungen                                     | 127,6          | <b>141,1</b>   |                            |              | 127,6          | <b>141,1</b>   |
| <b>Marktwert Planvermögen am 31. Dezember</b>                              | <b>3.224,7</b> | <b>3.619,7</b> |                            |              | <b>3.224,7</b> | <b>3.619,7</b> |

HeidelbergCement zahlte 55,8 (i.V.: 57,0) Mio EUR direkt an die Pensionäre und 80,5 (i.V.: 70,1) Mio EUR Arbeitgeberbeiträge an die Fonds. Im Jahr 2011 werden Zahlungen von 113,8 (i.V.: 135,6) Mio EUR erwartet, im Wesentlichen bedingt durch den deutlichen Rückgang der Beiträge in Großbritannien.

### Aufteilung des Fondsvermögens

Das Fondsvermögen entfällt im Wesentlichen auf Nordamerika mit 28 % (i.V.: 29 %), auf Großbritannien mit 59 % (i.V.: 58 %) und auf die Niederlande mit 9 % (i.V.: 9 %). Die in den Fonds vorhandenen Vermögenswerte teilen sich prozentual auf die folgenden Kategorien auf:

| Aufteilung des Fondsvermögens |      |             |
|-------------------------------|------|-------------|
|                               | 2009 | 2010        |
| Aktien Nordamerika            | 9 %  | <b>9 %</b>  |
| Aktien Westeuropa             | 12 % | <b>11 %</b> |
| Aktien übrige Regionen        | 8 %  | <b>8 %</b>  |
| Anleihen Nordamerika          | 20 % | <b>21 %</b> |
| Anleihen Westeuropa           | 42 % | <b>37 %</b> |
| Anleihen übrige Regionen      | 1 %  | <b>2 %</b>  |
| Sonstiges                     | 8 %  | <b>12 %</b> |

| HeidelbergCement bilanziert              |                                                                      |
|------------------------------------------|----------------------------------------------------------------------|
| Gewinn- und Verlustrechnung des Konzerns | Eigenkapitalveränderungsrechnung des Konzerns                        |
| Gesamtergebnisrechnung des Konzerns      | Segmentberichterstattung/Teil des Anhangs                            |
| Kapitalflussrechnung des Konzerns        | Anhang des Konzerns                                                  |
| Bilanz des Konzerns                      | Bericht des Abschlussprüfers/Versicherung der gesetzlichen Vertreter |

## Fünf-Jahres-Vergleich

Die Entwicklung der Pensionsverpflichtungen und des Fondsvermögens ist in der folgenden Tabelle dargestellt.

| Fünf-Jahres-Vergleich: Fortzuführende Geschäftsbereiche              |         |          |          |          |                 |
|----------------------------------------------------------------------|---------|----------|----------|----------|-----------------|
| Mio EUR                                                              | 2006    | 2007     | 2008     | 2009     | 2010            |
| <b>Pensionspläne</b>                                                 |         |          |          |          |                 |
| Barwert der fondsgedeckten Verpflichtungen Pensionspläne             | 1.055,3 | 3.627,5  | 2.976,7  | 3.397,0  | <b>3.652,8</b>  |
| Barwert der direkten Verpflichtungen Pensionspläne                   | 537,0   | 471,0    | 461,6    | 464,9    | <b>553,5</b>    |
| Barwert der direkten Verpflichtungen für Pläne für Krankheitskosten  | 124,9   | 212,7    | 198,9    | 201,1    | <b>218,9</b>    |
| Barwert der Verpflichtungen                                          | 1.717,2 | 4.311,2  | 3.637,2  | 4.063,0  | <b>4.425,2</b>  |
| Marktwert des Fondsvermögens nach Begrenzung gem. IAS 19.58 B        | -976,2  | -3.668,6 | -3.004,4 | -3.198,6 | <b>-3.602,0</b> |
| Unter- (+) / Überdeckung (-)                                         | 741,0   | 642,6    | 632,8    | 864,4    | <b>823,2</b>    |
| Verminderung/Erhöhung der Verpflichtung durch Bestandsveränderungen  | 29,8    | -7,6     | 0,6      | -22,0    | <b>-85,3</b>    |
| Verminderung/Erhöhung des Fondsvermögens durch Bestandsveränderungen | -11,7   | -47,2    | 260,3    | 8,9      | <b>-166,2</b>   |
| Erwartete Entwicklung der Verpflichtungen                            | 30,9    | 85,9     | 40,8     | 37,2     | <b>20,5</b>     |
| Erwartete Entwicklung des Fondsvermögens                             | 42,9    | 120,1    | 71,1     | 75,7     | <b>59,5</b>     |

HeidelbergCement nimmt vorwiegend in den USA auch an so genannten Multi-Employer Pension Plans (MEP) teil, die einigen gewerkschaftlich organisierten Mitarbeitern nach deren Pensionierung feste Leistungen gewähren. Multi-Employer Pension Plans werden als beitragsorientierte Versorgungspläne bilanziert, da es nicht möglich ist, die einzelnen Komponenten solcher Pläne zu isolieren. Die Beiträge werden auf Basis von Tarifverhandlungen festgelegt. Die Über- und Unterdeckungen aus diesen Plänen haben keinen wesentlichen Einfluss auf den Konzernabschluss. Im Jahr 2010 wurden Beiträge in Höhe von 14,0 (i.V.: 14,0) Mio EUR gezahlt.

## 46 Sonstige Rückstellungen

Die Entwicklung der sonstigen Rückstellungen wird in der folgenden Tabelle erläutert. Die Zeile „Anpassung“ beinhaltet Konsolidierungskreisveränderungen und Währungsdifferenzen sowie Umgliederungen aus der Aufrechnung von Verpflichtungen mit korrespondierenden Erstattungsansprüchen.

| Rückstellungen           |                                          |                                        |              |                |
|--------------------------|------------------------------------------|----------------------------------------|--------------|----------------|
| Mio EUR                  | Schadenersatz- und Umweltverpflichtungen | Sonstige umweltbezogene Rückstellungen | Sonstige     | Gesamt         |
| 1. Januar 2010           | 448,4                                    | 315,0                                  | 436,7        | <b>1.200,1</b> |
| Anpassung                | -7,1                                     | 30,6                                   | 25,2         | <b>48,7</b>    |
| Verbrauch                | -32,5                                    | -34,6                                  | -64,8        | <b>-131,9</b>  |
| Auflösung                | -1,6                                     | -25,3                                  | -24,0        | <b>-50,9</b>   |
| Zuführung/Aufzinsung     | 65,0                                     | 34,3                                   | 95,9         | <b>195,2</b>   |
| <b>31. Dezember 2010</b> | <b>472,2</b>                             | <b>320,0</b>                           | <b>469,0</b> | <b>1.261,2</b> |

Die Restlaufzeiten für die im Geschäftsjahr 2010 bilanzierten Rückstellungen gliedern sich wie folgt:

| Restlaufzeiten           |                                          |                                        |              |                |
|--------------------------|------------------------------------------|----------------------------------------|--------------|----------------|
| Mio EUR                  | Schadenersatz- und Umweltverpflichtungen | Sonstige umweltbezogene Rückstellungen | Sonstige     | Gesamt         |
| ≤ 1 Jahr                 | 85,4                                     | 30,9                                   | 93,6         | <b>209,9</b>   |
| > 1 Jahr ≤ 5 Jahre       | 210,5                                    | 141,7                                  | 263,7        | <b>615,9</b>   |
| > 5 Jahre                | 176,3                                    | 147,4                                  | 111,7        | <b>435,4</b>   |
| <b>31. Dezember 2010</b> | <b>472,2</b>                             | <b>320,0</b>                           | <b>469,0</b> | <b>1.261,2</b> |



### Schadenersatz- und Umweltverpflichtungen

Die Schadenersatz- und Umweltverpflichtungen betreffen ehemalige und noch existierende US-amerikanische Beteiligungen der 2007 übernommenen Hanson-Gruppe. Die Verpflichtungen stehen nicht im Zusammenhang mit der fortgeführten Geschäftstätigkeit des HeidelbergCement Konzerns. Die Schadenersatzverpflichtungen beruhen auf dem Verkauf von asbesthaltigen Produkten im Zeitraum von 1973 bis 1984. Die Umwelthaftungsansprüche umfassen Sanierungsverpflichtungen, die durch chemische Produkte einer ehemaligen Hanson-Beteiligung entstanden sind. Die Rückstellungen werden anhand von zuverlässigen Schätzungen der Kostenentwicklung bewertet. Den Rückstellungen stehen Erstattungsansprüche gegen Umwelt- und Haftpflichtversicherer in Höhe von 167,6 (i.V.: 162,8) Mio EUR gegenüber, von denen 117,1 (i.V.: 118,2) Mio EUR unter den langfristigen sonstigen operativen Forderungen und 50,5 (i.V.: 44,6) Mio EUR unter den sonstigen kurzfristigen operativen Forderungen ausgewiesen werden.

### Sonstige umweltbezogene Rückstellungen

Die sonstigen umweltbezogenen Rückstellungen beinhalten Rekultivierungs-, Umwelt- und Rückbauverpflichtungen. Für Verpflichtungen zur Auffüllung und Rekultivierung von Gelände, welches zum Abbau natürlicher Ressourcen verwendet wird, sind Rekultivierungsrückstellungen in Höhe von 208,7 (i.V.: 201,3) Mio EUR gebildet. Diese Rückstellungen werden entsprechend des Abbaufortschritts anhand der bestmöglichen Kostenschätzung zur Erfüllung der Verpflichtung ergebniswirksam bilanziert. Rückstellungen für Umweltverpflichtungen umfassen im Wesentlichen Kosten im Zusammenhang mit der Sanierung kontaminierter Flächen und der Beseitigung von Abbauschäden. Die Verpflichtungen betragen zum Bilanzstichtag 48,9 (i.V.: 54,4) Mio EUR. Rückstellungen für Rückbauverpflichtungen sind in Höhe von 62,4 (i.V.: 59,3) Mio EUR gebildet. Diese Rückstellungen betreffen Kosten, die im Zusammenhang mit der Beseitigung von Anlagen (z.B. Förderanlagen auf gemieteten Standorten) entstehen, damit ein Standort nach Ablauf der Nutzungsdauer in seinen vertraglich vereinbarten oder gesetzlich definierten Zustand zurückversetzt werden kann.

### Sonstige Rückstellungen

Sonstige Rückstellungen bestehen insbesondere für Restrukturierungsmaßnahmen, für Prozessrisiken sowie für Verpflichtungen, die dem Konzern in Zusammenhang mit Arbeitsunfällen entstehen. Für Restrukturierungsmaßnahmen (wie z.B. die Schließung von Betrieben oder die Verlagerung von Aktivitäten) sind zum Bilanzstichtag Rückstellungen in Höhe von 47,3 (i.V.: 41,7) Mio EUR angesetzt. Rückstellungen für Prozessrisiken, die auch schwebende Kartellverfahren betreffen, sind aufgrund von anhängigen Klagen gegen den Konzern in Höhe von 203,6 (i.V.: 204,8) Mio EUR bilanziell erfasst. Aufgrund von Entschädigungsverpflichtungen durch Arbeitsunfälle sind Rückstellungen in Höhe von 72,2 (i.V.: 63,3) Mio EUR zum Bilanzstichtag gebildet. Darüber hinaus sind weitere sonstige Rückstellungen für eine Vielzahl von untergeordneten Sachverhalten gebildet.

### Auswirkungen von Zinseffekten

Die Bewertung der Rückstellungen erfolgt zum Barwert, welcher anhand der erwarteten Auszahlungen und einem risikoadjustierten Vorsteuerzinssatz ermittelt wird. Der Zinseffekt aus der Aufzinsung erhöhte die sonstigen umweltbezogenen Rückstellungen um 8,7 (i.V.: 6,5) Mio EUR sowie die sonstigen Rückstellungen um 6,1 (i.V.: 5,8) Mio EUR. Änderungen des Zinssatzes führten zu einer Erhöhung der sonstigen umweltbezogenen Rückstellungen um 8,7 (i.V.: 2,7) Mio EUR.

| HeidelbergCement bilanziert              |                                                                      |
|------------------------------------------|----------------------------------------------------------------------|
| Gewinn- und Verlustrechnung des Konzerns | Eigenkapitalveränderungsrechnung des Konzerns                        |
| Gesamtergebnisrechnung des Konzerns      | Segmentberichterstattung/Teil des Anhangs                            |
| Kapitalflussrechnung des Konzerns        | Anhang des Konzerns                                                  |
| Bilanz des Konzerns                      | Bericht des Abschlussprüfers/Versicherung der gesetzlichen Vertreter |

## 47 Verbindlichkeiten

Die folgende Tabelle untergliedert die Verbindlichkeiten in verzinsliche und operative Verbindlichkeiten.

| Verbindlichkeiten                                                  |          |          |
|--------------------------------------------------------------------|----------|----------|
| Mio EUR                                                            | 2009     | 2010     |
| <b>Verzinsliche Verbindlichkeiten</b>                              |          |          |
| Anleihen                                                           | 5.598,3  | 7.228,8  |
| Verbindlichkeiten gegenüber Kreditinstituten                       | 3.178,1  | 1.139,0  |
| Sonstige verzinsliche Verbindlichkeiten                            |          |          |
| Übrige verzinsliche Verbindlichkeiten                              | 509,8    | 613,0    |
| Verbindlichkeiten aus Finanzierungsleasing                         | 12,3     | 15,6     |
| Derivative Finanzinstrumente                                       | 27,0     | 55,3     |
|                                                                    | 549,1    | 683,9    |
| Put-Optionen von Minderheitsgesellschaftern                        | 36,9     | 95,5     |
|                                                                    | 9.362,4  | 9.147,2  |
| <b>Operative Verbindlichkeiten</b>                                 |          |          |
| Verbindlichkeiten aus Lieferungen und Leistungen                   | 931,6    | 1.084,7  |
| Verbindlichkeiten aus Ertragsteuern                                | 279,3    | 229,6    |
| Personalverbindlichkeiten                                          | 209,8    | 233,6    |
| Sonstige operative Verbindlichkeiten                               | 692,3    | 657,4    |
| Rechnungsabgrenzungsposten und nicht finanzielle Verbindlichkeiten | 65,4     | 112,2    |
|                                                                    | 2.178,4  | 2.317,5  |
|                                                                    | 11.540,8 | 11.464,7 |

Der Anstieg der Anleihen ist im Wesentlichen auf die Emission von drei Anleihen der HeidelbergCement AG von insgesamt 2,05 Mrd EUR zurückzuführen. Darüber hinaus wurde eine 2010 fällige USD Anleihe in Höhe von 0,6 Mrd EUR getilgt. Der Rückgang der Verbindlichkeiten gegenüber Kreditinstituten resultiert im Wesentlichen aus der Rückzahlung von 2,1 Mrd EUR der syndizierten Akquisitionsfazilität. Die übrigen verzinslichen Verbindlichkeiten enthalten im Wesentlichen Ziehungen unter dem Euro Medium Term Note Programm und ausstehende Emissionen unter dem Commercial Paper Programm.

Die derivativen Finanzinstrumente mit negativen Marktwerten beinhalten Devisentermingeschäfte in Höhe von 1,1 (i.V.: 4,5) Mio EUR, Devisenswaps in Höhe von 9,5 (i.V.: 18,7) Mio EUR, Zinsswaps in Höhe von 44,7 (i.V.: 0,6) und Energiederivate in Höhe von 0,0 (i.V.: 3,2) Mio EUR. Die Veränderung der Marktwerte von derivativen Finanzinstrumenten, die als Sicherungsinstrumente im Rahmen von Cash Flow Hedges bilanziert werden und erfolgsneutral im Eigenkapital erfasst wurden, beträgt -3,2 (i.V.: 4,4) Mio EUR; 0,0 (i.V.: 7,1) Mio EUR wurden erfolgswirksam aufgelöst. Vom effektiven Teil der Marktwertveränderung der derivativen Finanzinstrumente, die als Sicherungsinstrumente von Fair Value Hedges bilanziert werden, wurden 43,9 (i.V.: 0,0) Mio EUR erfolgswirksam im Sicherungsergebnis erfasst. Die Marktwertveränderung der als „Held for trading“ bilanzierten Derivate beträgt -12,4 (i.V.: 4,6) Mio EUR und wurde erfolgswirksam erfasst. Weitere Angaben zu den derivativen Finanzinstrumenten erfolgen auf den Seiten 199 ff.

Von den verzinslichen Verbindlichkeiten gegenüber Kreditinstituten sind 125,4 (i.V.: 103,2) Mio EUR durch Grundpfandrechte gesichert. Die Erhöhung resultiert im Wesentlichen aus Kreditaufnahmen von Gemeinschaftsunternehmen.

Die folgende Tabelle gibt eine Übersicht über die Fristigkeiten der verzinslichen Verbindlichkeiten.

| <b>Restlaufzeiten verzinslicher Verbindlichkeiten</b>  |          |             |           |                |
|--------------------------------------------------------|----------|-------------|-----------|----------------|
| Mio EUR                                                | < 1 Jahr | 1 - 5 Jahre | > 5 Jahre | <b>Gesamt</b>  |
| <b>31. Dezember 2010</b>                               |          |             |           |                |
| Anleihen                                               | 204,9    | 3.862,2     | 3.161,7   | <b>7.228,8</b> |
| Verbindlichkeiten gegenüber Kreditinstituten           | 203,3    | 884,8       | 50,9      | <b>1.139,0</b> |
| Übrige verzinsliche Verbindlichkeiten und Put-Optionen | 419,8    | 224,0       | 64,7      | <b>708,5</b>   |
| Verbindlichkeiten aus Finanzierungsleasing             | 4,8      | 6,7         | 4,1       | <b>15,6</b>    |
| Derivative Finanzinstrumente                           | 11,0     | 25,1        | 19,2      | <b>55,3</b>    |
|                                                        | 843,8    | 5.002,8     | 3.300,6   | <b>9.147,2</b> |
| <b>31. Dezember 2009</b>                               |          |             |           |                |
| Anleihen                                               | 699,5    | 2.498,9     | 2.399,9   | <b>5.598,3</b> |
| Verbindlichkeiten gegenüber Kreditinstituten           | 196,2    | 2.944,7     | 37,2      | <b>3.178,1</b> |
| Übrige verzinsliche Verbindlichkeiten und Put-Optionen | 255,8    | 234,2       | 56,7      | <b>546,7</b>   |
| Verbindlichkeiten aus Finanzierungsleasing             | 6,5      | 5,8         |           | <b>12,3</b>    |
| Derivative Finanzinstrumente                           | 23,3     | 3,7         |           | <b>27,0</b>    |
|                                                        | 1.181,3  | 5.687,3     | 2.493,8   | <b>9.362,4</b> |

Die folgende Tabelle enthält weitere Erläuterungen bezüglich der Verbindlichkeiten aus Finanzierungsleasing. Sie zeigt die Überleitungsrechnung von der Summe der künftigen Mindestleasingzahlungen zum Bilanzstichtag zu deren Barwert.

| <b>Mindestleasingzahlungen aus Finanzierungsleasing</b> |          |             |           |               |
|---------------------------------------------------------|----------|-------------|-----------|---------------|
| Mio EUR                                                 | < 1 Jahr | 1 - 5 Jahre | > 5 Jahre | <b>Gesamt</b> |
| <b>31. Dezember 2010</b>                                |          |             |           |               |
| Barwert zukünftiger Mindestleasingzahlungen             | 4,8      | 6,7         | 4,1       | <b>15,6</b>   |
| Zinsanteil zukünftiger Mindestleasingzahlungen          | 1,2      | 2,7         |           | <b>3,9</b>    |
| Zukünftige Mindestleasingzahlungen                      | 6,0      | 9,4         | 4,1       | <b>19,5</b>   |
| <b>31. Dezember 2009</b>                                |          |             |           |               |
| Barwert zukünftiger Mindestleasingzahlungen             | 6,5      | 5,8         |           | <b>12,3</b>   |
| Zinsanteil zukünftiger Mindestleasingzahlungen          | 0,5      | 0,5         |           | <b>1,0</b>    |
| Zukünftige Mindestleasingzahlungen                      | 7,0      | 6,3         |           | <b>13,3</b>   |

### Weitere Angaben zu Finanzinstrumenten

Die folgende Tabelle leitet die einzelnen Bilanzpositionen der Finanzinstrumente zu Klassen und Kategorien über. Außerdem werden die aggregierten Buchwerte pro Bewertungskategorie und die beizulegenden Zeitwerte für jede Klasse dargestellt.

| HeidelbergCement bilanziert              |                                                                      |
|------------------------------------------|----------------------------------------------------------------------|
| Gewinn- und Verlustrechnung des Konzerns | Eigenkapitalveränderungsrechnung des Konzerns                        |
| Gesamtergebnisrechnung des Konzerns      | Segmentberichterstattung/Teil des Anhangs                            |
| Kapitalflussrechnung des Konzerns        | Anhang des Konzerns                                                  |
| Bilanz des Konzerns                      | Bericht des Abschlussprüfers/Versicherung der gesetzlichen Vertreter |

| Buchwerte und beizulegende Zeitwerte von Finanzinstrumenten                               | 31. Dezember 2009 |                        | 31. Dezember 2010 |                        |
|-------------------------------------------------------------------------------------------|-------------------|------------------------|-------------------|------------------------|
|                                                                                           | Buchwert          | Beizulegender Zeitwert | Buchwert          | Beizulegender Zeitwert |
| Mio EUR                                                                                   |                   |                        |                   |                        |
| <b>Aktiva</b>                                                                             |                   |                        |                   |                        |
| Finanzinvestitionen „Available for sale at cost“                                          | 60,1              |                        | 40,4              |                        |
| Finanzinvestitionen „Available for sale at fair value“                                    | 19,2              | 19,2                   | 23,4              | 23,4                   |
| Ausleihungen und sonstige verzinsliche Forderungen                                        | 164,5             | 161,1                  | 161,5             | 166,3                  |
| Forderungen aus Lieferungen und Leistungen und sonstige operative Forderungen             | 1.722,9           | 1.714,3                | 1.843,6           | 1.843,4                |
| Liquide Mittel                                                                            | 854,4             | 854,4                  | 869,7             | 869,7                  |
| Derivate mit Sicherungsbeziehung                                                          | 23,1              | 23,1                   | 21,8              | 21,8                   |
| Derivate ohne Sicherungsbeziehung                                                         | 24,8              | 24,8                   | 18,3              | 18,3                   |
| <b>Passiva</b>                                                                            |                   |                        |                   |                        |
| Anleihen, Darlehen und sonstige finanzielle Verbindlichkeiten                             | 9.323,1           | 9.522,5                | 9.076,3           | 9.466,8                |
| Verbindlichkeiten aus Lieferungen und Leistungen und sonstige operative Verbindlichkeiten | 1.833,7           | 1.829,0                | 1.975,7           | 1.976,9                |
| Verbindlichkeiten aus Finanzierungsleasing                                                | 12,3              | 12,3                   | 15,6              | 15,6                   |
| Derivate mit Sicherungsbeziehung                                                          | 3,9               | 3,9                    | 45,0              | 45,0                   |
| Derivate ohne Sicherungsbeziehung                                                         | 23,1              | 23,1                   | 10,3              | 10,3                   |

Finanzinvestitionen „Available for sale at cost“ sind zu Anschaffungskosten bewertete Eigenkapitaltitel, für die kein notierter Preis auf einem aktiven Markt vorliegt und der beizulegende Zeitwert nicht zuverlässig ermittelt werden kann. Deshalb wird für diese Instrumente kein beizulegender Zeitwert angegeben. Die Finanzinvestitionen „Available for sale at fair value“ werden zum beizulegenden Zeitwert anhand der am Abschlussstichtag festgestellten Börsenkurse bewertet. Auch bei den derivativen Finanzinstrumenten mit und ohne Sicherungsbeziehung erfolgt die Bewertung zum beizulegenden Zeitwert. Bei diesen Posten entspricht somit der beizulegende Zeitwert stets dem Buchwert.

Die beizulegenden Zeitwerte der langfristigen Ausleihungen, sonstigen langfristigen operativen Forderungen, Bankdarlehen, Verbindlichkeiten aus Finanzierungsleasing, sonstigen langfristigen verzinslichen und operativen Verbindlichkeiten entsprechen den Barwerten der zukünftigen Zahlungen unter Berücksichtigung der jeweils aktuellen Zinsparameter.

Die beizulegenden Zeitwerte der börsennotierten Anleihen entsprechen den Nominalwerten multipliziert mit den Kursnotierungen am Abschlussstichtag. Bei den Finanzinstrumenten mit kurzfristigen Restlaufzeiten stellen die Buchwerte am Abschlussstichtag vernünftige Schätzungen der beizulegenden Zeitwerte dar.

In der folgenden Übersicht werden die Buchwerte der Finanzinstrumente aggregiert nach den Bewertungskategorien des IAS 39 dargestellt.

| Finanzinstrumente nach Bewertungskategorien des IAS 39 |                                      |                                          |                                      |                               |          |
|--------------------------------------------------------|--------------------------------------|------------------------------------------|--------------------------------------|-------------------------------|----------|
| Mio EUR                                                | Ausgereichte Kredite und Forderungen | Finanzinvestitionen „Available for sale“ | Finanzinstrumente „Held for trading“ | Finanzielle Verbindlichkeiten | Gesamt   |
| <b>31. Dezember 2010</b>                               |                                      |                                          |                                      |                               |          |
| Beizulegender Zeitwert erfolgswirksam                  |                                      |                                          | 8,0                                  |                               | 8,0      |
| Beizulegender Zeitwert erfolgsneutral                  |                                      | 23,4                                     |                                      | -73,2                         | -49,8    |
| Anschaffungskosten / fortgeführte Anschaffungskosten   | 2.874,8                              | 40,4                                     |                                      | -10.994,4                     | -8.079,2 |
| <b>31. Dezember 2009</b>                               |                                      |                                          |                                      |                               |          |
| Beizulegender Zeitwert erfolgswirksam                  |                                      |                                          | 1,7                                  |                               | 1,7      |
| Beizulegender Zeitwert erfolgsneutral                  |                                      | 19,2                                     |                                      | -15,0 <sup>1)</sup>           | 4,2      |
| Anschaffungskosten / fortgeführte Anschaffungskosten   | 2.741,8                              | 60,1                                     |                                      | -11.154,1                     | -8.352,2 |

1) Im Vorjahr unter „fortgeführte Anschaffungskosten“ ausgewiesen.

Die folgende Tabelle zeigt die Fair Value-Hierarchien der zum beizulegenden Zeitwert bewerteten Finanzinstrumente.

| Fair Value-Hierarchie                                  | 31. Dezember 2009 |              | 31. Dezember 2010 |              |
|--------------------------------------------------------|-------------------|--------------|-------------------|--------------|
|                                                        | Hierarchie 1      | Hierarchie 2 | Hierarchie 1      | Hierarchie 2 |
| Mio EUR                                                |                   |              |                   |              |
| <b>Aktiva</b>                                          |                   |              |                   |              |
| Finanzinvestitionen "Available for sale at fair value" | 19,2              |              | 23,4              |              |
| Derivate                                               |                   |              |                   |              |
| Devisentermingeschäfte                                 |                   | 0,9          |                   | 0,3          |
| Devisenswaps                                           |                   | 23,4         |                   | 18,0         |
| Zinsswaps                                              |                   | 23,3         |                   | 17,4         |
| Energiederivate                                        |                   | 0,3          |                   | 4,4          |
| <b>Passiva</b>                                         |                   |              |                   |              |
| Derivate                                               |                   |              |                   |              |
| Devisentermingeschäfte                                 |                   | 4,5          |                   | 1,1          |
| Devisenswaps                                           |                   | 18,7         |                   | 9,5          |
| Zinsswaps                                              |                   | 0,6          |                   | 44,7         |
| Energiederivate                                        |                   | 3,2          |                   |              |

Die Berechnung des beizulegenden Zeitwertes erfolgt in der Hierarchie 1 mittels an einem aktiven Markt notierter Preise (unbereinigt) für identische Vermögenswerte oder Verbindlichkeiten, zu denen das Unternehmen am Bewertungsstichtag Zugang hat. Für die Hierarchie 2 erfolgt die Ermittlung des beizulegenden Zeitwertes mittels eines Discounted Cash Flow-Modells anhand von Inputdaten, bei denen es sich nicht um in Stufe 1 eingeordnete notierte Preise handelt, und die direkt oder indirekt beobachtbar sind.

Die folgende Tabelle stellt die Nettoergebnisse der Finanzinstrumente nach Bewertungskategorien zusammen.

| Nettogewinne oder -verluste              |       |       |
|------------------------------------------|-------|-------|
| Mio EUR                                  | 2009  | 2010  |
| Ausgereichte Kredite und Forderungen     | -45,4 | -36,6 |
| Finanzinvestitionen „Available for sale“ | -2,7  | -5,3  |
| Finanzinstrumente „Held for trading“     | -87,6 | 6,4   |
| Finanzielle Verbindlichkeiten            | 178,4 | 59,0  |
|                                          | 42,7  | 23,5  |

Im Nettoergebnis aus Krediten und Forderungen sind die Ergebnisse aus Wertminderungen in Höhe von -19,2 (i.V.: -46,9) Mio EUR und Währungseffekte in Höhe von -17,4 (i.V.: 1,5) Mio EUR enthalten.

Bei der erfolgsneutralen Bewertung der Finanzinvestitionen „Available for sale at fair value“ wurde ein Bewertungserfolg in Höhe von 6,5 (i.V.: 4,3) Mio EUR im Eigenkapital erfasst und 8,7 (i.V.: 2,9) Mio EUR aus dem Eigenkapital aufgelöst. Außerdem ist ein Gewinn in Höhe von 0,8 (i.V.: -0,5) Mio EUR aus dem Abgang entstanden. Ein Nettoverlust in Höhe von -12,0 (i.V.: -2,9) Mio EUR ist auf Wertberichtigungen zurückzuführen. Außerdem sind Währungsverluste in Höhe von -0,6 (i.V.: -0,7) Mio EUR entstanden.

Das Nettoergebnis aus der Folgebewertung der „Held for trading“ Finanzinstrumente beinhaltet Währungs- und Zinseffekte. Bei den finanziellen Verbindlichkeiten enthält das Nettoergebnis Effekte aus der Währungsumrechnung in Höhe von 59,0 (i.V.: 178,4) Mio EUR.

Die folgende Tabelle stellt die Gesamtzinserträge und -aufwendungen der Finanzinstrumente dar, die nicht erfolgswirksam zum beizulegenden Zeitwert bewertet wurden.



| HeidelbergCement bilanziert              |                                                                      |
|------------------------------------------|----------------------------------------------------------------------|
| Gewinn- und Verlustrechnung des Konzerns | Eigenkapitalveränderungsrechnung des Konzerns                        |
| Gesamtergebnisrechnung des Konzerns      | Segmentberichterstattung/Teil des Anhangs                            |
| Kapitalflussrechnung des Konzerns        | Anhang des Konzerns                                                  |
| Bilanz des Konzerns                      | Bericht des Abschlussprüfers/Versicherung der gesetzlichen Vertreter |

| Gesamtzinsertrag und -aufwand |        |        |
|-------------------------------|--------|--------|
| Mio EUR                       | 2009   | 2010   |
| Gesamtzinsertrag              | 84,7   | 93,5   |
| Gesamtzinsaufwand             | -706,0 | -677,3 |
|                               | -621,3 | -583,8 |

Der Wertminderungsaufwand der finanziellen Vermögenswerte nach Klassen ist in der folgenden Tabelle dargestellt.

| Wertminderungsaufwand                                                         |       |       |
|-------------------------------------------------------------------------------|-------|-------|
| Mio EUR                                                                       | 2009  | 2010  |
| Finanzinvestitionen „Available for sale at cost“                              | -2,9  | -0,9  |
| Finanzinvestitionen „Available for sale at fair value“                        |       | -11,1 |
| Ausleihungen und sonstige verzinsliche Forderungen                            | -0,3  | -1,3  |
| Forderungen aus Lieferungen und Leistungen und sonstige operative Forderungen | -46,6 | -17,9 |
|                                                                               | -49,8 | -31,2 |

Es wurden finanzielle Vermögenswerte in Höhe von 2,2 (i.V.: 13,5) Mio EUR zur Sicherung von Verbindlichkeiten und Eventualverbindlichkeiten verpfändet.

### Derivative Finanzinstrumente

Die folgende Tabelle zeigt die Nominalwerte und Marktwerte der derivativen Finanzinstrumente sowie der Energie-derivate, die in den Anwendungsbereich des IAS 39 fallen.

| Derivative Finanzinstrumente               | 31. Dezember 2009 |           | 31. Dezember 2010     |           |
|--------------------------------------------|-------------------|-----------|-----------------------|-----------|
|                                            | Nominalwert       | Marktwert | Nominalwert           | Marktwert |
| Mio EUR                                    |                   |           |                       |           |
| <b>Aktiva</b>                              |                   |           |                       |           |
| <b>Cash Flow Hedges</b> – Energiederivate  |                   |           |                       | 4,4       |
| <b>Fair Value Hedges</b> – Zinsswaps       | 2.000,0           | 23,1      | <sup>1)</sup>         | 17,4      |
| <b>Derivate ohne Sicherungsbeziehungen</b> |                   |           |                       |           |
| Devisentermingeschäfte                     | 38,3              | 0,9       | 17,5                  | 0,3       |
| Devisenswaps                               | 837,5             | 23,4      | 997,9                 | 18,0      |
| Zinsswaps                                  | 17,5              | 0,2       |                       |           |
| Energiederivate                            |                   | 0,3       |                       |           |
|                                            | 2.893,3           | 47,9      | 1.015,4               | 40,1      |
| <b>Passiva</b>                             |                   |           |                       |           |
| <b>Cash Flow Hedges</b>                    |                   |           |                       |           |
| Devisentermingeschäfte                     | 1,6               | 0,2       | 9,4                   | 0,7       |
| Zinsswaps                                  | 17,5              | 0,6       | 19,1                  | 0,4       |
| Energiederivate                            |                   | 3,1       |                       |           |
| <b>Fair Value Hedges</b> – Zinsswaps       |                   |           | 2.650,0 <sup>1)</sup> | 43,9      |
| <b>Derivate ohne Sicherungsbeziehungen</b> |                   |           |                       |           |
| Zinsswaps                                  |                   |           | 17,5                  | 0,4       |
| Devisentermingeschäfte                     | 113,2             | 4,3       | 26,8                  | 0,4       |
| Devisenswaps                               | 582,7             | 18,7      | 553,8                 | 9,5       |
| Energiederivate                            |                   | 0,1       |                       |           |
|                                            | 715,0             | 27,0      | 3.276,6               | 55,3      |

<sup>1)</sup> Der Nominalwert bezieht sich auf Zinsswaps mit negativem Marktwert in Höhe von -26,5 Mio EUR, die als Sicherungsinstrumente im Rahmen eines Fair Value Hedges designiert wurden. Der negative Marktwert wurde aufgrund der Trennung in langfristige und kurzfristige Bestandteile der Zinsswaps auf der Aktiv- und Passiv-Seite ausgewiesen.

Die positiven Marktwerte der Treibstoffderivate in Höhe von 0,3 (i.V.: 0,3) Mio EUR beziehen sich auf eine Liefermenge von 14,4 (i.V.: 7,2) Mio t. Die positiven Marktwerte der Stromderivate in Höhe von 4,1 (i.V.: -3,1) Mio EUR beziehen sich auf eine Liefermenge von 0,6 (i.V.: 0,2) Mio MWh.

### **Cash Flow Hedges**

Der am Bilanzstichtag offene Zinsswap sichert die zukünftigen Zinsrisiken eines variabel verzinslichen Darlehens. Dieser Swap mit einem Marktwert von -0,4 (i.V.: -0,6) Mio EUR ist im Juni 2012 fällig. Während des Berichtszeitraums wurden 0,2 Mio EUR erfolgsneutral im Eigenkapital erfasst.

Die am Bilanzstichtag offenen Devisentermingeschäfte sichern die Währungsrisiken zukünftiger Rohstoffkäufe in USD. Diese Termingeschäfte mit einem Marktwert von -0,7 (i.V.: -0,2) Mio EUR sind im Laufe des Jahres 2011 fällig. Während des Berichtszeitraums wurden -0,5 Mio EUR erfolgsneutral im Eigenkapital erfasst.

Die am Bilanzstichtag offenen Energiederivate in Höhe von 4,4 (i.V.: -3,1) Mio EUR sichern zukünftige Strompreise ab und werden ab 2011 fällig. Im Berichtsjahr wurden Bewertungseffekte in Höhe von 7,2 Mio EUR erfolgsneutral im Eigenkapital erfasst. Aus der Auflösung von Stromderivaten wurden im Eigenkapital erfasste Effekte in Höhe von 5,4 Mio EUR erfolgswirksam aufgelöst.

Es bestehen bezüglich der Cash Flow Hedges keine nennenswerten Ineffektivitäten.

### **Fair Value Hedges**

Die am Bilanzstichtag offenen Zinsswaps mit einem Marktwert von -26,5 (i.V.: 23,1) Mio EUR sichern die Zinsrisiken fest verzinslicher Darlehen ab. Der Marktwert in Höhe von 17,4 Mio ist kurzfristig. Der Marktwert in Höhe von -25,2 Mio EUR hat eine Laufzeit zwischen 1 bis 5 Jahren und der Marktwert in Höhe von -18,7 Mio EUR hat eine Laufzeit von mehr als 5 Jahren. Der Marktwert ohne Stückzinsen in Höhe von -59,3 (i.V.: -7,0) Mio EUR wurde erfolgswirksam im Sicherungsergebnis erfasst. Entsprechend wurde eine Marktwertanpassung der Darlehen von 59,4 (i.V.: 7,0) Mio EUR vorgenommen, die ebenfalls im Sicherungsergebnis gezeigt wurde. Die im Marktwert enthaltenen Stückzinsen in Höhe von 32,8 (i.V.: 30,1) Mio EUR wurden erfolgswirksam im Zinsergebnis erfasst.

### **Derivate, die nicht im Rahmen einer Sicherungsbeziehung bilanziert werden („Held for trading“)**

Die Derivate mit einem Marktwert von 8,0 Mio EUR, die nach IAS 39 nicht als Sicherungsbeziehung bilanziert wurden, sind innerhalb eines Jahres fällig.

### **Risiken der Finanzinstrumente**

HeidelbergCement unterliegt hinsichtlich seiner Vermögenswerte, Verbindlichkeiten, festen Verpflichtungen und geplanten Transaktionen insbesondere Risiken aus der Veränderung der Wechselkurse, der Zinssätze und der Markt- und Börsenpreise. Diese Marktpreisrisiken können einen negativen Einfluss auf die Vermögens-, Finanz- und Ertragslage des Konzerns haben. Der Konzern steuert diese Risiken vorwiegend im Rahmen seiner laufenden Geschäfts- und Finanzierungsaktivitäten und bei Bedarf durch den Einsatz derivativer Finanzinstrumente. Die Grundzüge der Finanzpolitik werden vom Vorstand festgelegt. Die Umsetzung der Finanzpolitik sowie das laufende Risikomanagement obliegen der Abteilung Group Treasury.

Die Abteilung Group Treasury agiert auf Basis bestehender Richtlinien, die die Entscheidungsgrundlagen, Kompetenzen, Verantwortlichkeiten und Prozesse für die Steuerung der Finanzrisiken verbindlich festlegen. Bestimmte Transaktionen bedürfen außerdem der vorherigen Genehmigung durch den Vorstand. Der Vorstand wird permanent über Betrag und Umfang des aktuellen Risiko-Exposures sowie aktuelle Marktentwicklungen auf den globalen Finanzmärkten durch die Abteilung Group Treasury informiert. Die Konzernrevision kontrolliert durch zielgerichtete Prüfung die Einhaltung der oben genannten Richtlinien und der entsprechenden gesetzlichen Rahmenbedingungen.

| HeidelbergCement bilanziert              |                                                                      |
|------------------------------------------|----------------------------------------------------------------------|
| Gewinn- und Verlustrechnung des Konzerns | Eigenkapitalveränderungsrechnung des Konzerns                        |
| Gesamtergebnisrechnung des Konzerns      | Segmentberichterstattung/Teil des Anhangs                            |
| Kapitalflussrechnung des Konzerns        | Anhang des Konzerns                                                  |
| Bilanz des Konzerns                      | Bericht des Abschlussprüfers/Versicherung der gesetzlichen Vertreter |

## Kreditrisiko

HeidelbergCement ist durch sein operatives Geschäft und bestimmte Finanztransaktionen Kreditrisiken ausgesetzt. Kreditrisiko ist das Risiko, dass eine Vertragspartei ihre bei Abschluss eines Finanzinstruments vertraglich zugesagten Verpflichtungen unerwartet nicht oder nur teilweise erfüllt. Das Kreditrisiko des Konzerns wird begrenzt, indem Finanzanlagen und derivative Finanzinstrumente nur mit Vertragspartnern erstklassiger Bonität getätigt bzw. abgeschlossen werden.

## Bonitätsbewertung (Rating)

Die Ratingagenturen Standard & Poor's, Moody's und Fitch Ratings bewerten die Kreditwürdigkeit von HeidelbergCement mit BB-/B (Ausblick positiv), Ba2/Not Prime (Ausblick positiv) und BB/B (Ausblick stabil) per Ende 2010. Herabstufungen der von den Ratingagenturen vergebenen Ratings könnten sich negativ auf die Kapitalkosten und Refinanzierungsmöglichkeiten von HeidelbergCement auswirken.

## Liquide Mittel

Die liquiden Mittel umfassen im Wesentlichen Zahlungsmittel. Im Zusammenhang mit der Anlage von liquiden Mitteln ist der Konzern Verlusten aus Kreditrisiken ausgesetzt, sofern Kontrahenten ihre Verpflichtungen nicht erfüllen. HeidelbergCement steuert die daraus entstehende Risikoposition durch Diversifizierung der Kontrahenten. Bei der Anlage liquider Mittel werden die Unternehmen, Banken und Finanzinstitute nach sorgfältiger Bonitätsanalyse ausgewählt. Gegenwärtig sind keine liquiden Mittel aufgrund von Ausfällen überfällig oder wertberichtigt. Das maximale Kreditrisiko der liquiden Mittel entspricht dem Buchwert.

## Forderungen aus Lieferungen und Leistungen

Forderungen aus Lieferungen und Leistungen resultieren hauptsächlich aus dem Verkauf von Zement, Beton und Zuschlagstoffen. Im operativen Geschäft werden die Außenstände fortlaufend überwacht. Ausfallrisiken werden mittels Einzelwertberichtigungen und pauschalierter Einzelwertberichtigungen Rechnung getragen. Die maximale Risikoposition aus den Forderungen aus Lieferungen und Leistungen entspricht dem Buchwert.

## Sonstige Forderungen und Vermögenswerte

Die Kreditrisikoposition aus sonstigen Forderungen und Vermögenswerten entspricht dem Buchwert dieser Instrumente. HeidelbergCement erachtet dieses Kreditrisiko als nicht bedeutend.

## Derivative Finanzinstrumente

Derivative Finanzinstrumente werden grundsätzlich zur Risikoreduktion eingesetzt. HeidelbergCement ist im Rahmen seiner Geschäftstätigkeit Zins-, Währungs- und Energiepreiskursrisiken ausgesetzt. Ein wesentlicher Teil der Derivate wird für bilanzielle Zwecke nicht als Sicherungsbeziehung (Hedge Accounting) im Sinne von IAS 39, sondern als Instrument der Kategorie „Held for trading“ bilanziert. Allerdings stellen die Marktwertveränderungen dieser Instrumente, wirtschaftlich betrachtet, eine ökonomisch wirksame Absicherung im Rahmen der Konzernstrategie dar. Das maximale Kreditrisiko dieser Position entspricht dem Marktwert der derivativen Finanzinstrumente, die einen positiven Marktwert aufweisen und zum Stichtag als finanzielle Vermögenswerte ausgewiesen werden. Zur Absicherung des Marktwerttrisikos wurden Zinsswaps kontrahiert, die im Sinne von IAS 39 als Sicherungsinstrumente designiert wurden. Zur Minderung des Ausfallrisikos werden die Sicherungsgeschäfte grundsätzlich nur mit führenden Finanzinstituten erstklassiger Bonität abgeschlossen. Die Kontrahenten verfügen über sehr gute, von externen Ratingagenturen, wie zum Beispiel Moody's, Standard & Poor's oder Fitch Ratings, vergebene Kreditratings. Derzeit bestehen keine Überfälligkeiten bei den im Bestand befindlichen derivativen Finanzinstrumenten.

## Liquiditätsrisiko

Das Liquiditätsrisiko beschreibt die Gefahr, dass ein Unternehmen seine finanziellen Verpflichtungen nicht in ausreichendem Maß erfüllen kann. HeidelbergCement steuert seine Liquidität, indem der Konzern neben dem Zahlungs-

mittelzufluss aus dem operativen Geschäft in ausreichendem Umfang liquide Mittel und umfangreiche Kreditlinien bei Banken vorhält. Das operative Liquiditätsmanagement umfasst eine tägliche Zusammenführung von liquiden Mitteln; die Abteilung Group Treasury mit Sitz in Heidelberg fungiert dabei als Inhouse-Bank. Dadurch können Liquiditätsüberschüsse und -anforderungen entsprechend den Bedürfnissen des Gesamtkonzerns sowie einzelner Konzerngesellschaften gesteuert werden.

Zum Jahresende stehen neben verfügbaren Barmitteln noch ungezogene, bestätigte Kreditlinien in Höhe von 2,6 Mrd EUR zur Liquiditätssicherung zur Verfügung. Zur Deckung kurzfristiger Liquiditätsspitzen verfügt HeidelbergCement über einen unbefristeten Rahmenvertrag zur Emission kurzfristiger Inhaberschuldverschreibungen („Commercial Paper“) in Höhe von 1,0 Mrd EUR. Im Rahmen des Programms werden je nach Marktlage zu unterschiedlichen Zeitpunkten einzelne Tranchen mit unterschiedlichen Laufzeiten begeben. Zum Jahresende 2010 waren in der Summe 173,8 Mio EUR Commercial Paper ausstehend. Weitere Informationen zu Liquiditätsrisiken sind im Lagebericht, Kapitel Risikobericht auf Seite 88 zu finden.

Da die Finanzdokumente von HeidelbergCement keine Klauseln enthalten, welche im Falle einer Bonitätsherabstufung (Rating) eine Rückzahlungsverpflichtung auslösen, bleibt auch im Falle veränderter Bonitätsbeurteilungen die Fälligkeitsstruktur unberührt. In keinem der wesentlichen bestehenden Finanzinstrumente sind Nachschusspflichten („Margin Calls“) vereinbart, die zu einem Liquiditätsabfluss führen könnten. Alle derivativen Finanzinstrumente werden auf Basis bestehender Rahmenvereinbarungen kontrahiert, die zwecks Reduzierung von Bonitäts- und Liquiditätsrisiken Nettingvereinbarungen enthalten.

Zur weiteren Optimierung der Fälligkeitenstruktur hat die HeidelbergCement AG im Jahr 2010 drei Euroanleihen mit einem Gesamtnominalvolumen von 2,05 Mrd EUR an institutionelle Investoren im In- und Ausland begeben.

Die folgende Fälligkeitsübersicht zeigt, wie die Cashflows der Verbindlichkeiten per 31. Dezember 2010 die Liquiditätssituation des Konzerns beeinflussen. Die Übersicht beschreibt den Ablauf der

- undiskontierten Tilgungs- und Zinsauszahlungen der Anleihen,
- undiskontierten Verbindlichkeiten und Zinszahlungen gegenüber Kreditinstituten,
- undiskontierten sonstigen Verbindlichkeiten und
- undiskontierten, für das jeweilige Jahr summierten vertraglich vereinbarten Auszahlungen der derivativen Finanzinstrumente.

Die Verbindlichkeiten aus Lieferungen und Leistungen sind den kurzfristigen Fälligkeiten zuzuordnen (innerhalb eines Jahres). Bei variablen Zinszahlungen wird der aktuelle Zins als Basis gewählt. Auszahlungen in Fremdwährungen werden mit dem Stichtagskurs umgerechnet.

| <b>Cashflows der finanziellen Verbindlichkeiten und derivativen Finanzinstrumente</b> |                                  |                   |                   |                   |                   |                          |
|---------------------------------------------------------------------------------------|----------------------------------|-------------------|-------------------|-------------------|-------------------|--------------------------|
| Mio EUR                                                                               | <b>Buchwert<br/>31. 12. 2010</b> | Cashflows<br>2011 | Cashflows<br>2012 | Cashflows<br>2013 | Cashflows<br>2014 | Cashflows<br>2015 - 2024 |
| Anleihen                                                                              | <b>7.728,8</b>                   | 506,4             | 1.506,4           | 976,2             | 1.400,9           | 5.574,8                  |
| Verbindlichkeiten gegenüber Kreditinstituten                                          | <b>1.139,0</b>                   | 215,8             | 455,4             | 378,2             | 159,8             | 56,3                     |
| Sonstige finanzielle Verbindlichkeiten                                                | <b>724,1</b>                     | 374,0             | 180,0             | 1,9               | 2,0               | 37,0                     |
| Derivate mit positivem Marktwert                                                      |                                  |                   |                   |                   |                   |                          |
| Cash Flow Hedges                                                                      | <b>4,4</b>                       | 2,0               |                   |                   |                   |                          |
| Fair Value Hedges                                                                     | <b>17,4</b>                      |                   |                   |                   |                   |                          |
| Derivate ohne Sicherungsbeziehung                                                     | <b>18,3</b>                      | 1.015,4           |                   |                   |                   |                          |
| Derivate mit negativem Marktwert                                                      |                                  |                   |                   |                   |                   |                          |
| Cash Flow Hedges                                                                      | <b>1,1</b>                       | 8,7               | 0,6               |                   |                   |                          |
| Fair Value Hedges                                                                     | <b>43,9</b>                      | 176,5             | 176,5             | 176,5             | 165,1             | 181,7                    |
| Derivate ohne Sicherungsbeziehung                                                     | <b>10,3</b>                      | 581,1             | 0,4               | 0,4               | 0,4               | 0,9                      |

| HeidelbergCement bilanziert              |                                                                      |
|------------------------------------------|----------------------------------------------------------------------|
| Gewinn- und Verlustrechnung des Konzerns | Eigenkapitalveränderungsrechnung des Konzerns                        |
| Gesamtergebnisrechnung des Konzerns      | Segmentberichterstattung/Teil des Anhangs                            |
| Kapitalflussrechnung des Konzerns        | Anhang des Konzerns                                                  |
| Bilanz des Konzerns                      | Bericht des Abschlussprüfers/Versicherung der gesetzlichen Vertreter |

| Cashflows der finanziellen Verbindlichkeiten und derivativen Finanzinstrumente |                          |                   |                   |                   |                   |                          |
|--------------------------------------------------------------------------------|--------------------------|-------------------|-------------------|-------------------|-------------------|--------------------------|
| Mio EUR                                                                        | Buchwert<br>31. 12. 2009 | Cashflows<br>2010 | Cashflows<br>2011 | Cashflows<br>2012 | Cashflows<br>2013 | Cashflows<br>2014 - 2020 |
| Anleihen                                                                       | 5.598,3                  | 914,6             | 362,8             | 1.461,3           | 796,2             | 4.350,2                  |
| Verbindlichkeiten gegenüber Kreditinstituten                                   | 3.178,1                  | 356,4             | 2.481,1           | 347,3             | 237,5             | 177,4                    |
| Sonstige finanzielle Verbindlichkeiten                                         | 559,0                    | 106,9             | 156,1             | 87,4              | 0,8               | 34,9                     |
| Derivate mit positivem Marktwert                                               |                          |                   |                   |                   |                   |                          |
| Fair Value Hedges                                                              | 23,1                     | 109,1             | 109,1             | 109,1             | 109,1             | 213,8                    |
| Derivate ohne Sicherungsbeziehung                                              | 24,8                     | 876,5             | 0,8               | 0,8               | 0,8               | 2,4                      |
| Derivate mit negativem Marktwert                                               |                          |                   |                   |                   |                   |                          |
| Cash Flow Hedges                                                               | 3,9                      | 2,7               | 1,1               | 0,6               |                   |                          |
| Derivate ohne Sicherungsbeziehung                                              | 23,1                     | 695,9             |                   |                   |                   |                          |

Der Liquiditätszufluss in Höhe von 993,5 (i.V.: 964,6) Mio EUR aus Zinsswaps wurde in der Tabelle nicht berücksichtigt. Die undiskontierten vertraglichen Cashflows der Verbindlichkeiten aus Finanzierungsleasing werden in einer separaten Tabelle auf Seite 196 dargestellt.

### Zinsänderungsrisiko

Zinsänderungsrisiken bestehen aufgrund potenzieller Änderungen des Marktzinses und können bei festverzinslichen Finanzinstrumenten zu einer Änderung des beizulegenden Zeitwertes und bei variabel verzinslichen Finanzinstrumenten zu Zinszahlungsschwankungen führen. Der Vorstand und Aufsichtsrat der HeidelbergCement AG haben sich gegen eine Absicherung der variabel verzinslichen Finanzinstrumente entschieden. Diese Strategie basiert auf der historisch hohen Korrelation steigender Ergebnisse mit steigenden Zinsen. Bei Finanzinstrumenten mit fester Verzinsung, die zu fortgeführten Anschaffungskosten bewertet werden, haben Zinsänderungsrisiken keine Auswirkungen auf das Ergebnis und das Eigenkapital.

Der Anteil der variabel verzinslichen Finanzinstrumente liegt bei durchschnittlich 43 % (i.V.: 66 %). Wenn das Marktzinsniveau zum 31. Dezember 2010 um 100 Basispunkte höher (niedriger) gewesen wäre, wäre der Zinsaufwand des HeidelbergCement Konzerns um 38 (i.V.: 71) Mio EUR gestiegen (gefallen).

Durch die Absicherung der im Oktober 2009 und Juli 2010 emittierten Bonds mit Zinsswaps im Rahmen von Fair Value Hedge Accounting ergeben sich Ergebnisauswirkungen aus der Buchwertanpassung der Grundgeschäfte (Bonds – gesichertes Risiko) sowie aus der Bewertung der Zinsswaps. Diese Ergebnisauswirkungen wurden bei der Sensitivitätsanalyse berücksichtigt.

### Währungsrisiko

Die Währungsrisiken von HeidelbergCement resultieren aus Investitionen, Finanzierungsmaßnahmen und operativen Tätigkeiten. Risiken aus Fremdwährungen werden im Wesentlichen gesichert, soweit sie die Cashflows des Konzerns beeinflussen. Fremdwährungsrisiken, die die Cashflows des Konzerns nicht beeinflussen (d.h. die Risiken, die aus der Umrechnung der Vermögenswerte und Verbindlichkeiten ausländischer Unternehmenseinheiten in die Konzern-Berichterstattungswährung resultieren) bleiben hingegen grundsätzlich ungesichert. Unter Umständen kann HeidelbergCement jedoch auch dieses Fremdwährungsrisiko absichern. Bei der Eliminierung bestehender Währungsrisiken werden Devisentermingeschäfte, Devisenswaps und vereinzelt Währungsoptionen eingesetzt.

Im Rahmen der Inhouse-Banking-Aktivität der HeidelbergCement AG ergeben sich durch Aufnahme und Anlage von Liquidität der Tochtergesellschaften Währungspositionen, die durch entsprechende fristen- und betragskongruente externe Devisenswapgeschäfte abgesichert werden. Vor diesem Hintergrund hätten Währungsschwankungen im Rahmen der Inhouse-Banking-Aktivität keine Auswirkungen auf Ergebnis oder Eigenkapital.



Die hypothetischen Ergebnisimplikationen bei isolierter Betrachtung der externen Finanzinstrumente (im Wesentlichen Devisenswapgeschäfte) und bei Aufwertung (Abwertung) des Euro um 10% gegenüber sämtlichen Währungen zum 31.12.2010 wären wie folgt:

EUR/USD: +11,8 Mio EUR, EUR/AUD: +49,2 Mio EUR, EUR/SEK: -4,9 Mio EUR, EUR/GBP: +6,0 Mio EUR, EUR/NOK: +11,1 Mio EUR, EUR/CAD: +21,1 Mio EUR, EUR/DKK: -0,8 Mio EUR, EUR/CZK: +1,2 Mio EUR, EUR/RUB: -25,2 Mio EUR, EUR/ILS +4,3 Mio EUR, EUR/PLN: +0,4 Mio EUR, EUR/HKD: +2,7 Mio EUR, EUR/LVL -0,4 Mio EUR, EUR/INR -0,6 Mio EUR, EUR/MYR +0,7 EUR, IDR/USD: -1,9 Mio EUR, EUR/KZT: -3,2 Mio EUR, EUR/RON: -6,0 Mio EUR, CAD/USD -0,8 Mio EUR, SEK/LVL -0,4 Mio EUR, AUD/USD -0,4 Mio EUR

(Zum 31.12.2009: EUR/USD: +19,6 Mio EUR, EUR/AUD: +39,4 Mio EUR, EUR/SEK: -6,8 Mio EUR, EUR/GBP: -29,7 Mio EUR, EUR/NOK: +7,0 Mio EUR, EUR/CAD: -0,5 Mio EUR, EUR/DKK: -0,7 Mio EUR, EUR/CZK: -2,4 Mio EUR, EUR/RUB: -12,2 Mio EUR, EUR/EEK: +2,7 Mio EUR, EUR/ILS: +1,8 Mio EUR, EUR/PLN: +0,6 Mio EUR, EUR/HKD: +2,4 Mio EUR, IDR/USD: +0,5 Mio EUR, EUR/KZT: -3,1 Mio EUR, EUR/RON: -4,3 Mio EUR)

### Kapitalsteuerung

Zur Sicherstellung einer nachhaltigen Vermögens-, Finanz- und Ertragslage des Unternehmens bedient sich das Management im Wesentlichen dreier Instrumente. Die Investitionen werden nach der strategischen und operativen Planung von HeidelbergCement ausgerichtet. Hierbei wird für sämtliche Investitionen, mit Ausnahme der Ersatzinvestitionen, der langfristige Ergebnisbeitrag für das Unternehmen gemessen und einer Prüfung unterzogen. Wesentliche strategische Investitionen mit einem Volumen von über 10 Mio EUR unterliegen einer zentralen Prüfung und werden einzeln im Vorstand vorgetragen. Im Mittelpunkt der Prüfung steht die Auswirkung von Investitionen auf die Gewinn- und Verlustrechnung, die Bilanz und die Kapitalflussrechnung des Konzerns.

Außerdem verwendet HeidelbergCement länderspezifische, durchschnittliche, gewichtete Kapitalkosten nach Steuern, die für das Jahr 2010 zwischen 6,5 % und 18,9 % lagen (im Vorjahr: zwischen 6,3 % und 17,7 %). Sämtliche Entscheidungen zur Vorteilhaftigkeit von Erweiterungsinvestitionen werden an den internen Rentabilitätszielen anhand der durchschnittlichen, gewichteten Kapitalkosten gemessen.

HeidelbergCement besitzt ein weltweites, ergebnisabhängiges Vergütungssystem für das Management. Im Rahmen klarer Zielvereinbarungen wird eine ergebnis- und kapitalbedarfsbezogene Ausrichtung des Managements sichergestellt. Der Vorstand definiert hierbei für sämtliche Länder des Konzerns die Höhe des jeweiligen Zielergebnisses und des Working Capital zur Erreichung der Bonuszahlungen.

Der Vorstand von HeidelbergCement bespricht und verfolgt vereinbarte Ziele, die Ergebnisse der Länder und den Ausblick sowie die strategische Ausrichtung im Rahmen von Quartalsgespräche mit allen länderverantwortlichen Managern. Ausführliche Diskussionen zur operativen Planung der Länder finden im vierten Quartal mit allen Länderverantwortlichen statt. Der Vorstand legt in persönlichen Gesprächsrunden mit dem Ländermanagement Ergebnisziele, die Steuerung von spezifischen Aktivitäten und die wesentlichen Investitionen fest.

Eine wesentliche Bedeutung bei der Überwachung des Konzernkapitals kommt dem dynamischen Verschuldungsgrad zu, der dem Verhältnis von Nettofinanzschulden zum operativen Ergebnis vor Abschreibungen entspricht.

| <b>Dynamischer Verschuldungsgrad</b>                                 |              |              |
|----------------------------------------------------------------------|--------------|--------------|
| Mio EUR                                                              | 31. 12. 2009 | 31. 12. 2010 |
| Liquide Mittel, Finanzinvestitionen und derivative Finanzinstrumente | 902,3        | 905,7        |
| Finanzverbindlichkeiten                                              | 9.362,4      | 9.147,3      |
| Put-Optionen von Minderheitsgesellschaftern                          | -36,9        | -95,6        |
| Nettofinanzschulden                                                  | 8.423,2      | 8.146,0      |
| Operatives Ergebnis vor Abschreibungen                               | 2.102,0      | 2.239,4      |
| <b>Dynamischer Verschuldungsgrad</b>                                 | 4,01         | 3,64         |

| HeidelbergCement bilanziert              |                                                                      |
|------------------------------------------|----------------------------------------------------------------------|
| Gewinn- und Verlustrechnung des Konzerns | Eigenkapitalveränderungsrechnung des Konzerns                        |
| Gesamtergebnisrechnung des Konzerns      | Segmentberichterstattung/Teil des Anhangs                            |
| Kapitalflussrechnung des Konzerns        | Anhang des Konzerns                                                  |
| Bilanz des Konzerns                      | Bericht des Abschlussprüfers/Versicherung der gesetzlichen Vertreter |

Im Rahmen von Kreditverträgen wurde die Einhaltung verschiedener Finanzrelationen (Financial Covenants) vereinbart, die alle in der Berichtsperiode erfüllt wurden. Die wichtigsten Finanzkennzahlen sind das Verhältnis der Nettoverschuldung zu EBITDA und der Zinsdeckungsfaktor. Die Kennzahl EBITDA leitet sich aus den Kreditverträgen ab und weicht daher von der Kennzahl „operatives Ergebnis vor Abschreibungen“ ab, da Bestandteile des zusätzlichen ordentlichen Ergebnisses sowie Effekte aus Konsolidierungskreisänderungen berücksichtigt werden. Weitere Erläuterungen werden im Lagebericht auf Seite 88 f. gegeben.

Im Rahmen der Konzernplanung wird die Einhaltung der Kreditvereinbarungen konsequent überwacht und vierteljährlich den Gläubigern gemeldet. Im Falle einer Verletzung der Covenants könnten die Gläubiger unter bestimmten Voraussetzungen entsprechende Kredite, ungeachtet der vertraglich vereinbarten Laufzeiten, fällig stellen.

### Haftungsverhältnisse und sonstige finanzielle Verpflichtungen

Haftungsverhältnisse sind potenzielle zukünftige Verpflichtungen gegenüber Dritten, deren Existenz erst durch den Eintritt mindestens eines ungewissen zukünftigen Ereignisses bestätigt werden muss, welches jedoch außerhalb des Einflussbereiches von HeidelbergCement liegt.

Zum Abschlussstichtag bestehen vertraglich gegebene Sicherheiten und Gewährleistungen in Höhe von 376,4 (i.V.: 366,4) Mio EUR. Hierin enthalten sind Verpflichtungen in Höhe von 303,4 (i.V.: 330,7) Mio EUR, bei denen die Wahrscheinlichkeit einer Inanspruchnahme äußerst gering ist (IAS 37.28).

| Sonstige finanzielle Verpflichtungen                                                           |       |       |
|------------------------------------------------------------------------------------------------|-------|-------|
| Mio EUR                                                                                        | 2009  | 2010  |
| <b>Miet- und Leasingverträge</b>                                                               |       |       |
| Summe der bis zu einem Jahr fälligen Leasingraten                                              | 84,8  | 98,6  |
| Summe der von 1 bis 5 Jahre fälligen Leasingraten                                              | 227,1 | 246,5 |
| Summe der über 5 Jahre fälligen Leasingraten                                                   | 346,6 | 362,0 |
|                                                                                                | 658,5 | 707,1 |
| <b>Sonstige Verpflichtungen für planvorbereitete Investitionen bei Sach- und Finanzanlagen</b> | 216,4 | 270,7 |

Die sonstigen finanziellen Verpflichtungen werden mit ihrem Nominalwert angegeben. Die zukünftigen Miet- und Leasingverpflichtungen beziehen sich im Wesentlichen auf Immobilien und andere Vermögenswerte, die von HeidelbergCement genutzt werden.

### Beziehungen zu nahe stehenden Unternehmen und Personen

IAS 24 verlangt die Darlegung der wichtigsten Beziehungen mit nahe stehenden Gesellschaften und Personen, die maßgeblichen Einfluss auf die HeidelbergCement AG ausüben können, die zu den Mitgliedern des Managements in Schlüsselpositionen gehören oder als Gemeinschaftsunternehmen bzw. assoziierte Unternehmen bilanziert sind.

Herr Ludwig Merckle hält zum 31. Dezember 2010 einen Anteil von 25,11 % an der HeidelbergCement AG über von ihm kontrollierte Unternehmen. Diese Stimmrechte, insbesondere von der SC Vermögensverwaltung GmbH (ehemals Spohn Cement GmbH), Zossen (24,06 %), wurden nach uns vorliegenden Mitteilungen vom 24. Januar 2011 umgeschichtet und auf der Spohn Cement Beteiligungen GmbH, Zossen (25,01 %), gebündelt.

HeidelbergCement AG hat Dienstleistungen in Höhe von 574,1 (i.V.: 42,0 für Spohn Cement GmbH) TEUR netto für die PHOENIX Pharmahandel GmbH & Co KG, Mannheim, eine Gesellschaft der Merckle-Gruppe, erbracht.

Am 13. September 2009 hat die HeidelbergCement AG eine Kooperationsvereinbarung mit den zur Merckle-Gruppe gehörenden Gesellschaften SC Vermögensverwaltung GmbH (ehemals Spohn Cement GmbH), VEM Vermögensverwaltung GmbH, HC Treuhand GmbH und VEM erste Treuhand GmbH abgeschlossen. Der Vertrag endet mit Ablauf des 30. Juni 2011.

Geschäftliche Transaktionen mit assoziierten Unternehmen umfassen Umsätze und sonstige Verkäufe in Höhe von 22,9 (i.V.: 32,6) Mio EUR, den Bezug von Waren und Dienstleistungen in Höhe von 9,0 (i.V.: 32,2) Mio EUR sowie

erbrachte Dienstleistungen in Höhe von 0,3 (i.V.: 0,5) Mio EUR. Des Weiteren wurden assoziierten Unternehmen im Jahr 2010 Darlehen in Höhe von 0,0 (i.V.: 1,0) Mio EUR gewährt sowie Kapitalerhöhungen in Höhe von 2,4 (i.V.: 0,0) Mio EUR durchgeführt.

Mit den im HeidelbergCement Konzern als Gemeinschaftsunternehmen geführten Gesellschaften wurden Umsätze und sonstige Verkäufe in Höhe von 66,1 (i.V.: 114,3) Mio EUR getätigt sowie Rohstoffe, Waren und sonstige Dienstleistungen in Höhe von 114,5 (i.V.: 284,0) Mio EUR bezogen. An Dienstleistungen und sonstigen Service- und Finanzleistungen wurden 3,3 (i.V.: 7,8) Mio EUR erbracht. Des Weiteren beteiligte sich die Lehigh Hanson Materials Ltd an der Kapitalerhöhung des Gemeinschaftsunternehmen Parsons Creek in Höhe von 1,1 (i.V.: 2,9) Mio EUR. Aus diesen Aktivitäten sowie aus Finanztransaktionen bestehen Forderungen in Höhe von 81,4 (i.V.: 118,2) Mio EUR und Verbindlichkeiten von 39,2 (i.V.: 81,6) Mio EUR. Garantien zugunsten von Gemeinschaftsunternehmen bestehen in Höhe von 70,6 (i.V.: 59,9) Mio EUR.

Darüber hinaus haben Unternehmen des HeidelbergCement Konzerns keinerlei berichtspflichtige Geschäfte mit Mitgliedern des Aufsichtsrats oder des Vorstands als Personen in Schlüsselpositionen bzw. mit Gesellschaften, in deren Geschäftsführungs- oder Aufsichtsgremien diese Personen vertreten sind, vorgenommen.

### Entsprechenserklärung zum Deutschen Corporate Governance Kodex

Vorstand und Aufsichtsrat der HeidelbergCement AG haben die nach § 161 AktG geforderte Entsprechenserklärung zum Deutschen Corporate Governance Kodex am 17. März 2010 veröffentlicht. Die Erklärung für 2011 wurde am 10. Februar 2011 unter der Internet-Adresse [www.heidelbergcement.com](http://www.heidelbergcement.com) veröffentlicht.

### Honorare des Abschlussprüfers

Der Abschlussprüfer Ernst & Young GmbH Wirtschaftsprüfungsgesellschaft erhielt im Geschäftsjahr ein Honorar von 4,7 (i.V.: 8,4) Mio EUR.

| Honorare des Abschlussprüfers |      |      |
|-------------------------------|------|------|
| Mio EUR                       | 2009 | 2010 |
| Abschlussprüfungsleistungen   | 2,8  | 2,9  |
| Andere Bestätigungsleistungen | 4,8  | 1,0  |
| Steuerberatungsleistungen     | 0,5  | 0,3  |
| Sonstige Leistungen           | 0,3  | 0,5  |
|                               | 8,4  | 4,7  |

### Aufsichtsrat und Vorstand

Wir verweisen auf die im Lagebericht im Kapitel Corporate Governance auf den Seiten 124 ff. gemachten Ausführungen. Die Festvergütung des Vorstands erhöhte sich gegenüber dem Vorjahr auf 4,3 (i.V.: 3,9) Mio EUR.

Dagegen verringerte sich die Summe der variablen Vergütungsbestandteile, die in diesem Jahr nur aus einer Jahrestantieme mit Einjahresbezug bestanden, auf 8,1 (i.V.: 11,7) Mio EUR. Die Verringerung der Summe der variablen Vergütungsbestandteile ist im Wesentlichen auf den Wegfall zweier Sondereffekte zurückzuführen: Zum einen wurde dem Vorstand im Vorjahr eine Sondertantieme im Zusammenhang mit der erfolgreichen Neuordnung der Kapital- und Finanzierungsstruktur in Höhe von 5,0 Mio EUR gewährt. Zum anderen wurde der erdiente Teil des Mehrjahresbonus 2008/2009 im Vorjahr in Höhe von 2,9 Mio EUR erfasst.

Die sonstigen Vergütungsbestandteile betrugen 1,2 (i.V.: 1,0) Mio EUR. Die sonstigen Vergütungsbestandteile bestanden in Zahlungen für Gremientätigkeiten bei Tochterunternehmen der HeidelbergCement AG, Aufwandsentschädigungen sowie geldwerten Vorteilen aus der Zurverfügungstellung von Dienstwagen.

Die Gesamtvergütung des Vorstands belief sich im Jahr 2010 auf 13,6 (i.V.: 16,6) Mio EUR. Außerdem ist gemäß § 314 Abs. 1 Ziffer 6. lit. a) Satz 3 HGB noch ein Betrag in Höhe von 1,7 Mio EUR anzugeben, der im Wesentlichen

| HeidelbergCement bilanziert              |                                                                      |
|------------------------------------------|----------------------------------------------------------------------|
| Gewinn- und Verlustrechnung des Konzerns | Eigenkapitalveränderungsrechnung des Konzerns                        |
| Gesamtergebnisrechnung des Konzerns      | Segmentberichterstattung/Teil des Anhangs                            |
| Kapitalflussrechnung des Konzerns        | Anhang des Konzerns                                                  |
| Bilanz des Konzerns                      | Bericht des Abschlussprüfers/Versicherung der gesetzlichen Vertreter |

auf die Abweichung der finalen Zielerreichung des Mehrjahresbonus 2008/2009 gegenüber den zum Zeitpunkt der Erstellung des Konzernabschlusses 2009 getroffenen Annahmen zurückzuführen ist.

Für die aktuellen Mitglieder des Vorstands wurden 1,3 (i.V.: 1,3) Mio EUR den Rückstellungen für Pensionsverpflichtungen (laufender Dienstzeitaufwand) zugeführt. An frühere Mitglieder des Vorstands und deren Hinterbliebene wurden im Berichtsjahr 3,0 (i.V.: 2,3) Mio EUR gezahlt. Die Rückstellungen für Pensionsverpflichtungen gegenüber früheren Vorstandsmitgliedern beliefen sich auf 28,1 (i.V.: 26,1) Mio EUR.

Die Gesamtvergütung des Aufsichtsrats belief sich im Jahr 2010 auf 815.432 (i.V.: 499.895) EUR.

### Ereignisse nach dem Bilanzstichtag

Nach dem Bilanzstichtag 31. Dezember 2010 haben sich keine berichtspflichtigen Ereignisse ergeben.

### Prüfung durch den Aufsichtsrat

Der Konzernabschluss wurde vom Vorstand aufgestellt und am 16. März 2011 verabschiedet. Anschließend wurde er dem Aufsichtsrat zur Prüfung vorgelegt.

## Aufstellung des Anteilsbesitzes (§ 285 Nr. 11 i.V.m. § 287 bzw. § 313 Abs. 2 i.V.m. Abs. 4 HGB) des HeidelbergCement Konzerns und der HeidelbergCement AG zum 31. Dezember 2010

| Name der Gesellschaft                                                                        | Sitz                        | Kapital-<br>anteil<br>in % | Wäh-<br>rung | Eigen-<br>kapital<br>in Mio |
|----------------------------------------------------------------------------------------------|-----------------------------|----------------------------|--------------|-----------------------------|
| <b>Vollkonsolidierte Unternehmen</b>                                                         |                             |                            |              |                             |
| <b>West- und Nordeuropa</b>                                                                  |                             |                            |              |                             |
| „Exakt“ Kiesaufbereitung-Gesellschaft mit beschränkter Haftung & Co Kommanditgesellschaft *) | Paderborn, Deutschland      | 100,00                     | EUR          | 1                           |
| A.R.C. (Western) Limited                                                                     | Maidenhead, Großbritannien  | 100,00                     | GBP          | 6                           |
| AB Gotlands Kalkverk                                                                         | Stockholm, Schweden         | 100,00                     | SEK          | 8                           |
| Abetong AB                                                                                   | Växjö, Schweden             | 100,00                     | SEK          | 243                         |
| Alexandre Limited                                                                            | Maidenhead, Großbritannien  | 100,00                     | GBP          | 4                           |
| Amey Group Limited (The)                                                                     | Maidenhead, Großbritannien  | 100,00                     | GBP          | 13                          |
| Amey Roadstone International Limited                                                         | Maidenhead, Großbritannien  | 100,00                     | GBP          | 0                           |
| Appleby Group Limited                                                                        | Maidenhead, Großbritannien  | 100,00                     | GBP          | 75                          |
| ARC Aggregates Limited                                                                       | Maidenhead, Großbritannien  | 100,00                     | GBP          | 3                           |
| ARC Building Limited                                                                         | Maidenhead, Großbritannien  | 100,00                     | GBP          | -18                         |
| ARC Concrete (Anglia) Limited                                                                | Maidenhead, Großbritannien  | 100,00                     | GBP          | 0                           |
| ARC Concrete Limited                                                                         | Maidenhead, Großbritannien  | 100,00                     | GBP          | 0                           |
| ARC Holdings Limited                                                                         | Maidenhead, Großbritannien  | 100,00                     | GBP          | 0                           |
| ARC Land Holdings Limited                                                                    | Maidenhead, Großbritannien  | 100,00                     | GBP          | 0                           |
| ARC Limited                                                                                  | Maidenhead, Großbritannien  | 100,00                     | GBP          | 0                           |
| ARC Property Investments Limited                                                             | Maidenhead, Großbritannien  | 100,00                     | GBP          | 39                          |
| ARC Slimline Limited                                                                         | Maidenhead, Großbritannien  | 100,00                     | GBP          | -3                          |
| ARC South Wales Limited                                                                      | Maidenhead, Großbritannien  | 100,00                     | GBP          | 0                           |
| ARC South Wales Mortar Limited                                                               | Maidenhead, Großbritannien  | 100,00                     | GBP          | 0                           |
| ARC South Wales Quarries Limited                                                             | Maidenhead, Großbritannien  | 100,00                     | GBP          | 0                           |
| ARC South Wales Surfacing Limited                                                            | Maidenhead, Großbritannien  | 100,00                     | GBP          | 0                           |
| ARC Wales Limited                                                                            | Maidenhead, Großbritannien  | 100,00                     | GBP          | 0                           |
| Aridos Martinez Garcia S.L.                                                                  | Toledo, Spanien             | 100,00                     | EUR          | 1                           |
| Aridos Sanz S.L.                                                                             | Valladolid, Spanien         | 100,00                     | EUR          | 5                           |
| Aridos Velilla, S.A.                                                                         | Toledo, Spanien             | 100,00                     | EUR          | -1                          |
| AS Abetong                                                                                   | Oslo, Norwegen              | 100,00                     | NOK          | 5                           |
| Attendflower Limited                                                                         | Maidenhead, Großbritannien  | 100,00                     | GBP          | 1.000                       |
| B.V. Betoncentrale De Schelde                                                                | Bergen op Zoom, Niederlande | 60,00                      | EUR          | -1                          |
| B.V. Betonmortelcentrale 'BEMA'                                                              | Alkmaar, Niederlande        | 66,67                      | EUR          | 0                           |
| B.V. Bouwgrondstoffen A.G.M.                                                                 | Amsterdam, Niederlande      | 90,00                      | EUR          | 2                           |
| B.V. Internationale Bagger- Scheepvaart- en Handel Maatschappij I                            | Amsterdam, Niederlande      | 100,00                     | EUR          | 2                           |
| Baltic Saule                                                                                 | Riga, Lettland              | 100,00                     | LVL          | 1                           |

| Name der Gesellschaft                                    | Sitz                          | Kapital-<br>anteil<br>in % | Wäh-<br>rung | Eigen-<br>kapital<br>in Mio |
|----------------------------------------------------------|-------------------------------|----------------------------|--------------|-----------------------------|
| Banbury Alton Limited                                    | Maidenhead, Großbritannien    | 100,00                     | GBP          | 0                           |
| Basalt Ibérica, S.A.                                     | Madrid, Spanien               | 100,00                     | EUR          | 2                           |
| Bath and Portland Stone (Holdings) Limited               | Maidenhead, Großbritannien    | 100,00                     | GBP          | 0                           |
| Baustoffwerke Dresden GmbH & Co. KG <sup>9</sup>         | Dresden, Deutschland          | 51,00                      | EUR          | 1                           |
| Beazer Insurance Services Limited                        | Douglas, Insel Man            | 100,00                     | GBP          | 2                           |
| Beazer Limited                                           | Maidenhead, Großbritannien    | 100,00                     | GBP          | 3                           |
| Beforebeam Limited                                       | Maidenhead, Großbritannien    | 100,00                     | GBP          | 400                         |
| Beforeblend Limited                                      | Maidenhead, Großbritannien    | 100,00                     | GBP          | 204                         |
| Berec Holdings B.V.                                      | Amsterdam, Niederlande        | 100,00                     | EUR          | 188                         |
| Berry's Electric Magicoal Limited                        | Maidenhead, Großbritannien    | 100,00                     | GBP          | 1                           |
| Beton Baguette Marcel S.A.                               | Bruxelles, Belgien            | 85,29                      | EUR          | 1                           |
| Béton de Liège SA                                        | Bruxelles, Belgien            | 85,27                      | EUR          | 1                           |
| BetonCenter Swinkels B.V. <sup>1)</sup>                  | Helmond, Niederlande          | 50,00                      | EUR          | -1                          |
| Betong Sør AS                                            | Oslo, Norwegen                | 67,50                      | NOK          | 11                          |
| Betongindustri AB                                        | Stockholm, Schweden           | 100,00                     | SEK          | 91                          |
| Birchwood Concrete Products Limited                      | Maidenhead, Großbritannien    | 100,00                     | GBP          | 159                         |
| Birchwood Omnia Limited                                  | Maidenhead, Großbritannien    | 100,00                     | GBP          | 1.013                       |
| Bjerkli Betongpumping AS                                 | Oslo, Norwegen                | 75,50                      | NOK          | 0                           |
| BLG Betonlieferungsgesellschaft mit beschränkter Haftung | München, Deutschland          | 100,00                     | EUR          | 8                           |
| Bonny Holding Ltd.                                       | Irish Town, Gibraltar         | 93,94                      | USD          | 0                           |
| Boons Granite Quarries Limited                           | Maidenhead, Großbritannien    | 100,00                     | GBP          | 0                           |
| Brazier Aggregates Limited                               | Maidenhead, Großbritannien    | 100,00                     | GBP          | 2                           |
| Bristol Sand and Gravel Company Limited                  | Maidenhead, Großbritannien    | 100,00                     | GBP          | 0                           |
| British Agricultural Services Limited                    | Maidenhead, Großbritannien    | 100,00                     | GBP          | 342                         |
| British Ever Ready Limited                               | Maidenhead, Großbritannien    | 100,00                     | GBP          | 24                          |
| British Thermostat Company Limited (The)                 | Maidenhead, Großbritannien    | 100,00                     | GBP          | 4                           |
| Buckland Sand & Silica Company Limited                   | Maidenhead, Großbritannien    | 100,00                     | GBP          | 0                           |
| Building Material Holdings B.V.                          | Amsterdam, Niederlande        | 100,00                     | EUR          | 0                           |
| Bulldog Company Limited                                  | St. Peter Port, Guernsey      | 100,00                     | USD          | 65                          |
| Butterley Aglite                                         | Maidenhead, Großbritannien    | 100,00                     | GBP          | 0                           |
| Butterley Brick Investments (No 2) Limited               | Maidenhead, Großbritannien    | 76,00                      | GBP          | 26                          |
| Butterley Brick Limited                                  | Maidenhead, Großbritannien    | 100,00                     | GBP          | 0                           |
| C.B.R. Finance S.A.                                      | Luxembourg, Luxemburg         | 100,00                     | EUR          | 4                           |
| Calumite Limited                                         | Maidenhead, Großbritannien    | 51,00                      | GBP          | 2                           |
| Cantera El Hoyon, S.A.                                   | Madrid, Spanien               | 100,00                     | EUR          | 5                           |
| Canteras Mecánicas Cárcaba, S.A.                         | Oviedo, Spanien               | 100,00                     | EUR          | 12                          |
| Carrieres d'Antoing S.A.                                 | Tournai, Belgien              | 100,00                     | EUR          | 13                          |
| Carrieres Lemay S.A.                                     | Tournai, Belgien              | 100,00                     | EUR          | 12                          |
| Castle Building Products Limited                         | Maidenhead, Großbritannien    | 100,00                     | GBP          | 0                           |
| Castle Cement (Chatburn) Limited                         | Maidenhead, Großbritannien    | 100,00                     | GBP          | 0                           |
| Castle Cement (Clyde) Limited                            | Maidenhead, Großbritannien    | 100,00                     | GBP          | 0                           |
| Castle Cement (Ketton) Limited                           | Maidenhead, Großbritannien    | 100,00                     | GBP          | 23                          |
| Castle Cement (Padeswood) Limited                        | Maidenhead, Großbritannien    | 100,00                     | GBP          | 6                           |
| Castle Cement (Pitstone) Limited                         | Maidenhead, Großbritannien    | 100,00                     | GBP          | 10                          |
| Castle Cement (Ribblesdale) Limited                      | Maidenhead, Großbritannien    | 100,00                     | GBP          | 21                          |
| Castle Cement Limited                                    | Maidenhead, Großbritannien    | 100,00                     | GBP          | 91                          |
| Castle Lime Limited                                      | Maidenhead, Großbritannien    | 100,00                     | GBP          | 0                           |
| CaucasusCement Holding B.V.                              | 's-Hertogenbosch, Niederlande | 75,00                      | EUR          | 95                          |
| CBR Asset Management Belgium S.A.                        | Bruxelles, Belgien            | 100,00                     | EUR          | 9                           |
| CBR Baltic B.V.                                          | 's-Hertogenbosch, Niederlande | 100,00                     | EUR          | 0                           |
| CBR International Services S.A.                          | Bruxelles, Belgien            | 100,00                     | EUR          | 1.246                       |
| CBR Portland B.V.                                        | 's-Hertogenbosch, Niederlande | 100,00                     | EUR          | 74                          |
| Cem Invest Ltd <sup>1)</sup>                             | Irish Town, Gibraltar         | 46,97                      | USD          | 3                           |
| Cementa AB                                               | Stockholm, Schweden           | 100,00                     | SEK          | 417                         |
| Cementa Fastighets AB                                    | Stockholm, Schweden           | 100,00                     | SEK          | 0                           |
| Cementum I B.V.                                          | 's-Hertogenbosch, Niederlande | 100,00                     | EUR          | 5                           |
| Cementum II B.V.                                         | 's-Hertogenbosch, Niederlande | 100,00                     | EUR          | 1                           |
| CGF Capital B.V.                                         | Amsterdam, Niederlande        | 100,00                     | EUR          | 0                           |
| CHB Exeter Limited                                       | Maidenhead, Großbritannien    | 100,00                     | GBP          | 6                           |
| CHB Group Limited                                        | Maidenhead, Großbritannien    | 100,00                     | GBP          | 415                         |
| CHB P H R Limited                                        | Maidenhead, Großbritannien    | 100,00                     | GBP          | -34                         |
| CHB Products Limited                                     | Maidenhead, Großbritannien    | 100,00                     | GBP          | 2.000                       |
| Chemical Manufacture and Refining Limited                | Maidenhead, Großbritannien    | 100,00                     | GBP          | 5                           |



| HeidelbergCement bilanziert              |                                                                      |
|------------------------------------------|----------------------------------------------------------------------|
| Gewinn- und Verlustrechnung des Konzerns | Eigenkapitalveränderungsrechnung des Konzerns                        |
| Gesamtergebnisrechnung des Konzerns      | Segmentberichterstattung/Teil des Anhangs                            |
| Kapitalflussrechnung des Konzerns        | Anhang des Konzerns                                                  |
| Bilanz des Konzerns                      | Bericht des Abschlussprüfers/Versicherung der gesetzlichen Vertreter |

| Name der Gesellschaft                                | Sitz                          | Kapital-<br>anteil<br>in % | Wäh-<br>rung | Eigen-<br>kapital<br>in Mio |
|------------------------------------------------------|-------------------------------|----------------------------|--------------|-----------------------------|
| Chester Road Sand and Gravel Company Limited         | Maidenhead, Großbritannien    | 100,00                     | GBP          | 0                           |
| City of London Heliport Limited                      | Maidenhead, Großbritannien    | 55,56                      | GBP          | -2                          |
| Civil and Marine (Holdings) Limited                  | Maidenhead, Großbritannien    | 100,00                     | GBP          | 16                          |
| Civil and Marine Limited                             | Maidenhead, Großbritannien    | 100,00                     | GBP          | 262                         |
| Civil and Marine Slag Cement Limited                 | Maidenhead, Großbritannien    | 100,00                     | GBP          | 161                         |
| Cloughton Manor Brick Limited (The)                  | Maidenhead, Großbritannien    | 100,00                     | GBP          | 0                           |
| Clyde Cement Limited                                 | Maidenhead, Großbritannien    | 100,00                     | GBP          | 0                           |
| Coln Gravel Company Limited                          | Maidenhead, Großbritannien    | 100,00                     | GBP          | 0                           |
| Conbloc Limited                                      | Maidenhead, Großbritannien    | 100,00                     | GBP          | 0                           |
| Cradley Special Brick Company Limited                | Maidenhead, Großbritannien    | 100,00                     | GBP          | 2                           |
| Creamix N.V.                                         | Bruxelles, Belgien            | 99,32                      | EUR          | 0                           |
| Creative Land Developers Limited <sup>1)</sup>       | Maidenhead, Großbritannien    | 50,00                      | GBP          | 0                           |
| Crispway Limited                                     | Maidenhead, Großbritannien    | 100,00                     | GBP          | 0                           |
| Cromhall Quarries, Limited                           | Maidenhead, Großbritannien    | 100,00                     | GBP          | 0                           |
| Cumbrian Industrials Limited                         | Maidenhead, Großbritannien    | 100,00                     | GBP          | 20                          |
| D. & H. Sand Supplies Limited                        | Maidenhead, Großbritannien    | 100,00                     | GBP          | 0                           |
| Delmorgal Limited                                    | Maidenhead, Großbritannien    | 100,00                     | GBP          | 0                           |
| Desimpel Brick Limited                               | Maidenhead, Großbritannien    | 100,00                     | GBP          | 3                           |
| Devon Concrete Works, Limited                        | Maidenhead, Großbritannien    | 100,00                     | GBP          | 0                           |
| DK Beton A/S                                         | Ringsted, Dänemark            | 100,00                     | DKK          | 76                          |
| DK Cement A/S                                        | Copenhagen, Dänemark          | 100,00                     | DKK          | 36                          |
| DUPAMIJ Holding GmbH                                 | Kalkar, Deutschland           | 100,00                     | EUR          | 2                           |
| E & S Retail Limited                                 | Maidenhead, Großbritannien    | 100,00                     | GBP          | 0                           |
| E Sub Limited                                        | Maidenhead, Großbritannien    | 100,00                     | GBP          | 6                           |
| Effectengage Limited                                 | Maidenhead, Großbritannien    | 100,00                     | GBP          | 264                         |
| ENCI B.V.                                            | Maastricht, Niederlande       | 100,00                     | EUR          | 147                         |
| ENCI Holding N.V.                                    | 's-Hertogenbosch, Niederlande | 100,00                     | EUR          | 419                         |
| Ensign Park Limited <sup>1)</sup>                    | Maidenhead, Großbritannien    | 50,00                      | GBP          | -2                          |
| Exploitatiemaatschappij Australiëhaven B.V.          | Amsterdam, Niederlande        | 100,00                     | EUR          | 0                           |
| F.C. Precast Concrete Limited                        | Maidenhead, Großbritannien    | 100,00                     | GBP          | 0                           |
| Fastighets AB Limhamns Kalkbrott                     | Stockholm, Schweden           | 100,00                     | SEK          | 23                          |
| Ferrersand Aggregates Limited                        | Maidenhead, Großbritannien    | 100,00                     | GBP          | 1                           |
| Formpave Holdings Limited                            | Maidenhead, Großbritannien    | 100,00                     | GBP          | 3                           |
| Formpave Limited                                     | Maidenhead, Großbritannien    | 100,00                     | GBP          | 5                           |
| Frederick Harker (Sack Hire) Limited                 | Maidenhead, Großbritannien    | 100,00                     | GBP          | 0                           |
| Freshhove Limited                                    | Maidenhead, Großbritannien    | 100,00                     | GBP          | 1                           |
| Fruitbat Company                                     | Maidenhead, Großbritannien    | 100,00                     | AUD          | 1.321                       |
| Fulber Limited                                       | St. Peter Port, Guernsey      | 100,00                     | GBP          | 216                         |
| Garkalnes Grants SIA                                 | Riga, Lettland                | 100,00                     | LVL          | 2                           |
| Granor S.A.                                          | Loos, Frankreich              | 100,00                     | EUR          | 1                           |
| Greenways Environmental and Waste Management Limited | Maidenhead, Großbritannien    | 100,00                     | GBP          | 0                           |
| Greenwoods (St. Ives) Limited                        | Maidenhead, Großbritannien    | 100,00                     | GBP          | 2                           |
| Guidelink                                            | Maidenhead, Großbritannien    | 99,99                      | USD          | 0                           |
| Habfield Limited                                     | Maidenhead, Großbritannien    | 100,00                     | GBP          | 0                           |
| Hanson (BHHL) Limited                                | Maidenhead, Großbritannien    | 100,00                     | GBP          | 369                         |
| Hanson (BHL) Limited                                 | Maidenhead, Großbritannien    | 100,00                     | GBP          | 278                         |
| Hanson (CGF) (No.1) Limited                          | Maidenhead, Großbritannien    | 100,00                     | GBP          | 2.835                       |
| Hanson (CGF) (No2) Limited                           | Maidenhead, Großbritannien    | 100,00                     | GBP          | 3.994                       |
| Hanson (CGF) Finance Limited                         | Maidenhead, Großbritannien    | 100,00                     | GBP          | 859                         |
| Hanson (CGF) Holdings Limited                        | Maidenhead, Großbritannien    | 100,00                     | GBP          | 161                         |
| Hanson (ER-No 10) Limited                            | Maidenhead, Großbritannien    | 100,00                     | GBP          | 254                         |
| Hanson (ER-No 12) Limited                            | Maidenhead, Großbritannien    | 100,00                     | GBP          | 0                           |
| Hanson (ER-No 14) Limited                            | Maidenhead, Großbritannien    | 100,00                     | GBP          | 1                           |
| Hanson (ER-No 5) Limited                             | Maidenhead, Großbritannien    | 100,00                     | GBP          | 45                          |
| Hanson (ER-No 8) Limited                             | Maidenhead, Großbritannien    | 100,00                     | GBP          | 0                           |
| Hanson (ER-No 9) Limited                             | Maidenhead, Großbritannien    | 100,00                     | GBP          | 3                           |
| Hanson (FP) Limited                                  | Maidenhead, Großbritannien    | 100,00                     | GBP          | 0                           |
| Hanson (MR) Limited                                  | Maidenhead, Großbritannien    | 99,99                      | GBP          | 2.195                       |
| Hanson (NAIL) Limited                                | Maidenhead, Großbritannien    | 100,00                     | GBP          | 5                           |
| Hanson Aggregates (North) Limited                    | Maidenhead, Großbritannien    | 100,00                     | GBP          | 40                          |
| Hanson Aggregates Belgium N.V.                       | Zebrugge, Belgien             | 100,00                     | EUR          | 9                           |
| Hanson Aggregates Holding Nederland B.V.             | Amsterdam, Niederlande        | 100,00                     | EUR          | 4                           |
| Hanson Aggregates Limited                            | Maidenhead, Großbritannien    | 100,00                     | GBP          | 82                          |

| Name der Gesellschaft                            | Sitz                       | Kapital-<br>anteil<br>in % | Wäh-<br>rung | Eigen-<br>kapital<br>in Mio |
|--------------------------------------------------|----------------------------|----------------------------|--------------|-----------------------------|
| Hanson Aggregates Marine Limited                 | Maidenhead, Großbritannien | 100,00                     | GBP          | 96                          |
| Hanson Aggregates Nederland B.V.                 | Amsterdam, Niederlande     | 100,00                     | EUR          | 0                           |
| Hanson Aggregates South Wales Holdings Limited   | Maidenhead, Großbritannien | 100,00                     | GBP          | 7                           |
| Hanson Aggregates South Wales Limited            | Maidenhead, Großbritannien | 100,00                     | GBP          | 39                          |
| Hanson Aggregates UK Limited                     | Maidenhead, Großbritannien | 100,00                     | GBP          | 2.000                       |
| Hanson Amalgamated Industries Limited            | Maidenhead, Großbritannien | 100,00                     | GBP          | 0                           |
| Hanson America Holdings (1) Limited              | Maidenhead, Großbritannien | 100,00                     | GBP          | 1.902                       |
| Hanson America Holdings (2) Limited              | Maidenhead, Großbritannien | 100,00                     | GBP          | 476                         |
| Hanson America Holdings (3) Limited              | Maidenhead, Großbritannien | 100,00                     | GBP          | 471                         |
| Hanson America Holdings (4) Limited              | Maidenhead, Großbritannien | 100,00                     | GBP          | 41                          |
| Hanson Aruba Limited                             | St. Peter Port, Guernsey   | 99,99                      | USD          | 1.473                       |
| Hanson Bath and Portland Stone Limited           | Maidenhead, Großbritannien | 100,00                     | GBP          | -2                          |
| Hanson Batteries Limited                         | Maidenhead, Großbritannien | 100,00                     | GBP          | 46                          |
| Hanson Blocks North Limited                      | Maidenhead, Großbritannien | 100,00                     | GBP          | 13                          |
| Hanson Brick Ltd                                 | Maidenhead, Großbritannien | 100,00                     | GBP          | 0                           |
| Hanson Building Materials Europe Limited         | Maidenhead, Großbritannien | 100,00                     | GBP          | 2.172                       |
| Hanson Building Materials Limited                | Maidenhead, Großbritannien | 100,00                     | GBP          | 3.219                       |
| Hanson Building Products (2003) Limited          | Maidenhead, Großbritannien | 100,00                     | GBP          | 1.515                       |
| Hanson Building Products Limited                 | Maidenhead, Großbritannien | 100,00                     | GBP          | -53                         |
| Hanson Canada Limited                            | Maidenhead, Großbritannien | 100,00                     | GBP          | 0                           |
| Hanson Clay Products Limited                     | Maidenhead, Großbritannien | 100,00                     | GBP          | 15                          |
| Hanson Concrete Products Limited                 | Maidenhead, Großbritannien | 100,00                     | GBP          | 52                          |
| Hanson Crewing Services Limited                  | Maidenhead, Großbritannien | 100,00                     | GBP          | 0                           |
| Hanson Devon Limited                             | Shannon, Irland            | 100,00                     | USD          | 5.009                       |
| Hanson Devon Limited (Luxembourg Branch)         | Luxembourg, Luxemburg      | 100,00                     | USD          | 6                           |
| Hanson Facing Bricks Limited                     | Maidenhead, Großbritannien | 100,00                     | GBP          | 248                         |
| Hanson Finance (2003) Limited                    | Maidenhead, Großbritannien | 100,00                     | GBP          | 502                         |
| Hanson Finance (UK) Limited                      | Maidenhead, Großbritannien | 100,00                     | GBP          | 85                          |
| Hanson Finance Limited                           | Maidenhead, Großbritannien | 100,00                     | GBP          | 852                         |
| Hanson Financial Services Limited                | Maidenhead, Großbritannien | 100,00                     | GBP          | 264                         |
| Hanson Fletton Bricks Limited                    | Maidenhead, Großbritannien | 100,00                     | GBP          | 32                          |
| Hanson Foods Limited                             | Maidenhead, Großbritannien | 100,00                     | GBP          | 180                         |
| Hanson FP Holdings B.V.                          | Amsterdam, Niederlande     | 100,00                     | USD          | 444                         |
| Hanson Funding (G) Limited                       | Maidenhead, Großbritannien | 100,00                     | GBP          | 174                         |
| Hanson Germany GmbH & Co. KG <sup>*)</sup>       | Leinatal, Deutschland      | 100,00                     | EUR          | -3                          |
| Hanson Gerrard Limited                           | St. Peter Port, Guernsey   | 100,00                     | GBP          | 0                           |
| Hanson H4 Limited                                | Maidenhead, Großbritannien | 100,00                     | GBP          | 1.549                       |
| Hanson H5                                        | Maidenhead, Großbritannien | 100,00                     | GBP          | 0                           |
| Hanson Hedging (Dollars) (1) Limited             | Maidenhead, Großbritannien | 100,00                     | GBP          | 194                         |
| Hanson Hedging (Dollars) (2) Limited             | Maidenhead, Großbritannien | 100,00                     | GBP          | 0                           |
| Hanson Hispania, S.A.                            | Madrid, Spanien            | 100,00                     | EUR          | 99                          |
| Hanson Holdings (1) Limited                      | Maidenhead, Großbritannien | 100,00                     | GBP          | 37.637                      |
| Hanson Holdings (2) Limited                      | Maidenhead, Großbritannien | 100,00                     | GBP          | 736                         |
| Hanson Holdings (3) Limited                      | Maidenhead, Großbritannien | 100,00                     | GBP          | 829                         |
| Hanson Holdings Limited                          | Maidenhead, Großbritannien | 100,00                     | GBP          | 2.060                       |
| Hanson Iceland EHF                               | Reykjavik, Island          | 100,00                     | GBP          | 2.000                       |
| Hanson Industrial (Engineering Holdings) Limited | Maidenhead, Großbritannien | 100,00                     | GBP          | 5                           |
| Hanson Industrial Limited                        | Maidenhead, Großbritannien | 100,00                     | GBP          | 143                         |
| Hanson International Holdings Limited            | Maidenhead, Großbritannien | 100,00                     | GBP          | 10.997                      |
| Hanson Island Management Limited                 | St. Peter Port, Guernsey   | 100,00                     | GBP          | 0                           |
| Hanson Land Development Limited                  | Maidenhead, Großbritannien | 100,00                     | GBP          | -30                         |
| Hanson LHA Limited                               | Maidenhead, Großbritannien | 100,00                     | GBP          | 25                          |
| Hanson Limited                                   | Maidenhead, Großbritannien | 100,00                     | GBP          | 5.637                       |
| Hanson Marine Holdings Limited                   | Maidenhead, Großbritannien | 100,00                     | GBP          | 7                           |
| Hanson Marine Limited                            | Maidenhead, Großbritannien | 100,00                     | GBP          | 49                          |
| Hanson Overseas Corporation Limited              | Maidenhead, Großbritannien | 100,00                     | GBP          | 1.896                       |
| Hanson Overseas Holdings Limited                 | Maidenhead, Großbritannien | 100,00                     | GBP          | 17.570                      |
| Hanson Pacific Limited                           | Maidenhead, Großbritannien | 100,00                     | GBP          | 1                           |
| Hanson Peabody Limited                           | Maidenhead, Großbritannien | 100,00                     | GBP          | 1.003                       |
| Hanson Pioneer España, S.L.                      | Madrid, Spanien            | 100,00                     | EUR          | 83                          |
| Hanson Quarry Products Europe Limited            | Maidenhead, Großbritannien | 100,00                     | GBP          | 39.655                      |
| Hanson Quarry Products Holdings Limited          | Maidenhead, Großbritannien | 100,00                     | GBP          | 42                          |
| Hanson Quarry Products Overseas Limited          | Maidenhead, Großbritannien | 100,00                     | GBP          | 2                           |

| HeidelbergCement bilanziert              |                                                                      |
|------------------------------------------|----------------------------------------------------------------------|
| Gewinn- und Verlustrechnung des Konzerns | Eigenkapitalveränderungsrechnung des Konzerns                        |
| Gesamtergebnisrechnung des Konzerns      | Segmentberichterstattung/Teil des Anhangs                            |
| Kapitalflussrechnung des Konzerns        | Anhang des Konzerns                                                  |
| Bilanz des Konzerns                      | Bericht des Abschlussprüfers/Versicherung der gesetzlichen Vertreter |

| Name der Gesellschaft                                                      | Sitz                          | Kapital-<br>anteil<br>in % | Wäh-<br>rung | Eigen-<br>kapital<br>in Mio |
|----------------------------------------------------------------------------|-------------------------------|----------------------------|--------------|-----------------------------|
| Hanson Quarry Products Trade Finance Limited                               | Maidenhead, Großbritannien    | 100,00                     | GBP          | 22                          |
| Hanson Quarry Products Transport Limited                                   | Maidenhead, Großbritannien    | 100,00                     | GBP          | 0                           |
| Hanson Quarry Products Ventures Limited                                    | Maidenhead, Großbritannien    | 100,00                     | GBP          | 43                          |
| Hanson RBS Trustees Limited                                                | Maidenhead, Großbritannien    | 100,00                     | GBP          | 0                           |
| Hanson Recycling Limited                                                   | Maidenhead, Großbritannien    | 100,00                     | GBP          | 0                           |
| Hanson Retail Limited                                                      | Maidenhead, Großbritannien    | 100,00                     | GBP          | 99                          |
| Hanson Ship Management Ltd                                                 | St. Peter Port, Guernsey      | 100,00                     | GBP          | 0                           |
| Hanson Thermalite Limited                                                  | Maidenhead, Großbritannien    | 100,00                     | GBP          | 42                          |
| Hanson TIS Holdings Limited                                                | Maidenhead, Großbritannien    | 100,00                     | GBP          | 0                           |
| Hanson TIS Limited                                                         | Maidenhead, Großbritannien    | 100,00                     | GBP          | -2                          |
| Hanson Tobacco Limited                                                     | Maidenhead, Großbritannien    | 100,00                     | GBP          | 2.127                       |
| Hanson Trust Limited                                                       | Maidenhead, Großbritannien    | 100,00                     | GBP          | 97                          |
| Hanson Trustees Limited                                                    | Maidenhead, Großbritannien    | 100,00                     | GBP          | 12                          |
| Hanson Warwickshire Limited                                                | Maidenhead, Großbritannien    | 100,00                     | GBP          | 738                         |
| Hanson Wiltshire Limited                                                   | Maidenhead, Großbritannien    | 100,00                     | GBP          | 2.100                       |
| Harrisons Limeworks Limited                                                | Maidenhead, Großbritannien    | 100,00                     | GBP          | 0                           |
| Hartsholme Property Limited                                                | Maidenhead, Großbritannien    | 100,00                     | GBP          | 0                           |
| HB Hotels Limited                                                          | Maidenhead, Großbritannien    | 100,00                     | GBP          | -1                          |
| HB Pacific Limited                                                         | Maidenhead, Großbritannien    | 100,00                     | GBP          | 3                           |
| HC Asia Holding GmbH                                                       | Heidelberg, Deutschland       | 100,00                     | EUR          | 7                           |
| HC Betons SIA                                                              | Riga, Lettland                | 100,00                     | LVL          | 1                           |
| HC Betocon AS, Estonia                                                     | Tallinn, Estland              | 100,00                     | EEK          | 5                           |
| HC Central Asia B.V.                                                       | 's-Hertogenbosch, Niederlande | 100,00                     | EUR          | 83                          |
| HC Fuels Limited                                                           | London, Großbritannien        | 100,00                     | GBP          | 6                           |
| HC Hanson Holding B.V.                                                     | 's-Hertogenbosch, Niederlande | 100,00                     | EUR          | 327                         |
| HC Italia SRL                                                              | Rom, Italien                  | 100,00                     | EUR          | 2                           |
| HC Materialien B.V.                                                        | Nieuwegein, Niederlande       | 100,00                     | EUR          | 3                           |
| HC Trading B.V.                                                            | 's-Hertogenbosch, Niederlande | 100,00                     | EUR          | 41                          |
| HC Trading Malta Limited                                                   | St. Julian's, Malta           | 100,00                     | USD          | 0                           |
| HCT Holding Malta Limited                                                  | St. Julian's, Malta           | 100,00                     | USD          | 95                          |
| HeidelbergCement Baustoffe für Geotechnik GmbH & Co. KG *)                 | Ennigerloh, Deutschland       | 100,00                     | EUR          | 4                           |
| HeidelbergCement Canada Holding Limited                                    | Maidenhead, Großbritannien    | 100,00                     | CAD          | 4.376                       |
| HeidelbergCement Central Europe East Holding B.V.                          | 's-Hertogenbosch, Niederlande | 100,00                     | EUR          | 979                         |
| HeidelbergCement Danmark A/S                                               | Ringsted, Dänemark            | 100,00                     | DKK          | 375                         |
| HeidelbergCement Finance B.V.                                              | 's-Hertogenbosch, Niederlande | 100,00                     | EUR          | 1                           |
| HeidelbergCement Grundstücksgesellschaft mbH & Co. KG *)                   | Heidelberg, Deutschland       | 100,00                     | EUR          | 18                          |
| HeidelbergCement Grundstücksgesellschaft Wetzlar mbH & Co. KG *)           | Heidelberg, Deutschland       | 100,00                     | EUR          | 2                           |
| HeidelbergCement Holding Coöperatief U.A.                                  | 's-Hertogenbosch, Niederlande | 100,00                     | EUR          | 1.125                       |
| HeidelbergCement Holding S.à r.l.                                          | Luxembourg, Luxemburg         | 100,00                     | EUR          | 13.427                      |
| HeidelbergCement Holdings Limited                                          | Maidenhead, Großbritannien    | 100,00                     | GBP          | 2                           |
| HeidelbergCement International Holding GmbH                                | Heidelberg, Deutschland       | 100,00                     | EUR          | 6.807                       |
| HeidelbergCement Mediterranean Basin Holdings S.L.                         | Madrid, Spanien               | 100,00                     | EUR          | 301                         |
| HeidelbergCement Miljö AB                                                  | Stockholm, Schweden           | 100,00                     | SEK          | 28                          |
| HeidelbergCement Netherlands Holding B.V.                                  | 's-Hertogenbosch, Niederlande | 100,00                     | EUR          | 694                         |
| HeidelbergCement Northern Europe AB                                        | Stockholm, Schweden           | 100,00                     | SEK          | 5.160                       |
| HeidelbergCement Northern Europe Pumps & Trucks A/S                        | Ringsted, Dänemark            | 100,00                     | EUR          | 0                           |
| HeidelbergCement Norway a.s.                                               | Oslo, Norwegen                | 100,00                     | NOK          | 1.469                       |
| HeidelbergCement Shared Service Centre AB                                  | Stockholm, Schweden           | 100,00                     | SEK          | 374                         |
| HeidelbergCement Sweden AB                                                 | Stockholm, Schweden           | 100,00                     | SEK          | 7.022                       |
| HeidelbergCement UK Holding II Limited                                     | Maidenhead, Großbritannien    | 100,00                     | USD          | 12.810                      |
| HeidelbergCement UK Holding Limited                                        | Maidenhead, Großbritannien    | 100,00                     | EUR          | 5.067                       |
| HeidelbergCement UK Limited                                                | Maidenhead, Großbritannien    | 100,00                     | GBP          | 79                          |
| Heidelberger Beton Donau-Naab GmbH & Co. KG *)                             | Burglengenfeld, Deutschland   | 85,00                      | EUR          | 2                           |
| Heidelberger Beton GmbH                                                    | Heidelberg, Deutschland       | 100,00                     | EUR          | 25                          |
| Heidelberger Betonelemente GmbH & Co. KG *)                                | Chemnitz, Deutschland         | 83,00                      | EUR          | 5                           |
| Heidelberger Betonpumpen Rhein-Main-Nahe GmbH & Co. KG *)                  | Frankfurt/Main, Deutschland   | 93,77                      | EUR          | 0                           |
| Heidelberger Kalksandstein GmbH                                            | Durmernheim, Deutschland      | 100,00                     | EUR          | 15                          |
| Heidelberger Kalksandstein Grundstücks- und Beteiligungs- GmbH & Co. KG *) | Durmernheim, Deutschland      | 100,00                     | EUR          | 22                          |
| Heidelberger Kieswerke Niederrhein GmbH                                    | Essen, Deutschland            | 100,00                     | EUR          | 1                           |
| Heidelberger Kieswerke Rhein-Ruhr GmbH                                     | Essen, Deutschland            | 100,00                     | EUR          | 3                           |
| Heidelberger KS Beteiligungen Deutschland GmbH & Co. KG *)                 | Heidelberg, Deutschland       | 100,00                     | EUR          | 5                           |
| Heidelberger Sand und Kies GmbH                                            | Heidelberg, Deutschland       | 100,00                     | EUR          | 74                          |
| Heidelberger Weserkies GmbH & Co. KG *)                                    | Bremen, Deutschland           | 100,00                     | EUR          | 0                           |

| Name der Gesellschaft                                                                    | Sitz                          | Kapital-<br>anteil<br>in % | Wäh-<br>rung | Eigen-<br>kapital<br>in Mio |
|------------------------------------------------------------------------------------------|-------------------------------|----------------------------|--------------|-----------------------------|
| HIPS (Trustees) Limited                                                                  | Bedford, Großbritannien       | 100,00                     | GBP          | 0                           |
| HK Holdings (No 2) Limited                                                               | Maidenhead, Großbritannien    | 100,00                     | GBP          | 64                          |
| HK Holdings (No.1) Limited                                                               | Maidenhead, Großbritannien    | 100,00                     | GBP          | 28                          |
| HKS Hunziker Kalksandstein AG                                                            | Aargau, Schweiz               | 66,66                      | CHF          | 10                          |
| Holms Sand & Gravel Company (1985) (The)                                                 | Maidenhead, Großbritannien    | 100,00                     | GBP          | 0                           |
| Holms Sand & Gravel Company Limited (The)                                                | Maidenhead, Großbritannien    | 100,00                     | GBP          | 0                           |
| Homes (East Anglia) Limited                                                              | Maidenhead, Großbritannien    | 100,00                     | GBP          | 0                           |
| Hormigones y Aridos, S.A.                                                                | Bilbao, Spanien               | 100,00                     | EUR          | 7                           |
| Housemotor Limited                                                                       | Maidenhead, Großbritannien    | 100,00                     | GBP          | 1.544                       |
| Houseprice Limited                                                                       | Maidenhead, Großbritannien    | 100,00                     | GBP          | 586                         |
| Houserate Limited                                                                        | Maidenhead, Großbritannien    | 100,00                     | GBP          | 1.071                       |
| HPL Albany House Developments Limited <sup>1)</sup>                                      | Maidenhead, Großbritannien    | 50,00                      | GBP          | -1                          |
| HPL Estates Limited                                                                      | Maidenhead, Großbritannien    | 100,00                     | GBP          | 4                           |
| HPL Investments Limited                                                                  | Maidenhead, Großbritannien    | 100,00                     | GBP          | 403                         |
| HPL Properties Limited                                                                   | Maidenhead, Großbritannien    | 100,00                     | GBP          | 40                          |
| HPL Property Limited                                                                     | Maidenhead, Großbritannien    | 100,00                     | GBP          | 39                          |
| HPL West London Developments Limited <sup>1)</sup>                                       | Maidenhead, Großbritannien    | 50,00                      | GBP          | 0                           |
| Hurst and Sandler Limited                                                                | Maidenhead, Großbritannien    | 100,00                     | GBP          | 5                           |
| Imperial Group Limited                                                                   | Maidenhead, Großbritannien    | 100,00                     | GBP          | 16                          |
| Imperial Potted Shrimps Limited                                                          | Maidenhead, Großbritannien    | 100,00                     | GBP          | 0                           |
| Imperial Seafoods (Gulf) Limited                                                         | Maidenhead, Großbritannien    | 100,00                     | GBP          | 2                           |
| Imperial Seafoods Limited                                                                | Maidenhead, Großbritannien    | 100,00                     | GBP          | 0                           |
| Inter-Beton SA                                                                           | Bruxelles, Belgien            | 99,82                      | EUR          | 13                          |
| International Trading and Finance (ITF) B.V.                                             | 's-Hertogenbosch, Niederlande | 100,00                     | EUR          | 10                          |
| Irvine - Whitlock Limited                                                                | Maidenhead, Großbritannien    | 100,00                     | GBP          | 16                          |
| J A Crabtree & Co Limited                                                                | Maidenhead, Großbritannien    | 100,00                     | GBP          | 0                           |
| J. Riera, S.A.                                                                           | Barcelona, Spanien            | 100,00                     | EUR          | 2                           |
| James Grant & Company (West) Limited                                                     | Edinburgh, Großbritannien     | 100,00                     | GBP          | 2                           |
| Joseph Wones (Holdings) Limited                                                          | Maidenhead, Großbritannien    | 100,00                     | GBP          | 0                           |
| Judkins Limited                                                                          | Maidenhead, Großbritannien    | 100,00                     | GBP          | 0                           |
| K.M. Property Development Company Limited                                                | Maidenhead, Großbritannien    | 100,00                     | GBP          | 0                           |
| KalininCement Holding B.V.                                                               | 's-Hertogenbosch, Niederlande | 74,90                      | EUR          | 1                           |
| Kalko B.V.                                                                               | 's-Hertogenbosch, Niederlande | 100,00                     | EUR          | 0                           |
| Kerpen & Kerpen GmbH & Co. KG <sup>1)</sup>                                              | Ochtendung, Deutschland       | 30,00                      | EUR          | 0                           |
| Ketton Cement Limited                                                                    | Maidenhead, Großbritannien    | 100,00                     | GBP          | 0                           |
| Kieswerk Maas-Roeloffs GmbH & Co KG                                                      | Kalkar, Deutschland           | 100,00                     | EUR          | 1                           |
| Kieswerk Maas-Roeloffs Verwaltungsgesellschaft mbH                                       | Kalkar, Deutschland           | 100,00                     | EUR          | 0                           |
| Kieswerke Andresen GmbH                                                                  | Damsdorf, Deutschland         | 100,00                     | EUR          | 1                           |
| Kingston Minerals Limited                                                                | Maidenhead, Großbritannien    | 100,00                     | GBP          | 0                           |
| Kivel Properties Limited                                                                 | Maidenhead, Großbritannien    | 100,00                     | GBP          | 0                           |
| Kommanditbolaget Cementen                                                                | Stockholm, Schweden           | 100,00                     | SEK          | 205                         |
| Kunda Nordic Cement Corp.                                                                | Kunda, Estland                | 75,00                      | EEK          | 2.040                       |
| L.B. (Stewartby) Limited                                                                 | Maidenhead, Großbritannien    | 100,00                     | GBP          | 50                          |
| Leamaat Omikron B.V.                                                                     | Amsterdam, Niederlande        | 100,00                     | EUR          | 12                          |
| Leca (Great Britain) Limited                                                             | Maidenhead, Großbritannien    | 100,00                     | GBP          | 1                           |
| Lehigh B.V.                                                                              | 's-Hertogenbosch, Niederlande | 100,00                     | EUR          | 5.966                       |
| Lehigh UK Limited                                                                        | Maidenhead, Großbritannien    | 100,00                     | GBP          | 11.781                      |
| Lindum Information Systems Limited                                                       | Maidenhead, Großbritannien    | 100,00                     | GBP          | 0                           |
| Lindustries Limited                                                                      | Edinburgh, Großbritannien     | 100,00                     | GBP          | 45                          |
| Llan Concrete Products Limited                                                           | Maidenhead, Großbritannien    | 100,00                     | GBP          | 1                           |
| Localdouble Limited                                                                      | Maidenhead, Großbritannien    | 100,00                     | GBP          | 644                         |
| London Brick Company Limited                                                             | Maidenhead, Großbritannien    | 100,00                     | GBP          | 22                          |
| London Brick Engineering Limited                                                         | Maidenhead, Großbritannien    | 100,00                     | GBP          | 2                           |
| M E Sub Limited                                                                          | Maidenhead, Großbritannien    | 100,00                     | GBP          | 18                          |
| Maatschappij tot Exploitatie van Betoncentrale De Zilvermeeuw MATOZ v.o.f. <sup>1)</sup> | Rotterdam, Niederlande        | 50,00                      | EUR          | 0                           |
| Magnatool AB                                                                             | Malmö, Schweden               | 75,00                      | SEK          | 0                           |
| Malmö-Limhamns Järnvägsaktiebolag                                                        | Stockholm, Schweden           | 100,00                     | SEK          | 1                           |
| Mantle & Llay Limited                                                                    | Maidenhead, Großbritannien    | 100,00                     | GBP          | 0                           |
| Marnee Limited                                                                           | Maidenhead, Großbritannien    | 100,00                     | GBP          | 54                          |
| Marples Ridgway Limited                                                                  | Maidenhead, Großbritannien    | 100,00                     | GBP          | -4                          |
| Marples Ridgway Overseas Limited                                                         | Maidenhead, Großbritannien    | 100,00                     | GBP          | 0                           |
| Mebin B.V.                                                                               | 's-Hertogenbosch, Niederlande | 100,00                     | EUR          | 44                          |
| Mebin Leeuwarden B.V.                                                                    | Leeuwarden, Niederlande       | 79,79                      | EUR          | 1                           |

| HeidelbergCement bilanziert              |                                                                      |
|------------------------------------------|----------------------------------------------------------------------|
| Gewinn- und Verlustrechnung des Konzerns | Eigenkapitalveränderungsrechnung des Konzerns                        |
| Gesamtergebnisrechnung des Konzerns      | Segmentberichterstattung/Teil des Anhangs                            |
| Kapitalflussrechnung des Konzerns        | Anhang des Konzerns                                                  |
| Bilanz des Konzerns                      | Bericht des Abschlussprüfers/Versicherung der gesetzlichen Vertreter |

| Name der Gesellschaft                                                            | Sitz                          | Kapital-<br>anteil<br>in % | Wäh-<br>rung | Eigen-<br>kapital<br>in Mio |
|----------------------------------------------------------------------------------|-------------------------------|----------------------------|--------------|-----------------------------|
| Meppeler Betoncentrale B.V.                                                      | Drenthe, Niederlande          | 66,67                      | EUR          | 0                           |
| Milton Hall (Southend) Brick Company Limited (The)                               | Maidenhead, Großbritannien    | 100,00                     | GBP          | 1                           |
| Minerals Resource Management Limited                                             | Maidenhead, Großbritannien    | 100,00                     | GBP          | 0                           |
| Minster Quarries Limited                                                         | Maidenhead, Großbritannien    | 100,00                     | GBP          | -1                          |
| Mixconcrete Holdings Limited                                                     | Maidenhead, Großbritannien    | 100,00                     | GBP          | 4                           |
| Mixconcrete Limited                                                              | Maidenhead, Großbritannien    | 100,00                     | GBP          | -2                          |
| Mold Tar Macadam Co.Limited                                                      | Maidenhead, Großbritannien    | 100,00                     | GBP          | 0                           |
| Morebeat Limited                                                                 | Maidenhead, Großbritannien    | 100,00                     | GBP          | 123                         |
| Motioneager Limited                                                              | Maidenhead, Großbritannien    | 100,00                     | GBP          | 213                         |
| National Brick Company Limited                                                   | Maidenhead, Großbritannien    | 100,00                     | GBP          | 2                           |
| National Star Brick and Tile Holdings Limited                                    | Maidenhead, Großbritannien    | 100,00                     | GBP          | 2                           |
| National Star Limited                                                            | Maidenhead, Großbritannien    | 100,00                     | GBP          | 0                           |
| Norbetong AS                                                                     | Oslo, Norwegen                | 100,00                     | NOK          | 479                         |
| Norcem á Islandi ehf                                                             | Reykjavik, Island             | 100,00                     | NOK          | 1                           |
| Norcem AS                                                                        | Oslo, Norwegen                | 100,00                     | NOK          | 375                         |
| Nord-fosen Pukkverk AS                                                           | Steinsdalen, Norwegen         | 60,00                      | NOK          | 21                          |
| Norstone AS                                                                      | Oslo, Norwegen                | 100,00                     | NOK          | 133                         |
| Oswald Tillotson Limited                                                         | Maidenhead, Großbritannien    | 100,00                     | GBP          | 1                           |
| P. & B. J. Dallimore Limited                                                     | Maidenhead, Großbritannien    | 100,00                     | GBP          | 0                           |
| Paderborner Transport-Beton-Gesellschaft mit beschränkter Haftung & Co. K.-G. *) | Paderborn, Deutschland        | 87,50                      | EUR          | 1                           |
| Padyear Limited <sup>1)</sup>                                                    | Maidenhead, Großbritannien    | 50,00                      | GBP          | 0                           |
| Palatina Insurance Ltd.                                                          | Sliema, Malta                 | 100,00                     | EUR          | 46                          |
| Paperbefore Limited                                                              | Maidenhead, Großbritannien    | 100,00                     | GBP          | 269                         |
| Pencrete Limited                                                                 | Maidenhead, Großbritannien    | 100,00                     | GBP          | 0                           |
| Penfolds Builders Merchants Limited                                              | Maidenhead, Großbritannien    | 100,00                     | GBP          | 0                           |
| Perstrup Beton Industri A/S                                                      | Kolind, Dänemark              | 100,00                     | DKK          | 70                          |
| Peter Pell Limited                                                               | Maidenhead, Großbritannien    | 100,00                     | GBP          | 1                           |
| Picon Overseas Limited                                                           | Guernsey, Guernsey            | 100,00                     | GBP          | 181                         |
| Piedras y Derivados, S.A.                                                        | Barcelona, Spanien            | 100,00                     | EUR          | 22                          |
| PILC Limited                                                                     | Guernsey, Guernsey            | 100,00                     | USD          | 23                          |
| Pinden Plant & Processing Co. Limited (The)                                      | Maidenhead, Großbritannien    | 100,00                     | GBP          | 6                           |
| Pioneer Aggregates (UK) Limited                                                  | Maidenhead, Großbritannien    | 100,00                     | GBP          | 4                           |
| Pioneer Asphalts (U.K.) Limited                                                  | Maidenhead, Großbritannien    | 100,00                     | GBP          | 0                           |
| Pioneer Concrete (U.K.) Limited                                                  | Maidenhead, Großbritannien    | 100,00                     | GBP          | 0                           |
| Pioneer Concrete Development Limited                                             | Maidenhead, Großbritannien    | 100,00                     | GBP          | 0                           |
| Pioneer Concrete Holdings Limited                                                | Maidenhead, Großbritannien    | 100,00                     | GBP          | 115                         |
| Pioneer International Finance (UK) Limited                                       | Maidenhead, Großbritannien    | 100,00                     | GBP          | 8                           |
| Pioneer International Group Holdings Limited                                     | Maidenhead, Großbritannien    | 100,00                     | GBP          | 885                         |
| Pioneer International Investments Limited                                        | Maidenhead, Großbritannien    | 100,00                     | GBP          | 0                           |
| Pioneer Overseas Investments Limited                                             | Guernsey, Guernsey            | 100,00                     | USD          | 144                         |
| Pioneer Willment Concrete Limited                                                | Maidenhead, Großbritannien    | 100,00                     | GBP          | 0                           |
| Pluswelcome Limited                                                              | Maidenhead, Großbritannien    | 100,00                     | GBP          | 225                         |
| Porfidos de Guadarrama, S.A.                                                     | Madrid, Spanien               | 100,00                     | EUR          | -17                         |
| Premix Concrete Limited                                                          | Maidenhead, Großbritannien    | 100,00                     | GBP          | 0                           |
| Protenna AB                                                                      | Stockholm, Schweden           | 75,00                      | SEK          | 249                         |
| Queens Buildings (Manchester), Limited                                           | Maidenhead, Großbritannien    | 100,00                     | GBP          | 0                           |
| Recem S.A.                                                                       | Luxembourg, Luxemburg         | 100,00                     | EUR          | 3                           |
| Red Bank Manufacturing Company Limited                                           | Maidenhead, Großbritannien    | 100,00                     | GBP          | 12                          |
| Redshow Limited                                                                  | Maidenhead, Großbritannien    | 100,00                     | GBP          | 107                         |
| Renor AS                                                                         | Aurskog, Norwegen             | 100,00                     | NOK          | 36                          |
| Rezincote (1995) Limited                                                         | Maidenhead, Großbritannien    | 100,00                     | GBP          | 0                           |
| Ribblesdale Cement Limited                                                       | Maidenhead, Großbritannien    | 100,00                     | GBP          | 2                           |
| Roads Reconstruction Limited                                                     | Maidenhead, Großbritannien    | 100,00                     | GBP          | 9                           |
| Roewekamp GmbH & Co Kommanditgesellschaft *)                                     | Gelsenkirchen, Deutschland    | 100,00                     | EUR          | 1                           |
| S Sub Limited                                                                    | Maidenhead, Großbritannien    | 100,00                     | GBP          | 0                           |
| S.A. CBR Asset Management                                                        | Luxembourg, Luxemburg         | 100,00                     | EUR          | 0                           |
| S.A. Cimenteries CBR                                                             | Bruxelles, Belgien            | 100,00                     | EUR          | 682                         |
| Sabine Limited                                                                   | St. Peter Port, Guernsey      | 100,00                     | GBP          | 216                         |
| Sagrex B.V.                                                                      | 's-Hertogenbosch, Niederlande | 100,00                     | EUR          | -1                          |
| Sagrex Holding B.V.                                                              | 's-Hertogenbosch, Niederlande | 100,00                     | EUR          | 18                          |
| Sagrex Productie B.V.                                                            | 's-Hertogenbosch, Niederlande | 100,00                     | EUR          | 4                           |
| SAGREX S.A.                                                                      | Bruxelles, Belgien            | 100,00                     | EUR          | 29                          |
| Sailtown Limited                                                                 | Maidenhead, Großbritannien    | 100,00                     | EUR          | 276                         |



| Name der Gesellschaft                                   | Sitz                       | Kapital-<br>anteil<br>in % | Wäh-<br>rung | Eigen-<br>kapital<br>in Mio |
|---------------------------------------------------------|----------------------------|----------------------------|--------------|-----------------------------|
| Saint Hubert Investments S.à r.l.                       | Luxembourg, Luxemburg      | 100,00                     | USD          | 488                         |
| Samuel Wilkinson & Sons Limited                         | Maidenhead, Großbritannien | 100,00                     | GBP          | 0                           |
| Sand- & Grusaktiebolag Jehander                         | Stockholm, Schweden        | 100,00                     | SEK          | 118                         |
| Sand Supplies (Western) Limited                         | Maidenhead, Großbritannien | 100,00                     | GBP          | 0                           |
| Sandwerke Biesern GmbH                                  | Penig, Deutschland         | 100,00                     | EUR          | 10                          |
| Saunders (Ipswich) Limited                              | Maidenhead, Großbritannien | 100,00                     | GBP          | 0                           |
| Scancem Central Africa Holding 1 AB                     | Stockholm, Schweden        | 100,00                     | SEK          | 749                         |
| Scancem Central Africa Holding 2 AB                     | Stockholm, Schweden        | 100,00                     | SEK          | 1                           |
| Scancem Central Africa Holding 3 AB                     | Stockholm, Schweden        | 100,00                     | SEK          | 3                           |
| Scancem Central Africa Holding 4 AB                     | Stockholm, Schweden        | 100,00                     | SEK          | 1                           |
| Scancem East OY AB                                      | Helsinki, Finnland         | 100,00                     | EUR          | 8                           |
| Scancem Energy and Recovery Limited                     | Maidenhead, Großbritannien | 100,00                     | GBP          | 18                          |
| Scancem International a.s                               | Oslo, Norwegen             | 100,00                     | NOK          | 1.140                       |
| Scancem International DA                                | Oslo, Norwegen             | 93,94                      | NOK          | 1.069                       |
| Scancem International Limited                           | Maidenhead, Großbritannien | 100,00                     | GBP          | 18                          |
| Scancem Recovery Limited                                | Maidenhead, Großbritannien | 100,00                     | GBP          | 17                          |
| Scancem Supply Limited                                  | Maidenhead, Großbritannien | 100,00                     | GBP          | -2                          |
| Seagoe Concrete Products Limited                        | Maidenhead, Großbritannien | 100,00                     | GBP          | 0                           |
| Second City Properties Limited                          | Maidenhead, Großbritannien | 100,00                     | GBP          | 12                          |
| Shanon Limited Partnership                              | Edinburgh, Großbritannien  | 99,99                      | USD          | 2                           |
| Shapedirect Limited                                     | Maidenhead, Großbritannien | 100,00                     | GBP          | 5.829                       |
| Signgrid Limited                                        | Maidenhead, Großbritannien | 100,00                     | GBP          | 38                          |
| SILO PLUS Internationale Speditions GmbH                | München, Deutschland       | 100,00                     | EUR          | 1                           |
| SJP 1 Limited                                           | Maidenhead, Großbritannien | 100,00                     | GBP          | 0                           |
| SJP 2 Limited                                           | Maidenhead, Großbritannien | 100,00                     | GBP          | 2                           |
| Slotcount Limited                                       | Maidenhead, Großbritannien | 100,00                     | GBP          | 1.053                       |
| Small Lots (Mix-It) Limited                             | Maidenhead, Großbritannien | 100,00                     | GBP          | 11                          |
| Solrec Limited                                          | Maidenhead, Großbritannien | 100,00                     | GBP          | 9                           |
| Solvent Resource Management Limited                     | Maidenhead, Großbritannien | 100,00                     | GBP          | 15                          |
| Speedypaper Limited                                     | Maidenhead, Großbritannien | 100,00                     | GBP          | 8                           |
| SQ Corporation Limited                                  | Maidenhead, Großbritannien | 100,00                     | GBP          | 2.426                       |
| SQ Finance No 1 Limited                                 | Maidenhead, Großbritannien | 100,00                     | GBP          | 2.426                       |
| SQ Finance No 2 Limited                                 | Maidenhead, Großbritannien | 100,00                     | GBP          | 2.501                       |
| St Edouard S.a.r.l.                                     | Luxembourg, Luxemburg      | 99,99                      | USD          | 3.288                       |
| St Jude S.a.r.l.                                        | Luxembourg, Luxemburg      | 100,00                     | GBP          | 2.000                       |
| ST LUKE S.a.r.l.                                        | Luxembourg, Luxemburg      | 100,00                     | EUR          | 14                          |
| St Marius S.a.r.l.                                      | Luxembourg, Luxemburg      | 100,00                     | EUR          | 146                         |
| St Nicolas S.a.r.l.                                     | Luxembourg, Luxemburg      | 100,00                     | EUR          | 156                         |
| St Pierre S.a.r.l.                                      | Luxembourg, Luxemburg      | 99,99                      | USD          | 1                           |
| St Yvette S.a.r.l.                                      | Luxembourg, Luxemburg      | 100,00                     | USD          | 0                           |
| Stahlsaiten Betonwerke GmbH                             | Ennigerloh, Deutschland    | 74,00                      | EUR          | 0                           |
| Stephen Toulson & Sons Limited                          | Maidenhead, Großbritannien | 100,00                     | GBP          | 0                           |
| Stewartby Housing Association, Limited                  | Maidenhead, Großbritannien | 100,00                     | GBP          | 0                           |
| Structherm Holdings Limited                             | Maidenhead, Großbritannien | 100,00                     | GBP          | 1                           |
| Structherm Limited                                      | Maidenhead, Großbritannien | 100,00                     | GBP          | 2                           |
| Supamix Limited                                         | Maidenhead, Großbritannien | 100,00                     | GBP          | 6                           |
| Svenska Cementföreningen UPA                            | Stockholm, Schweden        | 100,00                     | SEK          | 0                           |
| TBG Transportbeton Kurpfalz GmbH & Co. KG <sup>9)</sup> | Eppelheim, Deutschland     | 51,11                      | EUR          | 4                           |
| TBH Transportbeton Hamburg GmbH & Co. KG <sup>9)</sup>  | Hamburg, Deutschland       | 85,00                      | EUR          | 0                           |
| The Purfleet Ship to Shore Conveyor Company Limited     | Maidenhead, Großbritannien | 100,00                     | GBP          | 0                           |
| Thistleton Quarries Limited                             | Maidenhead, Großbritannien | 100,00                     | GBP          | -1                          |
| Tillotson Commercial Motors Limited                     | Maidenhead, Großbritannien | 100,00                     | GBP          | -19                         |
| Tillotson Commercial Vehicles Limited                   | Maidenhead, Großbritannien | 100,00                     | GBP          | 0                           |
| Tilmanstone Brick Limited                               | Maidenhead, Großbritannien | 100,00                     | GBP          | 7                           |
| Timesound                                               | Maidenhead, Großbritannien | 100,00                     | EUR          | 1                           |
| TLQ Limited                                             | Edinburgh, Großbritannien  | 100,00                     | GBP          | 0                           |
| TMC Pioneer Aggregates Limited                          | Maidenhead, Großbritannien | 100,00                     | GBP          | 0                           |
| Transformers (Watford) Limited                          | Maidenhead, Großbritannien | 100,00                     | GBP          | 1                           |
| Trawlers Grimsby Limited                                | Maidenhead, Großbritannien | 100,00                     | GBP          | 0                           |
| Tunnel Cement Limited                                   | Maidenhead, Großbritannien | 100,00                     | GBP          | 0                           |
| U.D.S. Holdings B.V.                                    | Amsterdam, Niederlande     | 100,00                     | EUR          | 613                         |
| UAB Gerdukas                                            | Vilnius, Litauen           | 70,00                      | LTL          | 5                           |
| UAB Heidelberg Cement Klaipeda                          | Klaipeda, Litauen          | 100,00                     | EUR          | 0                           |

| HeidelbergCement bilanziert              |                                                                      |
|------------------------------------------|----------------------------------------------------------------------|
| Gewinn- und Verlustrechnung des Konzerns | Eigenkapitalveränderungsrechnung des Konzerns                        |
| Gesamtergebnisrechnung des Konzerns      | Segmentberichterstattung/Teil des Anhangs                            |
| Kapitalflussrechnung des Konzerns        | Anhang des Konzerns                                                  |
| Bilanz des Konzerns                      | Bericht des Abschlussprüfers/Versicherung der gesetzlichen Vertreter |

| Name der Gesellschaft                 | Sitz                          | Kapital-<br>anteil<br>in % | Wäh-<br>rung | Eigen-<br>kapital<br>in Mio |
|---------------------------------------|-------------------------------|----------------------------|--------------|-----------------------------|
| UDS (Head Office) Limited             | Maidenhead, Großbritannien    | 100,00                     | GBP          | -8                          |
| UDS (No 10)                           | Maidenhead, Großbritannien    | 100,00                     | GBP          | 0                           |
| UDS (No 3) Limited                    | Maidenhead, Großbritannien    | 100,00                     | GBP          | 6                           |
| UDS Corporation Limited               | Maidenhead, Großbritannien    | 100,00                     | GBP          | 365                         |
| UDS Finance Limited                   | Maidenhead, Großbritannien    | 100,00                     | GBP          | 41                          |
| UDS Group Limited                     | Maidenhead, Großbritannien    | 100,00                     | GBP          | 110                         |
| UDS Holdings (1) Limited              | Maidenhead, Großbritannien    | 100,00                     | GBP          | 187                         |
| UGI Group Limited                     | Maidenhead, Großbritannien    | 100,00                     | GBP          | 90                          |
| UGI Meters Limited                    | Maidenhead, Großbritannien    | 100,00                     | GBP          | 1                           |
| UGI Smith Meters Limited              | Maidenhead, Großbritannien    | 100,00                     | GBP          | 5                           |
| United Gas Industries Limited         | Maidenhead, Großbritannien    | 100,00                     | GBP          | 12                          |
| UralCement Holding B.V.               | 's-Hertogenbosch, Niederlande | 51,00                      | EUR          | -1                          |
| V.E.A. Limited                        | Guernsey, Guernsey            | 100,00                     | GBP          | 158                         |
| V.O.F. 'Bouwdok Barendrecht'          | Barendrecht, Niederlande      | 60,01                      | EUR          | 0                           |
| Verwaard Handelsonderneming B.V.      | Brielle, Niederlande          | 100,00                     | EUR          | 0                           |
| Viewgrove Investments Limited         | Maidenhead, Großbritannien    | 100,00                     | GBP          | 6.391                       |
| Visionfocus Limited                   | Maidenhead, Großbritannien    | 100,00                     | GBP          | 360                         |
| Visionrefine Limited                  | Maidenhead, Großbritannien    | 100,00                     | GBP          | 0                           |
| Walhalla Kalk GmbH & Co. KG *)        | Regensburg, Deutschland       | 79,91                      | EUR          | 8                           |
| Welbecson Group Limited               | Maidenhead, Großbritannien    | 100,00                     | GBP          | 0                           |
| West of England Sack Holdings Limited | Maidenhead, Großbritannien    | 100,00                     | GBP          | 2                           |
| WIKA Stade GmbH u. Co. KG *)          | Stade, Deutschland            | 100,00                     | EUR          | 4                           |
| Wiles Securities Limited              | Maidenhead, Großbritannien    | 100,00                     | GBP          | 169                         |
| Wineholm Limited                      | Maidenhead, Großbritannien    | 100,00                     | GBP          | -2                          |

| Vollkonsolidierte Unternehmen                         |                                 |        |     |        |
|-------------------------------------------------------|---------------------------------|--------|-----|--------|
| Osteuropa-Zentralasien                                |                                 |        |     |        |
| BayKaz Beton LLP                                      | Almaty, Kasachstan              | 99,00  | KZT | -1.234 |
| BEKTAS Group LLP                                      | Almaty, Kasachstan              | 99,00  | KZT | -108   |
| Betonpumpy a doprava SK a.s.                          | Bratislava, Slowakei            | 100,00 | EUR | 0      |
| BETOTECH, s.r.o.                                      | Beroun, Tschechien              | 91,50  | CZK | 21     |
| Bialostockie Kopalnie Surowców Mineralnych sp. z o.o. | Bialystok, Polen                | 99,99  | PLN | 10     |
| BT Poznan Sp. z o.o.                                  | Poznan, Polen                   | 74,99  | PLN | 4      |
| BT Topbeton Sp. z o.o. *)                             | Zielona Góra, Polen             | 50,00  | PLN | 26     |
| Calumite s.r.o.                                       | Ostrava, Tschechien             | 51,00  | CZK | 110    |
| Carpat Agregate S.A.                                  | Bucharest, Rumänien             | 98,51  | RON | 32     |
| Carpat Beton S.R.L.                                   | Bucharest, Rumänien             | 99,03  | RON | 92     |
| Carpat Beton Servicii Pompe SRL                       | Bucharest, Rumänien             | 99,03  | RON | 7      |
| Carpat Cemtrans S.R.L.                                | Bucharest, Rumänien             | 99,03  | RON | 12     |
| Carpatcement Holding S.A.                             | Bucharest, Rumänien             | 99,03  | RON | 1.026  |
| CaspiCement Limited Liability Partnership             | Shetpe, Kasachstan              | 100,00 | KZT | 6.736  |
| CaspiNerud Limited Liability Partnership              | Aktau, Kasachstan               | 75,10  | KZT | 2.455  |
| Ceskomoravsky beton, a.s.                             | Beroun, Tschechien              | 100,00 | CZK | 985    |
| Ceskomoravsky cement, a.s., nástupnická společnost    | Mokra, Tschechien               | 100,00 | CZK | 5.272  |
| Ceskomoravsky sterk, a.s.                             | Mokra, Tschechien               | 100,00 | CZK | 1.752  |
| Closed Jointed Stock Company "Construction Materials" | Sterlitamak, Russland           | 51,00  | RUB | 2.331  |
| Ekocem Sp. z o.o.                                     | Katowice, Polen                 | 99,99  | PLN | 140    |
| Górażdze Beton Sp. z o.o.                             | Opole, Polen                    | 99,99  | PLN | 102    |
| Górażdze Cement S. A.                                 | Opole, Polen                    | 99,99  | PLN | 793    |
| Górażdze Kruszywa sp. z o.o.                          | Opole, Polen                    | 99,99  | PLN | 106    |
| Heidelberg Vostok-Cement LLP                          | Almaty, Kasachstan              | 100,00 | KZT | 857    |
| Joint Stock Company - Bukhtarminskaya Cement Company  | Oktyabrskiy village, Kasachstan | 100,00 | KZT | 9.476  |
| Kamenivo Slovakia a.s.                                | Bytca-Hrabove, Slowakei         | 100,00 | EUR | 2      |
| Limited Liability Company "HeidelbergBeton Ukraine"   | Kyryvi Rih, Ukraine             | 99,97  | UAH | 51     |
| Limited Liability Company "KSL"                       | Busheve, Ukraine                | 100,00 | UAH | 53     |
| Limited Liability Company "Rybalsky Quarry"           | Dnepropetrovsk, Ukraine         | 100,00 | UAH | 17     |
| LLC "HeidelbergGranit Ukraine"                        | Kyryvi Rih, Ukraine             | 99,79  | UAH | 32     |
| LLC 'HeidelbergBeton Georgia'                         | Tbilisi, Georgien               | 100,00 | GEL | 3      |
| LLC 'HeidelbergCement Rus'                            | Podolsk, Russland               | 100,00 | RUB | -21    |
| LLC 'Kartuli Cementi'                                 | Tbilisi, Georgien               | 70,00  | GEL | -8     |
| LLC 'SaqCementi'                                      | Tbilisi, Georgien               | 75,00  | GEL | 28     |
| LLC 'Terjola-Quarry'                                  | Tbilisi, Georgien               | 100,00 | GEL | 2      |

| Name der Gesellschaft                                 | Sitz                     | Kapital-<br>anteil<br>in % | Wäh-<br>rung | Eigen-<br>kapital<br>in Mio |
|-------------------------------------------------------|--------------------------|----------------------------|--------------|-----------------------------|
| OAO Cesla                                             | Slantsy, Russland        | 96,70                      | RUB          | 1.846                       |
| OAO Voronezhskoe Rudoupravlenije                      | Strelica, Russland       | 79,60                      | RUB          | 116                         |
| OOO "Norcem Kola"                                     | Murmansk, Russland       | 100,00                     | RUB          | 6                           |
| OOO KaliningradCement                                 | Kaliningrad, Russland    | 74,90                      | RUB          | 39                          |
| Open Joint Stock Company Gurovo-Beton                 | Novogurovskiy, Russland  | 100,00                     | RUB          | 19                          |
| Precon Polska Sp.z.o.o.                               | Warsaw, Polen            | 100,00                     | PLN          | 6                           |
| Public Joint Stock Company "HeidelbergCement Ukraine" | Kryvyi Rih, Ukraine      | 99,73                      | UAH          | 823                         |
| Recyfuel SRL                                          | Bucharest, Rumänien      | 99,03                      | RON          | 1                           |
| TBG BAK s.r.o.                                        | Trutnov, Tschechien      | 70,04                      | CZK          | 64                          |
| TBG BETONMIX a. s.                                    | Brno, Tschechien         | 66,00                      | CZK          | 330                         |
| TBG BETONPUMPY MORAVA s.r.o.                          | Brno, Tschechien         | 84,90                      | CZK          | 19                          |
| TBG Plzen Transportbeton s.r.o.                       | Beroun, Tschechien       | 50,10                      | CZK          | 61                          |
| TBG SEVEROZAPADNI CECHY s.r.o.                        | Chomutov, Tschechien     | 66,00                      | CZK          | 107                         |
| TBG Vysocina s.r.o.                                   | Kozichovice, Tschechien  | 59,40                      | CZK          | 52                          |
| TBG ZNOJMO s. r. o.                                   | Dyje, Tschechien         | 66,00                      | CZK          | 50                          |
| Tulacement - Limited Liability Company                | Novogurovskiy, Russland  | 100,00                     | RUB          | 29                          |
| ZAO Roscem                                            | St. Petersburg, Russland | 100,00                     | RUB          | 16                          |

#### Vollkonsolidierte Unternehmen

##### Nordamerika

|                                                    |                     |        |     |        |
|----------------------------------------------------|---------------------|--------|-----|--------|
| Allied Ready Mix Concrete Limited                  | Richmond, Kanada    | 100,00 | CAD | 0      |
| Amangani SA                                        | Panama City, Panama | 100,00 | GBP | 0      |
| Amcord, Inc.                                       | Dover, USA          | 100,00 | USD | 41     |
| Anche Holdings Inc                                 | Panama City, Panama | 100,00 | USD | 2.111  |
| Asian Carriers Inc.                                | Panama City, Panama | 100,00 | USD | 44     |
| Astravance Corp.                                   | Panama City, Panama | 100,00 | GBP | 44.027 |
| Beazer East, Inc.                                  | Dover, USA          | 100,00 | USD | -2.357 |
| Cadman (Black Diamond), Inc.                       | Olympia, USA        | 100,00 | USD | 11     |
| Cadman (Rock), Inc.                                | Olympia, USA        | 100,00 | USD | 15     |
| Cadman (Seattle), Inc.                             | Wilmington, USA     | 100,00 | USD | 51     |
| Cadman, Inc.                                       | Olympia, USA        | 100,00 | USD | 17     |
| Calaveras Materials Inc.                           | Sacramento, USA     | 100,00 | USD | 116    |
| Calaveras-Standard Materials, Inc.                 | Sacramento, USA     | 100,00 | USD | 40     |
| Campbell Concrete & Materials LLC                  | Austin, USA         | 100,00 | USD | 65     |
| Cascapedia Corporation                             | Panama City, Panama | 100,00 | GBP | 0      |
| Cavenham Forest Industries LLC                     | Wilmington, USA     | 100,00 | USD | 17     |
| Civil and Marine Inc.                              | Wilmington, USA     | 100,00 | USD | -63    |
| Commercial Aggregates Transportation and Sales LLC | Wilmington, USA     | 100,00 | USD | 1      |
| Constar LLC                                        | Wilmington, USA     | 100,00 | USD | 278    |
| Continental Florida Materials Inc.                 | Tallahassee, USA    | 100,00 | USD | 127    |
| Cowichan Corporation                               | Panama City, Panama | 100,00 | GBP | 1.997  |
| Essex NA Holdings LLC                              | Wilmington, USA     | 100,00 | USD | 53     |
| Ferndale Ready Mix & Gravel, Inc.                  | Olympia, USA        | 100,00 | USD | 22     |
| HACM, Inc.                                         | Wilmington, USA     | 100,00 | USD | 14     |
| HAMW Minerals, Inc.                                | Wilmington, USA     | 100,00 | USD | 9      |
| Hanson Aggregates LLC                              | Wilmington, USA     | 100,00 | USD | 1.027  |
| Hanson Aggregates BMC, Inc.                        | Harrisburg, USA     | 100,00 | USD | 284    |
| Hanson Aggregates Davon LLC                        | Columbus, USA       | 100,00 | USD | 138    |
| Hanson Aggregates East LLC                         | Wilmington, USA     | 100,00 | USD | 82     |
| Hanson Aggregates Mid-Pacific, Inc.                | Wilmington, USA     | 100,00 | USD | 310    |
| Hanson Aggregates Midwest LLC                      | Frankfort, USA      | 100,00 | USD | 210    |
| Hanson Aggregates New York LLC                     | Albany, USA         | 100,00 | USD | 328    |
| Hanson Aggregates Pacific Southwest, Inc.          | Wilmington, USA     | 100,00 | USD | 397    |
| Hanson Aggregates Pennsylvania LLC                 | Wilmington, USA     | 100,00 | USD | 217    |
| Hanson Aggregates Southeast LLC                    | Wilmington, USA     | 100,00 | USD | 705    |
| Hanson Aggregates WRP, Inc.                        | Wilmington, USA     | 100,00 | USD | 81     |
| Hanson BC Limited                                  | Hamilton, Bermudas  | 100,00 | GBP | 1.035  |
| Hanson Brick East, LLC                             | Wilmington, USA     | 100,00 | USD | 234    |
| Hanson Brick Ltd.                                  | Burlington, Kanada  | 100,00 | CAD | -11    |
| Hanson Building Materials America LLC              | Wilmington, USA     | 100,00 | USD | 1.011  |
| Hanson Canada Acquisition #1 Ltd.                  | Toronto, Kanada     | 100,00 | CAD | 59     |
| Hanson Canada Acquisition #2 Ltd.                  | Toronto, Kanada     | 100,00 | CAD | 33     |

| HeidelbergCement bilanziert              |                                                                      |
|------------------------------------------|----------------------------------------------------------------------|
| Gewinn- und Verlustrechnung des Konzerns | Eigenkapitalveränderungsrechnung des Konzerns                        |
| Gesamtergebnisrechnung des Konzerns      | Segmentberichterstattung/Teil des Anhangs                            |
| Kapitalflussrechnung des Konzerns        | Anhang des Konzerns                                                  |
| Bilanz des Konzerns                      | Bericht des Abschlussprüfers/Versicherung der gesetzlichen Vertreter |

| Name der Gesellschaft                      | Sitz                        | Kapital-<br>anteil<br>in % | Wäh-<br>rung | Eigen-<br>kapital<br>in Mio |
|--------------------------------------------|-----------------------------|----------------------------|--------------|-----------------------------|
| Hanson Green Limited                       | Hamilton, Bermudas          | 100,00                     | GBP          | 0                           |
| Hanson Hardscape Products LLC              | Wilmington, USA             | 100,00                     | USD          | 51                          |
| Hanson Holdings Esker, Inc.                | Wilmington, USA             | 100,00                     | USD          | 259                         |
| Hanson Marine Finance, Inc.                | Sacramento, USA             | 100,00                     | USD          | 1                           |
| Hanson Marine Operations, Inc.             | Sacramento, USA             | 100,00                     | USD          | 9                           |
| Hanson Micronesia Cement, Inc.             | Wilmington, USA             | 100,00                     | USD          | 5                           |
| Hanson Permanente Cement of Guam, Inc.     | Sacramento, USA             | 100,00                     | USD          | 42                          |
| Hanson Permanente Cement, Inc.             | Phoenix, USA                | 100,00                     | USD          | 324                         |
| Hanson Pipe & Precast LLC                  | Wilmington, USA             | 100,00                     | USD          | 618                         |
| Hanson Pipe & Precast Quebec Ltd.          | Ontario, Kanada             | 100,00                     | CAD          | 39                          |
| Hanson Pipe & Precast, Ltd.                | Toronto, Kanada             | 100,00                     | CAD          | 100                         |
| Hanson Pressure Pipe Inc.                  | Montreal, Kanada            | 100,00                     | CAD          | 104                         |
| Hanson Pressure Pipe, Inc.                 | Columbus, USA               | 100,00                     | USD          | 68                          |
| Hanson Roof Tile, Inc.                     | Wilmington, USA             | 100,00                     | USD          | 82                          |
| Hanson Structural Precast, Inc.            | Los Angeles, USA            | 100,00                     | USD          | 71                          |
| HBMA Holdings, LLC                         | Wilmington, USA             | 100,00                     | USD          | 4.200                       |
| HC Trading International Inc.              | Nassau, Bahamas             | 100,00                     | USD          | 50                          |
| HNA Investments                            | Wilmington, USA             | 100,00                     | USD          | 2.052                       |
| Indocement (Cayman Island) Ltd.            | George Town, Cayman Islands | 51,00                      | IDR          | 1.108                       |
| Kaiser Gypsum Company, Inc.                | Olympia, USA                | 100,00                     | USD          | 17                          |
| KH 1 Inc.                                  | Dover, USA                  | 100,00                     | USD          | 259                         |
| Lehigh Cement Company LLC                  | Wilmington, USA             | 100,00                     | USD          | 1.258                       |
| Lehigh Hanson Materials Limited            | Alberta, Kanada             | 100,00                     | CAD          | 1.170                       |
| Lehigh Hanson, Inc.                        | Wilmington, USA             | 100,00                     | USD          | 2.217                       |
| Lehigh Northwest Cement Company            | Olympia, USA                | 100,00                     | USD          | 182                         |
| Lehigh Northwest Marine, LLC               | Wilmington, USA             | 100,00                     | USD          | 3                           |
| Lehigh Portland Holdings, LLC              | Wilmington, USA             | 100,00                     | USD          | 0                           |
| Lehigh Portland Investments, LLC           | Wilmington, USA             | 100,00                     | USD          | 44                          |
| Lehigh Realty Company                      | Richmond, USA               | 100,00                     | USD          | -1                          |
| Lehigh Southwest Cement Company            | Sacramento, USA             | 100,00                     | USD          | 360                         |
| Lehigh White Cement Company                | Harrisburg, USA             | 51,00                      | USD          | 54                          |
| Les Placements Domenico Miceli Inc.        | Montreal, Kanada            | 100,00                     | CAD          | 0                           |
| Material Service Corporation               | Wilmington, USA             | 100,00                     | USD          | 45                          |
| Mayco Mix Ltd.                             | British Columbia, Kanada    | 100,00                     | CAD          | 0                           |
| Mays Landing Sand & Gravel Company         | Trenton, USA                | 100,00                     | USD          | 20                          |
| Mill Run Associates                        | Harrisburg, USA             | 100,00                     | USD          | 7                           |
| Mineral and Land Resources Corporation     | Wilmington, USA             | 100,00                     | USD          | 37                          |
| Mission Valley Rock Co.                    | Sacramento, USA             | 100,00                     | USD          | 111                         |
| Navastone USA, Inc.                        | Albany, USA                 | 100,00                     | USD          | -1                          |
| Navastone, Inc.                            | Lansing, USA                | 100,00                     | USD          | -1                          |
| Newbury Development Management, LLC        | Pennsylvania, USA           | 100,00                     | USD          | 0                           |
| Ocean Marine Towing Services Limited       | Victoria, Kanada            | 100,00                     | CAD          | 2                           |
| PCAz Leasing, Inc.                         | Phoenix, USA                | 100,00                     | USD          | 11                          |
| Pioneer International Overseas Corporation | Cardiff, Jungferninseln     | 100,00                     | GBP          | 171                         |
| Rempel Bros. Concrete Ltd.                 | British Columbia, Kanada    | 100,00                     | CAD          | 0                           |
| Rimarc Corporation                         | Panama City, Panama         | 100,00                     | GBP          | 2.203                       |
| Sherman Industries LLC                     | Wilmington, USA             | 100,00                     | USD          | 104                         |
| Sinclair General Corporation               | Panama City, Panama         | 100,00                     | GBP          | 7.101                       |
| South Valley Materials, Inc.               | Sacramento, USA             | 100,00                     | USD          | 21                          |
| Standard Concrete Products, Inc.           | Sacramento, USA             | 100,00                     | USD          | 21                          |
| Vestur Insurance (Bermuda) Ltd             | Hamilton, Bermudas          | 100,00                     | USD          | 0                           |
| Wire Products Investment Company           | Lansing, USA                | 100,00                     | USD          | 0                           |

| Vollkonsolidierte Unternehmen    |                             |        |     |     |
|----------------------------------|-----------------------------|--------|-----|-----|
| Asien-Pazifik                    |                             |        |     |     |
| Apex Quarries Pty Ltd.           | Victoria, Australien        | 100,00 | AUD | 0   |
| Bitumix Granite Sdn Bhd          | Kuala Lumpur, Malaysia      | 100,00 | MYR | 12  |
| Butra HeidelbergCement Sdn. Bhd. | Bandar Seri Begawan, Brunei | 70,00  | BND | 19  |
| CGF Pty Limited                  | New South Wales, Australien | 100,00 | AUD | 341 |
| Christies Stone Quarries Pty Ltd | South Australia, Australien | 100,00 | AUD | 0   |
| Clemco Ltd.                      | Hongkong, Hongkong          | 100,00 | HKD | 125 |
| COCHIN Cements Ltd.              | Kottiyam, Indien            | 98,72  | INR | -2  |
| Consolidated Quarries Pty Ltd.   | Victoria, Australien        | 100,00 | AUD | 0   |

| Name der Gesellschaft                           | Sitz                                     | Kapital-<br>anteil<br>in % | Wäh-<br>rung | Eigen-<br>kapital<br>in Mio |
|-------------------------------------------------|------------------------------------------|----------------------------|--------------|-----------------------------|
| Excel Quarries Pty Limited                      | Queensland, Australien                   | 100,00                     | AUD          | 0                           |
| Gerak Harapan Sdn Bhd                           | Kuala Lumpur, Malaysia                   | 70,00                      | MYR          | 5                           |
| Hanson Australia (Holdings) Proprietary Limited | Victoria, Australien                     | 100,00                     | AUD          | 3.066                       |
| Hanson Australia Cement Pty Limited             | New South Wales, Australien              | 100,00                     | AUD          | 12                          |
| Hanson Australia Funding Limited                | New South Wales, Australien              | 100,00                     | USD          | -34                         |
| Hanson Australia Investments Pty Limited        | New South Wales, Australien              | 100,00                     | AUD          | 31                          |
| Hanson Australia Pty Limited                    | New South Wales, Australien              | 100,00                     | AUD          | 1.334                       |
| Hanson Building Materials Cartage Sdn Bhd       | Kuala Lumpur, Malaysia                   | 100,00                     | MYR          | -1                          |
| Hanson Building Materials Industries Sdn Bhd    | Kuala Lumpur, Malaysia                   | 100,00                     | MYR          | 0                           |
| Hanson Building Materials Laboratory Sdn Bhd    | Kuala Lumpur, Malaysia                   | 100,00                     | MYR          | -1                          |
| Hanson Building Materials Malaysia Sdn Bhd      | Kuala Lumpur, Malaysia                   | 100,00                     | MYR          | 57                          |
| Hanson Building Materials Manufacturing Sdn Bhd | Kuala Lumpur, Malaysia                   | 100,00                     | MYR          | 8                           |
| Hanson Building Materials Production Sdn Bhd    | Kuala Lumpur, Malaysia                   | 100,00                     | MYR          | 78                          |
| Hanson Building Materials Services Sdn Bhd      | Kuala Lumpur, Malaysia                   | 100,00                     | MYR          | 0                           |
| Hanson Building Materials Transport Sdn Bhd     | Kuala Lumpur, Malaysia                   | 100,00                     | MYR          | 0                           |
| Hanson Building Materials-KTPC Sdn Bhd          | Kuala Lumpur, Malaysia                   | 65,00                      | MYR          | 1                           |
| Hanson Building Materials-KTPC-PBPM Sdn Bhd     | Kuala Lumpur, Malaysia                   | 67,50                      | MYR          | 4                           |
| Hanson Building Materials-PBPM Sdn Bhd          | Kuala Lumpur, Malaysia                   | 70,00                      | MYR          | 1                           |
| Hanson Concrete (M) Sdn Bhd                     | Kuala Lumpur, Malaysia                   | 100,00                     | MYR          | -5                          |
| Hanson Construction Materials Pty Ltd           | Queensland, Australien                   | 100,00                     | AUD          | 67                          |
| Hanson Finance Australia Ltd                    | Australian Capital Territory, Australien | 100,00                     | AUD          | -33                         |
| Hanson Holdings (M) Sdn Bhd                     | Kuala Lumpur, Malaysia                   | 100,00                     | MYR          | -2                          |
| Hanson Holdings Australia Pty Ltd               | Victoria, Australien                     | 100,00                     | AUD          | 4.026                       |
| Hanson Investment Holdings Pte Ltd              | Singapore, Singapur                      | 100,00                     | SGD          | 43                          |
| Hanson Landfill Services Pty Ltd                | Victoria, Australien                     | 100,00                     | AUD          | 7                           |
| Hanson Mauritius Pty Ltd                        | Port Louis, Mauritius                    | 100,00                     | SGD          | 0                           |
| Hanson Pacific (S) Pte Ltd                      | Singapore, Singapur                      | 100,00                     | SGD          | -11                         |
| Hanson Precast (S) Pte Limited                  | Singapore, Singapur                      | 100,00                     | SGD          | 9                           |
| Hanson Precast Pty Ltd                          | New South Wales, Australien              | 100,00                     | AUD          | -2                          |
| Hanson Pty Limited                              | Victoria, Australien                     | 100,00                     | AUD          | 4.026                       |
| Hanson Quarries Victoria Pty Limited            | New South Wales, Australien              | 100,00                     | AUD          | 0                           |
| Hanson Quarry Products (Asphalt) Sdn Bhd        | Kuala Lumpur, Malaysia                   | 100,00                     | MYR          | 0                           |
| Hanson Quarry Products (Batu Pahat) Sdn Bhd     | Kuala Lumpur, Malaysia                   | 100,00                     | MYR          | 1                           |
| Hanson Quarry Products (Bricks) Sdn Bhd         | Kuala Lumpur, Malaysia                   | 100,00                     | MYR          | 0                           |
| Hanson Quarry Products (EA) Sdn Bhd             | Kuala Lumpur, Malaysia                   | 100,00                     | MYR          | 6                           |
| Hanson Quarry Products (Holdings) Sdn Bhd       | Kuala Lumpur, Malaysia                   | 100,00                     | MYR          | 232                         |
| Hanson Quarry Products (Kluang) Sdn Bhd         | Kuala Lumpur, Malaysia                   | 100,00                     | MYR          | 0                           |
| Hanson Quarry Products (Kuantan) Sdn Bhd        | Kuala Lumpur, Malaysia                   | 100,00                     | MYR          | 14                          |
| Hanson Quarry Products (Kulai) Sdn Bhd          | Kuala Lumpur, Malaysia                   | 100,00                     | MYR          | 20                          |
| Hanson Quarry Products (Land) Sdn Bhd           | Kuala Lumpur, Malaysia                   | 100,00                     | MYR          | 19                          |
| Hanson Quarry Products (Masai) Sdn Bhd          | Kuala Lumpur, Malaysia                   | 100,00                     | MYR          | 3                           |
| Hanson Quarry Products (Northern) Sdn Bhd       | Kuala Lumpur, Malaysia                   | 100,00                     | MYR          | 10                          |
| Hanson Quarry Products (Pengerang) Sdn Bhd      | Kuala Lumpur, Malaysia                   | 100,00                     | MYR          | 0                           |
| Hanson Quarry Products (Perak) Sdn Bhd          | Kuala Lumpur, Malaysia                   | 100,00                     | MYR          | 7                           |
| Hanson Quarry Products (Premix) Sdn Bhd         | Kuala Lumpur, Malaysia                   | 100,00                     | MYR          | 3                           |
| Hanson Quarry Products (Rawang) Sdn Bhd         | Kuala Lumpur, Malaysia                   | 100,00                     | MYR          | 5                           |
| Hanson Quarry Products (Segamat) Sdn Bhd        | Kuala Lumpur, Malaysia                   | 100,00                     | MYR          | 1                           |
| Hanson Quarry Products (Tempoyak) Sdn Bhd       | Kuala Lumpur, Malaysia                   | 100,00                     | MYR          | -1                          |
| Hanson Quarry Products (Terengganu) Sdn Bhd     | Kuala Lumpur, Malaysia                   | 100,00                     | MYR          | 7                           |
| Hanson Quarry Products (Transport) Sdn Bhd      | Kuala Lumpur, Malaysia                   | 100,00                     | MYR          | 2                           |
| Hanson Quarry Products Sdn Bhd                  | Kuala Lumpur, Malaysia                   | 100,00                     | MYR          | 198                         |
| HCT Asia Services Pte. Ltd.                     | Singapore, Singapur                      | 100,00                     | SGD          | 1                           |
| HeidelbergCement Asia Pte Ltd                   | Singapore, Singapur                      | 100,00                     | SGD          | 8                           |
| HeidelbergCement Bangladesh Limited             | Chittagong, Bangladesch                  | 60,66                      | BDT          | 4.356                       |
| HeidelbergCement Holding HK Limited             | Hongkong, Hongkong                       | 100,00                     | HKD          | 517                         |
| HeidelbergCement India Ltd.                     | Ammasandra, Indien                       | 68,55                      | INR          | 7.833                       |
| Hymix Australia Pty Ltd                         | New South Wales, Australien              | 100,00                     | AUD          | 125                         |
| Hymix Holding Company Pty Ltd                   | New South Wales, Australien              | 100,00                     | AUD          | 0                           |
| Meghna Energy Limited                           | Dhaka, Bangladesch                       | 100,00                     | BDT          | 1.227                       |
| Pioneer Concrete (Hong Kong) Limited            | Hongkong, Hongkong                       | 100,00                     | HKD          | 435                         |
| Pioneer Concrete (NT) Pty Ltd                   | Northern Territory, Australien           | 100,00                     | AUD          | 0                           |
| Pioneer Concrete (Tasmania) Proprietary Limited | Tasmania, Australien                     | 100,00                     | AUD          | 8                           |
| Pioneer Concrete (WA) Pty Ltd                   | Western Australia, Australien            | 100,00                     | AUD          | 0                           |
| Pioneer Gravels (Qld) Pty Ltd                   | Queensland, Australien                   | 100,00                     | AUD          | 0                           |



| HeidelbergCement bilanziert              |                                                                      |
|------------------------------------------|----------------------------------------------------------------------|
| Gewinn- und Verlustrechnung des Konzerns | Eigenkapitalveränderungsrechnung des Konzerns                        |
| Gesamtergebnisrechnung des Konzerns      | Segmentberichterstattung/Teil des Anhangs                            |
| Kapitalflussrechnung des Konzerns        | Anhang des Konzerns                                                  |
| Bilanz des Konzerns                      | Bericht des Abschlussprüfers/Versicherung der gesetzlichen Vertreter |

| Name der Gesellschaft                  | Sitz                           | Kapital-<br>anteil<br>in % | Wäh-<br>rung | Eigen-<br>kapital<br>in Mio |
|----------------------------------------|--------------------------------|----------------------------|--------------|-----------------------------|
| Pioneer Group Holdings Pty Ltd         | New South Wales, Australien    | 100,00                     | AUD          | 27                          |
| Pioneer International (Labuan) Ltd     | Labuan, Malaysia               | 100,00                     | USD          | 1                           |
| Pioneer International Holdings Pty Ltd | New South Wales, Australien    | 100,00                     | AUD          | 1.521                       |
| Pioneer North Queensland Pty Ltd       | Queensland, Australien         | 100,00                     | AUD          | 22                          |
| Pioneer Petroleum Australia Pty Ltd    | Northern Territory, Australien | 100,00                     | AUD          | 0                           |
| Plentong Granite Industries Sdn Bhd    | Kuala Lumpur, Malaysia         | 70,00                      | MYR          | 29                          |
| PT Bahana Indonor                      | Jakarta, Indonesien            | 51,00                      | IDR          | 51.453                      |
| PT Dian Abadi Perkasa                  | Jakarta, Indonesien            | 51,00                      | IDR          | 249.185                     |
| PT Gunung Tua Mandiri <sup>1)</sup>    | Bogor, Indonesien              | 26,01                      | IDR          | 48.164                      |
| PT Indocement Tunggal Prakarsa Tbk.    | Jakarta, Indonesien            | 51,00                      | IDR          | 12.875.605                  |
| PT Indomix Perkasa                     | Jakarta, Indonesien            | 51,00                      | IDR          | 53.283                      |
| PT Mandiri Sejahtera Sentra (MSS)      | Jakarta, Indonesien            | 51,00                      | IDR          | 67.990                      |
| PT Mineral Industri Sukabumi           | Sukabumi, Indonesien           | 51,00                      | IDR          | 13.624                      |
| PT Multi Bangun Galaxy                 | Lombok, Indonesien             | 51,00                      | IDR          | 1.518                       |
| PT Pionirbeton Industri                | Jakarta, Indonesien            | 51,00                      | IDR          | 6.045                       |
| PT Sari Bhakti Sejati                  | Jakarta, Indonesien            | 51,00                      | IDR          | 13                          |
| Rajang Perkasa Sdn Bhd                 | Kuala Lumpur, Malaysia         | 60,00                      | MYR          | 2                           |
| Realistic Sensation Sdn Bhd            | Kuala Lumpur, Malaysia         | 70,00                      | MYR          | 4                           |
| Sofinaz Holdings Sdn Bhd               | Kuala Lumpur, Malaysia         | 100,00                     | MYR          | 1                           |
| South Coast Basalt Pty Ltd             | New South Wales, Australien    | 100,00                     | AUD          | 2                           |
| Tanah Merah Quarry Sdn Bhd             | Kuala Lumpur, Malaysia         | 100,00                     | MYR          | -16                         |
| Valscot Pty Limited                    | New South Wales, Australien    | 100,00                     | AUD          | 0                           |
| Waterfall Quarries Pty Limited         | Victoria, Australien           | 100,00                     | AUD          | 0                           |

| Vollkonsolidierte Unternehmen                |                                          |        |     |         |
|----------------------------------------------|------------------------------------------|--------|-----|---------|
| Afrika-Mittelmeerraum                        |                                          |        |     |         |
| Calcim S.A.                                  | Cotonou, Benin                           | 93,94  | XOF | 3       |
| Cimbenin SA                                  | Cotonou, Benin                           | 52,51  | XOF | 2.410   |
| Ciments du Togo SA                           | Lome, Togo                               | 93,59  | XOF | 6.141   |
| Cimgabon S.A.                                | Libreville, Gabun                        | 70,46  | XAF | 5.000   |
| Ghacem Ltd.                                  | Accra, Ghana                             | 87,46  | GHS | 116     |
| Hanson (Israel) Ltd                          | Ramat Gan, Israel                        | 99,97  | ILS | 371     |
| Hanson Quarry Products (Israel) Ltd          | Ramat Gan, Israel                        | 99,97  | ILS | 491     |
| HC Trading B.V. - Turkey Branch              | Istanbul, Türkei                         | 100,00 | TRY | -10     |
| Interlacs S.A.R.L.                           | Lubumbashi, Demokratische Republik Kongo | 70,00  | CDF | 1.734   |
| La Cimenterie de Lukala S.A.R.L.             | Kinshasa, Demokratische Republik Kongo   | 55,00  | CDF | 10.271  |
| Liberia Cement Corporation Ltd.              | Monrovia, Liberia                        | 59,00  | USD | 4       |
| Pioneer Beton Muva Umachavot Ltd             | Ramat Gan, Israel                        | 99,97  | ILS | 1       |
| Scantogo Mines SA                            | Lome, Togo                               | 93,94  | XOF | 10      |
| Sierra Leone Cement Corp. Ltd. <sup>1)</sup> | Freetown, Sierra Leone                   | 46,97  | SLL | 39.117  |
| Tadir Readymix Concrete (1965) Ltd           | Ramat Gan, Israel                        | 100,00 | ILS | 0       |
| TPCC Tanzania Portland Cement Company Ltd.   | Dar Es Salaam, Tansania                  | 65,05  | TZS | 168.329 |
| West Africa Quarries Limited                 | Accra, Ghana                             | 87,46  | GHS | 0       |

| Quotal einbezogene Unternehmen                                    |                               |       |     |    |
|-------------------------------------------------------------------|-------------------------------|-------|-----|----|
| West- und Nordeuropa                                              |                               |       |     |    |
| Betong Öst AS                                                     | Kongsvinger, Norwegen         | 50,00 | NOK | 19 |
| BLG Betonlieferungsgesellschaft mbH Freising-Erding <sup>2)</sup> | Freising, Deutschland         | 57,30 | EUR | 1  |
| BLG Transportbeton GmbH & Co. KG <sup>2)</sup>                    | München, Deutschland          | 61,75 | EUR | 6  |
| ENCI Zand en Grind B.V.                                           | 's-Hertogenbosch, Niederlande | 50,00 | EUR | 7  |
| GriValim S.A.                                                     | Bruxelles, Belgien            | 50,00 | EUR | -3 |
| Heidelberg Beton Aschaffenburg GmbH & Co. KG <sup>2)</sup>        | Aschaffenburg, Deutschland    | 70,95 | EUR | 0  |
| Heidelberg Beton Rhein-Nahe GmbH & Co. KG <sup>2)</sup>           | Bad Kreuznach, Deutschland    | 74,00 | EUR | 0  |
| Heidelberg Beton Schwandorf GmbH                                  | Schwandorf, Deutschland       | 42,59 | EUR | 0  |
| Heidelberg Beton Zwickau GmbH & Co. KG <sup>2)</sup>              | Zwickau, Deutschland          | 60,00 | EUR | 1  |
| Heidelberg Betonelemente GmbH & Co. KG <sup>2)</sup>              | Baden-Baden, Deutschland      | 89,89 | EUR | 2  |
| Lithonplus GmbH & Co. KG <sup>2)</sup>                            | Lingenfeld, Deutschland       | 60,00 | EUR | 9  |
| Mibau Holding GmbH                                                | Cadenberge, Deutschland       | 50,00 | EUR | 26 |
| Midland Quarry Products Limited                                   | Whitwick, Großbritannien      | 50,00 | GBP | 59 |
| Reederei Hans Jürgen Hartmann MS 'Beltnes' GmbH & CO KG           | Cadenberge, Deutschland       | 50,00 | EUR | 9  |
| Reederei Hans-Jürgen Hartmann 'MS Bulknes' GmbH & Co. KG          | Cadenberge, Deutschland       | 50,00 | EUR | 10 |
| Sola Betong AS                                                    | Tananger, Norwegen            | 33,33 | NOK | 19 |

| Name der Gesellschaft                                             | Sitz                        | Kapital-<br>anteil<br>in % | Wäh-<br>rung | Eigen-<br>kapital<br>in Mio |
|-------------------------------------------------------------------|-----------------------------|----------------------------|--------------|-----------------------------|
| Specialstabilisering i Stockholm AB                               | Stockholm, Schweden         | 50,00                      | SEK          | 0                           |
| TBG Transportbeton Franken GmbH & Co. KG <sup>2)</sup>            | Fürth, Deutschland          | 51,00                      | EUR          | 1                           |
| TBG Transportbeton GmbH & Co. KG Naabbeton                        | Nabburg, Deutschland        | 50,00                      | EUR          | 1                           |
| TBG Transportbeton Mainfranken GmbH & Co. KG <sup>2)</sup>        | Sand am Main, Deutschland   | 57,00                      | EUR          | 1                           |
| TBG Transportbeton Oder-Spree GmbH & Co. KG                       | Wriezen, Deutschland        | 50,00                      | EUR          | 2                           |
| TBG Transportbeton Saalfeld GmbH & Co. KG <sup>2)</sup>           | Saalfeld, Deutschland       | 56,67                      | EUR          | 0                           |
| Trapobet Transportbeton GmbH Kaiserslautern Kommanditgesellschaft | Kaiserslautern, Deutschland | 50,00                      | EUR          | 2                           |
| UTE "Ave la Seda" <sup>2)</sup>                                   | Barcelona, Spanien          | 60,00                      | EUR          | 2                           |
| Wetterauer Lieferbeton GmbH & Co. KG <sup>2)</sup>                | Bad Nauheim, Deutschland    | 57,50                      | EUR          | 1                           |
| WIKING Baustoff- und Transport GmbH & Co. Kommanditgesellschaft   | Soest, Deutschland          | 50,00                      | EUR          | 0                           |

#### Quotal einbezogene Unternehmen

##### Osteuropa-Zentralasien

|                                          |                              |       |     |        |
|------------------------------------------|------------------------------|-------|-----|--------|
| Brnenske pisky a.s.                      | Nemcicky, Tschechien         | 48,00 | CZK | 27     |
| Duna-Dráva Cement Kft.                   | Vác, Ungarn                  | 50,00 | HUF | 67.216 |
| PÍSKOVNÝ MORAVA spol. s.r.o.             | Brno, Tschechien             | 50,00 | CZK | 41     |
| TBG Doprastav, a.s.                      | Bratislava, Slowakei         | 50,00 | EUR | 11     |
| TBG METROSTAV s.r.o.                     | Praha, Tschechien            | 50,00 | CZK | 449    |
| TBG SWIETELSKY s.r.o. <sup>2)</sup>      | Ceske Budejovice, Tschechien | 51,00 | CZK | 25     |
| Tvornica cementa Kakanj dionicko drustvo | Kakanj, Bosnien-Herzegowina  | 45,58 | BAM | 171    |
| Vltavske sterkopisky s.r.o.              | Chlumin, Tschechien          | 50,00 | CZK | 117    |

#### Quotal einbezogene Unternehmen

##### Nordamerika

|                                |                    |       |     |     |
|--------------------------------|--------------------|-------|-----|-----|
| China Century Cement Ltd.      | Hamilton, Bermudas | 50,00 | HKD | 689 |
| Texas Lehigh Cement Company LP | Austin, USA        | 50,00 | USD | 29  |

#### Quotal einbezogene Unternehmen

##### Asien-Pazifik

|                                                     |                             |       |     |     |
|-----------------------------------------------------|-----------------------------|-------|-----|-----|
| Alliance Construction Materials Ltd                 | Hongkong, Hongkong          | 50,00 | HKD | 236 |
| Cement Australia Holdings Pty Ltd                   | New South Wales, Australien | 25,00 | AUD | 500 |
| Cement Australia Partnership                        | New South Wales, Australien | 25,00 | AUD | 45  |
| Cement Australia Pty Limited                        | Victoria, Australien        | 25,00 | AUD | 0   |
| Easy Point Industrial Ltd.                          | Hongkong, Hongkong          | 50,00 | HKD | 1   |
| Jidong Heidelberg (Fufeng) Cement Company Limited   | Baoji, China                | 48,11 | CNY | 744 |
| Jidong Heidelberg (Jingyang) Cement Company Limited | Xianyang City, China        | 50,00 | CNY | 789 |
| Lytton Unincorporated Joint Venture                 | Queensland, Australien      | 50,00 | AUD | 0   |
| Squareal Cement Ltd                                 | Hongkong, Hongkong          | 50,00 | HKD | -11 |

#### Quotal einbezogene Unternehmen

##### Afrika-Mittelmeerraum

|                                              |                   |       |     |     |
|----------------------------------------------|-------------------|-------|-----|-----|
| Akçansa Çimento Sanayii Ve Ticaret A.S.      | Istanbul, Türkei  | 39,72 | TRY | 838 |
| Hanson Yam Limited Partnership <sup>2)</sup> | Ramat Gan, Israel | 50,98 | ILS | 2   |
| Karcimsa Cimento San.Ve Tic.A.S.             | Karabük, Türkei   | 20,26 | TRY | 23  |

#### Assoziierte Unternehmen

##### West- und Nordeuropa

|                                                               |                             |        |     |   |
|---------------------------------------------------------------|-----------------------------|--------|-----|---|
| Bauelementewerk Hertweck GmbH & Co. KG                        | Baden-Baden, Deutschland    | 32,62  | EUR | 2 |
| Beton/Marketing Nord GmbH <sup>3)</sup>                       | Hannover, Deutschland       | 50,00  | EUR | 0 |
| Betonpumpendienst Simonis GmbH & Co. KG <sup>2)</sup>         | Ubstadt-Weiher, Deutschland | 56,12  | EUR | 3 |
| Betonpumpen-Service Niedersachsen GmbH & Co. KG <sup>3)</sup> | Hannover, Deutschland       | 50,00  | EUR | 0 |
| Betotech GmbH & Co. KG <sup>2)</sup>                          | Heidelberg, Deutschland     | 100,00 | EUR | 0 |
| Betotech GmbH, Baustofftechnisches Labor <sup>2)</sup>        | Amberg, Deutschland         | 60,96  | EUR | 0 |
| Betotech GmbH, Baustofftechnisches Labor <sup>2)</sup>        | Eppelheim, Deutschland      | 58,62  | EUR | 0 |
| betotech München GmbH & Co. KG <sup>2)</sup>                  | München, Deutschland        | 62,50  | EUR | 0 |
| BÜG Beton-Überwachung GmbH <sup>2)</sup>                      | Leimen, Deutschland         | 100,00 | EUR | 0 |
| BVS Beton-Vertrieb-Südbayern GmbH & Co. KG <sup>2)</sup>      | Rohrdorf, Deutschland       | 61,75  | EUR | 2 |
| Condroz Béton S.A. <sup>2)</sup>                              | Bruxelles, Belgien          | 66,92  | EUR | 1 |
| Donau Kies GmbH & Co. KG <sup>2)</sup>                        | Plattling, Deutschland      | 75,00  | EUR | 7 |

| HeidelbergCement bilanziert              |                                                                      |
|------------------------------------------|----------------------------------------------------------------------|
| Gewinn- und Verlustrechnung des Konzerns | Eigenkapitalveränderungsrechnung des Konzerns                        |
| Gesamtergebnisrechnung des Konzerns      | Segmentberichterstattung/Teil des Anhangs                            |
| Kapitalflussrechnung des Konzerns        | Anhang des Konzerns                                                  |
| Bilanz des Konzerns                      | Bericht des Abschlussprüfers/Versicherung der gesetzlichen Vertreter |

| Name der Gesellschaft                                                                                           | Sitz                            | Kapital-<br>anteil<br>in % | Wäh-<br>rung | Eigen-<br>kapital<br>in Mio |
|-----------------------------------------------------------------------------------------------------------------|---------------------------------|----------------------------|--------------|-----------------------------|
| DONAU MÖRTEL - GmbH & Co. KG <sup>3)</sup>                                                                      | Neuburg a. Inn, Deutschland     | 50,00                      | EUR          | 0                           |
| Ernst Marschall GmbH & Co. KG Kies- und Schotterwerke                                                           | Kressbronn, Deutschland         | 20,50                      | EUR          | 4                           |
| Fertigbeton (FBU) GmbH & Co Kommanditgesellschaft Unterwittbach <sup>2)</sup>                                   | Unterwittbach, Deutschland      | 57,14                      | EUR          | 0                           |
| Fredy Lemke Baustoffhandel Spedition und Reederei GmbH & Co. KG <sup>2)</sup>                                   | Berlin, Deutschland             | 100,00                     | EUR          | 0                           |
| Gebrüder Willersinn Industriesandwerk GmbH & Co. KG                                                             | Raunheim, Deutschland           | 33,33                      | EUR          | 1                           |
| GENAMO Gesellschaft zur Entwicklung des Naherholungsgebietes Misburg-Ost mbH <sup>3)</sup>                      | Hannover, Deutschland           | 50,00                      | EUR          | 0                           |
| H.H. & D.E. Drew Limited                                                                                        | New Milton, Großbritannien      | 49,00                      | GBP          | 11                          |
| Hafenbetriebsgesellschaft mbH & Co KG Stade <sup>3)</sup>                                                       | Stade, Deutschland              | 50,00                      | EUR          | 1                           |
| Heidelberger Beton Donau-Iller GmbH & Co. KG                                                                    | Elchingen, Deutschland          | 50,48                      | EUR          | 1                           |
| Heidelberger Beton GmbH & Co Stuttgart KG                                                                       | Remseck a. N., Deutschland      | 33,33                      | EUR          | 0                           |
| Heidelberger Beton Grenzland GmbH & Co. KG <sup>3)</sup>                                                        | Marktredwitz, Deutschland       | 50,00                      | EUR          | 1                           |
| Heidelberger Beton Nesselwang GmbH & Co. KG <sup>2)</sup>                                                       | Nesselwang, Deutschland         | 60,00                      | EUR          | 0                           |
| Heidelberger Fließestrich Südwest GmbH <sup>2)</sup>                                                            | Eppelheim, Deutschland          | 56,76                      | EUR          | 0                           |
| Hessisches Bausteinwerk Dr. Blasberg GmbH & Co. KG                                                              | Mörfelden-Walldorf, Deutschland | 47,08                      | EUR          | 4                           |
| Humber Sand and Gravel Limited <sup>3)</sup>                                                                    | Egham, Großbritannien           | 50,00                      | GBP          | 0                           |
| ID Beton N.V. <sup>3)</sup>                                                                                     | Zeebrugge, Belgien              | 50,00                      | EUR          | 0                           |
| ISAR-DONAU MÖRTEL-GmbH & Co. KG                                                                                 | Passau, Deutschland             | 33,33                      | EUR          | 0                           |
| Kalksandsteinwerke Birkenmeier Gesellschaft mit beschränkter Haftung                                            | Breisach am Rhein, Deutschland  | 40,00                      | EUR          | 3                           |
| KANN Beton GmbH & Co. KG <sup>3)</sup>                                                                          | Bendorf, Deutschland            | 50,00                      | EUR          | 2                           |
| Kieswerk Langsdorf GmbH <sup>2)</sup>                                                                           | Langsdorf, Deutschland          | 62,45                      | EUR          | 2                           |
| Kieswerke Flemmingen GmbH <sup>2)</sup>                                                                         | Penig, Deutschland              | 54,00                      | EUR          | 1                           |
| Kronimus Aktiengesellschaft                                                                                     | Iffezheim, Deutschland          | 24,90                      | EUR          | 20                          |
| KVB Kies- Vertrieb GmbH & Co. KG                                                                                | Karlsdorf-Neuthard, Deutschland | 24,90                      | EUR          | 0                           |
| MDB Mörteldienst GmbH & Co. KG Berlin-Brandenburg <sup>2)</sup>                                                 | Berlin, Deutschland             | 90,00                      | EUR          | 0                           |
| MDF Mörtel- und Estrich-Dienst Franken GmbH & Co. KG                                                            | Nürnberg, Deutschland           | 26,52                      | EUR          | 0                           |
| Meier Betonwerk GmbH u. Co KG <sup>3)</sup>                                                                     | Claußnitz, Deutschland          | 50,00                      | EUR          | 0                           |
| Meier Betonwerk GmbH u. Co KG <sup>3)</sup>                                                                     | Teuchern, Deutschland           | 50,00                      | EUR          | 0                           |
| Mendip Rail Limited <sup>3)</sup>                                                                               | Markfield, Großbritannien       | 50,00                      | GBP          | 3                           |
| MERMANS BETON N.V.                                                                                              | Arendonk, Belgien               | 49,91                      | EUR          | 1                           |
| Misburger Hafengesellschaft mit beschränkter Haftung                                                            | Hannover, Deutschland           | 39,66                      | EUR          | 1                           |
| Mittelschwäbische Transport- und Frischbeton- Gesellschaft mit beschränkter Haftung & Co. Kommanditgesellschaft | Thannhausen, Deutschland        | 30,23                      | EUR          | 0                           |
| MM MAIN-MÖRTEL GmbH & Co.KG <sup>2)</sup>                                                                       | Aschaffenburg, Deutschland      | 59,74                      | EUR          | 0                           |
| NCD Nederlandse Cement Deelnemingsmaatschappij B.V.                                                             | Nieuwegein, Niederlande         | 36,88                      | EUR          | 1                           |
| Nederlands Cement Transport Cetra B.V. <sup>3)</sup>                                                            | Amsterdam, Niederlande          | 50,00                      | EUR          | 2                           |
| North Tyne Roadstone Limited <sup>3)</sup>                                                                      | Wolverhampton, Großbritannien   | 50,00                      | GBP          | 1                           |
| OVRC NV                                                                                                         | Bruxelles, Belgien              | 49,91                      | EUR          | 0                           |
| Peene Kies GmbH                                                                                                 | Jarmen, Deutschland             | 24,90                      | EUR          | 4                           |
| Peters Cementoverslagbedrijf B.V. Den Hout                                                                      | Breda, Niederlande              | 33,33                      | EUR          | 2                           |
| Purfleet Aggregates Limited <sup>3)</sup>                                                                       | Maidenhead, Großbritannien      | 50,00                      | GBP          | 0                           |
| Raunheimer Sand- und Kiesgewinnung Blasberg GmbH & Co. KG                                                       | Raunheim, Deutschland           | 23,53                      | EUR          | 1                           |
| Rederij Cement-Tankvaart B.V. <sup>2)</sup>                                                                     | Terneuzen, Niederlande          | 66,66                      | EUR          | 6                           |
| Renor Loop Service AS <sup>3)</sup>                                                                             | Björkelangen, Norwegen          | 50,00                      | NOK          | 2                           |
| Rhein-Neckar-Mörtel GmbH & Co. KG i.L.                                                                          | Bruchsal, Deutschland           | 23,03                      | EUR          | 0                           |
| S.A. Cimescaut                                                                                                  | Tournai, Belgien                | 34,02                      | EUR          | 27                          |
| SAFA Saarfilterasche-Vertriebs-GmbH & Co. Kommanditgesellschaft.                                                | Baden-Baden, Deutschland        | 30,00                      | EUR          | 1                           |
| SBU Sandwerke Dresden GmbH                                                                                      | Dresden, Deutschland            | 24,00                      | EUR          | 2                           |
| Schwaben Mörtel GmbH u. Co.KG                                                                                   | Stuttgart, Deutschland          | 30,00                      | EUR          | 0                           |
| Smiths Concrete Limited                                                                                         | Oxford, Großbritannien          | 49,00                      | GBP          | 7                           |
| SMW Sand und Mörtelwerk GmbH & Co. KG <sup>2)</sup>                                                             | Niederlehme, Deutschland        | 100,00                     | EUR          | 1                           |
| Südbayerisches Portland-Zementwerk Gebr. Wiesböck & Co. GmbH                                                    | Rohrdorf, Deutschland           | 24,99                      | EUR          | 242                         |
| Tangen Eiendom AS <sup>3)</sup>                                                                                 | Brevik, Norwegen                | 50,00                      | NOK          | 17                          |
| TBG Bayerwald Transportbeton GmbH & Co. KG <sup>3)</sup>                                                        | Straubing, Deutschland          | 50,00                      | EUR          | 0                           |
| TBG Deggendorfer Transportbeton GmbH                                                                            | Deggendorf, Deutschland         | 33,33                      | EUR          | 1                           |
| TBG Ilm-Beton GmbH & Co. KG <sup>2)</sup>                                                                       | Arnstadt, Deutschland           | 55,00                      | EUR          | 1                           |
| TBG KANN Beton Guben GmbH & Co. KG <sup>3)</sup>                                                                | Guben, Deutschland              | 50,00                      | EUR          | 0                           |
| TBG Lieferbeton Karlsruhe GmbH & Co. KG                                                                         | Karlsruhe, Deutschland          | 38,00                      | EUR          | 1                           |
| TBG Pegnitz-Beton GmbH & Co. KG                                                                                 | Hersbruck, Deutschland          | 28,00                      | EUR          | 0                           |
| TBG Rott Kies und Transportbeton GmbH                                                                           | Kelheim, Deutschland            | 20,40                      | EUR          | 1                           |
| TBG Saale-Beton GmbH & Co. KG                                                                                   | Hammelburg, Deutschland         | 29,07                      | EUR          | 0                           |
| TBG Transportbeton Aue-Schwarzenberg GmbH & Co. KG <sup>2)</sup>                                                | Schwarzenberg, Deutschland      | 54,00                      | EUR          | 0                           |
| TBG Transportbeton Bad Mergentheim GmbH & Co KG                                                                 | Bad Mergentheim, Deutschland    | 38,00                      | EUR          | 0                           |
| TBG Transportbeton Caprano GmbH & Co. KG <sup>3)</sup>                                                          | Pirmasens, Deutschland          | 50,00                      | EUR          | 0                           |

| Name der Gesellschaft                                                                    | Sitz                               | Kapital-<br>anteil<br>in % | Wäh-<br>rung | Eigen-<br>kapital<br>in Mio |
|------------------------------------------------------------------------------------------|------------------------------------|----------------------------|--------------|-----------------------------|
| TBG Transportbeton Elsenz GmbH & Co. KG <sup>2)</sup>                                    | Bammental, Deutschland             | 51,11                      | EUR          | 0                           |
| TBG Transportbeton Elster-Spree GmbH & Co. KG <sup>2)</sup>                              | Cottbus, Deutschland               | 60,00                      | EUR          | 0                           |
| TBG Transportbeton Gesellschaft, Eck-Beton, Eck GmbH & Co. KG                            | Bad Windsheim, Deutschland         | 28,50                      | EUR          | 0                           |
| TBG Transportbeton Glöckle GmbH & Co. KG                                                 | Grafenrheinfeld, Deutschland       | 31,35                      | EUR          | 0                           |
| TBG Transportbeton GmbH & Co. KG Betonpumpendienst <sup>2)</sup>                         | Nabburg, Deutschland               | 52,54                      | EUR          | 1                           |
| TBG Transportbeton GmbH & Co. KG Lohr-Beton <sup>3)</sup>                                | Lohr a. Main, Deutschland          | 50,00                      | EUR          | 0                           |
| TBG Transportbeton Meier GmbH & Co. KG <sup>3)</sup>                                     | Wilkau-Haßlau, Deutschland         | 50,00                      | EUR          | 0                           |
| TBG Transportbeton Mittweida GmbH & Co. KG                                               | Mittweida, Deutschland             | 40,00                      | EUR          | 0                           |
| TBG Transportbeton Pfaffenhofen GmbH & Co. KG                                            | Pfaffenhofen, Deutschland          | 35,61                      | EUR          | 0                           |
| TBG Transportbeton Reichenbach GmbH & Co. KG <sup>2)</sup>                               | Reichenbach, Deutschland           | 70,00                      | EUR          | 1                           |
| TBG Transportbeton Rhein-Donau-Raum GmbH & Co. KG                                        | Singen, Deutschland                | 36,90                      | EUR          | 0                           |
| TBG Transportbeton Schleiz GmbH & Co. KG <sup>3)</sup>                                   | Schleiz, Deutschland               | 50,00                      | EUR          | 0                           |
| TBG Transportbeton Selb GmbH & Co. KG                                                    | Selb, Deutschland                  | 33,33                      | EUR          | 0                           |
| TBG Transportbeton Werner GmbH & Co. KG                                                  | Dietfurt a.d. Altmühl, Deutschland | 42,50                      | EUR          | 0                           |
| TBM Transportbeton-Gesellschaft mbH Marienfeld & Co. Kommanditgesellschaft <sup>2)</sup> | Marienfeld, Deutschland            | 64,69                      | EUR          | 0                           |
| Trans CBR S.A. <sup>2)</sup>                                                             | Bruxelles, Belgien                 | 100,00                     | EUR          | 1                           |
| Transbeton Gesellschaft mit beschränkter Haftung & Co Kommanditgesell-<br>schaft         | Löhne, Deutschland                 | 26,81                      | EUR          | 1                           |
| Transportbeton - Gesellschaft m.b.H. 'Garant' & Co., Kommanditgesellschaft               | Bad Salzuffen, Deutschland         | 30,00                      | EUR          | 1                           |
| Transportbeton Bad Waldsee GmbH & Co. KG <sup>2)</sup>                                   | Bad Waldsee, Deutschland           | 64,00                      | EUR          | 0                           |
| Transportbeton Beuschlein GmbH & Co. KG                                                  | Würzburg, Deutschland              | 28,50                      | EUR          | 0                           |
| Union Beton Werke GmbH                                                                   | Söchtenau, Deutschland             | 43,54                      | EUR          | 2                           |
| WEIDEMANN GmbH                                                                           | Beckum, Deutschland                | 22,00                      | EUR          | 2                           |
| Westfalia Transportbetonunion GmbH & Co. KG                                              | Werl, Deutschland                  | 25,00                      | EUR          | 0                           |
| WTG Walhalla Transportbeton GmbH                                                         | Regensburg, Deutschland            | 28,33                      | EUR          | 0                           |
| Zement- und Kalkwerke Otterbein GmbH & Co. KG                                            | Müs, Deutschland                   | 38,10                      | EUR          | 1                           |

#### Assoziierte Unternehmen

##### Osteuropa-Zentralasien

|                                                          |                               |        |     |     |
|----------------------------------------------------------|-------------------------------|--------|-----|-----|
| BETONIKA plus s.r.o.                                     | Luzec nad Vltavou, Tschechien | 33,33  | CZK | 85  |
| CEMET S.A.                                               | Warsaw, Polen                 | 42,91  | PLN | 52  |
| Centrum Technologiczne Betotech Sp. z o.o. <sup>2)</sup> | Katowice, Polen               | 99,99  | PLN | 4   |
| Gorazdze Trans Sp z o.o. w likwidacji <sup>2)</sup>      | Opole, Polen                  | 99,99  | PLN | 4   |
| Open Joint Stock Company "Mineral Resources Company"     | Ishimbay, Russland            | 25,50  | RUB | 759 |
| Podgrodzie Sp. z o.o. <sup>2)</sup>                      | Wroclaw, Polen                | 100,00 | PLN | 14  |
| PREFA Grygov a.s. <sup>2)</sup>                          | Grygov, Tschechien            | 53,73  | CZK | 70  |
| SP Bohemia, k.s. <sup>2)</sup>                           | Kraluv Dvur, Tschechien       | 75,00  | CZK | 233 |
| TBG Betonove stavby Klatovy s.r.o.                       | Beroun, Tschechien            | 25,05  | CZK | 42  |
| TBG Louny s.r.o.                                         | Louny, Tschechien             | 33,33  | CZK | 34  |
| TBG PKS a.s.                                             | Zdar nad Sazavou, Tschechien  | 29,70  | CZK | 29  |
| TBG Wroclaw Sp. z o.o. <sup>3)</sup>                     | Wroclaw, Polen                | 50,00  | PLN | 7   |

#### Assoziierte Unternehmen

##### Nordamerika

|                                                                                         |                          |        |     |    |
|-----------------------------------------------------------------------------------------|--------------------------|--------|-----|----|
| Allied Cement Company, d/b/a CPC Terminals (Limited Partnership Interest) <sup>3)</sup> | Austin, USA              | 50,00  | USD | 1  |
| American Stone Company <sup>3)</sup>                                                    | Raleigh, USA             | 50,00  | USD | 4  |
| California Commercial Asphalt Company LLC <sup>3)</sup>                                 | Wilmington, USA          | 50,00  | USD | 9  |
| Cemstone Products Company                                                               | St. Paul, USA            | 49,45  | USD | 10 |
| Cemstone Ready Mix Inc.                                                                 | Madison, USA             | 44,01  | USD | 4  |
| Chandler Concrete/Piedmont, Inc.                                                        | Raleigh, USA             | 33,33  | USD | 7  |
| Chaney Enterprises Limited Partnership                                                  | Olympia, USA             | 25,00  | USD | 13 |
| Concrete Accessory Manufacturing <sup>3)</sup>                                          | Bingham Farms, USA       | 50,00  | USD | 0  |
| KSA Limited Partnership <sup>3)</sup>                                                   | Columbus, USA            | 50,00  | USD | 1  |
| Newbury Development Associates, LP <sup>2)</sup>                                        | Pennsylvania, USA        | 100,00 | USD | 3  |
| Red Bluff Sand & Gravel, L.L.C. <sup>3)</sup>                                           | Montgomery, USA          | 50,00  | USD | 2  |
| Southstar Limited Partnership                                                           | Annapolis, USA           | 25,00  | USD | 15 |
| Twin City Concrete Products Co.                                                         | St. Paul, USA            | 33,63  | USD | 11 |
| Two Rivers Cement LLC <sup>3)</sup>                                                     | Newport Beach, USA       | 50,00  | USD | 23 |
| Upland Ready Mix Ltd. <sup>3)</sup>                                                     | British Columbia, Kanada | 50,00  | CAD | 1  |

| HeidelbergCement bilanziert              |                                                                      |
|------------------------------------------|----------------------------------------------------------------------|
| Gewinn- und Verlustrechnung des Konzerns | Eigenkapitalveränderungsrechnung des Konzerns                        |
| Gesamtergebnisrechnung des Konzerns      | Segmentberichterstattung/Teil des Anhangs                            |
| Kapitalflussrechnung des Konzerns        | Anhang des Konzerns                                                  |
| Bilanz des Konzerns                      | Bericht des Abschlussprüfers/Versicherung der gesetzlichen Vertreter |

| Name der Gesellschaft | Sitz | Kapital-<br>anteil<br>in % | Wäh-<br>rung | Eigen-<br>kapital<br>in Mio |
|-----------------------|------|----------------------------|--------------|-----------------------------|
|-----------------------|------|----------------------------|--------------|-----------------------------|

| Assoziierte Unternehmen                                 |                             |       |     |        |
|---------------------------------------------------------|-----------------------------|-------|-----|--------|
| Asien-Pazifik                                           |                             |       |     |        |
| M&H Quarries Partnership <sup>3)</sup>                  | Victoria, Australien        | 50,00 | AUD | -1     |
| Metromix Pty Limited <sup>3)</sup>                      | New South Wales, Australien | 50,00 | AUD | 24     |
| Penrith Lakes Development Corporation Limited           | New South Wales, Australien | 20,00 | AUD | -299   |
| PT Bhakti Sari Perkasa Abadi <sup>2)</sup>              | Jakarta, Indonesien         | 51,00 | IDR | 13     |
| PT Cibinong Center Industrial Estate                    | Jakarta, Indonesien         | 25,50 | IDR | 35.980 |
| PT Lentera Abadi Sejahtera <sup>2)</sup>                | Jakarta, Indonesien         | 51,00 | IDR | 4      |
| PT Makmur Abadi Perkasa Mandiri <sup>2)</sup>           | Jakarta, Indonesien         | 51,00 | IDR | 13     |
| PT Pama Indo Mining                                     | Jakarta, Indonesien         | 20,40 | IDR | 33.449 |
| West Australian Landfill Services Pty Ltd <sup>3)</sup> | Victoria, Australien        | 50,00 | AUD | 3      |
| Western Suburbs Concrete Partnership <sup>3)</sup>      | New South Wales, Australien | 50,00 | AUD | 6      |

| Assoziierte Unternehmen      |                       |       |     |       |
|------------------------------|-----------------------|-------|-----|-------|
| Afrika - Mittelmeerraum      |                       |       |     |       |
| Alrashid Abetong Company Ltd | Riyadh, Saudi Arabien | 45,00 | SAR | 120   |
| Fortia Cement S.A.           | Lome, Togo            | 46,97 | XAF | 7.646 |

Folgende Tochterunternehmen werden aufgrund ihrer untergeordneten Bedeutung zu Anschaffungskosten („Available for sale at cost“) in den Konzernabschluss einbezogen.

| Name der Gesellschaft | Sitz | Kapital-<br>anteil<br>in % | Wäh-<br>rung | Eigen-<br>kapital<br>in Mio | Er-<br>gebnis<br>in Mio |
|-----------------------|------|----------------------------|--------------|-----------------------------|-------------------------|
|-----------------------|------|----------------------------|--------------|-----------------------------|-------------------------|

| Tochterunternehmen von untergeordneter Bedeutung <sup>a)</sup>            |                                      |        |     |   |   |
|---------------------------------------------------------------------------|--------------------------------------|--------|-----|---|---|
| West- und Nordeuropa                                                      |                                      |        |     |   |   |
| ACOM Prefa sarl - Agence Commercial Prefa sarl                            | Brumath, Frankreich                  | 89,89  | EUR | 0 | 0 |
| B.V. Mortel Installatie Assen 'M.I.A.'                                    | Assen, Niederlande                   | 66,67  | EUR | 2 | 1 |
| Bausteinwerk Bott - Blasberg G.m.b.H. & Co. Kommanditgesellschaft         | Heppenheim (Bergstraße), Deutschland | 61,58  | EUR | 1 | 0 |
| Betonpumpendienst Simonis Verwaltungsgesellschaft mbH                     | Ubstadt-Weiher, Deutschland          | 56,07  | EUR | 0 | 0 |
| betotech München Verwaltungs GmbH                                         | München, Deutschland                 | 62,50  | EUR | 0 | 0 |
| Betotech Verwaltungs-GmbH                                                 | Heidelberg, Deutschland              | 100,00 | EUR | 0 | 0 |
| BLG Beteiligungen GmbH                                                    | München, Deutschland                 | 61,75  | EUR | 0 | 0 |
| BVS Beton-Vertrieb-Südbayern Verwaltung GmbH                              | Rohrdorf, Deutschland                | 61,75  | EUR | 0 | 0 |
| Donau Kies Verwaltungs GmbH                                               | Plattling, Deutschland               | 75,00  | EUR | 0 | 0 |
| Etablissement F.S. Bivois SARL                                            | Strasbourg, Frankreich               | 60,00  | EUR | 0 | 0 |
| Feroc Ver- und Entsorgungshandelsgesellschaft mbH                         | Seesen, Deutschland                  | 76,00  | EUR | 0 | 0 |
| Fertigbeton (FBU) GmbH                                                    | Unterwittbach, Deutschland           | 57,14  | EUR | 0 | 0 |
| FML Restoration Limited                                                   | Maidenhead, Großbritannien           | 100,00 | GBP | 0 | 0 |
| Hanson Aggregates Verwaltungs-GmbH                                        | Leinatal, Deutschland                | 100,00 | EUR | 0 | 0 |
| HeidelbergCement Baustoffe für Geotechnik Verwaltungs-GmbH                | Ennigerloh, Deutschland              | 100,00 | EUR | 0 | 0 |
| HeidelbergCement Grundstücksgesellschaft Wetzlar Verwaltungs-GmbH         | Heidelberg, Deutschland              | 100,00 | EUR | 0 | 0 |
| HeidelbergCement Grundstücksverwaltungsgesellschaft mbH                   | Heidelberg, Deutschland              | 100,00 | EUR | 0 | 0 |
| HeidelbergCement Malta Prima Limited                                      | Valletta, Malta                      | 100,00 | EUR | 0 | 0 |
| HeidelbergCement Shared Services GmbH                                     | Leimen, Deutschland                  | 100,00 | EUR | 0 | 0 |
| HeidelbergCement Technology Center GmbH                                   | Heidelberg, Deutschland              | 100,00 | EUR | 0 | 0 |
| Heidelberger Beton Aschaffenburg Verwaltungs-GmbH                         | Aschaffenburg, Deutschland           | 70,74  | EUR | 0 | 0 |
| Heidelberger Beton Donau-Iller Verwaltungs-GmbH                           | Unterelchingen, Deutschland          | 50,46  | EUR | 0 | 0 |
| Heidelberger Beton Donau-Naab Verwaltungsgesellschaft mbH                 | Burglengenfeld, Deutschland          | 85,00  | EUR | 0 | 0 |
| Heidelberger Beton Nesselwang Verwaltungs-GmbH                            | Nesselwang, Deutschland              | 60,06  | EUR | 0 | 0 |
| Heidelberger Beton Rhein-Nahe Verwaltungs-GmbH                            | Bad Kreuznach, Deutschland           | 74,04  | EUR | 0 | 0 |
| Heidelberger Beton Zwickau Verwaltungs-GmbH                               | Zwickau, Deutschland                 | 60,00  | EUR | 0 | 0 |
| Heidelberger Betonelemente Verwaltungs-GmbH                               | Baden-Baden, Deutschland             | 89,89  | EUR | 0 | 0 |
| Heidelberger Betonelemente Verwaltungs-GmbH                               | Chemnitz, Deutschland                | 83,00  | EUR | 0 | 0 |
| Heidelberger Betonpumpen Rhein-Main-Nahe Verwaltungs-GmbH                 | Frankfurt/Main, Deutschland          | 93,74  | EUR | 0 | 0 |
| Heidelberger Energie GmbH                                                 | Heidelberg, Deutschland              | 100,00 | EUR | 0 | 0 |
| Heidelberger Kalksandstein Grundstücks- und Beteiligungs-Verwaltungs-GmbH | Durmersheim, Deutschland             | 100,00 | EUR | 0 | 0 |
| Heidelberger KS Beteiligungen Deutschland Verwaltungsgesellschaft mbH     | Heidelberg, Deutschland              | 100,00 | EUR | 0 | 0 |
| Heidelberger Sand und Kies Handel & Logistik GmbH                         | Essen, Deutschland                   | 100,00 | EUR | 0 | 0 |



| Name der Gesellschaft                                                                         | Sitz                            | Kapital-<br>anteil<br>in % | Wäh-<br>rung | Eigen-<br>kapital<br>in Mio | Er-<br>gebnis<br>in Mio |
|-----------------------------------------------------------------------------------------------|---------------------------------|----------------------------|--------------|-----------------------------|-------------------------|
| Heidelberger Sand und Kies Handels- und Vertriebs-GmbH                                        | Heidelberg, Deutschland         | 100,00                     | EUR          | 0                           | 0                       |
| Heidelberger Weserkies Verwaltungs-GmbH                                                       | Bremen, Deutschland             | 100,00                     | EUR          | 0                           | 0                       |
| Kalksandsteinwerk Amberg GmbH & Co. KG                                                        | Ebermannsdorf, Deutschland      | 50,10                      | EUR          | 2                           | 0                       |
| Kalksandsteinwerk Amberg Verwaltungs-GmbH                                                     | Ebermannsdorf, Deutschland      | 50,10                      | EUR          | 0                           | 0                       |
| Kazakhstan Cement Holding B.V.                                                                | 's-Hertogenbosch, Niederlande   | 100,00                     | EUR          | 0                           | 0                       |
| Kieswerke Kieser GmbH & Co. KG                                                                | Gotha, Deutschland              | 51,00                      | EUR          | 1                           | 0                       |
| Kieswerke Kieser Verwaltungs-GmbH                                                             | Gotha, Deutschland              | 51,00                      | EUR          | 0                           | 0                       |
| L e m k e & Co. Baustoffhandel, Spedition und Reederei, Gesellschaft mit beschränkter Haftung | Berlin, Deutschland             | 100,00                     | EUR          | 0                           | 0                       |
| Lieferbeton Gesellschaft mit beschränkter Haftung                                             | Bad Nauheim, Deutschland        | 57,60                      | EUR          | 0                           | 0                       |
| Lithonplus Verwaltungs-GmbH                                                                   | Lingenfeld, Deutschland         | 60,00                      | EUR          | 0                           | 0                       |
| Marmor-Industrie Kiefer GmbH                                                                  | Kiefersfelden, Deutschland      | 100,00                     | EUR          | 1                           | 0                       |
| Materiaux de Boran S.A.                                                                       | Boran-sur-Oise, Frankreich      | 99,84                      | EUR          | 0                           | 0                       |
| MDB Mörteldienst Verwaltungs-GmbH Berlin-Brandenburg                                          | Berlin, Deutschland             | 90,00                      | EUR          | 0                           | 0                       |
| MM MAIN-MÖRTEL Verwaltungsgesellschaft mbH                                                    | Aschaffenburg, Deutschland      | 59,74                      | EUR          | 0                           | 0                       |
| NAAB Mörtel GmbH                                                                              | Schwandorf, Deutschland         | 53,51                      | EUR          | 0                           | 0                       |
| NedCem Holding B.V.                                                                           | 's-Hertogenbosch, Niederlande   | 100,00                     | EUR          | 0                           | 0                       |
| Paderborner Transport - Beton - Gesellschaft mit beschränkter Haftung                         | Paderborn, Deutschland          | 75,00                      | EUR          | 0                           | 0                       |
| Pioneer Investments UK Limited                                                                | Maidenhead, Großbritannien      | 100,00                     | GBP          | 0                           | 0                       |
| Quadro Bausysteme GmbH                                                                        | Durmursheim, Deutschland        | 80,00                      | EUR          | 0                           | 0                       |
| RLG Rohstoffe GmbH & Co. KG                                                                   | Essen, Deutschland              | 100,00                     | EUR          | 0                           | 0                       |
| RLG Rohstoffe Verwaltungsgesellschaft mbH                                                     | Mülheim a. d. Ruhr, Deutschland | 100,00                     | EUR          | 0                           | 0                       |
| Roewekamp GmbH                                                                                | Gelsenkirchen, Deutschland      | 100,00                     | EUR          | 0                           | 0                       |
| SBM Systembaumontagen GmbH                                                                    | Chemnitz, Deutschland           | 83,00                      | EUR          | 0                           | 0                       |
| SCI Bicowal                                                                                   | Strasbourg, Frankreich          | 60,00                      | EUR          | 0                           | 0                       |
| SMW Sand und Mörtelwerk Verwaltungs-GmbH                                                      | Niederlehme, Deutschland        | 100,00                     | EUR          | 0                           | 0                       |
| SPRL Ferme de Wisempierre                                                                     | Saint-Maur-Ere, Belgien         | 100,00                     | EUR          | 2                           | 0                       |
| SRS Rail Vehicles AB                                                                          | Osby, Schweden                  | 100,00                     | SEK          | 1                           | 0                       |
| SRS Sjölanders AB                                                                             | Stockholm, Schweden             | 100,00                     | SEK          | 4                           | -6                      |
| Svabo Kaross & Hydraulservice AB                                                              | Stockholm, Schweden             | 51,00                      | SEK          | 0                           | 0                       |
| TBG Ilm-Beton Verwaltungs-GmbH                                                                | Arnstadt, Deutschland           | 55,00                      | EUR          | 0                           | 0                       |
| TBG Transportbeton Elsenz Verwaltungsgesellschaft mbH                                         | Bammental, Deutschland          | 51,11                      | EUR          | 0                           | 0                       |
| TBG Transportbeton Elster-Spree Verwaltungs-GmbH                                              | Cottbus, Deutschland            | 60,00                      | EUR          | 0                           | 0                       |
| TBG Transportbeton Franken Geschäftsführung GmbH                                              | Fürth, Deutschland              | 51,00                      | EUR          | 0                           | 0                       |
| TBG Transportbeton Kurpfalz Verwaltungsgesellschaft mbH                                       | Eppelheim, Deutschland          | 51,11                      | EUR          | 0                           | 0                       |
| TBG Transportbeton Mainfranken Geschäftsführungs GmbH                                         | Sand am Main, Deutschland       | 57,00                      | EUR          | 0                           | 0                       |
| TBG Transportbeton Reichenbach Verwaltungs-GmbH                                               | Reichenbach, Deutschland        | 70,00                      | EUR          | 0                           | 0                       |
| TBG Transportbeton Saalfeld Verwaltungs-GmbH                                                  | Saalfeld, Deutschland           | 56,67                      | EUR          | 0                           | 0                       |
| TBG Transportbeton Schwarzenberg Verwaltungs-GmbH                                             | Schwarzenberg, Deutschland      | 60,00                      | EUR          | 0                           | 0                       |
| TBG WIKÄ-Beton Verwaltungs-GmbH                                                               | Stade, Deutschland              | 100,00                     | EUR          | 0                           | 0                       |
| TBH Transportbeton Hamburg Verwaltungs GmbH                                                   | Hamburg, Deutschland            | 85,00                      | EUR          | 0                           | 0                       |
| TBM Transportbeton-Gesellschaft mit beschränkter Haftung Marienfeld                           | Harsewinkel, Deutschland        | 64,69                      | EUR          | 0                           | 0                       |
| TopCem Holding B.V.                                                                           | 's-Hertogenbosch, Niederlande   | 100,00                     | EUR          | 0                           | 0                       |
| Transportbeton Bad Waldsee Geschäftsführungs GmbH                                             | Bad Waldsee, Deutschland        | 64,00                      | EUR          | 0                           | 0                       |
| Verwaltungsgesellschaft Baustoffwerke Dresden mbH                                             | Dresden, Deutschland            | 51,00                      | EUR          | 0                           | 0                       |
| Walhalla Kalk Verwaltungsgesellschaft mbH                                                     | Regensburg, Deutschland         | 80,00                      | EUR          | 0                           | 0                       |

#### Tochterunternehmen von untergeordneter Bedeutung <sup>a)</sup>

##### Osteuropa-Zentralasien

|                                                  |                                 |        |     |      |     |
|--------------------------------------------------|---------------------------------|--------|-----|------|-----|
| Bratislavské štrkopiesky, s.r.o.                 | Blatne, Slowakei                | 75,00  | EUR | -1   | 0   |
| Budejovicke Sterkopisky, spol. s.r.o.            | Budweis, Tschechien             | 73,50  | CZK | 21   | 2   |
| Bukhtarma TeploEnergo LLP                        | Oktyabrskiy village, Kasachstan | 100,00 | KZT | -164 | -98 |
| Bukhtarma Vodokanal LLP                          | Oktyabrskiy village, Kasachstan | 100,00 | KZT | -81  | -8  |
| CEMTECH akciová spoločnosť v likvidácii          | Mokra, Tschechien               | 100,00 | CZK | 1    | 0   |
| Center Cement Plus Limited Liability Partnership | Astana, Kasachstan              | 100,00 | KZT | 193  | 36  |
| Donau Kies Bohemia Verwaltungs, s.r.o.           | Pilsen, Tschechien              | 75,00  | CZK | 0    | 0   |
| Donau Kies Bohemia, s.r.o.                       | Kraluv Dvur, Tschechien         | 75,00  | CZK | 17   | 1   |
| HeidelbergCement Services - LLP                  | Almaty, Kasachstan              | 100,00 | KZT | 12   | 9   |
| Klatovske sterkopisky s.r.o.                     | Pilsen, Tschechien              | 71,25  | CZK | -8   | 0   |
| Labske sterkopisky a beton s.r.o.                | Litomerice, Tschechien          | 60,00  | CZK | -4   | 0   |
| LLC 'HeidelbergCement Caucasus Shared Services'  | Tbilisi, Georgien               | 100,00 | GEL | 0    | 0   |
| MIXT Sp. z o. o.                                 | Opole, Polen                    | 99,99  | PLN | 4    | 1   |
| OOO StrelicaCement                               | Strelica, Russland              | 100,00 | RUB | 1    | -1  |

| HeidelbergCement bilanziert              |                                                                      |
|------------------------------------------|----------------------------------------------------------------------|
| Gewinn- und Verlustrechnung des Konzerns | Eigenkapitalveränderungsrechnung des Konzerns                        |
| Gesamtergebnisrechnung des Konzerns      | Segmentberichterstattung/Teil des Anhangs                            |
| Kapitalflussrechnung des Konzerns        | Anhang des Konzerns                                                  |
| Bilanz des Konzerns                      | Bericht des Abschlussprüfers/Versicherung der gesetzlichen Vertreter |

| Name der Gesellschaft                                                                                   | Sitz                           | Kapital-<br>anteil<br>in % | Wäh-<br>rung | Eigen-<br>kapital<br>in Mio | Er-<br>gebnis<br>in Mio |
|---------------------------------------------------------------------------------------------------------|--------------------------------|----------------------------|--------------|-----------------------------|-------------------------|
| Plzenske sterkopisky s.r.o.                                                                             | Pilsen, Tschechien             | 60,00                      | CZK          | -3                          | 4                       |
| Polgrunt Sp. z o. o.                                                                                    | Opole, Polen                   | 99,99                      | PLN          | 1                           | 0                       |
| PZP Bohemia, k.s.                                                                                       | Kraluv Dvur, Tschechien        | 75,00                      | CZK          | 0                           | 0                       |
| ROBA sterkovny Nové Sedlo s.r.o.                                                                        | Roztyly cp.3., Tschechien      | 75,00                      | CZK          | -12                         | 4                       |
| SABIA spol. s.r.o.                                                                                      | Bohusovice nad Ori, Tschechien | 59,40                      | CZK          | 9                           | 2                       |
| Severoceske piskovny a sterkovny s.r.o.                                                                 | Zatec, Tschechien              | 73,50                      | CZK          | 70                          | 16                      |
| TRANS-SERVIS spol. s.r.o.                                                                               | Kraluv Dvur, Tschechien        | 100,00                     | CZK          | 78                          | -1                      |
| Udružene Pjescare i šljuncare d.o.o., za istraživanje i iskorištavanje pijeska i šljunka, u likvidacije | Zagreb, Kroatien               | 100,00                     | HRK          | 0                           | 0                       |
| VAPIS stavebni hmoty s.r.o.                                                                             | Praha, Tschechien              | 51,00                      | CZK          | 1                           | 0                       |

| Tochterunternehmen von untergeordneter Bedeutung <sup>a)</sup> |                         |        |     |    |   |
|----------------------------------------------------------------|-------------------------|--------|-----|----|---|
| Nordamerika                                                    |                         |        |     |    |   |
| Campbell Transportation Services LLC <sup>**)</sup>            | Austin, USA             | 99,00  | USD | 16 | 0 |
| Cementi Meridionali Ltd.                                       | Tortola, Jungferninseln | 100,00 | USD | 2  | 0 |
| Gypsum Carrier Inc                                             | Panama City, Panama     | 100,00 | GBP | 55 | 0 |
| Mediterranean Carriers, Inc.                                   | Panama City, Panama     | 100,00 | USD | -3 | 0 |
| Piedras y Arenas Baja SA de CV                                 | Tijuana, Mexiko         | 100,00 | MXN | 0  | 0 |

| Tochterunternehmen von untergeordneter Bedeutung <sup>a)</sup> |                 |        |     |   |   |
|----------------------------------------------------------------|-----------------|--------|-----|---|---|
| Asien-Pazifik                                                  |                 |        |     |   |   |
| HC Trading Office Shanghai - Liason office                     | Shanghai, China | 100,00 | CNY | 0 | 0 |

| Tochterunternehmen von untergeordneter Bedeutung <sup>a)</sup> |                                     |        |     |   |   |
|----------------------------------------------------------------|-------------------------------------|--------|-----|---|---|
| Afrika-Mittelmeerraum                                          |                                     |        |     |   |   |
| HC Trading Dubai Liason office                                 | Dubai, Vereinigte Arabische Emirate | 100,00 | AED | 0 | 0 |

Folgende assoziierte oder Gemeinschaftsunternehmen werden aufgrund ihrer untergeordneten Bedeutung zu Anschaffungskosten („Available for sale at cost“) in den Konzernabschluss einbezogen.

| Assoziierte oder Gemeinschaftsunternehmen von untergeordneter Bedeutung <sup>a)</sup>  |                           |       |     |    |   |
|----------------------------------------------------------------------------------------|---------------------------|-------|-----|----|---|
| West- und Nordeuropa                                                                   |                           |       |     |    |   |
| AB Stebo                                                                               | Göteborg, Schweden        | 50,00 | SEK | 0  | 0 |
| AB Strömstadsbetong                                                                    | Göteborg, Schweden        | 33,00 | SEK | 0  | 0 |
| AB Strömstadsbetong & Co Kommanditbolag                                                | Göteborg, Schweden        | 33,00 | SEK | 4  | 4 |
| Alzagri NV                                                                             | Brugge, Belgien           | 50,00 | EUR | 1  | 0 |
| Anton Beirer Hartsteinwerke GmbH & Co. KG                                              | Pinswang, Österreich      | 30,00 | EUR | 1  | 0 |
| B.V. Autotransport Sint Pieter                                                         | Maastricht, Niederlande   | 50,00 | EUR | 0  | 0 |
| B.V. Edese Beton Centrale E.B.C.                                                       | Arnhem, Niederlande       | 12,00 | EUR | 22 | 1 |
| Baustoff- und Umschlags-GmbH                                                           | Mosbach, Deutschland      | 38,14 | EUR | 0  | 0 |
| BEHAG Bauelemente Gesellschaft mit beschränkter Haftung                                | Baden-Baden, Deutschland  | 31,54 | EUR | 0  | 0 |
| Betonmortel Grevelingen B.V.                                                           | Zierikzee, Niederlande    | 50,00 | EUR | 1  | 0 |
| Betonmortelcentrale De Mark B.V.                                                       | Breda, Niederlande        | 28,57 | EUR | 1  | 0 |
| Betonmortelfabriek Tilburg Bemoti B.V.                                                 | Tilburg, Niederlande      | 38,67 | EUR | 0  | 0 |
| Betonpumpen-Service Niedersachsen Verwaltungs-GmbH                                     | Hannover, Deutschland     | 50,00 | EUR | 0  | 0 |
| Betuwe Beton Holding B.V.                                                              | Tiel, Niederlande         | 50,00 | EUR | 6  | 1 |
| Beuschlein Verwaltung-GmbH                                                             | Randersacker, Deutschland | 28,50 | EUR | 0  | 0 |
| Cotrano B.V.                                                                           | Rotterdam, Niederlande    | 7,41  | EUR | 8  | 4 |
| Cugla B.V.                                                                             | Breda, Niederlande        | 50,00 | EUR | 5  | 3 |
| DONAU MÖRTEL-Verwaltungs-GmbH                                                          | Passau, Deutschland       | 50,00 | EUR | 0  | 0 |
| Eemshaven Betoncentrale V.O.F.                                                         | Groningen, Niederlande    | 33,16 | EUR | 0  | 0 |
| Eemsmond Betoncentrale B.V.                                                            | Veend, Niederlande        | 50,00 | EUR | 2  | 0 |
| Europomp B.V.                                                                          | Heer, Niederlande         | 47,25 | EUR | 1  | 0 |
| Gebrüder Willersinn Industriesandwerk Verwaltungsgesellschaft mit beschränkter Haftung | Raunheim, Deutschland     | 33,33 | EUR | 0  | 0 |
| Gottåsa Fastighets AB                                                                  | Grimslov, Schweden        | 50,00 | SEK | 4  | 4 |
| Greystone Ambient & Style GmbH & Co. KG                                                | Lingenfeld, Deutschland   | 45,00 | EUR | 0  | 0 |
| Greystone Ambient & Style Verwaltungsgesellschaft mbH                                  | Lingenfeld, Deutschland   | 45,00 | EUR | 0  | 0 |
| H S Hartsteinwerke GmbH                                                                | Pinswang, Österreich      | 30,00 | EUR | 0  | 0 |
| Hafenbetriebs- und Beteiligungs-GmbH, Stade                                            | Stade, Deutschland        | 50,00 | EUR | 0  | 0 |

| Name der Gesellschaft                                                                   | Sitz                               | Kapital-<br>anteil<br>in % | Wäh-<br>rung | Eigen-<br>kapital<br>in Mio | Er-<br>gebnis<br>in Mio |
|-----------------------------------------------------------------------------------------|------------------------------------|----------------------------|--------------|-----------------------------|-------------------------|
| Hausgesellschaft des Vereins Deutscher Zementwerke mit beschränkter Haftung             | Düsseldorf, Deutschland            | 33,16                      | EUR          | 0                           | 0                       |
| Hormigones Mecanizados, S.A.                                                            | Palma de Mallorca, Spanien         | 25,00                      | EUR          | 0                           | 0                       |
| HSL Noord-Brabant 5-B v.o.f.                                                            | Oosterhout, Niederlande            | 20,00                      | EUR          | 0                           | 0                       |
| ISAR-DONAU MÖRTEL-Verwaltungs-GmbH                                                      | Plattling, Deutschland             | 33,33                      | EUR          | 0                           | 0                       |
| Joyce Green Aggregates Limited                                                          | Dartford, Großbritannien           | 50,00                      | GBP          | 0                           | 0                       |
| KANN Beton Verwaltungsgesellschaft mbH                                                  | Bendorf, Deutschland               | 50,00                      | EUR          | 0                           | 0                       |
| KVB Verwaltungs- und Beteiligungs-GmbH                                                  | Karlsdorf-Neuthard, Deutschland    | 24,80                      | EUR          | 0                           | 0                       |
| Martin Milch Gesellschaft mit beschränkter Haftung                                      | Ochtendung, Deutschland            | 30,00                      | EUR          | 0                           | 0                       |
| MDF Mörtel-Dienst Franken Verwaltungs-GmbH                                              | Nürnberg, Deutschland              | 26,52                      | EUR          | 0                           | 0                       |
| Meier Verwaltungs GmbH                                                                  | Claußnitz, Deutschland             | 50,00                      | EUR          | 0                           | 0                       |
| Mittelschwäbische Transport- und Frischbeton Gesellschaft mit beschränkter Haftung      | Thannhausen, Deutschland           | 20,00                      | EUR          | 0                           | 0                       |
| Mortel Produktie Vianen (MPV) B.V.                                                      | Utrecht, Niederlande               | 50,00                      | EUR          | 0                           | 0                       |
| MWK Kies Verwaltungs-GmbH                                                               | Kressbronn, Deutschland            | 20,00                      | EUR          | 0                           | 0                       |
| Nordhafen Stade-Bützfleth Verwaltungsgesellschaft mbH                                   | Stade, Deutschland                 | 25,00                      | EUR          | 0                           | 0                       |
| NORMENSAND GMBH                                                                         | Beckum, Deutschland                | 48,37                      | EUR          | 2                           | 1                       |
| NSI-Holland B.V.                                                                        | Wessem, Niederlande                | 45,00                      | EUR          | 1                           | 0                       |
| Otterbein Gesellschaft mit beschränkter Haftung                                         | Großenluder, Deutschland           | 20,00                      | EUR          | 0                           | 0                       |
| Recyfuel S.A.                                                                           | Bruxelles, Belgien                 | 50,00                      | EUR          | 13                          | 1                       |
| Rhein-Neckar-Mörtel Verwaltungs-GmbH i.L.                                               | Bruchsal, Deutschland              | 23,04                      | EUR          | 0                           | 0                       |
| Roca Beton V.O.F.                                                                       | Tilburg, Niederlande               | 50,00                      | EUR          | 0                           | 0                       |
| Saarfilterasche-Vertriebs-Gesellschaft mit beschränkter Haftung                         | Baden-Baden, Deutschland           | 30,00                      | EUR          | 0                           | 0                       |
| Schmitt Beton GmbH & Co. KG                                                             | Markt Schwaben, Deutschland        | 27,79                      | EUR          | 1                           | 0                       |
| Schwaben Mörtel Beteiligungs GmbH                                                       | Stuttgart, Deutschland             | 28,21                      | EUR          | 0                           | 0                       |
| Shire Business Park Limited                                                             | London, Großbritannien             | 50,00                      | GBP          | 0                           | 0                       |
| Südkalk - Vertriebsgesellschaft mit beschränkter Haftung                                | Freiburg i. Breisgau, Deutschland  | 50,00                      | EUR          | 0                           | 0                       |
| TBG Bayerwald Verwaltungs-GmbH                                                          | Straubing, Deutschland             | 50,00                      | EUR          | 0                           | 0                       |
| TBG Eck Verwaltungsgesellschaft mbH                                                     | Bad Windsheim, Deutschland         | 28,50                      | EUR          | 0                           | 0                       |
| TBG Gersdorfer Transportbeton GmbH & Co. KG                                             | Gersdorf, Deutschland              | 30,00                      | EUR          | 0                           | 0                       |
| TBG Gersdorfer Transportbeton Verwaltungs- und Beteiligungs-GmbH                        | Gersdorf, Deutschland              | 30,00                      | EUR          | 0                           | 0                       |
| TBG KANN Beton Guben Verwaltungs-GmbH                                                   | Guben, Deutschland                 | 50,00                      | EUR          | 0                           | 0                       |
| TBG Pegnitz-Beton Verwaltungs-GmbH                                                      | Hersbruck, Deutschland             | 25,61                      | EUR          | 0                           | 0                       |
| TBG Saale-Beton Verwaltungsgesellschaft mbH                                             | Hammelburg, Deutschland            | 29,07                      | EUR          | 0                           | 0                       |
| TBG Transportbeton Bad Mergentheim Verwaltungs-GmbH                                     | Bad Mergentheim, Deutschland       | 37,96                      | EUR          | 0                           | 0                       |
| TBG Transportbeton Caprano Verwaltungs-GmbH                                             | Pirmasens, Deutschland             | 50,00                      | EUR          | 0                           | 0                       |
| TBG Transportbeton Glöckle Verwaltungs-GmbH                                             | Grafenrheinfeld, Deutschland       | 31,35                      | EUR          | 0                           | 0                       |
| TBG Transportbeton Lohr Verwaltungsgesellschaft mbH                                     | Lohr a. Main, Deutschland          | 50,00                      | EUR          | 0                           | 0                       |
| TBG Transportbeton Meier Verwaltungs-GmbH                                               | Wilkau-Haßlau, Deutschland         | 50,00                      | EUR          | 0                           | 0                       |
| TBG Transportbeton Mittweida Verwaltungs-GmbH                                           | Mittweida, Deutschland             | 40,00                      | EUR          | 0                           | 0                       |
| TBG Transportbeton Oder-Spree Verwaltungs-GmbH                                          | Wriezen, Deutschland               | 50,00                      | EUR          | 0                           | 0                       |
| TBG Transportbeton Pfaffenhofen Verwaltungsgesellschaft mbH                             | Pfaffenhofen, Deutschland          | 35,40                      | EUR          | 0                           | 0                       |
| TBG Transportbeton Schleiz Verwaltungs-GmbH                                             | Schleiz, Deutschland               | 50,00                      | EUR          | 0                           | 0                       |
| TBG Transportbeton Selb Verwaltungsgesellschaft mbH                                     | Selb, Deutschland                  | 33,33                      | EUR          | 0                           | 0                       |
| TBG Transportbeton Verwaltungsgesellschaft mbH                                          | Nabburg, Deutschland               | 50,00                      | EUR          | 0                           | 0                       |
| TBG Transportbeton Werner Verwaltungsgesellschaft mbH                                   | Dietfurt a.d. Altmühl, Deutschland | 42,50                      | EUR          | 0                           | 0                       |
| Tournai Ternaire S.A.                                                                   | Tournai, Belgien                   | 50,00                      | EUR          | 0                           | 0                       |
| Transmix B.V.                                                                           | Amsterdam, Niederlande             | 50,00                      | EUR          | 1                           | 0                       |
| Transportbeton-Gesellschaft mit beschränkter Haftung Garant                             | Bad Salzuflen, Deutschland         | 23,33                      | EUR          | 0                           | 0                       |
| Transportbetonunion Gesellschaft mit beschränkter Haftung                               | Werl, Deutschland                  | 25,00                      | EUR          | 0                           | 0                       |
| Van Zanten Holding B.V.                                                                 | Zuidbroek, Niederlande             | 25,00                      | EUR          | 2                           | 0                       |
| Verheul Westpoort B.V.                                                                  | Amsterdam, Niederlande             | 25,00                      | EUR          | 1                           | 0                       |
| Verwaltungsgesellschaft mit beschränkter Haftung TRAPOBET Transportbeton Kaiserslautern | Kaiserslautern, Deutschland        | 50,00                      | EUR          | 0                           | 0                       |
| Vislingse Transportbeton Onderneming B.V.                                               | Middelb, Niederlande               | 50,00                      | EUR          | 2                           | 1                       |
| Westland Beton B.V.                                                                     | Vlaar, Niederlande                 | 50,00                      | EUR          | 1                           | 0                       |
| WIKING Baustoff- und Transport Gesellschaft mit beschränkter Haftung                    | Soest, Deutschland                 | 50,00                      | EUR          | 0                           | 0                       |
| Woerdense Betonmortel Centrale B.V.                                                     | Utrecht, Niederlande               | 50,00                      | EUR          | 0                           | 0                       |

| HeidelbergCement bilanziert              |                                                                      |
|------------------------------------------|----------------------------------------------------------------------|
| Gewinn- und Verlustrechnung des Konzerns | Eigenkapitalveränderungsrechnung des Konzerns                        |
| Gesamtergebnisrechnung des Konzerns      | Segmentberichterstattung/Teil des Anhangs                            |
| Kapitalflussrechnung des Konzerns        | Anhang des Konzerns                                                  |
| Bilanz des Konzerns                      | Bericht des Abschlussprüfers/Versicherung der gesetzlichen Vertreter |

| Name der Gesellschaft | Sitz | Kapital-<br>anteil<br>in % | Wäh-<br>rung | Eigen-<br>kapital<br>in Mio | Er-<br>gebnis<br>in Mio |
|-----------------------|------|----------------------------|--------------|-----------------------------|-------------------------|
|-----------------------|------|----------------------------|--------------|-----------------------------|-------------------------|

| Assoziierte oder Gemeinschaftsunternehmen von untergeordneter Bedeutung <sup>a)</sup> |                                   |       |     |       |     |
|---------------------------------------------------------------------------------------|-----------------------------------|-------|-----|-------|-----|
| Osteuropa-Zentralasien                                                                |                                   |       |     |       |     |
| ASDAG Kavicsbanya es Epitő Kft.                                                       | Janossomorja, Ungarn              | 48,68 | HUF | 1.202 | 78  |
| Asdeka Kft.                                                                           | Hegyeshalom, Ungarn               | 24,34 | HUF | 16    | -12 |
| Bukhtarma Teplo Tranzit LLP                                                           | New Bukhtarma village, Kasachstan | 20,00 | KZT | -30   | 0   |
| LOMY MORINA spol. s r.o.                                                              | Morina, Tschechien                | 48,95 | CZK | 363   | 0   |
| RS Czech Republic, s.r.o.                                                             | Kraluv Dvur, Tschechien           | 37,50 | CZK | 3     | 2   |
| Velkolom Certovy schody, akciová společnost                                           | Tman, Tschechien                  | 50,00 | CZK | 202   | 2   |

| Assoziierte oder Gemeinschaftsunternehmen von untergeordneter Bedeutung <sup>a)</sup> |                 |       |     |      |     |
|---------------------------------------------------------------------------------------|-----------------|-------|-----|------|-----|
| Nordamerika                                                                           |                 |       |     |      |     |
| Cornerstone Partners I, LLC <sup>**)</sup>                                            | Reno, USA       | 50,00 | USD | 0    | 0   |
| CPC Terminals, Inc <sup>**)</sup>                                                     | Sacramento, USA | 50,00 | USD | 0    | 0   |
| Petres del Pacifico, S.A. de C.V.                                                     | Tijuana, Mexiko | 50,00 | MXN | -187 | -59 |
| Transportadora Maritima de Baja California, S.A. de C.V.                              | Tijuana, Mexiko | 50,00 | MXN | 35   | -7  |

| Assoziierte oder Gemeinschaftsunternehmen von untergeordneter Bedeutung <sup>a)</sup> |                        |       |     |   |   |
|---------------------------------------------------------------------------------------|------------------------|-------|-----|---|---|
| Asien-Pazifik                                                                         |                        |       |     |   |   |
| Diversified Function Sdn Bhd                                                          | Kuala Lumpur, Malaysia | 50,00 | MYR | 0 | 0 |

| Assoziierte oder Gemeinschaftsunternehmen von untergeordneter Bedeutung <sup>a)</sup> |                                              |       |     |   |    |
|---------------------------------------------------------------------------------------|----------------------------------------------|-------|-----|---|----|
| Afrika-Mittelmeerraum                                                                 |                                              |       |     |   |    |
| Union Cement Norcem C.o. (W.L.L.)                                                     | Ras Al Khaimah, Vereinigte Arabische Emirate | 40,00 | AED | 4 | 21 |

<sup>\*</sup>) Gemäß § 264b HGB von der Pflicht zur Aufstellung eines Jahresabschlusses befreit.

<sup>\*\*)</sup>) Vorsteuerergebnis, Steuerbelastung erfolgt auf der Mutterebene von Lehigh Hanson, Inc.

<sup>a)</sup>) Werte gemäß letztem verfügbaren Jahresabschluss.

1) Beherrschender Einfluss durch vertragliche Gestaltung bzw. rechtliche Vorschriften

2) Fehlender beherrschender Einfluss durch vertragliche Gestaltung bzw. rechtliche Vorschriften

3) Fehlende gemeinschaftliche Führung durch vertragliche Gestaltung bzw. rechtliche Vorschriften

Heidelberg, 16. März 2011

HeidelbergCement AG

Der Vorstand

## Bericht des Abschlussprüfers

Zu dem Konzernabschluss und dem zusammengefassten Lagebericht des HeidelbergCement Konzerns und der HeidelbergCement AG haben wir folgenden Bestätigungsvermerk erteilt:

„Wir haben den von der HeidelbergCement AG, Heidelberg, aufgestellten Konzernabschluss - bestehend aus Gewinn- und Verlustrechnung, Gesamtergebnisrechnung, Kapitalflussrechnung, Bilanz, Eigenkapitalveränderungsrechnung und Anhang - sowie den zusammengefassten Lagebericht des HeidelbergCement Konzerns und der HeidelbergCement AG für das Geschäftsjahr vom 1. Januar bis 31. Dezember 2010 geprüft. Die Aufstellung von Konzernabschluss und Konzernlagebericht nach den IFRS, wie sie in der EU anzuwenden sind, und den ergänzend nach § 315a Abs. 1 HGB anzuwendenden handelsrechtlichen Vorschriften sowie den ergänzenden Bestimmungen der Satzung liegt in der Verantwortung der gesetzlichen Vertreter der Gesellschaft. Unsere Aufgabe ist es, auf der Grundlage der von uns durchgeführten Prüfung eine Beurteilung über den Konzernabschluss und den Konzernlagebericht abzugeben.

Wir haben unsere Konzernabschlussprüfung nach § 317 HGB unter Beachtung der vom Institut der Wirtschaftsprüfer (IDW) festgestellten deutschen Grundsätze ordnungsmäßiger Abschlussprüfung vorgenommen. Danach ist die Prüfung so zu planen und durchzuführen, dass Unrichtigkeiten und Verstöße, die sich auf die Darstellung des durch den Konzernabschluss unter Beachtung der anzuwendenden Rechnungslegungsvorschriften und durch den Konzernlagebericht vermittelten Bildes der Vermögens-, Finanz- und Ertragslage wesentlich auswirken, mit hinreichender Sicherheit erkannt werden. Bei der Festlegung der Prüfungshandlungen werden die Kenntnisse über die Geschäftstätigkeit und über das wirtschaftliche und rechtliche Umfeld des Konzerns sowie die Erwartungen über mögliche Fehler berücksichtigt. Im Rahmen der Prüfung werden die Wirksamkeit des rechnungslegungsbezogenen internen Kontrollsystems sowie Nachweise für die Angaben im Konzernabschluss und Konzernlagebericht überwiegend auf der Basis von Stichproben beurteilt. Die Prüfung umfasst die Beurteilung der Jahresabschlüsse der in den Konzernabschluss einbezogenen Unternehmen, der Abgrenzung des Konsolidierungskreises, der angewandten Bilanzierungs- und Konsolidierungsgrundsätze und der wesentlichen Einschätzungen der gesetzlichen Vertreter sowie die Würdigung der Gesamtdarstellung des Konzernabschlusses und des Konzernlageberichts. Wir sind der Auffassung, dass unsere Prüfung eine hinreichend sichere Grundlage für unsere Beurteilung bildet.

Unsere Prüfung hat zu keinen Einwendungen geführt.

Nach unserer Beurteilung aufgrund der bei der Prüfung gewonnenen Erkenntnisse entspricht der Konzernabschluss den IFRS, wie sie in der EU anzuwenden sind, und den ergänzend nach § 315a Abs. 1 HGB anzuwendenden handelsrechtlichen Vorschriften sowie den ergänzenden Bestimmungen der Satzung und vermittelt unter Beachtung dieser Vorschriften ein den tatsächlichen Verhältnissen entsprechendes Bild der Vermögens-, Finanz- und Ertragslage des Konzerns. Der Konzernlagebericht steht in Einklang mit dem Konzernabschluss, vermittelt insgesamt ein zutreffendes Bild von der Lage des Konzerns und stellt die Chancen und Risiken der zukünftigen Entwicklung zutreffend dar.“

Stuttgart, 16. März 2011

Ernst & Young GmbH

Wirtschaftsprüfungsgesellschaft

Prof. Dr. Wollmert

Wirtschaftsprüfer

Somes

Wirtschaftsprüferin



| HeidelbergCement bilanziert              |                                                                      |
|------------------------------------------|----------------------------------------------------------------------|
| Gewinn- und Verlustrechnung des Konzerns | Eigenkapitalveränderungsrechnung des Konzerns                        |
| Gesamtergebnisrechnung des Konzerns      | Segmentberichterstattung/Teil des Anhangs                            |
| Kapitalflussrechnung des Konzerns        | Anhang des Konzerns                                                  |
| Bilanz des Konzerns                      | Bericht des Abschlussprüfers/Versicherung der gesetzlichen Vertreter |

## Versicherung der gesetzlichen Vertreter

Wir versichern nach bestem Wissen, dass gemäß den anzuwendenden Rechnungslegungsgrundsätzen der Konzernabschluss ein den tatsächlichen Verhältnissen entsprechendes Bild der Vermögens-, Finanz- und Ertragslage des Konzerns vermittelt und im Konzernlagebericht, der mit dem Lagebericht der HeidelbergCement AG zusammengefasst wurde, der Geschäftsverlauf einschließlich des Geschäftsergebnisses und die Lage des Konzerns so dargestellt sind, dass ein den tatsächlichen Verhältnissen entsprechendes Bild vermittelt wird, sowie die wesentlichen Chancen und Risiken der voraussichtlichen Entwicklung des Konzerns beschrieben sind.

Heidelberg, 16. März 2011

HeidelbergCement AG

Der Vorstand



Dr. Bernd Scheifele



Andreas Kern



Dr. Dominik von Achten



Dr. Lorenz Näger



Daniel Gauthier



Dr. Albert Scheuer

# Weitere Informationen

- 232    Leiter Konzernfunktionen und Länderverantwortliche**
- 234    Glossar und Stichwortverzeichnis**
- 236    Impressum**
  - Zementkapazitäten und Zuschlagstoffreserven  
(Umschlag)**

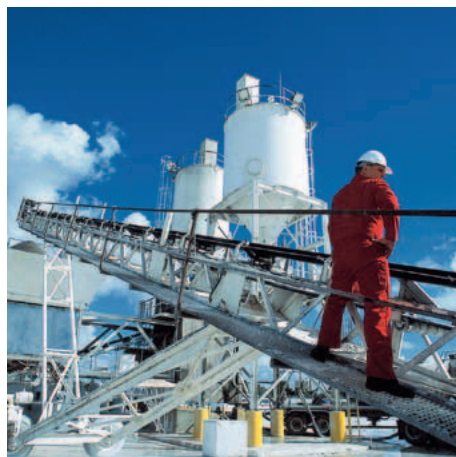

## Weitere Informationen

### Leiter Konzernfunktionen und Länderverantwortliche

#### Leiter Konzernfunktionen

| Konzernfunktionen       |                                                        |
|-------------------------|--------------------------------------------------------|
| Böttcher, Henner        | Director Group Treasury                                |
| Jordanoff, Plamen       | Director Group Strategy & Development and Cementitious |
| Kozelka, Rolf           | Director Group Tax                                     |
| Russell, Matthew        | Director Group Reporting, Controlling & Consolidation  |
| Schaffernak, Dr. Ingo   | Director Group Legal                                   |
| Schaller, Andreas       | Director Group Communication & Investor Relations      |
| Schnurr, Andreas        | Director Group Human Resources and Group Compliance    |
| Schwind, Klaus          | Director Group Shared Service Centers                  |
| Sijbring, Henk          | Director Group Purchasing                              |
| Standhaft, Dr. Wolfgang | Director Group Information Technology                  |
| Vandenberghe, Marc      | Director Group Insurance & Corporate Risk Management   |
| Weingardt, Stefan       | Director Group Internal Audit                          |

| Heidelberg Technology Center (HTC) |                                                                                                                                      |
|------------------------------------|--------------------------------------------------------------------------------------------------------------------------------------|
| Jelito, Ernest                     | Director HTC Global and Director Manufacturing & Engineering Central Europe-Central Asia and Head of HTC Central Europe-Central Asia |
| Tomlinson, Stuart                  | Senior Vice President Manufacturing & Engineering, President HTC North America                                                       |
| Fritz, Daniel                      | Director Manufacturing & Engineering Asia-Oceania and Head of HTC Asia-Oceania                                                       |
| Gupta, Akhilesh                    | Director Manufacturing & Engineering TEAM and Head of HTC TEAM                                                                       |

| Competence Center Materials (CCM) |                                             |
|-----------------------------------|---------------------------------------------|
| Mühlbeyer, Gerhard                | Director Global Competence Center Materials |

| Global Environmental Sustainability |                                              |
|-------------------------------------|----------------------------------------------|
| Mathieu, Bernard                    | Director Global Environmental Sustainability |

| Global Sales & Marketing |                                   |
|--------------------------|-----------------------------------|
| Oerter, Gerald           | Director Global Sales & Marketing |

## Länderverantwortliche

| West- und Nordeuropa                  |                             |                                                                          |
|---------------------------------------|-----------------------------|--------------------------------------------------------------------------|
| Baltikum/Dänemark/Norwegen/Schweden   | Syvrtsen, Gunnar            | General Manager Northern Europe                                          |
| Belgien/Niederlande                   | Jacquemart, André           | General Manager Benelux                                                  |
| Deutschland                           | Seitz, Gerhard              | General Manager Germany bis 31. August 2011                              |
|                                       | Knell, Christian            | General Manager Germany ab 1. September 2011                             |
| Großbritannien                        | O'Shea, Patrick             | Chief Executive Officer UK                                               |
|                                       |                             |                                                                          |
| Osteuropa-Zentralasien                |                             |                                                                          |
| Bosnien & Herzegowina                 | Muidza, Branimir            | Country Manager Bosnia & Herzegovina                                     |
| Georgien                              | Hampel, Michael             | General Manager Georgia                                                  |
| Kasachstan                            | Kempe, Roman                | General Manager Kazakhstan                                               |
| Polen                                 | Balcerek, Andrzej           | General Manager Poland                                                   |
| Rumänien                              | Aldea, Dr. Florian          | General Manager Romania                                                  |
| Russland                              | Knell, Christian            | General Manager Russia bis 31. August 2011                               |
|                                       | Polendakov, Mihail          | General Manager Russia ab 1. September 2011                              |
| Tschechische Republik                 | Hrozek, Jan                 | General Manager Czech Republic                                           |
| Ukraine                               | Oklestek, Karel             | General Manager Ukraine                                                  |
| Ungarn                                | Szarkándi, János            | General Manager Hungary                                                  |
|                                       |                             |                                                                          |
| Nordamerika                           |                             |                                                                          |
| Harrington, Dan                       | Chief Executive Officer USA |                                                                          |
| Derkatch, Jim                         | Regional President Canada   |                                                                          |
| Hahne, Clifford                       | Regional President South    |                                                                          |
| Saragusa, Kari                        | Regional President West     |                                                                          |
| Purcell, Jim                          | Regional President North    |                                                                          |
| Capelli, Tom                          | President Building Products |                                                                          |
|                                       |                             |                                                                          |
| Asien-Pazifik                         |                             |                                                                          |
| China                                 | Bogdan, Ludek               | Chief Operating Officer China                                            |
| Indien                                | Guha, Ashish                | Chief Executive Officer India                                            |
| Indonesien/Bangladesh/Brunei/Malaysia | Lavallé, Daniel             | Chief Executive Officer South East Asia                                  |
| Australien                            | Gluskie, Kevin              | Chief Executive Officer Australia                                        |
|                                       |                             |                                                                          |
| Afrika-Mittelmeerraum                 |                             |                                                                          |
| Afrika                                | Junon, Jean-Marc            | Chief Operating Officer Africa                                           |
| Israel                                | Priel, Eliezer              | Country Manager Israel                                                   |
| Mittelmeerraum/HC Trading             | Adigüzel, Emir              | Chief Operating Officer Mediterranean Basin & Middle East and HC Trading |
| Spanien                               | Ortiz, Jesus                | Country Manager Spain                                                    |



## Glossar und Stichwortverzeichnis<sup>1)</sup>

**Asphalt** S. 48, 51, 53, 56, 58, 60f., 63f., 97, 113

Asphalt wird aus einem Gemisch von Zuschlagstoffen verschiedener Korngrößen, Füller (Gesteinsmehl) und Bitumen hergestellt. Verwendet wird Asphalt vor allem im Verkehrswegebau – hauptsächlich für Straßen, Wege und Plätze.

**Beton**

Beton ist ein Baustoff, der durch das Mischen von Zement, Zuschlag (in der Regel Kies, Sand oder Splitt) und Wasser hergestellt wird.

**Biodiversität** S. 43, 94, 97, 103f., 117

Biodiversität umfasst die genetische Vielfalt innerhalb einzelner Arten, die Artenvielfalt und die Vielfalt der Ökosysteme. Synonym: biologische Vielfalt.

**Cement Sustainability Initiative** S. 102, 104, 117

HeidelbergCement ist Gründungsmitglied der Cement Sustainability Initiative (CSI). Die Nachhaltigkeitsinitiative der Zementindustrie ist ein Zusammenschluss von 23 weltweit führenden Zementproduzenten zur Förderung einer nachhaltigen Entwicklung unter der Schirmherrschaft des World Business Council for Sustainable Development (WBCSD).

**Commercial Paper** S. 74f., 116, 180, 195, 202

Inhaberschuldverschreibungen, die innerhalb eines Rahmenprogramms (Commercial Paper Programm, CP Programm) zur Steuerung des kurzfristigen Finanzbedarfs begeben werden.

**Euro Medium Term Note (EMTN) Programm** S. 37, 72, 116, 195

Ein EMTN-Programm stellt eine Rahmenvereinbarung dar, die zwischen Unternehmen und den zu Platzeuren benannten Banken geschlossen wird. HeidelbergCement verfügt über die Möglichkeit, unter seinem EMTN-Programm Schuldverschreibungen bis zu einem Volumen von insgesamt 10 Mrd EUR zu begeben.

**Flugasche** S. 110

Fester, teilchenförmiger Verbrennungsrückstand aus Kohlekraftwerken. Zumahlstoff für Zement.

**Hüttensand** S. 52, 93, 110

Feinkörniges, glasiges Nebenprodukt aus der Roheisenherstellung im Hochofen. Zumahlstoff für Hochofenzemente.

**Klinker (Zementklinker)** S. 54, 59, 63ff., 92f., 97, 106f., 110, 115, 118

Zwischenprodukt bei der Zementherstellung, das durch Erhitzen einer feingemahlenen Rohstoffmischung auf etwa 1.450° C im Zementofen entsteht. Zur Herstellung von Zement wird der kleinkugelige, grauschwarze Klinker äußerst fein gemahlen. Klinker ist der Hauptbestandteil der meisten Zementsorten.

**Kompositzement** S. 106, 109f.

Kompositzemente sind Zemente, bei denen ein Teil des Klinkers durch sekundäre Rohstoffe, meist Nebenprodukte aus anderen Industrien wie Hüttensand oder Flugasche, ersetzt wird. Die Verringerung des Anteils des energieintensiven Klinkers im Zement ist von entscheidender Bedeutung für die Reduzierung des Energieverbrauchs und der CO<sub>2</sub>-Emissionen sowie für die Schonung natürlicher Rohstoffe.

**Mahlwerk** S. 60, 75, 115

Ein Mahlwerk ist eine Zementproduktionsanlage ohne eigene Klinkerherstellung. Der angelieferte Klinker wird – je nach Zementart auch mit anderen Zumahlstoffen – zu Zement gemahlen. Mahlwerke werden insbesondere dort betrieben, wo es keine geeigneten Rohstoffvorkommen für die Klinkerherstellung gibt.

**Nachhaltigkeit** S. 43, 93f., 96f., 102, 104ff., 117, 129, 135

Nachhaltige Entwicklung bedeutet, den ökonomischen, ökologischen und sozialen Bedürfnissen der gegenwärtig lebenden Menschen zu entsprechen, ohne die Fähigkeiten zukünftiger Generationen zur Befriedigung ihrer Bedürfnisse zu gefährden.

**Nettofinanzschulden**

S. 23, 45, 66, 69 ff., 77, 88, 116, 204 f.

Die Nettofinanzschulden umfassen die Summe aller finanziellen langfristigen und kurzfristigen Verbindlichkeiten abzüglich der liquiden Mittel, der kurzfristigen Finanzinvestitionen und kurzfristigen Derivate. Synonyme: Nettoverbindlichkeiten, Nettoverschuldung.

**Rating (Kreditrating)**

S. 37 f., 45, 75, 87, 116, 201 f.

Klassifizierung der Bonität von Schuldtiteln und deren Emittenten. Spezialisierte Agenturen wie Standard & Poor's, Fitch Ratings und Moody's erstellen ein Rating. Die Bewertung reicht von AAA bzw. Aaa als höchste Bonität bis C oder D als niedrigste Bonität.

**Sekundärbrennstoffe**

S. 52, 57, 59, 68, 92 f., 97, 105 f., 109, 118 f.

Brennbare Stoffe und Materialien, die fossile Energieträger beim Brennprozess im Zementofen ersetzen.

**Sekundärrohstoffe**

S. 92, 97, 105, 109, 118 f.

Nebenprodukte oder Abfälle aus anderen Industriezweigen, die natürliche Rohstoffe bei der Zementherstellung ersetzen. Sekundärrohstoffe werden sowohl bei der Herstellung von Klinker, dem wichtigsten Zwischenprodukt bei der Zementherstellung, als auch bei der Zementmahlung als Zumahlstoffe eingesetzt, um natürliche Rohstoffressourcen zu schonen und den Anteil des energieintensiven Klinkers im Endprodukt Zement zu reduzieren.

**Sekundärstoffe**

Nebenprodukte oder Abfälle aus anderen Industriezweigen, die durch ihre Inhaltsstoffe in der Lage sind, natürliche Ressourcen zu ersetzen. Durch ihren Einsatz trägt HeidelbergCement aktiv zur Ressourcenschonung und Kreislaufwirtschaft bei. Man unterscheidet zwischen Sekundärbrennstoffen und Sekundärrohstoffen.

**Syndizierter Kredit**

S. 28, 37, 50, 71 f., 74 ff., 80, 88 f., 114, 116, 175, 180, 195

Großvolumiger Kredit, der zur Risikostreuung auf mehrere Kreditgeber verteilt wird.

**Transportbeton**

In einem Transportbetonwerk hergestellter Beton, der mit Fahrmischern zur Baustelle befördert wird.

**World Business Council for Sustainable Development**

S. 104 f.

HeidelbergCement ist Mitglied im World Business Council for Sustainable Development (WBCSD), einem Zusammenschluss von rund 200 internationalen Unternehmen, die sich der Idee der nachhaltigen Entwicklung, basierend auf nachhaltigem Wachstum, ökologischer Ausgewogenheit und sozialem Fortschritt, verpflichtet haben.

**Zement**

Zement ist ein hydraulisches Bindemittel, d.h. ein fein gemahlener anorganischer Stoff, der nach dem Anmachen mit Wasser sowohl an der Luft als auch unter Wasser selbständig erhärtet und dauerhaft fest bleibt. Zement wird hauptsächlich zur Herstellung von Beton verwendet. Er verbindet die einzelnen Sand- und Kieskörner zu einer festen Masse.

**Zementmühle**

S. 6, 55, 59 f., 62, 115, 119

Die Zementmahlung ist die letzte Stufe im Zementherstellungsprozess. Der Klinker wird in Zementmühlen unter Zusatz von Gips, Anhydrit und je nach Zementart auch mit anderen Zumahlstoffen, wie z.B. Kalkstein, Hüttensand oder Flugasche, zu Zement gemahlen.

**Zuschlagstoffe**

Zuschlagstoffe sind mineralische Rohstoffe in Form von Sand, Kies, Splitt und Schotter, die zur Betonherstellung oder im Straßen- und Wegebau verwendet werden.

1) Das Stichwortverzeichnis verweist auf die zentralen Stellen.

# Impressum

## Copyright © 2011

HeidelbergCement AG  
Berliner Straße 6  
69120 Heidelberg

## Konzept und Realisation

Unternehmenskommunikation & Investor Relations HeidelbergCement  
ServiceDesign Werbeagentur GmbH, Heidelberg  
abcdruck GmbH, Heidelberg

## Bildnachweis

Bildarchiv HeidelbergCement, Heidelberg

Dieser Geschäftsbericht liegt auch in englischer Sprache vor.

Den Jahresabschluss der HeidelbergCement AG sowie weitere Informationen senden wir Ihnen gerne zu.  
Den Geschäftsbericht und weitere Informationen zum Unternehmen finden Sie auch im Internet unter [www.heidelbergcement.com](http://www.heidelbergcement.com)

Kontakt:

## Unternehmenskommunikation

Telefon: +49 (0) 6221 481-227  
Telefax: +49 (0) 6221 481-217  
E-Mail: [info@heidelbergcement.com](mailto:info@heidelbergcement.com)

## Investor Relations

Telefon:  
Institutionelle Anleger USA und UK: +49 (0) 6221 481-925  
Institutionelle Anleger EU und Rest der Welt: +49 (0) 6221 481-9568  
Privatanleger: +49 (0) 6221 481-256  
Telefax: +49 (0) 6221 481-217  
E-Mail: [ir-info@heidelbergcement.com](mailto:ir-info@heidelbergcement.com)

Dieser Geschäftsbericht wurde am 17. März 2011 veröffentlicht.

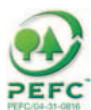

Der Geschäftsbericht wurde auf umweltfreundlichem, PEFC zertifiziertem Papier gedruckt.  
Förderung nachhaltiger Waldbewirtschaftung – nähere Informationen unter [www.pefc.org](http://www.pefc.org)

- ← HeidelbergCement weltweit – Zementkapazitäten und Zuschlagstoffreserven

| Finanzkalender 2011                          |                  |
|----------------------------------------------|------------------|
| Zwischenbericht Januar bis März 2011         | 5. Mai 2011      |
| Hauptversammlung                             | 5. Mai 2011      |
| Halbjahresfinanzbericht Januar bis Juni 2011 | 29. Juli 2011    |
| Zwischenbericht Januar bis September 2011    | 3. November 2011 |

# HeidelbergCement weltweit – Zementkapazitäten und Zuschlagstoffreserven

| Zementkapazitäten                 | Mio t        |
|-----------------------------------|--------------|
| <b>West- und Nordeuropa</b>       |              |
| Belgien                           | 4,2          |
| Deutschland                       | 12,7         |
| Estland                           | 1,3          |
| Großbritannien                    | 6,0          |
| Niederlande                       | 4,6          |
| Norwegen                          | 1,7          |
| Schweden                          | 3,2          |
|                                   | <b>33,6</b>  |
| <b>Osteuropa-Zentralasien</b>     |              |
| Bosnien-Herzegowina <sup>1)</sup> | 0,4          |
| Georgien                          | 1,6          |
| Kasachstan                        | 1,6          |
| Polen                             | 5,0          |
| Rumänien                          | 6,1          |
| Russland                          | 3,0          |
| Tschechische Republik             | 2,2          |
| Ukraine                           | 5,6          |
| Ungarn <sup>1)</sup>              | 1,6          |
|                                   | <b>27,2</b>  |
| <b>Nordamerika</b>                |              |
| USA <sup>1)</sup>                 | 11,3         |
| Kanada                            | 2,4          |
|                                   | <b>13,8</b>  |
| <b>Asien-Pazifik</b>              |              |
| Bangladesh                        | 1,5          |
| Brunei                            | 0,4          |
| China <sup>1)</sup>               | 7,2          |
| Indien                            | 3,3          |
| Indonesien                        | 18,6         |
| Australien <sup>1)</sup>          | 1,1          |
|                                   | <b>32,1</b>  |
| <b>Afrika-Mittelmeerraum</b>      |              |
| Benin                             | 0,3          |
| DR Kongo                          | 0,6          |
| Gabun                             | 0,4          |
| Ghana                             | 2,6          |
| Liberia                           | 0,2          |
| Sierra Leone                      | 0,7          |
| Tansania                          | 1,4          |
| Togo                              | 0,7          |
| Türkei <sup>1)</sup>              | 3,0          |
|                                   | <b>9,8</b>   |
| <b>HeidelbergCement gesamt</b>    | <b>116,4</b> |

1) Quotal einbezogene Zementkapazitäten

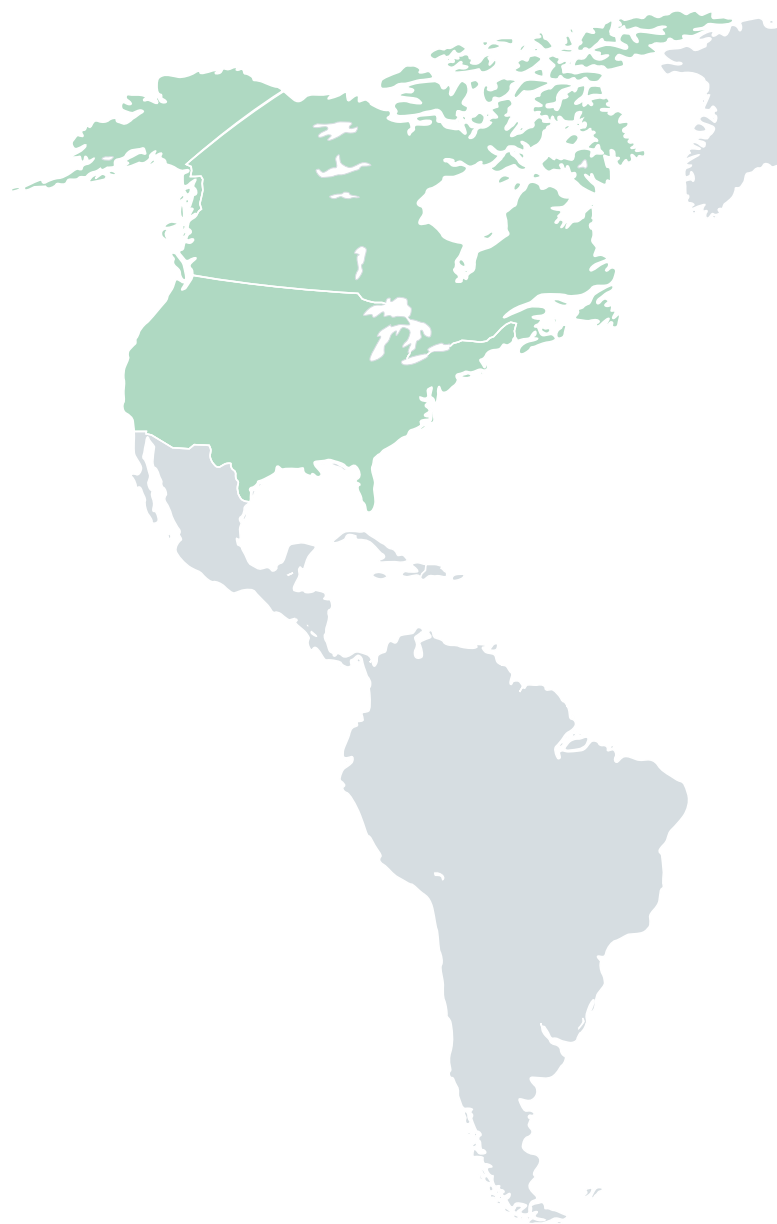

| Zuschlagstoffreserven <sup>2)</sup> | Mrd t       |
|-------------------------------------|-------------|
| West- und Nordeuropa                | 3,4         |
| Osteuropa-Zentralasien              | 1,0         |
| Nordamerika                         | 13,2        |
| Asien-Pazifik                       | 1,3         |
| Afrika-Mittelmeerraum               | 0,5         |
| <b>HeidelbergCement gesamt</b>      | <b>19,3</b> |

2) Eigene und gepachtete Reserven



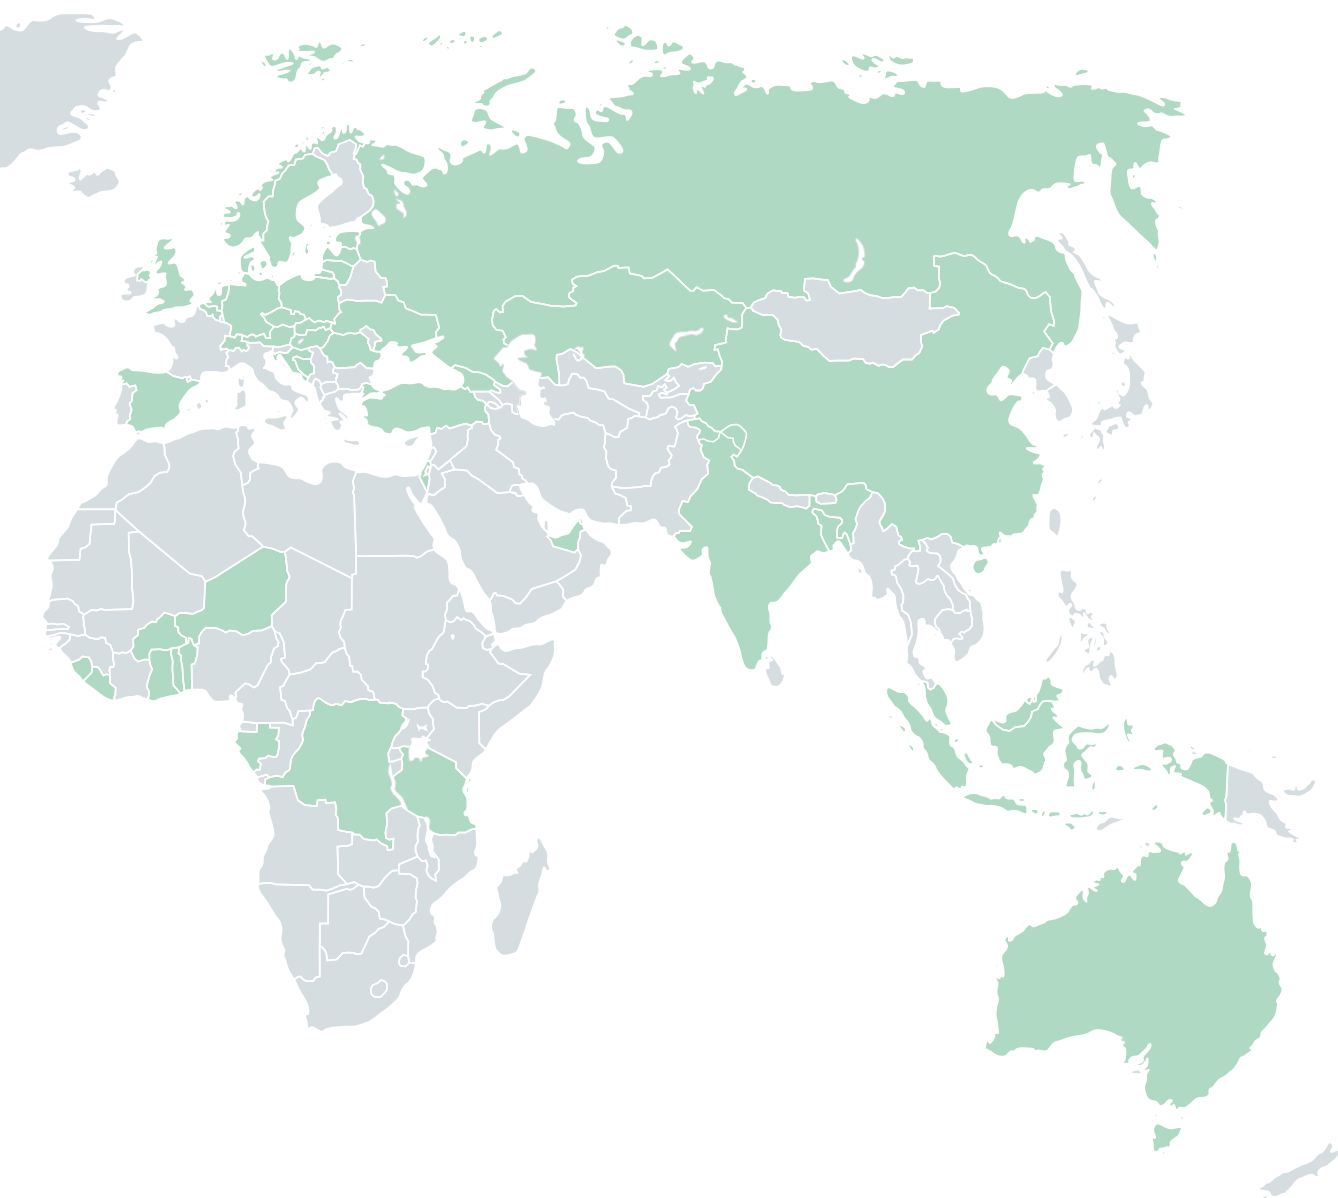

HeidelbergCement ist Mitglied in:

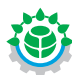

World Business Council for  
Sustainable Development

**econsense**  
Forum Nachhaltige Entwicklung
