# Supplementary material
Source: publisher site journal article supplement (https://www.degruyterbrill.com/publication/isbn/9783110432879/downloadAsset/9783110432879_Elektronischer_Anhang_2.zip)
Supplement: Supplementary file 57 [file HeidelbergCement Unser Unternehmensleitbild.pdf › Korpustexte/Korpustexte pdf/HeidelbergCement/HeidelbergCement Unser Unternehmensleitbild.pdf]

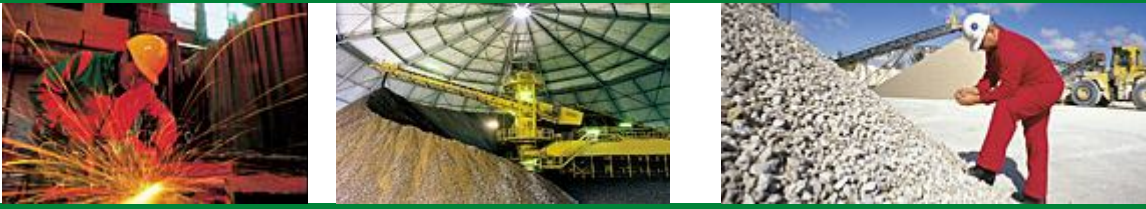

## Unser Unternehmensleitbild

### Unsere Unternehmenskultur und unsere Werte

- Wir bauen auf die drei Pfeiler einer nachhaltigen Entwicklung:  
Ökonomie, Ökologie und gesellschaftliche Verantwortung.
- Unser wirtschaftliches Ziel ist eine kontinuierliche Steigerung der Ergebnisse durch Kostenführerschaft und langfristiges, am Ergebnis orientiertes Wachstum.
- Wir streben eine langfristige, von Verlässlichkeit und Integrität geprägte Kundenbeziehung an.
- Unser Erfolg basiert auf kompetenten, engagierten Mitarbeitern und einer exzellenten Führungsmannschaft.
- Klimaschutz und Ressourcenschonung sind unsere vorrangige Ziele im Umweltschutz.
- Unsere Informationspolitik ist transparent, wahrheitsgetreu und verantwortungsbewusst.
- Aktive und offene Kommunikation prägen unseren Umgang miteinander.

### Führungsleitlinien

**Die HeidelbergCement Führungsleitlinien sind aus der Corporate Mission abgeleitet und schaffen die Voraussetzung für eine einheitliche Führungskultur.**

Die Ausrichtung auf ganzheitliche Effizienz, nachhaltige Profitabilität, ausgeprägte Kundenorientierung und ertragsorientiertes Wachstum haben absolute Priorität. Dies erfordert Kostenbewusstsein, hocheffiziente Strukturen und Abläufe sowie Schnelligkeit und Umsetzungsstärke. Um unsere Ziele zu erreichen, bauen wir auf engagierte und qualifizierte Mitarbeiter und auf eine exzellente Führungsmannschaft. Wir sind davon überzeugt, dass vor allem eine mitarbeiterorientierte und partnerschaftliche Unternehmenskultur zum langfristigen Erfolg von HeidelbergCement führt.

- Partnerschaftliche Zusammenarbeit | "Vertrauen und Fairness"
- Leistungs- und Ergebnisorientierung | "Besser sein als andere - Maßstäbe setzen"
- Kundenorientierung | "Größtmöglicher Nutzen für den Kunden"
- Nachhaltige Entwicklung | "Verantwortung übernehmen"
- Fach-, Sozial- und Managementkompetenz | "Erfolg durch Kompetenz"
- Vorbild | "Beispiel sein"

- Kommunikation und Information | "Transparenz schaffen"
- Leistungsbereitschaft | "Sich und andere begeistern"
- Personalentwicklung | "Fordern und fördern"
- Beurteilung und Feedback | "Entwicklung und Leistung durch Feedback"

## Umwelt- und Energiepolitik

### Das neue Energiemanagementsystem der HeidelbergCement AG in Deutschland

Das Integrierte Managementsystems (IMS) der Geschäftsbereiche Zement, Kalk und HeidelbergCement Baustoffe für Geotechnik GmbH der HeidelbergCement AG Deutschland, das bislang das Qualitätsmanagement, Umweltmanagement und die Arbeitssicherheit in einer einheitlichen Struktur zusammengefasst hat, wurde um ein Energiemanagementsystem erweitert. Mit der Einführung des Energiemanagementsystems soll die kontinuierliche Reduzierung des Gesamtenergieverbrauches noch stärker als bislang forciert und die Erfolge nachhaltig dokumentiert werden.

Aufgrund des hohen Energiebedarfs (Brennstoff, elektrische Energie) in der Produktion zählt HeidelbergCement zu den energieintensiven Unternehmen. Zudem werden bei der Produktion natürliche Ressourcen (Kalkstein, Wasser etc.) verbraucht. Als energie- und ressourcenintensives sowie kostenorientiertes Unternehmen ist eines unserer Ziele die kontinuierliche Steigerung der Energieeffizienz. Daher verpflichten sich die deutschen Geschäftsbereiche Zement, Kalk und HC Geotechnik der HeidelbergCement AG zur:

- Einführung und Aufrechterhaltung eines systematischen Energiemanagementsystems als wirksame Maßnahme zur Senkung des spezifischen Energieverbrauches.
- Einhaltung aller rechtlichen Verpflichtungen und Selbstverpflichtungen in den Bereichen Qualität, Umwelt, Arbeitssicherheit und Energie.
- Erfassung und Auswertung spezifischer elektrischer und thermischer Energieverbräuche als Basis der effizienten Produktionsführung.
- Kontinuierlichen Investitionen in energieeffiziente Technologien und Produktionsprozesse.
- Berücksichtigung des Energieverbrauchs bei der Neubeschaffung von Anlagen im Rahmen einer „Life Cycle Cost Perspective“, um den Stromverbrauch pro Tonne Klinker zu reduzieren.
- Förderung von Kompositzementen im Produktportfolio zur Reduzierung des Klinker/Zementfaktors, um die CO<sub>2</sub> Emissionen pro Tonne Zement zu reduzieren und natürliche Rohstoffe zu schonen.
- Verstärkte Nutzung von alternativen Brennstoffen inklusive Biomasse zur Reduzierung des Primärbrennstoffverbrauchs. Der Biomasseanteil, der im Jahr 2011 21,4 % unseres Gesamtenergieverbrauchs betrug, soll kontinuierlich ausgebaut werden.
- Unterstützung der gesetzlichen Bestimmungen und Strategien zur Minderung der Auswirkungen des Klimawandels.
