# Supplementary material
Source: publisher site journal article supplement (https://www.degruyterbrill.com/publication/isbn/9783110432879/downloadAsset/9783110432879_Elektronischer_Anhang_2.zip)
Supplement: Supplementary file 58 [file Henkel Corporate Identity.pdf › Korpustexte/Korpustexte pdf/Henkel/Henkel Corporate Identity.pdf]

# Corporate Identity

**Henkel.** Eine Marke wie ein Freund.

**Henkel.** A Brand like a Friend.

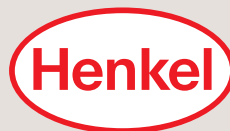

*A Brand like a Friend*

„**Wir alle sind Henkel** und wir haben verstanden, dass Henkel als Marke ein sehr wertvoller Besitz ist. Darum werden wir keine Kompromisse im Zusammenhang mit unserer Unternehmensmarke zulassen. Vielmehr werden wir alles tun, um die Identität von Henkel weiter zu stärken. Jeder, jeden Tag und überall.“

**Ulrich Lehner**, Vorsitzender der Geschäftsführung

“**We are all Henkel** people and are well aware that the Henkel name is a truly valuable asset. So there can be no compromise when it comes to maintaining the integrity of our corporate brand. Rather, we intend to do everything in our power to further enhance the Henkel identity – each of us, every day and everywhere.”

**Ulrich Lehner**, Chairman of the Management Board

### **Henkel entwickelt sich zur weltweiten Marke. Und verbindet dies mit einer sympathischen Botschaft.**

Für Unternehmen gelten die gleichen Gesetze wie für Menschen: Jedes Unternehmen und jeder Mensch hat ein Gesicht, wir erkennen andere daran und – wenn wir in den Spiegel sehen – erkennen wir uns selbst darin wieder.

Unternehmen benötigen ein Gesicht, damit sie von ihren Kunden, Aktionären, Lieferanten, Börsianern, Journalisten, Politikern und anderen Außenstehenden wahrgenommen werden können. Eine ganz entscheidende Rolle spielt das Gesicht des Unternehmens für die Mitarbeiter: Bei einem im wahrsten Sinne des Wortes angesehenen Unternehmen zu arbeiten, hebt das eigene Selbstwertgefühl.

Gewichtige Gründe also für ein international gültiges Corporate Design, so wie es für Henkel entwickelt wurde: als zentrales Element der Kommunikation und sichtbarer Ausdruck der strategischen Positionierung, der Identität und des Selbstverständnisses des Unternehmens.

Die Entwicklung der Dachmarkenstrategie und die Bedeutung von Corporate Identity und Corporate Design werden in dieser kleinen Broschüre erläutert.

#### **Volker Krug**

Leiter Corporate Identity | Head of Corporate Identity

### **Henkel is evolving into a global brand. And linking this with an emotional message.**

Companies are bound by the same laws as people: each company and every individual has a recognizable face – and when we look in a mirror, we expect to see our own familiar features looking back at us.

Companies need a face so that they can be immediately identified by their customers, shareholders and suppliers, not to mention stock market operators, journalists, politicians and other stakeholders. The face of a company also plays a major role for its employees: working for a company that ‘looks good’ in all senses of the word – enjoys a good reputation and commands respect – raises their own feeling of worth.

Cogent reasons, then, for a globally applicable corporate design such as has been developed for Henkel – as a central communications instrument and a visible expression of the strategic positioning, identity and self-image of the company.

The development of the corporate brand strategy and the significance of corporate identity and corporate design are explained in this booklet.

**Henkel.** Eine Marke wie ein Freund

**Henkel.** A Brand like a Friend ..... 6

**Ein neues Selbstverständnis:** Das Unternehmen als Marke

**A new self-image:** the Company as a brand ..... 8

**Abbau von Komplexität** im Unternehmen

**Reducing complexity** within the Company ..... 12

**Orientierung über den Tag hinaus:** Die Unternehmensvision

**Looking beyond today:** the corporate vision ..... 14

**Das Vermächtnis** des Firmengründers

**The legacy** of the Company’s founder ..... 16

**Basis für nachhaltigen Erfolg:** Ein verbindliches Wertesystem

**Basis for sustainable success:** a binding value system ..... 18

**Symbol für Vertrauen:** Eine Marke mit persönlichem Charakter

**Symbol of trust:** a brand with personality ..... 20

**Die eigenen Mitarbeiter** als Botschafter der Marke

**Employees** as brand ambassadors ..... 22

**Weltweites Versprechen:** Qualität von Henkel

**Worldwide promise:** Quality from Henkel ..... 26

**Klares Signal** auf den Personal- und Finanzmärkten

**Clear signal** on the recruitment and financial markets ..... 28

**Markenbildung** als nachhaltige Unternehmensstrategie

**Brand-building** as a sustainable corporate strategy ..... 32

## Henkel. Eine Marke wie ein Freund.

## Henkel. A Brand like a friend.

**Der Firmenname** in klassisch geschwungenen Lettern, dazu ein Kupferstich des Düsseldorfer Fabrikgeländes mit rauchenden Schloten, so imposant und ehrwürdig sahen die Briefköpfe von Henkel in den Anfangszeiten des Unternehmens aus. Heute tragen sie ein schlichtes ovales Logo mit dem Namenszug und den handschriftlichen Zusatz „A Brand like a Friend“. Der Kontrast führt den Wandel nicht nur im Erscheinungsbild, sondern auch im Selbstverständnis von Henkel vor Augen – vom Fabrikantenstolz des Gründers zum Understatement des Global Players.

Es sind zumeist dynamische Worte und Bilder, mit denen Firmen für sich werben. Von Leistung, Wachstum und Zukunft ist in vielen Slogans die Rede, oftmals illustriert durch moderne Hochhausfassaden, die wie einstmals Henkels Fabrikschlote in den Himmel ragen und wirtschaftliche Kraft symbolisieren. Ganz anders klingt da die Botschaft, mit der sich Henkel seit dem Jahr 2001 als Unternehmen präsentiert: „A Brand like a Friend“ –

wegen der internationalen Verwendung in englischer Sprache formuliert – schlägt im Konzert der globalen Konzerne andere Töne an. Leiser als üblich, doch nicht weniger aufmerksamkeitsstark. Wie ist Henkel darauf gekommen, sich als „eine Marke wie ein Freund“ zu bezeichnen? Was wird mit dieser Aussage bezweckt? Was hat sie mit den Leistungen des Unternehmens zu tun?

**The Company name** in classic cursive script, accompanied by a copperplate print of the Düsseldorf factory with smoking chimneys. This was Henkel's imposing and venerable letterhead in the Company's early years. Today it is a simple oval with the Company name and the handwritten claim "A Brand like a Friend." The contrast is indicative not just of a change in outward appearance but also of a change in how Henkel sees itself. The emphasis has shifted from its founder's pride in manufacturing prowess to the understated assurance of a global player.

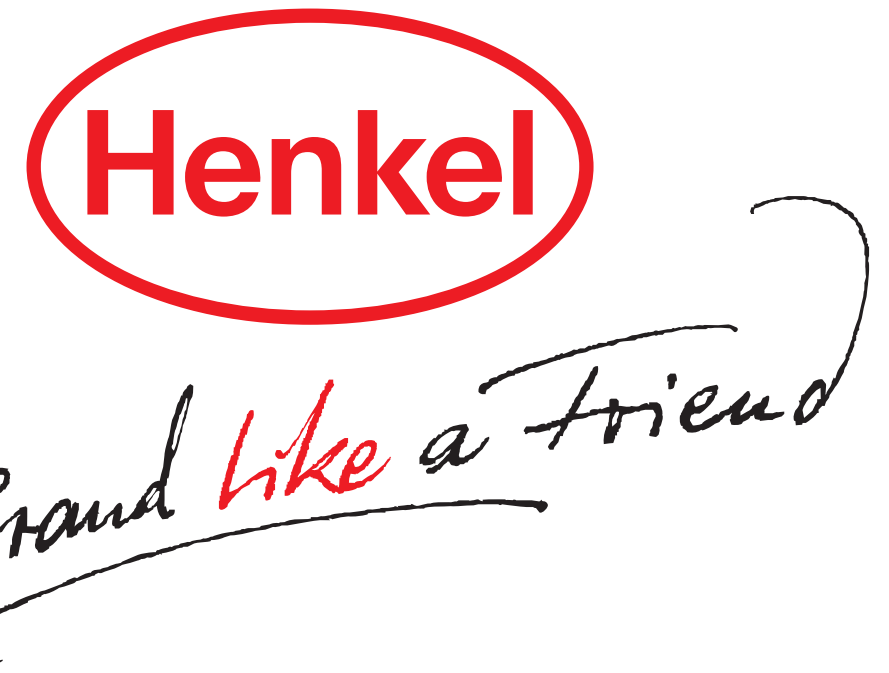

Companies usually advertise through dynamic words and images. Slogans often refer to achievements, growth and the future, and many of them are accompanied by images of modern high-rise buildings reaching toward the skies, much as Henkel's factory chimneys used to, symbolizing economic strength. The contrast between these signals and the message with which Henkel has been presenting itself since 2001 could

not be greater. "A Brand like a Friend" – formulated in English so that it can be used internationally – strikes a very different note in the concert of global corporations. Softer than usual, yet with just as strong an impact. How did Henkel come to define itself as "A Brand like a Friend"? What is the intention behind this statement? What does it have to do with the Company's achievements?

Noch nie in der 130-jährigen Firmengeschichte haben sich Management und Mitarbeiter so intensiv mit den **Unternehmensgrundsätzen und der Unternehmensidentität** (Corporate Identity) von Henkel beschäftigt wie in den vergangenen Jahren.

Never before in the 130 years of Henkel's history have management and employees been so intensively involved in its **corporate principles and identity** as in recent years.

## Ein neues Selbstverständnis: Das Unternehmen als Marke

### A new self-image: the company as a brand

**Tatsächlich** stehen weit reichende Überlegungen hinter der neuen Botschaft von Henkel. Noch nie in der 130-jährigen Firmengeschichte haben sich Management und Mitarbeiter so intensiv mit den Unternehmensgrundsätzen und der Unternehmensidentität (Corporate Identity) von Henkel beschäftigt wie in den vergangenen Jahren. Ausgangspunkt war die Neuausrichtung von Henkel im Jahr 2001.

Angesichts eines breiten Portfolios, das von modernen Alltagsprodukten für Verbraucher bis zu komplexen chemisch-technischen Systemlösungen für Industriekunden reicht, wurden Markenartikel und Technologien als **strategische Säulen** für die Zukunft bestimmt.

So gibt es im Jahr 2006 drei Geschäftsfelder

- Wasch-/Reinigungsmittel
- Kosmetik/Körperpflege
- Klebstoffe, Dichtstoffe und Oberflächentechnik

**In fact**, there are a number of far-reaching considerations behind the new message from Henkel. Never before in the Company's 130-year history have management and employees focused so intensively on its corporate identity as in recent years. The starting point was Henkel's realignment in 2001.

In view of its broad portfolio, stretching from modern consumer products for everyday use to complex chemical and technical system solutions for industrial customers, branded products and technologies were identified as **strategic pillars** for the future.

Reflecting this, there are three areas of competence in 2006

- Home Care
- Personal Care
- Adhesives, Sealants and Surface Treatment

und vier Unternehmensbereiche

- Wasch-/Reinigungsmittel
- Kosmetik/Körperpflege
- Klebstoffe für Konsumenten und Handwerker
- Henkel Technologies (Industrie- und Strukturklebstoffe, Dichtstoffe, Oberflächentechnik).

Die Neuausrichtung hatte aber nicht nur organisatorische Konsequenzen, sondern schloss auch Fragen nach dem Unternehmenszweck und dem Selbstverständnis von Henkel ein. So markierte das neue Jahrtausend den Beginn eines umfassenden Prozesses, in dessen Verlauf **Vision und Werte**, Identität und Erscheinungsbild des Unternehmens sorgfältig analysiert, reflektiert und auf der Grundlage bewährter und gefestigter Traditionen schließlich neu definiert und gestaltet wurden.

Es ging und geht dabei um mehr als um schöne Worte und Äußerlichkeiten. Dahinter steht die durch mehrere Studien belegte Erkenntnis, dass eine ausgeprägte und stimmige **Corporate Identity** maßgeblich zum wirtschaftlichen Erfolg eines Unternehmens beiträgt.

So wurde schließlich das langfristige Ziel gesetzt, Henkel zu einer weltweit bekannten Unternehmensmarke auszubauen, die kraft ihrer Reputation sämtliche Geschäftsaktivitäten auf internationalen Märkten unterstützen und

den **Unternehmenswert steigern** soll. Damit war ein neuer Gedanke geboren – der Gedanke, das Unternehmen Henkel insgesamt als Marke zu verstehen und zu führen. So wie erfolgreiche Markenartikel Konsumenten Orientierung bieten und Vertrauen genießen, weil sie ein hohes, gleich bleibendes Qualitätsniveau garantieren, so will Henkel von Kunden, Mitarbeitern, Aktionären, Lieferanten, Behörden, Medien und der gesamten Öffentlichkeit als **vertrauenswürdigen Unternehmen** wahrgenommen werden.

and four business sectors

- Laundry & Home Care
- Cosmetics/Toiletries
- Consumer and Craftsmen Adhesives
- Henkel Technologies (industrial and engineering adhesives, sealants and surface treatments)

As well as having organizational consequences, the realignment raised questions about the Company's mission and how it perceives itself. The new millennium marked the start of an intensive process in which the **vision and values**, identity and outward appearance of the Company were carefully analyzed and thought out, then redefined and reshaped on the basis of proven and established traditions.

This was and is about more than fine words and superficialities. Behind it is the knowledge, confirmed by a number of studies, that a distinctive and consistent **corporate identity** makes an important contribution to a company's economic success.

As a long-term objective it was therefore agreed that Henkel should be built up into a globally recognized corporate brand, whose reputation would support all of its business activities in international markets and increase its **corporate value**.

A new idea was born – the idea of looking at Henkel in its totality not as a company but as a brand, and managing it accordingly. Just as successful branded products offer consumers orientation and enjoy their trust, because they guarantee a consistently high level of quality, Henkel wants consumers, customers, employees, shareholders, suppliers, regulatory bodies, media and the general public to perceive it as a trustworthy company.

Eine **ausgeprägte und stimmige Corporate Identity** trägt maßgeblich zum wirtschaftlichen Erfolg eines Unternehmens bei.  
A **distinct and harmonious corporate identity** makes an important contribution to a company's economic success.



## Abbau von Komplexität im Unternehmen

### Reducing complexity within the company

**Die Gründe** für diesen neuen Managementansatz, der unter dem Begriff „Corporate Branding“ auch in den Wirtschaftswissenschaften stark diskutiert wird, sind vielschichtig. So ist es infolge der täglichen Informationsflut, der Dynamik des internationalen Wettbewerbs und der kaum überschaubaren Zahl von Marktteilnehmern selbst für große Unternehmen immer schwerer, in der Öffentlichkeit wahrgenommen zu werden und ein klares Bild von sich zu vermitteln.

Verstärkend wirkt, dass die Komplexität der Unternehmen zunimmt. Neue Märkte werden erschlossen, Firmen akquiriert, das Angebotsportfolio erweitert und zugleich werden Geschäftsprozesse und Organisationsstrukturen immer diffiziler. Damit einher geht eine enorme Ausweitung und **Intensität der Kommunikation**, was nach schnellen und

eindeutigen Kommunikationsinhalten verlangt. Eine Unternehmensmarke bietet hier eine wesentliche Erleichterung für die Verständigung, da sie Assoziationen, Informationen und Erlebnisse zu einem Vorstellungsbild zu bündeln vermag und damit Komplexität reduziert.

**The reasons** for this new management approach are varied. Referred to as corporate branding, it is a subject of considerable debate among economists. In view of the daily flood of information, the dynamism of international competition and the enormous number of market players, large corporations are finding it increasingly difficult to make an impact on public awareness and project a clear image of who they are and what they stand for.

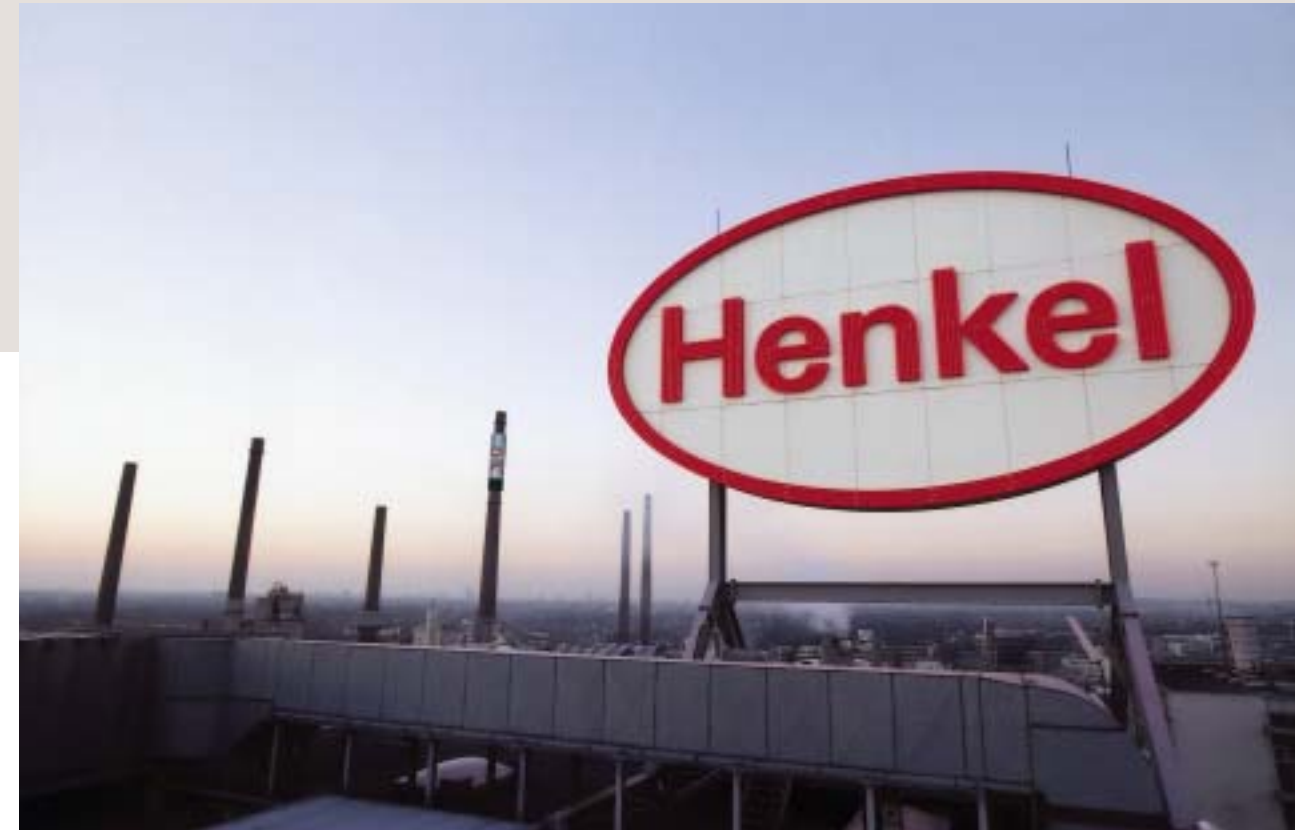

Zeichen setzen: Das Firmenlogo über den Dächern der Produktionsbetriebe in Düsseldorf-Holthausen. | Showing the flag: the company logo above the roofs of the production facilities in Düsseldorf-Holthausen (Germany).

The fact that companies themselves are becoming more complex only exacerbates the situation. New markets are created, companies are taken over, and product and service portfolios are expanded, making the associated business processes and organizational structures even more intricate. This is accompanied by enormous growth in the

scope and **intensity of communication**, which calls for increasingly rapid formulation of clear messages. A corporate brand can help to communicate a message more simply, because it is capable of merging associations, information and experiences into one image and thus reducing complexity.

## Orientierung über den Tag hinaus:

### Die Unternehmensvision

## Looking beyond today:

### the corporate vision

**Die wichtigste Voraussetzung zur Bildung einer Marke ist eine tragende Idee, die Anziehungskraft nach innen und außen entwickelt und über den Tag hinaus Gültigkeit besitzt. So stand am Anfang die Neudefinition der Unternehmensvision, um auf den Punkt zu bringen, wofür der Name Henkel steht.**

Die lange Zeit verwendete Bezeichnung des Unternehmens als „Spezialist für angewandte Chemie“ – gemeint war die Umsetzung von Erkenntnissen aus der Chemie auf Produkte für Haushalt, Handwerk und Industrie – wurde als zu nüchtern empfunden, um die Idee und das **Potenzial von Henkel** treffend zu charakterisieren.

Dies gelang schließlich mit der Formulierung „Henkel ist führend mit Marken und Technologien, die das Leben der Menschen leichter, besser und schöner machen.“ Damit wird sowohl der Führungsanspruch auf den Geschäftsfeldern von Henkel hervorgehoben als auch der Unternehmenszweck beschrieben, immer wieder neue Produkte und innovative Lösungen zu entwickeln, die für Verbraucher und Industriekunden wesentliche **Erleichterungen und Verbesserungen** bedeuten.

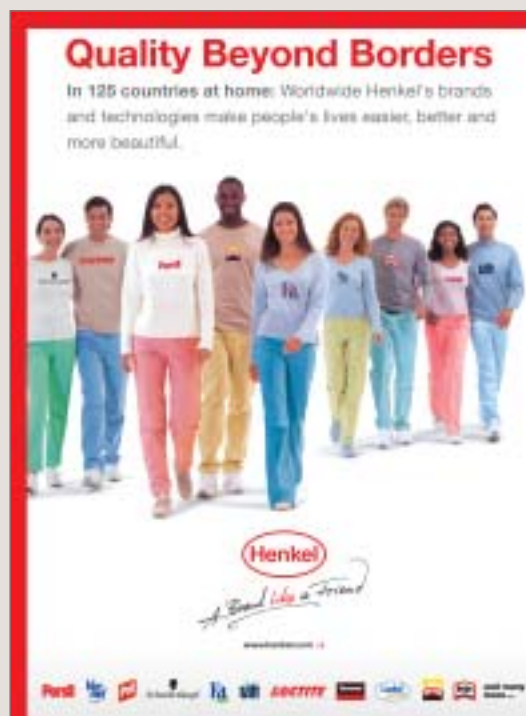

**The most important prerequisite for building a brand is a strong idea with internal and external appeal, which can withstand the test of time. Identifying what Henkel stands for was therefore the first step in redefining its corporate vision.**

The long-serving claim “Specialist in applied chemistry” – referring to the utilization of chemical know-how to create products for the home, craftsmen and industry – was judged to be too sober to aptly characterize the idea and **potential of Henkel**.

The true spirit of the Company was finally captured in the wording “Henkel is a leader with brands and technologies that make people’s lives easier, better and more beautiful.” This emphasizes Henkel’s claim to leadership in its areas of competence as well as its corporate mission of continuously developing new products and innovative solutions that considerably **simplify and improve the lives** of consumers and industrial customers.

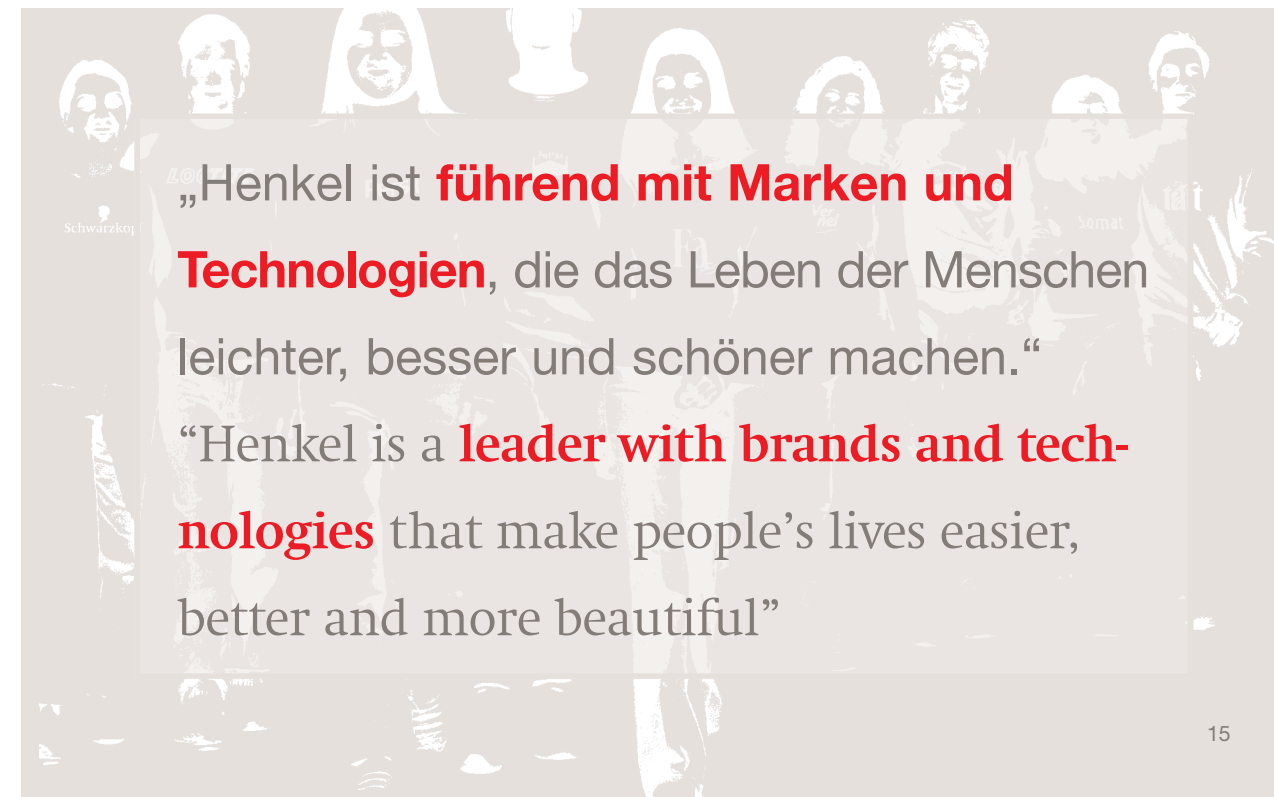



## Das Vermächtnis des Firmengründers

### The legacy of the company's founder

**Bei der Formulierung dieser Vision hat man sich auf die historischen Wurzeln des Unternehmens und das Vermächtnis des Firmengründers zurückbesonnen. Schon Fritz Henkel (1848–1930) hatte das Ziel, Produkte herzustellen, die das Leben der Menschen einfacher und besser machen.**

Als er mit Persil im Jahr 1907 zum ersten Mal ein selbsttätiges, also gleichzeitig reinigendes und bleichendes Waschmittel auf den Markt brachte und damit die mühselige und Zeit raubende Hausarbeit des Waschens erleichterte, ist ihm dies nachhaltig gelungen.

Er revolutionierte damals aber nicht nur die Wäschepflege und erleichterte den Alltag der Frauen, sondern war auch ein **Wegbereiter der modernen Markenführung**. Durch neuartige, Aufsehen erregende Werbekampagnen machte er Persil systematisch in der breiten Bevölkerung bekannt und schuf auf diese Weise einen der erfolgreichsten Markenartikel der deutschen Wirtschaftsgeschichte überhaupt. So legte er den Grundstein für die Entwicklung von Henkel zu einem Weltunternehmen. Seither bildet die Verknüpfung von herausragender Produktqualität und intelligenter Markenführung den Eckpfeiler für den Erfolg von Henkel.

**To formulate this vision**, the Company went back to its historic roots and the legacy of its founder, Fritz Henkel (1848-1930). He, too, aimed to make products that would make people's lives easier and better.

He succeeded in doing this, with lasting effect, in 1907, when he launched Persil, the first self-acting (i.e. simultaneously cleaning and bleaching) detergent, which radically simplified the laborious and time-consuming household chore of washing the laundry.

However, he did more than revolutionize laundry care, making life so much easier ever after for housewives, for he was also a **pioneer of modern brand management**. He systematically raised awareness of Persil among the general public by means of innovative and sensational advertising campaigns, thus creating one of the most successful branded products in the history of German business. In doing so, he laid the foundations for Henkel's development into a global company. Ever since then, the combination of outstanding product quality and intelligent brand management has been the cornerstone of Henkel's success.

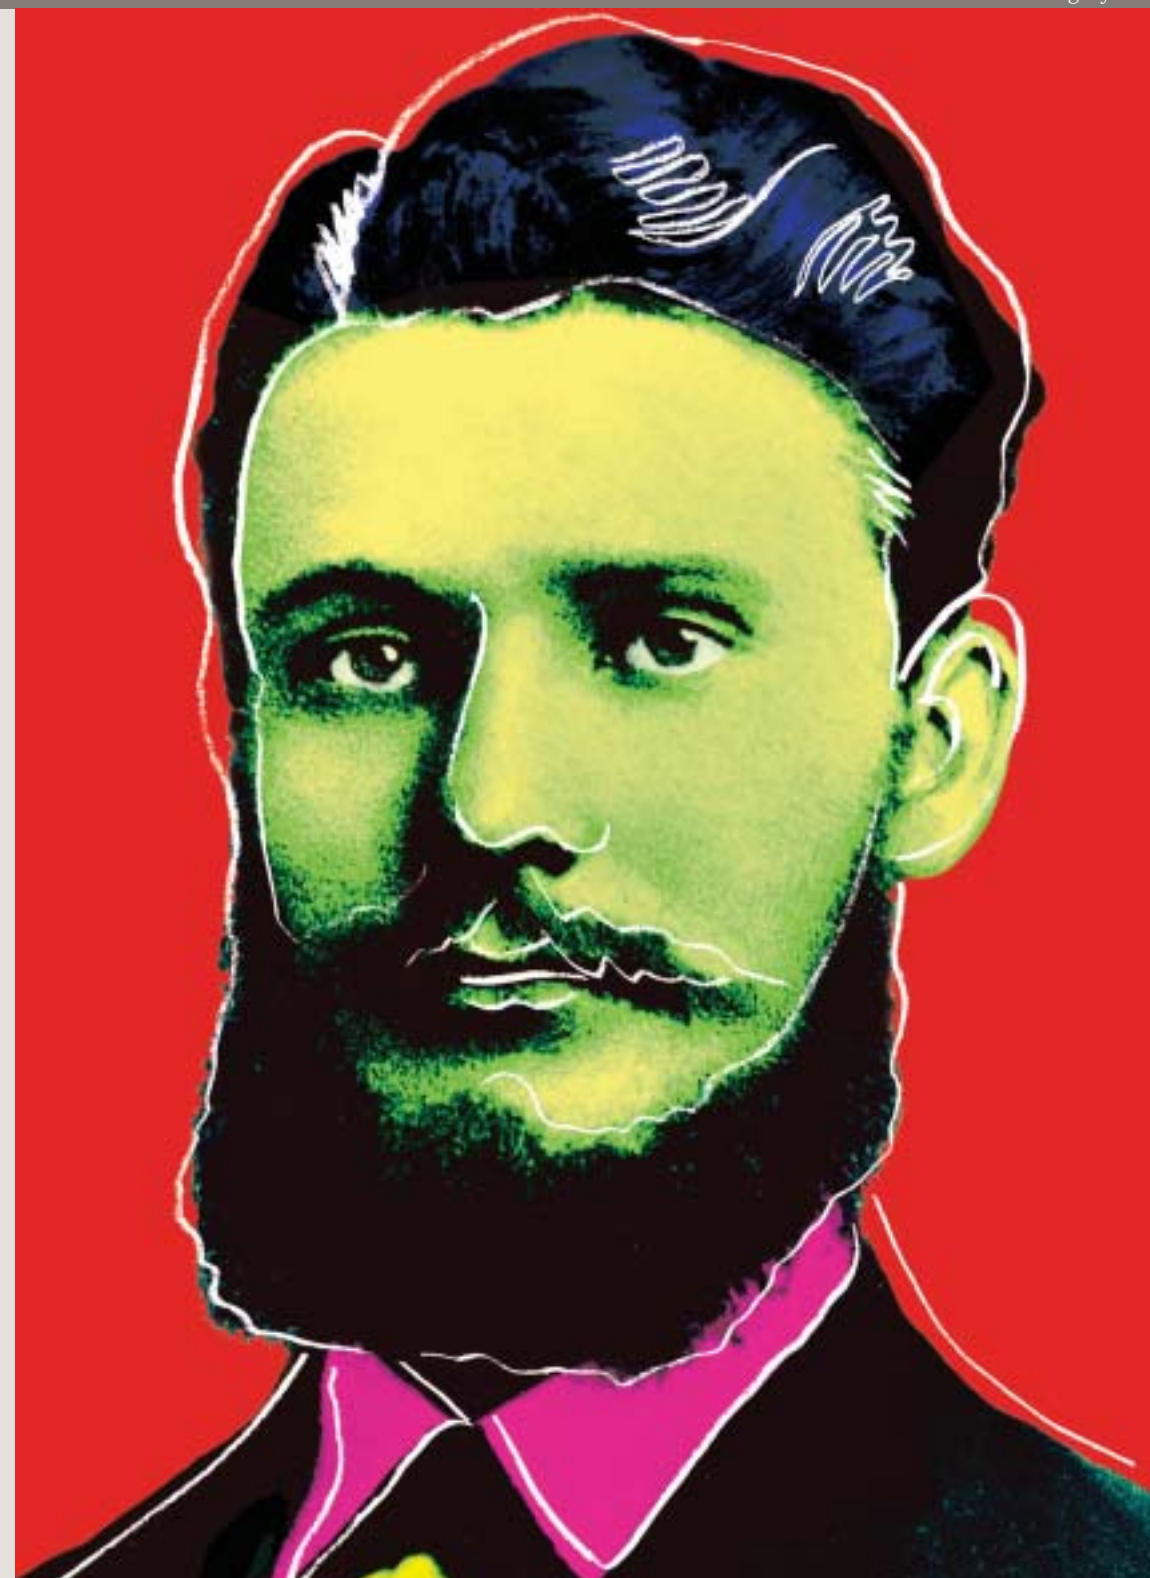

Farbenfroh: Firmengründer Fritz Henkel – dargestellt in einer modernen Interpretation. | Warholesque: company founder Fritz Henkel depicted in pop-art style.

## Basis für nachhaltigen Erfolg: Ein verbindliches Wertesystem

## Basis for sustainable success: a binding value system

**Zusammen** mit der Unternehmensvision wurden auch die Unternehmenswerte von Henkel neu formuliert. In dieses Wertesystem fließen Erfahrungen und Prinzipien ein, die sich in der Unternehmensgeschichte bewährt haben und die Anpassungsfähigkeit des Unternehmens im gesellschaftlichen und wirtschaftlichen Wandel gewährleisten. Je stärker ein solches Wertesystem in der Unternehmenspraxis verankert ist, desto größer ist die Fähigkeit, auf Dauer erfolgreich zu agieren.

Der **Wertekatalog** von Henkel umfasst zehn Punkte, die für alle Mitarbeiter weltweit verbindlich sind. Dazu zählen zum Beispiel die absolute Kundenorientierung, die zentrale Bedeutung von Qualität und Innovationen sowie die Übernahme von **Verantwortung im gesellschaftlichen Umfeld**.

Aus den Werten leiten sich die Führungsprinzipien und Regeln für die Zusammenarbeit mit Kollegen und Lieferanten sowie die Verpflichtung gegenüber den Kapitalgebern ab. Einen besonderen Wert für Henkel stellt die **aktive und offene Informationspolitik** dar, da sie Transparenz schafft und damit eine wichtige Voraussetzung für die Bildung von öffentlichem Vertrauen erfüllt.

**Along with** its corporate vision, Henkel's corporate values were also reformulated. This value system incorporates experiences and principles that have proven themselves over the course of the Company's history, and guarantee the Company's ability to adapt to social and economic change. The more firmly such a value

system is anchored in the Company's business practices, the greater its ability to operate successfully in the long term.

Henkel's "**Vision and Values**" includes ten values that are binding for all employees worldwide. They document the Company's customer-driven approach, the key significance of quality and innovation, and its **dedication to corporate social responsibility**.

These values are the basis for deriving management principles and rules for working together with colleagues and suppliers, and for the Company's duty toward investors.

The values include a commitment to **open and active communication**, to which the Company assigns special priority, as the resulting transparency is a crucial prerequisite for the creation of public trust.

Werte – einprägsam vermittelt: In der weltweiten Mitarbeiter-Kommunikation spielen die Icons als Symbole der Unternehmenswerte eine wichtige Rolle. | Values prominently communicated: in Henkel's worldwide employee media, these icons symbolizing its corporate values provide a major visual accent.

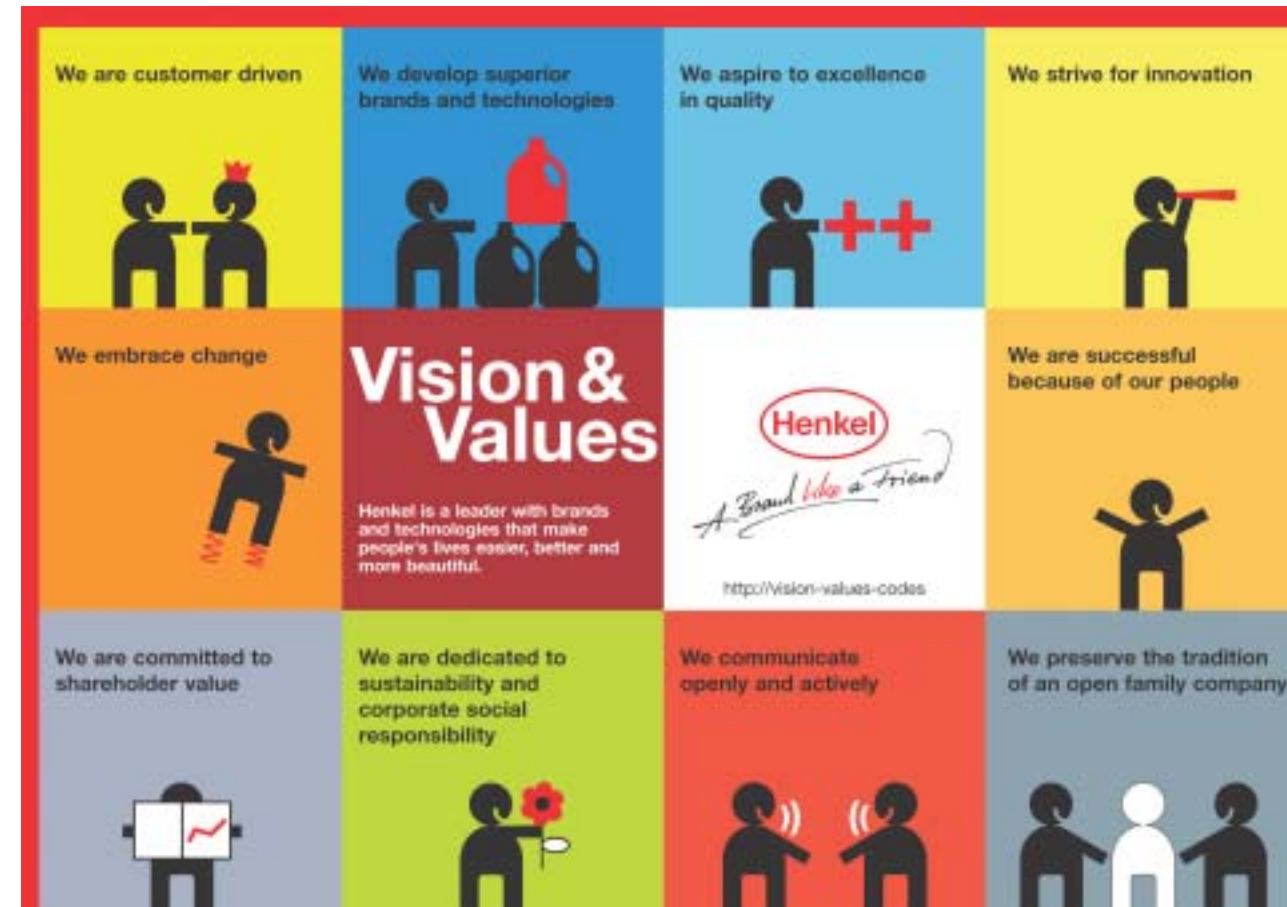



## Symbol für Vertrauen: Eine Marke mit persönlichem Charakter.

## Symbol of trust: a brand with personality.

Mit der Neuformulierung der Vision und Werte war die inhaltliche Grundlage für die Positionierung und die Zukunft der Marke Henkel geschaffen. Doch da Papier bekanntlich geduldig ist, kam es im nächsten Schritt darauf an, sie auch sichtbar und erlebbar zu machen. Einprägsame und einheitliche Symbole sind notwendig, um einer Marke ein Gesicht zu geben und ihre Botschaft zu verbreiten.

Dazu wurden das Corporate Design, das Unternehmenslogo und der Unternehmensslogan neu gestaltet beziehungsweise formu-

liert. Ausgangsbasis war das Henkel-Oval, das schon seit Jahrzehnten in Gebrauch war, von dem jedoch die verschiedensten Varianten existierten. Erstmals wurde seine Gestaltung nun im Zuge eines weltweit einheitlichen Corporate Designs exakt festgelegt. Teil des Logos wurde auch der neue Unternehmens-Claim „A Brand like a Friend“, in dem die Markenbotschaft zusammengefasst wurde.

Henkel will mit dieser Aussage Nähe und Vertrauen schaffen, will die Distanz überwinden, die gegenüber Großunternehmen oft empfunden wird. Einen Freund wünscht sich

jeder Mensch – jemanden, der einem im Leben zur Seite steht und auf den man sich verlassen kann. Henkel wird durch diesen Vergleich zu einer konkreten Person, die ein Gesicht und etwas zu sagen hat, mit der man sich identifizieren und auseinander setzen kann.

The reformulation of the Vision and Values established the basis for the positioning and future of the Henkel brand. But since words alone are not enough, the next step was to make them visible and tangible. Catchy and uniform symbols are necessary in order to give a brand a face and to disseminate its message. The corporate design, logo and claim were therefore redesigned and reformulated.

The starting point was the Henkel oval, which had been in use for decades, but which existed in many different variations. For the

first time, its design was defined exactly as part of a globally standardized corporate design. The new corporate claim “A Brand like a Friend,” expressing the brand message, became part of the logo. Henkel’s intention is that the claim should suggest closeness and trust.

In other words, it wants to banish the feeling of remoteness often associated with large companies. Everyone wants a friend – someone to be at their side, someone who can be relied on. As the comparison makes clear, Henkel acquired a personality, with a face and a message, with which people can identify and interact.

Leben auf der Großfläche: Eine Serie von Jahreszeit-bezogenen Plakaten machte den Mitarbeitern das Standardlogo vertraut. | Poster show: a series of seasonal themes selected to raise employee awareness of the standard logo.

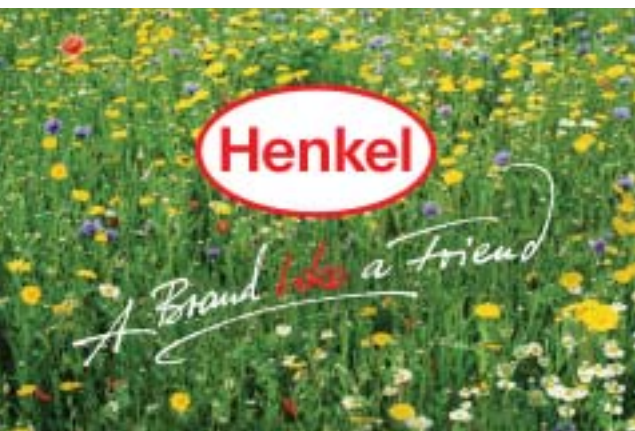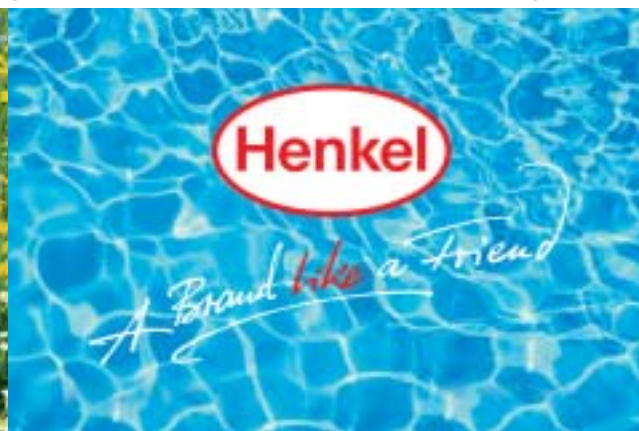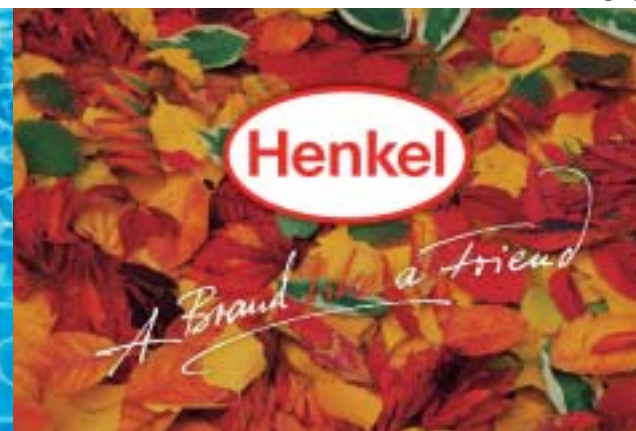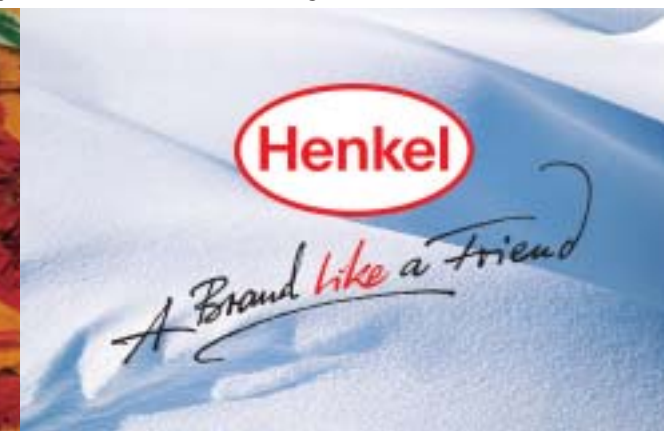

Wenn eine Marke **Attraktivität** auf Kunden ausstrahlen soll, muss sie als erstes von denjenigen verstanden, akzeptiert und gelebt werden, die täglich mit ihr zu tun haben und die **Produktqualität** sicherstellen müssen.

If a brand is to radiate **appeal** to customers, it must first be understood, accepted and assimilated by those coming into daily contact with it and responsible for ensuring the kind of **product and service quality** that will maintain or – preferably – increase its equity.

## Die Mitarbeiter als Botschafter der Marke Employees as brand ambassadors

**Um die Unternehmensmarke Henkel bekannt zu machen, entschied man sich für ein schrittweises Vorgehen. Priorität hatte dabei die interne Kommunikation, die für ein global agierendes Unternehmen eine besondere Herausforderung darstellt.**

Henkel ist heute in 125 Ländern der Erde tätig und beschäftigt über **52.000 Mitarbeiter**. Rund 80 Prozent von ihnen arbeiten außerhalb Deutschlands, womit Henkel eines der am stärksten international ausgerichteten deutschen Unternehmen ist.

Wenn eine Marke Attraktivität auf Kunden ausstrahlen soll, muss sie als Erstes von denjenigen verstanden, akzeptiert und gelebt werden, die täglich mit ihr zu tun haben und die Produktqualität sicherstellen müssen. Die vorrangige Aufgabe bestand also darin, die Marke Henkel und ihre **grundlegenden Ideen, Werte und Prinzipien** den Mitarbeitern rund um den Globus zu erklären. Mit dem Ziel, diese zu überzeugten Botschaftern der Marke Henkel zu machen, wurden zahlreiche Kommunikationsmaßnahmen realisiert. Dazu gehörten Handbücher mit detaillierten Vorgaben zum Corporate Design, eine **Sonderausgabe** der Mitarbeiterzeitung Henkel-Life, Broschüren

**It was decided** to take a step-by-step approach to the process of raising awareness of the Henkel corporate brand. The top priority was internal communication, which is always a major challenge for globally operating companies.

Henkel now operates in 125 countries and employs more than **52,000 people**. About 80 percent of them work worldwide. This makes Henkel one of the most strongly internationally oriented German companies.

For a brand to be attractive to consumers and customers, it must first be understood, accepted and internalized by those who deal with it every day and are responsible for ensuring its product quality. The main task was therefore to explain the Henkel brand and its **basic ideas, values and principles** to employees around the world. Numerous communication activities were launched with the aim of making employees enthusiastic ambassadors of the Henkel brand. These included corporate design manuals, a **special edition** of the employee newspaper Henkel-Life, "Vision and Values" brochures, new business cards, an image film and much more.

über die Vision und Werte, neue Visitenkarten, ein Image-Film und vieles mehr.

Das neue Corporate Design eroberte in Form von Briefbögen, Schreibblöcken, Kugelschreibern und Mouse-Pads bis hin zu Bildschirmschonern überall auf der Welt die Henkel-Büros, zugleich wurden die Standorte mit Eingangsschildern, Flaggen, Plakatwänden und anderen Medien **im neuen Henkel-Look** unterzogen. Vom Geschäftsbericht über Produktbroschüren und Power-Point-Präsentationen bis zu den Henkel-Seiten im Internet und Intranet ist der typische Henkel-Auftritt heute auf Anhieb erkennbar.

Auf große Resonanz bei den Mitarbeitern stieß der eigens komponierte Firmensong „**We together**“, den es inzwischen auch in einer deutschen, chinesischen, japanischen, mexikanischen, russischen, türkischen und ukrainischen Fassung gibt. Darüber hinaus wurde ein internationaler **Henkel Friendship Day** ins Leben gerufen, der jedes Jahr am 26. September an die Gründung des Unternehmens und an die gemeinsame Unternehmensvision erinnert. All dies hat dazu beigetragen, dass die Markenbotschaft innerhalb kurzer Zeit bei den Mitarbeitern angekommen ist und auch im Alltag gelebt wird.

The new corporate design swept through Henkel offices across the world, appearing on letterheads, writing pads, ballpoint pens, mouse pads and screen savers. At the same time, sites were provided with entrance signs, flags, billboards and other media in the **new Henkel look**. From the Annual Report to product brochures, PowerPoint presentations and the Henkel Internet and intranet sites, the typical Henkel look is now immediately recognizable.

The specially commissioned Corporate song, “**We together**”, was a big hit with employees and now also exists in local versions

in China, Japan, Mexico, Russia, Turkey, and Ukraine. Moreover, September 26 was declared an annual international **Henkel Friendship Day**, as a reminder of the Company’s foundation and its shared corporate vision. All of these activities contributed to the rapid acceptance of the brand message by the Company’s employees, who live it out in their daily activities.

Ein Lied für die Welt: Zum insgesamt emotionaleren Auftritt des Unternehmens gehört auch ein eigener Henkel-Song : „We together“. | A song for the world: adding to the overall emotional appeal of the company’s identity, Henkel also has its own corporate anthem: “We together”.

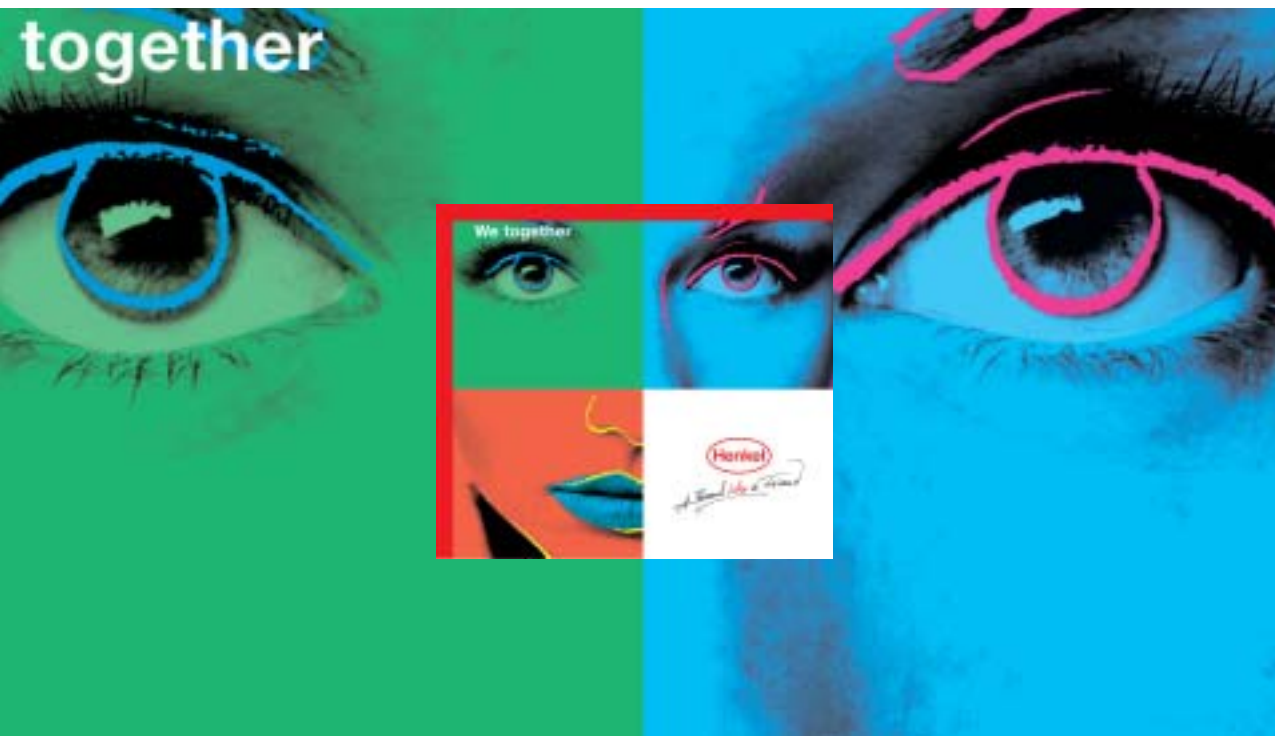

Das neue **Corporate Design** eroberte überall auf der Welt die Henkel-Büros. The new **corporate design** swept through Henkel offices across the world.



## Weltweites Versprechen: Qualität von Henkel

### Worldwide promise: Quality from Henkel

**Darüber hinaus** soll die Unternehmensmarke langfristig dazu beitragen, als Dachmarke einzelne Produktmarken zu unterstützen. Dies ist zum Beispiel bei der Einführung neuer Produktmarken effizient, auf die der Markenname Henkel positiv abstrahlt, wodurch beträchtliche Marketingausgaben eingespart werden können.

Das **Markenportfolio** von Henkel umfasst weltweit mehr als 750 Marken, wozu sowohl internationale als auch regionale Marken gehören. Henkel verfolgt nun konsequent die

Strategie, überall, wo es einer Produktmarke nützt, auf den Packungen und in der Werbung deutlich auf den Hersteller hinzuweisen. Dies geschieht in Form eines standardisierten Logos mit dem Dachmarkenslogan „Qualität von Henkel“, der in der jeweiligen Landessprache erscheint. Auf diese Weise wird die **Marke Henkel** täglich millionenfach kommuniziert – auf allen Kontinenten, in 125 Ländern der Welt.

Das Versprechen „Qualität von Henkel“ gilt für alle Produkte und Leistungen und stellt für die Mitarbeiter eine besondere Verpflichtung

dar. Denn herausragende Qualität ist die unbedingte Voraussetzung, um die **anspruchsvolle Unternehmensvision** zu erfüllen.

**Taking the long-term view**, the corporate brand has also been designed to support individual product brands by functioning as an umbrella brand. This is effective when new product brands are introduced. They benefit from the positive image of the Henkel brand name, enabling considerable savings to be achieved in marketing outlay.

Henkel's **brand portfolio** consists of more than 750 brands worldwide, including both international and regional brands. Whenever it considers that this will help to promote a

product brand, Henkel now consistently follows the strategy of drawing attention to the manufacturer on the packaging and in its advertising. This is done in the form of a standardized logo with the umbrella brand endorser “Quality from Henkel” in the appropriate national language.

The **Henkel brand** is therefore communicated millions of times each day – on all continents and in 125 countries around the globe. The “Quality from Henkel” promise applies to all products and services and means that each and every employee is under a special obligation. Because outstanding quality is an absolute prerequisite for fulfilling Henkel's **demanding corporate vision**.

Das Markenportfolio von Henkel umfasst rund **750 Marken** weltweit, wozu sowohl internationale als auch regionale Marken gehören.

Henkel's brand portfolio worldwide encloses around **750 brands** of both international and regional standing.

Um seine **Zukunftsfähigkeit** zu sichern, ist es für ein international tätiges und stark innovatives Unternehmen wie Henkel wichtig, ständig herausragend qualifizierte Fach- und Führungskräfte zu rekrutieren.

In order to ensure its **future viability**, an internationally operating and strongly innovative company such as Henkel needs to be able to recruit a steady stream of outstanding and highly qualified specialists and management staff.

Henkel

*Brand a friend*

**Klares Signal** auf den Personal- und Finanzmärkten.

**Clear signal** on the recruitment and financial markets.

**Wichtige Unterstützung** leistet die Unternehmensmarke Henkel schließlich auch im Wettbewerb um Köpfe und Kapital. Gerade auf den Personal- und Finanzmärkten erweist sie sich von unschätzbarem Wert. Um seine Zukunftsfähigkeit zu sichern, ist es für ein international tätiges und stark innovatives Unternehmen wie Henkel wichtig, ständig herausragend qualifizierte Fach- und Führungskräfte zu rekrutieren.

Voraussetzung dafür ist ein Ruf als **attraktiver Arbeitgeber**, der sowohl interessante Karriere- und Zukunftsperspektiven bietet als auch durch sein soziales und gesellschaftliches Engagement anerkannt ist. Ein Unternehmen, das den Charakter einer Marke besitzt, signalisiert dies auf Anhieb und gehört damit für Bewerber zu den ersten Adressen. So verbindet sich mit Henkel der Ruf eines sehr innovativen und besonders familienfreundlichen Unternehmens.

**The Henkel corporate brand** also provides key support in attracting new talents and capital. In the recruitment and financial markets it is of inestimable value. In order to ensure its future viability, an internationally operating and strongly innovative company such as Henkel needs to be able to recruit a steady stream of outstanding and highly qualified specialists and management staff.

The prerequisite for this is a good reputation as an **attractive employer** that offers exciting career opportunities and future prospects and is known for its social commitment. A company which has a brand character signals this immediately and acts as a beacon for job applicants. Henkel is associated with a reputation for being a highly innovative and especially family-friendly company.

Auch bei Firmenakquisitionen vermittelt eine Unternehmensmarke den neu hinzugekommenen Mitarbeitern ein klares Bild, was die Integration in neue Strukturen und eine neue **Unternehmenskultur** erleichtert. Dies hat sich unter anderem bei den größeren Akquisitionen gezeigt, die Henkel zuletzt in den USA realisiert hat.

Die Unternehmensmarke spielt schließlich auch für Kapitalgeber und Analysten eine wichtige Rolle, da sie eine solide **Wachstumsstrategie** und glaubwürdige Finanzinformationen verbürgt. Die Aktie Henkel repräsentiert sozusagen die

gesamte „Qualität von Henkel“ und den **Wert des Unternehmens**. Ihre positive Kursentwicklung in den vergangenen Jahren beweist ebenso wie die Jahresberichte, dass die eingeschlagene Strategie der **Markenbildung** beachtliche wirtschaftliche Früchte trägt.

When other companies are acquired, a corporate brand conveys a clear image to the new employees, which simplifies their integration into different structures and a different **corporate culture**. This was the case with Henkel's recent major acquisitions in the USA.

And finally, the corporate brand plays an important role for investors and analysts, as it stands for a solid **growth strategy** and reliable financial information. It could be said that the Henkel share represents the total

“Quality from Henkel” and the **Company's value**. Its positive price performance in recent years and the key figures in Henkel's Annual Reports both show that the chosen **strategy of brand building** is bearing considerable economic fruits.

Lebendig und optimistisch: So präsentiert sich das Corporate Design von Henkel. | Vivid and uplifting: essential aspects of the Henkel corporate design.

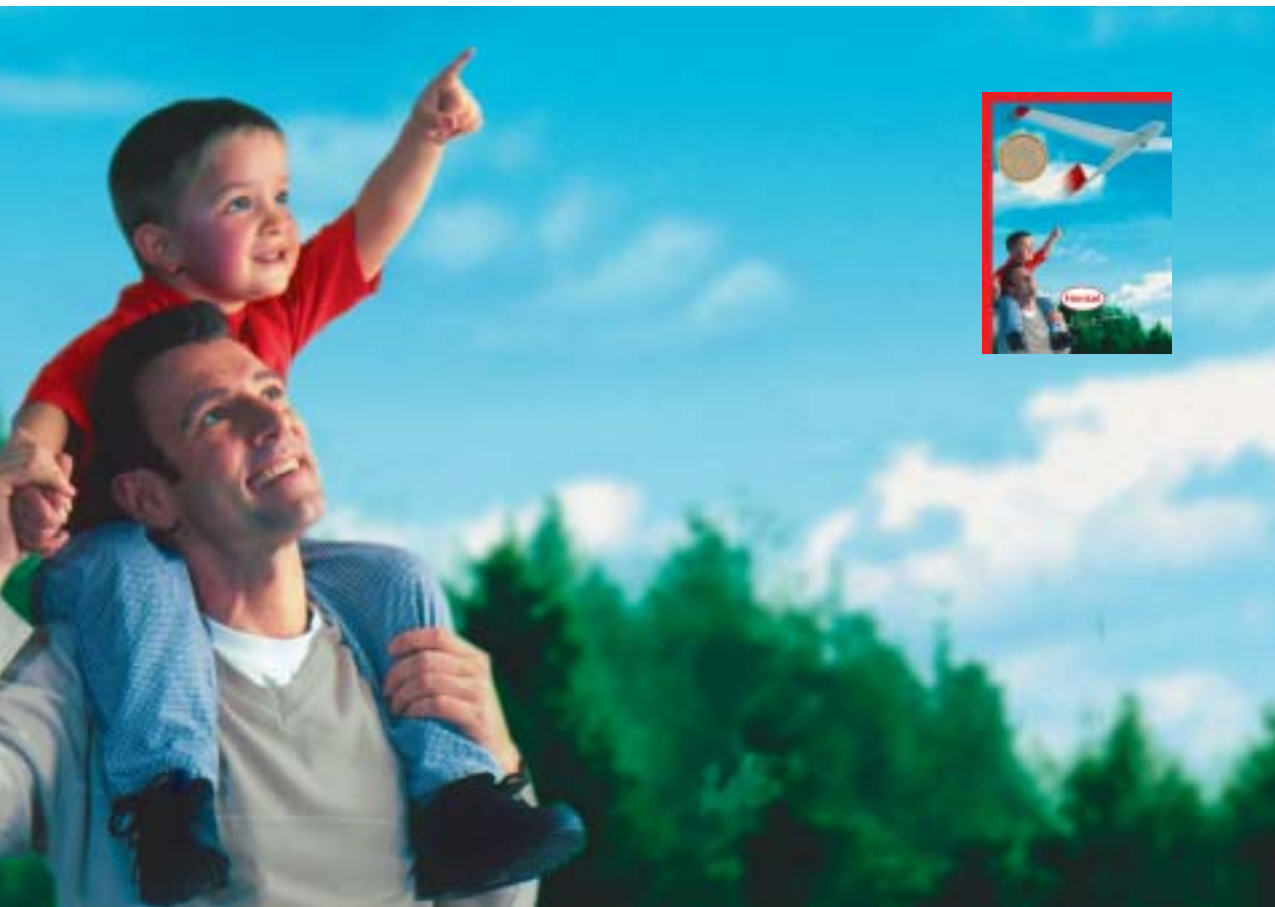

Mit Henkel verbindet sich der Ruf eines sehr **innovativen** und besonders **familienfreundlichen** Unternehmens.

Henkel is associated with a reputation for being a highly **innovative** and especially **family-friendly** company.

## Markenbildung als nachhaltige Unternehmensstrategie

### Brand-building as a sustainable corporate strategy

Die einflussreiche amerikanische Trendforscherin Faith Popcorn hat schon vor Jahren prophezeit, dass in Zukunft diejenigen Unternehmen am erfolgreichsten sind, die sich moralisch und gesellschaftsdienlich verhalten.

Demnach sind Wirtschaftsunternehmen auch dem Gemeinwohl verpflichtet, vor allem, wenn sie global agieren und Einfluss auf die Entwicklung in den verschiedensten Weltregionen ausüben. Henkel hat sich dazu nachdrücklich bekannt, was zum Beispiel der Beitritt zum Global Compact der Vereinten Nationen wie auch der jährlich veröffentlichte Nachhaltigkeitsbericht belegen.

Der Weg von Henkel zur Weltmarke ist eng verknüpft mit dem Bekenntnis zu klaren Werten und einer transparenten Unternehmenspolitik. Die emotionale Positionierung als Freund, dem man vertrauen kann, ist eine hohe Selbstverpflichtung, der sich das Unternehmen täglich stellt. Wie erfolgreich dieser

Weg begangen wird, belegen die Spitzenplätze in Image-Ranglisten und der steigende Unternehmenswert von Henkel in den letzten Jahren. Darauf dürfen die Henkelaner in aller Welt durchaus stolz sein, so wie es einst Fritz Henkel auf sein Unternehmen war.

The influential U.S. trend researcher Faith Popcorn predicted some years ago that the most successful companies would be those that act ethically and demonstrate social responsibility.

Businesses must take account of the common good, especially when they operate globally and have an effect on development in widely differing regions of the world. Henkel has firmly embraced this philosophy, as demonstrated by the fact that it has become a signatory to the United Nations' Global Compact and by its annual Sustainability Report.

Henkel's path to becoming a global brand is closely linked with its endorsement of clear values and a transparent corporate policy. With its emotional positioning as a friend who can be trusted, the Company has made a serious commitment, which it lives up to every day. The success of this approach is

reflected by top rankings in image listings and an increase in Henkel's corporate value in recent years. The Henkel community throughout the world can be proud of this, as Fritz Henkel was proud of his company so many years ago.

Der Weg von Henkel zur Weltmarke ist eng verknüpft mit dem **Bekenntnis zu klaren Werten** und einer transparenten Unternehmenspolitik.

Henkel's path to becoming a global brand is closely linked with its **endorsement of clear values** and a transparent corporate policy.

**Impressum | Imprint**

**Herausgeber | Publisher**

Ernst Primosch  
Henkel KGaA

Copyright © 2006 Henkel KGaA,  
Düsseldorf

**Redaktion | Editorial team**

Volker Krug  
Kai Schmidhuber

**Gestaltung | Art direction**

Jaspert Grafik, Düsseldorf

**Druck | Printing**

Name der Firma

PR 10063000



**Henkel**

*A Brand like a friend*
