# Supplementary material
Source: publisher site journal article supplement (https://www.degruyterbrill.com/publication/isbn/9783110432879/downloadAsset/9783110432879_Elektronischer_Anhang_2.zip)
Supplement: Supplementary file 59 [file Henkel GB 2010.pdf › Korpustexte/Korpustexte pdf/Henkel/Henkel GB 2010.pdf]

# Geschäftsbericht 2010

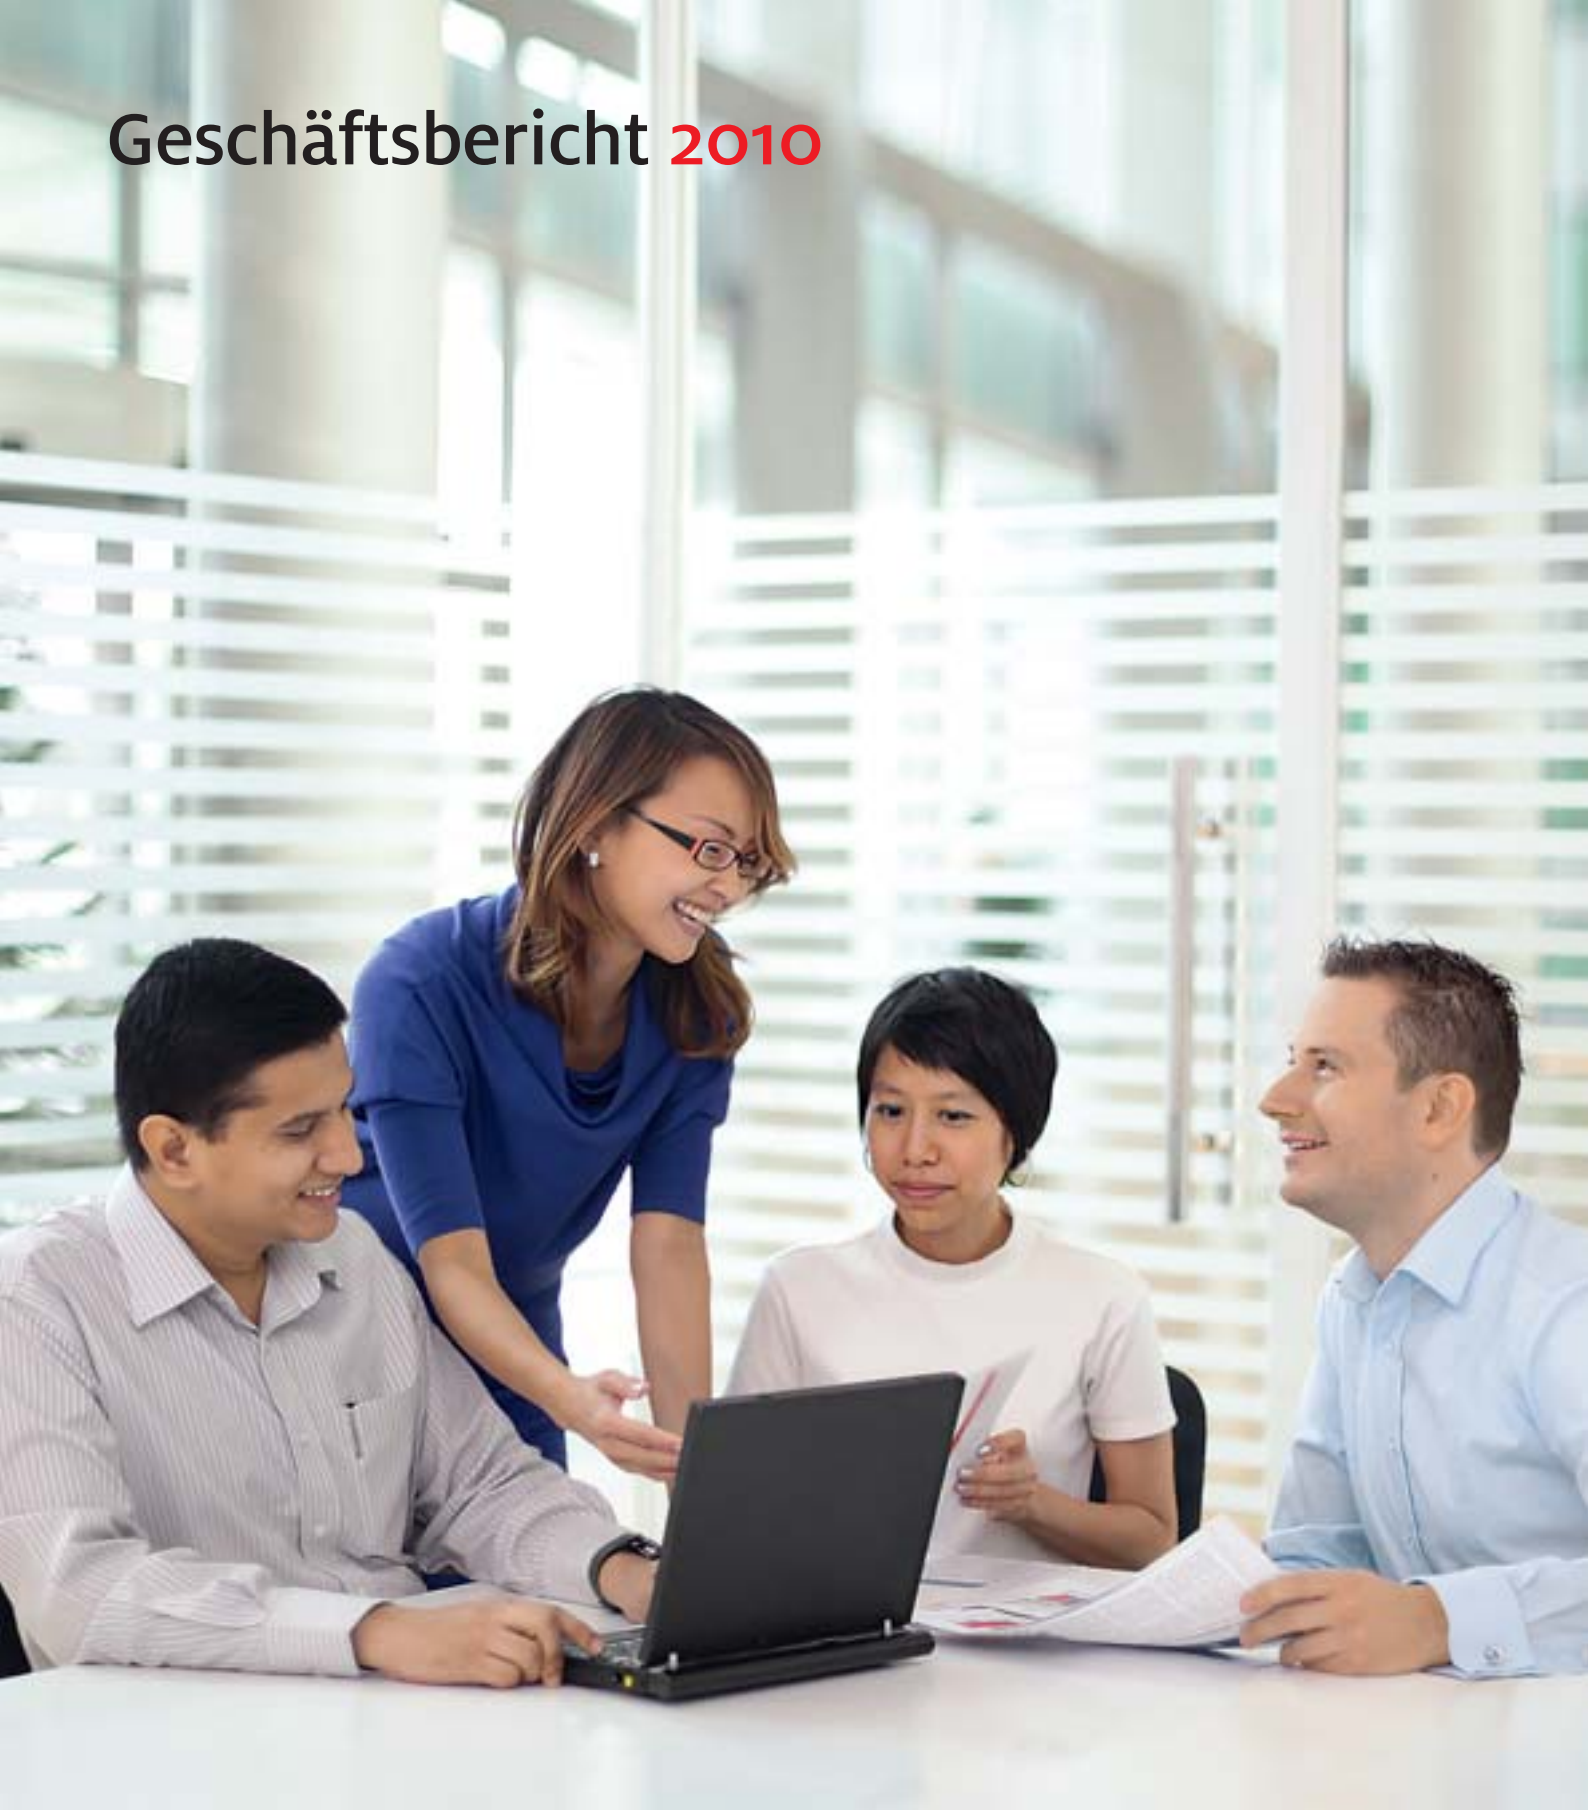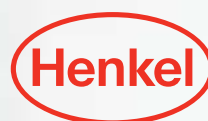

Excellence is our Passion

## Unsere strategischen Prioritäten

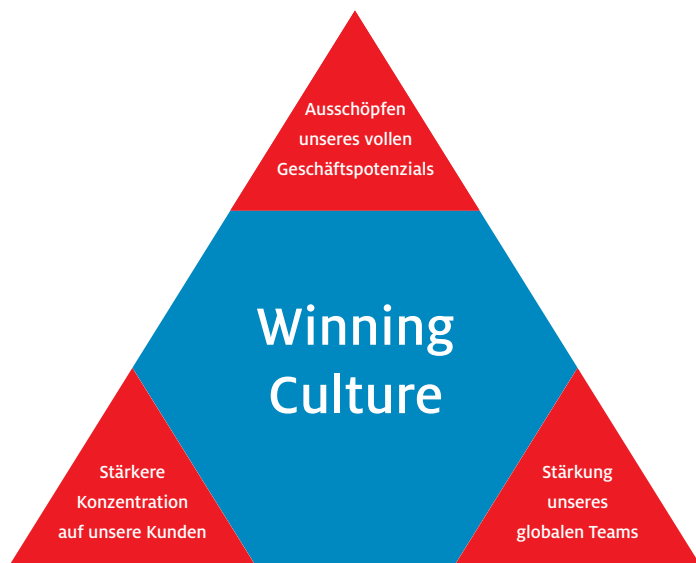

Wir arbeiten konsequent an der Umsetzung der strategischen Prioritäten, die wir 2008 formuliert haben, um den langfristigen Erfolg von Henkel sicherzustellen. Auch im Geschäftsjahr 2010 haben wir dabei große Fortschritte gemacht.

Im Mittelpunkt steht eine starke und unverwechselbare Unternehmenskultur: eine „Winning Culture“, die durch ein klares Bekenntnis zu überdurchschnittlichen Leistungen und die Ausrichtung auf den Erfolg im Wettbewerb gekennzeichnet ist. Dabei richten wir unsere Entscheidungen und unser Handeln an einer langfristigen Vision und fünf gemeinsamen Werten aus.

## Unsere Top-Marken

**Persil Purex Dixan**

**Schwarzkopf**

**Dial**

**Fa**

**LOCTITE**

**Teroson**

**technomelt**

Unsere starken Marken sind die Basis unseres wirtschaftlichen Erfolgs. Auch zukünftig werden wir den Fokus auf die großen und bekannten Marken legen: Mit Schwarzkopf, Loctite und Persil – unseren drei größten Marken – erzielen wir 23 Prozent unseres Konzernumsatzes. Die zehn größten Marken tragen 41 Prozent zum Konzernumsatz bei.

Der Unternehmensbereich Wasch-/Reinigungsmittel erwirtschaftet mit seinen drei stärksten Marken Persil, Purex (in Nordamerika) und Dixan 32 Prozent seines Umsatzes. Der Unternehmensbereich Kosmetik/Körperpflege erzielt mit seinen drei größten Marken Schwarzkopf, Dial (in Nordamerika) und Fa 71 Prozent seines Umsatzes. Und der Unternehmensbereich Adhesive Technologies macht 26 Prozent seines Umsatzes mit seinen drei größten Marken Loctite, Teroson und Technomelt.

# Unsere Entwicklung im Jahr 2010

## Umsatz nach Unternehmensbereichen

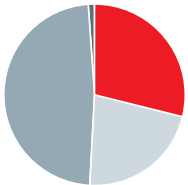

- 29% Wasch-/Reinigungsmittel
- 22% Kosmetik/Körperpflege
- 48% Adhesive Technologies
- 1% Corporate

Corporate = Umsätze und Leistungen, die nicht den Unternehmensbereichen zugeordnet werden können.

## Kennzahlen

| in Mio. Euro                                               | 2009   | 2010               | +/-    |
|------------------------------------------------------------|--------|--------------------|--------|
| Umsatz                                                     | 13.573 | 15.092             | 11,2%  |
| Betriebliches Ergebnis (EBIT)                              | 1.080  | 1.723              | 59,5%  |
| Bereinigtes <sup>1)</sup> betriebliches Ergebnis (EBIT)    | 1.364  | 1.862              | 36,5%  |
| Umsatzrendite (EBIT) in %                                  | 8,0    | 11,4               | 3,4 pp |
| Bereinigte <sup>1)</sup> Umsatzrendite (EBIT) in %         | 10,0   | 12,3               | 2,3 pp |
| Jahresüberschuss                                           | 628    | 1.143              | 82,0%  |
| – auf nicht beherrschende Anteile entfallend               | 26     | 25                 | –3,8%  |
| – auf Aktionäre der Henkel AG & Co. KGaA entfallend        | 602    | 1.118              | 87,5%  |
| Ergebnis je Vorzugsaktie in Euro                           | 1,40   | 2,59               | 85,0%  |
| Bereinigtes <sup>1)</sup> Ergebnis je Vorzugsaktie in Euro | 1,91   | 2,82               | 47,6%  |
| Rendite auf das eingesetzte Kapital (ROCE) in %            | 9,8    | 14,9               | 5,1 pp |
| Investitionen in Sachanlagen                               | 344    | 240                | –30,2% |
| Forschungs- und Entwicklungsaufwendungen                   | 396    | 391                | –1,3%  |
| Mitarbeiter (Jahresdurchschnitt) Anzahl                    | 51.361 | 48.141             | –6,3%  |
| Dividende je Stammaktie in Euro                            | 0,51   | 0,70 <sup>2)</sup> | 37,3%  |
| Dividende je Vorzugsaktie in Euro                          | 0,53   | 0,72 <sup>2)</sup> | 35,8%  |

<sup>1)</sup> Bereinigt um einmalige Aufwendungen und Erträge sowie Restrukturierungsaufwendungen.

pp = Prozentpunkte

<sup>2)</sup> Vorschlag.

## Henkel auf einen Blick

### Globaler Anbieter von Marken und Technologien

- 134 Jahre Markenerfolg
- Rund 48.000 Mitarbeiter

### Kompetenz in drei Unternehmensbereichen:

- Wasch-/Reinigungsmittel
- Kosmetik/Körperpflege
- Adhesive Technologies

## Umsatz nach Regionen

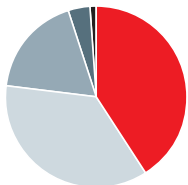

- 41% Wachstumsregionen<sup>1)</sup>
- 36% Westeuropa
- 18% Nordamerika
- 4% Japan/Australien/Neuseeland
- 1% Corporate

<sup>1)</sup> Osteuropa, Afrika/Nahost, Lateinamerika, Asien (ohne Japan).

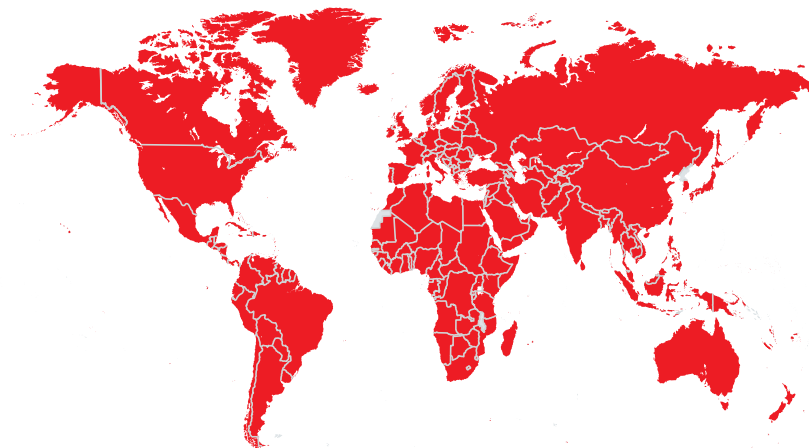

## Wasch-/Reinigungsmittel

Wir belegen weltweit führende Marktpositionen.

Wir wachsen profitabel durch Innovationen und starke Marken sowie durch gute und intensive Beziehungen zu unseren Kunden.

Wir erweitern unsere starke Marktstellung in Europa und bauen unsere Präsenz in Nordamerika und in den Wachstumsregionen weiter aus.

### Kennzahlen

| in Mio. Euro                                            | 2009   | 2010   | +/-    |
|---------------------------------------------------------|--------|--------|--------|
| Umsatz                                                  | 4.129  | 4.319  | 4,6 %  |
| Betriebliches Ergebnis (EBIT)                           | 501    | 542    | 8,2 %  |
| Bereinigtes <sup>1)</sup> betriebliches Ergebnis (EBIT) | 530    | 562    | 6,2 %  |
| Umsatzrendite (EBIT)                                    | 12,1 % | 12,6 % | 0,5 pp |
| Bereinigte <sup>1)</sup> Umsatzrendite (EBIT)           | 12,8 % | 13,0 % | 0,2 pp |

pp = Prozentpunkte  
<sup>1)</sup> Bereinigt um einmalige Aufwendungen und Erträge sowie Restrukturierungsaufwendungen.

**+1,5 %**

organisches Umsatzwachstum

### Umsatz

in Mio. Euro

|      |       |
|------|-------|
| 2006 | 4.117 |
| 2007 | 4.148 |
| 2008 | 4.172 |
| 2009 | 4.129 |
| 2010 | 4.319 |

## Kosmetik/Körperpflege

Wir belegen weltweit führende Marktpositionen.

Wir wachsen profitabel durch attraktive Innovationen unserer starken Marken zur Erfüllung anspruchsvoller Kundenwünsche.

Wir erweitern unsere starke Marktstellung in Europa und bauen unsere Präsenz in Nordamerika und selektiv in den Wachstumsregionen aus.

### Kennzahlen

| in Mio. Euro                                            | 2009   | 2010   | +/-     |
|---------------------------------------------------------|--------|--------|---------|
| Umsatz                                                  | 3.010  | 3.269  | 8,6 %   |
| Betriebliches Ergebnis (EBIT)                           | 387    | 411    | 6,1 %   |
| Bereinigtes <sup>1)</sup> betriebliches Ergebnis (EBIT) | 387    | 436    | 12,4 %  |
| Umsatzrendite (EBIT)                                    | 12,9 % | 12,6 % | -0,3 pp |
| Bereinigte <sup>1)</sup> Umsatzrendite (EBIT)           | 12,9 % | 13,3 % | 0,4 pp  |

pp = Prozentpunkte  
<sup>1)</sup> Bereinigt um einmalige Aufwendungen und Erträge sowie Restrukturierungsaufwendungen.

**+4,8 %**

organisches Umsatzwachstum

### Umsatz

in Mio. Euro

|      |       |
|------|-------|
| 2006 | 2.864 |
| 2007 | 2.972 |
| 2008 | 3.016 |
| 2009 | 3.010 |
| 2010 | 3.269 |

## Adhesive Technologies

Wir sind weltweit führend.

Wir wachsen profitabel durch Innovationen unter starken Marken und durch effiziente Prozesse sowie Fokussierung auf unsere Kunden.

Wir erschließen neue Anwendungen und Wachstumspotenziale in allen Regionen der Welt.

### Kennzahlen

| in Mio. Euro                                            | 2009  | 2010   | +/-    |
|---------------------------------------------------------|-------|--------|--------|
| Umsatz                                                  | 6.224 | 7.306  | 17,4 % |
| Betriebliches Ergebnis (EBIT)                           | 290   | 878    | >100 % |
| Bereinigtes <sup>1)</sup> betriebliches Ergebnis (EBIT) | 506   | 938    | 85,5 % |
| Umsatzrendite (EBIT)                                    | 4,7 % | 12,0 % | 7,3 pp |
| Bereinigte <sup>1)</sup> Umsatzrendite (EBIT)           | 8,1 % | 12,8 % | 4,7 pp |

pp = Prozentpunkte  
<sup>1)</sup> Bereinigt um einmalige Aufwendungen und Erträge sowie Restrukturierungsaufwendungen.

**+11,8 %**

organisches Umsatzwachstum

### Umsatz

in Mio. Euro

|      |       |
|------|-------|
| 2006 | 5.510 |
| 2007 | 5.711 |
| 2008 | 6.700 |
| 2009 | 6.224 |
| 2010 | 7.306 |

## Unsere Vision

Global führend  
mit Marken  
und Technologien.

## Unsere Werte

Wir stellen unsere **Kunden** in  
den Mittelpunkt unseres Handelns.

Wir schätzen, fordern und fördern  
unsere **Mitarbeiter**.

Wir streben herausragenden und  
nachhaltigen **wirtschaftlichen Erfolg** an.

Wir verpflichten uns, unsere  
führende Rolle im Bereich  
**Nachhaltigkeit** auszubauen.

Wir gestalten unsere Zukunft auf  
dem Fundament eines erfolgreichen  
**Familienunternehmens**.

### Weiterführende Informationen

Im Geschäftsbericht 2010 finden  
Sie Verweise auf andere Seiten im  
Geschäftsbericht sowie auf weitere  
Informationen im Nachhaltigkeits-  
bericht und im Internet.

**GB** Geschäftsbericht

**NB** Nachhaltigkeitsbericht

 Internet

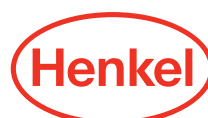

Excellence is our Passion

**Kasper Rorsted**  
Vorsitzender des Vorstands.

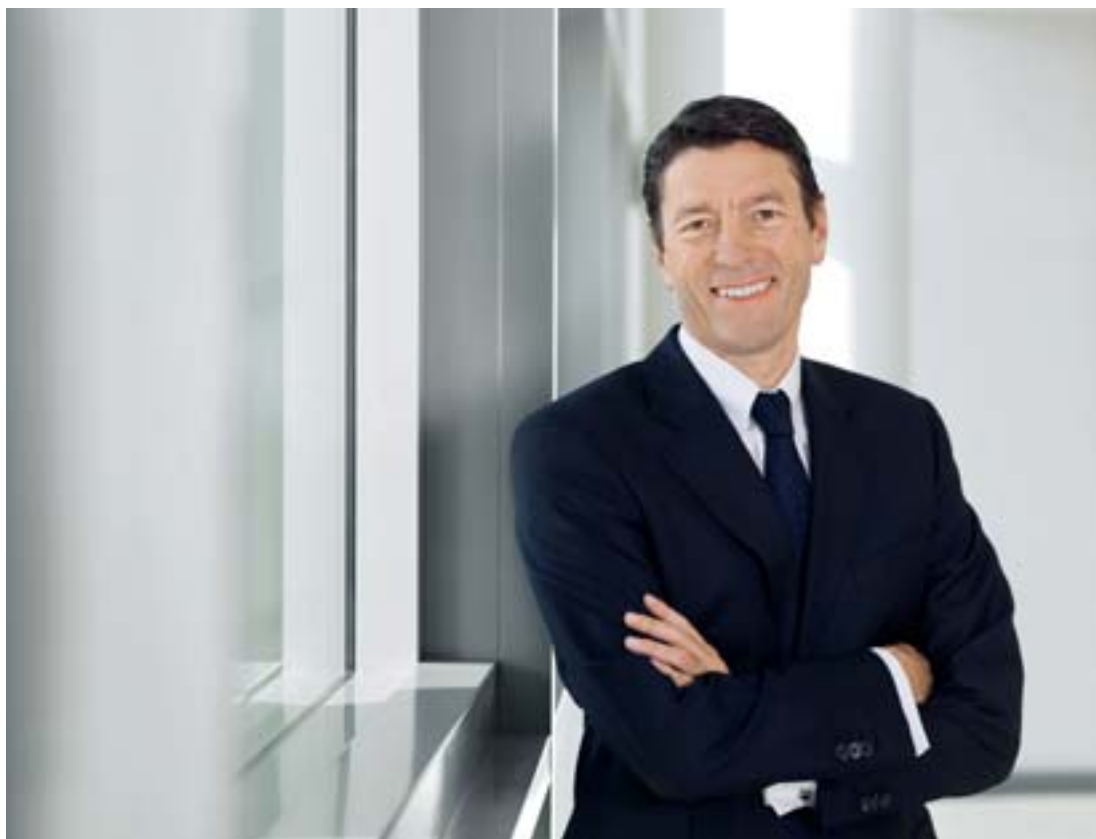

## Liebe Freunde des Unternehmens,

**12,3 %**

bereinigtes<sup>1)</sup> Umsatzrendite.

**+ 7 %**

organisches  
Umsatzwachstum.

**+ 47,6 %**

bereinigtes<sup>1)</sup> Ergebnis  
je Vorzugsaktie.

2010 war ein hervorragendes Jahr für Henkel. Erstmals in unserer Unternehmensgeschichte haben wir ein Geschäftsjahr mit einer bereinigten<sup>1)</sup> Umsatzrendite von mehr als 12 Prozent abgeschlossen. Organisch stieg der Umsatz um 7 Prozent; und das bereinigte<sup>1)</sup> Ergebnis je Vorzugsaktie legte um 47,6 Prozent zu. Damit sind wir auf gutem Weg, unsere Finanzziele für das Jahr 2012 zu erreichen.

Wir haben in allen Geschäftsbereichen unsere Marktpositionen gegenüber unseren Wettbewerbern weiter verbessert, unsere Top-Marken gestärkt und die Geschäftsbeziehungen zu unseren Kunden weiter vertieft. Insbesondere in den Wachstumsmärkten konnten wir unsere Stellung weiter ausbauen, vor allem in Asien sowie im Nahen und Mittleren Osten. Zudem haben wir im gesamten Unternehmen einen umfassenden Prozess eingeleitet, um unsere Unternehmenskultur zu einer „Winning Culture“ weiterzuentwickeln, die sich an einer klaren, langfristigen Vision für Henkel ausrichtet: Global führend mit Marken und Technologien.

Die ausgezeichneten Ergebnisse des Jahres 2010 belegen: Wir haben unsere Hausaufgaben gemacht. Wir sind gestärkt aus der Krise hervorgegangen, weil wir uns frühzeitig auf den Wachstumsrückgang in der Weltwirtschaft eingestellt hatten. Daher konnten wir – mit veränderten Strukturen und verbesserten Prozessen – von der deutlichen Erholung der Weltwirtschaft profitieren. Insgesamt zeigt sich, dass Henkel durch die fortschreitende Globalisierung gewinnt und gestärkt wird.

### Wachstum in allen Bereichen und Regionen

Während die Wirtschaft in den USA eher verhalten wuchs, verzeichneten die Wachstumsregionen einmal mehr die stärkste positive Entwicklung. Die Industrieproduktion, die im Rezessionsjahr 2009 deutlich zurückgegangen war, hat 2010 wieder stark zugelegt. Besonders in Asien, vor allem in China, Südkorea und Taiwan, war die Erholung ausgeprägt. Unter den Industrienationen fiel Deutschland mit einem zweistelligen Wachstum der Industrieproduktion positiv auf und wurde so zum Wachstumsmotor Europas.

<sup>1)</sup> Bereinigt um einmalige Aufwendungen und Erträge sowie Restrukturierungsaufwendungen.



Mit Blick auf einzelne Branchen zeigte sich ein starkes Wachstum vor allem bei den Industriebranchen, die im Vorjahr noch deutlich rückläufig gewesen waren, zum Beispiel in der Automobil-, Metall- und Elektronikindustrie. Hingegen war beim privaten Konsum, der im Vorjahr vergleichsweise wenig zurückgegangen war, nur ein moderates Wachstum zu verzeichnen.

In diesem verbesserten, aber in manchen Märkten immer noch schwierigen Umfeld haben alle Unternehmensbereiche und Regionen einen wesentlichen Beitrag zu unserem Geschäftserfolg geleistet. Das ist nicht nur eine Folge der wirtschaftlichen Erholung, sondern vor allem das Ergebnis unserer strategischen Prioritäten

- Ausschöpfen unseres vollen Geschäftspotenzials,
- stärkere Konzentration auf unsere Kunden und
- Stärkung unseres globalen Teams.

Zum erfolgreichen Geschäftsjahr 2010 haben unsere Mitarbeiterinnen und Mitarbeiter mit ihrem großen Einsatz entscheidend beigetragen. Für diese Leistung möchte ich ihnen im Namen des Vorstands herzlich danken!

### Ständige Anpassung unserer Strukturen

Gerade die vergangenen Jahre haben gezeigt, wie wichtig es ist, flexibel, entschieden und schnell auf Veränderungen zu reagieren. Auch wenn sich die wirtschaftliche Lage in den meisten Märkten wieder stabilisiert hat, so bleibt doch die Notwendigkeit, bestehende Strukturen ständig weiterzuentwickeln, um im internationalen Wettbewerb auch in Zukunft an der Spitze zu stehen. Wir haben daher im vergangenen Jahr wesentliche Veränderungen vorangetrieben.

So konnten wir den Integrationsprozess der National Starch-Geschäfte – der bisher größten Akquisition in unserer Firmengeschichte – erfolgreich abschließen. Durch weitere Verbesserungen in den Bereichen Einkauf, Personal und Logistik sowie den Ausbau unserer Shared Service Center in Bratislava, Slowakei, und in Manila, Philippinen, konnten wir Prozesse vereinfachen und die Effizienz weiter steigern. Auch die ständige Optimierung unserer Produktionsstandorte weltweit hat sich positiv auf die Wirtschaftlichkeit ausgewirkt.

Ein wesentlicher Erfolgsfaktor sind und bleiben auch künftig die Wachstumsregionen, in denen wir auch 2010 wieder zweistellige Wachstumsraten erreichen konnten. In diesen Regionen erzielen wir inzwischen schon 41 Prozent unseres Gesamtumsatzes; und dort sind mittlerweile 53 Prozent unserer Mitarbeiter tätig.

Ebenso bedeutsam für den Geschäftserfolg sind unsere starken Marken. Wir haben unser Markenportfolio auch 2010 weiter optimiert und unsere Top-Marken gestärkt. Mittlerweile erzielen wir im Unternehmensbereich Wasch-/Reinigungsmittel – angeführt von Persil – 81 Prozent<sup>1)</sup> unserer Umsätze mit den zehn stärksten Marken. Im Bereich Kosmetik/Körperpflege sind es sogar 89 Prozent. Hier hat sich Schwarzkopf mittlerweile zu einer Mega-Marke entwickelt, mit der wir 1,8 Milliarden Euro Umsatz im Jahr erzielen. Im Unternehmensbereich Adhesive Technologies erzielen wir 52 Prozent des Umsatzes mit unseren Top 10-Marken, darunter Loctite als stärkste Marke.

Besonders die neuen und innovativen Produkte leisten einen wesentlichen Beitrag zum Wachstum. Im Konsumgüterbereich erzielen wir rund 40 Prozent der Umsätze mit Produkten, die seit weniger als drei Jahren im Markt sind. Im Industriegeschäft, in dem die Entwicklungszeiten von Technologien mit unseren Kunden wesentlich langfristiger ausgerichtet sind, liegt die Quote der Produkte, die weniger als fünf Jahre im Markt sind, bei rund 24 Prozent.

### Stärkung unserer Unternehmenskultur

Wir haben im vergangenen Jahr einen Prozess gestartet, um unsere Unternehmenskultur weiterzuentwickeln. Die Internationalität und die Vielfalt in unserem Unternehmen erfordern eine starke, gemeinsame Kultur – mit einer klaren Vision und aktiv gelebten Werten, die Orientierung und Identifikation für die Mitarbeiter in aller Welt bieten. Unsere Vision, mit unseren Marken und Technologien global führend zu sein, formuliert einen klaren Leistungsanspruch für jeden Einzelnen im Unternehmen. Um dieses Ziel zu erreichen, richten alle Mitarbeiter bei Henkel ihr Handeln an fünf Werten aus: Kunden, Mitarbeiter, Wirtschaftlicher Erfolg, Nachhaltigkeit und Familie.

Doch nur wer die Werte kennt und versteht, kann sie auch zur Grundlage seines täglichen Handelns machen und damit dazu beitragen, unsere Ziele zu erreichen. Deshalb haben sich alle Henkel-Mitarbeiter in der zweiten Jahreshälfte 2010 mit der Vision und den neuen Werten auseinandergesetzt. In rund 5.000 Workshops haben sie erarbeitet, wie sie die Vision und Werte in ihrem Arbeitsalltag konkret umsetzen können. Wie wir unsere Werte Tag für Tag leben, erläutern wir anhand ausgewählter Beispiele in diesem Bericht. (Siehe **GB** Seiten 12 bis 21.)

### Umsatz Top 10-Marken in %

Wasch-/Reinigungsmittel

81<sup>1)</sup>

Kosmetik/Körperpflege

89

Adhesive Technologies

52

41 %

unseres Umsatzes erzielen wir in den Wachstumsregionen.

<sup>1)</sup> Top-Marken-Cluster.

Wir haben auch unser weltweit gültiges System zur Mitarbeiterbeurteilung konsequent an den fünf Werten ausgerichtet. So wurden bereits Ende 2010 die Leistungen und Entwicklungspotenziale von rund 9.000 Führungskräften nach diesen einheitlichen Kriterien bewertet. Damit stellen wir sicher, dass sich die Entscheidungen und die Leistungen unserer Führungskräfte konsequent an diesem Wertesystem orientieren.

Zusammen definieren die Vision und die Werte, wofür wir als Unternehmen weltweit stehen – als „One Henkel“. Um diese Entwicklung auch nach außen zu kommunizieren und die Marke Henkel zu stärken, führen wir ein neues Erscheinungsbild in Verbindung mit einem neuen Claim ein. Dieser Claim fasst zusammen, was uns charakterisiert und wofür wir stehen:

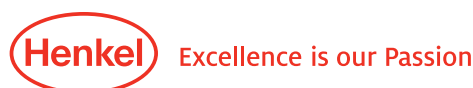

Was erwarten wir für das Jahr 2011? Um unser Geschäftspotenzial voll auszuschöpfen, werden wir unser Portfolio durch Veräußerung von Randgeschäften sowie nicht strategischer lokaler Marken weiter optimieren. Daneben werden auch weiterhin konsequente Kostenkontrolle, die Anpassung von Strukturen in den reifen Märkten und weitere Maßnahmen zur Effizienzsteigerung im gesamten Unternehmen wichtige Beiträge zur Zielerreichung leisten. Wesentliche Elemente dieses Prozesses sind der weitere Ausbau unserer Shared Service Center-Organisation und auch die stärkere Nutzung standardisierter Abläufe in allen Unternehmensbereichen und Funktionen.

Unsere starke Kundenorientierung in allen Geschäftsbereichen werden wir durch zahlreiche Projekte weiter vorantreiben. Für viele unserer Kunden und Konsumenten gewinnt an Bedeutung, wie wir die Nachhaltigkeit unseres Handelns gewährleisten. Henkel nimmt bereits eine führende Position bei nachhaltigem Handeln ein, die regelmäßig in internationalen Rankings bestätigt wird. Auf dieser Grundlage wollen wir 2011 unsere langfristige Nachhaltigkeitsstrategie weiterentwickeln.

Im Personalbereich wird 2011 – neben der Einführung eines neuen Vergütungssystems, das höhere Anreize für überdurchschnittliche Leistungen bietet – auch ein starker Fokus auf Talente gelegt. Insbesondere streben wir an, den Frauenanteil bei unseren Führungskräften weiter zu erhöhen.

Ende 2010 waren bereits rund 29 Prozent unserer Führungskräfte weiblich.

#### Ausblick 2011

Wir gehen für 2011 von einem weiteren Wachstum der Weltwirtschaft aus. Nach den deutlichen Wachstumssprüngen in vielen Abnehmerindustrien, insbesondere Anfang des Jahres 2010, rechnen wir für den Industriesektor mit einer Normalisierung des Wachstums. Für den privaten Konsum erwarten wir eine moderate Entwicklung.

Wir sind zuversichtlich, dass wir im Geschäftsjahr 2011 ein organisches Umsatzwachstum – bereinigt um Wechselkurseffekte und Akquisitionen/Divestments – innerhalb einer Bandbreite von drei bis fünf Prozent erzielen werden. Für die bereinigte<sup>1)</sup> Umsatzrendite (EBIT) erwarten wir einen Anstieg auf etwa 13 Prozent. Das bereinigte<sup>1)</sup> Ergebnis je Vorzugsaktie soll sich um etwa zehn Prozent verbessern.

Einen wichtigen Beitrag zum Geschäftserfolg von Henkel haben auch 2010 wieder unsere Aufsichtsgremien geleistet. Daher möchte ich im Namen des gesamten Vorstands dem Aufsichtsrat und dem Gesellschafterausschuss für die konstruktive Begleitung durch das vergangene Geschäftsjahr danken.

Im Namen des gesamten Unternehmens bedanke ich mich auch bei unseren Aktionärinnen und Aktionären für ihr Vertrauen und für ihre Unterstützung. Unser besonderer Dank gilt unseren Kunden für ihr Vertrauen in unser Unternehmen, unsere Marken und unsere Technologien.

Wir sehen uns für die Zukunft gut gerüstet. Wir haben eine solide Finanzbasis, wir sind in den internationalen Märkten sehr gut positioniert, wir haben hoch motivierte Mitarbeiter, erfolgreiche Marken und eine starke Präsenz in den Wachstumsregionen. Wir werden 2011 unseren Transformationsprozess konsequent fortführen und damit die Voraussetzungen für den langfristigen Erfolg unseres Unternehmens schaffen.

Düsseldorf, 28. Januar 2011

Kasper Rorsted  
Vorsitzender des Vorstands

<sup>1)</sup> Bereinigt um einmalige Aufwendungen und Erträge sowie Restrukturierungsaufwendungen.



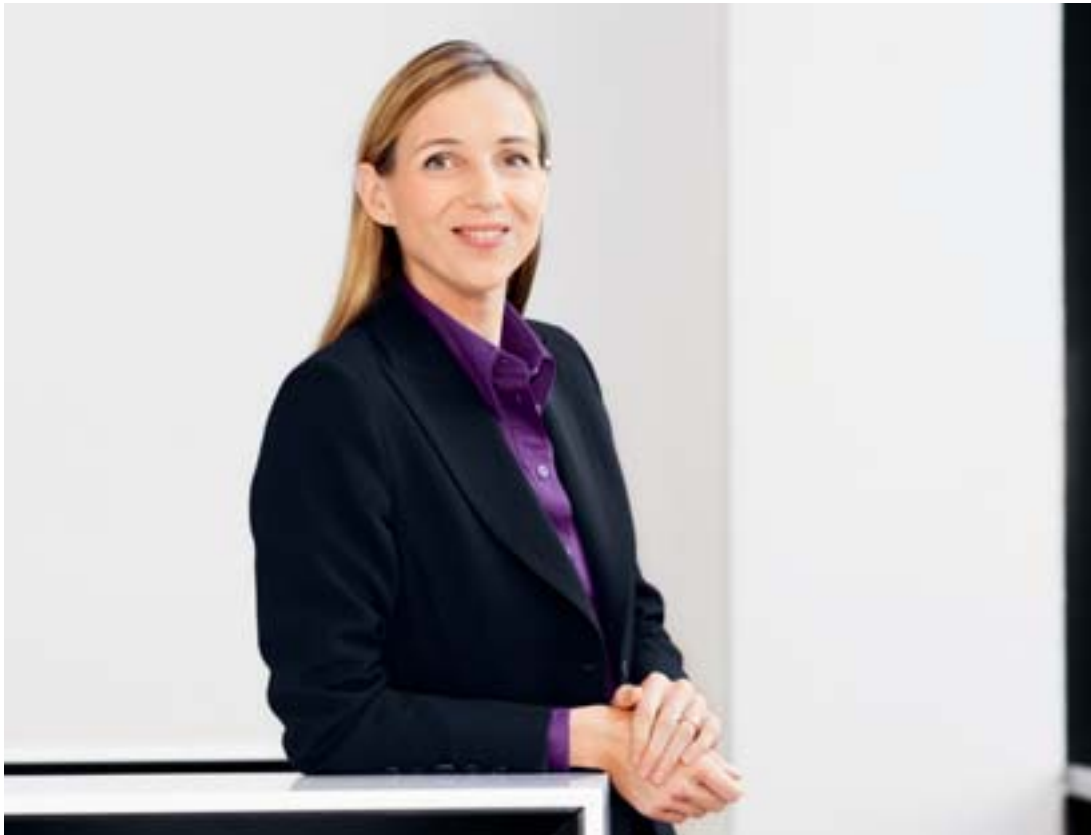

**Dr. Simone Bagel-Trah**  
Vorsitzende des Gesellschafterausschusses und des Aufsichtsrats.

## *Liebe Aktionäre und Freunde des Unternehmens,*

nach einem wirtschaftlich schwierigen Vorjahr war 2010 für uns ein sehr erfolgreiches Geschäftsjahr. Im Umfeld einer sich spürbar von der Finanzkrise erholenden Weltwirtschaft haben alle unsere Unternehmensbereiche hervorragende Umsatz- und Ergebnisbeiträge erwirtschaftet. Dies gilt nicht nur für unsere beiden Konsumgütergeschäfte Wasch-/Reinigungsmittel sowie Kosmetik/Körperpflege, sondern auch für unseren Unternehmensbereich Adhesive Technologies, der ein deutliches Wachstum bei steigender Profitabilität erzielen konnte.

Für diese herausragenden Ergebnisse bedanke ich mich herzlich im Namen des Aufsichtsrats bei allen Mitarbeiterinnen und Mitarbeitern von Henkel für ihren engagierten Einsatz. Mein Dank gilt auch den Mitgliedern des Vorstands und unseren Betriebsräten für ihre konstruktive und effiziente Zusammenarbeit.

Mein besonderer Dank gilt auch Ihnen, unseren Aktionären, dafür, dass Sie auch im vergangenen Geschäftsjahr unserem Unternehmen, seinem Management und seinen Mitarbeitern sowie unseren Produkten Ihr Vertrauen geschenkt haben.

### **Kontinuierlicher Dialog mit dem Vorstand**

Als Aufsichtsrat haben wir die uns nach Gesetz, Satzung und Geschäftsordnung obliegenden Aufgaben auch im Geschäftsjahr 2010 sorgfältig wahrgenommen.

Wir haben den Vorstand bei seiner Geschäftsführung regelmäßig überwacht und ihn bei der strategischen Weiterentwicklung des Unternehmens sowie bei wesentlichen Entscheidungen beratend begleitet.

Während des gesamten Geschäftsjahres standen der Vorstand und der Aufsichtsrat in einem intensiven und vertrauensvollen Austausch. Der Vorstand ist seinen Informationspflichten vollständig und zeitnah nachgekommen und hat uns regelmäßig und ausführlich in schriftlicher und mündlicher Form über die wesentlichen Belange des Unternehmens und seiner Konzerngesellschaften unterrichtet. Er erläuterte insbesondere die Geschäftslage und -entwicklung, die Geschäftspolitik, die Rentabilität, die kurz- und langfristige Unternehmens-, Finanz- und Personalplanung sowie Investitionen und organisatorische Maßnahmen.

Im Rahmen der quartalsmäßigen Berichterstattung wurden jeweils Umsatz und Ergebnis für den Henkel-Konzern insgesamt und in den Gliederungen nach Unternehmensbereichen und Regionen dargestellt. Auch außerhalb von Aufsichtsratssitzungen stand ich als Vorsitzende in einem regelmäßigen Informationsaustausch mit dem Vorsitzenden des Vorstands; hierdurch war sichergestellt, dass der Aufsichtsrat stets über die aktuelle Geschäftsentwicklung und die wesentlichen Geschäftsvorfälle informiert war.

### Schwerpunkthemen in Aufsichtsratssitzungen

Im Geschäftsjahr 2010 trat der Aufsichtsrat zu insgesamt vier Sitzungen zusammen. In diesen Sitzungen haben wir die Berichte des Vorstands ausführlich besprochen und mit ihm die Entwicklung des Unternehmens sowie strategische Fragestellungen diskutiert.

In allen unseren Sitzungen haben wir uns mit den gesamtwirtschaftlichen Rahmenbedingungen und der Geschäftsentwicklung von Henkel befasst.

Themenschwerpunkt unserer Sitzung am 23. Februar 2010 war der Jahres- und Konzernabschluss 2009 einschließlich des Risikoberichts und des Berichts zur Corporate Governance/Unternehmensführung. Auch haben wir in dieser Sitzung den Geschäftsbericht sowie unsere Beschlussvorschläge an die Hauptversammlung verabschiedet. Ferner befassten wir uns mit Fragen der Organisation unseres Unternehmensbereichs Adhesive Technologies und der kundenorientierten Ausrichtung seiner fünf Geschäftseinheiten.

In der Sitzung am 19. April 2010 haben wir die aktuelle Geschäftsentwicklung sowie die Weiterentwicklung des Vergütungskonzepts für unsere Führungskräfte behandelt.

Ein Themenschwerpunkt unserer Sitzung am 5. Oktober 2010 war der Bereich Einkauf. So haben wir uns ausführlich mit der globalen Steuerung unseres weltweiten Einkaufs befasst, besonders mit der Sicherstellung der Versorgungskontinuität und Optimierung der Wertschöpfungskette sowie der Preisentwicklungen der Rohstoffe. Erörtert haben wir zudem unsere Forschungs- und Entwicklungsstrategie. Hierzu gehörten auch die auf geschäftsbereichsübergreifende Kooperationen abzielende F&E-Organisation sowie Fragen, wie externe Ressourcen eingebunden werden und weltweit verfügbares Know-how optimal genutzt wird.

Mit der Bilanz- und Finanzplanung einschließlich der Gewinn- und Verlustrechnung sowie den Planungen unserer Unternehmensbereiche haben wir uns intensiv in unserer Sitzung am 14. Dezember 2010 befasst. Auch haben wir uns anhand eines von einem externen Berater gehaltenen Vortrags eingehend mit den rechtlichen Grundlagen der Aufsichtsrats Tätigkeit unter besonderer Berücksichtigung der jüngeren Entwicklungen beschäftigt.

Die Präsenz bei den Aufsichtsratssitzungen lag im Berichtsjahr bei durchschnittlich 92 Prozent. Kein Aufsichtsratsmitglied hat an weniger als der Hälfte der Sitzungen teilgenommen. Interessenkonflikte von Vorstands- oder Aufsichtsratsmitgliedern, die dem Aufsichtsrat gegenüber offenzulegen sind und über deren Behandlung die Hauptversammlung zu informieren ist, sind nicht aufgetreten.

### Tätigkeit der Ausschüsse

Zur effizienten Wahrnehmung der uns nach Gesetz und Satzung obliegenden Aufgaben gibt es zwei Ausschüsse: einen Prüfungsausschuss, dem je drei Anteilseigner- und Arbeitnehmervertreter angehören, sowie einen Nominierungsausschuss, der sich aus drei Anteilseignervertretern zusammensetzt. Die Zusammensetzung der Ausschüsse können Sie der Aufstellung auf den  Seiten 138 und 139 entnehmen.

Der Prüfungsausschuss, dem insbesondere die Vorbereitung der Verhandlungen und Beschlussfassungen des Aufsichtsrats sowie die Billigung des Jahres- und Konzernabschlusses obliegen, trat im Berichtsjahr zu vier Sitzungen zusammen. Über die Inhalte und Ergebnisse der Ausschuss-Sitzungen hat der Vorsitzende des Ausschusses das Plenum jeweils zeitnah und umfassend unterrichtet.

Schwerpunktmäßig haben wir uns in allen Sitzungen mit dem Jahres- und Konzernabschluss sowie den Zwischenfinanzberichten befasst und diese mit dem Vorstand erörtert. An den Sitzungen, in denen wir den Halbjahresfinanzbericht sowie den Bericht zum dritten Quartal ausführlich erörtert und gebilligt haben, nahm auch der Abschlussprüfer teil. Er berichtete über die Ergebnisse der jeweiligen prüferischen Durchsicht sowie über alle für die Arbeit des Prüfungsausschusses wesentlichen Feststellungen und Vorkommnisse. Es gab keine Beanstandungen.

Vertieft haben wir uns auch mit dem Aufbau und Ablauf des Rechnungslegungsprozesses befasst sowie mit der Wirksamkeit des internen konzernweiten Kontroll- und Risikomanagementsystems und dessen Weiterentwicklung. Zudem nahm der Ausschuss die Statusberichte des Chief Compliance Officers und des Leiters der Internen Revision entgegen und verabschiedete den Prüfungsplan der Internen Revision. Dieser bezieht sich auch auf die Prüfung der Funktionsfähigkeit und Wirksamkeit des internen Kontrollsystems und der Compliance-Organisation.

Nach der Wahl durch die Hauptversammlung 2010 beauftragte der Prüfungsausschuss den Abschlussprüfer mit der Prüfung des Jahres- und Konzernabschlusses für das Geschäftsjahr 2010 und legte dabei einen Prüfungsschwerpunkt sowie das Prüfungshonorar fest. Gleichfalls beauftragte der Prüfungsausschuss den Abschlussprüfer mit der prüferischen Durchsicht des Halbjahresfinanzberichts und des Berichts zum dritten Quartal 2010. Der Prüfungsausschuss überzeugte sich auch von der erforderlichen Unabhängigkeit des Abschlussprüfers.

Unter Teilnahme des Abschlussprüfers diskutierte der Prüfungsausschuss in seiner Sitzung am 21. Februar 2011 den Jahres- und Konzernabschluss für das Geschäftsjahr 2010, den entsprechenden Gewinnverwendungsvorschlag sowie den Risikobericht und bereitete die entsprechenden Beschlussfassungen des Aufsichtsrats vor. Gleichfalls sprach er eine Empfehlung an den Aufsichtsrat zu dessen Wahlvorschlag an die Hauptversammlung für den Abschlussprüfer aus. Hierbei wurde erneut eine Erklärung des Abschlussprüfers eingeholt zu seiner Unabhängigkeit unter Darlegung der im Geschäftsjahr 2010 erbrachten sowie der für das Geschäftsjahr 2011 möglicherweise vorgesehenen nicht prüfungsbezogenen Dienstleistungen. Umstände, die eine Befangenheit des Abschlussprüfers vermuten lassen, bestanden nicht. An dieser Bilanzsitzung des Prüfungsausschusses nahmen auch andere Mitglieder des Aufsichtsrats als Gäste teil.

Der Prüfungsausschuss beriet im Berichtsjahr jeweils in vollständiger Besetzung.

Der Nominierungsausschuss hat die Beschlussvorschläge des Aufsichtsrats für die in der Hauptversammlung 2010 erfolgten Ergänzungswahlen durch entsprechende Empfehlungen vorbereitet.

### **Corporate Governance und Entsprechenserklärung**

Auch im Jahr 2010 haben wir uns mit Fragen der Corporate Governance und den Neuerungen des Deutschen Corporate Governance Kodex befasst.

So haben wir in unserer Sitzung am 14. Dezember 2010 die Zielsetzung für die Zusammensetzung unseres Aufsichtsrats erörtert. Hierbei haben wir unter Berücksichtigung der unternehmensspezifischen Situation Kriterien für die Neuwahl von Aufsichtsratsmitgliedern festgelegt, auf deren Basis der Nominierungsausschuss dem Gesamtaufsichtsrat Kandidaten für seinen Wahlvorschlag an die Hauptversammlung vorschlagen soll. Einzelheiten hierzu sowie zu weiteren Details der Corporate Governance der Gesellschaft können dem Bericht zur Corporate Governance/Unternehmensführung (auf den  Seiten 26 bis 31) entnommen werden, den wir uns inhaltlich zu eigen machen.

In der Sitzung am 22. Februar 2011 haben wir die gemeinsame Entsprechenserklärung von Vorstand, Gesellschafterausschuss und Aufsichtsrat zum Deutschen Corporate Governance Kodex für 2011 erörtert und verabschiedet. Der vollständige Wortlaut der aktuellen sowie der vorherigen Entsprechenserklärungen ist auf der Internetseite der Gesellschaft eingestellt.

### **Jahres- und Konzernabschluss, Abschlussprüfung**

Der Jahresabschluss der Henkel AG & Co. KGaA und der Lagebericht wurden vom Vorstand nach den Vorschriften des Handelsgesetzbuchs (HGB) aufgestellt, der Konzernabschluss und Konzernlagebericht nach den International Financial Reporting Standards (IFRS), wie sie in der Europäischen Union anzuwenden sind, und nach den ergänzend gemäß Paragraf 315 a Absatz 1 HGB anzuwendenden handelsrechtlichen Vorschriften.

Die von der Hauptversammlung zum Prüfer der Abschlüsse 2010 gewählte KPMG AG Wirtschaftsprüfungsgesellschaft (KPMG), Berlin, hat den Jahresabschluss 2010 der Henkel AG & Co. KGaA und den Konzernabschluss einschließlich der Lageberichte geprüft unter Beachtung der vom Institut der Wirtschaftsprüfer (IDW) aufgestellten deutschen Grundsätze ordnungsmäßiger Abschlussprüfung sowie für den Konzernabschluss unter ergänzender Beachtung der International Standards on Auditing (ISA). Sie wurden mit dem uneingeschränkten Bestätigungsvermerk versehen.

Nach den Feststellungen der KPMG vermittelt der Jahresabschluss unter Beachtung der Grundsätze ordnungsmäßiger Buchführung ein den tatsächlichen Verhältnissen entsprechendes Bild der Vermögens-, Finanz- und Ertragslage der Henkel AG & Co. KGaA. Der Konzernabschluss vermittelt in Übereinstimmung mit den International Financial Reporting Standards ein den tatsächlichen Verhältnissen entsprechendes Bild der Vermögens-, Finanz- und Ertragslage des Konzerns sowie der Zahlungsströme des Geschäftsjahres. Die KPMG bestätigte ferner, dass der vorliegende Konzernabschluss und der Konzernlagebericht den Vorgaben des Paragraphen 315 a Absatz 1 HGB entsprechen.

Jahresabschluss und Lagebericht, Konzernabschluss und Konzernlagebericht sowie die Prüfungsberichte des Abschlussprüfers und der Vorschlag der persönlich haftenden Gesellschafterin für die Verwendung des Bilanzgewinns der Henkel AG & Co. KGaA lagen allen Mitgliedern des Aufsichtsrats rechtzeitig vor. Diese Unterlagen haben wir geprüft und in der Sitzung am 22. Februar 2011 im Beisein des Abschlussprüfers, der über die wesentlichen Ergebnisse seiner Prüfungen berichtete, erörtert. Die Berichte des Abschlussprüfers haben wir zustimmend zur Kenntnis genommen. Der Vorsitzende des Prüfungsausschusses unterrichtete uns in der Plenumsitzung ausführlich über die Behandlung des Jahresabschlusses und Konzernabschlusses im Prüfungsausschuss. Nach dem abschließenden Ergebnis der Prüfung durch den Prüfungsausschuss und unserer eigenen Prüfung sind gegen vorgenannte Unterlagen keine Einwendungen zu erheben; die von der persönlich haftenden Gesellschafterin getroffene Einschätzung der Lage von Gesellschaft und Konzern stimmt mit unserer Einschätzung überein. Wir haben den von der persönlich haftenden Gesellschafterin aufgestellten Jahresabschluss und Konzernabschluss sowie die Lageberichte in Übereinstimmung mit den Empfehlungen des Prüfungsausschusses in unserer Sitzung am 22. Februar 2011 gebilligt.

Den Vorschlag der persönlich haftenden Gesellschafterin, den Bilanzgewinn der Henkel AG & Co. KGaA zur Zahlung einer Dividende von 0,70 Euro je Stammaktie und von 0,72 Euro je Vorzugsaktie zu verwenden sowie den Restbetrag in die Gewinnrücklagen einzustellen beziehungsweise – einschließlich des auf die von der Gesellschaft zum Zeitpunkt der Hauptversammlung gehaltenen eigenen Aktien entfallenden Betrags – auf neue Rechnung vorzutragen, haben wir erörtert und gebilligt unter Berücksichtigung der Finanz- und Ertragslage des Unternehmens, der mittelfristigen Finanz- und Investitionsplanung und der Interessen der Aktionäre. Wir halten die vorgeschlagene Dividende für angemessen. Auch haben wir in dieser Sitzung unter Berücksichtigung der Empfehlung des Prüfungsausschusses zur Wahl des Abschlussprüfers unsere Beschlussvorschläge an die Hauptversammlung verabschiedet sowie Schwerpunkte und Kosten der Abschlussprüfung behandelt.

### Risikomanagement

Mit Fragen des Risikomanagements hat sich nicht nur der Prüfungsausschuss, sondern auch der gesamte Aufsichtsrat befasst. Der Schwerpunkt lag hierbei auf dem Risikomanagementsystem bei Henkel, wobei wir uns über größere Einzelrisiken berichten ließen; bestandsgefährdende Risiken waren nicht erkennbar. Struktur und Funktion des Risikomanagementsystems wurden auch im Rahmen der Abschlussprüfung von der KPMG geprüft, und zwar ohne Beanstandungen. Auch nach unserer Auffassung entspricht das Risikomanagementsystem den gesetzlichen Anforderungen und ist geeignet, Entwicklungen, die den Fortbestand des Unternehmens gefährden könnten, frühzeitig zu erkennen.

### Veränderungen im Aufsichtsrat und Vorstand

Infolge des Eintritts in den Ruhestand schieden Herr Fritz Franke zum 31. Dezember 2009 sowie Herr Bernd Hinz zum 31. Juli 2010 aus dem Aufsichtsrat aus. Als ihre Nachfolger sind Herr Mayc Nienhaus zum 1. Januar 2010 sowie Herr Edgar Topsch zum 1. August 2010 neu in den Aufsichtsrat eingetreten. Herr Konstantin von Unger ist mit Wirkung zum Ablauf der Hauptversammlung 2010 aus dem Aufsichtsrat ausgeschieden. Wir haben den ausgeschiedenen Mitgliedern für ihren engagierten Einsatz im Aufsichtsrat gedankt.

Herr Dr. Kaspar Freiherr von Braun wurde neu in den Aufsichtsrat gewählt. Darüber hinaus wurde Herr Dipl.-Kfm. Johann-Christoph Frey wiedergewählt, der anstelle von Herrn Dipl.-Ing. Albrecht Woeste 2009 in den Aufsichtsrat eingetreten war und dessen Mandat in Übereinstimmung mit den Regelungen des Deutschen Corporate Governance Kodex bis zum Ablauf der ordentlichen Hauptversammlung 2010 befristet war. Wir haben Herrn Frey zum Mitglied des Nominierungsausschusses gewählt.

Herr Thomas Geitner ist mit Wirkung zum 31. Dezember 2010 aus dem Vorstand ausgeschieden. In unserer Sitzung am 14. Dezember haben wir Herrn Geitner für die erfolgreich abgeschlossene Integration der National Starch-Aktivitäten in das Klebstoff-Geschäft von Henkel gedankt; damit wurde ein weltweit hervorragend aufgestellter Marktführer in dieser Industrie geschaffen. Herr Jan-Dirk Auris, der

neu in den Vorstand berufen wurde, führt seit dem 1. Januar 2011 den Unternehmensbereich Adhesive Technologies.

In unserer Sitzung am 22. Februar 2011 haben wir Herrn Dr. Friedrich Stara, der zum 1. März 2011 in den Ruhestand tritt, verabschiedet. Wir haben Herrn Dr. Stara, der seit 1976 für Henkel tätig ist und seit Juli 2005 den Unternehmensbereich Wasch-/Reinigungsmittel leitet, unseren Dank für seine langjährige und sehr erfolgreiche Tätigkeit ausgesprochen. Besonders hervorzuheben ist hier der Aufbau unserer Geschäfte in Osteuropa, die Herr Dr. Stara als Präsident Henkel Central Eastern Europe von 1998 bis 2005 überaus erfolgreich führte.

Herr Bruno Piacenza ist mit Wirkung zum 1. Januar 2011 neu in den Vorstand eingetreten und wird mit Wirkung zum 1. März 2011 von Herrn Dr. Stara die Führung des Unternehmensbereichs Wasch-/Reinigungsmittel übernehmen.

Wir wünschen Herrn Auris und Herrn Piacenza viel Erfolg für die vor ihnen liegenden verantwortungsvollen Aufgaben.

Düsseldorf, 22. Februar 2011

Für den Aufsichtsrat



Dr. Simone Bagel-Trah  
(Vorsitzende)

## Unser Vorstand

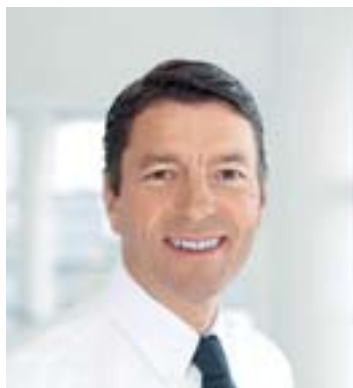

### Kasper Rorsted

Vorsitzender des Vorstands,  
Jahrgang 1962, seit 2005 bei Henkel.

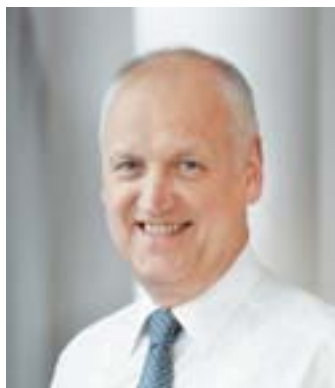

### Dr. Lothar Steinebach

Mitglied des Vorstands und  
zuständig für den Unternehmens-  
bereich Finanzen/Einkauf/IT/Recht,  
Jahrgang 1948, seit 1980 bei Henkel.

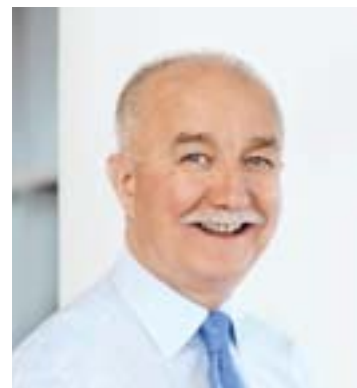

### Dr. Friedrich Stara

Mitglied des Vorstands bis zum  
28. Februar 2011 und zuständig  
für den Unternehmensbereich  
Wasch-/Reinigungsmittel,  
Jahrgang 1949, seit 1976 bei Henkel.

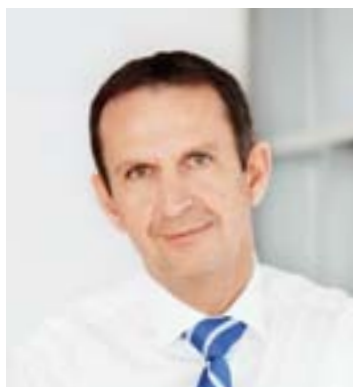

### Hans Van Bylen

Mitglied des Vorstands und  
zuständig für den Unternehmens-  
bereich Kosmetik/Körperpflege,  
Jahrgang 1961, seit 1984 bei Henkel.

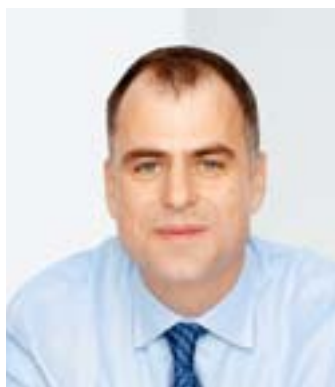

### Jan-Dirk Auris

Mitglied des Vorstands seit  
1. Januar 2011 und zuständig für  
den Unternehmensbereich  
Adhesive Technologies,  
Jahrgang 1968, seit 1984 bei Henkel.

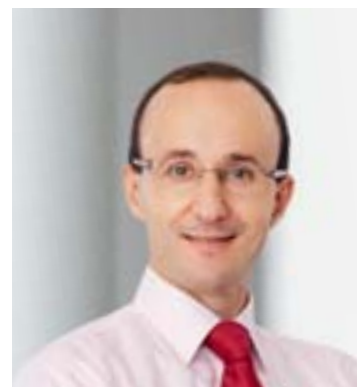

### Bruno Piacenza

Mitglied des Vorstands seit 1. Januar  
2011 und ab 1. März 2011 zuständig  
für den Unternehmensbereich  
Wasch-/Reinigungsmittel,  
Jahrgang 1965, seit 1990 bei Henkel.



## Unsere Vision

# Global führend mit Marken und Technologien.

## Unsere Werte

Wir stellen unsere **Kunden** in den Mittelpunkt unseres Handelns.

Wir schätzen unsere Kunden und stellen sie in den Mittelpunkt unserer Arbeit. Nur so können wir ihnen Mehrwert bieten. Da nicht alle Henkel-Mitarbeiter im direkten Kontakt mit den Kunden stehen, ist es umso wichtiger für uns alle zu wissen, was dieser Wert für Henkel bedeutet. Denn er ist maßgeblich für unseren Erfolg. Um die besten Produkte, die höchste Qualität und hervorragenden Service zu gewährleisten, müssen wir Kunden und Konsumenten besser verstehen, als es unsere Wettbewerber tun. Wenn uns das gelingt, werden wir in all unseren Märkten weiter erfolgreich wachsen.

Wir verpflichten uns, unsere führende Rolle im Bereich **Nachhaltigkeit** auszubauen.

Unser starkes Bekenntnis zur Nachhaltigkeit war schon immer ein wichtiger Erfolgsfaktor. Wir verfolgen alle Elemente der Nachhaltigkeit langfristig und unternehmerisch. Wir wollen nicht nur bestehende Standards einhalten, sondern auch neue setzen. Henkel hatte schon immer den Anspruch, eine Balance zwischen Mensch, Umwelt und Gewinnstreben zu schaffen. Diese Einstellung bringt uns einen klaren Wettbewerbsvorteil und hilft mit, unser volles Geschäftspotenzial auszuschöpfen. Nachhaltigkeit wird in Zukunft auch ein wesentlicher Vorteil im Wettbewerb um neue Talente sein.

Wir schätzen, fordern und fördern unsere **Mitarbeiter**.

Es sind immer die Menschen, die den Unterschied machen. Durch ihre Kreativität und ihr Wissen wird eine gute Idee erst zu einem großartigen Geschäftserfolg. Sie sind die Schnittstelle zu unseren Kunden, machen Innovationen möglich, entwickeln erfolgreiche Strategien und geben dem Unternehmen eine unverwechselbare Identität. Nur indem wir unsere Mitarbeiter schätzen, fordern und fördern, etablieren wir bei Henkel eine „Winning Culture“. Dazu müssen alle mit gutem Beispiel vorangehen: in der Art, wie wir unsere Teams führen, und wie wir selbst Verantwortung für unsere Entwicklung übernehmen. Gemeinsam werden wir Henkel global führend machen mit Marken und Technologien.

Wir gestalten unsere Zukunft auf dem Fundament eines erfolgreichen **Familienunternehmens**.

Der Familien-Wert macht uns einzigartig. Wir bauen unsere Zukunft auf ein starkes Fundament. Seit der Gründung der Firma im Jahr 1876 zeigt die Familie Henkel ihr Bekenntnis zum Unternehmen. Die Familie vertraut uns und ermöglicht uns, langfristig zu agieren. Sie unterstützt uns auch, wenn wir schwierige strategische Entscheidungen treffen müssen. Wir führen Henkel auf allen Ebenen mit Unternehmergeist – das macht letztendlich am Markt den Unterschied.

Wir streben herausragenden und nachhaltigen **wirtschaftlichen Erfolg** an.

Wir verfolgen unsere strategischen Prioritäten, um unsere Finanzziele zu erreichen und Henkel noch erfolgreicher zu machen. Ausgezeichnete und nachhaltige finanzielle Ergebnisse ermöglichen uns, in Zukunft flexibler handeln zu können. Das ist die Voraussetzung für langfristiges und gesundes Wachstum – davon profitieren nicht nur unsere Aktionäre, sondern auch unsere Mitarbeiter. Dieser Wert beeinflusst unsere Entscheidungen über Investitionen, Mitarbeiter, Strategien, unsere Teamarbeit und viele weitere Aspekte in unserem Arbeitsalltag.

## Wir stellen unsere **Kunden** in den Mittelpunkt unseres Handelns.

Wir denken voraus und gehen auf die Wünsche und Bedürfnisse unserer Kunden ein, indem wir höchsten Kundennutzen, ausgezeichnete Qualität sowie innovative Marken und Technologien bieten.

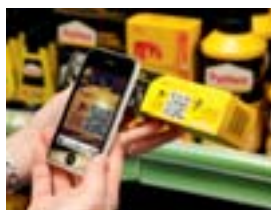

*Pattex holt das Internet ins Regal: Mit einem Mobiltelefon wird der „Quick-Response-Code“ auf der Packung fotografiert; und über die hinterlegte Internet-Adresse können zusätzliche Informationen von Pattex aufgerufen werden.*

*Handelsmarketing-Managerin Dagmar Nelles und Jochen Wagener (Zweiter von links), Marketingleiter Konsumenten-Klebstoffe Deutschland, im Gespräch mit Heimwerker Philipp Schmid vor dem neu konzipierten Pattex-Regal.*

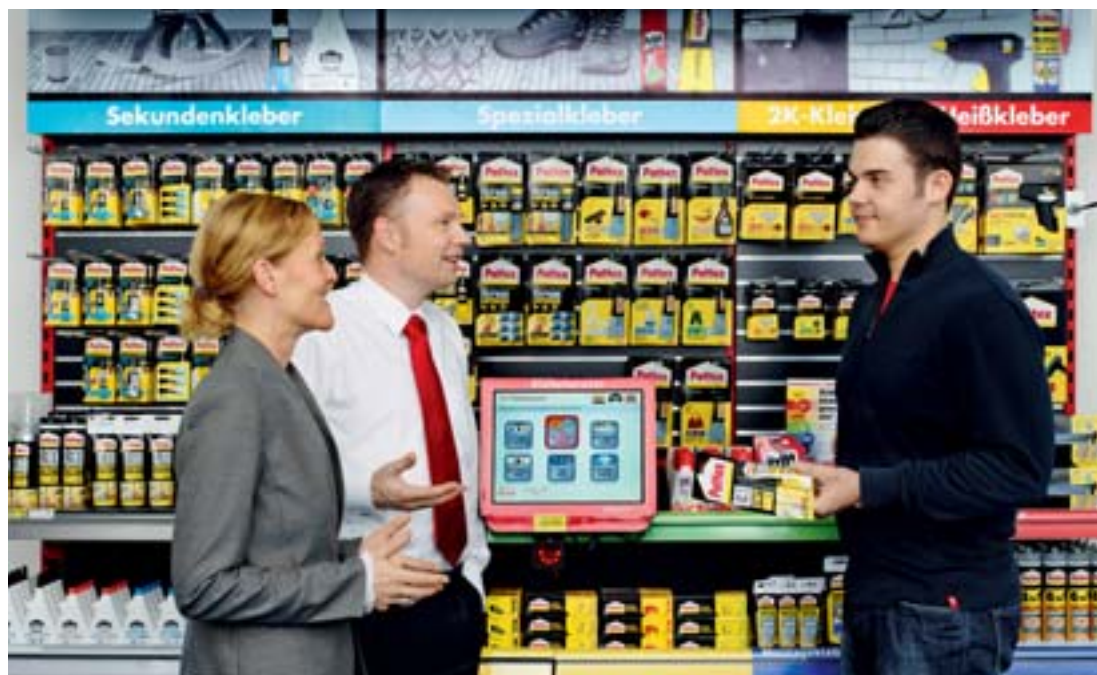

### Leichtere Orientierung für Pattex-Kunden

Marktforschungsstudien zum Verbraucherverhalten beim Kauf von Klebstoffen haben gezeigt, dass sich viele Verbraucher durch die große Produktvielfalt überfordert fühlen. Deshalb hat Henkel ein neues Regalkonzept für Haushaltsklebstoffe in Baumärkten entwickelt: Es führt die Verbraucher schnell und einfach zum richtigen Produkt und erhöht damit die Kundenzufriedenheit. Farbliche Orientierungshilfen und eine neue Gliederung im Regal unterstützen das

Suchverhalten. Zudem präsentieren sich unsere bekannten Marken Pattex, Pritt und Ponal im neuen Verpackungsdesign sowie mit eindeutigen Kategoriebezeichnungen.

Ein leicht zu bedienender Beratungscomputer mit Online-Anbindung am Regal bietet zusätzlich Informationen zu mehr als 1.700 Klebevarianten. Bis Mitte 2011 werden rund 1.000 Baumärkte mit den neuen Klebstoffregalen ausgestattet sein.

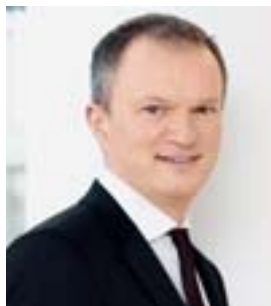

**Oliver Boßmann**  
Geschäftsführer Konsumenten- und Handwerkerklebstoffe Deutschland und Schweiz.

### Kundenzufriedenheit steigern

„Wir wollen unsere Handelskunden sowie die Verbraucher zufriedenstellen und so die Grundlage für erfolgreiche und beständige Geschäftsbeziehungen schaffen. Die Handelskunden sind zugleich unsere Partner und Teil unseres Geschäfts. Ihre Erwartungen gilt es bestmöglich zu erfüllen. Erst durch die Fokussierung auf unsere Kunden können wir unser volles Geschäftspotenzial ausschöpfen. Aus diesem Grund ist es umso wichtiger, dass wir unsere Handelskunden im Umgang mit den Verbrauchern unterstützen.“

Innovative Lösungen wie das neue Pattex-Regalsystem mit übersichtlicher Gliederung und zusätzlichen Kommunikationsflächen sowie der Computer, der am Regal angebracht ist und direkt auf aktuelle Informationen im Internet zugreifen kann, informieren die Verbraucher im Baumarkt zielgerecht und schnell. Gleichzeitig helfen ihnen die neuen Konzepte, den richtigen Klebstoff zu finden. Durch die Entlastung des Verkaufspersonals sowie eine geringere Fehlkaufo- und Reklamationsquote fördern wir die Kundenzufriedenheit.“

### Mehrwert für die Kunden schaffen

Der Wert „Kunde“ ist maßgeblich für unseren Erfolg. Unsere Kunden und Verbraucher stehen im Fokus aller unserer Aktivitäten. Dies gilt nicht nur für die Mitarbeiter, die im Marketing, Kundenservice oder Vertrieb im direkten Kontakt mit den Kunden stehen, sondern es gilt für jeden Mitarbeiter. Denn auch in der Forschung, der Personalabteilung oder Buchhaltung werden Entscheidungen getroffen, die sich auf unsere Kundenbeziehungen auswirken.

Bei allem, was wir tun, erinnert uns der Kundenwert daran, dass unsere Kunden in der Industrie, im Handel und im Handwerk nicht nur unsere Produkte, Technologien und Dienstleistungen kaufen, sondern darüber hinaus auch unsere Partner sind. Gemeinsam mit ihnen entwickeln wir Lösungen, die direkt auf sie zugeschnitten sind.

Diese erhöhen auch die Qualität und Nachhaltigkeit der Produkte, die unsere Kunden wiederum anbieten. Zum Beispiel in der Automobilindustrie: Dort produzieren unsere Kunden Fahrzeuge, die höchsten Belastungen standhalten müssen. Hierfür erforschen und testen unsere Experten in sehr enger Zusammenarbeit mit den Fahrzeugherstellern Kleb- und Dichtstoffe sowie Oberflächenbehandlungen. In Autokarosserien eingearbeitet, erhöhen unsere Produkte und Technologien die Unfall-Sicherheit, dämpfen Vibrationen und Schall, schützen vor Korrosion, reduzieren das Gewicht und senken somit den Kraftstoffverbrauch und verlängern die Lebensdauer der Fahrzeuge.

Wir schaffen für unsere Kunden und Verbraucher Mehrwert durch Innovationen und legen damit gleichzeitig den Grundstein für weiteres Wachstum in all unseren Märkten.

#### ASK Academy Schwarzkopf schult Friseure

Die ASK Academy Schwarzkopf bietet Friseuren in 38 Ländern professionelle Schulungen, die alle fachlichen und unternehmerischen Fähigkeiten für den beruflichen Erfolg vermitteln. Über 460.000 Friseure hat Schwarzkopf Professional im Jahr 2010 in Schnitttechniken, Farbe und Styling trainiert und in Managementkursen geschult.

Insbesondere in Asien und Südamerika hilft ASK, verbindliche Ausbildungsstandards und Weiterbildungen für Friseure zu etablieren.

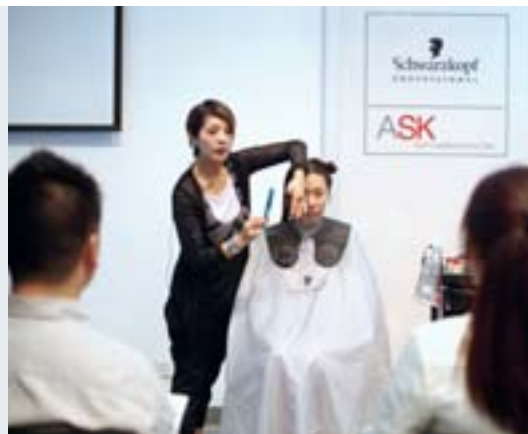

Green Yao, Seminarleiterin von Schwarzkopf Professional in China, demonstriert an einem Model, wie Haare für den professionellen Schnitt durch das Abteilen der Haarpartien vorbereitet werden. Die Zuschauer sind Friseure und Schwarzkopf-Kunden. Sie vertiefen durch ihre Teilnahme an einem „Essential Look“-Schnittseminar der ASK Academy Schwarzkopf in Shanghai ihre Fertigkeiten.

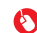

[www.ask-schwarzkopf.com](http://www.ask-schwarzkopf.com)

#### Praxistests für die Autos von morgen

Im globalen Technologiezentrum des Unternehmensbereichs Adhesive Technologies in Heidelberg werden Kunden und Mitarbeiter geschult sowie innovative Kleb-, Dicht- und Beschichtungstechnologien und Applikationsverfahren entwickelt. Unsere Experten führen für Kunden aus der Automobil-, Zuliefer- und Transportindustrie Tests durch und entwickeln mit ihnen Prototypen. Unsere Kunden profitieren enorm von dem Wissen unserer Klebstoff-Experten: So werden gemeinsam optimale Lösungen gefunden.

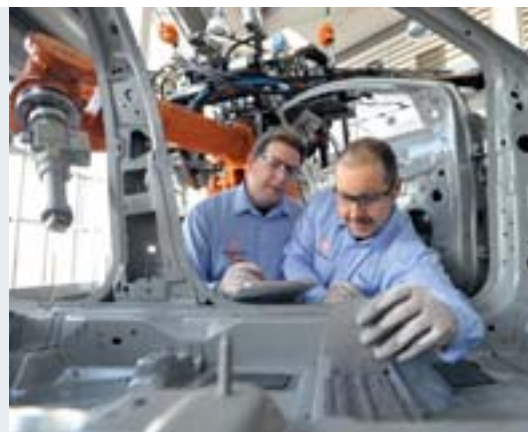

Die Anwendungstechniker Mario Werner (links) und Harald Nees haben mithilfe eines robotergeführten Applikationssystems eine schalldämmende Beschichtung in eine Karosserie aufgetragen. Jetzt prüft Harald Nees die Schichtdicke.



## Wir schätzen, fordern und fördern unsere **Mitarbeiter.**

Wir begegnen uns mit Respekt und Achtung, vertrauen einander und entwickeln unsere Fähigkeiten gemeinsam weiter. Wir erwarten von jedem Einzelnen eigenverantwortliches Handeln und ein hohes Leistungsniveau, um unseren Erfolg als Unternehmen zu sichern.

*In ihrem „Vision und Werte“-Workshop in Shanghai diskutierten Antje Chu (Zweite von links) und ihr Team Kosmetik/Körperpflege Asien/Pazifik, wie sie die Vision und Werte mit Blick auf ihre Kunden und die Verbraucher erfolgreich umsetzen können. Neben Antje Chu (von links): Paul Khol, Vijay Manickavasagam und Rungaroon Koohasaneh.*

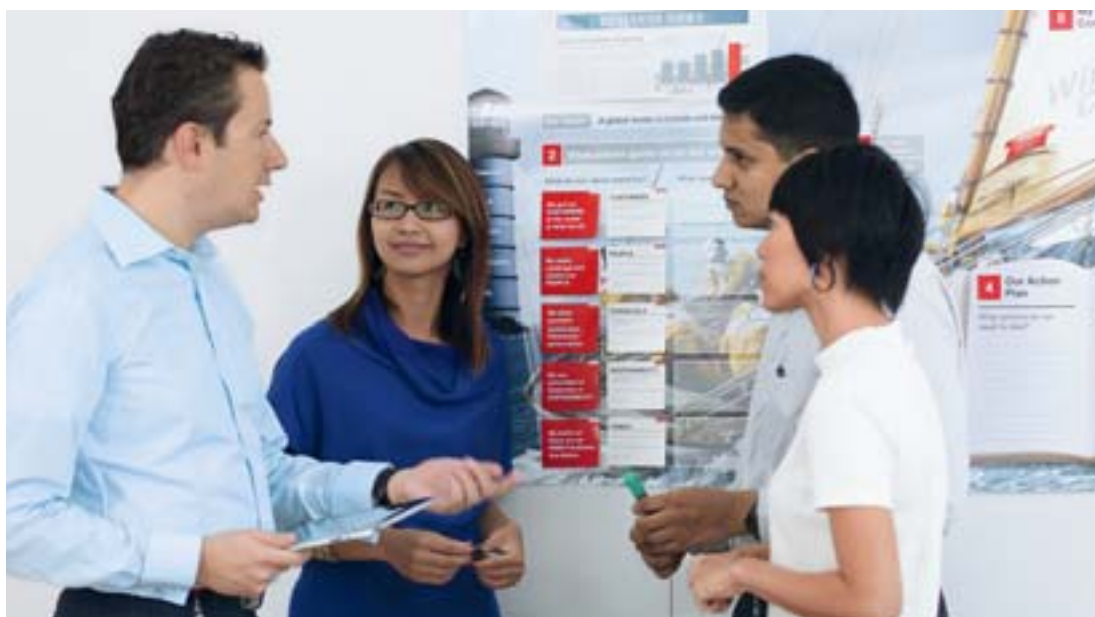

### Workshops zu Vision und Werten

Mit dem „Henkel Day“ am 24. September 2010, dem „Geburtstag“ des Unternehmens, starteten rund um den Globus „Vision und Werte“-Workshops für alle Henkel-Mitarbeiter. Überall an unseren Standorten setzten sich die Mitarbeiter in ihren Teams mit unserer Vision und den Werten intensiv auseinander. Sie diskutierten, welche konkrete Bedeutung diese für ihren Arbeitsalltag haben, und entwickelten daraus Maßnahmen für das tägliche Geschäft.

Die intensive Beschäftigung führt dazu, dass die Mitarbeiter die Vision und die Werte sich selbst, für ihr Team und ihre Arbeit zu eigen machen, sie täglich umsetzen und leben.

Bis Ende 2010 gab es weltweit rund 5.000 Workshops. Das Ergebnis jedes Workshops ist ein konkreter Aktionsplan. Darin hat jedes Team Zeitpläne und Verantwortlichkeiten für die entwickelten Maßnahmen genau definiert und schriftlich festgehalten.

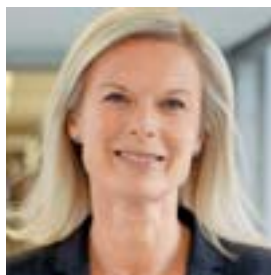

**Kathrin Menges**  
weltweite Personalchefin von Henkel.

### Mitarbeiter fordern und fördern

„Wir streben bei Henkel eine ‚Winning Culture‘ an, die durch eine klare Leistungsorientierung und den Willen geprägt ist, sich auch in einem intensiven internationalen Wettbewerb erfolgreich durchzusetzen. Um diese Unternehmenskultur zu entwickeln und zu stärken, fordern und fördern wir unsere Mitarbeiterinnen und Mitarbeiter. Durch ein entsprechendes Vergütungssystem setzen wir klare Anreize zu überdurchschnittlichen Leistungen.“

Wir sehen bei unseren Führungskräften eine hohe Verantwortung für die Entwicklung ihrer

Teams sowie für die Förderung von Talenten durch konkretes und offenes Feedback. Zudem sind wir bei Henkel überzeugt, dass jeder Einzelne auch Verantwortung für seine Karriere übernehmen und seine Zukunft aktiv mitgestalten muss – dafür bieten wir als globales Unternehmen viele attraktive Möglichkeiten an.

Die Orientierung an einer klaren Vision und an gemeinsamen Werten ist dabei eine wichtige Voraussetzung für den Erfolg. Wir wollen, dass alle Mitarbeiter unsere Werte verstehen und in das tägliche Handeln und ihre Entscheidungen einbeziehen.“

### Mitarbeiter sind entscheidend für den Erfolg

Henkel agiert als Unternehmen global. 80 Prozent unserer rund 48.000 Mitarbeiter arbeiten außerhalb Deutschlands. Im Kontakt zu unseren Kunden entwickeln sie Innovationen, setzen Strategien erfolgreich um und geben dem Unternehmen eine unverwechselbare Identität. Unsere Mitarbeiter sind der entscheidende Erfolgsfaktor im internationalen Wettbewerb.

Unsere neue Vision und die überarbeiteten Werte sollen dazu beitragen, im Unternehmen dauerhaft eine „Winning Culture“ zu verankern. Eine gemeinsame Vision und aktiv gelebte Unternehmenswerte stehen für ein Gefühl der Einheit und

bieten uns Orientierung bei unserem täglichen Arbeiten und Handeln. So entwickeln wir innovative und nachhaltige Produkte, Technologien und Dienstleistungen für unsere Kunden sowie überlegene Marketing- und Vertriebskonzepte.

Unsere Unternehmenskultur dient weltweit als verbindendes Element und macht es möglich, das volle Potenzial unserer Internationalität und Vielfalt im Unternehmen zu nutzen. Die Mitarbeiter spielen hierbei die entscheidende Rolle: Sie sind offen, sie nehmen mit einer positiven Grundhaltung neue Entwicklungen und Herausforderungen an und gestalten diese, sie handeln unternehmerisch, und sie sind bereit, Verantwortung zu übernehmen.

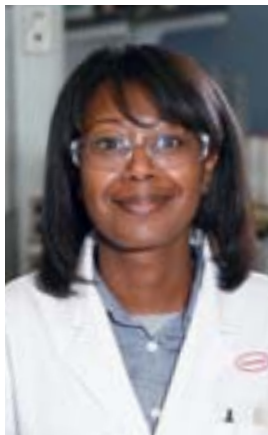

„Es ist wichtig für ein Unternehmen, eine Vision und Werte zu haben, nach denen sich die Mitarbeiter richten können. Vision und Werte bekräftigen unsere Ziele und wofür wir stehen. Sie bieten uns Orientierung, wie wir unsere Geschäfte am besten entwickeln.“

**Crystal Frazier**, Chemikerin in der Produktentwicklung Adhesive Technologies, USA.

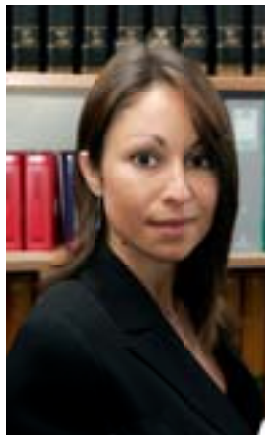

„Unsere Vision und Werte sind authentisch und nicht einfach ausgedacht. Indem wir sie täglich leben, werden wir eine ‚Winning Culture‘ entwickeln. Wir lassen die Kunden nie im Stich und verhalten uns stets nach den Compliance-Prinzipien.“

**Emmanuelle Manier**, Rechtsanwältin in der Henkel-Rechtsabteilung, Frankreich.

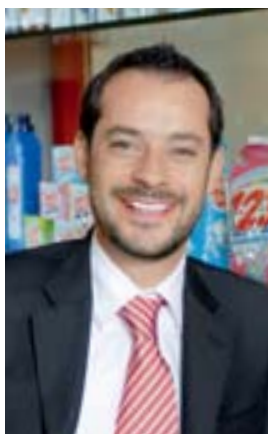

„Das Klima bei Henkel ist familiär, voll Vertrauen in die Mitarbeiter. Risiken werden gemeinsam getragen. Dies sieht man besonders in den Wachstumsmärkten: Hier hat sich Henkel zu einem wettbewerbsstarken und strategischen Anbieter für seine Kunden entwickelt.“

**Eduardo Díaz Cortazar**, Teamleiter für den Kunden Walmart im Unternehmensbereich Wasch-/Reinigungsmittel, Mexiko.

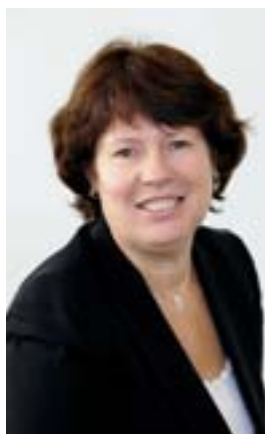

„Der Wert ‚Mitarbeiter‘ unterstützt das grundlegende menschliche Bedürfnis nach Respekt, nach Anerkennung und Belohnung für hervorragende Leistung, nach Unterstützung durch die Kollegen sowie den Wunsch, Teil eines erfolgreichen Teams zu sein.“

**Olga Gadetskaya**, Personal-Direktorin, Russland.

Rund **32 %**  
unserer Mitarbeiter sind  
Frauen.

Rund **29 %**  
unserer Führungskräfte  
sind Frauen.

**GB**  
Seiten 55 bis 57.

**NB**  
Nachhaltigkeitsbericht,  
Seiten 30 bis 37.

## Wir streben herausragenden und nachhaltigen **wirtschaftlichen Erfolg** an.

Wir fühlen uns als leistungsorientiertes Unternehmen verpflichtet, den Wert unseres Unternehmens zu steigern und unseren Aktionären eine attraktive Rendite zu sichern.

*Maria Lancellotti überwacht die Abfüllung flüssiger Wasch- und Reinigungsmittel in Düsseldorf. Die Kunststoff-Flaschen werden von einem externen Lieferanten umweltverträglich direkt neben der Abfüllanlage hergestellt.*

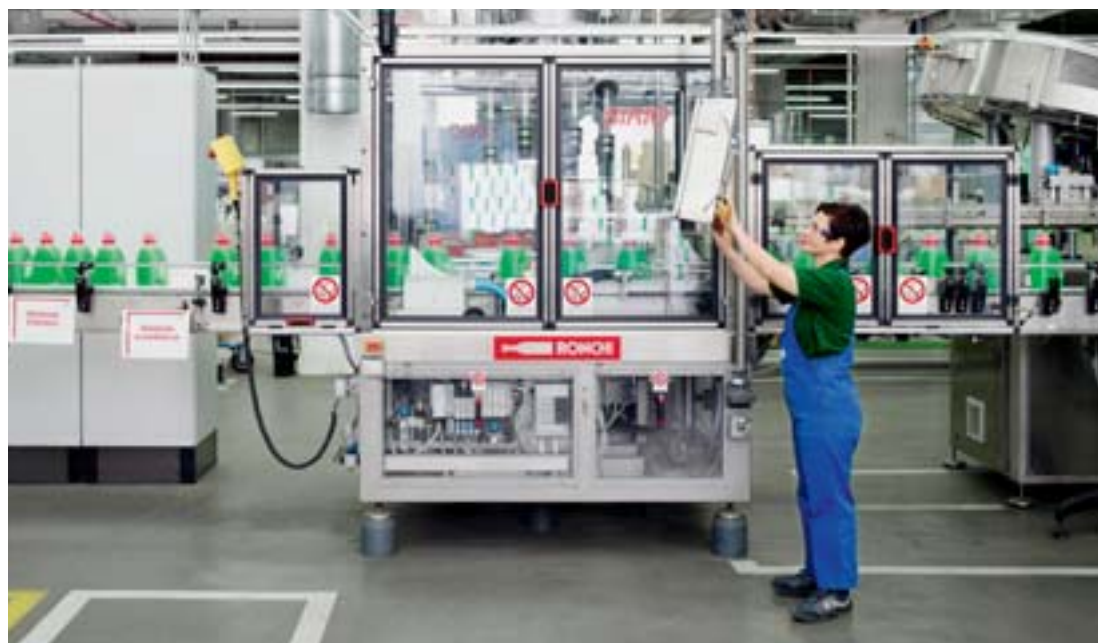

### Lieferanten in die Produktion integriert

Im Unternehmensbereich Wasch-/Reinigungsmittel kooperieren wir weltweit in allen wichtigen Flüssigprodukte-Fabriken mit ausgewählten Partnern zur Herstellung von Kunststoff-Flaschen direkt neben den Produktionsanlagen.

Die Mehrzahl der Kunststoff-Flaschen für unsere Wasch- und Reinigungsmittel wird auf diese effiziente Weise geliefert. Durch die Kooperation mit den Lieferanten optimieren wir gemein-

sam die Herstellprozesse im Werk – bei hoher Flexibilität und optimalen Lagerbeständen. Zudem senken wir die Kohlendioxid-Emissionen, da so Tausende Lkw-Ladungen und mehr als eine Million Kilometer für den Transport leerer Kunststoff-Flaschen vermieden werden.

Durch dieses Logistik-Konzept erreichen wir Spitzenpositionen in internationalen Supply-Chain-Vergleichen innerhalb der Wasch- und Reinigungsmittelindustrie.

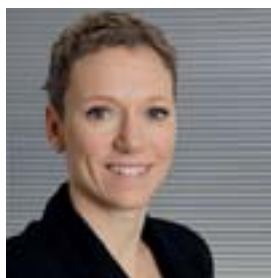

**Gaby Deußen**  
Leiterin Shared Service Center  
in Bratislava, Slowakei.

### Höhere Effizienz durch zentrale Services

„In unseren Shared Service Centern in Bratislava und Manila erbringen wir zentral Dienstleistungen für die weltweite Henkel-Organisation, hauptsächlich in den Bereichen Finanzen, Einkauf, Personal und Informationstechnik (IT).

Prozesse wie Rechnungsverbuchung, Kostenkalkulationen, Erstellen von Preislisten oder Berichten und viele weitere Aufgaben werden bei uns von Spezialistenteams zentral übernommen. Da wir diese Dienstleistungen für viele Einheiten von Henkel erbringen, können wir einen hohen

Grad an Standardisierung erreichen. Dabei helfen uns auch leistungsfähige IT-Systeme. Damit steigt die Effizienz und Geschwindigkeit, während die Kosten für den einzelnen Prozess sinken.

So erhöhen wir auch die Transparenz von wichtigen Prozessen; und wir können eine bessere Compliance gewährleisten. Nicht zuletzt bieten unsere Shared Service Center die Möglichkeit, Managementnachwuchs in den aufstrebenden Märkten für Henkel zu gewinnen. Ich bin sicher, dass unsere Shared Service Center noch viel Potenzial für die Zukunft bieten.“



### Profitabel wachsen

Effizientes und effektives Wirtschaften ist der Eckpfeiler für unseren ökonomischen Erfolg. Den brauchen wir als Wirtschaftsunternehmen, um unsere langfristige Wettbewerbsfähigkeit zu halten und immer wieder zu stärken. Mit Innovationen wollen wir in wettbewerbsintensiven Märkten stärker als unsere Wettbewerber wachsen und uns neue Märkte erschließen.

Eine wachsende Profitabilität ist kein Selbstzweck. Grundsätzlich können wir nur das Geld ausgeben, das wir zuvor verdient haben. Je mehr wir verdienen, desto mehr können wir in Forschung und Innovationen sowie in unsere Märkte inves-

tieren. Dieses Grundverständnis leitet das Handeln unserer drei Unternehmensbereiche und unserer zentralen Funktionen: Sie optimieren ihre Prozesse und suchen Synergien in der gesamten Wertschöpfungskette – in enger Zusammenarbeit mit unseren strategischen Lieferanten und unseren Kooperationspartnern in Forschung, Entwicklung, Produktion und Logistik.

Eine hohe Profitabilität garantiert uns einen größeren finanziellen Spielraum, gibt uns mehr Flexibilität und Entwicklungsmöglichkeiten. Je besser wir wirtschaften, umso besser sind auch die Konditionen, zu denen wir auf den Finanzmärkten Mittel für Investitionen erhalten.

#### Erfolgsmarke Schwarzkopf

Unsere Haarkosmetik-Marke Schwarzkopf ist die größte und am schnellsten wachsende Marke von Henkel. Sie zählt zu den global führenden Haarkosmetik-Marken. Aus 500 Mio. Euro Umsatz 1995 wurden 1,8 Milliarden Euro im Jahr 2010. Schwarzkopf steht seit mittlerweile 113 Jahren für Haar-Kompetenz sowie für Werte wie Modernität, hohe Qualität und Innovationskraft. Damit ist Schwarzkopf ein ideales Dach für ein klar differenziertes Marken-Portfolio mit unserem Endverbrauchergeschäft und unserem internationalen Friseurgeschäft Schwarzkopf Professional.

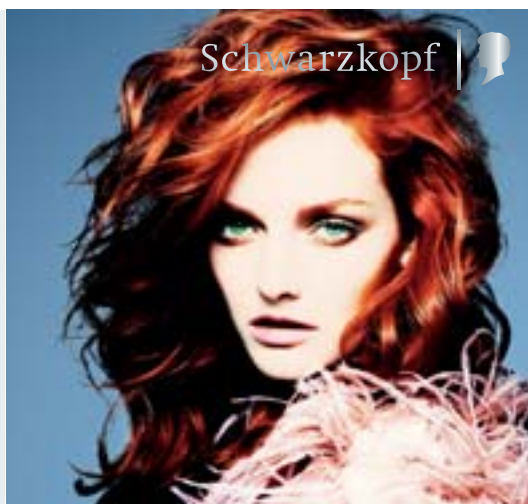

20

Quartale in Folge profitables Wachstum unserer Kosmetik/Körperpflege.

#### Kommunikation mit dem Kapitalmarkt

Mehr als 500 Termine mit Investoren und Analysten hatte das Investor-Relations-Team von Henkel im vergangenen Jahr. Einen besonderen Höhepunkt gab es am 16. September 2010 in Düsseldorf: Fast 70 internationale Investoren und Analysten erhielten vom Top-Management des Unternehmensbereichs Adhesive Technologies einen umfassenden Einblick in die Klebstoff-Märkte, das innovative Portfolio und die Wachstumstreiber. Neben den Präsentationen zeigten Henkel-Mitarbeiter bei einer Ausstellung den Investoren und Analysten das Potenzial des Unternehmensbereichs.

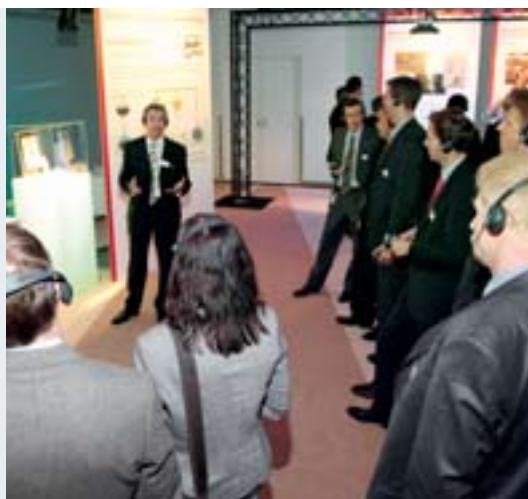

Peter Rushe stellte den Investoren und Analysten neue Produkte für Konsumenten und Handwerker vor: den Pattex Power PU Schaum und den Pritt Ecomfort Roller.

## Wir verpflichten uns, unsere führende Rolle im Bereich **Nachhaltigkeit** auszubauen.

Wir bieten Produkte, Technologien und Prozesse, die höchste Standards erfüllen. Wir verpflichten uns, für die Sicherheit und Gesundheit unserer Mitarbeiter, den Schutz unserer Umwelt und die Lebensqualität der Menschen in unserem Umfeld zu sorgen.

An der Pilotanlage Puerto Errado 1 für Solarthermie in Südspanien besprechen Meike Schumann, Qualitätsingenieurin der Firma Novatec Biosol, und Thomas Wittmann, Außendienstmitarbeiter bei Henkel, die Beständigkeit der Terostat MS-Klebstoffe von Henkel. Damit wurden Spiegel auf Stahlrahmen geklebt. Die Spiegel bündeln das Sonnenlicht, um Energie zu produzieren.

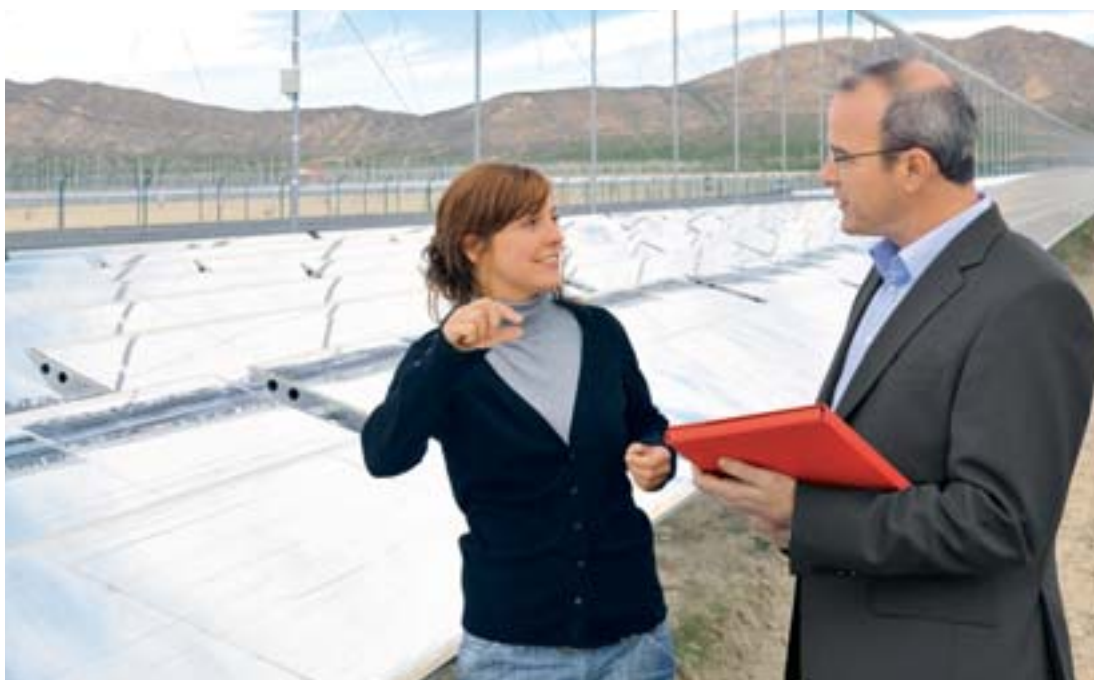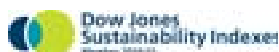

Zum vierten Mal in Folge ist Henkel Branchenführer im Dow Jones Sustainability World Index und im Dow Jones Sustainability Index Europe. In der Kategorie „Kurzlebige Konsumgüter“ belegte Henkel erneut den ersten Platz.

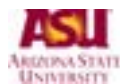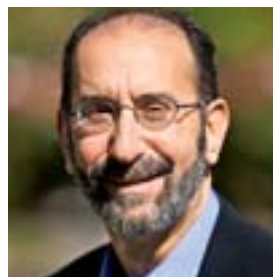

**Dr. Rob Melnick**  
Dekan des Global Institute of Sustainability sowie President Professor of Practice der School of Sustainability, Arizona State University, USA.

### Solarthermie mit Klebstoffen von Henkel

Weltweit entwickeln unsere Forscher und Ingenieure Produkte und Technologien, die erstklassige Leistung mit wirtschaftlichen und ökologischen Vorteilen für unsere Kunden und Verbraucher kombinieren. So unterstützen wir mit unserem Klebstoff-Wissen die Firma Novatec Biosol seit 2006 bei der Entwicklung ihrer „konzentrierten Solarthermie-Spiegel“, die mithilfe von Sonnenlicht Energie produzieren. Die Herausforderung bestand darin, die leicht gebogenen Spiegel auf

verzinkten Stahlrahmen zu verkleben. Der Einsatz eines elastischen Terostat MS-Klebstoffs und einer Härterkomponente erwies sich als beste Lösung. Die Klebstoffe sind nicht kennzeichnungspflichtig und extrem wetterbeständig. Bis Ende 2011 wird nun mithilfe unserer Klebstoffe ein 30-Megawatt-Kraftwerk in Südspanien errichtet. Dieses Projekt von Adhesive Technologies zeigt beispielhaft, wie wir zusammen mit unseren Kunden neue und nachhaltige Technologien entwickeln, die wirtschaftlich erfolgreich sind.

### Herausforderung Nachhaltigkeit

„Unternehmen stehen vor einer bedeutenden und stetig wachsenden Herausforderung: Behörden, Lieferanten, Mitarbeiter und Verbraucher erwarten von ihnen, dass sie verantwortungsvoll mit Energie und natürlichen Ressourcen umgehen und auf ihre Auswirkungen im Umfeld ihrer Standorte sowie auf das Wohlergehen der Menschen und Nachbarschaften achten, die sie versorgen. Gleichzeitig müssen Unternehmen auch Gewinne erzielen, die in einem angemessenen Verhältnis zu den Investitionen stehen

und die Erwartungen der Aktionäre erfüllen. Im Jahr 2011 und darüber hinaus liegt der Schlüssel zur Branchenführerschaft in Strategien und der Umsetzung von Maßnahmen, die nachhaltige Ergebnisse sichern. Henkel gehörte zu den ersten Unternehmen, die sich ausdrücklich zur Nachhaltigkeit als Kernwert bekannt haben. Dem Unternehmen ist es auf bemerkenswerte und vorbildliche Weise gelungen, eine Balance zwischen Qualitätsprodukten, Rentabilität und Nachhaltigkeit zu schaffen – ein Beispiel, dem andere Unternehmen folgen sollten.“

### Verantwortung für Menschen und Umwelt

Nachhaltiges Wirtschaften war schon immer Teil unseres Selbstverständnisses bei Henkel. Wir erfüllen mit unseren Marken und Technologien sowie auch als Arbeitgeber die Bedürfnisse der Menschen heute, ohne dabei die Entwicklungsmöglichkeiten künftiger Generationen zu gefährden.

Entlang der gesamten Wertschöpfungskette wirtschaften wir nachhaltig und gesellschaftlich verantwortlich. Dies hat zu einer ausgezeichneten Reputation des Unternehmens und zu weltweit führenden Marktpositionen beigetragen. Diesen Vorsprung wollen wir in unseren Märkten weiter ausbauen. Denn Nachhaltigkeit wird im Wettbewerb immer mehr zu einem Erfolgsfaktor.

Unser Anspruch, Produktleistung und Verantwortung für Menschen und Umwelt miteinander zu

verknüpfen, treibt Innovationen voran und bringt uns und unseren Kunden auch wirtschaftlichen Erfolg: Unseren Kunden bieten wir effiziente und umweltverträgliche Produkte, Technologien und Dienstleistungen mit verbraucherrelevantem Nutzen an. Somit können auch die Verbraucher ihr Verhalten ändern und nachhaltiger konsumieren, ohne auf Lebensqualität zu verzichten. Durch gezielte Kommunikation verdeutlichen wir den Verbrauchern die Vorteile unserer Produkte und unterstützen sie bei einer effizienten Anwendung.

Täglich entscheiden sich weltweit Millionen Kunden und Verbraucher für unsere Marken und Technologien. Diese sind unser zentraler Wertbeitrag für die Gesellschaft. Mit unseren Produkten und Technologien unterstützen wir den Klimaschutz, die Ressourcenschonung sowie den gesellschaftlichen Fortschritt.

### Fritz Henkel Stiftung

Henkel hat im Januar 2011 die Fritz Henkel Stiftung gegründet. Das gesellschaftliche Engagement wird zukünftig in dieser Stiftung gebündelt. Die Stiftungsgründung unterstreicht das langfristige Bekenntnis von Henkel, sich über die Geschäftstätigkeit hinaus gesellschaftlich zu engagieren. Der Stiftungszweck umfasst die Unterstützung des ehrenamtlichen Einsatzes unserer Mitarbeiter, die internationale Katastrophenhilfe sowie das gesellschaftliche Engagement des Unternehmens und unserer Marken.

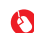

[www.henkel.de/smile](http://www.henkel.de/smile)

### Hilfe für Schüler in Nigeria

Emmanuel Nweke, IT-Berater im Global Delivery Service bei Henkel in Düsseldorf, zeigt Kindern in Awkuzu, Nigeria, wie sie mit Laptops arbeiten und lernen können. Die Laptops hat Henkel im Rahmen der Mitarbeiter-Initiative „Miteinander im Team“ (MIT) gespendet. Für die meisten Kinder ist dies der Erstkontakt mit einem Computer. Emmanuel Nwekes Projekt „Awkuzu Children“ ermöglicht Kindern eine bessere Bildung. Mithilfe von Spenden wurden seit 2007 zwei Schulgebäude ausgestattet und Unterrichtsmaterialien gekauft.

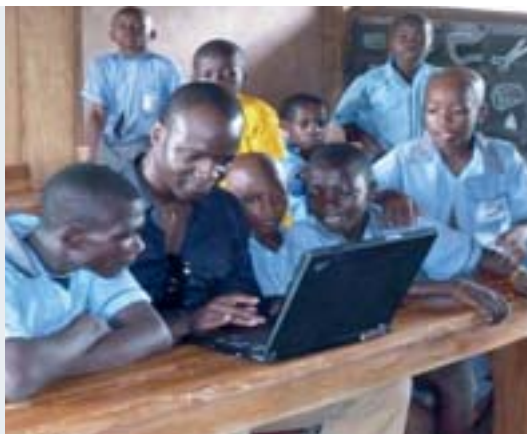

Rund **730.000**

Menschen in 72 Ländern hat Henkel weltweit im Jahr 2010 durch Henkel Smile-Projekte geholfen.

### Moderne Energietechnologie in Toluca

In unseren Werken optimieren wir die Produktion kontinuierlich. So konnten wir in unserem Waschmittelwerk in Toluca, Mexiko, durch neue Technologien wie eine „Beiluftanlage“ den Energieverbrauch bei der Produktion von Pulverwaschmitteln senken – um 28 Prozent pro Tonne Produkt seit 2007. Die 2009 in Betrieb genommene Produktion für Flüssigwaschmittel entspricht ebenfalls neuesten Standards und ist entsprechend wasser- und energiesparend. Auch hier werden die Verpackungen direkt neben der Produktion hergestellt.

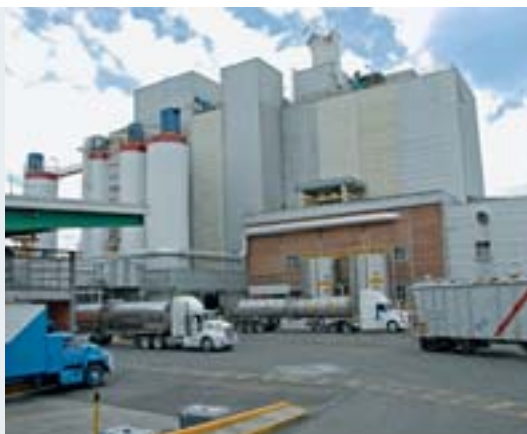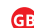

Seiten 62 bis 65.

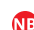

Nachhaltigkeitsbericht, Seite 26.



## Wir gestalten unsere Zukunft auf dem Fundament eines erfolgreichen Familienunternehmens.

Basierend auf unseren Werten und unserer langjährigen erfolgreichen Geschichte verfolgen wir eine langfristig ausgerichtete Unternehmensentwicklung, die durch faires unternehmerisches Handeln und eine solide Finanzierung geprägt ist.

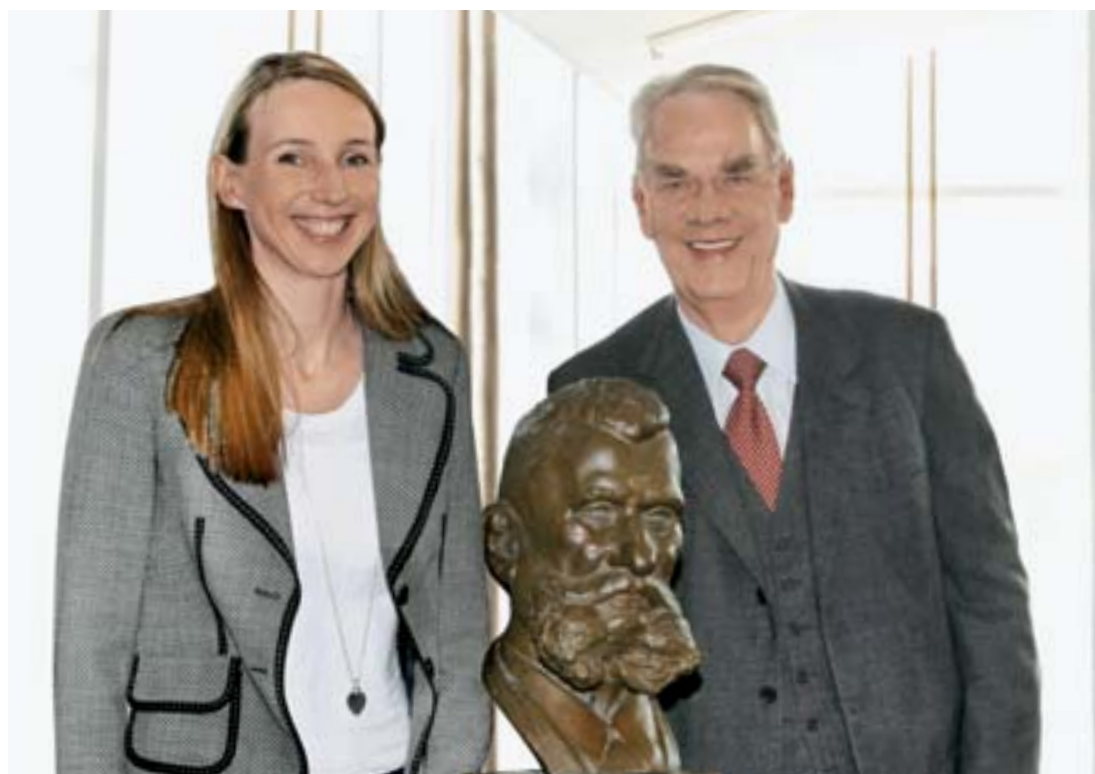

### Firma und Familie

Feierliche Einweihung der Henkel-Zentrale für das nordamerikanische Konsumenten-Geschäft im März 2009 in Scottsdale, Arizona, USA: Wie in Düsseldorf, Moskau, Shanghai und Wien steht dort im Eingang eine Büste des Firmengründers Fritz Henkel, ein Zeichen für den entschlossenen

Unternehmergeist der Familie Henkel. Die Büste symbolisiert die enge Bindung zwischen Firma und Familie. Darüber freuen sich Dr. Simone Bagel-Trah und Dipl.-Ing. Albrecht Woeste, der als Vertreter der vierten Generation der Familie Henkel von 1990 bis 2009 Vorsitzender des Aufsichtsrats und des Gesellschafterausschusses war.

### Identität und Orientierung

Der Wert „Familienunternehmen“ gibt uns eine ganz besondere und unverwechselbare Identität. Der Unternehmergeist des Firmengründers Fritz Henkel hat das Unternehmen geprägt. Er ist auch heute noch Vorbild für die Mitarbeiter.

Henkel war immer ein Unternehmen mit festen Wertvorstellungen. Natürlich verändern sich ein Unternehmen und sein Umfeld im Lauf der Zeit. Doch wesentliche Werte haben nach wie vor Bestand. Bereits für den Firmengründer Fritz Henkel standen seine Kunden im Mittelpunkt aller Entscheidungen, ebenso die Verantwortung für die

Mitarbeiter oder die Verpflichtung zu wirtschaftlichem und nachhaltigem Handeln.

Der Wert „Familienunternehmen“ ist ein klares Bekenntnis der Familie Henkel zum Unternehmen. Die Bedeutung des Unternehmergeistes und der Verantwortung für die Zukunft, die sich aus der Geschichte ableitet, wird uns immer wieder von vielen innerhalb wie außerhalb des Unternehmens bestätigt. Der Wert „Familienunternehmen“ unterscheidet uns von anderen Unternehmen. Wir haben eine langfristige Perspektive. Aber es gilt auch: Ohne kurzfristige Erfolge gibt es keinen langfristigen Erfolg.

### Dr. Jost-Henkel-Stiftung

Seit 1958 fördert die Dr. Jost-Henkel-Stiftung Studierende, die mit exzellenten Studienleistungen überzeugen und ein zügiges Studium mit eigenen Mitteln nicht ausreichend finanzieren können. Stipendien werden international vergeben nach einem individuellen Auswahlverfahren. Die Stiftung ist offen für alle Fachrichtungen mit Schwerpunkt auf Wirtschafts- und Naturwissenschaften. Das Unternehmen und die Familie Henkel haben die Stiftung 1958 anlässlich des 25-jährigen Dienstjubiläums des damaligen Firmenchefs Dr. Jost Henkel gegründet.

### Konrad-Henkel-Stiftung

Seit 1985 fördert die Konrad-Henkel-Stiftung in vielfacher Weise Forschung und Lehre an der Heinrich-Heine-Universität Düsseldorf. Das Unternehmen Henkel hat diese Stiftung gegründet anlässlich des 70. Geburtstags des langjährigen Firmenchefs und damaligen Aufsichtsratsvorsitzenden Dr. Konrad Henkel. Der Förderungsschwerpunkt der Stiftung liegt vorrangig auf dem Gebiet der Wirtschaftswissenschaften und dem internationalen Wissensaustausch. Seit 1990 ehrt die Stiftung zudem zweimal jährlich die besten Wirtschaftsstudenten der Düsseldorfer Universität mit dem Konrad-Henkel-Examenspreis.

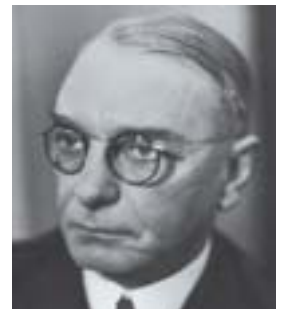

### Hugo-Henkel-Preis

Seit 2005 zeichnet Henkel im Umfeld seiner Standorte in Deutschland allgemeinbildende Schulen, die die naturwissenschaftliche und technische Bildung ihrer Schüler in besonderem Maße fördern, mit dem Hugo-Henkel-Preis aus. Der Preis ist benannt nach Dr. Hugo Henkel, dem jüngeren Sohn des Firmengründers Fritz Henkel und dem ersten Chemiker in der väterlichen Firma.

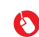

[www.henkel.de/hugo-henkel-preis](http://www.henkel.de/hugo-henkel-preis)

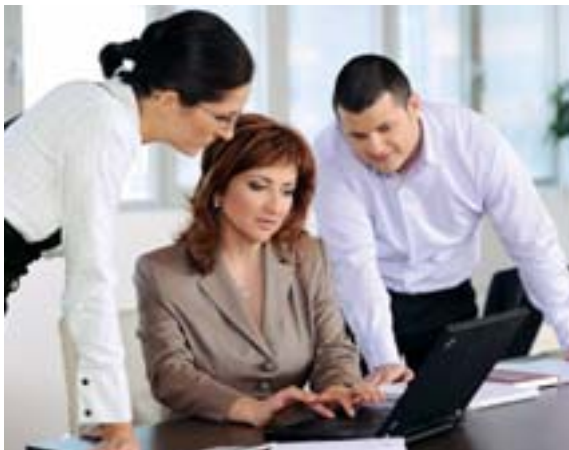

*Gelebter Unternehmergeist bei Henkel Bulgaria: Darina Stoyanova (Mitte), Geschäftsführerin Henkel Bulgaria, bespricht sich mit ihrer Assistentin Nina Metodieva und Panaiot Dimitrov, Leiter Vertriebsstab Wasch-/Reinigungsmittel.*

### Erfolgsfaktor Unternehmergeist

Das Team von Henkel Bulgaria baute unter der unternehmerischen Leitung von Darina Stoyanova das Wasch- und Reinigungsmittelgeschäft in Bulgarien auf. Heute ist sie zudem Geschäftsführerin von Henkel Bulgaria. Als Erfolgsfaktor für den Aufbau der Geschäfte von Henkel in Bulgarien sehen sie und ihr Team den Unternehmergeist, der letztendlich am Markt den Unterschied macht.

„In den Anfangszeiten war der bulgarische Markt sehr turbulent und geprägt von starken lokalen und internationalen Wettbewerbern“, berichtet Stoyanova. „Trotzdem haben wir es geschafft, innerhalb einer kurzen Zeitspanne alle Wettbewerber zu überholen. Bereits 2009 wurden wir Marktführer.“ Für sie steht fest: „Das wäre niemals möglich gewesen, wenn nicht jeder Einzelne diesen speziellen Unternehmergeist gelebt hätte.“

Dazu gehört für Stoyanova auch die Fähigkeit, sich für eine Aufgabe zu begeistern: „Wer mit Leidenschaft arbeitet, zeigt Enthusiasmus. Er entwickelt seine Talente stetig weiter und erreicht dementsprechend hohe Ergebnisse.“

Das Denken und Handeln des Firmengründers Fritz Henkel und seiner Nachfahren ist Vorbild für das Team in Bulgarien: „Unsere Firmengeschichte macht uns stolz und gibt uns die Möglichkeit, uns mit dem Unternehmergeist von Henkel zu identifizieren“, erklärt Stoyanova. „Die Geschichte lehrt uns, dass Erfolg ein sich ständig entwickelnder Prozess ist, der Zeit, harte Arbeit, Ausdauer und einen in die Zukunft gerichteten Blick erfordert.“

### Henkel in Bulgarien

Im Jahr 1998 startete Henkel das Exportgeschäft nach Bulgarien. Bereits zwei Jahre später haben wir Henkel Bulgaria in der Hauptstadt Sofia gegründet. Heute sind wir mit allen drei Unternehmensbereichen Marktführer in Bulgarien. Unsere wichtigsten Marken dort sind Bref, Ceresit, Clin, Fa, Gliss, Loctite, Moment, Palette, Persil, Perwoll, Pur, Rex, Schauma, Silan, Somat, Taft und Thomsit. Derzeit arbeiten 152 Mitarbeiter am weiteren Erfolg von Henkel Bulgaria.

## Aktien und Anleihen

- Henkel-Aktien stiegen stärker als der Gesamtmarkt und erreichten historische Höchstkurse
- Gewichtung der Henkel-Vorzugsaktien im DAX 30 erhöht
- Internationale und breit gestreute Aktionärsstruktur
- Intensive Kapitalmarkt-Kommunikation fortgesetzt

Im Jahr 2010 waren die Henkel-Aktien erneut in einem überdurchschnittlich starken Aufwärtstrend und erreichten historische Höchstkurse. Dank des Endes der globalen Rezession und positiver Wachstumsraten der Weltwirtschaft gewann der DAX im Vergleich zum Schlusskurs des Vorjahres 16,1 Prozent. Der Branchenindex für Konsumgüter, der Dow Jones Euro Stoxx Consumer Goods, erhöhte sich um 25,6 Prozent. In diesem positiven Marktumfeld stieg der Kurs der Henkel-Vorzugsaktie überproportional und schloss das Jahr mit 46,54 Euro, 27,7 Prozent über dem Vorjahresniveau, nachdem am 1. Dezember mit 48,40 Euro ein historischer Höchstkurs erreicht worden war. Die Stammaktie legte bei einem Schlusskurs von 38,62 Euro 24,0 Prozent zu und konnte am 6. Dezember mit 40,30 Euro ebenfalls einen historischen Höchstkurs verzeichnen.

In den ersten zehn Monaten des Jahres 2010 entwickelten sich die Henkel-Aktien zunächst größtenteils gleichlaufend zum Gesamtmarkt leicht positiv, um dann gegen Jahresende deutlich anzusteigen. Positiv beeinflusst wurde der Kurs durch die sehr starke operative Entwicklung des Unternehmens. Gegen Ende des Jahres konnten die Henkel-Aktien ihre bisherigen Höchstkurse sukzessive weiter verbessern und das Jahr 2010 mit einer besseren Performance als die relevanten Vergleichsindizes abschließen.

Das Handelsvolumen der Vorzugsaktien blieb im Vergleich zum Vorjahr nahezu unverändert. Pro Handelstag wurden durchschnittlich 1,0 Mio. Vorzugsaktien gehandelt (Vorjahr: 1,0 Mio.). Bei den Stammaktien sank das durchschnittliche Volumen auf 130.000 Stück pro Börsentag (Vorjahr: 200.000). Die Marktkapitalisierung der Stamm- und Vorzugsaktien stieg aufgrund der positiven Kursentwicklung von 14,6 Mrd. Euro auf 18,3 Mrd. Euro.

Für langfristig orientierte Investoren bleibt die Henkel-Aktie ein attraktives Investment. Aktionäre, die im Jahr 1985 bei der Emission der Henkel-Vorzugsaktie umgerechnet 1.000 Euro angelegt und die ihnen zugeflossenen Dividenden (ohne Steuerabzug) wieder in die Aktie investiert haben, verfügten Ende 2010 über einen Depotwert von 14.344 Euro. Dies entspricht einer Wertsteigerung von 1.334 Prozent oder einer durchschnittlichen Verzinsung von 11,1 Prozent pro Jahr. Der DAX erreichte im selben Zeitraum eine jährliche Verzinsung von 7,4 Prozent. Über die letzten fünf beziehungsweise zehn Jahre verzeichnete die Henkel-Vorzugsaktie eine durchschnittliche Verzinsung von 12,4 beziehungsweise 9,1 Prozent pro Jahr und stieg damit in diesen Zeiträumen deutlich stärker als der DAX, der 5,0 Prozent beziehungsweise 0,7 Prozent zulegen konnte.

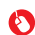

[www.henkel.de/aktien](http://www.henkel.de/aktien)

Entwicklung Henkel-Vorzugsaktie im Marktvergleich 2010

in Euro

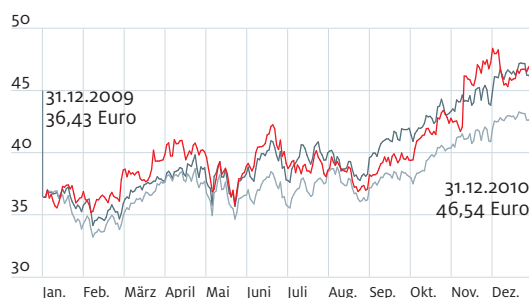

- Henkel-Vorzugsaktie
- DAX (indexiert)
- DJ Euro Stoxx Consumer Goods (indexiert)

Entwicklung Henkel-Vorzugsaktie im Marktvergleich 2001 bis 2010

in Euro

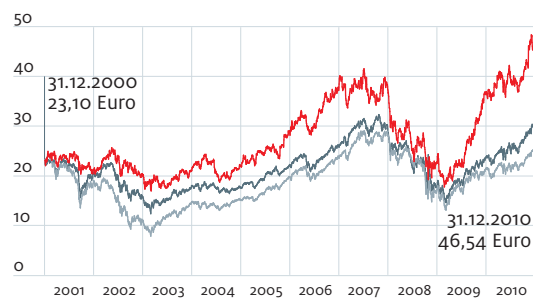

- Henkel-Vorzugsaktie
- DAX (indexiert)
- DJ Euro Stoxx Consumer Goods (indexiert)



## Kennzahlen zur Henkel-Aktie 2006 bis 2010

| in Euro                                               | 2006 <sup>1)</sup> | 2007 <sup>1)</sup> | 2008  | 2009  | 2010               |
|-------------------------------------------------------|--------------------|--------------------|-------|-------|--------------------|
| <b>Ergebnis je Aktie</b>                              |                    |                    |       |       |                    |
| Stammaktie                                            | 1,97               | 2,12               | 2,81  | 1,38  | 2,57               |
| Vorzugsaktie                                          | 1,99               | 2,14               | 2,83  | 1,40  | 2,59               |
| <b>Börsenkurs zum Jahresende<sup>2)</sup></b>         |                    |                    |       |       |                    |
| Stammaktie                                            | 32,73              | 34,95              | 18,75 | 31,15 | 38,62              |
| Vorzugsaktie                                          | 37,16              | 38,43              | 22,59 | 36,43 | 46,54              |
| <b>Höchster Börsenkurs<sup>2)</sup></b>               |                    |                    |       |       |                    |
| Stammaktie                                            | 33,14              | 37,50              | 34,95 | 31,60 | 40,30              |
| Vorzugsaktie                                          | 37,82              | 41,60              | 38,43 | 36,87 | 48,40              |
| <b>Niedrigster Börsenkurs<sup>2)</sup></b>            |                    |                    |       |       |                    |
| Stammaktie                                            | 25,66              | 29,96              | 16,68 | 16,19 | 30,31              |
| Vorzugsaktie                                          | 28,21              | 33,70              | 19,30 | 17,84 | 35,21              |
| <b>Dividende</b>                                      |                    |                    |       |       |                    |
| Stammaktie                                            | 0,48               | 0,51               | 0,51  | 0,51  | 0,70 <sup>3)</sup> |
| Vorzugsaktie                                          | 0,50               | 0,53               | 0,53  | 0,53  | 0,72 <sup>3)</sup> |
| <b>Marktkapitalisierung<sup>2)</sup> in Mrd. Euro</b> |                    |                    |       |       |                    |
| Stammaktie in Mrd. Euro                               | 8,5                | 9,1                | 4,9   | 8,1   | 10,0               |
| Vorzugsaktie in Mrd. Euro                             | 6,6                | 6,8                | 4,0   | 6,5   | 8,3                |

<sup>1)</sup> Vergleichbar nach dem Aktiensplit (1:3) vom 18. Juni 2007.

<sup>2)</sup> Aktienschlusskurse Xetra-Handel.

<sup>3)</sup> Vorschlag.

**18,3 Mrd. €**  
Marktkapitalisierung.

## Henkel in allen wichtigen Indizes vertreten

Die Henkel-Aktien werden vor allem im Xetra-Handel der Frankfurter Wertpapierbörse gehandelt. Daneben notiert Henkel dort auch im Parketthandel sowie an allen deutschen Regionalbörsen. In den USA können Anleger im Rahmen des „Sponsored Level I ADR (American Depositary Receipt) Program“ in Zertifikate auf Henkel-Vorzugs- sowie -Stammaktien investieren. Die Zahl der am Jahresende ausstehenden ADRs auf Stamm- und Vorzugsaktien betrug etwa 4,1 Mio. Stück (2009: 5,1 Mio. Stück).

## Aktien-Daten

|                    | Vorzüge      | Stämme       |
|--------------------|--------------|--------------|
| Wertpapierkenn-Nr. | 604843       | 604840       |
| ISIN Code          | DE0006048432 | DE0006048408 |
| Börsenkürzel       | HEN3.ETR     | HEN.ETR      |
| Anzahl der Aktien  | 178.162.875  | 259.795.875  |

## ADR-Daten

|            | Vorzüge      | Stämme       |
|------------|--------------|--------------|
| CUSIP      | 42550U208    | 42550U109    |
| ISIN Code  | US42550U2087 | US42550U1097 |
| ADR Symbol | HEN0Y        | HENKY        |

Die internationale Bedeutung der Henkel-Vorzugsaktie zeigt sich nicht zuletzt daran, dass sie in zahlreichen führenden Indizes enthalten ist. Diese Indizes sind wichtige Indikatoren für die Kapital-

märkte und Benchmarks für Fondsmanager. Besonders hervorzuheben sind dabei der MSCI World, Dow Jones Euro Stoxx und FTSE World Europe. Mit der Zugehörigkeit zum Dow Jones Titans 30 Personal & Household Goods Index gehört Henkel außerdem zu den 30 weltweit wichtigsten Unternehmen im Bereich Personal & Household Goods. In Deutschland zählt Henkel als DAX-Wert zu den 30 bedeutendsten Börsengesellschaften.

Zum Ende des Jahres 2010 betrug die Marktkapitalisierung der im DAX enthaltenen Vorzugsaktien 8,3 Mrd. Euro. Damit belegte Henkel den 21. Rang (2009: 20), bezogen auf das Handelsvolumen den 26. Rang (2009: 28). Die Gewichtung im DAX stieg auf 1,32 Prozent (2009: 1,22 Prozent).

## Internationale Aktionärsstruktur

Unsere Vorzugsaktien – die deutlich liquidere Aktiegattung – befinden sich zu 100 Prozent im Streubesitz. Der überwiegende Anteil davon wird von institutionellen Anlegern gehalten, deren Anteilsbesitz international breit gestreut ist.

Gemäß den der Gesellschaft zugegangenen Mitteilungen halten die Mitglieder der Familie Henkel mit 53,21 Prozent die Mehrheit der Stammaktien. Darüber hinaus liegen uns keine Mitteilungen vor, dass ein Aktionär mehr als 3 Prozent der Stimmrechtsanteile besitzt (meldepflichtiger Besitz).

Aktionärsstruktur:  
Institutionelle Anleger  
Henkel-Vorzugsaktie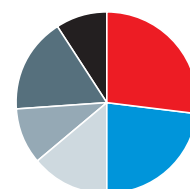

- 27% USA
- 23% Großbritannien
- 14% Deutschland
- 10% Frankreich
- 17% Sonstiges Europa
- 9% Sonstige Welt

Quelle: Thomson Reuters.

### Analystenempfehlungen

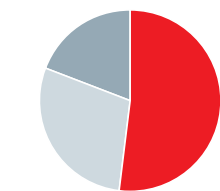

- 52% Kaufen
- 29% Halten
- 19% Verkaufen

Stand: 31.12.2010,  
Basis 31 Aktienanalysten.

Rund 7,5 Mio. Vorzugsaktien kaufte Henkel bis zum Jahr 2007 für das Aktien-Optionsprogramm des Top-Managements zurück. Zum 31. Dezember 2010 betrug der Bestand eigener Aktien 4,0 Mio. Stück.

### Mitarbeiter-Aktienprogramm

Seit 2001 bietet Henkel ein Aktienprogramm für seine Mitarbeiter an. Jeden investierten Euro eines Mitarbeiters (bis zu maximal 4 Prozent des Gehalts oder maximal 5.000 Euro pro Jahr) hat Henkel 2010 mit 33 Cent gefördert. Die Zahl der Teilnehmer stieg im Berichtsjahr um 12 Prozent gegenüber dem Vorjahr: Etwa 10.500 Mitarbeiter in 57 Ländern kauften 2010 im Rahmen des Programms Henkel-Vorzugsaktien. Insgesamt hielten rund 14.000 Mitarbeiter zum Jahresende knapp 3,6 Mio. Stück und damit rund 2,0 Prozent der Vorzugsaktien. Die Haltefrist für neu erworbene Aktien beträgt drei Jahre.

### Henkel-Anleihen

Henkel ist mit drei Anleihen im Gesamtnominalvolumen von 3,3 Mrd. Euro an den internationalen Anleihemärkten vertreten:

#### Anleihen-Daten

|                    | Senior-Anleihe | Senior-Anleihe | Hybrid-Anleihe           |
|--------------------|----------------|----------------|--------------------------|
| Fälligkeit         | 10.06.2013     | 19.03.2014     | 25.11.2104 <sup>1)</sup> |
| Volumen            | 1,0 Mrd. Euro  | 1,0 Mrd. Euro  | 1,3 Mrd. Euro            |
| Nominalzins        | 4,25 %         | 4,625 %        | 5,375 %                  |
| Zinszahlungstermin | 10.06.         | 19.03.         | 25.11.                   |
| Listing            | Frankfurt      | Luxemburg      | Luxemburg                |
| Wertpapierkenn-Nr. | 664196         | A0AD9Q         | A0JBUR                   |
| ISIN Code          | DE0006641962   | XS0418268198   | XS0234434222             |

<sup>1)</sup> Option zur erstmaligen Kündigung durch Henkel am 25. November 2015.

Weitere detaillierte Informationen zu diesen Anleihen sowie zur aktuellen Entwicklung der Anleihenkurse und der Risikoaufschläge (Kreditmarge) finden Sie im Internet: [www.henkel.de/anleihen](http://www.henkel.de/anleihen)

### Intensive Kapitalmarkt-Kommunikation

Henkel wird von zahlreichen Finanzanalysten – vor allem aus Großbritannien, Deutschland und den USA – beobachtet. Mehr als 35 Aktien- und Anleiheanalysten veröffentlichen regelmäßig Studien und Kommentare zur aktuellen Entwicklung des Unternehmens.

Der Dialog mit Investoren und Analysten hat für Henkel einen hohen Stellenwert. Bei mehr als 30 Kapitalmarktkonferenzen und Roadshows in Europa, Nordamerika und Asien hatten institutionelle Anleger und Finanzanalysten die Möglichkeit, direkt mit unserem Top-Management zu sprechen. Die beiden Höhepunkte des Jahres bildeten dabei unsere Analysten- und Investorenkonferenz in Düsseldorf am 25. Februar 2010 und unser Investorentag für den Unternehmensbereich Adhesive Technologies am 16. September 2010. Bei Letzterem stellte das Management-Team des Unternehmensbereichs Adhesive Technologies die Strategie und die neuen Entwicklungen für diesen Unternehmensbereich rund 70 Investoren und Analysten aus aller Welt vor. Darüber hinaus haben wir Telefonkonferenzen und Einzelgespräche geführt – insgesamt mehr als 500 Termine.

Privatanleger können alle relevanten Informationen auf telefonische Anfrage sowie auf der Investor-Relations-Internetseite [www.henkel.de/ir](http://www.henkel.de/ir) erhalten. Dort werden auch die Telefon- und Analystenkonferenzen sowie die jährliche Hauptversammlung live übertragen. Die Hauptversammlung bietet allen Aktionären die Möglichkeit, vom Henkel-Vorstand direkt umfassende Informationen zu bekommen.

Die Qualität unserer Kapitalmarkt-Kommunikation wurde im Jahr 2010 durch unabhängige Rankings bewertet. Dabei belegte unser Investor-Relations-Team im Vergleich mit anderen europäischen Unternehmen des Bereichs Home & Personal Care und anderen DAX-Unternehmen erneut Spitzenplätze – zum Beispiel den jeweils ersten Platz im ThomsonExtel und IR Magazine Ranking für europäische Home & Personal Care-Unternehmen.

Den **Finanzkalender** mit allen wichtigen Terminen finden Sie auf der hinteren Umschlaginnenseite dieses Geschäftsberichts.

# Detailindex Konzernlagebericht

- 26 Corporate Governance
  - 26 I. Bericht zur Corporate Governance/  
Unternehmensführung
  - 31 II. Vergütungsbericht
- 40 Geschäftstätigkeit
  - 40 Überblick
  - 40 Organisation und Unternehmensbereiche
- 40 Strategie und Finanzziele 2012
  - 41 Strategische Prioritäten und Fortschritte  
im Geschäftsjahr 2010
  - 42 Fortschritte im Geschäftsjahr 2010
  - 42 Finanzziele 2012
- 43 Wertmanagement und Steuerungssystem
  - 44 EVA® und ROCE
  - 44 Rechtliche und regulatorische  
Rahmenbedingungen
- 45 Geschäftsverlauf
  - 45 Weltwirtschaft
  - 47 Gesamtaussage des Vorstands zur  
Geschäftsentwicklung
  - 47 Umsatz und Ergebnis
  - 49 Vergleich des tatsächlichen mit dem  
prognostizierten Geschäftsverlauf
  - 50 National Starch-Geschäfte:  
Integration in Adhesive Technologies  
erfolgreich abgeschlossen
  - 50 Aufwandsposten
  - 51 Sonstige betriebliche Aufwendungen  
und Erträge
  - 51 Finanzergebnis
  - 51 Jahresüberschuss
  - 51 Dividenden
  - 51 Ergebnis je Aktie (EPS)
- 52 Vermögens- und Finanzlage
  - 52 Akquisitionen und Divestments
  - 52 Investitionen
  - 52 Vermögenslage
  - 53 Finanzierung
  - 54 Finanzlage
  - 54 Finanzkennzahlen
- 55 Mitarbeiter
- 57 Beschaffung
- 58 Produktion
- 59 Forschung und Entwicklung
- 61 Marketing und Vertrieb
- 62 Nachhaltigkeit
  - 63 Ausrichtung und Fokus
  - 63 Ziele und Fortschritte
  - 64 Organisation
  - 65 Stakeholder-Dialog
- 66 Unternehmensbereiche
  - 66 Wasch-/Reinigungsmittel
  - 70 Kosmetik/Körperpflege
  - 74 Adhesive Technologies
- 78 Risikobericht
  - 78 Risikomanagementsystem
  - 79 Darstellung der wesentlichen Einzelrisiken
  - 82 Gesamtrisiko – Beurteilung aus Sicht  
des Vorstands
- 83 Prognosebericht
  - 83 Gesamtwirtschaftliche Entwicklung
  - 83 Branchenentwicklung
  - 84 Chancen: Wachstumsregionen und  
innovative Produkte mit viel Potenzial
  - 84 Ausblick des Henkel-Konzerns 2011
  - 85 Umsatz- und Ergebnisprognose 2012
- 86 Nachtragsbericht

# Konzernlagebericht

## Corporate Governance der Henkel AG & Co. KGaA

Corporate Governance im Sinn einer verantwortungsvollen, transparenten und auf die langfristige Steigerung des Unternehmenswerts ausgerichteten Führung und Kontrolle des Unternehmens ist seit jeher ein integraler Bestandteil unserer Unternehmenskultur. Dies wird auch in Zukunft so bleiben.

Entsprechend haben sich der Vorstand, der Gesellschafterausschuss und der Aufsichtsrat auf die folgenden drei Prinzipien verpflichtet:

- **Wertorientierung** ist die Maxime unserer Unternehmensführung.
- **Nachhaltigkeit** erreichen wir durch verantwortungsvolle Unternehmensführung.
- **Transparenz** erzielen wir mit unserer aktiven und offenen Informationspolitik.

### I. Bericht zur Corporate Governance/ Unternehmensführung

Der Bericht beschreibt die Grundsätze der Führungs- und Kontrollstruktur, der Unternehmensführung sowie die wesentlichen Rechte der Aktionäre der Henkel AG & Co. KGaA; darüber hinaus erläutert er die Besonderheiten, die sich im Vergleich zu einer Aktiengesellschaft (AG) aus unserer spezifischen Rechtsform und Satzung ergeben. Er berücksichtigt die Empfehlungen des Deutschen Corporate Governance Kodex und enthält sämtliche nach den Paragraphen (§§) 289 Absatz 4, 289a und 315 Absatz 4 des Handelsgesetzbuchs (HGB) notwendigen Angaben und Erläuterungen.

### Rechtsform-/satzungsspezifische Besonderheiten der Henkel AG & Co. KGaA

Bei der Gesellschaft handelt es sich um eine Kommanditgesellschaft auf Aktien (KGaA). Die KGaA ist eine Gesellschaft mit eigener Rechtspersönlichkeit (juristische Person), bei der mindestens ein Gesellschafter den Gesellschaftsgläubigern unbeschränkt haftet (persönlich haftender Gesellschafter) und die übrigen Gesellschafter an dem in Aktien zerlegten Grundkapital beteiligt sind, ohne persönlich für die Verbindlichkeiten der Gesellschaft zu haften (Kommanditaktionäre, Paragraph (§) 278 Absatz 1 des Aktiengesetzes [AktG]).

Zu einer AG bestehen im Wesentlichen folgende Unterschiede:

- Die Aufgaben des Vorstands einer AG nimmt bei der Henkel AG & Co. KGaA die Henkel Management AG – handelnd durch ihren Vorstand – als alleinige persönlich haftende Gesellschafterin wahr (§§ 278 Absatz 2, 283 AktG in Verbindung mit Artikel 11 der Satzung).

- Im Vergleich zum Aufsichtsrat einer AG sind die Rechte und Pflichten des Aufsichtsrats einer KGaA eingeschränkt. Insbesondere hat der Aufsichtsrat nicht die Kompetenz, persönlich haftende Gesellschafter zu bestellen und deren vertragliche Bedingungen zu regeln, eine Geschäftsordnung für die Geschäftsführung zu erlassen oder zustimmungsbedürftige Geschäfte festzulegen. Bei einer KGaA ist, auch wenn sie wie Henkel dem Mitbestimmungsgesetz 1976 unterfällt, kein Arbeitsdirektor zu bestellen.
- Die Hauptversammlung einer KGaA hat grundsätzlich die gleichen Rechte wie die Hauptversammlung einer AG. Zusätzlich beschließt sie über die Feststellung des Jahresabschlusses der Gesellschaft und die Entlastung der persönlich haftenden Gesellschafterin sowie bei Henkel über die Wahl und Entlastung der Mitglieder des Gesellschafterausschusses. Beschlüsse der Hauptversammlung bedürfen der Zustimmung der persönlich haftenden Gesellschafterin, soweit sie Angelegenheiten betreffen, für die bei einer Kommanditgesellschaft sowohl das Einverständnis der persönlich haftenden Gesellschafter als auch der Kommanditisten erforderlich ist (§ 285 Absatz 2 AktG) oder es die Feststellung des Jahresabschlusses betrifft (§ 286 Absatz 1 AktG).

Satzungsgemäß besteht neben dem Aufsichtsrat noch ein Gesellschafterausschuss, der sich aus mindestens fünf und höchstens zehn Mitgliedern zusammensetzt, die durch die Hauptversammlung gewählt werden (Artikel 27 der Satzung). Der Gesellschafterausschuss hat insbesondere folgende Funktionen:

- Er wirkt anstelle der Hauptversammlung bei der Führung der Geschäfte der Gesellschaft mit.
- Er beschließt über Eintritt und Ausscheiden von persönlich haftenden Gesellschaftern.
- Er hat Vertretungsmacht sowie Geschäftsführungsbefugnis für die Rechtsverhältnisse zwischen der Gesellschaft und der Henkel Management AG als persönlich haftender Gesellschafterin.
- Er übt das Stimmrecht der Gesellschaft in der Hauptversammlung der Henkel Management AG aus.
- Und er erlässt für die Henkel Management AG eine Geschäftsordnung (§ 278 Absatz 2 AktG in Verbindung mit §§ 114, 161 HGB und Artikeln 8, 9 und 26 der Satzung).

### Einteilung Grundkapital; Aktionärsrechte

Das Grundkapital der Gesellschaft beträgt 437.958.750 Euro. Es ist eingeteilt in 437.958.750 Stückaktien (Aktien ohne Nennbetrag), die auf den Inhaber lauten, davon 259.795.875 auf den Inhaber

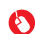

lautende Stammaktien (mit einem rechnerischen Anteil am Grundkapital von 259.795.875 Euro, das entspricht 59,3 Prozent), sowie 178.162.875 auf den Inhaber lautende Vorzugsaktien (mit einem rechnerischen Anteil am Grundkapital von 178.162.875 Euro, das entspricht 40,7 Prozent). Sämtliche Aktien sind voll eingezahlt.

Jede Stammaktie gewährt eine Stimme. Die Vorzugsaktien gewähren mit Ausnahme des Stimmrechts die jedem Aktionär zustehenden Rechte. Sofern die Hauptversammlung nicht etwas anderes beschließt, wird der Bilanzgewinn wie folgt verteilt: Zunächst erhalten die Inhaber von Vorzugsaktien eine Vorzugsdividende von 0,04 Euro je Vorzugsaktie und danach die Stammaktionäre eine Dividende von 0,02 Euro je Stammaktie; der Restbetrag wird an die Aktionäre entsprechend ihren Anteilen am Grundkapital ausgeschüttet (Artikel 35 Absatz 2 der Satzung). Sollte dieser Vorzugsbetrag in einem Jahr nicht oder nicht vollständig gezahlt und der Rückstand im nächsten Jahr nicht neben dem vollen Vorzug dieses Jahres nachgezahlt werden, so haben die Vorzugsaktionäre das Stimmrecht, bis die Rückstände nachgezahlt sind (§ 140 Absatz 2 AktG). Die Aufhebung oder Beschränkung dieses Vorzugs bedarf der Zustimmung der Vorzugsaktionäre (§ 141 Absatz 1 AktG).

Aktien mit Mehrfachstimmrechten oder Vorzugsstimmrechten sowie Höchststimmrechte gibt es nicht.

Die Aktionäre nehmen nach Maßgabe der gesetzlichen Vorschriften und der Satzung der Henkel AG & Co. KGaA ihre Rechte in der Hauptversammlung wahr. Sie üben dort ihr Stimmrecht aus und sind berechtigt, das Wort zu Gegenständen der Tagesordnung zu ergreifen sowie sachbezogene Fragen und Anträge zu stellen.

Beschlüsse der Hauptversammlung werden, soweit nicht Gesetz oder Satzung zwingend etwas anderes vorschreiben, mit einfacher Mehrheit der abgegebenen Stimmen und, soweit nach dem Gesetz eine Kapitalmehrheit erforderlich ist, mit einfacher Mehrheit des vertretenen stimmberechtigten Kapitals gefasst (Artikel 24 der Satzung). Dies gilt auch für Satzungsänderungen; Änderungen des Gegenstands des Unternehmens bedürfen jedoch einer Dreiviertel-Mehrheit (§ 179 Absatz 2 AktG).

#### **Genehmigtes Kapital; Aktienrückkauf**

Gemäß Artikel 6 Absatz 5 der Satzung besteht ein genehmigtes Kapital. Hiernach ist die persön-

lich haftende Gesellschafterin ermächtigt, bis zum 18. April 2015 mit Zustimmung des Aufsichtsrats und des Gesellschafterausschusses das Grundkapital der Gesellschaft einmalig oder mehrmals um bis zu insgesamt 25.600.000 Euro durch Ausgabe neuer Vorzugsaktien ohne Stimmrecht gegen Geldeinlagen zu erhöhen. Den Aktionären steht grundsätzlich ein Bezugsrecht zu. Das Bezugsrecht kann jedoch in drei Fällen ausgeschlossen werden: erstens, um etwaige Spitzenbeträge zu verwerten; zweitens, um Gläubigern von Schuldverschreibungen mit Wandlungs- oder Optionsrechten, die von der Gesellschaft oder von einer von ihr abhängigen Gesellschaft ausgegeben werden, ein Bezugsrecht in dem Umfang zu gewähren, wie es ihnen nach Ausübung des Wandlungs- oder Optionsrechts beziehungsweise nach Erfüllung ihrer Wandlungspflicht zustünde; drittens, wenn der Ausgabebetrag der neuen Aktien den zum Zeitpunkt der endgültigen Festlegung des Ausgabebetrags aktuellen Börsenkurs nicht wesentlich unterschreitet.

Darüber hinaus ist die persönlich haftende Gesellschafterin ermächtigt, bis zum 18. April 2015 Stamm- oder Vorzugsaktien der Gesellschaft zu erwerben. Die Ermächtigung kann zu jedem gesetzlich zulässigen Zweck ausgeübt werden. Unter Ausschluss des Bezugsrechts der Aktionäre können eigene Aktien dazu verwendet werden, um den Stock Incentive Plan von Henkel zu bedienen oder sie an Dritte zum Zweck des Erwerbs von Unternehmen oder Beteiligungen an Unternehmen zu übertragen. Auch können eigene Aktien gegen Barzahlung veräußert werden, sofern der Kaufpreis den aktuellen Börsenpreis zum Zeitpunkt der Veräußerung nicht wesentlich unterschreitet. Ferner dürfen eigene Aktien auch zur Erfüllung von Wandlungs- oder Optionsrechten, die von der Gesellschaft eingeräumt wurden, verwendet werden. Die persönlich haftende Gesellschafterin wurde darüber hinaus ermächtigt, eigene Aktien mit Zustimmung des Gesellschafterausschusses und des Aufsichtsrats ohne weiteren Hauptversammlungsbeschluss einzuziehen.

Soweit Aktien unter Ausschluss des Bezugsrechts ausgegeben beziehungsweise verwendet werden, darf der anteilige Betrag am Grundkapital solcher Aktien insgesamt 10 Prozent des Grundkapitals nicht übersteigen.

#### **Bedeutende Aktionäre**

Gemäß den der Gesellschaft zugegangenen Mitteilungen vom 21. Oktober 2010 werden insgesamt 53,21 Prozent der Stimmrechte von den Mitgliedern des Aktienbindungsvertrags Henkel gehalten. Dieser Vertrag wurde zwischen Mitgliedern der Fami-

lien der Nachfahren des Unternehmensgründers Fritz Henkel abgeschlossen; er enthält Beschränkungen bezüglich der Übertragungen der hiervon erfassten Stammaktien (Artikel 7 der Satzung).

#### **Zusammenwirken von Vorstand, Aufsichtsrat und Gesellschafterausschuss; Ausschüsse**

Der Vorstand der Henkel Management AG (Vorstand), dem die operative Geschäftsführung obliegt, der Aufsichtsrat und der Gesellschafterausschuss der Gesellschaft arbeiten zum Wohl des Unternehmens eng zusammen.

Der Vorstand stimmt die strategische Ausrichtung des Unternehmens mit dem Gesellschafterausschuss ab und erörtert mit ihm in regelmäßigen Abständen den Stand der Strategieumsetzung.

Im Sinn einer guten Unternehmensführung informiert der Vorstand den Aufsichtsrat und den Gesellschafterausschuss der Gesellschaft regelmäßig, zeitnah und umfassend über alle für das Unternehmen relevanten Fragen der Geschäftspolitik, der Unternehmensplanung, der Rentabilität, der Geschäftsentwicklung der Gesellschaft und der wesentlichen Konzernunternehmen sowie über die Risikolage und das Risikomanagement.

Für Geschäfte von grundlegender Bedeutung hat der Gesellschafterausschuss in einer Geschäftsordnung für die Henkel Management AG in ihrer Funktion als alleinige persönlich haftende Gesellschafterin Zustimmungsvorbehalte festgelegt (Artikel 26 der Satzung). Hierzu gehören insbesondere Entscheidungen oder Maßnahmen, welche die Vermögens-, Finanz- oder Ertragslage des Unternehmens wesentlich verändern. Der Vorstand beachtet diese Zustimmungsvorbehalte des Gesellschafterausschusses ebenso wie die Entscheidungszuständigkeiten der Hauptversammlung der Gesellschaft.

Der Gesellschafterausschuss fasst seine Beschlüsse mit der Mehrheit der abgegebenen Stimmen. Er hat einen Finanz- sowie einen Personalausschuss eingerichtet, dem jeweils fünf seiner Mitglieder angehören. Der Finanzausschuss befasst sich vornehmlich mit Finanzangelegenheiten, Fragen der Rechnungslegung einschließlich der Abschlussprüfung, der Steuer- und Bilanzpolitik, der Internen Revision sowie des Risikomanagements des Unternehmens. Außerdem bereitet er die entsprechenden Entscheidungen des Gesellschafterausschusses vor. Der Personalausschuss befasst sich insbesondere mit der Erörterung von Personalangelegenheiten der Mitglieder des Vorstands und mit Fragen der Personalstrategie sowie der Vergütung. Auch befasst er sich mit Fragen der

Nachfolgeplanung sowie der Managementpotenziale innerhalb der einzelnen Unternehmensbereiche. Hierbei trägt er dem Gesichtspunkt der Vielfalt (Diversity) Rechnung.

Der Aufsichtsrat fasst seine Beschlüsse mit der Mehrheit der abgegebenen Stimmen; bei Stimmengleichheit gibt die Stimme der Vorsitzenden den Ausschlag. Der Aufsichtsrat hat einen Prüfungs- und einen Nominierungsausschuss gebildet. Dem Prüfungsausschuss gehören je drei auf Vorschlag der Anteilseignervertreter und der Arbeitnehmervertreter gewählte Aufsichtsratsmitglieder an; der Vorsitzende des Prüfungsausschusses wird auf Vorschlag der Anteilseignervertreter gewählt. Entsprechend den gesetzlichen Vorschriften muss dem Prüfungsausschuss mindestens ein unabhängiges Mitglied des Aufsichtsrats angehören, das über Sachverstand auf den Gebieten der Rechnungslegung und der Abschlussprüfung verfügt. Der Vorsitzende des Prüfungsausschusses, Dr. h.c. Bernhard Walter, der nicht Vorsitzender des Aufsichtsrats oder ein ehemaliges Mitglied des Vorstands ist, erfüllt diese Anforderungen. Der Prüfungsausschuss bereitet die Verhandlungen und Beschlussfassungen des Aufsichtsrats über die Billigung des Jahresabschlusses und des Konzernabschlusses sowie die Verabschiedung des Vorschlags an die Hauptversammlung zur Wahl des Abschlussprüfers vor. Darüber hinaus befasst er sich mit der Überwachung des Rechnungslegungsprozesses, der Wirksamkeit des internen Kontrollsystems, des Risikomanagementsystems und der Internen Revision sowie mit Fragen der Compliance. Weiterhin erörtert er die Quartalsabschlüsse und den Halbjahresfinanzbericht vor deren Veröffentlichung im Beisein des Abschlussprüfers mit dem Vorstand, erteilt die Prüfungsaufträge an den Abschlussprüfer und legt Prüfungsschwerpunkte fest.

Dem Nominierungsausschuss gehören die Vorsitzende des Aufsichtsrats sowie zwei weitere Anteilseignervertreter an, die auf Vorschlag der Anteilseignervertreter gewählt werden; den Vorsitz im Nominierungsausschuss führt die Vorsitzende des Aufsichtsrats. Der Nominierungsausschuss bereitet die Beschlussfassungen des Aufsichtsrats über Wahlvorschläge an die Hauptversammlung zur Wahl von Aufsichtsratsmitgliedern (Anteilseignervertreter) vor.

Aufsichtsrat und Gesellschafterausschuss führen in regelmäßigen Abständen eine Selbstbeurteilung der Effizienz ihrer Tätigkeit und der Tätigkeit der Ausschüsse durch. Diese Selbstbeurteilung erfolgt auf Basis eines Fragenkatalogs, wobei auch Fragen



der Corporate Governance sowie Verbesserungsmöglichkeiten behandelt werden. Gemäß dem Deutschen Corporate Governance Kodex sind Interessenkonflikte in geeigneter Form dem Aufsichtsrat beziehungsweise Gesellschafterausschuss gegenüber offenzulegen, insbesondere solche, die aufgrund einer Beratung von oder Organfunktion bei Kunden, Lieferanten, Kreditgebern oder sonstigen Geschäftspartnern entstehen können. Wesentliche und nicht nur vorübergehende Interessenkonflikte in der Person eines Mitglieds sollen zur Beendigung des Mandats im Weg der Amtsniederlegung führen.

Die Mitglieder des Vorstands sind für die Führung der Geschäfte von Henkel in ihrer Gesamtheit verantwortlich. Hierbei sind den einzelnen Mitgliedern des Vorstands durch den Geschäftsverteilungsplan bestimmte Arbeitsgebiete zugewiesen, für die sie in erster Linie Verantwortung tragen. Die Mitglieder des Vorstands arbeiten kollegial zusammen; sie unterrichten sich über alle wesentlichen Vorfälle aus ihren Arbeitsgebieten und stimmen sich über alle Maßnahmen ab, von denen mehrere Arbeitsgebiete betroffen sind. Weitere Einzelheiten der Zusammenarbeit und die Geschäftsverteilung regelt eine vom Aufsichtsrat der Henkel Management AG erlassene Geschäftsordnung. Der Vorstand fasst seine Beschlüsse mit Mehrheit der abgegebenen Stimmen; bei Stimmengleichheit gibt die Stimme des Vorsitzenden den Ausschlag.

Einige Mitglieder des Aufsichtsrats und des Gesellschafterausschusses sind oder waren im vergangenen Jahr in führenden Positionen bei anderen Unternehmen tätig. Soweit Henkel mit diesen Unternehmen Geschäfte tätigt, gelten hierbei Bedingungen wie unter fremden Dritten.

Zur Zusammensetzung von Vorstand, Aufsichtsrat und Gesellschafterausschuss sowie der von Aufsichtsrat und Gesellschafterausschuss gebildeten Ausschüsse verweisen wir auf die Darstellung auf den  **Seiten 137 bis 141**. Die Vergütung ist im Vergütungsbericht auf den  **Seiten 31 bis 39** detailliert dargestellt.

Weitere Einzelheiten der Corporate Governance finden Sie auf der Internetseite:  [www.henkel.de/ir](http://www.henkel.de/ir)

### Grundsätze der Unternehmensführung/ Compliance

Für den Erfolg des Unternehmens ist ein gemeinsames Verständnis des unternehmerischen Handelns Voraussetzung. Die Vision des Unternehmens gibt seinen Gremien und Mitarbeiterinnen und Mitarbeitern weltweit die Richtung und

das Ziel vor. Sie bekräftigt unseren Anspruch, in allem, was wir tun, höchsten Anforderungen Rechnung zu tragen.

#### Unsere Vision:

- Global führend mit Marken und Technologien.

Sie ist das Fundament für ein Unternehmen mit gemeinsamen Werten: „One Henkel“. Die Werte des Unternehmens leiten seine Mitarbeiterinnen und Mitarbeiter bei allen Entscheidungen in ihrem Arbeitsalltag, sie bilden die Orientierungsgrundlage für ihr Verhalten und Handeln.

#### Unsere Werte:

- Wir stellen unsere Kunden in den Mittelpunkt unseres Handelns.
- Wir schätzen, fordern und fördern unsere Mitarbeiter.
- Wir streben herausragenden und nachhaltigen wirtschaftlichen Erfolg an.
- Wir verpflichten uns, unsere führende Rolle im Bereich Nachhaltigkeit auszubauen.
- Wir gestalten unsere Zukunft auf dem Fundament eines erfolgreichen Familienunternehmens.

Anspruch von Henkel ist es, alle Geschäfte in ethisch und rechtlich einwandfreier Weise zu tätigen. Daher erwartet Henkel von allen Mitarbeiterinnen und Mitarbeitern, dass sie neben den internen Regeln alle relevanten Gesetze befolgen, Interessenkonflikte vermeiden, die Vermögenswerte von Henkel schützen sowie die Sitten, Traditionen und gesellschaftlichen Werte der Länder und Kulturkreise, in denen Henkel Geschäfte tätigt, berücksichtigen. Dazu hat der Vorstand konzernweit geltende Codes, Standards und Richtlinien mit verbindlichen Vorgaben für das Verhalten erlassen. Diese sind nicht statisch, sondern werden weiterentwickelt und den sich laufend ändernden rechtlichen und wirtschaftlichen Bedingungen angepasst, denen Henkel als global tätiges Unternehmen unterliegt. Der Code of Conduct unterstützt die Mitarbeiterinnen und Mitarbeiter bei ethischen und rechtlichen Fragen. Der Code of Teamwork and Leadership definiert den Handlungsrahmen für Führungskräfte sowie für Mitarbeiterinnen und Mitarbeiter. Der Code of Corporate Sustainability beschreibt die Grundsätze nachhaltigen und gesellschaftlich verantwortlichen Wirtschaftens. Durch diese Codes wird auch der Global Compact der Vereinten Nationen bei Henkel umgesetzt.

Compliance im Sinn des Einhaltens von Gesetzen und Richtlinien ist integraler Bestandteil unserer Geschäftsprozesse. Henkel hat eine unterneh-

mensweite Compliance-Organisation mit lokal beziehungsweise regional verantwortlichen Compliance Officers eingerichtet, die von einem Chief Compliance Officer mit weltweiter Zuständigkeit geführt wird. Der Chief Compliance Officer steuert die Compliance-Aktivitäten auf Gesamtunternehmensebene, koordiniert Trainings, kontrolliert, inwieweit die externen wie internen Anforderungen erfüllt sind, und unterstützt das Unternehmen bei der Weiterentwicklung und Durchsetzung der Standards. Hierbei wird er von der ihm zugeordneten Internen Revision sowie einem interdisziplinär zusammengesetzten Compliance Committee unterstützt.

Die lokalen beziehungsweise regionalen Compliance Officers sind verantwortlich für die Schulungs- und Umsetzungsmaßnahmen, die auf die lokalen beziehungsweise regionalen Erfordernisse zugeschnitten sind, sowie für die entsprechende Beaufsichtigung. Sie berichten über die lokal oder regional zuständigen Presidents an den Chief Compliance Officer. Der Chief Compliance Officer und der Leiter der Internen Revision berichten regelmäßig an den Vorstand sowie an den Prüfungsausschuss des Aufsichtsrats über festgestellte Compliance-Verstöße.

Das Thema Compliance ist auch ein fester Bestandteil der Zielvereinbarung mit allen Führungskräften im Konzern. Diese sind aufgrund ihrer Stellung besonders verpflichtet, Vorbild für ihre Mitarbeiterinnen und Mitarbeiter zu sein, die Compliance-Regelungen zu kommunizieren und deren Durchsetzung durch geeignete organisatorische Maßnahmen sicherzustellen.

Ein wesentliches Element von Compliance ist auch der Umgang mit Beschwerden und Hinweisen auf ein Fehlverhalten. Zusätzlich zu den internen Berichts- und Beschwerdewegen besteht für die Mitarbeiterinnen und Mitarbeiter die Möglichkeit, Hinweise auf schwerwiegende Verstöße auch über eine Compliance Hotline, die von einem externen Anbieter betrieben wird, an den Chief Compliance Officer zu melden. Dieser kann dann die entsprechenden Maßnahmen einleiten.

Die Schwerpunkte der konzernweiten Compliance-Aktivitäten liegen in den Bereichen Sicherheit, Umwelt und Gesundheit sowie auf den Gebieten Kartellrecht und Korruptionsbekämpfung. Ein weiterer Compliance-Bereich betrifft das Kapitalmarktrecht. In Ergänzung zu den gesetzlichen Bestimmungen regeln interne Richtlinien den Umgang mit potenziell kurserheblichen Sachverhalten und Informationen. So besteht ein aus Vertretern

verschiedener Abteilungen zusammengesetztes „Ad-hoc-Committee“, das potenziell kurserhebliche Sachverhalte auf ihre Ad-hoc-Relevanz überprüft, um einen gesetzeskonformen Umgang mit Insiderinformationen sicherzustellen. Auch bestehen für die Mitglieder von Vorstand, Gesellschafterausschuss und Aufsichtsrat sowie für Mitarbeiter, die aufgrund ihrer Funktion oder ihrer Einbindung in Projekte Zugang zu Insiderinformationen haben, über die gesetzlichen Verbote hinausgehende Verhaltenspflichten. Über diesen Personenkreis wird ein Insiderverzeichnis geführt.

Zu weiteren Einzelheiten zu den Grundsätzen der Unternehmensführung verweisen wir auf die Darstellung auf der Internetseite:  [www.henkel.de/ir](http://www.henkel.de/ir)

#### Anwendung Deutscher Corporate Governance Kodex

Unter Berücksichtigung der rechtsform- und satzungsspezifischen Besonderheiten entspricht die Henkel AG & Co. KGaA mit zwei Ausnahmen den Empfehlungen (Soll-Vorschriften) des Deutschen Corporate Governance Kodex: Die im Jahr 2008 abgeschlossenen Vorstandsverträge derjenigen Vorstandsmitglieder, die im Zusammenhang mit dem Eintritt der Henkel Management AG als persönlich haftende Gesellschafterin im Jahr 2008 zu Mitgliedern des Vorstands bestellt wurden, enthalten für den Fall der vorzeitigen Beendigung der Vorstandstätigkeit ohne wichtigen Grund kein Abfindungs-Cap, also keine Begrenzung einer eventuellen Abfindungszahlung auf maximal zwei Jahresvergütungen. Nach 2008 neu abgeschlossene beziehungsweise für einen Zeitraum von mehr als zwei Jahren verlängerte Vorstandsverträge enthalten ein Abfindungs-Cap. Soweit nicht weitergehende gesetzliche Verpflichtungen bestehen, wird zur Wahrung der schutzwürdigen Interessen und der Privatsphäre der Organmitglieder, die Mitglieder der Familie Henkel sind, deren individuell gehaltener Aktienbesitz nicht angegeben. Der Kodex sieht eine Angabe ab einer Beteiligung von 1 Prozent vor.

Darüber hinaus folgt Henkel – unter Berücksichtigung der rechtsform- sowie satzungsspezifischen Besonderheiten – den Anregungen (Kann-Vorschriften) des Kodex. Die jeweiligen Entsprechenserklärungen, einschließlich der Begründungen der Abweichungen von Empfehlungen, sind auf der Internetseite  [www.henkel.de/ir](http://www.henkel.de/ir) eingestellt.

Gemäß der Entsprechenserklärung werden zum mitteilungspflichtigen Aktienbesitz folgende Angaben gemacht: Die Mitglieder des Aufsichtsrats und des Gesellschafterausschusses halten jeweils in ihrer Gesamtheit mehr als 1 Prozent der von der Ge-

sellschaft ausgegebenen Aktien. Die Mitglieder des Vorstands halten insgesamt weniger als 1 Prozent der von der Gesellschaft ausgegebenen Aktien.

Im Geschäftsjahr 2010 wurden insgesamt 19 Transaktionen nach Paragraph 15a Wertpapierhandelsgesetz (WpHG, sogenannte Directors' Dealings) mitgeteilt. Von einem Mitglied des Gesellschafterausschusses wurden insgesamt 360.000 Stammaktien verkauft und 16 Put- beziehungsweise Call-Optionsgeschäfte über insgesamt 1.430.000 Vorzugsaktien und 311.000 Stammaktien eingegangen. Weitere Einzelheiten hierzu finden Sie auf der Internetseite:  [www.henkel.de/ir](http://www.henkel.de/ir)

#### Zielsetzung des Aufsichtsrats hinsichtlich seiner Zusammensetzung

Gemäß den im Rahmen der Änderung des Deutschen Corporate Governance Kodex neu eingeführten Empfehlungen soll der Aufsichtsrat konkrete Ziele für seine Zusammensetzung festlegen. Vor diesem Hintergrund hat der Aufsichtsrat in seiner Sitzung am 14. Dezember 2010 die bereits bestehenden Kriterien für die Verabschiedung von Wahlvorschlägen überarbeitet und unter Beachtung der unternehmensspezifischen Situation sowie der internationalen Tätigkeit des Unternehmens nachfolgend beschriebene Ziele für seine Zusammensetzung verabschiedet. Diese Ziele, die in regelmäßigen Abständen überprüft werden, wird der Aufsichtsrat bei seinen Wahlvorschlägen an die Hauptversammlung sowohl bei turnusmäßigen Neuwahlen als auch bei Ersatzwahlen berücksichtigen.

- Die Mitglieder des Aufsichtsrats sollen insgesamt über die zur ordnungsgemäßen Wahrnehmung der Aufgaben erforderlichen Kenntnisse, Fähigkeiten und fachlichen Erfahrungen verfügen. Hierzu gehören insbesondere Erfahrungen und Kenntnisse auf den Gebieten Unternehmensführung, Rechnungswesen und Rechnungslegung, Controlling/Risikomanagement und Governance/Compliance sowie in Fragen von Forschung und Entwicklung, Produktion/Technik, Marketing/Vertrieb sowie Kenntnisse im Industrie- beziehungsweise Konsumentengeschäft und der wesentlichen Märkte, in denen Henkel tätig ist. Auch sollen die Aufsichtsratsmitglieder ausreichend Zeit für die Wahrnehmung ihres Mandats haben.
- Die internationale Tätigkeit des Unternehmens soll sich angemessen in der Besetzung des Aufsichtsrats widerspiegeln. Daher wird angestrebt, den derzeitigen Anteil an Aufsichtsratsmitgliedern mit einem internationalen Hintergrund beizubehalten. Auch soll bei Wahlvorschlägen auf eine angemessene Beteiligung von Frauen

geachtet werden. Der derzeitige Anteil von 25 Prozent wird als grundsätzlich angemessen betrachtet. Es wird angestrebt, diesen Anteil bei anstehenden Neuwahlen beziehungsweise Ergänzungswahlen zu wahren oder wenn möglich zu erhöhen.

- Ferner soll dem Aufsichtsrat eine ausreichende Anzahl an unabhängigen Mitgliedern angehören. So sollen ihm nicht mehr als zwei ehemalige Mitglieder des Vorstands angehören und auch keine Personen, die Organfunktionen oder Beratungsaufgaben bei wesentlichen Wettbewerbern ausüben oder in geschäftlichen beziehungsweise persönlichen Beziehungen zum Unternehmen oder den Mitgliedern des Vorstands stehen, die einen Interessenkonflikt begründen könnten. Außerdem sollen keine Personen vorgeschlagen werden, die zum Zeitpunkt der Wahl das 70. Lebensjahr bereits vollendet haben.

## II. Vergütungsbericht

Der Vergütungsbericht fasst die Grundzüge der Vergütungssysteme zusammen für den Vorstand, die Henkel Management AG als persönlich haftende Gesellschafterin, den Aufsichtsrat und den Gesellschafterausschuss der Henkel AG & Co. KGaA sowie den Aufsichtsrat der Henkel Management AG; und er erläutert die Höhe und Struktur der Vergütung.

Der Vergütungsbericht berücksichtigt die Empfehlungen des Deutschen Corporate Governance Kodex und enthält sämtliche nach den Paragraphen 285 Satz 1 Nummer 9, 289 Absatz 2 Nummer 5, 314 Absatz 1 Nummer 6 und 315 Absatz 2 Nummer 4 HGB erforderlichen Angaben und Erläuterungen. Eine zusätzliche Darstellung dieser Angaben im Anhang erfolgt daher nicht.

### 1. Vergütung des Vorstands

In Übereinstimmung mit dem Ziel des Gesetzes zur Angemessenheit der Vorstandsvergütung (VorstAG), die Vergütung des Vorstands im Sinn einer nachhaltigen und auf Langfristigkeit ausgerichteten Unternehmensentwicklung auszugestalten, hat der Aufsichtsrat der Henkel Management AG im Jahr 2010 das Vergütungssystem modifiziert und die bisher schon gegebene nachhaltige Ausrichtung verstärkt.

Das nachfolgend beschriebene Vergütungssystem wurde der Hauptversammlung 2010 der Henkel AG & Co. KGaA vorgelegt und von ihr mit großer Mehrheit gebilligt. Es gilt einheitlich mit Wirkung ab dem Geschäftsjahr 2010 für die Vergütung aller Vorstandsmitglieder, unabhängig von den Laufzeiten der Vorstandsverträge und vormaligen abweichenden Regelungen.

# 25 %

Anteil von Frauen  
im Aufsichtsrat.

**Festlegung, Höhe und Struktur**

Die Vergütung für die Mitglieder des Vorstands der Henkel Management AG wird – nach vorheriger Erörterung im Personalausschuss des Gesellschafterausschusses – durch den Aufsichtsrat der Henkel Management AG festgelegt, der mit drei Mitgliedern des Gesellschafterausschusses besetzt ist.

Höhe und Struktur der Vergütung des Vorstands orientieren sich an der Größe und der internationalen Tätigkeit des Unternehmens, seiner wirtschaftlichen und finanziellen Lage, dem Erfolg und den Zukunftsaussichten sowie der Üblichkeit der Vergütung unter Berücksichtigung seines Vergleichsumfelds und der Vergütungsstruktur, die ansonsten in der Gesellschaft gilt. Die Vergütung richtet sich darüber hinaus nach den Aufgaben des jeweiligen Vorstandsmitglieds, seinen persönlichen Leistungen und der Leistung des Gesamtvorstands. Bei der Ausgestaltung der jährlichen variablen Vergütungsteile wird sowohl positiven als auch negativen Entwicklungen Rechnung getragen. Die Vergütung ist insgesamt so bemessen, dass sie international wettbewerbsfähig ist und Anreiz für eine nachhaltige Unternehmensentwicklung und die nachhaltige Steigerung des Unternehmenswerts in einem dynamischen Umfeld bietet. Der Aufsichtsrat der Henkel Management AG überprüft das Vergütungssystem für den Vorstand regelmäßig.

Die Vergütung der Mitglieder des Vorstands basiert auf einer sogenannten Zielvergütung (Gesamtvergütung ohne sonstige Bezüge und Pensionszusagen), die sich für ein Vorstandsmitglied bei Erfüllen aller Erfolgsziele zu 100 Prozent (= at target) auf einen Betrag von insgesamt rund 2,1 Mio. Euro für ein Geschäftsjahr beläuft. Von dieser Zielvergütung entfallen rund 30 Prozent auf die feste Vergütung, rund 35 Prozent auf die erfolgsabhängigen kurzfristig ausgerichteten und weitere 35 Prozent auf die erfolgsabhängigen langfristig ausgerichteten Bestandteile.

**Vergütungsstruktur**

| <b>Festvergütung:</b><br><b>30 Prozent</b> | <b>Kurzfristige Komponenten:</b><br><b>35 Prozent</b>               | <b>Langfristige Komponenten:</b><br><b>35 Prozent</b>                                         |
|--------------------------------------------|---------------------------------------------------------------------|-----------------------------------------------------------------------------------------------|
|                                            | 35 Prozentpunkte aus jährlicher variabler Vergütung (Barkomponente) | 25 Prozentpunkte aus jährlicher variabler Vergütung (Eigeninvestment in Henkel-Vorzugsaktien) |
|                                            |                                                                     | 10 Prozentpunkte aus Long Term Incentive                                                      |

Neben dieser Zielvergütung bestehen sonstige Bezüge und Pensionszusagen. Im Einzelnen:

**Festvergütung**

Auf die jährliche erfolgsunabhängige feste Vergütung entfällt ein Anteil von rund 30 Prozent der Zielvergütung. Die erfolgsunabhängige Festvergütung wird in monatlichen Raten ausbezahlt. Sie berücksichtigt die übertragene Funktion und Verantwortung sowie die Marktbedingungen.

**Jährliche variable Vergütung**

Auf die jährliche variable Vergütung entfällt ein Anteil an der Zielvergütung von insgesamt rund 60 Prozent. Die jährliche variable Vergütung beinhaltet in Höhe von rund 35 Prozent der Zielvergütung eine erfolgsabhängige jahresbezogene Komponente und in Höhe von rund 25 Prozent der Zielvergütung einen langfristigen variablen Bestandteil, der als Eigeninvestment in Henkel-Vorzugsaktien mit einer Mindesthaltfrist von drei Jahren ausgestaltet ist.

**Ermittlung der jährlichen variablen Vergütung**

Erfolgsparameter der jährlichen variablen Vergütung sind zum überwiegenden Teil die im betreffenden Geschäftsjahr erzielte Rendite auf das eingesetzte Kapital (Return on Capital Employed, abgekürzt ROCE) und das Ergebnis je Vorzugsaktie (Earnings per Share, abgekürzt EPS) – beide jeweils um Sonderinflüsse bereinigt. Zum anderen fließen folgende Faktoren in die Bemessung der jährlichen variablen Vergütung für das jeweilige Vorstandsmitglied ein: das Konzernergebnis sowie das Ergebnis des verantworteten Unternehmensbereichs, die Führung des jeweiligen Unternehmensbereichs sowie die persönliche Leistung des jeweiligen Vorstandsmitglieds.

Abhängig vom Grad der Zielerreichung wird der Zielbetrag mit einem Performance-Faktor belegt. Bei der Festlegung der jährlichen variablen Vergütung wird auch die nach dem Ablauf des Geschäftsjahres erkennbare Nachhaltigkeit des wirtschaftlichen Erfolgs und der Leistung der Vorstände in angemessener Weise durch den Aufsichtsrat der Henkel Management AG berücksichtigt.

Insgesamt wird die jährliche variable Vergütung durch einen Auszahlungs-Cap begrenzt, sodass die Auszahlung zwischen 0 und 250 Prozent des Zielbetrags liegen kann.

**Kurzfristige und langfristige Komponenten der jährlichen variablen Vergütung**

Die Auszahlung der jährlichen variablen Vergütung erfolgt nachträglich einmal jährlich nach der Feststellung des Jahresabschlusses der Gesellschaft

durch die Hauptversammlung. Hierbei wird die jährliche variable Vergütung zu rund 60 Prozent – das entspricht einem Anteil an der Zielvergütung von rund 35 Prozent – in bar ausbezahlt. In Höhe der verbleibenden rund 40 Prozent – das entspricht einem Anteil an der Zielvergütung von rund 25 Prozent – erwerben die Vorstandsmitglieder zu dem zum Erwerbszeitpunkt aktuellen Kurs Henkel-Vorzugsaktien (Eigeninvestment). Diese werden in ein Sperrdepot mit einer dreijährigen Verfügungsbeschränkung eingelegt. Durch das Eigeninvestment ist sichergestellt, dass die Vorstandsmitglieder mit diesem Vergütungsanteil an der langfristigen Entwicklung des Unternehmens teilnehmen.

Damit entfallen rund 35 Prozent der Zielvergütung auf erfolgsabhängige kurzfristig ausgerichtete und – aufgrund des Eigeninvestments und des nachfolgend beschriebenen Long Term Incentive – weitere 35 Prozent auf erfolgsabhängige langfristig ausgerichtete Bestandteile.

#### Long Term Incentive (LTI)

Das Long Term Incentive, auf das ein Anteil an der Zielvergütung von 10 Prozent entfällt, ist eine variable, auf den langfristigen Unternehmenserfolg bezogene Barvergütung, die von der zukünftigen Steigerung des EPS in einem Zeitraum von drei Jahren (Performance-Zeitraum) abhängt. Zusammen mit dem Eigeninvestment aus der jährlichen variablen Vergütung ergibt sich ein Anteil der erfolgsabhängigen, langfristig ausgerichteten Bestandteile an der Zielvergütung von 35 Prozent.

Nach Ablauf des Performance-Zeitraums wird der Zielerreichungsgrad gemäß der im Performance-Zeitraum erreichten EPS-Steigerung durch den Aufsichtsrat der Henkel Management AG festgestellt. Für die Berechnung der Steigerung ist jeweils das in den uneingeschränkt testierten und gebilligten Konzernabschlüssen der betreffenden Geschäftsjahre ausgewiesene – um Sondereinflüsse bereinigte – Ergebnis je Vorzugsaktie maßgebend.

Abhängig von der durch den Aufsichtsrat der Henkel Management AG festgestellten Zielerreichung wird der Zielbetrag mit einem Performance-Faktor belegt. Insgesamt wird das Long Term Incentive durch einen Auszahlungs-Cap begrenzt, sodass die Auszahlung zwischen 0 und 250 Prozent des Zielbetrags liegen kann.

#### Pensionszusagen

Das Ruhegehalt derjenigen Vorstandsmitglieder, die bereits vor dem 1. Januar 2005 der damaligen Geschäftsführung (der Henkel KGaA) angehörten, errechnet sich aus einem bestimmten Prozentsatz

der zuletzt gezahlten Festvergütung („Defined Benefit“). Für diese Vorstandsmitglieder gilt grundsätzlich ein Prozentsatz von 60 Prozent der Festvergütung, der im Fall der Pensionierung nach Vollendung des 62. Lebensjahres erreicht wird. Der für jedes Vorstandsmitglied individuell zu bestimmende tatsächliche Prozentsatz setzt sich aus zwei Komponenten zusammen: zum einen aus dem sogenannten Sockelprozentsatz, der sich aus den bis zum Eintritt in den Vorstand beziehungsweise die Geschäftsführung erdienten Pensionsanswartschaften im Unternehmen ergibt; zum anderen aus einer jährlichen prozentualen Erhöhung des Sockelprozentsatzes für jedes Jahr der Zugehörigkeit zur Geschäftsführung beziehungsweise zum Vorstand.

Zum 1. Januar 2005 haben wir die Pensionszusagen für neu bestellte Vorstandsmitglieder auf ein beitragsorientiertes Pensionssystem („Defined Contribution“) umgestellt. Hierbei erhalten die Mitglieder im Versorgungsfall ein Alterskapital in Form einer Einmalzahlung sowie eine laufende Basispension. Das Alterskapital setzt sich aus der Summe der jährlichen Zuführungen zusammen, die sich aus einem bestimmten – für alle Mitglieder gleichen – Prozentsatz der Zielvergütung ergeben. Hierbei nimmt der jährliche Zuführungsbetrag in einem gewissen Umfang an der Entwicklung der aktuell in dem betreffenden Geschäftsjahr ausgezahlten Gesamt-Barvergütung teil. Etwaige bereits vor Bestellung im Unternehmen erdiente Pensionsanswartschaften werden in Form eines Pensionsstartbausteins berücksichtigt. Das beitragsorientierte Pensionssystem gewährleistet eine angemessene und auch leistungsorientierte Altersversorgung.

Sofern ein Vorstandsmitglied zum Zeitpunkt seines Todes noch keine Versorgungsleistungen bezogen hat, wird das bis dahin angesparte Alterskapital an die Witwe beziehungsweise an seine Waisen ausgezahlt. Darüber hinaus erhält seine Witwe Pensionszahlungen in Höhe von 60 Prozent und jedes unterhaltsberechtigten Kind Pensionszahlungen in Höhe von 15 Prozent – insgesamt jedoch maximal 100 Prozent für alle Versorgungsberechtigten – der dem Vorstandsmitglied zustehenden Pension. Die Waisenpension wird in der Regel bis zum 18. Lebensjahr beziehungsweise bis zur Beendigung der Berufsausbildung, längstens jedoch bis zur Vollendung des 27. Lebensjahres gezahlt.

#### Sonstige Bezüge

Darüber hinaus werden den Vorstandsmitgliedern Sonstige Bezüge gewährt, die im Wesentlichen marktübliche Versicherungsleistungen sowie die Bereitstellung eines Dienstwagens umfassen.



## Sonstige Regelungen

Die Mitglieder des Vorstands, deren Anstellungsverträge vor 2009 abgeschlossen wurden, haben nach ihrem Ausscheiden aus dem Vorstand infolge Pensionierung sechs Monate lang Anspruch auf Fortzahlung ihrer Festvergütung, nicht jedoch über die Vollendung des 65. Lebensjahres hinaus.

Die Vorstandsverträge sehen für den Fall, dass ohne wichtigen Grund die Vorstandstätigkeit vorzeitig beendet wird, eine Abfindung in Höhe der Vergütung für die verbleibende Vertragslaufzeit als abgezinste Einmalzahlung vor. Hierbei ist die Abfindung für seit der Hauptversammlung 2008 neu abgeschlossene beziehungsweise für einen Zeitraum von mehr als zwei Jahren verlängerte Anstellungsverträge auf zwei Jahresvergütungen beschränkt (Abfindungs-Cap). Darüber hinaus enthalten die Vorstandsverträge ein nachvertragliches Wettbewerbsverbot mit einer Laufzeit von bis zu zwei Jahren. Die Karenzentschädigung beläuft sich auf 50 Prozent der Jahresbezüge; eventuelle Abfindungen werden angerechnet. Zusagen für den Fall der vorzeitigen Beendigung der Vorstandstätigkeit aus Anlass eines Kontrollwechsels („change in control“) bestehen nicht.

Die Gesellschaft unterhält eine Vermögensschaden-Haftpflicht-Gruppenversicherung für Organmitglieder und Mitarbeiter des Henkel-Konzerns (D&O-Versicherung), in die auch die Mitglieder des Vorstands einbezogen werden. Für die Mitglieder des Vorstands ist ein Selbstbehalt in Höhe von 10 Prozent je Schadensfall vorgesehen, innerhalb

eines Geschäftsjahres jedoch höchstens in Höhe des Eineinhalbfachen der jährlichen Festvergütung.

## Vergütung für das Jahr 2010

Die Gesamtbezüge der Mitglieder des Vorstands für die Wahrnehmung ihrer Aufgaben bei der Henkel AG & Co. KGaA und deren Tochtergesellschaften belaufen sich für das Berichtsjahr – einschließlich der Ansparrückstellung für das Sonderincentive 2012 und Kompensationszahlungen – auf 18.297 T Euro (Vorjahr: 10.357 T Euro). Hierbei entfallen von den für 2010 ausbezahlten Gesamtbarbezügen in Höhe von insgesamt 13.866 T Euro (Vorjahr: 9.651 T Euro) 3.531 T Euro auf die Festvergütung (Vorjahr: 3.531 T Euro), 10.203 T Euro auf das Short Term Incentive (Vorjahr: 5.953 T Euro) und 132 T Euro auf die Sonstigen Bezüge (Vorjahr: 167 T Euro). In die Gesamtbezüge ist zudem das für 2010 gewährte Long Term Incentive einbezogen, das – abhängig vom Erreichen der Erfolgsziele – erst im Jahr 2013 zur Auszahlung kommt. Nach den gesetzlichen Vorgaben ist hierbei bereits für das Jahr der Gewährung ein Wert auszuweisen. Für die Ermittlung dieses Werts wurde eine „at target“-Zielerreichung zugrunde gelegt, das heißt eine Steigerung des EPS im Performance-Zeitraum um 30 Prozent, sodass sich ein angenommener Betrag von 963 T Euro (Vorjahr: 706 T Euro) ergibt.

Die Bezüge der einzelnen Mitglieder des Vorstands für das Berichtsjahr, aufgeteilt nach vorgenannten Komponenten, ergeben sich aus der untenstehenden Tabelle.

Vergütung des Vorstands<sup>1)</sup>

Ausweis in Tausend Euro

|                                                  |             | Bestandteile Gesamtbarbezüge |                             |                    |                      |                                           |                   |  |
|--------------------------------------------------|-------------|------------------------------|-----------------------------|--------------------|----------------------|-------------------------------------------|-------------------|--|
|                                                  |             | Fest-<br>vergütung           | Variable<br>Jahresvergütung | Sonstige<br>Bezüge | Gesamt-<br>barbezüge | Wert Long<br>Term Incentive <sup>2)</sup> | Gesamt-<br>bezüge |  |
| Kasper Rorsted <sup>3)</sup>                     | 2010        | 963,0                        | 2.834,4                     | 42,1               | 3.839,5              | 321,0                                     | 4.160,5           |  |
|                                                  | 2009        | 963,0                        | 1.658,1                     | 25,9               | 2.647,0              | 189,7                                     | 2.836,7           |  |
| Thomas Geitner <sup>4)</sup><br>(bis 31.12.2010) | 2010        | 642,0                        | 1.819,6                     | 19,1               | 2.480,7              | –                                         | 2.480,7           |  |
|                                                  | 2009        | 642,0                        | 1.068,8                     | 25,2               | 1.736,0              | –                                         | 1.736,0           |  |
| Dr. Friedrich Stara <sup>5)</sup>                | 2010        | 642,0                        | 1.849,6                     | 21,3               | 2.512,9              | 214,0                                     | 2.726,9           |  |
|                                                  | 2009        | 642,0                        | 1.068,8                     | 18,9               | 1.729,7              | 137,0                                     | 1.866,7           |  |
| Dr. Lothar Steinebach                            | 2010        | 642,0                        | 1.849,6                     | 25,8               | 2.517,4              | 214,0                                     | 2.731,4           |  |
|                                                  | 2009        | 642,0                        | 1.088,8                     | 23,4               | 1.754,2              | 189,7                                     | 1.943,9           |  |
| Hans Van Bylen <sup>3)</sup>                     | 2010        | 642,0                        | 1.849,6                     | 23,9               | 2.515,5              | 214,0                                     | 2.729,5           |  |
|                                                  | 2009        | 642,0                        | 1.068,8                     | 73,1               | 1.783,9              | 189,7                                     | 1.973,6           |  |
| <b>Gesamt</b>                                    | <b>2010</b> | <b>3.531,0</b>               | <b>10.202,8</b>             | <b>132,2</b>       | <b>13.866,0</b>      | <b>963,0</b>                              | <b>14.829,0</b>   |  |
| <b>Gesamt</b>                                    | <b>2009</b> | <b>3.531,0</b>               | <b>5.953,3</b>              | <b>166,5</b>       | <b>9.650,8</b>       | <b>706,1</b>                              | <b>10.356,9</b>   |  |

<sup>1)</sup> Bruno Piacenza und Jan-Dirk Auris sind mit Wirkung vom 1. Januar 2011 zu Mitgliedern des Vorstands bestellt worden; sie haben im Berichtsjahr 2010 keine Zahlungen mit Bezug auf ihre künftige Tätigkeit als Vorstandsmitglieder erhalten.

<sup>2)</sup> Auszahlung LTI für 2010 im Jahr 2013; diese Werte werden nur dann erreicht, wenn das EPS im Performance-Zeitraum um 30 Prozent steigt.

<sup>3)</sup> Zusätzlich zu den vorstehend angegebenen und für die Tätigkeit im Geschäftsjahr gewährten Bezügen wurden zur teilweisen Kompensation der durch die Umstellung des Vergütungssystems bedingten Eingriffe in die Vergütungsstruktur folgende einmalige Zahlungen geleistet: Kasper Rorsted 380 T Euro, Hans Van Bylen 241 T Euro.

<sup>4)</sup> LTI für 2009 und 2010 bei Thomas Geitner Bestandteil der Abfindung.

<sup>5)</sup> LTI für 2009 bei Dr. Friedrich Stara bis zur regulären Pensionierung Ende Februar 2011 berücksichtigt.



## Struktur der Vorstandsvergütung

Ausweis in Tausend Euro

|        |      | Fest-<br>vergütung | Kurzfristige<br>Komponente der<br>variablen<br>Jahresvergütung | Langfristige<br>Vergütungsbestandteile                         |                        | Sonstige<br>Bezüge | Gesamt-<br>bezüge |
|--------|------|--------------------|----------------------------------------------------------------|----------------------------------------------------------------|------------------------|--------------------|-------------------|
|        |      |                    |                                                                | Langfristige<br>Komponente der<br>variablen<br>Jahresvergütung | Long Term<br>Incentive |                    |                   |
| Gesamt | 2010 | 3.531,0            | 6.121,6                                                        | 4.081,2                                                        | 963,0                  | 132,2              | 14.829,0          |
|        |      | 23,8%              | 41,2%                                                          | 27,6%                                                          | 6,5%                   | 0,9%               | 100,0%            |
| Gesamt | 2009 | 3.531,0            | 5.953,3                                                        | –                                                              | 706,1                  | 166,5              | 10.356,9          |
|        |      | 34,1%              | 57,5%                                                          | –                                                              | 6,8%                   | 1,6%               | 100,0%            |

Dr. Friedrich Stara, der wie vorgesehen Ende Februar 2011 aus dem Unternehmen ausscheidet, ist gemäß dem mit ihm abgeschlossenen Anstellungsvertrag noch an ein nachvertragliches Wettbewerbsverbot für eine Laufzeit von 16 Monaten, beginnend ab dem 1. März 2011, gebunden. Die Karenzentschädigung hierfür beträgt monatlich rund 104 T Euro brutto. Pensionsleistungen erfolgen erst nach Ablauf des Wettbewerbsverbots.

Thomas Geitner ist mit Wirkung zum 31. Dezember 2010 aus dem Vorstand ausgeschieden. Im Zusammenhang mit der entsprechenden Beendigung seines Anstellungsverhältnisses erhielt Thomas Geitner eine Abfindung in Höhe etwa einer Jahresvergütung unter Berücksichtigung der hierauf entfallenden Zuführungen zum Alterskapital. Zugleich wurden sämtliche Ansprüche aus LTI-Programmen abgegolten, sodass sich insgesamt ein Abfindungsbetrag von 4,9 Mio. Euro ergibt.

Im Übrigen wurden im Berichtsjahr keinem Vorstandsmitglied seitens der Gesellschaft anderweitige Leistungen für den Fall der vorzeitigen Beendigung seiner Tätigkeit zugesagt oder solche Zusagen geändert. Auch wurden keinem Vorstandsmitglied im Hinblick auf seine Tätigkeit als Vorstandsmitglied Leistungen von Dritten zugesagt oder im Berichtsjahr gewährt.

### Sonderincentive 2012

Zur Untermauerung der strategischen Prioritäten und der in diesem Zusammenhang ausgelobten anspruchsvollen Finanzziele 2012 hat der Aufsichtsrat der Henkel Management AG in Übereinstimmung mit den Empfehlungen des Personalausschusses des Gesellschafterausschusses die Gewährung einer in bar auszuzahlenden Zusatzvergütung an die Vorstände beschlossen. Diese kommt unter der Bedingung zur Auszahlung, dass 2012 eine bereinigte Umsatzrendite von mindestens 14 Prozent erreicht wird („Sonderincentive 2012“). Maßgebend für das Erreichen der Schwellenwerte ist jeweils die in den uneingeschränkt testierten und gebilligten Konzernabschlüssen ausgewiesene, um Sondereinflüsse bereinigte Umsatzrendite. Das Volumen des

„Sonderincentive 2012“ beträgt 50 Prozent der sich ergebenden jährlichen variablen Vergütung für 2012.

Das Sonderincentive wird wie folgt ausgezahlt: Vorbehaltlich des Erreichens einer bereinigten Umsatzrendite von mindestens 14 Prozent im Jahr 2012 wird das Sonderincentive zu 60 Prozent nach der Hauptversammlung 2013 ausgezahlt. Die verbleibenden 40 Prozent werden nach der Hauptversammlung im Jahr 2014 ausgezahlt, sofern im Jahr 2013 eine bereinigte Umsatzrendite von mindestens 13,8 Prozent erreicht wird. Durch diese gestaffelte Auszahlung wird dem Aspekt der Nachhaltigkeit angemessen Rechnung getragen.

Das Sonderincentive ist bereits für das Jahr der Zusage wertmäßig auszuweisen. Da es sich um einen aufschiebend bedingten Zahlungsanspruch handelt, wurde auf Basis eines angenommenen und aus der Unternehmensplanung abgeleiteten Werts für das „Sonderincentive 2012“ eine Ansparrückstellung gebildet, die in den Folgejahren fortgeschrieben wird. Die auf Basis der derzeitigen Einschätzungen über den Unternehmenserfolg in den Jahren 2011 und 2012 für die bezugsberechtigten Vorstandsmitglieder gebildeten Ansparrückstellungen sind in der nachfolgenden Tabelle aufgeführt:

### Sonderincentive 2012

| Ausweis in Tausend Euro           | Ansparrückstellung 2010 |
|-----------------------------------|-------------------------|
| Kasper Rorsted                    | 1.098                   |
| Dr. Friedrich Stara <sup>1)</sup> | 285                     |
| Dr. Lothar Steinebach             | 732                     |
| Hans Van Bylen                    | 732                     |
| <b>Gesamt</b>                     | <b>2.847</b>            |

<sup>1)</sup> Zugehörigkeit zum Vorstand bis 28.2.2011 berücksichtigt.

### Pensionsleistungen

Die den einzelnen Mitgliedern des Vorstands und der ehemaligen Geschäftsführung der Henkel KGaA zum Bilanzstichtag zugesagten Pensionsleistungen beziehungsweise Zuführungen zur Altersversorgung im Jahr 2010 zeigen die Tabellen auf der nächsten Seite.

**Defined Benefit**

| Ausweis in Euro       | Ruhegehalt p.a. bei Eintritt<br>des Pensionsfalls zum Bilanzstichtag | Veränderung Pensionsrück-<br>stellungen im Jahr 2010 |
|-----------------------|----------------------------------------------------------------------|------------------------------------------------------|
| Dr. Lothar Steinebach | 391.620                                                              | 232.363                                              |

**Defined Contribution**

| Ausweis in Euro     | Alterskapital              |                                         | Basispension                     |                                          |
|---------------------|----------------------------|-----------------------------------------|----------------------------------|------------------------------------------|
|                     | Alterskapital<br>insgesamt | Zuführung zum<br>Alterskapital für 2010 | Basispension<br>insgesamt (p.a.) | Zuführung zur Basis-<br>pension für 2010 |
| Kasper Rorsted      | 1.946.655,00               | 460.462,50                              | 1.504,34                         | 230,69                                   |
| Dr. Friedrich Stara | 1.474.920,00               | 296.595,00                              | 744,88                           | 120,53                                   |
| Hans Van Bylen      | 1.472.264,10               | 296.595,00                              | 1.358,85                         | 219,31                                   |
| Thomas Geitner      | 657.637,50                 | 296.595,00                              | 511,48                           | 162,14                                   |

Für die Pensionsverpflichtungen gegenüber ehemaligen Mitgliedern des Vorstands und der Geschäftsführung der Henkel KGaA und den ehemaligen Geschäftsführern der Rechtsvorgängerin und deren Hinterbliebenen sind 78.759 T Euro (Vorjahr: 78.612 T Euro) zurückgestellt. Die Gesamtbezüge dieses Personenkreises betrugen im Berichtsjahr 6.430 T Euro (Vorjahr: 6.311 T Euro).

**2. Haftungsvergütung der Henkel****Management AG, Aufwendersatz**

Für die Übernahme der Geschäftsführung und der persönlichen Haftung erhält die Henkel Management AG in ihrer Funktion als persönlich haftende Gesellschafterin eine gewinn- und verlustunabhängige jährliche Vergütung in Höhe von 50.000 Euro (= 5 Prozent ihres Grundkapitals) zuzüglich etwaig anfallender Umsatzsteuer.

Darüber hinaus hat die Henkel Management AG gegenüber der Gesellschaft Anspruch auf Ersatz aller ihr im Zusammenhang mit der Führung der Geschäfte der Gesellschaft entstehenden Aufwendungen, einschließlich der Vergütung ihrer Organe.

**3. Vergütung des Aufsichtsrats und des  
Gesellschafterausschusses der  
Henkel AG & Co. KGaA****Festlegung, Höhe und Struktur**

Die Vergütung für den Aufsichtsrat und den Gesellschafterausschuss wurde von der Hauptversammlung festgesetzt; die entsprechenden Regelungen sind in den Artikeln 17 und 33 der Satzung enthalten. Höhe und Struktur der Vergütung orientieren sich an der Unternehmensgröße, an den Aufgaben des Aufsichtsrats beziehungsweise des Gesellschafterausschusses sowie am wirtschaftlichen Erfolg der Gesellschaft.

Die Vergütung setzt sich aus drei Komponenten zusammen: einer festen Vergütung, einem variablen, dividendenabhängigen Bonus sowie einer

jährlichen variablen, auf den langfristigen Unternehmenserfolg bezogenen Tantieme (Long Term Incentive). Im Einzelnen:

**Festvergütung**

Jedes Mitglied des Aufsichtsrats beziehungsweise des Gesellschafterausschusses erhält jährlich eine Festvergütung von 20.000 Euro beziehungsweise 50.000 Euro. Die im Vergleich zum Aufsichtsrat höhere Festvergütung der Mitglieder des Gesellschafterausschusses trägt dem Umstand Rechnung, dass der Gesellschafterausschuss satzungsgemäß an der Geschäftsführung mitwirkt.

**Dividendenbonus**

Zusätzlich erhält jedes Mitglied des Aufsichtsrats und des Gesellschafterausschusses eine jährliche Tantieme von je 2.400 Euro für jede volle 0,02 Euro Dividende, die über 0,25 Euro Dividende je Vorzugsaktie hinaus für das jeweils abgelaufene Geschäftsjahr ausgeschüttet wird.

**Long Term Incentive**

Als Long Term Incentive erhält jedes Mitglied des Aufsichtsrats und des Gesellschafterausschusses jährlich eine bare Zusatzvergütung, deren Höhe von der Steigerung des Ergebnisses je Vorzugsaktie in einem dreijährigen Performance-Zeitraum abhängig ist. Verglichen wird hierbei das Ergebnis je Vorzugsaktie, das in dem dem Vergütungsjahr vorhergehenden Geschäftsjahr erreicht wurde, mit dem Ergebnis je Vorzugsaktie des dem Vergütungsjahr nachfolgenden zweiten Geschäftsjahres. Beträgt die Steigerung mindestens 15 Prozent, wird für jeden vollen Prozentpunkt der insgesamt erreichten Steigerung ein Betrag von 600 Euro gezahlt. Bei einer Steigerung von mindestens 21 Prozent wird ein Betrag von 700 Euro gezahlt, bei mindestens 30 Prozent ein Betrag von 800 Euro für jeden Prozentpunkt Steigerung. Maßgebend für die Berechnung der Steigerung sind jeweils die in den uneingeschränkt testierten und gebilligten Konzernabschlüssen der betreffenden Geschäfts-

jahre ausgewiesenen – um Sondereinflüsse bereinigten – Ergebnisse je Vorzugsaktie.

Dividendenbonus und Long Term Incentive dürfen insgesamt einen Betrag in Höhe von 50.000 Euro nicht übersteigen (Cap).

#### Vergütung Vorsitzende, Stellvertreter, Ausschussmitglieder

Die Vorsitzende des Aufsichtsrats und des Gesellschafterausschusses erhält das Doppelte, die Stellvertreter erhalten das Eineinhalbfache des auf ein Mitglied entfallenden Betrags.

Mitglieder des Gesellschafterausschusses, die zugleich einem oder mehreren Ausschüssen des Gesellschafterausschusses angehören, erhalten zusätzlich eine Vergütung in Höhe des auf ein Mitglied des Gesellschafterausschusses entfallenden Betrags; wenn sie Vorsitzender eines oder mehrerer Ausschüsse sind, zusätzlich das Doppelte.

Mitglieder des Aufsichtsrats, die zugleich einem oder mehreren Ausschüssen angehören, erhalten zusätzlich eine Vergütung von 50 Prozent der auf ein Mitglied des Aufsichtsrats entfallenden Barvergütung (Festvergütung nebst Dividendenbonus); wenn sie Vorsitzender eines oder mehrerer Ausschüsse sind, eine zusätzliche Vergütung von 100 Prozent. Die Tätigkeit im Nominierungsausschuss wird nicht gesondert vergütet.

#### Sonstige Regelungen

Die Mitglieder des Aufsichtsrats beziehungsweise eines Ausschusses erhalten für jede Sitzung, an der sie teilnehmen, ein Sitzungsgeld in Höhe von 500 Euro. Finden mehrere Sitzungen an einem Tag statt, wird das Sitzungsgeld nur einmal gezahlt. Darüber hinaus werden den Mitgliedern des Aufsichtsrats und des Gesellschafterausschusses Auslagen ersetzt, die ihnen im Zusammenhang mit der Wahrnehmung des Mandats entstehen. Den Mitgliedern des Aufsichtsrats wird auch die auf die Gesamtvergütung und den Auslagenersatz entfallende Umsatzsteuer erstattet.

Die Gesellschaft unterhält eine Vermögensschaden-Haftpflicht-Gruppenversicherung für Organmitglieder und Mitarbeiter des Henkel-Konzerns, in die auch die Mitglieder des Aufsichtsrats und des Gesellschafterausschusses einbezogen sind. Für die Mitglieder des Aufsichtsrats und Gesellschafterausschusses ist ein Selbstbehalt in Höhe von 10 Prozent je Schadensfall vorgesehen, innerhalb eines Geschäftsjahres jedoch höchstens in Höhe des Eineinhalbfachen der jährlichen Festvergütung.

#### Vergütung für das Jahr 2010

Die Gesamtbezüge der Mitglieder des Aufsichtsrats (Festvergütung, Dividendenbonus, Sitzungsgeld, Vergütung der Ausschusstätigkeit und Long Term Incentive für 2010) betragen für das Berichtsjahr 1.516 T Euro zuzüglich Umsatzsteuer (Vorjahr: 1.425 T Euro zuzüglich Umsatzsteuer). Hierbei entfallen von den für 2010 ausbezahlten Gesamtbarbezügen (Festvergütung, Dividendenbonus, Vergütung der Ausschusstätigkeit und Sitzungsgeld) in Höhe von insgesamt 1.516 T Euro zuzüglich Umsatzsteuer in Höhe von 247 T Euro (Vorjahr: 1.168 T Euro zuzüglich Umsatzsteuer in Höhe von 198 T Euro) 350 T Euro auf die Festvergütung, 875 T Euro auf den Dividendenbonus, 37 T Euro auf das Sitzungsgeld sowie 254 T Euro auf die Vergütung der Ausschusstätigkeit (einschließlich des hierfür gezahlten Sitzungsgelds).

Die Gesamtbezüge der Mitglieder des Gesellschafterausschusses (Festvergütung, Dividendenbonus, Vergütung der Ausschusstätigkeit und Long Term Incentive für 2010) betragen für das Berichtsjahr 2.209 T Euro (Vorjahr: 2.345 T Euro). Von den für 2010 ausbezahlten Gesamtbarbezügen (Festvergütung und Dividendenbonus – einschließlich der auf die Vergütung der Ausschusstätigkeit entfallenden Anteile der vorgenannten Komponenten) – in Höhe von insgesamt 2.209 T Euro (Vorjahr: 1.994 T Euro) entfallen 540 T Euro auf die Festvergütung, 540 T Euro auf den Dividendenbonus sowie 1.129 T Euro auf die Vergütung der Ausschusstätigkeit (ohne den hierauf entfallenden LTI-Betrag).

Für den Dividendenbonus wurde entsprechend dem Vorschlag des Vorstands jeweils eine Dividende von 0,72 Euro je Vorzugsaktie zugrunde gelegt.

Gemäß Artikel 17 Absatz 3 beziehungsweise Artikel 33 Absatz 3 der Satzung ergäbe sich bei vorgenannter Dividende rechnerisch ein Dividendenbonus von 55,2 T Euro je Mitglied. Da nach Artikel 17 Absatz 5 beziehungsweise Artikel 33 Absatz 5 der Satzung der sich für ein Geschäftsjahr ergebende Betrag für den Dividendenbonus und den LTI für ein einfaches Mitglied insgesamt einen Betrag in Höhe von 50 T Euro nicht übersteigen darf (Cap), wurde für das Berichtsjahr der Dividendenbonus auf 50 T Euro begrenzt; die Zahlung eines LTI für 2010 entfällt.

Die Bezüge der einzelnen Mitglieder des Aufsichtsrats und des Gesellschafterausschusses sind, aufgeteilt nach vorgenannten Komponenten, in den Tabellen auf den nachfolgenden Seiten dargestellt.

## Vergütung des Aufsichtsrats

Ausweis in Euro

|                                                                              |      | Bestandteile Gesamtbarbezüge |                 |              |                                            | Gesamtbarbezüge | Wert Long Term Incentive <sup>2)</sup> | Gesamtbezüge <sup>3)</sup> |
|------------------------------------------------------------------------------|------|------------------------------|-----------------|--------------|--------------------------------------------|-----------------|----------------------------------------|----------------------------|
|                                                                              |      | Festvergütung                | Dividendenbonus | Sitzungsgeld | Vergütung Ausschusstätigkeit <sup>1)</sup> |                 |                                        |                            |
| Dr. Simone Bagel-Trah <sup>4)</sup> ,<br>Vorsitzende seit 23.9.2009          | 2010 | 40.000                       | 100.000         | 2.500        | 36.500                                     | 179.000         | –                                      | 179.000                    |
|                                                                              | 2009 | 25.480                       | 42.806          | 2.000        | 7.842                                      | 78.128          | 18.727                                 | 96.855                     |
| Dipl.-Ing. Albrecht Woeste <sup>4)</sup> ,<br>bis 22.9.2009,<br>Vorsitzender | 2010 | –                            | –               | –            | –                                          | –               | –                                      | –                          |
|                                                                              | 2009 | 29.041                       | 48.789          | 1.500        | 20.958                                     | 100.288         | 21.345                                 | 121.633                    |
| Winfried Zander <sup>4)</sup> ,<br>stellvertretender Vorsitzender            | 2010 | 30.000                       | 75.000          | 2.500        | 36.500                                     | 144.000         | –                                      | 144.000                    |
|                                                                              | 2009 | 30.000                       | 50.400          | 2.000        | 28.800                                     | 111.200         | 22.050                                 | 133.250                    |
| Dr. Friderike Bagel <sup>4)</sup><br>(bis 20.4.2009)                         | 2010 | –                            | –               | –            | –                                          | –               | –                                      | –                          |
|                                                                              | 2009 | 5.973                        | 10.034          | 500          | 8.503                                      | 25.010          | 4.390                                  | 29.400                     |
| Jutta Bernicke                                                               | 2010 | 20.000                       | 50.000          | 2.500        | –                                          | 72.500          | –                                      | 72.500                     |
|                                                                              | 2009 | 20.000                       | 33.600          | 2.000        | –                                          | 55.600          | 14.700                                 | 70.300                     |
| Fritz Franke<br>(bis 31.12.2009)                                             | 2010 | –                            | –               | –            | –                                          | –               | –                                      | –                          |
|                                                                              | 2009 | 20.000                       | 33.600          | 1.500        | –                                          | 55.100          | 14.700                                 | 69.800                     |
| Johann-Christoph Frey<br>(seit 23.9.2009)                                    | 2010 | 20.000                       | 50.000          | 2.000        | –                                          | 72.000          | –                                      | 72.000                     |
|                                                                              | 2009 | 5.479                        | 9.205           | 500          | –                                          | 15.184          | 4.028                                  | 19.212                     |
| Birgit Helten-Kindlein <sup>4)</sup>                                         | 2010 | 20.000                       | 50.000          | 2.500        | 36.500                                     | 109.000         | –                                      | 109.000                    |
|                                                                              | 2009 | 20.000                       | 33.600          | 2.000        | 28.800                                     | 84.400          | 14.700                                 | 99.100                     |
| Bernd Hinz<br>(bis 31.7.2010)                                                | 2010 | 11.616                       | 29.041          | 1.500        | –                                          | 42.157          | –                                      | 42.157                     |
|                                                                              | 2009 | 20.000                       | 33.600          | 2.000        | –                                          | 55.600          | 14.700                                 | 70.300                     |
| Prof. Dr. Michael Kaschke                                                    | 2010 | 20.000                       | 50.000          | 2.000        | –                                          | 72.000          | –                                      | 72.000                     |
|                                                                              | 2009 | 20.000                       | 33.600          | 1.500        | –                                          | 55.100          | 14.700                                 | 69.800                     |
| Thomas Manchot                                                               | 2010 | 20.000                       | 50.000          | 2.000        | –                                          | 72.000          | –                                      | 72.000                     |
|                                                                              | 2009 | 20.000                       | 33.600          | 2.000        | –                                          | 55.600          | 14.700                                 | 70.300                     |
| Mayc Nienhaus<br>(seit 1.1.2010)                                             | 2010 | 20.000                       | 50.000          | 2.500        | –                                          | 72.500          | –                                      | 72.500                     |
|                                                                              | 2009 | –                            | –               | –            | –                                          | –               | –                                      | –                          |
| Thierry Paternot                                                             | 2010 | 20.000                       | 50.000          | 2.000        | –                                          | 72.000          | –                                      | 72.000                     |
|                                                                              | 2009 | 20.000                       | 33.600          | 2.000        | –                                          | 55.600          | 14.700                                 | 70.300                     |
| Andrea Pichottka                                                             | 2010 | 20.000                       | 50.000          | 2.500        | –                                          | 72.500          | –                                      | 72.500                     |
|                                                                              | 2009 | 20.000                       | 33.600          | 2.000        | –                                          | 55.600          | 14.700                                 | 70.300                     |
| Prof. Dr. Theo Siegert <sup>4)</sup><br>(seit 20.4.2009)                     | 2010 | 20.000                       | 50.000          | 2.500        | 36.500                                     | 109.000         | –                                      | 109.000                    |
|                                                                              | 2009 | 14.027                       | 23.566          | 1.500        | 20.297                                     | 59.390          | 10.310                                 | 69.700                     |
| Edgar Topsch<br>(seit 1.8.2010)                                              | 2010 | 8.384                        | 20.959          | 1.000        | –                                          | 30.343          | –                                      | 30.343                     |
|                                                                              | 2009 | –                            | –               | –            | –                                          | –               | –                                      | –                          |
| Dr. Kaspar von Braun<br>(seit 19.4.2010)                                     | 2010 | 14.082                       | 35.205          | 1.000        | –                                          | 50.287          | –                                      | 50.287                     |
|                                                                              | 2009 | –                            | –               | –            | –                                          | –               | –                                      | –                          |
| Konstantin von Unger<br>(bis 19.4.2010)                                      | 2010 | 5.918                        | 14.795          | 1.000        | –                                          | 21.713          | –                                      | 21.713                     |
|                                                                              | 2009 | 20.000                       | 33.600          | 2.000        | –                                          | 55.600          | 14.700                                 | 70.300                     |
| Michael Vassiliadis <sup>4)</sup>                                            | 2010 | 20.000                       | 50.000          | 2.500        | 36.500                                     | 109.000         | –                                      | 109.000                    |
|                                                                              | 2009 | 20.000                       | 33.600          | 2.000        | 28.300                                     | 83.900          | 14.700                                 | 98.600                     |
| Dr. h.c. Bernhard Walter <sup>4)</sup>                                       | 2010 | 20.000                       | 50.000          | 2.000        | 71.500                                     | 143.500         | –                                      | 143.500                    |
|                                                                              | 2009 | 20.000                       | 33.600          | 1.500        | 55.600                                     | 110.700         | 14.700                                 | 125.400                    |
| Ulf Wentzien                                                                 | 2010 | 20.000                       | 50.000          | 2.500        | –                                          | 72.500          | –                                      | 72.500                     |
|                                                                              | 2009 | 20.000                       | 33.600          | 2.000        | –                                          | 55.600          | 14.700                                 | 70.300                     |
| <b>Gesamt</b>                                                                | 2010 | 350.000                      | 875.000         | 37.000       | 254.000                                    | 1.516.000       | –                                      | 1.516.000                  |
|                                                                              | 2009 | 350.000                      | 588.000         | 30.500       | 199.100                                    | 1.167.600       | 257.250                                | 1.424.850                  |

<sup>1)</sup> Vergütung für die Tätigkeit im Prüfungsausschuss. Die Tätigkeit im Nominierungsausschuss wird nicht gesondert vergütet.<sup>2)</sup> Dividendenbonus und LTI dürfen für ein Bezugsjahr für ein einfaches Mitglied einen Betrag von 50.000 Euro nicht überschreiten (Cap): Daher wurde der sich rechnerisch bei einer Dividende von 0,72 Euro je Vorzugsaktie ergebende Dividendenbonus von 55.200 Euro auf den Betrag von 50.000 Euro reduziert. Da es infolge des Erreichens des Cap für das Bezugsjahr 2010 nicht mehr zur Auszahlung eines LTI kommen kann, wurde für den LTI kein Wert angesetzt.<sup>3)</sup> Ausweis ohne Umsatzsteuer.<sup>4)</sup> Mitglied des Prüfungsausschusses. Vorsitz im Prüfungsausschuss: Dr. h.c. Bernhard Walter.

## Vergütung des Gesellschafterausschusses

Ausweis in Euro

|                                                                                                       |      | Bestandteile Gesamtbarbezüge |                 |                                            | Gesamtbarbezüge | Wert Long Term Incentive <sup>2)</sup> | Gesamtbezüge |
|-------------------------------------------------------------------------------------------------------|------|------------------------------|-----------------|--------------------------------------------|-----------------|----------------------------------------|--------------|
|                                                                                                       |      | Festvergütung                | Dividendenbonus | Vergütung Ausschusstätigkeit <sup>1)</sup> |                 |                                        |              |
| Dr. Simone Bagel-Trah, Vorsitzende, stellv. Vorsitzende bis 18.9.2009 (Vorsitzende Personalausschuss) | 2010 | 100.000                      | 100.000         | 200.000                                    | 400.000         | –                                      | 400.000      |
|                                                                                                       | 2009 | 82.123                       | 55.187          | 167.200                                    | 304.510         | 53.544                                 | 358.054      |
| Dipl.-Ing. Albrecht Woeste (bis 18.9.2009), Vorsitzender (Mitglied Personalausschuss)                 | 2010 | –                            | –               | –                                          | –               | –                                      | –            |
|                                                                                                       | 2009 | 71.507                       | 48.052          | 59.779                                     | 179.338         | 31.535                                 | 210.873      |
| Dr. h.c. Christoph Henkel, stellv. Vorsitzender (Vorsitzender Finanzausschuss)                        | 2010 | 75.000                       | 75.000          | 200.000                                    | 350.000         | –                                      | 350.000      |
|                                                                                                       | 2009 | 75.000                       | 50.400          | 167.200                                    | 292.600         | 51.450                                 | 344.050      |
| Dr. Paul Achleitner (Mitglied Finanzausschuss)                                                        | 2010 | 50.000                       | 50.000          | 100.000                                    | 200.000         | –                                      | 200.000      |
|                                                                                                       | 2009 | 50.000                       | 33.600          | 83.600                                     | 167.200         | 29.400                                 | 196.600      |
| Boris Canessa (seit 19.9.2009) (Mitglied Personalausschuss)                                           | 2010 | 50.000                       | 50.000          | 100.000                                    | 200.000         | –                                      | 200.000      |
|                                                                                                       | 2009 | 14.247                       | 9.574           | 23.821                                     | 47.642          | 8.377                                  | 56.019       |
| Stefan Hamelmann (stellv. Vorsitzender Finanzausschuss)                                               | 2010 | 50.000                       | 50.000          | 100.000                                    | 200.000         | –                                      | 200.000      |
|                                                                                                       | 2009 | 50.000                       | 33.600          | 83.600                                     | 167.200         | 29.400                                 | 196.600      |
| Dr. h.c. Ulrich Hartmann (bis 19.4.2010) (Mitglied Finanzausschuss)                                   | 2010 | 14.795                       | 14.795          | 29.590                                     | 59.180          | –                                      | 59.180       |
|                                                                                                       | 2009 | 50.000                       | 33.600          | 83.600                                     | 167.200         | 29.400                                 | 196.600      |
| Prof. Dr. Ulrich Lehner (Mitglied Finanzausschuss)                                                    | 2010 | 50.000                       | 50.000          | 100.000                                    | 200.000         | –                                      | 200.000      |
|                                                                                                       | 2009 | 50.000                       | 33.600          | 83.600                                     | 167.200         | 29.400                                 | 196.600      |
| Konstantin von Unger (stellv. Vorsitzender Personalausschuss)                                         | 2010 | 50.000                       | 50.000          | 100.000                                    | 200.000         | –                                      | 200.000      |
|                                                                                                       | 2009 | 50.000                       | 33.600          | 83.600                                     | 167.200         | 29.400                                 | 196.600      |
| Karel Vuursteen (Mitglied Personalausschuss)                                                          | 2010 | 50.000                       | 50.000          | 100.000                                    | 200.000         | –                                      | 200.000      |
|                                                                                                       | 2009 | 50.000                       | 33.600          | 83.600                                     | 167.200         | 29.400                                 | 196.600      |
| Werner Wenning (Mitglied Personalausschuss)                                                           | 2010 | 50.000                       | 50.000          | 100.000                                    | 200.000         | –                                      | 200.000      |
|                                                                                                       | 2009 | 50.000                       | 33.600          | 83.600                                     | 167.200         | 29.400                                 | 196.600      |
| <b>Gesamt</b>                                                                                         | 2010 | 539.795                      | 539.795         | 1.129.590                                  | 2.209.180       | –                                      | 2.209.180    |
|                                                                                                       | 2009 | 592.877                      | 398.413         | 1.003.200                                  | 1.994.490       | 350.706                                | 2.345.196    |

<sup>1)</sup> Anteilige Festvergütung und Dividendenbonus.<sup>2)</sup> Dividendenbonus und LTI dürfen für ein Bezugsjahr für ein einfaches Mitglied einen Betrag von 50.000 Euro nicht überschreiten (Cap): Daher wurde der sich rechnerisch bei einer Dividende von 0,72 Euro je Vorzugsaktie ergebende Dividendenbonus von 55.200 Euro auf den Betrag von 50.000 Euro reduziert. Da es infolge des Erreichens des Cap für das Bezugsjahr 2010 nicht mehr zur Auszahlung eines LTI kommen kann, wurde für den LTI kein Wert angesetzt. Für 2009 einschließlich des auf die Ausschusstätigkeit entfallenden LTI-Betrags.4. Vergütung des Aufsichtsrats der  
Henkel Management AG

Gemäß Artikel 14 der Satzung der Henkel Management AG erhalten die Mitglieder des Aufsichtsrats der Henkel Management AG eine jährliche Vergütung in Höhe von 10.000 Euro. Keine Vergütung erhalten jedoch Mitglieder des Aufsichtsrats, die gleichzeitig Mitglieder des Aufsichtsrats oder des Gesellschafterausschusses der Henkel AG & Co. KGaA sind.

Da der Aufsichtsrat der Henkel Management AG mit Mitgliedern des Gesellschafterausschusses besetzt ist, fiel im Berichtsjahr keine Vergütung für den Aufsichtsrat an.



## Geschäftstätigkeit

### Überblick

Henkel wurde im Jahr 1876 gegründet. Somit blickten wir im Berichtsjahr auf eine 134-jährige Unternehmensgeschichte zurück. Heute sind weltweit rund 48.000 Mitarbeiter für das Unternehmen tätig. Wir halten global führende Marktpositionen im Konsumenten- und im Industriegeschäft.

### Weltweit tätig

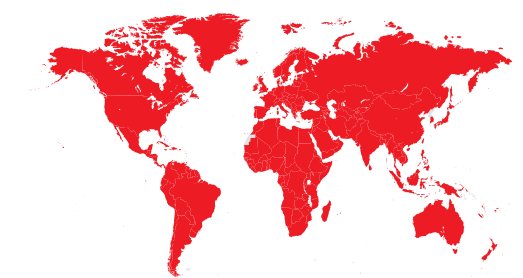

● Länder, in denen Henkel tätig ist.

### Organisation und Unternehmensbereiche

Die Henkel AG & Co. KGaA ist operativ tätig und zugleich Mutterunternehmen des Henkel-Konzerns. Als solches ist sie dafür verantwortlich, die unternehmerischen Ziele festzulegen und zu verfolgen. Zudem verantwortet sie das Führungs-, Steuerungs- und Kontrollinstrumentarium einschließlich des Risikomanagements sowie die Verteilung der Ressourcen. All diese Verantwortlichkeiten nimmt die Henkel AG & Co. KGaA im Rahmen ihrer rechtlichen Möglichkeiten innerhalb des Henkel-Konzerns wahr, wobei die rechtliche Selbstständigkeit der Konzerngesellschaften gewahrt bleibt.

Die operative Steuerung obliegt dem Vorstand der Henkel Management AG in ihrer Funktion als alleinige, persönlich haftende Gesellschafterin. Der Vorstand wird hierbei von den Funktionen des Corporate-Bereichs unterstützt.

Henkel ist in drei Unternehmensbereiche gegliedert:

- Wasch-/Reinigungsmittel,
- Kosmetik/Körperpflege,
- Adhesive Technologies.

Im Unternehmensbereich Wasch-/Reinigungsmittel umfasst unser Produktangebot Universalwaschmittel, Spezialwaschmittel und Reinigungsmittel. Zum Sortiment des Unternehmensbereichs Kosmetik/Körperpflege gehören Produkte für die Haarkosmetik, Körper-, Haut- und Mundpflege

sowie für das Friseurgeschäft. Im Unternehmensbereich Adhesive Technologies bieten wir Renovierungsprodukte, Klebe- und Korrekturprodukte für Haushalt und Büro, Bauklebstoffe sowie Industrie- und Strukturklebstoffe, Dichtstoffe und Produkte für die Oberflächenbehandlung an.

Unsere drei Unternehmensbereiche werden in weltweit operativ verantwortlichen strategischen Geschäftseinheiten geführt. Diese werden von den Funktionen der Henkel AG & Co. KGaA unterstützt, damit Synergien des Konzernverbunds optimal genutzt werden können. Die Verantwortung für die Umsetzung der jeweiligen Strategien in den Regionen und Ländern liegt in den Ländergesellschaften. Die Leitungsorgane dieser Gesellschaften führen ihre Unternehmen im Rahmen der jeweiligen gesetzlichen Bestimmungen, Satzungen und Geschäftsordnungen sowie nach den Regeln unserer weltweit geltenden Grundsätze zur Unternehmensführung.

### Strategie und Finanzziele 2012

Wir bauen unsere drei wachstumsstarken Unternehmensbereiche Wasch-/Reinigungsmittel, Kosmetik/Körperpflege und Adhesive Technologies weiter aus. In allen drei verfügen wir über ein starkes und ausgewogenes Portfolio von Aktivitäten, die in einem positiven Marktumfeld deutlich wachsen und sich in einem rezessiven Umfeld relativ stabil zeigen. Das haben die Jahre 2009 und 2010 eindrucksvoll gezeigt. In allen drei Bereichen nehmen wir bereits heute führende Marktpositionen in den reifen Märkten Westeuropa und Nordamerika ein, die wir auch zukünftig weiter ausbauen wollen. Aber auch in den Wachstumsmärkten verfügen wir in den Unternehmensbereichen Wasch-/Reinigungsmittel und Kosmetik/Körperpflege schon über mehr als 100 führende Positionen in den jeweiligen Kategorien. Im Unternehmensbereich Adhesive Technologies sind wir in über 30 Wachstumsländern marktführend. Dabei ist es für uns wichtig, in den Ländern, in denen wir präsent sind, über starke beziehungsweise ausbaufähige Marktpositionen zu verfügen. Insgesamt erzielen wir heute bereits 41 Prozent unseres Umsatzes in den Wachstumsregionen. Im Jahr 2004 lag dieser Anteil noch bei 26 Prozent.

Mit unseren drei wachstumsstarken Unternehmensbereichen und den führenden Positionen, die wir sowohl in den reifen Märkten als auch in den Wachstumsregionen einnehmen, haben wir eine starke Basis für unser zukünftiges profitables Wachstum.

# 41 %

unseres Umsatzes erzielen wir in den Wachstumsregionen.

## Strategische Prioritäten und Fortschritte im Geschäftsjahr 2010

Wir haben im Geschäftsjahr 2008 drei strategische Prioritäten festgelegt:

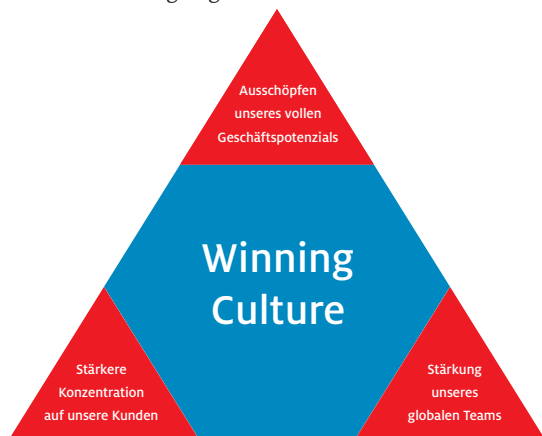

**Ausschöpfen unseres vollen Geschäftspotenzials**  
Hierzu haben wir die folgenden Treiber identifiziert:

### 1. Portfolio-Optimierung

Im Unternehmensbereich Wasch-/Reinigungsmittel wollen wir die Rentabilität in Massenkategorien wie Universalwaschmittel und Handgeschirrspülmittel verbessern und das Wachstum in profitablen Spezialkategorien wie Haushaltsreiniger oder Weichspüler vorantreiben. Der Unternehmensbereich Kosmetik/Körperpflege will seine Rentabilität durch die Stärkung der Innovationsführerschaft und den Ausbau der Marke Schwarzkopf weiter steigern. Im Unternehmensbereich Adhesive Technologies sollen die Rentabilität im Automobilbereich und im Konsumentenklebstoffgeschäft erhöht, das Wachstum im Geschäft mit Spezialanwendungen vorangetrieben und Skaleneffekte durch Innovationen im Bereich Industrieklebstoffe genutzt werden.

Zusätzlich wollen wir durch verstärkte Investitionen in den Wachstumsregionen überproportional wachsen und unseren Umsatzanteil in diesen Märkten bis 2012 – bei weiter steigenden Margen – auf 45 Prozent erhöhen. Gleichzeitig wollen wir unsere Marktanteile in den reifen Märkten weiter ausbauen.

### 2. Konzentration auf Top-Marken

Unser Fokus liegt auf weniger, dafür aber stärkeren Marken sowie einem weiteren Ausbau unserer starken regionalen und globalen Marken. Die Markenbekanntheit werden wir durch umfangreiche Marketing-Investitionen weiter steigern. Unsere drei Top-Marken Schwarzkopf, Loctite und Persil erzielen bereits heute 23 Prozent des

Umsatzes. Ziel ist es, mit diesen und anderen Top-Marken organisch doppelt so schnell zu wachsen wie Henkel gesamt und den Anteil am Gesamtumsatz deutlich auszubauen. Gleichzeitig reduzieren wir die Gesamtzahl unserer Marken, indem wir kleinere unbedeutende Marken veräußern oder einstellen.

### 3. Innovationen und Innovationsrate

Mit Innovationsraten<sup>1)</sup> von jeweils rund 40 Prozent in den Unternehmensbereichen Wasch-/Reinigungsmittel und Kosmetik/Körperpflege und von etwa 24 Prozent im Unternehmensbereich Adhesive Technologies zählen wir zu den innovationsstärksten Unternehmen in unseren Kompetenzbereichen. Dabei hilft uns die Nähe zu unseren Konsumenten und Kunden, die wir zum Teil aktiv in die Produktentwicklung einbinden. Zudem haben wir es uns zum Grundsatz gemacht, ein neues Produkt nur dann auf den Markt zu bringen, wenn es sich positiv auf die Bruttomarge auswirkt und in mindestens einem unserer fünf Fokusfelder (siehe **GB** Seite 63) einen Beitrag zur nachhaltigen Entwicklung leistet.

### 4. Operational Excellence

Im Einkauf wollen wir über die Weiterentwicklung effektiver Strategien Vorteile erzielen. Dazu zählen die Konzentration auf weniger, aber leistungsfähigere Zulieferer und Materialbeschaffung in kostengünstigen Wachstumsländern. In Produktion und Supply Chain wollen wir die Zahl der Produktionsstandorte vor allem in den reifen Märkten weiter reduzieren. Dadurch können wir komplexe Strukturen abbauen und gleichzeitig die verfügbaren Kapazitäten besser nutzen. Außerdem werden wir unsere Verwaltungs- und Vertriebskosten verbessern, indem wir standardisierte Prozesse in den Bereichen Finanzen, Einkauf und Personal in unseren Shared Service Centern in Bratislava, Slowakei, und Manila, Philippinen, bündeln sowie Nichtkernaktivitäten wie den IT-Support auslagern. Davon versprechen wir uns weitere Kosteneinsparungen.

### Stärkere Konzentration auf unsere Kunden

Um die Kunden noch stärker in den Mittelpunkt unseres Handelns zu stellen, stehen die Intensivierung von Kundenkontakten auf höchster Führungsebene und der Ausbau unserer Partnerschaften mit Kunden im Vordergrund. Dabei geht es um die gemeinsame strategische Ausrichtung, die Erweiterung von Dienstleistungen mit einem messbaren Mehrwert für die Kunden und die konsequente Nutzung der eigenen Kompetenzen, etwa unserer

## 23 %

unseres Umsatzes erzielen wir mit unseren Top-Marken Schwarzkopf, Loctite und Persil.

## 40 %

Innovationsrate erzielen wir in den Unternehmensbereichen Wasch-/Reinigungsmittel und Kosmetik/Körperpflege.

## 24 %

Innovationsrate erzielen wir im Unternehmensbereich Adhesive Technologies.

<sup>1)</sup> Prozentualer Umsatzanteil neuer Produkte, die in den vergangenen drei Jahren in den Markt eingeführt wurden (fünf Jahre für Adhesive Technologies).

führenden Rolle auf dem Gebiet der Nachhaltigkeit/ Corporate Social Responsibility (CSR). Ziel ist es, mit unseren Top-Kunden organisch eineinhalbmal so schnell zu wachsen wie Henkel insgesamt.

#### Stärkung unseres globalen Teams

Die Mitarbeiterinnen und Mitarbeiter sind die wichtigste Ressource von Henkel. Mit klarem Feedback, deutlicher Honorierung individueller Leistungsbeiträge und maßgeschneiderten Entwicklungsplänen stellen wir sicher, dass ein kompetentes und motiviertes Team die Herausforderungen meistert. Wir entwickeln unsere Führungskräfte in erster Linie aus dem Unternehmen heraus. Gleichzeitig fördern wir die Einstellung von externen Talenten, zum Beispiel dann, wenn sie die lokalen Märkte besser kennen als Führungskräfte innerhalb des Unternehmens. Bereits heute arbeiten Mitarbeiter aus mehr als 110 Nationen für Henkel; und der Anteil weiblicher Führungskräfte liegt weltweit bei 29 Prozent mit deutlich steigender Tendenz. Die Vielfalt unseres globalen Teams ist für Henkel ein Wettbewerbsvorteil, den wir kontinuierlich ausbauen wollen.

#### Fortschritte im Geschäftsjahr 2010

Im Geschäftsjahr 2010 haben wir weitere wesentliche Fortschritte bei unseren drei strategischen Prioritäten gemacht. Dazu gehören:

#### Ausschöpfen des vollen Geschäftspotenzials

- Alle drei Unternehmensbereiche mit Höchstständen bei Umsatz und Ergebnis,
- Effizienzsteigerungsprogramm „Global Excellence“ und Integration der National Starch-Geschäfte schneller als geplant erfolgreich umgesetzt,
- weiterer Ausbau unserer beiden Shared Service Center in Bratislava, Slowakei, und Manila, Philippinen, sowie vermehrte Nutzung dieser Einrichtungen für die Bereiche Finanzen, Einkauf und Personal.

#### Stärkere Konzentration auf unsere Kunden

- Weiterer Ausbau von Kundenkontakten auf höchster Management-Ebene zur Identifizierung gemeinsamer Projekte,
- Ausbau unserer Positionierung als führender Partner unserer Kunden im Feld der Nachhaltigkeit.

#### Stärkung unseres globalen Teams

- Einführung der neuen Vision „Global führend mit Marken und Technologien“ und Fokussierung auf fünf Werte,
- Entwicklung und Einführung eines neuen Systems zur Führungskräftebeurteilung.

#### Finanzziele 2012

Im Jahr 2008 haben wir uns für das Jahr 2012 Finanzziele gesetzt, die wir mit der Umsetzung unserer strategischen Prioritäten erreichen wollen.

#### Finanzziele 2012

Jährliches organisches Umsatzwachstum (durchschnittlich):

**3–5 Prozent**

Bereinigte<sup>1)</sup> Umsatzrendite (EBIT):

**14 Prozent**

Jährliches Wachstum des bereinigten<sup>1)</sup> Ergebnisses je Vorzugsaktie (durchschnittlich):

**> 10 Prozent**

Den durch die Finanz- und Wirtschaftskrise im Geschäftsjahr 2009 bedingten Umsatz- und Ergebnisrückgang haben wir im Berichtsjahr mehr als ausgleichen können: So haben wir im Geschäftsjahr 2010 ein starkes organisches Umsatzwachstum von 7,0 Prozent erreicht und unsere bereinigte<sup>1)</sup> Umsatzrendite um 2,3 Prozentpunkte auf 12,3 Prozent steigern können. Das bereinigte<sup>1)</sup> Ergebnis je Vorzugsaktie betrug 2,82 Euro und lag damit um 47,6 Prozent über dem Wert des Jahres 2009.

Nach dem sehr erfolgreichen Geschäftsjahr 2010 sind wir sehr zuversichtlich, dass wir unsere Finanzziele 2012 erreichen werden. Das gilt insbesondere für die Ziele eines durchschnittlichen jährlichen Wachstums des bereinigten Ergebnisses je Vorzugsaktie von mehr als 10 Prozent sowie einer bereinigten Umsatzrendite von 14 Prozent. Da der Umsatz im Jahr 2009 organisch rückläufig war, werden wir wahrscheinlich den unteren Bereich des Ziels eines durchschnittlichen jährlichen organischen Umsatzwachstums von 3 bis 5 Prozent erreichen.

#### Entwicklung bis 2010

|                                                            | 2009   | 2010   |
|------------------------------------------------------------|--------|--------|
| Organisches Umsatzwachstum                                 | –3,5%  | +7,0%  |
| Organisches Umsatzwachstum, durchschnittlich               | –      | +1,8%  |
| Bereinigte <sup>1)</sup> Umsatzrendite (EBIT)              | 10,0%  | 12,3%  |
| Bereinigtes <sup>1)</sup> Ergebnis je Vorzugsaktie in Euro | 1,91   | 2,82   |
| Wachstum                                                   | –12,8% | +47,6% |
| Durchschnittliches Wachstum*)                              |        | +13,5% |

\*) Compound annual growth rate (CAGR).

<sup>1)</sup> Bereinigt um einmalige Aufwendungen und Erträge sowie Restrukturierungsaufwendungen.

Mitarbeiter aus mehr als

**110 Nationen**

arbeiten für Henkel.

Um das Erreichen der anspruchsvollen Finanzziele zu untermauern, wurde für etwa 3.000 obere Führungskräfte des Henkel-Konzerns (Führungskreise o bis I Ib) eine Einmalzahlung von etwa einer jährlichen variablen Vergütung beschlossen („Sonderincentive 2012“). Diese kommt unter der Bedingung zur Auszahlung, dass im Jahr 2012 eine bereinigte Umsatzrendite von mindestens 14 Prozent erreicht wird.

Für den Fall, dass das 14-Prozent-Ziel bereits im Jahr 2011 erreicht wird, werden rund 60 Prozent des Sonderincentive unverfallbar. Mit dieser Regelung wollen wir einen deutlichen Anreiz setzen, unser ehrgeiziges Renditeziel – einen entsprechend günstigen Geschäftsverlauf unterstellt – bereits früher zu erreichen. Die Auszahlung des „Sonderincentive 2012“ erfolgt im Jahr 2013. Das Programm ist so konzipiert, dass keine Auszahlung erfolgt, wenn das Ziel einer bereinigten Umsatzrendite von 14 Prozent sowohl im Jahr 2011 als auch im Jahr 2012 nicht erreicht wird. Zu den Regelungen des „Sonderincentive 2012“ für den Vorstand verweisen wir auf [GB Seite 35](#).

### Wertmanagement und Steuerungssystem

Wir richten die Unternehmenssteuerung an der nachhaltigen Steigerung des Unternehmenswerts aus. Um messen zu können, inwieweit wir unsere Wachstumsziele erreicht haben, setzen wir ein modernes Kennzahlensystem ein, mit dem wir Wertzuwächse und Renditen kapitalmarktorientiert berechnen.

Zur Beurteilung der bereits realisierten und zukünftigen Wachstumsschritte verwenden wir das international anerkannte Steuerungs- und Managementkonzept Economic Value Added (EVA®)<sup>1)</sup>. Sämtliche operativen und strategischen Entscheidungen werden auf ihren nachhaltigen Wertbeitrag überprüft. Das EVA®-Konzept gibt den wirtschaftlichen Mehrwert an, den ein Unternehmen in einem bestimmten Zeitraum erwirtschaftet. Ein Unternehmen erzielt einen positiven EVA®, wenn das betriebliche Ergebnis die Kapitalkosten übersteigt. Die Kapitalkosten entsprechen der vom Kapitalmarkt erwarteten Verzinsung des eingesetzten Kapitals (Capital Employed).

Die operative Geschäftsentwicklung bilden wir mit dem betrieblichen Ergebnis (EBIT, bereinigt um etwaige Geschäftswertabschreibungen) ab. Das eingesetzte Kapital ermitteln wir über die Aktivseite der Bilanz. Eine Überleitung der Stichtagswerte in der Bilanz zu den für das eingesetzte Kapital verwendeten Durchschnittswerten befindet sich auf [GB Seite 129](#).

Der Kapitalkostensatz (Weighted Average Cost of Capital – abgekürzt WACC) wird als gewichteter Durchschnittskostensatz aus Eigen- und Fremdkapitalkosten errechnet. Im Geschäftsjahr 2010 rechneten wir mit einem Kapitalkostensatz nach Steuern von 7,0 Prozent. Vor Steuern betrug er 10,0 Prozent. Wir überprüfen in regelmäßigen Abständen die Höhe unserer Kapitalkosten, um den Veränderungen in den Marktparametern Rechnung zu tragen. Vom Geschäftsjahr 2011 an verwenden wir einen Kapitalkostensatz vor Steuern von 9,0 Prozent, nach Steuern von 6,5 Prozent.

Wir setzen differenzierte Kapitalkostensätze nach Unternehmensbereichen an. Dazu werden unternehmensbereichsspezifische Beta-Faktoren aus einem Vergleich mit Wettbewerbern ermittelt. Für die Unternehmensbereiche Wasch-/Reinigungsmittel und Kosmetik/Körperpflege betrug der Kapitalkostensatz vor Steuern im Geschäftsjahr 2010 10,0 Prozent (nach Steuern 7,0 Prozent) und für Adhesive Technologies 11,5 Prozent vor Steuern (nach Steuern 8,0 Prozent). Im Jahr 2011 verwenden wir für die Unternehmensbereiche Wasch-/Reinigungsmittel und Kosmetik/Körperpflege einen WACC von 9,0 Prozent vor Steuern (nach Steuern 6,5 Prozent) und für Adhesive Technologies von 10,5 Prozent vor Steuern (nach Steuern 7,5 Prozent).

### Kapitalkosten (WACC)

|                                                 | 2010          | ab 2011      |
|-------------------------------------------------|---------------|--------------|
| Risikoloser Zinssatz                            | 4,3 %         | 3,3 %        |
| Markt-Risikoprämie                              | 4,5 %         | 4,5 %        |
| Beta-Faktor                                     | 0,8           | 0,8          |
| <b>Eigenkapitalkosten nach Steuern</b>          | <b>8,0 %</b>  | <b>6,8 %</b> |
| Fremdkapitalkosten vor Steuern                  | 5,0 %         | 4,1 %        |
| Tax Shield (30 %)                               | -1,5 %        | -1,2 %       |
| <b>Fremdkapitalkosten nach Steuern</b>          | <b>3,5 %</b>  | <b>2,9 %</b> |
| Anteil Eigenkapital <sup>1)</sup>               |               |              |
| (Peer-Group-Struktur) <sup>2)</sup>             | 75 %          | 85 %         |
| Anteil Fremdkapital <sup>1)</sup>               |               |              |
| (Peer-Group-Struktur) <sup>2)</sup>             | 25 %          | 15 %         |
| <b>Kapitalkosten nach Steuern <sup>3)</sup></b> | <b>7,0 %</b>  | <b>6,5 %</b> |
| Steuersatz                                      | 30 %          | 30 %         |
| <b>Kapitalkosten vor Steuern <sup>3)</sup></b>  | <b>10,0 %</b> | <b>9,0 %</b> |

<sup>1)</sup> Zu Marktwerten. <sup>2)</sup> Im Vorjahr Zielstruktur. <sup>3)</sup> Gerundet.

### Kapitalkosten vor Steuern je Unternehmensbereich

|                         | 2010   | ab 2011 |
|-------------------------|--------|---------|
| Wasch-/Reinigungsmittel | 10,0 % | 9,0 %   |
| Kosmetik/Körperpflege   | 10,0 % | 9,0 %   |
| Adhesive Technologies   | 11,5 % | 10,5 %  |

# 10,0 %

WACC vor Steuern im Jahr 2010 im Konzern.

<sup>1)</sup> EVA® ist eine eingetragene Marke der Stern Stewart & Co.

**EVA® und ROCE**

Mit der EVA®-Kennzahl werden wertschaffende Entscheidungen und profitables Wachstum in den Unternehmensbereichen gefördert. Aus Geschäften mit negativen Wertbeiträgen ziehen wir uns zurück, wenn wir keine Möglichkeit sehen, in absehbarer Zeit positive EVA®-Werte zu erzielen.

Die Kennzahl EVA® ermitteln wir mit folgender Formel:

$$\text{EVA}^{\circ} = \text{EBIT}^*) - (\text{Capital Employed} \times \text{WACC}).$$

Um unterschiedlich große Geschäftseinheiten besser miteinander vergleichen zu können, ziehen wir zusätzlich eine Renditekennziffer heran: die Rendite auf das eingesetzte Kapital, den sogenannten Return on Capital Employed (ROCE). Diesen ermitteln wir wie folgt:

$$\text{ROCE} = \text{EBIT}^*) : \text{Capital Employed}.$$

Der ROCE repräsentiert die Verzinsung des durchschnittlich eingesetzten Kapitals. Wir schaffen Wert, wenn die Rendite des eingesetzten Kapitals die Kapitalkosten vor Steuern übersteigt.

Der Henkel-Konzern erwirtschaftete im Geschäftsjahr 2010 einen positiven Economic Value Added (EVA®) in Höhe von 569 Mio. Euro. Dieser war 770 Mio. Euro höher als im Vorjahr und ist vor allem auf das stark gestiegene betriebliche Ergebnis zurückzuführen. Alle Unternehmensbereiche erzielten einen positiven Wertbeitrag. Dieser Wertbeitrag lag bei Wasch-/Reinigungsmittel mit 286 Mio. Euro um 23,5 Prozent deutlich über dem Vorjahresniveau; Kosmetik/Körperpflege konnte mit 207 Mio. Euro den Vorjahreswert um 25,8 Prozent ebenfalls stark verbessern. Auch im Unternehmensbereich Adhesive Technologies konnten wir mit 73 Mio. Euro einen positiven Wertbeitrag erwirtschaften, nachdem im Jahr 2009 noch ein negativer Wertbeitrag von –543 Mio. Euro angefallen

war, der wesentlich durch erhebliche Restrukturierungsaufwendungen und einmalige Aufwendungen geprägt war.

Die Verzinsung des eingesetzten Kapitals (ROCE) erhöhte sich deutlich von 9,8 Prozent auf 14,9 Prozent. Zurückzuführen ist dies im Wesentlichen auf die sehr positive Entwicklung des betrieblichen Ergebnisses bei zugleich nahezu konstantem eingesetztem Kapital.

**Rechtliche und regulatorische Rahmenbedingungen**

Unser Geschäft unterliegt den jeweiligen nationalen Vorschriften sowie – im Rahmen der Europäischen Union (EU) – zunehmend auch harmonisierten europaweit geltenden Regelungen. Darüber hinaus bestehen in einigen Teilbereichen Auflagen aus Genehmigungsbescheiden oder Erlaubnissen.

Im Rahmen der Herstellung der Produkte unterliegen wir insbesondere Vorschriften in Bezug auf Verwendung, Lagerung, Transport und Handhabung bestimmter Substanzen sowie in Bezug auf Emissionen, Abwässer und Abfälle. Auch für die Errichtung und den Betrieb von Anlagen sind rechtliche und regulatorische Rahmenbedingungen – einschließlich Vorschriften über die Sanierung von Altlasten – zu beachten.

Die für uns relevanten produktbezogenen Vorschriften betreffen vor allem Inhaltsstoffe sowie die Sicherheit bei der Herstellung und im Umgang mit diesen Produkten und deren Inhaltsstoffen, bei deren Verpackung sowie bei der Vermarktung. Dabei handelt es sich vor allem um stoffrechtliche Vorschriften, Verwendungsverbote und -beschränkungen sowie Prüf-, Kennzeichnungs- und Warnvorschriften sowie um produkthaftungsrechtliche Regelungen.

# 569 Mio. €

Economic Value Added (EVA®)  
im Jahr 2010 erwirtschaftet.

**EVA® und ROCE<sup>1)</sup>**

in Mio. Euro

|                             | Wasch-/<br>Reinigungsmittel | Kosmetik/<br>Körperpflege | Adhesive<br>Technologies | Konzern             |
|-----------------------------|-----------------------------|---------------------------|--------------------------|---------------------|
| EBIT                        | 542                         | 411                       | 884 <sup>3)</sup>        | 1.729 <sup>3)</sup> |
| Eingesetztes Kapital        | 2.558                       | 2.041                     | 7.049                    | 11.595              |
| Kapitalkosten <sup>2)</sup> | 256                         | 204                       | 811                      | 1.160 <sup>4)</sup> |
| EVA® 2010                   | 286                         | 207                       | 73                       | 569 <sup>4)</sup>   |
| EVA® 2009                   | 232                         | 164                       | –543                     | –201 <sup>3)</sup>  |
| ROCE 2010                   | 21,2%                       | 20,1%                     | 12,5%                    | 14,9%               |
| ROCE 2009                   | 19,6%                       | 18,2%                     | 4,8%                     | 9,8%                |

<sup>1)</sup> Berechnet auf Basis der Werte in Tausend Euro.

<sup>2)</sup> Berechnet auf Basis differenzierter Kapitalkostensätze nach Unternehmensbereichen.

<sup>3)</sup> Berechnet auf Basis des Konzern-Kapitalkostensatzes von 11,5 Prozent.

<sup>4)</sup> Berechnet auf Basis des Konzern-Kapitalkostensatzes von 10,0 Prozent.

<sup>5)</sup> EBIT bereinigt um 6 Mio. Euro Geschäftswertabschreibungen.

\*) Bereinigt um Geschäftswertabschreibungen.



Unsere internen Standards sollen gewährleisten, dass die rechtlichen Anforderungen eingehalten werden und die Produktionsanlagen und Produkte sicher sind. Diese Vorgaben setzen wir im Rahmen unserer Managementsysteme um und überprüfen sie regelmäßig. Dazu gehört auch, relevante rechtliche und regulatorische Anforderungen und Veränderungen frühzeitig zu beobachten und zu bewerten.

Ein Beispiel für eine wesentliche rechtliche Rahmenbedingung ist die europäische Verordnung zur Registrierung, Evaluierung, Autorisierung und Beschränkung von Chemikalien – VO (EG) Nr. 1907/2006 (englisch abgekürzt: REACH). Durch sie werden die Registrierung, Bewertung und Zulassung von chemischen Stoffen geregelt. Henkel nimmt unter REACH vor allem die Rolle als Verwender von chemischen Stoffen ein, ist aber auch Importeur und Hersteller. Um eine effiziente Umsetzung von REACH zu gewährleisten, haben wir eine zentrale Bearbeitung der wesentlichen REACH-Prozesse festgelegt.

## Geschäftsverlauf

### Weltwirtschaft

#### Überblick:

#### Kräftige Erholung nach schwerer Rezession

Die Weltwirtschaft hat sich 2010 von der schweren Rezession schneller und kräftiger erholt als zunächst erwartet. Weltweit verzeichnete das Bruttoinlandsprodukt ein starkes Wachstum von 4 Prozent. Während die Wachstumsregionen einen Anstieg von etwa 7 Prozent erzielten, übertrafen die Industrieländer das Vorjahresniveau um etwa 2,5 Prozent. Die Wirtschaftsleistung hat damit das Vorkrisenniveau bereits wieder erreicht und teilweise sogar überschritten. Ein wesentlicher Wachstumstreiber war die sehr expansive Geld- und Fiskalpolitik der einzelnen Staaten. Die Zinsen erreichten historische Tiefststände und auch die Finanzpakete zur Stabilisierung und Stimulierung der Wirtschaft haben ihre Aufgabe erfüllt: Sie führten zu steigender Nachfrage. Zudem hat sich das Vertrauen der Konsumenten in die Wirtschaft überraschend schnell erholt.

#### Verlauf im Jahr 2010:

#### Stärkeres erstes Halbjahr

Gegenläufig zu der wirtschaftlichen Entwicklung des Jahres 2009, die durch einen stärkeren Rückgang in der ersten Jahreshälfte gekennzeichnet war, verlief die Erholung im Jahr 2010: Zwar reduzierte sich die hohe Wachstumsrate des ersten Halbjahres 2010 im zweiten Halbjahr, jedoch nahm die Wirtschaftsleistung in der zweiten Jahreshälfte, verglichen mit dem Vorjahreszeitraum, merklich zu.

### Industrie und Konsum:

#### Industrie legte zweistellig zu

Die Industrie partizipierte mit einem Plus von mehr als 10 Prozent erheblich stärker an der Konjunkturbelebung als der private Konsum, der um gut 2,5 Prozent zunahm. Besonders die exportabhängigen Industrien im Bereich Vorleistungen und Investitionsgüter verzeichneten kräftige Zuwächse. Diese Zweiteilung in eine lebhaftere Industrie- und eine gedämpfte Konsumkonjunktur entspricht spiegelbildlich der Entwicklung im vorherigen Abschwung, als die Industrie stark rückläufig war und der Konsum vergleichsweise stabil blieb.

#### Regionen:

#### Reife Märkte verhalten,

#### Wachstumsregionen dynamisch

In Westeuropa war die Aufwärtsbewegung mit einem Anstieg des Bruttosozialprodukts von etwa 2 Prozent vergleichsweise verhalten. Deutschland nahm eine Sonderrolle ein und verzeichnete mit mehr als 3,5 Prozent ein hohes Wachstum. Die verbesserte Preiswettbewerbsfähigkeit regte die deutschen Exporte an und der robuste Arbeitsmarkt stimulierte die Inlandsnachfrage. Die Wirtschaft in den USA hat sich mit einem Wachstum des Bruttoinlandsprodukts von gut 2,5 Prozent zwar erholt, aber hohe Arbeitslosenzahlen, ein beträchtliches Staatsdefizit sowie die Furcht vor einer neuen Rezession haben eine stärkere Dynamik verhindert. Die Wirtschaftsleistung in Japan nahm mit über 4 Prozent kräftig zu, vor allem dank der sehr dynamischen Industrieentwicklung. Die Wachstumsregionen Asien (ohne Japan), Lateinamerika und Afrika/Nahost verzeichneten ein kräftiges, zum Teil zweistelliges Wirtschaftswachstum. Dies gilt im Besonderen für China, Indien und Brasilien. Während Indien und Brasilien vor allem dank einer robusten Binnenkonjunktur wuchsen, verzeichnete China sowohl ein starkes Wachstum der Exporte als auch der Inlandsnachfrage. Osteuropa fiel demgegenüber etwas zurück. Dabei gehörte Russland, das auch von steigenden Rohstoffpreisen profitierte, mit einem Plus von rund 3,5 Prozent zu den dynamischeren Volkswirtschaften innerhalb der Region.

#### Rohstoffpreise:

#### Starker Anstieg und teilweise Lieferengpässe

Die wirtschaftliche Erholung führte auch zu einer vermehrten Nachfrage nach Rohstoffen. Teilweise war die Nachfrage so hoch, dass es zu Lieferengpässen kam. So sind die Preise von wichtigen Rohstoffen wie Rohöl, Ethylen, Propylen, Palmkernöl, Metallen und Papier im Lauf des Jahres weiter gestiegen. Im Jahresdurchschnitt lag der Rohölpreis

mit etwa 80 US-Dollar pro Barrel um fast 20 Dollar über dem Niveau des Vorjahres.

#### Währungen:

##### Euro im Bann der europäischen Finanzkrise

Im Jahresdurchschnitt hat der Euro gegenüber dem US-Dollar – verglichen mit dem Vorjahr – leicht an Wert verloren. Im Jahresverlauf ergaben sich jedoch größere Schwankungen: Zu Jahresbeginn tendierte der Euro mit unter 1,30 US-Dollar schwächer. Zur Mitte des Jahres stieg der Euro deutlich auf über 1,40 US-Dollar und lag am Jahresende wieder tiefer bei 1,34 US-Dollar. Dieser Verlauf hat seine Ursachen unter anderem in der Finanzkrise in Europa sowie in der expansiven Geldpolitik der US-amerikanischen Notenbank.

Die Entwicklung anderer wichtiger Währungen gegenüber dem Euro stellt nachfolgende Tabelle dar:

##### Durchschnittskurse gegenüber dem Euro

|                   | 2009   | 2010   |
|-------------------|--------|--------|
| US-Dollar         | 1,39   | 1,33   |
| Britisches Pfund  | 0,89   | 0,86   |
| Chinesischer Yuan | 9,53   | 8,98   |
| Japanischer Yen   | 130,33 | 116,38 |
| Russischer Rubel  | 44,15  | 40,26  |

#### Inflation:

##### Das weltweite Preisklima blieb ruhig

Der Anstieg der Inflation von knapp 2 auf 3 Prozent ist in erster Linie auf eine starke Erhöhung der Rohstoff- und Nahrungsmittelpreise zurückzuführen. Die um solche Effekte bereinigte Kerninflationsrate hat sich kaum verändert. Die Entwicklung war allerdings regional recht unterschiedlich. Während die Inflation in den Industrieländern ausgesprochen niedrig blieb – in den USA und in Westeuropa zog sie nur wenig an und in Japan waren die Preise sogar rückläufig –, nahm sie in einigen Wachstumsländern wie in Indien oder China wieder zu. Hierfür waren sowohl die starke Nachfragedynamik als auch die große Bedeutung von Rohstoffen und Nahrungsmitteln verantwortlich.

#### Arbeitslosigkeit:

##### Leichter Anstieg auf weltweit 8 Prozent

Die Arbeitslosigkeit hat in den Industrieregionen leicht auf 8 Prozent zugenommen. In den USA und Frankreich wurden Werte von 10 Prozent erreicht. In Südeuropa liegen einige Länder zum Teil noch deutlich darüber. In Deutschland erwies sich der Arbeitsmarkt hingegen als sehr robust, sodass die Arbeitslosenquote um fast einen halben Prozentpunkt auf 7,4 Prozent zurückging. In den Wach-

tumsregionen blieben die Arbeitslosenquoten mit etwa 8 Prozent stabil.

#### Branchenentwicklung:

##### Konsum und Einzelhandel mit leichtem Anstieg

Das Verbrauchervertrauen hat sich mit dem konjunkturellen Aufschwung aufgehellt. Die Konsumenten gaben im Berichtsjahr gut 2,5 Prozent mehr aus als im Vorjahr. Die Sorge um den eigenen Arbeitsplatz und vorhandene Zweifel an der Dauer des Aufschwungs standen einem stärkeren Zuwachs der weltweiten Konsumausgaben entgegen.

Der Anstieg der Konsumausgaben – und daran gekoppelt die Entwicklung des Einzelhandels – war in den Industrieländern mit 1,5 Prozent verhalten. In Westeuropa lag das Plus bei einem Prozent, in den USA bei 1,5 Prozent. Der Konsum in Deutschland nahm trotz des kräftigen gesamtwirtschaftlichen Wachstums mit 0,5 Prozent nur geringfügig zu. In den Wachstumsregionen expandierte der private Konsum mit knapp 5 Prozent deutlich stärker, blieb aber auch hinter der gesamtwirtschaftlichen Entwicklung zurück.

##### Industrie mit starker Belebung

Nach dem Krisenjahr 2009 stand 2010 im Zeichen einer starken industriellen Belebung. Wenngleich in einigen Branchen und Ländern das Vorkrisenniveau noch nicht wieder erreicht wurde, so zeigt doch das Wachstum von mehr als 10 Prozent die hohe industrielle Dynamik. Besonders stark war der Anstieg in exportabhängigen Branchen des Vorleistungs- und Investitionsgütersektors, die überdurchschnittlich unter der Krise gelitten hatten. Dazu gehören unter anderem die Transportbranche, die Metallindustrie sowie die Elektronikbranche.

Alle Regionen verzeichneten einen kräftigen Anstieg der Industrieproduktion. Das Verarbeitende Gewerbe in Westeuropa und in den USA expandierte mit etwa 6 Prozent. Asiens Industrie legte um mehr als 15 Prozent zu. Dazu trug – neben den Wachstumsländern China und Südkorea – auch die japanische Industrie bei, die damit einen Teil des rezessionsbedingten Rückgangs wettmachen konnte.

Die für Henkel wichtigen Abnehmerbranchen Transportindustrie und Elektronik konnten ihre Produktion mit 18 beziehungsweise 14 Prozent merklich ausweiten. In der Automobilindustrie legten die leistungsstarken Kraftfahrzeuge überproportional zu, während die kleinmotorigen Kraftwagen insbesondere in der zweiten Jahreshälfte – nachdem die Abwrack- und ähnliche

Förderprogramme ausgelaufen waren – an Fahrt verloren. Innerhalb der Elektronikbranche war das Wachstum bei den Basisprodukten wie Halbleitern und Halbleiterplatten überproportional, besonders im ersten Halbjahr 2010.

Kräftig war auch das Wachstum in der Metallindustrie, das um etwa 11 Prozent ausgeweitet wurde. Mit der Festigung des Aufschwungs und steigenden Investitionen verbesserte sich auch die Lage im Maschinenbau deutlich. Um mehr als 16 Prozent nahm die Produktion hier zu.

In den konsumnahen Sparten war das Wachstum verhalten. Die globale Verpackungsindustrie mit den Branchen Nahrungsmittel, Getränke sowie Papier und Druck wuchs im unteren einstelligen Bereich.

Unter den Erwartungen blieb die Entwicklung im Baugewerbe. Weltweit ging die Bauindustrie um fast 2 Prozent zurück. In den USA kam es zu einem Produktionsrückgang von mehr als 10 Prozent. Rückgänge in einer Größenordnung von 4 bis 6 Prozent gab es in Westeuropa und Japan. Dank der weiterhin regen Bautätigkeit in den Wachstumsregionen – und hier insbesondere in China und Indien – konnte weltweit der Rückgang in Grenzen gehalten werden.

### Gesamtaussage des Vorstands zur Geschäftsentwicklung

Das Jahr 2010 war ein hervorragendes Jahr für Henkel. Die Geschäftsentwicklung war geprägt durch die im Vergleich zum Krisenjahr 2009 deutlich verbesserten wirtschaftlichen Rahmenbedingungen. Wir konnten in allen Unternehmensbereichen stärker wachsen als die relevanten Märkte und unsere Marktanteile weiter ausbauen. Auch steigerten wir den Anteil der Wachstumsregionen auf 41 Prozent vom Umsatz.

Die noch zu Beginn des Jahres entspannte Lage auf den Beschaffungsmärkten verschärfte sich im Verlauf des Geschäftsjahres. Die dank der wirtschaftlichen Erholung verstärkte Nachfrage nach Rohstoffen wirkte sich über erhöhte Rohstoffpreise auf unsere Herstellkosten aus. Die gestiegenen Rohstoffpreise konnten wir jedoch durch größere Absatzmengen und eine damit verbesserte Kapazitätsauslastung sowie unsere Einsparungsanstrengungen überkompensieren. Die bereinigte<sup>1)</sup> Bruttomarge erhöhte sich auf 47,1 Prozent.

Die Erholung in unseren Märkten sowie die erfolgreichen Einsparungen aus unseren Initiativen zur Struktur- und Kostenanpassung zeigten sich auch in den Ergebnissen. Zudem haben wir die Integration der National Starch-Geschäfte in diesem Geschäftsjahr erfolgreich abgeschlossen. Wir steigerten das bereinigte<sup>1)</sup> betriebliche Ergebnis um 36,5 Prozent auf 1.862 Mio. Euro und die bereinigte<sup>1)</sup> Umsatzrendite um 2,3 Prozentpunkte auf 12,3 Prozent. Erstmals in unserer Unternehmensgeschichte haben wir damit ein Geschäftsjahr mit einer bereinigten<sup>1)</sup> Umsatzrendite von mehr als 12 Prozent abgeschlossen.

Durch den Verkauf von Randgeschäften haben wir unser Portfolio weiter optimiert: Wir veräußerten unter anderem unser Bauklebstoffgeschäft in Südkorea sowie unser Geschäft mit Lötkugeln in Taiwan.

Eine unserer wichtigsten Prioritäten bleibt es, unser Ziel-Kreditrating von „A flat“ (Standard & Poor's) beziehungsweise „A2“ (Moody's) wiederzuerlangen. Akquisitionen haben wir nur in dem Umfang durchgeführt, wie sie diesem Ziel nicht zuwiderliefen. Im Geschäftsjahr konnten wir unsere Finanzkennzahlen deutlich verbessern: Die Nettoverschuldung des Henkel-Konzerns reduzierte sich im Jahresverlauf aus dem starken Cashflow aus laufender Geschäftstätigkeit auf 2,3 Mrd. Euro. Unsere operative Schuldendeckung haben wir von 42 Prozent auf 71 Prozent erhöht. Insgesamt verfügen wir über eine solide langfristige Finanzierungsstruktur und ausreichende Liquiditätsreserven.

Das Geschäftsjahr 2010 markiert mit seinen sehr erfreulichen Ergebnissen einen wichtigen Schritt hin zu unseren anspruchsvollen Finanzzielen 2012. Wir blicken zuversichtlich auf das Geschäftsjahr 2011.

### Umsatz und Ergebnis

Im Geschäftsjahr 2010 haben wir den Umsatz des Henkel-Konzerns deutlich auf 15.092 Mio. Euro und damit um 11,2 Prozent gegenüber dem Wert des Vorjahres gesteigert. Bereinigt um Wechselkurseffekte erhöhte sich der Umsatz um 6,4 Prozent. Die organische Umsatzentwicklung (also bereinigt um Wechselkurseffekte und Akquisitionen/Divestments) zeigte mit 7,0 Prozent nach dem von der Wirtschaftskrise belasteten Jahr 2009 eine vergleichsweise hohe Steigerungsrate. Negative Preiseffekte, vor allem in den Konsumentengeschäften, konnten wir durch Volumenzuwächse mehr als kompensieren.

**12,3 %**  
bereinigte<sup>1)</sup> Umsatzrendite.

Umsatz  
in Mio. Euro

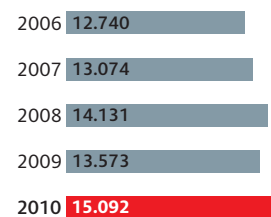

<sup>1)</sup> Bereinigt um einmalige Aufwendungen und Erträge sowie Restrukturierungsaufwendungen.

Im Verlauf des Geschäftsjahres schwächte sich das Wachstum aufgrund der stärkeren Vergleichsbasis des entsprechenden Vorjahreszeitraums leicht ab. Während das organische Wachstum im ersten Halbjahr bei 7,8 Prozent lag, verlangsamte es sich im zweiten Halbjahr auf 6,2 Prozent.

#### Umsatzveränderung<sup>1)</sup>

| in Prozent                      | 2010 |
|---------------------------------|------|
| Veränderung zum Vorjahr         | 11,2 |
| Wechselkurseffekte              | 4,8  |
| Bereinigt um Wechselkurseffekte | 6,4  |
| Akquisitionen/Divestments       | -0,6 |
| Organisch                       | 7,0  |
| Davon Preis                     | -1,5 |
| Davon Menge                     | 8,5  |

<sup>1)</sup> Berechnet auf Basis der Werte in Tausend Euro.

#### Umsatz nach Unternehmensbereichen<sup>\*)</sup>

in Mio. Euro

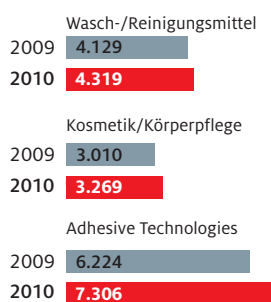

<sup>\*)</sup> Ohne Corporate.

#### Umsatz nach Regionen<sup>\*)</sup>

in Mio. Euro

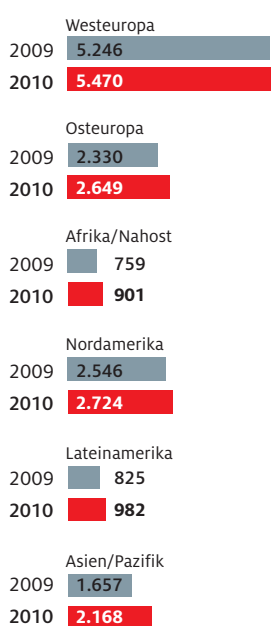

<sup>\*)</sup> Ohne Corporate.

In allen Unternehmensbereichen konnten wir den Umsatz organisch steigern: Der Unternehmensbereich Adhesive Technologies entwickelte sich ausgezeichnet und erzielte eine zweistellige Wachstumsrate von 11,8 Prozent. Der Unternehmensbereich Kosmetik/Körperpflege setzte seinen positiven Wachstumstrend der vergangenen Jahre fort und lag mit 4,8 Prozent deutlich oberhalb des stagnierenden Marktes. Der Unternehmensbereich Wasch-/Reinigungsmittel erreichte in einem leicht rückläufigen Marktumfeld eine organische Umsatzsteigerung in Höhe von 1,5 Prozent. Unsere Marktanteile haben wir in allen drei Unternehmensbereichen in den für uns relevanten Märkten weiter ausgebaut.

Wir konnten den Umsatz in allen Regionen weiter verbessern:

In der Region Westeuropa erhöhten wir den Umsatz um 4,3 Prozent auf 5.470 Mio. Euro. Das organische Umsatzwachstum von 4,0 Prozent wurde von allen Unternehmensbereichen getragen, insbesondere von Adhesive Technologies mit einer organischen Wachstumsrate im hohen einstelligen Bereich. Aufgrund des noch stärkeren Wachstums in anderen Regionen ging der Umsatzanteil der Region von 39 auf 36 Prozent zurück.

Den Umsatz in der Region Osteuropa steigerten wir deutlich um 13,7 Prozent auf 2.649 Mio. Euro. Das organische Umsatzwachstum von 7,2 Prozent wurde vor allem durch die Unternehmensbereiche Kosmetik/Körperpflege und Adhesive Technologies getragen, die Wachstumsraten im zweistelligen Prozentbereich realisierten. Der Umsatz des Unternehmensbereichs Wasch-/Reinigungsmittel lag auf dem Niveau des Vorjahres. Der Umsatzanteil der Region stieg von 16 auf 18 Prozent.

Die Region Afrika/Nahost entwickelte sich weiterhin sehr erfreulich und wies ein Umsatzwachstum von 18,7 Prozent auf 901 Mio. Euro auf. Der Umsatzanteil blieb konstant bei 6 Prozent. Zu dem organischen Umsatzwachstum von 12,8 Prozent trugen alle drei Unternehmensbereiche mit jeweils zweistelligen Wachstumsraten bei.

Den Umsatz in der Region Nordamerika steigerten wir um 7,0 Prozent auf 2.724 Mio. Euro. Das organische Umsatzwachstum von 3,5 Prozent wurde durch den Unternehmensbereich Adhesive Technologies getragen. Dagegen war der Umsatz in den Unternehmensbereichen Wasch-/Reinigungsmittel und Kosmetik/Körperpflege rückläufig. Der Umsatzanteil der Region Nordamerika sank von 19 auf 18 Prozent.

Die Region Lateinamerika entwickelte sich weiterhin sehr erfreulich und wies ein Umsatzwachstum von 19,1 Prozent auf 982 Mio. Euro auf. Die organische Wachstumsrate von 9,8 Prozent wurde von den Unternehmensbereichen Kosmetik/Körperpflege und Adhesive Technologies getragen. Der Umsatzanteil der Region erhöhte sich von 6 auf 7 Prozent.

In der Region Asien/Pazifik zeigte sich der Aufwärtstrend am deutlichsten: Der Umsatz erhöhte sich um 30,8 Prozent auf 2.168 Mio. Euro; die organische Wachstumsrate erreichte 17,8 Prozent. Besonders erfreulich entwickelten sich die Unternehmensbereiche Adhesive Technologies und Kosmetik/Körperpflege mit zweistelligen Wachstumsraten; der organische Umsatzrückgang im Unternehmensbereich Wasch-/Reinigungsmittel konnte dadurch deutlich überkompensiert werden. Asien/Pazifik steigerte den Umsatzanteil im Vergleich zum Vorjahr von 12 auf 14 Prozent.

Den Umsatz unserer Wachstumsregionen Osteuropa, Afrika/Nahost, Lateinamerika und Asien (ohne Japan) steigerten wir um 19,9 Prozent auf 6.132 Mio. Euro. Das organische Wachstum erreichte 11,8 Prozent. Hierzu trugen insbesondere die Unternehmensbereiche Adhesive Technologies und Kosmetik/Körperpflege bei. Der Umsatzanteil der Wachstumsregionen erhöhte sich von 38 auf 41 Prozent.

Nachfolgend kommentieren wir die Ergebnisentwicklung der Unternehmensbereiche ohne einmalige Aufwendungen und Erträge sowie Restrukturierungsaufwendungen, um die operative Entwicklung transparenter darzustellen:

**Bereinigtes<sup>1)</sup> betriebliches Ergebnis (EBIT)**

| in Mio. Euro                         | 2009         | 2010         | %    |
|--------------------------------------|--------------|--------------|------|
| <b>EBIT (wie berichtet)</b>          | <b>1.080</b> | <b>1.723</b> | 59,5 |
| Einmalige Erträge                    | -9           | -59          |      |
| Einmalige Aufwendungen               | 134          | 14           |      |
| Restrukturierungsaufwendungen        | 159          | 184          |      |
| <b>Bereinigter<sup>1)</sup> EBIT</b> | <b>1.364</b> | <b>1.862</b> | 36,5 |

Das bereinigte<sup>1)</sup> betriebliche Ergebnis („bereinigter EBIT“) konnten wir von 1.364 Mio. Euro im Vorjahr um 36,5 Prozent auf 1.862 Mio. Euro erhöhen. Alle drei Unternehmensbereiche trugen zu dieser positiven Entwicklung bei. Die bereinigte<sup>1)</sup> Umsatzrendite („bereinigte EBIT-Marge“) des Konzerns verbesserte sich um 2,3 Prozentpunkte auf 12,3 Prozent und liegt damit im Rahmen unserer im November 2010 aktualisierten Prognose von „deutlich über 12,0 Prozent“. Die deutlichste Margenverbesserung zeigte der Unternehmensbereich Adhesive Technologies mit einer Verbesserung von 8,1 auf 12,8 Prozent. Dazu trug neben dem starken Volumenwachstum der konsequente Kostenfokus bei. Die Konsumentengeschäfte Wasch-/Reinigungsmittel und Kosmetik/Körperpflege konnten ihre bereinigten<sup>1)</sup> Umsatzrenditen erfreulich auf 13,0 Prozent (Vorjahr: 12,8 Prozent) und 13,3 Prozent (Vorjahr: 12,9 Prozent) steigern. Hierzu trug ebenfalls die strikte Kostenkontrolle bei.

Das positive Marktumfeld prägte auch die gute Ergebnisentwicklung in unseren Regionen:

In Westeuropa verbesserte sich das betriebliche Ergebnis um 32,8 Prozent (32,1 Prozent bereinigt um Wechselkurseffekte) auf 706 Mio. Euro. Insbesondere die Unternehmensbereiche Adhesive Technologies und Wasch-/Reinigungsmittel konnten das um Wechselkurseffekte bereinigte operative Ergebnis steigern. Die Umsatzrendite dieser Region lag mit 12,9 Prozent deutlich über dem Vorjahreswert von 10,1 Prozent.

In Osteuropa steigerten wir das betriebliche Ergebnis um 35,2 Prozent (25,2 Prozent bereinigt um Wechselkurseffekte) auf 314 Mio. Euro. Alle drei Unternehmensbereiche konnten hier das um Wechselkurseffekte bereinigte operative Ergebnis verbessern. Die Umsatzrendite dieser Region erhöhte sich ebenfalls deutlich von 10,0 Prozent im Vorjahr auf 11,9 Prozent.

In Afrika/Nahost verbesserten wir das betriebliche Ergebnis um 8,7 Prozent (0,5 Prozent bereinigt um Wechselkurseffekte) auf 81 Mio. Euro, getragen

durch den signifikanten Anstieg im Unternehmensbereich Wasch-/Reinigungsmittel. Die Umsatzrendite dieser Region lag mit 9,0 Prozent unter dem Vorjahreswert von 9,8 Prozent.

In Nordamerika haben wir das betriebliche Ergebnis stark um 152,7 Prozent auf 320 Mio. Euro gesteigert (137,6 Prozent bereinigt um Wechselkurseffekte). Aufgrund des sich erholenden Marktumfelds konnte insbesondere der Unternehmensbereich Adhesive Technologies das betriebliche Ergebnis deutlich verbessern, sodass der Rückgang im Unternehmensbereich Wasch-/Reinigungsmittel mehr als kompensiert werden konnte. Die Umsatzrendite erhöhte sich insgesamt signifikant von 5,0 Prozent auf 11,8 Prozent.

Das betriebliche Ergebnis in der Region Lateinamerika verbesserte sich deutlich um 39,8 Prozent auf 104 Mio. Euro. Bereinigt um Wechselkurseffekte stieg das Ergebnis um 29,9 Prozent. Die Umsatzrendite erhöhte sich um 1,5 Prozentpunkte auf 10,5 Prozent.

In der Region Asien/Pazifik haben wir das betriebliche Ergebnis um 119,7 Prozent auf 306 Mio. Euro mehr als verdoppelt (96,6 Prozent bereinigt um Wechselkurseffekte). Dies ist vor allem auf die deutliche Erholung im Unternehmensbereich Adhesive Technologies zurückzuführen. Die Umsatzrendite der Region erholte sich signifikant von 8,4 Prozent auf 14,1 Prozent.

Weitere Erläuterungen zur Geschäftsentwicklung finden Sie in der Darstellung der Unternehmensbereiche ab [GB Seite 66](#).

**Vergleich des tatsächlichen mit dem prognostizierten Geschäftsverlauf**

Im Rahmen des Berichts über das Geschäftsjahr 2009 hatten wir für das Geschäftsjahr 2010 die Prognose abgegeben, dass sich die Umsätze der Unternehmensbereiche wieder besser entwickeln werden als unsere relevanten Märkte und wir für das bereinigte<sup>1)</sup> betriebliche Ergebnis (EBIT) und das bereinigte<sup>1)</sup> Ergebnis je Vorzugsaktie (EPS) jeweils eine spürbare Verbesserung gegenüber den Werten des Jahres 2009 erwarten. Diese Prognose haben wir in vollem Umfang erreicht.

In allen drei Unternehmensbereichen erzielten wir organische Wachstumsraten, die über dem jeweiligen relevanten Marktwachstum lagen. Auf Konzernebene erreichten wir eine deutliche Steigerung des bereinigten<sup>1)</sup> betrieblichen Ergeb-

**EBIT nach Regionen<sup>\*)</sup>**  
in Mio. Euro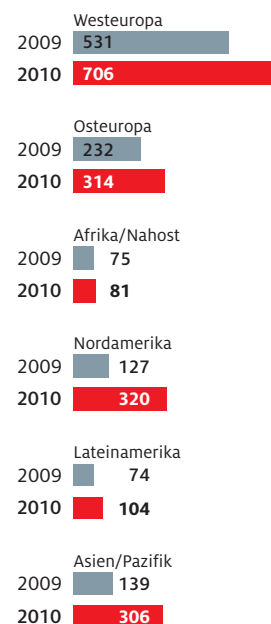

<sup>\*)</sup> Ohne Corporate.

**Prognose**  
für das Jahr 2010 erreicht.

<sup>1)</sup> Bereinigt um einmalige Aufwendungen und Erträge sowie Restrukturierungsaufwendungen.



nisses von 36,5 Prozent auf 1.862 Mio. Euro (2009: 1.364 Mio. Euro) sowie eine noch stärkere Steigerung des bereinigten<sup>1)</sup> Ergebnisses je Vorzugsaktie von 47,6 Prozent auf 2,82 Euro (2009: 1,91 Euro).

Die bereinigte<sup>1)</sup> Umsatzrendite erfüllte mit einem erfreulichen Anstieg von 2,3 Prozentpunkten auf 12,3 Prozent ebenfalls die im Rahmen der Berichterstattung über das dritte Quartal am 10. November 2010 abgegebene Prognose von „deutlich über 12,0 Prozent“.

#### Vergleich Prognose und Ergebnisse 2010

|                                                    | Prognose 2010                                        | Ergebnisse 2010                                                                                                                                                                                                         |
|----------------------------------------------------|------------------------------------------------------|-------------------------------------------------------------------------------------------------------------------------------------------------------------------------------------------------------------------------|
| Organisches Umsatzwachstum                         | Besser als die Entwicklung unserer relevanten Märkte | Wasch-/Reinigungsmittel: +1,5 Prozent (relevanter Markt: -0,8 Prozent)<br>Kosmetik/Körperpflege: +4,8 Prozent (relevanter Markt: -0,2 Prozent)<br>Adhesive Technologies: +11,8 Prozent (relevanter Markt: +5,0 Prozent) |
| Bereinigter <sup>1)</sup> EBIT                     | Spürbare Verbesserung                                | Verbesserung um 36,5 Prozent                                                                                                                                                                                            |
| Bereinigtes <sup>1)</sup> Ergebnis je Vorzugsaktie | Spürbare Verbesserung                                | Verbesserung um 47,6 Prozent                                                                                                                                                                                            |

#### National Starch-Geschäfte: Integration in Adhesive Technologies erfolgreich abgeschlossen

Die weltweite Integration der 2008 erworbenen National Starch-Geschäfte Adhesives (Klebstoffe) und Electronic Materials (Elektronik) konnten wir Ende des Jahres 2010 erfolgreich abschließen. Die Integrationsaktivitäten haben wir schneller als ursprünglich geplant umgesetzt und erwarten für das Jahr 2011, die geplanten Synergien in Höhe von 250 Mio. Euro mindestens erreichen zu können. Die Optimierung des gemeinsamen Produktionsnetzwerks und der Supply Chain sowie die Identifizierung von zusätzlichen Potenzialen in den Absatzmärkten bildeten die Schwerpunkte der Integrationsarbeit des vergangenen Jahres. Für die Produktion haben wir Kompetenzzentren eingerichtet, in denen wir Technologien gebündelt haben und Skaleneffekte erzielen konnten. Für wesentliche Teile der Materialwirtschaft in Westeuropa haben wir ein Regionalkonzept implementiert, das wir in seinen Grundzügen mit dem Geschäft von National Starch übernommen haben.

In unseren Absatzmärkten haben wir systematisch zusätzliche Potenziale identifiziert. Wir haben die Möglichkeit genutzt, den jeweils neuen Kunden die moderne Technologie von National Starch beziehungsweise von Henkel anzubieten. Das angebotene Produktportfolio haben wir so konsolidiert und weiter optimiert. Dies führte auch zu einer deutlichen Reduktion der Komplexität.

Das Integrationsprogramm stellt seit seinem Beginn im April 2008 einen wichtigen Beitrag zum Erfolg des Unternehmensbereichs Adhesive

Technologies dar. Mit der beschleunigten Integration der National Starch-Geschäfte und der damit verbundenen organisatorischen und strategischen Neuausrichtung des Unternehmensbereichs haben wir eine wichtige Voraussetzung für weiteres profitables Wachstum geschaffen.

#### Aufwandsposten

Im Folgenden werden die um einmalige Aufwendungen und Erträge sowie Restrukturierungsaufwendungen bereinigten betrieblichen Aufwandsposten kommentiert. Die Überleitungsrechnung sowie die Verteilung der Restrukturierungsaufwendungen auf die Kostenzeilen der Gewinn- und Verlustrechnung finden Sie auf [GB Seite 90](#).

Die Kosten der umgesetzten Leistungen erhöhten sich gegenüber dem Vorjahr um 9,3 Prozent auf 7.983 Mio. Euro. Das Bruttoergebnis vom Umsatz stieg auf 7.109 Mio. Euro; die Bruttomarge verbesserte sich um 0,9 Prozentpunkte auf 47,1 Prozent. Insbesondere unsere consequenten Effizienzverbesserungen sowie die Steigerung des Absatzvolumens trugen zu dieser positiven Entwicklung bei. Sie konnten den Einfluss von gesunkenen Verkaufspreisen sowie von steigenden Preisen für Rohstoffe und Verpackungen überkompensieren.

Die Aufwendungen für Marketing und Vertrieb lagen mit 4.229 Mio. Euro um 10,4 Prozent über dem Vorjahreswert. Auch dieses Jahr haben wir zur Unterstützung unserer Marken wieder stark in Werbung und Promotion investiert. Die Quote in Prozent vom Umsatz reduzierte sich leicht um 0,1 Prozentpunkte auf 28,1 Prozent.

Mindestens

**250 Mio. €**

Synergien aus der Integration der National Starch-Geschäfte für das Jahr 2011 erwartet.

**47,1 %**

bereinigtes<sup>1)</sup> Bruttomarge.

<sup>1)</sup> Bereinigt um einmalige Aufwendungen und Erträge sowie Restrukturierungsaufwendungen.

Für Forschung und Entwicklung wendeten wir insgesamt 383 Mio. Euro auf. Die Forschungsquote – das Verhältnis der Forschungs- und Entwicklungsaufwendungen zum Umsatz – betrug 2,5 Prozent. Der leichte Rückgang im Vergleich zum Vorjahr resultiert aus Synergien aus unseren Effizienzsteigerungsprogrammen.

Der Anteil der Verwaltungsaufwendungen bezogen auf den Umsatz verminderte sich um 0,5 Prozentpunkte. Dies ist vor allem auf die konsequente Umsetzung unserer Programme zur Effizienzsteigerung sowie auf den Ausbau unserer Shared Service Center zurückzuführen.

### Sonstige betriebliche Aufwendungen und Erträge

Der Saldo der bereinigten betrieblichen Erträge und Aufwendungen stieg auf 76 Mio. Euro. So führten höhere Gewinne aus Anlageabgängen und Zuschreibungen sowie geringere Abgangsverluste insgesamt zu einer Verbesserung um 20 Mio. Euro. Darüber hinaus stieg der Saldo durch eine Vielzahl von Einzelfällen aus dem operativen Geschäft, zum Beispiel Versicherungsentschädigungen, Zuschüsse, Bonusgutschriften und ähnliche Erträge.

### Finanzergebnis

Insgesamt verbesserte sich das Finanzergebnis auf –171 Mio. Euro. Positiv auf das Zinsergebnis wirkten sich insbesondere die gestiegenen Erträge des Vermögens unserer Pensionsfonds aus. Die weitere Reduzierung der Nettoverschuldung entlastete den Zinsaufwand, während sich langfristige US-Dollar-Zinssicherungen erhöhend auswirkten.

### Jahresüberschuss

Das Ergebnis vor Steuern stieg um 75,4 Prozent auf 1.552 Mio. Euro. Die Steuern vom Einkommen und Ertrag betrugen 409 Mio. Euro. Die Steuerquote lag bei 26,4 Prozent und ist damit um 2,6 Prozent-

punkte niedriger als im Vorjahr. Im Vorjahr war die Steuerquote von Sondereffekten aus der Integration der National Starch-Geschäfte belastet.

Der Jahresüberschuss erhöhte sich um 82,0 Prozent auf 1.143 Mio. Euro. Nach Abzug von nicht beherrschenden Anteilen in Höhe von 25 Mio. Euro lag das Ergebnis bei 1.118 Mio. Euro (+85,7 Prozent). Der bereinigte Jahresüberschuss nach nicht beherrschenden Anteilen stieg um 47,9 Prozent auf 1.217 Mio. Euro.

Den Jahresabschluss des Mutterunternehmens des Henkel-Konzerns, der Henkel AG & Co. KGaA, in Kurzfassung finden Sie auf [GB Seite 134](#).

### Dividenden

Entsprechend unserer Finanzstrategie soll die Dividendenausschüttung der Henkel AG & Co. KGaA etwa 25 Prozent des um Sondereinflüsse bereinigten Konzernergebnisses nach nicht beherrschenden Anteilen betragen. Wir werden der Hauptversammlung daher eine im Vergleich zum Vorjahr höhere Dividende vorschlagen, und zwar von 0,72 Euro je Vorzugsaktie und von 0,70 Euro je Stammaktie. Die Ausschüttungsquote würde dadurch bei 25,5 Prozent liegen.

### Ergebnis je Aktie (EPS)

Das unverwässerte Ergebnis je Vorzugsaktie stieg von 1,40 Euro auf 2,59 Euro. Das Ergebnis je Stammaktie erhöhte sich von 1,38 Euro auf 2,57 Euro. Das bereinigte Ergebnis je Vorzugsaktie belief sich auf 2,82 Euro (Vorjahr: 1,91 Euro). Das im Jahr 2000 gestartete Aktien-Optionsprogramm führte zum 31. Dezember 2010 zu einer Verwässerung des Ergebnisses je Stamm- und Vorzugsaktie von jeweils einem Eurozent.

### Jahresüberschuss in Mio. Euro

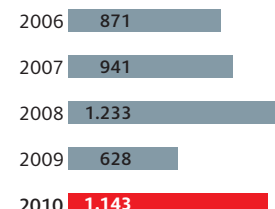

### Dividende Vorzugsaktie in Euro

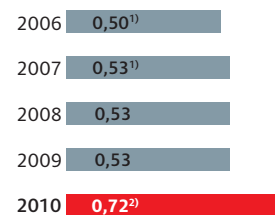

<sup>1)</sup> Vergleichbar nach Aktiensplit 1:3 vom 18. Juni 2007.

<sup>2)</sup> Vorschlag.

### Überleitung vom Umsatz zum bereinigten betrieblichen Ergebnis

| in Mio. Euro                                     | 2009         | %           | 2010         | %           | Veränderung  |
|--------------------------------------------------|--------------|-------------|--------------|-------------|--------------|
| Umsatzerlöse                                     | 13.573       | 100,0       | 15.092       | 100,0       | 11,2%        |
| Kosten der umgesetzten Leistungen                | -7.305       | -53,8       | -7.983       | -52,9       | 9,3%         |
| <b>Bruttoergebnis vom Umsatz</b>                 | <b>6.268</b> | <b>46,2</b> | <b>7.109</b> | <b>47,1</b> | <b>13,4%</b> |
| Marketing- und Vertriebsaufwendungen             | -3.830       | -28,2       | -4.229       | -28,1       | 10,4%        |
| Forschungs- und Entwicklungsaufwendungen         | -383         | -2,8        | -383         | -2,5        | 0,0%         |
| Verwaltungsaufwendungen                          | -703         | -5,2        | -711         | -4,7        | 1,1%         |
| Sonstige betriebliche Erträge/Aufwendungen       | 12           | 0,1         | 76           | 0,5         | >100%        |
| <b>Bereinigtes betriebliches Ergebnis (EBIT)</b> | <b>1.364</b> | <b>10,0</b> | <b>1.862</b> | <b>12,3</b> | <b>36,5%</b> |

## Vermögens- und Finanzlage

### Akquisitionen und Divestments

Im Unternehmensbereich Wasch-/Reinigungsmittel haben wir bei zwei Gesellschaften unseren Anteilsbesitz auf 100 Prozent aufgestockt. Hierfür wurden in Guatemala 23 Mio. Euro und auf Zypern 6 Mio. Euro gezahlt.

Wir haben für den Unternehmensbereich Kosmetik/Körperpflege für den Erwerb der Schwarzkopf Inc., Culver City, Kalifornien, USA, einen Betrag von 41 Mio. Euro gezahlt, um durch die direkte Präsenz im Markt die Potenziale besser ausschöpfen zu können. Darüber hinaus haben wir für eine Akquisition in Nahost einen Kaufpreis in Höhe von 1 Mio. Euro gezahlt.

Im Unternehmensbereich Adhesive Technologies haben wir bei einer Gesellschaft in China unseren Anteilsbesitz auf 100 Prozent aufgestockt. Hierfür wurden 7 Mio. Euro aufgewendet. In Taiwan haben wir das Geschäft mit Lötkugeln für 5 Mio. Euro verkauft. Nicht zum Kerngeschäft zählende Aktivitäten haben wir in Südkorea mit einem Verkaufserlös von 15 Mio. Euro und in Japan mit einem Verkaufserlös von 2 Mio. Euro veräußert.

Weder aus den getätigten Akquisitionen und Divestments noch aus anderen Maßnahmen ergaben sich Änderungen in der Geschäfts- und Organisationsstruktur. Für eine ausführliche Darstellung der Organisation und Geschäftstätigkeit verweisen wir auf die entsprechenden Ausführungen auf [GB Seite 40](#).

### Investitionen

Das Investitionsvolumen (ohne Finanzanlagen) betrug im Berichtsjahr 256 Mio. Euro. Die Investitionen in Sachanlagen bestehender Geschäfte beliefen sich auf 240 Mio. Euro und lagen damit um 104 Mio. Euro unter dem Vorjahr. Der Rückgang der Investitionen gegenüber dem Vorjahr ist bedingt durch eine Reduzierung der Investitionsvorhaben und eine zeitliche Verschiebung von Großprojekten. Einen wesentlichen Teil der Sachanlageinvestitionen haben wir im Jahr 2010 für die Fortsetzung der Integration und Konsolidierung der akquirierten Standorte von National Starch eingesetzt. Weitere Schwerpunkte waren Strukturoptimierungen in der Produktion und Investitionen in Produktionsanlagen zur Herstellung innovativer, nachhaltiger Produktlinien.

Große Einzelprojekte des Jahres 2010 waren:

- eine neue Produktionsanlage für Gel-Flüssigwaschmittel in Wien, Österreich (Wasch-/Reinigungsmittel),
- die Erweiterung der Lagerkapazitäten für Waschmittel in Russland und Italien (Wasch-/Reinigungsmittel),
- eine Produktionsanlage für eine neue Deo-Roller-Generation in West Hazleton, Pennsylvania, USA (Kosmetik/Körperpflege),
- die Erweiterung der Produktion von Duschgelen in West Hazleton, Pennsylvania, USA (Kosmetik/Körperpflege),
- die Fertigstellung und Inbetriebnahme neuer Produktionsanlagen für Bautechnikprodukte in der Ukraine und in Russland (Adhesive Technologies),
- die Erweiterung der Produktion für Schmelzklebstoffe in Bopfingen, Deutschland (Adhesive Technologies),
- die Inbetriebnahme des neuen Fertigwarenlagers für Konsumentenklebstoffe in Louisville, Kentucky, USA (Adhesive Technologies).

### Investitionen 2010

| in Mio. Euro                | Bestehendes Geschäft | Akquisitionen | Gesamt     |
|-----------------------------|----------------------|---------------|------------|
| Immaterielle Vermögenswerte | 16                   | 4             | 20         |
| Sachanlagen                 | 240                  | –             | 240        |
| <b>Summe</b>                | <b>256</b>           | <b>4</b>      | <b>260</b> |

Strukturbedingt lag der Schwerpunkt der Investitionen im Jahr 2010 auf Europa und Nordamerika. Rund zwei Drittel der Investitionssumme haben wir für Erweiterungsinvestitionen aufgewendet.

### Vermögenslage

Die Bilanzsumme 2010 stieg gegenüber dem Vorjahr um 1,7 Mrd. Euro auf 17,5 Mrd. Euro. Auf der Aktivseite war der Anstieg der Immateriellen Vermögenswerte im Wesentlichen durch die Währungsumrechnung mit dem stärkeren US-Dollar bedingt. Im leicht gesunkenen Sachanlagevermögen standen den Investitionen in bestehende Geschäfte in Höhe von 240 Mio. Euro Abschreibungen von 342 Mio. Euro und Abgänge mit einem Buchwert von 38 Mio. Euro gegenüber. Gegenläufig wirkte ein positiver Währungskurseffekt von 100 Mio. Euro.

Das kurzfristige Vermögen ist von 4,6 Mrd. Euro auf 5,9 Mrd. Euro gestiegen. Zurückzuführen ist dies neben dem Wechselkurseinfluss auf höhere Vorräte und Forderungen aus Lieferungen

### Investitionen nach Unternehmensbereichen

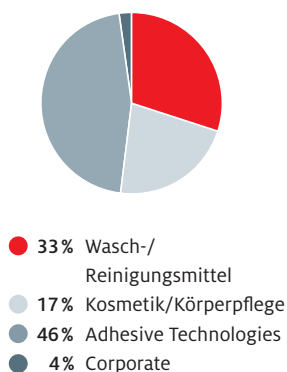

Corporate = Umsätze und Leistungen, die nicht den Unternehmensbereichen zugeordnet werden können.

**Bilanzstruktur**

in Mio. Euro

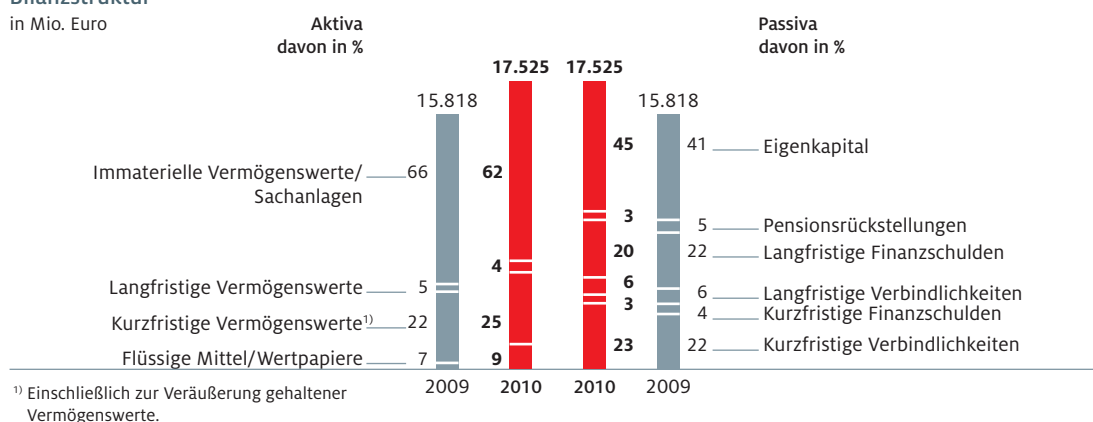

und Leistungen, bedingt durch das gestiegene Geschäftsvolumen. Die Sonstigen kurzfristigen finanziellen Vermögenswerte sind durch höhere Marktwerte der Zinsderivate zur Absicherung der langfristigen Finanzschulden gekennzeichnet. Die Flüssigen Mittel erhöhten sich infolge des erneut kräftigen Mittelzuflusses aus der laufenden Geschäftstätigkeit um 405 Mio. Euro auf 1.515 Mio. Euro.

Das Eigenkapital einschließlich der nicht beherrschenden Anteile stieg auf 7.950 Mio. Euro. Die Veränderungen sind im Einzelnen in der Eigenkapitalveränderungsrechnung auf [Seite 91](#) dargestellt. Die Eigenkapitalquote ist im Vergleich zum Vorjahr um 4,0 Prozentpunkte auf 45,4 Prozent gestiegen.

Die Langfristigen Verbindlichkeiten sind im Vergleich zum Vorjahr stabil bei 5,1 Mrd. Euro. Der Anstieg der Langfristigen Finanzschulden um 144 Mio. Euro ist hauptsächlich auf die Umrechnung von US-Dollar-Schulden mit dem gestiegenen Wechselkurs zurückzuführen. Bei den Pensionsverpflichtungen nutzten wir den starken operativen Mittelzufluss zu einer deutlichen Dotierung des Vermögens unserer Pensionsfonds. Dies trug zur Reduzierung der Pensionsrückstellung bei.

Bei den Kurzfristigen Verbindlichkeiten war ein Anstieg von 316 Mio. Euro zu verzeichnen. Dieser ist mit 423 Mio. Euro auf die Verbindlichkeiten aus Lieferungen und Leistungen zurückzuführen und spiegelt das höhere Einkaufsvolumen entsprechend der positiven Geschäftsentwicklung wider. Gegenläufig wirkte die Rückführung unserer kurzfristigen Finanzschulden um 124 Mio. Euro.

Die Nettoverschuldung<sup>1)</sup> haben wir im Lauf des Geschäftsjahres weiter verringert. Sie betrug 2.343 Mio. Euro und lag damit um 456 Mio. Euro unter dem Vorjahreswert.

**Finanzierung**

Die finanzielle Steuerung des Konzerns erfolgt zentral durch die Henkel AG & Co. KGaA. Finanzmittel werden in der Regel zentral beschafft und konzernintern verteilt. Wir verfolgen eine konservative und auf Flexibilität ausgerichtete Verschuldungspolitik mit einem ausgewogen gestalteten Finanzierungsportfolio. Die Sicherung der Liquidität und der Kreditwürdigkeit des Konzerns sowie die nachhaltige Steigerung des Unternehmenswerts sind die wichtigsten Ziele des Finanzmanagements. Dabei stimmen wir Kapitalbedarf und Kapitalbeschaffung so aufeinander ab, dass den Erfordernissen an Ertrag, Liquidität, Sicherheit und Unabhängigkeit ausgewogen Rechnung getragen wird. Den nicht für Investitionen, Dividenden und Zinsausgaben benötigten Cashflow verwenden wir zur Rückführung der Nettoverschuldung, zur Dotierung des Pensionsvermögens sowie zur Finanzierung von Akquisitionen. Den kurzfristigen Finanzierungsbedarf decken wir vor allem über Commercial Paper und Bankdarlehen. Das Multi-Currency-Commercial-Paper-Programm ist zusätzlich durch eine syndizierte Kreditfazilität abgesichert. Die ausstehenden Anleihen dienen der Deckung langfristiger Finanzierungserfordernisse.

Unsere Kreditwürdigkeit wird regelmäßig von den beiden Ratingagenturen Standard & Poor's und Moody's überprüft. Sowohl Standard & Poor's als auch Moody's stufen Henkel derzeit mit „A-/A-2“ (S&P) und „A3/P2“ (Moody's) im bestmöglichen,

**Nettoverschuldung**

in Mio. Euro

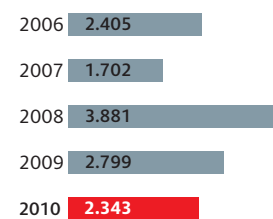

<sup>1)</sup> Finanzschulden abzüglich der Flüssigen Mittel und abzüglich eines positiven oder zuzüglich eines negativen Marktwerts der Sicherungsgeschäfte für die Finanzschulden, sofern die Finanzschulden selbst ebenfalls einer „Mark to Market“-Bewertung unterliegen.

dem Investment-Grade-Segment ein. Wir streben eine Heraufstufung unseres langfristigen Kredit-Ratings um eine Stufe auf „A flat“ (Standard & Poor's) und „A2“ (Moody's) an.

#### Kredit-Ratings

|             | Standard & Poor's | Moody's |
|-------------|-------------------|---------|
| Langfristig | A–                | A3      |
| Ausblick    | stabil            | stabil  |
| Kurzfristig | A–2               | P2      |

Stand: 31.12.2010.

Zum 31. Dezember 2010 betrugen unsere Langfristigen Finanzschulden 3.570 Mio. Euro. Darin enthalten sind die im November 2005 begebene Hybrid-Anleihe mit einem Nennwert von 1,3 Mrd. Euro und die im Mai 2003 sowie März 2009 emittierten Festzins-Anleihen mit jeweils 1,0 Mrd. Euro. Die Kurzfristigen – das heißt mit einer Laufzeit unter zwölf Monaten ausgestatteten – Finanzschulden betrugen zum Bilanzstichtag 536 Mio. Euro. Dabei handelt es sich um verzinsliche Darlehen und Kredite von Banken.

Den Cashflow aus laufender Geschäftstätigkeit haben wir zur Rückzahlung von Kurzfristigen Finanzschulden und zum Aufbau von Flüssigen Mitteln verwendet. Insgesamt wurde somit die Nettoverschuldung reduziert. Die Hybrid-Anleihe wird von Standard & Poor's zu 50 Prozent und von Moody's nach Änderung der Bewertungsmethode ebenfalls zu 50 Prozent als Eigenkapital angerechnet. Die Anrechnung entlastet die ratingspezifischen Verschuldungskennziffern des Konzerns (siehe Tabelle Finanzkennzahlen auf [GB Seite 55](#)).

Weitere Informationen zur finanziellen Steuerung und zu den Finanzinstrumenten finden Sie im Konzernanhang unter den [GB Textziffern 30 und 31](#) auf den Seiten 115 bis 121.

Das finanzielle Risikomanagement von Henkel wird im [GB Risikobericht](#) ausführlich erläutert, [Seiten 78 bis 82](#).

#### Finanzlage

Der Cashflow aus laufender Geschäftstätigkeit 2010 betrug 1.851 Mio. Euro; damit lag er annähernd auf der Höhe des Vorjahres. Der Cashflow wurde von dem deutlich gestiegenen betrieblichen Ergebnis geprägt. Niedrigere Steuerzahlungen für Vorjahre und die Nutzung von Verlustvorträgen bewirkten,

dass die Auszahlungen für Ertragsteuern in geringerem Maß stiegen als das betriebliche Ergebnis. Trotz der kräftigen Belebung des Geschäfts war der Mittelfluss im Netto-Umlaufvermögen weitgehend ausgeglichen. Im Vorjahr hatten Optimierungsmaßnahmen zu einer deutlichen Reduzierung des Netto-Umlaufvermögens geführt.

Der Cashflow aus Investitionstätigkeit/Akquisitionen war im Vergleich zum Vorjahr einerseits durch niedrigere Investitionen in Immaterielle Vermögenswerte und Sachanlagen entlastet. Andererseits flossen nach der Veräußerung der nordamerikanischen Konsumentenklebstoffmarken im Jahr 2009 niedrigere Erlöse durch den Verkauf einzelner Aktivitäten im laufenden Geschäftsjahr zu.

Der Cashflow aus laufender Geschäftstätigkeit wurde im Berichtsjahr erneut für Zuweisungen zum Vermögen der Pensionsfonds genutzt. Das dadurch gestiegene Pensionsvermögen erhöhte den Deckungsgrad der Pensionsverpflichtungen auf das angestrebte Niveau von circa 90 Prozent. Diese Dotierung sowie die Reduzierung von Finanzschulden führte gegenüber dem Vorjahr zu einem um 291 Mio. Euro höheren Mittelabfluss im Cashflow aus Finanzierungstätigkeit.

Die Flüssigen Mittel/Wertpapiere haben sich im Zug des starken Cashflows aus laufender Geschäftstätigkeit um 405 Mio. Euro auf 1.515 Mio. Euro erhöht.

Der Free Cashflow in Höhe von 1.508 Mio. Euro lag um 46 Mio. Euro über dem vergleichbaren Vorjahreswert und wurde durch die Entwicklung des Cashflows aus laufender Geschäftstätigkeit bestimmt. Ferner trug das im Berichtsjahr niedrigere Investitionsvolumen zum hohen Free Cashflow bei.

#### Finanzkennzahlen

Der Zinsdeckungsfaktor, also die Deckung des Zinsergebnisses durch das betriebliche Ergebnis vor Abschreibungen (EBITDA), wurde sowohl von dem verbesserten Zinsergebnis als auch von dem höheren EBITDA positiv beeinflusst.

Der Abbau der Nettoverschuldung im Jahr 2010 wirkt sich günstig auf die Operative Schuldendeckung aus. In der gestiegenen Eigenkapitalquote zeigt sich die im Berichtsjahr gestärkte Finanzierungskraft des Konzerns.



## Finanzkennzahlen

|                                                                                                                                                                                       | 2009  | 2010  |
|---------------------------------------------------------------------------------------------------------------------------------------------------------------------------------------|-------|-------|
| <b>Zinsdeckungsfaktor</b><br>(EBITDA / Zinsergebnis inklusive<br>Zinsanteil Pensionsrückstellungen)                                                                                   | 8,7   | 12,8  |
| <b>Operative Schuldendeckung</b><br>(Jahresüberschuss + Abschreibungen<br>+ Zinsanteil<br>Pensionsrückstellungen / Nettofinanz-<br>schulden und Pensionsrückstellungen) <sup>1)</sup> | 41,8% | 71,4% |
| <b>Eigenkapitalquote</b><br>(Eigenkapital / Bilanzsumme)                                                                                                                              | 41,4% | 45,4% |

<sup>1)</sup> Berücksichtigung der Hybrid-Anleihe nur zu 50 Prozent als Fremdkapital.

## Mitarbeiter

Eine positive Entwicklung der wirtschaftlichen Rahmenbedingungen und die Effekte unserer zügig abgeschlossenen Restrukturierungsprogramme prägten den Personalbestand im Jahr 2010. Er ist zum Jahresende gegenüber dem Vorjahr um 1.408 auf 47.854 Beschäftigte leicht gesunken. Der Umsatz pro Mitarbeiter wuchs deutlich um 19 Prozent auf 313.502 Euro. Der Personalaufwand des Henkel-Konzerns betrug 2.487 Mio. Euro. Entsprechend unserer Strategie, Wachstumsregionen auszubauen, erhöhten wir den Personalbestand in Osteuropa und Asien, während er sich in den reifen Märkten Westeuropa und Nordamerika reduzierte. Auch im Jahr 2011 wollen wir Mitarbeiter in den Wachstumsregionen einstellen, vor allem in den Bereichen Marketing und Vertrieb.

Im Jahr 2010 konnten wir uns erneut in Arbeitgeber rankings vieler Länder als attraktives Unternehmen sowohl für Hochschulabgänger als auch für Interessenten mit Berufserfahrung erfolgreich positionieren. Das CRF Institute, eines der führenden Forschungsunternehmen im Bereich Arbeitgeberzertifizierung und Employer Branding, kürte Henkel mit Platz 1 zum „Top Arbeitgeber Deutschland 2010“.

Weltweit arbeiten wir eng mit für uns wichtigen Universitäten und renommierten Professoren zusammen, um die besten Nachwuchskräfte für uns zu gewinnen. Darüber hinaus haben wir zum Wintersemester 2010/2011 – nach einem erfolgreichen Abschluss der dritten Staffel – eine weitere Runde unseres Innovationswettbewerbs für Studierende, „Henkel Innovation Challenge“, in 14 europäischen und vier asiatischen Ländern gestartet. Für die zielgruppengerechte Ansprache der Studierenden nutzen wir verstärkt „Social Media“ wie Facebook. Ein vereinfachter Teilnahmeprozess und ein begleitendes Mentorenprogramm erhöhen die Attraktivität des Wettbewerbs und führen zu einem deutlichen Anstieg von qualifizierten Bewerbungen.

2010 haben wir intensiv an einer neuen „Employer Branding“-Kampagne gearbeitet, um Henkel ab 2011 noch stärker als Wunsch-Arbeitgeber zu positionieren. Die neue Kampagne stellt das Besondere von Henkel und die Chancen und Möglichkeiten dar, die das Unternehmen bietet, um weltweit die besten Talente für Henkel zu begeistern. Genauso wichtig ist es aber auch, bestehende Mitarbeiter zu halten und ihre Bindung an Henkel zu stärken.

Henkel bietet in Deutschland mehr als 20 Ausbildungsberufe an, in denen wir im vergangenen Jahr 165 Auszubildende eingestellt haben. Insgesamt sind 494 Auszubildende unter Vertrag. 2010 bestanden erstmalig acht Auszubildende des neuen, von Henkel maßgeblich mitentwickelten Ausbildungsberufs Werkfeuerwehrmann/-frau ihre Abschlussprüfung vor der Industrie- und Handelskammer (IHK). Über die Ausbildung hinaus haben wir die im Jahr 2009 eingeführten dualen Studiengänge fest etabliert. Hierbei verbinden die Studenten eine herkömmliche Ausbildung mit einem Bachelor-Studium an einer Hochschule und erlangen bei gleichzeitiger beruflicher Praxiserfahrung einen akademischen Abschluss. Insgesamt stieg die Zahl der Bewerbungen für beide Ausbildungsangebote

## Mitarbeiter nach Unternehmensbereichen

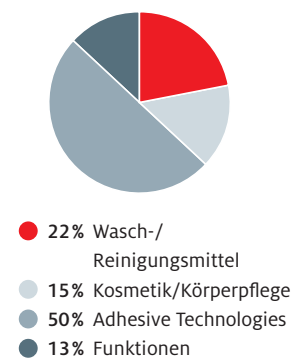

## Mitarbeiter nach Regionen im Jahr 2010

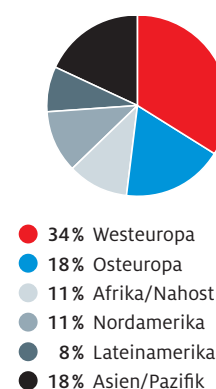

## Mitarbeiter

| (Stand jeweils am 31. Dezember <sup>1)</sup> ) | 2006          | %            | 2007          | %            | 2008          | %            | 2009          | %            | 2010          | %            |
|------------------------------------------------|---------------|--------------|---------------|--------------|---------------|--------------|---------------|--------------|---------------|--------------|
| Europa/Afrika/Nahost                           | 33.326        | 64,3         | 33.687        | 64,0         | 33.485        | 60,7         | 30.933        | 62,8         | 30.078        | 62,9         |
| Nordamerika                                    | 6.651         | 12,8         | 6.438         | 12,2         | 7.360         | 13,4         | 5.714         | 11,6         | 5.440         | 11,4         |
| Lateinamerika                                  | 4.297         | 8,3          | 4.268         | 8,1          | 4.293         | 7,8          | 4.002         | 8,1          | 3.699         | 7,7          |
| Asien/Pazifik                                  | 7.545         | 14,6         | 8.235         | 15,7         | 10.004        | 18,1         | 8.613         | 17,5         | 8.637         | 18,0         |
| <b>Gesamt</b>                                  | <b>51.819</b> | <b>100,0</b> | <b>52.628</b> | <b>100,0</b> | <b>55.142</b> | <b>100,0</b> | <b>49.262</b> | <b>100,0</b> | <b>47.854</b> | <b>100,0</b> |

<sup>1)</sup> Basis: Stammpersonal ohne Auszubildende.

Mitarbeiter  
nach Tätigkeitsbereichen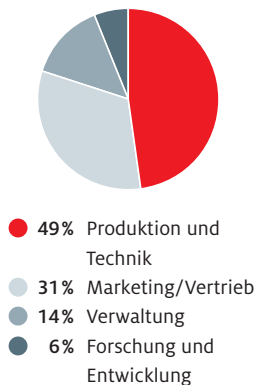Mitarbeiter nach  
Altersgruppen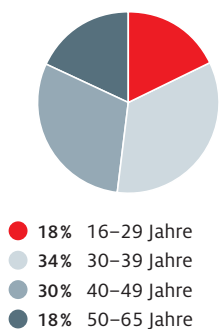

Rund **29%**  
unserer Führungskräfte  
sind Frauen.

im Vergleich zum Vorjahr deutlich an, was auf die Attraktivität der Henkel-Ausbildung schließen lässt. Unseren Bewerbungsprozess, der eine berufsspezifische Eignungsdiagnostik beinhaltet, haben wir mit dem Grundsatz „Online only“ weiter optimiert. Dies führt für die Bewerber zu einem reibungslosen Bewerbungsablauf und intern zu mehr Effizienz.

Der im Jahr 2009 weltweit auf alle Führungskräfte ausgeweitete Talent-Management-Prozess ist nun bei Henkel fest etabliert. Kern des Prozesses sind sogenannte Talentrunden. Hierbei evaluieren Gruppen von Führungskräften unter Vorsitz ihrer nächsthöheren Führungskraft die Leistung und das Potenzial ihrer Mitarbeiter nach globalen Standards und beschließen gezielte Weiterbildungsmaßnahmen. 2010 haben wir nun die bisher parallel vom Vorgesetzten beurteilten Management-Kompetenzen in diesen Prozess integriert und an künftige Anforderungen eines sich verändernden Marktumfelds angepasst. Insbesondere die präzise Definition der Potenzialkompetenzen und der Leistungskriterien sowie deren klare Abgrenzung voneinander machen den Prozess für die Mitarbeiter und die Führungskräfte noch transparenter und ermöglichen im Anschluss an die Talentrunden ein konsistentes und umfassendes Feedback. Hierbei erläutert der direkte Vorgesetzte seinen Mitarbeitern ihre Stärken und den weiteren Entwicklungsbedarf. Gemeinsam werden nächste Schritte im individuellen Entwicklungsplan festgelegt und umgesetzt.

Durch diese regelmäßige Rückmeldung zu Leistung und Zielerreichung sind wir in der Lage, einerseits die Motivation unserer Mitarbeiter zu stärken und andererseits exzellente Leistungen zu honorieren. Im Besonderen trägt hierzu auch das mit Wirkung für das Jahr 2011 deutlich weiterentwickelte und leistungsorientierte Entlohnungssystem für unsere Führungskräfte weltweit bei. Hierdurch erzielen wir eine verbesserte und transparente Leistungsdifferenzierung – also die Verbindung zwischen persönlichem Beitrag und individueller Entlohnung. Für eine künftige Auszahlung spielen neben dem Grundgehalt und einem an das Management-Level geknüpften Faktor insbesondere drei Komponenten eine Rolle: gewichtete Gruppen- und Teamkomponenten, die additiv miteinander verbunden sind und einen deutlichen Anreiz zur Erreichung der Wachstums- und Profitabilitätsziele bieten, so-

wie eine die persönliche Leistung des Mitarbeiters berücksichtigende Individualkomponente, die als Faktor auf die Summe der beiden ersten Komponenten wirkt. Die Beteiligung der Mitarbeiter am Erfolg des Unternehmens untermauert unsere „Winning Culture“ und ist für das Erreichen der strategischen Ziele des Unternehmens von besonderer Bedeutung.

Für die Etablierung einer „Winning Culture“ hat die Weiterentwicklung unseres globalen Teams eine wichtige Bedeutung. In dafür konzipierten Veranstaltungen entwickeln wir die Fach- und Führungskompetenzen unserer Mitarbeiter kontinuierlich weiter. Wir nutzen darüber hinaus internationale Entwicklungs- und Assessment-Center, um das derzeitige Kompetenzprofil unserer Führungskräfte mit zukünftigen Anforderungen abzugleichen. Wenn sich daraus Hinweise zu möglichen Entwicklungsfeldern ergeben, so können wir gezielt durch anspruchsvolle Trainingsangebote die Kompetenzen verbessern, unter anderem in Zusammenarbeit mit international renommierten Business Schools. Um eine stabile, unternehmensweite Nachfolgeplanung und kulturelle Vielfalt zu gewährleisten, haben wir im Jahr 2010 das „Executive Resource Program“ für leistungsstarke Mitarbeiter mit hohem Potenzial etabliert. Um diese Manager gezielt auf zukünftige Aufgaben vorzubereiten, betreuen wir sie in einem konsistenten und bereichsübergreifenden Prozess, der in einer maßgeschneiderten Entwicklung mündet.

Ein Schwerpunkt der Arbeit im Bereich Vielfalt & Einbeziehung (Diversity & Inclusion) lag 2010 auf der Kommunikation. So haben wir beispielsweise durch eine regelmäßige Kolumne in unserer Mitarbeiterzeitung verschiedene Aspekte von Vielfalt (Geschlecht, Nationalität, Handicap) beleuchtet sowie einen international anerkannten „Diversity Blog“ gestartet. Das internationale Team unserer Diversity-Botschafter ist weiter angewachsen und weltweit aktiv. Die Botschafter entwickeln und implementieren lokale Initiativen zur Förderung der Vielfalt. Ein anderer Schwerpunkt lag auf der Entwicklung eines Mentoring-Konzepts. Dabei tauschen sich erfahrene Führungskräfte (Mentoren) mit jüngeren Führungskräften (Mentees) in einem informellen Rahmen aus, um Unterstützung bei der persönlichen und beruflichen Weiterentwicklung zu leisten. Dies geschieht zusätzlich zur beruflichen Weiterbildung und Personalentwicklung durch die

direkten Vorgesetzten. Während wir im Jahr 2010 ein Pilotprojekt dieses Mentoring-Programms in Russland gestartet haben, planen wir die weltweite Einführung übergreifender Mentoring-Programme für 2011.

Die im Jahr 2006 in Deutschland ins Leben gerufene „Charta der Vielfalt“ wurde Ende September 2010 in eine Öffentlich-Private-Partnerschaft überführt. Henkel ist eins der elf Gründungsmitglieder dieses Vereins. Die „Charta der Vielfalt“ ist ein grundlegendes Bekenntnis zu Vielfalt, Toleranz, Fairness und Wertschätzung in einer vorurteilsfreien Arbeitswelt. Deutschlandweit haben sich mit ihrer Unterschrift mittlerweile rund 870 Unternehmen den Inhalten der „Charta der Vielfalt“ verpflichtet.

### Beschaffung

Im Geschäftsjahr 2010 hielten die außerordentlichen Preisschwankungen an den Beschaffungsmärkten an. Der Preisauftrieb bei den petrochemischen Derivaten setzte sich weiter fort und erreichte andere Rohstoffmärkte wie oleochemische Produkte, Papier und Metalle. Deren Preise stiegen ebenfalls an. Diese Preisentwicklung wurde durch Engpässe auf den Rohstoffmärkten noch verstärkt, die sich aufgrund niedriger Lagerbestände und gleichzeitig unvorhergesehener Nachfraganstiege ergaben. Störungen in der Beschaffungskette, die durch aufgeschobene Instandhaltungsmaßnahmen und unvorhergesehene Ausfälle von Produktionsanlagen verursacht wurden, verschärften die Situation zusätzlich. Diese Entwicklungen führten bei den Vorrohstoffen zu Preisniveaus, die im Gesamtjahresdurchschnitt deutlich über dem Wert des Vorjahres lagen. Diese Preise wirkten sich mit Zeitverzug wiederum negativ auf die Kosten der von Henkel eingekauften Rohstoffe und Verpackungen aus.

Unser Aufwand für direkte Materialien (Rohstoffe, Verpackungen, bezogene Waren und Leistungen) betrug im Berichtsjahr 6,7 Mrd. Euro und erhöhte sich gegenüber dem Vorjahr um 0,8 Mrd. Euro. Dies ist zum Großteil auf erhöhte Produktionsvolumina, gestiegene Preise für Rohstoffe sowie auf Wechselkurseffekte zurückzuführen. Die gestiegenen Preise für Rohstoffe konnten durch unsere globalen Beschaffungsstrategien zwar abgemildert, aber nicht kompensiert werden.

Neben der fortlaufenden Verhandlung neuer, wettbewerbsfähiger Vertragskonditionen ist unser Programm zur Reduzierung der Gesamtbeschaffungskosten ein wesentlicher Erfolgsfaktor unserer Einkaufsstrategie. Dabei arbeiten wir gemeinsam mit den drei Unternehmensbereichen kontinuierlich an der Reduktion der Produktkomplexität, der Optimierung des Rohstoffmix sowie an der weiteren Standardisierung von Verpackungen und Rohstoffen. Damit schaffen wir einerseits stärkere Verhandlungspositionen und Spielraum für die weitere Konsolidierung der Lieferantenbasis, andererseits aber auch für unsere strategischen Hauptlieferanten die Voraussetzung für ein Umsatzwachstum über alle Unternehmensbereiche hinweg. Im Verlauf der letzten beiden Jahre hat Henkel die Zahl der Lieferanten um 25 Prozent reduziert. Für den Aufbau langfristiger Geschäftsbeziehungen wählen wir Lieferanten aus, bei denen wir großes Potenzial sehen bezüglich Innovation, Optimierung von Herstellungskosten und Logistikprozessen sowie Risikomanagement zur Vermeidung von Lieferengpässen. Dies begleiten wir durch individuelle Zielvereinbarungen.

Um die Effizienz zu verbessern und die Materialversorgung sicherzustellen, optimieren wir fortlaufend die Wertschöpfungskette bei gleichzeitiger Erhaltung eines exzellenten Qualitätsniveaus. Diese Aktivitäten begleiten wir, indem wir unsere Beschaffungsprozesse verstärkt konsolidieren, zentralisieren und automatisieren.

Die Standardisierung und zentrale Steuerung der Zahlungskonditionen über alle Regionen und Geschäftsbereiche hinweg trägt zudem dauerhaft zur Verbesserung des Netto-Umlaufvermögens bei.

Im Umfeld anhaltend hoher Preisschwankungen und Versorgungsengpässe an den Beschaffungsmärkten ist ein proaktives Risikomanagement ein wichtiger Bestandteil unserer Einkaufsstrategie. Hier steht die Verringerung von Preis- und Lieferrisiken bei gleichbleibend hoher Qualität im Vordergrund. Dabei setzen wir im Rahmen eines aktiven Preismanagements Strategien zur längerfristigen Preisabsicherung sowohl über Verträge als auch – wo sinnvoll und möglich – über finanzielle Sicherungsinstrumente ein. Um die Lieferantenausfallrisiken zu minimieren, nutzen wir Lieferausfallklauseln sowie eine grundsätzliche Risikobewertung der Lieferanten im Hinblick auf

Materialaufwand nach Unternehmensbereichen

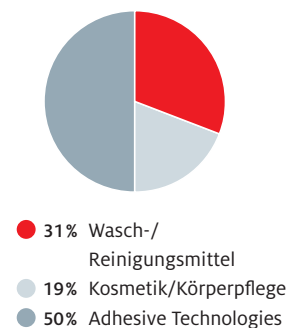

Materialaufwand nach Materialart

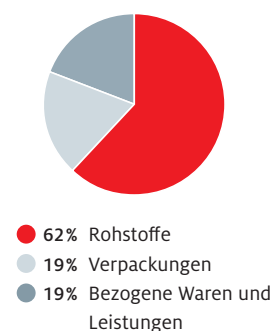

ihre finanzielle Stabilität. Wichtige, aber finanziell kritisch eingeschätzte Lieferanten unterwerfen wir einer kontinuierlichen Überwachung durch einen externen unabhängigen Finanzdienstleister. Wird bei einem Lieferanten ein hohes Ausfallrisiko identifiziert, erstellen wir systematisch Notfallpläne, um eine durchgehende Versorgung sicherzustellen.

Unsere fünf wichtigsten Rohstoffgruppen sind waschaktive Substanzen (Tenside), Rohstoffe für Polyurethan-basierte Klebstoffe, Rohstoffe für wässrige Klebsysteme, Rohstoffe zur Verwendung in Schmelzklebstoffen sowie anorganische Rohstoffe, unter anderem zum Einsatz in Waschmitteln und Oberflächen-Vorbehandlungsprodukten. Diese machen etwa 31 Prozent des Aufwands für direkte Materialien aus. Unsere fünf größten Zulieferer repräsentieren etwa 13 Prozent des Materialaufwands.

Aufgrund der deutlich verbesserten Geschäftsentwicklung erhöhte sich im Berichtsjahr auch die Nachfrage nach indirekten Materialien und Dienstleistungen sowie nach Logistikleistungen. Gleichzeitig konnten wir die Beschaffungspreise im Vergleich zum Vorjahr durch Einsparungsmaßnahmen reduzieren, die wir regional und global in allen Kategorien im Rahmen von Beschaffungsstrategien für das Gesamtunternehmen erzielt haben. Die Ausgaben stiegen in Summe um 0,5 Mrd. Euro auf 3,9 Mrd. Euro an.

### Produktion

Im Geschäftsjahr 2010 haben wir unsere Produktionsstandorte weiter optimiert. Henkel produziert in 57 Ländern an 188 Standorten. Unsere größte Produktionsstätte befindet sich in Düsseldorf, Deutschland. Hier stellen wir neben Wasch- und Reinigungsmitteln auch Klebstoffe für Konsumenten und Handwerker sowie Produkte für unsere industriellen Kunden her.

Unser Werk in Düsseldorf ist gleichzeitig der größte Produktionsstandort des Unternehmensbereichs Wasch-/Reinigungsmittel. Hier produzieren wir hauptsächlich feste und flüssige Waschmittel, Weichspüler sowie flüssige Reinigerprodukte. Insgesamt wurde der Standort Deutschland im europäischen Produktionskonzept aufgewertet. So haben wir in Düsseldorf eine neue Fabrik zur Herstellung von flüssigen Wasch- und Reinigungsmitteln in Betrieb genommen, die die Märkte in Deutschland, Benelux und der Schweiz versorgt. Die Zahl unserer Produktionsstandorte haben wir im letzten

Jahr weltweit weiter von 33 auf 31 reduziert. Durch die Konzentration unserer Wasch- und Reinigungsmittelproduktion auf weniger, aber leistungsfähigere Fabriken in Kundennähe haben wir deutliche Kosten- und Nachhaltigkeitsvorteile erzielt.

Unser größtes Werk für Kosmetik/Körperpflege steht in Wassertrüdingen, Deutschland. Neben Körper- und Haarpflegeprodukten für Konsumenten stellen wir hier auch Produkte für das Friseurgeschäft her. Mit acht Fabriken weltweit ist die Produktion unseres Unternehmensbereichs Kosmetik/Körperpflege effizient aufgestellt.

Die beiden größten Standorte für Adhesive Technologies befinden sich ebenfalls in Deutschland: in Düsseldorf – mit einem Portfolio von hochwertigen Spezialklebstoffen für Industriekunden und Konsumenten – sowie in Heidelberg, wo wir eine breite Palette von Kleb- und Dichtstoffen herstellen. Im Rahmen der Optimierung unserer weltweiten Produktion haben wir im Jahr 2010 die Konsolidierung unseres Produktionsnetzwerks fortgesetzt und die Anzahl der Fabriken um 13 auf 149 reduziert. Auch im Jahr 2011 werden wir unser globales Produktionsnetzwerk mit Blick auf die regionalen Bedürfnisse straffen, um unsere Herstellkosten weiter zu senken. Gleichzeitig erweitern wir unsere Kapazitäten in den Wachstumsregionen: Im Jahr 2010 haben wir den Bau unseres weltweit größten Werks in China beschlossen.

Im Rahmen der Effizienzsteigerungsprogramme haben wir unser Produktionsnetzwerk konzernweit verbessert: In den entwickelten Märkten haben wir die Zahl der Produktionsstandorte weiter reduziert. Innerhalb des gesamten Wertschöpfungsprozesses der Produktion und der Logistik haben wir die Komplexität abgebaut. Das umfasst die Ebene der Produktherstellung sowie die Auswahl unserer Lieferanten. Auf diese Weise konnten wir die Effizienz erheblich steigern und Kosten senken.

Unsere Optimierungen sind auch darauf ausgerichtet, unsere Produktion noch umweltverträglicher zu gestalten. Maßnahmen zur Einsparung von Energie und Wasser tragen unmittelbar zur besseren Klimaverträglichkeit der Herstellprozesse bei. Neue Lagerkonzepte sowie die Herstellung von Verpackungsmaterial unmittelbar am Ort der Abfüllung reduzieren den Transportaufwand und leisten somit ebenfalls einen Beitrag zum Klima-

schutz. Die Entwicklung unserer Umweltkennzahlen ist im Abschnitt Nachhaltigkeit auf **GB** Seite 64 dargestellt.

Die laufenden und geplanten Maßnahmen werden gleichermaßen zur Kostenoptimierung wie zur Steigerung der Nachhaltigkeit beitragen. Schwerpunkte sind weitere Ressourceneinsparungen im Bereich von Rohstoffen und Verpackungen, zusätzliche Verbesserungen in der Lieferkette sowie die stärkere Nutzung verbesserter Informationstechnologie für Planung und Steuerung.

#### Anzahl Produktionsstätten

|                         | 2009       | 2010       |
|-------------------------|------------|------------|
| Wasch-/Reinigungsmittel | 33         | 31         |
| Kosmetik/Körperpflege   | 8          | 8          |
| Adhesive Technologies   | 162        | 149        |
| <b>Gesamt</b>           | <b>203</b> | <b>188</b> |

#### Forschung und Entwicklung

Die Aufwendungen des Henkel-Konzerns für Forschung und Entwicklung betrugen im Berichtsjahr 391 Mio. Euro (bereinigt um Restrukturierungsaufwendungen: 383 Mio. Euro) nach 396 Mio. Euro (bereinigt: 383 Mio. Euro) im Jahr 2009. Dies veranschaulicht den kontinuierlichen Einsatz des Henkel-Konzerns für Innovationen, denn sie sind der wichtigste Motor für profitables Wachstum. In Relation zum Umsatz haben wir 2,6 Prozent (bereinigt: 2,5 Prozent) für Forschung und Entwicklung aufgewendet, nach 2,9 Prozent (bereinigt: 2,8 Prozent) im Vorjahr.

Der Hauptteil der Forschungs- und Entwicklungsaufwendungen entfiel auf die Bereiche der Polymerforschung und der Oberflächenmodifikation, die für alle drei Unternehmensbereiche von großer Bedeutung sind. Etwa 55 Prozent der Gesamtaufwendungen für Forschung und Entwicklung betrug der Personalaufwand.

Die Forschungs- und Entwicklungskosten wurden vollständig als Aufwand gebucht; es gab keine Entwicklungskosten, die nach den International Financial Reporting Standards in der Bilanz aktiviert wurden.

Im Jahresdurchschnitt waren 2.665 Mitarbeiter in der Forschung und Entwicklung beschäftigt (2009: 2.743). Dies entspricht 6 Prozent der gesamten Belegschaft. Die Hauptgründe für den Mitarbeiterrückgang liegen in dem im Jahr 2008

begonnenen Restrukturierungsprogramm mit der Auflösung der Zentralen Forschung sowie der Integration der National Starch-Geschäfte. Die Forschungsbereiche der Zentralen Forschung haben wir 2008 in die Forschungseinheiten unserer drei operativen Unternehmensbereiche integriert, wodurch wir marktnäher aufgestellt sind.

#### F&E-Kennzahlen

|                                | 2006  | 2007  | 2008              | 2009              | 2010              |
|--------------------------------|-------|-------|-------------------|-------------------|-------------------|
| F&E-Aufwand (Mio. Euro)        | 340   | 350   | 377 <sup>1)</sup> | 383 <sup>1)</sup> | 383 <sup>1)</sup> |
| F&E-Aufwand (in % vom Umsatz)  | 2,7   | 2,7   | 2,7 <sup>1)</sup> | 2,8 <sup>1)</sup> | 2,5 <sup>1)</sup> |
| Mitarbeiter (durchschnittlich) | 2.800 | 2.794 | 2.942             | 2.743             | 2.665             |

<sup>1)</sup> Bereinigt um Restrukturierungsaufwendungen.

Der Erfolg unserer Forschungs- und Entwicklungsaktivitäten basiert auf den Fähigkeiten unserer hoch qualifizierten Mitarbeiter. Die Teams bestehen aus Naturwissenschaftlern, überwiegend Chemikern, sowie Ingenieuren und Technikern; 18 Prozent der Mitarbeiter sind promoviert.

Als Teil unserer Forschungs- und Entwicklungsstrategie haben wir die „Open Innovation“ (offene Innovation) weiterentwickelt, das heißt die stärkere Einbindung von Universitäten, Forschungsinstituten, Lieferanten und Kunden in unseren Innovationsprozess. Wir haben ebenfalls die Mittel für die Zusammenarbeit mit externen Partnern erhöht. Die nachfolgenden Beispiele zeigen den Erfolg, den wir mit diesem Ansatz erzielt haben:

- Für den neuartigen Re-New-Effekt in den Spezialwaschmittel-Rezepturen haben wir The Dow Chemical Company mit dem „Best Innovation Contributor Award 2010“ ausgezeichnet. Das speziell für diesen Zweck entwickelte Polymer sorgt aktiv für den Formerhalt von Textilien.
- In Zusammenarbeit mit unseren Partnern in Industrie, Universitäten und Forschungsinstituten haben wir antibakterielle Silbermoleküle für die neuen Deodorants von Right Guard entwickelt, neuartige synergistische Polymerkombinationen für Taft Schaumfestiger sowie die Stammzell-technologie für Anti-Age-Kosmetik von Diadermine Novagen.
- In Kooperation mit einem großen Automobilhersteller und der Tongji-Universität in Shanghai, China, hat unser Unternehmensbereich Adhesive Technologies eine neue Generation von Strukturklebstoffen für den Leichtbau im Automobilbereich entwickelt.

#### F&E-Aufwand in Mio. Euro

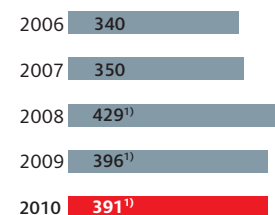

<sup>1)</sup> Inklusive Restrukturierungsaufwendungen: 52 Mio. Euro (2008), 13 Mio. Euro (2009), 8 Mio. Euro (2010).

#### F&E-Aufwand nach Unternehmensbereichen

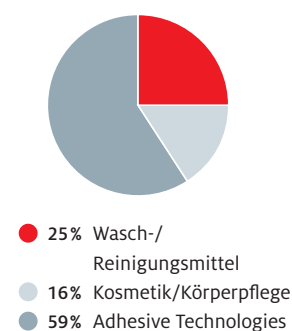



- Als Teil unserer Strategie für Asien/Pazifik haben wir wichtige Forschungsaktivitäten mit japanischen und chinesischen Universitäten und Instituten initiiert, unter anderem zur Gewichtsreduktion im Fahrzeugbau.

#### Wichtigste F&E-Standorte

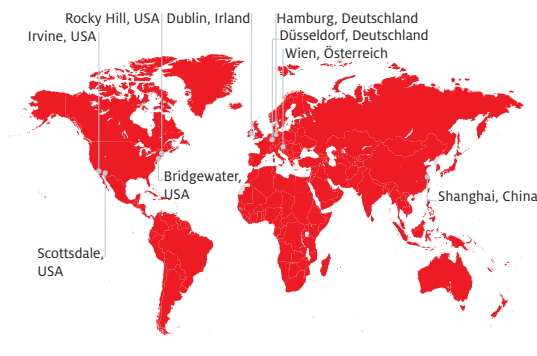

Unsere Wissenschaftler haben in vielen Bereichen wertvolle Beiträge zum Unternehmenserfolg geleistet. Die folgenden Beispiele zeigen eine Auswahl der bedeutendsten Entwicklungen:

#### Wasch-/Reinigungsmittel

- Entwicklung von Spezialwaschmittelrezepturen mit signifikant verbessertem Farbschutz und Farbauffrischung für bunte und schwarze Wäsche.
- Entwicklung eines modernen und diskret anmutenden WC-Spülers, der vier Kugeln mit den Funktionen Reinigungsschaum, Kalklösung, Schutz vor Wiederanschmutzung und Extrafrische umfasst.
- Entwicklung einer neuen Generation von Handgeschirrspülmitteln mit fühlbaren Power Crystals für die schnelle und mühelose Entfernung hartnäckiger Fettreste sowie mit höherer Ergiebigkeit.

#### Kosmetik/Körperpflege

- Entwicklung der ersten ammoniakfreien permanenten Schaumcoloration.
- Entwicklung innovativer Antitranspirant-Technologien mit Fünffach-Wirkung: Eine patentierte Powerstripe- und Powergel-Technologie blockt besonders effektiv Achselnässe, neutralisiert geruchsbildende Bakterien und bekämpft so langfristig über 48 Stunden Körpergeruch. Die zum Patent angemeldeten Deo-Aktivkapseln

sorgen für einen zusätzlichen Schutz bei Stress und erhöhter Aktivität.

- Formulierung innovativer Styling-Produkte, die 48 Stunden Volumen garantieren, ohne das Haar zu beschweren, sowie Entwicklung eines Pulvers, das sich beim Verreiben in der Hand in eine glanzgebende Haarcreme verwandelt.

#### Adhesive Technologies

- Entwicklung des ersten MDI (Methylendiisocyanat)-reduzierten und somit kennzeichnungsfreien Polyurethanschaums für Konsumenten und Handwerker: Pattex Power PU Schaum.
- Entwicklung einer neuen Generation von Liofol Robust, einem Kaschierklebstoff, der den Kunden eine sichere und einfachere Nutzung durch flexiblere und verkürzte Aushärtezeiten ermöglicht.
- Entwicklung von TeroPhon HDF, einer neuen Generation von Dämpfungsmaterialien für die Automobilindustrie, die eine sehr gute Schalldämpfung bieten und weniger wiegen.

Alle diese neuen Produkte und Entwicklungen weisen ein verbessertes Nachhaltigkeitsprofil auf: niedrigerer Energieverbrauch, Verwendung von erneuerbaren Rohstoffen und reduzierter Abfall.

Jedes Jahr verleihen wir für eine Reihe von außergewöhnlichen Entwicklungen den „Fritz-Henkel-Preis für Innovation“. Für das Jahr 2010 ging der Innovationspreis an drei interdisziplinär zusammengesetzte Projektteams, die neue Ideen verwirklicht und erfolgreich im Markt durchgesetzt haben.

- **Hygiene-Produktpalette:** Das Waschmittel Dixan Igiene e Purezza (Hygiene und Reinheit) in Italien gibt der Wäsche Frische und Reinheit, sogar bei niedrigen Temperaturen. Da immer mehr Wäsche nicht bei Temperaturen von mehr als 30 bis 40 Grad Celsius gewaschen werden sollte, reicht der Zusatz einer Dosis des Persil Hygiene Spülers zum herkömmlichen Waschmittel, um 99,99 Prozent der Bakterien und Keime zu entfernen. Die neuen Reiniger Bref / Dac Disinfectant bieten eine überlegene Desinfektionsleistung: Sie wirken sofort und schützen lang anhaltend über 24 Stunden gegen Bakterien im Haushalt. Diese gesamte Hygiene-Produktpalette liefert perfekte Reinheit für die Wäsche und für harte Oberflächen und trägt zu unseren

Nachhaltigkeits-Fokusfeldern Gesundheit und Sicherheit sowie Energie und Klima bei.

- **Syoss Color:** Syoss Color gibt lang anhaltende Farbe, Glanz und Grauhaarabdeckung jetzt in professioneller Qualität auch zu Hause – zu einem Preis, den man sich leisten kann. Die permanente Haarfarbe enthält eine Hochleistungsformel mit farbintensiver Pigmentmischung und verleiht ein farbgnaues, intensives und glänzendes Farbergebnis. Syoss Color versiegelt die Pigmentmischung tief im Haar und sorgt so für lang anhaltende, intensive Farben. Der Farb-Versiegelungs-Conditioner mit Nutri-Pflege-Komplex baut das Haar nach dem Colorieren von innen heraus auf und gibt faszinierenden Glanz.
- **Loctite HF:** Unsere halogenfreien Strukturklebstoffe werden von den innovativsten Herstellern tragbarer elektronischer Geräte eingesetzt. Diese einzigartigen Klebstoffe ermöglichen besonders starke, schnelle und widerstandsfähige Verbindungen einer Vielzahl von Materialien. Zusätzlich zu dem patentrechtlich geschützten halogenfreien Aushärtungssystem sind Fließverhalten und Reaktionsgeschwindigkeit maßgeschneidert, um zuverlässige Dosierung und Aushärtung selbst bei extrem dünnen Klebstoffstärken von 0,3 Millimetern oder weniger zu gewährleisten.

Unsere Technologien schützen wir weltweit durch rund 7.500 erteilte Erfindungspatente. Knapp 5.000 Patentanmeldungen befinden sich im Erteilungsverfahren. Im Rahmen unseres Designschutzes haben wir rund 2.000 Geschmacksmuster eintragen lassen.

Weitere Informationen zu unseren Forschungs- und Entwicklungsaktivitäten erhalten Sie im Internet unter:  [www.henkel.de/innovation](http://www.henkel.de/innovation)

### Marketing und Vertrieb

Unsere Kunden stehen im Mittelpunkt unseres Denkens und Handelns. Dementsprechend richten wir unsere Marketing- und Vertriebsaktivitäten in jedem Unternehmensbereich an den jeweiligen Bedürfnissen unserer Zielgruppen aus.

Im Unternehmensbereich Wasch-/Reinigungsmittel werden die Marketingaktivitäten aus der Zentrale und aus regionalen Kompetenzzentren heraus gesteuert. Dabei verfolgen wir eine Priorisierung von Produktkategorien, um gezielt Investitionen in den für uns bedeutendsten Marken- und Marktseg-

menten zu tätigen und dort überproportional zu wachsen. Die vertrieblichen Aktivitäten hingegen werden länderspezifisch geplant und dabei regional koordiniert. Unser unmittelbarer Kunde ist der Lebensmitteleinzelhandel mit seinen Vertriebskanälen: Supermärkte, großflächige Warenhäuser und Discounter. In Europa hat auch der Drogeriefachhandel eine hohe Bedeutung, während in den Märkten außerhalb Europas und Nordamerikas weiterhin der Absatz über Großhändler und Distributoren einen großen Anteil hat. Unser Vertrieb ist der kompetente Partner für den Handel. Für das Marketing stehen die Bedürfnisse der Endverbraucher im Vordergrund. Unser Marketing setzt Innovationsprozesse in Gang und die Erkenntnisse aus Marktforschung und -beobachtung um. Um die Verbraucher anzusprechen, entwickeln und realisieren unsere Marketing-Teams Medienstrategien und Werbeformate.

Im Unternehmensbereich Kosmetik/Körperpflege werden die Marketingstrategien sowohl im Markenartikel- als auch im Friseurgeschäft global entwickelt und lokal umgesetzt. Die Vertriebsaktivitäten hingegen werden auch hier länderspezifisch gesteuert, jedoch zunehmend international koordiniert. Die Konsumenten werden überwiegend durch Medienwerbung und Maßnahmen im Handel angesprochen. Die Ansprache durch neue Medien haben wir intensiviert. Die Verbraucher beziehen unsere Produkte über die Zwischenstufe des Handels, und zwar vor allem über den Drogeriefachhandel, den Lebensmitteleinzelhandel und die Warenhäuser. Unsere Kunden im Friseurgeschäft werden durch einen eigenen Außendienst angesprochen, der die Salons unter anderem durch Produktdemonstrationen und technische Beratung vor Ort betreut. Einen zusätzlichen Service bieten die Fachseminare und Schulungen in unseren weltweit etablierten Schwarzkopf-Akademien.

Der Unternehmensbereich Adhesive Technologies wendet sich an ein weites Spektrum von Verwendern, die Klebstoffe für ihre unterschiedlichen Anwendungen einsetzen: Dieses Spektrum reicht von großen, international tätigen Industriekunden über kleine und mittlere Industriebetriebe, Handwerker und Heimwerker bis hin zu den privaten Haushalten.

In der Regel werden unsere Kunden über eigene Vertriebsmitarbeiter angesprochen. Unsere direkten Kunden sind Industriekunden und auch

Handelsunternehmen; Letztere decken den Bedarf der privaten Verwender, Handwerker und kleinerer Industriekunden effizienter ab als ein Direktvertrieb. Während für die privaten Verwender der Lebensmitteleinzelhandel, die Baumärkte und der Facheinzelhandel eine hohe Bedeutung haben, kaufen die Handwerker unsere Produkte vornehmlich im Fachgroßhandel ein. Große, international agierende Kunden, zum Beispiel Automobilhersteller oder große Handelsketten, können wir wegen unserer einzigartigen globalen Position umfassend durch Key-Account-Management-Teams betreuen. Da viele unserer Produkte eine hohe technische Komplexität aufweisen, spielen der technische Kundenservice und die Ausbildung der Verwender eine wichtige Rolle. Der technische Kundenservice verfügt über detaillierte Kenntnisse sowohl der Produkteigenschaften als auch der kundenspezifischen Produkthanwendung und kann damit unsere Kunden von der Auswahl der einzusetzenden Produkte bis hin zur Optimierung ihrer Herstellungsprozesse beraten.

Der enge Kontakt unserer Mitarbeiter zu unseren Kunden und Verwendern ist zudem eine wichtige Quelle für Innovationen, mit denen wir bestehende Anforderungen noch besser abdecken oder auch neue Anwendungen für Klebstoffe erschließen. Unsere Marketing-Strategie entwickeln wir auf globaler wie auf regionaler Ebene. Die daraus abgeleiteten Maßnahmen setzen wir dann auf lokaler Ebene um. Für private Verwender setzen wir auf klassische Medienwerbung und unterstützende Maßnahmen am Verkaufsort („Point of Sale“) im Handel. Handwerker und Industriekunden erreichen wir vor allem über unsere Verkaufsorganisation durch technische Beratung, Produktdemonstrationen und Schulungen sowie auf Industriemessen. Unsere starken, international etablierten Marken sind dabei ein zentraler Bestandteil unseres Leistungsangebots.

### Nachhaltigkeit

Eine Balance zwischen wirtschaftlichem Erfolg, Schutz der Umwelt und gesellschaftlicher Verantwortung anzustreben – diese Grundeinstellung ist schon seit Jahrzehnten fester Bestandteil unserer Unternehmenskultur und spiegelt sich auch in unseren Unternehmenswerten wider. Wir verfolgen

das Thema Nachhaltigkeit langfristig und unternehmerisch – in all unseren Aktivitäten entlang der Wertschöpfungskette. Durch die langjährige Auseinandersetzung mit nachhaltigem Handeln haben wir eine ausgezeichnete Reputation als Unternehmen und weltweit führende Positionen erlangt. Diese führende Stellung in puncto Nachhaltigkeit wollen wir auch in Zukunft halten. Die Basis dafür bilden unsere weltweit rund 48.000 Mitarbeiter, für die die Prinzipien des nachhaltigen Wirtschaftens fest in ihrem täglichen Denken und Handeln verankert sind. Unseren Unternehmenswerten kommt dabei eine zentrale Bedeutung zu: Als Leitbilder geben sie Orientierung bei konkreten Entscheidungen im Arbeitsalltag und sind damit die Grundlage für einen langfristigen Unternehmenserfolg, der auf klaren Wertvorstellungen beruht.

Wir sind überzeugt, dass nachhaltiges Wirtschaften zum Erfolg unserer strategischen Prioritäten und damit zum langfristigen Wachstum unseres Unternehmens beiträgt. Der Anspruch, dass jedes neue Produkt bestmögliche Qualität mit der Verantwortung für Mensch und Umwelt verbindet, führt zu effizienteren Produkten und verbesserten technischen Lösungen. Nachhaltigkeit ist damit wichtiger Treiber von Innovationen und ermutigt uns, unser volles Geschäftspotenzial auszuschöpfen. Mit unserer jahrzehntelangen Erfahrung, unser Handeln nachhaltig zu gestalten, bieten wir unseren Kunden zukunftsfähige Lösungsansätze und positionieren uns als führender Partner in den Kompetenzbereichen, in denen wir tätig sind. Nach innen stärkt verantwortliches und nachhaltiges Wirtschaften die Identifikation der Mitarbeiter mit dem Unternehmen und ihre Motivation. In Zukunft wird das Thema auch ein wesentlicher Vorteil im Wettbewerb um neue Mitarbeiter sein.

Unsere Fortschritte und Leistungen im nachhaltigen Wirtschaften überzeugten auch im Jahr 2010 wieder externe Experten. Dies spiegelte sich in verschiedenen globalen und nationalen Nachhaltigkeitsratings wider. So sind wir im Dow Jones Sustainability World Index und im europäischen Dow Jones Sustainability Europe Index erneut „Nachhaltigkeits-Führer“ und als einziges Unternehmen des Marktsektors „Nondurable Household

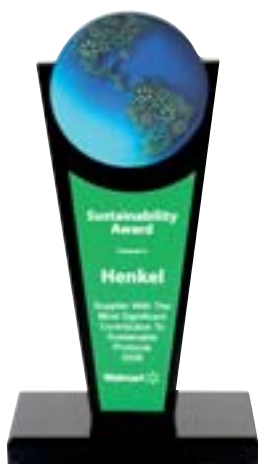

Zum zweiten Mal hat Walmart Henkel mit dem „Walmart Sustainability Award“ ausgezeichnet.

Products“ vertreten. Auch unsere Zugehörigkeit zum FTSE4Good wurde bestätigt. Die Bank Sarasin hat das Nachhaltigkeitsprofil von Henkel aktualisiert und das Unternehmensrating in der besten Kategorie („Hoch“) bestätigt.

Im Rahmen des deutschen Markenrankings „Best Brands“ wurde Henkel als „Beste Nachhaltigkeitsmarke“ von dem Magazin „Wirtschaftswoche“ und dem Markenverband ausgezeichnet. Das kanadische Medienunternehmen Corporate Knights Inc. nahm Henkel erneut in die Rangliste der weltweit 100 nachhaltigsten Unternehmen aus dem Morgan Stanley Capital Investment World Index auf. Und auch mit der Aufnahme in das Ranking der „World's Most Ethical Companies“ von Ethisphere Institute und „Forbes Business Magazine“ wurde Henkel wieder ausgezeichnet.

Eine besondere Anerkennung ist es für uns, wenn wir von unseren Kunden ausgezeichnet werden. So hat Walmart Henkel im Jahr 2010 zum zweiten Mal als seinen Lieferanten mit dem global gesehen größten Beitrag zur Nachhaltigkeit mit dem „Walmart Sustainability Award“ geehrt.

### Ausrichtung und Fokus

Unsere Aktivitäten richten wir entlang der gesamten Wertschöpfungskette konsequent und systematisch auf die Herausforderungen einer nachhaltigen Entwicklung aus. Diese Herausforderungen haben wir in fünf übergreifende Fokusfelder gegliedert: Energie und Klima, Wasser und Abwasser, Materialien und Abfall, Gesundheit und Sicherheit sowie gesellschaftlicher/sozialer Fortschritt. Die Bedeutung dieser Herausforderungen wird mit dem Wachstum der Weltbevölkerung sowie der Steigerung des allgemeinen Lebensstandards und des damit verbundenen Konsums weiter zunehmen. Weltweit müssen Wachstum und Lebensqualität von Ressourcenverbrauch und Emissionen entkoppelt werden. Unser Beitrag als führendes Unternehmen liegt in der Entwicklung von innovativen Produkten und Prozessen, die bei gleicher oder besserer Leistung immer weniger Ressourcen verbrauchen.

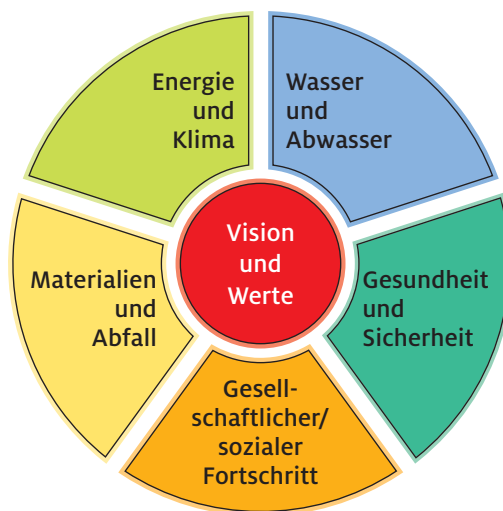

*Unsere Herausforderungen einer nachhaltigen Entwicklung haben wir in fünf Fokusfelder gegliedert.*

Daher gehört zu unserem Selbstverständnis auch der Anspruch, dass alle neuen Produkte in mindestens einem der fünf definierten Fokusfelder einen Beitrag zur nachhaltigen Entwicklung leisten.

Dabei konzentrieren wir unsere Anstrengungen auf solche Innovationen, die Produktleistung und Qualität mit der Verantwortung für Mensch und Umwelt kombinieren. Wir bemühen uns intensiv, unseren Kunden und Konsumenten den Mehrwert dieser Innovationen zu vermitteln. Dazu nutzen wir die direkte Produktkommunikation ebenso wie ausführlichere Informationen, zum Beispiel in Newslettern, Online-Plattformen oder auf Veranstaltungen.

Dass sich das Unternehmen und seine Marken auf die zentralen Herausforderungen konzentrieren, ist eine wichtige Grundlage für die glaubwürdige Umsetzung unserer Nachhaltigkeitsstrategie im Markt. So stärken wir sowohl unsere Marken als auch die Reputation unseres Unternehmens sowie weltweit unsere Marktpositionen.

### Ziele und Fortschritte

Auf Grundlage der bis 2007 erreichten Verbesserungen bei Arbeitsschutz, Ressourcenschonung und Emissionsminderung haben wir Anfang des Jahres 2008 konzernweite Ziele bis 2012 definiert:

- Senkung des Energieverbrauchs pro Tonne Produktionsmenge um weitere 15 Prozent,
- Senkung des Wasserverbrauchs pro Tonne Produktionsmenge um weitere 10 Prozent,
- Senkung des Abfallaufkommens pro Tonne Produktionsmenge um weitere 10 Prozent,
- Senkung der Arbeitsunfälle pro eine Million Arbeitsstunden um weitere 20 Prozent.

Diese Ziele konnten wir aufgrund des hohen Engagements unserer Mitarbeiter bereits 2010 vorzeitig erreichen. Wir sind überzeugt, dass die Fortschritte im Bereich Ressourceneffizienz und Wirtschaftlichkeit auch einen wichtigen Beitrag zu unseren Finanzzielen für 2012 leisten werden. Den Prozess zur Definition der Nachhaltigkeitsziele für die kommenden Jahre haben wir 2010 initiiert.

#### Nachhaltigkeitsbilanz 2007 bis 2010

Umweltkennzahlen pro Tonne Produktionsmenge

|                              |       |   |
|------------------------------|-------|---|
| Energieverbrauch             | -21 % | ↘ |
| Wasserverbrauch              | -26 % | ↘ |
| Abfallaufkommen              | -24 % | ↘ |
| Arbeitsunfälle <sup>1)</sup> | -29 % | ↘ |

<sup>1)</sup> Pro eine Million Arbeitsstunden.

Mit der Optimierung unserer eigenen Produktionsprozesse und unserer Wertschöpfungsketten leisten wir – gemeinsam mit unseren Partnern – relevante Beiträge zum Klimaschutz. So helfen viele unserer Produkte unseren Kunden und Verbrauchern, Energie zu sparen. Dazu gehören Kleb- und Dichtstoffe ebenso wie Wasch- und Reinigungsmittel, die schon bei niedrigen Temperaturen ihre Waschkraft entfalten. So lassen sich mit hochwertigen Dichtmassen über die Lebensdauer eines Fensters bis zu 1.000-mal mehr Emissionen einsparen, als bei der Herstellung der Dichtmassen ursprünglich verursacht wurden.

Um diese Beiträge fundiert und glaubwürdig ermitteln zu können, ist die Entwicklung entsprechender Methoden notwendig, die wir mitgestalten und vorantreiben wollen. Daher haben wir uns mit Produkten aus allen drei Unternehmensbereichen am Pilotprojekt „Product Carbon Footprint“ beteiligt und bringen uns intensiv in den nationalen und internationalen Dialog ein.

#### Organisation

Der Vorstand trägt die Gesamtverantwortung für die Nachhaltigkeitsstrategie und -ziele sowie deren Umsetzung im Unternehmen. Der Sustainability Council von Henkel steuert die globalen Aktivitäten in Zusammenarbeit mit den einzelnen Unternehmensbereichen und den Funktionen sowie den regionalen und nationalen Gesellschaften.

Mit dem Beitritt zum Global Compact der Vereinten Nationen im Juli 2003 haben wir auch öffentlich unsere Verpflichtung dokumentiert, die Menschenrechte, die grundlegenden Arbeitnehmerrechte und den Umweltschutz zu achten sowie gegen alle Formen von Korruption vorzugehen. Unser Verständnis von verantwortungsbewusstem Handeln haben wir für alle Mitarbeiter weltweit im Code of Corporate Sustainability und im Code of Conduct konkretisiert. Sie gelten gemeinsam mit den daraus abgeleiteten internen Standards für Sicherheit, Gesundheit und Umweltschutz, mit den Sozialstandards sowie mit unseren konzernweiten Einkaufsstandards. Die Einhaltung dieser Regeln überprüfen wir regelmäßig konzernweit durch interne Revisionsprüfungen an unseren Produktions- und Verwaltungsstandorten sowie zunehmend auch bei unseren Lohnherstellern und Logistikzentren. Zusätzlich lassen Henkel-Unternehmen ihre Managementsysteme extern zertifizieren. Ende 2010 kamen 71 Prozent der Produktionsmenge aus Standorten, die nach der internationalen Umweltmanagement-Norm ISO 14001 zertifiziert sind.

Entsprechend unserem Selbstverständnis als einem verantwortlichen Mitglied der Gesellschaft leisten wir in den Bereichen Soziales, Umwelt, Bildung, Wissenschaft, Gesundheit, Sport, Kunst und Kultur finanzielle Unterstützung für eine Vielzahl von Projekten mit einem Gesamtvolumen von 2,9 Mio. Euro im Jahr 2010. 40 Prozent davon setzten wir im Rahmen unserer Initiative „Miteinander im Team“ (MIT) ein, mit der wir seit 1998 das ehrenamtliche Engagement unserer Mitarbeiter und Pensionäre unterstützen. Im Jahr 2010 haben wir MIT-Projekte in 72 Ländern gefördert. Über Geldspenden hinaus unterstützen wir die Projekte auch mit Sach- und Produktspenden sowie bezahlten Freistellungen von der Arbeit.

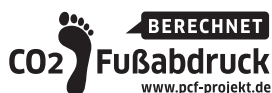

Mit Produkten aus allen drei Unternehmensbereichen haben wir uns am Pilotprojekt „Product Carbon Footprint“ in Deutschland beteiligt.



## Stakeholder-Dialog

Zukunftsfähige Lösungen für ein nachhaltiges Wirtschaften können nur im Dialog mit allen gesellschaftlichen Gruppen entwickelt werden. Dazu gehören unsere Mitarbeiter, Aktionäre, Kunden, Lieferanten, Behörden, Politiker, Verbände, staatliche und nicht-staatliche Organisationen sowie Wissenschaft und Öffentlichkeit. Wir verstehen den Dialog mit unseren Stakeholdern als Chance, Anforderungen in den verschiedenen Märkten frühzeitig zu erkennen und Schwerpunkte für unsere Aktivitäten zu definieren. Impulse, die aus dem Dialog mit den verschiedenen Interessengruppen ins Unternehmen getragen werden, fließen kontinuierlich in die Weiterentwicklung unserer Strategie und Berichterstattung ein.

Um die Informationswünsche unserer Stakeholder zielgruppengerecht erfüllen zu können, nutzen wir eine Vielzahl von Kommunikationsinstrumenten. Ausführliche Informationen und Hintergründe zum Thema Nachhaltigkeit kommunizieren wir in unserem **NB Nachhaltigkeitsbericht**. Damit dokumentieren wir, welch hohen Stellenwert die Nachhaltigkeit in unserem Unternehmen einnimmt. Und wir erfüllen zugleich unsere Berichtspflichten im Rahmen des Global Compact der Vereinten Nationen.

Die Förderung eines nachhaltigen Konsums sehen wir als eine Hauptaufgabe der kommenden Jahre. Dazu sind entsprechende Produkte ebenso wie die Unterstützung durch die Politik und letztlich die Zusammenarbeit mit den Verbrauchern erforderlich. Daher sind wir ständig bestrebt, Akteure auf unterschiedlichen Ebenen für das Thema zu sensibilisieren – durch Engagement in Verbänden, Arbeitsgruppen und auf Konferenzen, durch den Dialog mit der Politik und Nichtregierungsorganisationen oder durch Produktkommunikation.

Darüber hinaus engagieren wir uns in nationalen und internationalen Initiativen – zum Beispiel im World Business Council for Sustainable Development (WBCSD) oder im 2009 gegründeten „Consumer Goods Forum“. Durch unsere langjährige Erfahrung beim nachhaltigen Wirtschaften können wir uns hier als gefragter Partner positionieren.

Weitere Informationen, Berichte, Hintergründe sowie aktuelle Meldungen zum nachhaltigen Wirtschaften bei Henkel bietet die Internetseite:

 [www.henkel.de/nachhaltigkeit](http://www.henkel.de/nachhaltigkeit)

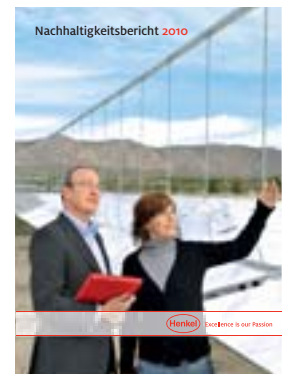

*Ausführliche Informationen und Hintergründe zum Thema Nachhaltigkeit kommunizieren wir in unserem Nachhaltigkeitsbericht – gedruckt und online.*

## Wasch-/Reinigungsmittel

- Organisches Umsatzwachstum von 1,5 Prozent
- Bereinigtes betriebliches Ergebnis um 6,2 Prozent auf 562 Mio. Euro verbessert
- Bereinigte Umsatzrendite um 0,2 Prozentpunkte auf 13,0 Prozent gesteigert
- Rendite auf das eingesetzte Kapital (ROCE) um 1,6 Prozentpunkte auf 21,2 Prozent erhöht
- Economic Value Added (EVA®) weiter auf 286 Mio. Euro verbessert

### Innovationen 2010

#### Persil Gold Plus Cold Active

Volle Leistungsfähigkeit bei der Fleckentfernung bereits bei kaltem Waschwasser bietet Persil Gold Plus Cold Active den Verbrauchern in Osteuropa.

#### Dac Disinfectant

Dieser Reiniger für die Märkte in Nordafrika und Nahost wirkt sofort und schützt lang anhaltend über 24 Stunden gegen Bakterien im Haushalt.

#### Bref / WC Frisch Kraft-Aktiv

Der erste WC-Spüler mit vier Aktiv-Kugeln: Er hat eine innovative Aktivstoff-Kombination für ein frisches WC und ist in drei Duft-Varianten erhältlich.

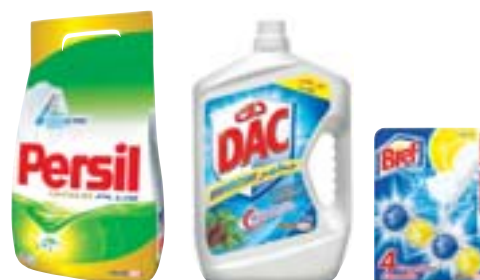

### Umsatz in Mio. Euro

|      |       |
|------|-------|
| 2006 | 4.117 |
| 2007 | 4.148 |
| 2008 | 4.172 |
| 2009 | 4.129 |
| 2010 | 4.319 |

### Wichtige Kennzahlen<sup>1)</sup>

| in Mio. Euro                                            | 2009  | 2010  | +/-    |
|---------------------------------------------------------|-------|-------|--------|
| Umsatz                                                  | 4.129 | 4.319 | 4,6%   |
| Anteil am Konzernumsatz                                 | 30%   | 29%   | -1 pp  |
| Betriebliches Ergebnis (EBIT)                           | 501   | 542   | 8,2%   |
| Bereinigtes betriebliches Ergebnis (EBIT) <sup>2)</sup> | 530   | 562   | 6,2%   |
| Umsatzrendite (EBIT)                                    | 12,1% | 12,6% | 0,5 pp |
| Bereinigte Umsatzrendite (EBIT) <sup>2)</sup>           | 12,8% | 13,0% | 0,2 pp |
| Rendite auf das eingesetzte Kapital (ROCE)              | 19,6% | 21,2% | 1,6 pp |
| Economic Value Added (EVA®)                             | 232   | 286   | 23,5%  |

pp = Prozentpunkte

<sup>1)</sup> Berechnet auf Basis der Werte in Tausend Euro; Werte sind kaufmännisch gerundet.

<sup>2)</sup> Bereinigt um einmalige Aufwendungen und Erträge sowie Restrukturierungsaufwendungen.

### Umsatzveränderung<sup>1)</sup>

| in Prozent                      | 2010 |
|---------------------------------|------|
| Veränderung zum Vorjahr         | 4,6  |
| Wechselkurseffekte              | 3,5  |
| Bereinigt um Wechselkurseffekte | 1,1  |
| Akquisitionen/Divestments       | -0,4 |
| Organisch                       | 1,5  |
| Davon Preis                     | -4,2 |
| Davon Menge                     | 5,7  |

<sup>1)</sup> Berechnet auf Basis der Werte in Tausend Euro.

### Top-Marken und Produktgruppen

**Persil Purex Dixan**

Universalwaschmittel, Weichspüler, Wäschepflegemittel, Geschirrspülmittel, Allzweckreiniger, Scheuermittel, Boden- und Teppichpflegemittel, Bad- und WC-Reiniger, Glasreiniger, Küchenreiniger, Spezialreiniger, Lufterfrischer und Insektizide für den Haushalt.

## Umfeld und Marktposition

Der Weltmarkt für Wasch- und Reinigungsmittel belief sich im Jahr 2010 auf rund 94 Mrd. Euro. Die für Henkel relevanten Märkte waren im Jahr 2010 geprägt von starkem Preis- und Promotionswettbewerb, der zu signifikanten Preisrückgängen geführt hat. Infolge des im Vergleich zu 2009 deutlich eingetrübten Konsumklimas konnte der Rückgang des Preisniveaus durch entsprechende Volumenzuwächse nicht ganz ausgeglichen werden, sodass unsere relevanten Märkte im Jahr 2010 insgesamt leicht rückläufig waren.

In den von Arbeitslosigkeit und Sparzwang der Konsumenten besonders betroffenen südlichen Ländern Europas, in den USA, aber auch weiten Teilen Osteuropas entwickelten sich unsere Märkte deutlich schwächer als im Vorjahr. Robust zeigten sich hingegen Deutschland und ein Großteil der Region Afrika/Nahost. Generell waren die Rahmenbedingungen insbesondere für höherwertige Wasch- und Reinigungsmittel herausfordernd. Dennoch konnten Markenartikelhersteller von den Private-Label-Anbietern durch hohe Werbe- und Promotionsintensität gekoppelt mit niedrigeren Preisen sogar Marktanteile gewinnen. Allerdings gingen diese Marktanteilszuwächse zulasten der Bruttomargen, die nicht nur durch die Preiserosion, sondern auch durch deutlich gestiegene Rohstoffpreise belastet wurden.

In Westeuropa ging der Markt für Wasch- und Reinigungsmittel im abgelaufenen Jahr leicht zurück. Dennoch gelang es uns, unsere Marktposition weiter auszubauen. Besonders erfolgreich waren wir dabei in den deutschsprachigen Ländern. Deutlich rückläufig war hingegen der Markt in Nordamerika, bedingt durch eine erhöhte Arbeitslosigkeit und Sparneigung der Konsumenten, auf die die Hersteller mit Preisnachlässen reagierten. Trotzdem konnten wir die Marktanteile behaupten. Der Markt in Osteuropa stieg nur leicht an, bedingt durch die weltweite Wirtschafts- und Finanzkrise sowie durch ein ebenfalls sehr preisaggressives Wettbewerbsumfeld. In diesem schwierigen Markt gelang es uns, die Marktanteile zu steigern. Die Region Afrika/Nahost wies erneut ein zweistelliges Marktwachstum auf und aufgrund unserer starken

Marktposition konnten wir unsere Marktanteile weiter ausbauen. Der Markt in Lateinamerika verblieb wegen starker Preisrückgänge auf dem Niveau des Vorjahres. Hier konnten wir unsere Marktpositionen festigen. Der asiatische Markt war geprägt von einem starken Preiswettbewerb in Indien und war dadurch auch insgesamt rückläufig.

## Geschäftstätigkeit und Strategie

Der Unternehmensbereich ist weltweit im Markenartikelgeschäft für Wasch- und Reinigungsmittel tätig. Das Segment *Waschmittel* umfasst neben Universal- und Spezialwaschmitteln auch Weichspüler, Waschkraftverstärker und Wäschepflegemittel. Im Produktportfolio der *Reinigungsmittel* finden sich Hand- und Maschinengeschirrspülmittel, Reiniger für Bad und WC sowie Haushalts-, Glas- und Spezialreiniger. Daneben werden in ausgewählten Regionen Lufterfrischer sowie Insektizide für den Haushalt angeboten.

Wir wollen den profitablen Wachstumskurs durch den organischen Ausbau bestehender Geschäfte weiter fortsetzen. Dabei streben wir sowohl dauerhafte Marktanteilsgewinne als auch eine weitere Margenverbesserung an. Auf der Basis unserer ertragsstarken Positionen in Westeuropa und Nordamerika wollen wir den Umsatzanteil der Wachstumsregionen insbesondere in Osteuropa und Afrika/Nahost noch weiter ausbauen. Deren Umsatzdynamik wollen wir aufgreifen, unseren Marktanteil erhöhen und die Rentabilität an das höhere Niveau der reifen Regionen heranführen.

Innovationen, die einen Mehrwert für die Konsumenten bieten, sind die Basis unserer Strategie profitablen Wachstums. Das vergangene Jahr hat erneut gezeigt, dass erfolgreiche Produkteinführungen gerade unter schwierigen Rahmenbedingungen einen positiven Beitrag leisten. Es bleibt daher unser Ziel, auch langfristig eine hohe Innovationsrate von etwa 40 Prozent zu erzielen sowie die Innovationsführerschaft in unseren Märkten zu behaupten und auszubauen. Durch eine konsequente und effiziente Steuerung des gesamten Innovationsprozesses gelingt es uns, Verbrauchertrends schnell zu erkennen, aufzugreifen und in neue Produkte umzusetzen. Zusätzlich überprüfen wir ständig unsere beste-

Weltmarkt für Wasch-/  
Reinigungsmittel:  
rund 94 Mrd. Euro

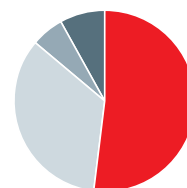

- 53% Waschmittel
- 35% Reinigungsmittel
- 6% Lufterfrischer
- 6% Insektizide

**+1,5%**

organisches Umsatzwachstum bei leicht rückläufigem Weltmarkt.

**40%**

Innovationsrate.

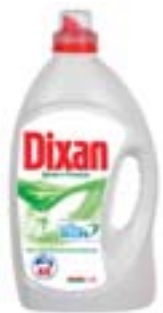

*Dixan Igiene e Purezza (Hygiene und Reinheit) in Italien sorgt schon bei niedrigen Temperaturen für hygienisch reine Wäsche.*

henden Marken- und Marktsegmente und passen aufgrund veränderter Konsumentenwünsche unsere Produktpalette an. Die Priorisierung von Produktkategorien und die Steuerung des Markenportfolios nach Marken-Clustern<sup>1)</sup> helfen uns, gezielt in den Markt zu investieren, um mittelfristig Ressourcen in wachstums- und ertragsstarke Segmente zu allokalieren und mit den für uns wichtigsten Marken- und Marktsegmenten überproportional zu wachsen. Mit unseren zehn Top-Marken-Clustern erzielen wir 81 Prozent unseres Umsatzes und schöpfen die Stärke unserer internationalen Marken sowie unserer gut positionierten lokalen Marken optimal aus.

### Umsatz und Ergebnis

Der Umsatz stieg im Berichtsjahr nominal um 4,6 Prozent auf 4.319 Mio. Euro an. Organisch – das heißt bereinigt um Wechselkurseffekte und Akquisitionen/Divestments – konnten wir den Umsatz um 1,5 Prozent steigern.

Mit einem Anstieg von 5,7 Prozent haben wir im Jahr 2010 ein starkes Mengenwachstum erzielt. Bedingt durch die Konzentration der Markenartikelhersteller auf Volumen und Marktanteilsgewinne war das Berichtsjahr durch ein sehr preisaggressives Wettbewerbsumfeld und erhöhte Promotionsintensität gekennzeichnet. Dies führte zu einem Rückgang unserer durchschnittlichen Preise von 4,2 Prozent, der allerdings durch das hohe Mengenwachstum deutlich überkompensiert werden konnte.

Regional betrachtet lag der Schwerpunkt des Umsatzwachstums in Europa und Afrika/Nahost. In Afrika/Nahost erzielen wir ein zweistelliges organisches Umsatzwachstum. Vor allem in Saudi-Arabien und in der Maghreb-Region konnten wir unseren Umsatz deutlich steigern. Auch in Westeuropa verzeichneten wir ein deutliches Umsatzplus und erzielten den stärksten Anstieg seit 2007. Zu dieser positiven Entwicklung trugen vor allem Deutschland und Frankreich, aber auch Spanien, trotz der schwierigen gesamtwirtschaftlichen Lage, bei. Bedingt durch deutliche Preisrückgänge erreichten wir in Osteuropa nicht die Wachstumsraten der vergangenen Jahre, dennoch konnte auch Osteuropa ein positives Wachstum realisieren. In Nordamerika führten der aggressive Wettbewerb sowie die Kaufzurückhaltung zu einem deutlichen Umsatzrückgang. Lateinamerika und Asien/Pazifik waren nur leicht rückläufig.

Das betriebliche Ergebnis (EBIT) erhöhte sich um 8,2 Prozent auf einen Rekordwert von

542 Mio. Euro. Wechselkursbereinigt betrug der Anstieg 4,7 Prozent. Dieses positive Ergebnis konnte trotz des anhaltenden Drucks auf die Brutomarge infolge der im Jahresverlauf gestiegenen Materialpreise und des rückläufigen Preisniveaus erreicht werden. Im Ergebniszuwachs spiegeln sich positive Volumeneffekte sowie erfolgreiche Maßnahmen zur Kostensenkung und Effizienzsteigerung wider. Dadurch konnten wir den Anstieg der Materialpreise und die Preisreduktionen überkompensieren. Zur Unterstützung unseres Wachstums behielten wir die Werbeinvestitionen auf dem hohen Niveau des Vorjahres. Die Umsatzrendite erreichte 12,6 Prozent und verbesserte sich um 0,5 Prozentpunkte. Die bereinigte Umsatzrendite konnte ebenfalls gesteigert werden und erzielte ein neues Rekordniveau von 13 Prozent. Die Rendite auf das eingesetzte Kapital (ROCE) konnte aufgrund der Steigerung des betrieblichen Ergebnisses (EBIT) und eines sehr niedrigen Netto-Umlaufvermögens um 1,6 Prozentpunkte auf 21,2 Prozent gesteigert werden. Der Economic Value Added (EVA®) stieg von 232 Mio. Euro im Jahr 2009 auf 286 Mio. Euro im Berichtsjahr an.

### Geschäftsfelder

Im Geschäftsbereich *Waschmittel* verzeichneten wir im abgelaufenen Jahr die stärksten Wachstumsimpulse bei den Universalwaschmitteln und den Weichspülern. In Westeuropa konnten wir bei den Universalwaschmitteln den Marktanteil trotz der schwierigen Rahmenbedingungen und des intensiven Wettbewerbs steigern. Hierzu trug vor allem unsere größte Marke Persil bei, insbesondere durch die Flüssigwaschmittel. Henkel hat früh den zunehmenden Bedarf für hygienische Reinheit auch bei niedrigen Temperaturen erkannt. So haben wir in Europa erfolgreich die innovative Hygiene-Produktpalette für Universalwaschmittel eingeführt, in Italien beispielsweise Dixan Igiene e Purezza (Hygiene und Reinheit). Ebenfalls erfolgreich waren die Marken Spee und Weißer Riese, die durch neue Pulver- und Gel-Varianten „Intensiv Color mit Aktiv-Farbkraft für leuchtende Farben“ zu überdurchschnittlichen Wachstumsraten beitragen konnten. In West- und Osteuropa sowie in Israel haben wir die positive Entwicklung der Weichspüler-Marken Vernel, Silan und Soad durch die neuen Varianten mit innovativen Frische-Perlen unterstützt.

In Osteuropa führten wir Persil Gold Plus Cold Active ein, das die volle Leistungsfähigkeit zu Beginn des Waschzyklus schon mit kaltem Wasser erreicht. Mit diesem Produkt werden nicht nur Verunreinigungen entfernt, sondern wird auch

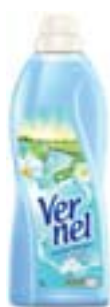

*Vernel mit innovativen Frische-Perlen macht die Wäsche angenehm weich und sorgt aufgrund des besonders lang anhaltenden Frische-Dufts den ganzen Tag für ein Gefühl frisch gewaschener Kleidung.*

<sup>1)</sup> Ein Marken-Cluster umfasst mehrere lokale Einzelmarken, die einer großen internationalen Marke in der Positionierung angeglichen sind. Damit realisieren wir hohe Synergien im Marketingmix.

die Umwelt geschont, da weniger Energie benötigt wird. Zudem sind in diesem Produkt „Frischeperlen“ von Silan enthalten, sodass neben der vollen Leistungsfähigkeit bei kaltem Wasser auch ein Frischduft beim Tragen der Wäsche über den Tag hinweg freigesetzt wird. In großen Teilen der Region Afrika/Nahost haben wir Universalwaschmittel-Pulver eingeführt, bei dem die Dosiermenge bei gleicher Leistung verringert werden kann. Neben den positiven ökologischen Effekten senken wir damit gleichzeitig die Verpackungs- und Logistikkosten.

Das organische Umsatzwachstum des Geschäftsbereichs *Reinigungsmittel* wurde weiterhin vor allem von den Geschirrspülmitteln und den WC-Produkten getragen. Bei den Maschinengeschirrspülmitteln trugen insbesondere die Produkte Somat 9 und Somat Perfect Gel zur positiven Entwicklung bei. Die Handgeschirrspülmittel verzeichneten ebenfalls deutliche Wachstumsraten. In Osteuropa haben wir unter der Marke Pur ein neues Handgeschirrspülmittel in den Markt eingeführt, das mit der besonders dickflüssigen und extra starken „Pur-Max-Gel Formel“ sogar hartnäckigsten Schmutz bei geringer Dosierung entfernt. Zudem wurde unter den Marken Pril und Pur eine neue Generation von Handgeschirrspülmitteln auf den Markt gebracht, die mit „Power Crystals“ für schnelle und unkomplizierte Entfernung von hartnäckigem Schmutz sorgen. Die spezielle Rezeptur stellt sicher, dass das Geschirrspülmittel im Schwamm seine Schmutzentfernungskraft bis zu viermal so lange behält wie herkömmliche Handgeschirrspülmittel. Weiterhin haben wir für die Marke Der General einen Allzweckreiniger entwickelt, der dank geringer Schaumbildung und Schnelltrocken-Formel für strahlenden Glanz und streifenfreie Reinigung sorgt.

Bei den WC-Produkten erzielten wir ein positives Umsatzwachstum in West- und Osteuropa durch das neue WC-Produkt Bref „Power-Activ“ – in Deutschland unter der Marke WC Frisch: Der WC-Spüler befindet sich in einer modernen und diskreten Halterung und enthält vier aktive Komponenten.

In Nordamerika führten wir unter der Marke Soft Scrub Produkte zur sanften Oberflächenreinigung für das Bad und die Küche ein. Sie erleichtern die Reinigung von allen Oberflächen und sind zur Beseitigung vielfältiger Verunreinigungen einsetzbar.

Der neue Reiniger Dac Disinfectant für die Märkte in Nordafrika und Nahost bietet eine überlegene

Desinfektionsleistung. Er wirkt sofort, schützt lang anhaltend über 24 Stunden gegen Bakterien im Haushalt und duftet angenehm frisch.

### Investitionen

Unsere Investitionsschwerpunkte lagen auf Innovationen sowie auf der Optimierung von Produktions- und Distributionsprozessen. Weitere Investitionen haben wir im Bereich der Anlagensicherheit getätigt. Umwelt- und Brandschutzsysteme waren hierbei die Schwerpunkte. Insgesamt investierten wir 83 Mio. Euro in Sachanlagen nach 151 Mio. Euro im Vorjahr. Der Rückgang im Jahr 2010 ist auf einen reduzierten Investitionsbedarf nach Optimierungen des Produktionsnetzwerks und einigen Großprojekten vergangener Jahre zurückzuführen.

### Ausblick

Für das Jahr 2011 rechnen wir in den für uns relevanten Märkten mit einer stagnierenden Entwicklung. In Nordamerika erwarten wir ein unverändert schwieriges Marktumfeld, ebenso wie für Teile Westeuropas. Hier gehen wir weiterhin von einem rückläufigen Markt bei gleichzeitig intensivem Wettbewerb aus. In den Wachstumsregionen erwarten wir einen moderaten Anstieg.

In diesem Umfeld wollen wir 2011 unsere Marktpositionen weiter ausbauen und uns beim organischen Umsatzwachstum erneut besser entwickeln als unsere relevanten Märkte. Durch die kontinuierliche Senkung der Kosten und Steigerung der Effizienz erwarten wir bei der bereinigten Umsatzrendite – trotz weiter steigender Materialpreise – eine Steigerung gegenüber dem Vorjahreswert (2010: 13,0 Prozent).

Als Chancen sehen wir eine Nachfragebelebung in Westeuropa und Nordamerika, eine schnelle Rückkehr auf einen dynamischeren Wachstumspfad in Osteuropa sowie eine erfolgreiche Einführung von weiteren Innovationen.

Risiken sehen wir in der Gefahr einer Eintrübung der gesamtwirtschaftlichen Rahmenbedingungen. Stark steigende Arbeitslosigkeit, höhere Steuern und Abgaben sowie Streiks könnten das Konsumklima negativ beeinflussen. Hinzu kommt das Risiko einer starken Steigerung der Materialpreise, deren Ausmaß ungewiss und von der Nachfragesituation an den Rohstoffmärkten sowie der allgemeinen weltwirtschaftlichen Situation abhängig ist.

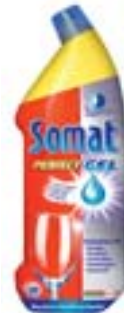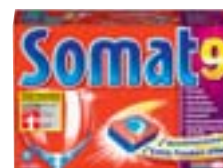

*Somat 9 und Somat Perfect Gel trugen besonders zur positiven Entwicklung unserer Maschinengeschirrspülmittel bei.*

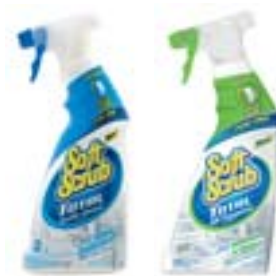

*Unsere Soft Scrub-Produkte in Nordamerika beseitigen sanft vielfältige Verunreinigungen von Oberflächen in Bad und Küche.*



## Kosmetik/Körperpflege

- Organisches Umsatzwachstum von 4,8 Prozent
- Bereinigtes betriebliches Ergebnis um 12,4 Prozent auf 436 Mio. Euro verbessert
- Bereinigte Umsatzrendite um 0,4 Prozentpunkte auf 13,3 Prozent gesteigert
- Rendite auf das eingesetzte Kapital (ROCE) um 1,9 Prozentpunkte auf 20,1 Prozent erhöht
- Economic Value Added (EVA®) weiter auf 207 Mio. Euro verbessert

### Innovationen 2010

#### Schwarzkopf Perfect Mousse

Die erste permanente Coloration als Schaum von Schwarzkopf. Die Coloration ohne Ammoniak lässt sich erstmals so leicht anwenden wie ein Shampoo.

#### Osis

Neue Osis-Stylingprodukte inspirieren Friseure und Endverbraucher. Das Glanzpuder Shine Duster verwandelt sich bei leichtem Druck in eine weiche Creme.

#### Right Guard Total Defense 5

Das erste Antitranspirant von Right Guard, das fünffach wirkt – mit patentierter Powerstripe-Technologie 48 Stunden lang gegen Körpergeruch.

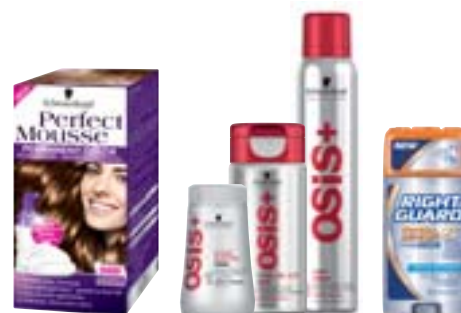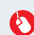

[www.perfectmousse.de](http://www.perfectmousse.de)

[www.schwarzkopf-professional.de/produkte/styling/osis](http://www.schwarzkopf-professional.de/produkte/styling/osis)

[www.rightguard.com](http://www.rightguard.com)

#### Umsatz

in Mio. Euro

|      |       |
|------|-------|
| 2006 | 2.864 |
| 2007 | 2.972 |
| 2008 | 3.016 |
| 2009 | 3.010 |
| 2010 | 3.269 |

#### Wichtige Kennzahlen<sup>1)</sup>

in Mio. Euro

|                                                         | 2009  | 2010  | +/-     |
|---------------------------------------------------------|-------|-------|---------|
| Umsatz                                                  | 3.010 | 3.269 | 8,6%    |
| Anteil am Konzernumsatz                                 | 22%   | 22%   | -       |
| Betriebliches Ergebnis (EBIT)                           | 387   | 411   | 6,1%    |
| Bereinigtes betriebliches Ergebnis (EBIT) <sup>2)</sup> | 387   | 436   | 12,4%   |
| Umsatzrendite (EBIT)                                    | 12,9% | 12,6% | -0,3 pp |
| Bereinigte Umsatzrendite (EBIT) <sup>2)</sup>           | 12,9% | 13,3% | 0,4 pp  |
| Rendite auf das eingesetzte Kapital (ROCE)              | 18,2% | 20,1% | 1,9 pp  |
| Economic Value Added (EVA®)                             | 164   | 207   | 25,8%   |

pp = Prozentpunkte

<sup>1)</sup> Berechnet auf Basis der Werte in Tausend Euro; Werte sind kaufmännisch gerundet.

<sup>2)</sup> Bereinigt um einmalige Aufwendungen und Erträge sowie Restrukturierungsaufwendungen.

#### Umsatzveränderung<sup>1)</sup>

in Prozent

|                                 | 2010 |
|---------------------------------|------|
| Veränderung zum Vorjahr         | 8,6  |
| Wechselkurseffekte              | 3,9  |
| Bereinigt um Wechselkurseffekte | 4,7  |
| Akquisitionen/Divestments       | -0,1 |
| Organisch                       | 4,8  |
| Davon Preis                     | -0,9 |
| Davon Menge                     | 5,7  |

<sup>1)</sup> Berechnet auf Basis der Werte in Tausend Euro.

### Top-Marken und Produktgruppen

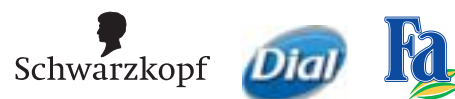

Haarwasch- und -pflegemittel, Haarcolorationen, Haarstylingprodukte, Seifen, Duschgele und Badezusätze, Deodorants, Hautcremes, Hautpflegeprodukte, Mundpflege, Produkte für den Friseurbedarf.

## Umfeld und Marktposition

Der für uns relevante Weltkosmetikmarkt belief sich im Jahr 2010 auf rund 135 Mrd. Euro. Die Märkte zeigten insgesamt keine signifikanten Erholungstendenzen und entwickelten sich in weiten Teilen rückläufig.

Unsere Kernmärkte in Westeuropa und Nordamerika entwickelten sich aufgrund der schwierigen wirtschaftlichen Bedingungen weiter negativ. Insbesondere der Markt für Haarkosmetik im Einzelhandel verzeichnete wegen des hohen Preisdrucks und der intensiven Promotionsaktivitäten einen Rückgang. Trotz des herausfordernden Marktumfelds gelang es uns jedoch, auf dem Wachstumspfad der vergangenen Jahre zu bleiben und weiter überproportional zu wachsen. Getragen von der positiven Entwicklung des westeuropäischen Haargeschäfts haben wir deutliche Marktanteilssteigerungen erzielt und unsere führende Marktposition weiter ausgebaut. In Nordamerika konnten wir unsere Position in unserem Kerngeschäft ausbauen.

Die Märkte in den Wachstumsregionen Afrika/Nahost, Lateinamerika und Asien/Pazifik haben sich positiv entwickelt. Dagegen hat sich die Wachstumsdynamik in den Märkten Osteuropas deutlich verringert und lag in unseren Kategorien unter den Werten der Vorjahre. Gleichwohl konnten wir unser Geschäft in allen Regionen weiter ausbauen und signifikante Marktanteilsgewinne durch überproportionales Wachstum erzielen.

Im Friseurmarkt dauert die durch die Wirtschaftskrise bedingte Zurückhaltung der Kunden an und führte zu einem Rückgang des Marktes im mittleren einstelligen Bereich. Unserem Friseurgeschäft Schwarzkopf Professional gelang es jedoch, gegen den Markttrend zu wachsen und somit die Position als weltweite Nummer 3 im Friseurmarkt weiter zu stärken.

Weltweit belegt der Unternehmensbereich Kosmetik/Körperpflege in den für uns relevanten Märkten führende Positionen und konnte seine Marktanteile erneut deutlich ausbauen.

## Geschäftstätigkeit und Strategie

Der Unternehmensbereich Kosmetik/Körperpflege ist im Markenartikelgeschäft in den Segmenten Haarkosmetik, Körperpflege, Hautpflege und Mundpflege sowie im Friseurgeschäft aktiv.

Der Ausbau des Markenartikelgeschäfts in Westeuropa und Nordamerika konzentriert sich auf die weitere Steigerung von Marktanteilen. Hierzu setzen wir unsere offensive Innovationsstrategie konsequent um, bei gleichzeitig striktem Kostenmanagement zur Stärkung von Marktinvestitionen und Steigerung der Profitabilität. In Osteuropa, im Nahen Osten und anderen selektiven Wachstumsmärkten treiben wir die Geschäftsentwicklung darüber hinaus voran, indem wir neue Länder erschließen und unser Portfolio beschleunigt ausbauen.

Im Friseurgeschäft führen wir unsere Globalisierungsstrategie weiter fort und setzen Wachstumsimpulse insbesondere in Asien, Lateinamerika sowie im Nahen Osten.

Die organische Entwicklung steht im Zentrum unserer Wachstumsstrategie. Diese treiben wir durch den Ausbau unserer Innovationsführerschaft in einem hochkompetitiven Marktumfeld voran. Wesentliche Erfolgsfaktoren sind dabei die kontinuierliche Entwicklung erfolgreicher Innovationen und deren schnelle internationale Einführung. Darüber hinaus tragen die regionale Expansion unserer führenden Marken und die Etablierung verbraucherrelevanter Angebote in allen Preissegmenten entscheidend zum organischen Wachstum bei. Im Rahmen eines aktiven Portfoliomanagements prüfen wir regelmäßig unsere Geschäfte und Marken.

In unserem Markenartikelgeschäft konzentrieren wir uns auf den internationalen Ausbau unserer Kerngeschäfte Haarkosmetik, Körper- sowie Mund- und Hautpflege. Aufgrund unseres gezielten Portfolio-Managements und der damit einhergehenden Marketingmaßnahmen zur Stärkung unserer Top-Marken wuchsen die zehn größten Marken auch im Jahr 2010 wieder deutlich stärker als das Gesamt-Portfolio und tragen jetzt 89 Prozent zum

Weltmarkt für  
Kosmetik/Körperpflege:  
rund 135 Mrd. Euro

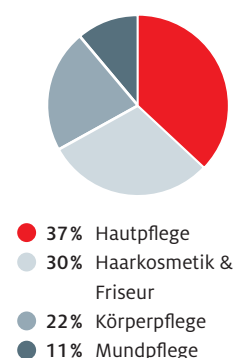

**+ 4,8 %**

organisches Umsatzwachstum bei stagnierendem Weltmarkt.

**>40 %**  
Innovationsrate.

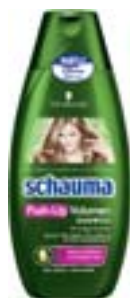

Schauma Push-Up  
Volumen.

Umsatz bei. Neben der Stärkung der Markenwerte steht vor allem die Ausschöpfung des Wachstumspotenzials mit unseren Top-Kunden im Fokus. Unser Friseurgeschäft wollen wir weiter durch Produktinnovationen und effiziente Vertriebsstrukturen vorantreiben. Zusätzlich sollen selektiv neue regionale Potenziale erschlossen werden.

Wir werden auch zukünftig durch unsere offensive Innovationsstrategie und die konsequente Stärkung der Markenwerte dynamisch und profitabel wachsen. Derzeit liegt die Innovationsrate bei mehr als 40 Prozent. Durch den Ausbau strategischer Partnerschaften mit unseren Kunden entwickeln wir zusätzliche Wachstumspotenziale.

### Umsatz und Ergebnis

Mit einem exzellenten Wachstum von 8,6 Prozent steigerte der Unternehmensbereich Kosmetik/Körperpflege den Umsatz erneut deutlich und setzte den kontinuierlichen Wachstumstrend der Vorjahre erfolgreich fort. Bereinigt um Akquisitionen/Divestments und Wechselkurseffekte erhöhte sich der Umsatz organisch um 4,8 Prozent. Erneut wuchsen wir damit stärker als der Markt und bauten die weltweite Marktposition in unseren Märkten weiter signifikant aus.

Grundlage der sehr guten Entwicklung war die konsequente Fortführung unserer Innovationsoffensive mit einer deutlichen Steigerung der umgesetzten Menge. Der starke Preiswettbewerb und hohe Promotionsaktivitäten führten zu einem leicht rückläufigen Preisniveau.

Es gelang uns, den Umsatz in allen Wachstumsregionen zu steigern. Zweistellige Zuwachsraten erreichten wir in Afrika/Nahost, Lateinamerika und Osteuropa. Auch Asien/Pazifik erzielte ein überdurchschnittliches Wachstum. In Westeuropa setzten wir unser kontinuierliches Wachstum fort, insbesondere Deutschland erzielte ein starkes Umsatzplus. Erfreulich war zudem die sehr gute Entwicklung der reifen Märkte Asiens. In Nordamerika hingegen haben wir in einem schwierigen Marktumfeld trotz Marktanteilsgewinnen den Umsatz des Vorjahres leicht unterschritten.

Im Markenartikelgeschäft erzielten wir über alle Regionen deutliche Zuwächse. Das Friseurgeschäft übertraf das Vorjahresniveau und liegt trotz weiter negativem Marktumfeld auf Wachstumskurs.

Unsere profitable Wachstumsstrategie haben wir im Jahr 2010 konsequent fortgeführt. Die Verbesserung der Bruttomarge und Kostensenkungen

wurden über steigende Marketingaufwendungen teilweise in den Markt investiert, um weitere Wachstumsdynamik zu erzeugen. Das betriebliche Ergebnis (EBIT) erhöhten wir um 6,1 Prozent auf 411 Mio. Euro, bereinigt um einmalige Erträge und Restrukturierungsaufwendungen sogar um 12,4 Prozent auf einen neuen Rekordwert von 436 Mio. Euro. Die bereinigte Umsatzrendite stieg erstmals über die 13-Prozent-Marke und erreichte mit 13,3 Prozent einen neuen Höchstwert. Gleiches gilt für die Rendite auf das eingesetzte Kapital (ROCE), die sich ergebnis- und kapitalbedingt um 1,9 Prozentpunkte auf 20,1 Prozent verbesserte. Der Economic Value Added (EVA®) stieg von 164 Mio. Euro im Vorjahr auf 207 Mio. Euro im Berichtsjahr. Neben der erfreulichen Ergebnisentwicklung trug insbesondere das deutlich weiter optimierte Netto-Umlaufvermögen im Verhältnis zum Umsatz zu dieser Steigerung bei.

### Geschäftsfelder

Im *Haarkosmetikgeschäft* haben wir einen starken organischen Umsatzzuwachs erreicht. Damit verbunden bauten wir unsere Marktanteile auf neue Höchststände aus, insbesondere durch die erfolgreiche Einführung von Top-Innovationen in allen Segmenten. Die weltweite Markteinführung von Syoss in weitere Produktkategorien hat deutlich dazu beigetragen. Wesentlicher Wachstumstreiber waren darüber hinaus die Colorationen.

Im Bereich *Haarpflege* konnten wir die Marktanteile auf neue Rekordwerte steigern. Hierzu haben insbesondere Syoss, unterstützt durch die neuen Produkt-Varianten Moisture Intensive Care und Anti-Dandruff Control, sowie weitere erfolgreiche internationale Markteinführungen beigetragen. Die Hair-Repair-Marke Gliss Kur verteidigte ihre Marktposition durch die weltweit erfolgreiche Einführung der Nährpflegelinie Shea Cashmere und neue Haarkuren-Konzepte. Schauma profitierte deutlich von den erfolgreichen Einführungen der Linien Push-Up Volumen, Intensiv-Anti-Schuppen und Seidenkamm.

Auch im Segment *Haarcolorationen* ist es uns gelungen, die Marktanteile auf einen neuen Höchstwert zu steigern. Hierfür zeichnen vor allem die internationalen Neueinführungen verantwortlich, wie die sehr erfolgreiche Lancierung von Syoss Color und das innovative Produkt Perfect Mousse, die erste permanente ammoniakfreie Haarfarbe in Schaumform in Europa. Palette konnte seine Marktführerschaft in Europa durch den Relaunch von Palette ICC, der ersten pflegenden Farbcreme von Palette mit natürlichem Gelée Royale, sowie

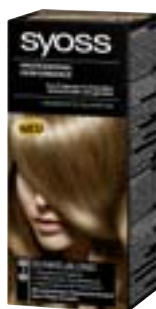

Syoss Haarcoloration.

durch den Launch von Palette Color & Gloss weiter stärken. Neue Marktpulse setzte auch Brillance durch eine Erweiterung des Sortiments um intensive Rot- und kühle Blondtöne.

Der Bereich *Haarstyling* konnte ebenfalls erneut Rekordmarktanteile gewinnen. Drei Wetter Taft, Europas Nummer 1 im Styling, wurde einem internationalen Markenrelaunch unterzogen und profitierte darüber hinaus von den Neueinführungen Taft Volumen für trockenes und strapaziertes Haar sowie Taft Ultra mit Arganöl. Daneben trug die internationale Einführung des Styling-Sortiments der Marke Syoss zum Wachstum bei. Die Trendstyling-Marke Got2b konnte insbesondere durch die erfolgreiche Einführung des Hitzeschutzprodukts Got2b Schutzengel Marktanteile hinzugewinnen.

Das *Körperpflegegeschäft* war durch Innovationen und weitere Produkteinführungen bei den Marken Fa, Dial und Right Guard geprägt. Bei Fa haben wir die Serie Active Pearls eingeführt. Gleichzeitig konnte Fa im Männersegment durch 3D Protect Wachstumsimpulse setzen. Das Innovationsprogramm wurde abgerundet mit Fa Mystic Moments. In Nordamerika haben wir mit der Dial NutriSkin Körperpflegeserie eine der erfolgreichsten Körperpflegeinnovationen des Jahres 2010 in dieser Region lanciert. In Nordamerika stand zudem die Einführung der Deo-Innovation Right Guard Total Defense 5 im Vordergrund. Zur weiteren globalen Erschließung des Markts für Männerprodukte haben wir die bisherige US-Marke Right Guard auch in Deutschland und Osteuropa eingeführt. Sie konnte sich in kurzer Zeit in einem herausfordernden Wettbewerbsumfeld etablieren.

Im *Hautpflegegeschäft* steht weiterhin die Entwicklung von innovativen Anti-Age-Produkten im Fokus. Die Einführung von Diadermine Dr. Caspari Novagen – die erste Pflege mit pflanzlichen Stammzellen – trug zur Stärkung der Position von Diadermine im Anti-Aging-Segment bei.

Im Geschäftsfeld *Mundpflege* erzielten wir gute Ergebnisse mit den neuen Varianten Theramed 2in1 16h Xtra Fresh und Theramed 2in1 Power Clean & White.

Das *Friseurgeschäft* trug ebenfalls zu unserer Wachstumsdynamik bei. Trotz eines weiterhin schwierigen Marktumfelds bauten wir unsere Position als weltweite Nummer 3 erneut aus. Mit innovativen Neueinführungen konnten wir zahlreiche Neukunden gewinnen und das Geschäft mit unseren bestehenden Kunden beleben. Im Stylingbereich

haben wir unsere Top-Stylingmarke Osis mit neuen innovativen Produkten wie dem Creme Wachs Flexwax, dem Styling Pulver Osis Shine Duster oder auch dem Volumen Serum Body Me erweitert. Im Pflegebereich haben wir die Serie Bonacure Smooth Shine eingeführt. Darüber hinaus wurde bei Essensity, nach dem erfolgreichen Relaunch der ammoniakfreien Coloration, das Pflege- und Stylingangebot komplett neu eingeführt.

### Investitionen

Unser Investitionsschwerpunkt lag im Berichtsjahr auf der Optimierung von Produktionsstrukturen und -prozessen. In Sachanlagen haben wir wie im Vorjahr 40 Mio. Euro investiert. Unter anderem wurde in Kapazitätsausweitungen und die effizientere Produktion hochvolumiger Artikel investiert.

### Ausblick

Für das Jahr 2011 erwarten wir in den für uns relevanten Märkten ein Andauern der schwierigen Rahmenbedingungen und damit eine stagnierende Entwicklung. Die reifen Märkte werden keine signifikanten Erholungstendenzen zeigen und sich weiter schwach entwickeln. Wachstumsimpulse erwarten wir jedoch nach wie vor aus den Wachstumsregionen Osteuropa, Lateinamerika, Afrika/Nahost und Asien/Pazifik.

Trotz der schwierigen Rahmenbedingungen wollen wir das profitable Wachstum fortsetzen. Beim organischen Umsatzwachstum wollen wir uns erneut besser entwickeln als unsere relevanten Märkte und erwarten bei der bereinigten Umsatzrendite – trotz weiter steigender Materialpreise – eine Steigerung gegenüber dem Vorjahreswert (2010: 13,3 Prozent).

Chancen sehen wir in einem weiteren Ausbau unserer Marktpositionen in Europa und Nordamerika durch die konsequente Fortsetzung unserer Innovationsoffensive. Daneben liegen Chancen im weiteren Ausschöpfen des Potenzials unserer Wachstumsregionen.

Risiken bestehen in der Möglichkeit einer deutlichen Verschlechterung des Konsumklimas und einer weiteren Intensivierung des Wettbewerbs in unseren Märkten, die sich in kontinuierlichem Promotionsdruck, Preiskämpfen und hohen Werbeausgaben manifestieren würden. Zudem könnten unerwartet stark ansteigende Rohstoff- und Verpackungspreise den Druck auf die Margen erhöhen.

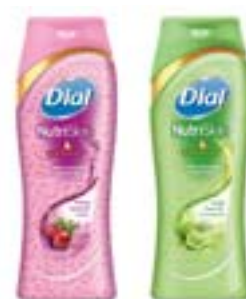

Dial NutriSkin.

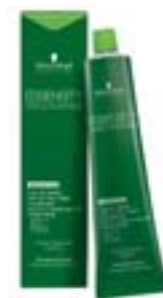

Essensity Haarcoloration.

# Adhesive Technologies

- Organisches Umsatzwachstum von 11,8 Prozent
- Bereinigtes betriebliches Ergebnis um 85,5 Prozent auf 938 Mio. Euro verbessert
- Bereinigte Umsatzrendite um 4,7 Prozentpunkte auf 12,8 Prozent gesteigert
- Rendite auf das eingesetzte Kapital (ROCE) um 7,7 Prozentpunkte auf 12,5 Prozent erhöht
- Economic Value Added (EVA®) um 616 Mio. Euro auf 73 Mio. Euro verbessert

## Innovationen 2010

### Loctite Power Easy

Dieser geruchlose und lösemittelfreie Sekundenkleber klebt schnell und stark verschiedenste Materialien, ohne dabei Hautflächen sofort zu verkleben.

### Terophon HDF

Dieses Dämpfungsmaterial minimiert Störgeräusche im Fahrzeuginnenraum. Und es ermöglicht, dünnere Bleche und leichtere Materialien in Autos zu verarbeiten.

### Loctite 3090

Der erste Sofortklebstoff mit spaltfüllenden Eigenschaften: Er vereint hohe Klebkraft mit schneller Aushärtung für eine Vielzahl von Materialien.

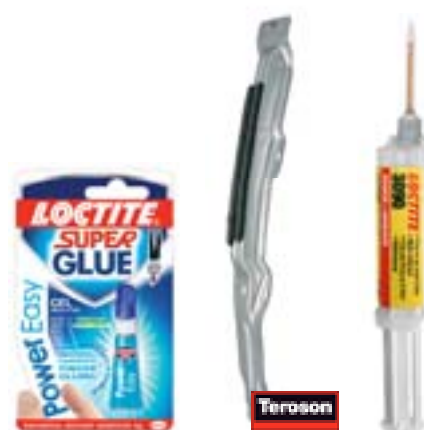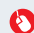

[www.loctiteproducts.com](http://www.loctiteproducts.com)  
[www.terophon.de](http://www.terophon.de)  
[www.loctite.de](http://www.loctite.de)

## Umsatz in Mio. Euro

|      |       |
|------|-------|
| 2006 | 5.510 |
| 2007 | 5.711 |
| 2008 | 6.700 |
| 2009 | 6.224 |
| 2010 | 7.306 |

## Wichtige Kennzahlen<sup>1)</sup>

| in Mio. Euro                                            | 2009  | 2010  | +/-    |
|---------------------------------------------------------|-------|-------|--------|
| Umsatz                                                  | 6.224 | 7.306 | 17,4%  |
| Anteil am Konzernumsatz                                 | 46%   | 48%   | 2 pp   |
| Betriebliches Ergebnis (EBIT)                           | 290   | 878   | >100%  |
| Bereinigtes betriebliches Ergebnis (EBIT) <sup>2)</sup> | 506   | 938   | 85,5%  |
| Umsatzrendite (EBIT)                                    | 4,7%  | 12,0% | 7,3 pp |
| Bereinigte Umsatzrendite (EBIT) <sup>2)</sup>           | 8,1%  | 12,8% | 4,7 pp |
| Rendite auf das eingesetzte Kapital (ROCE)              | 4,8%  | 12,5% | 7,7 pp |
| Economic Value Added (EVA®)                             | -543  | 73    | >100%  |

pp = Prozentpunkte

<sup>1)</sup> Berechnet auf Basis der Werte in Tausend Euro;  
Werte sind kaufmännisch gerundet.

<sup>2)</sup> Bereinigt um einmalige Aufwendungen und Erträge  
sowie Restrukturierungsaufwendungen.

## Umsatzveränderung<sup>1)</sup>

| in Prozent                      | 2010 |
|---------------------------------|------|
| Veränderung zum Vorjahr         | 17,4 |
| Wechselkurseffekte              | 6,3  |
| Bereinigt um Wechselkurseffekte | 11,1 |
| Akquisitionen/Divestments       | -0,7 |
| Organisch                       | 11,8 |
| Davon Preis                     | -0,1 |
| Davon Menge                     | 11,9 |

<sup>1)</sup> Berechnet auf Basis der Werte in Tausend Euro.

## Top-Marken und Produktgruppen

**LOCTITE** **Teroson** **technomelt**

Kleb- und Dichtstoffsysteme und Oberflächenbehandlung für industrielle Anwendungen in den Branchen Automobil, Verpackung, Luftfahrt, Elektronik, langlebige Gebrauchsgüter und Metall sowie für Wartung, Reparatur und Instandhaltung. Kleb- und Dichtstoffe für Heim- und Handwerker sowie für Anwendungen im Haushalt, in der Schule und im Büro.



## Umfeld und Marktposition

Nach den negativen Auswirkungen der Wirtschafts- und Finanzkrise im Jahr 2009 hat sich das wirtschaftliche Umfeld unserer Absatzmärkte im Jahr 2010 spürbar erholt. Die Wirtschaftsleistung zeigte im ersten Halbjahr eine sehr positive Dynamik, das Wachstum verlangsamte sich jedoch in der zweiten Jahreshälfte. Dabei expandierte das verarbeitende Gewerbe deutlich kräftiger als der private Konsum. Nach signifikanten Rückgängen in der Produktion der Stahl-, Automobil- und Elektronikindustrie im Jahr 2009 folgten 2010 deutliche Zuwächse. Auch der Maschinenbau profitierte von der Konjunkturbelebung und erholte sich kräftig. Die konsumnahe Verpackungsindustrie expandierte dagegen vergleichsweise moderat. Die Bauindustrie zeigte eine rückläufige Entwicklung. Alle Regionen konnten gegenüber dem Vorjahr ihre Wirtschaftsleistung deutlich steigern. Besonders stark war der Aufwärtstrend in den Wachstumsregionen, während in den reifen Märkten im zweiten Halbjahr die Wachstumsraten eine geringere Steigerung verzeichneten.

Der für uns relevante Markt für Klebstoffe, Dichtstoffe und Oberflächentechnik entwickelte sich unterschiedlich und erreichte insgesamt ein Wachstum im mittleren einstelligen Prozentbereich. Aufgrund des ausgewogenen Geschäfts- und Regionalportfolios und der Einführung neuer Produkte konnten wir das Marktwachstum in seiner gesamten Breite nutzen und dieses in vielen Bereichen übertreffen. Insbesondere unsere starke Position in den Wachstumsregionen unterstützte die positive Entwicklung des Unternehmensbereichs. Insgesamt konnten wir unsere führenden Positionen weltweit sowie in den einzelnen Regionen festigen oder sogar ausbauen.

Neben der überproportional steigenden Nachfrage nach Klebstoffen in den Wachstumsregionen werden auch in Zukunft weitere dominierende Trends das Wachstum des Klebstoffmarkts stützen. Hierzu zählt die anhaltende Notwendigkeit höherer Energieeffizienz und Kohlendioxid-Reduktion, die die Nachfrage nach nachhaltigen Produkten steigert. So gibt es im Bereich der erneuerbaren Energien vielfältige Klebstoffanwendungen; und die vermehrte Verwendung von Leichtbaumaterialien

bedingt einen höheren Klebstoffeinsatz. Neben den bereits etablierten Anwendungsbereichen für Kleb- und Dichtstoffe eröffnen sich zudem immer mehr neue Einsatzmöglichkeiten für moderne Produktsysteme, beispielsweise bei der Herstellung von LEDs (Light Emitting Diodes) oder bei der Weiterentwicklung der Medikamentenverabreichung über die Haut.

## Geschäftstätigkeit und Strategie

Der Unternehmensbereich Adhesive Technologies besteht aus fünf markt- und kundenfokussierten strategischen Geschäftseinheiten, die darauf ausgerichtet sind, Wettbewerbsvorteile für unsere Kunden zu schaffen.

Das Geschäftsfeld *Klebstoffe für Konsumenten, Handwerk und Bau* umfasst Markenprodukte für private und handwerkliche Endanwender sowie für das baunahe Handwerk. Auf vier internationalen Markenplattformen bieten wir zielgruppengerechte Systemlösungen. Kleb- und Korrekturprodukte für Schule und Büro vertreiben wir unter der Marke Pritt. Für Reparaturen im Haushalt bieten wir fortschrittliche Klebstofftechnologien unter der Marke Loctite. Heim- und Handwerker vertrauen auf vielfältige Lösungen aus dem Pattex-Produktportfolio, während professionelle Handwerker und Bauunternehmen auf Systeme zur Fliesenverlegung, Feuchtigkeitsabdichtung sowie zur Fassadenisolierung unter der Marke Ceresit setzen.

Das Geschäftsfeld *Transport und Metall* betreibt das Geschäft mit großen internationalen Kunden der Automobil- und Metall verarbeitenden Industrie. Wir bieten unseren Kunden maßgeschneiderte Systemlösungen und spezialisierten technischen Service über die gesamte Wertschöpfungskette an – vom bandbeschichteten Stahl bis zur Endmontage von Kraftfahrzeugen. Durch die partnerschaftliche Zusammenarbeit mit unseren Kunden insbesondere in der frühen Phase der Produktentwicklung ermöglichen wir ihnen die Herstellung innovativer und nachhaltiger Produkte.

Unsere Kunden im Geschäftsfeld *Allgemeine Industrie* sind kleine und mittelgroße Hersteller aus einer Vielzahl von Branchen – von der

## Weltmarkt für Klebstoffe, Dichtstoffe und Oberflächentechnik

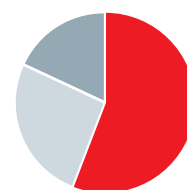

- 56% Industrie
- 26% Bauklebstoffe
- 18% Konsumenten und Handwerker

## + 11,8 %

organisches Umsatzwachstum (Weltmarkt: +5 %).

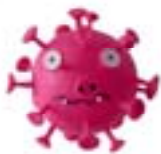

Tennisballgroße rote Gummi-„Bakterien“ mit dem Slogan „Ich muss draußen bleiben“ symbolisieren unseren Industrie-Kunden anschaulich und witzig, dass Bakterien in unseren neuen Multan-Kühlschmierstoffen keine Chance haben.

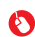

[www.henkelmultan.com](http://www.henkelmultan.com)

Haushaltsgeräte- bis zur Windkraftindustrie. Unser Produktportfolio umfasst neben den Loctite-Produkten für die industrielle Instandhaltung auch ein differenziertes Sortiment von Dichtstoffen und Systemlösungen zur Oberflächenbehandlung. Über ein flächendeckendes Distributionsnetzwerk helfen wir unseren Kunden mit hochwertigen Lösungen, ihre Wettbewerbsfähigkeit zu stärken.

Im Geschäftsfeld *Verpackungs-, Konsumgüter- und Konstruktionsklebstoffe* zählen sowohl Großkunden als auch mittlere und kleine Hersteller der Konsumgüter- und Möbelindustrie zu unseren Kunden. Nach der Integration der National Starch-Geschäfte sind wir durch die konsequente Nutzung von Größenvorteilen in der Lage, eine Vielzahl von wettbewerbsfähigen Lösungen für Standard- und Volumenwendungen erfolgreich zu vermarkten.

Im Geschäftsfeld *Elektronik* bieten wir unseren Kunden aus der Elektronikindustrie weltweit eine breite Palette von innovativen Hightech-Klebstoffen und Lötmaterialien für die Fertigung von Mikrochips und Elektronikbaugruppen an.

Auf Basis dieser im Jahr 2009 eingeführten Geschäftsstruktur wollen wir den profitablen Wachstumspfad in den nächsten Jahren fortsetzen.

Als zentrale Wachstumstreiber sehen wir dabei die noch stärkere Fokussierung auf die Nutzenerwartungen unserer Kunden, die dynamische Entwicklung der Wachstumsregionen, deren Umsatzanteil bereits bei 45 Prozent liegt, sowie die raschere Entwicklung und Marktdurchdringung von Innovationen.

Basierend auf einem breiten Technologieportfolio steigern wir unsere Innovationsrate kontinuierlich. Im Geschäftsjahr 2010 erzielten wir etwa 24 Prozent des Umsatzes mit Produkten, die wir innerhalb der letzten fünf Jahre eingeführt haben.

Nachdem in den letzten Jahren die Verbesserung der Ergebnisqualität stark durch größere Restrukturierungsmaßnahmen getrieben wurde, liegt der zukünftige Schwerpunkt auf der Verbesserung der „Operational Excellence“: Über eine Vielzahl von Maßnahmen wollen wir Skaleneffekte und weitere Optimierungspotenziale in allen Teilen der Wertschöpfung noch konsequenter nutzen. Dazu gehört auch die stärkere Konzentration unseres Markenportfolios auf starke, international bekannte Marken.

Durch diese Maßnahmen streben wir an, in allen strategischen Geschäftseinheiten marktführende Positionen mit hoher Rentabilität zu erreichen.

Der weitere Ausbau unserer Marktpositionen kann nur in dem Maß gelingen, in dem wir uns vom Wettbewerb unterscheiden. Einen wichtigen Ansatzpunkt sehen wir hier im überlegenen Anwendungs-Know-how in den für uns relevanten Arbeitsfeldern. Auf dieser Basis können wir unseren Kunden differenzierte Leistungsangebote zur Verfügung stellen, die deren Nutzenerwartungen optimal erfüllen. Diese Lösungen umfassen, neben den Produkten selbst, meist auch intensive Beratung und Schulung der Anwender. Darüber hinaus gelingt es uns aufgrund unserer Größe und internationalen Präsenz, für unsere Kunden weltweit solche Lösungen anzubieten, die wir über ein Netzwerk aus zentralen und dezentralen Produktionsstätten zuverlässig und zeitnah bereitstellen.

Regelmäßig prüfen wir alle Bestandteile unseres Portfolios im Hinblick auf ihren Beitrag zu den langfristigen Zielen des Unternehmensbereichs. In diesem Zusammenhang haben wir im Berichtszeitraum erneut mehrere kleine Randaktivitäten veräußert.

### Umsatz und Ergebnis

In einem sich erholenden Marktumfeld konnten wir den Umsatz des Unternehmensbereichs Adhesive Technologies deutlich um 17,4 Prozent auf 7.306 Mio. Euro steigern. Dieser lag somit um 9,0 Prozent über dem bisherigen Rekordjahr 2008. Das organische Wachstum erreichte einen Höchstwert von 11,8 Prozent. In einem sich verschärfenden Wettbewerbsumfeld war das Preisniveau stabil. Unser Wachstum von 11,8 Prozent war somit ausschließlich mengengetrieben. In den reifen Märkten Westeuropa und Nordamerika haben wir nach dem marktbedingten Rückgang des Vorjahres insgesamt ein Wachstum im hohen einstelligen Prozentbereich erzielt. Die Wachstumsmärkte legten überproportional zu und verzeichneten insgesamt ein zweistelliges Wachstum. Die höchsten Wachstumsraten haben wir in der Region Asien/Pazifik erreicht.

Die im Jahr 2009 eingeleiteten Maßnahmen haben entscheidend dazu beigetragen, unsere Kostenstruktur und die fokussierte Steuerung unseres Vertriebs deutlich zu verbessern. Infolgedessen konnten wir die Bruttomarge trotz deutlich höherer Materialpreise steigern und das betriebliche Ergebnis konnte verdreifacht werden auf den neuen Höchstwert von 878 Mio. Euro. Das bereinigte betriebliche Ergebnis konnte im Berichtsjahr fast verdoppelt werden und erreichte 938 Mio. Euro. Im Vergleich zum Vorjahr stieg die Umsatzrendite um 7,3 Prozentpunkte auf 12,0 Prozent, bereinigt stieg sie um 4,7 Prozentpunkte auf 12,8 Prozent. Die

## 45%

unseres Umsatzes erzielen wir in den Wachstumsregionen.

Rendite auf das eingesetzte Kapital (ROCE) erhöhte sich deutlich um 7,7 Prozentpunkte auf 12,5 Prozent. Der Economic Value Added (EVA®) verbesserte sich um 616 Mio. Euro auf plus 73 Mio. Euro im Berichtsjahr. Das Netto-Umlaufvermögen im Verhältnis zum Umsatz haben wir im Vergleich zum Vorjahr erneut verbessert.

### Geschäftsfelder

Das Geschäftsfeld *Klebstoffe für Konsumenten, Handwerk und Bau* entwickelte sich positiv. Zu dem Wachstum haben trotz der anhaltend schwierigen Situation im Baugewerbe sowohl das Geschäft mit Handwerkern und Konsumenten als auch das Geschäft mit der Bauindustrie beigetragen. Vor allem in Nord- und Lateinamerika sowie Afrika/Nahost konnten wir deutliche Zuwächse im Vergleich zum Vorjahr erzielen. Unser neu entwickeltes Systemkonzept für Do-it-yourself-Klebstoffe in Erweiterung der Marke Pattex findet im Handel großen Anklang. Wir bieten dabei ein breites Produktspektrum unter einer Marke in Verbindung mit einem innovativen Konzept für die Navigation der Endkunden im Verkaufsregal.

Nach den negativen Auswirkungen der globalen Wirtschafts- und Finanzkrise zeigte das Geschäftsfeld *Transport und Metall* im Berichtsjahr eine besonders erfreuliche Entwicklung. Die kontinuierliche Investition in Forschung und Entwicklung wurde, wie bereits im Jahr 2009, mit dem PACE Award für Automobilzulieferer honoriert. Ausgezeichnet wurde dieses Jahr die innovative Metallvorbehandlung Aquence.

Den Umsatz im Geschäftsfeld *Allgemeine Industrie* konnten wir ebenfalls deutlich steigern. Alle Regionen trugen zu dem signifikanten Wachstum bei, angeführt von Asien/Pazifik und Nordamerika. Das Geschäft mit Produkten für die industrielle Instandhaltung unter der Marke Loctite hat entscheidend zu dieser Entwicklung beigetragen.

Auch im Geschäftsfeld *Verpackungs-, Konsumgüter- und Konstruktionsklebstoffe* konnten wir den Umsatz steigern. Insbesondere die Regionen Asien/Pazifik und Lateinamerika verzeichneten deutliche Zuwächse.

Nach starken Rückgängen im Vorjahr war das Geschäftsfeld *Elektronik* geprägt durch die Erholung in der Halbleiterindustrie. Hier erreichten wir das stärkste Umsatzwachstum aller Geschäftsfelder und lagen sowohl in den Wachstumsregionen als auch in den reifen Märkten deutlich über den Vorjahreswerten.

### Investitionen

Im Jahr 2010 haben wir nochmals vorrangig in die Konsolidierung unserer Produktionskapazitäten investiert. Insgesamt wurden die Investitionen in Sachanlagen nach 135 Mio. Euro im Vorjahr auf 109 Mio. Euro im Berichtsjahr zurückgeführt.

### Ausblick

Für das Jahr 2011 erwarten wir in den für uns relevanten Märkten mit durchschnittlich 3 bis 5 Prozent ein Wachstum, das unter dem des Jahres 2010 liegen wird. Dabei werden sich die Wachstumsregionen wieder besser als die reifen Märkte entwickeln.

Bei den Preisen für Rohstoffe und Verpackungsmaterialien rechnen wir mit weiteren Anstiegen. Wie schon im Jahr 2010 kann es hier aufgrund begrenzter Kapazitäten bei den Herstellern auch wieder zu Lieferengpässen kommen.

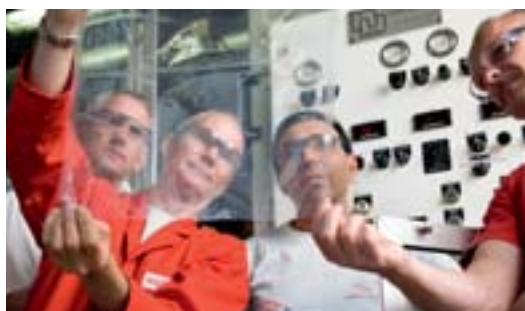

In unserer Liofol-Akademie schulen wir die Anlagenfahrer von Folien-Herstellern. Davon profitiert die gesamte Wertschöpfungskette flexibler Verpackungen, für die unsere Marke Liofol weltweit die passenden Klebstoffe anbietet. Auf dem Foto begutachten Schulungsteilnehmer eine gerade laminierte mehrlagige Klarsichtfolie.

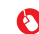

[www.liofolacademy.com](http://www.liofolacademy.com)

Nach dem sehr erfolgreichen Jahr 2010 wollen wir 2011 unser profitables Wachstum weiter fortsetzen. Beim organischen Umsatzwachstum wollen wir uns wieder besser entwickeln als unsere relevanten Märkte. Auch aufgrund der deutlichen Verbesserung der Kostenstruktur durch die in den letzten Jahren durchgeführten Maßnahmen erwarten wir bei der bereinigten Umsatzrendite eine Steigerung gegenüber dem Vorjahreswert (2010: 12,8 Prozent).

Chancen für unsere Geschäftsentwicklung sehen wir vor allem in der rascheren Einführung von Innovationen sowie in einer gegenüber den derzeitigen Erwartungen positiveren Marktdynamik.

Risiken sehen wir primär in der volatilen gesamtwirtschaftlichen Entwicklung in Nordamerika und Europa, aber auch teilweise in den Wachstumsregionen. Über den derzeitigen Erwartungen liegende Preissteigerungen und Engpässe bei den Rohstoffen können ebenfalls das profitable Wachstum gefährden.

## Risikobericht

### Risikomanagementsystem

Das *Risikomanagementsystem (RMS)* bei Henkel ist integraler Bestandteil sämtlicher Planungs-, Controlling- und Berichterstattungssysteme in den einzelnen Gesellschaften, den Unternehmensbereichen sowie auf Konzernebene. Dies umfasst die systematische Identifikation, Bewertung, Steuerung, Dokumentation, Kommunikation und Überwachung von Risiken. Im Rahmen der Corporate Governance tragen sowohl Risikosteuerung und -überwachung als auch das *Interne Kontrollsystem (IKS)* zum Risikomanagement bei.

Grundsätze, Prozesse und Verantwortlichkeiten im Risikomanagement haben wir in einer konzernweit gültigen Richtlinie geregelt. Bei der kontinuierlichen Weiterentwicklung unserer Richtlinien und Systeme berücksichtigen wir neue Erkenntnisse. Unser Risikomanagement folgt somit einem ganzheitlichen, integrativen Ansatz zum systematischen Umgang mit Risiken. Risiko verstehen wir als die Möglichkeit einer durch ein Ereignis oder einen Umstand bedingten negativen Abweichung von dem Zielwert einer finanziellen Erfolgsgröße.

Unser jährlicher *Risikoreporting-Prozess* beginnt damit, dass wir wesentliche Risiken nach definierten operativen (zum Beispiel Beschaffung und Produktion) und funktionalen (zum Beispiel Informationstechnologie und Personal) Risikofeldern mithilfe von Checklisten identifizieren. Die Risiken bewerten wir in einem zweistufigen Prozess hinsichtlich ihrer Eintrittswahrscheinlichkeit und möglichen Schadenshöhe. Als wesentlich gelten Risiken ab 1 Mio. Euro Schadenshöhe. Wir ermitteln zunächst das Bruttoisiko und im zweiten Schritt dann das Nettoisiko nach Gegenmaßnahmen. Ausgangspunkt ist eine dezentrale Erfassung der Risiken auf Länderebene. Sie wird von Regionalverantwortlichen unterstützt. Die lokal erhobenen Risiken werden anschließend von den Experten der Unternehmensbereiche und Zentralfunktionen analysiert, für die jeweiligen Führungsgremien aufbereitet und schließlich als bereichsspezifisches Risikoinventar verabschiedet. Die Koordination des gesamten Prozesses sowie die Analyse der inventarisierten Risiken obliegen der Konzernrechnungslegung. Alle Prozesse des Risikomanagements werden durch eine intranetbasierte Datenbank unterstützt. Sie stellt eine transparente Kommunikation im Gesamtunternehmen sicher. Im Rahmen der Abschlussprüfung

2010 hat der Abschlussprüfer die Struktur und Funktion unseres Risikofrüherkennungssystems geprüft und dessen Ordnungsmäßigkeit bestätigt.

### Risikomanagementsystem

|                                   | Wasch-/<br>Reinigungs-<br>mittel | Kosmetik/<br>Körper-<br>pflege | Adhesive<br>Tech-<br>nologies | Funk-<br>tionen<br>(HR, IT ...) |
|-----------------------------------|----------------------------------|--------------------------------|-------------------------------|---------------------------------|
| Regionalver-<br>antwortlicher 1   |                                  |                                |                               |                                 |
| Regionalver-<br>antwortlicher 2   |                                  |                                |                               |                                 |
| Regionalver-<br>antwortlicher 3   |                                  |                                |                               |                                 |
| Regionalver-<br>antwortlicher ... |                                  |                                |                               |                                 |

**Konzernrechnungslegung:  
Koordination/Analyse**

Nachfolgend beschreiben wir gemäß den Paragraphen 289 Absatz 5, 315 Absatz 2 Nummer 5 Handelsgesetzbuch (HGB) in der Fassung durch das Bilanzrechtsmodernisierungsgesetz (BilMoG) die wesentlichen Merkmale unseres internen Kontroll- und Risikomanagementsystems im Hinblick auf die *Rechnungslegungsprozesse*. Entsprechend der Definition unseres Risikomanagementsystems liegt dessen Ziel hinsichtlich der Rechnungslegungsprozesse in der Identifizierung, Bewertung und Steuerung all jener Risiken, die einer regelkonformen Erstellung unseres Jahres- beziehungsweise Konzernabschlusses entgegenstehen. Dementsprechend ist es Aufgabe des hierauf bezogenen Internen Kontrollsystems, durch Implementierung entsprechender Grundsätze, Verfahren und Kontrollen den regelkonformen Abschlussprozess sicherzustellen.

In der *Organisation* des Internen Kontrollsystems nimmt der Vorstand eine übergreifende Zuständigkeit auf Konzernebene wahr. Die aufeinander abgestimmten Teilsysteme des Internen Kontrollsystems liegen in der Verantwortung der Bereiche des Risikomanagements, der Compliance, des Corporate Accounting, von Corporate Finance und der Financial Operations. Innerhalb dieser Bereiche greift eine Vielzahl von Kontrollebenen ineinander und sorgt für eine Multi-Stabilität des internen Kontroll- und Risikomanagementsystems. Diese wird zudem durch umfangreiche Wirksamkeitstests der Internen Revision regelmäßig geprüft.

Von den vielfältigen *Kontrollprozessen* in der Rechnungslegung sind einige als wesentlich

hervorzuheben. Basis für sämtliche Rechnungslegungsprozesse ist der Corporate Standard „Accounting“; er enthält detaillierte Kontierungsanweisungen für alle wesentlichen Sachverhalte. Dies umfasst zum Beispiel auch klare Vorgaben für den Prozess der Vorratsbewertung oder die Transferpreisbestimmung im Rahmen der konzerninternen Liefer- und Leistungsbeziehungen. Dieser Corporate Standard ist für das Gesamtunternehmen verbindlich und wird in regelmäßigem Abstand überarbeitet und vom Finanzvorstand freigegeben. Weitere weltweit verbindliche Verfahrensanweisungen mit Wirkung auf die Rechnungslegung enthalten unsere Corporate Standards „Treasury“ und „Investments“.

Durch entsprechende organisatorische Maßnahmen in Verbindung mit der Begrenzung von Zugriffsberechtigungen auf unsere Informationssysteme stellen wir in den Rechnungslegungssystemen eine Aufgabentrennung zwischen Eingaben von Vorgängen sowie deren Prüfung und Freigabe sicher. Prozessdokumentationen der operativen Abschlussprozesse gewährleisten, dass wichtige Aufgaben – etwa die Abstimmung von Forderungen und Verbindlichkeiten durch Saldenbestätigungen – klar zugeordnet sind. Darüber hinaus sind die strikten Verfügungsberechtigungen im Rahmen der Autorisierung von Verträgen, Gutschriften und Ähnlichem ebenso zu nennen wie das durchgehend implementierte Vier-Augen-Prinzip. Dies ist ebenfalls in konzernweiten Corporate Standards fixiert.

Wir erachten die eingerichteten Systeme, die regelmäßig hinsichtlich ihrer Optimierungs- und Weiterentwicklungspotenziale überprüft werden, als angemessen und funktionsfähig. Identifizierte Verbesserungspotenziale setzen wir um.

### Darstellung der wesentlichen Einzelrisiken

**Umfeld- und Branchenrisiken:** Trotz der wirtschaftlichen Erholung sind wir weiterhin Umfeldrisiken ausgesetzt. Insbesondere das Umfeld im Industriebereich birgt Risiken und könnte zu Rückgängen im Absatzvolumen führen. Im Konsumgüterbereich besteht das Risiko, dass sich das Marktwachstum abschwächen könnte, in Verbindung mit einem intensivierten Wettbewerb. Wir beobachten hier eine weiter fortschreitende Konsolidierung im Handel, einen daraus resultierenden Druck auf Preise sowie Konditionen bei Eigenmarken des Handels. Unser Fokus liegt daher auf einer kontinuierlichen Stärkung des Werts unserer Marken

und der konsequenten Entwicklung von Innovationen, da wir innovative Produkte als wesentlichen Erfolgsfaktor unseres Unternehmens erachten, mit dem wir uns von Wettbewerbern abgrenzen.

**Beschaffungsmarktrisiken:** Auf unseren Beschaffungsmärkten erwarten wir weiter steigende Preise bei wichtigen Rohstoffen und Verpackungsmaterialien. Diese Preisanstiege werden durch den Trend höherer Vorrohstoffpreise im Rahmen der anziehenden Weltwirtschaft und durch zunehmend auftretende Lieferengpässe verursacht. Preis- und Lieferrisiken wirken wir durch ein umfassendes Risikomanagement entgegen. Es beinhaltet eine proaktive Steuerung unseres Lieferantenportfolios durch unser global operierendes, bereichsübergreifendes Einkaufsmanagement und den Einsatz von Strategien zur Preis- und Volumenabsicherung sowohl über Verträge als auch – wo sinnvoll und möglich – mithilfe von finanziellen Sicherungsinstrumenten. Weiterhin arbeiten wir in interdisziplinären Teams (Forschung und Entwicklung, Supply Chain Management und Einkauf) an alternativen Rezepturen und Verpackungen, um auf unvorhergesehene Schwankungen bei Rohstoffpreisen flexibel reagieren zu können. Zudem achten wir darauf, nicht von einzelnen Lieferanten abhängig zu werden, um so die von uns benötigten Güter und Dienstleistungen jederzeit beschaffen zu können. Eine außerordentlich wichtige Rolle in unserem Risikomanagement nimmt schließlich die enge Zusammenarbeit mit unseren strategischen Lieferanten ein. Auf die Risikobewertung von Lieferanten im Hinblick auf ihre finanzielle Stabilität gehen wir im Kapitel „Beschaffung“ auf den  **Seiten 57 und 58** näher ein. Die Basis für ein erfolgreiches Risikomanagement liefert ein umfassendes Einkaufsinformationssystem. Es stellt die permanente Transparenz über unser Einkaufsvolumen sicher.

**Produktionsrisiken:** Risiken im Produktionsbereich bestehen für Henkel in der Gefahr von zu niedriger Kapazitätsauslastung aufgrund von Volumrückgängen und in eventuellen Betriebsunterbrechungen, insbesondere bei sogenannten Single-Source-Standorten. Nachteilige Auswirkungen möglicher Produktionsausfälle lassen sich durch flexible Produktionssteuerung auffangen und durch Versicherungsverträge wirtschaftlich sinnvoll absichern. Hohe Mitarbeiterqualifikation, klar definierte Sicherheitsstandards und die regelmäßige Wartung der Anlagen minimieren solche Produktionsrisiken. Entscheidungen über Investi-



tionen in Sachanlagen richten sich nach festgelegten und differenzierten Zuständigkeitsregelungen und Genehmigungsprozessen. Sie beziehen alle relevanten Fachgebiete ein und sind in einer internen Richtlinie geregelt. Dabei analysieren wir Investitionen im Vorfeld detailliert auf Risikoaspekte. Projektbegleitende Prüfungen bilden die Grundlage für eine erfolgreiche Projektsteuerung und eine wirksame Risikoreduzierung.

*Informationstechnische Risiken:* Risiken im IT-Bereich sehen wir vor allem durch potenzielle unautorisierte Zugriffe und Datenverluste. Um diese abzuwenden, werden adäquate Genehmigungsprozesse, Zugriffsprofile und Technologien eingesetzt. Für alle kritischen Datenbestände werden täglich Datensicherungen erstellt, die an einen anderen Standort ausgelagert sind; außerdem führen wir regelmäßig sogenannte Restore-Tests durch. Die im Jahr 2010 aufgetretenen externen Angriffe – zum Beispiel durch Viren, Hacker oder Spam-Mails – haben zu keinen Störungen in den Geschäftsprozessen geführt, da sie durch die implementierten Sicherheitsmaßnahmen erfolgreich abgewehrt wurden. Henkel verfügt darüber hinaus über eine weltweit verbindliche interne IT-Richtlinie, zu deren Einhaltung auch externe Dienstleister verpflichtet sind. Wesentliche Bestandteile sind Maßnahmen zur Risikovermeidung, Darstellung von Eskalationsprozessen und Beschreibung von Best-Practice-Technologien. Die korrekte Umsetzung überprüft unsere weltweit tätige Interne Revision fortlaufend. Zusätzlich lassen wir unsere Schutzmaßnahmen durch externe Spezialisten bezüglich Effektivität und Effizienz begutachten.

*Personalrisiken:* Die zukünftige wirtschaftliche Entwicklung von Henkel wird wesentlich vom Engagement und von der Leistungsfähigkeit unserer Mitarbeiter getragen. Dem stärker werden den Wettbewerb um hoch qualifizierte Fach- und Führungskräfte begegnen wir durch enge Kontakte zu ausgewählten Universitäten und durch spezielle Rekrutierungsprogramme. Unsere neue „Employer Branding“-Kampagne positioniert uns noch stärker als Wunsch-Arbeitgeber. Mit gezielter Mitarbeiterförderung wirken wir dem Risiko entgegen, wertvolle Mitarbeiter nicht langfristig an uns binden zu können. Die Grundlage dieser Förderung bilden eine regelmäßige Potenzial- und Leistungsanalyse und darauf aufbauend attraktive Qualifizierungsmöglichkeiten und leistungsbezogene Vergütungssysteme. Weitergehende Informationen zu unseren Mitarbeitern finden Sie auf den

 [Seiten 55 bis 57.](#)

*Finanzwirtschaftliche Risiken:* Wir begegnen dem Forderungsausfallrisiko im Rahmen unserer Global Credit Policy durch standardisierte Vorgehensweisen, ein proaktives Forderungsmanagement sowie durch den Einsatz von Kreditversicherungen und Garantien. Neben einem detaillierten lokalen Monitoring überwachen wir unsere wichtigsten Kundenbeziehungen auch auf globaler Ebene. Ausfallrisiken entstehen auch aus finanziellen Investments, zum Beispiel Bankguthaben und dem positiven Marktwert aus Derivaten. Solche Risiken werden von unseren Experten im Bereich Corporate Treasury durch die Auswahl bonitätsstarker Banken (mindestens A-Rating) und eine Limitierung der Anlagebeträge begrenzt. Darüber hinaus diversifizieren wir unsere finanziellen Investments breit sowohl auf unterschiedliche Kontrahenten als auch auf verschiedene Finanzanlagen. Weitergehende Informationen zum Ausfallrisiko finden Sie im Konzernanhang unter  [Textziffer 31 auf den Seiten 115 bis 121.](#)

*Risiken aus Pensionsverpflichtungen* resultieren aus der Veränderung von Zinsen, Inflationsraten, Gehaltstrends und der Veränderung der statistischen Lebenserwartung der Pensionsberechtigten. Zur Risikominderung und besseren Risikosteuerung sind deshalb die Pensionsverpflichtungen in den wichtigsten Ländern ausfinanziert und werden mit einem zweigeteilten Portfolioansatz gesteuert: Der Hauptteil des Portfolios wird in Vermögenswerten mit gleicher Laufzeitstruktur und ähnlichen Zins- und Inflationssensitivitäten wie die Pensionsverpflichtungen investiert (Liability-Driven Investments), um das Zins- und Inflationsrisiko zu reduzieren. Um die Risiken aus Gehaltstrends und Langlebigkeit abzudecken und die Deckungslücke zwischen Pensionsvermögen und Pensionsverpflichtungen langfristig zu schließen, investieren wir als Beimischung in ein Return-Enhancing-Portfolio, das Anlageklassen wie Aktien, Private Equity, Hedgefonds, Immobilien und Rohstoffinvestments enthält.

Das Pensionsvermögen kann bei negativer Entwicklung der Kapitalmärkte belastet werden. Diesem Risiko tragen wir durch eine breite Diversifizierung der Anlageklassen und der Instrumente innerhalb der Anlageklassen Rechnung. Die in den Pensionsvermögen bestehenden Risiken werden fortlaufend überwacht und unter Risiko- und Ertragsgesichtspunkten gesteuert. Zur Quantifizierung von Risiken werden Sensitivitätsanalysen durchgeführt. Wesentliche Pensionsvermögen

werden in Deutschland, den USA, Großbritannien, Irland und den Niederlanden von externen Vermögensverwaltern betreut. Alle diese Länder verfolgen die oben genannte einheitliche Investitionsstrategie und werden zentral überwacht. Die zur Deckung der Pensionsverpflichtungen bestimmten Mittel legen wir auf Basis einer sogenannten Asset-Liability-Studie an, die auf den jeweiligen erwarteten Zahlungsströmen der länderspezifischen Pensionsverpflichtungen basiert. Weitere Angaben zur Entwicklung der Pensionsverpflichtungen stehen im Konzernanhang unter  Textziffer 17 auf den Seiten 106 bis 110.

Aus der globalen Ausrichtung unserer Geschäfte resultieren zwei Arten von *Währungsrisiken*. Das Transaktionsrisiko entsteht durch mögliche Wertänderungen zukünftiger Fremdwährungszahlungen aufgrund von Wechselkursschwankungen. Transaktionsrisiken aus dem operativen Geschäft werden teilweise dadurch reduziert, dass wir unsere Produkte in den Ländern produzieren, in denen wir sie verkaufen. Verbleibende Transaktionsrisiken aus dem operativen Geschäft steuern wir aktiv durch unsere Einheit Corporate Treasury. Wir beurteilen das spezifische Währungsrisiko und entwickeln eine Sicherungsstrategie. Da wir potenzielle Verluste limitieren, sind negative Auswirkungen auf das Ergebnis begrenzt. Das Transaktionsrisiko aus großen Finanzforderungen und -verbindlichkeiten wird weitgehend zu 100 Prozent gesichert. Zur Steuerung der Risiken setzen wir hauptsächlich Devisentermingeschäfte und Währungsswaps ein. Das Translationsrisiko beschreibt das Risiko einer Veränderung der Bilanz- sowie der Gewinn- und Verlust-Positionen einer Tochtergesellschaft aufgrund von Währungskursveränderungen bei der Umrechnung der lokalen Einzelabschlüsse in die Konzernwährung. Die Risiken aus der Umrechnung von Ergebnissen der Tochtergesellschaften in Fremdwährungen und aus Nettoinvestitionen in ausländische Gesellschaften (Hedge of a Net Investment in a Foreign Entity) werden nur in Ausnahmefällen gesichert.

Das *Zinsrisiko* umfasst jeglichen potenziell positiven oder negativen Einfluss von Veränderungen der Zinsen auf das Ergebnis, das Eigenkapital oder den Cashflow der aktuellen und zukünftigen Berichtsperioden. Der Einsatz zinstragender Finanzinstrumente mit dem Ziel, das Zinsergebnis des Henkel-Konzerns zu optimieren, ist ein Bestandteil unserer Finanzpolitik. Die Fristigkeitsstruktur steuern wir durch die Wahl der Zinsbindungs-

fristen bei den originären liquiditätswirksamen Finanzaktiva und -passiva sowie durch den Einsatz von Zinsderivaten. Die Verzinsung der beiden durch Henkel begebenen, in Euro denominierten Anleihen haben wir mithilfe von Zinsswaps von Festzins in variable Zinsen gewandelt. Da Anleihen und Zinsswaps in einem dokumentierten Sicherungszusammenhang stehen, neutralisieren sich die Bewertung der Anleihen und die Bewertung der Zinsswaps (Fair Value Hedge Accounting). Einen Großteil der Finanzierung der Henkel of America, Inc. in US-Dollar haben wir durch Zinsswaps in fixe Zinsen gewandelt. Beim Einsatz von Zinsswaps zur Fixierung eines Zinssatzes werden die Ergebnisse des Zinsswaps im Eigenkapital abgegrenzt (Cashflow Hedge Accounting). In Abhängigkeit von der Zinserwartung schützt sich Henkel durch den Abschluss zusätzlicher sogenannter Zinscaps und Forward Rate Agreements vor kurzfristig steigenden Zinsen. Dadurch besteht die Nettozinsposition aus einer gemischt fixen und variablen Verzinsungsstruktur.

Das *Liquiditätsrisiko* ist definiert als Risiko, dass die Gesellschaft ihren finanziellen Verpflichtungen nicht jederzeit nachkommen kann. Diesem Risiko begegnen wir dadurch, dass wir langfristige Finanzinstrumente einsetzen und über zusätzliche Liquiditätsreserven in Form von fest zugesagten Kreditlinien verfügen. Die Steuerung der Währungs-, Zins- und Liquiditätsrisiken basiert auf der vom Vorstand verabschiedeten, konzernweit gültigen Treasury-Richtlinie. Darin werden die Ziele, Prinzipien, Verantwortlichkeiten und Kompetenzen von Corporate Treasury definiert. Sie beschreibt die Verantwortungsbereiche und legt deren Verteilung auf die Corporate-Treasury-Abteilung und die Tochtergesellschaften fest. Der Vorstand wird über alle wesentlichen Risiken und über die bestehenden Sicherungsgeschäfte regelmäßig umfassend informiert.

Zusätzliche Informationen zum *Risikomanagement in Bezug auf Finanzinstrumente* finden sich im Konzernanhang unter  Textziffer 31 auf den Seiten 115 bis 121.

*Rechtliche Risiken:* Als weltweit tätiges Unternehmen unterliegen wir im Rahmen unserer gewöhnlichen Geschäftstätigkeit einer Reihe von Risiken im Zusammenhang mit Rechtsstreitigkeiten und anderen, auch behördlichen Verfahren, an denen wir zurzeit beteiligt sind oder in Zukunft beteiligt sein könnten. Hierzu zählen insbesondere Risiken

aus den Bereichen Produkthaftung, Produktfehler, Wettbewerbs- und Kartellrecht, Schutzrechtsverletzungen, Patentrecht, Steuerrecht sowie Umweltschutz beziehungsweise Altlasten. Es kann nicht ausgeschlossen werden, dass in einigen dieser Verfahren für uns negative Entscheidungen ergehen.

Rechtlichen Risiken begegnen wir durch entsprechende verbindliche Leitlinien, Verhaltensanweisungen und Schulungsmaßnahmen. Durch den ständigen Kontakt der zentralen Rechtsabteilung mit lokalen Anwälten sowie durch unser gesonderes Berichterstattungssystem erfassen wir laufende Verfahren und potenzielle Risiken. Für bestimmte rechtliche Risiken haben wir branchenübliche Versicherungen abgeschlossen, die wir als angemessen ansehen. Für Rechtsstreitigkeiten bilden wir Rückstellungen, sofern es nach unserer Einschätzung wahrscheinlich ist, dass entsprechende, nicht oder nicht vollständig durch Versicherungen abgedeckte Verpflichtungen entstehen und eine adäquate Schadensschätzung möglich ist. Eine Prognose von Verfahrensergebnissen ist jedoch vor allem in solchen Fällen mit erheblichen Schwierigkeiten verbunden, in denen die Anspruchsteller substantielle oder unbestimmte Schadensersatzansprüche geltend machen. Im Hinblick darauf können wir keine Vorhersage darüber treffen, welche Verpflichtungen sich aus einem solchen Verfahren eventuell ergeben könnten. Daher können aus Rechtsstreitigkeiten und Verfahren auch eventuell wesentliche Verluste entstehen, die nicht durch unseren Versicherungsschutz oder durch Rückstellungen abgedeckt sind.

Zum gegenwärtigen Zeitpunkt erwarten wir aus Rechtsstreitigkeiten und Verfahren keine wesentlichen negativen Auswirkungen auf die Vermögens-, Finanz- und Ertragslage von Henkel.

*Unternehmensstrategische Risiken* können daraus resultieren, dass möglicherweise die Erwartungen, die wir in interne Projekte sowie in Akquisitionen und strategische Kooperationen gesetzt haben, nicht erfüllt werden. Die damit erfolgten Investitionen können sich möglicherweise nicht amortisieren. Des Weiteren können sich einzelne Projekte durch nicht vorhersehbare Risiken verzögern.

Mit unserer Strategie, weltweit Prozesse zu vereinheitlichen und Produktionsstätten zu konzentrieren, können zum Beispiel Belastungen für

die Beziehungen zu Mitarbeitern und Zulieferern entstehen. Weiterhin müssen im Lauf einer Integration von erworbenen Unternehmen logistische Abläufe harmonisiert werden. Mit frühzeitigen Risikoanalysen durch erfahrene Facheinheiten, gegebenenfalls unterstützt durch externe Berater, begrenzen wir solche Risiken.

### **Gesamtrisiko – Beurteilung aus Sicht des Vorstands**

Zum Zeitpunkt der Erstellung dieses Berichts sind keine Risiken im Zusammenhang mit der zukünftigen Entwicklung erkennbar, die den Fortbestand der Henkel AG & Co. KGaA oder des Konzerns gefährden könnten. Da wir keine Zweckgesellschaften haben, geht von dieser Seite auch kein Risiko aus. Eine Aggregation der wichtigsten Einzelrisiken ist nicht angemessen, da ein gleichzeitiges Eintreten der Einzelrisiken unwahrscheinlich ist. Unsere Risikoanalyse zeigt, dass die Risiken nicht dauerhaft die Vermögens-, Finanz- und Ertragslage der Henkel AG & Co. KGaA und des Konzerns beeinträchtigen. Im Gesamtbild ergibt sich im Vergleich zum Vorjahr keine grundlegende Änderung der Risikolage. In Bezug auf die bei Henkel vorgenommene Kategorisierung in Risikofelder zeigt sich weiterhin der Schwerpunkt der Risiken auf den Umfeld- und Branchenrisiken sowie den finanzwirtschaftlichen Risiken, auf die wir mit den beschriebenen Gegenmaßnahmen reagieren.

## Prognosebericht

### Gesamtwirtschaftliche Entwicklung

#### Überblick: Wachstum des Bruttoinlandsprodukts von 3 Prozent erwartet

Die Weltwirtschaft wird auch im Jahr 2011 weiter wachsen. Wir erwarten einen Anstieg des Bruttoinlandsprodukts von etwa 3 Prozent. Der private Konsum dürfte weltweit um gut 2,5 Prozent ansteigen, während die Industrie mit 6 Prozent ein deutlich stärkeres Wachstum aufweisen wird.

#### Regionen: Wachstumsregionen werden auch 2011 deutlich zulegen

Die Wachstumsregionen – und hier besonders die sogenannten BRIC-Staaten Brasilien, Russland, Indien und China – werden sich auch 2011 als die „Wachstumslokomotiven“ der Weltwirtschaft erweisen.

Wir rechnen für die Industrieländer 2011 mit einem Wachstum von 2 Prozent bei vergleichsweise geringen regionalen Differenzen. Die US-Wirtschaft dürfte um rund 2 Prozent wachsen, Westeuropa und Japan um jeweils 1,5 Prozent. Für Asien (ohne Japan) und Lateinamerika gehen wir von einem Plus von knapp 7 Prozent beziehungsweise 4 Prozent aus. Osteuropa wird unserer Einschätzung zufolge an Dynamik gewinnen und um etwa 4 Prozent wachsen. Für die Region Afrika/Nahost erwarten wir – trotz aktueller politischer Spannungen in einigen Ländern – ein Wirtschaftswachstum von ebenfalls etwa 4 Prozent.

#### Rohstoffpreise: Weiterer Anstieg

Angesichts einer aufwärtsgerichteten Konjunktur erwarten wir einen weiteren Anstieg der Rohstoffpreise, zum Teil im zweistelligen Prozentbereich. Auch bei den Preisen für Energie rechnen wir mit Steigerungen.

#### Währungen: Keine wesentlichen Veränderungen

Wir erwarten keine materielle Veränderung des Euro gegenüber dem US-Dollar und gehen im Jahresdurchschnitt 2011 von einem Wert von etwa 1,30 US-Dollar aus. Dabei unterstellen wir, dass sich die Finanzkrise in Europa nicht verschärfen wird. Darüber hinaus gehen wir davon aus, dass sich der Euro auch gegenüber anderen wichtigen Währungen wie dem japanischen Yen, dem chinesischen Yuan oder dem russischen Rubel nicht wesentlich verändern wird (siehe Tabelle oben rechts).

### Durchschnittskurse gegenüber dem Euro

|                   | 2010   | 2011 <sup>1)</sup> |
|-------------------|--------|--------------------|
| US-Dollar         | 1,33   | 1,30               |
| Britisches Pfund  | 0,86   | 0,89               |
| Chinesischer Yuan | 8,98   | 8,85               |
| Japanischer Yen   | 116,38 | 120,00             |
| Russischer Rubel  | 40,26  | 39,00              |

<sup>1)</sup> Erwartet.

#### Inflation: Leichter Anstieg erwartet

Die Inflation dürfte 2011 weltweit bei etwa 3 Prozent liegen. Während wir für die Industrieländer mit gut 1,5 Prozent ein hohes Maß an Preisstabilität erwarten, dürfte die Inflation in den Wachstumsregionen bei durchschnittlich gut 5 Prozent liegen.

#### Zinspolitik: Niedrige Zinsen dürften vorerst Bestand haben

Wir erwarten, dass die Notenbanken ihre niedrigen Zinsen und ihre expansive Geldpolitik aufrechterhalten werden, und gehen dementsprechend von einem günstigen Zinsumfeld aus.

#### Arbeitslosigkeit: Weltweit leichter Rückgang erwartet

Die Chancen auf den Arbeitsmärkten werden sich mit der Fortsetzung der globalen Erholung allmählich verbessern. Die weltweite Arbeitslosenquote wird unserer Einschätzung zufolge leicht von 8 auf etwa 7,8 Prozent zurückgehen.

### Branchenentwicklung

#### Konsum und Einzelhandel: Zuwachs von 2,5 Prozent

Wir erwarten, dass der private Konsum – und daran gekoppelt der Einzelhandel – im Jahr 2011 mit gut 2,5 Prozent etwa gleich stark expandieren wird wie im Jahr 2010. Ein gestärktes Verbrauchervertrauen, leicht verbesserte Perspektiven am Arbeitsmarkt und anhaltend niedrige Zinsen dürften dem privaten Verbrauch Impulse geben.

Angesichts des scharfen Wettbewerbs werden Handelsunternehmen versuchen, die Verkaufspreise trotz gestiegener Rohstoffpreise weitgehend stabil zu halten. Die Bedeutung von Handelsmarken sollte mit der Fortsetzung des Aufschwungs zunächst nicht weiter zunehmen.

#### Industrie: Wachstum von 6 Prozent

Das Wachstum in der Industrie wird sich nach unserer Einschätzung im Vergleich zum Vorjahr

abschwächen, aber mit 6 Prozent noch immer deutlich ausfallen.

Für die Transportindustrie rechnen wir mit einem Plus von etwa 7 Prozent, ebenso für die Automobilindustrie. Regional liegen die Wachstumsraten zwischen 5 Prozent in den USA und gut 10 Prozent in China und Indien.

Auch die Produktion im Bereich Elektronikindustrie wird weiter zunehmen. Das Wachstum von knapp 10 Prozent dürfte von allen Regionen und Branchen getragen werden. Asien wird überproportional wachsen; bei den Branchen werden Personal Computer überproportional zum Anstieg beitragen.

Die Produktion in den Bereichen Metallverarbeitung und Maschinenbau wird 2011 um etwa 7 Prozent ausgeweitet werden. Die Branchen werden hierbei von einem allmählich steigenden Bedarf an Erweiterungsinvestitionen profitieren.

Die Verpackungsbranche wird nach unserer Einschätzung mit etwa 3 Prozent wachsen. Dabei sind die Chancen für industrienahen Verpackungen günstiger als für konsumnahe Verpackungssparten.

Für die weltweite Bauwirtschaft erwarten wir ein Produktionsplus von etwa 3 Prozent, das sich regional sehr unterschiedlich verteilen wird. Während wir für die Wachstumsregionen ein Plus bei der Bauproduktion von mehr als 5 Prozent erwarten, gehen wir für Nordamerika, Westeuropa und Japan von einer Stabilisierung oder einem nur geringen Zuwachs aus.

#### Chancen: Wachstumsregionen und innovative Produkte mit viel Potenzial

Großes Potenzial sehen wir weiterhin in den Wachstumsregionen. Hier gibt es überdurchschnittliche Wachstumsmöglichkeiten, von denen wir über unsere lokalen Geschäftsaktivitäten profitieren werden. Hierzu gehören insbesondere die Regionen Asien, Osteuropa und Afrika/Nahost, aber auch Lateinamerika.

Chancen sehen wir auch in unseren Forschungs- und Entwicklungsaktivitäten. Wir entwickeln stetig neue und innovative Produkte und Problem-

lösungen, die unseren Kunden einen Mehrwert bieten. Wir verfügen über eine gut gefüllte und ausgewogene Pipeline an mittel- und langfristigen Innovationsprojekten, die wir in diesem und den kommenden Jahren in allen drei Unternehmensbereichen auf den Markt bringen werden.

Eine weitere Chance stellt unser strikter Kostenfokus dar. Hierbei handelt es sich um einen Prozess, in dem wir den jeweiligen Status quo kontinuierlich hinterfragen und analysieren. Anschließend leiten wir aus den Ergebnissen Maßnahmen ab, die zu Kostensenkung, Kapazitätsanpassung und Bereinigung unseres Portfolios um Randgeschäfte und kleinere Marken führen.

Darüber hinaus ergeben sich Chancen aus der konsequenten Umsetzung und Implementierung unserer drei strategischen Prioritäten, die wir ausführlich im Kapitel „Strategie und Finanzziele 2012“ auf den [GB Seiten 40 bis 43](#) erläutern.

Weitere spezifische Chancen und auch Risiken erläutern wir in den Kapiteln der Unternehmensbereiche ab [GB Seite 66](#).

#### Ausblick des Henkel-Konzerns 2011

Bei unserer Prognose gehen wir von einem Anstieg des weltweiten Bruttoinlandsprodukts von etwa 3 Prozent aus.

Wir sind zuversichtlich, dass wir uns beim organischen Umsatzwachstum (bereinigt um Wechselkurseffekte und Akquisitionen/Divestments) erneut besser entwickeln werden als unsere relevanten Märkte, und erwarten ein organisches Umsatzwachstum innerhalb der Bandbreite von 3 bis 5 Prozent.

#### Erwartete Entwicklung der für Henkel relevanten Märkte

| Unternehmensbereich     | 2011 |
|-------------------------|------|
| Wasch-/Reinigungsmittel | 0%   |
| Kosmetik/Körperpflege   | 0%   |
| Adhesive Technologies   | 3–5% |

Die Basis dafür bildet unsere starke Wettbewerbsposition. Diese haben wir in den vergangenen Jahren mit unserer Innovationskraft, unseren

## 3 bis 5 %

organisches Umsatzwachstum für 2011 erwartet.



starken Marken und führenden Marktpositionen sowie der Qualität unseres Portfolios gefestigt und weiter ausgebaut.

Wir haben in den vergangenen Jahren eine Reihe von Maßnahmen eingeleitet, die sich positiv auf unsere Kostenstruktur ausgewirkt haben. Aber auch in diesem Jahr wollen wir unsere Strukturen weiter an die sich stetig ändernden Marktverhältnisse anpassen und unsere strikte Kostendisziplin fortführen.

All diese Faktoren werden zusammen mit der erwarteten Umsatzsteigerung die Entwicklung unserer Ergebnisse positiv beeinflussen. Gegenüber den Werten des Jahres 2010 erwarten wir bei der bereinigten<sup>1)</sup> Umsatzrendite (EBIT) eine Steigerung auf etwa 13 Prozent (2010: 12,3 Prozent) sowie einen Anstieg des bereinigten<sup>1)</sup> Ergebnisses je Vorzugsaktie von etwa 10 Prozent.

Weitere spezifische Erwartungen erläutern wir in den Kapiteln der Unternehmensbereiche ab

 Seite 66.

### Dividende

Entsprechend unserer Finanzstrategie soll die Dividendenausschüttung der Henkel AG & Co. KGaA etwa 25 Prozent des um Sondereinflüsse bereinigten Konzernergebnisses nach nicht beherrschenden Anteilen betragen. Aufgrund der erwarteten Ergebnissteigerung rechnen wir dementsprechend auch für das Geschäftsjahr 2011 mit einer Erhöhung der Dividende.

### Forschung und Entwicklung

Die Entwicklung von innovativen Produkten spielt für uns in allen drei Unternehmensbereichen eine zentrale Rolle. Dementsprechend planen wir, im Geschäftsjahr 2011 etwa 2,6 Prozent unseres Umsatzes in Forschung und Entwicklung zu investieren.

### Investitionen in Sachanlagen

Nachdem wir im Jahr 2010, das durch die Nachwirkungen der Krise gekennzeichnet war, unsere Investitionen zurückgefahren haben, wollen wir im Geschäftsjahr 2011 etwa 400 Mio. Euro in Sachanlagen investieren. Wir planen eine deutliche Erhöhung der Investitionen in unseren Wachs-

tumsregionen. Strukturbedingt wird der größte Teil der Investitionen auf Europa und Nordamerika entfallen. Bedeutende Investitionsobjekte werden eine Hochleistungs-Verpackungslinie für Lufterfrischer in den USA (Unternehmensbereich Wasch-/Reinigungsmittel), eine Verpackungsanlage für neue Faltschachteln in Deutschland (Unternehmensbereich Kosmetik/Körperpflege) und der Bau unseres größten Werks für Klebstoffe in China (Unternehmensbereich Adhesive Technologies) sein.

### Akquisitionen und Finanzierung

Im Geschäftsjahr 2011 liegt unsere Priorität auf einer weiteren Reduzierung unserer Nettoverschuldung und damit verbunden einer weiteren Stärkung unserer finanziellen Basis. Wir streben eine Wiedererlangung unseres Ziel-Ratings von „A flat“ (Standard & Poor's) beziehungsweise „A2“ (Moody's) an. Akquisitionen werden wir daher – wenn überhaupt – nur in dem Umfang durchführen, wie sie diesem Ziel nicht zuwiderlaufen.

Darüber hinaus erwarten wir für 2011 die folgenden Entwicklungen:

- Anstieg der Preise für Rohstoffe, Verpackungen, bezogene Waren und Leistungen im hohen einstelligen Prozentbereich,
- Restrukturierungsaufwendungen in Höhe von 100 bis 120 Mio. Euro,
- ein Finanzergebnis von etwa minus 160 Mio. Euro,
- eine Steuerquote von etwa 26 Prozent.

### Umsatz- und Ergebnisprognose 2012

Mit dem Fokus auf unsere im Jahr 2008 implementierten drei strategischen Prioritäten und den bisher gemachten Fortschritten zu deren Erreichung haben wir die Grundlage für unser zukünftiges profitables Wachstum gelegt.

Wir gehen davon aus, dass die Weltwirtschaft nach dem Jahr 2011, für das wir ein Wachstum von etwa 3 Prozent erwarten, auch im Jahr 2012 ähnlich stark expandieren wird.

Darauf basierend streben wir auch im Jahr 2012 mit 3 bis 5 Prozent ein über unseren relevanten Märkten liegendes organisches Umsatzwachstum an.

Etwa **13 %**  
bereinigte<sup>1)</sup> Umsatzrendite  
für 2011 erwartet.

Etwa **10 %**  
Anstieg des bereinigten<sup>1)</sup>  
Ergebnisses je Vorzugsaktie  
erwartet.

<sup>1)</sup> Bereinigt um einmalige Aufwendungen und Erträge sowie Restrukturierungsaufwendungen.

Aufgrund der bereits realisierten und noch ausstehenden Maßnahmen zum Ausschöpfen des vollen Geschäftspotenzials sind wir sehr zuversichtlich, bei der bereinigten<sup>1)</sup> Umsatzrendite (EBIT) im Jahr 2012 unser Ziel von 14 Prozent und beim bereinigten<sup>1)</sup> Ergebnis je Vorzugsaktie (EPS) unser Ziel eines Anstiegs von mehr als 10 Prozent zu erreichen.

#### Finanzziele 2012

Jährliches organisches Umsatzwachstum  
(durchschnittlich):  
**3–5 Prozent**

Bereinigte<sup>1)</sup> Umsatzrendite (EBIT):  
**14 Prozent**

Jährliches Wachstum des bereinigten<sup>1)</sup> Ergebnisses je Vorzugsaktie (durchschnittlich):  
**> 10 Prozent**

#### Nachtragsbericht

Mit wirtschaftlicher Wirkung zum 1. Januar 2011 haben wir 100 Prozent der Anteile an der Schwarzkopf Inc., Culver City, Kalifornien, USA, erworben; sie wird von diesem Zeitpunkt an in den Konsolidierungskreis einbezogen. Bis Ende 2010 haben wir unser Friseurgeschäft in den USA mit den bekannten Marken von Schwarzkopf Professional als Lizenzgeschäft betrieben.

Mit Wirkung vom 11. Januar 2011 haben wir den Veräußerungsprozess eines nicht zum Kerngeschäft zählenden Teils des Bauklebstoffgeschäfts in Südkorea abgeschlossen. Die bis zum Zeitpunkt der Veräußerung unter dem Bilanzposten „Zur Veräußerung gehaltene Vermögenswerte“ bilanzierten Vermögenswerte wurden an den Käufer übertragen.

Gemeinsam mit unserem Kooperationspartner Sandoz haben wir beschlossen, unser 1984 gegründetes Gemeinschaftsunternehmen Biozym in Kundl, Österreich, zum Jahresende 2012 zu beenden und die dortige Eigenproduktion von Enzymen aufzugeben. Dieser Schritt trägt den veränderten Marktgegebenheiten bei Qualität und Preisen Rechnung. Am 17. Januar 2011 wurden die betroffenen Mitarbeiter unterrichtet.

Wir haben uns entschieden, die Tablettenproduktion für Maschinengeschirrspülmittel zurück in unser Werk in Düsseldorf-Holthausen zu verlagern, und den mit einem Lohnfertiger bestehenden Vertrag gekündigt. Bis zum Frühjahr 2012 werden wir rund 25 Mio. Euro investieren und in Düsseldorf-Holthausen eine Tablettenproduktion für Maschinengeschirrspülmittel aufbauen. Die zuständigen betrieblichen Gremien haben wir Mitte Januar 2011 hierüber unterrichtet.

Ende Januar 2011 haben wir unsere Eigenproduktion des Bleichaktivators TAED in Cork, Irland, durch Verkauf an einen Investor beendet. TAED (Tetra-Acetyl-Ethylen-Diamin) ist ein Zusatzstoff in Waschmitteln zur Unterstützung der Bleichleistung. Der Investor übernimmt das Werk und versorgt Henkel mit TAED.

<sup>1)</sup> Bereinigt um einmalige Aufwendungen und Erträge sowie Restrukturierungsaufwendungen.

# Detailindex Konzernabschluss/-anhang

|                                        |                                                                                                                                    |
|----------------------------------------|------------------------------------------------------------------------------------------------------------------------------------|
| 88 Konzernbilanz                       | 93 Konzernsegmentberichterstattung<br>nach Unternehmensbereichen                                                                   |
| 90 Konzern-Gewinn- und Verlustrechnung | 94 Berichterstattung nach Regionen                                                                                                 |
| 91 Gesamtergebnisrechnung              | 95 Entwicklung der Immateriellen Vermögenswerte<br>und Sachanlagen                                                                 |
| 91 Eigenkapitalveränderungsrechnung    | 96 Erläuterungen zu Grundlagen und Methoden<br>des Konzernabschlusses                                                              |
| 92 Konzernkapitalflussrechnung         | 99 Erläuterungen zur Konzernbilanz                                                                                                 |
|                                        | 122 Erläuterungen zur Konzern-Gewinn-<br>und Verlustrechnung                                                                       |
|                                        | 126 Zusatzangaben zur Konzernbilanz/<br>Konzern-Gewinn- und Verlustrechnung                                                        |
|                                        | 133 Vorschlag für die Feststellung des Jahres-<br>abschlusses und für die Verwendung des<br>Bilanzgewinns der Henkel AG & Co. KGaA |
|                                        | 134 Jahresabschluss Henkel AG & Co. KGaA<br>Kurzfassung                                                                            |
|                                        | 135 Bestätigungsvermerk des unabhängigen<br>Abschlussprüfers                                                                       |
|                                        | 136 Versicherung der persönlich haftenden<br>Gesellschafterin                                                                      |
|                                        | 137 Gremien der Henkel AG & Co. KGaA                                                                                               |

# Konzernbilanz

| <b>Aktiva</b>                                 |        |               |              |               |              |
|-----------------------------------------------|--------|---------------|--------------|---------------|--------------|
| in Mio. Euro                                  | Anhang | 2009          | %            | 2010          | %            |
| Immaterielle Vermögenswerte                   | 1      | 8.218         | 52,0         | 8.641         | 49,3         |
| Sachanlagen                                   | 2      | 2.248         | 14,2         | 2.215         | 12,6         |
| Langfristige finanzielle Vermögenswerte       | 3      | 360           | 2,3          | 328           | 1,9          |
| Langfristige Ertragsteuererstattungsansprüche |        | 2             | –            | 3             | –            |
| Andere langfristige Vermögenswerte            | 4      | 12            | 0,1          | 30            | 0,2          |
| Latente Steuern                               | 5      | 322           | 2,0          | 358           | 2,0          |
| <b>Langfristiges Vermögen</b>                 |        | <b>11.162</b> | <b>70,6</b>  | <b>11.575</b> | <b>66,0</b>  |
| Vorräte                                       | 6      | 1.218         | 7,7          | 1.460         | 8,3          |
| Forderungen aus Lieferungen und Leistungen    | 7      | 1.721         | 10,9         | 1.893         | 10,8         |
| Sonstige finanzielle Vermögenswerte           | 8      | 214           | 1,3          | 708           | 4,0          |
| Andere kurzfristige Vermögenswerte            | 9      | 224           | 1,4          | 210           | 1,2          |
| Kurzfristige Ertragsteuererstattungsansprüche |        | 139           | 0,9          | 133           | 0,8          |
| Flüssige Mittel/Wertpapiere                   | 10     | 1.110         | 7,0          | 1.515         | 8,7          |
| <b>Kurzfristiges Vermögen</b>                 |        | <b>4.626</b>  | <b>29,2</b>  | <b>5.919</b>  | <b>33,8</b>  |
| Zur Veräußerung gehaltene Vermögenswerte      | 11     | 30            | 0,2          | 31            | 0,2          |
| <b>Aktiva insgesamt</b>                       |        | <b>15.818</b> | <b>100,0</b> | <b>17.525</b> | <b>100,0</b> |

## Passiva

| in Mio. Euro                                                   | Anhang | 2009          | %            | 2010          | %            |
|----------------------------------------------------------------|--------|---------------|--------------|---------------|--------------|
| Gezeichnetes Kapital                                           | 12     | 438           | 2,8          | 438           | 2,5          |
| Kapitalrücklage                                                | 13     | 652           | 4,1          | 652           | 3,7          |
| Eigene Aktien                                                  |        | -109          | -0,7         | -99           | -0,5         |
| Gewinnrücklagen                                                | 14     | 7.017         | 44,4         | 7.926         | 45,2         |
| Sonstige Bestandteile des Eigenkapitals                        | 15     | -1.524        | -9,6         | -1.058        | -6,0         |
| <b>Eigenkapital der Aktionäre der Henkel AG &amp; Co. KGaA</b> |        | <b>6.474</b>  | <b>41,0</b>  | <b>7.859</b>  | <b>44,9</b>  |
| Nicht beherrschende Anteile                                    | 16     | 70            | 0,4          | 91            | 0,5          |
| <b>Eigenkapital</b>                                            |        | <b>6.544</b>  | <b>41,4</b>  | <b>7.950</b>  | <b>45,4</b>  |
| Pensionsverpflichtungen                                        | 17     | 867           | 5,5          | 594           | 3,4          |
| Langfristige Ertragsteuerrückstellungen                        | 18     | 152           | 1,0          | 119           | 0,7          |
| Andere langfristige Rückstellungen                             | 18     | 241           | 1,5          | 302           | 1,7          |
| Langfristige Finanzschulden                                    | 19     | 3.426         | 21,7         | 3.570         | 20,4         |
| Langfristige finanzielle Verbindlichkeiten                     | 20     | 88            | 0,5          | 128           | 0,7          |
| Andere langfristige Verbindlichkeiten                          | 21     | 20            | 0,1          | 17            | 0,1          |
| Latente Steuern                                                | 22     | 367           | 2,3          | 416           | 2,4          |
| <b>Langfristige Verbindlichkeiten</b>                          |        | <b>5.161</b>  | <b>32,6</b>  | <b>5.146</b>  | <b>29,4</b>  |
| Kurzfristige Ertragsteuerrückstellungen                        | 23     | 224           | 1,4          | 327           | 1,9          |
| Andere kurzfristige Rückstellungen                             | 23     | 938           | 5,9          | 867           | 4,9          |
| Kurzfristige Finanzschulden                                    | 24     | 660           | 4,2          | 536           | 3,1          |
| Verbindlichkeiten aus Lieferungen und Leistungen               | 25     | 1.885         | 11,9         | 2.308         | 13,1         |
| Kurzfristige finanzielle Verbindlichkeiten                     | 26     | 145           | 0,9          | 175           | 1,0          |
| Andere kurzfristige Verbindlichkeiten                          | 27     | 251           | 1,6          | 205           | 1,1          |
| Kurzfristige Ertragsteuerverbindlichkeiten                     |        | 10            | 0,1          | 11            | 0,1          |
| <b>Kurzfristige Verbindlichkeiten</b>                          |        | <b>4.113</b>  | <b>26,0</b>  | <b>4.429</b>  | <b>25,2</b>  |
| <b>Passiva insgesamt</b>                                       |        | <b>15.818</b> | <b>100,0</b> | <b>17.525</b> | <b>100,0</b> |



# Konzern-Gewinn- und Verlustrechnung

| in Mio. Euro                                           | Anhang | 2009         | %           | 2010         | %           | Veränderung   |
|--------------------------------------------------------|--------|--------------|-------------|--------------|-------------|---------------|
| Umsatzerlöse                                           | 32     | 13.573       | 100,0       | 15.092       | 100,0       | 11,2%         |
| Kosten der umgesetzten Leistungen <sup>1)</sup>        | 33     | -7.411       | -54,6       | -8.078       | -53,5       | 9,0%          |
| <b>Bruttoergebnis vom Umsatz</b>                       |        | <b>6.162</b> | <b>45,4</b> | <b>7.014</b> | <b>46,5</b> | <b>13,8%</b>  |
| Marketing- und Vertriebsaufwendungen <sup>1)</sup>     | 34     | -3.926       | -28,9       | -4.257       | -28,2       | 8,4%          |
| Forschungs- und Entwicklungsaufwendungen <sup>1)</sup> | 35     | -396         | -2,9        | -391         | -2,6        | -1,3%         |
| Verwaltungsaufwendungen <sup>1)</sup>                  | 36     | -735         | -5,4        | -750         | -5,0        | 2,0%          |
| Sonstige betriebliche Erträge                          | 37     | 140          | 1,0         | 216          | 1,4         | 54,3%         |
| Sonstige betriebliche Aufwendungen                     | 38     | -165         | -1,2        | -109         | -0,7        | -33,9%        |
| <b>Betriebliches Ergebnis (EBIT)</b>                   |        | <b>1.080</b> | <b>8,0</b>  | <b>1.723</b> | <b>11,4</b> | <b>59,5%</b>  |
| Zinsertrag                                             |        | 70           | 0,5         | 64           | 0,4         | -8,6%         |
| Zinsaufwand                                            |        | -261         | -1,9        | -236         | -1,5        | -9,6%         |
| Zinsergebnis                                           |        | -191         | -1,4        | -172         | -1,1        | -9,9%         |
| Beteiligungsergebnis                                   |        | -4           | -           | 1            | -           | >100,0%       |
| <b>Finanzergebnis</b>                                  | 39     | <b>-195</b>  | <b>-1,4</b> | <b>-171</b>  | <b>-1,1</b> | <b>-12,3%</b> |
| <b>Ergebnis vor Steuern</b>                            |        | <b>885</b>   | <b>6,6</b>  | <b>1.552</b> | <b>10,3</b> | <b>75,4%</b>  |
| Steuern vom Einkommen und vom Ertrag                   | 40     | -257         | -1,9        | -409         | -2,7        | 59,1%         |
| <b>Jahresüberschuss</b>                                |        | <b>628</b>   | <b>4,7</b>  | <b>1.143</b> | <b>7,6</b>  | <b>82,0%</b>  |
| – auf nicht beherrschende Anteile entfallend           | 41     | 26           | 0,2         | 25           | 0,2         | -3,8%         |
| – auf Aktionäre der Henkel AG & Co. KGaA entfallend    |        | 602          | 4,5         | 1.118        | 7,4         | 85,7%         |

<sup>1)</sup> Restrukturierungsaufwendungen 2010: 184 Mio. Euro (2009: 159 Mio. Euro), darin enthalten: Kosten der umgesetzten Leistungen 114 Mio. Euro (2009: 70 Mio. Euro), Marketing- und Vertriebsaufwendungen 23 Mio. Euro (2009: 52 Mio. Euro), Forschungs- und Entwicklungsaufwendungen 8 Mio. Euro (2009: 52 Mio. Euro), Verwaltungsaufwendungen 39 Mio. Euro (2009: 24 Mio. Euro).

## Ergebnis je Aktie (Earnings per Share) nicht verwässert

| in Euro                      | Anhang | 2009 | 2010 | Veränderung |
|------------------------------|--------|------|------|-------------|
| Stammaktie                   | 45     | 1,38 | 2,57 | 86,2%       |
| Vorzugsaktie ohne Stimmrecht | 45     | 1,40 | 2,59 | 85,0%       |

## Ergebnis je Aktie (Earnings per Share) verwässert

| in Euro                      | Anhang | 2009 | 2010 | Veränderung |
|------------------------------|--------|------|------|-------------|
| Stammaktie                   | 45     | 1,38 | 2,56 | 85,5%       |
| Vorzugsaktie ohne Stimmrecht | 45     | 1,40 | 2,58 | 84,3%       |

## Freiwillige Zusatzinformation

| in Mio. Euro                                    | 2009    | 2010  |      |
|-------------------------------------------------|---------|-------|------|
| EBIT (wie berichtet)                            | 1.080   | 1.723 |      |
| Einmalige Erträge <sup>1)</sup>                 | -9      | -59   |      |
| Einmalige Aufwendungen <sup>2)</sup>            | 134     | 14    |      |
| Restrukturierungsaufwendungen                   | 159     | 184   |      |
| Bereinigter EBIT                                | 1.364   | 1.862 |      |
| Bereinigte Umsatzrendite                        | in %    | 10,0  | 12,3 |
| Bereinigtes Finanzergebnis                      | -195    | -171  |      |
| Bereinigter Jahresüberschuss                    |         |       |      |
| – Anteil der Aktionäre der Henkel AG & Co. KGaA | 822     | 1.217 |      |
| Bereinigtes Ergebnis je Vorzugsaktie            | in Euro | 1,91  | 2,82 |

<sup>1)</sup> Davon: 19 Mio. Euro Auflösung einer Rückstellung für einen nachteiligen Lieferantenkontrakt, 15 Mio. Euro Erlös aus einer Abstandsanzahlung für Lizenzrechte, 15 Mio. Euro aus der Auflösung von Rückstellungen für Pensionsverpflichtungen, 10 Mio. Euro aus der Auflösung von Restrukturierungsrückstellungen.

<sup>2)</sup> Davon: 6 Mio. Euro aus der Abschreibung von Vermögenswerten im Zusammenhang mit der Veräußerung unseres Klebstoffgeschäfts in Südkorea, 5 Mio. Euro aus einer außerplanmäßigen Abschreibung einer Kundenbeziehung im Bereich Adhesive Technologies, 3 Mio. Euro aus dem Verkauf des Geschäfts mit Lötkegeln in Taiwan.

# Gesamtergebnisrechnung

| in Mio. Euro                                        | 2009        | 2010         |
|-----------------------------------------------------|-------------|--------------|
| <b>Jahresüberschuss</b>                             | <b>628</b>  | <b>1.143</b> |
| Unterschied aus Währungsumrechnung                  | -104        | 531          |
| Derivative Finanzinstrumente                        | -11         | -59          |
| Versicherungsmathematische Gewinne/Verluste         | -285        | 53           |
| <b>Sonstiges Ergebnis (nach Steuern)</b>            | <b>-400</b> | <b>525</b>   |
| <b>Gesamtergebnis der Periode</b>                   | <b>228</b>  | <b>1.668</b> |
| – auf nicht beherrschende Anteile entfallend        | 24          | 31           |
| – auf Aktionäre der Henkel AG & Co. KGaA entfallend | 204         | 1.637        |

# Eigenkapitalveränderungsrechnung

## Erläuterungen in den Textziffern 12 bis 16

in Mio. Euro

|                                   | Gezeichnetes Kapital |                | Kapital-rücklage | Eigene Aktien | Gewinn-rück-lagen | Sonstige Bestandteile des Eigenkapitals |                     | Aktionäre der Henkel AG & Co. KGaA | Nicht beherrschende Anteile | Gesamt       |
|-----------------------------------|----------------------|----------------|------------------|---------------|-------------------|-----------------------------------------|---------------------|------------------------------------|-----------------------------|--------------|
|                                   | Stamm-aktien         | Vorzugs-aktien |                  |               |                   | Währungs-umrech-nung                    | Finanz-instru-mente |                                    |                             |              |
| Stand 1.1.2009                    | 260                  | 178            | 652              | -115          | 6.920             | -1.199                                  | -212                | 6.484                              | 51                          | 6.535        |
| Jahresüberschuss                  |                      |                |                  |               | 602               |                                         |                     | 602                                | 26                          | 628          |
| Sonstiges Ergebnis                |                      |                |                  |               | -285              | -102                                    | -11                 | -398                               | -2                          | -400         |
| <b>Gesamtergebnis der Periode</b> |                      |                |                  |               | <b>317</b>        | <b>-102</b>                             | <b>-11</b>          | <b>204</b>                         | <b>24</b>                   | <b>228</b>   |
| Ausschüttungen                    |                      |                |                  |               | -224              |                                         |                     | -224                               | -12                         | -236         |
| Verkauf eigener Aktien            |                      |                |                  | 6             | 4                 |                                         |                     | 10                                 |                             | 10           |
| Sonstige neutrale Veränderungen   |                      |                |                  |               | -                 |                                         |                     |                                    | 7                           | 7            |
| Stand 31.12.2009/1.1.2010         | 260                  | 178            | 652              | -109          | 7.017             | -1.301                                  | -223                | 6.474                              | 70                          | 6.544        |
| Jahresüberschuss                  |                      |                |                  |               | 1.118             |                                         |                     | 1.118                              | 25                          | 1.143        |
| Sonstiges Ergebnis                |                      |                |                  |               | 53                | 525                                     | -59                 | 519                                | 6                           | 525          |
| <b>Gesamtergebnis der Periode</b> |                      |                |                  |               | <b>1.171</b>      | <b>525</b>                              | <b>-59</b>          | <b>1.637</b>                       | <b>31</b>                   | <b>1.668</b> |
| Ausschüttungen                    |                      |                |                  |               | -225              |                                         |                     | -225                               | -19                         | -244         |
| Verkauf eigener Aktien            |                      |                |                  | 10            | 9                 |                                         |                     | 19                                 |                             | 19           |
| Sonstige neutrale Veränderungen   |                      |                |                  |               | -46               |                                         |                     | -46                                | 9                           | -37          |
| Stand 31.12.2010                  | 260                  | 178            | 652              | -99           | 7.926             | -776                                    | -282                | 7.859                              | 91                          | 7.950        |

# Konzernkapitalflussrechnung

## Erläuterungen unter Textziffer 46

| in Mio. Euro                                                                   | 2009                | 2010          |
|--------------------------------------------------------------------------------|---------------------|---------------|
| <b>Betriebliches Ergebnis (EBIT)</b>                                           | <b>1.080</b>        | <b>1.723</b>  |
| Gezahlte Ertragsteuern                                                         | -305                | -365          |
| Abschreibungen/Zuschreibungen Anlagevermögen (ohne Finanzanlagen)              | 588                 | 478           |
| Gewinne/Verluste aus Anlageabgängen (ohne Finanzanlagen)                       | 12                  | -5            |
| Veränderung der Vorräte                                                        | 276                 | -182          |
| Veränderung der Forderungen aus Lieferungen und Leistungen                     | 136                 | -72           |
| Veränderung sonstiger finanzieller Vermögenswerte und sonstiger Vermögenswerte | -15                 | -14           |
| Veränderung der Verbindlichkeiten aus Lieferungen und Leistungen               | 208                 | 341           |
| Veränderung anderer Verbindlichkeiten und Rückstellungen                       | -61                 | -53           |
| <b>Cashflow aus laufender Geschäftstätigkeit</b>                               | <b>1.919</b>        | <b>1.851</b>  |
| Investitionen in Immaterielle Vermögenswerte                                   | -28                 | -16           |
| Investitionen in Sachanlagen                                                   | -344                | -240          |
| Investitionen in Finanzanlagen/Akquisitionen                                   | 19 <sup>1) 2)</sup> | -46           |
| Erlöse aus der Veräußerung von Tochterunternehmen und Geschäftseinheiten       | 90                  | 19            |
| Erlöse aus Sonstigen Anlageabgängen                                            | 51                  | 43            |
| <b>Cashflow aus Investitionstätigkeit/Akquisitionstätigkeit</b>                | <b>-212</b>         | <b>-240</b>   |
| Dividenden Henkel AG & Co. KGaA                                                | -224                | -225          |
| Dividenden Tochterunternehmen (an nicht beherrschende Anteile)                 | -12                 | -19           |
| Erhaltene Zinsen                                                               | 70                  | 60            |
| Gezahlte Zinsen                                                                | -211                | -220          |
| <i>Gezahlte und erhaltene Dividenden und Zinsen</i>                            | <i>-377</i>         | <i>-404</i>   |
| Veränderung der Finanzschulden                                                 | -152                | -174          |
| Zuführungen an Pensionsfonds                                                   | -389                | -312          |
| Sonstige Veränderung Pensionsverpflichtungen                                   | 5                   | 30            |
| Sonstige Finanzierungsvorgänge                                                 | -19 <sup>2)</sup>   | -363          |
| <b>Cashflow aus Finanzierungstätigkeit</b>                                     | <b>-932</b>         | <b>-1.223</b> |
| Zahlungswirksame Veränderung des Finanzmittelfonds                             | 775                 | 388           |
| Wechselkursbedingte Veränderung des Finanzmittelfonds                          | -3                  | 17            |
| <b>Veränderung Flüssige Mittel/Wertpapiere</b>                                 | <b>772</b>          | <b>405</b>    |
| Flüssige Mittel/Wertpapiere am 1.1.                                            | 338                 | 1.110         |
| Flüssige Mittel/Wertpapiere am 31.12.                                          | 1.110               | 1.515         |

<sup>1)</sup> Darin enthalten: 103 Mio. Euro Einzahlungen durch das Settlement von Finanzforderungen aus dem Erwerb der National Starch-Geschäfte.

<sup>2)</sup> Vorjahr angepasst aufgrund retrospektiver Anwendung in IAS 7 durch IAS 27.

## Freiwillige Zusatzinformation Überleitung zum Free Cashflow

| in Mio. Euro                                 | 2009         | 2010         |
|----------------------------------------------|--------------|--------------|
| Cashflow aus laufender Geschäftstätigkeit    | 1.919        | 1.851        |
| Investitionen in Immaterielle Vermögenswerte | -28          | -16          |
| Investitionen in Sachanlagen                 | -344         | -240         |
| Erlöse aus Sonstigen Anlageabgängen          | 51           | 43           |
| Zinssaldo                                    | -141         | -160         |
| Sonstige Veränderung Pensionsverpflichtungen | 5            | 30           |
| <b>Free Cashflow</b>                         | <b>1.462</b> | <b>1.508</b> |

# Konzernsegmentberichterstattung nach Unternehmensbereichen<sup>1)</sup>

## Erläuterungen unter Textziffer 44

in Mio. Euro

|                                                                                              | Wasch-/<br>Reini-<br>gungs-<br>mittel | Kosmetik/<br>Körper-<br>pflege | Klebstoffe für<br>Handwerker<br>und Konsu-<br>menten | Industrie-<br>klebstoffe | Summe<br>Adhesive<br>Tech-<br>nologies | Summe<br>operative<br>Unternehmens-<br>bereiche | Corporate                | Konzern       |
|----------------------------------------------------------------------------------------------|---------------------------------------|--------------------------------|------------------------------------------------------|--------------------------|----------------------------------------|-------------------------------------------------|--------------------------|---------------|
| <b>Umsatz 2010</b>                                                                           | <b>4.319</b>                          | <b>3.269</b>                   | <b>1.872</b>                                         | <b>5.434</b>             | <b>7.306</b>                           | <b>14.894</b>                                   | <b>199</b>               | <b>15.092</b> |
| Veränderung gegenüber Vorjahr                                                                | 4,6%                                  | 8,6%                           | 7,7%                                                 | 21,1%                    | 17,4%                                  | 11,5%                                           | –                        | 11,2%         |
| bereinigt um Wechselkurseffekte                                                              | 1,1%                                  | 4,7%                           | 3,0%                                                 | 14,2%                    | 11,1%                                  | 6,6%                                            | –                        | 6,4%          |
| organisch                                                                                    | 1,5%                                  | 4,8%                           | 6,6%                                                 | 13,9%                    | 11,8%                                  | 7,0%                                            | –                        | 7,0%          |
| Anteil am Konzernumsatz                                                                      | 29%                                   | 22%                            | 12%                                                  | 36%                      | 48%                                    | 99%                                             | 1%                       | 100%          |
| <b>Umsatz 2009</b>                                                                           | <b>4.129</b>                          | <b>3.010</b>                   | <b>1.738</b>                                         | <b>4.486</b>             | <b>6.224</b>                           | <b>13.363</b>                                   | <b>210</b>               | <b>13.573</b> |
| <b>EBIT 2010</b>                                                                             | <b>542</b>                            | <b>411</b>                     | <b>216</b>                                           | <b>662</b>               | <b>878</b>                             | <b>1.831</b>                                    | <b>–108<sup>4)</sup></b> | <b>1.723</b>  |
| <b>EBIT 2009</b>                                                                             | <b>501</b>                            | <b>387</b>                     | <b>104</b>                                           | <b>186</b>               | <b>290</b>                             | <b>1.178</b>                                    | <b>–98<sup>4)</sup></b>  | <b>1.080</b>  |
| Veränderung gegenüber Vorjahr                                                                | 8,2%                                  | 6,1%                           | >100%                                                | >100%                    | >100%                                  | 55,4%                                           | –                        | 59,5%         |
| <b>Umsatzrendite (EBIT) 2010</b>                                                             | <b>12,6%</b>                          | <b>12,6%</b>                   | <b>11,5%</b>                                         | <b>12,2%</b>             | <b>12,0%</b>                           | <b>12,3%</b>                                    | <b>–</b>                 | <b>11,4%</b>  |
| Umsatzrendite (EBIT) 2009                                                                    | 12,1%                                 | 12,9%                          | 6,0%                                                 | 4,2%                     | 4,7%                                   | 8,8%                                            | –                        | 8,0%          |
| <b>Bereinigter EBIT 2010</b>                                                                 | <b>562</b>                            | <b>436</b>                     | <b>246</b>                                           | <b>692</b>               | <b>938</b>                             | <b>1.936</b>                                    | <b>–74</b>               | <b>1.862</b>  |
| Bereinigter EBIT 2009                                                                        | 530                                   | 387                            | 199                                                  | 307                      | 506                                    | 1.423                                           | –59                      | 1.364         |
| Veränderung gegenüber Vorjahr                                                                | 6,2%                                  | 12,4%                          | 23,9%                                                | >100%                    | 85,5%                                  | 36,1%                                           | –                        | 36,5%         |
| <b>Umsatzrendite (bereinigter EBIT) 2010</b>                                                 | <b>13,0%</b>                          | <b>13,3%</b>                   | <b>13,1%</b>                                         | <b>12,7%</b>             | <b>12,8%</b>                           | <b>13,0%</b>                                    | <b>–</b>                 | <b>12,3%</b>  |
| Umsatzrendite (bereinigter EBIT) 2009                                                        | 12,8%                                 | 12,9%                          | 11,4%                                                | 6,8%                     | 8,1%                                   | 10,6%                                           | –                        | 10,0%         |
| <b>Eingesetztes Kapital 2010<sup>2)</sup></b>                                                | <b>2.558</b>                          | <b>2.041</b>                   | <b>1.004</b>                                         | <b>6.046</b>             | <b>7.049</b>                           | <b>11.648</b>                                   | <b>–53</b>               | <b>11.595</b> |
| Eingesetztes Kapital 2009 <sup>2)</sup>                                                      | 2.562                                 | 2.125                          | 1.161                                                | 5.874                    | 7.035                                  | 11.722                                          | –181                     | 11.541        |
| Veränderung gegenüber Vorjahr                                                                | –0,2%                                 | –3,9%                          | –13,5%                                               | 2,9%                     | 0,2%                                   | –0,6%                                           | –                        | 0,5%          |
| <b>Rendite auf eingesetztes Kapital (ROCE) 2010</b>                                          | <b>21,2%</b>                          | <b>20,1%</b>                   | <b>22,1%</b>                                         | <b>11,0%</b>             | <b>12,5%</b>                           | <b>15,8%</b>                                    | <b>–</b>                 | <b>14,9%</b>  |
| Rendite auf eingesetztes Kapital (ROCE) 2009                                                 | 19,6%                                 | 18,2%                          | 10,4%                                                | 3,7%                     | 4,8%                                   | 10,4%                                           | –                        | 9,8%          |
| <b>Abschreibungen/Zuschreibungen auf Immaterielle Vermögenswerte/ Sachanlagevermögen</b>     |                                       |                                |                                                      |                          |                                        |                                                 |                          |               |
| <b>Sachanlagevermögen 2010</b>                                                               | <b>121</b>                            | <b>48</b>                      | <b>67</b>                                            | <b>220</b>               | <b>287</b>                             | <b>456</b>                                      | <b>22</b>                | <b>478</b>    |
| Davon außerplanmäßige Abschreibungen 2010                                                    | 12                                    | 2                              | 25                                                   | 35                       | 60                                     | 74                                              | 1                        | 75            |
| Davon Zuschreibungen 2010                                                                    | –                                     | –                              | 1                                                    | 4                        | 5                                      | 5                                               | 1                        | 6             |
| <b>Abschreibungen/Zuschreibungen auf Immaterielle Vermögenswerte/Sachanlagevermögen 2009</b> | <b>121</b>                            | <b>46</b>                      | <b>96</b>                                            | <b>282</b>               | <b>378</b>                             | <b>545</b>                                      | <b>43</b>                | <b>588</b>    |
| Davon außerplanmäßige Abschreibungen 2009                                                    | 10                                    | 1                              | 32                                                   | 105                      | 137                                    | 148                                             | 27                       | 175           |
| Davon Zuschreibungen 2009                                                                    | 1                                     | –                              | –                                                    | 2                        | 2                                      | 3                                               | –                        | 3             |
| <b>Investitionen (ohne Finanzanlagen) 2010</b>                                               | <b>85</b>                             | <b>43</b>                      | <b>35</b>                                            | <b>85</b>                | <b>120</b>                             | <b>248</b>                                      | <b>11</b>                | <b>260</b>    |
| Investitionen (ohne Finanzanlagen) 2009                                                      | 156                                   | 43                             | 40                                                   | 153                      | 193                                    | 392                                             | 23                       | 415           |
| <b>Operatives Bruttovermögen 2010<sup>3)</sup></b>                                           | <b>4.135</b>                          | <b>2.919</b>                   | <b>1.433</b>                                         | <b>7.190</b>             | <b>8.623</b>                           | <b>15.677</b>                                   | <b>352</b>               | <b>16.029</b> |
| Operative Verbindlichkeiten 2010                                                             | 1.408                                 | 1.077                          | 487                                                  | 1.419                    | 1.906                                  | 4.391                                           | 405                      | 4.796         |
| <b>Operatives Vermögen 2010<sup>3)</sup></b>                                                 | <b>2.727</b>                          | <b>1.842</b>                   | <b>946</b>                                           | <b>5.770</b>             | <b>6.717</b>                           | <b>11.286</b>                                   | <b>–53</b>               | <b>11.233</b> |
| Operatives Bruttovermögen 2009 <sup>3)</sup>                                                 | 3.838                                 | 2.723                          | 1.470                                                | 6.789                    | 8.259                                  | 14.820                                          | 357                      | 15.177        |
| Operative Verbindlichkeiten 2009                                                             | 1.123                                 | 800                            | 375                                                  | 1.195                    | 1.570                                  | 3.493                                           | 538                      | 4.031         |
| <b>Operatives Vermögen 2009<sup>3)</sup></b>                                                 | <b>2.715</b>                          | <b>1.923</b>                   | <b>1.095</b>                                         | <b>5.594</b>             | <b>6.689</b>                           | <b>11.327</b>                                   | <b>–181</b>              | <b>11.146</b> |

<sup>1)</sup> Berechnung auf Basis der Werte in Tausend Euro.<sup>2)</sup> Mit Geschäftswerten zu Anschaffungskosten vor Verrechnung mit kumulierten Abschreibungen gemäß IFRS 3.79(b).<sup>3)</sup> Mit Geschäftswerten zu Nettobuchwerten.<sup>4)</sup> Einschließlich der letztmalig unter Corporate ausgewiesenen Restrukturierungsaufwendungen für die Integration der National Starch-Geschäfte in Höhe von 14 Mio. Euro (im Vorjahr: 44 Mio. Euro).

## Berichterstattung nach Regionen<sup>1)</sup>

| in Mio. Euro                                        | West-europa  | Ost-europa   | Afrika/<br>Nahost | Nord-amerika | Latein-amerika | Asien/<br>Pazifik | Summe<br>Regionen | Corporate   | Konzern       |
|-----------------------------------------------------|--------------|--------------|-------------------|--------------|----------------|-------------------|-------------------|-------------|---------------|
| <b>Umsatz<sup>2)</sup> 2010</b>                     | <b>5.470</b> | <b>2.649</b> | <b>901</b>        | <b>2.724</b> | <b>982</b>     | <b>2.168</b>      | <b>14.894</b>     | <b>199</b>  | <b>15.092</b> |
| Veränderung gegenüber Vorjahr                       | 4,3%         | 13,7%        | 18,7%             | 7,0%         | 19,1%          | 30,8%             | 11,5%             | –           | 11,2%         |
| Bereinigt um Wechselkurseffekte                     | 3,6%         | 7,4%         | 12,8%             | 1,0%         | 11,6%          | 17,9%             | 6,6%              | –           | 6,4%          |
| Organisch                                           | 4,0%         | 7,2%         | 12,8%             | 3,5%         | 9,8%           | 17,8%             | 7,0%              | –           | 7,0%          |
| Anteil am Konzernumsatz                             | 36%          | 18%          | 6%                | 18%          | 7%             | 14%               | 99%               | 1%          | 100%          |
| <b>Umsatz<sup>2)</sup> 2009</b>                     | <b>5.246</b> | <b>2.330</b> | <b>759</b>        | <b>2.546</b> | <b>825</b>     | <b>1.657</b>      | <b>13.363</b>     | <b>210</b>  | <b>13.573</b> |
| <b>EBIT 2010</b>                                    | <b>706</b>   | <b>314</b>   | <b>81</b>         | <b>320</b>   | <b>104</b>     | <b>306</b>        | <b>1.831</b>      | <b>–108</b> | <b>1.723</b>  |
| <b>EBIT 2009</b>                                    | <b>531</b>   | <b>232</b>   | <b>75</b>         | <b>127</b>   | <b>74</b>      | <b>139</b>        | <b>1.178</b>      | <b>–98</b>  | <b>1.080</b>  |
| Veränderung gegenüber Vorjahr                       | 32,8%        | 35,2%        | 8,7%              | >100%        | 39,8%          | >100%             | 55,4%             | –           | 59,5%         |
| Bereinigt um Wechselkurseffekte                     | 32,1%        | 25,2%        | 0,5%              | >100%        | 29,9%          | 96,6%             | 47,6%             | –           | 53,2%         |
| <b>Umsatzrendite (EBIT) 2010</b>                    | <b>12,9%</b> | <b>11,9%</b> | <b>9,0%</b>       | <b>11,8%</b> | <b>10,5%</b>   | <b>14,1%</b>      | <b>12,3%</b>      | <b>–</b>    | <b>11,4%</b>  |
| Umsatzrendite (EBIT) 2009                           | 10,1%        | 10,0%        | 9,8%              | 5,0%         | 9,0%           | 8,4%              | 8,8%              | –           | 8,0%          |
| <b>Rendite auf eingesetztes Kapital (ROCE) 2010</b> | <b>26,6%</b> | <b>49,5%</b> | <b>25,9%</b>      | <b>5,5%</b>  | <b>20,3%</b>   | <b>18,5%</b>      | <b>15,8%</b>      | <b>–</b>    | <b>14,9%</b>  |
| Rendite auf eingesetztes Kapital (ROCE) 2009        | 17,6%        | 35,7%        | 26,0%             | 2,5%         | 14,8%          | 11,1%             | 10,4%             | –           | 9,8%          |

<sup>1)</sup> Berechnung auf Basis der Werte in Tausend Euro.

<sup>2)</sup> Nach Sitz der Gesellschaft.

Die in Deutschland ansässigen Verbundenen Unternehmen einschließlich der Henkel AG & Co. KGaA erzielten im Jahr 2010 einen Umsatz in Höhe von 2.182 Mio. Euro (Vorjahr: 2.048 Mio. Euro). Von den in den USA ansässigen Verbundenen Unternehmen wurden im Jahr 2010 Umsätze in Höhe von 2.502 Mio. Euro (Vorjahr: 2.363 Mio. Euro) erzielt.

Von den insgesamt zum 31. Dezember 2010 im Henkel-Konzern bilanzierten langfristigen Vermögenswerten (ohne

Finanzinstrumente und latente Steuerforderungen) in Höhe von 10.876 Mio. Euro (Vorjahr: 10.471 Mio. Euro) entfielen 1.043 Mio. Euro (Vorjahr: 1.087 Mio. Euro) auf die in Deutschland ansässigen Verbundenen Unternehmen einschließlich der Henkel AG & Co. KGaA. Die in den USA ansässigen Verbundenen Unternehmen bilanzierten zum 31. Dezember 2010 langfristige Vermögenswerte (ohne finanzielle Vermögenswerte und latente Steuerforderungen) in Höhe von 5.731 Mio. Euro (Vorjahr: 5.448 Mio. Euro).



# Entwicklung der Immateriellen Vermögenswerte und Sachanlagen

## Anschaffungswerte

in Mio. Euro

|                                                                     | Immaterielle Vermögenswerte | Sachanlagen  | Gesamt        |
|---------------------------------------------------------------------|-----------------------------|--------------|---------------|
| <b>Stand 1.1.2009</b>                                               | <b>9.027</b>                | <b>5.713</b> | <b>14.740</b> |
| Veränderung Konsolidierungskreis/Akquisitionen                      | 39                          | 3            | 42            |
| Zugänge                                                             | 28                          | 344          | 372           |
| Abgänge <sup>1)</sup>                                               | -68                         | -410         | -478          |
| Umbuchungen                                                         | 10                          | -10          | -             |
| Währungsänderungen                                                  | -139                        | -27          | -166          |
| <b>Stand 31.12.2009/1.1.2010</b>                                    | <b>8.897</b>                | <b>5.613</b> | <b>14.510</b> |
| Veränderung Konsolidierungskreis/Akquisitionen                      | 1                           | -            | 1             |
| Zugänge                                                             | 16                          | 240          | 256           |
| Abgänge <sup>2)</sup>                                               | -91                         | -320         | -411          |
| Umbuchungen                                                         | 2                           | 4            | 6             |
| Währungsänderungen                                                  | 632                         | 182          | 814           |
| <b>Stand 31.12.2010</b>                                             | <b>9.457</b>                | <b>5.719</b> | <b>15.176</b> |
| <sup>1)</sup> Davon: zur Veräußerung gehaltene Vermögenswerte 2009. | -41                         | -46          | -87           |
| <sup>2)</sup> Davon: zur Veräußerung gehaltene Vermögenswerte 2010. | -                           | -46          | -46           |

## Kumulierte Abschreibungen

in Mio. Euro

|                                                                     | Immaterielle Vermögenswerte | Sachanlagen  | Gesamt       |
|---------------------------------------------------------------------|-----------------------------|--------------|--------------|
| <b>Stand 1.1.2009</b>                                               | <b>536</b>                  | <b>3.352</b> | <b>3.888</b> |
| Veränderung Konsolidierungskreis/Akquisitionen                      | -                           | -            | -            |
| Zuschreibungen                                                      | -                           | -3           | -3           |
| Planmäßige Abschreibungen                                           | 108                         | 308          | 416          |
| Außerplanmäßige Abschreibungen                                      | 106                         | 69           | 175          |
| Abgänge <sup>1)</sup>                                               | -63                         | -347         | -410         |
| Umbuchungen                                                         | -                           | -            | -            |
| Währungsänderungen                                                  | -8                          | -14          | -22          |
| <b>Stand 31.12.2009/1.1.2010</b>                                    | <b>679</b>                  | <b>3.365</b> | <b>4.044</b> |
| Veränderung Konsolidierungskreis/Akquisitionen                      | -                           | -            | -            |
| Zuschreibungen                                                      | -                           | -6           | -6           |
| Planmäßige Abschreibungen                                           | 109                         | 300          | 409          |
| Außerplanmäßige Abschreibungen                                      | 33                          | 42           | 75           |
| Abgänge <sup>2)</sup>                                               | -23                         | -282         | -305         |
| Umbuchungen                                                         | -                           | 3            | 3            |
| Währungsänderungen                                                  | 18                          | 82           | 100          |
| <b>Stand 31.12.2010</b>                                             | <b>816</b>                  | <b>3.504</b> | <b>4.320</b> |
| <sup>1)</sup> Davon: zur Veräußerung gehaltene Vermögenswerte 2009. | -37                         | -32          | -69          |
| <sup>2)</sup> Davon: zur Veräußerung gehaltene Vermögenswerte 2010. | -                           | -41          | -41          |

Die außerplanmäßigen Abschreibungen sind den Funktionen zugeordnet.

## Nettobuchwerte

in Mio. Euro

|                         | Immaterielle Vermögenswerte | Sachanlagen  | Gesamt        |
|-------------------------|-----------------------------|--------------|---------------|
| <b>Stand 31.12.2010</b> | <b>8.641</b>                | <b>2.215</b> | <b>10.856</b> |
| <b>Stand 31.12.2009</b> | <b>8.218</b>                | <b>2.248</b> | <b>10.466</b> |

# Erläuterungen zu Grundlagen und Methoden des Konzernabschlusses

## Allgemeine Angaben

Der Konzernabschluss der Henkel AG & Co. KGaA, Düsseldorf, zum 31. Dezember 2010 ist in Übereinstimmung mit den International Financial Reporting Standards (IFRS), wie sie in der Europäischen Union anzuwenden sind, und unter Beachtung des Paragraphen 315a Handelsgesetzbuch (HGB) aufgestellt.

Die Jahresabschlüsse der einbezogenen Unternehmen sind auf den Bilanztag der Henkel AG & Co. KGaA erstellt.

Die Abschlussprüfer KPMG beziehungsweise andere beauftragte Prüfungsgesellschaften haben die Abschlüsse, die in den Konzernabschluss einbezogen worden sind, geprüft oder im Einzelfall einer sogenannten Prüferischen Durchsicht unterzogen. Der Vorstand der Henkel Management AG – die persönlich haftende Gesellschafterin der Henkel AG & Co. KGaA – hat den Konzernabschluss am 28. Januar 2011 zur Weitergabe an den Aufsichtsrat freigegeben. Der Aufsichtsrat hat die Aufgabe, den Konzernabschluss zu prüfen und zu erklären, ob er den Konzernabschluss billigt.

Der Konzernabschluss ist auf Basis der historischen Anschaffungs- oder Herstellungskosten erstellt mit der Ausnahme, dass bestimmte Finanzinstrumente zum Marktwert bilanziert sind. Die Konzernwährung ist Euro. Soweit nicht anders vermerkt, werden alle Beträge in Millionen Euro (Mio. Euro) angegeben. Um die Klarheit und Aussagefähigkeit des Konzernabschlusses zu verbessern, werden sowohl in der Konzernbilanz als auch in der Konzern-Gewinn- und Verlustrechnung sowie in der Gesamtergebnisrechnung einzelne Posten zusammengefasst und im Konzernanhang gesondert ausgewiesen.

## Konsolidierungskreis

In den Konzernabschluss zum 31. Dezember 2010 sind neben der Henkel AG & Co. KGaA als oberstes Mutterunternehmen neun inländische und 182 ausländische Gesellschaften einbezogen, bei denen die Henkel AG & Co. KGaA nach dem Kontrollkonzept die Finanz- und Geschäftspolitik bestimmen kann. Dies ist in der Regel dann der Fall, wenn die Henkel AG & Co. KGaA direkt oder indirekt die Mehrheit der Stimmrechte besitzt. Gesellschaften mit einer Beteiligung von nicht mehr als der Hälfte der Anteile werden voll konsolidiert, sofern die Henkel AG & Co. KGaA direkt oder indirekt deren Finanz- und Geschäftspolitik bestimmen kann.

Im Vergleich zum 31. Dezember 2009 wurden drei Gesellschaften neu in den Konsolidierungskreis aufgenommen, sieben Gesellschaften wurden fusioniert, und weitere sechzehn Gesellschaften haben den Konsolidierungskreis verlassen. Quotal konsolidierte Unternehmen sind im Konsolidierungskreis nicht enthalten. Die Änderungen des Konsolidierungskreises haben die wesentlichen Konzernabschlussposten nicht nennenswert verändert.

## Akquisitionen und Divestments

Im April 2010 haben wir zum Erwerb von ausstehenden nicht beherrschenden Anteilen an der Henkel Huawei Electronics Co. Ltd., Lianyungang, China, 7 Mio. Euro aufgewendet. Der Anteilsbesitz an der Henkel Huawei Electronics Co. Ltd. beträgt seitdem 95 Prozent. Im August 2010 haben wir in Nahost eine Akquisition in Höhe von 1 Mio. Euro im Unternehmensbereich Kosmetik/Körperpflege getätigt. Darüber hinaus haben wir im November 2010 unseren Anteilsbesitz in Guatemala für 23 Mio. Euro und auf Zypern für 6 Mio. Euro auf 100 Prozent aufgestockt. Im Dezember 2010 ist die Schwarzkopf Inc., Culver City, Kalifornien, USA, erworben worden. Der Kaufpreis betrug 41 Mio. Euro.

Im Juni 2010 haben wir unser Geschäft mit Lötkugeln in Taiwan für 5 Mio. Euro veräußert.

Darüber hinaus haben wir uns im März und Dezember 2010 von nicht zum Kerngeschäft zählenden Aktivitäten in Japan und Südkorea getrennt. Der Veräußerungserlös aus dem Verkauf in Japan betrug 2 Mio. Euro, der Veräußerungserlös in Südkorea betrug 15 Mio. Euro.

Infolge des Inkrafttretens der Änderungen von IFRS 3 zum 1. Januar 2010 fließen (Anschaffungsneben-)Kosten, die im Zusammenhang mit dem Erwerb von Unternehmensanteilen stehen, nicht mehr in die Bewertung der Anteile ein. Sie werden anstelle dessen in der Periode ihres Anfalls aufwandswirksam in der Gewinn- und Verlustrechnung erfasst.

Durch die getätigten Akquisitionen und Divestments im Geschäftsjahr 2010 wurden weder die Geschäfts- und Organisationsstruktur von Henkel noch die Vermögens-, Finanz- und Ertragslage wesentlich beeinflusst.

## Konsolidierungsgrundsätze

Die Kapitalkonsolidierung erfolgt nach der Erwerbsmethode. Diese Methode schreibt vor, dass bei Unternehmenszusammenschlüssen im Rahmen einer Neubewertung sämtliche stillen Reserven und stillen Lasten des übernommenen Unternehmens aufgedeckt und alle identifizierbaren Immateriellen Vermögenswerte gesondert ausgewiesen werden. Ein sich nach der Kaufpreisallokation ergebender aktiver Unterschiedsbetrag wird als Geschäfts- oder Firmenwert aktiviert. Bei der erstmaligen Einbeziehung von erworbenen Gesellschaften in den Konsolidierungskreis werden deren Beteiligungsbuchwerte bei der Henkel AG & Co. KGaA gegen die Vermögenswerte und Schulden verrechnet. In den Folgejahren werden die Beteiligungsbuchwerte der Henkel AG & Co. KGaA gegen das fortgeführte Eigenkapital der Tochterunternehmen aufgerechnet.

Alle Forderungen und Verbindlichkeiten, Umsätze, Aufwendungen und Erträge sowie Zwischenergebnisse, die aus konzern-internen Lieferungen in das Anlage- und in das Vorratsvermögen stammen, werden im Konzernabschluss eliminiert. Konzern-interne Lieferungen erfolgen entweder auf der Basis von Marktpreisen oder auf der Grundlage von Verrechnungspreisen.

### Währungsumrechnung

Die Jahresabschlüsse einschließlich der im Rahmen der Erwerbsmethode aufgedeckten stillen Reserven und Lasten der Konzerngesellschaften sowie die aus der Kapitalkonsolidierung entstandenen Geschäfts- oder Firmenwerte werden gemäß IAS 21 „Auswirkungen von Wechselkursänderungen“ nach dem Konzept der funktionalen Währung in Euro umgerechnet. Die funktionale Währung ist die Währung, in der eine ausländische Gesellschaft

überwiegend ihre Mittel erwirtschaftet und Zahlungen leistet. Da die funktionale Währung bei allen Konzerngesellschaften die jeweilige Landeswährung ist, werden die Vermögenswerte und Schulden zu Stichtagskursen umgerechnet und die Aufwendungen und Erträge zum Transaktionskurs, approximiert durch Jahresdurchschnittskurse. Der Unterschiedsbetrag, der sich gegenüber den Stichtagskursen ergibt, wird im Eigenkapital gesondert in der Spalte „Erfolgsneutrale Eigenkapitalveränderungen“ ausgewiesen und bleibt ohne Auswirkung auf den Jahresüberschuss.

Die Fremdwährungsforderungen und -verbindlichkeiten werden zum Stichtagskurs bewertet. Für die Umrechnung der wesentlichen Währungen im Konzern wurden folgende Wechselkurse für einen Euro zugrunde gelegt:

### Währung

|                   | ISO-Code | Durchschnittskurs |        | Stichtagskurs |          |
|-------------------|----------|-------------------|--------|---------------|----------|
|                   |          | 2009              | 2010   | 2009          | 2010     |
| US-Dollar         | USD      | 1,39              | 1,33   | 1,4406        | 1,3362   |
| Britisches Pfund  | GBP      | 0,89              | 0,86   | 0,8881        | 0,8608   |
| Chinesischer Yuan | CNY      | 9,53              | 8,98   | 9,8350        | 8,8220   |
| Japanischer Yen   | JPY      | 130,33            | 116,38 | 133,1600      | 108,6500 |
| Russischer Rubel  | RUB      | 44,15             | 40,26  | 43,1540       | 40,8200  |

### Schätzungen und Annahmen

Für die Erstellung des Konzernabschlusses müssen Schätzungen vorgenommen und Annahmen getroffen werden. Diese haben Einfluss auf die angegebenen Beträge für Vermögenswerte, Schulden und Eventualverbindlichkeiten zum Bilanztag sowie den Ausweis von Erträgen und Aufwendungen des Berichtszeitraums. Die sich tatsächlich ergebenden Beträge können von diesen Schätzungen abweichen.

Die Schätzungen und die zugrunde liegenden Annahmen werden fortlaufend überprüft. Anpassungen bezüglich der für die Rechnungslegung relevanten Schätzungen werden in der Periode der Änderung berücksichtigt, sofern die Änderung nur diese Periode betrifft. Eine Änderung wird in der Periode der Änderung und in späteren Perioden berücksichtigt, sofern die Änderung sowohl die Berichtsperiode als auch spätere Perioden betrifft. Beurteilungen des Vorstands hinsichtlich der Anwendung der IFRS, die wesentliche Auswirkungen auf den Konzernabschluss haben, werden insbesondere bei den erläuternden Angaben zu den Steuern vom Einkommen und vom Ertrag

(siehe Textziffer 40, [GB](#) Seiten 123 bis 125), zu den Immateriellen Vermögenswerten (siehe Textziffer 1, [GB](#) Seiten 99 bis 102), zu den Pensionsverpflichtungen (siehe Textziffer 17, [GB](#) Seiten 106 bis 110), zu den Derivaten und anderen Finanzinstrumenten (siehe Textziffer 31, [GB](#) Seiten 115 bis 121) sowie zu den aktienbasierten Vergütungsprogrammen (siehe Textziffer 42, [GB](#) Seiten 126 bis 128) dargestellt.

### Noch nicht vorzeitig angewandte Rechnungslegungsvorschriften

Die im Folgenden dargestellten, in das EU-Recht übernommenen („Endorsement“), allerdings noch nicht verpflichtend anzuwendenden Interpretationen und Änderungen zu bestehenden Standards mit möglicher Relevanz für Henkel werden noch nicht vorzeitig angewandt:

- Im Oktober 2009 veröffentlichte das International Accounting Standards Board (IASB) Änderungen des International Accounting Standard (IAS) 32 „Finanzinstrumente: Darstellung“. Die Änderungen regeln die Bilanzierung beim Emittenten von Bezugsrechten, Optionen und Optionsscheinen auf den Erwerb

einer festen Anzahl von Eigenkapitalinstrumenten, die in einer anderen Währung als der des Emittenten denominiert sind. Bisher wurden solche Fälle als derivative Verbindlichkeiten bilanziert. Bezugsrechte, die zu einem festgelegten Währungsbetrag anteilig an die bestehenden Anteilseigner des Unternehmens ausgegeben werden, sind zukünftig als Eigenkapital zu klassifizieren. Die Währung, auf die der Ausübungspreis lautet, ist dabei unbeachtlich. Die Änderung ist erstmals auf Geschäftsjahre anzuwenden, die am oder nach dem 1. Februar 2010 beginnen. Eine frühere Anwendung ist zulässig.

- Im November 2009 hat das IASB eine überarbeitete Fassung von IAS 24 „Angaben über Beziehungen zu nahestehenden Unternehmen und Personen“ veröffentlicht. Die Standardänderungen verdeutlichen die Definition von nahestehenden Unternehmen und Personen und vereinfachen die Angabepflichten für Unternehmen, die öffentlichen Stellen nahestehen. Die Änderungen sind anzuwenden auf Geschäftsjahre, die nach dem 31. Dezember 2010 beginnen; eine frühere Anwendung ist zulässig.
- International Financial Reporting Interpretations Committee (IFRIC) 14 „IAS 19 – Die Begrenzung eines leistungsorientierten Vermögenswertes, Mindestdotierungspflichten und ihre Wechselwirkungen“ behandelt die bilanzielle Behandlung von Beitragsvorauszahlungen, die ein Unternehmen leistet, um vorliegende Mindestdotierungspflichten zu erfüllen. Durch die Änderung wird den Unternehmen gestattet, den Nutzen aus einer solchen Vorauszahlung als Vermögenswert darzustellen. Die Interpretation ist für Geschäftsjahre anzuwenden, die nach dem 31. Dezember 2010 beginnen. Eine frühere Anwendung ist möglich.
- IFRIC 19 „Tilgung finanzieller Verbindlichkeiten durch Eigenkapitalinstrumente“ stellt insbesondere klar, dass Eigenkapitalinstrumente, die zur Tilgung einer finanziellen Verbindlichkeit an einen Gläubiger ausgegeben werden, Bestandteil des „gezahlten Entgelts“ im Sinn von IAS 39.41 sind. Die ausgegebenen Eigenkapitalinstrumente sind grundsätzlich zum beizulegenden Zeitwert zu bewerten. Die Differenz zwischen dem Buchwert der auszubuchenden finanziellen Verbindlichkeit und dem erstmaligen Wertansatz der ausgegebenen Eigenkapitalinstrumente ist in der Gewinn- und Verlustrechnung zu erfassen. Die Interpretation ist für Geschäftsjahre anzuwenden, die nach dem 30. Juni 2010 beginnen. Eine frühere Anwendung ist möglich.

Alle angeführten Standards und Interpretationen werden von Henkel erst ab dem Geschäftsjahr 2011 oder später angewandt. Aus der zukünftigen Anwendung der Änderungen von IAS 24 und IAS 32 sowie der IFRIC 14 und 19 erwarten wir keine wesentlichen Einflüsse auf die Darstellung der Abschlüsse.

Im Geschäftsjahr 2010 hat das IASB die folgenden für Henkel relevanten Standards, Interpretationen und Änderungen zu bestehenden Standards herausgegeben, deren Anwendung noch die Übernahme in EU-Recht („Endorsement“) erfordert:

- Änderungen IFRS 7 „Finanzinstrumente: Angaben“,
- IFRS 9 „Finanzinstrumente“,
- Sammelstandard „Improvements to IFRSs“.

Diese Standards werden von Henkel erst ab dem Geschäftsjahr 2011 oder später angewandt. Aus der zukünftigen Anwendung der genannten Standards und Interpretationen erwarten wir keine wesentlichen Einflüsse auf die Darstellung der Abschlüsse.

# Erläuterungen zur Konzernbilanz

Die Bilanzierungs- und Bewertungsgrundsätze für die Bilanzposten werden unter der jeweiligen Textziffer erläutert.

## Anlagevermögen

Das abnutzbare Anlagevermögen wird auf der Grundlage konzern-einheitlicher Nutzungsdauern ausschließlich linear abgeschrieben; soweit notwendig, werden außerplanmäßige Abschreibungen vorgenommen.

Es werden folgende unveränderte, einheitliche Nutzungsdauern zugrunde gelegt:

## Nutzungsdauer

in Jahren

|                                                                        |           |
|------------------------------------------------------------------------|-----------|
| Immaterielle Vermögenswerte mit bestimmter Nutzungsdauer               | 3 bis 20  |
| Wohngebäude                                                            | 50        |
| Geschäftsgebäude                                                       | 40        |
| Forschungs-/Fabrikationsgebäude, Werkstätten, Lager- und Sozialgebäude | 25 bis 33 |
| Betriebsvorrichtungen                                                  | 10 bis 25 |
| Maschinen                                                              | 7 bis 10  |
| Geschäftsausstattungen                                                 | 10        |
| Fahrzeuge                                                              | 5 bis 20  |
| Betriebsausstattungen/Einrichtungen für Forschung                      | 2 bis 5   |

## (1) Immaterielle Vermögenswerte

### Anschaffungswerte

in Mio. Euro

|                                                                        | Marken- und sonstige Rechte                         |                                                   | Selbst erstellte Imma-<br>terielle Vermögenswerte mit<br>bestimmter Nutzungsdauer | Geschäfts- oder<br>Firmenwerte | Gesamt |
|------------------------------------------------------------------------|-----------------------------------------------------|---------------------------------------------------|-----------------------------------------------------------------------------------|--------------------------------|--------|
|                                                                        | Vermögenswerte<br>mit unbestimmter<br>Nutzungsdauer | Vermögenswerte<br>mit bestimmter<br>Nutzungsdauer |                                                                                   |                                |        |
| Stand 1.1.2009                                                         | 1.201                                               | 1.468                                             | 136                                                                               | 6.222                          | 9.027  |
| Veränderung Konsolidierungskreis/Akquisitionen                         | –                                                   | –                                                 | –1                                                                                | 40                             | 39     |
| Zugänge                                                                | –                                                   | 11                                                | 16                                                                                | 1                              | 28     |
| Abgänge <sup>1)</sup>                                                  | –                                                   | –27                                               | –2                                                                                | –39                            | –68    |
| Umbuchungen                                                            | 5                                                   | –3                                                | 8                                                                                 | –                              | 10     |
| Währungsänderungen                                                     | –50                                                 | –12                                               | –1                                                                                | –76                            | –139   |
| Stand 31.12.2009/1.1.2010                                              | 1.156                                               | 1.437                                             | 156                                                                               | 6.148                          | 8.897  |
| Veränderung Konsolidierungskreis/Akquisitionen                         | –                                                   | –                                                 | –                                                                                 | 1                              | 1      |
| Zugänge                                                                | –                                                   | 6                                                 | 10                                                                                | –                              | 16     |
| Abgänge <sup>2)</sup>                                                  | –                                                   | –16                                               | –1                                                                                | –74 <sup>3)</sup>              | –91    |
| Umbuchungen                                                            | –                                                   | 2                                                 | –                                                                                 | –                              | 2      |
| Währungsänderungen                                                     | 84                                                  | 88                                                | 3                                                                                 | 457                            | 632    |
| Stand 31.12.2010                                                       | 1.240                                               | 1.517                                             | 168                                                                               | 6.532                          | 9.457  |
| <sup>1)</sup> Davon: zur Veräußerung gehaltene<br>Vermögenswerte 2009. | –                                                   | –2                                                | –                                                                                 | –39                            | –41    |
| <sup>2)</sup> Davon: zur Veräußerung gehaltene<br>Vermögenswerte 2010. | –                                                   | –                                                 | –                                                                                 | –                              | –      |

<sup>3)</sup> Zur Erläuterung des Abgangs eines Goodwills in Höhe von 63 Mio. Euro siehe Textziffer 23, Seite 113.



## Kumulierte Abschreibungen

in Mio. Euro

|                                                                        | Marken- und sonstige Rechte                         |                                                   | Selbst erstellte Imma-<br>terielle Vermögenswerte mit<br>bestimmter Nutzungsdauer | Geschäfts- oder<br>Firmenwerte | Gesamt |
|------------------------------------------------------------------------|-----------------------------------------------------|---------------------------------------------------|-----------------------------------------------------------------------------------|--------------------------------|--------|
|                                                                        | Vermögenswerte<br>mit unbestimmter<br>Nutzungsdauer | Vermögenswerte<br>mit bestimmter<br>Nutzungsdauer |                                                                                   |                                |        |
| Stand 1.1.2009                                                         | 4                                                   | 492                                               | 40                                                                                | –                              | 536    |
| Veränderung Konsolidierungskreis/Akquisitionen                         | –                                                   | –                                                 | –                                                                                 | –                              | –      |
| Zuschreibungen                                                         | –                                                   | –                                                 | –                                                                                 | –                              | –      |
| Planmäßige Abschreibungen                                              | –                                                   | 90                                                | 18                                                                                | –                              | 108    |
| Außerplanmäßige Abschreibungen                                         | 5                                                   | 55                                                | –                                                                                 | 46                             | 106    |
| Abgänge <sup>1)</sup>                                                  | –                                                   | –26                                               | –2                                                                                | –35                            | –63    |
| Umbuchungen                                                            | –                                                   | –                                                 | –                                                                                 | –                              | –      |
| Währungsänderungen                                                     | –                                                   | –8                                                | –                                                                                 | –                              | –8     |
| Stand 31.12.2009/1.1.2010                                              | 9                                                   | 603                                               | 56                                                                                | 11                             | 679    |
| Veränderung Konsolidierungskreis/Akquisitionen                         | –                                                   | –                                                 | –                                                                                 | –                              | –      |
| Zuschreibungen                                                         | –                                                   | –                                                 | –                                                                                 | –                              | –      |
| Planmäßige Abschreibungen                                              | –                                                   | 86                                                | 23                                                                                | –                              | 109    |
| Außerplanmäßige Abschreibungen                                         | 4                                                   | 23                                                | –                                                                                 | 6                              | 33     |
| Abgänge <sup>2)</sup>                                                  | –                                                   | –16                                               | –1                                                                                | –6                             | –23    |
| Umbuchungen                                                            | –                                                   | –                                                 | –                                                                                 | –                              | –      |
| Währungsänderungen                                                     | –                                                   | 17                                                | 1                                                                                 | –                              | 18     |
| Stand 31.12.2010                                                       | 13                                                  | 713                                               | 79                                                                                | 11                             | 816    |
| <sup>1)</sup> Davon: zur Veräußerung gehaltene<br>Vermögenswerte 2009. | –                                                   | –2                                                | –                                                                                 | –35                            | –37    |
| <sup>2)</sup> Davon: zur Veräußerung gehaltene<br>Vermögenswerte 2010. | –                                                   | –                                                 | –                                                                                 | –                              | –      |

## Nettobuchwerte

in Mio. Euro

|                  | Marken- und sonstige Rechte                         |                                                   | Selbst erstellte Imma-<br>terielle Vermögenswerte mit<br>bestimmter Nutzungsdauer | Geschäfts- oder<br>Firmenwerte | Gesamt |
|------------------|-----------------------------------------------------|---------------------------------------------------|-----------------------------------------------------------------------------------|--------------------------------|--------|
|                  | Vermögenswerte<br>mit unbestimmter<br>Nutzungsdauer | Vermögenswerte<br>mit bestimmter<br>Nutzungsdauer |                                                                                   |                                |        |
| Stand 31.12.2010 | 1.227                                               | 804                                               | 89                                                                                | 6.521                          | 8.641  |
| Stand 31.12.2009 | 1.147                                               | 834                                               | 100                                                                               | 6.137                          | 8.218  |

Entgeltlich erworbene Marken- und sonstige Rechte werden zu Anschaffungskosten, selbst erstellte Software wird zu Herstellungskosten aktiviert. In der Folgebilanzierung werden Geschäfts- oder Firmenwerte sowie Marken- und sonstige Rechte mit unbestimmter Nutzungsdauer mindestens einmal jährlich einem Werthaltigkeitstest unterzogen („Impairment only“-Ansatz). Im Rahmen unserer jährlichen Analyse haben wir die Werthaltigkeit

der Geschäfts- oder Firmenwerte sowie der Marken- und sonstigen Rechte mit unbestimmter Nutzungsdauer überprüft. Die Zahlungsmittel generierenden Einheiten mit den jeweils zum Bilanztag enthaltenen Geschäfts- oder Firmenwerten sowie die Marken- und sonstigen Rechte mit unbestimmter Nutzungsdauer zu Buchwerten sind der folgenden Tabelle zu entnehmen.

## Buchwerte

in Mio. Euro

|                                                        | 31.12.2009                                                 |                             | 31.12.2010                                                 |                             |
|--------------------------------------------------------|------------------------------------------------------------|-----------------------------|------------------------------------------------------------|-----------------------------|
|                                                        | Marken- und sonstige Rechte mit unbestimmter Nutzungsdauer | Geschäfts- oder Firmenwerte | Marken- und sonstige Rechte mit unbestimmter Nutzungsdauer | Geschäfts- oder Firmenwerte |
| <b>Zahlungsmittel generierende Einheiten</b>           |                                                            |                             |                                                            |                             |
| Waschmittel                                            | 336                                                        | 637                         | 362                                                        | 683                         |
| Reinigungsmittel                                       | 224                                                        | 717                         | 241                                                        | 776                         |
| <b>Wasch-/Reinigungsmittel gesamt</b>                  | <b>560</b>                                                 | <b>1.354</b>                | <b>603</b>                                                 | <b>1.459</b>                |
| Kosmetik Markenartikel                                 | 450                                                        | 982                         | 481                                                        | 1.046                       |
| Kosmetik Friseur                                       | 13                                                         | 49                          | 13                                                         | 51                          |
| <b>Kosmetik/Körperpflege gesamt</b>                    | <b>463</b>                                                 | <b>1.031</b>                | <b>494</b>                                                 | <b>1.097</b>                |
| Klebstoffe für Handwerker, Konsumenten und Bau         | 44                                                         | 390                         | 47                                                         | 411                         |
| Verpackungs-, Konsumgüter- und Konstruktionsklebstoffe | 39                                                         | 1.745                       | 42                                                         | 1.817                       |
| Transport, Metall, Allgemeine Industrie und Elektronik | 41                                                         | 1.617                       | 41                                                         | 1.737                       |
| <b>Adhesive Technologies gesamt</b>                    | <b>124</b>                                                 | <b>3.752</b>                | <b>130</b>                                                 | <b>3.965</b>                |

Die Prüfung der Werthaltigkeit der Geschäfts- oder Firmenwerte gemäß dem sogenannten Fair-Value-Less-Cost-To-Sell-Ansatz erfolgt auf der Basis geschätzter zukünftiger Cashflows, die aus der Planung abgeleitet werden. Diese Planung basiert auf einem Finanzplanungshorizont von drei Jahren. Für den Zeitraum danach wird für Zwecke der Werthaltigkeitstests eine Wachstumsrate der Cashflows in einer Bandbreite zwischen 1 und 2 Prozent angesetzt. Der zugrunde gelegte Wechselkurs von US-Dollar zu Euro beträgt 1,34. Die Cashflows werden in allen Zahlungsmittel generierenden Einheiten unter Berücksichtigung spezifischer Steuerwirkungen mit nach Unternehmensbereichen differenzierten Kapitalkostensätzen von 6,5 Prozent nach Steuern für Wasch-/Reinigungsmittel und Kosmetik/Körperpflege sowie von 7,5 Prozent nach Steuern für Adhesive Technologies abgezinst.

Im Unternehmensbereich *Wasch-/Reinigungsmittel* gehen wir von einer Umsatzsteigerung in der dreijährigen Planungsperiode in Höhe von jährlich rund 3 Prozent aus, die mit leicht steigenden Weltmarktanteilen einhergeht.

Für den Unternehmensbereich *Kosmetik/Körperpflege* beträgt das geplante Umsatzwachstum im dreijährigen Planungshorizont

rund 3 Prozent jährlich. Bei einem erwarteten Wachstum des für Henkel relevanten Kosmetikmarkts von jährlich unter 1 Prozent bedeutet dies einen Anstieg der Marktanteile.

Die erwartete durchschnittliche Umsatzsteigerung während der dreijährigen Planungsperiode im Unternehmensbereich *Adhesive Technologies* liegt bei jährlich rund 5 Prozent.

In allen Unternehmensbereichen wird angenommen, dass ein künftiger Anstieg der Kosten für Rohstoffe weitgehend durch Einsparprogramme im Einkauf und Weitergabe an unsere Kunden kompensiert werden kann. Gemeinsam mit Effizienzsteigerungsmaßnahmen und der aktiven Gestaltung des Portfolios gehen wir davon aus, in allen Unternehmensbereichen steigende Bruttomargen zu erzielen.

Als Ergebnis der Werthaltigkeitstests sind sogenannte Verlustpuffer („Impairment Buffer“) in ausreichender Höhe festgestellt worden, sodass kein Anlass für Geschäfts- oder Firmenwertabschreibungen bestand.

Im Zusammenhang mit der Veräußerung unseres Klebstoffgeschäfts in Südkorea haben wir eine Geschäftswertabschreibung von 6 Mio. Euro gebucht. Die Geschäftswertabschreibung ist in den Sonstigen betrieblichen Aufwendungen ausgewiesen (siehe Textziffer 38, [GB Seite 123](#)).

Im Rahmen der jährlichen Werthaltigkeitstests für Marken- und sonstige Rechte mit unbestimmter Nutzungsdauer in Höhe von 1.227 Mio. Euro ergab sich ein Abschreibungsbedarf von 4 Mio. Euro.

Die Marken- und sonstigen Rechte mit unbestimmter Nutzungsdauer sind in ihren Märkten etabliert und werden auch in Zukunft weiterhin intensiv beworben.

Außerplanmäßige Abschreibungen auf Marken- und sonstige Rechte mit bestimmter Nutzungsdauer in Höhe von 23 Mio. Euro betreffen überwiegend in Vorjahren erworbene Vermögenswerte im Unternehmensbereich Adhesive Technologies.

## (2) Sachanlagen

### Anschaffungswerte

in Mio. Euro

|                                                                     | Grundstücke,<br>grundstücksgleiche<br>Rechte und Bauten | Technische<br>Anlagen und<br>Maschinen | Andere Anlagen,<br>Betriebs- und<br>Geschäftsausstattungen | Geleistete<br>Anzahlungen und<br>Anlagen im Bau | Gesamt       |
|---------------------------------------------------------------------|---------------------------------------------------------|----------------------------------------|------------------------------------------------------------|-------------------------------------------------|--------------|
| <b>Stand 1.1.2009</b>                                               | <b>1.938</b>                                            | <b>2.752</b>                           | <b>887</b>                                                 | <b>136</b>                                      | <b>5.713</b> |
| Veränderung Konsolidierungskreis/Akquisitionen                      | –                                                       | 2                                      | 1                                                          | –                                               | 3            |
| Zugänge                                                             | 60                                                      | 134                                    | 62                                                         | 88                                              | 344          |
| Abgänge <sup>1)</sup>                                               | –92                                                     | –230                                   | –85                                                        | –3                                              | –410         |
| Umbuchungen                                                         | 22                                                      | 45                                     | 36                                                         | –113                                            | –10          |
| Währungsänderungen                                                  | –13                                                     | –11                                    | –3                                                         | –                                               | –27          |
| <b>Stand 31.12.2009/1.1.2010</b>                                    | <b>1.915</b>                                            | <b>2.692</b>                           | <b>898</b>                                                 | <b>108</b>                                      | <b>5.613</b> |
| Zugänge                                                             | 21                                                      | 74                                     | 50                                                         | 95                                              | 240          |
| Abgänge <sup>2)</sup>                                               | –65                                                     | –188                                   | –65                                                        | –2                                              | –320         |
| Umbuchungen                                                         | 50 <sup>3)</sup>                                        | 42                                     | 17                                                         | –105                                            | 4            |
| Währungsänderungen                                                  | 81                                                      | 67                                     | 34                                                         | –                                               | 182          |
| <b>Stand 31.12.2010</b>                                             | <b>2.002</b>                                            | <b>2.687</b>                           | <b>934</b>                                                 | <b>96</b>                                       | <b>5.719</b> |
| <sup>1)</sup> Davon: zur Veräußerung gehaltene Vermögenswerte 2009. | –28                                                     | –16                                    | –2                                                         | –                                               | –46          |
| <sup>2)</sup> Davon: zur Veräußerung gehaltene Vermögenswerte 2010. | –10                                                     | –34                                    | –2                                                         | –                                               | –46          |

<sup>3)</sup> Davon 6 Mio. Euro Anschaffungskosten (3 Mio. Euro Abschreibungen) aus der Umbuchung von zur Veräußerung gehaltenen Vermögenswerten, da eine Veräußerungsabsicht nicht mehr besteht.

**Kumulierte Abschreibungen**

in Mio. Euro

|                                                                     | Grundstücke,<br>grundstücksgleiche<br>Rechte und Bauten | Technische<br>Anlagen und<br>Maschinen | Andere Anlagen,<br>Betriebs- und<br>Geschäftsausstattungen | Geleistete<br>Anzahlungen und<br>Anlagen im Bau | Gesamt       |
|---------------------------------------------------------------------|---------------------------------------------------------|----------------------------------------|------------------------------------------------------------|-------------------------------------------------|--------------|
| <b>Stand 1.1.2009</b>                                               | <b>822</b>                                              | <b>1.899</b>                           | <b>630</b>                                                 | <b>1</b>                                        | <b>3.352</b> |
| Veränderung Konsolidierungskreis/Akquisitionen                      | –                                                       | –                                      | –                                                          | –                                               | –            |
| Zuschreibungen                                                      | –                                                       | –2                                     | –                                                          | –1                                              | –3           |
| Planmäßige Abschreibungen                                           | 56                                                      | 158                                    | 94                                                         | –                                               | 308          |
| Außerplanmäßige Abschreibungen                                      | 19                                                      | 46                                     | 3                                                          | 1                                               | 69           |
| Abgänge <sup>1)</sup>                                               | –67                                                     | –217                                   | –63                                                        | –                                               | –347         |
| Umbuchungen                                                         | 3                                                       | –4                                     | 1                                                          | –                                               | –            |
| Währungsänderungen                                                  | –5                                                      | –7                                     | –1                                                         | –1                                              | –14          |
| <b>Stand 31.12.2009/1.1.2010</b>                                    | <b>828</b>                                              | <b>1.873</b>                           | <b>664</b>                                                 | <b>–</b>                                        | <b>3.365</b> |
| Zuschreibungen                                                      | –4                                                      | –2                                     | –                                                          | –                                               | –6           |
| Planmäßige Abschreibungen                                           | 57                                                      | 152                                    | 91                                                         | –                                               | 300          |
| Außerplanmäßige Abschreibungen                                      | 13                                                      | 25                                     | 4                                                          | –                                               | 42           |
| Abgänge <sup>2)</sup>                                               | –47                                                     | –173                                   | –62                                                        | –                                               | –282         |
| Umbuchungen                                                         | 6 <sup>3)</sup>                                         | 1                                      | –4                                                         | –                                               | 3            |
| Währungsänderungen                                                  | 29                                                      | 39                                     | 14                                                         | –                                               | 82           |
| <b>Stand 31.12.2010</b>                                             | <b>882</b>                                              | <b>1.915</b>                           | <b>707</b>                                                 | <b>–</b>                                        | <b>3.504</b> |
| <sup>1)</sup> Davon: zur Veräußerung gehaltene Vermögenswerte 2009. | –16                                                     | –14                                    | –2                                                         | –                                               | –32          |
| <sup>2)</sup> Davon: zur Veräußerung gehaltene Vermögenswerte 2010. | –7                                                      | –32                                    | –2                                                         | –                                               | –41          |

<sup>3)</sup> Davon 6 Mio. Euro Anschaffungskosten (3 Mio. Euro Abschreibungen) aus der Umbuchung von zur Veräußerung gehaltenen Vermögenswerten, da eine Veräußerungsabsicht nicht mehr besteht.

**Nettobuchwerte**

in Mio. Euro

|                         | Grundstücke,<br>grundstücksgleiche<br>Rechte und Bauten | Technische<br>Anlagen und<br>Maschinen | Andere Anlagen,<br>Betriebs- und<br>Geschäftsausstattungen | Geleistete<br>Anzahlungen und<br>Anlagen im Bau | Gesamt       |
|-------------------------|---------------------------------------------------------|----------------------------------------|------------------------------------------------------------|-------------------------------------------------|--------------|
| <b>Stand 31.12.2010</b> | <b>1.120</b>                                            | <b>772</b>                             | <b>227</b>                                                 | <b>96</b>                                       | <b>2.215</b> |
| <b>Stand 31.12.2009</b> | <b>1.087</b>                                            | <b>819</b>                             | <b>234</b>                                                 | <b>108</b>                                      | <b>2.248</b> |

Die Zugänge sind zu Anschaffungs- oder Herstellungskosten bewertet. Letztere umfassen Einzelkosten und anteilige Gemeinkosten. Nicht einbezogen werden die Zinsen auf Fremdkapital, da Henkel derzeit über keine qualifizierten Vermögenswerte nach IAS 23 „Fremdkapitalkosten“ verfügt. Ein qualifizierter Vermögenswert liegt vor, wenn ein beträchtlicher Zeitraum erforderlich ist, um den Vermögenswert in seinen beabsichtigten gebrauchsfähigen Zustand zu versetzen. Investitionszuschüsse und -zulagen mindern die Anschaffungs- und Herstellungskosten der Anlagegüter. Die mit Grundpfandrechten besicherten Verbindlichkeiten betrugen zum 31. Dezember 2010 30 Mio. Euro (Vorjahr: 21 Mio. Euro).

Die Abschreibungszeiträume entsprechen den auf [Seite 99](#) genannten Nutzungsdauern. Planmäßige und außerplanmäßige Abschreibungen werden entsprechend den Funktionen, in denen die Vermögenswerte genutzt werden, in der Konzern-Gewinn- und Verlustrechnung ausgewiesen.

Von den außerplanmäßigen Abschreibungen in Höhe von 42 Mio. Euro entfallen 15 Mio. Euro auf weitergehende Produktionsoptimierungen im Unternehmensbereich Adhesive Technologies in Westeuropa.

**(3) Langfristige finanzielle Vermögenswerte****Langfristige finanzielle Vermögenswerte**

| in Mio. Euro                                   | 31.12.2009 | 31.12.2010 |
|------------------------------------------------|------------|------------|
| Finanzforderungen an Fremde                    | 27         | 26         |
| Marktwert Derivate                             | 189        | 187        |
| Finanzanlagen                                  | 20         | 22         |
| Übrige langfristige finanzielle Vermögenswerte | 124        | 93         |
| <b>Gesamt</b>                                  | <b>360</b> | <b>328</b> |

Die Langfristigen finanziellen Vermögenswerte sind mit Ausnahme von Derivaten und Finanzanlagen stets zu fortgeführten Anschaffungskosten bilanziert. Soweit Risiken erkennbar sind, werden diese durch Wertberichtigungen berücksichtigt. Derivative Finanzinstrumente werden zunächst mit ihren Anschaffungskosten in der Bilanz erfasst und in der Folge zu ihrem Marktwert am Bilanztag bewertet (siehe Textziffer 31, [GB](#) Seiten 115 bis 121).

Die Übrigen langfristigen finanziellen Vermögenswerte umfassen unter anderem Forderungen an einen Treuhänder aufgrund von Entgeltumwandlungen von 73 Mio. Euro (Vorjahr: 70 Mio. Euro) sowie Forderungen an die Belegschaft und an Versicherungen.

Aufgrund ihres geringen relativen Wertes werden Finanzanlagen im Geschäftsjahr 2010 erstmalig unter den Langfristigen finanziellen Vermögenswerten aufgeführt. Die in den Finanzanlagen ausgewiesenen Anteile an den Verbundenen Unternehmen und die Sonstigen Beteiligungen werden grundsätzlich zu Anschaffungskosten und in der Folge zu beizulegenden Zeitwerten angesetzt. Eine Folgebewertung zu fortgeführten Anschaffungskosten wird für diejenigen Anteile an Verbundenen Unternehmen und Sonstigen Beteiligungen vorgenommen, deren Marktwerte nicht zuverlässig bestimmt werden können. Die Anteile an assoziierten Unternehmen werden nach der „at equity“-Methode mit ihrem anteiligen Eigenkapital bilanziert.

**(4) Andere langfristige Vermögenswerte**

Die Anderen langfristigen Vermögenswerte betreffen neben anderen Steuerforderungen insbesondere verschiedene Abgrenzungen.

**(5) Latente Steuern**

Latente Steuern ergeben sich aus folgenden Posten:

- zeitlich abweichende Wertansätze in der Handels- und Steuerbilanz,
- erwarteter zukünftiger Ausgleich steuerlicher Verlustvorträge,
- Konsolidierungsvorgänge auf Konzernebene.

Die Aufteilung der Ansprüche auf die verschiedenen Bilanzposten ist unter der Textziffer 40 („Steuern vom Einkommen und vom Ertrag“) auf den [GB](#) Seiten 123 bis 125 dargestellt.

**(6) Vorräte**

Die Vorräte sind zu Anschaffungs- oder Herstellungskosten bewertet. Bei der Bewertung der Vorräte kommen die Methode „First In First Out“ (FIFO) und die Durchschnittsmethode zum Ansatz.

Die Herstellungskosten enthalten neben den Einzelkosten angemessene Teile der notwendigen Gemeinkosten (zum Beispiel Wareneingang, Rohstofflager, Abfüllung, Kosten bis zum Fertigwarenlager) sowie herstellungsbezogene Verwaltungskosten, Kosten der Altersversorgung der Mitarbeiter, die im Produktionsprozess beschäftigt sind, und fertigungsbedingte Abschreibungen. Die Zuschläge für Gemeinkosten werden auf Basis von durchschnittlichen Auslastungen ermittelt. Nicht enthalten sind hingegen Zinsaufwendungen, die auf den Herstellzeitraum entfallen.

Abwertungen auf den Nettoveräußerungswert werden vorgenommen, wenn am Bilanztag die Buchwerte der Vorräte aufgrund von niedrigeren Marktwerten zu hoch sind. Die Wertminderung beträgt 108 Mio. Euro (Vorjahr: 113 Mio. Euro).

**Struktur des Vorratsvermögens**

| in Mio. Euro                     | 31.12.2009   | 31.12.2010   |
|----------------------------------|--------------|--------------|
| Roh-, Hilfs- und Betriebsstoffe  | 368          | 446          |
| Unfertige Erzeugnisse            | 50           | 61           |
| Fertige Erzeugnisse und Waren    | 797          | 950          |
| Geleistete Anzahlungen auf Waren | 3            | 3            |
| <b>Gesamt</b>                    | <b>1.218</b> | <b>1.460</b> |

**(7) Forderungen aus Lieferungen und Leistungen**

Die Forderungen sind innerhalb eines Jahres fällig. Einzelrisiken werden durch angemessene Abschreibungen berücksichtigt. Insgesamt wurden Abschreibungen in Höhe von 24 Mio. Euro vorgenommen (Vorjahr: 32 Mio. Euro). Es bestehen wie im Vorjahr keine Forderungen aus Lieferungen und Leistungen, die im Rahmen von Factoring veräußert wurden, jedoch weiterhin in der Bilanz aktiviert sind, da das Ausfallrisiko nicht vollständig übergegangen ist.

**(8) Sonstige kurzfristige finanzielle Vermögenswerte****Sonstige kurzfristige finanzielle Vermögenswerte**

| in Mio. Euro                                                             | 31.12.2009 | 31.12.2010 |
|--------------------------------------------------------------------------|------------|------------|
| Forderungen an Unternehmen, mit denen ein Beteiligungsverhältnis besteht | 2          | 2          |
| Finanzforderungen an Fremde                                              | 38         | 27         |
| Marktwert Derivate                                                       | 70         | 144        |
| Wertpapiere und Terminanlagen                                            | –          | 362        |
| Übrige kurzfristige finanzielle Vermögenswerte                           | 104        | 173        |
| <b>Gesamt</b>                                                            | <b>214</b> | <b>708</b> |



Die Sonstigen kurzfristigen finanziellen Vermögenswerte sind mit Ausnahme von Derivaten, Wertpapieren und Terminanlagen zu fortgeführten Anschaffungskosten angesetzt. Die fortgeführten Anschaffungskosten entsprechen annähernd dem beizulegenden Zeitwert. Sofern Risiken bestehen, sind diese durch Abschreibungen berücksichtigt. Derivative Finanzinstrumente werden zunächst mit ihren Anschaffungskosten in der Bilanz erfasst und in der Folge zu ihrem beizulegenden Zeitwert am Bilanztag bewertet (siehe Textziffer 31, **GB** Seiten 115 bis 121).

Der Posten Wertpapiere und Terminanlagen umfasst im Rahmen unserer kurzfristigen Finanzdisposition angelegte Gelder. Die Wertpapiere und Terminanlagen sind mit den Marktwerten (Fair Value) am Bilanztag bewertet. Wertänderungen werden erfolgsneutral im Eigenkapital verrechnet (Erläuterungen unter Textziffer 31, **GB** Seite 115).

Die Übrigen kurzfristigen finanziellen Vermögenswerte umfassen unter anderem:

- Forderungen an die Belegschaft in Höhe von 10 Mio. Euro (Vorjahr: 10 Mio. Euro),
- Forderungen an Lieferanten in Höhe von 21 Mio. Euro (Vorjahr: 21 Mio. Euro),
- Forderungen aus Depotstellungen/Kauttionen in Höhe von 32 Mio. Euro (Vorjahr: 27 Mio. Euro),
- Vermögenswerte aus der Überdeckung von Pensionsverpflichtungen in Höhe von 15 Mio. Euro (Vorjahr: 7 Mio. Euro).

### (9) Andere kurzfristige Vermögenswerte

Die Anderen kurzfristigen Vermögenswerte enthalten neben Steuerforderungen in Höhe von 134 Mio. Euro (Vorjahr: 157 Mio. Euro) und geleisteten Anzahlungen in Höhe von 26 Mio. Euro (Vorjahr: 18 Mio. Euro) auch verschiedene Abgrenzungen.

### (10) Flüssige Mittel/Wertpapiere

#### Flüssige Mittel/Wertpapiere

| in Mio. Euro    | 31.12.2009   | 31.12.2010   |
|-----------------|--------------|--------------|
| Flüssige Mittel | 1.088        | 1.515        |
| Wertpapiere     | 22           | –            |
| <b>Gesamt</b>   | <b>1.110</b> | <b>1.515</b> |

### (11) Zur Veräußerung gehaltene Vermögenswerte

Aus der Bewertung von zur Veräußerung gehaltenen Vermögenswerten zum niedrigeren Wert aus Buchwert und beizulegendem Zeitwert abzüglich Veräußerungskosten im Unternehmensbereich Wasch-/Reinigungsmittel ergab sich eine Wertminderung von 3 Mio. Euro.

### (12) Gezeichnetes Kapital

#### Gezeichnetes Kapital

| in Mio. Euro          | 31.12.2009 | 31.12.2010 |
|-----------------------|------------|------------|
| Inhaber-Stammaktien   | 260        | 260        |
| Inhaber-Vorzugsaktien | 178        | 178        |
| <b>Grundkapital</b>   | <b>438</b> | <b>438</b> |

Stückelung: 259.795.875 Stammaktien, 178.162.875 Vorzugsaktien (ohne Stimmrecht).

Gemäß Artikel 6 Absatz 5 der Satzung ist die persönlich haftende Gesellschafterin ermächtigt, bis zum 18. April 2015 mit Zustimmung des Gesellschafterausschusses und des Aufsichtsrats das Grundkapital der Gesellschaft einmalig oder in Teilbeträgen mehrmals um bis zu insgesamt 25,6 Mio. Euro durch Ausgabe neuer Vorzugsaktien ohne Stimmrecht gegen Geldeinlagen zu erhöhen (genehmigtes Kapital). Den Aktionären steht grundsätzlich ein Bezugsrecht zu. Das Bezugsrecht kann jedoch ausgeschlossen werden, soweit es erforderlich ist, um Gläubigern von Schuldverschreibungen mit Wandlungs- oder Optionsrechten, die von der Gesellschaft oder von einer von ihr abhängigen Gesellschaft ausgegeben werden, ein Bezugsrecht auf neue Aktien in dem Umfang zu gewähren, wie es ihnen nach Ausübung ihres Wandlungs- oder Optionsrechts zustünde, oder wenn der Ausgabebetrag der neuen Aktien den zum Zeitpunkt der endgültigen Festlegung des Ausgabebetrags aktuellen Börsenkurs nicht wesentlich unterschreitet oder um etwaige Spitzenbeträge verwerten zu können.

In der Hauptversammlung der Henkel AG & Co. KGaA am 19. April 2010 wurde die persönlich haftende Gesellschafterin (unter zeitgleicher Aufhebung der entsprechenden Ermächtigung des Vorjahres) ermächtigt, bis zum 18. April 2015 Stamm- oder Vorzugsaktien der Gesellschaft mit einem rechnerischen Anteil am Grundkapital von höchstens 10 Prozent zu erwerben. Die Ermächtigung kann zu jedem gesetzlich zulässigen Zweck ausgeübt werden. Unter Ausschluss des Bezugsrechts der Aktionäre können eigene Aktien dazu verwendet werden, um sie an Dritte zum Zweck des Erwerbs von Unternehmen oder Beteiligungen an Unternehmen zu übertragen. Auch können eigene Aktien gegen Barzahlung veräußert werden, sofern der Kaufpreis den aktuellen Börsenpreis zum Zeitpunkt der Veräußerung nicht wesentlich unterschreitet. Ferner dürfen eigene Aktien auch zur Erfüllung von Wandlungs- oder Optionsrechten, die von der Gesellschaft eingeräumt wurden, verwendet werden.

Die persönlich haftende Gesellschafterin wurde darüber hinaus ermächtigt, eigene Aktien mit Zustimmung des Gesellschafterausschusses und des Aufsichtsrats ohne weiteren Hauptversammlungsbeschluss einzuziehen. Hierbei darf der anteilige Betrag am Grundkapital der Aktien, die aufgrund dieser Ermächtigungen ausgegeben beziehungsweise veräußert werden, insgesamt 10 Prozent des Grundkapitals nicht übersteigen. Auf diese Begrenzung sind auch solche Aktien anzurechnen, die zur Bedienung der von der Gesellschaft oder von ihr abhängigen Unternehmen begebenen Schuldverschreibungen mit Options-

oder Wandlungsrechten beziehungsweise einer Wandlungspflicht ausgegeben werden, wenn diese Schuldverschreibungen unter Ausschluss des Bezugsrechts begeben werden.

Der Bestand eigener Aktien zum 31. Dezember 2010 belief sich auf 4.026.565 Stück Vorzugsaktien. Dies entspricht einem rechnerischen Anteil am Grundkapital von 4,0 Mio. Euro (0,92 Prozent des Grundkapitals). Ursprünglich wurden 992.680 Stück im Jahr 2000, 808.120 Stück im Jahr 2001 und 694.900 Stück im Jahr 2002 erworben. Dies entspricht insgesamt 2.495.700 Stück beziehungsweise nach dem im Jahr 2007 durchgeführten Aktiensplit (Verhältnis 1:3) 7.487.100 Stück. Im Jahr 2004 wurden erstmals Optionen im Rahmen des Aktien-Optionsprogramms ausgeübt. Seit 2004 haben die Ausübungen unter Berücksichtigung des Aktiensplits zu einer Minderung des Bestands eigener Aktien um 3.460.535 Stück mit einem rechnerischen Anteil am Grundkapital von 3,5 Mio. Euro (0,79 Prozent des Grundkapitals) geführt. Im Jahr 2010 minderte sich der Bestand eigener Aktien durch die Ausübung von Optionen um 515.305 Stück. Der rechnerische Anteil am Grundkapital belief sich auf 0,5 Mio. Euro (0,12 Prozent). Den Veräußerungspreisen lagen die Börsenkurse zum jeweiligen Veräußerungszeitpunkt zugrunde. Der Veräußerungserlös betrug insgesamt 18,8 Mio. Euro und wurde erfolgsneutral im Eigenkapital verrechnet.

### (13) Kapitalrücklage

Die Kapitalrücklage enthält die in den Vorjahren bei der Ausgabe von Vorzugsaktien und Optionsschuldverschreibungen durch die Henkel AG & Co. KGaA über den Nennbetrag hinaus erzielten Beträge.

### (14) Gewinnrücklagen

In den Gewinnrücklagen sind enthalten:

- die in den früheren Geschäftsjahren bei der Henkel AG & Co. KGaA gebildeten Beträge,
- Einstellungen aus dem Jahresüberschuss des Konzerns abzüglich des nicht auf beherrschende Anteile entfallenden Ergebnisses,
- Rückkauf eigener Aktien zum Anschaffungspreis durch die Henkel AG & Co. KGaA sowie Erlöse aus deren Verkauf und
- die erfolgsneutrale Verrechnung von versicherungsmathematischen Gewinnen und Verlusten.

### (15) Erfolgsneutrale Eigenkapitalveränderungen

Unter diesem Posten sind die Unterschiede aus der erfolgsneutralen Währungsumrechnung von Jahresabschlüssen ausländischer Tochterunternehmen ausgewiesen sowie die Auswirkungen aus der erfolgsneutralen Bewertung von derivativen Finanzinstrumenten und finanziellen Vermögenswerten der Kategorie „avail-

able for sale“. Bei den Finanzinstrumenten handelt es sich um im Zusammenhang mit „Cashflow Hedges“ eingesetzte Derivate sowie um „Hedges of a Net Investment in a Foreign Entity“.

Vor allem wegen des gegenüber dem Euro aufgewerteten US-Dollars verringerte sich der auf die Aktionäre der Henkel AG & Co. KGaA entfallende negative Unterschiedsbetrag aus der Währungsumrechnung gegenüber dem 31. Dezember 2009 um 525 Mio. Euro.

### (16) Nicht beherrschende Anteile

Der Ausgleichsposten enthält Anteile von Dritten am Eigenkapital bei einer Anzahl von Konzerngesellschaften.

### (17) Pensionsverpflichtungen

Mitarbeitern von in den Konzernabschluss einbezogenen Gesellschaften stehen Ansprüche aus beitrags- oder leistungsorientierten Versorgungsplänen im Rahmen der betrieblichen Altersversorgung zu. Diese weist je nach den rechtlichen, wirtschaftlichen und steuerlichen Gegebenheiten in den einzelnen Ländern unterschiedliche Formen auf. Die Höhe der Versorgungsleistungen richtet sich grundsätzlich nach der Beschäftigungsdauer und den Bezügen der begünstigten Mitarbeiter.

Die beitragsorientierten Versorgungspläne („Defined Contribution Plans“) sind so ausgestaltet, dass das Unternehmen Beiträge an öffentliche oder private Einrichtungen aufgrund gesetzlicher oder vertraglicher Bestimmungen oder auf freiwilliger Basis zahlt, ohne mit der Zahlung eine weitere Leistungsverpflichtung gegenüber den Arbeitnehmern einzugehen. Die Beiträge für die beitragsorientierten Versorgungspläne belaufen sich für das Berichtsjahr auf 91 Mio. Euro (Vorjahr: 111 Mio. Euro). An die öffentlichen Einrichtungen haben wir im Jahr 2010 46 Mio. Euro (Vorjahr: 57 Mio. Euro) bezahlt und an die privaten Einrichtungen im Jahr 2010 45 Mio. Euro (Vorjahr: 54 Mio. Euro).

Bei den leistungsorientierten Versorgungsplänen („Defined Benefit Plans“) werden Pensionen und andere Leistungen nach Beendigung des Arbeitsverhältnisses mit dem Barwert der zukünftigen Verpflichtungen berechnet („Projected Unit Credit“-Methode). Bei diesem versicherungsmathematischen Verfahren werden auch künftige Lohn-, Gehalts- und Rententrends mit einbezogen.

Um die Pensionsansprüche der Mitarbeiter und Pensionäre der Henkel AG & Co. KGaA auf privatrechtlicher Basis gegen Insolvenz zu sichern, haben wir die Mittel aus der im Jahr 2005 begebenen Anleihe und weitere Vermögenswerte auf den Henkel Trust e.V. übertragen. Der Treuhänder investiert die ihm übertragenen Barmittel am Kapitalmarkt nach Maßgabe der im Treuhandvertrag vereinbarten Anlagegrundsätze.

**Lohn-, Gehalts- und Rententrends**

in Prozent

|                                                        | Deutschland |      | USA  |      | Übrige Welt <sup>1)</sup> |      |
|--------------------------------------------------------|-------------|------|------|------|---------------------------|------|
|                                                        | 2009        | 2010 | 2009 | 2010 | 2009                      | 2010 |
| Abzinsungsfaktor                                       | 4,95        | 4,50 | 5,25 | 5,40 | 5,1                       | 4,6  |
| Einkommensentwicklung                                  | 3,25        | 3,25 | 4,3  | 4,25 | 3,3                       | 3,4  |
| Rententrend                                            | 2,00        | 2,00 | 4,3  | 4,25 | 2,4                       | 3,0  |
| Erwartete Rendite des Fondsvermögens                   | 6,32        | 6,19 | 7,0  | 5,80 | 5,9                       | 5,2  |
| Erwartete Kostensteigerung für medizinische Leistungen | –           | –    | 8,0  | 8,50 | 8,0                       | 8,0  |

<sup>1)</sup> Es handelt sich um das gewichtete Mittel.**Anwartschaftsbarwert der Pensionsverpflichtungen zum 31.12.2009**

in Mio. Euro

|                                                                  | Deutschland | USA | Übrige Welt | Gesamt |
|------------------------------------------------------------------|-------------|-----|-------------|--------|
| <b>Anfangsbestand 1.1.2009</b>                                   | 1.826       | 857 | 565         | 3.248  |
| Veränderungen Konsolidierungskreis                               | –           | –   | 1           | 1      |
| Veränderungen Währungskurse                                      | –           | –30 | 10          | –20    |
| Versicherungsmathematische Gewinne (–)/Verluste (+)              | 216         | 95  | 97          | 408    |
| Dienstzeitaufwand                                                | 53          | 17  | 24          | 94     |
| Gewinne (–)/Verluste (+) aus Beendigung und Kürzungen von Plänen | –           | –4  | –1          | –5     |
| Zinsaufwand                                                      | 107         | 52  | 33          | 192    |
| Gezahlte Versorgungsleistungen aus dem Fondsvermögen             | –5          | –42 | –30         | –77    |
| Zahlungen des Arbeitgebers für Pensionsverpflichtungen           | –127        | –21 | –11         | –159   |
| Nachzuverrechnender Dienstzeitaufwand                            | –           | –   | 2           | 2      |
| <b>Endbestand 31.12.2009</b>                                     | 2.070       | 924 | 690         | 3.684  |
| Davon: nicht durch Fonds gedeckte Verpflichtungen                | 113         | 223 | 86          | 422    |
| Davon: durch Fonds gedeckte Verpflichtungen                      | 1.957       | 701 | 604         | 3.262  |

**Marktwert des Fondsvermögens zum 31.12.2009**

in Mio. Euro

|                                                     | Deutschland | USA | Übrige Welt | Gesamt |
|-----------------------------------------------------|-------------|-----|-------------|--------|
| <b>Anfangsbestand 1.1.2009</b>                      | 1.511       | 490 | 444         | 2.445  |
| Veränderungen Konsolidierungskreis                  | –           | –   | –           | –      |
| Veränderungen Währungskurse                         | –           | –20 | 13          | –7     |
| Arbeitgeberbeiträge zu Pensionsfonds                | 131         | 99  | 48          | 278    |
| Arbeitnehmerbeiträge zu Pensionsfonds               | –           | –   | 1           | 1      |
| Gezahlte Versorgungsleistung aus dem Fondsvermögen  | –5          | –42 | –30         | –77    |
| Erwartete Erträge des Fondsvermögens                | 96          | 27  | 24          | 147    |
| Versicherungsmathematische Gewinne (+)/Verluste (–) | –3          | 13  | 43          | 53     |
| <b>Endbestand 31.12.2009</b>                        | 1.730       | 567 | 543         | 2.840  |
| Erzielte Erträge des Fondsvermögens                 | 93          | 40  | 67          | 200    |

**Netto-Pensionsaufwendungen 2009**

in Mio. Euro

|                                                                  | Deutschland | USA | Übrige Welt | Gesamt |
|------------------------------------------------------------------|-------------|-----|-------------|--------|
| Dienstzeitaufwand                                                | 53          | 17  | 24          | 94     |
| Amortisation von Aufwendungen aus rückwirkenden Planänderungen   | –           | 1   | –1          | –      |
| Gewinne (–)/Verluste (+) aus Beendigung und Kürzungen von Plänen | –           | –4  | –1          | –5     |
| Zinsaufwand                                                      | 107         | 52  | 33          | 192    |
| Erwartete Erträge des Fondsvermögens                             | –96         | –27 | –24         | –147   |
| <b>Netto-Pensionsaufwendungen</b>                                | 64          | 39  | 31          | 134    |

**Anwartschaftsbarwert der Pensionsverpflichtungen zum 31.12.2010**

| in Mio. Euro                                                     | Deutschland  | USA        | Übrige Welt | Gesamt       |
|------------------------------------------------------------------|--------------|------------|-------------|--------------|
| <b>Anfangsbestand 1.1.2010</b>                                   | <b>2.070</b> | <b>924</b> | <b>690</b>  | <b>3.684</b> |
| Veränderungen Konsolidierungskreis                               | –            | –          | –2          | –2           |
| Veränderungen Währungskurse                                      | –            | 73         | 30          | 103          |
| Versicherungsmathematische Gewinne (–)/Verluste (+)              | 110          | –10        | 40          | 140          |
| Dienstzeitaufwand                                                | 78           | 16         | 26          | 120          |
| Gewinne (–)/Verluste (+) aus Beendigung und Kürzungen von Plänen | –            | –16        | –2          | –18          |
| Zinsaufwand                                                      | 100          | 50         | 34          | 184          |
| Gezahlte Versorgungsleistungen aus dem Fondsvermögen             | –130         | –48        | –37         | –215         |
| Zahlungen des Arbeitgebers für Pensionsverpflichtungen           | –5           | –20        | –17         | –42          |
| Nachzuverrechnender Dienstzeitaufwand (Ertrag)                   | –            | –1         | –           | –1           |
| <b>Endbestand 31.12.2010</b>                                     | <b>2.223</b> | <b>968</b> | <b>762</b>  | <b>3.953</b> |
| Davon: nicht durch Fonds gedeckte Verpflichtungen                | 134          | 236        | 97          | 467          |
| Davon: durch Fonds gedeckte Verpflichtungen                      | 2.089        | 732        | 665         | 3.486        |

**Marktwert des Fondsvermögens zum 31.12.2010**

| in Mio. Euro                                        | Deutschland  | USA        | Übrige Welt | Gesamt       |
|-----------------------------------------------------|--------------|------------|-------------|--------------|
| <b>Anfangsbestand 1.1.2010</b>                      | <b>1.730</b> | <b>567</b> | <b>543</b>  | <b>2.840</b> |
| Veränderungen Konsolidierungskreis                  | –            | –          | –1          | –1           |
| Veränderungen Währungskurse                         | –            | 44         | 21          | 65           |
| Arbeitgeberbeiträge zu Pensionsfonds                | 213          | 77         | 22          | 312          |
| Arbeitnehmerbeiträge zu Pensionsfonds               | –            | –          | 1           | 1            |
| Gezahlte Versorgungsleistung aus dem Fondsvermögen  | –130         | –48        | –37         | –215         |
| Erwartete Erträge des Fondsvermögens                | 107          | 36         | 28          | 171          |
| Versicherungsmathematische Gewinne (+)/Verluste (–) | 178          | 10         | 26          | 214          |
| <b>Endbestand 31.12.2010</b>                        | <b>2.098</b> | <b>686</b> | <b>603</b>  | <b>3.387</b> |
| Erzielte Erträge des Fondsvermögens                 | 285          | 46         | 54          | 385          |

**Netto-Pensionsaufwendungen 2010**

| in Mio. Euro                                                     | Deutschland | USA       | Übrige Welt | Gesamt     |
|------------------------------------------------------------------|-------------|-----------|-------------|------------|
| Dienstzeitaufwand                                                | 78          | 16        | 26          | 120        |
| Amortisation von Aufwendungen aus rückwirkenden Planänderungen   | –           | –         | –           | –          |
| Gewinne (–)/Verluste (+) aus Beendigung und Kürzungen von Plänen | –           | –16       | –2          | –18        |
| Zinsaufwand                                                      | 100         | 50        | 34          | 184        |
| Erwartete Erträge des Fondsvermögens                             | –107        | –36       | –28         | –171       |
| <b>Netto-Pensionsaufwendungen 2010</b>                           | <b>71</b>   | <b>14</b> | <b>30</b>   | <b>115</b> |

**Überleitung von der Über-/Unterdeckung auf die bilanzierte Rückstellung für Pensionsverpflichtungen zum 31.12.2010**

| in Mio. Euro                                                  | Deutschland | USA         | Übrige Welt | Gesamt      |
|---------------------------------------------------------------|-------------|-------------|-------------|-------------|
| Über-/Unterdeckung der Verpflichtung                          | –125        | –282        | –159        | –566        |
| Als Netto-Vermögenswert ausgewiesenes Fondsvermögen           | –9          | –           | –6          | –15         |
| Aufgrund der Vermögenswertbegrenzung nicht angesetzter Betrag | –           | –           | –9          | –9          |
| Nachzuverrechnender Dienstzeitaufwand                         | –           | –6          | 2           | –4          |
| <b>Bilanzierter Betrag</b>                                    | <b>–134</b> | <b>–288</b> | <b>–172</b> | <b>–594</b> |

In Ausübung des bestehenden Wahlrechts werden Versicherungsmathematische Gewinne und Verluste im Jahr ihres Entstehens als Teil der Pensionsrückstellung bilanziert und gemäß IAS 19.93B „Leistungen an Arbeitnehmer“ in die Gesamtergebnisrechnung aufgenommen. Dadurch ist zu jedem Bilanztag der vollständige Verpflichtungsumfang berücksichtigt. Bis zum 31. Dezember 2010 wurden kumulierte versicherungsmathematische Verluste in Höhe von 1.084 Mio. Euro (Vorjahr: 1.159 Mio. Euro) mit den Gewinnrücklagen verrechnet.

Die erwartete Rendite des gesamten Fondsvermögens haben wir aus der gewichteten langfristig zu erwartenden Rendite der einzelnen Vermögensklassen abgeleitet.

#### Zusammensetzung des Fondsvermögens<sup>1)</sup>

in Mio. Euro

|                           | 31.12.2009   |              | 31.12.2010   |              |
|---------------------------|--------------|--------------|--------------|--------------|
|                           | Marktwert    | in %         | Marktwert    | in %         |
| Fondsanteile              |              |              |              |              |
| investiert in Aktien      | 743          | 26,2         | 952          | 28,1         |
| investiert in Anleihen    | 1.531        | 53,9         | 1.826        | 53,9         |
| investiert in Barvermögen | 265          | 9,3          | 360          | 10,6         |
| Andere Vermögenswerte     | 167          | 5,9          | 176          | 5,2          |
| Barvermögen               | 134          | 4,7          | 73           | 2,2          |
| <b>Gesamt</b>             | <b>2.840</b> | <b>100,0</b> | <b>3.387</b> | <b>100,0</b> |

<sup>1)</sup> Zur Verbesserung des Einblicks haben wir die im Vorjahr unter „investiert in Fondsanteile“ gezeigten Anlagen bei Fondsgesellschaften auf die einzelnen Anlageklassen aufgeteilt.

Ende 2010 ist in den Anderen Vermögenswerten des Fondsvermögens der Barwert einer langfristigen Forderung in Höhe von 42 Mio. Euro (Vorjahr: 43 Mio. Euro) enthalten, die ein von der Henkel AG & Co. KGaA bestelltes Erbbaurecht betrifft und von dieser an den Henkel Trust e.V. abgetreten worden ist. Darüber hinaus ist hier eine Forderung zur Freistellung von Pensionsverpflichtungen gegenüber Cognis in Höhe von 135 Mio. Euro (Vorjahr: 102 Mio. Euro) ausgewiesen.

Die Henkel AG & Co. KGaA hat im Jahr 2010 Erstattungen der an die Pensionäre geleisteten Zahlungen aus dem Vermögen des Henkel Trust e.V. in Höhe von 113 Mio. Euro erhalten beziehungsweise geltend gemacht.

#### Auswirkungen einer Änderung des Abzinsungsfaktors auf den Anwartschaftsbarwert

| in Mio. Euro                           | Deutschland | USA |
|----------------------------------------|-------------|-----|
| Anwartschaftsbarwert der Verpflichtung | 2.223       | 968 |
| Erhöhung um 0,5 Prozentpunkte          | -118        | -44 |
| Verminderung um 0,5 Prozentpunkte      | 132         | 49  |

#### Auswirkungen einer Änderung im Trend der medizinischen Kosten

in Mio. Euro

|                                                     | 31.12.2009         |             |                       | 31.12.2010         |             |                       |
|-----------------------------------------------------|--------------------|-------------|-----------------------|--------------------|-------------|-----------------------|
|                                                     | Dienstzeit-aufwand | Zinsaufwand | Anwartschafts-barwert | Dienstzeit-aufwand | Zinsaufwand | Anwartschafts-barwert |
| Anstieg der medizinischen Kosten um 1 Prozentpunkt  | -                  | 1           | 9                     | -                  | -           | 8                     |
| Rückgang der medizinischen Kosten um 1 Prozentpunkt | -                  | -1          | -8                    | -                  | -           | -7                    |



## Weitere Angaben

| in Mio. Euro                                               | 2005   | 2006  | 2007                | 2008                | 2009                | 2010                |
|------------------------------------------------------------|--------|-------|---------------------|---------------------|---------------------|---------------------|
| Anwartschaftsbarwert der Verpflichtungen                   | 3.354  | 3.352 | 3.118 <sup>1)</sup> | 3.248 <sup>3)</sup> | 3.684 <sup>5)</sup> | 3.953 <sup>7)</sup> |
| Marktwert des Fondsvermögens                               | 2.294  | 2.564 | 2.461 <sup>2)</sup> | 2.445 <sup>4)</sup> | 2.840 <sup>6)</sup> | 3.387 <sup>8)</sup> |
| Über-/Unterdeckung der Verpflichtungen                     | -1.060 | -788  | -657                | -803                | -844                | -566                |
| Erwartungsanpassungen hinsichtlich Pensionsverpflichtungen | -11    | -1    | -14                 | 5                   | 25                  | 9                   |
| Erwartungsanpassungen hinsichtlich Fondsvermögen           | 29     | 31    | -125                | -499                | 53                  | 214                 |

<sup>1)</sup> Davon Verpflichtungen aus Post-Retirement Health Care: 189 Mio. Euro (2007).

<sup>2)</sup> Davon Fondsvermögen zugunsten Verpflichtungen aus Post-Retirement Health Care: 4 Mio. Euro (2007).

<sup>3)</sup> Davon Verpflichtungen aus Post-Retirement Health Care: 212 Mio. Euro (2008).

<sup>4)</sup> Davon Fondsvermögen zugunsten Verpflichtungen aus Post-Retirement Health Care: 8 Mio. Euro (2008).

<sup>5)</sup> Davon Verpflichtungen aus Post-Retirement Health Care: 199 Mio. Euro (2009).

<sup>6)</sup> Davon Fondsvermögen zugunsten Verpflichtungen aus Post-Retirement Health Care: 7 Mio. Euro (2009).

<sup>7)</sup> Davon Verpflichtungen aus Post-Retirement Health Care: 191 Mio. Euro (2010).

<sup>8)</sup> Davon Fondsvermögen zugunsten Verpflichtungen aus Post-Retirement Health Care: 7 Mio. Euro (2010).

## (18) Langfristige Rückstellungen

## Entwicklung 2009

| in Mio. Euro                                    | Anfangs-<br>bestand<br>1.1.2009 | Sonstige<br>Verände-<br>rungen | Verbrauch | Auflösung | Zuführung | Endbestand<br>31.12.2009 |
|-------------------------------------------------|---------------------------------|--------------------------------|-----------|-----------|-----------|--------------------------|
| Ertragsteuerrückstellungen                      | 177                             | -22                            | -         | 4         | 1         | 152                      |
| Sonstige langfristige Rückstellungen            | 127                             | -13                            | 3         | 4         | 73        | 180                      |
| „Global Excellence“                             | 161                             | -106                           | 17        | -         | -         | 38                       |
| Zusammenführung Adhesive Technologies-Geschäfte | 48                              | -16                            | 8         | 6         | 5         | 23                       |
| <b>Gesamt</b>                                   | <b>513</b>                      | <b>-157</b>                    | <b>28</b> | <b>14</b> | <b>79</b> | <b>393</b>               |

## Entwicklung 2010

| in Mio. Euro                                    | Anfangs-<br>bestand<br>1.1.2010 | Sonstige<br>Verände-<br>rungen | Verbrauch | Auflösung | Zuführung  | Endbestand<br>31.12.2010 |
|-------------------------------------------------|---------------------------------|--------------------------------|-----------|-----------|------------|--------------------------|
| Ertragsteuerrückstellungen                      | 152                             | -34                            | -         | -         | 1          | 119                      |
| Sonstige langfristige Rückstellungen            | 180                             | 5                              | 25        | 4         | 103        | 259                      |
| „Global Excellence“                             | 38                              | -                              | 6         | -         | -          | 32                       |
| Zusammenführung Adhesive Technologies-Geschäfte | 23                              | -9                             | 2         | 4         | 3          | 11                       |
| <b>Gesamt</b>                                   | <b>393</b>                      | <b>-38</b>                     | <b>33</b> | <b>8</b>  | <b>107</b> | <b>421</b>               |

Bei der Bewertung der langfristigen Rückstellungen wurde die bestmögliche Schätzung der Ausgaben, die zur Erfüllung der gegenwärtigen Verpflichtung zum Bilanztag erforderlich sind, zugrunde gelegt („best estimate“). Preissteigerungen, die bis zum Erfüllungszeitpunkt erwartet werden, fließen in die Bewertung ein. Rückstellungen, bei denen der Zinseffekt wesentlich ist, werden auf den Bilanztag abgezinst. Für die Verpflichtungen in Deutschland haben wir einen Zinssatz zwischen 2,2 und 4,0 Prozent angesetzt.

„Global Excellence“ bezeichnet unser weltweites Programm zur Effizienzsteigerung in den Jahren 2008 bis 2010. Das Programm umfasste eine Vielzahl von Einzelmaßnahmen in allen Unternehmensbereichen, Regionen und Funktionen zur dauerhaften Stärkung unserer Ertragskraft und langfristigen Wettbewerbsfähigkeit. Die Rückstellungen werden planmäßig in Anspruch genommen.

Die für die Zusammenführung der Adhesive Technologies-Geschäfte gebildeten Rückstellungen betreffen Restrukturierungsaufwendungen, die im Rahmen der Integration der erworbenen National Starch-Geschäfte in die Henkel-Organisation anfielen.

Sonstige Veränderungen umfassen Veränderungen des Konsolidierungskreises/Akquisitionen, Währungsänderungen und die Berücksichtigung von Änderungen der Fristigkeit im Zeitablauf.

Die Ertragsteuerrückstellungen enthalten Steuerverpflichtungen sowie Beträge für Risiken aus Außenprüfungen.

Die Sonstigen langfristigen Rückstellungen umfassen die erkennbaren Risiken gegenüber Dritten. Sie sind zu Vollkosten bewertet.

#### Aufteilung der Sonstigen langfristigen Rückstellungen nach Funktionsbereichen

| in Mio. Euro                        | 31.12.2009 | 31.12.2010 |
|-------------------------------------|------------|------------|
| Vertrieb                            | 8          | 9          |
| Personal                            | 83         | 154        |
| Produktion und Technik              | 35         | 41         |
| Verschiedene übrige Verpflichtungen | 54         | 55         |
| <b>Gesamt</b>                       | <b>180</b> | <b>259</b> |

Unter dem Posten Personal sind 51 Mio. Euro für das „Sonderincentive 2012“ enthalten. Dieses betrifft die Führungskreise o bis IIB. Das Programm hat ein erwartetes Gesamtvolumen von 85 Mio. Euro (siehe [GB](#) Seite 43).

### (19) Langfristige Finanzschulden

Fristigkeitsstruktur zum 31. Dezember 2009:

#### Aufteilung

in Mio. Euro

|                                                            | Restlaufzeit        |                       | 31.12.2009<br>insgesamt |
|------------------------------------------------------------|---------------------|-----------------------|-------------------------|
|                                                            | mehr als<br>5 Jahre | über 1<br>bis 5 Jahre |                         |
| Anleihen                                                   | 1.368               | 2.040                 | 3.408                   |
| (Davon: gesichert)                                         |                     |                       | (1)                     |
| Verbindlichkeiten gegenüber Kreditinstituten <sup>1)</sup> | 2                   | 13                    | 15                      |
| (Davon: gesichert)                                         |                     |                       | (11)                    |
| Sonstige Finanzverbindlichkeiten                           | –                   | 3                     | 3                       |
| (Davon: gesichert)                                         |                     |                       | (–)                     |
| <b>Gesamt</b>                                              | <b>1.370</b>        | <b>2.056</b>          | <b>3.426</b>            |

<sup>1)</sup> Verpflichtungen mit variabler Verzinsung oder Zinsbindung unter 1 Jahr.

Zusammensetzung der Anleihen zum 31. Dezember 2009:

#### Anleihen

in Mio. Euro

| Emittent                       | Art            | Nominalwert | Buchwert | Marktwerte<br>ohne Einschluss<br>aufgelaufener Zinsen <sup>1)</sup> | Marktwerte<br>einschließlich<br>aufgelaufener Zinsen <sup>1)</sup> | Zinssatz <sup>2)</sup> | Zinsbindung            |
|--------------------------------|----------------|-------------|----------|---------------------------------------------------------------------|--------------------------------------------------------------------|------------------------|------------------------|
| Henkel AG & Co. KGaA           | Anleihe        | 1.000       | 1.045    | 1.052                                                               | 1.076                                                              | 4,2500                 | bis 2013 <sup>3)</sup> |
| Zinsswap (3M-Euribor +0,405 %) | Receiver-Swap  | 1.000       | 46       | 46                                                                  | 69                                                                 | 1,1211                 | 3 Monate               |
| Henkel AG & Co. KGaA           | Anleihe        | 1.000       | 994      | 1.066                                                               | 1.102                                                              | 4,6250                 | bis 2014 <sup>4)</sup> |
| Zinsswap (3M-Euribor +2,02 %)  | Receiver-Swap  | 1.000       | –2       | –2                                                                  | 34                                                                 | 2,7333                 | 3 Monate               |
| Henkel AG & Co. KGaA           | Hybrid-Anleihe | 1.300       | 1.360    | 1.192                                                               | 1.199                                                              | 5,3750                 | bis 2015 <sup>5)</sup> |
| Zinsswap (3M-Euribor +1,80 %)  | Receiver-Swap  | 650         | 19       | 19                                                                  | 21                                                                 | 2,5152                 | 3 Monate               |
| Zinsswap (1M-Euribor +0,955 %) | Receiver-Swap  | 650         | 50       | 50                                                                  | 53                                                                 | 1,4290                 | 1 Monat                |

<sup>1)</sup> Vom Börsenkurs abgeleiteter Marktwert der Anleihen am 31.12.2009.

<sup>2)</sup> Zinssatz am 31.12.2009.

<sup>3)</sup> Festzins des Anleihe-Kupons: 4,25 Prozent – durch Zinsswaps in variable Verzinsung umgewandelt, nächstes Zinsfixing am 10.03.2010 (Fair Value Hedge).

<sup>4)</sup> Festzins des Anleihe-Kupons: 4,625 Prozent – durch Zinsswaps in variable Verzinsung umgewandelt, nächstes Zinsfixing am 19.03.2010 (Fair Value Hedge).

<sup>5)</sup> Festzins des Anleihe-Kupons: 5,375 Prozent – durch Zinsswaps in variable Verzinsung umgewandelt, nächstes Zinsfixing am 25.02.2010 (Fair Value Hedge).

Fristigkeitsstruktur zum 31. Dezember 2010:

### Aufteilung

in Mio. Euro

|                                              | Restlaufzeit        |                       | 31.12.2010<br>insgesamt |
|----------------------------------------------|---------------------|-----------------------|-------------------------|
|                                              | mehr als<br>5 Jahre | über 1<br>bis 5 Jahre |                         |
| Anleihen                                     | –                   | 3.468                 | 3.468                   |
| (Davon: gesichert)                           |                     |                       | (–)                     |
| Verbindlichkeiten gegenüber Kreditinstituten | 2                   | 100                   | 102                     |
| (Davon: gesichert)                           |                     |                       | (11)                    |
| Sonstige Finanzverbindlichkeiten             | –                   | –                     | –                       |
| (Davon: gesichert)                           |                     |                       |                         |
| <b>Gesamt</b>                                | <b>2</b>            | <b>3.568</b>          | <b>3.570</b>            |

Zusammensetzung der Anleihen zum 31. Dezember 2010:

### Anleihen

in Mio. Euro

| Emittent                       | Art            | Nominalwert | Buchwert | Marktwerte<br>ohne Einschluss<br>aufgelaufener Zinsen <sup>1)</sup> | Marktwerte<br>einschließlich<br>aufgelaufener Zinsen <sup>1)</sup> | Zinssatz <sup>2)</sup> | Zinsbindung            |
|--------------------------------|----------------|-------------|----------|---------------------------------------------------------------------|--------------------------------------------------------------------|------------------------|------------------------|
| Henkel AG & Co. KGaA           | Anleihe        | 1.000       | 1.049    | 1.057                                                               | 1.081                                                              | 4,2500                 | bis 2013 <sup>3)</sup> |
| Zinsswap (3M-Euribor +0,405 %) | Receiver-Swap  | 1.000       | 55       | 55                                                                  | 78                                                                 | 1,4351                 | 3 Monate               |
| Henkel AG & Co. KGaA           | Anleihe        | 1.000       | 1.020    | 1.076                                                               | 1.112                                                              | 4,6250                 | bis 2014 <sup>4)</sup> |
| Zinsswap (3M-Euribor +2,02 %)  | Receiver-Swap  | 1.000       | 24       | 24                                                                  | 59                                                                 | 3,0453                 | 3 Monate               |
| Henkel AG & Co. KGaA           | Hybrid-Anleihe | 1.300       | 1.399    | 1.320                                                               | 1.327                                                              | 5,3750                 | bis 2015 <sup>5)</sup> |
| Zinsswap (3M-Euribor +1,80 %)  | Receiver-Swap  | 650         | 37       | 37                                                                  | 39                                                                 | 2,8352                 | 3 Monate               |
| Zinsswap (1M-Euribor +0,955 %) | Receiver-Swap  | 650         | 69       | 69                                                                  | 72                                                                 | 1,7590                 | 1 Monat                |

<sup>1)</sup> Vom Börsenkurs abgeleiteter Marktwert der Anleihen am 31.12.2010.

<sup>2)</sup> Zinssatz am 31.12.2010.

<sup>3)</sup> Festzins des Anleihe-Kupons: 4,25 Prozent – durch Zinsswaps in variable Verzinsung umgewandelt, nächstes Zinsfixing am 10.03.2011 (Fair Value Hedge).

<sup>4)</sup> Festzins des Anleihe-Kupons: 4,625 Prozent – durch Zinsswaps in variable Verzinsung umgewandelt, nächstes Zinsfixing am 21.03.2011 (Fair Value Hedge).

<sup>5)</sup> Festzins des Anleihe-Kupons: 5,375 Prozent – durch Zinsswaps in variable Verzinsung umgewandelt, nächstes Zinsfixing am 25.01.2011 (Fair Value Hedge).

Die im Jahr 2003 durch die Henkel AG & Co. KGaA begebene Zehn-Jahres-Anleihe über 1 Mrd. Euro mit einem Kupon von 4,25 Prozent ist im Juni 2013 fällig.

Die im Jahr 2009 durch die Henkel AG & Co. KGaA begebene Fünf-Jahres-Anleihe über 1 Mrd. Euro mit einem Kupon von 4,625 Prozent ist im März 2014 fällig.

Die zur Finanzierung eines großen Teils der Pensionsverpflichtungen in Deutschland im November 2005 durch die Henkel AG & Co. KGaA emittierte nachrangige Hybrid-Anleihe in Höhe von 1,3 Mrd. Euro ist im Jahr 2014 fällig. Gemäß den Anleihebedingungen liegt der Kupon für die ersten zehn Jahre bei 5,375 Prozent. Ab dem 25. November 2015 kann die Anleihe erstmals zurückgezahlt werden. Sofern sie nicht zurückgezahlt wird, erfolgt die Verzinsung auf Basis des 3-Monats-Euribor-Zinssatzes zuzüglich eines Aufschlags von 2,85 Prozent. Ferner sehen die Anleihebedingun-

gen vor, dass die Henkel AG & Co. KGaA im Fall eines Cashflow-Ereignisses die Option oder die Verpflichtung zur Aufschiebung der Zinszahlungen hat. Ein Cashflow-Ereignis liegt vor, sofern der angepasste Cashflow aus laufender Geschäftstätigkeit einen bestimmten Prozentsatz (20 Prozent für optionale Stundung, 15 Prozent für zwingende Stundung) der Netto-Verbindlichkeiten unterschreitet; vergleiche zur Begriffsbestimmung Paragraf 3 (4) der Anleihebedingungen. Auf der Basis des zum 31. Dezember 2010 ermittelten Cashflows ergab sich ein Prozentsatz in Höhe von 72,23 Prozent (Vorjahr: 43,06 Prozent).

Die US-Dollar-Verbindlichkeiten der Henkel of America, Inc. werden mit Sicherheitsleistungen der Henkel AG & Co. KGaA aufgerechnet, da Geldanlage und Kreditaufnahme mit gleicher Laufzeit bei demselben Kreditinstitut bestehen. Die aufgerechneten Verbindlichkeiten gegenüber Kreditinstituten betrugen 1.411 Mio. Euro.

**(20) Langfristige finanzielle Verbindlichkeiten**

Die Langfristigen finanziellen Verbindlichkeiten betreffen im Wesentlichen Verbindlichkeiten gegenüber der Belegschaft in Höhe von 55 Mio. Euro (Vorjahr: 54 Mio. Euro) und Marktwerte von Derivaten in Höhe von 69 Mio. Euro (Vorjahr: 19 Mio. Euro).

**(21) Andere langfristige Verbindlichkeiten**

Die Anderen langfristigen Verbindlichkeiten betreffen insbesondere verschiedene Abgrenzungen.

**(22) Latente Steuern**

Die Rückstellungen betreffen unterschiedliche Wertansätze in der Konzernbilanz im Vergleich zur steuerrechtlichen Gewinnermittlung der einbezogenen Unternehmen (siehe Textziffer 40, **GB** Seiten 123 bis 125).

**(23) Kurzfristige Rückstellungen****Entwicklung 2009**

in Mio. Euro

|                                                 | Anfangs-<br>bestand<br>1.1.2009 <sup>1)</sup> | Sonstige<br>Verände-<br>rungen | Verbrauch  | Auflösung | Zuführung  | Endbestand<br>31.12.2009 |
|-------------------------------------------------|-----------------------------------------------|--------------------------------|------------|-----------|------------|--------------------------|
| Ertragsteuerrückstellungen                      | 343                                           | 29                             | 269        | 26        | 147        | 224                      |
| Sonstige kurzfristige Rückstellungen            | 783                                           | 21                             | 519        | 39        | 559        | 805                      |
| „Global Excellence“                             | 129                                           | 106                            | 141        | –         | –          | 94                       |
| Zusammenführung Adhesive Technologies-Geschäfte | 52                                            | 15                             | 42         | –         | 14         | 39                       |
| <b>Gesamt</b>                                   | <b>1.307</b>                                  | <b>171</b>                     | <b>971</b> | <b>65</b> | <b>720</b> | <b>1.162</b>             |

<sup>1)</sup> Angepasst aufgrund der Finalisierung der Kaufpreisallokation aus dem Erwerb der National Starch-Geschäfte.

**Entwicklung 2010**

in Mio. Euro

|                                                 | Anfangs-<br>bestand<br>1.1.2010 | Sonstige<br>Verände-<br>rungen | Verbrauch  | Auflösung  | Zuführung  | Endbestand<br>31.12.2010 |
|-------------------------------------------------|---------------------------------|--------------------------------|------------|------------|------------|--------------------------|
| Ertragsteuerrückstellungen                      | 224                             | 26                             | 212        | 26         | 315        | 327                      |
| Sonstige kurzfristige Rückstellungen            | 805                             | –9                             | 496        | 98         | 588        | 790                      |
| „Global Excellence“                             | 94                              | –                              | 45         | 5          | –          | 44                       |
| Zusammenführung Adhesive Technologies-Geschäfte | 39                              | 11                             | 22         | 1          | 6          | 33                       |
| <b>Gesamt</b>                                   | <b>1.162</b>                    | <b>28</b>                      | <b>775</b> | <b>130</b> | <b>909</b> | <b>1.194</b>             |

Bei der Bewertung der kurzfristigen Rückstellungen haben wir die bestmögliche Schätzung der Ausgaben, die zur Erfüllung der gegenwärtigen Verpflichtungen zum Bilanztag erforderlich sind, zugrunde gelegt („best estimate“).

Am 3. Dezember 2010 haben wir eine Reihe offener Fragen und streitig diskutierter Sachverhalte, die sich aus dem am 3. April 2008 mit Akzo Nobel geschlossenen Kaufvertrag zum Erwerb der Geschäftsbereiche Adhesives (Klebstoffe) und Electronic Materials (Elektronik) der National Starch & Chemical Company ergeben hatten, abschließend geregelt.

Diese im „Third Amendment Agreement to the Master Implementation Agreement“ insbesondere zur Kaufpreisermittlung beziehungsweise -anpassung getroffenen Bestimmungen führten dazu, dass ein in den Sonstigen kurzfristigen Rückstellungen gebildeter Betrag von 63 Mio. Euro aufgelöst werden konnte. Gegenläufig ist ein Posten in gleicher Höhe unter den Immateriellen Vermögenswerten abgegangen.

**Aufteilung der Sonstigen kurzfristigen Rückstellungen nach Funktionsbereichen**

| in Mio. Euro                        | 31.12.2009 | 31.12.2010 |
|-------------------------------------|------------|------------|
| Vertrieb                            | 177        | 157        |
| Personal                            | 324        | 416        |
| Produktion und Technik              | 56         | 59         |
| Verschiedene übrige Verpflichtungen | 248        | 158        |
| <b>Gesamt</b>                       | <b>805</b> | <b>790</b> |

In den Vertriebsrückstellungen sind Verpflichtungen aus Umsatzvergütungen und für Risiken aus schwebenden Geschäften enthalten. In der Kategorie „Personal“ sind insbesondere Rückstellungen für Personalanpassungsmaßnahmen sowie für variable Entgeltbestandteile (Short Term Incentives) enthalten.

**(24) Kurzfristige Finanzschulden****Aufteilung**

| in Mio. Euro                                                       | 31.12.2009<br>insgesamt | 31.12.2010<br>insgesamt |
|--------------------------------------------------------------------|-------------------------|-------------------------|
| Anleihen                                                           | 300                     | 219                     |
| Commercial Paper <sup>1)</sup>                                     | 71                      | 79                      |
| Verbindlichkeiten gegenüber Kreditinstituten<br>(Davon: gesichert) | 288<br>(125)            | 233<br>(93)             |
| Sonstige Finanzverbindlichkeiten                                   | 1                       | 5                       |
| <b>Gesamt</b>                                                      | <b>660</b>              | <b>536</b>              |

<sup>1)</sup> Aus dem Euro- und dem US-Dollar-Commercial-Paper-Programm  
(Gesamtvolumen 2,1 Mrd. Euro).

Der Rückgang der kurzfristigen Verbindlichkeiten aus Anleihen ist auf die teilweise Rückzahlung der Floating Rate Note zurückzuführen.

Die Sicherheiten für Verbindlichkeiten gegenüber Kreditinstituten betreffen Grundpfandrechte, Forderungsabtretungen und Vorratsübereignungen.

Der Marktwert der kurzfristigen Finanzschulden entspricht aufgrund ihrer kurzfristigen Natur dem Buchwert.

**(25) Verbindlichkeiten aus Lieferungen und Leistungen**

Diese betreffen neben Eingangsrechnungen auch Abgrenzungen für ausstehende Rechnungen auf erhaltene Lieferungen und Leistungen.

**(26) Kurzfristige finanzielle Verbindlichkeiten****Aufteilung**

| in Mio. Euro                                                                | 31.12.2009<br>insgesamt | 31.12.2010<br>insgesamt |
|-----------------------------------------------------------------------------|-------------------------|-------------------------|
| Verbindlichkeiten gegenüber nicht konsolidierten<br>Verbundenen Unternehmen | 15                      | 15                      |
| Marktwert Derivate                                                          | 60                      | 90                      |
| Übrige kurzfristige finanzielle Verbindlichkeiten<br>(Davon: gesichert)     | 70<br>(-)               | 70<br>(-)               |
| <b>Gesamt</b>                                                               | <b>145</b>              | <b>175</b>              |

In den Übrigen kurzfristigen finanziellen Verbindlichkeiten sind unter anderem enthalten:

- Kundenverbindlichkeiten in Höhe von 30 Mio. Euro (Vorjahr: 23 Mio. Euro),
- Provisionen in Höhe von 3 Mio. Euro (Vorjahr: 3 Mio. Euro) und
- Verbindlichkeiten gegenüber der Belegschaft in Höhe von 28 Mio. Euro (Vorjahr: 26 Mio. Euro).

**(27) Andere kurzfristige Verbindlichkeiten**

Die Anderen kurzfristigen Verbindlichkeiten betreffen neben verschiedenen Abgrenzungen unter anderem:

- Verbindlichkeiten im Rahmen der sozialen Sicherheit in Höhe von 21 Mio. Euro (Vorjahr: 22 Mio. Euro),
- erhaltene Anzahlungen in Höhe von 5 Mio. Euro (Vorjahr: 4 Mio. Euro),
- Verbindlichkeiten aus Abgaben für Arbeitnehmer in Höhe von 51 Mio. Euro (Vorjahr: 41 Mio. Euro) und
- andere Steuerverbindlichkeiten in Höhe von 83 Mio. Euro (Vorjahr: 130 Mio. Euro).

**(28) Haftungsverhältnisse****Aufteilung**

| in Mio. Euro                                                                                                 | 31.12.2009 | 31.12.2010 |
|--------------------------------------------------------------------------------------------------------------|------------|------------|
| Verbindlichkeiten aus Bürgschaften,<br>Wechsel- und Scheckbürgschaften<br>sowie aus Gewährleistungsverträgen | 11         | 15         |

**(29) Kurzfristige finanzielle Verpflichtungen**

Operating-Leasingverhältnisse im Sinn von IAS 17 umfassen sämtliche Formen der Nutzungsüberlassung von Vermögenswerten einschließlich Miet- und Pachtverträgen. Die Verpflichtungen aus Operating-Leasingverträgen werden mit der Summe der Beträge ausgewiesen, die bis zum frühesten Kündigungstermin anfallen. Ausgewiesen sind Nominalwerte. Sie stellen sich zum 31. Dezember 2010 wie folgt dar:

**Operating-Leasingverpflichtungen**

| in Mio. Euro                       | 31.12.2009 | 31.12.2010 |
|------------------------------------|------------|------------|
| Fälligkeit im Folgejahr            | 44         | 58         |
| Fälligkeit zwischen 1 bis 5 Jahren | 89         | 127        |
| Fälligkeit über 5 Jahre            | 37         | 36         |
| <b>Gesamt</b>                      | <b>170</b> | <b>221</b> |

Im Lauf des Geschäftsjahres 2010 sind Aufwendungen aus Operating-Leasingverhältnissen in Höhe von 67 Mio. Euro (Vorjahr: 51 Mio. Euro) angefallen.

Die Verpflichtungen aus Bestellungen für Sachanlagen beliefen sich Ende 2010 auf 36 Mio. Euro (Vorjahr: 23 Mio. Euro). Es bestanden wie im Vorjahr keine Abnahmeverpflichtungen aus Lohnherstellungsverträgen.

Aus Verträgen über Kapitalerhöhungen und Anteilserwerbe, die vor dem 31. Dezember 2010 geschlossen wurden, resultieren Zahlungsverpflichtungen in Höhe von 5 Mio. Euro (Vorjahr: 18 Mio. Euro).



### (30) Kapitalmanagement

Die Ziele des Kapitalmanagements leiten sich aus der Finanzstrategie ab. Hierzu gehören die Sicherstellung der Liquidität und die Gewährleistung des jederzeitigen Zugangs zum Kapitalmarkt.

Maßnahmen zur Erreichung der Ziele des Kapitalmanagements sind die Optimierung der Kapitalstruktur, die Dividendenpolitik, Eigenkapitalmaßnahmen, Akquisitionen und Divestments sowie die Reduzierung von Schulden.

Im abgelaufenen Geschäftsjahr wurde eine gegenüber dem Vorjahr unveränderte Dividende für Stamm- und Vorzugsaktien gezahlt. Der nicht für Dividendenzahlungen verwendete Free-Cashflow (GB Seite 92) wurde im Wesentlichen zur Reduzierung der Nettoverschuldung und für die Zuführung zu Pensionsfonds verwendet. Der kurzfristige Finanzierungsbedarf wurde über Commercial Paper und Bankdarlehen gedeckt. Die ausstehenden Anleihen dienen der Deckung langfristiger Finanzierungserfordernisse.

Unsere finanzwirtschaftliche Steuerung orientiert sich an den in unserer Finanzstrategie festgelegten Kennzahlen. Der Zinsdeckungsfaktor lag 2010 bei 12,8 (Vorjahr: 8,7). Die operative Schuldendeckung lag 2010 bei 71,4 Prozent (Vorjahr: 41,8 Prozent). Die Eigenkapitalquote betrug 45,4 Prozent (Vorjahr: 41,4 Prozent). Im Einzelnen siehe hierzu im Konzernlagebericht „Finanzkennzahlen“ auf den GB Seiten 54 und 55. Aufgrund der internationalen Ausrichtung der Geschäfte sind je nach Region unterschiedliche rechtliche und regulatorische Vorschriften zu beachten. Stand und Weiterentwicklung dieser Vorschriften werden lokal und zentral verfolgt und Veränderungen im Rahmen des Kapitalmanagements berücksichtigt.

### (31) Derivate und andere Finanzinstrumente

#### Treasury-Richtlinien und -Systeme

Corporate Treasury steuert zentral das Währungs- und Zinsmanagement des Konzerns und entsprechend alle Abschlüsse von Geschäften mit Finanzderivaten und sonstigen Finanzinstrumenten. Handel, Treasury Controlling und Abwicklung (Front-, Middle- und Back-Office) sind räumlich und organisatorisch getrennt. Kontraktpartner sind deutsche und internationale Banken, die in Übereinstimmung mit den Treasury-Richtlinien des Henkel-Konzerns regelmäßig in Bezug auf Bonität und Qualität der Quotierungen überprüft werden. Der Einsatz von Finanzderivaten zur Steuerung der Währungs- und Zinsrisiken aus dem operativen Geschäft und der daraus resultierenden Finanzanforderungen erfolgt ebenfalls in Übereinstimmung mit den Treasury-Richtlinien. Finanzderivate werden ausschließlich zu Sicherungszwecken abgeschlossen.

Das Währungs- und Zinsrisikomanagement des Konzerns wird durch ein integriertes Treasury-System unterstützt, das zur Identifizierung, Bewertung und Analyse der Währungs- und Zinsrisiken dient. Integriert bedeutet in diesem Zusammenhang, dass der Gesamtprozess von der Erfassung von Finanztransaktionen bis zu deren Buchung abgedeckt ist. Ein großer Teil des Devisenhandels erfolgt über internetbasierte, multibankfähige Handelsplattformen. Die abgeschlossenen Devisengeschäfte werden automatisch in das Treasury-System übergeleitet. Die im Rahmen eines standardisierten Berichtswesens von allen Tochtergesellschaften gemeldeten Währungs- und Zinsrisiken werden durch einen Datentransfer in das Treasury-System integriert. Hierdurch sind sowohl alle konzernweiten Währungs- und Zinsrisiken als auch die zur Sicherung dieser Risiken abgeschlossenen Derivate jederzeit abrufbar und bewertbar. Das Treasury-System erlaubt den systemgestützten Einsatz verschiedener Risikokonzepte. So werden die Risikopositionen und der Erfolg des Risikomanagements pro Einzelgesellschaft, Land und Ländergruppe auf „Mark to Market“-Basis regelmäßig ermittelt und mit einer Benchmark verglichen.

#### Ansatz und Bewertung von Finanzinstrumenten

Alle Finanzinstrumente werden zunächst mit ihren Anschaffungskosten am Handelstag eingebucht. Die Wertpapiere und Terminanlagen werden als „available for sale“ klassifiziert und zum Bilanztag mit dem beizulegenden Zeitwert bewertet, der ohne Ausnahme auf notierten Marktpreisen (Stufe 1 der Fair-Value-Hierarchie) basiert. Die beizulegenden Zeitwerte entsprechen somit zum 31. Dezember 2010 den Buchwerten. Sofern sich aus der Bewertung Wertänderungen ergeben, werden diese erfolgsneutral im Eigenkapital erfasst, es sei denn, es handelt sich um dauerhafte Wertminderungen. Diese werden erfolgswirksam erfasst. Die Bewertung der ebenfalls als „available for sale“ klassifizierten Sonstigen Beteiligungen/Anteile an Verbundenen Unternehmen erfolgt zu fortgeführten Anschaffungskosten, da deren Marktwerte nicht zuverlässig bestimmbar sind.

#### Kategorisierung bestimmter Finanzinstrumente

| in Mio. Euro                                                     | 31.12.2009 | 31.12.2010 |
|------------------------------------------------------------------|------------|------------|
| <b>Wertpapiere und Terminanlagen</b>                             | <b>22</b>  | <b>362</b> |
| – erfolgswirksam zum beizulegenden Zeitwert                      | –          | –          |
| – erfolgsneutral zum beizulegenden Zeitwert                      | 22         | 362        |
| <b>Sonstige Beteiligungen/Anteile an Verbundenen Unternehmen</b> | <b>19</b>  | <b>21</b>  |
| – erfolgswirksam zum beizulegenden Zeitwert                      | –          | –          |
| – zu fortgeführten Anschaffungskosten                            | 19         | 21         |

Finanzielle Vermögenswerte, die der Kategorie „held to maturity“ zuzuordnen sind, bestehen nicht. Langfristige Ausleihungen werden ebenso wie alle übrigen finanziellen Vermögenswerte als „loans and receivables“ kategorisiert und zu fortgeführten Anschaffungskosten bilanziert.

Der Buchwert der Forderungen aus Lieferungen und Leistungen, sonstigen kurzfristigen finanziellen Vermögenswerte sowie Flüssigen Mittel entspricht aufgrund ihrer kurzfristigen Natur dem beizulegenden Zeitwert. Finanzielle Verbindlichkeiten mit einer festen Laufzeit werden mit ihren fortgeführten Anschaffungskosten nach der Effektivzinsmethode bewertet. Finanzielle Verbindlichkeiten, für die ein Sicherungsgeschäft abgeschlossen wurde, das die Voraussetzungen von IAS 39 bezüglich des Sicherungszusammenhangs erfüllt, werden im Rahmen des sogenannten Hedge Accounting bilanziert. Der beizulegende Zeitwert der Verbindlichkeiten aus Lieferungen und Leistungen sowie der sonstigen kurzfristigen Verbindlichkeiten entspricht dem Buchwert.

Alle im Konzern abgeschlossenen derivativen Finanzinstrumente werden zunächst in der Bilanz mit ihren Anschaffungskosten eingebucht und in der Folge zu ihrem beizulegenden Zeitwert am Bilanztag bewertet. Die Erfassung der aus Marktwertänderungen von derivativen Finanzinstrumenten resultierenden Gewinne und Verluste ist davon abhängig, ob die Anforderungen von IAS 39 hinsichtlich der Bilanzierung als Sicherungsgeschäft erfüllt sind (Hedge Accounting).

Für den überwiegenden Teil der derivativen Finanzinstrumente wird kein Hedge Accounting angewandt. Die Marktwertänderungen dieser Derivate, die aber wirtschaftlich betrachtet wirksame Absicherungen im Rahmen der Konzernstrategie darstellen, werden ergebniswirksam erfasst. Diesen stehen nahezu kompensierende Marktwertänderungen aus den abgesicherten Grundgeschäften gegenüber.

Bei Anwendung des Hedge Accounting werden derivative Finanzinstrumente entweder als Instrumente zur Absicherung des beizulegenden Werts eines bilanzierten Grundgeschäfts („Fair Value Hedge“), als Instrumente zur Absicherung von zukünftigen Zahlungsverpflichtungen („Cashflow Hedge“) oder als Instrumente zur Absicherung einer Nettoinvestition in eine ausländische Tochtergesellschaft („Hedge of a Net Investment in a Foreign Entity“) qualifiziert.

**Fair Value Hedges:** Marktwertänderungen von derivativen Finanzinstrumenten zur Absicherung von beizulegenden Zeitwerten („Fair Value Hedge“) werden zusammen mit der Wertänderung der abgesicherten Grundgeschäfte erfolgswirksam im Finanzergebnis erfasst. Als Fair Value Hedges wurden ausschließlich die unter Textziffer 19 auf den [GB Seiten 111 bis 112](#) dargestellten Receiver-Zinsswaps zur Sicherung des Zinsrisikos der von der Henkel AG & Co. KGaA begebenen Anleihen qualifiziert. Zur Bestimmung der Marktwertänderung der Anleihen (vergleiche Textziffer 19, [GB Seiten 111 bis 112](#)) wird ausschließlich der Anteil berücksichtigt, der sich auf das Zinsrisiko bezieht.

Die Marktwerte der Zinssicherungsinstrumente betragen zum Bilanztag 185 Mio. Euro (Vorjahr: 113 Mio. Euro) ohne Einschluss von aufgelaufenen Zinsen. Die Marktwertänderungen aus Marktzinsrisiken der Receiver-Zinsswaps betragen 72 Mio. Euro (Vorjahr: 48 Mio. Euro). Die korrespondierenden Marktwertänderungen der abgesicherten Anleihen betragen –69 Mio. Euro (Vorjahr: –47 Mio. Euro).

**Cashflow Hedges:** Veränderungen des Marktwerts von Derivaten zur Absicherung von Cashflows werden erfolgsneutral im Eigenkapital erfasst. Diejenigen Teile der Marktwertänderung des Derivats, die bezüglich des abgesicherten Risikos als ineffektiv gelten, werden unmittelbar in der Konzern-Gewinn- und Verlustrechnung erfasst. Resultiert eine feste Verpflichtung oder eine erwartete und mit hoher Wahrscheinlichkeit eintretende künftige Transaktion in der Bilanzierung eines Vermögenswerts oder einer Schuld, werden die zuvor im Eigenkapital erfassten kumulierten Marktwertänderungen des Sicherungsgeschäfts in der Regel in die Erstbewertung des Bilanzpostens mit einbezogen. Anderenfalls werden die direkt im Eigenkapital erfassten Beträge in denjenigen Berichtsperioden erfolgswirksam, in denen die abgesicherte Transaktion die Erfolgsrechnung beeinflusst.

#### Cashflow Hedges

(nach Berücksichtigung von Ertragsteuern)

| in Mio. Euro | Anfangs-<br>bestand | Zugang<br>(erfolgsneutral) | Abgang<br>(erfolgswirksam) | Endbestand |
|--------------|---------------------|----------------------------|----------------------------|------------|
| 2010         | –276                | –75                        | –                          | –351       |
| 2009         | –265                | –11                        | –                          | –276       |

Der Anfangsbestand betrifft als Cashflow Hedge designierte noch laufende Zinssicherungen der US-Dollar-Verbindlichkeiten der Henkel of America, Inc. sowie bereits in Vorjahren abgeschlossene und glattgestellte Devisentermingeschäfte. Der Zugang in Höhe von –75 Mio. Euro betrifft mit –46 Mio. Euro den Erwerb der National Starch-Geschäfte. Auf die Zinssicherung der US-Dollar-Verbindlichkeiten der Henkel of America, Inc. entfällt nach Berücksichtigung von Ertragsteuern ein Zugang in Höhe von –29 Mio. Euro. Die Marktwerte der Zinssicherungsgeschäfte auf die US-Dollar-Verbindlichkeiten der Henkel of America, Inc. betragen –69 Mio. Euro. Im abgelaufenen Geschäftsjahr wurden Ineffektivitäten in Höhe von 0,4 Mio. Euro aufwandswirksam im Finanzergebnis erfasst. Die Cashflows aus den zum 31. Dezember 2010 gesicherten Transaktionen werden im Juni 2013 und im März 2014 erwartet.

**Hedge of a Net Investment in a Foreign Entity:** Absicherungen von Nettoinvestitionen in ausländische Gesellschaften werden ähnlich der Absicherung von Cashflows bilanziert. Dies ist der Fall bei der Sicherung von Translationsrisiken ausländischer Beteiligungen durch den Einsatz von Devisentermingeschäften.

Die im Eigenkapital erfassten Posten betreffen Translationsrisiken von Nettoinvestitionen in Schweizer Franken (CHF) und US-Dollar (USD), bei denen die entsprechenden Sicherungsgeschäfte bereits in Vorjahren abgeschlossen und glattgestellt wurden.

Im abgelaufenen Geschäftsjahr wurden keine „Hedges of a Net Investment in a Foreign Entity“ abgeschlossen. Der Zugang in Höhe von 16 Mio. Euro entfällt auf den Erwerb der National Starch-Geschäfte. Es wurden keine erfolgswirksamen Ausbuchungen aus dem Eigenkapital vorgenommen und keine Ineffektivitäten erfolgswirksam erfasst.

#### Hedges of a Net Investment in a Foreign Entity (nach Berücksichtigung von Ertragsteuern)

| in Mio. Euro | Anfangs-<br>bestand | Zugang<br>(erfolgsneutral) | Abgang<br>(erfolgswirksam) | Endbestand |
|--------------|---------------------|----------------------------|----------------------------|------------|
| 2010         | 53                  | 16                         | –                          | 69         |
| 2009         | 53                  | –                          | –                          | 53         |

#### Marktwerte von derivativen Finanzinstrumenten

Die beizulegenden Zeitwerte der derivativen Finanzinstrumente basieren auf beobachtbaren Marktdaten (Stufe 2 der Fair-Value-Hierarchie). Für Devisentermingeschäfte wird der beizulegende Zeitwert auf Basis der am Bilanztag geltenden aktuellen Referenzkurse der Europäischen Zentralbank unter Berücksichtigung von Terminaufschlägen und -abschlägen für die jeweilige Restlaufzeit des Kontraktes im Vergleich zum kontrahierten Devisenkurs ermittelt. Devisenoptionen werden mittels Kursnotierungen oder anerkannter Modelle zur Ermittlung von Optionspreisen bewertet. Die Bewertung der Zinssicherungsinstrumente erfolgt auf Basis abgezinster, zukünftig erwarteter Cashflows unter Zugrundelegung von Marktzinssätzen, die für die Restlaufzeit der Kontrakte gelten. Diese sind für die vier wichtigsten Währungen in der nachfolgenden Tabelle angegeben. Sie zeigt die jeweils zum 31. Dezember am Interbanken-Markt quotierten Zinssätze.

#### Zinssätze in Prozent p.a.

jeweils zum 31.12.

| Laufzeiten | EUR  |      | USD  |      | JPY  |      | GBP  |      |
|------------|------|------|------|------|------|------|------|------|
|            | 2009 | 2010 | 2009 | 2010 | 2009 | 2010 | 2009 | 2010 |
| 3 Monate   | 0,50 | 0,96 | 0,47 | 0,48 | 0,45 | 0,11 | 0,71 | 0,82 |
| 6 Monate   | 0,93 | 1,23 | 0,68 | 0,40 | 0,30 | 0,44 | 0,93 | 1,27 |
| 1 Jahr     | 1,21 | 1,51 | 1,12 | 0,88 | 0,47 | 0,71 | 1,58 | 1,52 |
| 2 Jahre    | 1,84 | 1,53 | 1,38 | 0,82 | 0,48 | 0,38 | 2,01 | 1,51 |
| 5 Jahre    | 2,80 | 2,50 | 2,99 | 2,23 | 0,70 | 0,57 | 3,45 | 2,67 |
| 10 Jahre   | 3,65 | 3,35 | 4,07 | 3,56 | 1,44 | 1,19 | 4,21 | 3,65 |

Bei der Bewertung von Finanzderivaten zur Sicherung von Rohstoffpreisrisiken nutzen wir aufgrund ihrer Komplexität vornehmlich Simulationsmodelle der Banken, die von Börsennotierungen abgeleitet sind. Die Sicherstellung korrekter Bewertungen erfolgt durch regelmäßige Plausibilitätsprüfungen.

Bei der Bewertung der derivativen Finanzinstrumente wird das Ausfallrisiko des Vertragspartners durch eine pauschale Anpassung der Marktwerte auf der Basis von Kreditrisikoprämien berücksichtigt. Die im Berichtsjahr 2010 bestehende Anpassung beträgt 0,8 Mio. Euro.

In Abhängigkeit vom Marktwert und von der Fristigkeit am Bilanztag werden derivative Finanzinstrumente als finanzieller Vermögenswert (bei positivem Marktwert) oder als finanzielle Verbindlichkeit (bei negativem Marktwert) ausgewiesen.

Der überwiegende Teil der Devisenterminkontrakte und der Währungsoptionen ist zur Sicherung von Forderungen aus Lieferungen und Leistungen sowie Konzernfinanzierungen in US-Dollar abgeschlossen.

Am Bilanztag bestanden folgende Positionen:

### Derivative Finanzinstrumente

jeweils zum 31.12.

| in Mio. Euro                                      | Nominalwert  |              | Positiver Marktwert <sup>3)</sup> |            | Negativer Marktwert <sup>3)</sup> |             |
|---------------------------------------------------|--------------|--------------|-----------------------------------|------------|-----------------------------------|-------------|
|                                                   | 2009         | 2010         | 2009                              | 2010       | 2009                              | 2010        |
| Devisenterminkontrakte <sup>1)</sup>              | 2.450        | 2.396        | 70                                | 77         | -60                               | -89         |
| (Davon: zur Absicherung konzerninterner Darlehen) | (2.091)      | (1.848)      | (68)                              | (75)       | (-56)                             | (-83)       |
| Zinsswaps                                         | 4.688        | 4.797        | 177                               | 248        | -19                               | -70         |
| (Davon: als Fair Value Hedge designed)            | (3.300)      | (3.300)      | (177)                             | (248)      | (-)                               | (-)         |
| (Davon: als Cashflow Hedge designed)              | (1.388)      | (1.497)      | (-)                               | (-)        | (-19)                             | (-70)       |
| Andere Zinssicherungsinstrumente                  | 1.000        | 500          | 11                                | 2          | -                                 | -           |
| (Davon: als Hedge Accounting designed)            | (-)          | (-)          | (-)                               | (-)        | (-)                               | (-)         |
| Waretermingeschäfte <sup>2)</sup>                 | 16           | 44           | 1                                 | 4          | -                                 | -           |
| (Davon: als Hedge Accounting designed)            | (-)          | (-)          | (-)                               | (-)        | (-)                               | (-)         |
| <b>Summe derivative Finanzinstrumente</b>         | <b>8.154</b> | <b>7.737</b> | <b>259</b>                        | <b>331</b> | <b>-79</b>                        | <b>-159</b> |

<sup>1)</sup> Laufzeit kürzer als 1 Jahr.

<sup>2)</sup> Im Jahr 2010 Laufzeit kürzer als 1 Jahr; im Jahr 2009 Laufzeit länger als 1 Jahr.

<sup>3)</sup> Marktwerte einschließlich aufgelaufener Zinsen.

### Risiken aus Finanzinstrumenten

Henkel ist als weltweit agierender Konzern im Rahmen seiner gewöhnlichen Geschäftstätigkeit Ausfallrisiken, Liquiditätsrisiken und Marktrisiken (Währungs-, Zins- und Rohstoffpreisrisiken) ausgesetzt. Ziel des finanziellen Risikomanagements ist es, die aus den operativen Geschäften entstehenden Risiken durch den Einsatz ausgewählter derivativer und nicht-derivativer Sicherungsinstrumente zu begrenzen. Bedeutende Risikokonzentrationen lagen im Berichtsjahr nicht vor. Bezüglich des Managements von finanzwirtschaftlichen Risiken verweisen wir auch auf den Risikobericht auf den  Seiten 78 bis 82.

### Ausfallrisiko

Der Henkel-Konzern ist im Rahmen seiner Geschäftstätigkeit mit Dritten in verschiedenen Geschäftsbereichen grundsätzlich einem weltweiten Ausfallrisiko ausgesetzt. Dieses Risiko resultiert aus der möglichen Nichterfüllung einer Vertragspartei. Das maximale Ausfallrisiko wird durch die Buchwerte der in der Bilanz angesetzten finanziellen Vermögenswerte wiedergegeben. Grundsätzlich sieht sich Henkel mit einer fortschreitenden Konzentration auf der Abnehmerseite konfrontiert, was sich entsprechend in den Forderungspositionen von Einzelkunden ausdrückt.

Ein Kreditrisikomanagement mit einer weltweit gültigen „Credit Policy“ sorgt für eine permanente Überwachung der Kreditrisiken und minimiert die Forderungsverluste. Sie regelt für bestehende Kundenbeziehungen und Neukunden die Vergabe und Einhaltung von Kreditlimiten, kundenindividuelle Bonitätsanalysen unter Nutzung interner und externer Finanzinformationen, die Risikoklassifizierung und die kontinuierliche Überwachung

der Forderungsrisiken auf lokaler Ebene. Des Weiteren werden unsere wichtigsten Kundenbeziehungen auch auf regionaler und globaler Ebene überwacht. Weiterhin werden selektiv länder- und kundenspezifische Absicherungsmaßnahmen vorgenommen, zum Beispiel durch Kreditversicherungen.

Im Rahmen der Geldanlage und des Derivatehandels mit deutschen und internationalen Banken schließen wir Geschäfte nur mit Kontrahenten bester Bonität ab. Die Geldanlage erfolgt in der Regel mit einer Laufzeit von unter einem Jahr. Zur Minimierung des Ausfallrisikos werden mit den Kontrahenten Netting-Vereinbarungen geschlossen und Anlagelimits vergeben. Diese Limits werden entsprechend den Ratings der Kontrahenten vergeben und regelmäßig überprüft und angepasst. Neben den Ratings werden bei der Festsetzung der Limits weitere Indikatoren wie die Notierung der „Credit Default Swaps“ (CDS) der Banken hinzugezogen. Zudem bestehen mit ausgewählten Banken sogenannte Collateral-Vereinbarungen, im Rahmen derer zur Absicherung der Marktwerte abgeschlossener Derivate gegenseitige Sicherheitszahlungen geleistet werden.

Erhaltene Sicherheiten beziehungsweise Absicherungsmaßnahmen betreffen die länder- und kundenspezifische Absicherung durch Kreditversicherungen, bestätigte und unbestätigte Akkreditive im Exportgeschäft sowie Bürgschaften, Garantien und Deckungszusagen.

Der Buchwert von Forderungen und Darlehen, die überfällig wären oder auf die Abschreibungen vorzunehmen wären und deren Fälligkeit neu verhandelt worden ist, beträgt wie im Vorjahr weniger als 1 Mio. Euro.

## Altersanalyse der Überfälligkeit nicht wertgeminderter Forderungen und Darlehen

### Aufteilung

| in Mio. Euro     | weniger als 30 Tage | 30 bis 60 Tage | 61 bis 90 Tage | 91 bis 180 Tage | Gesamt |
|------------------|---------------------|----------------|----------------|-----------------|--------|
| Stand 31.12.2010 | 96                  | 28             | 10             | 3               | 137    |
| Stand 31.12.2009 | 137                 | 26             | 12             | 3               | 178    |

Insgesamt haben wir auf Forderungen und Darlehen im Jahr 2010 Einzelwertberichtigungen in Höhe von 35 Mio. Euro (Vorjahr: 36 Mio. Euro) und pauschalierte Einzelwertberichtigungen in Höhe von 6 Mio. Euro (Vorjahr: 7 Mio. Euro) vorgenommen.

### Liquiditätsrisiko

Das Liquiditätsrisiko ist aufgrund des Einsatzes langfristiger Finanzierungsinstrumente und zusätzlicher Liquiditätsreserven als sehr gering einzustufen. Um die Liquidität und die finan-

zielle Flexibilität des Henkel-Konzerns zu jedem Zeitpunkt sicherzustellen, verfügt der Henkel-Konzern über fest zugesagte Kreditlinien in Höhe von 2,1 Mrd. Euro. Diese Kreditlinien sind zur Sicherung des Commercial-Paper-Programms abgeschlossen worden. Die einzelnen Tochtergesellschaften des Henkel-Konzerns verfügen zusätzlich über bilaterale Kreditzusagen in Höhe von 0,4 Mrd. Euro.

Unsere Kreditwürdigkeit wird regelmäßig von den Ratingagenturen Standard & Poor's und Moody's bewertet.

### Cashflows aus Finanzverbindlichkeiten

in Mio. Euro

|                                                  | 31.12.2009<br>Buchwerte | Restlaufzeit     |                       |                     | 31.12.2009<br>Cashflow<br>insgesamt |
|--------------------------------------------------|-------------------------|------------------|-----------------------|---------------------|-------------------------------------|
|                                                  |                         | bis zu<br>1 Jahr | über 1<br>bis 5 Jahre | mehr als<br>5 Jahre |                                     |
| Anleihen <sup>1)</sup>                           | 3.708                   | 394              | 2.593                 | 1.378               | 4.365                               |
| Commercial Paper <sup>2)</sup>                   | 71                      | 71               | –                     | –                   | 71                                  |
| Verbindlichkeiten gegenüber Kreditinstituten     | 303                     | 291              | 17                    | 6                   | 314                                 |
| Verbindlichkeiten aus Lieferungen und Leistungen | 1.885                   | 1.885            | –                     | –                   | 1.885                               |
| Sonstige Finanzinstrumente <sup>3)</sup>         | 156                     | 86               | 32                    | 38                  | 156                                 |
| Originäre Finanzinstrumente                      | 6.123                   | 2.727            | 2.642                 | 1.422               | 6.791                               |
| Derivative Finanzinstrumente                     | 79                      | 86               | – <sup>4)</sup>       | –                   | 80                                  |
| <b>Gesamt</b>                                    | <b>6.202</b>            | <b>2.813</b>     | <b>2.636</b>          | <b>1.422</b>        | <b>6.871</b>                        |

<sup>1)</sup> Die Cashflows aus der im Jahr 2005 begebenen Hybrid-Anleihe sind bis zum erstmöglichen Kündigungstermin durch Henkel am 25. November 2015 angegeben.

<sup>2)</sup> Aus dem Euro- und US-Dollar-Commercial-Paper-Programm (Gesamtvolumen 2,1 Mrd. Euro).

<sup>3)</sup> In den sonstigen Finanzinstrumenten sind auch Verbindlichkeiten gegenüber Mitgliedern der Belegschaft und Finanzierungswechsel enthalten.

<sup>4)</sup> Positiver Effekt resultiert aus der Berücksichtigung von Cashflows aus aufgelaufenen Zinsen.

### Cashflows aus Finanzverbindlichkeiten

in Mio. Euro

|                                                  | 31.12.2010<br>Buchwerte | Restlaufzeit     |                       |                     | 31.12.2010<br>Cashflow<br>insgesamt |
|--------------------------------------------------|-------------------------|------------------|-----------------------|---------------------|-------------------------------------|
|                                                  |                         | bis zu<br>1 Jahr | über 1<br>bis 5 Jahre | mehr als<br>5 Jahre |                                     |
| Anleihen <sup>1)</sup>                           | 3.687                   | 313              | 3.736                 | –                   | 4.049                               |
| Commercial Paper <sup>2)</sup>                   | 79                      | 79               | –                     | –                   | 79                                  |
| Verbindlichkeiten gegenüber Kreditinstituten     | 335                     | 240              | 100                   | 2                   | 342                                 |
| Verbindlichkeiten aus Lieferungen und Leistungen | 2.308                   | 2.308            | –                     | –                   | 2.308                               |
| Sonstige Finanzinstrumente <sup>3)</sup>         | 143                     | 87               | 26                    | 37                  | 150                                 |
| Originäre Finanzinstrumente                      | 6.552                   | 3.027            | 3.862                 | 39                  | 6.928                               |
| Derivative Finanzinstrumente                     | 159                     | 119              | 41                    | –                   | 160                                 |
| <b>Gesamt</b>                                    | <b>6.711</b>            | <b>3.146</b>     | <b>3.903</b>          | <b>39</b>           | <b>7.088</b>                        |

<sup>1)</sup> Die Cashflows aus der im Jahr 2005 begebenen Hybrid-Anleihe sind bis zum erstmöglichen Kündigungstermin durch Henkel am 25. November 2015 angegeben.

<sup>2)</sup> Aus dem Euro- und US-Dollar-Commercial-Paper-Programm (Gesamtvolumen 2,1 Mrd. Euro).

<sup>3)</sup> In den sonstigen Finanzinstrumenten sind auch Verbindlichkeiten gegenüber Mitgliedern der Belegschaft und Finanzierungswechsel enthalten.

**Marktrisiko**

Das Marktrisiko von Finanzinstrumenten besteht vor allem aus dem Währungs- und dem Zinsrisiko sowie den Rohstoffpreisen. Es wird mittels Sensitivitätsanalysen überwacht.

**Währungsrisiko**

Die Internationalität unserer Geschäftstätigkeit bringt eine Vielzahl von Zahlungsströmen in unterschiedlichen Währungen mit sich. Die Absicherung der hieraus resultierenden Wechselkursrisiken ist wesentlicher Bestandteil unseres zentralen Risikomanagements. Zielsetzung bei der Währungsabsicherung ist das Festschreiben von Preisen auf Basis von Sicherungskursen zum Schutz vor zukünftigen ungünstigen Währungsschwankungen. Weitere Informationen zu den Zielen und Maßnahmen des Währungsmanagements finden Sie im Konzernlagebericht auf

 Seite 81.

Der sogenannte Value-at-Risk des Transaktionsrisikos des Henkel-Konzerns betrug zum Stichtag 31. Dezember 2010 nach Sicherung 17 Mio. Euro (Vorjahr: 12 Mio. Euro). Es handelt sich um einen Value-at-Risk mit einem angenommenen Zeithorizont von einem Monat und einem einseitigen Konfidenzintervall von 95 Prozent. Als Berechnungsgrundlage wird der sogenannte Varianz-Kovarianz-Ansatz verwendet. Volatilitäten und Korrelationen werden auf Basis historischer Daten ermittelt. Grundlage der Value-at-Risk-Berechnung sind die operativen Buchpositionen und Planpositionen in Fremdwährung mit einem Planungshorizont von bis zu neun Monaten.

Der Value-at-Risk zeigt das höchste zu erwartende Verlustrisiko eines Monats aufgrund von Währungsschwankungen. Das Risiko entsteht durch Im- und Exporte der Henkel AG & Co. KGaA und der ausländischen Tochtergesellschaften. Aufgrund der internationalen Ausrichtung des Henkel-Konzerns handelt es sich um ein Portfolio mit mehr als 50 verschiedenen Währungen. Wesentlichen Einfluss auf das Währungsrisiko hat neben dem US-Dollar der russische Rubel, der mexikanische Peso und der ukrainische Hrywnja.

**Zinsrisiko**

Die Liquiditätsbeschaffung des Henkel-Konzerns findet zum größten Teil an den internationalen Geld- und Kapitalmärkten statt. Die hieraus resultierenden Finanzverbindlichkeiten sowie unsere Geldanlagen sind einem Zinsänderungsrisiko ausgesetzt. Ziel unseres zentralen Zinsmanagements ist es, durch die Wahl von Laufzeiten und den Einsatz von derivativen Finanzinstrumenten dieses Zinsänderungsrisiko zu steuern. Zur Absicherung des Zinsänderungsrisikos dürfen ausschließlich derivative

Finanzinstrumente eingesetzt werden, die sich im Risikomanagementsystem abbilden und bewerten lassen.

Die Zinsstrategie von Henkel ist darauf ausgerichtet, das Zinsergebnis des Henkel-Konzerns zu optimieren. Basis für die Entscheidungen im Zinsmanagement sind die zur Liquiditätssicherung emittierten Anleihen und die sonstigen Finanzierungsinstrumente. In Abhängigkeit von der Zinserwartung schließt Henkel zur Optimierung der Zinsbindungsstruktur derivative Finanzinstrumente, im Wesentlichen Zinsswaps, ab. Ein Großteil der Finanzierung der Henkel of America, Inc. in US-Dollar ist durch Zinsswaps in fixe Zinsen gewandelt. Die Verzinsung der durch Henkel begebenen in Euro denominierten Anleihen wurde mithilfe von Zinsswaps von Festzins in variable Zinsen gewandelt. Dadurch besteht die Nettozinsposition aus einer gemischt US-Dollar-fixen und Euro-variablen Verzinsungsstruktur.

In der folgenden Tabelle wird im Rahmen einer Basis-Point-Value (BPV)-Analyse das Risiko von Zinsschwankungen für das Ergebnis des Henkel-Konzerns dargestellt.

**Zinsrisiko**

| in Mio. Euro                                                      | 31.12.2009 | 31.12.2010 |
|-------------------------------------------------------------------|------------|------------|
| Auf Basis einer Zinsänderung in Höhe von jeweils 100 Basispunkten | 64         | 52         |
| Davon:                                                            |            |            |
| Cashflow erfolgswirksam durch die Gewinn- und Verlustrechnung     | 14         | 10         |
| Fair Value erfolgsneutral durch die Gesamtergebnisrechnung        | 50         | 42         |

Grundlage für die Berechnung des Zinsrisikos sind Sensitivitätsanalysen. Bei der Analyse des Cashflow-Risikos werden alle wesentlichen variabel verzinslichen Finanzinstrumente zum Bilanztag betrachtet. Ausgehend von der Nettofinanzverschuldung, die die flüssigen Mittel, Wertpapiere sowie langfristigen und kurzfristigen Finanzschulden umfasst, werden Festzinsinstrumente und vorhandene Zinssicherungen in Abzug gebracht. Auf Basis dieser Berechnung ergeben sich zum jeweiligen Bilanztag – bei einer unterstellten Parallelverschiebung der Zinskurve um 100 Basispunkte – die in der Tabelle aufgeführten Zinsrisiken. Bei der Analyse des Fair-Value-Risikos wird von einer Parallelverschiebung der Zinskurve um 100 Basispunkte ausgegangen und die hypothetische Marktwertänderung der zugrunde liegenden Zinsderivate zum Stichtag ermittelt. Zinsrisiken bestehen vor allem durch zinstragende Finanzinstrumente und Zinsderivate in Euro und in US-Dollar.



### Rohstoffpreisrisiken

Die Volatilität der Rohstoffpreise hat Auswirkungen auf den Konzern. Die Einkaufspreise für Rohstoffe können je nach Marktsituation erheblich schwanken und die Vermögens-, Finanz- und Ertragslage des Konzerns beeinflussen. Die von der Konzernleitung vorgesehene Risikomanagementstrategie hinsichtlich des Rohstoffpreisrisikos und seines Ausgleichs wird im Risikobericht auf  Seite 79 näher beschrieben.

Im Rahmen dieser Risikomanagementstrategie werden auf der Grundlage von Prognosen des erforderlichen Einkaufsbedarfs in geringem Umfang auch Waretermingeschäfte mit Barausgleich zur Absicherung der Rohstoffpreisschwankungen abgeschlossen. Der Einsatz von Waretermingeschäften mit Barausgleich erfolgt bei Henkel nur bei Vorliegen einer direkten Sicherungsbeziehung zwischen Warenderivat und physischem Grundgeschäft. Henkel wendet kein Hedge Accounting an und ist daher aufgrund des Haltens von Warenderivaten temporären Preisrisiken ausgesetzt. Diese bestehen darin, dass die Warenderivate zum Marktwert bewertet werden und der Einkaufsbedarf als schwebendes Geschäft nicht bewertet wird. Dies kann zu Belastungen von Ergebnis und Eigenkapital führen. Die Entwicklung der Marktwerte und die daraus resultierenden Risiken werden laufend überwacht.

# Erläuterungen zur Konzern-Gewinn- und Verlustrechnung

## (32) Umsatzerlöse und Grundsätze der Ertragsrealisierung

Die Umsätze umfassen Verkäufe von Produkten und Dienstleistungen, vermindert um direkte Erlösschmälerungen wie kundenbezogene Rabatte, Rückvergütungen und übrige Entgelte. Umsatzerlöse werden erfasst, sobald die Lieferung erfolgt ist oder die Leistung erbracht wurde. Dies ist bei Liefergeschäften grundsätzlich nach der physischen Auslieferung zum Zeitpunkt des Gefahrenübergangs der Fall. Darüber hinaus müssen der wirtschaftliche Nutzen hinreichend wahrscheinlich und die angefallenen Kosten verlässlich bestimmbar sein. Dienstleistungen werden in der Regel in Verbindung mit dem Verkauf von Produkten erbracht und erfasst, sobald die Leistung erbracht wurde. Keine Umsätze werden erfasst, wenn wesentliche Risiken bezüglich des Erhalts der Gegenleistung oder einer möglichen Warenrückgabe bestehen.

Zinserträge werden unter Berücksichtigung des ausstehenden Kapitalertrags und des geltenden Zinssatzes zeitanteilig vereinahmt. Dividendenerträge aus Kapitalanlagen werden erfasst, wenn der Anspruch auf Zahlung rechtlich entstanden ist.

Die Umsätze und ihre Entwicklung nach Unternehmensbereichen und Regionen sind aus der Übersicht zur Konzernsegmentberichterstattung und zur Berichterstattung nach Regionen auf den  [Seiten 93 und 94](#) zu ersehen.

## (33) Kosten der umgesetzten Leistungen

Die Kosten der umgesetzten Leistungen setzen sich aus den Kosten der verkauften Erzeugnisse und Dienstleistungen sowie den Estandskosten der verkauften Handelswaren zusammen. Neben direkt zurechenbaren Material- und Fertigungseinzelkosten umfassen die Kosten der umgesetzten Leistungen indirekte Gemeinkosten der Produktion einschließlich der fertigungsbezogenen Abschreibungen auf Immaterielle Vermögenswerte und Sachanlagen.

## (34) Marketing- und Vertriebsaufwendungen

Neben den Kosten der Vertriebsorganisation und Distribution sind in den Marketing- und Vertriebsaufwendungen vor allem Aufwendungen aus den Bereichen Werbung, Verkaufsförderung und Marktforschung enthalten. Auch die Kosten der anwendungstechnischen Beratung bei Kunden und Abschreibungen auf Forderungen werden unter diesem Posten ausgewiesen.

## (35) Forschungs- und Entwicklungsaufwendungen

Für Forschungskosten besteht ein Aktivierungsverbot. Entwicklungskosten sind zu aktivieren, wenn kumulativ alle Ansatzkriterien erfüllt sind, die Forschungsphase eindeutig von der Entwicklungsphase getrennt werden kann und entstehende Kosten den einzelnen Projektphasen überschneidungsfrei zuordenbar sind. Aufgrund zahlreicher Interdependenzen innerhalb von Entwicklungsprojekten und der Schwierigkeit der Einschätzung, welche Produkte letztlich Marktreife erreichen, sind derzeit nicht alle Aktivierungskriterien des IAS 38 „Immaterielle Vermögenswerte“ erfüllt.

## (36) Verwaltungsaufwendungen

In den Verwaltungsaufwendungen werden die Personal- und Sachkosten aus den Bereichen Konzernsteuerung, Personal, Einkauf, Rechnungswesen und Informationstechnologie ausgewiesen.

## (37) Sonstige betriebliche Erträge

### Sonstige betriebliche Erträge

| in Mio. Euro                                                     | 2009       | 2010       |
|------------------------------------------------------------------|------------|------------|
| Erträge aus der Auflösung von Rückstellungen <sup>1)</sup>       | 38         | 68         |
| Erträge aus Anlagenabgängen                                      | 10         | 19         |
| Versicherungsentschädigungen                                     | 8          | 12         |
| Zuschreibungen zum Anlagevermögen                                | 3          | 6          |
| Erträge aus der Auflösung von Wertberichtigungen auf Forderungen | 2          | 3          |
| Erträge aus Geschäftsveräußerungen                               | –          | 3          |
| Übrige betriebliche Erträge                                      | 79         | 105        |
| <b>Gesamt</b>                                                    | <b>140</b> | <b>216</b> |

<sup>1)</sup> Darin enthalten: Erträge aus der Auflösung von Rückstellungen für Pensionsverpflichtungen (sogenannte Curtailment Gains) in Höhe von 18 Mio. Euro (Vorjahr: 7 Mio. Euro).

Die übrigen betrieblichen Erträge betreffen eine Vielzahl von Einzelfällen aus dem operativen Geschäft, zum Beispiel Mieterträge, Zuschüsse, Bonusgutschriften und ähnliche Erträge, und enthalten im Berichtsjahr eine Abstandszahlung für Lizenzrechte in Höhe von 15 Mio. Euro im Unternehmensbereich Wasch-/Reinigungsmittel.

**(38) Sonstige betriebliche Aufwendungen****Sonstige betriebliche Aufwendungen**

| in Mio. Euro                                                  | 2009       | 2010       |
|---------------------------------------------------------------|------------|------------|
| Verluste aus Anlagenabgängen                                  | 22         | 14         |
| Geschäftswertabschreibungen                                   | 46         | 6          |
| Aufwendungen aus der Abschreibung<br>Sonstiger Vermögenswerte | –          | 1          |
| Übrige betriebliche Aufwendungen                              | 97         | 88         |
| <b>Gesamt</b>                                                 | <b>165</b> | <b>109</b> |

Die übrigen betrieblichen Aufwendungen betreffen eine Vielzahl von Einzelposten aus dem operativen Geschäft, zum Beispiel Vertragsbeendigungen, Abstandszahlungen und ähnliche Aufwendungen, und enthalten im Berichtsjahr Aufwendungen in Höhe von 3 Mio. Euro aus dem Verkauf des Geschäfts mit Löt-kugeln in Taiwan.

**(39) Finanzergebnis****Finanzergebnis**

| in Mio. Euro                   | 2009        | 2010        |
|--------------------------------|-------------|-------------|
| Sonstiges Beteiligungsergebnis | –4          | 1           |
| Zinsergebnis                   | –191        | –172        |
| <b>Gesamt</b>                  | <b>–195</b> | <b>–171</b> |

**Sonstiges Beteiligungsergebnis**

| in Mio. Euro                        | 2009      | 2010     |
|-------------------------------------|-----------|----------|
| Erträge aus sonstigen Beteiligungen | 1         | –        |
| Übriges Beteiligungsergebnis        | –5        | 1        |
| <b>Gesamt</b>                       | <b>–4</b> | <b>1</b> |

**Zinsergebnis**

| in Mio. Euro                                                                                           | 2009        | 2010        |
|--------------------------------------------------------------------------------------------------------|-------------|-------------|
| Zinsen und ähnliche Erträge von Dritten <sup>1)</sup>                                                  | 47          | 56          |
| Sonstige Finanzerträge                                                                                 | 23          | 8           |
| <b>Summe Zinserträge</b>                                                                               | <b>70</b>   | <b>64</b>   |
| Zinsen an Dritte <sup>1)</sup>                                                                         | –162        | –176        |
| Sonstige Finanzaufwendungen                                                                            | –54         | –47         |
| Zinsaufwand für Pensionsrückstellungen abzüglich<br>erwarteter Erträge aus Fondsvermögen <sup>2)</sup> | –45         | –13         |
| <b>Summe Zinsaufwand</b>                                                                               | <b>–261</b> | <b>–236</b> |
| <b>Gesamt</b>                                                                                          | <b>–191</b> | <b>–172</b> |

<sup>1)</sup> Darin enthalten sind Zinserträge und Zinsaufwendungen in Höhe von jeweils 39 Mio. Euro für bilanziell aufgerechnete Geldanlagen und Kreditaufnahmen.

<sup>2)</sup> Zinsaufwand: 184 Mio. Euro; erwarteter Zinsertrag: 171 Mio. Euro  
(Vorjahr: Zinsaufwand: 192 Mio. Euro; erwarteter Zinsertrag: 147 Mio. Euro).

Im Zinsergebnis sind ein Nettoergebnis aus der Umrechnung und Realisierung von Fremdwährungsforderungen und -verbindlichkeiten in Höhe von 58 Mio. Euro (Vorjahr: 22 Mio. Euro) sowie ein Nettoergebnis aus der Marktbewertung und Realisierung von derivativen Sicherungsgeschäften in Höhe von –92 Mio. Euro (Vorjahr: –57 Mio. Euro) enthalten.

**(40) Steuern vom Einkommen und vom Ertrag****Ergebnis vor Steuern und Steueraufteilung**

| in Mio. Euro                                | 2009       | 2010         |
|---------------------------------------------|------------|--------------|
| <b>Ergebnis vor Steuern</b>                 | <b>885</b> | <b>1.552</b> |
| Laufende Steuern                            | 239        | 424          |
| Latente Steuern                             | 18         | –15          |
| <b>Steuern vom Einkommen und vom Ertrag</b> | <b>257</b> | <b>409</b>   |

**Wesentliche Komponenten des Steueraufwands und -ertrags**

| in Mio. Euro                                                              | 2009 | 2010 |
|---------------------------------------------------------------------------|------|------|
| Laufender Steueraufwand/-ertrag Berichtsjahr                              | 259  | 432  |
| Laufende Steueranpassungen für Vorjahre                                   | –20  | –8   |
| Latenter Steueraufwand/-ertrag aus<br>temporären Differenzen              | 47   | –25  |
| Latenter Steueraufwand/-ertrag aus Verlustvorträgen                       | –7   | 38   |
| Latenter Steueraufwand/-ertrag aus<br>Steueranrechnungsguthaben           | –12  | 3    |
| Latenter Steueraufwand/-ertrag aus<br>geänderten Steuersätzen             | 3    | 6    |
| Erhöhung/Verminderung der Wertberichtigung<br>auf latente Steueransprüche | –13  | –37  |

Latente Steuern werden gemäß IAS 12 auf temporäre Differenzen zwischen handelsrechtlichen und steuerlichen Wertansätzen, auf Verlustvorträge, Steueranrechnungsguthaben sowie auf ergebnis-wirksame Konsolidierungsvorgänge angesetzt.

Die Latenten Steuern werden auf Basis der Steuersätze ermittelt, die in den einzelnen Ländern zum Zeitpunkt der Realisation gelten bzw. erwartet werden. In Deutschland gilt ein einheitlicher Körperschaftsteuersatz von 15 Prozent zuzüglich des Solidaritäts-zuschlags von 5,5 Prozent. Unter Berücksichtigung der Gewerbe-steuer ergibt sich ein Gesamtsteuersatz von 31 Prozent.

Aktive Latente Steuern werden angesetzt, sofern es wahrschein-lich ist, dass zukünftig ausreichend steuerpflichtige Gewinne zur Realisierung des entsprechenden Nutzens erzielt werden können.

Aktive und passive Latente Steuern werden saldiert, wenn sie gegenüber der gleichen Steuerbehörde bestehen und denselben Steuergläubiger betreffen.

Der Bestand an aktiven und passiven Latenten Steuern entfällt zum 31. Dezember 2010 auf folgende Bilanzpositionen, Verlustvorträge und Steueranrechnungsguthaben:

### Zuordnung der Latenten Steuern

in Mio. Euro

|                                                | Aktive Latente Steuern |            | Passive Latente Steuern |            |
|------------------------------------------------|------------------------|------------|-------------------------|------------|
|                                                | 31.12.2009             | 31.12.2010 | 31.12.2009              | 31.12.2010 |
| Immaterielle Vermögenswerte                    | 144                    | 122        | 643                     | 669        |
| Sachanlagen                                    | 24                     | 23         | 84                      | 86         |
| Finanzanlagen                                  | 29                     | 1          | 6                       | 7          |
| Vorräte                                        | 36                     | 41         | 4                       | 5          |
| Andere Forderungen und Sonstige Vermögenswerte | 56                     | 63         | 94                      | 144        |
| Steuerliche Sonderposten                       | –                      | –          | 53                      | 49         |
| Rückstellungen                                 | 446                    | 409        | 6                       | 6          |
| Verbindlichkeiten                              | 104                    | 188        | 14                      | 11         |
| Steueranrechnungsguthaben                      | 14                     | 11         | –                       | –          |
| Verlustvorträge                                | 137                    | 106        | –                       | –          |
|                                                | 990                    | 964        | 904                     | 977        |
| Saldierungen                                   | –537                   | –560       | –537                    | –560       |
| Wertberichtigungen                             | –131                   | –46        | –                       | –          |
| Bilanzposten                                   | 322                    | 358        | 367                     | 417        |

Die aktiven Latenten Steuern für die Bilanzposition Rückstellungen in Höhe von 409 Mio. Euro (Vorjahr: 446 Mio. Euro) resultieren hauptsächlich aus Ansatz- und Bewertungsunterschieden bei Pensionen und ähnlichen Verpflichtungen.

Die auf Immaterielle Vermögenswerte entfallenden passiven Latenten Steuern in Höhe von 669 Mio. Euro (Vorjahr: 643 Mio. Euro) sind im Wesentlichen auf Unternehmenszusammenschlüsse, wie zum Beispiel auf den Erwerb der National Starch-Geschäfte im Jahr 2008, zurückzuführen.

Für steuerliche Verlustvorträge in Höhe von 144 Mio. Euro (Vorjahr: 347 Mio. Euro) wurden keine Latenten Steuern angesetzt,

da deren Nutzung durch positive steuerliche Ergebnisse nicht wahrscheinlich ist.

In der nachfolgenden Übersicht werden die Verfallsdaten steuerlicher Verlustvorträge und von Steueranrechnungsguthaben zusammengefasst. Diese Übersicht enthält Verlustvorträge aus Veräußerungsverlusten in Höhe von 13 Mio. Euro (Vorjahr: 11 Mio. Euro), die unbegrenzt vortragsfähig sind. Veräußerungsverluste unterliegen in manchen Ländern anderen Steuersätzen als operative Gewinne und können gegebenenfalls nur gegen Veräußerungsgewinne verrechnet werden.

### Verfallsdaten steuerlicher Verlustvorträge und von Steueranrechnungsguthaben (Tax Credits)

|                             | Steuerliche Verlustvorträge |            | Tax Credits |            |
|-----------------------------|-----------------------------|------------|-------------|------------|
|                             | 31.12.2009                  | 31.12.2010 | 31.12.2009  | 31.12.2010 |
| Verfallsdatum innerhalb von |                             |            |             |            |
| 1 Jahr                      | 36                          | 10         | –           | –          |
| 2 Jahren                    | 63                          | 23         | –           | –          |
| 3 Jahren                    | 39                          | 19         | –           | –          |
| nach 3 Jahren               | 310                         | 364        | 14          | 11         |
| Unbegrenzt vortragsfähig    | 169                         | 167        | –           | –          |
| Gesamt                      | 617                         | 583        | 14          | 11         |

Von den Verlustvorträgen, die später als innerhalb von drei Jahren verfallen, entfallen 220 Mio. Euro auf Verlustvorträge US-amerikanischer Tochtergesellschaften für „State Taxes“ (Steuersatz circa 5 Prozent).

Eigenkapitalmindernd wurden Latente Steuern in Höhe von 33 Mio. Euro (Vorjahr: eigenkapitalerhöhend 78 Mio. Euro) erfasst. Diese Latenten Steuern resultieren mit 21 Mio. Euro aus versicherungsmathematischen Gewinnen und Verlusten bei Pensionsverpflichtungen und mit 12 Mio. Euro aus Gewinnen und Verlusten aus Cashflow Hedges.

In der folgenden Überleitungsrechnung werden die einzelnen gesellschaftsbezogenen und mit dem jeweiligen länderspezifischen Steuersatz erstellten Reports unter Berücksichtigung von Konsolidierungsmaßnahmen zusammengefasst. Dabei wird der erwartete Steueraufwand, berechnet mit dem Steuersatz der Henkel AG & Co. KGaA (31 Prozent), auf den ausgewiesenen Steueraufwand übergeleitet.

#### Steuerüberleitungsrechnung

| in Mio. Euro                                                                                                                     | 2009          | 2010          |
|----------------------------------------------------------------------------------------------------------------------------------|---------------|---------------|
| Ergebnis vor Ertragsteuern                                                                                                       | 885           | 1.552         |
| Ertragsteuersatz (einschließlich Gewerbesteuer) der Henkel AG & Co. KGaA                                                         | 31 %          | 31 %          |
| <b>Erwarteter Steueraufwand</b>                                                                                                  | <b>274</b>    | <b>481</b>    |
| Steuererminderungen aufgrund von abweichenden ausländischen Steuersätzen                                                         | -70           | -64           |
| Steuerermehrungen/-minderungen für Vorjahre                                                                                      | 7             | 9             |
| Steuerermehrungen/-minderungen aufgrund von Steuersatzänderungen                                                                 | 3             | 6             |
| Steuerermehrungen/-minderungen aufgrund der Bewertung von aktiven Latenten Steuern auf Verlustvorträge und temporäre Differenzen | -9            | -37           |
| Steuererminderungen aufgrund steuerfreier Erträge und sonstiger Posten                                                           | -22           | -46           |
| Steuerermehrungen aufgrund steuerlich nicht abzugsfähiger Aufwendungen                                                           | 74            | 60            |
| Davon                                                                                                                            |               |               |
| Steuerlich nicht abzugsfähige Abschreibungen auf Immaterielle Vermögenswerte                                                     | 14            | 2             |
| Steuereffekte aus Hinzurechnungen und Kürzungen für lokale Steuern                                                               | 13            | 15            |
| Nicht abziehbare und nicht anrechenbare Quellensteuer                                                                            | 14            | 12            |
| Sonstige steuerlich nicht abzugsfähige Aufwendungen                                                                              | 33            | 31            |
| <b>Ausgewiesener Steueraufwand</b>                                                                                               | <b>257</b>    | <b>409</b>    |
| <b>Steuerbelastung</b>                                                                                                           | <b>29,0 %</b> | <b>26,4 %</b> |

Der Rückgang des effektiven Steuersatzes im Jahr 2010 auf 26,4 Prozent (Vorjahr: 29,0 Prozent) ist im Wesentlichen auf die Auflösung von Wertberichtigungen aktiver Latenter Steuern auf Verlustvorträge und temporäre Differenzen zurückzuführen. Aufgrund konzerninterner Optimierungen und positiver Geschäftsentwicklungen wird davon ausgegangen, dass das zukünftige steuerliche Einkommen ausreicht, um die aktiven Latenten Steuern realisieren zu können. Zudem war im Jahr 2009 die effektive Steuerquote durch steuerlich nicht abzugsfähige Abschreibungen auf Immaterielle Vermögenswerte beeinflusst.

Passive Latente Steuern auf einbehaltene Gewinne bei ausländischen Tochtergesellschaften wurden nicht berechnet, da diese Gewinne den Tochtergesellschaften zur Verfügung stehen.

#### (41) Nicht beherrschende Anteile

Hierbei handelt es sich um Gewinn- oder Verlustanteile, die anderen Gesellschaftern zustehen.

Die Gewinne belaufen sich auf 31 Mio. Euro (Vorjahr: 31 Mio. Euro); die Verluste betragen 6 Mio. Euro (Vorjahr: 5 Mio. Euro).

# Zusatzangaben zur Konzernbilanz/ Konzern-Gewinn- und Verlustrechnung

## (42) Personalaufwand

### Personalaufwand<sup>1)</sup>

| in Mio. Euro                                       | 2009         | 2010         |
|----------------------------------------------------|--------------|--------------|
| Löhne und Gehälter                                 | 1.888        | 2.012        |
| Soziale Abgaben und Aufwendungen für Unterstützung | 333          | 331          |
| Aufwendungen für Altersversorgung                  | 161          | 144          |
| <b>Gesamt</b>                                      | <b>2.382</b> | <b>2.487</b> |

<sup>1)</sup> Ohne personalbezogene Restrukturierungsaufwendungen in Höhe von 128 Mio. Euro (Vorjahr: 86 Mio. Euro).

### Aktienbasierte Vergütungsprogramme

Ziel des im Jahr 2000 bei Henkel eingeführten Aktien-Optionsprogramms ist es, weltweit rund 700 Führungskräfte zusätzlich zu motivieren. Den Teilnehmern werden Optionsrechte zum Bezug von Henkel-Vorzugsaktien gewährt, die erstmals nach Ablauf einer Wartefrist von drei Jahren ausgeübt werden können; die Ausübung muss innerhalb eines Zeitraums von fünf Jahren nach Ablauf der Wartefrist erfolgen. Das Programm wurde jährlich revolvierend aufgelegt, wobei Vorstand und Gesellschafterausschuss die jeweilige Ausstattung jährlich neu bestimmten. Im Jahr 2004 sind letztmals Optionen ausgegeben worden, und zwar an die Mitglieder des Vorstands.

Jedes gewährte Optionsrecht beinhaltet ursprünglich das Recht, bis zu acht Henkel-Vorzugsaktien zu erwerben. Nach dem Aktiensplit von 1:3 am 18. Juni 2007 wurde die Anzahl der Vorzugsaktien je Optionsrecht entsprechend verdreifacht. Die genaue Anzahl der Aktien, die pro Optionsrecht zu einem definierten Kaufpreis erworben werden können, hängt davon ab, inwieweit die Erfolgsziele erreicht wurden. Bei den Erfolgszielen handelt es sich zum einen um die absolute Performance, ausgedrückt durch die Kursentwicklung der Henkel-Vorzugsaktie. Zum anderen wird die relative Performance, das heißt der Vergleich der Wertentwicklung der Henkel-Vorzugsaktie mit der des Dow Jones Euro Stoxx (600) Index, berücksichtigt. Für beide Erfolgsziele wird der Durchschnittskurs der Henkel-Vorzugsaktie zum Ausgabetermin mit dem Kurs drei Jahre nach Ausgabe verglichen. Der Durch-

schnittskursberechnung liegen jeweils 20 Börsenhandelstage nach den Hauptversammlungen zugrunde. Bei der Ermittlung der relativen Performance werden neben der Kursentwicklung auch die Dividendenzahlungen und sonstige Rechte und Vorteile berücksichtigt („Total Shareholder Return“). Die Erwerbsrechte einer Option sind in zwei Kategorien aufgeteilt: Unter Berücksichtigung des Aktiensplits können bis zu 15 Erwerbsrechte nach der absoluten Performance und bis zu neun Erwerbsrechte nach der relativen Performance ausgeübt werden.

Die Gewährung von Optionsrechten an die Mitglieder des Vorstands sowie an die Corporate Senior Vice Presidents und an vergleichbar eingestufte Manager in- und ausländischer Verbundener Unternehmen setzt ein Eigeninvestment in Höhe von je drei Vorzugsaktien pro Optionsrecht voraus.

Der Gesamtwert der den Führungskräften gewährten Aktienoptionen zum Ausgabetag wird mithilfe eines Optionspreis-Bewertungsmodells bestimmt. Der errechnete Gesamtwert der Aktienoptionen wird als Personalaufwand über den Zeitraum der Leistungserbringung durch den Begünstigten verteilt. Die ergebniswirksame Erfassung des Optionswerts ist verpflichtend für die Geschäftsjahre seit 2005 und betrifft die Optionsrechte, die in den Jahren 2003 (Tranche 4) und 2004 (Tranche 5) ausgegeben wurden.

Die Übersicht zeigt den Bestand ausgegebener Optionsrechte und die Aktienzahl pro Tranche unter Berücksichtigung des am 18. Juni 2007 erfolgten Aktiensplits von 1:3. Für alle Tranchen ist die Wartefrist bereits abgelaufen. Da die Ausübungsfrist für die dritte Tranche am 16. Mai 2010 ablief, sind nicht ausgeübte Optionsrechte verfallen.

Der Vorstand hat für die vierte Tranche im Jahr 2004 und für die fünfte Tranche im Jahr 2007 entschieden, von seinem Recht Gebrauch zu machen, den an dem Programm teilnehmenden Mitarbeitern den Vorteil bei Ausübung der Optionen in bar auszuzahlen. Die fünfte Tranche wird behandelt, als ob sie in Aktien vergütet würde.



## Optionsrechte/beziehbare Vorzugsaktien

| in Stück                           | 3. Tranche     | 4. Tranche     | 5. Tranche     | Summe          |
|------------------------------------|----------------|----------------|----------------|----------------|
| <b>Bestand am 1.1.2010</b>         | <b>21.746</b>  | <b>43.228</b>  | <b>7.200</b>   | <b>72.174</b>  |
| <i>Entspricht in Vorzugsaktien</i> | <i>195.715</i> | <i>648.420</i> | <i>151.200</i> | <i>995.335</i> |
| Gewährte Optionen                  | –              | 105            | –              | 105            |
| <i>Entspricht in Vorzugsaktien</i> | –              | 1.575          | –              | 1.575          |
| Ausgeübte Optionen <sup>1)</sup>   | 18.881         | 20.507         | –              | 39.388         |
| <i>Entspricht in Vorzugsaktien</i> | <i>169.930</i> | <i>307.600</i> | –              | <i>477.530</i> |
| Verwirkte Optionen                 | –              | 1.770          | –              | 1.770          |
| <i>Entspricht in Vorzugsaktien</i> | –              | 26.550         | –              | 26.550         |
| Verfallene Optionen                | 2.865          | –              | –              | 2.865          |
| <i>Entspricht in Vorzugsaktien</i> | <i>25.785</i>  | –              | –              | <i>25.785</i>  |
| <b>Bestand am 31.12.2010</b>       | <b>–</b>       | <b>21.056</b>  | <b>7.200</b>   | <b>28.256</b>  |
| <i>Entspricht in Vorzugsaktien</i> | –              | <i>315.845</i> | <i>151.200</i> | <i>467.045</i> |
| Davon: Vorstand                    | –              | 2.900          | 7.200          | 10.100         |
| <i>Entspricht in Vorzugsaktien</i> | –              | <i>43.500</i>  | <i>151.200</i> | <i>194.700</i> |
| Davon: sonstige Führungskräfte     | –              | 18.156         | –              | 18.156         |
| <i>Entspricht in Vorzugsaktien</i> | –              | <i>272.345</i> | –              | <i>272.345</i> |

<sup>1)</sup> Durchschnittlicher Aktienkurs bei Ausübung: 40,28 Euro.

Für die vierte Tranche besteht zum 31. Dezember 2010 eine Rückstellung in Höhe von 8,3 Mio. Euro (Vorjahr: 11,6 Mio. Euro). Der Auflösungsbetrag von 3,3 Mio. Euro hat das Periodenergebnis erhöht. Der innere Wert der ausübenden Optionen der vierten Tranche am Ende der Berichtsperiode beträgt 8,5 Mio. Euro (Vorjahr: 11,5 Mio. Euro).

Die Aufwandsermittlung basiert auf dem Black-Scholes-Optionspreismodell, das entsprechend den Besonderheiten des Aktien-Optionsplans modifiziert worden ist. Bei der Aufwandsermittlung wurden folgende Bewertungsparameter zugrunde gelegt:

## Black-Scholes-Optionspreismodell

|                                        |         | Bei Ausgabe<br>3. Tranche | Zum<br>31.12.2010<br>4. Tranche | Bei Ausgabe<br>5. Tranche |
|----------------------------------------|---------|---------------------------|---------------------------------|---------------------------|
| Ausübungskurs (vor Aktiensplit)        | in Euro | 74,67                     | 57,66                           | 71,28                     |
| Ausübungskurs (nach Aktiensplit)       | in Euro | 24,89                     | 19,22                           | 23,76                     |
| Erwartete Volatilität der Vorzugsaktie | in %    | 32,4                      | 22,4                            | 26,6                      |
| Erwartete Volatilität des Index        | in %    | 22,4                      | –                               | 18,6                      |
| Erwartete Kündigungsrate               | in %    | 3                         | –                               | –                         |
| Risikofreier Zins                      | in %    | 4,78                      | 0,52                            | 3,96                      |

Die erwarteten Volatilitäten basieren auf der historischen Volatilität der Henkel-Vorzugsaktie und des Dow Jones Euro Stoxx (600) Index. Der Zeitraum, auf dem die Schätzung der Volatilität der Henkel-Aktie beruht, reicht vom Bewertungsstichtag zurück über die Zeitspanne, die der verbleibenden erwarteten Restlaufzeit der zu bewertenden Tranche entspricht.

Am 16. Mai 2005 endete der Zeitraum für die dritte Tranche, am 11. Mai 2006 der Zeitraum für die vierte Tranche und am 15. Mai 2007 der Zeitraum für die fünfte Tranche. Danach konnten bei der dritten Tranche die Begünstigten innerhalb eines Zeitraums von fünf Jahren pro Optionsrecht neun Henkel-Vorzugsaktien erwerben. Bei der vierten Tranche können die Begünstigten 15 Aktien je Option und bei der fünften Tranche 21 Aktien je Option erwerben. Die Zuteilung der vierten Tranche resultierte ausschließlich

aus der absoluten Performance. Die absoluten Performanceziele der dritten Tranche sowie die relative Performance der vierten Tranche wurden nicht erreicht. Bei der fünften Tranche resultieren 15 Aktien aus der absoluten Performance und sechs Aktien aus der relativen Performance. Die Optionsrechte für die dritte Tranche sind am 16. Mai 2010 fristgemäß verfallen. Die noch ausstehenden Optionsrechte für die Tranchen vier und fünf können grundsätzlich jederzeit ausgeübt werden mit Ausnahme von Blocked Periods, die für einen Zeitraum von jeweils vier Wochen vor den öffentlichen Berichtsterminen der Gesellschaft gelten.

## Global Cash Performance Units (CPU-Plan)

Mit dem Ende des Aktien-Optionsprogramms nehmen die begünstigten Führungskräfte des Henkel-Konzerns (bis auf die Mitglieder des Vorstands) seit dem Jahr 2004 am Global-CPU-Plan

teil, einem Programm zur Beteiligung an der Kurssteigerung der Henkel-Vorzugsaktie. In Abhängigkeit vom Erreichen bestimmter Zielvorgaben werden Cash Performance Units (CPUs) gewährt. Sie räumen den Begünstigten das Recht ein, zu einem festgelegten Zeitpunkt einen Barausgleich zu erhalten. Die CPUs werden unter der Bedingung gewährt, dass der Begünstigte drei Jahre bei der Henkel AG & Co. KGaA oder einer ihrer Tochtergesellschaften in einer zur Teilnahme an dem Programm berechtigenden Hierarchiestufe ungekündigt beschäftigt ist. Diese Mindestbeschäftigungsdauer bezieht sich auf das Kalenderjahr der Gewährung der CPUs und die darauf folgenden zwei Kalenderjahre.

Bemessungskriterium für die Anzahl der gewährten CPUs ist neben der Hierarchiestufe die Erreichung von im Voraus festgelegten Zielgrößen. Für die bisherigen Zyklen sind dies das betriebliche Ergebnis (EBIT) und der Jahresüberschuss nach Fremdbanteilen. Der Wert einer CPU entspricht dem Durchschnittskurs der Henkel-Vorzugsaktie jeweils 20 Börsenhandeltage nach der dem Performance-Zeitraum folgenden Hauptversammlung. Im Fall von außergewöhnlichen Kurssteigerungen besteht eine Obergrenze (Cap). Nach dem Aktiensplit von 1:3 am 18. Juni 2007 wurde die Anzahl der CPUs entsprechend verdreifacht.

Der Gesamtwert der den Führungskräften gewährten CPUs wird an jedem Bilanztag neu ermittelt und als Personalaufwand über den Zeitraum der Leistungserbringung durch den Begünstigten verteilt. Die vierte, im Jahr 2007 ausgegebene Tranche kam im Juli 2010 zur Auszahlung. Weltweit waren zum 31. Dezember 2010 318.220 CPUs aus der fünften, im Jahr 2008 ausgegebenen Tranche (Aufwand: 4,9 Mio. Euro), 349.769 CPUs aus der sechsten, im Jahr 2009 ausgegebenen Tranche (Aufwand: 5,4 Mio. Euro) und 462.814 CPUs aus der siebten, im Berichtsjahr ausgegebenen Tranche (Aufwand: 7,1 Mio. Euro) zu berücksichtigen. Die entsprechende Rückstellung beläuft sich auf 32,5 Mio. Euro (Vorjahr: 27,1 Mio. Euro).

### Cash-Performance-Units-Programm

Mit Wirkung ab dem Geschäftsjahr 2010 einschließlich wurde das Vergütungssystem für die Mitglieder des Vorstands geändert. Ab 2010 erhalten die Vorstandsmitglieder als Long Term Incentive (LTI) eine variable, auf den langfristigen Unternehmenserfolg bezogene Barvergütung, die von der zukünftigen Steigerung des EPS in einem Zeitraum von drei Jahren (Performance-Zeitraum) abhängt (Details finden Sie im Vergütungsbericht auf den

**GB** Seiten 31 bis 39).

In den Geschäftsjahren 2005 bis 2009 erhielten die Mitglieder des Vorstands einen LTI in Form einer aktienkursbasierten Vergütung. Hiernach erhielten die Mitglieder des Vorstands für ein Geschäftsjahr (= Tranche) in Abhängigkeit von der in einem Zeitraum von drei Jahren (Performance-Zeitraum) erzielten absoluten Kurssteigerung und der Steigerung des Ergebnisses je Henkel-Vorzugsaktie (EPS) den Geldwert von insgesamt bis zu 10.800 Henkel-Vorzugsaktien – sogenannte Cash Performance Units. Nach Ablauf des Performance-Zeitraums werden die konkrete

Anzahl und der Wert der Cash Performance Units ermittelt und der daraus resultierende Tranchenertrag in bar ausgezahlt. Als Eigeninvestment muss jedes an einer Tranche teilnehmende Mitglied des Vorstands Henkel-Vorzugsaktien im Wert von 25 Prozent des (Brutto-)Tranchenertrags erwerben und diese in ein Sperrdepot mit fünfjähriger Verfügungsbeschränkung einlegen.

Bei einer absoluten Kurssteigerung im Performance-Zeitraum von mindestens 15 Prozent beziehungsweise 21 Prozent oder 30 Prozent werden jedem Teilnehmer 1.800 beziehungsweise 3.600 oder 5.400 Cash Performance Units zugeteilt. Zur Berechnung der Kurssteigerung wird der Durchschnittskurs im Januar des Jahres der Ausgabe einer Tranche mit dem Durchschnittskurs im Januar des dritten auf das Ausgabejahr folgenden Geschäftsjahres (Referenzkurs) verglichen. Wird im Performance-Zeitraum das Ergebnis je Vorzugsaktie um mindestens 15 Prozent beziehungsweise 21 Prozent oder 30 Prozent gesteigert, werden jedem Teilnehmer weitere 1.800 beziehungsweise 3.600 oder 5.400 Cash Performance Units zugeteilt. Zur Berechnung der Steigerung des Ergebnisses je Vorzugsaktie wird das Ergebnis je Vorzugsaktie des vor dem Ausgabejahr liegenden Geschäftsjahres mit dem des zweiten auf das Ausgabejahr folgenden Geschäftsjahres verglichen. Für die Berechnung der Steigerung sind jeweils die in den uneingeschränkt testierten und gebilligten Konzernabschlüssen der betreffenden Geschäftsjahre ausgewiesenen – um Sondereinflüsse bereinigten – Ergebnisse je Vorzugsaktie maßgebend.

Der Geldwert einer Cash Performance Unit entspricht grundsätzlich dem Referenzkurs der Henkel-Vorzugsaktie. Im Fall von außergewöhnlichen Kurssteigerungen besteht eine Obergrenze.

Die Basiskurse für die Tranchen 2008 und 2009 betrugen 33,72 Euro und 21,78 Euro. Bei der Bemessung der Rückstellung im Jahr der Ausgabe einer solchen Tranche wurde von einer mittleren Zielerreichung ausgegangen; in den Folgejahren wurden die anteiligen Rückstellungen der in den Vorjahren begebenen laufenden Tranchen auf Basis aktueller Zahlen angepasst. Dies führte im Berichtsjahr zu einer Zuführung des Aufwands von 3,0 Mio. Euro. Die Rückstellung für sämtliche noch laufenden Tranchen aus diesem mit Wirkung für 2009 beendeten Programm beträgt zum 31. Dezember 2010 3,4 Mio. Euro (Vorjahr: 0,4 Mio. Euro).

### (43) Personalstruktur

Jahresdurchschnittszahlen ohne Auszubildende, Werkstudenten und Praktikanten, ermittelt auf Basis der Quartale:

#### Personalstruktur nach Anzahl der Mitarbeiter

|                           | 2009          | 2010          |
|---------------------------|---------------|---------------|
| Produktion und Technik    | 24.665        | 23.672        |
| Marketing/Vertrieb        | 16.123        | 15.106        |
| Forschung und Entwicklung | 2.743         | 2.665         |
| Verwaltung                | 7.830         | 6.698         |
| <b>Gesamt</b>             | <b>51.361</b> | <b>48.141</b> |

**(44) Angaben zur Konzernsegmentberichterstattung**

Im Rahmen der Konzernsegmentberichterstattung werden die Aktivitäten des Henkel-Konzerns nach Unternehmensbereichen und darüber hinaus nach Regionen abgegrenzt. Diese Aufgliederung entspricht der Steuerung des operativen Geschäfts.

Die Aktivitäten des Henkel-Konzerns sind gekennzeichnet durch die operativen Segmente Wasch-/Reinigungsmittel, Kosmetik/Körperpflege und Adhesive Technologies (Klebstoffe für Handwerker und Konsumenten sowie Industrieklebstoffe).

**Wasch-/Reinigungsmittel**

Der Unternehmensbereich produziert und verkauft Waschmittel, Produkte der Wäschepflege, Spül- und Reinigungsmittel sowie Insektizide.

**Kosmetik/Körperpflege**

Das Sortiment des Unternehmensbereichs umfasst Produkte der Haarkosmetik, Körperpflege, Haut- und Mundpflege sowie des Friseurgeschäfts.

**Adhesive Technologies (Klebstoffe für Handwerker und Konsumenten sowie Industrieklebstoffe)**

Der Unternehmensbereich produziert und verkauft Sekundenkleber, Produkte zum Kleben und Korrigieren im Büro, Klebebänder, Kraftkleber, Klebstoffe für den Renovier-, Bau- und Do-it-yourself-Bedarf, Kleb- und Dichtstoffe für industrielle Anwendungen sowie Produkte für Oberflächentechnik.

Bei der Ermittlung der Segmentergebnisse sowie der Vermögenswerte und Schulden werden grundsätzlich dieselben Bilanzierungs- und Bewertungsgrundsätze wie für den Konzernabschluss angewandt.

Zur Überleitung auf den Henkel-Konzern werden unter Corporate die Aufwendungen für die Konzernsteuerung sowie die Aufwendungen und Erträge, die nicht den einzelnen Unternehmensbereichen zugeordnet werden, zusammengefasst.

Im Berichtsjahr werden die Aufwendungen aus der „Zusammenführung Adhesive Technologies-Geschäfte“ unter Corporate gezeigt und in der Konzernsegmentberichterstattung nachrichtlich auf die Unternehmensbereiche aufgeteilt, da es sich hierbei um zentral gesteuerte und überwachte Programme handelt.

**Überleitung vom operativen Vermögen/ eingesetzten Kapital zu den Bilanzwerten**

in Mio. Euro

|                                                                                                      | Operatives Vermögen                   |               | Bilanzwerte   |                                                                                        |
|------------------------------------------------------------------------------------------------------|---------------------------------------|---------------|---------------|----------------------------------------------------------------------------------------|
|                                                                                                      | Jahresdurchschnitt <sup>1)</sup> 2010 | 31.12.2010    | 31.12.2010    |                                                                                        |
| Geschäfts- oder Firmenwerte zu Buchwerten                                                            | 6.512                                 | 6.521         | 6.521         | Geschäfts- oder Firmenwerte zu Buchwerten                                              |
| Übrige Immaterielle Vermögenswerte und Sachanlagen (gesamt)                                          | 4.500                                 | 4.335         | 4.335         | Übrige Immaterielle Vermögenswerte und Sachanlagen (gesamt)                            |
|                                                                                                      |                                       |               | –             | Finanzanlagen                                                                          |
|                                                                                                      |                                       |               | 358           | Latente Steuern                                                                        |
| Vorräte                                                                                              | 1.451                                 | 1.460         | 1.460         | Vorräte                                                                                |
| Forderungen aus Lieferungen und Leistungen an Fremde                                                 | 2.062                                 | 1.893         | 1.893         | Forderungen aus Lieferungen und Leistungen an Fremde                                   |
| Konzerninterne Forderungen aus Lieferungen und Leistungen                                            | 1.079                                 | 919           | –             |                                                                                        |
| Andere Vermögenswerte und Steuererstattungsansprüche <sup>2)</sup>                                   | 425                                   | 388           | 1.412         | Andere Vermögenswerte und Steuererstattungsansprüche                                   |
|                                                                                                      |                                       |               | 1.515         | Flüssige Mittel/Wertpapiere                                                            |
|                                                                                                      |                                       |               | 31            | Zur Veräußerung gehaltene Vermögenswerte                                               |
| <b>Operatives Bruttovermögen</b>                                                                     | <b>16.029</b>                         | <b>15.516</b> | <b>17.525</b> | <b>Aktiva gesamt</b>                                                                   |
| – Operative Verbindlichkeiten                                                                        | 4.796                                 | 4.648         |               |                                                                                        |
| Davon:                                                                                               |                                       |               |               |                                                                                        |
| Verbindlichkeiten aus Lieferungen und Leistungen an Fremde                                           | 2.262                                 | 2.308         | 2.308         | Verbindlichkeiten aus Lieferungen und Leistungen an Fremde                             |
| Konzerninterne Verbindlichkeiten aus Lieferungen und Leistungen                                      | 1.079                                 | 919           |               |                                                                                        |
| Andere Rückstellungen und sonstige Verbindlichkeiten <sup>3)</sup> (finanziell und nicht finanziell) | 1.455                                 | 1.421         | 1.694         | Andere Rückstellungen und sonstige Verbindlichkeiten (finanziell und nicht finanziell) |
| <b>Operatives Vermögen</b>                                                                           | <b>11.233</b>                         | <b>10.868</b> |               |                                                                                        |
| – Geschäfts- oder Firmenwerte zu Buchwerten                                                          | 6.512                                 | –             | –             |                                                                                        |
| + Geschäfts- oder Firmenwerte zu Anschaffungswerten <sup>3)</sup>                                    | 6.874                                 | –             | –             |                                                                                        |
| <b>Eingesetztes Kapital</b>                                                                          | <b>11.595</b>                         | <b>–</b>      | <b>–</b>      |                                                                                        |

<sup>1)</sup> Jahresdurchschnitt aus zwölf Monatswerten gebildet.

<sup>2)</sup> Für die Ermittlung des operativen Vermögens werden jeweils nur die der betrieblichen Sphäre zuzurechnenden Posten berücksichtigt.

<sup>3)</sup> Vor Verrechnung mit kumulierten Abschreibungen gemäß IFRS 3.79(b).

**(45) Angaben zum Ergebnis je Aktie  
(Earnings per Share)**

Das Aktien-Optionsprogramm (Textziffer 42, **GB** Seiten 126 bis 128) verwässert das Ergebnis unserer Stammaktie und unserer Vorzugsaktie um je 1 Eurocent.

**Ergebnis je Aktie**

in Mio. Euro (gerundet)

|                                                                          | 2009        | 2010                     |
|--------------------------------------------------------------------------|-------------|--------------------------|
| <b>Ergebnis nach nicht beherrschenden Anteilen</b>                       | <b>602</b>  | <b>1.118</b>             |
| Dividenden Stammaktien                                                   | 132         | 182                      |
| Dividenden Vorzugsaktien                                                 | 92          | 125                      |
| Gesamte Dividende                                                        | 224         | 307                      |
| Einbehaltener Gewinn Stammaktien                                         | 227         | 486                      |
| Einbehaltener Gewinn Vorzugsaktien                                       | 151         | 325                      |
| <b>Einbehaltener Gewinn</b>                                              | <b>378</b>  | <b>811</b>               |
| Anzahl der Stammaktien                                                   | 259.795.875 | 259.795.875              |
| Dividende je Stammaktie in Euro                                          | 0,51        | 0,70 <sup>4)</sup>       |
| <i>Davon Vorabdividende je Stammaktie in Euro<sup>1)</sup></i>           | <i>0,02</i> | <i>0,02</i>              |
| Einbehaltener Gewinn je Stammaktie in Euro                               | 0,87        | 1,87                     |
| <b>EPS je Stammaktie in Euro</b>                                         | <b>1,38</b> | <b>2,57</b>              |
| Anzahl der im Umlauf befindlichen Vorzugsaktien <sup>2)</sup>            | 173.363.241 | 173.924.174              |
| Dividende je Vorzugsaktie in Euro                                        | 0,53        | 0,72 <sup>4)</sup>       |
| <i>Davon Vorzugsdividende je Vorzugsaktie in Euro<sup>1)</sup></i>       | <i>0,04</i> | <i>0,04</i>              |
| Einbehaltener Gewinn je Vorzugsaktie in Euro                             | 0,87        | 1,87                     |
| <b>EPS je Vorzugsaktie in Euro</b>                                       | <b>1,40</b> | <b>2,59</b>              |
| Anzahl Stammaktien                                                       | 259.795.875 | 259.795.875              |
| Dividende je Stammaktie in Euro                                          | 0,51        | 0,70 <sup>4)</sup>       |
| <i>Davon Vorabdividende je Stammaktie in Euro<sup>1)</sup></i>           | <i>0,02</i> | <i>0,02</i>              |
| Einbehaltener Gewinn je Stammaktie in Euro (nach Verwässerungseffekt)    | 0,87        | 1,86                     |
| <b>EPS verwässert je Stammaktie in Euro</b>                              | <b>1,38</b> | <b>2,56<sup>5)</sup></b> |
| Anzahl der potenziell im Umlauf befindlichen Vorzugsaktien <sup>3)</sup> | 173.392.463 | 174.300.359              |
| Dividende je Vorzugsaktie in Euro                                        | 0,53        | 0,72 <sup>4)</sup>       |
| <i>Davon Vorzugsdividende je Vorzugsaktie in Euro<sup>1)</sup></i>       | <i>0,04</i> | <i>0,04</i>              |
| Einbehaltener Gewinn je Vorzugsaktie in Euro (nach Verwässerungseffekt)  | 0,87        | 1,86                     |
| <b>EPS verwässert je Vorzugsaktie in Euro</b>                            | <b>1,40</b> | <b>2,58<sup>5)</sup></b> |

<sup>1)</sup> Siehe Konzernlagebericht, Corporate Governance, Einteilung Grundkapital, Aktionärsrechte, Seiten 26 bis 39.

<sup>2)</sup> Gewichteter Jahresdurchschnitt der Vorzugsaktien (Rückkaufprogramm Henkel).

<sup>3)</sup> Gewichteter Jahresdurchschnitt der Vorzugsaktien (korrigiert um potenzielle Zahl der Aktien nach Aktien-Optionsprogramm).

<sup>4)</sup> Vorschlag.

<sup>5)</sup> Basiert auf einem auf die Aktionäre der Henkel AG & Co. KGaA entfallenden Ergebnis in Höhe von 1.116 Mio. Euro (IAS 33.59).

**(46) Angaben zur Kapitalflussrechnung**

Der Cashflow aus Investitionstätigkeit/Akquisitionstätigkeit enthält in den Investitionen in Finanzanlagen/Akquisitionen die verwendeten Mittel für durchgeführte Akquisitionen (46 Mio. Euro, Vorjahr: -19 Mio. Euro). Die Investitionen in Akquisitionen entfallen mit 42 Mio. Euro auf den Unternehmensbereich Kosmetik/Körperpflege und mit 4 Mio. Euro auf den Unternehmensbereich Adhesive Technologies. Im Vorjahr wurden Mittelzuflüsse aus Investitionen in Höhe von 19 Mio. Euro

ausgewiesen. Darin enthalten waren 103 Mio. Euro Einzahlungen durch das Settlement von Finanzforderungen aus dem Erwerb der National Starch-Geschäfte.

Im Finanzmittelfonds werden neben den Flüssigen Mitteln insoweit Wertpapiere ausgewiesen, als diese kurzfristig verfügbar sind und nur einem unwesentlichen Kursänderungsrisiko unterliegen. Wie im Vorjahr entspricht der Finanzmittelfonds dem Bilanzposten Flüssige Mittel/Wertpapiere.

#### (47) Stimmrechtsmitteilungen, Beziehungen zu nahestehenden Unternehmen und Personen („Related Parties“)

Angaben gemäß Paragraph 160 Absatz 1 Nummer 8 Aktiengesetz (AktG):

Der Gesellschaft ist mitgeteilt worden, dass der Stimmrechtsanteil der Mitglieder des Aktienbindungsvertrags Henkel zum 21. Oktober 2010 insgesamt rund 53,21 Prozent der Stimmrechte (138.240.804 Stimmen) an der Henkel AG & Co. KGaA beträgt und gehalten wird von

- 111 Mitgliedern der Familien der Nachfahren des Unternehmensgründers Fritz Henkel,
- vier von Mitgliedern dieser Familien gegründeten Stiftungen,
- einer von Mitgliedern dieser Familien gegründeten Gesellschaft bürgerlichen Rechts,
- acht von Mitgliedern dieser Familien gegründeten Gesellschaften mit beschränkter Haftung, sieben GmbH & Co. KGs und einer KG

aufgrund eines Aktienbindungsvertrags gemäß Paragraph 22 Absatz 2 Wertpapierhandelsgesetz (WpHG), wobei die von den acht Gesellschaften mit beschränkter Haftung, sieben GmbH & Co. KGs und der einen KG gehaltenen Anteile in Höhe von insgesamt rund 14,02 Prozent (36.419.097 Stimmrechte) den Mitgliedern der Familie, die diese Gesellschaften kontrollieren, auch nach Paragraph 22 Absatz 1 Nummer 1 WpHG zugerechnet werden.

Dr. h.c. Christoph Henkel, London, überschreitet mit Stimmrechten aus 14.172.457 Stammaktien der Henkel AG & Co. KGaA (entsprechend gerundet 5,46 Prozent) die Schwelle von 5 Prozent der Stimmrechtsanteile an der Henkel AG & Co. KGaA. Auch bei Hinzurechnung der mit Nießbrauchverträgen ausdrücklich eingeräumten Stimmrechte besteht für kein weiteres Mitglied des Aktienbindungsvertrags die Verpflichtung zur Mitteilung des Erreichens beziehungsweise Überschreitens der Schwelle von 3 Prozent oder mehr der Stimmrechtsanteile an der Henkel AG & Co. KGaA.

Bevollmächtigte der Mitglieder des Aktienbindungsvertrags Henkel ist Dr. Simone Bagel-Trah, Düsseldorf.

#### (48) Bezüge der Gremien

Die Gesamtbezüge der Mitglieder des Aufsichtsrats und des Gesellschafterausschusses der Henkel AG & Co. KGaA beliefen sich auf 1.516 T Euro zuzüglich Umsatzsteuer (Vorjahr: 1.425 T Euro) beziehungsweise auf 2.209 T Euro (Vorjahr: 2.345 T Euro). Die Gesamtbezüge (Paragraph 285 Nummer 9 HGB) des Vorstands beziehungsweise der Mitglieder des Vorstands der Henkel Management AG betrugen 18.297 T Euro (Vorjahr: 11.084 T Euro). Bezüglich der Bezüge der Gremien wird auf den Vergütungsbericht verwiesen auf den  Seiten 31 bis 39.

#### (49) Entsprechenserklärung zum Corporate Governance Kodex

Im Februar 2010 haben der Vorstand der Henkel Management AG sowie der Aufsichtsrat und Gesellschafterausschuss der Henkel AG & Co. KGaA gemäß Paragraph 161 Aktiengesetz (AktG) eine gemeinsame Entsprechenserklärung zu den Empfehlungen des Deutschen Corporate Governance Kodex verabschiedet. Sie wurde auf der Internetseite der Gesellschaft den Aktionären dauerhaft zugänglich gemacht:  [www.henkel.de/ir](http://www.henkel.de/ir)

#### (50) Konzerngesellschaften und Beteiligungen

Die Angaben zum Anteilsbesitz der Henkel AG & Co. KGaA und des Henkel-Konzerns erfolgen in einer Anlage zum Anhang, die in die gedruckte Version des Geschäftsberichts nicht mit aufgenommen ist. Die Anlage mit den Angaben zum Anteilsbesitz ist bei den zum elektronischen Bundesanzeiger eingereichten Rechnungslegungsunterlagen enthalten und kann über diesen oder bei der Hauptversammlung eingesehen werden. Zusätzlich finden Sie die Angaben zum Anteilsbesitz in der Online-Version des Geschäftsberichts auf der Internetseite:  [www.henkel.de/ir](http://www.henkel.de/ir)

**(51) Honorare und Dienstleistungen des Abschlussprüfers**

Die für Dienstleistungen des Abschlussprüfers KPMG für die Geschäftsjahre 2009 und 2010 im Konzern berechneten Gesamthonorare betrugen:

**Art der Honorare**

| in Mio. Euro                                 | 2009        | 2010        |
|----------------------------------------------|-------------|-------------|
| Abschlussprüfungen (einschließlich Auslagen) | 9,8         | 9,6         |
| Andere Bestätigungsleistungen                | 0,4         | 0,1         |
| Steuerberatungsleistungen                    | 2,1         | 0,9         |
| Sonstige Leistungen                          | 0,3         | 0,6         |
| <b>Gesamt</b>                                | <b>12,6</b> | <b>11,2</b> |

Der Posten **Honorare für Abschlussprüfungen** enthält die gesamten an die KPMG-Organisation gezahlten und noch zu zahlenden Honorare samt Auslagen für die Abschlussprüfung der Konzernrechnungslegung und deren Testierung, die Prüfung der gesetzlich vorgeschriebenen Abschlüsse der Henkel AG & Co. KGaA und ihrer Verbundenen Unternehmen sowie die Durchführung der prüferischen Durchsicht des Halbjahresfinanzberichts.

Der Posten **Steuerberatungsleistungen** umfasst Honorare für die Unterstützung bei Steuerfragen im Nachgang des Erwerbs der National Starch-Geschäfte sowie die Durchführung sogenannter Tax-Compliance-Arbeiten bei ausländischen Verbundenen Unternehmen.

Die **Sonstigen Leistungen** umfassen sogenannte Agreed-Upon-Procedures und die Unterstützung von „Process Improvement“-Aktivitäten.



# Vorschlag für die Feststellung des Jahresabschlusses und für die Verwendung des Bilanzgewinns der Henkel AG & Co. KGaA

Es wird vorgeschlagen, den Jahresabschluss in der vorgelegten Fassung festzustellen und den Bilanzgewinn in Höhe von 861.527.712,35 Euro für das Geschäftsjahr 2010 wie folgt zu verwenden:

- |                                                                                 |                            |
|---------------------------------------------------------------------------------|----------------------------|
| a) Zahlung einer Dividende von 0,70 Euro je Stammaktie<br>(Stück 259.795.875)   | = 181.857.112,50 Euro      |
| b) Zahlung einer Dividende von 0,72 Euro je Vorzugsaktie<br>(Stück 178.162.875) | = 128.277.270,00 Euro      |
| c) Einstellung in die anderen Gewinnrücklagen                                   | = 250.000.000,00 Euro      |
| d) Vortrag des verbleibenden Betrags von<br>auf neue Rechnung (Gewinnvortrag)   | 301.393.329,85 Euro        |
|                                                                                 | <u>861.527.712,35 Euro</u> |

Eigene Aktien sind gemäß Paragraph 71 Aktiengesetz nicht dividendenberechtigt. Der aus dem Bilanzgewinn auf die von der Gesellschaft zum Zeitpunkt der Hauptversammlung gehaltenen eigenen Aktien entfallende Betrag wird auf neue Rechnung vorgetragen. Da sich bis zur Hauptversammlung die Zahl der eigenen Aktien ändern kann, wird der Hauptversammlung ein entsprechend angepasster Gewinnvorschlag unterbreitet, der unverändert eine Ausschüttung von 0,70 Euro je dividendenberechtigter Stammaktie beziehungsweise von 0,72 Euro je dividendenberechtigter Vorzugsaktie bei entsprechender Anpassung des auf neue Rechnung vorzutragenden Betrags vorsieht.

Düsseldorf, 28. Januar 2011

Henkel Management AG  
(persönlich haftende Gesellschafterin  
der Henkel AG & Co. KGaA)

Der Vorstand

# Jahresabschluss Henkel AG & Co. KGaA Kurzfassung<sup>\*)</sup>

## Gewinn- und Verlustrechnung

| in Mio. Euro                                        | 2009   | 2010   |
|-----------------------------------------------------|--------|--------|
| <b>Umsatzerlöse</b>                                 | 2.971  | 3.272  |
| Kosten der umgesetzten Leistungen                   | -2.035 | -2.262 |
| <b>Bruttoergebnis vom Umsatz</b>                    | 936    | 1.010  |
| Vertriebs-, Forschungs- und Verwaltungsaufwendungen | -1.267 | -1.283 |
| Übrige Erträge (Saldo)                              | 403    | 458    |
| <b>Betriebliches Ergebnis</b>                       | 72     | 185    |
| <b>Finanzergebnis</b>                               | 253    | 874    |
| <b>Ergebnis der gewöhnlichen Geschäftstätigkeit</b> | 325    | 1.059  |
| Veränderung der Sonderposten mit Rücklageanteil     | 18     | 14     |
| Außerordentliches Ergebnis                          | -      | 37     |
| <b>Ergebnis vor Steuern</b>                         | 343    | 1.110  |
| Steuern vom Einkommen und vom Ertrag                | -60    | -141   |
| <b>Jahresüberschuss</b>                             | 283    | 969    |
| Gewinnvortrag                                       | 325    | 377    |
| Einstellung in andere Gewinnrücklagen               | -      | -484   |
| Einstellung in die Rücklage für eigene Aktien       | -6     | -      |
| <b>Bilanzgewinn<sup>1)</sup></b>                    | 602    | 862    |

<sup>1)</sup> Gewinn- und Verlustrechnung gerundet; Bilanzgewinn 2009: 601.597.840,27 Euro; Bilanzgewinn 2010: 861.527.712,35 Euro.

## Bilanz

| in Mio. Euro                                                             | 2009   | 2010   |
|--------------------------------------------------------------------------|--------|--------|
| Immaterielle Vermögensgegenstände und Sachanlagen                        | 729    | 671    |
| Finanzanlagen                                                            | 8.376  | 7.017  |
| <b>Anlagevermögen</b>                                                    | 9.105  | 7.688  |
| Vorräte                                                                  | 186    | 224    |
| Forderungen und Sonstige Vermögensgegenstände/Rechnungsabgrenzungsposten | 2.599  | 1.994  |
| Wertpapiere                                                              | 109    | 250    |
| Flüssige Mittel                                                          | 727    | 1.117  |
| <b>Umlaufvermögen</b>                                                    | 3.621  | 3.585  |
| <b>Aktiver Unterschiedsbetrag aus der Vermögensverrechnung</b>           | -      | 115    |
| <b>Aktiva insgesamt</b>                                                  | 12.726 | 11.388 |
| <b>Eigenkapital</b>                                                      | 4.809  | 5.468  |
| Sonderposten mit Rücklageanteil                                          | 165    | 151    |
| Rückstellungen                                                           | 2.524  | 654    |
| Verbindlichkeiten/Rechnungsabgrenzungsposten                             | 5.228  | 5.115  |
| <b>Passiva insgesamt</b>                                                 | 12.726 | 11.388 |

<sup>\*)</sup> Der vollständige, mit dem uneingeschränkten Bestätigungsvermerk des Abschlussprüfers versehene Jahresabschluss der Henkel AG & Co. KGaA ist beim Unternehmensregister zugänglich. Er kann als Sonderdruck bei der Henkel AG & Co. KGaA angefordert werden.

# Bestätigungsvermerk des unabhängigen Abschlussprüfers

Den uneingeschränkten Bestätigungsvermerk haben wir wie folgt erteilt:  
„Bestätigungsvermerk des unabhängigen Abschlussprüfers  
An die Henkel AG & Co. KGaA, Düsseldorf

## Vermerk zum Konzernabschluss

Wir haben den beigefügten Konzernabschluss der Henkel AG & Co. KGaA, Düsseldorf, und ihrer Tochtergesellschaften – bestehend aus der Konzernbilanz zum 31. Dezember 2010, Konzern-Gewinn- und Verlustrechnung, Gesamtergebnisrechnung, Eigenkapitalveränderungsrechnung und Konzernkapitalflussrechnung für das an diesem Stichtag endende Geschäftsjahr sowie aus dem Konzernanhang – geprüft.

## Verantwortung der persönlich haftenden Gesellschafterin für den Konzernabschluss

Die persönlich haftende Gesellschafterin der Henkel AG & Co. KGaA ist verantwortlich für die Aufstellung dieses Konzernabschlusses. Diese Verantwortung umfasst, dass dieser Konzernabschluss in Übereinstimmung mit den IFRS, wie sie in der EU anzuwenden sind, und den ergänzend nach § 315a Abs. 1 HGB anzuwendenden deutschen gesetzlichen Vorschriften aufgestellt wird und unter Beachtung dieser Vorschriften ein den tatsächlichen Verhältnissen entsprechendes Bild der Vermögens-, Finanz- und Ertragslage des Konzerns vermittelt. Die persönlich haftende Gesellschafterin ist auch verantwortlich für die internen Kontrollen, die sie als notwendig erachtet, um die Aufstellung eines Konzernabschlusses zu ermöglichen, der frei von wesentlichen – beabsichtigten oder unbeabsichtigten – falschen Darstellungen ist.

## Verantwortung des Abschlussprüfers

Unsere Aufgabe ist es, auf der Grundlage unserer Prüfung ein Urteil zu diesem Konzernabschluss abzugeben. Wir haben unsere Abschlussprüfung in Übereinstimmung mit § 317 HGB unter Beachtung der vom Institut der Wirtschaftsprüfer (IDW) festgestellten deutschen Grundsätze ordnungsmäßiger Abschlussprüfung sowie unter ergänzender Beachtung der International Standards on Auditing (ISA) vorgenommen. Danach haben wir die Berufspflichten einzuhalten und die Abschlussprüfung so zu planen und durchzuführen, dass hinreichende Sicherheit darüber erlangt wird, ob der Konzernabschluss frei von wesentlichen falschen Darstellungen ist.

Eine Abschlussprüfung umfasst die Durchführung von Prüfungshandlungen, um Prüfungsnachweise für die im Konzernabschluss enthaltenen Wertansätze und sonstigen Angaben zu erlangen. Die Auswahl der Prüfungshandlungen liegt im pflichtgemäßen Ermessen des Abschlussprüfers. Dies schließt die Beurteilung der Risiken wesentlicher – beabsichtigter oder unbeabsichtigter – falscher Darstellungen im Konzernabschluss ein. Bei der Beurteilung dieser Risiken berücksichtigt der Abschlussprüfer das interne Kontrollsystem, das relevant ist für die Aufstellung eines Konzernabschlusses, der in Übereinstimmung mit den IFRS, wie sie in der EU anzuwenden sind, und den ergänzend nach § 315 a Abs. 1 HGB anzuwendenden deutschen gesetzlichen Vorschriften, ein den tatsächlichen Verhältnissen entsprechendes Bild vermittelt. Ziel hierbei ist es, Prüfungshandlungen zu planen und durchzuführen, die unter den gegebenen Umständen angemessen sind, jedoch nicht, ein Prüfungsurteil zur Wirksamkeit des internen Kontrollsystems des Konzerns abzugeben. Eine Abschlussprüfung umfasst auch die Beurteilung der Angemessenheit der angewandten Rechnungslegungs-

methoden und der Vertretbarkeit der von der persönlich haftenden Gesellschafterin ermittelten geschätzten Werte in der Rechnungslegung sowie die Beurteilung der Gesamtdarstellung des Konzernabschlusses.

Wir sind der Auffassung, dass die von uns erlangten Prüfungsnachweise ausreichend und geeignet sind, um als Grundlage für unser Prüfungsurteil zu dienen.

## Prüfungsurteil

Gemäß § 322 Abs. 3 Satz 1 HGB erklären wir, dass unsere Prüfung des Konzernabschlusses zu keinen Einwendungen geführt hat.

Nach unserer Beurteilung auf Grund der bei der Prüfung gewonnenen Erkenntnisse entspricht der Konzernabschluss in allen wesentlichen Belangen den IFRS, wie sie in der EU anzuwenden sind, und den ergänzend nach § 315a Abs. 1 HGB anzuwendenden deutschen gesetzlichen Vorschriften und vermittelt unter Beachtung dieser Vorschriften ein den tatsächlichen Verhältnissen entsprechendes Bild der Vermögens- und Finanzlage des Henkel-Konzerns zum 31. Dezember 2010 sowie der Ertragslage für das an diesem Stichtag endende Geschäftsjahr.

## Vermerk zum Konzernlagebericht

Wir haben den beigefügten Konzernlagebericht der Henkel AG & Co. KGaA geprüft. Die persönlich haftende Gesellschafterin der Henkel AG & Co. KGaA ist verantwortlich für die Aufstellung des Konzernlageberichts in Übereinstimmung mit den nach § 315a Abs. 1 HGB anzuwendenden deutschen gesetzlichen Vorschriften. Wir haben unsere Prüfung in Übereinstimmung mit § 317 Abs. 2 HGB und unter Beachtung der für die Prüfung von Konzernlageberichten vom Institut der Wirtschaftsprüfer (IDW) festgestellten deutschen Grundsätze ordnungsmäßiger Abschlussprüfung vorgenommen. Danach ist die Prüfung des Konzernlageberichts so zu planen und durchzuführen, dass hinreichende Sicherheit darüber erlangt wird, ob der Konzernlagebericht mit dem Konzernabschluss sowie mit den bei der Abschlussprüfung gewonnenen Erkenntnissen in Einklang steht, insgesamt ein zutreffendes Bild von der Lage des Konzerns vermittelt und die Chancen und Risiken der zukünftigen Entwicklung zutreffend darstellt.

Gemäß § 322 Abs. 3 Satz 1 HGB erklären wir, dass unsere Prüfung des Konzernlageberichts zu keinen Einwendungen geführt hat.

Nach unserer Beurteilung auf Grund der bei der Prüfung des Konzernabschlusses und des Konzernlageberichts gewonnenen Erkenntnisse steht der Konzernlagebericht in Einklang mit dem Konzernabschluss, vermittelt insgesamt ein zutreffendes Bild von der Lage des Henkel-Konzerns und stellt die Chancen und Risiken der zukünftigen Entwicklung zutreffend dar.

Düsseldorf, den 28. Januar 2011

KPMG AG  
Wirtschaftsprüfungsgesellschaft

Thomas Sauter  
Wirtschaftsprüfer

Michael Gewehr  
Wirtschaftsprüfer“

## Versicherung der persönlich haftenden Gesellschafterin

Nach bestem Wissen versichern wir, dass gemäß den anzuwendenden Rechnungslegungsgrundsätzen für die Berichterstattung der Konzernabschluss ein den tatsächlichen Verhältnissen entsprechendes Bild der Vermögens-, Finanz- und Ertragslage des Konzerns vermittelt und im Konzernlagebericht der Geschäftsverlauf einschließlich des Geschäftsergebnisses und der Lage des Konzerns so dargestellt ist, dass ein den tatsächlichen Verhältnissen entsprechendes Bild vermittelt wird, sowie die wesent-

lichen Chancen und Risiken der voraussichtlichen Entwicklung des Konzerns beschrieben sind.

Düsseldorf, 28. Januar 2011

Henkel Management AG  
Der Vorstand  
Kasper Rorsted,  
Jan-Dirk Auris, Bruno Piacenza, Dr. Friedrich Stara,  
Dr. Lothar Steinebach, Hans Van Bylen

# Gremien der Henkel AG & Co. KGaA

Gremien/Mitgliedschaften im Sinn des Paragraphen 125 Absatz 1 Satz 5 Aktiengesetz (Stand Januar 2011)

Dipl.-Ing. Albrecht Woeste Ehrenvorsitzender der Henkel-Gruppe

## Aufsichtsrat der Henkel AG & Co. KGaA

| Mitglieder des Aufsichtsrats<br>der Henkel AG & Co. KGaA                                                                                                                                                                                                                      | Mitgliedschaft in gesetzlich zu bildenden<br>inländischen Aufsichts-/Verwaltungsräten           | Mitgliedschaft in<br>vergleichbaren Kontrollgremien                                                                                   |
|-------------------------------------------------------------------------------------------------------------------------------------------------------------------------------------------------------------------------------------------------------------------------------|-------------------------------------------------------------------------------------------------|---------------------------------------------------------------------------------------------------------------------------------------|
| <b>Dr. Simone Bagel-Trah</b><br>Vorsitzende,<br>Unternehmerin, Düsseldorf<br>Geburtsjahr: 1969<br>Mitglied seit: 14.4.2008                                                                                                                                                    | Henkel Management AG (Vorsitz)                                                                  | Henkel AG & Co. KGaA<br>(Gesellschafterausschuss, Vorsitz)                                                                            |
| <b>Winfried Zander<sup>1)</sup></b><br>stellvertretender Vorsitzender,<br>Vorsitzender des Gesamtbetriebsrats der<br>Henkel AG & Co. KGaA und Vorsitzender des Betriebsrats<br>der Henkel AG & Co. KGaA, Standort Düsseldorf<br>Geburtsjahr: 1954<br>Mitglied seit: 17.5.1993 |                                                                                                 |                                                                                                                                       |
| <b>Jutta Bernicke<sup>1)</sup></b><br>Mitglied des Betriebsrats der Henkel AG & Co. KGaA,<br>Standort Düsseldorf<br>Geburtsjahr: 1962<br>Mitglied seit: 14.4.2008                                                                                                             |                                                                                                 |                                                                                                                                       |
| <b>Dr. rer. nat. Kaspar von Braun</b><br>(seit 19.4.2010)<br>Astrophysiker, Pasadena<br>Geburtsjahr: 1971<br>Mitglied seit: 19.4.2010                                                                                                                                         |                                                                                                 |                                                                                                                                       |
| <b>Johann-Christoph Frey</b><br>Diplom-Kaufmann, Klostern<br>Geburtsjahr: 1955<br>Mitglied seit: 23.9.2009                                                                                                                                                                    |                                                                                                 |                                                                                                                                       |
| <b>Birgit Helten-Kindlein<sup>1)</sup></b><br>Mitglied des Betriebsrats der Henkel AG & Co. KGaA,<br>Standort Düsseldorf<br>Geburtsjahr: 1964<br>Mitglied seit: 14.4.2008                                                                                                     |                                                                                                 |                                                                                                                                       |
| <b>Bernd Hinz<sup>1)</sup></b><br>(bis 31.7.2010)<br>Mitglied des Gesamtbetriebsrats der<br>Henkel AG & Co. KGaA und stellvertretender Vorsitzender<br>des Betriebsrats der Henkel AG & Co. KGaA,<br>Standort Düsseldorf<br>Geburtsjahr: 1951<br>Mitglied seit: 4.5.1998      |                                                                                                 |                                                                                                                                       |
| <b>Prof. Dr. sc. nat. Michael Kaschke</b><br>Vorsitzender des Vorstands<br>der Carl Zeiss AG, Oberkochen<br>Geburtsjahr: 1957<br>Mitglied seit: 14.4.2008                                                                                                                     | Carl Zeiss Konzern:<br>Carl Zeiss MicroImaging GmbH (Vorsitz),<br>Carl Zeiss SMT GmbH (Vorsitz) | Carl Zeiss Konzern:<br>Carl Zeiss Japan Co. Ltd. (Vorsitz),<br>Carl Zeiss Far East (Vorsitz),<br>Carl Zeiss India Pte. Ltd. (Vorsitz) |
| <b>Thomas Manchot</b><br>Unternehmer, Düsseldorf<br>Geburtsjahr: 1965<br>Mitglied seit: 10.4.2006                                                                                                                                                                             |                                                                                                 |                                                                                                                                       |
| <b>Mayc Nienhaus<sup>1)</sup></b><br>(seit 1.1.2010)<br>Mitglied des Gesamtbetriebsrats der<br>Henkel AG & Co. KGaA und Vorsitzender<br>des Betriebsrats der Henkel AG & Co. KGaA,<br>Standort Unna<br>Geburtsjahr: 1961<br>Mitglied seit: 1.1.2010                           |                                                                                                 |                                                                                                                                       |

<sup>1)</sup> Arbeitnehmervertreter.

## Aufsichtsrat der Henkel AG &amp; Co. KGaA

| Mitglieder des Aufsichtsrats der Henkel AG & Co. KGaA                                                                                                                                                                                                                      | Mitgliedschaft in gesetzlich zu bildenden inländischen Aufsichts-/Verwaltungsräten                 | Mitgliedschaft in vergleichbaren Kontrollgremien                                                       |
|----------------------------------------------------------------------------------------------------------------------------------------------------------------------------------------------------------------------------------------------------------------------------|----------------------------------------------------------------------------------------------------|--------------------------------------------------------------------------------------------------------|
| <b>Thierry Paternot</b><br>Operating Partner, Duke Street Capital, Paris<br>Geburtsjahr: 1948<br>Mitglied seit: 14.4.2008                                                                                                                                                  | Eckes AG                                                                                           | Bio DS SAS, Frankreich,<br>Freedom-FullSix SAS (Vorsitz), Frankreich,<br>Oeneo SA, Frankreich          |
| <b>Andrea Pichottka<sup>1)</sup></b><br>Vorstandssekretärin des Vorstandsmitglieds<br>Vorstandsbereich 3<br>Mitglieder/Zielgruppen/Bildung<br>IG Bergbau, Chemie, Energie, Hannover<br>Geburtsjahr: 1959<br>Mitglied seit: 26.10.2004                                      | Siltronic AG                                                                                       |                                                                                                        |
| <b>Prof. Dr. Theo Siegert</b><br>Geschäftsführender Gesellschafter<br>de Haen-Carstanjen & Söhne, Düsseldorf<br>Geburtsjahr: 1947<br>Mitglied seit: 20.4.2009                                                                                                              | Deutsche Bank AG,<br>E.ON AG,<br>Merck KGaA                                                        | DKSH Holding Ltd., Schweiz,<br>E. Merck OHG                                                            |
| <b>Edgar Topsch<sup>1)</sup></b><br>(seit 1.8.2010)<br>Mitglied des Gesamtbetriebsrats der<br>Henkel AG & Co. KGaA und stellvertretender Vorsitzender<br>des Betriebsrats der Henkel AG & Co. KGaA,<br>Standort Düsseldorf<br>Geburtsjahr: 1960<br>Mitglied seit: 1.8.2010 |                                                                                                    |                                                                                                        |
| <b>Konstantin von Unger</b><br>(bis 19.4.2010)<br>Founding Partner Blue Corporate Finance, London<br>Geburtsjahr: 1966<br>Mitglied seit: 10.4.2006                                                                                                                         |                                                                                                    | Henkel AG & Co. KGaA<br>(Gesellschafterausschuss),<br>Ten Lifestyle Management Ltd.,<br>Großbritannien |
| <b>Michael Vassiliadis<sup>1)</sup></b><br>Vorsitzender des geschäftsführenden<br>Hauptvorstands der IG Bergbau,<br>Chemie, Energie, Hannover<br>Geburtsjahr: 1964<br>Mitglied seit: 4.5.1998                                                                              | BASF SE,<br>K + S AG (stellvertretender Vorsitz),<br>Evonik Steag GmbH (stellvertretender Vorsitz) |                                                                                                        |
| <b>Dr. h.c. Bernhard Walter</b><br>ehemals Sprecher des Vorstands der<br>Dresdner Bank AG, Frankfurt/Main<br>Geburtsjahr: 1942<br>Mitglied seit: 4.5.1998                                                                                                                  | Bilfinger Berger AG (Vorsitz),<br>Daimler AG,<br>Deutsche Telekom AG                               |                                                                                                        |
| <b>Ulf Wentzien<sup>1)</sup></b><br>Diplom-Kaufmann, Düsseldorf<br>Vertreter der Leitenden Angestellten der<br>Henkel AG & Co. KGaA<br>Geburtsjahr: 1963<br>Mitglied seit: 14.4.2008                                                                                       |                                                                                                    |                                                                                                        |

<sup>1)</sup> Arbeitnehmervertreter.

## Ausschüsse des Aufsichtsrats

|                              | Aufgaben                                                                                                                                                                                                                                                                                                                                                 | Mitglieder                                                                                                                                                                                    |
|------------------------------|----------------------------------------------------------------------------------------------------------------------------------------------------------------------------------------------------------------------------------------------------------------------------------------------------------------------------------------------------------|-----------------------------------------------------------------------------------------------------------------------------------------------------------------------------------------------|
| <b>Nominierungsausschuss</b> | Der Nominierungsausschuss bereitet die Beschlussfassungen des Aufsichtsrats über Wahlvorschläge an die Hauptversammlung zur Wahl von Aufsichtsratsmitgliedern (Anteilseignervertreter) vor.                                                                                                                                                              | Dr. Simone Bagel-Trah, Vorsitzende<br>Dr. h.c. Bernhard Walter<br>Johann-Christoph Frey (seit 19.4.2010)<br>Konstantin von Unger (bis 19.4.2010)                                              |
| <b>Prüfungsausschuss</b>     | Der Prüfungsausschuss bereitet die Verhandlungen und Beschlussfassungen des Aufsichtsrats über die Billigung des Jahresabschlusses und des Konzernabschlusses sowie die Verabschiedung des Vorschlags an die Hauptversammlung zur Wahl des Abschlussprüfers vor. Auch behandelt er Fragen der Rechnungslegung, des Risikomanagements und der Compliance. | Dr. h.c. Bernhard Walter, Vorsitzender<br>Prof. Dr. Theo Siegert, stellvertretender Vorsitzender<br>Dr. Simone Bagel-Trah<br>Birgit Helten-Kindlein<br>Michael Vassiliadis<br>Winfried Zander |



## Gesellschafterausschuss der Henkel AG &amp; Co. KGaA

| Mitglieder des Gesellschafterausschusses der Henkel AG & Co. KGaA                                                                                                  | Mitgliedschaft in gesetzlich zu bildenden inländischen Aufsichts-/Verwaltungsräten                                                                       | Mitgliedschaft in vergleichbaren Kontrollgremien                                                                      |
|--------------------------------------------------------------------------------------------------------------------------------------------------------------------|----------------------------------------------------------------------------------------------------------------------------------------------------------|-----------------------------------------------------------------------------------------------------------------------|
| <b>Dr. Simone Bagel-Trah</b><br>Vorsitzende,<br>Unternehmerin, Düsseldorf<br>Geburtsjahr: 1969<br>Mitglied seit: 18.4.2005                                         | Henkel AG & Co. KGaA (Vorsitz),<br>Henkel Management AG (Vorsitz)                                                                                        |                                                                                                                       |
| <b>Dr. h.c. Christoph Henkel</b><br>stellvertretender Vorsitzender,<br>Managing Partner Canyon Equity LLC, London<br>Geburtsjahr: 1958<br>Mitglied seit: 27.5.1991 |                                                                                                                                                          |                                                                                                                       |
| <b>Dr. Paul Achleitner</b><br>Mitglied des Vorstands der Allianz SE, München<br>Geburtsjahr: 1956<br>Mitglied seit: 30.4.2001                                      | Bayer AG,<br>RWE AG,<br>Daimler AG,<br>Allianz-Konzern: Allianz Global Investors AG,<br>Allianz Investment Management SE (Vorsitz)                       |                                                                                                                       |
| <b>Boris Canessa</b><br>Unternehmer, Düsseldorf<br>Geburtsjahr: 1963<br>Mitglied seit: 19.9.2009                                                                   | Wilhelm von Finck AG                                                                                                                                     |                                                                                                                       |
| <b>Stefan Hamelmann</b><br>Unternehmer, Düsseldorf<br>Geburtsjahr: 1963<br>Mitglied seit: 3.5.1999                                                                 | Henkel Management AG (stellvertretender Vorsitz)                                                                                                         |                                                                                                                       |
| <b>Dr. h.c. Ulrich Hartmann</b><br>(bis 19.4.2010)<br>Vorsitzender des Aufsichtsrats<br>der E.ON AG, Düsseldorf<br>Geburtsjahr: 1938<br>Mitglied seit: 4.5.1998    | Deutsche Lufthansa AG,<br>E.ON AG (Vorsitz)                                                                                                              |                                                                                                                       |
| <b>Prof. Dr. Ulrich Lehner</b><br>ehemals Vorsitzender der Geschäftsführung<br>der Henkel KGaA, Düsseldorf<br>Geburtsjahr: 1946<br>Mitglied seit: 14.4.2008        | Deutsche Telekom AG (Vorsitz),<br>E.ON AG,<br>Henkel Management AG,<br>HSBC Trinkaus & Burkhardt AG,<br>Porsche Automobil Holding SE,<br>ThyssenKrupp AG | Dr. August Oetker KG,<br>Novartis AG, Schweiz                                                                         |
| <b>Konstantin von Unger</b><br>Gründungsmitglied Blue Corporate Finance, London<br>Geburtsjahr: 1966<br>Mitglied seit: 14.4.2003                                   | Henkel AG & Co. KGaA                                                                                                                                     | Ten Lifestyle Management Ltd.,<br>Großbritannien                                                                      |
| <b>Karel Vuursteen</b><br>ehemals Vorsitzender der Geschäftsführung<br>der Heineken N.V., Amsterdam<br>Geburtsjahr: 1941<br>Mitglied seit: 6.5.2002                |                                                                                                                                                          | Akzo Nobel N.V. (Vorsitz), Niederlande,<br>Heineken Holding N.V., Niederlande,<br>Tom Tom N.V. (Vorsitz), Niederlande |
| <b>Werner Wenning</b><br>ehemals Vorsitzender des Vorstands<br>der Bayer AG, Leverkusen<br>Geburtsjahr: 1946<br>Mitglied seit: 14.4.2008                           | Deutsche Bank AG,<br>E.ON AG,<br>HDI V.a.G,<br>Talanx AG                                                                                                 |                                                                                                                       |

## Ausschüsse des Gesellschafterausschusses

| Aufgaben                                                                                                                                                                                                                                                          | Mitglieder                                                                                                                                                                                |
|-------------------------------------------------------------------------------------------------------------------------------------------------------------------------------------------------------------------------------------------------------------------|-------------------------------------------------------------------------------------------------------------------------------------------------------------------------------------------|
| <b>Finanzausschuss</b><br>Der Finanzausschuss befasst sich insbesondere mit Finanzangelegenheiten, Fragen der Rechnungslegung einschließlich Abschlussprüfung, der Steuer- und Bilanzpolitik, der internen Revision sowie des Risikomanagements des Unternehmens. | Dr. h.c. Christoph Henkel, Vorsitzender<br>Stefan Hamelmann, stellvertretender Vorsitzender<br>Dr. Paul Achleitner<br>Dr. h.c. Ulrich Hartmann (bis 19.4.2010)<br>Prof. Dr. Ulrich Lehner |
| <b>Personalausschuss</b><br>Der Personalausschuss befasst sich insbesondere mit der Erörterung von Personalangelegenheiten der Mitglieder des Vorstands und mit Fragen der Personalstrategie sowie der Vergütung.                                                 | Dr. Simone Bagel-Trah, Vorsitzende<br>Konstantin von Unger, stellvertretender Vorsitzender<br>Boris Canessa<br>Karel Vuursteen<br>Werner Wenning                                          |

## Persönlich haftende Gesellschafterin der Henkel AG &amp; Co. KGaA

## Henkel Management AG

Düsseldorf,  
HRB 58139, Amtsgericht Düsseldorf

## Vorstand der Henkel Management AG

| Mitglieder des Vorstands der<br>Henkel Management AG                                                                                                                            | Mitgliedschaft in gesetzlich zu bildenden<br>inländischen Aufsichts-/Verwaltungsräten | Mitgliedschaft in<br>vergleichbaren Kontrollgremien                                                                                                                                                                                                                                                                                                                                                                |
|---------------------------------------------------------------------------------------------------------------------------------------------------------------------------------|---------------------------------------------------------------------------------------|--------------------------------------------------------------------------------------------------------------------------------------------------------------------------------------------------------------------------------------------------------------------------------------------------------------------------------------------------------------------------------------------------------------------|
| <b>Kasper Rorsted</b><br>Vorsitzender,<br>Human Resources / Infrastructure Services /<br>Corporate Communications<br>Geburtsjahr: 1962<br>Mitglied seit: 1.4.2005 <sup>1)</sup> |                                                                                       | Danfoss A/S, Dänemark                                                                                                                                                                                                                                                                                                                                                                                              |
| <b>Jan-Dirk Auris</b><br>(seit 1.1.2011)<br>Adhesive Technologies<br>Geburtsjahr: 1968<br>Mitglied seit: 1.1.2011                                                               |                                                                                       |                                                                                                                                                                                                                                                                                                                                                                                                                    |
| <b>Thomas Geitner</b><br>(bis 31.12.2010)<br>Adhesive Technologies<br>Geburtsjahr: 1955<br>Mitglied seit: 1.3.2008 <sup>1)</sup>                                                | BBC Worldwide Ltd., Großbritannien                                                    | Henkel Corp. (Vorsitz), USA                                                                                                                                                                                                                                                                                                                                                                                        |
| <b>Bruno Piacenza</b><br>(seit 1.1.2011)<br>Wasch-/Reinigungsmittel<br>(ab 1.3.2011)<br>Geburtsjahr: 1965<br>Mitglied seit: 1.1.2011                                            |                                                                                       |                                                                                                                                                                                                                                                                                                                                                                                                                    |
| <b>Dr. Friedrich Stara</b><br>(bis 28.2.2011)<br>Wasch-/Reinigungsmittel<br>Geburtsjahr: 1949<br>Mitglied seit: 1.7.2005 <sup>1)</sup>                                          |                                                                                       | The Dial Corp. (Vorsitz), USA,<br>Wiener Städtische Allgemeine<br>Versicherung AG, Österreich                                                                                                                                                                                                                                                                                                                      |
| <b>Dr. Lothar Steinebach</b><br>Finanzen / Einkauf / IT / Recht<br>Geburtsjahr: 1948<br>Mitglied seit: 1.7.2003 <sup>1)</sup>                                                   | LSG Lufthansa Service Holding AG                                                      | Henkel Adhesives Middle East E.C., Bahrain,<br>Henkel (China) Investment Co. Ltd., China,<br>Henkel & Cie AG, Schweiz,<br>Henkel Central Eastern Europe GmbH (Vorsitz), Österreich,<br>Henkel Consumer Goods Inc. (Vorsitz), USA,<br>Henkel Ltd., Großbritannien,<br>Henkel of America Inc. (Vorsitz), USA,<br>Henkel Technologies Egypt SAE, Ägypten,<br>Türk Henkel Kimya Sanayi ve Ticaret AS (Vorsitz), Türkei |
| <b>Hans Van Bylen</b><br>Kosmetik/Körperpflege<br>Geburtsjahr: 1961<br>Mitglied seit: 1.7.2005 <sup>1)</sup>                                                                    |                                                                                       | Henkel Belgium N.V., Belgien,<br>Henkel Nederland BV, Niederlande                                                                                                                                                                                                                                                                                                                                                  |

<sup>1)</sup> Unter Berücksichtigung der Mitgliedschaft in der Geschäftsführung der Henkel KGaA.

**Aufsichtsrat der Henkel Management AG**

| <b>Mitglieder des Aufsichtsrats der<br/>Henkel Management AG</b>                                                                                            | <b>Mitgliedschaft in gesetzlich zu bildenden<br/>inländischen Aufsichts-/Verwaltungsräten</b>                                   | <b>Mitgliedschaft in<br/>vergleichbaren Kontrollgremien</b>                                         |
|-------------------------------------------------------------------------------------------------------------------------------------------------------------|---------------------------------------------------------------------------------------------------------------------------------|-----------------------------------------------------------------------------------------------------|
| <b>Dr. Simone Bagel-Trah</b><br>Vorsitzende,<br>Unternehmerin, Düsseldorf<br>Geburtsjahr: 1969<br>Mitglied seit: 15.2.2008                                  | Henkel AG & Co. KGaA (Vorsitz)                                                                                                  | Henkel AG & Co. KGaA<br>(Gesellschafterausschuss, Vorsitz)                                          |
| <b>Stefan Hamelmann</b><br>stellvertretender Vorsitzender,<br>Unternehmer, Düsseldorf<br>Geburtsjahr: 1963<br>Mitglied seit: 19.9.2009                      |                                                                                                                                 | Henkel AG & Co. KGaA<br>(Gesellschafterausschuss)                                                   |
| <b>Prof. Dr. Ulrich Lehner</b><br>ehemals Vorsitzender der Geschäftsführung<br>der Henkel KGaA, Düsseldorf<br>Geburtsjahr: 1946<br>Mitglied seit: 15.2.2008 | Deutsche Telekom AG (Vorsitz),<br>E.ON AG,<br>HSBC Trinkaus & Burkhardt AG,<br>Porsche Automobil Holding SE,<br>ThyssenKrupp AG | Henkel AG & Co. KGaA<br>(Gesellschafterausschuss),<br>Dr. August Oetker KG,<br>Novartis AG, Schweiz |

# Weitere Informationen

## Corporate Senior Vice Presidents

|                                                                                                                     |                                                                                                                                                                                              |                                                                                                              |                                                                                                                            |
|---------------------------------------------------------------------------------------------------------------------|----------------------------------------------------------------------------------------------------------------------------------------------------------------------------------------------|--------------------------------------------------------------------------------------------------------------|----------------------------------------------------------------------------------------------------------------------------|
| <b>Prof. Dr. Ramón Bacardit</b><br>Adhesive Technologies<br>Research                                                | <b>Enric Holzbacher</b><br>Adhesive Technologies<br>Region Western Europe/<br>Central Eastern Europe/<br>Middle East/Africa and<br>SBU Consumer & Craftsman Adhesives/<br>Building Adhesives | <b>Carsten Knobel</b><br>Cosmetics/Toiletries –<br>Financial Director and<br>Finance – Corporate Controlling | <b>Prof. Dr. Thomas Müller-Kirschbaum</b><br>Laundry & Home Care<br>R&D/Technology/Supply Chain                            |
| <b>Georg Baratta-Dragono</b><br>Laundry & Home Care<br>Germany and Latin America                                    | <b>Dr. Stefan Huchler</b><br>Cosmetics/Toiletries<br>Supply Chain/Packaging<br>(seit 1.4.2010)                                                                                               | <b>Dirk-Stephan Koedijk</b><br>Chief Compliance Officer                                                      | <b>Dr. Matthias Schmidt</b><br>Adhesive Technologies –<br>Financial Director                                               |
| <b>Alain Bauwens</b><br>Laundry & Home Care<br>Global Marketing,<br>Business Development and<br>Region Asia-Pacific | <b>Dr. Joachim Jäckle</b><br>Financial Operations                                                                                                                                            | <b>Norbert Koll</b><br>Cosmetics/Toiletries<br>Schwarzkopf Professional                                      | <b>Stefan Sudhoff</b><br>Laundry & Home Care &<br>Cosmetics/Toiletries North America<br>Cosmetics/Toiletries Latin America |
| <b>Wolfgang Beynio</b><br>Finance/Controlling                                                                       | <b>Patrick Kaminski</b><br>Cosmetics/Toiletries<br>Asia-Pacific/Africa/Middle East/<br>Eastern Europe/CIS & Export<br>(seit 1.11.2010)                                                       | <b>Thomas Gerd Kühn</b><br>Legal, IP, Insurance                                                              | <b>Alan Syzdek</b><br>Adhesive Technologies<br>SBU Global Electronic Materials                                             |
| <b>Dr. Andreas Bruns</b><br>Infrastructure Services                                                                 | <b>Paul Kirsch</b><br>Adhesive Technologies<br>SBU Global Transportation<br>(seit 1.4.2010)                                                                                                  | <b>Dr. Marcus Kuhnert</b><br>Laundry & Home Care –<br>Financial Director                                     | <b>Günter Thumser</b><br>Henkel Central Eastern Europe                                                                     |
| <b>Julian Colquitt</b><br>Adhesive Technologies<br>North America                                                    |                                                                                                                                                                                              | <b>Andreas Lange</b><br>Laundry & Home Care<br>Region Western Europe                                         | <b>Carsten Tilger</b><br>Corporate Communications                                                                          |
| <b>Bertrand Conquéret</b><br>Global Purchasing                                                                      |                                                                                                                                                                                              | <b>Kathrin Menges</b><br>Human Resources                                                                     | <b>Dr. Peter Wroblowski</b><br>Information Technology                                                                      |
| <b>Jean Fayolle</b><br>Adhesive Technologies<br>SBU Packaging, Consumer Goods and<br>Construction Adhesives         |                                                                                                                                                                                              | <b>Tina Müller</b><br>Cosmetics/Toiletries<br>Chief Marketing Officer Retail                                 |                                                                                                                            |

SBU = Strategic Business Unit (Strategische Geschäftseinheit)

Stand: Januar 2011

## Führungskreis I weltweit

|                        |                       |                           |                               |
|------------------------|-----------------------|---------------------------|-------------------------------|
| Hikaru Adachi          | Christof Eibel        | Klaus Keutmann            | Dr. Michael Robl              |
| Aleksej Ananishnov     | Wolfgang Eichstaedt   | Dr. Christian Kirsten     | Jean Baptiste Santoul         |
| Giacomo Archi          | Ashraf El Afifi       | Dr. Wolfgang Klauk        | Dr. Arndt Scheidgen           |
| Faruk Arig             | Steven Essick         | Rolf Knoerzer             | Rolf Schlue                   |
| Thomas Hans Jörg Auris | Charles Evans         | Nuriedem Kocak            | Dr. Berthold Schreck          |
| Paul Berry             | Sam Ewe               | Dr. Harald Köster         | Marie-Eve Schroeder           |
| Cedric Berthod         | Ahmed Fahmy           | Jayant Kumar Singh        | Prof. Dr. Hans-Willi Schroiff |
| Michael Biondolillo    | Thomas Feldbrügge     | Luis Carlos Lacorte       | Jens-Martin Schwärzler        |
| Dr. Joachim Bolz       | Dr. Lars Feuerpeil    | Dr. Daniel Langer         | Dr. Johann Seif               |
| Oriol Bonaclocha       | Dr. Peter Florenz     | Tom Linckens              | Dr. Simone Siebeke            |
| Guy Boone              | Dr. Thomas Förster    | Oliver Luckenbach         | Katrin Steinbüchel            |
| Oliver Boßmann         | Timm Rainer Fries     | Dr. Klaus Marten          | Dr. Walter Sterzel            |
| Robert Bossuyt         | Stephan Füstli-Molnár | Lutz Mehlhorn             | Klaus Strottmann              |
| Hanno Brenningmeyer    | Holger Gerdes         | Scott Moffitt             | Monica Sun                    |
| Daniel Brogan          | Roberto Gianetti      | Alfredo Morales           | Marco Swoboda                 |
| Beat Buser             | Dr. Karl W. Gladit    | Dr. Heinrich Müller       | Csaba Szendrei                |
| Sergej Bykovskikh      | Michael Goder         | Julio Muñoz-Kampff        | Makoto Tamaki                 |
| Edward Capasso         | Ralf Grauel           | Liam Murphy               | Dr. Boris Tasche              |
| Michelle Cheung        | Peter Günther         | Christoph Neufeldt        | Richard Theiler               |
| Adil Choudhry          | Dr. Zuzana Halkova    | Sylvie Nicol              | Greg Tipsord                  |
| Jürgen Convent         | Peter Hassel          | Joseph O'Brien            | Michael G. Todd               |
| Susanne Cornelius      | Andreas Haupt         | Björk Ohlhorst            | Thomas Tönnemann              |
| Matthias Czaja         | Roswitha Heiland      | Michael Olosky            | Johnny Tong                   |
| Michael Czech          | Lars Hennemann        | Dr. Uwe Over              | Gordon Tredgold               |
| Nils Daecke            | Georg Höbenstreit     | Ian Parish                | Patrick Trippel               |
| Paul De Bruecker       | Dr. Alois Hoeger      | Campbell Peacock          | Tracy Van Bibber              |
| Ivan de Jonghe         | Katharina Höhne       | Jerry Perkins             | Amelie Vidal-Simi             |
| Patrick de Meyer       | Dr. Dirk Holbach      | Jeffrey Piccolomini       | Dr. Tilo Weiss                |
| Joseph Debiase         | Jos Hubin             | Dr. Torsten Pilz          | Ulf Wentzien                  |
| Hermann Deitzer        | Jeremy Hunter         | Michael Prange            | Dr. Jürgen Wichelhaus         |
| Nicola delli Venneri   | Will Jacobs           | Michael Rauch             | Dr. Hans-Christof Wilk        |
| Serge Delobel          | Dr. Regina Jäger      | Gary Raykowitz            | Dorian Williams               |
| Raymond Dimuzio        | Peter Kardorff        | Birgit Rechberger-Krammer |                               |
| Dr. Alexander Ditzel   | Georg Kazantzis       | Dr. Michael Reuter        |                               |
| Eric Dumez             | Thomas Keller         | Robert Risse              |                               |

Stand: Januar 2011

# Kennzahlen nach Quartalen

| in Mio. Euro                                        | 1. Quartal   |              | 2. Quartal   |              | 3. Quartal   |              | 4. Quartal   |              | Gesamtjahr    |               |
|-----------------------------------------------------|--------------|--------------|--------------|--------------|--------------|--------------|--------------|--------------|---------------|---------------|
|                                                     | 2009         | 2010         | 2009         | 2010         | 2009         | 2010         | 2009         | 2010         | 2009          | 2010          |
| <b>Umsatzerlöse</b>                                 |              |              |              |              |              |              |              |              |               |               |
| Wasch-/Reinigungsmittel                             | 1.013        | 1.049        | 1.058        | 1.086        | 1.035        | 1.123        | 1.023        | 1.061        | 4.129         | 4.319         |
| Kosmetik/Körperpflege                               | 720          | 762          | 790          | 865          | 764          | 845          | 736          | 797          | 3.010         | 3.269         |
| Adhesive Technologies                               | 1.469        | 1.651        | 1.582        | 1.890        | 1.630        | 1.945        | 1.543        | 1.820        | 6.224         | 7.306         |
| Corporate                                           | 56           | 50           | 55           | 49           | 56           | 49           | 43           | 51           | 210           | 199           |
| <b>Henkel-Konzern</b>                               | <b>3.258</b> | <b>3.512</b> | <b>3.485</b> | <b>3.890</b> | <b>3.485</b> | <b>3.961</b> | <b>3.345</b> | <b>3.729</b> | <b>13.573</b> | <b>15.092</b> |
| Kosten der umgesetzten Leistungen                   | -1.814       | -1.829       | -1.906       | -2.074       | -1.882       | -2.106       | -1.809       | -2.069       | -7.411        | -8.078        |
| <b>Bruttoergebnis vom Umsatz</b>                    | <b>1.444</b> | <b>1.683</b> | <b>1.579</b> | <b>1.816</b> | <b>1.603</b> | <b>1.855</b> | <b>1.536</b> | <b>1.660</b> | <b>6.162</b>  | <b>7.014</b>  |
| Marketing- und Vertriebsaufwendungen                | -948         | -1.011       | -1.007       | -1.108       | -1.002       | -1.090       | -969         | -1.048       | -3.926        | -4.257        |
| Forschungs- und Entwicklungsaufwendungen            | -99          | -95          | -103         | -103         | -99          | -95          | -95          | -98          | -396          | -391          |
| Verwaltungsaufwendungen                             | -183         | -185         | -191         | -202         | -196         | -185         | -165         | -178         | -735          | -750          |
| Sonstige betriebliche Aufwendungen und Erträge      | 4            | 30           | 1            | 18           | -16          | 16           | -14          | 43           | -25           | 107           |
| <b>EBIT</b>                                         |              |              |              |              |              |              |              |              |               |               |
| Wasch-/Reinigungsmittel                             | 107          | 151          | 119          | 137          | 137          | 139          | 138          | 115          | 501           | 542           |
| Kosmetik/Körperpflege                               | 91           | 100          | 100          | 112          | 99           | 113          | 97           | 86           | 387           | 411           |
| Adhesive Technologies                               | 47           | 185          | 95           | 222          | 89           | 268          | 59           | 202          | 290           | 878           |
| Corporate                                           | -27          | -15          | -35          | -50          | -35          | -19          | -1           | -24          | -98           | -108          |
| <b>Henkel-Konzern</b>                               | <b>218</b>   | <b>422</b>   | <b>279</b>   | <b>421</b>   | <b>290</b>   | <b>501</b>   | <b>293</b>   | <b>379</b>   | <b>1.080</b>  | <b>1.723</b>  |
| Beteiligungsergebnis                                | -            | -            | -4           | -            | -            | -            | -            | 1            | -4            | 1             |
| Zinsergebnis                                        | -52          | -54          | -56          | -35          | -40          | -37          | -43          | -46          | -191          | -172          |
| Finanzergebnis                                      | -52          | -54          | -60          | -35          | -40          | -37          | -43          | -45          | -195          | -171          |
| <b>Ergebnis vor Steuern</b>                         | <b>166</b>   | <b>368</b>   | <b>219</b>   | <b>386</b>   | <b>250</b>   | <b>464</b>   | <b>250</b>   | <b>334</b>   | <b>885</b>    | <b>1.552</b>  |
| Steuern vom Einkommen und vom Ertrag                | -45          | -102         | -69          | -106         | -70          | -121         | -73          | -80          | -257          | -409          |
| <b>Quartalsüberschuss</b>                           | <b>121</b>   | <b>266</b>   | <b>150</b>   | <b>280</b>   | <b>180</b>   | <b>343</b>   | <b>177</b>   | <b>254</b>   | <b>628</b>    | <b>1.143</b>  |
| – auf nicht beherrschende Anteile entfallend        | -4           | -7           | -7           | -7           | -8           | -6           | -7           | -5           | -26           | -25           |
| – auf Aktionäre der Henkel AG & Co. KGaA entfallend | 117          | 259          | 143          | 273          | 172          | 337          | 170          | 249          | 602           | 1.118         |
| <b>Ergebnis je Vorzugsaktie</b> in Euro             | <b>0,28</b>  | <b>0,60</b>  | <b>0,33</b>  | <b>0,63</b>  | <b>0,39</b>  | <b>0,78</b>  | <b>0,39</b>  | <b>0,58</b>  | <b>1,40</b>   | <b>2,59</b>   |

| in Mio. Euro                                        | 1. Quartal  |             | 2. Quartal  |             | 3. Quartal  |             | 4. Quartal  |             | Gesamtjahr   |              |
|-----------------------------------------------------|-------------|-------------|-------------|-------------|-------------|-------------|-------------|-------------|--------------|--------------|
|                                                     | 2009        | 2010        | 2009        | 2010        | 2009        | 2010        | 2009        | 2010        | 2009         | 2010         |
| <b>EBIT (wie berichtet)</b>                         | <b>218</b>  | <b>422</b>  | <b>279</b>  | <b>421</b>  | <b>290</b>  | <b>501</b>  | <b>293</b>  | <b>379</b>  | <b>1.080</b> | <b>1.723</b> |
| Einmalige Erträge                                   | -3          | -32         | -           | -1          | -           | -10         | -6          | -16         | -9           | -59          |
| Einmalige Aufwendungen                              | 4           | -           | 4           | 9           | 46          | -           | 80          | 5           | 134          | 14           |
| Restrukturierungsaufwendungen                       | 16          | 31          | 25          | 47          | 71          | 26          | 47          | 80          | 159          | 184          |
| <b>Bereinigter EBIT</b>                             | <b>235</b>  | <b>421</b>  | <b>308</b>  | <b>476</b>  | <b>407</b>  | <b>517</b>  | <b>414</b>  | <b>448</b>  | <b>1.364</b> | <b>1.862</b> |
| <b>Bereinigtes Ergebnis je Vorzugsaktie</b> in Euro | <b>0,31</b> | <b>0,60</b> | <b>0,37</b> | <b>0,73</b> | <b>0,59</b> | <b>0,80</b> | <b>0,64</b> | <b>0,69</b> | <b>1,91</b>  | <b>2,82</b>  |

Die Quartalswerte ergeben sich quartalsbezogen und sind kaufmännisch gerundet.

# Mehrjahresübersicht

| in Mio. Euro                                         | 2004 <sup>5)</sup> | 2005   | 2006   | 2007   | 2008 <sup>6)</sup> | 2009   | 2010               |
|------------------------------------------------------|--------------------|--------|--------|--------|--------------------|--------|--------------------|
| Umsatz                                               | 10.592             | 11.974 | 12.740 | 13.074 | 14.131             | 13.573 | 15.092             |
| Betriebliches Ergebnis (EBIT)                        | 996                | 1.162  | 1.298  | 1.344  | 779                | 1.080  | 1.723              |
| Ergebnis vor Steuern                                 | 1.007              | 1.042  | 1.176  | 1.250  | 1.627              | 885    | 1.552              |
| Jahresüberschuss                                     | 748                | 770    | 871    | 941    | 1.233              | 628    | 1.143              |
| Anteil der Aktionäre der Henkel AG & Co. KGaA        | 747                | 757    | 855    | 921    | 1.221              | 602    | 1.118              |
| Ergebnis je Vorzugsaktie (EPS) <sup>1)</sup> in Euro | 1,75               | 1,77   | 1,99   | 2,14   | 2,83               | 1,40   | 2,59               |
| Bilanzsumme                                          | 13.287             | 13.944 | 13.346 | 13.048 | 16.173             | 15.818 | 17.525             |
| Langfristiges Vermögen                               | 7.989              | 9.065  | 8.664  | 7.931  | 11.360             | 11.162 | 11.575             |
| Kurzfristiges Vermögen                               | 5.248              | 4.879  | 4.682  | 5.117  | 4.813              | 4.656  | 5.950              |
| Verbindlichkeiten                                    | 8.941              | 8.545  | 7.799  | 7.342  | 9.539              | 9.274  | 9.575              |
| Operative Schuldendeckung <sup>2)</sup> in %         | 31,6               | 39,9   | 48,4   | 71,6   | 45,1               | 41,8   | 71,4               |
| Zinsdeckungsfaktor <sup>2)</sup>                     | 8,4                | 7,1    | 9,4    | 9,4    | 4,8                | 8,7    | 12,8               |
| Eigenkapital                                         | 4.346              | 5.399  | 5.547  | 5.706  | 6.535              | 6.544  | 7.950              |
| Eigenkapitalquote in %                               | 32,7               | 38,7   | 41,6   | 43,7   | 40,3               | 41,4   | 45,4               |
| Nettoumsatzrendite <sup>3)</sup> in %                | 7,1                | 6,4    | 6,8    | 7,2    | 8,7                | 4,7    | 7,6                |
| Eigenkapitalrendite <sup>4)</sup> in %               | 17,2               | 17,7   | 16,1   | 17,0   | 21,6               | 9,6    | 17,5               |
| Dividende je Stammaktie in Euro                      | 0,41               | 0,43   | 0,48   | 0,51   | 0,51               | 0,51   | 0,70 <sup>7)</sup> |
| Dividende je Vorzugsaktie in Euro                    | 0,43               | 0,45   | 0,50   | 0,53   | 0,53               | 0,53   | 0,72 <sup>7)</sup> |
| Dividendensumme                                      | 185                | 193    | 214    | 227    | 227                | 227    | 310 <sup>7)</sup>  |
| Investitionen (mit Finanzanlagen)                    | 4.678              | 1.119  | 897    | 548    | 4.074              | 415    | 260                |
| Investitionsquote in % vom Umsatz                    | 43,7               | 9,3    | 7,0    | 4,2    | 28,8               | 3,0    | 1,7                |
| Forschungs- und Entwicklungskosten                   | 272                | 324    | 340    | 350    | 429                | 396    | 391                |
| Mitarbeiter (Jahresdurchschnitt)                     | 49.947             | 51.724 | 51.716 | 52.303 | 55.513             | 51.361 | 48.141             |
| Inland (Anzahl)                                      | 10.488             | 10.264 | 9.995  | 9.899  | 9.892              | 9.397  | 8.897              |
| Ausland (Anzahl)                                     | 39.459             | 41.460 | 41.721 | 42.404 | 45.621             | 41.964 | 39.244             |

<sup>1)</sup> Basis Aktiensplit (1:3) vom 18. Juni 2007.

<sup>2)</sup> Berechnung auf Seite 55.

<sup>3)</sup> Jahresüberschuss geteilt durch Umsatz.

<sup>4)</sup> Jahresüberschuss geteilt durch Eigenkapital am Jahresanfang.

<sup>5)</sup> Restated und vergleichbar.

<sup>6)</sup> Angepasst aufgrund der Finalisierung der Kaufpreisallokation aus dem Erwerb der National Starch-Geschäfte.

<sup>7)</sup> Vorschlag.



# Impressum

## Herausgeber

Henkel AG & Co. KGaA  
40191 Düsseldorf  
Telefon: 02 11 / 7 97-0

© 2011 Henkel AG & Co. KGaA

## Redaktion:

Corporate Communications, Investor Relations,  
Corporate Accounting and Reporting  
**Koordination:** Oliver Luckenbach,  
Jens Bruno Wilhelm, Wolfgang Zengerling  
**Konzept und Design:** Kirchhoff Consult AG, Hamburg  
**Fotos:** Brian Ambrose, Thomas Bauer, Tobias Ebert,  
Andreas Fechner, Michael Hetzmannseder, Xu Jian,  
Claudia Kempf, Dmitry Livshits, Dilian Markov, Alain Pérus,  
Mark Susan, Alberto Venegas; Henkel  
**Gesamtproduktion:** Druckpartner Schotte, Essen/Krefeld

Veröffentlichungsdatum dieses Berichts:  
24. Februar 2011

Corporate Communications  
Telefon: +49 (0) 211 / 7 97-26 06  
Fax: +49 (0) 211 / 7 98-24 84  
E-Mail: lars.witteck@henkel.com

Investor Relations  
Telefon: +49 (0) 211 / 7 97-39 37  
Fax: +49 (0) 211 / 7 98-28 63  
E-Mail: oliver.luckenbach@henkel.com

PR-Nr.: 02 11 8.000  
ISSN: 0724-4738  
ISBN: 978-3-941517-21-9

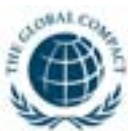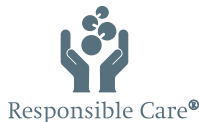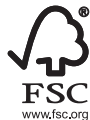

**MIX**  
Papier aus verantwortungsvollen Quellen  
**FSC® C017894**

Der Geschäftsbericht ist gedruckt auf PROFIL®/FSC von Sappi. Das Papier ist aus chlorfrei gebleichtem Zellstoff. Es besteht aus Holzfaser, die aus nachhaltig bewirtschafteten Wäldern stammt und nach den Regeln des Forest Stewardship Council (FSC) zertifiziert ist. Die Druckfarben enthalten keine Schwermetalle. Umschlagveredelung und buchbinderische Verarbeitung mit diesen Henkel-Produkten: MiraFoil Metallliceeffekt, Softtouch-Cellophanierung mit Adhesin-Kaschierklebstoff, UV-Spotlackierung mit MiraCure UV-Lack, buchbinderische Verarbeitung recyclinggerecht mit Purmelt MicroEmission und Technomelt Ultra für höchste Standards im Arbeits- und Gesundheitsschutz.

Alle Produktnamen sind geschützte Marken der Henkel AG & Co. KGaA, Düsseldorf, oder der mit ihr Verbundenen Unternehmen.

# Finanzkalender

## Hauptversammlung der

Henkel AG & Co. KGaA 2011:  
Montag, 11. April 2011

Veröffentlichung des Berichts  
über das erste Quartal 2011:  
Mittwoch, 4. Mai 2011

Veröffentlichung des Berichts  
über das zweite Quartal / erste Halbjahr 2011:  
Mittwoch, 10. August 2011

Veröffentlichung des Berichts  
über das dritte Quartal / Dreivierteljahr 2011:  
Mittwoch, 9. November 2011

Veröffentlichung des Berichts  
über das Geschäftsjahr 2011:  
Donnerstag, 8. März 2012

## Hauptversammlung der

Henkel AG & Co. KGaA 2012:  
Montag, 16. April 2012

Alle aktuellen Zahlen und Angaben zum  
Unternehmen im Internet:

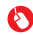

[www.henkel.de](http://www.henkel.de)

Diese Information enthält zukunftsbezogene Aussagen, die auf den gegenwärtigen Annahmen und Einschätzungen der Unternehmensleitung der Henkel AG & Co. KGaA beruhen. Mit der Verwendung von Worten wie erwarten, beabsichtigen, planen, vorhersehen, davon ausgehen, glauben, schätzen und ähnlichen Formulierungen werden zukunftsgerichtete Aussagen gekennzeichnet. Diese Aussagen sind nicht als Garantien dafür zu verstehen, dass sich diese Erwartungen auch als richtig erweisen. Die zukünftige Entwicklung sowie die von der Henkel AG & Co. KGaA und ihren Verbundenen Unternehmen tatsächlich erreichten Ergebnisse sind abhängig von einer Reihe von Risiken und Unsicherheiten und können daher wesentlich von den zukunftsbezogenen Aussagen abweichen. Verschiedene dieser Faktoren liegen außerhalb des Einflussbereichs von Henkel und können nicht präzise vorausgeschätzt werden, zum Beispiel das künftige wirtschaftliche Umfeld sowie das Verhalten von Wettbewerbern und anderen Marktteilnehmern. Eine Aktualisierung der zukunftsbezogenen Aussagen ist weder geplant noch übernimmt Henkel hierzu eine gesonderte Verpflichtung.

# Inhalt

## Unternehmen

- 2 Vorwort
- 5 Bericht des Aufsichtsrats
- 10 Vorstand
- 11 Vision und Werte
- 12 Unsere Werte
- 22 Aktien und Anleihen

## Konzernlagebericht

- 25 Detailindex Konzernlagebericht
- 26 Corporate Governance
- 40 Geschäftstätigkeit
- 40 Strategie und Finanzziele 2012
- 43 Wertmanagement und Steuerungssystem
- 45 Geschäftsverlauf
- 52 Vermögens- und Finanzlage
- 55 Mitarbeiter
- 57 Beschaffung
- 58 Produktion
- 59 Forschung und Entwicklung
- 61 Marketing und Vertrieb
- 62 Nachhaltigkeit
- 66 Unternehmensbereiche
- 78 Risikobericht
- 83 Prognosebericht
- 86 Nachtragsbericht

## Konzernabschluss

- 87 Detailindex Konzernabschluss/-anhang
- 88 Konzernbilanz
- 90 Konzern-Gewinn- und Verlustrechnung
- 91 Gesamtergebnisrechnung
- 91 Eigenkapitalveränderungsrechnung
- 92 Konzernkapitalflussrechnung

## 93 Konzernanhang

- 135 Bestätigungsvermerk des unabhängigen Abschlussprüfers
- 136 Versicherung der persönlich haftenden  
Gesellschafterin
- 137 Gremien der Henkel AG & Co. KGaA

## 142 Weitere Informationen

- 143 Kennzahlen nach Quartalen
- 144 Mehrjahresübersicht
- Impressum/Finanzkalender

Das Titelbild zeigt einen Teil des Führungsteams Kosmetik/Körperpflege in der Region Asien/Pazifik bei seinem „Vision und Werte“-Workshop in Shanghai, China. Von links: Vijay Manickavasagam, Antje Chu, Rungaroon Koohasaneh und Paul Khol.

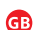

Lesen Sie mehr auf Seite 14.

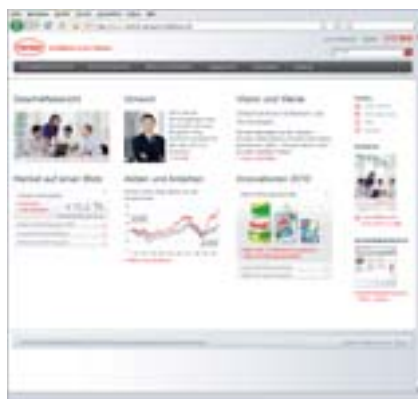

[www.henkel.de/geschaeftsbericht](http://www.henkel.de/geschaeftsbericht)

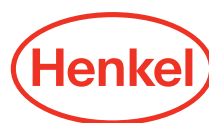

Excellence is our Passion
