# Supplementary material
Source: publisher site journal article supplement (https://www.degruyterbrill.com/publication/isbn/9783110432879/downloadAsset/9783110432879_Elektronischer_Anhang_2.zip)
Supplement: Supplementary file 60 [file Henkel Vision und Werte.pdf › Korpustexte/Korpustexte pdf/Henkel/Henkel Vision und Werte.pdf]

# Vision und Werte

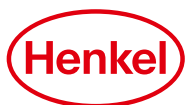

Excellence is our Passion

Wir haben klare strategische Prioritäten definiert und uns ehrgeizige Ziele für unser Unternehmen gesetzt.

Wir sind dabei, in unserem Unternehmen eine „Winning Culture“ zu etablieren. Sie hilft uns, unsere Geschäfte weiter voranzutreiben, unsere strategischen Prioritäten erfolgreich umzusetzen und unsere Ziele zu erreichen.

Eine Winning Culture ist geprägt von unternehmerischem Denken und Handeln sowie von der fortwährenden Bereitschaft zu Veränderungen.

Für unseren Erfolg ist ein gemeinsames Verständnis unseres unternehmerischen Handelns Voraussetzung. Unsere neue Vision gibt uns die Richtung und unser Ziel vor. Sie bekräftigt unseren Anspruch, in allem, was wir tun, die Besten zu sein. Sie ist das Fundament für ein Unternehmen mit gemeinsamen Werten: „One Henkel“. Unsere neuen Werte leiten uns bei allen Entscheidungen, die wir in unserem Arbeitsalltag treffen.

Jeder Einzelne trägt dazu bei, unsere Vision wahr werden zu lassen. Und es ist unsere Verantwortung, unsere Werte bei Henkel tagtäglich zu leben.

Kasper Rorsted

Vorsitzender des Vorstands

**Global führend  
mit Marken  
und Technologien.**

1.

Wir stellen unsere **Kunden** in den Mittelpunkt unseres Handelns.

2.

Wir schätzen, fordern und fördern unsere **Mitarbeiter**.

3.

Wir streben herausragenden und nachhaltigen **wirtschaftlichen Erfolg** an.

4.

Wir verpflichten uns, unsere führende Rolle im Bereich **Nachhaltigkeit** auszubauen.

5.

Wir gestalten unsere Zukunft auf dem Fundament eines erfolgreichen **Familienunternehmens**.

# 1.

---

## Wir stellen unsere **Kunden** in den Mittel- punkt unseres Handelns.

Wir denken voraus und gehen auf die Wünsche und Bedürfnisse unserer Kunden ein, indem wir höchsten Kundennutzen, ausgezeichnete Qualität sowie innovative Marken und Technologien bieten.

Wir schätzen unsere Kunden und stellen sie in den Mittelpunkt unserer Arbeit. Nur so können wir ihnen Mehrwert bieten. Da nicht alle Henkel-Mitarbeiter in direktem Kontakt mit den Kunden stehen, ist es umso wichtiger für uns alle zu wissen, was dieser Wert für Henkel bedeutet. Denn er ist maßgeblich für unseren Erfolg. Um die besten Produkte, die höchste Qualität und hervorragenden Service zu gewährleisten, müssen wir Kunden und Konsumenten besser verstehen, als es unsere Wettbewerber tun. Wenn uns das gelingt, werden wir in all unseren Märkten weiter erfolgreich wachsen.

## 2.

---

Wir schätzen,  
fordern und fördern  
unsere **Mitarbeiter**.

Wir begegnen uns mit Respekt und Achtung, vertrauen einander und entwickeln unsere Fähigkeiten gemeinsam weiter. Wir erwarten von jedem Einzelnen eigenverantwortliches Handeln und ein hohes Leistungsniveau, um unseren Erfolg als Unternehmen zu sichern.

Es sind immer die Menschen, die den Unterschied machen. Durch ihre Kreativität und ihr Wissen wird eine gute Idee erst zu einem großartigen Geschäftserfolg. Sie sind die Schnittstelle zu unseren Kunden, machen Innovationen möglich, entwickeln erfolgreiche Strategien und geben dem Unternehmen eine unverwechselbare Identität. Nur indem wir unsere Mitarbeiter schätzen, fordern und fördern, etablieren wir bei Henkel eine „Winning Culture“. Dazu müssen alle mit gutem Beispiel vorangehen: in der Art, wie wir unsere Teams führen und wie wir selbst Verantwortung für unsere Entwicklung übernehmen. Gemeinsam werden wir Henkel global führend mit Marken und Technologien machen.

## 4.

---

Wir verpflichten uns,  
unsere führende Rolle  
im Bereich **Nachhaltigkeit**  
auszubauen.

Wir bieten Produkte, Technologien und Prozesse, die höchste Standards erfüllen. Wir verpflichten uns, für die Sicherheit und Gesundheit unserer Mitarbeiter, den Schutz unserer Umwelt und die Lebensqualität der Menschen in unserem Umfeld zu sorgen.

Unser starkes Bekenntnis zur Nachhaltigkeit war schon immer ein wichtiger Erfolgsfaktor. Wir verfolgen alle Elemente der Nachhaltigkeit langfristig und unternehmerisch. Wir wollen nicht nur bestehende Standards einhalten, sondern auch neue setzen. Henkel hatte schon immer den Anspruch, eine Balance zwischen Mensch, Umwelt und Gewinnstreben zu schaffen. Diese Einstellung bringt uns einen klaren Wettbewerbsvorteil und hilft mit, unser volles Geschäftspotenzial auszuschöpfen. Nachhaltigkeit wird in Zukunft auch ein wesentlicher Vorteil im Wettbewerb um neue Talente sein.

## 5.

---

# Wir gestalten unsere Zukunft auf dem Fundament eines erfolgreichen Familienunternehmens.

Basierend auf unseren Werten und unserer langjährigen erfolgreichen Geschichte verfolgen wir eine langfristig ausgerichtete Unternehmensentwicklung, die durch faires unternehmerisches Handeln und eine solide Finanzierung geprägt ist.

Der Familien-Wert macht uns einzigartig. Wir bauen unsere Zukunft auf ein starkes Fundament. Seit der Gründung der Firma im Jahr 1876 zeigt die Familie Henkel ihr Bekenntnis zum Unternehmen. Die Familie vertraut uns und ermöglicht uns, langfristig zu agieren. Sie unterstützt uns auch, wenn wir schwierige strategische Entscheidungen treffen müssen. Wir führen Henkel auf allen Ebenen mit Unternehmergeist – das macht letztendlich am Markt den Unterschied.



### 3.

---

Wir streben herausragenden und nachhaltigen **wirtschaftlichen Erfolg** an.

Wir fühlen uns als leistungsorientiertes Unternehmen verpflichtet, den Wert unseres Unternehmens zu steigern und unseren Aktionären eine attraktive Rendite zu sichern.

Wir verfolgen unsere strategischen Prioritäten, um unsere Finanzziele zu erreichen und Henkel noch erfolgreicher zu machen. Ausgezeichnete und nachhaltige finanzielle Ergebnisse ermöglichen es uns, in Zukunft flexibler handeln zu können. Das ist die Voraussetzung für langfristiges und gesundes Wachstum – davon profitieren nicht nur unsere Aktionäre, sondern auch unsere Mitarbeiter. Dieser Wert beeinflusst unsere Entscheidungen über Investitionen, Mitarbeiter, Strategien, unsere Teamarbeit und viele weitere Aspekte in unserem Arbeitsalltag.

**Herausgeber**

Henkel AG & Co. KGaA

40191 Düsseldorf

Deutschland

© 2011 Henkel AG & Co. KGaA

Verwendete Sammelbezeichnungen wie  
Mitarbeiter, Aktionäre oder Kunden sind  
als geschlechtsneutral anzusehen.

---
