# Supplementary material
Source: publisher site journal article supplement (https://www.degruyterbrill.com/publication/isbn/9783110432879/downloadAsset/9783110432879_Elektronischer_Anhang_2.zip)
Supplement: Supplementary file 61 [file Infineon GB 2010.pdf › Korpustexte/Korpustexte pdf/Infineon/Infineon GB 2010.pdf]

AUS  
POTENZIAL  
WERT  
SCHAFFEN

Infineon Technologies AG  
Geschäftsbericht 2010

# Infineon Technologies AG

## Geschäftsbericht 2010

### UNSER UNTERNEHMEN

|      |                                                                   |     |
|------|-------------------------------------------------------------------|-----|
| ← 01 | Der Vorstand .....                                                | 002 |
| ← 02 | Brief an die Aktionäre .....                                      | 003 |
| ← 03 | Strategie und Finanzen .....                                      | 008 |
| ← 04 | Produkte und Applikationen .....                                  | 026 |
|      | Automotive .....                                                  | 028 |
|      | Industrial & Multimarket .....                                    | 036 |
|      | Chip Card & Security .....                                        | 044 |
|      | Wireless Solutions .....                                          | 052 |
| ← 05 | Forschung & Entwicklung, Fertigung .....                          | 058 |
| ← 06 | Nachhaltigkeit bei Infineon .....                                 | 066 |
| ← 07 | Exzellente Mitarbeiter in einem<br>Hochleistungsunternehmen ..... | 072 |
| ← 08 | Die Infineon-Aktie .....                                          | 076 |
| ← 09 | Infineon weltweit .....                                           | 080 |
| ← 10 | Infineon 2010 .....                                               | 082 |

### FINANZBERICHT DER INFINEON TECHNOLOGIES AG

|      |                                                |     |
|------|------------------------------------------------|-----|
| ← 11 | Inhalt .....                                   | 084 |
| ← 12 | Bericht des Aufsichtsrats .....                | 085 |
| ← 13 | Corporate Governance Bericht .....             | 096 |
| ← 14 | Vergütungsbericht .....                        | 102 |
| ← 15 | Lagebericht und Konzernlagebericht .....       | 109 |
| ← 16 | Konzernabschluss .....                         | 164 |
| ← 17 | Anhang zum Konzernabschluss .....              | 172 |
| ← 18 | Versicherung der gesetzlichen Vertreter .....  | 242 |
| ← 19 | Bestätigungsvermerk des Abschlussprüfers ..... | 243 |
| ← 20 | Finanzglossar .....                            | 244 |
| ← 21 | Technologieglossar .....                       | 246 |

#### HINWEIS

Der Begriff Mitarbeiter wird im vorliegenden Geschäftsbericht für Mitarbeiter und Mitarbeiterinnen gleichermaßen verwendet.

#### ZUKUNFTSORIENTIERTE AUSSAGEN

Der Geschäftsbericht enthält zukunftsorientierte Aussagen und Annahmen über unser zukünftiges Geschäft und die Branche, in der wir tätig sind. Diese beruhen auf gegenwärtigen Plänen, Einschätzungen und Prognosen des Managements der Gesellschaft. Anleger sollten sich nicht uneingeschränkt auf diese Aussagen verlassen. Zukunftsorientierte Aussagen stehen im Kontext ihres Entstehungszeitpunkts. Die Gesellschaft übernimmt keine Verpflichtung, die in diesem Bericht enthaltenen zukunftsorientierten Aussagen auf Grund neuer Informationen oder zukünftiger Ereignisse zu aktualisieren. Zukunftsorientierte Aussagen beinhalten immer Risiken und Ungewissheiten. Eine Vielzahl von Faktoren, die in diesem Bericht beschrieben sind, kann dazu führen, dass die tatsächlich eintretenden Ereignisse erheblich von den in diesem Bericht enthaltenen zukunftsorientierten Aussagen abweichen.

#### Legende:

 mehr Informationen  
in der Grafik

 mehr Informationen  
im Text

# 01 INFINEON-KENNZAHLEN FÜR DIE AM 30. SEPTEMBER ENDENDEN GESCHÄFTSJAHRE (NACH IFRS)<sup>1</sup>

| Geschäftsjahr vom 1. Oktober bis 30. September                                              | 2010   |                 | 2009   |                 | 2010/2009        |
|---------------------------------------------------------------------------------------------|--------|-----------------|--------|-----------------|------------------|
|                                                                                             | Mio. € | in % vom Umsatz | Mio. € | in % vom Umsatz | Veränderung in % |
| <b>Umsatzerlöse fortgeführte Aktivitäten nach Regionen</b>                                  | 3.295  |                 | 2.184  |                 | 51               |
| Deutschland                                                                                 | 862    | 26              | 530    | 24              | 63               |
| Übriges Europa                                                                              | 656    | 20              | 484    | 22              | 36               |
| Nordamerika                                                                                 | 351    | 11              | 261    | 12              | 34               |
| Asien-Pazifik                                                                               | 1.202  | 36              | 768    | 35              | 57               |
| Japan                                                                                       | 184    | 6               | 116    | 6               | 59               |
| Andere                                                                                      | 40     | 1               | 25     | 1               | 60               |
| <b>Umsatzerlöse nach Segmenten</b>                                                          | 4.585  |                 | 3.027  |                 | 51               |
| Automotive                                                                                  | 1.268  | 28              | 839    | 28              | 51               |
| Industrial & Multimarket                                                                    | 1.374  | 30              | 905    | 30              | 52               |
| Chip Card & Security                                                                        | 407    | 9               | 341    | 11              | 19               |
| Wireless Solutions                                                                          | 1.372  | 30              | 917    | 30              | 50               |
| Sonstige Geschäftsbereiche                                                                  | 167    | 3               | 17     | 1               | 882              |
| Konzernfunktionen und Eliminierungen                                                        | -3     | 0               | 8      | 0               | -138             |
| bereinigt um Umsatzerlöse nicht fortgeführter Aktivitäten von Wireless Solutions            | -1.290 |                 | -843   |                 |                  |
| Umsatzerlöse fortgeführte Aktivitäten                                                       | 3.295  |                 | 2.184  |                 | 51               |
| <b>Bruttoergebnis vom Umsatz Bruttomarge</b>                                                | 1.237  | 38              | 497    | 23              | 149              |
| Forschungs- und Entwicklungskosten                                                          | 399    | 12              | 319    | 15              | 25               |
| Vertriebskosten und allgemeine Verwaltungskosten                                            | 386    | 12              | 332    | 15              | 16               |
| Betriebsergebnis                                                                            | 348    |                 | -183   |                 | 290              |
| Ergebnis aus fortgeführten Aktivitäten                                                      | 312    |                 | -233   |                 | 234              |
| Ergebnis aus nicht fortgeführten Aktivitäten, abzgl. Steuern                                | 348    |                 | -441   |                 | 179              |
| Konzernjahresüberschuss (-fehlbetrag)                                                       | 660    |                 | -674   |                 | 198              |
| Segmentergebnis in Summe Marge                                                              | 635    | 14              | -167   | -6              | 480              |
| bereinigt um das Segmentergebnis aus nicht fortgeführten Aktivitäten von Wireless Solutions | -160   |                 | 27     |                 |                  |
| Segmentergebnis in Summe aus fortgeführten Aktivitäten Marge                                | 475    | 14              | -140   | -6              | 439              |
| Sachanlagen                                                                                 | 838    |                 | 928    |                 | -10              |
| Bilanzsumme                                                                                 | 4.993  |                 | 4.366  |                 | 14               |
| Summe Eigenkapital                                                                          | 2.625  |                 | 2.093  |                 | 25               |
| Mittelzufluss aus laufender Geschäftstätigkeit aus fortgeführten Aktivitäten                | 958    |                 | 282    |                 | 240              |
| Mittelzufluss (-abfluss) aus Investitionstätigkeit aus fortgeführten Aktivitäten            | -355   |                 | 25     |                 | -1.520           |
| Mittelzufluss (-abfluss) aus Finanzierungstätigkeit aus fortgeführten Aktivitäten           | -487   |                 | 391    |                 | -225             |
| Free-Cash-Flow <sup>2</sup>                                                                 | 573    |                 | 274    |                 | 109              |
| Planmäßige Abschreibungen                                                                   | 336    |                 | 453    |                 | -26              |
| Auszahlungen für Sachanlagen und immaterielle Vermögenswerte                                | -325   |                 | -115   |                 | 183              |
| Brutto-Cash-Position <sup>3</sup>                                                           | 1.727  |                 | 1.507  |                 | 15               |
| Netto-Cash-Position <sup>4</sup>                                                            | 1.331  |                 | 657    |                 | 103              |
| <b>Ergebnis je Aktie – unverwässert in €</b>                                                | 0,61   |                 | -0,73  |                 | 184              |
| <b>Ergebnis je Aktie – verwässert in €</b>                                                  | 0,58   |                 | -0,73  |                 | 179              |
| <b>Dividende pro Aktie in €<sup>5</sup></b>                                                 | 0,10   |                 | -      |                 |                  |
| Eigenkapitalquote                                                                           | 53%    |                 | 48%    |                 | 10               |
| Eigenkapitalrendite <sup>6</sup>                                                            | 25%    |                 | -32%   |                 | 178              |
| Gesamtkapitalrendite <sup>7</sup>                                                           | 13%    |                 | -15%   |                 | 186              |
| Anlagendeckung <sup>8</sup>                                                                 | 317%   |                 | 226%   |                 | 41               |
| Verschuldungsgrad <sup>9</sup>                                                              | 15%    |                 | 41%    |                 | -63              |
| Gesamtverschuldungsgrad <sup>10</sup>                                                       | 8%     |                 | 19%    |                 | -59              |
| Rendite auf das eingesetzte Kapital (RoCE) <sup>11</sup>                                    | 24%    |                 | -11%   |                 | 318              |
| <b>Mitarbeiter Infineon zum 30. September</b>                                               | 26.654 |                 | 26.464 |                 | 1                |

1 Abweichungen von der Summe durch Rundungsdifferenzen möglich.

2 Free-Cash-Flow = Mittelzufluss aus laufender Geschäftstätigkeit aus fortgeführten Aktivitäten und Mittelzufluss (-abfluss) aus Investitionstätigkeit aus fortgeführten Aktivitäten, bereinigt um Nettoeinzahlungen aus dem Kauf/Verkauf von zur Veräußerung verfügbaren finanziellen Vermögenswerten.

3 Brutto-Cash-Position = Zahlungsmittel und Zahlungsmitteläquivalente einschließlich zur Veräußerung verfügbare finanzielle Vermögenswerte.

4 Netto-Cash-Position = Brutto-Cash-Position, abzüglich kurz- und langfristige Finanzverbindlichkeiten.

5 Eine Dividendenzahlung für das Geschäftsjahr 2010 in Höhe von 0,10 Euro wird der Hauptversammlung am 17.02.2011 vorgeschlagen.

6 Eigenkapitalrendite = Konzernjahresüberschuss (-fehlbetrag) im Verhältnis zum eingesetzten Eigenkapital.

7 Gesamtkapitalrendite = Konzernjahresüberschuss (-fehlbetrag) im Verhältnis zur Bilanzsumme.

8 Anlagendeckung = Eigenkapital im Verhältnis zu Sachanlagen.

9 Verschuldungsgrad = Verhältnis von kurz- und langfristigen Finanzverbindlichkeiten zum Eigenkapital.

10 Gesamtverschuldungsgrad = Verhältnis von kurz- und langfristigen Finanzverbindlichkeiten zur Bilanzsumme.

11 Rendite auf das eingesetzte Kapital (Return on Capital Employed, RoCE) = Ergebnis nach Steuern zum eingesetzten Kapital.

## INFINEON AUF EINEN BLICK

Infineon bietet Halbleiter- und Systemlösungen an, die drei zentrale Herausforderungen der modernen Gesellschaft adressieren: (Ende September) einen Umsatz von 3,295 Milliarden Euro. Die Aktien des Unternehmens sind in Frankfurt unter dem Symbol

### AUTOMOTIVE

> SEITE 28

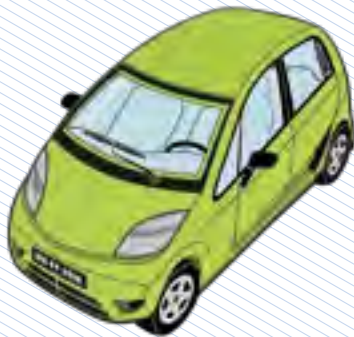

### INDUSTRIAL & MULTIMARKET

> SEITE 36

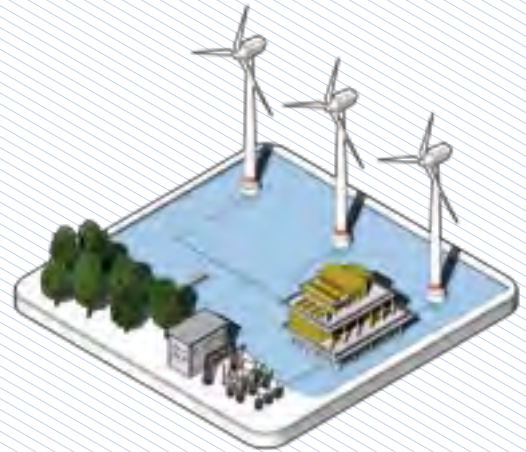

#### ANWENDUNGSFELDER

Antriebsstrang (Motor- und Getriebesteuerung) ◦ Hybrid- und Elektroauto ◦ Karosserie- und Komfornik (Lenkung, Dämpfung, Licht, Klimaanlage, Schiebedach, Fensterheber, Scheibenwischer, zentrale Karosseriesteuergeräte, Tür-elektronik) ◦ Sicherheit (ABS, Airbag, ESP)

#### ANWENDUNGSFELDER

Steuerung von elektrischen Antrieben für Industrieanwendungen und Haushaltsgeräte ◦ Module für erneuerbare Energieerzeugung, Energieübertragung und -wandlung ◦ Halbleiterkomponenten für Lichtmanagementsysteme und LED-Beleuchtung ◦ Netzteile für Server, PCs, Notebooks, Netbooks, Spielekonsolen, Unterhaltungselektronik ◦ kundenspezifische Bausteine für Peripheriegeräte für PCs (z. B. Maus), Spielekonsolen, Anwendungen in der Medizintechnik ◦ Hochfrequenzbausteine mit Schutzfunktion für Kommunikations- (z. B. GPS, UMTS, WLAN, Digital-TV) und Tunersysteme ◦ Silicium-MEMS-Mikrofone

#### SCHLÜSSELKUNDEN<sup>1</sup>

Autoliv ◦ Bosch ◦ Continental ◦ Delphi ◦ Denso ◦ Hella ◦ Hyundai ◦ Kostal ◦ Lear ◦ Mitsubishi ◦ TRW ◦ Valeo

#### SCHLÜSSELKUNDEN<sup>1</sup>

ABB ◦ Alstom ◦ Cisco ◦ Convertteam ◦ Dell ◦ Delta ◦ Emerson ◦ HP ◦ LG Electronics ◦ Microsoft ◦ Nokia ◦ Panasonic ◦ Philips ◦ RIM ◦ Samsung ◦ Schneider Electric ◦ Siemens ◦ SMA Solar Technology ◦ Sony

#### HAUPTWETTBEWERBER<sup>2</sup>

Freescale ◦ Fujitsu ◦ NEC ◦ NXP ◦ ON Semiconductor ◦ Renesas ◦ STMicroelectronics ◦ Texas Instruments ◦ Toshiba

#### HAUPTWETTBEWERBER<sup>2</sup>

Fairchild ◦ Fuji ◦ International Rectifier ◦ Intersil ◦ Mitsubishi ◦ NXP ◦ ON Semiconductor ◦ Renesas ◦ STMicroelectronics ◦ Texas Instruments ◦ Toshiba ◦ Vishay

#### MARKTPPOSITION<sup>3</sup>

Nummer 1 mit 9%

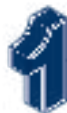

Quelle: Strategy Analytics, April 2010

#### MARKTPPOSITION<sup>3</sup>

Nummer 1 mit 11% bei diskreten Leistungshalbleitern und -modulen

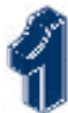

Quelle: IMS Research, Juli 2010

Energieeffizienz, Mobilität und Sicherheit. Mit weltweit rund 26.650 Mitarbeitern erzielte Infineon im Geschäftsjahr 2010 „IFX“ und in den USA im Freiverkehrsmarkt „OTCQX International Premier“ unter dem Symbol „IFNYY“ notiert.

## CHIP CARD & SECURITY

› SEITE 44

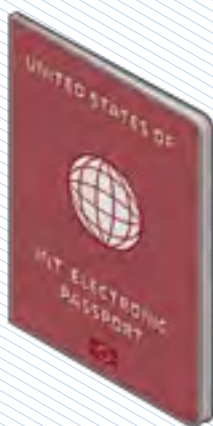

## WIRELESS SOLUTIONS

› SEITE 52

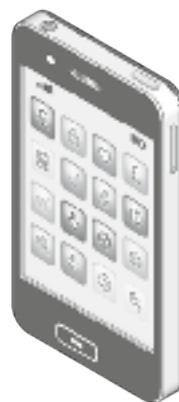

### ANWENDUNGSFELDER

SIM-Karte für Mobiltelefone ◦ Zahlungsverkehr ◦ Elektronische Reisepässe, Personalausweise, Gesundheitskarten und Führerscheine ◦ Personenidentifikation ◦ Objektidentifikation ◦ Bezahlfernsehen ◦ Plattformensicherheit bei Rechnern und in Netzwerken ◦ Authentifizierung und Systemintegrität z. B. in Spielekonsolen, Druckern, Industriesteuerungen

### ANWENDUNGSFELDER

Basisbandprozessoren, Hochfrequenzlösungen, Stromversorgungschips, größtenteils auch als Ein-Chip-Lösungen ◦ komplette Plattformen inklusive Software für Mobiltelefone (GSM, EDGE, HSPA, LTE) ◦ Bluetooth und GPS-Empfänger ◦ Leistungstransistoren für Verstärker in Mobilfunk-Basisstationen

### SCHLÜSSELKUNDEN<sup>1</sup>

Beijing Watch Data ◦ Cisco ◦ Gemalto ◦ Giesecke & Devrient ◦ Oberthur ◦ Sagem Orga ◦ US Government Printing Office

### SCHLÜSSELKUNDEN<sup>1</sup>

Ericsson ◦ Huawei ◦ LG Electronics ◦ Nokia ◦ RIM ◦ Samsung ◦ ZTE

### HAUPTWETTBEWERBER<sup>2</sup>

Inside Contactless ◦ NXP ◦ Renesas ◦ Samsung ◦ STMicroelectronics

### HAUPTWETTBEWERBER<sup>2</sup>

Broadcom ◦ Mediatek ◦ Qualcomm ◦ ST-Ericsson

### MARKTPPOSITION<sup>3</sup>

Nummer 1 mit 27 %

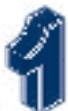

Quelle: Frost & Sullivan, Oktober 2010

### MARKTPPOSITION<sup>3</sup>

Nummer 3 mit 14 %  
(basierend auf Stückzahlen)

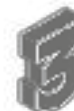

Quelle: Strategy Analytics, Februar 2010

<sup>1</sup> In alphabetischer Reihenfolge. Distributionskunden für Infineon sind Arrow, Avnet, Beijing Jingchuan, Rutronik, Tomen, Toyotsu und WPG Holding.

<sup>2</sup> In alphabetischer Reihenfolge.

<sup>3</sup> Alle Angaben beziehen sich auf das Kalenderjahr 2009.

## ERFOLGREICHE BILANZ

Wir sind auf dem Weg zum wertvollen Unternehmen.

Mit innovativen Produkten, führend in der Technologie  
und in führenden Marktpositionen.

Mit dem Know-how, der Kundenorientierung  
und dem Engagement unserer Mitarbeiter.

Mit einer gesunden Jahresbilanz und ertragsstarkem Wachstum.

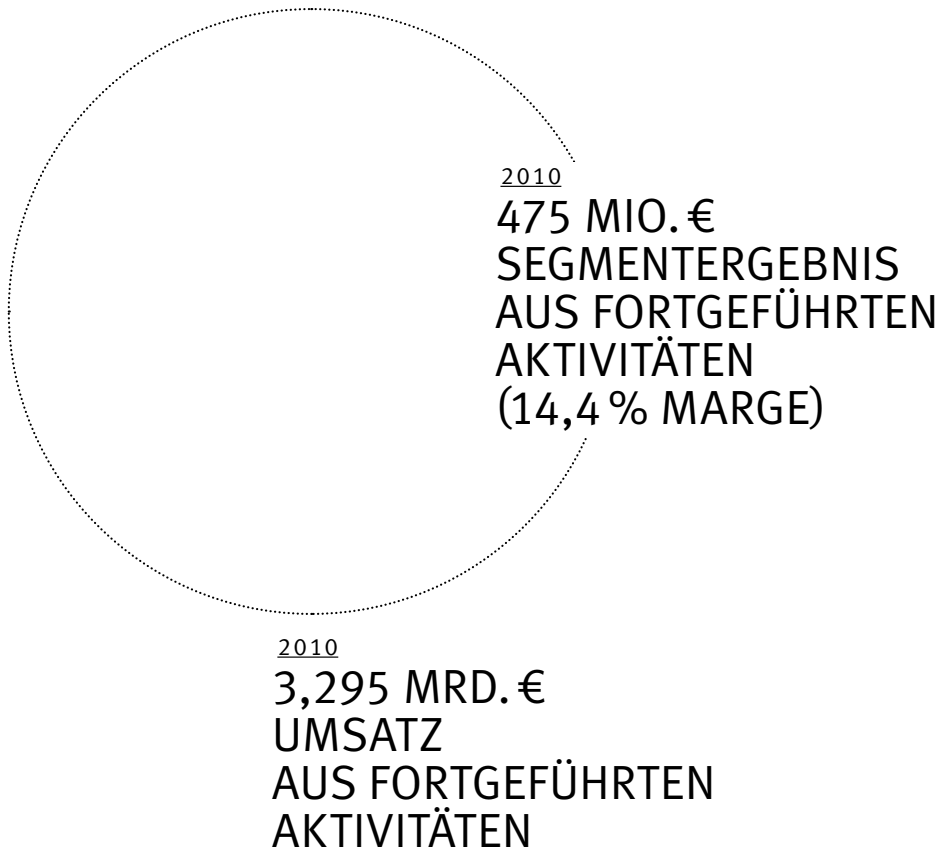

## EXZELLENTEN PERSPEKTIVEN

Wir besetzen die globalen Zukunftsthemen:  
Energieeffizienz, Mobilität und Sicherheit.

Wir wachsen in unseren Zielmärkten:  
Automobilelektronik, Industrieelektronik und Sicherheit.  
Mit ambitionierten Zielen bei Umsatz und Ertrag.

Das macht Infineon nachhaltig wertvoll.  
Als Unternehmen. Für Investoren.

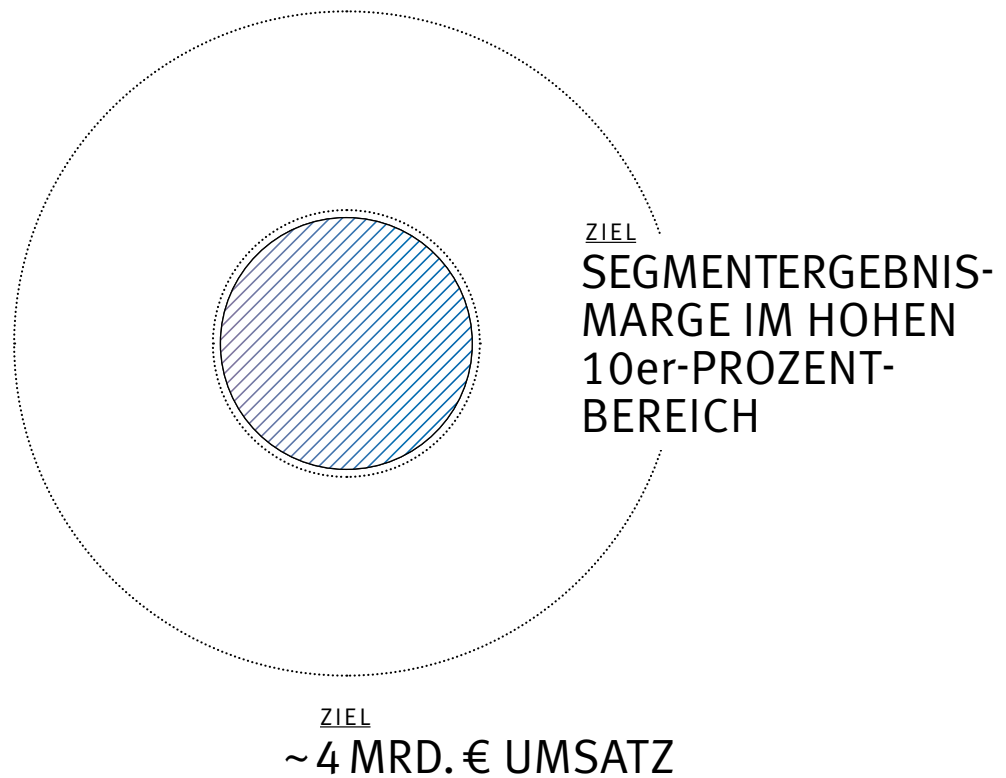

## DER VORSTAND DER INFINEON TECHNOLOGIES AG

01  
02  
03  
04  
05  
06  
07  
08  
09  
10  
11  
12  
13  
14  
15  
16  
17  
18  
19  
20  
21

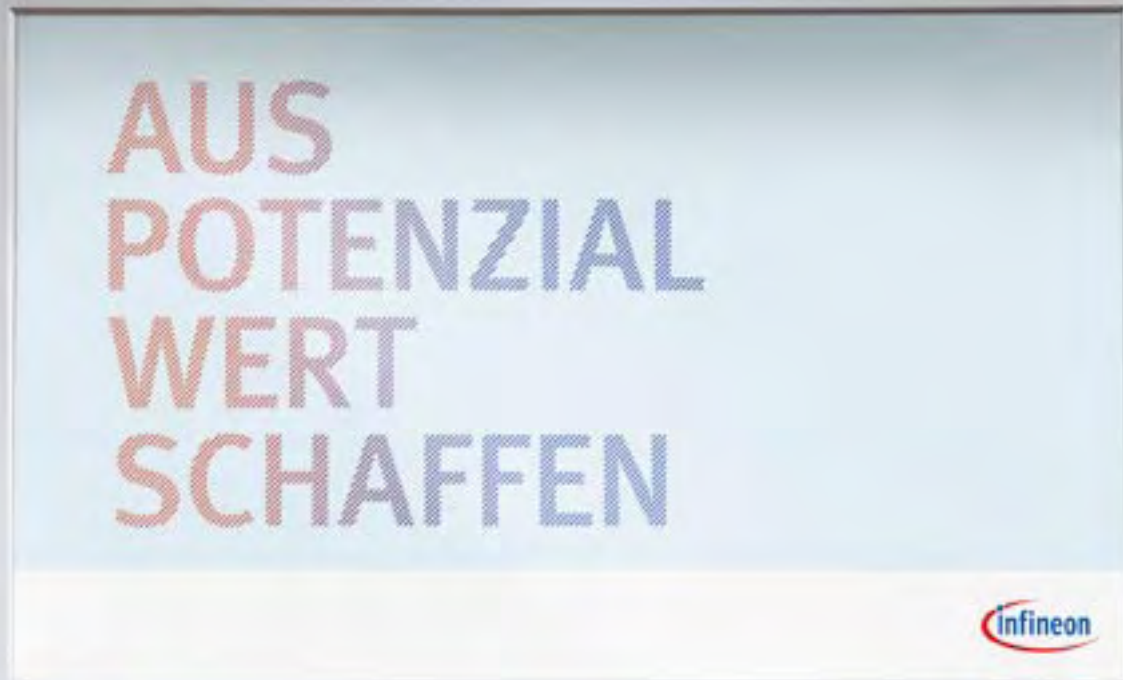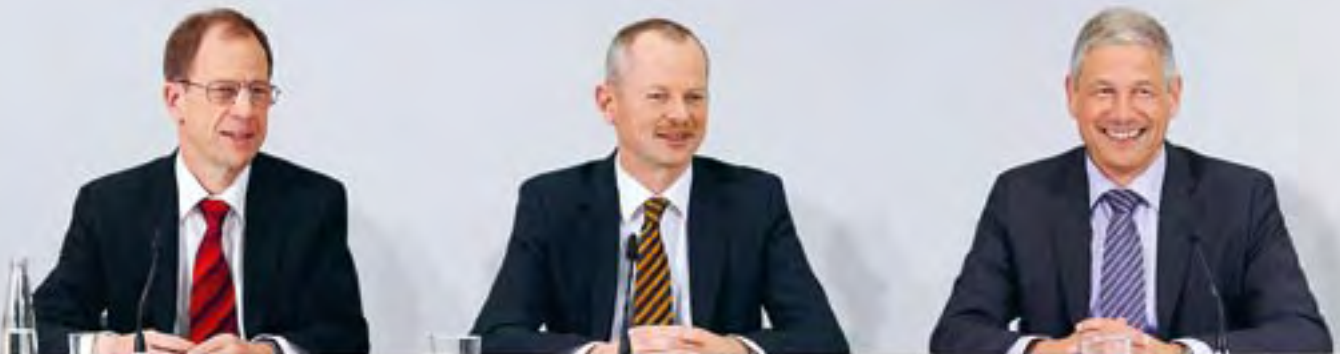

Ploss

Bauer

Eul



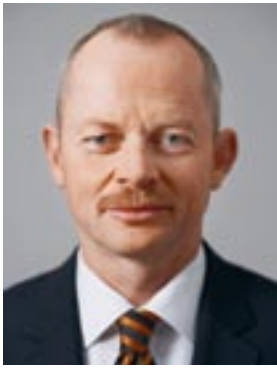

PETER BAUER  
VORSTANDSVORSITZENDER

## Sehr verehrte Aktionärinnen und Aktionäre,

es freut mich sehr, Ihnen für das Geschäftsjahr 2010 über die erfolgreiche Fortsetzung einer Entwicklung berichten zu können, die im Geschäftsjahr 2009 ihren Anfang nahm. Damals gelang es, Infineon trotz aller Widrigkeiten mit einer sehr robusten Bilanz auszustatten. Dies war eine solide Basis für das Geschäftsjahr 2010: Getrieben durch Maßnahmen zur Kostenreduktion und zur Produktivitätssteigerung, durch weitere Marktanteilsgewinne sowie unterstützt durch die allgemeine Verbesserung des Wirtschaftsumfelds stehen für das Unternehmen im Geschäftsjahr 2010 51 Prozent Umsatzwachstum auf 3,3 Milliarden Euro sowie ein Konzernjahresüberschuss von 660 Millionen Euro zu Buche. Unser Wachstum liegt damit erheblich über dem des Halbleitermarkts insgesamt; unsere Kapitalrendite liegt deutlich über den Kapitalkosten. Wir sind durch konsequentes Handeln, durch eine erfolgreiche Restrukturierung und Refinanzierung, aber auch durch erfolgreiches Agieren im Markt nicht nur gut durch die Krise gekommen, sondern stärker und leistungsfähiger geworden. Um Sie, unsere Aktionäre, an diesem Erfolg teilhaben zu lassen, werden Aufsichtsrat und Vorstand der Hauptversammlung im Februar 2011 eine Dividendenzahlung in Höhe von 10 Eurocent je Aktie vorschlagen.

Der Erfolg der letzten beiden Geschäftsjahre soll auch zukünftig fortgesetzt werden. Bei allen bereits sichtbaren Verbesserungen unserer Finanzparameter wollen wir diesem Ziel auch durch die Wahl des Titels unseres Geschäftsberichts, „Aus Potenzial Wert schaffen“, Gewicht verleihen. Der Titel weist darauf hin, dass auch das Geschäftsjahr 2010 für uns nur eine Zwischenstation war auf dem Weg zu langfristigem und nachhaltigem Unternehmenserfolg sowie zu Wertsteigerung für unsere Eigentümer – für Sie als Aktionäre.

Um diese langfristige und nachhaltige Wertsteigerung zu erreichen, haben wir für uns eine Reihe von unternehmensspezifischen strategischen Prinzipien aufgestellt, aus denen wir unsere Wettbewerbsfähigkeit schöpfen. Teilweise sind diese aus historischen Stärken heraus entstanden, teilweise haben wir sie neu definiert (mehr Details dazu finden Sie in den Folgekapiteln dieses Geschäftsberichts):

**1. Schlüsselthemen Energieeffizienz, Mobilität und Sicherheit:** Die Aktivitäten des Unternehmens sind konzentriert auf die Schlüsselthemen Energieeffizienz, Mobilität und Sicherheit. Alle drei sind von hoher gesellschaftlicher Relevanz und treiben langfristig überdurchschnittliches Wachstum.

**2. Ausrichtung des Unternehmens auf die Zielmärkte:** Die Dynamik der Schlüsselthemen treibt das Wachstum von Halbleiterlösungen im Auto, in Industrieanwendungen sowie in Chipkarten- und Sicherheitstechnologien. Mit unseren drei Divisionen Automotive, Industrial & Multimarket sowie Chip Card & Security orientiert sich die Organisation unseres Unternehmens genau an diesen Zielmärkten, um deren Wachstumsdynamik optimal nutzen und unsere Innovationsleistung fokussiert platzieren zu können.

**3. Technologische Kernkompetenzen:** Wir heben uns in den Disziplinen Analog- und Mixed-Signal-Schaltungen, Embedded Control und Leistungshalbleiter deutlich vom Wettbewerb ab und schaffen mit unseren proprietären Fertigungsprozessen weitere Differenzierung. Unsere Technologieführerschaft in diesen anspruchsvollen Bereichen bauen wir aus und münzen sie in Wettbewerbsvorteile, in mehr Wachstum und in höhere Margen um.

**4. Systemverständnis:** Unser tiefes Wissen um die Gesamtsysteme, in denen unsere Halbleiter zur Anwendung kommen, und unsere große technische Erfahrung in der Beratung der Systemhersteller machen uns zum bevorzugten Partner der Automobilindustrie. Das gilt für die Technik von heute und noch viel mehr bei der Konzeption der Hybrid- und Elektroautos von morgen. Wir definieren gemeinsam mit Industriekunden Inverter für die Solarstromerzeugung, IGBT-Module für Hochgeschwindigkeitszüge und LED-Treiber für die Beleuchtung der Zukunft. Mit unserem neuen Konzept „Integrity Guard“ haben wir den nächsten Sicherheitsstandard unter anderem für Reisepässe und Personalausweise geschaffen. Daraus resultieren ausgezeichnete Kundenbeziehungen, die wiederum zu Marktanteilsgewinnen führen.

Die Ausrichtung des Handelns im Unternehmen nach diesen Regeln lässt uns im Wettbewerb bestehen und erfolgreich sein. Die Basis für ihre erfolgreiche Umsetzung ist eine gute Führungsmannschaft. Mit unserer Führungsmannschaft haben wir die letzten Jahre erfolgreich gemeistert. Gemeinsam haben wir uns vorgenommen, unsere Führungskompetenz weiterzuentwickeln, um für die Zukunft gerüstet zu sein. Die Schwerpunkte in den nächsten Jahren werden sein: dezentral unternehmerisch zu handeln, sich ambitionierte Ziele zu setzen, mit schlanken Prozessen die Geschwindigkeit zu erhöhen und so Mitarbeiter und das Unternehmen zu nachhaltigem Erfolg zu führen.

Mit konsequentem Portfolio-Management haben wir in den letzten 18 Monaten zudem Infineon noch weiter auf stabilere Wachstumsfelder und weniger volatile Branchen mit führender Marktposition fokussiert. Im Geschäftsjahr 2010 haben wir im Zuge dieser Neuausrichtung den Verkauf des Geschäftsbereichs Wireline Communications abgeschlossen sowie einen Vertrag über den Verkauf des Mobilfunkgeschäfts des Segments Wireless Solutions an Intel unterzeichnet. Infineon belegt heute in allen drei verbleibenden Bereichen, in der Automobilelektronik, der Industrieelektronik wie auch bei Sicherheit, jeweils die Nummer-1-Position im Weltmarkt und hat ausgezeichnete Wachstums- und Gewinnaussichten in diesen Märkten.

Damit habe ich Ihnen das strategische Fundament skizziert, auf dem wir aufbauen. Bei aller Zufriedenheit mit dem Ergebnis des abgelaufenen Geschäftsjahrs wollen wir von diesem Fundament aus nunmehr langfristig und nachhaltig Wert schaffen. Dazu haben wir einfache und dennoch anspruchsvolle Ziele formuliert: Wir wollen mittelfristig bei einem Jahresumsatz von rund vier Milliarden Euro eine prozentuale Bruttoergebnis-Marge im niedrigen 40er-Bereich sowie eine Segmentergebnis-Marge von mehr als 15 Prozent erwirtschaften. Durch unsere hohe Ertragskraft wollen wir auch in konjunkturell schlechten Zeiten unseren Cash-Flow positiv halten und strategisch wichtige Investitionen tätigen können.

Als einen ersten Schritt hin zu diesem Ziel betrachten wir unseren Ausblick für das Geschäftsjahr 2011: Wir streben eine Umsatzsteigerung von nahezu 10 Prozent und eine prozentuale Segmentergebnis-Marge im mittleren bis hohen 10er-Bereich an.

Mit unseren strategischen Prinzipien und Zielsetzungen wollen wir für unsere Aktionäre eine Gesamt- sowie Eigenkapitalrendite erwirtschaften, die langfristige und nachhaltige Wertsteigerungen ermöglicht. Ich bin mir sicher, dass wir die oben genannten Ziele erreichen können und erreichen werden. Gute Gründe sprechen dafür: Die von uns adressierten und für die Entwicklung unserer Gesellschaft sehr relevanten Märkte lassen bei guten wirtschaftlichen Rahmenbedingungen im langfristigen Mittel ein durchschnittliches Umsatzwachstum von mehr als 10 Prozent pro Jahr erwarten. Dieses Wachstum adressieren wir in all unseren Zielmärkten als Marktführer und damit auf der Basis einer nachweislich erfolgreichen historischen Entwicklung dieser heutigen Kerngeschäfte. Mit einer hohen Innovationsrate, überlegten Investitionen in Weltklasse-Fertigungen, einer ständigen Optimierung des Portfolios und der Kostenstrukturen dürfte unser Wachstum Bruttoergebnis-Margen von mehr als 40 Prozent ermöglichen. In den Gemeinkosten werden wir weiterhin diszipliniert sein; sie sollen sich parallel oder unterproportional zum Umsatz entwickeln. In Summe wollen wir so unser Margenziel für das Segmentergebnis erreichen.

Wir möchten hervorheben, dass wir unsere beachtlichen Ergebnisse nur mithilfe unserer Mitarbeiter erreicht haben und dass wir unsere anspruchsvollen Zielsetzungen für die Zukunft nur mit ihrer Unterstützung erreichen werden. Die letzten beiden Jahre haben sie einigen Unwägbarkeiten ausgesetzt und ihnen einige Härten abverlangt. Dennoch hat die gesamte Belegschaft mit Einsatz und Hingabe zum Wohle des Unternehmens gearbeitet – für diese Leistung ein herzliches Dankeschön des gesamten Vorstands an dieser Stelle. Wir haben nun begonnen, die Früchte unserer Arbeit zu ernten. Unser Unternehmen hat sich in den letzten zwei Jahren kulturell verändert. Wir haben mit unseren Führungskräften und Mitarbeitern diesen Wandel hin zu einem langfristig und nachhaltig erfolgreichen Unternehmen gestaltet.

Neubiberg, im Dezember 2010



Peter Bauer  
Vorstandsvorsitzender



## DER VORSTAND

┌ **DR. REINHARD PLOSS** ─┐  
Vorstand Operations  
Studium der Verfahrenstechnik, Promotion zum Dr.-Ing.  
Mitglied des Vorstands seit Juni 2007

┌ **PETER BAUER** ─┐  
Vorstandsvorsitzender  
Studium der Elektrotechnik, Diplomingenieur  
Mitglied des Vorstands seit April 1999

┌ **PROF. DR. HERMANN EUL** ─┐  
Vorstand Sales, Marketing, Technologie und F&E  
Studium der Elektrotechnik, Promotion zum Dr.-Ing.,  
Universitätsprofessor  
Mitglied des Vorstands seit Juli 2005

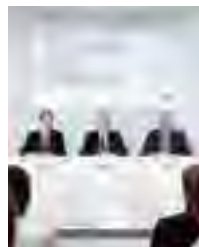

Auf der Infineon Bilanzpressekonferenz 2010 standen neben dem Rückblick auf das abgelaufene Geschäftsjahr vor allem die langfristigen Perspektiven des Konzerns in den entscheidenden Zielmärkten im Mittelpunkt. Im abgelaufenen Geschäftsjahr konnte der Umsatz gegenüber dem Vorjahr um mehr als 50 Prozent gesteigert und auch das Ergebnis signifikant verbessert werden. Infineon positioniert sich damit als profitables, wachstumsstarkes und stabiles Unternehmen.

01

02

03

04

05

06

07

08

09

10

11

12

13

14

15

16

17

18

19

20

21

## STRATEGIE UND FINANZEN

2010 war ein erfolgreiches Geschäftsjahr für Infineon: Bei einem Umsatz in Höhe von 3.295 Millionen Euro aus fortgeführten Aktivitäten erzielten wir ein Segmentergebnis in Summe aus fortgeführten Aktivitäten von 475 Millionen Euro, was einer Segmentergebnis-Marge von 14,4 Prozent entspricht.

### I. FORTSETZUNG EINER ERFOLGSGESCHICHTE

03 Damit konnten wir im Geschäftsjahr 2010 eine Erfolgsgeschichte fortsetzen, die bereits in 2008 ihren Anfang nahm: Damals hat Infineon begonnen, das Unternehmen grundlegend umzustrukturieren und auf Geschäftsfelder zu fokussieren, die überdurchschnittliches Wachstum und überdurchschnittliche Marge versprechen. Durch unterschiedliche unternehmensweite Maßnahmen ist es uns gelungen, Infineons finanzielle Situation deutlich zu verbessern und damit die Attraktivität des Unternehmens für unsere Anleger stark zu erhöhen.

Den Anfang machte im Sommer 2008 das Kostensenkungsprogramm IFX10+, das signifikante Kosteneinsparungen brachte. Diese verhalfen uns nicht nur dazu, die Wirtschaftskrise gut zu überstehen und ein starker Spieler am Halbleitermarkt zu bleiben, sondern auch zur Steigerung unserer Profitabilität.

Auch das Portfoliomanagement haben wir in den vergangenen beiden Jahren aktiv vorangetrieben: Neben der Entkonsolidierung von Qimonda im Geschäftsjahr 2009 und dem Abschluss des Verkaufs des Geschäfts mit drahtgebundener Kommunikation Anfang des Geschäftsjahrs 2010 wurde im Sommer 2010 ein Vertrag über den Verkauf des Mobilfunkgeschäfts des Segments Wireless Solutions (WLS) an Intel unterzeichnet. Durch diese Maßnahmen haben wir Infineon auf weniger volatile und schnell wachsende Zielmärkte fokussiert, in denen wir führende Marktpositionen belegen. In allen drei verbleibenden Kerngeschäften, Automobilelektronik, Industrieelektronik und Sicherheit,

### 03 UNTERNEHMENSUMBAU TREIBT DEN FINANZIELLEN ERFOLG: FIRMENWEITES MASSNAHMENBÜNDEL ERHÖHT DIE PROFITABILITÄT DES UNTERNEHMENS

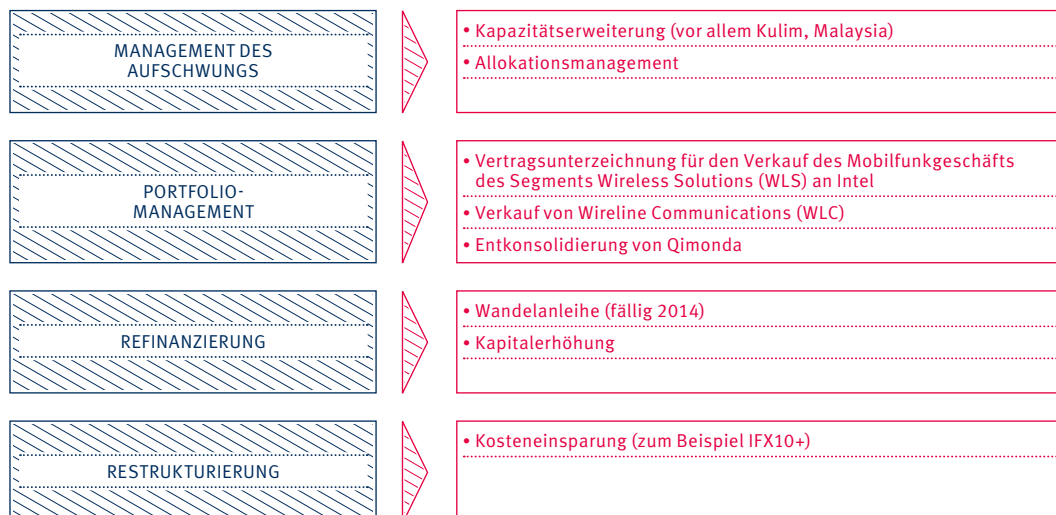

haben wir heute die Nummer-1-Position im Weltmarkt inne. Durch erfolgreiche Kapitalmarktmaßnahmen, die uns über 900 Millionen Euro einbrachten, konnten wir zudem zum Ende des Geschäftsjahrs 2009 unsere Bilanz deutlich stärken.

- 04 Im Geschäftsjahr 2010 konnten wir an die Erfolge des Vorjahrs anknüpfen und, auch unterstützt durch eine deutliche Nachfrageerholung, unseren Umsatz gegenüber dem Vorjahr um 51 Prozent auf 3.295 Millionen Euro steigern. Es ist uns gelungen, für unsere fortgeführten Aktivitäten ein negatives
  - 05 Segmentergebnis in Summe in Höhe von minus 140 Millionen Euro in ein positives Segmentergebnis in Summe in Höhe von 475 Millionen Euro zu drehen. Auch gelang es, nach einem Konzernjahres-
  - 06 fehlbetrag von 674 Millionen Euro für das Geschäftsjahr 2009 im abgelaufenen Geschäftsjahr einen Konzernjahresüberschuss von 660 Millionen Euro zu erwirtschaften. Der Free-Cash-Flow stieg von 274 Millionen Euro im Geschäftsjahr 2009 auf 573 Millionen Euro im Geschäftsjahr 2010. Die Netto-
- Cash-Position betrug zum Ende des Geschäftsjahrs 2010 1.331 Millionen Euro und lag damit um 674 Millionen Euro höher als noch zum Ende des Krisenjahrs 2009 (657 Millionen Euro).

#### 04 ENTWICKLUNG DES UMSATZES AUS FORTGEFÜHRTEN AKTIVITÄTEN IN MIO. €

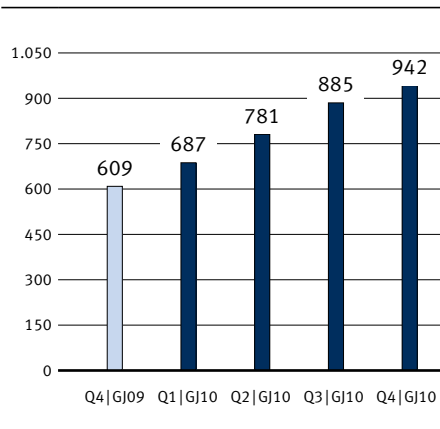

#### 05 ENTWICKLUNG DES SEGMENTERGEBNISSES AUS FORTGEFÜHRTEN AKTIVITÄTEN IN MIO. €

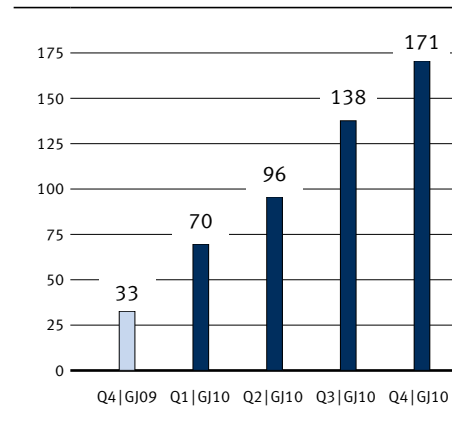

#### 06 ENTWICKLUNG DES FREE-CASH-FLOW AUS FORTGEFÜHRTEN AKTIVITÄTEN IN MIO. €

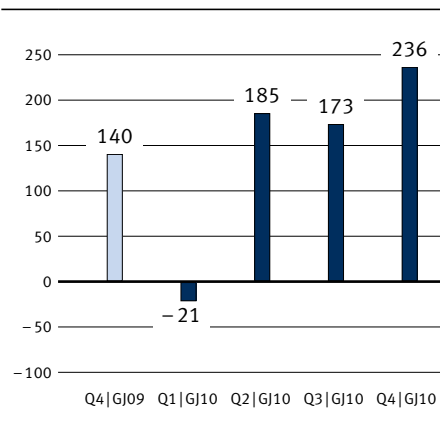

01  
02  
03  
04  
05  
06  
07  
08  
09  
10  
11  
12  
13  
14  
15  
16  
17  
18  
19  
20  
21

## II. POTENZIALE NUTZEN – LANGFRISTIG WERT SCHAFFEN

Das erfolgreiche Geschäftsjahr 2010 verstehen wir aber nicht als Abschluss, sondern als Zwischenstation auf unserem Weg zu dauerhaftem Unternehmenserfolg. Während wir in 2010 die Profitabilität von Infineon deutlich gesteigert und unsere Bilanz weiter gestärkt haben, wollen wir künftig nicht nur nachhaltig profitabel sein, sondern hinsichtlich unseres Unternehmenserfolgs auch planbarer und weniger volatil werden. Um dies zu erreichen, greifen wir auf Potenziale und Fähigkeiten zurück, die sich in folgenden vier strategischen Prinzipien wiederfinden. Teilweise sind diese aus historischen Stärken heraus entstanden, teilweise haben wir sie neu definiert. In jedem Fall sollen sie uns ermöglichen, das im Unternehmen liegende Potenzial auszuschöpfen und in Wertsteigerung umzusetzen.

### 1. KONZENTRATION AUF DIE SCHLÜSSELTHEMEN ENERGIEEFFIZIENZ, MOBILITÄT UND SICHERHEIT

Die Aktivitäten unseres Unternehmens konzentrieren sich auf die drei großen gesellschaftlichen Herausforderungen Energieeffizienz, Mobilität und Sicherheit. Alle drei bieten langfristig überdurchschnittlich gute Wachstumsperspektiven.

- **Energieeffizienz:** Energieeffizienz spielt eine zentrale Rolle in der modernen Gesellschaft. Die Weltbevölkerung wächst ständig und mit ihr der globale Energiebedarf. Elektrizität wird dabei zum wichtigsten Energieträger des 21. Jahrhunderts. Zum einen, weil die fossilen Energieträger in absehbarer Zeit zur Neige gehen, zum anderen, weil Strom günstig und sehr schnell transportiert und effizient gewandelt werden kann.

Halbleiter von Infineon erhöhen die Energieeffizienz in allen Wertschöpfungsstufen der Energiewirtschaft: bei der Erzeugung, der Übertragung und insbesondere der Nutzung elektrischer Energie. Sie bilden die Grundlage für intelligente und optimale Nutzung von Energie in Industrieanwendungen, Stromversorgungen für Computer und Unterhaltungselektronik sowie in Autos. Der Einsatz unserer Halbleiter hilft dabei, den CO<sub>2</sub>-Ausstoß zu reduzieren und so die weltweiten Klimaziele einzuhalten. Zunehmend werden daher auch erneuerbare Energien als nachhaltige Energiequellen eingesetzt. All dies treibt unser Geschäft mit Industrieanwendungen, aber auch im Bereich der Automobilelektronik.

- **Mobilität:** Das Bedürfnis der Menschen nach Mobilität ist eine weitere große Herausforderung der modernen Gesellschaft. Dieser Trend stärkt vor allem unser Geschäft mit Halbleiterlösungen für die Automobilindustrie.

Die zunehmende Urbanisierung erhöht aber auch die Nachfrage nach zuverlässigen öffentlichen Verkehrsmitteln. Infineon liefert für eine Vielzahl von Zugsystemen die Leistungshalbleiter für die Antriebssteuerung und sorgt so für die Mobilität der Menschen in und zwischen den Metropolen. Für Schnellzüge, Trolleybusse und Metrobahnen sowie Zweiräder mit Elektroantrieb entwickeln wir immer kompaktere Lösungen, um unseren Kunden mehr Funktionalität auf immer kleinerem Raum anzubieten.

- **Sicherheit:** Die Anforderungen an sichere Datensysteme werden immer höher; Infineons Geschäft mit hardware-basierten Sicherheitslösungen profitiert davon. Unsere Halbleiter ermöglichen die Einhaltung der weltweit höchsten Sicherheitsstandards. Dadurch sorgen sie dafür, dass zum Beispiel Datenaustausch, Finanztransaktionen, Logistiksysteme und Grenzkontrollen immer einfacher und sicherer werden.

Wichtige Anwendungsbereiche sind elektronische Reisepässe, Personalausweise sowie Bezahlkarten und zunehmend auch Sicherheitsanwendungen über die Chipkarte hinaus.



## 2. AUSRICHTUNG DES UNTERNEHMENS AUF DIE ZIELMÄRKTE

Die Dynamik der genannten Schlüsselthemen treibt das Marktwachstum für Halbleiterlösungen in Automobil- und Industrieanwendungen sowie in Chipkarten-Technologien. Mit unseren drei Divisionen Automotive, Industrial & Multimarket sowie Chip Card & Security folgt die Organisation des Unternehmens diesen Zielmärkten, um deren Wachstumspotenzial optimal nutzen zu können.

- **Automotive:** Infineon deckt in seiner Division Automotive (ATV) die wichtigsten Anwendungsfelder beim Auto ab: Antriebsstrang, Sicherheit und Komfortelektronik. Die dafür benötigten Halbleiterprodukte sind Mikrocontroller, Sensoren und Leistungshalbleiter. Auf dem Markt für Automobilelektronik ist Infineon mit 9 Prozent Marktanteil weltweit die Nummer 1 (Quelle: Strategy Analytics, April 2010). Die Basis für diesen Erfolg sind Kundennähe, innovative Produkte und Technologien, Systemverständnis sowie ein industrieweit führendes Qualitätssicherungsprogramm.
- **Industrial & Multimarket:** Als weltweit einziges Unternehmen bietet Infineon Leistungshalbleiter und -module für die gesamte Kette der Erzeugung, Übertragung und des Verbrauchs elektrischer Energie an. Diese Produkte – insbesondere IGBT-Module, diskrete und integrierte Leistungshalbleiter – sind in der Division Industrial & Multimarket (IMM) zusammengefasst. Ebenso gehören Kleinsignaltransistoren und -dioden sowie Hochfrequenz (HF)-Bausteine mit Schutzfunktion zum Produktportfolio. Infineon ist bei Leistungshalbleitern weltweit die Nummer 1 mit 11 Prozent Marktanteil (Quelle: IMS Research, Juli 2010).
- **Chip Card & Security:** Wir liefern Mikrocontroller für die SIM-Karten der Mobiltelefonie, Sicherheitschips für Bezahlkarten, chipbasierte Lösungen für Reisepässe, Personalausweise, Führerscheine und sonstige behördliche Dokumente. Darüber hinaus entwickeln wir Lösungen für Anwendungen mit hohen Sicherheitsanforderungen wie zum Beispiel Bezahlfernsehen und Trusted Computing. Unsere Chiplösungen, die alle diese Anwendungsfelder unserer Kunden bedienen, sind in der Division Chip Card & Security (CCS) zusammengefasst. Unser Unternehmen war 2009 im 13. Jahr in Folge Weltmarktführer bei Chips für Kartenanwendungen mit einem Marktanteil von 27 Prozent (Quelle: Frost & Sullivan, Oktober 2010).

01

02

03

04

05

06

07

08

09

10

11

12

13

14

15

16

17

18

19

20

21

### 3. TECHNOLOGISCHE KERNKOMPETENZEN

Wir sehen in den drei Disziplinen Analog- und Mixed-Signal-Schaltungen, Embedded Control und Leistungshalbleiter unsere technologischen Kernkompetenzen. Denn für alle drei Disziplinen haben wir spezielle, proprietäre Fertigungsprozesse entwickelt, die optimal an die jeweiligen Schaltungsanforderungen angepasst sind. Durch die Kombination von Schaltungsdesign-Know-how und optimierten Fertigungsprozessen wurden wir zum bevorzugten Halbleiterlieferanten vieler Kunden.

- **Analog- und Mixed-Signal-Schaltungen:** Aus technischen wie ökonomischen Gründen ist es in vielen Fällen erforderlich, zusätzlich zur digitalen Logik, je nach Anwendung, auch analoge Schaltungseinheiten wie Sensorik, Schnittstellen und Leistungselektronik auf einem Chip unterzubringen. Die Realisierung komplexer Funktionsblöcke mittels modernster Fertigungstechnologien ermöglicht spezifisch auf die Anforderungen des Kunden zugeschnittene Halbleiterbausteine. Da weniger Komponenten benötigt werden, verringert sich die Fehleranfälligkeit solcher Steuerungssysteme. Angewendet werden diese Fähigkeiten beispielsweise bei unserem neuen SPT9-Fertigungsprozess (Smart Power Technology der neunten Generation). Dieser ermöglicht es uns zum Beispiel, die gesamte Steuerung eines Fensterhebers auf einem einzigen Chip unterzubringen.
- **Embedded Control:** Unter Embedded Control verstehen wir die applikationsspezifische Einbettung eines Mikrocontrollers auf einem Chip, kombiniert mit Schnittstellen-Komponenten und einem nichtflüchtigen Speicher (Embedded Flash). Mit solchen Chips lassen sich komplexe Applikationen per Software steuern. Die Herausforderung besteht darin, die Rechenleistung des Mikrocontrollers, die Kombination der Schnittstellen und den Speicher möglichst kosteneffizient und nicht zuletzt stromsparend an die betreffende Anwendung des Kunden anzupassen. Zum Einsatz kommen solche Embedded-Control-Lösungen zum Beispiel bei Mikrocontrollern für Industrie- und Automobilanwendungen. Die optimale Abwägung der Anforderungen für das jeweilige Anwendungsfeld spielt auch bei der hardware-basierten Sicherheit eine große Rolle. Insbesondere in Anwendungen mit kontaktloser Übertragung sind Kriterien wie Rechenleistung, Stromverbrauch und Sicherheit bei jeweils günstigster Kostenposition aufeinander abzustimmen.
- **Leistungshalbleiter:** Leistungshalbleiter dienen dem Schalten und Regeln hoher Ströme und hoher Spannungen, also hoher elektrischer Lasten. Als weltweit einziges Unternehmen bietet Infineon Leistungshalbleiter und Leistungsmodule für die gesamte Kette der Erzeugung, Übertragung und Umwandlung elektrischer Energie an. Höchste Effizienz und damit geringste Wärmeentwicklung sowie kompakte Gehäusebauformen zeichnen unsere Produkte aus. Ohne eine überragende Fertigungstechnologie lässt sich ein hoher Grad an Effizienz und Systemminiaturisierung nicht erreichen. Mit unserer weltweit führenden Dünnpwafer-Technologie stellen wir unsere Spitzenstellung bei Fertigungstechnologien für Leistungshalbleiter unter Beweis.

#### 4. SYSTEMVERSTÄNDNIS

Infineon hat, wie kaum ein anderer Halbleiterhersteller, ein profundes Verständnis der auf Halbleitern basierenden Systeme seiner Kunden. 25 Jahre Erfahrung mit Sicherheitschips und rund 40 Jahre Systemverständnis bei Automobil- und Industrieanwendungen machen uns zum bevorzugten Partner unserer Kunden. Hierzu drei Beispiele:

Moderne Pkws sind mit ihren vielen Sensoren, Regelkreisen und vernetzten Steuereinheiten bereits sehr komplex. Bei **Hybridautos** nimmt die Komplexität durch die Kombination aus Verbrennungs- und Elektromotor nochmals deutlich zu. Erst ein optimales und damit effizientes Zusammenspiel beider Motoren rechtfertigt die Entwicklung und Nutzung dieser neuen Fahrzeugklasse. Ähnliches gilt für reine **Elektroautos**. Die großen Herausforderungen beider Fahrzeugtypen liegen in der Motorsteuerung des Elektroantriebs, dem Batteriemanagement sowie in der Ladeinheit. Überwiegend mit unseren Leistungshalbleitern, aber auch mit Mikrocontrollern und Sensoren können wir alle diese Anwendungsfelder bedienen und zu deren Optimierung beitragen.

Bei der Solarstromerzeugung spielen **Umrichter** eine wichtige Rolle. Sie wandeln die in den Solarmodulen erzeugte Gleichspannung in Wechselspannung um und speisen sie ins Stromnetz ein. Die Umrichter unserer Kunden arbeiten bereits heute mit einer Effizienz von über 90 Prozent. Trotzdem wird an weiteren Verbesserungen gearbeitet. Denn jede weitere Steigerung der Effizienz verringert die Verlustleistung, senkt dadurch die Systemkosten für unsere Kunden und erhöht somit deren Wettbewerbsvorteile. In enger Abstimmung mit unseren Kunden liefern wir die für ihre Umrichter-Topologie geeigneten Leistungskomponenten wie IGBT-, MOSFET- und Siliciumkarbid (SiC)-Komponenten. Erst das Zusammenspiel aller Komponenten kann auf dem hohen Niveau zu einer weiteren Effizienzsteigerung führen.

s. 59  Auch was sicherheitskritische Anwendungen betrifft, ist eine systemweite Sicht unerlässlich. Das schwächste Glied der Kette stellt häufig das Ziel für Angreifer dar. Deshalb haben wir mit unserer neuen Sicherheitstechnologie „**Integrity Guard**“ einen neuen Sicherheitsstandard unter anderem für behördliche Dokumente und Bezahlkarten geschaffen. Bei „Integrity Guard“ bietet der Sicherheitscontroller eine umfassende Fehlererkennung und eine vollständige Verschlüsselung über den gesamten Datenpfad im Chip. Der Prozessorkern besteht aus zwei Einheiten, die sich gegenseitig ständig überwachen und sofort feststellen, ob eine Rechenoperation korrekt ausgeführt wurde oder nicht. Ein wichtiger technischer Fortschritt des „Integrity Guard“ ist außerdem das Rechnen mit verschlüsselten Daten im Prozessorkern selbst. Damit wurde eine Schwachstelle herkömmlicher Sicherheitscontroller beseitigt, bei denen Daten zur Verarbeitung erst entschlüsselt und damit kurzfristig im Klartext sichtbar werden und so ein lohnendes Ziel für mögliche Angreifer darstellen.

Die beschriebenen strategischen Prinzipien werden flankiert durch unser „High Performance Programm“, das auf die Entwicklung unseres Unternehmens zu einer exzellenten Organisation abzielt, die dauerhaft herausragende Leistungen erbringt und die Erwartungen aller ihrer Interessengruppen erfüllt oder übertrifft. Über ausgewählte Schlüsselprojekte und die Einbeziehung der Mitarbeiter werden Verbesserungspotenziale systematisch identifiziert und realisiert. Neben kulturellen Aspekten zum konsequenten Leistungsanspruch werden vor allem interne Strukturen und Abläufe in Schlüsselprojekten weiterentwickelt. Dies hilft uns, flexibler mit Marktabschwüngen umzugehen und Infineons stetigen Wachstumskurs in Schwellenländern durch eine stärkere Ausrichtung auf regionale Anforderungen fortzusetzen.

01  
02  
03  
04  
05  
06  
07  
08  
09  
10  
11  
12  
13  
14  
15  
16  
17  
18  
19  
20  
21

## 07 UNSER ANGESTREBTES GESCHÄFTSMODELL

|                       | GJ 2009    | GJ 2010    | Ziel                        |
|-----------------------|------------|------------|-----------------------------|
| Umsatz                | 2,2 Mrd. € | 3,3 Mrd. € | ~ 4 Mrd. €                  |
| Bruttoergebnis-Marge  | 22,8 %     | 37,5 %     | Niedriger<br>40er-%-Bereich |
| Segmentergebnis-Marge | -6,4 %     | 14,4 %     | Hoher<br>10er-%-Bereich     |

## III. UNSER ANGESTREBTES GESCHÄFTSMODELL

Unser unternehmerisches Handeln beruht also auf vier strategischen Prinzipien:

- Wir fokussieren uns auf die drei großen gesellschaftlichen Herausforderungen Energieeffizienz, Mobilität und Sicherheit.
- Wir richten unsere Organisationsstruktur auf die Zielmärkte aus, in denen unsere Kunden tätig sind.
- Durch unsere technologischen Kernkompetenzen versuchen wir uns vom Wettbewerb abzuheben.
- Durch unser tiefes Systemverständnis der von unseren Kunden adressierten Applikationen erarbeiten wir weitere Wettbewerbsvorteile.

Die Orientierung an unseren strategischen Prinzipien ist die Voraussetzung dafür, dauerhaft und auf hohem Niveau profitabel zu arbeiten. Basierend darauf zielen wir auf ein Finanzmodell ab, durch das wir dauerhaft Wert für unsere Aktionäre generieren.

07  Mit unserem angestrebten Geschäftsmodell haben wir uns bei einem Jahresumsatz von rund 4 Milliarden Euro eine Bruttoergebnis-Marge im niedrigen 40er-Prozent-Bereich und eine Segmentergebnis-Marge im hohen 10er-Prozent-Bereich vorgenommen. Das Erreichen dieser Finanzziele wird uns eine Kapitalrendite bringen, die über unseren durchschnittlichen Kapitalkosten liegt.

**08** ENTWICKLUNG DES ADDIERTEN UMSATZES DER BEREICHE AUTOMOTIVE, INDUSTRIAL & MULTIMARKET SOWIE CHIP CARD & SECURITY IN DEN GESCHÄFTSJAHREN 2000 BIS 2010  
IN MIO. €

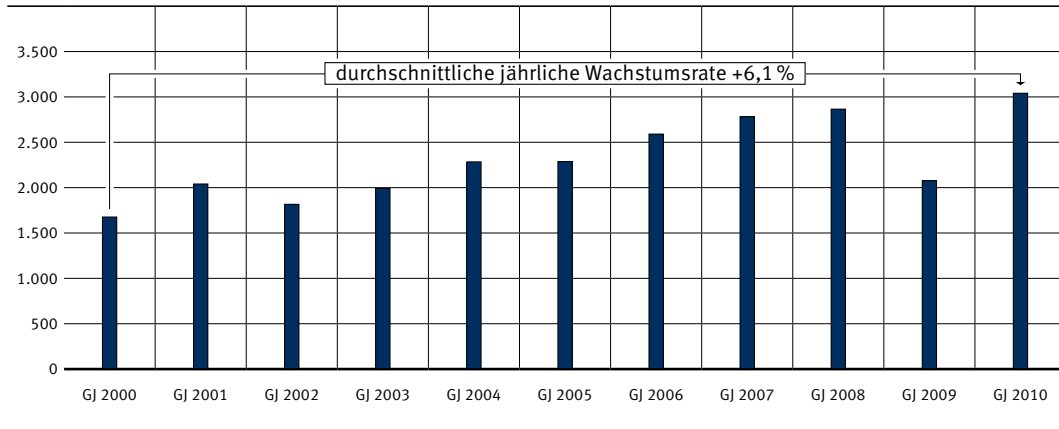

**IV. WACHSTUMS- UND GEWINNAUSSICHTEN UNSERES PORTFOLIOS**

08 Mit dem Verkauf des Mobilfunkgeschäfts von Wireless Solutions (WLS) starten wir ein neues Kapitel der Unternehmensgeschichte. Um die Wachstumsperspektiven des verbleibenden Kerngeschäfts hervorzuheben, ist hier die Entwicklung des addierten Umsatzes der Bereiche Automotive, Industrial & Multimarket sowie Chip Card & Security aufgezeigt.

Wie der Grafik 08 zu entnehmen ist, lag die durchschnittliche Wachstumsrate der drei Kerngeschäfte von Infineon über den 11-Jahres-Zeitraum von 2000 bis 2010 bei knapp über 6 Prozent. Diese Segmente waren über den genannten Zeitraum wenig volatil und bis auf das Geschäftsjahr 2009 profitabel. So war das operative Ergebnis unseres Segments Industrial & Multimarket nur in einem von 44 Quartalen negativ; im Segment Automotive war dies nur in drei Quartalen der Fall.

01  
02  
03  
04  
05  
06  
07  
08  
09  
10  
11  
12  
13  
14  
15  
16  
17  
18  
19  
20  
21

09 WELTWEITER AUTOMOTIVE-, INDUSTRIELEKTRONIK- UND CHIPKARTEN-HALBLEITERMARKT  
IN MRD. \$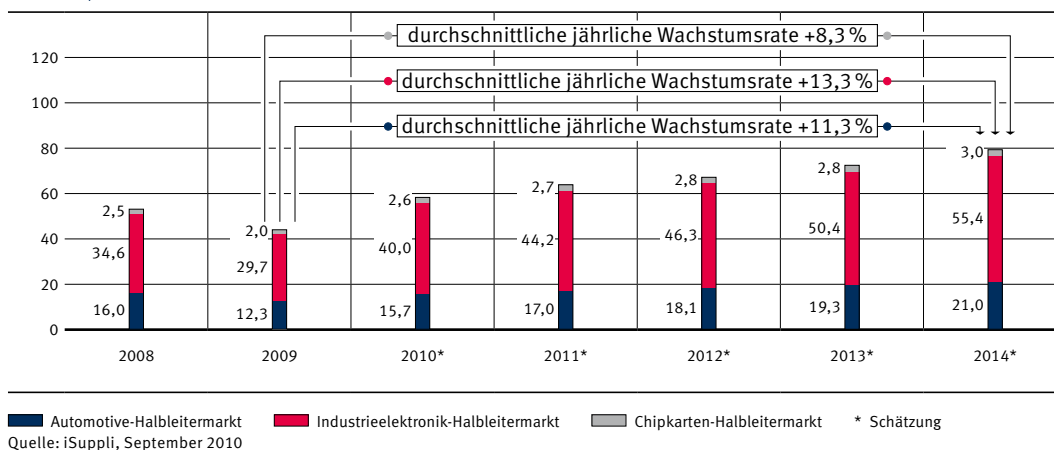

Die Wachstumsaussichten für die drei Kerngeschäfte sind gemäß jüngsten Marktstudien weiterhin sehr gut.

09 Für unsere drei Zielmärkte werden im Zeitraum von 2009 bis 2014 durchschnittliche jährliche Wachstumsraten von 11,3 Prozent für Automotive, 13,3 Prozent für Industrial & Multimarket und 8,3 Prozent für Chip Card & Security erwartet.

Wir sind in allen drei Segmenten Marktführer und glauben, dass wir Infineon in seinen neuen Kernbereichen zukünftig nachhaltig profitabler und weniger volatil betreiben können. Im Folgenden werden wir das für jedes Segment ausführlicher begründen.

## AUTOMOTIVE

- 10  Das Geschäftsjahr 2009 war von einem Einbruch der Weltwirtschaft, einem Produktionsrückgang von 12 Prozent in der Automobilindustrie im Kalenderjahr 2009 sowie einem darüber hinausgehenden
- 11  Rückgang der Umsätze mit Automobilhalbleitern von 23 Prozent im selben Zeitraum gekennzeichnet.

Für das Geschäftsjahr 2010 ergibt sich dagegen ein ganz anderes Bild: Durch die Erholung der Weltkonjunktur dürfte die Autoproduktion sogar über dem Niveau des Vorkrisen-Geschäftsjahrs 2008 liegen. Die Autobauer profitieren derzeit vor allem vom Wachstum in China, Indien, Russland und Brasilien – nicht mehr, wie im Vorjahr, von staatlich finanzierten Abwrackprämien in Westeuropa. Die Situation hat sich also binnen zwölf Monaten vollständig gewandelt. Besonders groß war zudem die Nachfrage aus China sowie weltweit nach Fahrzeugen der Oberklasse mit überdurchschnittlich hohem Wert der verbauten Halbleiter.

### WACHSTUMSPOTENZIAL UND -TREIBER FÜR AUTOMOTIVE

Für den Automobilhalbleiter-Markt geht das Marktforschungsunternehmen iSuppli für den Zeitraum von 2009 bis 2014 von einer durchschnittlichen Wachstumsrate von 11,3 Prozent aus. Diese liegt leicht über der entsprechenden Wachstumsrate der Autoproduktion von 9,0 Prozent (Quelle: CSM, November 2010) und auch über der für den gesamten Halbleitermarkt erwarteten Rate von 9,2 Prozent.

Folgende Trends sehen wir als Hauptwachstumstreiber im Automotive-Segment: Elektrifizierung des Antriebsstrangs, mehr Sicherheit und stringenter CO<sub>2</sub>-Auflagen sowie günstige Autos in Schwellenländern.

### ELEKTRIFIZIERUNG DES ANTRIEBSSTRANGS

Elektromobilität ist eine der wichtigsten Entwicklungen in der Automobilindustrie der nächsten Jahre. Laut einer Studie der Unternehmensberatung Boston Consulting wird sich der Fahrzeugbestand in den nächsten 40 Jahren auf 2 Milliarden Autos verdoppeln. Ohne vollelektrischen Antrieb kann das Weltklima diesen Zuwachs an Verkehrsmitteln nicht verkraften. Derzeit fahren rund 30.000 Hybrid- und 1.600 Elektroautos auf deutschen Straßen. Es wird erwartet, dass die Gesamtzahl dieser Autos bis zum Jahr 2020 auf eine Million steigt. Im Vergleich zu einem Mittelklassewagen mit verbauten Halbleitern im Gesamtwert von 300 US-Dollar erhöht sich der Halbleiteranteil in einem Hybrid- oder Elektroauto um 600 bis 700 US-Dollar je nach Motorleistung und Ausstattung.

Infineon wird davon profitieren, nicht nur im Markt für Automobilhalbleiter Marktführer zu sein, sondern auch bei Leistungshalbleitern – den Schlüsselkomponenten für den Hybrid- und Elektroantrieb. Durch das umfangreiche Systemverständnis unserer Entwickler kennen wir die Bedürfnisse unserer Kunden wie kaum ein anderer Wettbewerber. Im Zukunftsmarkt Elektromobilität wollen wir der führende Chipanbieter sein. Bis zum Ende des Jahrzehnts erwarten wir einen hohen dreistelligen Millionenumsatz im Segment Elektromobilität.

01

02

03

04

05

06

07

08

09

10

11

12

13

14

15

16

17

18

19

20

21

01 Die Elektromobilität hat auch jenseits des Autos für Infineon eine sehr große Bedeutung. Infineon  
02 bietet hier Mikrocontroller, Hall-Sensoren und spezielle Leistungshalbleiter wie Leistungstransis-  
03 toren und Spannungsregler an. Bei den 8-Bit-Mikrocontrollern der XC800-Familie für eBikes, also  
04 Fahrräder mit Elektroantrieb, hat sich Infineon innerhalb von nur drei Jahren weltweit einen Markt-  
05 anteil von etwa einem Drittel erarbeitet: 2009 wurden rund acht Millionen von Infineon-Halbleitern  
06 geregelte eBikes verkauft – vornehmlich in China, Tendenz stark steigend. Neben dem asiatischen  
07 hat auch der europäische Markt enormes Wachstumspotenzial.

#### MEHR SICHERHEIT UND STRINGENTERE CO<sub>2</sub>-AUFLAGEN

05 Mehr Sicherheit verlangt mehr Sensoren, die Informationen über verschiedenste sicherheitsrele-  
06 vante Ereignisse zur Verfügung stellen können. Unsere Produktschwerpunkte für Sicherheitsanwen-  
07 dungen liegen auf Airbags, Seitenaufprallschutz, elektronischer Lenkunterstützung, Gurtstraffern,  
08 ABS/Fahrzeugstabilitätsregelung (ESP), elektronisch geregelten Fahrwerken, radarbasierter Fah-  
09 rerrassistenz und Reifendruckkontrolle. Infineon sieht sich bei Reifendrucksensoren und Drucksen-  
10 soren für Seitenairbags als Weltmarktführer.

11 Um die stringenteren CO<sub>2</sub>-Auflagen – in Europa die bereits beschlossene Norm Euro 6 – einhalten  
12 zu können, wird neben mehr Sensorik auch mehr Rechenleistung benötigt. Mittels Turboladern wird  
13 aus kleineren Hubräumen und oft auch aus einer geringeren Zahl von Zylindern eine höhere Motor-  
14 leistung bei gleichzeitig reduziertem Verbrauch erzielt. Dieser Entwicklungsschritt wird Downsizing  
15 von Otto- und Dieselmotoren genannt. Diese Verbesserungen betreffen den kompletten Regelkreis  
16 von der Sensorik über die Rechenleistung bis zur Ansteuerlektronik. Dabei werden die Abläufe  
17 noch präziser: Die Benzineinspritzmengen werden längst in Millilitern und die Steuerzeiten in Mikro-  
18 sekunden gemessen.

19 Unsere 32-Bit-Controller AUDO Future und AUDO MAX sind speziell für die Anforderungen im  
20 Bereich Motor- und Getriebesteuerung entwickelt. In jedem dritten weltweit hergestellten Automobil  
21 sorgen unsere 32-Bit-Automotive-Controller für einen emissionsarmen Antrieb.

#### GÜNSTIGE AUTOS IN SCHWELLENLÄNDERN

22 In China gibt es heute bereits mehr als ein Handy pro Haushalt. In 97 Prozent der Stadthaushalte fin-  
23 det man eine Waschmaschine. Mehr als 50 Prozent der Haushalte haben einen Computer. Aber erst  
24 6 Prozent besitzen ein Auto. Aufgrund eines erhöhten Lebensstandards ist ein deutliches Nachfrage-  
25 wachstum in Asien, vor allem aber in China und Indien, zu beobachten. Bis 2020 werden auf Chinas  
26 Straßen mehr Autos unterwegs sein als in jedem anderen Land.

27 Gemeinsam mit unseren Kunden versuchen wir, die Fahrzeuge den Anforderungen der Menschen  
28 entsprechend zu gestalten und die Kostenziele zu treffen. So haben wir zum Beispiel eine Variante  
29 unserer 32-Bit-TriCore™-Familie auf die speziellen Anforderungen der Schwellenländer angepasst.



## 10 WELTWEITE AUTOPRODUKTION IN MIO. STÜCK

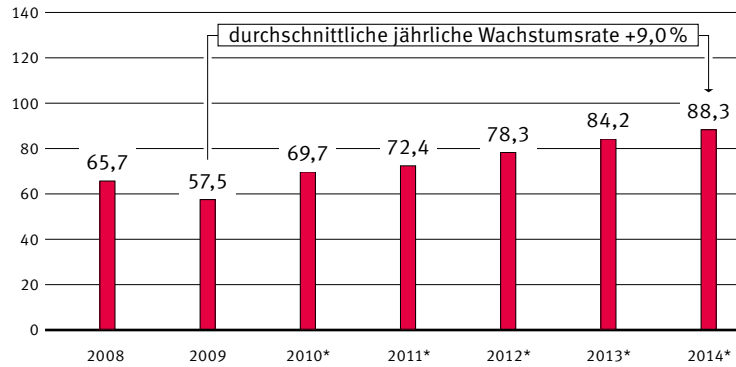

Quelle: CSM, November 2010 \* Schätzung

## 11 AUTOMOTIVE-HALBLEITERMARKT IN MRD. \$

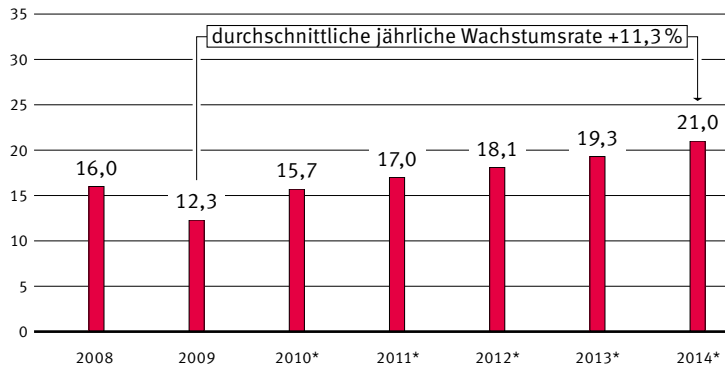

Quelle: iSuppli, September 2010 \* Schätzung

### ENGE KUNDENBINDUNG, HOHE EINTRITTSBARRIEREN, VERBESSERTE PROFITABILITÄT

Die hohen Qualitätsanforderungen führen zu engen Kundenbindungen und hohen Eintrittsbarrieren. Unter den größten Wettbewerbern fand sich in den letzten zehn Jahren kein neuer Konkurrent. Der Markt ist zwischen europäischen, US-amerikanischen und japanischen Herstellern aufgeteilt. Mit einem Marktanteil von 9 Prozent belegte Infineon im Jahr 2009 Platz 1 des weltweiten Automotive-Halbleitermarkts.

Unser IFX10+-Programm führte zu einer deutlichen Verbesserung der Profitabilität dieses Segments. Bei einem Umsatz von 340 Millionen Euro für das vierte Quartal des Geschäftsjahrs 2010 erzielte unser Automotive-Segment eine Segmentergebnis-Marge von 17,1 Prozent. Im Vorkrisenjahr 2008 lag die Marge im vierten Geschäftsquartal bei 6,7 Prozent bei einem Umsatz von 312 Millionen Euro.

01  
02  
03  
04  
05  
06  
07  
08  
09  
10

11  
12  
13  
14  
15  
16  
17  
18  
19  
20  
21

## INDUSTRIAL & MULTIMARKET

Nach Schätzungen des Marktforschungsunternehmens iSuppli für das Segment Industrial & Multimarket wird bereits in diesem Jahr das Vorkrisenniveau im Markt der Halbleiter für Industrieanwendungen übertroffen. Für den Zeitraum von 2009 bis 2014 geht iSuppli von einer durchschnittlichen jährlichen Wachstumsrate im Markt für Industriehalbleiter von etwa 13 Prozent aus.

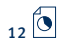

Als ein Beispiel aus dem Leistungselektronikbereich ist in Abbildung 13 die vom Marktforschungsunternehmen IMS Research erwartete Marktentwicklung bei Modulen für die lastabhängige Drehzahlsteuerung von Elektromotoren in Industrieanwendungen gezeigt – einer der Wachstumstreiber unseres Industrie-Portfolios. Dieser Markt soll mit einer durchschnittlichen Rate von 13,0 Prozent pro Jahr wachsen.

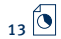

Im Bereich der Industriehalbleiter bietet Infineon vorwiegend Leistungselektronikprodukte an. Das sind Bausteine, zum größten Teil Stromschalter, die an verschiedenen Stellen in der Stromversorgungskette für die Wandlung und das Management von Strömen und Spannungen sowie zur Motorsteuerung eingesetzt werden.

### WACHSTUMSPOTENZIAL UND -TREIBER FÜR INDUSTRIAL & MULTIMARKET

Drei makroökonomische Trends spielen eine wichtige Rolle für unser Industrieelektronikgeschäft: die Industrialisierung der Schwellenländer, das weltweite Bestreben nach CO<sub>2</sub>-Reduzierung sowie die Urbanisierung der Metropolen. Im Mittelpunkt steht bei allen drei Trends die Elektrizität als bedeutendster Energieträger des 21. Jahrhunderts. Unsere Komponenten spielen dort eine Rolle, wo elektrische Energie erzeugt, übertragen oder verbraucht wird. An allen diesen Punkten der elektrischen Wertschöpfungs- beziehungsweise Verbrauchskette erfolgen die Wandlung und das Management von Spannungen und Strömen. Abgeleitet aus den drei makroökonomischen Trends sehen wir für unser Segment Industrial & Multimarket folgende Wachstumsfelder:

### ERNEUERBARE ENERGIEN

Gefördert durch nationale Subventionen in Deutschland auf Basis des Erneuerbare-Energien-Gesetzes und Exportmöglichkeiten aufgrund von hohen Zubauraten im Ausland bietet die Windenergie den Anlagenherstellern und damit Infineon als Zulieferer ein dynamisch wachsendes Geschäftsfeld. In aller Welt werden nach Meinung des Marktforschers IHS ERR Ende dieses Jahres Windräder mit einer Gesamtleistung von 190 Gigawatt installiert sein. Davon wurden rund 35 Gigawatt 2010 neu aufgebaut. Für 2011 ist mit weiterhin zweistelligem Wachstum zu rechnen. So sollen zum Beispiel in den nächsten 20 Jahren 5.000 Windräder mit einer Kapazität von 25 Gigawatt in den deutschen Gewässern der Nord- und Ostsee gebaut werden. Unsere robusten, auf höchste Zuverlässigkeit ausgelegten Schalter, sogenannte IGBT-Module, finden sich in der Gondel der Windräder unter anderem der Firmen Enercon, Goldwind, Siemens und Vestas sowie in den Umrichter-Plattformen.

Darüber hinaus ist Deutschland der größte Markt der Welt für Photovoltaik (PV). Rund die Hälfte der weltweit installierten PV-Leistung wird in Deutschland installiert. Für 2011 rechnet das Marktforschungsunternehmen iSuppli mit einem weiteren Zuwachs in Deutschland von 44 Prozent auf 9,5 Gigawatt neu zu installierender Leistung, nach mehr als 70 Prozent Wachstum im Jahr 2010. Des Weiteren wird erwartet, dass außer Deutschland auch die Märkte in Italien, Frankreich und den USA stark wachsen. Der weltweite PV-Markt wird im Jahr 2011 laut iSuppli kräftig um 43 Prozent auf 20 Gigawatt zulegen.

## 12 INDUSTRIELEKTRONIK-HALBLEITERMARKT IN MRD. \$

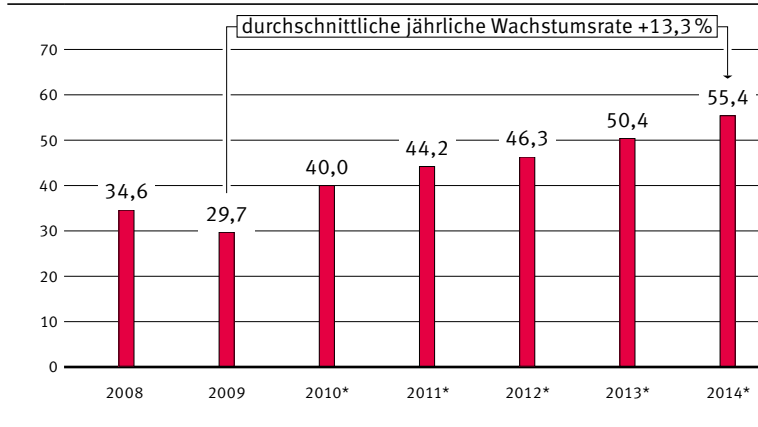

Quelle: iSuppli, September 2010 \* Schätzung

## 13 LEISTUNGSMODULE FÜR ELEKTROMOTOREN IN INDUSTRIEANWENDUNGEN IN MIO. \$

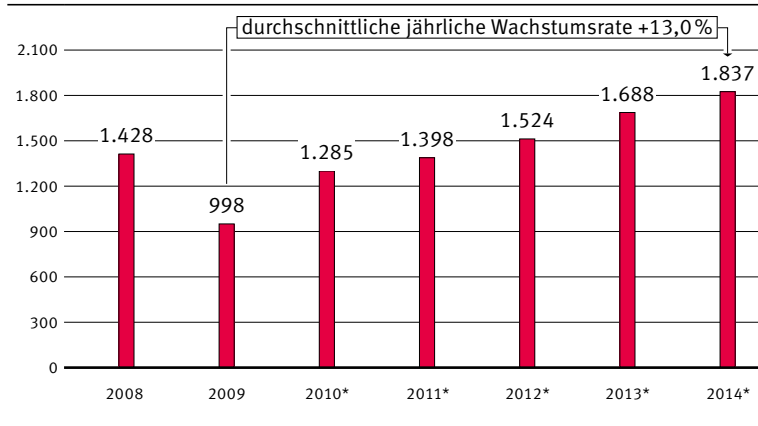

Quelle: IMS Research, Juli 2010 \* Schätzung

Wir liefern an unsere Kunden, die Hersteller von Invertern zur Einspeisung der Solarenergie ins Netz, IGBT-, MOSFET- und SiC-Komponenten. Unsere Kunden – in diesem Sektor zum Beispiel SMA Solar Technology – erreichen damit Wirkungsgrade auf Weltrekordniveau.

### INFRASTRUKTUR FÜR DIE ENERGIEVERSORGUNG

Der Anteil der erneuerbaren Energie aus Quellen wie Wind oder Sonne wird steigen. Da aber Wind und Sonne schwer prognostizierbare Wetterlagen sind und deshalb die Stromerzeugung daraus dementsprechend unberechenbar und volatil ist, liegt in der Integration von erneuerbaren Energien in das Stromnetz die größte Herausforderung für die Energiewirtschaft in den kommenden Jahren. Ein Problem bei der Integration erneuerbarer Energien ist, dass die erzeugte Energie nicht gespeichert werden kann. Erzeugung und Verbrauch müssen jederzeit gleich groß sein, weil sonst das Netz

01

02

03

04

05

06

07

08

09

10

11

12

13

14

15

16

17

18

19

20

21

01 nicht stabil ist. Um diesen Ausgleich gewährleisten zu können, muss das ganze Versorgungsnetz  
02 so ausgelegt werden, dass konventionelle Kraftwerke, abhängig vom Stromverbrauch im Netz  
03 und von der Stromerzeugung aus erneuerbaren Energieträgern, schnell hoch- und herunterge-  
fahren werden können.

04 Für dieses neue Netz der Zukunft, auch Smart Grid genannt, müssen neue Leitungen gebaut  
werden. Neben dem reinen Energietransport soll dieses Netz auch die reibungslose Kommunikation  
zwischen den Energieversorgern und den Verbrauchern bewerkstelligen. Elementarer Bestandteil  
des Smart Grid ist der digitale Verbrauchszähler, auch Smart Meter genannt. Das Smart Meter und  
die entsprechend kommunikationsfähigen Haushaltsgeräte sind die Verlängerung des Smart Grid  
zum Verbraucher. Das Smart Meter liefert Verbrauchsdaten per Datennetz; es informiert gleich-  
zeitig den Verbraucher in Echtzeit über seinen Stromverbrauch und die Stromkosten. Dabei ist die  
05 sichere, also verschlüsselte und für Fremde nicht les- oder manipulierbare Kommunikation eine  
06 wichtige Voraussetzung. Für die Sicherheit, Daten- und Energieübertragung bietet Infineon kom-  
07 plette Lösungen an.

08 Neben dem Smart Grid ist aber auch der Ausbau konventioneller Stromversorgungsnetze ein Nach-  
09 fragetreiber. Relevant ist dies vor allem in Schwellenländern wie Brasilien, Russland, China oder  
10 Indien. Insbesondere in diesen Ländern liegen tendenziell lange Distanzen zwischen dem Ort der  
Energieerzeugung und dem Ort des Energieverbrauchs in den schnell wachsenden Metropolen. Über  
lange Distanzen bietet sich die verlustarme Technologie der Hochspannungs-Gleichstrom-Übertra-  
gung (HGÜ) an. HGÜ kommt aber auch zum Einsatz bei der Anbindung von Offshore-Windparks. Für  
HGÜ werden die leistungsstärksten Halbleiterkomponenten im Infineon-Portfolio, IGBT-Module und  
bipolare Komponenten wie zum Beispiel Thyristoren, benötigt. Wir beliefern unter anderem Siemens  
und Alstom Grid.

### 13 **SCHIENENVERKEHR**

14 Die Eisenbahn erlebt eine Renaissance. In China, Indien, Brasilien, am Arabischen Golf, in Europa  
15 und sogar in den USA entstehen gewaltige neue Strecken. 30.000 Kilometer Schienen sind derzeit  
16 weltweit geplant oder im Bau. In Europa bauen Länder wie Spanien und Italien schnelle Strecken.  
17 China investiert in einem immensen Konjunkturprogramm umgerechnet 80 Milliarden Euro in das  
Bahnsystem. Die USA wollen, ebenfalls mit Mitteln ihres Konjunkturprogramms, ihr Schienennetz  
18 ausbauen und setzen dabei auf den Personenverkehr. Überall sollen neue Bahnlinien entstehen,  
19 zum Teil sogar Hochgeschwindigkeitsstrecken nach europäischem Vorbild, etwa zwischen Los Angeles,  
San Francisco und Sacramento.

20 Zwei Gründe hat die Bahnrenaissance: Zum einen hat sich die Technik der Bahn weiterentwickelt.  
21 Nicht nur in Europa, vor allem auch in Japan kann man verfolgen, wie schnell und komfortabel  
moderne Züge gerade für mittlere Entfernungen sind. Zugleich ist das Fliegen wegen der zeitrauben-  
den Sicherheitskontrollen weniger attraktiv als früher. Außerdem stoßen Flughäfen und Straßen, vor  
allem in den Ballungsräumen, zunehmend an die Grenzen ihrer Kapazität.

Praktisch alle neuen Verbindungen basieren auf Elektrozügen. Davon profitieren wir durch  
unsere Komponenten, die in elektrischen Antrieben zum Einsatz kommen. Infineon beliefert große  
Bahnhersteller wie Siemens, Alstom oder Bombardier mit IGBT-Modulen, die die starken Elektromo-  
toren steuern. In Spanien, Russland und seit 2008 auch in China fährt zum Beispiel der Velaro von  
Siemens, die internationale Variante des deutschen ICE, mit einem Wert an Leistungshalbleitern  
zwischen 50.000 und 100.000 Euro.

### DREHZAHLSSTEUERUNG FÜR ELEKTROMOTOREN

Auch bei der Drehzahlsteuerung von Elektromotoren (Variable Speed Drive – VSD) in Antrieben, Pumpen und Ventilatoren sind wir mit unseren Leistungselektronik-Komponenten vertreten. Bei VSD geht es darum, die Leistung der Elektromotoren kontinuierlich und präzise der Last anzupassen. Insgesamt wird dadurch effizienter mit Energie umgegangen und der Stromverbrauch in der Regel um 30 bis 40 Prozent reduziert. Die Marktdurchdringung bei VSD ist heute noch sehr gering. Sie liegt nach Schätzungen des ZVEI (Zentralverband Elektrotechnik- und Elektronikindustrie e. V.) in Europa bei 20 Prozent, weltweit nur bei 5 Prozent. Der Anteil bei Neuinvestitionen ist heute ebenfalls noch gering, in Deutschland liegt dieser Wert erst bei 25 Prozent. Es ist jedoch ein klar steigender Trend zu sehen, da sich Investitionen aufgrund der gestiegenen Energiepreise schnell amortisieren. Wachstumspotenzial ist hier noch auf Jahrzehnte gegeben.

Für die elektronische Drehzahlregelung bieten wir IGBT-Module für einen großen Leistungsbe- reich von wenigen Hundert Watt bis Megawatt an. Zusätzlich runden die für Motorsteuerung opti- mierten Mikrocontroller sowie die IGBT-Treiber-Bausteine unser Lösungspaket ab.

### STROMVERSORGUNG

Der Stromverbrauch von Rechenzentren erreicht Großstadtniveau. Der Energiehunger von Rechen- zentren und Serverfarmen, in denen Milliarden von Web-Seiten, Mails, sozialen Kontakten, Blog- Einträgen, Bildern oder Videos gespeichert sind, ist kaum zu stillen. Die größten Rechenzentren erreichen heute 50 bis 100 Megawatt Leistungsverbrauch; das entspricht dem Verbrauch von rund 80.000 Haushalten. Strom ist damit der größte Einzelkostenfaktor im Rechenzentrumsbetrieb.

Ein höherer Wirkungsgrad der Netzteile, etwa durch den Einsatz unserer CoolMOS™-Hochvolt- Leistungstransistoren, leistet hier einen entscheidenden Beitrag zur Kosten- und CO<sub>2</sub>-Senkung. Durch die Einführung des digitalen Regelkreises (digital power management) in Server-Netzteilen der 500-Watt- bis 1.000-Watt-Klasse kann die Effizienz der Stromversorgung weiter gesteigert werden.

### MIT QUALITÄT UND ZUVERLÄSSIGKEIT ZUM SIEBTEN MAL IN FOLGE MARKTFÜHRER

Mit einem Marktanteil von 11 Prozent belegte Infineon 2009 zum siebten Mal in Folge Platz 1 des Leistungshalbleiter-Marktes für Module und diskrete Komponenten. Mit dem genannten Marktanteil und unseren auf Qualität und Zuverlässigkeit ausgelegten Leistungselektronik-Produkten sind wir sehr gut positioniert, um vom Wachstumspotenzial der Zielmärkte profitieren zu können.

Mit dem IFX10+-Programm konnte auch die Division Industrial & Multimarket deutliche Fortschritte in ihrer Profitabilität erzielen. Im vierten Quartal des Geschäftsjahrs 2010 erzielte die Division bei einem Umsatz von 413 Millionen Euro eine Segmentergebnis-Marge von 23,7 Prozent. Zum Vergleich: Die Marge im vierten Quartal des Vorkrisen-Geschäftsjahrs 2008 lag bei 17,2 Prozent bei einem Umsatz in Höhe von 325 Millionen Euro.

01

02

03

04

05

06

07

08

09

10

11

12

13

14

15

16

17

18

19

20

21

## CHIP CARD & SECURITY

Im Markt der Halbleiter für Chipkarten wird laut Marktforschungsunternehmen iSuppli erst im Jahr 2011 das Vorkrisenniveau wieder erreicht. Für den Zeitraum von 2009 bis 2014 geht iSuppli von einer durchschnittlichen jährlichen Wachstumsrate von 8,3 Prozent aus. In diesem Segment bietet Infineon Sicherheitschips für Applikationen wie elektronische Ausweisdokumente, Bezahlkarten, kontaktlose elektronische Nahverkehrs-Fahrscheine, SIM-Karten, aber auch für Anwendungen wie Markenschutz oder sichere Maschine-zu-Maschine-Kommunikation an.

### WACHSTUMSPOTENZIAL UND -TREIBER FÜR CHIP CARD & SECURITY

Elektronische Ausweisdokumente, Bezahlkarten und Embedded Security sind die Hauptwachstumstreiber für unser Segment Chip Card & Security. In Abbildung 15 ist die vom Marktforschungsunternehmen IMS Research geschätzte Marktentwicklung bei elektronischen Ausweisdokumenten bis zum Jahr 2014 dargestellt. Für den Zeitraum von 2009 bis 2014 rechnet IMS Research mit einem durchschnittlichen jährlichen Stückwachstum von 10,6 Prozent.

### ELEKTRONISCHE AUSWEISDOKUMENTE

Weltweit gibt es einen klaren Trend hin zum Einsatz von Sicherheitschips in Ausweisdokumenten. Dieser begann mit der Einführung des elektronischen Reisepasses vor einigen Jahren. Heutzutage werden mittlerweile auch Personalausweise, Gesundheitskarten und Führerscheine mit Sicherheitschips ausgestattet. Diese Produkte haben wesentlich höhere Sicherheits- und Lebensdaueranforderungen als Hochvolumen-Produkte wie SIM-Karten. Sie zeichnen sich daher durch höhere Eintrittsbarrieren, einen höheren durchschnittlichen Verkaufspreis und moderateren Preisverfall aus. Gleichzeitig zählt dieser Markt zu den am schnellsten wachsenden Anwendungsbereichen für Sicherheitschips.

### BEZAHLKARTEN

Der Trend zu sicherem bargeldlosem Bezahlen ist ein weiterer Motor im Segment Chip Card & Security. Beispielsweise sind nur etwa 20 Prozent aller EC- und Kreditkarten mit einem Sicherheitschip ausgestattet – bei jedoch klar steigendem Trend.

Bei der Bevölkerung der großen Städte in den wirtschaftlich aufstrebenden Ländern stößt bequemes und schnelles Bezahlen mit kontaktlosen Karten auf zunehmende Resonanz. Neben Kleinbeträgen, die mit diesen Karten bezahlt werden können, lassen sich diese auch als Fahrkarten im öffentlichen Nahverkehr nutzen. Weiteres Wachstumspotenzial sehen wir beim Einsatz der Nahfeld-Kommunikation (Near-Field-Communication-Technologie, NFC), die das Bezahlen – zunächst von Fahrscheinen – mittels Mobiltelefonen ermöglichen soll.

### EMBEDDED SECURITY

Embedded Security ermöglicht Anwendungen, die die Echtheit von Daten oder Produkten durch Sicherheitschips überprüfen. Große und kleine Firmen weltweit wollen sicherstellen, dass echte Produkte und nicht Fälschungen die Endkunden erreichen. Die Produkte, die dabei auf Echtheit überprüft werden, reichen von Medikamenten über Speicher bis zu Maschinenteilen.

Echtheit der Daten ist auch entscheidend für den Erfolg des Energieversorgungsnetzes der Zukunft, des Smart Grid. Wie bereits beschrieben, werden die Energieunternehmen mit Smart Metern, speziellen Stromzählern, in der Lage sein, Zählerstände – mit authentischen Daten – aus der Ferne auszulesen. Dafür ist eine sichere Datenübertragung ausschlaggebend.

## 14 CHIPKARTEN-HALBLEITERMARKT IN MRD. \$

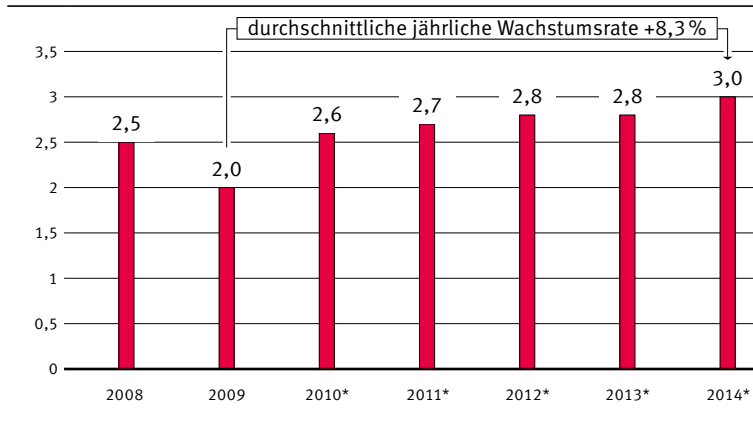

Quelle: iSuppli, September 2010 \* Schätzung

## 15 ELEKTRONISCHE AUSWEISDOKUMENTE IN MIO. \$

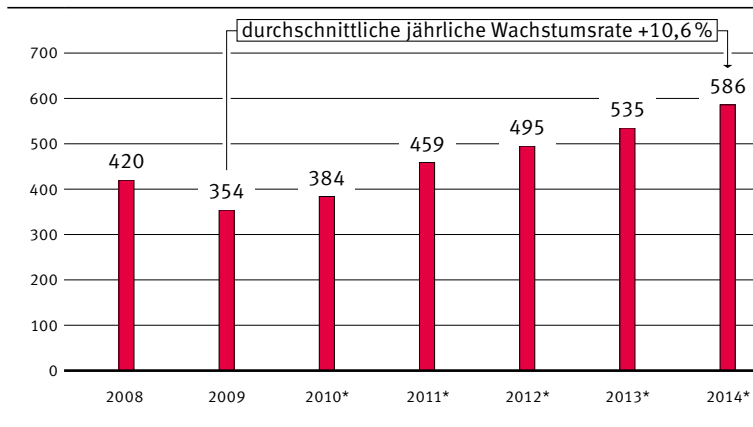

Quelle: IMS Research, Juli 2010 \* Schätzung

### INFINEON ZUM 13. MAL IN FOLGE WELTMARKTFÜHRER

Mit einem Marktanteil von 27 Prozent für das Jahr 2009 war Infineon zum 13. Mal in Folge die Nummer 1 im Weltmarkt für Sicherheitschips. Unsere langjährigen und großen Kunden Gemalto, Giesecke & Devrient und Oberthur sind selbst Marktführer in ihren Kartensegmenten und haben im Geschäftsjahr 2010 auf uns vertraut.

Durch unser IFX10+-Programm haben wir auch im Bereich Chip Card & Security seit Sommer 2008 die Kosten deutlich reduziert. Hinzu tritt aktives Management des Produktportfolios. Im Rahmen dessen priorisiert Infineon wachstumsstarke und profitablere Produkte und zieht sich selektiv und gezielt aus eher stagnierenden und margenschwachen Märkten zurück. Der Fokus der Division Chip Card & Security liegt weniger auf Wachstum und mehr auf Verbesserung der Profitabilität.

So erzielte die Division im vierten Quartal des Geschäftsjahrs 2010 eine Segmentergebnis-Marge von 10,4 Prozent bei einem Umsatz von 115 Millionen Euro. Demgegenüber lag die Marge im vierten Quartal des Geschäftsjahrs 2008 bei 5,2 Prozent bei einem Umsatz in Höhe von 115 Millionen Euro.

01  
02  
03  
04  
05  
06  
07  
08  
09  
10  
11  
12  
13  
14  
15  
16  
17  
18  
19  
20  
21

01  
02  
03  
04  
05  
06  
07  
08  
09  
10  
11  
12  
13  
14  
15  
16  
17  
18  
19  
20  
21

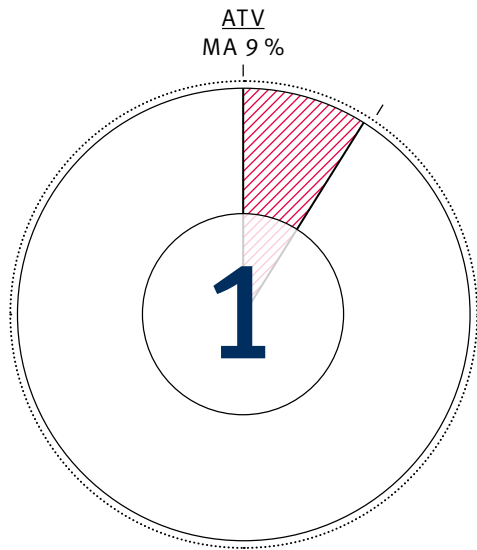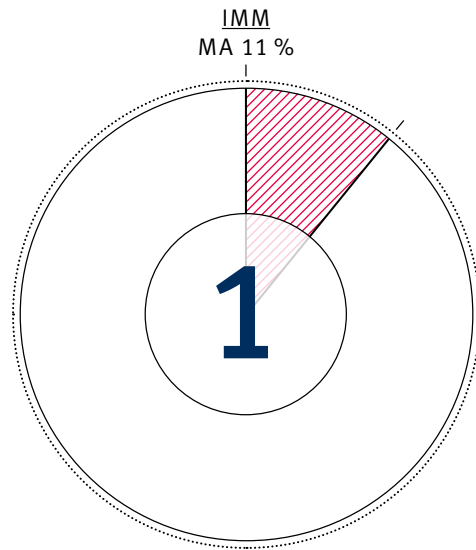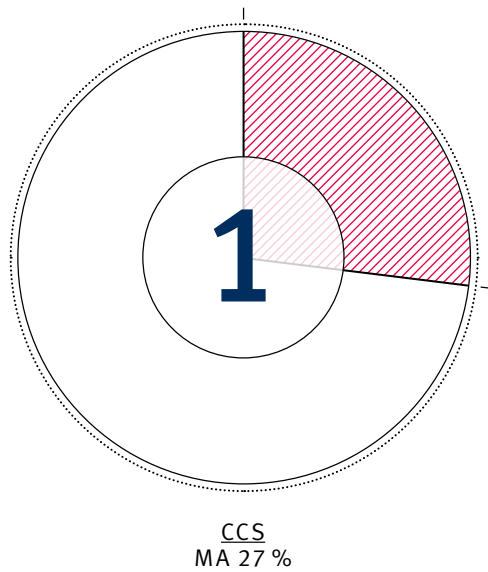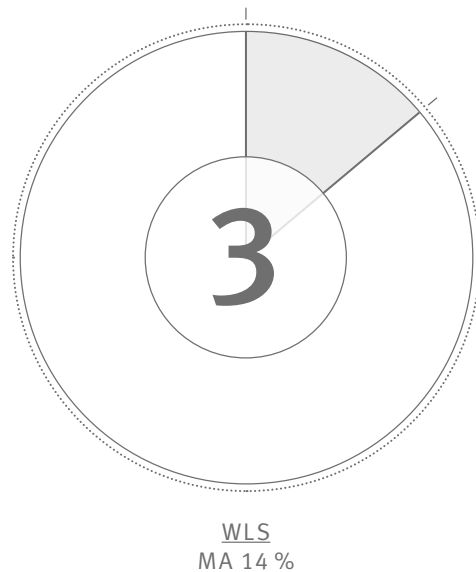



# PRODUKTE UND APPLIKATIONEN

MILLIONEN MENSCHEN VERTRAUEN TÄGLICH  
AUF UNSERE PRODUKTE – BEWUSST ODER  
UNBEWUSST.

ZU HAUSE, IM BÜRO, AUF REISEN.

IM INDUSTRIELLEN UMFELD WIE IN DER FREIZEIT  
SORGEN UNSERE HALBLEITERLÖSUNGEN  
UNBEMERKT FÜR ENERGIEEFFIZIENZ, MOBILITÄT  
UND SICHERHEIT.

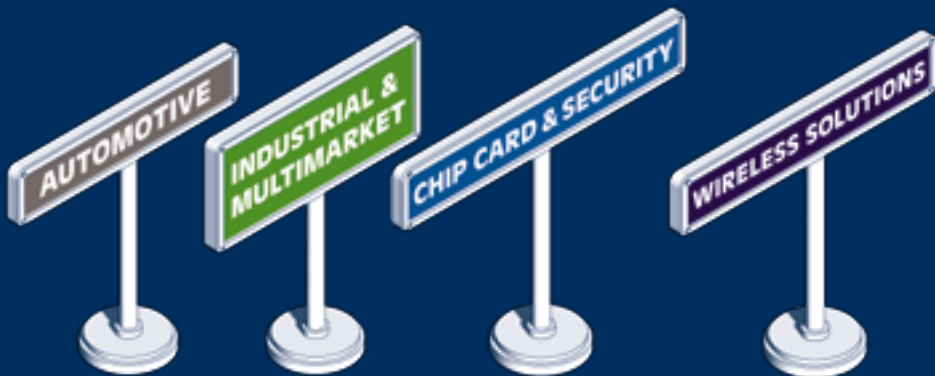

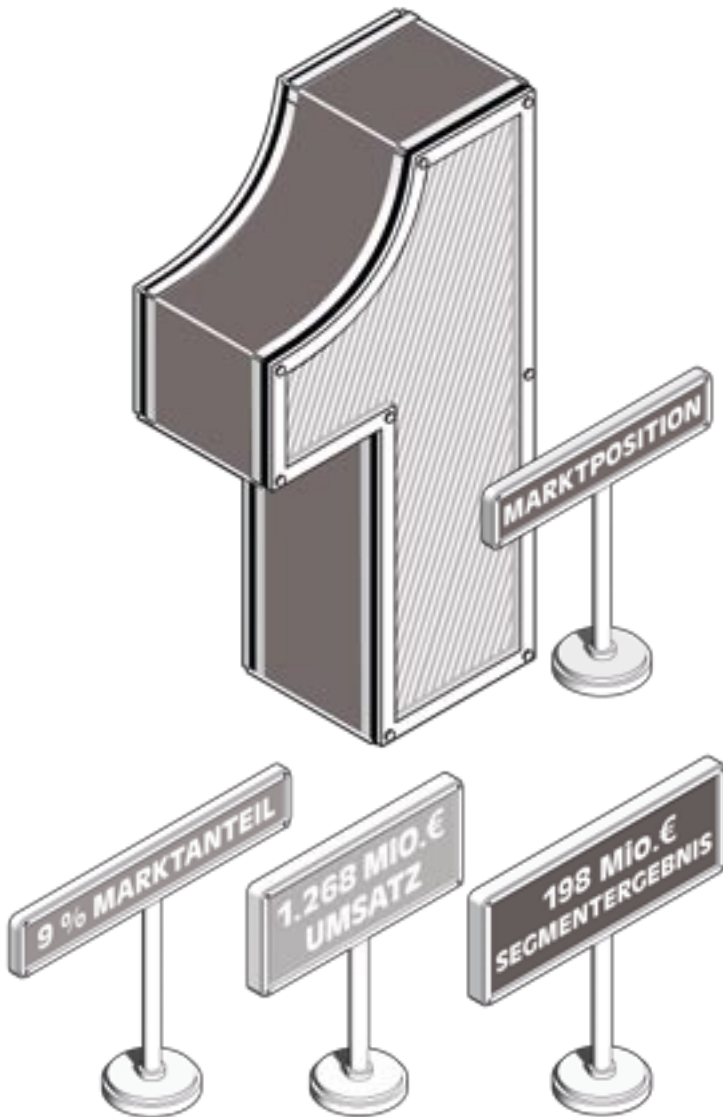

## ANTRIEBSSTRANG

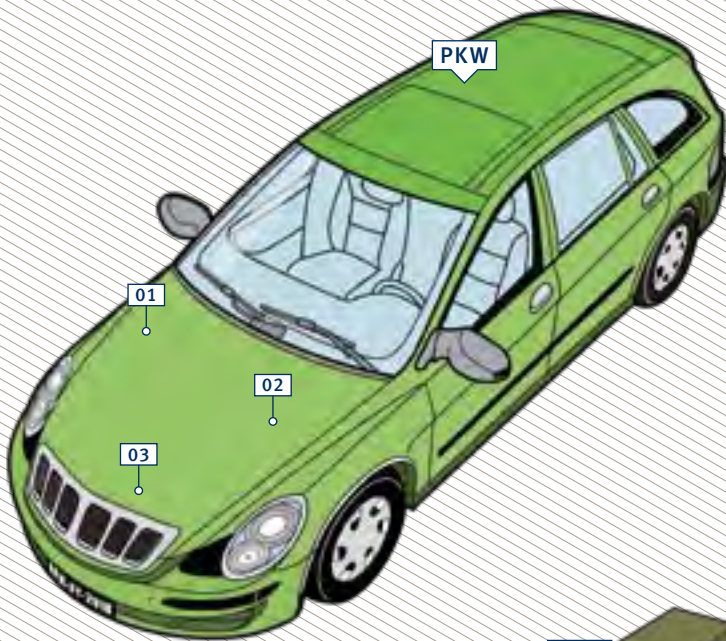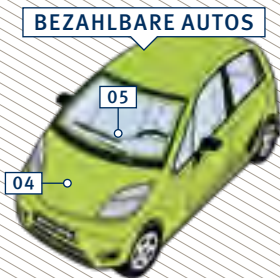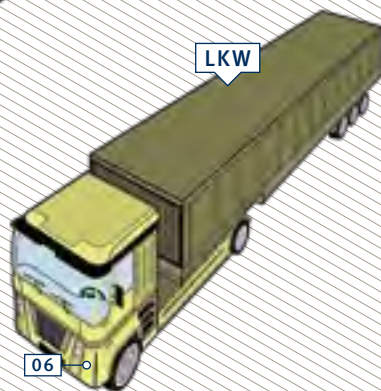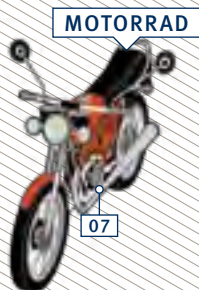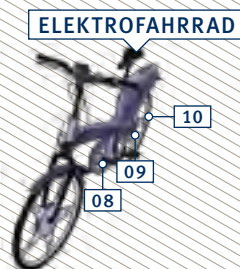

01 / 32-Bit-Mikrocontroller für Motor- und Getriebesteuerung

02 / Luftdrucksensor für Luft-Kraftstoff-Gemisch-Optimierung und CO<sub>2</sub>-Reduzierung

03 / Hall-Sensor zur Positionserkennung der Kurbel- und Nockenwelle für Start-Stopp-Automatik

04 / 32-Bit-Mikrocontroller für Motorsteuerung

05 / 16-Bit-Mikrocontroller für Anzeigeelemente

06 / Leistungstransistoren für Licht- und Aggregatsteuerung

07 / 8-Bit-Mikrocontroller für Motorsteuerung

08 / 8-Bit-Mikrocontroller für Elektromotorsteuerung

09 / Leistungstransistoren für Batterieladeelektronik

10 / Spannungsregler zur Stromversorgung

## SICHERHEIT

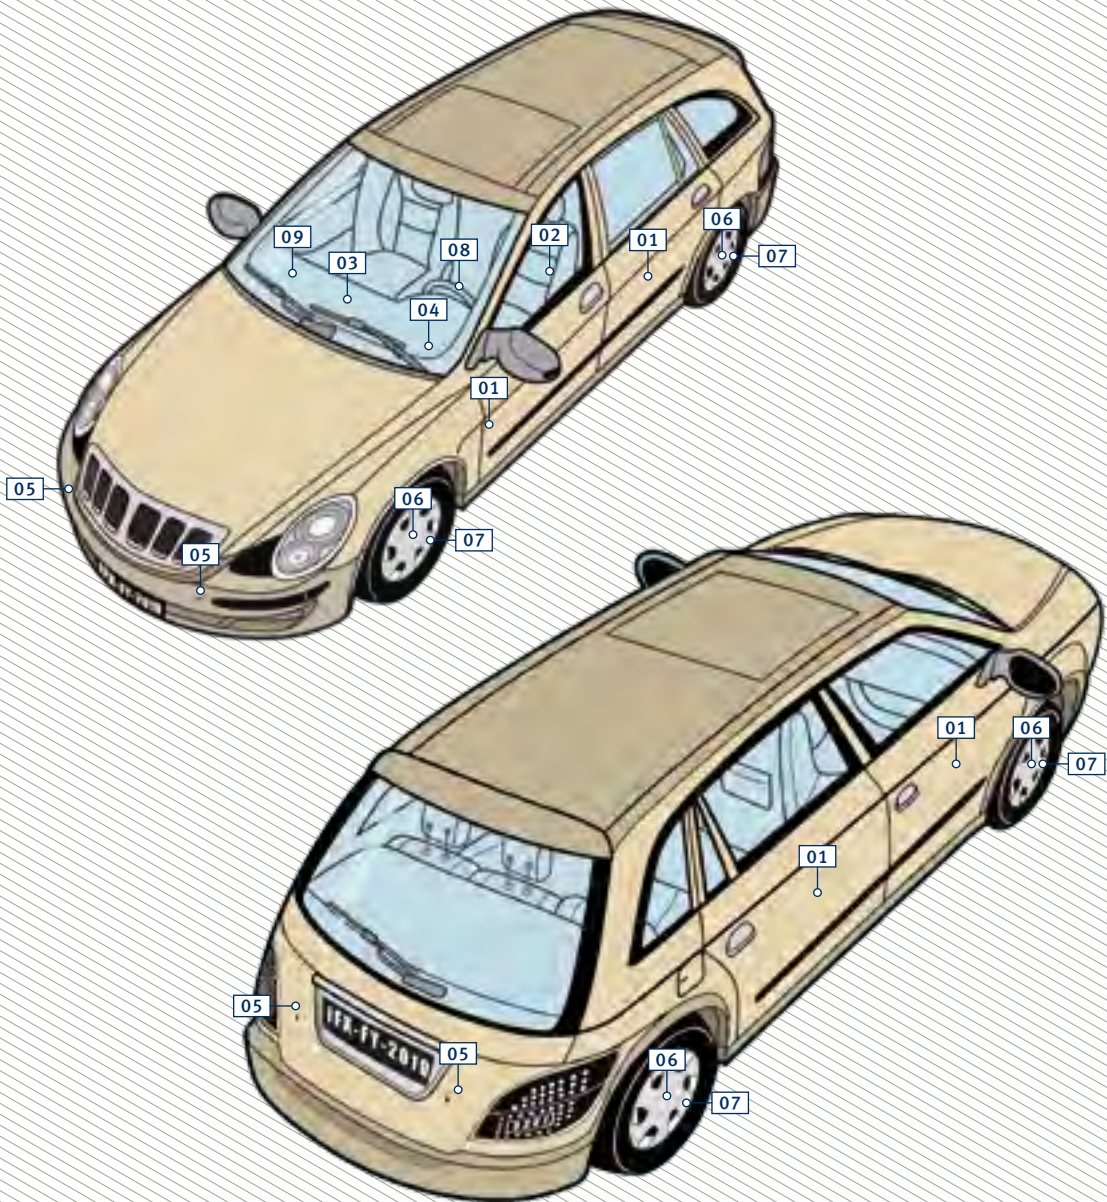

01 / Luftdrucksensor für Seitenairbag

02 / Leistungs-IC für elektronischen  
(reversiblen) Gurtstraffer

03 / Hall-Sensor zur Positionserkennung  
der Pedalstellung

04 / GMR-Lenkwinkelsensoren an der Lenksäule

05 / Radar-IC zur Abstandsüberwachung

06 / Reifendrucküberwachungssystem bestehend aus  
Mikrocontroller, Drucksensor und drahtloser  
Datenübertragung ins Cockpit

07 / Hall-Sensor für ABS-System

08 / System-IC für Airbag

09 / 32-Bit-Mikrocontroller für ESP

## KOMFORTELEKTRONIK

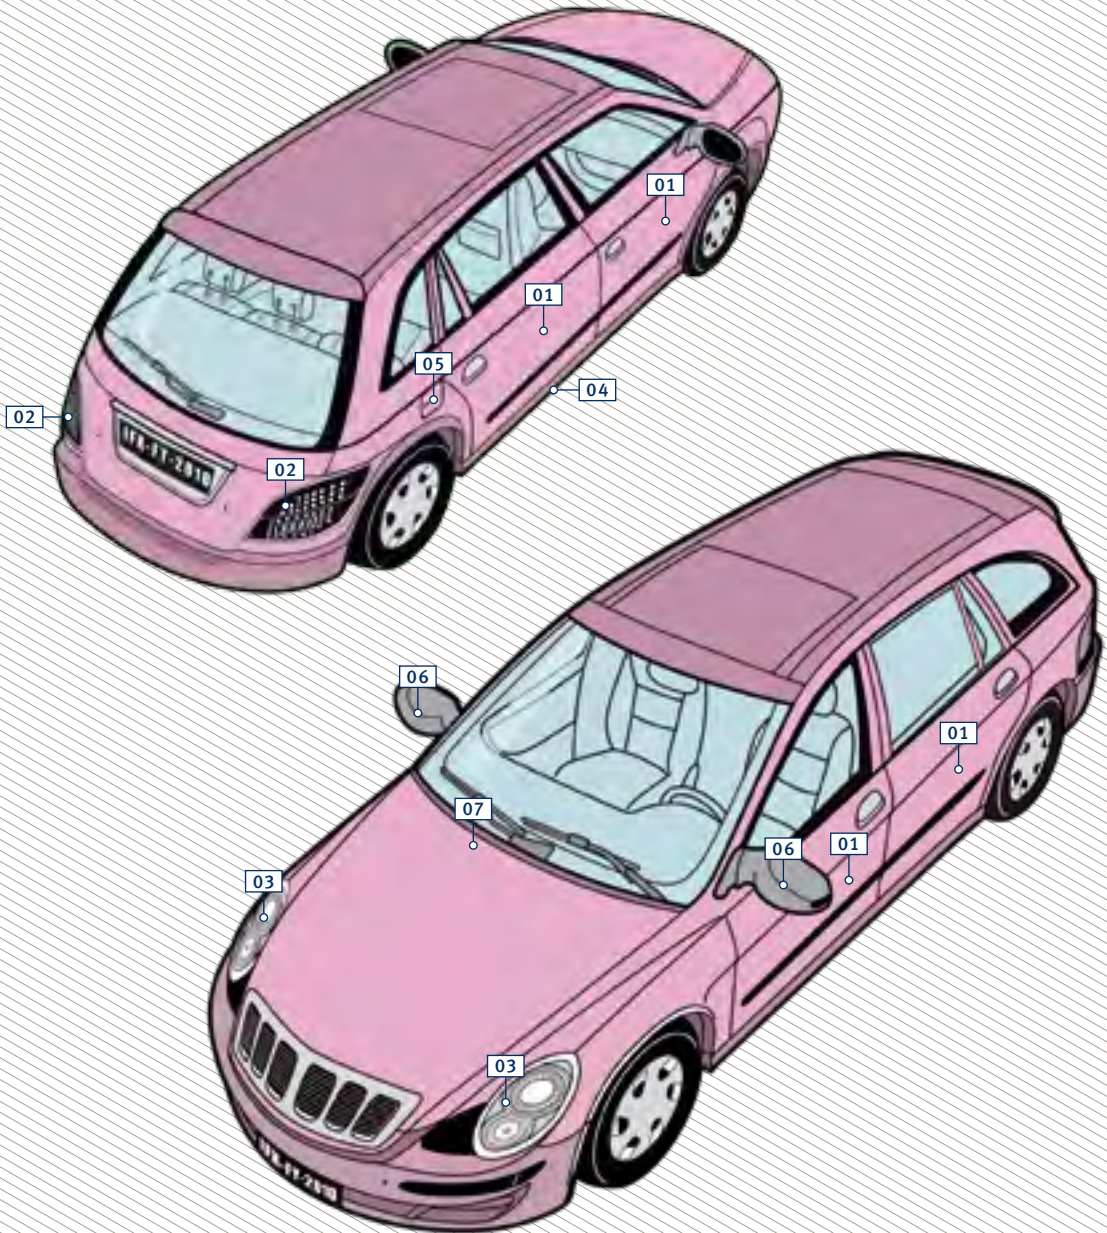

01 / Fensterheber-IC mit Mikrocontroller,  
Leistungselektronik und Schutzsensor  
02 / LED-Treiber für Rücklicht und Blinker  
03 / Treiber-ICs für Fern- und Abblendlicht

04 / Schnittstellen-ICs fürs Bordnetz  
05 / 16-Bit-Mikrocontroller für Benzinpumpe  
06 / Leistungselektronik für Außenspiegeladjustierung  
07 / Leistungshalbleiter für Gebläsesteuerung

## ELEKTROMOBILITÄT

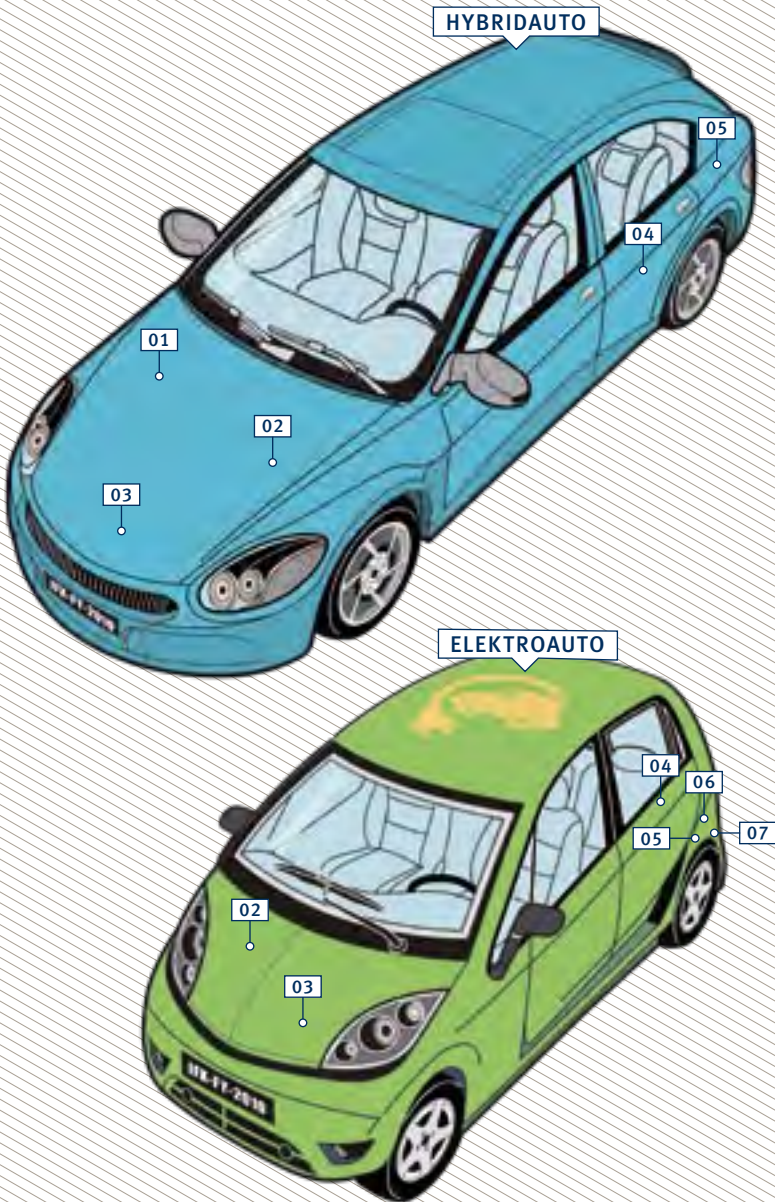

- 01 / HybridPACK™ 1 (bis zu 30 kW) zur Ansteuerung des Elektromotors für Mild-Hybridfahrzeuge
- 02 / HybridPACK™ 2 (bis zu 80 kW) zur Ansteuerung des Elektromotors für Voll-Hybridfahrzeuge
- 03 / 32-Bit-Mikrocontroller für Elektromotorsteuerung

- 04 / 16-Bit-Mikrocontroller für Batteriemangement
- 05 / CoolMOS™-Leistungstransistoren und IGBT-Module für Batterieladegerät
- 06 / Hall-Sensoren zur Ladestromüberwachung
- 07 / MOSFET für Ladegerät und Spannungshochsetzer

# AUTOMOTIVE

18 

- In der Division Automotive erzielte Infineon im Geschäftsjahr 2010 einen Umsatz in Höhe von 1.268 Millionen Euro. Dies entspricht rund 38 Prozent der Umsätze aus fortgeführten Aktivitäten. Das Segmentergebnis betrug 198 Millionen Euro.
- Der starke Umsatzanstieg von rund 50 Prozent gegenüber dem Vorjahr begründet sich durch die unerwartet schnelle Erholung des weltweiten Automobilmarkts und der besonders großen Nachfrage aus China sowie weltweit nach Fahrzeugen der Oberklasse mit überdurchschnittlich hohem Wert der verbauten Halbleiter.
- Zur Verbesserung des Segmentergebnisses trugen die höhere Auslastung der Fabriken und ein vorteilhafter Produktmix bei.
- Die ersten drei Quartale des Geschäftsjahrs 2009 sind die einzigen Verlustquartale seit unserem Börsengang im Jahr 2000.

## 18 UMSATZ UND SEGMENTERGEBNIS DER LETZTEN 12 QUARTALE IN MIO. €

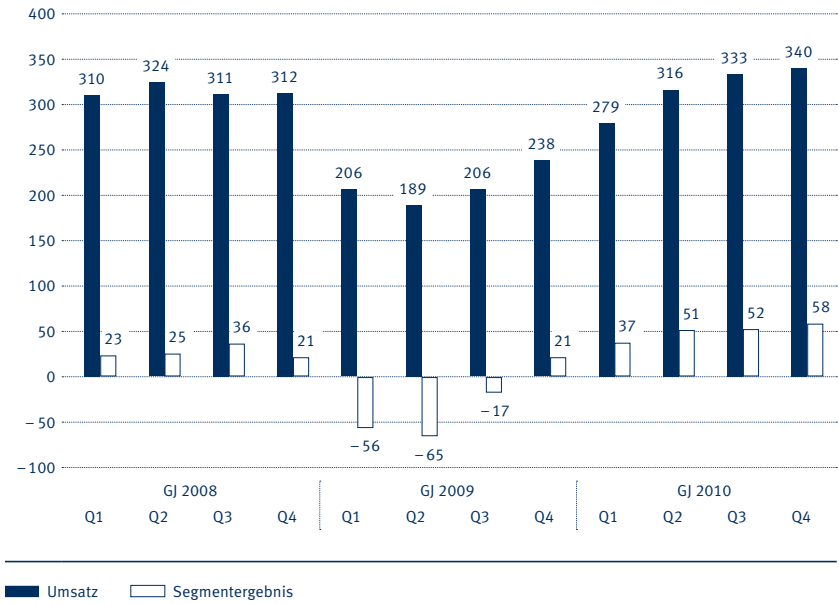

## SAUBER, SICHER, BEZAHLBAR

Infineon ist einer der wenigen Chiphersteller, der eine derart breitgefächerte und skalierbare Produktpalette fürs Auto bietet – gekoppelt mit hohem Systemverständnis und Qualitätsniveau. Diese Kompetenzen machen uns seit über 40 Jahren zum bevorzugten Partner unserer Kunden. Unser Innovationsschwerpunkt liegt auf der Integration von Funktionalität und damit auf Halbleitern mit hervorragendem Preis-Leistungs-Verhältnis. Wir setzen auf die Zukunfts- und Wachstumstreiber und damit auf Verbesserung der Energieeffizienz, Erhöhung der Sicherheit und das entstehende Segment der in Schwellenländern bezahlbaren Autos. Je nach Anforderung von Antriebsstrang, Sicherheitsanwendung oder Komfortelektronik lässt sich die am besten geeignete Halbleiterlösung aus unserem Produktportfolio von Mikrocontrollern, intelligenten Sensoren und Leistungshalbleitern zusammenstellen. Sehr erfreulich ist deshalb, dass wir dieses Jahr zum ersten Mal mit der begehrten Auszeichnung von Toyota für „außergewöhnliche Qualität über fünf aufeinanderfolgende Jahre“ geehrt wurden.

### CO<sub>2</sub>-REDUKTION DURCH DOWNSIZING

Die Evolution konventioneller Verbrennungsmotoren ist auf ein Downsizing von Otto- und Dieselmotoren ausgerichtet. Mittels Turboladern wird aus kleineren Hubräumen und oft auch aus einer geringeren Zahl von Zylindern eine höhere Motorleistung bei gleichzeitig reduziertem Verbrauch erzielt. Diese Verbesserungen betreffen den kompletten Regelkreis von der Sensorik über die Rechenleistung bis zur Ansteuerlektronik. Motorseitig wird eine Senkung des Treibstoffverbrauchs und der Emissionen über eine abermals optimierte Verbrennung erreicht. Aber auch die Getriebesteuerungen für bessere Schaltabläufe stehen im Blickfeld der Ingenieure.

Die Ingenieure streben danach, „bedarfsgerechte“ Lösungen zu entwickeln. Hier geht es darum, dem Motor genau die Menge Treibstoff zur Verfügung zu stellen, die er gerade benötigt. Das passiert in der gesamten Förderkette, von der Pumpe bis zu Treibstoffinjektoren und Einspritzpumpen – alle Abläufe werden noch genauer, denn die Mengen werden längst in Millilitern gemessen, die Steuerzeiten in Mikrosekunden: Präzision auf höchstem Niveau, die nur mit der aufwendigeren Sensorik und höheren Rechenleistung der modernsten Automobil-Halbleitergenerationen erreicht werden kann.

s. 59  Im Hinblick auf zukünftige Antriebe und die Einhaltung schärfster Abgas- und Sicherheitsnormen entwickeln wir zusammen mit einem Leitkunden die 32-Bit-Mehrkern-Mikrocontroller-Familie AURIX™. Die einzelnen Kerne werden für die erforderliche Rechenleistung und die redundante Berechnung sicherheitskritischer Abläufe benötigt. Die Auslieferung beginnt 2014; Verträge haben wir bereits bis 2028 geschlossen. Dieses Projekt verdeutlicht auch die tendenziell langen Produktlebenszyklen in der Automobilindustrie. Sie führen zu einem vergleichsweise stabilen und prognostizierbaren Geschäft.

### ELEKTRIFIZIERUNG DES ANTRIEBSSTRANGS – AUCH BEI NUTZFAHRZEUGEN

Warum Elektrifizierung? Beim herkömmlichen Verbrennungsmotor werden wir noch deutliche Fortschritte in der CO<sub>2</sub>-Reduktion vor allem bei Kleinwagen sehen.



Zum nachhaltigen Durchbruch über alle Fahrzeugkategorien wird uns aber erst die Elektrifizierung des Antriebsstrangs führen. Die Lenker der großen Autokonzerne sind sich deshalb einig: Am Ende steht der vollelektrische Antrieb. Nicht das „Ob“ wird diskutiert, sondern lediglich das „Wann“. Auch bei Bussen und Nutzfahrzeugen geht der Trend zur Elektrifizierung des Antriebsstrangs; vor allem für den Verkehr in der Stadt. Als Treiber wirken vor allem Einfahrbeschränkungen, wie es sie heute schon für die Innenstädte von Millionenmetropolen wie London und Schanghai gibt.

Rund 80 Prozent der zusätzlichen Halbleiter für Hybrid- und Elektrofahrzeuge sind Leistungshalbleiter. Hier profitieren wir von der jahrzehntelangen Erfahrung aus dem Industriegeschäft. Diskrete IGBTs und IGBT-Module müssen nicht neu entwickelt werden, sondern können mit geringen Modifikationen an die Anforderungen der Automobiltechnik angepasst werden. Dies spart Entwicklungsaufwendungen. Als Nummer 1 sowohl bei Automobilelektronik als auch bei Leistungshalbleitern sind wir für den wachsenden Markt der Hybrid- und Elektroautos bestens positioniert.

#### **SENSOREN WICHTIG FÜR AKTIVE UND PASSIVE SICHERHEIT**

Unsere Produktschwerpunkte für Sicherheitsanwendungen liegen auf Airbags, Seitenaufprallschutz, elektronischer Lenkunterstützung, Gurtstraffer, ABS/Fahrzeugstabilitätsregelung (ESP), elektronisch geregelten Fahrwerken, Radar-basierter Fahrerassistenz und Reifendruckkontrolle.

Das elektronische Stabilitäts-Programm (ESP) ist mittlerweile neben dem Sicherheitsgurt und dem Airbag das wichtigste Sicherheitssystem im Auto. Unser Partner Bosch hat das erste System für die Serie entwickelt und seit dem Produktionsstart 1995 bereits 50 Millionen Systeme gefertigt. ESPs rüsten wir unter anderem mit Lenkwinkel- und Raddrehzahlsensoren aus.

#### **BEZAHLBARE INDIVIDUELLE MOBILITÄT**

Auch in Wachstumsregionen gilt das Auto als Inbegriff der individuellen Mobilität. In Ländern wie Indien und China muss es vor allem eines sein: bezahlbar. Der Markt für Klein- und Kleinstwagen gewinnt jedoch auch international, etwa in Japan und Europa, an Bedeutung. Zusammen mit unseren Kunden versuchen wir, die Fahrzeuge den Anforderungen der Menschen entsprechend zu gestalten und die Kostenziele zu treffen.

Aufgrund der hohen Stückzahlen sind auch Zweiräder für uns interessant. Zwei Entwicklungen treiben – vor allem in Asien – den Markt: Erstens müssen die populären Zweitakter umweltfreundlicher werden. Zweitens dürfen in Peking seit einigen Jahren keine Zweiräder mit Verbrennungsmotor mehr fahren, was den Markt für Elektroräder, auch eBikes, Pedelecs oder Elektro-Scooter genannt, stark befeuert hat. Mit unserem führenden Know-how bei der Elektronik in hocheffizienten Elektroantrieben sind wir auch Partner für die Motorrad- und Fahrradhersteller.

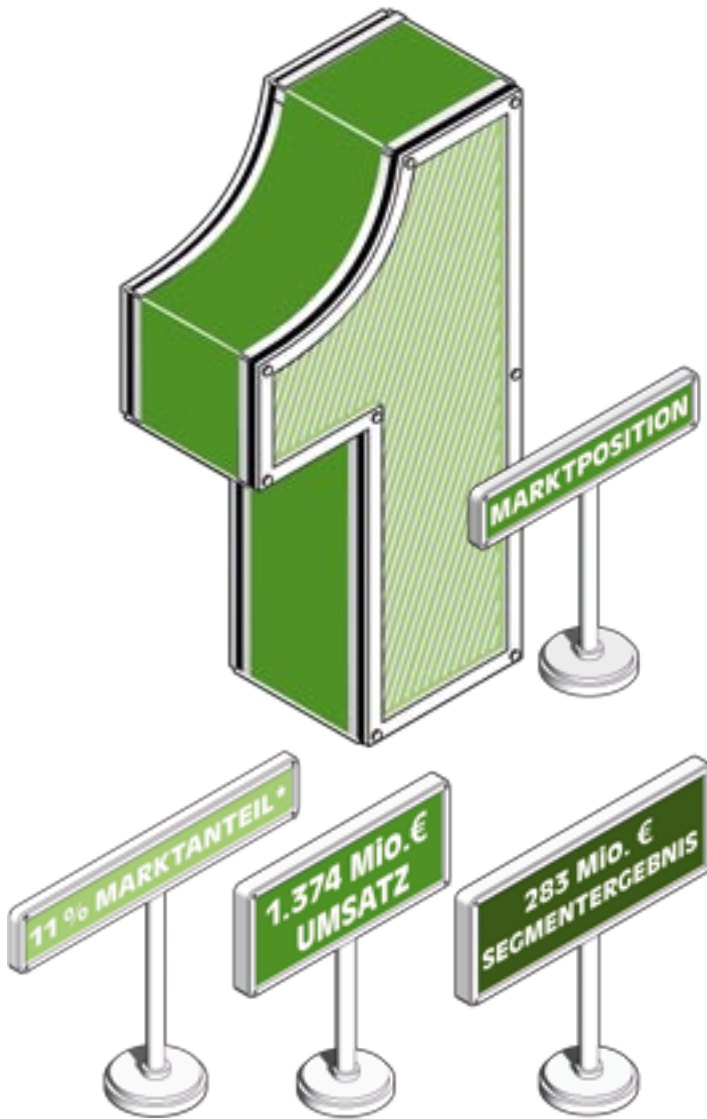

## INDUSTRIEANWENDUNGEN

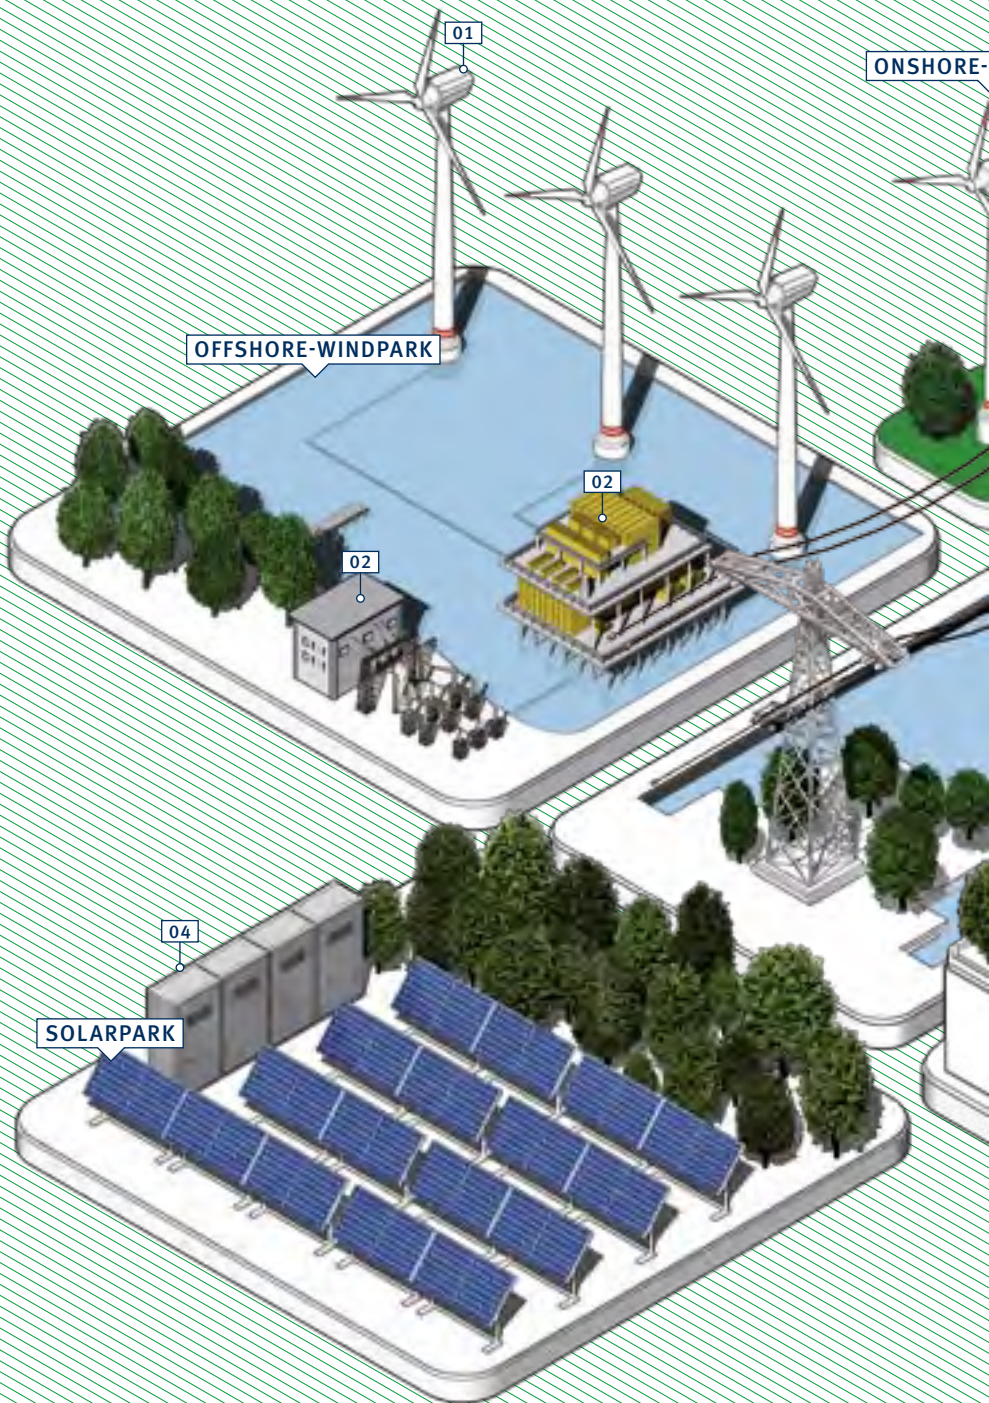

01 / IGBT-Module im Offshore-Windrad (bis zu 6 MW)

02 / Thyristoren für HGÜ-Seekabelverbindung

03 / IGBT-Module im Onshore-Windrad (bis zu 2,5 MW)

04 / IGBT-Module im Solar-Wechselrichter

05 / Licht- und elektrisch gezündete Thyristoren

06 / IGBT-Module für diesel-elektrischen Antrieb

07 / IGBT-Module für die elektrische  
Versorgung auf dem Schiff

08 / IGBT-Module für Antrieb und Bremsenergie-  
rückgewinnung in Schnellzügen, Trams und Bahnen

09 / CoolMOS™- und OptiMOS™-Leistungstransistoren  
im Netzteil der Server

10 / Digitale Spannungsregler im Netzteil der Server

11 / IGBT-Module in Klimaanlage zur Lüftersteuerung

12 / IGBT-Module in Rolltreppe für Motorsteuerung

13 / IGBT-Module im Aufzug für Motorsteuerung

14 / LED

15 / Tre

16 / IGE

17 / IGE

18 / IGE

wie

WINDPARK

03

HOCHSPANNUNGS-  
GLEICHSTROMÜBERTRAGUNG (HGÜ)

05

SCHIFFE,  
FRACHTER

06

ZÜGE,  
BAHNEN

07

08

08

08

18

0-Treiber für LED-Fassadenbeleuchtung  
 iber für Energiesparlampen und Fluoreszenzlampen  
 T-Modul für diesel-elektrischen Antrieb in Nutzfahrzeugen  
 T-Modul für Elektroantrieb in Elektro- und Hybridbussen  
 T-Modul für Elektroantrieb in Nutzfahrzeugen  
 Gabelstaplern

19 / LED-Treiber für Ampeln, Stadtmöbel  
 und Straßenbeleuchtung  
 20 / Diskrete IGBTs und IGBT-Module  
 für Ladeelektronik in Stromtankstationen  
 21 / IGBT-Module für Elektromotoren in  
 Robotern, Förderbändern, Antrieben etc.

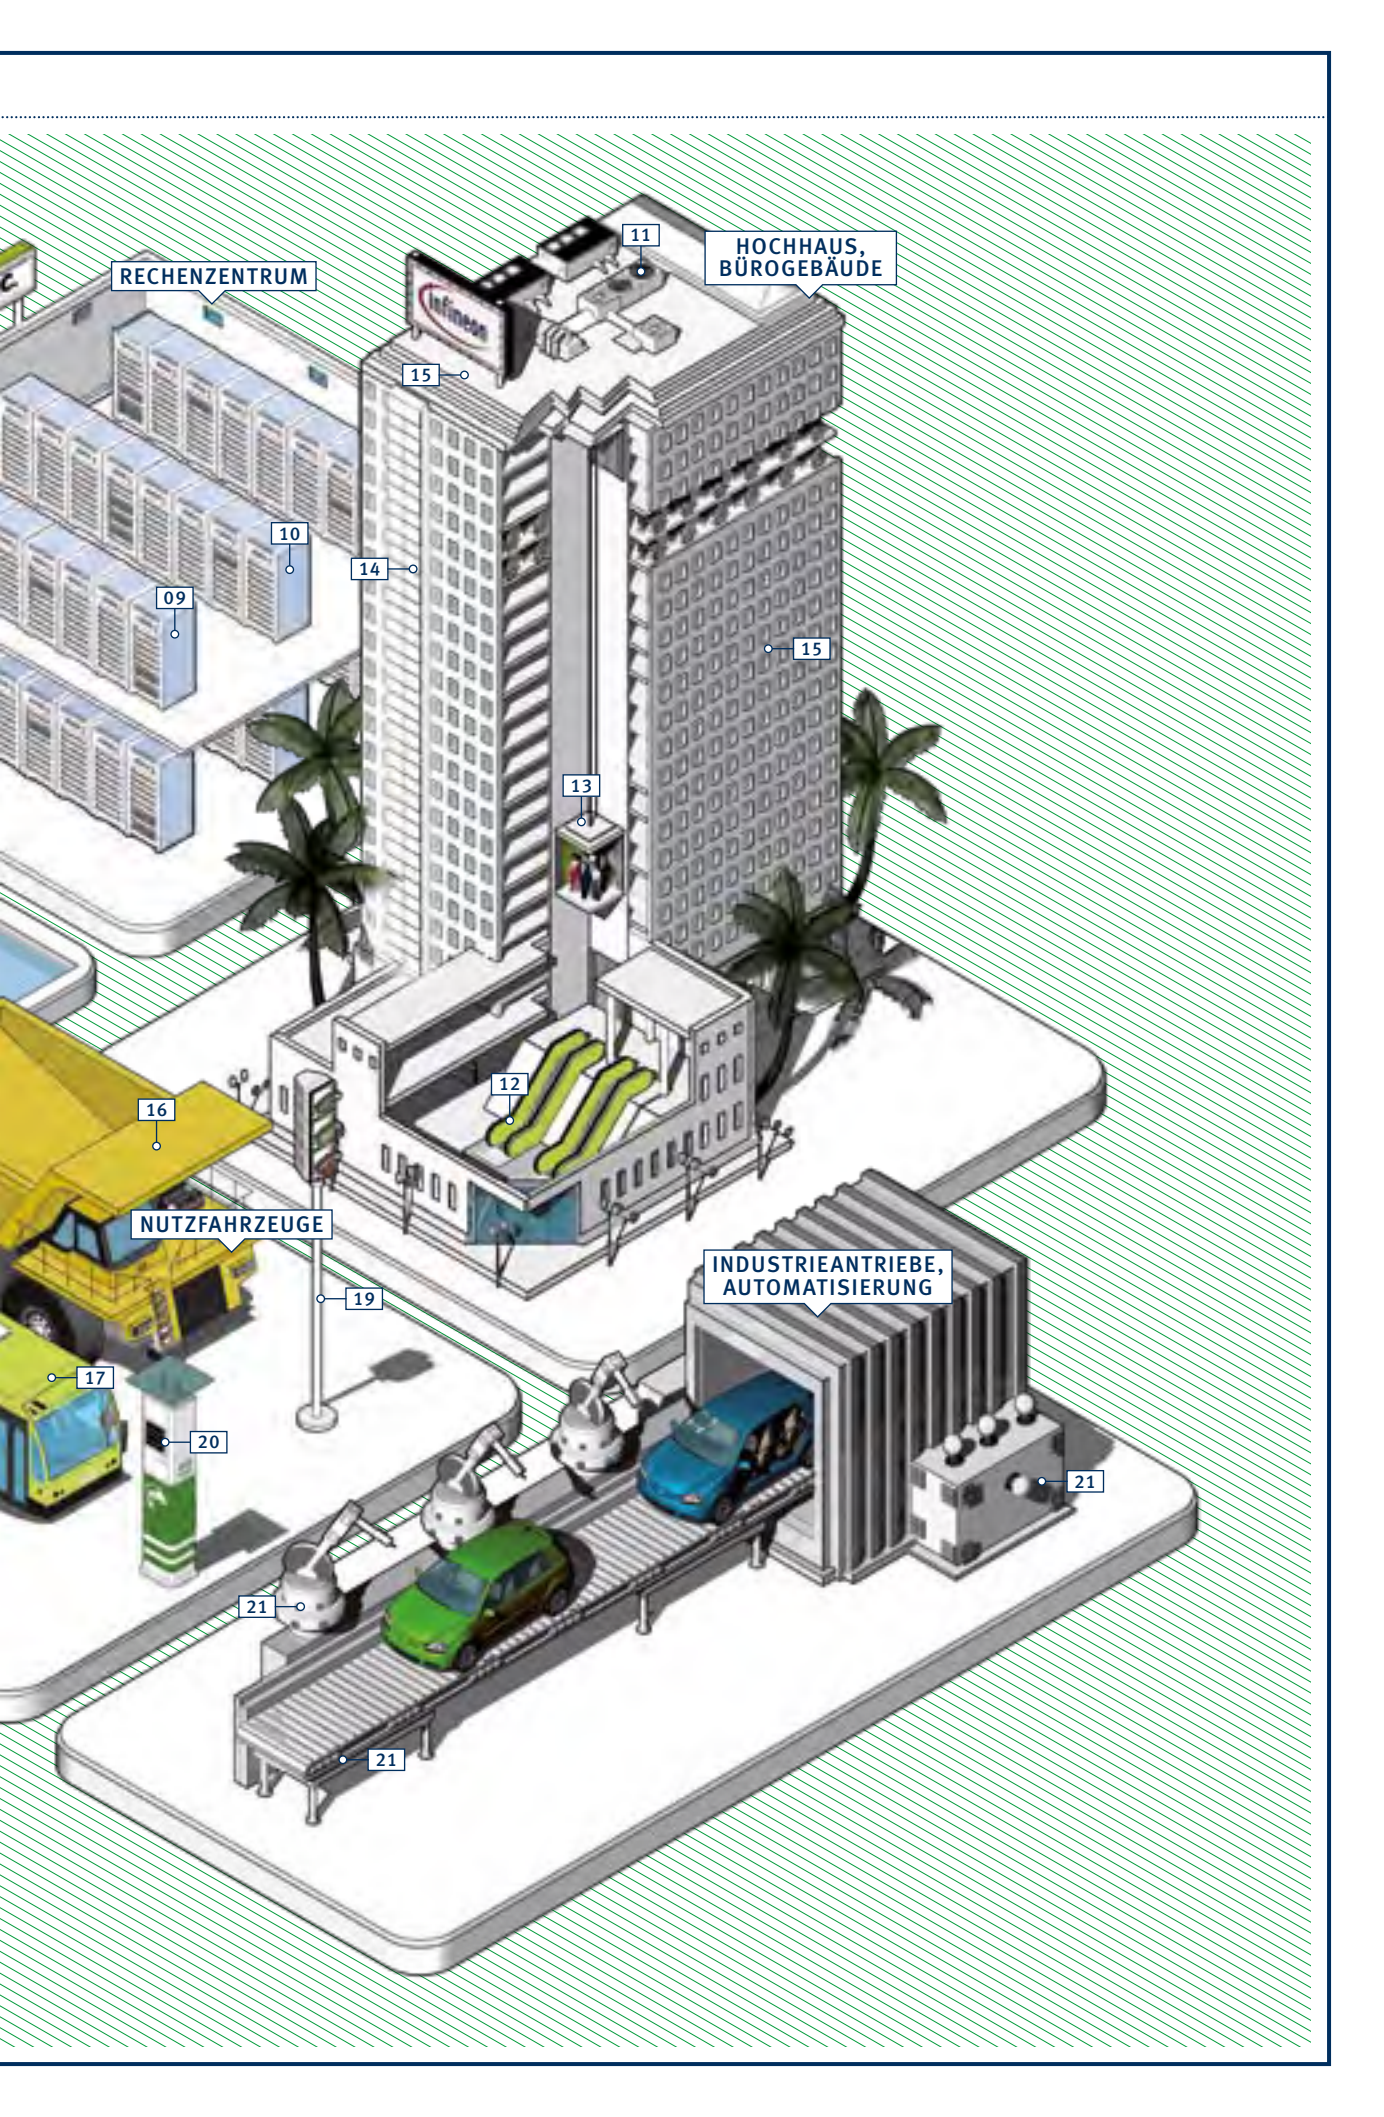

RECHENZENTRUM

HOCHHAUS,  
BÜROGEBÄUDE

NUTZFAHRZEUGE

INDUSTRIENTRIEBE,  
AUTOMATISIERUNG

## HAUSHALT

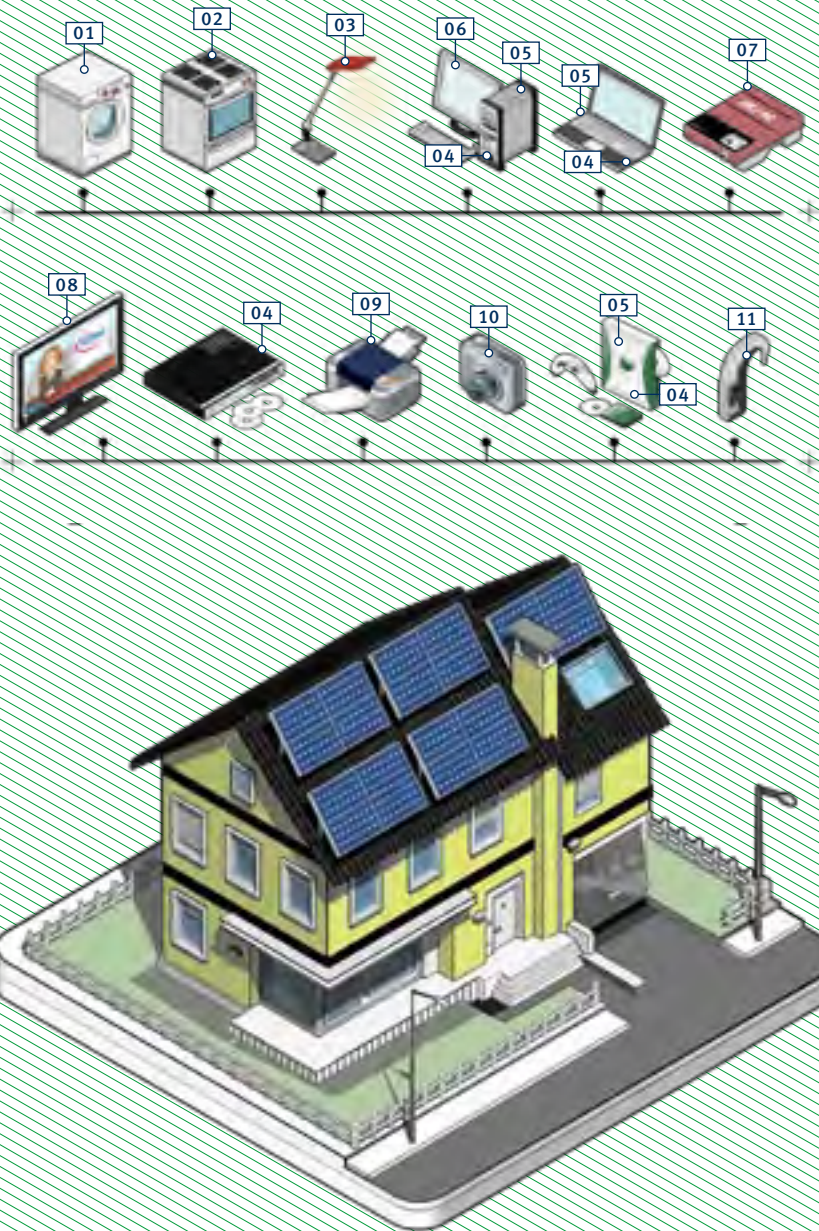

- 01 / WASCHMASCHINE: IGBT-Modul für Motorantrieb
- 02 / INDUKTIONSHERD: Diskrete IGBTs zur Steuerung der Induktionsspulen
- 03 / LED-BÜROLAMPE:  
LED-Treiber für LED-Beleuchtungselemente
- 04 / PC / NOTEBOOK / SPIELEKONSOLE / DVD-PLAYER:  
CoolMOS™, OptiMOS™-Leistungstransistoren und SiC-Dioden im Netzteil
- 05 / PC / NOTEBOOK / SPIELEKONSOLE: OptiMOS™-Leistungstransistoren und Leistungs-ICs auf Motherboard
- 06 / PC: OptiMOS™-Leistungstransistoren und Leistungs-ICs auf Grafikkarte

- 07 / SOLAR-WECHSELRICHTER: CoolMOS™-, OptiMOS™-Leistungstransistoren, SiC-Dioden und IGBT-Module zur Gleichstrom-Wechselstrom-Wandlung
- 08 / FLACHBILDSCHIRM: Diskrete IGBTs für Hintergrundbeleuchtung
- 09 / DRUCKER: Etiketten mit ORIGA-Chip auf Druckerpatronen für Markenschutz
- 10 / DIGITALKAMERA: Etiketten mit ORIGA-Chip auf Akku für Markenschutz
- 11 / HÖRGERÄT:  
Spezialchip zur Audiosignalverarbeitung

# INDUSTRIAL & MULTIMARKET

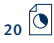

- In der Division Industrial & Multimarket erzielte Infineon im Geschäftsjahr 2010 einen Umsatz in Höhe von 1.374 Millionen Euro. Dies entspricht rund 42 Prozent der Umsätze aus fortgeführten Aktivitäten. Das Segmentergebnis betrug 283 Millionen Euro.
- Der Umsatz stieg gegenüber dem Vorjahr um über 50 Prozent. Dies erklärt sich aus der zügigen Erholung vieler Volkswirtschaften nach der Wirtschaftskrise. Das Geschäft mit Leistungshalbleitern für erneuerbare Energien verdoppelte sich im Geschäftsjahr 2010 auf über 100 Millionen Euro.
- Das Segmentergebnis verbesserte sich überproportional durch die höhere Fabrikauslastung.
- Der Verlust im zweiten Quartal des Geschäftsjahrs 2009 in Höhe von 7 Millionen Euro war der einzige Verlust bei IMM seit unserem Börsengang.

## 20 UMSATZ UND SEGMENTERGEBNIS DER LETZTEN 12 QUARTALE IN MIO. €

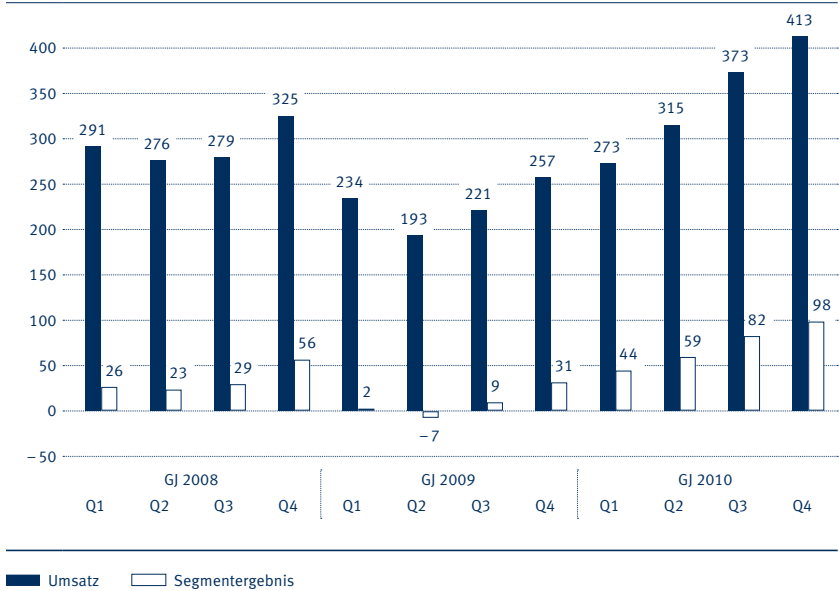

## ERNEUERBARE ENERGIEN, SMART GRID, MOBILITÄT

Nachhaltige Stromversorgung bedeutet, elektrische Energie aus umweltfreundlichen Quellen zu gewinnen, mit geringen Verlusten zu übertragen, zuverlässig zu verteilen und effizient anzuwenden. Als einziges Unternehmen weltweit bietet Infineon Leistungshalbleiter und Leistungsmodule für den gesamten Prozess der Erzeugung, Übertragung und des Verbrauchs von elektrischer Energie an. Unsere Produkte haben eine enorme Bedeutung für die zukünftige Energieversorgung, sowohl beim Einsatz erneuerbarer Energien als auch bei der effizienten Nutzung von elektrischer Energie in Industrie, Gewerbe und im Privatbereich.

Elektrizität wird zum wichtigsten Energieträger des 21. Jahrhunderts. Davon sind wir überzeugt. Nicht nur, weil in der Mitte dieses Jahrhunderts die fossilen Ressourcen knapp werden. Sondern auch, weil Strom günstig und extrem schnell transportiert sowie effizient gewandelt werden kann.

### BOOM BEI WIND- UND SONNENERGIE UNGEBROCHEN

Viele Regierungen weltweit haben erklärt, die Windenergie ausbauen zu wollen, um damit den Anteil regenerativer Energien am Energiemix zu erhöhen und den CO<sub>2</sub>-Ausstoß zu reduzieren. Neben dem Neuanlagengeschäft auf neu ausgewiesenen Flächen kommt auch das Repowering – der Austausch bestehender Anlagen mit hohem Anlagenalter gegen neue und leistungsstärkere Anlagen – in Schwung. Moderne Windräder erzeugen eine Leistung von rund 2 Megawatt, ältere dagegen weniger als 0,5 Megawatt.

Weitere neue Impulse wird der großflächige Ausbau der Windenergie im Meer („Off-shore“) bringen. Die vor der Küste installierten Anlagen fallen mit einer Kapazität von bis zu 6 Megawatt noch größer aus als die an Land. Bei diesen in rauer Umgebung aufgestellten Energieerzeugern kommt es auf höchste Zuverlässigkeit an. Unsere robusten, hochseetauglichen Schalter, sogenannte IGBT-Module, finden sich in der Gondel in einer Höhe von über 100 Metern und in den Umrichter-Plattformen wieder.

s. 60  Generell sind die Weiterentwicklung der IGBT-Module und die Anpassung an die speziellen Bedürfnisse unserer Kunden ein kontinuierlicher Prozess.

Neben der Windenergie bleibt auch die Photovoltaik (PV) auf Wachstumskurs. PV-Anlagen, wie sie auf Hausdächern oder Freiflächenanlagen zum Einsatz kommen, benötigen einen Umrichter, um die in den Solarmodulen erzeugte Gleichspannung ins Netz einspeisen zu können. Neben den Anschaffungskosten ist der Wirkungsgrad dieser Inverter die entscheidende Kenngröße für die Rentabilität der Anlage. Wir liefern an die Inverter-Hersteller IGBT-, MOSFET- und SiC-Komponenten. Unsere Kunden erreichen damit Wirkungsgrade auf Weltrekordniveau.

### SMART GRIDS SOLLEN LASTMANAGEMENT DER NETZE VERBESSERN

Der schnell steigende Anteil an Strom aus erneuerbaren Energien muss in die Stromnetze eingespeist werden (EU-Vorgabe: 2020 sollen 20 Prozent des elektrischen Energiebedarfs aus erneuerbaren Energien kommen). Dieser Strom wird dezentral und unregelmäßig erzeugt. Trotzdem darf die Leistung der Netze nicht schwanken und



die stabile Stromversorgung in konstant hoher Qualität nicht gefährdet werden. Um dies zu erreichen, muss man den Verbrauch an die oft wetterabhängige Erzeugung anpassen und auch Wege finden, nicht abgenommenen Strom zwischenzuspeichern. Die weite Übertragung des Stroms von den Wind- und PV-Anlagen zu den Verbrauchern führt zu nicht unerheblichen Energieverlusten, die jedoch durch intelligente HGÜ-Systeme stark reduziert werden können.

Smart Grids, die intelligenten Stromnetze der Zukunft, sollen durch den Datenaustausch zwischen Versorgern und Verbrauchern helfen, den Verbrauch an die Angebotsschwankungen der Energiequellen anzupassen. Elementarer Bestandteil des Smart Grid ist der digitale Verbrauchszähler, auch Smart Meter genannt. Das Smart Meter und die entsprechend kommunikationsfähigen Haushaltsgeräte sind die Verlängerung des Smart Grid zum Verbraucher. Das Smart Meter liefert Verbrauchsdaten per Datennetz; es informiert gleichzeitig den Verbraucher in Echtzeit über seinen Stromverbrauch und die Stromkosten.

Dabei ist die sichere, also verschlüsselte und für Fremde nicht les- oder manipulierbare Kommunikation eine wichtige Voraussetzung. Für die Sicherheit, Daten- und Energieübertragung bietet Infineon komplette Lösungen an.

#### **MOBILITÄT IN BALLUNGRÄUMEN**

Die zunehmende Urbanisierung erhöht auch die Nachfrage nach zuverlässigen öffentlichen Verkehrsmitteln. Infineon liefert für eine Vielzahl von Zugsystemen die Leistungskomponenten für die Antriebssteuerung und sorgt so für die Mobilität der Bürger in und zwischen den Metropolen. Für Schnellzüge, Trolleybusse und Metrobahnen entwickeln wir immer kompaktere Lösungen, um unseren Kunden mehr Funktionalität auf immer kleinerem Bauraum anzubieten. So liefern wir etwa IGBT-Module für den französischen TGV und AGV und die Velaro-Zug-Familie von Siemens, die in Deutschland, Spanien, Russland und China zum Einsatz kommt.

#### **LEDs ALS ENERGIEEFFIZIENTE BELEUCHTUNGALTERNATIVE**

25 Prozent der weltweiten Energie werden für Beleuchtung benötigt. Bei Glühlampen verpuffen 80 Prozent davon in Wärme. Nur 20 Prozent der Energie werden in Licht umgewandelt. LEDs dagegen werden nicht warm, haben eine viel bessere Lichtausbeute und eine wesentlich längere Lebensdauer. Sie werden vielfältig eingesetzt: in der Straßenbeleuchtung, in Hochhausfassaden, zur Beleuchtung im Büro, im Auto, im Haushalt. Die Nachfrage nach diesen Lichtquellen, für die Infineon Chips zur Ansteuerung liefert, wächst rasant. Daneben bietet Infineon auch Komponenten für Energiesparlampen und für Vorschaltgeräte von Leuchtstofflampen an.

Die genannten Beispiele zeigen, wie Halbleiter den Wirkungsgrad bei der Gewinnung, Übertragung und Wandlung von elektrischer Energie erhöhen können. Überall in unserem täglichen Leben werden Leistungshalbleiter daher eine immer größere Rolle spielen.

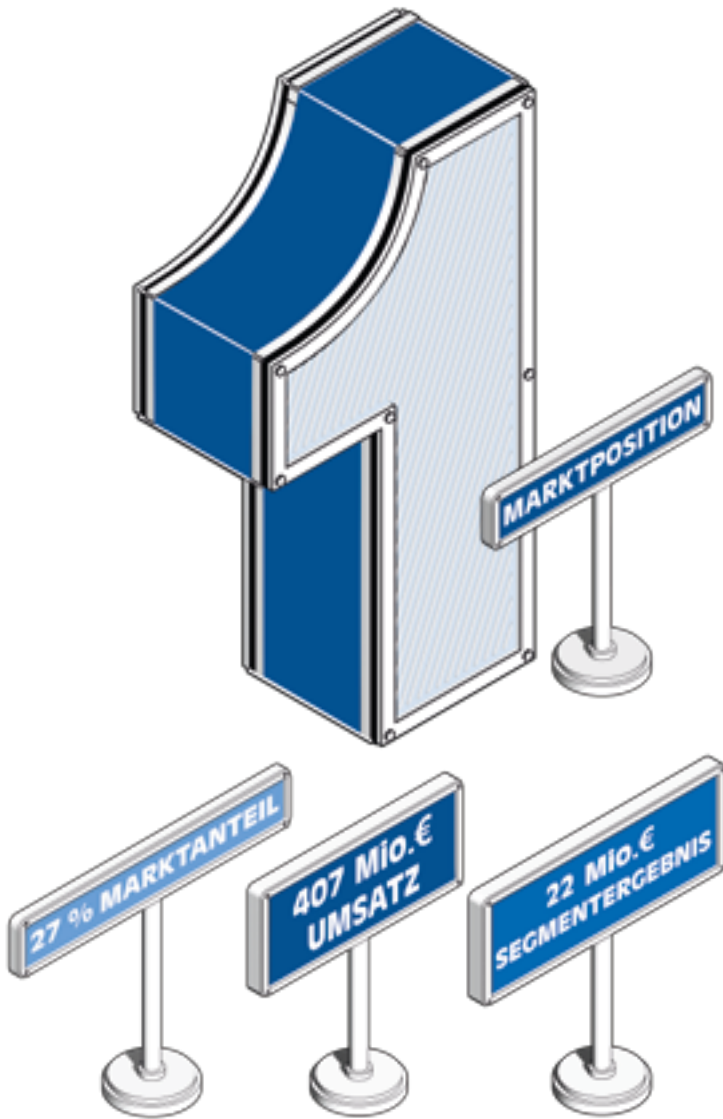

## KOMMUNIKATION

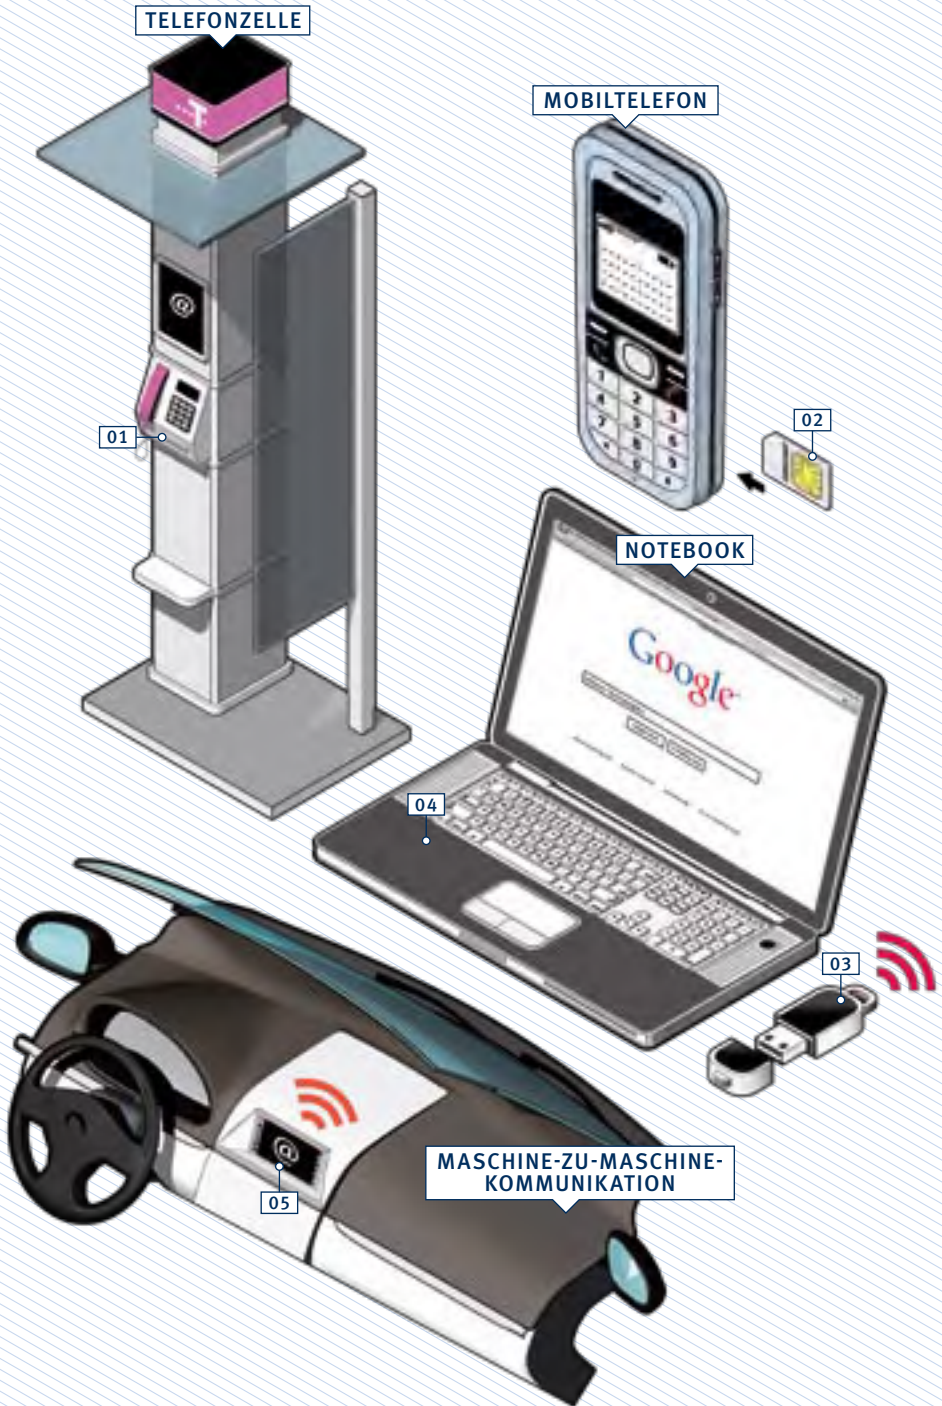

01 / Vorausbezahlte Telefonkarte

02 / SIM-Karte

03 / SIM-Karte im USB-Dongle

04 / Trusted Platform Module (TPM) auf Motherboard

05 / Sicherheitschip für drahtlose Maschine-zu-Maschine-Kommunikation über Mobilfunknetze

## IDENTIFIKATION

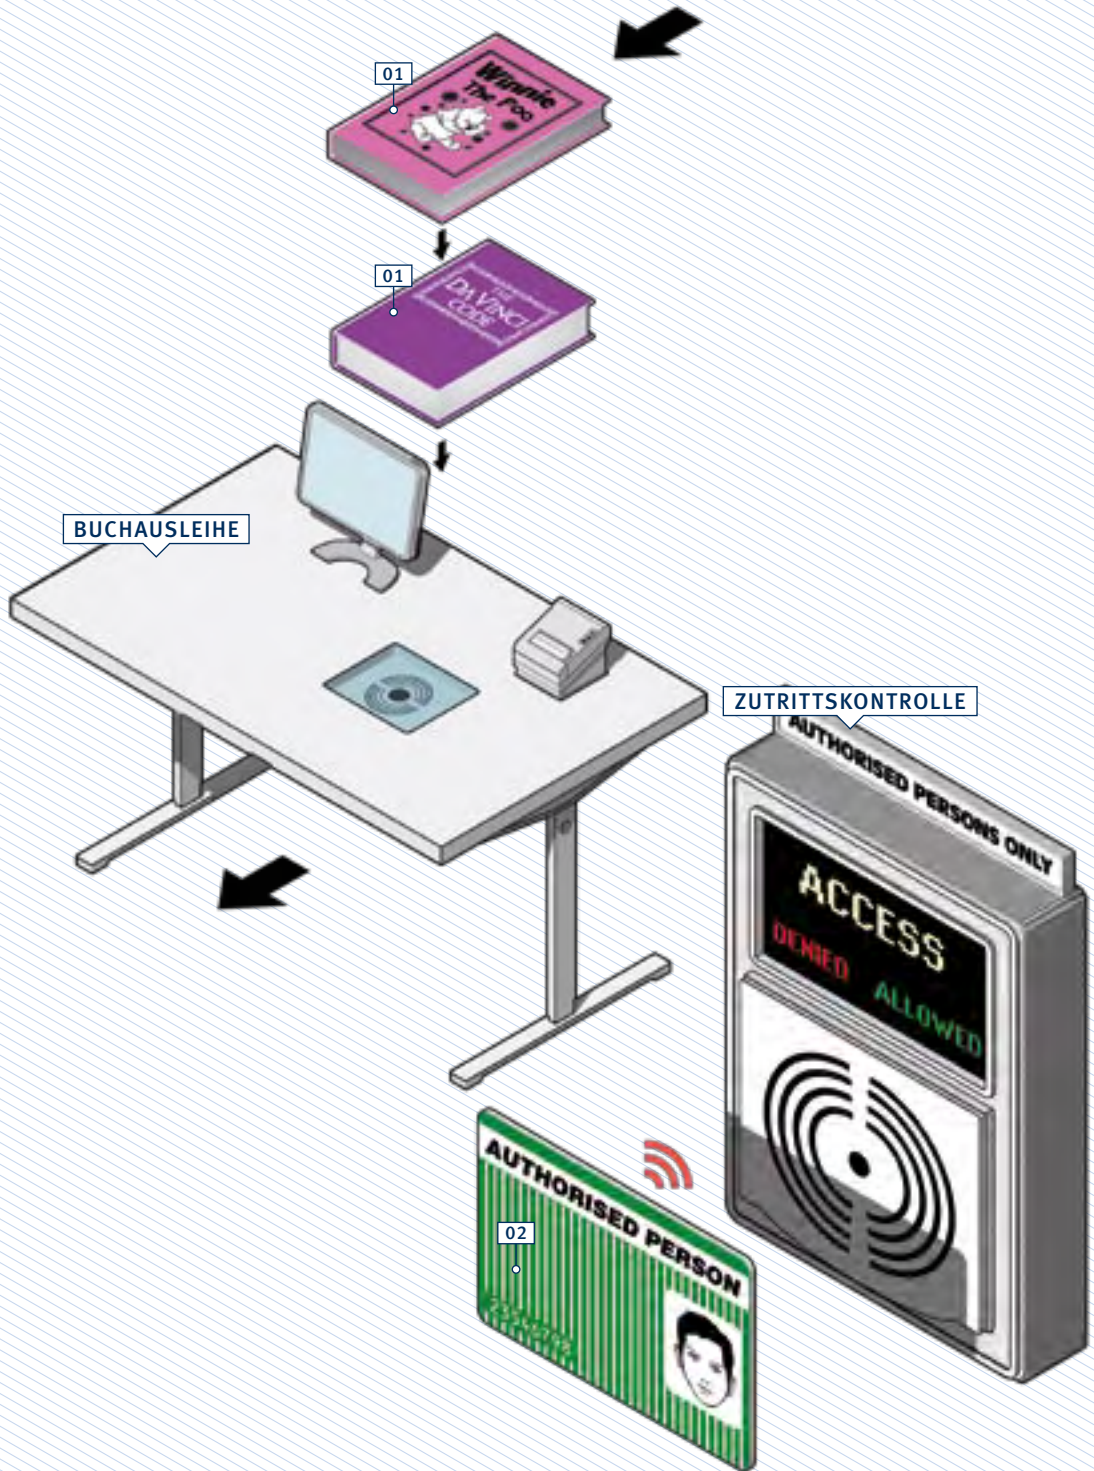

01 / RFID-Chip im Buchdeckel für kontaktlose Ausleihe und Rückgabe von Medien in Büchereien

02 / Zutrittskontrolle durch kontaktlosen Sicherheitschip in der Ausweiskarte

## BEZAHLKARTEN

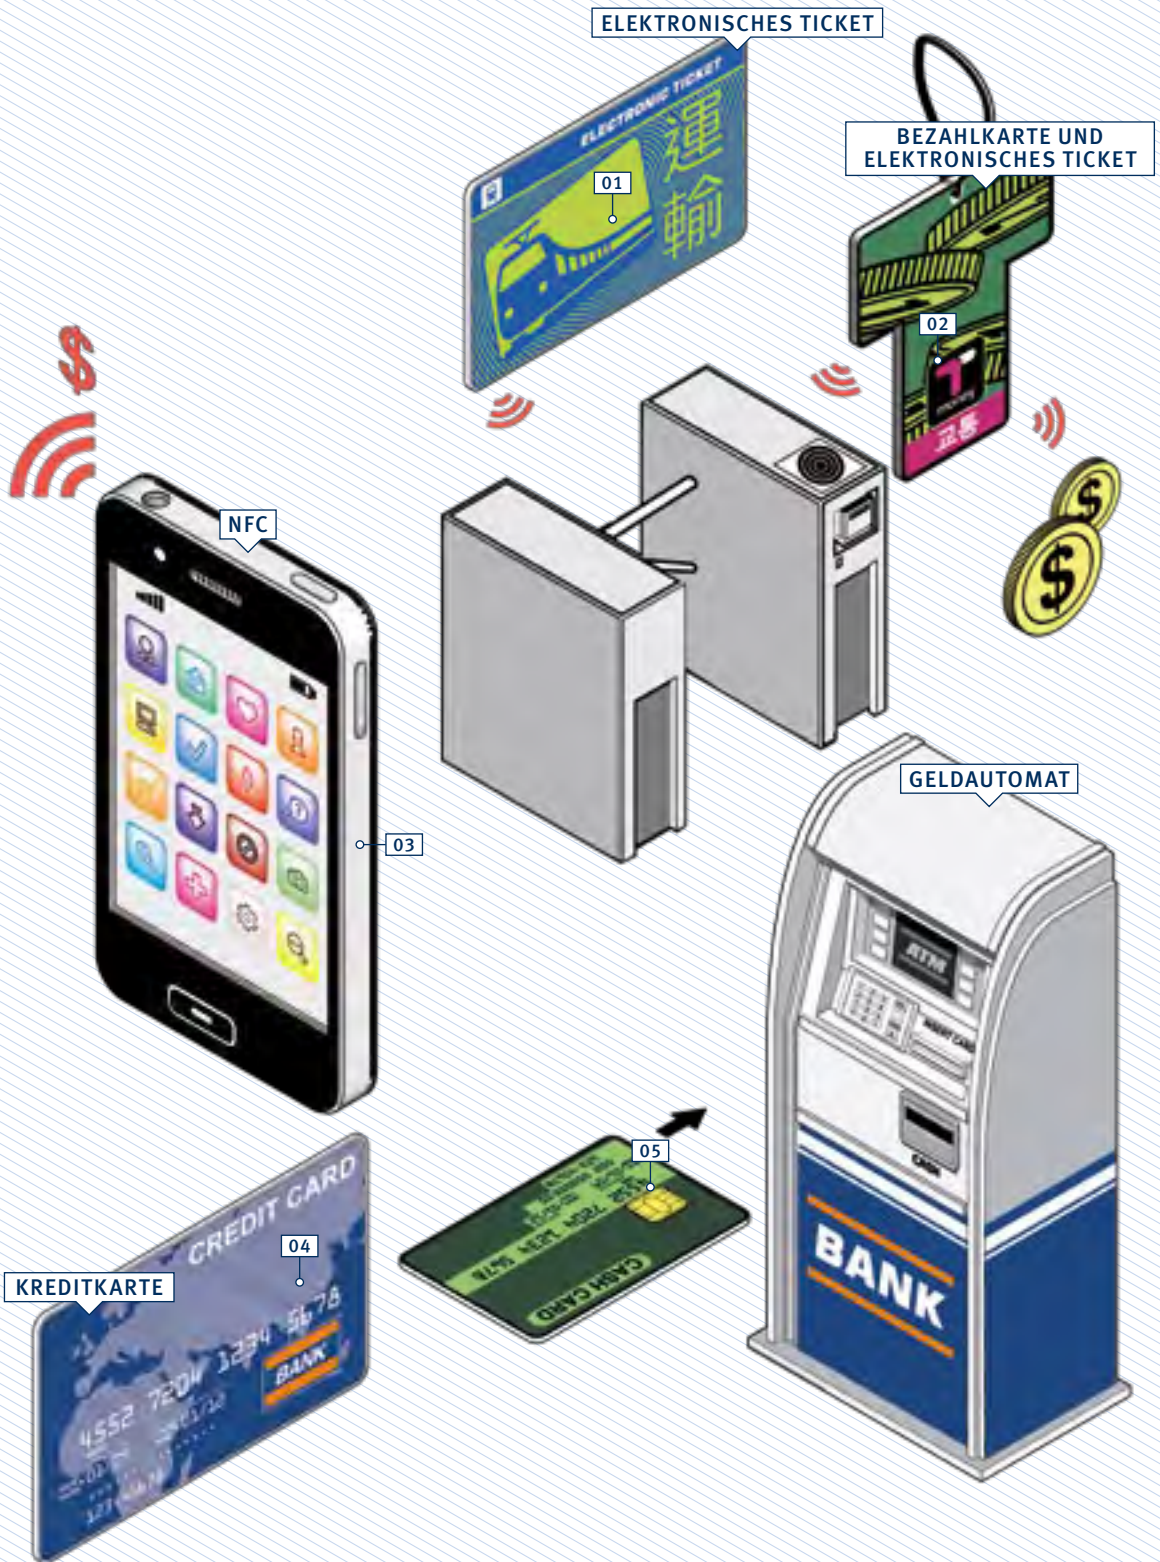

01 / Kontaktloser Sicherheitschip für den öffentlichen Personennahverkehr  
02 / Kontaktloser Sicherheitschip für öffentlichen Personennahverkehr und Bezahlen von Kleinbeträgen

03 / NFC (Near Field Communication)-Sicherheitschip in Smartphones zum Bezahlen von Fahrscheinen  
04 / Kontaktloser Sicherheitschip in der Kreditkarte  
05 / Sicherheitschip in Bankkarte zum Geldabheben

## BEHÖRDLICHE AUSWEISE

ELEKTRONISCHER REISEPASS

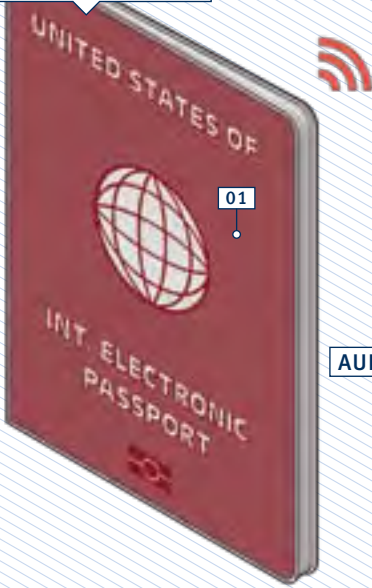

PERSONALAUSWEIS

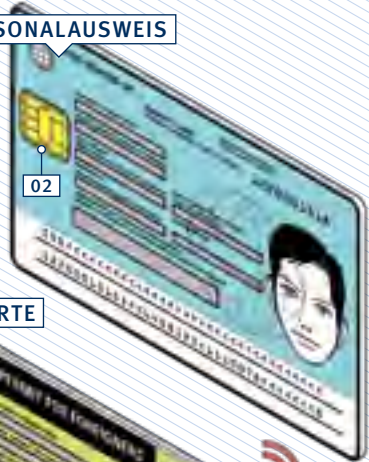

AUFENTHALTSKARTE

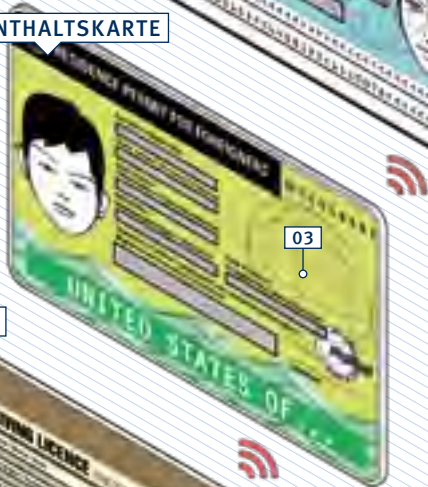

FÜHRERSCHEIN

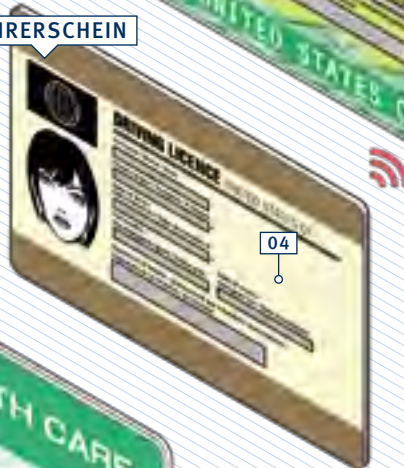

GESUNDHEITSKARTE

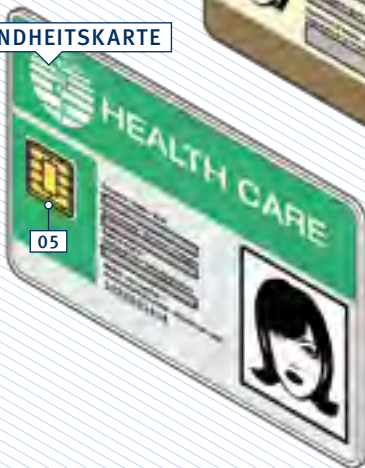

01 / Kontaktloser Sicherheitschip im elektronischen Reisepass

02 / Sicherheitschip im elektronischen Personalausweis

03 / Kontaktloser Sicherheitschip in elektronischer Aufenthaltskarte

04 / Kontaktloser Sicherheitschip im elektronischen Führerschein

05 / Sicherheitschip in der elektronischen Gesundheitskarte

# CHIP CARD & SECURITY

22

- In der Division Chip Card & Security erzielte Infineon im Geschäftsjahr 2010 einen Umsatz in Höhe von 407 Millionen Euro. Dies entspricht 12 Prozent der Umsätze aus fortgeführten Aktivitäten. Das Segmentergebnis betrug 22 Millionen Euro.
- Als Folge einer höheren Nachfrage nach behördlichen Ausweisen sowie Bezahlkarten stieg der Umsatz im Vergleich zum Vorjahr um rund 20 Prozent.
- Das Segmentergebnis verbesserte sich aufgrund der höheren Fabrikauslastung, einer Verschiebung des Produktportfolios hin zu Produkten mit höherer Marge sowie dem Hochlauf kostengünstigerer Fertigungstechnologien.

## 22 UMSATZ UND SEGMENTERGEBNIS DER LETZTEN 12 QUARTALE IN MIO. €

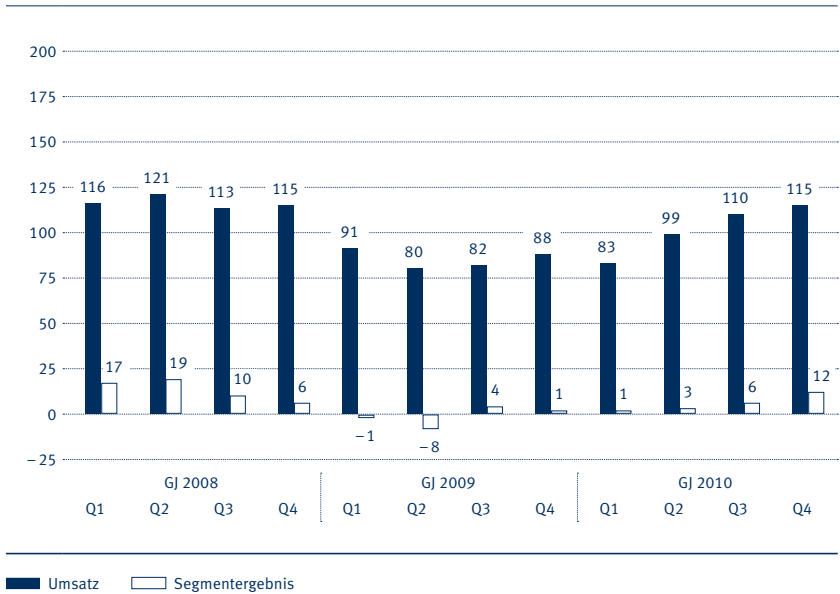

## BEHÖRDLICHE AUSWEISE, KONTAKTLOSE ANWENDUNGEN, MARKENSCHUTZ

Infineon ist der weltweit führende Anbieter von Sicherheitsmikrocontrollern für ein breites Spektrum an Chipkarten und Sicherheitsanwendungen. Dazu zählen elektronische Reisepässe, Ausweise, kontaktlose und kontaktbasierte Bezahlkarten, Zugangskarten und RFID-Anwendungen sowie Chips für Trusted-Computing-Lösungen.

Beim Thema Sicherheit sind wir seit 25 Jahren mit den anspruchsvollsten und größten Chipkartenprojekten betraut. Dabei profitieren wir mit unserem führenden Sicherheits-Know-how von den steigenden Sicherheitsanforderungen einer zunehmend mobilen Welt. Und unsere Innovationen in der Sicherheits- und Kontaktlos-Technologie ermöglichen wiederum weiter wachsende Mobilität und mehr Freiheit auf der Grundlage von Sicherheit und Wahrung der Privatsphäre jedes Einzelnen.

Unser Erfolg beruht unter anderem auf zahlreichen Innovationen in drei Kompetenzfeldern:

**Tailored Security:** Darunter verstehen wir die Implementierung maßgeschneiderter Sicherheitsfunktionen, die anwendungsspezifische Sicherheitsbedürfnisse erfüllen. Um auch in Zukunft gegen Angriffe auf Daten gewappnet zu sein, haben wir <sup>s. 59</sup>  das revolutionäre Sicherheitskonzept Integrity Guard in der neuen SLE 78-Familie implementiert.

**Contactless Excellence:** Speziell bei Anwendungen im öffentlichen Nahverkehr, der Identifizierung und Bezahlung ist eine schnelle und sichere Übertragung der auf der Karte oder im Ausweisdokument gespeicherten Daten zur Vermeidung von Wartezeiten oberstes Gebot. Nur mit großer Lesegeschwindigkeit kann eine hohe Akzeptanz und Benutzerfreundlichkeit solcher kontaktloser Vorgänge erreicht werden. Hier gehören wir zur Weltspitze, und wir wollen diese Position weiter ausbauen.

**Embedded Control:** Durch langjährige Erfahrung im Bereich der Hardware-basierten Sicherheit sind wir in der Lage, alle Anforderungen für das jeweilige Anwendungsfeld optimal abzuwägen. Dabei sind Kriterien wie Rechenleistung, Stromverbrauch und Sicherheit bei jeweils günstigster Kostenposition aufeinander abzustimmen.

Unsere Innovationen in diesen drei Kompetenzfeldern ermöglichen unseren Kunden die Implementierung moderner Hardware-basierter Sicherheitslösungen. Diese schaffen das notwendige Vertrauen in die neuen Anwendungen der mobilen Daten-gesellschaft und verbinden Freiheit und Mobilität des Einzelnen mit höchstmöglicher Sicherheit und Wahrung der Privatsphäre.

Auf der anderen Seite führt der Einsatz von Sicherheitslösungen zu immer mehr zukunftsweisenden Anwendungen in Kommunikation, Verkehr und IT-Infrastruktur. Infineon bietet industrieweit das breiteste Produktportfolio an Chips und Schnittstellen für die jeweils benötigten Sicherheitsanforderungen an. Mit unseren Aktivitäten glauben wir, auch in Zukunft der kompetenteste und führende Chiplieferant für Sicherheitslösungen zu sein.



#### BEHÖRDLICHE AUSWEISE

Elektronische Ausweise zählen zu den am schnellsten wachsenden Anwendungen von Sicherheitschips mit den höchsten Sicherheits- und Qualitätsanforderungen. Infineon beliefert die derzeit größten nationalen Projekte mit Sicherheitscontrollern für Reisepässe (unter anderem den US-amerikanischen Reisepass), Personalausweise sowie Gesundheitskarten.

#### BEZAHLEN VON KLEINBETRÄGEN, ÖPNV

Sicheres Bezahlen mit kontaktlosen Karten setzt sich zunehmend durch. Gerade in den boomenden Städten der wirtschaftlich aufstrebenden Länder gewinnt die bequeme und schnelle Art der Bezahlung von Kleinbeträgen sehr stark an Bedeutung. Viele dieser Karten lassen sich neben dem Bezahlen in Geschäften auch als Fahrkarten im öffentlichen Nahverkehr nutzen. Bis Ende 2010 wurden mehrere Hundert Millionen Infineon-ICs für Karten und Tickets in China, Korea, Singapur, Brasilien, den USA, Großbritannien, Russland und vielen anderen Ländern ausgegeben.

Das Unternehmen erweitert seine Geschäftsfelder über die klassische Chipkarte hinaus um Anwendungen mit anderen Gehäusebauformen, zum Beispiel zur Messdatenerfassung im Bereich Maschine-zu-Maschine (M2M)-Kommunikation, Bezahlungsfunktion im Handy und Markenschutz. Hierzu drei Beispiele:

#### SICHERE DATENÜBERTRAGUNG IM SMART GRID

s. 42  M2M-Kommunikation kommt unter anderem im Smart Grid zum Einsatz. Hier ermöglichen Smart Meter den Versorgungsunternehmen, Verbrauchsdaten aus der Ferne auszulesen. Smart Meter ermöglichen ferner zeitvariable Tarifierung und eine transparente Darstellung des Verbrauchs für den Endkunden. Datenschutz und Schutz vor Manipulation sind bei diesen Systemen Grundvoraussetzungen für die Akzeptanz dieser Technologie in der Bevölkerung.

#### NFC – FAHRSCHEINKAUF MIT DEM HANDY

Mit Nahfeld-Kommunikation (Near-Field-Communication-Technologie; NFC) sollen Nutzer in Zukunft mittels Handy bezahlen können, indem sie dieses nahe an ein Zahlungsterminal halten. Schon jetzt gibt es erste Pilotprojekte im öffentlichen Nahverkehr. Dort ersetzen Handys mit NFC-Technologie den üblichen Fahrschein aus Papier. Die dazu notwendigen Sicherheitsfunktionen sind in einem Chip von Infineon integriert.

#### PRODUKT- UND MARKENSCHUTZ

Die Herkunft und die Echtheit von Originalprodukten – seien es hochwertige Medikamente oder teure Maschinenteile – sollen gewährleistet sein. Mit speziellen chipbasierten Etiketten (sogenannten RFID-Labeln) kann die Wertschöpfungskette vom Ort der Herstellung des Produkts über Zoll- und Landesgrenzen bis zum Endverbraucher verfolgt und protokolliert werden. Somit kann der Nachweis geführt werden, dass dem Kunden die Originalware und keine Fälschung vorliegt.

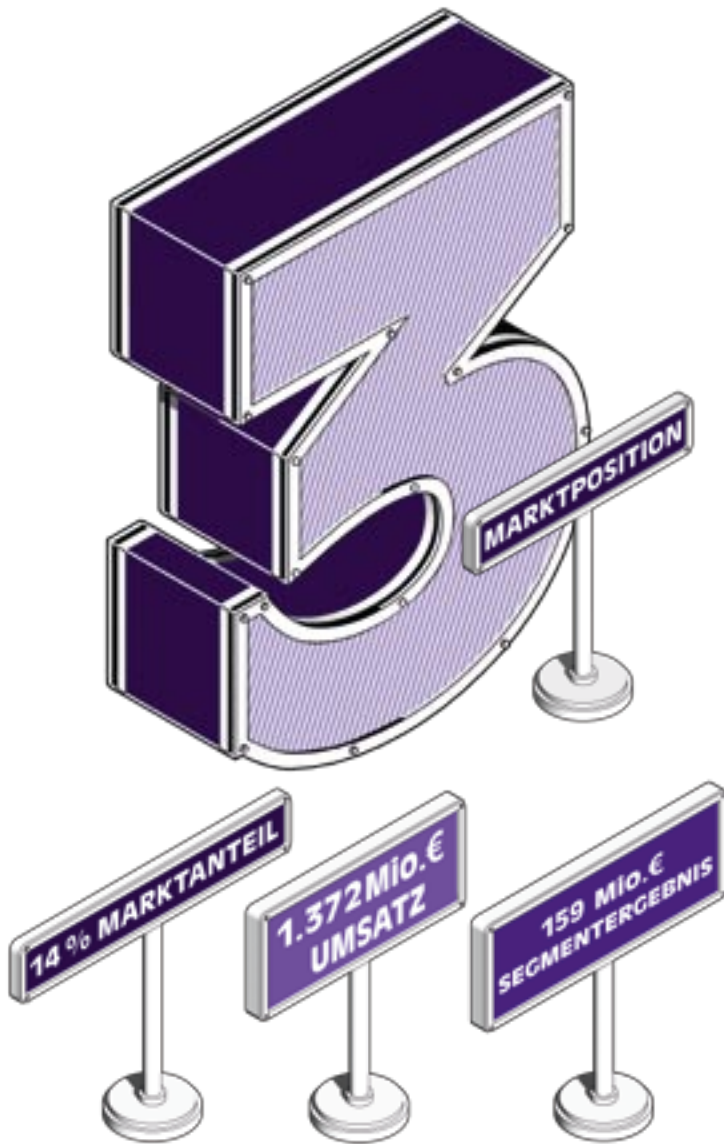

# WIRELESS SOLUTIONS

24 

- In der Division Wireless Solutions erzielte Infineon im Geschäftsjahr 2010 einen Umsatz in Höhe von 1.372 Millionen Euro. Das Segmentergebnis betrug 159 Millionen Euro.
- Der Umsatz im Geschäftsjahr 2010 erhöhte sich gegenüber dem Vorjahr um rund 50 Prozent. Dieses Umsatzwachstum ist im Wesentlichen auf die hohe Akzeptanz unserer neuen Plattformen für Smartphones und Einstiegsmodelle bei unseren Kunden zurückzuführen.
- Im Laufe des Geschäftsjahrs 2010 haben etablierte Mobiltelefonhersteller mehrere populäre Smartphone-Modelle lanciert, die mit Infineons neuer HSUPA-Plattform ausgestattet sind. Weitere Wachstumstreiber unseres Wireless-Geschäfts waren die Markteinführungen unserer neuen Ultra-Low-Cost-Plattform für sehr preiswerte Mobiltelefone sowie unserer neuen EDGE-Ein-Chip-Lösung.

## 24 UMSATZ UND SEGMENTERGEBNIS DER LETZTEN 12 QUARTALE IN MIO. €

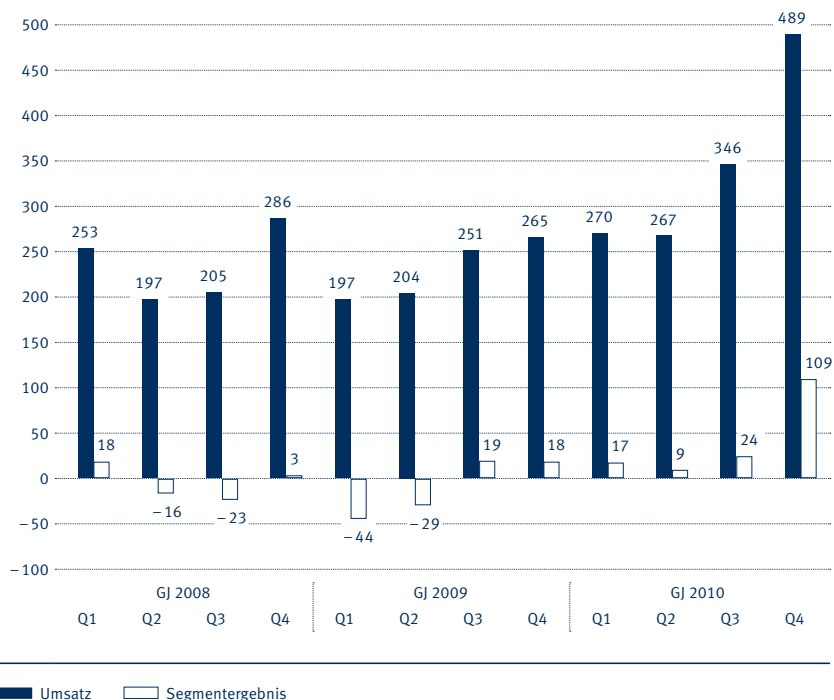

## MOBILES INTERNET, SMARTPHONES, TABLET-PCs

Am 30. August dieses Jahres gab Infineon die Absicht bekannt, das Mobilfunkgeschäft des Segments Wireless Solutions (WLS) an Intel zu verkaufen. Die Transaktion soll spätestens im ersten Kalenderquartal 2011 mit dem Übergang von rund 3.400 Mitarbeitern an Intel abgeschlossen werden. Das Mobilfunkgeschäft von WLS wird dann als eigenständiges Geschäft innerhalb von Intel geführt.

Infineons Geschäftsaktivitäten mit Tunern, Satellitenreceivern und Hochfrequenz-Leistungstransistoren für Basisstationen sind nicht Teil der Transaktion.

Infineon stellt nicht nur klassische Komponenten von Mobiltelefonen her, wie zum Beispiel Basisbandprozessoren, Hochfrequenz (HF)-Transceiver und Chips zum Batteriemangement der Geräte, sondern bietet auch komplette Plattformen inklusive Software-Lösungen, kundenspezifischer Anpassungen und erforderlicher Interoperabilitätstests an. Die großen Mobiltelefonhersteller setzen zunehmend auf diese integrierten Plattformlösungen und reduzieren in gleichem Maße die Eigenentwicklung. Infineon sieht sich als führend in den Bereichen Hochfrequenztechnologie, System-on-Chip-Integration sowie Systemsoftware.

Nach unserer Einschätzung sind portable Rechner (mobile computing), Smartphones und preiswerte Telefone für Schwellenländer die am schnellsten wachsenden Märkte. Wir bedienen diese mit den hierfür ideal angepassten Komponenten beziehungsweise Plattformlösungen.

### MOBILES INTERNET

Als einer der größten Wachstumstreiber der Branche gilt die mobile Nutzung des Internets. 60 Prozent der Zugriffe auf Internet-Seiten in China erfolgen bereits über mobile Geräte – meist Smartphones mit hohen Datenübertragungsraten und umfangreichen Anwendungsmöglichkeiten. Mobiltelefone sind für viele Anwender sogar der einzige Zugang zum Internet. Deshalb wird es zunehmend wichtig, die Vorteile von schnellen 3G-Verbindungen nicht nur im Premiumsegment, sondern auch für das untere Preissegment des Marktes verfügbar zu machen. Wir beliefern beide Segmente mit unseren leistungsfähigen HSDPA/HSUPA- sowie Low-Cost-3G-Plattformen.

In 2010 haben wir sehr erfolgreich unsere HSUPA-Plattform XMM™ 6160 im Markt etabliert. So beliefern wir seit Sommer 2010 unter anderem das Samsung Top-Modell Galaxy S. Im Einsteigersegment steht mit der XMM™ 6181-Plattform eine kostengünstige Lösung für Android-basierte Telefone zur Verfügung.

Wir haben jedoch schon die nächste Übertragungstechnologie im Visier: HSPA+. Infineon liefert mit seiner in 40-Nanometer-Technologie gefertigten Plattform XMM™ 6260 hierfür eine überzeugende Lösung für Smartphones: Durch den hohen Integrationsgrad lässt sich die gesamte Modemfunktionalität auf einer Platinenfläche von gerade einmal 600 Quadratmillimetern unterbringen. Ermöglicht wird das im Wesentlichen durch einen revolutionären Ansatz in unserem neuen HF-Transceiver SMARTi™ UE2. Die Senderarchitektur ist hier so definiert, dass die verschiedenen Modulationsarten der weltweit relevanten Funkstandards (GSM, GPRS, EDGE, W-CDMA, HSDPA,

HSUPA, HSPA+) in einem Signalpfad im Chip kombiniert werden. Das ist ein Novum in der Mobilfunkindustrie. Damit bietet Infineon die industrieweit kompakteste und batterieschonendste HSPA+-Lösung an. Kunden aus Asien und den USA arbeiten schon an den ersten Modellen.

#### **MOBILER ZUGANG ZUM INTERNET VON JEDEM PORTABLEN COMPUTER**

In drei bis fünf Jahren wird nahezu jeder portable Computer – sei es ein Notebook, ein Netbook oder ein Tablet-Computer – einen mobilen Zugang zum Internet haben. All diese Geräte werden mit einem Kommunikationsmodul ausgestattet, damit der Nutzer jederzeit und überall mit dem Internet verbunden sein kann, etwa um sich in sozialen Netzen mit Freunden auszutauschen oder um neuen Lesestoff aufzuspielen. Infineon erzielt insbesondere im boomenden Tablet-Markt mit seinen HSDPA/HSUPA-Plattformen große Erfolge.

#### **WEITERES WACHSTUMSPOTENZIAL BEI EINSTEIGERTELEFONEN**

Das Wachstum im Ultra-Low-Cost (ULC)/Entry-Segment wird nach wie vor getrieben durch die starke Nachfrage nach preiswerten Mobiltelefonen in Schwellenländern. Es gibt zwar heute bereits 4,5 Milliarden Mobilfunkkunden, was rund drei Viertel der Weltbevölkerung entspricht. Aber in den nächsten Jahren wird diese Zahl weiter steigen, da immer mehr Menschen in Indien, Südamerika und Afrika mobil telefonieren möchten. Hinzu kommt, dass sich immer mehr Mobilfunkkunden ein neues Telefon mit mehr Funktionen, wie zum Beispiel Radioempfang, Musikwiedergabe, E-Mail und Webseiten-Abruf kaufen möchten, was weiteres Wachstum für die Branche bedeutet.

Von dieser Entwicklung profitieren wir mit unseren Ein-Chip-Lösungen, die die wesentlichen Mobilfunkelemente wie Basisbandprozessor, Sende- und Empfangseinheit, Batteriemangement und Arbeitsspeicher auf einem Chip integrieren. Die beeindruckende Zahl von bislang mehr als 300 Millionen verkauften Ein-Chip-Lösungen spricht für sich.

Im Geschäftsjahr 2010 haben wir sehr erfolgreich unsere dritte Generation der ULC-Mobilfunkchips, den X-GOLD™ 110 sowie die neue EDGE-Ein-Chip-Lösung X-GOLD™ 213, auf den Markt gebracht. Alle führenden Mobiltelefonhersteller in diesem Segment wie Nokia, Samsung und LG Electronics zählen zu unseren Kunden.

#### **MEHR ALS 350 MILLIONEN MOBILFUNK-HOCHFREQUENZ-TRANSCIEVER AUSGELIEFERT**

Infineon nimmt nach wie vor eine weltweit führende Position im Bereich der Mobilfunk-HF-Transceiver ein und hat im Geschäftsjahr 2010 mehr als 350 Millionen Einheiten ausgeliefert. Mit diesem beeindruckenden Verkaufserfolg schraubt sich die Zahl der bislang insgesamt verkauften Mobilfunk-HF-Transceiver auf rund 1,8 Milliarden Einheiten.

# UNSERE STRATEGIE

## 01 /

AUGENMERK AUF DIE CHANCEN UND WACHSTUMSMÖGLICHKEITEN VON ENERGIEEFFIZIENZ, MOBILITÄT UND SICHERHEIT.

## 02 /

ORGANISATORISCHE AUSRICHTUNG AUF DIE ZIELMÄRKTE AUTOMOBILELEKTRONIK, INDUSTRIELEKTRONIK UND SICHERHEIT.

## 03 /

TECHNOLOGISCHE KERNKOMPETENZ IN ANALOG- UND MIXED-SIGNAL-SCHALTUNGEN, EMBEDDED CONTROL, LEISTUNGSELEKTRONIK UND FERTIGUNGS-KNOW-HOW.

## 04 /

SYSTEMVERSTÄNDNIS DER PRODUKTE, AGGREGATE UND KOMPONENTEN UNSERER KUNDEN.

ZIEL  
UMSATZ: ~4 MRD. €  
SEGMENTERGEBNIS-MARGE:  
HOHER 10er-PROZENT-BEREICH

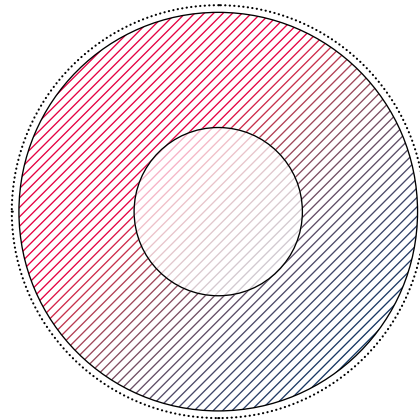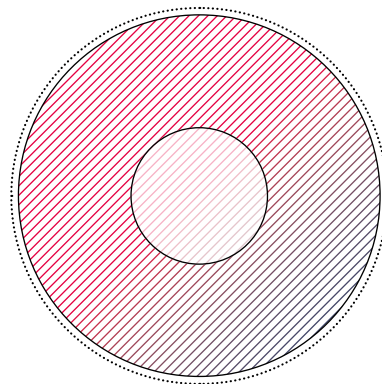

GJ 2010  
UMSATZ: 3,295 MRD. €  
SEGMENTERGEBNIS AUS FORTGEFÜHRTEN  
AKTIVITÄTEN: 475 MIO. € (14,4 % Marge)

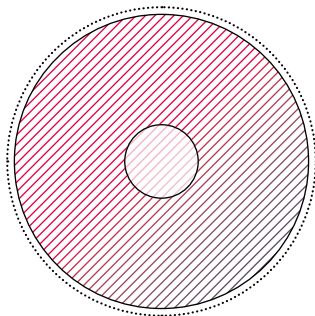

GJ 2009  
UMSATZ: 2,184 MRD. €  
SEGMENTERGEBNIS AUS FORTGEFÜHRTEN  
AKTIVITÄTEN: - 140 MIO. €

01  
02  
03  
**04**  
05  
06  
07  
08  
09  
10  
11  
12  
13  
14  
15  
16  
17  
18  
19  
20  
21

# FERTIGUNGSPROZESSE ALS WESENTLICHES DIFFERENZIERUNGSMERKMAL UNSERER PRODUKTE

## FORSCHUNG & ENTWICKLUNG

Nach dem krisenbedingten Rückgang der Ausgaben für Forschung & Entwicklung (F&E) im Geschäftsjahr 2009 erhöhten sich die F&E-Ausgaben im Geschäftsjahr 2010 um 80 Millionen Euro auf 400 Millionen Euro. Die F&E-Ausgaben betragen 12,1 Prozent vom Umsatz gegenüber 14,6 Prozent vom Umsatz im Vorjahr.

Zum Ende des Geschäftsjahrs arbeiteten 5.771 Mitarbeiter in F&E (inklusive der Mitarbeiter, die im Rahmen des Verkaufs des Mobilfunkgeschäfts zu Intel wechseln), davon 2.939 in Deutschland.

Wir haben jahrzehntelange Erfahrung im Design von Analog- und Mixed-Signal-Schaltungen, bei Mikrocontroller-Lösungen für Motorsteuerungen (Embedded Control), Sicherheitsanwendungen und nicht zuletzt bei der Integration vieler Funktionsblöcke auf einem Chip. Durch dieses Know-how und unser Systemverständnis der Produkte, Aggregate und Komponenten unserer Kunden sind wir zu deren strategisch wichtigem Entwicklungspartner geworden.

Infineon erzielt inzwischen über die Hälfte seines Umsatzes mit Leistungshalbleitern. Diese sind entscheidend für die Effizienzsteigerung der Systeme unserer Kunden. Konsequenterweise hat Infineon eine der branchengrößten Entwicklungsmannschaften für Leistungselektronik.

Innovationen sind der Schlüssel zu den Märkten von morgen und daher eine Daueraufgabe von Unternehmen. Auf den nächsten Seiten stellen wir Ihnen einige innovative Ideen vor, die bald in marktreifen Produkten von uns zu finden sein werden.

### 26 AUSGABEN FÜR FORSCHUNG & ENTWICKLUNG IN MIO. € (linke Skala) UND IN PROZENT VOM UMSATZ (rechte Skala)

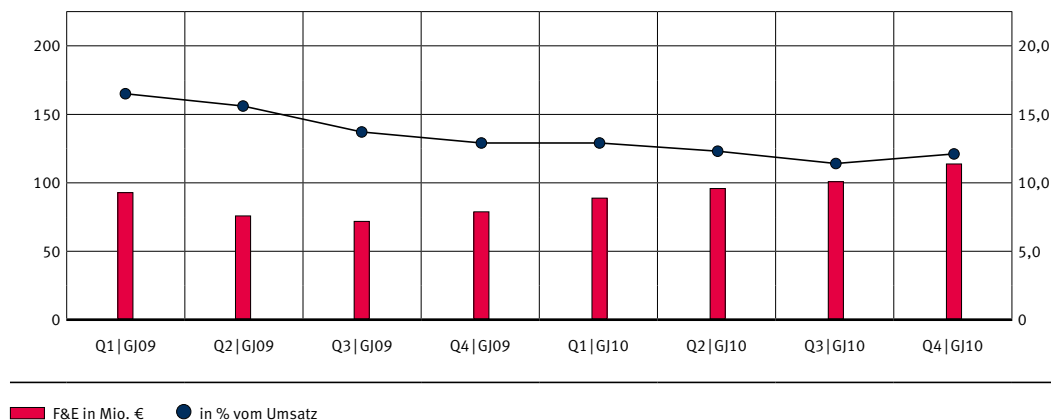



**AURIX™: UNSERE 32-BIT-MEHRKERN-MIKROCONTROLLER-FAMILIE FÜR ZUKÜNFTIGE FAHRZEUGPLATTFORMEN**

Unsere 32-Bit-Automotive-Mikrocontroller (MCUs) werden speziell für rechenintensive Anwendungen entwickelt, zum Beispiel für sicherheitskritische Funktionen wie das elektronisch geregelte Spurhaltesystem ESP sowie die Bereiche Antriebsstrang und Fahrwerksteuerung.

Ein Blick in die Entwicklungsabteilungen der führenden Automobilhersteller zeigt, dass selbst die leistungsstärksten heute verfügbaren MCUs den Leistungsanforderungen zukünftiger Standards nicht mehr gerecht werden können. Die treibenden Kräfte für mehr Rechenleistung sind neue Sicherheitsvorgaben für Insassen- und Fußgängerschutz sowie die Elektrifizierung des Antriebsstrangs, also der Übergang vom Verbrennungs- zum Elektromotor. Ferner spielt bei all diesen Erneuerungen die Echtzeit-Fähigkeit – darunter versteht man die Eigenschaft eines Mikrocontrollers, in einer vorgegebenen Zeitspanne auf unerwartete, externe Unterbrechungen reagieren zu können – eine entscheidende Rolle. Alle unsere 32-Bit-MCUs erfüllen die so wichtige Echtzeit-Anforderung.

Unsere neue AURIX™-Familie besitzt durch die 32-Bit-Mehrkern-Architektur die in den zukünftigen Automobilgenerationen erforderliche Rechenleistung. Durch die Integration von bis zu fünf Rechenkernen auf einem Chip können einerseits zeitkritische Berechnungen auf mehrere Kerne verteilt oder andererseits sicherheitskritische Berechnungen redundant auf verschiedenen Kernen berechnet werden. AURIX™ basiert auf der Prozessorarchitektur TriCore™.

Ferner erweitert die neue AURIX™-Familie durch variantenreiche Speicher- und Interface-Konfigurationen ihre Einsatzmöglichkeiten. Unseren Kunden steht damit von einfachen bis zu hochkomplexen Systemen eine einheitliche, skalierbare Prozessorarchitektur zur Verfügung. Dies vereinfacht und beschleunigt die Hard- und Software-Entwicklung. Erste Varianten der AURIX™-Familie werden ab 2014 in 65-Nanometer-Technologie gefertigt. Für die Produktlebensdauer dieser MCU-Familie rechnen wir mit mindestens 15 Jahren.

**„INTEGRITY GUARD“ – REVOLUTIONÄRES SICHERHEITSKONZEPT FÜR HÖCHSTE ANFORDERUNGEN**

In den vergangenen Jahren sind die Angriffe auf Chipkartenanwendungen immer effektiver geworden. Mit der revolutionären Sicherheitstechnologie „Integrity Guard“ leitet Infineon ein neues Zeitalter im Bereich der hardware-basierten Sicherheit für Chipkarten- und Sicherheitsanwendungen ein. „Integrity Guard“ wurde speziell für anspruchsvolle und langlebige Chipkarten- und Sicherheitsanwendungen entwickelt. Hierzu gehören unter anderem Bezahlkarten und hoheitliche Dokumente.

Durch „Integrity Guard“ bietet ein Sicherheitscontroller zum ersten Mal in der Geschichte der Chipkarte vollständige Fehlererkennung sowie umfassende Verschlüsselung aller Chipfunktionen über den gesamten Datenpfad im Chip. Man spricht bei diesem revolutionären Konzept daher auch von der „digitalen Sicherheit“.

„Integrity Guard“ wird in der neuen 16-Bit-Sicherheits-Mikrocontroller-Familie SLE 78 eingesetzt. „Integrity Guard“ im SLE 78 wurde vom Bundesamt für Sicherheit in der Informationstechnik (BSI) zertifiziert und gilt als die fortschrittlichste Möglichkeit des Datenschutzes auf Sicherheitschips.

01  
02  
03  
04  
05  
06  
07  
08  
09  
10  
11  
12  
13  
14  
15  
16  
17  
18  
19  
20  
21

### .XT-TECHNOLOGIE: IGBT-VERBINDUNGSTECHNOLOGIE FÜR HÖHERE ZUVERLÄSSIGKEIT

Infineon stellte im Mai 2010 eine neue Verbindungstechnologie für IGBT (Insulated Gate Bipolar Transistor)-Module vor, die die Lebensdauer von IGBT-Modulen deutlich erhöht. Die neue .XT-Technologie (XT = extended) optimiert alle Verbindungen innerhalb eines IGBT-Moduls, die für die Lebensdauer und Zuverlässigkeit entscheidend sind. Damit erfüllt Infineon die steigenden Anforderungen bei bestehenden und neuen Applikationen vor allem in Bezug auf eine höhere Lebensdauer der Module.

Mit der .XT-Technologie unterstreicht Infineon seine technologische Spitzenstellung bei Design und Fertigung von IGBT-Modulen. Die .XT-Technologie kann die Lebensdauer von IGBT-Modulen im Vergleich zu herkömmlichen Verbindungs-Technologien um den Faktor 10 verlängern. Alternativ kann die Leistungsdichte um bis zu 25 Prozent erhöht werden. Nicht zuletzt ermöglicht die .XT-Technologie höhere Sperrschicht-Temperaturen für neue Chiptechnologien.

In IGBT-Modulen führen Temperaturänderungen aufgrund von Lastwechseln zwischen ein- und ausgeschaltetem Zustand zu Beanspruchung der modulinternen Verbindungen. Die unterschiedlichen Längenausdehnungs-Koeffizienten der einzelnen Schichten verursachen mechanische Spannungen, die letztlich zu Materialermüdung und Verschleiß führen können. Die neue .XT-Technologie deckt alle kritischen Bereiche für die Lastwechselfestigkeit ab: die Verbindungen auf der Chip-Oberseite, die Rückseitenlötung der Chips und die Lötung von der DCB (Direct Copper Bond) genannten Trägerplatte zur Bodenplatte aus Kupfer.

## 27 IGBT-MODUL (BASIEREND AUF DER .XT-GEHÄUSE-TECHNOLOGIE)

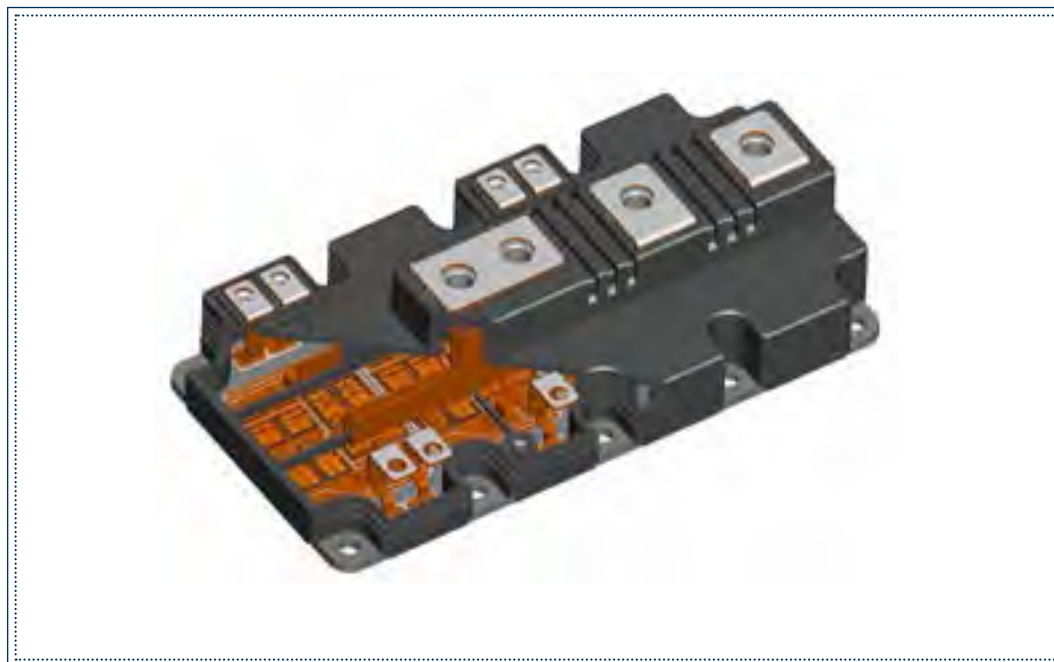

Die neue Technologie optimiert beispielsweise große Transportfahrzeuge, Baumaschinen (Minenfahrzeuge), Agrarfahrzeuge und Elektrobusse, die elektrisch oder diesel-elektrisch angetrieben werden. Denn hier spielen hohe Verfügbarkeit und damit eine hohe Zuverlässigkeit eine zunehmende Rolle für unsere Kunden. Sie wird auch eingesetzt in Offshore-Windturbinen, wo der Austausch von Komponenten auf hoher See aufwendig und teuer ist und deshalb hohe Lebensdauer und Zuverlässigkeit aller verwendeten Komponenten eine entscheidende Rolle spielen.

**ERWEITERUNG DER DÜNNWAFER-TECHNOLOGIE VON 200- AUF 300-MILLIMETER-WAFER**

Ein Wafer für Leistungshalbleiter ist normalerweise 350 Mikrometer dick, wenn er in die einzelnen Chips gesägt wird. Von Dünnwafern spricht man, wenn der Wafer auf unter 170 Mikrometer dünn geschliffen wird. Als „ultradünn“ werden solche Wafer bezeichnet, die unter 100 Mikrometer liegen. Infineon setzt heute je nach Produkthanforderung Dünnwafer-Technologien von 170 bis 40 Mikrometer ein. Zum Vergleich: Ein Haar misst 50 bis 70 Mikrometer. Infineon ist weltweit der einzige Hersteller, der die Technologie beherrscht, Leistungshalbleiter von nur 40 Mikrometer Dicke (auf 200-Millimeter-Wafern) zu fertigen.

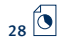

Dabei stellt vor allem die Handhabung der Dünnwafer eine große Herausforderung dar. Wafer mit einer Dicke von weniger als 100 Mikrometern brechen leicht, und es ist schwierig, sie zu transportieren und den einzelnen Bearbeitungsprozessen zu unterziehen.

**28 40-MIKROMETER-DÜNNWAFER MIT EINEM DURCHMESSER VON 200 mm (heute) / 300 mm (in Zukunft)**

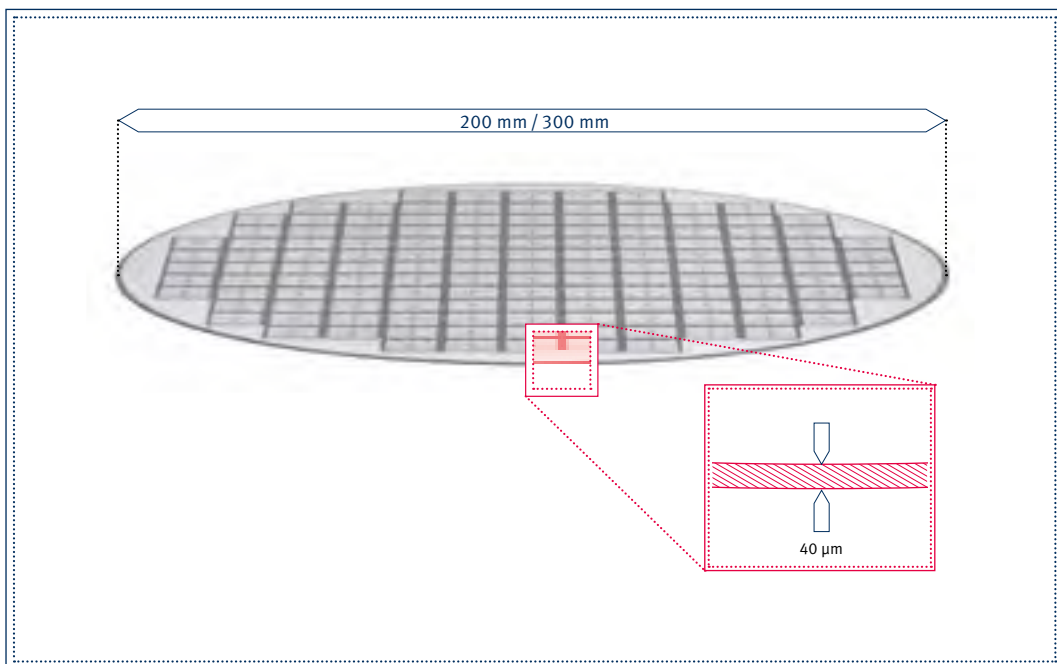

01  
02  
03  
04  
05  
06  
07  
08  
09  
10  
11  
12  
13  
14  
15  
16  
17  
18  
19  
20  
21

01 Die Dünnpwafer-Technologie hat jedoch große Vorteile: Im Gegensatz zu normalen ICs fließt bei den  
02 meisten Leistungshalbleitern der Strom von der Vorderseite zur Rückseite des Chips. Dünnpwafer bie-  
03 ten die Möglichkeit, sowohl die Vorder- wie die Rückseite zu prozessieren. Damit ergeben sich neue  
04 Schaltungs- und Designfunktionalitäten. Mit den auf Dünnpwafern hergestellten, energieeffizienteren  
Chips kann man sowohl die Verluste reduzieren als auch die entstehende Wärme besser abführen.  
Zudem haben Dünnpwafer-Chips in kompakteren Gehäusen Platz.

Beispiele für die auf Dünnpwafern gefertigten Komponenten sind IGBTs sowie Hochvolt (CoolMOS™)-  
und Niedervolt (OptiMOS™)-Leistungstransistoren. Im Induktionsherd schalten IGBTs die hochfre-  
quenten Ströme der Induktionsspulen, die die Kochhitze in den Töpfen erzeugen. OptiMOS™- und  
CoolMOS™-Leistungstransistoren wandeln in Netzteilen und Adaptern die Netz-Wechselspannung  
in die erforderliche Gleichspannung. Unsere Komponenten und die daraus gebauten Systeme tragen  
durch die Dünnpwafer-Technologie zu größerer Energieeffizienz bei.

Infineon hat für 200-Millimeter-Dünnpwafer bei allen relevanten Schritten der gesamten Prozesskette  
eng mit den Fertigungsmaschinenherstellern zusammengearbeitet und den gesamten Fertigungs-  
prozess zur Marktreife entwickelt. Wir wollen nun innerhalb eines Jahres prüfen, inwieweit bei  
Leistungsbau-elementen auch der Einsatz von 300-Millimeter-Wafern bei der Dünnpwafer-Technologie  
möglich ist. Hierzu wird Infineon ab Ende 2010 eine Pilotlinie im österreichischen Villach, einem  
seiner Entwicklungsstandorte für Leistungsbau-elemente, einrichten.

## FERTIGUNG

### DIFFERENZIERUNG DURCH SPEZIELLES FERTIGUNGS-KNOW-HOW

Wir heben uns in den Bereichen Analog- und Mixed-Signal-Schaltungen, Embedded Control und Leis-  
tungshalbleiterentwicklung deutlich vom Wettbewerb ab. Denn für alle drei Anwendungsfelder haben  
wir spezielle proprietäre Fertigungsprozesse entwickelt, die optimal an die jeweiligen Schaltungs-  
anforderungen angepasst sind. Indem wir unser Schaltungs-Know-how mit optimierten Fertigungs-  
prozessen verknüpft haben, wurden wir zum strategischen Halbleiterlieferanten vieler Kunden.

Wir fertigen vorwiegend in eigenen Fabriken. Leistungshalbleiter, integrierte nichtflüchtige Speicher  
(Embedded Flash) und analoge Schaltungsblöcke erfordern spezielle Herstellungsverfahren, die  
nicht frei am Weltmarkt verfügbar sind. Daher liegt in unseren Fertigungsprozessen bei der Wafer-  
Behandlung (Front-End) wie auch beim Testen und der Gehäusemontage (Back-End) ein wesentli-  
ches Differenzierungsmerkmal unserer Produkte.

Der Kapazitätsausbau in unseren Werken kam während der Wirtschaftskrise zum Stillstand. Um  
Kosten zu sparen, wurden die meisten Investitionen eingefroren; teilweise wurden sogar Produktions-  
linien stillgelegt. Die Situation änderte sich zu Beginn des Geschäftsjahrs 2010 schlagartig.  
Die unerwartet starke wirtschaftliche Erholung führte zur Reaktivierung stillgelegter Fertigungslinien.  
Vor allem die Nachfrage unserer Kunden nach Leistungshalbleitern für Automobil- und Industrie-  
elektronik veranlasste uns zum zügigen Ausbau unseres jüngsten Front-End-Werkes in Kulim,  
Malaysia. Zum Ende des Geschäftsjahrs 2010 war in Kulim knapp die Hälfte der maximal möglichen

Fertigungskapazität installiert. Der Standort hat voraussichtlich bis Anfang des Kalenderjahrs 2013 seine maximale Fertigungskapazität erreicht.

01  
02

Der Kapazitätsausbau in allen unseren Fertigungsstandorten war begrenzt durch die Verfügbarkeit von neuen Fertigungsmaschinen. Trotzdem konnten wir am Ende des Geschäftsjahrs mehr Ware an unsere Kunden liefern, als es zu Beginn des Geschäftsjahrs geplant war. Dadurch haben wir einerseits unseren außergewöhnlich hohen Umsatzzuwachs erst ermöglicht, andererseits auch unseren Kunden zusätzlichen Umsatz gesichert.

03  
04

Zum Ende des Geschäftsjahrs waren insgesamt 17.924 Mitarbeiter in der Fertigung beschäftigt (Fertigungsstandorte siehe Weltkarte auf der nächsten Doppelseite).

05

**AUFNAHME IN DEN DOW JONES SUSTAINABILITY INDEX**

Infineon hat im gesamten Entwicklungsprozess den Aspekt der Ressourcen-Schonung beziehungsweise der Ressourcen-Effizienz ganz besonders in den Mittelpunkt gestellt. Unsere Innovationen sollen einen starken Beitrag zur Nachhaltigkeit leisten – nicht nur bei unseren Kunden, sondern bereits bei uns im Herstellungsprozess. Wir beachten dabei nicht nur die wirtschaftlichen Effekte, sondern auch den Umgang mit Material und Energie sowie die Folgen für unsere Mitarbeiter. Erfreuliches Ergebnis unserer Bemühungen ist die Aufnahme in den „Dow Jones Sustainability Index Europe“ im September 2010. Wir nahmen dieses Jahr zum ersten Mal an der Befragung teil und schafften auf Anhieb die Aufnahme in den Kreis der zehn nachhaltigsten Halbleiterfirmen der Welt.

06  
07  
08  
09  
10

11  
12  
13  
14  
15  
16  
17  
18  
19  
20  
21

01  
02  
03  
04  
05  
06  
07  
08  
09  
10  
11  
12  
13  
14  
15  
16  
17  
18  
19  
20  
21

Infineon-Fertigungsstandorte

- Fertigung Front-End
- Fertigung Back-End
- Fertigung Front-End und Back-End

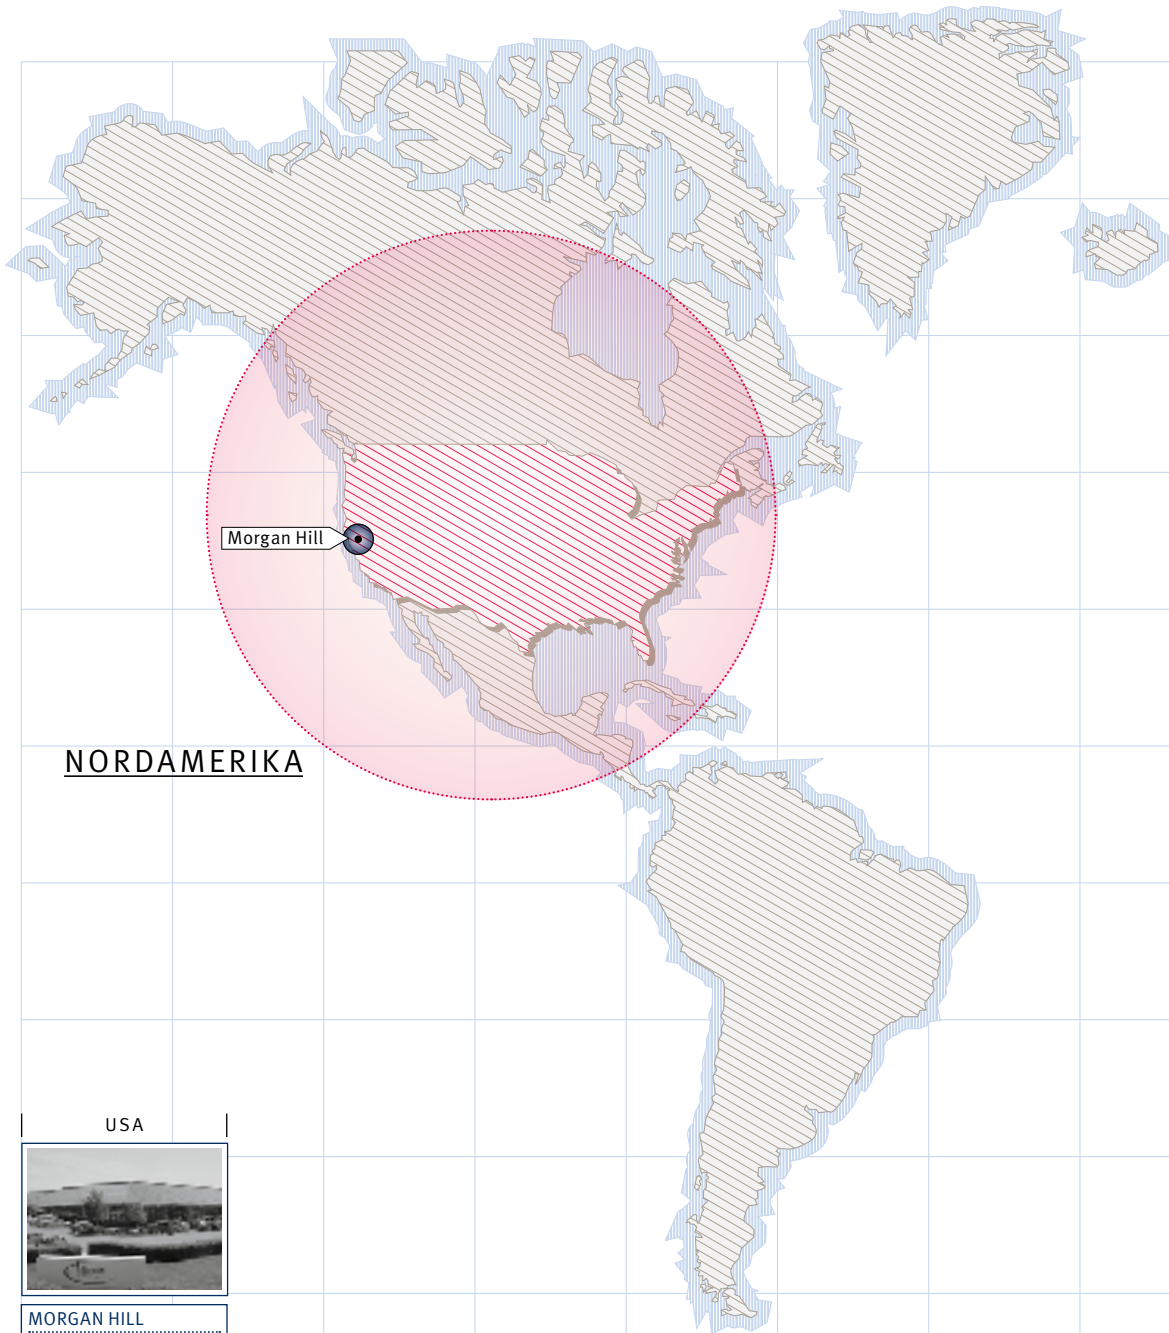

**NORDAMERIKA**

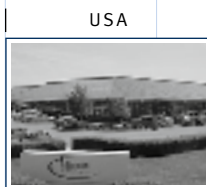

**MORGAN HILL**  
132 Mitarbeiter  
Kompetenzzentrum  
für Hochfrequenz-  
Leistungstransistoren

| DEUTSCHLAND                                                                      |                                                                                                                                                      |                                                                                   |                                                                                   | UNGARN                                                                             | ÖSTERREICH                                                                                                 |
|----------------------------------------------------------------------------------|------------------------------------------------------------------------------------------------------------------------------------------------------|-----------------------------------------------------------------------------------|-----------------------------------------------------------------------------------|------------------------------------------------------------------------------------|------------------------------------------------------------------------------------------------------------|
|  |                                                                     |  |  |  |                         |
| <b>DRESDEN</b><br>1.699 Mitarbeiter<br>CMOS, Analog/Mixed-Signal-Technologien    | <b>REGENSBURG</b><br>718 Mitarbeiter<br>Leistungshalbleiter, Sensoren, Chipkarte, eWLB, Diskrete Halbleiter, Kompetenzzentrum für Gehäuseentwicklung | <b>REGENSBURG</b><br>939 Mitarbeiter<br>Spezialtechnologien, Leistungshalbleiter  | <b>WARSTEIN</b><br>504 Mitarbeiter<br>Module, F&E für Module                      | <b>CEGLÉD</b><br>517 Mitarbeiter<br>Module                                         | <b>VILLACH</b><br>1.279 Mitarbeiter<br>Leistungstransistoren, Kompetenzzentrum für Dünnschicht-Technologie |

EUROPA

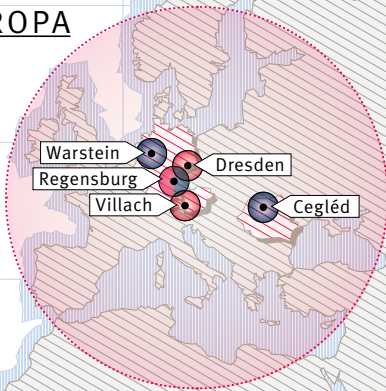

ASIEN

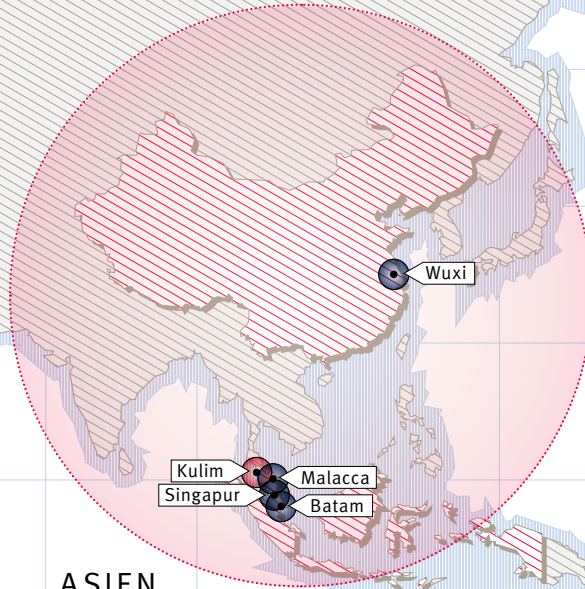

| INDONESIEN                                                                         | MALAYSIA                                                                            | SINGAPUR                                                                                         | CHINA                                                                               |
|------------------------------------------------------------------------------------|-------------------------------------------------------------------------------------|--------------------------------------------------------------------------------------------------|-------------------------------------------------------------------------------------|
|  |  |               |  |
| <b>BATAM</b><br>2.132 Mitarbeiter<br>Leistungshalbleiter                           | <b>KULIM</b><br>942 Mitarbeiter<br>CMOS, Leistungs-transistoren                     | <b>MALACCA</b><br>5.746 Mitarbeiter<br>Chipkarte, Diskrete Halbleiter, Sensoren, F&E für Gehäuse | <b>SINGAPUR</b><br>1.351 Mitarbeiter<br>Tester, F&E für Testkonzepte                |
|                                                                                    |                                                                                     |                                                                                                  | <b>WUXI</b><br>1.023 Mitarbeiter<br>Chipkarte, Diskrete Halbleiter                  |

01  
02  
03  
04  
05  
06  
07  
08  
09  
10  
11  
12  
13  
14  
15  
16  
17  
18  
19  
20  
21

## NACHHALTIGKEIT BEI INFINEON: VERANTWORTUNG FÜR ZUKÜNFTIGE GENERATIONEN ÜBERNEHMEN

Als global agierendes Unternehmen und Teilnehmer der UN Global Compact Initiative fühlen wir uns der multinationalen Gemeinschaft verpflichtet. Wir nehmen unsere Aufgabe der gesellschaftlichen Verantwortung und des Umweltschutzes sehr ernst. Sie ist ein wichtiger Bestandteil unserer strategischen Unternehmensausrichtung. Diese freiwillige Verantwortung ist das Ergebnis einer proaktiven Grundhaltung. Wir haben die notwendigen Strukturen, Prozesse und Richtlinien in unserem Unternehmen festgelegt, die sich an den Prinzipien des UN Global Compact orientieren. Unsere Teilnahme an der UN Initiative Global Compact, der wir bereits 2004 beigetreten sind, ist Ausdruck unseres Selbstverständnisses als verantwortungsbewusstes Unternehmen.

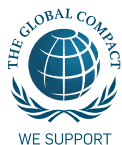

Die Verbindung aller Handlungsfelder – ökonomischer, ökologischer und sozialer Art – ist eine Voraussetzung für Nachhaltigkeit. Wir richten unseren Fokus auf sechs wesentliche Bereiche: Personalführung und Menschenrechte, gesellschaftliches Engagement, unternehmerische und gesellschaftliche Ethik, Arbeitssicherheit und Gesundheitsschutz, Umweltschutz sowie Nachhaltigkeit in unserer Wertschöpfungskette. In diesen Handlungsfeldern streben wir stetig nach Verbesserungspotenzialen. Ihre Umsetzung ist mehr als eine Pflicht – sie ist vielmehr Bestandteil unseres täglichen Handelns.

Unsere Leistungen im Bereich Nachhaltigkeit spiegeln sich unter anderem in der diesjährigen Aufnahme von Infineon Technologies in den Dow Jones Sustainability Europe Index wider. Die erzielten Ergebnisse sehen wir als Ansporn. Nachhaltigkeit wird auch in Zukunft eine große Herausforderung sein, der wir weiterhin aktiv begegnen.

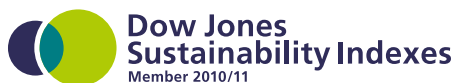

### UNSER SOZIALES ENGAGEMENT

Unser Unternehmen setzt sich freiwillig und weltweit für Benachteiligte ein. Das Erdbebenunglück auf Haiti und die katastrophalen Zustände, in denen die Bewohner Haitis nach diesem Erdbeben lebten, haben alle Vorstellungen überstiegen. Wir haben uns im vergangenen Geschäftsjahr dazu entschieden, an die Hilfsorganisationen zu spenden und somit einen Beitrag zur Versorgung der Opfer und zum Wiederaufbau zu leisten.

Unsere Mitarbeiter setzen sich für andere ein. Ein Beispiel ist die Teilnahme am Benefizturnier „Munich City Company Championship“ (MCCC 2010) im Juni 2010. Hierbei handelt es sich um Deutschlands größtes Firmenfußballturnier, bei dem die Infineon-Mannschaft für das Projekt „Freudentanz“, das sich für sozial benachteiligte Kinder im Raum München einsetzt, spielte. Des Weiteren erhielt auch das UNICEF-Projekt „Schulen für Afrika“ Spenden.



**UNSERE WERTSCHÖPFUNGSKETTE**

Wir tragen unsere Werte in die gesamte Wertschöpfungskette. Dienstleistungen, die von unseren Auftragnehmern erbracht werden, zugekaufte Produkte und Materialien sowie Equipment und Anlagen müssen unseren Anforderungen an den Umweltschutz, die Arbeitssicherheit und den Gesundheitsschutz entsprechen sowie die Arbeits- und sozialen Bedingungen erfüllen. Unsere formulierten Standards und Maßnahmen können umso besser umgesetzt und realisiert werden, je stabiler die Partnerschaft und je offener die Kommunikation ist. Im vergangenen Geschäftsjahr haben wir das Thema Konfliktmetalle freiwillig aufgenommen und mit unseren Lieferanten diskutiert, um sicherzustellen, dass wir keine Metalle aus Konfliktgebieten verwenden. Darüber hinaus tragen wir dieses Thema aktiv in unsere Verbände, um das notwendige Bewusstsein zu schaffen und innerhalb der Branche zu verankern.

Die Anforderungen und Beschränkungen zur Verwendung bestimmter Stoffe in elektrischen Erzeugnissen und Produkten haben in den letzten Jahren weltweit zugenommen. Die Einhaltung dieser Beschränkungen ist für uns eine Selbstverständlichkeit. Wichtig ist uns dabei, unseren Kunden ein Höchstmaß an Vertrauen und Sicherheit bezüglich der Konformität unserer Produkte zu vermitteln. Neben der Implementierung entsprechender Prozesse ist eine effiziente Kommunikation wesentliche Voraussetzung, um dieses Vertrauen zu schaffen. Dass wir unseren Kunden ein Höchstmaß an Sicherheit bieten, spiegelt sich in zahlreichen Anerkennungen unserer Leistungen bei Kundenaudits und -gesprächen wider.

**VERANTWORTUNG FÜR UNSERE MITARBEITER**

30 Verantwortung für unsere Mitarbeiter übernehmen – das bedeutet in erster Linie Prävention und Vermeidung von möglichen Risiken. Unsere modernen Konzepte in der Arbeitssicherheit setzen wir weltweit konsequent um, und wir suchen dabei immer nach Möglichkeiten der Optimierung. Die erzielten Erfolge in der Arbeitssicherheit werden von unserer Statistik der Arbeitsunfälle belegt. Sie zeigt, dass unsere Konzepte gelebt werden.

Wir haben selbst auf weltweitem Niveau eine deutlich geringere Anzahl von Arbeitsunfällen als der Durchschnitt der deutschen Berufsgenossenschaft Energie Textil Elektro Medienerzeugnisse.

**30 STATISTIK DER ARBEITSUNFÄLLE PRO 1.000 MITARBEITER**

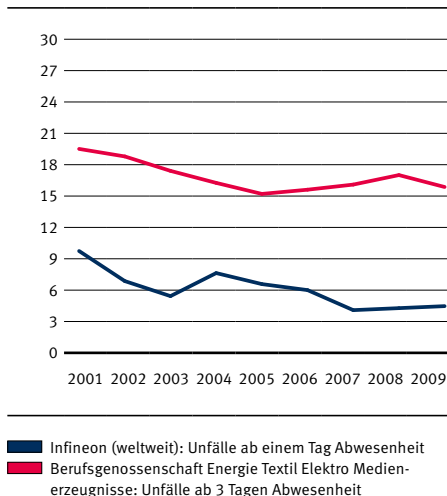

01  
02  
03  
04  
05  
06  
07  
08  
09  
10  
11  
12  
13  
14  
15  
16  
17  
18  
19  
20  
21

## 31 VEREINFACHTE DARSTELLUNG DER HERSTELLUNGS- UND NUTZUNGSPHASE EINES HALBLEITERS INKLUSIVE WICHTIGER ÖKOLOGISCHER EINFLUSSGRÖSSEN

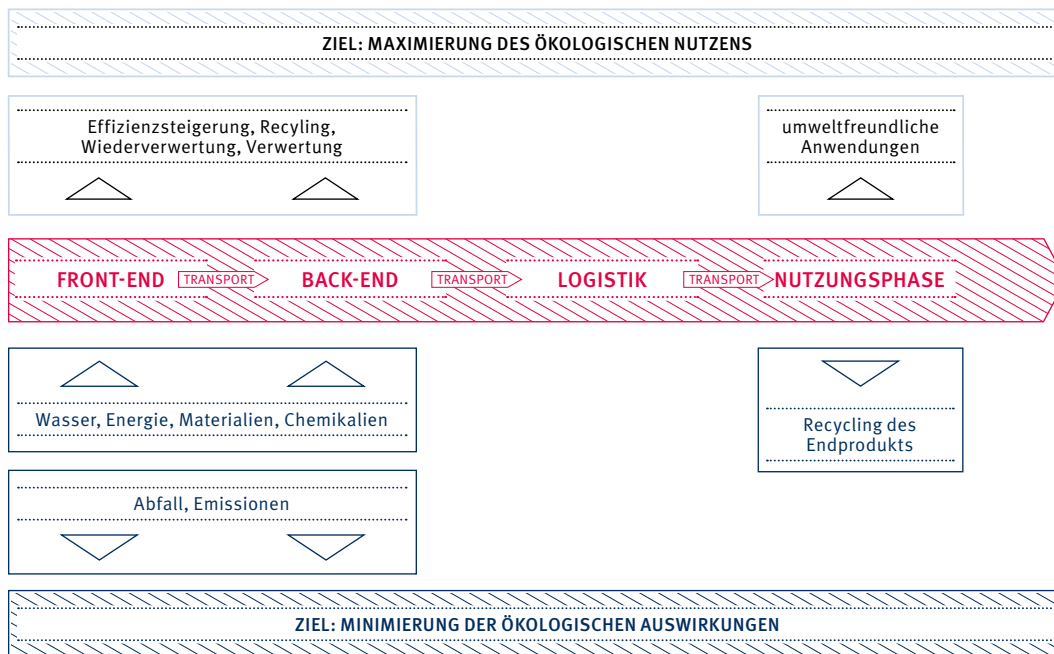

Dabei fällt noch mehr ins Gewicht, dass wir alle Arbeitsunfälle ab einem Tag Abwesenheit erfassen. In die Vergleichswerte der Berufsgenossenschaft fließen dagegen nur solche Arbeitsunfälle ein, die mit einer Abwesenheit von mindestens drei Arbeitstagen verbunden sind.

### ÖKOLOGISCHE NACHHALTIGKEIT BEI DER HERSTELLUNG VON HALBLEITERN

Neben der wirtschaftlichen und sozialen Dimension konzentriert sich Infineon Technologies besonders auf den Ausbau seines Portfolios an energieeinsparenden Lösungen sowie auf die Reduzierung von Emissionen und den schonenden Einsatz der knapper werdenden natürlichen Ressourcen bei der Produktion seiner Halbleiter.

Der weltweite Bedarf an Ressourcen – hauptsächlich Energie und Wasser – wird in den nächsten Jahren weiter steigen. Der Zugang zu diesen Ressourcen ist eine Grundvoraussetzung für den Wohlstand einer jeden Volkswirtschaft. Die effiziente und verantwortungsvolle Nutzung der Ressourcen dient damit zwei Zielen: dem Erhalt unserer globalen Umwelt – beispielsweise durch intelligenten Klimaschutz – und der gerechteren Verteilung von Wohlstand mit den damit verbundenen positiven sozialen Aspekten.

Wesentlich für die Bewertung der Umwelteinflüsse eines Unternehmens und Grundlage für die Ableitung von Handlungsbedarf ist dessen „ökologischer Fußabdruck“. Für unsere Halbleiter lässt sich dieser in etwas vereinfachter Weise wie in Abbildung 31 darstellen mit den entsprechenden Stellgrößen: Energie, Materialeinsatz, Wasserverbrauch, Abfallgenerierung, Recycling, Transport und ökologischer Einfluss während der Nutzungsphase.

Die Produktion von Halbleitern ist – wie grundsätzlich jede industrielle Produktion – ohne den Einsatz von Energie, Wasser, Chemikalien und Materialien nicht möglich. Ein Schwerpunkt liegt hierbei – technologiebedingt – auf unseren Front-End-Fertigungen, in denen die Siliziumscheiben strukturiert werden. Dort wird naturgemäß die meiste Energie benötigt. Es handelt sich hierbei vor allem um elektrische Energie.

Nach dem Grundsatz „Energieeinsparungen sind die beste Energiequelle“ unternehmen wir seit Jahren – lange vor der berechtigten und intensiven gesellschaftspolitischen Diskussion – systematische Anstrengungen, unseren Energieverbrauch, bezogen auf die Produktionseinheiten Quadratzentimeter strukturierte Siliziumfläche (Chipfläche), zu reduzieren. Durch die Beachtung dieses Grundsatzes konnten wir in den letzten Jahren den Energieverbrauch trotz steigender Komplexität unserer Produkte und Prozesse in unseren Front-End-Fertigungen deutlich senken. Die Optimierungen reichen von der Berücksichtigung der Verbrauchswerte beim Einkauf von Infrastruktur- und Fertigungsequipment über die Verbesserung bestehender Systeme bis hin zu bewusstseinsbildenden Maßnahmen bei unseren Mitarbeitern und Auftragnehmern, sich unserem Nachhaltigkeitsgedanken anzuschließen. Eine geeignete Größe, um die Effizienzsteigerung zu beschreiben, sind die sogenannten Negajoules. Dabei handelt es sich um die Energiemenge, die aufgrund von Effizienzsteigerungen nicht verbraucht und damit eingespart wurde. Abbildung 32 zeigt die Negajoules unserer Front-End-Werke aufsummiert von 2002 bis 2009. Die bis 2009 eingesparte Energie- oder Elektrizitätsmenge entspricht 716.000 Tonnen Kohlenstoffdioxid.

32

Interner Erfahrungsaustausch und Benchmarks sorgen dafür, dass Optimierungen standortübergreifend und unternehmensweit umgesetzt werden. So wurden in unseren Back-End-Fertigungen – hier werden unsere strukturierten Siliziumscheiben zu fertigen Halbleiterprodukten weiterverarbeitet – in ähnlichem Maße optimiert. Der Energieverbrauch der Back-End-Fertigungen ist dabei deutlich geringer als der Energieverbrauch der Front-End-Fertigungen.

Wenngleich unsere Fertigungen den Löwenanteil unseres Energieverbrauchs ausmachen, ruhen wir uns auf unseren Erfolgen nicht aus. Wir bewerten alle möglichen Einsparpotenziale – auch im Bürobereich.

### 32 NEGAJOULES TWh

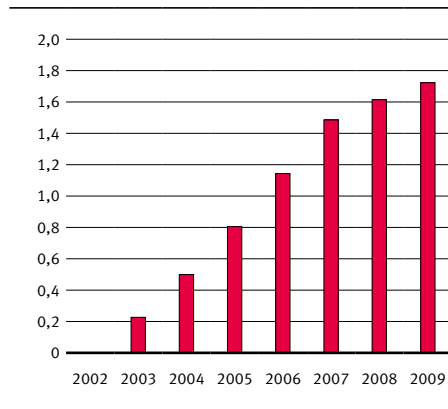

■ Negajoules kumuliert  
Eingesparte Energiemenge in unseren Front-End-Fertigungen ohne unsere früheren Tochterunternehmen, die sogenannten Negajoules in Terawattstunden von 2002–2009.

### 33 PFC-EMISSIONEN 1995 BIS 2010 (EU) CO<sub>2</sub>-ÄQUIVALENTE IN %

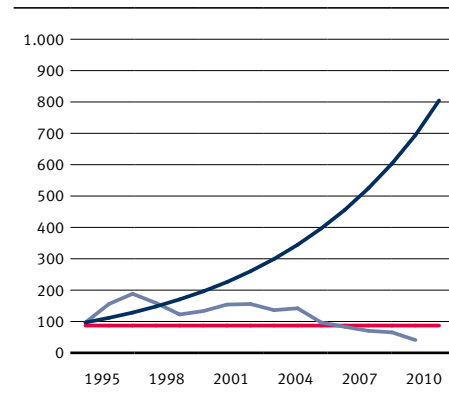

■ Geschätzte Emissionen  
■ Ziel der freiwilligen Selbstverpflichtung  
■ Reale Emissionen

01  
02  
03  
04  
05  
06  
07  
08  
09  
10  
11  
12  
13  
14  
15  
16  
17  
18  
19  
20  
21

01 Durch Mitarbeiterinformationen haben wir zum Beispiel in unserer Konzernzentrale Campeon das  
02 entsprechende Bewusstsein geschaffen und konkrete Handlungsempfehlungen gegeben. Im Ergebnis  
03 können wir hier jährlich 172.000 Kilogramm Kohlenstoffdioxid einsparen. Eine weitere klimafreund-  
04 liche Besonderheit im Campeon, die im Juni 2010 implementiert wurde, stellt die Wärmeversorgung  
durch Geothermie dar. Bei der Geothermie (Erdwärme) handelt es sich um die Wärme, die im oberen  
Teil der Erdkruste, unter anderem im Thermalwasser, gespeichert ist. Es wird 122 Grad Celsius  
heißes Thermalwasser aus einer Tiefe von 3,5 Kilometern genutzt, um Fernwärme und Strom zu  
gewinnen. Erdwärme ist nahezu unerschöpflich, zählt zu den regenerativen Energiequellen und  
spart jährlich rund 1.000 Tonnen Kohlenstoffdioxid an unserem Unternehmenssitz.

05 Die Halbleiterindustrie ist kein Großverbraucher von Chemikalien. Dennoch ist deren Einsatz zur  
Herstellung von Chips in einem gewissen Umfang notwendig, beispielsweise bei der Erzeugung der  
06 Strukturen auf den Siliziumscheiben. Neben Prozessoptimierungen wenden wir, wo immer sinn-  
voll, Recyclingverfahren an, um den „ökologischen Fußabdruck“ zu minimieren. Wasser nutzen  
wir hauptsächlich als Prozess- und Kühlwasser. Hier verwenden wir zur Schonung der Ressource  
08 möglichst geschlossene Kreisläufe. Bei all unseren Leistungen im Bereich Wasserverbrauch, Abfall-  
09 reduktion und -recycling, Treibhausgasreduktion und Energieeffizienz stellen wir uns stets dem  
internationalen Vergleich. Dabei zeigt sich, dass unseren Fertigungen seit Jahren eine Führungsposi-  
10 tion im aktiven Umweltschutz zukommt.

11 Neben der Reduktion des Energieeinsatzes ist besonders im Klimaschutz die Reduktion von Emis-  
sionen eine wesentliche Herausforderung zur Erhaltung unseres Ökosystems. Für den Klimaschutz  
33  haben wir uns deshalb bereits 1998 freiwillig zur Reduzierung perfluorierter Verbindungen (PFC)  
12 verpflichtet. Bei den PFCs handelt es sich um Treibhausgase, die für die Produktion von Halbleitern  
benötigt werden. Unser freiwilliges Ziel war es, die absoluten PFC-Emissionen bis zum Jahr 2010 auf  
13 den Wert von 1995 minus 10 Prozent, berechnet in Kohlenstoffdioxid-Äquivalenten, zu reduzieren.  
14 Durch die Umsetzung kluger Konzepte im Bereich der alternativen Prozesschemikalien und intelli-  
15 gente Ansätze bei der Abluftreinigung konnten wir dieses ambitionierte Ziel bereits 2007 erreichen  
und damit einen aktiven Beitrag zum Schutz unserer Erdatmosphäre leisten.

17 Bei der Abluftreinigung streben wir nach dem ökologischen Optimum. Dies bedeutet, dass wir mit-  
18 hilfe interner Analysen die potenziellen Hauptemittenten ermittelt und mit Abluftreinigungsanlagen  
19 versehen haben. Da die Abluftreinigung selbst einen Energie- und gegebenenfalls Chemikalienein-  
satz benötigt, ist es notwendig zu bewerten, bis zu welchem Abreinigungsgrad dieser Einsatz öko-  
20 logisch sinnvoll ist, respektive ab wann sich die ökologische Bilanz ins Negative umkehrt. Letzteres  
21 gilt es durch technisch-ökologische Bewertungen zu vermeiden. Wie der Verlauf der Kurve unserer  
realen Emissionen in der Abbildung 33 zeigt, setzen wir unsere genannten Konzepte nachhaltig um –  
auch über das Erreichen unserer freiwilligen Selbstverpflichtung hinaus.

#### ÖKOLOGISCHE NACHHALTIGKEIT DURCH UNSERE PRODUKTE UND LÖSUNGEN

Betrachtungen des „ökologischen Fußabdrucks“ eines Unternehmens dürfen nicht am eigenen  
Werkstor enden, sondern müssen die Nutzungsphase der hergestellten Produkte in adäquater Weise  
berücksichtigen. Denn letztlich stellt sich die Frage, ob sich der Einsatz von Ressourcen zur Herstel-  
lung eines Produkts auch aus ökologischen Gesichtspunkten „rechnet“.

Deshalb unterstützen wir neben den Themen Sicherheit und Mobilität die Realisierung energieeffizienter Konzepte und Endprodukte in den verschiedensten Anwendungsbereichen. Unsere Produkte und Innovationen schaffen einen erheblichen Mehrwert für die Umwelt, verglichen mit herkömmlichen Technologien. Dieser Mehrwert erstreckt sich von der Energieerzeugung über die Verteilung von Energie bis hin zur Nutzungsphase der Applikationen und Endprodukte. Unsere Produkte und Lösungen kommen beispielsweise in Windkraft- und Solaranlagen, in Beleuchtungen und Netzteilen zum Einsatz. Als weltweiter Marktführer im Bereich Halbleiter für die Automobilelektronik ermöglichen unsere Produkte und Lösungen Optimierungen im Energieverbrauch zahlreicher Automobilapplikationen und tragen hier zu erheblichen Verbrauchsreduktionen bei. Im Bereich der Elektromobilität bieten wir Halbleiterlösungen für alle dort relevanten Anwendungen an und unterstützen damit maßgeblich die Entwicklungen auf diesem innovativen Technologiegebiet. Innovationen stellen somit ein wichtiges Element zur ökologischen Nachhaltigkeit dar. Wie beeindruckend unsere Leistungen sind, zeigen folgende ausgewählte Beispiele:

- Mit unseren Produkten und Lösungen ermöglichen wir im Automobil eine jährliche Emissionsreduktion, die 3,8 Millionen Tonnen Kohlenstoffdioxid entspricht.
- Mit unseren Produkten und Lösungen in den Stromversorgungen von PCs ermöglichen wir eine jährliche Emissionsreduktion, die 140.000 Tonnen Kohlenstoffdioxid entspricht.
- Mit unseren Produkten und Lösungen in elektronischen Vorschaltgeräten ermöglichen wir – im Vergleich zu magnetischen Vorschaltgeräten – eine jährliche Emissionsreduktion, die 330.000 Tonnen Kohlenstoffdioxid entspricht.

Um auf die Ausgangsfrage zurückzukommen, ob sich der Einsatz der notwendigen Ressourcen zur Herstellung eines Produkts auch aus ökologischen Gesichtspunkten „rechnet“, lässt sich das anhand der Werte und unserer berechneten Zahlen klar belegen und für unsere Produkte bejahen. Stellt man die Kohlenstoffdioxid-Äquivalente, die sich durch die Emissionsreduktion unserer Produkte und Lösungen in den Endprodukten ergeben, denen gegenüber, die während der Produktion unserer Produkte anfallen, so liegt der Nutzen knapp siebenfach höher.

Verantwortung für Mensch und Umwelt übernehmen – das ist der Grundgedanke des modernen integrativen Konzepts, nach dem wir bei Infineon handeln. Das Wichtigste dabei ist, dass soziale und ökologische Prinzipien bei uns mit Leben gefüllt sind und werden: in unseren Fertigungen, in unseren Produkten und bei unserem täglichen Handeln. Und sie gelten bei uns weltweit, denn beim Schutz von Mensch und Umwelt darf es keine Ländergrenzen geben.

Die Summe aus der ökologischen Effizienz unserer Fertigungen und dem ökologischen Nutzen, den unsere Produkte ermöglichen, verdeutlicht, dass Innovationen und Verantwortung für die Umwelt bei Infineon Hand in Hand gehen. Der Einsatz unserer Produkte ist damit ökologisch klug – er „rechnet“ sich für die Umwelt.

Unser Produktportfolio, welches Effizienzsteigerungen entlang der gesamten Energiewertschöpfung und -verteilung einschließlich des -verbrauchs ermöglicht, ist unseres Erachtens einmalig. Dass wir diese Produkte auf derart ökologisch effiziente Weise herstellen, ist wiederum nachhaltig.

01  
02  
03  
04  
05  
06  
07  
08  
09  
10  
11  
12  
13  
14  
15  
16  
17  
18  
19  
20  
21

## EXZELLENTER MITARBEITER IN EINEM HOCHLEISTUNGSUNTERNEHMEN

01 Der Unternehmensbereich Human Resources sieht seine Kernaufgabe darin, dafür zu sorgen, dass  
02 bei Infineon qualifizierte und engagierte Mitarbeiter in schlanken und effizienten Strukturen arbei-  
03 ten. Dies ist ein zentraler Faktor im Wertschöpfungsprozess und bei der Profilierung von Infineon  
04 als Hochleistungsunternehmen. Human Resources hat diesen Prozess im Geschäftsjahr 2010 durch  
05 zahlreiche Projekte und Aktivitäten begleitet; so wurde das Krisenmanagement von 2009 erfolg-  
06 reich zum Abschluss gebracht und aktiv an Infineons Umgestaltungsprozess mitgewirkt. Mit der  
07 Einführung eines neuen Leitbildes wurde bewusst eine neue Phase eingeleitet, um nach der Krise  
08 Orientierung zu geben und eine gemeinsame neue Identität zu schaffen. Ein weiterer wichtiger  
09 Schritt war die unternehmensweite Einführung eines neuen Vergütungssystems, das die variable  
10 Vergütung zukünftig ausschließlich an den gesamtunternehmerischen Erfolg koppelt. Wesentlich für  
11 uns war auch die Pflege und Verbesserung unserer Attraktivität als Arbeitgeber, um dauerhaft das  
12 Engagement unserer Mitarbeiter zu sichern. Außerdem nimmt Human Resources bei der Umsetzung  
13 unternehmerischer Entscheidungen, wie aktuell beim Verkauf unseres Mobilfunkgeschäfts, eine  
14 Schlüsselrolle ein. Hierbei setzen wir wie in der Vergangenheit auf eine kontinuierliche und kon-  
15 struktive Zusammenarbeit mit den Arbeitnehmervertretern.

### SICHERUNG NACHHALTIGER PROFITABILITÄT

10 Trotz positiver Finanzergebnisse im ersten Quartal 2010 stand im Geschäftsjahr 2010 zunächst die  
11 Sicherung einer nachhaltigen Profitabilität im Vordergrund. So waren auch die Aufgaben von Human  
12 Resources in der ersten Hälfte des Geschäftsjahres 2010 noch stark von den Aktivitäten aus dem  
13 vorangegangenen Krisenmanagement geprägt: Der eingeleitete Personalabbau wurde in einigen  
14 Bereichen fortgeführt, Organisationsveränderungen wurden weiterhin umgesetzt, und auch die  
15 Einschränkungen hinsichtlich der Kostenrichtlinien (wie z. B. die Reiserichtlinie) wurden weitestge-  
16 hend aufrechterhalten. Insbesondere das Trainingsbudget blieb restriktiv, sodass nur geschäfts-  
17 kritische und rechtlich notwendige Trainings möglich waren. Für uns bedeutete dies, den Fokus bei  
18 der Personalentwicklung auf interne Optionen zu richten: Gemeinsam mit den Fachbereichen gelang  
19 es uns, im Jahr 2010 zahlreiche neue interne Trainings aufzusetzen und mit den Aktivitäten „Inno-  
20 vation Fab“, „Innovation Star“ und den daraus resultierenden „iCommunities“ den Wissenstransfer  
21 zu fördern. Speziell an den Produktionsstandorten war Human Resources gefordert: Die schnell  
ansteigende Nachfrage nach der Krise erforderte nicht nur die Ausweitung der lokalen Kapazitäten,  
sondern auch die schnelle und flexible Verfügbarkeit von Arbeitskräften.

### EINFÜHRUNG EINES NEUEN LEITBILDES: DER INFINEON COMPASS

19 Infineon hat die Krise der letzten zwei Jahre mit außergewöhnlichem Erfolg bewältigt. Um auch in  
20 Zukunft erfolgreich zu sein, müssen wir eine neue Phase profitablen Wachstums einleiten und alle  
21 Anstrengungen darauf ausrichten, Infineon von einem guten Unternehmen zu einer High Perfor-  
mance Company zu entwickeln. Vor allem die Nachhaltigkeit unserer Profitabilität spielt eine wich-  
tige Rolle: Die von uns erwirtschafteten Erträge müssen die Kapitalkosten decken und Investitionen  
erlauben, damit wir auf dem Finanzmarkt weiterhin wettbewerbsfähig und attraktiv sind. Dabei  
streben wir die Innovationsführerschaft bei Halbleitern in den Bereichen Energieeffizienz, Mobilität  
und Sicherheit an.

Den Weg zu einem kontinuierlich erfolgreichen Unternehmen begleitet der Infineon Compass, der  
als neues Leitbild unseren Mitarbeitern Orientierung bietet und zeigt, wonach wir streben, welchen  
Weg wir gehen und welche Werte unser Handeln bestimmen.

**34 MITARBEITER NACH REGIONEN**  
 BASIS: KONSOLIDIERTE INFINEON-GESELLSCHAFTEN, NOMINAL

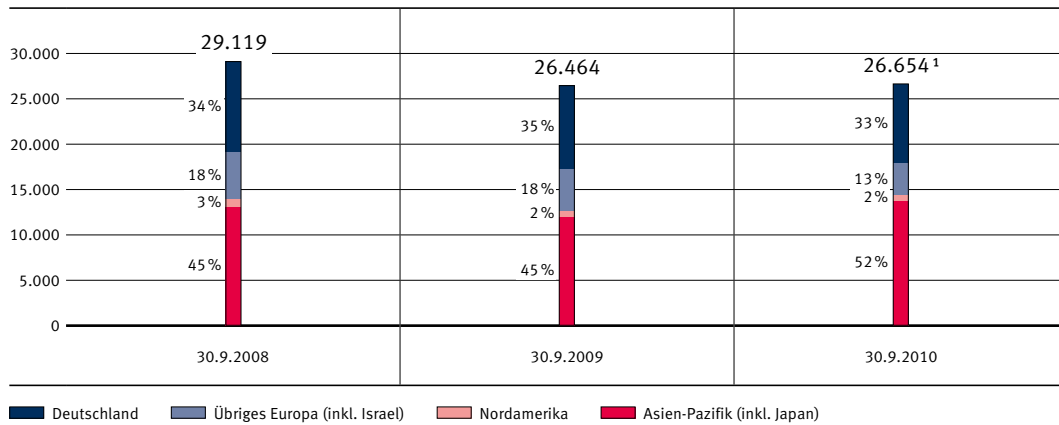

<sup>1</sup> Es ist vorgesehen, dass weltweit ungefähr 3.400 Mitarbeiter unseres Segments Wireless Solutions und aus Zentralfunktionen im Rahmen des Verkaufs des Mobilfunkgeschäfts an Intel übergehen.

Die vier Grundwerte „**We commit – We innovate – We partner – We perform**“ bestimmen unser Handeln und sind der Antrieb für unsere tägliche Arbeit. Sie werden im Leitbild ergänzt um vier Kriterien der Höchstleistung:

- **Ambitionierte Ziele und ein klarer Fokus auf Ergebnisse:** Wir stecken uns ambitionierte Ziele und konzentrieren unser Handeln auf die Dinge, die uns zum gewünschten Ergebnis führen.
- **Unternehmerische Entscheidungsprozesse:** Wir treffen Entscheidungen unternehmerisch – übernehmen Verantwortung für die Zielerreichung und gehen mit Chancen und Risiken bewusst um.
- **Schnelle und effiziente Umsetzung:** Wir setzen getroffene Entscheidungen zügig und effizient um, statt sie wieder infrage zu stellen.
- **Leidenschaftliche und talentierte Mitarbeiter:** Wir arbeiten leidenschaftlich und vertrauensvoll über Organisationsgrenzen hinweg auf den gemeinsamen Erfolg hin.

Mit diesen Leitlinien setzt der Compass einen Rahmen, bietet aber auch Freiräume für jedes Team und jeden Mitarbeiter, den individuellen Beitrag zu definieren: Seit Mitte des Jahres werden hierzu weltweit in allen Bereichen und auf allen Ebenen des Unternehmens Compass Workshops durchgeführt.

**UMSTELLUNG DES VERGÜTUNGSSYSTEMS**

Mit der Umstellung des Vergütungssystems zum 1. Oktober 2010 für Mitarbeiter, die in den Geltungsbereich der bisherigen Bonus & Incentive Guideline fallen, haben wir einen weiteren Beitrag auf dem Weg zum Hochleistungsunternehmen verwirklicht. Das neue System entkoppelt die variable Vergütung von der Erreichung individueller Ziele und knüpft stattdessen zukünftige Bonuszahlungen ausschließlich an den Erfolg von Infineon: Jeder Mitarbeiter erhält ein attraktives Grundgehalt sowie einen Erfolgsbonus, der sich an Zielen und Messgrößen orientiert, die den wirtschaftlichen Erfolg des Unternehmens widerspiegeln. Mit dieser Umstellung partizipieren Mitarbeiter noch stärker am realisierten Unternehmenserfolg.

01  
02  
03  
04  
05  
06  
07  
08  
09  
10  
11  
12  
13  
14  
15  
16  
17  
18  
19  
20  
21

01 Wir sehen jedoch noch weitere wesentliche Vorteile im neuen Vergütungssystem: Im Zentrum der  
02 jährlichen Mitarbeitergespräche kann nun das individuelle Feedback der Führungskraft an den  
03 Mitarbeiter stehen. Dies bedeutet nicht, dass Gespräche über erbrachte Leistungen und die Defini-  
04 tion von individuellen Zielen an Bedeutung verlieren. Ganz im Gegenteil: Wir sind der Meinung, dass  
wir diese Elemente stärken, wenn der Dialog über Ergebnisse nicht mit der Festlegung der Höhe von  
Bonuszahlungen verknüpft ist. Mit der Neustrukturierung folgen wir auch unserem Anspruch, die  
internen Prozesse schneller und effizienter zu gestalten: Wir reduzieren den administrativen Auf-  
wand und verschlanken die internen Personalprozesse, wodurch wir erneut Freiraum für den Dialog  
zwischen Führungskraft und Mitarbeiter gewinnen.

#### 05 **ARBEITSPLATZKULTUR, VIELFALT UND TALENTE**

06 Auf dem Weg zum Hochleistungsunternehmen ist es für Infineon wichtig, eine Arbeitsplatzkultur  
07 zu entwickeln, die von der Belegschaft als attraktiv wahrgenommen wird. Ein positives Arbeitge-  
08 berimage und eine attraktive Arbeitsplatzkultur erhöhen nicht nur das Engagement der Mitarbeiter.  
09 Wenn es uns gelingt, dass unsere eigenen Mitarbeiter als Botschafter der Unternehmensmarke  
10 auftreten, können sie das Arbeitgeberimage von Infineon glaubwürdig nach außen kommunizieren.

11 Um die Unternehmenskultur und das Arbeitgeberimage von Infineon zu bewerten, wurde Anfang  
12 des Geschäftsjahrs 2010 die Studie „Great Place to Work“<sup>®</sup> erstmalig für die deutschen Standorte  
13 der Infineon Technologies AG und Infineon Dresden durchgeführt. Die Ergebnisse nehmen wir zum  
14 Anlass, noch aktiver an der positiven Entwicklung des intern wahrgenommenen Arbeitgeberimages  
15 zu arbeiten: Wir wissen nun, wo wir stehen und woran wir arbeiten müssen, damit wir zukünftig,  
16 auch in herausfordernden Zeiten, eine gute Platzierung unter den Top-Arbeitgebern erreichen. Denn  
17 für die weitere Profilierung unseres Unternehmens sehen wir die regelmäßige Rückmeldung unserer  
18 Mitarbeiter als wesentlich an. So war die Teilnahme im Jahr 2009 der Auftakt für eine langfristig  
19 angelegte, alljährliche Durchführung der Studie. Infineon wird deshalb auch zu Beginn des kommen-  
20 den Geschäftsjahrs wieder an der Studie teilnehmen.

21 Die Entwicklung und Stärkung einer attraktiven Arbeitgebermarke wollen wir insbesondere auch  
durch eine Unternehmenskultur unterstützen, die auf **Vielfalt, faire Arbeitsbedingungen und  
Chancengleichheit** für alle Mitarbeiter von Infineon setzt. Hierfür hat Infineon bereits vor einiger  
Zeit ein Diversity Management eingeführt, das sich intensiv und überregional mit den relevanten  
Fragestellungen befasst. Vor allem der Anteil der Frauen in Führungspositionen war in den vergan-  
genen Monaten ein viel diskutiertes Thema, das auch im Management von Infineon Beachtung fand.  
Wir verfolgen bereits seit mehreren Jahren engagiert und erfolgreich das Ziel, Frauen und Männer  
gleichermaßen für naturwissenschaftlich-technische Berufsfelder zu begeistern und in allen Unter-  
nehmens- und Verantwortungsbereichen gezielt zu fördern. So ist es uns gelungen, den Anteil der  
Frauen im Top-Management in den letzten Jahren deutlich zu erhöhen. Den Fokus richten wir dabei  
auf Aktivitäten, die die Chancengleichheit von Frauen und Männern erhöhen und die Vereinbarkeit  
von Familie und Beruf verbessern. Unser Ziel ist es, Familienbewusstsein bei Infineon zu leben und  
in unserer Unternehmenskultur zu verankern. Mit der Auditierung „berufundfamilie“ im Sommer  
2010 haben wir hierzu einen weiteren Schritt getan: Das Ergebnis ist Grundlage für einen auf drei  
Jahre angelegten Maßnahmenplan, wie wir unsere Mitarbeiter bei der Vereinbarkeit von Beruf und  
Familie noch besser unterstützen können. Die Entwicklung von Frauen in Führungspositionen ist ein  
unternehmerisches Ziel von Infineon. Wir haben uns vorgenommen, den Anteil von Frauen in Füh-  
rungspositionen bis zum Jahr 2015 von derzeit rund 11 auf 15 Prozent und bis zum Jahr 2020 auf



20 Prozent zu entwickeln. Dabei ist es für Infineon eine herausragende Aufgabe, insbesondere in den technischen Bereichen eine zukunftsfähige Nachwuchsplanung sicherzustellen.

Infineon steht in einem globalen Kontext. Personelle und kulturelle Vielfalt spielen deshalb eine wichtige Rolle. Um die Potenziale der Vielfalt im Unternehmen stärker zu nutzen, haben wir im Geschäftsjahr 2010 eine **Talent Management Initiative in Asien** gestartet. Asien ist für uns von zentraler Bedeutung. Die Region, die sich durch die Vielfalt unterschiedlicher Kulturen und Länder mit einem immensen Wachstumspotenzial auszeichnet, bietet einmalige Möglichkeiten, Talente für uns zu gewinnen. Wir investieren daher in Kooperationen mit namhaften Universitäten und Instituten vor Ort, um den Nachwuchs in der Region sicherzustellen. Ziel ist es, unsere asiatischen Mitarbeiter noch mehr in Schlüsselfunktionen zu entwickeln und unseren Talentpool sowohl auf regionaler als auch auf globaler Ebene auszubauen. So wollen wir mittel- bis langfristig aus der Vielfalt schöpfen und die wechselseitigen Stärken nutzen, indem wir zum Beispiel innerhalb des Talentprogramms Mitarbeiter aus verschiedenen Kulturkreisen zusammenbringen. Wir erleben als Unternehmen aber auch rasante Weiterentwicklungen innerhalb Asiens, mit denen wir Schritt halten müssen. Dies verlangt nach intensiver Kenntnis im Markt und engen lokalen Kontakten. Der Förderung von Talenten vor Ort kommt daher eine besonders wichtige Rolle zu. Das initiierte Talent Management Programm wird in Asien mit Beginn des neuen Geschäftsjahres gestartet. Es soll den Talenten ausgewählte Weiterbildungsmöglichkeiten bieten, um ihre asienspezifischen Kenntnisse um internationale Führungsfähigkeiten zu erweitern und innerhalb des Unternehmens ein optimales Netzwerk für den weiteren Karriereverlauf bei Infineon aufzubauen. Wir planen auch den weltweiten Roll-out des einheitlichen Talentprogramms.

**UMSETZUNG DES VERKAUFS UNSERES MOBILFUNKGESCHÄFTS**

Human Resources nimmt auch eine Schlüsselfunktion ein, wenn es um die Umsetzung unternehmerischer Entscheidungen auf dem Weg zum Hochleistungsunternehmen geht. Hierzu zählt aktuell in erster Linie der geplante Verkauf unseres Mobilfunkgeschäfts, der einen Transfer von weltweit zirka 3.400 Mitarbeitern an über 20 Standorten erfordert. Human Resources ist im Rahmen dieses Projekts hinsichtlich vieler Themen gefordert: Wir unterstützen bei der Ausarbeitung einer Rechtsstruktur für das neue Unternehmen, haben in Deutschland die Verhandlungen mit dem Betriebsrat geführt und einen Interessenausgleich verhandelt. Neben gestalterischen Aufgaben bieten wir Führungskräften der betroffenen Bereiche Schulungen zu arbeitsrechtlichen Fragestellungen und zum Thema „Change Management“ an, um sie auf die Gespräche mit den Mitarbeitern, die für das neue Unternehmen vorgesehen sind, vorzubereiten. Des Weiteren leistet Human Resources sowohl für das neue Unternehmen, aber auch für Infineon einen wesentlichen Beitrag: In beiden Unternehmen ist mit Zeitpunkt der Ausgliederung sicherzustellen, dass alle Funktionen und Prozesse in effizienten Strukturen weiterhin zur Verfügung stehen. Für uns bedeutet dies nicht nur, den operativen Transfer von Mitarbeitern, Vergütungssystemen, Strukturen und Personaldaten zu gewährleisten. Vielmehr müssen wir das Selbstbewusstsein und die Motivation der Mitarbeiter beider Firmen stärken und sie erneut auf eine spannende Reise in die Zukunft mitnehmen.

Infineon hat im vergangenen Geschäftsjahr den Prozess seiner Umgestaltung fortgesetzt und damit bewusst eine neue Phase in der unternehmerischen Entwicklung eingeleitet. Hier ist Human Resources in besonderem Maße gefordert: Wir begleiten den Weg zum Hochleistungsunternehmen und treiben ihn gezielt voran. Mit der Einführung des Infineon Compass und ersten Maßnahmen mit Fokus auf den High-Performance-Gedanken haben wir bereits wichtige Schritte in Richtung Gipfel gemacht und werden auch in Zukunft die Entwicklung zur High Performance Company aktiv begleiten.

01  
02  
03  
04  
05  
06  
07  
08  
09  
10  
11  
12  
13  
14  
15  
16  
17  
18  
19  
20  
21

## GRUNDKAPITAL, ANZAHL AKTIEN UND MARKTKAPITALISIERUNG DER INFINEON TECHNOLOGIES AG

| Stichtag                                   | 30.9.2009 | 30.9.2010 | Entwicklung |
|--------------------------------------------|-----------|-----------|-------------|
| Grundkapital in Mio. €                     | 2.173     | 2.173     | 0 %         |
| Ausstehende Aktien in Mio. <sup>1</sup>    | 1.087     | 1.087     | 0 %         |
| Im Jahresdurchschnitt in Mio. <sup>2</sup> | 855       | 1.171     | + 36,96 %   |
| Marktkapitalisierung in Mio. €             | 4.189     | 5.521     | + 31,80 %   |
| Marktkapitalisierung in Mio. US-\$         | 6.129     | 7.514     | + 22,60 %   |

1 Unverwässert 2 Verwässert

## BASISINFORMATIONEN ZUR AKTIE

| Art der Aktien              | Namensaktien (Stammaktien) in Form von Aktien oder American Depositary Shares (ADS) mit einem auf die einzelne Stückaktie entfallenden anteiligen Betrag des Grundkapitals von je 2,00 € (Verhältnis ADS:Aktien = 1:1) |
|-----------------------------|------------------------------------------------------------------------------------------------------------------------------------------------------------------------------------------------------------------------|
| Grundkapital                | € 2,173 Mio. (am 30.9.2010)                                                                                                                                                                                            |
| Ausstehende Aktien          | 1.087 Mio. (am 30.9.2010)                                                                                                                                                                                              |
| Notierungen                 | Aktien: Frankfurter Wertpapierbörse (FWB)<br>ADS: over the counter Markt (OTCQX)                                                                                                                                       |
| Optionshandel               | Optionen auf die Aktien: u. a. Eurex                                                                                                                                                                                   |
| Börsengang                  | 13. März 2000 an der FWB und New York Stock Exchange                                                                                                                                                                   |
| Emissionspreis <sup>1</sup> | € 31,31 pro Aktie<br>US-\$ 30,35 pro ADS                                                                                                                                                                               |
| Börsenkürzel                | IFX, IFNNY                                                                                                                                                                                                             |
| ISIN-Code                   | DE0006231004                                                                                                                                                                                                           |
| Wertpapierkennnummer        | 623100                                                                                                                                                                                                                 |
| CUSIP                       | 45662N103                                                                                                                                                                                                              |
| Bloomberg                   | IFX.GY (Xetra-Handelssystem), IFNNY US                                                                                                                                                                                 |
| Reuters                     | IFXGn.DE                                                                                                                                                                                                               |
| Indexmitglied (Auswahl)     | Dax-30<br>Dow-Jones-German-Titans-30<br>Dow Jones Euro Stoxx Technology<br>MSCI Germany<br>S&P-Europe-350<br>Dow Jones Sustainability Index Europe                                                                     |

KURSDATEN DER INFINEON-AKTIE  
GESCHÄFTSJAHR ZUM 30.9.

|                                                                      | 2008       | 2009       | 2010       |
|----------------------------------------------------------------------|------------|------------|------------|
| <b>Xetra-Schlusskurse</b><br>in €                                    |            |            |            |
| Jahresendkurs <sup>1</sup><br>Ende September                         | 3,50       | 3,86       | 5,08       |
| Höchstkurs <sup>1</sup>                                              | 10,69      | 4,00       | 5,54       |
| Tiefstkurs <sup>1</sup>                                              | 3,27       | 0,35       | 3,05       |
| Durchschnittlich<br>gehandelte Aktien<br>pro Tag in Stück            | 16.992.529 | 24.100.158 | 20.699.149 |
| Davon auf Xetra in %                                                 | 98         | 92         | 95         |
| <b>USA OTCQX Schlusskurse</b><br>in US-\$                            |            |            |            |
| Jahresendkurs <sup>1</sup><br>Ende September                         | 5,17       | 5,60       | 6,93       |
| Höchstkurs <sup>1</sup>                                              | 15,84      | 5,82       | 7,31       |
| Tiefstkurs <sup>1</sup>                                              | 4,85       | 0,43       | 4,38       |
| Durchschnittlich gehandelte<br>Aktienzertifikate<br>pro Tag in Stück | 2.895.908  | 1.578.963  | 160.308    |

1 Der Kurs der Infineon-Aktie handelt seit der Kapitalerhöhung 2009 ex Bezugsrecht. Historische Werte wurden angepasst.

AKTIONÄRSSTRUKTUR<sup>1</sup>

|                                |        |
|--------------------------------|--------|
| Dodge & Cox (per 5.8.2009)     | 9,95 % |
| BlackRock Inc. (per 29.1.2010) | 5,11 % |

1 Gemäß den Infineon bekannten Pflichtmeldungen. Die Anzahl der Aktien im Besitz der in der obigen Übersicht genannten Investoren ist der jeweils letzten Pflichtmitteilung an Infineon entnommen. Die entsprechenden Prozent-Zahlen beziehen sich auf das zum Zeitpunkt der jeweiligen Meldung vorhandene Grundkapital (bis 4. August 2009: 749.742.085 Aktien, bis 11. August 2009: 1.072.569.049 Aktien, ab 11. August 2009: 1.086.742.085 Aktien).

Streubesitz: 100% gemäß Definition von FTSE.

**DAS INVESTOR-RELATIONS-TEAM VON INFINEON INFORMIERT SIE GERNE:**  
TELEFON: +49 89 234 26655 • FAX: +49 89 234 955 2987 • E-MAIL: INVESTOR.RELATIONS@INFINEON.COM

## DIE INFINEON-AKTIE

Im Geschäftsjahr 2010 stieg der Infineon-Aktienkurs von 3,86 Euro per 30. September 2009 um 32 Prozent auf 5,08 Euro (jeweils Xetra-Schlusskurs) per Ende September 2010 an.

### NACH SCHWACHEM START TREIBEN STETIGE ERGEBNISVERBESSERUNGEN DEN KURS IM 1. HALBJAHR

Im ersten Monat des Geschäftsjahres bewegte sich der Kurs der Infineon-Aktie, im Einklang mit vergleichbaren Indizes, kontinuierlich abwärts. Verstärkt wurde die Tendenz durch Spekulationen, Infineon habe einen wichtigen Kundenauftrag verloren. Das Jahrestief von 3,05 Euro erreichte die Aktie am 28. Oktober 2009. Auch als Infineon am 6. November den erfolgreichen Abschluss des Verkaufs des Geschäfts mit drahtgebundener Kommunikation bekannt gab, reagierte der Kurs mit einem Anstieg von 1 Prozent kaum. Nachdem Infineon am 22. Dezember den Ausblick für das erste Quartal des Geschäftsjahrs 2010 an hob, reagierte aber der Kurs mit einem starken Anstieg bis in den Januar hinein. Ab Mitte Februar profitierte die Infineon-Aktie von der weiteren Konjunkturerholung. Getragen von allgemeiner Spekulation auf sehr gut ausfallende Quartalsergebnisse auch für das zweite Geschäftsquartal, stieg der Kurs gegen Ende der ersten Geschäftsjahreshälfte nochmals deutlich an.

Vergleichbare Indizes erlebten in der ersten Geschäftsjahreshälfte 2010 ebenfalls einen Aufwärtstrend. So stieg der Dow Jones US Semiconductor Index bis zum 31. März 2010 um 12 Prozent, der Philadelphia Semiconductor Index um 19 Prozent und der Deutsche Aktienindex Dax um 8 Prozent. Der Kurs der Infineon-Aktie gewann im selben Zeitraum 33 Prozent.

### SORGEN UM HALBLEITERKONJUNKTUR UND NEUAUFSTELLUNG INFINEONS PRÄGEN DAS 2. GESCHÄFTSHALBJAHR

Im April 2010 knüpfte die Infineon-Aktie an die positive Entwicklung des zweiten Geschäftsquartals 2010 an. Am 26. April verzeichnete die Aktie ihr Jahreshoch von 5,54 Euro. Als zwei Tage später Infineon zum zweiten Mal die Prognose an hob, verlor der Kurs wegen makroökonomischer Befürchtungen im Zusammenhang mit der Schuldenkrise Griechenlands dennoch an Wert. Positiv hingegen beeinflussten den Infineon-Aktienkurs ab Mitte Mai 2010 eine generelle Wiederbelebung der Aktienmärkte sowie möglicherweise auch Medienspekulationen zu einem Verkauf des Mobilfunkgeschäfts des Segments Wireless Solutions. Der Kursverlauf der Aktie in den Monaten Juli und August war geprägt von Unsicherheiten bezüglich der weltwirtschaftlichen Entwicklung generell sowie, speziell mit Blick auf die Halbleiterindustrie, Sorgen um den Aufbau von Vorratsbeständen in der Lieferkette und daraus resultierenden Risiken eines größeren Nachfrageeinbruchs. Besonders im Laufe des Monats August beeinflusste dies die Aktienkursentwicklung negativ.

Ab Mitte September stieg der Infineon-Aktienkurs stetig. Eine wachsende Zahl von Investoren begrüßte die neue Aufstellung der Firma nach der Bekanntgabe des Verkaufs des Mobilfunkgeschäfts am 30. August. Ferner hob Infineon am 21. September 2010 zum dritten Mal in diesem Geschäftsjahr die Quartalsprognose an und kündigte an, auch im ersten Quartal des Geschäftsjahrs 2011 den Umsatz stabil halten zu wollen. Dies unterstützte den Aufwärtstrend des Aktienkurses ebenfalls.

Sorgen um die Halbleiterkonjunktur in der zweiten Geschäftsjahreshälfte beeinflussten auch die relevanten Halbleiter-Vergleichsindizes negativ. So fiel der Dow Jones US Semiconductor Index um 7 und der Philadelphia Semiconductor Index um 5 Prozent zwischen 31. März und Ende September 2010. Die Infineon-Aktie verlor im selben Zeitraum jedoch nur 1 Prozent an Wert (Deutsche Aktienindex Dax: +1 Prozent).

## 36 RELATIVE ENTWICKLUNG DER AKTIE DER INFINEON TECHNOLOGIES AG, DES DAX-INDEX, DES PHILADELPHIA SEMICONDUCTOS INDEX SOWIE DES DOW JONES US SEMICONDUCTOR INDEX SEIT BEGINN DES GESCHÄFTSJAHR 2010 (TAGES-SCHLUSSKURSE)

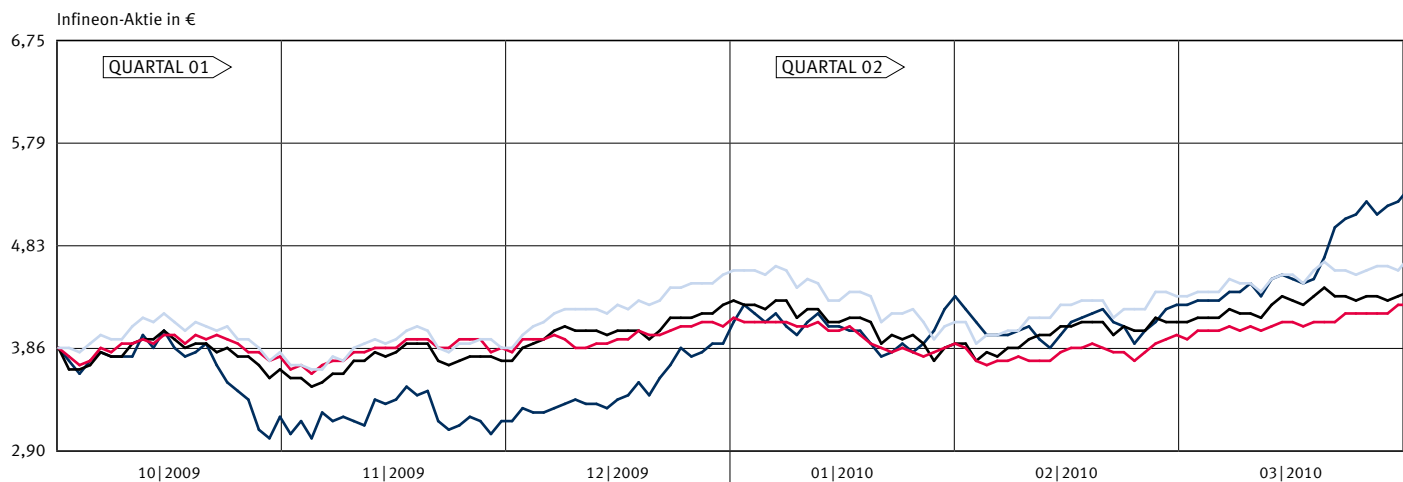

Für den gesamten Zeitraum des Geschäftsjahrs entwickelte sich der Infineon-Aktienkurs deutlich besser als die Vergleichsindizes. Während der Dow Jones US Semiconductor Index nur um 4 und der Philadelphia Semiconductor Index nur um 13 Prozent stiegen, erreichte Infineon ein Kursplus von 32 Prozent (Deutsche Aktienindex Dax: +10 Prozent).

### DEREGISTRIERUNG BEI DER US-BÖRSENAUFSICHT ABGESCHLOSSEN; AUFSICHTSRAT UND VORSTAND SCHLAGEN EINE DIVIDENDENZAHLUNG VOR

Auf Xetra, dem Frankfurter Parkett und an den deutschen Regionalbörsen wurden im Geschäftsjahr 2010 im Durchschnitt täglich 20,7 Millionen Infineon-Aktien gehandelt. Im Vorjahr waren es noch 24,1 Millionen Aktien. Das für die Zugehörigkeit zum Deutschen Aktienindex Dax relevante Handelsvolumen in Euro hingegen stieg um 120 Prozent von 10,9 Milliarden Euro im Vorjahr auf 23,9 Milliarden Euro und stabilisierte die Dax-Zugehörigkeit unseres Unternehmens nach der Wiederaufnahme im September 2009. Belegte Infineon am 30. September 2009 in der Dax-Rangliste nach Handelsvolumen in Euro noch Position 24, so verbesserte sich unser Unternehmen zum 30. September 2010 auf Platz 14.

Das durchschnittliche Handelsvolumen am außerbörslichen Markt OTCQX verringerte sich von 1,6 Millionen ADS pro Tag im Vorjahr auf 160 Tausend pro Tag im Geschäftsjahr 2010. Im Berichtszeitraum ging der Anteil der ADS an der Gesamtzahl der ausstehenden Infineon-Aktien weiter zurück: Während zu Beginn des Geschäftsjahrs noch 37,6 Millionen ADS im Umlauf waren, waren es zum Geschäftsjahresende 14,1 Millionen ADS.

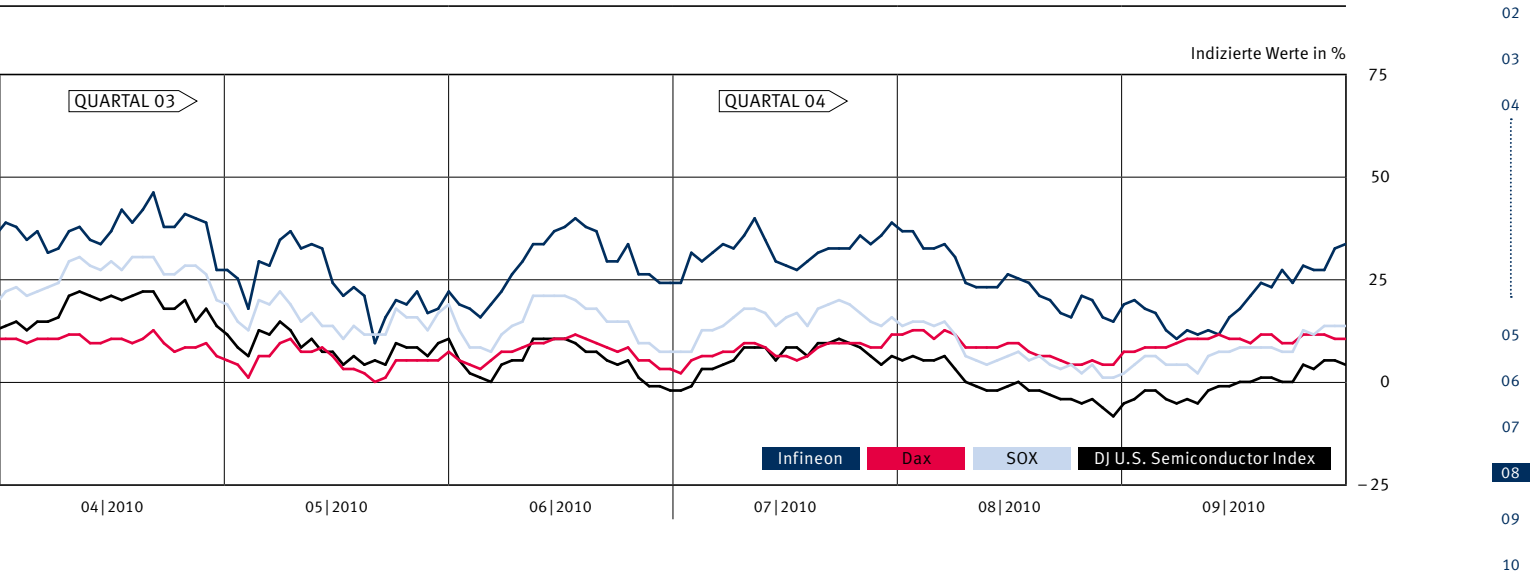

### 37 RELATIVE ENTWICKLUNG DER INFINEON-AKTIE UND WELTWEITER INDIZES

Entwicklung bis Ende September 2010

|                  | Seit Ende September 2008 | Seit Ende September 2009 |
|------------------|--------------------------|--------------------------|
| <b>Europa</b>    |                          |                          |
| Infineon (Xetra) | + 45,14 %                | + 31,61 %                |
| Dax              | + 6,83 %                 | + 9,76 %                 |
| DJ-Stoxx-50      | - 5,80 %                 | + 1,15 %                 |

Entwicklung bis Ende September 2010

|                                        | Seit Ende September 2008 | Seit Ende September 2009 |
|----------------------------------------|--------------------------|--------------------------|
| <b>USA</b>                             |                          |                          |
| Infineon (OTCQX)                       | + 34,04 %                | + 23,75 %                |
| DJ US Semiconductor Index              | + 13,73 %                | + 4,10 %                 |
| Philadelphia Semiconductor Index (SOX) | + 14,63 %                | + 7,99 %                 |

Am 6. August 2010 stellte Infineon bei der US-amerikanischen Börsenaufsicht SEC (Securities and Exchange Commission) einen Antrag zur Aufhebung der Registrierung ihrer Stammaktien nach dem „U.S. Securities Exchange Act“. Die Deregistrierung erfolgte am 4. November 2010. Damit wurde Infineon von seinen Berichtspflichten gemäß den Vorgaben des Exchange Act, die unter anderem die Vorlage eines Jahresberichts als sogenannten 20-F sowie laufender Finanzberichte als 6-K umfasst, freigestellt.

Nach dem sehr erfolgreichen Geschäftsjahr 2010 beschlossen Vorstand und Aufsichtsrat, der Hauptversammlung eine Dividendenzahlung in Höhe von 0,10 Euro je Aktie vorzuschlagen. Die Muttergesellschaft des Konzerns, die Infineon Technologies AG, weist einen Bilanzgewinn in Höhe von 109 Millionen Euro aus, verglichen mit dem kumulierten Bilanzverlust von 5.940 Millionen Euro im Vorjahr.

11  
12  
13  
14  
15  
16  
17  
18  
19  
20  
21

01  
02  
03  
04  
05  
06  
07  
08  
09  
10  
11  
12  
13  
14  
15  
16  
17  
18  
19  
20  
21

**Infineon-Standorte**

|   |                      |     |                         |    |                      |
|---|----------------------|-----|-------------------------|----|----------------------|
| ■ | Headquarter          | P   | Produktion              | V  | Vertrieb             |
| ○ | Mehrheitsbeteiligung | F&E | Forschung & Entwicklung | DZ | Distributionszentrum |

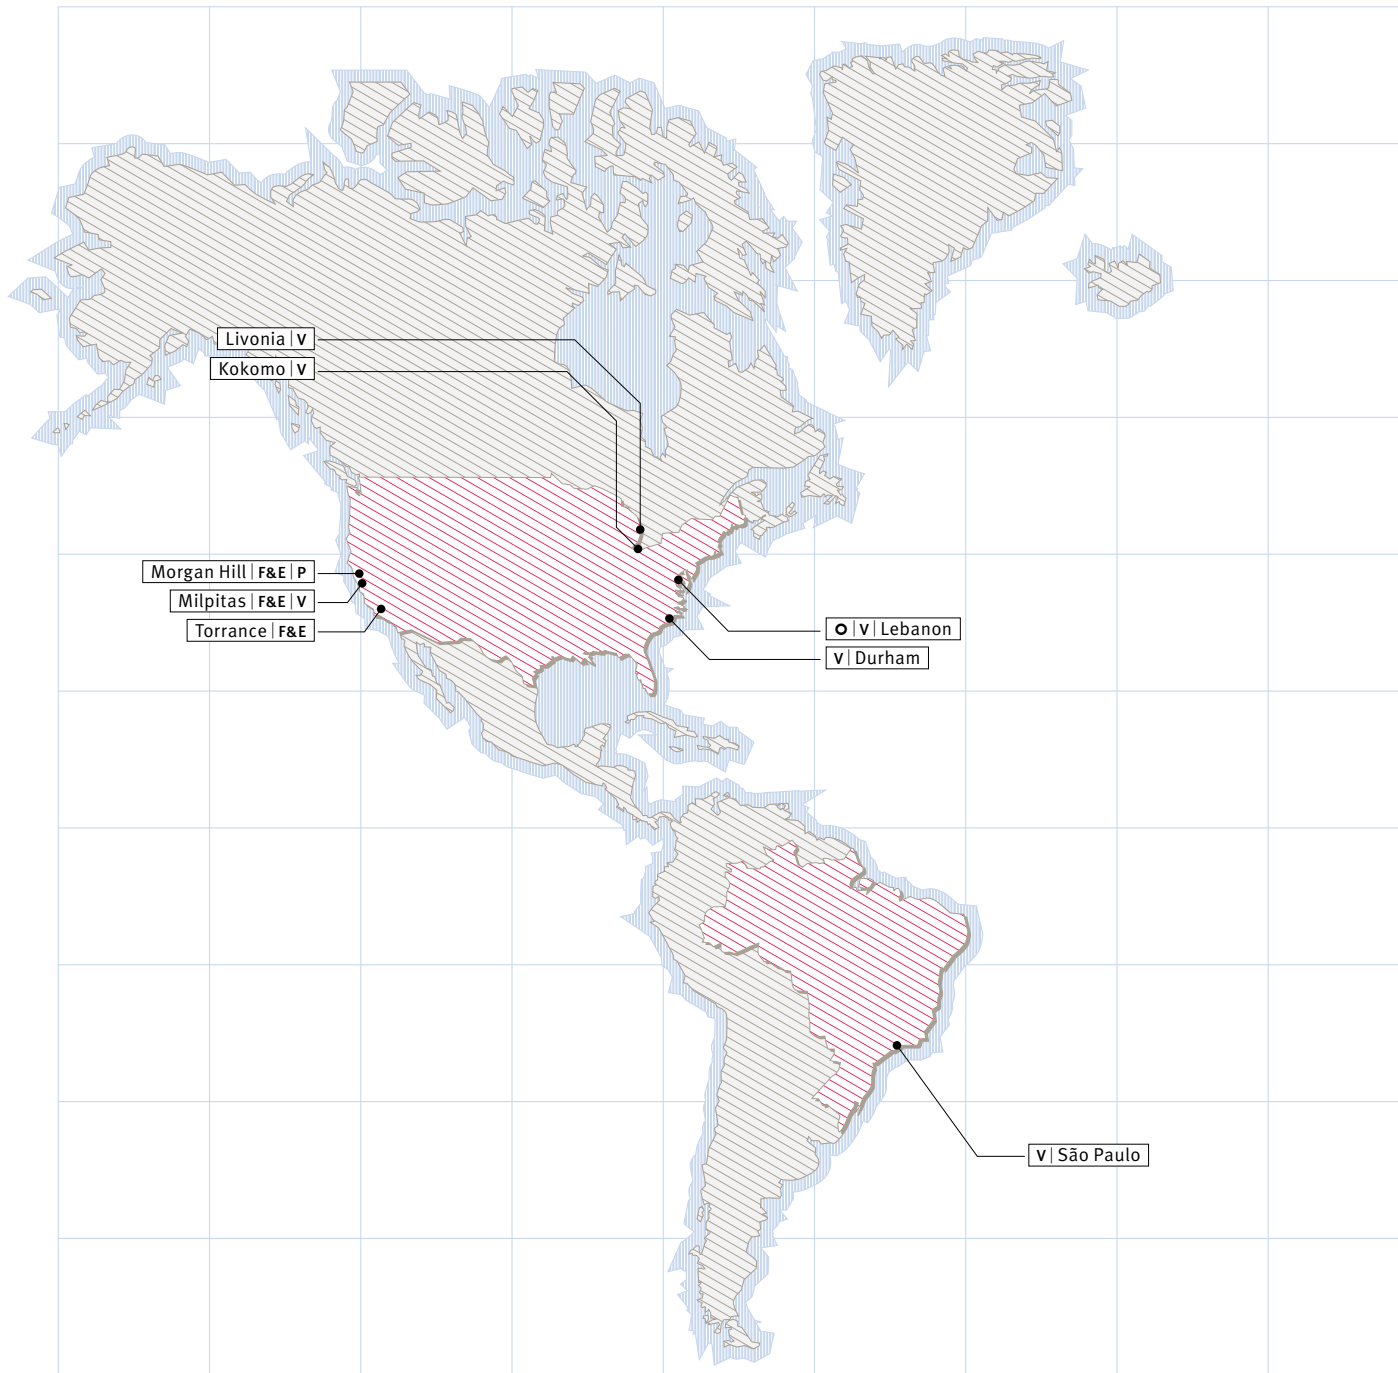

# DEUTSCHLAND

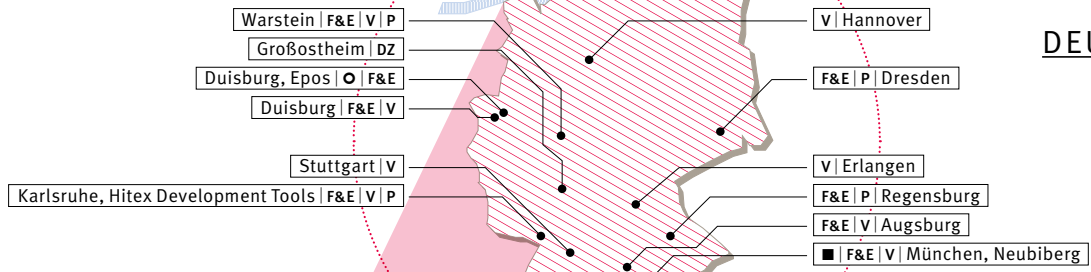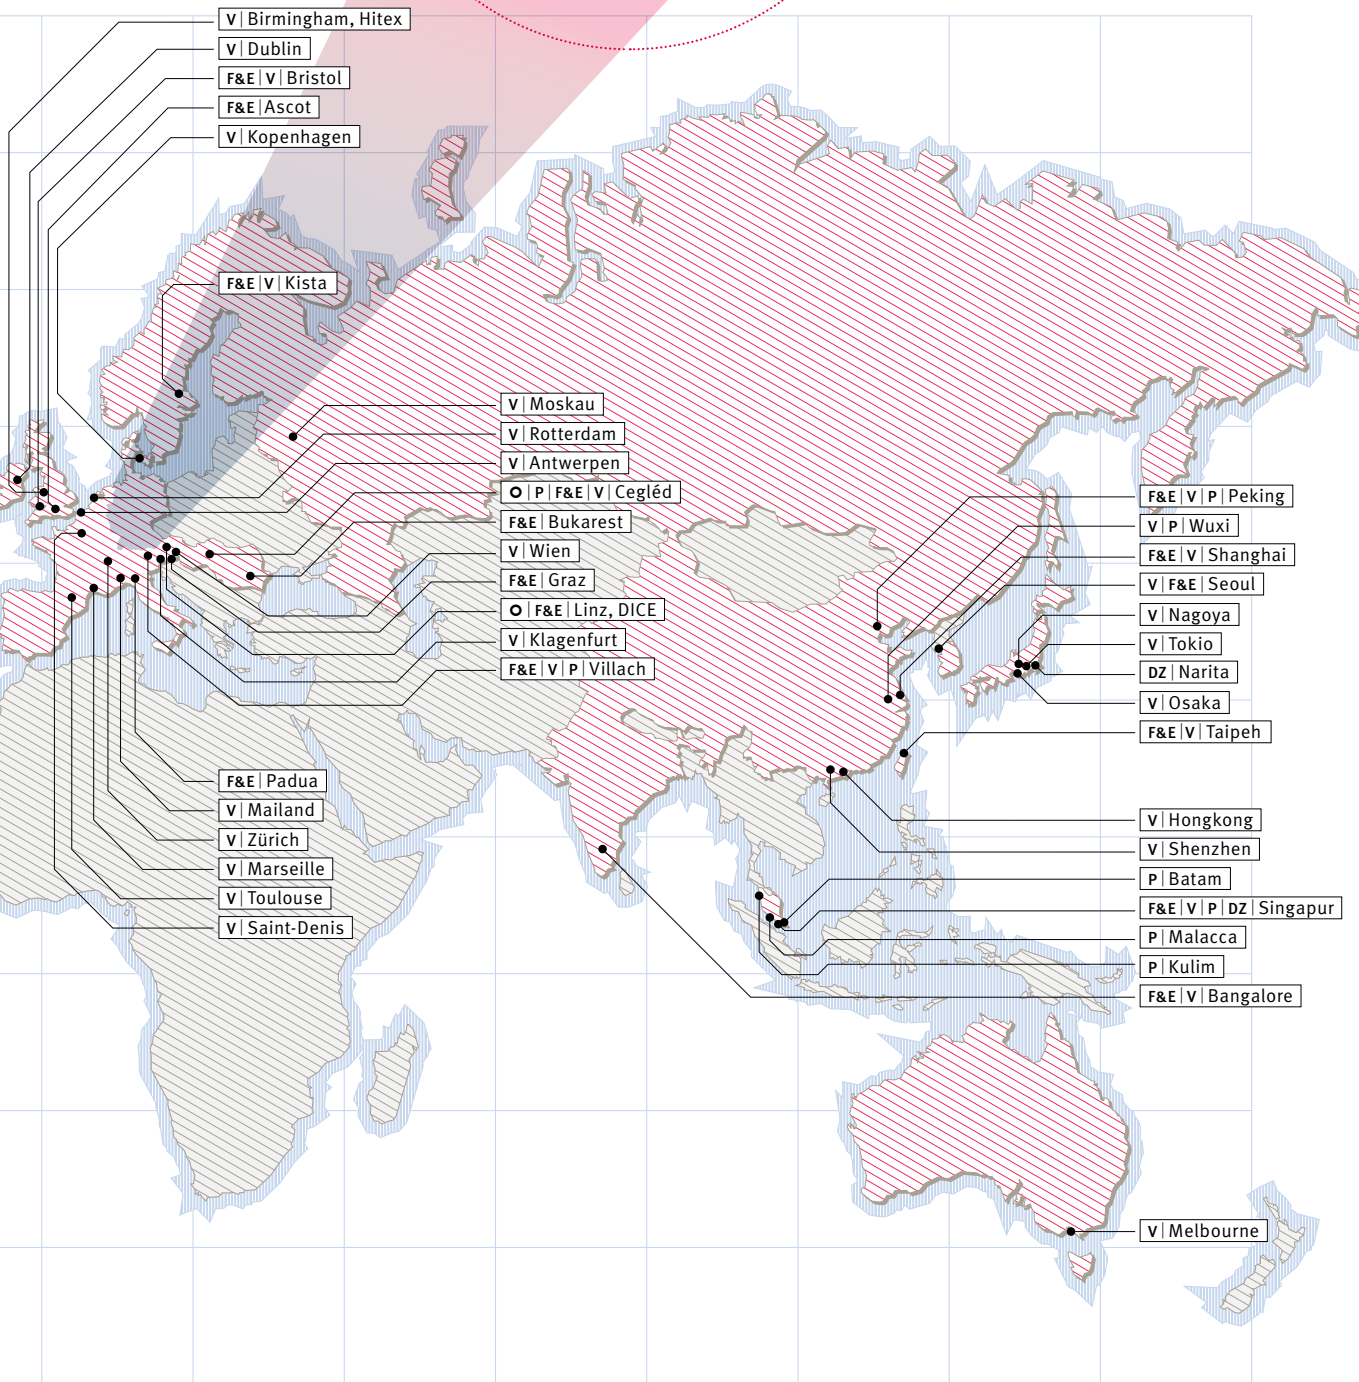

01  
02  
03  
04  
05  
06  
07  
08  
09  
10  
11  
12  
13  
14  
15  
16  
17  
18  
19  
20  
21

## INFINEON 2010

01  
02  
03  
04  
05  
06  
07  
08  
09  
10  
11  
12  
13  
14  
15  
16  
17  
18  
19  
20  
21

## QUARTAL 01

**11|2009** Infineon und TSMC erweitern ihre Entwicklungs- und Fertigungspartnerschaft auf Embedded-Flash-Verfahren mit einer Strukturbreite von 65 Nanometer für Automobil- und Sicherheitsanwendungen.

**11|2009** Abschluss des Verkaufs von Wireline Communications an Golden Gate Capital. Unter dem Namen Lantiq fungiert das Geschäft als rechtlich selbstständiges Unternehmen.

**11|2009** Infineon liefert Sicherheitschips für elektronischen Reisepass in China.

**12|2009** Infineons Sicherheitschip TPM (Trusted Platform Module) besteht als weltweit erster die strengsten internationalen Sicherheitstests für PC-Sicherheit und ist für Anwendungen der britischen Regierung zugelassen.

## QUARTAL 02

**02|2010** Präsentation des weltweit kleinsten voll integrierten GPS-Empfangsmoduls BGM781N11.

**02|2010** Produktvorstellung des LED-Treibers für höchste Effizienz und ausgezeichneten Leistungsfaktor für Glühlampenersatz.

**02|2010** Vorstellung der 25-V-OptiMOS™ Leistungs-MOSFETs mit industrieweit geringstem Einschaltwiderstand. Einsatz für Spannungsregelung in Stromversorgungen von Server- und Telekommunikationsanwendungen.

**03|2010** Ankündigung der 8-Bit-Mikrocontroller-Familie XC800 für Hochtemperaturen von 150 °C. Anwendungsgebiete sind Turbolader, Motorlüfter, Drosselklappen, Benzinpumpe und elektrische Servolenkung.

## QUARTAL 03

**05|2010** Infineon erhält als erstes nicht japanische Unternehmen den höchsten Qualitätspreis von Toyotas Automobilwerk in Hirose für außergewöhnlich gute Produktqualität.

**05|2010** Ankündigung der Verbindungstechnologie für IGBT-Module .XT-Technologie. Sie erhöht die Lebensdauer und Zuverlässigkeit von IGBT-Modulen um den Faktor 10.

**06|2010** Produkteinführung der sechsten Generation von Hochvolt-Leistungs-MOSFETs 650-V-CoolMOS™ C6/E6 für höchste Effizienz und einfache Kontrolle des Schaltverhaltens in Schaltnetzteilen.

**06|2010** Bundesamt für Sicherheit in der Informationstechnik bestätigt höchste Sicherheit der SLE 78 Sicherheitscontroller mit revolutionärer „Integrity Guard“-Sicherheits-technologie.

## QUARTAL 04

**07|2010** Präsentation 32-Bit-Mikrocontroller-Familie AUDO MAX für die Bereiche Antriebsstrang und Fahrwerksteuerung für besonders verbrauchsarme Autos und Elektrofahrzeuge.

**08|2010** Antrag auf Aufhebung der Registrierung der Infineon-Stammaktien bei der US-Börsenaufsicht SEC gestellt. Die Deregistrierung bei der US-Börsenaufsicht SEC wurde nach Ablauf des Geschäftsjahrs im November 2010 abgeschlossen. Infineon ist damit von seinen Berichtspflichten (Quartals- und Jahresberichte) gemäß den Vorgaben des U.S. Securities Exchange Act freigestellt.

**08|2010** Verkauf des Mobilfunkgeschäfts des Segments Wireless Solutions an Intel angekündigt.



AUS

POTENZIAL

WERT

SCHAFFEN

Infineon Technologies AG  
Finanzbericht 2010

# INHALT

|                                                                                                                           |            |                                                                                               |            |
|---------------------------------------------------------------------------------------------------------------------------|------------|-----------------------------------------------------------------------------------------------|------------|
| Bericht des Aufsichtsrats .....                                                                                           | 85         | 9 / Finanzerträge .....                                                                       | 192        |
| Corporate Governance Bericht .....                                                                                        | 96         | 10 / Finanzaufwendungen .....                                                                 | 192        |
| Vergütungsbericht .....                                                                                                   | 102        | 11 / Steuern vom Einkommen und vom Ertrag .....                                               | 192        |
| <b>Lagebericht und Konzernlagebericht .....</b>                                                                           | <b>109</b> | 12 / Ergebnis je Aktie .....                                                                  | 194        |
| Grundlagen der Lageberichterstattung .....                                                                                | 109        | 13 / Zur Veräußerung verfügbare finanzielle Vermögenswerte .....                              | 196        |
| Wesentliche Entwicklungen im Geschäftsjahr 2010 .....                                                                     | 110        | 14 / Forderungen aus Lieferungen und Leistungen und<br>sonstige Forderungen .....             | 196        |
| Unser Geschäft .....                                                                                                      | 114        | 15 / Vorräte .....                                                                            | 197        |
| Die Halbleiterindustrie und Faktoren mit Einfluss<br>auf unser Geschäft .....                                             | 118        | 16 / Sonstige kurzfristige finanzielle Vermögenswerte .....                                   | 197        |
| Entwicklung der Ertragslage .....                                                                                         | 124        | 17 / Sonstige kurzfristige Vermögenswerte .....                                               | 197        |
| Darstellung der Vermögenslage .....                                                                                       | 135        | 18 / Sachanlagen .....                                                                        | 198        |
| Kennzahlen .....                                                                                                          | 137        | 19 / Nach der Equity-Methode bilanzierte Beteiligungen .....                                  | 200        |
| Darstellung der Finanzlage .....                                                                                          | 138        | 20 / Sonstige finanzielle Vermögenswerte .....                                                | 201        |
| Kapitalbedarf .....                                                                                                       | 140        | 21 / Sonstige Vermögenswerte .....                                                            | 201        |
| Gesamtaussage des Vorstands zur wirtschaftlichen Lage<br>des Konzerns zum Zeitpunkt der Aufstellung dieses Berichts ..... | 143        | 22 / Geschäfts- oder Firmenwerte und andere<br>immaterielle Vermögenswerte .....              | 202        |
| Nicht-Finanzielle Leistungsindikatoren .....                                                                              | 144        | 23 / Verbindlichkeiten aus Lieferungen und Leistungen<br>und sonstige Verbindlichkeiten ..... | 204        |
| Infineon Technologies AG .....                                                                                            | 148        | 24 / Rückstellungen .....                                                                     | 204        |
| Wesentliche Ereignisse nach dem Bilanzstichtag .....                                                                      | 149        | 25 / Sonstige kurzfristige finanzielle Verbindlichkeiten .....                                | 205        |
| Bericht über die voraussichtliche Entwicklung<br>mit ihren wesentlichen Chancen und Risiken .....                         | 149        | 26 / Sonstige kurzfristige Verbindlichkeiten .....                                            | 205        |
| Angaben nach § 289 Absatz 4 und § 315 Absatz 4 HGB .....                                                                  | 159        | 27 / Finanzverbindlichkeiten .....                                                            | 205        |
| <b>Konzernabschluss .....</b>                                                                                             | <b>164</b> | 28 / Sonstige finanzielle Verbindlichkeiten .....                                             | 207        |
| Konzern-Gewinn-und-Verlust-Rechnung für das am<br>30. September 2010 endende Geschäftsjahr .....                          | 164        | 29 / Sonstige Verbindlichkeiten .....                                                         | 207        |
| Konzern-Gesamtergebnisrechnung für das am<br>30. September 2010 endende Geschäftsjahr .....                               | 165        | 30 / Eigenkapital .....                                                                       | 207        |
| Konzern-Bilanz zum 30. September 2010 .....                                                                               | 166        | 31 / Kapitalmanagement .....                                                                  | 209        |
| Konzern-Kapitalflussrechnung für das am<br>30. September 2010 endende Geschäftsjahr .....                                 | 168        | 32 / Aktienoptionspläne .....                                                                 | 210        |
| Konzern-Eigenkapital-Veränderungsrechnung für das am<br>30. September 2010 endende Geschäftsjahr .....                    | 170        | 33 / Ergänzende Informationen zur<br>Konzern-Kapitalflussrechnung .....                       | 213        |
| <b>Anhang zum Konzernabschluss .....</b>                                                                                  | <b>172</b> | 34 / Transaktionen mit nahestehenden<br>Unternehmen und Personen .....                        | 213        |
| 1 / Beschreibung der Geschäftstätigkeit und Grundlagen<br>der Darstellung .....                                           | 172        | 35 / Pensionspläne .....                                                                      | 214        |
| 2 / Bilanzierung und Bewertung .....                                                                                      | 172        | 36 / Zusätzliche Angaben zu Finanzinstrumenten .....                                          | 218        |
| 3 / Anpassungen nach IAS 8 .....                                                                                          | 182        | 37 / Management finanzieller Risiken .....                                                    | 221        |
| 4 / Schätzungen und Annahmen .....                                                                                        | 183        | 38 / Finanzielle Verpflichtungen und Eventualverbindlichkeiten .....                          | 224        |
| 5 / Akquisitionen .....                                                                                                   | 185        | 39 / Segmentberichterstattung .....                                                           | 230        |
| 6 / Geschäftsanteilsveräußerungen und nicht<br>fortgeführte Aktivitäten .....                                             | 185        | 40 / Wesentliche Ereignisse nach dem Bilanzstichtag .....                                     | 234        |
| 7 / Zuschüsse und Zulagen .....                                                                                           | 191        | 41 / Ergänzende Erläuterungen nach HGB .....                                                  | 234        |
| 8 / Zusätzliche Angaben zu betrieblichen<br>Aufwendungen und Erträgen .....                                               | 191        | <b>Versicherung der gesetzlichen Vertreter .....</b>                                          | <b>242</b> |
|                                                                                                                           |            | <b>Bestätigungsvermerk des Abschlussprüfers .....</b>                                         | <b>243</b> |
|                                                                                                                           |            | <b>Finanzglossar .....</b>                                                                    | <b>244</b> |
|                                                                                                                           |            | <b>Technologieglossar .....</b>                                                               | <b>246</b> |

## BERICHT DES AUFSICHTSRATS AN DIE HAUPTVERSAMMLUNG

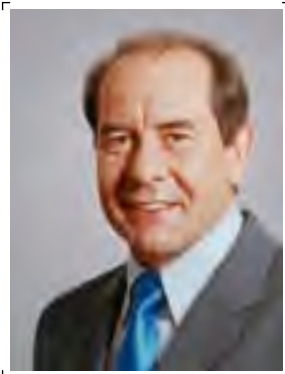

PROF. DR. KLAUS WUCHERER  
 VORSITZENDER DES AUFSICHTSRATS

01  
 02  
 03  
 04  
 .....  
 05  
 06  
 07  
 08  
 09  
 10

Sehr geehrte Damen und Herren,

11  
 12

der Aufsichtsrat erstattet hiermit Bericht über die Wahrnehmung seiner Aufgaben im Geschäftsjahr 2010. Nach einem schwierigen Geschäftsjahr 2009 blicken wir auf ein äußerst positives Geschäftsjahr 2010 zurück, in dem es der Gesellschaft gelungen ist, eine Segmentergebnis-Marge aus fortgeführten Aktivitäten von 14,4 Prozent zu erzielen und den Aktionären eine Dividende anzukündigen.

13  
 14  
 15  
 16  
 17  
 18  
 19  
 20  
 21

Auch im Geschäftsjahr 2010 hat sich der Aufsichtsrat in vielen Sitzungen (Plenum und Ausschüsse) eingehend mit der Lage des Unternehmens beschäftigt. Er überwachte die Geschäftsführung durch den Vorstand regelmäßig und unterstützte den Vorstand beratend. Der Aufsichtsrat war in alle Entscheidungen, die für die Gesellschaft von grundlegender Bedeutung waren, unmittelbar eingebunden. Der Vorstand informierte den Aufsichtsrat im Rahmen der ordentlichen Sitzungen umfassend und zeitnah über die Geschäftsentwicklung, die wirtschaftliche Situation des Unternehmens und der einzelnen Geschäftsbereiche sowie über die Finanz- und Investitionsplanung. Die relevanten Themen wurden mit dem Vorstand eingehend erörtert. Außerdem informierte der Vorstand über Vorgänge von besonderer Bedeutung in außerordentlichen Sitzungen sowie auch außerhalb von Sitzungen auf schriftlichem und mündlichem Wege. In der ausführlichen

01  
02  
03  
04  
05  
06  
07  
08  
09  
10

Quartalsberichterstattung an den Aufsichtsrat berichtete der Vorstand unter anderem über die wirtschaftliche und finanzielle Entwicklung einschließlich der Rentabilität der Gesellschaft in dem jeweiligen abgelaufenen Quartal, wesentliche Geschäftsvorfälle, die Risikosituation und wesentliche Rechtsstreitigkeiten.

Zusätzlich zu den Sitzungen ließen sich der Aufsichtsratsvorsitzende, der Vorsitzende des Investitions-, Finanz- und Prüfungsausschusses und der Vorsitzende bzw. später die Vorsitzende des Strategie- und Technologieausschusses in Einzelgesprächen laufend vom Vorstand über wesentliche Entwicklungen und Entscheidungen im Unternehmen unterrichten.

Im Berichtsjahr fanden vier ordentliche und vier außerordentliche Sitzungen des Aufsichtsrats statt. Kein Mitglied des Aufsichtsrats hat im Berichtsjahr an weniger als der Hälfte der Sitzungen des Aufsichtsrats teilgenommen.

## TÄTIGKEITSSCHWERPUNKTE DES AUFSICHTSRATS

11  
12  
13  
14  
15  
16  
17  
18  
19  
20  
21

### Verkauf des Geschäftsbereichs Wireless Solutions an Intel

Der Vorstand berichtete in zwei ordentlichen und zwei außerordentlichen Sitzungen ausführlich über die beabsichtigte Veräußerung des Geschäftsbereichs Wireless Solutions, der in den Geschäftsjahren 2009 und 2010 jeweils rund 30 Prozent zu dem Konzernumsatz beigesteuert hat. Bei diesen Sitzungen befasste sich der Aufsichtsrat insbesondere mit den Gründen für die vom Vorstand befürwortete Trennung vom Mobilfunkchip-Geschäft, den unterschiedlichen Transaktionsstrukturen, dem zu erzielenden Kaufpreis, den Auswirkungen auf die Mitarbeiter sowie mit der Strategie und den Perspektiven für das verbleibende Geschäft der Gesellschaft.

Angesichts der besonderen Tragweite der Transaktion für das gesamte Unternehmen beauftragte der Aufsichtsrat die Mitglieder des Strategie- und Technologieausschusses, die Planungen, Entwicklungen in den Verhandlungen und Umsetzungsschritte im Detail mit dem Vorstand zu erörtern. Alle Beratungen des Plenums in dieser Sache wurden durch den Strategie- und Technologieausschuss eingehend vorbereitet. Nach abschließender intensiver Erörterung der Transaktion mit dem Vorstand stimmte der Aufsichtsrat am 25. August 2010 der Veräußerung des Geschäftsbereichs Wireless Solutions an die Intel Corporation zu.

Der Aufsichtsrat unterstützt den Kurs des Vorstands, das Geschäft von Infineon auf die Zukunftsthemen Energieeffizienz, Mobilität und Sicherheit auszurichten, die auch nach Ansicht des Aufsichtsrats in den kommenden Jahren weiter an Bedeutung gewinnen werden.

### **Zustimmungspflichtige Geschäfte**

Nach der Geschäftsordnung des Aufsichtsrats bedürfen bestimmte Geschäfte und Maßnahmen, insbesondere die Finanz- und Investitionsplanung, einschließlich des Investitionsbudgets und der Festlegung von Verschuldungsgrenzen der Zustimmung des Aufsichtsrats.

Im Rahmen dieser Zustimmungsvorbehalte erörterte der Aufsichtsrat – zusätzlich zu dem oben genannten Verkauf des Geschäftsbereichs Wireless Solutions – in seinen Sitzungen vom 26. November 2009 und 4. August 2010 die Finanz- und Investitionsplanung einschließlich des Investitionsbudgets für das Geschäftsjahr 2010 unter Zugrundelegung verschiedener Szenarien für die künftige Umsatzentwicklung. Dabei legte er auch eine Verschuldungsgrenze fest.

### **Vorstandsvergütung**

Der Aufsichtsrat befasste sich detailliert mit den Vorgaben des Gesetzes zur Angemessenheit der Vorstandsvergütung (VorstAG) und den Empfehlungen des Deutschen Corporate Governance Kodex zur Vorstandsvergütung und beauftragte unabhängige externe Vergütungsexperten, das bestehende Vergütungssystem im Hinblick auf seine Vereinbarkeit mit dem VorstAG und den Kodex-Empfehlungen zu prüfen und auf Basis dieser Analyse ein modifiziertes System der Vorstandsvergütung für die Gesellschaft auszuarbeiten. Die Vorschläge der externen Experten wurden in mehreren Sitzungen des Präsidialausschusses ausführlich besprochen und für die Beschlussfassung im Plenum vorbereitet. Die Rahmenparameter des neuen Vergütungssystems wurden in der Sitzung des Aufsichtsrats vom 4. August 2010 eingehend erörtert. In der Sitzung vom 22. November 2010 wurde das neue Vergütungssystem verabschiedet. Zu den Einzelheiten des neuen Vergütungssystems wird auf den Vergütungsbericht verwiesen, der im Geschäftsbericht ab Seite 102 abgedruckt ist. Das neue Vergütungssystem wird der Hauptversammlung 2011 zur Beschlussfassung vorgelegt werden und soll für alle zukünftigen Vorstandsmitglieder gelten. Die bestehenden

01  
 02  
 03  
 04  
 .....  
 05  
 06  
 07  
 08  
 09  
 10  
 11  
 12  
 13  
 14  
 15  
 16  
 17  
 18  
 19  
 20  
 21

01  
02  
03 Dienstverträge der Vorstandsmitglieder Peter Bauer und Dr. Reinhard Ploss werden an das  
04 neue Vergütungssystem angepasst.

### Vorstandsangelegenheiten

05 Vor dem Hintergrund des Gesetzes zur Angemessenheit der Vorstandsvergütung hatte der  
06 Aufsichtsrat im August 2009 beschlossen, die Vergütung des ehemaligen Vorstandsvor-  
07 sitzenden Dr. Wolfgang Ziebart zu kürzen. In konstruktiven Verhandlungen mit Herrn  
08 Dr. Ziebart konnte eine vergleichsweise Einigung über eine angemessene Kürzung der Gehalts-  
09 und Pensionsansprüche von Herrn Dr. Ziebart erzielt werden. Der Aufsichtsrat erörterte den  
10 Inhalt dieser Einigung und stimmte dem Abschluss des Vergleichsvertrags zu.

11 Auch mit dem ehemaligen Vorstandsvorsitzenden Dr. Ulrich Schumacher steht eine Ein-  
12 gung über wechselseitige Ansprüche kurz vor dem Abschluss. Die Bedingungen eines mög-  
13 lichen Vergleichs wurden in zwei Sitzungen des Aufsichtsrats eingehend besprochen und  
14 werden von diesem befürwortet. Nachdem auch von der Gesellschaft geltend gemachte  
15 Schadenersatzansprüche Gegenstand des Vergleichs sind, ist die Zustimmung der Haupt-  
16 versammlung zum Abschluss des Vergleichs erforderlich.

17 Im August 2010 schied das Vorstandsmitglied Dr. Marco Schröter aufgrund unterschiedli-  
18 cher Auffassungen über die künftige Geschäftspolitik des Unternehmens aus dem Vorstand  
19 aus. In seiner Sitzung am 4. August hatte sich der Aufsichtsrat ausführlich mit der Situation  
20 im Vorstand befasst. Im September 2010 konnte eine einvernehmliche Lösung mit Herrn  
21 Dr. Schröter über eine Auflösung seines Dienstvertrags und seine Gehalts- und Pensions-  
ansprüche gefunden werden. Der Aufsichtsrat dankt Herrn Dr. Schröter für die bei Infineon  
geleistete Arbeit.

Im Zusammenhang mit der Veräußerung des Mobilfunkchip-Geschäfts an Intel wird das  
Vorstandsmitglied Prof. Dr. Hermann Eul den Vorsitz der Geschäftsleitung der neu gegrün-  
deten Intel Mobile Communications Gesellschaft übernehmen. Der Aufsichtsrat erörterte  
und beschloss die Bedingungen der Vertragsaufhebung mit Herrn Prof. Dr. Eul. Der Auf-  
sichtsrat dankt Herrn Prof. Dr. Eul für seine großen Verdienste um das Unternehmen. Er hat  
den Bereich Wireless Solutions mit hohem persönlichem Engagement aus einer wirtschaft-  
lich schwierigen Ausgangslage heraus so hervorragend entwickelt und positioniert, dass  
nunmehr ein Kaufpreis von 1,4 Milliarden US-Dollar erzielt werden konnte.

Die oben genannten Angelegenheiten wurden vor einer Beschlussfassung durch das Plenum vom Präsidialausschuss erörtert und vorbereitet.

## CORPORATE GOVERNANCE

Der Aufsichtsrat hat sich, wie schon in den Vorjahren, regelmäßig mit den anwendbaren Corporate-Governance-Regelungen und ihrer Umsetzung im Unternehmen auseinandergesetzt. In der Sitzung vom 22. November 2010 erörterte der Aufsichtsrat die von der Regierungskommission im Mai 2010 beschlossenen Änderungen des Deutschen Corporate Governance Kodex. Entsprechend der Empfehlung in Ziffer 5.4.1 des Deutschen Corporate Governance Kodex hat der Aufsichtsrat in der Sitzung vom 22. November 2010 auch konkrete Ziele für seine Zusammensetzung beschlossen.

Die Entsprechenserklärung 2009 gemäß §161 Aktiengesetz hat der Aufsichtsrat im November 2009, die Entsprechenserklärung 2010 im November 2010 beschlossen. Die Entsprechenserklärung 2010 wurde am 23. November 2010 auf der Internet-Seite der Gesellschaft veröffentlicht. Dies und weitere Ausführungen zur Corporate Governance des Unternehmens sind im Corporate-Governance-Bericht von Vorstand und Aufsichtsrat gesondert dargestellt.

Einmal jährlich überprüft der Aufsichtsrat die Effizienz seiner Tätigkeit einschließlich der Zusammenarbeit mit dem Vorstand. Im Geschäftsjahr 2010 wurde erstmals eine Bestandsaufnahme der Aufsichtsrats-tätigkeit durch einen unabhängigen externen Berater vorgenommen. Der Aufsichtsrat hat mit der Einschaltung des externen Beraters eine Anregung der Aktionäre aufgenommen. Der Berater hat im Zeitraum von Juli bis September 2010 vertrauliche Einzelgespräche mit allen Aufsichtsräten und Vorständen geführt. Auf Grundlage dieser Gespräche wurden die bisherige Arbeit des Aufsichtsrats analysiert und Empfehlungen für die zukünftige Tätigkeit des Gremiums ausgesprochen. Die Ergebnisse der Effizienzprüfung wurden in der Aufsichtsratssitzung am 30. November 2010 präsentiert und diskutiert.

01  
02  
03  
04  
05  
06  
07  
08  
09  
10  
11  
12  
13  
14  
15  
16  
17  
18  
19  
20  
21

01  
02  
03  
04  
05  
06  
07  
08  
09  
10  
11  
12  
13  
14  
15  
16  
17  
18  
19  
20  
21

Die Mitglieder des Vorstands und Aufsichtsrats legen etwaige Interessenkonflikte dem Aufsichtsrat unverzüglich offen. Wesentliche Geschäfte zwischen der Gesellschaft und Mitgliedern des Vorstands oder ihnen nahe stehenden Personen bedürfen der Zustimmung des Aufsichtsrats. Im Geschäftsjahr 2010 sind bei Mitgliedern des Vorstands und des Aufsichtsrats keine Interessenkonflikte aufgetreten.

#### **ZUSAMMENSETZUNG DES AUFSICHTSRATS**

Der Vorstand hat im Jahr 2009 ein Statusverfahren durchgeführt, um den Aufsichtsrat von bisher 16 auf 12 Mitglieder zu verkleinern. Dem Aufsichtsrat gehören daher nun jeweils sechs Anteilseigner- und Arbeitnehmervertreter an.

Die Wahlen der Arbeitnehmervertreter fanden im Dezember 2009 statt. Gewählt wurden die Herren Wigand Cramer, Alfred Eibl, Peter Gruber, Gerhard Hobbach, Jürgen Scholz und Gerd Schmidt. Frau Kerstin Schulzendorf sowie die Herren Horst Schuler und Alexander Trüby gehören dem neuen Aufsichtsrat nicht mehr an.

Die Amtszeit der Anteilseignervertreter endete mit Beendigung der Hauptversammlung 2010. In der Hauptversammlung 2010 wurden als Anteilseignervertreter Frau Prof. Dr. Renate Köcher und Frau Prof. Dr. Doris Schmitt-Landsiedel sowie die Herren Hans-Ulrich Holdenried, Dr. Manfred Puffer, Dr. Eckart Sünner und Prof. Dr. Klaus Wucherer gewählt. Die Herren Max-Dietrich Kley, Dr. Siegfried Luther und Arnaud de Weert sind aus dem Aufsichtsrat ausgeschieden.

Die Amtszeit des neuen Aufsichtsrats begann mit Beendigung der Hauptversammlung am 11. Februar 2010 und dauert bis zum Ende der Hauptversammlung, die über die Entlastung für das Geschäftsjahr 2013/2014 beschließen wird.



Der Aufsichtsrat dankt allen ausgeschiedenen Mitgliedern für die konstruktive und vertrauensvolle Zusammenarbeit. Ein besonderer Dank des Aufsichtsrats gebührt dem langjährigen Vorsitzenden Max-Dietrich Kley, der sich stets mit großem persönlichem Engagement und unternehmerischer Weitsicht für die Belange der Gesellschaft – gerade auch in schwierigen Zeiten – eingesetzt hat.

In der konstituierenden Sitzung des Aufsichtsrats am 11. Februar 2010 wurde Herr Prof. Dr. Klaus Wucherer zum Aufsichtsratsvorsitzenden und Herr Gerd Schmidt zum stellvertretenden Vorsitzenden gewählt.

Der Aufsichtsrat bildete die folgenden Ausschüsse: Vermittlungsausschuss gemäß § 27 Abs. 3 MitbestG, Präsidialausschuss, Investitions-, Finanz- und Prüfungsausschuss, Strategie- und Technologieausschuss sowie den Nominierungsausschuss gemäß der Empfehlung des Deutschen Corporate Governance Kodex.

Der Aufsichtsrat beschloss, alle Aufsichtsratsausschüsse – mit Ausnahme des lediglich von Anteilseignern besetzten Nominierungsausschusses – paritätisch zu besetzen.

Zum Vorsitzenden des Vermittlungs- und des Nominierungsausschusses wurde Herr Prof. Dr. Wucherer gewählt, zum Vorsitzenden des Investitions-, Finanz- und Prüfungsausschusses Herr Dr. Sünner und zur Vorsitzenden des Strategie- und Technologieausschusses Frau Prof. Dr. Schmitt-Landsiedel. Vorsitzender des Präsidialausschusses ist kraft Geschäftsordnung des Aufsichtsrats der Vorsitzende des Aufsichtsrats, Herr Prof. Dr. Wucherer.

Herr Prof. Dr. Wucherer wird sein Aufsichtsratsmandat zum Tag der Hauptversammlung 2011 niederlegen. Die Anteilseignervertreter im Aufsichtsrat beschlossen am 22. November 2010, der Hauptversammlung vorzuschlagen, Herrn Wolfgang Mayrhuber als Vertreter der Anteilseigner in den Aufsichtsrat zu wählen. In der gleichen Sitzung wurde Herr Wolfgang Mayrhuber vom gesamten Aufsichtsrat zum Kandidaten für den künftigen Vorsitz des Aufsichtsrats nominiert.

01  
02  
03  
04  
05  
06  
07  
08  
09  
10  
11  
12  
13  
14  
15  
16  
17  
18  
19  
20  
21

01  
02  
03  
04  
05  
06  
07  
08  
09  
10  
11  
12  
13  
14  
15  
16  
17  
18  
19  
20  
21

## BERICHT AUS DEN AUSSCHÜSSEN DES AUFSICHTSRATS

Im Berichtsjahr fanden vier ordentliche und zwei außerordentliche Sitzungen des **Investitions-, Finanz- und Prüfungsausschusses** statt.

Schwerpunkte seiner Tätigkeit waren die Überwachung des Rechnungslegungsprozesses, die Prüfung der Quartalsabschlüsse, die Vorprüfung des Jahresabschlusses, des Konzernabschlusses und des zusammengefassten Lageberichts, die Erörterung des Prüfungsberichts mit dem Abschlussprüfer sowie die Prüfung und Erörterung der Finanz- und Investitionsplanung und der Verschuldungsgrenze. Darüber hinaus befasste sich der Ausschuss unter anderem mit der Wirksamkeit des internen Kontrollsystems, des internen Revisionsystems, des Risikomanagementsystems und der Compliance-Organisation der Gesellschaft.

Zu den weiteren Aufgaben des Ausschusses gehörten die Festlegung der Prüfungsschwerpunkte im Geschäftsjahr 2010 sowie die Überwachung der Unabhängigkeit des Abschlussprüfers und der vom Abschlussprüfer zusätzlich erbrachten Leistungen. Der Ausschuss bereitete den Vorschlag des Aufsichtsrats an die Hauptversammlung für die Wahl des Abschlussprüfers vor und erteilte den Prüfungsauftrag für den Jahres- und Konzernabschluss und die prüferische Durchsicht von Zwischenfinanzberichten.

Der Abschlussprüfer nahm an allen ordentlichen Sitzungen des Prüfungsausschusses teil und berichtete ausführlich über seine Prüfungstätigkeit.

Der **Strategie- und Technologieausschuss** kam im Berichtsjahr zu vier ordentlichen Sitzungen und vier außerordentlichen Sitzungen zusammen.

Der geplante Verkauf des Mobilfunkchip-Geschäfts stellte den Schwerpunkt der Ausschusarbeit dar. In zwei ordentlichen und vier außerordentlichen Sitzungen wurde das Projekt eingehend mit dem Vorstand erörtert. Dabei war nicht nur der vom Vorstand befürwortete Ausstieg aus dem Mobilfunkchip-Geschäft Gegenstand der Beratungen im Ausschuss, sondern auch die weiteren Optionen für diesen Geschäftsbereich und die zukünftige Ausrichtung und Strategie für das verbleibende Infineon-Geschäft.

Darüber hinaus beschäftigte sich der Ausschuss auch mit der Fertigungsstrategie der Gesellschaft.

Im Berichtsjahr fanden acht Sitzungen des **Präsidialausschusses** statt.

Der Ausschuss befasste sich in mehreren Sitzungen ausführlich mit den Vorschlägen der externen Berater zu einem neuen Vorstandsvergütungssystem. Hierbei wurden insbesondere die Angemessenheit der Vergütung, die Vergleichbarkeit mit der Vergütung in anderen Unternehmen und der Struktur der Mitarbeitervergütung, die Ausgestaltung von variablen Vergütungsbestandteilen, aktienbasierte langfristige Vergütungskomponenten und die Altersversorgung des Vorstands eingehend diskutiert und für eine Entscheidung des gesamten Aufsichtsrats vorbereitet.

Der Ausschuss bereitete außerdem die Beschlussfassungen des Aufsichtsrats in den oben genannten Vorstandsangelegenheiten vor und wählte einen externen Berater für die Evaluierung der Arbeit des Aufsichtsrats aus.

Außerdem befasste sich der Ausschuss mit der im Dax-30-Vergleich geringen Vergütung des Aufsichtsrats und beauftragte einen unabhängigen Berater, Vorschläge für die Änderung der Aufsichtsratsvergütung auszuarbeiten. Nach Abstimmung mit dem Aufsichtsratsplenum und dem Vorstand soll die geänderte Aufsichtsratsvergütung der Hauptversammlung 2011 zur Beschlussfassung vorgelegt werden.

Der Ausschuss empfahl dem Aufsichtsratsplenum, den Selbstbehalt in der D&O-Versicherung des Aufsichtsrats anzuheben, um damit einer Empfehlung des Deutschen Corporate Governance Kodex zu entsprechen.

Der **Nominierungsausschuss** kam im Berichtsjahr zu vier Sitzungen zusammen.

In seiner Sitzung im Oktober 2009 beriet der Ausschuss über die Kandidaten, die dem Aufsichtsratsplenum für dessen Wahlvorschläge an die Hauptversammlung 2010 vorgeschlagen wurden.

01  
 02  
 03  
 04  
 .....  
 05  
 06  
 07  
 08  
 09  
 10  
  
 11  
 12  
 13  
 14  
 15  
 16  
 17  
 18  
 19  
 20  
 21

01  
02  
03  
04  
05  
06  
07  
08  
09  
10  
11  
12  
13  
14  
15  
16  
17  
18  
19  
20  
21

Nachdem Herr Prof. Dr. Wucherer bereits vor der Hauptversammlung öffentlich angekündigt hatte, dass er sein Aufsichtsratsmandat und den Aufsichtsratsvorsitz nur bis zur Hauptversammlung 2011 ausüben werde, befasste sich der Ausschuss in den weiteren Sitzungen mit dem Prozess zur Auswahl und der konkreten Suche eines geeigneten Nachfolgers. In diesem Zusammenhang erteilte der Ausschuss nach einem sorgfältigen Auswahlprozess einem international operierenden Berater das Mandat zur Unterstützung des Aufsichtsrats bei der Suche nach Kandidaten und legte die einzelnen Schritte bis zur Vorlage eines Wahlvorschlags des Aufsichtsrats an die Hauptversammlung 2011 fest.

Nach eingehenden Beratungen konnte der Ausschuss dem Aufsichtsrat im November 2010 Herrn Wolfgang Mayrhuber für die Nachfolge von Herrn Prof. Dr. Wucherer als Aufsichtsratsvorsitzenden vorschlagen.

Der gemäß §27 Absatz 3 Mitbestimmungsgesetz gebildete **Vermittlungsausschuss** hat nicht getagt.

Die Vorsitzenden der Ausschüsse haben das Aufsichtsratsplenum in dessen ordentlichen Sitzungen regelmäßig umfassend über ihre Arbeit informiert.

## JAHRES- UND KONZERNABSCHLUSS

Die KPMG AG Wirtschaftsprüfungsgesellschaft, Berlin, hat den Jahresabschluss der Infineon Technologies AG und den Konzernabschluss zum 30. September 2010 sowie den zusammengefassten Lagebericht der Infineon Technologies AG und des Infineon-Konzerns geprüft und mit uneingeschränkten Bestätigungsvermerken versehen. Außerdem wurde auch der Halbjahresfinanzbericht durch die KPMG einer prüferischen Durchsicht unterzogen.

Allen Mitgliedern des Aufsichtsrats wurden Mitte November 2010 der vom Vorstand aufgestellte Jahresabschluss, der nach IFRS aufgestellte Konzernabschluss, der zusammengefasste Lagebericht und der Vorschlag des Vorstands über die Verwendung des Bilanzgewinns vorgelegt.

Die Berichte der KPMG über die Prüfung des Jahresabschlusses, des Konzernabschlusses sowie des zusammengefassten Lageberichts lagen ebenfalls allen Mitgliedern des Aufsichtsrats vor und wurden zusammen mit den Abschlussunterlagen selbst zunächst in der Sitzung des Investitions-, Finanz- und Prüfungsausschusses am 12. November 2010 mit der KPMG intensiv erörtert. Der Investitions-, Finanz- und Prüfungsausschuss hat beschlossen, dem Aufsichtsrat die Billigung der Abschlüsse vorzuschlagen. Der Vorsitzende des Investitions-, Finanz- und Prüfungsausschusses erläuterte in der Sitzung des Aufsichtsrats am 22. November 2010 die Empfehlungen des Ausschusses. Die Abschlussunterlagen wurden in Gegenwart des Abschlussprüfers ausführlich behandelt und vom Aufsichtsrat insbesondere mit Blick auf die Rechtmäßigkeit, Ordnungsmäßigkeit und Zweckmäßigkeit geprüft.

Außerdem berichtete der Vorstand detailliert über Umfang, Schwerpunkte und Kosten der Abschlussprüfung und erläuterte das Risikomanagementsystem. Der zusammengefasste Lagebericht entsprach den Berichten des Vorstands an den Aufsichtsrat. Der Aufsichtsrat stimmt den Aussagen zur weiteren Unternehmensentwicklung zu. Der Aufsichtsrat hat den Gewinnverwendungsvorschlag des Vorstands, der eine Dividende von 0,10 € je dividendenberechtigte Aktie vorsieht, geprüft und schließt sich diesem an. Nach dem abschließenden Ergebnis der Prüfung durch den Aufsichtsrat erhebt der Aufsichtsrat keine Einwendungen gegen die Abschlüsse und die Prüfung durch den Abschlussprüfer. Der Aufsichtsrat hat dem Ergebnis der Abschlussprüfung am 22. November 2010 seine Zustimmung erteilt und den Jahresabschluss und Konzernabschluss der Infineon Technologies AG und des Infineon-Konzerns gebilligt. Der Jahresabschluss ist damit festgestellt.

Der Aufsichtsrat dankt den Arbeitnehmervertretungen für die gute Zusammenarbeit und dem Vorstand und allen Mitarbeiterinnen und Mitarbeitern für ihren großen Einsatz und ihre exzellente Leistung im vergangenen Geschäftsjahr.

Neubiberg, im November 2010  
für den Aufsichtsrat



Prof. Dr. Klaus Wucherer  
Vorsitzender des Aufsichtsrats

01  
02  
03  
04  
05  
06  
07  
08  
09  
10  
11  
12  
13  
14  
15  
16  
17  
18  
19  
20  
21

# CORPORATE GOVERNANCE BERICHT

## ERKLÄRUNG ZUR UNTERNEHMENSFÜHRUNG (BESTANDTEIL DES LAGEBERICHTS – UNGEPRÜFT)

### ENTSPRECHENSERKLÄRUNG 2010 VON VORSTAND UND AUF SICHTSRAT DER INFINEON TECHNOLOGIES AG GEMÄSS § 161 AKTIENGESETZ ZUM DEUTSCHEN CORPORATE GOVERNANCE KODEX

Die Infineon Technologies AG hat seit der Abgabe der letzten Entsprechenserklärung im November 2009 gemäß § 161 Aktiengesetz jeweils mit folgenden Ausnahmen allen Empfehlungen der Regierungskommission „Deutscher Corporate Governance Kodex“ („DCGK“) in der Fassung vom 18. Juni 2009 und seit deren Bekanntmachung im elektronischen Bundesanzeiger am 2. Juli 2010 allen Empfehlungen der Regierungskommission „Deutscher Corporate Governance Kodex“ in der Fassung vom 26. Mai 2010 entsprochen:

- In der D&O-Versicherung wurde für die Mitglieder des Aufsichtsrats kein der gesetzlichen Regelung für Vorstandsmitglieder entsprechender Selbstbehalt vereinbart (Abweichung von Ziffer 3.8 DCGK).

Abweichend von der Empfehlung der Ziffer 3.8 DCGK hat die Infineon Technologies AG bisher persönliche Verpflichtungserklärungen der Aufsichtsratsmitglieder eingeholt, wonach sich die Aufsichtsratsmitglieder verpflichten, pro Kalenderjahr einen Selbstbehalt in Höhe von 100 Prozent der ihnen für ihre Tätigkeit als Mitglied des Aufsichtsrats und seiner Ausschüsse im jeweiligen Kalenderjahr zustehenden festen Vergütung zu tragen. Der Aufsichtsrat hat jedoch in seiner Sitzung am 22. November 2010 beschlossen, anstelle der bisherigen Selbstverpflichtungserklärungen gemäß der Empfehlung in Ziffer 3.8 Absatz 3 des Deutschen Corporate Governance Kodex unmittelbar in der D&O Versicherung für die Mitglieder des Aufsichtsrats einen Selbstbehalt in Höhe von 10 Prozent des Schadens und bis 150 Prozent der jährlichen festen Vergütung der Aufsichtsratsmitglieder zu vereinbaren. Die laufende Police der D&O Versicherung wird mit Wirkung für das Geschäftsjahr 2011 entsprechend angepasst.

- In den bisherigen Vorstandsdiensverträgen wurde bei der Ausgestaltung der variablen Vergütungsteile negativen Entwicklungen nur eingeschränkt Rechnung getragen (Abweichung von Ziffer 4.2.3 Abs. 2 Satz 4 DCGK).

Die Empfehlung, bei der Ausgestaltung der variablen Vergütungsteile auch negativen Entwicklungen Rechnung zu tragen, wurde mit der Fassung des DCGK vom 18. Juni 2009 neu in den DCGK eingefügt. Die Vorstandsdiensverträge der Infineon Technologies AG wurden alle vorher abgeschlossen und konnten diese Empfehlung daher noch nicht berücksichtigen.

- Die Leistungen aus Anlass der vorzeitigen Beendigung der Vorstandstätigkeit infolge eines Kontrollwechsels (Change of Control) können im Einzelfall 150 Prozent des Abfindungscaps übersteigen (Abweichung von Ziffer 4.2.3 Abs. 5 DCGK).

Die Vorstandsverträge wurden bereits im Geschäftsjahr 2007 einheitlich um sogenannte Change-of-Control-Klauseln ergänzt, wonach die Vorstandsmitglieder, wenn sie im Rahmen eines Kontrollwechsels ausscheiden, Anspruch auf Fortzahlung des Jahreszieleinkommens bis zum Ende der vertraglich vereinbarten Laufzeit haben; dies kann im Einzelfall über die vom DCGK empfohlene Dreijahresgrenze hinausgehen.

Im Geschäftsjahr 2010 wurde das Vergütungssystem für den Vorstand der Infineon Technologies AG durch einen unabhängigen externen Vergütungsexperten überprüft. Unter Berücksichtigung des Ergebnisses dieser Überprüfung hat der Aufsichtsrat auf Vorschlag des Präsidialausschusses in seiner Sitzung am 22. November 2010 ein neues Vorstandsvergütungssystem beschlossen, das für alle zukünftigen Vorstandsmitglieder gelten soll. Auch die bestehenden Verträge mit den derzeitigen Vorstandsmitgliedern werden entsprechend angepasst. Zukünftig soll die variable Vergütung des Vorstands gemäß der Empfehlung in Ziffer 4.2.3 Abs. 2 Satz 4 DCGK auch negativen Entwicklungen Rechnung tragen und alle Vorstandsdiensverträge werden eine Change-of-Control-Klausel enthalten, die der Empfehlung in Ziffer 4.2.3 Abs. 5 DCGK entspricht.

Zukünftig wird die Infineon Technologies AG allen Empfehlungen der Regierungskommission „Deutscher Corporate Governance Kodex“ in der Fassung vom 26. Mai 2010 entsprechen.

Darüber hinaus hat Infineon alle Anregungen des Deutschen Corporate Governance Kodex in der Fassung vom 26. Mai 2010 übernommen.

### RELEVANTE ANGABEN ZU UNTERNEHMENSFÜHRUNGSPRAKTIKEN Corporate Governance – Standards guter und verantwortungsbewusster Unternehmensführung

Der Vorstand und der Aufsichtsrat der Infineon Technologies AG verstehen unter Corporate Governance ein umfassendes Konzept für eine verantwortungsvolle, transparente und wertorientierte Unternehmensführung. Gute Corporate Governance fördert das Vertrauen der nationalen und internationalen Anleger, der Finanzmärkte, der Geschäftspartner und Mitarbeiter sowie der Öffentlichkeit in unser Unternehmen. Vorstand, Aufsichtsrat und Führungskräfte sorgen dafür, dass die Corporate Governance in allen Bereichen des Unternehmens aktiv gelebt und ständig weiterentwickelt wird. Neben dem Deutschen Corporate Governance Kodex umfasst Corporate

Governance bei Infineon auch die Standards des internen Kontrollsystems, Compliance – dabei insbesondere die Leitlinien für das unternehmerische Verhalten im Wettbewerb („Infineon Business Conduct Guidelines“) – sowie die Regelungen zu den Organisations- und Aufsichtspflichten im Unternehmen, die im Infineon Intranet von allen Mitarbeitern eingesehen werden können.

Infineon hat einen Corporate-Governance-Beauftragten bestellt, der direkt an Vorstand und Aufsichtsrat berichtet.

### „Business Conduct Guidelines“

Wir führen unser Geschäft verantwortungsvoll in Übereinstimmung mit den gesetzlichen Vorschriften und behördlichen Regelungen – und wir haben verschiedene Richtlinien aufgestellt, die dazu beitragen, dass dieses Ziel erreicht wird. Die „Business Conduct Guidelines“ der Infineon Technologies AG als wichtigster Bestandteil sind im Internet unter [www.infineon.com](http://www.infineon.com) („Über Infineon/Investor/Corporate Governance“) veröffentlicht und für den Vorstand und alle Mitarbeiter weltweit verbindlich. Die „Business Conduct Guidelines“ werden regelmäßig überprüft und weiterentwickelt. Sie enthalten insbesondere Regelungen zum gesetzeskonformen Verhalten, zum Umgang mit Geschäftspartnern und Dritten, zur Vermeidung von Interessenkonflikten, zum Umgang mit Firmeneinrichtungen, Daten und Informationen sowie zum Thema Umweltschutz, Gesundheit und Sicherheit. Daneben enthalten sie aber auch Regeln zum Umgang mit Beschwerden und Hinweisen auf Verstöße gegen diese Richtlinien.

### Corporate Compliance Officer und Compliance-Panel

Der Corporate Compliance Officer der Infineon Technologies AG berichtet direkt an den Vorstand, koordiniert das Infineon-Compliance-Programm und nimmt Beschwerden und Hinweise – auch anonym – entgegen. Er wird unterstützt von regionalen Compliance Officers. Wir haben außerdem ein Compliance-Panel implementiert, das sich aus erfahrenen Führungskräften der Bereiche Recht, Personal, interne Revision und Unternehmenssicherheit zusammensetzt. Die Mitglieder des Compliance-Panel treffen sich regelmäßig und beraten den Compliance Officer.

### Risikomanagement

Als Teil einer guten Corporate Governance stellt der Vorstand ein angemessenes Risikomanagement sicher, denn ein systematisches und effektives Risiko- und Chancenmanagement ist einer unserer wichtigen Erfolgsfaktoren. Es ist integraler Bestandteil unserer Geschäftstätigkeit und sorgt dafür, dass Risiken frühzeitig erkannt und Risikopositionen minimiert werden.

Unser unternehmensweites Risiko- und Chancenmanagementsystem besteht aus den Teilprozessen Risikoidentifikation, Risikoanalyse, Risikosteuerung und Risikoüberwachung

und wird kontinuierlich den veränderten Rahmenbedingungen angepasst. Seine Wirksamkeit wird regelmäßig vom Investitions-, Finanz- und Prüfungsausschuss des Aufsichtsrats überprüft.

Einzelheiten zum Risikomanagement bei Infineon sind im Risiko- und Chancenbericht dargestellt, der sowohl das Risiko- und Chancenmanagement als auch das interne Kontrollsystem bei Infineon näher beschreibt.

### Transparente Unternehmensführung

Wir erstatten unseren Aktionären nach einem festen Finanzkalender viermal im Jahr Bericht über die Geschäftsentwicklung sowie die Vermögens-, Finanz- und Ertragslage des Unternehmens. Die Mitglieder des Vorstands informieren Aktionäre, Analysten und die Öffentlichkeit regelmäßig über die Quartals- und Jahresergebnisse. Unsere umfangreiche Investor-Relations-Arbeit umfasst regelmäßige Treffen mit Analysten und institutionellen Anlegern sowie Telefonkonferenzen. Alle Mitteilungen und Informationen stehen in der Regel auf unserer Internet-Seite und dort auch in englischer Sprache zur Verfügung.

Neben der regelmäßigen Berichterstattung informiert die Infineon Technologies AG in Ad-hoc-Mitteilungen über nicht-öffentlich bekannte Umstände, die geeignet sind, im Falle ihres Bekanntwerdens den Börsenpreis der Infineon-Aktie erheblich zu beeinflussen.

Eine detaillierte Auflistung aller im Geschäftsjahr 2010 veröffentlichten kapitalmarktbezogenen Informationen enthält das Jährliche Dokument, das gemäß § 10 WpPG auf der Internet-Seite der Infineon Technologies AG veröffentlicht wird.

Infineon hat einen Offenlegungsausschuss („Disclosure Committee“), bestehend aus Mitarbeitern verschiedener Fachabteilungen, eingerichtet, der die Veröffentlichung bestimmter Finanzinformationen und anderer wesentlicher Informationen überprüft und freigibt.

Der Vorstand muss nach deutschem Recht einen Bilanzzeit leisten. Die hierzu erforderlichen Angaben werden in einem internen Verfahren von Führungskräften, die unternehmerische Verantwortung tragen, gegenüber dem Vorstand bestätigt.

### RECHNUNGSLEGUNG UND ABSCHLUSSPRÜFUNG

Seit dem Geschäftsjahr 2009 erstellt die Infineon Technologies AG den Konzernabschluss ausschließlich nach den Grundsätzen der International Financial Reporting Standards (IFRS). Der Jahresabschluss der Infineon Technologies AG wird weiterhin nach den Vorschriften des HGB erstellt. Der Jahresabschluss der Infineon Technologies AG und der Konzernabschluss für den Infineon Konzern und der zusammengefasste Lagebericht werden nach Billigung durch den Aufsichtsrat innerhalb von 90 Tagen nach dem Ende eines Geschäftsjahrs veröffentlicht.

01  
02  
03  
04  
05  
06  
07  
08  
09  
10  
11  
12  
13  
14  
15  
16  
17  
18  
19  
20  
21

Die Rechnungslegung unseres Unternehmens für das Geschäftsjahr 2010 wurde von der KPMG AG Wirtschaftsprüfungsgesellschaft, Berlin (KPMG) geprüft. Außerdem wurde auch der Halbjahresfinanzbericht durch die KPMG einer prüferischen Durchsicht unterzogen. Die Prüfungen umfassen auch das Risikomanagement und die Abgabe der Entsprechenserklärung nach § 161 AktG. Die Quartalsberichte sowie der Halbjahresfinanzbericht werden vor der Veröffentlichung vom Investitions-, Finanz- und Prüfungsausschuss mit dem Vorstand erörtert. Mit der KPMG wurde vereinbart, dass der Vorsitzende des Prüfungsausschusses über während der Prüfung auftretende mögliche Ausschluss- oder Befangenheitsgründe unverzüglich unterrichtet wird, soweit diese nicht unverzüglich beseitigt werden. Der Abschlussprüfer soll auch über alle für die Aufgaben des Aufsichtsrats wesentlichen Feststellungen und Vorkommnisse, die sich bei der Durchführung der Abschlussprüfung ergeben, unverzüglich berichten.

#### **BESCHREIBUNG DER ARBEITSWEISE VON VORSTAND UND AUFSICHTSRAT SOWIE DER ZUSAMMENSETZUNG UND ARBEITSWEISE IHRER AUSSCHÜSSE**

Das deutsche Aktienrecht, dem die Infineon Technologies AG unterliegt, sieht ein zweistufiges System der Verwaltung der Gesellschaft vor, nämlich die Unternehmensführung durch den Vorstand und die Unternehmenskontrolle durch den Aufsichtsrat. Wir sind davon überzeugt, dass diese Trennung der beiden Funktionen eine wesentliche Voraussetzung für eine gute Corporate Governance ist. Vorstand und Aufsichtsrat arbeiten aber im Interesse des Unternehmens eng zusammen.

#### **Vorstand**

Der Vorstand der Infineon Technologies AG besteht derzeit aus drei Mitgliedern, für die der Aufsichtsrat entsprechend den Vorgaben des Deutschen Corporate Governance Kodex eine Altersgrenze festgesetzt hat. Die Mitglieder des Vorstands sollten demgemäß in der Regel nicht älter als 67 Jahre sein. Bei der Zusammensetzung des Vorstands achtet der Aufsichtsrat nach seiner Geschäftsordnung neben der fachlichen und persönlichen Eignung auch auf Vielfalt (Diversity) und strebt dabei insbesondere eine angemessene Berücksichtigung von Frauen an.

Der Vorstand ist das Leitungsorgan des Unternehmens; er ist allein an das Unternehmensinteresse gebunden und orientiert sich dabei am Ziel einer nachhaltigen Steigerung des Unternehmenswerts. Er bestimmt die unternehmerischen Ziele, die strategische Ausrichtung, die Unternehmenspolitik und die Konzernorganisation.

Nach deutschem Aktienrecht ist der Vorstand insgesamt für die Führung des Unternehmens verantwortlich. Der Infineon-Vorstand hat sich mit Zustimmung des Aufsichtsrats eine Geschäftsordnung gegeben. Danach leiten alle seine Mitglieder das Unternehmen gemeinschaftlich und arbeiten

kollegial zusammen. Der Vorstandsvorsitzende koordiniert die Zusammenarbeit des Vorstands mit dem Aufsichtsrat. Er hält mit dem Aufsichtsratsvorsitzenden regelmäßig Kontakt und berät mit ihm die Strategie, Planung, Geschäftsentwicklung und das Risikomanagement des Konzerns. Der Vorstand informiert den Aufsichtsrat im Rahmen der ordentlichen Sitzungen umfassend und zeitnah über die Geschäftsentwicklung, die wirtschaftliche Situation des Unternehmens und der einzelnen Geschäftsbereiche sowie über die Finanz- und Investitionsplanung. Über Angelegenheiten, die für die Beurteilung der Lage und Entwicklung sowie für die Leitung des Unternehmens von wesentlicher Bedeutung sind, unterrichtet der Vorsitzende des Vorstands den Aufsichtsratsvorsitzenden unverzüglich.

#### **Aufsichtsrat**

##### **Arbeit des Aufsichtsrats**

Der Aufsichtsrat berät und überwacht den Vorstand bei der Unternehmensführung. Der Vorstand berichtet dem Aufsichtsrat regelmäßig, zeitnah und umfassend über alle für das Unternehmen relevanten Belange der Geschäftsentwicklung, der Planung sowie der Risikolage und stimmt mit dem Aufsichtsrat die Strategie und deren Umsetzung ab. Der Aufsichtsrat erörtert die Quartalsberichte und prüft und billigt den Jahresabschluss und den Konzernabschluss der Infineon Technologies AG. Wesentliche Vorstandsentscheidungen, wie größere Akquisitionen, Desinvestitionen und Finanzmaßnahmen, unterliegen seiner Zustimmung. Einzelheiten sind in den Geschäftsordnungen von Vorstand und Aufsichtsrat geregelt. Bei Abstimmungen im Aufsichtsrat hat bei Stimmgleichheit der Vorsitzende des Aufsichtsrats in einer erneuten Abstimmung bei nochmaliger Stimmgleichheit die ausschlaggebende Stimme.

Die Aufgaben des Aufsichtsrats und seiner Ausschüsse sind im Gesetz, in der Satzung und in den Geschäftsordnungen des Aufsichtsrats beziehungsweise seiner Ausschüsse geregelt.

Einmal jährlich überprüft der Aufsichtsrat die Effizienz seiner Tätigkeit einschließlich der Zusammenarbeit mit dem Vorstand. Im Geschäftsjahr 2010 wurde erstmals eine Bestandsaufnahme der Aufsichtsratsaktivität durch einen unabhängigen externen Berater vorgenommen. Der Aufsichtsrat hat mit der Einschaltung des externen Beraters eine Anregung der Aktionäre aufgenommen. Der Berater hat im Zeitraum von Juli bis September 2010 vertrauliche Einzelgespräche mit allen Aufsichtsräten und Vorständen geführt. Auf Grundlage dieser Gespräche wurde die bisherige Arbeit des Aufsichtsrates analysiert und Empfehlungen für die zukünftige Tätigkeit des Gremiums ausgesprochen. Die Ergebnisse der Effizienzprüfung werden in der Aufsichtsratssitzung am 30. November 2010 präsentiert und diskutiert.



### Zusammensetzung des Aufsichtsrats

Der Aufsichtsrat der Infineon Technologies AG setzt sich nach dem Mitbestimmungsgesetz (MitbestG) zu gleichen Teilen aus Vertretern der Anteilseigner und Vertretern der Mitarbeiter zusammen. Die Vertreter der Anteilseigner werden von der Hauptversammlung, die Vertreter der Mitarbeiter von Delegierten der Mitarbeiter der deutschen Infineon-Betriebsstätten nach Maßgabe des MitbestG gewählt. Die Amtszeit der Aufsichtsratsmitglieder beträgt regelmäßig fünf Jahre. Auf Grund des Rückgangs der Mitarbeiterzahlen wurde der Aufsichtsrat im Geschäftsjahr 2010 im Wege eines sogenannten Statusverfahrens von bisher sechzehn auf zwölf Mitglieder verkleinert. Infolgedessen wurden sowohl die Vertreter der Anteilseigner als auch die Vertreter der Arbeitnehmer im Aufsichtsrat im Geschäftsjahr 2010 neu gewählt. Die Amtszeit des neuen Aufsichtsrats begann mit Beendigung der Hauptversammlung am 11. Februar 2010 und dauert bis zum Ende der Hauptversammlung, die über die Entlastung für das Geschäftsjahr 2013/2014 beschließen wird.

Die Zusammensetzung des Aufsichtsrats insgesamt soll nach Auffassung des Aufsichtsrats den Grundsätzen der Vielfalt (Diversity) entsprechen. Das bedeutet zum einen, dass die Zusammensetzung des Aufsichtsrats der in einem offenen, innovativen, weltweit tätigen Unternehmen wie Infineon vorzufindenden Vielfalt möglichst Rechnung tragen soll. Es bedeutet aber auch, dass niemand nur deshalb als Kandidat für den Aufsichtsrat ausscheidet oder für den Aufsichtsrat vorgeschlagen wird, weil er über eine bestimmte Diversity-Eigenschaft verfügt beziehungsweise nicht verfügt. Dabei ist „Diversity“ als internationale (nicht im Sinne einer bestimmten Staatsbürgerschaft, sondern einer prägenden Herkunft, Erziehung, Ausbildung oder beruflichen Tätigkeit), geschlechtliche und Alters-Vielfalt zu verstehen.

Entsprechend der Empfehlung in Ziffer 5.4.1 DCGK hat der Aufsichtsrat in seiner Sitzung am 22. November 2010 konkrete Ziele für seine Zusammensetzung beschlossen:

- i / mindestens zwei Frauen und
- ii / mindestens ein Drittel – wie oben definiert – „internationale“ Vertreter vorhanden sind.

Diesen Mindest-Zielen entspricht die Zusammensetzung des Aufsichtsrates bereits jetzt. Sie sollen auch in Zukunft jederzeit verwirklicht werden. Der Aufsichtsrat beachtet außerdem die in seiner Geschäftsordnung festgesetzte Altersgrenze, wonach als Mitglied des Aufsichtsrats in der Regel nur eine Person vorgeschlagen werden soll, die nicht älter als 69 Jahre ist.

Der Aufsichtsrat wird dieses Anforderungsprofil und diese Ziele bei seinen künftigen Personalvorschlägen berücksichtigen. Entsprechendes gilt für den Nominierungsausschuss, soweit er das Votum des Aufsichtsrats vorbereitet. Der Aufsichtsrat empfiehlt seinen von den Arbeitnehmern gewählten Mitgliedern, sich im Rahmen ihrer Möglichkeiten nach Kräften um eine Berücksichtigung des Anforderungsprofils und der Ziele im Hinblick auf die von den zuständigen Gremien der Arbeitnehmer gemachten Wahlvorschläge zu bemühen. Weiter empfiehlt der Aufsichtsrat eine Berücksichtigung der Ziele auch denjenigen seiner Mitglieder, die einen Antrag auf gerichtliche Bestellung eines Aufsichtsratsmitglieds stellen.

### Aufsichtsratsausschüsse

Die Geschäftsordnung des Aufsichtsrats sieht die Bildung von drei Ausschüssen vor. Dies sind der Vermittlungsausschuss, der Präsidialausschuss und der Investitions-, Finanz- und Prüfungsausschuss. Daneben hat der Aufsichtsrat einen Strategie- und Technologieausschuss und den vom Deutschen Corporate Governance Kodex vorgesehenen Nominierungsausschuss eingerichtet. Alle Aufsichtsratsausschüsse – mit Ausnahme des lediglich von Anteilseignern besetzten Nominierungsausschusses – sind paritätisch besetzt.

Der **Präsidialausschuss**, dem der Aufsichtsratsvorsitzende, sein Stellvertreter und je ein Vertreter der Anteilseigner und der Mitarbeiter angehören, bereitet unter anderem die Bestellung und Abberufung von Vorstandsmitgliedern sowie die Entscheidung des Aufsichtsratsplenums über die Vorstandsvergütung vor und ist für den Abschluss, die Änderung und die Beendigung der Verträge mit Vorstandsmitgliedern zuständig, soweit nicht die Bezüge betroffen sind.

Der **Investitions-, Finanz- und Prüfungsausschuss („Prüfungsausschuss“)** besteht aus dem Aufsichtsratsvorsitzenden, seinem Stellvertreter und je einem weiteren Vertreter der Anteilseigner und der Mitarbeiter. Der Vorsitzende des Ausschusses, Herr Dr. Eckart Sünner, ist unabhängiger Finanzexperte und verfügt auf Grund seiner langjährigen Tätigkeit als Vorsitzender im Prüfungsausschuss eines anderen DAX-Konzerns über besondere Kenntnisse und langjährige Erfahrung auf dem Gebiet der Rechnungslegung.

Der Prüfungsausschuss überwacht den Rechnungslegungsprozess, erörtert und prüft den vom Vorstand aufgestellten Jahres- und Konzernabschluss und den zusammengefassten Lagebericht sowie die Quartals- und Halbjahresfinanzberichte. Auf der Grundlage des Berichts des Abschlussprüfers macht der Ausschuss Vorschläge zur Billigung des Jahresabschlusses und des Konzernabschlusses durch den Aufsichtsrat. Der Prüfungsausschuss erteilt den Prüfungsauftrag für den Jahres- und Konzernabschluss an den von der Hauptversammlung gewählten Abschlussprüfer, legt die Prüfungsschwerpunkte fest und ist für die Festsetzung der Vergütung des Abschlussprüfers zuständig.

01  
02  
03  
04  
05  
06  
07  
08  
09  
10  
11  
12  
13  
14  
15  
16  
17  
18  
19  
20  
21

Darüber hinaus befasst sich der Prüfungsausschuss unter anderem mit der Wirksamkeit des internen Kontrollsystems, des internen Revisionsystems und des Risikomanagementsystems. Dazu kann er sich direkt an alle Mitarbeiter des Unternehmens wenden und auch externe Hilfe in Anspruch nehmen. Die interne Revision berichtet jährlich an den Prüfungsausschuss, der einen Prüfungsplan und Prüfungsschwerpunkte festlegen kann.

Dem Prüfungsausschuss wurde ferner die Zuständigkeit für Compliance übertragen. Der Vorstand beziehungsweise der Corporate Compliance Officer erstatten dem Prüfungsausschuss regelmäßig Bericht über die Compliance-Organisation und informieren auch über gegebenenfalls auftretende Compliance-Fälle. Mitarbeiter haben die Möglichkeit, dem Prüfungsausschuss anonym Hinweise auf Verstöße gegen interne Richtlinien und gesetzliche Regelungen zur Rechnungslegung zu geben.

Der **Vermittlungsausschuss**, dem der Aufsichtsratsvorsitzende, sein Stellvertreter, ein Vertreter der Anteilseigner und ein Vertreter der Mitarbeiter angehören, unterbreitet dem Aufsichtsrat Vorschläge für die Bestellung von Vorstandsmitgliedern, wenn im ersten Wahlgang über die Bestellung die erforderliche Mehrheit von zwei Dritteln der Stimmen der Aufsichtsratsmitglieder nicht erreicht wird.

Der **Strategie- und Technologieausschuss**, dem drei Vertreter der Anteilseigner und drei Vertreter der Arbeitnehmer angehören, beschäftigt sich mit Themen, die unsere Geschäftsstrategie und wichtige Technologiethemata betreffen.

Der **Nominierungsausschuss**, dem der Aufsichtsratsvorsitzende und zwei weitere Vertreter der Anteilseigner angehören, schlägt dem Aufsichtsrat für dessen Wahlvorschläge an die Hauptversammlung geeignete Kandidaten vor.

Alle Ausschüsse berichten dem Aufsichtsrat regelmäßig umfassend über ihre Arbeit. Weitere Angaben zur Arbeit des Aufsichtsrats und seiner Ausschüsse sowie zu ihrer personellen Zusammensetzung finden Sie im Bericht Anhang unter Nr. 41 Abschnitt „Vorstand und Aufsichtsrat“ sowie im Bericht des Aufsichtsrats an die Hauptversammlung, der im Geschäftsbericht abgedruckt ist.

### Vermeidung von Interessenkonflikten

Die Mitglieder des Vorstands und des Aufsichtsrats legen etwaige Interessenkonflikte dem Aufsichtsrat unverzüglich offen. Wesentliche Geschäfte zwischen der Gesellschaft und Mitgliedern des Vorstands oder ihnen nahe stehenden Personen bedürfen der Zustimmung des Aufsichtsrats. Im Geschäftsjahr 2010 sind bei Mitgliedern des Vorstands und des Aufsichtsrats keine Interessenkonflikte aufgetreten.

### Anteilsbesitz von Vorstand und Aufsichtsrat

Der Anteilsbesitz aller Vorstands- und Aufsichtsratsmitglieder an der Infineon Technologies AG betrug zum 30. September 2010 weniger als 1 Prozent der von der Gesellschaft ausgegebenen Aktien.

### MELDEPFLICHTIGE WERTPAPIERGESCHÄFTE („DIRECTORS' DEALINGS“)

Mitglieder des Vorstands und des Aufsichtsrats sowie bestimmte weitere Führungskräfte, die regelmäßig Zugang zu Insiderinformationen haben, sowie diesen nahe stehende Personen sind gemäß § 15a Wertpapierhandelsgesetz verpflichtet, der Gesellschaft und der Bundesanstalt für Finanzdienstleistungsaufsicht (BaFin) eigene Geschäfte mit Aktien der Gesellschaft mitzuteilen. Dies gilt jedoch nur, solange die Gesamtsumme der von einer der oben genannten Führungskräfte und ihr nahe stehenden Personen getätigten Wertpapiergeschäfte innerhalb eines Kalenderjahrs mindestens 5.000 Euro erreicht. Mitteilungen über entsprechende Geschäfte werden von uns auf unserer Internet-Seite unter [www.infineon.com](http://www.infineon.com) („Über Infineon/Investor/Corporate Governance/Directors' Dealings“) veröffentlicht und dem Unternehmensregister übermittelt. Die Veröffentlichung wird außerdem der BaFin mitgeteilt. Im abgelaufenen Geschäftsjahr sind dem Unternehmen keine derartigen Wertpapiergeschäfte gemeldet worden.

### VERGÜTUNG DES VORSTANDS UND DES AUFSICHTSRATS

Zur Vergütung des Vorstands und des Aufsichtsrats im Geschäftsjahr 2010 wird auf den ausführlichen, nachfolgend abgedruckten Vergütungsbericht verwiesen, der Bestandteil des Konzernlageberichts ist.

### AKTIONÄRE UND HAUPTVERSAMMLUNG

Die Aktionäre der Infineon Technologies AG treffen ihre Entscheidungen in der Hauptversammlung, die mindestens einmal im Jahr stattfindet. Jede Aktie hat eine Stimme. Zur Teilnahme an der Hauptversammlung sind alle Aktionäre berechtigt, die im Aktienregister eingetragen sind und sich rechtzeitig angemeldet haben. Die Hauptversammlung fasst Beschlüsse zu allen ihr gesetzlich zugewiesenen Angelegenheiten, insbesondere über die Entlastung des Vorstands und des Aufsichtsrats, die Wahl des Abschlussprüfers und Satzungsänderungen. Aktionäre können Gegenanträge zu den Beschlussvorschlägen der Verwaltung stellen, in der Hauptversammlung reden und Fragen stellen und haben unter bestimmten Voraussetzungen das Recht, Beschlüsse der Hauptversammlung anzufechten, gerichtliche Sonderprüfungen zu verlangen und Schadenersatzansprüche der

Gesellschaft gegen deren Organe geltend zu machen, wenn sie ein Fehlverhalten oder Missstände bei der Unternehmensführung und -kontrolle vermuten. Wir wollen die Aktionäre bei der Ausübung ihrer Rechte so weit wie möglich unterstützen. Die Aktionäre können sich zum Beispiel elektronisch zur Hauptversammlung anmelden, über online erteilte Weisungen an den Stimmrechtsvertreter an den Abstimmungen teilnehmen oder die Generaldebatte im Internet verfolgen. Alle Dokumente und Informationen zur Hauptversammlung stehen auf unserer Internet-Seite zur Verfügung. Außerdem ist unsere Investor-Relations-Abteilung das ganze Jahr über sowohl telefonisch als auch auf elektronischem Wege erreichbar, um den Informationsaustausch zwischen uns und unseren Aktionären sicherzustellen.

### INFINEON-AKTIOPTIONSPÄNE

Der am 16. Februar 2006 von der Hauptversammlung beschlossene Infineon-Aktioptionsplan 2006 ist am 30. September 2009 ausgelaufen. Am 11. Februar 2010 hat die Hauptversammlung daraufhin einen neuen Infineon-Aktioptionsplan 2010 („SOP 2010“) beschlossen, der den Aktioptionsplan 2006 ablöst. Gemäß den Bedingungen des SOP 2010 kann die Gesellschaft innerhalb von drei Jahren bis zu 12 Millionen Optionen ausgeben. Der Ausübungspreis für eine neue Aktie entspricht 120 Prozent des durchschnittlichen Aktienpreises während der fünf Handelstage vor dem Ausgabetag der Option. Die ausgegebenen Optionen können nur ausgeübt werden, wenn der Infineon-Aktienkurs sich besser entwickelt als der „Philadelphia Semiconductor Index“ (SOX). Hierzu

werden zunächst als jeweilige Referenzwerte (100 Prozent) die arithmetischen Durchschnitte der Infineon-Aktienkurse und der Tagesendstände des SOX während eines Dreimonatszeitraums nach der Ausgabe der Bezugsrechte gebildet. Während eines Zeitraumes, der ein Jahr nach Ausgabe der Bezugsrechte beginnt und bis zum Ende ihrer Laufzeit dauert, muss der Infineon-Aktienkurs den SOX (Tagesendstand), gemessen an den jeweiligen Referenzwerten, sodann mindestens einmal an mindestens zehn aufeinander folgenden Handelstagen übertreffen.

Nach der Regelung des SOP 2010 entscheidet der Aufsichtsrat jährlich innerhalb von 45 Tagen nach Veröffentlichung des Konzernabschlusses oder innerhalb von 45 Tagen nach Veröffentlichung der Konzernergebnisse für das erste, zweite oder dritte Quartal über die Zahl der dem Vorstand zu gewährenden Optionen, spätestens jedoch bis zwei Wochen vor dem Ende des zum Zeitpunkt der Zuteilung laufenden Quartals. Der Vorstand entscheidet im gleichen Zeitraum über die Zahl der an bezugsberechtigte Mitarbeiter zu gewährenden Optionen.

Eine Darstellung unserer übrigen Aktioptionspläne findet sich im Anhang zum Konzernabschluss unter Nr. 32 Aktioptionspläne; im Volltext sind die Pläne unter [www.infineon.com](http://www.infineon.com) („Über Infineon/Investor/Corporate Governance/Aktioptionsplan“) einsehbar.

Weitere Informationen zum Thema Corporate Governance bei Infineon finden Sie im Internet unter [www.infineon.com](http://www.infineon.com) („Über Infineon/Investor/Corporate Governance“).

01  
02  
03  
04  
05  
06  
07  
08  
09  
10  
11  
12  
13  
14  
15  
16  
17  
18  
19  
20  
21

# VERGÜTUNGSBERICHT

Dieser Vergütungsbericht ist integrierter Bestandteil des Lageberichts und erläutert entsprechend den gesetzlichen Vorschriften und den Empfehlungen des Deutschen Corporate Governance Kodex in der Fassung vom 26. Mai 2010 die Grundlagen für die Festlegung der Vergütung von Vorstand und Aufsichtsrat der Infineon Technologies AG sowie die Höhe der Einkommen der einzelnen Vorstands- und Aufsichtsratsmitglieder.

## VERGÜTUNG DES VORSTANDS

### VERGÜTUNGSSTRUKTUR

Das Vergütungssystem für den Vorstand und die Vergütung der einzelnen Vorstandsmitglieder werden vom Aufsichtsratsplenium auf Vorschlag des Präsidialausschusses festgelegt und regelmäßig überprüft. Die Vergütung der Mitglieder des Vorstands soll sich an der Größe und der globalen Ausrichtung des Unternehmens, seiner wirtschaftlichen Lage und den Zukunftsaussichten sowie an der üblichen Höhe und Struktur der Vorstandsvergütung bei vergleichbaren Unternehmen im In- und Ausland orientieren. Zusätzlich sollen die Aufgaben und Leistungen des jeweiligen Vorstandsmitglieds und das Gehaltsgefüge innerhalb des Unternehmens berücksichtigt werden. Die Vergütung soll so bemessen sein, dass sie im nationalen und internationalen Vergleich wettbewerbsfähig ist und damit Anreize für eine engagierte und erfolgreiche Arbeit in einem dynamischen Umfeld bietet. Im Geschäftsjahr 2010 wurde das Vergütungssystem durch einen unabhängigen externen Vergütungsexperten überprüft. Unter Berücksichtigung des Ergebnisses dieser Überprüfung hat der Aufsichtsrat einen weiteren unabhängigen Vergütungsexperten beauftragt, einen Vorschlag für ein neues Vergütungssystem auszuarbeiten. In mehreren Sitzungen hat der Präsidialausschuss mit dem Vergütungsexperten die Rahmenparameter definiert und anschließend den konkreten Vorschlag des Vergütungsexperten für das neue Vergütungssystem erörtert. Schließlich hat der Aufsichtsrat in seiner Sitzung am 22. November 2010 auf Vorschlag des Präsidialausschusses ein neues Vorstandsvergütungssystem beschlossen, das für alle zukünftigen Vorstandsmitglieder gelten soll. Auch die bestehenden Verträge mit den derzeitigen Vorstandsmitgliedern Peter Bauer und Dr. Reinhard Ploss werden an das neue Vergütungssystem angepasst.

## BESTANDTEILE DES VERGÜTUNGSSYSTEMS FÜR DEN VORSTAND IM GESCHÄFTSJAHR 2010

Bisher setzte sich die Vorstandsvergütung aus folgenden Komponenten zusammen:

- **Fixe Vergütung.** Diese besteht aus einem fest vereinbarten erfolgsunabhängigen Jahresgrundgehalt. Das Jahresgrundgehalt wird zum einen Teil in zwölf gleichen monatlichen Raten und zum anderen Teil als Einmalzahlung nach Ablauf des Geschäftsjahrs ausgezahlt (in der Tabelle unten als „jährliche Einmalzahlung“ ausgewiesen).
- **Erfolgsbezogene Vergütung.** Diese besteht aus einem an die Gesamtkapitalrendite gekoppelten Jahresbonus. Die Gesamtkapitalrendite ist definiert als Geschäftsergebnis vor Steuern und Zinsen (Ebit), bereinigt um Sondereffekte, im Verhältnis zum eingesetzten Kapital. Dadurch wird sichergestellt, dass ein Bonus nur bei positivem Geschäftsverlauf verdient wird. Der Jahresbonus wird vom Aufsichtsrat in einem zweistufigen Verfahren festgelegt. Im ersten Schritt wird auf Grundlage der erzielten Gesamtkapitalrendite aus einer im Dienstvertrag vereinbarten Tabelle ein Zielbetrag des Bonus ermittelt. Danach beurteilt der Aufsichtsrat die persönliche Leistung der einzelnen Vorstandsmitglieder im abgelaufenen Geschäftsjahr und setzt den konkreten Bonusbetrag fest. Neben dem an die Gesamtkapitalrendite geknüpften Bonus sehen die bisherigen Vorstandsverträge die Möglichkeit vor, für besondere Leistungen einen Sonderbonus zu gewähren.
- **Optionen auf Aktien der Infineon Technologies AG.** Mitglieder des Vorstands konnten bisher aus dem von der Hauptversammlung der Infineon Technologies AG am 16. Februar 2006 beschlossenen Aktienoptionsplan 2006 als variable Vergütungskomponente mit langfristiger Anreizwirkung und Risikocharakter Aktienoptionen (Bezugsrechte) erhalten. Da der Aktienoptionsplan 2006 am Ende des Geschäftsjahrs 2009 ausgelaufen ist, hat die Hauptversammlung am 11. Februar 2010 einen neuen Aktienoptionsplan 2010 beschlossen, unter dem auch wieder Aktien an Mitglieder des Vorstands ausgegeben werden können. Über die Ausgabe von Bezugsrechten unter dem Aktienoptionsplan 2010 an Mitglieder des Vorstands entscheidet der Aufsichtsrat. Jedes Bezugsrecht gewährt das Recht zum Bezug einer Aktie der Infineon Technologies AG. Der Ausübungspreis für eine neue Aktie

entspricht 120 Prozent des durchschnittlichen Aktienpreises während der fünf Handelstage vor dem Ausgabetag der Option. Die ausgegebenen Optionen können nur ausgeübt werden, wenn der Infineon-Aktienkurs sich besser entwickelt als der „Philadelphia Semiconductor Index“ (SOX). Hierzu werden zunächst als jeweilige Referenzwerte (100 Prozent) die arithmetischen Durchschnitte der Infineon-Aktienkurse und der Tagesendstände des SOX während eines Dreimonatszeitraums nach der Ausgabe der Bezugsrechte gebildet. Während eines Zeitraumes, der ein Jahr nach Ausgabe der Bezugsrechte beginnt und bis zum Ende ihrer Laufzeit dauert, muss der Infineon-Aktienkurs den SOX (Tagesendstand), gemessen an den jeweiligen Referenzwerten, sodann mindestens einmal an mindestens zehn aufeinander folgenden Handelstagen übertreffen. Einzelheiten unseres Aktienoptionsplans 2010 sind im Anhang zum Konzernabschluss zum Geschäftsjahr 2010 aufgeführt (siehe Anhang Nr. 32) und im Volltext im Internet unter [www.infineon.com](http://www.infineon.com) einsehbar.

## VORSTANDSVERGÜTUNG IM GESCHÄFTSJAHR 2010

### Gesamtbarvergütung

Die im Geschäftsjahr 2010 aktiven Mitglieder des Vorstands erhielten für ihre Tätigkeit eine erfolgsunabhängige fixe Vergütung in Höhe von insgesamt € 4.053.593 (Vorjahr: € 3.605.108). Angesichts der wirtschaftlichen Situation hatten die Mitglieder des Vorstands im Februar 2009 für das Geschäftsjahr 2009 auf einen Teil ihres Fixgehalts verzichtet (der Vorstandssprecher auf 20 Prozent, die anderen Vorstandsmitglieder auf 10 Prozent); ein erfolgsabhängiger Bonus wurde im Geschäftsjahr 2009 nicht gezahlt. Im Geschäftsjahr 2010 wurde wieder das volle Gehalt gezahlt und die Vorstandsmitglieder haben für ihre Tätigkeit im Geschäftsjahr 2010 außerdem einen erfolgsabhängigen Bonus in Höhe von jeweils € 786.000 (Dr. Schröter € 780.000) erhalten. Die Gesamtbarvergütung im Geschäftsjahr 2010 beträgt daher € 7.191.593 (Vorjahr: € 3.605.108).

Die im Geschäftsjahr 2010 gewährte Gesamtbarvergütung setzt sich aus folgenden Bestandteilen zusammen (brutto, ohne gesetzliche Abzüge):

## 01 GESAMTBARVERGÜTUNG

| in € | Vorstand                                         | Geschäftsjahr | Erfolgsunabhängige Vergütung |                         |                        | Variable Vergütung | Gesamtbarvergütung |
|------|--------------------------------------------------|---------------|------------------------------|-------------------------|------------------------|--------------------|--------------------|
|      |                                                  |               | Auszahlung in Monatsraten    | Jährliche Einmalzahlung | Sonstiges <sup>1</sup> |                    |                    |
|      | Peter Bauer (Vorstandsvorsitzender)              | 2010          | 700.000                      | 700.000                 | 40.979                 | 786.000            | 2.226.979          |
|      |                                                  | 2009          | 700.000                      | 420.000                 | 35.087                 | –                  | 1.155.087          |
|      | Prof. Dr. Hermann Eul                            | 2010          | 450.000                      | 450.000                 | 13.432                 | 786.000            | 1.699.432          |
|      |                                                  | 2009          | 450.000                      | 360.000                 | 13.590                 | –                  | 823.590            |
|      | Dr. Reinhard Ploss                               | 2010          | 350.000                      | 350.000                 | 10.846                 | 786.000            | 1.496.846          |
|      |                                                  | 2009          | 350.000                      | 280.000                 | 10.616                 | –                  | 640.616            |
|      | Dr. Marco Schröter <sup>2</sup> (bis 04.08.2010) | 2010          | 458.333                      | 500.000                 | 30.003                 | 780.000            | 1.768.336          |
|      |                                                  | 2009          | 500.000                      | 400.000                 | 85.815                 | –                  | 985.815            |
|      | <b>Gesamt</b>                                    | 2010          | 1.958.333                    | 2.000.000               | 95.260                 | 3.138.000          | 7.191.593          |
|      |                                                  | 2009          | 2.000.000                    | 1.460.000               | 145.108                | –                  | 3.605.108          |

<sup>1</sup> In der Spalte „Sonstiges“ aufgeführte Vergütungsbestandteile umfassen grundsätzlich geldwerte Vorteile aus der Bereitstellung von Dienstwagen und Zuschüsse zu Versicherungen.

<sup>2</sup> Die jährliche Einmalzahlung in Höhe von € 500.000 und der Bonus in Höhe von € 780.000 für das Geschäftsjahr 2010 sind Teil der Abschlusszahlung an Herrn Dr. Schröter in Höhe von € 1.280.000 gemäß Aufhebungsvereinbarung.

### Aktienbasierte Vergütung

Da der Aktienoptionsplan 2006 am Ende des Geschäftsjahrs 2009 ausgelaufen ist, hat die Hauptversammlung am 11. Februar 2010 einen neuen Aktienoptionsplan 2010 beschlossen. Auf dieser Grundlage hat der Aufsichtsrat in seiner Sitzung am 22. November 2010 beschlossen, den Vorstandsmitgliedern Aktienoptionen zuzuteilen. Demnach sollen Herr Bauer als Vorstandsvorsitzender 200.000 und die Herren Prof. Dr. Eul und Dr. Ploss jeweils 120.000 Aktienoptionen erhalten. Der Fair Market Value dieser Aktienoptionen ist insbesondere abhängig vom Ausübungspreis, d.h. vom Kurs der Infineon-Aktie an

den letzten fünf Börsentagen vor Zuteilung der Aktienoptionen. Die Zuteilung soll für die Mitglieder des Vorstands und die Mitarbeiter der Gesellschaft einheitlich am 16. Dezember 2010 erfolgen. Darüber hinaus halten Herr Bauer noch insgesamt 275.000 und Herr Prof. Dr. Eul noch insgesamt 180.000 Aktienoptionen, die sie in den Vorjahren als Mitglieder des Vorstands aus dem Aktienoptionsplan 2006 und dem Long Term Incentive Plan 2001 erhalten haben; Herr Dr. Ploss hat als Mitglied des Vorstands keine Aktienoptionen erhalten. Die Ausübungspreise für diese Aktienoptionen liegen zwischen € 8,20 und € 13,30, und sie verfallen spätestens im Februar 2013.

## ZUSAGEN AN DEN VORSTAND FÜR DEN FALL EINER BEENDIGUNG DER TÄTIGKEIT

### Versorgungszusagen und Ruhegehälter im Geschäftsjahr 2010

Den aktiven Mitgliedern des Vorstands ist vertraglich ein Festbetrag zur Altersversorgung zugesagt worden, der sich bis zum Erreichen eines Maximalbetrags für jedes volle Geschäftsjahr der Zugehörigkeit zum Vorstand jährlich um € 5.000 (im Fall von Herrn Bauer um € 10.000) erhöht. Hierfür wurden nach IFRS für die im Geschäftsjahr 2010 aktiven Mitglieder des Vorstands insgesamt € 1.165.159 (Vorjahr: € 786.292) den Pensionsrückstellungen erfolgswirksam zugeführt. Endet ein Vorstandsmandat, beginnt der Ruhegehaltsanspruch im Regelfall frühestens mit Vollendung des 65. Lebensjahres (im Fall von Herrn Bauer mit Vollendung des

60. Lebensjahres), das Ruhegehalt kann aber bei Ausscheiden aus medizinischen Gründen auch früher gezahlt werden. Abweichend hiervon hat Herr Bauer bei Nichterneuerung seiner Bestellung, sofern kein wichtiger Grund zum Widerruf gemäß § 84 Abs. 3 AktG vorlag, auch vor Vollendung des 60. Lebensjahres einen Anspruch auf Ruhegehalt. In jedem Fall einer Ruhegehaltszahlung vor Vollendung des 65. Lebensjahres (im Fall von Herrn Bauer: 60. Lebensjahres) müssen sich die Vorstandsmitglieder jedoch anderweitige Bezüge aus selbstständiger oder unselbstständiger Tätigkeit bis zu maximal der Hälfte des Ruhegehaltsanspruchs anrechnen lassen.

Die folgende Übersicht zeigt den jährlichen Ruhegehaltsanspruch der im Geschäftsjahr 2010 aktiven Vorstandsmitglieder bei Eintritt in den Ruhestand auf Basis der bisher erworbenen Ansprüche:

## 02 RUHEGEHALTSANSPRUCH

| in €                                | Ruhegehaltsansprüche<br>(Jahresbezug) bei Eintritt<br>des Pensionsfalls | Maximalbetrag  | Erfolgswirksame Zuführung<br>zu den Pensionsrückstellun-<br>gen im Geschäftsjahr 2010<br>(nach IFRS) |
|-------------------------------------|-------------------------------------------------------------------------|----------------|------------------------------------------------------------------------------------------------------|
| Vorstand                            |                                                                         |                |                                                                                                      |
| Peter Bauer (Vorstandsvorsitzender) | 300.000                                                                 | 400.000        | 282.926                                                                                              |
| Prof. Dr. Hermann Eul <sup>1</sup>  | 210.000                                                                 | 270.000        | 253.013                                                                                              |
| Dr. Reinhard Ploss                  | 180.000                                                                 | 210.000        | 200.892                                                                                              |
| Dr. Marco Schröter (bis 04.08.2010) | 100.000                                                                 | 100.000        | 428.328                                                                                              |
| <b>Gesamt</b>                       | <b>790.000</b>                                                          | <b>980.000</b> | <b>1.165.159</b>                                                                                     |

<sup>1</sup> Bei Wechsel zu Intel Ruhegehaltsanspruch in Höhe von € 220.000 gemäß Aufhebungsvertrag.

Im Dienstvertrag von Herrn Bauer ist darüber hinaus die Zahlung eines einmaligen Übergangsgelds für den Fall des Übertritts in den Ruhestand oder eines anderweitigen Ausscheidens aus der Gesellschaft vorgesehen. Das Übergangsgeld entspricht einem Jahreseinkommen, das sich aus den letzten zwölf Monatsgrundgehältern sowie einem Betrag in Höhe des Durchschnitts der für die letzten drei Geschäftsjahre vor Beendigung gezahlten Bonusbeträge zusammensetzt. Es besteht kein Anspruch auf Übergangsbezüge bei einer nicht durch die Gesellschaft veranlassten Kündigung durch das Vorstandsmitglied oder wenn für die Gesellschaft ein wichtiger Kündigungsgrund vorliegt.

### Vorzeitige Beendigung des Dienstvertrages

Die derzeitigen Vorstandsverträge enthalten eine sogenannte Change-of-Control-Klausel: Ein Kontrollwechsel im Sinne dieser Klausel liegt vor, wenn ein Dritter einzeln oder gemeinsam mit einem anderen im Sinne von § 30 des Wertpapiererwerbs- und Übernahmegesetzes 30 Prozent der Stimmrechte an der Infineon Technologies AG hält. Bei einem Kontrollwechsel sind die Mitglieder des Vorstands berechtigt, innerhalb einer Frist von zwölf Monaten nach Bekanntwerden des Kontrollwechsels

ihr Mandat niederzulegen und ihren Dienstvertrag zu kündigen, wenn ihnen die Ausübung ihres Mandats und die Erfüllung ihres Dienstvertrags unzumutbar geworden sind, zum Beispiel auf Grund einer erheblichen Einschränkung ihres Aufgabenbereichs. In diesem Fall haben die Mitglieder des Vorstands Anspruch auf Fortzahlung des Jahreszieleinkommens bis zum Ende der vertraglich vereinbarten Laufzeit, mindestens jedoch für zwei Jahre. Dabei ist vom Jahreszieleinkommen im Jahr des Ausscheidens auszugehen und die variable Komponente unter Annahme einer Gesamtkapitalrendite von 6 Prozent zu berechnen. Im Fall einer Abberufung und Kündigung durch die Infineon Technologies AG innerhalb von zwölf Monaten nach Bekanntwerden eines Kontrollwechsels haben die Vorstandsmitglieder Anspruch auf Fortzahlung des Jahreszieleinkommens bis zum Ende der vertraglich vereinbarten Laufzeit, mindestens jedoch für drei Jahre. Der jeweilige Ruhegehaltsanspruch der Vorstandsmitglieder bleibt bestehen. Diese Rechte der Vorstandsmitglieder für den Fall eines Kontrollwechsels bestehen jedoch nur, soweit die Gesellschaft nicht nach § 84 Abs. 3 AktG zum Widerruf der Bestellung berechtigt wäre.

Herr Dr. Schröter und der Aufsichtsrat der Infineon Technologies AG haben sich im August 2010 im gegenseitigen Einvernehmen über eine Aufhebung des Dienstvertrages von Herrn Dr. Schröter geeinigt. Zur Abgeltung seiner vertraglichen Ansprüche auf eine jährliche Einmalzahlung in Höhe von € 500.000 und auf einen erfolgsabhängigen Jahresbonus für das Geschäftsjahr 2010 in Höhe von € 780.000 hat Herr Dr. Schröter eine Abschlusszahlung in Höhe von € 1.280.000 erhalten. Darüber hinaus und zur Abgeltung aller zukünftigen Ansprüche aus und im Zusammenhang mit dem Dienstverhältnis wurde mit Herrn Dr. Schröter eine Abfindung in Höhe von insgesamt € 3.500.000 vereinbart, die in zwei Raten ausbezahlt wird. Die erste Rate hat Herr Dr. Schröter bereits am Ende des Geschäftsjahrs 2010 erhalten.

Im Rahmen des Verkaufs des Mobilfunkgeschäfts der Infineon Technologies AG an die Intel Corporation wird Herr Prof. Dr. Eul mit dem Abschluss der Transaktion, der voraussichtlich im ersten Kalenderquartal 2011 stattfinden soll, aus dem Vorstand der Gesellschaft ausscheiden und zu Intel wechseln. Die Gesellschaft hat daher mit Herrn Prof. Dr. Eul einen Aufhebungsvertrag geschlossen. Demnach erhält Herr Prof. Dr. Eul einen Zusatzbonus, der bei einer unterstellten fiktiven Gesamtkapitalrendite von 10 Prozent seinem Jahreszieleinkommen bis zum Ende der ursprünglichen Laufzeit seines Dienstvertrages entspricht. Darüber hinaus wird der Aufsichtsrat nach seinem Ermessen bei einem für das Unternehmen besonders günstigen Abschluss der Transaktion Herrn Prof. Dr. Eul einen weiteren Zusatzbonus in Höhe von bis zu € 900.000 gewähren. Hinsichtlich seines Anspruchs auf Ruhegehalt wurde mit Herrn Prof. Dr. Eul vereinbart, dass er zahlbar ab Vollendung des 65. Lebensjahres Ruhegehalt in Höhe von jährlich € 220.000 erhält. Eine Anrechnung anderweitiger Bezüge findet nicht statt. Die Herrn Prof. Dr. Eul bis zu seinem Ausscheiden gewährten Aktienoptionen bestehen fort, als ob Herr Prof. Dr. Eul noch bis zu ihrem Verfall für das Unternehmen tätig wäre.

Im Übrigen enthalten die Vorstandsverträge für den Fall einer vorzeitigen Beendigung des Dienstverhältnisses keine Abfindungszusage.

### Nebenleistungen und sonstige Zusagen im Geschäftsjahr 2010

- Neben den in der Spalte „Sonstiges“ aufgeführten Vergütungsbestandteilen erhielten die Mitglieder des Vorstands keine Nebenleistungen. 01
- Mitglieder des Vorstands erhalten vom Unternehmen keine Kredite. 02
- Die Mitglieder des Vorstands haben im Geschäftsjahr 2010 keine Leistungen von Dritten erhalten, die im Hinblick auf die Tätigkeit als Vorstand zugesagt oder gewährt worden sind. 03 04
- Die Gesellschaft unterhält eine Vermögensschaden-Haftpflicht-Gruppenversicherung für Organmitglieder des Infineon-Konzerns (sog. D&O-Versicherung). Die Versicherung deckt das persönliche Haftungsrisiko für den Fall ab, dass Vorstandsmitglieder bei der Ausübung ihrer Tätigkeit für Vermögensschäden in Anspruch genommen werden. Entsprechend der geltenden Regelung in den Vorstandsdienstverträgen wurde ein Selbstbehalt in Höhe von 25 Prozent des erfolgsunabhängigen Jahresgrundgehalts vorgesehen (Selbstbehalt im Sinne des § 93 Abs. 2 AktG in Verbindung mit § 23 Abs. 1 EGAktG). Nach der Anpassung der geltenden Vorstandsdienstverträge an das neue Vergütungssystem und bei Neuabschluss von Vorstandsverträgen soll jedoch zukünftig entsprechend der gesetzlichen Regelung in § 93 Abs. 2 ein Selbstbehalt von 10 Prozent des Schadens bis zur Höhe des Eineinhalbfachen der jährlichen festen Vergütung des Vorstandsmitglieds gelten. 05 06 07 08 09 10 11
- Die Gesellschaft hat mit jedem Vorstandsmitglied eine Erstattungsvereinbarung abgeschlossen. Diese Vereinbarungen sehen vor, dass die Gesellschaft, soweit rechtlich zulässig, alle Kosten und Auslagen erstattet, die von dem jeweiligen Vorstandsmitglied im Zusammenhang mit gerichtlichen, behördlichen, regulatorischen oder parlamentarischen Verfahren und Untersuchungen sowie Schiedsverfahren, an denen das Vorstandsmitglied auf Grund seiner Vorstandstätigkeit für die Gesellschaft beteiligt ist, aufgewendet wurden. Eine Kostenerstattung ist aber insbesondere ausgeschlossen, soweit das Verfahren eine Handlung oder Unterlassung des Erstattungsberechtigten zum Gegenstand hat, mit welcher der Erstattungsberechtigte seine Sorgfaltspflichten als Vorstandsmitglied im Sinne von § 93 Abs. 2 AktG schuldhaft verletzt hat. 12 13 14 15 16 17 18 19 20 21

### GESAMTBEZÜGE DER FRÜHEREN MITGLIEDER DES VORSTANDS IM GESCHÄFTSJAHR 2010

An frühere Mitglieder des Vorstands wurden im Geschäftsjahr 2010 Gesamtbezüge (Abfindungen und Versorgungsleistungen) von € 3.373.352 (Vorjahr: € 1.798.225) ausbezahlt. Hierin enthalten ist die erste Rate der an Herrn Dr. Schröter gezahlten Abfindung in Höhe von € 1.750.000. Die Pensionsrückstellungen für frühere Mitglieder des Vorstandes betragen zum 30. September 2010 insgesamt € 36.597.097 (Vorjahr: € 27.034.008).

### BESTANDTEILE DES VERGÜTUNGSSYSTEMS FÜR DEN VORSTAND AB DEM GESCHÄFTSJAHR 2011

Zukünftig sollen die Vorstandsmitglieder als Vergütung für ihre Tätigkeit ein Zieljahreseinkommen erhalten, das sich aus folgenden Bestandteilen zusammensetzt:

- **45 Prozent fixe Vergütung.** Diese besteht aus einem fest vereinbarten erfolgsunabhängigen Jahresgrundgehalt, das in zwölf gleichen monatlichen Raten gezahlt wird.
- **55 Prozent variable, d.h. erfolgsbezogene Vergütung.** Diese ist aufgeteilt in drei Komponenten und besteht aus einem Jahresbonus (Short Term Incentive) und einem Mehrjahres-Bonus (Mid Term Incentive) sowie aus einer langfristigen variablen Vergütung (Long Term Incentive).

Der **Short Term Incentive (STI)** soll im Einklang mit der kurzfristigen Unternehmensentwicklung die Leistung im zurückliegenden Geschäftsjahr belohnen. Der STI entspricht 20 Prozent der Ziel-Gesamtvergütung. Er wird vom Aufsichtsrat in einem zweistufigen Verfahren festgelegt. Zunächst werden zu Beginn eines jeden Geschäftsjahrs einheitlich für alle Vorstände zwei gleichwertige Zielfunktionen hinsichtlich der maßgeblichen Erfolgsgrößen Free Cash-Flow (FCF) und Return On Capital Employed (ROCE) definiert. Die gleichen Erfolgsgrößen sind grundsätzlich auch für Bonuszahlungen an die Mitarbeiter des Unternehmens maßgeblich. Nach Ablauf des Geschäftsjahrs wird in Abhängigkeit von der Zielerreichung vom Aufsichtsrat der konkrete Bonusbetrag festgesetzt. Ein STI wird nur gezahlt, wenn bei beiden Erfolgsgrößen ein Schwellenwert von mindestens 50 Prozent erreicht wird. Wird auch nur eines der beiden Ziele verfehlt, entfällt eine STI-Zahlung für das betreffende Jahr. Bei Überschreiten dieses Schwellenwertes wird für beide Ziele die konkrete Zielerreichung separat ermittelt. Hieraus ergibt sich der konkrete Auszahlungsbetrag. Es gilt

ein Cap von 250 Prozent, es werden also maximal 250 Prozent des Ziel-STI ausgezahlt. Außerdem kann der Aufsichtsrat den jeweiligen Auszahlungsbetrag abhängig von der Leistung des gesamten Vorstands sowie unter Berücksichtigung der Lage des Unternehmens und eventueller Sondereffekte nach seinem billigen Ermessen um bis zu 50 Prozent erhöhen oder reduzieren, wobei das Limit nach unten bei dem sich aus einer 50-prozentigen Zielerreichung ergebenden Auszahlungsbetrag liegt. Darüber hinaus hat der Aufsichtsrat, wie auch bisher, die Möglichkeit, bei besonderen Leistungen einen Zusatzbonus zu gewähren.

Als neue Vergütungskomponente wurde ein **Mid Term Incentive (MTI)** eingeführt, der in Einklang mit der mittelfristigen Unternehmensentwicklung eine nachhaltige Leistung des Vorstands belohnen soll. Dieser MTI stellt zusammen mit dem Long Term Incentive sicher, dass die variablen Vergütungsbestandteile den neuen aktienrechtlichen Anforderungen einer mehrjährigen Bemessungsgrundlage genügen. Der MTI entspricht 20 Prozent der Ziel-Gesamtvergütung. Jede Tranche des MTI hat eine Laufzeit von drei Jahren und wird am Ende der Laufzeit in bar ausgezahlt. Die Zielwerte für ROCE und FCF entsprechen den jährlich vorab für das nächste Jahr des Dreijahreszeitraums festgelegten STI-Zielen. Pro Jahr des jeweiligen Dreijahreszeitraums muss für das ROCE-Ziel und das FCF-Ziel jeweils ein Schwellenwert von 50 Prozent erreicht werden, andernfalls liegt die für den MTI maßgebliche Zielerreichung für beide Zielgrößen für das betreffende Jahr bei null. Bei Überschreiten dieses Schwellenwertes gilt für den MTI des betreffenden Jahres der für den STI ermittelte konkrete Gesamt-Zielerreichungsgrad. Für die Berechnung des nach Ablauf des Dreijahreszeitraums zu zahlenden MTI ist der arithmetische Durchschnitt der drei jährlichen Zielerreichungsgrade zu bilden. Dabei kommt es auch dann zu einer entsprechenden Auszahlung des MTI, wenn der durchschnittliche Zielerreichungsgrad für den Dreijahreszeitraum unter dem Schwellenwert von 50 Prozent liegt. Der Aufsichtsrat kann nach seinem billigen Ermessen abhängig von der Leistung des Gesamtvorstands und unter Berücksichtigung der aktuellen Unternehmenssituation und etwaiger Sondereffekte den Auszahlungsbetrag des MTI um bis zu 50 Prozent erhöhen oder reduzieren, wobei anders als für den STI keine Untergrenze gilt. Außerdem gilt ein Cap von 200 Prozent, das heißt es werden maximal 200 Prozent des Ziel-MTI ausgezahlt.



Für die Geschäftsjahre 2011 und 2012 gilt für die derzeit amtierenden Vorstandsmitglieder Peter Bauer und Dr. Reinhard Ploss im Hinblick auf den MTI eine Übergangsregelung, wonach (i) ein Zielerreichungsgrad von jeweils mindestens 50 Prozent garantiert und (ii) für die Berechnung des MTI am Ende des ersten Jahres die tatsächliche Zielerreichung dieses Jahres, am Ende des zweiten Jahres der Durchschnitt der Zielerreichungsgrade der beiden Jahre, mindestens jedoch jeweils 50 Prozent, zugrunde gelegt wird.

Der **Long Term Incentive (LTI)** soll eine langfristige, nachhaltige Leistung der Vorstandsmitglieder belohnen und einen Einklang mit dem Interesse der Aktionäre an einer positiven Entwicklung des Aktienkurses sicherstellen. Der LTI entspricht 15 Prozent der Ziel-Gesamtvergütung. Solange die Gesellschaft einen Aktienoptionsplan unterhält, in dessen Rahmen ausreichende Möglichkeiten zur Setzung eines langfristigen Leistungsanreizes mittels Aktienoptionen bestehen, soll der Aufsichtsrat den Vorstandsmitgliedern als LTI jährlich eine Tranche von Aktienoptionen zuteilen, die dem auf den LTI entfallenden Anteil am Zieljahreseinkommen entspricht. Maßgeblich für die zuzuteilende Zahl der Optionen ist grundsätzlich deren „fair market value“. Beläuft sich der Gewinn aus ausgeübten Aktienoptionen auf mehr als 250 Prozent des auf den LTI des betreffenden Jahres entfallenden Zieljahreseinkommens, so verfallen die Optionen in Höhe des übersteigenden Teils (Cap). Ist die Bereitstellung eines LTI in ausreichender Höhe auf der Basis der bestehenden Aktienoptionspläne nicht möglich, wird der Aufsichtsrat geeignete andere LTI-Instrumente festsetzen.

#### ZUSAGEN AN DEN VORSTAND FÜR DEN FALL EINER BEENDIGUNG DER TÄTIGKEIT

Die für die derzeit aktiven Mitglieder des Vorstands geltenden Versorgungszusagen bleiben unverändert. Alle neuen Mitglieder des Vorstands sollen jedoch anstelle einer dienstzeitabhängigen Festrentenzusage zukünftig eine beitragsorientierte, fondsbasierte Ruhegehaltszusage erhalten.

Die zukünftige Change-of-Control-Klausel entspricht im Wesentlichen der bisherigen Regelung, gemäß der Empfehlung in Ziffer 4.2.3 Abs. 5 DCGK sind die Ansprüche der Vorstandsmitglieder wegen einer etwaigen vorzeitigen Beendigung ihres Dienstvertrages im Fall eines Change-of-Control jedoch begrenzt auf die Fortzahlung des Zieljahreseinkommens bis zum Ende der Laufzeit, maximal jedoch für 36 Monate.

#### VERGÜTUNG DES AUFSICHTSRATS

##### Vergütungsstruktur

Die Vergütung des Aufsichtsrats ist in der Satzung der Gesellschaft festgelegt. Sie orientiert sich an der Größe des Unternehmens, an den Aufgaben und der Verantwortung der Aufsichtsratsmitglieder sowie an der wirtschaftlichen Lage und Performance der Gesellschaft. Die Vergütung des Aufsichtsrats ist in § 11 der Satzung geregelt und enthält zwei Komponenten:

- **eine feste jährliche Vergütung** in Höhe von € 25.000 sowie
- **einen variablen Anteil** in Form von jährlich 1.500 Wertsteigerungsrechten, die zu den gleichen Bedingungen ausgegeben werden und ausgeübt werden dürfen, wie sie der im Geschäftsjahr der Ausgabe der Wertsteigerungsrechte für die Gesellschaft geltende, von der Hauptversammlung genehmigte Aktienoptionsplan vorsieht. Diese Wertsteigerungsrechte berechtigen jedoch nicht zum Bezug von Aktien, sondern allein zum Barausgleich. Grundzüge unseres Aktienoptionsplans 2010 sind im Anhang zum Konzernabschluss zum Geschäftsjahr 2010 aufgeführt (siehe Anhang Nr. 32) und im Volltext im Internet unter [www.infineon.com](http://www.infineon.com) einsehbar.

Bestimmte Funktionen innerhalb des Aufsichtsrats werden zusätzlich vergütet. Der Vorsitzende des Aufsichtsrats erhält zusätzlich 100 Prozent der festen Vergütung, jeder Stellvertreter und jedes andere Mitglied eines Aufsichtsratsausschusses, mit Ausnahme des Nominierungsausschusses und des Vermittlungsausschusses, zusätzlich 50 Prozent der festen Vergütung.

Mitgliedern des Aufsichtsrats werden zudem sämtliche Auslagen, die im Zusammenhang mit der Ausübung des Mandats entstehen, sowie die auf ihre Vergütung entfallende Umsatzsteuer ersetzt, soweit sie diese gesondert in Rechnung stellen können und stellen.

Das System der Aufsichtsratsvergütung wurde allerdings, wie auch das System der Vorstandsvergütung, überprüft. Der nächsten Hauptversammlung, die voraussichtlich im Februar 2011 stattfinden wird, soll daher vorgeschlagen werden, die Aufsichtsratsvergütung entsprechend anzupassen.

01  
02  
03  
04  
05  
06  
07  
08  
09  
10  
11  
12  
13  
14  
15  
16  
17  
18  
19  
20  
21

**Aufsichtsratsvergütung im Geschäftsjahr 2010**

Auf Grund des Rückgangs der Mitarbeiterzahlen wurde der Aufsichtsrat im Geschäftsjahr 2010 im Wege eines sogenannten Statusverfahrens von bisher sechzehn auf zwölf Mitglieder verkleinert. Infolgedessen wurden sowohl die Vertreter der Anteilseigner als auch die Vertreter der Arbeitnehmer im Aufsichtsrat neu gewählt.

Die Aufsichtsratsvergütung ist im Geschäftsjahr 2010 gegenüber dem Vorjahr unverändert geblieben. Da der Aktienoptionsplan 2006 am Ende des Geschäftsjahrs 2009 ausgelaufen ist, hat die Hauptversammlung am 11. Februar

2010 einen neuen Aktienoptionsplan 2010 beschlossen.

Auf dieser Grundlage erhalten die Aufsichtsräte im üblichen Zuteilungszeitraum im Dezember 2010 jeweils 1.500 Wertsteigerungsrechte, wie sie der für die Gesellschaft geltende, von der Hauptversammlung genehmigte Aktienoptionsplan 2010 vorsieht.

Die einzelnen Mitglieder des Aufsichtsrats erhielten zeitan- teilig für die Dauer ihrer Zugehörigkeit zum Aufsichtsrat für das Geschäftsjahr 2010 die folgende Bruttobarvergütung (hierin nicht enthalten ist die Umsatzsteuer in Höhe von 19 Prozent):

**03 AUFSICHTSRATSVERGÜTUNG**

| in €                                                   | Feste Vergütung | Zusätzliche Vergütung für besondere Funktionen | Gesamtvergütung |
|--------------------------------------------------------|-----------------|------------------------------------------------|-----------------|
| Aufsichtsratsmitglied                                  |                 |                                                |                 |
| Max Dietrich Kley (zeitanteilig bis zum 11.02.2010)    | 8.333           | 8.333                                          | 16.666          |
| Wigand Cramer                                          | 25.000          | 12.500                                         | 37.500          |
| Alfred Eibl                                            | 25.000          | 12.500                                         | 37.500          |
| Peter Gruber                                           | 25.000          | 8.333                                          | 33.333          |
| Gerhard Hobbach                                        | 25.000          | 12.500                                         | 37.500          |
| Hans-Ulrich Holdenried (zeitanteilig ab 11.02.2010)    | 16.667          | 8.333                                          | 25.000          |
| Prof. Dr. Renate Köcher                                | 25.000          | –                                              | 25.000          |
| Dr. Siegfried Luther (zeitanteilig bis zum 11.02.2010) | 8.333           | 4.167                                          | 12.500          |
| Manfred Puffer                                         | 25.000          | –                                              | 25.000          |
| Gerd Schmidt                                           | 25.000          | 12.500                                         | 37.500          |
| Prof. Dr. Doris Schmitt-Landsiedel                     | 25.000          | 12.500                                         | 37.500          |
| Jürgen Scholz (zeitanteilig ab 11.02.2010)             | 16.667          | 8.333                                          | 25.000          |
| Horst Schuler (zeitanteilig bis zum 11.02.2010)        | 8.333           | –                                              | 8.333           |
| Kerstin Schulzendorf (zeitanteilig bis zum 11.02.2010) | 8.333           | –                                              | 8.333           |
| Dr. Eckart Sünner                                      | 25.000          | 8.333                                          | 33.333          |
| Alexander Trüby (zeitanteilig bis zum 11.02.2010)      | 8.333           | –                                              | 8.333           |
| Arnaud de Weert (zeitanteilig bis zum 11.02.2010)      | 8.333           | 4.167                                          | 12.500          |
| Prof. Dr.-Ing. Klaus Wucherer                          | 25.000          | 20.833                                         | 45.833          |
| <b>Gesamt</b>                                          | <b>333.332</b>  | <b>133.332</b>                                 | <b>466.664</b>  |

**Sonstiges (Geschäftsjahr 2010)**

- Mitglieder des Aufsichtsrats erhalten vom Unternehmen keine Kredite.
- Die Gesellschaft unterhält eine Vermögensschaden-Haftpflicht-Gruppenversicherung für Organmitglieder des Infineon-Konzerns. Die Versicherung deckt das persönliche Haftungsrisiko für den Fall ab, dass Aufsichtsratsmitglieder bei der Ausübung ihrer Tätigkeit für Vermögensschäden in Anspruch genommen werden. Es wurde ein angemessener Selbstbehalt vereinbart.

# LAGEBERICHT UND KONZERNLAGEBERICHT FÜR DAS GESCHÄFTSJAHR 2010

## GRUNDLAGEN DER LAGEBERICHTERSTATTUNG

Dieser zusammengefasste Lagebericht und Konzernlagebericht („Lagebericht“) sollte im Kontext mit dem geprüften Konzernabschluss einschließlich der Angaben des Konzernanhangs („Anhang“), die an anderer Stelle in diesem Bericht abgedruckt sind, gelesen werden. Der geprüfte Konzernabschluss basiert auf einer Reihe von Annahmen sowie Bilanzierungs- und Bewertungsmethoden, die detaillierter im Anhang Nr. 1 (Beschreibung der Geschäftstätigkeit und Grundlagen der Darstellung) und Nr. 2 (Bilanzierung und Bewertung) dargestellt sind. Unser Geschäftsjahr endet zum 30. September.

Dieser Bericht fasst den Konzernlagebericht der Infineon-Gruppe bestehend aus der Infineon Technologies AG und ihrer konsolidierten Tochtergesellschaften (gemeinsam „Infineon“ oder die „Gesellschaft“) mit dem Lagebericht der Infineon Technologies AG zusammen.

Dieser Lagebericht enthält in die Zukunft gerichtete Aussagen, die nicht auf der Vergangenheit, sondern auf aktuellen Planungen, Annahmen und Schätzungen beruhen. Diese Zukunftsaussagen sind immer nur für den Zeitpunkt gültig, zu dem sie gemacht werden. Infineon übernimmt keine Verpflichtung, diese beim Auftreten neuer Informationen zu aktualisieren. Zukunftsaussagen unterliegen immer Risiken und Unsicherheiten. Wir möchten diesbezüglich deutlich darauf hinweisen, dass eine Reihe von Faktoren die tatsächlichen Ergebnisse dahingehend beeinflussen können, dass diese wesentlich von den prognostizierten Ergebnissen abweichen. Einige dieser Faktoren sind im Abschnitt „Risikobericht“ und in weiteren Teilen dieses Berichts beschrieben.

Im Juli 2009 haben wir einen Vertrag über den Verkauf unseres Wireline-Communications-Geschäfts an Lantiq, ein mit Golden Gate Private Equity Inc. verbundenes Unternehmen („Lantiq“) geschlossen. Der Verkauf wurde am 6. November 2009 vollzogen. Alle Vermögenswerte und Verbindlichkeiten des Wireline-Communications-Geschäfts wurden in der Konzern-Bilanz zum 30. September 2009 als „zur Veräußerung stehende Vermögenswerte“ und „zur Veräußerung stehende Verbindlichkeiten“ ausgewiesen. Die Ergebnisse des Wireline-Communications-Geschäfts sind in der Konzern-Gewinn- und Verlust-Rechnung für alle ausgewiesenen Perioden im „Ergebnis aus nicht fortgeführten Aktivitäten, abzüglich Steuern vom Einkommen und vom Ertrag“ erfasst.

Im August 2010 haben wir mit der Intel Corporation („Intel“) einen Vertrag über den Verkauf des Mobilfunkgeschäfts unseres Segments Wireless Solutions („Mobilfunkgeschäft“) geschlossen. Der Verkauf soll im ersten Quartal

des Kalenderjahrs 2011 abgeschlossen werden, abhängig von behördlichen Genehmigungen und anderen vereinbarten üblichen Vollzugsbedingungen. Auf Grund dieses Verkaufs wurden alle Vermögenswerte beziehungsweise alle Verbindlichkeiten, die übertragen werden sollen, in der Konzern-Bilanz zum 30. September 2010 als „zur Veräußerung stehende Vermögenswerte“ und „zur Veräußerung stehende Verbindlichkeiten“ ausgewiesen. In der Konzern-Gewinn- und Verlust-Rechnung sind die Ergebnisse des Mobilfunkgeschäfts nicht mehr in den einzelnen Positionen der Konzern-Gewinn- und Verlust-Rechnung enthalten, sondern im „Ergebnis aus nicht fortgeführten Aktivitäten, abzüglich Steuern vom Einkommen und vom Ertrag“ erfasst. Die einzelnen übrigen Positionen der Konzern-Gewinn- und Verlust-Rechnung weisen somit die Ergebnisse von Infineons fortgeführten Aktivitäten aus. Ebenso zeigt die Konzern-Kapitalflussrechnung die Mittelzu- und -abflüsse des zu veräußernden Mobilfunkgeschäfts als „nicht fortgeführte Aktivitäten“. Die Vorjahresbeträge der Konzern-Gewinn- und Verlust-Rechnung sowie der Konzern-Kapitalflussrechnung wurden entsprechend angepasst. Entsprechend der internen Berichterstattung im abgelaufenen Geschäftsjahr 2010 wird das Wireless-Solutions-Geschäft unverändert als Segment berichtet. Bezüglich weiterer Details zu diesem Verkauf siehe nachfolgender Abschnitt „Verkauf des Mobilfunkgeschäfts unseres Segments Wireless Solutions“ und Anhang Nr. 6.

Die Deutsche Prüfstelle für Rechnungslegung DPR e.V. („DPR“), eine behördlich eingesetzte private Institution, hat den Konzernabschluss der Infineon Technologies AG für das Geschäftsjahr 2008 einer anlassunabhängigen Stichprobenprüfung unterzogen. Im Rahmen dieser Prüfung beanstandet die DPR die Bilanzierung aktiver latenter Steuern auf Verlustvorträge in Höhe von € 237 Millionen zum 30. September 2008. Die Grundlage für den Ansatz dieser aktiven latenten Steuern waren Steuerstrategien der Gesellschaft. Diese Steuerstrategien beinhalten Maßnahmen zur Nutzung und Sicherung des steuerlichen Vorteils aus Verlustvorträgen in Deutschland. Die DPR ist der Auffassung, dass diese Steuerstrategien wegen nicht hinreichender Umsetzungswahrscheinlichkeit nicht geeignet sind, die Werthaltigkeit angesetzter aktiver latenter Steuern auf Verlustvorträge in Höhe von € 237 Millionen zu belegen.

Aus verfahrensökonomischen Gründen hat sich die Gesellschaft entschlossen, der Forderung der DPR zu folgen. Dies erfolgt auch vor dem Hintergrund, dass die vorgenannten Steuerstrategien wegen der veränderten Sachlage durch die bevorstehende Veräußerung des Mobilfunkgeschäfts zum

01  
02  
03  
04  
05  
06  
07  
08  
09  
10  
11  
12  
13  
14  
15  
16  
17  
18  
19  
20  
21

30. September 2010 vom Management ohnehin nicht mehr verfolgt werden. Des Weiteren wurden neben der tatsächlichen Nutzung latenter Steuervorteile im laufenden Geschäftsjahr zum 30. September 2010 aktive latente Steuern in Höhe von € 151 Millionen angesetzt, da die Gesellschaft zum einen auf Grund der Fokussierung auf das weniger volatile sowie ertragsstarke Geschäft von Automotive, Industrial & Multimarket und Chip Card & Security und der damit einhergehenden positiven Ergebnisse erwartet, zukünftig Verlustvorträge in Deutschland nutzen zu können. Zum anderen wird der erwartete Gewinn aus dem bevorstehenden Vollzug der Veräußerung des Mobilfunkgeschäfts zu einer zusätzlichen Nutzung von steuerlichen Verlustvorträgen in Deutschland führen.

Die Eröffnungsbilanzwerte zum 1. Oktober 2008 wurden gemäß IAS 8 korrigiert. Die Anpassungen betreffen den Ansatz aktiver latenter Steuern sowie den bilanziellen Verlustvortrag. Die Anpassungen sind in den Zahlen dieses Konzernabschlusses, die sich auf die Jahre 2008 und 2009 beziehen, enthalten. Diese können daher von Zahlen abweichen, die in den Konzernabschlüssen der Vergangenheit enthalten waren. Die retrospektiven Anpassungen haben keinen Einfluss auf die vorhandenen steuerlichen Verlustvorträge und nur unwesentliche Auswirkungen auf das Konzernergebnis in den berichteten Perioden. Sie führen zu keinen Zahlungsmittelabflüssen. Eine Übersicht über die Anpassungen im Einzelnen findet sich in Anhang Nr. 3.

## WESENTLICHE ENTWICKLUNGEN IM GESCHÄFTSJAHRE 2010

### UNTERNEHMENSERGEBNISSE

- Nach dem Krisengeschäftsjahr 2009 konnten wir einen deutlichen Zuwachs bei den Umsatzerlösen und dem Segmentergebnis in Summe erzielen. Das Geschäftsjahr 2010 war auf der Umsatzseite deutlich von den Auswirkungen des allgemeinen wirtschaftlichen Aufschwungs und des damit einhergehenden Wachstums des weltweiten Halbleitermarktes beeinflusst. Auf der Ergebnisseite konnten wir neben allgemeinen Produktivitätseffekten infolge höherer Umsätze und einer verbesserten Auslastung unserer Produktion eine Ergebnisverbesserung als Folge von den strukturellen Maßnahmen erreichen, die wir im Rahmen unseres Kostensenkungsprogramms „IFX10+“ umgesetzt haben und welche im Geschäftsjahr 2010 erstmals ein volles Geschäftsjahr zum Tragen kamen.
- Unsere Umsatzerlöse aus fortgeführten Aktivitäten beliefen sich im Geschäftsjahr 2010 auf € 3.295 Millionen. Dies entspricht einer Steigerung von 51 Prozent gegenüber € 2.184 Millionen im Geschäftsjahr 2009.
- Der Segmentumsatz in Summe (einschließlich der im „Ergebnis aus nicht fortgeführten Aktivitäten, abzüglich Steuern vom Einkommen und vom Ertrag“ ausgewiesenen

Umsatzerlöse des zu veräußernden Mobilfunkgeschäfts) stieg im Geschäftsjahr 2010 auf € 4.585 Millionen gegenüber € 3.027 Millionen im Geschäftsjahr 2009.

- Die im Geschäftsjahr 2010 erzielten Umsatzerlöse inklusive wie exklusive des zu veräußernden Mobilfunkgeschäfts übertrafen auch die jeweils vergleichbaren Umsatzerlöse des Vorkrisengeschäftsjahrs 2008.
- Das Segmentergebnis aus fortgeführten Aktivitäten (das heißt ohne das Segmentergebnis der nicht fortgeführten Aktivitäten von Wireless Solutions) betrug im Geschäftsjahr 2010 € 475 Millionen und verbesserte sich um € 615 Millionen gegenüber minus € 140 Millionen im Vorjahr.
- Das Segmentergebnis in Summe einschließlich des Segmentergebnisses von Wireless Solutions verbesserte sich auf € 635 Millionen, ein Anstieg von € 802 Millionen verglichen zu minus € 167 Millionen im Vorjahr.
- Das Segmentergebnis unserer operativen Segmente einschließlich Wireless Solutions für das Geschäftsjahr 2010 belief sich für Automotive auf € 198 Millionen (Vorjahr minus € 117 Millionen), für Industrial & Multimarket auf € 283 Millionen (Vorjahr € 35 Millionen), für Chip Card & Security auf € 22 Millionen (Vorjahr minus € 4 Millionen) und für Wireless Solutions auf € 159 Millionen (Vorjahr minus € 36 Millionen). Damit verbesserten sich die Segmentergebnisse aller unserer operativen Segmente im Geschäftsjahr 2010 im Vergleich zum Vorjahr. Das Segmentergebnis der sonstigen Geschäftsbereiche betrug im Geschäftsjahr 2010 minus € 12 Millionen (Vorjahr minus € 13 Millionen) und für Konzernfunktionen und Eliminierungen minus € 15 Millionen (Vorjahr minus € 32 Millionen).
- Unser Ergebnis aus fortgeführten Aktivitäten vor Steuern vom Einkommen und vom Ertrag betrug im Geschäftsjahr 2010 € 290 Millionen; eine Verbesserung um € 519 Millionen von minus € 229 Millionen im Geschäftsjahr 2009. Diese Verbesserung resultiert aus der oben beschriebenen Steigerung der Ergebnisse unserer fortgeführten Aktivitäten und gelang trotz eines negativen Effektes im Zusammenhang mit der nachfolgend beschriebenen Entkonsolidierung von ALTIS Semiconductor S.N.C., Essones, Frankreich („ALTIS“) sowie trotz gesunkener Finanzerträge.
- Im Geschäftsjahr 2010 betrug das Ergebnis aus nicht fortgeführten Aktivitäten, abzüglich Steuern vom Einkommen und vom Ertrag, € 348 Millionen verglichen mit minus € 441 Millionen im Vorjahr. Das Ergebnis aus nicht fortgeführten Aktivitäten im Geschäftsjahr 2010 setzt sich im Wesentlichen aus dem Ergebnis des zu veräußernden Mobilfunkgeschäfts sowie aus dem durch den Verkauf des Wireline-Communications-Geschäfts realisierten Veräußerungsgewinn zusammen. Im Vorjahr resultierte das Ergebnis aus nicht fortgeführten Aktivitäten, abzüglich Steuern vom Einkommen und vom Ertrag, im Wesentlichen aus der Insolvenz der Qimonda AG i. In. („Qimonda“).

- Wir haben im Geschäftsjahr 2010 einen Konzernjahresüberschuss von € 660 Millionen erzielt, eine Steigerung von € 1.334 Millionen gegenüber minus € 674 Millionen im Geschäftsjahr 2009. Demgemäß verbesserte sich das unverwässerte Ergebnis je Aktie auf € 0,61 verglichen zu einem unverwässerten Ergebnis je Aktie von minus € 0,73 im Vorjahr. Wir werden der Hauptversammlung im Februar 2011 die Ausschüttung einer Dividende von € 0,10 je Aktie vorschlagen.
- Unser Mittelzufluss aus laufender Geschäftstätigkeit aus fortgeführten Aktivitäten betrug im Geschäftsjahr 2010 € 958 Millionen im Vergleich zu € 282 Millionen im Geschäftsjahr 2009. Demgemäß verbesserte sich der Free-Cash-Flow aus fortgeführten Aktivitäten - definiert als Mittelzufluss aus laufender Geschäftstätigkeit aus fortgeführten Aktivitäten und Mittelabfluss aus Investitionstätigkeit aus fortgeführten Aktivitäten, bereinigt um den Kauf und Verkauf von zur Veräußerung verfügbaren finanziellen Vermögenswerten - auf € 573 Millionen im Geschäftsjahr 2010 im Vergleich zu € 274 Millionen im Geschäftsjahr 2009, trotz der im Free-Cash-Flow für das Geschäftsjahr 2010 enthaltenen negativen Wirkung auf Grund der Entkonsolidierung der Zahlungsmittel von ALTIS in Höhe von € 88 Millionen und der deutlich gestiegenen Investitionen in den fortgeführten Aktivitäten in Höhe von € 325 Millionen im Geschäftsjahr 2010.
- Zum 30. September 2010 beläuft sich unsere Brutto-Cash-Position - definiert als Zahlungsmittel und Zahlungsmitteläquivalente einschließlich zur Veräußerung verfügbarer finanzieller Vermögenswerte - auf € 1.727 Millionen, ein Anstieg von 15 Prozent verglichen mit € 1.507 Millionen zum 30. September 2009. Im Geschäftsjahr 2010 haben wir Anteile unserer im Juni 2010 fälligen nachrangigen Wandelanleihe mit einem Nominalwert von € 448 Millionen zurückgekauft beziehungsweise zurückbezahlt sowie andere Finanzverbindlichkeiten in Höhe von netto € 41 Millionen zurückgezahlt. Insgesamt verbesserte sich somit unsere Netto-Cash-Position - definiert als Brutto-Cash-Position abzüglich kurzfristiger und langfristiger Finanzverbindlichkeiten - zum 30. September 2010 um € 674 Millionen auf € 1.331 Millionen verglichen zu € 657 Millionen zum 30. September 2009.

**MASSNAHMEN DER NEUAUSRICHTUNG DES INFINEON KONZERNS**

Neben den Auswirkungen des wirtschaftlichen Aufschwungs war unser Geschäftsjahr 2010 von verschiedenen Maßnahmen der Neuausrichtung des Konzerns geprägt:

**Abschluss des Verkaufs unseres Wireline-Communications-Geschäfts**

- Der Verkauf unseres Wireline-Communications-Geschäfts an Lantiq wurde am 6. November 2009 abgeschlossen. Mit Vollzug des Verkaufs vereinnahmten wir einen Betrag von € 223 Millionen. Zusätzlich haben wir € 20 Millionen bei

Fälligkeit im August 2010 erhalten. Durch den Verkauf realisierten wir im Geschäftsjahr 2010 einen Gewinn vor Steuern von € 108 Millionen.

**Verkauf des Mobilfunkgeschäfts unseres Segments Wireless Solutions**

- Im August 2010 haben wir mit Intel einen Vertrag über den Verkauf des Mobilfunkgeschäfts unseres Segments Wireless Solutions („Mobilfunkgeschäft“) geschlossen. Lediglich das zuvor dem Segment Wireless Solutions zugeordnete Geschäft mit analogen und digitalen TV-Tunern und Empfangskomponenten für Satellitenradio sowie Hochfrequenz-Leistungsverstärkern für Mobilfunk-Basisstationen (mit einem Umsatz von € 82 Millionen im Geschäftsjahr 2010) verbleibt bei uns. Der Verkauf soll im ersten Quartal des Kalenderjahrs 2011 abgeschlossen werden, abhängig von behördlichen Genehmigungen und anderen vereinbarten üblichen Vollzugsbedingungen. Der Kaufpreis beträgt 1.400 Millionen US-Dollar, fällig bei Vollzug des Verkaufs. Weltweit sollen voraussichtlich 3.400 Mitarbeiter im Zuge des Verkaufs von Infineon zu Intel transferiert werden. Der Verkauf wird überwiegend als „Asset Deal“ vollzogen.
- Der Mobilfunkmarkt erfährt derzeit eine signifikante Strukturänderung, getrieben durch die Konvergenz der Computer- und Mobiltelefonindustrie. Während das Wachstum bei traditionellen Mobiltelefonen zurückgeht, entwickeln sich Smartphones, Netbooks, Tablets, E-Readers, Machine-to-Machine und Ähnliches zu Wachstumstreibern. Um in diesem konvergierenden und dynamischen Markt mittel- bis langfristig erfolgreich bestehen zu können, sind eine führende Kundenbasis im Handset- und (mobilen) Computer-Markt, ein breites Produktportfolio (Cellular-Modem-, Applikationsprozessor- und Connectivity-Lösungen) sowie sehr hohe Investitionen in Forschung und Entwicklung, zum Beispiel für künftige breitbandige Übertragungsstandards, und in massiv gesteigerte Prozessorleistung zur schnellen Bearbeitung der Anwendungssoftware, erforderlich. Dieses fällt sehr großen Akteuren mit großen Budgets für Forschung und Entwicklung leichter, da sich der verfügbare Markt für diese Unternehmen angebotsbedingt vergrößert und sich das Geschäftsrisiko verringert. Wireless Solutions findet unter dem Dach von Intel sehr gute Voraussetzungen für die Entwicklung und den Absatz von Halbleiterlösungen im konvergierenden PC- und Kommunikationsmarkt und Zugang zu neuen Märkten inklusive zusätzlichen Möglichkeiten in zusammenwachsenden Handy- & PC-Märkten, inklusive Tablets, Netbooks, Notebooks und anderer Geräte. Intel hat die finanziellen und personellen Ressourcen, um das zu veräußernde Mobilfunkgeschäft weiter zu entwickeln.
- Durch den Verkauf des Mobilfunkgeschäfts sind wir weniger von kurzen Markt- und Produktzyklen abhängig. Dadurch können wir uns auf die Weiterentwicklung der Segmente Automotive, Industrial & Multimarket und Chip Card & Security

01  
02  
03  
04  
05  
06  
07  
08  
09  
10  
11  
12  
13  
14  
15  
16  
17  
18  
19  
20  
21

konzentrieren, die alle Marktführer in ihren jeweiligen Halbleiterzielmärkten sind und einen starken Verbund bilden, der auf technologischen Synergien aufbaut. Mit dem Verkauf des Mobilfunkgeschäfts konzentrieren wir uns ausschließlich auf die Zukunftsthemen Energieeffizienz, Mobilität und Sicherheit, die in den kommenden Jahren weiter an Bedeutung gewinnen werden und die wir entscheidend prägen wollen. Wir bekräftigen unseren Führungsanspruch im Markt für Automobilelektronik und tragen der wachsenden Bedeutung neuer Mobilitätskonzepte Rechnung, indem wir den Zukunftstrend Mobilität in unsere Fokusthemen aufnehmen. Unsere drei Zielmärkte bieten uns hervorragende Wachstums- und Ertragsperspektiven: Der von unseren drei Kernsegmenten adressierte Halbleitermarkt hatte insgesamt ein Volumen von rund 44 Milliarden US-Dollar im Kalenderjahr 2009 und es wird erwartet (iSuppli, September 2010), dass er bis 2014 um durchschnittlich 12,5 Prozent pro Jahr wächst.

- Der Verkauf des Mobilfunkgeschäfts schließt damit – nach den vorangegangenen Ausgliederungen des Speicher- geschäfts und von Wireline Communications – unsere strate- gische Fokussierung auf profitable, wachstumsstarke und weniger volatile Halbleitergeschäfte ab.

#### WEITERE WESENTLICHE KONZERNAKTIVITÄTEN IM GESCHÄFTSJAHR 2010

- Im Geschäftsjahr 2010 haben wir uns von unserer Beteiligung an ALTIS getrennt:
  - Ende Dezember 2009 haben wir ALTIS, unser Joint Venture mit IBM Corporation, entkonsolidiert, nachdem wir auf unsere Option verzichtet haben, weitere Stimmrechte an ALTIS von unserem Joint-Venture-Partner zu erwerben. Der im Zusammenhang mit der Entkonsolidierung insgesamt entstandene operative Verlust betrug im Geschäftsjahr 2010 € 69 Millionen.
  - Im gemeinsamen Bemühen, die Zukunft von ALTIS und seiner Beschäftigten zu sichern, haben IBM und wir am 12. August 2010 den Verkauf von 100 Prozent des Aktienka- pitals von ALTIS an den neuen Konzern Altis International abgeschlossen und vollzogen. IBM und wir sind Lieferver- einbarungen mit ALTIS eingegangen. Diese sehen die Nut- zung der Fertigungskapazitäten des französischen Werks von ALTIS vor.
- Im Juni 2010 haben wir den noch ausstehenden Nominalbe- trag in Höhe von € 255 Millionen unserer nachrangigen Wan- delanleihe bei Fälligkeit zurückgezahlt. Vor der Rückzahlung haben wir Anteile mit einem Nennwert von € 193 Millionen dieser Wandelanleihe für € 194 Millionen im Geschäftsjahr 2010 zurückgekauft.
- Im Geschäftsjahr 2010 waren unsere Fertigungskapazitä- ten im Front-End und Back-End nahezu voll ausgelastet. Auf Grund des deutlichen Umsatzwachstums, der nahezu vollausgelasteten Produktion und des Erreichens bestimmter

Entwicklungsfortschritte haben wir unser ursprünglich für das Geschäftsjahr 2010 geplante Investitionsbudget von € 220 Millionen bis € 250 Millionen weiter erhöht. Die Inves- tionen in Sachanlagen und immaterielle Vermögenswerte, einschließlich aktivierter Entwicklungsleistungen für unsere fortgeführten Aktivitäten, beliefen sich im Gesäftsjahr 2010 endgültig auf € 325 Millionen. Im Geschäftsjahr 2009 hatten wir vor dem Hintergrund der damals ungewissen gesamt- wirtschaftlichen Situation sowie unserer eigenen angespann- ten Finanzsituation € 115 Millionen in unseren fortgeführten Aktivitäten investiert.

#### DEREGISTRIERUNG DER INFINEON AKTIEN IN DEN VEREINIGTEN STAATEN VON AMERIKA

- Im August 2010 haben wir bei der US-amerikanischen Börsenaufsicht SEC (Securities and Exchange Commission) einen Antrag zur Aufhebung der Registrierung unserer Stammaktien nach dem „U.S. Securities Exchange Act“ gestellt, der 90 Tage nach Einreichung Anfang November 2010 endgültig in Kraft getreten ist. Wir hatten im April 2009 die Einstellung der Börsennotierung an der New York Stock Exchange („NYSE“) beantragt. Seither werden die Infineon American Depositary Shares („ADS“) am außerbörslichen Markt OTCQX International Premier gehandelt. Unsere Stammaktien werden an der Frankfurter Wertpapierbörse sowie an unterschiedlichen regionalen Handelsplätzen in Deutschland gehandelt. Wir werden unsere Präsenz am US- amerikanischen Wertpapiermarkt auch nach der Deregistrie- rung in Form eines sogenannten „Level 1“-ADR-Programms aufrechterhalten. Die ADS werden am OTCQX-Markt unter dem Symbol „IFNNY“ notiert.

#### PRODUKT- UND TECHNOLOGIE-ENTWICKLUNG

- Wir investieren in Forschung und Entwicklung. Bedeutende Erfolge, die wir in unseren Fokusbereichen Energieeffizienz, Mobilität sowie Sicherheit im abgelaufenen Geschäftsjahr 2010 erzielt haben, sind:

##### Energieeffizienz

- Wir brachten neue OptiMOS™ Leistungs-MOSFETs auf den Markt, die die Energieeffizienz von Computing- und Telekommunikations-Anwendungen weiter verbessern. Die neue 25-V-OptiMOS-Familie ist für die Spannungsregelung in Stromversorgungen für Server und Telekommunikations-/ Datenkommunikations-Switches optimiert. Die neuen MOS- FETs kommen auch in unserem DrMOS-Multichip TDA21220 zur Anwendung, der mit der DrMOS-Spezifikation von Intel kompatibel ist. Entwickler von Stromversorgungen können mit den neuen 25-V-OptiMOS-Bauelementen die Energie- aufnahme, die Wärmeentwicklung und die Gesamtgröße ihrer Produkte reduzieren. Diese Verbesserungen kommen besonders in Daten- beziehungsweise Rechenzentren zum

Tragen, also bei Anwendungen, bei denen die Kosten für die elektrische Energie und die Kühlung ganz wesentlich zum Gesamtbudget beitragen. Auch eine Reduzierung der Gerätegröße bringt Vorteile für die Endanwender. Nach Angaben verschiedener Marktforscher werden 2011 weltweit bis zu 60 Millionen Server im Einsatz sein.

- Wir sind Innovationstreiber bei LED-Beleuchtungen mit unserem neuen Offline-Treiber-IC für hocheffiziente, dimmbare LED-Lampen in Haushaltsbeleuchtungen. Dank einer flexiblen Architektur, die einen kosteneffektiven Ersatz von konventionellen Glühlampen mit 40 W, 60 W oder 100 W sowie anderen Beleuchtungsanwendungen ermöglicht, setzen wir mit dem ICL8001G neue Maßstäbe bezüglich Integration, Leistungsfähigkeit, Funktionalität und Systemkosten. Glühlampen werden in immer mehr Staaten gesetzlich verboten. Statt dessen werden energiesparende Alternativen vorgeschrieben. LED-Lampen werden heute als der beste Ersatz angesehen, denn ihre Effizienz ist um 85 Prozent höher als die von Glühlampen. Diese höhere Effizienz kann einen wesentlichen Einfluss auf die CO<sub>2</sub>-Bilanz haben, da Beleuchtung etwa 20 Prozent der weltweiten Energie (Quelle: EuroStat) verbraucht.
- Wir stellten eine innovative, modulinterne IGBT-Verbindungstechnologie vor, welche die Lebensdauer von IGBT-Modulen deutlich erhöht. Die neue .XT-Technologie kann die Lebensdauer von IGBT-Modulen im Vergleich zu herkömmlichen Verbindungstechnologien um den Faktor 10 verlängern. Alternativ kann die Leistungsdichte um bis zu 25 Prozent erhöht werden. Die neue Technologie unterstützt Sperrschicht-Temperaturen von bis zu 200 °C. Die neue .XT-Technologie deckt alle kritischen Bereiche für die Lastwechselfestigkeit (Power Cycling) ab: die Bondverbindungen auf der Chip-Oberseite, die Rückseitenlötung der Chips und die Lötung der Bodenplatte. Damit ermöglicht die .XT-Technologie anspruchsvollste Anwendungen, beispielsweise in Nutzfahrzeugen oder Windkraftanlagen.

### Mobilität

- Auch in herausfordernden Zeiten für die Automobilindustrie ist es uns durch hohe Innovationskraft in unserem Gesamtportfolio gelungen, unsere Nummer 1 Position bei Chips für die Automobilelektronik zu sichern. Unsere Halbleiter stellen die Grundlage der elektronischen Innovation im Auto dar.
- Auf der Basis unserer langjährigen Erfahrung in der Entwicklung von führenden IGBT Leistungsmodulen und hocheffizienten Halbleitertechnologien für den Industriemarkt haben wir speziell für den Automobilbereich qualifizierte, hocheffiziente Leistungsmodule für sehr hohe Leistungsdichten entwickelt. Unser breites Produktportfolio unterstützt dabei einen nahtlosen Übergang zwischen den unterschiedlichen Anwendungsklassen der Elektromobilität, von mild-hybriden Systemen bis hin zu Hochleistungs-Elektrofahrzeugen. Um unterschiedlichste Architekturen des elektrischen

Antriebsstranges zu ermöglichen, erstreckt sich unser Produktangebot über diskrete Komponenten, Leistungshalbleiter, Mikrocontroller, Sensoren und Hochleistungsmodule. Mit unserer Systemexpertise sind wir daher in der Lage, komplette Chipsätze anzubieten, die für den jeweiligen Anwendungsfall bezüglich hoher Effizienz und niedriger Gesamtsystemkosten optimiert sind. Mit unterschiedlichsten neuen Plattform-Geschäften in allen Regionen sind wir auf dem Weg, der führende Chiphersteller im zukünftigen Markt für Hybrid- und Elektrofahrzeuge zu werden.

- Ein weiterer wichtiger Meilenstein auf unserem Weg zum führenden Anbieter von Mikrocontrollern für den Antriebsstrang und die Fahrwerksteuerung ist die Markteinführung der Tricore basierten AUDO MAX Familie im Jahr 2010. Diese 32-Bit-Mikrocontroller bieten eine sehr hohe Verarbeitungsleistung und Echtzeitfähigkeit, mit denen es derzeit kein anderer Mikrocontroller in diesem Anwendungsbereich aufnehmen kann.
- In den schnell wachsenden aufstrebenden Märkten haben wir unsere Position durch den Gewinn neuer Geschäfte mit chinesischen und indischen Automobil- und Motorrad-Herstellern erfolgreich ausgebaut. In Korea haben wir bereits die klare Marktführerschaft übernommen.

### Sicherheit

- Zu den Anwendungen für behördliche Ausweise („ID“) gehören zum Beispiel elektronische Reisepässe sowie Gesundheitskarten, Führerscheine und Sozialversicherungskarten. Neben anderen wichtigen ID-Projekten nutzt nun auch China in seinen neuen elektronischen Reisepässen einen Sicherheitschip von uns. Der chinesische elektronische Reisepass ist eines der zwei größten nationalen Passprojekte der Welt. Ausschließlich auf Infineon setzen auch die beiden chinesischen Sonderverwaltungszone Hongkong und Macau, wo wir der alleinige Chiplieferant sind.
- Das Bundesamt für Sicherheit in der Informationstechnik (BSI) hat das hohe Sicherheitsniveau der Sicherheitscontroller unserer SLE 78-Familie mit der neuen „Integrity Guard“-Technologie bestätigt und ein international anerkanntes Zertifikat ausgestellt, welches bestätigt, dass das Produkt die internationale Sicherheitsstufe „Common Criteria EAL5+ high“ erreicht hat.
- „Integrity Guard“ bedeutet den Sprung von konventionellen Sicherheitskonzepten zur neuen Generation digitaler Sicherheit. Diese bietet die vollständige Verschlüsselung des Datenpfads und dessen kontinuierliche Überwachung sowie zwei sich gegenseitig überprüfende CPUs. Unsere neue Generation von Sicherheitschips ist daher insbesondere für Anwendungen mit langlebigen Sicherheitsanforderungen geeignet. Wir ermöglichen es außerdem nun zum ersten Mal in der über 25-jährigen Geschichte der Chipkarte, dass Daten im Prozessorkern selbst verschlüsselt verarbeitet werden.

01  
02  
03  
04  
05  
06  
07  
08  
09  
10  
11  
12  
13  
14  
15  
16  
17  
18  
19  
20  
21

## UNSER GESCHÄFT

Wir entwerfen, entwickeln, produzieren und vermarkten ein breites Spektrum von Halbleiterprodukten und kompletten Systemlösungen. Diese werden vornehmlich in Produkten der Automobilindustrie, der industriellen Automatisierungs- und Steuerungstechnik sowie Chipkarten eingesetzt, finden sich aber auch in einer Vielzahl von anderen mikroelektronischen Anwendungen, wie Computersystemen, Telekommunikationssystemen oder Konsumgütern. Unser Produktspektrum umfasst Standardkomponenten, kundenspezifische Teil- oder Komplettlösungen sowie spezifische Bauelemente für Analog-, Digital- und Mixed-Signal-Anwendungen. Unsere Fertigungsstätten, Beteiligungen und Kunden befinden sich hauptsächlich in Europa, Asien und Nordamerika.

Unser fortgeführtes Geschäft ist in die drei operativen Segmente Automotive, Industrial & Multimarket und Chip Card & Security strukturiert, welche nachfolgend im Detail beschrieben werden und in denen wir die zentralen Herausforderungen der modernen Gesellschaft Energieeffizienz, Mobilität und Sicherheit adressieren.

Zum Zwecke der Berichterstattung haben wir zwei weitere Segmente: Das Segment Sonstige Geschäftsbereiche umfasst verbleibende Aktivitäten von veräußerten Geschäftsbereichen und andere Geschäftsaktivitäten und liefert seit dem Abschluss des Verkaufs unseres Wireline-Communications-Geschäfts entsprechend der abgeschlossenen Produktionsvereinbarungen, Produkte an Lantiq. Das Segment Konzernfunktionen und Eliminierungen erfasst die Aktivitäten und Positionen, die nicht den anderen Segmenten zugerechnet werden können, wie bestimmte Kosten der Konzernzentrale, strategische Investitionen, Kosten nicht verrechneter Produktionsüberkapazitäten und Umstrukturierungskosten.

Im November 2009 haben wir den Verkauf unseres Wireline-Communications-Geschäfts abgeschlossen.

Im August 2010 haben wir mit Intel einen Vertrag über den Verkauf unseres Mobilfunkgeschäfts geschlossen. Der Verkauf soll im ersten Quartal des Kalenderjahrs 2011 abgeschlossen werden, abhängig von behördlichen Genehmigungen und anderen vereinbarten üblichen Vollzugsbedingungen.

Des Weiteren halten wir einen Anteil von 77,5 Prozent an Qimonda, welche 2006 ausgegliedert wurde. Am 23. Januar 2009 stellten Qimonda und ihre hundertprozentige Tochter Qimonda Dresden GmbH & Co. oHG („Qimonda Dresden“) beim Amtsgericht in München Antrag auf Eröffnung des Insolvenzverfahrens. Am 1. April 2009 wurden die Insolvenzverfahren formell eröffnet. Insolvenzverfahren über weitere Tochterunternehmen von Qimonda in verschiedenen Staaten wurden mittlerweile eröffnet. Auf Grund des Insolvenzantrags von Qimonda haben wir Qimonda im zweiten Quartal des Geschäftsjahrs 2009 entkonsolidiert.

Die Ergebnisse des Wireline-Communications-Geschäfts bis zum Vollzug des Verkaufs, des zu veräußernden Mobilfunkgeschäfts und von Qimonda bis zur Entkonsolidierung werden in der Konzern-Gewinn-und-Verlust-Rechnung als „nicht fortgeführte Aktivitäten“ ausgewiesen. Das Vorjahr wurde entsprechend angepasst.

### WICHTIGE PRODUKTE UND APPLIKATIONEN

Die folgende Aufstellung gibt einen Überblick über unsere wichtigsten Produkte und Applikationen und unserer größten direkten Kunden und Distributoren (in alphabetischer Reihenfolge) unserer fortgeführten Aktivitäten.

## 04 ÜBERBLICK ÜBER UNSERE WICHTIGSTEN PRODUKTE UND APPLIKATIONEN UND UNSERER GRÖSSTEN DIREKTEN KUNDEN UND DISTRIBUTOREN (IN ALPHABETISCHER REIHENFOLGE)

| Segment                  | Wichtige Produkte                                                                                                                                                | Wichtige Applikationen                                                                                                                                                                                                                                                                                                           | Signifikante Kunden und Distributoren im Geschäftsjahr 2010                        |
|--------------------------|------------------------------------------------------------------------------------------------------------------------------------------------------------------|----------------------------------------------------------------------------------------------------------------------------------------------------------------------------------------------------------------------------------------------------------------------------------------------------------------------------------|------------------------------------------------------------------------------------|
| Automotive               | Leistungshalbleiter (diskrete Komponenten, ICs und Module), Sensoren und Mikrocontroller (8-Bit, 16-Bit, 32-Bit) mit und ohne Embedded Memory, diskrete Elemente | Antriebsstrang (Motorsteuerung, Getriebesteuerung, Hybrid), Karosserie- und Komfotelektronik, Sicherheit und Fahrzeugdynamik (ABS, Airbag, Stabilitätskontrolle), Konnektivität                                                                                                                                                  | Arrow, Avnet, Bosch, Continental                                                   |
| Industrial & Multimarket | Leistungshalbleiter (Module, diskrete Bausteine und ICs), diskrete Bauelemente, ASIC-Lösungen einschließlich Sicherheits-ASICs                                   | Industrieantriebe, Züge, erneuerbare Energien, Stromübertragung, Stromversorgungen, Netzteile, Beleuchtung, Industriesteuerungen, Hochfrequenz- und ESD-Schutz-Bausteine für Multimarket-Applikationen, ASICs (zum Beispiel für Spielekonsolen, Hörgeräte, Computerzubehör)                                                      | Avnet, Bejing Jingchuan Electronic Tech, Delta, Siemens                            |
| Chip Card & Security     | Sicherheitsmikrocontroller für Chipkarten und Sicherheitsanwendungen                                                                                             | Sicherheitsmikrocontroller und Sicherheits-Memories für Ausweisdokumente, Bezahlkarten, SIM-Karten, Telefonkarten, Zugangskontrollkarten, Karten für den öffentlichen Nahverkehr, Bezahlfernsehen und Chips für Computer und Netzwerke (zum Beispiel Trusted Platform Module) sowie RFID ICs für die Identifikation von Objekten | Gemalto, Giesecke & Devrient, Oberthur Card Systems, US Government Printing Office |



**Automotive**

Das Segment Automotive entwirft, entwickelt, fertigt und vertreibt Halbleiterprodukte und komplette Systemlösungen für Anwendungen in der Automobilindustrie. Das Produktportfolio erstreckt sich dabei über Mikrocontroller, Leistungshalbleiter (die höhere Spannungen und höhere Ströme als gewöhnliche Halbleiter handhaben), zugehörige Leistungsmodule, Sensoren und diskrete Komponenten. Laut Strategy Analytics (April 2010) waren wir im Kalenderjahr 2009 der weltweit umsatzstärkste Halbleiterhersteller für die Automobilindustrie mit einem Marktanteil von 9,0 Prozent.

Da der Anteil der elektronischen Bauteile in den Einsatzbereichen Antriebsstrang, Sicherheit, Karosserie- und Komfotelektronik weiter zunimmt, ist für den Automobil-Halbleitermarkt in den nächsten Jahren ein signifikantes Wachstum vorhergesagt (11 Prozent durchschnittliche jährliche Wachstumsrate in den Jahren 2009 bis 2014, iSuppli, September 2010). Mehrere Trends unterstützen dieses Wachstum. So wird sich der Anteil an elektronischen Bauteilen im Antriebsstrang durch die zunehmende Verbreitung von Hybrid- oder reinen Elektrofahrzeugen stark erhöhen. Allgemein werden mechanische beziehungsweise elektromechanische Bauteile, wie zum Beispiel Relais, durch Halbleiter ersetzt, um den steigenden Anforderungen an Zuverlässigkeit, Größe, Gewicht und Effizienz gerecht zu werden.

Das Produktangebot von Automotive enthält vor allem die folgenden Komponenten und Systemlösungen:

- Halbleiter für Anwendungen im Antriebsstrang, zum Beispiel für die Motor- und Getriebesteuerung oder die Implementierung von hybriden Systemen;
- Halbleiter für das Management von Sicherheitsfunktionen, zum Beispiel für die Überwachung und Steuerung von Airbags, ABS-Systemen, elektronischen Stabilitätssystemen, Reifendruck-Kontrollsystemen und Servolenkung; sowie
- Halbleiter für die Karosserie- und Komfotelektronik, zum Beispiel Module für die Beleuchtung, Heizung, Lüftung und Klimatisierung, aber auch Türmodule (elektrische Fensterheber, Türschließsysteme, Steuerung von Spiegeln) und Systeme für die Verteilung elektrischer Leistung.

Laut Strategy Analytics (Juni 2010) stellt das Karosserie- und Sicherheitssegment den größten Anteil des gesamten Automobilelektronikmarktes dar, gefolgt von Sicherheitsanwendungen, Anwendungen im Antriebsstrang und zuletzt dem Bereich Fahrerinformationssysteme und In-Car-Entertainment.

Um unsere Position in allen Bereichen der Automobilelektronik weiter zu stärken, bauen wir unsere intensiven Geschäftsbeziehungen zu den weltweit führenden Automobilherstellern und zu deren Zulieferern weiter aus. Wir sind davon überzeugt, dass unser breites Angebot an Halbleiterlösungen

und die Verbindung unserer Kompetenzen in den Bereichen Leistungs-, Analog-, Mixed-Signal- und Sensortechnologien wichtige differenzierende Faktoren unter den Unternehmen des Automobilmarktes darstellen.

Die höchste Qualität unserer Produkte steht für das Segment Automotive grundsätzlich im Mittelpunkt. Daher haben wir im Jahr 2003 das Automotive Excellence Programm gestartet, mit dem wir das Null-Fehler-Konzept als Qualitätsziel für unsere Entwicklungs- und Fertigungsprozesse eingeführt haben. Die Fähigkeiten, höchste Produktqualitäten zu garantieren und zugleich langfristige Lieferverpflichtungen einhalten zu können, erfordern enge Kundenbeziehungen und stellen zugleich hohe Eintrittsbarrieren für potenzielle neue Wettbewerber dar.

**Industrial & Multimarket**

Das Segment Industrial & Multimarket entwirft, entwickelt, fertigt und vertreibt Halbleiterprodukte und komplette Systemlösungen vorrangig für den Einsatz in Industrie- und Multimarket-Applikationen und darüber hinaus für kundenspezifische Produktanwendungen. Unser breites Produktportfolio für Konsumgüter, Computersysteme und Telekommunikationssysteme vervollständigt unser Portfolio für den Industriemarkt.

Der Markt für Halbleiterprodukte für Anwendungen der Industrieelektronik ist stark fragmentiert sowohl hinsichtlich der Anbieter als auch hinsichtlich der Kunden. Er ist gekennzeichnet durch eine große Anzahl sowohl von Standardkomponenten als auch von anwendungsspezifischen Produkten, die in einer Vielzahl unterschiedlicher Industrienanwendungen wie Transport, Fabrikautomatisierung und Netzteilen zum Einsatz kommen.

Innerhalb des Industriegeschäfts konzentrieren wir uns auf die Hauptanwendungen Leistungsumwandlung und Stromversorgung. Um die spezifischen Anforderungen unserer Kunden erfüllen zu können, bieten wir differenzierte Produkte an, die unterschiedliche Technologien beinhalten. Bei weiter steigendem weltweiten Energiebedarf, sich verknappenden Ressourcen und wachsender Besorgnis über die Auswirkungen der Stromerzeugung auf die Umwelt können Leistungshalbleiter einen bedeutenden Beitrag zur zunehmenden Stromerzeugung aus erneuerbaren Energien wie Windenergie und Photovoltaik und zum effizienten Energieverbrauch leisten.

Wir haben eine führende Marktposition in der Leistungselektronik. Laut IMS Research (Juli 2010) waren wir in den vergangenen sieben Jahren weltweit Marktführer für Leistungshalbleiterbausteine und -module. Unser Marktanteil im Kalenderjahr 2009 betrug 10,7 Prozent.

01  
02  
03  
04  
05  
06  
07  
08  
09  
10  
11  
12  
13  
14  
15  
16  
17  
18  
19  
20  
21

### Chip Card & Security

Unser Segment Chip Card & Security entwirft, entwickelt, produziert und vermarktet ein breites Portfolio an Sicherheitsmikrocontrollern und Sicherheitsmemories für Chipkarten und Sicherheitsanwendungen. Nach Angaben des US- Marktforschungsunternehmens Frost & Sullivan vom Oktober 2010 waren wir weiterhin Marktführer mit einem Marktanteil von 27 Prozent im Bereich ICs für Smart-Card-Anwendungen im Kalenderjahr 2009. Diese Position haben wir nun bereits seit 13 Jahren in Folge erreicht.

Unsere Zielmärkte zeichnen sich aus durch eine zunehmende Bedeutung von Anwendungen im Hochsicherheitsbereich, wie zum Beispiel Zahlungssysteme und Identifikation sowie durch steigende Nachfrage nach Sicherheitsanwendungen über den klassischen Chipkarten-Formfaktor hinaus.

In unserem Bereich Chip Card & Security nutzen wir unsere drei Kernkompetenzen Sicherheit, kontaktlose Kommunikation und Embedded-Control. Unsere Produkte werden in unterschiedlichsten Märkten verwendet, wobei Schwerpunkte in den Bereichen Kommunikation, Bezahlkarten, behördliche Ausweise, Zugangssysteme sowie Objektidentifikation und Plattformsicherheit zu sehen ist. Die Hauptprodukte in diesem Segment umfassen:

- Kontaktbasierte und kontaktlose Sicherheitsmikrocontroller-ICs für Ausweisdokumente (zum Beispiel Reisepässe, Personalausweise und Gesundheitskarten), Bezahlkarten, SIM-Karten und Bezahlfernsehen;
- Sicherheitsspeicher für Telefonkarten, Zugangskarten und Tickets im öffentlichen Nahverkehr;
- Trusted Platform Module („TPM“) Produkte in Computern und Netzwerken;
- Sicherheitsmikrocontroller für neue Märkte für Sicherheitsanwendungen wie zum Beispiel Authentisierung von Zubehörteilen oder automatisches Auslesen von Stromzählern; sowie
- RFID-ICs zur Objektidentifizierung (zum Beispiel in der Logistik).

### AUFTRAGSBESTAND

Auf Grund der Zyklizität der Industriebranche schließen unsere Kunden gewöhnlich keine langfristigen Festpreisverträge für Standardhalbleiter (dies betrifft nicht kundenspezifische Produkte) ab. Das hat als Konsequenz, dass die Marktpreise für unsere Standardhalbleiter und unsere Umsätze mit diesen Produkten von Periode zu Periode stark schwanken können. Die meisten unserer Standardprodukte werden zu einem Festpreis angeboten, und Aufträge werden mit dem Verständnis abgeschlossen, dass Preis und andere Vertragskonditionen angepasst werden können, um die Marktbedingungen zum Lieferzeitpunkt widerspiegeln zu können. Dies ist eine gebräuchliche Handhabung in der Industrie, um es unseren Hauptkunden zu ermöglichen, das Lieferdatum zu verschieben oder bestehende Aufträge zu streichen. Aus diesen Gründen sind wir der Ansicht, dass der Auftragsbestand von Standardprodukten im Allgemeinen kein verlässlicher Indikator für zukünftige Umsätze ist.

Für unsere kundenspezifischeren Produkte werden die Aufträge in der Regel länger im Voraus platziert. Stückzahl und Preis von solchen Produkten können dennoch zwischen der Auftragsabgabe und der Auslieferung variieren, worin sich Änderungen in Kundenwünschen und Branchengegebenheiten widerspiegeln. In Zeiten von Überkapazität und fallenden Verkaufspreisen werden die Bestellungen der Kunden meistens nicht so weit vor dem Auslieferungsdatum abgegeben wie in Zeiten von Kapazitätsengpässen. Immer mehr Kunden bitten um Rahmenvereinbarungen, welche auf einer rollierenden Vorausplanung basieren. Der daraus resultierende niedrige Auftragsbestand reduziert unsere Möglichkeit, die optimalen Mengen und zukünftigen Umsätze verlässlich zu planen. Im Ergebnis ist festzuhalten, dass wir uns nicht ausschließlich auf den Auftragsbestand verlassen, um unser Geschäft zu steuern, und ihn nicht nutzen, um unsere Leistung zu beurteilen.

### KUNDEN

Wir verkaufen unsere Produkte an Kunden in allen Regionen der Welt, vorrangig in Europa, in den USA, in Asien-Pazifik und in Japan.

Wir bedienen rund 370 Direktkunden (davon rund 40 Kunden ausschließlich des Mobilfunkgeschäfts).

Auf keinen Kunden unserer fortgeführten Aktivitäten entfiel im Geschäftsjahr 2010 mehr als 10 Prozent unserer Umsatzerlöse. Mit unseren Top-25-Kunden unserer fortgeführten Aktivitäten haben wir in Summe in etwa 72 Prozent unseres Umsatzes erzielt.

Der Anteil der Umsatzerlöse der fortgeführten Aktivitäten, welchen wir über Großhändler (sogenannte Distributoren) erzielen, beträgt ungefähr 29 Prozent.

Einige bedeutende Kunden von jedem unserer Kernbereiche sind in der obigen Tabelle im Abschnitt „Wichtige Produkte und Applikationen“ aufgeführt.

Wir fokussieren unsere Vertriebsaktivitäten auf kundenspezifische Halbleiter, um die Wünsche unserer Kunden zu erfüllen. Ziel ist es, unsere Produkte und Lösungen in Kooperation mit unseren Kunden zu entwickeln, um deren bevorzugter Lieferant zu werden. Wir streben den Aufbau von stabilen Kundenbeziehungen zu Unternehmen an, die führend in ihren Marktsegmenten sind. Die von diesen Kunden nachgefragten technologischen Anforderungen stellen eine große Herausforderung dar. Dies führt dazu, dass wir das entsprechende Applikationswissen erlangen, welches erforderlich ist, um im Halbleitergeschäft wettbewerbsfähig zu bleiben.

Unsere Vertriebszentren sind weltweit verteilt. Diese globale Präsenz ermöglicht es uns nicht nur, schnell auf die Wünsche unserer Kunden einzugehen, sondern auch, in den Produkt-Entwicklungsprozess unserer Kunden involviert und dadurch in einer besseren Position zu sein, kundenspezifische ICs und Lösungen für deren neue Produkte zu entwickeln. Die Kooperation mit Kunden, die führend in ihrem jeweiligen Markt sind, ermöglicht es uns, früh Einblick in deren Bedürfnisse und die zukünftige Entwicklung ihrer Märkte zu gewinnen. Kontakte zu den Kunden unserer Kunden sowie Marktstudien über den Endverbraucher ermöglichen es uns zusätzlich, ein effektiver Partner für unsere Kunden zu sein.

Wir sind davon überzeugt, dass ein Schlüsselement unseres Erfolgs die Fähigkeit ist, ein umfassendes Portfolio an technologischen Ressourcen und wettbewerbsfähigen Leistungen anzubieten, um unsere Kunden dabei zu unterstützen, innovative und wettbewerbsfähige Produkte bereitzustellen. Diese Fähigkeit ermöglicht es uns, Schwankungen in der Nachfrage verschiedener Märkte auszugleichen. Dies ist ein wichtiger Faktor, um uns von vielen unserer Wettbewerber zu differenzieren.

**WETTBEWERB**

Die Märkte für unsere Produkte sind von intensivem Wettbewerb geprägt. Wir begegnen einer starken Konkurrenz in jedem unserer Produktbereiche und wir stehen im Wettbewerb mit anderen großen internationalen Halbleiterunternehmen. Einige dieser Unternehmen haben wesentlich größere finanzielle und sonstige Ressourcen, mit denen sie Forschung, Entwicklung, Produktion, Marketing und Distribution für ihre Produkte betreiben können. Kleinere Nischenunternehmen werden in der Halbleiterindustrie ebenfalls immer bedeutender. Halbleiter-Auftragsfertiger haben in den vergangenen Jahren ihre Kapazität massiv ausgebaut. In speziellen Geschäftsbereichen kooperieren wir mit Unternehmen, die in anderen Bereichen unsere Wettbewerber sind.

Die folgende Tabelle zeigt unsere wesentlichen Wettbewerber für jedes operative Segment unserer fortgeführten Aktivitäten (in alphabetischer Reihenfolge):

| 05 WESENTLICHE WETTBEWERBER |                                                                                                                                               | 01 |
|-----------------------------|-----------------------------------------------------------------------------------------------------------------------------------------------|----|
| Automotive                  | Freescale, NXP, ON Semiconductor, Renesas, STMicroelectronics, Texas Instruments                                                              | 02 |
| Industrial & Multimarket    | Fairchild, Fuji Electric, International Rectifier, Intersil, Mitsubishi, NXP, Renesas, STMicroelectronics, Texas Instruments, Toshiba, Vishay | 03 |
| Chip Card & Security        | NXP, Renesas, Samsung, STMicroelectronics                                                                                                     | 04 |

Differenzierungskriterien im Wettbewerb sind das Produkt-Design, die technische Leistungsfähigkeit, der Preis, die Produktionskapazität, die Produkteigenschaften, die Vereinbarkeit von Produktsystemen, die Lieferzeit, die Qualität sowie der Grad an technischer Unterstützung, den wir unseren Kunden bieten können. Innovation und Qualität sind Wettbewerbsfaktoren für alle Segmente. Produktionskapazitäten ebenso wie Liefertreue, auch binnen sehr kurzer Zeit, spielen des Weiteren wichtige Rollen.

Unser Wettbewerbserfolg hängt von verschiedenen Faktoren ab, die teilweise außerhalb unserer Kontrolle liegen. Sie schließen ein:

- erfolgreiche und rechtzeitige Entwicklung von neuen Produkten, Serviceleistungen und Produktionsprozessen
- Produktleistung und Qualität
- Produktionskosten, Ausbeute und Produktverfügbarkeit
- Preisfestsetzung
- unsere Fähigkeit, Änderungen in der Nachfrage unserer Kunden durch Produktionsanpassungen in unserer Fabrikation umzusetzen
- unsere Fähigkeit, Lösungen anzubieten, die die spezifischen Wünsche unserer Kunden befriedigen
- Kompetenz und Mobilität unseres Vertriebs, des technischen Supports und der Marketing Organisation
- die Zuverlässigkeit unserer Lieferkette für Leistungen, die wir ausgliedern und die Lieferung von Produkten, Rohstoffen und Leistungen von Dritten, die wir für unsere Produktion benötigen.

## DIE HALBLEITERINDUSTRIE UND FAKTOREN MIT EINFLUSS AUF UNSER GESCHÄFT

Unser Geschäft und die Halbleiterindustrie sind allgemein durch eine hohe Zyklizität gekennzeichnet. Charakteristisch sind konstante und rapide technologische Veränderungen, schnelle Produktalterung und plötzliche Preiserosion, die kontinuierliche Entstehung neuer Standards, kurze Produktlebenszyklen und starke Schwankungen bei Produktangebot und -nachfrage.

### DARSTELLUNG DES HALBLEITERMARKTS IM GESCHÄFTSJAHR 2010

Gemäß World Semiconductor Trade Statistics (Oktober 2010) expandierte der Welt-Halbleitermarkt (auf US-Dollar-Basis) in den ersten neun Monaten des Kalenderjahrs 2010 um 41 Prozent gegenüber dem gleichen Zeitraum des Vorjahrs, nachdem er im Kalenderjahr 2009 um rund 12 Prozent (iSuppli, September 2010) zurückgegangen war. Im September 2010 erwartete iSuppli für das gesamte Kalenderjahr 2010 einen Anstieg von 32 Prozent. iSuppli erwartet in Amerika und Asien-Pazifik (ausgenommen Japan) einen Nachfrageanstieg von jeweils rund 33 Prozent in Kalenderjahr 2010. Für den japanischen Markt wird ein Wachstum des Halbleitermarkts von 30 Prozent und für den europäischen Markt von 29 Prozent vorausgesagt.

### ZYKLIZITÄT

Der Gesamtmarkt für Halbleiterprodukte zeichnet sich durch eine hohe Volatilität aus. Angebot und Nachfrage schwanken zyklisch und verursachen deutliche Schwankungen in Preisen und Gewinnspanne. Basierend auf iSuppli (September 2010), betrug das Gesamtmarktwachstum (auf US-Dollar-Basis) 2006 10,1 Prozent im Vergleich zum Vorjahr und 3,8 Prozent im Jahr 2007, bevor der Gesamtmarkt im Kalenderjahr 2008 um 5,3 Prozent und im Kalenderjahr 2009 um 11,9 Prozent schrumpfte. iSuppli geht von einem Wachstum des Gesamtmarktes von 32,0 Prozent im Kalenderjahr 2010 aus.

Wir sind bestrebt, den Einfluss der Zyklizität mit Hilfe von kontinuierlichen Investitionen in Fertigungskapazitäten über den gesamten Zyklus und mit Hilfe von Kooperationsvereinbarungen sowie Auftragsfertigungsabkommen zu mindern, um auf Zyklusänderungen flexibler reagieren zu können.

Durch den Verkauf des Mobilfunkgeschäfts sind wir weniger von kurzen Markt- und Produktzyklen abhängig, was uns ermöglicht, uns auf die Weiterentwicklung der Segmente Automotive, Industrial & Multimarket und Chip Card & Security zu konzentrieren, die alle Marktführer in ihren jeweiligen Halbleiterzielmärkten sind. Zusammen bilden sie einen starken Verbund, der auf technologischen Synergien aufbaut. Der Verkauf des Mobilfunkgeschäfts schließt damit – nach den vorangegangenen Ausgliederungen des Speichergeschäfts

## 06 WELTWIRTSCHAFTSWACHSTUM IN %

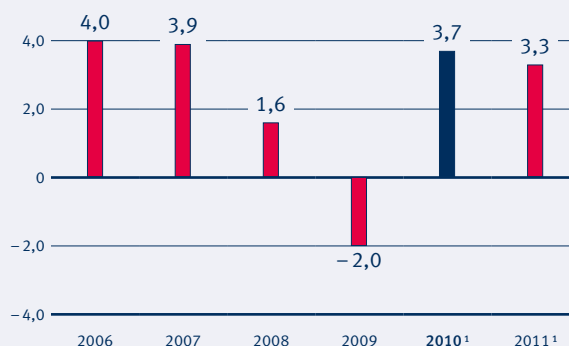

Quelle: Internationaler Währungsfonds; Stand: Oktober 2010.  
1 Geschätzt.

## 07 ENTWICKLUNG DES HALBLEITERMARKTS IN MRD. US-\$

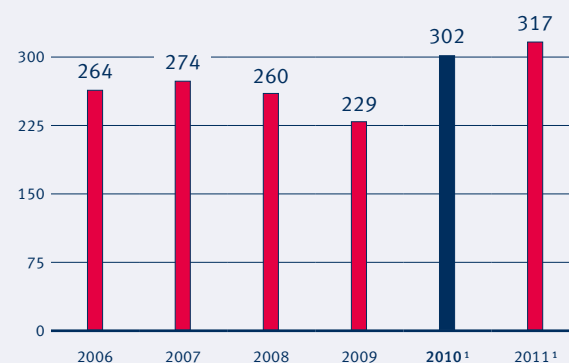

Quelle: iSuppli, Application Market Forecast Tool (AMFT), Q3 2010, Regional Shipments, 21. September 2010.  
1 Geschätzt.

und dem Verkauf von Wireline Communications – unsere strategische Fokussierung auf profitable, wachstumsstarke und weniger volatile Halbleitergeschäfte ab.

### SUBSTANZIELLE FORSCHUNGS-, ENTWICKLUNGS- UND INVESTITIONSAUSGABEN

Die Halbleiterproduktion ist sehr kapitalintensiv. Die für eine wettbewerbsfähige Kostenposition notwendigen Produktionskapazitäten fordern hohe Investitionen in Fertigungsanlagen. Nach einer Studie von IC Insights, Inc. haben die 10 Unternehmen mit dem größten Investitionsbudget in der Halbleiterindustrie einen Anteil von 69 Prozent an den von der Halbleiterindustrie insgesamt für das Kalenderjahr 2010 geplanten Investitionsausgaben. Fertigungsprozesse und Produktgestaltung basieren auf Spitzentechnologien, denen beträchtliche F&E-Kosten vorausgehen. Der Großteil der Betriebskosten einer Fertigungsstätte sind Fixkosten; daher können sich Fluktuationen in der Auslastung der Kapazitäten signifikant auf die Profitabilität auswirken.

Während sich der Markt für Standardprodukte durch eine stark marktabhängige Preisfindung auszeichnet, die sich größtenteils unserem Einfluss entzieht, herrschen auf dem Markt für Spezialprodukte längerfristige Preis- und Mengenvereinbarungen vor. In beiden Fällen ist die Senkung der Herstellungskosten durch kontinuierliche Steigerung unserer Produktivität ein Schlüssel zur Sicherung der Profitabilität.

Ungefähr zwei Drittel unserer internen Scheibenfertigungskapazität wird für die Produktion von Leistungshalbleitern für Anwendungen in der Automobilindustrie und Industrieelektronik verwendet. Wir haben Fertigungsstätten für Leistungshalbleiter in Regensburg, Deutschland, in Villach, Österreich, und in Kulim, Malaysia. Wir zielen sowohl auf die Weiterentwicklung von Leistungshalbleitern, zum Beispiel mit der Einführung der Kupfer-Metallisierung und mit speziellen Prozessen zur Herstellung immer dünnerer Wafer zur Optimierung des elektrischen Widerstands, als auch auf die kontinuierliche Produktivitätssteigerung ab.

Ein weiteres Drittel der internen Scheibenfertigungskapazität wird für die Fertigung von Logikchips für Anwendungen ebenfalls in der Automobilindustrie, im Sicherheitsbereich und im Consumer-Markt genutzt. Hierzu haben wir eine Fertigungsstätte in Dresden, Deutschland, und arbeiten mit Auftragsfertigern zusammen. Diese sind die Taiwan Semiconductor Manufacturing Company („TSMC“), United Microelectronics Corporation („UMC“), Global Foundries Incorporation („GF“), IBM und ALTIS. Bei den Auftragsfertigern werden Produkte von 130 Nanometer bis 65 Nanometer Strukturbreite für Standard-Logik-Anwendungen sowie Flash-Anwendungen produziert.

Zur Reduzierung unserer Fertigungs- und Entwicklungskosten dienen uns langfristige Vereinbarungen mit den Auftragsfertigern und Entwicklungsallianzen wie die International Semiconductor Development Alliance („ISDA“), eine Technologieallianz unter anderen mit IBM, GF, Freescale Semiconductor, Inc., NEC Corporation, Samsung Electronics Ltd., STMicroelectronics NV und Toshiba Corporation.

Wir erwarten eine fortlaufende Erhöhung der Stückzahlen, insbesondere durch die weitergehende Verkleinerung der Chip-Strukturen, die Migration in Richtung Produktion auf größerem Scheibendurchmesser, die Erhöhung des Durchsatzes der Fertigungsanlagen und die Ausweitung der Fertigungskapazität.

Wir betreiben Montage- und Test-Standorte für unsere Leistungshalbleiter in Malacca, Malaysia und Batam, Indonesien. Weitere Backend-Standorte sind Wuxi (VR China), Regensburg und Warstein (Deutschland) und Cegled (Ungarn) sowie Singapur und Morgan Hill (USA). Wir ergänzen unsere internen Fertigungskapazitäten im Backend durch Auftragsfertiger wie Amkor Technology, Inc. und Advanced Semiconductor Engineering, Inc.

**FORSCHUNG UND ENTWICKLUNG**

Unsere Standorte für Forschungs- und Entwicklungsaktivitäten sind weltweit verteilt. Die folgende Tabelle zeigt unsere wichtigsten Forschungs- und Entwicklungsstandorte und deren jeweilige Kompetenzbereiche für unsere fortgeführten Aktivitäten.

**08 FORSCHUNGS- UND ENTWICKLUNGSSTANDORTE**

| Standort                      | Kompetenzbereiche unserer fortgeführten Aktivitäten                                                                                                                                                                                                                                                    |
|-------------------------------|--------------------------------------------------------------------------------------------------------------------------------------------------------------------------------------------------------------------------------------------------------------------------------------------------------|
| Bangalore, Indien             | IC-, Software- und Systementwicklung für Automotive- und Industrial- Produkte, CAD flow und library Entwicklung                                                                                                                                                                                        |
| Bukarest, Rumänien            | Leistungshalbleiter für Mixed-Signal-Anwendungen, Chipkarten-ICs                                                                                                                                                                                                                                       |
| Dresden, Deutschland          | Advanced-Technology-Entwicklung                                                                                                                                                                                                                                                                        |
| Graz, Österreich              | Contactless Systeme, Automotive Power Systeme, Sensor Produkte                                                                                                                                                                                                                                         |
| Linz, Österreich              | RF-IC- und Software-Entwicklung für Sensorprodukte                                                                                                                                                                                                                                                     |
| Morgan Hill, Kalifornien, USA | Entwicklung für HF-Leistungstransceiver für Basisstationen                                                                                                                                                                                                                                             |
| München, Deutschland          | Hauptproduktentwicklungsstätte. Technologieintegration, CAD-Entwicklungsumgebung, Bibliotheksentwicklung, IC-, Software- und Systementwicklung für Mikrocontroller, ASICs, Chipkarten-ICs, Leistungselektronik für Automobilanwendungen und Industrieranwendungen, Entwicklung von Fertigungsprozessen |
| Regensburg, Deutschland       | Gehäuseentwicklung, Entwicklung von Fertigungsprozessen                                                                                                                                                                                                                                                |
| Singapur                      | IC-, Software- und Systementwicklung für Automobil- und Industrieprodukte, Gehäusetechnologieentwicklung                                                                                                                                                                                               |
| Torrance, Kalifornien, USA    | Entwicklung von ICs für den digitalen Regelkreis in Schaltnetzteilen                                                                                                                                                                                                                                   |
| Villach, Österreich           | Entwicklung von Leistungshalbleitern, Entwicklung von Mixed-Signal-ICs für Automobil- und Industrieranwendungen                                                                                                                                                                                        |

01  
02  
03  
04  
05  
06  
07  
08  
09  
10  
11  
12  
13  
14  
15

Zum 30. September 2010 waren weltweit 5.771 Mitarbeiter in unseren Forschungs- und Entwicklungszentren beschäftigt (einschließlich der Mitarbeiter, die mit dem Verkauf des Mobilfunkgeschäfts auf Intel übergehen sollen). Dies entspricht 22 Prozent der gesamten Belegschaft. Wir haben in den letzten Jahren den Schwerpunkt insbesondere auf die Ausweitung unserer Forschungs- und Entwicklungsstandorte mit einer attraktiven Kostenstruktur und gutem Zugang zu den führenden Märkten und Kunden gelegt. Wir sind davon überzeugt, dass der Einsatz von Fachkräften im Forschungs- und Entwicklungsbereich an kostengünstigen Standorten es uns ermöglicht, unsere technische Position zu behaupten, während wir die Ausgaben unter Kontrolle halten können.

Unsere Forschungs- und Entwicklungsaktivitäten konzentrieren sich auf halbleiterbasierte Produkt- und System-Entwicklungen sowie auf Verfahrenstechnologien. Wesentliche Forschungs- und Entwicklungsaktivitäten reichen von der Entwicklung von führenden Hochfrequenz-, Analog- und Leistungs-ICs, komplexen digitalen System-on-chip-Lösungen, Leistungs- und Kleinsignal-Einzelhalbleitern, Sensoren, Software-Bausteinen, CAD-Entwicklungsumgebungen und -Bibliotheken sowie Gehäusetechnologien.

Unsere ICs werden in der Regel in komplexen System-on-chip-Ausführungen eingesetzt und erfordern ein breites Spektrum an geistigem Eigentum und technisch ausgereiften Design-Methodiken, um eine hohe Leistung mit niedrigem Energieverbrauch zu kombinieren. Wir sind der Überzeugung, dass unser Angebot an geistigem Eigentum und Methodiken für Logik-ICs, besonders unsere Fähigkeit, verschiedene ICs mit komplexen Software-Produkten zusammenzuführen, es uns ermöglichen wird, unsere Position im Markt für Logik-IC zu festigen. Wir betrachten unsere Erfahrung und Know-how in den Analog-, Mixed-Signal und HF-Anwendungen als besonderes Wettbewerbsvorteil.

Unsere Leistungs-ICs und diskreten Leistungstransistoren besitzen ein hochentwickeltes Co-Design von Schaltkreisen und Fertigungsverfahren, um Parameter wie Durchlasswiderstand, Schaltgeschwindigkeit und Zuverlässigkeit zu verbessern. Wir glauben, dass unsere Erfahrung in allen Bereichen der Leistungselektronik für höchste Spannungen und Ströme es uns ermöglichen wird, unsere führende Entwicklungsposition zu halten und ein führender Lieferant für Leistungshalbleiter zu bleiben.

Ein weiterer Schwerpunkt unserer Forschungs- und Entwicklungsaktivitäten liegt auf den Prozesstechnologien. Wir entwickeln kontinuierlich unsere Herstellungsverfahren für Leistungshalbleiter weiter, um unsere Position als Marktführer aufrechtzuerhalten. Die Anforderungen für Automobil- und Industrieanwendungen, wie beispielsweise für Hochtemperatur, hohe Schaltleistung und Verlässlichkeit, erlauben eine Differenzierung vom Wettbewerb durch firmeninterne Forschung und Entwicklung. Für CMOS-Fertigungstechnologien von 65 Nanometer Strukturbreite und kleiner verfolgen wir

eine Strategie aus Allianzen mit verschiedenen Partnern und Entwicklungskooperationen, um auch zukünftig Zugang zu wettbewerbsfähigen Fertigungstechnologien mit finanziell tragbaren Kosten zu haben. Unsere Fertigungstechnologien erlauben die Kombination verschiedener Funktionseigenschaften, zum Beispiel geringer Stromverbrauch, analoge Schaltdesigns und Leistungselektronik.

### Produktionsstätten

Etwa die Hälfte unserer internen Fertigungskapazitäten wird für die Produktion von Leistungs-Halbleitern genutzt, die in Automobil- und Industrie-Applikationen Verwendung finden. Unsere Fabriken für die Waferherstellung von Leistungshalbleitern liegen in Regensburg, Deutschland, in Villach, Österreich, und in Kulim, Malaysia. Wir wollen uns weiterhin auf die Weiterentwicklung von Leistungshalbleitern sowie die Einführung von Kupfermetallisierung und Sonderverfahren fokussieren, um dünnere Wafer herzustellen und dadurch den elektrischen Widerstand zu optimieren.

## 09 PRODUKTIONSSTÄTTEN

| Standort                             | Anwendung/Funktion                                            |
|--------------------------------------|---------------------------------------------------------------|
| <b>Scheibenfertigung (Front-End)</b> |                                                               |
| Dresden, Deutschland                 | Logikanwendungen, Mikrocontroller, Flash                      |
| Kulim, Malaysia                      | Power, Smart Power, Flash                                     |
| Regensburg, Deutschland              | Power, Smart Power, Sensoren, Mixed Signal                    |
| Villach, Österreich                  | Power, Smart Power, diskrete Halbleiter                       |
| <b>Gehäuse (Back-End) und Test</b>   |                                                               |
| Batam, Indonesien                    | Power und Non-Power ICs                                       |
| Cegled, Ungarn                       | Power Module                                                  |
| Morgan Hill, USA                     | Hochfrequenz-Leistungsbausteine                               |
| Regensburg, Deutschland              | Chipkarten Module, Sensoren, Pilotlinien                      |
| Singapur                             | Non-Power ICs, Test                                           |
| Warstein, Deutschland                | Power Module                                                  |
| Wuxi, China                          | diskrete Halbleiter, Chipkarten Module                        |
| Malacca, Malaysia                    | diskrete Halbleiter, Leistungshalbleiter, Sensoren, Logik ICs |

### TECHNOLOGISCHE ENTWICKLUNG UND WETTBEWERB

Die Verkaufspreise pro Stück sind volatil und sinken üblicherweise wegen der technologischen Entwicklung und des Wettbewerbsdrucks im Zeitverlauf. Obwohl Logikchip-Produkte zu einem gewissen Grad anwendungsspezifisch sind, sinken die Verkaufspreise mit der Weiterentwicklung der Technologie.

Unser Ziel ist es, die Auswirkungen der sinkenden Preise auf unsere Erlöse dadurch zu kompensieren, dass wir das Verkaufsvolumen erhöhen, den Produkt-Mix optimieren sowie kontinuierlich unsere Stückkosten reduzieren. Erhöhungen im Verkaufsvolumen hängen teilweise von

Produktivitätsverbesserungen bei der Herstellung ab, zum Beispiel durch die Reduzierung der Strukturgrößen.

### SAISONABHÄNGIGKEIT

Unsere Umsatzerlöse unterliegen saisonalen und zyklischen Einflüssen. Das umsatzstärkste Quartal ist erfahrungsgemäß das vierte Quartal des Geschäftsjahrs. Diese kurzfristigen Zyklen sind jedoch beeinflusst von längerfristigen Zyklen, die aus den Neuerungen der technischen Lösungen unserer Kunden, die unsere Produkte beinhalten, resultieren. Die kurz- und mittelfristige Zyklizität unserer Umsätze reflektiert die Schwankungen in Angebot und Nachfrage nach den Produkten, die unsere Halbleiter beinhalten. Wenn antizipierte Umsätze und Lieferungen nicht wie erwartet stattfinden, können in einem solchen Quartal überproportional hohe Ausgaben und Lagerbestände auftreten, was das Ergebnis des Quartals und möglicherweise das Ergebnis der folgenden Quartale negativ beeinflussen kann.

### PRODUKTENTWICKLUNGSZYKLEN

Bei unseren Produkten kann sich die Zeitspanne vom Test über die Evaluierung und Kundenakzeptanz bis hin zur Serienfertigung über mehrere Monate bis zu mehr als einem Jahr hinziehen. Wegen der Länge dieses Zyklus kann es zu signifikanten zeitlichen Verzögerungen zwischen den Aufwendungen für F&E sowie Marketingaktivitäten und dem Aufbau von Vorräten und der Realisierung der entsprechenden Erlöse kommen.

### AKQUISITIONS- UND DESINVESTITIONSSTRATEGIE

Ein Schlüsselfaktor unserer Kerngeschäftsstrategie ist es, die Entwicklungszeit neuer Technologien und Produkte und deren Markteinführung zu verkürzen und unser existierendes Produktangebot, die Marktabdeckung, den Einsatz von Ingenieuren sowie unsere technologischen Kompetenzen zu optimieren. Wir planen, auch weiterhin sich bietende strategische Möglichkeiten zu evaluieren. Dies umfasst Unternehmensakquisitionen, strategische Partnerschaften, Kapitalbeteiligungen und auch den Erwerb oder Verkauf von Vermögenswerten oder Geschäftsaktivitäten.

### GEISTIGES EIGENTUM

Bedingt durch den High-Tech-Charakter der Halbleiterindustrie sind immaterielle Vermögenswerte, die sich auf geschützte Technologien beziehen, von großer Bedeutung. Dieses geistige Eigentum umfasst Patente, Urheberrechte, Geschäftsgeheimnisse, Markenzeichen, Gebrauchsmuster und Designs. Unsere Patente betreffen im Wesentlichen den Aufbau von integrierten Schaltkreisen und Prozesstechnologien. Wir sind der Ansicht, dass unser geistiges Eigentum ein wertvoller Vermögenswert ist, nicht nur zum Schutz unserer Technologieinvestitionen, sondern auch eine entscheidende Grundvoraussetzung für gegenseitige Lizenzvereinbarungen mit Dritten. Infineon erzielt außerdem Umsatzerlöse aus der Lizenzierung

unseres geistigen Eigentums, insbesondere aus Technologie- sowie gegenseitigen Patent-Lizenzvereinbarungen.

Zum 30. September 2010 besitzen wir mehr als 17.700 Patentanträge oder Patente (im Folgenden als „Patente“ bezeichnet) in über 40 Ländern weltweit. Diese Patente gehören zu ungefähr 7.600 „Patentfamilien“ (jede Patentfamilie umfasst alle Patente, die auf die gleiche Erfindung zurückzuführen sind).

In etwa 2.650 dieser Patentanträge und Patente (zirka 1.000 Patentfamilien) werden im Rahmen des Vollzugs des Verkaufs des Mobilfunkgeschäfts auf Intel übertragen.

IFRS erfordert, dass die Kosten für Entwicklungsaktivitäten von selbsterstelltem geistigem Eigentum bei Vorliegen bestimmter Voraussetzungen aktiviert werden. Voraussetzungen für die Aktivierung sind, dass die Entwicklungskosten verlässlich ermittelt werden können, dass das Produkt oder der Prozess technisch und wirtschaftlich realisierbar sowie ein zukünftiger wirtschaftlicher Nutzen wahrscheinlich ist. Darüber hinaus müssen wir die Absicht haben und über ausreichende Ressourcen verfügen, die Entwicklung abzuschließen und den Vermögenswert zu nutzen oder zu verkaufen. Die aktivierten Kosten umfassen die Materialkosten, die Fertigungslöhne und die direkt zurechenbaren Gemeinkosten, soweit diese dazu dienen, die Nutzung des Vermögenswerts vorzubereiten. Entwicklungskosten, welche die Aktivierungsvoraussetzungen nicht erfüllen, werden als Aufwand erfasst. Im Geschäftsjahr 2010 haben wir € 79 Millionen (davon entfielen auf das Mobilfunkgeschäft € 52 Millionen) aktiviert. Im Vorjahr aktivierten wir Entwicklungskosten in Höhe von € 47 Millionen (davon entfielen auf das Mobilfunkgeschäft und auf das Wireline-Communications-Geschäft insgesamt € 31 Millionen). Zum 30. September 2010 betrug der Buchwert der aktivierten Entwicklungskosten für die fortgeführten Aktivitäten € 53 Millionen.

Bewertungsansätze für erworbenes geistiges Eigentum, insbesondere im Falle eines Erwerbs im Zusammenhang mit Unternehmensakquisitionen, gestalten sich in der Regel äußerst komplex und sind schwer zu schätzen. Geistiges Eigentum, welches von anderen durch Lizenzerwerb oder im Rahmen von Unternehmenszusammenschlüssen erworben wurde, wird ebenfalls in der Bilanz geführt und über die erwartete technische und wirtschaftliche Lebensdauer abgeschrieben. Zum 30. September 2010 betrug der Buchwert des bilanzierten erworbenen geistigen Eigentums (ohne als zur Veräußerung ausgewiesene Beträge) € 13 Millionen.

### HERAUSFORDERUNGEN IN DER ZUKUNFT UND UNTERNEHMENSSTEUERUNGSGRÖSSEN

Unser künftiger Erfolg wird vor allem von unserer Fähigkeit abhängen, weiterhin Spitzentechnologien zu entwickeln und unser Produktportfolio zu optimieren. Wir müssen beide Ziele erreichen, um der Nachfrage nach verschiedensten Halbleiterprodukten flexibel begegnen zu können. Wir sind

01  
02  
03  
04  
05  
06  
07  
08  
09  
10  
11  
12  
13  
14  
15  
16  
17  
18  
19  
20  
21

der Überzeugung, dass die Fähigkeit, ein breites Portfolio anzubieten und flexibel zu fertigen, in zunehmendem Maße für unseren langfristigen Erfolg auf vielen Märkten in der Halbleiterindustrie wichtig sein wird. Die Entwicklung und Erhaltung eines Technologievorsprungs, von Entwicklungs- und Fertigungsallianzen, einschließlich der Auftragsfertigung durch Dritte, sowie die beständigen Bemühungen zur Verbreiterung des Portfolios werden es uns erleichtern, auf veränderte Marktbedingungen zu reagieren und unsere finanzielle Ertragskraft zu stärken.

Als High-Tech-Unternehmen agieren wir in einem wachsenden Markt und in einem äußerst dynamischen wirtschaftlichen Umfeld. Zum Erhalt unserer führenden Marktposition sind kontinuierlich Innovationen bei Produkten und Technologien notwendig. Unsere Fertigungstechnologien sind in vielen Marktsegmenten ein wichtiges Differenzierungsmerkmal. Deshalb müssen wir stetig in Forschung und Entwicklung wie auch in unsere Fertigungen investieren. Der Aufbau zusätzlicher Fertigungskapazitäten erfolgt dabei mit Blick auf die Erschließung von Wachstumspotenzialen, aber auch unter Berücksichtigung einer bestmöglichen Kapazitätsausnutzung zur Vermeidung von Leerstandskosten.

Profitables Wachstum versetzt uns in die Lage, unser Geschäft und unsere Investitionen aus eigenen Mitteln zu finanzieren. Dies erfordert jedoch eine effiziente Nutzung unserer finanziellen Ressourcen.

Als Konsequenz daraus fokussieren wir uns auf drei Erfolgsfaktoren:

- Profitabilität des Geschäftsportfolios
- effektives Cash-Flow-Management
- effizienter Kapitaleinsatz

Wir nutzen ein umfassendes Controllingssystem zur Steuerung des Geschäftes entlang dieser drei Erfolgsfaktoren. Dies umfasst Finanzkennzahlen ebenso wie operative Kennzahlen. Die zur Steuerung herangezogenen Informationen stammen aus der jährlichen Langfristplanung, dem quartalsweisen Forecasting sowie aus Ist-Daten. Dies erlaubt es unserem Top-Management, Entscheidungen zu treffen, die auf einer fundierten Informationsbasis bezüglich der aktuellen Situation und der erwarteten Entwicklung der wirtschaftlichen und operativen Leistungsfähigkeit basieren.

Der Vorstand führt regelmäßige Durchsprachen mit den Verantwortlichen der Geschäftsbereiche, der Fertigungsbereiche und der Zentralfunktionen durch. Der Fokus dieser Durchsprachen liegt auf den Haupttreibern für Profitabilität, Cash-Flow und Kapitaleffizienz. Die Bewertung basiert dabei auf Finanzkennzahlen wie Auftragseingang, Umsatz, Bruttomarge, Funktionskosten, Nettoumlaufvermögen und Investitionen. Zusätzlich werden ausgewählte nicht-finanzielle Kennzahlen betrachtet wie zum Beispiel die Kapazitätsauslastung der

Fertigung, um einem Anstieg von Leerstandskosten rechtzeitig gegensteuern zu können.

Um die Wirkung dieser Steuerungsparameter auf die definierten Erfolgsfaktoren zu bewerten, nutzen wir die folgenden drei übergreifenden Unternehmenskennzahlen:

- das Segmentergebnis zur Bewertung der operativen Profitabilität unseres Geschäft,
- den Free-Cash-Flow zur Bewertung der Höhe des Mittelzuflusses ohne Finanzierungstätigkeit und
- den Return on Capital Employed (ROCE) zur Bewertung der Kapitaleffizienz.

Diese drei Finanzkennzahlen sind auch die Eckpfeiler unseres Systems zur variablen Vergütung. Ein erheblicher Anteil der variablen Gehaltsbestandteile von Mitarbeitern und Führungskräften ist direkt an diese Kennzahlen gekoppelt.

### Segmentergebnis

Wir haben das Segmentergebnis definiert als Betriebsergebnis, ohne Berücksichtigung von Wertminderungen von Vermögenswerten (Saldo), Aufwendungen für Umstrukturierungen und andere Schließungskosten (Saldo), Aufwendungen für aktienbasierte Vergütungen, akquisitionsbedingten Abschreibungen und Gewinne (Verluste), Gewinne (Verluste) aus dem Abgang von Vermögenswerten, Geschäftsbereichen oder Beteiligungen an Tochtergesellschaften und sonstige Erträge (Aufwendungen), einschließlich Kosten für Gerichtsverfahren.

Wir nutzen diese Kennzahl zur Bewertung der operativen Leistungsfähigkeit unserer Segmente. Sowohl das Gesamtunternehmen als auch die einzelnen Segmente haben das Ziel, über den gesamten Marktzyklus eine Segmentergebnis-Marge zu erwirtschaften, die deutlich über den Kapitalkosten liegt.

Die wesentlichen Hebel zur Steigerung des Segmentergebnisses sind die Bruttomarge und die Höhe der operativen Kosten. Die Bruttomarge errechnet sich dabei aus den Umsätzen abzüglich der Herstellungskosten. Die operativen Kosten umfassen die Aufwendungen für Forschung und Entwicklung sowie für Vertrieb und Verwaltung.

### Free-Cash-Flow

Wir definieren den Free-Cash-Flow als Mittelzufluss (-abfluss) aus laufender Geschäftstätigkeit und Mittelzufluss (-abfluss) aus Investitionstätigkeit aus fortgeführten Aktivitäten, bereinigt um den Kauf und Verkauf von zur Veräußerung stehenden finanziellen Vermögenswerten.

Der Free-Cash-Flow misst unsere Fähigkeit, den laufenden Betrieb und die notwendigen Investitionen aus unserem operativen Geschäft heraus zu finanzieren. Es ist unser Ziel, einen nachhaltigen positiven Free-Cash-Flow zu generieren.



Die wesentlichen Stellgrößen für den Free-Cash-Flow sind neben unserer Profitabilität ein wirksames Management des Nettoumlaufvermögens sowie die Höhe der Investitionen im Verhältnis zu den Abschreibungen.

**Return on Capital Employed (ROCE)**

Return on Capital Employed ist eine gängige Kennzahl für die Bewertung der Kapitalrentabilität. Die Gegenüberstellung des ROCE mit den gewichteten Kapitalkosten eines Unternehmens gibt Auskunft darüber, wie viel Wert nach Befriedigung der Renditeerwartungen der Eigen- und Fremdkapitalgeber geschaffen wurde. Somit dient der ROCE als Instrument der wertorientierten Unternehmenssteuerung.

ROCE ist definiert als Ergebnis nach Steuern, dividiert durch das eingesetzte Kapital. Die Kennzahl ROCE zeigt den Zusammenhang zwischen der Profitabilität und dem für den Geschäftsbetrieb notwendigen Kapital auf. Es misst, wie effizient ein Unternehmen seine Ressourcennutzung steuert.

Das eingesetzte Kapital errechnet sich aus dem Gesamtvermögen, abzüglich Zahlungsmittel und Zahlungsmitteläquivalenten, abzüglich zur Veräußerung verfügbare finanzielle Vermögenswerte, abzüglich kurzfristiger Verbindlichkeiten, bereinigt um kurzfristige Finanzverbindlichkeiten sowie kurzfristig fällige Bestandteile langfristiger Finanzverbindlichkeiten. Mit anderen Worten: Das eingesetzte Kapital ist die Summe aus Anlagevermögen, Nettoumlaufvermögen und der Differenz aus zur Veräußerung stehenden Vermögenswerten und Verbindlichkeiten.

Neben der Profitabilität wird der ROCE von der Kapitalintensität in Bezug auf das Sachanlagevermögen sowie auf das Nettoumlaufvermögen beeinflusst. Die Kapitalintensität beschreibt, in welchem Umfang Vermögenswerte eingesetzt werden müssen, um einen bestimmten Umsatz zu realisieren.

Es ist unser Ziel, einen ROCE zu erwirtschaften, der über den gewichteten Kapitalkosten liegt, um Wert für unsere Anteilseigner zu schaffen. Mit einem ROCE in Höhe von 24 Prozent haben wir dieses Ziel im Jahr 2010 klar erreicht.

**10 STEUERUNGSGRÖSSEN DER UNTERNEHMENSFÜHRUNG**

| € in Millionen, außer bei Prozentsätzen      | 2010 | 2009  |
|----------------------------------------------|------|-------|
| Segmentergebnis <sup>1</sup>                 | 635  | -167  |
| Segmentergebnis-Marge <sup>1</sup>           | 14 % | -6 %  |
| Free-Cash-Flow aus fortgeführten Aktivitäten | 573  | 274   |
| ROCE                                         | 24 % | -11 % |

<sup>1</sup> Einschließlich dem zu veräußernden Mobilfunkgeschäft.

**UNSERE AKTIE**

**Entwicklung der Infineon-Aktie**

Im Geschäftsjahr 2010 stieg der Aktienkurs der Infineon-Aktie von € 3,86 am 30. September 2009 um 32 Prozent auf € 5,08 Euro (Xetra-Schlusskurs) zum 30. September 2010 an und entwickelte sich somit deutlich besser als relevante Indizes.

Vergleichbare Indizes erlebten im Geschäftsjahr 2010 ebenfalls einen Aufwärtstrend. So verteuerte sich der Dow Jones US Semiconductor Index im selben Zeitraum um 4 Prozent, der Philadelphia Stock Exchange Semiconductor Index um 13 Prozent und der Deutsche Aktienindex DAX um 10 Prozent.

Das Jahrestief von € 3,05 erreichte die Aktie am 28. Oktober 2009 und lag damit 21 Prozent unter dem Kurs vom 30. September 2009. In der zweiten Hälfte des Geschäftsjahrs 2010, am 26. April 2010, verzeichnete die Aktie ihr Jahreshoch von € 5,54.

**Aktionärsstruktur**

Gemäß dem Wertpapierhandelsgesetz (WpHG) sind Anteilseigner dazu verpflichtet, uns sowie die Bundesanstalt für Finanzdienstleistungsaufsicht („BaFin“) darüber zu informieren, wenn deren Anteilsbesitz die Schwellenwerte von 3 Prozent, 5 Prozent, 10 Prozent, 15 Prozent, 20 Prozent, 25 Prozent, 30 Prozent, 50 Prozent oder 75 Prozent erreicht, übersteigt oder, nachdem deren Anteilsbesitz diese Schwellenwerte überstiegen hat, wieder darunter fällt. Die Mitteilung muss auch die Anzahl der gehaltenen Aktien beinhalten.

Entsprechend der uns zum 30. September 2010 vorliegenden Mitteilungen halten nachfolgend aufgeführte Anteilseigner die in der Tabelle angegebene Anzahl von Aktien:

**11 AKTIEN IM BESITZ**

| Stand zum 30. September 2010 | Anzahl      | In Prozent bezogen auf die Anzahl der Aktien am Stichtag |
|------------------------------|-------------|----------------------------------------------------------|
| Dodge & Cox                  | 106.771.627 | 9,82 %                                                   |
| Black Rock Inc.              | 55.553.415  | 5,11 %                                                   |

**Dividendenpolitik**

Für die vorangegangenen Geschäftsjahre wurde keine Dividende gezahlt. Für das Geschäftsjahr 2010 werden wir der Hauptversammlung die Ausschüttung einer Bardividende von € 0,10 je Aktie vorschlagen. Dies entspräche einem Ausschüttungsvolumen von € 109 Millionen.

Die strategische Neuausrichtung des Unternehmens auf stabilere und ertragsreichere Marktsegmente hat die nachhaltige Profitabilität und die Generierung von Liquiditätsüberschüssen zum Ziel. An dieser Entwicklung sollen die Aktionäre dauerhaft durch kontinuierliche Ausschüttungen partizipieren.

Deren Höhe wird so bemessen, dass einerseits genügend Liquiditätsreserven zur wertsteigernden Erschließung von Wachstumspotenzialen, auch in konjunkturell schwächeren Marktphasen, erhalten bleiben, andererseits kontinuierliche Dividendenzahlungen auch durch Marktzyklen hindurch möglich sind. Zusätzlich zu Dividendenausschüttungen können grundsätzlich auch andere Instrumente wie Aktienrückkäufe zur weiteren Kapitalrückführung an die Aktionäre in Betracht kommen.

Nach dem Aktiengesetz richtet sich der Betrag, der zur Dividendenzahlung an die Aktionäre zur Verfügung steht, nach dem Bilanzgewinn der Muttergesellschaft, der nach den Vorschriften des Handelsgesetzbuches (HGB) ermittelt wird. Die zentrale Orientierungsgröße für die Bestimmung der Dividendenhöhe ist aus Sicht des Unternehmens jedoch der Free-Cash-Flow, also das Verhältnis von Liquiditätszuflüssen aus dem operativen Geschäft zu Investitionsausgaben, weil diese Größe die finanzielle Leistungsfähigkeit des Geschäfts am besten widerspiegelt.

Bezogen auf den Durchschnitt der XETRA-Schlusskurse der Infineon-Aktie im Geschäftsjahr 2010 von € 4,37 macht die vorgeschlagene Dividende eine Dividendenrendite von 2,3 Prozent aus.

## ENTWICKLUNG DER ERTRAGSLAGE

### NEUAUSRICHTUNG DES INFINEON-KONZERNS UND AUSWIRKUNGEN AUF DIE DARSTELLUNG IN DER KONZERN-GEWINN-UND-VERLUST-RECHNUNG

Im Juli 2009 haben wir einen Vertrag über den Verkauf unseres Wireline-Communications-Geschäfts mit Lantiq geschlossen. Der Verkauf wurde am 6. November 2009 vollzogen. Alle Vermögenswerte und Verbindlichkeiten des Wireline-Communications-Geschäfts zum 30. September 2009 wurden in der Konzern-Bilanz zum 30. September 2009 als „zur Veräußerung stehende Vermögenswerte“ und „zur Veräußerung stehende Verbindlichkeiten“ ausgewiesen. Die Ergebnisse des Wireline-Communications-Geschäfts sind in der Konzern-Gewinn- und -Verlust-Rechnung für die Geschäftsjahre 2010 und 2009 im „Ergebnis aus nicht fortgeführte Aktivitäten, abzüglich Steuern vom Einkommen und vom Ertrag“ erfasst. Die interne Berichterstattung und in der Folge auch die Segmentberichterstattung wurde entsprechend angepasst und reflektiert nicht mehr das frühere Segment Wireline Communications.

Im August 2010 haben wir einen Vertrag mit Intel über den Verkauf unseres Mobilfunkgeschäfts geschlossen. Auf Grund des geplanten Verkaufs werden in der Konzern-Bilanz zum 30. September 2010 alle Vermögenswerte und Verbindlichkeiten, die verkauft und übertragen werden sollen, als „zur Veräußerung stehende Vermögenswerte“ beziehungsweise als „zur Veräußerung stehende Verbindlichkeiten“ ausgewiesen. In der Konzern-Gewinn- und -Verlust-Rechnung sind die

Ergebnisse des Mobilfunkgeschäfts nicht mehr in den einzelnen Positionen der Konzern-Gewinn- und -Verlust-Rechnung enthalten, sondern im „Ergebnis aus nicht fortgeführten Aktivitäten, abzüglich Steuern vom Einkommen und vom Ertrag“ erfasst. Die einzelnen übrigen Positionen der Konzern-Gewinn- und -Verlust-Rechnung weisen somit lediglich die Ergebnisse von Infineons fortgeführten Aktivitäten aus. Ebenso zeigt die Konzern-Kapitalflussrechnung die Mittelzu- und -abflüsse des Mobilfunkgeschäfts als „nicht fortgeführte Aktivitäten“. Die Vorjahresbeträge der Konzern-Gewinn- und -Verlust-Rechnung sowie der Konzern-Kapitalflussrechnung wurden entsprechend angepasst.

Unser Ausblick für das Geschäftsjahr 2010 stellte auf den Gesamtumsatz der Segmente und die Segmentergebnis-Marge ab, das heißt beide Größen enthielten die Umsatzerlöse und das Segmentergebnis des Mobilfunkgeschäfts. Entsprechend erläutern wir im Folgenden die Ertragslage zunächst auf dieser Basis anhand der tatsächlichen Entwicklung im Vergleich zum Ausblick für das Geschäftsjahr 2010. Dies entspricht der Struktur unseres internen Berichtswesens für das Geschäftsjahr 2010 und damit unserer Segmentberichterstattung. Danach folgt die Erläuterung der Ertragslage anhand der Konzern-Gewinn- und -Verlust-Rechnung, in der das zu veräußernde Mobilfunkgeschäft sowohl für das Geschäftsjahr 2010 als auch für das Vorjahr im „Ergebnis aus nicht fortgeführten Tätigkeiten, abzüglich Steuern vom Einkommen und vom Ertrag“ ausgewiesen wird.

## ENTWICKLUNG DER SEGMENTE

### Umsatzerlöse der Segmente und Segmentergebnis im Geschäftsjahr 2010 im Vergleich zum Ausblick für das Geschäftsjahr 2010

Als wir im November 2009 erstmals unseren Ausblick für das Geschäftsjahr 2010 präsentierten, war eine Prognose für die wirtschaftliche Entwicklung im Geschäftsjahr 2010 nur begrenzt möglich. Die allgemeine Nachfrageentwicklung schien positiv, allerdings bestanden große Unsicherheiten, wie nachhaltig diese Entwicklung nach dem extremen Abschwung im Geschäftsjahr 2009 sein würde. Auch war die Entwicklung des Euro/US-Dollar-Wechselkurses nur schwer vorhersehbar. Wir sind damals von einem Euro/US-Dollar-Wechselkurs von 1,50 ausgegangen.

Basierend auf den damaligen Erwartungen, haben wir einen Anstieg unserer Umsatzerlöse im Geschäftsjahr 2010 um mindestens 10 Prozent im Vergleich zu den Umsatzerlösen im Geschäftsjahr 2009 prognostiziert. Im Laufe des Geschäftsjahrs haben wir im April 2010, im August 2010 und im September 2010 unsere Erwartungen zur Umsatzentwicklung für das Geschäftsjahr 2010 jeweils auf Basis der jeweiligen guten Geschäftslage und der Entwicklung des Euro/US-Dollar-Wechselkurses angepasst. Während wir im April 2010 von einem Umsatzanstieg für das Geschäftsjahr 2010 gegenüber dem Vorjahr im hohen 30-Prozent-Bereich ausgingen, passten

wir unsere Erwartung im August auf einen hohen 40-Prozent-Bereich an und prognostizierten im September 2010 einen Anstieg der Umsatzerlöse im Geschäftsjahr 2010 auf mehr als 50 Prozent gegenüber dem Vorjahreswert.

Im Rahmen unserer Einschätzungen im November 2009 haben wir einen deutlichen Anstieg unseres Segmentergebnisses in Summe gegenüber dem Vorjahr und eine Segmentergebnis-Marge im mittleren einstelligen Prozentbereich prognostiziert. Im Laufe des Geschäftsjahrs 2010 haben wir im April 2010, im August 2010 und im September 2010 die Entwicklung der Segmentergebnis-Marge für das Geschäftsjahr 2010 angepasst. Dies geschah jeweils auf Basis der guten Geschäftslage, der bis dato bereits realisierten Ergebnisse und der Entwicklung des Euro/US-Dollar-Wechselkurses. Während wir im April 2010 eine Segmentergebnis-Marge von knapp über 10 Prozent für das Geschäftsjahr 2010 in Aussicht stellten, erhöhten wir unsere Erwartung im August 2010 auf einen niedrigen 10-Prozent-Bereich und prognostizierten im September 2010 eine Segmentergebnis-Marge von 13 bis 14 Prozent.

Insgesamt sind die Umsatzerlöse einschließlich der Umsatzerlöse des zu veräußernden Mobilfunkgeschäfts, im Geschäftsjahr 2010 um 51 Prozent gegenüber dem Vorjahr gestiegen. Alle Segmente haben zu diesem Umsatzwachstum, das deutlich höher liegt als erwartet, beigetragen. Der wirtschaftliche Aufschwung und die Stärke des US-Dollars gegenüber dem Euro im Geschäftsjahr 2010 trugen maßgeblich zum Umsatzzuwachs in allen unseren Segmenten bei. Das Segment Automotive profitierte von der höher als ursprünglich erwarteten Endkundennachfrage und der Auffüllung der Lagerbestände in der weltweiten Automobilzulieferindustrie. Ebenso hat das Segment Industrial & Multimarket von der deutlich höheren als der ursprünglich erwarteten Nachfrageerholung bei Computern, Kommunikations- und Industrieprodukten sowie der Auffüllung der Lager in der Wertschöpfungskette profitiert. Das Umsatzwachstum im Segment Chip Card & Security fiel, wie erwartet, geringer als bei den übrigen Segmenten aus. Jedoch war auch das Umsatzwachstum dieses Segments deutlich höher als prognostiziert, was auf die deutlich höher als vorhergesehene Nachfragesteigerung

für Bezahlkarten- und Kommunikationsanwendungen zurückzuführen ist. Das Segment Wireless Solutions profitierte von dem deutlich höher als angenommenen Bedarf bedeutender Mobiltelefonplattform-Kunden.

Übereinstimmend mit dem im September 2010 angepassten Ausblick hat sich die Segmentergebnis-Marge im Geschäftsjahr 2010 auf 14 Prozent gegenüber dem Vorjahreswert von minus 6 Prozent im Zuge des wirtschaftlichen Aufschwungs und den damit einhergehenden Umsatzzuwächsen verbessert. Alle operativen Segmente haben zu dieser deutlich über der ursprünglich erwarteten Segmentergebnis-Marge beigetragen. Neben dem über den ursprünglichen Annahmen liegenden Umsatzzuwächsen hat sich auch die über den Erwartungen liegende Kapazitätsauslastung und die damit einhergehenden geringeren Leerstandskosten positiv auf die Segmentergebnis-Marge ausgewirkt.

### Umsatzerlöse nach Segmenten

Die Umsatzerlöse im Geschäftsjahr 2009 waren deutlich beeinflusst von der weltweiten Finanz- und Wirtschaftskrise mit Auswirkungen auf alle operativen Segmente. Mit der schnellen und allgemeinen Erholung der Wirtschaft in den vergangenen 15 Monaten ist auch eine entsprechende Verbesserung der Umsatzerlöse unserer operativen Segmente festzustellen.

• **Automotive** – Im Geschäftsjahr 2010 belief sich der Umsatz auf € 1.268 Millionen und stieg um € 429 Millionen oder 51 Prozent verglichen zum Geschäftsjahr 2009 mit € 839 Millionen. Sowohl in der ersten Geschäftsjahreshälfte 2010 als auch in der zweiten Geschäftsjahreshälfte 2010 konnten wir ein gleichbleibend hohes Umsatzwachstum gegenüber den vergleichbaren Vorjahreszeiträumen realisieren. Die Umsatzerlöse des Geschäftsjahrs 2010 erreichten damit wieder das Niveau vor der Finanz- und Wirtschaftskrise im Geschäftsjahr 2008. Die Nachfrage nach Halbleitern für die Automobilindustrie wurde durch die gestiegene weltweite Autoproduktion belebt. Die Autonachfrage wurde durch überproportionales Wachstum in Asien, vor allem in China und Indien, getragen. Zusätzlicher Halbleiterbedarf entstand

## 12 UMSATZERLÖSE NACH SEGMENTEN

| € in Millionen, außer bei Prozentsätzen                         | 2010         | %          | 2009         | %          |
|-----------------------------------------------------------------|--------------|------------|--------------|------------|
| Automotive                                                      | 1.268        | 28         | 839          | 28         |
| Industrial & Multimarket                                        | 1.374        | 30         | 905          | 30         |
| Chip Card & Security                                            | 407          | 9          | 341          | 11         |
| Wireless Solutions                                              | 1.372        | 30         | 917          | 30         |
| Sonstige Geschäftsbereiche                                      | 167          | 3          | 17           | 1          |
| Konzernfunktionen und Eliminierungen                            | -3           | 0          | 8            | 0          |
| <b>Segmentumsatz in Summe einschließlich Wireless Solutions</b> | <b>4.585</b> | <b>100</b> | <b>3.027</b> | <b>100</b> |
| abzüglich nicht fortgeführte Aktivitäten Wireless Solutions     | -1.290       |            | -843         |            |
| <b>Umsatzerlöse</b>                                             | <b>3.295</b> |            | <b>2.184</b> |            |

durch die Verschiebung des Marktes von Kleinfahrzeugen hin zu Oberklassefahrzeugen. 2009 war der Anteil von Kleinfahrzeugen am gesamten Autoabsatz durch staatliche Förderprogramme wie die Abwrackprämie in Deutschland überdurchschnittlich hoch.

01 • **Industrial & Multimarket** – Im Geschäftsjahr 2010 betru-  
02 gen die Umsatzerlöse € 1.374 Millionen, ein Anstieg um  
03 € 469 Millionen oder 52 Prozent verglichen zu € 905 Millionen  
04 im Geschäftsjahr 2009. Sowohl in der ersten Geschäftsjah-  
reshälfte 2010, aber vor allem in der zweiten Geschäftsjah-  
reshälfte 2010 war ein deutliches Umsatzwachstum im  
Vergleich zu den entsprechenden Vorjahreszeiträumen zu  
verzeichnen. Während in der ersten Geschäftsjahreshälfte  
2010 die Umsatzerlöse um 38 Prozent gegenüber dem ver-  
gleichbaren Vorjahreszeitraum gestiegen sind, erhöhte sich  
05 das Umsatzwachstum in der zweiten Geschäftsjahreshälfte  
06 2010 auf 64 Prozent gegenüber dem vergleichbaren Vorjah-  
reszeitraum. Insgesamt konnten wir die Umsätze in diesem  
07 Segment auch im Vergleich zum Vorkrisengeschäftsjahr  
08 2008 deutlich verbessern. Ausgehend vom zweiten Quartal  
09 des Geschäftsjahrs 2009 konnten wir nun insgesamt sechs  
10 Quartale in Folge das Geschäftsvolumen im Bereich Indust-  
rial & Multimarket steigern. Neben der allgemeinen Erholung  
der Märkte nach der Wirtschaftskrise haben vor allem die  
herausragende technologische Wettbewerbsposition unserer  
11 Produkte sowie ein hohes Maß an Flexibilität im Bezug auf  
12 den Hochlauf der Produktion diese Entwicklung ermöglicht.  
13 Der Anstieg der Umsatzerlöse erstreckt sich dabei über alle  
14 Anwendungsgebiete wie etwa Konsumgüter, industrielle  
Antriebstechnik, Computer und Server sowie schwerpunktmäßig  
auch auf unterschiedliche Applikationen im Bereich  
15 der erneuerbaren Energien.

16 • **Chip Card & Security** – Im Geschäftsjahr 2010 betru-  
17 gen die Umsätze € 407 Millionen, ein Anstieg von 19 Prozent oder  
18 € 66 Millionen im Vergleich zu € 341 Millionen im Geschäfts-  
19 jahr 2009. Während sich die Umsätze während der ersten  
20 Hälfte des Geschäftsjahrs lediglich um 6 Prozent gegenüber  
21 dem vergleichbaren Vorjahreszeitraum erhöhten, stiegen die  
Umsätze in der zweiten Geschäftsjahreshälfte 2010 deutlich  
um 32 Prozent gegenüber dem vergleichbaren Vorjahreszeit-  
raum an. Das starke Umsatzwachstum im Gesamtjahr und  
insbesondere in der zweiten Geschäftsjahreshälfte ist auf  
eine stark gestiegene Nachfrage im Geschäft mit Bezahlkar-  
ten, behördlichen Ausweisen sowie SIM-Karten zurückzu-  
führen. Bei den Bezahlkarten haben Sicherheitsprobleme  
in Spanien Ende 2009 die Migration von Magnetstreifen auf  
chipbasierte Karten forciert. Außerdem haben Softwarepro-  
bleme zum Jahreswechsel zu erhöhter Nachfrage geführt.  
Bei behördlichen Dokumenten (wie elektronischen Reisepäs-  
sen) verzeichneten wir eine gestiegene Nachfrage, die das  
Umsatzwachstum insbesondere in der zweiten Jahreshälfte

trieb. Schließlich hat die erfolgreiche Einführung einer neuen  
Produktplattform für das SIM-Karten-Geschäft den Umsatz  
im abgelaufenen Geschäftsjahr deutlich erhöht. Wechsel-  
kurseffekte spielten im Vergleich der beiden Geschäftsjahre  
nahezu keine Rolle. Die Umsätze des Segments erreichten  
allerdings nicht vollständig das Niveau des Vorkrisenge-  
schäftsjahrs 2008, welches durch außergewöhnlich hohe  
und projektspezifische Nachfrage nach dem amerikanischen  
elektronischen Reisepass gekennzeichnet war.

• **Wireless Solutions** – Im Geschäftsjahr 2010 beliefen sich  
die Umsatzerlöse auf € 1.372 Millionen, ein Anstieg um  
€ 455 Millionen oder 50 Prozent im Vergleich zu € 917 Milli-  
onen im Geschäftsjahr 2009. Die Umsatzerlöse lagen damit  
auch deutlich über denen des Vorkrisengeschäftsjahrs 2008.  
Bereits in der ersten Geschäftsjahreshälfte 2010 stiegen  
die Umsätze des Segments um 34 Prozent gegenüber dem  
vergleichbaren Vorjahreszeitraum. In der zweiten Geschäfts-  
jahreshälfte 2010 hat sich das Umsatzwachstum noch ein-  
mal deutlich auf 62 Prozent gegenüber dem vergleichbaren  
Vorjahreszeitraum erhöht. Dieses Umsatzwachstum ist im  
Wesentlichen auf die hohe Nachfrage unserer neuen Platt-  
formen für Smartphone- und Einstiegsmodelle bei unseren  
Kunden zurückzuführen. Unsere performanten, innovativen  
Ultra-Low-Cost, Entry-Phone- und HSPA-Lösungen wurden  
vom Markt gleichermaßen positiv aufgenommen. Im Laufe  
des Geschäftsjahrs 2010 haben etablierte Mobiltelefon-  
hersteller mehrere populäre Smartphone-Modelle lanciert,  
die mit unserer neuen 65-Nanometer-HSUPA-Plattform  
XMM™-6160 ausgestattet sind. Der Markterfolg dieser  
Plattform lieferte einen wesentlichen Beitrag zur posi-  
tiven Geschäftsentwicklung. Weitere Wachstumstreiber  
unseres Geschäftes waren die Markteinführungen unserer  
65-Nanometer-Ultra-Low-Cost-Plattform XMM™-1100 für  
sehr preiswerte Mobiltelefone sowie unserer 65-Nanometer-  
EDGE-Plattform XMM™-2130. Beide Ein-Chip-Lösungen  
kommen bei zahlreichen großen Mobiltelefonherstellern zum  
Einsatz. Infolge des erfolgreichen Volumenhochlaufs der  
vorgenannten Lösungen konnten insbesondere in der zweiten  
Hälfte des abgelaufenen Geschäftsjahrs hohe Stückzahlen  
am Markt platziert werden.

• **Sonstige Geschäftsbereiche** – Die Umsatzerlöse betru-  
gen im Geschäftsjahr 2010 € 167 Millionen, ein deutlicher  
Anstieg um € 150 Millionen im Vergleich zu € 17 Millionen  
im Geschäftsjahr 2009. Der Anstieg ist vor allem auf die  
Umsatzerlöse mit Lantiq nach dem Abschluss des Verkaufs  
von Wireline Communications im November 2009 zurückzu-  
führen. Der Großteil der im Geschäftsjahr 2009 von den sons-  
tigen Geschäftsbereichen erzielten Umsatzerlöse resultierte  
aus unseren Festplatten-Aktivitäten, welche wir im April  
2008 an die LSI Corporation veräußert haben.

**Ergebnisentwicklung in den Segmenten**

Das Segmentergebnis unserer Segmente betrug:

**13 UMSATZERLÖSE NACH SEGMENTEN**

| € in Millionen                                                                          | 2010       | 2009        |
|-----------------------------------------------------------------------------------------|------------|-------------|
| <b>Segmentergebnis:</b>                                                                 |            |             |
| Automotive                                                                              | 198        | -117        |
| Industrial & Multimarket                                                                | 283        | 35          |
| Chip Card & Security                                                                    | 22         | -4          |
| Wireless Solutions                                                                      | 159        | -36         |
| Sonstige Geschäftsbereiche                                                              | -12        | -13         |
| Konzernfunktionen und Eliminierungen                                                    | -15        | -32         |
| <b>Segmentergebnis in Summe einschließlich Wireless Solutions</b>                       | <b>635</b> | <b>-167</b> |
| bereinigt um das Segmentergebnis nicht fortgeführter Aktivitäten von Wireless Solutions | -160       | 27          |
| <b>Segmentergebnis in Summe von fortgeführte Aktivitäten</b>                            | <b>475</b> | <b>-140</b> |

Im Geschäftsjahr 2010 profitierte das Segmentergebnis aller operativen Segmente deutlich von den Umsatzzuwächsen, die wiederum zu einer erhöhten Fertigungsauslastung und damit einhergehend zu einer Verringerung der Leerstandskosten führten. Demgegenüber wirkte sich unser Hedging-Ergebnis negativ auf das Segmentergebnis aus, da wir einen Großteil der für das Geschäftsjahr 2010 erwarteten US-Dollar-Umsätze zu einem höheren Euro/US-Dollar-Wechselkurs als im Vorjahr abgesichert hatten und die tatsächliche Euro/US-Dollar-Wechselkursentwicklung teilweise gegenläufig war. Darüber hinaus profitierten die Segmente von den strukturellen Maßnahmen, die wir im Rahmen unseres Kostensenkungsprogramms „IFX10+“ umgesetzt haben und welche im Geschäftsjahr 2010 erstmals ein volles Geschäftsjahr zum Tragen kamen. Unser Segment Automotive konnte mit einem Anstieg des Segmentergebnisses im Geschäftsjahr 2010 um € 315 Millionen den größten Ergebnissprung erreichen, gefolgt vom Segment Industrial & Multimarket mit einer Ergebnisverbesserung von € 248 Millionen.

Die Segmentergebnisse des Geschäftsjahrs 2009 hatten deutlich unter den negativen Auswirkungen der Finanz- und Wirtschaftskrise gelitten. Umsatzrückgänge und damit einhergehend hohe Leerstandskosten in der Fertigung führten zu Einbrüchen bei den Segmentergebnissen aller operativen Segmente im Geschäftsjahr 2009. Realisierte Kosteneinsparungen aus unserem Kostensenkungsprogramm „IFX10+“ und aus Kurzarbeit und unbezahltm Urlaub konnten dies nur teilweise ausgleichen. Das Segmentergebnis in Summe der fortgeführten Aktivitäten ermittelt sich nach Abzug des unter „Ergebnis aus nicht fortgeführten Aktivitäten, abzüglich Steuern vom Einkommen und vom Ertrag“ ausgewiesenen Ergebnisses des zu veräußernden Mobilfunkgeschäfts, welches

im Geschäftsjahr 2010 € 160 Millionen und im Vorjahr minus € 27 Millionen betrug.

Die Veränderung der Segmentergebnisse innerhalb unserer operativen Segmente war wie folgt:

- **Automotive** – Im Geschäftsjahr 2010 belief sich das Segmentergebnis auf € 198 Millionen, ein Anstieg um € 315 Millionen im Vergleich zu minus € 117 Millionen im Geschäftsjahr 2009. Wesentliche Gründe für die signifikante Ergebnisverbesserung waren der Umsatzanstieg und die deutlich gestiegene Auslastung in allen Fertigungsstandorten. Zur Absicherung unserer führenden Marktstellung im Automotive-Bereich wurden die Entwicklungsaufwendungen, zum Beispiel für Mikrocontroller in der fortschrittlichen 65-Nanometer-Multicore-Architektur, neue Sensorprodukte, Hochintegration von Leistungs- und Kontroll-Schaltungen auf einem Silizium-Chip und für Produkte für Hybrid- und Elektrofahrzeuge, weiter verstärkt. In den überproportional wachsenden Märkten in Asien (China, Korea und Indien) wurde die lokale Präsenz mit zusätzlichen Ressourcen für Applikations-Unterstützung und Kundenbetreuung weiter gestärkt.

- **Industrial & Multimarket** – Im Geschäftsjahr 2010 belief sich das Segmentergebnis auf € 283 Millionen oder 21 Prozent bezogen auf die Umsatzerlöse des Segments. Dies entspricht einem Anstieg um € 248 Millionen im Vergleich zu € 35 Millionen oder 4 Prozent bezogen auf die Umsatzerlöse im Geschäftsjahr 2009. Diese Steigerung der Profitabilität ist, neben stetigen Verbesserungen unseres Produktportfolios sowie kontinuierlichen Anstrengungen im Bezug auf unsere Kostenposition, vor allem vor dem Hintergrund positiver Skaleneffekte im Zusammenhang mit dem deutlich gestiegenen Geschäftsvolumen zu sehen. Ein im Vergleich zu den Umsatzerlösen unterproportionaler Anstieg der Aufwendungen für Forschung und Entwicklung, den Vertrieb sowie die allgemeine Verwaltung hat sein Übriges zu dieser Entwicklung beigetragen.

- **Chip Card & Security** – Im Geschäftsjahr 2010 belief sich das Segmentergebnis auf € 22 Millionen, ein Anstieg um € 26 Millionen im Vergleich zu minus € 4 Millionen im Geschäftsjahr 2009. Der Hauptteil der Ergebnisverbesserung kam dabei aus dem Bruttoergebnis vom Umsatz. Wesentlicher Treiber waren das höhere Volumen sowie eine deutlich verbesserte Produktstruktur. Hier kamen hauptsächlich eine Portfolioverbesserung hin zu höhermargigen Produkten in Anwendungen wie Bezahlkarten und Ausweisdokumenten zum Tragen sowie Produktivitätsfortschritte in der Fertigung und der beginnende Hochlauf der 90-Nanometer-Technologie. Darüber hinaus hat auch die Reduzierung der Leerstandskosten für nicht ausgelastete Fertigungskapazitäten gegenüber dem Geschäftsjahr 2009 zum verbesserten Bruttoergebnis vom Umsatz beigetragen. Die Kosten für Forschung und Entwicklung sowie Vertrieb und Verwaltung sind im Jahresvergleich hauptsächlich durch den Wegfall der temporären Einspareffekte aus der Kurzarbeit im Vorjahr angestiegen.

01  
02  
03  
04  
05  
06  
07  
08  
09  
10  
11  
12  
13  
14  
15  
16  
17  
18  
19  
20  
21

• **Wireless Solutions** – Im Geschäftsjahr 2010 belief sich das Segmentergebnis auf € 159 Millionen, ein Anstieg um € 195 Millionen im Vergleich zu minus € 36 Millionen im Geschäftsjahr 2009. Dieser Zuwachs ist besonders auf die signifikante Umsatzsteigerung, anhaltende Produktivitätsfortschritte und eine erhöhte Kapazitätsauslastung zurückzuführen, nachdem insbesondere die erste Hälfte des Vorjahrs von der weltweiten Wirtschaftskrise geprägt war. Das gute Segmentergebnis von Wireless Solutions im abgelaufenen Geschäftsjahr konnte trotz gesteigerter F&E-Aufwendungen zur Unterstützung einer wachsenden Anzahl von Projekten und der durch den Produktionsanlauf unserer neuen Plattformen resultierenden Kostenbelastungen realisiert werden.

• **Sonstige Geschäftsbereiche** – Im Geschäftsjahr 2010 belief sich das Segmentergebnis auf minus € 12 Millionen und blieb damit nahezu unverändert zu minus € 13 Millionen im Geschäftsjahr 2009. Das Segmentergebnis 2010 resultierte aus niedrigmargigen Umsätzen mit Lantiq, die die aus den nach der Veräußerung des Wireline-Communications-Geschäft verbleibenden Gemeinkosten nicht decken konnten.

• **Konzernfunktionen und Eliminierungen** – Im Geschäftsjahr 2010 belief sich das Segmentergebnis auf minus € 15 Millionen, eine Verbesserung um € 17 Millionen im Vergleich zu minus € 32 Millionen im Geschäftsjahr 2009. Die Verbesserung resultiert vorrangig aus dem Rückgang strategischer Leerstandskosten.

## ERLÄUTERUNG DER WESENTLICHEN POSTEN DER KONZERN-GEWINN-UND-VERLUST-RECHNUNG

### 14 KONZERN-GEWINN-UND-VERLUST-RECHNUNG FÜR DAS AM 30. SEPTEMBER 2010 ENDEnde GESCHÄFTSJAHr

| € in Millionen                                                                                      | 2010         | 2009<br>angepasst <sup>1</sup> |
|-----------------------------------------------------------------------------------------------------|--------------|--------------------------------|
| Umsatzerlöse                                                                                        | 3.295        | 2.184                          |
| Umsatzkosten                                                                                        | -2.058       | -1.687                         |
| <b>Bruttoergebnis vom Umsatz</b>                                                                    | <b>1.237</b> | <b>497</b>                     |
| Forschungs- und Entwicklungskosten                                                                  | -399         | -319                           |
| Vertriebskosten und allgemeine Verwaltungskosten                                                    | -386         | -332                           |
| Sonstige betriebliche Erträge                                                                       | 18           | 17                             |
| Sonstige betriebliche Aufwendungen                                                                  | -122         | -46                            |
| <b>Betriebsergebnis</b>                                                                             | <b>348</b>   | <b>-183</b>                    |
| Finanzerträge                                                                                       | 29           | 101                            |
| Finanzaufwendungen                                                                                  | -95          | -154                           |
| Ergebnis von nach der Equity-Methode bilanzierten Beteiligungen                                     | 8            | 7                              |
| <b>Ergebnis aus fortgeführten Aktivitäten vor Steuern vom Einkommen und vom Ertrag</b>              | <b>290</b>   | <b>-229</b>                    |
| Erträge (Aufwendungen) aus Steuern vom Einkommen und vom Ertrag                                     | 22           | -4                             |
| <b>Ergebnis aus fortgeführten Aktivitäten</b>                                                       | <b>312</b>   | <b>-233</b>                    |
| Ergebnis aus nicht fortgeführten Aktivitäten, abzüglich Steuern vom Einkommen und vom Ertrag        | 348          | -441                           |
| <b>Konzernjahresüberschuss/-fehlbetrag</b>                                                          | <b>660</b>   | <b>-674</b>                    |
| Davon entfallen auf:                                                                                |              |                                |
| Minderheitsanteile                                                                                  | 1            | -48                            |
| Aktionäre der Infineon Technologies AG                                                              | 659          | -626                           |
| Ergebnis je Aktie (in Euro), zurechenbar auf Aktionäre der Infineon Technologies AG – unverwässert: |              |                                |
| Ergebnis je Aktie (in Euro) aus fortgeführten Aktivitäten – unverwässert                            | 0,29         | -0,27                          |
| Ergebnis je Aktie (in Euro) aus nicht fortgeführten Aktivitäten – unverwässert                      | 0,32         | -0,46                          |
| <b>Ergebnis je Aktie (in Euro) – unverwässert</b>                                                   | <b>0,61</b>  | <b>-0,73</b>                   |
| Ergebnis je Aktie (in Euro), zurechenbar auf Aktionäre der Infineon Technologies AG – verwässert:   |              |                                |
| Ergebnis je Aktie (in Euro) aus fortgeführten Aktivitäten – verwässert                              | 0,28         | -0,27                          |
| Ergebnis je Aktie (in Euro) aus nicht fortgeführten Aktivitäten – verwässert                        | 0,30         | -0,46                          |
| <b>Ergebnis je Aktie (in Euro) – verwässert</b>                                                     | <b>0,58</b>  | <b>-0,73</b>                   |

<sup>1</sup> Die Vorjahreszahlen sind angepasst worden (siehe Konzernanhang Nr. 3).

**UMSATZERLÖSE**

Wir generieren Erlöse im Wesentlichen aus dem Verkauf von Halbleiterprodukten und Systemlösungen. Unsere Halbleiterprodukte beinhalten eine große Anzahl an Chips und Komponenten, die eine breite Anwendung in elektronischen Geräten haben und die von der Automobilelektronik über die Industrietechnik bis zu Chipkarten reichen.

Wir erzielen moderate Einkünfte aus Lizenzen über Stück- und Pauschalgebühren, durch die Vergabe von Lizenzen für Technologien, deren Eigentümer wir sind, an Dritte. So können wir einen Teil unserer Forschungs- und Entwicklungsaufwendungen abdecken und erlangen oft gleichzeitig über Lizenzierungs- und Kapazitätsreservierungsvereinbarungen Zugang zu zusätzlichen Fertigungskapazitäten bei Auftragsherstellern.

Unsere Umsatzerlöse schwanken auf Grund von verschiedenen Faktoren wie:

- globalen und regionalen ökonomischen Zyklen,
- Marktpreisen für unsere Produkte, insbesondere resultierend aus Wechselkursschwankungen, die unsere Verkaufspreise beeinflussen,
- unserem gesamten Produkt-Mix und unserem Verkaufsvolumen,
- der Phase im Lebenszyklus unserer Produkte,
- Wettbewerbseffekten und konkurrenzfähigen Preisstrategien sowie
- staatlichen Eingriffen, die den Markt beeinflussen (etwa Regulierungen, die die Energieeffizienz von Produkten betreffen).

Geschäftsjahr 2010 zu beobachten, wobei das Wachstum in der zweiten Jahreshälfte des Geschäftsjahrs 2010 noch deutlicher ausfiel als in der ersten Jahreshälfte. Das erzielte Umsatzwachstum im Geschäftsjahr 2010 lag über dem Wachstum des Halbleitermarktes in diesem Zeitraum. Wir haben nicht nur vorhandene, im Krisengeschäftsjahr 2009 stillgelegte Kapazitäten wieder reaktiviert, sondern zusätzliche Kapazitäten aufgebaut und zügig hochgefahren. Durch diese Ausweitung der Produktionskapazitäten haben wir es unseren Kunden ermöglicht, ihrerseits das entsprechende Wachstum zu realisieren, und haben so am Markterfolg unserer Kunden partizipiert.

Nur ein geringer Teil des Umsatzwachstums im Geschäftsjahr war währungsbedingt. Ungefähr 46 Prozent der Umsatzerlöse unserer fortgeführten Aktivitäten des Geschäftsjahrs 2010 sind in Fremdwährungen angefallen. Umsatzerlöse in US-Dollar haben daran den größten Anteil. Im Geschäftsjahr 2010 war die Entwicklung des US-Dollar gegenüber dem Euro zwar sehr volatil, hat sich, über das gesamte Geschäftsjahr 2010 gesehen, aber im Vergleich zum Geschäftsjahr 2009 nicht wesentlich verändert. Lag der Euro/US-Dollar-Wechselkurs zu Beginn des Geschäftsjahrs 2010 bei 1,45, stieg er bis Dezember 2009 relativ kontinuierlich an und erreichte mit 1,51 sein Jahreshoch. Den Jahrestiefststand im Geschäftsjahr 2010 erreichte der Euro/US-Dollar-Wechselkurs mit 1,19 im Juni 2010. Zum Geschäftsjahresende 2010 schloss der Euro/US-Dollar-Wechselkurs bei 1,36. Demgegenüber lag das Jahreshoch im Geschäftsjahr 2009 bei 1,48 und der Jahrestiefststand bei 1,24. Die Schwäche des Euros gegenüber Fremdwährungen (vorwiegend dem US-Dollar) beeinflusste sowohl im Geschäftsjahr 2010 als auch 2009 die Umsatzerlöse positiv. Über das gesamte Geschäftsjahr gesehen, war der Fremdwährungseffekt auf die Umsatzerlöse mit € 21 Millionen jedoch nicht signifikant, da sich der durchschnittliche Kurs, zu dem die Umsatzerlöse realisiert wurden, im Geschäftsjahr 2010 gegenüber dem Vorjahr lediglich um 1,3 US-Dollar-Cent verändert hat. Der in der obigen Tabelle dargestellte Fremdwährungseffekt im Vergleich zum Vorjahr wird ermittelt, indem der durchschnittliche Wechselkurs des vergangenen Jahres als konstanter Wechselkurs auf die Umsatzerlöse des aktuellen Jahres angewendet wird.

Die Umsatzerlöse der Geschäftsjahre 2010 und 2009 beinhalten keine Effekte aus Unternehmensakquisitionen, da wir in diesen Geschäftsjahren keine Akquisitionen getätigt haben.

**15 VERÄNDERUNGEN DER UMSATZERLÖSE IM JAHRESVERGLEICH**

| € in Millionen, außer bei Prozentsätzen       | 2010         | 2009         |
|-----------------------------------------------|--------------|--------------|
| <b>Umsatzerlöse</b>                           | <b>3.295</b> | <b>2.184</b> |
| Prozentuale jährliche Veränderung             | 51 %         |              |
| Fremdwährungseffekte im Vergleich zum Vorjahr | 21           | 94           |
| Prozent des Umsatzes                          | 1 %          | 4 %          |

Im Geschäftsjahr 2010 erhöhten sich unsere Umsatzerlöse um 51 Prozent im Vergleich zum Geschäftsjahr 2009, im Wesentlichen auf Grund des überdurchschnittlichen Umsatzwachstums in den Segmenten Automotive und Industrial & Multimarket sowie auf Grund der im Geschäftsjahr 2010 mit Lantiq nach dem Verkauf unseres Wireline-Communications-Geschäfts getätigten Umsätze. Diese Entwicklung war über das gesamte

01  
02  
03  
04  
05  
06  
07  
08  
09  
10  
11  
12  
13  
14  
15  
16  
17  
18  
19  
20  
21

**UMSATZERLÖSE NACH REGIONEN UND KUNDEN**

Die regionale Verteilung der Umsatzerlöse unserer fortgeführten Aktivitäten blieb im Geschäftsjahr 2010 nahezu unverändert im Vergleich zum Vorjahr.

Kein einzelner Kunde unserer fortgeführten Aktivitäten trug im Geschäftsjahr 2010 zu mehr als 10 Prozent zu unseren Umsatzerlösen bei. Im Geschäftsjahr 2010 entfielen auf unsere 25 größten Kunden 72 Prozent unserer Umsatzerlöse.

**16 UMSATZERLÖSE NACH REGIONEN**

| € in Millionen, außer bei Prozentsätzen | 2010         | %          | 2009         | %          |
|-----------------------------------------|--------------|------------|--------------|------------|
| Deutschland                             | 862          | 26         | 530          | 24         |
| Übriges Europa                          | 656          | 20         | 484          | 22         |
| Nordamerika                             | 351          | 11         | 261          | 12         |
| Asien-Pazifik <sup>1</sup>              | 1.202        | 36         | 768          | 35         |
| Japan                                   | 184          | 6          | 116          | 6          |
| Andere                                  | 40           | 1          | 25           | 1          |
| <b>Gesamt</b>                           | <b>3.295</b> | <b>100</b> | <b>2.184</b> | <b>100</b> |

<sup>1</sup> Darin enthalten: € 595 Millionen und € 359 Millionen an Umsatzerlösen in der Volksrepublik China im Geschäftsjahr 2010 und im Geschäftsjahr 2009.

**17 UMSATZERLÖSE NACH REGIONEN  
€ IN MILLIONEN**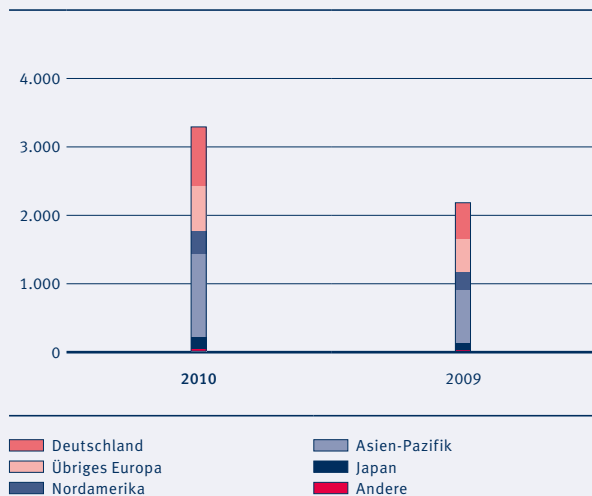

Zusätzlich zu den umsatzbezogenen Faktoren ist die Bruttomarge beeinflusst durch:

- Auslastung der Fertigungsstätten und damit verbundene Leerstandskosten,
- Abschreibung erworbener immaterieller Vermögenswerte und aktivierter Entwicklungskosten,
- Produktgarantieleistungen,
- Wertberichtigungen für überschüssigen oder veralteten Lagerbestand sowie
- Zulagen und Zuschüsse, die über die wirtschaftliche Restnutzungsdauer der Fertigungsanlagen realisiert werden.

Da wir einen Großteil unserer Produkte in eigenen Produktionsstätten fertigen und daher einen relativ hohen Fixkostenblock haben, reagieren unsere Umsatzkosten nicht proportional zu einem Anstieg beziehungsweise Rückgang der Umsatzerlöse. Fixkosten zeichnen sich dadurch aus, dass sie in Zeiten rückläufiger Umsätze und damit einhergehend geringerer Fertigungsauslastung nicht zurückgehen, es entstehen sogenannte „Leerstandskosten“, die den weiteren Anfall der Fixkosten bei geringerer Fertigungsauslastung widerspiegeln. In Zeiten rückläufiger Umsatzerlöse sinkt durch diesen Effekt die Bruttomarge überproportional verglichen mit dem Rückgang der Umsatzerlöse. In Zeiten des Umsatzwachstums kehrt sich der Effekt um, das bedeutet, die Bruttomarge steigt überproportional zum Umsatzwachstum bis zum Erreichen der Vollauslastung.

**UMSATZKOSTEN – BRUTTOERGEBNIS VOM UMSATZ**

Unsere Umsatzkosten enthalten vor allem:

- Materialkosten – vor allem Kosten für Rohwafer,
- Personalkosten,
- Gemeinkosten, einschließlich der Wartung der Produktionsanlagen, Betriebsstoffe, Betriebsmittel und Lizenzgebühren,
- Abschreibungen und Amortisation, inklusive Abschreibung auf aktivierte Entwicklungskosten,
- Kosten für Zulieferer für Montage und Tests,
- Fertigungsunterstützung inklusive Gebäudeflächen, Versorgungsanlagen, Qualitätskontrolle, Automatisierung und Leitungsfunktionen sowie
- Kosten der Auftragsfertigung.

**18 UMSATZKOSTEN UND BRUTTOERGEBNIS VOM UMSATZ**

| € in Millionen, außer bei Prozentsätzen | 2010  | 2009  |
|-----------------------------------------|-------|-------|
| Umsatzkosten                            | 2.058 | 1.687 |
| Prozentuale jährliche Veränderung       | 22 %  |       |
| Prozent des Umsatzes                    | 62 %  | 77 %  |
| Bruttoergebnis vom Umsatz               | 1.237 | 497   |
| Prozent des Umsatzes (Bruttomarge)      | 38 %  | 23 %  |



Die Kosten für die Materialbezüge von unseren Gemeinschaftsunternehmen und anderen nahestehenden und assoziierten Unternehmen sind in den Umsatzkosten enthalten. Die Bezüge von diesen nahestehenden und assoziierten Unternehmen beliefen sich im Geschäftsjahr 2010 auf € 229 Millionen gegenüber € 138 Millionen im Geschäftsjahr 2009.

Die Umsatzkosten beliefen sich im Geschäftsjahr 2010 auf € 2.058 Millionen, ein Anstieg von € 371 Millionen oder 22 Prozent verglichen zu € 1.687 Millionen im Geschäftsjahr 2009. Als Prozent des Umsatzes verringerten sich die Umsatzkosten im Geschäftsjahr 2010 auf 62 Prozent verglichen zu 77 Prozent im Vorjahr, im Wesentlichen bedingt durch die Fixkostendegression im Zuge des Umsatzwachstums.

Im Geschäftsjahr 2010 stieg unsere Bruttomarge auf 38 Prozent verglichen zu 23 Prozent im Vorjahr, im Wesentlichen auf Grund der gestiegenen Umsatzerlöse. Infolge des höheren Umsatzvolumens stieg die Auslastung unserer Produktion deutlich an. Seit Dezember 2009 sind unsere Fertigungskapazitäten mit einer Auslastungsrate von 90 bis 100 Prozent, einschließlich der im Geschäftsjahr 2010 zusätzlich aufgebauten Kapazitäten, nahezu voll ausgelastet. Dies führte zu einem deutlichen Rückgang der Leerstandskosten im Geschäftsjahr 2010 gegenüber dem Vorjahr. Negativ wirkte sich der Wegfall der temporären Kosteneinsparungsmaßnahmen Kurzarbeit und unbezahlter Urlaub aus, die wir im Geschäftsjahr 2009 auf Grund der damaligen Geschäftsentwicklung eingeführt hatten. Darüber hinaus notierten im Geschäftsjahr 2010 Währungen aus dem asiatischen Raum stärker gegenüber dem Euro. Da ein Teil unserer Produktion in Asien erfolgt, führte dies zu einem entsprechenden Anstieg der Umsatzkosten und wirkte sich negativ auf unsere Bruttomarge aus. Im Geschäftsjahr 2009 war unsere Bruttomarge signifikant niedriger. Insbesondere im ersten Halbjahr 2009 wirkte sich das verminderte Umsatzvolumen aus. Daneben entstanden in signifikantem Umfang Leerstandskosten, vorrangig dadurch bedingt, dass die Fixkosten in der Produktion sich nicht in gleichem Maße verringern ließen wie die Umsatzerlöse sich reduzierten. Die ansteigenden Umsatzerlöse in der zweiten Hälfte des Geschäftsjahrs 2009 im Vergleich zum ersten Halbjahr 2009 führten zu einer teilweisen Verbesserung unseres Bruttoergebnisses vom Umsatz.

**FORSCHUNGS- UND ENTWICKLUNGSKOSTEN**

Die Aufwendungen für F&E umfassen vor allem Personalkosten, Materialkosten, Abschreibungen und Instandhaltung der Laboreinrichtungen, die wir für unsere F&E-Projekte benötigen, sowie Kosten aus vertraglich vereinbarter Technologieentwicklung. In den Aufwendungen für F&E sind die Aufwendungen aus Vereinbarungen über die Entwicklungen von gemeinsamer Technologie mit unseren Partnern enthalten. Kosten der Forschungsaktivitäten, die zukünftig die Erlangung neuen wissenschaftlichen oder technischen Know-hows

und Verständnisses versprechen, werden sofort als Aufwand erfasst. Die Kosten für Entwicklungsaktivitäten, bei denen Forschungsergebnisse in einen Plan oder einen Entwurf für die Produktion von neuen oder deutlich verbesserten Produkten und Prozessen umgesetzt werden, werden aktiviert, soweit die Voraussetzungen für eine Aktivierung vorliegen. Die aktivierten Kosten umfassen die Materialkosten, die Fertigungslöhne und die direkt zurechenbaren Gemeinkosten, soweit diese dazu dienen, die Nutzung des Vermögenswerts vorzubereiten.

Wir werden weiterhin unsere Investitionen auf die Entwicklung von fortschrittlichen Fertigungstechnologien sowie von Produkten mit großem Wachstums- und Ergebnispotenzial fokussieren.

**19 FORSCHUNGS- UND ENTWICKLUNGSKOSTEN**

| € in Millionen, außer bei Prozentsätzen        | 2010 | 2009 |
|------------------------------------------------|------|------|
| Forschungs- und Entwicklungskosten             | 399  | 319  |
| Prozentuale jährliche Veränderung              | 25 % |      |
| Prozent des Umsatzes                           | 12 % | 15 % |
| Zulagen und Zuschüsse                          | 47   | 41   |
| Prozent des Umsatzes                           | 1 %  | 2 %  |
| Aktivierte Entwicklungskosten                  | 27   | 16   |
| Prozent der Forschungs- und Entwicklungskosten | 7 %  | 5 %  |

Einige unserer F&E-Projekte erhalten Zulagen und Zuschüsse von lokalen und regionalen Behörden. Werden die Kriterien für solche Zuwendungen erfüllt, reduzieren die Zuschüsse die F&E-Aufwendungen über die Projektdauer, in der die Kosten anfallen.

Im Geschäftsjahr 2010 sind die F&E-Kosten um € 80 Millionen oder 25 Prozent gegenüber dem Geschäftsjahr 2009 gestiegen. Der Anstieg spiegelt die gestiegenen Forschungs- und Entwicklungsaktivitäten in allen operativen Segmenten wider, im Wesentlichen im Zusammenhang mit einer höheren Anzahl an Kundenprojekten. Ferner hatten wir im Vorjahr durch Kurzarbeit und unbezahlten Urlaub temporäre Kosteneinsparungen erzielt. Darüber hinaus haben Rückstellungen für die variable Mitarbeitervergütung im Zuge unserer verbesserten Ergebnissituation zum Anstieg der Forschungs- und Entwicklungskosten im Geschäftsjahr 2010 gegenüber dem Vorjahr beigetragen. Die Forschungs- und Entwicklungskosten erhöhten sich verglichen zu den deutlich stärker gestiegenen Umsatzerlösen unterproportional.

Entsprechend dem Anstieg der Forschungs- und Entwicklungskosten haben sich auch die aktivierten Entwicklungskosten auf € 27 Millionen von € 16 Millionen im Vorjahr 2009 erhöht.

**VERTRIEBSKOSTEN UND ALLGEMEINE VERWALTUNGSKOSTEN**

Die Vertriebskosten umfassen Personalkosten für die Mitarbeiter des Vertriebs und des Marketings, Kosten für Kundenmuster, Verkaufsförderungsmaßnahmen und Marketingaufwendungen. Marketingaufwendungen für Werbung und Messeauftritte haben auf Grund unserer Vertriebs- und Kundenstruktur lediglich einen unwesentlichen Umfang.

Die allgemeinen Verwaltungskosten umfassen die Personalkosten der Mitarbeiter in der Verwaltung, nicht produktionsbezogene Gemeinkosten, Beratungshonorare, Rechtsanwaltskosten und andere Honorare für externe Dienstleister.

**20 VERTRIEBSKOSTEN UND ALLGEMEINE VERWALTUNGSKOSTEN**

| € in Millionen, außer bei Prozentsätzen          | 2010 | 2009 |
|--------------------------------------------------|------|------|
| Vertriebskosten und allgemeine Verwaltungskosten | 386  | 332  |
| Prozentuale jährliche Veränderung                | 16%  |      |
| Prozent des Umsatzes                             | 12%  | 15%  |

Im Geschäftsjahr 2010 betragen die Vertriebs- und allgemeinen Verwaltungskosten € 386 Millionen, ein Anstieg um € 54 Millionen oder 16 Prozent gegenüber € 332 Millionen im Vorjahr. Der Anstieg ist vor allem bedingt durch den mit dem höheren Umsatzvolumen zusammenhängenden Anstieg der Vertriebskosten. Der Wegfall der temporären Kosteneinsparungen im Vorjahr aus Kurzarbeit und unbezahltem Urlaub trug ebenso zur Erhöhung der Vertriebskosten und allgemeinen Verwaltungskosten bei. Darüber hinaus haben Rückstellungen für die variable Mitarbeitervergütung im Zuge unserer verbesserten Ergebnissituation zum Anstieg der Vertriebs- und allgemeinen Verwaltungskosten im Geschäftsjahr 2010 gegenüber dem Vorjahr beigetragen. Der Anstieg war jedoch geringer als das Umsatzwachstum, weshalb sich in Prozent vom Umsatz die Vertriebskosten und allgemeinen Verwaltungskosten insgesamt von 15 Prozent im Geschäftsjahr 2009 auf 12 Prozent im Geschäftsjahr 2010 verringert haben.

**SONSTIGE BETRIEBLICHE ERTRÄGE UND SONSTIGE BETRIEBLICHE AUFWENDUNGEN****21 SONSTIGE BETRIEBLICHE ERTRÄGE UND SONSTIGE BETRIEBLICHE AUFWENDUNGEN**

| € in Millionen, außer bei Prozentsätzen | 2010 | 2009 |
|-----------------------------------------|------|------|
| Sonstige betriebliche Erträge           | 18   | 17   |
| Prozent des Umsatzes                    | 1%   | 1%   |
| Sonstige betriebliche Aufwendungen      | -122 | -46  |
| Prozent des Umsatzes                    | -4%  | -2%  |

Die sonstigen betrieblichen Erträge blieben mit € 18 Millionen im Geschäftsjahr 2010 nahezu konstant verglichen zu

€ 17 Millionen im Geschäftsjahr 2009. Im November 2009 haben wir und das koreanische Unternehmen LS Industrial Systems („LSIS“) das Gemeinschaftsunternehmen LS Power Semitech Co., Ltd. („LS“) gegründet. LSIS hält 54 Prozent und wir 46 Prozent des Gemeinschaftsunternehmens, das seinen Hauptsitz auf dem Gelände von LSIS in Cheonan in Südkorea hat. Durch die Einbringung von Lizenzen für geistiges Eigentum sowie für Technologie- und Prozess-Know-how für unsere Leistungsmodulfamilie CIPOSTM (Control Integrated Power System) sowie bestehende CIPOSTM-Back-End-Produktionsanlagen in das Gemeinschaftsunternehmen realisierten wir einen Gewinn vor Steuern von € 3 Millionen. In den sonstigen betrieblichen Erträgen für das Geschäftsjahr 2009 sind Erträge in Höhe von € 10 Millionen auf Grund von Zahlungen des Insolvenzverwalters unseres ehemaligen Kunden BenQ enthalten. Im Übrigen enthalten die sonstigen betrieblichen Erträge unterschiedliche unwesentliche Sachverhalte.

Die sonstigen betrieblichen Aufwendungen stiegen um € 76 Millionen von € 46 Millionen im Geschäftsjahr 2009 auf € 122 Millionen im Geschäftsjahr 2010 an. Die sonstigen betrieblichen Aufwendungen des Geschäftsjahrs 2010 beinhalten vor allem € 69 Millionen im Zusammenhang mit der oben beschriebenen Entkonsolidierung von ALTIS. Darüber hinaus enthalten sind € 12 Millionen für Wertberichtigungen auf Vermögenswerte und € 7 Millionen für belastende Mietverträge. Die sonstigen betrieblichen Aufwendungen des Vorjahrs enthielten unter anderem € 17 Millionen aus dem Verkauf unseres SensoNor-Geschäfts (siehe Anhang Nr. 6) und € 8 Millionen aus belastenden Mietverträgen.

**FINANZERTRÄGE UND FINANZAUFWENDUNGEN****22 FINANZERTRÄGE UND FINANZAUFWENDUNGEN**

| € in Millionen, außer bei Prozentsätzen | 2010 | 2009 |
|-----------------------------------------|------|------|
| Finanzerträge                           | 29   | 101  |
| Prozent des Umsatzes                    | 1%   | 5%   |
| Finanzaufwendungen                      | -95  | -154 |
| Prozent des Umsatzes                    | -3%  | -7%  |

Im Geschäftsjahr 2010 verringerten sich die Finanzerträge um € 72 Millionen auf € 29 Millionen im Vergleich zum Geschäftsjahr 2009 mit € 101 Millionen. Dies war im Wesentlichen bedingt durch einen Rückgang der Zinserträge im Geschäftsjahr 2010 um € 66 Millionen. Während im Geschäftsjahr 2009 die Zinserträge unter anderem realisierte Gewinne von € 61 Millionen aus dem Rückkauf von Anteilen der jeweils im Jahr 2010 fälligen nachrangigen Umtausch- und Wandelanleihe enthielten, wurden im Geschäftsjahr 2010 keine Gewinne durch den Rückkauf von Anleihen realisiert. Zusätzlich hatten Erträge aus der Bewertung von Zins-Swaps die Finanzerträge

im Geschäftsjahr 2009 positiv beeinflusst, wohingegen diese Erträge im Geschäftsjahr 2010 unwesentlich waren. Die im Geschäftsjahr 2010 massiv gesunkenen Geldmarkt-Zinsen führten zudem dazu, dass trotz höheren Anlagevolumens, die Zinserträge aus der Anlage von Finanzmitteln rückläufig waren. Dem gegenüber erzielten wir Wertsteigerungen und Gewinne aus der Veräußerung von „zur Veräußerung verfügbaren finanziellen Vermögenswerten“ in Höhe von € 6 Millionen.

Im Geschäftsjahr 2010 betragen die Finanzaufwendungen € 95 Millionen und verringerten sich um € 59 Millionen gegenüber € 154 Millionen im Vorjahr. Vor allem führten geringere Zinsaufwendungen im Zusammenhang mit Zinszahlungen und der Aufzinsung unserer im Juni 2010 fälligen nachrangigen Wandelanleihe sowie unserer Ende des Geschäftsjahrs 2009 vollständig zurückgeführten Umtauschanleihe zu diesem Rückgang. Diese Verringerung beruht auf dem Rückgang des ausstehenden Nominalbetrags dieser Anleihen im Zeitablauf, der auf die seit dem Beginn des Geschäftsjahrs 2009 getätigten Rückkäufe und die endgültige Tilgung der nachrangigen Umtauschanleihe im September 2009, beziehungsweise der nachrangigen Wandelanleihe im Juni 2010, zurückzuführen ist. Teilweise kompensiert wurde dieser Rückgang durch den Zinsaufwand für unsere im Jahr 2014 fällige nachrangige Wandelanleihe. Darüber hinaus beeinflussten Wertänderungen und Verluste aus der Veräußerung von „zur Veräußerung verfügbaren finanziellen Vermögenswerten“ in Höhe von € 28 Millionen auf Grund der Finanzkrise die Finanzaufwendungen im Geschäftsjahr 2009. Im Geschäftsjahr 2010 sind hieraus keine wesentlichen Verluste entstanden.

**ERGEBNIS VON NACH DER EQUITY-METHODE BILANZIERTEN BETEILIGUNGEN**

Das Ergebnis von nach der Equity-Methode bilanzierten Beteiligungen im Geschäftsjahr 2010 betrug € 8 Millionen, ein Anstieg von € 1 Million im Vergleich zu € 7 Millionen im Geschäftsjahr 2009. Es beinhaltet in beiden Geschäftsjahren vor allem unseren Anteil in Höhe von € 7 Millionen am Ergebnis der zusammen mit der Siemens AG geführten Infineon Technologies Bipolar GmbH & Co. KG („Bipolar“).

**ERTRÄGE (AUFWENDUNGEN) AUS STEUERN VOM EINKOMMEN UND VOM ERTRAG**

Unsere effektive Steuerquote wird durch Steuervergünstigungen in ausländischen Jurisdiktionen, unterschiedliche Steuersätze in den Jurisdiktionen, in denen wir unser Geschäft betreiben, steuerlich nicht abzugsfähige Aufwendungen und vor allem durch die Veränderung der Wertberichtigungen auf aktive latente Steuern beziehungsweise die Nutzung von unberücksichtigten Steuervorteilen beeinflusst.

Im Vorjahr erhöhten sich die Wertberichtigungen auf aktive latente Steuern um € 73 Millionen. Im abgelaufenen Geschäftsjahr wurden Wertberichtigungen in Höhe von € 73 Millionen aufgelöst.

**23 ERTRÄGE (AUFWENDUNGEN) AUS STEUERN VOM EINKOMMEN UND VOM ERTRAG**

| € in Millionen, außer bei Prozentsätzen                         | 2010 | 2009 |
|-----------------------------------------------------------------|------|------|
| Erträge (Aufwendungen) aus Steuern vom Einkommen und vom Ertrag | 22   | -4   |
| Prozent des Umsatzes                                            | 1 %  | 0 %  |
| Effektive Steuerquote                                           | -8 % | -2 % |

**ERGEBNIS AUS NICHT FORTGEFÜHRTEN AKTIVITÄTEN, ABZÜGLICH STEUERN VOM EINKOMMEN UND VOM ERTRAG**

Das Ergebnis aus nicht fortgeführten Aktivitäten, abzüglich Steuern vom Einkommen und vom Ertrag, für die Geschäftsjahre 2010 und 2009 setzen sich wie folgt zusammen:

**24 ERGEBNIS AUS NICHT FORTGEFÜHRTEN AKTIVITÄTEN, ABZÜGLICH STEUERN VOM EINKOMMEN UND VOM ERTRAG**

| € in Millionen                                                                               | 2010 | 2009 |
|----------------------------------------------------------------------------------------------|------|------|
| Qimonda                                                                                      | 15   | -420 |
| Wireline Communications                                                                      | 93   | 22   |
| Mobilfunkgeschäft                                                                            | 240  | -43  |
| Ergebnis aus nicht fortgeführten Aktivitäten, abzüglich Steuern vom Einkommen und vom Ertrag | 348  | -441 |

**Qimonda**

Am 23. Januar 2009 stellten die Qimonda AG i. In. („Qimonda“) und deren hundertprozentige Tochtergesellschaft Qimonda Dresden GmbH & Co. oHG („Qimonda Dresden“) beim Amtsgericht München Antrag auf Eröffnung des Insolvenzverfahrens. Auf Grund des Insolvenzantrags von Qimonda erfolgte in Übereinstimmung mit IAS 27, „Consolidated and Separate Financial Statements“, im zweiten Quartal des Geschäftsjahrs 2009 die Entkonsolidierung von Qimonda. Am 1. April 2009 wurden die Insolvenzverfahren eröffnet. Insolvenzverfahren wurden auch über weitere Tochterunternehmen von Qimonda in verschiedenen Staaten eröffnet.

Die Ergebnisse von Qimonda sind im Geschäftsjahr 2010 und 2009 in der Konzern-Gewinn-und-Verlust-Rechnung als nicht fortgeführte Aktivitäten ausgewiesen. Die operativen Verluste von Qimonda im Geschäftsjahr 2009 bis zur Entkonsolidierung wurden ausgeglichen durch eine teilweise Rücknahme der im Geschäftsjahr 2008 erfassten Wertberichtigung auf Qimondas Nettovermögenswerte, da diese bereits zum 30. September 2008 mit Null bewertet waren. Für das Geschäftsjahr 2009 enthalten die ausgewiesenen Beträge hinsichtlich Qimonda im „Ergebnis aus nicht fortgeführten Aktivitäten, abzüglich Steuern vom Einkommen und vom Ertrag“ im Wesentlichen die Realisierung von aufgelaufenen Währungsumrechnungsverlusten in Höhe von € 188 Millionen

und Aufwendungen für Rückstellungen und Wertberichtigungen in Höhe von € 227 Millionen im Zusammenhang mit der Insolvenz von Qimonda. Die Realisierung von aufgelaufenen Währungsumrechnungsdifferenzen, die zuvor im Eigenkapital erfasst waren, resultierte hauptsächlich aus Qimondas Veräußerung seiner Beteiligung an Inotera Memories Inc. („Inotera“) an Micron Technology, Inc. („Micron“) sowie aus der Entkonsolidierung von Qimonda.

Im Zusammenhang mit der Eröffnung des Insolvenzverfahrens von Qimonda sind wir zusätzlichen potenziellen Verbindlichkeiten im Zusammenhang mit dem Qimondageschäft ausgesetzt, die detailliert im Anhang Nr. 6 und Nr. 38 dargestellt sind.

Im Geschäftsjahr 2010 waren bestimmte Anpassungen von einzelnen Rückstellungen für potenzielle Verbindlichkeiten an die aktuellen Entwicklungen erforderlich. Der Nettoeffekt unter den nicht fortgeführten Aktivitäten auf die Konzern-Gewinn- und Verlust-Rechnung vor Steuern betrug minus € 5 Millionen. Darüber hinaus führte der Abschluss einer steuerlichen Außenprüfung bezüglich des Qimondageschäfts und der Gründung von Qimonda zu einem Steuerertrag von € 20 Millionen.

#### **Wireline-Communications-Geschäft**

Im November 2009 haben wir den Verkauf unseres Wireline-Communications-Geschäfts, eines unserer ehemaligen Segmente, an Lantiq abgeschlossen. Der Kaufpreis betrug insgesamt € 243 Millionen. Wir haben aus dem Abschluss des Verkaufs einen Gewinn vor Steuern von € 108 Millionen realisiert. Der Ertragsteueraufwand, der diesem Gewinn zuzuordnen ist, betrug € 15 Millionen.

Im Geschäftsjahr 2009 belief sich das Ergebnis vor Steuern des Wireline-Communications-Geschäfts auf € 24 Millionen.

#### **Mobilfunkgeschäft**

Auf Grund des im August 2010 mit Intel geschlossenen Vertrags weisen wir das realisierte Ergebnis des Mobilfunkgeschäfts im Geschäftsjahr 2010 und im Vorjahr unter dem „Ergebnis aus nicht fortgeführten Aktivitäten, abzüglich Steuern vom Einkommen und vom Ertrag“ aus. Das Ergebnis der nicht veräußerten Bereiche des Segments Wireless Solutions wird weiterhin als Teil der fortgeführten Aktivitäten ausgewiesen. Ebenso sind Aufwendungen, die zuvor dem Mobilfunkgeschäft zugeordnet waren, die aber nach dem geplanten Verkauf weiterhin anfallen, nicht im „Ergebnis aus nicht fortgeführten Aktivitäten, abzüglich Steuern vom Einkommen und vom Ertrag“ ausgewiesen, sondern weiterhin als Teil des Ergebnisses an fortgeführten Aktivitäten.

Das Ergebnis des Mobilfunkgeschäfts hat sich im Geschäftsjahr 2010 im Zuge der Erholung der Weltwirtschaft und der Halbleiterindustrie verglichen zum Geschäftsjahr 2009 deutlich verbessert, was sich entsprechend in der Verbesserung des Ergebnisses vor Steuern niederschlug. Neben dem Segmentergebnis sind Aufwendungen in Höhe von € 19 Millionen, im

Wesentlichen aus akquisitionsbedingten Abschreibungen, die entsprechend unserer Definition im Segmentergebnis selbst nicht enthalten sind, umgegliedert worden.

Zur Absicherung des voraussichtlichen Verkaufserlöses von 1.400 Millionen US-Dollar, haben wir Ende August 2010 Euro/US-Dollar-Verkaufsoptionen erworben, deren Ausübungskurs bei einem Euro/US-Dollar-Wechselkurs von 1,32 liegt. Auf Grund der zwischenzeitlichen Abschwächung des US-Dollar gegenüber dem Euro hat sich der Wert der Optionen bis zum 30. September 2010 erhöht, was zu einer Ertragsrealisierung in unseren Büchern führte. Im Geschäftsjahr 2010 sind bereits dem Verkauf einzeln zurechenbare Transaktionskosten angefallen. In Summe resultiert aus diesen Sachverhalten im Geschäftsjahr 2010 ein positiver Ergebniseffekt von € 19 Millionen. Infolge der Veräußerung des Mobilfunkgeschäfts werden bei Vollzug des Verkaufs kurzfristig steuerliche Verlustvorträge genutzt. Dies führt im abgelaufenen vierten Quartal des Geschäftsjahrs 2010 zu einer Aktivierung latenter Steuerforderungen in Höhe von € 82 Millionen.

#### **KONZERNJAHRESÜBERSCHUSS/-FEHLBETRAG**

Im Geschäftsjahr 2010 haben wir einen Konzernjahresüberschuss in Höhe von € 660 Millionen erzielt, eine deutliche Verbesserung gegenüber einem Konzernjahresfehlbetrag von € 674 Millionen im Vorjahr. Im Geschäftsjahr 2009 waren wir deutlich von den negativen Auswirkungen des wirtschaftlichen Abschwungs betroffen. Unsere fortgeführten Aktivitäten waren insbesondere während des ersten Halbjahrs des Geschäftsjahrs 2009 maßgeblich vom wirtschaftlichen Abschwung beeinflusst. Auch das Ergebnis aus nicht fortgeführten Aktivitäten, abzüglich Steuern vom Einkommen und vom Ertrag, im ersten Halbjahr des Geschäftsjahrs 2009 hatte einen deutlichen Einfluss auf unseren Konzernjahresfehlbetrag im ersten Halbjahr des Geschäftsjahrs 2009. Es resultierte vorrangig aus der Entkonsolidierung von Qimonda sowie den Aufwendungen für Rückstellungen und Wertberichtigungen im Zusammenhang mit der Insolvenz von Qimonda. Unser Konzernjahresfehlbetrag verringerte sich in der zweiten Hälfte des Geschäftsjahrs 2009 und wir erreichten ein positives Ergebnis für das vierte Quartal des Geschäftsjahrs 2009. Diese Verbesserung resultierte aus der teilweisen Erholung der Wirtschaft und aus dem positiven Einfluss unserer Kosteneinsparungsmaßnahmen sowie aus deutlich niedrigeren Aufwendungen im Zusammenhang mit der Insolvenz von Qimonda im zweiten Halbjahr des Geschäftsjahrs 2009 verglichen zum ersten Halbjahr des Geschäftsjahrs 2009.

Im Geschäftsjahr 2010 verbesserte sich unser Konzernergebnis kontinuierlich bedingt durch die im Zuge des gesamtwirtschaftlichen Aufschwungs verbesserten Segmentergebnisse unserer fortgeführten Aktivitäten. Des Weiteren trug der realisierte Gewinn nach Steuern aus der Veräußerung unseres Wireline-Communications-Geschäfts von € 93 Millionen zur Steigerung des Konzernergebnisses bei. Darüber hinaus profitierte

auch das zu veräußernde Mobilfunkgeschäft deutlich von der erhöhten Nachfrage nach drahtlosen Kommunikationsanwendungen. Ebenso wirkte sich die erfolgswirksame Erfassung aktiver latenter Steuern auf Verlustvorträge im Geschäftsjahr 2010 positiv auf den Konzernjahresüberschuss aus.

## DARSTELLUNG DER VERMÖGENSLAGE

### 25 DARSTELLUNG DER VERMÖGENSLAGE

| € in Millionen, außer bei Prozentsätzen                 | 2010         | 2009 <sup>1</sup> | Veränderung |
|---------------------------------------------------------|--------------|-------------------|-------------|
| <b>Kurzfristige Vermögenswerte</b>                      | <b>3.590</b> | <b>2.744</b>      | <b>31 %</b> |
| Davon: Zur Veräußerung stehende Vermögenswerte          | 495          | 112               | +++         |
| Langfristige Vermögenswerte                             | 1.403        | 1.622             | -14 %       |
| <b>Summe Vermögenswerte</b>                             | <b>4.993</b> | <b>4.366</b>      | <b>14 %</b> |
| <b>Kurzfristige Verbindlichkeiten</b>                   | <b>1.808</b> | <b>1.658</b>      | <b>9 %</b>  |
| Davon: Zur Veräußerung stehende Verbindlichkeiten       | 177          | 9                 | +++         |
| Langfristige Verbindlichkeiten                          | 560          | 615               | -9 %        |
| <b>Summe Verbindlichkeiten</b>                          | <b>2.368</b> | <b>2.273</b>      | <b>4 %</b>  |
| Minderheitsanteile                                      | -            | 60                | ---         |
| Eigenkapital der Aktionäre der Infineon Technologies AG | 2.625        | 2.033             | 29 %        |
| <b>Gesamtes Eigenkapital</b>                            | <b>2.625</b> | <b>2.093</b>      | <b>25 %</b> |

<sup>1</sup> Die Eröffnungsbilanzwerte zum 1. Oktober 2008 wurden angepasst, da wir uns im Rahmen der Prüfung unseres Konzernabschlusses zum 30. September 2008 durch die Deutsche Prüfstelle für Rechnungslegung e.V. („DPR“) in einer strittigen Frage aus Gründen der Verfahrensökonomie dazu entschlossen haben, der Auffassung der DPR zu folgen. Die Anpassungen betreffen den Ansatz aktiver latenter Steuern sowie den bilanziellen Verlustvortrag (siehe Anhang Nr. 3). Die Anpassungen sind in den Zahlen dieses Konzernabschlusses, die sich auf die Jahre 2008 und 2009 beziehen, enthalten.

Die Summe unserer Vermögenswerte betrug zum 30. September 2010 € 4.993 Millionen und ist damit im Vergleich zum Vorjahr (€ 4.366 Millionen) um 14 Prozent oder € 627 Millionen angestiegen. Unsere Zahlungsmittel und Zahlungsmitteläquivalente sind um € 253 Millionen angestiegen. Positiv wirkten sich der hohe Free-Cash-Flow aus fortgeführten Aktivitäten sowie die Kaufpreiszahlung aus dem Verkauf des Wireline-Communications-Geschäfts aus. Gegenläufig wirkten teilweise die Rückkäufe und Rückzahlung des verbleibenden Betrags unserer nachrangigen Wandelanleihe mit Fälligkeit 2010 und Investitionen in Sachanlagen und immaterielle Vermögenswerte. Korrespondierend zu dem Anstieg der Umsatzerlöse sind ebenfalls die Forderungen aus Lieferungen und Leistungen um € 173 Millionen angestiegen. Die aktiven latenten Steuern stiegen um € 152 Millionen an. Auf der Passivseite hat sich im Wesentlichen das Eigenkapital um € 532 Millionen oder 25 Prozent erhöht, was insbesondere auf den Konzernjahresüberschuss des Geschäftsjahrs 2010 zurückzuführen ist.

In Verbindung mit dem Verkauf des Mobilfunkgeschäfts sind alle Vermögenswerte und Schulden, die für den Verkauf

an Intel vorgesehen sind, als „zur Veräußerung stehende Vermögenswerte“ beziehungsweise als „zur Veräußerung stehende Verbindlichkeiten“ in der Konzern-Bilanz zum 30. September 2010 ausgewiesen. Insgesamt wurden € 493 Millionen in „zur Veräußerung stehende Vermögenswerte“ umgegliedert, € 177 Millionen werden als „zur Veräußerung stehende Verbindlichkeiten“ ausgewiesen.

Zum 30. September 2010 sind unsere kurzfristigen Vermögenswerte um € 846 Millionen oder 31 Prozent im Vergleich zum 30. September 2009 angestiegen. Ein Teil davon stammt aus dem Anstieg der „zur Veräußerung stehenden Vermögenswerte“ von € 112 Millionen zum 30. September 2009 auf € 495 Millionen zum 30. September 2010. Waren zum 30. September 2009 die im ersten Quartal des Geschäftsjahrs 2010 an Lantiq verkauften Vermögenswerte des Wireline-Communications-Geschäfts in den „zur Veräußerung stehenden Vermögenswerten“ ausgewiesen, umfasst diese Position zum 30. September 2010 die mit dem Mobilfunkgeschäft an Intel zu übertragenden Vermögenswerte.

Unsere Brutto-Cash-Position, die sich aus Zahlungsmitteln und Zahlungsmitteläquivalenten sowie den zur Veräußerung verfügbaren finanziellen Vermögenswerten zusammensetzt, erhöhte sich im Geschäftsjahr 2010 um € 220 Millionen auf € 1.727 Millionen im Vergleich zu € 1.507 Millionen zum 30. September 2009 (siehe hierzu den Abschnitt „Brutto-Cash-Position und Netto-Cash-Position“ innerhalb der Beschreibung der Finanzlage).

Ferner ist der Anstieg der kurzfristigen Vermögenswerte hauptsächlich auf einen Anstieg der Forderungen aus Lieferungen und Leistungen um € 173 Millionen sowie auf die Erhöhung der Vorräte um € 54 Millionen zurückzuführen. Dies resultierte im Wesentlichen aus dem korrespondierenden Umsatzwachstum sowie aus einem moderaten Bestandsaufbau. Der Anstieg der sonstigen kurzfristigen finanziellen Vermögenswerte um € 46 Millionen ist im Wesentlichen auf die im Zusammenhang mit der Absicherung des Verkaufserlöses von 1.400 Millionen US-Dollar aus dem Verkauf des Mobilfunkgeschäfts an Intel erworbenen Optionen zurückzuführen. Gegenläufig wirkte der Rückgang der sonstigen kurzfristigen Vermögenswerte um € 26 Millionen.

Die langfristigen Vermögenswerte sind zum 30. September 2010 um € 219 Millionen oder 14 Prozent im Vergleich zum 30. September 2009 zurückgegangen. Der überwiegende Teil des Rückgangs resultierte aus der Umgliederung der zum Mobilfunkgeschäft gehörenden immateriellen Vermögenswerte von € 312 Millionen und Sachanlagen von € 54 Millionen in die „zur Veräußerung stehenden Vermögenswerte“. Darüber hinaus verringerten sich die Sachanlagen im Geschäftsjahr 2010, da trotz zunehmender Investitionstätigkeit die Investitionen im Geschäftsjahr 2010 niedriger waren als die Abschreibungen. Des Weiteren hat die Entkonsolidierung von ALTIS zum Rückgang des Sachanlagevermögens beigetragen.

## 26 BILANZSTRUKTUR AKTIVA € IN MILLIONEN

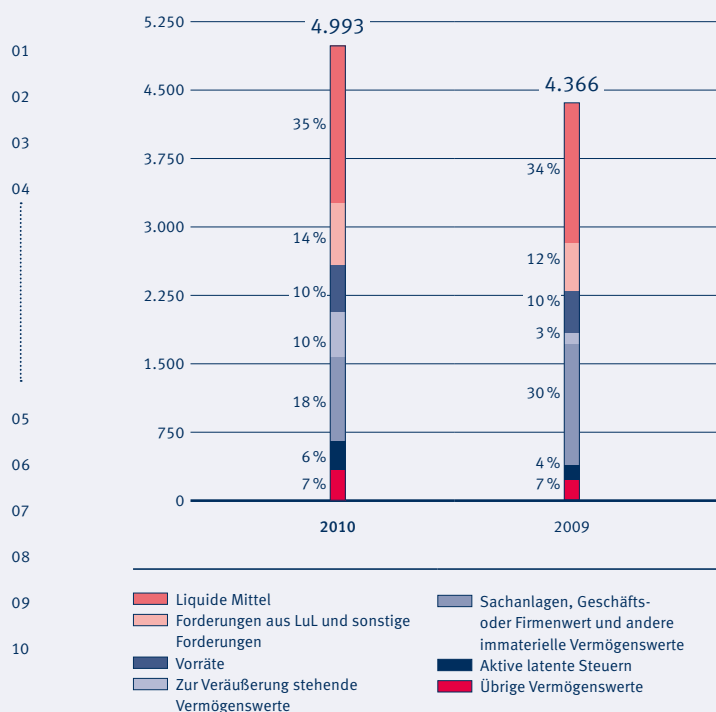

## 27 BILANZSTRUKTUR PASSIVA € IN MILLIONEN

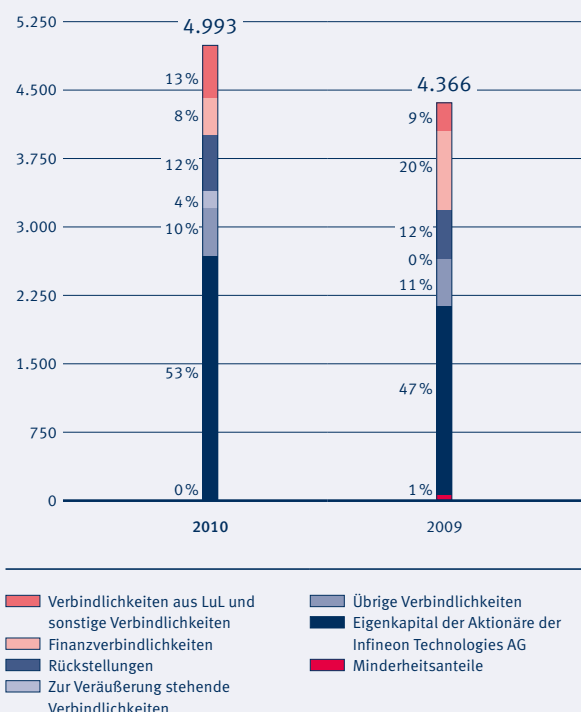

Gegenläufig wirkte sich die Erhöhung der aktiven latenten Steuern um € 152 Millionen aus.

Die Summe der Verbindlichkeiten zum 30. September 2010 hat sich um € 95 Millionen oder 4 Prozent erhöht und betrug € 2.368 Millionen im Vergleich zu € 2.273 Millionen zum 30. September 2009. Die kurzfristigen Verbindlichkeiten erhöhten sich um € 150 Millionen oder 9 Prozent, während die langfristigen Verbindlichkeiten um € 55 Millionen oder 9 Prozent gesunken sind.

Die Veränderungen innerhalb der kurzfristigen Verbindlichkeiten betreffen hauptsächlich den Anstieg in den Verbindlichkeiten aus Lieferungen und Leistungen und sonstigen Verbindlichkeiten um € 272 Millionen und der kurzfristigen Rückstellungen um € 117 Millionen sowie den Anstieg der „zur Veräußerung stehenden Verbindlichkeiten“ um € 168 Millionen. Diese Effekte wurden durch die Rückzahlung des verbleibenden ausstehenden Betrags unserer im Juni 2010 fälligen nachrangigen Wandelanleihe von € 255 Millionen und vorherige Rückkäufe von € 193 Millionen an Nominalwerten dieser Wandelanleihe nahezu ausgeglichen. Darüber hinaus verringerten sich die Rückstellungen und Verbindlichkeiten im Zusammenhang mit der Insolvenz von Qimonda im Geschäftsjahr 2010, im Wesentlichen auf Grund von Zahlungen in Höhe von € 108 Millionen. Der Anstieg bei den Verbindlichkeiten aus Lieferungen und Leistungen resultiert aus höheren Einkäufen von Rohmaterialien und von Wafern bei Auftragsfertigern als Folge des höheren Produktionsniveaus sowie höherer

Investitionen in Produktionsanlagen. Im Bereich der kurzfristigen Rückstellungen sind vor allem die Rückstellungen für Gewährleistungen sowie die Personalrückstellungen angestiegen. Wesentlicher Grund für den Anstieg der Personalrückstellungen sind die infolge der besseren wirtschaftlichen Situation der Gesellschaft zu zahlenden höheren erfolgsabhängigen Mitarbeitervergütungen. Die Summe der „zur Veräußerung stehenden Verbindlichkeiten“ ist von € 9 Millionen auf € 177 Millionen gestiegen. Wesentlicher Grund ist die Umgliederung der zum Mobilfunkgeschäft gehörenden Verbindlichkeiten, insbesondere der Pensionsverbindlichkeiten sowie der Personalrückstellungen für die an die Mitarbeiter zu leistenden erfolgsabhängigen Vergütungen, die zum Abschluss des Verkaufs mit dem dann bestehenden Wert an Intel übertragen werden. Diese Verpflichtungen wurden mit dem am 30. September 2010 bestehenden Wert gemäß IFRS 5 in „zur Veräußerung stehende Verbindlichkeiten“ umgliedert.

Der Rückgang der langfristigen Verbindlichkeiten um € 55 Millionen im Vergleich zum 30. September 2009 hat seinen Grund unter anderem in Umgliederungen von € 76 Millionen von langfristigen in die kurzfristigen Finanzverbindlichkeiten und den oben beschriebenen Umgliederungen in die „zur Veräußerung stehenden Verbindlichkeiten“. Dieser Effekt wurde teilweise durch einen Anstieg der Pensionsverbindlichkeiten von € 94 Millionen im Vorjahr auf € 146 Millionen zum 30. September 2010, im Wesentlichen infolge gesunkener Zinsen, kompensiert (siehe Anhang Nr. 35).

Das Eigenkapital zum 30. September 2010 erhöhte sich um € 532 Millionen oder 25 Prozent auf € 2.625 Millionen im Vergleich zu € 2.093 Millionen zum 30. September 2009. Dieser Anstieg reflektiert den im Geschäftsjahr erzielten Konzernjahresüberschuss von € 660 Millionen. Gegenläufig wirkten direkt im Eigenkapital erfasste Aufwendungen und Erträge von netto minus € 67 Millionen, im Wesentlichen aus den nicht erfolgswirksamen, direkt im Eigenkapital erfassten Effekten auf Grund der veränderten Annahmen im Rahmen der Pensionsbewertung sowie verschiedene unrealisierte Währungseffekte. Darüber hinaus verringerten sich die Minderheitsanteile gegenüber dem Vorjahr um € 60 Millionen im Zusammenhang mit der Entkonsolidierung von ALTIS. Die Eigenkapitalquote betrug zum 30. September 2010 53 Prozent (30. September 2009: 48 Prozent).

**KENNZAHLEN**

Auf Grund einer deutlich verbesserten Geschäftssituation im Geschäftsjahr 2010 im Vergleich zum Geschäftsjahr 2009 und der damit höheren Forderungen aus Lieferungen und Leistungen und Vorräte sowie Zahlungsmittel und Zahlungsmitteläquivalente sowie des Effekts aus der Umgliederung der zu veräußernden langfristigen Vermögenswerte des zu

Mobilfunkgeschäfts in „zur Veräußerung stehende Vermögenswerte“ erhöhte sich der Anteil der kurzfristigen Vermögenswerte am Gesamtvermögen.

Demgegenüber verringerte sich der Anteil langfristiger Vermögenswerte am Gesamtvermögen im Vergleich zum Vorjahr, unter anderem auch auf Grund deutlich geringerer immaterieller Vermögenswerte durch die Zuordnung des Firmenwerts aus dem Erwerb des LSI-Mobilfunk-Geschäfts in „zur Veräußerung stehende Vermögenswerte“. Dieser Effekt wird durch eine im Jahresvergleich höhere Steuerposition teilweise kompensiert.

Die Vorräte erhöhten sich im Geschäftsjahr 2010 im Vergleich zum Vorjahr relativ gesehen geringer als das Geschäftsvolumen (gemessen an den Umsatzkosten), was zu einer leicht geringeren Vorratsintensität führte. Durch ein forciertes Working-Capital-Management verbesserten sich sowohl die Umschlagsdauer der Vorräte als auch die Forderungsreichweite in Tagen.

Der deutliche Konzernjahresüberschuss im Vergleich zum Konzernjahresfehlbetrag im Vorjahr führt sowohl zu einer höheren Eigenkapitalquote als auch zu einer deutlichen Verbesserung der Eigenkapitalrendite. Schließlich resultierte der Konzernjahresüberschuss, einhergehend mit der Rückzahlung der im Juni 2010 fälligen Wandelanleihe, zu einem deutlich verringerten Verschuldungsgrad.

**28 KENNZAHLEN**

|                                                                                              | 2010 | 2009   |
|----------------------------------------------------------------------------------------------|------|--------|
| Anteil langfristiger Vermögenswerte am Gesamtvermögen <sup>1</sup>                           | 28 % | 37 %   |
| Anteil kurzfristig gebundener Vermögenswerte am Gesamtvermögen <sup>2</sup>                  | 72 % | 63 %   |
| Vorratsintensität <sup>3</sup>                                                               | 10 % | 11 %   |
| Umschlagsdauer der Vorräte in Tagen <sup>4,9</sup>                                           | 90   | 98     |
| Umschlagsdauer der Vorräte in Tagen (Basis: einschließlich Mobilfunkgeschäft) <sup>4,9</sup> | 72   | 70     |
| Forderungsreichweite in Tagen <sup>5,9</sup>                                                 | 68   | 74     |
| Forderungsreichweite in Tagen (Basis: einschließlich Mobilfunkgeschäft) <sup>5,9</sup>       | 49   | 53     |
| Eigenkapitalquote <sup>6</sup>                                                               | 53 % | 48 %   |
| Eigenkapitalrendite <sup>7</sup>                                                             | 25 % | - 32 % |
| Verschuldungsgrad <sup>8</sup>                                                               | 15 % | 41 %   |

Die oben stehenden Kennzahlen zur Vermögenslage werden wie folgt berechnet:  
 1 Anteil langfristiger Vermögenswerte am Gesamtvermögen = langfristige Vermögenswerte / Gesamtvermögen  
 2 Anteil kurzfristig gebundener Vermögenswerte am Gesamtvermögen = kurzfristige Vermögenswerte / Gesamtvermögen  
 3 Vorratsintensität = Vorräte (netto) / Gesamtvermögen  
 4 Umschlagsdauer der Vorräte in Tagen = Bestand an Vorräten (netto) x 360 Tage / Umsatzkosten des Jahres  
 5 Forderungsreichweite in Tagen = Bestand an Forderungen aus Lieferungen und Leistungen (netto) x 360 Tage / Umsatzerlöse des Jahres  
 6 Eigenkapitalquote = Eigenkapital / Gesamtvermögen  
 7 Eigenkapitalrendite = Konzernjahresüberschuss (-fehlbetrag) des Jahres / Eigenkapital  
 8 Verschuldungsgrad = (langfristige + kurzfristige Finanzverbindlichkeiten) / Eigenkapital  
 9 Die Umschlagsdauer der Vorräte in Tagen sowie Forderungsreichweite in Tagen ist beeinflusst durch den Effekt aus der Umgliederung der Vermögenswerte des Mobilfunkgeschäfts in „zur Veräußerung stehende Vermögenswerte“ sowie den Ausweis des Ergebniseffekts des zu Mobilfunkgeschäfts im „Ergebnis aus nicht fortgeführten Aktivitäten abzüglich Steuern vom Einkommen und Ertrag“. Da einerseits nicht sämtliche Vorräte und Forderungen aus Lieferungen und Leistungen übertragen und unter „zur Veräußerung stehende Vermögenswerte“ ausgewiesen werden und andererseits die Kennzahlen auf Jahresbasis errechnet werden, stellen wir zur besseren Vergleichbarkeit diese beiden Kennzahlen auch so dar, als ob die Umgliederungen in „zur Veräußerung stehende Vermögenswerte“ sowie der Ausweis des zu im „Ergebnis aus nicht fortgeführte Aktivitäten abzüglich Steuern vom Einkommen und Ertrag“ nicht vorgenommen worden wäre (Basis: einschließlich Mobilfunkgeschäft).

## DARSTELLUNG DER FINANZLAGE

### CASH-FLOW

Der Cash-Flow zeigt die Herkunft und die Verwendung der Geldströme in den Berichtsperioden. Ihm kommt damit eine zentrale Bedeutung für die Beurteilung unserer Finanzlage zu.

Die Mittelabflüsse aus Investitionstätigkeit und die Mittelzu- und -abflüsse aus Finanzierungstätigkeit sind jeweils direkt zahlungsbezogen ermittelt. Der Mittelzufluss aus laufender Geschäftstätigkeit wird ausgehend vom Konzernjahresergebnis indirekt abgeleitet. Die Veränderungen von Bilanzpositionen sind um Effekte aus Währungsschwankungen und aus Konsolidierungskreisänderungen bereinigt. Sie können deshalb nicht mit den entsprechenden Veränderungen in der Konzern-Bilanz abgestimmt werden.

### 29 CASH-FLOW

| € in Millionen                                                                                   | 2010       | 2009       |
|--------------------------------------------------------------------------------------------------|------------|------------|
| Mittelzufluss aus laufender Geschäftstätigkeit aus fortgeführten Aktivitäten                     | 958        | 282        |
| Mittelabfluss (-zufluss) aus Investitionstätigkeit aus fortgeführten Aktivitäten                 | -355       | 25         |
| Mittelabfluss (-zufluss) aus Finanzierungstätigkeit aus fortgeführten Aktivitäten                | -487       | 391        |
| Veränderung der Zahlungsmittel und Zahlungsmitteläquivalente aus nicht fortgeführten Aktivitäten | 136        | -446       |
| <b>Veränderung der Zahlungsmittel und Zahlungsmitteläquivalente</b>                              | <b>252</b> | <b>252</b> |

### Mittelzufluss aus laufender Geschäftstätigkeit aus fortgeführten Aktivitäten

Der Mittelzufluss aus laufender Geschäftstätigkeit aus fortgeführten Aktivitäten betrug €958 Millionen im Geschäftsjahr 2010, eine Verbesserung um €676 Millionen im Vergleich zu €282 Millionen im Geschäftsjahr 2009. Hauptgrund für diesen Anstieg war das bessere Ergebnis aus fortgeführten Aktivitäten. Der Mittelzufluss aus laufender Geschäftstätigkeit aus fortgeführten Aktivitäten spiegelt im Wesentlichen das Ergebnis aus fortgeführten Aktivitäten von €312 Millionen (Vorjahr minus €233 Millionen), zuzüglich nicht zahlungswirksamer planmäßiger Abschreibungen von €336 Millionen sowie dem nicht zahlungswirksamen Teil des operativen Verlustes aus der Entkonsolidierung von ALTIS von €55 Millionen wider. Der Mittelzufluss aus laufender Geschäftstätigkeit aus fortgeführten Aktivitäten wurde im Geschäftsjahr 2010 ferner positiv durch die Verringerung des Nettoumlaufvermögens um €385 Millionen beeinflusst. Die aktuelle Geschäftssituation und ein anhaltendes Working-Capital-Management wirkten sich positiv aus. Gezahlte Steuern vom Einkommen und vom

Ertrag sowie gezahlte Zinsen abzüglich erhaltener Zinsen wirkten sich mit insgesamt €68 Millionen gegenläufig aus.

### Mittelabfluss (-zufluss) aus Investitionstätigkeit aus fortgeführten Aktivitäten

Der Mittelabfluss aus Investitionstätigkeit aus fortgeführten Aktivitäten im Geschäftsjahr 2010 ist vorrangig auf die wieder verstärkt getätigten Investitionen von €292 Millionen in Sachanlagen, vor allem in unsere Produktionsstandorte in Malaysia in Kulim und Malacca sowie unseren deutschen Produktionsstandort Regensburg zurückzuführen. Investitionen in immaterielle Vermögenswerte und andere Vermögenswerte wurden in Höhe von €33 Millionen getätigt. Des Weiteren sind die Zahlungsmittel um €88 Millionen im Zuge der Entkonsolidierung von ALTIS zurückgegangen. Dem stehen getätigte Investitionen in Sachanlagen, immaterielle Vermögenswerte und andere Vermögenswerte von insgesamt €115 Millionen im Vorjahr gegenüber. Netto-Einzahlungen (Verkäufe abzüglich Erwerbe) von €30 Millionen (Vorjahr €33 Millionen) aus den zur Veräußerung verfügbaren finanziellen Vermögenswerten haben sich demgegenüber positiv auf den Mittelabfluss aus Investitionstätigkeit ausgewirkt.

### Mittelabfluss (-zufluss) aus Finanzierungstätigkeit aus fortgeführten Aktivitäten

Der Mittelabfluss aus Finanzierungstätigkeit aus fortgeführten Aktivitäten betrug im Geschäftsjahr 2010 €487 Millionen im Vergleich zu einem Mittelzufluss aus Finanzierungstätigkeit aus fortgeführten Aktivitäten im Geschäftsjahr 2009 in Höhe von €391 Millionen. Der Mittelabfluss aus Finanzierungstätigkeit aus fortgeführten Aktivitäten im Geschäftsjahr 2010 resultierte im Wesentlichen aus dem Rückkauf von Anteilen im Nennwert von €193 Millionen und der Tilgung des verbleibenden ausstehenden Betrages von €255 Millionen der im Juni 2010 fälligen nachrangigen Wandelanleihe. Zusätzlich wurden weitere Darlehensrückzahlungen in Höhe von €41 Millionen getätigt. Im Geschäftsjahr 2009 haben wir eine Erhöhung des Grundkapitals um €674 Millionen durchgeführt, was im Vorjahr zu einem Mittelzufluss aus Finanzierungstätigkeit aus fortgeführten Aktivitäten von €680 Millionen geführt hat. Weitere Mittelzuflüsse im Vorjahr von €182 Millionen resultierten aus der Ausgabe einer in 2014 fälligen nachrangigen Wandelanleihe im Nominalbetrag von €196 Millionen, nach Abzug von Emissionskosten und Disagio. Die Mittelzuflüsse im Vorjahr wurden teilweise ausgeglichen durch Rückzahlungen und Rückkäufe von langfristigen Finanzverbindlichkeiten in Höhe von €455 Millionen.

### Veränderung der Zahlungsmittel und Zahlungsmitteläquivalente aus nicht fortgeführten Aktivitäten

Die Veränderung der Zahlungsmittel und Zahlungsmitteläquivalente aus nicht fortgeführten Aktivitäten betrug im Geschäftsjahr 2010 plus €136 Millionen im Vergleich zu minus



€ 446 Millionen im Vorjahr und resultiert im Wesentlichen aus den Mittelzuflüssen aus Investitionstätigkeit aus nicht fortgeführten Aktivitäten in Höhe von € 147 Millionen, die teilweise kompensiert wurden durch einen Mittelabfluss aus laufender Geschäftstätigkeit aus nicht fortgeführten Aktivitäten von € 11 Millionen.

Der Mittelzufluss aus Investitionstätigkeit aus nicht fortgeführten Aktivitäten im Geschäftsjahr 2010 in Höhe von € 147 Millionen ist im Wesentlichen auf die erhaltene Kaufpreiszahlung von insgesamt € 243 Millionen aus dem Verkauf unseres Wireline-Communications-Geschäfts zurückzuführen. Diese Zahlungen erhöhten den Mittelzufluss aus Investitionstätigkeit aus nicht fortgeführten Aktivitäten. Gegenläufig wirkten die Mittelabflüsse aus Investitionstätigkeiten des Mobilfunkgeschäfts, welche in nicht fortgeführte Aktivitäten umgliedert wurden.

Der Mittelabfluss aus laufender Geschäftstätigkeit aus nicht fortgeführten Aktivitäten von € 11 Millionen im Geschäftsjahr 2010 resultiert aus Zahlungen im Zusammenhang mit Qimonda von € 108 Millionen, die nahezu kompensiert wurden durch die Mittelzuflüsse aus laufender Geschäftstätigkeit des Mobilfunkgeschäfts sowie durch die Mittelzuflüsse aus dem Wireline-Communications-Geschäft bis zum Abschluss des Verkaufs abzüglich nachträglicher Netto-Auszahlungen für verbliebene kurzfristige Verbindlichkeiten. Die Zahlungen im Zusammenhang mit potenziellen Verbindlichkeiten aus der Insolvenz von Qimonda enthalten die Zahlung von € 57 Millionen auf Grund des mit der Europäischen Kommission geschlossenen Vergleichs, die Zahlung der letzten Rate in Höhe von € 17 Millionen aus dem „Plea Agreement“ mit dem U.S. Department of Justice („DOJ“), sowie bestimmte Zahlungen im Zusammenhang mit mitarbeiterbezogenen Ansprüchen und auf Grund des separaten Vergleichs mit dem letzten direkten US-DRAM-Käufer, der sich nicht dem allgemeinen Vergleich der übrigen Sammelkläger angeschlossen hat (siehe Anhang Nr. 38).

Die Veränderung der Zahlungsmittel und Zahlungsmitteläquivalente aus nicht fortgeführten Aktivitäten im Vorjahr von € 446 Millionen resultierte im Wesentlichen aus Qimondas Mittelabfluss aus laufender Geschäftstätigkeit von € 416 Millionen, die nur zu einem geringen Teil durch die Mittelzuflüsse aus laufender Tätigkeit unseres Wireline-Communications-Geschäfts und des Mobilfunkgeschäfts ausgeglichen wurden. Qimondas Mittelabfluss aus laufender Geschäftstätigkeit war vor allem auf die negative Geschäftsentwicklung von Qimonda bis zur Entkonsolidierung von Qimonda zurückzuführen.

### FREE-CASH-FLOW

Wir definieren den Free-Cash-Flow als Mittelzufluss aus laufender Geschäftstätigkeit und Mittelabfluss aus Investitionstätigkeit aus fortgeführten Aktivitäten, bereinigt um Zahlungsströme aus dem Kauf und Verkauf von zur Veräußerung verfügbaren finanziellen Vermögenswerten. Da wir einen

Teil unserer liquiden Mittel in Form von zur Veräußerung verfügbaren finanziellen Vermögenswerten halten und in einer kapitalintensiven Industrie tätig sind, berichten wir den Free-Cash-Flow, um Investoren eine Kennzahl zur Verfügung zu stellen, die die Veränderung der Liquidität unter Berücksichtigung von Investitionen zeigt. Das bedeutet nicht, dass der so ermittelte Free-Cash-Flow für sonstige Ausgaben verwendet werden kann, da Schuldendienstverpflichtungen oder andere feste Ausgaben noch nicht abgezogen sind. Der Free-Cash-Flow beinhaltet nur Werte aus fortgeführten Aktivitäten und wird wie folgt aus der Konzern-Kapitalflussrechnung hergeleitet:

### 30 FREE-CASH-FLOW

| € in Millionen                                                                   | 2010       | 2009       |
|----------------------------------------------------------------------------------|------------|------------|
| Mittelzufluss aus laufender Geschäftstätigkeit aus fortgeführten Aktivitäten     | 958        | 282        |
| Mittelabfluss (-zufluss) aus Investitionstätigkeit aus fortgeführten Aktivitäten | -355       | 25         |
| Verkauf von Wertpapieren, Saldo                                                  | -30        | -33        |
| <b>Free-Cash-Flow</b>                                                            | <b>573</b> | <b>274</b> |

Der Free-Cash-Flow betrug € 573 Millionen im Geschäftsjahr 2010 im Vergleich zu einem Free-Cash-Flow von € 274 Millionen im Geschäftsjahr 2009. Dies entspricht einer Verbesserung von € 299 Millionen. Der Free-Cash-Flow im Geschäftsjahr 2010 ist hauptsächlich geprägt durch den verbesserten Mittelzufluss aus laufender Geschäftstätigkeit von € 958 Millionen im Vergleich zu einem Mittelzufluss von € 282 Millionen im Vorjahr. Die Zunahme bei den Mittelzuflüssen aus laufender Geschäftstätigkeit wurde zum Teil ausgeglichen durch den Rückgang der Zahlungsmittel um € 88 Millionen im Zuge der Entkonsolidierung von ALTIS und durch Mittelabflüsse für Investitionen in Sachanlagen und immaterielle Vermögenswerte von € 325 Millionen, verglichen mit € 115 Millionen im Vorjahr. Nicht in der Free-Cash-Flow-Ermittlung berücksichtigt sind Nettoverkäufe von € 30 Millionen (Vorjahr € 33 Millionen) von zur Veräußerung verfügbaren finanziellen Vermögenswerten. Diese sind im Mittelabfluss aus Investitionstätigkeit enthalten und müssen daher bei der Free-Cash-Flow-Ermittlung von diesem abgezogen werden. Der Free-Cash-Flow enthält im Geschäftsjahr 2009 auch erhaltene Zahlungen von € 120 Millionen vom Einlagensicherungsfonds des Bundesverbandes deutscher Banken e.V. im Zuge der Lehman-Insolvenz sowie Auszahlungen auf Grund unseres IFX10+ Kostensenkungsprogramms.

**BRUTTO-CASH-POSITION UND NETTO-CASH-POSITION**

Die folgende Tabelle stellt unsere Brutto-Cash-Position und Netto-Cash-Position sowie die Finanzverbindlichkeiten nach ihren Fälligkeiten dar. Die Darstellung ist kein Ausblick auf die verfügbaren Zahlungsmittel der künftigen Periode. Da wir einen Teil unserer liquiden Mittel in Form von zur Veräußerung verfügbaren finanziellen Vermögenswerten halten, die unter

**31 NETTO-CASH-POSITION**

| € in Millionen                                                                                             | Gesamt       | weniger<br>als 1 Jahr | 1-2 Jahren | 2-3 Jahren | 3-4 Jahren  | 4-5 Jahren | 5 Jahren<br>und länger |
|------------------------------------------------------------------------------------------------------------|--------------|-----------------------|------------|------------|-------------|------------|------------------------|
| Zahlungsmittel und Zahlungsmitteläquivalente                                                               | 1.667        | 1.667                 | –          | –          | –           | –          | –                      |
| Zur Veräußerung verfügbare finanzielle Vermögenswerte                                                      | 60           | 60                    | –          | –          | –           | –          | –                      |
| <b>Brutto-Cash-Position</b>                                                                                | <b>1.727</b> | <b>1.727</b>          | –          | –          | –           | –          | –                      |
| Abzüglich:                                                                                                 |              |                       |            |            |             |            |                        |
| Langfristige Finanzverbindlichkeiten                                                                       | 263          | –                     | 66         | 44         | 153         | –          | –                      |
| Kurzfristige Finanzverbindlichkeiten sowie kurzfristige Bestandteile langfristiger Finanzverbindlichkeiten | 133          | 133                   | –          | –          | –           | –          | –                      |
| <b>Gesamte Finanzverbindlichkeiten</b>                                                                     | <b>396</b>   | <b>133</b>            | <b>66</b>  | <b>44</b>  | <b>153</b>  | –          | –                      |
| <b>Netto-Cash-Position</b>                                                                                 | <b>1.331</b> | <b>1.594</b>          | <b>–66</b> | <b>–44</b> | <b>–153</b> | –          | –                      |

Die Gesellschaft weist eine sehr solide Finanzposition aus.

Unsere Brutto-Cash-Position – definiert als Zahlungsmittel und Zahlungsmitteläquivalente einschließlich zur Veräußerung verfügbarer finanzieller Vermögenswerte – betrug zum 30. September 2010 € 1.727 Millionen im Vergleich zu € 1.507 Millionen zum 30. September 2009. Unsere Brutto-Cash-Position spiegelt hauptsächlich die positiven Mittelzuflüsse aus laufender Geschäftstätigkeit aus fortgeführten Aktivitäten von € 958 Millionen und den Erhalt von € 243 Millionen aus dem Verkauf unseres Wireline-Communications-Geschäfts wider. Gegenläufig wirkten Rückkäufe von Nominalbeträgen von € 193 Millionen unserer im Juni 2010 fälligen nachrangigen Wandelanleihe und die Tilgung des verbleibenden ausstehenden Betrages von € 255 Millionen dieser Wandelanleihe am Tag der Fälligkeit sowie Investitionen der fortgeführten Aktivitäten in Sachanlagen und immaterielle Vermögenswerte von € 325 Millionen und darüber hinaus der Rückgang der Zahlungsmittel um € 88 Millionen im Zuge der Entkonsolidierung von ALTIS. Ebenso wirkten sich die Investitionen des Mobilfunkgeschäfts in Höhe von € 93 Millionen gegenläufig auf unsere Brutto-Cash-Position aus.

Unsere Netto-Cash-Position, definiert als Brutto-Cash-Position abzüglich kurzfristiger und langfristiger Finanzverbindlichkeiten, erhöhte sich zum 30. September 2010 auf € 1.331 Millionen, im Vergleich zu € 657 Millionen zum 30. September 2009. Der Anstieg im Free-Cash-Flow aus fortgeführten Aktivitäten und Erlöse aus dem Verkauf des Wireline-Communications-Geschäfts waren hierfür die wesentlichen Gründe.

Die langfristigen und kurzfristigen Finanzverbindlichkeiten beinhalten eine nachrangige Wandelanleihe im Nennwert von € 196 Millionen mit Fälligkeit 2014, die 2009 zur Stärkung

IFRS nicht als Zahlungsmittel und Zahlungsmitteläquivalente klassifiziert sind, berichten wir die Brutto- und die Netto-Cash-Position, um Investoren die gesamte Liquiditätslage der Gesellschaft besser zu erläutern. Die Brutto- und die Netto-Cash-Position werden ohne Anpassung der IFRS-Werte wie folgt aus der Konzern-Bilanz hergeleitet:

unserer Liquidität begeben wurde sowie Kredite für Betriebskapital und für Projektfinanzierungen. Die im Jahre 2014 fällige nachrangige Wandelanleihe zum Nennwert in Höhe von € 196 Millionen wurde am 26. Mai 2009 mit einem Disagio von 7,2 Prozent begeben. Die Wandelanleihe kann jederzeit während der Laufzeit in ursprünglich maximal 74,9 Millionen unserer Aktien umgewandelt werden, wobei der Wandelpreis ursprünglich € 2,61 je Aktie betrug. Nach unserer Kapitalerhöhung im August 2009 ist der Wandelpreis auf Basis einer in den Anleihebedingungen enthaltenen Verwässerungsschutzklausel auf € 2,33 und das Wandlungsverhältnis auf maximal 84 Millionen angepasst worden. Die Wandelanleihe verzinst sich mit 7,5 Prozent pro Jahr. Die Wandelanleihe ist unbesichert und steht gleichrangig mit allen unseren gegenwärtigen und künftigen nachrangigen Verbindlichkeiten.

Zur Sicherung unseres Zahlungsmittelbestands und zur Gewährleistung flexibler Liquidität haben wir eine Richtlinie implementiert, die das Anlagevolumen bezüglich Geschäftspartner, Rating, Branche, Laufzeit und Instrument begrenzt.

**KAPITALBEDARF**

Im Geschäftsjahr 2011 benötigen wir Kapital zur

- Finanzierung der operativen Geschäftstätigkeit,
- Rückzahlung fälliger Darlehen,
- Zahlung unserer Eventualverpflichtungen, sofern sie eintreten,
- planmäßigen Durchführung von Investitionen, und
- Zahlung der geplanten Dividende.

Wir erwarten, diese Anforderungen zu erfüllen durch

- Zahlungsmittelzuflüsse aus dem laufenden Geschäft,
- verfügbare Zahlungsmittel einschließlich veräußerbarer Wertpapiere sowie
- verfügbare Kreditlinien.

Zum 30. September 2010 benötigen wir für das Geschäftsjahr 2011 Geldmittel in Höhe von € 808 Millionen, bestehend aus € 133 Millionen für kurzfristige Finanzverbindlichkeiten und € 675 Millionen für vertragliche Verpflichtungen. Zusätzlich könnten derzeit bekannte und schätzbare Eventualverpflichtungen in Höhe von € 20 Millionen auftreten. Wir planen rund € 550 Millionen für Investitionen in Sachanlagen sowie immaterielle Vermögenswerte einschließlich aktivierter Entwicklungskosten aufzuwenden. Unser Brutto-Zahlungsmittelbestand beläuft sich am 30. September 2010 auf € 1.727 Millionen, und wir können € 227 Millionen aus den verfügbaren Kreditlinien finanzieren. Darüber hinaus erwarten wir für das Geschäftsjahr 2011 entsprechend der erwarteten Ergebnisentwicklung Zahlungsmittelzuflüsse aus dem laufenden Geschäft. Mit dem Abschluss des Verkaufs des Mobilfunkgeschäfts erwarten wir den Zufluss von 1.400 Millionen US-Dollar im Geschäftsjahr 2011.

**VERTRAGLICHE VERPFLICHTUNGEN UND EVENTUALVERPFLICHTUNGEN**

Die unten stehende Tabelle sollte im Zusammenhang mit dem Anhang Nr. 38 des Konzernabschlusses des Geschäftsjahrs 2010 gelesen werden.

**32 VERTRAGLICHE VERPFLICHTUNGEN UND EVENTUALVERPFLICHTUNGEN**

| € in Millionen, Zahlung fällig in:                    | Gesamt <sup>1</sup> | weniger als 1 Jahr | 1 – 2 Jahren | 2 – 3 Jahren | 3 – 4 Jahren | 4 – 5 Jahren | 5 Jahren und länger |
|-------------------------------------------------------|---------------------|--------------------|--------------|--------------|--------------|--------------|---------------------|
| <b>Vertragliche Verpflichtungen:</b>                  |                     |                    |              |              |              |              |                     |
| Langfristige und kurzfristige Finanzverbindlichkeiten | 396                 | 133                | 66           | 44           | 153          | –            | –                   |
| Zahlungen aus Leasingverträgen                        | 656                 | 60                 | 61           | 52           | 50           | 47           | 386                 |
| Unbedingte Abnahmeverpflichtungen                     | 710                 | 596                | 81           | 27           | 5            | 1            | –                   |
| Zukünftige Zinszahlungen <sup>2</sup>                 | 110                 | 19                 | 17           | 16           | 58           | –            | –                   |
| Sonstige langfristige Verbindlichkeiten               | 34                  | –                  | 34           | –            | –            | –            | –                   |
| <b>Summe vertragliche Verpflichtungen</b>             | <b>1.906</b>        | <b>808</b>         | <b>259</b>   | <b>139</b>   | <b>266</b>   | <b>48</b>    | <b>386</b>          |
| <b>Eventualverpflichtungen:</b>                       |                     |                    |              |              |              |              |                     |
| Garantien <sup>3</sup>                                | 88                  | 15                 | 1            | 5            | 2            | 4            | 61                  |
| Bedingte Zulagen und Zuschüsse <sup>4</sup>           | 22                  | 5                  | 6            | 6            | 2            | 3            | –                   |
| <b>Summe Eventualverpflichtungen</b>                  | <b>110</b>          | <b>20</b>          | <b>7</b>     | <b>11</b>    | <b>4</b>     | <b>7</b>     | <b>61</b>           |

1 Die Tabelle enthält gewisse Zahlungsverpflichtungen oder Fälligkeiten von Verpflichtungen, die von dem Erreichen von Leistungszielen oder anderen Ereignissen, die nicht zeitlich fixiert sind, abhängen. Die wahrscheinliche Fälligkeit wurde von der Gesellschaft geschätzt. Die tatsächlichen Fälligkeiten können von diesen Schätzungen abweichen.  
 2 Beinhaltet den Effekt aus der Aufzinsung der im Jahr 2014 fälligen nachrangigen Wandelanleihe in der Spalte 3 – 4 Jahre.  
 3 Garantien werden im Wesentlichen für Zahlungen auf Einfuhrzölle, für Mieten von Gebäuden und für Eventualverbindlichkeiten in Verbindung mit erhaltenen staatlichen Zuschüssen ausgegeben.  
 4 Bedingte Zuschüsse und Zulagen beziehen sich auf bisher erhaltene Beträge, die im Zusammenhang mit der Errichtung und Finanzierung von bestimmten Fertigungsstätten stehen und gegebenenfalls zurückerstattet werden müssen, falls die genannten behördlichen Projektanforderungen nicht erfüllt werden. Sie enthalten keine potenziellen bedingten Zulagen und Zuschüsse im Zusammenhang mit Qimonda.

**AUSSERBILANZIELLE TRANSAKTIONEN**

Im Rahmen der gewöhnlichen betrieblichen Tätigkeit begeben wir Garantien vor allem für die Zahlung von Importzöllen, Gebäudemieten und möglichen Verpflichtungen in Bezug auf erhaltene staatliche Zuschüsse. Zum 30. September 2010 betrug die Höhe der undiskontierten, potenziellen zukünftigen Zahlungen für Garantien € 88 Millionen.

**INVESTITIONEN**

**33 INVESTITIONEN**

| € in Millionen                                              | 2010       |
|-------------------------------------------------------------|------------|
| Sachanlagen                                                 | 331        |
| Immaterielle Vermögenswerte – eigene Entwicklungsleistungen | 79         |
| Immaterielle Vermögenswerte – erworben                      | 8          |
| <b>Gesamt</b>                                               | <b>418</b> |
| in zur Veräußerung stehend umgegliedert                     | – 93       |
| <b>Gesamt nach Umgliederung</b>                             | <b>325</b> |

Gemäß unserem im Vorjahr erstellten Budget für das Geschäftsjahr 2010 hatten wir Investitionen in Sachanlagen von ungefähr € 220 Millionen bis € 250 Millionen erwartet, im Wesentlichen in unsere Produktionsanlagen in Kulim, Malaysia und Malacca, Malaysia. Als Ergebnis des wirtschaftlichen Aufschwungs haben wir die Investitionsentscheidungen nach oben angepasst und tatsächliche Investitionen

01  
02  
03  
04  
05  
06  
07  
08  
09  
10  
11  
12  
13  
14  
15

in Sachanlagen von € 331 Millionen im Geschäftsjahr 2010 getätigt. Wir versuchen, fortlaufend die Produktivität zu verbessern und entwickeln die Technologien in unseren Standorten ständig weiter. In den Investitionen in Sachanlagen enthalten sind Investitionen des Mobilfunkgeschäfts von € 39 Millionen, die wir in zur Veräußerung stehend umgliedert haben.

Da Forschungs- und Entwicklungstätigkeiten wesentlich für unser Geschäft sind und weil die zahlreichen Wachstumschancen unserer Zielmärkte eine Weiterentwicklung und Erweiterung unserer Produktbasis erfordern, haben wir ebenfalls die Forschungs- und Entwicklungstätigkeiten entsprechend nach oben angepasst. Damit im Einklang steht auch die Zunahme der im Geschäftsjahr aktivierten Entwicklungskosten auf € 79 Millionen. Darin enthalten sind aktivierte Entwicklungskosten unseres Mobilfunkgeschäfts von € 52 Millionen, die wir in zur Veräußerung stehend umgliedert haben.

Investitionen in erworbene immaterielle Vermögenswerte von € 8 Millionen betreffen vor allem im Geschäftsjahr erworbene Lizenzen. Davon entfallen € 2 Millionen auf das Mobilfunkgeschäft, die wir in zur Veräußerung stehend umgliedert haben.

Im Geschäftsjahr 2009 wurden Investitionen von € 5 Millionen in zur Veräußerung stehend umgliedert aus dem

geplanten Verkauf unseres Wireline-Communications-Geschäfts.

Abhängig von der Marktentwicklung und unserer Geschäftssituation erwarten wir derzeit im Geschäftsjahr 2011 rund € 550 in Sachanlagen sowie immaterielle Vermögenswerte einschließlich aktivierter Entwicklungskosten zu investieren. Auf Grund des Erreichens der Kapazitätsgrenzen in den Geschäftsjahren 2009 und 2010 planen wir unsere Fertigungskapazitäten, besonders in der Front-End Fertigung in Kulim, Malaysia und in verschiedenen Back-End Fertigungen auszubauen. Zum 30. September 2010 waren von den geplanten Anlageinvestitionen € 171 Millionen fest vereinbart und in den unbedingten Abnahmeverpflichtungen enthalten. Auf Grund der Länge des Zeitraums zwischen der Bestellung und der Lieferung von Anlagen sind üblicherweise erhebliche Investitionsbeträge vorab festgelegt.

#### KREDITLINIEN

Wir haben verschiedene, voneinander unabhängige kurz- und langfristige Kreditlinien mit mehreren Finanzinstituten für den zu erwartenden Finanzbedarf vereinbart. Diese Kreditlinien haben eine Höhe von € 470 Millionen, von denen € 227 Millionen zum 30. September 2010 verfügbar waren.

Die Kreditlinien bestehen aus den folgenden drei Gruppen:

## 34 KREDITLINIEN

| € in Millionen           |                             |                                                           | Zum 30. September 2010 |                      |            |
|--------------------------|-----------------------------|-----------------------------------------------------------|------------------------|----------------------|------------|
| Laufzeit                 | Zusage durch Finanzinstitut | Zweck/beabsichtigter Einsatz                              | Gesamthöhe             | In Anspruch genommen | Verfügbar  |
| Kurzfristig              | feste Zusage                | Generelle betriebliche Zwecke, Betriebskapital, Garantien | 136                    | 75                   | 61         |
| Kurzfristig              | keine feste Zusage          | Betriebskapital, Cash-Management                          | 98                     | –                    | 98         |
| Langfristig <sup>1</sup> | feste Zusage                | Projektfinanzierung                                       | 236                    | 168                  | 68         |
| <b>Gesamt</b>            |                             |                                                           | <b>470</b>             | <b>243</b>           | <b>227</b> |

<sup>1</sup> Einschließlich kurzfristiger Bestandteile der langfristigen Finanzverbindlichkeiten.

Nach unserer Planung soll die Finanzierung des Nettoumlaufvermögens und des übrigen Finanzmittelbedarfs im Wesentlichen aus Mittelzuflüssen aus laufender Geschäftstätigkeit erfolgen. Im Zusammenhang mit bestimmten Investitionsprojekten haben wir auch staatliche Zulagen und Zuschüsse beantragt, können jedoch nicht garantieren, dass die Mittel rechtzeitig oder überhaupt genehmigt werden.

Unter Berücksichtigung der verfügbaren finanziellen Ressourcen, einschließlich der intern vorhandenen und künftig generierten Zahlungsmittel und der derzeit verfügbaren Kreditlinien, gehen wir davon aus, unseren derzeit geplanten Kapitalbedarf für das Geschäftsjahr 2011 bedienen zu können.

#### FINANZIERUNG DER PENSIONSVERPFLICHTUNGEN

Der Anwartschaftsbarwert (DBO) unserer Gesellschaft, der künftige Gehalts- und Rentensteigerungen berücksichtigt,

betrug € 539 Millionen zum 30. September 2010 im Vergleich zu € 425 Millionen zum 30. September 2009. Der beizulegende Zeitwert des Planvermögens betrug € 347 Millionen zum 30. September 2010 im Vergleich zu € 330 Millionen zum 30. September 2009.

Die tatsächliche Gesamtrendite auf das Planvermögen zwischen den letzten Fälligkeitszeitpunkten betrug für inländische (deutsche) Pensionspläne 7,0 Prozent oder € 22 Millionen und für ausländische Pensionspläne 11,0 Prozent oder € 3 Millionen. Die erwartete Gesamtrendite auf das Planvermögen für diesen Zeitraum betrug für inländische Pensionspläne 6,3 Prozent und für ausländische Pensionspläne 7,2 Prozent. Für das nächste Geschäftsjahr haben wir eine Rendite auf das Planvermögen in Höhe von 5,0 Prozent oder € 16 Millionen für inländische Pensionspläne und in Höhe von 7,2 Prozent oder € 2 Millionen für ausländische Pensionspläne geschätzt.

Zum 30. September 2010 und 2009 wies der zusammengefasste Finanzierungsstatus für unsere Pensionspläne eine Unterdeckung in Höhe von € 192 Millionen und € 95 Millionen auf. Davon waren € 46 Millionen zum 30. September 2010 und € 1 Million zum 30. September 2009 als „zur Veräußerung stehend“ ausgewiesen.

Unsere Investitionsstrategie für die Pensionspläne beinhaltet ein gewisses Maß an Flexibilität, um sich ergebende Anlagechancen so früh wie möglich ergreifen zu können. Gleichzeitig stellen angemessene Kennzahlen sicher, dass die Vorsichts- und Sorgfaltspflichten bei der Ausführung des Investitionsprogramms erfüllt werden. Das Vermögen der Pensionspläne wird von mehreren Anlageberatern angelegt. Die Pläne sehen eine Kombination aus aktiven und passiven Investitionsprogrammen vor. Unter Berücksichtigung der Laufzeit der zugrunde liegenden Verpflichtungen wird ein Portfolio der Investitionen des Planvermögens, bestehend aus Anteils-, Gläubiger- und anderen Wertpapieren, angestrebt, das die langfristige Gesamtkapitalrendite bei einem bestimmten Risiko maximiert. Das Investitionsrisiko wird durch laufende periodenweise Prüfungen des Portfolios, durch Meetings mit Anlageberatern und durch Verbindlichkeitsberechnungen kontrolliert. Die Investitionsmethoden und -strategien werden periodisch überprüft, um sicherzustellen, dass die Ziele der Versorgungspläne, unter Berücksichtigung jeder Änderung im Aufbau des Versorgungsplans, der Marktbedingungen oder anderer wesentlicher Punkte, erreicht werden.

Die Verteilung unseres Planvermögens auf das Anlagevermögen des Pensionsplans basiert auf der Einschätzung der Geschäfts- und Finanzlage, ferner auf demographischen und versicherungsmathematischen Daten, auf Finanzierungsmöglichkeiten, geschäftsbezogenen Risikofaktoren, Marktsensitivitätsanalysen und anderen relevanten Faktoren. Insgesamt soll die Verteilung der Sicherung des Planvermögens dienen und gleichzeitig für ausreichend stabile, also beispielsweise inflationsbereinigte Einkünfte sorgen, um sowohl derzeitige wie auch künftige Pensionszusagen zu erfüllen. Auf Grund des aktiven Portfoliomanagements kann die tatsächliche Verteilung des Anlagevermögens, innerhalb bestimmter Grenzen, von der geplanten Verteilung abweichen. Gemäß unseren Richtlinien investieren unsere Pensionspläne nicht in eigene Aktien.

#### DERIVATIVE FINANZINSTRUMENTE

Wir schließen Geschäfte über derivative Finanzinstrumente einschließlich Zins-Swap-Vereinbarungen, Fremdwährungstermin- und -optionsgeschäften ab. Ziel dieser Transaktionen ist die Verringerung der Zins- und Währungsschwankungen für die in Fremdwährung lautenden künftigen Netto-Zahlungsströme. Derivative Finanzinstrumente werden von uns nicht zu Handels- oder spekulativen Zwecken eingesetzt. Für weitere Informationen zu derivativen Finanzinstrumenten und dem Management von finanziellen Risiken siehe Anhang Nr. 36 und 37.

## GESAMTAUSSAGE DES VORSTANDS ZUR WIRTSCHAFTLICHEN LAGE DES KONZERNS ZUM ZEITPUNKT DER AUFSTELLUNG DIESES BERICHTS

Im Geschäftsjahr 2010 konnten wir den Aufschwung, der in der zweiten Hälfte des Geschäftsjahrs 2009 seinen Anfang nahm, mit erheblich über dem gesamten Halbleitermarkt liegenden Wachstumsraten erfolgreich fortsetzen. Wir haben seitdem in jedem Quartal deutliche, teilweise zweistellige Umsatzzuwächse gegenüber dem jeweiligen Vorquartal erzielen können. Durch die konsequente Fortführung des Kostensenkungsprogramms „IFX10+“, zusätzliche Maßnahmen zur Kostenreduktion sowie zur Produktivitätssteigerung, durch weitere Marktanteilsgewinne sowie unterstützt durch die allgemeine Verbesserung des Wirtschaftsumfeldes erreichten wir im Geschäftsjahr 2010 ein Umsatzwachstum von 51 Prozent gegenüber dem Vorjahreswert und erzielten nach einem Konzernjahresfehlbetrag von € 674 Millionen im Vorjahr einen Konzernjahresüberschuss von € 660 Millionen im Geschäftsjahr 2010. Wir konnten damit durch konsequentes Handeln, durch eine erfolgreiche Restrukturierung und Refinanzierung nicht nur die Krise meistern, sondern sind stärker und leistungsfähiger geworden.

Mit konsequentem Portfolio-Management haben wir in den letzten 18 Monaten zudem Infineon noch weiter auf stabilere Wachstumfelder und weniger volatile Branchen mit führender Marktposition fokussiert – der Abschluss des Verkaufs des Wireline-Communications-Geschäfts sowie der Vertragsabschluss über den Verkauf unseres Mobilfunkgeschäft an Intel waren wichtige Schritte einer Neuausrichtung unseres Geschäfts. Infineon belegt heute in allen drei verbleibenden Bereichen, in Automotive, in der industriellen Leistungselektronik wie auch in Chip Card & Security, jeweils die Nummer-1-Position im Weltmarkt mit entsprechenden Wachstums- und Gewinnaussichten in diesen Märkten.

Ein konsequentes Working-Capital-Management sowie eine maßvolle Investitionspolitik haben dazu beigetragen, dass wir nicht nur die Verschuldung um € 454 Millionen auf € 396 Millionen zum 30. September 2010 im Vergleich zum Vorjahr weiter reduzieren konnten – zusätzlich hat sich unsere Brutto-Cash-Position von € 1.507 Millionen zum 30. September 2009 auf € 1.727 Millionen zum 30. September 2010 weiter erhöht, eine beachtliche Entwicklung, wenn man bedenkt, dass wir zum 30. Juni 2009 noch eine Netto-Debt-Position von € 151 Millionen ausgewiesen haben. Belief sich zum 30. September 2009 der Verschuldungsgrad auf 41 Prozent, konnte dieser zum 30. September 2010 auf gerade noch 15 Prozent gesenkt werden, ein überzeugender Beweis für unsere solide Bilanzstruktur zum 30. September 2010.

Auf diesem Fundament werden wir aufbauen auf unserem Weg zu einem langfristigen und nachhaltigen Unternehmenserfolg sowie Wertsteigerung für unsere Aktionäre.

01  
02  
03  
04  
05  
06  
07  
08  
09  
10  
11  
12  
13  
14  
15  
16  
17  
18  
19  
20  
21

## NICHT-FINANZIELLE LEISTUNGSINDIKATOREN

## UNSERE MITARBEITER

## Mitarbeiterzahlen

Die folgende Übersicht zeigt die Zusammensetzung unserer Belegschaft nach Funktionen und Regionen jeweils zum 30. September eines genannten Geschäftsjahrs:

35 MITARBEITER<sup>1</sup>

|                           | 2010          | %          | 2009          | %          | 2008          | %          |
|---------------------------|---------------|------------|---------------|------------|---------------|------------|
| <b>Funktionen:</b>        |               |            |               |            |               |            |
| Produktion                | 17.924        | 67         | 17.338        | 65         | 19.358        | 66         |
| Forschung und Entwicklung | 5.771         | 22         | 5.971         | 23         | 6.273         | 22         |
| Vertrieb und Marketing    | 1.520         | 6          | 1.681         | 6          | 1.905         | 7          |
| Verwaltung                | 1.439         | 5          | 1.474         | 6          | 1.583         | 5          |
| <b>Gesamt</b>             | <b>26.654</b> | <b>100</b> | <b>26.464</b> | <b>100</b> | <b>29.119</b> | <b>100</b> |
| <b>Regionen:</b>          |               |            |               |            |               |            |
| Deutschland               | 8.826         | 33         | 9.160         | 35         | 10.053        | 34         |
| Übriges Europa            | 3.449         | 13         | 4.676         | 18         | 5.192         | 18         |
| Nordamerika               | 640           | 2          | 687           | 2          | 821           | 3          |
| Asien-Pazifik             | 13.619        | 51         | 11.803        | 45         | 12.897        | 44         |
| Japan                     | 120           | 1          | 138           | -          | 156           | 1          |
| <b>Gesamt</b>             | <b>26.654</b> | <b>100</b> | <b>26.464</b> | <b>100</b> | <b>29.119</b> | <b>100</b> |

<sup>1</sup> Es ist vorgesehen, dass weltweit ungefähr 3.400 Mitarbeiter unseres Segments Wireless Solutions und aus Zentralfunktionen im Rahmen des Verkaufs des Mobilfunkgeschäfts an Intel übergehen.

Die Entwicklung der Mitarbeiterzahlen im Geschäftsjahr 2010 umfasst in erster Linie den Abschluss des Krisenmanagements und den damit verbundenen Personalabbau, der bereits im Jahr 2009 eingeleitet wurde. Des Weiteren sind in der Mitarbeiterzahl Sondereffekte durch die Entkonsolidierung von ALTIS enthalten, welche zur Ausgliederung von 1.315 Mitarbeitern vorrangig im Produktionsbereich zum 31. Dezember 2009 führte. Im Zuge des Verkaufs unseres Wireline-Communications-Geschäfts gingen im Geschäftsjahr 2010 insgesamt 807 Mitarbeiter aus den Bereichen Wireline Communications sowie aus den Zentralfunktionen auf Lantiq über.

Der Personalabbau, der aus den genannten Aktivitäten resultierte, wurde durch eine erfolgreiche Phase mit hoher Fabrikauslastung mehr als ausgeglichen: Während sich die Zahl der Mitarbeiter in den Bereichen der Forschung und Entwicklung sowie im Vertrieb und im Marketing verglichen zum Vorjahr noch einmal leicht reduzierte, konnten wir auf Grund der verbesserten Auftragslage vor allem die Anzahl der Mitarbeiter im Produktionsbereich erhöhen. Der Personalaufbau erfolgte vorrangig an unseren asiatischen Standorten. Insgesamt wurde auf diese Weise die Gesamtanzahl unserer Mitarbeiter leicht erhöht.

## Mitarbeiterstruktur: Alter, Geschlecht und Einstellungen

Im Geschäftsjahr 2010 sank das weltweite Durchschnittsalter auf 36,4 Jahre (Vorjahr: 37,2 Jahre). In der Gruppe der Mitarbeiter mit akademischer Ausbildung sind mehr als 65 Prozent unserer Akademiker jünger als 40 Jahre.

36 ALTERSSTRUKTUR (INFINEON WELTWEIT 2010)  
in Prozent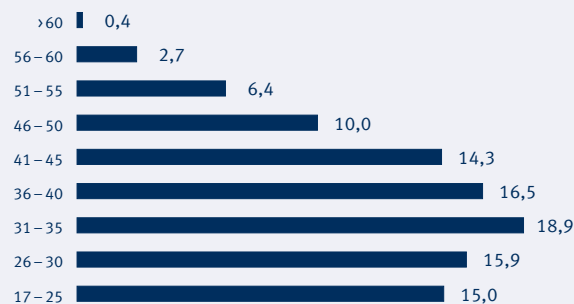

Beim Anteil der Frauen an der Gesamtbelegschaft können wir im Geschäftsjahr 2010 einen positiven Trend verzeichnen: der Anteil stieg um knapp 3 Prozentpunkte von 32,6 auf 35,5 Prozent an.

**37** GESCHLECHTERVERTEILUNG (INFINEON WELTWEIT 2010)  
in Prozent

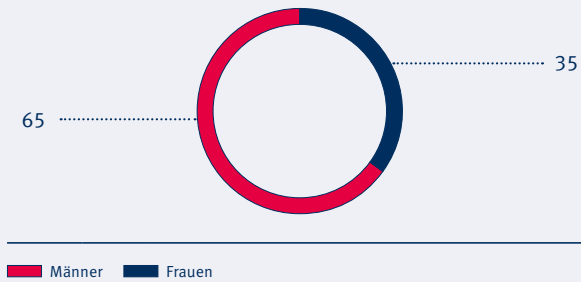

Die Einstellungspolitik und die Entwicklung von Nachwuchs sind für Infineon auf Grund des demografischen Wandels und des vielerorts zu erwartenden Fachkräftemangels von besonderer Bedeutung.

Infineon hat das Engagement in die Berufsausbildung von jungen Mitarbeitern wieder bekräftigt und die Einstellungen der Auszubildenden in Deutschland auf das Vorkrisen-Niveau von 2008 erhöht. Des Weiteren haben wir im Jahr 2010 weltweit mehr als hundert Praktika an Studenten und Studentinnen unterschiedlicher Fachrichtungen vergeben.

Insgesamt haben wir im Geschäftsjahr 2010 weltweit 5.354 Mitarbeiter eingestellt. Die Neueinstellungen erfolgten mit 4.704 Mitarbeitern weitestgehend im asiatischen Raum und mit 4.385 Mitarbeitern hauptsächlich im Bereich der Produktion. Da gleichzeitig Mitarbeiter auf Grund des Abschlusses des Kostensenkungsprogramms „IFX10+“, der Entkonsolidierung von Altis und auf Grund des Verkaufs des Wireline-Communications-Geschäfts an Lantiq ausschieden, wurde die Mitarbeiterzahl jedoch nur leicht erhöht.

Die zahlreichen Kooperationen mit Universitäten und Hochschulen trugen mit dazu bei, dass wir im Geschäftsjahr 2010 im Rahmen der Neueinstellungen weltweit mehr als 2.300 Akademiker rekrutieren konnten. Dies entspricht einem Akademierteil von mehr als 40 Prozent an den weltweit gesamten Einstellungen. Von den Neueinstellungen im akademischen Bereich ist jede vierte Person eine Frau – ein Indiz, dass unsere Bemühungen, Frauen in MINT-(Mathematik, Informatik, Naturwissenschaften, Technik)-Berufe zu fördern, erfolgreich sind. Die meisten Neueinstellungen mit Hochschulbildung entfielen auf die Standorte in Asien-Pazifik (> 1.800 Einstellungen), gefolgt von Deutschland (> 300 Einstellungen) und den übrigen europäischen Standorten (> 100 Einstellungen). Auch bei den neuen Mitarbeitern und Mitarbeiterinnen mit Berufsausbildung ist der Anteil von Frauen mit 40 Prozent im Geschäftsjahr 2010 erwähnenswert.

Zusätzlich zu den Festanstellungen waren bei Infineon zum 30. September 2010 weltweit 3.282 externe Mitarbeiter beschäftigt, um das Flexibilitätspotenzial zu erhöhen. Davon waren mehr als 50 Prozent an unseren asiatischen Standorten beschäftigt.

**Fluktuation und Betriebszugehörigkeit**

In Deutschland belief sich die Fluktuationsrate (inklusive Eigenkündigungen und sonstigen Abgängen) im Geschäftsjahr 2010 auf 3,2 Prozent. Diese Quote umfasst nicht die Personalabgänge durch den Verkauf des Wireline-Communications-Geschäfts an Lantiq.

Damit liegt die Fluktuationsquote in Deutschland nach dem umfangreichen Personalabbau im Rahmen von IFX 10+ im Geschäftsjahr 2009 wieder auf einem niedrigen Niveau (Vorjahr: 12,8 Prozent). Weltweit betrug die Fluktuationsquote (ohne Lantiq) im Geschäftsjahr 2010 12,7 Prozent. Der Anteil der Fluktuation, der sich auf Eigenkündigungen von Mitarbeitern zurückführen lässt, belief sich 2010 weltweit auf 9,9 Prozent.

Im Gegensatz zu den niedrigen Fluktuationsraten in Deutschland betrug die Fluktuationsquote in den asiatischen Märkten ohne Lantiq 21,0 Prozent - dies spiegelt die Dynamik und den Wettbewerb um Fach- und Führungskräfte in dieser Region wider.

Die weltweit durchschnittliche Betriebszugehörigkeit ist im Geschäftsjahr 2010 bei 9,0 Jahren nahezu konstant geblieben (Vorjahr: 9,2 Jahre). Im Gegensatz dazu hat sich in Deutschland die Dauer der Betriebszugehörigkeit erhöht. Mit 13,4 Jahren liegt der Wert deutlich über der durchschnittlichen deutschen Betriebszugehörigkeit von 11,8 Jahren im Vorjahr.

**Weiterbildung und Wissenstransfer**

Die Weiterbildung unserer Mitarbeiter aller Altersgruppen ist ein wesentliches Element, um der demografischen Entwicklung entgegenzuwirken. Zur Sicherung der Profitabilität blieb jedoch auch im Geschäftsjahr 2010 das Trainingsbudget restriktiv, so dass nur geschäftskritische und rechtlich notwendige Trainings möglich waren. Für Infineon bedeutete dies, den Fokus weiterhin auf interne Optionen zu richten. Gemeinsam mit den Fachbereichen gelang es uns, im Geschäftsjahr 2010 zahlreiche neue interne Trainings aufzusetzen und mit den Aktivitäten „Innovation Fab“, „Innovation Star“ und den daraus resultieren „iCommunities“ den Wissenstransfer zu fördern. Mit diesen Maßnahmen leisten wir einen wichtigen Beitrag, um erfahrene Mitarbeiter an das Unternehmen zu binden und das Wissen auf hohem Niveau weiter auszubauen.

01  
02  
03  
04  
05  
06  
07  
08  
09  
10  
11  
12  
13  
14  
15  
16  
17  
18  
19  
20  
21

### Weitere HR-Initiativen

Die Entwicklung von Infineon zu einem Höchstleistungsunternehmen gelingt nur, wenn wir auch in Zukunft erfolgreich sind und nachhaltig starke Finanzergebnisse erzielen. Für diese neue Phase haben wir im vergangenen Geschäftsjahr Aktivitäten eingeleitet und Initiativen ergriffen, um den Mitarbeitern Orientierung zu geben, sie stärker an der Unternehmensentwicklung partizipieren zu lassen und kulturelle Elemente wie Arbeitsplatzkultur und Chancengleichheit zu verbessern:

Mit der Einführung des neuen Leitbilds „Infineon Compass“ wurde das Profil von Infineon nach der Krise geschärft und den Mitarbeitern eine neue Orientierung gegeben. Der Infineon Compass zeigt, wonach wir streben, welchen Weg wir gehen und welche Werte unser Handeln bestimmen. Zahlreiche Workshops stellen sicher, dass sich diese Elemente in der Belegschaft verfestigen und jedes Team und jeder Mitarbeiter seinen individuellen Beitrag definiert.

Mit der Umstellung des Vergütungssystems zum 1. Oktober 2010 für Mitarbeiterinnen und Mitarbeiter, die in den Geltungsbereich der bisherigen Bonus & Incentive Guideline fallen, haben wir einen weiteren Beitrag auf dem Weg zum Höchstleistungsunternehmen geleistet. Das neue System entkoppelt die variable Vergütung von der Erreichung individueller Ziele und knüpft stattdessen zukünftige Bonuszahlungen ausschließlich an den Erfolg von Infineon: Jede Mitarbeiterin und jeder Mitarbeiter erhält ein attraktives Grundgehalt sowie einen Erfolgsbonus, der sich an Zielen und Messgrößen orientiert, die den wirtschaftlichen Erfolg des Unternehmens widerspiegeln. Mit dieser Umstellung partizipieren Mitarbeiterinnen und Mitarbeiter noch stärker am realisierten Unternehmenserfolg.

Um die Feedbackkultur bei Infineon zu stärken, wurde im Geschäftsjahr 2010 erstmals die Studie „Great Place to Work“® für die deutschen Standorte Infineon Technologies AG und Infineon Dresden durchgeführt. Die Studie ist der Auftakt für eine jährliche Befragung, um regelmäßig von den Mitarbeitern eine Rückmeldung über ihre Einschätzung hinsichtlich der Unternehmenskultur und Arbeitsplatzqualität zu erhalten. Es ist geplant, die Befragung in den nächsten Jahren auf andere Standorte, insbesondere auf die asiatische Region, auszuweiten.

Ein Hochleistungsunternehmen ist von Vielfalt und Chancengleichheit geprägt. Wir haben deshalb auch im Geschäftsjahr 2010 unsere Anstrengungen fortgesetzt, die Vereinbarkeit von Familie und Beruf zu verbessern. So engagiert sich Infineon in mehreren unternehmensexternen Netzwerken und Initiativen, wie beispielsweise „Erfolgsfaktor Familie“ oder „Best Practices for Women in ICT“. Mit der Auditierung „berufundfamilie“ unter der Schirmherrschaft des Bundesministeriums für Familie, Senioren, Frauen und Jugend im Sommer 2010 haben wir hierzu einen weiteren Schritt getan: Das Ergebnis des Audits ist Grundlage für einen auf drei Jahre angelegten Maßnahmenplan, wie wir unsere Mitarbeiter bei der Vereinbarkeit von Beruf und Familie noch besser unterstützen können. Damit verfolgen wir das Ziel, die Rahmenbedingungen für eine erfolgreiche Karriere für beide Geschlechter zu verbessern.

### NACHHALTIGKEIT BEI INFINEON

Als global tätiges Unternehmen und Teilnehmer der UN Global Compact Initiative fühlen wir uns der multinationalen Gemeinschaft verpflichtet. Wir nehmen unsere Aufgabe der gesellschaftlichen Verantwortung und des Umweltschutzes sehr ernst – sie ist daher ein integrierter Bestandteil unserer strategischen Unternehmensausrichtung. Wir haben die notwendigen Strukturen, Prozesse und Richtlinien in unserem Unternehmen festgelegt, die sich an den Prinzipien des UN Global Compact orientieren.

Die Verbindung aller Handlungsfelder – ökonomischer, ökologischer und sozialer Art – ist eine Voraussetzung für Nachhaltigkeit. Wir richten unseren Fokus, der die Einhaltung der Gesetze einschließt, auf sechs wesentliche Bereiche: Personalführung und Menschenrechte, gesellschaftliches Engagement, unternehmerische und gesellschaftliche Ethik, Arbeitssicherheit und Gesundheitsschutz, Umweltschutz sowie Nachhaltigkeit in unserer Wertschöpfungskette. In diesen Handlungsfeldern streben wir stetig nach Verbesserungspotenzialen. Die Bewertung und Umsetzung ist mehr als eine Pflicht – sie ist vielmehr Bestandteil unseres täglichen Handelns.

Unsere Leistungen im Bereich Nachhaltigkeit spiegeln sich unter anderem in der diesjährigen Aufnahme von Infineon Technologies in den Dow Jones Sustainability Europe Index

## 38 NACHHALTIGKEIT BEI INFINEON

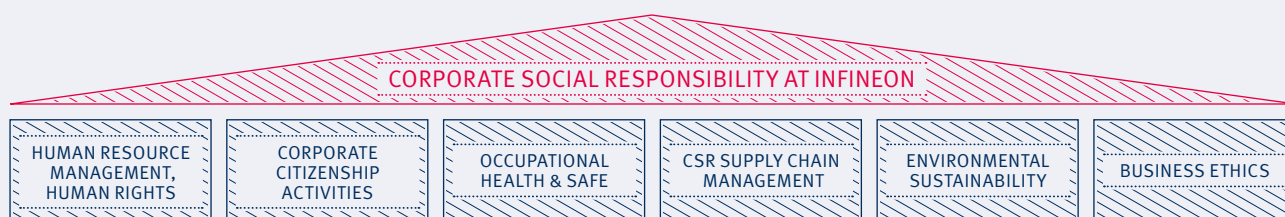



wider. Nachhaltigkeit wird auch in Zukunft eine große Herausforderung sein, der wir weiterhin aktiv begegnen.

Unser Unternehmen setzt sich freiwillig und weltweit für Benachteiligte ein. Das Erdbebenunglück auf Haiti und die humanitäre Katastrophe, die sich infolge dieses Erdbebens ereignete, hat alle Vorstellungen überstiegen. Wir haben uns im vergangenen Geschäftsjahr entschieden, einen finanziellen Beitrag an die Hilfsorganisationen zu spenden und somit einen Beitrag zur Versorgung der Opfer und zum Wiederaufbau zu leisten.

Wir tragen unsere Werte in die gesamte Wertschöpfungskette. Dienstleistungen, die von unseren Auftragnehmern erbracht werden, zugekaufte Produkte und Materialien sowie Equipment und Anlagen müssen unseren Anforderungen an den Umweltschutz, die Arbeitssicherheit und den Gesundheitsschutz entsprechen sowie die Arbeits- und sozialen Bedingungen erfüllen. Unsere formulierten Standards und Maßnahmen können umso besser umgesetzt und realisiert werden, je stabiler die Partnerschaft und je offener die Kommunikation ist. Im vergangenen Geschäftsjahr haben wir freiwillig das Thema Konfliktmetalle aktiv aufgenommen und bei unseren Lieferanten adressiert, um sicherzustellen, dass wir keine Metalle aus Konfliktgebieten verwenden.

Verantwortung für unsere Mitarbeiter übernehmen bedeutet in erster Linie Prävention und Vermeidung von möglichen Risiken. Unsere modernen Konzepte in der Arbeitssicherheit setzen wir konsequent um und suchen stetig nach Optimierungspotenzialen. Diese werden weltweit umgesetzt.

Die erzielten Erfolge in der Arbeitssicherheit werden von unserer Statistik der Arbeitsunfälle belegt. Wir sind selbst auf weltweitem Niveau erheblich besser als der Durchschnitt der deutschen Berufsgenossenschaft Energie Textil Elektro Medienerzeugnisse. Dabei fällt noch mehr ins Gewicht, dass wir alle Arbeitsunfälle ab einem Tag Abwesenheit erfassen. In die Vergleichswerte der Berufsgenossenschaft fließen dagegen nur solche Arbeitsunfälle ein, die mit einer Abwesenheit von mindestens drei Arbeitstagen verbunden sind.

### Ökologische Nachhaltigkeit

Unser IMPRES System - Infineon Integrated Management Program for Environment, Safety and Health - ist weltweit implementiert und integriert sämtliche Prozesse, Strategien und Zielsetzungen im Bereich Arbeitssicherheit, Umwelt- und Gesundheitsschutz. IMPRES ist höchst effizient, und unsere Produktionsstandorte sind gemäß den Standards ISO 14001 und OHSAS 18001 zertifiziert. Villach ist auf Grund der Länderspezifika zusätzlich noch nach EMAS validiert. Wir stellen sicher, dass wir nicht nur die gesetzlichen und behördlichen Vorgaben einhalten, sondern auch, über diese Vorgaben hinaus, uns kontinuierlich verbessern.

Wesentlich für die Bewertung der Umwelteinflüsse eines Unternehmens und Grundlage für die Ableitung von Handlungsbedarf ist dessen ökologischer Fußabdruck. Für unsere

Halbleiter lässt sich dieser in vereinfachter Weise darstellen, mit den entsprechenden Stellgrößen – Energie, Materialeinsatz, Wasserverbrauch, Abfallgenerierung, Recycling, Transport des ökologischen Einfluss während der Nutzungsphase.

Die Produktion von Halbleitern ist – wie grundsätzlich jede industrielle Produktion – ohne den Einsatz von Energie, Wasser, Chemikalien und Materialien nicht möglich. Ein Schwerpunkt liegt hierbei – technologiebedingt – auf unseren Frontend-Fertigungen, in denen die Siliziumscheiben strukturiert werden. Dort wird naturgemäß die meiste Energie benötigt. Es handelt sich hierbei maßgeblich um elektrische Energie.

In den letzten Jahren konnten wir den Energieverbrauch trotz steigender Komplexität unserer Produkte und Prozesse in unseren Frontend-Fertigungen deutlich reduzieren. Eine geeignete Größe, um die Effizienzsteigerung zu beschreiben, sind die sogenannten „Negajoules“. Dabei handelt es sich um die Energiemenge, die auf Grund von Effizienzsteigerungen nicht verbraucht und damit eingespart wurde. Die von 2002 bis 2009 aufsummierte eingesparte Energie- oder Elektrizitätsmenge entspricht 716.000 Tonnen Kohlenstoffdioxid. Das Thema Energieeffizienz bleibt auch in den folgenden Jahren eine Herausforderung, der wir uns stellen, so unter anderem im unternehmensinternen „Energy Efficiency Project“. Im Rahmen dieses Projektes arbeiten unsere Produktionsstandorte eng zusammen, um optimale Lösungen auszutauschen. Schwerpunkte sind derzeit unter anderem die Optimierung der Reinräume, in denen unsere Halbleiter produziert werden, der Einsatz regenerativer Energie sowie die Erprobung und Umsetzung neuer Beleuchtungstechnologien. Neben dem ökologischen Aspekt der nachhaltigen Ressourcenschonung haben diese Aktivitäten auch einen ökonomischen Nutzen und leisten einen Beitrag zur Wettbewerbsfähigkeit.

Neben der Reduktion des Energieeinsatzes ist besonders im Klimaschutz die Reduktion von Emissionen eine wesentliche Herausforderung zur Erhaltung unseres Ökosystems. Für den Klimaschutz haben wir uns deshalb bereits 1998 freiwillig zur Reduzierung perfluorierter Verbindungen (PFC) verpflichtet. Bei den PFCs handelt es sich um Treibhausgase, die für die Produktion von Halbleitern benötigt werden. Unser freiwilliges Ziel war es, die absoluten PFC-Emissionen bis zum Jahr 2010 auf den Wert von 1995 minus 10 Prozent, berechnet in Kohlenstoffdioxid-Äquivalenten, zu reduzieren. Durch die Umsetzung kluger Konzepte im Bereich der alternativen Prozesschemikalien und intelligente Ansätze zur Abluftreinigung konnten wir dieses ambitionierte Ziel bereits 2007 erreichen und damit einen aktiven Beitrag zum Schutz unserer Atmosphäre leisten - sogar über das Erreichen unserer freiwilligen Selbstverpflichtung hinaus.

In all unseren Leistungen im Bereich Wasserverbrauch, Abfallreduktion und -recycling, Treibhausgasreduktionen und Energieeffizienz stellen wir uns dem internationalen Benchmark. Die Vergleiche zeigen, dass unseren Fertigungen

01  
02  
03  
04  
05  
06  
07  
08  
09  
10  
11  
12  
13  
14  
15  
16  
17  
18  
19  
20  
21

seit Jahren eine Führungsposition im aktiven Umweltschutz zukommt.

Die Anforderungen und Beschränkungen bei der Verwendung bestimmter Stoffe in elektrischen Erzeugnissen und Produkten haben in den letzten Jahren weltweit zugenommen. Die Einhaltung dieser Beschränkungen ist für uns eine Selbstverständlichkeit. Wichtig ist uns dabei, unseren Kunden ein Höchstmaß an Vertrauen und Sicherheit bezüglich der Konformität unserer Produkte zu geben. Neben der Implementierung entsprechender Prozesse ist eine effiziente Kommunikation wesentliche Voraussetzung, um dieses Vertrauen zu schaffen. Dass wir unseren Kunden ein Höchstmaß an Sicherheit bieten, spiegelt sich in zahlreichen Anerkennungen unserer Leistungen bei Kundenaudits und -gesprächen wider.

Betrachtungen des „ökologischen Fußabdrucks“ eines Unternehmens dürfen nicht am eigenen Werkstopfen enden, sondern müssen die Nutzungsphase der hergestellten Produkte in adäquater Weise berücksichtigen. Denn letztlich stellt sich die Frage, ob sich der Einsatz von Ressourcen zur Herstellung eines Produkts auch aus ökologischen Gesichtspunkten „rechnet“. Hierbei ruhen wir uns auf dem Erreichten jedoch nicht aus, sondern treiben die Optimierungen weiter voran und ermutigen unsere Branchenpartner und Lieferanten, unseren Ansätzen zu folgen.

Neben der Verbesserung der Sicherheit und der Ermöglichung moderner Kommunikation ist die Realisierbarkeit und Unterstützung energieeffizienter Konzepte und Endprodukte in den verschiedensten Anwendungsbereichen ein wesentlicher Anspruch unseres Unternehmens. Wie beeindruckend unsere Leistungen sind, zeigen folgende ausgewählte Beispiele:

- Mit unseren Produkten und Lösungen ermöglichen wir im Automobil eine jährliche Emissionsreduktion, die 3,8 Millionen Tonnen Kohlenstoffdioxid entspricht.
- Mit unseren Produkten und Lösungen in den Stromversorgungen von PCs ermöglichen wir eine jährliche Emissionsreduktion, die 140.000 Tonnen Kohlenstoffdioxid entspricht.
- Mit unseren Produkten und Lösungen in elektronischen Vorschaltgeräten ermöglichen wir - im Vergleich zu magnetischen Vorschaltgeräten - eine jährliche Emissionsreduktion, die 330.000 Tonnen Kohlenstoffdioxid entspricht.

## INFINEON TECHNOLOGIES AG

Die Infineon Technologies AG ist die Führungsgesellschaft des Infineon-Konzerns und führt die entsprechenden Leistungs- und Zentralfunktionen aus. Die Infineon Technologies AG übernimmt wesentliche übergreifende Aufgaben, wie das konzernweite Finanz- und Rechnungswesen, das Personalwesen, strategische und produktionsorientierte F&E-Aktivitäten sowie die weltweite Unternehmens- und Marketingkommunikation, und steuert die logistischen Prozesse im Konzern. Die Infineon Technologies AG verfügt über eigene Fertigungen

in Regensburg und Warstein. Da die Infineon Technologies AG den größten Teil der Transaktionen mit derivativen Finanzinstrumenten für den Infineon-Konzern abwickelt, gelten die Ausführungen zu Art und Umfang der Transaktionen mit derivativen Finanzinstrumenten sowie zu den abgesicherten Risiken analog auch für die Infineon Technologies AG.

Die Chancen und Risiken sowie die zukünftige Entwicklung der Infineon Technologies AG entsprechen im Wesentlichen den Chancen und Risiken sowie der zukünftigen Entwicklung des Infineon-Konzerns, wie im Risiko- und Prognosebericht dargelegt.

Die Infineon Technologies AG stellt ihren Einzelabschluss nach den Regeln des deutschen Handelsgesetzbuches („HGB“) auf. Der vollständige Abschluss wird separat veröffentlicht.

## 39 GEWINN-UND-VERLUST-RECHNUNG <sup>1</sup> (KURZFASSUNG)

| € in Millionen                            | 2010         | 2009          |
|-------------------------------------------|--------------|---------------|
| Umsatz                                    | 5.685        | 4.115         |
| Umsatzkosten                              | -4.653       | -3.747        |
| <b>Bruttoergebnis vom Umsatz</b>          | <b>1.032</b> | <b>368</b>    |
| Aufwendungen für übrige Funktionsbereiche | -961         | -850          |
| Beteiligungsergebnis, Saldo               | 212          | 47            |
| Übrige Aufwendungen, Saldo                | -19          | -230          |
| <b>Ergebnis vor Ertragsteuer</b>          | <b>264</b>   | <b>-665</b>   |
| Ertragsteuer                              | -29          | -1            |
| <b>Jahresüberschuss/Jahresfehlbetrag</b>  | <b>235</b>   | <b>-666</b>   |
| Verlustvortrag aus Vorjahr                | -6.014       | -5.348        |
| Entnahmen aus den Kapitalrücklagen        | 5.888        | -             |
| <b>Bilanzgewinn/Bilanzverlust</b>         | <b>109</b>   | <b>-6.014</b> |

<sup>1</sup> Erstellt nach HGB.

Der im Geschäftsjahr 2010 erzielte Jahresüberschuss der Infineon Technologies AG beläuft sich auf € 235 Millionen. Nach Entnahmen aus den Kapitalrücklagen in Höhe von € 5.888 Millionen und Verrechnung mit dem Verlustvortrag aus dem Vorjahr in Höhe von € 6.014 Millionen verbleibt ein Bilanzgewinn von € 109 Millionen.

Der Jahresüberschuss der Infineon Technologies AG für das Geschäftsjahr 2010 ist deutlich beeinflusst von den Auswirkungen des allgemeinen wirtschaftlichen Aufschwungs und des damit einhergehenden Wachstums des weltweiten Halbleitermarktes. Im Geschäftsjahr 2010 erholten sich sowohl die Umsatzerlöse unserer Segmente als auch die Segmentergebnisse, sodass wir in Summe einen deutlichen Zuwachs bei den Umsatzerlösen und dem Bruttoergebnis vom Umsatz in Summe erzielen konnten.

Der Jahresfehlbetrag der Infineon Technologies AG für das Geschäftsjahr 2009 war im Wesentlichen durch die deutlich gesunkene Nachfrage im Zuge der allgemeinen wirtschaftlichen Abschwächung verursacht. Darüber hinaus beinhaltete

der Jahresfehlbetrag Aufwendungen aus der Insolvenz von Qimonda und Qimonda Dresden.

## 40 BILANZEN <sup>1</sup> (KURZFASSUNG)

| € in Millionen                                    | 2010         | 2009         |
|---------------------------------------------------|--------------|--------------|
| Sachanlagen und immaterielle Vermögensgegenstände | 658          | 747          |
| Finanzanlagen                                     | 3.040        | 3.389        |
| <b>Anlagevermögen</b>                             | <b>3.698</b> | <b>4.136</b> |
| Vorräte                                           | 351          | 306          |
| Forderungen und Sonstiges                         | 751          | 870          |
| Zahlungsmittel, Wertpapiere                       | 1.664        | 1.280        |
| <b>Umlaufvermögen</b>                             | <b>2.766</b> | <b>2.456</b> |
| <b>Summe Aktiva</b>                               | <b>6.464</b> | <b>6.592</b> |
| Eigenkapital                                      | 3.442        | 3.207        |
| Rückstellungen                                    | 1.062        | 847          |
| Verbindlichkeiten und Sonstiges                   | 1.960        | 2.538        |
| <b>Summe Passiva</b>                              | <b>6.464</b> | <b>6.592</b> |

<sup>1</sup> Erstellt nach HGB.

Die Vermögenslage der Infineon Technologies AG ist bei den Aktiva im Wesentlichen durch die Zunahme der Zahlungsmittel und Wertpapiere (€ 384 Millionen) und bei den Passiva durch die Zunahme der Rückstellungen (€ 215 Millionen) und den Rückgang der Verbindlichkeiten und Sonstiges (€ 578 Millionen) geprägt.

Die Finanzanlagen haben sich im Geschäftsjahr 2010 um € 349 Millionen verringert. Die Veränderung ergibt sich im Wesentlichen aus einer Kapitalrückzahlung der Infineon Technologies Holding B.V. Rotterdam, Niederlande (€ 280 Millionen).

Im Bereich der Rückstellungen sind vor allem die Rückstellungen für Gewährleistungen sowie die Personalrückstellungen angestiegen. Wesentliche Gründe sind der Anstieg von Rückstellungen für die infolge der besseren wirtschaftlichen Situation der Gesellschaft zu zahlenden erfolgsabhängigen Vergütungen an die Mitarbeiter sowie eine deutliche Erhöhung der Pensionsrückstellungen (€ 89 Millionen).

Die Verbindlichkeiten und Sonstiges haben sich im Geschäftsjahr 2010 um € 578 Millionen verringert. Dies ist im Wesentlichen auf den Rückgang der Verbindlichkeiten gegenüber verbundenen Unternehmen um € 730 Millionen zurückzuführen.

Die Eigenkapitalquote beträgt 53 Prozent (Vorjahr: 49 Prozent).

### DIVIDENDE

Nach dem Aktiengesetz richtet sich der Betrag, der zur Dividendenzahlung an die Aktionäre zur Verfügung steht, nach dem Bilanzgewinn der Muttergesellschaft, der nach den Vorschriften des HGB ermittelt wird.

Für die vorangegangenen Geschäftsjahre wurde keine Dividende gezahlt.

Für das abgelaufene Geschäftsjahr 2010 weist der Jahresabschluss der Muttergesellschaft Infineon Technologies AG einen Bilanzgewinn von € 109 Millionen aus. Für das Geschäftsjahr 2010 wird der Hauptversammlung eine Ausschüttung einer Bardividende von € 0,10 je Aktie vorgeschlagen werden.

Die vorgeschlagene Dividende ist abhängig von der Zustimmung der Hauptversammlung.

### WESENTLICHE EREIGNISSE NACH DEM BILANZSTICHTAG

Am 19. Oktober 2010 haben wir 100 Prozent der Anteile an der Blue Wonder Communications GmbH mit Sitz in Dresden erworben. Gegenstand der Aktivitäten der Blue Wonder Communications GmbH ist die Entwicklung und Vermarktung von Produkten, Rechnerprogrammen, Ingenieurs-, und Beratungsdienstleistungen im Bereich der Informationstechnologie und der Telekommunikation. Insbesondere sollen die Technologien und Systemlösungen die Entwicklung des Mobilfunkstandards der nächsten Generation LTE (Long Term Evolution) unterstützen. Im Rahmen des Verkaufes des Mobilfunkgeschäfts sollen die Anteile an der Gesellschaft ebenfalls an die Intel Corporation übertragen werden.

### BERICHT ÜBER DIE VORAUSSICHTLICHE ENTWICKLUNG MIT IHREN WESENTLICHEN CHANCEN UND RISIKEN

#### RISIKO- UND CHANCEN-BERICHT

##### Vorbemerkung

Das Halbleitergeschäft ist wie kaum ein anderes Geschäft in sehr hohem Maße durch den regelmäßigen Wechsel von Perioden des Marktwachstums mit Perioden erheblicher Marktrückgänge gekennzeichnet. Marktrückgänge sind insbesondere geprägt durch Überkapazitäten, steigende Auftragsstornierungen sowie überdurchschnittlich sinkende Preise und rückläufige Umsatzerlöse.

Begleitet wird diese Risiko- und Chancenlage von einem hohen Investitionsbedarf zur Erreichung und Absicherung der Marktführerschaft sowie einem außerordentlich schnellen technologischen Wandel. In diesem Umfeld wollen wir die in unserem Geschäft auftretenden Risiken reduzieren und die Chancen bestmöglich nutzen. Effektives Risiko- und Chancenmanagement ist deshalb einer unserer wichtigen Erfolgsfaktoren. Es ist Bestandteil unserer Geschäftstätigkeit und unterstützt unser Ziel, nachhaltig und profitabel zu wachsen.

01  
02  
03  
04  
05  
06  
07  
08  
09  
10  
11  
12  
13  
14  
15

### Rechnungslegungsbezogenes internes Kontrollsystem sowie Risiko- und Chancenmanagementsystem: Etablierter Prozess im Rahmen des Planungszyklus

Das interne Kontrollsystem sowie das Risiko- und Chancenmanagementsystem bei Infineon sind Bestandteil des gesamten (rechnungslegungsbezogenen) Planungs-, Steuerungs- und Berichterstattungs-Prozesses in allen relevanten rechtlichen Einheiten, Segmenten und Zentralfunktionen. Beide Systeme orientieren sich dabei am internationalen COSO II Standard (Committee of Sponsoring Organizations of the Treadway Commission).

Das unternehmensweite Risiko- und Chancenmanagementsystem (RMS) basiert auf einer Risikopolitik, die ein Risiko als negative Abweichung von der Geschäftsplanung definiert. Es geht dabei weit über das Erkennen von Entwicklungen, die den Fortbestand des Unternehmens gefährden können, hinaus. Ein wesentliches Element des RMS ist der aus den Komponenten Risikoidentifikation, Risikoanalyse, Risikosteuerung und Risikoüberwachung bestehende Prozess. Die systematische Umsetzung dieses Risikomanagementprozesses verbessert unsere Planungsgenauigkeit, erhöht die Transparenz von Entscheidungen unter unsicheren Rahmenbedingungen und fördert unser allgemeines Risikobewusstsein.

Die Risikomanagementorganisation besteht aus dem zentralen Risikomanagement, das dem Finanzvorstand zugeordnet ist, und aus sogenannten Risikobeauftragten, die in den verschiedenen Bereichen des Unternehmens für die Umsetzung des Risikomanagementprozesses verantwortlich sind. Eine wesentliche Aufgabe der Risikobeauftragten ist die Erfassung, Bewertung und Dokumentation wesentlicher Risiken und Chancen. Sie bilden die Schnittstelle zum zentralen Risikomanagement, das hauptsächlich für den Prozess, seine Weiterentwicklung und die damit verbundenen Methoden bei dessen Umsetzung sowie für die Risiko- und Chancendarstellung auf Konzernebene verantwortlich zeichnet.

Die systematische Weiterentwicklung unseres Risiko- und Chancenmanagementsystems trägt maßgeblich zur weiteren Festigung und zum gezielten Ausbau unserer unternehmensweiten Risiko- und Chancenkultur bei. Die Stärkung unserer Risikokultur wird ebenso durch unsere Risiko-Foren erreicht, die vorrangig als Diskussionsbasis und Informationsplattform für die Risikobeauftragten dienen.

Der alle Bereiche umfassende Ansatz zur Risikoberichterstattung nutzt einen Risiko- und Chancenkatalog, der einmal jährlich auf Vollständigkeit überprüft wird und dessen Inhalte ihrer Bedeutung nach bewertet werden. Die quartalsweise Identifikation und Analyse von Risiken und Chancen wird auf Grundlage einer Einschätzung des Einflusses auf das Konzernjahresergebnis und der Eintrittswahrscheinlichkeit vorgenommen. Des Weiteren werden Maßnahmen zur Risikoreduktion und zur Berücksichtigung in der Rechnungslegung festgehalten und der aktuelle Umsetzungsgrad verfolgt und dokumentiert. Für die quartalsweise Berichterstattung wurden

Schwellenwerte definiert, die eine Meldung von wesentlichen Risiken beziehungsweise Chancen obligatorisch vorschreiben. Zudem besteht zusätzlich zur Regelberichterstattung für unerwartet auftretende wesentliche Risiken ebenfalls eine konzerninterne Berichterstattungspflicht.

Die Berichterstattung wesentlicher und bestandsgefährdender Risiken erfolgt über das zentrale Risikomanagement an Vorstand und Aufsichtsrat.

Das Risikomanagementsystem ermöglicht dem Vorstand sowie Verantwortlichen, wesentliche Risiken frühzeitig zu erkennen und gegensteuernde Maßnahmen einzuleiten. Ferner werden Risiken aus dem operativen Geschäft durch die Verantwortlichen regelmäßig mit dem Vorstand diskutiert, wobei unternehmensübergreifende Risiken dem Vorstand durch das zentrale Risikomanagement vorgelegt werden.

Der Investitions-, Finanz- und Prüfungsausschuss des Aufsichtsrats befasst sich mit der Überwachung der Effektivität des Risikomanagementsystems.

Darüber hinaus kontrolliert die Konzernrevision durch zielgerichtete Prüfungen die Einhaltung gesetzlicher Rahmenbedingungen und konzern einheitlicher Richtlinien und initiiert bei Bedarf entsprechende Maßnahmen.

Unser Risikofrüherkennungssystem wird vom Abschlussprüfer im Rahmen der Jahresabschlussprüfung auf seine grundsätzliche Eignung geprüft, bestandsgefährdende Risiken des Unternehmens frühzeitig zu erkennen und er berichtet hierzu dem Finanzvorstand und dem Investitions-, Finanz- und Prüfungsausschuss des Aufsichtsrats. Der Abschlussprüfer prüft dabei nicht die Effektivität unseres Risikofrüherkennungssystems.

Im Vergleich zum Risikomanagementsystem liegt der Schwerpunkt des internen Kontrollsystems auf dem Rechnungslegungsprozess mit dem Ziel der Überwachung der Ordnungsmäßigkeit und Wirksamkeit der Rechnungslegung und der Finanzberichterstattung. Es basiert auf den SEC („Security Exchange Commission“) Anforderungen der Section 404 des Sarbanes-Oxley-Acts und ist Bestandteil des Rechnungslegungsprozesses in allen bedeutenden rechtlichen Einheiten und Zentralfunktionen. Das System überwacht die Grundsätze und Verfahren anhand von präventiven und aufdeckenden Kontrollen.

Unter anderem prüfen wir regelmäßig, ob:

- konzernweite Bilanzierungs-, Bewertungs- und Kontierungsvorgaben fortlaufend aktualisiert und eingehalten werden;
- konzerninterne Transaktionen vollständig erfasst und sachgerecht eliminiert werden;
- bilanzierungsrelevante und angabepflichtige Sachverhalte aus getroffenen Vereinbarungen berücksichtigt und entsprechend abgebildet werden;
- Prozesse und Kontrollen existieren, die explizit die Vollständigkeit und Ordnungsmäßigkeit der Finanzberichterstattung im Jahres- und Konzernabschluss gewährleisten;

- Prozesse zur Funktionstrennung und zum Vier-Augen-Prinzip im Rahmen der Abschlusserstellung sowie Autorisierungs- und Zugriffsregelungen bei relevanten IT-Rechnungslegungssystemen bestehen.

Die Wirksamkeit des internen Kontrollsystems im Hinblick auf den Rechnungslegungsprozess wird systematisch bewertet. Zunächst erfolgt eine jährliche Risikoanalyse und Überarbeitung der definierten Kontrollen. Dabei identifizieren und aktualisieren wir bedeutende Risiken im Hinblick auf die Rechnungslegung und Finanzberichterstattung in den bedeutenden rechtlichen Einheiten und Zentralfunktionen. Die für die Identifizierung der Risiken definierten Kontrollen werden gemäß konzernweiten Vorgaben dokumentiert. Um die Wirksamkeit der Kontrollen zu beurteilen, führen wir regelmäßig Tests auf Basis von Stichproben durch. Diese bilden die Grundlage für eine Selbsteinschätzung, ob die Kontrollen angemessen ausgestaltet und wirksam sind. Die Ergebnisse dieser Selbsteinschätzung werden in einem globalen IT-System dokumentiert und berichtet. Erkannte Kontrollschwächen werden unter Beachtung ihrer potenziellen Auswirkungen behoben.

Zusätzlich bestätigen alle rechtlichen Einheiten, Segmente und bedeutende Zentralfunktionen durch die Vollständigkeitserklärung, dass alle buchungspflichtigen Geschäftsvorfälle erfasst wurden und sämtliche bilanzierungspflichtigen Vermögenswerte und Verpflichtungen in der Bilanz berücksichtigt sind.

**Bestätigung der Wirksamkeit**

Die wesentlichen rechtlichen Einheiten überprüfen und bestätigen am Ende des jährlichen Zyklus die Effektivität des internen Kontrollsystems im Hinblick auf den Rechnungslegungsprozess. Der Vorstand und der Investitions-, Finanz- und Prüfungsausschuss des Aufsichtsrats werden über wesentliche Kontrollschwächen sowie die Wirksamkeit der eingerichteten Kontrollen regelmäßig informiert.

Das interne Kontroll- und Risikomanagementsystem im Hinblick auf den Rechnungslegungsprozess kann jedoch keine absolute Sicherheit bieten, dass wesentliche Falschaussagen in der Rechnungslegung vermieden werden. In Bezug auf die Rechnungslegung besteht das Risiko, dass der zu veröffentlichende Konzernabschluss Fehler enthält, die sich wesentlich auf die Darstellung der Vermögens-, Finanz- und Ertragslage des Konzerns auswirken. Dieses Risiko besteht insbesondere bei der Abbildung ungewöhnlicher oder komplexer Geschäfte, die mit einem relativ hohen inhärenten Risiko behaftet sind.

Das interne Kontroll- und Risikomanagementsystem wird kontinuierlich weiterentwickelt, um den internen und auch externen Anforderungen – zum Beispiel den Vorgaben des Bilanzrechtsmodernisierungsgesetzes (BilMoG) – zu entsprechen. Die Verbesserung des Systems dient der fortlaufenden Überwachung der relevanten Risikofelder einschließlich der verantwortlichen Organisationseinheiten.

**Risiko-Kategorien**

Verschiedene – insbesondere finanzwirtschaftliche – Risiken, die wir im folgenden Abschnitt als Risiken beschreiben, stellen bei einer positiven Entwicklung entsprechende Chancen dar:

**Branchen- und Marktrisiken: Risiko-Handhabung in volatilen Industrien und Märkten**

Der weltweite Halbleitermarkt ist extremen Schwankungen ausgesetzt. So besteht auch in den von uns adressierten Märkten das Risiko von kurzfristigen Marktschwankungen.

In unseren Segmenten bestehen Risiken bei der Absatzmenge, durch erheblichen Preisdruck und daraus resultierende weitere Risiken.

Der schnelle technologische Wandel kann zusätzlich zum Beispiel bei Verzögerungen in einzelnen Projekten zu einem erheblichen Rückgang des Geschäftsvolumens bis hin zum Verlust von Kundenbeziehungen führen.

Einige unserer Produkte werden nur von bestimmten Kunden erworben. Damit erhöht sich die Abhängigkeit vom Geschäftserfolg dieser Kunden in ihren Märkten. Wir versuchen in solchen Fällen unsere Kundenbasis konsequent zu verbreitern und haben mit dieser Strategie in der Vergangenheit bereits nachweisbare Erfolge durch neue Kunden und damit verbundene „Design Wins“ erzielt.

Als weltweit agierendes Unternehmen sind wir darüber hinaus stark von der konjunkturellen Entwicklung der Weltwirtschaft abhängig. Eine weltweite wirtschaftliche konjunkturelle Abschwächung - insbesondere in den von uns bedienten Märkten - kann dazu führen, dass unsere geplanten Umsätze sich nicht wie erwartet entwickeln. Darüber hinaus könnten durch Veränderungen in einigen Teilen der Welt, in denen wir aktiv sind, Risiken entstehen. Die breite Diversifikation innerhalb unseres Produktportfolios und eine Streuung der Entwicklungs- und Fertigungsaktivitäten sind jedoch ein wirksames Mittel gegen die Auswirkungen solcher regionaler Krisen.

**Qimonda: Signifikante Risiken in Bezug auf die Qimonda-Insolvenz**

Auf Grund des Insolvenzverfahrens von Qimonda sind wir potenziellen Verbindlichkeiten ausgesetzt, die detailliert im Anhang unter Nr. 6 und Nr. 38 beschrieben sind.

Wir haben Verbindlichkeiten und Rückstellungen zum 30. September 2010 für solche Sachverhalte erfasst, von denen wir annehmen, dass sie wahrscheinlich eintreten können, und die mit hinreichender Genauigkeit zum jetzigen Zeitpunkt eingeschätzt werden können. Es gibt keine Sicherheit, dass diese Rückstellungen ausreichen, um allen Verpflichtungen nachzukommen, die im Zusammenhang mit diesen Angelegenheiten entstehen könnten.

01  
02  
03  
04  
05  
06  
07  
08  
09  
10  
11  
12  
13  
14  
15  
16  
17  
18  
19  
20  
21

### **Management-Risiken: Risiken, insbesondere verbunden mit möglichem Verkauf von Unternehmensteilen, mit Akquisitionen und Kooperationsvereinbarungen**

Um unser bestehendes Geschäft zu entwickeln oder auch weiter auszubauen, könnten wir weitere Akquisitionen, beziehungsweise Verkäufe von Unternehmensteilen vornehmen oder andere Formen der Partnerschaft mit externen Unternehmen eingehen. Es besteht prinzipiell das Risiko, dass wir im Fall eines Kaufs, insbesondere in Bezug auf die Integration in bestehende operative Strukturen, nicht erfolgreich sind und im Fall von Verkäufen Remanenzkosten entstehen können, beziehungsweise Probleme bei der Anpassung der Konzernstruktur entstehen.

### **Operative Risiken: Fertigung hat entscheidenden Einfluss auf wirtschaftlichen Erfolg**

Ein für Halbleiterunternehmen mit eigener Produktion geschäftstypisches Risiko ist das Risiko von Verzögerungen beim Hochlauf neuer Technologien beziehungsweise von zu geringen Ausbeuten oder erheblichen Ausbeuteschwankungen. Diesem Risiko versuchen wir mit einem kontinuierlich verbesserten Projektmanagement und entsprechend enger Beobachtung der betroffenen Geschäftsprozesse zu begegnen.

Kostenrisiken durch Auslastungsschwankungen oder potenzielle Fertigungsunterbrechungen, verbunden mit korrespondierenden Leerstandskosten in den Fertigungsstätten, minimieren wir durch gezielte Flexibilisierung der Fertigung hinsichtlich Technologien und Produkten.

Wir sind auf Grund unserer Abhängigkeit von verschiedenen in der Produktion verwendeten Materialien Preisrisiken ausgesetzt. Wir versuchen, diese Risiken durch unsere Einkaufsstrategien und durch den Einsatz geeigneter Methoden wie stetiger Produkt- und Kostenanalysen („Best Cost Country Sourcing“ und „Focus-on-Value“) zu minimieren. Diese Programme beinhalten funktionsübergreifende Expertenteams zur Standardisierung der Einkaufsprozesse für Material und Equipment.

Wir arbeiten mit einer Vielzahl von Lieferanten zusammen, die uns mit Materialien, Dienstleistungen oder durch Übernahme bestimmter Unteraufträge unterstützen, für die nicht immer mehrere Alternativen bestehen. Wir sind damit zum Teil von der rechtzeitigen und qualitativen Art dieser Zulieferungen abhängig.

Gegen Qualitätsrisiken setzen wir spezifische Qualitätsmanagementstrategien wie „Zero Defect“ und „Six Sigma“ zur Vorbeugung, Problemlösung und kontinuierlichen Verbesserung aller unserer Geschäftsprozesse ein. Das unternehmensweit gültige Qualitätsmanagementsystem ist seit Jahren nach den Normen ISO9001 beziehungsweise ISO/TS16949 zertifiziert und bezieht auch die Entwicklung unserer Lieferanten mit ein.

### **Finanz- und Währungs-Risiken: Hoher Finanzbedarf**

Da wir eigene Fertigungsstätten betreiben, müssen erhebliche Kapitalbeträge für den Bau, die Erweiterung, die

Modernisierung und die Instandhaltung dieser Anlagen eingesetzt werden. Darüber hinaus müssen erhebliche finanzielle Mittel für F&E aufgewendet werden. Der Finanzmittelbedarf soll im Wesentlichen aus vorhandener Liquidität und Mittelzuflüssen aus laufender Geschäftstätigkeit gedeckt werden.

Im Zusammenhang mit bestimmten Investitionsprojekten haben wir auch staatliche Zulagen und Zuschüsse beantragt, können jedoch nicht garantieren, dass die Mittel rechtzeitig oder überhaupt genehmigt werden. Kooperationsmöglichkeiten im Rahmen von F&E und der Fertigung werden weiterhin aktiv genutzt, um den Finanzierungsbedarf zu reduzieren.

Unsere Zinsrisikopositionen resultieren hauptsächlich aus Geldanlageinstrumenten und Finanzverbindlichkeiten, die von Wertpapieremissionen und Kreditaufnahmen herrühren. Vor dem Hintergrund der hohen Volatilität unseres Geschäfts und der angestrebten operativen Flexibilität halten wir einen vergleichsweise hohen Kassenbestand, den wir hauptsächlich in Instrumente mit kurzer Zinsbindungsdauer anlegen. Das damit einhergehende Zinsrisiko wird in gewissem Umfang durch Finanzverbindlichkeiten kompensiert, die zu einem Teil variabel verzinslich sind. Zur Reduzierung des verbleibenden Netto-Zinsänderungsrisikos nutzen wir Zinsderivate, um die aktivische und passivische Zinsbindungsdauer einander anzunähern.

Die internationale Ausrichtung unserer Geschäftstätigkeit bringt eine Vielzahl von nicht eurobasierten Zahlungsströmen in unterschiedlichen Währungen, vor allem in US-Dollar, mit sich. Deshalb entsteht ein großer Anteil unserer Umsatzerlöse, Fertigungs-, Vertriebs-, Verwaltungs- sowie F&E-Kosten vorwiegend in US-Dollar. Wechselkursschwankungen gegenüber dem Euro können einen negativen Effekt auf Umsatzerlöse, Kosten und Ergebnis haben.

Unsere Geschäftspolitik zur Begrenzung von kurzfristigen Fremdwährungsrisiken ist es, mindestens 75 Prozent des erwarteten Netto-Cash-Flows über einen Zeitraum von zwei Monaten, mindestens 50 Prozent des erwarteten Netto-Cash-Flows im dritten Monat und je nach Art des Grundgeschäfts einen Anteil auch darüber hinaus zu sichern. Ein Teil des Fremdwährungsrisikos bleibt auf Grund des Unterschieds zwischen tatsächlichen und erwarteten Beträgen bestehen. Wir berechnen dieses Nettorisiko auf Basis des Kapitalflusses unter Berücksichtigung von eingegangenen oder vergebenen Aufträgen und von allen anderen geplanten Einnahmen und Ausgaben.

Unsere operativen Ergebnisse haben sich in der Vergangenheit über die verschiedenen Quartale hinweg stark verändert. Diese hohe Volatilität wird wahrscheinlich auch in Zukunft wegen einer Reihe von Faktoren zu beobachten sein, die wir nicht vollständig unter unserer Kontrolle haben. Wenn unsere operativen Ergebnisse nicht den Erwartungen der Finanzanalysten und Investoren entsprechen, könnte zudem der Wert der Infineon-Aktie sinken.

Ergänzende Beschreibungen zum Management finanzieller Risiken können dem beiliegenden Anhang zum Konzernabschluss entnommen werden.

**Informationstechnische Risiken: Ansteigende Abhängigkeit von IT-Systemen in allen Prozessen**

Wie für andere globale Unternehmen ist auch für uns die Zuverlässigkeit und Sicherheit der Informationstechnologie von großer Bedeutung. Dies gilt in zunehmendem Maße sowohl für den Einsatz informationstechnologischer Systeme zur Unterstützung unserer Geschäftsprozesse als auch für die Unterstützung der internen und externen Kommunikation.

Trotz aller technischen Vorsichtsmaßnahmen kann jede gravierende Störung dieser Systeme zu einem Datenverlust beziehungsweise zu einer Beeinträchtigung der Produktion oder Störung von Geschäftsprozessen führen.

Deshalb sind alle kritischen IT-Systeme auf Servern hoher Verfügbarkeit untergebracht. Diese mit Redundanzen in verschiedenen Datenzentren ausgestatteten Systeme minimieren beziehungsweise eliminieren die Konsequenzen von Hardware-Störungen. Redundante Netzwerkverbindungen unterschiedlicher Lieferanten reduzieren beziehungsweise eliminieren des Weiteren das Risiko eines Verbindungsausfalls zwischen unseren Standorten. Eine ständige automatisierte Überwachung der IT-Infrastruktur ermöglicht uns ein rasches Eingreifen im Falle von unvorhersehbaren Störfällen.

Besondere Vorkehrungen wurden zudem zur Abwehr von Virusangriffen getroffen, insbesondere in Bezug auf IT-Systeme, die in unseren Fertigungen verwendet werden. Außerordentlich sensible Daten werden darüber hinaus nur in vollkommen isolierten Netzwerken gehalten.

**Personalrisiken: Nachfrage nach qualifizierten Mitarbeitern**

Ein wichtiger Baustein unseres Unternehmenserfolgs ist es, jederzeit über die benötigte Anzahl qualifizierter Mitarbeiter zu verfügen. Es besteht aber generell das Risiko, qualifizierte Mitarbeiter zu verlieren. Es ist deshalb wichtig, Mitarbeiter durch attraktive Arbeitsbedingungen für unser Unternehmen zu gewinnen und durch motivierende Führung im Unternehmen zu halten.

Unsere Instrumente zur Personalentwicklung und -qualifizierung unterstützen die Sicherung unseres aktuellen und zukünftigen Personalbedarfs. Durch spezifische und zeitnahe Trainingsprogramme werden die erforderlichen fachlichen und persönlichen Kompetenzen entwickelt. Diese Bemühungen werden durch attraktive Bonus- und Anreizprogramme sowie langfristige Karrieremöglichkeiten und -planungen ergänzt.

**Rechtliche Risiken: Hohe mögliche Kosten durch Abwehr von Rechtsklagen**

Wie bei vielen Unternehmen in der Halbleiterbranche wird auch uns gegenüber behauptet, das Unternehmen habe gewerbliche Schutzrechte verletzt, fehlerhafte Produkte

geliefert oder gesetzliche Pflichten verletzt. Ungeachtet der Erfolgsaussichten derartiger Ansprüche, können uns im Zusammenhang mit der Abwehr derartiger Ansprüche hohe Kosten entstehen. Wir wehren uns in solchen Angelegenheiten energisch mit Unterstützung interner und externer Experten. Weitere Informationen sind dem Anhang zum Konzernabschluss unter Nr. 38 zu entnehmen.

Im Patentbereich profitieren wir vom Schutz durch mehrere Verträge mit wichtigen Wettbewerbern. Wir streben an, diesen Schutz durch Verhandlungen mit führenden Wettbewerbern, mit denen noch keine patentrechtlichen Vertragsbeziehungen bestehen, weiter auszudehnen und somit Risiken zu minimieren.

Steuerliche, wettbewerbs- und kapitalmarktrechtliche Regelungen können ebenfalls Unternehmensrisiken beinhalten. Wir lassen uns deshalb umfassend von internen und externen Fachleuten beraten.

Unsere weltweite Strategie sieht vor, dass wir aus den unterschiedlichsten Gründen F&E- und Fertigungsstandorte über den ganzen Globus verteilt unterhalten. Dies können Marktzugangs- oder auch Technologie- sowie Kostengründe sein. Es können daher Risiken entstehen, die sich daraus ergeben, dass wirtschaftliche und geopolitische Krisen Auswirkungen auf regionale Märkte haben, länderspezifische Gesetze und Regelungen den Investitionsrahmen und die Möglichkeiten, freien Handel zu betreiben, beeinflussen und dass unterschiedliche Praktiken bei der Auslegung von steuerlichen, juristischen oder administrativen Regeln die Ausübung unternehmerischer Tätigkeiten einschränken. Diese Risiken könnten unsere Geschäftstätigkeit in diesen Ländern einengen.

Wir schützen uns darüber hinaus mit Versicherungen gegen bestimmte Auswirkungen von Haftungsrisiken oder Schadensfällen auf die Vermögens-, Finanz- und Ertragslage.

**Gesamtaussage zur Risikosituation des Konzerns durch die Unternehmensleitung**

Die Einschätzung der gesamten Risikosituation ist das Ergebnis der konsolidierten Betrachtung aller wesentlichen Einzelrisiken.

Risiken, die den Fortbestand des Unternehmens gefährden können, sind uns derzeit nicht bekannt.

Ergänzende Beschreibungen der Risiken können dem beiliegenden Anhang zum Konzernabschluss entnommen werden.

**Chancen**

Das Chancenmanagementsystem – als Teil des Risiko- und Chancenmanagementsystems bei Infineon – ist Bestandteil des gesamten (rechnungslegungsbezogenen) Planungs-, Steuerungs- und Berichterstattungs-Prozesses.

Die direkte Verantwortung für das frühzeitige und regelmäßige Identifizieren, Analysieren und Managen von Chancen obliegt dem operativen Management in den

01  
02  
03  
04  
05  
06  
07  
08  
09  
10  
11  
12  
13  
14  
15  
16  
17  
18  
19  
20  
21

Geschäftsbereichen beziehungsweise den Leitern der zentralen Funktionen.

Wir erachten die Optimierung unseres Produktportfolios, die Steigerung der Produktivität in unseren Produktlinien und ein positives Marktumfeld als essentielle Chancen für eine nachhaltige Verbesserung unserer operativen Ergebnisse.

Verschiedene – insbesondere finanzwirtschaftliche – Risiken, die wir im vorherigen Abschnitt als Risiken beschrieben haben, stellen bei einer positiven Entwicklung entsprechende Chancen dar.

So kann zum Beispiel unser Power-Halbleitergeschäft ein zusätzliches Wachstum erfahren, das durch Anforderungen an die Energieeffizienz und durch staatliche Regulierungen in verschiedenen Marktsegmenten hervorgerufen wird.

Die fortschreitende weltweite Einführung von elektronischen ID-Dokumenten sowie die Bewegung in Richtung elektronische Tickets in Transportsystemen könnten außerdem dem Chipkarten- & Sicherheitsmarkt Wachstumschancen eröffnen.

Im Fall einer Akquisition kann es darüber hinaus zu einem deutlichen Umsatzwachstum durch zusätzliches Geschäft beziehungsweise bei einem Verkauf eines Unternehmensanteils zur Erhöhung des Cash-Bestands kommen.

## PROGNOSEBERICHT

### Grundlegende Planungsannahmen

Infineon plant den Ausblick für die Geschäftsjahre 2011 und Folgende basierend auf einem angenommenen Euro/US-Dollar-Wechselkurs von 1,40. Die Gesellschaft erwartet nach Abschluss des Verkaufs des Mobilfunkgeschäfts an Intel, dass die US-Dollar-denominierten Währungsrisiken sinken. Die Auswirkungen einer Abweichung des tatsächlichen Euro/US-Dollar-Wechselkurses auf das Segmentergebnis, ohne Berücksichtigung von potenziellen Sicherungsgeschäften, betragen dann für jeden Cent, um den der Euro/US-Dollar-Wechselkurs von den geplanten 1,40 abweicht, zwischen € 0,5 Millionen und € 1 Millionen pro Quartal beziehungsweise zwischen € 2 Millionen und € 4 Millionen für das Gesamtjahr. Die Auswirkungen einer Abweichung des tatsächlichen US-Dollar Wechselkurses auf die Umsatzerlöse, ohne Berücksichtigung von potenziellen Sicherungsgeschäften, betragen dann für jeden Cent, um den der Euro/US-Dollar-Wechselkurs von den geplanten 1,40 abweicht, zwischen € 2,5 Millionen und € 3,5 Millionen pro Quartal beziehungsweise zwischen € 10 Millionen und € 14 Millionen für das Gesamtjahr.

Außerdem erwartet Infineon, dass sich aus dem Abschluss des Verkaufs des Mobilfunkgeschäfts an Intel Auswirkungen auf die Finanzen ergeben werden, die in diesem Ausblick noch nicht berücksichtigt sind. Infineon wird für eine Übergangszeit von einigen Monaten nach dem Abschluss des Verkaufs alle Einkäufe von Wafern bei Dritten für das Mobilfunkgeschäft/Intel vornehmen. Infineon wird die Beschaffungskosten tragen und diese zuzüglich einer Bearbeitungsgebühr an Intel weiterbelasten. Dieser Ausblick berücksichtigt dies nicht, da die

Vereinbarungen hierfür noch nicht endgültig sind und insoweit keine abschließende Beurteilung der Rechnungslegung möglich ist.

### Zusammenfassung des Ausblicks

Nach einem Wachstumsschub im Winterhalbjahr 2009/2010 scheint die Dynamik der globalen Erholung der Wirtschaft in den entwickelten wie in den aufstrebenden Volkswirtschaften nachzulassen. Die Unterstützung durch den Vorratszyklus und staatliche Förderprogramme flacht ab. Außerdem bestehen nach wie vor Unsicherheiten an den Finanzmärkten und eine hohe Arbeitslosigkeit in zahlreichen Ländern. Experten gehen davon aus, dass sich das Wachstum in naher Zukunft verlangsamen und im Laufe des Jahres 2011 wieder beschleunigen wird. Insgesamt erwarten Volkswirte ein Wachstum der Weltwirtschaft von 3,3 Prozent. Insgesamt bestehen nach wie vor große Unsicherheiten an den Finanzmärkten, die das Prognoserisiko erhöhen. Insbesondere die Verschuldungskrise in einzelnen Euro-Ländern steigert die Unsicherheit.

Bezüglich der Nachhaltigkeit und Dynamik der weltweiten gesamtwirtschaftlichen Erholung bleiben Unsicherheiten. Speziell in der Halbleiterindustrie ergeben sich zusätzliche Risiken aus der Unsicherheit bezüglich der Vorratsbestände, die sich in der Lieferkette aufgebaut haben könnten. Unter der Annahme, dass die Weltwirtschaft weiter wachsen wird, wenn auch in eher gemäßigterem Tempo, und unter der Annahme, dass es in der Halbleiter-Lieferkette zu keinen größeren Korrekturen der Vorratsbestände kommt, erwartet Infineon im Geschäftsjahr 2011 ein Wachstum der Umsatzerlöse aus fortgeführten Geschäftsbereichen von nahezu 10 Prozent. Außerdem beruht diese Umsatzprognose auf dem unterstellten Euro/US-Dollar-Wechselkurs von 1,40. Die Bruttomarge aus fortgeführten Aktivitäten des Konzerns wird für das Geschäftsjahr 2011 im niedrigen 40-Prozent-Bereich erwartet. Die konzernweite Segmentmarge aus fortgeführten Aktivitäten sollte im Geschäftsjahr 2011 im mittleren bis hohen 10-Prozent-Bereich liegen. Infineon erwartet Nettoaufwendungen im nicht den Segmenten zugeordneten Ergebnis von ungefähr € 30 Millionen und einen Nettofinanzaufwand von ungefähr € 25 Millionen. Der effektive Konzernsteuersatz sollte zwischen 10 und 15 Prozent liegen.

Zusätzlich zum Ergebnis aus fortgeführten Aktivitäten erwartet Infineon ein signifikantes Ergebnis aus nicht fortgeführten Aktivitäten, abzüglich Steuern vom Einkommen und Ertrag, von etwa € 500 Millionen, im Wesentlichen aus dem Gewinn aus dem Verkauf des Mobilfunkgeschäfts an Intel.

### Erholung der Weltwirtschaft setzt sich fort, ist aber mit Risiken verbunden

Nach einem Wachstumsschub im Winterhalbjahr 2009/2010 scheint die Dynamik der globalen Erholung der Wirtschaft in den entwickelten wie den aufstrebenden Volkswirtschaften nachzulassen. Die Unterstützung durch den Vorratszyklus und



staatliche Förderprogramme flacht ab. Außerdem bestehen nach wie vor Unsicherheiten an den Finanzmärkten und eine hohe Arbeitslosigkeit in zahlreichen Ländern. Experten gehen davon aus, dass sich das Wachstum in naher Zukunft verlangsamten und im Laufe des Jahres 2011 wieder beschleunigen wird. Die wirtschaftlichen Aussichten für die verschiedenen Länder und Regionen sind unterschiedlich, und einmal mehr zeigt sich Asien führend, während, gemessen an der Vergangenheit, die etablierten Volkswirtschaften hinten anstehen.

Insgesamt wird erwartet, dass sich die weltweite Erholung fortsetzt, aber das Ausmaß bleibt abzuwarten. Der Internationale Währungsfonds („IWF“) stellt in seinem Weltwirtschaftsausblick vom Oktober 2010 fest, dass sich die Erholung fortsetzen sollte, aber anfällig für Schocks ist. Somit bleibt ein gewisser Grad der Unsicherheit für das Wirtschaftswachstum und das Wachstum des Halbleitermarktes im Jahr 2011.

### **Weltweites Wirtschaftswachstum im Jahr 2011 niedriger**

Laut dem Weltwirtschaftsausblick vom Oktober 2010 erwartet der Internationale Währungsfonds („IWF“) für das Jahr 2010 ein weltweites Wachstum von 3,7 Prozent, und von 3,3 Prozent im Jahr 2011. Insgesamt bestehen nach wie vor große Unsicherheiten an den Finanzmärkten, die das Prognoserisiko erhöhen. Insbesondere die Verschuldungskrise in einzelnen Euro-Ländern steigert die Unsicherheit.

Die Schätzung für das Wachstum des realen Bruttoinlandsprodukts („BIP“) im Euro-Raum liegt für das Jahr 2011 bei 1,5 Prozent, eine Verlangsamung gegenüber den 1,7 Prozent für 2010. Entschiedene Konsolidierungsmaßnahmen der öffentlichen Haushalte werden die Staatsnachfrage und das verfügbare Einkommen der Privathaushalte im Jahr 2011 reduzieren. Des Weiteren wird sich die nach wie vor hohe Arbeitslosigkeit in einigen Ländern, vor allem in Spanien und in Irland, negativ auf den Privatkonsum auswirken. Die erwartete Abkühlung der Weltkonjunktur und ein möglicherweise starker Euro könnten zusätzlichen Druck auf die Exporte ausüben.

Der IWF erwartet für die zentral- und osteuropäischen Länder für 2011 eine Wachstumsrate von 3,1 Prozent nach 3,7 Prozent im Jahr 2010. Für die Russische Föderation (CIS) einschließlich Russland wird für 2011 ein Wachstum von 4,6 Prozent prognostiziert, eine Beschleunigung von 4,3 Prozent im Jahr 2010. Energieexportierende Unternehmen in der CIS-Region werden von höheren Rohstoffpreisen und einem sich verknappenden Angebot profitieren. In Russland werden außerdem sich schrittweise erhöhende Löhne und niedrigere Arbeitslosigkeit den Privatkonsum stützen.

Für Nordamerika wird für das Jahr 2011 ein Wachstum des BIP von 2,5 Prozent erwartet, nach 2,9 Prozent im Jahr 2010. In den USA wirkt sich ein schwacher Arbeitsmarkt auf die Privateinkommen und die Bonität von Kreditnehmern aus. Zusätzlich sind die Privatvermögen durch die in den letzten drei Jahren dramatisch gefallen Immobilienpreise stark in Mitleidenschaft gezogen. Daraus könnte ein schleppender

Privatkonsum resultieren. Andererseits werden wahrscheinlich die privaten Investitionen die Binnennachfrage im Jahr 2011 ankurbeln. Zusätzlich könnte ein schwacher US-Dollar sich positiv auf die US-Exporte auswirken.

Nach den aktuellen Prognosen des IWF werden Lateinamerika und die Karibik im Jahr 2011 um 4,0 Prozent wachsen, nach 5,7 Prozent im Jahr 2010. Es werden robuste Rohstoffexport-Erlöse erwartet, die vermutlich Inlandseinkommen und Inlandsnachfrage beschleunigen.

Für die Wirtschaft Japans wird für 2011 ein Wachstum von 1,5 Prozent erwartet, nach 2,8 Prozent in 2010. Die Aufwertung des japanischen Yen und die erwartete Abkühlung der US Konjunktur könnten die Exporte negativ beeinflussen. Zudem ist damit zu rechnen, dass Deflation und ein weiterhin schwacher Arbeitsmarkt die Inlandsnachfrage unter Druck setzen.

Für Asien wird für 2011 ein Wachstum von 6,7 Prozent erwartet, nach 7,9 Prozent im Jahr 2010. Vor allem in China wird die Wirtschaftspolitik das Wachstum in 2011 dämpfen, um eine Überhitzung der Immobilienmärkte zu verhindern. Für Indien ist davon auszugehen, dass stabile Unternehmenserträge und günstige externe Finanzierungsbedingungen Investitionen anlocken. Insgesamt wird erwartet, dass sich das Wachstum in der Region verlangsamt, aber die Wachstumsraten auf hohem Niveau verbleiben. Das Wachstum wird sowohl von privaten Investitionen und Konsum als auch von der Exportnachfrage generiert werden. Im Fazit erwartet der IWF, dass Asien weiterhin das Wachstum der Weltwirtschaft anführt.

### **Ausblick für das weltweite Wirtschaftswachstum nach 2011**

Der IWF erwartet für die Weltwirtschaft ein Wachstum von etwa 3,7 Prozent für die Jahre nach 2011. Auch für die Folgejahre wird für Asien ein starkes Wachstum erwartet, wobei sich die Wachstumsraten mit steigendem Wohlstand wahrscheinlich mäßigen werden. Aus heutiger Sicht und trotz der gegenwärtig hohen Risiken geht der IWF für die nächsten Jahre nicht von einer Rezession aus. Aufstrebende Volkswirtschaften werden weiterhin über den globalen durchschnittlichen Wachstumsraten wachsen, was die Bedeutung dieser Länder und die Verschiebung der Wirtschaftskraft beschleunigen wird. In den kommenden Jahren werden neue Konsumenten die globalen Märkte betreten, wenn ihr wirtschaftlicher Wohlstand das Niveau erreicht, ab dem Konsumenten beginnen, Geld für nicht lebensnotwendige Güter auszugeben.

### **Die von Infineon adressierten Marktsegmente wachsen in 2011 stärker als der Halbleitermarkt**

Für den Halbleitermarkt wird für das Jahr 2011 weiteres Wachstum prognostiziert: Die Marktforschungsfirma iSuppli sagt ein Wachstum von zirka 5 Prozent voraus (auf Basis des US-Dollar und verglichen zu 32 Prozent für 2010), gefolgt von 2 Prozent für 2012 (iSuppli, September 2010). Die erwartete

01  
02  
03  
04  
05  
06  
07  
08  
09  
10  
11  
12  
13  
14  
15  
16  
17  
18  
19  
20  
21

Verlangsamung des Wachstums ist im Wesentlichen auf die langsamere Entwicklung der Weltwirtschaft und die Tatsache zurückzuführen, dass der Wiederaufbau der Vorratsbestände abgeschlossen sein wird. Die Wachstumsraten des Halbleitermarkts waren in 2010 in allen Regionen außergewöhnlich stark. Für 2011 erwarten die Experten für alle Regionen ein einstelliges Marktwachstum: Amerika um zirka 2 Prozent, Europa um zirka 4 Prozent, Japan um zirka 5 Prozent und Asien-Pazifik um zirka 6 Prozent (iSuppli, September 2010). Unter der Annahme, dass die Halbleiterindustrie reift und damit weniger zyklisch wird, prognostiziert iSuppli auch für die Folgejahre ein einstelliges Wachstum. Unter den gegenwärtigen Bedingungen wird weder ein Boom noch ein Einbruch erwartet.

Im Jahr 2011 werden alle Segmente des Halbleitermarktes vom Wirtschaftswachstum profitieren, wenn auch im Vergleich zu 2010 auf niedrigerem Niveau. Für den Automotive-Halbleitermarkt wird laut iSuppli für 2011 ein Wachstum von 8 Prozent erwartet (iSuppli, September 2010). Auch in den Folgejahren wird der Automotive-Halbleitermarkt über den durchschnittlichen Steigerungsraten des Marktes wachsen; die langfristige Wachstumsrate wird für den Zeitraum 2009 bis 2014 auf 11 Prozent geschätzt. Wesentliche Wachstumstreiber werden die sogenannten BRIC-Länder Brasilien, Russland, Indien und China sein. Sicherheitsanwendungen, wie Hilfen für den toten Winkel und Nachtsicht, sowie Systeme zur Energieeffizienz und Kontrolle der Umweltbelastung werden den Markt antreiben. Außerdem wird der steigende Anteil an Hybrid- und Elektro-Fahrzeugen durch einen höheren Halbleiteranteil in den Fahrzeugen den Markt ankurbeln.

Das zweite richtungweisende Segment des Halbleitermarktes, der Industrial und Multimarket Halbleitermarkt, wird unter anderem durch erneuerbare Energien und energiesparende elektrische Anwendungen bestimmt. Effizientes Speichern von Energie wird das Abrufen der Energie für verschiedenste Systeme wie wasserstoffbasierte Anwendungen, eine Vielzahl von erneuerbaren Energiequellen wie Wind und Solarenergie und Niederemissions-Transportfahrzeuge ermöglichen. Wesentliche Treiber dieser Entwicklung sind die hohen Preise für fossile Brennstoffe sowie der Wunsch, den CO<sub>2</sub>-Ausstoß und die Abhängigkeit vom Import von Energie zu verringern. Laut iSuppli wird der Industrial und Multimarket Welt-Halbleitermarkt in 2011 um zirka 11 Prozent wachsen (iSuppli, September 2010); die langfristige Wachstumsrate für die Jahre 2009 bis 2014 wird auf etwa 13 Prozent geschätzt. Es wird erwartet, dass langfristig das aufstrebende Asien auch weiterhin überdurchschnittlich wachsen und Marktanteile gewinnen wird.

Für den Chip-Card-Halbleitermarkt wird für 2011 ein Wachstum von zirka 3 Prozent vorausgesagt (iSuppli, September 2010); die langfristige Wachstumsrate für die Jahre 2009 bis 2014 wird auf rund 8 Prozent geschätzt. Die drei wichtigsten Marktsegmente in 2011 werden SIM Karten, Bezahl- und

Bankkarten sowie Ausweisdokumente sein. Der Marktanteil Asiens, einschließlich Japan, am weltweiten Volumen an Smart Cards wird in 2011 bei 51 Prozent liegen, gefolgt von Europa mit zirka 34 Prozent und Amerika mit 15 Prozent (IMS, Juli 2010).

### **Wachstum des Umsatzes des Infineon Konzerns im Geschäftsjahr 2011 von nahezu 10 Prozent**

Bezüglich der Nachhaltigkeit und Dynamik der weltweiten gesamtwirtschaftlichen Erholung bleiben Unsicherheiten. Speziell in der Halbleiterindustrie ergeben sich zusätzliche Risiken aus der Unsicherheit bezüglich der Vorratsbestände, die sich in der Lieferkette aufgebaut haben könnten. Unter der Annahme, dass die Weltwirtschaft weiter wachsen wird, wenn auch in eher gemäßigterem Tempo, und unter der Annahme dass es in der Halbleiter-Lieferkette zu keinen größeren Korrekturen der Vorratsbestände kommt, erwartet Infineon im Geschäftsjahr 2011 ein Wachstum der Umsatzerlöse aus fortgeführten Geschäftsbereichen von nahezu 10 Prozent. Außerdem beruht diese Umsatzprognose auf einem unterstellten Euro/US-Dollar-Wechselkurs von 1,40.

Innerhalb dieser Umsatzprognose geht die Gesellschaft davon aus, dass das Umsatzwachstum im Segment Automotive im Geschäftsjahr 2011 rund zehn Prozent gegenüber dem Geschäftsjahr 2010 betragen wird. Die Gesellschaft geht davon aus, dass die weltweite Autoproduktion Haupttreiber für den Umsatz mit Automotive-Halbleitern sein wird. Das Marktforschungsinstitut CSM sagte im Oktober 2010 ein Wachstum der weltweiten Autoproduktion von zirka 4 Prozent für das Jahr 2011 auf 71,8 Millionen Einheiten voraus. Ein solches Produktionsniveau würde zu quartalsweisen Umsätzen leicht über dem Niveau des vierten Quartals des Geschäftsjahrs 2010 führen.

Im Segment Industrial & Multimarket sollte das Umsatzwachstum die Wachstumsrate für den Konzern deutlich übersteigen. Durch die sehr breite Palette von Produkten und Endkunden wird der Segmentumsatz im Wesentlichen durch das gesamtwirtschaftliche Wachstum und die daraus resultierenden Wachstumstrends für die Halbleiterindustrie bestimmt. Zusätzliches Wachstum ergibt sich für das Segment aus der Tendenz hin zu umweltfreundlicherer Energieerzeugung sowie effizienterem Energietransport und Energiekonsum. Ein solches Wachstum wird beispielsweise in den Bereichen erneuerbare Energien, Hochspannungsübertragung, lastabhängige Steuerung von Elektromotoren und digitales Energiemanagement gesehen.

Das Umsatzwachstum in Infineons Segment Chip Card & Security für 2011 sollte sich mehr oder weniger analog zum Chip-Card IC Markt entwickeln, wird aber wahrscheinlich sehr niedrig ausfallen. Das Segment wird weiterhin in Bereichen mit höheren Margen wie Reisepässe, Ausweise, Bezahlkarten und eingebettete Sicherheitsanwendungen wachsen.

### **Infineon's Bruttomarge aus fortgeführten Aktivitäten wird in 2011 im niedrigen 40-Prozent-Bereich liegen**

Infineon's Bruttomarge aus fortgeführten Aktivitäten hängt stark von der Auslastung der Produktion über das Jahr ab. Sollten sich die Umsätze wie geplant entwickeln, dürfte die Bruttomarge im niedrigen 40-Prozent-Bereich liegen. Das würde eine wesentliche Verbesserung im Vergleich zu 38 Prozent im Geschäftsjahr 2010 darstellen. Diese Verbesserung ist im Wesentlichen auf die erwartete hohe Auslastung der Produktionsanlagen über das gesamte Jahr hinweg zurückzuführen. Des Weiteren geht die Gesellschaft davon aus, dass Produktivitätsverbesserungen und laufende Verschiebungen in der Produktpalette hin zu Bereichen mit höherer Marge insgesamt ausreichen, den typischerweise zu erwartenden Preisrückgang zu kompensieren.

### **Betriebsaufwendungen werden sich korrespondierend zum Umsatz erhöhen**

Infineon geht davon aus, dass sowohl die Forschungs- und Entwicklungs- als auch die Vertriebs- und Verwaltungskosten im Geschäftsjahr 2011 ungefähr in gleichem Maße wie die Umsätze steigen werden. Darin sollten allerdings die Verwaltungskosten gegenüber dem Geschäftsjahr 2010 rückläufig sein. Die Erhöhung der gesamten operativen Kosten sollte in etwa mit der Wachstumsrate des Umsatzes einhergehen.

Infineon sieht die Segmente Automotive und Industrial & Multimarket als Haupttreiber für das Wachstum der F&E-Kosten an. Im Segment Automotive liegt der Schwerpunkt bei neuen 65-Nanometer-Mikrocontrollern, neuen Sensoren und bei der Integration von Leistungs- und Controller-Funktionalität auf einem Chip unter Verwendung des neuen und verbesserten 130-Nanometer-BCD Prozesses der Gesellschaft. Daneben investiert das Segment in die Entwicklung von Produkten für die aufstrebenden Bereiche Hybrid- und Elektroautos. Der größte Anteil der zusätzlichen Halbleiter-Produkte in Hybrid- und Elektroautos sind Leistungshalbleiter. Während wir Marktführer für solche Komponenten innerhalb des Segments Industrial & Multimarket sind, investiert das Segment Automotive dahingehend, das vorhandene Know-how bestmöglich auch in Hybrid- und Elektroautos zu nutzen. Im Segment Industrial & Multimarket liegt der Fokus der F&E-Kosten darin, im Vergleich zu den heutigen Standardkomponenten die Energiedichte zu erhöhen und die Lebensdauer zu verlängern. Neue und weiter entwickelte Generationen von IGBTs, „CoolMOS“, „OptiMOS“ und anderen Leistungshalbleitern für verschiedenste Anwendungen wie Beleuchtung, Bildschirmansteuerung und Audio-Verstärkung befinden sich ebenfalls in der Entwicklung. Außerdem investiert die Gesellschaft in Verbindungshalbleiter wie beispielsweise Silizium-Carbid für die nächste Generation von Leistungshalbleitern.

Die Erhöhung der Vertriebs- und Verwaltungskosten der Gesellschaft ergibt sich ausschließlich im Bereich der

Vertriebskosten. Die Vertriebskosten werden vor allem in den Segmenten Automotive und Industrial & Multimarket steigen. Im Segment Automotive liegt der Fokus der höheren Vertriebskosten auf Applikationsunterstützung beim Kunden und dem Ausbau des Vertriebs in den Wachstumsmärkten China, Korea und Indien. Im Segment Industrial & Multimarket spiegelt die Steigerung die zunehmende Komplexität der Produkte wider, die erhöhte Unterstützungsanstrengungen unsererseits beim Kunden für das Design-In unserer Produkte in die Applikation des Kunden erforderlich macht. Daneben investiert die Gesellschaft in den Ausbau der Präsenz in Asien, insbesondere in China.

### **Segmentergebnismarge im mittleren bis hohen 10-Prozent-Bereich**

Infineon erwartet eine Segmentergebnis-Marge für die Summe der Segmente für das Geschäftsjahr 2011 im mittleren bis hohen 10-Prozent-Bereich. Diese Erwartung basiert auf dem geplanten Umsatzwachstum, der erwarteten Verbesserung der Bruttomarge und des Wachstums der operativen Aufwendungen in etwa analog zum Umsatzwachstum.

### **Übrige Aufwendungen**

Infineon erwartet ein nicht den operativen Segmenten zugeordnetes Ergebnis von etwa minus € 30 Millionen. Die Nettofinanzaufwendungen für das Geschäftsjahr 2011 sollten etwa minus € 25 Millionen betragen, eine deutliche Verbesserung von minus € 66 Millionen im Geschäftsjahr 2010. Die Hauptursache für diese Verbesserung sind die niedrigeren Zinsaufwendungen infolge der Rückzahlung der 2010-Wandelanleihe der Gesellschaft im Juni 2010. Infineon geht von einem effektiven Konzernsteuersatz zwischen 10 und 15 Prozent aus, der sich aus vergleichbaren ausländischen Steuersätzen und den Steuern in Deutschland mit einem Steuersatz von etwa 11 Prozent zusammensetzt. Zum 30. September 2010 betragen Infineons steuerliche Verlustvorträge € 3,4 Milliarden für die Körperschaftsteuer und € 4,6 Milliarden für die Gewerbesteuer. Durch die Nutzung von Verlustvorträgen unterliegen nur 40 Prozent der inländischen Einkünfte der Besteuerung, was zu einem inländischen zahlungswirksamen Steuersatz von zirka 11 Prozent führt. Die Gesellschaft geht davon aus, dass der effektive inländische zahlungswirksame Steuersatz für die kommenden Jahre auf diesem Niveau bleibt, bis die inländischen steuerlichen Verlustvorträge verbraucht sind.

### **Ergebnis aus nicht fortgeführten Aktivitäten, abzüglich Steuern vom Einkommen und Ertrag**

Zusätzlich zum Ergebnis aus fortgeführten Aktivitäten erwartet Infineon ein signifikantes Ergebnis aus nicht fortgeführten Aktivitäten, abzüglich Steuern vom Einkommen und Ertrag, von etwa € 500 Millionen, im Wesentlichen aus dem Gewinn aus dem Verkauf des Mobilfunkgeschäfts an Intel.

01  
02  
03  
04  
05  
06  
07  
08  
09  
10  
11  
12  
13  
14  
15  
16  
17  
18  
19  
20  
21

### Entwicklung des Working Capital

Zum 30. September betrug das Nettoumlaufvermögen der Gesellschaft minus € 130 Millionen. Nach Zeiten anhaltender Kapazitätsengpässe glaubt die Gesellschaft, dass zu einem gewissen Ausmaß Investitionen in den Wiederaufbau der Vorratsbestände erforderlich werden. Außerdem enthält das Nettoumlaufvermögen nach wie vor Rückstellungen aus der Qimonda-Insolvenz. Im Geschäftsjahr 2011 werden möglicherweise Zahlungen unter Nutzung dieser Rückstellungen getätigt. Schließlich enthält das Nettoumlaufvermögen als Folge der starken Verbesserung des Unternehmensergebnisses im Geschäftsjahr 2010 zum 30. September 2010 auch relativ hohe Rückstellungen für Mitarbeiterboni, die Ende Dezember 2010 oder Ende Januar 2011 ausgezahlt werden. Insofern erwartet Infineon, dass das Nettoumlaufvermögen im Geschäftsjahr 2011 Mittelabflüsse erforderlich machen wird.

### Investitionen und Abschreibungen

Infineon schätzt, dass die Investitionen, definiert als Summe der Investitionsausgaben für Sachanlagen und immaterielle Vermögenswerte einschließlich aktivierter Entwicklungskosten nach IFRS, im Geschäftsjahr 2011 bei rund € 550 Millionen liegen werden. Nach Zeiten anhaltender Kapazitätsengpässe von Ende 2009 bis zum Ende des Geschäftsjahres 2010 wird Infineon versuchen, die Kapazität insbesondere in der Wafer-Fertigung in Kulim (Malaysia) und in verschiedenen Montage- und Test-Produktionsstätten zu erhöhen. Außerdem ist ein Teil des Budgets für eine 300-Millimeter-Pilotanlage in der Wafer-Fertigung in Villach (Österreich) vorgesehen, mit der wir die Herstellung von diskreten Leistungshalbleitern auf 300-Millimeter-Wafern in Massenproduktion vorbereiten wollen.

Abschreibungen werden für das Geschäftsjahr 2011 in einer Höhe von annähernd € 400 Millionen erwartet.

### Free-Cash-Flow, Mittelverwendung und Bilanzstruktur

Dank der erwarteten Profitabilität auf hohem Niveau geht Infineon trotz im Geschäftsjahr 2011 erwarteter Zahlungsmittelabflüsse im Nettoumlaufvermögen und trotz Investitionen oberhalb der Abschreibungen, davon aus, einen soliden Free-Cash-Flow zu generieren.

Infineon beabsichtigt, den im Konzern erwirtschafteten Free-Cash-Flow im Geschäftsjahr 2011 unter anderem zur Rückzahlung von Verbindlichkeiten in Höhe von € 133 Millionen zu nutzen.

Außerdem plant Infineon, auch die Aktionäre am Erfolg des Unternehmens teilhaben zu lassen, und wird Auszahlungen vornehmen, die mit der erwarteten Generierung von Zahlungsmitteln und den Liquiditätsanforderungen vereinbar sind. In diesem Sinne werden Vorstand und Aufsichtsrat der bevorstehenden Hauptversammlung am 17. Februar 2011 eine Dividende von € 0,10 je Aktie vorschlagen. Falls diese Dividende genehmigt wird, würde sie zu einer Auszahlung von zirka € 109 Millionen führen.

Des Weiteren planen Vorstand und Aufsichtsrat, die Hauptversammlung um die Genehmigung eines Aktienrückkaufprogramms für bis zu 10 Prozent der ausstehenden Aktien zu bitten. Wenn dieser Antrag genehmigt wird, hätte Infineon die Möglichkeit, einen Teil des Free-Cash-Flows beziehungsweise der verfügbaren Liquiditätsreserven flexibel für den Rückkauf eigener Aktien zu nutzen.

Bezüglich der Bilanzstruktur verfolgt Infineon das langfristige Ziel, zirka 30 bis 40 Prozent der Umsatzerlöse als Brutto-Cash-Position in der Bilanz zu halten. Die Gesellschaft plant, eine Netto-Cash-Position zu halten, und strebt an, die Brutto-Finanzverbindlichkeiten auf das Zweifache des EBITDA zu begrenzen. Die Planungen der Gesellschaft sehen vor, dass diese Ziele im Geschäftsjahr 2011 komfortabel erreicht werden und das Ziel für das Verhältnis der Brutto-Cash-Position zu den Umsatzerlösen deutlich übertroffen werden wird. Aus strategischen Gründen beabsichtigt die Gesellschaft, für eine gewisse Zeit eine Brutto-Cash-Position oberhalb des langfristigen Ziels zu halten. Infineon geht davon aus, dass dieser strategische Zahlungsmittelbestand in wertschaffender Art und Weise für (1) Produktionsanlagen für den geplanten Einstieg in die Massenfertigung von diskreten Leistungshalbleitern auf 300-Millimeter-Wafern und (2) mögliche Akquisitionen verwendet werden kann. Sollte die Gesellschaft im Zeitablauf feststellen, dass der strategische Zahlungsmittelbestand nicht produktiv im Unternehmen eingesetzt werden kann, könnten die Bemühungen, Kapital an die Investoren zurückzuführen, intensiviert werden.

Abschließend sei erwähnt, dass Infineon im Geschäftsjahr 2011 keine wesentlichen Finanzierungs-Transaktionen plant.

### Starke Wachstumstreiber über das Geschäftsjahr 2011 hinaus

Über das Geschäftsjahr 2011 hinaus ist Infineon bezüglich der Wachstumsaussichten der adressierten Endmärkte zuversichtlich. Das Marktforschungsinstitut iSuppli sagt für die Jahre 2009 bis 2014 für den Automotive-Halbleitermarkt eine Wachstumsrate von 11,3 Prozent, den Industrial & Multimarket-Halbleitermarkt von 13,3 Prozent und den Chip-Card-Halbleitermarkt von 8,3 Prozent voraus.

Das Wachstum in den Endmärkten wird von drei dominierenden Faktoren getrieben:

- **Energieeffizienz:** Die weltweite Energieerzeugung wird sich in zunehmendem Maße in Richtung erneuerbarer Energien verschieben; im Bereich des Transports und Verbrauchs von Energie weltweit wird es immer wichtiger werden, alle Schritte der Wandlung von Elektrizität effizienter zu gestalten. Beide Tendenzen werden die Nachfrage nach unseren Leistungshalbleitern stärken.
- **Mobilität:** Immer mehr Menschen weltweit müssen aus wirtschaftlichen Gründen mobil sein und haben die finanziellen Mittel dazu. Ob in Zügen oder Autos, die Anzahl der

Halbleiter, die erforderlich ist, um diese Mobilität zu ermöglichen, nimmt zu. Wir ermöglichen Mobilität im Wesentlichen mit unseren Produkten der Segmente Automotive und Industrial & Multimarket.

- **Sicherheit:** Die Menge sensibler Daten, die gespeichert und/oder fernabgerufen werden, erhöht sich täglich. Die Produkte unseres Segments Chip Card & Security helfen dabei, sicherzustellen, dass Nutzer vor der Nutzung der Daten identifiziert und Daten sicher gespeichert werden.

Auf Grund unserer Marktführerschaft in den von uns bedienten Endmärkten für Automobil-, Energie- und Chip-Card-Produkte sind wir zuversichtlich, dass wir vom Wachstumspotenzial dieser Märkte profitieren werden können.

**Ziel-Geschäftsmodell: Bruttomarge im niedrigen 40-Prozent-Bereich und Segmentergebnismarge im hohen 10-Prozent-Bereich bei einem Umsatz von € 4 Milliarden**

Für den Zeitraum nach Abschluss des Verkaufs unseres Mobilfunkgeschäfts an Intel haben wir uns ein Ziel-Geschäftsmodell vorgegeben. Basierend auf den oben beschriebenen Wachstumschancen der von uns bedienten Märkte sind wir der Meinung, dass ein nachhaltiges Umsatzniveau von € 4 Milliarden für unser Geschäft ab dem Geschäftsjahr 2012 durchaus erreichbar ist. Auf diesem Umsatzniveau streben wir eine Bruttomarge in niedrigen 40-Prozent-Bereich sowie ein Verhältnis von F&E- und ein Vertriebs- und Verwaltungskosten zum Umsatz im jeweils niedrigen 10-Prozent-Bereich an. In Summe sollte dies zu einer Segmentergebnismarge im hohen 10-Prozent-Bereich führen. Im letzten Quartal des Geschäftsjahrs 2010 war die Gesellschaft bei Umsätzen von € 942 Millionen bereits fast in Übereinstimmung mit diesem Zielmodell.

Nach der Normalisierung des Nettoumlaufvermögens der Gesellschaft, wie im Ausblick für das Geschäftsjahr 2011 beschrieben, erwartet Infineon, dass das anhaltende Wachstum einige weitere Investitionen in das Nettoumlaufvermögen nach dem Geschäftsjahr 2011 erfordern wird.

Wir schätzen, dass wir langfristig in der Lage sein sollten, das Verhältnis der Investitionen, definiert als Summe der Investitionsausgaben für Sachanlagen und immaterielle Vermögenswerte einschließlich aktivierter Entwicklungskosten nach IFRS, zu den Umsätzen im niedrigen 10-Prozent-Bereich halten zu können, einschließlich der Investitionen in die 300-Millimeter-Produktionsanlage für diskrete Leistungshalbleiter. Wir glauben, dass die Abschreibungen in etwa auf dem Niveau der Investitionen liegen werden.

Unter dem Ziel-Geschäftsmodell der Gesellschaft, den Liquiditätsanforderungen im Nettoumlaufvermögen und dem geplanten Niveau an Investitionen im Verhältnis zu den Abschreibungen erwartet Infineon, in den kommenden Jahren positive Free-Cash-Flows zu erzielen. Daher geht die Gesellschaft davon aus, dass die für das Geschäftsjahr 2010 zu zahlende Dividende auf nachhaltigem Niveau liegt, auch wenn

dabei, insbesondere in Zeiten des Abschwungs, immer auch auf den Free-Cash-Flow abzustellen ist.

Wie weiter oben beschrieben, strebt die Gesellschaft an, folgende Bilanzrelationen einzuhalten, die vergleichbar mit anderen Unternehmen der Halbleiterindustrie sind:

- Brutto-Cash-Position zwischen 30 und 40 Prozent der Umsatzerlöse
- Netto-Cash-Position
- Brutto-Finanzverbindlichkeiten maximal 2x EBITDA

**ANGABEN NACH § 289 ABSATZ 4 UND § 315 ABSATZ 4 HGB**

**ZUSAMMENSETZUNG DES GEZEICHNETEN KAPITALS**

Das Grundkapital der Infineon Technologies AG betrug zum 30. September 2010 € 2.173.484.170. Es ist eingeteilt in 1.086.742.085 auf den Namen lautende nennwertlose Stückaktien mit einem rechnerischen Anteil von € 2 am Grundkapital. Mit allen Aktien sind die gleichen Rechte und Pflichten verbunden. Jede Aktie gewährt eine Stimme. Aktien der Infineon Technologies AG werden an der Frankfurter Wertpapierbörse (FSE) unter dem Symbol „IFX“ notiert. Außerdem werden die Aktien der Infineon Technologies AG in Form von American Depositary Shares (ADS) unter dem Börsenkürzel „IFNNY“ auch am OTCQX International Premier Markt im Freiverkehr (over-the-counter) gehandelt, wobei jeweils ein Infineon-ADS eine Infineon-Aktie repräsentiert.

**BESCHRÄNKUNGEN, DIE STIMMRECHTE ODER DIE ÜBERTRAGUNG VON AKTIEN BETREFFEN**

Beschränkungen des Stimmrechts der Aktien können sich insbesondere aus den Vorschriften des Aktiengesetzes ergeben. Beispielsweise unterliegen Aktionäre unter bestimmten Voraussetzungen nach § 136 AktG einem Stimmverbot und der Infineon Technologies AG steht gemäß § 71b AktG aus eigenen Aktien kein Stimmrecht zu. Vertragliche Beschränkungen, die Stimmrechte oder die Übertragung von Aktien betreffen, sind uns nicht bekannt.

Gemäß § 67 Abs. 2 AktG gilt im Verhältnis zur Infineon Technologies AG als Aktionär nur, wer als solcher im Aktienregister eingetragen ist. Die Aktionäre haben der Infineon Technologies AG zur Eintragung im Aktienregister ihren Namen beziehungsweise Firma, ihre Anschrift sowie ggf. ihren Sitz und ihr Geburtsdatum sowie die Zahl der von ihnen gehaltenen Aktien mitzuteilen. Die Infineon Technologies AG ist nach § 67 Abs. 4 AktG berechtigt, von dem im Aktienregister Eingetragenen Auskunft darüber zu verlangen, inwieweit ihm die Aktien, als deren Inhaber er im Aktienregister eingetragen ist, tatsächlich gehören, und, soweit dies nicht der Fall ist, die zur Führung des Aktienregisters notwendigen Informationen demjenigen zu übermitteln, für den er die Aktien hält. Solange einem solchen Auskunftsverlangen nicht nachgekommen wird,

01  
02  
03  
04  
05  
06  
07  
08  
09  
10  
11  
12  
13  
14  
15  
16  
17  
18  
19  
20  
21

bestehen die Stimmrechte aus dem betreffenden Aktienbestand nach § 67 Abs. 2 AktG nicht.

#### **BETEILIGUNGEN AM KAPITAL, DIE 10 PROZENT DER STIMMRECHTE ÜBERSCHREITEN**

Nach dem deutschen Wertpapierhandelsgesetz (WpHG) hat jeder Aktionär, der die Schwellen von 3, 5, 10, 15, 20, 25, 30, 50 oder 75 Prozent der Stimmrechte eines börsennotierten Unternehmens erreicht, überschreitet oder unterschreitet, dies der Infineon Technologies AG und der Bundesanstalt für Finanzdienstleistungsaufsicht unverzüglich mitzuteilen. Uns sind hiernach zum 30. September 2010 keine direkten oder indirekten Beteiligungen am Kapital bekannt, die 10 Prozent der Stimmrechte erreichen oder überschreiten. Die uns gemeldeten Beteiligungen sind im Anhang zum Konzernabschluss unter den Angaben gemäß § 160 Abs. 1 Nr. 8 AktG dargestellt.

#### **AKTIEN MIT SONDERRECHTEN, DIE KONTROLLBEFUGNISSE VERLEIHEN**

Aktien mit Sonderrechten, die Kontrollbefugnisse verleihen, wurden nicht ausgegeben.

#### **ART DER STIMMRECHTSKONTROLLE, WENN ARBEITNEHMER AM KAPITAL BETEILIGT SIND UND IHRE KONTROLLRECHTE NICHT UNMITTELBAR AUSÜBEN**

Arbeitnehmer, die am Kapital der Infineon Technologies AG beteiligt sind, üben ihre Kontrollrechte wie andere Aktionäre unmittelbar nach Maßgabe der gesetzlichen Vorschriften und der Satzung aus.

#### **BESTIMMUNGEN ÜBER DIE ERNENNUNG UND ABBERUFUNG VON VORSTANDSMITGLIEDERN**

Der Vorstand der Infineon Technologies AG besteht nach § 5 Abs. 1 der Satzung aus mindestens zwei Personen. Derzeit besteht der Vorstand der Infineon Technologies AG aus drei Personen. Die Bestimmung der genauen Zahl sowie die Bestellung und Abberufung der Vorstandsmitglieder erfolgt gemäß § 5 Abs. 1 der Satzung und § 84 Abs. 1 AktG durch den Aufsichtsrat. Da die Infineon Technologies AG unter das Mitbestimmungsgesetz fällt, ist für die Bestellung beziehungsweise Abberufung von Vorstandsmitgliedern eine Mehrheit von mindestens zwei Dritteln der Mitglieder des Aufsichtsrats erforderlich (§ 31 Abs. 2 MitbestG). Kommt eine solche Mehrheit in der ersten Abstimmung nicht zustande, kann die Bestellung auf Vorschlag des Vermittlungsausschusses in einer zweiten Abstimmung mit einfacher Mehrheit der Stimmen der Mitglieder des Aufsichtsrats erfolgen (§ 31 Abs. 3 MitbestG). Wird auch hierbei die erforderliche Mehrheit nicht erreicht, erfolgt eine dritte Abstimmung, in der dem Aufsichtsratsvorsitzenden jedoch zwei Stimmen zustehen (§ 31 Abs. 4 MitbestG). Fehlt ein erforderliches Vorstandsmitglied, so hat gemäß § 85 Abs. 1 AktG in dringenden Fällen das Amtsgericht München auf Antrag eines Beteiligten ein Vorstandsmitglied zu bestellen.

Vorstandsmitglieder dürfen gemäß § 84 Abs. 1 Satz 1 AktG für höchstens fünf Jahre bestellt werden. Eine wiederholte Bestellung oder Verlängerung der Amtszeit, jeweils für höchstens fünf Jahre, ist zulässig (§84 Abs. 1 Satz 2 AktG). Der Aufsichtsrat kann gemäß § 5 Abs. 1 der Satzung und § 84 Abs. 2 AktG einen Vorsitzenden des Vorstands sowie einen stellvertretenden Vorsitzenden ernennen. Der Aufsichtsrat kann die Bestellung zum Vorstandsmitglied und die Ernennung zum Vorsitzenden des Vorstands widerrufen, wenn ein wichtiger Grund vorliegt (§ 84 Abs. 3 AktG).

#### **BESTIMMUNGEN ÜBER DIE ÄNDERUNG DER SATZUNG**

Für Änderungen der Satzung ist gemäß § 179 Abs. 1 AktG die Hauptversammlung zuständig. Der Aufsichtsrat ist jedoch gemäß § 10 Abs. 4 der Satzung ermächtigt, Satzungsänderungen zu beschließen, die nur die Fassung betreffen, wie zum Beispiel Änderungen des Grundkapitals infolge einer Kapitalerhöhung aus bedingtem oder genehmigtem Kapital. Soweit die Satzung keine andere Mehrheit vorsieht, bedürfen Beschlüsse der Hauptversammlung über Änderungen der Satzung gemäß § 179 Abs. 2 AktG einer Mehrheit von mindestens drei Vierteln des bei der Beschlussfassung vertretenen Grundkapitals. Die Satzung der Infineon Technologies AG sieht in § 17 Abs. 1 vor, dass Beschlüsse grundsätzlich mit einfacher Mehrheit und, soweit eine Kapitalmehrheit erforderlich ist, mit einfacher Kapitalmehrheit gefasst werden können, sofern nicht nach zwingenden gesetzlichen Vorschriften oder der Satzung eine höhere Mehrheit erforderlich ist.

#### **BEFUGNISSE DES VORSTANDS ZUR AKTIENAUSGABE**

##### **Genehmigtes Kapital**

##### **Genehmigtes Kapital 2010/I**

Der Vorstand ist gemäß § 4 Abs. 8 der Satzung ermächtigt, das Grundkapital in der Zeit bis zum 10. Februar 2015 mit Zustimmung des Aufsichtsrats einmalig oder in Teilbeträgen um insgesamt bis zu € 648.000.000,00 durch Ausgabe neuer, auf den Namen lautender Stückaktien mit Gewinnberechtigung ab Beginn des Geschäftsjahrs ihrer Ausgabe gegen Bar- oder Sacheinlagen zu erhöhen (Genehmigtes Kapital 2010/I). Bei Barkapitalerhöhungen steht den Aktionären grundsätzlich ein Bezugsrecht zu. Der Vorstand ist jedoch ermächtigt, mit Zustimmung des Aufsichtsrats das Bezugsrecht der Aktionäre auszuschließen,

- (a) um Spitzenbeträge vom Bezugsrecht auszunehmen,
- (b) soweit es erforderlich ist, um Inhabern von Options- oder Wandlungsrechten aus Options- und Wandelschuldverschreibungen, die von der Gesellschaft oder deren nachgeordneten Konzernunternehmen ausgegeben wurden oder werden, ein Bezugsrecht auf neue Aktien in dem Umfang zu gewähren, wie es ihnen nach Ausübung der Options- oder Wandlungsrechte beziehungsweise nach Erfüllung von Wandlungspflichten zustände,

(c) wenn der Ausgabebetrag der neuen Aktien den Börsenpreis nicht wesentlich unterschreitet und die unter Ausschluss des Bezugsrechts gem. § 186 Abs. 3 Satz 4 AktG ausgegebenen Aktien insgesamt 10 Prozent des Grundkapitals nicht überschreiten, und zwar weder im Zeitpunkt des Wirksamwerdens noch im Zeitpunkt der Ausübung dieser Ermächtigung.

Darüber hinaus ist der Vorstand ermächtigt, mit Zustimmung des Aufsichtsrats das Bezugsrecht bei Kapitalerhöhungen gegen Sacheinlagen auszuschließen. Der Vorstand der Infineon Technologies AG hat sich allerdings zum Schutz der Aktionäre vor Verwässerung verpflichtet, von dieser Ermächtigung zum Ausschluss des Bezugsrechts sowohl bei Bar- als auch bei Sachkapitalerhöhungen aus dem Genehmigten Kapital 2010/I nur bis zu einem Betrag von insgesamt maximal 10 Prozent des zum Zeitpunkt des Wirksamwerdens der Ermächtigung beziehungsweise – falls dieser Wert geringer sein sollte – des zum Zeitpunkt der Ausnutzung der Ermächtigung bestehenden Grundkapitals Gebrauch zu machen. Eine Kapitalerhöhung unter Ausschluss des Bezugsrechts in Ausnutzung des Genehmigten Kapitals 2010/I ist damit derzeit auf maximal € 217.348.417 beziehungsweise 108.674.208 Stückaktien, beschränkt.

Über den weiteren Inhalt der Aktienrechte und die Bedingungen der Aktienaussgabe entscheidet der Vorstand mit Zustimmung des Aufsichtsrats.

#### **Genehmigtes Kapital 2010/II**

Gemäß § 4 Abs. 9 der Satzung ist der Vorstand außerdem ermächtigt, das Grundkapital in der Zeit bis zum 10. Februar 2015 mit Zustimmung des Aufsichtsrats einmalig oder in Teilbeträgen um insgesamt bis zu € 40.000.000,00 durch Ausgabe neuer, auf den Namen lautender Stückaktien gegen Bareinlagen zum Zwecke der Ausgabe an Mitarbeiter der Gesellschaft oder ihrer Konzernunternehmen zu erhöhen (Genehmigtes Kapital 2010/II). Dabei ist das Bezugsrecht der Aktionäre ausgeschlossen. Über den weiteren Inhalt der Aktienrechte und die Bedingungen der Aktienaussgabe entscheidet der Vorstand mit Zustimmung des Aufsichtsrats.

### **Bedingtes Kapital**

#### **Bedingtes Kapital I**

§ 4 Abs. 4 der Satzung sieht vor, dass das Grundkapital der Infineon Technologies AG um bis zu nominal € 34.635.548,00 bedingt erhöht ist (Bedingtes Kapital I, eingetragen im Handelsregister als Bedingtes Kapital 1999/I). Die bedingte Kapitalerhöhung wird durch Ausgabe von bis zu 17.317.774 neuen, auf Namen lautenden Aktien mit Gewinnberechtigung ab dem Beginn des Geschäftsjahrs ihrer Ausgabe nur insoweit durchgeführt, wie die Inhaber von Bezugsrechten, die im Rahmen des „Infineon Technologies AG 2001 International Long Term Incentive Plans“ auf Grund der am 6. April 2001 erteilten Ermächtigung ausgegeben werden, von ihren Bezugsrechten Gebrauch machen.

#### **Bedingtes Kapital III**

§ 4 Abs. 5 der Satzung sieht vor, dass das Grundkapital der Infineon Technologies AG um bis zu nominal € 29.000.000,00 bedingt erhöht ist (Bedingtes Kapital III, eingetragen im Handelsregister als Bedingtes Kapital 2001/I). Die bedingte Kapitalerhöhung wird durch Ausgabe von bis zu 14.500.000 neuen, auf Namen lautenden Aktien mit Gewinnberechtigung ab dem Beginn des Geschäftsjahrs ihrer Ausgabe nur insoweit durchgeführt, wie die Inhaber von Bezugsrechten, die im Rahmen des „Infineon Technologies AG 2001 International Long Term Incentive Plan“ auf Grund der am 6. April 2001 erteilten Ermächtigung ausgegeben werden oder wie die Inhaber von Bezugsrechten, die im Rahmen des „Infineon Technologies AG Aktienoptionsplan 2006“ auf Grund der am 16. Februar 2006 erteilten Ermächtigung ausgegeben werden, von ihren Bezugsrechten Gebrauch machen.

#### **Bedingtes Kapital 2002**

Darüber hinaus ist das Grundkapital der Infineon Technologies AG gemäß § 4 Abs. 6 der Satzung um bis zu € 134.000.000,00 durch Ausgabe von bis zu 67.000.000 neuen, auf den Namen lautenden Stückaktien mit Gewinnberechtigung ab Beginn des Geschäftsjahrs ihrer Ausgabe bedingt erhöht (Bedingtes Kapital 2002, eingetragen im Handelsregister als Bedingtes Kapital 2007/II). Die bedingte Kapitalerhöhung dient der Gewährung von Aktien an die Inhaber der im Mai 2009 von der Infineon Technologies Holding B.V., Rotterdam, Niederlande, begebenen und von der Infineon Technologies AG garantierten Wandelschuldverschreibung. Sie wird nur insoweit durchgeführt, wie von Wandlungsrechten aus der Wandelschuldverschreibung Gebrauch gemacht wird beziehungsweise Wandlungspflichten daraus erfüllt werden. Der Vorstand ist ermächtigt, die weiteren Einzelheiten der Durchführung der bedingten Kapitalerhöhung festzusetzen.

#### **Bedingtes Kapital 2009/I**

Das Grundkapital der Infineon Technologies AG ist gemäß § 4 Abs. 7 der Satzung um bis zu € 149.900.000,00 durch Ausgabe von bis zu 74.950.000 neuen, auf den Namen lautenden Stückaktien mit Gewinnberechtigung ab Beginn des Geschäftsjahrs ihrer Ausgabe bedingt erhöht (Bedingtes Kapital 2009/I). Die bedingte Kapitalerhöhung dient der Gewährung von Aktien an die Inhaber der im Mai 2009 von der Infineon Technologies Holding B.V., Rotterdam, Niederlande, begebenen und von der Infineon Technologies AG garantierten Wandelschuldverschreibung. Die bedingte Kapitalerhöhung ist nur insoweit durchzuführen, wie von Wandlungsrechten aus der Wandelschuldverschreibung Gebrauch gemacht wird beziehungsweise Wandlungspflichten daraus erfüllt und soweit nicht ein Barausgleich gewährt oder eigene Aktien zur Bedienung eingesetzt werden.

01  
02  
03  
04  
05  
06  
07  
08  
09  
10  
11  
12  
13  
14  
15  
16  
17  
18  
19  
20  
21

**Bedingtes Kapital 2010/I**

§ 4 Abs. 10 der Satzung sieht ferner vor, dass das Grundkapital der Gesellschaft um bis zu nominal € 24.000.000,00 durch Ausgabe von bis zu 12.000.000 neuen, auf Namen lautende Stückaktien bedingt erhöht ist (Bedingtes Kapital 2010/I). Die bedingte Kapitalerhöhung wird nur insoweit durchgeführt, wie Inhaber von Bezugsrechten, die im Rahmen des „Infineon Technologies AG Aktienoptionsplan 2010“ bis zum 30. September 2013 begeben werden, von ihrem Bezugsrecht auf Aktien der Gesellschaft Gebrauch machen und die Gesellschaft in Erfüllung dessen nicht einen Barausgleich gewährt oder eigene Aktien liefert. Die neuen Aktien sind mit Wirkung ab dem Beginn des Geschäftsjahrs ihrer Ausgabe gewinnberechtigt.

**Bedingtes Kapital 2010/II**

Das Grundkapital ist gemäß § 4 Abs. 11 der Satzung außerdem um bis zu € 260.000.000,00 durch Ausgabe von bis zu 130.000.000 neuen, auf den Namen lautenden Stückaktien mit Gewinnberechtigung ab Beginn des Geschäftsjahrs ihrer Ausgabe bedingt erhöht (Bedingtes Kapital 2010/II). Die bedingte Kapitalerhöhung dient der Gewährung von Aktien an die Inhaber oder Gläubiger von Options- und/oder Wandelschuldverschreibungen, die auf Grund der Ermächtigung der Hauptversammlung vom 11. Februar 2010 von der Gesellschaft oder einem nachgeordneten Konzernunternehmen gegen Barleistung begeben werden. Die bedingte Kapitalerhöhung ist nur insoweit durchzuführen, wie von Options- und/oder Wandlungsrechten aus den Schuldverschreibungen Gebrauch gemacht wird beziehungsweise Wandlungspflichten aus den Schuldverschreibungen erfüllt werden, und soweit nicht ein Barausgleich gewährt oder eigene Aktien zur Bedienung eingesetzt werden. Der Vorstand ist ermächtigt, die weiteren Einzelheiten der Durchführung der bedingten Kapitalerhöhung festzusetzen.

Die näheren Einzelheiten der verschiedenen Aktienoptionspläne sind unter Anhang Nr. 32 Aktienoptionspläne, die näheren Einzelheiten der von der Infineon Technologies AG bereits begebenen oder garantierten Wandelschuldverschreibungen sind unter Anhang Nr. 27 Finanzverbindlichkeiten dargestellt.

**ERMÄCHTIGUNG ZUR AUSGABE VON OPTIONS- UND/ODER WANDELSCHULDVERSCHREIBUNGEN**

Die Hauptversammlung vom 11. Februar 2010 hat den Vorstand ermächtigt, bis zum 10. Februar 2015 einmalig oder mehrmals Options- und/oder Wandelschuldverschreibungen im Gesamtnennbetrag von bis zu € 2.000.000.000,00 zu begeben und für solche von nachgeordneten Konzernunternehmen der Gesellschaft begebene Schuldverschreibungen die Garantie zu übernehmen und den Inhabern von Schuldverschreibungen Options- oder Wandlungsrechte auf insgesamt

bis zu 130.000.000 auf den Namen lautende Stückaktien der Gesellschaft mit einem anteiligen Betrag am Grundkapital von bis zu € 260.000.000,00 nach näherer Maßgabe der jeweiligen Bedingungen der Schuldverschreibungen zu gewähren. Der Vorstand ist ermächtigt, mit Zustimmung des Aufsichtsrats das Bezugsrecht der Aktionäre auf die Schuldverschreibungen auszuschließen,

- sofern der Ausgabepreis den nach anerkannten finanzmathematischen Methoden ermittelten theoretischen Marktwert der Schuldverschreibungen nicht wesentlich unterschreitet; dies gilt jedoch nur insoweit, als die zur Bedienung der dabei begründeten Options- und/oder Wandlungsrechte auszugebenden Aktien insgesamt 10 Prozent des Grundkapitals nicht überschreiten, und zwar weder bezogen auf den Zeitpunkt des Wirksamwerdens noch auf den Zeitpunkt der Ausübung dieser Ermächtigung.
- um Spitzenbeträge, die sich auf Grund des Bezugsverhältnisses ergeben, vom Bezugsrecht der Aktionäre auf die Schuldverschreibungen auszunehmen oder, soweit es erforderlich ist, um Inhabern von Options- oder Wandlungsrechten aus Options- und Wandelschuldverschreibungen, die von der Gesellschaft oder ihren nachgeordneten Konzernunternehmen ausgegeben wurden oder werden, ein Bezugsrecht in dem Umfang zu gewähren, wie es ihnen nach Ausübung der Rechte beziehungsweise nach Erfüllung von Wandlungspflichten zustände.

Der Options- oder Wandlungspreis muss – auch bei Anwendung der Regelungen zum Verwässerungsschutz – mindestens 90 Prozent des durchschnittlichen Börsenkurses der Aktien der Gesellschaft in der Xetra-Schlussauktion an der Frankfurter Wertpapierbörse (oder einem vergleichbaren Nachfolgesystem) betragen und zwar während der zehn Börsentage vor dem Tag der Beschlussfassung durch den Vorstand über die Begebung der Schuldverschreibungen oder, sofern den Aktionären ein Bezugsrecht auf die Schuldverschreibungen zusteht, während der Tage, an denen Bezugsrechte auf die Schuldverschreibungen an der Frankfurter Wertpapierbörse gehandelt werden, mit Ausnahme der letzten beiden Börsentage des Bezugsrechtshandels. Der Options- beziehungsweise Wandlungspreis kann unbeschadet des § 9 Abs. 1 AktG auf Grund einer Verwässerungsschutzklausel nach näherer Bestimmung der Bedingungen der Schuldverschreibungen dann ermäßigt werden, wenn die Gesellschaft bis zum Ablauf der Options- oder Wandlungsfrist unter Einräumung eines Bezugsrechts an ihre Aktionäre das Grundkapital erhöht oder weitere Schuldverschreibungen begibt oder garantiert und den Inhabern von Optionsrechten oder den Gläubigern von Wandelschuldverschreibungen hierbei kein Bezugsrecht eingeräumt wird. Die Bedingungen können auch für andere Maßnahmen, die zu einer wirtschaftlichen Verwässerung der



Options- beziehungsweise Wandlungsrechte führen können, eine wertwahrende Anpassung des Options- beziehungsweise Wandlungspreises oder des Options- beziehungsweise Wandlungsverhältnisses vorsehen. In jedem Fall darf der anteilige Betrag am Grundkapital der je Schuldverschreibung zu beziehenden Aktien den Nennbetrag der Schuldverschreibung nicht übersteigen.

Der Vorstand ist ermächtigt, unter Beachtung der Vorgaben des Hauptversammlungsbeschlusses die weiteren Einzelheiten der Ausgabe und Ausstattung der Schuldverschreibungen und deren Bedingungen festzulegen.

#### ERWERB EIGENER AKTIEN

Die von der Hauptversammlung am 12. Februar 2009 beschlossene Ermächtigung zum Erwerb eigener Aktien endete am 11. August 2010.

#### WESENTLICHE VEREINBARUNGEN FÜR DEN FALL EINES KONTROLLWECHSELS INFOLGE EINES ÜBERNAHMEANGEBOTS

Die am 26. Mai 2009 von der Infineon Technologies AG als Bürgin durch ihre Tochtergesellschaft Infineon Technologies Holding B.V., Rotterdam, Niederlande begebene Wandelschuldverschreibung zum Nennwert von € 195.600.000,00, die im Jahr 2014 fällig wird (siehe Anhang Nr. 27 zu Finanzverbindlichkeiten), enthält eine sogenannte „Change of Control“-Klausel, die den Gläubigern für den Fall eines definierten Kontrollwechsels einen Rückzahlungsanspruch einräumt.

Darüber hinaus enthalten einige Patentlizenzaustauschverträge, Entwicklungskooperationen und Lizenzverträge „Change of Control“-Klauseln, die dem Vertragspartner bei einer Änderung der Kontrolle über Infineon das Recht zur Kündigung einräumen oder die Fortsetzung des Vertrags von der Zustimmung des Vertragspartners abhängig machen.

#### ENTSCHÄDIGUNGSVEREINBARUNGEN FÜR DEN FALL EINES ÜBERNAHMEANGEBOTS

Sofern ein Vorstandsmitglied im Rahmen eines Kontrollwechsels ausscheidet, hat es derzeit Anspruch auf Fortzahlung des Jahreszieleinkommens bis zum Ende der vertraglich vereinbarten Laufzeit, im Fall einer Amtsniederlegung/Kündigung durch das betreffende Vorstandsmitglied jedoch auf mindestens zwei Jahreszieleinkommen beziehungsweise im Fall einer Abberufung/Kündigung durch die Infineon Technologies AG auf mindestens drei Jahreszieleinkommen. Der jeweilige Ruhegehaltsanspruch der Vorstandsmitglieder bleibt bestehen. Diese Ansprüche der Vorstandsmitglieder für den Fall eines Kontrollwechsels bestehen jedoch nur, soweit kein Fall der groben Pflichtverletzung durch das entsprechende Vorstandsmitglied vorliegt. Nähere Einzelheiten hierzu finden sich im Vergütungsbericht. Vergleichbare Regelungen für Arbeitnehmer existieren nicht.

#### ERLÄUTERNDER BERICHT DES VORSTANDS ZU DEN ANGABEN NACH § 315 ABSATZ 4 HGB

Die vorstehend dargestellten Ermächtigungen des Vorstands zur Ausgabe von Options- und/oder Wandelschuldverschreibungen und zur Ausgabe neuer Aktien aus genehmigtem Kapital sollen den Vorstand in die Lage versetzen, zeitnah flexibel und kostengünstig einen auftretenden Kapitalbedarf zu decken und je nach Marktlage attraktive Finanzierungsmöglichkeiten zu nutzen. Die durch die verschiedenen bedingten Kapitalia abgesicherte Ausgabe von Aktienoptionen ist ein sinnvoller und in deutschen Unternehmen üblicher Bestandteil der Vergütung von Mitarbeitern und Organmitgliedern.

Die in der im Jahr 2009 begebenen Wandelschuldverschreibung enthaltene „Change of Control“-Klausel entspricht der bei Finanzierungsvereinbarungen marktüblichen Praxis zum Schutz der Gläubiger. Die Regelungen, die die Infineon Technologies AG im Rahmen ihrer allgemeinen Geschäftstätigkeit mit ihren Vertragspartnern für den Fall eines Kontrollwechsels vereinbart hat, entsprechen ebenfalls marktüblichen Gepflogenheiten.

Die mit den Mitgliedern des Vorstands vereinbarten „Change of Control“-Klauseln sollen dazu dienen, die Vorstandsmitglieder abzusichern und im Falle eines Kontrollwechsels ihre Unabhängigkeit zu erhalten. Diese „Change of Control“-Klauseln sehen vor, dass die Vorstandsmitglieder, wenn sie im Rahmen eines Kontrollwechsels ausscheiden, Anspruch auf Fortzahlung des Jahreszieleinkommens bis zum Ende der vertraglich vereinbarten Laufzeit haben; dies kann im Einzelfall über die vom Corporate Governance Kodex empfohlene Dreijahresgrenze hinausgehen. Die bestehenden Verträge mit den derzeitigen Vorstandsmitgliedern werden jedoch derzeit an das vom Aufsichtsrat am 22. November 2010 beschlossene neue Vergütungssystem für die Mitglieder des Vorstands angepasst. Zukünftig werden alle Vorstandsdienstverträge eine Change-of-Control-Klausel enthalten, die der Empfehlung in Ziffer 4.2.3 Abs. 5 DCGK entspricht.

#### CORPORATE GOVERNANCE BERICHT UND VERGÜTUNGSBERICHT

Der Corporate Governance Bericht, der ein ungeprüfter Bestandteil des Konzernlageberichts ist, ist auf den Seiten 96 – 101 dieses Geschäftsberichts abgedruckt. Der auf den Seiten 102 – 108 abgedruckte Vergütungsbericht ist Bestandteil des Konzernlageberichts.

Neubiberg, im November 2010

Der Vorstand  
**Peter Bauer**  
**Prof. Dr. Hermann Eul**  
**Dr. Reinhard Ploss**

01  
02  
03  
04  
05  
06  
07  
08  
09  
10  
11  
12  
13  
14  
15  
16  
17  
18  
19  
20  
21

# KONZERNABSCHLUSS

## 41 KONZERN-GEWINN-UND-VERLUST-RECHNUNG FÜR DAS AM 30. SEPTEMBER 2010 ENDEnde GESCHÄFTSJAHR IN MIO. €, AUSSER BEI ANGABEN JE AKTIE

|                                                                                                            | Anhang Nr. | 2010         | 2009<br>angepasst <sup>1</sup> |
|------------------------------------------------------------------------------------------------------------|------------|--------------|--------------------------------|
| Umsatzerlöse                                                                                               |            | 3.295        | 2.184                          |
| Umsatzkosten                                                                                               |            | -2.058       | -1.687                         |
| <b>Bruttoergebnis vom Umsatz</b>                                                                           |            | <b>1.237</b> | <b>497</b>                     |
| Forschungs- und Entwicklungskosten                                                                         |            | -399         | -319                           |
| Vertriebskosten und allgemeine Verwaltungskosten                                                           |            | -386         | -332                           |
| Sonstige betriebliche Erträge                                                                              | 8          | 18           | 17                             |
| Sonstige betriebliche Aufwendungen                                                                         | 8          | -122         | -46                            |
| <b>Betriebsergebnis</b>                                                                                    |            | <b>348</b>   | <b>-183</b>                    |
| Finanzerträge                                                                                              | 9          | 29           | 101                            |
| Finanzaufwendungen                                                                                         | 10         | -95          | -154                           |
| Ergebnis von nach der Equity-Methode bilanzierten Beteiligungen                                            | 19         | 8            | 7                              |
| <b>Ergebnis aus fortgeführten Aktivitäten vor Steuern vom Einkommen und vom Ertrag</b>                     |            | <b>290</b>   | <b>-229</b>                    |
| Erträge (Aufwendungen) aus Steuern vom Einkommen und vom Ertrag                                            | 11         | 22           | -4                             |
| <b>Ergebnis aus fortgeführten Aktivitäten</b>                                                              |            | <b>312</b>   | <b>-233</b>                    |
| Ergebnis aus nicht fortgeführten Aktivitäten, abzüglich Steuern vom Einkommen und vom Ertrag               | 6          | 348          | -441                           |
| <b>Konzernjahresüberschuss/-fehlbetrag</b>                                                                 |            | <b>660</b>   | <b>-674</b>                    |
| Davon entfallen auf:                                                                                       |            |              |                                |
| Minderheitsanteile                                                                                         |            | 1            | -48                            |
| Aktionäre der Infineon Technologies AG                                                                     |            | 659          | -626                           |
| <b>Ergebnis je Aktie (in Euro), zurechenbar auf Aktionäre der Infineon Technologies AG – unverwässert:</b> |            |              |                                |
| Ergebnis je Aktie (in Euro) aus fortgeführten Aktivitäten – unverwässert                                   | 12         | 0,29         | -0,27                          |
| Ergebnis je Aktie (in Euro) aus nicht fortgeführten Aktivitäten – unverwässert                             | 12         | 0,32         | -0,46                          |
| <b>Ergebnis je Aktie (in Euro) – unverwässert</b>                                                          | <b>12</b>  | <b>0,61</b>  | <b>-0,73</b>                   |
| <b>Ergebnis je Aktie (in Euro), zurechenbar auf Aktionäre der Infineon Technologies AG – verwässert:</b>   |            |              |                                |
| Ergebnis je Aktie (in Euro) aus fortgeführten Aktivitäten – verwässert                                     | 12         | 0,28         | -0,27                          |
| Ergebnis je Aktie (in Euro) aus nicht fortgeführten Aktivitäten – verwässert                               | 12         | 0,30         | -0,46                          |
| <b>Ergebnis je Aktie (in Euro) – verwässert</b>                                                            | <b>12</b>  | <b>0,58</b>  | <b>-0,73</b>                   |

<sup>1</sup> Die Vorjahreszahlen sind angepasst worden (siehe Konzernanhang Nr. 3).  
Siehe auch die beigegefügte Erläuterungen zu dem Konzernabschluss.

**42 KONZERN-GESAMTERGEBNISRECHNUNG FÜR DAS ZUM 30. SEPTEMBER 2010 ENDENDE GESCHÄFTSJAHR**  
 IN MIO. €

|                                                                                                     | 2010 | 2009<br>angepasst <sup>1</sup> |    |
|-----------------------------------------------------------------------------------------------------|------|--------------------------------|----|
| <b>Konzernjahresüberschuss/-fehlbetrag</b>                                                          | 660  | - 674                          | 01 |
| Fremdwährungsumrechnungsdifferenzen                                                                 | 13   | 185                            | 02 |
| Versicherungsmathematische Gewinne (Verluste) aus Pensionen und ähnlichen Verpflichtungen           | - 92 | - 66                           | 03 |
| Veränderung des beizulegenden Zeitwerts der zur Veräußerung verfügbaren finanziellen Vermögenswerte | 2    | 4                              | 04 |
| Veränderung des beizulegenden Zeitwerts von Sicherungsgeschäften                                    | 10   | 8                              | 05 |
| <b>Sonstiges Ergebnis nach Steuern</b>                                                              | - 67 | 131                            |    |
| <b>Gesamtergebnis nach Steuern</b>                                                                  | 593  | - 543                          |    |
| Davon entfallen auf:                                                                                |      |                                |    |
| Minderheitsanteile                                                                                  | 1    | - 8                            |    |
| Aktionäre der Infineon Technologies AG                                                              | 592  | - 535                          |    |

<sup>1</sup> Die Vorjahreszahlen sind angepasst worden (siehe Konzernanhang Nr. 3).  
 Siehe auch die beigefügten Erläuterungen zu dem Konzernabschluss.

## 43 KONZERN-BILANZ ZUM 30. SEPTEMBER 2010 IN MIO. €

|                        | Anhang Nr. | 30.9.2010    | 30.9.2009<br>angepasst <sup>1</sup> | 01.10.2008<br>angepasst <sup>1</sup> |
|------------------------|------------|--------------|-------------------------------------|--------------------------------------|
| <b>AKTIVA:</b>         |            |              |                                     |                                      |
| <b>Umlaufvermögen:</b> |            |              |                                     |                                      |
| 01                     |            |              |                                     |                                      |
|                        |            |              |                                     |                                      |
| 02                     |            | 1.667        | 1.414                               | 749                                  |
|                        |            |              |                                     |                                      |
| 03                     | 13         | 60           | 93                                  | 134                                  |
|                        |            |              |                                     |                                      |
| 04                     | 14         | 687          | 514                                 | 799                                  |
|                        |            |              |                                     |                                      |
| 04                     | 15         | 514          | 460                                 | 665                                  |
|                        |            |              |                                     |                                      |
|                        |            | 7            | 11                                  | 29                                   |
|                        |            |              |                                     |                                      |
|                        | 16         | 72           | 26                                  | 19                                   |
|                        | 17         | 88           | 114                                 | 124                                  |
|                        | 6          | 495          | 112                                 | 2.129                                |
|                        |            | <b>3.590</b> | <b>2.744</b>                        | <b>4.648</b>                         |
|                        | 18         | 838          | 928                                 | 1.310                                |
| 05                     | 22         | 87           | 369                                 | 443                                  |
|                        | 19         | 35           | 27                                  | 20                                   |
| 06                     | 11         | 308          | 156                                 | 163                                  |
| 07                     | 20         | 119          | 124                                 | 144                                  |
| 08                     | 21         | 16           | 18                                  | 17                                   |
| 09                     |            | <b>4.993</b> | <b>4.366</b>                        | <b>6.745</b>                         |

<sup>1</sup> Die Vorjahreszahlen sind angepasst worden (siehe Konzernanhang Nr. 3).  
Siehe auch die beigefügten Erläuterungen zu dem Konzernabschluss.

11  
12  
13  
14  
15  
16  
17  
18  
19  
20  
21

**44** KONZERN-BILANZ ZUM 30. SEPTEMBER 2010  
IN MIO. €

|                                                                                                                   | Anhang Nr. | 30.9.2010    | 30.9.2009<br>angepasst <sup>1</sup> | 01.10.2008<br>angepasst <sup>1</sup> |    |
|-------------------------------------------------------------------------------------------------------------------|------------|--------------|-------------------------------------|--------------------------------------|----|
| <b>PASSIVA:</b>                                                                                                   |            |              |                                     |                                      |    |
| Kurzfristige Verbindlichkeiten:                                                                                   |            |              |                                     |                                      |    |
| Kurzfristige Finanzverbindlichkeiten sowie kurzfristig fällige Bestandteile langfristiger Finanzverbindlichkeiten | 27         | 133          | 521                                 | 207                                  | 01 |
| Verbindlichkeiten aus Lieferungen und Leistungen und sonstige Verbindlichkeiten                                   | 23         | 665          | 393                                 | 506                                  | 02 |
| Rückstellungen                                                                                                    | 24         | 553          | 436                                 | 424                                  | 03 |
| Ertragsteuerverbindlichkeiten                                                                                     |            | 111          | 102                                 | 87                                   | 04 |
| Sonstige kurzfristige finanzielle Verbindlichkeiten                                                               | 25         | 16           | 50                                  | 63                                   |    |
| Sonstige kurzfristige Verbindlichkeiten                                                                           | 26         | 153          | 147                                 | 263                                  |    |
| Zur Veräußerung stehende Verbindlichkeiten                                                                        | 6          | 177          | 9                                   | 2.123                                |    |
| <b>Summe kurzfristige Verbindlichkeiten</b>                                                                       |            | <b>1.808</b> | <b>1.658</b>                        | <b>3.673</b>                         |    |
| Langfristige Finanzverbindlichkeiten                                                                              | 27         | 263          | 329                                 | 963                                  |    |
| Pensionen und ähnliche Verpflichtungen                                                                            | 35         | 146          | 94                                  | 43                                   | 05 |
| Passive latente Steuern                                                                                           | 11         | 11           | 13                                  | 19                                   | 06 |
| Langfristige Rückstellungen                                                                                       | 24         | 55           | 89                                  | 27                                   |    |
| Sonstige finanzielle Verbindlichkeiten                                                                            | 28         | 6            | 5                                   | 20                                   | 07 |
| Sonstige Verbindlichkeiten                                                                                        | 29         | 79           | 85                                  | 76                                   | 08 |
| <b>Summe Verbindlichkeiten</b>                                                                                    |            | <b>2.368</b> | <b>2.273</b>                        | <b>4.821</b>                         | 09 |
| Eigenkapital:                                                                                                     |            |              |                                     |                                      |    |
| Grundkapital                                                                                                      | 30         | 2.173        | 2.173                               | 1.499                                | 10 |
| Zusätzlich eingezahltes Kapital (Kapitalrücklage)                                                                 |            | 6.048        | 6.048                               | 6.008                                |    |
| Verlustvortrag                                                                                                    |            | -5.613       | -6.180                              | -5.489                               |    |
| Andere Rücklagen                                                                                                  |            | 17           | -8                                  | -164                                 |    |
| <b>Summe Eigenkapital der Aktionäre der Infineon Technologies AG</b>                                              |            | <b>2.625</b> | <b>2.033</b>                        | <b>1.854</b>                         | 11 |
| Minderheitsanteile                                                                                                |            | -            | 60                                  | 70                                   | 12 |
| <b>Summe Eigenkapital</b>                                                                                         |            | <b>2.625</b> | <b>2.093</b>                        | <b>1.924</b>                         | 13 |
| <b>Summe Passiva</b>                                                                                              |            | <b>4.993</b> | <b>4.366</b>                        | <b>6.745</b>                         | 14 |

<sup>1</sup> Die Vorjahreszahlen sind angepasst worden (siehe Konzernanhang Nr. 3).  
Siehe auch die beigefügten Erläuterungen zu dem Konzernabschluss.

## 45 KONZERN-KAPITALFLUSSRECHNUNG FÜR DAS AM 30. SEPTEMBER 2010 ENDEnde GESCHÄFTSJAHR IN MIO. €

|                                                                                                                                               | 2010        | 2009<br>angepasst <sup>1</sup> |
|-----------------------------------------------------------------------------------------------------------------------------------------------|-------------|--------------------------------|
| <b>Konzernjahresüberschuss/-fehlbetrag</b>                                                                                                    | <b>660</b>  | <b>- 674</b>                   |
| 01 Abzüglich: Ergebnis aus nicht fortgeführten Aktivitäten, abzüglich Steuern von Einkommen und vom Ertrag                                    | - 348       | 441                            |
| 02 Anpassungen zur Überleitung des Konzernjahresüberschusses/-fehlbetrags auf den Mittelzufluss/-abfluss<br>aus laufender Geschäftstätigkeit: |             |                                |
| 03 Planmäßige Abschreibungen                                                                                                                  | 336         | 453                            |
| 04 Wertberichtigungen auf Forderungen                                                                                                         | 3           | - 7                            |
| Verluste (Gewinne) aus dem Verkauf von zur Veräußerung verfügbaren finanziellen Vermögenswerten                                               | - 2         | 3                              |
| Verluste (Gewinne) aus dem Verkauf von Geschäftsaktivitäten und Anteilen an Tochterunternehmen                                                | - 3         | 16                             |
| Verluste im Zusammenhang mit der Entkonsolidierung von ALTIS                                                                                  | 55          | -                              |
| Verluste (Gewinne) aus dem Abgang von Sachanlagen                                                                                             | - 3         | 1                              |
| Anteiliges Ergebnis von nach der Equity-Methode bilanzierten Beteiligungen                                                                    | - 8         | - 7                            |
| Dividende von assoziierten Unternehmen                                                                                                        | 7           | -                              |
| 05 Außerplanmäßige Abschreibungen                                                                                                             | 12          | 1                              |
| 06 Aktienbasierte Vergütung                                                                                                                   | -           | 2                              |
| 07 Latente Steuern                                                                                                                            | - 68        | - 3                            |
| Veränderungen des Nettoumlaufvermögens:                                                                                                       |             |                                |
| 08 Forderungen aus Lieferungen und Leistungen und sonstige Forderungen                                                                        | - 151       | 149                            |
| 09 Vorräte                                                                                                                                    | - 42        | 134                            |
| 10 Sonstige kurzfristige Vermögenswerte                                                                                                       | 16          | - 10                           |
| Verbindlichkeiten aus Lieferungen und Leistungen und sonstige Verbindlichkeiten                                                               | 272         | - 83                           |
| Rückstellungen                                                                                                                                | 96          | - 105                          |
| Sonstige kurzfristige Verbindlichkeiten                                                                                                       | 134         | - 24                           |
| Sonstige Vermögenswerte und Verbindlichkeiten                                                                                                 | 60          | 7                              |
| 11 Erhaltene Zinsen                                                                                                                           | 13          | 21                             |
| 12 Gezahlte Zinsen                                                                                                                            | - 44        | - 49                           |
| 13 Erhaltene (gezahlte) Steuern vom Einkommen und vom Ertrag                                                                                  | - 37        | 16                             |
| <b>Mittelzufluss aus laufender Geschäftstätigkeit aus fortgeführten Aktivitäten</b>                                                           | <b>958</b>  | <b>282</b>                     |
| <b>Mittelabfluss aus laufender Geschäftstätigkeit aus nicht fortgeführten Aktivitäten</b>                                                     | <b>- 11</b> | <b>- 394</b>                   |
| <b>Mittelzufluss/-abfluss aus laufender Geschäftstätigkeit</b>                                                                                | <b>947</b>  | <b>- 112</b>                   |

16

<sup>1</sup> Die Vorjahreszahlen sind angepasst worden (siehe Konzernanhang Nr. 3).  
Siehe auch die beigefügten Erläuterungen zu dem Konzernabschluss.

17

18

19

20

21

**46** KONZERN-KAPITALFLUSSRECHNUNG FÜR DAS AM 30. SEPTEMBER 2010 ENDEnde GESCHÄFTSJAHR  
IN MIO. €

|                                                                                                  | 2010         | 2009<br>angepasst <sup>1</sup> |    |
|--------------------------------------------------------------------------------------------------|--------------|--------------------------------|----|
| <b>Mittelabfluss/-zufluss aus Investitionstätigkeit:</b>                                         |              |                                |    |
| Auszahlungen für zur Veräußerung verfügbare finanzielle Vermögenswerte                           | - 375        | - 31                           | 01 |
| Einzahlungen aus zur Veräußerung verfügbaren finanziellen Vermögenswerten                        | 405          | 64                             | 02 |
| Einzahlungen aus dem Verkauf von Geschäftsaktivitäten und Anteilen an Tochterunternehmen         | 2            | 4                              |    |
| Rückgang der Zahlungsmittel auf Grund der Entkonsolidierung von ALTIS                            | - 88         | -                              | 03 |
| Auszahlungen für immaterielle Vermögenswerte und sonstige Vermögenswerte                         | - 33         | - 18                           | 04 |
| Auszahlungen für Sachanlagen                                                                     | - 292        | - 97                           |    |
| Einzahlungen aus dem Abgang von Sachanlagen und sonstigen Vermögenswerten                        | 26           | 103                            |    |
| <b>Mittelzufluss/-abfluss aus Investitionstätigkeit aus fortgeführten Aktivitäten</b>            | <b>- 355</b> | <b>25</b>                      |    |
| <b>Mittelzufluss/-abfluss aus Investitionstätigkeit aus nicht fortgeführten Aktivitäten</b>      | <b>147</b>   | <b>- 12</b>                    |    |
| <b>Mittelzufluss/-abfluss aus Investitionstätigkeit</b>                                          | <b>- 208</b> | <b>13</b>                      |    |
| <b>Mittelzufluss/-abfluss aus der Finanzierungstätigkeit:</b>                                    |              |                                |    |
| Veränderung der Finanzforderungen und -verbindlichkeiten von nahestehenden Unternehmen           | 1            | - 1                            | 05 |
| Erhöhung langfristiger Verbindlichkeiten                                                         | 4            | 182                            | 06 |
| Rückzahlungen langfristiger Verbindlichkeiten                                                    | - 493        | - 455                          |    |
| Veränderung der als Sicherheitsleistungen hinterlegten liquiden Mittel                           | 1            | - 7                            | 07 |
| Einzahlungen aus Ausgabe von Aktien                                                              | -            | 680                            | 08 |
| Dividendenzahlungen an nicht beherrschende Gesellschafter                                        | -            | - 3                            | 09 |
| Kapitaleinlagen                                                                                  | -            | - 5                            |    |
| <b>Mittelzufluss/-abfluss aus der Finanzierungstätigkeit aus fortgeführten Aktivitäten</b>       | <b>- 487</b> | <b>391</b>                     | 10 |
| <b>Mittelzufluss/-abfluss aus der Finanzierungstätigkeit aus nicht fortgeführten Aktivitäten</b> | <b>-</b>     | <b>- 40</b>                    |    |
| <b>Mittelzufluss/-abfluss aus der Finanzierungstätigkeit</b>                                     | <b>- 487</b> | <b>351</b>                     |    |
| Veränderung der Zahlungsmittel und Zahlungsmitteläquivalente                                     | 252          | 252                            |    |
| Währungsumrechnungseffekte auf Zahlungsmittel und Zahlungsmitteläquivalente                      | 1            | - 8                            | 11 |
| Zahlungsmittel und Zahlungsmitteläquivalente am Periodenanfang <sup>2</sup>                      | 1.414        | 1.170                          | 12 |
| <b>Zahlungsmittel und Zahlungsmitteläquivalente am Periodenende</b>                              | <b>1.667</b> | <b>1.414</b>                   | 13 |

1 Die Vorjahreszahlen sind angepasst worden (siehe Konzernanhang Nr. 3).

2 Von den € 1.170 Millionen zum 30. September 2008 sind € 421 Millionen von Qimonda als „zur Veräußerung stehend“ ausgewiesen worden. Siehe auch die beigefügten Erläuterungen zu dem Konzernabschluss.

**47** KONZERN-EIGENKAPITAL-VERÄNDERUNGSRECHNUNG FÜR DAS AM 30. SEPTEMBER 2010 ENDEnde GESCHÄFTSJAHR  
IN MIO. €, AUSSER ANZAHL DER AKTIEN

|                                                             | Ausgegebene Stückaktien |              | Zusätzlich eingezahltes<br>Kapital (Kapitalrücklage) |
|-------------------------------------------------------------|-------------------------|--------------|------------------------------------------------------|
|                                                             | Anzahl                  | Betrag       |                                                      |
| 01 <b>Konzern-Bilanz zum 1. Oktober 2008 (berichtet)</b>    | 749.742.085             | 1.499        | 6.008                                                |
| 02 Anpassung gemäß IAS 8                                    | -                       | -            | -                                                    |
| 03 <b>Konzern-Bilanz zum 1. Oktober 2008 (angepasst)</b>    | 749.742.085             | 1.499        | 6.008                                                |
| 04 Konzernjahresfehlbetrag                                  | -                       | -            | -                                                    |
| Sonstiges Ergebnis nach Steuern                             | -                       | -            | -                                                    |
| Gesamtergebnis nach Steuern                                 | -                       | -            | -                                                    |
| Ausgabe von auf den Namen lautenden Stückaktien:            |                         |              |                                                      |
| Einnahmen aus der Ausgabe von Aktien                        | 337.000.000             | 674          | 6                                                    |
| Aktienbasierte Vergütungen                                  | -                       | -            | 3                                                    |
| Sonstige Eigenkapitalveränderungen                          | -                       | -            | 31                                                   |
| 05 <b>Konzern-Bilanz zum 30. September 2009 (angepasst)</b> | 1.086.742.085           | 2.173        | 6.048                                                |
| 06 Konzernjahresüberschuss                                  | -                       | -            | -                                                    |
| 07 Sonstiges Ergebnis nach Steuern                          | -                       | -            | -                                                    |
| 08 Gesamtergebnis nach Steuern                              | -                       | -            | -                                                    |
| 09 Entkonsolidierung von ALTIS                              | -                       | -            | -                                                    |
| <b>Konzern-Bilanz zum 30. September 2010</b>                | <b>1.086.742.085</b>    | <b>2.173</b> | <b>6.048</b>                                         |

Siehe auch die beigefügten Erläuterungen zu dem Konzernabschluss.

11  
12  
13  
14  
15  
16  
17  
18  
19  
20  
21



| Verlustvortrag | Andere Rücklagen                         |                                                          |                                                                     | Summe Eigenkapital der Aktionäre der Infineon Technologies AG | Minderheitsanteile | Gesamt |
|----------------|------------------------------------------|----------------------------------------------------------|---------------------------------------------------------------------|---------------------------------------------------------------|--------------------|--------|
|                | Fremdwährungs-<br>umrechnungsdifferenzen | Nicht realisierte Gewinne<br>(Verluste) aus Wertpapieren | Nicht realisierte<br>Gewinne (Verluste) aus<br>Sicherungsgeschäften |                                                               |                    |        |
| - 5.252        | - 142                                    | - 3                                                      | - 19                                                                | 2.091                                                         | 70                 | 2.161  |
| - 237          | -                                        | -                                                        | -                                                                   | - 237                                                         | -                  | - 237  |
| - 5.489        | - 142                                    | - 3                                                      | - 19                                                                | 1.854                                                         | 70                 | 1.924  |
| - 626          | -                                        | -                                                        | -                                                                   | - 626                                                         | - 48               | - 674  |
| - 65           | 145                                      | 4                                                        | 7                                                                   | 91                                                            | 40                 | 131    |
| - 691          | 145                                      | 4                                                        | 7                                                                   | - 535                                                         | - 8                | - 543  |
| -              | -                                        | -                                                        | -                                                                   | 680                                                           | -                  | 680    |
| -              | -                                        | -                                                        | -                                                                   | 3                                                             | -                  | 3      |
| -              | -                                        | -                                                        | -                                                                   | 31                                                            | - 2                | 29     |
| - 6.180        | 3                                        | 1                                                        | - 12                                                                | 2.033                                                         | 60                 | 2.093  |
| 659            | -                                        | -                                                        | -                                                                   | 659                                                           | 1                  | 660    |
| - 92           | 13                                       | 2                                                        | 10                                                                  | - 67                                                          | -                  | - 67   |
| 567            | 13                                       | 2                                                        | 10                                                                  | 592                                                           | 1                  | 593    |
| -              | -                                        | -                                                        | -                                                                   | -                                                             | - 61               | - 61   |
| - 5.613        | 16                                       | 3                                                        | - 2                                                                 | 2.625                                                         | -                  | 2.625  |

01  
02  
03  
04  
05  
06  
07  
08  
09  
10  
11  
12  
13  
14  
15  
16  
17  
18  
19  
20  
21

# ANHANG ZUM KONZERNABSCHLUSS

## 1 / BESCHREIBUNG DER GESCHÄFTSTÄTIGKEIT UND GRUNDLAGEN DER DARSTELLUNG

### BESCHREIBUNG DER GESCHÄFTSTÄTIGKEIT

Die Infineon Technologies AG und ihre Tochtergesellschaften („Infineon“ oder „die Gesellschaft“) entwerfen, entwickeln, produzieren und vermarkten ein breites Spektrum an Halbleiterprodukten und kompletten Systemlösungen. Diese werden in einer Vielzahl mikroelektronischer Anwendungen eingesetzt, wie Computersystemen, Telekommunikationssystemen, Konsumgütern, Produkten der Automobilindustrie und der industriellen Automatisierungs- und Steuerungstechnik sowie in Chipkarten. Das Produktspektrum der Gesellschaft umfasst Standardkomponenten, kundenspezifische Teil- oder Komplettlösungen sowie spezifische Bauelemente für Speicher-, Analog-, Digital- und Mixed-Signal-Anwendungen. Fertigungsstätten, Beteiligungen und Kunden der Gesellschaft befinden sich hauptsächlich in Europa, Asien und Nordamerika.

Die Gesellschaft hat ihren Firmensitz Am Campeon 1 – 12, 85579 Neubiberg, Deutschland und ist im Handelsregister des Amtsgerichts München unter der Registernummer HRB 126492 eingetragen.

### GRUNDLAGEN DER DARSTELLUNG

Der Konzernabschluss wurde gemäß den vom International Accounting Standards Board („IASB“) erlassenen International Financial Reporting Standards („IFRS“) und den diesbezüglichen Interpretationen, die zum 30. September 2010 anzuwenden waren, soweit die IFRS und Interpretationen von der Europäischen Union („EU“) übernommen sind, sowie gemäß den Anforderungen nach § 315a Absatz 1 des Handelsgesetzbuches („HGB“) erstellt. Das Geschäftsjahr der Gesellschaft endet zum 30. September.

Am 22. November 2010 hat der Vorstand der Gesellschaft den Konzernabschluss aufgestellt und zur Vorlage an den Aufsichtsrat der Gesellschaft freigegeben.

Alle in diesem Konzernabschluss gezeigten Beträge lauten in Euro („€“), außer wenn anders angegeben.

Abweichungen von Betragsangaben untereinander sind auf Grund von Rundungen möglich.

## 2 / BILANZIERUNG UND BEWERTUNG

Bei der Erstellung des Konzernabschlusses wurden im Wesentlichen die folgenden Bilanzierungs- und Bewertungsgrundsätze zugrunde gelegt.

### KONSOLIDIERUNGSGRUNDSÄTZE

Der Konzernabschluss bezieht, einschließlich der Infineon Technologies AG und der Gesellschaften, die zur Veräußerung stehen, die folgende Zahl von Unternehmen im Geschäftsjahr 2010 und 2009 ein:

|                           | Vollkonsolidierte Unternehmen | Nach der Equity-Methode bilanzierte Unternehmen | Gesamt |
|---------------------------|-------------------------------|-------------------------------------------------|--------|
| <b>30. September 2008</b> | 73                            | 7                                               | 80     |
| Zugänge                   | –                             | –                                               | –      |
| Abgänge                   | –33                           | –5                                              | –38    |
| <b>30. September 2009</b> | 40                            | 2                                               | 42     |
| Zugänge                   | 2                             | 2                                               | 4      |
| Abgänge                   | –2                            | –1                                              | –3     |
| <b>30. September 2010</b> | 40                            | 3                                               | 43     |

### KONSOLIDIERUNGSKREIS

Der vorliegende Konzernabschluss umfasst auf konsolidierter Basis die Einzelabschlüsse der Infineon Technologies AG und ihrer Tochtergesellschaften, die sie unmittelbar oder mittelbar beherrscht. Beherrschung ist die Möglichkeit, die Finanz- und Geschäftspolitik eines Unternehmens zu bestimmen, um aus dessen Tätigkeit Nutzen zu ziehen, und ergibt sich grundsätzlich aus der Verfügungsgewalt über die Mehrheit der Stimmrechte. Bei der Beurteilung, ob ein Unternehmen ein anderes beherrscht, sind die Existenz und die Auswirkung potenzieller Stimmrechte zu berücksichtigen. Darüber hinaus werden Zweckgesellschaften (sogenannte „Special Purpose Entities“ oder „SPEs“) gemäß der Standing Interpretations Committee („SIC“) Interpretation 12, „Consolidation – Special Purpose Entities“, konsolidiert, sofern die Gesellschaft, wirtschaftlich betrachtet, die SPE beherrscht.

Die Auswirkungen sämtlicher wesentlicher konzerninterner Transaktionen wurden im Rahmen der Konsolidierung eliminiert.

Die Gesellschaft entkonsolidiert ein Tochterunternehmen zu dem Zeitpunkt, zu dem die Beherrschung der Finanz- und Geschäftspolitik verloren geht und kein Nutzen mehr aus der Tätigkeit des Tochterunternehmens gezogen werden kann, zum Beispiel durch den vollständigen oder teilweisen Verkauf der Anteile an einem Tochterunternehmen. Des Weiteren kann die Gesellschaft die Beherrschung über ein Tochterunternehmen verlieren, wenn dieses zum Beispiel Gegenstand eines Insolvenzverfahrens ist.

**NACH DER EQUITY-METHODE BILANZIERTE BETEILIGUNGEN**

Die Gesellschaft wendet die Equity-Methode an, um ihre Beteiligungen an assoziierten Unternehmen und Joint Ventures (wie unten definiert) zu bilanzieren (zusammen: „Nach der Equity-Methode bilanzierte Beteiligungen“ siehe Anhang Nr. 19):

**(A) ASSOZIIERTE UNTERNEHMEN**

Ein „assoziiertes Unternehmen“ ist ein Unternehmen, bei welchem die Gesellschaft über maßgeblichen Einfluss, nicht jedoch über die Möglichkeit der Beherrschung der finanz- und geschäftspolitischen Entscheidungen verfügt. Ein maßgeblicher Einfluss wird regelmäßig vermutet, wenn die Gesellschaft zwischen 20 und 50 Prozent der Stimmrechte hält.

**(B) JOINT VENTURES**

Ein „Joint Venture“ beruht auf einer vertraglichen Vereinbarung, nach der zwei oder mehr Partner eine wirtschaftliche Tätigkeit durchführen, die der gemeinschaftlichen Führung unterliegt. Anteile an Joint Ventures werden nach der Equity-Methode bilanziert.

**Equity-Methode**

Nach der Equity-Methode werden die Beteiligungen der Gesellschaft an assoziierten Unternehmen und Joint Ventures zunächst mit ihren Anschaffungskosten angesetzt und nachfolgend um den Anteil der Gesellschaft an dem nach der Akquisition angefallenen Gewinn (Verlust) oder an sonstigen Reinvermögensänderungen des betreffenden assoziierten Unternehmens oder Joint Ventures erhöht (vermindert). Ein Geschäfts- oder Firmenwert, der bei der Akquisition eines assoziierten Unternehmens oder eines Joint Venture entsteht, ist im Buchwert der Beteiligung (abzüglich aufgelaufener Aufwendungen für Wertminderungen) enthalten. Übersteigen die Wertminderungen den Buchwert der jeweiligen Beteiligung, werden andere Vermögenswerte der Gesellschaft, die im Zusammenhang mit dem Beteiligungsunternehmen stehen, abgeschrieben. Sollten diese anderen Vermögenswerte vollständig abgeschrieben sein, ist zu prüfen, ob zusätzliche Verluste zu erfassen sind, weil die Gesellschaft verpflichtet ist, diese auszugleichen.

Gewinne und Verluste aus Transaktionen zwischen der Gesellschaft und einem Unternehmen, an dem die Gesellschaft eine nach der Equity-Methode bilanzierte Beteiligung hält, werden entsprechend dem Anteil der Gesellschaft an dem jeweiligen Unternehmen eliminiert.

Soweit das Geschäftsjahresende des Unternehmens, an dem die Gesellschaft eine nach der Equity-Methode bilanzierte Beteiligung hält, um nicht mehr als drei Monate vom Geschäftsjahresende der Gesellschaft abweicht, wird der Anteil der Gesellschaft am Periodenergebnis des entsprechenden Unternehmens zeitversetzt erfasst.

Gewinne und Verluste durch die Ausgabe von Aktien durch ein Unternehmen, an dem die Gesellschaft eine nach der Equity-Methode bilanzierte Beteiligungen hält, und die zu Veränderungen des Anteils der Gesellschaft am Reinvermögen des entsprechenden Unternehmens führen, werden in der Gewinn- und Verlust-Rechnung erfasst.

Sonstige Beteiligungen, an denen die Gesellschaft weniger als 20 Prozent hält, werden zu Anschaffungskosten bilanziert, sofern der beizulegende Zeitwert nicht verlässlich bestimmbar ist.

**BERICHTSWÄHRUNG UND WÄHRUNGSUMRECHNUNG**

Die Währung des primären Wirtschaftsumfelds, in dem die Infineon Technologies AG tätig ist, und sogenannte funktionale Währung ist der Euro. Die Berichtswährung der Gesellschaft ist ebenfalls der Euro. Der Konzernabschluss wird entsprechend in Euro aufgestellt.

Fremdwährungstransaktionen werden zu dem am Tag des Geschäftsvorfalles geltenden Wechselkurs in die funktionale Währung umgerechnet. Kursgewinne und -verluste, die aus der Abwicklung solcher Transaktionen sowie durch die Umrechnung monetärer Vermögenswerte und Verbindlichkeiten, die auf Fremdwährungen lauten, zum Stichtagskurs am Bilanzstichtag entstehen, werden in der Konzern-Gewinn- und Verlust-Rechnung erfasst.

Die Vermögenswerte und Schulden ausländischer Tochtergesellschaften, deren funktionale Währung nicht der Euro ist, werden mit dem Kurs zum Ende des Berichtszeitraums in Euro umgerechnet. Erträge und Aufwendungen dieser Gesellschaften werden, soweit die Wechselkurse nicht beträchtlich schwanken, mit dem durchschnittlichen Wechselkurs des Berichtszeitraums umgerechnet. Unterschiede aus der Umrechnung von Vermögenswerten und Schulden, die aus zu den Vorjahren abweichenden Wechselkursen resultieren, werden innerhalb des Postens „Andere Rücklagen“ im Eigenkapital ausgewiesen.

Nachfolgend sind die bei der Erstellung des Konzernabschlusses verwendeten Wechselkurse (€ 1,00 in Fremdwährungseinheiten) für die wesentlichen Währungen in Euro aufgeführt:

| € 1,00 in Fremdwährungseinheiten | Stichtagskurs      |                    | Jahresdurchschnittskurs |          |
|----------------------------------|--------------------|--------------------|-------------------------|----------|
|                                  | 30. September 2010 | 30. September 2009 | 2010                    | 2009     |
| US-Dollar                        | 1,3611             | 1,4549             | 1,3476                  | 1,3593   |
| Japanischer Yen                  | 113,8500           | 130,9100           | 120,1646                | 128,8580 |

## SEGMENTBERICHTERSTATTUNG

IFRS 8, „Operating Segments“, verpflichtet ein Unternehmen zur finanziellen und erläuternden Berichterstattung bezüglich seiner berichtspflichtigen Segmente. Berichtspflichtige Segmente sind Geschäftssegmente oder Zusammenfassungen von Geschäftssegmenten, die bestimmte Anforderungen erfüllen. Geschäftssegmente sind Unternehmensbereiche, für die separate Finanzinformationen verfügbar sind, welche von den oder dem Hauptentscheidungsträger der Gesellschaft („Chief Operating Decision Maker“ beziehungsweise „CODM“) regelmäßig im Hinblick auf die Allokation von Ressourcen und die Bewertung der Ertragskraft analysiert werden. Grundsätzlich sind Finanzinformationen so zu berichten, wie sie auch zur internen Steuerung verwendet werden, zur Beurteilung der Ertragskraft eines Geschäftssegments sowie zur Zuteilung von Ressourcen zu diesem Segment. Jedes dieser Segmente wird von zwei Bereichsleitern geführt, der direkt dem Vorstand der Gesellschaft berichtet. Der Vorstand wurde dementsprechend als CODM identifiziert.

## UMSATZREALISIERUNG

Umsatzerlöse resultieren aus dem Verkauf von Produkten und der Erbringung von Leistungen im Rahmen der gewöhnlichen Geschäftstätigkeit der Gesellschaft. Die Bewertung basiert auf dem beizulegenden Zeitwert der erhaltenen Gegenleistung.

## UMSATZERLÖSE

Die Gesellschaft erwirtschaftet Umsatzerlöse durch den Verkauf ihrer Halbleiterprodukte und Systemlösungen. Die Halbleiterprodukte der Gesellschaft beinhalten ein weites Spektrum von Chips und Komponenten, die in elektronischen Applikationen für Fahrzeugelektronik über Industrieanwendungen bis hin zu Chipkarten zum Einsatz kommen. Zusätzlich erwirtschaftet die Gesellschaft einen kleinen Teil ihrer Umsätze aus der Gewährung von Lizenzen für ihre Schutz- und Urheberrechte. Zu einem geringen Anteil erwirtschaftet die Gesellschaft außerdem Umsätze aus Entwicklungs- oder Produktverbesserungsvereinbarungen.

Umsatzerlöse aus Produktverkäufen werden gemäß IAS 18, „Revenue“, erfasst, wenn die Voraussetzungen zur Umsatzrealisierung erfüllt sind. IAS 18 erfordert insbesondere, dass der Nachweis einer Vereinbarung vorliegt, die Lieferung erfolgt ist beziehungsweise die Leistung ausgeführt wurde, die Chancen und Risiken, die mit dem Eigentum verbunden sind, auf den Käufer übergegangen sind, die Höhe der Erlöse verlässlich bestimmt werden kann und die Zahlung durch den Kunden hinreichend wahrscheinlich ist.

Die Gesellschaft realisiert bei Verkäufen an Großhändler den Umsatz grundsätzlich, wenn das Produkt an den Großhändler verkauft wird (sogenannte „sell in“-Methode). Gemäß der üblichen Vorgehensweise in der Halbleiterindustrie können Großhändler unter bestimmten Umständen eine Preisabsicherung verlangen. Preisabsicherungen ermöglichen

den Großhändlern, eine Gutschrift für noch nicht verkaufte Vorräte zu beantragen, wenn die Gesellschaft die Standardlistenpreise für solche Produkte reduziert hat. Zusätzlich kann ein Großhändler eine sogenannte „Ship-and-debit“-Gutschrift verlangen, falls dieser den Verkaufspreis für einen bestimmten Verkauf an einen Endkunden reduzieren möchte. Die Entscheidung über die Genehmigung einer solchen Gutschrift an den Großhändler liegt ausschließlich bei der Gesellschaft. Die Gesellschaft ermittelt die Rückstellung für Preisabsicherung in der Periode, in der der relevante Umsatz gelegt wird, auf Basis eines rollierenden historischen Preistrends, von Verkaufsrabatten, der Prüfung der Kreditwürdigkeit, von speziellen Ausführungen der Preissicherungsvereinbarung und von anderen zu diesem Zeitpunkt bekannten Faktoren. Der historische Preistrend wird ermittelt als die Differenz zwischen den in Rechnung gestellten Preisen und den Standardlistenpreisen für den Großhändler. Auf Grund der Umschlagshäufigkeit der Vorräte, der Transparenz der allgemeinen Preisbildung für Vorratsvermögen von Standardprodukten sowie der langjährigen Erfahrung der Preisbildung mit Großhändlern ist die Gesellschaft in der Lage, die Rückstellung für Preisabsicherung zum Periodenende verlässlich zu schätzen. Die Gesellschaft überwacht fortwährend mögliche Preisanpassungen.

Weiterhin können die Großhändler unter bestimmten Voraussetzungen Bestände gegen gleiche oder andere Produkte umtauschen („Warenrotation“) oder Verwurfsgutschriften verlangen. Gutschriften werden auf Grundlage der erwarteten Warenrotation gemäß den vertraglichen Vereinbarungen abgegrenzt. Verwurfsgutschriften werden entsprechend den vertraglichen Vereinbarungen abgegrenzt und bei berechtigtem Anspruch bis zur Höhe eines bestimmten Maximalbetrags des durchschnittlichen Warenbestands werts gewährt. In der Vergangenheit waren derartige Rückgaben dem Betrag nach unwesentlich. Die Gesellschaft überwacht fortwährend derartige Rückgaben.

Teilweise werden mit bestimmten Kunden oder Großhändlern Rabatte vereinbart, welche bei Erreichung bestimmter Umsatzgrenzen gewährt werden. Fallweise erhalten die Kunden oder Großhändler auch für gemeinsam festgelegte Werbemaßnahmen eine Erstattung.

Andere Warenrückgaben sind nur innerhalb der regulären Gewährleistungsfrist auf Grund von Qualitätsmängeln zulässig. Die Gesellschaft bildet Rückstellungen für Gewährleistungsgarantien auf der Grundlage von Erfahrungswerten sowie auf Grund vorliegender Kenntnisse über andere Gewährleistungskosten und erfasst den Aufwand in den Umsatzkosten.

## LIZENZERTRÄGE

Lizenerträge werden vereinnahmt, wenn die Leistung erbracht ist. Erhaltene Einmalzahlungen sind in der Regel nicht zurückzahlbar; sie werden, soweit erforderlich, entsprechend abgegrenzt und über den Zeitraum der künftigen Leistungserbringung vereinnahmt.

Gemäß IAS 18 werden Umsatzerlöse aus Verträgen mit mehreren Bestandteilen in Höhe des beizulegenden Zeitwerts eines jeden Bestandteils dann realisiert, wenn es keine nicht gelieferten Elemente gibt, die für die Funktionsfähigkeit der gelieferten Bestandteile von Bedeutung sind, und die Bezahlung nicht von der Lieferung der noch ausstehenden Bestandteile abhängt. Solche Verträge mit mehreren Bestandteilen sind selten, und die Umsatzerlöse aus solchen Verträgen unwesentlich.

Stücklizenzgebühren werden zum Realisierungszeitpunkt erfolgswirksam vereinnahmt.

### FORSCHUNGS- UND ENTWICKLUNGSKOSTEN

Die Kosten für Forschungsaktivitäten, die unternommen werden, um zu neuen wissenschaftlichen oder technischen Erkenntnissen zu gelangen, werden als Aufwand erfasst.

Die Kosten für Entwicklungsaktivitäten, bei denen die Ergebnisse in einen Plan oder einen Entwurf für die Produktion von neuen oder deutlich verbesserten Produkten oder für verbesserte Prozesse umgesetzt werden, werden aktiviert. Voraussetzung der Aktivierung ist, dass die Entwicklungskosten verlässlich ermittelt werden können, das Produkt oder der Prozess technisch und wirtschaftlich realisierbar sowie zukünftiger Nutzen wahrscheinlich ist. Darüber hinaus muss die Gesellschaft die Absicht haben und über ausreichende Ressourcen verfügen, die Entwicklung abzuschließen und den Vermögenswert zu nutzen oder zu verkaufen. Die aktivierten Kosten umfassen die Materialkosten, die Fertigungslöhne und die direkt zurechenbaren Gemeinkosten, soweit diese dazu dienen, die Nutzung des Vermögenswerts vorzubereiten. Die aktivierten Kosten sind als selbst erstellte immaterielle Vermögenswerte in dem Bilanzposten „Geschäfts- oder Firmenwert und andere immaterielle Vermögenswerte“ enthalten (siehe Anhang Nr. 22). Entwicklungskosten, welche die Aktivierungsvoraussetzungen nicht erfüllen, werden als Aufwand erfasst. Die aktivierten Entwicklungskosten werden zu Herstellungskosten abzüglich kumulierter Abschreibungen und Wertminderungen bewertet. Selbst erstellte Vermögenswerte werden als Teil der Umsatzkosten über einen Zeitraum von drei bis fünf Jahren abgeschrieben.

Aktivierte Entwicklungskosten werden einem jährlichen Wertminderungstest unterzogen, sofern sie noch nicht der planmäßigen Abschreibung unterliegen.

### ZUSCHÜSSE UND ZULAGEN

Fördergelder für Investitionen beinhalten steuerfreie Investitionszulagen und zu versteuernde Investitionszuschüsse für Sachanlagen. Fördermittel werden zu dem Zeitpunkt erfasst, zu dem es hinreichend sichergestellt ist, dass einerseits die Gesellschaft die Förderbedingungen erfüllt und andererseits die Fördermittel ausgezahlt werden. Steuerfreie Investitionszulagen werden passivisch abgegrenzt und erfolgswirksam über die verbleibende Nutzungsdauer der geförderten

Sachanlagen vereinnahmt. Zu versteuernde Investitionszuschüsse werden von den Anschaffungs- und Herstellungskosten abgesetzt und reduzieren damit die Abschreibungen der künftigen Perioden. Zuschüsse und Zulagen zu Aufwendungen werden mit der entsprechenden Aufwandsposition in der Konzern-Gewinn- und -Verlust-Rechnung verrechnet (siehe Anhang Nr. 7).

### AKTIENBASIERTE VERGÜTUNG

Die Gesellschaft unterhält Aktienoptionspläne, die einen Ausgleich durch Eigenkapitalinstrumente vorsehen.

Der beizulegende Zeitwert der Arbeitnehmerleistungen, welche die Gesellschaft als Gegenleistung für die gewährten Aktienoptionen erhält, wird als Aufwand erfasst. Der Gesamtaufwand während des Ausübungszeitraums wird unter Bezugnahme auf den beizulegenden Zeitwert der Optionen zum Zeitpunkt der Gewährung unter Ausschluss marktunabhängiger Ausübungsbedingungen ermittelt. Die marktunabhängigen Ausübungsbedingungen werden in den Annahmen hinsichtlich der Anzahl der erwarteten ausübenden Optionen berücksichtigt. Zu den Bilanzstichtagen überprüft die Gesellschaft ihre Schätzungen der Anzahl der Optionen, die voraussichtlich ausübbar werden. Die Gesellschaft erfasst die Auswirkung dieser Überprüfungen in der Gewinn- und -Verlust-Rechnung unter entsprechender Anpassung des Eigenkapitals.

Der Mittelzufluss aus der Ausübung von Aktienoptionen wird zum Zeitpunkt der Ausübung abzüglich der direkt zurechenbaren Transaktionskosten im Grundkapital sowie in der Kapitalrücklage erfasst.

### FINANZINSTRUMENTE

Gemäß IAS 32, „Financial Instruments: Presentation“, ist ein Finanzinstrument definiert als ein Vertrag, der gleichzeitig bei einem Unternehmen zu einem finanziellen Vermögenswert und bei einem anderen Unternehmen zu einer finanziellen Verbindlichkeit oder einem Eigenkapitalinstrument führt. Finanzinstrumente, die sowohl einen Eigenkapital- wie einen Fremdkapitalanteil beinhalten, werden entsprechend IAS 32 beurteilt und, soweit erforderlich, in eine Eigenkapital- und Fremdkapitalkomponente aufgeteilt.

Die Zugangsbewertung von Finanzinstrumenten erfolgt zum beizulegenden Wert. Die dem Erwerb oder der Emission von Finanzinstrumenten direkt zurechenbaren Transaktionskosten gehen nur in den Buchwert ein, soweit die Finanzinstrumente nicht erfolgswirksam zum beizulegenden Zeitwert bewertet werden. Finanzielle Vermögenswerte werden ausgebucht, wenn die Rechte auf Zahlungen aus der Investition ausgelaufen sind oder übertragen wurden und die Gesellschaft alle Risiken und Chancen, die mit dem Eigentum des finanziellen Vermögenswerts verbunden sind, übertragen hat. Eine finanzielle Verbindlichkeit wird ausgebucht, wenn diese getilgt ist, das heißt, wenn die im Vertrag genannten Verpflichtungen beglichen, aufgehoben oder ausgelaufen sind.

01  
02  
03  
04  
05  
06  
07  
08  
09  
10  
11  
12  
13  
14  
15  
16  
17  
18  
19  
20  
21

**FINANZIELLE VERMÖGENSWERTE**

Die Gesellschaft unterscheidet ihre finanziellen Vermögenswerte nach folgenden Kategorien: „Erfolgswirksam zum beizulegenden Zeitwert bewertet“, „Kredite und Forderungen“ sowie „Zur Veräußerung verfügbar“. Das Management bestimmt die Einteilung bei erstmaliger Erfassung eines finanziellen Vermögenswerts.

Erfolgswirksam zum beizulegenden Zeitwert bewertete finanzielle Vermögenswerte umfassen zu Handelszwecken gehaltene finanzielle Vermögenswerte. Ein finanzieller Vermögenswert wird in dieser Kategorie erfasst, sofern er hauptsächlich mit der Absicht erworben wurde, ihn kurzfristig wieder zu veräußern.

Kredite und Forderungen sind nicht-derivative finanzielle Vermögenswerte mit festen oder bestimmaren Zahlungen, die nicht in einem aktiven Markt notiert sind. Sie werden unter den kurzfristigen Vermögenswerten ausgewiesen, es sei denn, die Restlaufzeit zum Bilanzstichtag ist länger als zwölf Monate. In diesem Fall werden sie als langfristige Vermögenswerte ausgewiesen. Die Kredite und Forderungen der Gesellschaft beinhalten die Bilanzposten „Zahlungsmittel und Zahlungsmitteläquivalente“ sowie „Forderungen aus Lieferungen und Leistungen und sonstige Forderungen“. Kredite und Forderungen werden mit den fortgeführten Anschaffungskosten unter Anwendung der Effektivzinsmethode bewertet.

Als Zahlungsmittel und Zahlungsmitteläquivalente werden Bargeld sowie alle Finanzmittel mit einer ursprünglichen Laufzeit von bis zu drei Monaten ausgewiesen.

Die Zugangsbewertung der „Forderungen aus Lieferungen und Leistungen und sonstige Forderungen“ erfolgt mit dem beizulegenden Zeitwert, abzüglich Anschaffungsnebenkosten. Sie unterliegen einer Werthaltigkeitsprüfung. Eine Wertminderung wird angenommen, wenn objektive Hinweise darauf schließen lassen, dass die Gesellschaft zu dem jeweiligen Fälligkeitstermin ein nicht alle vertraglich vereinbarten Beträge erhalten wird. Objektive Hinweise, die auf eine Wertminderung hindeuten, sind zum Beispiel bekannte Zahlungsschwierigkeiten oder die Insolvenz eines Kunden. Die Wertberichtigung erfolgt über ein Wertberichtigungskonto, es sei denn die Gesellschaft ist sich sicher, dass es zu keiner Erholung des Wertes künftig kommen wird. Zu diesem Zeitpunkt werden die Forderungen als uneinbringlich eingestuft und ausgebucht.

Zur Veräußerung verfügbare finanzielle Vermögenswerte sind nicht-derivative finanzielle Vermögenswerte, die als zur Veräußerung verfügbar klassifiziert oder keiner der weiteren Kategorien zugeordnet sind.

Zur Veräußerung verfügbare finanzielle Vermögenswerte und erfolgswirksam zum beizulegenden Zeitwert bewertete finanzielle Vermögenswerte werden mit dem beizulegenden Zeitwert folgebewertet.

Gewinne und Verluste aus Änderungen des beizulegenden Zeitwerts von zur Veräußerung verfügbaren finanziellen Vermögenswerten werden direkt im Eigenkapital erfasst, mit

Ausnahme von Wertberichtigungen, die ergebniswirksam darzustellen sind. Wenn als zur Veräußerung verfügbar eingestufte finanzielle Vermögenswerte verkauft oder wertberichtigt werden, werden die zuvor im Eigenkapital erfassten kumulierten Anpassungen des beizulegenden Zeitwerts erfolgswirksam erfasst.

Die Gesellschaft beurteilt Rückgänge der beizulegenden Zeitwerte zu jedem Bilanzstichtag dahingehend, ob ein objektiver Hinweis vorliegt, dass eine Wertberichtigung von finanziellen Vermögenswerten oder von Gruppen finanzieller Vermögenswerte erforderlich ist. Im Fall von zur Veräußerung verfügbaren finanziellen Vermögenswerten wird ein erheblicher oder dauerhafter Rückgang des beizulegenden Zeitwerts des finanziellen Vermögenswerts unter seine Anschaffungskosten als Anhaltspunkt für eine Wertminderung angesehen. Sofern ein solches Anzeichen vorliegt, wird der direkt im Eigenkapital angesetzte kumulierte Verlust in Höhe der Differenz zwischen Anschaffungskosten und dem aktuellen beizulegenden Zeitwert abzüglich etwaiger Wertminderungen, die zuvor ergebniswirksam behandelt worden waren, aus dem Eigenkapital eliminiert und ergebniswirksam erfasst.

Marktübliche Käufe und Verkäufe von finanziellen Vermögenswerten werden am Erfüllungstag bilanziert. Der Erfüllungstag ist der Tag, an dem ein Vermögenswert an oder durch die Gesellschaft geliefert wird.

**FINANZIELLE VERBINDLICHKEITEN**

Grundsätzlich unterteilt die Gesellschaft ihre finanziellen Verbindlichkeiten in zwei Kategorien: „Erfolgswirksam zum beizulegenden Zeitwert bewertete finanzielle Verbindlichkeiten“ sowie „Sonstige finanzielle Verbindlichkeiten“.

Erfolgswirksam zum beizulegenden Zeitwert bewertete finanzielle Verbindlichkeiten sind zu Handelszwecken gehaltene finanzielle Verbindlichkeiten sowie finanzielle Verbindlichkeiten, die bei erstmaliger Erfassung dieser Kategorie zugeordnet wurden. Die einzigen finanziellen Verbindlichkeiten der Gesellschaft, die zum beizulegenden Zeitwert bewertet werden, sind derivative Finanzinstrumente mit negativem beizulegenden Zeitwert zum Bilanzstichtag.

Sämtliche sonstigen finanziellen Verbindlichkeiten, darunter Verbindlichkeiten aus Lieferungen und Leistungen sowie Schuldinstrumente, werden mit fortgeführten Anschaffungskosten unter Anwendung der Effektivzinsmethode bewertet. Dies gilt auch für den Fremdkapitalanteil von zusammengesetzten Finanzinstrumenten wie die von der Gesellschaft ausgegebenen nachrangigen Wandelanleihen.

**DERIVATIVE FINANZINSTRUMENTE**

Die Gesellschaft ist als weltweit operierendes Unternehmen den Auswirkungen von Währungsschwankungen ausgesetzt. Zur Sicherung gegen Währungs- und Zinsrisiken werden derivative Finanzinstrumente wie Devisentermin- und Optionsgeschäfte sowie Zins-Swap-Geschäfte abgeschlossen.

Derivative Finanzinstrumente werden als „zu Handelszwecken gehalten“ eingestuft und mit dem beizulegenden Zeitwert bewertet, sofern sie nicht als Sicherungsinstrumente klassifiziert sind. Die Gesellschaft ordnet bestimmte derivative Finanzinstrumente einer erwarteten und mit hoher Wahrscheinlichkeit eintretenden zukünftigen Transaktion als Sicherungsinstrumente zu, um das damit verbundene Fremdwährungsrisiko abzusichern (Absicherung von Zahlungsströmen).

Derivative Finanzinstrumente werden zum beizulegenden Zeitwert als „sonstige kurzfristige finanzielle Vermögenswerte“ oder „sonstige kurzfristige finanzielle Verbindlichkeiten“ bilanziert. Veränderungen der beizulegenden Zeitwerte undesignierter derivativer Finanzinstrumente, die mit dem operativen Geschäft in Verbindung stehen, werden als Teil der Umsatzkosten erfasst. Veränderungen der beizulegenden Zeitwerte undesignierter derivativer Finanzinstrumente, die zu Finanzierungszwecken genutzt werden, werden dagegen als Finanzerträge beziehungsweise Finanzaufwendungen ausgewiesen.

Der effektive Teil der Veränderungen des beizulegenden Zeitwerts derivativer Finanzinstrumente, die zur Absicherung von Zahlungsströmen designed sind und die Voraussetzungen zur Bilanzierung als Teil einer Sicherungsbeziehung erfüllen, wird unmittelbar im Eigenkapital erfasst. Der Gewinn oder Verlust aus dem ineffektiven Teil wird erfolgswirksam gebucht. Im Eigenkapital direkt erfasste Beträge werden in den Perioden in die Konzern-Gewinn-und-Verlust-Rechnung umgebucht, in denen das Grundgeschäft ertragswirksam wird (das heißt, wenn die abgesicherte erwartete Transaktion stattfindet).

Wenn ein Sicherungsinstrument ausläuft oder veräußert wird oder wenn die Voraussetzungen zur Bilanzierung als Sicherungsbeziehung nicht mehr erfüllt sind, verbleibt der bis zu diesem Zeitpunkt erfasste Gewinn oder Verlust im Eigenkapital, bis das entsprechende Grundgeschäft tatsächlich stattfindet. Sofern ein erwartetes Grundgeschäft nicht mehr eintreten wird, erfolgt eine sofortige erfolgswirksame Auflösung des im Eigenkapital aufgelaufenen Gewinns oder Verlusts.

## VORRÄTE

Unter den Vorräten werden gemäß IAS 2, „Inventories“, diejenigen Vermögenswerte ausgewiesen, die zum Verkauf im normalen Geschäftsgang gehalten werden (fertige Erzeugnisse und Waren), die sich in der Herstellung für den Verkauf befinden (unfertige Erzeugnisse) oder die im Rahmen der Produktion oder bei der Erbringung von Dienstleistungen verbraucht werden (Roh-, Hilfs- und Betriebsstoffe). Die Bewertung der Vorräte erfolgt zum niedrigeren Wert aus auf Basis der Durchschnittsmethode ermittelten Anschaffungsbeziehungsweise Herstellungskosten (produktionsbezogener Vollkosten) und ihrem Nettoveräußerungswert, das heißt dem im normalen Geschäftsgang erzielbaren Verkaufserlös

abzüglich der geschätzten Fertigstellungs- und Vertriebskosten. Die Herstellungskosten beinhalten die Kosten zugekaufter Bauteile, die direkt zurechenbaren Material- und Lohnkosten sowie anteilige Gemeinkosten, darunter Abschreibungen.

## TATSÄCHLICHE UND LATENTE ERTRAGSTEUERN

Die Ermittlung der tatsächlichen Ertragsteuerbelastung erfolgt auf der Grundlage der zum Bilanzstichtag geltenden Steuergesetzgebung der Länder, in denen die Gesellschaft tätig ist und steuerpflichtige Erträge erzielt.

In Übereinstimmung mit IAS 12, „Income Taxes“, werden zukünftige Steuererstattungen beziehungsweise Steuerbelastungen auf Grund temporärer Differenzen zwischen den Wertansätzen in der Konzern-Bilanz und den entsprechenden steuerlichen Buchwerten von Vermögenswerten und Schulden als latente Steuern erfasst. Allerdings erfolgt keine Berücksichtigung latenter Ertragsteuern im Rahmen des erstmaligen Ansatzes eines Vermögenswertes oder einer Schuld im Zusammenhang mit einem Geschäftsvorfall, der kein Unternehmenszusammenschluss ist und zum Zeitpunkt des Geschäftsvorfalles weder das handelsrechtliche noch das zu versteuernde Ergebnis beeinflusst. Die Bewertung aktiver und passiver latenter Steuern erfolgt anhand der Steuersätze und steuerlichen Vorschriften, die am Bilanzstichtag gelten oder in Kürze gelten werden und die anzuwenden sind, wenn die aktiven latenten Steuern realisiert beziehungsweise die passiven latenten Steuern erfüllt werden.

Zukünftige Steuerersparnisse auf Grund ertragsteuerlicher Verlustvorträge, welche die Gesellschaft erwartet nutzen zu können, werden als latente Steuern aktiviert. Aktive latente Steuern aus abzugsfähigen temporären Differenzen sowie steuerlichen Verlustvorträgen werden – sofern sie den Bestand an passiven latenten Steuern auf Grund temporärer Differenzen, welche zu einer zukünftigen Belastung mit Ertragsteuern führen, übersteigen – nur insoweit angesetzt, als zukünftig steuerpflichtige Erträge erzielt werden, mit denen die aktiven latenten Steuern verrechnet werden können. Latente Steuern werden nicht abgezinst.

Aktive und passive latente Steuern werden saldiert, soweit sie dieselbe Steuerbehörde und dasselbe Steuersubjekt oder eine Gruppe verschiedener Steuersubjekte, die gemeinsam ertragsteuerlich veranlagt werden, betreffen.

## NICHT FORTGEFÜHRTE AKTIVITÄTEN

Nicht fortgeführte Aktivitäten werden ausgewiesen, sobald ein Unternehmensbestandteil als zur Veräußerung bestimmt klassifiziert wird oder bereits abgegangen ist und wenn der Unternehmensbestandteil entweder (a) einen gesonderten wesentlichen Geschäftszweig oder geografischen Geschäftsbereich darstellt oder (b) Teil eines abgestimmten Gesamtplans zur Veräußerung eines gesonderten wesentlichen Geschäftszweigs oder geografischen Geschäftsbereichs ist oder (c) ein Tochterunternehmen darstellt, das ausschließlich

01  
02  
03  
04  
05  
06  
07  
08  
09  
10  
11  
12  
13  
14  
15  
16  
17  
18  
19  
20  
21

mit Weiterveräußerungsabsicht erworben wurde. Nicht fortgeführte Aktivitäten werden in der Konzern-Gewinn- und Verlust-Rechnung und in der Konzern-Kapitalflussrechnung in gesonderten Zeilen ausgewiesen. Die Vorjahresperioden werden so angepasst, dass diese den nicht fortgeführten Aktivitäten zum jeweiligen Bilanzstichtag entsprechen.

### ZUR VERÄUSSERUNG STEHENDE VERMÖGENSWERTE UND VERBINDLICHKEITEN IN VERBINDUNG MIT ZUR VERÄUSSERUNG STEHENDEN VERMÖGENSWERTEN

Die zur Veräußerung stehenden Vermögenswerte umfassen langfristige Vermögenswerte und Gruppen von Vermögenswerten (ggf. zusammen mit Rückstellungen und Verbindlichkeiten), bei denen der Buchwert überwiegend durch ein hochwahrscheinliches Veräußerungsgeschäft innerhalb der nächsten 12 Monate oder durch ein bereits abgewickelter Veräußerungsgeschäft und nicht durch fortgesetzte Nutzung realisiert wird. Diese Vermögenswerte werden zum Bilanzstichtag zum niedrigeren Wert aus Buchwert und beizulegendem Zeitwert abzüglich Veräußerungskosten angesetzt und in der Konzern-Bilanz als separater Posten innerhalb der kurzfristigen Vermögenswerte beziehungsweise kurzfristigen Verbindlichkeiten ausgewiesen. Die Vorjahreswerte werden nicht angepasst.

### SACHANLAGEN

Die Bilanzierung der Sachanlagen erfolgt zu Anschaffungs- beziehungsweise Herstellungskosten, vermindert um planmäßige, nutzungsbedingte Abschreibungen sowie gegebenenfalls außerplanmäßige Wertminderungen. Anlagen im Bau enthalten Anzahlungen auf Vermögenswerte des Anlagevermögens.

Die Anschaffungskosten setzen sich aus dem Anschaffungspreis, den Anschaffungsnebenkosten und nachträglichen Anschaffungskosten abzüglich erhaltener Anschaffungspreisminderungen zusammen. Die Herstellungskosten der selbst erstellten Anlagen enthalten neben den Einzelkosten angemessene Teile der notwendigen Material- und Fertigungsgemeinkosten. Besteht eine Verpflichtung, einen Vermögenswert des Sachanlagevermögens zum Ende der Nutzungsdauer stillzulegen oder rückzubauen oder einen Standort wiederherzustellen, wird bei Anschaffung beziehungsweise Fertigstellung der Barwert der hierfür anfallenden zukünftigen Zahlungen zusammen mit den Herstellungs- beziehungsweise Anschaffungskosten aktiviert und in gleicher Höhe die Verpflichtung passiviert.

Erstreckt sich die Bauphase von Vermögenswerten des Sachanlagevermögens über einen längeren Zeitraum, werden die bis zur Fertigstellung anfallenden Fremdkapitalzinsen als Bestandteil der Anschaffungs- oder Herstellungskosten in Übereinstimmung mit den Bedingungen des IAS 23, „Borrowing Costs“, aktiviert. In den Geschäftsjahren 2010 und 2009 wurden keine Zinsen aktiviert.

Kosten für die Reparatur von Sachanlagen, wie zum Beispiel laufende Unterhaltungsaufwendungen, werden grundsätzlich erfolgswirksam erfasst. Eine Aktivierung nachträglicher Anschaffungs- oder Herstellungskosten erfolgt dann, wenn durch die Maßnahme (zum Beispiel Generalüberholung einer technischen Anlage) künftig wirtschaftlicher Nutzen zufließen wird.

Planmäßige Abschreibungen auf Sachanlagen werden nach der linearen Methode vorgenommen. Grund und Boden, grundstücksgleiche Rechte und Anlagen im Bau werden nicht planmäßig abgeschrieben. Den planmäßigen Abschreibungen auf Sachanlagen liegen die folgenden konzerneinheitlichen Nutzungsdauern zugrunde:

|                                                      | Jahre   |
|------------------------------------------------------|---------|
| Gebäude                                              | 10 – 25 |
| Technische Anlagen und Maschinen                     | 3 – 10  |
| Sonstige Anlagen, Betriebs- und Geschäftsausstattung | 1 – 10  |

Voraussichtlich dauerhaften Wertminderungen, die über den nutzungsbedingten Werteverzehr hinausgehen, wird durch außerplanmäßige Abschreibungen Rechnung getragen. Bei Fortfall der Gründe für außerplanmäßige Abschreibungen werden entsprechende Zuschreibungen vorgenommen, welche die fortgeführten Anschaffungskosten nicht übersteigen dürfen.

Wenn Sachanlagen verkauft, stillgelegt oder verschrottet werden, wird der Gewinn beziehungsweise Verlust als Differenz zwischen dem Nettoverkaufserlös und dem Restbuchwert unter den sonstigen betrieblichen Erträgen beziehungsweise Aufwendungen erfasst.

Die Gesellschaft nimmt das in IAS 16, „Property, plant and equipment“, bestehende Wahlrecht zur Neubewertung von Sachanlagen nicht in Anspruch.

Zur Veräußerung stehende langfristige Vermögenswerte werden zum niedrigeren Wert aus Buchwert und beizulegendem Zeitwert abzüglich Veräußerungskosten angesetzt. Für diese Vermögenswerte erfolgt keine planmäßige Abschreibung.

### FINANZIMMOBILIEN

Die Gesellschaft verfügt nicht über Finanzimmobilien und wendet daher IAS 40, „Investment Property“, nicht an.

### LEASING

Die Gesellschaft ist Leasingnehmerin von Sachanlagen. Alle Leasinggeschäfte, bei denen die Gesellschaft als Leasingnehmerin auf Grund bestimmter Kriterien als wirtschaftliche Eigentümerin anzusehen ist, werden nach IAS 17, „Leases“, als Finanzierungsleasing behandelt. Alle anderen Leasinggeschäfte werden als operatives Leasing bilanziert.



**WERTHALTIGKEIT VON IMMATERIELLEN VERMÖGENSWERTEN UND ANDEREM ANLAGEVERMÖGEN  
GESCHÄFTS- ODER FIRNENWERT UND ANDERE IMMATERIELLE VERMÖGENSWERTE**

Ein Geschäfts- oder Firmenwert ist der Betrag, um den die Anschaffungskosten eines Unternehmenszusammenschlusses den beizulegenden Nettozeitwert der identifizierbaren Vermögenswerte, Schulden und Eventualschulden am Tag des Unternehmenszusammenschlusses übersteigen. Der Geschäfts- oder Firmenwert aus dem Erwerb von Tochterunternehmen wird in dem Bilanzposten „Geschäfts- oder Firmenwert und andere immaterielle Vermögenswerte“ ausgewiesen. Der Geschäfts- oder Firmenwert aus dem Erwerb assoziierter Unternehmen ist in „Nach der Equity-Methode bilanzierte Beteiligungen“ enthalten und wird im Rahmen allgemeiner Werthaltigkeitstests auf Wertminderungen überprüft. Immaterielle Vermögenswerte, die im Rahmen eines Unternehmenszusammenschlusses erlangt werden, werden getrennt vom Geschäfts- oder Firmenwert erfasst und gezeigt.

Der Geschäfts- oder Firmenwert unterliegt keiner planmäßigen Abschreibung, sondern wird stattdessen jährlich im vierten Quartal, sowie wenn Ereignisse oder Veränderungen der Rahmenbedingungen („auslösende Ereignisse“) darauf hindeuten, dass der Wert unter den Buchwert gesunken sein könnte, auf eventuelle Wertminderungen überprüft. Der Geschäfts- oder Firmenwert wird zu Anschaffungskosten abzüglich kumulierter Wertminderungen bewertet. Der im Rahmen von Unternehmensakquisitionen erworbene Geschäfts- oder Firmenwert wird auf diejenigen zahlungsmittelgenerierenden Einheiten („cash generating units“, CGUs) verteilt, von denen erwartet wird, dass sie von dem Unternehmenszusammenschluss profitieren. Infineon's CGUs stellen die niedrigste Ebene dar, auf denen der Geschäfts- oder Firmenwert für interne Steuerungszwecke überwacht wird. Diese Ebene liegt unterhalb der Segmentebene und stellt die kleinste Gruppe von Vermögenswerten dar, die aus fortgeführter Tätigkeit Zahlungsströme generiert, die weitestgehend unabhängig von den Zahlungsströmen anderer Vermögenswerte und Gruppen von Vermögenswerten sind. Nach der Umgliederung des dem Segment Wireless Solutions zugeordneten Geschäfts- oder Firmenwerts in „zur Veräußerung stehende Vermögenswerte“ entfällt der verbleibende Geschäfts- oder Firmenwert nahezu vollständig auf eine CGU des Segments Industrial & Multimarke. Falls der Buchwert der CGU einschließlich des zugeordneten Geschäfts- oder Firmenwerts den „erzielbaren Betrag“ der CGU übersteigt, muss der Geschäfts- oder Firmenwert entsprechend gemindert werden. Der erzielbare Betrag einer CGU ist der größere Betrag aus beizulegendem Zeitwert abzüglich Veräußerungskosten und Nutzungswert. Für erfasste Wertminderungen dürfen in Folgeperioden keine Wertaufholungen erfasst werden. Die Bestimmung des erzielbaren Betrags einer CGU erfordert in erheblichem Umfang die Ausübung von Ermessen durch das Management.

Die Gesellschaft berechnet den erzielbaren Betrag einer CGU inklusive des Geschäfts- oder Firmenwerts einer CGU anhand des Barwerts der zukünftigen Zahlungsströme, da diese Methode am besten geeignet ist, den erzielbaren Betrag zu ermitteln und die Branchenzyklizität widerzuspiegeln. Die grundlegenden Annahmen dieser für alle CGUs benutzten Methode sind der gewichtete Durchschnitt der Kapitalkosten (weighted average cost of capital, „WACC“) und der Endwert der Wachstumsrate der CGUs. Die Ermittlung des Abzinsungsfaktors beruht auf der Sicht eines Marktteilnehmers. In Übereinstimmung mit IAS 36 bestimmt die Gesellschaft den anzuwendenden WACC anhand von Marktinformationen, die die Betafaktoren der Vergleichsgruppe für Infineon und den Verschuldungsgrad sowie andere Marktzinsen für Kredite einschließen. Der Endwert der Wachstumsrate wurde aus frei verfügbaren Marktstudien von Marktforschungsinstituten entnommen. Für den Geschäfts- oder Firmenwert, welcher auf Grund des Verkaufs des Mobilfunkgeschäfts zum 30. September 2010 als zur Veräußerung stehend ausgewiesen ist, erfolgte die Überprüfung der Werthaltigkeit anhand des beizulegenden Zeitwerts abzüglich Veräußerungskosten. Der beizulegende Zeitwert wurde ermittelt auf der Basis des vereinbarten Verkaufserlöses für das Mobilfunkgeschäft abzüglich Transaktionskosten.

Die für die Geschäftsjahre 2010 und 2009 verwendeten Annahmen spiegeln zwar Veränderungen auf Grund der Marktentwicklung wider, unterscheiden sich im Übrigen aber kaum.

Die für die Bestimmung des erzielbaren Betrags herangezogenen Cash-Flows wurden auf der Grundlage von in der Vergangenheit erlangter Sachkenntnis, der aktuellen wirtschaftlichen Ergebnisse und der Fünfjahrespläne ermittelt. Die Jahrespläne werden unter Verwendung von bestimmten konzerneinheitlichen Annahmen „von unten nach oben“ („bottom up“-Methode) ermittelt.

Bestimmte Cash-Flow-Parameter (Abschreibungen, Steuern, Investitionsausgaben, Änderung des Nettoumlaufvermögens) werden auf der Basis definierter Einflussfaktoren bestimmt. Cash-Flows für Zeiträume nach den Planungsperioden sind mit der Methode der ewigen Rente ermittelt.

Im Geschäftsjahr 2010 wurde als Nach-Steuer-Diskontierungsfaktor 8,5 Prozent angewendet, um den beizulegenden Wert der relevanten zahlungsmittelgenerierenden Einheit zu bestimmen. Der Diskontierungsfaktor basiert auf den gewichteten durchschnittlichen Kapitalkosten der Gesellschaft. Im Geschäftsjahr 2010 wurde als Wachstumsrate für die ewige Rente 3 Prozent angenommen. Die Wachstumsrate der ewigen Rente übersteigt nicht den langfristigen historischen Durchschnitt der Wachstumsrate der Industrie.

Zusätzlich beinhalten die einzelnen Werthaltigkeitstests Sensitivitätsanalysen für WACC, Endwert der Wachstumsrate und Änderungen der erwarteten Cash-Flows. Die Parameter wurden außerdem nach dem Ende des Geschäftsjahrs, bis

01  
02  
03  
04  
05  
06  
07  
08  
09  
10  
11  
12  
13  
14  
15  
16  
17  
18  
19  
20  
21

zur Aufstellung des Konzernabschlusses durch den Vorstand, überwacht.

Andere immaterielle Vermögenswerte bestehen hauptsächlich aus erworbenen immateriellen Vermögenswerten wie Lizenzen und erworbenen Technologien, die zu Anschaffungskosten angesetzt werden, sowie aus aktivierten Entwicklungskosten. Diese immateriellen Vermögenswerte haben eine begrenzte Nutzungsdauer von drei bis zehn Jahren und werden mit den fortgeführten Anschaffungskosten unter der Anwendung der linearen Abschreibungsmethode bewertet.

### ANDERES ANLAGEVERMÖGEN

Die Gesellschaft überprüft langfristige Vermögenswerte, einschließlich Sachanlagen auf Wertminderung, wenn Ereignisse oder Veränderungen der Umstände darauf hinweisen, dass der Buchwert des Vermögenswerts nicht mehr erzielbar sein könnte. Die Werthaltigkeit von Vermögenswerten, die gehalten und verwendet werden sollen, wird durch einen Vergleich des Buchwerts des Vermögenswerts mit dessen erzielbarem Betrag ermittelt. Der erzielbare Betrag eines Vermögenswerts ist der höhere der beiden Beträge aus beizulegendem Zeitwert abzüglich der Verkaufskosten und Nutzungswert. Der erwartete Nutzungswert wird grundsätzlich anhand diskontierter zukünftiger Einnahmeüberschüsse berechnet. Um die zukünftigen Einnahmeüberschüsse abzuschätzen, ist erhebliches Ermessen des Managements erforderlich.

Wird ein Vermögenswert als wertgemindert eingestuft, bemisst sich die Höhe der erfassten Abschreibung als Differenz zwischen dem Buchwert des Vermögenswerts und dem erzielbaren Betrag. In Vorjahren erfasste Wertminderungen für Vermögenswerte mit Ausnahme des Geschäfts- oder Firmenwerts werden aufgehoben oder reduziert, wenn sich seit der Erfassung der letzten Wertminderung eine Änderung der Schätzungen ergeben hat, die bei der Bestimmung herangezogen wurden und in der Folge sich ein verminderter Wertminderungsbedarf ergibt. Es erfolgt maximal eine Zuschreibung bis zu dem Buchwert, der bestimmt worden wäre (abzüglich der planmäßigen Abschreibungen), wenn in früheren Jahren kein Wertminderungsbedarf erfasst worden wäre.

### PENSIONEN UND ÄHNLICHE VERPFLICHTUNGEN

Die Gesellschaft unterhält verschiedene Pensionspläne. Diese Pläne werden grundsätzlich durch regelmäßig versicherungsmathematisch ermittelte Zahlungen an treuhänderisch verwaltete Pensionsfonds gespeist. Die Pensionspläne umfassen sowohl beitragsorientierte (defined contribution) als auch leistungsorientierte (defined benefit) Pläne.

Ein beitragsorientierter Plan ist ein Pensionsplan, nach dem die Gesellschaft festgelegte Beiträge an eine eigenständige Einheit (einen Fonds) entrichtet. Die Gesellschaft ist weder rechtlich noch faktisch zur Zahlung darüber hinausgehender Beträge verpflichtet, um alle Leistungen in Bezug auf Arbeitsleistungen der Arbeitnehmer in der Berichtsperiode

und früheren Perioden zu erbringen, wenn einer der beitragsorientierten Pläne nicht über ausreichende Vermögenswerte verfügt.

Die Gesellschaft entrichtet Beiträge an öffentliche und private Rentenversicherungen. Soweit die Beiträge entrichtet sind, bestehen keine weiteren Zahlungsverpflichtungen. Die Beiträge werden im Fälligkeitszeitpunkt als Personalaufwand erfasst. Für Zahlungsverpflichtungen, die an die verschiedenen beitragsorientierten Pläne zu leisten sind, werden Verbindlichkeiten eingestellt. Vorauszahlungen werden als Vermögenswert aktiviert, soweit eine Rückerstattung oder Reduzierung zukünftiger Zahlungen möglich ist.

Ein Pensionsplan, der nicht unter die Definition eines beitragsorientierten Plans fällt, wird als leistungsorientierter Plan bilanziert. Die für die leistungsorientierten Pläne ausgewiesene Verbindlichkeit umfasst den Barwert der leistungsorientierten Verpflichtung zum Bilanzstichtag abzüglich des beizulegenden Zeitwerts des Planvermögens sowie Anpassungen für nachzuerrechnenden Dienstzeitaufwand. Die leistungsorientierte Verpflichtung wird jährlich durch unabhängige Versicherungsmathematiker mittels der Methode der laufenden Einmalprämien (projected unit credit method) berechnet. Die Bestimmung des Barwerts der leistungsorientierten Verpflichtung erfolgt durch Abzinsung der erwarteten zukünftigen Zahlungsmittelabflüsse unter Verwendung von Zinssätzen erstrangiger Rentenpapiere, die auf die Währung lauten, in der die Leistungen erfolgen werden, und deren Restlaufzeiten etwa den Laufzeiten der jeweiligen Pensionsverpflichtungen entsprechen.

Versicherungsmathematische Gewinne und Verluste aus nicht erwarteten Änderungen der Pensionsverpflichtungen oder Planvermögenswerte sowie aus Änderungen der versicherungsmathematischen Annahmen werden in Ausübung des nach IAS 19 bestehenden Wahlrechts ergebnisneutral im Eigenkapital erfasst und in der Konzern-Gesamtergebnisrechnung in den Perioden ausgewiesen, in denen sie angefallen sind. Alternativ können nach IAS 19 versicherungsmathematische Gewinne und Verluste nach der Korridormethode oder jede schnellere Amortisation erfolgswirksam erfasst werden. Somit würden sich versicherungsmathematische Gewinne und Verluste auf die Gewinn- und Verlust-Rechnung auswirken und daher zu einer hohen Volatilität führen. Der in den Pensionsaufwendungen enthaltene Zinsanteil der Rückstellungszuführung wird als Zinsaufwand innerhalb des Finanzergebnisses gezeigt.

Ein nachzuerrechnender Dienstzeitaufwand wird sofort ergebniswirksam erfasst, es sei denn, die Änderungen des Pensionsplans hängen von einer gewissen Fortdauer des Arbeitsverhältnisses ab. In diesem Fall wird der nachzuerrechnende Dienstzeitaufwand linear über diesen Zeitraum bis zum Eintritt der Unverfallbarkeit verteilt.

## RÜCKSTELLUNGEN

Rückstellungen werden für gegenwärtige, rechtliche oder faktische Verpflichtungen gebildet, die aus Ereignissen der Vergangenheit resultieren, die wahrscheinlich zu einer künftigen wirtschaftlichen Belastung führen werden und deren Höhe verlässlich geschätzt werden kann.

Die Bewertung der Rückstellungen erfolgt nach IAS 37, „Provisions, Contingent Liabilities and Contingent Assets“, oder gegebenenfalls auch nach IAS 19, „Employee Benefits“. Soweit bei Verpflichtungen erst nach mehr als einem Jahr mit Mittelabflüssen gerechnet wird, werden die Rückstellungen mit dem Barwert der voraussichtlichen Mittelabflüsse angesetzt, sofern der Zinseffekt wesentlich ist. Als Zinssatz für die Barwertermittlung verwendet die Gesellschaft einen risiko-äquivalenten Vorsteuerzinssatz, der die aktuellen Markterwartungen im Hinblick auf den Zinssatz widerspiegelt. Bei der Abschätzung der künftigen wirtschaftlichen Belastung werden gegebenenfalls Preissteigerungsannahmen berücksichtigt. Drohverlustrückstellungen bewertet die Gesellschaft mit dem niedrigeren Wert aus den erwarteten Kosten bei Erfüllung oder bei Beendigung des Vertrags. Zuführungen zu Rückstellungen erfolgen grundsätzlich erfolgswirksam.

Erstattungsansprüche gegenüber Dritten werden getrennt von den Rückstellungen aktiviert, wenn ihre Realisation nahezu sicher ist.

Resultiert aus einer geänderten Einschätzung eine Reduzierung des Verpflichtungsumfangs, wird die Rückstellung anteilig aufgelöst und der Ertrag in den Funktionsbereichen erfasst, die ursprünglich bei der Bildung der Rückstellung mit dem Aufwand belastet waren.

## IM AKTUELLEN GESCHÄFTSJAHR ERSTMALIG ANGEWENDETE STANDARDS

Im September 2007 wurde vom IASB die Änderung des IAS 1, „Presentation of Financial Statements“, beschlossen. Das Ziel der Änderung ist es, dem Leser der Abschlüsse die Analyse und die Vergleichbarkeit von Finanzinformationen zu erleichtern. IAS 1 legt die allgemeinen Anforderungen an die Darstellung von Abschlüssen, deren Struktur, deren Gliederung sowie inhaltliche Mindestanforderungen fest. Die Gesellschaft wendet den geänderten IAS 1 seit dem 1. Oktober 2009 an. Infolgedessen hat die Gesellschaft den Konzernabschluss um eine Konzern-Gesamtergebnisrechnung ergänzt, die die Übersicht der im Konzern-Eigenkapital erfassten Erträge und Aufwendungen ersetzt. Die Konzern-Gesamtergebnisrechnung weist die gesamten Aufwendungen und Erträge einschließlich erfolgsneutraler Aufwendungen und Erträge aus. Veränderungen im Eigenkapital sind in der Eigenkapital-Veränderungsrechnung ausgewiesen.

Im Januar 2008 veröffentlichte das IASB eine überarbeitete Fassung von IFRS 3, „Business Combinations“ („IFRS 3 (2008)“), und eine geänderte Fassung von IAS 27, „Consolidated and Separate Financial Statements“ („IAS 27

(2008)“). Beide Verlautbarungen wurden von der EU übernommen. Beide Standards werden seit dem 1. Oktober 2009 angewendet.

IFRS 3 (2008) betrifft die Anwendung der Erwerbsmethode auf Unternehmenszusammenschlüsse. Wesentliche Änderungen beziehen sich auf die Bewertung der Minderheitsanteile, die Bilanzierung sukzessiver Unternehmenserwerbe sowie die Bilanzierung bedingter Gegenleistungen und Transaktionskosten. Auf Basis der neuen Regelungen können die Minderheitsanteile entweder zum beizulegenden Zeitwert im Erwerbszeitpunkt (full-goodwill method) oder zum beizulegenden Zeitwert der anteiligen identifizierbaren Vermögenswerte und Verbindlichkeiten des erworbenen Unternehmens bewertet werden. Im Fall eines sukzessiven Unternehmenserwerbs werden die bereits gehaltenen Anteile am erworbenen Unternehmen zum Zeitpunkt der Akquisition mit dem beizulegenden Zeitwert neu bewertet. Die Veränderungen von bedingten Gegenleistungen, die zum Erwerbszeitpunkt als Verbindlichkeiten mit dem beizulegenden Zeitwert bilanziert wurden, werden in der Konzern-Gewinn- und -Verlust-Rechnung erfasst. Transaktionskosten werden bei Entstehung aufwandswirksam erfasst.

Wesentliche Änderungen in Verbindung mit IAS 27 (2008) beziehen sich auf die Bilanzierung von Transaktionen, bei denen sich das Beherrschungsverhältnis nicht ändert, sowie von Transaktionen, bei denen der beherrschende Einfluss verloren geht. Wenn sich das Beherrschungsverhältnis nicht ändert, werden die Effekte der Transaktionen mit Minderheitsgesellschaftern im Eigenkapital, ohne Auswirkung auf die Konzern-Gewinn- und -Verlust-Rechnung, erfolgsneutral erfasst. Führen Transaktionen hingegen zu einem Verlust der Beherrschungsmöglichkeit, werden die zurückbehaltenen Beteiligungsanteile zum beizulegenden Zeitwert neu bewertet. Durch den geänderten Standard können die Minderheitsanteile negativ werden, da sowohl Gewinne als auch Verluste auf Basis des Eigenkapitalanteils den Anteilseignern zugerechnet werden.

Im März 2009 hat das IASB „Improving Disclosures about Financial Instruments (Amendments to IFRS 7 Financial Instruments: Disclosures)“ herausgegeben, die die Berichterstattung zur Bewertung von Finanzinstrumenten zum beizulegenden Zeitwert und zu den Liquiditätsrisiken erweitern. Der Standard verlangt mehr qualitative Angaben zu Risiken in Verbindung mit Finanzinstrumenten. Die Gesellschaft wendet den Standard erstmalig für das am 30. September 2010 endende Geschäftsjahr an.

## ERLASSENE, NOCH NICHT ANGEWENDETE STANDARDS

Im Juni 2009 änderte das IASB den IFRS 2, „Share-based Payment“, für den Fall, dass einzelne Tochtergesellschaften selbst keine Verpflichtung zur Zahlung der aktienbasierten Vergütungen haben, um das Anwendungsgebiet und die Bilanzierung von im Konzern gezahlten aktienbasierten Vergütungen in den Einzelabschlüssen klarzustellen. Die Änderung

01  
02  
03  
04  
05  
06  
07  
08  
09  
10  
11  
12  
13  
14  
15  
16  
17  
18  
19  
20  
21

ist anzuwenden für Geschäftsjahre, die am oder nach dem 1. Januar 2010 beginnen. Damit ist für die Gesellschaft der neue Standard ab dem am 1. Oktober 2010 beginnenden Geschäftsjahr anzuwenden. Es wird erwartet, dass der geänderte Standard keinen wesentlichen Einfluss auf den Konzernabschluss haben wird. Die EU hat die Änderung im März 2010 übernommen.

Im November 2009 hat das IASB den IFRS 9, „Financial Instruments“, veröffentlicht, der die Klassifizierung und die Bewertung von finanziellen Vermögenswerten beschreibt und die erste Phase des Projekts zur Ablösung des IAS 39, „Financial Instruments: Recognition and Measurement“, abschließt. Der neue Standard ermöglicht Investoren und anderen Nutzern von Finanzinformationen, die Bilanzierung von finanziellen Vermögenswerten besser zu verstehen, und trägt zur Komplexitätsreduzierung bei. IFRS 9 bedient sich eines einheitlichen Ansatzes zur Bestimmung, ob ein finanzieller Vermögenswert zu fortgeführten Anschaffungskosten oder zum Marktwert bewertet wird, und ersetzt die Vielzahl der unterschiedlichen Regelungen des IAS 39. Das Vorgehen nach IFRS 9 basiert darauf, wie ein Unternehmen seine Finanzinstrumente steuert (sein Unternehmensmodell) und auf den vertraglichen Cash-Flow-Eigenschaften der finanziellen Vermögenswerte. IFRS 9 ist anzuwenden für Geschäftsjahre, die am oder nach dem 1. Januar 2013 beginnen, wobei eine frühere Anwendung gestattet ist. Damit ist für die Gesellschaft der neue Standard ab dem am 1. Oktober 2013 beginnenden Geschäftsjahr anzuwenden. Die EU hat den neuen Standard noch nicht bestätigt. Die Gesellschaft analysiert derzeit die Auswirkungen des IFRS 9 auf ihren Konzernabschluss.

Im November 2009 veröffentlichte das IASB den überarbeitenden Standard IAS 24, „Related Party Disclosures“. Die Änderungen beinhalten im Wesentlichen eine Anpassung der Definition von nahestehenden Unternehmen und Personen und die Einführung einer Erleichterungsvorschrift bezüglich der Angabepflichten für Unternehmen, die unter der Beherrschung der gemeinschaftlichen Führung oder dem

maßgeblichen Einfluss der öffentlichen Hand stehen. Die Änderungen gelten für Geschäftsjahre, die am oder nach dem 1. Januar 2011 beginnen, wobei eine frühere Anwendung gestattet ist. Die Übernahme in europäisches Recht ist im Juli 2010 erfolgt. Die Gesellschaft plant, den geänderten Standard ab dem am 1. Oktober 2011 beginnenden Geschäftsjahr anzuwenden und analysiert derzeit die Auswirkungen des IAS 24 auf ihren Konzernabschluss.

Im Oktober 2010 hat das IASB Änderungen am IFRS 7, „Financial Instruments: Disclosures“, veröffentlicht. Die Änderungen am IFRS 7 betreffen erweiterte Angabepflichten bei der Übertragung finanzieller Vermögenswerte und sollen den Bilanzadressaten ein besseres Verständnis der Auswirkungen der beim Unternehmen verbleibenden Risiken ermöglichen. Unternehmen haben die Änderungen für Geschäftsjahre, die am oder nach dem 1. Juli 2011 beginnen, verpflichtend anzuwenden. Die Gesellschaft plant, den geänderten Standard ab dem am 1. Oktober 2011 beginnenden Geschäftsjahr anzuwenden und analysiert derzeit die Auswirkungen des geänderten IFRS 7 auf ihren Konzernabschluss.

### 3 / ANPASSUNGEN NACH IAS 8

Die Deutsche Prüfstelle für Rechnungslegung DPR e.V. („DPR“), eine behördlich eingesetzte private Institution, hat den Konzernabschluss der Infineon Technologies AG für das Geschäftsjahr 2008 einer anlassunabhängigen Stichprobenprüfung unterzogen. Die DPR ist der Auffassung, dass der Ansatz von aktiven latenten Steuern auf Verlustvorträge in Höhe von € 237 Millionen mit Steuerstrategien begründet wird, die wegen nicht hinreichender Umsetzungswahrscheinlichkeit nicht geeignet sind, deren Werthaltigkeit zu belegen.

Aus den im Lagebericht dargelegten Überlegungen hat sich die Gesellschaft entschlossen, der Forderung der DPR zu folgen. Die Konzernabschlüsse der Geschäftsjahre 2008 und 2009 wurden gemäß IAS 8 wie folgt korrigiert:

#### ANPASSUNG KONZERNBILANZ GEMÄSS IAS 8

| € in Millionen                                                | 30.09.2009<br>vor Anpassung | Anpassung<br>gemäß IAS 8 | 30.09.2009<br>nach Anpassung | 01.10.2008<br>vor Anpassung | Anpassung<br>gemäß IAS 8 | 01.10.2008<br>nach Anpassung |
|---------------------------------------------------------------|-----------------------------|--------------------------|------------------------------|-----------------------------|--------------------------|------------------------------|
| <b>Aktiva</b>                                                 |                             |                          |                              |                             |                          |                              |
| Aktive latente Steuern                                        | 396                         | -240                     | 156                          | 400                         | -237                     | 163                          |
| <b>Summe Aktiva</b>                                           | <b>4.606</b>                | <b>-240</b>              | <b>4.366</b>                 | <b>6.982</b>                | <b>-237</b>              | <b>6.745</b>                 |
| <b>Passiva</b>                                                |                             |                          |                              |                             |                          |                              |
| Verlustvortrag                                                | -5.940                      | -240                     | -6.180                       | -5.252                      | -237                     | -5.489                       |
| Summe Eigenkapital der Aktionäre der Infineon Technologies AG | 2.273                       | -240                     | 2.033                        | 2.091                       | -237                     | 1.854                        |
| Summe Eigenkapital                                            | 2.333                       | -240                     | 2.093                        | 2.161                       | -237                     | 1.924                        |
| <b>Summe Passiva</b>                                          | <b>4.606</b>                | <b>-240</b>              | <b>4.366</b>                 | <b>6.982</b>                | <b>-237</b>              | <b>6.745</b>                 |

ANPASSUNG KONZERN-GEWINN-UND-VERLUST-RECHNUNG GEMÄSS IAS 8

| € in Millionen                                        | 30.09.2009<br>vor Anpassung | Anpassung<br>gemäß IAS 8 | 30.09.2009 nach<br>Anpassung |
|-------------------------------------------------------|-----------------------------|--------------------------|------------------------------|
| Aufwendungen aus Steuern vom Einkommen und vom Ertrag | - 1                         | - 3                      | - 4                          |
| Ergebnis aus fortgeführten Aktivitäten                | - 230                       | - 3                      | - 233                        |
| Konzernjahresüberschuss/-fehlbetrag                   | - 671                       | - 3                      | - 674                        |

Die Anpassungen sind in den Zahlen dieses Konzernabschlusses, die sich auf die Geschäftsjahre 2008 und 2009 beziehen, enthalten. Diese können daher von Zahlen abweichen, die in den Konzernabschlüssen der Vergangenheit enthalten waren. Die retrospektiven Anpassungen haben keinen Einfluss auf die vorhandenen steuerlichen Verlustvorträge und nur unwesentliche Auswirkungen auf das Konzernergebnis in der Vergleichsperiode. Sie führen zu keinen Zahlungsmittelabflüssen und keiner Verletzung der Bedingungen der vergangenen und bestehenden Kreditvereinbarungen oder Anleihen der Gesellschaft.

4 / SCHÄTZUNGEN UND ANNAHMEN

Einige Bilanzierungsregeln erfordern wesentliche Schätzungen, die auf komplexen und subjektiven Ermessensausübungen beruhen und sich zum Teil auf Bereiche beziehen, die an sich schon unsicher sind und sensibel auf Veränderungen reagieren. Solche Beurteilungen können sich von Periode zu Periode ändern und einen wesentlichen Einfluss auf die Vermögens-, Finanz- und Ertragslage haben. Die wesentlichen Schätzungen und Annahmen können Schätzungen beinhalten, bei denen das Management für die gleiche Periode durchaus auch zu einer anderen Schätzung hätte gelangen können. Das Management gibt zu bedenken, dass zukünftige Ereignisse oftmals von den unterstellten Erwartungen abweichen können und Schätzungen regelmäßig angepasst werden müssen.

Im Folgenden werden diejenigen Schätzungen und Annahmen näher erläutert, die am ehesten dazu führen können, dass die tatsächlichen Ergebnisse von den Schätzungen abweichen.

**UMSATZREALISIERUNG**

Bei der Erfassung von Umsatzerlösen muss die Gesellschaft Umsatzminderungen auf Grund möglicher Produktrückgaben, Skonti- und Bonuszahlungen sowie Nachlässe aus Preissicherungsklauseln auf der Grundlage von Erfahrungswerten schätzen. Die Bestimmung der hierbei zugrunde gelegten Einflussfaktoren erfordert beachtliche Annahmen und Schätzungen, einschließlich der erwarteten Nachfrage, Rückgaben und der Preisentwicklung der Branche.

Der Rückstellungsbedarf könnte zukünftig steigen infolge (1) eines Verfalls der Preise für Halbleiterprodukte, (2) von Rückgängen der erwarteten Nachfrage nach Halbleitern oder (3) mangelnder Annahme neuer Produkte am Markt. Sofern

diese oder andere Faktoren zu einem deutlichen Anpassungsbedarf der Rückstellungen für Preisnachlässe und Produktrückgaben führen, könnte dies die Ertragslage der Gesellschaft erheblich beeinträchtigen.

Die Gesellschaft hat bereits in der Vergangenheit Lizenzverträge für ihre Technologien abgeschlossen und hat vor, zukünftig vermehrt Wertbeiträge aus deren Verwertung zu erzielen. Wie bei einigen bestehenden Lizenzverträgen können auch zukünftige Vereinbarungen Kapazitätsreservierungen beinhalten. Solche Verträge können mehrere Bestandteile umfassen. Die Bestimmung der jeweils zu erfassenden Umsatzerlöse aus derartigen Geschäftsvorfällen ist hochkomplex und erfordert subjektive Schätzungen und Annahmen, etwa hinsichtlich der Bestimmung des beizulegenden Zeitwerts oder der Fortdauer eines eventuell bestehenden eigentumsähnlichen Verfügungsrechts der Gesellschaft.

**WERTHALTIGKEIT NICHT-FINANZIELLER VERMÖGENSWERTE**

Die Überprüfung langfristiger Vermögenswerte, einschließlich des Geschäfts- oder Firmenwerts und anderer immaterieller Vermögenswerte, auf Wertminderung erfordert wesentliche Schätzungen und Annahmen. Diese umfassen den gewichteten Durchschnitt der Kapitalkosten (WACC) und die in dessen Bestimmung verwendeten Parameter, die auf der Unternehmensplanung basierenden künftigen Cash-Flows einschließlich der zugrunde liegenden Planungsannahmen und Parameter und schließlich die Wachstumsrate der ewigen Rente.

**BEWERTUNG DER VORRÄTE**

Die Vorräte werden mit dem niedrigeren Wert aus Anschaffungs- oder Herstellungskosten einerseits und Nettoveräußerungswert andererseits angesetzt. Die Gesellschaft überprüft die Werthaltigkeit der Vorräte unter Berücksichtigung von Quantität und Zusammensetzung der Vorratspositionen, aktuellen wirtschaftlichen Geschehnissen und Marktbedingungen, der erwarteten zukünftigen Produktnachfrage und der Entwicklung der Preise. Diese Beurteilung ist grundsätzlich wertend und erfordert umfangreiche Schätzungen auch hinsichtlich von Produktnachfrage und Preisentwicklung, welche anfällig für wesentliche Veränderungen sein können.

In zukünftigen Perioden könnte ein Abwertungsbedarf der Vorräte resultieren sowohl aus rückläufiger Produktnachfrage auf den durch die Gesellschaft bedienten Märkten als auch aus technologischer Überalterung auf Grund kurzfristiger

01  
02  
03  
04  
05  
06  
07  
08  
09  
10  
11  
12  
13  
14  
15  
16  
17  
18  
19  
20  
21

Weiterentwicklung der Produkte und auch aus technologischem Fortschritt oder Veränderungen im wirtschaftlichen Umfeld, die Einfluss auf die Marktpreise der Produkte der Gesellschaft haben könnten. Diese und andere Faktoren könnten in der Zukunft zu einer Anpassung der Bewertung der Vorräte führen und einen wesentlichen Einfluss auf die Ertragslage des Unternehmens haben.

#### WERTHALTIGKEIT AKTIVER LATENTER STEUERN

Die Gesellschaft überprüft aktivierte latente Steuern an jedem Bilanzstichtag auf Abwertungsbedarf. Die Einschätzung erfordert Annahmen des Managements im Hinblick auf die Höhe des zukünftig zu versteuernden Gewinns sowie weitere positive und negative Einflussgrößen. Die tatsächliche Nutzung aktiver Steuerlatenzen hängt von der Möglichkeit der Gesellschaft ab, zukünftig entsprechende zu versteuernde Gewinne zu erzielen, um steuerliche Verlustvorträge oder Steuervergünstigungen vor ihrem Verfall in Anspruch nehmen zu können.

Auf Grund dieser Überprüfung bilanziert die Gesellschaft zum 30. September 2010 beziehungsweise zum 30. September 2009 € 308 Millionen beziehungsweise € 156 Millionen aktive latente Steuern. Die Wertberichtigungen auf aktive latente Steuern betragen € 1.241 Millionen beziehungsweise € 1.410 Millionen zum 30. September 2010 beziehungsweise zum 30. September 2009.

Der erfasste Gesamtbetrag aktiver latenter Steuern könnte zu verringern sein, falls zukünftige steuerpflichtige Gewinne sowie Erträge geringer als erwartet ausfallen oder falls Änderungen der Steuergesetzgebung die Nutzung von steuerlichen Verlustvorträgen oder Steuervergünstigungen zeitlich oder der Höhe nach begrenzen. Umgekehrt ist der erfasste Gesamtbetrag aktiver latenter Steuern zu erhöhen, falls zukünftige steuerpflichtige Gewinne sowie Erträge höher als erwartet ausfallen.

#### BILANZIERUNG VON ERWERBSVORGÄNGEN

Die Bilanzierung von Unternehmenszusammenschlüssen erfordert die Bilanzierung der erworbenen materiellen und immateriellen Vermögenswerte sowie Verbindlichkeiten auf Grundlage des jeweiligen beizulegenden Zeitwerts. Die Bewertung basiert dabei in großem Umfang auf erwarteten zukünftigen Zahlungsmittelzuflüssen sowie auf Annahmen über den zugrundezulegenden Zinssatz. Die in der Folge tatsächlich erzielten Zahlungsmittelzuflüsse können von dem beim erstmaligen Ansatz zugrunde gelegten Cash-flow erheblich abweichen.

#### BILANZIERUNG VON PENSIONSPLÄNEN

Die Kosten für Pensionszusagen des Unternehmens werden anhand versicherungsmathematischer Gutachten unter Anwendung des Anwartschaftsbarwertverfahrens ermittelt, welches auf verschiedenen Annahmen wie

Abzinsungsfaktoren und erwartender Erträge des Planvermögens beruht. Die Abzinsungsfaktoren werden auf Grundlage erstrangiger Rentenpapiere bestimmt. Die Annahmen in Bezug auf die erwarteten Erträge aus Planvermögen berücksichtigen langfristige historische Renditen, die Anlagestrategie sowie Schätzungen langfristiger Anlageerträge. Weitere Basisannahmen in Bezug auf Pensionskosten werden auf Grund von aktuellen Marktbedingungen getroffen. Eine Veränderung einer oder mehrerer dieser grundlegenden Annahmen könnte wesentliche Auswirkungen auf die Bewertung der langfristigen Verpflichtungen haben. Für weitergehende Informationen siehe Anhang Nr. 35.

#### RÜCKSTELLUNGEN

Die Gesellschaft ist Beteiligte in verschiedenen Rechts- und Klageverfahren, etwa im Hinblick auf die Verletzung geistigen Eigentums, die innerhalb und außerhalb der regelmäßigen Geschäftstätigkeit entstehen.

Die Gesellschaft beurteilt in diesem Zusammenhang regelmäßig die Wahrscheinlichkeit ungünstiger Verfahrensausgänge oder Urteile und schätzt die Bandbreite möglicher Verluste und Rückerstattungen. Verbindlichkeiten im Zusammenhang mit Rechtsstreitigkeiten, darunter Rückstellungen für wesentliche Rechtskosten, werden erfasst, wenn es wahrscheinlich ist, dass die Verbindlichkeit entstanden ist und der entsprechende Betrag angemessen geschätzt werden kann. Die Gesellschaft hat dementsprechend zu den jeweiligen Bilanzstichtagen aufwandswirksam Rückstellungen in Bezug auf bestimmte geltend gemachte sowie nicht geltend gemachte Ansprüche gebildet. Sobald zusätzliche Informationen verfügbar sind, werden, sofern notwendig, die möglichen Rückstellungen für diese Verfahren bewertet und getroffene Schätzungen überprüft. Diese Rückstellungen können fallweise in der Zukunft Änderungen durch neue Entwicklungen oder durch Veränderungen der Rahmenbedingungen erfahren, die wesentlichen Einfluss auf die Vermögens-, Ertrags- und Finanzlage haben können.

Darüber hinaus sind Annahmen und Schätzungen in erheblichem Umfang für andere Rückstellungen, zum Beispiel für Gewährleistungen und Lizenzverpflichtungen, erforderlich. Die Annahmen und Schätzungen hierfür basieren vorrangig auf Erfahrungswerten der Vergangenheit und Einschätzungen damit betrauter Personen.

#### FORDERUNGEN AUS LIEFERUNGEN UND LEISTUNGEN UND SONSTIGE FORDERUNGEN

Die Wertberichtigung zweifelhafter Forderungen umfasst in erheblichem Maß Einschätzungen und Beurteilungen einzelner Forderungen, die auf der Kreditwürdigkeit des jeweiligen Kunden, auf aktuellen Konjunktorentwicklungen und der Analyse von Forderungsausfällen der Vergangenheit auf Portfolioebene beruhen. Soweit die Wertberichtigung aus historischen Ausfallraten auf Portfolioebene abgeleitet wird, führt ein

Rückgang der Forderungen zu einer entsprechenden Verminderung solcher Vorsorgen und umgekehrt.

## 5 / AKQUISITIONEN

Die Gesellschaft hat in den Geschäftsjahren 2010 und 2009 keine Akquisitionen getätigt.

## 6 / GESCHÄFTSANTEILSVERÄUSSERUNGEN UND NICHT FORTGEFÜHRTE AKTIVITÄTEN

### SENSOROR-GESCHÄFT

Im Laufe des Geschäftsjahrs 2003 erwarb die Gesellschaft SensoNor AS („SensoNor“) für einen Kaufpreis von € 34 Millionen in bar. SensoNor entwickelt, produziert und vermarktet Reifendrucküberwachungssysteme und Sensoren für die Beschleunigungsmessung. Am 4. März 2009 veräußerte die Gesellschaft Teile des Geschäfts von SensoNor einschließlich Sachanlagevermögen, Vorräten und Pensionsverpflichtungen an das neu gegründete Unternehmen SensoNor Technologies AS für € 4 Millionen in bar und eine Aktie. Die Mitarbeiter wurden von SensoNor Technologies AS übernommen. Zusätzlich lizenzierte die Gesellschaft geistiges Eigentum und schloss eine Zuliefervereinbarung bis Dezember 2011 ab. Der erhaltene Gegenwert wurde auf die verschiedenen Elemente der Transaktion verteilt, basierend auf deren relativen Marktwerten. Die Gesellschaft realisierte Verluste vor Steuern in Höhe von € 17 Millionen, die in den sonstigen betrieblichen Aufwendungen erfasst wurden. Darin enthalten war die Bildung einer Rückstellung in Höhe von € 8 Millionen, die über die Laufzeit der Zuliefervereinbarung verrechnet wird.

### VERKAUF DER VERMÖGENSWERTE FÜR DIE EINGEGOSSENEN LEISTUNGSMODULE UND GRÜNDUNG DES JOINT VENTURE LS POWER SEMITECH CO., LTD.

Im dritten Quartal des Geschäftsjahrs 2009 unterzeichnete die Gesellschaft eine Vereinbarung mit LS Industrial Systems Co., Ltd. („LSIS“), um das Joint Venture LS Power Semitech Co., Ltd. („LS“) zu gründen, welche am 27. November 2009 vollzogen wurde. Das Joint Venture ist in Korea und an anderen Standorten in Asien tätig und fokussiert sich auf die Entwicklung, Produktion und die Vermarktung von eingegossenen Leistungsmodulen für Anwendungen in Haushaltsgeräten. LSIS hält 54 Prozent und die Gesellschaft 46 Prozent an LS. Die Gesellschaft hat in LS Lizenzen für geistiges Eigentum sowie für Technologie- und Prozess-Know-how für ihre Leistungsmodulefamilie CIPOSTM (Control Integrated Power System) und bestehende CIPOSTM-Back-End-Produktionsanlagen eingebracht. Durch die Einbringung in das Gemeinschaftsunternehmen realisierte die Gesellschaft einen Gewinn vor Steuern von € 3 Millionen, welcher im Geschäftsjahr 2010 in den sonstigen

betrieblichen Erträgen ausgewiesen ist. Die Beteiligung an dem Gemeinschaftsunternehmen wird nach der Equity-Methode bilanziert.

### ALTIS

ALTIS Semiconductor S.N.C., Essonnes, Frankreich („ALTIS“) war bis August 2010 ein Gemeinschaftsunternehmen von Infineon und International Business Machines Corporation, New York, USA („IBM“), in dem beide Partner die gleichen Stimmrechtsanteile hatten. ALTIS wurde gemäß IAS 27, „Consolidated and Separate Financial Statements“, bis zum Dezember 2009 voll konsolidiert. Infineon hatte eine Option, weitere Stimmrechte an ALTIS von IBM (potenzielle Stimmrechte) zu erwerben. Unter anderem infolge des Ende Dezember 2009 erklärten Verzichts auf diese Option hat die Gesellschaft ALTIS Ende Dezember 2009 entkonsolidiert. Die Vermögenswerte und Schulden von ALTIS sowie die Minderheitsanteile in dem bis dahin voll konsolidierten Tochterunternehmen wurden ausgebucht, und die Gesellschaft hat ihre Beteiligung an ALTIS als eine Beteiligung an assoziierten Unternehmen zum beizulegenden Zeitwert von Null eingebucht. Die Beteiligung an ALTIS wurde seit diesem Zeitpunkt bis zum Verkauf nach der Equity-Methode bilanziert.

Mit der Entkonsolidierung als Tochtergesellschaft im Dezember 2009 sind die Zahlungsmittel um € 88 Millionen und die Minderheitsanteile um € 61 Millionen zurückgegangen. Der im Zusammenhang mit der Entkonsolidierung erfasste operative Verlust betrug im Geschäftsjahr € 69 Millionen, der unter den sonstigen betrieblichen Aufwendungen ausgewiesen ist. Darüber hinaus hat die Gesellschaft im dritten Quartal des Geschäftsjahrs 2010 eine Dividende in Höhe von € 3 Millionen von ALTIS erhalten.

Mit Wirkung zum 12. August 2010 haben die Gesellschaft und IBM sämtliche Anteile an ALTIS an Altis International, eine Gesellschaft im Besitz eines französischen Unternehmers, verkauft. Im Zusammenhang mit dem Verkauf haben IBM und Infineon Abnahmevereinbarungen mit ALTIS abgeschlossen. Diese sehen die Nutzung der ALTIS-Fertigungskapazitäten, die Lieferung von Halbleiterkomponenten sowie die Durchführung von Wafertests vor.

Aus dem Verkauf der Anteile resultierten keine Ergebniseffekte. Im Zuge der Beendigung des Joint Ventures mit IBM hat die Gesellschaft von IBM eine Ausgleichszahlung von € 14 Millionen für in der Vergangenheit verauslagter Umstrukturierungskosten erhalten.

### QIMONDA – NICHT FORTGEFÜHRTE AKTIVITÄTEN

Am 23. Januar 2009 stellten die Qimonda AG („Qimonda“), eine sich im Mehrheitsbesitz befindende Tochtergesellschaft, und deren hundertprozentige Tochtergesellschaft Qimonda Dresden GmbH & Co. oHG („Qimonda Dresden“) beim Amtsgericht München Antrag auf Eröffnung des Insolvenzverfahrens. Auf Grund des Insolvenzantrags von Qimonda erfolgte

01  
02  
03  
04  
05  
06  
07  
08  
09  
10  
11  
12  
13  
14  
15  
16  
17  
18  
19  
20  
21

in Übereinstimmung mit IAS 27, „Consolidated and Separate Financial Statements“, im zweiten Quartal des Geschäftsjahrs 2009 die Entkonsolidierung von Qimonda. Am 1. April 2009 wurden die Insolvenzverfahren eröffnet. Insolvenzverfahren wurden auch über weitere Tochterunternehmen von Qimonda in verschiedenen Staaten eröffnet. Die Ergebnisse von Qimonda sind in allen ausgewiesenen Berichtsperioden als nicht fortgeführte Aktivitäten in der Konzern-Gewinn- und Verlust-Rechnung dargestellt.

Im Zuge der Entkonsolidierung von Qimonda wurden Qimondas Zahlungsmittel und Zahlungsmitteläquivalente in Höhe von € 286 Millionen am Stichtag der Entkonsolidierung als Mittelabfluss aus Investitionstätigkeit aus nicht fortgeführten Aktivitäten ausgewiesen. Während des Geschäftsjahrs 2009 enthalten die ausgewiesenen Beträge hinsichtlich Qimonda im „Ergebnis aus nicht fortgeführten Aktivitäten, abzüglich Steuern vom Einkommen und vom Ertrag“ im Wesentlichen die Realisierung von aufgelaufenen Währungsumrechnungsverlusten in Höhe von € 188 Millionen und Aufwendungen für Rückstellungen und Wertberichtigungen in Höhe von € 227 Millionen im Zusammenhang mit der Insolvenz von Qimonda. Die Realisierung von aufgelaufenen Währungsumrechnungsdifferenzen, die zuvor im Eigenkapital erfasst waren, resultierte hauptsächlich aus Qimondas Veräußerung seiner Beteiligung an Inotera Memories Inc. („Inotera“) an Micron Technology, Inc. („Micron“) sowie aus der Entkonsolidierung von Qimonda.

Im Zusammenhang mit der Insolvenz von Qimonda ist Infineon neben den unter Anhang Nr. 38 ausgewiesenen Risiken unter anderem den folgenden potenziellen Verbindlichkeiten und Risiken ausgesetzt:

- Die Gesellschaft ist in bestimmten anhängigen kartell- und wertpapierrechtlichen Verfahren eine beklagte Partei. Qimonda ist verpflichtet, die Gesellschaft von Ansprüchen (einschließlich Aufwendungsersatz) im Zusammenhang mit den anhängigen kartell- und wertpapierrechtlichen Verfahren insgesamt oder teilweise freizustellen. Durch die Insolvenz von Qimonda erwartet die Gesellschaft, dass Qimonda nicht in der Lage sein wird, den Freistellungsanspruch der Gesellschaft zu erfüllen. Für weitere Informationen zu diesen anhängigen kartell- und wertpapierrechtlichen Verfahren und deren potenzieller Auswirkung auf die Gesellschaft siehe Anhang Nr. 38 („Finanzielle Verpflichtungen und Eventualverbindlichkeiten – Rechtsstreitigkeiten und staatliche Untersuchungsverfahren – Wettbewerbsrechtliche Verfahren“, „– Sonstige staatliche Ermittlungsverfahren“ und „– Wertpapierrechtliche Verfahren“).
- Die Gesellschaft ist Beklagte in einem in Delaware anhängigen Verfahren, in dem die Kläger Ansprüche auf Abfindungen und andere Bezüge geltend machen, die angeblich von Qimonda North America im Zusammenhang mit der Beendigung von Beschäftigungsverhältnissen auf Grund der Insolvenz von Qimonda zu zahlen sind. Für weitere Informationen

zu diesem Verfahren siehe Anhang Nr. 38 („Finanzielle Verpflichtungen und Eventualverbindlichkeiten – Rechtsstreitigkeiten und staatliche Untersuchungsverfahren – Arbeitsrechtliche Verfahren betreffend Qimonda“).

- Die Gesellschaft steht potenziellen Verbindlichkeiten gegenüber, die aus ihrer früheren Beteiligung an Qimonda Dresden erwachsen. Vor der Ausgliederung des Qimondageschäfts war die Gesellschaft persönlich haftende Gesellschafterin der Qimonda Dresden und könnte unter bestimmten Umständen auf Grund gesetzlicher Regelungen für einzelne Verbindlichkeiten von Qimonda Dresden, die vor der Ausgliederung begründet wurden, haftbar gemacht werden. Dies schließt, unter anderem, mögliche Rückzahlungen von öffentlichen Fördermitteln, aber auch mitarbeiterbezogene Ansprüche wie Vergütungen und Sozialabgaben ein. Die Gesellschaft ist zu diesen Sachverhalten in Verhandlungen mit dem Freistaat Sachsen und dem Insolvenzverwalter von Qimonda.
- Die Gesellschaft und ihre Tochtergesellschaft Infineon Technologies Dresden GmbH („Infineon Dresden“) sind Klagen von ungefähr 80 ehemaligen Infineon-Mitarbeitern ausgesetzt, die an Qimonda oder Qimonda Dresden im Rahmen der Ausgliederung transferiert wurden und die eine Wiederbeschäftigung durch die Gesellschaft verlangen. Bislang sind alle gerichtlichen Entscheidungen zugunsten der Gesellschaft oder Infineon Dresden ergangen.
- Der Insolvenzverwalter von Qimonda macht konzernrechtliche Schadensersatzansprüche gegen die Gesellschaft im Zusammenhang mit der Veräußerung der Inotera-Beteiligung durch Qimonda geltend. Es wird behauptet, dass Infineon, als Gesellschafterin von Qimonda, Qimonda dahingehend beeinflusst habe, einen Patentlizenzaustauschvertrag mit der Käuferin des Inotera-Anteils abzuschließen und Qimonda damit indirekt zu einem für Qimonda nachteiligen Rechtsgeschäft – nämlich der Veräußerung der Inotera-Beteiligung – veranlasst habe. Der Anspruch wurde ohne konkrete Sachverhaltsdarlegung vorgebracht. Die Gesellschaft hat die geltend gemachten Ansprüche zurückgewiesen.
- Die Insolvenzverwaltung macht außerdem geltend, dass es sich bei der Ausgliederung der Qimonda AG um eine sogenannte wirtschaftliche Neugründung gehandelt habe und dass die Gesellschaft es versäumt habe, dies gegenüber dem Registergericht offen zu legen. Vor diesem Hintergrund versucht die Insolvenzverwaltung, erhebliche Ansprüche gegen die Gesellschaft geltend zu machen. Die Gesellschaft hat sowohl die von der Insolvenzverwaltung vorgebrachte Darstellung des Sachverhalts als auch die geltend gemachten Rechtsfolgen zurückgewiesen.

Zusätzlich zu den oben beschriebenen Sachverhalten könnte die Gesellschaft Ansprüchen des Insolvenzverwalters nach deutschem Insolvenzrecht ausgesetzt sein, die zu Rückzahlungen bestimmter von Qimonda erhaltener Beträge führen können, wie zum Beispiel von Beträgen, die die Gesellschaft



für Konzerndienstleistungen und -lieferungen innerhalb bestimmter Zeiträume vor der Eröffnung des Insolvenzverfahrens erhalten hat. Die Insolvenz von Qimonda könnte die Gesellschaft auch anderen Ansprüchen aussetzen, die aus Verträgen, Angeboten, nicht abgeschlossenen Transaktionen, fortbestehenden Verpflichtungen, Risiken, Pfandrechten und anderen Verpflichtungen resultieren, die im Zusammenhang mit der Ausgliederung des Speichergeschäfts auf Qimonda übertragen wurden, da die Gesellschaft erwartet, dass Qimonda nicht in der Lage sein wird, seiner Freistellungsverpflichtung gegenüber der Gesellschaft in Bezug auf solche Ansprüche nachzukommen.

Die Gesellschaft sah sich dem Risiko ausgesetzt, dass im Zusammenhang mit öffentlichen Fördermitteln, die Qimonda Portugal S.A. (mittlerweile als Nanium S.A. fortgeführt) vor der Ausgliederung von Qimonda erhalten hat, Ansprüche gegen die Gesellschaft geltend gemacht werden könnten. Im Mai 2010 hat die Gesellschaft Verträge mit der Agência para o Investimento e Comércio Externo de Portugal, E.P.E. („AICEP“) und Nanium S.A. abgeschlossen. Die Verträge regeln einerseits Liefer- und Abnahmeverpflichtungen zwischen der Gesellschaft und Nanium bezüglich eWLB-Produkten; andererseits wurden alle offenen Punkte im Zusammenhang mit öffentlichen Fördermitteln einvernehmlich gelöst.

Im Geschäftsjahr 2010 waren bestimmte Anpassungen von einzelnen Rückstellungen für potenzielle Verbindlichkeiten an die aktuellen Entwicklungen erforderlich. Der Nettoeffekt vor Steuern unter den nicht fortgeführten Aktivitäten auf die zusammengefasste Konzern-Gewinn-und-Verlust-Rechnung der Gesellschaft betrug minus € 5 Millionen. Darüber hinaus führte der Abschluss einer steuerlichen Außenprüfung zu einem Steuerertrag von € 20 Millionen bezüglich des Speichergeschäfts und der Gründung von Qimonda.

Im Geschäftsjahr 2010 hat die Gesellschaft Zahlungen von insgesamt € 108 Millionen im Zusammenhang mit einzelnen oben ausgeführten Sachverhalten geleistet. Dieser Betrag enthält unter anderem die Zahlung von € 57 Millionen auf Grund des mit der Europäischen Kommission geschlossenen Vergleichs, die Zahlung der letzten Rate in Höhe von € 17 Millionen aus dem „Plea Agreement“ mit dem U.S. Department of Justice („DOJ“), sowie bestimmte Zahlungen im Zusammenhang mit mitarbeiterbezogenen Ansprüchen und auf Grund des separaten Vergleichs mit dem letzten direkten US-DRAM-Käufer, der sich nicht dem allgemeinen Vergleich der übrigen Sammelkläger angeschlossen hat (siehe Anhang Nr. 38). Die Diskussionen bezüglich mitarbeiterbezogener Ansprüche sind noch nicht abgeschlossen. Zum 30. September 2010 hat die Gesellschaft € 21 Millionen aus den kurzfristigen Rückstellungen in die kurzfristigen Verbindlichkeiten umgegliedert. Hintergrund ist die Einigung über einen Vergleich mit der Gruppe der indirekten Kunden (siehe Anhang Nr. 38).

Zum 30. September 2010 und zum 30. September 2009 hat die Gesellschaft im Zusammenhang mit einigen der

oben genannten Sachverhalte Verbindlichkeiten von jeweils € 21 Millionen in den beiden Abschlüssen sowie Rückstellungen von € 60 Millionen im Abschluss 2010 und € 163 Millionen im Abschluss 2009 bilanziert. Die erfassten Rückstellungen sind mehrheitlich unter „Kurzfristige Rückstellungen“ erfasst. Die entsprechenden Ergebnisbelastungen sind unter „Nicht fortgeführten Aktivitäten“ ausgewiesen.

Die erfassten Rückstellungen umfassen nur solche Verpflichtungen und Risiken, von denen die Gesellschaft annimmt, dass sie wahrscheinlich eintreten können, und die zum jetzigen Zeitpunkt mit hinreichender Genauigkeit eingeschätzt werden können. Es gibt keine Sicherheit, dass die erfassten Rückstellungen ausreichen, um allen Verpflichtungen nachzukommen, die sich im Zusammenhang mit der Insolvenz von Qimonda, insbesondere mit den oben dargestellten Angelegenheiten ergeben können. Die Erläuterung von konkret zurückgestellten Beträgen für einzelne Verpflichtungen und Risiken, die im Zusammenhang mit der Insolvenz von Qimonda stehen, könnte die rechtliche Position oder die Verhandlungsposition der Gesellschaft ernsthaft beeinträchtigen und erfolgt daher nicht. Aus denselben Gründen können für Verpflichtungen und Risiken, die möglicherweise eintreten könnten, momentan aber nicht als wahrscheinlich angesehen werden und daher nicht von den Rückstellungen erfasst sind, derzeit keine Beträge abgeschätzt oder Erläuterungen aufgenommen werden.

In jeder dieser Angelegenheiten überprüft die Gesellschaft fortlaufend die Begründetheit der geltend gemachten Ansprüche, setzt sich energisch gegen diese zur Wehr und versucht, im Ermessen und besten Interesse der Gesellschaft alternative Lösungsmöglichkeiten zu finden. Sollten die geltend gemachten Ansprüche Bestand haben, könnten erhebliche finanzielle Verpflichtungen für die Gesellschaft entstehen, welche einen negativen Einfluss auf das Geschäft und die Vermögens-, Finanz- und Ertragslage der Gesellschaft haben könnten.

## VERKAUF DES WIRELINE-COMMUNICATIONS-GESCHÄFTS – NICHT FORTGEFÜHRTE AKTIVITÄTEN

Am 7. Juli 2009 hat die Gesellschaft einen Vertrag über den Verkauf eines ihrer Segmente, das Wireline-Communications-Geschäft, an mehrere Lantiq-Gesellschaften, mit Golden Gate Private Equity Inc. verbundene Unternehmen („Lantiq“), geschlossen. Der Verkauf wurde am 6. November 2009 vollzogen. Der Großteil des Kaufpreises war mit Vollzug des Verkaufs in Höhe von € 223 Millionen fällig. Zusätzlich ist ein Anteil von € 20 Millionen des Kaufpreises wie im Kaufvertrag vereinbart neun Monate nach Vollzug des Verkaufs im August 2010 gezahlt worden. Aus technischen Gründen innerhalb der Logistikkette konnten Teile der Vorräte bei Verkauf nicht auf Lantiq übertragen werden und waren bis zur endgültigen Übertragung im Juli 2010 als zur Veräußerung stehende Vermögenswerte ausgewiesen. Im Zusammenhang mit diesen Vermögenswerten wurden erhaltene Anzahlungen bilanziert

01  
02  
03  
04  
05  
06  
07  
08  
09  
10  
11  
12  
13  
14  
15  
16  
17  
18  
19  
20  
21

und innerhalb der zur Veräußerung stehenden Verbindlichkeiten ausgewiesen. Mit erfolgter Übertragung der noch bei Infineon verbliebenen Vorräte auf Lantiq wurden diese im letzten Quartal des Geschäftsjahrs mit den dafür erhaltenen Anzahlungen verrechnet.

Auf Grund der Entscheidung, das Wireline-Communications-Geschäft zu verkaufen, hat die Gesellschaft in der Vorjahres-Konzern-Bilanz zum 30. September 2009 jene Vermögenswerte und Verbindlichkeiten des Wireline-Communications-Geschäfts, die zu Lantiq transferiert werden, gemäß IFRS 5, „Non-current Assets Held for Sale and Discontinued Operations“, als zur Veräußerung stehend erfasst. Die Ergebnisse aus dem Wireline-Communications-Geschäft sind zusammen mit dem Gewinn aus dem Verkauf in allen dargestellten Berichtsperioden in der Konzern-Gewinn-und-Verlust-Rechnung der Gesellschaft als „Ergebnis aus nicht fortgeführten Aktivitäten, abzüglich Steuern vom Einkommen und vom Ertrag“ ausgewiesen. Die Gesellschaft hat im Geschäftsjahr 2010 aus dem Verkauf einen Gewinn vor Steuern von € 108 Millionen erzielt. Der Ertragsteueraufwand, der diesem Veräußerungsgewinn zuzuordnen ist, beträgt € 15 Millionen. Der Gewinn nach Steuern beläuft sich somit auf € 93 Millionen.

## VERKAUF DES MOBILFUNKGESCHÄFTS – NICHT FORTGEFÜHRTE AKTIVITÄTEN

Am 30. August 2010 hat die Gesellschaft mit der Intel Corporation („Intel“) einen Vertrag über den Verkauf des Mobilfunkgeschäfts des Segments Wireless Solutions („Mobilfunkgeschäft“) abgeschlossen. Vom Geschäft des Segments Wireless Solutions verbleibt lediglich das Geschäft mit analogen und digitalen TV-Tunern und Empfangskomponenten für Satellitenradio sowie Hochfrequenz-Leistungsverstärkern für Mobilfunk-Basisstationen (mit einem Umsatz von € 82 Millionen im Geschäftsjahr 2010) bei der Gesellschaft. Der Verkauf soll Anfang des Kalenderjahrs 2011 vollzogen werden. Der Kaufpreis beträgt 1.400 Millionen US-Dollar und ist bei Vollzug fällig. Der Verkauf wird vorrangig als „Asset Deal“ vollzogen. Alle dem Mobilfunkgeschäft zugeordneten Vermögenswerte, Patente, sonstiges geistiges Eigentum sowie ausgewählte Verbindlichkeiten werden einzeln spezifiziert und verkauft. Forderungen gegen Kunden aus Umsatzerlösen vor dem Vollzug des Verkaufs sind nicht Bestandteil des Verkaufs. Die Gesellschaft hat mit Intel Produktliefervereinbarungen abgeschlossen. Bei Vollzug werden lediglich die fertigen Erzeugnisse übertragen. Bei Infineon verbleiben hingegen unfertige Erzeugnisse, Roh-, Hilfs- und Betriebsstoffe, die Forderungen aus Lieferungen und Leistungen, der Saldo aus geleisteten und empfangenen Vorauszahlungen sowie das sonstige Nettoumlaufvermögen. Bis auf wenige Ausnahmen bleibt die Fertigung der Gesellschaft von der Transaktion unberührt. Lediglich wenige einzelne dedizierte Produktionsanlagen werden übertragen, die von Intel zusätzlich zum oben genannten Kaufpreis in Höhe des Buchwertes dieser Produktionsanlagen in bar

ausgeglichen werden. Die Gesellschaft trägt alle Personalkosten bis zum Vollzug der Transaktion. Für einzelne definierte Personalverbindlichkeiten – namentlich Pensionsverbindlichkeiten und sonstige Personalverbindlichkeiten – wird die Gesellschaft für die Übernahme der Verbindlichkeiten durch Intel einen Barausgleich bei Vollzug des Verkaufs leisten. Im Zusammenhang mit der Transaktion anfallende Separationskosten für den Standortwechsel von Mitarbeitern und die Anpassung und Umgestaltung von bestehenden Anlagen und IT-Systemen werden von Intel und der Gesellschaft jeweils hälftig übernommen.

Auf Grund der Entscheidung über den Verkauf des Geschäfts des Mobilfunkgeschäfts hat die Gesellschaft in der Konzern-Bilanz zum 30. September 2010 jene Vermögenswerte und Verbindlichkeiten, die zu Intel transferiert werden, gemäß IFRS 5, „Non-current Assets Held for Sale and Discontinued Operations“, als zur Veräußerung stehend erfasst. Die Salden der als „zur Veräußerung stehend“ klassifizierten Vermögenswerte und Verbindlichkeiten zum Zeitpunkt des Vollzugs der Transaktion werden von den in der Konzern-Bilanz zum 30. September 2010 ausgewiesenen abweichen, da in der Zwischenzeit entsprechende Veränderungen der Positionen auftreten werden, zum Beispiel durch einen Auf- oder Abbau der Roh-, Hilfs- und Betriebsstoffe oder die Begleichung von Personalverbindlichkeiten. Seit Anfang August 2010 werden für die zur Veräußerung stehenden langfristigen Vermögenswerte entsprechend IFRS 5 keine Abschreibungen mehr vorgenommen.

Die Ergebnisse des Mobilfunkgeschäfts sind im Geschäftsjahr 2010 in der Konzern-Gewinn-und-Verlust-Rechnung der Gesellschaft als „Ergebnis aus nicht fortgeführten Aktivitäten, abzüglich Steuern vom Einkommen und vom Ertrag“ ausgewiesen. Die Vorjahresbeträge wurden entsprechend angepasst. Aufwendungen, die zuvor dem Mobilfunkgeschäft zugeordnet waren, die aber nach Abschluss des geplanten Verkaufs weiterhin anfallen, sind von diesem Ausweis nicht betroffen und werden weiterhin im „Ergebnis aus fortgeführten Aktivitäten“ ausgewiesen.

Zur Absicherung des voraussichtlichen Verkaufserlöses von 1.400 Millionen US-Dollar hat die Gesellschaft US-Dollar/Euro-Verkaufsoptionen erworben, deren Ausübungskurs bei einem Euro/US-Dollar-Wechselkurs von 1,32 liegt. Auf Grund der zwischenzeitlichen Abschwächung des US-Dollar gegenüber dem Euro hat sich der Wert der Optionen bis zum 30. September 2010 erhöht, was zu einer Ertragsrealisierung in unseren Büchern führte. Im Geschäftsjahr 2010 sind dem Verkauf einzeln zurechenbare Transaktionskosten angefallen. In Summe resultiert aus diesen Sachverhalten im Geschäftsjahr 2010 ein positiver Ergebniseffekt von € 19 Millionen, der unter dem „Ergebnis aus nicht fortgeführten Aktivitäten, abzüglich Steuern vom Einkommen und vom Ertrag“ erfasst wurde. Infolge der Veräußerung des Mobilfunkgeschäfts werden bei Vollzug des Verkaufs steuerliche Verlustvorträge genutzt. Dies

fürte im abgelaufenen vierten Quartal des Geschäftsjahrs 2010 zu einer Aktivierung latenter Steuerforderungen in Höhe von € 82 Millionen.

Entsprechend der internen Berichterstattung im Geschäftsjahr 2010 wird das Segment Wireless Solutions im Rahmen der Segmentberichterstattung unverändert berichtet (siehe Anhang Nr. 39).

### ZUR VERÄUSSERUNG STEHENDE VERMÖGENSWERTE UND VERBINDLICHKEITEN

Die zur Veräußerung stehenden Vermögenswerte und Verbindlichkeiten zum 30. September 2010 bestehen im Wesentlichen aus den Buchwerten der Vermögenswerte

und Verbindlichkeiten, die im Zusammenhang mit dem Mobilfunkgeschäft verkauft werden. Die Salden der als „zur Veräußerung stehend“ klassifizierten Vermögenswerte und Verbindlichkeiten zum Zeitpunkt des Vollzugs der Transaktion werden von den in der Konzern-Bilanz zum 30. September 2010 ausgewiesenen abweichen, da in der Zwischenzeit entsprechende Veränderungen der Positionen auftreten werden, zum Beispiel durch einen Auf- oder Abbau der Roh-, Hilfs- und Betriebsstoffe oder die Begleichung von Personalverbindlichkeiten.

Die Buchwerte der wesentlichen Klassen der zur Veräußerung stehenden Vermögenswerte und Verbindlichkeiten setzen sich zum 30. September 2010 wie folgt zusammen:

| € in Millionen                                                      | 30. September 2010 |
|---------------------------------------------------------------------|--------------------|
| Forderungen aus Lieferungen und Leistungen und sonstige Forderungen | 3                  |
| Vorräte                                                             | 74                 |
| Sonstige kurzfristige Vermögenswerte                                | 14                 |
| Sachanlagen                                                         | 56                 |
| Geschäfts- oder Firmenwert und andere immaterielle Vermögenswerte   | 312                |
| Sonstige finanzielle Vermögenswerte                                 | 1                  |
| Sonstige Vermögenswerte                                             | 35                 |
| <b>Gesamte zur Veräußerung stehende Vermögenswerte</b>              | <b>495</b>         |
| Kurzfristige Rückstellungen                                         | 71                 |
| Sonstige kurzfristige Verbindlichkeiten                             | 18                 |
| Pensionen und ähnliche Verpflichtungen                              | 46                 |
| Sonstige Verbindlichkeiten                                          | 42                 |
| <b>Gesamte zur Veräußerung stehende Verbindlichkeiten</b>           | <b>177</b>         |

Die zur Veräußerung stehenden Vermögenswerte und Verbindlichkeiten zum 30. September 2009 bestehen im Wesentlichen aus den Buchwerten der Vermögenswerte und Verbindlichkeiten, die im Zusammenhang mit dem Verkauf des Wireline-

Communications-Geschäft veräußert wurden. Die Buchwerte der wesentlichen Klassen der zur Veräußerung stehenden Vermögenswerte und Verbindlichkeiten setzen sich zum 30. September 2009 wie folgt zusammen:

| € in Millionen                                                    | 30. September 2009 |
|-------------------------------------------------------------------|--------------------|
| Vorräte                                                           | 43                 |
| Sonstige kurzfristige Vermögenswerte                              | 2                  |
| Sachanlagen                                                       | 9                  |
| Geschäfts- oder Firmenwert und andere immaterielle Vermögenswerte | 58                 |
| <b>Gesamte zur Veräußerung stehende Vermögenswerte</b>            | <b>112</b>         |
| Kurzfristige Rückstellungen                                       | 6                  |
| Sonstige kurzfristige Verbindlichkeiten                           | 2                  |
| Pensionen und ähnliche Verpflichtungen                            | 1                  |
| <b>Gesamte zur Veräußerung stehende Verbindlichkeiten</b>         | <b>9</b>           |

**ERGEBNIS AUS NICHT FORTGEFÜHRTEN AKTIVITÄTEN,  
ABZÜGLICH STEUERN VOM EINKOMMEN UND VOM  
ERTRAG**

Die Ergebnisse von Qimonda, dem veräußerten Wireline-Communications-Geschäft und dem zu veräußernden

Mobilfunkgeschäft, die in der Konzern-Gewinn-und-Verlust-Rechnung als „Ergebnis aus nicht fortgeführten Aktivitäten, abzüglich Steuern vom Einkommen und Ertrag“ dargestellt sind, setzen sich in den Geschäftsjahren 2010 und 2009 wie folgt zusammen:

| € in Millionen                                                                                                                                                   | 2010    | 2009  |
|------------------------------------------------------------------------------------------------------------------------------------------------------------------|---------|-------|
| <b>Qimonda</b>                                                                                                                                                   |         |       |
| Umsatzerlöse                                                                                                                                                     | –       | 314   |
| Kosten und Aufwendungen                                                                                                                                          | –       | – 779 |
| Rücknahme der Abschreibung auf den Zeitwert, abzüglich anfallender Veräußerungskosten                                                                            | –       | 460   |
| Geschätzte Aufwendungen infolge des Insolvenzantrags von Qimonda                                                                                                 | – 5     | – 227 |
| Realisierung aufgelaufener Verluste in Verbindung mit unrealisierten Währungseffekten im Wesentlichen aus der Entkonsolidierung und Qimondas Verkauf von Inotera | –       | – 188 |
| <b>Ergebnis vor Steuern</b>                                                                                                                                      | – 5     | – 420 |
| Erträge aus Steuern vom Einkommen und vom Ertrag                                                                                                                 | 20      | –     |
| <b>Qimondas Anteil am Ergebnis aus nicht fortgeführten Aktivitäten, abzüglich Steuern vom Einkommen und vom Ertrag</b>                                           | 15      | – 420 |
| <b>Wireline-Communications-Geschäft</b>                                                                                                                          |         |       |
| Umsatzerlöse                                                                                                                                                     | 31      | 333   |
| Kosten und Aufwendungen                                                                                                                                          | – 31    | – 309 |
| <b>Ergebnis vor Steuern</b>                                                                                                                                      | –       | 24    |
| Aufwendungen aus Steuern vom Einkommen und vom Ertrag                                                                                                            | –       | – 2   |
| <b>Ergebnis nach Steuern</b>                                                                                                                                     | –       | 22    |
| Gewinn vor Steuern aus dem Verkauf des Wireline-Communications-Geschäfts                                                                                         | 108     | –     |
| Steuern auf den Gewinn                                                                                                                                           | – 15    | –     |
| Gewinn nach Steuern aus dem Verkauf des Wireline-Communications-Geschäfts                                                                                        | 93      | –     |
| <b>Wireline-Communications-Anteil am Ergebnis aus nicht fortgeführten Aktivitäten, abzüglich Steuern vom Einkommen und vom Ertrag</b>                            | 93      | 22    |
| <b>Mobilfunkgeschäft</b>                                                                                                                                         |         |       |
| Umsatzerlöse                                                                                                                                                     | 1.290   | 843   |
| Kosten und Aufwendungen                                                                                                                                          | – 1.120 | – 882 |
| <b>Ergebnis vor Steuern</b>                                                                                                                                      | 170     | – 39  |
| Aufwendungen aus Steuern vom Einkommen und vom Ertrag                                                                                                            | – 12    | – 4   |
| <b>Steuerertrag durch Bilanzierung aktiver latenter Steuern</b>                                                                                                  | 82      | –     |
| <b>Anteil des Mobilfunkgeschäfts am Ergebnis aus nicht fortgeführten Aktivitäten, abzüglich Steuern vom Einkommen und vom Ertrag</b>                             | 240     | – 43  |
| <b>Ergebnis aus nicht fortgeführten Aktivitäten, abzüglich Steuern vom Einkommen und vom Ertrag</b>                                                              | 348     | – 441 |

## 7 / ZUSCHÜSSE UND ZULAGEN

Die Gesellschaft hat im Rahmen staatlicher Wirtschaftsförderungsprogramme von verschiedenen staatlichen Stellen Fördermittel, unter anderem für die Errichtung von Fertigungsstätten, für Forschung und Entwicklung und Mitarbeiterentwicklung, erhalten. Die im Konzernabschluss enthaltenen Zuschüsse und Zulagen stellen sich für die Geschäftsjahre 2010 und 2009 wie folgt dar:

| € in Millionen                                             | 2010      | 2009      |
|------------------------------------------------------------|-----------|-----------|
| In der Konzern-Gewinn-und-Verlust-Rechnung sind enthalten: |           |           |
| Forschung und Entwicklung                                  | 47        | 41        |
| Umsatzkosten                                               | 10        | 14        |
| Vertriebskosten und allgemeine Verwaltungskosten           | 1         | 1         |
| <b>Gesamt</b>                                              | <b>58</b> | <b>56</b> |

Abgegrenzte staatliche Zuschüsse und Zulagen betragen zum 30. September 2010 und 2009 € 21 Millionen und € 21 Millionen. Zum 30. September 2010 und 2009 bestanden Forderungen für Fördermittel in Höhe von € 39 Millionen und € 30 Millionen.

## 8 / ZUSÄTZLICHE ANGABEN ZU BETRIEBLICHEN AUFWENDUNGEN UND ERTRÄGEN

Die Personalaufwendungen setzen sich für die Geschäftsjahre 2010 und 2009 wie folgt zusammen:

| € in Millionen                           | 2010         | 2009         |
|------------------------------------------|--------------|--------------|
| Löhne und Gehälter                       | 1.199        | 1.010        |
| Sozialabgaben                            | 181          | 201          |
| Aufwendungen für Pensionsverpflichtungen | -1           | -13          |
| <b>Gesamt</b>                            | <b>1.379</b> | <b>1.198</b> |

Die durchschnittliche Anzahl der Mitarbeiter nach Regionen für die Geschäftsjahre zum 30. September 2010 und 2009 ist in folgender Übersicht dargestellt<sup>1</sup>:

|                | 2010          | 2009          |
|----------------|---------------|---------------|
| Deutschland    | 8.743         | 9.379         |
| Übriges Europa | 3.377         | 4.726         |
| Nordamerika    | 634           | 729           |
| Asien-Pazifik  | 12.837        | 11.763        |
| Japan          | 124           | 143           |
| <b>Gesamt</b>  | <b>25.715</b> | <b>26.740</b> |

<sup>1</sup> Es ist vorgesehen, dass weltweit ungefähr 3.400 Mitarbeiter des Segments Wireless Solutions und aus Zentralfunktionen im Rahmen des Verkaufs des Mobilfunkgeschäfts an Intel übergehen.

Die sonstigen betrieblichen Erträge setzen sich für die Geschäftsjahre 2010 und 2009 wie folgt zusammen:

| € in Millionen                                                                            | 2010      | 2009      |
|-------------------------------------------------------------------------------------------|-----------|-----------|
| Gewinne aus der Veräußerung von Geschäftseinheiten und von Anteilen an Tochterunternehmen | 3         | -         |
| Wertaufholung von außerplanmäßig abgeschriebenem Vermögenswerten                          | -         | 2         |
| Sonstige                                                                                  | 15        | 15        |
| <b>Gesamt</b>                                                                             | <b>18</b> | <b>17</b> |

Die sonstigen betrieblichen Aufwendungen setzen sich für die Geschäftsjahre 2010 und 2009 wie folgt zusammen:

| € in Millionen                                                                                              | 2010       | 2009      |
|-------------------------------------------------------------------------------------------------------------|------------|-----------|
| Verluste aus dem Verkauf von Geschäftsaktivitäten und Anteilen an Tochterunternehmen                        | -          | 17        |
| Außerplanmäßige Abschreibungen auf Geschäfts- oder Firmenwerte, immaterielle Vermögenswerte und Sachanlagen | 12         | 2         |
| Verlust in Zusammenhang mit der Entkonsolidierung von ALTIS                                                 | 69         | -         |
| Belastende Mietverträge                                                                                     | 7          | 8         |
| Sonstige                                                                                                    | 34         | 19        |
| <b>Gesamt</b>                                                                                               | <b>122</b> | <b>46</b> |

Die gesamten Aufwendungen für operative Leasing-Verträge betragen € 69 Millionen im Geschäftsjahr 2010 und € 88 Millionen im Geschäftsjahr 2009.

## 9 / FINANZERTRÄGE

Die Finanzerträge in den Geschäftsjahren 2010 und 2009 setzen sich wie folgt zusammen:

| € in Millionen                                                                             | 2010      | 2009       |
|--------------------------------------------------------------------------------------------|-----------|------------|
| Zinserträge                                                                                | 18        | 84         |
| Wertänderungen und Erträge aus dem Verkauf von zur Veräußerung verfügbaren Vermögenswerten | 6         | –          |
| Sonstige Finanzerträge                                                                     | 5         | 17         |
| <b>Gesamt</b>                                                                              | <b>29</b> | <b>101</b> |

Die Zinserträge im Geschäftsjahr 2009 enthalten einen Gewinn vor Steuern in Höhe von € 61 Millionen, der aus den Rückkäufen der im Jahr 2010 fälligen nachrangigen Umtausch- und Wandelanleihe resultiert (siehe Anhang Nr. 27). Aus den Rückkäufen im Geschäftsjahr 2010 resultierte kein Gewinn.

## 10 / FINANZAUFWENDUNGEN

Die Finanzaufwendungen in den Geschäftsjahren 2010 und 2009 setzen sich wie folgt zusammen:

| € in Millionen                                                                              | 2010      | 2009       |
|---------------------------------------------------------------------------------------------|-----------|------------|
| Zinsaufwendungen                                                                            | 91        | 124        |
| Wertänderungen und Verluste aus dem Verkauf von zur Veräußerung verfügbaren Vermögenswerten | 1         | 28         |
| Sonstige Finanzaufwendungen                                                                 | 3         | 2          |
| <b>Gesamt</b>                                                                               | <b>95</b> | <b>154</b> |

Die Zinsaufwendungen in den Geschäftsjahren 2010 und 2009 enthalten einen Verlust vor Steuern in Höhe von € 5 Millionen und € 6 Millionen, der aus den Rückkäufen und der Rückzahlung der im Jahr 2010 fälligen nachrangigen Wandel- und Umtauschanleihe resultiert (siehe Anhang Nr. 27).

## 11 / STEUERN VOM EINKOMMEN UND VOM ERTRAG

Das Ergebnis aus fortgeführten Aktivitäten vor Steuern verteilt sich in den Geschäftsjahren 2010 und 2009 wie folgt:

| € in Millionen                                                                         | 2010       | 2009         |
|----------------------------------------------------------------------------------------|------------|--------------|
| Deutschland                                                                            | 135        | – 251        |
| Ausland                                                                                | 155        | 22           |
| <b>Ergebnis aus fortgeführten Aktivitäten vor Steuern vom Einkommen und vom Ertrag</b> | <b>290</b> | <b>– 229</b> |

Die Aufwendungen aus Steuern vom Einkommen und vom Ertrag aus fortgeführten Aktivitäten ermitteln sich für die zum 30. September 2010 und 2009 endenden Geschäftsjahre wie folgt:

| € in Millionen                                               | 2010        | 2009 <sup>1</sup> |
|--------------------------------------------------------------|-------------|-------------------|
| <b>Laufender Steueraufwand:</b>                              |             |                   |
| Deutschland                                                  | 10          | 1                 |
| Ausland                                                      | 36          | 10                |
|                                                              | 46          | 11                |
| <b>Latenter Steueraufwand:</b>                               |             |                   |
| Deutschland                                                  | – 71        | – 5               |
| Ausland                                                      | 3           | – 2               |
|                                                              | – 68        | – 7               |
| <b>Aufwendungen aus Steuern vom Einkommen und vom Ertrag</b> | <b>– 22</b> | <b>4</b>          |

Vom laufenden Steueraufwand zum 30. September 2010 und 2009 entfallen auf Vorjahre € 2 Millionen und € 0 Millionen.

Für die Geschäftsjahre 2010 und 2009 beträgt der Körperschaftsteuersatz der Gesellschaft 15 Prozent zuzüglich des Solidaritätszuschlags von 5,5 Prozent. Der Gewerbesteuersatz beträgt für die Infineon Technologies AG 12 Prozent, woraus sich ein Gesamtsteuersatz von 28 Prozent ergibt.

<sup>1</sup> Die Vorjahreszahlen sind auf Grund IAS 8 angepasst (siehe Anhang Nr. 3).

Die folgende Überleitung der Steuern vom Einkommen und vom Ertrag aus fortgeführten Aktivitäten zum 30. September 2010 und 2009 erfolgt unter Zugrundelegung eines Gesamtsteuersatzes aus deutscher Körperschaftsteuer zuzüglich Gewerbesteuer in Höhe von 28 Prozent für 2010 und 2009:

| € in Millionen                                                            | 2010        | 2009 <sup>1</sup> |
|---------------------------------------------------------------------------|-------------|-------------------|
| Erwarteter Aufwand aus Steuern vom Einkommen und vom Ertrag               | 81          | - 64              |
| Veränderung verfügbarer Steuervergünstigungen                             | - 13        | - 13              |
| Steuersatzdifferenzen                                                     | - 29        | - 1               |
| Permanente Differenzen, netto                                             | 10          | 9                 |
| Veränderung der Wertberichtigung                                          | - 73        | 73                |
| Sonstiges                                                                 | 2           | -                 |
| <b>Tatsächliche Aufwendungen aus Steuern vom Einkommen und vom Ertrag</b> | <b>- 22</b> | <b>4</b>          |

Der Saldo der aktiven und passiven latenten Steuern aus fortgeführten Aktivitäten wird in der Konzern-Bilanz zum 30. September 2010 und 2009 wie folgt ausgewiesen:

| € in Millionen                      | 2010       | 2009 <sup>1</sup> |
|-------------------------------------|------------|-------------------|
| Aktive latente Steuer               | 308        | 156               |
| Passive latente Steuer              | - 11       | - 13              |
| <b>Summe latente Steuern, Saldo</b> | <b>297</b> | <b>143</b>        |

Die Veränderung des Saldos der aktiven und passiven latenten Steuern stellt sich wie folgt dar:

|                                                            | 2010       |
|------------------------------------------------------------|------------|
| Latente Steuern, Saldo zum 30. September 2009 <sup>1</sup> | 143        |
| Latenter Steuerertrag aus nicht fortgeführten Aktivitäten  | 78         |
| Latenter Steuerertrag aus fortgeführten Aktivitäten        | 68         |
| Latente Steuern, die direkt im Eigenkapital erfasst werden | 2          |
| Effekte aus der Währungsumrechnung                         | 6          |
| <b>Latente Steuern, Saldo zum 30. September 2010</b>       | <b>297</b> |

Die aktiven und passiven latenten Steuern setzen sich zum 30. September 2010 und 2009 wie folgt zusammen:

| € in Millionen                                   | 2010         | 2009 <sup>1</sup> |
|--------------------------------------------------|--------------|-------------------|
| <b>Aktive latente Steuern:</b>                   |              |                   |
| Immaterielle Vermögenswerte                      | 28           | 58                |
| Sachanlagen                                      | 117          | 123               |
| Verlustvorräte                                   | 1.103        | 1.130             |
| Steuervergünstigungen                            | 193          | 168               |
| Sonstiges                                        | 271          | 221               |
| <b>Bruttobetrag der aktiven latenten Steuern</b> | <b>1.712</b> | <b>1.700</b>      |
| Wertberichtigung                                 | - 1.241      | - 1.410           |
| <b>Aktive latente Steuern</b>                    | <b>471</b>   | <b>290</b>        |
| <b>Passive latente Steuern:</b>                  |              |                   |
| Immaterielle Vermögenswerte                      | - 33         | - 22              |
| Sachanlagen                                      | - 3          | - 6               |
| Forderungen                                      | - 10         | -                 |
| Rückstellungen und Pensionsverpflichtungen       | - 107        | - 112             |
| Sonstiges                                        | - 21         | - 7               |
| <b>Passive latente Steuern</b>                   | <b>- 174</b> | <b>- 147</b>      |
| <b>Summe latente Steuern, Saldo</b>              | <b>297</b>   | <b>143</b>        |

In Deutschland hatte die Gesellschaft zum 30. September 2010 körperschaftsteuerliche Verlustvorräte in Höhe von € 3,4 Milliarden und gewerbesteuerliche Verlustvorräte in Höhe von € 4,6 Milliarden. Im Ausland bestehen steuerliche Verlustvorräte in Höhe von € 56 Millionen sowie aktivierte Vorräte aus Steuervergünstigungen in Höhe von € 193 Millionen. Diese steuerlichen Verlustvorräte und Steuervergünstigungen sind grundsätzlich nur durch die Gesellschaft nutzbar, bei der die steuerlichen Verluste oder die Steuerforderungen entstanden und nach geltendem Recht nicht verfallen sind. Erträge aus Steuervergünstigungen werden im Steueraufwand erfasst, sofern die jeweilige Gesellschaft die Voraussetzungen für deren Gewährung erfüllt.

<sup>1</sup> Die Vorjahreszahlen sind auf Grund IAS 8 angepasst (siehe Anhang Nr. 3).

Die Gesellschaft hat die aktiven latenten Steuern auf die Notwendigkeit einer Wertberichtigung überprüft. Das Bestehen von steuerlichen Verlustvorträgen und eine Verlusthistorie sind generell ein gewichtiges Indiz, dass nicht von einer Nutzung der aktiven latenten Steuern ausgegangen werden kann. Die Gesellschaft hat in der Vergangenheit, insbesondere in Deutschland, steuerliche Verlustvorträge aufgebaut, die jedoch im Wesentlichen durch das Qimonda-Geschäft und das zu veräußernde Mobilfunkgeschäft verursacht wurden. Beide Geschäfte werden zum 30. September 2010 als nicht fortgeführte Aktivitäten ausgewiesen. Insoweit sind diese Verluste nicht als negativer Faktor in die Beurteilung der Wahrscheinlichkeit, mit der, insbesondere in Deutschland, zu versteuerndes Einkommen zur Nutzung der latenten Steuerforderungen zur Verfügung stehen wird, einzubeziehen.

Folglich wurde bei der Überprüfung der Werthaltigkeit der latenten Steuern der einzelnen Konzerngesellschaften auf die fortgeführten Aktivitäten der historisch insgesamt profitablen Segmente Automotive, Industrial & Multimarket und Chip Card & Security sowie die erwarteten Auswirkungen aus der bevorstehenden Veräußerung des Mobilfunkgeschäfts abgestellt. Basierend auf den Ergebnissen dieser Überprüfung und unter Abwägung aller positiven und negativen Faktoren und Informationen in Hinblick auf die vorhersehbare Zukunft, hat die Gesellschaft zum 30. September 2010 Wertberichtigungen auf die aktiven latenten Steuern aufgelöst.

Die Veränderung der Wertberichtigung auf die aktiven latenten Steuern stellt sich wie folgt dar:

| € in Millionen                                                                           | 2010         |
|------------------------------------------------------------------------------------------|--------------|
| Wertberichtigung zum 30. September 2009 <sup>1</sup>                                     | 1.410        |
| Reduktion der Wertberichtigung auf Grund tatsächlicher Nutzung, Inland                   | -92          |
| Davon aus nicht fortgeführten Aktivitäten                                                | -45          |
| Reduktion der Wertberichtigung auf Grund Neueinschätzung, Inland                         | -151         |
| Davon aus nicht fortgeführten Aktivitäten (siehe Anhang Nr. 6)                           | -82          |
| Veränderung Ausland, netto                                                               | 43           |
| Veränderung der Wertberichtigung auf latente Steuern, die im Eigenkapital erfasst werden | 21           |
| Sonstige                                                                                 | 10           |
| <b>Wertberichtigung zum 30. September 2010</b>                                           | <b>1.241</b> |

Die Erhöhung der Wertberichtigungen im Ausland resultiert im Wesentlichen aus der Einschätzung von im laufenden Geschäftsjahr zusätzlich gewährten und ungenutzten Steuervergünstigungen. Die sonstigen Veränderungen resultieren im Wesentlichen aus Währungseffekten und Anpassungen an endgültige Steuererklärungen für Vorjahre.

Die Gesellschaft hat zum 30. September 2010 und 2009 auf kumulierte einbehaltene Gewinne ausländischer Gesellschaften keine zusätzlichen Ertrag- oder Quellensteuern berechnet, da diese Gewinne in den Auslandsgesellschaften unbegrenzt reinvestiert bleiben sollen. Eine betragsmäßige Schätzung der nicht berücksichtigten passiven latenten Steuern auf diese einbehaltenen Gewinne ist nicht durchführbar.

## 12 / ERGEBNIS JE AKTIE

Das unverwässerte Ergebnis je Aktie errechnet sich aus dem Konzernjahresüberschuss (-fehlbetrag), dividiert durch den gewogenen Mittelwert der während des Berichtsjahrs ausstehenden Aktien. Bei der Berechnung des verwässerten Ergebnisses je Aktie wird der gewogene Mittelwert der ausstehenden Aktien um die Anzahl der zusätzlichen Aktien erhöht, die ausstünden, wenn potenziell verwässernde Instrumente in Aktien umgetauscht worden wären.

<sup>1</sup> Die Vorjahreszahlen sind auf Grund IAS 8 angepasst (siehe Anhang Nr. 3).



Das unverwässerte Ergebnis je Aktie und das verwässerte Ergebnis je Aktie für die zum 30. September 2010 und 2009 endenden Geschäftsjahre errechnen sich wie folgt:

|                                                                                                                                                            | 2010        | 2009          |    |
|------------------------------------------------------------------------------------------------------------------------------------------------------------|-------------|---------------|----|
| <b>Zähler (€ in Millionen):</b>                                                                                                                            |             |               | 01 |
| Ergebnis aus fortgeführten Aktivitäten                                                                                                                     | 312         | - 233         | 02 |
| Abzüglich: davon auf Minderheitsanteile entfallend                                                                                                         | - 1         | -             | 03 |
| <b>Ergebnis aus fortgeführten Aktivitäten zurechenbar auf Aktionäre der Infineon Technologies AG</b>                                                       | <b>311</b>  | <b>- 233</b>  | 04 |
| Ergebnis aus nicht fortgeführten Aktivitäten, abzüglich Steuern vom Einkommen und vom Ertrag                                                               | 348         | - 441         |    |
| Abzüglich: davon auf Minderheitsanteile entfallend                                                                                                         | -           | 48            |    |
| <b>Ergebnis aus nicht fortgeführten Aktivitäten, abzüglich Steuern vom Einkommen und vom Ertrag zurechenbar auf Aktionäre der Infineon Technologies AG</b> | <b>348</b>  | <b>- 393</b>  |    |
| <b>Konzernjahresüberschuss (-fehlbetrag) zurechenbar auf Aktionäre der Infineon Technologies AG</b>                                                        | <b>659</b>  | <b>- 626</b>  |    |
| <b>Nenner (Aktienanzahl in Millionen):</b>                                                                                                                 |             |               | 05 |
| Gewichtete Anzahl der ausstehenden Aktien – unverwässert                                                                                                   | 1.086,7     | 854,5         | 06 |
| Anpassungen für:                                                                                                                                           |             |               |    |
| – Effekt aus der potenziellen Wandlung der Wandelanleihe                                                                                                   | 84,0        | -             | 07 |
| – Effekt aus Aktienoptionen                                                                                                                                | 0,6         | -             | 08 |
| Gewichtete Anzahl der ausstehenden Aktien – verwässert                                                                                                     | 1.171,3     | 854,5         | 09 |
| <b>Ergebnis je Aktie (in €) – unverwässert:</b>                                                                                                            |             |               | 10 |
| Ergebnis aus fortgeführten Aktivitäten zurechenbar auf Aktionäre der Infineon Technologies AG                                                              | 0,29        | - 0,27        |    |
| Ergebnis aus nicht fortgeführten Aktivitäten, abzüglich Steuern vom Einkommen und vom Ertrag zurechenbar auf Aktionäre der Infineon Technologies AG        | 0,32        | - 0,46        |    |
| <b>Ergebnis je Aktie zurechenbar auf Aktionäre der Infineon Technologies AG</b>                                                                            | <b>0,61</b> | <b>- 0,73</b> | 11 |
| <b>Ergebnis je Aktie (in €) – verwässert:</b>                                                                                                              |             |               | 12 |
| Ergebnis aus fortgeführten Aktivitäten zurechenbar auf Aktionäre der Infineon Technologies AG                                                              | 0,28        | - 0,27        | 13 |
| Ergebnis aus nicht fortgeführten Aktivitäten, abzüglich Steuern vom Einkommen und vom Ertrag zurechenbar auf Aktionäre der Infineon Technologies AG        | 0,30        | - 0,46        | 14 |
| <b>Ergebnis je Aktie zurechenbar auf Aktionäre der Infineon Technologies AG</b>                                                                            | <b>0,58</b> | <b>- 0,73</b> | 15 |
|                                                                                                                                                            |             |               | 16 |

Die Berechnung des verwässerten Ergebnisses je Aktie basiert auf einem Ergebnis aus fortgeführten Aktivitäten, zurechenbar auf Aktionäre der Infineon Technologies AG von € 332 Millionen (Vorjahr minus € 233 Millionen). Dies beinhaltet die Anpassung von € 21 Millionen aus Zinsen nach Steuern auf die im Jahr 2014 fällige nachrangige Wandelanleihe (Vorjahr € 0).

Die durchschnittliche Anzahl potenziell verwässernder Instrumente, deren Ausübungspreis während der Berichtsperiode höher war als der durchschnittliche Aktienkurs, sowie diejenigen, die aus anderen Gründen nicht verwässernd gewirkt haben, wurden bei der Berechnung des verwässerten Ergebnisses je Aktie nicht berücksichtigt. Dazu gehörten

in den Geschäftsjahren 2010 und 2009 15,6 Millionen und 25,2 Millionen an Mitarbeiter ausgegebene Aktienoptionen. Zusätzlich wurden in den Geschäftsjahren 2010 und 2009 0 Millionen und 82,5 Millionen Aktien, die bei Wandlung der nachrangigen Wandelanleihen ausgegeben werden können, von der Berechnung des Ergebnisses je Aktie ausgenommen, da es keinen Verwässerungseffekt gegeben hätte.

Zu Bedingungen der Aktienoptionspläne siehe Anhang Nr. 32.

### 13 / ZUR VERÄUSSERUNG VERFÜGBARE FINANZIELLE VERMÖGENSWERTE

Als zur Veräußerung verfügbare finanzielle Vermögenswerte werden zu den jeweiligen Bilanzstichtagen mit dem beizulegenden Zeitwert angesetzt, wobei unrealisierte Gewinne oder

Verluste, die nicht als dauerhafte Wertminderung anzusehen sind, im Eigenkapital erfasst werden. Der als langfristig zu bilanzierende Anteil ist unter den sonstigen finanziellen Vermögenswerten ausgewiesen (siehe Anhang Nr. 20).

Die Wertpapiere setzen sich zum 30. September 2010 und 2009 wie folgt zusammen:

| € in Millionen                                            | 2010               |                        |                       |                        | 2009               |                        |                       |                        |
|-----------------------------------------------------------|--------------------|------------------------|-----------------------|------------------------|--------------------|------------------------|-----------------------|------------------------|
|                                                           | Anschaffungskosten | Beizulegender Zeitwert | Unrealisierte Gewinne | Unrealisierte Verluste | Anschaffungskosten | Beizulegender Zeitwert | Unrealisierte Gewinne | Unrealisierte Verluste |
| Gläubigerpapiere                                          | 70                 | 72                     | 2                     | –                      | 104                | 106                    | 2                     | –                      |
| Anteils-papiere                                           | 2                  | 2                      | –                     | –                      | 1                  | 1                      | –                     | –                      |
| <b>Summe</b>                                              | <b>72</b>          | <b>74</b>              | <b>2</b>              | <b>–</b>               | <b>105</b>         | <b>107</b>             | <b>2</b>              | <b>–</b>               |
| Ausgewiesen als:                                          |                    |                        |                       |                        |                    |                        |                       |                        |
| Zur Veräußerung verfügbare finanzielle Vermögenswerte     | 60                 | 60                     | –                     | –                      | 93                 | 93                     | –                     | –                      |
| Sonstige finanzielle Vermögenswerte (siehe Anhang Nr. 20) | 12                 | 14                     | 2                     | –                      | 12                 | 14                     | 2                     | –                      |
| <b>Gesamt</b>                                             | <b>72</b>          | <b>74</b>              | <b>2</b>              | <b>–</b>               | <b>105</b>         | <b>107</b>             | <b>2</b>              | <b>–</b>               |

Die realisierten Gewinne und Verluste aus Wertpapieren sind unter den Finanzerträgen beziehungsweise Finanzaufwendungen ausgewiesen und betragen für die Geschäftsjahre 2010 und 2009:

| € in Millionen                                 | 2010     | 2009      |
|------------------------------------------------|----------|-----------|
| Realisierte Gewinne                            | 2        | –         |
| Realisierte Verluste                           | –        | –3        |
| <b>Realisierte Gewinne und Verluste, Saldo</b> | <b>2</b> | <b>–3</b> |

Die Gläubigerpapiere zum 30. September 2010 werden gemäß den Anleihebedingungen wie folgt fällig:

| € in Millionen                 | Anschaffungskosten | Beizulegender Zeitwert |
|--------------------------------|--------------------|------------------------|
| Innerhalb eines Jahres         | 12                 | 14                     |
| Zwischen einem und fünf Jahren | 1                  | 1                      |
| Nach fünf Jahren               | 57                 | 57                     |
| <b>Gesamt</b>                  | <b>70</b>          | <b>72</b>              |

Die tatsächlichen Fälligkeiten können auf Grund von Veräußerungs- oder Rückzahlungsrechten abweichen.

### 14 / FORDERUNGEN AUS LIEFERUNGEN UND LEISTUNGEN UND SONSTIGE FORDERUNGEN

Die Forderungen aus Lieferungen und Leistungen und sonstige Forderungen, die innerhalb eines Jahres fällig sind, setzen sich zum 30. September 2010 und 2009 wie folgt zusammen:

| € in Millionen                                                            | 2010       | 2009       |
|---------------------------------------------------------------------------|------------|------------|
| Forderungen aus Lieferungen und Leistungen gegen Dritte                   | 648        | 469        |
| Forderungen aus Lieferungen und Leistungen gegen nahestehende Unternehmen | 3          | 3          |
| <b>Forderungen aus Lieferungen und Leistungen, brutto</b>                 | <b>651</b> | <b>472</b> |
| Wertberichtigungen                                                        | –29        | –23        |
| <b>Forderungen aus Lieferungen und Leistungen, Saldo</b>                  | <b>622</b> | <b>449</b> |
| Forderungen aus Fördermitteln (siehe Anhang Nr. 7)                        | 39         | 30         |
| Lizenzforderungen                                                         | 6          | 7          |
| Finanzforderungen und sonstige Forderungen gegen Dritte                   | 12         | 18         |
| Forderungen gegen Arbeitnehmer                                            | 6          | 6          |
| Sonstige Forderungen                                                      | 2          | 4          |
| <b>Gesamt</b>                                                             | <b>687</b> | <b>514</b> |

Die Wertberichtigungen auf Forderungen haben sich in den Geschäftsjahren 2010 und 2009 wie folgt entwickelt:

| € in Millionen                                        | 2010      | 2009      |
|-------------------------------------------------------|-----------|-----------|
| Wertberichtigungen zu Beginn des Geschäftsjahrs       | 23        | 29        |
| Verbrauch von Wertberichtigungen, Saldo               | -1        | -13       |
| Zuführung zu Wertberichtigungen                       | 7         | 7         |
| <b>Wertberichtigungen zum Ende des Geschäftsjahrs</b> | <b>29</b> | <b>23</b> |

Die zum Stichtag überfälligen, aber nicht wertberichtigten Forderungen aus Lieferungen und Leistungen gegen Dritte setzen sich wie folgt zusammen:

| € in Millionen                                                                                               | Buchwert | Davon weder wertberichtigt noch überfällig | Nicht wertberichtigt, aber überfällig |                                     |                                      |                                       |                                    |
|--------------------------------------------------------------------------------------------------------------|----------|--------------------------------------------|---------------------------------------|-------------------------------------|--------------------------------------|---------------------------------------|------------------------------------|
|                                                                                                              |          |                                            | Überfällig zwischen 0 und 30 Tagen    | Überfällig zwischen 31 und 60 Tagen | Überfällig zwischen 61 und 180 Tagen | Überfällig zwischen 181 und 360 Tagen | Überfällig seit mehr als 360 Tagen |
| Forderungen aus Lieferungen und Leistungen gegen Dritte, abzüglich Wertberichtigungen zum 30. September 2010 | 619      | 593                                        | 18                                    | 3                                   | 5                                    | -                                     | -                                  |
| Forderungen aus Lieferungen und Leistungen gegen Dritte, abzüglich Wertberichtigungen zum 30. September 2009 | 446      | 429                                        | 12                                    | -                                   | 1                                    | 4                                     | -                                  |

Wertberichtigungen auf noch nicht fällige Forderungen beziehungsweise auf bis zu 60 Tage überfällige Forderungen werden auf Grund historischer Ausfallraten nicht vorgenommen. Forderungen mit einer Restlaufzeit von über einem Jahr werden als sonstige finanzielle Vermögenswerte ausgewiesen (siehe Anhang Nr. 20).

## 15 / VORRÄTE

Die Vorräte setzen sich zum 30. September 2010 und 2009 wie folgt zusammen:

| € in Millionen                  | 2010       | 2009       |
|---------------------------------|------------|------------|
| Roh-, Hilfs- und Betriebsstoffe | 58         | 47         |
| Unfertige Erzeugnisse           | 329        | 259        |
| Fertige Erzeugnisse             | 127        | 154        |
| <b>Gesamt</b>                   | <b>514</b> | <b>460</b> |

In den Geschäftsjahren 2010 und 2009 wurden Wertberichtigungen auf Vorräte in Höhe von € 94 Millionen und € 125 Millionen erfasst.

## 16 / SONSTIGE KURZFRISTIGE FINANZIELLE VERMÖGENSWERTE

Die sonstigen kurzfristigen finanziellen Vermögenswerte setzen sich zum 30. September 2010 und 2009 aus derivativen Finanzinstrumenten in Höhe von € 72 Millionen und € 26 Millionen zusammen.

## 17 / SONSTIGE KURZFRISTIGE VERMÖGENSWERTE

Die sonstigen kurzfristigen Vermögenswerte setzen sich zum 30. September 2010 und 2009 wie folgt zusammen:

| € in Millionen                              | 2010      | 2009       |
|---------------------------------------------|-----------|------------|
| Umsatzsteuer und sonstige Steuerforderungen | 44        | 49         |
| Vorauszahlungen                             | 30        | 49         |
| Sonstige                                    | 14        | 16         |
| <b>Gesamt</b>                               | <b>88</b> | <b>114</b> |

## 18 / SACHANLAGEN

Die Zusammenfassung der Entwicklung der Sachanlagen in den Geschäftsjahren 2010 und 2009 ist in der folgenden Übersicht dargestellt:

## ENTWICKLUNG DES KONZERNANLAGEVERMÖGENS 2010

| € in Millionen                                     | Anschaffungs- und Herstellungskosten |            |               |             |                            |                      | 30. September 2010 |
|----------------------------------------------------|--------------------------------------|------------|---------------|-------------|----------------------------|----------------------|--------------------|
|                                                    | 1. Oktober 2009                      | Zugänge    | Abgänge       | Umbuchungen | Übertragungen <sup>1</sup> | Fremdwährungseffekte |                    |
| Grundstücke, grundstücksgleiche Rechte und Bauten  | 763                                  | 3          | -107          | 1           | -4                         | 3                    | 659                |
| Technische Anlagen und Maschinen                   | 4.766                                | 162        | -1.016        | 30          | -100                       | 10                   | 3.852              |
| Andere Anlagen, Betriebs- und Geschäftsausstattung | 1.300                                | 32         | -91           | -3          | -140                       | 6                    | 1.104              |
| Geleistete Anzahlungen und Anlagen im Bau          | 22                                   | 134        | 1             | -21         | -1                         | -                    | 135                |
| <b>Gesamt</b>                                      | <b>6.851</b>                         | <b>331</b> | <b>-1.213</b> | <b>7</b>    | <b>-245</b>                | <b>19</b>            | <b>5.750</b>       |

## ENTWICKLUNG DES KONZERNANLAGEVERMÖGENS 2009

| € in Millionen                                     | Anschaffungs- und Herstellungskosten |            |             |             |                            |                      | 30. September 2009 |
|----------------------------------------------------|--------------------------------------|------------|-------------|-------------|----------------------------|----------------------|--------------------|
|                                                    | 1. Oktober 2008                      | Zugänge    | Abgänge     | Umbuchungen | Übertragungen <sup>1</sup> | Fremdwährungseffekte |                    |
| Grundstücke, grundstücksgleiche Rechte und Bauten  | 761                                  | 9          | -12         | 5           | 1                          | -1                   | 763                |
| Technische Anlagen und Maschinen                   | 4.826                                | 54         | -167        | 58          | -2                         | -3                   | 4.766              |
| Andere Anlagen, Betriebs- und Geschäftsausstattung | 1.384                                | 23         | -74         | -4          | -28                        | -1                   | 1.300              |
| Geleistete Anzahlungen und Anlagen im Bau          | 64                                   | 18         | -           | -59         | -                          | -1                   | 22                 |
| <b>Gesamt</b>                                      | <b>7.035</b>                         | <b>104</b> | <b>-253</b> | <b>-</b>    | <b>-29</b>                 | <b>-6</b>            | <b>6.851</b>       |

<sup>1</sup> Zum 30. September 2010 beziehen sich die als Übertragung gezeigten Beträge hauptsächlich auf Vermögenswerte des Mobilfunkgeschäfts, die als „zur Veräußerung stehend“ umgliedert wurden. Zum 30. September 2009 beziehen sich die als Übertragung gezeigten Beträge hauptsächlich auf Vermögenswerte von Wireline Communications, die als „zur Veräußerung stehend“ umgliedert wurden.

Die Abschreibungen auf Sachanlagen werden in der Konzern-Gewinn- und -Verlust-Rechnung mehrheitlich in den Umsatzkosten erfasst.

Außerplanmäßige Abschreibungen werden in der Konzern-Gewinn- und -Verlust-Rechnung als sonstiger betrieblicher Aufwand ausgewiesen. Zum 30. September 2010 und 2009 war das Sachanlagevermögen weder sicherungsübereignet noch verpfändet.

| Kumulierte Abschreibungen |                |         |             |                            |                                |                      |                    | Buchwerte          |                    |  |
|---------------------------|----------------|---------|-------------|----------------------------|--------------------------------|----------------------|--------------------|--------------------|--------------------|--|
| 1. Oktober 2009           | Abschreibungen | Abgänge | Umbuchungen | Übertragungen <sup>1</sup> | Außerplanmäßige Abschreibungen | Fremdwährungseffekte | 30. September 2010 | 30. September 2010 | 30. September 2009 |  |
| - 523                     | - 25           | 87      | -           | 2                          | -                              | - 2                  | - 461              | 198                | 240                |  |
| - 4.167                   | - 261          | 1.011   | - 12        | 57                         | - 9                            | - 9                  | - 3.390            | 462                | 599                |  |
| - 1.233                   | - 48           | 90      | 5           | 130                        | -                              | - 5                  | - 1.061            | 43                 | 67                 |  |
| -                         | -              | -       | -           | -                          | -                              | -                    | -                  | 135                | 22                 |  |
| - 5.923                   | - 334          | 1.188   | - 7         | 189                        | - 9                            | - 16                 | - 4.912            | 838                | 928                |  |

| Kumulierte Abschreibungen |                |         |             |                            |                                |                      |                    | Buchwerte          |                    |  |
|---------------------------|----------------|---------|-------------|----------------------------|--------------------------------|----------------------|--------------------|--------------------|--------------------|--|
| 1. Oktober 2008           | Abschreibungen | Abgänge | Umbuchungen | Übertragungen <sup>1</sup> | Außerplanmäßige Abschreibungen | Fremdwährungseffekte | 30. September 2009 | 30. September 2009 | 30. September 2008 |  |
| - 500                     | - 30           | 6       | 1           | - 1                        | -                              | 1                    | - 523              | 240                | 261                |  |
| - 3.963                   | - 356          | 160     | - 12        | -                          | 2                              | 2                    | - 4.167            | 599                | 863                |  |
| - 1.262                   | - 81           | 73      | 11          | 25                         | -                              | 1                    | - 1.233            | 67                 | 122                |  |
| -                         | -              | -       | -           | -                          | -                              | -                    | -                  | 22                 | 64                 |  |
| - 5.725                   | - 467          | 239     | -           | 24                         | 2                              | 4                    | - 5.923            | 928                | 1.310              |  |

01  
02  
03  
04  
05  
06  
07  
08  
09  
10  
11  
12  
13  
14  
15  
16  
17  
18  
19  
20  
21

19 / NACH DER EQUITY-METHODE BILANZIERTE  
BETEILIGUNGEN**GESCHÄFT MIT BIPOLAREN LEISTUNGSHALBLEITERN**

Am 28. September 2007 schloss die Gesellschaft eine Joint-Venture-Vereinbarung mit der Siemens AG („Siemens“) ab. Die Gesellschaft hat daraufhin mit Wirkung zum 30. September 2007 alle Vermögenswerte und Verbindlichkeiten ihres Geschäfts mit bipolaren Leistungshalbleitern (einschließlich Lizenzen, Patenten sowie Front-End- und Back-End-Fertigung) in die neu gegründete Infineon Technologies Bipolar GmbH & Co. KG („Bipolar“) eingebracht. Siemens hat anschließend einen Anteil von 40 Prozent an Bipolar erworben. Nach kartellrechtlicher Genehmigung wurde die Transaktion am 30. November 2007 abgeschlossen. Die Joint-Venture-Vereinbarung gewährt Siemens bestimmte vertragliche Mitbestimmungsrechte, welche der Ausübung eines beherrschenden Einflusses der Gesellschaft über Bipolar entgegenstehen. Daher bilanziert die Gesellschaft ihren Anteil an Bipolar unter Anwendung der Equity-Methode. Das Geschäftsjahr von Bipolar endet zum 30. September.

**LS POWER SEMITECH CO., LTD.**

Im dritten Quartal des Geschäftsjahrs 2009 unterzeichnete die Gesellschaft eine Vereinbarung mit LS Industrial Systems Co., Ltd. („LSIS“), um das Joint Venture LS Power Semitech Co., Ltd. („LS“) zu gründen, welche am 27. November 2009 vollzogen

wurde. LSIS hält 54 Prozent und die Gesellschaft 46 Prozent an LS (siehe Anhang Nr. 6). Die Beteiligung an dem Gemeinschaftsunternehmen wird nach der Equity-Methode bilanziert. Das Geschäftsjahr von LS endet zum 31. Dezember, entsprechend dem Geschäftsjahr von LSIS. Das anteilige Ergebnis von LS wird mit einem dreimonatigen Zeitverzug erfasst. Die Auswirkungen sind unwesentlich.

**CRYPTOMATHIC HOLDING APS**

Die Anteile an der Cryptomathic Holding ApS („Cryptomathic“) in Höhe von 25,4 Prozent wurden von der Gesellschaft im Mai 2002 erworben. Die Cryptomathic entwickelt und vertreibt über ihre Tochtergesellschaft Cryptomathic A/S Software und Beratungsleistungen im Bereich der digitalen Sicherheit. Das Geschäftsjahr der Cryptomathic endet zum 31. Dezember. Das anteilige Ergebnis von Cryptomathic wird mit einem dreimonatigen Zeitverzug erfasst. Die Auswirkungen sind unwesentlich. Die Beteiligung wird auf Grund des Anteils der Gesellschaft an Cryptomathic von 25,4 Prozent nach der Equity-Methode bilanziert.

**ZUSAMMENGEFASSTE FINANZINFORMATIONEN**

Die zusammengefassten Finanzinformationen für die zum 30. September 2010 nach der Equity-Methode bilanzierten Beteiligungen der Gesellschaft, nicht an den prozentualen Anteil der Gesellschaft angepasst, stellen sich für die Geschäftsjahre 2010 und 2009 wie folgt dar:

**2010**

| € in Millionen | Umlaufvermögen | Anlagevermögen | Kurzfristige Verbindlichkeiten | langfristige Verbindlichkeiten | Eigenkapital | Umsatzerlöse | Bruttoergebnis vom Umsatz | Jahresüberschuss |
|----------------|----------------|----------------|--------------------------------|--------------------------------|--------------|--------------|---------------------------|------------------|
| Bipolar        | 65             | 15             | 18                             | 13                             | 49           | 100          | 23                        | 12               |
| LS             | 7              | 17             | 1                              | –                              | 23           | 1            | –1                        | –3               |
| Cryptomathic   | 2              | –              | 1                              | –                              | 1            | 6            | 3                         | –                |
| <b>Gesamt</b>  | <b>74</b>      | <b>32</b>      | <b>20</b>                      | <b>13</b>                      | <b>73</b>    | <b>107</b>   | <b>25</b>                 | <b>9</b>         |

**2009**

| € in Millionen | Umlaufvermögen | Anlagevermögen | Kurzfristige Verbindlichkeiten | langfristige Verbindlichkeiten | Eigenkapital | Umsatzerlöse | Bruttoergebnis vom Umsatz | Jahresüberschuss |
|----------------|----------------|----------------|--------------------------------|--------------------------------|--------------|--------------|---------------------------|------------------|
| Bipolar        | 65             | 16             | 23                             | 13                             | 45           | 113          | 23                        | 12               |
| LS             | –              | –              | –                              | –                              | –            | –            | –                         | –                |
| Cryptomathic   | 3              | –              | 2                              | –                              | 1            | 5            | 2                         | –1               |
| <b>Gesamt</b>  | <b>68</b>      | <b>16</b>      | <b>25</b>                      | <b>13</b>                      | <b>46</b>    | <b>118</b>   | <b>25</b>                 | <b>11</b>        |

20 / SONSTIGE FINANZIELLE VERMÖGENSWERTE

Die sonstigen langfristigen finanziellen Vermögenswerte setzen sich zum 30. September 2010 und 2009 wie folgt zusammen:

| € in Millionen                                                              | 2010       | 2009       |
|-----------------------------------------------------------------------------|------------|------------|
| Zur Veräußerung verfügbare finanzielle Vermögenswerte (siehe Anhang Nr. 13) | 14         | 14         |
| Langfristige Forderungen                                                    | 6          | 5          |
| Investitionen in sonstige Beteiligungen                                     | 6          | 12         |
| Verfügungsbeschränkte Zahlungsmittel                                        | 83         | 84         |
| Sonstige                                                                    | 10         | 9          |
| <b>Gesamt</b>                                                               | <b>119</b> | <b>124</b> |

In dem Posten „Verfügungsbeschränkte Zahlungsmittel“ ist sowohl zum 30. September 2010 als auch zum 30. September 2009 im Wesentlichen die Mietkaution für den Bürokomplex Campeon in Höhe von € 75 Millionen (siehe Anhang Nr. 38) sowie € 7 Millionen für Zinszahlungen der nachrangigen im Jahr 2014 fälligen Wandelanleihe (siehe Anhang Nr. 27) enthalten.

21 / SONSTIGE VERMÖGENSWERTE

Die sonstigen langfristigen Vermögenswerte setzen sich zum 30. September 2010 und 2009 wie folgt zusammen:

| € in Millionen  | 2010      | 2009      |
|-----------------|-----------|-----------|
| Vorauszahlungen | 14        | 17        |
| Sonstige        | 2         | 1         |
| <b>Gesamt</b>   | <b>16</b> | <b>18</b> |

01  
02  
03  
04  
05  
06  
07  
08  
09  
10  
11  
12  
13  
14  
15  
16  
17  
18  
19  
20  
21

## 22 / GESCHÄFTS- ODER FIRMENWERTE UND ANDERE IMMATERIELLE VERMÖGENSWERTE

Die folgende Tabelle zeigt die Zusammensetzung der immateriellen Vermögenswerte zum 30. September 2010 und 2009. Abschreibungen auf immaterielle Vermögenswerte werden mehrheitlich unter den Umsatzkosten ausgewiesen. Außerplanmäßige Abschreibungen werden unter den sonstigen betrieblichen Aufwendungen ausgewiesen.

### ENTWICKLUNG DER GESCHÄFTS- ODER FIRMENWERTE UND ANDERER IMMATERIELLER VERMÖGENSWERTE 2010

| € in Millionen                               | Anschaffungs- und Herstellungskosten |                         |                                                     |                  |             |                            |                      | 30. September 2010 |
|----------------------------------------------|--------------------------------------|-------------------------|-----------------------------------------------------|------------------|-------------|----------------------------|----------------------|--------------------|
|                                              | 1. Oktober 2009                      | Zugänge selbst erstellt | Zugänge erworben durch Unternehmenszusammenschlüsse | Zugänge erworben | Abgänge     | Übertragungen <sup>1</sup> | Fremdwährungseffekte |                    |
| Geschäfts- oder Firmenwerte                  | 181                                  | –                       | –                                                   | –                | –           | – 161                      | 1                    | 21                 |
| Selbst erstellte immaterielle Vermögenswerte | 164                                  | 79                      | –                                                   | –                | –           | – 145                      | –                    | 98                 |
| Sonstige immaterielle Vermögenswerte         | 400                                  | –                       | –                                                   | 8                | – 46        | – 220                      | 2                    | 144                |
| <b>Gesamt</b>                                | <b>745</b>                           | <b>79</b>               | <b>–</b>                                            | <b>8</b>         | <b>– 46</b> | <b>– 526</b>               | <b>3</b>             | <b>263</b>         |

### ENTWICKLUNG DER GESCHÄFTS- ODER FIRMENWERTE UND ANDERER IMMATERIELLER VERMÖGENSWERTE 2009

| € in Millionen                               | Anschaffungs- und Herstellungskosten |                         |                                                     |                  |             |                            |                      | 30. September 2009 |
|----------------------------------------------|--------------------------------------|-------------------------|-----------------------------------------------------|------------------|-------------|----------------------------|----------------------|--------------------|
|                                              | 1. Oktober 2008                      | Zugänge selbst erstellt | Zugänge erworben durch Unternehmenszusammenschlüsse | Zugänge erworben | Abgänge     | Übertragungen <sup>1</sup> | Fremdwährungseffekte |                    |
| Geschäfts- oder Firmenwerte                  | 225                                  | –                       | – 6                                                 | –                | –           | – 38                       | –                    | 181                |
| Selbst erstellte immaterielle Vermögenswerte | 169                                  | 47                      | –                                                   | –                | –           | – 52                       | –                    | 164                |
| Sonstige immaterielle Vermögenswerte         | 474                                  | –                       | –                                                   | 8                | – 33        | – 49                       | –                    | 400                |
| <b>Gesamt</b>                                | <b>868</b>                           | <b>47</b>               | <b>– 6</b>                                          | <b>8</b>         | <b>– 33</b> | <b>– 139</b>               | <b>–</b>             | <b>745</b>         |

<sup>1</sup> Im Geschäftsjahr 2010 beziehen sich die als Übertragungen gezeigten Beträge hauptsächlich auf Vermögenswerte für das Mobilfunkgeschäft, das als „zur Veräußerung stehend“ ausgewiesen wurde. Im Geschäftsjahr 2009 beziehen sich Übertragungen im Wesentlichen auf das Wireline-Communications-Geschäft, das als „zur Veräußerung stehend“ ausgewiesen wurde.

Die geschätzten Abschreibungen der selbst erstellten und sonstigen immateriellen Vermögenswerte weisen für die nächsten fünf Geschäftsjahre die folgenden Werte auf: 2011 € 21 Millionen, 2012 € 21 Millionen, 2013 € 15 Millionen, 2014 € 7 Millionen und 2015 € 1 Million.

Hinsichtlich der Vorgehensweise und der unterstellten Annahmen für den jährlich vorzunehmenden Werthaltigkeitstest des Geschäfts- oder Firmenwertes siehe Anhang Nr. 2 Abschnitt „Werthaltigkeit von immateriellen Vermögenswerten und anderem Anlagevermögen“.



01  
02  
03  
04  
05  
06  
07  
08  
09  
10  
11  
12  
13  
14  
15  
16  
17  
18  
19  
20  
21

| Kumulierte Abschreibungen |                |         |                            |                                |                      |                    | Buchwerte          |                    |  |
|---------------------------|----------------|---------|----------------------------|--------------------------------|----------------------|--------------------|--------------------|--------------------|--|
| 1. Oktober 2009           | Abschreibungen | Abgänge | Übertragungen <sup>1</sup> | Außerplanmäßige Abschreibungen | Fremdwährungseffekte | 30. September 2010 | 30. September 2010 | 30. September 2009 |  |
| –                         | –              | –       | –                          | –                              | –                    | –                  | 21                 | 181                |  |
| –79                       | –28            | –       | 62                         | –                              | –                    | –45                | 53                 | 85                 |  |
| –297                      | –25            | 45      | 151                        | –3                             | –2                   | –131               | 13                 | 103                |  |
| –376                      | –53            | 45      | 213                        | –3                             | –2                   | –176               | 87                 | 369                |  |

| Kumulierte Abschreibungen |                |         |                            |                                |                      |                    | Buchwerte          |                    |  |
|---------------------------|----------------|---------|----------------------------|--------------------------------|----------------------|--------------------|--------------------|--------------------|--|
| 1. Oktober 2008           | Abschreibungen | Abgänge | Übertragungen <sup>1</sup> | Außerplanmäßige Abschreibungen | Fremdwährungseffekte | 30. September 2009 | 30. September 2009 | 30. September 2008 |  |
| –                         | –              | –       | –                          | –                              | –                    | –                  | 181                | 225                |  |
| –86                       | –32            | –       | 41                         | –2                             | –                    | –79                | 85                 | 83                 |  |
| –339                      | –32            | 33      | 41                         | –1                             | 1                    | –297               | 103                | 135                |  |
| –425                      | –64            | 33      | 82                         | –3                             | 1                    | –376               | 369                | 443                |  |

## 23 / VERBINDLICHKEITEN AUS LIEFERUNGEN UND LEISTUNGEN UND SONSTIGE VERBINDLICHKEITEN

Die Verbindlichkeiten aus Lieferungen und Leistungen und sonstige kurzfristige finanzielle Verbindlichkeiten setzen sich zum 30. September 2010 und 2009 wie folgt zusammen:

| € in Millionen                                                                       | 2010       | 2009       |
|--------------------------------------------------------------------------------------|------------|------------|
| Verbindlichkeiten aus Lieferungen und Leistungen gegenüber Dritten                   | 645        | 373        |
| Verbindlichkeiten aus Lieferungen und Leistungen gegenüber nahestehenden Unternehmen | 14         | 11         |
| <b>Verbindlichkeiten aus Lieferungen und Leistungen</b>                              | <b>659</b> | <b>384</b> |
| Sonstige Verbindlichkeiten gegenüber nahestehenden Unternehmen                       | 4          | 4          |
| Sonstige                                                                             | 2          | 5          |
| <b>Gesamt</b>                                                                        | <b>665</b> | <b>393</b> |

Die Verbindlichkeiten aus Lieferungen und Leistungen haben eine Fälligkeit von unter einem Jahr. Der ausgewiesene Buchwert entspricht dem Marktwert.

Langfristige Verbindlichkeiten mit einer Restlaufzeit von über einem Jahr werden in den Sonstigen Verbindlichkeiten ausgewiesen (siehe Anhang Nr. 29).

## 24 / RÜCKSTELLUNGEN

Die Rückstellungen setzen sich zum 30. September 2010 und 2009 wie folgt zusammen:

| € in Millionen                                                              | 2010       | 2009       |
|-----------------------------------------------------------------------------|------------|------------|
| Verpflichtungen gegenüber Mitarbeitern                                      | 268        | 187        |
| Gewährleistungen und Lizenzen                                               | 159        | 72         |
| Rückstellungen im Zusammenhang mit Qimondas nicht fortgeführten Aktivitäten | 60         | 163        |
| Sonstige                                                                    | 121        | 103        |
| <b>Gesamt</b>                                                               | <b>608</b> | <b>525</b> |

Verpflichtungen gegenüber Mitarbeitern beinhalten u.a. Kosten für Incentive- und Bonuszahlungen, Urlaubsgeld, Abfindungen, Vorruhestandsanzahlung, Jubiläumszahlungen, andere Personalkosten sowie Sozialabgaben.

Rückstellungen für Gewährleistungen und Lizenzen spiegeln im Wesentlichen die geschätzten zukünftigen Kosten zur Erfüllung vertraglicher Anforderungen bzgl. verkaufter Produkte wider.

Sonstige Rückstellungen enthalten Rückstellungen für ausstehende Aufwendungen, Verzugsstrafen oder Vertragsverzug, Rückbauverpflichtungen sowie diverse andere Verpflichtungen.

Rückstellungen im Zusammenhang mit Qimondas nicht fortgeführten Aktivitäten sind in Anhang Nr. 6 und Nr. 38 näher erläutert.

Bis zu einem Betrag von € 553 Millionen und € 436 Millionen des Gesamtbetrages der Rückstellungen in Höhe von € 608 Millionen und € 525 Millionen für die Geschäftsjahre 2010 und 2009 wird der Zahlungsmittelabfluss innerhalb eines Jahres erwartet. Für die Mehrheit des verbleibenden Betrages von € 55 Millionen und € 89 Millionen zum 30. September 2010 beziehungsweise 2009 wird der Zahlungsmittelabfluss in einem Zeitraum von zwei bis fünf Jahren erwartet.

Eine Zusammenfassung der Entwicklung der Rückstellungen für das Geschäftsjahr 2010 wird folgend dargestellt:

| € in Millionen                                                              | Bestand zum 30. September 2009 | Zugänge    | Umgliederungen in "zur Veräußerung stehend" | Verbrauch   | Auflösung  | Währungsdifferenzen | Bestand zum 30. September 2010 |
|-----------------------------------------------------------------------------|--------------------------------|------------|---------------------------------------------|-------------|------------|---------------------|--------------------------------|
| Verpflichtungen gegenüber Mitarbeitern                                      | 187                            | 268        | -50                                         | -120        | -19        | 2                   | 268                            |
| Gewährleistungen und Lizenzen                                               | 72                             | 135        | -22                                         | -4          | -22        | -                   | 159                            |
| Rückstellungen im Zusammenhang mit Qimondas nicht fortgeführten Aktivitäten | 163                            | 20         | -                                           | -108        | -15        | -                   | 60                             |
| Sonstige                                                                    | 103                            | 57         | -1                                          | -20         | -19        | 1                   | 121                            |
| <b>Summe Rückstellungen</b>                                                 | <b>525</b>                     | <b>480</b> | <b>-73</b>                                  | <b>-252</b> | <b>-75</b> | <b>3</b>            | <b>608</b>                     |

Die Gesamtbeträge der Rückstellungen sind zum 30. September 2010 und 2009 in den Konzern-Bilanzen wie folgt dargestellt:

| € in Millionen | 2010       | 2009       |
|----------------|------------|------------|
| Kurzfristig    | 553        | 436        |
| Langfristig    | 55         | 89         |
| <b>Gesamt</b>  | <b>608</b> | <b>525</b> |

## 25 / SONSTIGE KURZFRISTIGE FINANZIELLE VERBINDLICHKEITEN

Die sonstigen kurzfristigen finanziellen Verbindlichkeiten setzen sich zum 30. September 2010 und 2009 wie folgt zusammen:

| € in Millionen                                                             | 2010      | 2009      |
|----------------------------------------------------------------------------|-----------|-----------|
| Verbindlichkeiten aus derivativen Finanzinstrumenten (siehe Anhang Nr. 36) | 6         | 15        |
| Zinsen                                                                     | 10        | 18        |
| Beilegung kartellrechtlicher Angelegenheiten (siehe Anhang Nr. 38)         | –         | 17        |
| <b>Gesamt</b>                                                              | <b>16</b> | <b>50</b> |

## 26 / SONSTIGE KURZFRISTIGE VERBINDLICHKEITEN

Die sonstigen kurzfristigen Verbindlichkeiten setzen sich zum 30. September 2010 und 2009 wie folgt zusammen:

| € in Millionen                                            | 2010       | 2009       |
|-----------------------------------------------------------|------------|------------|
| Abgegrenzte Erträge                                       | 28         | 24         |
| Umsatzsteuer- und sonstige Steuerverbindlichkeiten        | 23         | 19         |
| Lohn- und Gehaltsverbindlichkeiten gegenüber Mitarbeitern | 52         | 79         |
| Abgegrenzte Zuschüsse und Zulagen (siehe Anhang Nr. 7)    | 16         | 15         |
| Sonstige                                                  | 34         | 10         |
| <b>Gesamt</b>                                             | <b>153</b> | <b>147</b> |

## 27 / FINANZVERBINDLICHKEITEN

Die Finanzverbindlichkeiten setzen sich zum 30. September 2010 und 2009 wie folgt zusammen:

| € in Millionen                                                                                                     | 2010       | 2009       |
|--------------------------------------------------------------------------------------------------------------------|------------|------------|
| Kurzfristige Finanzverbindlichkeiten sowie kurzfristig fällige Bestandteile langfristiger Finanzverbindlichkeiten: |            |            |
| Verbindlichkeiten gegenüber Kreditinstituten, Durchschnittszinssatz 1,45 % (Vorjahr 1,85 %)                        | 51         | 51         |
| Ausstehende nachrangige Wandelanleihe, Zinssatz 5,0 %, fällig 2010                                                 | –          | 425        |
| Darlehen der öffentlichen Hand, fällig 2010                                                                        | 24         | –          |
| Kurzfristige Bestandteile der langfristigen Finanzverbindlichkeiten                                                | 58         | 45         |
| <b>Gesamt</b>                                                                                                      | <b>133</b> | <b>521</b> |
| Langfristige Finanzverbindlichkeiten:                                                                              |            |            |
| Ausstehende nachrangige Wandelanleihe, Zinssatz 7,5 %, fällig 2014                                                 | 153        | 145        |
| Verbindlichkeiten gegenüber Kreditinstituten:                                                                      |            |            |
| Unbesicherte Darlehen, Durchschnittszinssatz 2,16 % (Vorjahr 2,59 %), fällig 2011 – 2013                           | 110        | 164        |
| Darlehen der öffentlichen Hand, fällig 2010                                                                        | –          | 20         |
| <b>Gesamt</b>                                                                                                      | <b>263</b> | <b>329</b> |

Die kurzfristigen Finanzverbindlichkeiten gegenüber Kreditinstituten bestehen hauptsächlich aus Kreditaufnahmen im Rahmen von kurzfristigen Darlehensvereinbarungen.

Am 5. Juni 2003 hatte die Gesellschaft (als Bürgin) durch ihre Tochtergesellschaft Infineon Technologies Holding B.V. (als Emittentin) eine im Jahr 2010 fällige nachrangige Wandelanleihe zum Nennwert von € 700 Millionen im Rahmen eines verbindlichen Angebots an institutionelle Investoren in Europa begeben. Die Schuldverschreibungen konnten über die Laufzeit auf Anforderung in ursprünglich maximal 68,4 Millionen Aktien der Gesellschaft umgewandelt werden, wobei der ursprüngliche Wandlungspreis € 10,23 je Aktie betrug. Nach der Kapitalerhöhung der Gesellschaft im August 2009 ist der Wandlungspreis auf Basis einer Verwässerungsschutzklausel auf € 9,14 angepasst worden. Die Wandelanleihe verzinst sich mit 5,0 Prozent pro Jahr. Nach Rückkäufen in den vorangegangenen Jahren betrug der ausstehende Nominalwert dieser Anleihe zum 30. September 2009 € 448 Millionen. Im Geschäftsjahr 2010 hat die Gesellschaft Rückkäufe in Höhe von € 193 Millionen an Nominalwerten dieser Wandelanleihe getätigt sowie den verbleibenden ausstehenden Betrag von € 255 Millionen im Juni 2010 vollständig zurückgezahlt.

Am 26. Mai 2009 begab die Gesellschaft (als Garantin) durch ihre Tochtergesellschaft Infineon Technologies Holding B.V. (als Emittentin) eine im Jahr 2014 fällige nachrangige Wandelanleihe zum Nennwert in Höhe von € 196 Millionen

mit einem Disagio von 7,2 Prozent im Rahmen eines Angebots an institutionelle Investoren in Europa. Die Wandelanleihe kann jederzeit während der Laufzeit in ursprünglich maximal 74,9 Millionen Aktien der Gesellschaft umgewandelt werden, wobei der Wandlungspreis ursprünglich € 2,61 je Aktie betrug. Nach der Kapitalerhöhung der Gesellschaft im August 2009 ist auf Basis einer Verwässerungsschutzklausel das Wandlungsverhältnis auf maximal 84 Millionen und der Wandlungspreis auf € 2,33 angepasst worden. Die Wandelanleihe verzinst sich mit 7,5 Prozent pro Jahr. Der Nennwert der Wandelanleihe ist unbesichert und steht gleichrangig mit allen gegenwärtigen und künftigen nachrangigen Verbindlichkeiten der Gesellschaft. Die Zinskupons der Anleihe sind besichert und nicht nachrangig. Die Gesellschaft hat sich verpflichtet, solange die Anleihe aussteht, keine weiteren Sicherheiten aus ihrem Vermögen zu bestellen, ohne dass die Anleihegläubiger gleichrangig an dieser Sicherheit teilnehmen. Die Anleihe beinhaltet für die Gläubiger bei einem definierten Kontrollwechsel der Gesellschaft das Recht auf Rückzahlung. Die Gesellschaft kann die ausstehenden Anleihen nach zweieinhalb Jahren vorzeitig zum Nennbetrag, zuzüglich bis zum Rückzahlungstag aufgelaufener Zinsen zuzüglich des Barwerts aller noch ausstehenden Zinszahlungen bis Fälligkeit, zurückzahlen, wenn der Kurs der Aktie der Gesellschaft an 15 Handelstagen innerhalb eines Zeitraums von 30 aufeinanderfolgenden

Handelstagen 150 Prozent des Wandelpreises übersteigt. Die Wandelanleihe wird an der Frankfurter Wertpapierbörse im Freiverkehr gehandelt. Bei Ausgabe der nachrangigen Wandelanleihe wurden € 31 Millionen, die auf das Wandlungsrecht der Anleihegläubiger entfallen, in der Kapitalrücklage erfasst. Die Verbindlichkeitskomponente der Wandelanleihe wird nach der Effektivzinsmethode zu fortgeführten Anschaffungskosten bilanziert.

Verbindlichkeiten gegenüber Kreditinstituten bestehen hauptsächlich aus Projektfinanzierungen der Infineon Technologies Austria AG.

Im Juni 2009 und September 2010 wurden der Infineon Technologies (Wuxi) Co. Ltd. Kredite für Betriebskapital und Projektzwecke über einen Gesamtbetrag von 176 Millionen US-Dollar (€ 129 Millionen) durch lokale Finanzinstitute zugesagt. Diese mehrjährigen Kredite stehen für allgemeine betriebliche Zwecke sowie die Ausweitung von Produktionskapazitäten in Wuxi, China, auch durch gruppeninterne Transfers von Anlagen, zur Verfügung. Zum 30. September 2010 waren die Kreditlinien ungenutzt. Die Kreditlinien sind teilweise besichert durch eine Verpfändung von Vermögenswerten und durch eine Garantierklärung des Unternehmens.

Die Gesellschaft hat darüber hinaus verschiedene, voneinander unabhängige kurz- und langfristige Kreditlinien vereinbart.

| € in Millionen           |                             |                                                           | Zum 30. September 2010 |                      |            |
|--------------------------|-----------------------------|-----------------------------------------------------------|------------------------|----------------------|------------|
| Laufzeit                 | Zusage durch Finanzinstitut | Zweck/beabsichtigter Einsatz                              | Gesamthöhe             | In Anspruch genommen | Verfügbar  |
| Kurzfristig              | Feste Zusage                | Generelle betriebliche Zwecke, Betriebskapital, Garantien | 136                    | 75                   | 61         |
| Kurzfristig              | Keine feste Zusage          | Betriebskapital, Cash-Management                          | 98                     | –                    | 98         |
| Langfristig <sup>1</sup> | Feste Zusage                | Projektfinanzierung                                       | 236                    | 168                  | 68         |
| <b>Gesamt</b>            |                             |                                                           | <b>470</b>             | <b>243</b>           | <b>227</b> |

<sup>1</sup> Einschließlich kurzfristiger Bestandteile der langfristigen Finanzverbindlichkeiten.

Die auf Finanzverbindlichkeiten entfallenden Zinsaufwendungen beliefen sich auf € 63 Millionen und € 96 Millionen in den Geschäftsjahren 2010 und 2009.

Von den Finanzverbindlichkeiten werden in den nächsten Jahren folgende Beträge fällig:

| Geschäftsjahr (€ in Millionen) | Betrag     |
|--------------------------------|------------|
| 2011                           | 133        |
| 2012                           | 66         |
| 2013                           | 44         |
| 2014                           | 153        |
| <b>Gesamt</b>                  | <b>396</b> |

Für die Finanzverbindlichkeiten werden in den nächsten Jahren nachfolgende Zinszahlungen fällig:

#### FÄLLIGKEIT ZINSEN FÜR FINANZVERBINDLICHKEITEN

| Geschäftsjahr (€ in Millionen) | Betrag     |
|--------------------------------|------------|
| 2011                           | 19         |
| 2012                           | 17         |
| 2013                           | 16         |
| 2014 <sup>1</sup>              | 58         |
| <b>Gesamt</b>                  | <b>110</b> |

<sup>1</sup> Beinhaltet den Effekt aus der Aufzinsung der im Jahr 2014 fälligen nachrangigen Wandelanleihe.

## 28 / SONSTIGE FINANZIELLE VERBINDLICHKEITEN

Die sonstigen langfristigen finanziellen Verbindlichkeiten setzen sich zum 30. September 2010 und 2009 wie folgt zusammen:

| € in Millionen                                                                 | 2010     | 2009     |
|--------------------------------------------------------------------------------|----------|----------|
| Verbindlichkeiten gegenüber Dritten mit einer Restlaufzeit von über einem Jahr | 6        | 4        |
| Sonstige                                                                       | –        | 1        |
| <b>Gesamt</b>                                                                  | <b>6</b> | <b>5</b> |

## 29 / SONSTIGE VERBINDLICHKEITEN

Die sonstigen langfristigen Verbindlichkeiten setzen sich zum 30. September 2010 und 2009 wie folgt zusammen:

| € in Millionen                                         | 2010      | 2009      |
|--------------------------------------------------------|-----------|-----------|
| Abgegrenzte Erträge                                    | 46        | 53        |
| Abgegrenzte Zuschüsse und Zulagen (siehe Anhang Nr. 7) | 5         | 6         |
| Abgrenzungen von Personalaufwendungen                  | 10        | 10        |
| Sonstige                                               | 18        | 16        |
| <b>Gesamt</b>                                          | <b>79</b> | <b>85</b> |

## 30 / EIGENKAPITAL

### GRUNDKAPITAL

Das Grundkapital der Infineon Technologies AG betrug zum 30. September 2010 € 2.173.484.170. Es ist eingeteilt in 1.086.742.085 auf den Namen lautende nennwertlose Stückaktien mit einem rechnerischen Anteil von € 2,00 am Grundkapital. Am 5. August 2009 hatte die Gesellschaft in einem ersten Schritt ihr Grundkapital unter vollständiger Ausnutzung des von der Hauptversammlung am 15. Februar 2007 beschlossenen Genehmigten Kapitals 2007 sowie unter teilweiser Ausnutzung des von der Hauptversammlung am 12. Februar 2009 beschlossenen Genehmigten Kapitals 2009/I um € 645.653.928 durch Ausgabe von 322.826.964 Aktien erhöht. Die neuen Aktien wurden den Aktionären von Infineon in einem Verhältnis von je vier neuen für neun alte Aktien zum Bezug angeboten. Nach Eintragung des ersten Schritts der Kapitalerhöhung betrug das Grundkapital € 2.145.138.098. In einem zweiten Schritt wurde das Grundkapital der Gesellschaft am 11. August 2009 unter vollständiger Ausnutzung des von der Hauptversammlung am 12. Februar 2009 beschlossenen Genehmigten Kapitals 2009/I um weitere € 28.346.072 durch Ausgabe von 14.173.036 Aktien erhöht. Die neuen Aktien wurden Admiral Participations (Luxembourg) S.a.r.l. zum Bezug angeboten. Durch die Kapitalerhöhung erhöhte

sich das Grundkapital um insgesamt € 674 Millionen auf nun € 2.173.484.170. Im Geschäftsjahr 2010 wurden keine neuen Aktien ausgegeben.

### KAPITALRÜCKLAGE

Durch die Kapitalerhöhung im Geschäftsjahr 2009 erhöhte sich die Kapitalrücklage nach Abzug der Kosten der Kapitalerhöhung von € 45 Millionen um € 6 Millionen.

### GENEHMIGTES KAPITAL

Zum Stichtag 30. September 2010 sieht die Satzung der Gesellschaft zwei Genehmigte Kapitalia über insgesamt bis zu € 688 Millionen vor.

Der Vorstand ist gemäß § 4 Abs. 8 der Satzung ermächtigt, das Grundkapital in der Zeit bis zum 10. Februar 2015 mit Zustimmung des Aufsichtsrats einmalig oder in Teilbeträgen um insgesamt bis zu € 648 Millionen durch Ausgabe neuer, auf den Namen lautender Stückaktien mit Gewinnberechtigung ab Beginn des Geschäftsjahrs ihrer Ausgabe gegen Bar- oder Sacheinlagen zu erhöhen (Genehmigtes Kapital 2010/I). Dabei ist der Vorstand ermächtigt, mit Zustimmung des Aufsichtsrats das Bezugsrecht der Aktionäre in bestimmten Fällen auszuschließen.

Der Vorstand der Infineon Technologies AG hat sich allerdings zum Schutz der Aktionäre vor Verwässerung verpflichtet, von dieser Ermächtigung zum Ausschluss des Bezugsrechts sowohl bei Bar- als auch bei Sachkapitalerhöhungen aus dem Genehmigten Kapital 2010/I nur bis zu einem Betrag von insgesamt maximal 10 Prozent des zum Zeitpunkt des Wirksamwerdens der Ermächtigung beziehungsweise – falls dieser Wert geringer sein sollte – des zum Zeitpunkt der Ausnutzung der Ermächtigung bestehenden Grundkapitals Gebrauch zu machen. Eine Kapitalerhöhung unter Ausschluss des Bezugsrechts in Ausnutzung des Genehmigten Kapitals 2010/I ist damit derzeit auf maximal € 217.348.417 beziehungsweise 108.674.208 Stückaktien, beschränkt.

Gemäß § 4 Abs. 9 der Satzung ist der Vorstand außerdem ermächtigt, das Grundkapital in der Zeit bis zum 10. Februar 2015 mit Zustimmung des Aufsichtsrats einmalig oder in Teilbeträgen um insgesamt bis zu € 40 Millionen durch Ausgabe neuer, auf den Namen lautender Stückaktien gegen Bareinlagen zum Zwecke der Ausgabe an Mitarbeiter der Gesellschaft oder ihrer Konzernunternehmen zu erhöhen (Genehmigtes Kapital 2010/II). Dabei ist das Bezugsrecht der Aktionäre ausgeschlossen.

### BEDINGTES KAPITAL

Das im Handelsregister eingetragene Bedingte Kapital der Gesellschaft beträgt € 631,5 Millionen. Es setzt sich aus insgesamt sechs Bedingten Kapitalia zusammen:

- Bedingtes Kapital I (eingetragen im Handelsregister als „Bedingtes Kapital 1999/I“) gemäß § 4 Abs. 4 der Satzung um bis zu € 34,6 Millionen, das durch Ausgabe von bis zu

01  
02  
03  
04  
05  
06  
07  
08  
09  
10  
11  
12  
13  
14  
15  
16  
17  
18  
19  
20  
21

17,3 Millionen neuen, auf den Namen lautenden Stückaktien im Rahmen des Aktienoptionsplans 2001 der Gesellschaft verwendet werden kann;

- Bedingtes Kapital III (eingetragen im Handelsregister als „Bedingtes Kapital 2001/I“) gemäß § 4 Abs. 5 der Satzung um bis zu € 29 Millionen, das durch Ausgabe von bis zu 14,5 Millionen neuen, auf den Namen lautenden Stückaktien im Rahmen der Aktienoptionspläne 2001 und 2006 der Gesellschaft verwendet werden kann;
- Bedingtes Kapital 2002 (eingetragen im Handelsregister als „Bedingtes Kapital 2007/II“) gemäß § 4 Abs. 6 der Satzung um bis zu € 134 Millionen, das durch Ausgabe von bis zu 67 Millionen neuen, auf den Namen lautenden Stückaktien zur Gewährung von Rechten an die Inhaber der Wandelanleihe, die im Mai 2009 begeben wurde, verwendet werden kann;
- Bedingtes Kapital 2009/I gemäß § 4 Abs. 7 der Satzung um bis zu € 149,9 Millionen, das durch Ausgabe von bis zu 74,95 Millionen neuen, auf den Namen lautenden

Stückaktien zur Gewährung von Rechten an die Inhaber der Wandelanleihe, die im Mai 2009 begeben wurde, verwendet werden kann;

- Bedingtes Kapital 2010/I gemäß § 4 Abs. 10 der Satzung um bis zu € 24 Millionen, das durch Ausgabe von bis zu 12 Millionen neuen, auf den Namen lautenden Stückaktien im Rahmen des Aktienoptionsplans 2010 der Gesellschaft verwendet werden kann;
- Bedingtes Kapital 2010/II gemäß § 4 Abs. 11 der Satzung um bis zu € 260 Millionen, das durch Ausgabe von bis zu 130 Millionen neuen, auf den Namen lautenden Stückaktien zur Gewährung von Rechten an die Inhaber von Options- oder Wandelschuldverschreibungen, die bis zum 10. Februar 2015 begeben werden können, verwendet werden kann.

### ANDERE RÜCKLAGEN

Die Veränderungen in den anderen Rücklagen setzen sich in den Geschäftsjahren zum 30. September 2010 und 2009 wie folgt zusammen:

| € in Millionen                                               | 2010        |              |           | 2009        |              |            |
|--------------------------------------------------------------|-------------|--------------|-----------|-------------|--------------|------------|
|                                                              | Vor Steuern | Nach Steuern | Netto     | Vor Steuern | Nach Steuern | Netto      |
| Unrealisierte (Verluste) Gewinne aus Wertpapieren:           |             |              |           |             |              |            |
| Aufgelaufene unrealisierte (Verluste) Gewinne                | - 4         | -            | - 4       | - 15        | -            | - 15       |
| Ergebniswirksame Umbuchungen realisierter Verluste (Gewinne) | 5           | -            | 5         | 19          | -            | 19         |
| <b>Unrealisierte (Verluste) Gewinne, netto</b>               | <b>1</b>    | <b>-</b>     | <b>1</b>  | <b>4</b>    | <b>-</b>     | <b>4</b>   |
| Unrealisierte (Verluste) Gewinne Sicherungsbeziehungen       | 10          | -            | 10        | 7           | -            | 7          |
| Fremdwährungsumrechnungsdifferenzen                          | 13          | -            | 13        | 145         | -            | 145        |
| <b>Andere Rücklagen</b>                                      | <b>24</b>   | <b>-</b>     | <b>24</b> | <b>156</b>  | <b>-</b>     | <b>156</b> |

### DIVIDENDEN

Nach dem Aktiengesetz richtet sich der Betrag, der zur Dividendenzahlung an die Aktionäre zur Verfügung steht, nach dem Bilanzgewinn der Muttergesellschaft, der nach den Vorschriften des HGB ermittelt wird. Alle Dividendenzahlungen müssen von der Hauptversammlung beschlossen werden. Für das Geschäftsjahr 2010 wird der Hauptversammlung eine Ausschüttung einer Bardividende von € 0,10 je Aktie vorgeschlagen werden, was einem Ausschüttungsvolumen von € 109 Millionen entspricht.

### VERLUSTVORTRAG

Die folgende Tabelle zeigt eine Überleitung des Verlustvortrages zum 30. September 2009 und 2010:

| € in Millionen                                                                                                 |                |
|----------------------------------------------------------------------------------------------------------------|----------------|
| Saldo zum 1. Oktober 2008                                                                                      | - 5.489        |
| Konzernjahresfehlbetrag auf Aktionäre der Infineon Technologies AG entfallend                                  | - 626          |
| Versicherungsmathematische Verluste aus Pensionen und ähnlichen Verpflichtungen nach Steuern von € 1 Million   | - 65           |
| <b>Saldo zum 30. September 2009</b>                                                                            | <b>- 6.180</b> |
| Konzernjahresüberschuss auf Aktionäre der Infineon Technologies AG entfallend                                  | 659            |
| Versicherungsmathematische Verluste aus Pensionen und ähnlichen Verpflichtungen nach Steuern von € 2 Millionen | - 92           |
| <b>Saldo zum 30. September 2010</b>                                                                            | <b>- 5.613</b> |

### MINDERHEITSANTEILE

Bis zur Entkonsolidierung von ALTIS (siehe Anhang Nr. 6) im ersten Quartal des Geschäftsjahr 2010, wurde der 50-prozentige Minderheitsanteil IBMs im Eigenkapital ausgewiesen.

## 31 / KAPITALMANAGEMENT

Das primäre Ziel der Gesellschaft im Hinblick auf das Kapitalmanagement besteht darin, finanzielle Flexibilität auf Grundlage einer soliden Kapitalstruktur sicherzustellen. Wie bei vergleichbaren Unternehmen der Halbleiterbranche steht dabei eine ausreichende Liquiditätsausstattung im Vordergrund, um die laufende Geschäftstätigkeit finanzieren und geplante Investitionen in allen Phasen des Geschäftszyklus vornehmen zu können. Andererseits soll die Verschuldung nur einen moderaten Anteil am Finanzierungsmix ausmachen. Auf Basis dieser Leitlinien hat Infineon drei Hauptziele für sein Kapitalmanagement definiert:

- Brutto-Cash-Position zwischen 30 und 40 Prozent vom Umsatz
- Netto-Cash-Position
- Brutto-Verschuldung höchstens 2x EBITDA

Die Gesellschaft unterliegt keinen satzungsmäßigen oder gesetzlichen Auflagen im Hinblick auf die Kapitalausstattung. Das Kapitalmanagement, seine Ziele und Definitionen basieren auf Kennziffern ermittelt auf Grundlage des IFRS-Konzernabschlusses. Infineon definiert die Netto-Cash/(Debt)-Position als das Ergebnis aus Brutto-Cash-Position abzüglich der kurz- und langfristigen Finanzverbindlichkeiten. Die Brutto-Cash-Position setzt sich aus Zahlungsmitteln, Zahlungsmitteläquivalenten sowie zur Veräußerung verfügbaren finanziellen Vermögenswerten zusammen. Infineon definiert EBIT als den Überschuss (Fehlbetrag) vor dem Ergebnis aus nicht fortgeführten Aktivitäten, Zinsen und Steuern. EBITDA wiederum ist EBIT zuzüglich planmäßiger Abschreibungen.

Die im Geschäftsjahr 2009 durchgeführten Refinanzierungsmaßnahmen, insbesondere die im August 2009 abgeschlossene Kapitalerhöhung, haben zu einer erheblichen Verbesserung der Liquiditätsposition und Kapitalstruktur von Infineon geführt. Zusätzlich hat das operative Geschäft im Geschäftsjahr 2010 nennenswerte Liquiditätsüberschüsse erwirtschaftet. Zum 30. September 2009 wies Infineon eine Netto-Cash-Position von € 657 Millionen auf, die im Verlauf des Geschäftsjahrs 2010 auf € 1.331 Millionen anwuchs. Ursächlich hierfür war im Wesentlichen der positive Free-Cash-Flow, also die positiven Mittelzuflüsse aus operativer Geschäftstätigkeit, die die Mittelabflüsse aus Investitionstätigkeit überstiegen. Positive Free-Cash-Flows sollten angesichts der angestrebten Gewinnsituation, des angestrebten Betriebskapitalniveaus und der angestrebten Investitionen auch künftig maßgebliche Liquiditätsquellen darstellen. Gleichzeitig bedingen die für die Halbleiterbranche typischen Zyklen eine angemessene Kassenhaltung. Die Gesellschaft hatte zum 30. September 2010 eine Brutto-Cash-Position von € 1.727 Millionen, das heißt € 220 Millionen mehr als zum Ende des vorangegangenen Geschäftsjahrs. Dieser Anstieg

beruht in erster Linie auf dem Free-Cash-Flow, der die Rückführung der verbleibenden € 448 Millionen Nennbetrag der 2010 fälligen nachrangigen Wandelanleihe überstieg. Auf Basis von Umsatzerlösen von € 4.585 Millionen inklusive des Mobilfunkgeschäfts liegt das Verhältnis von Brutto-Cash zu Umsatz bei 37,7 Prozent zum 30. September 2010 und somit im angestrebten Zielkorridor. Die vollständige Rückzahlung der 2010 fälligen nachrangigen Wandelanleihe hat außerdem zu einer deutlichen Verbesserung der Größe Brutto-Verschuldung zu EBITDA beigetragen, die per 30. September 2010 bei 0,4 lag (einschließlich EBITDA des Mobilfunkgeschäfts).

Infineon hat durch eine Kombination finanzieller Maßnahmen und operativer Verbesserungen einen Status sehr solider Liquidität bei niedriger Verschuldung erreicht. In Anbetracht des angestrebten Geschäftsmodells, des Bedarfs an Betriebskapital sowie der geplanten Investitionen relativ zu laufenden Abschreibungen geht Infineon davon aus, nachhaltige Liquiditätsüberschüsse generieren zu können. In diesem Kontext plant das Unternehmen ab dem Geschäftsjahr 2010 regelmäßig Dividenden in einer dauerhaft darstellbaren Höhe zu bezahlen. Ausschlaggebende Faktoren für die Bemessung künftiger Dividenden werden die Generierung von Free-Cash-Flows auch in konjunkturellen Abschwungphasen sowie der Grad der Erreichung der Finanzziele des Unternehmens sein.

Für das Geschäftsjahr 2011 prognostiziert die Gesellschaft ihre genannten drei Ziele für Kapitalmanagement in hohem Maße zu erfüllen beziehungsweise den Zielwert für das Verhältnis von Brutto-Cash zu Umsatz sogar deutlich zu überschreiten. Diese über dem Langfristziel liegende Liquiditätsposition soll für eine gewisse Zeit aufrechterhalten werden, da Infineon der Auffassung ist, diese zusätzlichen Mittel strategisch in wertsteigernder Weise einsetzen zu können, und zwar für Investitionen in 300 Millimeter Fertigungsanlagen oder in die Ausweitung der Kapazitäten für die Volumenproduktion von diskreten Leistungshalbleitern oder möglicherweise auch für Unternehmenskäufe. Sollte die Gesellschaft im Zeitablauf feststellen, dass keine derartigen Verwendungsmöglichkeiten für die zusätzliche Liquidität gefunden werden können, könnten weitere Maßnahmen zur Rückführung von Kapital an die Aktionäre ergriffen werden.

Angesichts der gegenwärtig vorhandenen Liquidität und zusätzlich vorhandener Kreditlinien in Verbindung mit der künftig angestrebten Erzielung von Liquiditätsüberschüssen auf Basis eines stabileren und profitableren Geschäftsmodells hat die Gesellschaft nicht vor, innerhalb kurzer oder mittlerer Frist die Finanzmärkte in Anspruch nehmen zu müssen. Sollte jedoch ein unerwarteter Finanzierungsbedarf auftreten, geht die Gesellschaft davon aus, in breitem Umfang Zugangsmöglichkeiten zu Finanzinstrumenten und Kapitalquellen zu haben, insbesondere bei dem gegenwärtig niedrigen Verschuldungsgrad.

01  
02  
03  
04  
05  
06  
07  
08  
09  
10  
11  
12  
13  
14  
15  
16  
17  
18  
19  
20  
21

## 32 / AKTIENOPTIONSPLÄNE

Im Jahr 2001 verabschiedete die Hauptversammlung einen internationalen Aktienoptionsplan („Long-Term-Incentive-Plan 2001“), der den Aktienoptionsplan 1999 ablöst. Optionen, die auf Grundlage des Aktienoptionsplans 1999 ausgegeben wurden, behalten ihre Wirksamkeit zu den damaligen Ausgabekonditionen, allerdings werden keine weiteren Optionen aus diesem Plan mehr ausgegeben. Entsprechend den Bedingungen des Aktienoptionsplans von 2001 konnten insgesamt bis zu 51,5 Millionen Optionen innerhalb einer Fünfjahresfrist gewährt werden. Der Ausübungspreis für eine neue Aktie entspricht 105 Prozent des durchschnittlichen Aktienkurses während der fünf Handelstage vor Gewährung der Option. Die Optionsrechte können innerhalb von sieben Jahren ausgeübt werden, sofern seit der Ausgabe der jeweiligen Optionsrechte zwischen zwei und vier Jahren vergangen sind und der Aktienkurs der Gesellschaft den Ausübungspreis an mindestens einem Handelstag erreicht hat.

Nach den Regelungen des Aktienoptionsplans von 2001 entschied der Aufsichtsrat jährlich innerhalb von 45 Tagen nach Veröffentlichung des Konzernabschlusses über die Zahl der dem Vorstand zu gewährenden Optionen. Im gleichen Zeitraum hat der Vorstand entschieden, wie viele Optionen an bezugsberechtigte Mitarbeiter gewährt werden.

Im Jahr 2006 verabschiedete die Hauptversammlung einen Aktienoptionsplan 2006 („SOP 2006“), der den Aktienoptionsplan 2001 ablöst. Gemäß den Bedingungen des SOP 2006 kann die Gesellschaft innerhalb von drei Jahren bis zu 13 Millionen Optionen ausgeben. Der Ausübungspreis für eine neue Aktie entspricht 120 Prozent des durchschnittlichen Aktienpreises während der fünf Handelstage vor dem Ausgabebetrag der Option. Die ausgegebenen Optionen können nur ausgeübt werden, wenn die Entwicklung des Infineon-Aktienkurses den vergleichbaren Philadelphia Semiconductor Index („SOX“) an drei aufeinanderfolgenden Tagen mindestens einmal innerhalb der Laufzeit der Option übersteigt. Die ausgegebenen Optionen können innerhalb von sechs Jahren nach der Ausgabe ausgeübt werden, jedoch nur, wenn seit der Ausgabe der jeweiligen Optionsrechte drei Jahre vergangen sind und der Aktienkurs an mindestens einem Handelstag während der Laufzeit den Ausgabepreis erreicht hat.

Nach den Regelungen des SOP 2006 entscheidet der Aufsichtsrat jährlich innerhalb von 45 Tagen nach Veröffentlichung des Konzernabschlusses oder innerhalb von 45 Tagen nach Veröffentlichung der Konzernergebnisse für das erste oder zweite Quartal, spätestens jedoch bis zwei Wochen vor dem Ende des zum Zeitpunkt der Zuteilung laufenden Quartals über die Zahl der dem Vorstand zu gewährenden Optionen. Der Vorstand entscheidet im gleichen Zeitraum über die Zahl der an bezugsberechtigte Mitarbeiter zu gewährenden Optionen.

Im Jahr 2010 verabschiedete die Hauptversammlung einen Aktienoptionsplan 2010 („SOP 2010“), der den Aktienoptionsplan 2006 ablöst. Gemäß den Bedingungen des SOP 2010 kann die Gesellschaft innerhalb von drei Jahren bis zu 12 Millionen Optionen ausgeben. Der Ausübungspreis für eine neue Aktie entspricht 120 Prozent des durchschnittlichen Aktienpreises während der fünf Handelstage vor dem Ausgabebetrag der Option.

Die ausgegebenen Optionen können nur ausgeübt werden, wenn der Infineon-Aktienkurs sich besser entwickelt als der SOX. Hierzu werden zunächst als jeweilige Referenzwerte (100 Prozent) die arithmetischen Durchschnitte der Infineon-Aktienkurse und der Tagesendstände des SOX während eines Dreimonatszeitraums nach der Ausgabe der Bezugsrechte gebildet. Während eines Zeitraumes, der ein Jahr nach Ausgabe der Bezugsrechte beginnt und bis zum Ende ihrer Laufzeit dauert, muss der Infineon-Aktienkurs den SOX (Tagesendstand), gemessen an den jeweiligen Referenzwerten, sodann mindestens einmal an mindestens zehn aufeinanderfolgenden Handelstagen übertreffen. Die vorstehende Vergleichsrechnung ist für jede Ausgabe von Bezugsrechten mit entsprechend angepassten Referenzwerten durchzuführen.

Nach der Regelung des SOP 2010 entscheidet der Aufsichtsrat jährlich innerhalb von 45 Tagen nach Veröffentlichung des Konzernabschlusses oder innerhalb von 45 Tagen nach Veröffentlichung der Konzernergebnisse für das erste, zweite oder dritte Quartal über die Zahl der dem Vorstand zu gewährenden Optionen, spätestens jedoch bis zwei Wochen vor dem Ende des zum Zeitpunkt der Zuteilung laufenden Quartals. Der Vorstand entscheidet im gleichen Zeitraum über die Zahl der an bezugsberechtigte Mitarbeiter zu gewährenden Optionen.

Zur Bedienung der Optionsrechte, die unter dem Long-Term-Incentive-Plan 2001, dem SOP 2006 und dem SOP 2010 begeben wurden oder begeben werden, stehen verschiedene Bedingte Kapitalia zur Verfügung, die im Lagebericht im Abschnitt „Angaben nach § 289 Absatz 4 und § 315 Absatz 4 HGB“ und im Anhang unter Nr. 30 Eigenkapital dargestellt sind. Die Gesellschaft kann jedoch den Bezugsberechtigten anbieten, anstelle von Aktien aus dem hierfür zur Verfügung stehenden Bedingten Kapital wahlweise eigene Aktien der Gesellschaft zu erwerben oder einen Barausgleich zu erhalten.



Die Aktienoptionspläne von 2001 und 2006 zum 30. September 2008 sowie ihre Änderungen innerhalb der Geschäftsjahre 2009 und 2010 stellen sich wie folgt dar (Anzahl der Optionen in Millionen Stück, Ausübungspreis in Euro, innerer Wert in Millionen Euro):

|                                                                                                                                    | Anzahl der Optionen | Durchschnittlicher Ausübungspreis | Durchschnittliche Restlaufzeit (in Jahren) | Gesamter innerer Wert |
|------------------------------------------------------------------------------------------------------------------------------------|---------------------|-----------------------------------|--------------------------------------------|-----------------------|
| <b>Ausstehende Optionen zum 30. September 2008</b>                                                                                 | 33,2                | 12,30                             | 2,28                                       | –                     |
| Gewährte Optionen                                                                                                                  | 2,6                 | –                                 | –                                          | –                     |
| Ausgeübte Optionen                                                                                                                 | –                   | –                                 | –                                          | –                     |
| Verfallene und ausgelaufene Optionen                                                                                               | –12,1               | 16,28                             | –                                          | –                     |
| <b>Ausstehende Optionen zum 30. September 2009</b>                                                                                 | 23,7                | 9,18                              | 2,23                                       | 3,0                   |
| Ausübbar gewordene Optionen und zu erwartende ausübbare Optionen, abzüglich erwarteter verfallener Optionen zum 30. September 2009 | 23,1                | 9,22                              | 2,18                                       | 2,7                   |
| Ausübbar zum 30. September 2009                                                                                                    | 17,6                | 9,74                              | 1,51                                       | –                     |
| <b>Ausstehende Optionen zum 30. September 2009</b>                                                                                 | 23,7                | 9,18                              | 2,23                                       | 3,0                   |
| Gewährte Optionen                                                                                                                  | –                   | –                                 | –                                          | –                     |
| Ausgeübte Optionen                                                                                                                 | –                   | –                                 | –                                          | –                     |
| Verfallene und ausgelaufene Optionen                                                                                               | –8,0                | 9,08                              | –                                          | –                     |
| <b>Ausstehende Optionen zum 30. September 2010</b>                                                                                 | 15,7                | 9,22                              | 1,88                                       | 5,7                   |
| Ausübbar gewordene Optionen und zu erwartende ausübbare Optionen, abzüglich erwarteter verfallener Optionen zum 30. September 2010 | 15,5                | 9,32                              | 1,83                                       | 5,1                   |
| Ausübbar zum 30. September 2010                                                                                                    | 13,3                | 10,39                             | 1,37                                       | –                     |

Die nachfolgende Tabelle fasst die Informationen zu ausstehenden und ausübaren Aktienoptionen zum 30. September 2010 zusammen (Anzahl der Optionen in Millionen, Ausübungspreis in Euro):

| Ausübungspreise             | Ausstehend          |                                            |                                   | Ausübbar            |                                   |
|-----------------------------|---------------------|--------------------------------------------|-----------------------------------|---------------------|-----------------------------------|
|                             | Anzahl der Optionen | Durchschnittliche Restlaufzeit (in Jahren) | Durchschnittlicher Ausübungspreis | Anzahl der Optionen | Durchschnittlicher Ausübungspreis |
| Unter € 5                   | 2,4                 | 4,68                                       | 2,72                              | –                   | –                                 |
| € 5 – € 10                  | 7,5                 | 1,74                                       | 8,60                              | 7,5                 | 8,60                              |
| € 10 – € 15                 | 5,8                 | 0,89                                       | 12,68                             | 5,8                 | 12,68                             |
| <b>Summe Aktienoptionen</b> | 15,7                | 1,88                                       | 9,22                              | 13,3                | 10,39                             |

In den Geschäftsjahren zum 30. September 2010 und 2009 sind Optionen mit einem gesamten beizulegenden Zeitwert von € 8 Millionen und € 10 Millionen ausübbar geworden. In den Geschäftsjahren zum 30. September 2010 und 2009 wurden Optionen mit einem gesamten inneren Wert in Höhe von € 0 Millionen und € 0 Millionen ausgeübt.

Die Veränderungen der nicht ausübbaeren Optionen von Infineon im Geschäftsjahr 2009 und 2010 werden in der folgenden Tabelle dargestellt (Anzahl der Optionen in Millionen Stück, Marktpreise in Euro, innerer Wert in Millionen Euro):

|                                                                 | Anzahl der Optionen | Durchschnittlicher Marktpreis | Durchschnittliche Restlaufzeit (in Jahren) | Gesamter innerer Wert |
|-----------------------------------------------------------------|---------------------|-------------------------------|--------------------------------------------|-----------------------|
| <b>Nicht ausübbaere Optionen zum 30. September 2008</b>         | 6,7                 | 2,96                          | 4,05                                       | –                     |
| Gewährte Optionen                                               | 2,6                 | 0,71                          |                                            |                       |
| Ausübbaer gewordene Optionen                                    | – 2,9               | 3,54                          |                                            |                       |
| Verfallene Optionen                                             | – 0,4               | 2,99                          |                                            |                       |
| <b>Nicht ausübbaere Optionen zum 30. September 2009</b>         | 6,0                 | 1,70                          | 4,33                                       | 3,0                   |
| Nicht ausübbaere Optionen, die voraussichtlich ausübbaer werden | 5,5                 | 1,69                          | 4,34                                       | 2,7                   |
| <b>Nicht ausübbaere Optionen zum 30. September 2009</b>         | 6,0                 | 1,70                          | 4,33                                       | 3,0                   |
| Gewährte Optionen                                               | –                   | –                             | –                                          | –                     |
| Ausübbaer gewordene Optionen                                    | – 3,2               | 2,46                          | –                                          | –                     |
| Verfallene Optionen                                             | – 0,4               | 2,74                          | –                                          | 0,3                   |
| <b>Nicht ausübbaere Optionen zum 30. September 2010</b>         | 2,4                 | 0,71                          | 4,68                                       | 5,7                   |
| Nicht ausübbaere Optionen, die voraussichtlich ausübbaer werden | 2,2                 | 0,71                          | 4,68                                       | 5,1                   |

Infineon ermittelte den beizulegenden Zeitwert einer gewährten Aktienoption aus dem Long-Term-Incentive-Plan 2001 zum Ausgabezeitpunkt mittels des Black-Scholes-Optionspreismodells. Für die vor dem 1. Oktober 2005 gewährten Optionen nutzte Infineon historische Volatilitäten, um den beizulegenden Zeitwert der an Mitarbeiter gewährten Aktienoptionen zu schätzen. Für Optionen, die nach dem 1. Oktober 2005 gewährt wurden, nutzt Infineon eine Kombination von impliziter Volatilität von gehandelten Optionen auf die Aktie der Infineon Technologies AG und historischer Volatilität, um den beizulegenden Zeitwert der an Mitarbeiter gewährten Aktienoptionen zu schätzen, da Infineon der Ansicht ist, dass diese Methode die zukünftige erwartete Volatilität der Aktie besser darstellt. Die erwartete Laufzeit der gewährten Optionen wurde auf Grund der historischen Erfahrungen geschätzt.

Infineon ermittelte den beizulegenden Zeitwert einer gewährten Aktienoption aus dem Aktienoptionsplan 2006 zum Ausgabezeitpunkt mittels eines Monte-Carlo-Simulationsmodells. Dieses Modell berücksichtigt die Ausübungsbedingung in Bezug auf die Entwicklung des SOX und den Einfluss auf den beizulegenden Zeitwert der Aktienoptionen. Infineon nutzt eine Kombination von impliziter Volatilität von gehandelten Optionen auf die Aktie der Gesellschaft und historischer Volatilität, um den beizulegenden Zeitwert der an Mitarbeiter gewährten Aktienoptionen zu schätzen, da Infineon der Ansicht ist, dass diese Methode die zukünftige erwartete Volatilität der Aktie besser darstellt. Die erwartete Laufzeit der gewährten Optionen wurde mittels eines Monte-Carlo-Simulationsmodells geschätzt.

Der Verfall von Optionen, die vor dem 1. Oktober 2005 gewährt wurden, wird auf Basis von historischen Erfahrungen geschätzt und zum Zeitpunkt des Verfalls erfasst. Der risikofreie Zins beruht auf der Rendite von Bundesanleihen mit einer vergleichbaren Laufzeit zum Gewährungszeitpunkt der Optionen. Infineon hat im Geschäftsjahr zum 30. September 2010 keine Dividende gezahlt.

In der folgenden Tabelle sind die durchschnittlichen Annahmen zur Marktpreisbewertung für das Geschäftsjahr 2009 dargestellt, da es im Geschäftsjahr 2010 keine Ausgabe von Aktienoptionen gab:

|                                                                                          | 2009        |
|------------------------------------------------------------------------------------------|-------------|
| Durchschnittliche Annahmen:                                                              |             |
| Risikofreier Zinssatz                                                                    | 1,88 %      |
| Erwartete Volatilität der Aktie                                                          | 67 %        |
| Erwartete Volatilität des SOX                                                            | 36 %        |
| Verfallrate pro Jahr                                                                     | 3,40 %      |
| Dividendenertrag                                                                         | 0 %         |
| Erwartete Laufzeit in Jahren                                                             | 3,20        |
| <b>Durchschnittlicher beizulegender Zeitwert pro Option zum Gewährungszeitpunkt in €</b> | <b>0,71</b> |

Zum 30. September 2010 hatte die Gesellschaft noch nicht realisierte Aufwendungen für aktienbasierte Vergütungen für noch nicht ausübbaere Aktienoptionen in Höhe von € 1 Millionen, die voraussichtlich über einen durchschnittlichen Zeitraum von 1,68 Jahren erfasst werden.

## AUFWENDUNGEN FÜR AKTIENBASIERTE VERGÜTUNGEN

Aufwendungen für aktienbasierte Vergütungen stellten sich in den Geschäftsjahren zum 30. September 2010 und 2009 wie folgt dar:

| € in Millionen                                                                                        | 2010     | 2009     |
|-------------------------------------------------------------------------------------------------------|----------|----------|
| Realisierte Aufwendungen für aktienbasierte Vergütungen:                                              |          |          |
| Umsatzkosten                                                                                          | –        | –        |
| Vertriebskosten und allgemeine Verwaltungskosten                                                      | –        | 2        |
| Forschungs- und Entwicklungskosten                                                                    | –        | –        |
| <b>Gesamte Aufwendungen für aktienbasierte Vergütungen</b>                                            | <b>–</b> | <b>2</b> |
| Auswirkung der aktienbasierten Vergütung auf das unverwässerte und verwässerte Ergebnis je Aktie in € | –        | –        |

## 33 / ERGÄNZENDE INFORMATIONEN ZUR KONZERN-KAPITALFLUSSRECHNUNG

Im Geschäftsjahr 2010 und 2009 lagen keine wesentlichen zahlungsunwirksamen Investitions- und Finanzierungsaktivitäten vor.

Von den zum 30. September 2010 bilanzierten Zahlungsmitteln und Zahlungsmitteläquivalenten von € 1.667 Millionen unterliegen € 42 Millionen rechtlichen Transfereinschränkungen und stehen somit nicht zur generellen Verfügung der Gesellschaft. Es handelt sich dabei um Zahlungsmittel und Zahlungsmitteläquivalente von konsolidierten Gesellschaften, die in Ländern mit rechtlichen Transfereinschränkungen ansässig sind, wie zum Beispiel konsolidierte Gesellschaften mit Sitz in der Volksrepublik China.

## 34 / TRANSAKTIONEN MIT NAHESTEHENDEN UNTERNEHMEN UND PERSONEN

Die Gesellschaft nimmt im normalen Geschäftsbetrieb auch Transaktionen mit nach der Equity-Methode bilanzierten und anderen verbundenen Unternehmen vor („nahestehende Unternehmen“). Nahestehende Personen sind Personen in Schlüsselpositionen des Unternehmens wie Mitglieder des Vorstands und des Aufsichtsrats („nahestehende Personen“). Diese beziehen nur Vergütungen im Rahmen ihrer Tätigkeit.

Die Gesellschaft bezieht bestimmte Vorprodukte von und verkauft bestimmte Produkte an nahestehende Unternehmen. Diese Käufe von und Verkäufe an nahestehende Unternehmen orientieren sich grundsätzlich an Herstellungskosten zuzüglich einer Gewinnmarge.

Die Forderungen gegen nahestehende Unternehmen bestehen aus Forderungen aus Lieferungen und Leistungen, aus

Finanzforderungen und sonstigen Forderungen gegen nach der Equity-Methode bilanzierte Unternehmen und andere verbundene Unternehmen in Höhe von insgesamt jeweils € 3 Millionen beziehungsweise € 3 Millionen zum 30. September 2010 und 2009.

Die Verbindlichkeiten gegenüber nahestehenden Unternehmen bestehen aus Verbindlichkeiten aus Lieferungen und Leistungen, aus Finanzverbindlichkeiten und sonstigen Verbindlichkeiten gegenüber nach der Equity-Methode bilanzierten Unternehmen und anderen verbundenen Unternehmen in Höhe von insgesamt € 18 Millionen und € 15 Millionen zum 30. September 2010 und 2009.

Die Forderungen und Verbindlichkeiten gegen nahestehende Unternehmen zum 30. September 2010 und 2009 werden zunächst nach Forderungen gegen und Verbindlichkeiten gegenüber Gesellschaften, an denen die Gesellschaft beteiligt ist, unterteilt. Anschließend werden die Forderungen gegen und die Verbindlichkeiten gegenüber nahestehenden Unternehmen nach Art und Weise des Geschäftsvorfalles unterschieden. Die als Forderungen oder Verbindlichkeiten aus Lieferungen und Leistungen ausgewiesenen Beträge resultieren aus dem Kauf beziehungsweise Verkauf von Produkten und Dienstleistungen. Finanzforderungen und -verbindlichkeiten beinhalten die geschuldeten Beträge aus Darlehen sowie die zu Interbankensätzen aufgelaufenen Zinsen.

Die Umsätze mit nahestehenden Unternehmen betragen insgesamt € 28 Millionen und € 2 Millionen in den Geschäftsjahren 2010 und 2009, wohingegen die Bezüge von nahestehenden Unternehmen € 229 Millionen und € 138 Millionen in den Geschäftsjahren 2010 und 2009 betragen.

## VORSTANDSVERGÜTUNG

Die im Geschäftsjahr 2010 aktiven Mitglieder des Vorstands erhielten für ihre Tätigkeit eine erfolgsunabhängige fixe Vergütung in Höhe von insgesamt € 4,1 Millionen (Vorjahr: € 3,6 Millionen). Angesichts der wirtschaftlichen Situation hatten die Mitglieder des Vorstands im Februar 2009 für das Geschäftsjahr 2009 auf einen Teil ihres Fixgehalts verzichtet (der Vorstandssprecher auf 20 Prozent, die anderen Vorstandsmitglieder auf 10 Prozent); ein erfolgsabhängiger Bonus wurde im Geschäftsjahr 2009 nicht gezahlt. Im Geschäftsjahr 2010 wurde wieder das volle Gehalt gezahlt, und die Vorstandsmitglieder haben für ihre Tätigkeit im Geschäftsjahr 2010 außerdem einen erfolgsabhängigen Bonus in Höhe von jeweils € 0,79 Millionen (Dr. Schröter € 0,78 Millionen) erhalten. Die Gesamtbarvergütung im Geschäftsjahr 2010 beträgt daher € 7,2 Millionen (Vorjahr: € 3,6 Millionen). Im Geschäftsjahr 2009 wurden an Mitglieder des Vorstands keine Aktienoptionen ausgegeben. Für das Geschäftsjahr 2010 wurden den Mitgliedern des Vorstands vom Aufsichtsrat am 22. November 2010 insgesamt 440.000 Aktienoptionen zugeteilt.

Die Barvergütung der Mitglieder des Aufsichtsrats der Infineon Technologies AG betrug im Geschäftsjahr 2010

01  
02  
03  
04  
05  
06  
07  
08  
09  
10  
11  
12  
13  
14  
15  
16  
17  
18  
19  
20  
21

insgesamt €0,5 Millionen (Vorjahr: €0,5 Millionen). Im Geschäftsjahr 2009 wurden keine Wertsteigerungsrechte ausgegeben. Im üblichen Zuteilungszeitraum im Dezember 2010 erhalten die Aufsichtsräte jeweils 1.500 Wertsteigerungsrechte, wie sie der für die Gesellschaft geltende, von der Hauptversammlung genehmigte Aktienoptionsplan 2010 vorsieht.

An frühere Mitglieder des Vorstands wurden im Geschäftsjahr 2010 Gesamtbezüge (Abfindungen und Versorgungsleistungen) von €3,4 Millionen ausbezahlt (Vorjahr: €1,8 Millionen). Hierin enthalten ist die erste Rate der an Herrn Dr. Schröter gezahlten Abfindung in Höhe von €1,8 Millionen.

Die Pensionsrückstellungen für frühere Mitglieder des Vorstands betragen zum 30. September 2010 insgesamt €36,6 Millionen (Vorjahr: €27 Millionen).

Weder die Infineon Technologies AG noch eines ihrer Tochterunternehmen hat ein Darlehen an Mitglieder des Aufsichtsrats oder des Vorstands gewährt.

Hinsichtlich der Angaben zur individuellen Vergütung der Mitglieder des Vorstands und des Aufsichtsrats gemäß § 314 Abs. 1 Nr. 6 Buchstabe a Satz 5 bis 9 HGB wird auf die

Ausführungen im Vergütungsbericht verwiesen, der Bestandteil des Konzernlageberichts ist.

### 35 / PENSIONSPLÄNE

Pensionsverpflichtungen der Gesellschaft entstehen zurzeit überwiegend über leistungsorientierte Pensionszusagen (defined benefit obligations), die einem bedeutenden Anteil der Mitarbeiter gewährt werden. Die Pensionszusagen richten sich im Wesentlichen nach der Dauer der Betriebszugehörigkeit. Ein Teil der Altersversorgungspläne bezieht sich auf das Einkommen im letzten oder in den vergangenen fünf Jahren der Betriebszugehörigkeit, andere feste Versorgungspläne sind vom durchschnittlichen Einkommen und der Position abhängig. Der Bewertungsstichtag für die Pensionspläne der Gesellschaft ist der 30. September.

Die Daten zu den Pensionsplänen der Gesellschaft sind für die deutschen Versorgungspläne („Inland“) und die ausländischen Versorgungspläne („Ausland“) zum 30. September 2010 und 2009 in der folgenden Tabelle dargestellt:

| € in Millionen                                                                                  | 2010        |            | 2009        |            |
|-------------------------------------------------------------------------------------------------|-------------|------------|-------------|------------|
|                                                                                                 | Inland      | Ausland    | Inland      | Ausland    |
| <b>Änderung der Anwartschaftsbarwerte unter Berücksichtigung künftiger Gehaltssteigerungen:</b> |             |            |             |            |
| Anwartschaftsbarwerte (DBO) zum Beginn des Geschäftsjahrs                                       | -360        | -65        | -297        | -79        |
| Aufwendungen für die im Geschäftsjahr erworbenen Versorgungsansprüche                           | -10         | -2         | -10         | -2         |
| Aufwendungen für Versorgungsansprüche aus vorangegangenen Geschäftsjahren                       | -2          | -          | -           | -          |
| Aufwendungen aus Aufzinsung der Anwartschaftsbarwerte                                           | -19         | -3         | -19         | -4         |
| Versicherungsmathematische Gewinne (Verluste)                                                   | -85         | -13        | -46         | 2          |
| Desinvestitionen                                                                                | 11          | 1          | -           | 10         |
| Einführung neuer Pläne und Planänderungen                                                       | -           | -          | -           | -          |
| Kürzungen                                                                                       | -           | -          | 4           | 3          |
| Gezahlte Versorgungsleistungen                                                                  | 9           | 3          | 8           | 3          |
| Fremdwährungseffekte                                                                            | -           | -4         | -           | 2          |
| <b>Anwartschaftsbarwerte zum Ende des Geschäftsjahrs</b>                                        | <b>-456</b> | <b>-83</b> | <b>-360</b> | <b>-65</b> |
| <b>Entwicklung des beizulegenden Zeitwerts des Planvermögens:</b>                               |             |            |             |            |
| Beizulegender Zeitwert zu Beginn des Geschäftsjahrs                                             | 305         | 25         | 298         | 35         |
| Erwartete Rendite des Fondsvermögens                                                            | 18          | 2          | 21          | 2          |
| Versicherungsmathematische Gewinne (Verluste)                                                   | 3           | 1          | -14         | -4         |
| Desinvestitionen                                                                                | -10         | -          | -           | -6         |
| Beitrag des Unternehmens                                                                        | 10          | 4          | 8           | 3          |
| Gezahlte Versorgungsleistungen                                                                  | -9          | -3         | -8          | -3         |
| Fremdwährungseffekte                                                                            | -           | 1          | -           | -2         |
| <b>Beizulegender Zeitwert zum Ende des Geschäftsjahrs</b>                                       | <b>317</b>  | <b>30</b>  | <b>305</b>  | <b>25</b>  |

Der Finanzierungsstatus entwickelte sich seit dem Geschäftsjahr 2007 wie folgt:

**ÜBERLEITUNG FINANZIERUNGSSTATUS**

| € in Millionen                                   | 2010        |            | 2009       |            | 2008       |            | 2007       |            |
|--------------------------------------------------|-------------|------------|------------|------------|------------|------------|------------|------------|
|                                                  | Inland      | Ausland    | Inland     | Ausland    | Inland     | Ausland    | Inland     | Ausland    |
| Beizulegender Zeitwert der Anwartschaftsbarwerte | -456        | -83        | -360       | -65        | -348       | -83        | -398       | -77        |
| Beizulegender Zeitwert des Planvermögens         | 317         | 30         | 305        | 25         | 329        | 37         | 368        | 41         |
| <b>Finanzierungsstatus</b>                       | <b>-139</b> | <b>-53</b> | <b>-55</b> | <b>-40</b> | <b>-19</b> | <b>-46</b> | <b>-30</b> | <b>-36</b> |

Die Überleitung des Finanzierungsstatus der Pensionspläne der Gesellschaft auf die in der Konzern-Bilanz zum 30. September ausgewiesenen Beträge setzt sich wie folgt zusammen:

| € in Millionen                                       | 2010        |            | 2009       |            |
|------------------------------------------------------|-------------|------------|------------|------------|
|                                                      | Inland      | Ausland    | Inland     | Ausland    |
| <b>Finanzierungsstatus</b>                           | <b>-139</b> | <b>-53</b> | <b>-55</b> | <b>-40</b> |
| Vermögenswert Obergrenze (Asset Ceiling)             | -           | -          | -          | -          |
| <b>Pensionsverpflichtungen, Saldo</b>                | <b>-139</b> | <b>-53</b> | <b>-55</b> | <b>-40</b> |
| Davon in: Pensionen und ähnliche Verpflichtungen     | -93         | -53        | -55        | -39        |
| Davon in: zur Veräußerung stehende Verbindlichkeiten | -46         | -          | -          | -1         |

Die Unterschiede aus der erwarteten und tatsächlichen Entwicklung sind in der folgenden Tabelle dargestellt. Diese Unterschiede ergeben sich aus der erwarteten Veränderung der Vermögenswerte und Verbindlichkeiten, ermittelt auf

Basis von versicherungsmathematischen Annahmen und den tatsächlichen Veränderungen dieser Vermögenswerte und Verbindlichkeiten.

| € in Millionen                                               | 2010   |         | 2009   |         | 2008   |         | 2007   |         |
|--------------------------------------------------------------|--------|---------|--------|---------|--------|---------|--------|---------|
|                                                              | Inland | Ausland | Inland | Ausland | Inland | Ausland | Inland | Ausland |
| Unterschiede aus erwarteten und tatsächlichen Entwicklungen: |        |         |        |         |        |         |        |         |
| des beizulegenden Zeitwerts der Anwartschaftsbarwerte        | -3     | -       | -1     | 3       | 8      | -2      | 13     | 2       |
| des beizulegenden Zeitwerts des Fondsvermögens               | 3      | 1       | -14    | -4      | -68    | -5      | -2     | -       |

Der tatsächliche Gewinn (Verlust) aus dem Planvermögen in den Jahren zum 30. September 2010 und 2009 betrug € 25 Millionen und € 5 Millionen.

Der Ermittlung der versicherungsmathematischen Werte der Versorgungspläne lagen folgende durchschnittliche gewichtete Annahmen zugrunde:

| in %                                                                | 2010   |         | 2009   |         |
|---------------------------------------------------------------------|--------|---------|--------|---------|
|                                                                     | Inland | Ausland | Inland | Ausland |
| Abzinsungsfaktor zum Ende des Geschäftsjahrs                        | 4,3    | 4,5     | 5,8    | 5,3     |
| Personalkostenteuerungsrate                                         | 2,0    | 2,0     | 2,0    | 1,9     |
| Erwartete Rentenentwicklung                                         | 2,0    | 0,8     | 2,0    | 1,4     |
| Erwartete Rendite auf das Planvermögen zu Beginn des Geschäftsjahrs | 6,3    | 7,2     | 7,1    | 7,2     |

Die Abzinsungsfaktoren werden auf der Basis erstrangiger Rentenpapiere gebildet, die, falls die Pensionsanwartschaften zum Stichtag glattgestellt würden, bis zum Fälligkeitszeitpunkt die benötigten zukünftigen Einzahlungen bereitstellen würden. Die Gesellschaft geht davon aus, dass kurzfristige Schwankungen der Zinssätze keinen Einfluss auf ihre langfristigen Verpflichtungen haben werden.

#### INVESTITIONSSTRATEGIE

Die Investitionsstrategie für die Pensionspläne der Gesellschaft beinhaltet ein gewisses Maß an Flexibilität, um sich ergebende Anlagechancen frühestmöglich ergreifen zu können. Gleichzeitig stellen angemessene Kennzahlen sicher, dass die Vorsichts- und Sorgfaltspflichten bei der Ausführung des Investitionsprogramms erfüllt werden. Das Vermögen der Pensionspläne wird von mehreren Anlageberatern angelegt. Die Pläne sehen eine Kombination aus aktiven und passiven Investitionsprogrammen vor. Unter Berücksichtigung der Laufzeit der zugrunde liegenden Verpflichtungen wird ein Portfolio der Investitionen des Planvermögens, bestehend aus Anteils-, Gläubiger- und anderen Wertpapieren, angestrebt, um die langfristige Gesamtkapitalrendite bei einem bestimmten Risiko zu maximieren. Das Investitionsrisiko wird durch laufende periodenweise Prüfungen des Portfolios, durch Abstimmung mit Anlageberatern und durch jährliche Verbindlichkeitsberechnungen kontrolliert. Die Investitionsmethoden und -strategien werden periodisch überprüft, um

sicherzustellen, dass die Ziele der Versorgungspläne unter Berücksichtigung jeder Änderung im Aufbau des Versorgungsplans, der Marktbedingungen oder anderer wesentlicher Punkte erreicht werden.

#### ERWARTETE LANGFRISTIGE RENDITE DES PLANVERMÖGENS

Um die erwartete Gesamtkapitalrendite des Planvermögens festlegen zu können, bedarf es mehrerer Annahmen. Die Methode der Gesellschaft, die Rendite des Planvermögens zu bestimmen, basiert auf langjährigen historischen Finanzmarktbeziehungen, den verschiedenen Arten der Investitionsklassen, in denen das Pensionsvermögen angelegt wurde, auf langfristigen Investitionsstrategien sowie auch auf der kumulierten Rendite, welche die Gesellschaft mit ihrem Portfolio normalerweise in einem bestimmten Zeitraum erwarten kann.

Die Gesellschaft überprüft die erwartete langfristige Gesamtkapitalrendite jährlich und nimmt, wenn nötig, Anpassungen vor. Zusätzlich gibt die Gesellschaft detaillierte Vermögens-/Verbindlichkeitsstudien in Auftrag, die regelmäßig von unabhängigen Anlageberatern und Versicherungsfachleuten durchgeführt werden.

#### VERTEILUNG DES PLANVERMÖGENS

Am 30. September 2010 und 2009 stellen sich die prozentuale Verteilung des investierten Planvermögens und die Zielverteilung in den wesentlichen Anlagekategorien wie folgt dar:

| in %             | Zielverteilung |            | 2010       |            | 2009       |            |
|------------------|----------------|------------|------------|------------|------------|------------|
|                  | Inland         | Ausland    | Inland     | Ausland    | Inland     | Ausland    |
| Anteilspapiere   | 39             | 39         | 27         | 38         | 31         | 37         |
| Gläubigerpapiere | 33             | 15         | 36         | 13         | 28         | 17         |
| Sonstiges        | 28             | 46         | 37         | 49         | 41         | 46         |
| <b>Gesamt</b>    | <b>100</b>     | <b>100</b> | <b>100</b> | <b>100</b> | <b>100</b> | <b>100</b> |

Der in der obigen Tabelle aufgeführte Posten „Sonstiges“ beinhaltet Hedge Funds, Commodity Funds, Immobilienfonds, Rückdeckungsversicherungen und Zahlungsmittel.

Die Verteilung des Planvermögens der Gesellschaft auf das Anlagevermögen der Pensionspläne basiert auf der Einschätzung der Geschäfts- und Finanzlage, demographischen und versicherungsmathematischen Daten, Finanzierungsmöglichkeiten, geschäftsbezogenen Risikofaktoren, Marktsensitivitätsanalysen und anderen relevanten Faktoren. Insgesamt soll die Verteilung der Sicherung des Planvermögens dienen und

gleichzeitig für ausreichend stabile, beispielsweise inflationsbereinigte Einkünfte sorgen, um sowohl derzeitige als auch zukünftige Pensionszusagen zu erfüllen. Auf Grund des aktiven Portfoliomanagements kann die tatsächliche Verteilung des Anlagevermögens, innerhalb bestimmter Grenzen der verschiedenen Risikoklassen, von der geplanten Verteilung abweichen. Gemäß den Richtlinien der Gesellschaft investieren die Pensionspläne der Gesellschaft nicht in Aktien von Infineon.

Die Aufwendungen für Pensionsverpflichtungen in den Geschäftsjahren 2010 und 2009 beinhalten:

| € in Millionen                                                                                     | 2010       |           | 2009      |           |    |
|----------------------------------------------------------------------------------------------------|------------|-----------|-----------|-----------|----|
|                                                                                                    | Inland     | Ausland   | Inland    | Ausland   |    |
| Aufwendungen für die im Geschäftsjahr erworbenen Versorgungsansprüche                              | -10        | -2        | -10       | -2        | 01 |
| Aufwendungen aus Aufzinsung der Anwartschaftsbarwerte                                              | -19        | -3        | -19       | -4        | 02 |
| Erwarteter Ertrag aus Planvermögen                                                                 | 18         | 2         | 21        | 2         | 03 |
| Amortisation von noch nicht realisierten Versorgungsansprüchen aus vorangegangenen Geschäftsjahren | -2         | -         | -         | -         | 04 |
| Realisierter Gewinn aus Plankürzungen                                                              | -          | -         | 4         | 3         |    |
| <b>Aufwendungen für Pensionsverpflichtungen</b>                                                    | <b>-13</b> | <b>-3</b> | <b>-4</b> | <b>-1</b> |    |
| Pensionsaufwand aus nicht fortgeführten Aktivitäten                                                | -4         | -         | -4        | -         |    |
| <b>Pensionsaufwand aus fortgeführten Aktivitäten</b>                                               | <b>-9</b>  | <b>-3</b> | <b>-</b>  | <b>-1</b> |    |

Die aus den Pensionsplänen bereits entstandenen, noch nicht erfassten Versorgungsansprüche werden in gleich hohen Beträgen auf die erwartete Restdienstzeit der aktiven Mitarbeiter, die voraussichtlich Bezüge aus dem Pensionsvermögen erhalten werden, umgelegt.

Versicherungsmathematische Gewinne/Verluste für die Geschäftsjahre 2010 und 2009 in Höhe von minus € 93 Millionen und minus € 62 Millionen sind außerhalb der Gewinn- und Verlust-Rechnung in der Eigenkapitalveränderungsrechnung beziehungsweise Gesamtergebnisrechnung erfasst. Die kumulierten versicherungsmathematischen Gewinne/Verluste betragen zum 30. September 2010 und 2009 minus € 50 Millionen und € 43 Millionen.

Es ist weder geplant noch wird erwartet, dass Planvermögen an die Gesellschaft im nächsten Geschäftsjahr zurückübertragen wird.

Die Auswirkungen der Mitarbeiterentlassungen im Zusammenhang mit den Umstrukturierungsmaßnahmen auf die Pensionsverpflichtungen wurden auf Grund der Anwendung von IAS 19 als Plankürzung im Geschäftsjahr 2009 dargestellt.

Aufwendungen aus der Aufzinsung der Anwartschaftsbarwerte für Pensionen und Zinserträge aus Planvermögen werden im Zinsergebnis ausgewiesen. Die übrigen Aufwendungen für Pensionsverpflichtungen werden hauptsächlich den Umsatzkosten und den Forschungs- und Entwicklungskosten zugerechnet.

Die Gesellschaft hat in den Geschäftsjahren 2010 und 2009 € 103 Millionen und € 101 Millionen Aufwendungen für beitragsorientierte Pläne erfasst.

01  
02  
03  
04  
05  
06  
07  
08  
09  
10  
11  
12  
13  
14  
15  
16  
17  
18  
19  
20  
21

36 / ZUSÄTZLICHE ANGABEN ZU  
FINANZINSTRUMENTEN

Nachfolgende Tabelle stellt die Buchwerte sowie die beizulegenden Zeitwerte der Finanzinstrumente nach den jeweiligen Klassen sowie eine Aufgliederung in die verschiedenen Kategorien von Finanzinstrumenten gemäß IAS 39 dar.

| Finanzielle Vermögenswerte                                          | Kategorien der finanziellen Vermögenswerte |                                                    |                                                      |                           |                         | Beizulegender Zeitwert |
|---------------------------------------------------------------------|--------------------------------------------|----------------------------------------------------|------------------------------------------------------|---------------------------|-------------------------|------------------------|
|                                                                     | Buchwert                                   | Erfolgswirksam zum beizulegenden Zeitwert bewertet | Designierte Sicherungsinstrumente (Cash-Flow-Hedges) | Zur Veräußerung verfügbar | Kredite und Forderungen |                        |
| Bilanz zum 30. September 2009                                       |                                            |                                                    |                                                      |                           |                         |                        |
| <b>Kurzfristige Vermögenswerte:</b>                                 |                                            |                                                    |                                                      |                           |                         |                        |
| Zahlungsmittel und Zahlungsmitteläquivalente                        | 1.414                                      | –                                                  | –                                                    | –                         | 1.414                   | 1.414                  |
| Zur Veräußerung verfügbare finanzielle Vermögenswerte               | 93                                         | –                                                  | –                                                    | 93                        | –                       | 93                     |
| Forderungen aus Lieferungen und Leistungen und sonstige Forderungen | 514                                        | –                                                  | –                                                    | –                         | 514                     | 514                    |
| Sonstige kurzfristige finanzielle Vermögenswerte                    | 26                                         | 25                                                 | 1                                                    | –                         | –                       | 26                     |
| <b>Langfristige Vermögenswerte:</b>                                 |                                            |                                                    |                                                      |                           |                         |                        |
| Sonstige finanzielle Vermögenswerte                                 | 124                                        | –                                                  | –                                                    | 26                        | 98                      | 124                    |
| <b>Gesamt</b>                                                       | <b>2.171</b>                               | <b>25</b>                                          | <b>1</b>                                             | <b>119</b>                | <b>2.026</b>            | <b>2.171</b>           |
| Bilanz zum 30. September 2010                                       |                                            |                                                    |                                                      |                           |                         |                        |
| <b>Kurzfristige Vermögenswerte:</b>                                 |                                            |                                                    |                                                      |                           |                         |                        |
| Zahlungsmittel und Zahlungsmitteläquivalente                        | 1.667                                      | –                                                  | –                                                    | –                         | 1.667                   | 1.667                  |
| Zur Veräußerung verfügbare finanzielle Vermögenswerte               | 60                                         | –                                                  | –                                                    | 60                        | –                       | 60                     |
| Forderungen aus Lieferungen und Leistungen und sonstige Forderungen | 687                                        | –                                                  | –                                                    | –                         | 687                     | 687                    |
| Sonstige kurzfristige finanzielle Vermögenswerte                    | 72                                         | 63                                                 | 9                                                    | –                         | –                       | 72                     |
| Zur Veräußerung stehende Vermögenswerte                             | 4                                          | –                                                  | –                                                    | 1                         | 3                       | 4                      |
| <b>Langfristige Vermögenswerte:</b>                                 |                                            |                                                    |                                                      |                           |                         |                        |
| Sonstige finanzielle Vermögenswerte                                 | 119                                        | –                                                  | –                                                    | 20                        | 99                      | 119                    |
| <b>Gesamt</b>                                                       | <b>2.609</b>                               | <b>63</b>                                          | <b>9</b>                                             | <b>81</b>                 | <b>2.456</b>            | <b>2.609</b>           |



| Finanzielle Verbindlichkeiten                                                                                     | Kategorien der finanziellen Verbindlichkeiten |                                                    |                                                      |                                                       |                                    |                        |
|-------------------------------------------------------------------------------------------------------------------|-----------------------------------------------|----------------------------------------------------|------------------------------------------------------|-------------------------------------------------------|------------------------------------|------------------------|
|                                                                                                                   | Buchwert                                      | Erfolgswirksam zum beizulegenden Zeitwert bewertet | Designierte Sicherungsinstrumente (Cash-Flow-Hedges) | Sonstige finanzielle Verbindlichkeiten (Restbuchwert) | Miet- und Leasingverbindlichkeiten | Beizulegender Zeitwert |
| Bilanz zum 30. September 2009                                                                                     |                                               |                                                    |                                                      |                                                       |                                    |                        |
| Kurzfristige Verbindlichkeiten:                                                                                   |                                               |                                                    |                                                      |                                                       |                                    |                        |
| Kurzfristige Finanzverbindlichkeiten sowie kurzfristig fällige Bestandteile langfristiger Finanzverbindlichkeiten | 521                                           | –                                                  | –                                                    | 521                                                   | –                                  | 506                    |
| Verbindlichkeiten aus Lieferungen und Leistungen und sonstige kurzfristige finanzielle Verbindlichkeiten          | 393                                           | –                                                  | –                                                    | 393                                                   | –                                  | 393                    |
| Sonstige kurzfristige finanzielle Verbindlichkeiten                                                               | 50                                            | 15                                                 | –                                                    | 35                                                    | –                                  | 50                     |
| Langfristige Verbindlichkeiten:                                                                                   |                                               |                                                    |                                                      |                                                       |                                    |                        |
| Langfristige Finanzverbindlichkeiten                                                                              | 329                                           | –                                                  | –                                                    | 329                                                   | –                                  | 317                    |
| Sonstige finanzielle Verbindlichkeiten                                                                            | 5                                             | –                                                  | –                                                    | 5                                                     | –                                  | 5                      |
| <b>Gesamt</b>                                                                                                     | <b>1.298</b>                                  | <b>15</b>                                          | <b>–</b>                                             | <b>1.283</b>                                          | <b>–</b>                           | <b>1.271</b>           |
| Bilanz zum 30. September 2010                                                                                     |                                               |                                                    |                                                      |                                                       |                                    |                        |
| Kurzfristige Verbindlichkeiten:                                                                                   |                                               |                                                    |                                                      |                                                       |                                    |                        |
| Kurzfristige Finanzverbindlichkeiten sowie kurzfristig fällige Bestandteile langfristiger Finanzverbindlichkeiten | 133                                           | –                                                  | –                                                    | 133                                                   | –                                  | 133                    |
| Verbindlichkeiten aus Lieferungen und Leistungen und sonstige kurzfristige finanzielle Verbindlichkeiten          | 665                                           | –                                                  | –                                                    | 665                                                   | –                                  | 665                    |
| Sonstige kurzfristige finanzielle Verbindlichkeiten                                                               | 16                                            | 6                                                  | –                                                    | 10                                                    | –                                  | 16                     |
| Langfristige Verbindlichkeiten:                                                                                   |                                               |                                                    |                                                      |                                                       |                                    |                        |
| Langfristige Finanzverbindlichkeiten                                                                              | 263                                           | –                                                  | –                                                    | 263                                                   | –                                  | 276                    |
| Sonstige finanzielle Verbindlichkeiten                                                                            | 6                                             | –                                                  | –                                                    | 6                                                     | –                                  | 6                      |
| <b>Gesamt</b>                                                                                                     | <b>1.083</b>                                  | <b>6</b>                                           | <b>–</b>                                             | <b>1.077</b>                                          | <b>–</b>                           | <b>1.096</b>           |

Die beizulegenden Zeitwerte der derivativen Finanzinstrumente werden anhand von amtlichen Börsenkursen oder nach der Discounted-Cashflow-Methode ermittelt. Der beizulegende Zeitwert der ungesicherten Darlehen und der verzinslichen Bankverbindlichkeiten entspricht annähernd dem Buchwert, da die Verzinsung den derzeit marktüblichen Zinsen entspricht. Zum 30. September 2010 wurde die nachrangige Wandelanleihe mit Fälligkeiten im Jahr 2014 mit einem Aufschlag von 138,174 Prozent gegenüber ihrem Nominalwert an der Börse gehandelt. Die beizulegenden Zeitwerte der Zahlungsmittel, der Forderungen und Verbindlichkeiten gegenüber Dritten, der Forderungen und Verbindlichkeiten gegenüber nahestehenden Unternehmen sowie der übrigen Finanzinstrumente entsprechen auf Grund ihrer kurzfristigen Fälligkeiten annähernd deren Buchwerten. Zur Veräußerung verfügbare finanzielle Vermögenswerte werden zu beizulegenden Zeitwerten bilanziert (siehe Anhang Nr. 13).

Zum beizulegenden Zeitwert bilanzierte Finanzinstrumente werden gemäß IFRS 7 in verschiedene Bewertungslevels eingeteilt. Hierbei handelt es sich um Finanzinstrumente, die

- zu aktuellen Marktpreisen in einem aktiven Markt für identische Finanzinstrumente bewertet werden (Level 1),
- zu aktuellen Marktpreisen in einem aktiven Markt für vergleichbare Finanzinstrumente oder mit Bewertungsmodellen, deren wesentliche Inputfaktoren auf beobachtbare Marktdaten zurückzuführen sind, bewertet werden (Level 2) oder
- mit Hilfe von Inputfaktoren bewertet werden, die nicht auf beobachtbaren Marktpreisen basieren (Level 3).

01  
02  
03  
04  
05  
06  
07  
08  
09  
10  
11  
12  
13  
14  
15  
16  
17  
18  
19  
20  
21

Die Einteilung in Bewertungslevels stellt sich zum 30. September 2010 wie folgt dar:

| € in Millionen                                        | Fair Value | Level 1   | Level 2   | Level 3  |
|-------------------------------------------------------|------------|-----------|-----------|----------|
| 01 Finanzielle Vermögenswerte                         |            |           |           |          |
| 02 Kurzfristige Vermögenswerte:                       |            |           |           |          |
| Zur Veräußerung verfügbare finanzielle Vermögenswerte | 60         | –         | 60        | –        |
| 03 Sonstige kurzfristige finanzielle Vermögenswerte   | 72         | 72        | –         | –        |
| 04 Zur Veräußerung stehende Vermögenswerte            | 1          | –         | –         | 1        |
| Langfristige Vermögenswerte:                          |            |           |           |          |
| Sonstige finanzielle Vermögenswerte                   | 20         | 14        | –         | 6        |
| <b>Summe</b>                                          | <b>153</b> | <b>86</b> | <b>60</b> | <b>7</b> |
| Finanzielle Verbindlichkeiten                         |            |           |           |          |
| Kurzfristige Verbindlichkeiten:                       |            |           |           |          |
| Sonstige kurzfristige finanzielle Verbindlichkeiten   | 6          | 6         | –         | –        |
| 05 <b>Summe</b>                                       | <b>6</b>   | <b>6</b>  | <b>–</b>  | <b>–</b> |

Die folgende Tabelle stellt die Nettogewinne beziehungsweise -verluste aus fortgeführten Aktivitäten auf Ebene der unterschiedlichen Kategorien von Finanzinstrumenten für die Geschäftsjahre 2010 und 2009 dar:

| € in Millionen                                                      | Erfolgswirksam zum beizulegenden Zeitwert bewertete finanzielle Vermögenswerte und finanzielle Verbindlichkeiten |                         |                                                                      |                            |                                      |                                 |            |
|---------------------------------------------------------------------|------------------------------------------------------------------------------------------------------------------|-------------------------|----------------------------------------------------------------------|----------------------------|--------------------------------------|---------------------------------|------------|
|                                                                     | Zur Veräußerung verfügbare finanzielle Vermögenswerte                                                            | Kredite und Forderungen | Als erfolgswirksam zum beizulegenden Zeitwert zu bewerten eingestuft | Zu Handelszwecken gehalten | Andere finanzielle Verbindlichkeiten | Absicherung von Zahlungsströmen | Gesamt     |
| 12 <b>Geschäftsjahr 2009:</b>                                       |                                                                                                                  |                         |                                                                      |                            |                                      |                                 |            |
| 13 Erfolgswirksam aus dem Eigenkapital umgegliedert                 | 19                                                                                                               | –                       | –                                                                    | –                          | –                                    | 7                               | 26         |
| 14 Im Eigenkapital erfasste Veränderung des beizulegenden Zeitwerts | –15                                                                                                              | –                       | –                                                                    | –                          | –                                    | –                               | –15        |
| 15 Im Eigenkapital erfasste Nettogewinne (-verluste)                | 4                                                                                                                | –                       | –                                                                    | –                          | –                                    | 7                               | 11         |
| 16 Zinsergebnis                                                     | 61                                                                                                               | 22                      | –                                                                    | –                          | –124                                 | –2                              | –43        |
| 17 Netto-Währungseffekte                                            | –                                                                                                                | 3                       | –                                                                    | –16                        | 2                                    | –                               | –11        |
| 18 Veränderung des beizulegenden Zeitwerts                          | –23                                                                                                              | –                       | –4                                                                   | 17                         | –                                    | –                               | –10        |
| 19 Wertberichtigung (Aufholung)                                     | –                                                                                                                | –18                     | –                                                                    | –                          | –                                    | –                               | –18        |
| Erfolgswirksam erfasste Gewinne (Verluste)                          | 38                                                                                                               | 7                       | –4                                                                   | 1                          | –122                                 | –2                              | –82        |
| <b>Nettogewinne (-verluste) Gesamt</b>                              | <b>42</b>                                                                                                        | <b>7</b>                | <b>–4</b>                                                            | <b>1</b>                   | <b>–122</b>                          | <b>5</b>                        | <b>–71</b> |
| 20 <b>Geschäftsjahr 2010:</b>                                       |                                                                                                                  |                         |                                                                      |                            |                                      |                                 |            |
| 21 Erfolgswirksam aus dem Eigenkapital umgegliedert                 | 5                                                                                                                | –                       | –                                                                    | –                          | –                                    | –16                             | –11        |
| Im Eigenkapital erfasste Veränderung des beizulegenden Zeitwerts    | –4                                                                                                               | –                       | –                                                                    | –                          | –                                    | 26                              | 22         |
| Im Eigenkapital erfasste Nettogewinne (-verluste)                   | 1                                                                                                                | –                       | –                                                                    | –                          | –                                    | 10                              | 11         |
| Zinsergebnis                                                        | 1                                                                                                                | 17                      | –                                                                    | –                          | –89                                  | –2                              | –73        |
| Netto-Währungseffekte                                               | –                                                                                                                | 1                       | –                                                                    | 12                         | –15                                  | –26                             | –28        |
| Veränderung des beizulegenden Zeitwerts                             | 3                                                                                                                | 2                       | 4                                                                    | 1                          | –                                    | –                               | 10         |
| Wertberichtigung (Aufholung)                                        | –3                                                                                                               | –2                      | –                                                                    | –                          | –                                    | –                               | –5         |
| Erfolgswirksam erfasste Gewinne (Verluste)                          | 1                                                                                                                | 18                      | 4                                                                    | 13                         | –104                                 | –28                             | –96        |
| <b>Nettogewinne (-verluste) Gesamt</b>                              | <b>2</b>                                                                                                         | <b>18</b>               | <b>4</b>                                                             | <b>13</b>                  | <b>–104</b>                          | <b>–18</b>                      | <b>–85</b> |

## DERIVATIVE FINANZINSTRUMENTE UND SICHERUNGSBEZIEHUNGEN

Die Gesellschaft schließt Geschäfte über derivative Finanzinstrumente wie Zins-Swap-Vereinbarungen sowie Devisentermin- und -optionsgeschäfte ab. Ziel dieser Transaktionen ist die Verringerung der Auswirkungen von Zins- und Währungsschwankungen auf künftige Netto-Zahlungsströme. Derivative Finanzinstrumente werden bei der Gesellschaft nicht zu Handels- oder spekulativen Zwecken eingesetzt.

Die entsprechenden Nominalwerte und beizulegenden Zeitwerte der von der Gesellschaft zum 30. September 2010 und 2009 gehaltenen Derivate sind im Folgenden dargestellt:

| € in Millionen                       | 2010        |                        | 2009        |                        |
|--------------------------------------|-------------|------------------------|-------------|------------------------|
|                                      | Nominalwert | Beizulegende Zeitwerte | Nominalwert | Beizulegende Zeitwerte |
| <b>Devisenterminverträge Verkauf</b> |             |                        |             |                        |
| US-Dollar                            | 466         | 20                     | 390         | 8                      |
| Japanischer Yen                      | 4           | –                      | 4           | –                      |
| Singapur-Dollar                      | –           | –                      | 2           | –                      |
| Britisches Pfund                     | 1           | –                      | –           | –                      |
| <b>Devisenterminverträge Kauf</b>    |             |                        |             |                        |
| US-Dollar                            | 60          | –2                     | 78          | –5                     |
| Japanischer Yen                      | 7           | –                      | 5           | –                      |
| Singapur-Dollar                      | 17          | –                      | 16          | –                      |
| Britisches Pfund                     | 5           | –                      | 4           | –                      |
| Malaysische Ringgit                  | 50          | 1                      | 41          | –2                     |
| <b>Devisenoptionen Verkauf</b>       |             |                        |             |                        |
| US-Dollar                            | 1.061       | 47                     | –           | –                      |
| Zins-Swap-Vereinbarungen             | –           | –                      | 500         | 16                     |
| Sonstige                             | 3           | –                      | 13          | –6                     |
| <b>Gesamt</b>                        |             | <b>66</b>              |             | <b>11</b>              |

Zur Sicherung signifikanter erwarteter US-Dollar-Zahlungseingänge aus operativer Tätigkeit schließt die Gesellschaft Geschäfte über derivative Finanzinstrumente, im Wesentlichen Devisentermin- und -optionsgeschäfte, ab. In dem Geschäftsjahr 2010 hat die Gesellschaft bestimmte Devisentermingeschäfte und Devisenoptionen als Cash-Flow-Sicherungsbeziehungen für sehr wahrscheinliche zukünftige Umsätze in US-Dollar bestimmt. Der beizulegende Zeitwert dieser Devisentermingeschäfte beträgt € 9 Millionen. Im Geschäftsjahr 2010 wurden Wertänderungen im beizulegenden Zeitwert von derivativen Finanzinstrumenten in Höhe von minus € 18 Millionen in den anderen Rücklagen erfasst und minus € 26 Millionen wurden in den Umsatzkosten erfasst. Die Gesellschaft hat in dem Geschäftsjahr 2010 für diese Sicherungsbeziehungen keine Ineffektivitäten erfasst. Allerdings wurden bei der Beurteilung der Effektivität dieser Sicherungsbeziehungen die Differenz zwischen Kassa- und Terminkurs beziehungsweise der Zeitwert der Optionen nicht berücksichtigt und diesbezügliche

Gewinne und Verluste aus derivativen Finanzinstrumenten erfolgswirksam in den Umsatzkosten erfasst. Es wird erwartet, dass € 9 Millionen von den zum 30. September 2010 direkt unter den anderen Bestandteilen des Eigenkapitals erfassten Ergebnissen innerhalb des Geschäftsjahrs 2011 erfolgswirksam erfasst werden. Alle Devisentermingeschäfte, die als Cash-Flow-Sicherungsbeziehung bestimmt sind, haben eine Restlaufzeit von nicht mehr als vier Monaten. Die Gesellschaft schließt Fremdwährungsderivate ab, um das Währungsrisiko erwarteter Zahlungseingänge auszugleichen. Erfüllen sie die Voraussetzungen zur Anwendung der Regelungen für die Bilanzierung von Sicherungsbeziehungen nicht, werden sie in jeder Berichtsperiode zu beizulegenden Zeitwerten bewertet und die unrealisierten Gewinne und Verluste sofort ergebniswirksam erfasst. In den Geschäftsjahren 2009 und 2010 wurden keine Gewinne und Verluste aus den anderen Rücklagen erfolgswirksam erfasst, die daraus resultierten, dass Cash-Flow-Sicherungsbeziehungen aufgehoben wurden, da der Eintritt der abgesicherten Transaktion als unwahrscheinlich anzunehmen war.

## 37 / MANAGEMENT FINANZIELLER RISIKEN

Die Gesellschaft ist auf Grund ihrer Geschäftstätigkeit einer Vielfalt von finanziellen Risiken ausgesetzt: Marktrisiken (einschließlich Währungsrisiken, Zinsrisiken und Preisrisiken), Kreditbeziehungsweise Bonitätsrisiken und Liquiditätsrisiken. Das Risikomanagement der Gesellschaft bezüglich finanzieller Risiken zielt grundsätzlich auf die Unsicherheit der zukünftigen Entwicklung der Finanzmärkte ab und soll deren mögliche negative Auswirkungen auf die Ertragslage der Gesellschaft begrenzen. Zur Begrenzung bestimmter Risiken, denen die Gesellschaft ausgesetzt ist, nutzt sie derivative Finanzinstrumente. Das Risikomanagement wird durch eine zentrale „Finance and Treasury“-Abteilung („FT“) anhand von Richtlinien, die durch den Vorstand genehmigt wurden, vorgenommen. In enger Zusammenarbeit mit den operativen Einheiten der Gesellschaft werden die finanziellen Risiken durch FT identifiziert, bewertet und abgesichert. Die Richtlinien von FT umfassen neben schriftlichen Grundsätzen bezüglich des allgemeinen Risikomanagements dokumentierte Vorgaben im Hinblick auf einzelne Bereiche, wie beispielsweise Währungsrisiken, Zinsänderungsrisiken, Kreditrisiken, den Einsatz derivativer und nicht derivativer Finanzinstrumente oder die Anlage freier Liquidität.

01  
02  
03  
04  
05  
06  
07  
08  
09  
10  
11  
12  
13  
14  
15  
16  
17  
18  
19  
20  
21

**MARKTRISIKO**

Das Marktrisiko ist definiert als das Verlustrisiko, das aus einer nachteiligen Veränderung der Marktpreise von Finanzinstrumenten resultiert. Unter das Marktrisiko werden auch das Währungsrisiko und Zinsrisiko subsumiert.

Im Rahmen ihrer gewöhnlichen Geschäftstätigkeit ist die Gesellschaft dem Marktrisiko in verschiedener Weise ausgesetzt, im Wesentlichen durch Änderungen von Fremdwährungskursen und Zinssätzen. Um diesem Risiko zu begegnen, schließt die Gesellschaft verschiedene derivative Finanzgeschäfte mit zahlreichen Vertragspartnern ab. Derivate werden ausschließlich zur Absicherung, nicht jedoch zu Handels- oder Spekulationszwecken verwendet.

**WÄHRUNGSRIKIO**

Das Währungsrisiko bedeutet, dass sich der beizulegende Zeitwert zukünftiger Zahlungen von Finanzinstrumenten auf Grund von Währungsschwankungen ändert.

Obleich die Gesellschaft ihren Konzernabschluss in Euro aufstellt, fallen bedeutende Anteile der Umsatzerlöse wie auch der Entwurfs-, Entwicklungs-, Produktions- und Vermarktungskosten der Produkte in anderen Währungen, hauptsächlich in US-Dollar, an. Schwankungen der Wechselkurse dieser Währungen im Vergleich zum Euro hatten in den Geschäftsjahren 2010 und 2009 Auswirkungen auf die Ergebnisse der Gesellschaft.

Die Unternehmensführung hat Richtlinien erlassen, welche die einzelnen Unternehmen der Gesellschaft verpflichten, die Währungsrisiken gegenüber ihrer funktionalen Währung zu steuern. Die jeweiligen Einheiten der Gesellschaft sind verpflichtet, ihr jeweiliges gesamtes Gefährdungspotenzial aus dem Risiko durch Fremdwährungskursschwankungen bei FT intern abzusichern. Zur Steuerung der Währungsrisiken, die sich aus zukünftigen Geschäftsvorfällen und bilanzierten Vermögenswerten und Verbindlichkeiten ergeben, schließen die Unternehmen Terminverträge mit FT ab.

Die Geschäftspolitik der Gesellschaft zur Begrenzung kurzfristiger Fremdwährungsrisiken sieht vor, mindestens 75 Prozent des erwarteten Netto-Cash-Flows über einen Zeitraum von zwei Monaten, mindestens 50 Prozent des erwarteten Netto-Cash-Flows im dritten Monat und, in Abhängigkeit von der Art des Grundgeschäfts, einen Anteil in nachfolgenden Zeiträumen abzusichern. Ein Teil des Fremdwährungsrisikos bleibt auf Grund des Unterschieds zwischen tatsächlichen und erwarteten Beträgen bestehen. Die Gesellschaft ermittelt dieses Restrisiko auf Basis des Kapitalflusses unter Berücksichtigung der Bilanzposten, von eingegangenen oder vergebenen Aufträgen sowie auf Basis aller anderen geplanten Einnahmen und Ausgaben.

In den Geschäftsjahren 2010 und 2009 hat die Gesellschaft Nettogewinne beziehungsweise Nettoverluste aus Fremdwährungssicherungsgeschäften und Fremdwährungstransaktionen in Höhe von minus € 28 Millionen und minus € 11 Millionen im Konzernjahresüberschuss beziehungsweise -fehlbetrag erfasst.

Die folgende Tabelle stellt die Auswirkungen einer Änderung des Wechselkurses um 10 Prozent für die fortgeführten Aktivitäten zum 30. September 2010 und 2009 auf die wesentlichen Währungen dar:

| € in Millionen            | Konzern-Gewinn- und Verlust-Rechnung |        | Eigenkapital |        |
|---------------------------|--------------------------------------|--------|--------------|--------|
|                           | + 10 %                               | - 10 % | + 10 %       | - 10 % |
| <b>30. September 2009</b> |                                      |        |              |        |
| EUR/USD                   | 4                                    | - 5    | 11           | - 13   |
| EUR/MYR                   | - 2                                  | 3      | -            | -      |
| EUR/YEN                   | -                                    | -      | -            | -      |
| EUR/SGD                   | -                                    | -      | -            | -      |
| <b>30. September 2010</b> |                                      |        |              |        |
| EUR/USD                   | - 11                                 | 14     | 11           | - 14   |
| EUR/MYR                   | -                                    | - 2    | -            | -      |
| EUR/YEN                   | 1                                    | - 1    | -            | -      |
| EUR/SGD                   | -                                    | -      | -            | -      |

**ZINSRISIKO**

Entsprechend IFRS 7 ist das Zinsrisiko definiert als das Risiko einer Änderung des beizulegenden Zeitwerts oder zukünftiger Zahlungen eines Finanzinstruments auf Grund von Zinssatzänderungen.

Die Zinsrisikopositionen der Gesellschaft resultieren aus Geldanlageinstrumenten sowie Finanzverbindlichkeiten, die sich aus Wertpapieremissionen und Kreditaufnahmen zusammensetzen. Vor dem Hintergrund der hohen Zyklizität des Kerngeschäfts sowie zur Erhaltung hoher operativer Flexibilität hält die Gesellschaft einen vergleichsweise hohen Kassenbestand, der in Instrumente mit kurzer Zinsbindungsdauer angelegt wird. Diese Vermögenswerte werden hauptsächlich mit Vertragslaufzeiten zwischen einem und zwölf Monaten zu kurzfristig erzielbaren Zinssätzen angelegt. Das damit einhergehende Zinsrisiko wird in gewissem Umfang durch Finanzverbindlichkeiten kompensiert, die zu einem Teil variabel verzinslich sind.

Zur Reduzierung des verbleibenden Netto-Zinsänderungsrisikos nutzt die Gesellschaft Zinsderivate wie zum Beispiel Zins-Swaps, um die aktivische und passivische Zinsbindungsdauer einander anzunähern.

Gemäß IFRS 7 ist eine Sensitivitätsanalyse zu erstellen, welche die Auswirkungen möglicher Änderungen der Marktzinsen auf das Ergebnis sowie das Eigenkapital darstellt. Die Gesellschaft nutzt hierfür die Iterationsmethode. Die

Gesellschaft hält weder festverzinsliche finanzielle Vermögenswerte oder Verbindlichkeiten, die als erfolgswirksam zum beizulegenden Zeitwert zu bewerten eingestuft, noch bilanziert sind. Im Hinblick auf festverzinsliche, zur Veräußerung verfügbare finanzielle Vermögenswerte hätte eine Zinsänderung um 100 Basispunkte am Bilanzstichtag zu einer Erhöhung beziehungsweise Verminderung des Eigenkapitals um € 0,5 Millionen zum 30. September 2010 beziehungsweise um € 1 Million zum 30. September 2009 geführt.

Änderungen der Marktzinssätze wirken sich auf die Zinserträge und -aufwendungen variabel verzinslicher Finanzinstrumente und Zahlungen aus. Unter der Annahme einer Änderung des Marktzinssatzes um 100 Basispunkte wäre das Zinsergebnis um € 1,5 Millionen beziehungsweise € 2 Millionen im Geschäftsjahr 2010 und 2009 höher oder niedriger ausgefallen.

Eine Veränderung der Marktzinssätze beeinflusst den beizulegenden Zeitwert und die Cash-Flows von Zins-Swaps. Eine Veränderung der Marktzinssätze am Bilanzstichtag 30. September 2010 um 100 Basispunkte würde den Gewinn oder Verlust im Geschäftsjahr 2010 und 2009 um € 0 Millionen beziehungsweise € 3 Millionen vermindern oder erhöhen. Der Zins-Swap ist Anfang Juni 2010 ausgelaufen.

#### SONSTIGE PREISRISIKEN

IFRS 7 definiert das sonstige Preisrisiko als das Risiko, dass der beizulegende Zeitwert oder künftige Zahlungen eines Finanzinstruments auf Grund von Änderungen der Marktpreise schwanken können (bei denen es sich nicht um jene handelt, die sich aus dem Zinsrisiko oder dem Wechselkursrisiko ergeben), und zwar unabhängig davon, ob diese Änderungen durch Faktoren verursacht werden, die für jedes einzelne Finanzinstrument oder seinen Emittenten spezifisch sind, oder durch Faktoren, die alle ähnlichen auf dem Markt gehandelten Finanzinstrumente betreffen.

Infineon hält Finanzinstrumente, welche Preisrisiken ausgesetzt sind. Eine Änderung der relevanten Marktpreise um jeweils 5 Prozent hätte eine Ergebnisauswirkung von € 0,1 Millionen beziehungsweise € 1 Million in den Geschäftsjahren 2010 und 2009 gehabt.

Weiterhin ist die Gesellschaft auf Grund ihrer Abhängigkeit von verschiedenen Materialien Preisrisiken ausgesetzt. Die Gesellschaft versucht, diese Risiken durch ihre Einkaufsstrategie (einschließlich des Warenbezugs bei unterschiedlichen Anbietern, soweit möglich) und betriebliche Maßnahmen zu minimieren. Nach diesen erwähnten Maßnahmen schließt die Gesellschaft keinerlei derivative Finanzinstrumente ab, um das verbleibende Risiko aus einer Schwankung der Rohstoffpreise zu begrenzen.

#### KREDITRISIKO

Das Kreditrisiko ist das Risiko, dass eine Partei eines Finanzinstruments der anderen Partei einen finanziellen Verlust verursacht, indem sie einer Verpflichtung nicht nachkommt.

Die Kreditrisiken der Gesellschaft resultieren im Wesentlichen aus Forderungen aus Lieferungen und Leistungen, Zahlungsmitteläquivalenten, zur Veräußerung verfügbare finanzielle Vermögenswerte sowie aus Fremdwährungsderivaten. Das Kreditrisiko bei Forderungen ist auf Grund der großen Anzahl sowie wegen der regionalen Verteilung der Kunden begrenzt. Die Gesellschaft steuert Kreditrisiken durch Kundengenehmigungen, Kreditlimits und Überwachungsprozesse sowie umfassende Kreditprüfung aller wesentlichen Kunden. Das Kreditrisiko in Bezug auf zur Veräußerung verfügbare finanzielle Vermögenswerte und auf Fremdwährungsderivate durch Transaktionen mit einer begrenzten Anzahl von internationalen Finanzinstituten ist auf vorgegebene Obergrenzen beschränkt. Die Gesellschaft glaubt, dass das Risiko einer Nichterfüllung eines Geschäftspartners gering ist, da die Gesellschaft deren Kreditrisiko prüft und die Höhe der Verträge mit allen Finanzinstituten limitiert. Die Kreditwürdigkeit der Vertragsparteien wird regelmäßig überprüft, um die Wahrscheinlichkeit eines Kreditausfalls so niedrig wie möglich zu halten. Trotzdem kann die Gesellschaft die Möglichkeit eines Verlustes aus einem Kreditausfall einer der Vertragsparteien nicht im vollen Umfang ausschließen.

Die maximale Risikoposition aus finanziellen Vermögenswerten, die grundsätzlich einem Kreditrisiko unterliegen, entsprechen den Buchwerten.

#### LIQUIDITÄTSRISIKO

Das Liquiditätsrisiko ist das Risiko, dass ein Unternehmen Schwierigkeiten bei der Erfüllung seiner sich aus den finanziellen Verbindlichkeiten ergebenden Verpflichtungen hat.

Liquiditätsrisiken könnten aus einem potenziellen Unvermögen der Gesellschaft resultieren, fällige finanzielle Verpflichtungen zu erfüllen. Das Liquiditätsmanagement der Gesellschaft sieht vor, im Wesentlichen ausreichende Zahlungsmittelbestände und Wertpapiere des Umlaufvermögens vorzuhalten und zusätzlich die Verfügbarkeit einer Finanzierung durch adäquate zugesagte Kreditmittel sowie Marktpositionen erschließen zu können. Infolge der Dynamik der zugrunde liegenden Geschäfte erhält die Gesellschaft die Flexibilität hinsichtlich der Finanzierung durch die stetige Verfügbarkeit zugesicherter Kreditlinien aufrecht.

Nachfolgende Tabelle zeigt die Fälligkeitsstruktur nicht-derivativer Finanzverbindlichkeiten sowie eine Analyse der Zahlungsmittelabflüsse aus derivativen Finanzinstrumenten mit negativen beizulegenden Zeitwerten. Die Tabelle stellt die jeweiligen vertraglichen undiskontierten Zahlungen aus Finanzverbindlichkeiten dar. Zahlungen werden zu dem Zeitpunkt erfasst,

01  
02  
03  
04  
05  
06  
07  
08  
09  
10  
11  
12  
13  
14  
15  
16  
17  
18  
19  
20  
21

zu dem die Gesellschaft Vertragspartner eines Finanzinstruments geworden ist. Beträge in Fremdwährung sind mit dem Stichtagskurs zum Bilanzstichtag umgerechnet. Die Beträge in Bezug auf variabel verzinsliche Finanzinstrumente sind unter

Verwendung der Zinssätze der letzten Zinsfestsetzung vor dem 30. September 2010 ermittelt. Zahlungsausgänge, die jederzeit geleistet werden können, sind dem Zeitraum zugeordnet, zu dem die früheste Tilgung möglich ist.

01

| € in Millionen                           | Vertragliche Cash-Flows | 2011       | 2012      | 2013      | 2014       | 2015     | danach   |
|------------------------------------------|-------------------------|------------|-----------|-----------|------------|----------|----------|
| Nicht-derivative Finanzverbindlichkeiten | 1.188                   | 828        | 87        | 52        | 212        | –        | 9        |
| Derivative Finanzverbindlichkeiten:      |                         |            |           |           |            |          |          |
| Mittelabflüsse                           | – 148                   | – 148      | –         | –         | –          | –        | –        |
| Mittelzuflüsse <sup>1</sup>              | 144                     | 144        | –         | –         | –          | –        | –        |
| <b>Gesamt</b>                            | <b>1.184</b>            | <b>824</b> | <b>87</b> | <b>52</b> | <b>212</b> | <b>–</b> | <b>9</b> |

<sup>1</sup> Mittelzuflüsse aus derivativen Finanzverbindlichkeiten werden gezeigt, sofern diese bei Erfüllung des Instruments anfallen, um sämtliche vertraglichen Zahlungen darzustellen.

05

## 38 / FINANZIELLE VERPFLICHTUNGEN UND EVENTUALVERBINDLICHKEITEN

06

### RECHTSSTREITIGKEITEN UND STAATLICHE UNTERSUCHUNGSVERFAHREN US-JUSTIZMINISTERIUM

08

Im September 2004 hat die Gesellschaft mit der Kartellabteilung des US-Bundesjustizministeriums („DOJ“) in Verbindung mit deren Untersuchung möglicher Verletzungen US-amerikanischer Kartellgesetze in der DRAM-Industrie ein sogenanntes „Plea-Agreement“ abgeschlossen. In diesem Vertrag hat die Gesellschaft sich bereit erklärt, sich in einem einzigen und begrenzten Anklagepunkt schuldig zu bekennen, nämlich der Preisabsprachen für DRAM-Produkte mit anderen nicht weiter spezifizierten DRAM-Herstellern während bestimmter Zeiträume zwischen dem 1. Juli 1999 und dem 15. Juni 2002, und eine Strafzahlung in Höhe von 160 Millionen US-Dollar zuzüglich Zinsen in jährlichen Raten bis einschließlich 2009 zu leisten. Die letzte Rate in Höhe von 25 Millionen US-Dollar zuzüglich Zinsen (€ 17 Millionen) wurde im Oktober 2009 gezahlt. Der Strafvorwurf der Preisabsprache des DOJ bezog sich auf den Verkauf von DRAM-Produkten an sechs Original-Equipment-Manufacturer („OEM“)-Kunden, die Computer und Server herstellen. Die Gesellschaft hat mit den OEM-Kunden Vergleichsvereinbarungen abgeschlossen. Zusätzlich zu diesen OEM-Kunden hat die Gesellschaft mit acht Direktkunden und den nachstehend beschriebenen sechs Klägern, die aus der Sammelklage ausgetreten sind und gesondert Klage erhoben haben, Vergleichsvereinbarungen abgeschlossen.

17

18

19

20

21

### WETTBEWERBSRECHTLICHE VERFAHREN

Seit dem Beginn des DOJ-Verfahrens sind bei US-Bundesgerichten mehrere Sammelklagen gegen die Gesellschaft und ihre US-Tochtergesellschaft Infineon Technologies North America Corp. („IF North America“) und weitere DRAM-Hersteller von direkten Erwerbern, indirekten Erwerbern und Generalstaatsanwälten verschiedener US-amerikanischer

Bundesstaaten eingereicht worden. In den Klagen werden Preisabsprachen unter Verletzung des „Sherman Act“ behauptet und dreifacher Schadenersatz in unspezifizierter Höhe, Anwaltskosten und sonstige Kosten sowie eine Unterlassungsverfügung gegen das angeblich rechtswidrige Verhalten geltend gemacht. Im September 2002 wurden diese Verfahren an das US-Bundesgericht für Nordkalifornien verwiesen, um sie dort im Rahmen des vorgerichtlichen Verfahrens („Pretrial Proceedings“) gemeinsam oder in aufeinander abgestimmten Parallelverfahren als Teil einer Multi-District Litigation („MDL“) weiter zu verfolgen.

Im September 2005 haben die Gesellschaft und IF North America mit den Anwälten der Kläger der Sammelklage der direkten US-Erwerber von DRAM einen Vergleichsvertrag geschlossen (mit der Möglichkeit für die einzelnen Mitglieder der Klasse, aus diesem Vergleichsvertrag auszutreten). Im November 2006 hat das Gericht der Vergleichsvereinbarung zugestimmt, ein endgültiges Urteil erlassen und die anhängigen Verfahren eingestellt. Sechs Gesellschaften haben den Vergleichsvertrag in der Sammelklage nicht abgeschlossen und haben gesonderte Klagen gegen die Gesellschaft und IF North America erhoben. Die Gesellschaft und IF North America haben mit allen sechs Klägern Vergleichsvereinbarungen abgeschlossen.

Ungefähr 60 weitere Klagen wurden bis Oktober 2005, über das gesamte Staatsgebiet der USA verteilt, bei einer Vielzahl von Bundes- und Einzelstaatsgerichten eingereicht. Diese bundes- und einzelstaatlichen Klagen sind in der Form einer Sammelklage im Namen von Einzelpersonen und juristischen Personen erhoben worden, die DRAM-Produkte in einem bestimmten Zeitraum, beginnend 1999 oder später, in den USA indirekt erworben hatten. Die Kläger tragen in unterschiedlichen Konstellationen Verletzungen des „Sherman Act“, des kalifornischen „Cartwright Act“, verschiedener anderer Bundesgesetze, des Wettbewerbsrechts sowie Ansprüche aus ungerechtfertigter Bereicherung vor und

begehren dreifachen Schadenersatz in unbestimmter Höhe, Wiedergutmachung, Anwaltskosten, sonstige Kosten sowie eine Unterlassungsverfügung gegen das angeblich rechtswidrige Verhalten.

23 der an US-Bundes- und -Einzelstaatsgerichten anhängigen Klagen wurden auf Grund gerichtlicher Verfügung ebenfalls an das US-Bundesgericht für Nordkalifornien übertragen, um sie dort als Teil der oben beschriebenen MDL im Rahmen eines abgestimmten und gemeinsamen gerichtlichen Vorverfahrens weiter zu verfolgen. 19 der 23 übertragenen Klagen sind gegenwärtig im Rahmen der MDL anhängig. Die anhängigen kalifornischen Klagen wurden dem Bezirksgericht von San Francisco für ein koordiniertes und konsolidiertes vorgerichtliches Verfahren überwiesen. Die Sammelkläger der außerhalb von Kalifornien anhängigen Klagen der indirekten US-Erwerber, die nicht auf die MDL übertragen wurden, haben der Aussetzung ihrer Verfahren bis zur Entscheidung des MDL-Verfahrens zugestimmt.

Im Januar 2008 hat das Gericht in dem MDL-Verfahren indirekter Erwerber dem Antrag der Beklagten auf Klageabweisung einiger der erhobenen Ansprüche teilweise stattgegeben und ihn teilweise abgelehnt. Im Juni 2008 hat das Berufungsgericht für den 9. US-Bundesgerichtsbezirk eine Berufung angenommen. Die Kläger haben zugestimmt, das Verfahren in den MDL indirekten Käuferfällen auszusetzen, bis eine Entscheidung über die Berufung vorliegt.

Kläger in indirekten Erwerber-Klagen vor Bundesgerichten außerhalb der MDL haben nunmehr beantragt, eine Wiederaufnahme der zuvor ausgesetzten Verfahren zu erreichen. Mit Beschluss vom März 2009 hat der Richter des Bundesgerichts von Arizona in der bei ihm anhängigen Klage den Antrag der Kläger auf Wiederaufnahme abgelehnt. Mit Beschluss vom Dezember 2009 hat der Richter des Bundesgerichts von Minnesota in der bei ihm anhängigen Klage den Antrag der Kläger auf Wiederaufnahme abgelehnt. Im September 2009 hat das Bundesgericht von Arkansas einen Beschluss verkündet, der den Parteien aufgibt, innerhalb von 90 Tagen ein Schlichtungsverfahren durchzuführen, und der vorsieht, dass nach Ablauf dieser 90 Tage das Verfahren wieder aufgenommen wird. Die Parteien führten daraufhin am 7. Dezember 2009 ein Schlichtungsverfahren durch, konnten jedoch keine gütliche Einigung erzielen. Im Juli 2009 fand eine mündliche Verhandlung statt, in der das Bundesgericht von Wisconsin in dem bei ihm anhängigen Verfahren die Wiederaufnahme durch Beschluss verfügt hat. Im Oktober 2009 hat das Bundesgericht von West Virginia in der bei ihm anhängigen indirekten Erwerber-Klage einen Beschluss verkündet, durch den die Wiederaufnahme des Verfahrens in dieser Klage verfügt wurde.

Die Generalstaatsanwälte von 41 US-Bundesstaaten und -gebieten haben verschiedene Klagen gegen die Gesellschaft, IF North America und weitere DRAM-Hersteller im Namen von Behörden und Verbrauchern in jedem dieser Bundesstaaten, die DRAM-Produkte seit 1998 erworben haben, eingereicht.

Die Kläger tragen Verletzungen einzelstaatlicher und bundesstaatlicher Wettbewerbsgesetze vor, die sich auf den gleichen oben beschriebenen Vorwurf der DRAM-Preisabsprache und künstlichen Preiserhöhungen beziehen, und beantragen tatsächlichen und dreifachen Schadenersatz in unspezifizierter Höhe, Strafzahlungen, Anwaltskosten und sonstige Kosten sowie eine Unterlassungsverfügung gegen das angeblich rechtswidrige Verhalten und sonstige Wiedergutmachung. Die verschiedenen von den Generalstaatsanwälten anhängig gemachten Klagen wurden mit dem oben beschriebenen MDL-Verfahren zusammengeführt und in dieses Verfahren einbezogen. Zwischen Juni 2007 und Dezember 2008 haben die Generalstaatsanwälte von acht Bundesstaaten Klagerücknahme beantragt.

Im Oktober 2008 haben ungefähr 95 kalifornische Schulen, politische Unterabteilungen und staatliche Stellen, die zuvor Sammelkläger im Verfahren der Generalstaatsanwälte wie oben beschrieben waren, Klage beim California Superior Court gegen die Gesellschaft, IF North America und verschiedene andere DRAM-Hersteller erhoben mit der Behauptung, dass die Beklagten durch die oben beschriebenen Praktiken DRAM-Preisabsprachen und künstliche Preiserhöhungen unter Verstoß gegen kalifornisches Wettbewerbs- und Verbraucherschutzrecht begangen haben. Die Kläger verlangen Schadenersatz in tatsächlicher und dreifacher unbestimmter Höhe, Wiedergutmachung, Kosten (einschließlich Anwaltskosten) und sonstige aus Billigkeitsgründen zustehende Abhilfe. Die Klage ist weiterhin anhängig.

Infineon und einige der anderen Beklagten haben sich mit der Klasse der indirekten Kunden und den Generalstaatsanwälten auf einen Vergleich geeinigt. Der Vergleich sieht Zahlungen der Gesellschaft von ungefähr 29 Millionen US-Dollar vor. Die Gesellschaft hatte für diesen Betrag bereits eine Rückstellung gebildet, die zum 30. September 2010 unter „kurzfristige Verbindlichkeiten“ ausgewiesen ist.

Zwischen Dezember 2004 und Februar 2005 wurden zwei Sammelklagen gegen die Gesellschaft, IF North America und andere DRAM-Hersteller in der kanadischen Provinz Québec und je eine Sammelklage in den Provinzen Ontario und British Columbia im Namen aller direkten und aller indirekten Kunden eingereicht, die in Kanada ansässig sind und im Zeitraum zwischen Juli 1999 und Juni 2002 direkt oder indirekt DRAM-Produkte erworben hatten. In den Klagen werden jeweils Schadenersatz, Untersuchungs- und Verwaltungskosten sowie Zinsen, Gerichts- und Anwaltskosten geltend gemacht. Die Kläger tragen in erster Linie rechtswidrige Absprachen zur Wettbewerbsbeschränkung sowie unerlaubte Preisabsprachen im Hinblick auf DRAM-Preise vor. Gegenwärtig kann keine sinnvolle Einschätzung abgegeben werden, in welcher Höhe ein Schadenersatz in diesen Verfahren möglicherweise zugesprochen werden könnte.

01  
02  
03  
04  
05  
06  
07  
08  
09  
10  
11  
12  
13  
14  
15  
16  
17  
18  
19  
20  
21

**SONSTIGE STAATLICHE ERMITTLUNGSVERFAHREN**

Im April 2003 hat die Gesellschaft ein Auskunftsverlangen der Europäischen Kommission („EU-Kommission“) bezüglich bestimmter Wettbewerbspraktiken, die der EU-Kommission auf dem europäischen Markt für DRAM-Produkte zur Kenntnis gelangt sind, erhalten. Die Kommission hat im Februar 2009 ein förmliches Verfahren eingeleitet. Im Mai 2010 hat die Gesellschaft einen Vergleich mit der EU-Kommission geschlossen und sich bereit erklärt, ein Bußgeld in Höhe von € 57 Millionen zu zahlen. Das Bußgeld wurde im August 2010 gezahlt.

Im Oktober 2008 hat die Gesellschaft erfahren, dass die Kommission bezüglich des Geschäftssegments Chip Card & Security der Gesellschaft ein Untersuchungsverfahren wegen möglicher Verstöße gegen Wettbewerbsgesetze eingeleitet hat. Im September und Oktober 2009 haben die Gesellschaft und ihre französische Tochtergesellschaft schriftliche Auskunftsersuche der EU-Kommission erhalten. Die Gesellschaft kooperiert mit der Kommission bei der Beantwortung der gestellten Fragen. Zum jetzigen Zeitpunkt kann kein Betrag eines möglichen Bußgeldes als möglicher Ausgang dieser Untersuchung sinnvoll beziffert werden.

Am 21. Juni 2010 hat das brasilianische Justizministerium (Abteilung Wirtschaftsrecht) („SDE“) bekannt gegeben, dass es eine Untersuchung im Hinblick auf mögliche kartellrechtswidrige Aktivitäten in der DRAM-Industrie eingeleitet hat. Die Bekanntgabe der SDE nennt das Unternehmen, mehrere andere DRAM-Hersteller und diverse leitende Angestellte als Verfahrensbeteiligte und stellt klar, dass sich die Untersuchung auf den Zeitraum von Juli 1998 bis Juni 2002 konzentriert. Die Bekanntmachung der SDE basiert auf den durchgeführten Kartellverfahren in den USA und in Europa.

**WERTPAPIERRECHTLICHE VERFAHREN**

Zwischen September und November 2004 wurden im Namen einer Gruppe von Investoren, die öffentlich gehandelte Aktien der Gesellschaft zwischen März 2000 und Juli 2004 erworben haben, sieben Wertpapiersammelklagen gegen die Gesellschaft und gegenwärtige oder ehemalige Vorstandsmitglieder vor US-amerikanischen Bezirksgerichten eingereicht, die später am Bezirksgericht für Nordkalifornien zusammengefasst wurden. Die konsolidierte und ergänzte Klage behauptet Verstöße gegen US-Wertpapiergesetze und enthält den Vorwurf, dass die Beklagten sachlich falsche und irreführende öffentliche Angaben über vergangene und erwartete Geschäftsergebnisse der Gesellschaft und ihre Wettbewerbssituation gemacht hätten, weil sie die angebliche Beteiligung der Gesellschaft an wettbewerbswidrigen Preisabsprachen im Hinblick auf DRAM-Speicherprodukte nicht offengelegt hätten. In der Klage wird weiter behauptet, dass die Beklagten durch diese Preisabsprachen den Preis der Aktien der Gesellschaft manipuliert und dadurch ihre Aktionäre geschädigt hätten. Die Kläger verlangen nicht bezifferten Schadenersatz, Zinsen, Gerichts- und Anwaltskosten. Im Januar 2008 lehnte das

Gericht den Klageabweisungsantrag der Beklagten im Hinblick auf die Ansprüche der Kläger gemäß §§ 10(b) und 20(a) des U.S. Securities Exchange Act von 1934 ab und wies die Klage nach § 20A dieses Gesetzes vorbehaltlos ab. Im März 2009 gab das Gericht dem Antrag der Kläger, Personen zu einer Sammelklage zuzulassen, welche die Wertpapiere der Gesellschaft zwischen März 2000 und Juli 2004 gekauft haben, einschließlich der Käufer, die ihre Wertpapiere an der Frankfurter Wertpapierbörse gekauft und nach dem Juni 2002 verkauft haben, statt. Im April 2009 gab das Berufungsgericht für den 9. US-Bundesgerichtsbezirk dem Antrag der Gesellschaft statt, unverzüglich die Aufhebung der Verfügung des Gerichts vom März 2009, welche die Zulassung zu einer Sammelklage gewährt hatte, zu überprüfen. Im Mai 2009 hat das Gericht das Verfahren bis zur Entscheidung des Berufungsgerichts für den 9. US-Bundesgerichtsbezirk über diese Frage ausgesetzt. Im August 2010 hob das Berufungsgericht die Entscheidung des Bezirksgerichts auf und verwies die Angelegenheit zur weiteren Entscheidung, unter Berücksichtigung der Entscheidung Morrison v. Nat'l Australia Bank Ltd. des höchsten US Zivilgerichts, an das Bezirksgericht zurück.

Die Kläger haben die Höhe der Schadenersatzforderungen bislang nicht beziffert. Diese Angelegenheiten sind derzeit Gegenstand von Schlichtungsverfahren.

Die D&O-Versicherer der Gesellschaft haben die Deckung der Gesellschaft und ihrer Organe für die oben beschriebenen Wertpapiersammelklagen abgelehnt, und die Gesellschaft hat im Dezember 2005 und im August 2006 Deckungsklage gegen die Versicherer eingereicht. Die Klage gegen einen der Versicherer wurde im Mai 2007 endgültig abgewiesen. Die Klage gegen den anderen Versicherer ist noch anhängig.

**PATENTRECHTLICHE VERFAHREN**

Die CIF Licensing LLC („CIF“) – eine Konzerngesellschaft der General-Electric-Unternehmensgruppe – reichte im Oktober 2007 vor dem Landgericht Düsseldorf Patentverletzungsklage gegen die Deutsche Telekom AG wegen der Verletzung von vier europäischen Patenten in Deutschland durch CPE-Modems und ADSL-Systeme ein („CIF-Klage“). Die Deutsche Telekom hat ihren Zulieferern – darunter auch Kunden der Gesellschaft – mitgeteilt, dass eine mögliche Feststellung der Patentverletzung durch das Landgericht auch gegenüber den Zulieferern bindend ist. Die Gesellschaft ist im Januar 2008 dem Verfahren auf Seiten der Deutschen Telekom beigetreten. CIF hat die Gesellschaft daraufhin wegen mittelbarer Patentverletzung aus einem der vier europäischen Patente verklagt. Die Gesellschaft hat sich einer Verteidigungsgemeinschaft angeschlossen, der die Deutsche Telekom, die meisten ihrer Zulieferer und die meisten von deren Zulieferern angehören. Nach Maßgabe der bestehenden Kundenverträge ist die Gesellschaft verpflichtet, ihre Kunden unter bestimmten Umständen freizustellen und/oder Schadenersatz zu leisten.



Im Juli 2008 haben die Deutsche Telekom, die Gesellschaft und die anderen Beklagten gegen alle vier Patente Nichtigkeitsklage beim Bundespatentgericht in München eingereicht. Im Oktober 2008 hat CIF vor dem Landgericht Düsseldorf auch gegen die Arcor GmbH & Co. KG, die Hansenet Telekommunikation GmbH und die United Internet AG (alle drei nachfolgend „neue Beklagte“) Patentverletzungsklagen aus denselben vier europäischen Patenten erhoben. Die neuen Beklagten haben ihre Zulieferer von der Klage in Kenntnis gesetzt. Drei der Verfahren vor dem Landgericht in Düsseldorf wurden ausgesetzt, und die Gesellschaft geht davon aus, dass sie erst nach einer Entscheidung der beim Bundespatentgericht in München anhängigen Klage fortgesetzt werden. In diesen Klagen wurden seitens der CIF noch keine Schadenersatzforderungen beziffert. Eines der Verfahren vor dem Landgericht Düsseldorf wurde auf den 24. Februar 2011 terminiert. Das Bundespatentgericht hat zwei der vier anhängigen Nichtigkeitsklagen terminiert (15. Dezember 2010 und 26. Januar 2011). Jegliche Offenlegung einer Schätzung der Gesellschaft zum möglichen Ausgang dieser Verfahren, falls eine betragsmäßige Bezifferung sinnvollerweise erfolgen könnte, könnte die Position der Gesellschaft in diesen Verfahren ernsthaft beeinträchtigen.

Im November 2008 hat die Volterra Semiconductor Corporation („Volterra“) Klage gegen Primarion, Inc., die Gesellschaft und IF North America („die Beklagten“) wegen angeblicher Verletzung von fünf US-Patenten („die Patente“) durch Produkte, die von Primarion angeboten werden, bei dem US-Bezirksgericht für den nördlichen Bezirk Kalifornien eingereicht. Die Beklagten haben jegliche Verletzung bestritten und gleichzeitig eine Gegenklage gegen Volterra eingereicht, in der sie bestimmte wettbewerbsrechtliche Verstöße, eine mutmaßliche Täuschung des US-amerikanischen Patentamts („U.S. PTO“) vortragen und behaupten, dass die Patente unwirksam sind. Die U.S. PTO ließ die beantragte Überprüfung aller Patente zu. Im Juni 2009 ordnete das Gericht die Aussetzung des Verfahrens bezüglich zweier Patente an, wodurch die Überprüfungsverfahren gehemmt wurden. Im Juli 2009 stellte Volterra einen Antrag auf Erlass einer einstweiligen Verfügung sowie auf teilweise summarische Entscheidung über die Verletzung. Im September 2009 gab das Gericht Volterras Antrag auf Erlass einer einstweiligen Verfügung zunächst statt. Volterras Antrag auf teilweise summarische Entscheidung über die Patentverletzung wurde unter Vorbehalt zurückgewiesen. Im November 2009 revidierte das Gericht jedoch nach einer weiteren Anhörung seine Entscheidung und wies den Antrag auf Erlass einer einstweiligen Verfügung zurück. Im Mai 2010 hat Volterra anerkannt, dass die Gesellschaft eines der klagegegenständlichen Patente nicht benutzt. Ein Termin zur mündlichen Verhandlung (trial date) wurde auf Januar 2011 festgesetzt. Volterra hat den Schadenersatzanspruch bislang nicht der Höhe nach beziffert. Gegenwärtig kann keine sinnvolle Einschätzung abgegeben werden, in welcher Höhe ein Schadenersatz bezüglich des Anspruchs von Volterra

möglicherweise zugesprochen werden könnte. Im Januar 2010 hat die Gesellschaft Klage gegen Volterra vor dem US-Bezirksgericht für den Bezirk von Delaware wegen der Verletzung von vier US-Patenten der Gesellschaft erhoben.

Im Mai 2009 reichte Gregory Bender im US-Bundesgericht für den nördlichen Distrikt von Kalifornien Klage gegen vier Gesellschaften ein, darunter IF North America, in der die Verletzung eines US-Patents durch bestimmte Elektronikprodukte mit einem gepufferten Verstärker behauptet wird. Bislang wurden von dem Kläger keine Schadenersatzforderungen der Höhe nach beziffert, und es kann keine sinnvolle Einschätzung abgegeben werden, in welcher Höhe ein Schadenersatz möglicherweise zugesprochen werden könnte.

Im Februar 2010 hat Infineon bei der US International Trade Commission (ITC) Klage gegen Elpida Memory Inc. („Elpida“) sowie eine Reihe von deren Kunden eingereicht. Nach Ansicht von Infineon verletzen Elpidas DRAM-Produkte vier US-Patente von Infineon, die sich auf allgemeine Prozesstechnologien beziehen (keine DRAM-spezifischen Patente). Im Gegenzug hat Elpida am 2. April 2010 gegen die Gesellschaft und IF North America zwei Patentverletzungsklagen im District Court im Eastern District of Virginia eingereicht. Elpida und Infineon haben sich am 2. Juni 2010 verglichen und alle anhängigen Klagen zurückgenommen.

#### ARBEITSRECHTLICHE VERFAHREN BETREFFEND QIMONDA

Im April 2009 haben frühere Arbeitnehmer von Qimondas Tochtergesellschaften in den USA eine Klage gegen die Gesellschaft, IF North America und Qimonda AG im eigenen Namen und namens verschiedener Klänergemeinschaften vor dem U.S. Federal District Court in Delaware eingereicht. Die Klage bezieht sich auf die Beendigung der Arbeitsverhältnisse der Kläger im Zusammenhang mit der Insolvenz von Qimonda und auf die Zahlung von Trennungsgeld und anderen Zuwendungen, die angeblich von Qimonda geschuldet werden. Mit der Klage begehren die Kläger eine „Durchgriffshaftung“ sowie eine Haftung der Gesellschaft und IF North Americas unter verschiedenen Anspruchsgrundlagen, obgleich die Kläger die jeweilige Höhe der Schadenersatzforderungen weder gegenüber der Gesellschaft noch gegenüber IF North America oder der Qimonda AG spezifiziert haben. In einer am 29. Juni 2010 ergangenen Entscheidung lehnte der District Court den Klageabweisungsantrag der Gesellschaft ab und entschied, dass mit der Klage ein geeignetes Klagebegehren verfolgt werde. Das Gericht erklärte sich jedoch bereit, das Verfahren bis wenigstens Oktober 2010 auszusetzen, vorbehaltlich der Entwicklungen im Konkursverfahren von Qimondas US-amerikanischen Tochtergesellschaften. Die Gesellschaft und IF North America bestreiten die in der Klage vorgebrachten materiell-rechtlichen Behauptungen und werden sich gegen die Klage energisch verteidigen, sollte das Verfahren fortgeführt werden. Bis heute hat noch kein „Discovery-Verfahren“

01  
02  
03  
04  
05  
06  
07  
08  
09  
10  
11  
12  
13  
14  
15  
16  
17  
18  
19  
20  
21

begonnen, und momentan kann keine sinnvolle Einschätzung abgegeben werden, in welcher Höhe ein Schadenersatz möglicherweise zugesprochen werden könnte.

Die Gesellschaft und ihre Tochtergesellschaft Infineon Dresden sind Klagen von ungefähr 80 ehemaligen Infineon-Mitarbeitern ausgesetzt, die an Qimonda oder Qimonda Dresden im Rahmen der Ausgliederung von Qimonda transferiert wurden und die eine Wiederbeschäftigung durch die Gesellschaft verlangen. Eine verlässliche Schätzung über die Höhe der Ansprüche und den Ausgang der Verfahren ist derzeit nicht möglich.

### VORGÄNGE IM ZUSAMMENHANG MIT QIMONDA

Wie in Anhang Nr. 6 beschrieben, sieht sich die Gesellschaft im Zusammenhang mit dem Insolvenzverfahren über das Vermögen von Qimonda bestimmten Eventualverbindlichkeiten ausgesetzt und hat entsprechende Rückstellungen und Verbindlichkeiten erfasst. Zum 30. September 2010 und zum 30. September 2009 hat die Gesellschaft im Zusammenhang mit einigen der oben genannten Sachverhalte Verbindlichkeiten von jeweils € 21 Millionen erfasst sowie Rückstellungen von € 60 Millionen zum 30. September 2010 und € 163 Millionen zum 30. September 2009 bilanziert. Die erfassten Rückstellungen sind mehrheitlich unter „Kurzfristige Rückstellungen“ erfasst. Die entsprechenden Ergebnisbelastungen sind im „Ergebnis aus nicht fortgeführten Aktivitäten, abzüglich Steuern vom Einkommen und vom Ertrag“ ausgewiesen. Die erfassten Rückstellungen umfassen nur solche, von denen die Gesellschaft annimmt, dass sie wahrscheinlich eintreten können, und die mit hinreichender Genauigkeit zum jetzigen Zeitpunkt eingeschätzt werden können. Es gibt keine Sicherheit, dass die gebildeten Rückstellungen ausreichen, um allen Verpflichtungen nachzukommen, die im Zusammenhang mit der Insolvenz von Qimonda, insbesondere diesen Angelegenheiten entstehen könnten. Für detaillierte Informationen über diese Sachverhalte siehe Anhang Nr. 6.

Gemäß dem Einbringungsvertrag zwischen der Gesellschaft und Qimonda stehen der Gesellschaft Nutzungsrechte an geistigem Eigentum von Qimonda zu. Der Insolvenzverwalter hat für diese Vereinbarung das Wahlrecht der Nichterfüllung geltend gemacht. Sollte diese Nichterfüllungswahl rechtlich Bestand haben, wäre die Gesellschaft an Patenten, die die Gesellschaft im Wege der Einbringung auf Qimonda übertragen hat, als auch an Patenten, die von Qimonda selbst angemeldet wurden, nicht mehr lizenziert. Außerdem könnte die Gesellschaft diese Patente möglicherweise nicht mehr vollständig an Dritte unterlizenzieren. Dies könnte auch Vertragspartner der Gesellschaft betreffen, mit denen die Gesellschaft Patentlizenz austauschverträge abgeschlossen hat, und möglicherweise Schadenersatzansprüche gegen die Gesellschaft auslösen. Die Gesellschaft strebt zur Beilegung der Auseinandersetzung mit dem Insolvenzverwalter unter anderem an, das gesamte Patentportfolio von Qimonda zu erwerben, und

befindet sich in Verhandlungen mit dem Insolvenzverwalter über eine mögliche Einigung in dieser Angelegenheit.

Die möglichen Folgen der Nichterfüllungswahl betreffen – anders als die unter „Nicht fortgeführte Aktivitäten“ ausgewiesenen Effekte (siehe Anhang Nr. 6) – die „fortgeführten Aktivitäten“ der Gesellschaft, da die Gesellschaft selbst die besagten Patente nutzen könnte und/oder diese Patente im Rahmen von Patentlizenz austauschverträgen von Dritten genutzt werden können, die im Gegenzug der Gesellschaft Patente lizenzieren. Das Ergebnis der Verhandlungen mit dem Insolvenzverwalter würde nicht nur die Vergangenheit seit Ausübung des Wahlrechts betreffen, sondern auch für künftige Perioden gelten. Rückstellungen wurden für den bereits vergangenen Zeitraum gebildet. Diese Rückstellungen sind in den im Anhang Nr. 6 genannten Rückstellungsbeträgen nicht enthalten. Jegliche Offenlegung einer Schätzung der Gesellschaft zum Ergebnis der Verhandlungen könnte die Position der Gesellschaft beeinträchtigen.

### SONSTIGES

Gegen die Gesellschaft laufen verschiedene andere Rechtsstreitigkeiten und Verfahren im Zusammenhang mit ihrer Geschäftstätigkeit. Diese betreffen Produkte, Leistungen, Patente, Umweltangelegenheiten und andere Sachverhalte. Die Gesellschaft ist nach derzeitigem Kenntnisstand der Auffassung, dass aus dem Ausgang dieser übrigen Rechtsstreitigkeiten und Verfahren kein wesentlicher negativer Einfluss auf die Vermögens-, Finanz- und Ertragslage zu erwarten ist. Allerdings kann nicht ausgeschlossen werden, dass dies in Zukunft anders bewertet werden muss und sich aus der Neubewertung der anderen Rechtsstreitigkeiten und Verfahren eine wesentliche negative Beeinflussung der Vermögens-, Finanz- und Ertragslage ergeben könnte.

### RÜCKSTELLUNGEN UND MÖGLICHE AUSWIRKUNGEN DIESER VORGÄNGE

Rückstellungen für Rechtsstreitigkeiten und sonstige ungewisse Rechtspositionen werden gebildet, wenn es wahrscheinlich ist, dass eine Verpflichtung entstanden ist, und der entsprechende Betrag zumindest annähernd geschätzt werden kann. Wenn sich der geschätzte Betrag der Verbindlichkeiten innerhalb einer Bandbreite bewegt und kein Betrag innerhalb der Bandbreite wahrscheinlicher ist als ein anderer geschätzter Betrag, wird der Mittelwert der Bandbreite zurückgestellt.

Sobald weitere Informationen verfügbar sind, wird eine mögliche Haftung erneut überprüft und, wenn notwendig, werden die Schätzungen entsprechend angepasst. Die in Bezug auf diese Vorgänge gebildeten Rückstellungen sind abhängig von künftigen neuen Entwicklungen oder veränderten Umständen in jedem der Vorgänge, welche erhebliche negative Auswirkungen auf die Vermögens-, Finanz- und Ertragslage der Gesellschaft haben könnten.

Eine endgültige negative Entscheidung in jeder der oben beschriebenen Angelegenheiten könnte erhebliche finanzielle Verpflichtungen für die Gesellschaft begründen und andere negative Auswirkungen haben, was wiederum einen wesentlichen nachteiligen Einfluss auf das Geschäft und ihre Vermögens-, Finanz- und Ertragslage haben kann. In jeder dieser Angelegenheiten überprüft die Gesellschaft fortlaufend die Begründetheit der geltend gemachten Ansprüche, setzt sich energisch gegen diese zur Wehr und versucht, im Ermessen und besten Interesse der Gesellschaft alternative Lösungsmöglichkeiten zu finden. Unabhängig von

der Richtigkeit der Vorwürfe und dem Erfolg der genannten Klagen und anderen oben beschriebenen Angelegenheiten, können der Gesellschaft erhebliche Kosten im Zusammenhang mit der Verteidigung gegen die Vorwürfe oder mit deren gütlicher Erledigung entstehen, was erhebliche negative Auswirkungen auf ihre Vermögens-, Finanz- und Ertragslage haben kann.

## VERTRAGLICHE VERPFLICHTUNGEN

Die Verpflichtungen der Gesellschaft gegenüber Dritten zum 30. September 2010 sind wie folgt<sup>1</sup>:

| Zahlungen fällig in (€ in Millionen)                                | Gesamt       | Weniger als 1 Jahr | 1–2 Jahren | 2–3 Jahren | 3–4 Jahren | 4–5 Jahren | 5 Jahren und länger |
|---------------------------------------------------------------------|--------------|--------------------|------------|------------|------------|------------|---------------------|
| Zahlungen aus Leasingverträgen                                      | 656          | 60                 | 61         | 52         | 50         | 47         | 386                 |
| Unbedingte Abnahmeverpflichtungen von Sachanlagen                   | 171          | 170                | 1          | –          | –          | –          | –                   |
| Unbedingte Abnahmeverpflichtungen von immateriellen Vermögenswerten | 35           | 22                 | 10         | 3          | –          | –          | –                   |
| Sonstige unbedingte Abnahmeverpflichtungen                          | 504          | 404                | 70         | 24         | 5          | 1          | –                   |
| Zukünftige Zinszahlungen <sup>2</sup>                               | 110          | 19                 | 17         | 16         | 58         | –          | –                   |
| <b>Gesamt</b>                                                       | <b>1.476</b> | <b>675</b>         | <b>159</b> | <b>95</b>  | <b>113</b> | <b>48</b>  | <b>386</b>          |

<sup>1</sup> Die Tabelle enthält gewisse Zahlungsverpflichtungen oder Fälligkeiten von Verpflichtungen, die von dem Erreichen von Leistungszielen oder anderen Ereignissen, die nicht zeitlich fixiert sind, abhängen, und solche, deren wahrscheinliche Fälligkeiten im jeweiligen Fall vom Management geschätzt wurden. Die tatsächlichen Fälligkeiten können von diesen Schätzungen abweichen.

<sup>2</sup> Beinhaltet den Effekt aus der Aufzinsung der im Jahr 2014 fälligen nachrangigen Wandelanleihe in der Spalte 3–4 Jahre.

Die Gesellschaft ist mit verschiedenen assoziierten Unternehmen und externen Auftragsfertigern Vereinbarungen eingegangen, die der Gesellschaft Kapazitäten zur Produktion und zum Testen von Halbleiterprodukten garantieren. Diese verlängerbaren Vereinbarungen besitzen hauptsächlich eine Vertragslaufzeit von mehr als einem Jahr. Die Gesellschaft hat darin vereinbart, einen Teil der Produktion der Vertragspartner zu Marktpreisen zu kaufen.

Bezüge aus diesen Vereinbarungen werden entsprechend dem üblichen Geschäftsverlauf erfasst. Um der Nachfrage seitens ihrer Kunden nach ihren Produkten entsprechen zu können, überprüft die Gesellschaft regelmäßig den voraussichtlichen Einkaufsbedarf. Die Einkaufsverträge werden regelmäßig auf drohende Verluste überprüft, die eintreten können, falls die voraussichtlichen Bedarfsmengen unter die Bestellmengen beziehungsweise die Marktpreise unter die Vertragspreise fallen.

Am 23. Dezember 2003 hat die Gesellschaft einen langfristigen Leasingvertrag mit der MoTo Objekt Campeon GmbH & Co. KG („MoTo“) abgeschlossen. Dieser beinhaltet eine Leasingvereinbarung über einen Bürokomplex, genannt Campeon, im Süden Münchens, der von MoTo im zweiten Halbjahr 2005 fertiggestellt wurde. Die Gesellschaft hat keine Finanzierungsverpflichtung für MoTo und keine Garantien im Zusammenhang mit der Errichtung übernommen. Im Oktober 2005 hat die Gesellschaft Campeon im Rahmen einer

operativen Leasingvereinbarung übernommen und den Umzug der Mitarbeiter zum neuen Standort im Geschäftsjahr 2006 durchgeführt. Der Bürokomplex wurde für 20 Jahre von der Gesellschaft gemietet. Nach 15 Jahren hat die Gesellschaft das Recht, den Bürokomplex zu kaufen (non-bargain purchase option) oder weiterhin für die restlichen fünf Jahre zu mieten. Gemäß der Leasingvereinbarung leistete die Gesellschaft eine Mietkaution in Höhe von € 75 Millionen auf ein Treuhandkonto, die zum 30. September 2010 unter „Als Sicherheitsleistungen hinterlegte Zahlungsmittel“ innerhalb der sonstigen finanziellen Vermögenswerte der Konzern-Bilanz enthalten war. Die Leasingzahlungen unterliegen limitierten Anpassungen basierend auf festgelegten Finanzkennzahlen der Gesellschaft. Die Leasingvereinbarung wurde in der Rechnungslegung als operatives Leasing gemäß IAS 17 mit einer linearen monatlichen Aufwandsbelastung in Höhe der Leasingraten über den Leasingzeitraum ausgewiesen.

**EVENTUALVERPFLICHTUNGEN**

Die folgende Tabelle zeigt die Eventualverpflichtungen der Gesellschaft gegenüber Dritten zum 30. September 2010, ohne mögliche Verpflichtungen aus Rechtsstreitigkeiten <sup>1</sup>:

| Zahlungen fällig in (€ in Millionen)        | Gesamt     | Weniger als 1 Jahr | 1–2 Jahren | 2–3 Jahren | 3–4 Jahren | 4–5 Jahren | 5 Jahren und länger |
|---------------------------------------------|------------|--------------------|------------|------------|------------|------------|---------------------|
| Garantien <sup>2</sup>                      | 88         | 15                 | 1          | 5          | 2          | 4          | 61                  |
| Bedingte Zuschüsse und Zulagen <sup>3</sup> | 22         | 5                  | 6          | 6          | 2          | 3          | –                   |
| <b>Gesamt</b>                               | <b>110</b> | <b>20</b>          | <b>7</b>   | <b>11</b>  | <b>4</b>   | <b>7</b>   | <b>61</b>           |

<sup>1</sup> Die Tabelle enthält gewisse Zahlungsverpflichtungen oder Fälligkeiten von Verpflichtungen, die von dem Erreichen von Leistungszielen oder anderen Ereignissen, die nicht zeitlich fixiert sind, abhängen. Die wahrscheinliche Fälligkeit wurde von der Gesellschaft abgeschätzt. Die tatsächlichen Fälligkeiten können von diesen Schätzungen abweichen.

<sup>2</sup> Garantien werden im Wesentlichen für Zahlungen auf Einfuhrzölle, für Mieten von Gebäuden und für Eventualverbindlichkeiten in Verbindung mit erhaltenen staatlichen Zuschüssen ausgegeben.

<sup>3</sup> Bedingte Zuschüsse und Zulagen beziehen sich auf bisher erhaltene Beträge, die in Zusammenhang mit der Errichtung und Finanzierung von bestimmten Fertigungsstätten stehen und gegebenenfalls zurückerstattet werden müssen, falls die genannten behördlichen Projektanforderungen nicht erfüllt werden.

Auf Konzernebene hat die Gesellschaft zum 30. September 2010 gegenüber Dritten Garantien in Höhe von € 88 Millionen ausgereicht. Weiterhin hat die Gesellschaft als Mutterunternehmen in einigen üblichen Fällen Garantien für bestimmte Verpflichtungen konsolidierter Tochterunternehmen gegenüber Dritten übernommen. Diese Verpflichtungen gegenüber Dritten werden in dem Konzernabschluss infolge der Konsolidierung als Verbindlichkeiten aufgenommen. Zum 30. September 2010 betragen derartige Garantien – vornehmlich auf Grund von Finanzverbindlichkeiten konsolidierter Tochtergesellschaften gegenüber Dritten – € 439 Millionen. Von diesen Garantien entfallen € 196 Millionen auf die im Jahr 2014 fällige nachrangige Wandelanleihe.

Die Gesellschaft hat Zuschüsse und Zulagen für den Bau und die Finanzierung von bestimmten Fertigungsstätten erhalten. Diese Beträge werden bei Erreichen definierter Kriterien erfolgswirksam vereinnahmt. Die Gesellschaft hat bestimmte Zuwendungen erhalten unter der Voraussetzung, dass bestimmte projektbezogene Kriterien innerhalb einer bestimmten Periode nach Erhalt der Zuwendung erfüllt werden. Die Gesellschaft ist verpflichtet, diese Bedingungen zu erfüllen. Sollten jedoch diese Bedingungen nicht erfüllt werden, können maximal € 22 Millionen der zum Stichtag 30. September 2010 ausgewiesenen Zuwendungen zurückgefordert werden. Dieser Betrag enthält keine möglichen Verbindlichkeiten für von Qimonda bezogene Zuwendungen (siehe Anhang Nr. 6).

Im Zusammenhang mit ihrer regelmäßigen Geschäftstätigkeit kann die Gesellschaft bei bestimmten Umsätzen und anderen Verträgen verpflichtet sein, ihre Vertragspartner unter bestimmten Konditionen vom Schadenersatz bei Gewährleistungsfällen, Patentverletzungen und anderen Vorfällen freizustellen. Der Höchstbetrag von eventuellen zukünftigen Zahlungen für diese Art von Vereinbarungen kann nicht

zuverlässig abgeschätzt werden, da die eventuelle Verpflichtung von Vorkommnissen, deren Eintrittswahrscheinlichkeit nicht bestimmbar ist, und von bestimmten vertragspezifischen Fakten und Umständen abhängig ist. In der Vergangenheit hatten Zahlungen für diese Art von Vereinbarungen keinen wesentlichen Einfluss auf die Vermögens-, Finanz- und Ertragslage der Gesellschaft. Eine Überleitungstabelle im Anhang Nr. 24 zeigt die Veränderung der Gewährleistungsrückstellungen im Geschäftsjahr 2010.

**39 / SEGMENTBERICHTERSTATTUNG****SEGMENTDARSTELLUNG**

Die Berichterstattung der Gesellschaft über ihre Segmente und nach Regionen erfolgt gemäß IFRS 8.

Im Geschäftsjahr 2010 war das Geschäft der Gesellschaft in die vier operativen Segmente Automotive, Industrial & Multimarket, Chip Card & Security und Wireless Solutions strukturiert. Daneben hat die Gesellschaft als weitere Berichtssegmente die sonstigen Geschäftsbereiche sowie Konzernfunktionen und Eliminierungen.

**AUTOMOTIVE**

Das Segment Automotive entwirft, entwickelt, fertigt und vertreibt Halbleiterprodukte für Anwendungen in der Automobilindustrie. Zusammen mit seinem Produktportfolio bietet Infineon dementsprechendes System-Know-how und Unterstützung seiner Kunden.

**INDUSTRIAL & MULTIMARKET**

Das Segment Industrial & Multimarket entwirft, entwickelt, fertigt und vertreibt Halbleiterprodukte sowie komplette Systemlösungen vorrangig für Anwendungen der Industrieelektronik sowie für kundenspezifische Produktanwendungen.

**CHIP CARD & SECURITY**

Im Segment Chip Card & Security wird ein breites Portfolio an Sicherheitscontrollern und sicheren Memories für Chipkarten- und andere Sicherheitsanwendungen entworfen, entwickelt, produziert und vermarktet.

**WIRELESS SOLUTIONS**

Das Segment Wireless Solutions entwirft, entwickelt, fertigt und vertreibt eine große Bandbreite von ICs, anderen Halbleiterprodukten sowie kompletten Systemlösungen für drahtlose Kommunikationsanwendungen.

Am 30. August 2010 hat die Gesellschaft mit der Intel Corporation („Intel“) einen Vertrag über den Verkauf des Mobilfunkgeschäfts des Segments Wireless Solutions („Mobilfunkgeschäft“) an Intel Corporation („Intel“) abgeschlossen. Vom Wireless-Solutions-Geschäft verbleibt lediglich das Geschäft mit analogen und digitalen TV-Tuner und Empfangskomponenten für Satellitenradio sowie mit Hochfrequenz-Leistungsverstärker für Mobilfunk-Basisstationen bei der Gesellschaft. Auf Grund der Entscheidung über den Verkauf hat die Gesellschaft gemäß IFRS 5, „Non-current Assets Held for Sale and Discontinued Operations“, die Ergebnisse des Mobilfunkgeschäfts im Geschäftsjahr 2010 in der Konzern-Gewinn-und-Verlust-Rechnung der Gesellschaft als „Ergebnis aus nicht fortgeführten Aktivitäten, abzüglich Steuern vom Einkommen und vom Ertrag“ ausgewiesen. Die Vorjahresbeträge wurden entsprechend angepasst. Aufwendungen, die zuvor dem Mobilfunkgeschäft zugeordnet waren, die aber nach Abschluss des geplanten Verkaufs weiterhin anfallen, sind von diesem Ausweis nicht betroffen und werden weiterhin als Teil des „Ergebnis aus fortgeführten Aktivitäten“ ausgewiesen (siehe Anhang Nr. 6). Entsprechend der internen Berichterstattung im Geschäftsjahr 2010 wird das Segment Wireless Solutions im Rahmen der Segmentberichterstattung unverändert berichtet.

**SONSTIGE GESCHÄFTSBEREICHE**

Das Segment Sonstige Geschäftsbereiche umfasst verbleibende Aktivitäten von veräußerten Geschäften und anderen Geschäftsaktivitäten und liefert seit dem Abschluss des Verkaufs des Wireline-Communications-Geschäfts, entsprechend den abgeschlossenen Produktionsvereinbarungen, Produkte an Lantiq.

**KONZERNFUNKTIONEN UND ELIMINIERUNGEN**

Das Segment Konzernfunktionen und Eliminierungen dient der Eliminierung konzerninterner Umsatzerlöse und Ergebnisse. Darüber hinaus stehen die Roh-, Hilfs- und Betriebsstoffe sowie die unfertigen Erzeugnisse der gemeinsamen Front-End-Fertigungsstätten und die Roh-, Hilfs- und Betriebsstoffe der

gemeinsamen Back-End-Fertigungsstätten nicht unter der Kontrolle oder in Verantwortung des Managements der operativen Segmente, sondern unter der Kontrolle und in Verantwortung des Fertigungsmanagements. Das Fertigungsmanagement ist für die Durchführung der Fertigungsplanung, das Volumen und die Stückmengen verantwortlich. Das Vorratsvermögen ist dementsprechend nicht den operativen Segmenten, sondern dem Segment Konzernfunktionen und Eliminierungen zugeordnet. Lediglich die unfertigen Erzeugnisse der Back-End-Fertigungsstätten und die fertigen Erzeugnisse sind den operativen Segmenten zugeordnet. Ebenfalls stellt die Gesellschaft die Gewinne und Verluste aus dem Verkauf von Wertpapieren des Umlaufvermögens in dem Segment Konzernfunktionen und Eliminierungen dar.

**HAUPTENTSCHEIDUNGSTRÄGER, DEFINITION SEGMENTERGEBNIS UND ZURECHNUNG VON VERMÖGENSWERTEN UND VERBINDLICHKEITEN AUF DIE SEGMENTE**

Der Vorstand der Gesellschaft ist gemeinschaftlich Hauptentscheidungssträger (Chief Operating Decision Maker). Er entscheidet über die Ressourcenzuteilung auf die Segmente und beurteilt deren Erfolg anhand der Kennzahlen Umsatzerlöse und Segmentergebnis. Die Gesellschaft definiert das Segmentergebnis als Betriebsergebnis ohne Berücksichtigung von Wertminderungen von Vermögenswerten, Saldo, Aufwendungen für Umstrukturierungsmaßnahmen und andere Schließungskosten, Saldo, Aufwendungen für aktienbasierte Vergütung, akquisitionsbedingte Abschreibungen und Gewinne (Verluste), Gewinne (Verluste) aus dem Verkauf von Vermögenswerten, Geschäftsbereichen oder Beteiligungen an Tochtergesellschaften und sonstige Erträge (Aufwendungen), einschließlich Kosten für Gerichtsverfahren. Der Vorstand der Gesellschaft nutzt das Segmentergebnis, um Budgets und operative Ziele festzulegen und deren Umsetzung zu überprüfen sowie um das Geschäft der Gesellschaft zu leiten. Die Gesellschaft berichtet das Segmentergebnis, da sie der Ansicht ist, dass sie damit nützliche Informationen über den operativen Erfolg ihrer Segmente für Investoren zur Verfügung stellt.

Der Vorstand rechnet weder die Vermögenswerte noch Verbindlichkeiten den Segmenten zu, noch bewertet er regelmäßig die Segmente auf Basis dieser Größen, mit Ausnahme von bestimmten Vorratsinformationen, die ihm regelmäßig auf Segmentbasis berichtet werden. Allerdings werden den einzelnen Segmenten die Aufwendungen für Abschreibungen nach Maßgabe des Produktionsvolumens und der erzeugten Produkte auf Basis von Standardkosten zugeordnet.

01  
02  
03  
04  
05  
06  
07  
08  
09  
10  
11  
12  
13  
14  
15  
16  
17  
18  
19  
20  
21

**SEGMENTDATEN**

Im Juli 2009 ist die Gesellschaft einen Vertrag über den Verkauf ihres Geschäfts mit drahtgebundener Kommunikation (Wireline Communications) eingegangen, der am 6. November 2009 abgeschlossen wurde (siehe Anhang Nr. 6). Die interne Berichterstattung wurde entsprechend angepasst. Die Segmentberichterstattung des Geschäftsjahrs und des Vorjahrs wurde, aus Konsistenzgründen und um Analysen der operativen Segmentinformationen zu ermöglichen, an die aktuelle Struktur der Berichterstattung angepasst.

Die folgende Darstellung zeigt ausgewählte Segmentdaten:

| € in Millionen                                                                       | 2010         | 2009         |
|--------------------------------------------------------------------------------------|--------------|--------------|
| <b>Umsatzerlöse:</b>                                                                 |              |              |
| Automotive                                                                           | 1.268        | 839          |
| Industrial & Multimarket                                                             | 1.374        | 905          |
| Chip Card & Security                                                                 | 407          | 341          |
| Wireless Solutions                                                                   | 1.372        | 917          |
| Sonstige Geschäftsbereiche                                                           | 167          | 17           |
| Konzernfunktionen und Eliminierungen                                                 | -3           | 8            |
| <b>Segmentumsatz in Summe einschließlich Wireless Solutions</b>                      | <b>4.585</b> | <b>3.027</b> |
| bereinigt um Umsatzerlöse der nicht fortgeführten Aktivitäten von Wireless Solutions | -1.290       | -843         |
| <b>Umsatzerlöse fortgeführte Aktivitäten</b>                                         | <b>3.295</b> | <b>2.184</b> |

In den Umsatzerlösen der Segmente für das Geschäftsjahr 2010 sind keine intersegmentäre Umsätze enthalten.

| € in Millionen                                                                          | 2010       | 2009        |
|-----------------------------------------------------------------------------------------|------------|-------------|
| <b>Segmentergebnis:</b>                                                                 |            |             |
| Automotive                                                                              | 198        | -117        |
| Industrial & Multimarket                                                                | 283        | 35          |
| Chip Card & Security                                                                    | 22         | -4          |
| Wireless Solutions                                                                      | 159        | -36         |
| Sonstige Geschäftsbereiche                                                              | -12        | -13         |
| Konzernfunktionen und Eliminierungen                                                    | -15        | -32         |
| <b>Segmentergebnis in Summe einschließlich Wireless Solutions</b>                       | <b>635</b> | <b>-167</b> |
| bereinigt um das Segmentergebnis nicht fortgeführter Aktivitäten von Wireless Solutions | -160       | 27          |
| <b>Segmentergebnis in Summe fortgeführte Aktivitäten</b>                                | <b>475</b> | <b>-140</b> |

Die folgende Tabelle stellt die Überleitung vom Segmentergebnis auf das Ergebnis aus fortgeführten Aktivitäten vor Steuern vom Einkommen und vom Ertrag dar:

| € in Millionen                                                                                                      | 2010       | 2009        |
|---------------------------------------------------------------------------------------------------------------------|------------|-------------|
| Segmentergebnis in Summe fortgeführte Aktivitäten                                                                   | 475        | -140        |
| Bereinigt um:                                                                                                       |            |             |
| Wertminderungen von Vermögenswerten, Saldo                                                                          | -12        | 1           |
| Aufwendungen für Umstrukturierungen und andere Schließungskosten, Saldo                                             | 4          | 20          |
| Aufwendungen für aktienbasierte Vergütungen                                                                         | -          | -2          |
| Akquisitionsbedingte Abschreibungen und Verluste                                                                    | -4         | -4          |
| Verluste im Zusammenhang mit der Entkonsolidierung von ALTIS                                                        | -69        | -           |
| Gewinne (Verluste) aus dem Verkauf von Vermögenswerten, Geschäftsbereichen oder Beteiligungen an Tochterunternehmen | 4          | -18         |
| Sonstige Aufwendungen                                                                                               | -50        | -40         |
| <b>Betriebsergebnis</b>                                                                                             | <b>348</b> | <b>-183</b> |
| Finanzerträge                                                                                                       | 29         | 101         |
| Finanzaufwendungen                                                                                                  | -95        | -154        |
| Anteiliges Ergebnis von nach der Equity-Methode bilanzierten Beteiligungen                                          | 8          | 7           |
| <b>Ergebnis aus fortgeführten Aktivitäten vor Steuern vom Einkommen und vom Ertrag</b>                              | <b>290</b> | <b>-229</b> |

| € in Millionen                                                             | 2010       | 2009       |
|----------------------------------------------------------------------------|------------|------------|
| <b>Abschreibungen:</b>                                                     |            |            |
| Automotive                                                                 | 87         | 126        |
| Industrial & Multimarket <sup>1</sup>                                      | 104        | 137        |
| Chip Card & Security                                                       | 35         | 53         |
| Wireless Solutions <sup>2</sup>                                            | 136        | 152        |
| Sonstige Geschäftsbereiche                                                 | 27         | 45         |
| Konzernfunktionen und Eliminierungen                                       | -          | -          |
| <b>Gesamt</b>                                                              | <b>389</b> | <b>513</b> |
| abzüglich Abschreibungen nicht fortgeführte Aktivitäten Wireless Solutions | -53        | -60        |
| <b>Gesamt fortgeführte Aktivitäten</b>                                     | <b>336</b> | <b>453</b> |

<sup>1</sup> Enthält im Geschäftsjahr 2010 und 2009 jeweils € 3 Millionen an nicht im Segmentergebnis enthaltenen akquisitionsbedingten Abschreibungen.

<sup>2</sup> Enthält im Geschäftsjahr 2010 und 2009 jeweils € 19 Millionen an nicht im Segmentergebnis enthaltenen akquisitionsbedingten Abschreibungen.

Das anteilige Ergebnis von nach der Equity-Methode bilanzierten Gesellschaften wurde in Höhe von € 8 Millionen und € 7 Millionen im Segment Industrial & Multimarket in den Geschäftsjahren 2010 und 2009 vereinnahmt, jedoch nicht als Bestandteil des Segmentergebnisses. In den Berichtsperioden

enthielt keines der sonstigen Segmente ein Ergebnis von nach der Equity-Methode bilanzierten Gesellschaften.

| € in Millionen                                      | 2010       | 2009       |
|-----------------------------------------------------|------------|------------|
| <b>Vorräte:</b>                                     |            |            |
| Automotive                                          | 88         | 71         |
| Industrial & Multimarket                            | 128        | 109        |
| Chip Card & Security                                | 34         | 30         |
| Wireless Solutions                                  | 168        | 95         |
| Sonstige Geschäftsbereiche                          | 2          | –          |
| Konzernfunktionen und Eliminierungen                | 168        | 155        |
| <b>Zwischensumme</b>                                | <b>588</b> | <b>460</b> |
| abzüglich als „zur Veräußerung stehend“ ausgewiesen | –74        | –          |
| <b>Gesamt</b>                                       | <b>514</b> | <b>460</b> |

Am 30. September 2010 und 2009 sind alle Vorräte den entsprechenden operativen Segmenten zugeordnet, soweit sie unter die direkte Kontrolle und die Verantwortlichkeit der zuständigen Bereichsleiter fallen.

| € in Millionen                                      | 2010       | 2009       |
|-----------------------------------------------------|------------|------------|
| <b>Geschäfts- oder Firmenwert:</b>                  |            |            |
| Industrial & Multimarket                            | 19         | 19         |
| Wireless Solutions                                  | 160        | 160        |
| Konzernfunktionen und Eliminierungen                | 2          | 2          |
| <b>Zwischensumme</b>                                | <b>181</b> | <b>181</b> |
| abzüglich als „zur Veräußerung stehend“ ausgewiesen | –160       | –          |
| <b>Gesamt</b>                                       | <b>21</b>  | <b>181</b> |

Entsprechend der internen Berichterstattung sind bestimmte Posten in dem Segment Konzernfunktionen und Eliminierungen enthalten und werden nicht auf die übrigen Segmente umgelegt. Das gilt für bestimmte Kosten der Konzernzentrale, bestimmte Inkubatorkosten und Aufwendungen für Grundlagenforschung, für Einmalgewinne und spezielle strategische Technologieinitiativen. Ebenfalls werden Umstrukturierungsaufwendungen und Aufwendungen für aktienbasierte Mitarbeitervergütung unter den Konzernfunktionen und Eliminierungen berücksichtigt und sind nicht den Segmenten zugeordnet, da sie zentral entschieden werden und nicht der direkten Kontrolle des Segmentmanagements obliegen. Rechtskosten im Zusammenhang mit geistigem Eigentum und Produktangelegenheiten werden in den Segmenten zum Zeitpunkt der Ausgabewirksamkeit gezeigt. Dieser kann sich vom Zeitpunkt der Aufwandserfassung im Segment Konzernfunktionen und Eliminierungen unterscheiden. Die Gesellschaft ordnet Leerkosten auf Basis eines Auftragsfertigungsmodells zu, wobei die Vorlaufzeit der Auftragsstornierung oder -änderung bei der Leerkostenzuordnung berücksichtigt wird. Alle nicht verrechneten Leerkosten werden in den Konzernfunktionen und Eliminierungen gezeigt.

## UNTERNEHMENSWEITE ANGABEN GEMÄSS IFRS 8

Die Umsatzerlöse und langfristigen Vermögenswerte nach Regionen für die Geschäftsjahre 2010 und 2009 stellen sich wie folgt dar:

| € in Millionen             | 2010         | 2009         |
|----------------------------|--------------|--------------|
| <b>Umsatzerlöse:</b>       |              |              |
| Deutschland                | 862          | 530          |
| Übriges Europa             | 656          | 484          |
| Nordamerika                | 351          | 261          |
| Asien-Pazifik <sup>1</sup> | 1.202        | 768          |
| Japan                      | 184          | 116          |
| Andere                     | 40           | 25           |
| <b>Gesamt</b>              | <b>3.295</b> | <b>2.184</b> |

<sup>1</sup> Darin enthalten € 595 Millionen und € 359 Millionen an Umsatzerlösen in der Volksrepublik China in den Geschäftsjahren 2010 und 2009.

Der Ausweis des Umsatzes mit Dritten richtet sich nach dem Sitz des Rechnungsempfängers. Eine Aufgliederung der Beschäftigtenzahlen nach Regionen ist in Anhang Nr. 8 dargestellt.

In den Geschäftsjahren 2010 und 2009 entfielen auf keinen Einzelkunden mehr als 10 Prozent der Gesamtumsatzerlöse.

| € in Millionen                                                                         | 2010       | 2009         |
|----------------------------------------------------------------------------------------|------------|--------------|
| <b>Sachanlagen, Geschäfts- oder Firmenwert und andere immaterielle Vermögenswerte:</b> |            |              |
| Deutschland                                                                            | 340        | 641          |
| Übriges Europa                                                                         | 199        | 239          |
| Nordamerika                                                                            | 3          | 6            |
| Asien-Pazifik                                                                          | 382        | 409          |
| Japan                                                                                  | 1          | 2            |
| <b>Gesamt</b>                                                                          | <b>925</b> | <b>1.297</b> |

## 40 / WESENTLICHE EREIGNISSE NACH DEM BILANZSTICHTAG

Am 19. Oktober 2010 hat die Gesellschaft 100 Prozent der Anteile an der Blue Wonder Communications GmbH mit Sitz in Dresden erworben. Gegenstand der Aktivitäten der Blue Wonder Communications GmbH ist die Entwicklung und Vermarktung von Produkten, Rechnerprogrammen, Ingenieurs- und Beratungsdienstleistungen im Bereich der Informationstechnologie und der Telekommunikation. Insbesondere sollen die Technologien und Systemlösungen die Entwicklung des Mobilfunkstandards der nächsten Generation LTE (Long Term Evolution) unterstützen. Im Rahmen des Verkaufes des Mobilfunkgeschäfts sollen die Anteile an der Blue Wonder Communications GmbH ebenfalls an die Intel Corporation übertragen werden.

## 41 / ERGÄNZENDE ERLÄUTERUNGEN NACH HGB

### ANWENDUNG VON BEFREIUNGSVORSCHRIFTEN

Die unten genannten Konzerngesellschaften beabsichtigen die in § 264 Abs. 3 HGB eingeräumte Möglichkeit zur Befreiung von bestimmten Vorschriften über die Aufstellung, Prüfung und Offenlegung ihres Jahresabschlusses sowie ihres Lageberichtes nach den Regelungen für Kapitalgesellschaften in Anspruch zu nehmen, da zwischen diesen Konzerngesellschaften und der Infineon Technologies AG Beherrschungs- und Gewinnabführungsverträge bestehen:

- COMNEON GmbH, Nürnberg,
- Hitex Development Tools GmbH, Karlsruhe,
- Infineon Technologies Dresden GmbH, Dresden,
- Infineon Technologies Finance GmbH, München,
- Infineon Technologies Mantel 19 GmbH, Neubiberg,
- Infineon Technologies Mantel 21 GmbH, Neubiberg und
- Infineon Technologies Wireless Solutions GmbH, Neubiberg.

Auf Grund der Insolvenz der Qimonda AG, München, werden die Qimonda AG und ihre Tochterunternehmen nicht in den Konzernabschluss der Gesellschaft einbezogen. Der Gesellschaft liegen keine Informationen darüber vor, ob die Qimonda AG einen Konzernabschluss aufstellt oder von Möglichkeiten zur Befreiung von bestimmten Vorschriften über die Aufstellung eines Konzernabschlusses Gebrauch macht.

### ANGABE GEMÄSS § 160 ABS. 1 NR. 2 AKTG

Die Gesellschaft hat von der Ermächtigung zum Erwerb und zur Verwendung eigener Aktien, die von der Hauptversammlung am 12. Februar 2009 erteilt wurde und am 11. August 2010 ausgelaufen ist, keinen Gebrauch gemacht und im Geschäftsjahr 2010 keine eigenen Aktien erworben. Die Gesellschaft hält zum 30. September 2010 keine eigenen Aktien.

### ANGABE GEMÄSS § 160 ABS. 1 NR. 8 AKTG

Nach dem Wertpapierhandelsgesetz (WpHG) hat jeder Aktionär, der die Schwellen von 3, 5, 10, 15, 20, 25, 30, 50 oder 75 Prozent der Stimmrechte eines börsennotierten Unternehmens erreicht, überschreitet oder unterschreitet, dies dem Unternehmen und der Bundesanstalt für Finanzdienstleistungsaufsicht (BaFin) unverzüglich, spätestens jedoch innerhalb von vier Handelstagen, mitzuteilen. Der Gesellschaft wurde das Bestehen folgender Beteiligungen mitgeteilt (die entsprechenden Prozent- und Aktienzahlen beziehen sich auf das zum Zeitpunkt der jeweiligen Meldung vorhandene Grundkapital; die Anzahl der Aktien ist der letzten Stimmrechtsmitteilung an Infineon entnommen und kann daher zwischenzeitlich überholt sein):

- Dodge & Cox Investment Managers, San Francisco, USA, hat der Gesellschaft gemäß § 21 Abs. 1 WpHG am 7. August 2009 mitgeteilt, dass der Stimmrechtsanteil von Dodge & Cox International Stock Fund, San Francisco, USA, an der Infineon Technologies AG, Neubiberg, Deutschland, am 5. August 2009 durch Aktien die Schwelle von 10 Prozent der Stimmrechte unterschritten hat und zu diesem Zeitpunkt 9,88 Prozent (das entspricht 105.919.119 Stimmrechten) beträgt.
- Dodge & Cox Investment Managers, San Francisco, USA, hat der Gesellschaft gemäß § 21 Abs. 1 WpHG am 7. August 2009 mitgeteilt, dass der Stimmrechtsanteil von Dodge & Cox, San Francisco, USA, an der Infineon Technologies AG, Neubiberg, Deutschland, am 5. August 2009 durch Aktien die Schwelle von 10 Prozent der Stimmrechte unterschritten hat und zu diesem Zeitpunkt 9,95 Prozent (das entspricht 106.771.627 Stimmrechten) beträgt. 9,88 Prozent der Stimmrechte sind der Gesellschaft gemäß § 22 Abs. 1, Satz 1, Nr. 6 WpHG von Dodge & Cox International Stock Fund zuzurechnen, weitere 0,08 Prozent der Stimmrechte sind der Gesellschaft gemäß § 22 Abs. 1, Satz 1, Nr. 6 WpHG von Dodge & Cox Global Stock Fund zuzurechnen, der selbst weniger als 3 Prozent der Stimmrechte hält.
- Die BlackRock, Inc., New York, USA, hat der Gesellschaft gemäß § 21 Abs. 1 WpHG am 3. Februar 2010 mitgeteilt, dass ihr Stimmrechtsanteil an der Infineon Technologies AG, Neubiberg, Deutschland, am 29. Januar 2010 die Schwelle von 5 Prozent der Stimmrechte überschritten hat und an diesem Tag 5,11 Prozent der Stimmrechte (das entspricht 55.553.415



Stimmrechten) betragen hat. 5,11 Prozent der Stimmrechte (das entspricht 55.553.415 Stimmrechten) sind ihr gemäß § 22 Abs. 1 Satz 1 Nr. 6, Satz 2 WpHG zuzurechnen.

- Die Capital Research and Management Company, Los Angeles, USA hat der Gesellschaft gemäß § 21 Abs. 1 WpHG am 10. November 2010 mitgeteilt, dass ihr Stimmrechtsanteil an der Infineon Technologies AG, Neubiberg, Deutschland am 5. November 2010 die Schwelle von 3 Prozent der Stimmrechte überschritten hat und an diesem Tag 3,02 Prozent (das entspricht 32.845.000 Stimmrechten) betragen hat. 3,02 Prozent der Stimmrechte (das entspricht 32.845.000 Stimmrechten) sind ihr gemäß § 22 Abs. 1, Satz 1, Nr. 6 WpHG zuzurechnen.

#### ANGABE GEMÄSS § 161 AKTG

Die nach § 161 AktG vorgeschriebene Entsprechenserklärung wurde vom Vorstand und vom Aufsichtsrat abgegeben und dauerhaft öffentlich zugänglich gemacht. Sie ist im Internet unter [www.infineon.com](http://www.infineon.com) („Über Infineon/Investor/Corporate Governance/Entsprechenserklärung“) veröffentlicht.

#### GEBÜHREN FÜR PRÜFUNGS- UND BERATUNGS-LEISTUNGEN NACH § 314 ABS. 1 NR. 9 HGB GEBÜHREN FÜR ABSCHLUSSPRÜFUNG

Im Geschäftsjahr 2010 betrug das Prüfungshonorar von KPMG AG Wirtschaftsprüfungsgesellschaft („KPMG“), dem Wirtschaftsprüfer der Gesellschaft, insgesamt €0,8 Millionen für die jährlichen Konzern- und Einzeljahresabschlussprüfungen.

#### GEBÜHREN FÜR SONSTIGE BESTÄTIGUNGSLEISTUNGEN

Zusätzlich zu den oben genannten Beträgen berechnete KPMG an die Gesellschaft im Geschäftsjahr 2010 insgesamt €0,4 Millionen für sonstige Bestätigungsleistungen. Diese Leistungen bestanden im Wesentlichen für Leistungen im Rahmen der Prüfung des Konzernabschlusses zum 30. September 2008 durch die Deutsche Prüfstelle für Rechnungslegung e.V. („DPR“) sowie aus der prüferischen Durchsicht von Quartalsabschlüssen.

#### GEBÜHREN FÜR STEUERBERATUNGSLEISTUNGEN

Zusätzlich zu den oben genannten Beträgen berechnete KPMG im Geschäftsjahr 2010 €0 für steuerliche Beratungsleistungen.

#### GEBÜHREN FÜR SONSTIGE LEISTUNGEN

€0,0 Millionen wurden im Geschäftsjahr 2010 von KPMG für sonstige Leistungen an die Gesellschaft berechnet.

## VORSTAND UND AUFSICHTSRAT

### VERGÜTUNGEN IM GESCHÄFTSJAHR 2010

Hinsichtlich der Angaben zur individuellen Vergütung der Mitglieder des Vorstands und des Aufsichtsrats gemäß § 314 Abs. 1 Nr. 6 Buchstabe a Satz 5 bis 9 HGB wird auf die Ausführungen im Vergütungsbericht verwiesen, der Bestandteil des Konzernlageberichts ist.

01  
02  
03  
04  
05  
06  
07  
08  
09  
10  
11  
12  
13  
14  
15  
16  
17  
18  
19  
20  
21

**DER VORSTAND**

Als Vorstand der Gesellschaft waren im Geschäftsjahr 2010 folgende Herren bestellt beziehungsweise berufen:

| 01 | Name                  | Alter | Ende der Amtszeit  | Beruf                                                                                  | Mitgliedschaft in weiteren Aufsichtsräten und anderen vergleichbaren in- und ausländischen Kontrollgremien von Wirtschaftsunternehmen in dem zum 30. September 2010 endenden Geschäftsjahr                                                                                                                                                                                                                                                                                                                                                                     |
|----|-----------------------|-------|--------------------|----------------------------------------------------------------------------------------|----------------------------------------------------------------------------------------------------------------------------------------------------------------------------------------------------------------------------------------------------------------------------------------------------------------------------------------------------------------------------------------------------------------------------------------------------------------------------------------------------------------------------------------------------------------|
| 02 | Peter Bauer           | 50    | 30. September 2011 | Vorsitzender des Vorstands, Chief Executive Officer                                    | Mitglied des Board of Directors<br><ul style="list-style-type: none"> <li>• Infineon Technologies China Co., Ltd., Shanghai, Volksrepublik China</li> <li>• Infineon Technologies Asia Pacific Pte., Ltd., Singapur (Vorsitzender)</li> <li>• Infineon Technologies North America Corp., Wilmington, Delaware, USA (Vorsitzender)</li> <li>• Infineon Technologies Japan K.K., Tokio, Japan</li> </ul>                                                                                                                                                         |
| 03 |                       |       |                    |                                                                                        |                                                                                                                                                                                                                                                                                                                                                                                                                                                                                                                                                                |
| 04 |                       |       |                    |                                                                                        |                                                                                                                                                                                                                                                                                                                                                                                                                                                                                                                                                                |
| 05 | Prof. Dr. Hermann Eul | 51    | 31. August 2012    | Mitglied des Vorstands, Executive Vice President                                       | Mitglied des Aufsichtsrats<br><ul style="list-style-type: none"> <li>• 7Layers AG, Ratingen (bis zum 12. Oktober 2009)</li> <li>• Infineon Technologies Austria AG, Villach, Österreich</li> </ul>                                                                                                                                                                                                                                                                                                                                                             |
| 06 |                       |       |                    |                                                                                        |                                                                                                                                                                                                                                                                                                                                                                                                                                                                                                                                                                |
| 07 |                       |       |                    |                                                                                        |                                                                                                                                                                                                                                                                                                                                                                                                                                                                                                                                                                |
| 08 |                       |       |                    |                                                                                        |                                                                                                                                                                                                                                                                                                                                                                                                                                                                                                                                                                |
| 09 | Dr. Reinhard Ploss    | 54    | 31. Mai 2012       | Mitglied des Vorstands, Executive Vice President, seit 4. August 2010 Arbeitsdirektor  | Vorsitzender des Aufsichtsrats<br><ul style="list-style-type: none"> <li>• Infineon Technologies Austria AG, Villach, Österreich</li> <li>• Infineon Technologies Dresden GmbH, Dresden</li> </ul>                                                                                                                                                                                                                                                                                                                                                             |
| 10 |                       |       |                    |                                                                                        |                                                                                                                                                                                                                                                                                                                                                                                                                                                                                                                                                                |
| 11 |                       |       |                    |                                                                                        |                                                                                                                                                                                                                                                                                                                                                                                                                                                                                                                                                                |
| 12 |                       |       |                    |                                                                                        |                                                                                                                                                                                                                                                                                                                                                                                                                                                                                                                                                                |
| 13 |                       |       |                    |                                                                                        |                                                                                                                                                                                                                                                                                                                                                                                                                                                                                                                                                                |
| 14 |                       |       |                    |                                                                                        |                                                                                                                                                                                                                                                                                                                                                                                                                                                                                                                                                                |
| 15 |                       |       |                    |                                                                                        |                                                                                                                                                                                                                                                                                                                                                                                                                                                                                                                                                                |
| 16 |                       |       |                    |                                                                                        |                                                                                                                                                                                                                                                                                                                                                                                                                                                                                                                                                                |
| 17 | Dr. Marco Schröter    | 47    | 04. August 2010    | Mitglied des Vorstands, Executive Vice President, Finanzvorstand sowie Arbeitsdirektor | Mitglied des Aufsichtsrats:<br><ul style="list-style-type: none"> <li>• Infineon Technologies Austria AG, Villach, Österreich (bis zum 5. August 2010)</li> </ul><br>Mitglied des Board of Directors<br><ul style="list-style-type: none"> <li>• Infineon Technologies Asia Pacific Pte., Ltd., Singapur (bis zum 5. August 2010)</li> <li>• Infineon Technologies China Co., Ltd., Shanghai, Volksrepublik China (bis zum 5. August 2010)</li> <li>• Infineon Technologies North America Corp., Wilmington, Delaware, USA (bis zum 5. August 2010)</li> </ul> |
| 18 |                       |       |                    |                                                                                        |                                                                                                                                                                                                                                                                                                                                                                                                                                                                                                                                                                |
| 19 |                       |       |                    |                                                                                        |                                                                                                                                                                                                                                                                                                                                                                                                                                                                                                                                                                |
| 20 |                       |       |                    |                                                                                        |                                                                                                                                                                                                                                                                                                                                                                                                                                                                                                                                                                |
| 21 |                       |       |                    |                                                                                        |                                                                                                                                                                                                                                                                                                                                                                                                                                                                                                                                                                |

## DER AUFSICHTSRAT

Die Mitglieder des Aufsichtsrates im Geschäftsjahr 2010, deren Position im Aufsichtsrat, deren Beruf, deren hauptsächliche externe Position und deren Alter sind nachfolgend dargestellt:

| Name                                                                     | Alter | Ende der Amtszeit | Beruf                                                                                                                                      | Mitgliedschaft in weiteren Aufsichtsräten und anderen vergleichbaren in- und ausländischen Kontrollgremien von Wirtschaftsunternehmen (Stand: 30. September 2010)       |                      |
|--------------------------------------------------------------------------|-------|-------------------|--------------------------------------------------------------------------------------------------------------------------------------------|-------------------------------------------------------------------------------------------------------------------------------------------------------------------------|----------------------|
| Prof. Dr.-Ing. Dr.-Ing. E.h. Klaus Wucherer <sup>1</sup><br>Vorsitzender | 66    | Februar 2015      | Unternehmensberater                                                                                                                        | Mitglied des Aufsichtsrats<br>• Leoni AG, Nürnberg<br>• SAP AG, Walldorf<br>• Dürr AG, Stuttgart (seit 27. Oktober 2009)<br>• Heitec AG, Erlangen (seit 1. August 2010) | 01<br>02<br>03<br>04 |
| Gerd Schmidt <sup>2</sup><br>Stellvertretender Vorsitzender              | 56    | Februar 2015      | Vorsitzender des Infineon Gesamtbetriebsrats (bis 8. Juni 2010)<br>Vorsitzender des Infineon Betriebsrats Regensburg                       |                                                                                                                                                                         | 05                   |
| Wigand Cramer <sup>2</sup>                                               | 57    | Februar 2015      | Gewerkschaftssekretär der IG Metall, Berlin                                                                                                |                                                                                                                                                                         | 06                   |
| Alfred Eibl <sup>2</sup>                                                 | 61    | Februar 2015      | Vorsitzender des Betriebsrats Infineon München-Campeon (bis März 2014)<br>Vorsitzender des Infineon-Gesamtbetriebsrats (seit 8. Juni 2010) |                                                                                                                                                                         | 07<br>08             |
| Peter Gruber <sup>2</sup><br>Vertreter der leitenden Angestellten        | 49    | Februar 2015      | Leiter Operations Finanzen, Infineon Technologies AG                                                                                       | Mitglied des Aufsichtsrats<br>• Infineon Technologies Dresden GmbH, Dresden                                                                                             | 09                   |
|                                                                          |       |                   |                                                                                                                                            | Mitglied der Gesellschafterdelegation<br>• Comneon GmbH, Nürnberg (bis 18. März 2010)<br>• COMNEON Electronic Technology GmbH, Linz, Österreich (bis 9. Juli 2010)      | 10                   |
|                                                                          |       |                   |                                                                                                                                            | Mitglied des Board of Directors<br>• ALTIS Semiconductor S.N.C., Essonnes, Frankreich (bis 12. August 2010)                                                             | 11                   |
|                                                                          |       |                   |                                                                                                                                            | • Infineon Technologies Savan Ltd., Netanya, Israel (Amt ruhend) (bis 30. Juni 2010)                                                                                    | 12                   |
|                                                                          |       |                   |                                                                                                                                            | • Infineon Technologies (Kulim) Sdn. Bhd., Kulim, Malaysia                                                                                                              | 13                   |
| Gerhard Hobbach <sup>2</sup>                                             | 48    | Februar 2015      | Mitglied des Betriebsrats<br>• Infineon München-Campeon                                                                                    |                                                                                                                                                                         | 14                   |
| Hans-Ulrich Holdenried (seit 11. Februar 2010)                           | 59    | Februar 2015      | Unternehmensberater                                                                                                                        | Mitglied des Aufsichtsrats<br>• Integrata AG, Stuttgart (seit 25. Januar 2010)                                                                                          | 15<br>16             |
| Prof. Dr. Renate Köcher                                                  | 58    | Februar 2015      | Geschäftsführerin<br>• Institut für Demoskopie Allensbach GmbH, Allensbach                                                                 | Mitglied des Aufsichtsrats<br>• Allianz SE, München<br>• MAN AG, München<br>• BMW AG, München                                                                           | 17<br>18<br>19       |
| Dr. Manfred Puffer                                                       | 47    | Februar 2015      | Unternehmensberater                                                                                                                        |                                                                                                                                                                         | 20                   |
| Prof. Dr. rer. nat. Doris Schmitt-Landsiedel                             | 57    | Februar 2015      | Professorin<br>• Technische Universität München                                                                                            |                                                                                                                                                                         | 21                   |
| Jürgen Scholz <sup>2</sup> (seit 11. Februar 2010)                       | 49    | Februar 2015      | 1. Bevollmächtigter der IG Metall, Regensburg                                                                                              | Mitglied des Aufsichtsrats<br>• Krones AG, Neutraubling                                                                                                                 |                      |
|                                                                          |       |                   |                                                                                                                                            | Mitglied des Verwaltungsrats<br>• BKK BMW AG, Dingolfing                                                                                                                |                      |
| Dr. Eckart Sünner                                                        | 66    | Februar 2015      | President, Chief Compliance Officer<br>• BASF SE, Ludwigshafen                                                                             | Mitglied des Aufsichtsrats<br>• K+S AG, Kassel                                                                                                                          |                      |

1 Die Hauptversammlung 2010 hat Herrn Prof. Wucherer für eine Amtszeit bis zur Hauptversammlung 2015 gewählt, Herr Prof. Wucherer hat aber bereits vor seiner Wahl erklärt, dass er im Falle seiner Wahl das Amt nur bis zur Hauptversammlung 2011 ausüben werde.  
2 Arbeitnehmervertreter.

Mitgliedschaft in weiteren Aufsichtsräten und anderen vergleichbaren in- und ausländischen Kontrollgremien von Wirtschaftsunternehmen (Stand: 30. September 2010)

| Name                                                     | Alter                             | Ende der Amtszeit | Beruf               |                                                                   |                                                                                                                                                                                                                                                                                                                  |
|----------------------------------------------------------|-----------------------------------|-------------------|---------------------|-------------------------------------------------------------------|------------------------------------------------------------------------------------------------------------------------------------------------------------------------------------------------------------------------------------------------------------------------------------------------------------------|
| <b>Ausgeschiedene Aufsichtsräte</b>                      |                                   |                   |                     |                                                                   |                                                                                                                                                                                                                                                                                                                  |
| 01<br>02<br>03<br>04<br>05<br>06<br>07<br>08<br>09<br>10 | Max Dietrich Kley<br>Vorsitzender | 70                | 11. Februar<br>2010 | Rechtsanwalt                                                      | Vorsitzender des Aufsichtsrats<br>• SGL Carbon AG, Wiesbaden<br><br>Mitglied des Aufsichtsrats<br>• BASF SE, Ludwigshafen<br>• HeidelbergCement AG, Heidelberg                                                                                                                                                   |
|                                                          | Dr. Siegfried Luther              | 66                | 11. Februar<br>2010 | Geschäftsführer<br>• Reinhard Mohn Verwaltungs GmbH,<br>Gütersloh | Mitglied des Aufsichtsrats<br>• WestLB AG, Düsseldorf/Münster<br>• Wintershall Holding AG, Kassel<br>• EVONIK Industries AG, Essen<br><br>Vorsitzender des Verwaltungsrats<br>• RTL Group S.A., Luxemburg<br><br>Mitglied des Verwaltungsrats<br>• Compagnie Nationale à Portefeuille S.A.,<br>Loverval, Belgien |
|                                                          | Horst Schuler <sup>1</sup>        | 58                | 11. Februar<br>2010 | Stellv. Vorsitzender des<br>Infineon-Gesamtbetriebsrats           |                                                                                                                                                                                                                                                                                                                  |
|                                                          | Kerstin Schulzendorf <sup>1</sup> | 48                | 11. Februar<br>2010 | Mitglied des Betriebsrats<br>• Infineon Dresden                   |                                                                                                                                                                                                                                                                                                                  |
|                                                          | Alexander Trüby <sup>1</sup>      | 40                | 11. Februar<br>2010 | Mitglied des Betriebsrats<br>• Infineon Dresden                   | Mitglied des Aufsichtsrats<br>• Infineon Technologies Dresden GmbH, Dresden<br>(bis 9. Mai 2010)                                                                                                                                                                                                                 |
|                                                          | Arnaud de Weert                   | 46                | 11. Februar<br>2010 | Unternehmensberater                                               | Vorsitzender des Aufsichtsrats<br>• Aluminium Norf GmbH, Neuss                                                                                                                                                                                                                                                   |

11 1 Arbeitnehmervertreter.

12

13

14

15

16

17

18

19

20

21

**AUSSCHÜSSE DES AUFSICHTSRATS**

Präsidialausschuss

Prof. Dr.-Ing. Dr.-Ing. E.h. Klaus Wucherer (Vorsitzender)

Gerhard Hobbach

Hans-Ulrich Holdenried

Gerd Schmidt

01

02

03

Investitions-, Finanz- und Prüfungsausschuss

Dr. Eckart Sünner (Vorsitzender)

Wigand Cramer

Gerd Schmidt

Prof. Dr.-Ing. Dr.-Ing. E.h. Klaus Wucherer

04

Vermittlungsausschuss

Prof. Dr.-Ing. Dr.-Ing. E.h. Klaus Wucherer (Vorsitzender)

Alfred Eibl

Hans-Ulrich Holdenried

Gerd Schmidt

05

06

07

08

Nominierungsausschuss

Prof. Dr.-Ing. Dr.-Ing. E.h. Klaus Wucherer (Vorsitzender)

Prof. Dr. Renate Köcher

Dr. Manfred Puffer

09

10

Strategie- und Technologieausschuss

Prof. Dr. rer. nat. Doris Schmitt-Landsiedel (Vorsitzende)

Alfred Eibl

Peter Gruber

Hans-Ulrich Holdenried

Jürgen Scholz

Prof. Dr.-Ing. Dr.-Ing. E.h. Klaus Wucherer

11

12

13

14

15

16

Der Anteilsbesitz der Mitglieder des Aufsichtsrats an Aktien der Infineon Technologies AG einzeln oder gesamt betrug zum 30. September 2010 weniger als 1 Prozent der von der Gesellschaft ausgegebenen Aktien.

17

18

19

Die Geschäftsadresse jedes der Aufsichtsratsmitglieder ist: Infineon Technologies AG, Am Campeon 1 – 12, D-85579 Neubiberg, Deutschland.

20

21

## WESENTLICHE TOCHTERGESELLSCHAFTEN UND ASSOZIIERTE UNTERNEHMEN

|    | Name der Gesellschaft                                           | Sitz                            | Anteil |
|----|-----------------------------------------------------------------|---------------------------------|--------|
|    | <b>Vollkonsolidierte Beteiligungsgesellschaften:</b>            |                                 |        |
|    | COMNEON GmbH                                                    | Nürnberg                        | 100 %  |
| 01 | Hitex Development Tools GmbH                                    | Karlsruhe                       | 100 %  |
| 02 | Infineon Integrated Circuit (Beijing) Co., Ltd.                 | Beijing, Volksrepublik China    | 100 %  |
| 03 | Infineon Technologies (Advanced Logic) Sdn. Bhd.                | Malacca, Malaysia               | 100 %  |
| 04 | Infineon Technologies (Kulim) Sdn. Bhd.                         | Kulim, Malaysia                 | 100 %  |
|    | Infineon Technologies (Malaysia) Sdn. Bhd.                      | Malacca, Malaysia               | 100 %  |
|    | Infineon Technologies (Wuxi) Co., Ltd.                          | Wuxi, Volksrepublik China       | 100 %  |
|    | Infineon Technologies (Xi'an) Co., Ltd.                         | Xi'an, Volksrepublik China      | 100 %  |
|    | Infineon Technologies Asia-Pacific Pte. Ltd.                    | Singapur                        | 100 %  |
|    | Infineon Technologies Australia Pty. Ltd                        | Bayswater, Australien           | 100 %  |
|    | Infineon Technologies Austria AG                                | Villach, Österreich             | 100 %  |
| 05 | Infineon Technologies Batam P.T.                                | Batam, Indonesien               | 100 %  |
| 06 | Infineon Technologies Canada, Inc.                              | St. John, New Brunswick, Kanada | 100 %  |
| 06 | Infineon Technologies Cegled Kft.                               | Cegled, Ungarn                  | 100 %  |
| 07 | Infineon Technologies Center of Competence (Shanghai) Co., Ltd. | Shanghai, Volksrepublik China   | 100 %  |
| 08 | Infineon Technologies China Co., Ltd.                           | Shanghai, Volksrepublik China   | 100 %  |
| 09 | Infineon Technologies Dresden GmbH                              | Dresden                         | 100 %  |
|    | Infineon Technologies Dresden Verwaltungs GmbH                  | Dresden                         | 100 %  |
| 10 | Infineon Technologies Fiber Optics GmbH                         | Neubiberg                       | 100 %  |
|    | Infineon Technologies Finance GmbH                              | Neubiberg                       | 100 %  |
|    | Infineon Technologies France S.A.S.                             | St. Denis, Frankreich           | 100 %  |
|    | Infineon Technologies Holding B.V.                              | Rotterdam, Niederlande          | 100 %  |
| 11 | Infineon Technologies Hong Kong, Ltd.                           | Hongkong, Hongkong              | 100 %  |
| 12 | Infineon Technologies India, Pvt. Ltd.                          | Bangalore, Indien               | 100 %  |
|    | Infineon Technologies Industrial Power, Inc.                    | Wilmington, Delaware, USA       | 100 %  |
| 13 | Infineon Technologies Investment B.V.                           | Rotterdam, Niederlande          | 100 %  |
| 14 | Infineon Technologies Italia s.r.l.                             | Mailand, Italien                | 100 %  |
| 15 | Infineon Technologies IT-Services GmbH                          | Klagenfurt, Österreich          | 100 %  |
|    | Infineon Technologies Japan K.K.                                | Tokyo, Japan                    | 100 %  |
| 16 | Infineon Technologies Korea Co. Ltd.                            | Seoul, Korea                    | 100 %  |
| 17 | Infineon Technologies Nordic AB                                 | Kista, Schweden                 | 100 %  |
| 18 | Infineon Technologies North America Corp.                       | Wilmington, Delaware, USA       | 100 %  |
| 19 | Infineon Technologies Romania & Co. Societate in Comandita      | Bukarest, Rumänien              | 100 %  |
|    | Infineon Technologies Shared Service Center, Unipessoal Lda.    | Vila do Conde, Portugal         | 100 %  |
| 20 | Infineon Technologies Taiwan Co. Ltd.                           | Taipeh, Taiwan                  | 100 %  |
| 21 | Infineon Technologies U.K. Ltd.                                 | Bristol, Großbritannien         | 100 %  |
|    | Infineon Technologies Wireless Solutions GmbH                   | Neubiberg                       | 100 %  |
|    | Molstanda Vermietungsgesellschaft mbH                           | Neubiberg                       | 94 %   |
|    | Primarion Inc.                                                  | Torrance, Kalifornien, USA      | 100 %  |
|    | <b>Gemeinschaftsunternehmen/Assoziierte Unternehmen:</b>        |                                 |        |
|    | Cryptomathic Holding ApS                                        | Arhus, Dänemark                 | 25 %   |
|    | Infineon Technologies Bipolar GmbH & Co. KG                     | Warstein                        | 60 %   |
|    | LS Power Semitech Co., Ltd.                                     | Cheonan, Korea                  | 46 %   |

| Name der Gesellschaft                                                 | Sitz                      | Anteil |    |
|-----------------------------------------------------------------------|---------------------------|--------|----|
| <b>Tochterunternehmen von untergeordneter Bedeutung: <sup>1</sup></b> |                           |        |    |
| DICE Danube Integrated Circuit Engineering GmbH                       | Linz, Österreich          | 72 %   |    |
| DICE Danube Integrated Circuit Engineering GmbH & Co. KG              | Linz, Österreich          | 72 %   |    |
| EPOS embedded core & power systems GmbH & Co. KG                      | Duisburg                  | 100 %  | 01 |
| EPOS embedded core & power systems Verwaltungs GmbH                   | Duisburg                  | 100 %  |    |
| eupec Thermal Management Inc.                                         | Wilmington, Delaware, USA | 51 %   | 02 |
| Guardeon Solutions GmbH                                               | Neubiberg                 | 100 %  | 03 |
| Hitex (UK) Limited                                                    | Coventry, Großbritannien  | 88 %   | 04 |
| Infineon Technologies Alpha AG                                        | Neubiberg                 | 100 %  |    |
| Infineon Technologies Austria Pensionskasse AG                        | Villach, Österreich       | 100 %  |    |
| Infineon Technologies Belgium BVBA in Liquidation                     | Leuven, Belgien           | 100 %  |    |
| Infineon Technologies Bipolar Verwaltungs GmbH                        | Warstein                  | 60 %   |    |
| Infineon Technologies Delta GmbH                                      | Neubiberg                 | 100 %  |    |
| Infineon Technologies Denmark A/S                                     | Aalborg, Dänemark         | 100 %  |    |
| Infineon Technologies Ireland Ltd.                                    | Dublin, Irland            | 100 %  | 05 |
| Infineon Technologies Latvia SIA in Liquidation                       | Riga, Lettland            | 100 %  | 06 |
| Infineon Technologies Mantel 19 GmbH                                  | Neubiberg                 | 100 %  |    |
| Infineon Technologies Mantel 21 GmbH                                  | Neubiberg                 | 100 %  | 07 |
| Infineon Technologies Mantel 22 GmbH                                  | Neubiberg                 | 100 %  | 08 |
| Infineon Technologies Mantel 23 GmbH                                  | Neubiberg                 | 100 %  | 09 |
| Infineon Technologies Mantel 24 GmbH                                  | Neubiberg                 | 100 %  |    |
| Infineon Technologies Mantel 25 GmbH                                  | Neubiberg                 | 100 %  | 10 |
| Infineon Technologies Pluto GmbH in Liquidation                       | München                   | 100 %  |    |
| Infineon Technologies Romania s.r.l.                                  | Bukarest, Rumänien        | 100 %  |    |
| Infineon Technologies RUS LLC                                         | Moskau, Russland          | 100 %  |    |
| Infineon Technologies Schweiz GmbH                                    | Zürich, Schweiz           | 100 %  | 11 |
| Infineon Technologies SensoNor AS in Liquidation                      | Horten, Norwegen          | 100 %  | 12 |
| Infineon Technologies South America Ltda.                             | Sao Paulo, Brasilien      | 100 %  | 13 |
| Infineon Ventures Beteiligungs-Treuhand GmbH                          | Neubiberg                 | 100 %  | 14 |
| Kompetenzzentrum Automobil- und Industrieelektronik GmbH              | Villach, Österreich       | 60 %   | 15 |
| Magellan Technology Pty Ltd.                                          | Annandale, Australien     | 18 %   | 16 |
| MicroLinks Technology Corp.                                           | Kaohsiung, Taiwan         | 2 %    | 17 |
| OneSpin Solutions Holding GmbH                                        | München                   | 12 %   | 18 |
| Qimonda AG in Insolvenz                                               | München                   | 78 %   | 19 |
| RF-IT Solutions GmbH                                                  | Graz, Österreich          | 11 %   | 20 |
| SensoNor Technologies AS                                              | Horten, Norwegen          | 0 %    | 21 |
| SICED Electronics Development GmbH & Co. KG                           | Erlangen                  | 49 %   |    |
| SICED Electronics Development Verwaltungsgesellschaft mbH             | Erlangen                  | 49 %   |    |

<sup>1</sup> Einige unwesentliche Tochtergesellschaften wurden im Geschäftsjahr 2009 und 2010 nicht in die Konsolidierung einbezogen. Die Gesellschaft beurteilt jährlich die Wesentlichkeit dieser Tochtergesellschaften. Das Jahresergebnis, die Umsatzerlöse mit externen Kunden sowie der Gesamtvermögenswert aller als unwesentlich klassifizierten Tochtergesellschaften beliefen sich zusammen jeweils auf weniger als ein Prozent des jeweiligen Werts des Gesamtkonzerns.

Neubiberg, 22. November 2010  
Infineon Technologies AG

Der Vorstand  
**Peter Bauer**  
**Prof. Dr. Hermann Eul**  
**Dr. Reinhard Ploss**

# VERSICHERUNG DER GESETZLICHEN VERTRETER

01 Wir versichern nach bestem Wissen, dass gemäß den anzu-  
02 wendenden Rechnungslegungsgrundsätzen der Konzernab-  
03 schluss ein den tatsächlichen Verhältnissen entsprechendes  
04 Bild der Vermögens-, Finanz- und Ertragslage des Konzerns  
ermittelt und im Konzernlagebericht der Geschäftsverlauf  
einschließlich des Geschäftsergebnisses und die Lage des  
Konzerns so dargestellt sind, dass ein den tatsächlichen  
Verhältnissen entsprechendes Bild vermittelt wird, sowie  
die wesentlichen Chancen und Risiken der voraussichtlichen  
Entwicklung des Konzerns beschrieben sind.

05 Neubiberg, 22. November 2010

06 **Peter Bauer**  
07 **Prof. Dr. Hermann Eul**  
08 **Dr. Reinhard Ploss**

09  
10

11  
12  
13  
14  
15  
16  
17

18

19  
20  
21



# BESTÄTIGUNGSVERMERK DES ABSCHLUSSPRÜFERS

Wir haben den von der Infineon Technologies AG, Neubiberg, aufgestellten Konzernabschluss – bestehend aus Bilanz, Gewinn- und Verlustrechnung, Gesamtergebnisrechnung, Kapitalflussrechnung, Eigenkapital-Veränderungsrechnung und Anhang-- sowie ihren Bericht über die Lage der Gesellschaft und des Konzerns für das Geschäftsjahr vom 1. Oktober 2009 bis 30. September 2010 geprüft. Die Aufstellung von Konzernabschluss und Konzernlagebericht nach den IFRS, wie sie in der EU anzuwenden sind, und den ergänzend nach § 315a Abs. 1 HGB anzuwendenden handelsrechtlichen Vorschriften liegt in der Verantwortung der gesetzlichen Vertreter der Gesellschaft.

Unsere Aufgabe ist es, auf der Grundlage der von uns durchgeführten Prüfung eine Beurteilung über den Konzernabschluss und den Konzernlagebericht abzugeben.

Wir haben unsere Konzernabschlussprüfung nach § 317 HGB unter Beachtung der vom Institut der Wirtschaftsprüfer (IDW) festgestellten deutschen Grundsätze ordnungsmäßiger Abschlussprüfung vorgenommen. Danach ist die Prüfung so zu planen und durchzuführen, dass Unrichtigkeiten und Verstöße, die sich auf die Darstellung des durch den Konzernabschluss unter Beachtung der anzuwendenden Rechnungslegungsvorschriften und durch den Konzernlagebericht vermittelten Bildes der Vermögens-, Finanz- und Ertragslage wesentlich auswirken, mit hinreichender Sicherheit erkannt werden. Bei der Festlegung der Prüfungshandlungen werden die Kenntnisse über die Geschäftstätigkeit und über das wirtschaftliche und rechtliche Umfeld des Konzerns sowie die Erwartungen über mögliche Fehler berücksichtigt. Im Rahmen der Prüfung werden die Wirksamkeit des rechnungslegungsbezogenen internen Kontrollsystems sowie Nachweise für die Angaben im Konzernabschluss und Konzernlagebericht überwiegend auf der Basis von Stichproben beurteilt. Die Prüfung umfasst

die Beurteilung der Jahresabschlüsse der in den Konzernabschluss einbezogenen Unternehmen, der Abgrenzung des Konsolidierungskreises, der angewandten Bilanzierungs- und Konsolidierungsgrundsätze und der wesentlichen Einschätzungen der gesetzlichen Vertreter sowie die Würdigung der Gesamtdarstellung des Konzernabschlusses und des Konzernlageberichts. Wir sind der Auffassung, dass unsere Prüfung eine hinreichend sichere Grundlage für unsere Beurteilung bildet.

Unsere Prüfung hat zu keinen Einwendungen geführt.

Nach unserer Beurteilung auf Grund der bei der Prüfung gewonnenen Erkenntnisse entspricht der Konzernabschluss den IFRS, wie sie in der EU anzuwenden sind, und den ergänzend nach § 315a Abs. 1 HGB anzuwendenden handelsrechtlichen Vorschriften und vermittelt unter Beachtung dieser Vorschriften ein den tatsächlichen Verhältnissen entsprechendes Bild der Vermögens-, Finanz- und Ertragslage des Konzerns. Der Konzernlagebericht steht in Einklang mit dem Konzernabschluss, vermittelt insgesamt ein zutreffendes Bild von der Lage des Konzerns und stellt die Chancen und Risiken der zukünftigen Entwicklung zutreffend dar.

München, den 22. November 2010

**KPMG AG**

Wirtschaftsprüfungsgesellschaft

**Kozikowski**

Wirtschaftsprüfer

**Kempf**

Wirtschaftsprüfer

01  
02  
03  
04  
05  
06  
07  
08  
09  
10  
11  
12  
13  
14  
15  
16  
17  
18  
19  
20  
21

# FINANZGLOSSAR

01  
02  
03  
04  
05  
06  
07  
08  
09  
10  
11  
12  
13  
14  
15  
16  
17  
18  
19  
20  
21

## A

**ADS** • American Depositary Shares – ADS's sind in den USA gehandelte Wertpapiere repräsentiert durch ADR's (American Depositary Receipt) von nicht amerikanischen Emittenten. Sie erleichtern nicht amerikanischen Unternehmen den Zugang zu US-amerikanischen Kapitalmärkten und bieten so US-amerikanischen Anlegern Investitionsmöglichkeiten in nicht amerikanische Wertpapieren. Infineons ADS's werden seit Einstellung der Börsennotierung an der New York Stock Exchange („NYSE“) am außerbörslichen Markt OTCQX International Premier als sog. Level 1-Programm gehandelt. Nach der Deregistrierung werden Infineons ADS's weiterhin am OTCQX-Markt unter dem Symbol „IFNNY“ notiert.

**ASSOZIIERTE UNTERNEHMEN** • Ein Unternehmen, bei welchem die Gesellschaft über maßgeblichen Einfluss, nicht jedoch über die Möglichkeit der Beherrschung der finanz- und geschäftspolitischen Entscheidungen verfügt. Ein maßgeblicher Einfluss wird regelmäßig vermutet, wenn die Gesellschaft zwischen 20 und 50 Prozent der Stimmrechte hält.

**AUF MINDERHEITSANTEILE ENTFALLENDE ERGEBNIS- UND KAPITALANTEILE** • Anteile am Jahresergebnis beziehungsweise am Eigenkapital, die nicht dem Konzern, sondern Konzernfremden, zugerechnet werden.

**AUSGLIEDERUNG** • Rechtliche Verselbständigung von Unternehmensteilen (zum Beispiel Geschäftsgebieten).

## B

**BRUTTO-CASH-POSITION** • Zahlungsmittel und Zahlungsmitteläquivalente einschließlich zur Veräußerung verfügbare finanzielle Vermögenswerte.

**BRUTTOERGEBNIS VOM UMSATZ** • Umsatz abzüglich Herstellungskosten des Umsatzes.

## C

**CASH-FLOW** • Zahlungswirksamer Saldo aus Mittelzuflüssen und -abflüssen innerhalb eines Geschäftsjahrs. Der Cash-Flow ist Teil des Konzernabschlusses und zeigt für einen bestimmten Zeitraum, aus welchen Quellen sich eine Gesellschaft finanziert und wofür die Zahlungsmittel verwendet wurden, gegliedert nach laufender Geschäftstätigkeit (Mittel, die durch Kauf / Verkauf von Produkten und Dienstleistungen generiert wurden), Investitionstätigkeit (Mittelabfluss einer Gesellschaft für Investitionen oder Mittelzufluss aus Desinvestitionen) und Finanzierungstätigkeit (Mittelzufluss durch die Ausgabe von Aktien, Anleihen und Darlehen beziehungsweise Mittelabfluss durch die Rücknahme von Aktien und Anleihen beziehungsweise Rückzahlung von Darlehen).

## D

**DAX** • Deutscher Aktienindex – der Index bildet die Wertentwicklung der Aktien der 30 hinsichtlich Orderumsatz und Marktkapitalisierung größten deutschen Aktiengesellschaften ab, die an der Frankfurter Wertpapierbörse gehandelt werden.

**DEFINED BENEFIT OBLIGATION (DBO)** • Höhe der Verbindlichkeiten eines Pensionsplanes zum Zeitpunkt der Berechnung, unter der Annahme, dass der Plan weitergeführt wird und nicht in absehbarer Zeit ausläuft.

**DERIVATE** • Produkte, deren Wert sich hauptsächlich von Preisen, Preisschwankungen und Preiserwartungen des zugrunde liegenden Basisinstruments (zum Beispiel Aktien, Devisen, Zinspapiere) ableitet.

## E

**EQUITY-METHODE** • Bewertungsmethode für Anteile an assoziierten Unternehmen, bei denen wir einen maßgeblichen Einfluss auf die Finanz- und Geschäftspolitik haben.

**ERGEBNIS JE AKTIE** • Das unverwässerte Ergebnis je Aktie errechnet sich aus dem Konzernjahresüberschuss (-fehlbetrag), dividiert durch den gewogenen Mittelwert der während des Berichtsjahrs ausstehenden Aktien. Bei der Berechnung des verwässerten Ergebnisses je Aktie wird der gewogene Mittelwert der ausstehenden Aktien um die Anzahl der zusätzlichen Aktien erhöht, die ausstünden, wenn potenziell verwässernde Instrumente in Aktien umgetauscht worden wären.

**F**

**FREE-CASH-FLOW** • Mittelzufluss aus laufender Geschäftstätigkeit aus fortgeführten Aktivitäten und Mittelzufluss (-abfluss) aus Investitionstätigkeit aus fortgeführten Aktivitäten, bereinigt um den Kauf und Verkauf von zur Veräußerung stehenden finanziellen Vermögenswerten.

**G**

**GOODWILL (GESCHÄFTS- ODER FIRMIENWERT)** • Immaterieller Vermögenswert, der im Rahmen einer Unternehmensakquisition entstehen kann. Er stellt den Betrag dar, mit dem der Kaufpreis (die Kosten) für eine erworbene Gesellschaft den angenommenen Marktwert der erworbenen Vermögenswerte und Verbindlichkeiten übersteigt. Nach IFRS wird der Geschäfts- oder Firmenwert nicht über eine Nutzungsdauer abgeschrieben, sondern bei einer eventuellen Wertminderung durch eine außerplanmäßige Abschreibung reduziert. Die Überprüfung des Wertes erfolgt mindestens einmal jährlich.

**I**

**IFRS** • International Financial Reporting Standards; Infineon stellt den Konzernabschluss gemäß den Vorgaben von IFRS auf, soweit diese von der Europäischen Union übernommen sind.

**J**

**JOINT VENTURE** • Vertragliche Vereinbarung, nach der zwei oder mehr Partner eine wirtschaftliche Tätigkeit durchführen, die der gemeinschaftlichen Führung unterliegt.

**L**

**LATENTE STEUERN** • Da die steuerliche Gesetzgebung des Öfteren von den handelsrechtlichen Vorgaben abweicht, können Unterschiede zwischen (a) dem zu versteuernden Einkommen und dem handelsrechtlichen Ergebnis vor Steuern vom Einkommen und vom Ertrag und (b) der steuerlichen Bemessungsgrundlage von Vermögenswerten oder Verbindlichkeiten und ihren jeweiligen Buchwerten entstehen. Eine latente Steuerverbindlichkeit und der zugehörige Aufwand entstehen aus dem Einkommen, das bereits handelsrechtlich, jedoch nicht steuerrechtlich erfasst ist. Umgekehrt entsteht eine

latente Steuerforderung, wenn der Aufwand erst in Zukunft steuerlich abzugsfähig ist, jedoch handelsrechtlich bereits erfasst wurde.

**N**

**NAMENSAKTIE** • Aktien, die auf den Namen einer bestimmten Person lauten. Diese Person wird entsprechend den aktienrechtlichen Vorgaben mit einigen persönlichen Angaben sowie der Aktienanzahl in das Aktienregister der Gesellschaft eingetragen. Nur wer im Aktienregister der Gesellschaft eingetragen ist, gilt gegenüber der Gesellschaft als Aktionär und kann beispielsweise seine Rechte in der Hauptversammlung ausüben.

**NETTO-CASH-POSITION** • Brutto-Cash-Position minus kurz- und langfristige Finanzverbindlichkeiten.

**NETTOUMLAUFVERMÖGEN** • Nettoumlaufvermögen besteht aus kurzfristigen Vermögenswerten abzüglich Zahlungsmittel und Zahlungsmitteläquivalente, abzüglich zur Veräußerung verfügbare finanzielle Vermögenswerte, abzüglich zur Veräußerung stehende Vermögenswerte, abzüglich kurzfristige Verbindlichkeiten ohne kurzfristige Finanzverbindlichkeiten sowie kurzfristig fällige Bestandteile langfristiger Finanzverbindlichkeiten sowie ohne zur Veräußerung stehende Verbindlichkeiten.

**R**

**ROCE** • Return on Capital Employed (Kapitalrendite) ist definiert als Ergebnis nach Steuern, dividiert durch das eingesetzte Kapital. Die Kennzahl ROCE zeigt den Zusammenhang zwischen der Profitabilität und dem für den Geschäftsbetrieb notwendigen Kapital auf.

**S**

**SEGMENTERGEBNIS** • Wir definieren das Segmentergebnis als Betriebsergebnis, ohne Berücksichtigung von Wertminderungen von Vermögenswerten, Saldo, Aufwendungen für Umstrukturierungen und andere Schließungskosten, Saldo, Aufwendungen für aktienbasierte Vergütungen, akquisitionsbedingte Abschreibungen und Gewinne (Verluste), Gewinne (Verluste) aus dem Abgang von Vermögenswerten, Geschäftsbereichen oder Beteiligungen an Tochtergesellschaften und von sonstigen Erträgen (Aufwendungen), einschließlich Kosten für Gerichtsverfahren. Dies ist die Kennzahl, mit der Infineon die operative Ertragskraft seiner Segmente bewertet.

**SEGMENTERGEBNIS MARGE** • Kennzahl zur Bestimmung der operativen Ertragskraft, die das Segmentergebnis im Verhältnis zum Umsatz darstellt.

01  
02  
03  
04  
05  
06  
07  
08  
09  
10  
11  
12  
13  
14  
15  
16  
17  
18  
19  
20  
21

# TECHNOLOGIEGLOSSAR

01  
02  
03  
04  
05  
06  
07  
08  
09  
10  
11  
12  
13  
14  
15  
16  
17  
18  
19  
20

21

## 1, 2, 3

**2G** • Zweite Generation des Mobilfunks – digitale Mobiltelefonie. Nach den analogen Netzen (erste Generation) bekommt der Teilnehmer hier mit digitalen Signalisierungen einheitlich gute Sprachqualität und zahlreiche Datendienste. Mobilfunkstandard der zweiten Generation in Europa: GSM.

**3G** • Dritte Generation des Mobilfunks. Sprache und Daten werden gemeinsam breitbandig – also mit wesentlich höherer Transportkapazität als bei der zweiten Generation – übertragen. Mobilfunkstandard der dritten Generation in Europa: UMTS.

**300-MILLIMETER-TECHNOLOGIE** • Oberbegriff für die Herstellung und Prozessierung von Wafern mit einem Durchmesser von 300 Millimetern.

**65-NANOMETER-TECHNOLOGIE** • Fertigungstechnologie, mit der Strukturen auf dem Chip mit einer Breite von 65 Nanometer dargestellt werden können. Je feiner die Strukturen – also etwa Leiterbahnen und Zwischenräume – sind, desto kleiner und damit billiger kann der Chip hergestellt werden. Die Vorgängertechnologie erlaubte Strukturbreiten von 90 Nanometer, die Nachfolgeneration erreicht Strukturbreiten von rund 40 Nanometer.

## A

**ABS** • Antiblockiersystem. Elektronisches Sicherheitssystem für das Kraftfahrzeug, das bei starkem Bremsen das Blockieren der Räder verhindert.

**ANALOG/MIXED SIGNAL** • „Mixed Signal“ ist ein Oberbegriff für integrierte Schaltkreise, die gleichzeitig mit analogen und digitalen Signalen arbeiten. Sie werden aufgrund der ähnlichen Anforderungen an die Entwicklungs- und Fertigungsprozesse meist mit jenen integrierten Schaltkreisen zusammengefasst, die ausschließlich mit analogen Signalen arbeiten. Dadurch entsteht die Kombination „Analog/Mixed Signal“.

**ASIC** • Application Specific Integrated Circuit. Logikschaltung, die auf speziellen Kundenwunsch für eine spezifische Nutzung konstruiert wurde.

**ASSP** • Application Specific Standard Product. Standardprodukt, das für eine spezifische Nutzung konstruiert wurde und von vielen Kunden genutzt werden kann.

**B**

**BACK-END-FERTIGUNG** • Teil des Halbleiterherstellungsprozesses, der ausgeführt wird, nachdem der Wafer den Reinraum verlassen hat (vgl. Front-End-Fertigung). Zu diesem Vorgang gehören die Überprüfung der Chips auf dem Wafer, etwaige notwendige Reparaturen der Chips, Sägen der Wafer und Verpackung der einzelnen Chips. Immer mehr Halbleiterhersteller lagern den Montagevorgang an unabhängige Montageunternehmen aus, einige sogar das Testen. Ein Großteil der Montageunternehmen befindet sich in Ländern des pazifischen Raumes.

**BASISBAND-CHIP** • Im Basisband-Chip werden die empfangenen und zu sendenden digitalen Signale verarbeitet. Dieser komplexe Baustein enthält üblicherweise einen digitalen Signalprozessor, einen Mikrocontroller, Speicher und analoge Schaltungen. Er bildet gewissermaßen das Herz eines drahtlosen Kommunikationssystems.

**BIPOLAR** • Ein Leistungsbipolartransistor ist eine spezialisierte Version eines Bipolartransistors, der für das Leiten und Sperren von großen elektrischen Strömen (bis zu mehreren Hundert Ampere) und sehr hohen Spannungen (bis zu mehreren Tausend Volt) optimiert ist. In der Industrie stellt der Leistungsbipolartransistor – ebenso wie der häufig alternativ verwendete Leistungs-MOSFET (vgl. MOSFET) – eine wichtige industrielle Halbleiterkomponente zur Beeinflussung des elektrischen Stromes dar.

**BIT** • Informationseinheit, die einen von zwei Werten annimmt, zum Beispiel „richtig“ / „falsch“ oder „0“ / „1“.

**BYTE** • Maß für Informationseinheit bei Datenverarbeitungsanlagen. Ein Byte entspricht acht Bit (vgl. Bit).

**C**

**CHIPKARTE** • Kunststoffkarte mit eingebautem Speicherchip oder Mikroprozessor; kann mit Geheimzahl kombiniert werden.

**CMOS** • Complementary Metal Oxide Substrate. Halbleiter-Standardfertigungstechnologie, um Mikrochips mit geringem Energieverbrauch und hohem Integrationsgrad zu produzieren.

**CoolMOS** • Hochvolt-Leistungstransistor für Spannungen von 300 bis 1.200 Volt.

**D**

**DÜNNWAFER** • Ein Wafer (vgl. Wafer) ist normalerweise rund 350 Mikrometer ( $\mu\text{m}$ ; vgl. Mikrometer) dick, wenn er in die einzelnen Chips gesägt wird. Von Dünnyafer spricht man, wenn der Wafer auf unter 200 Mikrometer dünn geschliffen wird. Zum Vergleich: Ein Haar oder ein Blatt Papier liegt bei rund 60 Mikrometern. Die Dünnyafer-Technologie bietet Vorteile: Mit dünneren Chips kann man sowohl die Verluste reduzieren als auch die entstehende Wärme besser abführen. Daneben lassen sich auch elektrisch aktive Strukturen auf der Rückseite herstellen, die ganz neue Funktionen des Chips ermöglichen. Zudem haben Dünnyafer-Chips in kompakteren Gehäusen Platz.

**E**

**EDGE** • Enhanced Data Rates for GSM Evolution. Bezeichnet eine Technik zur Erhöhung der Datenrate in GSM-Mobilfunknetzen. EDGE ist wie GPRS eine evolutionäre Weiterentwicklung der GSM-Technik, die sich mit mäßigem Aufwand in die Mobilfunknetze einbauen lässt.

**EIN-CHIP-LÖSUNG** • Auf solch einem Chip werden die Funktionen mehrerer Chips zusammengeführt. Ein Anwendungsgebiet ist zum Beispiel das Mobiltelefon, für das die drei wichtigsten Chips – Basisband, Hochfrequenz-Transceiver und Stromversorgungs-Chip – monolithisch vereint werden. In den neueren Generationen wird auch noch ein Speicher integriert. Die Ein-Chip-Lösung reduziert die Anzahl der benötigten Komponenten und damit die Test- und Bestückungskosten.

**EMBEDDED FLASH** • Ein nicht-flüchtiger Speicher, der zusammen mit einem Mikrocontroller-Rechenkern auf einem Chip integriert wird. Der nicht-flüchtige Speicher enthält den Programmcode.

**ESP** • Elektronisches Stabilitätsprogramm. Eine Technik in Kraftfahrzeugen, die mittels Sensoren und Computer durch gezieltes Abbremsen einzelner Räder dem Schleudern entgegensteuert.

**F**

**FRONT-END-FERTIGUNG** • Verarbeitung von Wafern, die im Reinraum durchgeführt wird. Zu den wesentlichen Verarbeitungsschritten zählen Belichtung, Ionenimplantation und das Aufbringen von Metallisierungsschichten. Nachdem die Verarbeitung der Wafer im Reinraum beendet ist – insgesamt bis zu 500 Arbeitsschritte –, werden sie an die Back-End-Fertigung weitergeleitet; dort werden sie getestet und gehäust (vgl. Back-End-Fertigung).

01  
02  
03  
04  
05  
06  
07  
08  
09  
10  
11  
12  
13  
14  
15  
16  
17  
18  
19  
20

21

## G

**GIGA** •  $2^{30}$  im informationstechnischen Sinn, zum Beispiel Gigabit (Gbit), Gigabyte (GByte).

**GMR** • Giant magneto-resistance. Der GMR-Effekt wird in Sensoren zur Messung von Magnetfeldern eingesetzt. GMR-Sensoren werden unter anderem als Lenkwinkelsensor im Auto eingesetzt.

**GPRS** • General Packet Radio Service heißt die 2,5te Mobilfunkgeneration mit Datenübertragungsraten von bis zu 115 Kilobit pro Sekunde.

**GPS** • Global Positioning System. Satellitengestütztes Funkortungsverfahren zur Positionsbestimmung aufgrund von Laufzeitunterschieden der empfangenen Signale.

**GSM** • Das Global System for Mobile Communication ist heute weltweit das am meisten genutzte digitale Mobilfunksystem (vgl. 2G und GPRS).

## H

**HALBLEITER** • Kristalliner Werkstoff, dessen elektrische Leitfähigkeit durch Einbringung von Dotierstoffen (in der Regel Bor oder Phosphor) gezielt verändert werden kann. Halbleiter sind beispielsweise Silicium und Germanium. Der Begriff wird auch für ICs aus diesem Werkstoff verwendet.

**HALL-SENSOR** • Ein auf dem Hall-Prinzip basierender Sensor zu Messung von Magnetfeldern. Benannt nach dem US-amerikanischen Physiker Edwin Herbert Hall (1855 – 1938). Hall-Sensoren werden zum Beispiel zur Positionserkennung von Pedalstellungen oder zur Messung der Rotationsgeschwindigkeit von Achsen eingesetzt.

**HERTZ** • Hertz (Kurzzeichen Hz) ist die Einheit für die Frequenz. Die Einheit wurde nach dem deutschen Physiker Heinrich Rudolf Hertz (1857 – 1894) benannt. Die Frequenz ist die Anzahl der Schwingungen pro Sekunde, allgemeiner auch die Anzahl von beliebig sich wiederholenden Vorgängen pro Sekunde. Häufig verwendete Einheiten sind Kilohertz (tausend Schwingungen pro Sekunde), Megahertz (eine Million Schwingungen pro Sekunde) und Gigahertz (eine Milliarde Schwingungen pro Sekunde).

**HGÜ** • Hochspannung-Gleichstromübertragung. HGÜ ist ein Verfahren der elektrischen Energieübertragung mit hoher Gleichspannung von bis zu 800.000 Volt über Entfernungen von über 1.000 Kilometern. HGÜ wird auch zur Anbindung von Offshore-Windparks ans Stromnetz des Festlandes eingesetzt.

**HOCHFREQUENZ(HF)-TRANSCEIVER** • „Transceiver“ ist ein Kunstwort aus Transmitter (= Sender) und Receiver (= Empfänger). Es beschreibt für die drahtgebundene und drahtlose Kommunikation eine Kombination aus Sende- und Empfangsschaltung in einer Einheit. Hochfrequenz-Transceiver werden in der drahtlosen Kommunikation eingesetzt, zum Beispiel in Mobil- und Schnurlos-Telefonen.

**HSDPA, HSUPA, HSPA, HSPA+** • High Speed Downlink Packet Access, High Speed Uplink Packet Access. Ein Übertragungsverfahren des Mobilfunkstandards der dritten Generation, UMTS. HSDPA ermöglicht eine schnelle Datenübertragung von der Basisstation zum Mobilfunkgerät mit derzeit bis zu 7,2 Megabit pro Sekunde. So können große Datenmengen wie etwa Filme, Bilder, Internet-Seiten oder E-Mails sehr schnell auf dem mobilen Gerät empfangen werden. HSDPA wird nicht nur in Mobiltelefonen verwendet, auch viele Notebook-Benutzer arbeiten per Datenkarte mit der schnellen mobilen Datenverbindung. HSUPA ist wie HSDPA ein Übertragungsverfahren des Mobilfunkstandards der dritten Generation. HSUPA ermöglicht eine schnelle Datenverbindung vom Mobilfunkgerät zur Basisstation mit derzeit bis zu 5,8 Megabit pro Sekunde. HSPA ist der Oberbegriff für HSDPA und HSUPA. HSPA+ ist die Nachfolgeneration und erlaubt eine Datenübertragung von 28 bis 84 Megabit pro Sekunde von der Basisstation zum Mobilfunkgerät.

**HYBRIDAUTO** • Unter einem Hybridauto versteht man üblicherweise ein Kraftfahrzeug, das neben einem Verbrennungsmotor noch von mindestens einem Elektromotor angetrieben wird. Der Hybridantrieb wird im Serienautomobilbau eingesetzt, um die Effizienz zu verbessern, den fossilen Kraftstoffverbrauch zu verringern oder die Leistung im niedrigen Drehzahlbereich zu steigern. In Voll-Hybridautos kann das Fahrzeug allein mittels des Elektromotors angetrieben werden. In milden Hybridautos (oder auch Mild-Hybridautos genannt) dient der Elektromotor nur zur Unterstützung des Verbrennungsmotors, also etwa beim Beschleunigen.

## I

**IC** • Integrated Circuit (integrierte Schaltung). Bauelement auf Basis eines Halbleitermaterials wie beispielsweise Silicium, auf dem zahlreiche Komponenten wie Transistoren, Widerstände, Kondensatoren und Dioden integriert und miteinander verbunden sind.

**IGBT-MODUL** • Insulated-Gate-Bipolar-Transistor-Modul (Bipolartransistor mit isolierter Gate-Elektrode). Ein IGBT ist ein Halbleiterbauelement, das aufgrund seiner Robustheit, hohen Sperrspannung und nahezu leistungslosen Ansteuerung Anwendung in der Leistungselektronik findet. Mehrere

IGBTs, zusammengeschaltet und in einem Gehäuse verpackt, nennt man Modul. Diese Module werden für die Ansteuerung von Elektromotoren im Automobilbereich wie auch im Industriebereich eingesetzt. Drehzahl und Drehmoment des Elektromotors können stufenlos reguliert werden. Auch Züge wie der deutsche ICE oder der französische TGV nutzen für die effiziente Ansteuerung der Elektroantriebe IGBT-Module.

**INVERTER** • Ein Inverter, auch Wechselrichter genannt, ist ein elektrisches Gerät, das Gleichspannung in Wechselspannung beziehungsweise Gleichstrom in Wechselstrom umwandelt. Inverter werden zum Beispiel bei Solaranlagen eingesetzt, um die in den Solarmodulen erzeugte Gleichspannung in eine Wechselspannung zu wandeln und sie ins Netz einzuspeisen.

## K

**KILO** •  $2^{10}$  im informationstechnischen Sinn, zum Beispiel Kilobit (Kbit), Kilobyte (KByte).

## L

**LEISTUNGSHALBLEITER** • In den letzten 30 Jahren haben Leistungshalbleiter in der Antriebstechnik ebenso wie in der Energieübertragung und -verteilung weitgehend die elektromechanischen Lösungen verdrängt, weil mit ihnen hohe Energieflüsse fast nach Belieben geformt werden können. Der Vorteil der Bauelemente besteht darin, dass sie extrem schnell – typischerweise innerhalb von Bruchteilen von Sekunden – zwischen den Zuständen „offen“ und „geschlossen“ wechseln können. Durch die schnelle Folge von Ein / Aus-Pulsen kann fast jede beliebige Form des Energieflusses nachgebildet werden, beispielsweise auch eine Sinuswelle.

**LEISTUNGSTRANSISTOR** • Mit Leistungstransistor wird in der Elektronik ein Transistor zum Schalten oder Steuern großer Spannungen, Ströme beziehungsweise Leistungen bezeichnet. Eine exakte Grenze zwischen Transistoren zur Signalverarbeitung und Leistungstransistoren ist nicht einheitlich festgelegt. Leistungstransistoren werden überwiegend in Gehäusen produziert, die eine Montage auf Kühlkörpern ermöglicht, da es anders nicht möglich ist, die bei manchen Typen und Anwendungen bis zu einigen Kilowatt betragende Verlustleistung abzuführen (vgl. Leistungshalbleiter).

**LTE** • Long-Term Evolution. LTE wird als die derzeit vielversprechendste Alternative für den UMTS-Nachfolgestandard angesehen. Die ersten Labortests versprechen eine Übertragungsrate von 100 Megabit pro Sekunde. Damit soll es den Mobilfunkanbietern möglich sein, neben Sprache auch interaktive Dienste inklusive Hochgeschwindigkeitsdatentransfer und Fernsehen (IPTV) anzubieten.

## M

**MEGA** •  $2^{20}$  im informationstechnischen Sinn, zum Beispiel Megabit (Mbit), Megabyte (MByte).

**MIKROCONTROLLER** • Mikroprozessor, der auf einem einzelnen IC, mit Speicher und Schnittstellen kombiniert, integriert ist und als eingebettetes System funktioniert. In einem Mikrocontroller lassen sich komplexe logische Schaltungen realisieren und per Software kontrollieren.

**MIKROMETER** • Metrisches Längenmaß. Entspricht dem millionsten Teil eines Meters ( $10^{-6}$  Meter), das Symbol ist  $\mu\text{m}$ . Der Durchmesser eines Menschenhaars beträgt zum Beispiel 0,1 Millimeter oder 100 Mikrometer.

**MOBILFUNK-PLATTFORM** • Diese Plattform ist ein funktionierendes Mobiltelefon, dem der Kunde nur noch einige Peripherie wie etwa Gehäuse, Tastatur, Akku und Display hinzufügen muss. So ist es auch für Kunden ohne große technische Expertise möglich, ein Mobiltelefon zu entwerfen, zu fertigen und zu vertreiben.

**MOSFET** • Metal Oxid Substrate Feldeffekt-Transistor. Der MOSFET ist die heute am meisten verwendete Transistorarchitektur. Der MOSFET wird sowohl in hochintegrierten Schaltkreisen als auch in der Leistungselektronik als spezieller Leistungs-MOSFET verwendet.

## N

**NANOMETER** • Metrisches Längenmaß. Entspricht dem milliardsten Teil eines Meters ( $10^{-9}$ ), das Symbol ist nm. Der Durchmesser der Desoxyribonukleinsäure (DNS) beträgt ungefähr 2 Nanometer. Die Fertigungsstrukturbreiten in der Halbleiterbranche werden inzwischen in Nanometern gemessen (vgl. 65-Nanometer-Technologie).

## S

**SCHALTNETZTEIL** • Ein Schaltnetzteil ist eine elektronische Baugruppe, die eine Wechselspannung in eine Gleichspannung umwandelt. Schaltnetzteile besitzen einen höheren Wirkungsgrad als Netztransformatoren und können kompakter und leichter aufgebaut werden als konventionelle Netzteile, die einen schweren Trafo mit Eisenkern enthalten. Schaltnetzteile werden vor allem in PCs, Notebooks und Servern eingesetzt. Sie erreichen aber auch bei kleinen Leistungen bereits einen sehr hohen Wirkungsgrad, so dass sie zunehmend auch in Steckernetzteilen, etwa als Ladegerät für Mobiltelefone, zu finden sind.

01  
02  
03  
04  
05  
06  
07  
08  
09  
10  
11  
12  
13  
14  
15  
16  
17  
18  
19  
20  
21

**SCHOTTKY-DIODE** • Eine spezielle Diode, die keinen Halbleiter-Halbleiter-Übergang, sondern einen Metall-Halbleiter-Übergang besitzt. Als Halbleitermaterial verwendet man bis 250 Volt meist Silizium. Für Spannungen über 300 Volt kommt Siliciumkarbid (SiC) zum Einsatz. SiC-Schottky-Dioden bieten in der Leistungselektronik gegenüber den konventionellen Dioden eine Reihe von Vorteilen. Beim Einsatz zusammen mit IGBT-Transistoren ist eine erhebliche Reduktion der Schaltverluste in der Diode selbst aber auch im Transistor möglich. Der Name geht auf den deutschen Physiker Walter Schottky (1886–1976) zurück (vgl. Siliciumkarbid).

**SILICIUM** • Chemisches Element mit halbleitenden Eigenschaften. Silicium ist das wichtigste Ausgangsmaterial in der Halbleiterindustrie.

**SILICIUMKARBID** • Verbindungshalbleiter aus Silicium (chemisches Zeichen Si) und Kohlenstoff (chemisches Zeichen C). Abkürzung ist SiC. SiC wird auf Grund seiner besonderen Materialeigenschaften (zum Beispiel gute Wärmeleitfähigkeit) unterem anderem für Schottky-Dioden verwendet (vgl. Schottky-Diode).

**SIM-KARTE** • Subscriber-Identity-Module-Karte. Eine Chipkarte, die in ein Mobiltelefon gesteckt wird und zur Identifikation des Nutzers im Netz dient. Mit ihr stellen Mobilfunkanbieter Teilnehmern mobile Telefonanschlüsse zur Verfügung.

**SMART GRID** • Unter dem Schlagwort Smart Grid versteht man die Aufrüstung der bestehenden Stromnetze um Kommunikations- und Messfunktionen, um den Energiefluss zwischen der immer mehr dezentralen Stromerzeugung – zum Beispiel über Windkraftanlagen oder Blockheizkraftwerke – und den Verbrauchern effizienter zu gestalten.

**SMARTPHONE** • Ein Smartphone vereint den Leistungsumfang eines PDA mit einem Mobiltelefon, wobei der Ansatzpunkt je nach Hersteller mehr der PDA oder das Mobiltelefon ist. Das heißt, Smartphones haben einerseits die Fähigkeit, sich in ein Mobilfunknetz einzuloggen, andererseits haben sie auch die Fähigkeit, als kleine Rechner Anwendungen, sogenannte Apps, auszuführen.

## T

**TRANSCIVER** • vgl. Hochfrequenz (HF)-Transceiver.

**TRUSTED-COMPUTING** • Trusted-Computing bedeutet, dass die im PC, aber auch in anderen computergestützten Systemen wie Mobiltelefonen, verwendete Hard- und Software kontrolliert werden kann. Dies geschieht über einen zusätzlichen Chip, dem Trusted Platform Module (TPM), der mittels kryptografischer Verfahren die Integrität sowohl der Hardware als auch der Software-Datenstrukturen messen kann und diese Werte nachprüfbar abspeichert.

## U

**ULC** • Ultra Low Cost. Wird meist in Zusammenhang mit einem Mobiltelefon verwendet. Wesentlicher Bestandteil eines ULC-Telefons ist eine Ein-Chip-Lösung, die die elementaren Mobilfunkkomponenten wie Basisband-Prozessor, Sende- und Empfangseinheit, Stromversorgung und Speicher auf einem Chip vereint (vgl. Ein-Chip-Lösung).

**UMRICHTER** • Steuereinheit, die Wechselspannungen verschiedener Spannungen und Frequenzen ineinander überführen kann. Dies geschieht durch Leistungselektronik. Umrichter werden unter anderem in Windrädern eingesetzt, um die fluktuierende Windenergie ins Stromnetz mit einer Spannung mit konstanter Frequenz einzuspeisen. In der elektrischen Antriebstechnik, also etwa bei Motorsteuerungen und Zügen, wird mittels eines Umrichters aus einem Netz mit konstanter Frequenz und Spannung eine Ausgangsspannung mit variabler, lastabhängiger Frequenz erzeugt.

**UMTS** • Das Universal Mobile Telecommunications System ist ein digitaler Weltstandard für Mobilfunk. UMTS ermöglicht Datenübertragungsraten von bis zu zwei Megabit pro Sekunde (vgl. 3G).

## V

**VSD** • Variable Speed Drive. Elektronische Steuerung zur Drehzahlregelung von Elektromotoren.

## W

**WAFER** • Scheibe aus einem Halbleiterwerkstoff (meist Silicium, aber auch Germanium oder Galliumarsenid), aus der man den eigentlichen Chip herstellt. Gängige Durchmesser für Wafer sind 200 Millimeter und 300 Millimeter.

**WCDMA** • Wideband CDMA. Ein in UMTS-Netzen verwendetes Datenübertragungsverfahren.

**WECHSELRICHTER** • Ein Wechselrichter (auch Inverter genannt) ist ein elektrisches Gerät, das Gleichspannung in Wechselspannung beziehungsweise Gleichstrom in Wechselstrom umrichtet.



## IMPRESSUM GESCHÄFTSBERICHT 2010

|                         |                                                                          |
|-------------------------|--------------------------------------------------------------------------|
| HERAUSGEBER:            | Infineon Technologies AG, Neubiberg                                      |
| REDAKTION:              | Investor Relations, Communications, Consolidation and External Reporting |
| REDAKTIONSSCHLUSS:      | 22. Dezember 2010                                                        |
| GESCHÄFTSJAHR:          | 1. Oktober bis 30. September                                             |
| ABSCHLUSSPRÜFER:        | KPMG AG Wirtschaftsprüfungsgesellschaft, Berlin                          |
| GESTALTUNG:             | Strichpunkt, Stuttgart                                                   |
| FOTONACHWEIS:           | Fotostudio Reller GmbH, München; Tom Ziora, Aalen                        |
| ILLUSTRATIONEN:         | Stephan Walter, Zürich, Schweiz                                          |
| DRUCK:                  | Druckerei Fritz Kriechbaumer, Taufkirchen bei München                    |
| GEDRUCKT IN DEUTSCHLAND |                                                                          |

Die folgenden Bezeichnungen waren im Geschäftsjahr 2010 **Markennamen** der Infineon Technologies AG: Infineon, das Infineon-Logo, AURIX, CIPOS, CoolMOS, HybridPACK, OptiMOS, SMARTi, TriCore, X-GOLD, XMM.

Wenn Sie **zusätzliche Exemplare dieses Geschäftsberichts** in deutscher oder englischer Sprache bestellen oder wenn Sie diese Berichte und aktuelle Anlegerinformationen online lesen möchten, besuchen Sie uns im Internet unter [www.infineon.com/boerse](http://www.infineon.com/boerse). Aktionäre und andere interessierte Anleger können kostenlose Einzelexemplare telefonisch oder schriftlich bei der Abteilung Investor Relations anfordern.

**DIENSTAG, 01. FEBRUAR 2011\***

VERÖFFENTLICHUNG DES BERICHTS ÜBER DAS 1. QUARTAL 2011

**DONNERSTAG, 17. FEBRUAR 2011**

ORDENTLICHE HAUPTVERSAMMLUNG 2011 (BEGINN: 10:00 UHR)

ICM – INTERNATIONALES CONGRESS CENTER MÜNCHEN, DEUTSCHLAND

**DIENSTAG, 03. MAI 2011\***

VERÖFFENTLICHUNG DES BERICHTS ÜBER DAS 2. QUARTAL 2011

**DONNERSTAG, 28. JULI 2011\***

VERÖFFENTLICHUNG DES BERICHTS ÜBER DAS 3. QUARTAL 2011

**DONNERSTAG, 17. NOVEMBER 2011\***

VERÖFFENTLICHUNG DES BERICHTS ÜBER DAS 4. QUARTAL  
UND DAS GESCHÄFTSJAHR 2011

\* Vorläufig

INFINEON TECHNOLOGIES AG

**HAUPTVERWALTUNG:** Am Campeon 1 – 12, 85579 Neubiberg / München, Tel. +49 89 234-0

**KONTAKT FÜR ANLEGER UND ANALYSTEN:** Investor.Relations@infineon.com, Tel. +49 89 234-26655, Fax +49 89 234-955 2987

**KONTAKT FÜR JOURNALISTEN:** Media.Relations@infineon.com, Tel. +49 89 234-28480, Fax +49 89 234-955 4521

**BESUCHEN SIE UNS IM INTERNET:** [www.infineon.com](http://www.infineon.com)
