# Supplementary material
Source: publisher site journal article supplement (https://www.degruyterbrill.com/publication/isbn/9783110432879/downloadAsset/9783110432879_Elektronischer_Anhang_2.zip)
Supplement: Supplementary file 62 [file Infineon Unser Infineon Team.pdf › Korpustexte/Korpustexte pdf/Infineon/Infineon Unser Infineon Team.pdf]

# Die Menschen hinter Infineon

Infineon ist ein globales Hightech-Unternehmen mit hochqualifizierten und engagierten Mitarbeitern. Wir arbeiten Tag für Tag über nationale Grenzen hinweg, um gemeinsam das Beste zu erreichen. Mit ihrem fundierten und vielseitigen Wissen sind unsere Mitarbeiter der Schlüssel zum Erfolg. Sie unterstützen uns dabei, innovative Lösungen zu entwickeln und neue Herausforderungen im Halbleiterbereich zu meistern.

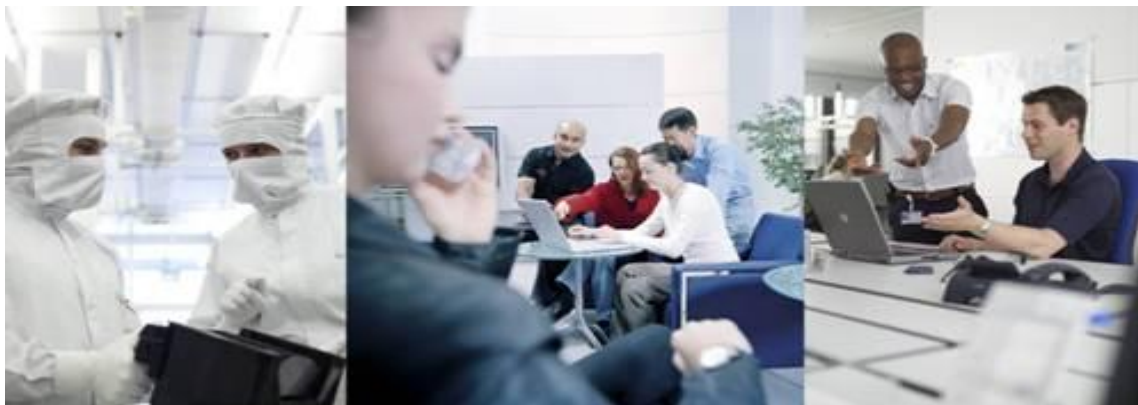

## Unsere Mitarbeiter-Philosophie

- **Infineon bietet** ein innovatives Arbeitsumfeld und motiviert seine Mitarbeitern, sich aktiv in ihrem Job einzubringen.
- **Infineon unterstützt** seine Mitarbeiter bei der Entfaltung ihres persönlichen Potenzials mit einem breiten Angebot an Schulungen, Entwicklungsmöglichkeiten und Karrierechancen.
- **Infineon fördert** eine von Vielfalt, Offenheit und Verständigung geprägte Kultur innerhalb eines global agierenden Unternehmens.
- **Infineon-Mitarbeiter** und Führungskräfte fühlen sich den gleichen Werten und Prinzipien verpflichtet. Ehrlichkeit, Offenheit und Verlässlichkeit im Umgang miteinander stehen dabei an oberster Stelle.

<http://www.infineon.com/cms/de/corporate/career/people/index.html>
