# Supplementary material
Source: publisher site journal article supplement (https://www.degruyterbrill.com/publication/isbn/9783110432879/downloadAsset/9783110432879_Elektronischer_Anhang_2.zip)
Supplement: Supplementary file 63 [file Infineon Unsere Werte.pdf › Korpustexte/Korpustexte pdf/Infineon/Infineon Unsere Werte.pdf]

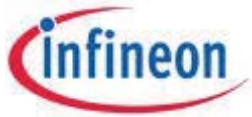

[Home](#) > [Unternehmen](#) > **Unsere Werte**

## Unsere Werte

### Wie wir arbeiten

**Vier Grundwerte sind der Antrieb in unserer täglichen Arbeit:**

#### **We commit - Wir handeln engagiert und verbindlich**

- Wir erfüllen die Bedürfnisse unserer Kunden
- Wir tun alles, um unsere Zusagen einzuhalten
- Wir bieten das beste Preis-Leistungsverhältnis

#### **We innovate - Wir sind innovativ**

- Wir lernen und werden jeden Tag besser
- Wir entdecken und entwickeln neue Möglichkeiten
- Wir bieten herausragende Ingenieursleistung

#### **We partner - Wir arbeiten partnerschaftlich zusammen**

- Wir kooperieren offen über Grenzen hinweg
- Wir respektieren und helfen uns gegenseitig
- Wir arbeiten zusammen für das beste Ergebnis

#### **We perform - Wir bringen Leistung**

- Wir schätzen den konstruktiven Konflikt
- Wir sind verantwortlich für unsere Ergebnisse
- Wir schöpfen Gewinnmöglichkeiten aktiv aus
- [Support](#)

Explore our Focus Areas [Energy](#) [Efficiency](#) [Mobility](#) [Security](#)
