# Supplementary material
Source: publisher site journal article supplement (https://www.degruyterbrill.com/publication/isbn/9783110432879/downloadAsset/9783110432879_Elektronischer_Anhang_2.zip)
Supplement: Supplementary file 64 [file Infineon Wer wir sind.pdf › Korpustexte/Korpustexte pdf/Infineon/Infineon Wer wir sind.pdf]

# Wer wir sind

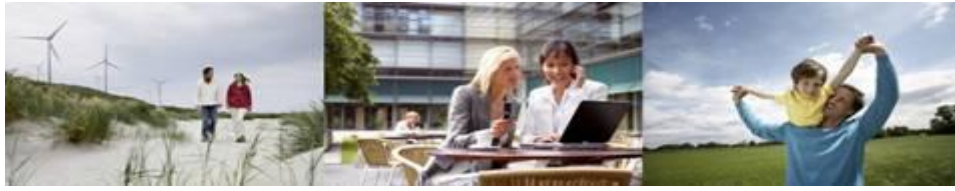

Infineon ist eines der führenden Unternehmen in der Halbleiterindustrie. Wir entwickeln, produzieren und vermarkten eine Vielzahl an Halbleitern und bieten komplette Systemlösungen an, welche helfen, drei zentrale Herausforderungen unserer Gesellschaft nachhaltig zu bewältigen: Energieeffizient, Mobilität und Sicherheit. Das spiegelt Infineons verantwortungsbewusste und radikale Reaktion auf die **weltweiten Veränderungen** wie Globalisierung, Klimaveränderungen und Bevölkerungswachstum wider.

Für unsere Kunden setzen sich bei Infineon weltweit über 26.000 Mitarbeiter dafür ein, aus Ideen Zukunftslösungen zu entwickeln.

Mit knapp 30 Forschungs- und Entwicklungsstandorten weltweit und mit unseren 6.000 Mitarbeitern im Bereich Forschung und Entwicklung, stellen wir uns den technologischen Herausforderungen von morgen.

Als Hightechunternehmen stellt Infineon weltweit hoch qualifizierte Menschen aus sehr unterschiedlichen Bereichen ein. Bei uns haben über 50 Prozent der Mitarbeiter einen akademischen Abschluss.

Erfahren Sie mehr über unsere [Arbeitswelt](#), [wie](#) wir arbeiten und wo Sie uns [persönlich treffen](#) können.

<http://www.infineon.com/cms/de/corporate/career/why-infineon/infineon/index.html>
