# Supplementary material
Source: publisher site journal article supplement (https://www.degruyterbrill.com/publication/isbn/9783110432879/downloadAsset/9783110432879_Elektronischer_Anhang_2.zip)
Supplement: Supplementary file 65 [file K+S Finanzbericht 2010.pdf › Korpustexte/Korpustexte pdf/K+S/K+S GB 2010/K+S Finanzbericht 2010.pdf]

# WACHSTUM ERLEBEN

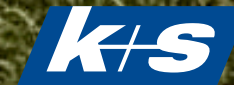

Wachstum erleben.

**ZEHNJAHRESÜBERSICHT DER K+S GRUPPE**

|                                                          |          | 2010    | 2009    | 2008    | 2007    | 2006               | 2005    | 2004    | 2003    | 2002    | 2001    |
|----------------------------------------------------------|----------|---------|---------|---------|---------|--------------------|---------|---------|---------|---------|---------|
|                                                          |          | IFRS    | IFRS    | IFRS    | IFRS    | IFRS               | IFRS    | IFRS    | HGB     | HGB     | HGB     |
| <b>Umsatz, Ergebnis, Cashflow</b>                        |          |         |         |         |         |                    |         |         |         |         |         |
| Umsatz                                                   | Mio. €   | 4.993,8 | 3.573,8 | 4.794,4 | 3.344,1 | 2.957,7            | 2.815,7 | 2.538,6 | 2.287,8 | 2.258,5 | 2.179,4 |
| Ergebnis vor Zinsen, Steuern und Abschreibungen (EBITDA) | Mio. €   | 975,2   | 411,8   | 1.484,4 | 413,9   | 401,1              | 383,1   | 289,5   | 223,7   | 240,1   | 248,4   |
| Operatives Ergebnis (EBIT I)                             | Mio. €   | 726,9   | 238,0   | 1.342,7 | 285,7   | 278,0              | 250,9   | 162,9   | 115,7   | 132,8   | 120,6   |
| Ergebnis nach operativen Sicherungsgeschäften (EBIT II)  | Mio. €   | 731,5   | 241,9   | 1.192,3 | -106,9  | 361,6              | 271,7   | 136,5   | —       | —       | —       |
| Ergebnis vor Ertragsteuern                               | Mio. €   | 608,0   | 126,5   | 1.199,1 | -142,6  | 341,5              | 259,6   | 123,4   | 111,6   | 113,9   | 121,1   |
| Ergebnis vor Ertragsteuern, bereinigt <sup>1</sup>       | Mio. €   | 603,4   | 122,6   | 1.349,5 | 250,0   | 257,9              | 238,8   | 149,9   | —       | —       | —       |
| Konzernergebnis                                          | Mio. €   | 448,6   | 96,4    | 870,9   | -93,3   | 228,9 <sup>2</sup> | 174,4   | 86,8    | 101,3   | 103,8   | 118,3   |
| Konzernergebnis, bereinigt <sup>1</sup>                  | Mio. €   | 445,3   | 93,6    | 979,3   | 175,3   | 176,2 <sup>2</sup> | 161,3   | 103,5   | —       | —       | —       |
| Brutto-Cashflow                                          | Mio. €   | 830,2   | 323,9   | 1.177,9 | 372,1   | 342,7              | 341,5   | 274,1   | 209,1   | 216,9   | 224,6   |
| Investitionen <sup>3</sup>                               | Mio. €   | 201,0   | 177,6   | 197,5   | 171,6   | 130,5              | 107,1   | 131,9   | 126,6   | 129,0   | 157,9   |
| Abschreibungen <sup>3</sup>                              | Mio. €   | 248,3   | 173,8   | 141,7   | 128,2   | 123,1              | 132,2   | 126,6   | 108,0   | 107,3   | 127,8   |
| Working Capital                                          | Mio. €   | 959,4   | 970,5   | 962,3   | 570,6   | 603,1              | 456,4   | 333,1   | 250,9   | 300,5   | 262,1   |
| <b>Bilanz</b>                                            |          |         |         |         |         |                    |         |         |         |         |         |
| Eigenkapital <sup>4</sup>                                | Mio. €   | 2.651,6 | 2.094,6 | 1.718,3 | 931,8   | 1.124,3            | 942,1   | 880,6   | 584,9   | 558,8   | 516,8   |
| Sachanlagen, immaterielles Vermögen                      | Mio. €   | 2.803,3 | 2.658,0 | 1.426,9 | 1.297,3 | 1.271,6            | 874,1   | 883,3   | 659,8   | 598,6   | 592,4   |
| Nettoverschuldung                                        | Mio. €   | 732,5   | 1.351,3 | 570,0   | 1.085,1 | 718,3              | 321,4   | 340,5   | 220,5   | 262,7   | 180,7   |
| Bilanzsumme                                              | Mio. €   | 5.573,7 | 5.217,1 | 3.473,8 | 2.964,8 | 2.830,9            | 2.259,1 | 2.147,7 | 1.754,5 | 1.666,7 | 1.601,0 |
| <b>Mitarbeiter</b>                                       |          |         |         |         |         |                    |         |         |         |         |         |
| Mitarbeiter per 31.12. <sup>5</sup>                      | Anzahl   | 15.241  | 15.208  | 12.368  | 12.033  | 11.873             | 11.012  | 10.988  | 10.554  | 10.536  | 10.178  |
| – davon Auszubildende                                    | Anzahl   | 647     | 642     | 615     | 614     | 620                | 591     | 591     | 550     | 542     | 533     |
| Mitarbeiter im Durchschnitt <sup>5</sup>                 | Anzahl   | 15.168  | 13.044  | 12.214  | 11.959  | 11.392             | 11.017  | 11.068  | 10.541  | 10.439  | 10.278  |
| Personalaufwand <sup>6</sup>                             | Mio. €   | 1.019,3 | 756,4   | 738,5   | 687,3   | 663,5              | 671,1   | 613,3   | 562,7   | 531,2   | 522,6   |
| <b>Kennzahlen</b>                                        |          |         |         |         |         |                    |         |         |         |         |         |
| Ergebnis je Aktie, bereinigt <sup>1</sup>                | €        | 2,33    | 0,56    | 5,94    | 1,06    | 1,07 <sup>2</sup>  | 0,95    | 0,61    | 0,61    | 0,61    | 0,68    |
| Dividende je Aktie <sup>7</sup>                          | €        | 1,00    | 0,20    | 2,40    | 0,50    | 0,50               | 0,45    | 0,33    | 0,25    | 0,25    | 0,25    |
| Dividendenrendite <sup>7</sup>                           | %        | 1,8     | 0,5     | 6,0     | 1,2     | 2,4                | 3,5     | 3,3     | 4,6     | 5,8     | 4,6     |
| EBITDA-Marge                                             | %        | 19,5    | 11,5    | 31,0    | 12,4    | 13,6               | 13,6    | 11,4    | 9,8     | 10,6    | 11,4    |
| EBIT-Marge                                               | %        | 14,6    | 6,7     | 28,0    | 8,5     | 9,4                | 8,9     | 6,4     | 5,1     | 5,9     | 5,5     |
| Umsatzrendite                                            | %        | 8,9     | 2,6     | 20,4    | 5,2     | 6,0 <sup>2</sup>   | 5,7     | 4,1     | 2,8     | 4,6     | 5,4     |
| Return on Capital Employed (ROCE)                        | %        | 20,9    | 9,3     | 64,0    | 15,5    | 17,4               | 19,5    | 14,2    | 12,7    | 14,7    | 14,1    |
| Gesamtkapitalrendite                                     | %        | 14,7    | 6,9     | 44,9    | 11,0    | 12,3               | 12,7    | 9,1     | 7,2     | 7,7     | 8,5     |
| Eigenkapitalrendite nach Steuern                         | %        | 18,7    | 8,4     | 68,6    | 16,1    | 17,7 <sup>2</sup>  | 17,8    | 12,1    | 17,3    | 18,6    | 22,9    |
| Buchwert je Aktie                                        | €        | 13,85   | 10,94   | 10,41   | 5,65    | 6,81               | 5,54    | 5,18    | 3,44    | 3,10    | 2,87    |
| Brutto-Cashflow je Aktie                                 | €        | 4,34    | 1,95    | 7,14    | 2,25    | 2,08               | 2,02    | 1,61    | 1,25    | 1,27    | 1,30    |
| <b>Aktie</b>                                             |          |         |         |         |         |                    |         |         |         |         |         |
| Schlusskurs per 31.12. <sup>8</sup>                      | XETRA, € | 56,36   | 39,99   | 39,97   | 40,69   | 20,55              | 12,76   | 9,78    | 5,44    | 4,33    | 5,48    |
| Marktkapitalisierung                                     | Mrd. €   | 10,8    | 7,7     | 6,6     | 6,7     | 3,4                | 2,1     | 1,7     | 0,9     | 0,8     | 1,0     |
| Enterprise Value per 31.12.                              | Mrd. €   | 11,5    | 9,0     | 7,2     | 7,8     | 4,1                | 2,4     | 2,0     | 0,9     | 0,8     | 1,0     |
| Gesamtanzahl Aktien per 31.12.                           | Mio.     | 191,40  | 191,40  | 165,00  | 165,00  | 165,00             | 170,00  | 170,00  | 170,00  | 180,00  | 180,00  |
| Ausstehende Aktien per 31.12. <sup>9</sup>               | Mio.     | 191,40  | 191,40  | 165,00  | 165,00  | 165,00             | 165,00  | 170,00  | 170,00  | 166,08  | 173,20  |
| Durchschnittliche Anzahl Aktien <sup>10</sup>            | Mio.     | 191,34  | 166,15  | 164,95  | 164,94  | 164,96             | 169,24  | 170,00  | 167,08  | 171,28  | 173,60  |

## GESCHÄFTSBEREICHE IM ÜBERBLICK

### KALI- UND MAGNESIUMPRODUKTE

|                      | 2010    | 2009    | 2008    | 2007    | 2006    |
|----------------------|---------|---------|---------|---------|---------|
| in Mio. €            |         |         |         |         |         |
| Umsatz               | 1.844,7 | 1.421,7 | 2.397,4 | 1.407,9 | 1.238,9 |
| EBITDA               | 567,1   | 317,2   | 1.286,3 | 255,1   | 235,7   |
| EBIT I               | 475,9   | 231,7   | 1.203,2 | 177,9   | 158,6   |
| Investitionen        | 96,9    | 107,4   | 111,1   | 79,7    | 83,8    |
| Mitarbeiter (Anzahl) | 7.900   | 7.818   | 7.845   | 7.672   | 7.601   |

In sechs Bergwerken werden Kali- und Magnesiumrohsalze gewonnen. Hieraus stellen wir eine Vielzahl von Düngemitteln her; außerdem verarbeiten wir unsere Rohstoffe zu Produkten für industrielle Anwendungen, zu hochreinen Kalium- und Magnesiumsalzen für die Pharma-, Kosmetik- und Lebensmittelindustrie sowie zu Bestandteilen von Futtermitteln.

### SALZ

|                      | 2010    | 2009    | 2008  | 2007  | 2006  |
|----------------------|---------|---------|-------|-------|-------|
| in Mio. €            |         |         |       |       |       |
| Umsatz               | 1.728,7 | 1.014,6 | 618,6 | 545,1 | 485,8 |
| EBITDA               | 369,7   | 200,3   | 77,6  | 76,5  | 92,0  |
| EBIT I               | 238,1   | 140,4   | 45,2  | 47,8  | 67,6  |
| Investitionen        | 79,0    | 48,0    | 58,6  | 47,9  | 21,2  |
| Mitarbeiter (Anzahl) | 5.235   | 5.279   | 2.394 | 2.294 | 2.194 |

Salzprodukte von höchster Reinheit und Qualität werden als Speise-, Gewerbe- und Industriesalze sowie als Auftausalz im Winterdienst für die Sicherheit im Straßenverkehr eingesetzt. Produziert wird in Deutschland und in anderen westeuropäischen Ländern sowie in Nord- und Südamerika.

### STICKSTOFFDÜNGEMITTEL

|                      | 2010    | 2009    | 2008    | 2007    | 2006    |
|----------------------|---------|---------|---------|---------|---------|
| in Mio. €            |         |         |         |         |         |
| Umsatz               | 1.286,2 | 1.016,2 | 1.652,4 | 1.265,4 | 1.108,6 |
| EBITDA               | 67,4    | -94,4   | 133,9   | 68,2    | 56,5    |
| EBIT I               | 55,7    | -108,1  | 121,4   | 57,3    | 45,9    |
| Investitionen        | 12,9    | 11,2    | 10,7    | 16,8    | 12,1    |
| Mitarbeiter (Anzahl) | 1.226   | 1.249   | 1.318   | 1.311   | 1.321   |

Der Geschäftsbereich Stickstoffdüngemittel vertreibt Felddünger für nahezu alle landwirtschaftlichen Kulturen. Außerdem werden neben Produkten für den Garten- und Hausbereich, die Pflanzenpflege und den Pflanzenschutz, Spezialdüngemittel für kommunale Grünflächen, Golfplätze, Baumschulbetriebe, den Gartenbau und verschiedene Sonderkulturen angeboten.

### ERGÄNZENDE GESCHÄFTSBEREICHE

|                      | 2010  | 2009  | 2008  | 2007  | 2006  |
|----------------------|-------|-------|-------|-------|-------|
| in Mio. €            |       |       |       |       |       |
| Umsatz               | 133,7 | 120,7 | 125,3 | 125,1 | 123,9 |
| EBITDA               | 27,7  | 21,7  | 31,2  | 42,4  | 41,8  |
| EBIT I               | 21,2  | 15,2  | 25,1  | 37,7  | 37,1  |
| Investitionen        | 4,2   | 4,6   | 10,0  | 17,2  | 7,7   |
| Mitarbeiter (Anzahl) | 280   | 278   | 285   | 273   | 306   |

Unter dem Begriff „Ergänzende Geschäftsbereiche“ sind neben Recyclingaktivitäten und der Entsorgung von Abfällen in Kali- bzw. Steinsalzbergwerken sowie der Granulierung von CATSAN® weitere für die K+S Gruppe wichtige Aktivitäten gebündelt. Mit der Kali-Transport Gesellschaft mbH (KTG) in Hamburg verfügt die K+S Gruppe über einen eigenen Logistik-Dienstleister. Die Chemische Fabrik Kalk GmbH (CFK) handelt mit verschiedenen Basischemikalien.

### ← Fußnoten zur Zehnjahresübersicht

<sup>1</sup> Die bereinigten Kennzahlen beinhalten unverändert lediglich das realisierte Ergebnis aus operativen, antizipativen Sicherungsgeschäften der jeweiligen Berichtsperiode. Die Marktwertveränderungen der noch ausstehenden, operativen, antizipativen Sicherungsgeschäfte werden hingegen in den bereinigten Ergebnissen nicht berücksichtigt. Ebenso werden darauf entfallene Effekte auf latente und zahlungswirksame Steuern eliminiert; Steuersatz 2010: 28,2% (2009: 27,9%).

<sup>2</sup> Ohne einmaligen latenten Steuerertrag von 41,9 Mio. € bzw. 0,25 € je Aktie.

<sup>3</sup> Zahlungswirksame Investitionen in bzw. Abschreibungen auf Sachanlagen, immaterielle Vermögenswerte.

<sup>4</sup> Bis einschl. 2003: Inkl. 50% Sonderposten mit Rücklageanteil und Unterschiedsbetrag aus der Kapitalkonsolidierung.

<sup>5</sup> FTE: Vollzeitäquivalente; Teilzeitstellen werden entsprechend ihrem jeweiligen Arbeitszeitanteil gewichtet.

Die Bezeichnung Mitarbeiter gilt für Frauen und Männer gleichermaßen und ist deshalb als geschlechtsneutral anzusehen.

<sup>6</sup> Der Personalaufwand enthält auch Aufwendungen für Altersteilzeit und Vorruhestand.

<sup>7</sup> Im Jahr 2010 entspricht die Angabe dem Dividendenvorschlag; Dividendenrendite bezogen auf Jahresschlusskurs.

<sup>8</sup> Der Kurs der K+S-Aktie handelt seit der Kapitalerhöhung im Dezember 2009 ex Bezugsrecht. Historische Werte wurden nicht angepasst.

<sup>9</sup> Gesamtanzahl Aktien abzgl. des Bestands der von K+S am Stichtag gehaltenen eigenen Aktien.

<sup>10</sup> Gesamtanzahl Aktien abzgl. des durchschnittlichen Bestands der von K+S gehaltenen eigenen Aktien.

← TITELBILD

MIT DER K+S GRUPPE WACHSTUM ERLEBEN: WIR FÖRDERN, VEREDELN  
UND VERTREIBEN NATÜRLICHE ROHSTOFFE WIE KALI UND SALZ.  
UNSERE DÜNGERMITTEL ERMÖGLICHEN QUALITATIV HOCHWERTIGE  
UND REICHE ERNTEN WELTWEIT.

BRIEF AN DIE AKTIONÄRE  
KASSEL, 1. MÄRZ 2011

## INHALT

*Sehr geehrte Aktionärinnen und Aktionäre,*

als ich im vergangenen Jahr meinen Brief an Sie schrieb, hatten wir die Finanz- und Wirtschaftskrise noch gut vor Augen, registrierten allerdings bereits auch erste Anzeichen einer Nachfragebelebung im Düngemittelgeschäft. Dementsprechend hatte ich zu diesem Zeitpunkt die Erwartung geäußert, dass sich diese sowie die erstmalig ganzjährige Konsolidierung von MORTON SALT positiv auf unser Geschäft auswirken sollten. Im Vergleich zur – zugegeben – recht niedrigen Ausgangsbasis des Jahres 2009 stellte ich Ihnen unter dem Strich ein deutlich höheres Ergebnis in Aussicht.

**Heute, ein Jahr später, freue ich mich, Ihnen wie folgt Rechenschaft ablegen zu können:**

- + Die K+S GRUPPE erwirtschaftete im Jahr 2010 einen Umsatz von 5,0 Mrd. €; dies ist ein Anstieg gegenüber dem Vorjahr von 40 %;
- + das operative Ergebnis EBIT I erreichte 727 Mio. € und hat sich in etwa verdreifacht;
- + das bereinigte Ergebnis je Aktie liegt bei 2,33 € und verbesserte sich um den Faktor 4;
- + der Vorstand wird der Hauptversammlung vorschlagen, für das abgelaufene Geschäftsjahr eine Dividende von 1,00 € je Aktie auszuschütten (Vorjahr: 0,20 €). Dies entspricht einer Ausschüttungsquote von 43 % und liegt innerhalb unseres grundsätzlich angestrebten Zielkorridors von 40 bis 50 %. Wir stellen auf diese Weise sicher, dass unsere Aktionäre fair am Gewinn beteiligt werden und das Unternehmen Rücklagen für künftiges Wachstum, aber auch nicht auszuschließende vorübergehende Krisen bilden kann;
- + wir haben die Integration von MORTON SALT zielstrebig und sachorientiert vorangetrieben und
- + mit dem Erwerb von POTASH ONE im Geschäftsbereich Kali- und Magnesiumprodukte einen entscheidenden strategischen Schritt nach vorn gemacht.

Ich möchte mich bereits an dieser Stelle für Ihr Vertrauen in die K+S GRUPPE und unsere Mannschaft bedanken, denn Sie haben uns damit sehr geholfen, in den drei zurückliegenden Jahren, die von großen Schwankungen und Turbulenzen gekennzeichnet waren, Kurs zu halten.

Der Kapitalmarkt scheint diesen Kurs offensichtlich gutzuheißen; hat doch unser Aktienkurs allein im vergangenen Jahr um mehr als 40 % und in den vergangenen drei Jahren um durchschnittlich 13,5 % pro Jahr zugelegt.

**Was waren nun aber im Detail die Gründe für diese fulminante Entwicklung, die sich die meisten von uns vor einem Jahr sicher kaum vorzustellen wagten?**

Im Kerngeschäftsfeld Düngemittel gab es zu Beginn des Jahres 2010 einen großen Nachholbedarf der Handelsstufe, um sehr niedrige Lagerbestände im Vorfeld der Frühjahrssaison wieder aufzufüllen. Dies allein hätte aber nicht ausgereicht, um von einer Normalisierung der Düngemittelnachfrage zu sprechen, denn dafür war es notwendig, dass zusätzlich auch die Landwirtschaft zu einem nachhaltigen Verbrauchsverhalten zurückkehrt. Dies ist erfreulicherweise geschehen, denn der stark reduzierte Düngemittelleinsatz im Jahr 2009 hatte zu relativ niedrigen Nährstoffgehalten in den Böden und damit zu erhöhten Ertragsrisiken für die kommenden Ernten geführt. Der in der zweiten Jahreshälfte einsetzende starke Anstieg der internationalen Getreidepreise und die damit einhergehende verbesserte Einkommenssituation der Landwirte begünstigte die Düngemittelnachfrage dann noch zusätzlich. Beide Effekte haben zu einem Anstieg unseres Düngemittelabsatzes um mehr als 40 % geführt. So konnten wir die Kalipreise angesichts der wieder erstarkten Nachfrage und im Einklang mit der Preisentwicklung auf den Überseemärkten in mehreren Schritten moderat anheben. Auch wenn sich insbesondere manche Kapitalmarktteilnehmer eine rasche Rückkehr zu den im Boomjahr 2008 gesehenen Kali-preisen wünschen, haben wir aus den negativen Erfahrungen in den Jahren 2008/09 unsere Lehren gezogen: Wichtig ist eine nachhaltige Preispolitik!

## INHALT

Im Geschäftsbereich Salz verlief das Jahr 2010 nicht minder spannend: Natürlich stand die Integration des zum 1. Oktober 2009 erworbenen nordamerikanischen Salzproduzenten MORTON SALT im Vordergrund. Vielleicht werden Sie sich jetzt auch fragen, warum Sie davon im vergangenen Jahr so wenig mitbekommen haben? – Nun, das liegt im Wesentlichen an den geringen operativen Überschneidungen zu unseren bisherigen Salzaktivitäten, sodass die bei anderen Übernahmetransaktionen häufig vorkommenden Standortschließungen und Stellenstreichungen hier nicht notwendig waren. Es ist aber auch schlicht unsere Verantwortung sicherzustellen, dass unsere Kunden davon im Tagesgeschäft nicht behelligt werden, selbst wenn im Hintergrund dies- und jenseits des Atlantiks eine Vielzahl von Projektteams an einer möglichst zügigen Integration arbeitet. Ich freue mich daher, dass MORTON SALT ab dem ersten Tag der Zugehörigkeit zur K+S GRUPPE, Quartal für Quartal, vom Umsatz bis zum Nettoergebnis deutlich positive Wertbeiträge liefert. Ich denke, darauf können wir alle stolz sein!

Das Jahr 2010 war aber auch in anderer Hinsicht außergewöhnlich: Wir haben sowohl zu Beginn als auch am Ende des Jahres in Europa einen Winter erlebt, wie es ihn in puncto Intensität lange nicht mehr gegeben hat. Während der langfristige Durchschnitt und damit das Absatzbudget für unsere europäische Salztochter esco bei rund 2 Mio. t Auftausalz liegt, wurde im vergangenen Jahr allein hier mehr als das Doppelte verkauft. Dass wir einen solchen Kraftakt nicht nur meistern, sondern von solchen Nachfragespitzen auch profitieren können, verdanken wir drei Faktoren: der über die Jahre immer flexibleren und den Saisoneffekten immer besser Rechnung tragenden Auftausalzproduktion in unseren europäischen Werken, den gelebten Synergien zwischen der Salz- und Kaliproduktion sowie dem sich neben Europa mittlerweile auf Süd- und Nordamerika erstreckenden Produktionsnetzwerk, das in diesem Winter beispielsweise 15 Schiffslieferungen mit Auftausalz für Europa von unseren Standorten in Chile und auf den Bahamas möglich machte.



Wir haben in den letzten zehn Jahren nicht nur einfach den größten Salzproduzenten, sondern vor allem den im Hinblick auf das Produkt- und Länderportfolio am breitesten aufgestellten Salzproduzenten der Welt geschaffen!

**Warum ist mir diese Differenzierung so wichtig? Nun, weil es deutlich macht, dass wir unser Leitmotiv „Wachstum erleben“ keineswegs nur eindimensional verstehen.**

Wachstum allein um des Wachstums willen ist für uns kein Ziel. Wachstum sollte wertgebunden und mit Augenmaß erfolgen. Zwei Eigenschaften, an denen wir uns messen lassen wollen. Am Beispiel der Entsorgung salzhaltiger Abwässer unseres Werks Werra wird deutlich, dass κ+s mit dem 360-Mio.-€-Maßnahmenpaket ihrer Verantwortung gerecht wird; wir haben einen dauerhaften Weg für die Entsorgung der zukünftig verbleibenden Salzabwässer entwickelt und wollen diesen bei Vorliegen entsprechender öffentlich-rechtlicher Genehmigungen wie versprochen umsetzen. Das Konzept führt in den nächsten vier Jahren zu einer 50%igen Reduzierung der Salzabwässer sowie zu einer 30%igen Reduzierung der Salzkonzentration in der Werra. Das Maßnahmenpaket umfasst dabei ausgesprochen innovative und aufwändige Verfahren, die bislang von keinem anderen Kaliproduzenten weltweit großtechnisch eingesetzt werden. Wir bekennen uns damit zum Standort Deutschland und gehen mit dem Maßnahmenpaket an die Grenze des technisch Möglichen und wirtschaftlich Vertretbaren. Da jedoch diese dauerhafte lokale Entsorgung einigen Seiten immer noch nicht ausreicht und eine langfristige Genehmigung damit nicht als gesichert angenommen werden kann, bereiten wir parallel Genehmigungsanträge für Salzabwasserfernleitungen zur Oberweser sowie zur Nordsee vor. Dies geschieht ungeachtet der Tatsache, dass die mit den Ländern Hessen und Thüringen definierten und vom Runden Tisch akzeptierten Prüfkriterien für Fernleitungen aus unserer Sicht heute nicht erfüllt sind. Dies muss aber der Fall sein, bevor eine Entscheidung über den Bau einer Fernleitung getroffen werden kann – eine solche Entscheidung ist mit der Vorbereitung der Anträge also nicht verbunden.



Gleichwohl stehe ich dafür ein, dass diese Antragsverfahren sorgfältig, vorurteilsfrei und ergebnisoffen bearbeitet werden.

**Wo steht die K+S GRUPPE in strategischer Hinsicht heute und warum hat das Jahr 2010 eine ganz besondere Bedeutung für die kommenden Jahrzehnte?**

Im Vergleich zu unseren internationalen Düngemittelkonkurrenten ist die K+S GRUPPE durch die Kombination von Kali und Salz weltweit beinahe einzigartig, denn sie bietet z.B. auf der Produktionsseite bei Technik, Bergbau und Geologie erhebliche Synergien und ergänzt sich auf der Absatzseite nahezu perfekt: So steht dem konjunkturabhängigen Düngemittelgeschäft das relativ krisenfestе, dafür wetterabhängige Salzgeschäft gegenüber. Diese Kombination ist für uns so überzeugend, dass wir Mitte letzten Jahres entschieden haben, unsere Zwei-Säulen-Strategie weiter voranzutreiben. Diese sieht vor, insbesondere in den Geschäftsbereichen Kali- und Magnesiumprodukte sowie Salz zu wachsen und unsere Managementressourcen und finanziellen Mittel hierauf zu fokussieren.

Diejenigen von Ihnen, die uns schon etwas länger kennen, wissen, dass sich der Vorstand auf die Fahnen geschrieben hatte, die eigenen Kalikapazitäten angesichts eines weltweit steigenden Kalibedarfs mittelfristig auszubauen. Wir haben in den letzten Jahren viele Kaliprojekte rund um den Globus sorgfältig analysiert. Mit der erfolgreichen Übernahme des kanadischen Kaliexplorationsunternehmens POTASH ONE mit seinen reichen Kalivorräten ist uns jetzt ein entscheidender strategischer Schritt gelungen. Nun können und werden wir in Saskatchewan ein neues Kaliwerk errichten, das ab 2015 erste Produkte liefern und aus heutiger Sicht im Endausbau mindestens 2,7 Mio. t Kaliumchlorid pro Jahr herstellen soll. Das hierfür veranschlagte Investitionsvolumen beläuft sich auf etwa 2,5 Mrd. USD, wird sich aber über Jahre verteilen und so die K+S GRUPPE finanziell nicht überfordern. Insofern steht der Erwerb von POTASH ONE ganz im Zeichen unserer Wachstumsstrategie, die neben dem Ausbau unserer Kalikapazitäten die Verlängerung der durchschnittlichen Lebensdauer unserer Kalibergwerke vorsieht. Darüber hinaus

INHALT

wird das neue Rohstoffvorkommen zusammen mit unseren bestehenden inländischen Kalibergwerken unsere internationale Wettbewerbsfähigkeit deutlich stärken und im Ergebnis der gesamten K+S GRUPPE in Europa und Übersee zugute kommen.

Mit Blick auf unsere Zwei-Säulen-Strategie haben wir im Juni 2010 auch die Prüfung einer Veränderung von COMPO angestoßen. Zur Vorbereitung haben wir seitdem ein Konzept für eine gesellschaftsrechtliche und unternehmerische Herauslösung der COMPO aus der K+S GRUPPE erarbeitet und einen Bieterprozess gestartet. Ein Ergebnis sollte Mitte dieses Jahres vorliegen.

#### **Wie gestalten sich nun die Perspektiven für das Jahr 2011?**

Das Jahr 2011 sollte erneut ein gutes Jahr für unsere K+S GRUPPE werden: Die weltweite Nachfrage nach Kalidüngemitteln wird weiter steigen, ein Weltkaliabsatz von 57 bis 60 Mio. t (2010e: 57 Mio. t) erscheint uns durchaus realistisch. Anhaltend hohe Preise für Agrarrohstoffe und infolgedessen sehr attraktive Einkommensperspektiven für die Landwirte sollten hierzu maßgeblich beitragen. Auch bei Stickstoffeinzel- und Mehrnährstoffdüngern erwarten wir eine Fortsetzung der positiven Nachfrageentwicklung. Im Salzgeschäft rechnen wir aufgrund des witterungsbedingt guten Starts des Auftausalzgeschäfts sowohl in Europa als auch in Nordamerika mit einem im Vergleich zum Spitzenjahr 2010 stabilen Geschäftsvolumen auf hohem Niveau. In Summe dürfte der Umsatz der K+S GRUPPE im Geschäftsjahr 2011 spürbar zulegen, und beim operativen Ergebnis bestehen sogar Chancen einer deutlichen Steigerung. Dies und ein verbessertes Finanzergebnis sollten auch beim bereinigten Ergebnis je Aktie zu einer deutlichen Steigerung führen und damit die Ausschüttungsfähigkeit für die Dividende weiter erhöhen.

Auch im Namen meiner Vorstandskollegen möchte ich unseren Mitarbeiterinnen und Mitarbeitern für ihr außerordentliches Engagement, ihr unternehmerisches Gespür und ihren bemerkenswerten Teamgeist herzlich danken.

Ihnen, sehr geehrte Aktionärinnen und Aktionäre, Kunden und Partner der K+S GRUPPE, danke ich erneut für Ihr Vertrauen, die Unterstützung und den offenen Dialog im vergangenen Geschäftsjahr. Wir wollen weiter mit Ihnen an einem Strang ziehen, Zukunft gemeinsam gestalten, kontrolliert wachsen und Sie mit unseren Leistungen überzeugen!

*Ihr Norbert Steiner*

**NORBERT STEINER**  
VORSITZENDER DES VORSTANDS

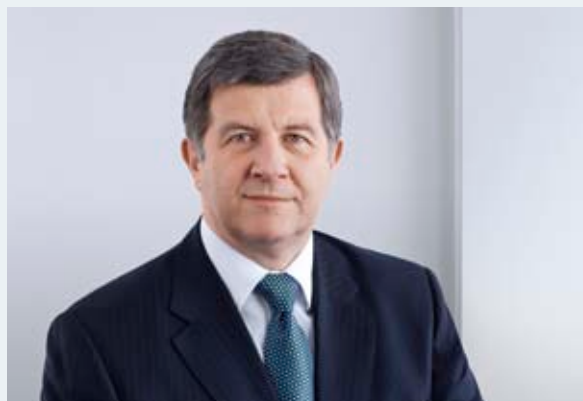

INHALT

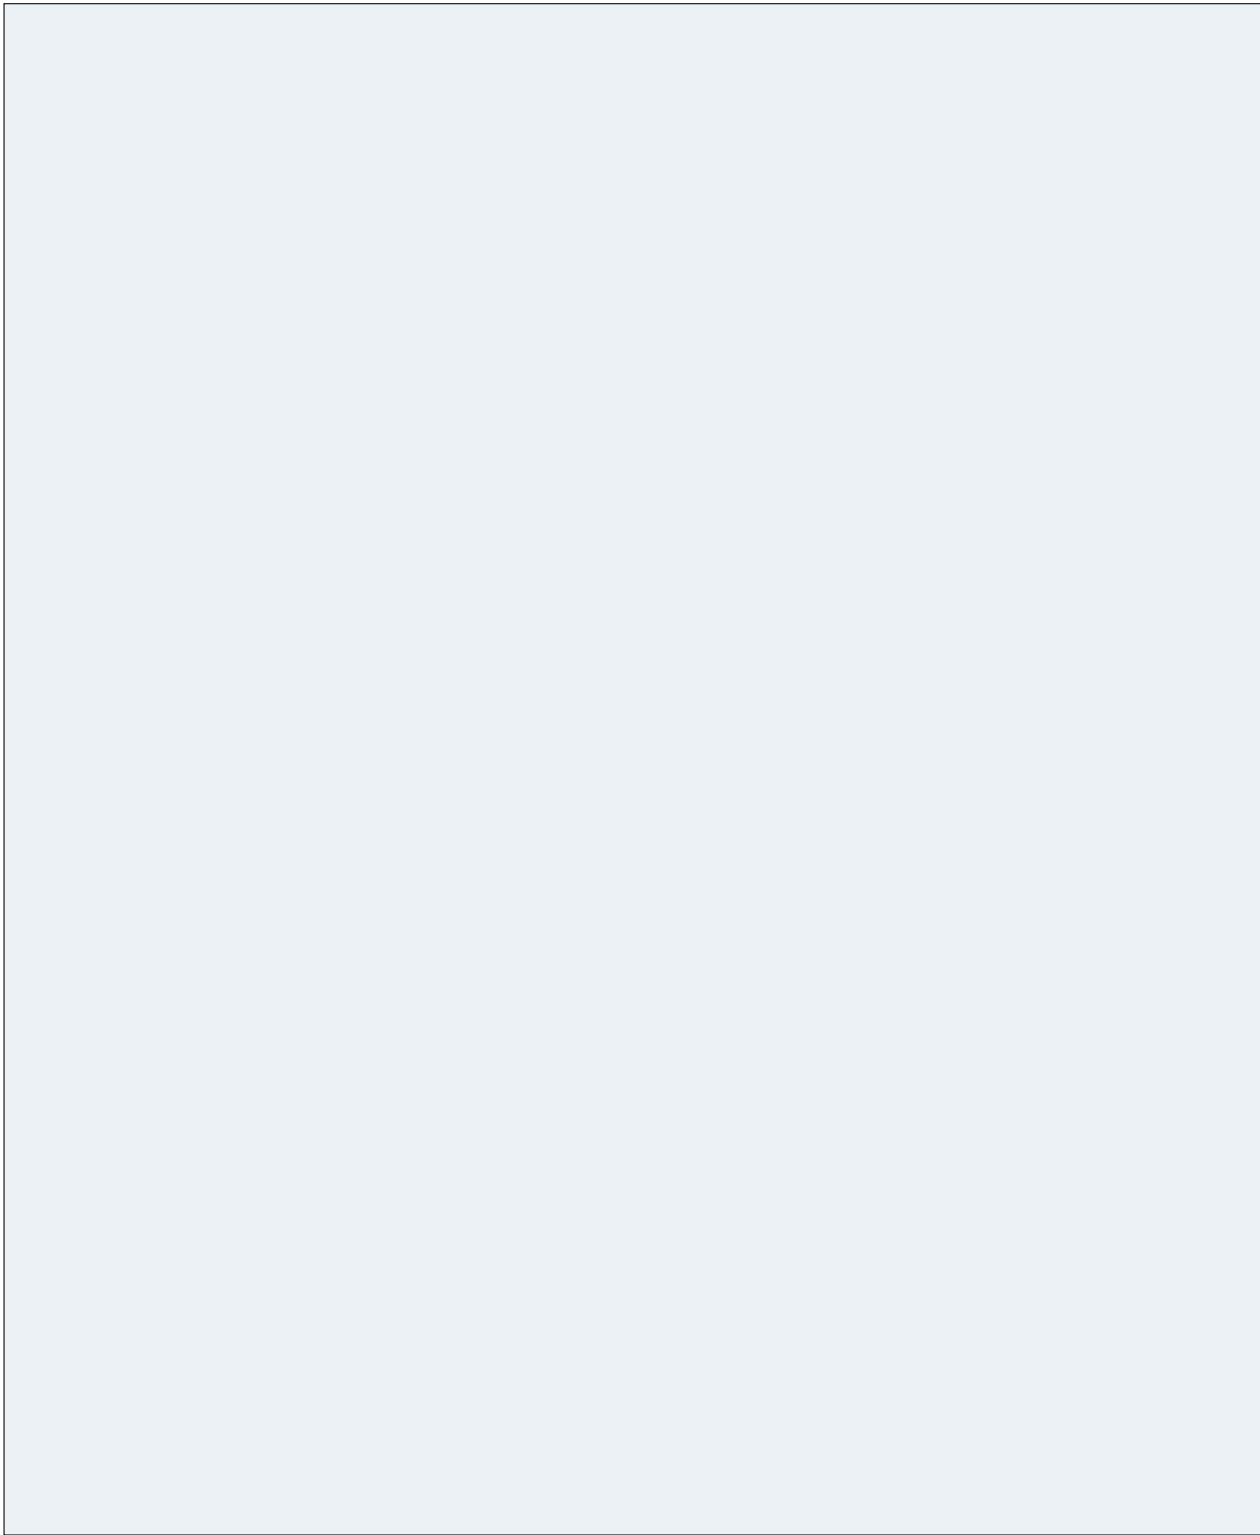

|                                      |    |
|--------------------------------------|----|
| ← Zehnjahresübersicht der K+S GRUPPE | U3 |
| ← Geschäftsbereiche im Überblick     | U4 |
| ← Brief an die Aktionäre             |    |

## 1 AN UNSERE AKTIONÄRE

|                               |   |
|-------------------------------|---|
| 1.1 Vision/Mission            | 3 |
| 1.2 Der Vorstand              | 4 |
| 1.3 Bericht des Aufsichtsrats | 6 |

## 2 K+S AM KAPITALMARKT

|                        |    |
|------------------------|----|
| 2.1 Die Aktie          | 12 |
| 2.2 Anleihe und Rating | 17 |
| 2.3 Investor Relations | 17 |

## 3 CORPORATE GOVERNANCE

|                                                                           |    |
|---------------------------------------------------------------------------|----|
| 3.1 Erklärung zur Unternehmensführung<br>und Corporate-Governance-Bericht | 21 |
| 3.2 Mitglieder des Vorstands                                              | 26 |
| 3.3 Mitglieder des Aufsichtsrats                                          | 27 |
| 3.4 Vergütungsbericht                                                     | 31 |

## WACHSTUM ERLEBEN

|                                  |    |
|----------------------------------|----|
| WACHSTUM BRAUCHT ROHSTOFFE       | 40 |
| WACHSTUM BRAUCHT ERFAHRUNG       | 46 |
| WACHSTUM BRAUCHT LOGISTIK        | 50 |
| WACHSTUM BRAUCHT PERSPEKTIVEN    | 54 |
| WACHSTUM BRAUCHT VERANTWORTUNG   | 58 |
| WACHSTUM BRAUCHT TIEFGANG        | 64 |
| WACHSTUM BRAUCHT VERLÄSSLICHKEIT | 68 |
| WACHSTUM BRAUCHT EIN ZUHAUSE     | 72 |

## 4 KONZERNLAGEBERICHT

|                                                          |     |
|----------------------------------------------------------|-----|
| 4.1 Konzernstruktur und Geschäftstätigkeit               | 77  |
| 4.2 Unternehmensstrategie und -steuerung                 | 87  |
| 4.3 Mitarbeiter                                          | 92  |
| 4.4 Forschung und Entwicklung                            | 95  |
| 4.5 Überblick über den Geschäftsverlauf                  | 101 |
| 4.6 Ertragslage                                          | 107 |
| 4.7 Finanzlage                                           | 114 |
| 4.8 Vermögenslage                                        | 119 |
| 4.9 Gesamtaussage zur aktuellen<br>wirtschaftlichen Lage | 121 |
| 4.10 Darstellung der<br>Geschäftsbereichsentwicklung     | 122 |
| 4.11 Risikobericht                                       | 129 |
| 4.12 Nachtragsbericht                                    | 145 |
| 4.13 Prognosebericht                                     | 145 |

## 5 KONZERNABSCHLUSS

|                                              |     |
|----------------------------------------------|-----|
| 5.1 Bestätigungsvermerk des Abschlussprüfers | 161 |
| 5.2 Gewinn- und Verlustrechnung              | 162 |
| 5.3 Kapitalflussrechnung                     | 163 |
| 5.4 Bilanz                                   | 164 |
| 5.5 Entwicklung des Eigenkapitals            | 165 |
| 5.6 Entwicklung des Anlagevermögens          | 166 |
| 5.7 Entwicklung der Rückstellungen           | 170 |
| 5.8 Segmentberichterstattung                 | 172 |
| 5.9 Anhang                                   | 174 |

## WEITERE INFORMATIONEN

|                                         |     |
|-----------------------------------------|-----|
| Informationen über Rohstofflagerstätten | 218 |
| Definition verwendeter Finanzkennzahlen | 221 |
| Glossar                                 | 222 |
| Abbildungsverzeichnis                   | 226 |
| Tabellenverzeichnis                     | 226 |
| Stichwortverzeichnis                    | 228 |
| Finanzkalender, Kontakt, Impressum      | 230 |

## INHALT

## AN UNSERE AKTIONÄRE

QUELLE FÜR WACHSTUM UND LEBEN DURCH  
NÄHRSTOFFE UND MINERALIEN

# 1

---

|     |                           |   |
|-----|---------------------------|---|
| 1.1 | Vision/Mission            | 3 |
| 1.2 | Der Vorstand              | 4 |
| 1.3 | Bericht des Aufsichtsrats | 6 |

## 1.1 VISION/MISSION

WIR WOLLEN AUF DER BASIS UNSERER GRUNDWERTE:

- + Rohstoffe fördern und veredeln und mit unseren Produkten und Leistungen Ernährung, Gesundheit sowie Lebensqualität verbessern
- + in den Märkten führende Positionen einnehmen
- + für unsere Kunden der bevorzugte Partner sein
- + unsere Rohstoff- und Produktionsbasis stärken und weltweit ausbauen
- + durch die Entwicklung neuer Produkte und effizienterer Verfahren die Wertschöpfung weiter erhöhen
- + einen fairen Ausgleich von wirtschaftlichen, ökologischen und sozialen Belangen erreichen
- + für unsere Stakeholder nachhaltige Werte schaffen und Verantwortung in der Gesellschaft übernehmen
- + für Mitarbeiter aus aller Welt ein attraktiver Arbeitgeber sein



## 1.2 DER VORSTAND

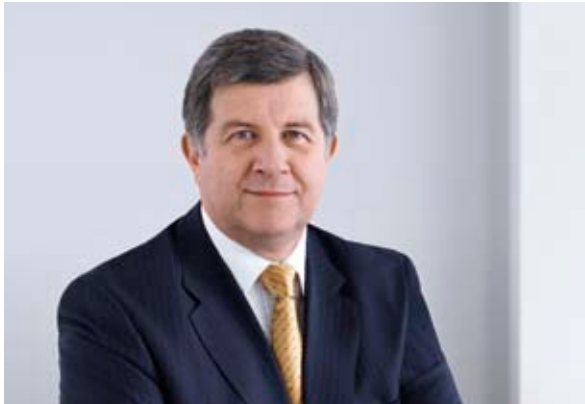

**NORBERT STEINER**  
JURIST, VORSTANDSVORSITZENDER

wurde 1954 in Siegen geboren. Nach dem Studium der Rechtswissenschaften in Heidelberg und seinem Referendariat im Bezirk des Oberlandesgerichts Karlsruhe nahm er 1983 seine Berufstätigkeit in der Steuerabteilung der BASF AG auf, deren Unterabteilung Zölle und Verbrauchssteuern er ab 1988 leitete. Im Jahr 1993 übernahm er die Leitung des Bereichs Recht, Steuern und Versicherungen der K+S AKTIENGESELLSCHAFT. Im Mai 2000 wurde Norbert Steiner Mitglied des Vorstands, im Januar 2006 stellvertretender Vorsitzender und am 1. Juli 2007 Vorstandsvorsitzender der K+S AKTIENGESELLSCHAFT. In seiner Verantwortung liegen der Geschäftsbereich Salz, die Bereiche Unternehmensentwicklung und Controlling, Recht/Compliance, Investor Relations, Kommunikation sowie Internationale HR-Koordination.

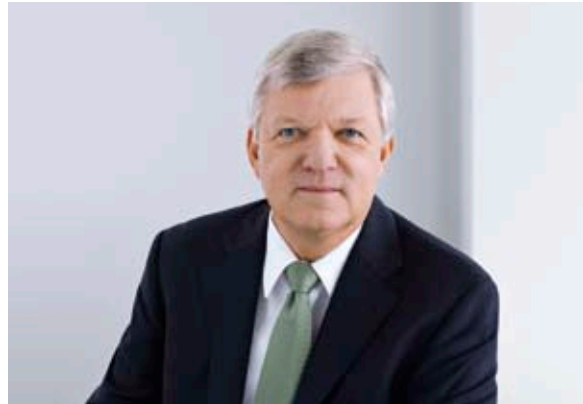

**JOACHIM FELKER**  
INDUSTRIEKAUFMANN

wurde 1952 in Bad Godesberg geboren. Nach seinem Abitur im Jahr 1974 absolvierte er eine Ausbildung zum Industriekaufmann bei der BASF AG und arbeitete dort als Wirtschaftsassistent. Von 1980 bis 1999 hatte er mehrere Management- und Marketingpositionen innerhalb des BASF-Konzerns inne, u. a. in Asien. Zuletzt war er als Abteilungsleiter des Bereichs Düngemittel tätig. Seit dem Jahr 2000 ist Joachim Felker in der K+S GRUPPE tätig, zunächst als Geschäftsführer der FERTIVA GMBH und ab 2003 als Mitglied der Geschäftsführung der K+S KALI GMBH. Im Oktober 2005 wurde er Mitglied des Vorstands der K+S AKTIENGESELLSCHAFT. Er ist zuständig für die Geschäftsbereiche Kali- und Magnesiumprodukte sowie Stickstoffdüngemittel.

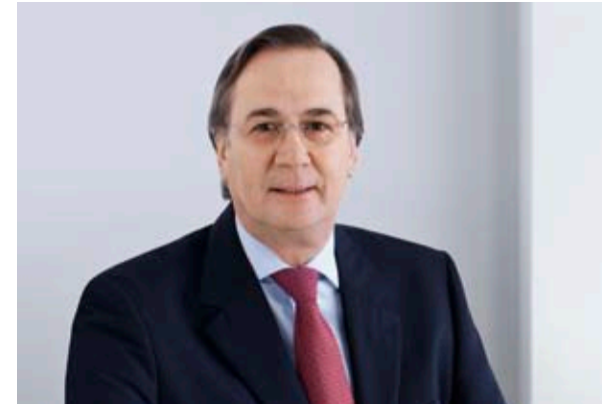

**GERD GRIMMIG**  
DIPLOM-INGENIEUR

wurde 1953 in Freden geboren. Nach seinem Bergbaustudium an der TU Clausthal war er in den Grubenbetrieben verschiedener Werke und im Bereich Bergbau der Hauptverwaltung der KALI UND SALZ AG (heute K+S AKTIENGESELLSCHAFT) tätig. Von 1990 bis 1996 hatte er verschiedene Werksleiterpositionen im Bereich Bergbau inne. Von Januar 1997 bis September 2001 war Gerd Grimmig Geschäftsführer der KALI UND SALZ GMBH und zuständig für das Ressort Bergbau. Seit Oktober 2000 ist er Mitglied des Vorstands der K+S AKTIENGESELLSCHAFT. In seiner Verantwortung liegen die Bereiche Bergbau, Geologie, Technik/Energie, Forschung und Entwicklung, Umwelt, Arbeitssicherheit, Qualitätsmanagement, Inaktive Werke, Entsorgung und Recycling, Tierhygieneprodukte, MSW CHEMIE und Consulting.

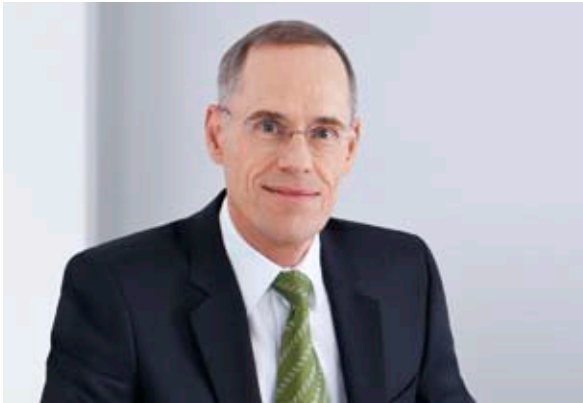

**DR. THOMAS NÖCKER**  
JURIST

wurde 1958 in Neukirchen-Vluyn geboren. Nach seinem Studium der Rechtswissenschaften und anschließender Promotion in Münster absolvierte er seine Referendarzeit u. a. in Düsseldorf und Montreal, Kanada. 1991 nahm er seine berufliche Tätigkeit bei der RAG AG auf, für die er in verschiedenen Funktionen tätig war. Im Anschluss daran wurde er 1998 zum Mitglied des Vorstands der RAG SAARBERG AG berufen und war dort für die Bereiche Personal, Recht sowie IT-Management/Organisation zuständig. Seit August 2003 ist Dr. Thomas Nöcker Mitglied des Vorstands der K+S AKTIENGESELLSCHAFT. Er ist Arbeitsdirektor und zuständig für Personal, IT-Services, Organisations- und Projektmanagement, Immobilienmanagement, Wissensmanagement, Gesundheitsmanagement, Logistik sowie Handelsgeschäfte (CFK).

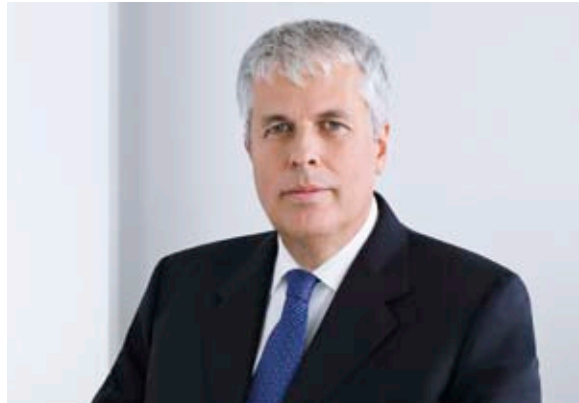

**JAN PETER NONNENKAMP**  
DIPLOM-ÖKONOM

wurde 1963 in Bremen geboren. Nach Beendigung seiner Ausbildung zum Bankkaufmann schloss er 1990 sein Studium der Wirtschaftswissenschaften an der Privaten Universität Witten/Herdecke ab. Anschließend war er in Unternehmen der Konsum- und Investitionsgüterindustrie, u. a. bei der FIELMANN AG sowie der LEOPOLD KOSTAL GMBH & CO. KG, in verschiedenen Finanzfunktionen tätig. Zuletzt verantwortete er seit 2004 als Vorstandsmitglied bei KNORR-BREMSE AG die Bereiche Finanzen, Bilanzierung und Steuern. Seit 1. Juni 2009 ist er als Mitglied des Vorstands der K+S AKTIENGESELLSCHAFT verantwortlich für die Bereiche Finanzen und Rechnungswesen, Einkauf, Material- und Lagerwirtschaft, Steuern, Revision und Versicherungen.

Weitere Informationen zu den Mitgliedern des Vorstands, ihren Zuständigkeiten und Mandaten finden Sie im Kapitel Corporate Governance auf den Seiten 26 f.

### 1.3 BERICHT DES AUFSICHTSRATS

*Der geehrte Aktionärinnen und Aktionäre,*

der folgende Bericht informiert gemäß § 171 Abs. 2 AktG über die Tätigkeit des Aufsichtsrats im Geschäftsjahr 2010 und das Ergebnis der Prüfung von Jahres- und Konzernabschluss 2010. Schwerpunkte unserer Sitzungen und Beratungen mit dem Vorstand waren die sich nach der Wirtschafts- und Finanzkrise wieder deutlich verbessernde Geschäftslage der K+S GRUPPE, die Erörterung der K+S Gruppenstrategie, die Erweiterung der Produktions- und Rohstoffbasis insbesondere durch den Erwerb der kanadischen Explorationsfirma POTASH ONE, der mögliche Verkauf der COMPO, die Salzabwasserentsorgung im hessisch-thüringischen Kalirevier sowie das neue Vorstandsvergütungssystem.

#### KONTINUIERLICHER DIALOG ZUM WOHL DER K+S GRUPPE

Der Aufsichtsrat hat auch im Geschäftsjahr 2010 die ihm nach Gesetz, Satzung und seiner Geschäftsordnung obliegenden Kontroll- und Beratungsaufgaben sorgfältig wahrgenommen. Eine Vielzahl an Sachthemen wurde eingehend diskutiert, und es wurden Beschlüsse über zustimmungspflichtige Geschäfte gefasst. Wir haben den Vorstand bei der Leitung des Unternehmens kontinuierlich beraten und dessen Geschäftsführung überwacht. Wir waren in alle Entscheidungen von grundlegender Bedeutung stets rechtzeitig und angemessen eingebunden. Der Vorstand unterrichtete uns regelmäßig, zeitnah und umfassend über den Geschäftsverlauf, die Ertrags- und Finanzlage, die Beschäftigungssituation sowie die Planungen und die strategische Weiterentwicklung des Unternehmens. Abweichungen von den Planungen wurden dem Aufsichtsrat ausführlich erläutert. Die Risikosituation sowie das Risikomanagement waren dabei stets in unserem Fokus.

Zur Vorbereitung der Sitzungstermine erhielt der Aufsichtsrat regelmäßig schriftliche Berichte vom Vorstand. Nach sorgfältiger Prüfung und Beratung hat der Aufsichtsrat zu den Berichten und Beschlussvorschlägen – soweit erforderlich – Beschlüsse gefasst. Der Aufsichtsratsvorsitzende stand auch außerhalb der Sitzungen mit dem Vorstand in engem Kontakt und besprach mit ihm wesentliche Vorgänge und anstehende Entscheidungen. Die Anteils-

eigner- und die Arbeitnehmervertreter haben wesentliche Themen der Tagesordnungen in jeweils gesonderten Treffen vor den Aufsichtsratssitzungen beraten.

Zu Geschäftsvorgängen, die für das Unternehmen von wesentlicher Bedeutung waren, wurde der Aufsichtsrat durch den Vorstand auch zwischen den turnusmäßigen Sitzungen unverzüglich und umfassend schriftlich informiert.

Die Präsenz in den Aufsichtsratssitzungen lag im Berichtszeitraum bei durchschnittlich 98 %; zwei Aufsichtsratsmitglieder haben an jeweils einer Sitzung nicht teilnehmen können, so dass auch im Jahr 2010 kein Aufsichtsratsmitglied an weniger als der Hälfte der Sitzungen teilgenommen hat. Die Ausschüsse tagten bis auf je eine Sitzung des Prüfungs- und des Personalausschusses, in der jeweils ein Aufsichtsratsmitglied verhindert war, in vollständiger Besetzung.

#### SITZUNGEN DES AUFSICHTSRATS

Im Geschäftsjahr 2010 fanden insgesamt sechs Aufsichtsratssitzungen statt, davon zwei außerordentliche. Der Aufsichtsrat hat zudem einen Beschluss im schriftlichen Verfahren gefasst.

In der Sitzung am 10. März 2010 haben wir den Jahresabschluss, den Konzernabschluss, die Lageberichte und den Gewinnverwendungsvorschlag des Vorstands für das Geschäftsjahr 2009 geprüft und die Abschlüsse auf Empfehlung des Prüfungsausschusses gebilligt. Wir haben uns im Rahmen der Prüfung besonders mit den Auswirkungen der erstmaligen Einbeziehung von MORTON SALT in den Konzernabschluss befasst. Die Geschäftslage und der Ausblick auf das laufende Jahr wurden eingehend erörtert. Auf Vorschlag des Personalausschusses wurde beschlossen, die bis jeweils 30. September 2010 befristeten Vorstandsmandate von Herrn Felker und Herrn Grimmig um zwei bzw. drei Jahre zu verlängern. Darüber hinaus hat der Aufsichtsrat auch im Hinblick auf die sich durch das Gesetz zur Angemessenheit der Vorstandsvergütung ergebenden Neuerungen auf Empfehlung des Personalausschusses beschlossen, das Vergütungssystem in Teilen zu modifizieren. Dies betrifft insbesondere das Anreizsystem für eine nachhaltige Unternehmensentwicklung (Long-term-Incentive) sowie die Pensionszusagen. Detaillierte Informationen über die Höhe der Vorstandsvergütungen in 2010 sowie die Struktur des Vergütungssystems, die sich seit der Billigung

durch die Hauptversammlung am 11. Mai 2010 nicht verändert hat, finden Sie auf den Seiten 31 ff. des Finanzberichts. Der Aufsichtsratsvorsitzende erläuterte außerdem die Empfehlung des Nominierungsausschusses, der Hauptversammlung die Wahl von Herrn Cardona, dessen gerichtliche Bestellung bis zum Ablauf der Hauptversammlung am 11. Mai 2010 befristet war, in den Aufsichtsrat vorzuschlagen. Weiter hat der Aufsichtsrat die Beschlussvorschläge für die Hauptversammlung 2010 verabschiedet. Der Vorschlag zur Wahl des Abschlussprüfers wurde hierbei auf eine entsprechende Empfehlung des Prüfungsausschusses gestützt. Anschließend berichtete der Vorstand über den Stand und die Perspektiven der Salzabwasserentsorgung im hessisch-thüringischen Kalirevier.

Am 11. Mai 2010 informierte der Vorstand über die Ergebnisse und Entwicklungen der Geschäftslage im ersten Quartal.

In einer für den 24. und 25. August 2010 angesetzten Sitzung befasste sich der Aufsichtsrat zu Beginn mit der Geschäftslage des ersten Halbjahres sowie mit dem Ausblick für das Gesamtjahr 2010. Dabei ging der Vorstand auch auf die aktuelle Marktsituation und insbesondere auf die Spekulationen über einen Zusammenschluss der russischen Kaliproduzenten sowie die angestrebte Übernahme von POTASHCORP durch BHP BILLITON ein. Danach gab der Vorstand einen Überblick über die weiteren Entwicklungen beim Thema Salzabwasserentsorgung. Im Anschluss erläuterte der Vorstand die neu entwickelte Zukunftsvision für die K+S GRUPPE. Dabei wurden die strategische Ausrichtungen der Geschäftsbereiche Kali- und Magnesiumprodukte, Stickstoffdüngemittel sowie Salz vom Vorstand ausführlich dargelegt. Eine mögliche Reaktivierung des Reservebergwerks Siegfried-Giesen sowie der Erwerb von POTASH ONE wurden hierbei ebenso behandelt wie die Frage einer möglichen Anschlussregelung für den im Jahr 2014 auslaufenden Stickstoffdüngemittelvertrag mit der BASF. Nach ausführlicher Erörterung haben sich Vorstand und Aufsichtsrat auf strategische Zielsetzungen für die K+S GRUPPE verständigt. Danach berichtete der Vorsitzende des Prüfungsausschusses über dessen vorangegangene Sitzung, in der u. a. das interne Kontrollsystem und das Compliance-Management der K+S GRUPPE behandelt wurden; nach Einschätzung des Ausschusses und des Plenums werden beide Themen vom Vorstand angemessen gehandhabt.

In außerordentlichen Sitzungen am 24. September und 7. Oktober 2010 hat sich der Aufsichtsrat im Wesentlichen mit dem Erwerb von POTASH ONE befasst. Der Vorstand informierte ausführlich über das Profil des Unternehmens, die damit verbundene strategische Stärkung der Rohstoffbasis für die K+S GRUPPE, die wesentlichen Feststellungen der Due-Diligence-Prüfung einschließlich der zu erwartenden Umweltgenehmigung des zuständigen Umweltministeriums in Saskatchewan, die Finanzierung sowie die technische Realisierung der neuen Kalikapazitäten. Bei der internen Wertfindung für POTASH ONE, die durch ein externes Gutachten einer namhaften Wirtschaftsprüfungsgesellschaft gestützt wurde, hat der Aufsichtsrat die Planansätze auch anhand von anspruchsvollen Stresstests kritisch hinterfragt. Der Vorstand führte aus, dass durch einen Erwerb von POTASH ONE die Kostenposition und damit die internationale Wettbewerbsfähigkeit des Geschäftsbereichs Kali- und Magnesiumprodukte spürbar gestärkt werden, sich die durchschnittliche Restlaufzeit der Kalilagerstätten erhöht und der Geschäftsbereich damit insgesamt robuster, auch gegen vorübergehende Turbulenzen am Kalimarkt, werden wird. Vor dem Hintergrund der zwischen Vorstand und Aufsichtsrat abgestimmten strategischen Zielsetzungen stimmte der Aufsichtsrat nach ausführlicher Diskussion der Abgabe eines bindenden Angebots zum Erwerb von 100 % der Aktien von POTASH ONE zu.

In der letzten Sitzung des Jahres, am 24. November 2010, hat der Aufsichtsrat auf Vorschlag des Personalausschusses beschlossen, das bis 31. Juli 2011 befristete Vorstandsmandat von Herrn Dr. Nöcker um weitere fünf Jahre zu verlängern und ihn für diesen Zeitraum erneut zum Arbeitsdirektor zu bestellen. Im Anschluss berichtete der Aufsichtsratsvorsitzende von seinem Besuch bei MORTON SALT und den auf den verschiedenen Standorten gewonnenen positiven Eindrücken. Danach erläuterte der Vorstand die aktuelle Geschäftslage und gab einen Ausblick über den voraussichtlichen Umsatz sowie das Ergebnis der K+S GRUPPE in 2010. Außerdem befasste sich der Aufsichtsrat mit der Planung 2011 sowie der mittelfristigen Vorausschau, einschließlich des Investitions- und Finanzierungsrahmens für die Folgejahre. Die Pläne wurden auf Übereinstimmung mit den strategischen Zielsetzungen sorgfältig überprüft und zustimmend zur Kenntnis genommen. Der Aufsichtsrat wurde ferner vom Vorstand auf Basis eines im Vorfeld der Sitzung an die Aufsichtsratsmitglieder versandten Berichts über den Stand der Salzabwasserentsorgung der Werke Werra und Neuhoft-Ellers unterrichtet. Insbesondere die vorsorgliche Erarbeitung von Antragsunterlagen für Fernpipelinevarianten zur Weser wie zur Nordsee wurde intensiv diskutiert und zustimmend

zur Kenntnis genommen. Anschließend berichtete der Vorsitzende des Prüfungsausschusses über die Ergebnisse der am Vormittag des gleichen Tages abgehaltenen Prüfungsausschusssitzung; hier standen die festgelegten Prüfungsschwerpunkte, die interne Revision sowie Regelungen zu Spenden und Sponsoring im Vordergrund. Danach berichtete der Vorstandsvorsitzende über die Eckpunkte der am 21./22. November 2010 mit POTASH ONE geschlossenen Vereinbarungen, die ersten positiven Reaktionen des Kapitalmarkts und der Regierung der Provinz Saskatchewan sowie das weitere Vorgehen. Schließlich erläuterte der Vorstand das Vorhaben, der kommenden Hauptversammlung vorzuschlagen, die Umstellung von Inhaber- auf Namensaktien vorzunehmen. Der Aufsichtsrat unterstützte dieses Vorhaben.

#### AUSSCHUSSSITZUNGEN

Zur Wahrnehmung und Unterstützung seiner Aufgaben hat der Aufsichtsrat neben dem gesetzlich vorgeschriebenen Vermittlungsausschuss drei weitere Ausschüsse eingerichtet: den Prüfungsausschuss, den Personalausschuss und den Nominierungsausschuss. Die Ausschüsse bereiten Beschlüsse des Aufsichtsrats sowie Themen vor, die im Plenum zu behandeln sind. Außer im Prüfungsausschuss führt der Aufsichtsratsvorsitzende den Vorsitz. Über die Inhalte und Ergebnisse der Ausschusssitzungen wird in der jeweils nachfolgenden Plenumsitzung berichtet. Eine Übersicht über die Ausschüsse und ihre personelle Besetzung finden Sie im Corporate-Governance-Kapitel des Finanzberichts 2010 auf der Seite 30 und auf der Internetseite der K+S AKTIENGESELLSCHAFT unter der Rubrik ‚Corporate Governance‘.

Der Prüfungsausschuss trat im Jahr 2010 dreimal zusammen. Der Ausschuss prüfte am 2. März 2010 im Beisein der Abschlussprüfer, des Vorstandsvorsitzenden und des Finanzvorstands den Jahresabschluss 2009 der K+S AKTIENGESELLSCHAFT, den Konzernabschluss 2009, die jeweiligen Lageberichte sowie den Gewinnverwendungsvorschlag; dabei wurden die bilanziellen Auswirkungen des Erwerbs von MORTON SALT, die Folgen des gegenüber dem Jahr 2008 stark rückläufigen Düngemittelgeschäfts auf die Ertrags- und Vermögenslage sowie die durchgeführten Kapitalmaßnahmen ausführlich besprochen. Außerdem wurde die Empfehlung an das Plenum für einen Vorschlag zur Wahl des Abschlussprüfers für das Geschäftsjahr 2010 an die Hauptversammlung beschlossen. In diesem Zusammenhang wurde die gemäß Ziffer 7.2.1 des Deutschen Corporate Governance Kodex vorgesehene Unabhängigkeitserklärung der DELOITTE & TOUCHE GMBH eingeholt. Am 25. August 2010 erörterte der Ausschuss Schwerpunkte für die Abschlussprüfung 2010. In der letzten Sitzung des Jahres, am 24. November

2010, informierte sich der Prüfungsausschuss über die Arbeit der internen Revision des laufenden Geschäftsjahres und besonders über die organisatorische Einbeziehung von MORTON SALT und SPL in das Revisionssystem. Der Ausschuss befasste sich ferner mit dem Wahlvorschlag für den Abschlussprüfer an die Hauptversammlung 2011. Schließlich wurden am 3. Mai, am 4. August sowie am 2. November zwischen den Mitgliedern des Prüfungsausschusses, dem Vorstandsvorsitzenden und dem Finanzvorstand per Telefonkonferenz die jeweils zur Veröffentlichung anstehenden Quartalsberichte erörtert.

Der Personalausschuss, der Personalentscheidungen des Aufsichtsrats vorbereitet und für sonstige Vorstandsangelegenheiten zuständig ist, trat im Jahr 2010 ebenfalls dreimal zusammen. Er beschäftigte sich mit den Zielerreichungen und Zielvereinbarungen, dem Vorstandsvergütungssystem, Mandatsabläufen, der langfristigen Nachfolgeplanung, dem Thema Diversity sowie mit den Pensionen und der Reisekostenregelung des Vorstands.

Die Mitglieder des Nominierungsausschusses haben sich zu zwei Beschlussvorschlägen telefonisch bzw. schriftlich abgestimmt.

Der nach den Vorschriften des Mitbestimmungsgesetzes zu bildende Vermittlungsausschuss wurde im abgelaufenen Geschäftsjahr nicht einberufen.

#### CORPORATE GOVERNANCE

Der Aufsichtsrat befasst sich regelmäßig mit der Anwendung und Weiterentwicklung der Corporate-Governance-Regelungen im Unternehmen. Ausführliche den Aufsichtsrat betreffende Informationen finden sich im Corporate-Governance-Kapitel des Finanzberichts 2010 auf den Seiten 23 ff.

Im abgelaufenen Jahr haben Aufsichtsrat und Vorstand die Neufassung des Deutschen Corporate Governance Kodex vom 26. Mai 2010 erörtert und in der Sitzung am 24. November 2010 die gemeinsame Entschensklärung 2010/2011 verabschiedet, die mit nur einer Ausnahme sämtlichen Empfehlungen der jeweiligen Fassung des Kodex entspricht; auch die Anregungen des Kodex werden mit nur zwei Ausnahmen befolgt. Sie finden die Entschensklärung auf der Internetseite der K+S AKTIENGESELLSCHAFT unter der Rubrik ‚Corporate Governance‘ und auf Seite 21 des Finanzberichts 2010. In derselben Sitzung erläuterte

der Vorsitzende des Aufsichtsrats den Beschlussvorschlag des Nominierungsausschusses zur Zielsetzung für die Besetzung des Aufsichtsrats gemäß Ziffer 5.4.1 des Deutschen Corporate Governance Kodex, der vom Plenum nach eingehender Diskussion verabschiedet wurde. Die Zielsetzung finden Sie auf der Internetseite der K+S AKTIENGESELLSCHAFT unter der Rubrik ‚Corporate Governance‘ und auf Seite 24 des Finanzberichts. Der Aufsichtsrat erörterte außerdem das Ergebnis der Auswertung des von den Mitgliedern beantworteten Fragebogens zur jährlichen Effizienzprüfung; die Ergebnisse lieferten einzelne wertvolle Anregungen für die künftige Arbeit im Aufsichtsrat wie auch in den Ausschüssen.

Interessenkonflikte von Vorstands- oder Aufsichtsratsmitgliedern, über die die Hauptversammlung zu informieren wäre, sind dem Aufsichtsrat gegenüber im Berichtszeitraum nicht offengelegt worden. Zur Vermeidung potenzieller Interessenkonflikte haben Herr Cardona und Herr Dr. Sünner in jeweils zwei Plenumsitzungen an Beratungen zu Themen, bei denen auch Interessen der OAO EUROCHEM bzw. der BASF SE berührt werden könnten, nicht teilgenommen. Herr Vassiliadis hat erklärt, er werde für den Fall, dass korrespondierende Themen im Aufsichtsrat der BASF SE behandelt werden sollten, nicht an dessen Beratungen teilnehmen. Beschlüsse wurden zu diesen Themen nicht gefasst.

#### PRÜFUNG DES JAHRES- UND KONZERNABSCHLUSSES 2010

Die DELOITTE & TOUCHE GMBH, Hannover, hat den vom Vorstand nach den Regeln des HGB aufgestellten Jahresabschluss und den Lagebericht der K+S AKTIENGESELLSCHAFT sowie den auf der Grundlage der internationalen Rechnungslegungsstandards IFRS aufgestellten Konzernabschluss und den Konzernlagebericht für das Geschäftsjahr 2010 geprüft und jeweils mit dem uneingeschränkten Bestätigungsvermerk versehen. Die genannten Unterlagen, der Vorschlag des Vorstands über die Verwendung des Bilanzgewinns sowie die Prüfungsberichte der DELOITTE & TOUCHE GMBH, die den Mitgliedern des Prüfungsausschusses und des Aufsichtsrats jeweils rechtzeitig übermittelt worden waren, wurden in der Prüfungsausschusssitzung am 1. März 2011 sowie in der Aufsichtsratsitzung am 9. März 2011, in der der Vorsitzende des Prüfungsausschusses sowie die Abschlussprüfer der DELOITTE & TOUCHE GMBH ausführlich über das Ergebnis ihrer Prüfungen berichteten, umfassend behandelt. Weder DELOITTE & TOUCHE noch der Prüfungsausschuss haben Schwächen des auf den Rechnungslegungsprozess bezogenen Kontroll- und Risikomanagementsystems festgestellt. In der Sitzung wurden alle Fragen vom Vorstand und den Abschlussprüfern erschöpfend beantwortet.

Der Aufsichtsrat hatte nach eigener Prüfung und Diskussion des Jahresabschlusses, des Konzernabschlusses, des Lageberichts und des Konzernlageberichts keinen Anlass, Einwendungen zu erheben. Er stimmte in seiner Einschätzung der Lage der K+S AKTIENGESELLSCHAFT sowie des Konzerns mit dem Vorstand überein und folgte dem Vorschlag des Prüfungsausschusses auch insoweit, als er die Abschlüsse für das Geschäftsjahr 2010 billigte; der Jahresabschluss 2010 der K+S AKTIENGESELLSCHAFT wurde damit festgestellt. Die vom Vorstand vorgeschlagene Gewinnverwendung wurde ebenfalls im Hinblick auf die derzeitige und künftig zu erwartende finanzielle Situation der K+S GRUPPE hin überprüft. Nach ausführlicher Diskussion schloss sich der Aufsichtsrat dem Vorschlag des Vorstands an.

Der Aufsichtsrat spricht den Mitgliedern des Vorstands, allen Mitarbeiterinnen und Mitarbeitern sowie den Arbeitnehmervertretungen seinen Dank für ihr hohes Engagement und die sehr erfolgreiche Arbeit im vergangenen Geschäftsjahr aus.

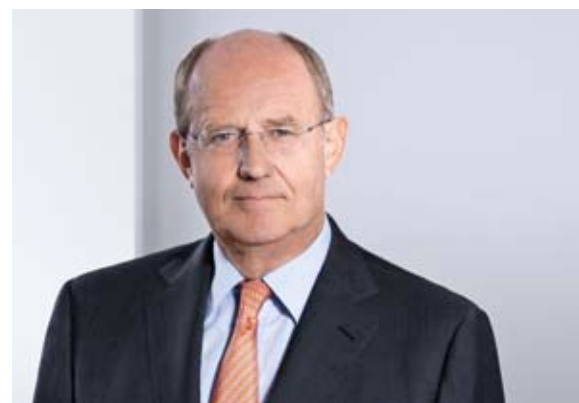

KASSEL, 9. MÄRZ 2011

*Ralf Bethke*

DR. RALF BETHKE  
VORSITZENDER DES AUFSICHTSRATS

## K+S AM KAPITALMARKT

K+S-AKTIE LEGTE IM JAHR 2010 UM 40,9% ZU (INKL. DIVIDENDE +41,4%)

/ Aus 5.000 € Anlage in K+S-Aktien wurden in fünf Jahren 26.157 €; +39,2% p.a. / Dividenden-  
vorschlag mit 1,00 €/Aktie entsprechend dem höheren Ergebnis deutlich über Vorjahr  
(0,20 €/Aktie) / Anleihe notierte zum Jahresende 2010 bei 107,476 % (+2,170 Prozentpunkte  
auf Jahressicht, stichtagsbezogene Rendite: 2,868 %) / Analystencoverage nochmals leicht  
ausgebaut

# 2

---

|     |                    |    |
|-----|--------------------|----|
| 2.1 | Die Aktie          | 12 |
| 2.2 | Anleihe und Rating | 17 |
| 2.3 | Investor Relations | 17 |



## KAPITALMARKTKENNZAHLEN

TAB: 2.0.1

|                                                 |         | 2010   | 2009   | 2008   | 2007   | 2006              |
|-------------------------------------------------|---------|--------|--------|--------|--------|-------------------|
| Ergebnis je Aktie, bereinigt <sup>1</sup>       | €/Aktie | 2,33   | 0,56   | 5,94   | 1,06   | 1,07 <sup>2</sup> |
| Brutto-Cashflow je Aktie                        | €/Aktie | 4,34   | 1,95   | 7,14   | 2,25   | 2,08              |
| Buchwert je Aktie                               | €/Aktie | 13,85  | 10,94  | 10,41  | 5,65   | 6,81              |
| Jahresschlusskurs (XETRA) <sup>3</sup>          | €       | 56,36  | 39,99  | 39,97  | 40,69  | 20,55             |
| Jahreshöchstkurs (XETRA) <sup>3</sup>           | €       | 56,65  | 53,04  | 95,90  | 40,69  | 20,55             |
| Jahrestiefstkurs (XETRA) <sup>3</sup>           | €       | 35,94  | 29,85  | 27,72  | 18,50  | 13,05             |
| Marktkapitalisierung zum Jahresende             | Mrd. €  | 10,8   | 7,7    | 6,6    | 6,7    | 3,4               |
| Gesamtbörsenumsatz                              | Mrd. €  | 16,8   | 16,9   | 33,4   | 10,2   | 4,3               |
| Durchschnittlicher Tagesumsatz                  | Mio. €  | 65,7   | 66,4   | 131,6  | 40,6   | 16,9              |
| DAX Indexgewichtung per 31.12.; 2006–2007: MDAX | %       | 1,3    | 1,1    | 1,2    | 5,9    | 3,2               |
| Gesamtanzahl Aktien per 31.12.                  | Mio.    | 191,40 | 191,40 | 165,00 | 165,00 | 165,00            |
| Ausstehende Aktien per 31.12. <sup>4</sup>      | Mio.    | 191,40 | 191,40 | 165,00 | 165,00 | 165,00            |
| Durchschnittliche Anzahl Aktien <sup>5</sup>    | Mio.    | 191,34 | 166,15 | 164,95 | 164,94 | 164,96            |
| Dividende je Aktie <sup>6</sup>                 | €/Aktie | 1,00   | 0,20   | 2,40   | 0,50   | 0,50              |
| Ausschüttungssumme <sup>6</sup>                 | Mio. €  | 191,4  | 38,3   | 396,0  | 82,5   | 82,5              |
| Ausschüttungsquote <sup>6,7</sup>               | %       | 43,0   | 40,9   | 40,4   | 47,1   | 46,8              |
| Dividendenrendite (Schlusskurs) <sup>6</sup>    | %       | 1,8    | 0,5    | 6,0    | 1,2    | 2,4               |
| Eigenkapitalrendite nach Steuern                | %       | 18,7   | 8,4    | 68,6   | 16,1   | 17,7 <sup>2</sup> |
| Return on Capital Employed (ROCE)               | %       | 20,9   | 9,3    | 64,0   | 15,5   | 17,4              |
| Enterprise Value (EV) per 31.12.                | Mrd. €  | 11,5   | 9,0    | 7,2    | 7,8    | 4,1               |
| Enterprise Value zu Umsatz (EV/Umsatz)          | x-fach  | 2,3    | 2,5    | 1,5    | 2,3    | 1,4               |
| Enterprise Value zu EBITDA (EV/EBITDA)          | x-fach  | 11,8   | 21,8   | 4,8    | 18,8   | 10,2              |
| Enterprise Value zu EBIT (EV/EBIT)              | x-fach  | 15,8   | 37,8   | 5,3    | 27,3   | 14,8              |

## K+S-AKTIE

Aktienart: nennwertlose Stückaktien  
 Gesamtzahl Aktien: 191.400.000 Stück  
 WKN/ISIN: 761 200/DE0007162000  
 Marktsegment: Prime Standard  
 Prime Branche: Chemie  
 Industriegruppe: Chemicals, Commodities  
 Notierung: alle Börsenplätze in Deutschland  
 Ticker-Symbol Bloomberg:  
 SDF GR bzw. SDF GY  
 Ticker-Symbol Reuters: SDFG  
 ADR CUSIP: 48265W108

## K+S-ANLEIHE

WKN/ISIN: A1A 6FV/DE000A1A6FV5  
 Börsenzulassung/-notierung:  
 Börse Luxemburg  
 Emissionsvolumen: 750 Mio. EUR  
 Stückelung: 1.000 EUR  
 Ausgabekurs: 99,598 %  
 Zinskupon: 5,000 %  
 Fälligkeit: 24.09.2014  
 Anleiherating: S&P: BBB; Moody's: Baa2

## UNTERNEHMENS RATING

S&P: BBB (Ausblick: positiv)  
 Moody's: Baa2 (Ausblick: stabil)

<sup>1</sup> Die bereinigten Kennzahlen beinhalten unverändert lediglich das realisierte Ergebnis aus operativen, antizipativen Sicherungsgeschäften der jeweiligen Berichtsperiode. Die Marktwertveränderungen der noch ausstehenden operativen, antizipativen Sicherungsgeschäfte werden hingegen in den bereinigten Ergebnissen nicht berücksichtigt. Ebenso werden darauf entfallende Effekte auf latente und zahlungswirksame Steuern eliminiert; Steuersatz 2010: 28,2 % (2009: 27,9 %).

<sup>2</sup> Ohne einmaligen latenten Steuerertrag von 41,9 Mio. € bzw. 0,25 € je Aktie.

<sup>3</sup> Der Kurs der K+S-Aktie handelt seit der Kapitalerhöhung im Dezember 2009 ex Bezugsrecht. Historische Werte wurden nicht angepasst.

<sup>4</sup> Gesamtanzahl Aktien abzgl. des Bestands der von K+S am Stichtag gehaltenen eigenen Aktien.

<sup>5</sup> Gesamtanzahl Aktien abzgl. des durchschnittlichen Bestands der von K+S gehaltenen eigenen Aktien.

<sup>6</sup> Im Jahr 2010 entspricht die Angabe dem Dividendenvorschlag; Dividendenrendite bezogen auf den Jahresschlusskurs.

<sup>7</sup> Bezogen auf das bereinigte Ergebnis nach Steuern.

## 2.1 DIE AKTIE

### ERHOLUNG AN DEN BÖRSEN

Im Börsenjahr 2010 setzte sich an den internationalen Aktienmärkten die in 2009 – nach den deutlichen Verlusten des Vorjahres – begonnene Erholung fort, dies jedoch mit einer geringeren Dynamik. So stieg der bedeutende US-amerikanische Aktienindex S&P 500 im Jahr 2010 um 12,8 % nach 23,5 % in 2009. Der deutsche Leitindex DAX konnte aufgrund einer starken konjunkturellen Entwicklung ein Plus von 16,1 % verzeichnen (2009: 23,8 %). Die Stimmung an den Aktienmärkten wurde allerdings zeitweise durch Verschuldungskrisen, insbesondere ausgelöst durch die Entwicklung in Griechenland und Irland, sowie eine stärkere Regulierung des Finanzsektors belastet. Die Aktienmärkte der Schwellenländer konnten sich aufgrund des dort stärkeren und dynamischeren Wirtschaftswachstums sowie größtenteils solider Haushaltslagen besser entwickeln als die der Industrieländer.

Auch die Notierungen für Rohstoffe legten im Jahr 2010 deutlich zu; insbesondere Palmöl und Mais waren durch eine starke Nachfrage begünstigt. Der Goldpreis notierte zu Jahresende bei 1.423,60 USD je Feinunze (ein Plus von 19,5 %). Der Ölpreis profitierte ebenfalls von der Erholung der Weltwirtschaft; er verteuerte sich um 21,6 % auf 94,75 USD je Barrel am Jahresende.

### K+S-AKTIE ENTWICKELT SICH BESSER ALS DAX, DJ STOXX 600 UND MSCI WORLD STANDARD

Der für K+S als Vergleichsmaßstab wichtige deutsche Aktienindex DAX schloss am 31. Dezember 2010 bei 6.914 Punkten und erzielte damit auf Jahressicht einen Gewinn von 16,1 % (Vorjahr: +23,8 %). Der europäische Aktienindex DJ STOXX 600 stieg um 8,6 % auf 276 Punkte, der globale Index MSCI WORLD STANDARD um 9,6 % auf 1.280 Punkte. Mit einem Plus von 40,9 % entwickelte sich die K+S-Aktie damit auf Jahressicht deutlich besser als diese Vergleichsindizes. Ein ähnliches Bild zeigt sich ebenfalls bei einer längeren Zeitbetrachtung: So hat sich der Wert der K+S-Aktie in den letzten fünf Jahren mehr

als vervierfacht, während DAX und MSCI WORLD STANDARD nur 27,8 bzw. 1,8 % zulegen konnten und der DJ STOXX 600 sogar 11,0 % verlor. Noch deutlicher zeigt sich dieser Effekt im Vergleich der vergangenen zehn Jahre.

/ TAB: 2.1.1

### K+S-AKTIENPERFORMANCE BETRÄGT AUF JAHRESSICHT 40,9 % (INKL. DIVIDENDE +41,4 %)

Der Schlusskurs des Jahres 2010 lag mit 56,36 € deutlich über dem Kurs von 39,99 € am Ende des Vorjahres. Die Kursentwicklung verlief zunächst sehr positiv, wurde aber in den Sommermonaten durch ein allgemein schwaches Umfeld auf den Aktienmärkten sowie die bis Mitte des Jahres noch rückläufige Preisentwicklung von Agrarrohstoffen vorübergehend leicht gedämpft; ab August setzte dann eine starke Erholung der K+S-Aktie ein. / ABB: 2.1.1, 2.1.2

Folgende wichtige Ereignisse beeinflussten den Kursverlauf im Jahr 2010:

+ Zu Beginn des Jahres notierte die K+S-Aktie bei rund 40 €. Unterstützt durch positive Analystenkommentare zu den Perspektiven des Düngemittelgeschäfts im Jahr 2010 stieg die Aktie bis Anfang März auch aufgrund eines günstigen Marktumfelds sowie der kalten Witterung in Europa auf 47 €. Nach der Veröffentlichung der Zahlen zum Geschäftsjahr 2009 am 11. März, die im Rahmen der Erwartungen lagen, bewegte sich der K+S-Aktienkurs bis Ende April zunächst seitwärts.

+ Die am 11. Mai veröffentlichten Zahlen konnten die Erwartungen der Analysten zwar übertreffen; der

| PERFORMANCE                 |                | TAB: 2.1.1           |                       |  |
|-----------------------------|----------------|----------------------|-----------------------|--|
|                             | 1 Jahr<br>2010 | 5 Jahre<br>2006–2010 | 10 Jahre<br>2001–2010 |  |
| in %                        |                |                      |                       |  |
| K+S-Aktie (ohne Dividende)  | +40,9          | +366,1               | +1.221,8              |  |
| K+S-Aktie (zzgl. Dividende) | +41,4          | +396,4               | +1.338,1              |  |
| DAX (Performance-Index)     | +16,1          | +27,8                | +7,5                  |  |
| DJ STOXX 600                | +8,6           | -11,0                | -23,3                 |  |
| MSCI World Standard         | +9,6           | +1,8                 | +4,8                  |  |

vorsichtige Ausblick der K+S GRUPPE bewegte jedoch einige Analysten dazu, ihre Schätzungen zu reduzieren. Die Aktie schloss in einem insgesamt schwachen Aktienmarktumfeld am 25. Mai auf ihrem Jahrestief bei 35,94 €.

- + Anfang Juni wirkten sich die von K+S angekündigte Erhöhung des Preises für granuliertes Kaliumchlorid um 8 auf 305 € je Tonne sowie die Mitteilung, den Verkauf von COMPO innerhalb eines Jahres zu prüfen, positiv auf den K+S-Aktienkurs aus, der bis auf 41 € stieg. Anfang August befand sich die K+S-Aktie in einem starken Aufwärtstrend und profitierte vor allem von steigenden Preisen für Agrarprodukte.
- + Im Rahmen der Veröffentlichung der Zahlen zum zweiten Quartal am 12. August hob K+S die Absatzprognose für Kali- und Magnesiumprodukte erneut an und gab wieder einen quantitativen Umsatz- und Ergebnisausblick. Die Annahme eines im Vergleich zum ersten Halbjahr leicht niedrigeren Durchschnittspreises für das Kali- und Magnesium-Produktportfolio für die zweite Jahreshälfte führte zur Anpassung einiger Analystenschätzungen und einem leichten Dämpfer auf den K+S-Aktienkurs.
- + Das am 17. August veröffentlichte Übernahmeangebot des britisch-australischen Bergbaukonzerns BHP BILLITON für den kanadischen Kaliproduzenten POTASHCORP lenkte die Aufmerksamkeit der Marktteilnehmer auf die nachhaltige Attraktivität des Kalimarktes und nährte Spekulationen über mögliche weitere Übernahmen in der Düngemittelbranche.
- + Die K+S-Aktie profitierte in den folgenden Wochen darüber hinaus von einer generell positiven Stim-

#### WERTENTWICKLUNG DER K+S-AKTIE IM VERGLEICH ZU DAX, DJ STOXX 600 UND MSCI WORLD ABB: 2.1.1

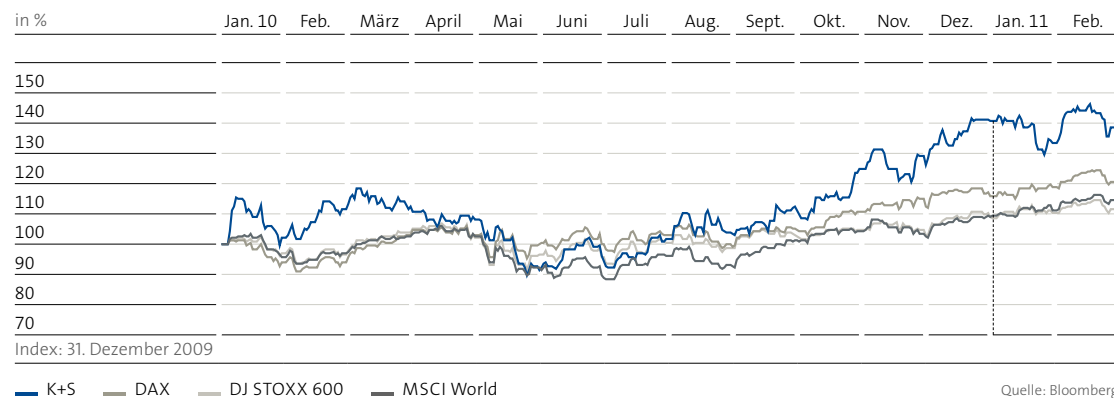

#### MONATLICHE HÖCHST-, TIEFST- UND DURCHSCHNITTSKURSE DER K+S-AKTIE ABB: 2.1.2

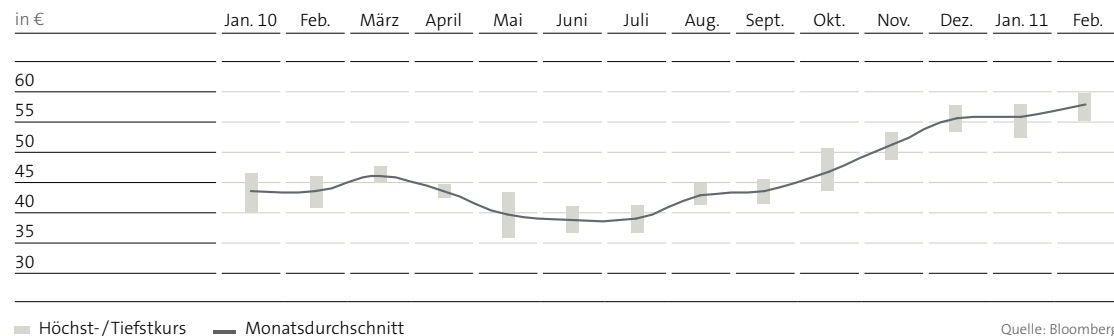

mung am Aktienmarkt sowie den anhaltend steigenden Agrarpreisen. Damit einhergehend kündigten POTASHCORP Preiserhöhungen für granuliertes

Kaliumchlorid für den amerikanischen Markt und BPC für Asien und Brasilien an.

- + Die im Rahmen einer Ad-hoc-Mitteilung vorab am 2. November veröffentlichten Ergebnisse zum dritten Quartal, welche die Konsenserwartungen zum Teil deutlich übertrafen, sowie die gleichzeitige Anhebung der Ergebnisprognose führten zu einem weiteren Anstieg der κ+s-Aktie.
- + Diese Entwicklung wurde Ende November durch die von κ+s beabsichtigte freundliche Übernahme des

kanadischen Kali-Explorations- und Entwicklungsunternehmen POTASH ONE zusätzlich unterstützt, welche im Rahmen der Wachstumsstrategie mittelfristig zu einem Ausbau der Kalikapazitäten der κ+s GRUPPE sowie der Verlängerung der durchschnittlichen Lebensdauer der Bergwerke führen wird.

- + Zum Jahresende erhielt die Aktie schließlich weiteren Rückenwind durch die von κ+s angekündigte Erhöhung des Preises für granuliertes Kaliumchlorid um weitere 18 €/t auf 335 €/t in Europa sowie den frühen Wintereinbruch in Europa und schloss am 31. Dezember bei 56,36 € mit einem Plus von 40,9% im Vergleich zum Jahresende 2009 (39,99 €). Berücksichtigt man die im Mai 2010 gezahlte Dividende, so betrug der Wertzuwachs insgesamt 41,4%.

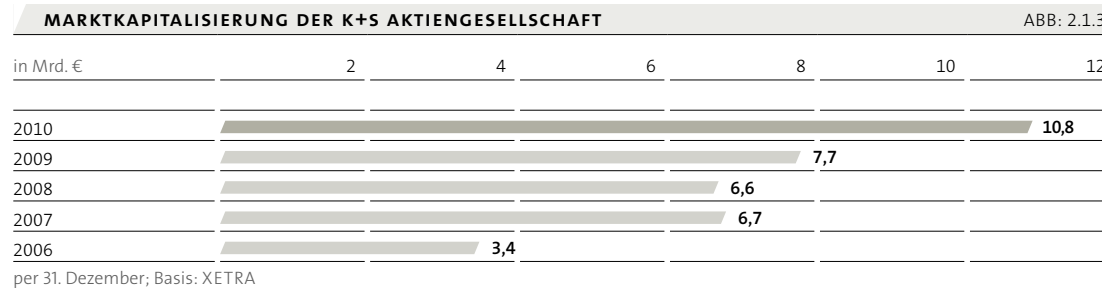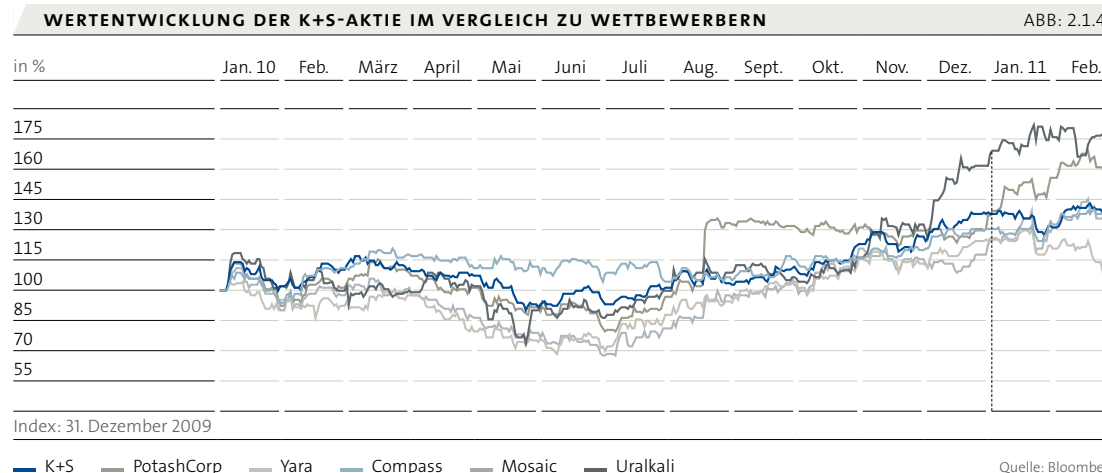

**K+S-AKTIENKURS TENDIERT ZU BEGINN DES JAHRES 2011 SEITWÄRTS**

Das Jahr 2011 begann für die κ+s-Aktie mit einer Seitwärtsbewegung. Die κ+s-Aktie notierte am 28. Februar 2011 mit rund 56 € in etwa auf dem Niveau zum Jahresende 2010. Der DAX stieg in diesem Zeitraum um rund 5%.

**WERTENTWICKLUNG DER K+S-AKTIE SEIT JAHRESBEGINN IM VERGLEICH ZU WETTBEWERBERN**

Wir verfolgen kontinuierlich die relative Aktienkursentwicklung im Vergleich zu unseren börsennotierten Wettbewerbern, der so genannten Peer Group. Hierzu gehören neben anderen die nordamerikanischen Düngemittelproduzenten POTASHCORP und MOSAIC, der russische Kaliproduzent URALKALI, der Düngemittelanbieter

YARA aus Norwegen sowie der Salzhersteller COMPASS aus den USA. / ABB: 2.1.4

Die bereits im ersten Quartal aufgrund eines sich verbessernden Marktumfelds einsetzende positive Kursentwicklung der Aktien von internationalen Düngemittelproduzenten wurde im zweiten Quartal durch die rückläufigen Preise von Agrarrohstoffen kurzfristig gedämpft. Im dritten und vierten Quartal wurde die Kursentwicklung jedoch von Übernahmespekulationen in der Düngemittelbranche sowie stark anziehenden Getreidepreisen begünstigt. Die K+S-Aktie konnte sich im Jahr 2010 sehr gut behaupten und schloss zum 31. Dezember 2010 mit einem Plus von 40,9%. Neben der leicht stärkeren Performance der Aktie unseres Wettbewerbers POTASHCORP (+42,7%), die zwischenzeitlich infolge des am 17. August 2010 veröffentlichten feindlichen Übernahmeangebots durch BHP BILLITON deutlich gestiegen war, entwickelte sich vor dem Hintergrund der Konsolidierung der russischen Kaliproduzenten lediglich die Aktie unseres Wettbewerbers URALKALI mit einem Plus von 74,9% besser.

#### GELDANLAGE IN K+S-AKTIE IN DEN LETZTEN FÜNF JAHREN UM 39,2% PRO JAHR GEWACHSEN

Eine Anlage in K+S-Aktien hat sich in den vergangenen fünf Jahren außerordentlich gut rentiert. Der Aktionär, der am 31. Dezember 2005 für 5.000 € K+S-Aktien erwarb und die in den nächsten fünf Jahren gezahlten Dividenden und zugeteilten Bezugsrechte in K+S-Aktien reinvestierte, verfügte am 31. Dezember 2010 über einen Depotwert von 26.157 €. In diesen fünf Jahren wuchs der Wert des Depots somit um durchschnittlich 39,2% pro

Jahr. Zum Vergleich: Der DAX erzielte im gleichen Zeitraum lediglich eine jährliche Rendite von +5,0%.

/ ABB: 2.1.5

#### AKTIONÄRSSTRUKTUR MIT HOHEM STREUBESITZ

Im Jahr 2010 kam es innerhalb unserer Aktionärsstruktur zu einigen Umschichtungen. Am 17. Mai 2010 teilte uns die BANK OF N.T. BUTTERFIELD AND SON LIMITED, Bermuda, über die MCC HOLDING PUBLIC COMPANY

LIMITED gemäß §21 WpHG mit, dass sie die Schwelle von 15,0% unterschritten und per 14. Mai 14,989% der Aktien gehalten habe. Die MERITUS TRUST COMPANY LIMITED, Bermuda, meldete uns am 22. September, dass sie die vorher der BANK OF N.T. BUTTERFIELD AND SON LIMITED, Bermuda, zuzurechnenden und über die EUROCHEM GROUP SE (früherer Name: MCC HOLDING PUBLIC COMPANY LIMITED) gehaltenen Stimmrechte übernommen, damit die Schwelle von 10% überschritten

#### WERTENTWICKLUNG K+S-DEPOT<sup>1</sup>

ABB: 2.1.5

| in € | 10.000 | 20.000 | 30.000 |
|------|--------|--------|--------|
| 2010 | 26.157 |        |        |
| 2009 | 18.475 |        |        |
| 2008 | 16.541 |        |        |
| 2007 | 16.630 |        |        |
| 2006 | 8.230  |        |        |
| 2005 | 5.000  |        |        |

Depotwert per 31. Dezember

<sup>1</sup> Inkl. Wiederanlage der Dividenden am Tag nach der HV und unter der Annahme der Durchführung einer aufwandsneutralen Ausübung erhaltener Bezugsrechte im Rahmen der Kapitalerhöhung 2009; zzgl. Bargeldrestbestand.

#### AKTIONÄRSSTRUKTUR PER 28.02.2011

ABB: 2.1.6

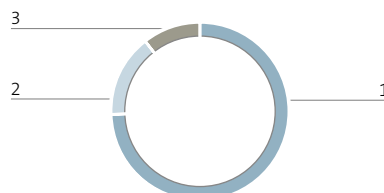

| in %                            | 2010 | 2009 |
|---------------------------------|------|------|
| 1 Freefloat                     | 74,8 | 74,7 |
| 2 Meritus Trust Company Limited | 14,9 | 15,0 |
| 3 BASF SE                       | 10,3 | 10,3 |

habe und zu diesem Zeitpunkt 14,86 % der Aktien halte. MERITUS hält treuhänderisch Industriebeteiligungen von Andrey Melnichenko. Die BASF SE besitzt weiterhin rund 10 % unserer Aktien. Nachdem BLACKROCK INC. uns am 2. September zunächst mitgeteilt hatte, dass sie die Schwelle von 3 % unterschritten habe, veröffentlichte das Unternehmen am 13. September wieder eine Überschreitung dieser Schwelle und einen Anteilsbesitz von 3,63 %. Am 26. November wurden wir von AXA S.A. darüber informiert, dass sie 3,06 % der K+S-Aktien halte. / ABB: 2.1.6

Nach der Streubesitzdefinition der DEUTSCHEN BÖRSE AG beträgt der Freefloat unverändert knapp 75 %. Eine im Oktober 2010 von einem externen Dienstleister durchgeführte Aktionärsidentifikation ergab darüber hinaus, dass jenseits des Festbesitzes knapp 19 % der ausstehenden Aktien auf inländische institutionelle Investoren entfallen und gut 35 % auf ausländische Institutionen. Weiterhin gehen wir davon aus, dass rund 20 % der Aktien, die im Rahmen der Aktionärsidentifikation nicht eindeutig zugeordnet werden konnten, von überwiegend inländischen Privatanlegern gehalten werden; davon entfällt schätzungsweise rund 1 % der Aktien auf K+S-Mitarbeiter.

Geografisch betrachtet werden rund 50 % unserer Aktien in Deutschland gehalten, wenn man die deutschen institutionellen Investoren, die BASF SE und unsere Mitarbeiter berücksichtigt und erneut unterstellt, dass es sich bei Privataktionären ausschließlich um Inländer handelt. Weltweit lassen sich die Investoren wie folgt

aufteilen: Russland (15 %), USA und Kanada (11 %) sowie Großbritannien und Irland (9 %). In Frankreich und Benelux befinden sich 6 %, die übrigen 9 % verteilen sich auf den Rest der Welt.

#### AMERICAN DEPOSITARY RECEIPTS ZUM HANDEL IN DEN VEREINIGTEN STAATEN

In Nordamerika bieten wir unseren Aktionären ein AMERICAN DEPOSITARY RECEIPTS (ADR)-Programm an, um den dortigen Investoren den Handel mit K+S-Wertpapieren zu ermöglichen und so die internationale Aktionärsbasis auszubauen. Da die ADRs in US-Dollar notiert sind und auch die Dividenden in US-Dollar gezahlt werden, ähnelt die Ausgestaltung im Wesentlichen amerikanischen Aktien. Zwei ADRs liegt jeweils eine K+S-Aktie zugrunde. Die ADRs werden in Form eines „Level 1“ ADR-Programms außerbörslich am OTC (over the counter)-Markt gehandelt. Die K+S-ADRS sind bei OTCQX gelistet, einer Handelsplattform, die Emittenten eine effiziente Möglichkeit bietet, die Liquidität ihrer ADRs zu erhöhen.

/ WEITERE INFORMATIONEN ZUM ADR-PROGRAMM finden Sie auf unserer Homepage unter [www.k-plus-s.com](http://www.k-plus-s.com) im Bereich Investor Relations/Aktie/ADR-Programm sowie auf der Internetseite der Handelsplattform OTCQX [www.otcqx.com](http://www.otcqx.com)

#### NOTIERUNG IN BÖRSENINDIZES

Laut Börsenrangliste von Februar 2011 nehmen wir im DAX bei der Marktkapitalisierung derzeit Position 22 (Vorjahr: 21) und bei den Börsenumsätzen Position 19 (Vorjahr: 16) ein. Darüber hinaus ist die K+S-Aktie in den folgenden Indizes notiert:

- + DAX
- + DJ STOXX 600
- + DJ EURO STOXX
- + HDAX
- + CDAX GESAMTINDEX
- + PRIME SECTOR CHEMICALS
- + INDUSTRY GROUP CHEMICALS/COMMODITY
- + MSCI WORLD STANDARD
- + MSCI EUROPE STANDARD
- + MSCI GERMANY STANDARD
- + ECPI ETHICAL INDEX GLOBAL

#### DIVIDENDENVORSCHLAG MIT 1,00 € DEUTLICH HÖHER ALS IM VORJAHR

Wir verfolgen eine grundsätzlich ertragsorientierte Dividendenpolitik. Mit dieser Maßgabe bildet eine Ausschüttungsquote von 40 bis 50 % des bereinigten Konzernergebnisses die Grundlage für die von Vorstand und Aufsichtsrat zu bestimmende Höhe der künftigen Dividendenvorschläge. Der Vorstand wird der Hauptversammlung daher vorschlagen, die Dividende für das abgelaufene Geschäftsjahr entsprechend dem deutlich gestiegenen Ergebnis anzuheben und 1,00 € je Aktie auszuschütten. / ABB: 2.1.7

Dies entspricht einer Ausschüttungsquote von etwa 43 %. Bei 191,4 Mio. Stück ausstehenden Aktien ergibt sich damit eine Ausschüttungssumme von 191,4 Mio. €. Der Dividendenvorschlag führt auf Basis des Jahresschlusskurses von 56,36 € zu einer Dividendenrendite von 1,8 %.

**DIVIDENDE JE K+S-AKTIE**

ABB: 2.1.7

| in €              | 0,50 | 1,00 | 1,50 | 2,00 | 2,50 | 3,00 |
|-------------------|------|------|------|------|------|------|
| 2010 <sup>1</sup> |      |      |      |      |      | 1,00 |
| 2009              | 0,20 |      |      |      |      |      |
| 2008              |      |      |      |      |      | 2,40 |
| 2007              | 0,50 |      |      |      |      |      |
| 2006              | 0,50 |      |      |      |      |      |

<sup>1</sup> Im Jahr 2010 entspricht die Angabe dem Dividendenvorschlag.

## 2.2 ANLEIHE UND RATING

### DIE K+S-ANLEIHE

Die K+S AKTIENGESELLSCHAFT hat im September 2009 erstmals eine Anleihe am Kapitalmarkt platziert. Die Schuldverschreibung hat ein Volumen von 750 Mio. € und eine Laufzeit von fünf Jahren. Mit einem Zinskupon von 5,0 % p.a. und einem Emissionskurs von 99,598 % betrug die Rendite bei Ausgabe 5,093 % p.a. Der Mittelzufluss wurde zur Finanzierung eines Teils des Kaufpreises zur Übernahme von MORTON SALT verwendet. Die Platzierung ermöglichte es, eine ausgewogene Laufzeitenstruktur der ausstehenden Finanzierungsinstrumente zu schaffen.

Nach wie vor niedrige Risikoaufschläge für Unternehmensanleihen haben dazu beigetragen, dass die K+S-Anleihe am 31. Dezember 2010 bei 107,476 % notierte; dies entspricht einem Zuwachs um 2,170 Prozentpunkte seit

dem Jahresende 2009. Damit betrug die stichtagsbezogene Rendite 2,848 % p.a.

### RATING

Zu Beginn des Jahres 2009 haben wir uns erstmals einem externen Ratingprozess unterzogen. Die Ratingagentur MOODY's stuft uns derzeit mit „Baa2“ und dem Ausblick „stabil“ ein. Diese Einstufung wurde am 29. November 2010 nach der Ankündigung der Übernahme von POTASH ONE bestätigt und mit einem sich verbessernden Marktumfeld für Düngemittel, einer sich über einen längeren Zeitraum erstreckenden Finanzierung, der Diversifizierung des Länderportfolios, der längeren Verfügbarkeit von Kalikapazitäten sowie der Verbesserung der Kostenposition begründet. STANDARD & POOR's bestätigte am 17. Januar 2011 unter Berücksichtigung der angekündigten Übernahme von POTASH ONE das „BBB“-Rating; der Ausblick verbesserte sich aufgrund sich stabilisierender Kali-Absatzvolumina und Preise von „stabil“ auf „positiv“.

## 2.3 INVESTOR RELATIONS

### RESEARCH-COVERAGE ÜBER K+S ERNEUT LEICHT AUSGEBAUT

Die bereits schon sehr umfangreiche Research-Coverage über K+S hat sich gegenüber dem Vorjahr nochmals erhöht. Dabei reicht das Spektrum der uns regelmäßig analysierenden Banken von der Investmentboutique mit regionaler Expertise bis hin zur Großbank mit internationalem Ansatz.

Folgende 34 Bankhäuser analysieren K+S regelmäßig:

- + B. METZLER SEEL. SOHN & CO.
- + BANKHAUS LAMPE
- + BANK OF AMERICA | MERRILL LYNCH
- + BERENBERG BANK
- + BHF-BANK
- + BMO CAPITAL MARKETS
- + CA CHEUVREUX
- + CITIGROUP
- + COMMERZBANK
- + CREDIT SUISSE
- + DEUTSCHE BANK
- + DZ BANK
- + EQUINET
- + EQUITA
- + EXANE BNP PARIBAS
- + GOLDMAN SACHS
- + HSBC TRINKAUS & BURKHARDT
- + INDEPENDENT RESEARCH
- + J.P. MORGAN CAZENOVE
- + LBBW



- + MACQUARIE SECURITIES EUROPE (neu)
- + MAIN FIRST BANK
- + MEITAV INVESTMENT HOUSE (neu)
- + M.M. WARBURG & CO
- + MORGAN STANLEY
- + NOMURA
- + REDBURN PARTNERS (neu)
- + SCOTIA CAPITAL (neu)
- + SILVIA QUANDT RESEARCH
- + SOCIÉTÉ GÉNÉRALE
- + SRH ALSTER RESEARCH
- + UBS INVESTMENT RESEARCH
- + UNICREDIT EQUITY RESEARCH
- + WESTLB

In der letzten der von uns regelmäßig durchgeführten Research-Umfragen stufen uns 15 Bankhäuser auf „Kaufen/Akkumulieren“, sieben auf „Halten/Neutral“ und vier auf „Reduzieren/Verkaufen“. Auf unserer Homepage bieten wir unter der Rubrik Investor Relations eine stets aktuelle Übersicht über die Research-Empfehlungen sowie die Konsensschätzungen zu Umsatz- und Ergebniszahlen.

**/ WEITERE INFORMATIONEN** hierzu finden Sie auf unserer Homepage unter [www.k-plus-s.com](http://www.k-plus-s.com) im Bereich Investor Relations/ Aktie.

#### **K+S-INVESTOR RELATIONS BIETET UMFANGREICHES INFORMATIONSANGEBOT**

Dem stetig zunehmenden Informationsbedarf des Kapitalmarkts haben wir im vergangenen Jahr mit einem Angebot von 43 Roadshow- und Konferenztagen (2009: 44) Rechnung getragen. So führten wir Investorengespräche in den USA, Deutschland, Großbritannien, Irland, der Schweiz, Frankreich, Kanada, Italien, Japan, Luxemburg, den Niederlanden, Österreich, Singapur und Skandinavien. Darüber hinaus organisierten wir zahlreiche Einzelgespräche und Telefonkonferenzen. Im Rahmen des K+S-Capital Markets Day in Berlin im Dezember 2010 und der dazugehörigen Besichtigung einer Kali-Mine stellten wir institutionellen Investoren und Wertpapieranalysten umfangreiche Informationen zur Verfügung und ermöglichten den direkten Dialog mit dem Vorstand sowie Mitgliedern der oberen Führungsebene. Den Kontakt zu Privataktionären intensivierten wir durch die Teilnahme an drei Aktienforen in Hannover, Göppingen und Kiel. Ziel unserer Investor-Relations-Arbeit ist eine transparente und faire Finanzkommunikation mit allen Marktteilnehmern, um das Vertrauen in die Qualität und Seriosität unserer Unternehmensführung zu erhalten bzw. zu stärken und umfassend, zeitnah und möglichst objektiv über unsere Strategie sowie über alle kapitalmarktrelevanten Geschehnisse rund um die K+S GRUPPE zu informieren.

#### **AUSZEICHNUNGEN**

Unsere Anstrengungen wurden auch im letzten Jahr von unabhängiger Seite gewürdigt:

- + Der K+S-Finanzbericht 2009 wurde im viel beachteten Wettbewerb des MANAGER MAGAZINS erstmals mit Platz 1 (Vorjahr: 5. Platz) unter den 30 DAX-Werten und Platz 1 (Vorjahr: 7. Platz) in der Gesamtwertung der rund 160 untersuchten Unternehmen aus DAX, MDAX, SDAX sowie TECDAX ausgezeichnet.
- + Unter rund 2.000 Unternehmen aus 30 Ländern wurden wir im Mai erstmals mit dem ARC AWARD (ANNUAL REPORT COMPETITION) für den Online-Finanzbericht 2009 ausgezeichnet.
- + Die Zeitschrift CAPITAL prämierte zusammen mit der DVFA auf Basis umfangreicher Bewertungen von Banken und Fondsgesellschaften aus ganz Europa unsere IR-Arbeit mit dem 9. Platz im DAX (Vorjahr: 13. Platz).
- + Beim THOMSON REUTERS EXTEL SURVEY Beste IR Deutschland 2010 erreichten wir den 18. Platz im DAX (2009: 15. Platz).

Wir freuen uns sehr über die erhaltenen Auszeichnungen; sind sie doch Ansporn und Verpflichtung zugleich, unseren Service für unsere Aktionäre, Anleihegläubiger und sonstige Interessierte weiter zu verbessern.

Schließlich zeigen jährliche anonyme Befragungen unserer Aktionäre und Analysten eine hohe Zufriedenheit mit unserer Investor Relations-Arbeit und geben uns darüber hinaus gute Anregungen zur stetigen Verbesserung unserer Finanzmarktkommunikation. Das starke Interesse an K+S wird auch daran deutlich, dass im Jahr 2010 insgesamt rund 50.000 Finanz- und Quartalsberichte, davon 23.000 in englischer Sprache, auf unserer Homepage elektronisch abgerufen wurden.

## **EIN BESUCH UNSERER NEUEN HOMEPAGE LOHNT SICH**

Seit 1. Juli 2010 ist unsere neu gestaltete Homepage online; bei dem Relaunch standen eine bedarfsorientierte Struktur und ein frisches Design im Vordergrund, um den Besuchern des Internetauftritts ein noch besseres Serviceangebot bieten zu können. Wer sich hier informieren möchte, findet auf der Investor Relations-Seite u.a. sämtliche Geschäfts- und Zwischenberichte, Antworten auf die am häufigsten gestellten Fragen sowie aktuelle Unternehmenspräsentationen, Aufzeichnungen von Conference Calls und Video-Webcasts – auch Podcasts können abonniert werden. Ein spezieller Newsletter stellt darüber hinaus die automatische und zeitnahe Versorgung per E-Mail mit aktuellen Presseinformationen und Unternehmensnachrichten sicher. Probieren Sie es doch einfach mal aus!

/ **WEITERE INFORMATIONEN** finden Sie auf unserer Homepage unter [www.k-plus-s.com](http://www.k-plus-s.com) im Bereich Investor Relations.

### **K+S AKTIENGESELLSCHAFT INVESTOR RELATIONS**

Bertha-von-Suttner-Straße 7, 34131 Kassel

Telefon: 0561/9301-1100

Fax: 0561/9301-2425

E-Mail: [investor-relations@k-plus-s.com](mailto:investor-relations@k-plus-s.com)

Internet: [www.k-plus-s.com/de/investor-relations](http://www.k-plus-s.com/de/investor-relations)

## CORPORATE GOVERNANCE

DIE GRUNDSÄTZE EINER GUTEN CORPORATE GOVERNANCE bilden die Basis für unsere internen Entscheidungs- und Kontrollprozesse / Lediglich eine Abweichung von den Kodex-Empfehlungen sowie zwei Abweichungen von den Kodex-Anregungen / Proaktive und transparente Kommunikation ist unser Anspruch

# 3

---

|     |                                                                       |    |
|-----|-----------------------------------------------------------------------|----|
| 3.1 | Erklärung zur Unternehmensführung<br>und Corporate-Governance-Bericht | 21 |
| 3.2 | Mitglieder des Vorstands                                              | 26 |
| 3.3 | Mitglieder des Aufsichtsrats                                          | 27 |
| 3.4 | Vergütungsbericht                                                     | 31 |

K+S verfolgt das Ziel einer verantwortungsbewussten und transparenten Unternehmensführung und -kontrolle, die auf langfristige Wertschaffung ausgerichtet ist. Diese Grundsätze bilden die Basis für unsere internen Entscheidungs- und Kontrollprozesse.

Der Vorstand gibt gemäß § 289a HGB im Lagebericht der K+S AKTIENGESELLSCHAFT die folgende Erklärung zur Unternehmensführung ab; mit dieser Erklärung wird gleichzeitig gemäß Ziffer 3.10 des Deutschen Corporate Governance Kodex berichtet:

### 3.1 ERKLÄRUNG ZUR UNTERNEHMENSFÜHRUNG UND CORPORATE-GOVERNANCE-BERICHT

#### ENTSPRECHENSERKLÄRUNG 2010/2011

Vorstand und Aufsichtsrat der K+S AKTIENGESELLSCHAFT haben im Dezember 2010 folgende gemeinsame Entsprechenserklärung gemäß § 161 Aktiengesetz abgegeben:

„Wir erklären, dass den vom Bundesministerium der Justiz im amtlichen Teil des elektronischen Bundesanzeigers bekannt gemachten Empfehlungen der Regierungskommission Deutscher Corporate Governance Kodex mit nachfolgenden Maßgaben im Jahr 2010 entsprochen wurde bzw. im Jahr 2011 entsprochen werden wird:

#### 2010

Den Empfehlungen des Deutschen Corporate Governance Kodex in der Fassung vom 18. Juni 2009 wurde in 2010 mit der Ausnahme entsprochen, dass lediglich für den Prüfungsausschuss des Aufsichtsrats Vorsitz und Mitgliedschaft bei der Vergütung berücksichtigt werden (Ziffer 5.4.6 des Kodex); für die übrigen Ausschüsse wird über die Gewährung eines gesonderten Sitzungsgeldes hinaus keine zusätzliche Vergütung für erforderlich angesehen.

#### 2011

Den Empfehlungen des Deutschen Corporate Governance Kodex in der Fassung vom 26. Mai 2010 wird in 2011 mit der Ausnahme entsprochen, dass lediglich für den Prüfungsausschuss des Aufsichtsrats Vorsitz und Mitgliedschaft bei der Vergütung berücksichtigt werden (Ziffer 5.4.6 des Kodex); für die übrigen Ausschüsse wird über die Gewährung eines gesonderten Sitzungsgeldes hinaus keine zusätzliche Vergütung für erforderlich angesehen.“

/ DIESE SOWIE ALLE FRÜHEREN ENTSPRECHENSERKLÄRUNGEN sind auch im Internet unter [www.k-plus-s.com](http://www.k-plus-s.com) im Bereich Corporate Governance veröffentlicht.

Von den zahlreichen Anregungen des Kodex werden von K+S lediglich die folgenden beiden nicht bzw. nicht vollständig umgesetzt:

- + Die Hauptversammlung wurde bislang nicht in voller Länge live im Internet übertragen (Kodex Ziffer 2.3.4), sondern nur bis zum Ende der Rede des Vorstandsvorsitzenden.

- + Die variable Vergütung des Aufsichtsrats ist an die Gesamtkapitalrendite des jeweiligen Geschäftsjahres geknüpft und enthält keine auf den langfristigen Unternehmenserfolg bezogenen Bestandteile (Kodex Ziffer 5.4.6 Abs. 2 Satz 2).

#### COMPLIANCE

Unser Compliance-System schafft die organisatorischen Voraussetzungen dafür, dass das jeweils geltende Recht, unsere internen Regelungen und Richtlinien sowie die vom Unternehmen anerkannten regulatorischen Standards konzernweit bekannt sind und ihre Einhaltung überwacht werden kann. Wir wollen so nicht nur Haftungs-, Straf- und Bußgeldrisiken sowie sonstige finanzielle Nachteile für das Unternehmen vermeiden, sondern auch die positive Reputation des Unternehmens und seiner Mitarbeiter in der Öffentlichkeit sicherstellen. Es ist für uns selbstverständlich, dass Compliance-Verstöße systematisch verfolgt und geahndet werden.

Mit der Koordinierung und Dokumentation der konzernweiten Compliance-Aktivitäten hat der Vorstand einen Chief Compliance Officer betraut, der direkt dem Vorstandsvorsitzenden unterstellt ist. Er leitet den zentralen Compliance-Ausschuss, dem die Compliance-Beauftragten der Holding und der Geschäftsbereiche sowie die Leiter von Holdingseinheiten angehören, die Compliance-relevante Aufgaben wahrnehmen (z.B. Revision, Risikomanagement, Recht, Personal, Umweltschutz, Arbeitssicherheit, Qualitätsmanagement).

Für κ+s sind die einschlägigen Rechtsvorschriften, insbesondere das Aktien-, Mitbestimmungs- und Kapitalmarktrecht, die Satzung, der Deutsche Corporate Governance Kodex sowie die Geschäftsordnungen des Aufsichtsrats und des Vorstands die Grundlagen für die Ausgestaltung von Führung und Kontrolle im Unternehmen. Über die gesetzlichen Pflichten hinaus haben wir für uns Grundwerte und daraus abgeleitete Verhaltensgrundsätze definiert, die den Rahmen für unser Verhalten und unsere Entscheidungen verbindlich vorgeben und Orientierung für unser unternehmerisches Handeln sind. Unsere Grundwerte und die Verhaltensgrundsätze sind auf unserer Homepage unter [www.k-plus-s.com](http://www.k-plus-s.com) im Bereich Über κ+s veröffentlicht. Jeder Mitarbeiter wird mit diesen konzernweit geltenden Grundwerten und Verhaltensgrundsätzen (Code of Conduct) sowie den sich daraus ableitenden Unternehmensrichtlinien vertraut gemacht. Zu speziellen Themen finden Pflichtschulungen für potenziell betroffene Mitarbeiter statt (z. B. Kartellrecht, Antikorruption, Umweltschutz, Arbeitssicherheitsrecht). Die Mitarbeiter haben die Möglichkeit, sich über interne Helplines Rat in Compliance-relevanten Angelegenheiten zu holen. Außerdem haben wir externe Help- und Hotlines (Ombudsleute) zur Beratung und – wenn gewünscht, auch anonymen – Meldung von Compliance-Verstößen eingerichtet.

#### **ORGANE DER GESELLSCHAFT**

Organe der Gesellschaft sind die Hauptversammlung, der Vorstand und der Aufsichtsrat. Die Kompetenzen

dieser Organe sind im Aktiengesetz, in der Satzung und den Geschäftsordnungen für Vorstand und Aufsichtsrat geregelt.

#### **AKTIONÄRE UND HAUPTVERSAMMLUNG**

Die Aktionäre nehmen ihre Rechte in der Hauptversammlung wahr und entscheiden über grundlegende Angelegenheiten der κ+s AKTIENGESELLSCHAFT durch die Ausübung ihres Stimmrechts. Jede Aktie besitzt eine Stimme (One-share-one-vote-Prinzip). Alle für die Entscheidungsbildung wichtigen Unterlagen stehen den Aktionären auch auf unserer Internetseite zur Verfügung. Zudem wird die Hauptversammlung bis zum Ende der Rede des Vorstandsvorsitzenden live im Internet übertragen. Die Aktionäre können ihr Stimmrecht durch einen Bevollmächtigten ihrer Wahl, z. B. durch einen von κ+s benannten Stimmrechtsvertreter, ausüben lassen und ihm Weisungen erteilen. Die Erteilung einer Vollmacht bzw. von Weisungen an einen von κ+s benannten Stimmrechtsvertreter ist auch über ein elektronisches Vollmachts- und Weisungssystem auf der Internetseite der κ+s möglich. Kurz nach dem Ende der Hauptversammlung veröffentlichen wir die Präsenz sowie die Abstimmungsergebnisse im Internet.

/ WEITERE INFORMATIONEN ZUR HAUPTVERSAMMLUNG finden Sie unter [www.k-plus-s.com/hv](http://www.k-plus-s.com/hv).

#### **ARBEITSWEISE DES VORSTANDS**

Der Vorstand leitet die Gesellschaft in eigener Verantwortung nach Maßgabe der Gesetze, der Satzung und seiner Geschäftsordnung sowie unter Berücksichtigung der Beschlüsse der Hauptversammlung. Der Vorstand

vertritt die Gesellschaft gegenüber Dritten. Die Steuerung der κ+s GRUPPE erfolgt über regelmäßige strategische Erörterungen auf Vorstandsebene sowie mit den Geschäftsbereichsleitungen und Leitern der Holdingeinheiten, um dann die entsprechenden Ergebnisse sowohl in Form der Jahres- und Mittelfristplanung als auch über Zielvereinbarungen systematisch und zeitnah umzusetzen. Vorstand und oberes Management werden monatlich über die Entwicklung wesentlicher Kenngrößen sowie operativer Frühindikatoren der Unternehmensgruppe und ihrer Geschäftsbereiche informiert – dabei stehen die Kommentierungen der Entwicklungen bzw. Zielabweichungen bei Produktion, Absatz, Umsatz, Kosten, Ergebnis, Personal und Investitionen im Vordergrund. Weitere Informationen zur Unternehmenssteuerung finden Sie auf den Seiten 89 ff.

/ DIE GESCHÄFTSORDNUNG DES VORSTANDS finden Sie auf unserer Internetseite unter der Rubrik ‚Corporate Governance‘.

Der Vorstand hat geeignete Maßnahmen getroffen, insbesondere ein Überwachungssystem eingerichtet, damit Entwicklungen, die den Fortbestand der Gesellschaft gefährden, früh erkannt werden. Dieses System wird kontinuierlich weiterentwickelt und an veränderte Rahmenbedingungen angepasst.

/ EINZELHEITEN ZUM RISIKO- UND CHANCENMANAGEMENT finden Sie im Risikobericht auf den Seiten 130 f.

Der Vorstand der Gesellschaft besteht gemäß § 5 Abs. 1 der Satzung der Gesellschaft aus mindestens zwei Mitgliedern. Die Anzahl der Mitglieder wird vom Aufsichtsrat festgelegt; gegenwärtig hat der Vorstand fünf Mit-

glieder. Die Geschäftsordnung regelt deren Zusammenarbeit und die Geschäftsverteilung. Über Angelegenheiten von ressortübergreifender Bedeutung sind die betroffenen Vorstandsmitglieder zu informieren; Maßnahmen, die auch andere Ressorts berühren oder in ihrer Tragweite vom üblichen Tagesgeschäft abweichen, sind mit den anderen Vorstandsmitgliedern abzustimmen. Solche Angelegenheiten sollen möglichst in den Vorstandssitzungen besprochen und Maßnahmen gegebenenfalls dort beschlossen werden; über wichtige personelle und strukturorganisatorische Maßnahmen sowie Geschäfte und Maßnahmen, die der Zustimmung des Aufsichtsrats bedürfen, ist stets eine Abstimmung bzw. Beschlussfassung herbeizuführen.

/ WEITERE INFORMATIONEN ZUR BESETZUNG DES VORSTANDS UND RESSORTVERTEILUNG finden Sie auf den Seiten 27 ff. sowie auf unserer Internetseite unter der Rubrik ‚Corporate Governance‘.

#### ARBEITSWEISE DES AUFSICHTSRATS

Der Aufsichtsrat der Gesellschaft setzt sich gemäß § 8 Abs. 1 der Satzung der Gesellschaft nach Maßgabe der zwingenden gesetzlichen Vorschriften zusammen. Er besteht derzeit aus 16 Mitgliedern und unterliegt der Mitbestimmung nach dem Mitbestimmungsgesetz. Die Aufsichtsratsmitglieder werden daher je zur Hälfte als Vertreter der Anteilseigner von der Hauptversammlung und von den Arbeitnehmern der K+S GRUPPE in Deutschland gewählt. Die Wahl erfolgt für jeweils fünf Jahre.

/ WEITERE INFORMATIONEN ZUR BESETZUNG DES AUFSICHTSRATS UND SEINER AUSSCHÜSSE finden Sie auf den Seiten 27 ff. sowie auf unserer Internetseite unter der Rubrik ‚Corporate Governance‘.

Der Aufsichtsrat überwacht und berät den Vorstand bei der Führung der Geschäfte. Dabei wird er in alle Entscheidungen von grundlegender Bedeutung rechtzeitig und angemessen eingebunden. Der Vorstand unterrichtet ihn regelmäßig, zeitnah und umfassend über den Geschäftsverlauf, die Ertrags- und Finanzlage, die Beschäftigungssituation sowie die Planungen und die Weiterentwicklung des Unternehmens. Zur Vorbereitung der Sitzungstermine erhält der Aufsichtsrat regelmäßig schriftliche Berichte vom Vorstand. Nach sorgfältiger Prüfung und Beratung fasst der Aufsichtsrat zu den Berichten und Beschlussvorschlägen – soweit erforderlich – Beschlüsse. Zu besonderen Geschäftsvorgängen, die für das Unternehmen von wesentlicher Bedeutung waren, wird der Aufsichtsrat durch den Vorstand auch zwischen den turnusmäßigen Sitzungen unverzüglich und umfassend schriftlich informiert. Außerdem führt der Aufsichtsrat in Form eines Fragebogens mindestens einmal jährlich eine Effizienzprüfung durch, um Anregungen für die künftige Arbeit im Aufsichtsrat wie auch in den Ausschüssen zu erhalten.

/ WEITERE EINZELHEITEN ZUR TÄTIGKEIT DES AUFSICHTSRATS im Geschäftsjahr 2010 finden Sie im Bericht des Aufsichtsrats auf den Seiten 6 ff. dieses Finanzberichts.

Der Aufsichtsrat hat sich eine Geschäftsordnung gegeben und aus dem Kreis seiner Mitglieder vier Ausschüsse gebildet:

+ Der Prüfungsausschuss (Audit Committee) hat die sich aus dem Aktiengesetz sowie Ziffer 5.3.2 des Deutschen Corporate Governance Kodex ergebenden Aufgaben. Er befasst sich insbesondere mit der Über-

wachung des Rechnungslegungsprozesses, der Wirksamkeit des internen Kontrollsystems, des Risikomanagementsystems, des internen Revisionssystems, des Compliance-Systems sowie der Abschlussprüfung. Er erörtert auch die Halbjahres- und Quartalsfinanzberichte vor der Veröffentlichung mit dem Vorstand. Herr Dr. Sünner, Vorsitzender des Prüfungsausschusses, verfügt aus seiner beruflichen Praxis als Leiter des Zentralbereichs Recht, Steuern und Versicherung (bis Ende 2007) und als Chief Compliance Officer der BASF SE über umfassende Kenntnisse und Erfahrungen in der Anwendung von Rechnungslegungsgrundsätzen und internen Kontrollverfahren. Der Prüfungsausschuss setzt sich aus fünf Mitgliedern zusammen, drei Anteilseigner- sowie zwei Arbeitnehmervertreter.

- + Dem Personalausschuss obliegt die Vorbereitung der Bestellung von Vorstandsmitgliedern, einschließlich der langfristigen Nachfolgeplanung. Hinsichtlich der Festlegung der Gesamtvergütung der einzelnen Vorstandsmitglieder unterbreitet der Ausschuss dem Aufsichtsratsplenum Beschlussvorschläge. Der Aufsichtsratsvorsitzende ist zugleich Vorsitzender dieses Ausschusses. Der Personalausschuss besteht aus vier Mitgliedern und ist zu gleichen Teilen durch Anteilseigner- sowie Arbeitnehmervertreter besetzt.
- + Der Nominierungsausschuss empfiehlt dem Aufsichtsrat für dessen Wahlvorschläge an die Hauptversammlung geeignete Aufsichtsratskandidaten. Der Aufsichtsratsvorsitzende ist zugleich Vorsitzender dieses Ausschusses. Der Ausschuss besteht aus

vier Mitgliedern und ist ausschließlich mit Vertretern der Anteilseigner besetzt.

- + Der Vermittlungsausschuss nimmt die in § 31 Abs. 3 Satz 1 Mitbestimmungsgesetz beschriebenen Aufgaben wahr. Der Aufsichtsratsvorsitzende ist zugleich Vorsitzender dieses Ausschusses. Die vier Mitglieder des Ausschusses vertreten zu gleichen Teilen die Anteilseigner und die Arbeitnehmer.

/ **DIE GESCHÄFTSORDNUNG DES AUFSICHTSRATS**  
finden Sie auf unserer Internetseite unter der Rubrik ‚Corporate Governance‘.

### ZIELSETZUNG FÜR DIE BESETZUNG DES AUFSICHTSRATS

Dem Aufsichtsrat der Gesellschaft gehören derzeit 16 Mitglieder an, von denen je acht von der Hauptversammlung bzw. den Arbeitnehmern der deutschen Betriebe der K+S GRUPPE (zwei dieser Mitglieder sind Vertreter der Gewerkschaften) gewählt wurden. Die Amtszeit des Vorsitzenden endet mit Ablauf der ordentlichen Hauptversammlung 2012, die von Herrn Cardona mit Ablauf der ordentlichen Hauptversammlung 2015 und die der übrigen Mitglieder mit Ablauf der ordentlichen Hauptversammlung 2013.

Aus der letzten Entsprechenserklärung der Gesellschaft ergibt sich, dass u. a. der Empfehlung der Ziffer 5.4.1 des Deutschen Corporate Governance Kodex gefolgt wird, nach der der Aufsichtsrat für seine Besetzung konkrete Ziele benennen soll. Dazu ist anzumerken, dass der Aufsichtsrat nicht selbst über seine Besetzung entscheidet und daher auf die Verwirklichung der von ihm ver-

folgten Zielsetzung nur durch entsprechende Wahlvorschläge an die Hauptversammlung hinwirken kann; eine Einflussnahme auf Vorschläge zur Wahl der Arbeitnehmervertreter steht ihm als Gesellschaftsorgan nicht zu.

Eingedenk dessen hat der Aufsichtsrat in seiner Sitzung am 24. November 2010 Folgendes beschlossen:

„Der Aufsichtsrat wird sich dafür einsetzen, dass seine Mitglieder integre, der sozialen Marktwirtschaft verbundene Persönlichkeiten sind und über Kompetenz und langjährige Erfahrung in der Führung und/oder Beratung von Wirtschaftsunternehmen oder wirtschaftsnahen Institutionen verfügen. Wünschenswert sind dabei Erfahrungen und spezielle Kenntnisse in den Haupttätigkeitsfeldern des Unternehmens. Dem Aufsichtsrat muss mindestens ein unabhängiger Finanzexperte angehören.

Dem Aufsichtsrat soll mindestens ein Mitglied angehören, das der gewachsenen Internationalität des Unternehmens aufgrund seiner Staatsangehörigkeit oder beruflichen Erfahrung in besonderem Maße Rechnung trägt. Dabei erscheinen Erfahrungen bezüglich der Regionen, in denen die K+S GRUPPE verstärkt präsent ist, besonders wünschenswert.

In diesem Rahmen wird angestrebt, dass dem Aufsichtsrat ein prozentualer Anteil weiblicher Mitglieder angehört, der mindestens dem prozentualen Anteil von Frauen an der Gesamtzahl der in der K+S GRUPPE beschäftigten Mitarbeiter entspricht.

Angestrebt wird ferner, dass mindestens die Hälfte der Anteilseignervertreter im Aufsichtsrat unabhängig ist. Dies setzt insbesondere voraus, dass die betreffenden Personen keine Organ- oder Beraterfunktion bei bedeutenden Kunden, Lieferanten, Kreditgebern, sonstigen Geschäftspartnern oder wesentlichen Wettbewerbern wahrnehmen und auch sonst in keiner wesentlichen geschäftlichen oder persönlichen Beziehung zu der Gesellschaft oder deren Vorstand stehen. Potenzielle Interessenkonflikte von zur Wahl in den Aufsichtsrat vorgeschlagenen Personen sollen möglichst ausgeschlossen sein.

Der Aufsichtsrat wird der Hauptversammlung Wahlvorschläge nur für solche Kandidaten unterbreiten, die zum Zeitpunkt ihrer Wahl das 70. Lebensjahr noch nicht vollendet haben.“

Der Aufsichtsrat ist der Auffassung, dass er gegenwärtig die vorstehenden Zielsetzungen mit einer Ausnahme erfüllt: Mit Frau Benner-Heinacher hat der Aufsichtsrat nur ein weibliches Mitglied; angesichts des aktuellen Frauenanteils von ca. 10 % an der Gesamtbelegschaft der K+S GRUPPE wird die Mitgliedschaft von mindestens zwei Frauen angestrebt.

### ZUSAMMENWIRKEN VON VORSTAND UND AUFSICHTSRAT

Der Vorstand informiert den Aufsichtsrat regelmäßig, zeitnah und umfassend über alle für das Gesamtunternehmen relevanten Fragen der Unternehmensstrategie, der Planung, der Geschäftsentwicklung, der Finanz-

und Ertragslage sowie über besondere unternehmerische Risiken und Chancen. Wesentliche Geschäfte und Maßnahmen erfordern die Zustimmung des Aufsichtsrats; weitere Informationen hierzu finden sich in § 12 der Geschäftsordnung des Aufsichtsrats.

#### INTERESSENKONFLIKTE

Interessenkonflikte von Vorstands- oder Aufsichtsratsmitgliedern, über die die Hauptversammlung zu informieren wäre, sind dem Aufsichtsrat gegenüber im Berichtszeitraum nicht offengelegt worden. Zur Vermeidung potenzieller Interessenkonflikte haben Herr Cardona und Herr Dr. Sünner in jeweils zwei Plenumsitzungen an Beratungen zu Themen, bei denen auch Interessen der OAO EUROCHEM bzw. der BASF SE berührt werden könnten, nicht teilgenommen. Herr Vassiliadis hat erklärt, er werde für den Fall, dass korrespondierende Themen im Aufsichtsrat der BASF SE behandelt werden sollten, nicht an diesen Beratungen teilnehmen. Beschlüsse wurden zu diesen Themen nicht gefasst.

#### VERMÖGENSSCHADEN-HAFTPFLICHTVERSICHERUNG (D&O)

K+S unterhält eine sogenannte Vermögensschaden-Haftpflichtversicherung (D&O-Versicherung) u.a. für den Fall, dass Vorstands- oder Aufsichtsratsmitglieder wegen einer bei der Ausübung ihrer Tätigkeit begangenen Pflichtverletzung aufgrund gesetzlicher Haftpflichtbestimmungen für einen Vermögensschaden auf Schadenersatz in Anspruch genommen werden. Der Selbstbehalt beträgt 10 % des jeweiligen Schadens bis maximal zur Höhe des Eineinhalbfachen der festen jährlichen

Vergütung. Die D&O-Versicherung findet auch auf Führungskräfte sowie sonstige leitende Angestellte Anwendung.

#### AKTIENGESCHÄFTE VON MITGLIEDERN DES AUFSICHTSRATS UND VORSTANDS

Nach § 15a Wertpapierhandelsgesetz (WpHG) müssen die Mitglieder des Vorstands und des Aufsichtsrats der K+S AKTIENGESELLSCHAFT den Erwerb und die Veräußerung von K+S-Aktien offenlegen.

Im Jahr 2010 haben fünf Organmitglieder Directors' Dealings-Meldungen abgegeben.

/ TAB: 3.1.1, 3.1.2

/ EINE STETS AKTUELLE TABELLE finden Sie auf unserer Homepage unter [www.k-plus-s.com/de/meldungen/directors-dealings/](http://www.k-plus-s.com/de/meldungen/directors-dealings/).

Die Mitglieder des Vorstands und des Aufsichtsrats hielten am 31. Dezember 2010 zusammen einen Anteil von weniger als 1 % der von der K+S AKTIENGESELLSCHAFT ausgegebenen Aktien.

#### RECHNUNGSLEGUNG UND ABSCHLUSSPRÜFUNG

Seit Beginn des Jahres 2005 werden für den Konzernabschluss der K+S AKTIENGESELLSCHAFT die internationalen Rechnungslegungsgrundsätze IFRS angewendet. Die Abschlussprüfungen für das Jahr 2010 wurden von der DELOITTE & TOUCHE GMBH, Hannover, durchgeführt, die die Unabhängigkeitserklärung nach Ziffer 7.2.1 des Deutschen Corporate Governance Kodex abge-

#### DIRECTORS' DEALINGS VORSTANDSMITGLIEDER

TAB: 3.1.1

|                   | Datum      | Transaktion        | Stückzahl | Kurs in € | Betrag in € |
|-------------------|------------|--------------------|-----------|-----------|-------------|
| Norbert Steiner   | 15.11.2010 | Verkauf von Aktien | 5.000     | 49,79     | 248.950,00  |
| Joachim Felker    | 15.11.2010 | Verkauf von Aktien | 3.956     | 49,14     | 194.397,84  |
| Gerd Grimmig      | 15.11.2010 | Verkauf von Aktien | 3.000     | 49,79     | 149.370,00  |
| Dr. Thomas Nöcker | 19.05.2010 | Kauf von Aktien    | 1.300     | 39,54     | 51.404,60   |

#### DIRECTORS' DEALINGS AUFSICHTSRATSMITGLIEDER

TAB: 3.1.2

|                 | Datum      | Transaktion        | Stückzahl | Kurs in € | Betrag in € |
|-----------------|------------|--------------------|-----------|-----------|-------------|
| Dr. Ralf Bethke | 11.03.2010 | Verkauf von Aktien | 6.004     | 45,65     | 274.104,69  |



geben hat. Die Erteilung des Prüfungsauftrags erfolgt durch den Aufsichtsrat auf Vorschlag des Prüfungsausschusses, nachdem mit dem durch die Hauptversammlung gewählten Abschlussprüfer die Prüfungsschwerpunkte sowie dessen Honorar vereinbart wurden. Der Vorsitzende des Aufsichtsrats und der Vorsitzende des Prüfungsausschusses werden vom Abschlussprüfer unverzüglich über während der Prüfung auftretende mögliche Ausschluss- oder Befangenheitsgründe unterrichtet, soweit diese nicht umgehend beseitigt werden. Ferner soll der Abschlussprüfer über alle für die Aufgaben des Aufsichtsrats wesentlichen Feststellungen und Vorkommnisse umgehend berichten, die sich bei der Durchführung der Abschlussprüfung ergeben. Außerdem hat der Abschlussprüfer den Aufsichtsrat zu informieren bzw. im Prüfungsbericht zu vermerken, wenn er im Zuge der Abschlussprüfung Tatsachen feststellt, die mit der von Vorstand und Aufsichtsrat nach § 161 AktG abgegebenen Entsprechenserklärung nicht vereinbar sind.

## TRANSPARENZ

Unser Ziel ist es, Aktionäre, Aktionärsvereinigungen, Finanzanalysten, Medien sowie die interessierte Öffentlichkeit durch regelmäßige, offene und aktuelle Kommunikation gleichzeitig und gleichberechtigt über die Lage sowie über bedeutende geschäftliche Veränderungen des Unternehmens zu unterrichten. Alle wesentlichen Informationen wie z.B. Informationen zur Hauptversammlung, Presse-, Ad-hoc- und Stimmrechtsmitteilun-

gen, sämtliche Finanzberichte, Unternehmens-/Nachhaltigkeitsberichte, aber auch Analystenempfehlungen und Konsensschätzungen sowie Unternehmenspräsentationen von Roadshows und Investorenkonferenzen veröffentlichen wir im Internet.

Der Finanzkalender befindet sich sowohl im Finanzbericht, in den Halbjahres- sowie Quartalsfinanzberichten als auch auf der Internetseite der Gesellschaft. Die Satzung der Gesellschaft sowie die Geschäftsordnungen für den Vorstand und den Aufsichtsrat sind ebenso auf dieser Internetseite abrufbar wie detaillierte Informationen zur Umsetzung der Empfehlungen und Anregungen des Deutschen Corporate Governance Kodex. Ein E-Mail-Newsletter informiert stets über Neues aus dem Konzern.

## 3.2 MITGLIEDER DES VORSTANDS

### **Norbert Steiner (56), Jurist, Baunatal, Vorsitzender**

- + Unternehmensentwicklung und Controlling
- + Recht/Compliance
- + Investor Relations
- + Kommunikation und Medien
- + Oberer Führungskreis/  
Internationale HR-Koordination
- + Salz

Mandat bis 11. Mai 2015

Erstbestellung: 12. Mai 2000

Aufsichtsratsmandate:

- + E.ON MITTE AG, Kassel
- + K+S KALI GMBH (Vorsitzender), Kassel

### **Joachim Felker (58), Industriekaufmann, München**

- + Kali- und Magnesiumprodukte
- + Stickstoffdüngemittel

Mandat bis 30. September 2012

Erstbestellung: 1. Oktober 2005

Aufsichtsratsmandate:

- + K+S KALI GMBH, Kassel

**Gerd Grimmig (57), Diplom-Ingenieur, Söhrewald**

- + Bergbau
- + Geologie
- + Technik/Energie
- + Forschung und Entwicklung
- + Umwelt, Arbeitssicherheit, Qualitätsmanagement
- + Inaktive Werke
- + Entsorgung und Recycling
- + Tierhygieneprodukte
- + Consulting
- + MSW CHEMIE

Mandat bis 30. September 2013

Erstbestellung: 1. Oktober 2000

Aufsichtsratsmandate:

- + K+S KALI GMBH, Kassel

**Dr. Thomas Nöcker (52), Jurist, Kassel, Arbeitsdirektor**

- + Personal
- + IT-Services
- + Organisations- und Projektmanagement
- + Immobilienmanagement
- + Wissensmanagement
- + Gesundheitsmanagement
- + Globale Logistik Strategie
- + Logistikeinkauf
- + KALI-TRANSPORT GMBH (KTG)
- + Handelsgeschäfte (CFK)

Mandat bis 31. Juli 2016

Erstbestellung: 1. August 2003

Aufsichtsratsmandate:

- + K+S KALI GMBH, Kassel

Kontrollgremien:

- + Beirat der RAG BILDUNG GMBH, Essen – bis Juli 2010

**Jan Peter Nonnenkamp (47), Diplom-Ökonom, München**

- + Finanzen und Rechnungswesen
- + Einkauf, Material- und Lagerwirtschaft
- + Revision
- + Steuern
- + Versicherungen

Mandat bis 31. Mai 2012

Erstbestellung: 1. Juni 2009

**EHRENVORSITZENDER DES AUFSICHTSRATS****Gerhard R. Wolf (75), Diplom-Kaufmann, Worms**

ehem. Mitglied des Vorstands der BASF AG, Ludwigshafen

ehem. Vorsitzender des Aufsichtsrats

der K+S AKTIENGESELLSCHAFT

Mandat und Vorsitz bis zum Ende der ordentlichen Hauptversammlung am 14. Mai 2008

**3.3 MITGLIEDER DES AUFSICHTSRATS**

Stand der Angaben: 31. Dezember 2010

**Dr. Ralf Bethke (68), Diplom-Kaufmann, Deidesheim, Aufsichtsratsvorsitzender Anteilseignervertreter**

ehem. Vorsitzender des Vorstands der K+S AKTIENGESELLSCHAFT

Aufsichtsratsvorsitz seit 14. Mai 2008

Mandat bis zum Ende der ordentlichen

Hauptversammlung im Jahr 2012

Erstbestellung: 1. Juli 2007

weitere Aufsichtsratsmandate:

- + BENTELER INTERNATIONAL AG, Salzburg (stellv. Vorsitzender)
- + DR. JENS EHRHARDT KAPITAL AG, Pullach (Aufsichtsratsvorsitzender)
- + SÜDDEUTSCHE ZUCKERRÜBENVERWERTUNGS-GENOSSENSCHAFT EG, Stuttgart-Ochsenfurt
- + SÜDZUCKER AG, Mannheim

---

**Michael Vassiliadis (46), Chemielaborant, Hannover, stellv. Vorsitzender Arbeitnehmervertreter**

Vorsitzender der IG BERGBAU, CHEMIE, ENERGIE, Hannover

Mandat bis zum Ende der ordentlichen Hauptversammlung im Jahr 2013  
Erstbestellung: 7. Mai 2003

weitere Aufsichtsratsmandate:

- + BASF SE, Ludwigshafen
- + EVONIK STEAG GMBH, Essen (stellv. Vorsitzender)
- + HENKEL AG & CO. KGAA, Düsseldorf

---

**Ralf Becker (45), Gewerkschaftssekretär, Lindwedel Arbeitnehmervertreter**

Landesbezirksleiter Nord der IG BERGBAU, CHEMIE, ENERGIE, Hannover

Mandat bis zum Ende der ordentlichen Hauptversammlung im Jahr 2013  
Erstbestellung: 1. August 2009

weitere Aufsichtsratsmandate:

- + CONTINENTAL REIFEN DEUTSCHLAND GMBH, Hannover

---

**Jella S. Benner-Heinacher (50), Juristin, Meerbusch Anteilseignervertreterin**

Bundesgeschäftsführerin der DEUTSCHE SCHUTZ-VEREINIGUNG FÜR WERTPAPIERBESITZ E.V., Düsseldorf

Mandat bis zum Ende der ordentlichen Hauptversammlung im Jahr 2013  
Erstbestellung: 7. Mai 2003

weitere Aufsichtsratsmandate:

- + A.S. CRÉATION TAPETEN AG, Gummersbach
- + TUI AG, Hannover

---

**George Cardona (59), Ökonom, Monaco Anteilseignervertreter**

Mitglied des Direktorenrats der OJSC EUROCHEM MINERAL AND CHEMICAL CO., Russland

Mandat bis zum Ende der ordentlichen Hauptversammlung im Jahr 2015  
Erstbestellung: 9. Oktober 2009

weitere Kontrollgremien:

- + Board der CARDONA LLOYD HEDGE PORTFOLIO LTD., Guernsey, Channel Islands – bis Juli 2010
- + Board der CARDONA LLOYD LTD., Guernsey, Channel Islands – bis Juli 2010
- + Board der DIVERSIFIED MACRO SOLUTIONS PLC, Irland
- + Board der DONALINK LTD., Zypern
- + Board der ERGLIS LTD., Zypern (Vorsitzender)
- + Board der EUROCHEM GROUP SE, Zypern (Vorsitzender, bis 22. September 2010: MCC HOLDING PLC)
- + Board der HAMILTON ART LTD., Isle of Man (Vorsitzender)
- + Board der HAMILTON JETS LTD., Bermuda (Vorsitzender)
- + Board der HAREWOOD HOUSE LTD., Jersey, Channel Islands (Vorsitzender)
- + Board der LINEA LTD., Bermuda (Vorsitzender)
- + Board der LINETRUST PTC LTD., Bermuda (Vorsitzender)
- + Direktorenrat der OJSC SIBERIAN COAL ENERGY CO., Russland
- + Board der VALISE LTD., Bermuda (Vorsitzender)
- + Board der VALTON LTD., Bermuda – seit Dezember 2010 (Vorsitzender)

**Harald Döll (46), Energieanlagenelektroniker,  
Philippsthal**

**Arbeitnehmervertreter**

Vorsitzender des Betriebsrats des Werks Werra der  
K+S KALI GMBH

Mandat bis zum Ende der ordentlichen  
Hauptversammlung im Jahr 2013  
Erstbestellung: 1. August 2009

**Dr. Rainer Gerling (52), Diplom-Ingenieur,  
Heringen (Werra)**

**Arbeitnehmervertreter**

Leiter des Werks Werra der K+S KALI GMBH

Mandat bis zum Ende der ordentlichen  
Hauptversammlung im Jahr 2013  
Erstbestellung: 14. Mai 2008

**Rainer Grohe (70), Diplom-Ingenieur, Otterstadt**  
**Anteilseignervertreter**

Lehrbeauftragter an der Universität der Bundeswehr  
München

Mandat bis zum Ende der ordentlichen  
Hauptversammlung im Jahr 2013  
Erstbestellung: 6. Mai 1998

weitere Aufsichtsratsmandate:  
+ AURUBIS AG, Hamburg

+ GRAPHIT KROPFMÜHL AG, Hauzenberg  
(stellv. Vorsitzender)

+ PFW AEROSPACE AG, Speyer

weitere Kontrollgremien:

+ Beirat VRD GMBH und VRD GBR, Heidelberg

**Dr. Karl Heidenreich (69), Diplom-Kaufmann,  
Mannheim**

**Anteilseignervertreter**

ehem. Mitglied des Vorstands der LANDESBANK  
BADEN-WÜRTTEMBERG, Stuttgart/Karlsruhe/  
Mannheim

Mandat bis zum Ende der ordentlichen  
Hauptversammlung im Jahr 2013  
Erstbestellung: 7. Mai 2003

**Rüdiger Kienitz (50), Bergbautechnologe, Geisa**  
**Arbeitnehmervertreter**

Mitglied des Betriebsrats des Werks Werra der  
K+S KALI GMBH

Mandat bis zum Ende der ordentlichen  
Hauptversammlung im Jahr 2013  
Erstbestellung: 26. März 1998

**Klaus Krüger (56), Bergbautechnologe, Wolmirstedt**  
**Arbeitnehmervertreter**

Vorsitzender des Betriebsrats des Werks

Zielitz der K+S KALI GMBH

Vorsitzender des Gesamtbetriebsrats der K+S GRUPPE

Mandat bis zum Ende der ordentlichen  
Hauptversammlung im Jahr 2013  
Erstbestellung: 9. August 1999

**Dieter Kuhn (52), Bergbaumaschinist, Bernburg**  
**Arbeitnehmervertreter**

Betriebsratsvorsitzender des Werks Bernburg der  
ESCO GMBH & CO. KG

erster stellvertretender Vorsitzender des Gesamt-  
betriebsrats der K+S GRUPPE

Mandat bis zum Ende der ordentlichen  
Hauptversammlung im Jahr 2013  
Erstbestellung: 7. Mai 2003

**Dr. Bernd Malmström (69), Jurist, Berlin**  
**Anteilseignervertreter**

Rechtsanwalt

Mandat bis zum Ende der ordentlichen  
Hauptversammlung im Jahr 2013  
Erstbestellung: 7. Mai 2003

weitere Aufsichtsratsmandate:

- + HHLA INTERMODAL GMBH, Hamburg
- + IFCO-SYSTEMS N.V., Amsterdam (Vorsitzender)
- + LEHNKERING GMBH, Duisburg (Vorsitzender)
- + SBB SCHWEIZER BUNDESBAHNEN AG, Bern  
(Verwaltungsrat)
- + VTG AG, Hamburg

weitere Kontrollgremien:

- + DAL – DEUTSCHE-AFRIKA-LINIEN GMBH & CO. KG,  
Hamburg
- + TIME:MATTERS GMBH, Neu-Isenburg (Vorsitzender)

**Dr. Rudolf Müller (67), Diplom-Ingenieur agr.,  
Ochsenfurt**

**Anteilseignervertreter**

ehem. Mitglied des Vorstands der SÜDZUCKER AG,  
Mannheim

Mandat bis zum Ende der ordentlichen  
Hauptversammlung im Jahr 2013  
Erstbestellung: 7. Mai 2003

weitere Kontrollgremien:

- + Hochschulrat Fachhochschule Weihenstephan-  
Triesdorf, Freising (Vorsitzender)
- + Universitätsrat der Universität Hohenheim, Stuttgart

**Renato De Salvo (46), Betriebsschlosser, Auhagen**  
**Arbeitnehmervertreter**

Betriebsschlosser im Werk Sigmundshall der  
K+S KALI GMBH

Mandat bis zum Ende der ordentlichen  
Hauptversammlung im Jahr 2013  
Erstbestellung: 7. Mai 2003

**Dr. Eckart Sünner (66), Jurist,  
Neustadt a. d. Weinstraße**

**Anteilseignervertreter**

Chief Compliance Officer der BASF SE, Ludwigshafen

Mandat bis zum Ende der ordentlichen  
Hauptversammlung im Jahr 2013  
Erstbestellung: 28. April 1992

weitere Aufsichtsratsmandate:

- + INFINEON TECHNOLOGIES AG, Neubiberg

## AUFSICHTSRATSAUSSCHÜSSE

### PRÜFUNGSAUSSCHUSS

ANTEILSEIGNERVERTRETER

- + Dr. Eckart Sünner (Vorsitzender)
- + Dr. Ralf Bethke
- + Dr. Karl Heidenreich

ARBEITNEHMERVERTRETER

- + Klaus Krüger
- + Michael Vassiliadis

### NOMINIERUNGSAUSSCHUSS

ANTEILSEIGNERVERTRETER

- + Dr. Ralf Bethke (Vorsitzender)
- + Jella S. Benner-Heinacher
- + Dr. Bernd Malmström
- + Dr. Rudolf Müller

### PERSONALAUSSCHUSS

ANTEILSEIGNERVERTRETER

- + Dr. Ralf Bethke (Vorsitzender)
- + Rainer Grohe

ARBEITNEHMERVERTRETER

- + Klaus Krüger
- + Michael Vassiliadis

### VERMITTLUNGSAUSSCHUSS

ANTEILSEIGNERVERTRETER

- + Dr. Ralf Bethke (Vorsitzender)
- + Dr. Eckart Sünner

ARBEITNEHMERVERTRETER

- + Klaus Krüger
- + Michael Vassiliadis

### 3.4 VERGÜTUNGSBERICHT

Mit dem nachstehenden Vergütungsbericht kommt der Vorstand seinen Berichtspflichten gemäß § 315 Abs. 2 Nr. 4 HGB sowie gemäß Ziffer 4.2.4, 4.2.5 und 5.4.6 Abs. 3 des Deutschen Corporate Governance Kodex nach.

#### VERGÜTUNG DES VORSTANDS

##### VERGÜTUNGSSTRUKTUR

Kriterien für die Angemessenheit der Vergütung bilden insbesondere die Aufgaben des jeweiligen Vorstandsmitglieds, seine persönliche Leistung, die Leistung des Gesamtvorstands, der Vergleich mit den übrigen Führungskräften sowie die wirtschaftliche Lage, der Erfolg und die Zukunftsaussichten des Unternehmens unter Berücksichtigung seines Vergleichsumfelds.

Die Vergütung für die Vorstandsmitglieder setzt sich aus jahresbezogenen Bestandteilen sowie Bestandteilen mit langfristiger Anreizwirkung zusammen. Die jahresbezogenen Vergütungsbestandteile beinhalten sowohl erfolgsunabhängige als auch erfolgsbezogene Komponenten. Die erfolgsunabhängigen Teile bestehen aus fixer Vergütung sowie Sach- und sonstigen Bezügen; die Tantieme ist der erfolgsbezogene Anteil. Außerdem besteht eine kennzahlenbasierte variable Vergütungskomponente mit langfristiger Anreizwirkung (sogenannter „Long Term Incentive“ (LTI)). Darüber hinaus haben die Mitglieder des Vorstands Pensionszusagen erhalten.

#### BEISPIELRECHNUNG FÜR DIE JAHRESVERGÜTUNG EINES ORDENTLICHEN VORSTANDSMITGLIEDS TAB: 3.4.1

| in €                                     | Zielerreichung<br>100% <sup>1</sup> | Zielerreichung<br>0% <sup>2</sup> | Maximale<br>Zielerreichung <sup>3</sup> |
|------------------------------------------|-------------------------------------|-----------------------------------|-----------------------------------------|
| Fixum: 40 %                              | 380.000                             | 380.000                           | 380.000                                 |
| Tantieme: 60 %                           | 570.000                             | 0                                 | 867.000                                 |
| – davon Unternehmensperformance: 80 %    | 456.000                             | 0                                 | 696.000                                 |
| – davon persönliche Zielerreichung: 20 % | 114.000                             | 0                                 | 171.000                                 |
| <b>Gesamtjahresvergütung</b>             | <b>950.000</b>                      | <b>380.000</b>                    | <b>1.247.000</b>                        |

<sup>1</sup> Gesamtkapitalrendite  $\hat{=}$  Mindestrendite; persönliche Zielerreichung  $\hat{=}$  100 %.

<sup>2</sup> Gesamtkapitalrendite  $\hat{=}$  0 %; persönliche Zielerreichung  $\hat{=}$  0 %.

<sup>3</sup> Gesamtkapitalrendite  $\geq$  Mindestrendite + 20 Prozentpunkte; persönliche Zielerreichung  $\hat{=}$  150 %.

Die fixe Vergütung als erfolgsunabhängige Grundvergütung wird monatlich ausgezahlt. Zusätzlich erhalten die Vorstandsmitglieder Nebenleistungen, insbesondere Zuschüsse zur Renten-, Kranken- und Pflegeversicherung sowie Sachbezüge, die im Wesentlichen aus der Dienstwagennutzung bestehen.

Um die Interessen der Anteilseigner mit denen des Vorstands im hohen Maße in Übereinstimmung zu bringen, bestimmt sich ein Teil der Tantieme nach der Gesamtkapitalrendite des Konzerns. Außerdem wird die persönliche Leistung der Mitglieder des Vorstands bei der Berechnung der Tantieme berücksichtigt; die Auszahlung erfolgt im jeweils folgenden Geschäftsjahr.

Die Struktur der Jahresvergütung sieht in einem Normaljahr eine fixe Vergütung von 40 % sowie variable, kurzfristige Erfolgsbausteine von 60 % vor. Der variable Anteil ist wiederum zu 80 % an die Unternehmens-

performance, d. h. an die erzielte Gesamtkapitalrendite, gebunden; die übrigen 20 % sind von der persönlichen Leistung abhängig. Eine Vergütung von 100 % wird dann erreicht, wenn zum einen die erzielte Gesamtkapitalrendite mindestens 115 % des jeweiligen Kapitalkostensatzes erreicht und zum anderen die persönliche Leistung mit 100 % bewertet wurde. Die Vergütung auf Basis der Gesamtkapitalrendite ist bei einer Obergrenze von 20 Prozentpunkten über der Mindestrendite gedeckelt. Die Zielerreichungsspannen beider variabler Vergütungsbestandteile bewegen sich zwischen 0 und rund 150 %. Die Vergütungshöhe auf Basis eines Normaljahres wird jährlich überprüft. / TAB: 3.4.1

Zusätzlich besteht ab 2010 die Möglichkeit, als variable Vergütungskomponente mit langfristiger Anreizwirkung und Risikocharakter Einkommen aus einem kennzahlenbasierten „Long Term Incentive“-Programm zu beziehen. Diese beruht auf einer mehrjährigen Bemessungs-

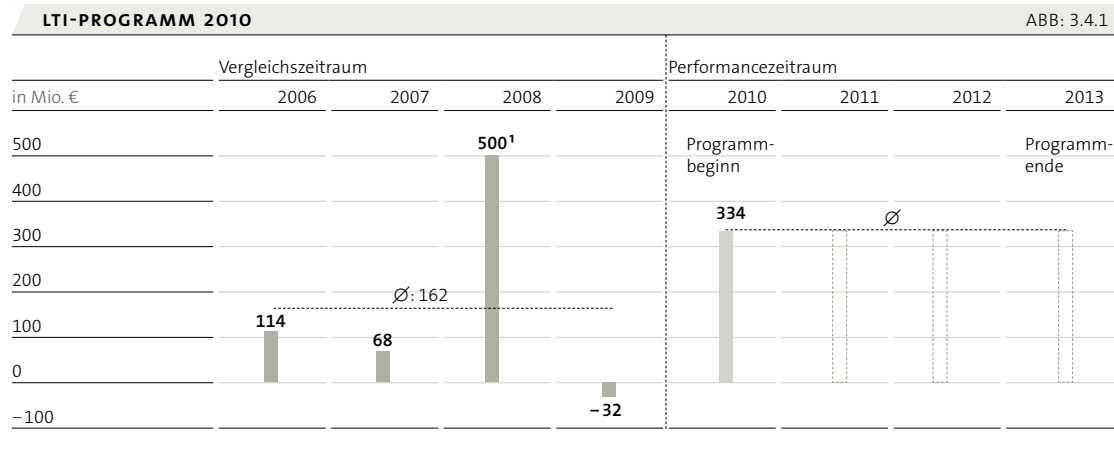

<sup>1</sup> Kappungsgrenze.

grundlage nach Maßgabe der erzielten Wertbeiträge. Dabei wird jeweils anhand von Vierjahreszeiträumen der Beitrag des Vorstands zum Unternehmenserfolg ermittelt. Der Wertbeitrag ergibt sich folgendermaßen:

$$\begin{aligned}
 &\text{Operatives Ergebnis (EBIT I)} \\
 &+ \text{Zinserträge des Geschäftsjahres} \\
 &- \text{Kapitalkosten (vor Steuern) des Geschäftsjahres} \\
 &= \text{Wertbeitrag}
 \end{aligned}$$

Eine Kappungsgrenze für den Wertbeitrag besteht bei  $\pm 500$  Mio. € pro Geschäftsjahr.

Zur Ermittlung des Ergebnisses einer LTI-Tranche werden zwei Vierjahreszeiträume („Vergleichszeitraum“ und „Performancezeitraum“) verglichen. Der Vergleichszeitraum umfasst die vier Jahre vor dem jeweiligen LTI-Beginn, der Performancezeitraum die vier Jahre der jeweiligen LTI-Laufzeit. In Abbildung 3.4.1 werden die Zeiträume des Programms 2010 dargestellt. / ABB: 3.4.1

Zu Beginn eines LTI's wird der Durchschnitt der vier Wertbeiträge des Vergleichszeitraums und nach Programmablauf der Durchschnitt der vier Wertbeiträge des Performancezeitraums ermittelt. Die Differenz dieser durchschnittlichen Wertbeiträge wird an einer Skalierung von  $-200$  bis  $+200$  Mio. € prozentual gespiegelt. Eine stabile Entwicklung, d.h. eine Differenz von

0 Mio. €, entspricht 100% und ist als Normaljahr definiert. In einem solchen Normaljahr beträgt die variable Vergütungskomponente mit langfristiger Anreizwirkung für ein ordentliches Vorstandsmitglied 350.000 €. Bei einer Minderperformance sinkt die Auszahlung linear entsprechend der prozentualen Abweichung bis auf 0%. Bei einer Überperformance steigt die Auszahlung entsprechend bis zu einer Obergrenze von 200% (= 700.000 €). Für den Vorstandsvorsitzenden beträgt die Vergütungskomponente das 1,5fache, d.h. 525.000 € in einem Normaljahr und 1.050.000 €, bei Erreichen der Obergrenze.

Die Auszahlung erfolgt jeweils im April des dem Programmende folgenden Jahres. Für den Fall der Beendigung des Arbeitsverhältnisses oder bei Eintritt in den Ruhestand erfolgt eine anteilige, abgezinsten Auszahlung aller laufenden Tranchen am Ende des darauffolgenden Jahres.

Für die aufgrund der Umstellung der variablen Vergütungskomponente mit langfristiger Anreizwirkung von einer zweijährigen auf eine vierjährige Laufzeit entstehenden Zuflusslücken in den Jahren 2012 und 2013 wurde das neue LTI-Programm virtuell bereits in den Jahren 2008 und 2009 mit jeweils einer Tranche gestartet.

Das neue Vorstandsvergütungssystem wurde von der Hauptversammlung 2010 mit großer Mehrheit gebilligt und vom Verband der Aktionärsvereinigungen in Europa, EUROSHAREHOLDERS, als besonders aktionärsfreundliches Vergütungssystem ausgezeichnet.

Das LTI-Programm ersetzt das zwischen 1999 und 2009 geltende System mit der Möglichkeit, als variable Vergütungskomponente mit langfristiger Anreizwirkung und Risikocharakter Einkommen aus der Ausübung von Aktioptionen zu beziehen. Im Rahmen eines virtuellen Optionsprogramms, das in seiner Ausgestaltung identisch ist mit dem der übrigen Optionsprogrammteilnehmer, konnte der Vorstand im Jahr 2009 letztmalig 30 % seiner erfolgsabhängigen Vergütung für ein Eigeninvestment in κ+s-Aktien verwenden. Mit dem Erwerb dieser Basisaktien erhielten die Teilnehmer virtuelle Optionen, bei denen im Fall der Ausübung eine Barauszahlung erfolgt.

Die Höhe der Barauszahlung bestimmt sich nach der Entwicklung der κ+s-Aktie gegenüber dem Referenzindex DAX. Die für die Berechnung der Performance maßgeblichen Basiskurse der κ+s-Aktie und des DAX entsprechen dem Durchschnittskurs der 100 Börsentage bis zum jeweiligen Basisstichtag (der drittletzte Freitag vor der ordentlichen Hauptversammlung). Eine nachträgliche Änderung der Erfolgsziele oder der Vergleichsparameter ist ausgeschlossen.

Die Gesamtlaufrzeit der bis zum Jahr 2009 gewährten Optionen beträgt fünf Jahre, danach verfallen die nicht

ausgeübten Optionen entschädigungslos. Die Ausübung der Optionen ist nach einer Sperrfrist von zwei Jahren innerhalb zweier Zeitfenster je Jahr im Mai und November nach der Veröffentlichung der Quartalszahlen möglich. Um die Optionen ausüben zu können, müssen die Basisaktien durchgängig bis zum Ausübungstag gehalten werden. Im Übernahmefall („Change of Control“) öffnet sich für sämtliche noch ausstehenden Optionen ein Sonderfenster für die Ausübung.

Bei Abberufung bzw. Eigenkündigung verfallen die bis zu diesem Zeitpunkt noch nicht ausgeübten virtuellen Optionen.

### VERGÜTUNGSHÖHE

Einzelheiten der Vergütung des Vorstands für das Geschäftsjahr 2010 sind in individualisierter Form in Tabelle 3.4.2 dargestellt. / TAB: 3.4.2

Die Gesamtbezüge des Vorstands entfielen im Berichtsjahr auf fünf Vorstandsmitglieder, die jeweils zwölf Monate im Amt waren. Im Vorjahr waren mit Ausnahme von Herrn Nonnenkamp, der vom Aufsichtsrat mit Wirkung vom 1. Juni 2009 als Mitglied des Vorstands bestellt wurde, alle Mitglieder zwölf Monate im Amt. Herr Nonnenkamp hat für das Jahr 2009 keinen Anspruch auf Optionsrechte erlangt, da er sich zum maßgeblichen Stichtag, dem 31. Dezember 2008, noch nicht im Amt befand. Der gegenüber dem Vorjahreszeitraum ausgewiesene Anstieg der Tantiemen beruht insbesondere auf der im Jahr 2010 deutlich gestiegenen Gesamtkapitalrendite. Der Rückgang der ausgewiesenen

### VERGÜTUNG DES VORSTANDS

TAB: 3.4.2

|                                   |             | Jahreseinkommen |                 |                | Gewährte Optionsrechte |                   | Insgesamt      |
|-----------------------------------|-------------|-----------------|-----------------|----------------|------------------------|-------------------|----------------|
|                                   |             | Fixum           | Nebenleistungen | Tantieme       | Anzahl in Stücken      | Wert <sup>1</sup> |                |
| in Tsd. €                         |             |                 |                 |                |                        |                   |                |
| Norbert Steiner                   | 2010        | 590,0           | 24,7            | 1.017,7        | —                      | —                 | 1.632,4        |
|                                   | 2009        | 590,0           | 24,1            | 527,7          | 190.000                | 959,3             | 2.101,1        |
| Joachim Felker                    | 2010        | 380,0           | 19,9            | 645,0          | —                      | —                 | 1.044,9        |
|                                   | 2009        | 380,0           | 20,5            | 320,0          | 152.900                | 772,0             | 1.492,4        |
| Gerd Grimmig                      | 2010        | 380,0           | 30,1            | 645,0          | —                      | —                 | 1.055,1        |
|                                   | 2009        | 380,0           | 26,8            | 325,7          | 153.060                | 772,8             | 1.505,3        |
| Dr. Thomas Nöcker                 | 2010        | 380,0           | 23,5            | 645,0          | —                      | —                 | 1.048,5        |
|                                   | 2009        | 380,0           | 22,2            | 320,0          | 152.900                | 772,0             | 1.494,2        |
| Jan Peter Nonnenkamp <sup>2</sup> | 2010        | 380,0           | 23,2            | 645,0          | —                      | —                 | 1.048,2        |
|                                   | 2009        | 221,7           | 42,6            | 186,7          | —                      | —                 | 451,0          |
| <b>Summe</b>                      | <b>2010</b> | <b>2.110,0</b>  | <b>121,4</b>    | <b>3.597,7</b> | <b>—</b>               | <b>—</b>          | <b>5.829,1</b> |
|                                   | <b>2009</b> | <b>1.951,7</b>  | <b>136,1</b>    | <b>1.680,1</b> | <b>648.860</b>         | <b>3.276,1</b>    | <b>7.044,0</b> |

<sup>1</sup> Zum Gewährungszeitpunkt; eine Ausübung der Optionsrechte ist frühestens zwei Jahre nach Gewährung möglich.

<sup>2</sup> Seit dem 1. Juni 2009.



**VERGÜTUNG MIT LANGFRISTIGER ANREIZWIRKUNG**

TAB: 3.4.3

|                      |      | Optionsprogramm 2009 |                          |
|----------------------|------|----------------------|--------------------------|
|                      |      | Anzahl Optionen      | Wert in Tsd. € am 31.12. |
| Norbert Steiner      | 2010 | 190.000              | 531,8                    |
|                      | 2009 | 190.000              | 387,0                    |
| Joachim Felker       | 2010 | 152.900              | 427,9                    |
|                      | 2009 | 152.900              | 311,4                    |
| Gerd Grimmig         | 2010 | 153.060              | 428,4                    |
|                      | 2009 | 153.060              | 311,7                    |
| Dr. Thomas Nöcker    | 2010 | 152.900              | 427,9                    |
|                      | 2009 | 152.900              | 311,4                    |
| Jan Peter Nonnenkamp | 2010 | –                    | –                        |
|                      | 2009 | –                    | –                        |
| <b>Summe</b>         | 2010 | <b>648.860</b>       | <b>1.816,0</b>           |
|                      | 2009 | <b>648.860</b>       | <b>1.321,5</b>           |

Gesamtvergütung gegenüber dem Vorjahr ist auf die im Rahmen des Aktienoptionsprogramms im Jahr 2009 letztmalig gewährten Optionsrechte zurückzuführen. Im Jahr 2010 kommt es zu keinem Ausweis des neuen LTI-Programms, da dieses zum Zeitpunkt der Auszahlung als Vergütungsbestandteil anzugeben ist.

Die Zahlungen für die im Jahr 2010 von Vorstandsmitgliedern vollständig ausgeübten virtuellen Optionen des Optionsprogramms 2008 betragen für die einzelnen Vorstandsmitglieder (Vorjahreszahlen in Klammern): Herr Steiner 278,2 Tsd. € (650,5 Tsd. €), Herr Felker

525,9 Tsd. € (596,2 Tsd. €), Herr Grimmig 526,8 Tsd. € (597,9 Tsd. €) und Herr Dr. Nöcker 525,9 Tsd. € (596,2 Tsd. €).

Die Werte der im Rahmen des letztmalig 2009 angebotenen Optionsprogramms erworbenen und noch nicht ausgeübten Aktienoptionen werden in Tabelle 3.4.3 dargestellt (Wert bei fiktiver Ausübung am 31. Dezember 2010). / TAB: 3.4.3

**PENSIONSZUSAGEN**

Die Pensionen der aktiven Vorstandsmitglieder bestimmen sich nach einem Bausteinsystem, d.h., für jedes Jahr der Vorstandstätigkeit wird ein Pensionsbaustein gebildet.

Die Basis für die Berechnung der Pensionsbausteine wurde im Jahr 2010 von der variablen Vergütung abgekoppelt und ausschließlich auf das fixe Einkommen des jeweiligen Vorstandsmitglieds bezogen. Um eine Bausteinbildung auf Basis der Vergütung für ein Normaljahr zu erreichen, bilden 40 % der fixen Vergütung die Berechnungsgrundlage. Die jährliche Gesamtpension aus diesem Bausteinsystem wurde nach oben limitiert, um unangemessene Pensionen bei langjährigen Berufungen (>15 Jahre) zu vermeiden. Die Obergrenze beträgt für ein ordentliches Vorstandsmitglied 225.000 € und für den Vorstandsvorsitzenden 300.000 €. Die Werte werden in einem Dreijahresrhythmus – erstmals für das Geschäftsjahr 2014 – überprüft und ggf. angepasst.

Der Betrag wird mittels versicherungsmathematischer Faktoren verrentet; die Faktoren für die Bildung der Bau-

steine 2010 liegen bei den Vorständen je nach Alter zwischen 16,5 und 10,0 % – die Faktoren verringern sich mit zunehmendem Lebensalter. Die einzelnen in den jeweiligen Geschäftsjahren erworbenen Pensionsbausteine werden aufsummiert und bestimmen im Versorgungsfall die dem jeweiligen Vorstandsmitglied oder ggf. seinen Hinterbliebenen zustehende Versorgungsleistung. Erst bei Auszahlung von Rentenleistungen werden diese entsprechend der Veränderung des „Verbraucherpreisindex für Deutschland“ angepasst. Die Ansprüche aus den erworbenen Bausteinen sind unverfallbar.

Endet ein Vorstandsmandat, beginnt die Alterspension nach Vollendung des 65. Lebensjahres, es sei denn, es handelt sich um einen Berufs- oder Erwerbsunfähigkeitsfall oder um eine Hinterbliebenenpension im Todesfall. Im Falle einer Berufs- oder Erwerbsunfähigkeit eines Vorstandsmitglieds vor Erreichen des Pensionsalters erhält dieser eine Invalidenrente in Höhe der bis zum Eintritt der Invalidität gebildeten Rentenbausteine. Tritt die Invalidität vor Erreichen des 55. Lebensjahres ein, werden Bausteine auf Basis eines Mindestwerts für die Jahre fiktiv gebildet, die bis zum 55. Lebensjahr fehlen. Im Falle des Todes eines aktiven oder ehemaligen Vorstandsmitglieds erhalten der hinterbliebene Ehegatte 60 %, jede Halbweise 15 % und jede Vollweise 30 % der Versorgungsleistung. Die Höchstgrenze für die Hinterbliebenenleistung kann 100 % der Versorgungsleistung nicht überschreiten – in diesem Fall werden sie verhältnismäßig gekürzt. Scheidet ein Vorstandsmitglied ab dem vollendeten 60. Lebensjahr aus, gilt dies als Eintritt des Versorgungsfalls im Sinne der Versorgungs-

## PENSIONEN

TAB: 3.4.4

|                                   |             | Alter | Zeitwert zum 1.1. | Pensionsaufwand <sup>1</sup> | Zeitwert zum 31.12. <sup>3</sup> |
|-----------------------------------|-------------|-------|-------------------|------------------------------|----------------------------------|
| in Tsd. €                         |             |       |                   |                              |                                  |
| Norbert Steiner                   | 2010        | 56    | 2.033,5           | 466,5                        | 2.721,6                          |
|                                   | 2009        |       | 1.734,3           | 300,8                        | 2.033,5                          |
| Joachim Felker                    | 2010        | 58    | 1.321,5           | 304,9                        | 1.738,9                          |
|                                   | 2009        |       | 1.126,6           | 194,2                        | 1.321,5                          |
| Gerd Grimmig                      | 2010        | 57    | 2.006,6           | 354,6                        | 2.544,8                          |
|                                   | 2009        |       | 1.771,3           | 235,6                        | 2.006,6                          |
| Dr. Thomas Nöcker                 | 2010        | 52    | 1.129,3           | 296,8                        | 1.553,9                          |
|                                   | 2009        |       | 942,5             | 187,8                        | 1.129,9                          |
| Jan Peter Nonnenkamp <sup>2</sup> | 2010        | 47    | 98,6              | 264,7                        | 393,7                            |
|                                   | 2009        |       | —                 | 89,0                         | 98,6                             |
| <b>Summe</b>                      | <b>2010</b> |       | <b>6.589,5</b>    | <b>1.687,5</b>               | <b>8.952,9</b>                   |
|                                   | <b>2009</b> |       | <b>5.574,7</b>    | <b>1.007,4</b>               | <b>6.589,5</b>                   |

<sup>1</sup> Einschließlich Zinsaufwand.<sup>2</sup> Seit dem 1. Juni 2009.<sup>3</sup> Aufgrund der Anwendung der sogenannten Korridormethode, nach der versicherungsmathematische Gewinne und Verluste nur im Falle der Überschreitung des 10 %-Korridors in der Gewinn- und Verlustrechnung erfasst werden, sind die Anwartschaftsbarwerte per 1. Januar 2010 nicht mittels des Pensionsaufwands 2010 auf die entsprechenden Werte zum 31. Dezember 2010 überleitbar.

zusage. Für die Mitglieder des Vorstands wurden im Jahr 2010 die in Tabelle 3.4.4 dargestellten Beträge den Pensionsrückstellungen zugeführt. / TAB: 3.4.4

Der deutliche Anstieg des Pensionsaufwands gegenüber dem Vorjahresniveau beruht auf den im Vorjahr ergebnisbedingt geringeren Pensionsbausteinen, die noch auf Basis der alten Berechnungsmethode ermittelt wurden.

#### VORZEITIGE BEENDIGUNG DER VORSTANDSVERTRÄGE

Im Falle eines wirksamen Widerrufs der Bestellung zum Vorstandsmitglied erhält das Vorstandsmitglied im Zeitpunkt der Beendigung eine Abfindung in Höhe von dem 1,5 fachen der Festvergütung, maximal aber in Höhe der Gesamtbezüge für die Restlaufzeit des Dienstvertrags.

Für den Fall der vorzeitigen Auflösung eines Dienstvertrags infolge eines Übernahmefalls („Change of Control“) erfolgt die Auszahlung der bis zum Ende der

ursprünglichen Bestelldauer noch ausstehenden Grundvergütung und Tantieme zuzüglich einer Ausgleichszahlung, sofern kein Grund vorliegt, der eine fristlose Beendigung des Vertrags des Betroffenen rechtfertigt. Die Tantieme bemisst sich nach dem Durchschnitt der vorausgegangenen zwei Jahre, zuzüglich einer Ausgleichszahlung. Die Ausgleichszahlung beträgt das 1,5 fache des Jahresfixums. Jedes Vorstandsmitglied hat bei einem „Change of Control“-Fall noch bis Ende Juli 2011 ein Sonderkündigungsrecht, wobei bei der Ausübung des Rechts kein Anspruch auf Ausgleichszahlung besteht. In diesem Fall besteht nur ein Anspruch auf die Auszahlung der noch anstehenden Grundvergütung und Tantieme.

#### SONSTIGES

Im Berichtsjahr wurden den Vorstandsmitgliedern Leistungen von Dritten im Hinblick auf die Vorstandstätigkeit weder zugesagt noch gewährt. Über die genannten Dienstverträge hinaus gibt es keine vertraglichen Beziehungen der Gesellschaft oder ihrer Konzerngesellschaften mit Mitgliedern des Vorstands oder diesen nahestehenden Personen.

Die Gesamtbezüge der früheren Mitglieder des Vorstands und ihrer Hinterbliebenen beliefen sich im Berichtsjahr auf 987,8 Tsd. € (Vorjahr: 2.288,7 Tsd. €). Der gegenüber dem Vorjahreszeitraum ausgewiesene Rückgang der Bezüge beruht insbesondere auf der im Jahr 2009 letztmalig erfolgten Ausübung von Aktienoptionen des ehemaligen Vorstandsvorsitzenden.

## VERGÜTUNG DES AUFSICHTSRATS

Die Vergütung des Aufsichtsrats ist in § 12 der Satzung geregelt. Danach erhält ein Mitglied des Aufsichtsrats eine jährlich feste Vergütung von 55.000 € sowie eine jährliche variable Vergütung, die durch die Höhe der von der K+S GRUPPE im jeweiligen Geschäftsjahr erzielten Gesamtkapitalrendite wie folgt bestimmt wird: Voraussetzung für den Anspruch auf Zahlung einer variablen Vergütung ist das Erreichen einer Mindestrendite; diese entspricht 115 % der Kapitalkosten vor Steuern der K+S GRUPPE im betreffenden Geschäftsjahr; bei Erreichen der Mindestrendite erhält ein Mitglied des Aufsichtsrats eine variable Vergütung von 15.000 €; für jeden Prozentpunkt, um den die Gesamtkapitalrendite die Mindestrendite übersteigt, erhöht sich die variable Vergütung um jeweils 1.500 €. Die variable Vergütung ist begrenzt auf maximal 45.000 € pro Jahr. Der Vorsitzende des Aufsichtsrats erhält das Doppelte, der stellvertretende Vorsitzende das 1,5fache der Vergütungen. Die Mitglieder des Prüfungsausschusses erhalten eine weitere Vergütung von 7.500 € pro Jahr. Auch der Vorsitzende dieses Ausschusses erhält das Doppelte dieser Vergütung. Die Gesellschaft gewährt jedem Mitglied des Aufsichtsrats für die Teilnahme an einer Sitzung des Aufsichtsrats oder eines seiner Ausschüsse, denen er angehört, ein Sitzungsgeld von 500 €, bei mehreren Sitzungen an einem Tag jedoch maximal 1.000 € pro Tag. Die Mitglieder des Aufsichtsrats haben gegenüber der Gesellschaft Anspruch auf Ersatz der zur Wahrnehmung ihrer Aufgaben notwendigen und angemessenen Auslagen. Sie haben ferner Anspruch auf Ersatz der von ihnen

## VERGÜTUNG DES AUFSICHTSRATS <sup>1</sup>

TAB: 3.4.5

|                                                         |      | Fixe Vergütung | Variable Vergütung | Prüfungsausschuss | Sitzungsgelder | Gesamt  |
|---------------------------------------------------------|------|----------------|--------------------|-------------------|----------------|---------|
| in €                                                    |      |                |                    |                   |                |         |
| Dr. Ralf Bethke<br>(Vorsitzender)                       | 2010 | 110.000        | 39.000             | 7.500             | 6.000          | 162.500 |
|                                                         | 2009 | 110.000        | –                  | 7.500             | 8.000          | 125.500 |
| Michael Vassiliadis<br>(Stellvertretender Vorsitzender) | 2010 | 82.500         | 29.250             | 7.500             | 5.500          | 124.750 |
|                                                         | 2009 | 82.500         | –                  | 7.500             | 7.000          | 97.000  |
| Ralf Becker<br>(seit 1.8.2009)                          | 2010 | 55.000         | 19.500             | –                 | 3.000          | 77.500  |
|                                                         | 2009 | 22.917         | –                  | –                 | 1.500          | 24.417  |
| Jella S. Benner-Heinacher                               | 2010 | 55.000         | 19.500             | –                 | 3.000          | 77.500  |
|                                                         | 2009 | 55.000         | –                  | –                 | 3.500          | 58.500  |
| Dr. Uwe-Ernst Bufe<br>(bis 31.8.2009)                   | 2010 | –              | –                  | –                 | –              | –       |
|                                                         | 2009 | 36.616         | –                  | –                 | 2.500          | 39.116  |
| George Cardona<br>(seit 9.10.2009)                      | 2010 | 55.000         | 19.500             | –                 | 3.000          | 77.500  |
|                                                         | 2009 | 12.658         | –                  | –                 | 500            | 13.158  |
| Harald Döll<br>(seit 1.8.2009)                          | 2010 | 55.000         | 19.500             | –                 | 3.000          | 77.500  |
|                                                         | 2009 | 22.917         | –                  | –                 | 1.500          | 24.417  |
| Dr. Rainer Gerling                                      | 2010 | 55.000         | 19.500             | –                 | 3.000          | 77.500  |
|                                                         | 2009 | 55.000         | –                  | –                 | 4.000          | 59.000  |
| Rainer Grohe                                            | 2010 | 55.000         | 19.500             | –                 | 3.500          | 78.000  |
|                                                         | 2009 | 55.000         | –                  | –                 | 6.000          | 61.000  |
| Dr. Karl Heidenreich                                    | 2010 | 55.000         | 19.500             | 7.500             | 4.500          | 86.500  |
|                                                         | 2009 | 55.000         | –                  | 7.500             | 4.500          | 67.000  |

<sup>1</sup> Angaben ohne Entschädigung für die von Aufsichtsratsmitgliedern aufgrund ihrer Tätigkeit zu entrichtende Umsatzsteuer.

aufgrund ihrer Aufsichtsrats-tätigkeit zu entrichtenden Umsatzsteuer.

Einzelheiten der Vergütung des Aufsichtsrats für das Geschäftsjahr 2010 ergeben sich in individualisierter Form aus Tabelle 3.4.5. / TAB: 3.4.5

Zusätzlich wurden im Jahr 2010 an die Aufsichtsratsmitglieder Aufwandsentschädigungen von insgesamt 29,7 Tsd. € gezahlt (Vorjahr: 20,7 Tsd. €). Im Geschäftsjahr 2010 wurden keine Vergütungen für Tätigkeiten im Aufsichtsrat von Tochterunternehmen gezahlt, auch Vorteile für persönlich erbrachte Leistungen, insbesondere Beratungs- und Vermittlungsleistungen, wurden den Aufsichtsratsmitgliedern nicht gewährt.

**VERGÜTUNG DES AUFSICHTSRATS<sup>1</sup> (FORTSETZUNG)**

TAB: 3.4.5

|                                            |             | Fixe<br>Vergütung | Variable<br>Vergütung | Prüfungs-<br>ausschuss | Sitzungs-<br>gelder | Gesamt           |
|--------------------------------------------|-------------|-------------------|-----------------------|------------------------|---------------------|------------------|
| in €                                       |             |                   |                       |                        |                     |                  |
| Rüdiger Kienitz                            | 2010        | 55.000            | 19.500                |                        | 3.000               | 77.500           |
|                                            | 2009        | 55.000            | —                     |                        | 3.500               | 58.500           |
| Klaus Krüger                               | 2010        | 55.000            | 19.500                | 7.500                  | 6.000               | 88.000           |
|                                            | 2009        | 55.000            | —                     | 7.500                  | 8.000               | 70.500           |
| Dieter Kuhn                                | 2010        | 55.000            | 19.500                |                        | 3.000               | 77.500           |
|                                            | 2009        | 55.000            | —                     |                        | 4.000               | 59.000           |
| Heinz-Gerd Kunaschewski<br>(bis 31.7.2009) | 2010        | —                 | —                     |                        | —                   | —                |
|                                            | 2009        | 32.083            | —                     |                        | 2.000               | 34.083           |
| Dr. Bernd Malmström                        | 2010        | 55.000            | 19.500                |                        | 3.000               | 77.500           |
|                                            | 2009        | 55.000            | —                     |                        | 3.500               | 58.500           |
| Dr. Rudolf Müller                          | 2010        | 55.000            | 19.500                |                        | 2.500               | 77.000           |
|                                            | 2009        | 55.000            | —                     |                        | 3.000               | 58.000           |
| Friedrich Nothhelfer<br>(bis 31.7.2009)    | 2010        | —                 | —                     |                        | —                   | —                |
|                                            | 2009        | 32.083            | —                     |                        | 3.000               | 35.083           |
| Renato De Salvo                            | 2010        | 55.000            | 19.500                |                        | 3.000               | 77.500           |
|                                            | 2009        | 55.000            | —                     |                        | 4.000               | 59.000           |
| Dr. Eckart Sünner                          | 2010        | 55.000            | 19.500                | 15.000                 | 4.500               | 94.000           |
|                                            | 2009        | 55.000            | —                     | 15.000                 | 5.500               | 75.500           |
| <b>Summe</b>                               | <b>2010</b> | <b>962.500</b>    | <b>341.250</b>        | <b>45.000</b>          | <b>59.500</b>       | <b>1.408.250</b> |
|                                            | <b>2009</b> | <b>956.774</b>    | <b>—</b>              | <b>45.000</b>          | <b>75.500</b>       | <b>1.077.274</b> |

<sup>1</sup> Angaben ohne Entschädigung für die von Aufsichtsratsmitgliedern aufgrund ihrer Tätigkeit zu entrichtende Umsatzsteuer.

DIE K+S GRUPPE IST AUF LANGFRISTIGES UND NACHHALTIGES WACHSTUM AUSGERICHTET. DABEI STREBEN WIR EINEN FAIREN AUSGLEICH VON WIRTSCHAFTLICHEN, ÖKOLOGISCHEN UND SOZIALEN BELANGEN AN. MIT DER FÖRDERUNG, DER VEREDELUNG UND DEM VERTRIEB VON ROHSTOFFEN LEISTEN WIR WELTWEIT EINEN WICHTIGEN BEITRAG ZUR VERBESSERUNG VON ERNÄHRUNG, GESUNDHEIT UND LEBENSQUALITÄT.

# WACHSTUM ERLEBEN

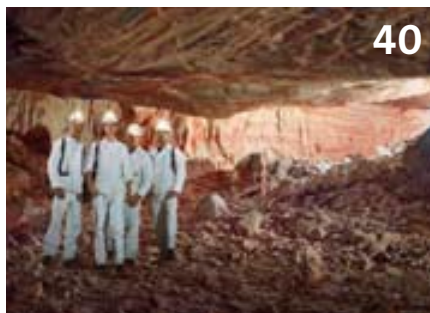

40

WACHSTUM BRAUCHT ROHSTOFFE

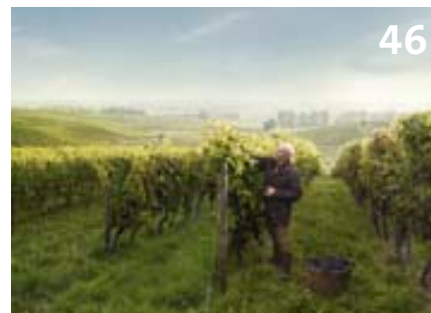

46

WACHSTUM BRAUCHT ERFAHRUNG

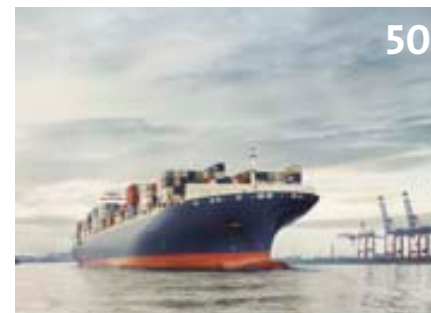

50

WACHSTUM BRAUCHT LOGISTIK

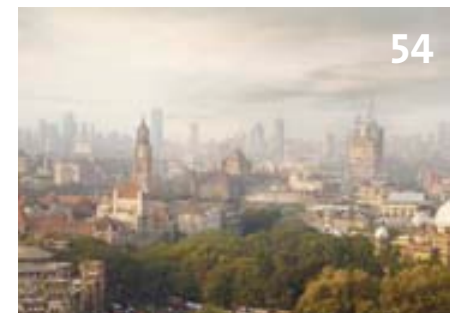

54

WACHSTUM BRAUCHT PERSPEKTIVEN

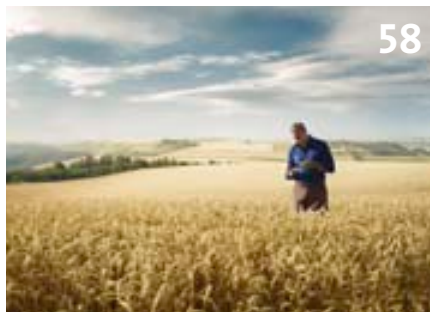

58

WACHSTUM BRAUCHT VERANTWORTUNG

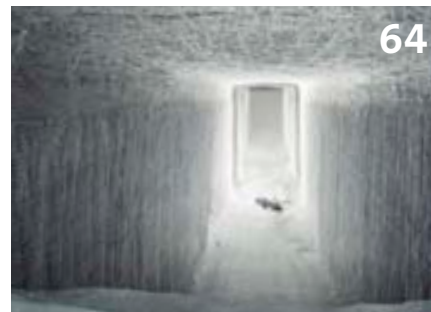

64

WACHSTUM BRAUCHT TIEFGANG

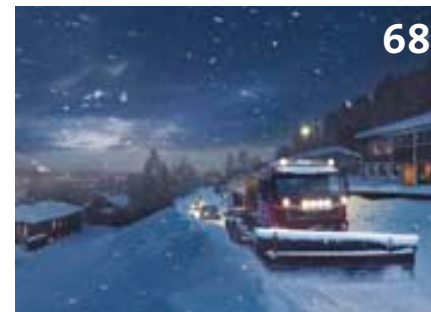

68

WACHSTUM BRAUCHT VERLÄSSLICHKEIT

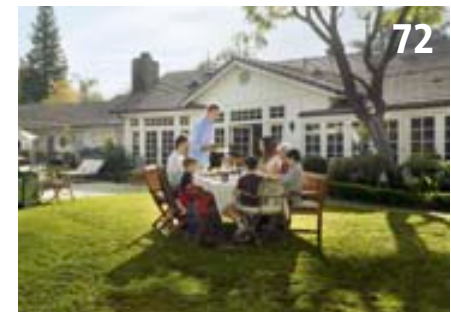

72

WACHSTUM BRAUCHT EIN ZUHAUSE



# WACHSTUM BRAUCHT ROHSTOFFE

*Seit mehr als 100 Jahren fördern und veredeln wir Rohstoffe, die in nahezu allen Bereichen des täglichen Lebens Grundlage für nachhaltiges Wachstum sind. In bis zu 1.500 Metern Tiefe fördern unsere Bergleute wertvolle Rohsalze und machen sie für uns alle nutzbar.*

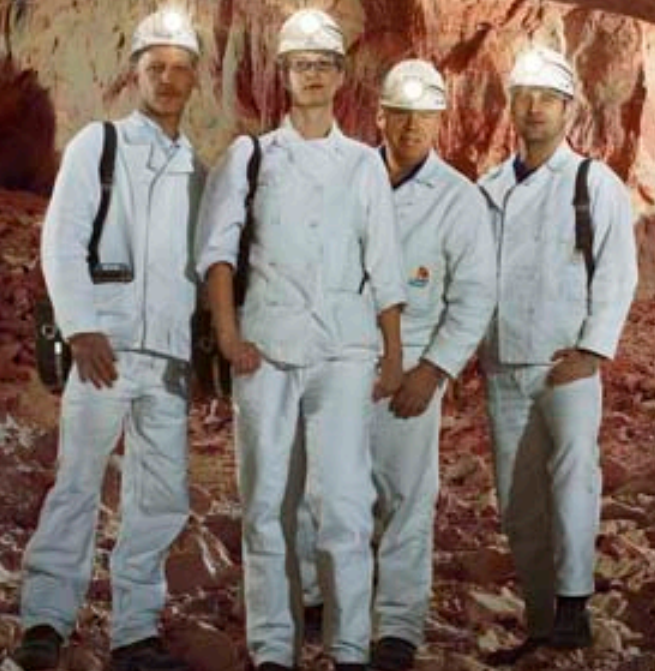

DIE BERGLEUTE AUS DEM KALIWERK NEUHOF-ELLERS SIND STOLZ AUF IHRE ARBEIT, DA SICH DIE ROHSALZE AUS DIESER LAGERSTÄTTE DURCH EINE VIELFALT AN UNTERSCHIEDLICHEN MINERALIEN AUSZEICHNEN – IDEAL FÜR HOCHWERTIGE DÜNGEMITTEL.



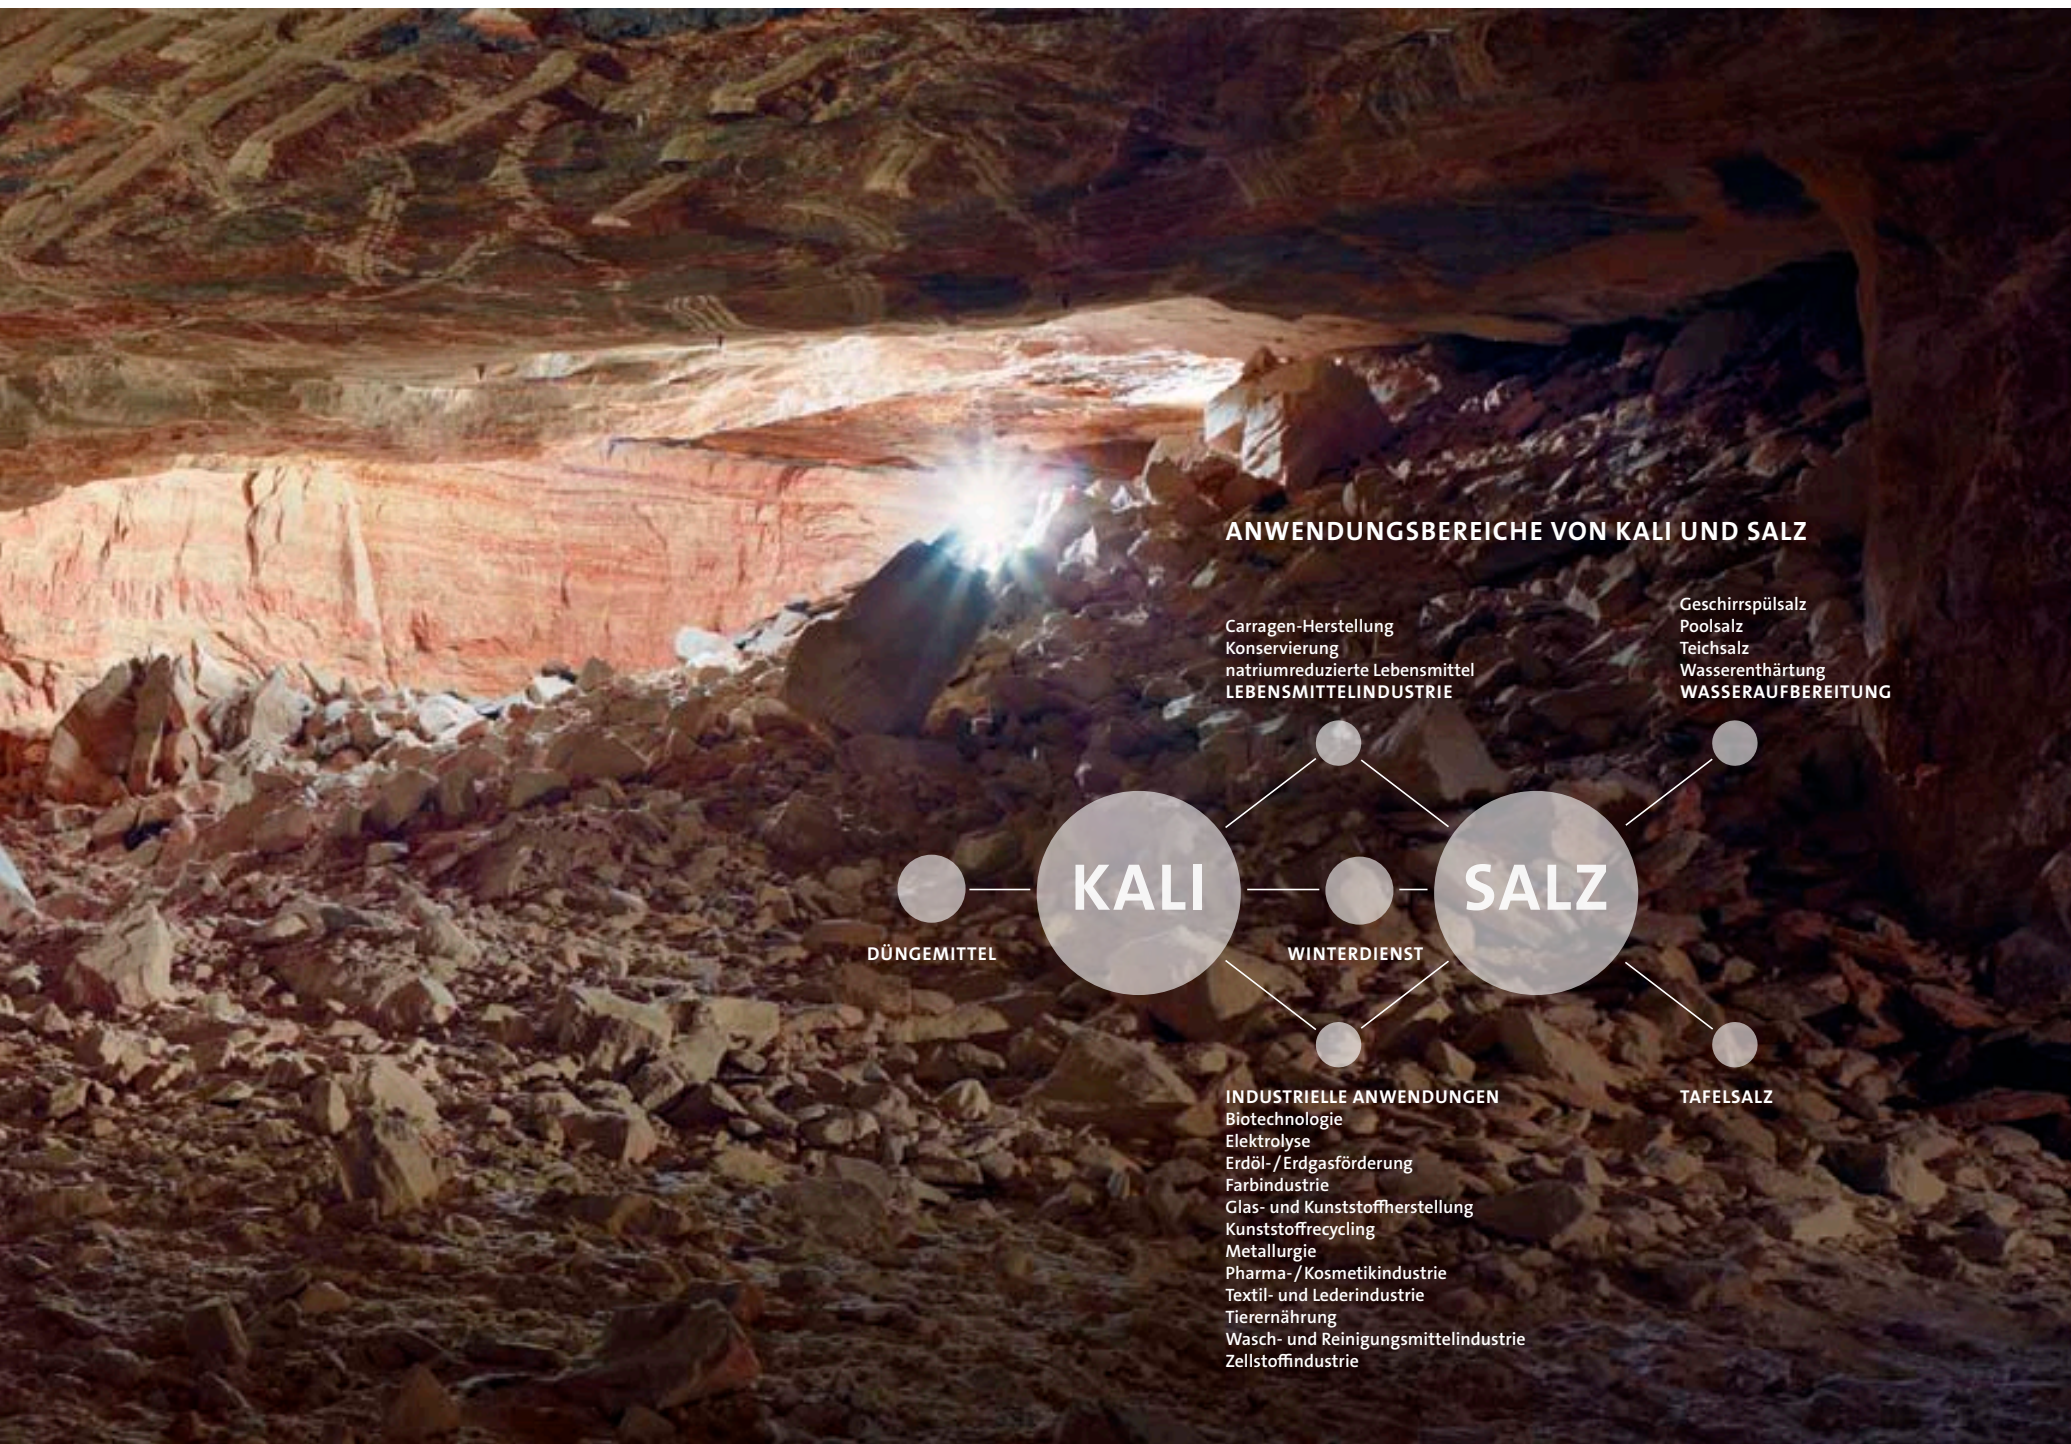

## ANWENDUNGSBEREICHE VON KALI UND SALZ

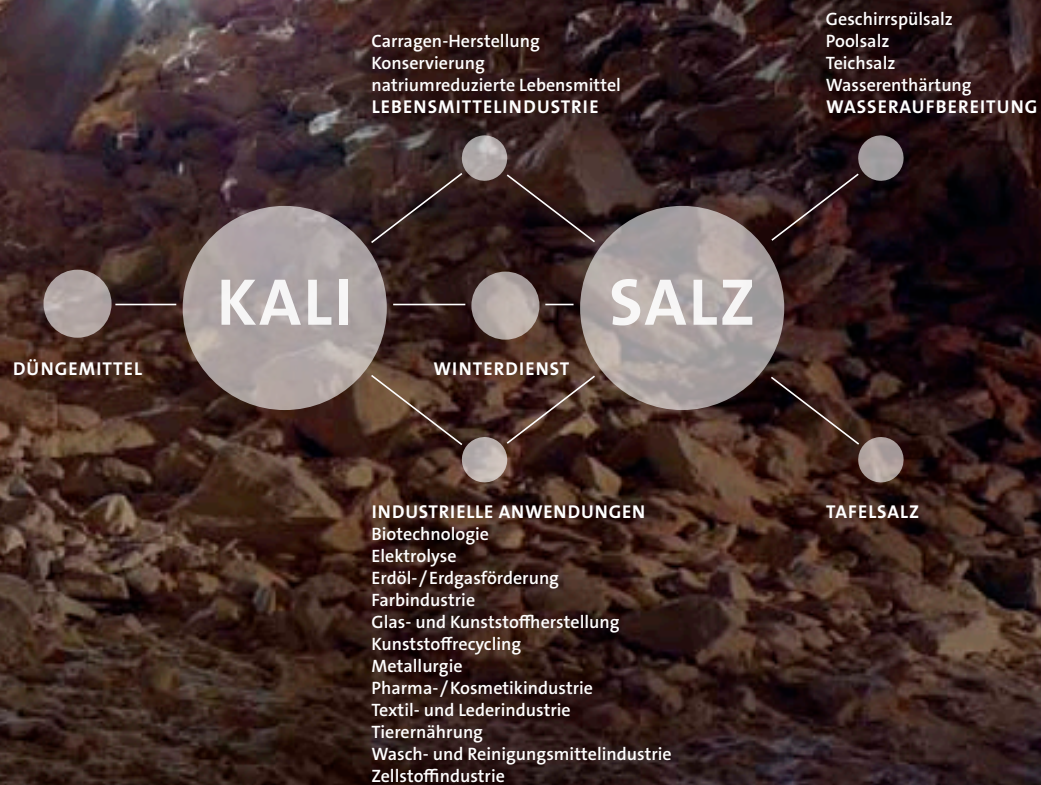



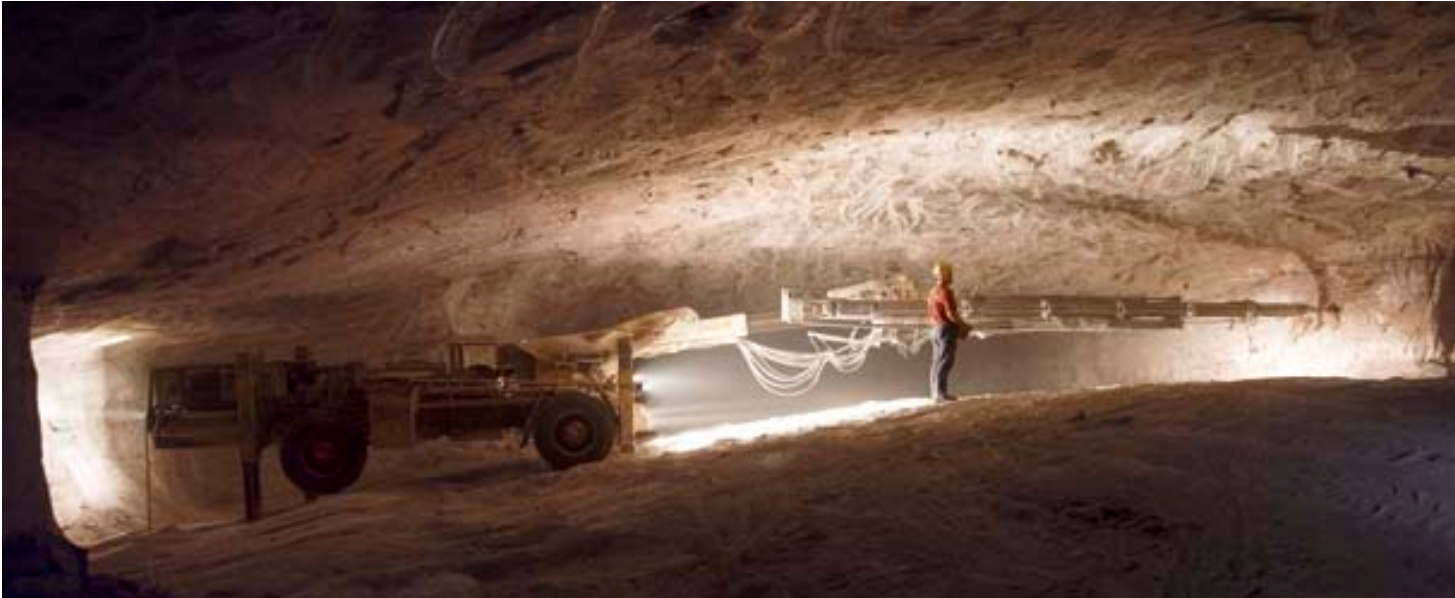

*„Mit unseren Rohstoffen, die wir zu hochwertigen Produkten veredeln, leisten wir einen wichtigen Beitrag zur Verbesserung von Ernährung, Gesundheit und Lebensqualität.“*

**NORBERT STEINER**  
VORSTANDSVORSITZENDER DER K+S GRUPPE

MIT EINEM COMPUTERGESTÜTZTEN BOHRWAGEN TREIBT EIN BERGMANN BIS ZU SIEBEN METER TIEFE LÖCHER IN DAS GEBIRGE, UM SO DIE SPRENGUNG DES ROHSALZES VORZUBEREITEN. DABEI IST FINGERSPITZENGEFÜHL GEFRAGT, DAMIT DIE BOHRLÖCHER OPTIMAL ANGEORDNET SIND.

### UNSERE NATÜRLICHEN ROHSTOFFE SIND DIE BASIS UNSERES WACHSTUMS

Die K+S GRUPPE gehört weltweit zur Spitzengruppe der Anbieter von Spezial- und Standarddüngemitteln sowie Salzprodukten. Die von uns gewonnenen Rohstoffe sind die Basis unserer weltweiten Aktivitäten. Wir gewinnen Kali- und Magnesiumrohsalze für eine jährliche Produktionsleistung von bis zu 7,5 Mio. t Ware in sechs deutschen Bergwerken. Zudem bieten wir die ganze Bandbreite von stickstoffhaltigen Düngemitteln für den Einsatz im Acker-, Gemüse-, Obst- und Weinbau an. Die zweite Säule der K+S GRUPPE ist Salz – hier sind wir weltweit die Nummer 1. Zur Gewinnung gehen unsere Mitarbeiter dies- und jenseits des Atlantiks in bis zu 750 Meter Tiefe. Ein Aufwand, der sich lohnt. Mit unserem über 100 Jahre gewachsenen Know-how machen wir die Ressourcen des Bodens für uns alle effizient nutzbar. Das Ergebnis ist eine Produktpalette von Speise-, Gewerbe-, Industrie- und Auftausalzen für Industrie und private Verbraucher, deren Breite kaum zu übertreffen ist. „Die Kombination unserer natürlichen Rohstoffe Kali, Magnesium und Salz macht uns weltweit beinahe einzigartig, denn sie bietet z.B. auf der Produktionsseite bei Technik, Bergbau und Geologie erhebliche Synergien und ergänzt sich auf der Absatzseite nahezu perfekt“, fasst Norbert Steiner, Vorstandsvorsitzender der K+S AKTIENGESELLSCHAFT, die strategische Ausrichtung der Gruppe zusammen.

### WACHSTUM DURCH KALI- UND MAGNESIUMSALZE

Als einer der wenigen deutschen Rohstoffproduzenten von Weltrang leisten wir einen wichtigen Beitrag zur nachhaltigen Ernährung der Weltbevölkerung. Immer mehr Menschen brauchen immer mehr Nahrung. Das bedeutet, dass auch die Getreide- und Nahrungsmittel-

produktion immer weiter wachsen muss. Kalium ist hier ein besonders wichtiges Element, denn es reguliert den Wasserhaushalt der Pflanze, erhöht die Standfestigkeit, macht sie widerstandsfähiger gegenüber Frost, Trockenheit, Pilzerkrankungen und Schädlingen und verbessert Qualität und Geschmack.

Die Ortung der begehrten Rohstoffe beginnt mit vielen Explorationsbohrungen und wird mit einem kaum handgroßen Detektor fortgesetzt. Sekundenschnell zeigt das Display des Messgerätes den Wertstoffgehalt an. Unsere Vorfahren konnten da noch nicht so exakt vorgehen; ein herausgebrochenes Stück Gestein wurde einer Geschmacksprobe unterzogen: Prickelte es auf der Zunge, war man fündig geworden. Um heute an das kalihaltige Gestein zu kommen, kommt High-Tech statt der Spitzhacke zum Einsatz. Modernste Bohrfahrzeuge fressen sich durch die bis zu 250 Millionen Jahre alten Ablagerungen urzeitlicher Meere. Bedient werden diese gewaltigen Maschinen von ausgebildeten Bergleuten. Jeder Mitarbeiter hier unten ist ein Spezialist an seinem Arbeitsplatz. So auch der Sprenghauer: Er befüllt nach dem Bohren die Löcher mit Gesteinssprengstoff. Wenn am Ende der Schicht alle Mann die Grube verlassen haben, wird die Ladung ferngezündet. Pro Abbaustätte werden täglich bis zu 70.000 Tonnen Material bewegt. Das Rohsalz mit bis zu 30 Prozent Kalianteil muss nun zur Weiterverarbeitung an die Oberfläche. Hier treten kilometerlange Förderbänder in Aktion, die das weiße Gold zum Schacht und dann ans Tageslicht bringen. Um an das begehrte Kalium und die anderen wichtigen Nährstoffe zu kommen, wird das zerkleinerte Mineral in seine Bestandteile getrennt.

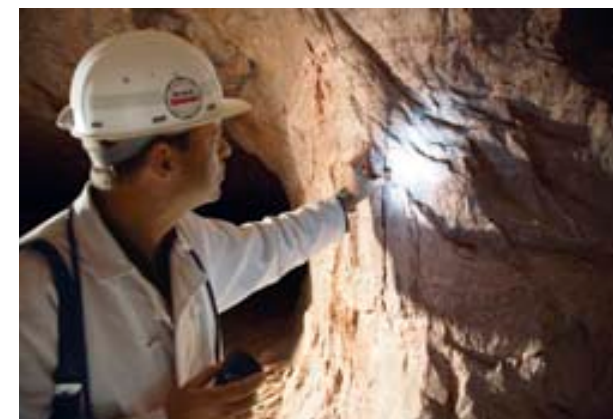

Ein Steiger prüft das Gestein auf seine Zusammensetzung, um den weiteren Abbau zu planen. Mit Hilfe moderner Diagnoseinstrumente stellt der Fachmann dann die genaue Lage der Wertstoffkomponenten fest, bevor die Sprengung vorbereitet werden kann.

UNSCHEINBARE SALZBROCKEN WERDEN MIT UNSEREN MODERNEN ABBAU- UND AUFBEREITUNGSTECHNIKEN ZU WERTVOLLEN SPEZIALDÜNGEMITTELN VERARBEITET. DIE IN DEUTSCHLAND EINZIGARTIGE NÄHRSTOFFKOMBINATION AUS KALIUM, MAGNESIUM UND SCHWEFEL ERMÖGLICHT REICHE ERNTEN.

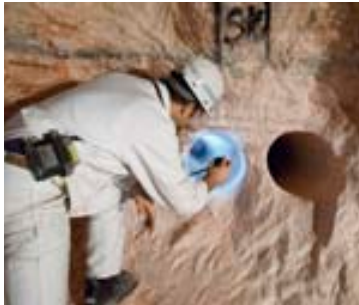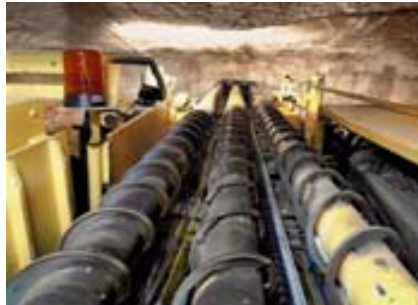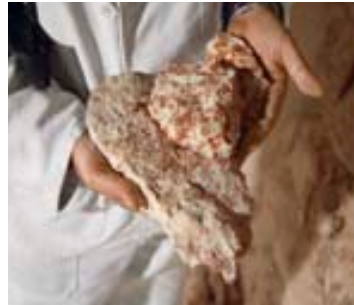

#### WACHSTUM DURCH VIELFALT UNSERER ROHSTOFFE

Wir machen den Reichtum der Natur für uns alle nutzbar. Neben Kalium können auch Magnesium und Schwefel in unseren heimischen Lagerstätten abgebaut werden. Zu Spezialdüngemitteln verarbeitet sind diese Nährstoffe die Voraussetzung für ertragreiche Ernten.

Wir sind weltweit der viertgrößte und in Europa der größte Produzent von Kali- und Magnesiumprodukten. Um unsere Rohstoffbasis auch langfristig international auszuweiten, haben wir 2011 mit dem Erwerb von POTASH ONE Zugang zu reichhaltigen Kalivorkommen in Kanada erhalten.

#### WACHSTUM DURCH SALZ

Unser Erfolg fußt auch auf einem weiteren essenziellen Rohstoff – Natriumchlorid. Denn Salz ist aus unserem Leben nicht wegzudenken. Es dient der Gesundheit, zum Würzen, Färben und Konservieren. Auch für die Sicherheit im Straßenverkehr ist es unentbehrlich und wichtiger Bestandteil bei der Produktion von Glas, Papier, Textilien oder Kunststoffen. Unsere Tochtergesellschaft *esco* ist Europas größter Salzproduzent. In Steinsalzbergwerken und Solbetrieben wird das nützliche Mineral mit einem Reinheitsgrad von bis zu 99% gewonnen. Dieser Reinheitsgrad nimmt im europäischen Wettbewerb einen Spitzenplatz ein. Ein Vorteil, der besonders bei der Herstellung von medizinischen Produkten zum Tragen kommt, denn Salz dieser Qualitätsstufe wird in Infusionen und Dialyseflüssigkeiten dringend benötigt. Ein wahrer Schatz befindet sich auch in den Lagerstätten unserer Tochterfirma *spl* in der chilenischen Atacama-Wüste: Die Reserven, entstanden aus den Überresten ehemaliger Salzseen, deren Wasser aufgrund starker Sonneneinstrahlung verdunstet ist, reichen dort alleine aus, um die Weltbevölkerung für die nächsten 200 Jahre zu versorgen. Wir haben dort einen einzigartigen Zugang zur Seelogistik, denn der Hafen und die Beladungsanlagen liegen in unmittelbarer Nähe. Im Jahr 2009 ist die *K+S GRUPPE* schließlich durch den Kauf des bekannten US-Salzproduzenten *MORTON SALT* zum weltgrößten Hersteller von Salz aufgestiegen.

Ein Zukauf, der die Wettbewerbsfähigkeit der gesamten K+S GRUPPE gestärkt hat. International sind wir im Salzgeschäft nun sehr gut aufgestellt. Dies zeigte sich besonders deutlich im Extremwinter 2010/2011: MORTON SALT, SPL und ESCO unterstützten sich über drei Kontinente hinweg erfolgreich mit gegenseitigen Salzlieferungen.

#### WACHSTUM DURCH HOHE WERTSCHÖPFUNGSTIEFE

Die Kernkompetenz der Unternehmensgruppe liegt in der Förderung und Veredelung von Rohstoffen und dem Vertrieb der daraus gewonnenen Produkte. Im Geschäftsfeld Düngemittel stellen wir aus den abgebauten Kali- und Magnesiumrohsalzen bedarfsgerechte Produkte für Landwirtschaft und Industrie her. Im Bereich der Mineraldünger ist unsere Produktvielfalt unübertroffen: Für jede Bodenart und Pflanzenkultur stellen wir das passende Düngemittel her. Im Geschäftsfeld Salz wird das geförderte Salz im Hinblick auf Qualität, Körnung und Verarbeitung sowie Konfektionierung auf den jeweiligen Kundenbedarf zugeschnitten. Damit alles beim Kunden in hoher Qualität und zuverlässig ankommt, haben wir ein weltumspannendes Logistiknetz mit eigenem Verladeterminale in Hamburg, produktionsnahe Hafen in Chile und zahlreichen Distributionszentren in Nordamerika von ISCO und MORTON SALT.

#### WACHSTUM DURCH NACHHALTIGES WIRTSCHAFTEN

Wir stellen uns den Herausforderungen im Spannungsfeld von Ökonomie, Ökologie und sozialer Verantwortung. Wesentlicher Bestandteil unserer Strategie ist es, auf Chancen und Herausforderungen frühzeitig zu reagieren, die sich aus den Megatrends Bevölkerungswachstum, veränderte Ernährungsgewohnheiten und steigende Nachfrage nach Agrarrohstoffen ergeben. Durch diese Ausrichtung auf die Märkte von Morgen ermöglichen und sichern wir viele tausend Arbeitsplätze vor allem in strukturschwachen Gebieten. Unsere Produktion und die daraus resultierende Wertschöpfung ist ein wichtiger wirtschaftlicher Impuls für viele Regionen. Im Bereich des Umweltschutzes arbeiten wir seit vielen Jahren erfolgreich daran, den Nutzungsgrad unserer Kraftwerke auf über 90 % zu erhöhen. Die Standorte arbeiten somit in der Nähe der theoretisch erzielbaren Energieeffizienz. Zudem werden wir bis zu 360 Mio. € zusätzlich in den regionalen Gewässerschutz investieren. Denn Wachstum und Nachhaltigkeit schließen sich nicht aus – sie sind wechselseitige Bedingung für eine wirtschaftlich erfolgreiche Unternehmensgruppe – jetzt und in Zukunft.

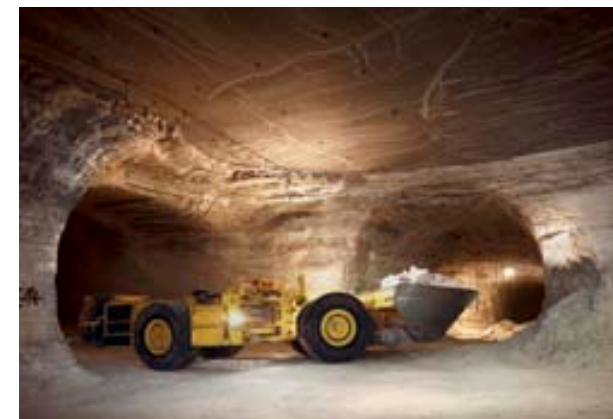

Robuste Radlader befördern in ihren mächtigen Schaufeln bis zu 20 Tonnen abgebautes Rohsalz, das sogenannte Haufwerk, zur Kippstelle im Bergwerk. Dort werden die Salzbrocken in einem Brecher zerkleinert, um dann auf langen Förderbändern zum Schacht und dann ans Tageslicht zu gelangen.



# WACHSTUM BRAUCHT ERFAHRUNG

---

*Wir geben unsere in über 100 Jahren gewachsene Erfahrung an die Landwirte im persönlichen Gespräch weiter. Mit unseren Düngemitteln auf Basis von Kalium, Magnesium und Stickstoff sind reife, gehaltvollere Trauben der Lohn für alle Mühen.*

DER WINZER PRÜFT MIT GEÜBTEM BLICK, WIE ER SEINE REBEN ZURÜCKSCHNEIDEN MUSS, UM GUTE ERTRÄGE ZU ERWIRTSCHAFTEN. DIE DÜNGEMITTELSPEZIALITÄTEN DER K+S GRUPPE HELFEN IHM DABEI, SEINE PFLANZEN OPTIMAL MIT NÄHRSTOFFEN ZU VERSORGEN.



## EINFLUSS DER KALIUMDÜNGUNG AUF DAS PFLANZENWACHSTUM

Der Ertrag einer Pflanze wird durch das Element bestimmt, das in der geringsten Menge zur Verfügung steht.

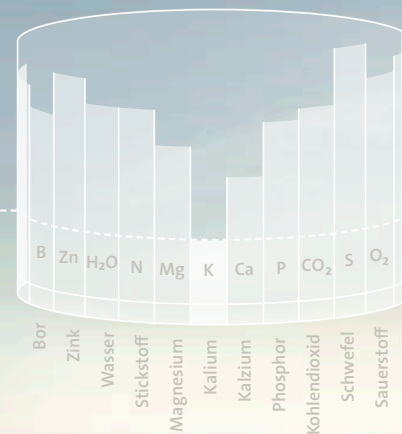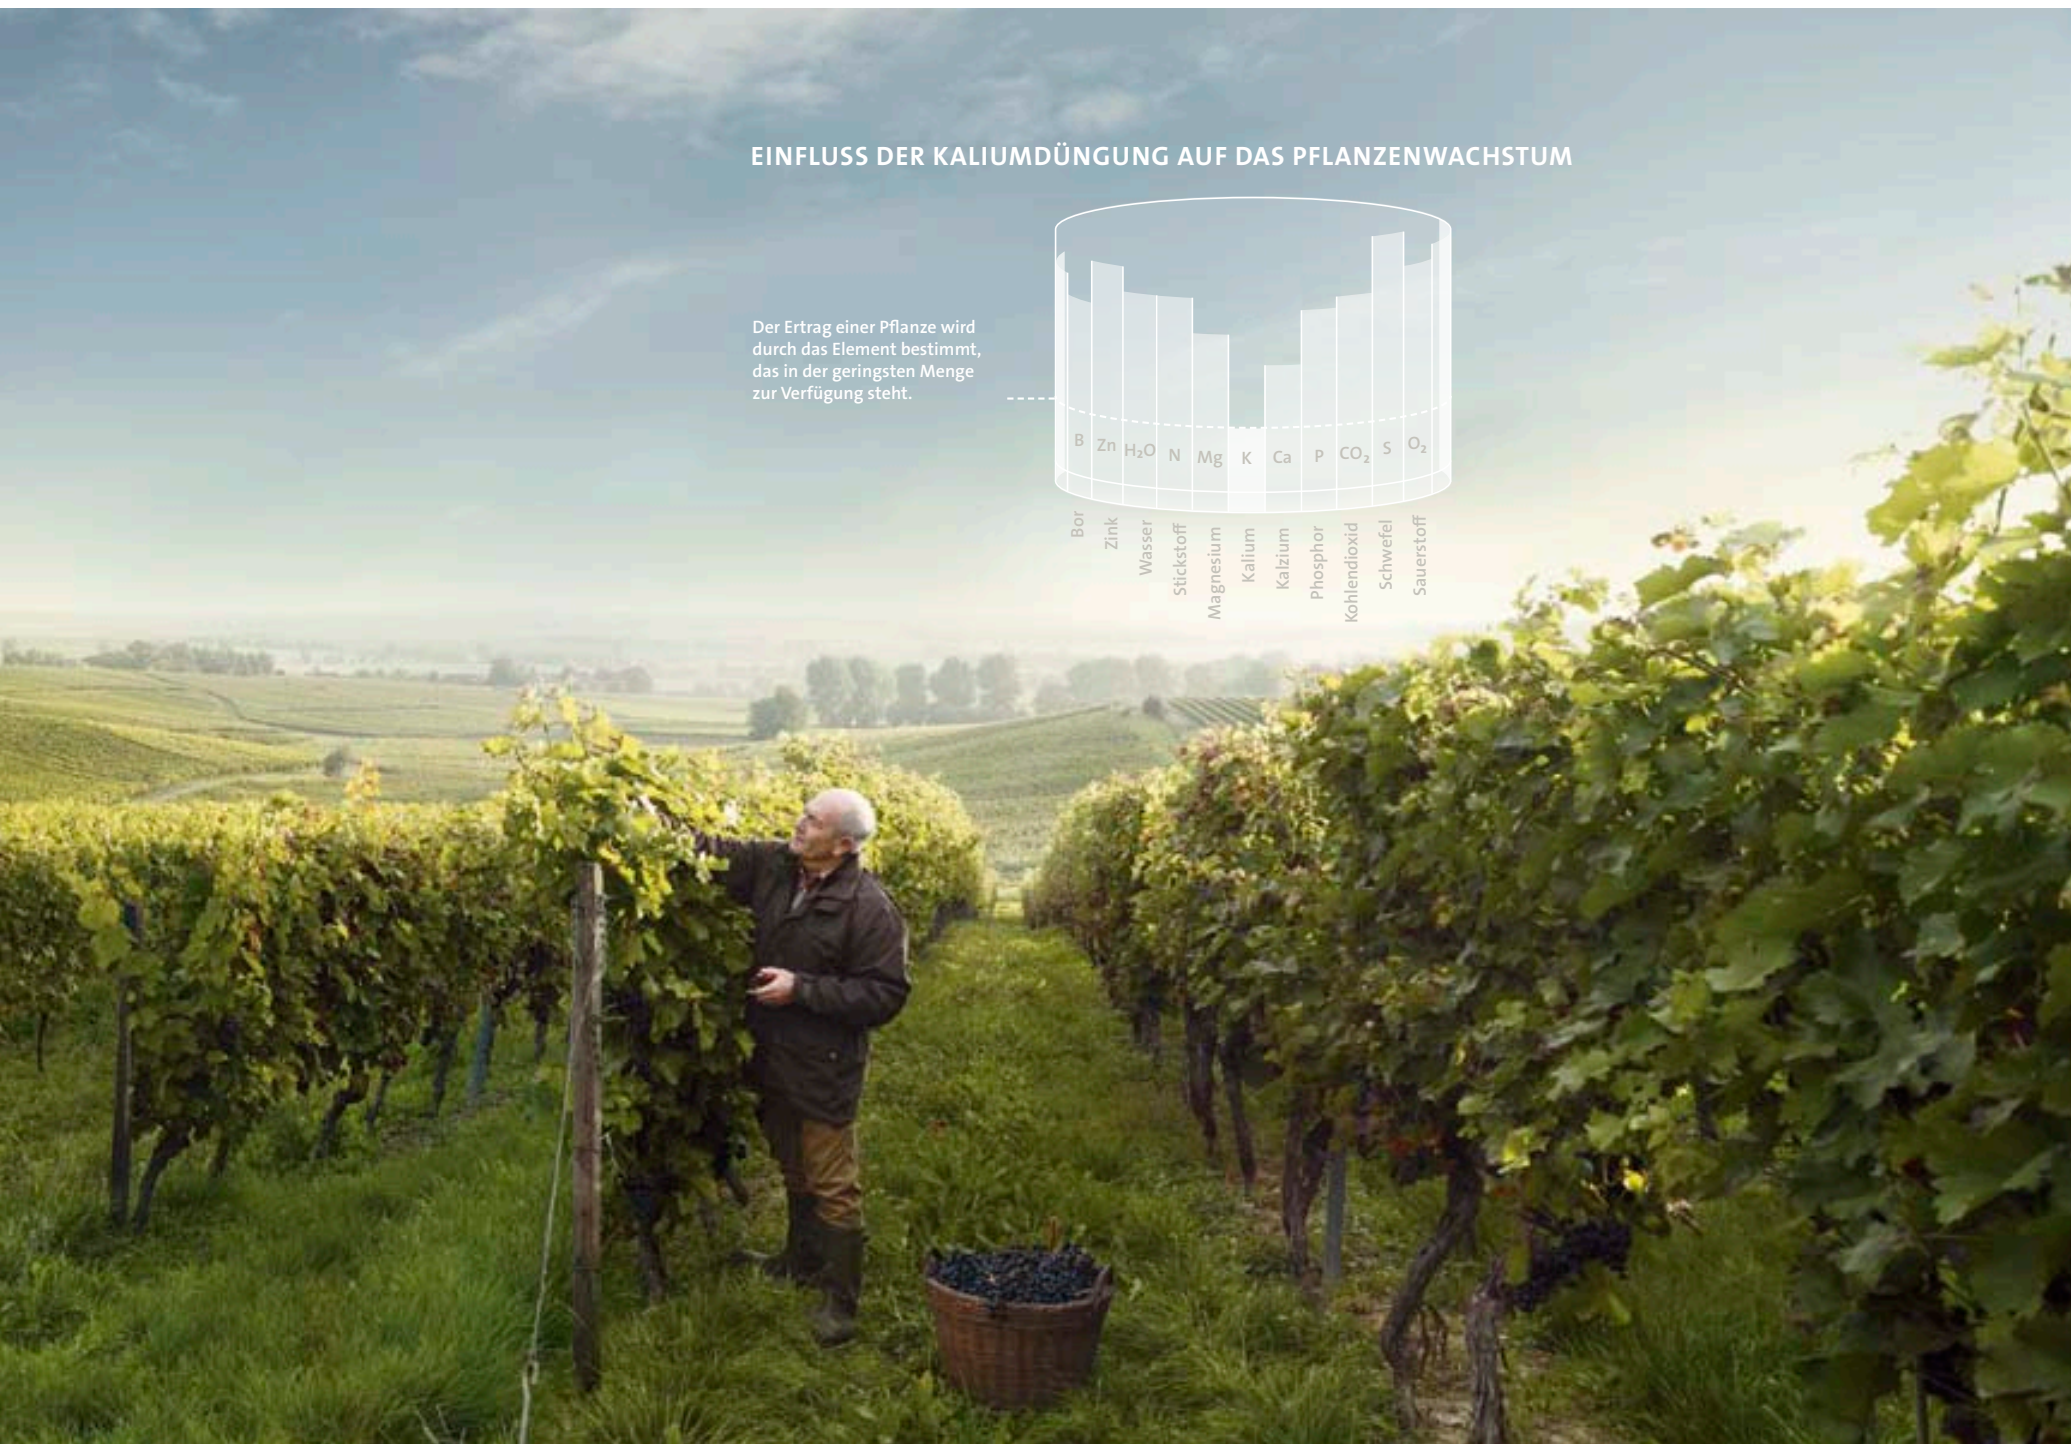

IM DIALOG ENTWICKELN WIR ZUSAMMEN MIT DEN ANWENDERN EINE STRATEGIE, WAS WIR GEMEINSAM FÜR BESSERE ERTRÄGE UND HÖHERE QUALITÄT TUN KÖNNEN. IM WEINBAU KOMMT ES DABEI VOR ALLEM AUF DIE OPTIMALE DÜNGUNG UND DIE PFLEGE DER WEINREBE AN.

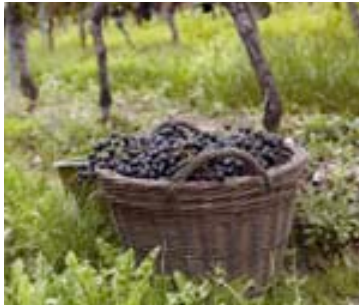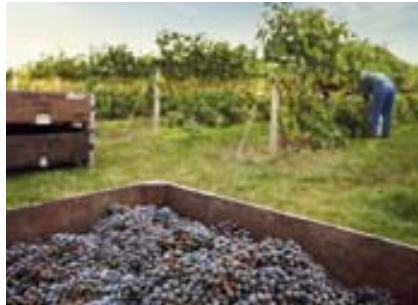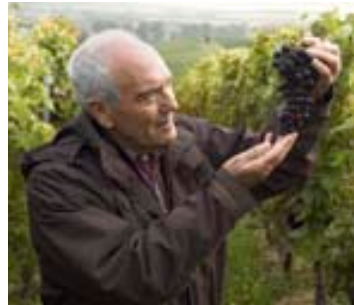

#### ERFAHRUNG DURCH UNSER GEWACHSENES WISSEN

Das Gespür für den richtigen Zeitpunkt, gepaart mit langjähriger Erfahrung mit Pflanze, Boden und Klima-einflüssen: Winzer können damit große Weine kreieren. Dazu brauchen sie zuverlässige Partner an ihrer Seite.

Die K+S GRUPPE besitzt mit ihrer über 100jährigen Erfahrung die Kompetenz, Landwirte bei ihren täglichen Herausforderungen mit über Generationen gewachsenem Know-how zu unterstützen. Wir bieten eine nachhaltige Anwendungsberatung und bedarfsgerechte Düngemittel aus einer Hand für eine Partnerschaft, die – wie der Weinbau – nicht auf kurzfristige Erfolge angelegt ist. Damit Kalium, Magnesium und Schwefel, die nach neuesten Erkenntnissen aus Forschung und Wissenschaft zu hochwertigen mineralischen Düngemitteln verarbeitet werden, auch den optimalen Ertrag bringen, sind die Berater der K+S GRUPPE weltweit beim Anwender vor Ort. Denn genauso wie der Winzer seine wertvollen Reben nur behutsam beschneiden darf, um damit das richtige Verhältnis von Menge und Qualität seiner Trauben zu erzielen, so muss auch die Zufuhr von Nährstoffen genau abgestimmt sein. Der kontinuierliche Dialog mit unseren Kunden trägt dazu bei, Vertrauen zu schaffen und gemeinsam individuelle Lösungen zu finden. Die K+S GRUPPE betreut dafür zurzeit circa 250 Feldversuche rund um den Globus.

### ERFAHRUNG DURCH EIGENE FORSCHUNGEN

Hauptziel der modernen Rebernährung ist es, die Düngung im Einklang mit Bodenfruchtbarkeit, Ertrag und Qualität zu optimieren. Schließlich kommt es dem Winzer nicht nur auf den Ertrag, sondern vor allem auf die Qualität an. Hier wirkt sich eine bedarfsgerechte Kaliumzufuhr nachweislich positiv auf die Weinqualität aus: Durch die Erhöhung des Extraktstoffgehalts und die höheren Zuckergehalte in den Beeren wird der Weingeschmack verbessert. Zudem senkt der erhöhte Zuckeranteil den Gefrierpunkt der Trauben und verringert dadurch die Gefahr von Frostschäden. Auch trockene Perioden können bei guter Kaliumversorgung von der Weinrebe deutlich besser verkraftet werden.

Wie erfolgreich unsere Spezialprodukte in der Praxis sind, zeigt auch die Erfolgsgeschichte unserer Stickstoffdünger im Weinbau. Mit den Produkten aus unserer ENTEC®-Reihe wird die im Boden stattfindende Umwandlung von Ammoniumstickstoff in Nitrat verzögert. Dadurch passt sich die Stickstoff-Freisetzung dem Pflanzenbedarf an und erhöht so die Düngungseffizienz. Zahlreiche Versuchsergebnisse zeigen, dass damit wirtschaftlich hohe Mehrerträge erzielt werden können.

Mit der genauen individuellen Dosierung einzelner Nährstoffe orientiert sich die K+S GRUPPE ganz an den Erkenntnissen Justus von Liebig. Der deutsche Chemi-

ker fand Anfang des 19. Jahrhunderts heraus, dass eine unausgewogene Düngung das Pflanzenwachstum stark beeinträchtigen kann. Fehlt nur ein wichtiger Nährstoff oder ist seine Dosierung zu gering, so hat dies bereits Auswirkungen auf das Wachstum und somit auf den Ertrag der Pflanze. Diese Erkenntnis nannte er das „Gesetz des Minimums“ – die Grundlage der heutigen Düngepraxis.

### ERFAHRUNG DURCH BERATUNG

Damit unsere Kunden ihre Düngungsplanung auch gezielt durchführen können, gibt die K+S GRUPPE den Landwirten zusätzlich eine kostenlose, interaktive Beratungssoftware an die Hand. Das Programm errechnet aus den eingegebenen Daten einen optimalen Nährstoffbedarf für die jeweilige Kultur. Viele Landwirte nutzen auch unser bebildertes Diagnose-Handbuch („Das kleine Nährstoff-1 x 1“), das dabei hilft, Mangelerscheinungen zu erkennen. Das Ziel all unserer Bemühungen sind reiche Ernten überall auf der Welt, die – wie ein guter Wein – auf Erfahrung, Kompetenz und Nachhaltigkeit beruhen.

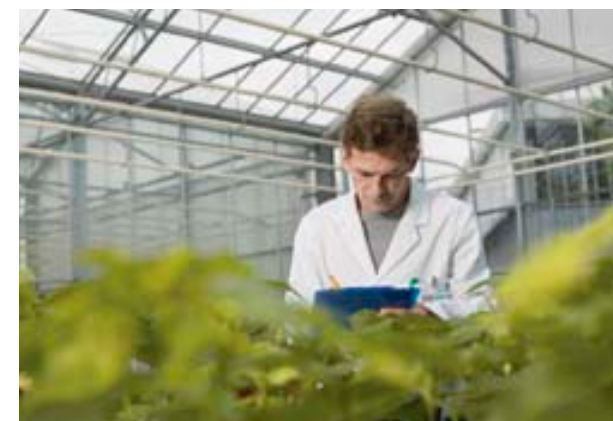

Wir entwickeln unsere Düngemittel ständig weiter: In Kooperation mit Universitäten erforschen wir, wie Pflanzen auch unter schwierigen Bedingungen Nährstoffe noch besser verwerten können. Mit diesem reichen Erfahrungsschatz sind wir gefragte Partner in der Landwirtschaft.



# WACHSTUM BRAUCHT LOGISTIK

---

*Die zuverlässige weltweite Belieferung unserer Kunden zu wettbewerbsfähigen Konditionen ist auch für unser Logistiksystem eine ständige Herausforderung. Pro Jahr befördern wir weltweit mehr als 60 Mio. t. Darum stimmen wir die gesamte Lieferkette mit unserem Supply-Chain-Management perfekt aufeinander ab.*

AM HAMBURGER HAFEN BELÄDT DIE K+S GRUPPE AM KALIKAI SEESCHIFFE UND CONTAINER MIT IHREN PRODUKTEN, UM SIE IN ANDERE LÄNDER EUROPAS UND IN DIE WEITE WELT ZU VERSCHIFFEN. DANEBEN ERWEITERN WIR AUCH UNSERE WELTWEITEN UMSCHLAG- UND LAGERKAPAZITÄTEN.

HANDELSSTRÖME KALI- UND MAGNESIUMPRODUKTE

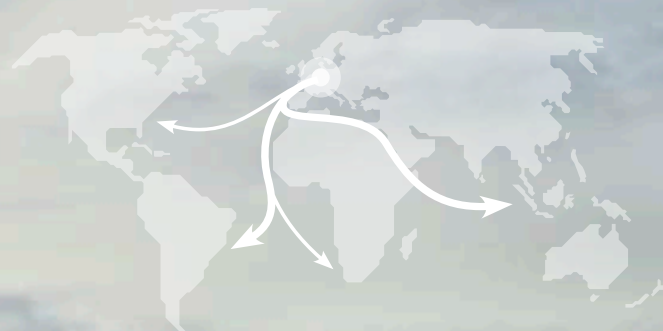

HANDELSSTRÖME SALZ

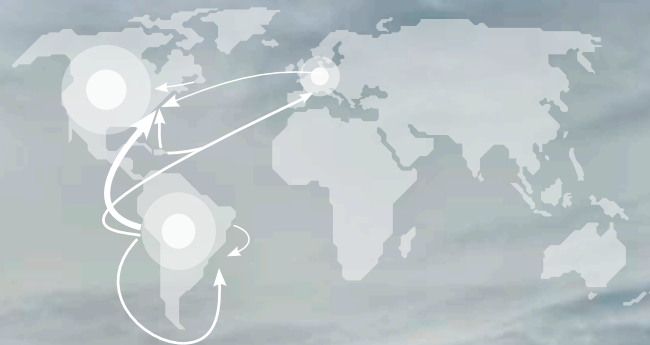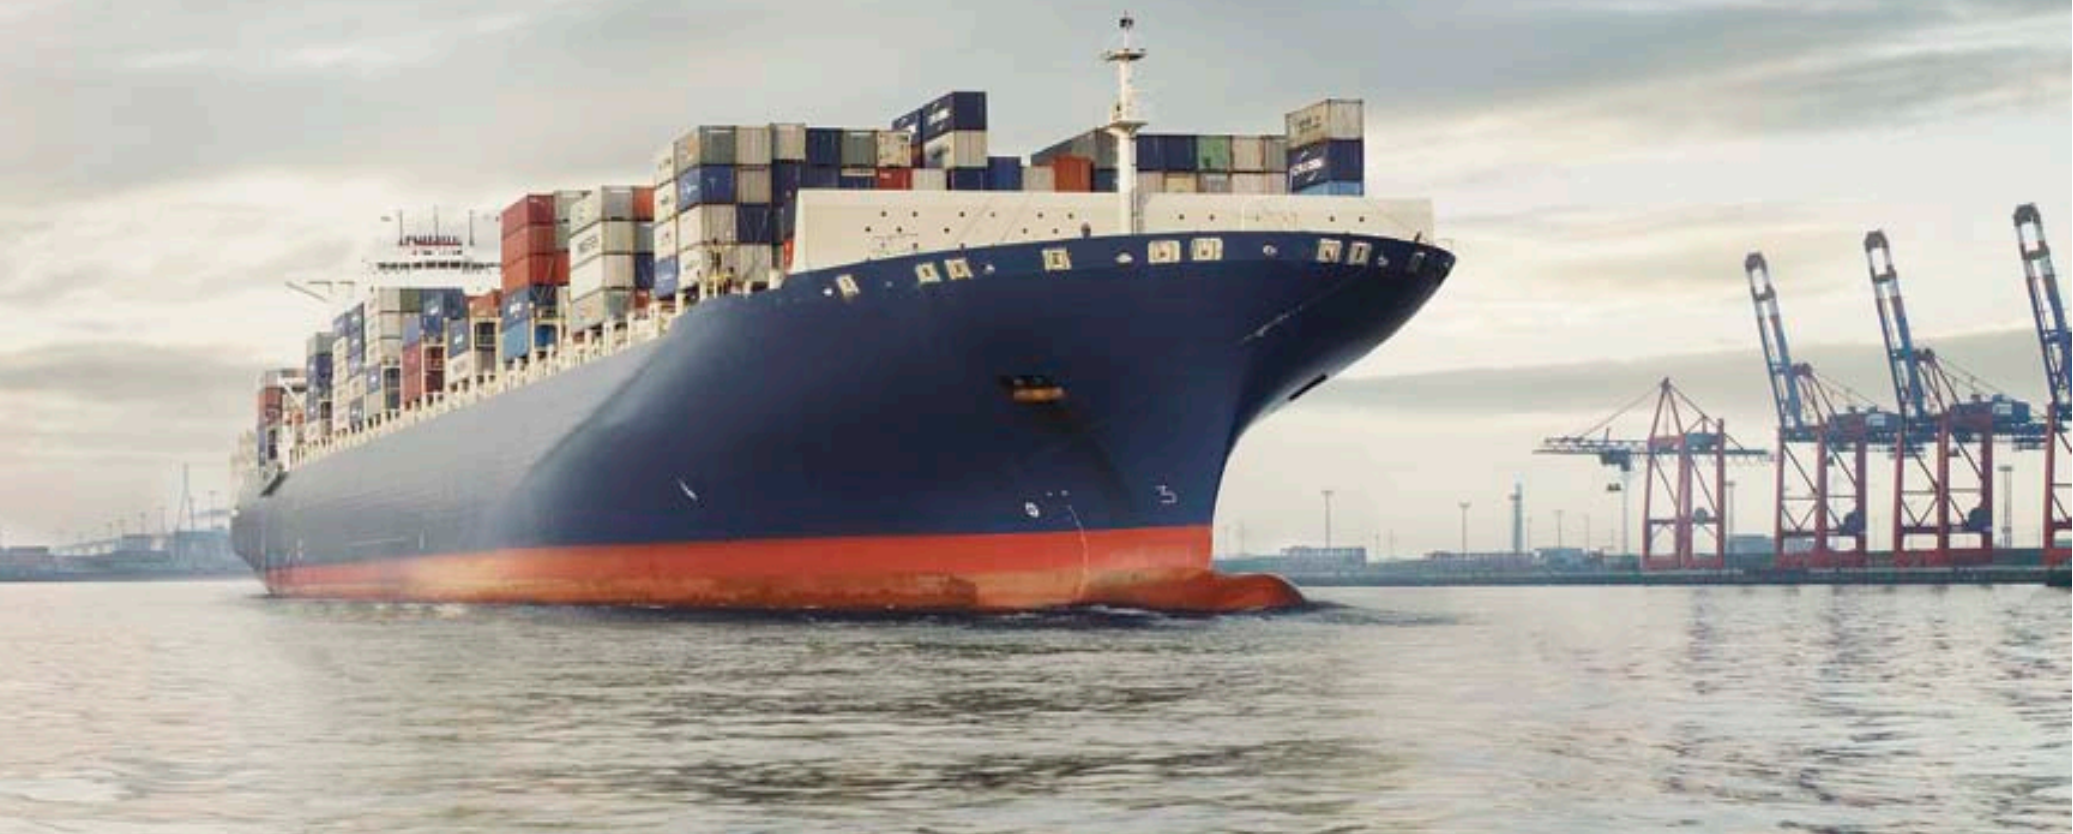

MODERNE LOGISTIKPROZESSE UND EIN HOHES TRANSPORTVOLUMEN ZEICHNEN DIE LOGISTIKLEISTUNGEN DER K+S GRUPPE AUS. WO IMMER MÖGLICH, VERLAGERT K+S DIE TRANSPORTE VON DER STRASSE AUF UMWELTFREUNDLICHE UND WIRTSCHAFTLICHE SCHIENEN- UND WASSERWEGE.

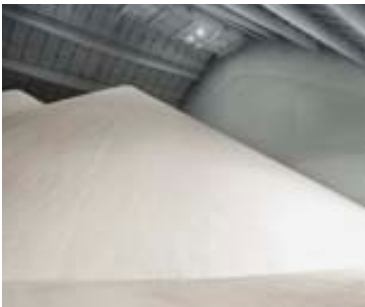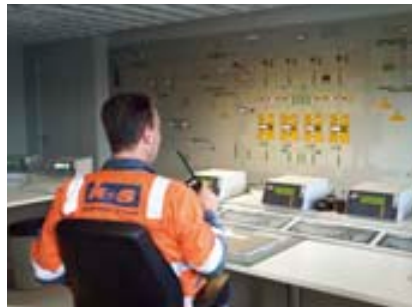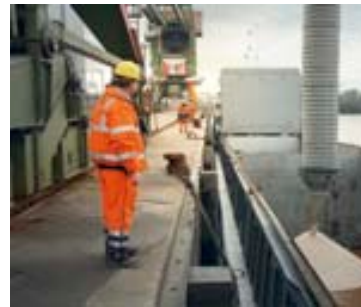

#### MODERNE LOGISTIK

Effiziente Logistikprozesse sind das Bindeglied zwischen laufender Produktion und volatilen Märkten. Der Verbrauch unserer Produkte ist zudem vielfach witterungsabhängig. Dies gilt für Düngemittel und ganz besonders für Auftausalz. Dafür halten wir weltweit ein Netzwerk von mehr als 300 Lager-, Hafen- und Distributionsstandorten vor. Unser größter Hafen ist Puerto Patillos in Chile; dort haben wir im Jahr 2010 mehr als 6 Mio. t Salz auf Seeschiffe verladen. Für Kali- und Magnesiumdüngemittel dient der Kalikai in Hamburg seit 85 Jahren als Tor zu den Weltmärkten. 3,5 Mio. t wurden hier im vergangenen Jahr umgeschlagen, und mit einer Lagerkapazität von 405.000 Tonnen auf einem Gelände von 10 ha wickelt die KALI-TRANSPORT GMBH (KTG) einen Großteil unseres internationalen Geschäfts mit Kalidüngemitteln ab. Schiffe, die zum Beispiel Soja aus Brasilien transportiert haben und ansonsten unter Umständen ohne Ladung zurückkehren müssten, werden hier für die Rückfahrt mit K+S-Düngemitteln beladen.

So schöpfen wir Schiffsraumkapazitäten optimal aus – zu günstigen Transportkosten. Darüber hinaus ist die KTG auch zuständig für die Organisation der Container-Transporte nach Übersee: Viele Waren aus Asien, wie Elektronikartikel und Spielzeug, kommen hauptsächlich in Containern in Europa an. Doch deren Auslastung mit Rückfracht ist in der Regel deutlich niedriger. Diese Con-



tainer werden von uns am Kalikai mit losen Düngemitteln beladen und können in Asien direkt beim Kunden kostengünstig entladen werden. 2010 wurden so mehr als 1 Million Tonnen Düngemittel per Container nach Asien exportiert.

#### WELTWEITES LOGISTIKNETZ

Durch den Erwerb von MORTON SALT ist die Transportmenge der K+S GRUPPE deutlich angestiegen. Darüber hinaus war nach der Akquisition die regionale Marktbearbeitung innerhalb der USA zwischen MORTON SALT und ISCO, der Vertriebsorganisation der chilenischen SPL, neu abzugrenzen. Die Logistik hatte diesen Optimierungsprozess aktiv begleitet und konnte das Ergebnis in der harten Wintersaison 2010/11 sogleich einer hohen Belastungsprobe unterziehen: Wir sind daher stolz darauf, dass alles reibungslos geklappt hat. Schließlich steht eine effektive und effiziente Logistik im Interesse unserer Kunden und damit letztlich von uns selbst – egal, ob das Salz nun aus Chile oder Nordamerika kommt. Unter einem Netzwerk verstehen wir aber nicht nur logistische Optimierungen innerhalb Nord- und Südamerikas, sondern auch die Nutzung globaler Synergiepotenziale dies- und jenseits des Atlantiks: Um den sehr hohen Bedarf an Auftausalz in Europa zu bedienen, konnten wir mit Verschiffungen von mehreren 100.000 Tonnen aus Chile und von den Bahamas unsere Lieferfähigkeit deutlich erhöhen. Die Flexibilität unserer weltweiten

Produktionsstandorte in Verbindung mit einer im Detail aufeinander abgestimmten Logistikkette hat sich für uns ausgezahlt.

#### SUPPLY-CHAIN-MANAGEMENT

Wir haben die Bewertung und Optimierung unserer Supply-Chain-Prozesse zur Daueraufgabe gemacht. Dazu gehören ein interner Benchmark der Logistik-Einheiten sowie ein gruppenweiter Wissenstransfer, der zentral organisiert wird. Auf diese Weise wird eine rechtzeitige Erfassung von Marktveränderungen sowie die Früherkennung von etwaigen Risiken gewährleistet.

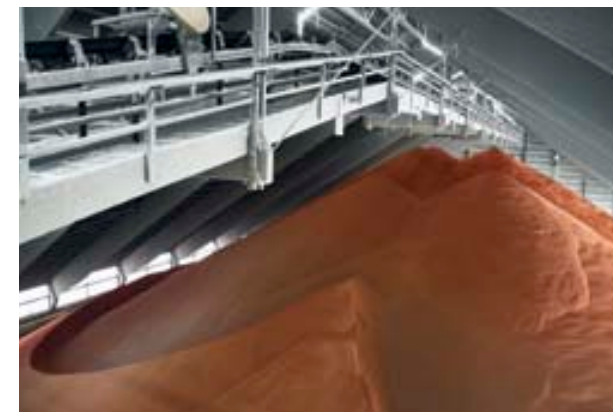

Über das Terminal Kalikai in Hamburg-Wilhelmsburg werden Kali- und Magnesiumprodukte der K+S Gruppe in die ganze Welt verschifft und Schüttgüter – vor allem Düngemittel und Getreide – für andere Firmen umgeschlagen.

# WACHSTUM BRAUCHT PERSPEKTIVEN

---

*Megastädte in aufstrebenden Ländern wie China und Indien wachsen, der Wohlstand und damit die Ansprüche an die Ernährung nehmen stetig zu. Die Folge: Die Nachfrage nach mineralischen Düngemitteln steigt. Der Erwerb von Potash One war daher ein entscheidender strategischer Schritt, um an diesem Wachstum auch mengenmäßig teilhaben zu können.*

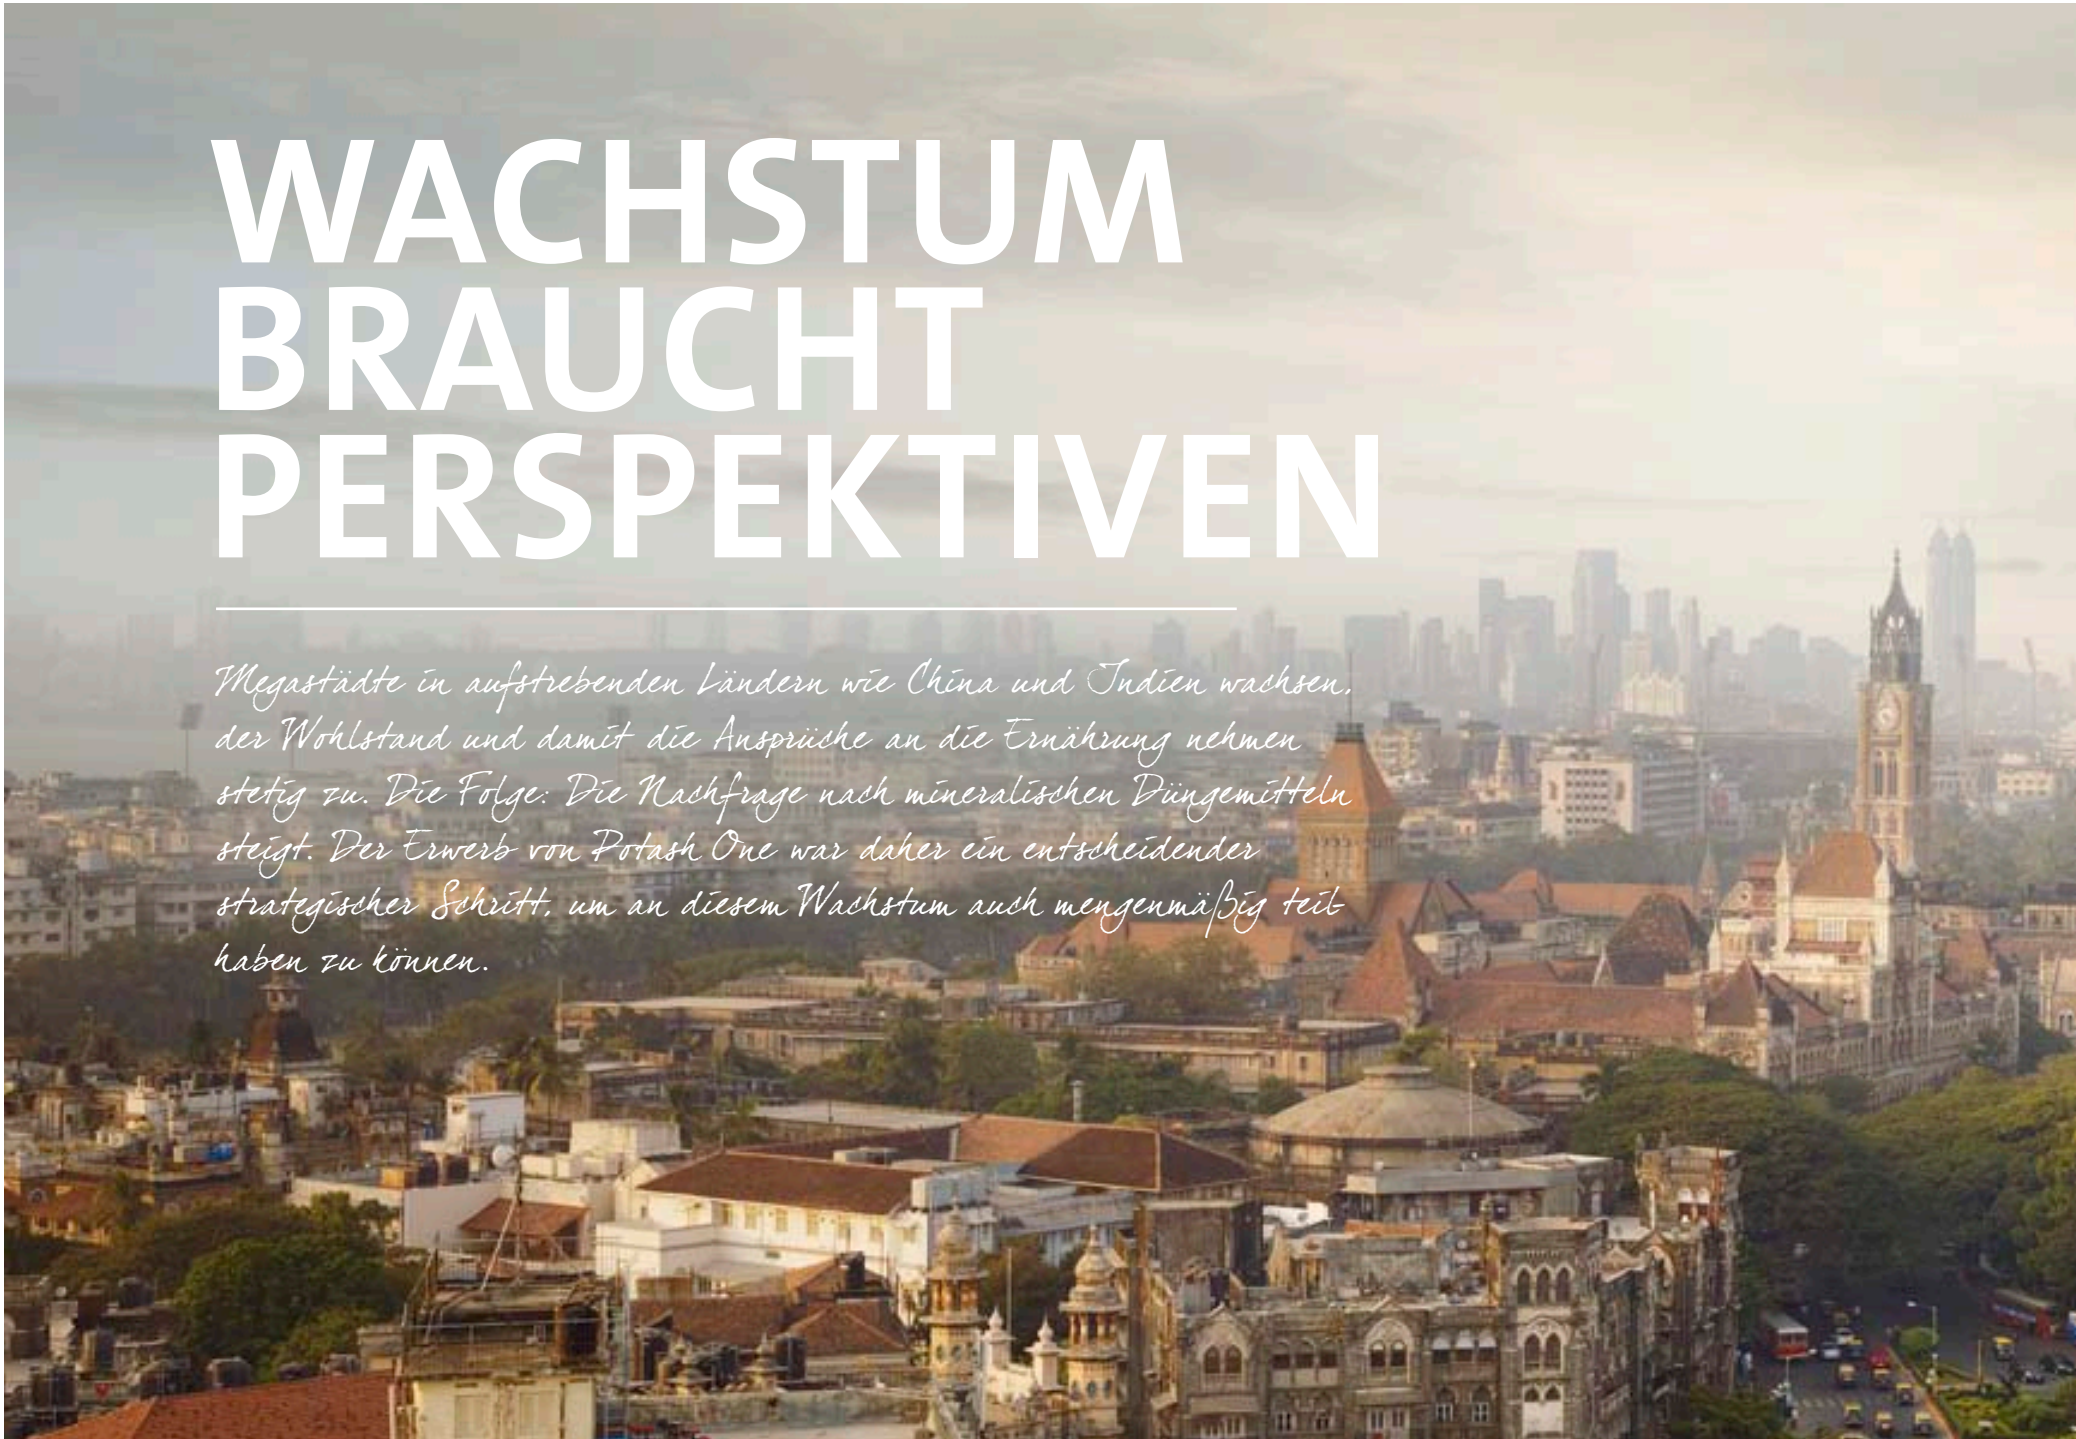



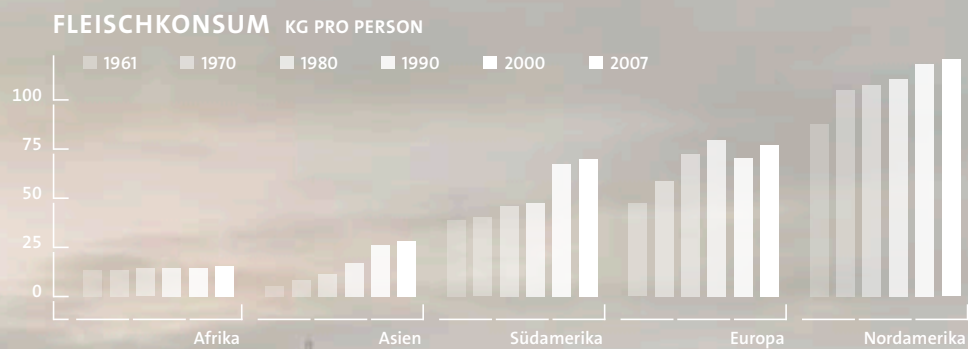

IN MUMBAI, EINER METROPOLE IM WESTEN INDIENS MIT ÜBER 13 MILLIONEN EINWOHNERN, ÄNDERN SICH IM ZUGE DES WACHSENDEN WOHLSTANDS DIE ERNÄHRUNGSGEWOHNHEITEN: FLEISCH- UND MILCHPRODUKTE WERDEN VERSTÄRKT NACHGEFRAGT UND FÜHREN ZU EINER HÖHEREN GETREIDENACHFRAGE.

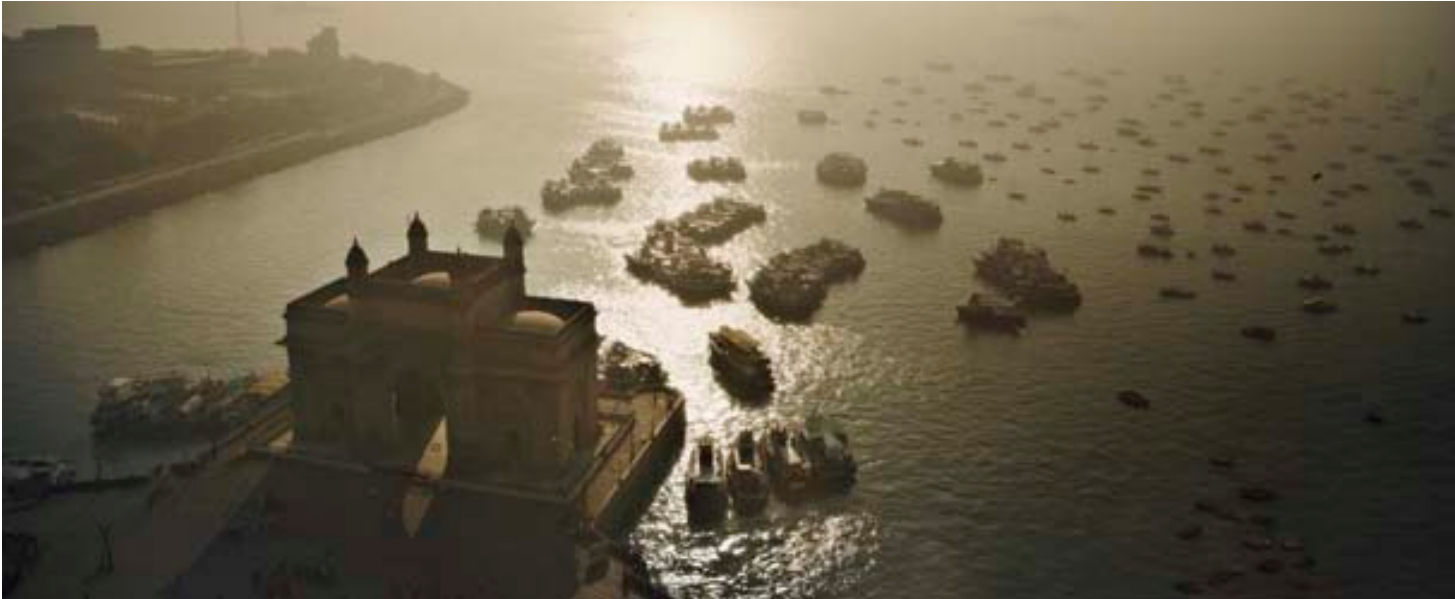

*Wir bauen unsere Marktpräsenz in den bedeutenden Überseemärkten aus und erschließen neue attraktive Absatzmärkte in zukünftigen Wachstumsregionen.*

ZUR VERSORGUNG DER WACHSENDEN BEVÖLKERUNG MIT AGRARPRODUKTEN  
LEISTEN WIR MIT UNSEREN DÜNGEMITTELN EINEN WICHTIGEN BEITRAG.



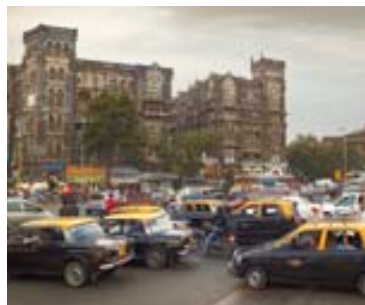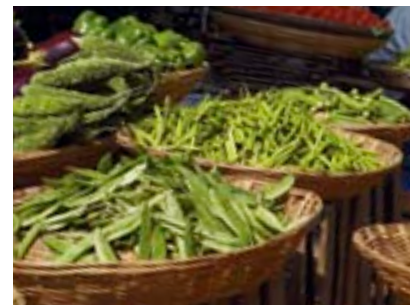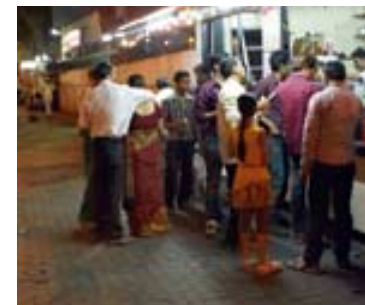

### DIE WELT IST IM WANDEL

Die Welt verändert sich rasant: Immer mehr Menschen benötigen immer mehr Nahrung. Dabei lassen sich die weltweiten Anbauflächen nur um maximal 10 Prozent erweitern.<sup>1</sup> Dies allein wird aber nicht reichen, um bis zum Jahr 2050 weitere zwei Milliarden Menschen zu ernähren. Nach jüngsten Prognosen muss dazu die landwirtschaftliche Produktion bis 2050 um 70 bis 100 Prozent steigen.<sup>1</sup> Auch der wachsende Wohlstand in Schwellenländern wie China und Indien lässt insbesondere den Fleisch- und Milchkonsum wachsen. Die Folge: Je mehr dieser Produkte auf dem Speiseplan stehen, desto höher ist der Bedarf an Futtermitteln. So benötigt man zur Produktion von einem Kilogramm Rindfleisch bis zu acht Kilogramm Futtermittel.

### STRATEGIE: AUSBAU DER MARKTPRÄSENZ

Die Strategie der K+S GRUPPE lautet vor diesem Hintergrund: Wir bauen unsere Marktpräsenz in den bedeutenden Überseemärkten aus und erschließen neue attraktive Absatzmärkte in zukünftigen Wachstumsregionen. Mit Blick darauf haben wir 2011 die kanadische POTASH ONE, ein Explorations- und Entwicklungsunternehmen mit Lizenzen für wertstoffreiche Kalilagerstätten, übernommen. Dies ist ein entscheidender strategischer Schritt, um am Wachstum der Düngemittelmärkte auch mengenmäßig teilnehmen zu können. Nun können und werden wir in Saskatchewan ein neues Kaliwerk errichten, das ab 2015 erste Produkte liefern und aus heutiger Sicht im Endausbau mindestens 2,7 Mio. t Kaliumchlorid pro Jahr herstellen soll. Das hierfür veranschlagte Investitionsvolumen beläuft sich auf etwa 2,5 Mrd. USD, wird sich aber über Jahre verteilen und so

die K+S GRUPPE finanziell nicht überfordern. Darüber hinaus wird das neue Rohstoffvorkommen zusammen mit unseren bestehenden inländischen Kalibergwerken unsere internationale Wettbewerbsfähigkeit deutlich stärken und im Ergebnis der gesamten K+S GRUPPE in Europa und Übersee zugute kommen.

### VERSORGUNGSSICHERHEIT

Die K+S GRUPPE leistet zur Versorgung der wachsenden Bevölkerung mit Agrarprodukten einen wichtigen Beitrag: Zusammen mit dem Einsatz moderner Pflanzenbautechnologien ist eine Düngung mit den Hauptnährstoffen Stickstoff, Phosphat und Kali für weltweit höhere Ernteerträge unabdingbar. Auch künftig werden wir uns daher auf unsere Kernkompetenz, also das Fördern, Veredeln und den Vertrieb von natürlichen Rohstoffen, konzentrieren.

<sup>1</sup> Quelle: FAO.

# WACHSTUM BRAUCHT VERANTWORTUNG

---

*Der Nahrungsmittelbedarf der wachsenden Weltbevölkerung ist eine große Herausforderung: Gemeinsam mit Landwirten entwickeln wir ganzheitliche Lösungen. Zusammen mit dem Einsatz moderner Pflanzenbautechnologien ist eine mineralische Düngung mit den Hauptnährstoffen Stickstoff, Phosphat und Kalium für weltweit höhere Ernteerträge unabdingbar.*



## WACHSENDE BEVÖLKERUNGSZAHLEN – SCHRUMPFENDE ACKERFLÄCHEN

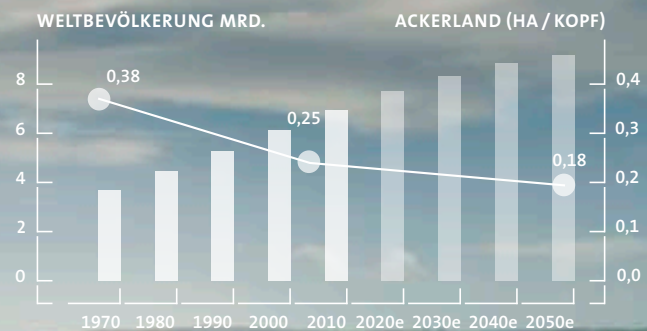

Quelle: UNO

EINE AUSGEWOGENE MINERALDÜNGUNG LEISTET EINEN ENTSCHEIDENDEN BEITRAG ZUR STEIGERUNG DER AGRARPRODUKTION. KALI REGULIERT DEN WASSERHAUSHALT DER PFLANZE, ERHÖHT DIE STANDFESTIGKEIT, MACHT SIE WIDERSTANDSFÄHIGER UND VERBESSERT QUALITÄT UND GESCHMACK.

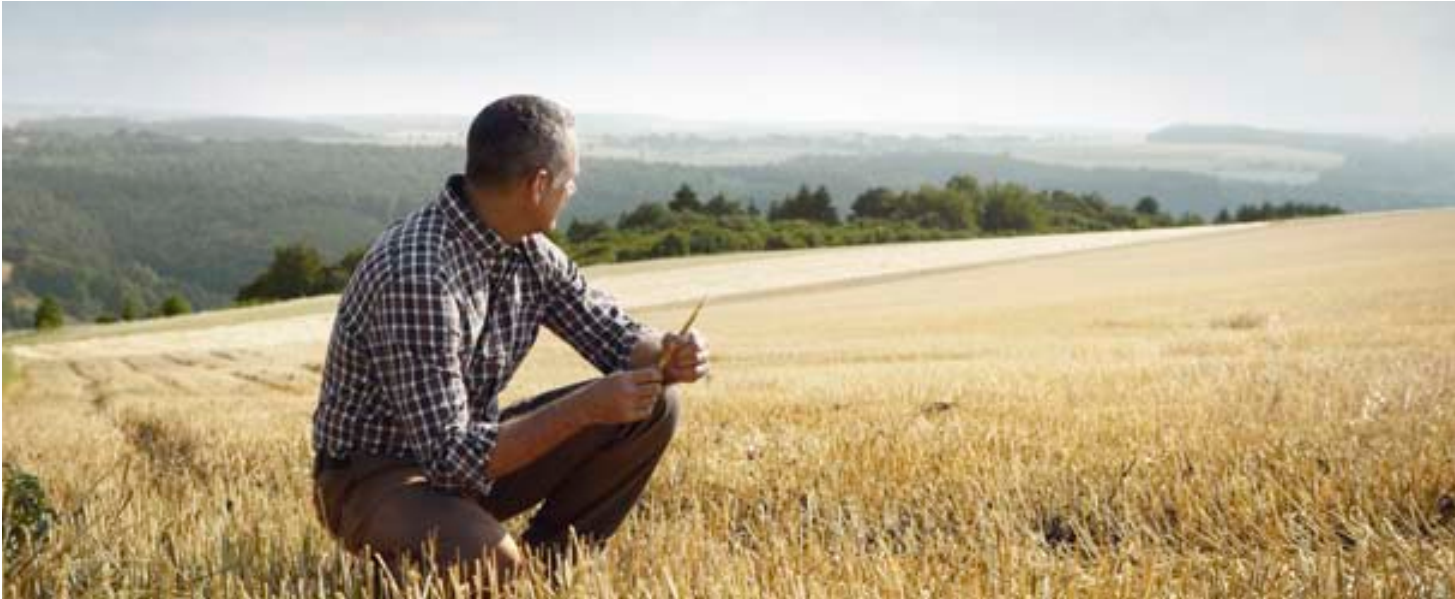

*Durch die Vielfalt unserer natürlichen Rohstoffe können wir ein bedarfsgerechtes, spezialisiertes Düngemittelsortiment anbieten.*

ZUR AUSREICHENDEN VERSORGUNG DER MENSCHHEIT MIT AGRARPRODUKTEN BEDARF ES PROFESSIONELLER AGRARTECHNOLOGIEN WIE SAATGUT, PFLANZENSCHUTZ UND PRODUKTE FÜR EINE BEDARFSGERECHTE PFLANZENERNÄHRUNG. MINERALISCHE DÜNGEMITTEL LEISTEN EINEN NOTWENDIGEN BEITRAG ZUM ERTRAGREICHEN ANBAU.



### HERAUSFORDERUNGEN IN DER ZUKUNFT

Ein Blick in die Zukunft zeigt, welche Herausforderungen uns in den nächsten Jahren erwarten: Mitte dieses Jahrhunderts werden nach Expertenschätzungen über 9 Milliarden Menschen auf der Erde leben. Wichtige Ressourcen wie Anbauflächen oder Süßwasser hingegen sind begrenzt. Für die Ernährungssicherung gilt es daher vor allem die Flächenerträge der Kulturpflanzen zu steigern. Ob im Getreide-, Mais- und Sojaanbau oder in Spezialkulturen wie Obst, Gemüse und Wein: Die Produkte der K+S GRUPPE unterstützen die nachhaltige Sicherung der weltweiten Nahrungsmittelproduktion.

### AGRARKOMPETENZ DURCH EIGENE FORSCHUNGEN

Die Ergebnisse mehrjähriger Feldversuche und internationaler Projekte bilden auch in Zukunft einen wichtigen Schwerpunkt unserer Agrarkompetenz. Das Anfang 2011 von uns gegründete „An-Institut für angewandte Pflanzenernährung“ forscht gemeinsam mit der Universität Göttingen an Neuentwicklungen. Dr. Ernst Andres, Geschäftsführer der K+S KALI GMBH: „Diese Kooperation bietet die exzellente Möglichkeit, universitäre und anwendungsorientierte Forschung zu verbinden.“

Eine unserer vielen Versuchsflächen liegt in Diendorf, einem Ort in einem österreichischen Trockengebiet, das etwa 60 km von Wien entfernt ist. Dort werden seit mehreren Jahren die Auswirkungen einer optimierten Blattdüngung an Winterweizen erprobt. Diese Getreidepflanze kann zu Beginn der Abreifephase auf vorhandenes Magnesium im Boden nicht mehr zurückgreifen, da die Wurzeln keine Nährstoffe mehr transportieren. So fand man heraus, dass etwa 60 % des Magnesiums in den reifen Körnern nicht aus dem Acker, sondern aus Umlagerungsprozessen innerhalb der Pflanze stam-

men. Nur eine Blattdüngung mit rein wasserlöslichem Magnesium vor Beginn der Reifung der Ähren kann den Magnesiumabzug aus den Blättern ausgleichen und so den Ernteertrag spürbar steigern.

### KALIUM ERHÖHT ERNTEERTRAG UND QUALITÄT

Das Thema Wassereffizienz bildet einen weiteren Schwerpunkt unserer Forschungsaktivitäten im Geschäftsbereich Kali- und Magnesiumprodukte. In einer Forschungskooperation mit den Universitäten Gießen, Halle und Kiel konnte nachgewiesen werden, dass sowohl das Wasserspeichervermögen als auch der Wassertransport zu den Wurzeln mit der Zufuhr von Kali verbessert werden. Damit erhöht sich die Wassermenge, die den Pflanzen potenziell zur Verfügung steht. Darüber hinaus bilden die Pflanzen ein größeres, besser verzweigtes Wurzelsystem und sind somit in der Lage, ein größeres Bodenvolumen für die Wasseraufnahme zu nutzen.

Kalium leistet auch einen entscheidenden Beitrag zur Steigerung der Qualität von Anbauprodukten. So richten sich die Qualitätsanforderungen im Kartoffelbau nach der jeweiligen Verwertungsrichtung (Speise-, Veredelungs-, Stärke- oder Pflanzkartoffeln). Bei Speisekartoffeln kommt den Kocheigenschaften größere Bedeutung zu als der Höhe des Stärkegehaltes. Die Kartoffeln für den Mittagstisch sollen beim Kochen nicht zerfallen und außen und innen keine Verfärbungen aufweisen. Ein häufiges Problem bei einer unausgewogenen Nährstoffzugabe ist eine auftretende Schwarzfleckigkeit der Kartoffel. So fanden Forscher der K+S GRUPPE heraus, dass eine ausgewogene Düngung mit Kalium nicht nur die schwarzen Verfärbungen vermindert, sondern auch die Ernteverträglichkeit sowie die Lagerfähigkeit deutlich verbessert: Die Kartoffel ist weniger stoßemp-

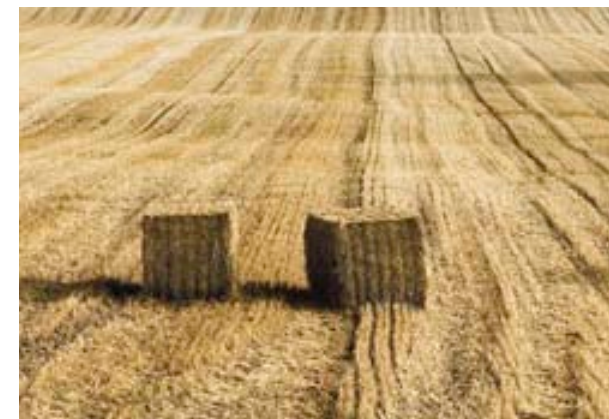

Nach der Getreideernte bestimmen Heuballen das Landschaftsbild. Doch für den Landwirt ist die Arbeit damit noch nicht getan, denn die mit der Ernte entzogenen Nährstoffe müssen durch Mineraldünger ersetzt werden.

DIE K+S GRUPPE LEISTET EINEN WICHTIGEN BEITRAG ZUR DECKUNG DER STEIGENDEN NACHFRAGE NACH AGRARPRODUKTEN. MIT UNSEREN SPEZIALDÜNGEMITTELN KÖNNEN DIE ERNTEN AUCH IN SCHWIERIGEN ANBAUGEBIETEN DER ERDE NACHHALTIG GESTEIGERT WERDEN.

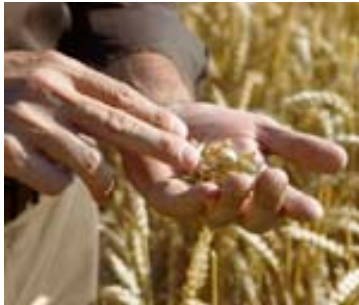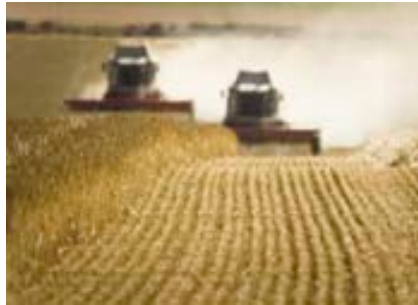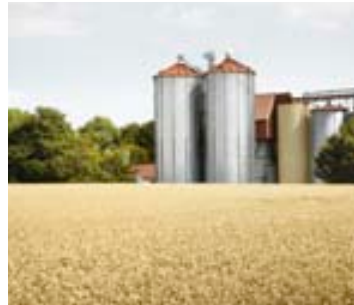

findlich und behält so länger ihr appetitliches Äußeres. Zudem steigt auch der Vitamin C-Gehalt der Knolle an.

#### **PARTNER AN DER SEITE DER LANDWIRTE WELTWEIT**

Auch international übernehmen wir Verantwortung: In Kolumbien leitet Dr. Bernd Ditschar, Anwendungsberater bei der K+S KALI GMBH, ein Palmöl-Projekt. Der Ertrag von Ölpalmen soll hier nachhaltig gesteigert, der Anbau intensiviert werden – ein wichtiger Beitrag zur Vermeidung einer weiteren Rodung des Regenwalds. Der Rohstoff Palmöl findet vor allem bei der Herstellung von Backwaren, Margarine und Süßwaren sowie von Biodiesel Verwendung, da er sehr hitzestabil ist. Für diese Kultur kommt eine unserer Spezialitäten zum Einsatz: Korn-Kali+B, eine Mischung aus Kalium, Magnesium, Schwefel und Bor. Der Vorteil: In nur einem Ausbringungsvorgang werden alle wichtigen Nährstoffe zeitgleich und exakt dosiert zugeführt. In Kombination mit einer Optimierung der Pflanzenpflege erhöht sich so die Ernte der gefragten Ölfrüchte erheblich.

Diese Beispiele machen deutlich, dass bei der Entwicklung neuer und verbesserter Produkte der K+S GRUPPE stets die bedarfsgerechte Ernährung der Pflanzen über den gesamten Vegetationszyklus im Vordergrund steht. In mehrjährigen Versuchen werden Produktinnovationen zunächst praxisnah geprüft. Wir arbeiten an der



Zusammensetzung, bis wir sicher sind, dass das Produkt den gewünschten Nutzen erzielt und weder Kundengesundheit noch Umwelt beeinträchtigt. Vor der Markteinführung führt die Bundesanstalt für Materialwesen umfangreiche Tests durch und stuft das Produkt dementsprechend ein. Die Produktsicherheit wird spätestens alle zehn Jahre neu untersucht.

#### SCHONENDER UMGANG MIT RESSOURCEN

Verantwortung zeigen wir auch beim Umgang mit begrenzten Ressourcen: Unser Ziel ist es, die unvermeidbaren Eingriffe in die Natur so gering wie möglich zu halten. Mit dem im Herbst 2008 vorgestellten 360-Millionen-Euro-Maßnahmenpaket tun wir alles wirtschaftlich Vertretbare, um eine Reduzierung salzhaltiger Abwässer des Werks Werra voranzubringen. Zusätzlich setzt die K+S GRUPPE modernste Explorations- und Gewinnungsverfahren ein und entwickelt die Verfahrenstechnik stetig weiter.

So können wir mit dem von uns entwickelten ESTA®-Verfahren bestimmte Rohsalze in seine Bestandteile aufspalten, ohne Einsatz von Wasser und hohen Energieaufwand. Das ist uns unter Zuhilfenahme der Physik perfekt gelungen: Die einzelnen Elemente des Rohsalzes werden unterschiedlich elektrisch aufgeladen und anschließend mit Hilfe eines Spannungsfelds in Natriumchlorid auf der einen sowie Kaliumchlorid und Kie-

serit auf der anderen Seite getrennt. Durch diese patentierte Technologie und andere Abwasser vermeidende Maßnahmen haben wir seit Beginn der 80er Jahre allein im Werk Werra unsere spezifischen Abwassermengen je geförderte Tonne Rohsalz um zwei Drittel reduziert. Darüber hinaus ist dieses Produktionsverfahren deutlich günstiger im Energieverbrauch als die klassischen, nassen Aufbereitungsverfahren.

#### HOHE ENERGIEEFFIZIENZ

Durch die Nutzung von Kraft-Wärme-Kopplungssystemen erreicht die K+S GRUPPE eine sehr hohe Energieeffizienz und trägt damit nachhaltig zu den deutschen Klimaschutzziele bei: Der Wirkungsgrad unserer eigenen Kraftwerke beträgt mehr als 90 Prozent. Mit dem K+S-Forschungsinstitut arbeiten wir weiter an einer kontinuierlichen Reduzierung der benötigten Ressourcen Energie und Material.

Dies alles zeigt anschaulich, dass wir uns den Herausforderungen von Morgen stellen: Ob bei der Sicherung der weltweiten Ernährung, bei der Versorgung mit hochreinen Mineralien zur Erhaltung der Gesundheit oder bei der Schonung der Umwelt – wir leisten einen wichtigen Beitrag für die Herausforderungen unserer Zeit.

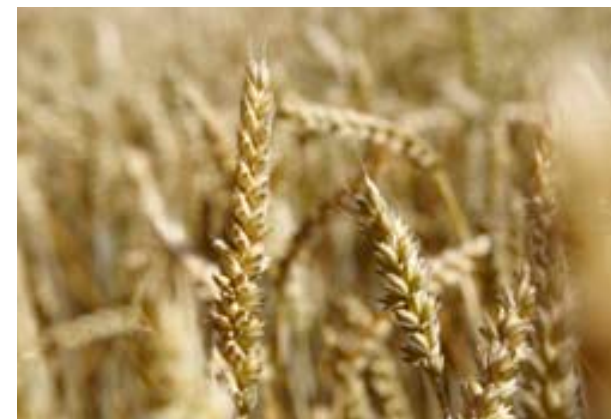

Getreide ist wichtig für eine ausreichende Versorgung der Weltbevölkerung mit Nahrungsmitteln. Durch den Einsatz mineralischer Düngemittel und die damit erzielten Ertragsteigerungen werden heute bereits 50% der Welt ernährt, denn nur wenige Böden sind ausreichend mit Nährstoffen versorgt.

# WACHSTUM BRAUCHT TIEFGANG

---

*Mit hohem technischem Know-how fördern, veredeln und vertreiben wir Rohsalze aus Bergwerken, Solbetrieben, unserem Tagebau sowie Solarsalzanlagen in Deutschland, den Niederlanden, Frankreich, Spanien, Portugal, Brasilien, auf den Bahamas, in Chile, USA und Kanada.*



## UNSERE WERTSCHÖPFUNGSTUFEN

## FÖRDERN

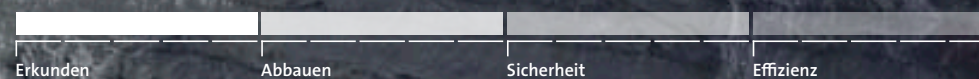

## VEREDELN

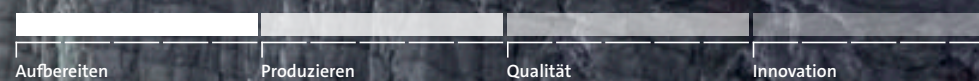

## VERMARKTEN

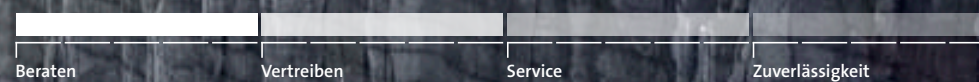

IN HOHEN KAMMERN WIRD IM BERGWERK BERNBURG HOCHREINES STEIN-SALZ ABGEBAUT. ES IST VOR 250 MILLIONEN JAHREN AUS URZEITLICHEN MEEREN ENTSTANDEN UND IST DAHER IN GROSSER TIEFE GESCHÜTZT VOR UMWELTEINFLÜSSEN UND VERUNREINIGUNGEN.

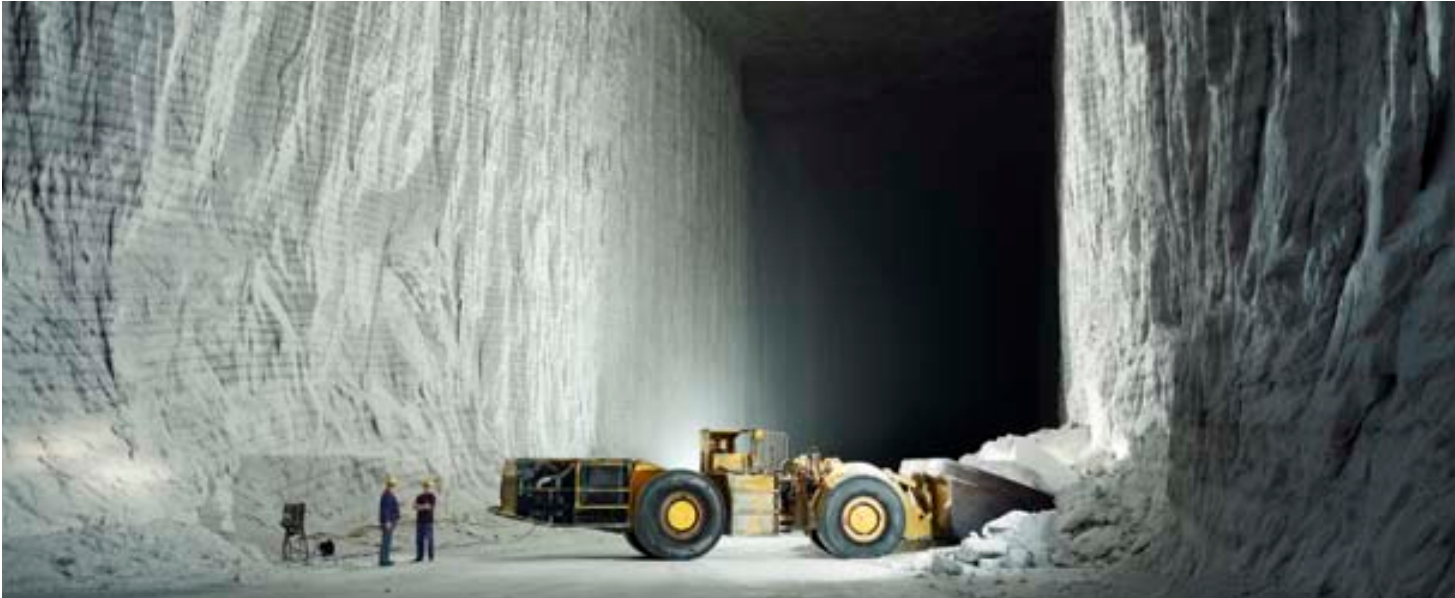

*Mit dem Abbau unseres bergmännisch geförderten Steinsalzes beginnt die erste Stufe unserer Wertschöpfungskette in der Salzproduktion: Mit der Veredelung zu hochwertigen Spezialprodukten und deren Vertrieb findet sie ihre Vollendung.*

WENN DIE NATUR DIE ELEMENTE Natrium und Chlor miteinander verbindet, dann schafft sie ein neues Produkt, eine eigenständige Verbindung: Natriumchlorid. Dieses ist unverzichtbar für alles Leben auf der Erde und wird von der K+S Gruppe für uns alle nutzbar gemacht.



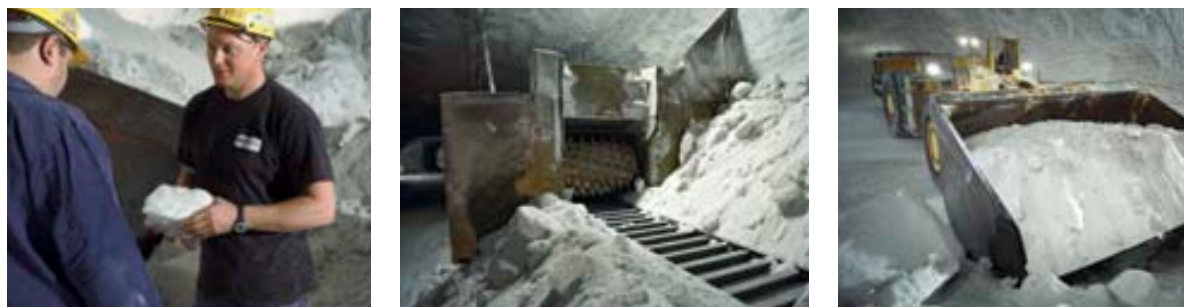

Über 6.000 Mitarbeiter der K+S GRUPPE stellen sich täglich den Herausforderungen unter Tage. Die vergleichbaren Abbaufverfahren zwischen den Kerngeschäftsfeldern Kali- und Magnesiumprodukte sowie Salz ermöglichen einen Austausch von technischem, geologischem und logistischem Know-how. Bei der Beschaffung von Maschinen und Hilfsstoffen erreichen wir Skalenvorteile, da sich viele Arbeitsschritte unter Tage sehr ähneln. Das senkt letztlich unsere Produktionskosten und ermöglicht einen konkurrenzfähigen Preis für unsere Rohstoffe und die daraus veredelten Produkte.

#### AUFWÄNDIGE INFRASTRUKTUR UNTER TAGE

Doch bevor der eigentliche Abbau beginnt, muss erst einmal eine leistungsfähige Infrastruktur unter Tage zur Verfügung stehen: Für die Versorgung mit Frischluft dienen die Schächte in einem komplexen Belüftungs-

system. Dahinter steckt ein ausgeklügeltes Prinzip des Ansaugens und Verteilens der Frischluft im ganzen Grubengebäude. Da die Abbaureviere je nach Bergwerk oft kilometerweit auseinander liegen, werden Tankstellen, Werkstattbereiche und Messstationen unter Tage installiert. Auch die sich wie Tausendfüßler durch die Strecken windenden Transportbänder sind unentbehrlich und werden täglich gewartet und erweitert.

#### TEAMWORK FÜR ERFOLGREICHEN ABBAU

Wer die Spezialisten unter Tage beobachtet, merkt, dass alle Arbeiten aufeinander aufbauen und jeder Handgriff sitzen muss. Die Bergleute arbeiten zwar weitgehend auf sich allein gestellt, aber letztlich begreifen sie sich als Team, das nur im Zusammenwirken Erfolg hat.

#### SICHERHEIT STEHT AN ERSTER STELLE

Sicherheit steht bei der K+S GRUPPE überall an erster Stelle: So ist das Sichern der Arbeitsbereiche unter Tage eine wichtige Aufgabe. Mit Hilfe von Beraubemaschinen, die eine entfernte Ähnlichkeit mit Baggern besitzen, werden Gesteinsbrocken, die sich an Firsten (= Decken) oder Stößen (= Wänden) gelockert haben, sorgfältig entfernt. Anschließend sichert der Firstankerbohrwagen die Firste des Stollens mit dübelartigen Gewindestangen. Die Arbeit des Bergmanns im Kali- und Steinsalzbergbau ist heute vom Einsatz moderner Großmaschinen geprägt, ohne die ein Abbau in Größenordnungen von Millionen Tonnen nicht denkbar wäre. Aber der Aufwand lohnt sich, denn nur so machen wir die Schätze der Erde für uns alle nutzbar.

# WACHSTUM BRAUCHT VERLÄSSLICHKEIT

---

*Wir sorgen mit unseren Auftausalzen für freie und sichere Straßen. Als größter Salzproduzent der Welt sind wir dank ausgefeilter Logistik ein verlässlicher Lieferpartner.*

MIT DEN QUALITÄTS-AUFTAUSALZEN DER K+S GRUPPE WERDEN VERSCHNEITE STRASSEN IN EUROPA UND NORDAMERIKA SCHNELLER WIEDER EISFREI. FÜR EINE ZUVERLÄSSIGE LIEFERUNG SORGEN UNSERE WELTWEIT VERNETZTEN PRODUKTIONSSTANDORTE DIES- UND JENSEITS DES ATLANTIKS.



## MILDERUNG DER VOLATILITÄT IM AUFTAUSALZGESCHÄFT

MENGEN

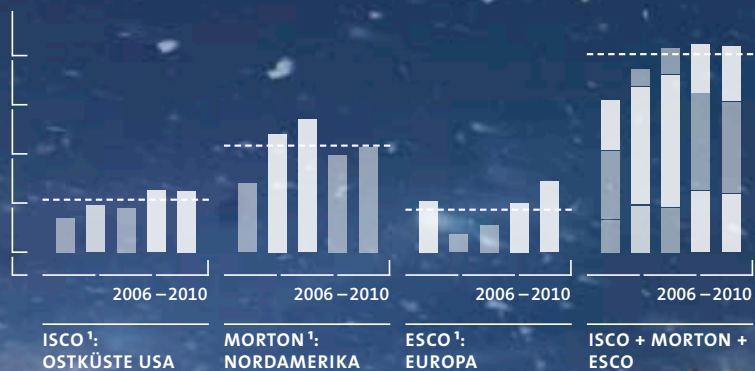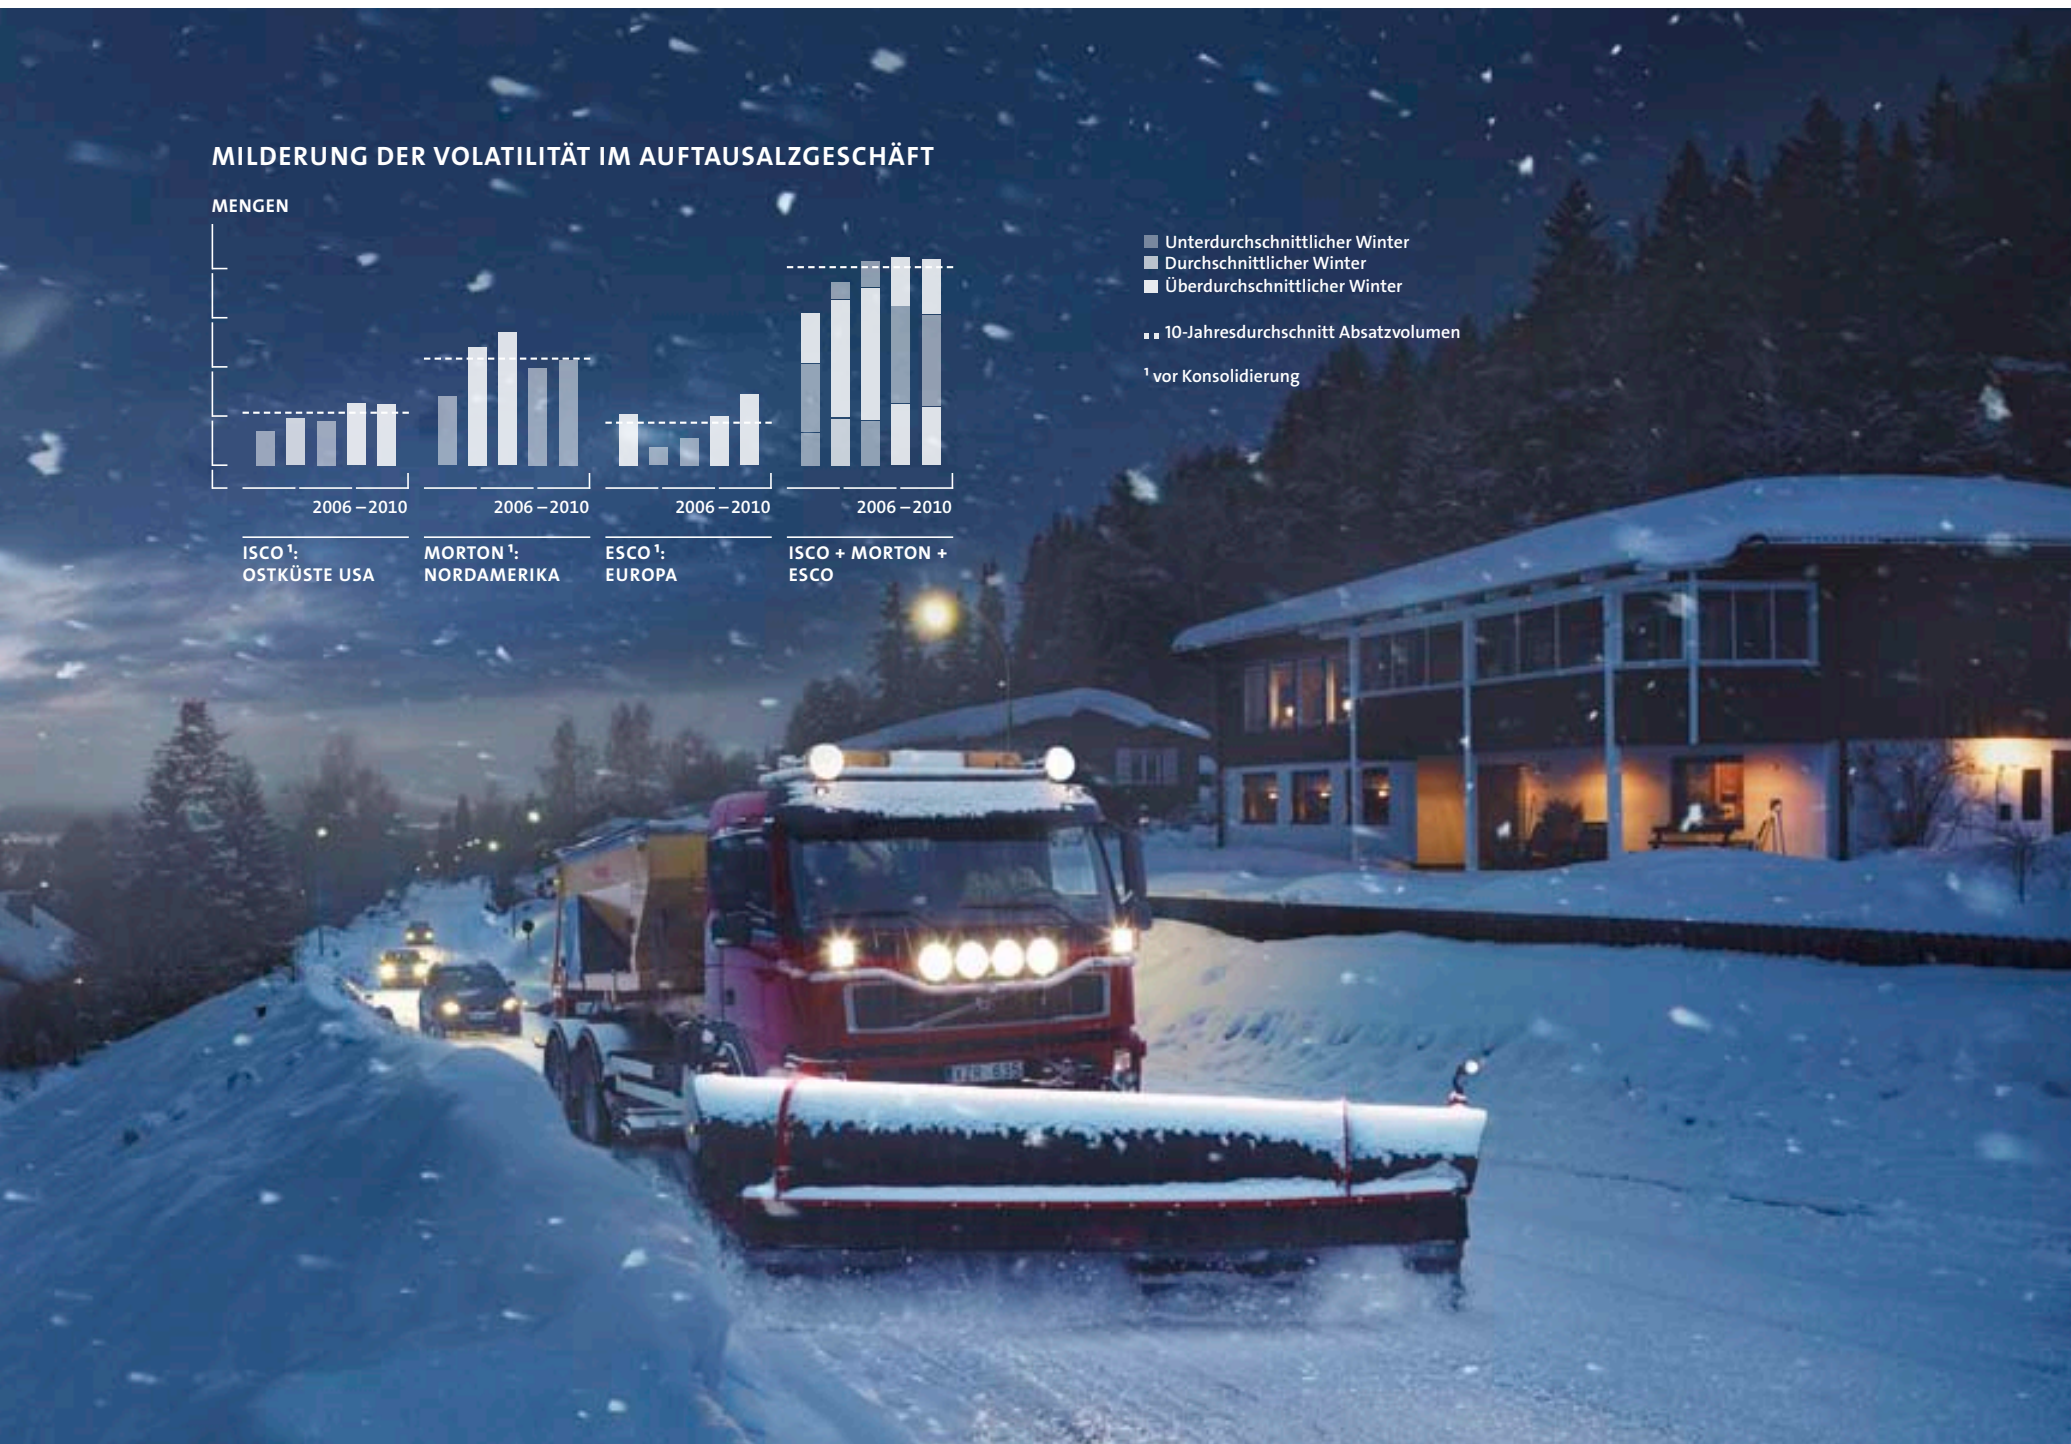

DIE FLEXIBLE NUTZUNG UNSERER FÖRDERKAPAZITÄTEN UND DIE GEOGRAFISCHE NÄHE ZU DEN KUNDEN ERMÖGLICHEN UNS, DIE VERSORGUNG MIT AUFTAUSALZEN FÜR DIE WINTERDIENSTE AUCH WÄHREND BESONDERS HARTER WINTER BESTMÖGLICH SICHERZUSTELLEN.

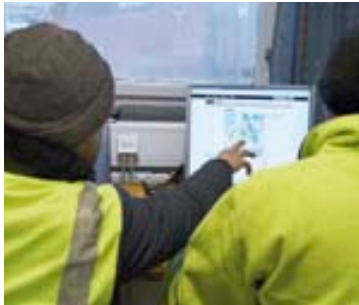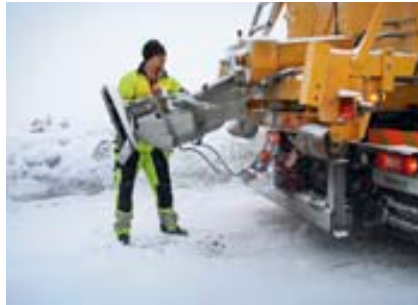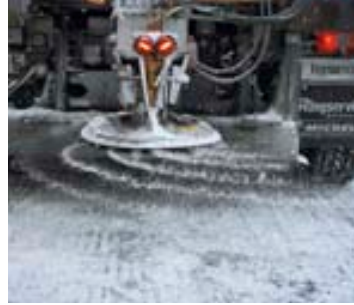

#### **PARTNER VON STÄDTEN UND GEMEINDEN**

Jeder Autofahrer kennt die Situation: Es ist Winter, in der Nacht hat es wieder geschneit und man stellt sich schon auf schnee- und eisfreie Straßen ein. Doch welche Erleichterung: Die Fahrbahnen sind dank modernster Streusalztechnologie und dem Einsatz der im Winterdienst tätigen Menschen schnee- und eisfrei. Um den in der kalten Jahreszeit so unentbehrlichen Winterdienst zu erfüllen, brauchen Städte- und Gemeinden Partner, auf die sie sich verlassen können.

#### **HOHE FÖRDERKAPAZITÄTEN FÜR ZUVERLÄSSIGE BELIEFERUNG**

Unsere Tochtergesellschaft esco, Salzproduzent Nummer 1 in Europa, kann durch flexible Nutzung seiner Förderkapazitäten schnell auf plötzlich eintretende Nachfragespitzen reagieren. Zusätzlich haben wir einen Pool aus erfahrenen und leistungsstarken Speditionen, Reedereien sowie Bahngesellschaften aufgebaut. Günstig gelegene Lagerstätten gewährleisten eine größtmögliche Präsenz in allen wichtigen Märkten Europas und ermöglichen es der esco, auch unter schwierigen Bedingungen die Versorgung mit Auftausalzen bestmöglich sicherzustellen. Die durchgängige Lieferfähigkeit auch in Spitzenbedarfszeiten ist unser Anspruch, für den wir alle Hebel in Bewegung setzen. Seit den Akquisitionen von SPL (Chile) und MORTON SALT (Nordamerika) besitzen wir ein noch ausgewogeneres Regionalportfolio, das

gruppenweit zu einem Ausgleich regional auftretender, witterungsbedingter Absatzschwankungen führt.

Kommt es tatsächlich einmal zu lokalen Lieferengpässen, dann nutzen wir die Synergien unserer weltweiten Salzstandorte, die sich untereinander nach Kräften unter die Arme greifen. Das sind wir als der weltweit größte Salzproduzent unseren Kunden schuldig!

#### SICHERHEIT DURCH EFFIZIENTE AUFTAUSALZE

Auch bei Auftausalzen ist uns der schonende und effiziente Umgang mit den Ressourcen im Sinne des Umweltschutzes wichtig. Wir meinen: So wenig wie möglich, aber so viel wie nötig – das sollte auch die Maxime bei der Anwendung von Auftausalzen sein. Wirksam und sparsam ist der Einsatz der Auftausalze dann, wenn sie im Feuchtsalzverfahren zusammen mit Magnesiumchloridsole eingesetzt werden. Bei dieser Feuchtsalzmischung ist eine Mischung von 30 Gewichtsprozent einer „Winterdienstlösung“ zusammen mit 70% trockenem Auftausalz ideal. Die Mischung erfolgt erst kurz vor dem Verteilen auf der Fahrbahn auf dem Streuteller des Winterdienstfahrzeugs. Das Feuchtsalz verhindert nun durch seine besondere Konsistenz das Verwehen von Salzkörnern. Zudem haftet es auf reif- und eisglatter Fahrbahn besser als Trockensalz: Der Auftauprozess wird schneller in Gang gesetzt und hält länger an. Durch die Ergiebigkeit des Salzes können die Streufahrzeuge außerdem länger im Einsatz bleiben. Dabei gewinnt

nicht nur die Umwelt: Die Einsparung durch die geringere Menge an ausgebrachtem Salz senkt letztlich auch die Kosten für den Winterdienst. In den vergangenen 50 Jahren konnte die ausgebrachte Auftausalzmenge pro m<sup>2</sup> in Europa durch den technischen Fortschritt bei Dosiereinrichtungen und die Feuchtsalztechnologie bei gleicher Tauwirkung um mehr als 60% reduziert werden. US-Experten haben außerdem errechnet, dass sich die Investition für das Enteisen der Fahrbahnen mehr als rechnet: Für einen eingesetzten Dollar für Auftausalze und Winterdienst wird der sechsfache Betrag an Kosten für die Wirtschaft aufgrund eingeschränkter Mobilität, Produktivität und umsonst gezahlter Löhne vermieden. Aber nicht nur für den professionellen Einsatz bietet die K+S GRUPPE zuverlässige Auftausalze, sondern auch für den Endverbraucher: In Europa verkauft unsere Tochtergesellschaft ESCO das seit Jahrzehnten bewährte ESCO-Auftausalz, dessen besonders effektive Mischung aus feinen und groben Salzkristallen für maximale Auftauwirkung gegen Eis und Schnee sorgt. Während die feinen Kristalle für eine sofort einsetzende Tauwirkung sorgen, garantieren die größeren Kristalle die erforderliche Langzeitwirkung bei dickeren Eis- und Schneeschichten. In den USA sind BLIZZARD WIZARD® und HALITE® sowie ACTION MELT® bekannte Verbrauchermarken. Somit können wir für jeden Bedarf und jede Zielgruppe das geeignete Auftausalz anbieten und so einen wichtigen Beitrag für mehr Sicherheit auf Straßen und Wegen leisten.

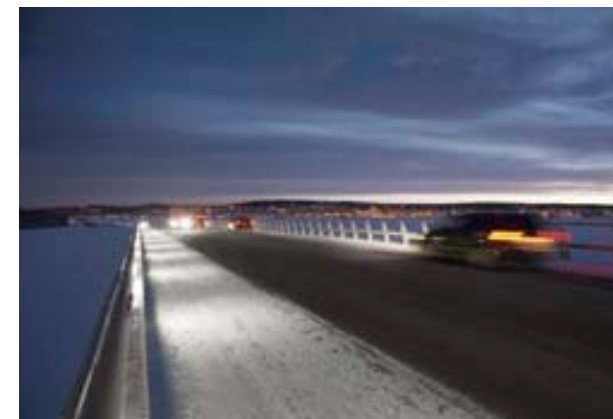

Mit den ergiebigen Auftausalzen der K+S Gruppe bleiben die Straßen länger eis- und schneefrei, besonders wenn sie im Feuchtsalzverfahren aufgebracht werden: Das Salz bleibt besser auf der Straße haften und ist ergiebiger.



# WACHSTUM BRAUCHT EIN ZUHAUSE

*Die Familie der K+S Gruppe ist nun auch in den USA zuhause:  
Mit dem Kauf des US-Salzproduzenten Morton Salt gehört  
jetzt eine der zehn bekanntesten Marken in Nordamerika zu uns.*

## MEILENSTEINE IN DER ENTWICKLUNG DER MARKE „UMBRELLA GIRL“

Zum allerersten Mal tauchte das Morton Salt „Umbrella Girl“ 1914 mit dem heute vertrauten Slogan „When It Rains It Pours“ auf.

Nach der großen Depression von 1933–1941 regierte der Jazz. Unter seiner Herrschaft streute unser Mädchen und streute ...

Seitdem es das letzte Mal 1968 neu eingekleidet worden war, hat das aktuelle Umbrella Girl mit uns die Mondlandung, Hip Hop und die Entwicklung des Internets erlebt.

1914

1920

1930

1960

1921 tanzte das zweite „Mädchen mit dem Schirm“ von Morton Salt auf die Bühne. Durch die Goldenen Zwanziger ließ das Morton-Mädchen es rieseln.

Auch als der Rock and Roll 1956 alles gründlich durchzuschütteln begann, schüttelte unsere Kleine den Salzstreuer.



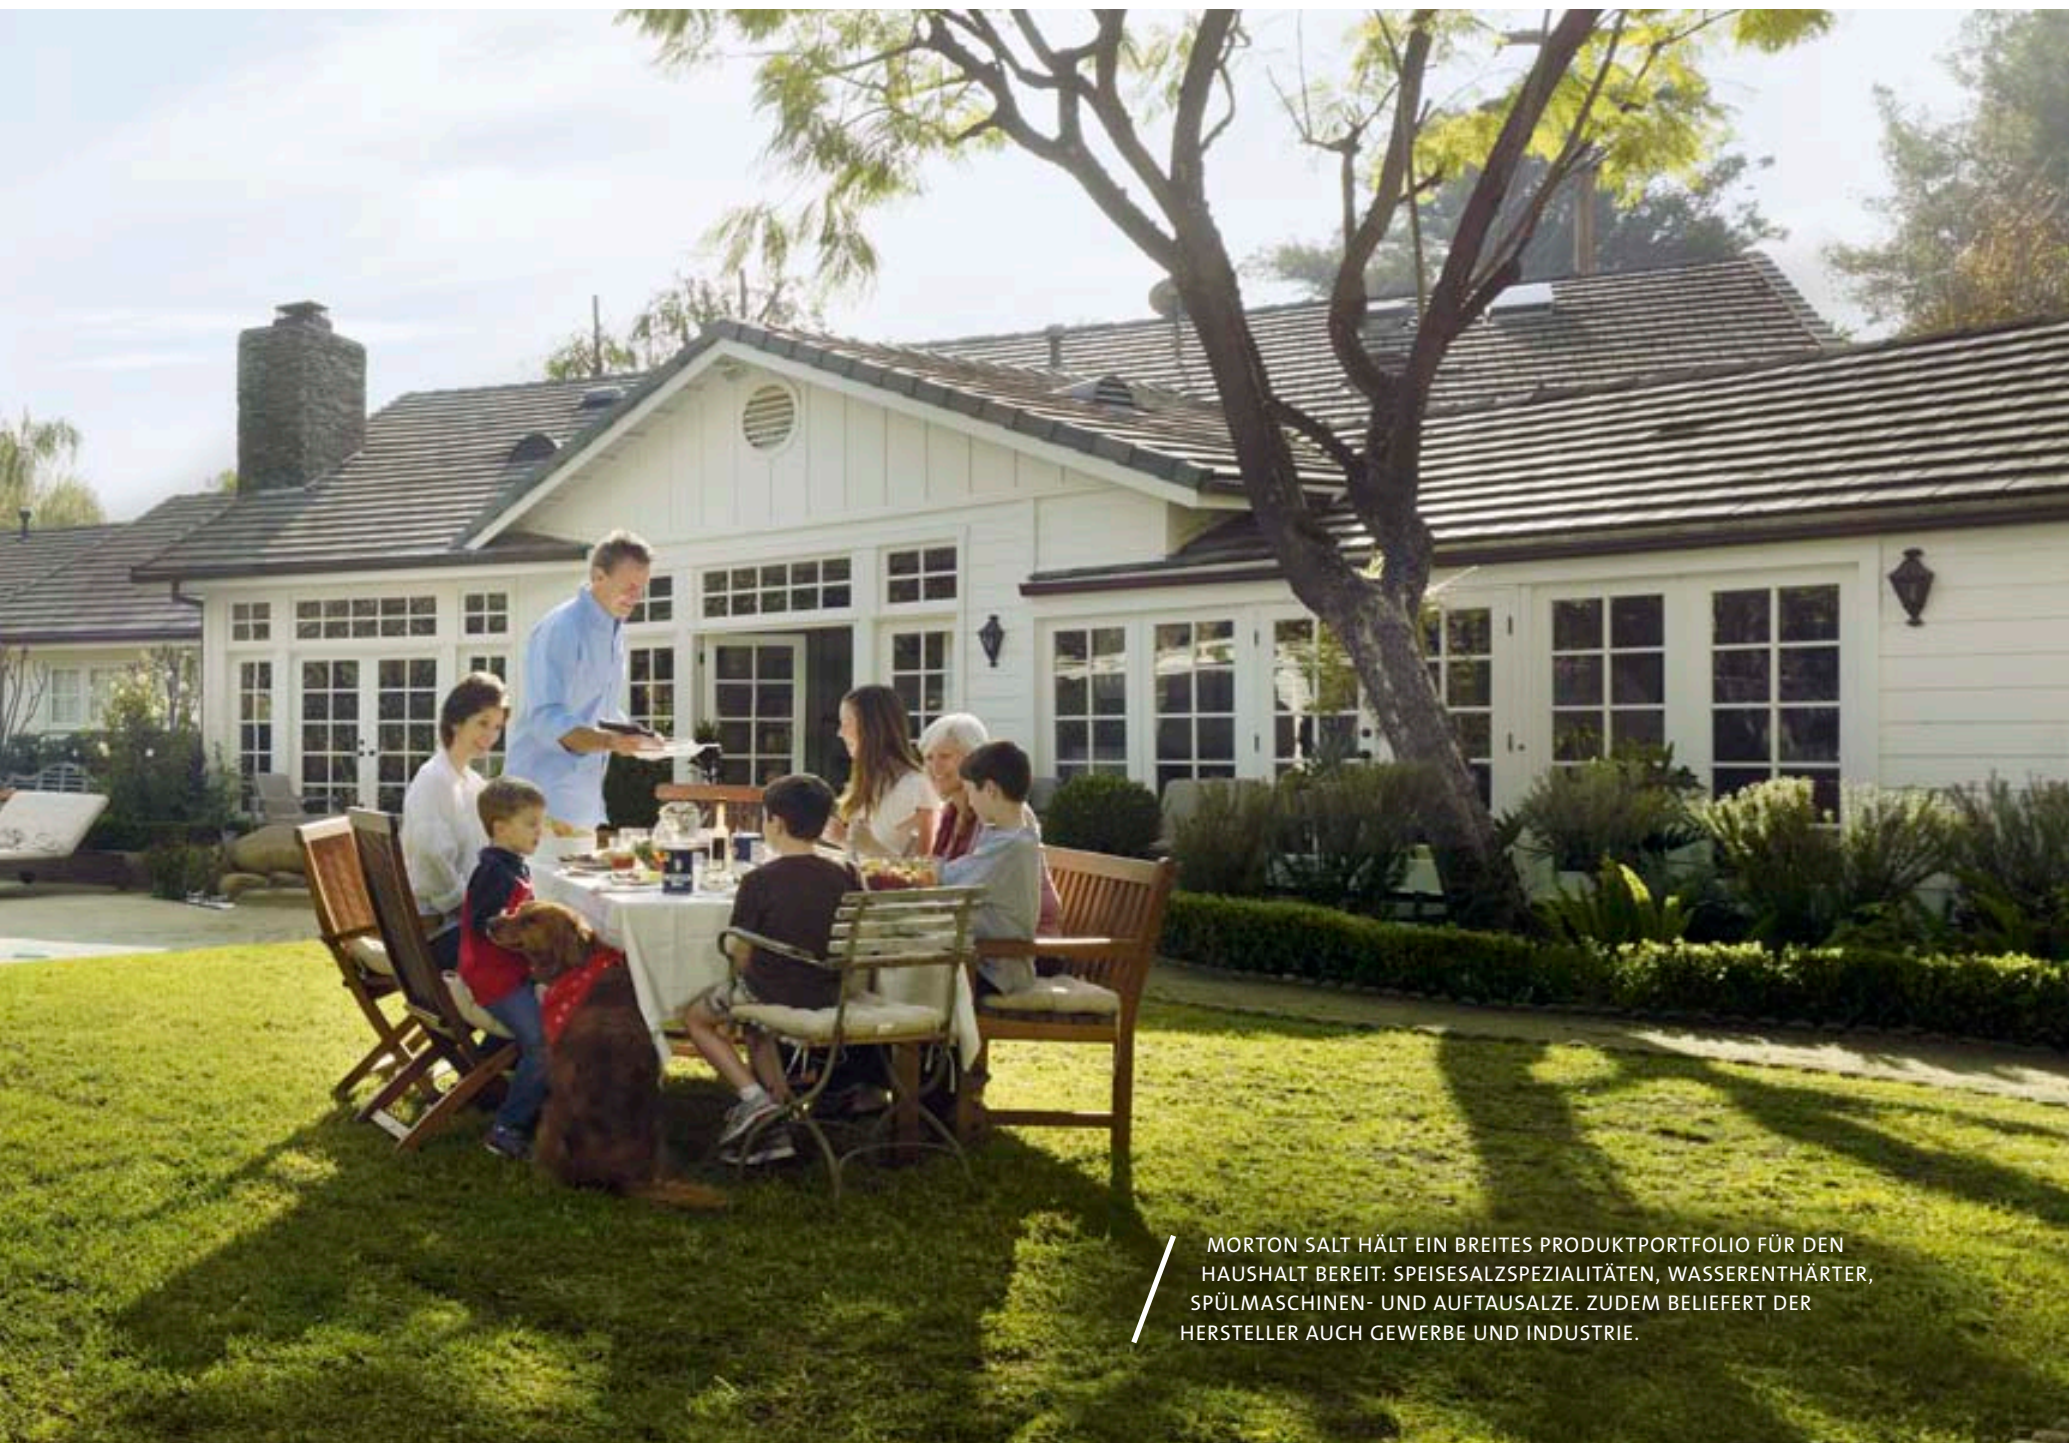

MORTON SALT HÄLT EIN BREITES PRODUKTPORTFOLIO FÜR DEN HAUSHALT BEREIT: SPEISESALZSPEZIALITÄTEN, WASSERENTHÄRTER, SPÜLMASCHINEN- UND AUFTAUSALZE. ZUDEM BELIEFERT DER HERSTELLER AUCH GEWERBE UND INDUSTRIE.



MIT DER AKQUISITION DES BEKANNTEN US-SALZPRODUZENTEN MORTON SALT SIND WIR NUN IN NORDAMERIKA BESTENS AUFGESTELLT UND GANZ NAH AN BEDEUTENDEN ABSATZREGIONEN.

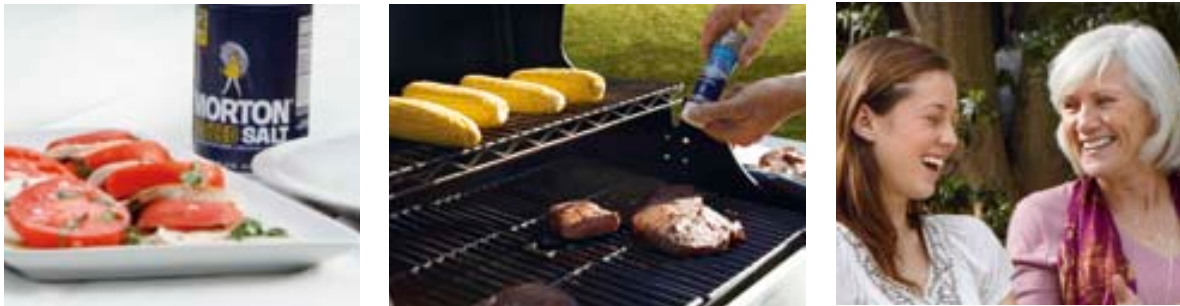

#### ZUKAUF EINES ERFOLGREICHEN US-SALZPRODUZENTEN

In den USA ist es seit 1914 in vielen amerikanischen Haushalten zuhause: Das unverwechselbare Umbrella-Girl mit dem weit aufgespannten Schirm im Regen. Dieses Markenlogo blickt von allen Verpackungen des US-Salzherstellers MORTON SALT und sorgt für einen sehr hohen Wiedererkennungswert. Symbolisiert werden damit die hohe Qualität und die außergewöhnlichen Eigenschaften der Morton Produkte: „When it rains, it pours“ – selbst wenn es regnet, bleibt unser Salz rieselfähig bis zum letzten Körnchen. Damit stärken wir unsere sehr profitablen Produktgruppen der Speise- und Gewerbesalze über Europa hinaus. Besonders die Meersalzprodukte von MORTON SALT sind in den Vereinigten Staaten sehr beliebt und haben dort letztes Jahr die Marktführerschaft übernommen. Seit 2009 ist diese Traditionsmarke nun Familienmitglied in der K+S GRUPPE – wir sind jetzt auch mit 6 Steinsalzbergwerken, 7 Solarsalz- und 10 Siedesalzanlagen in den USA, Kanada und auf den Bahamas zu Hause. Diese Akquisition hat eine hohe strategische Passfähigkeit zum bisherigen Salzgeschäft der K+S GRUPPE.

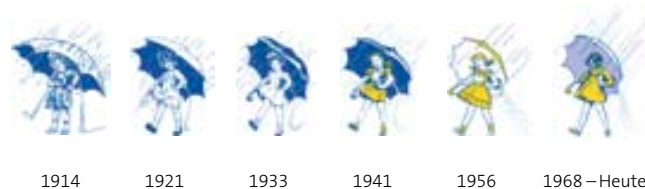

Mit MORTON SALT sind wir auf den nordamerikanischen Märkten angekommen und ganz dicht am Endkunden: In nahezu jedem Supermarkt Nordamerikas sind unsere Produkte erhältlich. MORTON SALT und in Kanada WIND-

SOR bieten eine breite Produktpalette an: Besonders vielfältig sind die Speisesalzprodukte in fertigen Gewürzmühen und anderen praktischen Darreichungsformen. Die pikanten Mischungen für jeden Geschmack in Form von Kräuter- und Gewürzsalzen lassen Gemüse- wie auch Fleischliebhaber begeistert mit der Zunge schnalzen. Ein Barbecue ohne MORTON? Fast schon undenkbar. Aber nicht nur die kulinarischen Spezialitäten stehen hoch im Kurs: Auch Spülmaschinensalze, Wasserenthärter, Poolsalze und Auftausalze sorgen für eine breite Präsenz in amerikanischen Haushalten.

Mit der vorletztes Jahr abgeschlossenen Akquisition von MORTON SALT führt die K+S GRUPPE ihre Zwei-Säulen-Strategie fort, indem sie sich international auf zwei Geschäftsfelder konzentriert: Düngemittel und Salz. Vorstandsvorsitzender Norbert Steiner: „In beiden Kerngeschäftsfeldern ist es seit Jahren unsere Strategie, auch extern zu wachsen, um unsere heutigen Marktpositionen auch künftig zu halten und auszubauen.“

### ZWEI-SÄULEN-STRATEGIE

Unser Wachstum steht auf einem soliden Fundament, denn zum einen stellt das Salzgeschäft ein zweites Standbein zusätzlich zum konjunkturabhängigeren Düngemittelgeschäft dar: Die regionale Diversifizierung ermöglicht uns ein nunmehr insgesamt weniger schwankungsanfälliges Wintergeschäft. Zum anderen sind unsere Rohstoffe

auch in Zukunft unersetzlich: Die Nährstoffe in unseren Düngemitteln sorgen für reiche Ernten und leisten damit einen Beitrag zur Ernährung der wachsenden Weltbevölkerung — unsere Salzprodukte sind der Grundstoff für viele lebenswichtige und lebensbereichernde Produkte und Anwendungen in der industriellen Produktion.

Weitere Vorteile unserer Zwei-Säulen-Strategie bieten die vergleichbaren Abbauverfahren von Kali und Salz: Sie ermöglichen einen Austausch von technischem, geologischem und logistischem Know-how. Bei der Beschaffung von Maschinen und Hilfsstoffen erreichen wir Skalenvorteile, da sich viele Arbeitsschritte unter Tage sehr ähneln. Das senkt letztlich unsere Produktionskosten und ermöglicht einen konkurrenzfähigen Preis für unsere Rohstoffe und die daraus veredelten Produkte.

Dies alles macht deutlich, dass der Erwerb von MORTON SALT weit mehr als nur eine bloße Addition von Standorten, Kapazitäten und Marktanteilen ist. Wir sind nicht nur einfach der weltweit größte Salzproduzent, sondern vor allem der im Hinblick auf die Regionen und die Produktpalette von Speise-, Industrie-, Pharma-, Gewerbe- und Auftausalzen am breitesten aufgestellte Salzproduzent der Welt. Das Mädchen mit dem Regenschirm hat sich in der K+S GRUPPE schon gut eingelebt und wird mit seinem Charme auch in Zukunft für gute Verkaufszahlen sorgen.

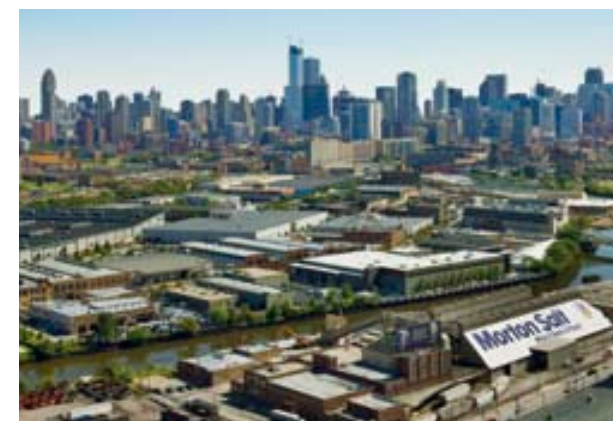

1848 begann in Chicago eine echte Erfolgsgeschichte: Eine kleine Verkaufsagentur wuchs zu einem führenden Salzproduzenten Nordamerikas heran. Heute bietet Morton Salt eine breite Palette an Salzspezialitäten für Haushalt, Winterdienste und Industrie.

## KONZERNLAGEBERICHT DER K+S GRUPPE

NACHHOLEFFEKTE UND NORMALISIERUNG DER WELTWEITEN DÜNGEMITTEL-MÄRKTE führen zu deutlich stärkerer Nachfrage und hoher Auslastung der installierten Kapazitäten / Starkes Salzgeschäft aufgrund eines sehr hohen Auftausalzabsatzes in Europa sowie erstmalig ganzjähriger Einbeziehung von MORTON SALT / Konzernumsatz um 40 % auf 5,0 Mrd. € gestiegen / Operatives Ergebnis EBIT I erreichte 727 Mio. € – eine Verdreifachung gegenüber dem Wert des Vorjahres / Erwerb von POTASH ONE entscheidender strategischer Schritt zur Erschließung neuer Kalikapazitäten / K+S GRUPPE mit attraktiven Perspektiven für die Jahre 2011 und 2012

# 4

---

|     |                                        |     |      |                                                   |     |
|-----|----------------------------------------|-----|------|---------------------------------------------------|-----|
| 4.1 | Konzernstruktur und Geschäftstätigkeit | 77  | 4.9  | Gesamtaussage zur aktuellen wirtschaftlichen Lage | 121 |
| 4.2 | Unternehmensstrategie und -steuerung   | 87  | 4.10 | Darstellung der Geschäftsbereichsentwicklung      | 122 |
| 4.3 | Mitarbeiter                            | 92  | 4.11 | Risikobericht                                     | 129 |
| 4.4 | Forschung und Entwicklung              | 95  | 4.12 | Nachtragsbericht                                  | 145 |
| 4.5 | Überblick über den Geschäftsverlauf    | 101 | 4.13 | Prognosebericht                                   | 145 |
| 4.6 | Ertragslage                            | 107 |      |                                                   |     |
| 4.7 | Finanzlage                             | 114 |      |                                                   |     |
| 4.8 | Vermögenslage                          | 119 |      |                                                   |     |

## 4.1 KONZERNSTRUKTUR UND GESCHÄFTSTÄTIGKEIT

### RECHTLICHE KONZERNSTRUKTUR

Die K+S AKTIENGESELLSCHAFT ist die Holding der K+S GRUPPE. Die wirtschaftliche Entwicklung der K+S GRUPPE wird maßgeblich durch die direkt und indirekt gehaltenen Tochtergesellschaften im In- und Ausland bestimmt. In den Konzernabschluss sind neben der Muttergesellschaft K+S AKTIENGESELLSCHAFT alle wesentlichen Beteiligungsgesellschaften einbezogen, bei denen die K+S AKTIENGESELLSCHAFT direkt oder indirekt die Mehrheit der Stimmrechte hält. Tochtergesellschaften von untergeordneter Bedeutung werden nicht konsolidiert.

/ DETAILS ZU TOCHTERGESELLSCHAFTEN, BETEILIGUNGEN UND NAHESTEHENDEN UNTERNEHMEN finden Sie auf Seite 212 sowie in der Anteilsbesitzliste auf den Seiten 214 ff.

Bedeutende Tochtergesellschaften sind die direkt gehaltenen K+S KALI GMBH, K+S NITROGEN GMBH, K+S SALZ GMBH und die K+S FINANCE BELGIUM BVBA. Über die K+S NITROGEN GMBH werden die COMPO GMBH & CO. KG und die FERTIVA GMBH gehalten. Unter der K+S SALZ GMBH sind die ESCO – EUROPEAN SALT COMPANY GMBH & CO. KG und die K+S SALT OF THE AMERICAS HOLDING B.V. zusammengefasst, die die Anteile an den mit den Geschäftsaktivitäten der SOCIEDAD PUNTA DE LOBOS S.A. (SPL), Chile, in Verbindung stehenden Gesellschaften hält. Die K+S FINANCE BELGIUM BVBA hält über die K+S NORTH AMERICA SALT HOLDINGS LLC die Anteile an der MORTON GRUPPE. Während bei der K+S KALI GMBH

sowie bei der K+S SALZ GMBH die ausländischen Gesellschaften im Wesentlichen unter eigenen Tochtergesellschaften zusammengefasst sind, werden die ausländischen Aktivitäten des Geschäftsbereichs Stickstoffdüngemittel weitestgehend unter der K+S BETEILIGUNGS GMBH geführt, einer direkten Tochtergesellschaft der K+S AKTIENGESELLSCHAFT. Auch die Ergänzenden Geschäftsbereiche sind weitgehend über Tochtergesellschaften mit der K+S AKTIENGESELLSCHAFT verbunden.

Der Konsolidierungskreis hat sich im Vergleich zum 31. Dezember 2009 nur geringfügig verändert: Im Zusam-

menhang mit der weiteren Integration von MORTON SALT wurde die MORTON SALT, INC. als Tochtergesellschaft der K+S NORTH AMERICA SALT HOLDINGS LLC. gegründet. Diese Gesellschaft hat im Zuge einer Reorganisation die Salzaktivitäten der MORTON INTERNATIONAL, INC. übernommen; danach wurde der Rechtsmantel der MORTON INTERNATIONAL, INC. gemäß der im Kaufvertrag vereinbarten Regelung an den Verkäufer rückübertragen. Darüber hinaus wurde im Vorfeld der Übernahme von POTASH ONE die K+S CANADA HOLDINGS INC. als Tochtergesellschaft der K+S SALT OF THE AMERICAS HOLDING B.V. gegründet.

### GESCHÄFTSFELDER UND ORGANISATIONSSTRUKTUR

ABB: 4.1.1

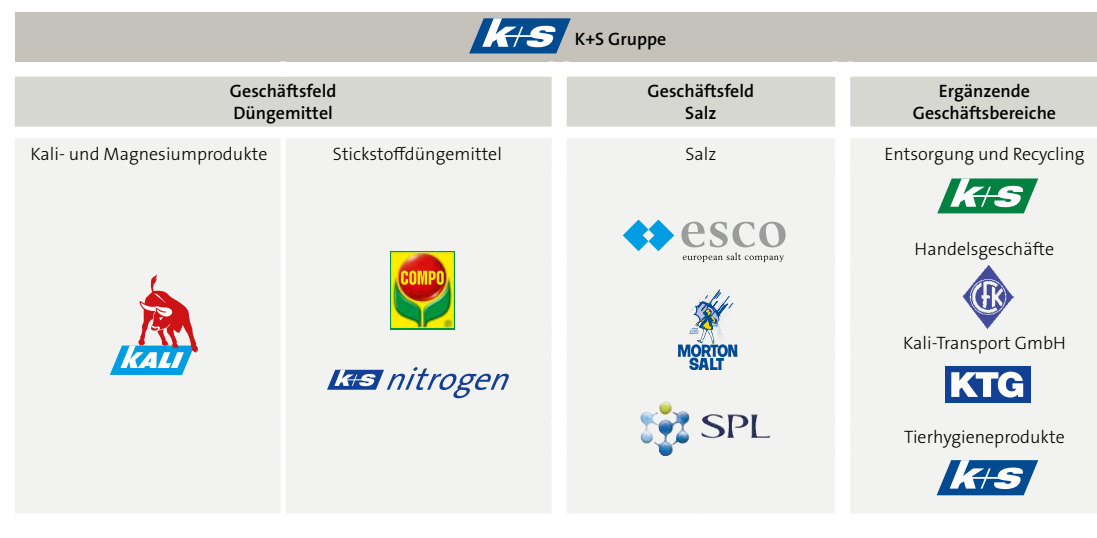

## GESCHÄFTSFELDER UND ORGANISATIONSSTRUKTUR

Die Berichterstattung der K+S GRUPPE gliedert sich in vier Bereiche, die strategisch, technisch und wirtschaftlich miteinander verknüpft sind. Sie werden durch Holding-Funktionen der K+S AKTIENGESELLSCHAFT gesteuert und unterstützt. / ABB: 4.1.1

### / ERGÄNZENDE INFORMATIONEN ZU DEN PRODUKTEN UND DIENSTLEISTUNGEN DER GESCHÄFTSBEREICHE

finden Sie im Unternehmens-/Nachhaltigkeitsbericht und auf unserer Internetseite [www.k-plus-s.com](http://www.k-plus-s.com).

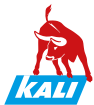

### GESCHÄFTSBEREICH KALI- UND MAGNESIUMPRODUKTE

Der Geschäftsbereich Kali- und Magnesiumprodukte gewinnt in sechs Bergwerken in Deutschland Kali- und Magnesiumrohsalze, die dort zu End- oder Zwischenprodukten weiterverarbeitet werden. Der in der Region Hannover gelegene ehemalige Bergwerksstandort Bergmannsseggen-Hugo ist seit 1995 ein reiner Weiterverarbeitungsstandort. Darüber hinaus verfügt der Geschäftsbereich über drei Weiterverarbeitungsstandorte in Frankreich. Gemessen an den Endprodukten beträgt die jährliche Produktionskapazität des Geschäftsbereichs bis zu 7,5 Mio. t Kali- und Magnesiumprodukte. Durch die Akquisition der kanadischen POTASH ONE verfügt der Geschäftsbereich zukünftig über die Möglichkeit, die Produktionskapazität mit dem Legacy Projekt lang-

fristig um mindestens 2,7 Mio. t zu erhöhen. Ein weitgespanntes Vertriebsnetz ermöglicht den Verkauf der Produkte auf nahezu allen Märkten in Europa und in vielen Überseemärkten. Der Geschäftsbereich Kali- und Magnesiumprodukte ist überwiegend in der K+S KALI GMBH und deren Tochtergesellschaften abgebildet. Der Sitz der Geschäftsführung befindet sich in Kassel.

/ WEITERE INFORMATIONEN ZUR AKQUISITION VON POTASH ONE finden Sie im Nachtragsbericht auf Seite 145.

### WICHTIGE PRODUKTE UND DIENSTLEISTUNGEN

Der Geschäftsbereich Kali- und Magnesiumprodukte bietet seinen Kunden Düngemittel, Produkte für industrielle Anwendungen, hochreine Kalium- und Magnesiumsalze für die Pharma-, Kosmetik- und Lebensmittelindustrie sowie Bestandteile für die Herstellung von Futtermitteln. Kaliumchlorid ist dabei das umsatzstärkste Produkt. Dieses universell einsetzbare Düngemittel wird weltweit insbesondere bei großen Anbaukulturen wie Getreide, Mais, Reis und Sojabohnen angewandt. Kaliumchlorid wird als Granulat direkt auf den Äckern ausgebracht oder mit anderen Einzeldüngern in Mischdüngeranlagen (Bulk Blender) gemischt. Als feinkörnige „Standard“-Ware liefert die K+S GRUPPE Kaliumchlorid an die Düngemittelindustrie, die es mit anderen Nährstoffen zu Mehrnährstoffdüngern weiterverarbeitet. Die Düngemittelspezialitäten des Geschäftsbereichs unterscheiden sich vom klassischen Kaliumchlorid durch verschiedene Nährstoffrezepturen mit Magnesium, Schwefel und Spurenelementen. Außerdem bietet der Geschäftsbereich eine breite Palette an hochwertigen Kalium- und Magnesiumprodukten für industrielle An-

wendungen in verschiedenen Reinheitsstufen und speziellen Körnungen an; diese kommen z.B. bei der Chloralkali-Elektrolyse in der chemischen Industrie, bei der Herstellung von Glas und Kunststoff, in der Mineralölindustrie, in metallurgischen Prozessen, in der Textilindustrie, in der Biotechnologie sowie beim Kunststoffrecycling zum Einsatz. Des Weiteren stellt der Geschäftsbereich Kali- und Magnesiumprodukte ein Produktportfolio für die besonders hohen Anforderungen der Pharma-, Kosmetik- und Lebensmittelindustrie bereit. Schließlich produziert der Geschäftsbereich für die Mischfutterindustrie hochwertige Kaliumchloride und Magnesiumsulfate für die Fütterung von Nutztieren. Der Geschäftsbereich Kali- und Magnesiumprodukte verfügt über ein Beraterteam, bestehend aus 31 Regionalberatern und weltweit tätigen Agronomen. Die Berater liefern wichtige Informationen und Anregungen für Innovationen rund um den Düngemiteleinsatz; auch für Industrieprodukte gibt es eine technische Anwendungsberatung.

### WESENTLICHE ABSATZMÄRKTE UND WETTBEWERBSPOSITIONEN

Etwas mehr als die Hälfte des Umsatzes erzielt der Geschäftsbereich in Europa. Hier profitiert er davon, dass die Produktionsstätten frachtkostengünstig zu den europäischen Kunden liegen. Darüber hinaus belegt der Geschäftsbereich auch auf der Südhalbkugel eine bedeutende Marktposition. So wird z.B. ein nennenswerter Teil der Düngemittel nach Südamerika, insbesondere nach Brasilien, sowie nach Asien verschifft. Dabei nutzt der Geschäftsbereich auch das Angebot kostengünstiger Container-Transporte.



Der Geschäftsbereich Kali- und Magnesiumprodukte ist weltweit der viertgrößte und in Europa der größte Produzent von Kali- und Magnesiumprodukten und hatte im Jahr 2010 einen Anteil von rund 10% am Weltkaliabsatz. Bedeutende Wettbewerber der K+S GRUPPE in diesem Geschäftsbereich sind die nordamerikanischen Unternehmen POTASH CORPORATION OF SASKATCHEWAN, THE MOSAIC COMPANY und AGRIMUM, die unter der Bezeichnung CANPOTEX eine gemeinsame Exportorganisation unterhalten, die russische URALKALI und die weißrussische BELARUSKALI, die außerhalb ihrer Heimatmärkte gemeinsam über die Exportorganisation BPC auftreten, die russische SILVINIT, deren vollständige Übernahme URALKALI im Jahr 2011 anstrebt, die israelische ICL sowie die jordanische APC. Durch seine kali- und magnesiumhaltigen Düngemittelspezialitäten unterscheidet sich der Geschäftsbereich deutlich vom Wettbewerb und nimmt bei diesen Düngemitteln weltweit die Spitzenposition ein. Auch mit den Produkten für industrielle, technische und pharmazeutische Anwendungen gehört K+S zu den leistungsstärksten Anbietern weltweit und ist in Europa der mit Abstand größte Anbieter.

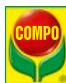

**K+S nitrogen**

#### GESCHÄFTSBEREICH STICKSTOFFDÜNGEMITTEL

Der Geschäftsbereich Stickstoffdüngemittel besteht im Wesentlichen aus der Gesellschaft K+S NITROGEN GMBH sowie deren Tochtergesellschaft COMPO GMBH & CO. KG. K+S NITROGEN vermarktet stickstoffhaltige Dün-

gemittel mit einer Ausrichtung auf Großverbraucher in der Landwirtschaft und in Spezialkulturen wie Obst-, Gemüse und Weinanbau. Die Gesellschaft hat ihren Sitz in Mannheim. Neben den exklusiv von BASF für sie produzierten Düngemitteln vermarktet K+S NITROGEN auch Waren anderer namhafter europäischer Düngemittelproduzenten. COMPO hat ihren Sitz in Münster; sie verfügt über Produktionsstandorte in Deutschland und Westeuropa. Daneben lässt COMPO einen Teil der Produkte bei der BASF in Ludwigshafen herstellen. COMPO vertreibt ihre Produkte in den Bereichen Consumer und EXPERT direkt und über Tochtergesellschaften im In- und Ausland. Mitte des Jahres 2010 wurde bekanntgegeben, dass eine Veräußerung von COMPO innerhalb eines Jahres geprüft wird, da die Wachstumsstrategie der K+S AKTIENGESELLSCHAFT vorsieht, Managementressourcen und finanzielle Mittel künftig insbesondere auf die Bereiche Kali- und Magnesiumprodukte sowie Salz zu fokussieren.

#### WICHTIGE PRODUKTE UND DIENSTLEISTUNGEN

Die Produkte der K+S NITROGEN lassen sich in Stickstoff-einzeldünger, Mehrnährstoffdünger und Ammonsulfat einteilen. Der Stickstoffeinzeldünger Kalkammonsalpeter (KAS) wird in allen landwirtschaftlichen Kulturen eingesetzt. Mehrnährstoffdünger enthalten neben Stickstoff die Nährstoffe Kalium und Phosphat sowie – je nach Bedarf und Anwendung – Magnesium, Schwefel oder auch Spurenelemente. Sie werden hauptsächlich im Anbau von Getreide, Mais, Raps oder Zuckerrüben, aber auch im Grünland eingesetzt. Die kaliumsulfathaltigen Mehrnährstoffdünger sind insbesondere für den

Obst-, Gemüse- und Weinanbau geeignet. Außerdem zeichnen sich stickstoffstabilisierte ENTEC®-Düngemittel durch eine einzigartige Stickstoffeffizienz aus und reduzieren so im Vergleich zu herkömmlichen Produkten die Anzahl der notwendigen arbeits- und kostenaufwändigen Düngergaben. Darüber hinaus bietet die K+S NITROGEN für borbedürftige Kulturen, wie z.B. Raps und Zuckerrüben, Ammonsulfatsalpeter mit Bor. Feinkristallines Ammonsulfat wird in Europa überwiegend als Rohstoff in der Düngemittelproduktion eingesetzt, während es in Südamerika meist direkt auf die Felder ausgebracht wird. Grobkörniges Ammonsulfat eignet sich sowohl zur Direktanwendung in der Landwirtschaft als auch als Komponente in Mischanlagen (Bulk Blender).

Das Consumergeschäft von COMPO umfasst Produkte für den Garten- und Hausbereich zum Zwecke der Pflanzenernährung, der Pflanzenpflege (Blumenerde, Blumenpflege, Rasen- und Gartendünger, Rasensamen) und des Pflanzenschutzes. Die wichtigste Produktgruppe im Sortiment ist Blumenerde. Außerdem werden hauptsächlich Flüssig- sowie granuliert Rasen- und Gartendünger vermarktet. Im Rahmen der Zusammenarbeit mit dem Schweizer Unternehmen SYNGENTA, einem führenden Hersteller von Pflanzenschutzmitteln, hat COMPO seit dem Geschäftsjahr 2007 ihr Angebot für Verbraucher in Europa mit innovativen Pflanzenschutzprodukten ergänzt. Im Bereich EXPERT der COMPO werden Spezialdüngemittel für kommunale Grünflächen (Sportflächen, Parkanlagen), für Golfplätze, für Baumschulbetriebe, für den Gartenbau und verschiedene Sonderkulturen angeboten.

#### WESENTLICHE ABSATZMÄRKTE UND WETTBEWERBSPOSITIONEN

K+S NITROGEN liefert pro Jahr bis zu 5 Mio. t Düngemittel in 60 Länder der Welt. Rund zwei Drittel des Umsatzes werden in Europa und rund ein Drittel in Übersee erzielt. Mit den internationalen Niederlassungen der K+S GRUPPE und ausgewählten externen Vertriebspartnern verfügt die K+S NITROGEN über ein weltweites Vertriebsnetz. In großen europäischen Kernmärkten wie Deutschland, Frankreich, Spanien, Italien und Griechenland beschäftigt K+S NITROGEN eigenes Vertriebspersonal. Weltweit ist Harnstoff (46 % Stickstoffanteil) der dominierende Stickstoffdünger. Harnstoff wird auf Basis von Gas und Ammoniak von mehreren hundert Produzenten weltweit produziert. In Europa und Nordamerika hingegen dominieren nitrathaltige Stickstoffdünger, da diese bei den gegebenen Boden- und Klimaverhältnissen in diesen Regionen für die Anwender vorteilhafter sind. Weltweit führender Anbieter von Stickstoffdüngemitteln ist der norwegische Produzent YARA. In Europa sind neben YARA die AGROFERT-Gruppe und FERTIBERIA die wichtigsten Wettbewerber. Die K+S GRUPPE gehört mit der K+S NITROGEN zu den führenden europäischen Anbietern. Bei dem schwefelhaltigen Stickstoffdüngemittel Ammonsulfat zählt K+S NITROGEN weltweit zu den führenden Anbietern.

Die Marktbearbeitung des Consumergeschäfts von COMPO konzentriert sich zu über 90 % auf West- und Südeuropa. Die Zielgruppe für Consumerprodukte sind primär Hobbygärtner, die die Produkte über die Vertriebskanäle Gartencenter, Baumärkte, RAIFFEISEN-

und Genossenschaftsmärkte oder Lebensmitteleinzelhandel erwerben. Die wichtigsten Wettbewerber auf europäischer Ebene sind der aus den USA stammende Anbieter THE SCOTTS MIRACLE-GRO COMPANY sowie die BAYER AG. Daneben gibt es zahlreiche kleine, meist nur nationale bzw. regionale Anbieter. COMPO ist der führende europäische Anbieter von Premiumprodukten im Bereich Blumenerden, Spezialdünger, Pflanzenpflege und Pflanzenschutz für Haus und Garten. Im Bereich Expert nimmt COMPO ebenfalls eine bedeutende Position in Europa ein.

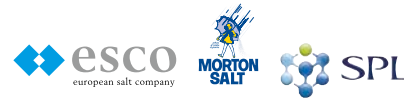

#### GESCHÄFTSBEREICH SALZ

Im Geschäftsbereich Salz gewinnt und vertreibt die K+S GRUPPE Speise-, Gewerbe-, Industrie- und Auftausalze. K+S ist der weltweit größte Anbieter von Salzprodukten, die jährliche Produktionskapazität beläuft sich auf rund 30 Mio. t Salz. Der Geschäftsbereich umfasst die Teileinheiten ESCO – EUROPEAN SALT COMPANY GMBH & CO. KG (ESCO), Hannover, mit Tätigkeitsschwerpunkt in Europa, die chilenische SOCIEDAD PUNTA DE LOBOS S. A. (SPL), Santiago de Chile, mit Aktivitäten in Südamerika und den USA sowie MORTON SALT, INC., Chicago, einen der größten Salzproduzenten in Nordamerika. ESCO verfügt über drei Steinsalzbergwerke, zwei Solbetriebe sowie mehrere Siedesalzanlagen in Deutschland, Frankreich, den Niederlanden, Portugal und Spanien sowie über zahlreiche Vertriebsstandorte in Europa. Die jährliche Produktionskapazität von ESCO liegt in

Europa bei rund 8,0 Mio. t Festsalz und bei 1,7 Mio. t Salz in Sole. Die chilenische SPL gewinnt im Salar Grande de Tarapacá Steinsalz im kostengünstigen Tagebau. Die Produktionskapazität beträgt dort rund 6,5 Mio. t pro Jahr. Außerdem betreibt die zur SPL-Gruppe gehörende SALINAS DIAMANTE BRANCO im Nordosten von Brasilien eine Meersalzanlage mit 0,5 Mio. t Jahreskapazität. In den USA vertreibt die SPL ihre Salzprodukte über die INTERNATIONAL SALT COMPANY (ISCO). Darüber hinaus ist die chilenische Reederei EMPREMAR, die mit einer Flotte von sechs eigenen sowie zusätzlichen gecharterten Schiffen die Seelogistik für die SPL-Gruppe in Südamerika abwickelt, Teil des Geschäftsbereichs Salz. MORTON SALT betreibt sechs Steinsalzbergwerke, sieben Solar- und zehn Siedesalzanlagen in den USA, in Kanada und auf den Bahamas; die jährliche Produktionskapazität beläuft sich auf rund 13 Mio. t Salz. Der Geschäftsbereich Salz ist in Europa sowie Nord- und Südamerika mit eigenen Vertriebseinheiten und über Plattformgesellschaften der K+S GRUPPE vertreten.

#### WICHTIGE PRODUKTE UND DIENSTLEISTUNGEN

Der Geschäftsbereich Salz bietet seinen Kunden Speise-, Gewerbe-, Industrie- und Auftausalze, die sämtlich auf Kochsalz (Natriumchlorid) basieren. Abhängig von den jeweiligen Anwendungen unterscheiden sich die Produkte vor allem durch die Körnung, den Reinheitsgrad, die Darreichungsform und eventuelle Zusatzstoffe. Im Bereich Speisesalz stellt die K+S GRUPPE sowohl Salz für die Lebensmittelindustrie als auch Tafelsalz für Endverbraucher her, hierzu gehören auch Premiumprodukte wie koscheres oder natriumreduziertes Salz. Ausgangs-

produkte für die breite Palette der Speisesalze sind i. d. R. hochreine Siedesalze, aber auch Stein- und Meersalze. Durch die Übernahme von MORTON SALT hat die Produktgruppe Speisesalz innerhalb der K+S GRUPPE deutlich an Gewicht gewonnen. MORTON SALT verfügt im Verbrauchergeschäft mit den Marken UMBRELLA GIRL® und WINDSOR CASTLE® in den USA und in Kanada über sehr gut positionierte Marken mit hohem Bekanntheitsgrad. Gewerbesalze werden in Färbereien, in der Textilindustrie, bei der Futtermittelproduktion, in der Fischkonservierung, in Bohrspülungen für die Erdöl- und Erdgasförderung sowie in vielen anderen gewerblichen Bereichen eingesetzt. Pharmasalze sind wesentlicher Bestandteil von Infusions- und Dialyselösungen. Auch im Bereich Gewerbesalz werden Produkte für Endverbraucher hergestellt, wie beispielsweise Wasserenthärtungssalze. Industriesalz ist einer der wichtigsten Rohstoffe der chemischen Industrie. In Elektrolyseanlagen wird es in Chlor, Natronlauge und Wasserstoff aufgespalten. Zum Endverbraucher gelangt es zum Beispiel als Bestandteil von Polyvinylchlorid (PVC). Winterdienste, öffentliche und private Straßenbauverwaltungen und Straßenmeistereien sowie gewerbliche Großverbraucher beziehen Auftaumittel der K+S GRUPPE. Außerdem werden Haushaltspackungen für Endverbraucher zur Verfügung gestellt. MORTON SALT bietet zudem Auftausalze an, die durch den Zusatz von Calciumchlorid beim Kontakt mit Eis und Schnee mehr Wärme erzeugen als konventionelle Produkte und deswegen vor allem bei sehr niedrigen Temperaturen schneller wirken.

#### WESENTLICHE ABSATZMÄRKTE UND WETTBEWERBSPOSITIONEN

Zu den wesentlichen europäischen Absatzmärkten des Geschäftsbereichs Salz gehören Deutschland, Benelux, Frankreich, Skandinavien, die iberische Halbinsel, Tschechien und Polen, während die USA, Kanada, Brasilien und Chile auf dem amerikanischen Kontinent von besonderer Bedeutung sind. Das Auftausalzgeschäft ist regional stark von den Witterungsbedingungen abhängig; K+S kann aufgrund ihres einzigartigen Netzwerks von Produktionsanlagen in Europa, Nord- und Südamerika flexibler auf Schwankungen der Auftausalznachfrage reagieren als die lokalen Wettbewerber. In den übrigen Segmenten besteht aufgrund der begrenzten Substituierbarkeit in den meisten Anwendungen eine verhältnismäßig stabile Nachfragesituation. Während der Markt für Salz in Westeuropa vergleichsweise reif ist und nur leichte Wachstumsraten aufweist, ist in den Schwellenländern ein tendenziell stärkerer Nachfrageanstieg zu verzeichnen. Salzvorkommen sind geografisch weit verstreut; aufgrund des relativ hohen Anteils der Transportkosten an den Gesamtkosten sind die Märkte in der Regel – ausgehend von den Produktionsstätten – regional begrenzt.

Die vergangenen Jahre waren in der Branche durch einen Konsolidierungsprozess gekennzeichnet. Die K+S GRUPPE hat mit dem im Jahr 2004 getätigten Kauf der 38%igen Beteiligung der SOLVAY-Gruppe an ESCO, dem im Jahr 2006 erfolgten Erwerb des chilenischen Produzenten SPL sowie der im Oktober 2009 erfolgreich abgeschlossenen Übernahme von MORTON SALT die-

sen Prozess aktiv mitgestaltet. ESCO ist bei Salzprodukten für den Lebensmittelbereich, Salzen für industrielle bzw. gewerbliche Anwendungen und Auftausalzen führend in Europa. Mit SPL hat die K+S GRUPPE Zugang zu den dynamisch wachsenden süd- und zentralamerikanischen Märkten. Dazu zählen die großen Märkte wie Brasilien, in denen die Chemiebranche, ein wichtiger Bereich für das Industriesalzgeschäft, stark wächst. MORTON SALT ist neben CARGILL und COMPASS MINERALS INTERNATIONAL einer der größten Salzproduzenten in Nordamerika. Mit dem Erwerb von MORTON SALT wurde die K+S GRUPPE – gemessen an der Produktionskapazität – der größte Salzproduzent der Welt mit einer Jahreskapazität von rund 30 Mio. t.

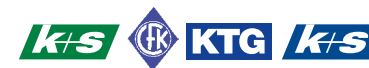

#### ERGÄNZENDE GESCHÄFTSBEREICHE

Unter dem Begriff „Ergänzende Geschäftsbereiche“ sind neben den Recyclingaktivitäten, der untertägigen Beseitigung und der Verwertung von Abfällen in Kali- bzw. Steinsalzbergwerken (Entsorgung und Recycling) sowie der Granulierung von CATSAN® am Standort Salzdettfurth weitere für die K+S GRUPPE wichtige Aktivitäten gebündelt. Mit der KALI-TRANSPORT GESELLSCHAFT MBH (KTG) in Hamburg verfügt die K+S GRUPPE über einen eigenen Logistik-Dienstleister. Die CHEMISCHE FABRIK KALK GMBH (CFK) handelt mit einer Auswahl von Basischemikalien.

**WICHTIGE PRODUKTE UND DIENSTLEISTUNGEN**

Der Geschäftsbereich Entsorgung und Recycling nutzt die durch die Rohsalzgewinnung entstandenen untertägigen Hohlräume zur langzeitsicheren Beseitigung und Verwertung von Abfällen und greift dabei auf die vorhandene Infrastruktur der aktiven Kali- bzw. Steinsalzbergwerke zurück. Der Geschäftsbereich betreibt zwei Untertagedeponien; die dort eingelagerten Abfälle werden der Biosphäre dauerhaft entzogen. Bei Bedarf können die Abfälle aber wieder auslagert werden, um die enthaltenen Wertstoffe zu recyceln. Die von der K+S GRUPPE für die Entsorgung genutzten Salzlagerstätten sind gas- sowie flüssigkeitsdicht und von den grundwasserführenden Schichten getrennt. Durch eine Kombination von geologischen und technischen Barrieren wird somit eine höchstmögliche Sicherheit erreicht. Daneben betreibt die K+S GRUPPE unter Tage fünf Anlagen zur Verwertung von Abfällen. Behördlich zugelassene Abfälle werden hier zur Verfüllung von Hohlräumen verwendet. Für die untertägige Verwertung geeignet sind beispielsweise Rückstände aus der Rauchgasreinigung. Für die Sekundäraluminiumindustrie bietet der Geschäftsbereich Schmelzsalze sowie das Recycling der Salzschlacken an.

Mit der KTG in Hamburg und deren Tochtergesellschaften verfügt die K+S GRUPPE neben der dem Geschäftsbereich Salz zugeordneten chilenischen Reederei EMPREMAR über einen weiteren eigenen Logistikdienstleister. Der Betrieb des Kalikais in Hamburg, mit einer Lagerkapazität von rund 400.000 t eine der größten Umschlaganlagen für Schüttgüter in Europa, ist Kern-

geschäft der KTG und gleichzeitig für den Geschäftsbereich Kali- und Magnesiumprodukte von strategischer Bedeutung. Auch das Containergeschäft der K+S GRUPPE wird von Hamburg aus gesteuert, einschließlich der Vortransporte von den Produktionsstandorten zu den Verladeterminals.

Am Standort Salzdettfurth ist es gelungen, vorhandene Anlagen und weite Teile der Infrastruktur eines stillgelegten Kaliwerks weiter wirtschaftlich zu nutzen, Arbeitsplätze zu erhalten und die Aktivitäten sogar wieder deutlich auszuweiten: Hier granulieren wir für die MARS GMBH u. a. das bekannte Tierhygienemarkenprodukt CATSAN®.

Die Produktpalette der CFK umfasst eine Auswahl von Basischemikalien. Dazu zählen unter anderem Natronlauge, Salpetersäure, Natriumcarbonat (Soda) sowie Calcium- und Magnesiumchlorid.

**WESENTLICHE ABSATZMÄRKTE UND WETTBEWERBSPOSITIONEN**

Die Kernmärkte des Geschäftsbereichs Entsorgung und Recycling liegen in West- und Mitteleuropa. Die osteuropäischen Staaten, allen voran Polen und das Baltikum, bieten darüber hinaus Potenzial, da dort die Nachfrage nach EU-konformen, untertägigen Entsorgungslösungen für Abfälle steigt. Der Markt der untertägigen Entsorgung ist sehr wettbewerbsintensiv, die K+S GRUPPE bietet jedoch mit ihren Full-Service-Lösungen einen Mehrwert für den Kunden. Auch beim Recycling von Salzschlacken aus der Sekundäraluminiumindustrie

zählt die K+S GRUPPE in Deutschland wie im übrigen Europa zu den führenden Anbietern. Zu den Kunden der CFK gehören viele namhafte europäische Chemiefirmen, Glashütten, Metallverarbeiter, Waschmittelproduzenten und Brauereien sowie Städte und Kommunen, die Calcium- oder Magnesiumchlorid für den Winterdienst verwenden.

**WESENTLICHE STANDORTE**

In der K+S GRUPPE waren am Jahresende 2010 gut 15.200 Mitarbeiter im In- und Ausland beschäftigt. Tabelle 4.1.1 zeigt die bedeutendsten Standorte der K+S GRUPPE sowie deren Mitarbeiterzahl am Jahresende 2010. / TAB: 4.1.1

**INFORMATIONEN ÜBER ROHSTOFFLAGERSTÄTTEN**

Eine Übersicht unserer Rohstofflagerstätten und -reserven finden Sie im Kapitel ‚Weitere Informationen‘ auf den Seiten 218 ff.

**LEITUNG UND KONTROLLE****ERKLÄRUNG ZUR UNTERNEHMENSFÜHRUNG**

Die Erklärung gemäß § 161 AktG, die Beschreibung der Arbeitsweise von Vorstand und Aufsichtsrat sowie die Zusammensetzung und Arbeitsweise der Ausschüsse und weitere Angaben zur Unternehmensführung sind in der Erklärung zur Unternehmensführung im Kapitel ‚Corporate Governance‘ auf den Seiten 21 ff. enthalten; diese



Erklärung zur Unternehmensführung ist auch Bestandteil des Lageberichts der K+S AKTIENGESELLSCHAFT.

### GRUNDZÜGE DES VERGÜTUNGSSYSTEMS

Die Angaben nach § 315 Abs. 2 Nr. 4 HGB sowie nach Ziffer 4.2.4, 4.2.5 und 5.4.6 Abs. 3 des Deutschen Corporate Governance Kodex sind im Vergütungsbericht des Corporate-Governance-Kapitels auf den Seiten 31 ff. enthalten; der Vergütungsbericht ist Bestandteil des Konzernlageberichts.

### TEILNEHMER UND BEDINGUNGEN VON PROGRAMMEN MIT LANGFRISTIGER ANREIZFUNKTION

Zwischen 1999 und 2009 hat K+S dem Vorstand und den Führungskräften die Teilnahme an einem virtuellen Aktioptionsprogramm ermöglicht. Hierzu waren bei K+S im Jahr 2009 insgesamt 308 Personen berechtigt (vgl. Finanzbericht 2009). Eine nähere Beschreibung dieses Programms, dessen Struktur für Vorstand und die übrigen Teilnehmer des Optionsprogramms identisch war, finden Sie im Vergütungsbericht auf den Seiten 31 ff.

Vor dem Hintergrund der durch das Vorstandsvergütungsgesetz geänderten gesetzlichen Bestimmungen sowie der geänderten Empfehlungen des Deutschen Corporate Governance Kodex zur Ausgestaltung der Vorstandsvergütung wurde eine Änderung des variablen Vergütungsbestandteils mit langfristiger Anreizwirkung (sogenannter „Long Term Incentive“ (LTI)) erforderlich. Daher wurde ab dem Jahr 2010 eine kennzahlenbasierte variable Vergütungskomponente eingeführt.

### BEDEUTENDE STANDORTE DER K+S GRUPPE

TAB: 4.1.1

|                                                                                       | Geschäftsbereich            | Mitarbeiter (FTE) <sup>1</sup> |
|---------------------------------------------------------------------------------------|-----------------------------|--------------------------------|
| K+S-Standorte in Kassel, Deutschland (K+S AG/K+S KALI/K+S Entsorgung/K+S IT Services) |                             | 639                            |
| Kaliverbundwerk Werra, Deutschland (Heringen/Merkers/Philippsthal/Unterbreizbach)     | Kali- und Magnesiumprodukte | 4.240                          |
| Kaliwerk Zielitz, Deutschland                                                         | Kali- und Magnesiumprodukte | 1.733                          |
| Kaliwerk Sigmundshall, Deutschland                                                    | Kali- und Magnesiumprodukte | 776                            |
| Kaliwerk Neuhoef-Ellers, Deutschland                                                  | Kali- und Magnesiumprodukte | 729                            |
| Kaliwerk Bergmannsseggen-Hugo, Deutschland                                            | Kali- und Magnesiumprodukte | 138                            |
| COMPO-Zentrale in Münster, Deutschland                                                | Stickstoffdüngemittel       | 297                            |
| COMPO-Werk in Krefeld, Deutschland                                                    | Stickstoffdüngemittel       | 184                            |
| COMPO France S.A.S, Roche-Lez-Beaupré, Frankreich                                     | Stickstoffdüngemittel       | 72                             |
| K+S Nitrogen in Mannheim, Deutschland                                                 | Stickstoffdüngemittel       | 81                             |
| Torf- und Humuswerk Gnarrenburg, Deutschland                                          | Stickstoffdüngemittel       | 64                             |
| Salzbergwerk Bernburg, Deutschland                                                    | Salz                        | 441                            |
| Salzbergwerk Borth, Deutschland                                                       | Salz                        | 310                            |
| Meersalzanlage Salina Diamante Branco, Brasilien                                      | Salz                        | 244                            |
| Reederei Empremar, Santiago de Chile, Chile                                           | Salz                        | 242                            |
| Siedesalzanlage Rittman, USA                                                          | Salz                        | 239                            |
| Salzbergwerk Ojibway, Kanada                                                          | Salz                        | 221                            |
| Salzbergwerk Pugwash, Kanada                                                          | Salz                        | 208                            |
| Salzbergwerk Grand Saline, USA                                                        | Salz                        | 208                            |
| Morton Salt-Zentrale, Chicago, USA                                                    | Salz                        | 215                            |
| Salzbergwerk Fairport, USA                                                            | Salz                        | 168                            |
| Salztagebaubetrieb SPL, Atacama-Wüste/Patillos, Chile                                 | Salz                        | 182                            |
| Salzbergwerk Braunschweig-Lüneburg, Deutschland                                       | Salz                        | 181                            |
| Salzbergwerk Weeks Island, USA                                                        | Salz                        | 166                            |
| Siedesalzanlage Hutchinson, USA                                                       | Salz                        | 162                            |
| Siedesalzanlage Silver Springs, USA                                                   | Salz                        | 159                            |
| Salzbergwerk Mines Seleine, Kanada                                                    | Salz                        | 146                            |
| Meersalzanlage Grantsville, USA                                                       | Salz                        | 145                            |
| Meersalzanlage Inagua, Bahamas                                                        | Salz                        | 139                            |
| SPL-Zentrale, Santiago de Chile, Chile                                                | Salz                        | 130                            |
| Siedesalzanlage Manistee, USA                                                         | Salz                        | 117                            |

<sup>1</sup> FTE = Full Time Equivalents: Vollzeitäquivalente; Teilzeitstellen werden entsprechend ihrem jeweiligen Arbeitszeitanteil gewichtet; inkl. Auszubildende.

**BEDEUTENDE STANDORTE DER K+S GRUPPE (FORTSETZUNG)**

TAB: 4.1.1

|                                                                      | Geschäftsbereich             | Mitarbeiter (FTE) <sup>1</sup> |
|----------------------------------------------------------------------|------------------------------|--------------------------------|
| Siedesalzanlage Windsor, Kanada                                      | Salz                         | 93                             |
| esco-Zentrale in Hannover, Deutschland                               | Salz                         | 81                             |
| Vertriebsgesellschaft ISCO, Clarks Summit, USA                       | Salz                         | 80                             |
| Siedesalz- und Meersalzanlage Newark, USA                            | Salz                         | 75                             |
| Solbetrieb Frisia Zout B.V., Harlingen, Niederlande                  | Salz                         | 73                             |
| Verarbeitungsstandort Port Canaveral, USA                            | Salz                         | 58                             |
| Solbetrieb Lindbergh, Kanada                                         | Salz                         | 49                             |
| Canadian Salt-Zentrale, Montreal, Kanada                             | Salz                         | 41                             |
| Siedesalzanlage Glendale, USA                                        | Salz                         | 33                             |
| Granulierung von Tierhygieneprodukten, Bad Salzdetfurth, Deutschland | Ergänzende Geschäftsbereiche | 116                            |
| KTG, Hamburg, Deutschland                                            | Ergänzende Geschäftsbereiche | 116                            |

<sup>1</sup> FTE = Full Time Equivalents: Vollzeitäquivalente; Teilzeitstellen werden entsprechend ihrem jeweiligen Arbeitszeitanteil gewichtet; inkl. Auszubildende.

Diese beruht auf einer mehrjährigen Bemessungsgrundlage nach Maßgabe der erzielten Wertbeiträge. Im Jahr 2010 waren bei K+S insgesamt 406 Personen zur Teilnahme berechtigt. Eine nähere Beschreibung dieses Programms, das in seiner Ausgestaltung für Vorstand und die übrigen Teilnehmer identisch ist, finden Sie im Vergütungsbericht auf den Seiten 31 ff.

#### RECHTLICHE UND WIRTSCHAFTLICHE EINFLUSSFAKTOREN

Die K+S GRUPPE muss eine Vielzahl von nationalen und internationalen Rechtsvorschriften beachten: Neben den allgemeinen Rechtsvorschriften sind für uns insbesondere das Berg- sowie das Umweltrecht (z.B. Wasser-,

Abfall-, Immissionsschutz-, Bodenschutzrecht etc.) und das Arbeitssicherheits- und Gesundheitsschutzrecht relevant. Auch die Sicherung vorhandener und ebenso der Erwerb neuer Abbaurechte sind für die K+S GRUPPE von elementarer Bedeutung.

Zu den für die K+S GRUPPE relevanten wirtschaftlichen Einflussfaktoren sind insbesondere Tarifabschlüsse in Deutschland und Nordamerika zu zählen, da rund 67% der Belegschaft in Deutschland und seit der Übernahme von MORTON SALT rund 20% in Nordamerika tätig sind und der Personalaufwand eine wesentliche Kostenposition der K+S GRUPPE darstellt. In den letzten Jahren konnten wir unser Reaktionsvermögen auf Ergebnisentwicklungen sowohl mit flexiblen Arbeitszeitmodellen als auch durch variable Gehaltsanteile erhöhen. Letztere

sind u.a. an den Unternehmenserfolg gekoppelt. Transport-, Energie- und Rohstoffkosten sowie die Wechselkursentwicklung des US-Dollars haben ebenfalls großen Einfluss auf den wirtschaftlichen Erfolg der K+S GRUPPE.

/ GESAMTWIRTSCHAFTLICHE RAHMENBEDINGUNGEN sowie deren Auswirkungen auf K+S werden auf den Seiten 101 ff. beschrieben.

#### ANGABEN GEMÄSS § 315 ABS. 4 HGB

##### ZIFFER 1: ZUSAMMENSETZUNG DES GEZEICHNETEN KAPITALS

Das Grundkapital beträgt 191,4 Mio. € und ist in 191.400.000 Aktien eingeteilt. Die auf den Inhaber lautenden Aktien der Gesellschaft sind Stückaktien ohne Nennbetrag. Darüber hinaus bestehen keine weiteren Aktiegattungen.

##### ZIFFER 2: BESCHRÄNKUNGEN DER STIMMRECHTE ODER DER ÜBERTRAGUNG VON AKTIEN

Jede Aktie besitzt eine Stimme; es existieren weder Beschränkungen der Stimmrechte noch Beschränkungen, die die Übertragung von Aktien betreffen. Entsprechende Gesellschaftervereinbarungen sind dem Vorstand nicht bekannt.

##### ZIFFER 3: DIREKTE ODER INDIREKTE BETEILIGUNGEN ÜBER 10% AM KAPITAL

Nach Meldung gemäß § 21 WpHG besitzt die MERITUS TRUST COMPANY LIMITED, Bermuda, über die EUROCHEM GROUP SE und ihr zuzurechnende Tochterunternehmen knapp 15% der Aktien. MERITUS hält treu-

händerisch Industriebeteiligungen von Andrey Melnichenko. Die BASF SE, Ludwigshafen, hält weiterhin etwas über 10 % unserer Aktien.

#### **ZIFFER 4: INHABER VON AKTIEN MIT SONDERRECHTEN, DIE KONTROLLBEFUGNISSE VERLEIHEN**

Es existieren keine Aktien mit Sonderrechten, die Kontrollbefugnisse verleihen.

#### **ZIFFER 5: STIMMRECHTSKONTROLLE BEI BETEILIGUNG VON ARBEITNEHMERN AM KAPITAL**

Es existieren keine Stimmrechtskontrollen.

#### **ZIFFER 6: GESETZLICHE VORSCHRIFTEN UND BESTIMMUNGEN DER SATZUNG ÜBER DIE ERNENNUNG UND ABERUFUNG DER VORSTANDSMITGLIEDER UND ÜBER SATZUNGSÄNDERUNGEN**

Bestellung und Abberufung des Vorstands regelt § 84 AktG. Danach werden die Vorstandsmitglieder für die Dauer von höchstens fünf Jahren durch den Aufsichtsrat bestellt. Nach § 5 der Satzung besteht der Vorstand der K+S AKTIENGESELLSCHAFT aus mindestens zwei Mitgliedern. Die Anzahl bestimmt der Aufsichtsrat. Er kann ein Vorstandsmitglied zum Vorsitzenden des Vorstands ernennen. Der Aufsichtsrat kann die Bestellung zum Vorstandsmitglied oder die Ernennung zum Vorstandsvorsitzenden aus wichtigem Grund widerrufen.

Die Hauptversammlung kann Satzungsänderungen mit der einfachen Mehrheit des vertretenen Grundkapitals beschließen (§ 179 Abs. 2 AktG i.V.m. § 17 Abs. 2 der

Satzung), sofern keine gesetzlich zwingenden höheren Mehrheitserfordernisse bestehen.

#### **ZIFFER 7: BEFUGNISSE DES VORSTANDS HINSICHTLICH DER MÖGLICHKEIT, AKTIEN AUSZUGEBEN ODER ZURÜCKZUKAUFEN**

##### **GENEHMIGTES KAPITAL**

Der Vorstand ist ermächtigt, mit Zustimmung des Aufsichtsrats das Grundkapital der Gesellschaft bis zum 9. Mai 2011 gegen Bar- oder Sacheinlagen einmal oder mehrmals, insgesamt jedoch um höchstens 56.100.000,00 €, durch Ausgabe von höchstens 56.100.000 neuen, auf den Inhaber lautenden Stückaktien zu erhöhen (Genehmigtes Kapital). Bei Durchführung der Kapitalerhöhung ist den Aktionären grundsätzlich ein Bezugsrecht einzuräumen. Der Vorstand kann mit Zustimmung des Aufsichtsrats das gesetzliche Bezugsrecht der Aktionäre bei Kapitalerhöhungen gegen Bareinlagen ausschließen, wenn die Kapitalerhöhung 10 % des Grundkapitals nicht übersteigt und der Ausgabebetrag für die neuen Aktien den maßgeblichen Börsenpreis nicht wesentlich unterschreitet. Bei Kapitalerhöhungen gegen Sacheinlagen kann der Vorstand mit Zustimmung des Aufsichtsrats das gesetzliche Bezugsrecht der Aktionäre insgesamt bis zu einem anteiligen Betrag des Grundkapitals von 41,25 Mio. € ausschließen, wenn die neuen Aktien beim Erwerb des Unternehmens oder einer Unternehmensbeteiligung durch die Gesellschaft als Gegenleistung eingesetzt werden sollen. Außerdem kann der Vorstand mit Zustimmung des Aufsichtsrats das gesetzliche Bezugsrecht der Aktionäre für Spitzenbeträge, die infolge des Bezugsrechts entstehen, ausschließen.

##### **ERWERB UND VERWENDUNG EIGENER AKTIEN**

Der Vorstand ist ermächtigt, bis zum 10. Mai 2015 eigene Aktien im Umfang von höchstens 10 % der gesamten Stückaktien des Grundkapitals der K+S AKTIENGESELLSCHAFT zu erwerben. Die Gesellschaft darf zu keinem Zeitpunkt mehr als 10 % der gesamten Stückaktien ihres Grundkapitals halten. Der Erwerb erfolgt über die Börse oder mittels eines an alle Aktionäre gerichteten öffentlichen Kaufangebots. Im Falle des Erwerbs über die Börse darf der gezahlte Kaufpreis je Aktie den maßgeblichen Börsenpreis um nicht mehr als 10 % über- oder unterschreiten; als maßgeblicher Börsenpreis gilt dabei der am Tag des Erwerbs durch die Eröffnungsauction ermittelte Kurs der K+S-Aktie im Computer-Handelsystem XETRA. Im Falle des Erwerbs mittels eines an alle Aktionäre gerichteten öffentlichen Kaufangebots darf der angebotene Kaufpreis je Aktie den maßgeblichen Börsenpreis um nicht mehr als 10 % über- oder unterschreiten; als maßgeblicher Börsenpreis gilt dabei der gewichtete durchschnittliche Börsenkurs der K+S-Aktie im Computer-Handelsystem XETRA während der letzten zehn Börsenhandelstage vor der Veröffentlichung des Kaufangebots.

Der Vorstand ist ferner ermächtigt, mit Zustimmung des Aufsichtsrats Aktien der Gesellschaft, die aufgrund einer Ermächtigung nach § 71 Abs. 1 Nr. 8 AktG erworben wurden, über die Börse oder durch öffentliches Angebot an alle Aktionäre zu veräußern. Die Aktien dürfen in folgenden Fällen auch in anderer Weise und damit unter Ausschluss des Bezugsrechts der Aktionäre veräußert werden:

- + Veräußerung gegen Zahlung eines Geldbetrags, der den maßgeblichen Börsenpreis nicht wesentlich unterschreitet;
- + Begebung der Aktien als Gegenleistung zum Zwecke des Erwerbs von Unternehmen, Unternehmensteilen oder Beteiligungen an Unternehmen;
- + Bedienung von Wandel- und Optionsschuldverschreibungen, die aufgrund einer Ermächtigung der Hauptversammlung begeben worden sind.

Die Ermächtigung zum Bezugsrechtsausschluss gilt insgesamt für Aktien mit einem anteiligen Betrag am Grundkapital von bis zu 10 % des Grundkapitals zum Zeitpunkt der Beschlussfassung oder zum Zeitpunkt der Ausübung der Ermächtigung, je nachdem, in welchem Zeitpunkt das Grundkapital auf einen kleineren Betrag lautet. Die Höchstgrenze von 10 % des Grundkapitals vermindert sich um den anteiligen Betrag des Grundkapitals, der auf diejenigen Aktien entfällt, die während der Laufzeit dieser Ermächtigung im Rahmen einer Kapitalerhöhung aus genehmigtem Kapital oder aus bedingtem Kapital unter Ausschluss des Bezugsrechts ausgegeben werden.

Der Vorstand ist schließlich ermächtigt, mit Zustimmung des Aufsichtsrats Aktien der Gesellschaft, die aufgrund einer gemäß § 71 Abs. 1 Nr. 8 AktG erteilten Ermächtigung erworben wurden, einzuziehen, ohne dass die Durchführung der Einziehung eines weiteren Hauptversammlungsbeschlusses bedarf. Die Einziehung hat nach § 237 Abs. 3 Nr. 3 AktG ohne Kapitalherabsetzung in der Weise zu erfolgen, dass sich durch die Ein-

ziehung der Anteil der übrigen Stückaktien am Grundkapital gemäß § 8 Abs. 3 AktG erhöht.

Die Ermächtigungen zum Erwerb eigener Aktien, zu ihrer Veräußerung bzw. zu ihrem Einzug können jeweils ganz oder teilweise, im letzteren Fall auch mehrmals, ausgeübt werden.

#### **ZIFFER 8: WESENTLICHE VEREINBARUNGEN, DIE UNTER DER BEDINGUNG EINES KONTROLLWECHSELS INFOLGE EINES ÜBERNAHMEANGEBOTS STEHEN**

K+S hat im Jahr 2010 eine syndizierte Kreditlinie über 800 Mio. € abgeschlossen. Gemäß den Vertragsbedingungen werden alle im Rahmen der Kreditlinie gezogenen Ausleihungen unmittelbar zur Rückzahlung fällig und zahlbar sowie die Kreditlinie insgesamt kündbar, sollten eine allein handelnde Person oder mehrere gemeinschaftlich handelnde Personen die Kontrolle über die K+S AKTIENGESELLSCHAFT erhalten. Außerdem hat K+S im Jahr 2009 eine Anleihe über 750 Mio. € emittiert. Im Fall eines Kontrollwechsels haben die Anleihegläubiger das Recht, die noch nicht zurückgezahlten Schuldverschreibungen zu kündigen.

#### **ZIFFER 9: ENTSCHÄDIGUNGSVEREINBARUNGEN, DIE FÜR DEN FALL EINES ÜBERNAHMEANGEBOTS MIT DEN MITGLIEDERN DES VORSTANDS ODER ARBEITNEHMERN GETROFFEN SIND**

Derartige Vereinbarungen bestehen mit den Mitgliedern des Vorstands der K+S AKTIENGESELLSCHAFT und sind auf der Seite 35 im Vergütungsbericht detailliert erläu-

tert. Das im Jahr 2009 letztmals gewährte Aktienoptionsprogramm für Vorstand und Führungskräfte sieht vor, dass sich im Übernahmefall („Change of Control“) für sämtliche noch ausstehende Optionen ein zeitliches Sonderfenster für die Ausübung öffnet. Die genaue Ausgestaltung dieses Programms, die für Vorstand und Führungskräfte identisch ist, wird ebenfalls im Vergütungsbericht erläutert (siehe Seite 31). Das seit dem Jahr 2010 für Vorstand und Führungskräfte eingeführte Programm mit langfristiger Anreizwirkung (LTI) sieht keine Entschädigungsvereinbarungen vor.

#### **ERLÄUTERNDER BERICHT DES VORSTANDS ZU DEN ANGABEN NACH §§ 289 ABS. 4, 315 ABS. 4 HGB**

Da die zu den Ziffern 1 bis 6 der §§ 289 Abs. 4 bzw. 315 Abs. 4 HGB im Lagebericht der K+S AKTIENGESELLSCHAFT bzw. im Konzernlagebericht (Seiten 84 ff.) gemachten Angaben für sich selbst sprechen, beschränken wir uns an dieser Stelle auf folgende Erläuterungen gemäß § 176 Abs. 1 Satz 1 AktG:

#### **ZIFFER 7: BEFUGNISSE DES VORSTANDS HINSICHTLICH DER MÖGLICHKEIT, AKTIEN AUSZUGEBEN ODER ZURÜCKZUKAUFEN**

- + Durch die dem Vorstand noch bis zum 9. Mai 2011 eingeräumte Möglichkeit, mit Zustimmung des Aufsichtsrats eine Kapitalerhöhung mit begrenztem Bezugsrechtsausschluss durchzuführen (Genehmigtes Kapital), wird der Gesellschaft ein weit verbreitetes



Instrument an die Hand gegeben, mit dessen Hilfe zum Beispiel sich bietende Gelegenheiten zur Durchführung von Akquisitionen schnell und flexibel genutzt werden können. Der Vorstand darf von dieser Möglichkeit nur dann Gebrauch machen, wenn der Wert der neuen Aktien und der Wert der Gegenleistung in einem angemessenen Verhältnis stehen.

- + Die dem Vorstand von der Hauptversammlung ferner erteilte Ermächtigung, in begrenztem Umfang eigene Aktien der Gesellschaft zu erwerben, ist ebenfalls ein in vielen Unternehmen übliches Instrument. Durch die Möglichkeit, die eigenen Aktien wieder zu veräußern, wird die Gesellschaft in die Lage versetzt, z.B. langfristig orientierte Anleger im In- und Ausland zu gewinnen oder Akquisitionen flexibel zu finanzieren. Die weiter bestehende Möglichkeit zur Einziehung eigener Aktien stellt eine ebenfalls übliche Verwendungsalternative im Interesse der Gesellschaft und ihrer Aktionäre dar.

#### **ZIFFER 8: WESENTLICHE VEREINBARUNGEN, DIE UNTER DER BEDINGUNG EINES KONTROLLWECHSELS INFOLGE EINES ÜBERNAHMEANGEBOTS STEHEN**

Die in den Kreditverträgen und Anleihebedingungen für den Fall eines Kontrollwechsels vereinbarten Regelungen sind bei vergleichbaren Transaktionen üblich und zum Schutz der berechtigten Gläubigerinteressen angemessen.

#### **ZIFFER 9: ENTSCHÄDIGUNGSVEREINBARUNGEN, DIE FÜR DEN FALL EINES ÜBERNAHMEANGEBOTS MIT DEN MITGLIEDERN DES VORSTANDS ODER ARBEITNEHMERN GETROFFEN SIND**

Die mit den Mitgliedern des Vorstands bestehenden Entschädigungsvereinbarungen sowie das im Aktienoptionsprogramm für Vorstand und Führungskräfte geregelte zeitliche Sonderfenster für die Ausübung im Fall eines Übernahmeangebots, welches im Jahr 2009 letztmals gewährt wurde, berücksichtigen in angemessenem Umfang sowohl die berechtigten Interessen der Betroffenen als auch der Gesellschaft und ihrer Aktionäre.

## **4.2 UNTERNEHMENSSTRATEGIE UND -STEUERUNG**

### **VISION UND MISSION**

Unsere Vision und Mission stecken den Rahmen für die heutige Tätigkeit und die strategische Ausrichtung der Gruppe ab und sollen unseren Mitarbeitern, Aktionären, Fremdkapitalgebern, Kunden, Lieferanten und der Öffentlichkeit die Grundlage für unser Denken und Handeln näherbringen.

/ **UNSERE VISION UND MISSION** finden Sie auf Seite 3 dieses Finanzberichts, weitere Informationen sind darüber hinaus im Unternehmens- / Nachhaltigkeitsbericht enthalten.

### **UNTERNEHMENSSTRATEGIE UND STRATEGISCHE AUSRICHTUNG DER GESCHÄFTSFELDER**

#### **DIFFERENZIERUNG UND NACHHALTIGES MARGENWACHSTUM DURCH SPEZIALISIERUNG**

Die K+S GRUPPE strebt die Festigung und den Ausbau der Marktpositionen in ihren Kerngeschäftsfeldern insbesondere über die verstärkte Vermarktung von Spezialprodukten an. Die Veredelungsstrategie ermöglicht in den Geschäftsfeldern Düngemittel und Salz die Realisierung attraktiverer Margen.

#### **EFFIZIENZSTEIGERUNG UND NUTZUNG VON SYNERGIEN**

Die Kostenposition stellt im Hinblick auf die wichtigsten Wettbewerber in den Hauptabsatzmärkten im Düngemittel- wie auch im Salzgeschäft einen zentralen Erfolgsfaktor dar. Neben der konsequenten Verfolgung von Kostensenkungs- und Flexibilisierungsinitiativen über die gesamte Prozesskette hinweg liegt ein besonderer Fokus auf der Optimierung des internationalen Produktionsnetzwerks und der damit verbundenen Mengenströme und Logistikkosten. Vergleichbare Abbauverfahren ermöglichen Synergien zwischen den Geschäftsbereichen Kali- und Magnesiumprodukte sowie Salz beim Austausch von technischem, geologischem und logistischem Know-how sowie Skaleneffekte in der Beschaffung von Maschinen und Hilfsstoffen.

#### **AUSBAU DES AUSGEWOGENEN REGIONALPORTFOLIOS**

Weltweit sind sowohl Düngemittel- als auch Salzmärkte durch saisonale wie auch regionale Nachfrageschwan-

kungen gekennzeichnet. Die Strategie der K+S GRUPPE zielt auf ein ausgewogenes Regionalportfolio ab, das einen Ausgleich von wetterbedingten Schwankungen sowie eine Abfederung zyklischer Markttrends ermöglicht. Zusätzlich ergänzen sich das Düngemittelgeschäft und das weniger konjunkturabhängige Salzgeschäft auch über vorübergehende Wirtschaftskrisen hinweg.

Im Düngemittelbereich ermöglicht die ausgewogene Marktpräsenz in den wichtigen Agrarmärkten Europa, Südamerika und Asien den Ausgleich von saisonalen Schwankungen zwischen Nord- und Südhalbkugel ebenso wie die Verminderung von konjunkturell bedingten, regionalen Nachfrageeffekten. Der Ausbau der Marktpräsenz in bedeutenden Überseemärkten und die Erschließung neuer, attraktiver Absatzmärkte in künftigen Wachstumsregionen werden daher weiter verfolgt.

Lokale Produktion ist im stark mengengetriebenen Salzgeschäft ein entscheidender Faktor bei der Erschließung neuer Märkte. Im Geschäftsbereich Salz war die Verbesserung des Ergebnisprofils durch die Verminderung der Abhängigkeit von der regionalen Volatilität des Auftausalzgeschäfts eine wichtige Triebfeder unserer Akquisitionen in Süd- und Nordamerika (SPL und MORTON SALT), welche einen wichtigen Beitrag zum Ausgleich der schwankenden Wintersaison in Europa liefern.

#### **SETZEN VON STANDARDS FÜR QUALITÄT, ZUVERLÄSSIGKEIT UND SERVICE**

Ziel der K+S GRUPPE ist es, im Markt der bevorzugte Partner unserer Kunden zu sein. Hohe Produktqualität

und Zuverlässigkeit sind hierfür entscheidende Voraussetzungen. In Ergänzung der Spezialisierungsstrategie werden dort, wo es wertschaffend ist, Service-Leistungen und -innovationen vorangetrieben. Insbesondere im Bereich Düngemittel ermöglicht die individuelle Beratung der Kunden, bedarfsgerechte Lösungen zu identifizieren und so die Kundenbindung zu stärken. Mit unseren Angeboten, wie z.B. der elektronischen Bestellabwicklung oder dem lieferantengesteuerten Bestand im europäischen Auftausalzgeschäft, streben wir an, im Markt neue Standards zu setzen.

#### **STRATEGISCHE AUSRICHTUNG DER GESCHÄFTSFELDER**

Die K+S GRUPPE verfügt mit den Geschäftsfeldern Düngemittel sowie Salz über zwei synergetisch verbundene und sich komplementär ergänzende Geschäftsfelder mit attraktiven Wachstumsperspektiven.

Neben dem organischen Wachstum streben wir in den angestammten Geschäftsfeldern auch Wachstum über Akquisitionen und Kooperationen an.

So steht der Erwerb von POTASH ONE, die zu einem Ausbau der Kalikapazitäten und zu einer Verlängerung der durchschnittlichen Lebensdauer unserer Bergwerke führen wird, ganz im Zeichen unserer Zwei-Säulen-Strategie. Diese verfolgt das Ziel, Managementressourcen und finanzielle Mittel künftig insbesondere auf die Geschäftsbereiche Kali- und Magnesiumprodukte sowie Salz zu fokussieren. Vor diesem Hintergrund haben wir im vergangenen Geschäftsjahr auch angekündigt, die

Veräußerung der COMPO in Erwägung zu ziehen, und infolgedessen einen Carve-out-Prozess begonnen.

/ WEITERE INFORMATIONEN ZUR AKQUISITION VON POTASH ONE finden Sie im Nachtragsbericht auf Seite 145.

#### **KALI- UND MAGNESIUMPRODUKTE**

Die sich für den Geschäftsbereich Kali- und Magnesiumprodukte für die Zukunft ergebenden strategischen Handlungsfelder werden in Abbildung 4.2.1 dargestellt. / ABB: 4.2.1

#### **SALZ**

Die sich für den Geschäftsbereich Salz für die Zukunft ergebenden strategischen Handlungsfelder werden in Abbildung 4.2.2 dargestellt. / ABB: 4.2.2

#### **STRATEGISCHE KONZERNSTRUKTUR**

Bei der Ausgestaltung der gesellschaftsrechtlichen Konzernstruktur stehen neben der Abbildung unserer Geschäftsbereichsstruktur insbesondere Fragen der Optimierung der Konzerninnenfinanzierung sowie der steuerlichen Optimierung im Vordergrund.

/ INFORMATIONEN ZUR KÜNFTIGEN AUSRICHTUNG DES KONZERNS finden Sie im Prognosebericht auf den Seiten 145 f.

#### **STRATEGISCHE FINANZIERUNGSMASSNAHMEN**

Mit den von uns ergriffenen Finanzierungsmaßnahmen verfolgen wir grundsätzlich folgende Ziele:

- + Gewährleistung einer ausgewogenen Kapitalstruktur
- + Begrenzung von Refinanzierungsrisiken durch Diversifizierung der Finanzierungsquellen und -instrumente sowie des Fälligkeitsprofils

**STRATEGIE KALI- UND MAGNESIUMPRODUKTE**

ABB: 4.2.1

|                                                                                   |                                               | Strategische Schwerpunkte                                                                                                                         |
|-----------------------------------------------------------------------------------|-----------------------------------------------|---------------------------------------------------------------------------------------------------------------------------------------------------|
| 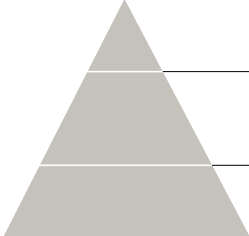 | Wachstum                                      | + Globale Erschließung neuer kostengünstiger Produktionsmöglichkeiten<br>+ Ausbau hochmargiger Produktsegmente                                    |
|                                                                                   | Optimierung der Marktbearbeitung              | + Fokussierung auf ausgewählte ertragsstarke Märkte und Kunden<br>+ Fokussierung auf ertragsstarke Nischen mit differenzierten Marketingkonzepten |
|                                                                                   | Optimierung bestehender Produktionsstrukturen | + Bestmögliche Nutzung unserer Ressourcen durch fortwährende Optimierung des bestehenden Produktionssystems                                       |

linie mit günstigeren Konditionen zusammengefasst und ihre Fälligkeit von April 2012 bis Juli 2015 verlängert. / **EINE ÜBERSICHT DES FÄLLIGKEITSPROFILS** finden Sie auf Seite 144.

Darüber hinaus haben wir im Berichtsjahr die Finanzierung des saisonalen Finanzbedarfs von MORTON SALT und ISCO im amerikanischen Salzgeschäft von externen Bankkrediten auf konzerninterne Quellen umgestellt. Damit haben wir das Ziel der Kostenoptimierung durch die Vermeidung von Margenverlusten im Falle gleichzeitiger Geldanlage und -aufnahme erreicht.

/ **INFORMATIONEN ZU KÜNFTIGEN FINANZIERUNGSMASSNAHMEN** finden Sie im Kapitel Prognosebericht auf Seite 155.

**STRATEGIE SALZ**

ABB: 4.2.2

|                                                                                    |                                    | Strategische Schwerpunkte                                                                                                              |
|------------------------------------------------------------------------------------|------------------------------------|----------------------------------------------------------------------------------------------------------------------------------------|
| 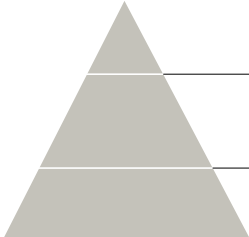 | Wachstum                           | + Eintritt in neue Regionalmärkte<br>+ Ausbau hochmargiger Produktsegmente                                                             |
|                                                                                    | Optimierung der Marktbearbeitung   | + Stärkung der Position in bestehenden und angrenzenden Märkten                                                                        |
|                                                                                    | Optimierung bestehender Strukturen | + Optimierung der Ressourcenausnutzung durch kontinuierliche Verbesserung von Strukturen und des vorhandenen internationalen Netzwerks |

**UNTERNEHMENSSTEUERUNG****UNTERNEHMENSINTERNES STEUERUNGSSYSTEM**

Die Geschäftsbereiche und Holding-Einheiten der K+S GRUPPE arbeiten in einer Matrixorganisation zusammen; das Gruppeninteresse steht dabei stets im Vordergrund. Die Matrixorganisation unterstützt folgende Ziele:

- + optimale Nutzung der Chancen und Erzielung von Synergien bei bestmöglicher Begrenzung von Risiken
- + optimale Nutzung des gruppenweit vorhandenen Know-hows („Wissensmanagement“)

Das unternehmensinterne Steuerungssystem der K+S GRUPPE besteht im Wesentlichen aus folgenden Komponenten:

- + Kostenoptimierung durch Kapitalbeschaffung zu nachhaltig günstigen Konditionen

/ **INFORMATIONEN ZU DEN ZIELEN DES FINANZMANAGEMENTS** finden Sie im Kapitel Finanzlage auf Seite 114.

Im Rahmen dieser Zielsetzung haben wir im Geschäftsjahr 2010 das Fälligkeitsprofil der Finanzierungsinstrumente der K+S GRUPPE optimiert. Dazu wurden zwei revolvingierende Kreditlinien zu einer Konsortialkredit-

- + regelmäßige Vorstandssitzungen im Zwei-Wochen-Rhythmus
- + monatlich rollierende Ergebnis- und Liquiditätshochschätzung für das laufende Geschäftsjahr sowie für die beiden Folgejahre
- + Monatsberichte der Geschäftsbereiche
- + vierteljährlicher Management-Dialog zwischen Vorstand und den Leitungen der Geschäftsbereiche Kali- und Magnesiumprodukte, Stickstoffdüngemittel und Salz
- + Kommissionen für Investitionen, Akquisitionen/Devestitionen und Personal sowie gruppenweite Gremien wie z.B. Compliance-Ausschuss, IT-Gremium, Marketing-Forum, Ausschuss zu Sicherheit, Gesundheit und Umweltschutz etc.
- + Risiko- und Chancenmanagement

Die Steuerung der K+S GRUPPE erfolgt über regelmäßige Erörterungen zwischen dem Vorstand und den Leitungen der Geschäftsbereiche. Dabei wird die Unternehmensstrategie diskutiert und festgelegt, wie diese im Rahmen der Jahres- und Mittelfristplanung systematisch umgesetzt wird. Dazu werden zwischen Vorstand und Geschäftsbereichsleitungen Zielvereinbarungen abgeschlossen. Die Geschäftsbereiche berichten monatlich über die Entwicklung wesentlicher externer Frühindikatoren sowie über interne Unternehmenskenngrößen. Die Beobachtung einer Vielzahl von externen Frühindikatoren, wie z.B. die Einschätzung des Marktpotenzials, bildet die Grundlage für unsere geschäftspolitischen Entscheidungen, um unsere Chancen zu nutzen und mögliche Fehlentwicklungen zu vermeiden. Bei

den internen Unternehmenskenngrößen steht die Kommentierung der aktuellen Entwicklungen bzw. Zielabweichungen bei Produktion, Absatz, Umsatz, Kosten, Ergebnis, Personal, Investitionen und weiteren Kennzahlen im Vordergrund. Auf Basis monatlich aktualisierter Hochschätzungen wird über die Entwicklung der Ergebnisgrößen des laufenden Jahres informiert. Ziel ist es, die Veränderungen der wichtigsten Erlös- und Kostengrößen der Ergebnisrechnung sowohl gegenüber der Schätzung des Vormonats als auch gegenüber dem Plan zu analysieren, um gegebenenfalls Korrekturmaßnahmen einzuleiten. Auch die Entwicklung der Liquidität wird mittels einer hochgerechneten Kapitalflussrechnung monatlich aufgezeigt. Als Informationsbasis dient ein elektronisches Management-Informationssystem (MIS).

Der Austausch zwischen dem Vorstand und den Leitern der Geschäftsbereiche Kali- und Magnesiumprodukte, Stickstoffdüngemittel und Salz ist im Rahmen von quartalsweise stattfindenden Management-Dialogen institutionalisiert. In jeder der vier Veranstaltungen wird ein Überblick über die jeweils aktuelle Marktsituation sowie die rollierende Hochschätzung gegeben. Darüber hinaus werden im Verlauf des Jahres u.a. Schwerpunkte auf Zielerreichung und Strategie gelegt.

Zur Unterstützung des Managements beschäftigen sich gruppenweite Gremien regelmäßig u.a. mit den Themen Personal, Compliance, Informationstechnologie und Marketing. Für die Prüfung, Bewertung und Genehmigung von Investitionen bzw. Akquisitionen/

Devestitionen sind spezielle Kommissionen eingerichtet; die Bewertung von Projekten erfolgt i.d.R. nach dem Ertragswertverfahren. Schließlich werden im Rahmen von Akquisitionen spezielle Teams gebildet, um die organisatorischen Voraussetzungen für eine zügige und effektive Integration zu schaffen.

Die permanente Einbindung aller Unternehmensbereiche in das interne Steuerungssystem, welches das interne Risiko- und Chancenmanagement beinhaltet, gewährleistet kurze Reaktionszeiten auf Veränderungen in allen Bereichen und auf allen Entscheidungsebenen der K+S GRUPPE. Bei wesentlichen ergebnisrelevanten Veränderungen innerhalb eines Beobachtungsfelds wird unverzüglich an Geschäftsführungen und Vorstand berichtet.

#### VALUE REPORTING

K+S verfolgt eine wertorientierte Berichterstattung. Wir verstehen unter Value Reporting eine strukturierte und regelmäßige Berichterstattung an den Kapitalmarkt, die den Kapitalgebern eine adäquate Unternehmenswertermittlung erleichtert. Dabei steht eine klare Kommunikation unserer Ziele sowie deren Erreichung im Vordergrund. Eine ausführliche Darstellung der zur Berichterstattung an den Kapitalmarkt genutzten Instrumente finden Sie im Bereich Transparenz des Corporate-Governance-Kapitels auf Seite 26. Eine Darstellung unserer finanziellen Ziele sowie der Steuerungskennzahlen der K+S GRUPPE finden Sie auf den Seiten 91 f.



### HERLEITUNG DER KAPITALKOSTEN

Der gewichtete durchschnittliche Kapitalkostensatz der K+S GRUPPE ergibt sich als Summe des Verzinsungsanspruchs der Eigenkapitalgeber auf den Eigenkapitalanteil sowie der Fremdkapitalverzinsung auf den verzinslichen Fremdkapitalanteil am Gesamtkapital. Da es sich um eine Nachsteuerbetrachtung handelt, wird der durchschnittliche Fremdkapitalzins um die Unternehmenssteuerquote reduziert.

Der Verzinsungsanspruch der Eigenkapitalgeber ergibt sich aus einem risikolosen Zinssatz zuzüglich einer Risikoprämie. Als risikoloser Zinssatz wurde der Mittelwert der Renditen von Staatsanleihen in Euro mit einer Laufzeit von einem bis 30 Jahren herangezogen; Ende 2010 lag dieser bei 3,0 % (Vorjahr: 4,2 %). Die Risikoprämie wurde aus dem empirischen Mittelwert der Marktisikoprämie von 4,5 % (Vorjahr: 4,5 %) und dem für K+S gültigen, längerfristig adjustierten Betafaktor in Höhe von 1,01 (Vorjahr: 0,99) gegenüber dem Vergleichsindex MSCI EUROPE ermittelt. Demnach ergibt sich ein Renditeanspruch der Eigenkapitalgeber in Höhe von 7,6 % (Vorjahr: 8,7 %). Der Marktwert des Eigenkapitals betrug Anfang November 2010, dem Zeitpunkt der Werthaltigkeitstests, rund 10,0 Mrd. € (Vorjahr: 7,6 Mrd. €) und errechnet sich aus dem Kurs der K+S-Aktie an diesem Stichtag (52,26 €) multipliziert mit der Anzahl der ausgegebenen Aktien (191,40 Mio. Stück).

Die durchschnittliche Fremdkapitalverzinsung vor Steuern liegt bei 4,0 % (Vorjahr: 4,4 %) und ergibt sich aus dem gewichteten Durchschnitt des risikolosen Zinssatzes zuzüglich des Kreditrisikozuschlags für das BBB /

Baa2-Rating der Finanzverbindlichkeiten von K+S sowie der Verzinsung der Pensions- und der bergbaulichen Rückstellungen. Nach Berücksichtigung der bereinigten Konzernsteuerquote von 26,2 % folgt daraus ein durchschnittlicher Fremdkapitalkostensatz nach Steuern von 2,9 % (Vorjahr: 3,3 %).

Anfang November 2010, dem Zeitpunkt für den Werthaltigkeitstest, belief sich das verzinsliche Fremdkapital auf rund 1,5 Mrd. €; es summierte sich aus dem Marktwert der Finanzverbindlichkeiten sowie den Barwerten der Pensionsrückstellungen und der bergbaulichen Rückstellungen. Das Gesamtkapital betrug demnach rund 11,5 Mrd. €, hiervon entfielen rund 87 % auf das zu Marktpreisen bewertete Eigenkapital.

In Summe resultiert hieraus ein gewichteter durchschnittlicher Kapitalkostensatz der K+S GRUPPE von rund 7,0 % (Vorjahr: 7,6 %) nach Steuern und ein entsprechender Kapitalkostensatz vor Steuern in Höhe von 9,5 % (Vorjahr: 9,9 %).

### FINANZIELLE ZIELE

Im Zentrum der finanziellen Ziele steht die nachhaltige Steigerung des Unternehmenswerts der K+S GRUPPE. Die Steuerung der Aktivitäten unserer Segmente erfolgt auf Basis des operativen Ergebnisses EBIT I; dieses ist aus unserer Sicht die geeignete Ergebnisgröße, um die Ertragskraft der K+S GRUPPE zu beschreiben. Wichtigstes finanzielles Ziel ist die Schaffung eines Mehrwerts, d. h., wir wollen dauerhaft eine Prämie auf unsere Kapitalkosten verdienen. Zur Überprüfung dieser Zielsetzung

nutzen wir die Steuerungskennzahlen Return on Capital Employed (ROCE), Value Added sowie Return on Investment (ROI). / **ABB: 4.2.3**

/ **DER VERGLEICH DES TATSÄCHLICHEN MIT DEM PROG-NOSTIZIERTEN GESCHÄFTSVERLAUF** auf den Seiten 106 f. beinhaltet u. a. die Steuerungskennzahlen EBIT I und EBITDA.

Eine weitere wichtige Kenngröße ist das Ergebnis vor Zinsen, Steuern und Abschreibungen (EBITDA), es bildet die Basis für die Ermittlung des Verschuldungsgrades, der u. a. eine Zielgröße der Kapitalstruktur darstellt. Da das EBITDA von Abschreibungen auf im Rahmen von Kaufpreisallokationen vorgenommene Wertansätze nicht beeinflusst wird und diese sich nach der Akquisition von MORTON SALT deutlich erhöht haben, kommt dem EBITDA zur Beurteilung der operativen Ertragskraft künftig eine höhere Bedeutung zu.

/ **DIE ZIELGRÖSSEN DER KENNZAHLEN ZUR STEUERUNG DER KAPITALSTRUKTUR** sowie deren tatsächlich erreichte Werte finden Sie auf Seite 114.

Wir streben an, dass der ROCE der K+S GRUPPE einen Wert von mindestens 12 % erreicht. Im Berichtsjahr wurde ein ROCE von 20,9 % erzielt; diese Rendite hat sich gegenüber dem Vorjahreswert (9,3 %) erhöht und lag damit deutlich über dem Zielwert. Der Value Added der K+S GRUPPE betrug 397,0 Mio. € im Geschäftsjahr 2010. Ausschlaggebend für den deutlichen Anstieg beider Kennzahlen sind die gestiegenen Ergebnisbeiträge aller Geschäftsbereiche.

/ **DEFINITIONEN HIER VERWENDETER KENNZAHLEN** finden Sie auf Seite 221.

Akquisitionen sollen im dritten Jahr nach dem Erwerb einen ROI von mindestens 10 % erzielen. Die Akquisition von MORTON SALT erzielte bereits im ersten Jahr nach dem Erwerb einen ROI von 8,7%, obwohl der nordamerikanische Auftausalzmarkt von einer unterdurchschnittlichen winterlichen Witterung geprägt war, das Ergebnis durch Abschreibungen auf im Rahmen der Kaufpreisallokation vorzunehmende Wertansätze belastet war und Synergiepotenziale noch nicht vollständig umgesetzt wurden.

Wir legen bei Kennzahlenbetrachtungen außerdem Wert auf eine hohe Eigenkapital- und Gesamtkapital-

rendite. Mit 18,7 bzw. 14,7% haben sich diese Rendite-kennziffern im Vergleich zum vergangenen Jahr (8,4 bzw. 6,9%) deutlich verbessert und wieder ein gutes Niveau erreicht. / TAB: 4.2.1

/ WEITERE KENNZAHLEN ZUR STEUERUNG DER KAPITAL-STRUKTUR, die Definition ihrer jeweiligen Zielkorridore sowie eine Analyse ihrer Zielerreichung finden Sie auf Seite 114.

#### NICHT FINANZIELLE ZIELE UND NACHHALTIGE PERFORMANCE-KENNZAHLEN

Eine ausführliche Darstellung nicht finanzieller Performance-Kennzahlen finden Sie in unserem Unternehmens-/Nachhaltigkeitsbericht.

## 4.3 MITARBEITER

Die ausgewiesene Mitarbeiteranzahl der K+S GRUPPE beinhaltet die Stammebelegschaft, Auszubildende und befristet Beschäftigte (ohne Studenten und Praktikanten). Die Anzahl der Mitarbeiter wird auf Basis von Vollzeitäquivalenten (FTE) ermittelt, d.h. Teilzeitstellen werden entsprechend ihrem jeweiligen Arbeitszeitanteil gewichtet.

Am 31. Dezember 2010 waren in der K+S GRUPPE insgesamt 15.241 Mitarbeiter beschäftigt. Gegenüber dem 31. Dezember 2009 (15.208 Mitarbeiter) ist die Anzahl damit wie erwartet in etwa gleich geblieben. Während die Mitarbeiterzahl in den Geschäftsbereichen Stickstoffdüngemittel und Salz jeweils leicht zurückging, wurde im Geschäftsbereich Kali- und Magnesiumprodukte begonnen, die Belegschaft zur Wiedererreichung der Vollausslastung der Jahreskapazität zu erhöhen. Zusätzlich erhöhte sich der Personalbedarf des Geschäftsbereichs Kali- und Magnesiumprodukte sowie der Holdingeinheiten durch verstärkte Aktivitäten im Bereich des Umweltschutzes. Darüber hinaus erforderte die IT-Integration von MORTON SALT einen Aufbau der Mitarbeiterzahl in der zu den Holdingeinheiten gehörenden K+S IT-SERVICES GMBH.

Bei der Durchschnittsbetrachtung zeigt sich ein deutlicher Zuwachs der Beschäftigtenzahl: Im Berichtsjahr waren durchschnittlich 15.168 Menschen bei K+S beschäftigt (2009: 13.044); der ebenfalls im Rahmen der Erwartungen liegende Anstieg beruht im Wesentlichen

#### FINANZIELLE PERFORMANCE-KENNZAHLEN DER K+S GRUPPE

ABB: 4.2.3

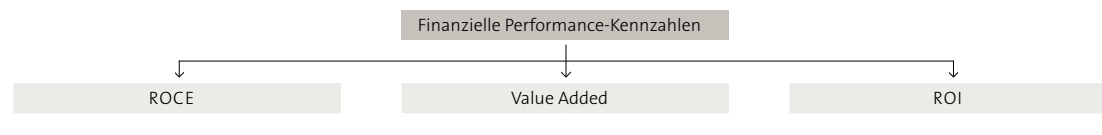

#### STEUERUNGSKENNZAHLEN DER K+S GRUPPE

TAB: 4.2.1

|                                                               | 2010  | 2009  | 2008    | 2007 | 2006              |
|---------------------------------------------------------------|-------|-------|---------|------|-------------------|
| in %                                                          |       |       |         |      |                   |
| ROCE                                                          | 20,9  | 9,3   | 64,0    | 15,5 | 17,4              |
| Gewichteter, durchschnittlicher Kapitalkostensatz vor Steuern | 9,5   | 9,9   | 10,4    | 10,7 | 9,6               |
| Value Added in Mio. €                                         | 397,0 | -16,2 | 1.124,5 | 88,3 | 125,5             |
| Eigenkapitalrendite                                           | 18,7  | 8,4   | 68,6    | 16,1 | 17,7 <sup>1</sup> |
| Gesamtkapitalrendite                                          | 14,7  | 6,9   | 44,9    | 11,0 | 12,3              |

<sup>1</sup> Die angegebene Eigenkapitalrendite bezieht sich auf das bereinigte Konzernergebnis ohne einmaligen latenten Steuerertrag von 41,9 Mio. €.

## MITARBEITER NACH GESCHÄFTSBEREICHEN

TAB: 4.3.1

|                                                        | 2010          | 2009          | %           |
|--------------------------------------------------------|---------------|---------------|-------------|
| in Full Time Equivalents per 31.12. (FTE) <sup>1</sup> |               |               |             |
| Kali- und Magnesiumprodukte                            | 7.900         | 7.818         | +1,0        |
| Stickstoffdüngemittel                                  | 1.226         | 1.249         | -1,8        |
| Salz                                                   | 5.235         | 5.279         | -0,8        |
| Ergänzende Geschäftsbereiche                           | 280           | 278           | +0,7        |
| Holdingeinheiten                                       | 600           | 584           | +2,7        |
| <b>K+S Gruppe</b>                                      | <b>15.241</b> | <b>15.208</b> | <b>+0,2</b> |

<sup>1</sup> FTE = Full Time Equivalents: Vollzeitäquivalente; Teilzeitstellen werden entsprechend ihrem jeweiligen Arbeitszeitanteil gewichtet.

## MITARBEITER NACH REGIONEN PER 31. DEZEMBER 2010

ABB: 4.3.1

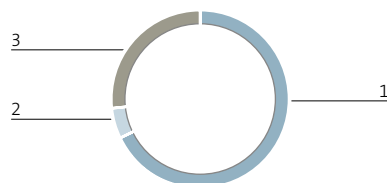

|                  | 2010 | 2009 |
|------------------|------|------|
| in %             |      |      |
| 1 Inland         | 67,9 | 67,1 |
| 2 Übriges Europa | 5,6  | 6,2  |
| 3 Übersee        | 26,5 | 26,7 |

auf der ganzjährigen Einbeziehung der Mitarbeiter von MORTON SALT, welche zum 1. Oktober 2009 in die K+S GRUPPE integriert wurden und somit die Durchschnittszahl des Vorjahres nur zu einem Viertel des Jahres beeinflussten.

## PERSONALAUFWAND

Im Jahr 2010 lag der Personalaufwand der K+S GRUPPE bei 1.019,3 Mio. € und damit erwartungsgemäß deutlich über dem Niveau des Vorjahres (2009: 756,4 Mio. €).

Der Anstieg ist insbesondere auf die erstmals ganzjährige Einbeziehung von MORTON SALT, eine aufgrund des gestiegenen Ergebnisses höhere erfolgsabhängige Vergütung, den Wegfall des im Vorjahr noch enthaltenen Kurzarbeitergeldes sowie Tariferhöhungen zurückzuführen. Die reinen Personalkosten ohne Rückstellungseffekte sind im Vergleich zum Vorjahr aus den gleichen Gründen um 261,6 Mio. € bzw. 34 % auf 1.026,8 Mio. € gestiegen; 199,8 Mio. € entfielen auf die ganzjährige Einbeziehung von MORTON SALT, 149,6 Mio. € auf den Konsolidierungs-

effekt in den ersten neun Monaten. Der Anteil im Personalaufwand enthaltener variabler Vergütungen betrug im vergangenen Jahr 95,3 Mio. € bzw. gut 9 % (2009: 60,2 Mio. € bzw. knapp 8 %).

## / EINE AUSFÜHRLICHE WERTSCHÖPFUNGSRECHNUNG

finden Sie in unserem Unternehmens- / Nachhaltigkeitsbericht auf Seite 83.

Im Jahr 2010 zahlten wir insgesamt 826,7 Mio. € an Löhnen und Gehältern (+ 39 %) sowie 166,4 Mio. € Sozialabgaben (+ 14 %). Die Aufwendungen für die betriebliche Altersversorgung betragen im Berichtsjahr 26,2 Mio. € und lagen damit um 9,3 Mio. € über dem Wert des Vorjahres; 17,6 Mio. € entfielen auf MORTON SALT.

Der Personalaufwand je Mitarbeiter betrug im Berichtsjahr 67.205 € (Vorjahr: 57.989 €) und ist damit um rund 16 % gestiegen; dieser Anstieg ist insbesondere auf eine infolge des gestiegenen Ergebnisses höhere erfolgsabhängige Vergütung, den Wegfall des im Vorjahr noch enthaltenen Kurzarbeitergeldes sowie Tariferhöhungen zurückzuführen.

## REGIONALE VERTEILUNG, ALTERSSTRUKTUR UND FLUKTUATION

Infolge der seit 2006 zunehmenden Internationalisierung der K+S GRUPPE sind mittlerweile ein Drittel der Mitarbeiter außerhalb von Deutschland und mehr als ein Viertel außerhalb von Europa beschäftigt. / ABB: 4.3.1

Eine vergleichsweise lange Unternehmenszugehörigkeit und eine niedrige Fluktuation unterstreichen die

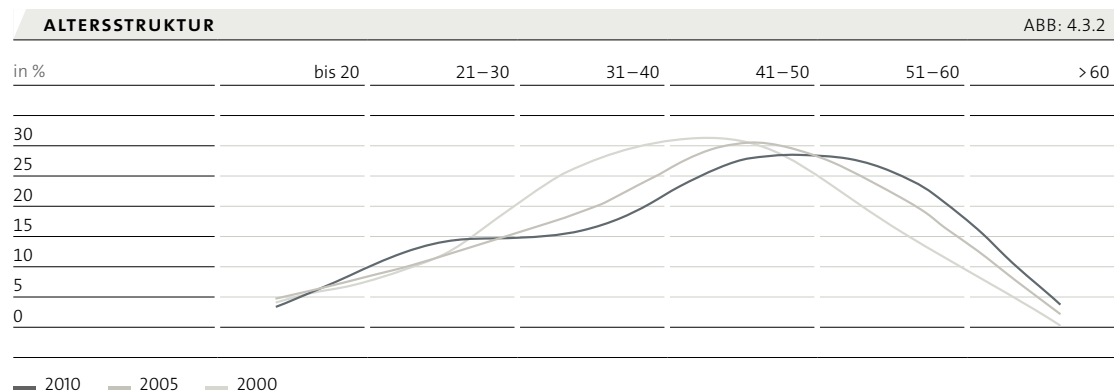

**AUSBILDUNGSKENNZAHLEN** TAB: 4.3.2

|                                  | 2010 | 2009 | 2008 | 2007 | 2006 |
|----------------------------------|------|------|------|------|------|
| Auszubildende gesamt (Anzahl)    | 647  | 642  | 615  | 614  | 620  |
| inländische Ausbildungsquote (%) | 6,2  | 6,3  | 6,0  | 6,1  | 6,2  |
| Ausbildungsaufwand (Mio. €)      | 14,8 | 13,5 | 12,6 | 11,6 | 11,0 |

Attraktivität von κ+s als Arbeitgeber. So lag die Fluktuationsrate mit 4 % auf dem niedrigen Niveau des Vorjahres. Der Teil der Fluktuation, der auf Eigenkündigung von Mitarbeitern bezogen auf die Gesamtbelegschaft beruht, belief sich sogar nur auf 1%. Unsere Altersstruktur verdichtet sich wie bei vielen anderen deutschen Industrieunternehmen in der Altersgruppe der 41- bis 50-Jährigen; das Durchschnittsalter der κ+s-Beschäftigten lag unverändert bei rund 43 Jahren (2009: 43 Jahre). / **ABB: 4.3.2**

#### AUSBILDUNG

Langjährige Firmenzugehörigkeit und der damit verbundene Erfahrungsschatz sind wichtige Bausteine einer nachhaltig erfolgreichen Personalpolitik. Dazu gehört jedoch auch der Wissenstransfer auf jüngere Mitarbeiter und damit die gezielte Ausbildung von Nachwuchskräften. Hier stellen wir bereits seit Jahren systematisch die Weichen für unser Wachstum von morgen. Im Jahr 2010 haben 168 junge Menschen eine Berufsausbildung bei uns begonnen. Dies geschieht in 15 Ausbildungsberu-

fen an 15 Standorten der κ+s GRUPPE. Per 31. Dezember 2010 beschäftigten wir insgesamt 647 Auszubildende, ein Zuwachs von fünf Auszubildenden im Vergleich zum Vorjahr. 645 Auszubildende entfallen davon auf deutsche Standorte. Die Ausbildungsquote der inländischen Gesellschaften liegt mit 6,2% auf dem hohen Niveau des Vorjahres. Unsere langfristig geplante und am Bedarf ausgerichtete Ausbildung sorgt für den benötigten Nachwuchs in gewerblichen, bergbaulichen, kaufmännischen, Chemie-, IT- und Logistikberufen. Dafür haben wir im Jahr 2010 rund 11,8 Mio. € Personal- sowie 3,0 Mio. € Sachkosten aufgewandt (2009: Personalkosten: 10,5 Mio. €; Sachkosten: 3,0 Mio. €). Wir freuen uns, dass wir im Berichtsjahr erneut etwa 90% der Ausgelernten übernehmen konnten. / **TAB: 4.3.2**

#### PERSONALENTWICKLUNG

Unsere Personalentwicklung hat zum Ziel, auch zukünftig Fach- und Führungspositionen vorrangig aus den eigenen Reihen zu besetzen. Vor dem Hintergrund der anstehenden altersbedingten Abgänge sowie des zusätzlichen Personalbedarfs aufgrund des künftigen Wachstums der κ+s GRUPPE müssen genügend qualifizierte Nachwuchskräfte gewonnen und die Mitarbeiter rechtzeitig auf wachsende bzw. wechselnde Anforderungen vorbereitet werden. Daher begreifen wir Personalentwicklung als Investitionen in unsere Mitarbeiter und damit in die Zukunft der κ+s GRUPPE.

/ **WEITERE INFORMATIONEN ZUM THEMA MITARBEITER** finden Sie im Unternehmens-/Nachhaltigkeitsbericht.



Der Aufwand für die Personalentwicklung in Deutschland belief sich auf rund 12,3 Mio. € (2009: 9,7 Mio. €). Davon entfielen 8,6 Mio. € auf Weiterbildungs- (2009: 6,3 Mio. €), 3,6 Mio. € auf Fortbildungsmaßnahmen (2009: 3,3 Mio. €) sowie 0,1 Mio. € auf Aktivitäten im Bereich des Personalmarketings (2009: 0,1 Mio. €).

Auch an unseren ausländischen Standorten spielt Personalentwicklung eine wichtige Rolle. Beispielsweise bei MORTON SALT bilden die Themen Arbeitssicherheit, Gesundheit und Umwelt wichtige Weiterbildungsschwerpunkte.

#### WEITERBILDUNG

Der Weiterbildung unserer Mitarbeiter kommt wegen wachsender und verstärkt internationaler Anforderungen sowie technischer Innovationen eine zunehmend größere Bedeutung zu. Die K+S GRUPPE bietet neben gesetzlich vorgeschriebenen Weiterbildungsmaßnahmen auch fachspezifische, fachübergreifende sowie IT- und Sprachschulungen an. Unmittelbare Unterstützung bei neuen und komplexen Aufgabenstellungen erhalten die Mitarbeiter durch begleitende Bildungsmaßnahmen. Mitarbeiter und Vorgesetzte ermitteln in Jahres- oder

Mitarbeitergesprächen gemeinsam den Weiterbildungsbedarf. Im Jahr 2010 hat sich die Anzahl der Teilnahmen an Weiterbildungsmaßnahmen unserer Mitarbeiter in Deutschland deutlich auf 8.353 erhöht (2009: 6.977 Teilnahmen an Weiterbildungsmaßnahmen). Dafür investierten wir rund 8,6 Mio. € (Vorjahr: 6,3 Mio. €) bzw. 831 € pro Mitarbeiter in Deutschland (Vorjahr: 616 €). Sowohl die Anzahl als auch die Qualität der Trainings in den Bereichen der Führungs-, Fach- und Methodenkompetenz wurden weiter erhöht. Darüber hinaus wurden in der zweiten Jahreshälfte Compliance-Workshops neu angeboten. Mitarbeiter im Untertagebetrieb qualifizierten sich zunehmend im Umgang mit der Großgerätektechnik. Um der zunehmenden Internationalisierung gerecht zu werden, lag wieder ein wichtiger Weiterbildungsschwerpunkt im Bereich der Fremdsprachen.

/ TAB: 4.3.3

#### FORTBILDUNG

Vielversprechenden Mitarbeitern aus technischen, bergmännischen und Produktionsbereichen ermöglichen wir eine Fortbildung zum Techniker oder eine darauf aufbauende Qualifizierung mit der Perspektive einer Führungslaufbahn. Unser Hauptpartner ist die Fach-

schule für Wirtschaft und Technik (FWT) in Clausthal-Zellerfeld. Derzeit absolvieren 80 Mitarbeiter das zweite Jahr ihrer Techniker Ausbildung.

#### PERSONALMARKETING

Das Personalmarketing umfasst Maßnahmen zur Imagebildung für K+S als attraktiven Arbeitgeber, Ausbildungsmarketing sowie Hochschulmarketing. Im Jahr 2010 haben wir uns auf elf Hochschulmessen präsentiert und die Kontakte zu Hochschulen mit bergbaulichem bzw. technischem Schwerpunkt ausgebaut.

Seit dem Wintersemester 2008/09 bieten wir darüber hinaus das Stipendienprogramm „K+S min(d)ing“ an. Wir fördern ausgewählte Studenten mit 1.000 € brutto pro Semester für insgesamt zwei Semester. Innerhalb dieser Zeit absolvieren sie ein dreimonatiges Praktikum oder eine Werkstudententätigkeit bei K+S.

## 4.4 FORSCHUNG UND ENTWICKLUNG

### FORSCHUNGS- UND ENTWICKLUNGSAKTIVITÄTEN

#### ZIELE UND SCHWERPUNKTE UNSERER FORSCHUNGS- UND ENTWICKLUNGSTÄTIGKEIT

Mit unseren Forschungs- und Entwicklungsaktivitäten verfolgen wir grundsätzlich drei Ziele:

- + Eine Erhöhung des Kundennutzens

WEITERBILDUNGSKENNZAHLEN <sup>1</sup>

TAB: 4.3.3

|                                                  | 2010  | 2009  | 2008  | 2007  | 2006  |
|--------------------------------------------------|-------|-------|-------|-------|-------|
| Anzahl der Teilnahmen an Weiterbildungsmaßnahmen | 8.353 | 6.977 | 5.550 | 4.652 | 3.762 |
| Weiterbildungsaufwand (Mio. €)                   | 8,6   | 6,3   | 4,4   | 3,8   | 3,4   |
| Aufwand je Mitarbeiter (€)                       | 831   | 616   | 430   | 377   | 345   |

<sup>1</sup> Angaben beziehen sich ausschließlich auf Deutschland.

- + Die Schonung der Ressourcen
- + Die Sicherstellung des Wachstums der K+S GRUPPE

Vor diesem Hintergrund konzentrieren sich unsere Forschungs- und Entwicklungstätigkeiten auf zwei Schwerpunkte: die Verfahrensoptimierung sowie die Produktneu- und Weiterentwicklung. Die kontinuierliche Überprüfung und Weiterentwicklung der Verfahren und Prozesse in der unter- und übertägigen Produktion soll einen nachhaltigen Einsatz der uns zur Verfügung stehenden Ressourcen sowie eine effiziente Nutzung von Kapital, Energie und Personal sicherstellen. Dazu bewerten wir neue Technologien und Materialien und betreiben ein eigenes Forschungsinstitut mit den Schwerpunkten Aufbereitung, Verfahrenstechnik und Analytik. Im Rahmen der Neuentwicklung und Verbesserung der von uns angebotenen Produkte setzen wir uns für die praxisorientierte Forschung auf dem Gebiet der Pflanzenernährung ein und erarbeiten Lösungen für den erhöhten Nahrungs- und Futtermittelbedarf aufgrund einer wachsenden Weltbevölkerung sowie sich ändernder Ernährungsgewohnheiten, die Ertragssicherung angesichts sich verändernder Klimabedingungen sowie einen Wissenstransfer für die weniger entwickelten Regionen. Unsere landwirtschaftliche Anwendungsberatung unterstützt insbesondere Kunden beim weltweiten Einsatz unserer Produkte.

Im Jahr 2010 standen die Anstrengungen zur Neuentwicklung und Verbesserung von Produktionsprozessen zur Verringerung unvermeidbarer fester und flüssiger Produktionsrückstände in der Kaliproduktion erneut

im Vordergrund. Im Rahmen des Maßnahmenpakets zum Gewässerschutz wurden weitere Untersuchungen durchgeführt und vielversprechende Entwicklungen im Bereich von trockenen Aufbereitungstechnologien vorangetrieben. Schwerpunkte der verfahrenstechnischen Forschung bildeten die weitere Verbesserung der vorhandenen Herstellungs- und Veredelungsverfahren sowie die Flexibilisierung der Prozesse zur Anpassung an veränderte Rohstoff-, Produktions- oder Marktbedingungen. Darüber hinaus wurde die Verbesserung der Explorationsverfahren für die Kali- und Salzlagerstätten fortgesetzt und eine Forschungskooperation bezüglich des Einflusses der optimalen Düngung auf die Wassernutzungseffizienz des Systems Boden/Pflanze erfolgreich abgeschlossen. Zur Stärkung der anwendungsorientierten Forschung gründeten wir ein gemeinsames Forschungsinstitut mit der Universität Göttingen. Bei MORTON SALT lag der Schwerpunkt der Forschung auf der Weiterentwicklung von Produktalternativen zur Reduktion des Natriumgehalts in Speisen sowie auf Produktentwicklungen in den Segmenten Wasserenthärtungs- und Auftausalze.

Um einen effektiven Wissenstransfer der Forschung innerhalb der K+S GRUPPE sicherzustellen und die Synergiepotenziale optimal zu nutzen, werden alle Forschungsaktivitäten zentral gesteuert.

#### **NUTZUNG VON EXTERNEM F&E-KNOW-HOW**

Die Forschungsstrategie der K+S GRUPPE umfasst interne sowie externe Forschungsaktivitäten. Kooperationen sehen wir als einen wichtigen Teil unserer Forschungs-

strategie an, da sie einen effektiven Wissenstransfer aus der Forschung in die Praxis, den Zugriff auf ein internationales Netzwerk sowie die Schaffung von Synergien erlauben.

Im Jahr 2010 wurden für die Kooperation mit externen Forschungseinrichtungen 2,5 Mio. € aufgewendet (2009: 5,6 Mio. €); dies sind etwa 16 % unserer insgesamt in diesem Geschäftsjahr aufgewendeten Forschungs- und Entwicklungskosten von 15,5 Mio. €. Der Rückgang der externen Forschungskosten begründet sich insbesondere durch die Umstrukturierung der Forschungsaktivitäten im Geschäftsbereich Stickstoffdüngemittel. Nach Auslaufen der Kooperation mit BASF hat die COMPO ihre Forschungsaufwendungen projektbezogen flexibilisiert und an ausgewählte Versuchsanstalten und Hochschulinstitute vergeben. Damit ist die Kontinuität der Forschung und Entwicklung auch bei einem möglichen Verkauf der COMPO gewährleistet. Insbesondere investierten wir in den folgenden Bereichen:

#### **INTERNATIONALE FELDVERSUCHE**

Wir vergeben weltweit angelegte Feldversuche an spezialisierte und erfahrene Landwirtschaftsbetriebe, die direkt von unseren Mitarbeitern oder von lokal ansässigen landwirtschaftlichen Instituten wissenschaftlich begleitet werden. Diese Vorgehensweise ermöglicht es uns, wertvolle Erkenntnisse in unterschiedlichen klimatischen Zonen auf lokalen Böden für verschiedene Kulturen zu gewinnen und unsere Produkte dementsprechend anzupassen. Die pflanzenbaulichen Versuche im Düngemittelbereich werden von unseren Abteilungen

für landwirtschaftliche Anwendungsberatung zentral koordiniert.

#### ZUSAMMENARBEIT MIT DEM INTERNATIONAL PLANT NUTRITION INSTITUTE

Zur Optimierung der Düngungsstrategien bei Ölpalmen führt das IPNI (INTERNATIONAL PLANT NUTRITION INSTITUTE), Norcross, USA, derzeit ein Projekt zur ‚Best Management Practice‘ durch. Das Projekt wird von der K+S KALI GMBH finanziell direkt unterstützt und hat das Ziel, das Konzept unter den kommerziellen Bedingungen von Plantagensgesellschaften zu etablieren, um somit im Rahmen einer nachhaltigen und ökonomischen Bewirtschaftung die Ölerträge zu steigern und seine Leistungen unter praktischen Gesichtspunkten zu prüfen. Von Vorteil ist hier insbesondere die langjährige Erfahrung des IPNI auf diesem Forschungsgebiet.

#### GEMEINSAME GRÜNDUNG DES INSTITUTE OF APPLIED PLANT NUTRITION MIT DER UNIVERSITÄT GÖTTINGEN

Im November 2010 gründeten die K+S KALI GMBH und die Universität Göttingen ein gemeinsames Forschungsinstitut. K+S stellt für das organisatorisch und rechtlich selbständige An-Institut für angewandte Pflanzenernährung (INSTITUTE OF APPLIED PLANT NUTRITION – IAPN) ein Startkapital sowie finanzielle Mittel für Personal und Forschung für konkrete Projekte der K+S KALI GMBH zur Verfügung. Die Zurverfügungstellung der Räumlichkeiten inklusive der laufenden Kosten erfolgt durch die Universität Göttingen. Die wissenschaftliche Leitung liegt beim Lehrstuhl für Pflanzenernährung der Universi-

tät Göttingen und wird durch den Geschäftsführer der Trägergesellschaft, einer 100 %igen Tochtergesellschaft der K+S KALI GMBH, ergänzt. Das Ziel ist es, im Rahmen einer Public-Private-Partnership eine Schnittstelle zwischen Wissenschaft und Wirtschaft zu schaffen und den Schwerpunkt auf die praxisorientierte Forschung im Bereich Pflanzenernährung zu legen. Die Zusammenarbeit ermöglicht die Wissensbündelung und bietet sich insbesondere aufgrund der räumlichen Nähe zu unserem K+S-Forschungsinstitut in Heringen sowie der Übereinstimmung der Forschungsschwerpunkte an. Das erarbeitete Wissen kann durch die K+S-Anwendungsberater zeitnah in die Praxis transferiert werden.

#### FORSCHUNGSPARTNERVERMITTLUNG DURCH NINESIGMA®

Um externe Ressourcen optimal zu nutzen und in Kooperationen mit passenden Partnern neue Herausforderungen zu bewältigen, arbeiten wir seit dem Jahr 2009 mit dem Dienstleister NINESIGMA®, Cleveland, USA, zusammen, der uns internationale Forschungspartner vermittelt. Durch das Ausschreibungs- und Auswahlverfahren von NINESIGMA® erschließen wir uns nicht nur den weltweiten Zugang zu Anbietern von akademischen Lösungen, sondern ermöglichen auch Forschungsk Kooperationen mit anderen Industriepartnern, die bisher nicht zu unseren etablierten Lieferanten gehören.

#### ZUSAMMENARBEIT MIT DER WETSUS-FORSCHUNGSPLATTFORM

Im Rahmen einer weiteren Public-Private-Partnership unterstützen wir die niederländische WETSUS-

Forschungsplattform bei Arbeiten zum Thema ‚Blue Energy‘. Dabei werden Möglichkeiten erforscht, beim Austausch zwischen zwei Lösungen mit stark unterschiedlichen Salzkonzentrationen, z.B. Flusswasser beim Übertritt ins Meer, elektrische Energie zu gewinnen.

#### HOCHSCHULKOOPERATIONEN

In den wirtschafts- und naturwissenschaftlichen sowie technischen Bereichen kooperieren wir mit Hochschulen, bislang überwiegend in Deutschland. Im Rahmen solcher Kooperationen unterstützen wir bundesweit Hochschulabsolventen finanziell bei Studien-, Diplom- und Doktorarbeiten im Bereich unserer Forschungs- und Entwicklungsschwerpunkte. Dies gibt uns die Möglichkeit, Talente frühzeitig zu erkennen und qualifizierte Nachwuchskräfte für unser Unternehmen zu gewinnen. Ein Schwerpunkt im Jahr 2010 war die Kooperation mit den technischen Hochschulen Aachen, Clausthal-Zellerfeld und Freiberg.

#### AUFTRÄGE AN DIE FORSCHUNGSEINRICHTUNGEN DER BASF

Die Kooperation mit BASF wurde auf eine neue vertragliche Basis gestellt, die es der K+S NITROGEN ermöglicht, Aufträge flexibel und projektbezogen an BASF zu vergeben und daneben mit anderen Hochschulinstituten und Forschungsanstalten kooperieren zu können. Die Erforschung von innovativen stickstoffhaltigen Düngemitteln wurde im Jahr 2010 in unserem Auftrag in den Forschungseinrichtungen der BASF fortgesetzt.

**FORSCHUNGSKENNZAHLEN**

TAB: 4.4.2

|                                                | 2010 | 2009 | 2008 | 2007 | 2006 |
|------------------------------------------------|------|------|------|------|------|
| in Mio. €                                      |      |      |      |      |      |
| Forschungskosten                               | 15,5 | 18,7 | 18,1 | 15,5 | 13,8 |
| Forschungsintensität (Forschungskosten/Umsatz) | 0,3% | 0,5% | 0,4% | 0,5% | 0,5% |
| Aktivierete Entwicklungsinvestitionen          | 2,2  | 1,8  | 2,8  | 2,7  | 2,0  |
| Mitarbeiter (Anzahl)                           | 78   | 78   | 65   | 56   | 51   |

**FORSCHUNGSKENNZAHLEN****FORSCHUNGSKOSTEN UND ENTWICKLUNGSINVESTITIONEN**

Die Forschungskosten beliefen sich im Berichtszeitraum auf insgesamt 15,5 Mio. € und lagen somit unter dem Niveau des Vorjahres (2009: 18,7 Mio. €). Der Hauptteil der Forschungskosten entfiel erneut auf die Verbesserung der Produktionsverfahren zur Verringerung fester und flüssiger Produktionsrückstände in der Kaliproduktion. Der Rückgang ist insbesondere auf die Flexibilisierung und Verlagerung der Forschungsaktivitäten im Geschäftsbereich Stickstoffdüngemittel zurückzuführen.

**FORSCHUNGSKOSTEN**

TAB: 4.4.1

|                             | 2010        | 2009        |
|-----------------------------|-------------|-------------|
| in Mio. €                   |             |             |
| Kali- und Magnesiumprodukte | 5,2         | 6,8         |
| Stickstoffdüngemittel       | 3,0         | 6,1         |
| Salz                        | 2,5         | 1,3         |
| Sonstige Forschungskosten   | 4,8         | 4,5         |
| <b>Gesamt</b>               | <b>15,5</b> | <b>18,7</b> |

Gemessen am Umsatz beträgt die Forschungsintensität der K+S GRUPPE 0,3 % (2009: 0,5 %); diese ist durch den sehr langen Produktlebenszyklus unserer Produkte aus mineralischen Rohstoffen gerechtfertigt. / TAB: 4.4.1

Nach IFRS müssen bestimmte Entwicklungskosten in der Bilanz aktiviert werden. Diese Entwicklungsinvestitionen lagen im Berichtsjahr mit rund 2,2 Mio. € (2009: 1,8 Mio. €) deutlich über dem Niveau des Vorjahres und wurden im Wesentlichen in den Geschäftsbereichen Stickstoffdüngemittel und Kali- und Magnesiumprodukte getätigt. Der Anstieg der aktivierten Entwicklungsinvestitionen ist auf die Verschiebung von Entwicklungsprojekten auf den im Jahr 2009 von Kurzarbeit betroffenen Standorten in das Jahr 2010 zurückzuführen. Die Aktivierung wird in den kommenden Jahren Abschreibungen auf Entwicklungsinvestitionen nach sich ziehen, diese liegen allerdings auf einem relativ geringen Niveau. / TAB: 4.4.2

**FORSCHUNGSMITARBEITER**

Die Anzahl der in der Forschung beschäftigten Mitarbeiter blieb mit 78 gegenüber dem Vorjahr konstant.

/ ABB: 4.4.1, 4.4.2

**AUSGEWÄHLTE FORSCHUNG- UND ENTWICKLUNGSPROJEKTE UND -ERGEBNISSE****GESCHÄFTSBEREICH KALI- UND MAGNESIUMPRODUKTE****VERBESSERUNG DER WASSERNUTZUNGSEFFIZIENZ DES SYSTEMS BODEN/PFLANZE**

Die Verbesserung der Wassernutzung wird eine der zentralen Herausforderungen der Zukunft bleiben. Dazu muss auch die landwirtschaftliche Produktion ihren Beitrag leisten. Eine wichtige Frage ist dabei, welche Rolle die Pflanzennährstoffe wie Kalium bei diesem Prozess spielen. Aus diesem Grund wurde ein Forschungsverbund der Universitäten Halle, Kiel und Gießen von der K+S KALI GMBH gefördert. Die Labor- und Felduntersuchungen sind im Jahr 2010 abgeschlossen worden. Es zeigte sich, dass im Gesamtsystem Boden/Pflanze eine optimale Versorgung vor allem mit Kalium die Fähigkeit zur Wassernutzung verbessern kann. Somit spart die Kaliumdüngung Wasser, d.h. mit einer vorhandenen Wassermenge kann mehr Ertrag erzielt werden bzw. für einen zu erzielenden Ertrag wird weniger Wasser benötigt. Es konnten die Ursachen dieses Zusammenhanges aufgedeckt werden. Die ausführlichen wissenschaftlichen Ergebnisse werden im Jahr 2011 in renommierten Fachzeitschriften veröffentlicht und bilden die Basis für ein besseres Verständnis der Wirkung von Nährstoffen und führen letztlich zu verbesserten Düngungsempfehlungen.



**QUALIFIKATIONSSTRUKTUR IM BEREICH FORSCHUNG UND ENTWICKLUNG**

ABB: 4.4.1

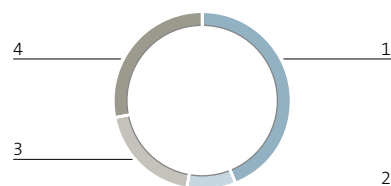

|                     | 2010 | 2009 |
|---------------------|------|------|
| in %                |      |      |
| 1 Fachausbildung    | 44   | 45   |
| 2 Meister/Techniker | 9    | 10   |
| 3 Studium           | 19   | 14   |
| 4 Promotion         | 28   | 31   |

**BERUFSGRUPPEN IM BEREICH FORSCHUNG UND ENTWICKLUNG**

ABB: 4.4.2

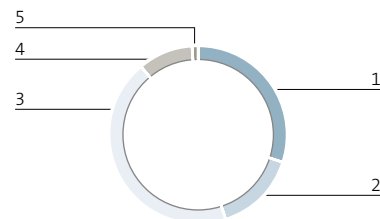

|                        | 2010 | 2009 |
|------------------------|------|------|
| in %                   |      |      |
| 1 Naturwissenschaftler | 30   | 29   |
| 2 Ingenieure           | 15   | 14   |
| 3 Laborfachkräfte      | 44   | 46   |
| 4 Kaufmännische Berufe | 10   | 10   |
| 5 Sonstige             | 1    | 1    |

**GESCHÄFTSBEREICH STICKSTOFFDÜNGEMITTEL****ERFORSCHUNG DER ERTRAGSWIRKUNG VON STICKSTOFFDÜNGEMITTELN**

Die Wirksamkeit verschiedener Stickstoffdünger wurde an zahlreichen landwirtschaftlichen Kulturen und unter unterschiedlichsten Bedingungen in lokalen Böden untersucht, um die Vorteilhaftigkeit unserer Produkte zu belegen.

**UMWELTRELEVANZ VON SULFAT- UND STICKSTOFFEMMISSIONEN BEI DER DÜNGUNG**

Unter exakt kontrollierten Versuchsbedingungen wurden die Sulfatauswaschung im Boden sowie die Lachgas-Emission ( $N_2O$ ) von Stickstoffdüngemitteln anhand einer mehrjährigen Versuchsanordnung gemessen. Ziel ist es, die Umweltverträglichkeit unserer Produkte nachzuweisen.

**ERFORSCHUNG DER EIGNUNG VON NEUEN NITRIFIKATIONS-INHIBITOREN BEI DER KARTOFFELDÜNGUNG**

Die Eignung von neuen Inhibitoren wurde bei der Kartoffeldüngung weiter analysiert. Der Einsatz dieser Inhibitoren reduziert die Stickstoffauswaschung im Boden, sodass der Pflanze effektiv mehr von dem gedüngten Stickstoff zur Verfügung steht. Die Entwicklungsarbeiten hierfür sind auf mehrere Jahre angelegt und verlaufen planmäßig.

**ERFORSCHUNG EINES UREASE-INHIBITORS**

Im Rahmen der Forschungsaktivitäten der  $K+S$  NITROGEN wurde ein Urease-Inhibitor entwickelt, der die

**DIAGNOSE DES VERSORGENGSZUSTANDS DER PFLANZE**

Um eine verbesserte Aussage zur Düngedürftigkeit von Böden und Pflanzen treffen zu können, wurden Untersuchungen mit neuen Sensoren unternommen, die eine einfachere, sicherere und präzisere Diagnose des Versorgungszustands der Pflanzen ermöglichen sollen. Dabei zeigte sich, dass in der nachhaltigen Düngeberatung für Nährstoffe wie Kali, Magnesium oder Phosphat dem Boden eine zentrale Rolle zukommt; dies soll künftig weiter untersucht werden.

**ERFORSCHUNG UND ENTWICKLUNG TROCKENER AUFBEREITUNGSTECHNOLOGIEN**

Im Rahmen des Maßnahmenpakets zum Gewässerschutz wurden weitere Untersuchungen durchgeführt und vielversprechende Entwicklungen im Bereich von trockenen Aufbereitungstechnologien vorangetrieben.

**OPTIMIERUNG DER EXPLORATIONSVERFAHREN**

Die Optimierung der Explorationsverfahren für die Lagerstätten wurde im Jahr 2010 fortgesetzt. Ziel ist es, bessere Voraussagen für die Abbauplanung treffen zu können.

Ammoniakverluste bei der Anwendung von Harnstoff erheblich verringern kann und damit eine effizientere Stickstoffversorgung ermöglicht.

#### **GESCHÄFTSBEREICH SALZ**

##### **FORSCHUNG AUF DEM GEBIET DER CHLORALKALI-ELEKTROLYSE**

In den Jahren 2008 und 2009 haben wir in Zusammenarbeit mit einem großen Kunden in Europa, der sein Verfahren der Chloralkali-Elektrolyse auf das moderne Membranverfahren umgestellt hat, ein spezielles Konzept zur qualitätsgerechten Versorgung mit Steinsalz anstelle von Siedesalz entwickelt. Da die bergmännische Gewinnung von Steinsalz einen gegenüber der Siedesalzproduktion durch Verdampfung von Salzsole geringeren Energieaufwand hat, ist das Ziel hier, CO<sub>2</sub>-Emissionen zu verringern. Dieses Konzept wurde im Jahr 2010 mit einem weiteren führenden Salzanwender der chemischen Industrie noch intensiver erforscht. Darüber hinaus wurde im Jahr 2010 mit der Universidad Católica de Chile eine Software zur Simulation verschiedener Salzqualitäten für die Chloralkali-Elektrolyse entwickelt. Der Geschäftsbereich Salz hat zu diesem Thema eine Expertengruppe gebildet, um Synergien optimal zu nutzen.

##### **ONLINEMESSUNG IN DER PROZESSKONTROLLE**

Im Rahmen der Prozesskontrolle und -steuerung und somit der Qualitätssicherung wurden Verfahren zur Onlinemessung auf den Standorten implementiert. Diese erlauben es uns, in Echtzeit qualitätsrelevante

Betriebsparameter zu messen und so den Produktions- und Verarbeitungsprozess optimal zu steuern.

##### **OPTIMIERUNG DER ABBAUFÜHRUNG UND ANLAGENSTANDORTE IM TAGEBAU**

In unserem Tagebau in der chilenischen Atacama-Wüste wurde im Jahr 2010 zusammen mit der Technischen Universität Clausthal-Zellerfeld die Modellierung der Salzlagerstätte vorangetrieben, um eine Optimierung des Tagebauzuschnitts und des Abbaus sowie die bestmögliche Festlegung von Standorten neuer Aufbereitungsanlagen zu gewährleisten.

##### **INNOVATIVE AUFTAUMITTEL**

MORTON SALT untersuchte neue und verbesserte Rezepturen sowie Anwendungsempfehlungen für Auftaumittel mit dem Ziel, Konsumenten und gewerblichen Nutzern Einsatzmöglichkeiten bei noch tieferen Temperaturen zu bieten, die Korrosion zu mindern und die Einsatzmengen sowie die Wirkung in Bereichen mit geringer Verkehrsdichte wie z.B. Parkplätze und Wohnanlagen zu optimieren.

##### **WEITERENTWICKLUNG DER WASSERENTHÄRTUNGSSALZE**

MORTON SALT entwickelte im Jahr 2010 die nächste Generation an Wasserenthärtungssalzen. Ziel ist es, diesen Markt weiterhin durch innovative Produkte anzuführen.

##### **NATRIUMREDUZIERUNG IN LEBENSMITTELEN**

Um Nahrungsmittelherstellern in den USA zu ermöglichen, den dortigen Ernährungsleitlinien nachzukommen, wurden geschmacksverbesserte Formulierungen für Diätsalze entwickelt.

In regelmäßigen Abständen werden alle Forschungsprojekte mit den Auftraggebern in Bezug auf Fortschritt, Anwendbarkeit, Rahmenbedingungen, Realisierungswahrscheinlichkeit sowie Renditechancen gemeinsam überprüft.

#### **MARKENPORTFOLIO UND PATENTBESTAND**

Das K+S-Markenportfolio wuchs im Jahr 2010 um 476 Anmeldungen bzw. Neuzugänge. Als Dachmarken nutzt die K+S GRUPPE u.a. ALGOFLASH®, CÉRÉBOS®, COMPO®, GESAL®, MORTON®, SEM®, UMBRELLA GIRL®, VATEL® und WINDSOR®. Als Produktmarken werden z.B. ACTION MELT®, AXAL®, BLAUKORN®, BLIZZARD WIZARD®, COMPO-SANA®, ENTEC®, FLORANID®, KORN-KALI®, NITROPHOSKA®, PATENTKALI®, SAL LOBOS® und VOROX® verwendet. 289 nicht mehr genutzte Markenrechte wurden aufgegeben. Die K+S GRUPPE hält damit zum Stichtag 5.345 (2009: 5.158) nationale Markenschutzrechte, die aus 1.110 Basismarken resultieren. Weltweit gehören der K+S GRUPPE derzeit 87 Patentfamilien, die durch 377 (2009: 357) nationale Rechte geschützt werden. Die Patente werden unter anderem in den Bereichen elektrostatische Aufbereitungsverfahren, Granulatherstellung und Flotation angewendet. Weiterhin halten wir

Patente für neue Verfahren zur Herstellung von Düngemitteln und Antibackmitteln sowie für die Bewässerungsdüngung von landwirtschaftlich oder gärtnerisch genutzten Substraten. Im Jahr 2010 wurden 30 Schutzrechte neu angemeldet und zehn Schutzrechte aufgegeben. Lizenzeinnahmen wurden nicht erzielt.

#### PROZENTUALE VERÄNDERUNG DES BRUTTOINLANDSPRODUKTS

TAB: 4.5.1

|                                 | 2010 | 2009 | 2008 | 2007 | 2006 |
|---------------------------------|------|------|------|------|------|
| in %; real                      |      |      |      |      |      |
| Deutschland                     | 3,6  | -4,7 | +1,3 | +2,5 | +2,9 |
| Europäische Union (EU-25/EU-27) | 1,7  | -4,2 | +1,2 | +3,1 | +3,3 |
| Welt                            | 4,9  | -0,8 | +3,1 | +4,8 | +5,3 |

Quelle: Deka Bank

## 4.5 ÜBERBLICK ÜBER DEN GESCHÄFTSVERLAUF

### GESAMTWIRTSCHAFTLICHE RAHMENBEDINGUNGEN

Nach dem starken Rückgang der Konjunktur während der Finanzkrise 2009 hat sich die Weltwirtschaft im Jahr 2010 deutlich erholt. Der Anstieg des Bruttoinlandsprodukts fiel mit 4,9% sogar höher aus als noch im Quartalsfinanzbericht Q3/10 erwartet. Getragen wurde der Aufschwung insbesondere von den Schwellenländern, während das Wachstum in den Industriestaaten im Laufe des Jahres an Schwung verlor. Grund hierfür waren das Auslaufen der in zahlreichen Ländern verabschiedeten Konjunkturprogramme und die Schuldenkrisen in einigen europäischen Staaten. Im Verlauf des Jahres beschleunigte sich der Preisanstieg spürbar, vor allem aufgrund steigender Rohstoffpreise. / TAB: 4.5.1

In der Eurozone zeigte sich die Konjunktur im Jahr 2010 weitestgehend robust. In einzelnen Mitgliedsländern, insbesondere in Deutschland, war ein merklicher Auf-

schwung zu beobachten. Im zweiten Halbjahr schwächte sich das Expansionstempo jedoch leicht ab. Das Bruttoinlandsprodukt in Deutschland wuchs im Jahr 2010 deutlich um 3,6% nach einem Rückgang von 4,7% im Vorjahr. In einigen anderen Ländern Europas zeigte sich dagegen ein eher gedämpftes Bild: In Spanien und Irland wuchs das Bruttoinlandsprodukt im Verlauf des Jahres kaum, und die griechische Wirtschaft rutschte in eine tiefe Rezession. Das Bruttoinlandsprodukt der gesamten Eurozone erhöhte sich dennoch um 1,7%. Die Inflation stieg gegen Ende des Jahres insbesondere infolge steigender Energiepreise auf 2,0%. Die Inanspruchnahme des Euro-Rettungsschirms durch einige Staaten führte nicht zu einer nachhaltigen Beruhigung der Kapitalmärkte – die Risikoprämien für Staatsanleihen einzelner Staaten lagen zum Ende des Jahres noch immer auf sehr hohem Niveau. Der Leitindex der EUROPÄISCHEN ZENTRALBANK (EZB) lag über das Jahr 2010 unverändert bei 1,0%.

In den USA verlor die Konjunkturerholung im Verlauf des Jahres etwas an Schwung. Nachdem die gesamtwirtschaftliche Produktion zu Beginn des Jahres noch kräftig gestiegen war, schwächte sich der Produktions-

anstieg mit Auslaufen der Konjunkturprogramme und den Effekten des Lagerzyklus in den Sommermonaten wieder ab. Das Bruttoinlandsprodukt stieg im Jahr 2010 dennoch um 2,9%, die Verbraucherpreise um 1,6%. Auf dem Arbeitsmarkt verbesserte sich die Lage im Jahresverlauf moderat, die Arbeitslosenquote ging von ihrem Höchststand von 9,5% Mitte des Jahres auf lediglich 9,4% gegen Jahresende zurück.

Auch in den Schwellenländern verlangsamte sich das Wachstum nach einem kräftigen Aufschwung im ersten Halbjahr. Grund dafür war hauptsächlich eine gegen Ende des Jahres restriktivere Wirtschafts- und Geldpolitik, um einer konjunkturellen Überhitzung entgegenzuwirken.

Auf den Rohstoffmärkten zeigte sich im Jahresverlauf ein uneinheitliches Bild. Nach einer vorübergehenden Abschwächung zog der Ölpreis gegen Jahresende spürbar an und erreichte zum Jahresende mit 94,75 US-Dollar je Barrel seinen Höchststand. Im Jahresdurchschnitt kostete ein Barrel Öl gut 80 US-Dollar, etwa 17 US-Dollar bzw. 27% mehr als im Jahr 2009. Die meisten Grundstoffe, wie

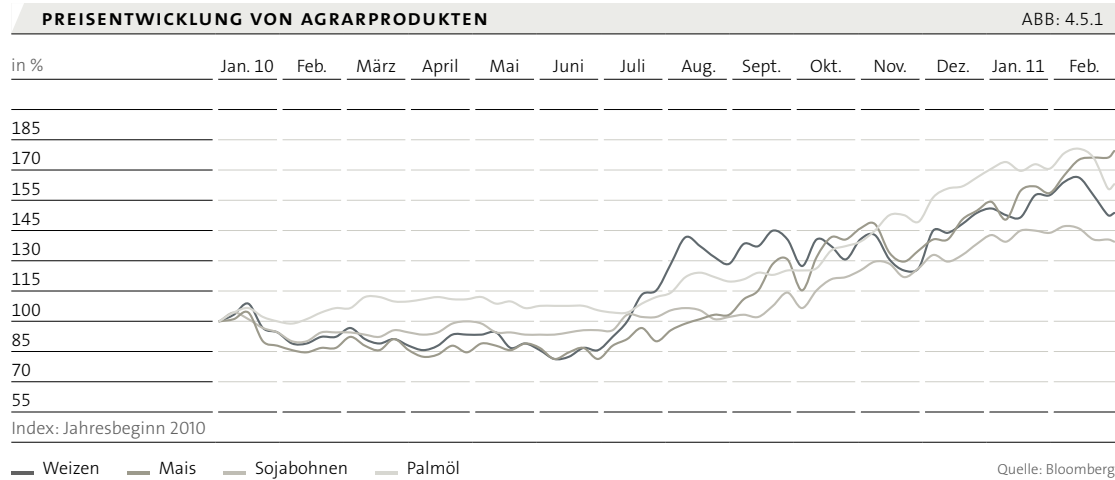

beispielsweise Metalle, folgten dem Ölpreisverlauf und erreichten gegen Jahresende ihre Höchststände. Auch Agrarrohstoffe stiegen, nach einer vorübergehenden Seitwärtsbewegung im ersten Halbjahr, aufgrund von Ernteaussfällen in Russland und Nordamerika bis zum Jahresende deutlich an. / **ABB: 4.5.1**

Die Entwicklung an den internationalen Devisenmärkten war von einem volatilen Verlauf des US-Dollars geprägt. Nachdem sich der US-Dollar zu Beginn des Jahres auf ein Niveau von 1,45 USD/EUR abschwächte, stieg er bis Mitte des Jahres auf über 1,19 USD/EUR. Im zweiten Halbjahr wertete der US-Dollar wieder deutlich ab und notierte Ende Dezember gegenüber dem Euro mit 1,34 USD/EUR dennoch um 7% stärker als ein Jahr zuvor (31.12.2009: 1,44 USD/EUR). Im Jahresdurchschnitt lag der US-Dollar bei 1,33 USD/EUR und legte damit knapp 5% zu (2009: 1,39 USD/EUR).

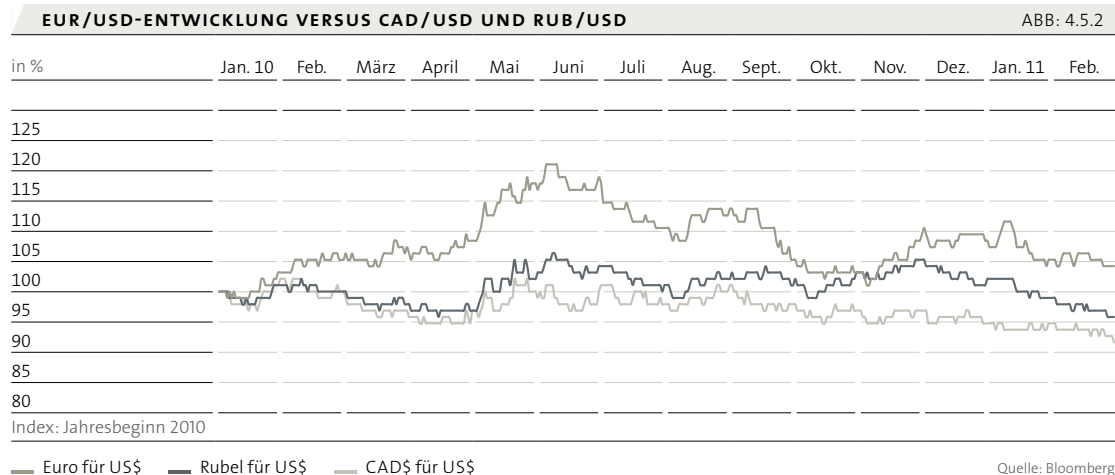

**AUSWIRKUNGEN AUF K+S**

Die Veränderungen der gesamtwirtschaftlichen Rahmenbedingungen hatten folgende Auswirkungen auf den Geschäftsverlauf von K+S:

- + Die Erholung der Preise von Agrarprodukten führte vor allem im zweiten Halbjahr 2010 zu einem spürbaren Anstieg der Nachfrage nach Düngemitteln. Nachdem der Absatz des Geschäftsbereichs Kali- und Magnesiumprodukte im Geschäftsjahr 2009 auf 4,35 Mio. t zurückgegangen war und die Produktionskapazität nur zu etwa 50% genutzt wurde, setzte der Geschäftsbereich im Jahr 2010 wieder 6,99 Mio. t ab und erreichte damit wieder eine hohe Auslastung.



- + Unsere Produktionskosten sind in nicht unerheblichem Maße von Energiekosten, insbesondere für den Bezug von Gas, beeinflusst. Aufgrund vereinbarter Energiebezugs Klauseln mit unseren Lieferanten schlagen sich Energiepreisveränderungen im Geschäftsbereich Kali- und Magnesiumprodukte zum Teil erst mit einem Zeitverzug von sechs bis neun Monaten in unserer Kostenrechnung nieder. Vor diesem Hintergrund wirkte sich das gestiegene Energiepreinsniveau zum Jahreswechsel 2009/2010 erst ab dem dritten Quartal mit einem leichten preisbedingten Anstieg der Energiekosten aus. Der in der zweiten Jahreshälfte 2010 zu beobachtende Anstieg der Energiepreise hatte im vergangenen Jahr noch keine wesentlichen Auswirkungen auf die Energiekosten der K+S GRUPPE.
- + Im Vergleich zum Vorjahr ergab sich für den Geschäftsbereich Kali- und Magnesiumprodukte mit durchschnittlich 1,35 USD/EUR inklusive Sicherungskosten ein deutlich günstigerer Umrechnungskurs als im Vorjahr (2009: 1,48 USD/EUR).
- + Neben dem USD/EUR-Währungsverhältnis ist auch der relative Vergleich zwischen dem Euro sowie den Währungen unserer Wettbewerber jeweils zum US-Dollar für uns von Bedeutung. Ein schwacher US-Dollar hat bei den meisten Kaliproduzenten der Welt einen negativen Einfluss auf die Ertragskraft in ihrer jeweiligen Landeswährung; dies liegt daran, dass der Großteil der weltweiten Kaliproduktion außerhalb des US-Dollarraums liegt, jedoch beinahe sämtliche Verkäufe, mit Ausnahme des europäischen Marktes, in US-Dollar fakturiert werden. Abbildung 4.5.2 zeigt, dass die K+S GRUPPE im Düngemittelgeschäft

insbesondere im ersten Halbjahr von der Stärke des US-Dollars gegenüber dem Euro profitieren konnte. Der Vorteil fiel im Vergleich zu Wettbewerbern aus Kanada und Russland höher aus, reduzierte sich jedoch wieder deutlich von seinen Höchstständen Anfang Juni. / ABB: 4.5.2

**/ EINE ERLÄUTERUNG DER MASSNAHMEN ZUR ABSCHWÄCHUNG VON ENERGIEPREISRISIKEN** finden Sie im Risikobericht auf Seite 139.

## BRANCHENSPEZIFISCHE RAHMENBEDINGUNGEN

### GESCHÄFTSFELD DÜNGEMITTEL

Das Geschäftsjahr 2010 war gegenüber dem Vorjahr von einer sich normalisierenden und damit deutlich höheren Nachfrage nach Düngemitteln geprägt. So stieg die Nachfrage des Handels auf der Nordhalbkugel zu Beginn des Berichtsjahres wieder erheblich an, um die nach der Kaufzurückhaltung des Vorjahres sehr niedrigen Düngemittelagerbestände im Vorfeld der Frühjahrssaison wieder aufzufüllen. Auch die Landwirtschaft kehrte weitgehend zu einem nachhaltigen Verbrauchsverhalten zurück: Angesichts eines stark reduzierten Düngemittelleinsatzes im Jahr 2009 und der daraus – infolge niedriger Nährstoffgehalte in den Böden – resultierenden Ertragsrisiken für die kommenden Ernten erhöhte die Landwirtschaft den Düngemittelleinsatz weltweit wieder deutlich. Der in der zweiten Jahreshälfte einsetzende starke Anstieg der internationalen Getreidepreise und die damit einhergehende, in Abbildung 4.5.3 exem-

plarisch dargestellte, verbesserte Einkommenssituation der Landwirte begünstigte die Düngemittelnachfrage dann noch zusätzlich.

/ ABB: 4.5.3

**/ EINE DARSTELLUNG DER AGRARPREISENTWICKLUNG** finden Sie in Abbildung 4.5.1 auf Seite 102.

Die deutlich steigende Weltkalinachfrage von 31 Mio. t im Jahr 2009 auf geschätzte 57 Mio. t im Jahr 2010 führte dazu, dass die Kapazitätsauslastung der meisten Kaliproduzenten vor dem Hintergrund deutlich rückläufiger Lagerbestände im Verlauf des Jahres wieder ein relativ hohes Niveau erreichte. Dies hatte Auswirkungen auf die Preisentwicklung von Kaliumchlorid: Nach Vertragsabschlüssen einiger Kalianbieter mit chinesischen und indischen Abnehmern Ende des Jahres 2009 und zu Beginn des Berichtsjahres von 350 bzw. 370 US\$/t Kaliumchlorid standard inklusive Fracht etablierte sich im zweiten Quartal weltweit ein Preisniveau zwischen 350 und 400 US\$/t Kaliumchlorid inklusive Fracht. Ende August kündigte die russisch-weißrussische Exportorganisation ВРС für den asiatischen Markt Preise von 405 US\$/t Kaliumchlorid standard bzw. 420 US\$/t granuliertes Kaliumchlorid und für den brasilianischen Markt Preise zwischen 410 und 420 US\$/t granuliertes Kaliumchlorid an. Ende November avisierte ВРС Preise zwischen 440 und 450 US\$/t granuliertes Kaliumchlorid für den asiatischen und brasilianischen Markt. Auch K+S erhöhte die Preise für granuliertes Kaliumchlorid in Europa im Verlauf des Jahres von 285 €/t auf 335 €/t und passte auch die Preise für andere Kali- und Magnesiumprodukte entsprechend an.

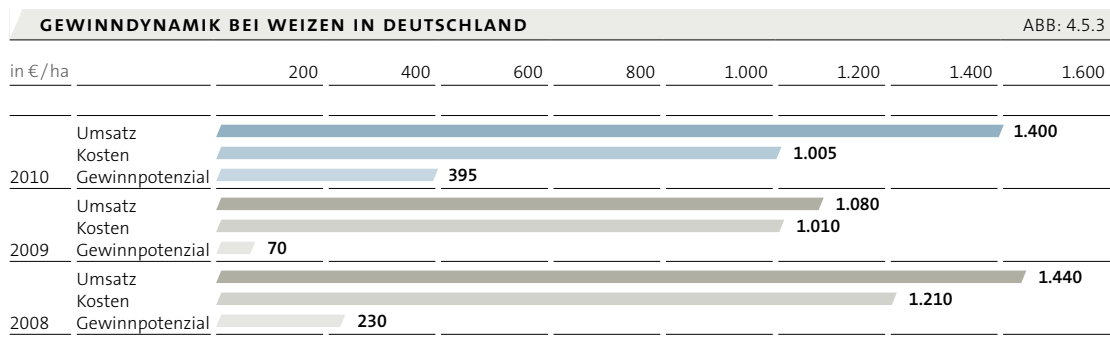

2010: Weizenpreis (e): 200 €/t, Ertrag (e): 7 t/ha    2009: Weizenpreis: 135 €/t, Ertrag: 8 t/ha    2008: Weizenpreis: 180 €/t, Ertrag: 8 t/ha

Annahmen: Ohne Agrar-Subventionen, 100% Einsatz mineralischer Düngemittel (keine organische Düngung), Stroh verbleibt im Feld (Strohdüngung), geringerer Düngemittelsatz für geringere Erträge entsprechend angepasst; Quellen: Kuratorium für Technik und Bauwesen in der Landwirtschaft e.V. (KTBL), LAND & Forst, Agrarstatistik Destatis, Leitfäden Düngung der Bundesländer, Euronext.

Im ersten Halbjahr liefen die europäischen Produktionsanlagen für Stickstoffdüngemittel bereits mit hoher Auslastung, im zweiten Halbjahr sogar auf Vollast. Die Preise für Stickstoffdüngemittel zogen daher im Jahresverlauf auch angesichts steigender Einstandskosten deutlich an.

#### / DIE MARKTPPOSITIONEN DER GESCHÄFTSBEREICHE

finden Sie im Bereich ‚Konzernstruktur und Geschäftstätigkeit‘ auf den Seiten 77 ff.

### GESCHÄFTSFELD SALZ

#### AUFTAUSALZ – WESTEUROPA

Der außergewöhnliche und flächendeckende Winter führte im ersten Quartal zu einer sehr hohen Nachfrage, die auch bei maximaler Ausnutzung der verfügbaren lokalen Produktionskapazitäten nicht ganz gedeckt werden konnte. Vor diesem Hintergrund kam es verstärkt zu

Importen, und auch Speise- sowie Gewerbesalze wurden als Auftaumittel genutzt. Nach einer noch zögerlichen Früheinlagerung im zweiten Quartal konnten die europäischen Ausschreibungen im dritten Quartal mit spürbar höheren Preisen abgeschlossen werden. Die dann einsetzende kurze und intensive Früheinlagerungsphase führte dazu, dass erneut alle europäischen Produktionsanlagen auf Vollast liefen. Der erneut flächendeckend starke Wintereinbruch im Dezember stellte die europäischen Produzenten wieder vor außergewöhnlich große Herausforderungen; die Rekordnachfrage konnte trotz erhöhter Importe aus Übersee nicht vollständig bedient werden.

#### AUFTAUSALZ – NORDAMERIKA

Während der Winter in den USA im ersten Quartal relativ normal verlief, herrschte in Kanada eine sehr milde Witterung. Bei der Früheinlagerung erschwerten daher noch relativ hohe Lagerbestände sowie ein zunehmender Wettbewerbsdruck an der Ostküste die Position der Lieferanten bei den dortigen Ausschreibungen; dies hatte moderate Preisrückgänge sowie generell geringere Vertragsvolumina zur Folge. Ein relativ später Wintereinbruch sorgte im vierten Quartal dafür, dass sich die Nachfrage gegenüber einem schwachen Vorjahresquartal zwar verbesserte, jedoch trotzdem unterdurchschnittlich verlief.

#### GEWERBESALZ

Der europäische Gewerbesalzmarkt war von einer insgesamt positiven Nachfrageentwicklung geprägt. Der Gewerbesalzmarkt in Nordamerika entwickelte sich relativ stabil; lediglich bei Wasserenthärtungsprodukten war noch eine gewisse Kaufzurückhaltung aufgrund des wirtschaftlich schwierigen Umfelds festzustellen. In Südamerika verlief das Geschäft relativ stabil.

#### SPEISESALZ

Die Nachfrage nach Speisesalz in Europa und Nordamerika zeigte sich im Berichtsjahr auf hohem Niveau relativ konstant. In Südamerika normalisierte sich die Situation auf dem Speisesalzmarkt im Verlauf des Jahres, nachdem die Nachfrage zu Beginn des Jahres infolge des Erdbebens in Chile deutlich angestiegen war.

## INDUSTRIESALZ

Bei Industriesalzen normalisierte sich die Nachfrage in Europa im Umfeld einer sich verstetigenden wirtschaftlichen Erholung; dies traf jedoch noch nicht auf den nordamerikanischen Markt zu. Im südamerikanischen Industriesalzmarkt erhöhte sich der Wettbewerbsdruck infolge des Erdbebens sowie der Belastung der Kunden durch höhere Energiekosten.

## WESENTLICHE, FÜR DEN GESCHÄFTS- VERLAUF URSÄCHLICHE EREIGNISSE

- + Der internationale Düngemittelmarkt zeichnete sich im Jahr 2010 – wie bereits unter der Rubrik ‚Branchenspezifische Rahmenbedingungen‘ beschrieben – durch einen starken Nachfrageanstieg aus. Dies führte dazu, dass die Kapazitätsauslastung der meisten Kaliproduzenten vor dem Hintergrund deutlich rückläufiger Lagerbestände im Verlauf des Jahres wieder ein relativ hohes Niveau erreichte, sodass κ+s auch angesichts eines steigenden Weltmarktpreinsniveaus die Preise für granuliertes Kaliumchlorid in Europa im Verlauf des Jahres von 285 €/t auf 335 €/t anheben konnte. Die europäischen Produktionsanlagen für Stickstoffdüngemittel liefen bereits im ersten Halbjahr mit hoher Auslastung und im zweiten Halbjahr sogar auf Vollast; die Preise für Stickstoffdüngemittel zogen angesichts steigender Einstandskosten deutlich an.
- + κ+s hat am 2. April 2009 einen Vertrag über den Erwerb von MORTON SALT unterzeichnet. Das Clo-

sing erfolgte am 1. Oktober 2009. Durch die erstmalige ganzjährige Einbeziehung von MORTON SALT im Jahr 2010 ergab sich ein Konsolidierungseffekt in Höhe von 582,2 Mio. € im Umsatz und 68,6 Mio. € im operativen Ergebnis. Der Ergebnisbeitrag war durch Abschreibungen auf im Rahmen der Kaufpreisallokation vorzunehmende Wertanpassungen, Integrationskosten sowie Einmaleffekte aus der Neubewertung und Konsolidierung im Rahmen der nach IFRS vorzunehmenden Vorratsbewertung belastet.

- + Die Verkäufe von Auftausalz sind erheblich von der jeweiligen winterlichen Witterung während des ersten und vierten Quartals abhängig. Vor diesem Hintergrund führte das in den branchenspezifischen Rahmenbedingungen beschriebene positive und über dem langjährigen Absatzdurchschnitt liegende Auftausalzgeschäft in Europa zu einer deutlichen Umsatz- und Ergebnissteigerung im Geschäftsbereich Salz.

## ENTWICKLUNG DES AKTIENKURSES

Die κ+s-Aktie legte im Berichtsjahr um 40,9% zu. Eine detaillierte Beschreibung des κ+s-Aktienkurses mit Kursverläufen, Kennzahlen und weiteren wichtigen Informationen rund um die κ+s-Aktie finden Sie im Kapitel ‚κ+s am Kapitalmarkt‘ auf den Seiten 11 ff.

## GESAMTAUSSAGE DES VORSTANDS ZUM GESCHÄFTSVERLAUF 2010

Im Vergleich zur recht niedrigen Ausgangsbasis des von der Finanz- und Wirtschaftskrise belasteten Jahres 2009 zeigte der Geschäftsverlauf im Jahr 2010 eine sehr erfreuliche Entwicklung, die sich die meisten von uns vor einem Jahr sicher kaum vorzustellen wagten. Zwar zeichnete sich bereits zu Beginn des Berichtsjahres ein hoher Nachholbedarf der Handelsstufe ab, um sehr niedrige Düngemittellagerbestände im Vorfeld der Frühjahrssaison wieder aufzufüllen. Dies allein hätte aber nicht ausgereicht, um von einer Normalisierung der Düngemittelnachfrage zu sprechen, denn dafür war es notwendig, dass zusätzlich auch die Landwirtschaft zu einem nachhaltigen Verbrauchsverhalten zurückkehrt. Dies ist erfreulicherweise geschehen, denn der stark reduzierte Düngemiteleinsatz im Jahr 2009 hatte zu relativ niedrigen Nährstoffgehalten in den Böden und damit zu erhöhten Ertragsrisiken für die kommenden Ernten geführt. Der in der zweiten Jahreshälfte einsetzende starke Anstieg der internationalen Getreidepreise und die damit einhergehende verbesserte Einkommenssituation der Landwirte begünstigte die Düngemittelnachfrage dann noch zusätzlich. Diese Effekte führten zu einem Anstieg unseres Düngemittelabsatzes um etwa 40%. Für den Geschäftsbereich Salz erwarteten wir bereits zu Beginn des Jahres, dass sich die erstmalig ganzjährige Konsolidierung von MORTON SALT positiv auf unser Geschäft auswirken sollte. Zusätzlich haben wir sowohl zu Beginn als auch am Ende des Jahres in Europa einen Winter erlebt, wie es ihn in puncto Inten-

sität lange nicht mehr gegeben hat. Während der langfristige Durchschnitt und damit das Absatzbudget für unsere europäische Salztochter ESCO bei rund 2 Mio. t Auftausalz liegt, wurde im vergangenen Jahr allein hier mehr als das Doppelte verkauft. Wir freuen uns, dass die K+S GRUPPE deutliche Steigerungen ihrer Umsätze und Ergebnisse erreichen konnte und damit gestärkt aus der Krise hervorgegangen ist.

#### VERGLEICH DES TATSÄCHLICHEN MIT DEM PROGNOTIZIERTEN GESCHÄFTSVERLAUF

##### UMSATZPROGNOSE

Die im Rahmen des Finanzberichts 2009 vom Vorstand am 23. Februar 2010 abgegebene Prognose für das Jahr 2010 ging davon aus, dass der Umsatz gegenüber dem Niveau des Vorjahres (3,6 Mrd. €) bei einem erwarteten US-Dollarkurs von 1,39 USD/EUR deutlich ansteigen sollte. Zu diesem Zeitpunkt war noch unklar, ob es sich bei der positiven Absatzsituation im Geschäftsbereich Kali- und Magnesiumprodukte zu Beginn des Jahres 2010 lediglich um eine Normalisierung der Bestände der Handelsstufe oder um eine nachhaltige Normalisierung der Endkundennachfrage handelte. Vor diesem Hintergrund basierte der Ausblick auf einem erwarteten Absatzanstieg auf knapp 6 Mio. t Ware im Geschäftsbereich Kali- und Magnesiumprodukte (2009: 4,3 Mio. t); die Möglichkeit einer Erhöhung dieser Prognose stellten wir jedoch unter der Voraussetzung einer guten Frühjahrssaison bereits zum damaligen Zeitpunkt in Aussicht. Die Absatzprognose des Geschäftsbereichs

#### SOLL-/IST-VERGLEICH

TAB: 4.5.2

|                                                     |        | Prognose<br>Finanzbericht<br>2009 + Q1/10 | Prognose<br>H1/10  | Prognose<br>9M/10  | Ist<br>2010 | Ist<br>2009 <sup>1</sup> | %     |
|-----------------------------------------------------|--------|-------------------------------------------|--------------------|--------------------|-------------|--------------------------|-------|
| <b>K+S Gruppe</b>                                   |        |                                           |                    |                    |             |                          |       |
| Umsatz                                              | Mrd. € | deutlicher Anstieg                        | 4,6 bis 5,0        | 4,8 bis 5,0        | 5,0         | 3,6                      | 39,7  |
| EBITDA                                              | Mio. € | deutlicher Anstieg                        | 800 bis 850        | 880 bis 920        | 975,2       | 411,8                    | 136,8 |
| Operatives Ergebnis (EBIT I)                        | Mio. € | deutlicher Anstieg                        | 550 bis 600        | 630 bis 670        | 726,9       | 238,0                    | 205,4 |
| Konzernergebnis, bereinigt                          | Mio. € | deutlicher Anstieg                        | 330 bis 370        | 375 bis 405        | 445,3       | 93,6                     | 375,7 |
| Ergebnis je Aktie, bereinigt                        | €      | deutlicher Anstieg                        | 1,75 bis 1,95      | 1,95 bis 2,10      | 2,33        | 0,56                     | 316,1 |
| Investitionen <sup>2</sup>                          | Mio. € | 260                                       | 210                | 200                | 201,0       | 177,6                    | 7,8   |
| Abschreibungen <sup>2</sup>                         | Mio. € | 230                                       | 250                | 250                | 248,3       | 173,8                    | 42,9  |
| Energiekosten <sup>3</sup>                          | Mio. € | moderater Anstieg                         | deutlicher Anstieg | deutlicher Anstieg | 265,8       | 210,7                    | 26,2  |
| Personalaufwand <sup>3</sup>                        | Mio. € | moderater Anstieg                         | deutlicher Anstieg | deutlicher Anstieg | 1.019,3     | 756,4                    | 34,8  |
| Frachtkosten <sup>3</sup>                           | Mio. € | deutlicher Anstieg                        | starker Anstieg    | starker Anstieg    | 790,0       | 521,8                    | 51,4  |
| <b>Geschäftsbereich Kali- und Magnesiumprodukte</b> |        |                                           |                    |                    |             |                          |       |
| Absatzmenge                                         | Mio. t | FB 09: knapp 6<br>Q1/10: gut 6,5          | 6,5 bis 7,0        | 6,7 bis 6,9        | 6,99        | 4,35                     | 60,7  |
| <b>Geschäftsbereich Salz</b>                        |        |                                           |                    |                    |             |                          |       |
| Absatzmenge Festsalz                                | Mio. t | n/a                                       | 21 bis 22          | 22                 | 22,53       | 14,81                    | 52,1  |
| – davon Auftausalz                                  | Mio. t | n/a                                       | 12 bis 13          | 13                 | 13,49       | 8,96                     | 50,1  |

<sup>1</sup> Seit Q4/2009 einschl. Morton Salt.

<sup>2</sup> Zahlungswirksame Investitionen in bzw. Abschreibungen auf Sachanlagen, immaterielle Vermögenswerte.

<sup>3</sup> Bei Abgabe der Prognosen wurden jeweils die konsolidierungsbedingten Effekte aus der Akquisition von Morton Salt ausgeblendet.

Kali- und Magnesiumprodukte wurde dann vor dem Hintergrund der anhaltend starken Nachfrage mit der Veröffentlichung des Quartalsfinanzberichts Q1/10 im

Mai auf gut 6,5 Mio. t Ware erhöht. Der Ausblick des im August veröffentlichten Halbjahresfinanzberichts H1/10 enthielt erstmals eine konkrete Bandbreite der



Umsatzerwartung in Höhe von 4,6 bis 5,0 Mrd. €, basierend auf einer erneut erhöhten Absatzprognose des Geschäftsbereichs Kali- und Magnesiumprodukte von 6,5 bis 7,0 Mio. t Ware. Dieser Ausblick wurde im Quartalsfinanzbericht Q3/10 mit einer Umsatzerwartung von 4,8 bis 5,0 Mrd. € weiter konkretisiert.

Der Umsatz der K+S GRUPPE im Jahr 2010 erreichte 5,0 Mrd. € und lag damit wie erwartet deutlich über dem Niveau des Vorjahres und am oberen Ende der prognostizierten Bandbreite.

#### AUFWANDSPROGNOSE

Im Finanzbericht 2009 prognostizierten wir, dass die Gesamtkosten, hauptsächlich aufgrund der erstmaligen Konsolidierung von MORTON SALT, im Vergleich zum Vorjahr deutlich ansteigen sollten. Ohne diesen konsolidierungsbedingten Effekt erwarteten wir bei den Personal- und Energiekosten einen moderaten Anstieg, die Frachtkosten sollten deutlich steigen. Die Abschreibungen erwarteten wir unter der Einbeziehung von MORTON SALT bei etwa 230 Mio. €. Im Rahmen der höheren Absatzerwartungen des Geschäftsbereichs Kali- und Magnesiumprodukte haben wir mit Veröffentlichung des Halbjahresfinanzberichts H1/10 einen deutlichen Anstieg der Energie- und Personalkosten sowie einen starken Anstieg der Frachtkosten prognostiziert. Die Abschreibungsprognose wurde auf etwa 250 Mio. € erhöht.

Im Jahr 2010 lag der Personalaufwand mit 1.019,3 Mio. € wie erwartet deutlich über dem des Vorjahres. Bei den

Energiekosten erwarteten wir ein deutlich höheres Niveau; ein Anstieg um 26 % auf 265,8 Mio. € bestätigte diese Prognose. Bei den Frachtkosten gingen wir von einem starken Anstieg aus; mit 790,0 Mio. € stieg diese Kostenposition um 51 %. Für Abschreibungen prognostizierten wir 250 Mio. €; sie lagen im Jahr 2010 bei 248,3 Mio. €.

#### ERGEBNISPROGNOSE

Die im Rahmen des Finanzberichts 2009 vom Vorstand am 23. Februar 2010 formulierte und im Quartalsfinanzbericht Q1/10 bestätigte Ergebnisprognose ging davon aus, dass das operative Ergebnis EBIT 1 im Geschäftsjahr 2010 deutlich höher ausfallen sollte als im Vorjahr. Im Halbjahresfinanzbericht H1/10 konkretisierten wir die Prognose auf eine Bandbreite von 550 bis 600 Mio. € und erhöhten diese mit der Veröffentlichung des Quartalsberichts Q3/10 auf 630 bis 670 Mio. €. Die Gründe hierfür lagen insbesondere in den über das Jahr steigenden Ergebniserwartungen des Geschäftsbereichs Kali- und Magnesiumprodukte, der, wie auch der Geschäftsbereich Stickstoff, von der deutlich gestiegenen Nachfrage nach Düngemitteln profitierte. Schlussendlich hat sich das operative Ergebnis im Gesamtjahr 2010 mit 726,9 Mio. € gegenüber dem Wert des Vorjahres (238,0 Mio. €) in etwa verdreifacht und übertraf damit den im Quartalsbericht Q3/10 angegebenen Prognosewert um 8 %. Dies ist vor allem auf die positive Entwicklung des Auftausalzgeschäfts in Europa im vierten Quartal zurückzuführen. / TAB: 4.5.2

## 4.6 ERTRAGSLAGE

### UMSATZ MIT 5,0 MRD. € UM 40% ÜBER VORJAHRESNIVEAU

Im Geschäftsjahr 2010 haben wir einen Umsatz von 4.993,8 Mio. € erzielt, dieser lag um 40 % über dem Wert des Vorjahres. Unterjährig lässt sich an den Quartalsumsätzen eine gewisse Saisonalität erkennen; so fällt das erste Quartal tendenziell am stärksten und das dritte Quartal am schwächsten aus. Bei einer mengenmäßigen Betrachtung profitiert das erste Quartal im Geschäftsfeld Düngemittel üblicherweise von der einsetzenden Frühjahrsdüngung in Europa; im dritten Quartal erfolgt zwar die Herbstdüngung, allerdings ist diese absatzmäßig weniger bedeutend. Das Auftausalzgeschäft konzentriert sich in der Regel auf das erste und vierte Quartal eines Jahres, während im zweiten und dritten Quartal Voreinlagerungen zu in der Regel günstigeren Preisen stattfinden. / TAB: 4.6.2

/ EINE DETAILLIERTE ERLÄUTERUNG DER UMSÄTZE DER EINZELNEN GESCHÄFTSBEREICHE finden Sie auf den Seiten 122 ff.

#### ABWEICHUNGSANALYSE

TAB: 4.6.1

|                              | 2010         |
|------------------------------|--------------|
| in %                         |              |
| <b>Umsatzveränderung</b>     | <b>+39,7</b> |
| mengen-/strukturbedingt      | +27,8        |
| preis-/preisstellungsbedingt | -6,5         |
| währungsbedingt              | +2,1         |
| konsolidierungsbedingt       | +16,3        |

## UMSATZ NACH GESCHÄFTSBEREICHEN

TAB: 4.6.2

|                              | Q1/10          | Q2/10          | Q3/10          | Q4/10          | 2010           | 2009           | %            |
|------------------------------|----------------|----------------|----------------|----------------|----------------|----------------|--------------|
| in Mio. €                    |                |                |                |                |                |                |              |
| Kali- und Magnesiumprodukte  | 498,4          | 463,5          | 417,8          | 465,0          | 1.844,7        | 1.421,7        | +29,8        |
| Stickstoffdüngemittel        | 385,5          | 287,4          | 306,1          | 307,2          | 1.286,2        | 1.016,2        | +26,6        |
| Salz                         | 616,4          | 275,3          | 305,2          | 531,8          | 1.728,7        | 1.014,6        | +70,4        |
| Ergänzende Geschäftsbereiche | 33,2           | 32,2           | 31,8           | 36,5           | 133,7          | 120,7          | +10,8        |
| Überleitung                  | 0,1            | 0,1            | 0,3            | 0,0            | 0,5            | 0,6            | -16,7        |
| <b>K+S Gruppe</b>            | <b>1.533,6</b> | <b>1.058,5</b> | <b>1.061,2</b> | <b>1.340,5</b> | <b>4.993,8</b> | <b>3.573,8</b> | <b>+39,7</b> |
| Anteil am Gesamtumsatz (%)   | 30,7           | 21,2           | 21,3           | 26,8           | 100,0          | —              | —            |

Der Umsatzanstieg im Jahr 2010 ist insbesondere auf positive Mengen- und Konsolidierungseffekte zurückzuführen, die negative Preiseffekte mehr als ausgleichen konnten. Die Geschäftsbereiche Kali- und Magnesiumprodukte sowie Stickstoffdüngemittel erzielten kräftige Umsatzzuwächse, da sich die Düngemittelnachfrage im Berichtsjahr deutlich erhöht hat. Im Geschäftsbereich Salz wirkten sich sowohl die ganzjährige Konsolidierung von MORTON SALT als auch ein hoher Auftausalzabsatz im ersten und vierten Quartal positiv auf den Umsatz aus. / TAB: 4.6.1

## UMSATZ NACH GESCHÄFTSBEREICHEN

ABB: 4.6.1

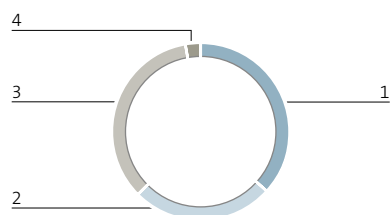

|                                | 2010 | 2009 |
|--------------------------------|------|------|
| in %                           |      |      |
| 1 Kali- und Magnesiumprodukte  | 36,9 | 39,8 |
| 2 Stickstoffdüngemittel        | 25,8 | 28,4 |
| 3 Salz                         | 34,6 | 28,4 |
| 4 Ergänzende Geschäftsbereiche | 2,7  | 3,4  |

Mit knapp 37 % war der Geschäftsbereich Kali- und Magnesiumprodukte der umsatzstärkste Geschäftsbereich der K+S GRUPPE, gefolgt von Salz und Stickstoffdüngemitteln. / ABB: 4.6.1

## UMSATZ NACH REGIONEN

ABB: 4.6.2

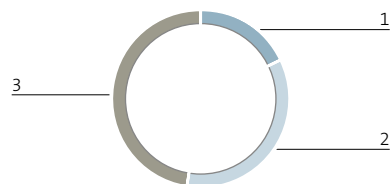

|                  | 2010 | 2009 |
|------------------|------|------|
| in %             |      |      |
| 1 Inland         | 18,0 | 18,0 |
| 2 Übriges Europa | 34,5 | 35,1 |
| 3 Übersee        | 47,5 | 46,9 |

In Europa erzielten wir einen Umsatz von 2,6 Mrd. € (+38 %). Damit entfielen rund 53 % des Gesamtumsatzes auf diese Region. Die Akquisition von MORTON SALT hat dazu beigetragen, dass sich die regionale Verteilung des Gruppenumsatzes mittlerweile sehr ausgewogen auf Europa und Übersee verteilt: Der Umsatz in den Überseemärkten stieg um 41 % auf insgesamt 2,4 Mrd. € bzw. rund 47 % des Gesamtumsatzes. / ABB: 4.6.2

## AKTUELLE UND KÜNFTIGE AUFTRAGSENTWICKLUNG

Für den Großteil des Geschäfts der K+S GRUPPE bestehen keine längerfristigen Vereinbarungen über feste

Mengen und Preise. Der geringe Anteil des Auftragsbestands in Relation zum Umsatz – im Geschäftsbereich Kali- und Magnesiumprodukte beispielsweise weniger als 10% am Jahresende – ist branchenüblich. Das Geschäft ist durch langfristige Kundenbeziehungen sowie revolvierende Rahmenvereinbarungen mit unverbindlichen Mengen- und Preisindikationen geprägt.

Ein Ausweis des Auftragsbestands der K+S GRUPPE und ihrer Geschäftsbereiche ist daher für die Beurteilung der kurz- und mittelfristigen Ertragskraft nicht aussagekräftig.

## ENTWICKLUNG AUSGEWÄHLTER KOSTENARTEN

Die gestiegene Produktionsleistung sowie die erstmals ganzjährige Konsolidierung von MORTON SALT führten im Vergleich zum Jahr 2009 zu einem Umsatzanstieg von rund 40%. Beide Effekte wirkten sich auch deutlich in der Entwicklung der Gesamtkosten aus. Die wichtigsten Kostenarten haben sich wie folgt entwickelt: Der Personalaufwand der K+S GRUPPE ist mit 1,02 Mrd. € gegenüber dem Vorjahr um 35% gestiegen; die Personalkosten ohne Rückstellungseffekte stiegen im Vergleich zum Jahr 2009 um 34% auf 1,03 Mrd. €, wovon 149,6 Mio. € auf den Konsolidierungseffekt aufgrund der Akquisition von MORTON SALT zurückzuführen sind. Die Aufwendungen für Roh-, Hilfs- und Betriebsstoffe und für bezogene Waren (Materialkosten), gemessen am Umsatz etwa 25%, erhöhten sich konsolidierungs- und mengenbedingt um etwa 27%

| EBITDA NACH GESCHÄFTSBEREICHEN |              |              |              |              |              |              | TAB: 4.6.3    |
|--------------------------------|--------------|--------------|--------------|--------------|--------------|--------------|---------------|
|                                | Q1/10        | Q2/10        | Q3/10        | Q4/10        | 2010         | 2009         | %             |
| in Mio. €                      |              |              |              |              |              |              |               |
| Kali- und Magnesiumprodukte    | 171,5        | 139,9        | 100,0        | 155,7        | 567,1        | 317,2        | +78,8         |
| Stickstoffdüngemittel          | 17,3         | 28,9         | 5,4          | 15,8         | 67,4         | -94,4        | —             |
| Salz                           | 146,4        | 56,3         | 60,8         | 106,2        | 369,7        | 200,3        | +84,6         |
| Ergänzende Geschäftsbereiche   | 7,9          | 7,8          | 5,8          | 6,2          | 27,7         | 21,7         | +27,6         |
| Überleitung <sup>1</sup>       | -10,0        | -15,9        | -7,7         | -23,1        | -56,7        | -33,0        | -71,8         |
| <b>K+S Gruppe</b>              | <b>333,1</b> | <b>217,0</b> | <b>164,3</b> | <b>260,8</b> | <b>975,2</b> | <b>411,8</b> | <b>+136,8</b> |
| Anteil am Gesamt-EBITDA (%)    | 34,2         | 22,3         | 16,8         | 26,7         | 100,0        | —            | —             |

<sup>1</sup> Aufwendungen und Erträge, die den Geschäftsbereichen nicht zuordenbar sind, werden gesondert erfasst und in der Zeile „Überleitung“ dargestellt.

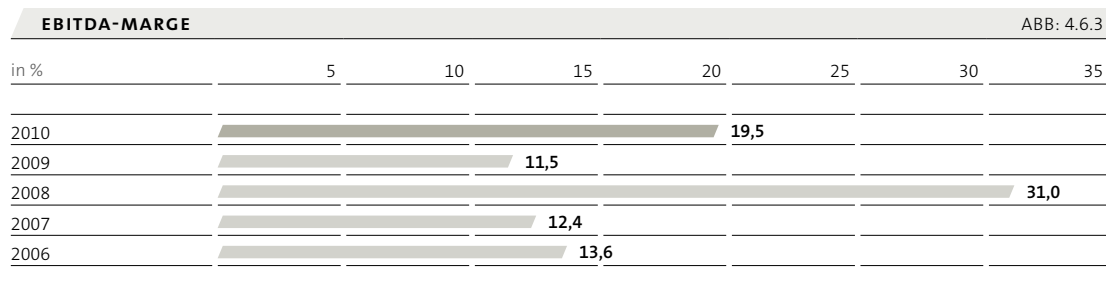

auf 1,29 Mrd. €. Die Frachtkosten, gemessen am Umsatz etwa 15%, stiegen konsolidierungs- und mengenbedingt sowie aufgrund gestiegener Frachtraten etwas stärker als der Umsatz um 51% auf 790,0 Mio. €. Die Energiekosten, etwa 5% des Umsatzes, erhöhten sich vor allem mengen- und konsolidierungsbedingt um 26% auf 265,8 Mio. €.

## ERGEBNISENTWICKLUNG

### ERGEBNIS VOR ZINSEN, STEUERN UND ABSCHREIBUNGEN (EBITDA) DEUTLICH GESTIEGEN

Das Ergebnis vor Zinsen, Steuern und Abschreibungen (EBITDA) stieg im Berichtsjahr um 137% auf 975,2 Mio. €. Da das EBITDA nicht von Abschreibungen auf im Rahmen von Kaufpreisallokationen vorgenommene Wert-

| EBIT I NACH GESCHÄFTSBEREICHEN |              |              |              |              |              |              | TAB: 4.6.4    |
|--------------------------------|--------------|--------------|--------------|--------------|--------------|--------------|---------------|
|                                | Q1/10        | Q2/10        | Q3/10        | Q4/10        | 2010         | 2009         | %             |
| in Mio. €                      |              |              |              |              |              |              |               |
| Kali- und Magnesiumprodukte    | 150,6        | 119,2        | 79,4         | 126,7        | 475,9        | 231,7        | +105,4        |
| Stickstoffdüngemittel          | 14,5         | 26,0         | 2,6          | 12,6         | 55,7         | -108,1       | —             |
| Salz                           | 107,9        | 21,8         | 31,8         | 76,6         | 238,1        | 140,4        | +69,6         |
| Ergänzende Geschäftsbereiche   | 6,4          | 6,2          | 4,3          | 4,3          | 21,2         | 15,2         | +39,5         |
| Überleitung <sup>1</sup>       | -11,7        | -17,7        | -9,6         | -25,0        | -64,0        | -41,2        | -55,3         |
| <b>K+S Gruppe</b>              | <b>267,7</b> | <b>155,5</b> | <b>108,5</b> | <b>195,2</b> | <b>726,9</b> | <b>238,0</b> | <b>+205,4</b> |
| Anteil am Gesamt-EBIT I (%)    | 36,8         | 21,4         | 14,9         | 26,9         | 100,0        | —            | —             |

<sup>1</sup> Aufwendungen und Erträge, die den Geschäftsbereichen nicht zuordenbar sind, werden gesondert erfasst und in der Zeile „Überleitung“ dargestellt.

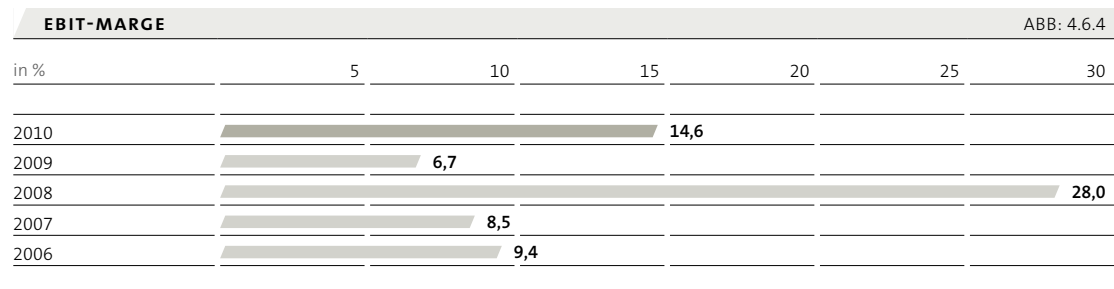

ansätze beeinflusst wird und diese sich nach der Akquisition von MORTON SALT deutlich erhöht haben, kommt dem EBITDA zur Beurteilung der operativen Ertragskraft mittlerweile eine höhere Bedeutung zu.

/ TAB: 4.6.3 / ABB: 4.6.3

#### OPERATIVES ERGEBNIS EBIT I DEUTLICH GESTIEGEN

Die Steuerungsgröße der K+S GRUPPE, das operative Ergebnis EBIT I, stieg um 488,9 Mio. € bzw. 205% auf 726,9 Mio. € (2009: 238,0 Mio. €). Darin sind Abschreibungen in Höhe von 248,3 Mio. € berücksichtigt, diese haben sich gegenüber dem Vorjahr um 74,5 Mio. € erhöht. Von diesem Anstieg entfielen 66,5 Mio. € auf den Konsolidierungseffekt von MORTON SALT. Die Abschreibun-

gen auf im Rahmen der Kaufpreisallokation vorzunehmende Wertanpassungen bei MORTON SALT betragen im Berichtsjahr 52,0 Mio. €. / TAB: 4.6.4 / ABB: 4.6.4

/ EINE ERLÄUTERUNG DES BEGRIFFS KAUFPREIS-ALLOKATION finden Sie auf Seite 223.

Das operative Ergebnis wurde insbesondere durch die folgenden Effekte beeinflusst: Während die Geschäftsbereiche Kali- und Magnesiumprodukte sowie Stickstoffdüngemittel ihre Ergebnisse aufgrund der im gesamten Jahr 2010 deutlich höheren Nachfrage nach Düngemitteln steigerten, ist das gute Ergebnis des Geschäftsbereichs Salz sowohl auf einen positiven Konsolidierungseffekt (68,6 Mio. €) als auch auf ein überdurchschnittliches Auftausalzgeschäft in Europa im ersten und vierten Quartal zurückzuführen.

Der Saldo der Aufwendungen und Erträge, die den Geschäftsbereichen nicht zuordenbar sind (Überleitung), belief sich im Berichtsjahr auf -64,0 Mio. €. Gegenüber dem Vorjahreswert ist die Überleitung damit um 22,8 Mio. € gestiegen. Dies ist hauptsächlich auf die folgenden Gründe zurückzuführen: Eine höhere erfolgsabhängige Vergütung für Vorstand, Aufsichtsrat und Mitarbeiter, einmalige Aufwendungen im Rahmen der Umstellung der langfristigen Vergütungskomponente für Vorstand und Führungskräfte (LTI-Programm) sowie Beratungskosten, insbesondere im Rahmen der gesellschaftsrechtlichen Herauslösung von COMPO.

Das operative Ergebnis EBIT I beinhaltet das realisierte Sicherungsergebnis der jeweiligen Berichtsperiode aus



den zur Sicherung geplanter Währungspositionen (im Wesentlichen Umsätze in US-Dollar) bzw. künftiger Translationsrisiken eingesetzten operativen Derivaten. Das realisierte Sicherungsergebnis entspricht dem Ausübungswert des Derivats zum Zeitpunkt der Fälligkeit (Differenz zwischen Kassakurs und Sicherungskurs), im Falle von Optionsgeschäften abzüglich der gezahlten Prämien. Die Marktwertveränderungen der noch ausstehenden operativen, antizipativen Sicherungsgeschäfte werden hingegen nur im Ergebnis nach operativen Sicherungsgeschäften (EBIT II) berücksichtigt.

/ EINE DETAILLIERTE ERLÄUTERUNG DER ERGEBNISSE DER EINZELNEN GESCHÄFTSBEREICHE finden Sie auf den Seiten 122 ff.

## ENTWICKLUNG ÜBRIGER WESENTLICHER POSTEN DER GEWINN- UND VERLUSTRECHNUNG

### BRUTTOMARGE MIT 38% GEGENÜBER DEM WERT DES VORJAHRS DEUTLICH GESTIEGEN

Im Jahr 2010 stieg der Umsatz um 39,7%. Da sich die Herstellungskosten lediglich um 31,2% erhöhten, verbesserte sich die Bruttomarge auf 38,4% nach einem Wert von 34,4% im Vorjahr. Die auf Seite 109 beschriebenen Kostensteigerungen konnten durch mengenbedingte Umsatzsteigerungen aller Geschäftsbereiche mehr als ausgeglichen werden. Ausschlaggebend hierfür war die in der Bergbauindustrie übliche Fixkostendegression.

### VERTRIEBSKOSTEN MENGENBEDINGT DEUTLICH HÖHER

Die Vertriebskosten der K+S GRUPPE sind im Berichtsjahr um 259,4 Mio. € bzw. 36% auf 971,9 Mio. € gestiegen; 116,5 Mio. € entfielen auf die ganzjährige Einbeziehung von MORTON SALT. Die Ausgangsfrachten, die über die Hälfte der Vertriebskosten ausmachen, stiegen aufgrund eines höheren Transportvolumens und höherer Frachtraten in der Berichtsperiode um 61% auf 571,7 Mio. €. Die übrigen Kosten für Vertriebspersonal, Vermarktung und Supply-Chain-Management betragen im Berichtsjahr 400,2 Mio. € (2009: 326,8 Mio. €). Darin ist ein mittlerer zweistelliger Millionenbetrag für Werbung in Form von Anzeigen, Broschüren, TV- und Radiospots, Messen, Produkteinführungen etc. enthalten. Der Großteil dieser Kosten entsteht in den Geschäftsbereichen Salz sowie Kali- und Magnesiumprodukte und bei COMPO.

### ALLGEMEINE VERWALTUNGSKOSTEN KONSOLIDIERUNGSBEDINGT ANGESTIEGEN

Im Jahr 2010 stiegen die allgemeinen Verwaltungskosten um 60,5 Mio. € bzw. 49% auf 183,6 Mio. €. Ein großer Teil dieses Anstiegs entfiel auf die erstmals ganzjährige Einbeziehung von MORTON SALT (36,2 Mio. €) sowie auf die infolge höherer Ergebnisse gestiegene erfolgsabhängige Vergütung.

### SONSTIGE BETRIEBLICHE ERTRÄGE UND AUFWENDUNGEN NAHEZU AUSGEGLICHEN

Der Saldo aus sonstigen betrieblichen Erträgen und Aufwendungen belief sich im Jahr 2010 auf –2,9 Mio. € nach –98,7 Mio. € im Vorjahreszeitraum. Die Verbesserung ist

im Wesentlichen zurückzuführen auf den Entfall aperiodischer Nachbelastungen im Geschäftsbereich Stickstoffdüngemittel, geringere Zuführungen zu den Rückstellungen für Altersteilzeit aufgrund des Auslaufens gesetzlicher Regelungen sowie positive Einmaleffekte im Rückstellungsbereich des Geschäftsbereichs Salz.

### BETEILIGUNGSERGEBNIS BEI 4,8 MIO. €

Das Beteiligungsergebnis lag im Jahr 2010 mit 4,8 Mio. € über dem Niveau des Vorjahres (2009: 0,9 Mio. €); dies ist auf höhere Beteiligungserträge sowie niedrigere Wertberichtigungen auf Beteiligungsbuchwerte zurückzuführen.

### ERGEBNIS NACH OPERATIVEN SICHERUNGSGESCHÄFTEN EBIT II DEUTLICH GESTIEGEN

Das Ergebnis nach operativen Sicherungsgeschäften EBIT II erreichte im Berichtsjahr 731,5 Mio. € nach 241,9 Mio. € im Vorjahr. Dabei wurde das EBIT II durch Ergebniseffekte aus operativen, antizipativen Sicherungsgeschäften in Höhe von 4,6 Mio. € begünstigt (2009: +3,9 Mio. €). Dieser Betrag entspricht dem Teil des Ergebnisses aus operativen, antizipativen Sicherungsgeschäften, der noch nicht als realisiertes Ergebnis im EBIT I erfasst wurde.

Nach IFRS werden die Marktwertveränderungen aus Sicherungsgeschäften in der Gewinn- und Verlustrechnung ausgewiesen. Das EBIT II beinhaltet sämtliche Ergebnisse aus operativen Sicherungsgeschäften, d.h. sowohl stichtagsbedingte Bewertungseffekte als auch Ergebnisse aus realisierten operativen Sicherungsderi-

vaten. Sicherungsgeschäfte des Finanzierungsbereichs werden im Finanzergebnis ausgewiesen.

#### FINANZERGEBNIS DURCH EINMALEFFEKTE BELASTET

Das Finanzergebnis setzt sich aus dem Zinsergebnis und dem sonstigen Finanzergebnis zusammen. Das Zinsergebnis verschlechterte sich im Jahr 2010 auf – 126,6 Mio. € (2009: – 57,0 Mio. €). Neben höheren Zinsaufwendungen infolge der Finanzierung des Erwerbs von MORTON SALT schlugen sich hier Einmalaufwendungen aus der Neustrukturierung unserer Finanzverbindlichkeiten in Höhe von 20,3 Mio. € nieder. Darüber hinaus entstand ein nicht zahlungswirksamer, außerplanmäßiger Zinsaufwand für bergbauliche Rückstellungen in Höhe von 23,0 Mio. €; dieser resultierte aus der nach IFRS-Vorschriften notwendigen Herabsetzung des durchschnittlichen gewichteten Diskontierungsfaktors für bergbauliche Rückstellungen der K+S GRUPPE von 5,6 auf 4,7% in Einklang mit dem im Jahresverlauf deutlich gesunkenen langfristigen Zinsniveau. Der nicht zahlungswirksame Zinsaufwand der Rückstellungen für bergbauliche Verpflichtungen stieg vor diesem Hintergrund auf insgesamt 44,4 Mio. € gegenüber 8,6 Mio. € im Jahr 2009, das zusätzlich durch eine einmalige Rückstellungsauflösung begünstigt war. Die nicht zahlungswirksamen Zinsaufwendungen für Pensionsrückstellungen lagen mit 7,6 Mio. € auf dem Niveau des Jahres 2009. Das sonstige Finanzergebnis hat sich im Berichtsjahr um 61,5 Mio. € auf 3,1 Mio. € verbessert; dies ist vor allem auf den Wegfall negativer Sondereffekte aus den zur Kaufpreissicherung des Erwerbs von MORTON SALT eingesetzten Sicherungsgeschäften im

#### HERLEITUNG DES BEREINIGTEN KONZERNERGEBNISSES

TAB: 4.6.5

|                                                                            | 2010         | 2009        |
|----------------------------------------------------------------------------|--------------|-------------|
| in Mio. €                                                                  |              |             |
| Konzernergebnis nach Steuern und Anteilen Dritter                          | 448,6        | 96,4        |
| Ergebnis aus operativen, antizipativen Sicherungsgeschäften                | + 17,6       | + 35,9      |
| Realisiertes Ergebnis aus operativen, antizipativen Sicherungsgeschäften   | – 22,2       | – 39,8      |
| Eliminierung daraus resultierender latenter bzw. zahlungswirksamer Steuern | + 1,3        | + 1,1       |
| <b>Bereinigtes Konzernergebnis nach Steuern und Anteilen Dritter</b>       | <b>445,3</b> | <b>93,6</b> |

#### UMSATZRENDITE

ABB: 4.6.5

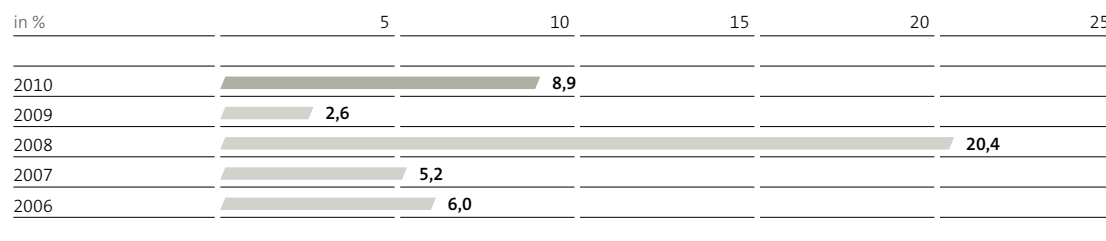

#### KONZERNERGEBNIS UND ERGEBNIS JE AKTIE

TAB: 4.6.6

|                                  | Q1/10  | Q2/10  | Q3/10  | Q4/10  | 2010   | 2009   | %       |
|----------------------------------|--------|--------|--------|--------|--------|--------|---------|
| in Mio. €                        |        |        |        |        |        |        |         |
| Konzernergebnis                  | 172,3  | 76,3   | 76,8   | 123,2  | 448,6  | 96,4   | + 365,4 |
| Ergebnis je Aktie (€)            | 0,90   | 0,40   | 0,40   | 0,64   | 2,34   | 0,58   | + 303,5 |
| Durchschnittl. Anzahl Aktien     | 191,23 | 191,33 | 191,40 | 191,40 | 191,34 | 166,15 | + 15,2  |
| Konzernergebnis, bereinigt       | 175,8  | 97,5   | 40,4   | 131,6  | 445,3  | 93,6   | + 375,7 |
| Ergebnis je Aktie, bereinigt (€) | 0,92   | 0,51   | 0,21   | 0,69   | 2,33   | 0,56   | + 316,1 |

Jahr 2009 zurückzuführen. Insgesamt betrug das Finanzergebnis – 123,5 Mio. € nach – 115,4 Mio. € im Vorjahr.

### VORSTEUERERGEBNIS UND BEREINIGTES VORSTEUERERGEBNIS FAST VERFÜNFACHT

Das Vorsteuerergebnis betrug im Berichtsjahr 608,0 Mio. €. Bereinigt man das Ergebnis um die Ergebnisse aus operativen, antizipativen Sicherungsgeschäften, die nicht bereits als realisiertes Ergebnis im EBIT I erfasst wurden (4,6 Mio. €), gelangt man zu einem bereinigten Vorsteuerergebnis in Höhe von 603,4 Mio. €. Diese Kenngröße ist damit gegenüber dem Vorjahreswert um 480,8 Mio. € gestiegen.

### KONZERNERGEBNIS UND BEREINIGTES KONZERNERGEBNIS NACH STEUERN STARK GESTIEGEN

Das Konzernergebnis nach Steuern und Anteilen Dritter lag im Berichtsjahr bei 448,6 Mio. € (2009: 96,4 Mio. €). Für die Berechnung des erwarteten Ertragsteueraufwands wurde ein inländischer Konzernsteuersatz von 28,2 % (Vorjahr: 27,9 %) zugrunde gelegt.

Im Jahr 2010 fiel ein Steueraufwand von insgesamt 158,6 Mio. € (2009: 29,6 Mio. €) an; dieser beinhaltet einen latenten und damit nicht zahlungswirksamen Steuerertrag von 20,6 Mio. € (2009: Steuerertrag 8,7 Mio. €).

Zur besseren Vergleichbarkeit weisen wir zusätzlich ein bereinigtes Konzernergebnis aus, das nur das realisierte Ergebnis aus operativen, antizipativen Sicherungsgeschäften der jeweiligen Berichtsperiode enthält. Marktwertveränderungen der noch ausstehenden operativen, antizipativen Sicherungsgeschäfte werden hierbei nicht berücksichtigt, sodass das bereinigte Konzernergebnis den Erfolg frei von stichtagsbezogenen Marktwert-

### MEHRPERIODENÜBERSICHT DER MARGEN- UND RENDITEKENNZAHLEN

TAB: 4.6.7

|                                   | 2010 | 2009 | 2008 | 2007 | 2006              |
|-----------------------------------|------|------|------|------|-------------------|
| Kennzahlen in %                   |      |      |      |      |                   |
| EBITDA-Marge                      | 19,5 | 11,5 | 31,0 | 12,4 | 13,6              |
| EBIT-Marge                        | 14,6 | 6,7  | 28,0 | 8,5  | 9,4               |
| Umsatzrendite                     | 8,9  | 2,6  | 20,4 | 5,2  | 6,0 <sup>1</sup>  |
| Eigenkapitalrendite nach Steuern  | 18,7 | 8,4  | 68,6 | 16,1 | 17,7 <sup>1</sup> |
| Gesamtkapitalrendite              | 14,7 | 6,9  | 44,9 | 11,0 | 12,3              |
| Return on Capital Employed (ROCE) | 20,9 | 9,3  | 64,0 | 15,5 | 17,4              |

<sup>1</sup> Ohne einmaligen latenten Steuerertrag von 41,9 Mio. € bzw. 0,25 € je Aktie.

schwankungen dieser Derivate wiedergibt. Des Weiteren werden auch die aus der Bereinigung resultierenden Effekte auf die latenten und zahlungswirksamen Steuern eliminiert. Die Ermittlung des bereinigten Konzernergebnisses wird in Tabelle 4.6.5 dargestellt.

/ TAB: 4.6.5

Das bereinigte Konzernergebnis lag mit 445,3 Mio. € um 351,7 Mio. € über dem Wert des Vorjahres (2009: 93,6 Mio. €). Die wesentliche Ursache hierfür war das stark gestiegene operative Ergebnis. Die bereinigte Konzernsteuerquote betrug im Berichtsjahr 26,2 nach 23,6 % im Vorjahr. / ABB: 4.6.5

### BEREINIGTES ERGEBNIS JE AKTIE BETRÄGT 2,33 € (2009: 0,56 €)

Das bereinigte Ergebnis je Aktie erreichte im Berichtsjahr 2,33 € und hat sich gegenüber dem Vorjahreswert von 0,56 € in etwa vervierfacht. Für die aktuelle Berechnung wurde eine durchschnittliche Anzahl an ausste-

henden Aktien von 191,34 Mio. Stückaktien zugrunde gelegt (Vorjahr: 166,15 Mio. Stückaktien). / TAB: 4.6.6

Zum 31. Dezember 2010 hielten wir keine eigenen Aktien im Bestand. Die Gesamtanzahl der ausstehenden Aktien der K+S GRUPPE belief sich am Jahresende auf 191,40 Mio. Stückaktien.

Das unverwässerte, bereinigte Ergebnis je Aktie ist der Quotient aus dem bereinigten Konzernergebnis nach Steuern und Anteilen Dritter und der gewichteten durchschnittlichen Anzahl ausstehender Aktien. Da bei K+S derzeit keine der Bedingungen erfüllt ist, die zu einer Verwässerung des Ergebnisses je Aktie führen könnte, entspricht das unverwässerte Ergebnis je Aktie dem verwässerten Ergebnis je Aktie. Im Ergebnis je Aktie waren weder aufgegebene Geschäftsbereiche noch Bilanzierungsänderungen gesondert zu berücksichtigen.

## KENNZAHLEN ZUR ERTRAGSLAGE

Die Margenkennzahlen haben sich gegenüber denen des Vorjahres deutlich verbessert. Das Ergebnis vor Abschreibungen, Zinsen und Steuern von 975,2 Mio. € führte zu einer EBITDA-Marge von 19,5% (2009: 11,5%), die EBIT-Marge erreichte 14,6% nach 6,7% im Jahr 2009. Auch die Umsatzrendite liegt mit 8,9% deutlich über dem Vorjahreswert von 2,6%.

/ DEFINITIONEN DER VERWENDETEN KENNZAHLEN finden im Glossar Sie auf den Seiten 222 ff.

Stark gestiegene Ergebnisbeiträge führten im Berichtsjahr bei einer ebenfalls gestiegenen Kapitalbindung zu einem deutlichen Anstieg der Renditekennziffern: Unsere Eigenkapitalrendite nach Steuern erreichte im Berichtsjahr 18,7% (2009: 8,4%) und die Gesamtkapitalrendite 14,7% (2009: 6,9%). Die bei uns besonders beachtete Rendite auf das eingesetzte Kapital, der ROCE, betrug für das Berichtsjahr 20,9% nach 9,3% im Vorjahreszeitraum. Er liegt damit deutlich über unseren Kapitalkosten von rund 9,5% vor Steuern, d.h., die K+S GRUPPE hat im abgelaufenen Geschäftsjahr einen Value Added von 397,0 Mio. € geschaffen. / TAB: 4.6.7

/ EINE DETAILLIERTE ERLÄUTERUNG DER FINANZIELLEN PERFORMANCE-KENNZAHLEN finden Sie auf den Seiten 91 f.

## 4.7 FINANZLAGE

### GRUNDSÄTZE UND ZIELE DES FINANZMANAGEMENTS DER K+S GRUPPE

#### FINANZMANAGEMENT WIRD ZENTRAL GESTEUERT

Zu den übergeordneten Zielen des Finanzmanagements der K+S GRUPPE gehört es,

- + die Liquidität zu sichern und gruppenweit effizient zu steuern,
- + die Finanzierungsfähigkeit des Konzerns zu erhalten und zu optimieren sowie
- + finanzielle Risiken auch unter Einsatz von Finanzinstrumenten zu reduzieren.

Im Cashmanagement konzentrieren wir uns auf die Steuerung unserer Liquidität sowie die Optimierung der Zahlungsströme innerhalb des Konzerns. Um die Finanzierungsfähigkeit des Konzerns zu erhalten bzw. zu optimieren, streben wir für die K+S GRUPPE nachhaltig eine Kapitalstruktur an, die sich an den für ein „Investment Grade“ Rating üblichen Kriterien und Kennzahlen orientiert. Innerhalb der durch die angestrebte Bonität vor-

gegebenen Möglichkeiten sollen die Kapitalkosten für Fremd- und Eigenkapital optimiert werden. Die Steuerung der Kapitalstruktur wird anhand der in Tabelle 4.7.1 dargestellten Kennzahlen vorgenommen. / TAB: 4.7.1

Vor dem Hintergrund des deutlich gestiegenen Ergebnisniveaus und der Rückführung der Nettoverschuldung konnten die gesetzten Ziele für die Kennzahlen zur Steuerung der Kapitalstruktur wieder erreicht und per 31. Dezember 2010 sogar übererfüllt werden. Angesichts der bevorstehenden Investitionen in das Werra-Maßnahmenpaket sowie den Ausbau unserer Kalikapazitäten in Kanada (Erwerb von POTASH ONE) bildet diese solide Kapitalstruktur eine sehr gute Ausgangsbasis für die weitere Entwicklung der K+S GRUPPE.

Das Währungs- und Zinsmanagement des Konzerns wird zentral für alle Konzerngesellschaften vorgenommen. Derivative Finanzinstrumente werden nur mit Banken guter Bonität abgeschlossen und zur Reduzierung des Ausfallrisikos auf mehrere Banken verteilt.

#### KENNZAHLEN ZUR STEUERUNG DER KAPITALSTRUKTUR

TAB: 4.7.1

|                                    | Zielkorridor | 2010 | 2009 | 2008 | 2007  | 2006 |
|------------------------------------|--------------|------|------|------|-------|------|
| Nettoverschuldung/EBITDA           | 1,0 bis 1,5  | 0,8  | 2,4  | 0,4  | 2,6   | 1,8  |
| Nettoverschuldung/Eigenkapital (%) | 50 bis 100   | 27,6 | 64,5 | 33,2 | 116,4 | 63,9 |
| Eigenkapitalquote (%)              | 35 bis 45    | 47,6 | 40,1 | 49,5 | 31,4  | 39,7 |

**GESCHÄFTSBEREICH KALI- UND MAGNESIUMPRODUKTE**

TAB: 4.7.2

|                                         | 2009 | Q1/10 <sup>1</sup> | Q2/10 | Q3/10 | Q4/10 | 2010 |
|-----------------------------------------|------|--------------------|-------|-------|-------|------|
| USD/EUR-Umrechnungskurs<br>nach Prämien | 1,48 | 1,39               | 1,29  | 1,33  | 1,39  | 1,35 |
| Durchschnittl. USD/EUR-Kassakurs        | 1,39 | 1,38               | 1,27  | 1,29  | 1,36  | 1,33 |

**PASSIVA**

ABB: 4.7.1

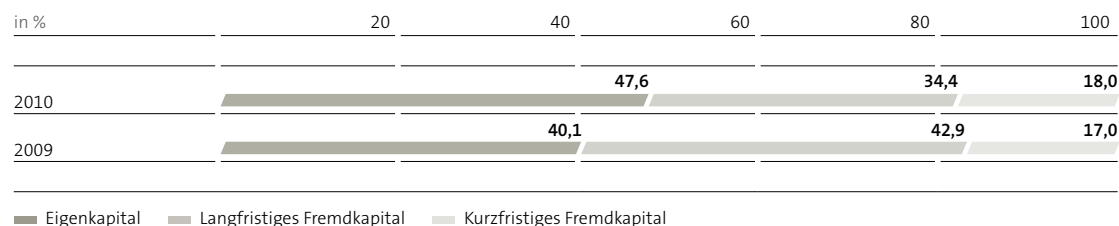**FREMDWÄHRUNGSSICHERUNGSSYSTEM**

Schwankungen der Wechselkurse zwischen dem Euro und den für unser Geschäft relevanten Landeswährungen können dazu führen, dass der Wert der erbrachten Leistung nicht mit dem Wert der erhaltenen Gegenleistung übereinstimmt, weil Aufwendungen und Einnahmen in unterschiedlichen Währungen entstehen (Transaktionsrisiken). Wechselkursschwankungen insbesondere gegenüber dem US-Dollar spielen vor allem im Geschäftsbereich Kali- und Magnesiumprodukte eine bedeutende Rolle. Für diese Transaktionsrisiken werden Optionen und teilweise auch Termingeschäfte auf den Zeitpunkt der erwarteten Umsatzenstehung abgeschlossen (Planungssicherung). Die nach Fakturie-

rung entstehenden US-Dollarforderungen werden dann abzüglich erwarteter US-Dollarausgaben über Termingeschäfte auf den vereinbarten Zeitpunkt des Zahlungseingangs gesichert (Fakturasicherung). Im Geschäftsbereich Salz entstehen Währungsrisiken i. d. R. aus der Umrechnung der überwiegend in US-Dollar erzielten Ergebnisse von MORTON SALT und SPL in die Konzernwährung Euro. Für diese Translationsrisiken werden analog zur Sicherungsstrategie für den Geschäftsbereich Kali- und Magnesiumprodukte Optionen und teilweise auch Termingeschäfte abgeschlossen (Planungssicherung).

Bei den eingesetzten Derivaten handelt es sich um einen Mix aus Optionen und Termingeschäften. Damit wird

ein „worst case“ abgesichert, zugleich aber die Chance eröffnet, für einen Teil der Sicherungsgeschäfte an einer besseren Kursentwicklung teilzuhaben.

Für das Jahr 2010 lag der realisierte Kurs des Geschäftsbereichs Kali- und Magnesiumprodukte bei 1,35 USD/EUR inkl. Kosten, der realisierte Kurs für den Geschäftsbereich Salz bei 1,39 USD/EUR. / TAB: 4.7.2

**FINANZIERUNGSANALYSE**

Die K+S GRUPPE verfügt über eine starke finanzielle Basis sowie über ein hohes operatives Ertragspotenzial. Beides führt dazu, dass wir flexibel auf Investitions- und Akquisitionschancen reagieren können, wenn sie strategisch passen und unsere Rentabilitätskriterien erfüllen.

**SOLIDE FINANZIERUNGSSTRUKTUR**

Die Finanzierungsstruktur der K+S GRUPPE zeigt sich im Vergleich zum Jahresende 2009 deutlich verbessert. Die Finanzierung der K+S GRUPPE erfolgte per 31. Dezember 2010 zu gut 80 % aus Eigenkapital und langfristigem Fremdkapital, das sich wiederum aus Anleiheverbindlichkeiten und Rückstellungen zusammensetzt. Es bestehen ferner bei Banken hinreichende Finanzierungsmöglichkeiten, die uns bei Bedarf eine zusätzliche Kreditaufnahme ermöglichen. / ABB: 4.7.1

Das Eigenkapital ist im Wesentlichen ergebnisbedingt gestiegen, die Eigenkapitalquote hat sich von 40,1 auf



## MEHRPERIODENÜBERSICHT DER FINANZLAGE

TAB: 4.7.3

|                                                                | 2010    | 2009    | 2008    | 2007    | 2006    |
|----------------------------------------------------------------|---------|---------|---------|---------|---------|
| in Mio. €                                                      |         |         |         |         |         |
| Eigenkapital                                                   | 2.651,6 | 2.094,6 | 1.718,3 | 931,8   | 1.124,3 |
| Eigenkapitalquote (%)                                          | 47,6    | 40,1    | 49,5    | 31,4    | 39,7    |
| Langfristiges Fremdkapital                                     | 1.919,1 | 2.235,7 | 756,4   | 1.004,2 | 822,1   |
| Kurzfristiges Fremdkapital                                     | 1.003,0 | 886,8   | 999,1   | 1.028,8 | 844,5   |
| Anteil langfr. Rückstellungen an Bilanzsumme (%)               | 15,5    | 16,0    | 16,4    | 20,5    | 20,9    |
| Finanzverbindlichkeiten                                        | 786,6   | 1.266,9 | 266,4   | 688,3   | 370,7   |
| Nettofinanzverbindlichkeiten                                   | 38,2    | 737,8   | 98,6    | 600,8   | 251,8   |
| Nettoverschuldung <sup>1</sup>                                 | 732,5   | 1.351,3 | 570,0   | 1.085,1 | 718,3   |
| Verschuldungsgrad I (%)                                        | 29,7    | 60,5    | 15,5    | 73,9    | 33,0    |
| Verschuldungsgrad II (%)                                       | 28,3    | 64,5    | 33,2    | 116,4   | 63,9    |
| Working Capital                                                | 959,4   | 970,5   | 962,3   | 570,6   | 603,1   |
| Cashflow aus laufender Geschäftstätigkeit <sup>2</sup>         | 863,1   | 499,9   | 844,6   | 258,7   | 227,6   |
| Freier Cashflow vor Akquisitionen / Devestitionen <sup>2</sup> | 672,9   | 330,9   | 674,5   | 115,3   | 155,6   |
| Cashflow aus Finanzierungstätigkeit                            | -454,2  | 1.168,1 | -318,0  | 81,7    | 170,9   |

<sup>1</sup> Ohne Gelder bei bzw. von verbundenen Unternehmen.<sup>2</sup> Bereinigt um die Veränderung der Mittelbindung für Prämienzahlungen für Sicherungsgeschäfte.

47,6 % der Bilanzsumme erhöht. Der Anteil des langfristigen Fremdkapitals einschließlich langfristiger Rückstellungen hat sich aufgrund geringerer Finanzverbindlichkeiten auf 34,4 % der Bilanzsumme verringert (31.12.2009: 42,9 %). Der Anteil des kurzfristigen Fremdkapitals blieb mit 18,0 % nahezu stabil.

/ WEITERE ANGABEN ZUR VERÄNDERUNG EINZELNER BILANZPOSTEN finden Sie im Anhang auf den Seiten 164 und 190.

Das Fremdkapital der K+S GRUPPE bestand zum 31. Dezember 2010 zu etwa 40 % aus Rückstellungen, zu knapp

27 % aus Finanzverbindlichkeiten, zu rund 18 % aus Verbindlichkeiten aus Lieferungen und Leistungen und zu 12 % aus Steuerverbindlichkeiten aus Ertragsteuern und latenten Steuern. Die wesentlichen langfristigen Rückstellungen der K+S GRUPPE betreffen bergbauliche Verpflichtungen (528,4 Mio. €) sowie Pensionen und ähnliche Verpflichtungen (184,8 Mio. €). Finanzverbindlichkeiten bestanden per 31. Dezember 2010 in Höhe von 786,6 Mio. €; davon waren lediglich 17,5 Mio. € als kurzfristig einzustufen.

Finanzverbindlichkeiten in Fremdwährungen bestehen überwiegend in US-Dollar. Sie beliefen sich zum 31. Dezember 2010 auf insgesamt 19,0 Mio. €. Zusätzlich bestanden Finanzverbindlichkeiten in kanadischem Dollar (5,6 Mio. €) sowie in chilenischem Peso (10,3 Mio. €).

/ TAB: 4.7.3

#### NIEDRIGES MARKTZINSNIVEAU FÜHRTE ZU ANPASSUNGEN BEIM RECHNUNGSZINS FÜR RÜCKSTELLUNGEN

Die versicherungsmathematische Bewertung der Pensionsrückstellungen erfolgt nach dem Anwartschaftsbarwertverfahren gemäß IAS 19. Der durchschnittliche gewichtete Rechnungszins für Pensionen und ähnliche Verpflichtungen zum 31. Dezember 2010 betrug 5,1 nach 5,7 % im Vorjahr. Der durchschnittliche gewichtete Diskontierungsfaktor für bergbauliche Verpflichtungen zum 31. Dezember 2010 sank von 5,6 auf 4,7 %.

Die Herabsetzung der Diskontierungsfaktoren erfolgte im Einklang mit dem im Jahr 2010 deutlich gesunkenen langfristigen Zinsniveau. Während dies zu einer nicht zahlungswirksamen Erhöhung des Zinsaufwands für bergbauliche Rückstellungen (23,0 Mio. €) führte, hatte die Herabsetzung des Rechnungszinses für Pensionen und ähnliche Verpflichtungen aufgrund der nach IFRS angewandten Korridormethode weder Auswirkungen auf den Zinsaufwand noch auf das Eigenkapital.

Eine Änderung des Marktzinsniveaus im Jahr 2011 hätte in erster Linie auf die Bewertung der Rückstellungen für bergbauliche Verpflichtungen Auswirkungen. Eine Erhö-

## INVESTITIONEN NACH GESCHÄFTSBEREICHEN

TAB: 4.7.4

|                                 | Q1/10       | Q2/10       | Q3/10       | Q4/10       | 2010         | 2009         | %            |
|---------------------------------|-------------|-------------|-------------|-------------|--------------|--------------|--------------|
| in Mio. €                       |             |             |             |             |              |              |              |
| Kali- und Magnesiumprodukte     | 12,3        | 14,6        | 23,7        | 46,3        | 96,9         | 107,4        | -9,8         |
| Stickstoffdüngemittel           | 2,5         | 2,4         | 2,8         | 5,2         | 12,9         | 11,2         | +15,2        |
| Salz                            | 11,1        | 14,9        | 15,7        | 37,3        | 79,0         | 48,0         | +64,6        |
| Ergänzende Geschäftsbereiche    | 0,4         | 1,4         | 1,9         | 0,5         | 4,2          | 4,6          | -8,7         |
| Übrige Investitionen            | 1,0         | 1,1         | 1,4         | 4,5         | 8,0          | 6,4          | +25,0        |
| <b>K+S Gruppe</b>               | <b>27,3</b> | <b>34,4</b> | <b>45,5</b> | <b>93,8</b> | <b>201,0</b> | <b>177,6</b> | <b>+13,2</b> |
| Anteil an den Investitionen (%) | 13,6        | 17,1        | 22,6        | 46,7        | 100,0        | —            | —            |

hung des Diskontierungssatzes um einen Prozentpunkt würde hier zu einer Verringerung des zu bilanzierenden Werts um rund 85 Mio. € führen. Umgekehrt hätte eine Senkung des Diskontierungsfaktors um einen Prozentpunkt einen Anstieg der bergbaulichen Rückstellungen um rund 142 Mio. € zur Folge.

Wichtig ist in diesem Zusammenhang, dass die dargestellten Veränderungen der Rückstellungen infolge einer Änderung des Diskontierungssatzes nicht zu einer entsprechenden Ergebnisauswirkung führen. Für einen wesentlichen Teil der bergbaulichen Rückstellungen sind die Anpassungen aufgrund der Änderung von Bewertungsparametern nach den Regelungen des IFRIC 1 durchzuführen. Damit würde sich für die entsprechenden Rückstellungspositionen grundsätzlich eine Bilanzverkürzung bzw. -verlängerung ergeben. Darüber hinaus können Effekte aus der Anpassung anderer Bewertungsparameter (z.B. Preissteigerungsrate) dem Effekt aus der Änderung des Diskontierungssatzes entgegenwirken.

Eine Änderung des Marktzinsniveaus hätte auch Auswirkungen auf die Höhe der Pensionsverpflichtungen, die jedoch aufgrund der angewendeten Korridormethode (IAS 19) keine unmittelbaren Änderungen des bilanziellen Werts nach sich ziehen.

#### BEDEUTUNG AUSSERBILANZIELLER FINANZIERUNGSTRUMENTE FÜR DIE FINANZ- UND VERMÖGENSLAGE

Nur in vernachlässigbarem Umfang bestehen außerbilanzielle Finanzierungsinstrumente im Sinne von Forderungsverkäufen, Asset-Backed-Securities, Sale-and-Lease-Back-Transaktionen oder gegenüber nicht im Konzernabschluss einbezogenen Zweckgesellschaften eingegangenen Haftungsverhältnissen. Wir nutzen vor allem operatives Leasing zum Beispiel von EDV-Zubehör und Fahrzeugen; der Umfang hat keinen wesentlichen Einfluss auf die wirtschaftliche Lage des Konzerns.

#### INVESTITIONSANALYSE

Im Jahr 2010 investierte die K+S GRUPPE insgesamt 201,0 Mio. €; davon entfielen 49,2 Mio. € auf MORTON SALT. Bereinigt um den Effekt der Konsolidierung von MORTON SALT (24,8 Mio. €) lag das Investitionsvolumen in etwa auf dem Niveau des Vorjahres. Im Finanzbericht 2009 rechneten wir für das Jahr 2010 noch mit Investitionen von 260 Mio. €. Im Halbjahresfinanzbericht H1/10 haben wir diese Prognose zunächst um 50 Mio. € im Quartalsfinanzbericht Q3/10 um weitere 10 Mio. € auf rund 200 Mio. € reduziert. Das niedriger als zu Beginn des Jahres erwartete Investitionsvolumen ist zurückzuführen auf Verzögerungen bei Investitionsprojekten – i.W. auch bei der Realisierung des Maßnahmenpakets zum Gewässerschutz aufgrund der noch ausstehenden Abstimmung zwischen K+S und den Ländern Hessen und Thüringen gemäß Öffentlich-Rechtlicher Vereinbarung. Bei den Investitionsausgaben ist eine gewisse Saisonalität zu erkennen; die Umsetzung der Investitionsvorhaben erfolgt in der Regel überwiegend im dritten und vierten Quartal, da wir die dann stattfindenden Produktionspausen für die Durchführung größerer Investitionsvorhaben nutzen. / TAB: 4.7.4

Am Jahresende bestanden wirtschaftliche Investitionsverpflichtungen in Höhe von 59,8 Mio. €; diese beziehen sich auf noch nicht abgeschlossene Investitionsvorhaben aus dem Jahr 2010.

145,5 Mio. € bzw. gut 72 % der getätigten Investitionen entfielen auf Ersatz- und Produktionssicherungsmaß-

**INVESTITIONEN IM VERGLEICH ZU ABSCHREIBUNGEN  
UND CASHFLOW AUS LAUFENDER GESCHÄFTSTÄTIGKEIT**

ABB: 4.7.2

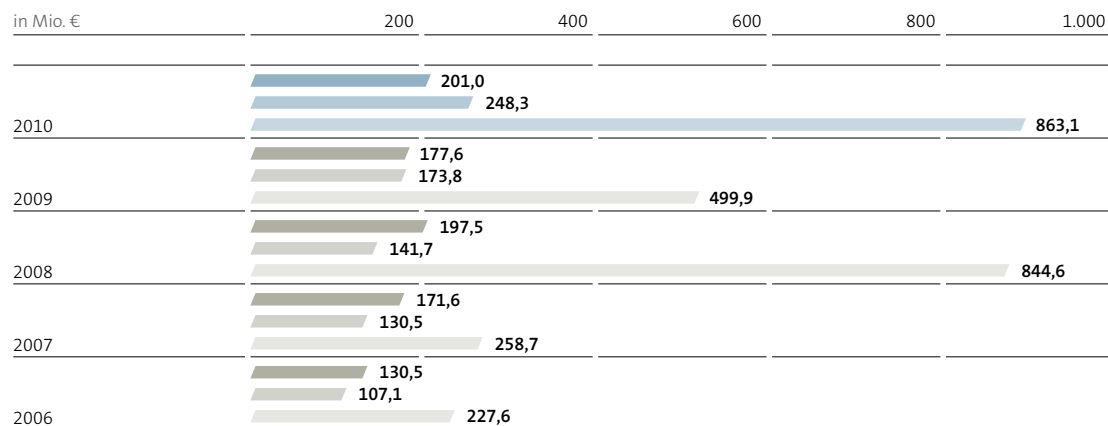

■ Investitionen<sup>1</sup> ■ Abschreibungen<sup>1</sup> ■ Cashflow aus laufender Geschäftstätigkeit<sup>2</sup>

<sup>1</sup> Zahlungswirksame Investitionen in bzw. Abschreibungen auf Sachanlagen, immaterielle Vermögenswerte.

<sup>2</sup> Bereinigt um die Mittelbindung für Prämienzahlungen für Sicherungsgeschäfte.

**CASHFLOWÜBERSICHT**

TAB: 4.7.5

| in Mio. €                                                   | Q1/10        | Q2/10        | Q3/10       | Q4/10       | 2010         | 2009         | %            |
|-------------------------------------------------------------|--------------|--------------|-------------|-------------|--------------|--------------|--------------|
| Brutto-Cashflow                                             | 321,2        | 181,6        | 81,1        | 246,3       | 830,2        | 323,9        | +156,3       |
| Cashflow aus lfd. Geschäftstätigkeit                        | 364,9        | 258,4        | 100,4       | 133,8       | 857,5        | 534,8        | +60,3        |
| Cashflow aus Investitionstätigkeit                          | -28,0        | -33,0        | -46,3       | -82,9       | -190,2       | -1.345,9     | +85,9        |
| – davon Akquisitionen/Devestitionen                         | –            | –            | –           | –           | –            | -1.176,9     | –            |
| Freier Cashflow                                             | 336,9        | 225,4        | 54,1        | 50,9        | 667,3        | -811,1       | –            |
| <b>Freier Cashflow vor Akquisitionen/<br/>Devestitionen</b> | <b>336,9</b> | <b>225,4</b> | <b>54,1</b> | <b>50,9</b> | <b>667,3</b> | <b>365,8</b> | <b>+82,4</b> |
| Anteil am freien Cashflow (%)                               | 50,5         | 33,8         | 8,1         | 7,6         | 100,0        | –            | –            |
| Cashflow aus Finanzierungstätigkeit                         | -366,6       | -72,1        | 1,6         | -17,1       | -454,2       | 1.168,1      | –            |
| Änderung des Finanzmittelbestands                           | -21,8        | +162,1       | +44,4       | +35,8       | +220,5       | +359,6       | -38,7        |

nahmen; diese lagen deutlich unter den Abschreibungen in Höhe von 248,3 Mio. €. / ABB: 4.7.2

**GESCHÄFTSBEREICH KALI- UND  
MAGNESIUMPRODUKTE**

Die Investitionen des Geschäftsbereichs Kali- und Magnesiumprodukte lagen mit 96,9 Mio. € aufgrund von Verzögerungen bei Investitionsprojekten um 10,5 Mio. € niedriger als im Vorjahr. Im Vordergrund standen Energieprojekte an den Standorten Zielitz und Wintershall, Projekte zur Verringerung fester und flüssiger Produktionsrückstände am Standort Neuhof-Ellers sowie Projekte zur Rohstoffausbeutesteigerung und Prozessoptimierung. Rund drei Viertel der Investitionen entfielen auf Ersatz- und Produktionssicherungsmaßnahmen.

**GESCHÄFTSBEREICH STICKSTOFFDÜNGEMITTEL**

Im Geschäftsbereich Stickstoffdüngemittel haben wir im Berichtsjahr mit 12,9 Mio. € rund 1,7 Mio. € mehr investiert als im Jahr 2009. Das größte Projekt war die Fertigstellung der dritten Anlage für umhüllte Düngemittel in Krefeld. Etwa die Hälfte der Investitionen entfiel auf Ersatz- und Produktionssicherungsmaßnahmen. Außerdem investierten wir in Projekte im Bereich Pflanzenschutz, die wir in Zusammenarbeit mit SYNGENTA durchführen.

**GESCHÄFTSBEREICH SALZ**

Im Jahr 2010 wurden im Geschäftsbereich Salz 79,0 Mio. € investiert; davon entfielen 49,2 Mio. € auf MORTON SALT. Bereinigt um den Effekt der Konsolidierung von MORTON SALT in den ersten neun Monaten (24,8 Mio. €) ist das Investitionsvolumen um 6,2 Mio. € gestiegen. Zu den

wesentlichen Projekten gehörten die Erneuerung einer Schachtfördermaschine am Standort Borth, der Ersatz der Auftausalzverladung am Standort Braunschweig-Lüneburg, die Erneuerung eines Verladeterminals auf den Bahamas, die Installation leistungsfähigerer Kristallisationsanlagen am Standort Grand Saline, Texas, sowie die Ausgaben für die Nutzungszeitverlängerung eines Teils des Schiffsbestands bei EMPREMAR. Etwa 80% des Investitionsvolumens entfielen auf Ersatz- und Produktionssicherungsmaßnahmen.

#### ERGÄNZENDE GESCHÄFTSBEREICHE

Die Investitionsausgaben der Ergänzenden Geschäftsbereiche betragen im Berichtsjahr 4,2 Mio. € und lagen 0,4 Mio. € unter dem Niveau des Vorjahres. In den Bereichen Entsorgung und Recycling sowie Tierhygieneprodukte standen vor allem Ersatz- und Produktionssicherungsmaßnahmen im Vordergrund. Bei der Logistik wurde in die Fertigstellung des Containerterminals für kombinierten Verkehr am Standort Werra investiert. Insgesamt entfiel gut ein Drittel der Investitionen auf Erweiterungsmaßnahmen.

#### LIQUIDITÄTSANALYSE

Der Brutto-Cashflow erreichte im Berichtsjahr 830,2 Mio. €. Er lag insbesondere wegen des deutlich gestiegenen operativen Ergebnisses um 506,3 Mio. € über dem Wert des Vorjahres (2009: 323,9 Mio. €). / TAB: 4.7.5

Der Cashflow aus laufender Geschäftstätigkeit erreichte 857,5 Mio. € nach 534,8 Mio. € ein Jahr zuvor. Der Anstieg fiel mit 322,7 Mio. € geringer aus als beim Brutto-Cashflow. Nachdem die Vorräte im Vorjahr u. a. aufgrund von Wertkorrekturen im Geschäftsbereich Stickstoffdüngemittel deutlich abgenommen hatten, ergab sich im Berichtsjahr eine leichte Zunahme der Vorräte im Geschäftsbereich Salz. Die Effekte aus steigenden Forderungen und Verbindlichkeiten aus der Belegung des operativen Geschäfts glichen sich weitestgehend aus.

Der Cashflow aus Investitionstätigkeit belief sich im Jahr 2010 auf –190,2 Mio. € und lag damit deutlich unter dem Niveau des Vorjahres (2009: –1.345,9 Mio. €). Der Vorjahreszeitraum beinhaltete die Kaufpreiszahlung für den Erwerb von MORTON SALT (–1.089,0 Mio. €) sowie Auszahlungen für die damit verbundene Kurssicherung (–87,9 Mio. €). Bereinigt man den Cashflow aus Investitionstätigkeit des Vorjahres um diese Zahlungen, liegt der Wert des Berichtsjahres infolge höherer Auszahlungen für Investitionen in Sachanlagen und immaterielle Vermögenswerte über dem des Vorjahres (–169,0 Mio. €).

Der freie Cashflow vor Akquisitionen/Devestitionen erreichte im Berichtszeitraum 667,3 Mio. € nach 365,8 Mio. € im Vorjahr.

Der Cashflow aus Finanzierungstätigkeit betrug im Berichtsjahr –454,2 Mio. € und betrifft vor allem die Tilgung von Finanzverbindlichkeiten in Höhe von 411,6 Mio. €. Im Vorjahr lag der Cashflow aus Finanzierungstätigkeit bei 1.168,1 Mio. € und umfasste vor allem Ein-

zahlungen aus der Begebung einer Anleihe sowie Eigenkapitalzuführungen aus der im Dezember 2009 durchgeführten Kapitalerhöhung. Am Jahresende 2010 betrug der Finanzmittelbestand 740,6 Mio. € (2009: 520,1 Mio. €).

## 4.8 VERMÖGENSLAGE

### VERMÖGENSSTRUKTURANALYSE

Die Bilanzsumme der K+S GRUPPE hat sich zum 31. Dezember 2010 um 6,8 % auf 5.573,7 Mio. € erhöht. Dies beruht in erster Linie auf der Zunahme von flüssigen Mitteln, Forderungen und Vorräten. Das Verhältnis von langfristigen zu kurzfristigen Vermögenswerten ist mit 53:47 nach wie vor sehr ausgewogen. Der Bestand an flüssigen Mitteln belief sich Ende des Jahres 2010 auf insgesamt 748,4 Mio. € (Vorjahr: 529,1 Mio. €). Unter Einbeziehung der flüssigen Mittel, der Rückstellungen für Pensionen und bergbauliche Verpflichtungen (184,8 Mio. € bzw. 528,4 Mio. €) sowie der Finanzverbindlichkeiten (786,6 Mio. €) und unter Berücksichtigung von Erstattungsansprüchen im Zusammenhang mit einer Anleihe bei MORTON SALT in Höhe von 18,9 Mio. € ergibt sich per Jahresende eine Nettoverschuldung der K+S GRUPPE von 732,5 Mio. € (Vorjahr: 1.351,3 Mio. €). Der Rückgang ist auf den starken freien Cashflow zurückzuführen, der in einem Anstieg der flüssigen Mittel resultierte und zur Rückführung von Finanzverbindlichkeiten genutzt wurde. / TAB: 4.8.1 / ABB: 4.8.1

**MHRPERIODENÜBERSICHT ZUR VERMÖGENSLAGE**

TAB: 4.8.1

|                                              | 2010    | 2009    | 2008    | 2007    | 2006    |
|----------------------------------------------|---------|---------|---------|---------|---------|
| in Mio. €                                    |         |         |         |         |         |
| Sachanlagen, immaterielles Vermögen          | 2.803,3 | 2.658,0 | 1.423,5 | 1.297,3 | 1.271,7 |
| Finanzanlagen und langfristige Wertpapiere   | 24,1    | 22,4    | 22,3    | 54,9    | 61,5    |
| Flüssige Mittel und kurzfristige Wertpapiere | 748,4   | 529,1   | 167,8   | 53,1    | 79,6    |
| Nettofinanzverbindlichkeiten                 | 19,3    | 737,8   | -98,6   | 600,8   | 251,8   |
| Nettoverschuldung <sup>1</sup>               | 732,5   | 1.351,3 | 570,0   | 1.085,1 | 718,3   |
| Anlagendeckungsgrad I (%)                    | 93,8    | 78,2    | 119,9   | 85,6    | 82,4    |
| Anlagendeckungsgrad II (%)                   | 161,8   | 161,7   | 171,9   | 162,1   | 146,2   |
| Liquiditätsgrad I (%)                        | 74,6    | 59,7    | 16,7    | 4,8     | 9,0     |
| Liquiditätsgrad II (%)                       | 186,7   | 172,6   | 121,7   | 108,8   | 119,1   |
| Liquiditätsgrad III (%)                      | 262,9   | 252,7   | 192,8   | 148,2   | 162,2   |

<sup>1</sup> Ohne Gelder bei bzw. von verbundenen Unternehmen und einschließlich langfristiger Rückstellungen für Pensionen und bergbauliche Verpflichtungen.

**AKTIVA**

ABB: 4.8.1

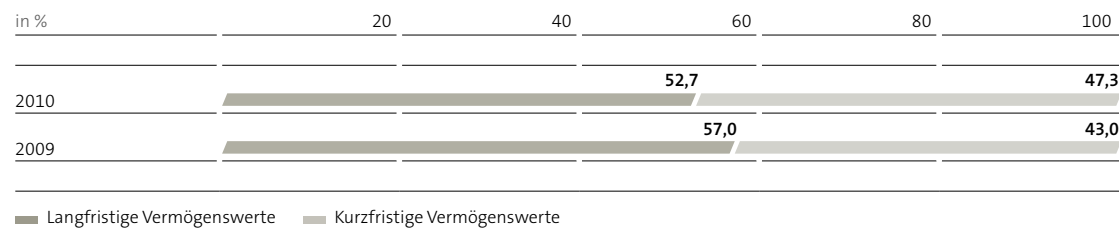

/ DEFINITIONEN DER VERWENDETEN MARGEN- UND RENDITEKENNZAHLEN finden Sie im Kapitel 'Weitere Informationen' auf Seite 221.

**ZWECKGEBUNDENES VERMÖGEN**

Im Jahr 2005 haben wir mit der Ausfinanzierung von Pensions- und Altersteilzeitverpflichtungen über ein Contractual Trust Arrangement (CTA-Modell) begonnen. Mit der Dotierung des CTA-Modells werden die entsprechenden Finanzierungsmittel zweckgebunden für die

Erfüllung von Pensionsverpflichtungen und Vorruhestandsregelungen eingesetzt. Das Gleiche gilt für Planvermögen, das zur Finanzierung von Pensionsverpflichtungen von MORTON SALT dient. Die Positionen werden gemäß IFRS bilanziell als Saldogröße dargestellt. Das im Zusammenhang mit Personalverpflichtungen zweckgebundene Vermögen hat sich infolge höherer Erträge des Planvermögens sowie positiver Wechselkurseffekte um 33,5 Mio. € auf insgesamt 272,1 Mio. € erhöht. Angaben zu der Zusammensetzung dieses Planvermögens sowie zu im Jahr 2010 vorgenommenen Ausfinanzierungen finden Sie im Konzernanhang unter Anmerkung (24) Rückstellungen Pensionen und ähnliche Verpflichtungen sowie unter Anmerkung (26) Langfristige Personalverpflichtungen.

**NICHT BILANZIERTES VERMÖGEN**

Sonstige finanzielle Verpflichtungen beliefen sich per 31. Dezember 2010 auf 141,8 Mio. € (2009: 130,7 Mio. €) und betreffen sowohl Verpflichtungen aus noch nicht abgeschlossenen Investitionen als auch Leasingverhältnisse auf Basis von Operating-Leasingverträgen für Gegenstände der Betriebs- und Geschäftsausstattung (z.B. Drucker, Kopiergeräte, EDV-Peripheriegeräte). Daneben sind Fahrzeuge geleast. Diese Gegenstände sind aufgrund der gewählten Vertragsstrukturen nicht im Anlagevermögen zu bilanzieren. Informationen zu sonstigen immateriellen, nicht bilanzierten Werten im Sinne von Kunden- und Lieferantenbeziehungen sowie Organisations- und Verfahrensvorteilen finden Sie in unserem Unterneh-



mens-/Nachhaltigkeitsbericht auf den Seiten 69 f., 89 f. bzw. 123 f. Investoren- und Kapitalmarktbeziehungen werden im Kapitel ‚K+S am Kapitalmarkt‘ auf den Seiten 17 ff. erläutert.

#### **ERLÄUTERUNG VON UNTERNEHMENS- KÄUFEN UND -VERKÄUFEN**

Unternehmenskäufe oder -verkäufe wurden im Berichtsjahr nicht getätigt. Gemäß unserer Strategie wollen wir in unseren angestammten Geschäftsfeldern, auch durch Akquisitionen und Kooperationen, extern weiter wachsen. Wir werden dabei die starke finanzielle Basis der K+S GRUPPE nicht gefährden und weiterhin mit Augenmaß vorgehen.

Im November 2010 gaben wir ein freundliches Übernahmeangebot an die Aktionäre des kanadischen Unternehmens POTASH ONE zum Erwerb sämtlicher Aktien zu einem Preis von 4,50 CAN\$ ab. Am 7. Februar 2011 gaben wir bekannt, dass sich die Andienungsquote auf 90,9% erhöht hat. Da das Angebot von mehr als 90% der POTASH-ONE-Aktionäre angenommen wurde, werden die verbleibenden ausstehenden POTASH-ONE-Aktien durch ein Ausschlussverfahren im Rahmen des Canada Business Corporations Act erworben. Mitte Mai 2011 sollte die vollständige Übernahme von POTASH ONE erfolgt sein.

/ WEITERE INFORMATIONEN FINDEN SIE IM NACHTRAGSBERICHT auf Seite 145.

## **4.9 GESAMTAUSSAGE ZUR AKTUELLEN WIRTSCHAFTLICHEN LAGE <sup>1</sup>**

### **BEURTEILUNG DER WIRTSCHAFTLICHEN LAGE DURCH DEN VORSTAND**

Das breite Produkt-, Branchen- und Kundenportfolio der K+S GRUPPE ist so diversifiziert, dass kritische Entwicklungen einzelner Kundengruppen im Hinblick auf die Profitabilität der gesamten K+S GRUPPE abgemildert werden können. Die Akquisition von MORTON SALT hat unser Portfolio, nicht zuletzt auch in regionaler Hinsicht, weiter verbessert. Der kürzlich in Kanada erfolgte Erwerb von POTASH ONE wird es uns darüber hinaus ermöglichen, in rohstoffreiche und kostengünstige Lagerstätten zu investieren, die eigenen Kalikapazitäten zu erhöhen, die durchschnittliche Lebensdauer unserer Bergwerke zu verlängern und mittel- bis langfristig am Marktwachstum teilzuhaben. Außerdem verfügen wir über eine solide finanzielle Basis, die es uns erlaubt, auch in Krisenzeiten flexibel agieren zu können.

Derzeit zieht weltweit sowohl die Nachfrage als auch das Preisniveau mineralischer Düngemittel an. Auch das Salzgeschäft wird im laufenden Jahr wahrscheinlich von einer erneut überdurchschnittlichen Auftausalznachfrage profitieren. Für die Geschäftsentwicklung im Jahr 2011 rechnen wir daher aus heutiger Sicht mit einem spürbaren Anstieg des Umsatzes. Da der erwartete Kostenanstieg voraussichtlich hinter dem Umsatzanstieg zurückbleiben wird, sehen wir beim operativen

Ergebnis EBIT I wie auch beim Konzernergebnis sogar gute Chancen einer deutlichen Steigerung gegenüber den entsprechenden Vorjahreswerten.

Mittel- bis langfristig ist die K+S GRUPPE für wichtige weltweite Megatrends, wie die zunehmende Weltbevölkerung, einen steigenden Lebensstandard, einen wachsenden Fleischkonsum der Schwellenländer und den damit einhergehenden steigenden Futtermittelbedarf sowie die wachsende Nachfrage nach Biokraftstoffen, richtig positioniert. Wachstum ist dabei allerdings für uns kein Selbstzweck, sondern muss mit der Schaffung von Werten einhergehen.

### **INANSPRUCHNAHME BILANZIELLER WAHLRECHTE**

Außerbilanzielle Finanzierungsinstrumente im Sinne von Forderungsverkäufen, Asset-Backed-Securities, Sale-and-Lease-Back-Transaktionen, Factoring oder gegenüber nicht im Konzernabschluss einbezogenen Zweckgesellschaften eingegangenen Haftungsverhältnissen bestehen nur in vernachlässigbarem Umfang. Weitere Angaben zur Inanspruchnahme von bilanziellen Wahlrechten finden Sie im Konzernanhang auf den Seiten 177 ff. Auswirkungen einer Änderung des Marktzininsniveaus auf die Bewertung der Rückstellungen werden auf den Seiten 116 f. beschrieben.

<sup>1</sup> Stand: 1. März 2011.

## 4.10 DARSTELLUNG DER GESCHÄFTSBEREICHSENTWICKLUNG

### GESCHÄFTSBEREICH KALI- UND MAGNESIUMPRODUKTE

/ EINE BESCHREIBUNG DES MARKTUMFELDS IM GESCHÄFTSFELD DÜNGEMITTEL finden Sie auf den Seiten 103 f. unter „Branchenspezifische Rahmenbedingungen“.

#### UMSATZ MIT 1.844,7 MIO. € UM 30 % ÜBER VORJAHRESNIVEAU

Im Geschäftsjahr 2010 stieg der Umsatz des Geschäftsbereichs um 30 % bzw. 423,0 Mio. € auf 1.844,7 Mio. €; dies ist vor allem auf deutlich höhere Absatzmengen zurückzuführen, die einen Rückgang des Durchschnittspreises mehr als ausgleichen konnten. In Europa konnte das Absatzvolumen um 109 % gesteigert werden; in Übersee

| ABWEICHUNGSANALYSE           |  | TAB: 4.10.1   |
|------------------------------|--|---------------|
|                              |  | <b>2010</b>   |
| in %                         |  |               |
| <b>Umsatzveränderung</b>     |  | <b>+ 29,8</b> |
| mengen-/strukturbedingt      |  | + 47,1        |
| preis-/preisstellungsbedingt |  | - 19,7        |
| währungsbedingt              |  | + 2,4         |
| konsolidierungsbedingt       |  | —             |
| Kaliumchlorid                |  | + 32,4        |
| Düngemittelspezialitäten     |  | + 51,9        |
| Industrieprodukte            |  | - 10,7        |

legte der Absatz um 24 % zu, nachdem dieser im Vorjahr deutlich weniger zurückgegangen war als in Europa. Insgesamt lag der Absatz im Jahr 2010 mit 6,99 Mio. t um 61 % über dem Vorjahresniveau (2009: 4,35 Mio. t).

/ TAB: 4.10.1, 4.10.2, 4.10.3

Aufgrund des deutlich stärkeren Absatzanstiegs in Europa stieg der Anteil des in Europa erwirtschafteten Umsatzes von 44 % im Vorjahr auf 56 %. Dieser Umsatzanteil ist weitgehend frei von einem unmittelbaren Währungsrisiko. Bei den in Übersee erzielten Umsätzen konnten wir vom unterjährigen Anstieg des US-Dollarkassakurses profitieren. / ABB: 4.10.1

Bei unserem volumenmäßig bedeutendsten Produkt Kaliumchlorid stieg der Umsatz im Berichtsjahr um 215,3 Mio. € bzw. rund 32 % auf 879,8 Mio. €. Der starke Mengenanstieg konnte negative Preiseffekte mehr als ausgleichen. Während der Umsatz in Übersee annähernd stabil blieb (+1 %), stieg der Umsatz in Europa um über 170 %. In Europa betrug die Absatzmenge bei Kaliumchlorid 1,13 Mio. t und erhöhte sich damit um 260 %. In Übersee wurden 1,96 Mio. t und damit 17 % mehr abgesetzt als im Vorjahr.

Bei Düngemittelspezialitäten erzielten wir im abgelaufenen Geschäftsjahr mit 700,1 Mio. € einen um knapp 52 % höheren Umsatz als im Vorjahr (2009: 460,8 Mio. €). Hierfür waren auch in dieser Produktgruppe deutliche

#### ENTWICKLUNG DER UMSÄTZE, ABSÄTZE UND DURCHSCHNITTSPREISE NACH REGIONEN <sup>1</sup>

TAB: 4.10.3

|                |                    | Q1/10        | Q2/10        | Q3/10        | Q4/10        | 2010           | 2009           | %             |
|----------------|--------------------|--------------|--------------|--------------|--------------|----------------|----------------|---------------|
| <b>Umsatz</b>  | <b>Mio. €</b>      | <b>498,4</b> | <b>463,5</b> | <b>417,8</b> | <b>465,0</b> | <b>1.844,7</b> | <b>1.421,7</b> | <b>+ 29,8</b> |
| Europa         | Mio. €             | 316,6        | 233,4        | 224,8        | 248,4        | 1.023,1        | 624,2          | + 63,9        |
| Übersee        | Mio. US\$          | 250,5        | 292,4        | 249,2        | 294,3        | 1.086,4        | 1.116,3        | - 2,7         |
| <b>Absatz</b>  | <b>Mio. t eff.</b> | <b>1,94</b>  | <b>1,73</b>  | <b>1,58</b>  | <b>1,74</b>  | <b>6,99</b>    | <b>4,35</b>    | <b>+ 60,7</b> |
| Europa         | Mio. t eff.        | 1,26         | 0,89         | 0,83         | 0,94         | 3,92           | 1,88           | + 108,6       |
| Übersee        | Mio. t eff.        | 0,68         | 0,84         | 0,75         | 0,80         | 3,07           | 2,47           | + 24,2        |
| <b>Ø-Preis</b> | <b>€/t eff.</b>    | <b>256,2</b> | <b>268,7</b> | <b>265,8</b> | <b>266,6</b> | <b>264,1</b>   | <b>327,1</b>   | <b>- 19,3</b> |
| Europa         | €/t eff.           | 250,6        | 262,5        | 273,2        | 263,5        | 261,1          | 332,3          | - 21,4        |
| Übersee        | US\$/t eff.        | 367,5        | 350,0        | 332,6        | 367,0        | 354,1          | 452,0          | - 21,7        |

<sup>1</sup> Der Umsatz beinhaltet sowohl Preise inkl. als auch exkl. Fracht und basiert bei den Übersee-Umsätzen auf den jeweiligen USD/EUR-Kassakursen. Für den Großteil dieser Umsatzerlöse wurden Kurssicherungsgeschäfte abgeschlossen. Die Preisangaben werden auch durch den jeweiligen Produktmix beeinflusst und sind daher nur als grobe Indikation zu verstehen.

Absatzsteigerungen ausschlaggebend, die negative Preiseffekte überkompensieren konnten. Der Umsatz stieg in Europa um knapp 89% sowie um 4% in Übersee. Das europäische Absatzvolumen erreichte 2,12 Mio. t (+118%); der Überseeabsatz lag mit 0,91 Mio. t um 43% über dem Vorjahresniveau.

Im Bereich Industrieprodukte ging der Umsatz um 11% auf 264,8 Mio. € zurück; positive Mengeneffekte konnten negative Preiseffekte nicht vollständig ausgleichen. Während der Umsatz in Europa um rund 18% unter dem des Vorjahres lag, nahm er in Übersee um knapp 20% zu. Der Absatz betrug in Europa 0,65 Mio. t (+11%) und in Übersee 0,20 Mio. t (+28%). / **ABB: 4.10.2**

#### EBITDA UND OPERATIVES ERGEBNIS EBIT I STARK GESTIEGEN

Das Ergebnis vor Zinsen, Steuern und Abschreibungen (EBITDA) des Geschäftsbereichs erreichte im Berichtsjahr 567,1 Mio. € und lag 249,9 Mio. € bzw. 79% über dem Wert des Vorjahres.

Die Steuerungsgröße der K+S GRUPPE, das operative Ergebnis EBIT I, konnte im Geschäftsbereich Kali- und Magnesiumprodukte um 244,2 Mio. € bzw. 105% auf 475,9 Mio. € gesteigert werden. Darin sind Abschreibungen in Höhe von 91,2 Mio. € berücksichtigt; diese haben sich gegenüber denen des Vorjahres um 5,7 Mio. € erhöht.

Der deutlich höhere Umsatz konnte die vor allem mengenbedingt höheren – aber aufgrund der in der Bergbauindustrie üblichen Fixkostendegression unterproportio-

| GESCHÄFTSBEREICH KALI- UND MAGNESIUMPRODUKTE             |       |       |       |       |         |         | TAB: 4.10.2 |
|----------------------------------------------------------|-------|-------|-------|-------|---------|---------|-------------|
|                                                          | Q1/10 | Q2/10 | Q3/10 | Q4/10 | 2010    | 2009    | %           |
| in Mio. €                                                |       |       |       |       |         |         |             |
| Umsatz                                                   | 498,4 | 463,5 | 417,8 | 465,0 | 1.844,7 | 1.421,7 | +29,8       |
| Ergebnis vor Zinsen, Steuern und Abschreibungen (EBITDA) | 171,5 | 139,9 | 100,0 | 155,7 | 567,1   | 317,2   | +78,8       |
| Operatives Ergebnis (EBIT I)                             | 150,6 | 119,2 | 79,4  | 126,7 | 475,9   | 231,7   | +105,4      |
| Investitionen                                            | 12,3  | 14,6  | 23,7  | 46,3  | 96,9    | 107,4   | -9,8        |
| Mitarbeiter am Stichtag (Anzahl)                         | 7.766 | 7.706 | 7.878 | —     | 7.900   | 7.818   | +1,0        |

| UMSATZ NACH REGIONEN |      |      | ABB: 4.10.1 |  |
|----------------------|------|------|-------------|--|
|                      | 2010 | 2009 |             |  |
| in %                 |      |      |             |  |
| 1 Inland             | 15,5 | 12,3 |             |  |
| 2 Übriges Europa     | 40,0 | 31,6 |             |  |
| 3 Übersee            | 44,5 | 56,1 |             |  |

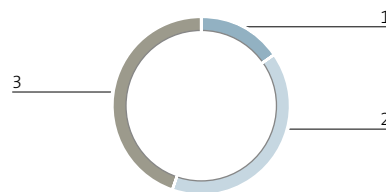

| UMSATZ NACH PRODUKTGRUPPEN |      |      | ABB: 4.10.2 |  |
|----------------------------|------|------|-------------|--|
|                            | 2010 | 2009 |             |  |
| in %                       |      |      |             |  |
| 1 Kaliumchlorid            | 47,7 | 46,7 |             |  |
| 2 Düngemittelspezialitäten | 38,0 | 32,4 |             |  |
| 3 Industrieprodukte        | 14,3 | 20,9 |             |  |

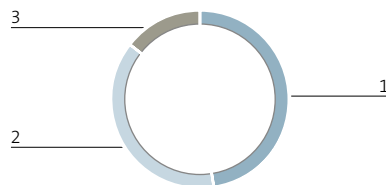

nal gestiegenen – Gesamtkosten mehr als ausgleichen. Die Entwicklung des US-Dollarkurses im Verhältnis zum Euro wirkte sich ebenfalls positiv auf das Ergebnis aus.

/ AUSSAGEN ZUR KÜNFTIGEN UMSATZ- UND ERGEBNIS-ENTWICKLUNG DES GESCHÄFTSBEREICHS KALI- UND MAGNESIUMPRODUKTE finden Sie auf Seite 154.

## GESCHÄFTSBEREICH STICKSTOFFDÜNGEMITTEL

Die Strategie der K+S GRUPPE sieht vor, insbesondere in den Geschäftsbereichen Kali- und Magnesiumprodukte sowie Salz zu wachsen und Managementressourcen sowie finanzielle Mittel hierauf entsprechend zu fokussieren. Vor diesem Hintergrund wurde im Juni 2010 die Prüfung einer Veräußerung von COMPO angestoßen. Ein Ergebnis wird Mitte des Jahres 2011 vorliegen. Zur Vorbereitung hat K+S im zweiten Halbjahr 2010 ein Konzept für eine mögliche gesellschaftsrechtliche und unternehmerische Herauslösung (Carve-Out) der COMPO aus der K+S GRUPPE erarbeitet und umgesetzt. Zu Beginn dieses Jahres wurde Kontakt mit potenziellen Interessenten aufgenommen; diese erhielten Anfang Februar Informationsunterlagen.

/ EINE BESCHREIBUNG DES MARKTUMFELDS IM GESCHÄFTSFELD DÜNGEMITTEL finden Sie auf den Seiten 103 f. unter ‚Branchenspezifische Rahmenbedingungen‘.

### UMSATZ UM KNAPP 27% AUF 1.286,2 MIO. € GESTIEGEN

Der Umsatz im Geschäftsbereich Stickstoffdüngemittel stieg im Berichtsjahr vor allem mengenbedingt um knapp 27 % auf 1.286,2 Mio. €. Der Geschäftsbereich erwirtschaftete rund 74 % seines Umsatzes in Europa und war daher nur begrenzt von Währungsschwankungen beeinflusst. / TAB: 4.10.4, 4.10.5 / ABB: 4.10.3

Der Umsatz mit Mehrnährstoffdüngern stieg im Berichtsjahr um rund 27 % bzw. 77,8 Mio. € auf 368,6 Mio. €. Posi-

## ABWEICHUNGSANALYSE TAB: 4.10.4

|                              | 2010          |
|------------------------------|---------------|
| in %                         |               |
| <b>Umsatzveränderung</b>     | <b>+ 26,6</b> |
| mengen-/strukturbedingt      | + 24,0        |
| preis-/preisstellungsbedingt | + 1,0         |
| währungsbedingt              | + 1,6         |
| konsolidierungsbedingt       | —             |
| Consumer                     | - 5,6         |
| Expert                       | + 53,2        |
| Mehrnährstoffdünger          | + 26,8        |
| Stickstoffeinzeldünger       | + 37,4        |
| Ammonsulfat                  | + 30,3        |

tive Mengeneffekte konnten negative Preiseffekte deutlich überkompensieren. Der Gesamtabsatz bei Mehrnährstoffdüngern konnte im Jahr 2010 um 47 % auf 1,14 Mio. t gesteigert werden.

Bei Stickstoffeinzeldüngern führten im Berichtsjahr sowohl Mengen- als auch Preissteigerungen aufgrund der Nachfrageerholung zu einem Umsatzanstieg von 37 % auf 355,5 Mio. € (2009: 258,8 Mio. €). In allen Regionen konnte ein Umsatzwachstum erzielt werden. Der Absatz von Stickstoffeinzeldüngern stieg um rund 18 % auf 1,85 Mio. t.

Der Umsatz mit Ammonsulfat ist im Jahr 2010 um rund 30 % auf 176,6 Mio. € gestiegen; dieser Anstieg ist vor allem auf positive Preis- und Mengeneffekte in Europa

zurückzuführen. Das Absatzvolumen von Ammonsulfat erreichte 1,64 Mio. t und konnte damit gegenüber dem des Vorjahres um knapp 7 % gesteigert werden.

Im Consumerbereich ging der Umsatz im Berichtsjahr um 5,6 % auf 195,5 Mio. € zurück. Umsatzzuwächse in Deutschland, Österreich und der Schweiz konnten mengen- und preisbedingte Umsatzrückgänge in Frankreich und Südeuropa nicht vollständig ausgleichen.

Im Bereich Expert erreichte der Umsatz 190,0 Mio. € und lag damit mengen- und strukturbedingt 53 % über dem Niveau des Vorjahres. Der Expert-Absatz stieg im Berichtsjahr um 40 % auf 0,26 Mio. t. / ABB: 4.10.4

### EBITDA UND OPERATIVES ERGEBNIS EBIT I NACH VERLUSTEN DES VORJAHRES WIEDER POSITIV

Das Ergebnis vor Zinsen, Steuern und Abschreibungen (EBITDA) des Geschäftsbereichs Stickstoffdüngemittel erreichte im Berichtsjahr 67,4 Mio. € nach -94,4 Mio. € im Jahr 2009.

Die Steuerungsgröße der K+S GRUPPE, das operative Ergebnis EBIT I, erreichte im Geschäftsbereich Stickstoffdüngemittel 55,7 Mio. € nach -108,1 Mio. € im Vorjahr. Darin sind Abschreibungen in Höhe von 11,7 Mio. € enthalten; diese sind gegenüber denen des Vorjahres um 2,0 Mio. € gesunken.

Das Ergebniswachstum war zurückzuführen auf höhere Absatzmengen, Preiserhöhungen für Stickstoffeinzeldünger und Ammonsulfat, die Einstandskostensteige-

**GESCHÄFTSBEREICH STICKSTOFFDÜNGEMITTEL**

TAB: 4.10.5

|                                                          | Q1/10 | Q2/10 | Q3/10 | Q4/10 | 2010    | 2009    | %      |
|----------------------------------------------------------|-------|-------|-------|-------|---------|---------|--------|
| in Mio. €                                                |       |       |       |       |         |         |        |
| Umsatz                                                   | 385,5 | 287,4 | 306,1 | 307,2 | 1.286,2 | 1.016,2 | + 26,6 |
| Ergebnis vor Zinsen, Steuern und Abschreibungen (EBITDA) | 17,3  | 28,9  | 5,4   | 15,8  | 67,4    | - 94,4  | —      |
| Operatives Ergebnis (EBIT I)                             | 14,5  | 26,0  | 2,6   | 12,6  | 55,7    | - 108,1 | —      |
| Investitionen                                            | 2,5   | 2,4   | 2,8   | 5,2   | 12,9    | 11,2    | + 15,2 |
| Mitarbeiter am Stichtag (Anzahl)                         | 1.264 | 1.252 | 1.226 | —     | 1.226   | 1.249   | - 1,8  |

**UMSATZ NACH REGIONEN**

ABB: 4.10.3

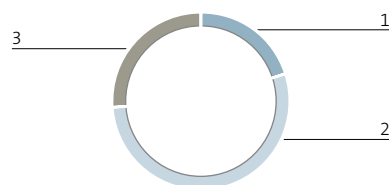

|                  | 2010 | 2009 |
|------------------|------|------|
| in %             |      |      |
| 1 Inland         | 20,0 | 18,6 |
| 2 Übriges Europa | 54,1 | 54,8 |
| 3 Übersee        | 25,9 | 26,6 |

**UMSATZ NACH BEREICHEN**

ABB: 4.10.4

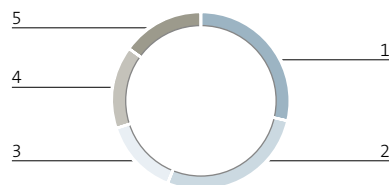

|                          | 2010 | 2009 |
|--------------------------|------|------|
| in %                     |      |      |
| 1 Mehrnährstoffdünger    | 28,7 | 28,6 |
| 2 Stickstoffeinzeldünger | 27,6 | 25,5 |
| 3 Ammonsulfat            | 13,7 | 13,3 |
| 4 Consumer               | 15,2 | 20,4 |
| 5 Expert                 | 14,8 | 12,2 |

rungen mehr als ausgleichen konnten, sowie deutlich gesunkene Einstandskosten bei Mehrnährstoffdüngern. Darüber hinaus ist zu berücksichtigen, dass das Jahr 2009 durch Wertkorrekturen der Bestände sowie Aufwendungen für Restrukturierungsmaßnahmen im Rahmen der Neuordnung des Geschäfts mit stickstoffhaltigen Düngemitteln belastet war.

/ AUSSAGEN ZUR KÜNFTIGEN UMSATZ- UND ERGEBNIS- ENTWICKLUNG DES GESCHÄFTSBEREICHS STICKSTOFF- DÜNGEMITTEL finden Sie auf Seite 154.

**GESCHÄFTSBEREICH SALZ**

MORTON SALT wurde ab dem 1. Oktober 2009 in den Konzernabschluss der K+S GRUPPE einbezogen. Im Jahr 2010 erfolgte die Einbeziehung daher zum ersten Mal ganzjährig. Aufgrund des dadurch für die ersten neun Monate entstehenden Konsolidierungseffekts sind die Vorjahreszahlen nicht vergleichbar.

/ EINE BESCHREIBUNG DES MARKTUMFELDS IM

GESCHÄFTSFELD SALZ finden Sie auf den Seiten 104 f. unter „Branchenspezifische Rahmenbedingungen“.

**UMSATZ ERREICHT 1.728,7 MIO. € (+70 %)**

Im Geschäftsbereich Salz erreichte der Umsatz im Berichtsjahr 1.728,7 Mio. € und lag damit 714,1 Mio. € bzw. 70 % über dem Vorjahreswert. 833,5 Mio. € des Jahresumsatzes entfielen auf MORTON SALT. Der Umsatzanstieg ist zurückzuführen auf positive Mengen- und Preiseffekte sowie den die ersten neun Monate betreffenden Effekt aus der Konsolidierung von MORTON SALT



**ABWEICHUNGSANALYSE**

TAB: 4.10.6

|                              | 2010         |
|------------------------------|--------------|
| in %                         |              |
| <b>Umsatzveränderung</b>     | <b>+70,4</b> |
| mengen-/strukturbedingt      | +6,9         |
| preis-/preisstellungsbedingt | +3,7         |
| währungsbedingt              | +2,4         |
| konsolidierungsbedingt       | +57,4        |
| Speisesalz                   | +117,5       |
| Gewerbesalz                  | +104,4       |
| Industriesalz                | +38,0        |
| Auftausalz                   | +48,6        |
| Sonstiges                    | +33,1        |

in Höhe von 582,2 Mio. €. Der Festsalzabsatz betrug im Berichtsjahr insgesamt 22,53 Mio. t und lag 52 % über dem des Vorjahres (14,81 Mio. t). Davon verkaufte MORTON SALT im Gesamtjahr 9,60 Mio. t; der Effekt aus der Konsolidierung in den ersten neun Monaten betrug 6,48 Mio. t. / TAB: 4.10.6, 4.10.7, 4.10.8

Knapp 30 % des Umsatzes wurden im vergangenen Jahr in Europa erwirtschaftet und sind damit weitgehend frei von einem unmittelbaren Währungsrisiko. Durch die Einbeziehung von MORTON SALT hat sich der Überseeanteil seit dem vierten Quartal 2009 deutlich erhöht. / ABB: 4.10.5

Der Umsatz mit Speisesalzen ist im Berichtsjahr um 177,3 Mio. € bzw. 118 % auf 328,2 Mio. € gestiegen; davon wur-

**GESCHÄFTSBEREICH SALZ**

TAB: 4.10.7

|                                                          | Q1/10 | Q2/10 | Q3/10 | Q4/10 | 2010    | 2009    | %     |
|----------------------------------------------------------|-------|-------|-------|-------|---------|---------|-------|
| in Mio. €                                                |       |       |       |       |         |         |       |
| Umsatz                                                   | 616,4 | 275,3 | 305,2 | 531,8 | 1.728,7 | 1.014,6 | +70,4 |
| Ergebnis vor Zinsen, Steuern und Abschreibungen (EBITDA) | 146,4 | 56,3  | 60,8  | 106,2 | 369,7   | 200,3   | +84,6 |
| Operatives Ergebnis (EBIT I)                             | 107,9 | 21,8  | 31,8  | 76,6  | 238,1   | 140,4   | +69,6 |
| Investitionen                                            | 11,1  | 14,9  | 15,7  | 37,3  | 79,0    | 48,0    | +64,6 |
| Mitarbeiter am Stichtag (Anzahl)                         | 5.268 | 5.283 | 5.283 | —     | 5.235   | 5.279   | -0,8  |

**UMSATZ NACH REGIONEN**

ABB: 4.10.5

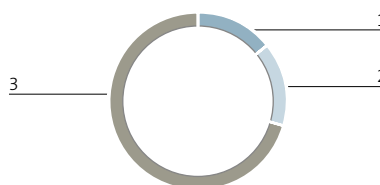

|                  | 2010 | 2009 |
|------------------|------|------|
| in %             |      |      |
| 1 Inland         | 14,3 | 17,6 |
| 2 Übriges Europa | 15,4 | 22,3 |
| 3 Übersee        | 70,3 | 60,1 |

**UMSATZ NACH PRODUKTGRUPPEN**

ABB: 4.10.6

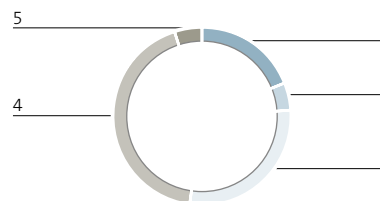

|                 | 2010 | 2009 |
|-----------------|------|------|
| in %            |      |      |
| 1 Speisesalz    | 19,0 | 14,9 |
| 2 Industriesalz | 5,0  | 6,2  |
| 3 Gewerbesalz   | 28,3 | 23,6 |
| 4 Auftausalz    | 42,8 | 49,0 |
| 5 Sonstiges     | 4,9  | 6,3  |

den 226,7 Mio. € von MORTON SALT erzielt. Positive Preiseffekte konnten verfügbarkeitsbedingt negative Mengeneffekte in Brasilien mehr als ausgleichen. Auf die Konsolidierung von MORTON SALT entfielen in den ersten neun Monaten 170,6 Mio. €. Der Absatz betrug 1,61 Mio. t und lag um rund 34 % über dem Wert des Vorjahres. Davon setzte MORTON SALT im Gesamtjahr 0,84 Mio. t ab; der Konsolidierungseffekt in den ersten neun Monaten betrug 0,63 Mio. t.

Der Umsatz mit Gewerbesalzen, wie z.B. Fischerei-, Futtermittel- und hochreinen Pharnasalzen, erreichte im abgelaufenen Geschäftsjahr 490,3 Mio. € und erhöhte sich um 250,4 Mio. € bzw. 104 %; MORTON SALT trug hierzu im Berichtsjahr 287,4 Mio. € bei. Höhere Absätze in Südamerika und Europa konnten etwas niedrigere Preise mehr als ausgleichen. Auf den Effekt aus der Konsolidierung von MORTON SALT entfielen in den ersten neun Monaten 217,0 Mio. €. Der Absatz betrug 5,02 Mio. t und lag damit um 89 % über dem Vorjahresniveau von 2,65 Mio. t. Davon setzte MORTON SALT im Gesamtjahr 2,63 Mio. t ab; der Konsolidierungseffekt in den ersten neun Monaten betrug 1,96 Mio. t.

Im Industriesalzgeschäft lag der Umsatz mit 86,5 Mio. € um 23,9 Mio. € bzw. 38 % über dem Vorjahreswert; davon wurden 16,7 Mio. € von MORTON SALT erzielt. Der Umsatzanstieg ist zurückzuführen auf positive Mengen- und Preiseffekte sowie den Effekt aus der Konsolidierung von MORTON SALT in den ersten neun Monaten in Höhe von 12,3 Mio. €. Der Absatz lag mit 2,41 Mio. t um 20 % über dem Vorjahresniveau. Auf MORTON SALT

| ENTWICKLUNG DER UMSÄTZE, ABSÄTZE UND DURCHSCHNITTSPREISE <sup>1</sup> |        |       |       |       |       |         |         | TAB: 4.10.8 |
|-----------------------------------------------------------------------|--------|-------|-------|-------|-------|---------|---------|-------------|
|                                                                       |        | Q1/10 | Q2/10 | Q3/10 | Q4/10 | 2010    | 2009    | %           |
| <b>Auftausalz</b>                                                     |        |       |       |       |       |         |         |             |
| Umsatz                                                                | Mio. € | 376,5 | 26,8  | 58,1  | 277,8 | 739,2   | 497,6   | +48,6       |
| Absatz                                                                | Mio. t | 7,05  | 0,49  | 1,10  | 4,85  | 13,49   | 8,96    | +50,6       |
| Ø-Preis                                                               | €/t    | 53,4  | 54,5  | 52,8  | 57,3  | 54,8    | 55,5    | -1,3        |
| <b>Gewerbe-, Industrie- und Speisesalz</b>                            |        |       |       |       |       |         |         |             |
| Umsatz                                                                | Mio. € | 217,4 | 232,0 | 228,2 | 227,4 | 905,0   | 453,5   | +99,6       |
| Absatz                                                                | Mio. t | 2,20  | 2,26  | 2,23  | 2,35  | 9,04    | 5,85    | +54,5       |
| Ø-Preis                                                               | €/t    | 98,9  | 102,8 | 102,4 | 96,8  | 100,1   | 77,5    | +29,1       |
| <b>Sonstiges</b>                                                      |        |       |       |       |       |         |         |             |
| Umsatz                                                                | Mio. € | 22,5  | 16,5  | 18,9  | 26,6  | 84,5    | 63,5    | +33,1       |
| <b>Geschäftsbereich Salz</b>                                          |        |       |       |       |       |         |         |             |
| Umsatz                                                                | Mio. € | 616,4 | 275,3 | 305,2 | 531,8 | 1.728,7 | 1.014,6 | +70,4       |

<sup>1</sup> Der Umsatz beinhaltet sowohl Preise inkl. als auch exkl. Fracht. Die Preisangaben werden auch durch Veränderungen von Wechselkursen sowie den jeweiligen Produktmix beeinflusst und sind daher nur als grobe Indikation zu verstehen.

entfielen davon im Gesamtjahr 0,41 Mio. t; der Konsolidierungseffekt in den ersten neun Monaten betrug 0,31 Mio. t.

Der Umsatz mit Auftausalz konnte im Berichtsjahr um 241,6 Mio. € bzw. 49 % auf 739,2 Mio. € gesteigert werden; MORTON SALT erzielte einen Umsatz in Höhe von 293,3 Mio. €. Folgende Effekte haben sich positiv ausgewirkt: Höhere Mengen und Preise infolge des außergewöhnlich guten Auftausalzgeschäfts im ersten und vierten Quartal in Europa sowie der Konsolidierungseffekt von MORTON SALT in den ersten neun Monaten von 175,2 Mio. €. Der Absatz betrug 13,49 Mio. t und hat sich damit im Vergleich zum Vorjahr um 51 % erhöht. MORTON SALT ver-

kaufte im Berichtsjahr 5,73 Mio. t; der Konsolidierungseffekt in den ersten neun Monaten betrug 3,58 Mio. t.

Neben dem Geschäft mit sonstigen Auftaumitteln, z.B. Magnesiumchloridlösung, umfasst „Sonstiges“ auch das Logistikgeschäft mit Dritten der zur chilenischen SPL-Gruppe gehörenden Reederei EMPREMAR. Der unter „Sonstiges“ erfasste Umsatz stieg um 21,0 Mio. € auf 84,5 Mio. €; MORTON SALT erzielte davon 9,4 Mio. €. Der Umsatzanstieg ist zurückzuführen auf Absatz- sowie Preissteigerungen bei EMPREMAR sowie den die ersten neun Monate betreffenden Effekt aus der Konsolidierung von MORTON SALT in Höhe von 7,2 Mio. €.

/ ABB: 4.10.6

### EBITDA UND OPERATIVES ERGEBNIS EBIT I STARK GESTIEGEN

Da das EBITDA von Abschreibungen auf im Rahmen von Kaufpreisallokationen vorgenommene Wertansätze nicht beeinflusst wird und diese sich nach der Akquisition von MORTON SALT deutlich erhöht haben, kommt dem EBITDA zur Beurteilung der operativen Ertragskraft mittlerweile eine höhere Bedeutung zu. Dieses stieg im Berichtsjahr um knapp 85 % auf 369,7 Mio. € an.

Das operative Ergebnis EBIT I des Geschäftsbereichs Salz stieg um 97,7 Mio. € auf 238,1 Mio. €. Das Ergebnis war in Höhe von 50 bis 70 Mio. € aufgrund des im Vergleich zum langfristigen Mittelwert überdurchschnittlichen Auftausalzgeschäfts begünstigt. Die Abweichung der Profitabilität gegenüber einem Normaljahr kann stark variieren, da diese vom Regionalmix, der jeweiligen Kapazitätsauslastung, der lokalen Marge sowie von Wechselkursen abhängig ist. MORTON SALT leistete einen Ergebnisbeitrag in Höhe von 101,8 Mio. €; darin waren Kosten in Höhe von 6,9 Mio. € für den bislang planmäßig verlaufenden Integrationsprozess enthalten. Von den im EBIT I enthaltenen Abschreibungen in Höhe von 131,6 Mio. € (2009: 59,9 Mio. €) entfielen 52,0 Mio. € auf Abschreibungen auf im Rahmen der Kaufpreisallokation vorzunehmende Wertansätze (PPA).

Dem deutlich höheren Umsatz standen auf der Kostenseite ebenfalls Konsolidierungseffekte sowie mengenbedingt höhere Produktions- und Frachtkosten gegenüber; diese konnten jedoch mehr als ausgeglichen werden. Der Effekt aus der Konsolidierung von MORTON

SALT in den ersten neun Monaten betrug 68,6 Mio. €. Im Berichtsjahr wirkten sich darüber hinaus Einmaleffekte in Höhe von insgesamt 13,2 Mio. € negativ auf das Ergebnis aus: Belastungen ergaben sich durch die Neubewertung und Konsolidierung im Rahmen der nach IFRS vorzunehmenden Vorratsbewertung bei MORTON SALT, die Schließung eines unwirtschaftlichen ESCO-Standorts in Frankreich sowie außerplanmäßige Abschreibungen auf Sachanlagen in den Niederlanden. Diesen Belastungen stand ein positiver Einmaleffekt im Rückstellungsreich bei MORTON SALT gegenüber.

/ AUSSAGEN ZUR KÜNFTIGEN UMSATZ- UND ERGEBNIS- ENTWICKLUNG DES GESCHÄFTSBEREICHS SALZ finden Sie auf den Seiten 154 f.

### ERGÄNZENDE GESCHÄFTSBEREICHE

#### UMSATZ ERREICHT 133,7 MIO. € (+11%)

Der Umsatz der Ergänzenden Geschäftsbereiche lag mit 133,7 Mio. € um knapp 11 % über dem Niveau des Vorjahres. Gemäß IFRS ist der Innenumsatz aus den gegenüber K+S-Gruppengesellschaften erbrachten Leistungen in diesen Zahlen nicht enthalten. Einschließlich dieser Innenumsätze betrug der Gesamtumsatz im Berichtsjahr 175,3 Mio. € (2009: 155,8 Mio. €).

/ TAB: 4.10.9, 4.10.10 / ABB: 4.10.7, 4.10.8

Im Bereich Entsorgung und Recycling stieg der Umsatz um knapp 10 % auf 73,8 Mio. € (2009: 67,2 Mio. €); hier wirkten sich insbesondere Preiserhöhungen im Recyclinggeschäft für die Sekundäraluminiumindustrie sowie

Absatzsteigerungen in den Arbeitsgebieten Verwertung und Beseitigung aus. Die Umsätze im Bereich Logistik (13,6 Mio. €) sowie Tierhygieneprodukten (34,2 Mio. €) stiegen vorwiegend mengenbedingt an. Das Handelsgeschäft erzielte einen Umsatz von 12,1 Mio. €; die Erhöhung um 4,0 Mio. € im Vergleich zum Vorjahreswert ist auf die erfolgreiche Vermarktung von Salpetersäure zurückzuführen.

/ EINE ÜBERSICHT ÜBER DIE EINZELNEN TÄTIGKEITSBEREICHE finden Sie auf den Seiten 81 f.

### EBITDA UND OPERATIVES ERGEBNIS EBIT I DEUTLICH GESTIEGEN

Das Ergebnis vor Zinsen, Steuern und Abschreibungen (EBITDA) der Ergänzenden Geschäftsbereiche erreichte im Berichtsjahr 27,7 Mio. € und lag damit 6,0 Mio. € bzw. 28 % über dem Wert des Vorjahres. Das operative

| ABWEICHUNGSANALYSE           |  | TAB: 4.10.9  |
|------------------------------|--|--------------|
|                              |  | 2010         |
| in %                         |  |              |
| <b>Umsatzveränderung</b>     |  | <b>+10,8</b> |
| mengen-/strukturbedingt      |  | +9,5         |
| preis-/preisstellungsbedingt |  | +1,3         |
| währungsbedingt              |  | –            |
| konsolidierungsbedingt       |  | –            |
| Entsorgung und Recycling     |  | +9,7         |
| Logistik                     |  | +9,7         |
| Tierhygieneprodukte          |  | +4,0         |
| Handel                       |  | +49,4        |

## ERGÄNZENDE GESCHÄFTSBEREICHE

TAB: 4.10.10

|                                                          | Q1/10 | Q2/10 | Q3/10 | Q4/10 | 2010  | 2009  | %     |
|----------------------------------------------------------|-------|-------|-------|-------|-------|-------|-------|
| in Mio. €                                                |       |       |       |       |       |       |       |
| Umsatz                                                   | 33,2  | 32,2  | 31,8  | 36,5  | 133,7 | 120,7 | +10,8 |
| Ergebnis vor Zinsen, Steuern und Abschreibungen (EBITDA) | 7,9   | 7,8   | 5,8   | 6,2   | 27,7  | 21,7  | +27,6 |
| Operatives Ergebnis (EBIT I)                             | 6,4   | 6,2   | 4,3   | 4,3   | 21,2  | 15,2  | +39,5 |
| Investitionen                                            | 0,4   | 1,4   | 1,9   | 0,5   | 4,2   | 4,6   | -8,7  |
| Mitarbeiter am Stichtag (Anzahl)                         | 280   | 277   | 281   | —     | 280   | 278   | +0,7  |

## UMSATZ NACH REGIONEN

ABB: 4.10.7

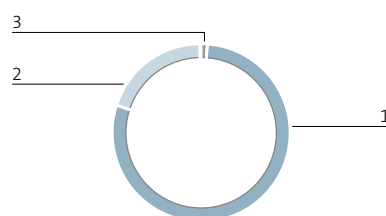

|                  | 2010 | 2009 |
|------------------|------|------|
| in %             |      |      |
| 1 Inland         | 79,9 | 81,8 |
| 2 Übriges Europa | 20,0 | 18,1 |
| 3 Übersee        | 0,1  | 0,1  |

## UMSATZ NACH BEREICHEN

ABB: 4.10.8

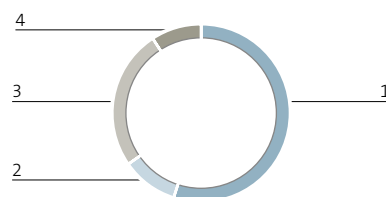

|                            | 2010 | 2009 |
|----------------------------|------|------|
| in %                       |      |      |
| 1 Entsorgung und Recycling | 55,2 | 55,7 |
| 2 Logistik                 | 10,2 | 10,3 |
| 3 Tierhygieneprodukte      | 25,6 | 27,3 |
| 4 Handel                   | 9,0  | 6,7  |

Ergebnis EBIT I erreichte 21,2 Mio. € (2009: 15,2 Mio. €). Die hier einbezogenen Abschreibungen beliefen sich auf 6,5 Mio. € und lagen auf dem Niveau des Vorjahres. Höhere Umschlags-, Transport- und Befrachtungsmengen im Bereich Logistik trugen positiv zum Ergebnis bei und kompensierten den Ergebnismrückgang im Bereich Tierhygieneprodukte. Der Bereich Entsorgung und Recycling konnte sein Ergebnis aufgrund gesteigerner Umsätze in allen Arbeitsgebieten deutlich steigern.

/ AUSSAGEN ZUR KÜNFTIGEN UMSATZ- UND ERGEBNIS-ENTWICKLUNG DER ERGÄNZENDEN GESCHÄFTSBEREICHE finden Sie auf Seite 155.

## 4.11 RISIKOBERICHT

## RISIKOPOLITIK

Die Geschäftspolitik der K+S GRUPPE ist darauf ausgerichtet, den Bestand des Unternehmens zu sichern, dauerhaft risikoadäquate Renditen zu erwirtschaften sowie den Unternehmenswert systematisch und kontinuierlich zu steigern. Um dieses Ziel zu erreichen, erfordern die weltweiten Aktivitäten ein permanentes, verantwortungsvolles Abwägen von Chancen und Risiken. Dabei verstehen wir Risiken als das potenzielle Eintreten interner wie externer Ereignisse, die das Erreichen unserer kurzfristigen sowie strategischen Ziele negativ beeinflussen können. Systematisches Risikomanagement ist die fortwährende Aufgabe des Vorstands und der Führungskräfte in ihren jeweiligen Verantwortungsbereichen. Langfristig können wir nur erfolgreich sein,

wenn wir Chancen nutzen und Risiken frühzeitig identifizieren, analysieren, sie entsprechend steuern und kontrollieren. In Abwägung der Gesamtumstände wird entschieden, inwiefern Risiken eingegangen werden, um Chancen nutzen zu können. Allerdings kann auch ein angemessenes und funktionsfähig eingerichtetes Risikomanagementsystem keine absolute Sicherheit gewährleisten.

#### CHANCENMANAGEMENT

In der K+S GRUPPE sind Chancen- und Risikomanagement eng miteinander verknüpft. Bei Chancen handelt es sich um interne und externe Entwicklungen, die sich positiv auf den Konzern auswirken können. Unser Chancenmanagement leiten wir im Wesentlichen aus den Zielen und Strategien der Geschäftsbereiche ab und sorgen für ein ausgewogenes Chancen-Risiko-Verhältnis. Die direkte Verantwortung für das frühzeitige und regelmäßige Identifizieren, Analysieren und Nutzen von Chancen obliegt dem operativen Management in den Geschäftsbereichen bzw. den Leitern der zentralen Holding-Einheiten. Das Chancenmanagement ist ein integraler Bestandteil der konzernweiten Planungs- und Steuerungssysteme. Wir beschäftigen uns dazu intensiv mit Markt- und Wettbewerbsanalysen, Marktsszenarien, den relevanten Kostentreibern und kritischen Erfolgsfaktoren auch im politischen Umfeld des Unternehmens. Daraus werden konkrete geschäftsbereichsspezifische Chancenpotenziale abgeleitet und im Rahmen von Zielvereinbarungsgesprächen zwischen Vorstand und den Geschäftsbereichsver-

antwortlichen diskutiert. Ausgewählte Chancenpotenziale der K+S GRUPPE werden im Prognosebericht erläutert.

#### RISIKOMANAGEMENTSYSTEM

Die Geschäftsbereiche der K+S GRUPPE weisen unterschiedliche Chancen und Risiken auf, zu deren frühzeitiger Erkennung, Bewertung und Begrenzung wir konzernweitliche Planungs-, Steuerungs- und Kontrollsysteme nutzen. Die bei uns eingesetzten Methoden der Risikoermittlung reichen von Markt- und Wettbewerbsanalysen über enge Kontakte zu Kunden, Lieferanten und Institutionen bis zur Verfolgung von Risikoindikatoren aus dem wirtschaftlichen und gesellschaftspolitischen Umfeld. Die Bewertung der Risiken erfolgt insbesondere im Hinblick auf Eintrittswahrscheinlichkeiten und potenzielle Schadenhöhen. Ein weiterer Baustein des Risikomanagements ist die Entwicklung von gegensteuernden Maßnahmen unter Einbeziehung alternativer Risikoszenarien. Wir sind auf diese Weise bestrebt, Risiken systematisch entgegenzuwirken.

Der Vorstand hat konzernweite Grundsätze und Verhaltensregeln sowie Richtlinien für ein systematisches und effektives Risikomanagement festgelegt. Das Risikomanagementsystem besteht aus folgenden Elementen:

- + einem unternehmensspezifischen Handbuch zum Risikomanagement,
- + einer Holdingeinheit Risikomanagement,
- + Risikomanagementbeauftragten in den Geschäftsbereichen,

- + standardisierten, geschäftsbereichsspezifischen Risikoprofilen,
- + Informationen über die vollständige, quantifizierte Risikosituation in Zielvereinbarungsgesprächen zwischen Vorstand und den Verantwortlichen der Geschäftsbereiche,
- + einer regelmäßigen, einheitlichen Risikoberichterstattung auf Konzern- und Geschäftsbereichsebene sowie
- + einer Sofort-Berichterstattung bei Eilbedürftigkeit.

Zuständigkeiten und Verantwortlichkeiten sowohl im Prozess der Risikoidentifikation als auch hinsichtlich der Analyse, Steuerung und Kommunikation identifizierter Risiken sind eindeutig geregelt. So obliegt die direkte Verantwortung im Umgang mit Risiken dem operativen Management in den Geschäftsbereichen bzw. den zentralen Holding-Einheiten. Die Risiken der einzelnen Geschäftsbereiche und der Holding werden vierteljährlich identifiziert, die daraus ermittelten Risikopotenziale analysiert, quantitativ bewertet und dem Vorstand berichtet. Kann einem Risiko durch wirksame und angemessene Maßnahmen zuverlässig entgegengewirkt werden, liegt der Fokus der Betrachtung auf dem Restrisiko. Wir beobachten insbesondere die Risiken, deren Eintrittswahrscheinlichkeit 5 % oder mehr beträgt und deren Schadenpotenzial gleichzeitig geschäftsbereichsspezifische Grenzwerte überschreitet. Die Risikoprofile haben sowohl einen Bezug zum laufenden Jahr als auch zur Mittelfristplanung und decken somit einen Zeithorizont von drei Jahren ab. Erwartete Risiken mit einer Eintrittswahrscheinlichkeit ab 50 % werden in der Mittelfristplanung bzw. Jahreshochschätzung in Form von



Ergebnisabschlägen berücksichtigt. Kurzfristig auftretende Risiken werden bei Eilbedürftigkeit unabhängig von den normalen Berichtswegen unverzüglich direkt an den Vorstand kommuniziert. Der Aufsichtsrat wird durch den Vorstand ebenfalls regelmäßig und zeitnah, bei besonderer Eilbedürftigkeit unverzüglich informiert. Geschäfte und Maßnahmen von besonderer Bedeutung und Tragweite bedürfen nach Maßgabe konzernweit geltender Regelungen der Zustimmung des Vorstands und in besonderen Fällen auch des Aufsichtsrats.

Die Funktionsfähigkeit des Risikomanagementsystems der K+S GRUPPE wird regelmäßig von der internen Revision geprüft. Weiterhin ist die Prüfung der Funktionsfähigkeit und Wirksamkeit des Risikofrüherkennungssystems auch Gegenstand der Abschlussprüfung; danach ist das bestehende System geeignet, solche Entwicklungen frühzeitig zu erkennen, die den Fortbestand des Unternehmens gefährden könnten.

#### **RISIKOMANAGEMENTSYSTEM IN BEZUG AUF FINANZINSTRUMENTE (IFRS 7)**

Die finanzwirtschaftliche Zielsetzung der K+S GRUPPE ist es, durch ein systematisches Finanzmanagement finanzielle Risiken (z.B. Preisänderungsrisiko, Ausfallrisiko und Liquiditätsrisiko) zu begrenzen. Dazu ist in der K+S AKTIENGESELLSCHAFT ein zentrales Finanzierungsmanagement eingerichtet. Darüber hinaus steuert die K+S GRUPPE ihre Kapitalstruktur und nimmt unter Berücksichtigung der erwarteten wirtschaftlichen Rahmenbedingungen gegebenenfalls Anpassungen vor. Ziel der Kapitalstruktursteuerung ist es, das Geschäft und

die Investitionsfähigkeit des Unternehmens nachhaltig sicherzustellen. Eine weitergehende Erläuterung zur Steuerung der Kapitalstruktur finden Sie auf Seite 114.

Aus unseren internationalen Aktivitäten können währungsbedingte Marktpreisrisiken entstehen, denen wir im Rahmen unseres Währungsmanagements durch Sicherungsgeschäfte entgegenwirken. Interne Verfahrensanweisungen regeln zulässige Sicherungsinstrumente sowie Sicherungsstrategien, Zuständigkeiten, Abläufe und Kontrollmechanismen. Weitere Marktpreisrisiken können sich aus Rohstoffpreisen (z.B. Energie) bzw. Transportkosten (z.B. Seefrachten) ergeben. Sofern hierzu selektiv Derivate eingesetzt werden, gelten analoge Regelungen. Die Sicherungsinstrumente werden ausschließlich zur Sicherung von Grundgeschäften, nicht aber zu Handels- und Spekulationszwecken eingesetzt. Die Finanzgeschäfte werden nur mit Banken guter Bonität abgeschlossen. In diesem Zusammenhang schreibt die Leitlinie u.a. zur Begrenzung von Ausfallrisiken eine Verteilung der Derivate auf verschiedene Institute vor. Der Abschluss von Sicherungsgeschäften erfolgt zum einen für bereits entstandene Grundgeschäfte und zum anderen für zukünftige Geschäfte, mit denen auf Basis empirisch belastbarer Erkenntnisse mit hoher Wahrscheinlichkeit gerechnet werden kann (antizipative Sicherungsgeschäfte). Eine weitergehende Erläuterung der Sicherungsgeschäfte finden Sie in der Darstellung der Risiken aus Wechselkursschwankungen auf Seite 142 f. und im Anhang auf Seite 194 ff.

#### **BESCHREIBUNG DER WESENTLICHEN MERKMALE DES INTERNEN KONTROLL- UND DES RISIKOMANAGEMENTSYSTEMS IM HINBLICK AUF DEN KONZERNRECHNUNGSLEGUNGS-PROZESS (§ 315 ABS. 2 NR. 5 HGB)**

Das interne Kontrollsystem in der K+S GRUPPE umfasst die Grundsätze, Verfahren und Maßnahmen zur Sicherstellung der Wirksamkeit, Wirtschaftlichkeit und Ordnungsmäßigkeit der Rechnungslegung sowie zur Sicherung der Einhaltung der maßgeblichen Vorschriften.

Die Richtlinien für die Rechnungslegung und Berichterstattung der K+S GRUPPE nach IFRS geben einheitliche Bilanzierungs- und Bewertungsgrundsätze für die in den Konzernabschluss einbezogenen inländischen und ausländischen Gesellschaften vor. Zusätzlich umfassen diese Vorschriften Regelungen für den Konzernabschluss sowie detaillierte und formalisierte Anforderungen an die Berichterstattung der einbezogenen Gesellschaften.

Neue Vorschriften und Änderungen bestehender Regelungen zur Rechnungslegung werden zeitnah auf ihre Auswirkungen hin analysiert und, sofern diese für uns relevant sind, in den Richtlinien und Rechnungslegungsprozessen umgesetzt.

Wir verfügen über ein weitgehend einheitliches IT-System, einen einheitlichen Kontenplan und maschinell standardisierte Rechnungslegungsprozesse. Durch diese Standardisierung ist eine ordnungsgemäße und zeitnahe Erfassung der wesentlichen Geschäftsvor-

fälle sichergestellt. Für zusätzliche manuelle Erfassungen buchhalterischer Vorgänge bestehen verbindliche Regelungen. Bilanzielle Bewertungen, wie z. B. die Kalkulation der bergbaulichen Verpflichtungen oder die Überprüfung der Werthaltigkeit der Geschäfts- und Firmenwerte, erfolgen durch konzerninterne Sachverständige. Nur in Einzelfällen, wie z. B. bei der Bewertung von Pensionsverpflichtungen, wird die Bewertung durch externe Gutachter durchgeführt.

Zur Erstellung des Konzernabschlusses der K+S GRUPPE werden die Einzelabschlüsse der Gesellschaften, deren Rechnungswesen auf der einheitlichen IT-Plattform der K+S GRUPPE geführt wird, direkt in ein IT-Konsolidierungssystem überführt. Bei den übrigen einbezogenen Gesellschaften erfolgt die Übertragung der Abschlussdaten durch eine internetbasierte Schnittstelle. Durch systemtechnische Kontrollen werden die übertragenen Abschlussdaten auf ihre Validität hin überprüft. Zusätzlich erfolgt zentral eine Überprüfung der von den einbezogenen Gesellschaften vorgelegten Einzelabschlüsse unter Beachtung der von den Abschlussprüfern erstellten Berichte. Durch systemseitige Ableitung bzw. formalisierte Abfrage von konsolidierungsrelevanten Informationen ist eine ordnungsgemäße und vollständige Eliminierung konzerninterner Transaktionen sichergestellt. Sämtliche Konsolidierungsprozesse zur Erstellung des Konzernabschlusses werden in dem IT-Konsolidierungssystem durchgeführt und dokumentiert. Die Bestandteile des Konzernabschlusses einschließlich wesentlicher Angaben für den Anhang werden hieraus entwickelt.

Prozessintegrierte bzw. -unabhängige Überwachungsmaßnahmen sind die Bausteine des internen Überwachungssystems. Einen wesentlichen Bestandteil der prozessintegrierten Maßnahmen bilden die maschinellen IT-Prozesskontrollen. Neben manuellen Prozesskontrollen, wie z. B. dem „Vier-Augen-Prinzip“, existiert eine organisatorische Trennung von Verwaltungs-, Ausführungs-, Abrechnungs- und Genehmigungsfunktionen. Weitere Überwachungsaufgaben werden durch Konzerneinheiten, wie z. B. der zentralen Steuerabteilung, wahrgenommen.

Die interne Revision ist mit prozessunabhängigen Prüfungstätigkeiten in das interne Kontrollsystem eingebunden.

Die Jahresabschlüsse der prüfungspflichtigen Gesellschaften und der Konzernabschluss werden durch unabhängige Abschlussprüfer geprüft; dies bildet die wesentliche prozessunabhängige Überwachungsmaßnahme im Hinblick auf den Konzernrechnungslegungsprozess. Die Jahresabschlüsse der übrigen inländischen Gesellschaften unterliegen der Prüfung durch die interne Revision.

## ÜBERSICHT DER UNTERNEHMENSRIKEN

Für die K+S GRUPPE wesentliche Risiken werden in den folgenden Abschnitten beschrieben, wobei aus deren Reihenfolge keine Rückschlüsse auf deren Eintrittswahrscheinlichkeit oder das potenzielle Schadenausmaß zu ziehen sind.

Dabei werden jeweils der mögliche Eintritt und die Wirkung von Risiken nach Gegensteuerungsmaßnahmen unter den derzeitigen Rahmenbedingungen eingeschätzt; dies erfolgt aus Konzernsicht und bezieht sich auf den Zeitraum der Mittelfristplanung.

Die Bewertung der Eintrittswahrscheinlichkeit eines Risikos erfolgt nach den Kriterien

- + unwahrscheinlich (Eintrittswahrscheinlichkeit: < 5 %)
- + möglich (Eintrittswahrscheinlichkeit: 5 – 50 %)
- + wahrscheinlich (Eintrittswahrscheinlichkeit: > 50 %)

Die Bewertung der möglichen Wirkung erfolgt nach den qualitativen Kriterien

- + moderat
- + wesentlich
- + bestandsgefährdend

Eine Veränderung der Rahmenbedingungen gegenüber unserer Mittelfristplanung kann im Zeitverlauf zu einer Neubewertung unserer Einschätzungen führen und wird entsprechend in unserer Zwischenberichterstattung kommuniziert. / TAB: 4.11.1

## EXTERNE UND BRANCHENSPEZIFISCHE RISIKEN

### EINFLÜSSE DURCH GESAMTWIRTSCHAFTLICHE ENTWICKLUNG

Das Nachfrageverhalten nach Düngemitteln der K+S GRUPPE wird erheblich durch das allgemeine Wirt-

## ÜBERSICHT DER UNTERNEHMENS RISIKEN

TAB: 4.11.1

|                                                                                     | Eintrittswahrscheinlichkeit | Mögliche finanzielle Auswirkungen |
|-------------------------------------------------------------------------------------|-----------------------------|-----------------------------------|
| <b>Externe und branchenspezifische Risiken</b>                                      |                             |                                   |
| Einflüsse durch gesamtwirtschaftliche Entwicklung                                   | möglich                     | wesentlich                        |
| Schwankungen bezüglich Nachfrage und Preis                                          | möglich                     | wesentlich                        |
| Saisonale Nachfrageschwankungen                                                     | möglich                     | moderat                           |
| Einflüsse von politischen und sozialen Veränderungen                                | unwahrscheinlich            | wesentlich                        |
| <b>Veränderungen rechtlicher Rahmenbedingungen</b>                                  |                             |                                   |
| Risiken aus der Veränderung bzw. Versagung behördlicher Genehmigungen               | möglich                     | wesentlich                        |
| Risiken aus der Veränderung von Arbeitsplatzgrenzwerten                             | möglich                     | moderat                           |
| Risiken aus der Reduzierung des Anti-Dumping-Schutzes                               | möglich                     | moderat                           |
| Steuerrechtliche Risiken                                                            | möglich                     | moderat                           |
| <b>Operative und strategische Risiken</b>                                           |                             |                                   |
| Risiken aus Akquisitionen und Investitionen                                         | unwahrscheinlich            | wesentlich                        |
| Risiken aus Lieferantenausfällen und Lieferengpässen                                | unwahrscheinlich            | moderat                           |
| Energiekosten- und Energieversorgungsrisiken                                        | möglich                     | moderat                           |
| Risiken aus der Verteuerung von Ammoniak                                            | möglich                     | moderat                           |
| Frachtkosten- und Transportverfügbarkeitsrisiken                                    | möglich                     | moderat                           |
| Produktionstechnische Risiken                                                       | möglich                     | moderat                           |
| Risiken aus Umweltschäden durch Gebirgsschlag                                       | unwahrscheinlich            | wesentlich                        |
| Risiken aus Kohlendioxid-Einschlüssen in Lagerstätten                               | möglich                     | moderat                           |
| Risiken aus Wasserzutritt                                                           | unwahrscheinlich            | wesentlich                        |
| Risiken aus Forschungs- und Entwicklungsaktivitäten                                 | unwahrscheinlich            | moderat                           |
| Personalrisiken                                                                     | unwahrscheinlich            | moderat                           |
| Compliance-Risiken                                                                  | unwahrscheinlich            | wesentlich                        |
| Informationstechnische Risiken                                                      | unwahrscheinlich            | moderat                           |
| <b>Finanzwirtschaftliche Risiken</b>                                                |                             |                                   |
| Risiken durch Wechselkursschwankungen                                               | möglich                     | moderat                           |
| Risiken aus einer Veränderung des allgemeinen Zinsniveaus                           | möglich                     | moderat                           |
| Risiken aus dem Forderungsausfall von Kunden und Ausfallrisiko von Finanzinstituten | unwahrscheinlich            | moderat                           |
| Liquiditätsrisiken                                                                  | unwahrscheinlich            | wesentlich                        |
| Risiken aus einer Veränderung des Unternehmensratings                               | unwahrscheinlich            | moderat                           |

schaftswachstum sowie die wirtschaftliche Entwicklung und die damit einhergehenden steigenden Lebensstandards in relevanten Märkten beeinflusst. Steigender Wohlstand führt hauptsächlich in Schwellenländern zu einem veränderten Ernährungsverhalten, das sich insbesondere in einem gesteigerten Fleischkonsum widerspiegelt. Da die Produktion von Fleisch ein Vielfaches an Getreide, Soja und anderen als Viehfutter verwendeten Produkten erfordert, führt dies zu einem steigenden Bedarf an Agrarrohstoffen (soft commodities), der wiederum eine erhöhte Nachfrage nach Düngemitteln nach sich zieht.

Die deutliche Erholung der Weltwirtschaft im Jahr 2010 sollte sich auch im Jahr 2011 fortsetzen, auch wenn das Wachstumstempo etwas moderater ausfallen könnte. Der in der zweiten Jahreshälfte 2010 einsetzende starke Anstieg der internationalen Getreidepreise und die damit einhergehende verbesserte Einkommenssituation der Landwirte begünstigt die Düngemittelnachfrage. Sollte sich die wirtschaftliche Erholung als nicht nachhaltig erweisen, könnten die Preise für Agrarprodukte wieder auf ein Niveau fallen, das bei den Landwirten erneut Verunsicherung über ihre künftige Ertragssituation auslöst und damit deren Nachfrageverhalten nach Düngemitteln negativ beeinflusst. In Abhängigkeit von Dauer und Intensität könnte dieses mögliche Szenario einen wesentlichen Einfluss auf die Vermögens-, Finanz- und Ertragslage der K+S GRUPPE haben.

Der Einfluss der allgemeinen Wirtschaftslage auf die Nachfrage nach Auftau-, Speise- und Gewerbesalzen

ist hingegen von untergeordneter Bedeutung, da das Geschäft weitgehend konjunkturunabhängig ist.

#### **SCHWANKUNGEN BEZÜGLICH NACHFRAGE UND PREIS**

Vor allem die Produkte unseres Geschäftsfelds Düngemittel können erheblichen Schwankungen in Nachfrage und Preis unterliegen. Durch äußere Einflüsse, auf deren Eintreten oder Ausbleiben wir in aller Regel keinen Einfluss haben, kann die Nachfrage nach unseren Produkten auf den relevanten Absatzmärkten stark zurückgehen und zu einem Druck auf das Preisniveau führen. Zu diesen Einflüssen zählen etwa weltweite oder auch regionale Konjunkturschwankungen, sinkende Weltmarktpreise von wichtigen Agrarerzeugnissen, der Markteintritt neuer Anbieter, eine Konzentration auf der Nachfrageseite sowie eine bewusste Kaufzurückhaltung unserer Kunden.

Diese möglichen Ereignisse können in Abhängigkeit von Dauer und Intensität einen wesentlichen Einfluss auf die Vermögens-, Finanz- und Ertragslage der κ+s GRUPPE haben. Da die Nachfrage nach Agrarprodukten und damit nach Düngemitteln von Megatrends wie der wachsenden Weltbevölkerung, einem steigenden Lebensstandard in den Schwellenländern und der Entwicklung des Bioenergiesektors getragen wird und Düngemittel mit ihrer ertrags- und qualitätssteigernden Wirkung somit in der Agrarproduktion eine zentrale Rolle spielen, sehen wir langfristig allerdings positive Entwicklungsmöglichkeiten.

Ein Eintritt neuer Wettbewerber in den internationalen Kalimarkt könnte zu einer spürbaren Verschiebung der Branchenstruktur führen. So haben kapitalstarke Bergbaukonzerne, wie z.B. BHP BILLITON und VALE, angekündigt, mittel- bis langfristig in neue Kaliprojekte zu investieren. Ein aggressiver Ausbau neuer Kalikapazitäten durch einen bislang branchenfremden Produzenten könnte gegebenenfalls mit einer Verstärkung des Wettbewerbsdrucks einhergehen, wenn der Markt für diese zusätzlichen Mengen nicht in voller Höhe aufnahmebereit ist oder der neue Wettbewerber sich über eine aggressive Preispolitik am Markt zu etablieren versucht. Da jedoch sowohl der Bau neuer Kalikapazitäten als auch der Erwerb eines bedeutenden Kaliproduzenten sehr kapitalintensiv ist, dürfte aufgrund der daraus resultierenden hohen Kapitalkosten eine derartige Verdrängungspolitik – wenn überhaupt – nur von kurzer Dauer sein. Vor diesem Hintergrund erachten wir eine dauerhaft aggressive Preispolitik von Marktteilnehmern, die eine wesentliche Wirkung auf unsere erwarteten Ergebnisse hätte, als unwahrscheinlich.

#### **SAISONALE NACHFRAGESCHWANKUNGEN**

Ein signifikantes Absatzrisiko für die Geschäftsbereiche Kali- und Magnesiumprodukte, Stickstoffdüngemittel sowie Salz resultiert insbesondere aus der Saisonalität der Nachfrage, speziell aufgrund der Witterungsabhängigkeit. Eine dauerhaft nasskalte Witterung während der insbesondere für Europa wichtigen Frühjahrsaison kann beispielsweise zu Absatzverschiebungen oder gar -einbußen bei Düngemitteln und Pflanzenpflegeprodukten führen. Ebenso können milde Winter in den

Hauptabsatzgebieten für Auftausalz (Europa, Nordamerika) den Absatz in dieser Produktgruppe erheblich verringern. Dieser Schwankungsanfälligkeit begegnen wir mit regionaler Diversifizierung, bedarfsorientierter Produktionssteuerung und flexiblen Arbeitszeitmodellen. Eine Absicherung durch spezielle Derivate wurde aufgrund der aus unserer Sicht unattraktiven Marktbedingungen für diese Instrumente bisher nicht vorgenommen. Entsprechende Beeinträchtigungen durch Witterungseinflüsse halten wir für möglich, deren Wirkung bewerten wir in Relation zu den erwarteten Ergebnissen jedoch als moderat.

Darüber hinaus führt der Aufbau und Abbau von Lagerbeständen durch unsere Kunden in Abhängigkeit von deren Erwartung hinsichtlich der zukünftigen Marktpreisentwicklung, der Witterung oder deren Liquiditätsmanagement zu einer schwankenden Nachfrage. Dies kann zu einer Unterauslastung der Produktionskapazität und damit zu steigenden Stückkosten führen. Die Bereitschaft der Handelsstufe zur Voreinlagerung von Düngemitteln ist abhängig von deren Erwartungen an die Nachfrage seitens der Landwirtschaft. κ+s bietet z.B. über ein Staffelpreissystem finanzielle Anreize, um die Einlagerungsbereitschaft zu fördern. Trotzdem ist nicht auszuschließen, dass die Handelsstufe bei hohen Marktschwankungen auf eine Voreinlagerung verzichtet. Dadurch könnten in der Düngehauptsaison so hohe Mengenanforderungen auf uns zukommen, dass einerseits die Vorräte in unseren Lägern nicht ausreichen oder diese andererseits aufgrund logistischer Engpässe nicht vollständig bedient werden können. Das Gleiche

gilt für den Salzbereich, wenn Städte, Gemeinden, Straßenmeistereien – auch mit Blick auf die öffentliche Kasenlage – in der Nebensaison zu geringe Vorräte an Auftausalz aufbauen. Derartige mögliche Effekte können sich moderat auf die Vermögens-, Finanz- und Ertragslage der K+S GRUPPE auswirken sowie die Vergleichbarkeit der Quartalsabschlüsse erschweren.

#### **EINFLÜSSE VON POLITISCHEN UND SOZIALEN VERÄNDERUNGEN**

Wir üben unsere Geschäftstätigkeit in einer Vielzahl von Ländern aus, von denen etliche außerhalb Westeuropas und Nordamerikas gelegen sind. Tiefgreifende Veränderungen von politischen, gesellschaftlichen und wirtschaftlichen Rahmenbedingungen in Produktions- und Absatzländern sowie in den Herkunftsländern von Zulieferern können nicht ausgeschlossen werden. In einigen der Länder, in denen unsere Produkte hergestellt bzw. in die sie exportiert werden oder aus denen wir Roh- oder Hilfsstoffe beziehen, sind die allgemeinen wirtschaftlichen, politischen und rechtlichen Rahmenbedingungen weniger stabil als etwa in Westeuropa oder Nordamerika. Wir sind dadurch von einer Reihe von Faktoren abhängig, auf die wir wenig oder gar keinen Einfluss haben. Zu diesen Faktoren zählen unter anderem politische Instabilität, entschädigungslose Enteignungen von Betriebsvermögen, Vorschriften zur Fremdwährungskontrolle und sonstige negative Auswirkungen im Zusammenhang mit Wechselkursen sowie Handelsbeschränkungen. Solche negativen Einflüsse könnten eine wesentliche Wirkung auf die Wachstumsperspektiven und auf die Vermögens-,

Finanz- und Ertragslage der K+S GRUPPE haben, sind derzeit in den für K+S in Bezug auf Produktion und Absatz relevanten Ländern jedoch unwahrscheinlich.

#### **VERÄNDERUNGEN RECHTLICHER RAHMENBEDINGUNGEN**

##### **RISIKEN AUS DER VERÄNDERUNG BZW. VERSAGUNG BEHÖRDLICHER GENEHMIGUNGEN ENTSORGUNG VON SALZABWÄSSERN**

Aufgrund von öffentlichen und politischen Diskussionen über künftig höhere Anforderungen an die Umweltverträglichkeit der Produktionsprozesse zur Herstellung von Kali- und Magnesiumprodukten sind Einflüsse auf die Erteilung und den Bestand von Betriebsgenehmigungen, Planfeststellungsbeschlüssen sowie von wasserrechtlichen Erlaubnissen möglich. Im Geschäftsbereich Kali- und Magnesiumprodukte entstehen unter anderem flüssige Rückstände (Salzabwässer) sowohl aus der laufenden Produktion als auch durch Niederschläge auf die Rückstandshalden. Auf der Grundlage bestehender Genehmigungen werden die Salzabwässer zum Teil in Flüsse eingeleitet und zum anderen in unterirdische Gesteinsschichten (Plattendolomit) versenkt. Die Feststellung einer wesentlichen Verminderung bisher prognostizierter Versenkmöglichkeiten bzw. die vorzeitige, vollständige Inanspruchnahme genehmigter Versenkräume sowie der Befund einer möglichen Beeinflussung von Trink- oder nutzbaren Grundwasserressourcen durch die Versenkung ließe eine unveränderte Verlängerung bestehender Versenkungsgenehmigungen

unwahrscheinlich erscheinen und könnte zudem eine sofortige teilweise oder gar vollständige Aufhebung von Versenkungsgenehmigungen zur Entsorgung flüssiger Rückstände nach sich ziehen. Darüber hinaus gehen wir davon aus, dass auch die gegenwärtig für die Einleitung der Salzabwässer in Oberflächengewässer genehmigten Grenzwerte für zukünftige Einleitungsgenehmigungen herabgesetzt werden. Verlängerungen der bestehenden Versenkungs- und Einleitungsgenehmigungen bzw. deren Neuerteilung können mithin zu wesentlichen Zusatzkosten für eine Vorbehandlung der Produktionsrückstände (etwa durch Eindampfung) oder zu erheblichen Produktionsreduzierungen an den betroffenen Standorten führen. Wir halten es für möglich, dass auslaufende Genehmigungen nicht verlängert bzw. nicht neu erteilt werden; dies hätte schlimmstenfalls eine Verringerung oder gar Einstellung der Produktion und ggf. Schließung der betroffenen Standorte mit erheblichen negativen Personalauswirkungen zur Folge; daraus würden sich nachhaltige und wesentliche Beeinträchtigungen der Vermögens-, Finanz- und Ertragslage der K+S GRUPPE ergeben.

Für die an der Werra gelegenen Standorte Hattorf, Unterbreizbach und Wintershall, mit einem Anteil an der gesamten Kali-Produktionskapazität der K+S GRUPPE von etwa 45 %, sind die bestehenden Versenkungs- und Einleitungsgenehmigungen bis November 2011 bzw. Dezember 2012 befristet. Wir haben bereits im Oktober 2008 ein umfassendes Maßnahmenpaket vorgestellt, das mit einem Investitionsvolumen von 360 Mio. € die Versenkung und die Einleitungen von Salzabwässern



bis 2015 nochmals erheblich reduzieren soll. Ergänzend wurde mit den Ländern Hessen und Thüringen eine öffentlich-rechtliche Vereinbarung geschlossen, in der sich die Vertragspartner gemeinsam zu nachhaltigem wirtschaftlichen Handeln, der Sicherung der Arbeitsplätze und einem schonenden Umgang mit der Natur für die nächsten 30 Jahre bekennen. Es besteht jedoch keine Gewähr, dass die Genehmigungen auf dieser Grundlage verlängert bzw. neu erteilt werden. Mithin kann nicht ausgeschlossen werden, dass weitere Investitionen an den betroffenen Standorten notwendig werden, die Produktionskosten weiter steigen und ggf. sogar die Schließung dieser Produktionsstandorte erforderlich sein kann. Die Verminderung fester und flüssiger Produktionsrückstände in der Kaliproduktion wird auch weiterhin zu den Schwerpunkten unserer Forschungs- und Entwicklungstätigkeit gehören.

Am Runden Tisch Gewässerschutz Werra/Weser und Kaliproduktion haben auf Initiative der Länder Hessen und Thüringen sowie von κ+s zwischen März 2008 und Februar 2010 Werra-Anrainer, Wirtschaft, Politik, Verwaltung und Verbände über langfristige Lösungen zur Verbesserung der Gewässerqualität beraten. Der Auftrag an die Teilnehmer am Runden Tisch: Er soll Lösungen vorschlagen, die zugleich weitere Verbesserungen des ökologischen Zustands von Werra und Weser, einen Beitrag zur Sicherung der Arbeitsplätze in der Kaliindustrie sowie die Stärkung der wirtschaftlichen Strukturen in den betroffenen Regionen beinhalten. Insgesamt 16 Mal haben sich die Teilnehmer am Runden Tisch getroffen und eine Vielzahl an Maßnahmen für den Umgang

mit salzhaltigen Abwässern geprüft. Außerdem wurden externe Vorschläge bewertet und eine Reihe von Gutachten in Auftrag gegeben.

In seiner abschließenden Sitzung am 9. Februar 2010 hat der Runde Tisch empfohlen, spätestens ab 2020 die Einleitung von Salzabwasser in die Werra und dessen Versenkung in den Untergrund vollständig einzustellen und eine Fernleitung zur Nordsee zu realisieren. Dabei lässt er jedoch offen, wie dies auf Grundlage der gemeinsam mit den Ländern Hessen und Thüringen definierten und am Runden Tisch akzeptierten Entscheidungskriterien bis 2020 erreicht werden kann. So findet die Entscheidung des Niedersächsischen Landtags gegen den Bau einer Leitung keine Berücksichtigung, Fragen der betriebswirtschaftlichen Angemessenheit und Finanzierbarkeit werden ausgeklammert. Darüber hinaus ist noch unklar, inwieweit durch den Fernleitungsbau die Ziele der EU-Wasserrahmenrichtlinie erreicht werden können. κ+s hat daher der Empfehlung des Runden Tisches nicht zugestimmt.

Da die dauerhafte lokale Entsorgung von einigen Seiten in Frage gestellt wird, kann eine langfristige Genehmigung des derzeitigen Konzepts nicht als gesichert angenommen werden. Deshalb hat sich κ+s aus Gründen vorausschauender Sorgfalt entschlossen, parallel zur Umsetzung der lokalen Maßnahmen auch Genehmigungsanträge für standortferne Entsorgungswege, d.h. Fernleitungen zur Oberweser und zur Nordsee, vorzubereiten. Dies geschieht ungeachtet des Umstands, dass die mit den Ländern Hessen und Thüringen definierten

und vom Runden Tisch akzeptierten Prüfkriterien für Fernleitungen aus Sicht des Unternehmens derzeit nicht erfüllt sind. Dies muss jedoch der Fall sein, bevor eine Entscheidung über den Bau einer Fernleitung getroffen werden kann – eine solche Entscheidung ist mit der Vorbereitung der Anträge daher nicht verbunden.

Das Kaliwerk Neuhoef-Ellers hat die Versenkung von Salzabwässern in den Plattendolomit nach vollständiger Inanspruchnahme des Versenkraums einstellen müssen. Um die ordnungsgemäße Entsorgung der dort anfallenden Haldenwässer gewährleisten zu können, erfolgt im Einklang mit geltenden Genehmigungen bis zur Fertigstellung der Mitte 2010 beantragten Planfeststellung für die Salzabwasserleitung der Transport der Salzabwässer per Bahn und LKW zum nächstgelegenen Standort, dem Werk Werra.

#### ENTSORGUNG VON FESTEN PRODUKTIONSRÜCKSTÄNDEN

An den Gewinnungsstandorten des Geschäftsbereichs Kali- und Magnesiumprodukte werden feste Rückstände derzeit im Rahmen bestehender Genehmigungen aufgehalten. Sollten Aufhaltungsgenehmigungen widerrufen oder notwendige Haldenerweiterungen nicht oder nur unter unzumutbar hohen Auflagen genehmigt werden, fehlt den Betrieben die Entsorgungsmöglichkeit für diese Rückstände. Die alternative Verbringung der Rückstände als Feuchtversatz in die vorhandenen Grubenhohlräume ist nur in begrenztem Umfang möglich. Auf längere Sicht stößt die Versatzeinbringung physisch an Grenzen, da hierbei nur eine wesentlich geringere

Verdichtung erreicht wird, als sie das Rohsalz in der Lagerstätte aufweist. Darüber hinaus würden hohe Zusatzkosten verursacht, die in keinem wirtschaftlich vertretbaren Verhältnis zum Aufwand stehen. Mögliche Auswirkungen auf die Vermögens-, Finanz- und Ertragslage der K+S GRUPPE bewerten wir als wesentlich.

#### HALDENERWEITERUNG

Das Verwaltungsgericht Hannover hat am 18. November 2009 den Klagen vom BUND FÜR UMWELT UND NATURSCHUTZ DEUTSCHLAND E. V. (BUND) und vom NATURSCHUTZBUND DEUTSCHLAND E. V. (NABU) stattgegeben und den Planfeststellungsbeschluss des Landesamtes für Bergbau, Energie und Geologie Niedersachsen (LBEG) vom 10. August 2007 sowie den Änderungsbeschluss vom 13. März 2009 zur Haldenerweiterung des Werks Sigmundshall aufgehoben. Im Planfeststellungsbeschluss war die Abdeckung der Halde eine Voraussetzung für die Erweiterung der Aufhaldung von Produktionsrückständen. Die Urteile des Verwaltungsgerichts beziehen sich ausschließlich auf die von K+S vorgesehene Art der Abdeckung der Halde, deren Eignung für eine langzeitsichere, eigenständige Begrünung der Halde in Frage gestellt wurde. Die weitere Aufhaldung von Rückständen aus der Kaliumaufbereitung wurde vom Verwaltungsgericht nicht als unzulässig angesehen. Die zuständige Bergbehörde hat gegen die beiden Urteile Berufung eingelegt, die K+S KALI GMBH wird sie im weiteren Prozess unterstützen. Derzeit ergeben sich kurzfristig keine Einschränkungen für den Betrieb des Kaliwerks Sigmundshall. Langfristige Auswirkungen lassen sich derzeit noch nicht abschätzen. Mögliche Auswir-

kungen auf die Vermögens-, Finanz- und Ertragslage der K+S GRUPPE bewerten wir mittelfristig als moderat.

#### SICHERHEITSLAISTUNGEN

Die Forderung nach insolvenz-sicheren Sicherheitsleistungen für die Ewigkeitskosten der Haldenverwahrung und für betriebseigene Deponien ist in Zukunft nicht auszuschließen. Bereits heute werden die erforderlichen Aufwendungen für die planmäßige Nachsorge der Halden bilanziell über Rückstellungen abgebildet. Sofern zusätzlich zur Rückstellungsbildung Sicherheitsleistungen hinterlegt werden müssten, würden finanzielle Mittel gebunden; dies könnte den finanziellen Spielraum des Unternehmens begrenzen. Mögliche Auswirkungen auf die Vermögens-, Finanz- und Ertragslage der K+S GRUPPE bewerten wir mittelfristig als moderat.

#### RISIKEN AUS DER VERÄNDERUNG VON ARBEITSPLATZGRENZWERTEN

Risiken für unsere Bergbauaktivitäten können aus der EU-Initiative zur Festsetzung von indikativen Arbeitsplatzgrenzwerten für Stickstoffmonoxid (NO) und Stickstoffdioxid (NO<sub>2</sub>) sowie Kohlenmonoxid (CO) entstehen, da solche Grenzwerte von erheblicher Bedeutung für die Genehmigung der Bergbauaktivitäten und somit die Produktion unter Tage sein können. Durch eine intensive Zusammenarbeit zwischen der EU-Kommission, den nationalen Regierungen sowie den betroffenen Unternehmen und deren Interessenverbänden sollen langfristig sinnvolle, realistische Grenzwerte erreicht werden. Würden Grenzwerte deutlich herabgesetzt, könnten erhebliche Investitionen zur Einhaltung der Grenzwerte

notwendig werden. Sollten die Arbeitsplatzgrenzwerte derart verschärft werden, dass die Produktion an den betreffenden Standorten unter Einhaltung dieser Grenzwerte mit wirtschaftlich vertretbarem Aufwand oder technisch insgesamt nicht mehr möglich wäre, könnte uns dies sogar zwingen, diese Standorte langfristig zu schließen. Mittelfristig sind Beeinträchtigungen möglich, die wir derzeit als moderat einschätzen.

#### RISIKEN AUS DER REDUZIERUNG DES ANTI-DUMPING-SCHUTZES

Die K+S GRUPPE steht im Düngemittelgeschäft auch mit Produzenten aus Russland und Weißrussland im Wettbewerb, die entweder in Staatseigentum stehen, in erheblichem Maße Subventionen, wie z.B. verbilligte Gaslieferungen oder vergünstigte Eisenbahntransporte, empfangen oder sonst direkt oder indirekt von Seiten des Staates finanzielle Unterstützung erfahren. Diese Wettbewerber können dadurch ihre Produkte zu besseren Konditionen anbieten als solche Hersteller, die keine vergleichbare staatliche Unterstützung erhalten. Im Jahr 2006 wurden die Regelungen zum Anti-Dumping-Schutz gegen unfairen Wettbewerb mit Kalidüngemitteln aus Russland und Weißrussland für den europäischen Markt bis Mitte 2011 erneuert; eine weitere Verlängerung wird angestrebt. Nachdem sich der Wettbewerbsdruck in der EU in den Jahren bis 2008 aufgrund der hohen Kalinachfrage auf dem Weltkalimarkt und den zwischenzeitlich eingetretenen deutlichen Preiserhöhungen in Grenzen hielt, führte die Veränderung der Marktsituation im Geschäftsjahr 2009 zu einer Zunahme des Wettbewerbsdrucks in Europa, auch

aus den genannten Ländern. Eine weitere Verschärfung des Wettbewerbsdrucks könnte dazu führen, dass wir einen größeren Anteil unserer Produkte in Übersee vermarkten müssen. Es ist jedoch nicht gewährleistet, dass die Absatzrückgänge in Europa durch Absatzsteigerungen in Übersee ausgeglichen werden können. Das Schadenpotenzial infolge von zukünftigen abgeschwächten oder entfallenden Anti-Dumping-Maßnahmen hängt vom Absatzerfolg in Übersee und der jeweiligen Kosten- und Preissituation ab. Das mögliche Risiko einer Aufweichung oder eines Wegfalls der europäischen Anti-Dumping-Vorschriften wird vor dem Hintergrund des derzeit auf den Weltmärkten vorherrschenden Preisniveaus als moderat eingeschätzt.

#### STEUERRECHTLICHE RISIKEN

Im Bereich der Energiesteuern können die als energieintensive Unternehmen eingestuftes Tochtergesellschaften der K+S GRUPPE in Deutschland derzeit den sogenannten Spitzenausgleich nutzen. Die maßgeblichen Regelungen wurden von der EU-Kommission bis 2012 genehmigt und gewähren Unternehmen des produzierenden Gewerbes für bestimmte Energieerzeugnisse und Strom, die sie zu betrieblichen Zwecken verwenden, Entlastungen von der Energie- und der Stromsteuer. Im Rahmen des Haushaltskonsolidierungsgesetzes wurde dieser Spitzenausgleich mit Wirkung ab 2011 leicht abgesenkt. Dadurch ergibt sich eine leichte Verteuerung unserer energieintensiven Produktion in Deutschland. Für eine Nachfolgeregelung ab 2013 werden politisch bereits erste Überlegungen angestellt. Wir beteiligen uns aktiv an dieser Diskussion, um einen Fort-

bestand dieser oder eine vergleichbare Anschlussregelung zu erreichen. Ein vollständiger Wegfall des Spitzenausgleichs ist möglich und würde im Vergleich zu der in 2010 noch bestehenden Rechtslage zu energiesteuerlichen Mehrbelastungen und zu Wettbewerbsnachteilen für unsere inländischen energieintensiven Unternehmen führen, die wir jedoch als moderat einschätzen.

#### OPERATIVE UND STRATEGISCHE RISIKEN

##### RISIKEN AUS AKQUISITIONEN UND INVESTITIONEN

Unsere Vision und Mission stecken den Rahmen für unsere Geschäftstätigkeit und die strategische Ausrichtung der K+S GRUPPE ab und sollen unseren Mitarbeitern, Aktionären, Fremdkapitalgebern, Kunden, Lieferanten und der Öffentlichkeit die Grundlage für unser Denken und Handeln erläutern. Dazu berät der Vorstand gemeinsam mit den Geschäftsbereichsleitungen regelmäßig die strategische Ausrichtung mit ihren Chancen und Risiken.

Aus einer Erweiterung der Geschäftstätigkeit durch Akquisitionen ergeben sich Chancen, aber auch Risiken. An jede Akquisition sowie Erweiterungsinvestition stellen wir gruppenweit die anspruchsvollen Renditeanforderungen, die auf den Seiten 91 f. unter ‚Finanzielle Ziele‘ detailliert erläutert werden. K+S beobachtet das Marktumfeld hinsichtlich geeigneter Akquisitionsprojekte bzw. Kooperationen. Wenn es unter strategischen Gesichtspunkten vorteilhaft erscheint, akquirieren oder

verkaufen wir Unternehmen bzw. Unternehmensteile. Von zentraler Bedeutung sind insoweit Unternehmensbewertungen, in welche die Erkenntnisse aus Unternehmensdaten (Due Diligence) und weiterer Analysen einfließen. Getätigte Akquisitionen werden von Integrationsteams intensiv begleitet. Zusätzlich erfolgen bei bedeutsamen Investitions- und Akquisitionsprojekten Nachkontrollen. Risiken könnten sich aus der Integration von Mitarbeitern, Prozessen, Technologien und Produkten ergeben. Unerwartet hohe Integrationskosten können die Realisierung der geplanten Ziele und Synergien gefährden. Zudem können Akquisitionen den Verschuldungsgrad und die Finanzierungsstruktur nachteilig beeinflussen sowie zu einem Anstieg der langfristigen Vermögensgegenstände, einschließlich der Geschäfts- und Firmenwerte, führen. Abschreibungen auf solche Vermögensgegenstände aufgrund unvorhergesehener Geschäftsentwicklungen können zu Belastungen führen.

Die K+S GRUPPE ist derzeit dabei, das kanadische Unternehmen POTASH ONE vollständig zu übernehmen. POTASH ONE besitzt mehrere Kali-Explorationslizenzen in der kanadischen Provinz Saskatchewan einschließlich eines bereits fortgeschrittenen Greenfield-Projekts zur Errichtung eines Solbetriebes. K+S erwartet im Endausbau des Legacy-Projekts eine Produktionskapazität von mindestens 2,7 Mio. t Kaliumchlorid pro Jahr. Die Realisierung dieser Produktionskapazität würde ein Investitionsvolumen von insgesamt rund 2,5 Mrd. USD in Saskatchewan umfassen. Die Gesellschaft wird in Saskatchewan, Kanada, angesiedelt sein. Alle im Rahmen des Projekts getroffenen Annahmen und Schätzungen unterliegen

potenziellen geschäftlichen, wirtschaftlichen, politischen und sozialen Unwägbarkeiten. Das Risiko besteht derzeit darin, dass die Erwartungen nicht erfüllt werden könnten, obwohl im Vorfeld der Übernahme eine intensive Due Diligence durchgeführt wurde und die geologischen, technischen, rechtlichen und finanziellen Rahmenbedingungen geprüft wurden. Faktoren, die zu gravierenden Beeinflussungen führen könnten, wären z.B. unerwartete geologische Störungen, technische Schwierigkeiten bei der Erschließung der Lagerstätte sowie Änderungen der lokalen Gesetzgebung, Genehmigungen und Vorschriften. Die genannten Einflüsse könnten unter Umständen zu einem Wertberichtigungsbedarf auf das erworbene Vermögen führen und eine wesentliche Wirkung auf die Vermögens-, Finanz- und Ertragslage haben, sind jedoch derzeit unwahrscheinlich.

/ WEITERE INFORMATIONEN ZUR AKQUISITION VON POTASH ONE finden Sie im Nachtragsbericht auf Seite 145.

Bei zukünftigen Akquisitionen, Kooperationen und Investitionen besteht das Risiko, dass diese durch politische Restriktionen nur unter erschwerten Bedingungen oder überhaupt nicht getätigt werden können. Dies könnte interessante Rohstofflagerstätten in bestimmten politisch instabilen Regionen betreffen. Ein daraus resultierender Mangel an geeigneten Akquisitionsobjekten könnte die Wachstumsaussichten der K+S GRUPPE deutlich beeinträchtigen. Geeignete Partner könnten diese Risiken mindern bzw. unsere Chancen verbessern. Wesentliche Beeinträchtigungen halten wir hier für unwahrscheinlich.

#### RISIKEN AUS LIEFERANTENAUSFÄLLEN UND LIEFERENGPÄSSEN

Die Anzahl der Lieferanten für Roh- und Hilfsstoffe wie Ammoniak (siehe Ausführungen zum Preisrisiko aus der Verteuerung von Ammoniak), Phosphat, Sprengstoffe, schwefelarmen Dieseltreibstoff sowie die erforderliche technische Ausstattung einschließlich Ersatzteile, die wir von externen Anbietern beziehen, ist begrenzt. Lieferboykotte, Lieferengpässe oder -ausfälle, auf die wir nur sehr begrenzt oder gar keinen Einfluss haben, könnten zu einer eingeschränkten Verfügbarkeit von Roh-, Hilfs- und Betriebsstoffen sowie bergbauspezifischer Maschinenausstattung und Ersatzteilen und damit zu einer erheblichen Kostensteigerung oder einer Produktionsbeeinträchtigung führen. Mit Marktanalysen, gezielter Lieferantenauswahl bzw. -bewertung, langfristigen Liefervereinbarungen, klar definierten Qualitätsstandards sowie modernen Einkaufsmethoden verringern wir diese Beschaffungsrisiken. Ein verbleibendes Beschaffungsrisiko könnte moderate Einflüsse auf die Vermögens-, Finanz- und Ertragslage haben; wir halten den Schadeneintritt jedoch für unwahrscheinlich.

#### ENERGIEKOSTEN- UND ENERGIEVERSORGUNGSRISIKEN

Die Energiekosten der K+S GRUPPE (2010: 265,8 Mio. €) werden insbesondere durch den Verbrauch von Erdgas bestimmt. Dies gilt in unterschiedlicher Ausprägung für sämtliche Geschäftsbereiche. Energiepreise sind häufig starken Schwankungen unterworfen. Deutliche Energiepreissteigerungen gegenüber dem aktuellen Preisniveau können in Zukunft nicht ausgeschlossen werden.

Zur Begrenzung dieses Risikos wird der Erdgasbedarf unserer Kali- und Salzproduktion durch die Nutzung von Dampf aus Ersatzbrennstoff-Heizwerken kontinuierlich reduziert. Das Preisrisiko beim Erdgasbezug wird darüber hinaus durch folgende Instrumente abgemildert: Neben der gezielten Nutzung von Festpreisvereinbarungen (z.B. vertragliche Sicherung der Erdgaspreise für bis zu zwei Jahre bei MORTON SALT) haben wir mit einigen Lieferanten auch Energielieferverträge mit Zeitverzugsklauseln vereinbart. Für das verbleibende Restrisiko kommen selektiv Absicherungsgeschäfte zum Einsatz. Es besteht keine Gewähr, dass wir uns gegen Preisschwankungen bei Energieträgern vollständig absichern oder Energiekostensteigerungen an unsere Kunden weitergeben können. Ferner sind wir auf die Zuverlässigkeit der Energielieferungen angewiesen, sodass bei kurzfristiger Unterbrechung des Gasbezugs Risiken für die Versorgungssicherheit bestehen. Risiken aus Energiekosten und Energieversorgung, die eine moderate Auswirkung auf die Vermögens-, Finanz- und Ertragslage haben könnten, halten wir für möglich.

#### RISIKEN AUS DER VERTEUERUNG VON AMMONIAK

Die Herstellkosten der von BASF für uns produzierten stickstoff- und phosphathaltigen Düngemittel werden in hohem Maße von den Weltmarktpreisen für Ammoniak und Phosphat bestimmt. Bei schwieriger werdendem Wettbewerbsumfeld mag es bei Stickstoffdüngemitteln nicht immer gelingen, Kostensteigerungen in vollem Umfang über die Preise weiterzugeben;

das daraus erwachsende mögliche Risiko für K+S wird jedoch als moderat eingestuft.

#### **FRACHTKOSTEN- UND TRANSPORTVERFÜGBARKEITSRISIKEN**

Unsere Gesamtkosten werden in nicht unerheblichem Maße von Frachtkosten (2010: 790,0 Mio. €) beeinflusst. Während die Produkte unseres Geschäftsbereichs Kali- und Magnesiumprodukte in unseren sechs Bergwerken in Deutschland gefördert werden, erzielten wir im vergangenen Jahr 40 % des Umsatzes in Europa außerhalb von Deutschland und 45 % in Übersee. Im Geschäftsbereich Salz haben wir Produktionsstätten in Europa, Nord- und Südamerika. Kennzeichnend für die Geschäftstätigkeit ist der zum Teil lange Transportweg, den unsere Produkte bei gleichzeitig hohen Transportvolumina zurücklegen müssen. Eine Verknappung des zur Verfügung stehenden Frachtraums könnte zu höheren Kosten für den Transport führen. Ferner entstehen bei steigenden Mineralölpreisen erhebliche Mehrkosten. Es besteht keine Gewähr, dass steigende Transportkosten stets an die Kunden weitergegeben werden können. Durch langfristige Frachtraumsicherung mit hohem Festpreisannteil und Nutzung kostengünstiger Container-Transporte begegnen wir solchen Entwicklungen; darüber hinaus kommen selektiv auch Absicherungsgeschäfte zum Einsatz, um die Effekte aus Preisschwankungen zu begrenzen. Die hohe Transportintensität unserer Geschäftstätigkeit bedingt zudem eine erhebliche Abhängigkeit von Infrastruktureinrichtungen wie Häfen, Straßen, Bahnstrecken und Verladestationen. Ein Ausfall oder Engpass könnte die Produktions- oder Absatzmöglichkeiten

einschränken. Entsprechende Beeinträchtigungen aus steigenden Frachtraten oder eingeschränkter Transportverfügbarkeit halten wir für möglich, sehen sie aber in Relation zu den erwarteten Ergebnissen als moderat an.

#### **PRODUKTIONSTECHNISCHE RISIKEN**

Die Produktionsanlagen der K+S GRUPPE, die unter anderem für Bergbauaktivitäten, Verarbeitung von Rohstoffen und Einlagerung von Gefahrstoffen genutzt werden, zeichnen sich durch eine hohe Leistungsfähigkeit aus. Aufgrund von Betriebs- und Unfallrisiken, denen die Anlagen, Produktionsstätten, Lager und Verladeanlagen ausgesetzt sind, können Betriebsstörungen eintreten und Personenschäden, Sachschäden und Umweltbelastungen entstehen. Durch den Einsatz vielfältiger Überwachungs-, Erkundungs- und Kontrollsysteme wollen wir potenzielle Produktionsrisiken frühzeitig erkennen und entsprechend reagieren. Mit einer Vielzahl von Maßnahmen zur Qualitätssicherung, vorbeugender Instandhaltung und kontinuierlicher Anlagenkontrolle werden diese Risiken verringert. Dazu tragen auch Zertifizierungen nach internationalen Normen und die ständige Weiterentwicklung unserer Anlagen und Produkte bei. Für Feuerschäden und damit verbundene Produktionsausfälle sowie für anderweitige Betriebsunterbrechungen haben wir entsprechende Versicherungen abgeschlossen. Aufgrund unserer Vorsorgemaßnahmen bewerten wir die verbleibenden möglichen produktionstechnischen Risiken als moderat.

#### **RISIKEN AUS UMWELTSCHÄDEN DURCH GEBIRGSSCHLAG**

Unsere Bergbauaktivitäten beinhalten das bergbauspezifische Risiko einer plötzlich auftretenden großflächigen und unter Umständen starken Absenkung der Erdoberfläche (Gebirgsschlag). Sollte dies eintreten, könnte es neben dem teilweisen oder vollständigen Verlust des Bergwerks und der Beschädigung der Anlagen zu erheblichen Schädigungen am Eigentum Dritter sowie zu Personenschäden und Todesfällen kommen. Zur Sicherung der Tagesoberfläche, der langzeitsicheren Standfestigkeit und somit der Vermeidung von solchen Gebirgsschlägen trägt unsere auf umfangreiche Forschungsarbeiten gestützte, fachgerechte Dimensionierung der Salzpfeiler in den Grubengebäuden bei. Eine ständige Überwachung der Grubengebäude liefert ggf. rechtzeitige Hinweise, ob zusätzliche Maßnahmen zur Sicherung der Grubengebäude und zur Vermeidung von Bergschäden erforderlich sind. Solche negativen Einflüsse hätten eine wesentliche Wirkung auf die Vermögens-, Finanz- und Ertragslage der K+S GRUPPE, sind jedoch unwahrscheinlich.

#### **RISIKEN AUS KOHLENDIOXID-EINSCHLÜSSEN IN LAGERSTÄTTEN**

Kohlendioxid-Einschlüsse stellen in bestimmten Bergwerken ein latentes Gefahrenpotenzial dar. Sollte Kohlendioxid aus diesen Einschlüssen unkontrolliert ausbrechen, könnte die K+S GRUPPE für damit im Zusammenhang stehende Schäden oder Verletzungen haftbar gemacht werden, Schäden an eigenem Gerät erleiden und Produktionseinschränkungen oder -ausfällen aus-



gesetzt sein. Um Auswirkungen auf Menschen, Maschinen und Lagerstätten so gering wie möglich zu halten, wird die Gewinnung unter Tage stets unter Beachtung von besonderen Sicherheitsrichtlinien für eventuelle CO<sub>2</sub>-Ausbrüche durchgeführt. Das mögliche Schadenpotenzial halten wir für moderat.

#### **RISIKEN AUS WASSERZUTRITT**

Grundsätzlich bestehen in Grubenbetrieben unter Tage hydrogeologische Risiken, die – sofern nicht beherrschbar – wesentliche Schäden nach sich ziehen könnten. Zur Absicherung der Gruben erfolgt eine umfangreiche Exploration mittels Seismik, Bohrungen und Georadar. Die Einhaltung von Schutzschichten gegen wasserführendes Gebirge und die Dimensionierung der Sicherheitspfeiler gewährleisten eine höchstmögliche Grubensicherheit. Durch kontinuierliche, planmäßige Instandhaltungsmaßnahmen ist ein Zuflussrisiko von Grundwasser über den Schachtausbau nahezu auszuschließen. Wegen der Höhenlage der Schachtansatzpunkte ist auch bei Hochwasser nicht mit dem Zutritt von Oberflächenwässern in die Grubengebäude zu rechnen. Aufgrund unserer umfangreichen Vorsorgemaßnahmen halten wir dieses Risiko für unwahrscheinlich.

#### **RISIKEN AUS FORSCHUNGS- UND ENTWICKLUNGSAKTIVITÄTEN**

Die für uns relevanten Märkte unterliegen nur einem begrenzten technologischen Wandel. Unsere eigenen Entwicklungsaktivitäten haben wir durch Forschungsk Kooperationen mit industriellen Partnern und auch Hochschulen intensiviert. So werden laufend technische Möglich-

keiten zur Optimierung von Produktionsverfahren untersucht. Dabei stehen die Verringerung fester und flüssiger Produktionsrückstände in der Kaliproduktion sowie Chancen zur Kostensenkung im Vordergrund. Zudem betreiben wir bei landwirtschaftlichen Kunden eine intensive Anwendungsberatung, durch die wir künftige Bedürfnisse frühzeitig erkennen können. Selbst moderate Beeinträchtigungen der Vermögens-, Finanz- und Ertragslage aus unseren Forschungs- und Entwicklungsaktivitäten halten wir für unwahrscheinlich.

#### **PERSONALRISIKEN**

Kompetenz und Engagement unserer Mitarbeiter sind wichtige Faktoren für unsere erfolgreiche Entwicklung. Zur Sicherung und Stärkung dieser Faktoren trägt unsere Berufsausbildung bei, auch im Hinblick auf den demografischen Wandel. Durch praxisorientierte Nachwuchsförderung, gezielte Weiterbildungsmaßnahmen und Förderung von Potenzialträgern erweist sich die K+S GRUPPE als attraktiver Arbeitgeber, der insbesondere auch Führungskräfte langfristig an sich binden kann. Mit dieser Strategie und einer verstärkten Zusammenarbeit mit ausgewählten Hochschulen bieten wir qualifizierten Mitarbeitern vielversprechende berufliche Perspektiven. Schlüsselpositionen werden regelmäßig im Hinblick auf eine vorausschauende Nachfolgeplanung analysiert, geeignete Kandidaten werden auf diese Aufgaben vorbereitet. Weitere Elemente unserer Personalstrategie sind eine zielgruppenorientierte Betreuung und Beratung sowie attraktive Anreizsysteme. Darüber hinaus pflegt die K+S GRUPPE ein gutes und konstruktives Verhältnis zu ihren Mitarbeitern und deren Gewerk-

schaften, in denen diese, insbesondere in Deutschland und in Nordamerika, traditionell weitgehend organisiert sind. Insgesamt halten wir selbst moderate Auswirkungen auf die Vermögens-, Finanz- und Ertragslage aufgrund der beschriebenen Personalrisiken für unwahrscheinlich.

#### **COMPLIANCE-RISIKEN**

Die Einhaltung von geltendem Recht, Unternehmensrichtlinien und vom Unternehmen anerkannten regulatorischen Standards sind integrierter Bestandteil der Unternehmenskultur und damit Aufgabe und Verpflichtung eines jeden Mitarbeiters. Zur Sicherstellung regelkonformen Verhaltens haben wir ein konzernweites Compliance-Programm etabliert, welches u. a. Mitarbeiterschulungen zu den Risikofeldern Kartell-/Wettbewerbsrecht und Anti-Korruption vorsieht. Schwerwiegende Verstöße durch einzelne Mitarbeiter, die eine wesentliche Wirkung auf die Vermögens-, Finanz- und Ertragslage haben könnten, halten wir für unwahrscheinlich. Eine detaillierte Darstellung unseres Compliance-Systems finden Sie im Corporate Governance-Kapitel auf den Seiten 21 ff. dieses Finanzberichts.

#### **INFORMATIONSTECHNISCHE RISIKEN**

Unsere IT-Systeme unterstützen nahezu alle Unternehmensfunktionen in hohem Maße. Unser Management von informationstechnischen Risiken orientiert sich an der Norm DIN ISO 31000 Risikomanagement – Grundsätze und Richtlinien. Mit der Einrichtung eines an der Norm DIN ISO 27001 ausgerichteten IT-Sicherheits-Management-Systems wurde eine wesentliche Voraus-

setzung für das Management von IT-Risiken geschaffen. Um unsere Geschäftsprozesse vor derartigen Risiken zu schützen, wurden Strukturen eingerichtet und Maßnahmen ergriffen, die das Eintreten von Risiken unwahrscheinlich machen. Hierbei ist die redundante Auslegung der IT-Systeme und ihrer Infrastruktur von besonderer Bedeutung. So wird unser Rechenzentrum als Zwei-Standorte-System betrieben, und auch die Komponenten der Infrastruktur (Stromversorgung, Datenleitungen etc.) sind doppelt ausgelegt. Den gewachsenen Sicherheitsanforderungen an die IT-Organisation werden wir durch die Funktionen IT-Compliance, den IT-Sicherheitsbeauftragten und den Datenschutzbeauftragten gerecht. Unsere betrieblichen Konzepte, z.B. in den Bereichen Monitoring, Datensicherung, Zugangskontrolle, Störungsmanagement und Business Continuity Management, sichern in einem hohen Maße die Verfügbarkeit der IT-Systeme. Kurzfristige Auswirkungen aufgrund von IT-Risiken schätzen wir als moderat ein. Den Schadeneintritt halten wir für unwahrscheinlich. Die Anfang 2010 begonnene IT-technische Integration von MORTON SALT wird voraussichtlich im Jahr 2012 mit der Bereitstellung aller benötigten IT-Funktionalitäten abgeschlossen sein. Für POTASH ONE ist geplant, alle SAP-Module für das Projekt- und Investitionscontrolling im ersten Halbjahr 2011 zur Verfügung zu stellen.

#### **FINANZWIRTSCHAFTLICHE RISIKEN**

Die K+S GRUPPE ist aufgrund der weltweiten operativen Geschäftstätigkeit verschiedenen finanziellen Risi-

ken ausgesetzt. Hierzu zählen das Preisänderungsrisiko (bestehend aus Währungs- und Zinsänderungsrisiko), das Ausfallrisiko, das Liquiditätsrisiko sowie daraus resultierende Zahlungsstromschwankungen. Marktpreisrisiken im Sinne von Energiepreisrisiken, Risiken aus der Veränderung von Frachtraten und aus der Verteuerung von Ammoniak bewerten wir als operative Risiken; diese werden auf den Seiten 139 f. beschrieben. Kommen zur Absicherung gegen die jeweiligen Risiken derivative Finanzinstrumente zum Einsatz, werden diese bei der Beschreibung des Risikomanagements in Bezug auf Finanzinstrumente auf Seite 131 weitergehend erläutert.

#### **RISIKEN DURCH WECHSELKURSSCHWANKUNGEN**

Ein Währungsrisiko resultiert aus Geschäften, die nicht in unserer funktionalen Währung (Euro) abgeschlossen werden. Bei diesem Risiko unterscheiden wir weiter zwischen Transaktions- und Translationsrisiken.

Während ein großer Anteil der Umsätze der K+S GRUPPE in Euro abgerechnet wird, lag der Umsatzanteil in US-Dollar im Geschäftsjahr 2010 bei knapp 40% des Konzernumsatzes. Daneben wurden Umsätze in untergeordneter Größenordnung auch in anderen Landeswährungen (z.B. kanadischer Dollar, chilenischer Peso und britisches Pfund) getätigt. Unsere Geschäftstätigkeit ist deshalb den Schwankungen der Wechselkurse zwischen dem Euro und den verschiedenen anderen Währungen ausgesetzt. Dies kann dazu führen, dass bei Geschäften der Wert der erbrachten Leistung nicht mit dem Wert

der erhaltenen Gegenleistung übereinstimmt, weil Einnahmen und Ausgaben in unterschiedlichen Währungen entstehen (Transaktionsrisiken). Wechselkursschwankungen, insbesondere gegenüber dem US-Dollar, spielen vor allem im Geschäftsbereich Kali- und Magnesiumprodukte eine bedeutende Rolle.

Darüber hinaus wirken sich Währungseffekte auch im Geschäftsbereich Salz aus, wo ein wesentlicher Teil der Ergebnisse und Cashflows in US-Dollar und kanadischem Dollar erzielt und in die Konzernwährung Euro umgerechnet wird (Translationsrisiken). Derartige Translationsrisiken bestehen auch in Bezug auf das Nettovermögen von Tochtergesellschaften, deren funktionale Währung nicht der Euro ist, was zu stichtagsbedingten Schwankungen im Eigenkapital führen kann. Dies gilt insbesondere im Hinblick auf den im Oktober 2009 abgeschlossenen Erwerb von MORTON SALT, der zu einem bedeutenden Anteil an Fremdwährungs-Aktiva geführt hat.

Wechselkursschwankungen können sich nachteilig auf die Vermögens-, Finanz- und Ertragslage der K+S GRUPPE auswirken. Um diesen Wechselkursrisiken entgegenzuwirken, setzen wir derivative Finanzinstrumente ein (siehe Risikomanagement in Bezug auf Finanzinstrumente auf Seite 131 und Anmerkung (18) derivate Finanzinstrumente im Anhang auf den Seiten 194 ff.). Im Rahmen der Transaktionssicherung werden die Nettopositionen, also die aus Fremdwährungsumsätzen resultierenden Einzahlungen abzüglich der Auszahlungen in Fremdwährung mit Hilfe von Derivaten,

i. d. R. durch Optionen und Termingeschäfte, gegen Kurschwankungen gesichert. Sicherungsgeschäfte werden auf fakturierte Forderungen und auf erwartete Netto-positionen auf der Grundlage geplanter Umsätze abgeschlossen. Die Netto-positionen werden hierbei anhand der Erlös- und Kostenplanung unter Anwendung von Sicherheitsabschlägen bestimmt und fortlaufend aktualisiert, um Über- oder Untersicherungen zu vermeiden. Daneben werden auch geplante Ergebnisse gegen Translationsrisiken gesichert, sofern diese von wesentlicher Bedeutung sind. Weitere Informationen zum Fremdwährungssicherungssystem finden Sie auf Seite 115. In Relation zu den derzeitigen Ergebnissen halten wir das mögliche Risiko aus Wechselkursschwankungen für moderat.

#### **RISIKEN AUS EINER VERÄNDERUNG DES ALLGEMEINEN ZINSNIVEAUS**

Das Zinsänderungsrisiko resultiert aus marktbedingten Schwankungen des allgemeinen Zinsniveaus. Eine Veränderung wirkt sich einerseits auf die Höhe von Zinszahlungen, andererseits auf die Marktwerte von Finanzinstrumenten aus.

Die Finanzverbindlichkeiten zum 31. Dezember 2010 sind nahezu komplett durch Festzinsfinanzierungen gegen einen Zinsanstieg gesichert. Die Geldanlagen haben überwiegend eine kurzfristige Zinsbindung. Steigende Zinsen würden das Finanzergebnis und die damit einhergehenden Zahlungsströme auf Basis der Vermögens- und Kapitalstruktur zum 31. Dezember 2010 tendenziell verbessern, fallende Zinsen würden zu einer

Verschlechterung führen. Zur Steuerung dieses Risikos werden daher regelmäßig Zinsanalysen erstellt. Eine Veränderung, insbesondere einen Anstieg, des allgemeinen Zinsniveaus gegenüber der in der Mittelfristplanung unterstellten Annahme halten wir für möglich, die Auswirkungen bewerten wir als moderat. Angaben zur Veränderung des Konzernergebnisses in Abhängigkeit der Änderung der Zinssätze finden Sie im Konzernanhang auf Seite 207.

#### **RISIKEN AUS DEM FORDERUNGS-AUSFALL VON KUNDEN UND AUSFALLRISIKO VON FINANZINSTITUTEN**

Unter diesem Ausfallrisiko ist das teilweise oder vollständige Ausbleiben von vertraglich zugesicherten Verpflichtungen seitens eines oder mehrerer Vertragspartner zu verstehen.

Wir unterhalten mit vielen Kunden ausgedehnte Geschäftsbeziehungen. Sollten einer oder mehrere Großkunden nicht in der Lage sein, ihre vertraglichen Verpflichtungen uns gegenüber zu erfüllen, oder zahlungsunfähig werden, könnten uns hieraus entsprechende Verluste entstehen. Risiken aus Zahlungsausfällen sind bei uns größtenteils durch Kreditversicherungen gedeckt. Der Verzicht auf eine Forderungssicherung erfolgt nur nach einer kritischen Überprüfung der Kundenbeziehung und einer ausdrücklichen Genehmigung, die abhängig von der Größenordnung durch die Geschäftsbereichsleitung bzw. durch das zuständige Vorstandsmitglied erfolgen muss. Konzernweit sind

mehr als 80 % aller versicherbaren Forderungen gegen einen Ausfall gesichert.

Ausfallrisiken bestehen auch im Hinblick auf Finanzinstitute, mit denen wir Sicherungsgeschäfte abgeschlossen haben, bei denen Kreditlinien bestehen oder Geldanlagen getätigt wurden. Dieses Risiko hat sich in jüngster Zeit aufgrund der Finanzkrise erhöht und wird dadurch begrenzt, dass Finanzgeschäfte nur mit Instituten guter Bonität getätigt werden. Hierzu wird die Bonität der Finanzinstitute fortlaufend überwacht.

Bürgschaften und Ausfallgarantien bestehen lediglich zwischen Gesellschaften der K+S GRUPPE, nicht jedoch für Dritte.

Ein potenzieller Forderungsausfall bzw. Ausfall einer Bank könnte zu einer moderaten Beeinträchtigung der Finanzlage der K+S GRUPPE führen. Aufgrund der vorgenommenen Maßnahmen zur Forderungssicherung bzw. der beschriebenen Auswahl der Finanzinstitute sowie der Diversifizierung halten wir dies jedoch für unwahrscheinlich.

#### **LIQUIDITÄTSRISIKEN**

Das Liquiditätsrisiko besteht darin, dass zur Erfüllung von Zahlungsverpflichtungen benötigte Finanzmittel nicht termingerecht beschafft werden und infolgedessen erhöhte Refinanzierungskosten anfallen können. Aus diesem Grund bestehen die wesentlichen Ziele unseres Liquiditätsmanagements in der Sicherstellung jederzeitiger Zahlungsfähigkeit und der steten Erfüllung

vertraglicher Zahlungsverpflichtungen. Der Liquiditätsbedarf wird grundsätzlich über die Liquiditätsplanung ermittelt und ist über zugesagte Kreditlinien und flüssige Mittel gedeckt.

Die Liquiditätssteuerung erfolgt über ein gruppenweites Cashpool-System durch die zentrale Treasury-Einheit. Bei Geldanlagen verfolgen wir das Ziel, die Erträge aus liquiden Mitteln risikoarm zu optimieren. Bei allen Anlageformen dürfen definierte Bonitätsanforderungen an die Emittenten nicht unterschritten werden. Im Geschäftsjahr 2010 haben wir das Fälligkeitsprofil der Finanzierungsinstrumente der K+S GRUPPE optimiert. Dazu wurden zwei revolvingierende Kreditlinien zu einer Konsortialkreditlinie mit günstigeren Konditionen zusammengefasst und ihre Fälligkeit von April 2012 bis Juli 2015 verlängert. / **ABB: 4.11.1**

Darüber hinaus bestehen derzeit nicht in Anspruch genommene bilaterale Rahmenkreditvereinbarungen. Besondere Abhängigkeiten von einzelnen Kreditgebern bestehen nicht. Im Rahmen der bestehenden Kreditlinien ist die K+S GRUPPE Verpflichtungen (Financial Covenants) eingegangen, bestimmte Finanzkennzahlen einzuhalten. Im Fall eines Verstoßes gegen diese Verpflichtungen ist eine vorzeitige Kündigung dieser Finanzierungen durch die Fremdkapitalgeber möglich. Eine Verletzung der derzeit gültigen Financial Covenants erscheint aufgrund deutlich positiver Finanzkennzahlen jedoch unwahrscheinlich. Die im September 2009 emittierte Anleihe mit einem Volumen von 750 Mio. € und einer Laufzeit von fünf Jahren unterliegt nicht der

#### FÄLLIGKEITSPROFIL DER FINANZVERBINDLICHKEITEN

ABB: 4.11.1

| in Mio. € | 200 | 400 | 600 | 800 | 1.000 |
|-----------|-----|-----|-----|-----|-------|
| 2011      | 0   |     |     |     |       |
| 2012      | 0   |     |     |     |       |
| 2013      | 0   |     |     |     |       |
| 2014      |     |     |     | 750 |       |
| 2015      |     |     |     |     | 800   |

■ Anleihe; Laufzeit bis 09/2014; Kupon: 5% ■ Kreditlinie; Laufzeit bis 07/2015

Pflicht zur Einhaltung bestimmter Finanzkennzahlen. Mit Blick auf die Fälligkeitsstruktur unserer Verbindlichkeiten halten wir für die K+S GRUPPE ein wesentliches Liquiditäts- oder Finanzierungsrisiko für unwahrscheinlich.

#### RISIKEN AUS EINER VERÄNDERUNG DES UNTERNEHMENS RATINGS

Ratings dienen der Beurteilung der Bonität von Unternehmen und werden i.d.R. von externen Ratingagenturen durchgeführt. Das Rating liefert insbesondere für Kreditinstitute und institutionelle Investoren Anhaltspunkte zur Zahlungsfähigkeit von Unternehmen und hat u. a. Auswirkungen auf die Kosten und Verfügbarkeit von Finanzierungsmöglichkeiten.

Wir sind derzeit von den Ratingagenturen STANDARD & POOR'S und MOODY'S INVESTORS SERVICE im „Investment Grade“ bewertet. Während der Ausblick von STANDARD & POOR'S angesichts unserer starken Finanzkenn-

zahlen „positiv“ lautet, wird er von MOODY'S „stabil“ eingestuft (STANDARD & POOR'S Emittenten-Rating: BBB positiver Ausblick, MOODY'S Emittenten-Rating: Baa2 stabiler Ausblick). Ratingherabstufungen, insbesondere der Verlust der Einstufung in die Kategorie „Investment Grade“, könnten sich negativ auf Finanzierungsbedingungen auswirken. Herabstufungen können beispielsweise die Stellung von Sicherheiten gegenüber Gläubigern erfordern sowie die Bereitschaft von Geschäftspartnern, mit der K+S GRUPPE Geschäfte zu tätigen, beeinträchtigen. Bei bestehenden Kreditlinien müssten unter Umständen höhere Zinsmargen gezahlt werden; gleichzeitig könnten sich neue Kreditlinien verteuern. Wir halten das Risiko einer Herabstufung des Kreditratings, insbesondere in den „Non-Investment“-Bereich, für unwahrscheinlich; die Wirkung bewerten wir als moderat. / **TAB: 4.11.2**

**ENTWICKLUNG DER KREDITRATINGS** TAB: 4.11.2

| Datum                        | Rating | Ausblick |
|------------------------------|--------|----------|
| <b>Standard &amp; Poor's</b> |        |          |
| 17. Januar 2011              | BBB    | positiv  |
| 29. Oktober 2010             | BBB    | stabil   |
| 30. November 2009            | BBB    | stabil   |
| 27. August 2009              | BBB    | negativ  |
| 18. Juni 2009                | BBB+   | negativ  |
| 23. April 2009               | BBB+   | stabil   |
| <b>Moody's</b>               |        |          |
| 29. November 2010            | Baa2   | stabil   |
| 31. März 2010                | Baa2   | stabil   |
| 4. September 2009            | Baa2   | negativ  |
| 23. April 2009               | Baa2   | stabil   |

**BEURTEILUNG DER GESAMTRISIKOSITUATION**

Die Einschätzung des Gesamtrisikos erfolgt auf Grundlage des Risikomanagementsystems in Kombination mit den eingesetzten Planungs-, Steuerungs- und Kontrollsystemen. Zu den wesentlichen potenziellen Risiken der zukünftigen Entwicklung der K+S GRUPPE gehören insbesondere Risiken aus Schwankungen von Angebot und Nachfrage und Risiken aus der Veränderung bzw. Versagung behördlicher Genehmigungen. Zum jetzigen Zeitpunkt sind auf Basis der Erkenntnisse unserer mittelfristigen Planung keine gravierenden Risiken für die zukünftige Entwicklung erkennbar, die einzeln oder in Wechselwirkung mit anderen Risiken zu einer dauerhaf-

ten und bestandsgefährdenden Beeinträchtigung der Vermögens-, Finanz- und Ertragslage der K+S GRUPPE führen könnten. Künftige Chancen sind in die Beurteilung des Gesamtrisikos nicht eingeflossen. Organisatorisch haben wir alle Voraussetzungen geschaffen, um mögliche Chancen und Risiken frühzeitig erkennen und entsprechend handeln zu können.

**4.12 NACHTRAGSBERICHT**

Nach Ende des Geschäftsjahres ergaben sich keine signifikanten Änderungen bei den wirtschaftlichen Rahmenbedingungen bzw. unserer Branchensituation.

**K+S ERWIRBT MEHRHEITSANTEIL AN POTASH ONE**

Die K+S AKTIENGESELLSCHAFT und POTASH ONE hatten am 22. November 2010 eine Vereinbarung unterzeichnet, wonach K+S allen POTASH-ONE-Aktionären ein Angebot zum Erwerb sämtlicher Aktien zu einem Preis von 4,50 CAN\$ (Transaktionsvolumen: 434 Mio. CAN\$ bzw. rund 325 Mio. €) unterbreitete. POTASH ONE besitzt mehrere Kali-Explorationslizenzen in der kanadischen Provinz Saskatchewan einschließlich des Legacy Projekts – ein fortgeschrittenes Greenfield-Projekt zur Errichtung eines Solbetriebs. Das formelle Übernahmeangebot wurde am 13. Dezember 2010 an die Inhaber der POTASH-ONE-Aktien versandt; die Annahmefrist endete zunächst am 18. Januar 2011.

Am 19. Januar 2011 hat K+S bekanntgegeben, dass innerhalb der Angebotsfrist rund 81% der POTASH-ONE-Aktien angedient worden waren. Die Frist wurde bis zum 4. Februar verlängert, um den verbleibenden Aktionären die Möglichkeit zu geben, ihre Aktien anzudienen. Am 7. Februar gaben wir bekannt, dass sich die Andienungsquote auf 90,9% erhöht hat. Da das Angebot von mehr als 90% der POTASH-ONE-Aktionäre angenommen wurde, werden die verbleibenden ausstehenden POTASH-ONE-Aktien durch ein Ausschlussverfahren im Rahmen des Canada Business Corporations Act erworben. Mitte Mai 2011 sollte die vollständige Übernahme von POTASH ONE erfolgt sein.

Darüber hinaus gibt es keine für die K+S GRUPPE zu berichtenden Ereignisse von besonderer Bedeutung.

**4.13 PROGNOSEBERICHT****KÜNFTIGE AUSRICHTUNG DES KONZERNS****KEINE ÄNDERUNGEN DER GESCHÄFTSPOLITIK VORGESEHEN**

Wir beabsichtigen in den kommenden Jahren keine grundlegende Änderung unserer Geschäftspolitik. Wir wollen in unseren Geschäftsbereichen unsere Marktpositionen insbesondere über den verstärkten Verkauf von Spezialprodukten ausbauen, unsere Effizienz durch Nutzung weiterer Synergien erhöhen, den Ausbau neuer Kalikapazitäten bei POTASH ONE vorantreiben sowie in



unseren angestammten Geschäftsfeldern sowohl organisch als auch extern wachsen.

#### **KÜNFTIGE ABSATZMÄRKTE WEITERHIN INTERNATIONAL AUSGEWOGEN**

Im vergangenen Jahr hat sich die Nachfrage nach Kali- und Magnesiumprodukten vor allem in Europa deutlich erhöht. Infolge der erstmalig ganzjährigen Einbeziehung des nordamerikanischen Salzproduzenten MORTON SALT haben sich auch die Umsätze in Übersee deutlich erhöht, sodass das Umsatzverhältnis zwischen Europa und Übersee für die K+S GRUPPE annähernd ausgeglichen war. Der für das Jahr 2011 erwartete Nachfrageanstieg im Geschäftsbereich Kali- und Magnesiumprodukte sollte zu einem Anstieg des Umsatzes in allen Regionen führen. Im Geschäftsbereich Salz sollte den erwarteten Umsatzrückgängen in Europa ein entsprechender Anstieg in Übersee – insbesondere Nordamerika – gegenüberstehen. Vor diesem Hintergrund erwarten wir für das Jahr 2011 eine erneut annähernd ausgeglichene Umsatzverteilung zwischen Europa und Übersee.

Die zunehmende Weltbevölkerung sowie der tendenziell wachsende Fleischkonsum in den Schwellenländern und der damit einhergehende steigende Futtermittelbedarf dürften die Nachfrage nach großen Teilen unserer Düngemittelproduktpalette sowohl in Europa als auch auf Überseemärkten in den kommenden Jahren weiter ansteigen lassen. Die Wachstumsraten der Überseemärkte Südamerika und Südostasien sollten dabei mittel- bis langfristig stärker zulegen; wir gehen davon aus,

in diesen Regionen künftig knapp ein Drittel unserer Düngemittelprodukte zu verkaufen. Mittelfristig sollte der geplante Ausbau von Kalikapazitäten bei POTASH ONE in Saskatchewan, Kanada, den Zugang zu diesen Wachstumsregionen erleichtern.

Der europäische Salzmarkt ist ein reifer Markt mit weitgehend konstant hohen Salzverbräuchen, abgesehen von witterungsbedingten Schwankungen bei Auftausalz. Im Vergleich zu den stärker wachsenden Überseemärkten weist er eine geringere Schwankungsfähigkeit aufgrund gewachsener Strukturen und einer sehr differenzierten Nachfrage auf. Seit dem Erwerb des chilenischen Salzproduzenten SPL im Jahr 2006 nutzen wir mittlerweile jedoch auch die Potenziale, die sich auf den dynamischeren Überseemärkten infolge einer steigenden und zunehmend wohlhabenderen Bevölkerung ergeben: So führt die Veränderung der Lebensgewohnheiten in Südamerika zu einem spürbar steigenden Bedarf an Speise-, Gewerbe- und Industriesalzen. Nach der Akquisition von MORTON SALT haben wir Zugang zu Regionen des nordamerikanischen Auftausalzmarkts erhalten, die sich durch eine tendenziell niedrigere Schwankungsfähigkeit auszeichnen, und auch die Segmente Speise- und Gewerbesalze in Nordamerika erschlossen.

Um noch flexibler auf witterungsbedingte, regionale Schwankungen der Auftausalznachfrage im Geschäftsbereich Salz reagieren zu können, soll die Nutzung des Netzwerks von Produktionsanlagen in Europa, Nord- und Südamerika weiter intensiviert werden.

**/ WEITERE INFORMATIONEN ZUR KÜNFTIGEN ENTWICKLUNG DER ABSATZMÄRKTE** finden Sie in der Beschreibung der ‚Künftigen Branchensituation‘ auf den Seiten 149 ff.

#### **KÜNFTIGE VERWENDUNG NEUER VERFAHREN ERLAUBT HÖHERE PROZESSEFFIZIENZ**

Wir arbeiten kontinuierlich an Prozessverbesserungen, um die Rohstoffausbeute und Energieeffizienz unserer Werke und Fabriken zu erhöhen und feste und flüssige Produktionsrückstände weiter zu verringern. Insbesondere im Geschäftsbereich Kali- und Magnesiumprodukte befinden sich sowohl über als auch unter Tage vielversprechende, die Wirtschaftlichkeit und Rohstoffausbeute steigernde Verfahren in der Entwicklung. ESCO, SPL und MORTON SALT arbeiten zusammen, um Best-Practice-Prozesse zu identifizieren und geeignete Verfahren innerhalb des Geschäftsbereichs Salz zu übertragen.

Wir planen bei POTASH ONE die Errichtung eines Produktionsstandorts für Kaliumchloridprodukte basierend auf der Solungsbergbautechnologie in Saskatchewan, Kanada. Die Produktion soll hier frühestens im Jahr 2015 aufgenommen werden.

Die Solungsbergbautechnologie erlaubt – sofern die Lagerstätte gegebenheit ein solches Verfahren zulässt – gegenüber konventionellen Abbauverfahren eine schnellere Produktionsaufnahme, eine flexiblere Anfahrtskurve der Produktion sowie den Abbau tiefer liegender Lagerstätten. Außerdem fällt das Verhältnis von Rohsalz zu

festen sowie flüssigen Produktionsrückständen günstiger aus.

### KÜNFTIGE FORSCHUNG UND ENTWICKLUNG MIT SCHWERPUNKT IM UMWELTBEREICH

Auch künftig wollen wir unsere in enger Abstimmung mit dem Marketing und der Produktion definierten Forschungs- und Entwicklungsziele weiterverfolgen; diese finden Sie auf den Seiten 95 f. dieses Berichts. Die Forschungs- und Entwicklungsaufwendungen sollten im Jahr 2011 wieder deutlich über dem Niveau des Jahres 2010 liegen. Die Anzahl der in der Forschung beschäftigten Mitarbeiter sollte im Jahr 2011 weiter ansteigen, um insbesondere die kommenden Herausforderungen im Umweltbereich zu bewältigen sowie die Forschung auf dem Gebiet des Solungsbergbaus weiter voranzutreiben. Für das Jahr 2012 erwarten wir eine im Vergleich zu diesem Jahr stabile Anzahl der in der Forschung beschäftigten Mitarbeiter.

Forschungsprojekte in den Jahren 2011 und 2012 stellen wir in der folgenden Aufzählung dar. Einige der beschriebenen Projekte wurden bereits in den Vorjahren begonnen; detaillierte Informationen finden Sie unter ‚Forschung und Entwicklung‘ auf den Seiten 98 ff. dieses Berichts.

#### KERNGESCHÄFTSFELD DÜNGEMITTEL

+ Im Geschäftsbereich Kali- und Magnesiumprodukte treiben wir die Verbesserung von Gewinnungs- und Produktionsverfahren voran, um Effizienzsteigerungen sowie die Verringerung fester und flüssiger Pro-

duktionsrückstände zu erzielen. In diesem Rahmen sind insbesondere die Weiterentwicklung von trockenen Aufbereitungstechnologien sowie die Verbesserung der Vorerkundungsverfahren für die Lagerstätten wichtige Themen.

- + Bei K+S NITROGEN liegen die Schwerpunkte in der Entwicklung von Düngemitteln mit neuen Inhibitoren, der Erforschung der Nachhaltigkeit des Nährstoffmanagements des Bodens bei Verwendung von Mehrnährstoffdüngern, der Erforschung der Wirkung spezieller Dünger unter tropischen Bedingungen in Asien sowie Fragestellungen zur Umweltrelevanz der eingesetzten Düngemittel.
- + Die Entwicklung von Pflanzenschutzprodukten sowohl in Eigenentwicklung der COMPO als auch in Zusammenarbeit mit anderen Wirkstoffherstellern, insbesondere SYNGENTA, wird fortgeführt.

#### KERNGESCHÄFTSFELD SALZ

- + Die Erforschung von Verfahren zur Qualitätserhöhung von Steinsalz für industrielle Anwendungen soll durch die Zusammenarbeit von ESCO, SPL und MORTON SALT vorangetrieben werden.
- + Die im Jahr 2010 begonnene Verbesserung der Abbauführung und Anlagenstandorte in unserem Tagebau in der chilenischen Atacama-Wüste wird weitergeführt.
- + Schwerpunkte von MORTON SALT bilden weiterhin die Erforschung innovativer Auftaumittel, die Reduzierung von Natrium in Lebensmitteln sowie die Weiterentwicklung von Wasserenthärtungssalzen.

+ Die Zusammenarbeit mit dem niederländischen Forschungsinstitut WETSUS zur Erzeugung regenerativer Energien aus Salzlösungen werden wir ebenfalls fortsetzen.

#### KÜNFTIGE PRODUKTE UND DIENSTLEISTUNGEN

- + Im Geschäftsbereich Kali- und Magnesiumprodukte gehen wir von keiner wesentlichen Veränderung des Produktportfolios aus. Jedoch werden wir insbesondere die Anwendungsberatung im Jahr 2011 durch die Forschungstätigkeiten und Lehrveranstaltungen an dem von uns gemeinsam mit der Universität Göttingen gegründeten INSTITUT FÜR ANGEWANDTE PFLANZENERNÄHRUNG in Göttingen durch einen effizienten Wissenstransfer aus der Forschung in die praktische Landwirtschaft weiter verbessern.
- + Im Rahmen der Forschungsaktivitäten für K+S NITROGEN wurde ein Urease-Inhibitor entwickelt, der die Ammoniakverluste bei der Anwendung von Harnstoff erheblich verringern kann und damit eine effizientere Stickstoffversorgung ermöglicht. Die Markteinführung in Übersee ist noch im Jahr 2011 geplant.
- + Im Fokus der Aktivitäten der ESCO werden im Jahr 2011 Produktoptimierungen in Europa für die Marken BALANCE® SALZ, CÉRÉBOS® SEL ÉQUILIBRE sowie VATEL® SAL EQUILÍBRIO liegen, um den steigenden Bedarf an natriumreduzierten Mineralsalzen in der Lebensmittelindustrie sowie bei den Konsumenten noch besser bedienen zu können.
- + Bei SPL in Südamerika werden die Ergänzung des Produktportfolios der Marke BIOSAL® sowie der Verkauf

und die Aufbereitung von Salzsole für die Fischindustrie weiter vorangetrieben.

- + MORTON SALT werden im Jahr 2011 den Fokus auf die Erweiterung des Angebots von Lebensmittelspezialitäten legen.

Darüber hinaus gehen wir von keinen wesentlichen Veränderungen unseres Produkt- und Dienstleistungsangebots aus.

#### HÖHERE MITARBEITERZAHLEN, HÖHERER PERSONALAUFWAND

K+S wird sich auch in Zukunft dem Wettbewerb um gute Mitarbeiter stellen. Wir werden weiterhin insbesondere jüngere Mitarbeiter an das Unternehmen heranzuführen, um dem demografischen Wandel rechtzeitig zu begegnen. Wir wollen aber auch ältere und erfahrene Mitarbeiter für unser Unternehmen gewinnen.

K+S sieht in der Berufsausbildung eine wichtige Investition in die Zukunft und strebt für inländische Gesellschaften weiterhin eine Ausbildungsquote von etwa 6 % an. Auch die Weiterbildung unserer Mitarbeiter wird einen besonderen Stellenwert behalten. Wir wollen auch künftig viele unserer Fach- und Führungskräfte aus den eigenen Reihen rekrutieren.

Zum Jahresende 2011 rechnen wir mit einer leicht höheren Mitarbeiterzahl im Vergleich zum 31. Dezember 2010 (15.241). Auch die durchschnittliche Mitarbeiterzahl sollte sich im kommenden Jahr auf rund 15.480 leicht erhöhen (2010: 15.168). Die Gründe für den Anstieg liegen insbe-

sondere in einem Personalaufbau zur Aufrechterhaltung der geförderten Rohsalzmengen im Geschäftsbereich Kali- und Magnesiumprodukte. Beim Personalaufwand (2010: 1.019,3 Mio. €) erwarten wir, dass die Mehrkosten der jüngsten Tarifierhöhung sowie die höheren Mitarbeiterzahlen zu einem spürbaren Anstieg führen werden.

#### KÜNFTIGE GESAMTWIRTSCHAFTLICHE SITUATION

Die nachfolgenden Ausführungen zur künftigen gesamtwirtschaftlichen Situation beruhen im Wesentlichen auf Einschätzungen des INSTITUTS FÜR WELTWIRTSCHAFT KIEL (Kieler Diskussionsbeiträge: Weltkonjunktur und deutsche Konjunktur im Winter 2010, Dezember 2010) sowie der DEKA BANK (Makro Research, Volkswirtschaft Prognosen, 8. Februar 2011). / TAB: 4.13.1

Die deutliche Erholung der Weltwirtschaft des Jahres 2010 sollte sich nach Meinung führender Wirtschaftsforschungsinstitute auch in den Jahren 2011 und 2012 fortsetzen; das Wachstumstempo dürfte dabei allerdings etwas moderater ausfallen. Die Prognosen der DEKA BANK gehen für die Weltwirtschaft von einem Wachstum des Bruttoinlandsprodukts von jeweils 4,2 % für die Jahre 2011 und 2012 aus.

Eine zunehmend restriktiv wirkende Finanzpolitik sowie eine nachlassende Auslandsnachfrage werden nach Erwartungen des INSTITUTS FÜR WELTWIRTSCHAFT KIEL zu einer Verlangsamung der wirtschaftlichen Ent-

wicklung in der Eurozone führen. Während eine Rezession in Griechenland, Spanien und Portugal aufgrund der hohen Staatsverschuldung nicht auszuschließen ist, sollte die Wirtschaft in Deutschland und den übrigen Eurostaaten weiter wachsen. Für die Jahre 2011 und 2012 geht die DEKA BANK von einem moderaten Anstieg des Bruttoinlandsprodukts in Europa um 1,6 % bzw. 1,8 % aus.

In den USA sollte sich die konjunkturelle Erholung im Jahr 2011 weiter fortsetzen, ohne jedoch eine besonders große Dynamik zu entfalten. Einer stärkeren Erholung entgegenwirken dürften neben den restriktiven Effekten durch das Auslaufen des Konjunkturprogramms die nach wie vor hohe Verschuldung der privaten Haushalte und die strukturellen Probleme am Immobilienmarkt. Das INSTITUT FÜR WELTWIRTSCHAFT KIEL sieht jedoch keine Gefahr eines Rückfalls in eine erneute Rezession. Die DEKA BANK unterstellt vor diesem Hintergrund für die Jahre 2011 und 2012 eine Wachstumsrate des Bruttoinlandsprodukts von 3,3 bzw. 3,2 %.

Für die Schwellenländer gehen führende Wirtschaftsinstitute von einer leicht nachlassenden Wachstumsdynamik aus. Dies liegt neben einer niedrigeren Auslandsnachfrage an den ergriffenen Maßnahmen in der Geld- und Finanzpolitik, um eine konjunkturelle Überhitzung zu vermeiden. Allen voran dürfte sich die Konjunktur in China und Indien weiter sehr positiv entwickeln; hier werden von der DEKA BANK Zuwächse des Bruttoinlandsprodukts von nahezu jeweils 10 % in den Jahren 2011 und 2012 erwartet.

**PROZENTUALE VERÄNDERUNG DES BRUTTOINLANDSPRODUKTS**

TAB: 4.13.1

|                                 | 2012e | 2011e | 2010 | 2009 | 2008 |
|---------------------------------|-------|-------|------|------|------|
| in %; real                      |       |       |      |      |      |
| Deutschland                     | +1,9  | +2,5  | +3,6 | -5,0 | +1,3 |
| Europäische Union (EU-25/EU-27) | +1,8  | +1,6  | +1,7 | -4,1 | +1,2 |
| Welt                            | +4,2  | +4,2  | +4,9 | -1,1 | +3,1 |

Quelle: Deka Bank

Der expansive geldpolitische Kurs der Notenbanken sollte sich vor dem Hintergrund einer weiterhin hohen Arbeitslosigkeit sowie sich verschlechternder konjunktureller Aussichten weiter fortsetzen. Nach Erwartungen des INSTITUTS FÜR WELTWIRTSCHAFT KIEL sollten die Notenbankzinsen über das gesamte Jahr 2011 hinweg unverändert niedrig bleiben und auch im Jahr 2012 nur allmählich angehoben werden. Unsere der Unternehmensplanung zugrunde liegenden Erwartungen für den Wechselkurs des US-Dollars gegenüber dem Euro liegen für die Jahre 2011 und 2012 bei durchschnittlich etwa 1,35 USD/EUR, beim Ölpreis wird ein Niveau von knapp 90 US\$ pro Barrel angenommen.

**AUSWIRKUNGEN AUF K+S**

+ Der wirtschaftliche Aufschwung in den Schwellenländern hält weiter an und verbessert das Wohlstandsniveau der dortigen Bevölkerung. Dies steigert den weltweiten Pro-Kopf-Verbrauch an Nahrungsmitteln, u. a. auch an Fleisch, und erhöht den Druck auf den Agrarsektor, dieser Herausforderung gerecht zu werden.

+ Die Erholung der Preise von Agrarprodukten führte seit dem zweiten Halbjahr 2010 zu einem spürbaren Anstieg der Nachfrage nach Düngemitteln. Die an den Börsen gehandelten Termingeschäfte für Agrarprodukte deuten darauf hin, dass sich die Preise für Agrarprodukte auch im Geschäftsjahr 2011 auf einem für die Landwirtschaft sehr lukrativen Niveau halten sollten. Von dieser Entwicklung sollte auch der Düngemittelmarkt profitieren, daher gehen wir für das Gesamtjahr 2011 von einem Weltkaliabsatz von rund 57 bis 60 Mio. t aus (2010e: 57 Mio. t).

+ Zur Absicherung der erwarteten US-Dollarzahlungseingänge der kommenden Jahre werden Optionen und Termingeschäfte eingesetzt, die für das Jahr 2011 einen „worst case“ bei etwa 1,36 USD/EUR inkl. Kosten für geplante Umsätze des Geschäftsbereichs Kali- und Magnesiumprodukte festschreiben. Im Rahmen der Translationssicherung im Geschäftsbereich Salz bestehen Sicherungsgeschäfte, die eine „worst case“-Umrechnung der abgesicherten Nettosition zu 1,37 USD/EUR gewährleisten. Die gewählten Instrumente eröffnen der K+S GRUPPE jedoch auch die Chance, an

einem eventuell stärker werdenden US-Dollar teilhaben zu können.

+ Unsere Produktionskosten sind in nicht unerheblichem Maße von Energiekosten, insbesondere für den Bezug von Gas, beeinflusst. Aufgrund vereinbarter Energiebezugsklauseln mit unseren Lieferanten schlagen sich Energiepreisveränderungen im Geschäftsbereich Kali- und Magnesiumprodukte zum Teil erst mit einem Zeitverzug von sechs bis neun Monaten in unseren Energiekosten nieder.

**KÜNFTIGE BRANCHENSITUATION**

Die im Bereich ‚Konzernstruktur und Geschäftstätigkeit‘ auf den Seiten 77 ff. beschriebenen Wettbewerbspositionen der einzelnen Geschäftsbereiche behalten im Wesentlichen ihre Gültigkeit.

**GESCHÄFTSFELD DÜNGEMITTEL**

Eine jährlich um rund 80 Millionen Menschen wachsende Weltbevölkerung sowie veränderte Ernährungsgewohnheiten hin zu einem höheren Fleischkonsum und nicht zuletzt eine steigende Bedeutung von nachwachsenden Rohstoffen zur Bioenergieerzeugung erhöhen den weltweiten Bedarf an Agrarrohstoffen. Dies stellt insbesondere vor dem Hintergrund rückläufiger zur Verfügung stehender landwirtschaftlicher Flächen pro Kopf eine große Herausforderung für die Landwirtschaft dar. Die nachfolgende Grafik zeigt, dass in den letzten 30 Jahren die weltweiten Ackerflächen für Getreideanbau um insgesamt 0,4 % p.a. zurückgingen;

im gleichen Zeitraum stieg die Weltbevölkerung von rund 4,5 auf 6,9 Mrd. Menschen. / ABB: 4.13.1

Dass die Getreideproduktion über diesen Zeitraum trotzdem deutlich gesteigert werden konnte, ist u. a. auf den Einsatz von mineralischen Düngemitteln zurückzuführen. Eine ausgewogene, nachhaltige mineralische Düngung wird auch künftig entscheidend dazu beitragen, den Verlust von Anbauflächen im Zuge von Verstädterung, Erosion und Überschwemmungen durch eine Intensivierung der Landwirtschaft auf den verbleibenden Flächen aufzufangen.

Trotz großer Produktionsanstrengungen wurde in den vergangenen Jahrzehnten häufig mehr Getreide verbraucht als produziert. Auch im letzten Wirtschaftsjahr traf die weltweit bisher höchste Nachfrage nach Getreide auf eine nicht ausreichende Produktionsmenge, sodass das Verhältnis von Beständen zum Verbrauch („stocks-to-use-ratio“) unter die kritische Grenze von 20 % fiel. Insbesondere vor diesem Hintergrund zogen die Preise für Agrarprodukte im zweiten Halbjahr 2010 deutlich an. / ABB: 4.13.2

Abbildung 4.13.3 zeigt, dass ein weiterer Rückgang der stocks-to-use-ratio im Wirtschaftsjahr 2011/12 nicht auszuschließen ist: Unterstellt man für das kommende Jahr eine dem Durchschnitt der vergangenen fünf Jahre entsprechende Flächennutzung, den durchschnittlichen Ertrag je Hektar in diesem Zeitraum, und wendet den 5-Jahresdurchschnitt des Nachfragewachstums auf den Verbrauch im Wirtschaftsjahr 2010/11 an, hätte dies das

**ANBAUFLÄCHE UND ERTRAG JE HEKTAR BEI GETREIDE** ABB: 4.13.1

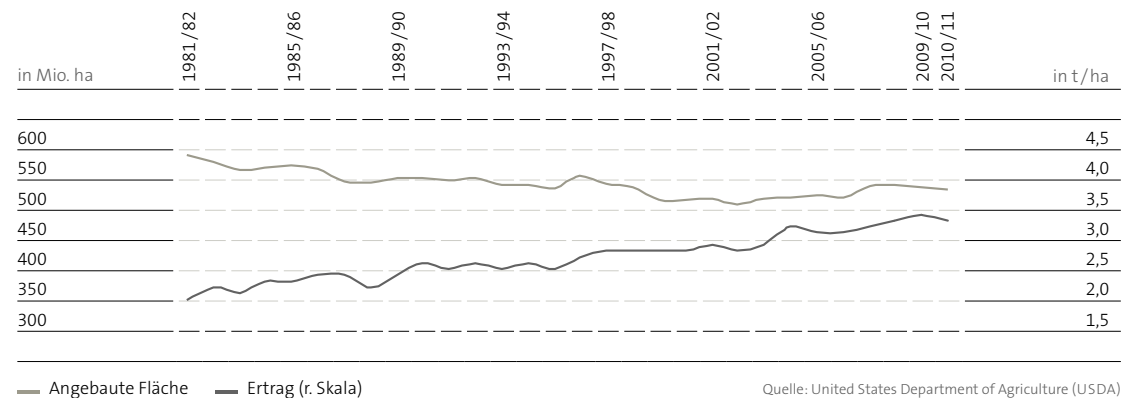

**PRODUKTIONSÜBERSCHUSS/-DEFIZIT UND STOCKS-TO-USE-RATIOS BEI GETREIDE** ABB: 4.13.2

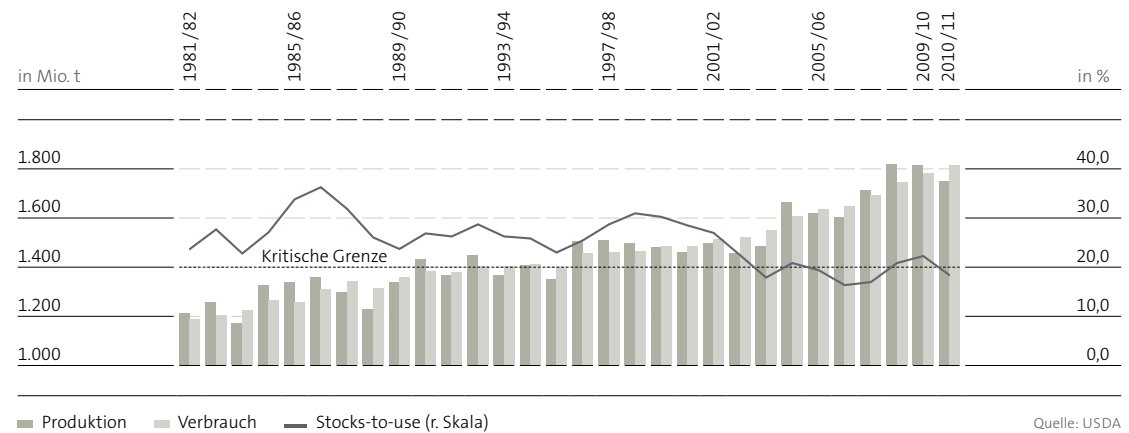



größte in den vergangenen 30 Jahren jemals registrierte Produktionsdefizit und damit einhergehend stark sinkende Lagerbestände an Getreide zur Folge. Die stocks-to-use-ratio würde in diesem Fall von 19 auf 13 % und damit auf den niedrigsten Wert seit Beginn der USDA-Aufzeichnungen (1973) führen. / ABB: 4.13.3

Sehr wahrscheinlich sehen die Kapitalmärkte das derzeitige, erhöhte Preisniveau für Agrarprodukte vor diesem Hintergrund in den nächsten zwei Jahren relativ stabil; zumindest spiegelt sich dies in den Terminkursen in Abbildung 4.13.4 wider. / ABB: 4.13.4

Im Jahr 2011 sollte die Düngemittelnachfrage vor allem aufgrund der voraussichtlich nicht nur vorübergehend positiven Entwicklung der Agrarpreise weiter ansteigen. Die daraus resultierenden attraktiveren Ertragsperspektiven der Landwirtschaft sollten ausreichenden Anreiz bieten, den Ertrag je Hektar durch einen höheren Düngemiteleinsatz zu steigern. Vor diesem Hintergrund ist sowohl bei Kali- und Magnesiumprodukten als auch Stickstoffdüngemitteln mit einer weltweit hohen Auslastung der jeweils vorhandenen Produktionskapazitäten zu rechnen.

Daher gehen wir im Gesamtjahr 2011 von einem Weltkaliabsatz von rund 57 bis 60 Mio. t (2010e: rund 57 Mio. t) aus; damit sollte das Absatzniveau vor der Finanz- und Wirtschaftskrise wieder erreicht werden und von diesem Niveau ausgehend in den kommenden Jahren wieder mit 3 bis 5 % p.a. wachsen. K+S sollte daran als weltweit viertgrößter Einzelproduzent mit einem Marktanteil von rund 10 % teilhaben.

**RISIKO FÜR GLOBALES DEFIZIT BEI GETREIDE<sup>1</sup> IN 2011/12** ABB: 4.13.3

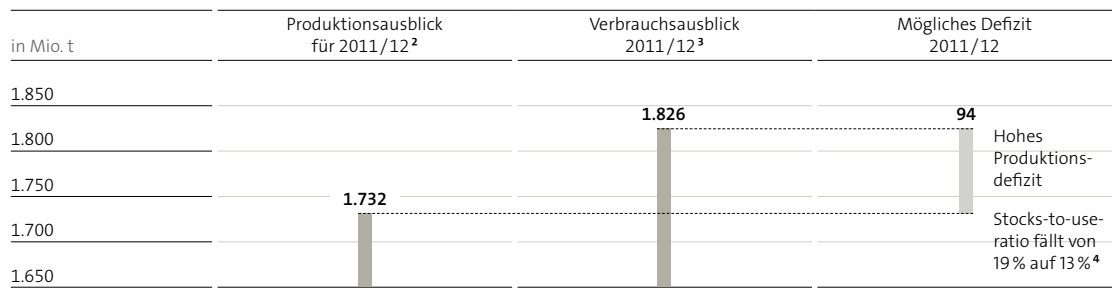

<sup>1</sup> Wheat and coarse grains. Quelle: USDA  
<sup>2</sup> Basierend auf einem 5-Jahresdurchschnitt der Ackerfläche multipliziert mit dem 5-Jahresdurchschnitt des Ertrags (531 Mio. ha x 3,3 t/ha).  
<sup>3</sup> Basierend auf Verbrauch (2010/11: 1.788 Mio. t) multipliziert mit dem 5-Jahresdurchschnitt des Nachfragewachstums von 2,1%.  
<sup>4</sup> Implizierte Stocks-to-use-ratio: Endvorräte 2010/11 (332 Mio. t) abzüglich potenzieller Unterdeckung (94 Mio. t) geteilt durch den potenziellen Verbrauch 2011/12 (1,1826 Mio. t).

**FUTURES FÜR AGRARPRODUKTE** ABB: 4.13.4

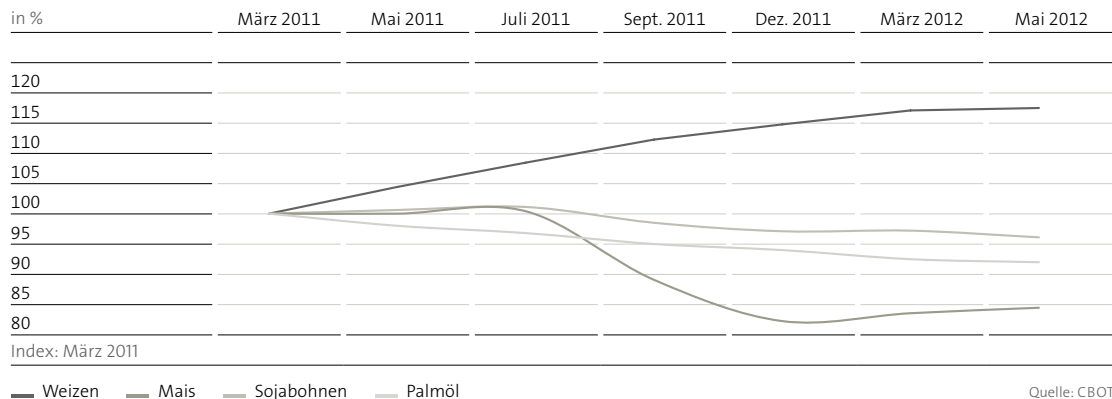

Zu den jüngsten Preisankündigungen: Vor dem Hintergrund weltweit bis in das erste Quartal hinein hoch ausgelasteter Produktionskapazitäten kündigte K+S Mitte Dezember 2010 für Europa eine Preiserhöhung auf 335 €/t granuliertes Kaliumchlorid an. Die russisch/weißrussische Exportorganisation BPC und die nordamerikanische Exportorganisation CANPOTEX haben Mitte Januar Verträge mit chinesischen Importeuren über die Lieferung von Kaliumchlorid standard zu 400 US\$/t (Vorjahr: 350 US\$/t) inklusive Fracht vereinbart. Nachdem BPC Anfang November 2010 einen Preis von 440 bis 450 US\$/t granuliertes Kaliumchlorid in Asien und Lateinamerika für Neuabschlüsse angekündigt hat, avisierte CANPOTEX Anfang Februar 2011 Preise in Höhe von 460 US\$/t für Kaliumchlorid standard und 475 US\$/t granuliertes Kaliumchlorid in diesen Märkten.

**/ EINE DARSTELLUNG DER PREISENTWICKLUNG VON KALIUMCHLORID** im Geschäftsjahr 2010 finden Sie in der Beschreibung der ‚Branchenspezifischen Rahmenbedingungen‘ auf den Seiten 103 f.

Eine Vorhersage des mittelfristigen Kalipreinsniveaus ist nur schwer möglich. Allerdings ist die Wirtschaftlichkeit von zeitaufwändigen und sehr kapitalintensiven Neuprojekten (Greenfield-Mine) von einem angemessenen Kalipreinsniveau abhängig: Neue Kapazitäten lassen sich nicht zu dem vor vier bis fünf Jahren noch gültigen niedrigeren Preisniveau wirtschaftlich realisieren. Und nach Jahrzehnten eines bis zum Jahr 2004 beinahe konstant gebliebenen Kalipreises und eines dadurch ausgelösten, ebenfalls jahrzehntelangen Investitionsstaus wird die Kalinachfrage einer globalisierten Welt mit stetig steigenden

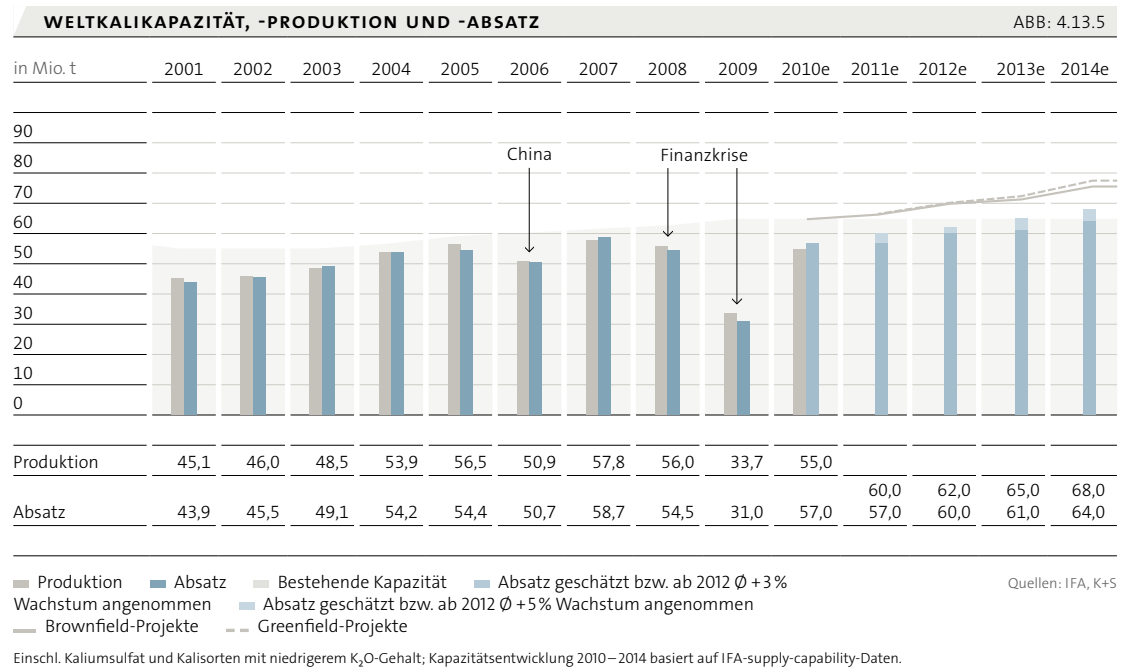

Ansprüchen an die Ernährung nicht allein mit den derzeit installierten Kapazitäten zu bedienen sein. / **ABB: 4.13.5**

**GESCHÄFTSFELD SALZ**

Auch in den kommenden Jahren wird die Branchen- und Wettbewerbssituation in Europa vom anhaltenden Konsolidierungsprozess in der Salzindustrie geprägt sein. Abhängig vom Frachtkostenniveau könnte sich die wettbewerbsintensive Marktsituation für die europäischen Produzenten auch durch steigende Importe aus Nicht-EU-

Ländern verschärfen. Als Europas größter Salzproduzent sind wir für die in diesem Marktumfeld entstehenden Herausforderungen gut gerüstet. Unter der Annahme durchschnittlicher Witterungsverhältnisse sollte sich die Nachfrage nach Auftausalz in Europa im Jahr 2011 nach dem Spitzenjahr 2010 allerdings wieder entsprechend reduzieren. Während die Nachfrage in den Segmenten Speise- und Gewerbesalz in Europa im kommenden Jahre stabil bleiben sollte, dürfte der Industriesalzabsatz angesichts der Konjunkturerholung moderat steigen.

Mit dem chilenischen Salzproduzenten SPL, dem größten Salzproduzenten Südamerikas, haben wir eine sehr gute Ausgangsposition, am dynamischen Wachstum der süd- und mittelamerikanischen Märkte teilzuhaben. Die Nachfrage der Chemieindustrie für Industriesalz sollte moderat steigen, der südamerikanische Gewerbe- und Speisesalzmarkt im Einklang mit der dortigen Bevölkerungsentwicklung stetig wachsen.

Nach der Akquisition von MORTON SALT, dem – gemessen an der Produktionskapazität – größten Salzproduzenten in Nordamerika, haben wir im Bereich der Auftausalze Zugang zu neuen Märkten mit in der Regel weniger schwankungsanfälliger Wintergeschäft in Nordamerika. Auch in den Segmenten Gewerbe- und Speisesalz gehört Nordamerika nun zu den bedeutendsten Absatzregionen. MORTON SALT verfügt mit den Marken UMBRELLA GIRL® und WINDSOR CASTLE® über in den USA und in Kanada im Consumergeschäft sehr gut positionierte Marken, die uns den verstärkten Absatz höhermargiger Spezialprodukte ermöglichen sollten. Unter der Annahme durchschnittlicher Witterungsverhältnisse sollte sich die Nachfrage nach Auftausalz in Nordamerika im Jahr 2011 etwas erhöhen, nachdem das Vorjahr etwas hinter dem langfristigen Durchschnitt zurückgeblieben ist. Der Frühbezug über die Sommermonate sollte unter Berücksichtigung der winterlichen Witterung zu Beginn des Jahres überdurchschnittlich verlaufen. Der Verbrauch von Speise- und Gewerbesalzen sollte weiter stabil verlaufen. Die Nachfrage der Chemieindustrie nach Industriesalz dürfte angesichts der sich abzeichnenden Konjunkturerholung wieder moderat steigen.

#### ERWARTETE UMSATZ- UND ERGEBNISENTWICKLUNG

Die nachfolgenden Prognosen beziehen sich ausschließlich auf die erwartete organische Umsatz- und Ergebnisentwicklung; Zuwächse aus möglichen Akquisitionen bzw. Kooperationen sind nicht berücksichtigt.

K+S verfolgt seit mehreren Jahren grundsätzlich eine klar definierte Prognosepolitik:

- + Im Finanzbericht wird ein Ausblick über zwei Jahre gegeben; der Ausblick erfolgt qualitativ in den Ausprägungen „leicht“, „moderat“, „spürbar“, „deutlich“ sowie „stark/kräftig“. Die jeweiligen Ausprägungen folgen dabei i.d.R. einer internen Klassifizierung in Abhängigkeit der erwarteten prozentualen Veränderung gegenüber den entsprechenden Vorjahreswerten.
- + Im Quartalsfinanzbericht zum ersten Quartal wird der Ausblick für das laufende Jahr aufgegriffen und ggf. angepasst; der Ausblick erfolgt qualitativ nach derselben Systematik des Finanzberichts.
- + Im Halbjahresfinanzbericht wird der Ausblick erstmals quantifiziert und es werden Bandbreiten für die Erwartungen bei Umsatz, EBITDA, operatives Ergebnis EBIT I, Konzernergebnis sowie Ergebnis je Aktie angegeben.
- + Im Quartalsfinanzbericht zum dritten Quartal werden die Bandbreiten für das laufende Jahr ggf. adjustiert und verengt. Darüber hinaus wird der qualitative Ausblick des Finanzberichts für das folgende Jahr wieder aufgegriffen und falls erforderlich verändert.

#### K+S GRUPPE MIT ATTRAKTIVEN PERSPEKTIVEN

DER UMSATZ SOLLTE IM JAHR 2011 GEGENÜBER DEM VORJAHRESWERT SPÜRBAR ZULEGEN

Anknüpfend an die Einschätzungen im Ausblick des dritten Quartals 2010 und vor dem Hintergrund der sich zum Jahresende und im Verlauf des ersten Quartals 2011 abzeichnenden positiven Nachfrage- und Preistendenzen dürfte der Umsatz der K+S GRUPPE im Geschäftsjahr 2011 gegenüber dem Vorjahr spürbar (bisher: moderat) ansteigen. Während wir im Geschäftsbereich Kali- und Magnesiumprodukte von einer spürbaren und im Geschäftsbereich Stickstoffdüngemittel von einer deutlichen (bisher: leichten) Umsatzsteigerung ausgehen, erwarten wir im Geschäftsbereich Salz ein stabiles (bisher: moderat rückläufiges) Umsatzniveau. Der Umsatzprognose zugrunde gelegt ist ein durchschnittlicher USDollarkurs von 1,35 USD/EUR (2010: 1,33 USD/EUR).

KOSTEN WERDEN VORAUSSICHTLICH SPÜRBAR, ABER UNTERPROPORTIONAL STEIGEN

Die nachfolgende Prognose der Kostenentwicklung erfolgt nach Kostenarten: Die Gesamtkosten der K+S GRUPPE dürften im Vergleich zum Vorjahr spürbar steigen. Beim Personalaufwand rechnen wir angesichts einer leicht erhöhten Mitarbeiterzahl sowie der Effekte aus den jüngsten Tariferhöhungen mit einem spürbaren Anstieg. Auch die Energie- bzw. Frachtkosten sollten gegenüber dem Vorjahr spürbar bzw. deutlich steigen. Schließlich werden höhere Einstandspreise voraussichtlich auch zu einem deutlichen Anstieg der Materialkosten führen. Die Abschreibungen erwarten wir auf einem moderat höheren Niveau.

**OPERATIVES ERGEBNIS DÜRFTE DEUTLICH ZULEGEN**

Das operative Ergebnis EBIT I sollte im Geschäftsjahr 2011 im Vergleich zum Vorjahreswert deutlich zulegen. Dies hängt in erster Linie mit dem zu erwartenden deutlich höheren Ergebnis im Geschäftsbereich Kali- und Magnesiumprodukte sowie einer moderaten (bisher: spürbaren) Verbesserung des operativen Ergebnisses im Geschäftsbereich Stickstoffdüngemittel zusammen. Das operative Ergebnis des Geschäftsbereichs Salz dürfte hingegen moderat (bisher: deutlich) zurückgehen. Auf Grundlage unserer für das Jahr 2011 durchschnittlichen US-Dollarkursschätzung von 1,35 USD/EUR (Durchschnittskurs 2010: 1,33 USD/EUR) ergibt sich kein wesentlicher währungsbedingter Ergebniseffekt.

**KONZERNERGEBNIS NACH STEUERN WIRD SICH VORAUSSICHTLICH DEUTLICH VERBESSERN**

Das bereinigte Konzernergebnis nach Steuern sollte der operativen Ergebnisentwicklung folgend im Jahr 2011 ebenfalls deutlich höher ausfallen. Unsere Einschätzung stützt sich neben den bei Umsatz und operativem Ergebnis beschriebenen Effekten auf folgende aus heutiger Sicht zu erwartende Sachverhalte:

- + ein deutlich verbessertes Finanzergebnis, nachdem dieses im Jahr 2010 durch Sondereffekte belastet war,
- + einen inländischen Konzernsteuersatz von 28,2 % und eine bereinigte Konzernsteuerquote von etwa 26 bis 27 % (2010: 26,2 %).

**PROGNOSE FÜR DAS JAHR 2012 EBENFALLS POSITIV**

Im Jahr 2012 dürfte sich der Umsatz gegenüber dem Vorjahr weitgehend stabil entwickeln; einem moderat

höheren Umsatz im Geschäftsbereich Kali- und Magnesiumprodukte werden voraussichtlich ein stabiler Umsatz bei Stickstoffdüngemitteln sowie ein moderat niedrigerer Umsatz im Geschäftsbereich Salz gegenüberstehen. Aufgrund der hohen Profitabilität des Geschäftsbereichs Kali- und Magnesiumprodukte sehen wir beim operativen Ergebnis realistische Chancen für eine moderate Steigerung gegenüber dem Vorjahr, die sich entsprechend positiv auch auf das bereinigte Konzernergebnis nach Steuern auswirken sollte.

**DEUTLICH HÖHERES ERGEBNIS BEI KALI- UND MAGNESIUMPRODUKTEN ERWARTET**

Die Perspektiven für die weltweite Nachfrageentwicklung nach kali- und magnesiumhaltigen Düngemitteln sind derzeit sehr attraktiv, sodass wir aus heutiger Sicht eine Vollausslastung unserer Werke sowie ein Absatzvolumen von 7,0 Mio. t Ware für das Jahr 2011 erwarten (2010: 6,99 Mio. t). Ausgehend von dem derzeit erreichten Kalipreisniveau ist mit einem gegenüber dem Vorjahr spürbar höheren Durchschnittspreisniveau zu rechnen. Auf dieser Basis sollte auch der Umsatz im Geschäftsbereich Kali- und Magnesiumprodukte gegenüber dem Vorjahr spürbar steigen. Die Gesamtkosten dürften sich insgesamt nur moderat erhöhen, auch wenn einzelne Kostenarten wie Energie- und Frachtkosten spürbar zulegen werden. Der positive Umsatzeffekt sollte den erwarteten Kostenanstieg überkompensieren und ein erneutes deutliches Ergebniswachstum ermöglichen.

Im Jahr 2012 erwarten wir aus heutiger Sicht bei einem stabilen Absatzniveau eine moderate Verbesserung unserer Umsatz- wie auch Ergebniswerte.

**POSITIVE ERGEBNISERWARTUNGEN BEI STICKSTOFFDÜNGEMITTELN**

Im Geschäftsjahr 2011 sollte der Umsatz des Geschäftsbereichs Stickstoffdüngemittel deutlich (bisher: leicht) zulegen: Bei COMPO dürfte sich der Umsatz aufgrund einer hohen Mehrnährstoffdüngenachfrage vor allem im Expertbereich verbessern können. Die Umsätze der K+S NITROGEN mit Stickstoffeinzeln-, Mehrnährstoffdüngern und Ammonsulfat sollten sich insgesamt vor allem preisbedingt positiv entwickeln. Eine hohe Kapazitätsauslastung, attraktive Preisperspektiven, aber auch anziehende Rohstoffkosten sollten im Vergleich zum guten Vorjahresergebnis eine moderate (bisher: spürbare) Steigerung des operativen Ergebnisses ermöglichen.

Im Jahr 2012 sollte sich der Umsatz aus heutiger Sicht weitgehend stabil entwickeln; beim operativen Ergebnis bestehen Chancen einer weiteren moderaten Steigerung.

**GESCHÄFTSBEREICH SALZ ERNEUT VON STARKEM WINTER BEGÜNSTIGT**

Aufgrund des witterungsbedingt guten Starts des Auftausalzgeschäfts sowohl in Europa als auch in Nordamerika erwarten wir für den Geschäftsbereich Salz im Jahr 2011 einen gegenüber dem Spitzenjahr 2010 stabilen (bisher: moderat rückläufig) Umsatz auf hohem Niveau. Diese Prognose unterstellt ein durchschnittliches Auftausalzgeschäft im vierten Quartal sowie eine insgesamt relativ stabile Umsatzentwicklung in den Segmenten Speise-, Gewerbe- und Industriesalzen, somit erscheint uns eine Prognose von 22 bis 23 Mio. t Festsalz

im Jahr 2011 realistisch (2010: 22,5 Mio. t). Auf der Kostenseite werden insbesondere höhere Frachtkosten sowie Verkäufe aus Beständen zu einem moderat (bisher: deutlich) rückläufigen operativen Ergebnis führen.

Gegenüber dem Umsatzniveau des Jahres 2011 rechnen wir für das Jahr 2012 auf Basis eines normalen und dem langfristigen Mengendurchschnitt historischer Auftausatzmengen folgenden Wintergeschäfts mit einem moderat niedrigeren Umsatz sowie operativen Ergebnis (Annahme Festsalzabsatz 2012: etwa 21 Mio. t).

#### **ERGÄNZENDE GESCHÄFTSBEREICHE SOLLTEN SICH STABIL ENTWICKELN**

Für das Jahr 2011 gehen wir aus heutiger Sicht von einer stabilen Umsatz- und einer moderat rückläufigen Ergebnisentwicklung aus.

Im Jahr 2012 erwarten wir sowohl eine stabile Umsatz- wie auch Ergebnisentwicklung der Ergänzenden Geschäftsbereiche.

#### **ERWARTETE FINANZLAGE**

##### **VORAUSSICHTLICHE FINANZIERUNGSSTRUKTUR VON HOHER EIGENKAPITALQUOTE GEPRÄGT**

Die K+S GRUPPE verfügt bei einer Nettoverschuldung (inklusive langfristiger Rückstellungen) von 732,5 Mio. € bzw. einem Verschuldungsgrad in Höhe von lediglich 29,7% und aufgrund eines hohen operativen Cashflows über eine starke finanzielle Basis. Beides führt dazu, dass

wir flexibel auf Investitions- und Akquisitionschancen reagieren können. Unsere Nettoverschuldung sollte sich in Anbetracht der für das Jahr 2011 erwarteten Ergebnisentwicklung im Vergleich zum Vorjahr auf stabilem Niveau bewegen. Diese Annahme berücksichtigt u. a. das für 2011 erwartete Investitionsbudget, die Kaufpreiszahlung für die POTASH-ONE-Aktien sowie die sich aus dem Dividendenvorschlag des Vorstands ergebende Dividendensumme. Nicht berücksichtigt sind Investitionen bei POTASH ONE, weitere Akquisitionen oder Aktienrückkäufe. Wir werden unter diesen Voraussetzungen in den Jahren 2011 und 2012 aller Voraussicht nach eine Eigenkapitalquote von rund 50% ausweisen, und der Verschuldungsgrad sollte unter 30% liegen.

##### **POSITIVE ENTWICKLUNG DER LIQUIDITÄT FÜR DIE KOMMENDEN ZWEI JAHRE ERWARTET**

Die für die Jahre 2011 und 2012 prognostizierte Ergebnisentwicklung sollte sich auch beim Cashflow aus laufender Geschäftstätigkeit positiv auswirken. Dieser dürfte die Ausgaben für Investitionen (ohne POTASH ONE) sowie die Kaufpreiszahlung für die POTASH-ONE-Aktien spürbar übersteigen, sodass wir in den beiden kommenden Jahren einen positiven freien Cashflow generieren dürften.

#### **GEPLANTE INVESTITIONEN**

##### **K+S GRUPPE**

Wir streben grundsätzlich an, dass die Ersatz- und Produktionssicherungsinvestitionen nicht über dem Niveau der Abschreibungen liegen. Außerdem sollte der Cash-

flow aus laufender Geschäftstätigkeit einen ausreichenden Spielraum für profitable Erweiterungs- und Rationalisierungsinvestitionen bieten.

Im Jahr 2011 sollte das Investitionsniveau der K+S GRUPPE bei mindestens 300 Mio. € liegen. Investitionen bei POTASH ONE sind in dieser Zahl noch nicht enthalten. Zur konsequenten Fortführung des Projekts werden allerdings erste Investitionen in die Infrastruktur sowie erste Bohrungen erfolgen. Die Feststellung der zur Umsetzung der gesamten ersten Ausbaustufe notwendigen Investitionsmittel ist für das zweite Halbjahr 2011 vorgesehen. Für das Maßnahmenpaket zum Gewässerschutz im hessisch-thüringischen Kalirevier sind Investitionen in Höhe von etwa 35 Mio. € berücksichtigt. Auf Ersatz- und Produktionssicherungsmaßnahmen sollten etwa 80% des Gesamtvolumens entfallen; dieser Anteil sollte etwas unter den erwarteten Abschreibungen in Höhe von 250 Mio. € liegen.

Im Jahr 2012 sollte das Investitionsniveau der K+S GRUPPE unter Berücksichtigung der auf das Maßnahmenpaket entfallenden Investitionen in Höhe von gut 50 Mio. € bei 320 Mio. € liegen. Investitionen bei POTASH ONE sind in dieser Zahl aus den oben genannten Gründen noch nicht enthalten. Auf Ersatz- und Produktionssicherungsmaßnahmen werden etwa 80% entfallen.

##### **GESCHÄFTSBEREICH KALI- UND MAGNESIUMPRODUKTE**

Das Investitionsniveau im Jahr 2011 sollte mit gut 150 Mio. € den Wert des Jahres 2010 (96,9 Mio. €) deutlich



übersteigen. Von diesem Anstieg entfallen rund 35 Mio. € auf das Maßnahmenpaket. Investitionen bei POTASH ONE sind in dieser Zahl noch nicht enthalten. Zur konsequenten Fortführung des Projekts werden allerdings erste Investitionen in die Infrastruktur sowie erste Bohrungen erfolgen. Darüber hinaus hat sich eine Verschiebung von Investitionsprojekten vom Jahr 2010 in das Jahr 2011 ergeben. Im Vordergrund stehen hier vor allem Projekte zur Rohstoffausbeutesteigerung und zur Prozessoptimierung. Insgesamt werden gut 80 % des Investitionsvolumens auf Ersatz- und Produktionssicherungsinvestitionen entfallen.

Im Jahr 2012 sollte das Investitionsniveau unter Berücksichtigung der auf das Maßnahmenpaket entfallenden Investitionen in Höhe von gut 50 Mio. € bei 185 Mio. € liegen. Investitionen bei POTASH ONE sind in dieser Zahl aus den oben genannten Gründen noch nicht enthalten. Darüber hinaus ist unterstellt, dass wir die Genehmigung für den geplanten Bau der Salzwasserleitung vom Standort Neuhaus zum Werk Werra erhalten und mit dem Bau beginnen können (rund 20 Mio. €).

#### **GESCHÄFTSBEREICH STICKSTOFFDÜNGEMITTEL**

Das Investitionsvolumen sollte sich im Jahr 2011 auf gut 10 Mio. € belaufen und damit annähernd auf dem Niveau des Jahres 2010 liegen. Bei COMPO wird ein wesentlicher Teil der Investitionen auf Ersatz- und Produktionssicherungsinvestitionen entfallen; darüber hinaus werden auch im Jahr 2011 Projekte zur Produktentwicklung im Consumer-Bereich umgesetzt. Bei K+S NITROGEN wird die Investition in eine Anlage zur farblichen

Kennzeichnung von Produkten im Vordergrund stehen. Insgesamt werden im Geschäftsbereich Stickstoffdüngemittel gut 80 % des Investitionsvolumens auf Ersatz- und Produktionssicherungsinvestitionen entfallen.

Für das Jahr 2012 ist mit einem Investitionsvolumen in Höhe von 8 Mio. € zu rechnen; davon entfällt erneut der Großteil auf COMPO.

#### **GESCHÄFTSBEREICH SALZ**

Das Investitionsvolumen im Jahr 2011 sollte mit knapp 95 Mio. € den Wert des Vorjahres (79,0 Mio. €) deutlich übersteigen. Investitionen in eine erhöhte Flexibilität bei der Auftausalzproduktion in Europa sowie in Effizienzsteigerungsmaßnahmen bei MORTON SALT werden hauptsächlich zu diesem Anstieg beitragen. Die folgenden Projekte werden im Vordergrund stehen: die Erneuerung einer Schachtfördermaschine am Standort Borth in Deutschland, die Erweiterung der Mahlanlagen am Standort Bernburg in Deutschland, die Solfelderweiterung bei Frisia in Harlingen in den Niederlanden, die Erneuerung der Siedesalzanlage am Standort Hutchinson, Kansas, USA, die Erweiterung von Sol- und Grubenfeldern an fünf verschiedenen Standorten in den USA, bei SPL die Erweiterung der Lagerkapazität in Brasilien sowie die Erneuerung eines Verladeterminals und die Erweiterung der Siebkapazitäten in Chile. Knapp 90 % werden in Ersatz- und Produktionssicherungsmaßnahmen investiert werden.

Für das Jahr 2012 ist ebenfalls mit einem Investitionsvolumen in Höhe von rund 95 Mio. € zu rechnen.

#### **ERGÄNZENDE GESCHÄFTSBEREICHE**

Das Investitionsvolumen wird in den Jahren 2011 und 2012 jeweils rund 5 Mio. € betragen und damit etwas über dem Niveau des Berichtsjahres (4,2 Mio. €) liegen und vor allem Ersatz- und Produktionssicherungsinvestitionen betreffen. Davon werden gut 3 Mio. € im Geschäftsbereich Entsorgung und Recycling und je 1 Mio. € in den Geschäftsbereichen Logistik und Tierhygieneprodukte investiert werden. Im Geschäftsbereich Entsorgung und Recycling wird am Standort Bernburg ein weiteres Feld für die untertägige Verwertung erschlossen.

#### **VORAUSSICHTLICHE ENTWICKLUNG DER DIVIDENDEN**

##### **DIVIDENDENVORSCHLAG FÜR DAS GESCHÄFTSJAHR 2010 STARK ANGEHOBEN**

Aus dem am Ende des Jahres 2009 vorhandenen Bilanzgewinn der K+S AKTIENGESELLSCHAFT von 46,2 Mio. € erfolgte am 12. Mai 2010 die Dividendenzahlung für das Jahr 2009 in Höhe von 38,3 Mio. €. Im Geschäftsjahr 2010 erzielte die K+S AKTIENGESELLSCHAFT einen Jahresüberschuss von 217,8 Mio. € (2009: 42,8 Mio. €). Unter Einbeziehung eines Gewinnvortrags in Höhe von 7,9 Mio. € werden 225,7 Mio. € als Bilanzgewinn ausgewiesen.

/ TAB: 4.13.2

Dem starken Anstieg des bereinigten Ergebnisses der K+S GRUPPE und unserer langfristigen Dividendenpolitik folgend schlägt der Vorstand der Hauptversammlung

**DIVIDENDENTWICKLUNG**

TAB: 4.13.2

|                    | 2010 <sup>1</sup> | 2009 | 2008 | 2007 | 2006 |
|--------------------|-------------------|------|------|------|------|
| in €               |                   |      |      |      |      |
| Dividende je Aktie | 1,00              | 0,20 | 2,40 | 0,50 | 0,50 |

<sup>1</sup> Im Jahr 2010 entspricht die Angabe dem Dividendenvorschlag.

lung vor, eine Dividende von 1,00 € je Aktie auszuschütten (Vorjahr: 0,20 € je Aktie).

Unter der Annahme, dass wir am Tag der Hauptversammlung keine eigenen Aktien halten, ergibt sich eine auszuschüttende Dividendensumme von 191,4 Mio. €; diese liegt mit einer Ausschüttungsquote von 43 % innerhalb unseres grundsätzlich angestrebten Ausschüttungskorridors von 40 bis 50 % des bereinigten Konzernergebnisses der K+S GRUPPE.

**KÜNFTIGE DIVIDENDENPOLITIK**

Wir verfolgen eine grundsätzlich ertragsorientierte Dividendenpolitik. Mit dieser Maßgabe bildet eine Ausschüttungsquote von 40 bis 50 % des bereinigten Konzernergebnisses die Grundlage für die von Vorstand und Aufsichtsrat zu bestimmende Höhe der künftigen Dividendenvorschläge. Der für das Jahr 2011 erwartete deutliche Anstieg des bereinigten Konzernergebnisses nach Steuern sollte sich auch entsprechend auf die künftige Dividendenzahlung auswirken. Für das Jahr 2012 ist aufgrund der erwarteten Verbesserung des Ergebnisniveaus eine entsprechende Anhebung der Dividende möglich.

**CHANCEN****CHANCEN AUS DER ENTWICKLUNG DER RAHMENBEDINGUNGEN**

Informationen zu unserem Chancenmanagement finden Sie im Risikobericht auf Seite 130.

Das bereits unter der Rubrik ‚Künftige Branchensituation‘ auf den Seiten 149 ff. beschriebene, im historischen Vergleich relativ niedrige Verhältnis des Bestands an wichtigen Agrarprodukten zum jährlichen Verbrauch könnte sich nachhaltig in einer relativ hohen Preisfindung für landwirtschaftliche Erzeugnisse widerspiegeln. Attraktive Preisniveaus wiederum ermutigen Landwirte weltweit, sowohl die ihnen gegebenenfalls noch zur Verfügung stehenden unbewirtschafteten Flächen zu nutzen als auch die Intensität der bestehenden Bewirtschaftung zu erhöhen; beides erfordert einen höheren Einsatz an Düngemitteln und könnte dazu führen, dass die globale Düngemittelnachfrage in Zukunft stärker wächst als bislang mit 2 bis 3 % p.a. prognostiziert.

**UNTERNEHMENSSTRATEGISCHE CHANCEN**

Angesichts der in Normaljahren hohen Auslastung unserer technisch verfügbaren Kapazitäten in Deutsch-

land sowie der voraussichtlich stark steigenden Nachfrage nach Düngemitteln in der Zukunft verfolgt der Geschäftsbereich Kali- und Magnesiumprodukte seit geraumer Zeit die Strategie, seine Produktionskapazitäten für Kali zu erweitern. Vor diesem Hintergrund haben wir am 22. November 2010 unsere Absicht erklärt, ein Übernahmeangebot für das kanadische Explorationsunternehmen POTASH ONE abgeben zu wollen. Am 7. Februar 2011 gaben wir bekannt, dass im Rahmen dieses Übernahmeangebots ein Mehrheitsanteil von 90,9 % der POTASH-ONE-Aktien angedient wurde. K+S sicherte sich damit die Rechte mehrerer Kali-Explorationslizenzen in der kanadischen Provinz Saskatchewan einschließlich des Legacy Projekts – ein fortgeschrittenes Greenfield-Projekt zur Errichtung einer auf Solungsbergbau basierenden Kaliumchloridproduktion. Mit ersten zur Verfügung stehenden Mengen rechnen wir frühestens ab dem Jahr 2015. Der Erwerb von POTASH ONE eröffnet uns die Chance, am weltweiten Marktwachstum teilzuhaben, den Umsatz und Ertrag des Geschäftsbereichs weiter zu verbessern, die internationale Wettbewerbsfähigkeit zu stärken sowie die durchschnittliche Lebensdauer unserer Bergwerke zu verlängern.

Außerdem führen wir derzeit für unser Reservebergwerk Siegfried-Giesen bei Hildesheim, Niedersachsen, eine Machbarkeitsstudie durch; die Ergebnisse sollten im Sommer 2011 vorliegen. Unter der Voraussetzung der Wirtschaftlichkeit und Gewährung der notwendigen bergbau- und umweltrechtlichen Genehmigungen durch eine Wiederinbetriebnahme von Siegfried-Giesen ergäbe sich für uns die Chance, die durch die im Jahr

2018 wahrscheinlich notwendig werdende Schließung des Standorts Sigmundshall wegfallende Produktionsleistung zu einem gewissen Grad zu kompensieren.

Ein besonderer Fokus liegt auf der Optimierung des internationalen Produktionsnetzwerks und der damit verbundenen Mengenströme und Logistikkosten. Vergleichbare Abbauverfahren ermöglichen Synergien zwischen den Geschäftsbereichen Kali- und Magnesiumprodukte sowie Salz beim Austausch von technischem, geologischem und logistischem Know-how sowie Skaleneffekte in der Beschaffung von Maschinen und Hilfsstoffen.

#### LEISTUNGSWIRTSCHAFTLICHE CHANCEN

Ein Rückgang der Energiekosten hätte speziell in den energiesensitiven Geschäftsbereichen Kali- und Magnesiumprodukte sowie Salz günstige Auswirkungen auf die Kostenstruktur und damit den Geschäftserfolg. Ein Rückgang der K+S-Energiekosten vom derzeitigen Niveau um 10 % bedeutet knapp 30 Mio. € niedrigere Kosten pro Jahr; ein entsprechender Rückgang der Frachtkosten entspräche einer Entlastung in Höhe von rund 80 Mio. €. Außerdem war in der Historie ein gewisser Gleichlauf zwischen Energie- und Ammoniakkosten festzustellen; ein Rückgang der Energiekosten würde sich demnach mit hoher Wahrscheinlichkeit auch in niedrigeren Ammoniakkosten und damit geringeren Beschaffungskosten im Geschäftsbereich Stickstoffdüngemittel auswirken.

#### SONSTIGE CHANCEN

Steigende Brennstoff- und Strompreise sowie umwelttechnische Aspekte veranlassen uns zu einer kontinu-

ierlichen Überprüfung und Verbesserung unseres Energiekonzepts. Nach der erfolgreichen Inbetriebnahme des Müllheizkraftwerks am Standort Wintershall, das einem deutschen Energieunternehmen gehört und von dem wir Dampf abnehmen, wird im Frühjahr 2011 das Müllheizkraftwerk unseres Partners OMRIN in Harlingen, Niederlande, in der Nähe unseres Standorts Frisia Zout in Betrieb genommen; mit der auch dort vereinbarten Dampfübernahme werden Gas eingespart und CO<sub>2</sub>-Emissionen vermieden. Weiterhin wird in Partnerschaft mit E.ON Energy Projects (Contracting-Modell) am Standort Hattorf in Kürze ein Gasturbinenblock zur Erweiterung und Effizienzsteigerung des dortigen Kraftwerks errichtet. Ziel aller Maßnahmen ist es, die Energieeffizienz zu erhöhen, dabei die Eigenstromerzeugung zu steigern und CO<sub>2</sub>-Emissionen zu senken.

Im Rahmen der erhöhten Flexibilisierung sowie Senkung von Einkaufskosten wurden die bisher ausschließlich an den Ölpreis gekoppelten Gasverträge neu verhandelt, um für einen Teil der Bezugsmengen zukünftig Preischancen an den Gasspotmärkten nutzen zu können. Weitere Chancen ergeben sich aus der Evaluierung von Best-Practice-Ansätzen innerhalb der K+S GRUPPE, wobei der Einsatz von Kraft-Wärme-Kopplungsanlagen auch an unseren ausländischen Standorten geprüft wird.

Für die K+S GRUPPE ist das USD/EUR-Währungsverhältnis grundsätzlich von hoher Bedeutung, da insbesondere Kaliverkäufe, mit Ausnahme des europäischen Marktes und einigen wenigen Überseeregionen, in US-Dollar fakturiert werden. Unserer Unternehmensplanung im Jahr 2011 liegt ein US-Dollarkurs von 1,35 USD/

EUR zugrunde. Unter der Annahme, dass der US-Dollar um 10 Cent auf 1,25 USD/EUR steigen würde, ergäbe sich auf Gruppenebene beim operativen Ergebnis ein positiver Effekt von rund 15 Mio. €. Würde sich der US-Dollar hingegen um 10 Cent auf 1,45 USD/EUR abschwächen, würde aufgrund der von uns eingesetzten Sicherungsinstrumente daraus nur ein vernachlässigbarer Ergebniseffekt resultieren.

#### GESAMTAUSSAGE ZUR VORAUSSICHTLICHEN ENTWICKLUNG DER K+S GRUPPE

Derzeit zieht weltweit sowohl die Nachfrage als auch das Preisniveau mineralischer Düngemittel an. Auch das Salzgeschäft wird im laufenden Jahr wahrscheinlich von einer erneut überdurchschnittlichen Auftausalznachfrage profitieren. Für die Geschäftsentwicklung im Jahr 2011 rechnen wir daher aus heutiger Sicht mit einem spürbaren Anstieg des Umsatzes. Da der erwartete Kostenanstieg voraussichtlich hinter dem Umsatzanstieg zurückbleiben wird, sehen wir beim operativen Ergebnis EBIT I wie auch beim Konzernergebnis sogar gute Chancen einer deutlichen Steigerung gegenüber den entsprechenden Vorjahreswerten. / TAB: 4.13.3

Weltweit nur begrenzt zur Verfügung stehende Agrarflächen und wahrscheinlich über einen längeren Zeitraum erhöhte Agrarpreise werden Landwirte weltweit motivieren, ihre Flächenerträge je Hektar zu steigern. Hierzu bedarf es insbesondere in den Schwellenländern einer erhöhten Düngeintensität, sodass im Jahr 2012 von einer weiteren Nachfrigesteigerung bei gleichzeitig

TABELLARISCHE ÜBERSICHT DER BESCHRIEBENEN UMSATZ- UND ERGEBNISTRENDS <sup>1</sup>

TAB: 4.13.3

| in Mio. €   | Kali- und Magnesiumprodukte | Stickstoffdüngemittel | Salz    | Ergänzende Geschäftsbereiche | K+S Gruppe |
|-------------|-----------------------------|-----------------------|---------|------------------------------|------------|
| Umsatz 2010 | 1.844,7                     | 1.286,2               | 1.728,7 | 133,7                        | 4.993,8    |
| Umsatz 2011 | ++                          | +++                   | o       | o                            | ++         |
| Umsatz 2012 | +                           | o                     | -       | o                            | o          |
| EBIT I 2010 | 475,9                       | 55,7                  | 238,1   | 21,2                         | 726,9      |
| EBIT I 2011 | +++                         | +                     | -       | -                            | +++        |
| EBIT I 2012 | +                           | +                     | -       | o                            | +          |

<sup>1</sup> Tendenz jeweils gegenüber Vorjahr; o: unverändert; -/+ : leicht bis moderat; --/++ : spürbar; ---/+++ : deutlich.

hoch ausgelasteten Produktionskapazitäten ausgegangen werden darf. Preispotenziale insbesondere für Kali- und Magnesiumdüngemittel sind daher möglich. Aufgrund des witterungsbedingt guten Starts des Auftausalzgeschäfts sowohl in Europa als auch in Nordamerika erwarten wir für den Geschäftsbereich Salz im Jahr 2011 einen gegenüber dem Spitzenjahr 2010 stabilen Umsatz auf hohem Niveau; auf der Kostenseite werden insbesondere höhere Frachtkosten sowie Verkäufe aus Beständen zu einem moderat rückläufigen operativen Ergebnis führen. Im Vergleich zu den Vorjahreswerten ist daher für die K+S GRUPPE im Jahr 2012 insgesamt von einer stabilen Umsatz- und einer sich moderat verbessernden Ergebnisentwicklung auszugehen.

Unser Ausblick für die Jahre 2011 und 2012 stützt sich u. a. auf folgende Prämissen:

- + anhaltend attraktive Agrarpreise;
- + höhere Durchschnittserlöse sowie stabile Absatzvolumina im Geschäftsbereich Kali- und Magnesium-

produkte (erwartete Absatzmenge in beiden Jahren: rund 7 Mio. t);

- + 22 bis 23 Mio. t Festsalzabsatz in 2011 sowie etwa 21 Mio. t in 2012 (Normaljahr);
- + ein US-Dollarkurs von 1,35 USD / EUR;
- + deutlich steigende Energiekosten in 2011 und eine stabile Kostenentwicklung im darauf folgenden Jahr auf Basis eines Ölpreisniveaus von knapp 90 US\$ pro Barrel und der für uns maßgeblichen Energievertragsklauseln;
- + eine mit 26 bis 27% stabile bereinigte Konzernsteuerquote.

Darüber hinaus bleibt es Schwerpunkt unserer Strategie, in den angestammten Geschäftsfeldern weiter zu wachsen; dies schließt Akquisitionen und Kooperationen ein.

#### VERSICHERUNG DER GESETZLICHEN VERTRETER DER K+S AKTIENGESELLSCHAFT

Wir versichern nach bestem Wissen, dass gemäß den anzuwendenden Rechnungslegungsgrundsätzen der

Konzernabschluss ein den tatsächlichen Verhältnissen entsprechendes Bild der Vermögens-, Finanz- und Ertragslage des Konzerns vermittelt und im Konzernlagebericht der Geschäftsverlauf einschließlich des Geschäftsergebnisses und die Lage des Konzerns so dargestellt sind, dass ein den tatsächlichen Verhältnissen entsprechendes Bild vermittelt wird, sowie die wesentlichen Chancen und Risiken der voraussichtlichen Entwicklung des Konzerns beschrieben sind.

Kassel, 1. März 2011

#### K+S AKTIENGESELLSCHAFT DER VORSTAND

#### ZUKUNFTSBEZOGENE AUSSAGEN

Dieser Bericht enthält Angaben und Prognosen, die sich auf die künftige Entwicklung der K+S GRUPPE und ihrer Gesellschaften beziehen. Die Prognosen stellen Einschätzungen dar, die wir auf der Basis aller uns zum jetzigen Zeitpunkt zur Verfügung stehenden Informationen getroffen haben. Sollten die den Prognosen zugrunde gelegten Annahmen nicht zutreffend sein oder Risiken – wie sie beispielsweise im Risikobericht genannt werden – eintreten, können die tatsächlichen Entwicklungen und Ergebnisse von den derzeitigen Erwartungen abweichen. Die Gesellschaft übernimmt außerhalb der gesetzlich vorgesehenen Veröffentlichungsvorschriften keine Verpflichtung, die in diesem Lagebericht enthaltenen Aussagen zu aktualisieren.

## KONZERNABSCHLUSS

# 5

---

|     |                                             |     |     |                                 |     |
|-----|---------------------------------------------|-----|-----|---------------------------------|-----|
| 5.1 | Bestätigungsvermerk<br>des Abschlussprüfers | 161 | 5.6 | Entwicklung des Anlagevermögens | 166 |
| 5.2 | Gewinn- und Verlustrechnung                 | 162 | 5.7 | Entwicklung der Rückstellungen  | 170 |
| 5.3 | Kapitalflussrechnung                        | 163 | 5.8 | Segmentberichterstattung        | 172 |
| 5.4 | Bilanz                                      | 164 | 5.9 | Anhang                          | 174 |
| 5.5 | Entwicklung des Eigenkapitals               | 165 |     |                                 |     |



## 5.1 BESTÄTIGUNGSVERMERK DES ABSCHLUSSPRÜFERS

Wir haben den von der K+S AKTIENGESELLSCHAFT, Kassel, aufgestellten Konzernabschluss – bestehend aus Bilanz, Gewinn- und Verlustrechnung sowie Gesamtergebnisrechnung, Eigenkapitalveränderungsrechnung, Kapitalflussrechnung und Anhang – sowie den Konzernlagebericht für das Geschäftsjahr vom 1. Januar bis 31. Dezember 2010 geprüft. Die Aufstellung von Konzernabschluss und Konzernlagebericht nach den International Financial Reporting Standards (IFRS), wie sie in der EU anzuwenden sind, und den ergänzend nach § 315a Abs. 1 HGB anzuwendenden handelsrechtlichen Vorschriften liegt in der Verantwortung des Vorstands der Gesellschaft. Unsere Aufgabe ist es, auf der Grundlage der von uns durchgeführten Prüfung eine Beurteilung über den Konzernabschluss und über den Konzernlagebericht abzugeben.

Wir haben unsere Konzernabschlussprüfung gemäß § 317 HGB unter Beachtung der vom Institut der Wirtschaftsprüfer festgestellten deutschen Grundsätze ordnungsmäßiger Abschlussprüfung vorgenommen. Danach ist die Prüfung so zu planen und durchzuführen, dass Unrichtigkeiten und Verstöße, die sich auf die Darstellung des durch den Konzernabschluss unter Beachtung der anzuwendenden Rechnungslegungsvorschriften und durch den Konzernlagebericht vermittelten Bildes der Vermögens-, Finanz- und Ertragslage wesentlich auswirken, mit hinreichender Sicherheit erkannt werden. Bei der Festlegung der Prüfungshandlungen werden die Kenntnisse über die Geschäftstätigkeit und über das wirtschaftliche und rechtliche Umfeld des Konzerns sowie die Erwartungen über mögliche Fehler berücksichtigt. Im Rahmen der Prüfung werden die Wirksamkeit des rechnungslegungsbezogenen internen Kontrollsystems sowie Nachweise für die Angaben in Konzernabschluss und Konzernlagebericht überwiegend auf der Basis von Stichproben beurteilt. Die Prüfung umfasst die Beurteilung der Jahresabschlüsse der in den Konzernabschluss einbezogenen Unternehmen, der Abgrenzung des Konsolidierungskreises, der angewandten Bilanzierungs- und Konsolidierungsgrundsätze und der wesentlichen Einschätzungen des Vorstands sowie die Würdigung der Gesamtdarstellung des Konzernabschlusses und des Konzernlageberichts. Wir sind der Auffassung, dass unsere Prüfung eine hinreichend sichere Grundlage für unsere Beurteilung bildet.

Unsere Prüfung hat zu keinen Einwendungen geführt.

Nach unserer Beurteilung aufgrund der bei der Prüfung gewonnenen Erkenntnisse entspricht der Konzernabschluss der K+S AKTIENGESELLSCHAFT, Kassel, den IFRS, wie sie in der EU anzuwenden sind, und den ergänzend nach § 315a Abs. 1 HGB anzuwendenden handelsrechtlichen Vorschriften und vermittelt unter Beachtung dieser Vorschriften ein den tatsächlichen Verhältnissen entsprechendes Bild der Vermögens-, Finanz- und Ertragslage des Konzerns. Der Konzernlagebericht steht in Einklang mit dem Konzernabschluss, vermittelt insgesamt ein zutreffendes Bild von der Lage des Konzerns und stellt die Chancen und Risiken der zukünftigen Entwicklung zutreffend dar.

Hannover, 1. März 2011

|                                 |                   |                   |
|---------------------------------|-------------------|-------------------|
| DELOITTE & TOUCHE GMBH          | (Prof. Dr. Beine) | (Römgens)         |
| Wirtschaftsprüfungsgesellschaft | Wirtschaftsprüfer | Wirtschaftsprüfer |

| <b>GEWINN- UND VERLUSTRECHNUNG</b>                                          |        |                |                | TAB: 5.2.1 |
|-----------------------------------------------------------------------------|--------|----------------|----------------|------------|
|                                                                             | Anhang | 2010           | 2009           |            |
| in Mio. €                                                                   |        |                |                |            |
| <b>Umsatzerlöse</b>                                                         | [1]    | <b>4.993,8</b> | <b>3.573,8</b> |            |
| Herstellungskosten der zur Erzielung der Umsatzerlöse erbrachten Leistungen |        | 3.075,6        | 2.343,9        |            |
| <b>Bruttoergebnis vom Umsatz</b>                                            |        | <b>1.918,2</b> | <b>1.229,9</b> |            |
| Vertriebskosten                                                             |        | 971,9          | 712,4          |            |
| Allgemeine Verwaltungskosten                                                |        | 183,6          | 123,1          |            |
| Forschungs- und Entwicklungskosten                                          |        | 15,5           | 18,7           |            |
| Sonstige betriebliche Erträge                                               | [2]    | 206,1          | 154,5          |            |
| Sonstige betriebliche Aufwendungen                                          | [3]    | 209,0          | 253,3          |            |
| Beteiligungsergebnis                                                        | [4]    | 4,8            | 0,9            |            |
| Ergebnis aus operativen, antizipativen Sicherungsgeschäften <sup>1</sup>    | [5]    | -17,6          | -35,9          |            |
| <b>Ergebnis nach operativen Sicherungsgeschäften (EBIT II)<sup>2</sup></b>  |        | <b>731,5</b>   | <b>241,9</b>   |            |
| Zinserträge                                                                 | [6]    | 7,6            | 4,7            |            |
| Zinsaufwendungen                                                            | [6]    | -134,2         | -61,7          |            |
| Sonstiges Finanzergebnis                                                    | [7]    | 3,1            | -58,4          |            |
| <b>Finanzergebnis</b>                                                       |        | <b>-123,5</b>  | <b>-115,4</b>  |            |
| <b>Ergebnis vor Ertragsteuern</b>                                           |        | <b>608,0</b>   | <b>126,5</b>   |            |
| Steuern vom Einkommen und vom Ertrag                                        | [8]    | 158,6          | 29,6           |            |
| – davon: Latente Steuern                                                    |        | -20,6          | -8,7           |            |
| <b>Jahresüberschuss</b>                                                     |        | <b>449,4</b>   | <b>96,9</b>    |            |
| <b>Anteile anderer Gesellschafter am Ergebnis</b>                           |        | <b>0,8</b>     | <b>0,5</b>     |            |
| <b>Konzernergebnis nach Steuern und Anteilen Dritter</b>                    |        | <b>448,6</b>   | <b>96,4</b>    |            |
| Ergebnis je Aktie in € (unverwässert Æ verwässert)                          | [11]   | 2,34           | 0,58           |            |
| <b>Operatives Ergebnis (EBIT I)<sup>2</sup></b>                             |        | <b>726,9</b>   | <b>238,0</b>   |            |
| <b>Ergebnis vor Ertragsteuern, bereinigt<sup>3</sup></b>                    |        | <b>603,4</b>   | <b>122,6</b>   |            |
| <b>Konzernergebnis, bereinigt<sup>3</sup></b>                               | [11]   | <b>445,3</b>   | <b>93,6</b>    |            |
| <b>Ergebnis je Aktie in €, bereinigt<sup>3</sup></b>                        | [11]   | <b>2,33</b>    | <b>0,56</b>    |            |
| Durchschnittliche Anzahl Aktien in Mio. Stück                               |        | 191,34         | 166,15         |            |

| <b>GESAMTERGEBNISRECHNUNG</b>                                  |        |              |              | TAB: 5.2.2 |
|----------------------------------------------------------------|--------|--------------|--------------|------------|
|                                                                | Anhang | 2010         | 2009         |            |
| in Mio. €                                                      |        |              |              |            |
| <b>Jahresüberschuss</b>                                        |        | <b>449,4</b> | <b>96,9</b>  |            |
| Währungsumrechnung                                             |        | 148,8        | 6,3          |            |
| <b>Erfolgsneutrales Ergebnis (nach Steuern)</b>                |        | <b>148,8</b> | <b>6,3</b>   |            |
| <b>Gesamtergebnis der Periode</b>                              |        | <b>598,2</b> | <b>103,2</b> |            |
| <b>Anteile anderer Gesellschafter am Gesamtergebnis</b>        |        | <b>0,8</b>   | <b>0,5</b>   |            |
| <b>Konzerngesamtergebnis nach Steuern und Anteilen Dritter</b> |        | <b>597,4</b> | <b>102,7</b> |            |

| <b>ÜBERLEITUNG ZUM EBIT I</b>                                                           |        |              |              | TAB: 5.2.3 |
|-----------------------------------------------------------------------------------------|--------|--------------|--------------|------------|
|                                                                                         | Anhang | 2010         | 2009         |            |
| in Mio. €                                                                               |        |              |              |            |
| <b>Ergebnis nach operativen Sicherungsgeschäften (EBIT II)<sup>2</sup></b>              |        | <b>731,5</b> | <b>241,9</b> |            |
| ± Ergebnis aus operativen, antizipativen Sicherungsgeschäften <sup>1,2</sup>            | [5]    | 17,6         | 35,9         |            |
| ± realisiertes Ergebnis aus operativen, antizipativen Sicherungsgeschäften <sup>2</sup> |        | -22,2        | -39,8        |            |
| <b>Operatives Ergebnis (EBIT I)<sup>2</sup></b>                                         |        | <b>726,9</b> | <b>238,0</b> |            |

<sup>1</sup> Seit dem Geschäftsjahr 2009 werden sämtliche Ergebniseffekte aus operativen, antizipativen Sicherungsgeschäften in der Zeile „Ergebnis aus operativen, antizipativen Sicherungsgeschäften“ ausgewiesen (siehe auch ‚Erläuterungen zur Gewinn- und Verlustrechnung und Gesamtergebnisrechnung‘ auf den Seiten 184 ff.).

<sup>2</sup> Die Steuerung der K+S Gruppe erfolgt auf Basis des operativen Ergebnisses (EBIT I). Die Überleitung des EBIT II auf das operative Ergebnis (EBIT I) wird in der Tabelle 48 vorgenommen (siehe auch ‚Erläuterungen zur Gewinn- und Verlustrechnung und Gesamtergebnisrechnung‘ auf den Seiten 184 ff.).

<sup>3</sup> Die bereinigten Kennzahlen beinhalten unverändert lediglich das realisierte Ergebnis aus operativen, antizipativen Sicherungsgeschäften der jeweiligen Berichtsperiode. Die Marktveränderungen der noch ausstehenden, operativen, antizipativen Sicherungsgeschäfte werden hingegen in den bereinigten Ergebnissen nicht berücksichtigt (siehe auch ‚Erläuterungen zur Gewinn- und Verlustrechnung und Gesamtergebnisrechnung‘ auf den Seiten 184 ff.). Ebenso werden darauf entfallene Effekte auf latente und zahlungswirksame Steuern eliminiert; Steuersatz 2010: 28,2% (2009: 27,9%).

| KAPITALFLUSSRECHNUNG                                                                                 |        | TAB: 5.3.1    |                 |
|------------------------------------------------------------------------------------------------------|--------|---------------|-----------------|
|                                                                                                      | Anhang | 2010          | 2009            |
| in Mio. €                                                                                            |        |               |                 |
| <b>Ergebnis nach operativen Sicherungsgeschäften (EBIT II)</b>                                       |        | <b>731,5</b>  | <b>241,9</b>    |
| Ertrag (-)/Aufwand (+) aus Marktwertveränderungen noch nicht fälliger Sicherungsgeschäfte            |        | 0,8           | 9,7             |
| Neutralisierung früherer Marktwertveränderungen von ausgebuchten Sicherungsgeschäften                |        | -5,4          | -13,6           |
| <b>Operatives Ergebnis (EBIT I)</b>                                                                  |        | <b>726,9</b>  | <b>238,0</b>    |
| Abschreibungen (+)/Zuschreibungen (-) auf immaterielle Vermögenswerte, Sachanlagen und Finanzanlagen |        | 248,3         | 173,8           |
| Zunahme (+)/Abnahme (-) langfristiger Rückstellungen (ohne Zinseffekte)                              |        | 33,2          | 6,5             |
| Erhaltene Zinsen, Dividenden und ähnliche Erträge                                                    |        | 6,4           | 4,4             |
| Gewinne (+)/Verluste (-) aus der Realisierung finanzieller Vermögenswerte/Verbindlichkeiten          |        | -1,0          | 1,6             |
| Gezahlte Zinsen (-)                                                                                  |        | -58,5         | -63,8           |
| Gezahlte Ertragsteuern (-)                                                                           |        | -123,2        | -38,2           |
| Sonstige zahlungsunwirksame Aufwendungen (+)/Erträge (-)                                             |        | -1,9          | 1,6             |
| <b>Brutto-Cashflow</b>                                                                               |        | <b>830,2</b>  | <b>323,9</b>    |
| Gewinn (-)/Verlust (+) aus Anlagen- und Wertpapierabgängen                                           |        | -0,6          | 0,4             |
| Zunahme (-)/Abnahme (+) Vorräte                                                                      |        | -30,0         | 210,2           |
| Zunahme (-)/Abnahme (+) Forderungen und sonstige Vermögenswerte aus laufender Geschäftstätigkeit     |        | -118,1        | 171,8           |
| – davon Prämienvolumen für Derivate                                                                  |        | -16,4         | 38,2            |
| Zunahme (+)/Abnahme (-) Verbindlichkeiten aus laufender Geschäftstätigkeit                           |        | 172,4         | -138,7          |
| – davon Prämienvolumen für Derivate                                                                  |        | 10,8          | -3,3            |
| Zunahme (+)/Abnahme (-) kurzfristiger Rückstellungen                                                 |        | 6,3           | -30,5           |
| Auslagerung von Rückstellungen                                                                       |        | -2,7          | -2,3            |
| <b>Cashflow aus laufender Geschäftstätigkeit</b>                                                     |        | <b>857,5</b>  | <b>534,8</b>    |
| Einzahlungen aus Anlagenabgängen                                                                     |        | 6,5           | 5,5             |
| Auszahlungen für immaterielles Anlagevermögen                                                        |        | -18,1         | -4,5            |
| Auszahlungen für Sachanlagevermögen                                                                  |        | -176,2        | -168,2          |
| Auszahlungen für Finanzanlagen                                                                       |        | -2,4          | -1,8            |
| Auszahlungen für den Erwerb konsolidierter Unternehmen                                               | [42]   | –             | -1.176,9        |
| <b>Cashflow aus Investitionstätigkeit</b>                                                            |        | <b>-190,2</b> | <b>-1.345,9</b> |
| <b>Freier Cashflow</b>                                                                               |        | <b>667,3</b>  | <b>-811,1</b>   |

| KAPITALFLUSSRECHNUNG (FORTSETZUNG)                                     |        | TAB: 5.3.1    |                |
|------------------------------------------------------------------------|--------|---------------|----------------|
|                                                                        | Anhang | 2010          | 2009           |
| in Mio. €                                                              |        |               |                |
| <b>Freier Cashflow</b>                                                 |        | <b>667,3</b>  | <b>-811,1</b>  |
| Dividendenzahlungen                                                    |        | -38,3         | -396,0         |
| Einzahlungen aus der Ausgabe von neuen Aktien (abzüglich Nebenkosten)  |        | –             | 668,1          |
| Einzahlungen aus sonstigen Eigenkapitalzuführungen                     |        | 6,1           | 7,9            |
| Erwerb von eigenen Aktien                                              |        | -8,4          | -13,9          |
| Verkauf von eigenen Aktien                                             |        | 0,5           | –              |
| Zunahme (+)/Abnahme (-) von Verbindlichkeiten aus Finanzierungsleasing |        | -2,5          | -1,2           |
| Aufnahme (+)/Tilgung (-) von Darlehen                                  |        | -411,6        | 156,2          |
| Einzahlungen (+)/Rückzahlungen (-) aus der Begebung von Anleihen       |        | –             | 747,0          |
| <b>Cashflow aus Finanzierungstätigkeit</b>                             |        | <b>-454,2</b> | <b>1.168,1</b> |
| <b>Zahlungswirksame Veränderung der Finanzmittel</b>                   |        | <b>213,1</b>  | <b>357,0</b>   |
| Wechselkursbedingte Veränderungen des Bestands an Finanzmitteln        |        | 7,4           | 1,6            |
| Konsolidierungsbedingte Veränderungen                                  |        | –             | 0,9            |
| <b>Änderung des Bestands an Finanzmitteln</b>                          |        | <b>220,5</b>  | <b>359,5</b>   |
| <b>Nettofinanzmittelbestand am 1.1.</b>                                |        | <b>520,1</b>  | <b>160,6</b>   |
| <b>Nettofinanzmittelbestand am 31.12.</b>                              | [43]   | <b>740,6</b>  | <b>520,1</b>   |

| <b>BILANZ</b>                                |          | TAB: 5.4.1     |                   |
|----------------------------------------------|----------|----------------|-------------------|
|                                              | Anhang   | 2010           | 2009 <sup>1</sup> |
| in Mio. €                                    |          |                |                   |
| Immaterielle Vermögenswerte                  | [12]     | 999,7          | 932,4             |
| – davon Goodwill aus Unternehmenserwerben    | [12]     | 615,3          | 563,5             |
| Sachanlagen                                  |          | 1.803,6        | 1.725,6           |
| Als Finanzinvestition gehaltene Immobilien   | [13]     | 7,8            | 7,9               |
| Finanzanlagen                                | [14]     | 24,1           | 22,4              |
| Forderungen und sonstige Vermögenswerte      | [17, 18] | 43,0           | 254,5             |
| – davon derivative Finanzinstrumente         |          | 6,4            | –                 |
| Latente Steuern                              | [15]     | 57,8           | 32,7              |
| Steuererstattungsansprüche aus Ertragsteuern |          | 0,4            | 0,5               |
| <b>Langfristige Vermögenswerte</b>           |          | <b>2.936,4</b> | <b>2.976,0</b>    |
| Vorräte                                      | [16]     | 740,2          | 680,4             |
| Forderungen aus Lieferungen und Leistungen   | [17]     | 949,8          | 849,6             |
| Übrige Forderungen und Vermögenswerte        | [17, 18] | 174,3          | 152,2             |
| – davon derivative Finanzinstrumente         |          | 35,4           | 19,6              |
| Steuererstattungsansprüche aus Ertragsteuern |          | 24,6           | 29,8              |
| Flüssige Mittel                              |          | 748,4          | 529,1             |
| <b>Kurzfristige Vermögenswerte</b>           |          | <b>2.637,3</b> | <b>2.241,1</b>    |
| <b>AKTIVA</b>                                |          | <b>5.573,7</b> | <b>5.217,1</b>    |

| <b>BILANZ</b>                                             |              | TAB: 5.4.1     |                   |
|-----------------------------------------------------------|--------------|----------------|-------------------|
|                                                           | Anhang       | 2010           | 2009 <sup>1</sup> |
| in Mio. €                                                 |              |                |                   |
| Gezeichnetes Kapital                                      | [20]         | 191,4          | 191,4             |
| Kapitalrücklage                                           |              | 647,5          | 648,8             |
| Andere Rücklagen und Bilanzgewinn                         | [21]         | 1.810,1        | 1.252,6           |
| Anteile anderer Gesellschafter                            |              | 2,6            | 1,8               |
| <b>Eigenkapital</b>                                       |              | <b>2.651,6</b> | <b>2.094,6</b>    |
| Finanzverbindlichkeiten                                   | [29]         | 769,1          | 1.146,4           |
| Übrige Verbindlichkeiten                                  | [18, 29]     | 22,8           | 18,6              |
| – davon derivative Finanzinstrumente                      |              | 4,6            | 4,5               |
| Rückstellungen für Pensionen und ähnliche Verpflichtungen | [24]         | 184,8          | 194,3             |
| Rückstellungen für bergbauliche Verpflichtungen           | [25]         | 528,4          | 419,2             |
| Sonstige Rückstellungen                                   | [26, 27]     | 152,4          | 220,1             |
| Latente Steuern                                           | [15]         | 261,6          | 237,1             |
| <b>Langfristiges Fremdkapital</b>                         |              | <b>1.919,1</b> | <b>2.235,7</b>    |
| Finanzverbindlichkeiten                                   | [29]         | 17,5           | 120,5             |
| Verbindlichkeiten aus Lieferungen und Leistungen          | [29]         | 511,2          | 346,9             |
| Sonstige Verbindlichkeiten                                | [18, 29]     | 86,7           | 77,4              |
| – davon derivative Finanzinstrumente                      |              | 12,5           | 3,3               |
| Steuerverbindlichkeiten aus Ertragsteuern                 |              | 82,4           | 41,9              |
| Rückstellungen                                            | [25, 26, 27] | 305,2          | 300,1             |
| <b>Kurzfristiges Fremdkapital</b>                         |              | <b>1.003,0</b> | <b>886,8</b>      |
| <b>PASSIVA</b>                                            |              | <b>5.573,7</b> | <b>5.217,1</b>    |

<sup>1</sup> Die Vorjahreszahlen wurden aufgrund der endgültigen Kaufpreisallokation von Morton Salt angepasst. Weitere Erläuterungen finden Sie unter ‚Endgültige Kaufpreisallokation Morton Salt und Anpassung Vorjahreszahlen‘ auf den Seiten 174 ff.

## ENTWICKLUNG DES EIGENKAPITALS

TAB: 5.5.1

|                                           | Gezeichnetes<br>Kapital [21] | Kapitalrücklage | Bilanzgewinn/<br>Gewinn-<br>rücklagen [22] | Unterschiede<br>aus Währungs-<br>umrechnung [22] | Summe Eigenkapital<br>der Aktionäre<br>der K+S AG | Anteile anderer<br>Gesellschafter | Eigenkapital   |
|-------------------------------------------|------------------------------|-----------------|--------------------------------------------|--------------------------------------------------|---------------------------------------------------|-----------------------------------|----------------|
| in Mio. €                                 |                              |                 |                                            |                                                  |                                                   |                                   |                |
| Stand 1.1.2010                            | 191,4                        | 648,8           | 1.263,0                                    | -10,4                                            | 2.092,8                                           | 1,8                               | 2.094,6        |
| Jahresüberschuss                          | —                            | —               | 448,6                                      | —                                                | 448,6                                             | 0,8                               | 449,4          |
| Erfolgsneutrales Ergebnis (nach Steuern)  | —                            | —               | —                                          | 148,8                                            | 148,8                                             | —                                 | 148,8          |
| Dividende des Vorjahres                   | —                            | —               | -38,3                                      | —                                                | -38,3                                             | —                                 | -38,3          |
| Bezug von Mitarbeiteraktien               | —                            | -1,3            | —                                          | —                                                | -1,3                                              | —                                 | -1,3           |
| Sonstige Eigenkapitalveränderungen        | —                            | —               | -1,6                                       | —                                                | -1,6                                              | —                                 | -1,6           |
| <b>Stand 31.12.2010</b>                   | <b>191,4</b>                 | <b>647,5</b>    | <b>1.671,7</b>                             | <b>138,4</b>                                     | <b>2.649,0</b>                                    | <b>2,6</b>                        | <b>2.651,6</b> |
| Stand 1.1.2009                            | 165,0                        | 4,5             | 1.564,2                                    | -16,7                                            | 1.717,0                                           | 1,3                               | 1.718,3        |
| Jahresüberschuss                          | —                            | —               | 96,4                                       | —                                                | 96,4                                              | 0,5                               | 96,9           |
| Erfolgsneutrales Ergebnis (nach Steuern)  | —                            | —               | —                                          | 6,3                                              | 6,3                                               | —                                 | 6,3            |
| Dividende des Vorjahres                   | —                            | —               | -396,0                                     | —                                                | -396,0                                            | —                                 | -396,0         |
| Bezug von Mitarbeiteraktien               | —                            | -1,6            | —                                          | —                                                | -1,6                                              | —                                 | -1,6           |
| Kapitalerhöhung aus Bareinlage            | 26,4                         | 662,4           | —                                          | —                                                | 688,8                                             | —                                 | 688,8          |
| Kosten der Kapitalerhöhung (nach Steuern) | —                            | -16,5           | —                                          | —                                                | -16,5                                             | —                                 | -16,5          |
| Sonstige Eigenkapitalveränderungen        | —                            | —               | -1,6                                       | —                                                | -1,6                                              | —                                 | -1,6           |
| <b>Stand 31.12.2009</b>                   | <b>191,4</b>                 | <b>648,8</b>    | <b>1.263,0</b>                             | <b>-10,4</b>                                     | <b>2.092,8</b>                                    | <b>1,8</b>                        | <b>2.094,6</b> |



## ENTWICKLUNG DES ANLAGEVERMÖGENS 2010

|                                                                                                                   |                      |                                     |              |             |             |                     |                     | Bruttobuchwerte |
|-------------------------------------------------------------------------------------------------------------------|----------------------|-------------------------------------|--------------|-------------|-------------|---------------------|---------------------|-----------------|
|                                                                                                                   | Stand am<br>1.1.2010 | Veränderung<br>Konsolidierungskreis | Zugänge      | Abgänge     | Umbuchungen | Währungsdifferenzen | Stand am 31.12.2010 |                 |
| in Mio. €                                                                                                         |                      |                                     |              |             |             |                     |                     |                 |
| Konzessionen, gewerbliche Schutzrechte und ähnliche Rechte und Werte sowie Lizenzen an solchen Rechten und Werten | 428,1                | —                                   | 5,5          | 5,3         | 0,3         | 31,7                | 460,3               |                 |
| Goodwill aus Unternehmenserwerben                                                                                 | 563,5                | —                                   | —            | —           | —           | 51,8                | 615,3               |                 |
| Selbsterstellte immaterielle Vermögenswerte                                                                       | 8,6                  | —                                   | 0,8          | 0,1         | 0,3         | —                   | 9,6                 |                 |
| Emissionsrechte                                                                                                   | 0,1                  | —                                   | 9,5          | —           | —           | —                   | 9,6                 |                 |
| Geleistete Anzahlungen                                                                                            | 2,8                  | —                                   | 2,9          | —           | -0,5        | —                   | 5,2                 |                 |
| <b>Immaterielle Vermögenswerte [12]</b>                                                                           | <b>1.003,1</b>       | <b>—</b>                            | <b>18,7</b>  | <b>5,4</b>  | <b>0,1</b>  | <b>83,5</b>         | <b>1.100,0</b>      |                 |
| Grundstücke, grundstücksgleiche Rechte und Bauten einschließlich der Bauten auf fremden Grundstücken              | 672,3                | —                                   | 77,1         | 11,0        | 12,0        | 13,8                | 764,2               |                 |
| Salzvorkommen                                                                                                     | 320,0                | —                                   | —            | —           | —           | 25,5                | 345,5               |                 |
| Technische Anlagen und Maschinen                                                                                  | 2.116,1              | —                                   | 97,1         | 34,3        | 41,0        | 25,0                | 2.244,9             |                 |
| Schiffe                                                                                                           | 62,3                 | —                                   | 4,6          | —           | —           | 4,9                 | 71,8                |                 |
| Andere Anlagen, Betriebs- und Geschäftsausstattung                                                                | 251,9                | —                                   | 22,0         | 8,7         | 2,1         | 2,2                 | 269,5               |                 |
| Geleistete Anzahlungen und Anlagen im Bau                                                                         | 72,2                 | —                                   | 37,6         | 0,6         | -55,2       | 3,3                 | 57,3                |                 |
| Leasing und ähnliche Rechte                                                                                       | 10,5                 | —                                   | 0,2          | 1,4         | —           | 0,8                 | 10,1                |                 |
| <b>Sachanlagen</b>                                                                                                | <b>3.505,3</b>       | <b>—</b>                            | <b>238,6</b> | <b>56,0</b> | <b>-0,1</b> | <b>75,5</b>         | <b>3.763,3</b>      |                 |
| <b>Als Finanzinvestition gehaltene Immobilien [13]</b>                                                            | <b>16,9</b>          | <b>—</b>                            | <b>—</b>     | <b>0,1</b>  | <b>—</b>    | <b>—</b>            | <b>16,8</b>         |                 |
| Anteile an verbundenen Unternehmen                                                                                | 12,1                 | —                                   | 1,5          | —           | —           | —                   | 13,6                |                 |
| Ausleihungen an verbundene Unternehmen                                                                            | 0,3                  | —                                   | —            | —           | —           | —                   | 0,3                 |                 |
| Beteiligungen                                                                                                     | 11,6                 | —                                   | 0,7          | 1,9         | —           | —                   | 10,4                |                 |
| Ausleihungen an Unternehmen, mit denen ein Beteiligungsverhältnis besteht                                         | 0,6                  | —                                   | —            | 0,2         | —           | —                   | 0,4                 |                 |
| Sonstige Ausleihungen und andere Finanzanlagen                                                                    | 1,5                  | —                                   | 0,2          | 0,5         | —           | —                   | 1,2                 |                 |
| <b>Finanzanlagen [14]</b>                                                                                         | <b>26,1</b>          | <b>—</b>                            | <b>2,4</b>   | <b>2,6</b>  | <b>—</b>    | <b>—</b>            | <b>25,9</b>         |                 |
| <b>Anlagevermögen</b>                                                                                             | <b>4.551,4</b>       | <b>—</b>                            | <b>259,7</b> | <b>64,1</b> | <b>—</b>    | <b>159,0</b>        | <b>4.906,0</b>      |                 |

TAB: 5.6.1

|  | Stand am<br>1.1.2010 | Veränderung<br>Konsolidierungskreis | Zugänge<br>planmäßig | Zugänge<br>außerplanmäßig | Abgänge     | Umbuchungen | Währungsdifferenzen | Abschreibungen      | Nettobuchwerte      |
|--|----------------------|-------------------------------------|----------------------|---------------------------|-------------|-------------|---------------------|---------------------|---------------------|
|  |                      |                                     |                      |                           |             |             |                     | Stand am 31.12.2010 | Stand am 31.12.2010 |
|  | 68,5                 | —                                   | 31,8                 | —                         | 5,3         | —           | 2,0                 | 97,0                | 363,3               |
|  | —                    | —                                   | —                    | —                         | —           | —           | —                   | —                   | 615,3               |
|  | 2,2                  | —                                   | 1,0                  | —                         | —           | —           | —                   | 3,2                 | 6,4                 |
|  | —                    | —                                   | —                    | —                         | —           | —           | —                   | —                   | 9,6                 |
|  | —                    | —                                   | —                    | 0,1                       | —           | —           | —                   | 0,1                 | 5,1                 |
|  | <b>70,7</b>          | —                                   | <b>32,8</b>          | <b>0,1</b>                | <b>5,3</b>  | —           | <b>2,0</b>          | <b>100,3</b>        | <b>999,7</b>        |
|  | 255,4                | —                                   | 20,9                 | 1,6                       | 1,5         | 0,1         | 0,9                 | 277,4               | 486,8               |
|  | 6,3                  | —                                   | 4,4                  | —                         | —           | —           | 0,2                 | 10,9                | 334,6               |
|  | 1.315,7              | —                                   | 140,9                | 11,1                      | 28,7        | -0,1        | 1,3                 | 1.440,2             | 804,7               |
|  | 11,3                 | —                                   | 9,0                  | —                         | —           | —           | 0,8                 | 21,1                | 50,7                |
|  | 189,2                | —                                   | 25,6                 | —                         | 8,3         | —           | 0,3                 | 206,8               | 62,7                |
|  | 0,1                  | —                                   | —                    | —                         | —           | —           | —                   | 0,1                 | 57,2                |
|  | 1,7                  | —                                   | 1,8                  | —                         | 0,4         | —           | 0,1                 | 3,2                 | 6,9                 |
|  | <b>1.779,7</b>       | —                                   | <b>202,6</b>         | <b>12,7</b>               | <b>38,9</b> | —           | <b>3,6</b>          | <b>1.959,7</b>      | <b>1.803,6</b>      |
|  | <b>9,0</b>           | —                                   | <b>0,1</b>           | —                         | <b>0,1</b>  | —           | —                   | <b>9,0</b>          | <b>7,8</b>          |
|  | 1,5                  | —                                   | —                    | —                         | —           | —           | —                   | 1,5                 | 12,1                |
|  | 0,1                  | —                                   | —                    | —                         | —           | —           | —                   | 0,1                 | 0,2                 |
|  | 2,1                  | —                                   | —                    | —                         | 1,9         | —           | —                   | 0,2                 | 10,2                |
|  | —                    | —                                   | —                    | —                         | —           | —           | —                   | —                   | 0,4                 |
|  | —                    | —                                   | —                    | —                         | —           | —           | —                   | —                   | 1,2                 |
|  | <b>3,7</b>           | —                                   | —                    | —                         | <b>1,9</b>  | —           | —                   | <b>1,8</b>          | <b>24,1</b>         |
|  | <b>1.863,1</b>       | —                                   | <b>235,5</b>         | <b>12,8</b>               | <b>46,2</b> | —           | <b>5,6</b>          | <b>2.070,8</b>      | <b>2.835,2</b>      |

## ENTWICKLUNG DES ANLAGEVERMÖGENS 2009

|                                                                                                                   |                      |                                     |              |             |              |                     |                     | Bruttobuchwerte |
|-------------------------------------------------------------------------------------------------------------------|----------------------|-------------------------------------|--------------|-------------|--------------|---------------------|---------------------|-----------------|
|                                                                                                                   | Stand am<br>1.1.2009 | Veränderung<br>Konsolidierungskreis | Zugänge      | Abgänge     | Umbuchungen  | Währungsdifferenzen | Stand am 31.12.2009 |                 |
| in Mio. €                                                                                                         |                      |                                     |              |             |              |                     |                     |                 |
| Konzessionen, gewerbliche Schutzrechte und ähnliche Rechte und Werte sowie Lizenzen an solchen Rechten und Werten | 114,1                | 307,8                               | 2,7          | 4,9         | 5,5          | 2,9                 | 428,1               |                 |
| Goodwill aus Unternehmenserwerben                                                                                 | 104,8                | 457,7                               | —            | —           | —            | 1,0                 | 563,5               |                 |
| Selbsterstellte immaterielle Vermögenswerte                                                                       | 9,7                  | —                                   | 1,3          | —           | - 2,4        | —                   | 8,6                 |                 |
| Emissionsrechte                                                                                                   | 0,1                  | —                                   | —            | —           | —            | —                   | 0,1                 |                 |
| Geleistete Anzahlungen                                                                                            | 5,7                  | —                                   | 0,5          | 0,5         | - 2,9        | —                   | 2,8                 |                 |
| <b>Immaterielle Vermögenswerte [12]</b>                                                                           | <b>234,4</b>         | <b>765,5</b>                        | <b>4,5</b>   | <b>5,4</b>  | <b>0,2</b>   | <b>3,9</b>          | <b>1.003,1</b>      |                 |
| Grundstücke, grundstücksgleiche Rechte und Bauten einschließlich der Bauten auf fremden Grundstücken              | 529,4                | 126,5                               | 14,8         | 7,4         | 8,3          | 0,7                 | 672,3               |                 |
| Salzvorkommen                                                                                                     | 255,4                | 71,3                                | —            | —           | —            | - 6,7               | 320,0               |                 |
| Technische Anlagen und Maschinen                                                                                  | 1.780,4              | 212,6                               | 97,8         | 22,3        | 43,3         | 4,3                 | 2.116,1             |                 |
| Schiffe                                                                                                           | 55,2                 | 2,8                                 | 6,1          | —           | 0,1          | - 1,9               | 62,3                |                 |
| Andere Anlagen, Betriebs- und Geschäftsausstattung                                                                | 218,9                | 12,9                                | 24,3         | 5,9         | 1,1          | 0,6                 | 251,9               |                 |
| Geleistete Anzahlungen und Anlagen im Bau                                                                         | 57,2                 | 36,1                                | 32,6         | 1,3         | - 53,0       | 0,6                 | 72,2                |                 |
| Leasing und ähnliche Rechte                                                                                       | 3,5                  | 6,9                                 | —            | —           | —            | 0,1                 | 10,5                |                 |
| <b>Sachanlagen</b>                                                                                                | <b>2.900,0</b>       | <b>469,1</b>                        | <b>175,6</b> | <b>36,9</b> | <b>- 0,2</b> | <b>- 2,3</b>        | <b>3.505,3</b>      |                 |
| <b>Als Finanzinvestition gehaltene Immobilien [13]</b>                                                            | <b>17,2</b>          | <b>0,6</b>                          | <b>—</b>     | <b>0,9</b>  | <b>—</b>     | <b>—</b>            | <b>16,9</b>         |                 |
| Anteile an verbundenen Unternehmen                                                                                | 11,8                 | - 0,3                               | 0,6          | —           | —            | —                   | 12,1                |                 |
| Ausleihungen an verbundene Unternehmen                                                                            | 0,4                  | —                                   | —            | 0,1         | —            | —                   | 0,3                 |                 |
| Beteiligungen                                                                                                     | 8,5                  | 2,2                                 | 0,9          | —           | —            | —                   | 11,6                |                 |
| Ausleihungen an Unternehmen, mit denen ein Beteiligungsverhältnis besteht                                         | 0,8                  | —                                   | —            | 0,2         | —            | —                   | 0,6                 |                 |
| Sonstige Ausleihungen und andere Finanzanlagen                                                                    | 2,0                  | —                                   | 0,2          | 0,7         | —            | —                   | 1,5                 |                 |
| <b>Finanzanlagen [14]</b>                                                                                         | <b>23,5</b>          | <b>1,9</b>                          | <b>1,7</b>   | <b>1,0</b>  | <b>—</b>     | <b>—</b>            | <b>26,1</b>         |                 |
| <b>Anlagevermögen</b>                                                                                             | <b>3.175,1</b>       | <b>1.237,1</b>                      | <b>181,8</b> | <b>44,2</b> | <b>—</b>     | <b>1,6</b>          | <b>4.551,4</b>      |                 |

TAB: 5.6.2

|  | Stand am<br>1.1.2009 | Veränderung<br>Konsolidierungskreis | Zugänge<br>planmäßig | Zugänge<br>außerplanmäßig | Abgänge     | Umbuchungen | Währungsdifferenzen | Abschreibungen      | Nettobuchwerte      |
|--|----------------------|-------------------------------------|----------------------|---------------------------|-------------|-------------|---------------------|---------------------|---------------------|
|  |                      |                                     |                      |                           |             |             |                     | Stand am 31.12.2009 | Stand am 31.12.2009 |
|  | 54,1                 | —                                   | 16,7                 | 0,1                       | 4,8         | 2,5         | -0,1                | 68,5                | 359,6               |
|  | —                    | —                                   | —                    | —                         | —           | —           | —                   | —                   | 563,5               |
|  | 3,2                  | —                                   | 0,9                  | 0,6                       | —           | -2,5        | —                   | 2,2                 | 6,4                 |
|  | —                    | —                                   | —                    | —                         | —           | —           | —                   | —                   | 0,1                 |
|  | —                    | —                                   | —                    | —                         | —           | —           | —                   | —                   | 2,8                 |
|  | <b>57,3</b>          | <b>—</b>                            | <b>17,6</b>          | <b>0,7</b>                | <b>4,8</b>  | <b>—</b>    | <b>-0,1</b>         | <b>70,7</b>         | <b>932,4</b>        |
|  | 235,9                | —                                   | 20,1                 | 0,1                       | 0,7         | —           | —                   | 255,4               | 416,9               |
|  | 4,1                  | —                                   | 2,2                  | —                         | —           | —           | —                   | 6,3                 | 313,7               |
|  | 1.233,7              | —                                   | 102,4                | 0,1                       | 20,7        | —           | 0,2                 | 1.315,7             | 800,4               |
|  | 4,6                  | —                                   | 6,9                  | —                         | —           | —           | -0,2                | 11,3                | 51,0                |
|  | 174,0                | —                                   | 20,7                 | —                         | 5,6         | —           | 0,1                 | 189,2               | 62,7                |
|  | 0,1                  | —                                   | —                    | —                         | —           | —           | —                   | 0,1                 | 72,1                |
|  | 1,2                  | —                                   | 0,5                  | —                         | —           | —           | —                   | 1,7                 | 8,8                 |
|  | <b>1.653,6</b>       | <b>—</b>                            | <b>152,8</b>         | <b>0,2</b>                | <b>27,0</b> | <b>—</b>    | <b>0,1</b>          | <b>1.779,7</b>      | <b>1.725,6</b>      |
|  | <b>9,4</b>           | <b>—</b>                            | <b>0,1</b>           | <b>—</b>                  | <b>0,5</b>  | <b>—</b>    | <b>—</b>            | <b>9,0</b>          | <b>7,9</b>          |
|  | 0,4                  | —                                   | —                    | 1,1                       | —           | —           | —                   | 1,5                 | 10,6                |
|  | 0,1                  | —                                   | —                    | —                         | —           | —           | —                   | 0,1                 | 0,2                 |
|  | 0,7                  | —                                   | —                    | 1,4                       | —           | —           | —                   | 2,1                 | 9,5                 |
|  | —                    | —                                   | —                    | —                         | —           | —           | —                   | —                   | 0,6                 |
|  | —                    | —                                   | —                    | —                         | —           | —           | —                   | —                   | 1,5                 |
|  | 1,2                  | —                                   | —                    | 2,5                       | —           | —           | —                   | 3,7                 | 22,4                |
|  | <b>1.721,5</b>       | <b>—</b>                            | <b>170,5</b>         | <b>3,4</b>                | <b>32,3</b> | <b>—</b>    | <b>—</b>            | <b>1.863,1</b>      | <b>2.688,3</b>      |

**ENTWICKLUNG DER RÜCKSTELLUNGEN**

|                                                                | Stand am 1.1.2010 | Währungsdifferenzen | Zuführung    |
|----------------------------------------------------------------|-------------------|---------------------|--------------|
| in Mio. €                                                      |                   |                     |              |
| Verfüllung Gruben und Schächte                                 | 219,1             | 1,8                 | 28,4         |
| Bergschädenwagnisse                                            | 33,5              | —                   | 7,7          |
| Haldenverwahrung                                               | 119,7             | —                   | 31,3         |
| Sonstige bergbauliche Verpflichtungen                          | 46,9              | 0,6                 | 9,0          |
| <b>Rückstellungen für bergbauliche Verpflichtungen [25]</b>    | <b>419,2</b>      | <b>2,4</b>          | <b>76,4</b>  |
| Jubiläum                                                       | 23,0              | —                   | 2,3          |
| Altersteilzeit                                                 | 37,1              | —                   | 15,4         |
| Sozialplanaufwendungen                                         | 0,5               | —                   | —            |
| Sonstige Personalverpflichtungen                               | 12,0              | 0,2                 | 40,8         |
| <b>Personalverpflichtungen [26]</b>                            | <b>72,6</b>       | <b>0,2</b>          | <b>58,5</b>  |
| <b>Sonstige Umweltverpflichtungen (Chemiestandorte) [27]</b>   | <b>104,9</b>      | <b>8,1</b>          | <b>—</b>     |
| <b>Sonstige Rückstellungen</b>                                 | <b>42,6</b>       | <b>1,6</b>          | <b>22,9</b>  |
| <b>Rückstellungen (langfristiges Fremdkapital)</b>             | <b>639,3</b>      | <b>12,3</b>         | <b>157,8</b> |
| Sonstige Steuern                                               | 0,1               | —                   | 0,1          |
| Rückstellungen für bergbauliche Verpflichtungen [25]           | 7,1               | —                   | 0,2          |
| Personalverpflichtungen [28]                                   | 96,3              | 1,8                 | 136,4        |
| Rückstellungen für Verpflichtungen aus Verkaufsgeschäften [28] | 89,7              | 0,9                 | 57,0         |
| Rückstellungen für Verpflichtungen aus Einkaufsverträgen [28]  | 38,7              | 0,5                 | 30,9         |
| Sonstige Umweltverpflichtungen (Chemiestandorte) [27]          | 13,2              | 1,2                 | —            |
| Sonstige Rückstellungen                                        | 55,0              | 1,4                 | 38,0         |
| <b>Rückstellungen (kurzfristiges Fremdkapital)</b>             | <b>300,1</b>      | <b>5,8</b>          | <b>262,6</b> |
| <b>Rückstellungen</b>                                          | <b>939,4</b>      | <b>18,1</b>         | <b>420,4</b> |



TAB: 5.7.1

|  | Zinsanteil  | Verbrauch    | Auflösung   | Umbuchung     | CTA-Umgliederung | Stand am 31.12.2010 |
|--|-------------|--------------|-------------|---------------|------------------|---------------------|
|  | 15,9        | 4,4          | 6,2         | —             | —                | 254,6               |
|  | 9,5         | 0,9          | 0,5         | —             | —                | 49,3                |
|  | 16,4        | 1,4          | 0,3         | —             | —                | 165,7               |
|  | 2,6         | —            | 0,3         | —             | —                | 58,8                |
|  | <b>44,4</b> | <b>6,7</b>   | <b>7,3</b>  | —             | —                | <b>528,4</b>        |
|  | 1,1         | 2,3          | 0,1         | —             | —                | 24,0                |
|  | 2,7         | 25,7         | 0,3         | —             | 2,7              | 26,5                |
|  | —           | 0,3          | 0,1         | —             | —                | 0,1                 |
|  | 0,4         | 7,4          | 0,3         | —             | —                | 45,7                |
|  | <b>4,2</b>  | <b>35,7</b>  | <b>0,8</b>  | —             | <b>2,7</b>       | <b>96,3</b>         |
|  | <b>3,1</b>  | —            | —           | <b>-116,1</b> | —                | —                   |
|  | <b>1,8</b>  | <b>0,6</b>   | <b>1,6</b>  | <b>-10,6</b>  | —                | <b>56,1</b>         |
|  | <b>53,5</b> | <b>43,0</b>  | <b>9,7</b>  | <b>-126,7</b> | <b>2,7</b>       | <b>680,8</b>        |
|  | —           | 0,1          | —           | —             | —                | 0,1                 |
|  | —           | —            | —           | —             | —                | 7,3                 |
|  | —           | 89,8         | 1,5         | 0,2           | —                | 143,4               |
|  | —           | 62,9         | 25,1        | 4,9           | —                | 64,5                |
|  | —           | 27,5         | 11,5        | 1,2           | —                | 32,3                |
|  | —           | 14,4         | —           | —             | —                | —                   |
|  | —           | 28,2         | 9,7         | 1,1           | —                | 57,6                |
|  | —           | <b>222,9</b> | <b>47,8</b> | <b>7,4</b>    | —                | <b>305,2</b>        |
|  | <b>53,5</b> | <b>265,9</b> | <b>57,5</b> | <b>-119,3</b> | <b>2,7</b>       | <b>986,0</b>        |

## SEGMENTBERICHTERSTATTUNG

|                               | Gesamtumsatz   |                | davon Umsatz mit Dritten [38] |                |
|-------------------------------|----------------|----------------|-------------------------------|----------------|
|                               | 2010           | 2009           | 2010                          | 2009           |
| in Mio. €                     |                |                |                               |                |
| Kali- und Magnesiumprodukte   | 1.930,1        | 1.500,0        | 1.844,7                       | 1.421,7        |
| Stickstoffdüngemittel         | 1.297,7        | 1.019,5        | 1.286,2                       | 1.016,2        |
| Salz                          | 1.733,3        | 1.018,8        | 1.728,7                       | 1.014,6        |
| Ergänzende Geschäftsbereiche  | 175,3          | 155,8          | 133,7                         | 120,7          |
| Überleitung <sup>2</sup> [38] | -142,6         | -120,3         | 0,5                           | 0,6            |
| <b>K+S Gruppe</b>             | <b>4.993,8</b> | <b>3.573,8</b> | <b>4.993,8</b>                | <b>3.573,8</b> |

|                               | Vermögen [39]  |                | Schulden       |                |
|-------------------------------|----------------|----------------|----------------|----------------|
|                               | 2010           | 2009           | 2010           | 2009           |
| in Mio. €                     |                |                |                |                |
| Kali- und Magnesiumprodukte   | 1.848,4        | 1.480,4        | 777,6          | 630,6          |
| Stickstoffdüngemittel         | 764,6          | 556,3          | 456,1          | 393,5          |
| Salz <sup>1</sup>             | 2.878,1        | 2.640,5        | 444,6          | 371,4          |
| Ergänzende Geschäftsbereiche  | 146,6          | 144,1          | 90,3           | 82,9           |
| Überleitung <sup>2</sup> [38] | -64,0          | 395,8          | 1.153,5        | 1.644,1        |
| <b>K+S Gruppe</b>             | <b>5.573,7</b> | <b>5.217,1</b> | <b>2.922,1</b> | <b>3.122,5</b> |

<sup>1</sup> Die Vorjahreszahlen wurden aufgrund der endgültigen Kaufpreisallokation von Morton Salt angepasst. Weitere Erläuterungen finden Sie unter „Endgültige Kaufpreisallokation Morton Salt und Anpassung Vorjahreszahlen“ auf den Seiten 174 ff.

<sup>2</sup> Die Angaben zu den Geschäftsbereichen werden vor intersegmentärer Konsolidierung dargestellt. Aufwendungen und Erträge sowie Bilanzposten, die den Geschäftsbereichen nicht zuordenbar sind, werden gesondert erfasst. Beide Effekte werden in der Zeile „Überleitung“ zusammengefasst und führen zu den Konzernzahlen.

TAB: 5.8.1

| davon intersegmentäre Umsätze |            | EBIT         |              | EBITDA       |              | Brutto-Cashflow |              |
|-------------------------------|------------|--------------|--------------|--------------|--------------|-----------------|--------------|
| 2010                          | 2009       | 2010         | 2009         | 2010         | 2009         | 2010            | 2009         |
| 85,4                          | 78,3       | 475,9        | 231,7        | 567,1        | 317,2        | 596,8           | 334,6        |
| 11,5                          | 3,3        | 55,7         | -108,1       | 67,4         | -94,4        | 69,4            | -95,9        |
| 4,6                           | 4,2        | 238,1        | 140,4        | 369,7        | 200,3        | 372,2           | 205,4        |
| 41,6                          | 35,1       | 21,2         | 15,2         | 27,7         | 21,7         | 27,3            | 21,2         |
| -143,1                        | -120,9     | -64,0        | -41,2        | -56,7        | -33,0        | -235,5          | -141,4       |
| <b>0,0</b>                    | <b>0,0</b> | <b>726,9</b> | <b>238,0</b> | <b>975,2</b> | <b>411,8</b> | <b>830,2</b>    | <b>323,9</b> |

  

| Eingesetztes Kapital <sup>3</sup> |                | Investitionen <sup>4</sup> [40] |              | Abschreibungen <sup>5</sup> |              | Mitarbeiter am 31.12. <sup>6</sup> |               |
|-----------------------------------|----------------|---------------------------------|--------------|-----------------------------|--------------|------------------------------------|---------------|
| 2010                              | 2009           | 2010                            | 2009         | 2010                        | 2009         | 2010                               | 2009          |
| 971,0                             | 956,5          | 96,9                            | 107,4        | 84,8                        | 84,4         | 7.900                              | 7.818         |
| 203,9                             | 264,1          | 12,9                            | 11,2         | 11,6                        | 11,5         | 1.226                              | 1.249         |
| 2.224,4                           | 2.048,0        | 79,0                            | 48,0         | 125,3                       | 60,0         | 5.235                              | 5.279         |
| 111,9                             | 118,2          | 4,1                             | 4,6          | 6,5                         | 6,4          | 280                                | 278           |
| 30,0                              | 18,1           | 8,1                             | 6,4          | 7,3                         | 8,2          | 600                                | 584           |
| <b>3.541,2</b>                    | <b>3.404,9</b> | <b>201,0</b>                    | <b>177,6</b> | <b>235,5</b>                | <b>170,5</b> | <b>15.241</b>                      | <b>15.208</b> |

<sup>3</sup> Operatives Anlagevermögen und Working Capital.

<sup>4</sup> Betrifft zahlungswirksame Investitionen für Sachanlagen und immaterielle Vermögenswerte.

<sup>5</sup> Betrifft die planmäßigen Abschreibungen. Die außerplanmäßigen Wertminderungen sind im Anhang (37) aufgeführt.

<sup>6</sup> Belegschaft per 31.12. inklusive befristet Beschäftigter (ohne Studenten und Praktikanten), gemessen in Vollzeitäquivalenten.

## 5.9 ANHANG

### ALLGEMEINE GRUNDLAGEN

Der Konzernabschluss der K+S GRUPPE zum 31. Dezember 2010 ist von der in Deutschland registrierten K+S AKTIENGESELLSCHAFT mit Sitz in Kassel als Mutterunternehmen nach den bis zum Abschlussstichtag in Kraft getretenen INTERNATIONAL FINANCIAL REPORTING STANDARDS (IFRS) des INTERNATIONAL ACCOUNTING STANDARDS BOARD (IASB) sowie den Interpretationen des INTERNATIONAL FINANCIAL REPORTING INTERPRETATIONS COMMITTEE (IFRIC) aufgestellt, sofern diese von der EUROPÄISCHEN UNION anerkannt wurden. Im Interesse einer übersichtlicheren Darstellung werden die einzelnen Posten des Konzernabschlusses in Millionen € (Mio. €) dargestellt.

Der Konzernabschluss wurde – nach Behandlung im Prüfungsausschuss – durch den Vorstand am 1. März 2011 aufgestellt und dem Aufsichtsrat für dessen Sitzung am 9. März 2011 zur Billigung vorgelegt.

### KONSOLIDIERUNGSKREIS

Der Konsolidierungskreis hat sich im Jahr 2010 wie folgt geändert:

Erstmals wurde die im August 2010 gegründete MORTON SALT INC. in den Konsolidierungskreis einbezogen. Die Gesellschaft übernahm die Salz-Aktivitäten der MORTON INTERNATIONAL LLC (vormals MORTON INTERNATIONAL INC.). Die MORTON INTERNATIONAL LLC wurde mit den in ihr belassenen Nicht-Salz-Aktivitäten an DOW CHEMICAL rückübertragen. Ebenso wurde die im September gegründete WEEKS ISLAND LANDOWNER LLC erstmals in den Konsolidierungskreis einbezogen. Die Gesellschaft besitzt Grund und Boden des Standortes Weeks Island.

Die im Rahmen der beabsichtigten Übernahme von POTASH ONE INC. im September 2010 gegründete K+S CANADA HOLDINGS INC. wird zum 31. Dezember 2010 erstmals im Konsolidierungskreis berücksichtigt.

Im Wege der Vollkonsolidierung sind 21 (Vorjahr: 21) inländische und 60 (Vorjahr: 58) ausländische Gesellschaften in den Konzernabschluss einbezogen worden. 41 (Vorjahr: 35) Tochtergesellschaften wurden wegen untergeordneter Bedeutung nicht in den Konzernabschluss einbezogen und zu Anschaffungskosten bewertet.

Gemeinschaftsunternehmen und Gesellschaften, bei denen Unternehmen der K+S GRUPPE einen maßgeblichen Einfluss ausüben (assoziierte Unternehmen), können nach der Equity-Methode bewertet werden, sofern sie nicht von untergeordneter Bedeutung sind. Die potenziellen Ergebnisauswirkungen einer Beteiligungsbilanzierung nach der Equity-Methode sind aus Konzernsicht als unwesentlich zu bezeichnen. Im Geschäftsjahr 2010 wurden daher wegen insgesamt untergeordneter Bedeutung sämtliche Beteiligungen an Gemeinschaftsunternehmen und assoziierten Unternehmen zu Anschaffungskosten bewertet.

Eine vollständige Übersicht der Beteiligungen der K+S AKTIENGESELLSCHAFT kann der Anteilsbesitzliste auf den Seiten 214 ff. entnommen werden.

### ENDGÜLTIGE KAUFPREISALLOKATION MORTON SALT UND ANPASSUNG DER VORJAHRESZAHLEN

Die K+S AKTIENGESELLSCHAFT hat am 1. Oktober 2009 100 % der Gesellschaftsanteile an der MORTON INTERNATIONAL INC., Chicago (USA), Mutterunternehmen der MORTON SALT-Gruppe, übernommen und die Beherrschung über die Gesellschaft erlangt. MORTON SALT betreibt sechs Steinsalzbergwerke, sieben Solar- und zehn Siedesalzanlagen und ist damit der größte Salzproduzent in Nordamerika. Die jährliche Produktionskapazität beläuft sich auf rund 13 Mio. t Salz. Durch die Marken UMBRELLA GIRL® und WINDSOR CASTLE® verfügt MORTON SALT in den USA sowie in Kanada im Verbrauchergeschäft über sehr gut positionierte Marken mit hohem Bekanntheitsgrad.

Aufgrund der komplexen Identifizierung und Bewertung der durch die Akquisition erworbenen Vermögenswerte und Schulden sowie des kurzen Zeitraums zwischen dem Erwerbszeitpunkt (1. Oktober 2009) und dem Zeitpunkt der Aufstellung des Konzernabschlusses der K+S GRUPPE konnte zum 31. Dezember 2009 noch keine abschließende Kaufpreisallokation vorgenommen werden. Die endgültigen Anschaffungskosten sowie die endgültige Kaufpreisallokation sind in den beiden nachfolgenden Tabellen dargestellt:

**ENDGÜLTIGER KAUFPREIS MORTON SALT**

TAB: 5.9.1

|                                                        | vorläufig      | Anpassungen | endgültig      |
|--------------------------------------------------------|----------------|-------------|----------------|
| in Mio. €                                              |                |             |                |
| Kaufpreis                                              | 1.071,4        | 12,6        | 1.084,0        |
| Aktivierete Anschaffungsnebenkosten                    | 14,0           | —           | 14,0           |
| Aufwendungen aus Währungssicherung des USD-Kaufpreises | 28,8           | —           | 28,8           |
| <b>Gesamtkaufpreis</b>                                 | <b>1.114,2</b> | <b>12,6</b> | <b>1.126,8</b> |

**ENDGÜLTIGE KAUFPREISALLOKATION MORTON SALT**

TAB: 5.9.2

|                                                           | Buchwerte zum Erwerbszeitpunkt | Anpassungen  | Zeitwerte zum Erwerbszeitpunkt | Delta zu den vorläufigen Zeitwerten |
|-----------------------------------------------------------|--------------------------------|--------------|--------------------------------|-------------------------------------|
| in Mio. €                                                 |                                |              |                                |                                     |
| Immaterielle Vermögenswerte                               | 7,6                            | 300,3        | 307,9                          | 1,5                                 |
| Sachanlagen                                               | 204,4                          | 264,7        | 469,1                          | -2,6                                |
| Finanzanlagen                                             | —                              | 2,2          | 2,2                            | —                                   |
| Forderungen und sonstige Vermögenswerte                   | 222,7                          | 17,3         | 240,0                          | 2,7                                 |
| Latente Steuern                                           | 39,5                           | -39,5        | —                              | —                                   |
| <b>Langfristige Vermögenswerte</b>                        | <b>474,2</b>                   | <b>545,0</b> | <b>1.019,2</b>                 | <b>1,6</b>                          |
| Vorräte                                                   | 172,5                          | 33,4         | 205,9                          | —                                   |
| Forderungen aus Lieferungen und Leistungen                | 81,5                           | —            | 81,5                           | —                                   |
| Übrige Forderungen und Vermögenswerte                     | 21,3                           | 0,7          | 22,0                           | —                                   |
| Flüssige Mittel                                           | 9,0                            | —            | 9,0                            | —                                   |
| <b>Kurzfristige Vermögenswerte</b>                        | <b>284,3</b>                   | <b>34,1</b>  | <b>318,4</b>                   | <b>—</b>                            |
| <b>AKTIVA</b>                                             | <b>758,5</b>                   | <b>579,1</b> | <b>1.337,6</b>                 | <b>1,6</b>                          |
| Finanzverbindlichkeiten                                   | 98,9                           | 13,9         | 112,8                          | —                                   |
| Übrige Verbindlichkeiten                                  | 1,1                            | —            | 1,1                            | —                                   |
| Rückstellungen für Pensionen und ähnliche Verpflichtungen | 34,2                           | 65,1         | 99,3                           | 12,0                                |
| Rückstellungen für bergbauliche Verpflichtungen           | 19,7                           | —            | 19,7                           | —                                   |
| Sonstige Rückstellungen                                   | 125,9                          | —            | 125,9                          | —                                   |
| Latente Steuern                                           | 49,8                           | 152,7        | 202,5                          | -7,9                                |
| <b>Langfristiges Fremdkapital</b>                         | <b>329,6</b>                   | <b>231,7</b> | <b>561,3</b>                   | <b>4,1</b>                          |
| Finanzverbindlichkeiten                                   | 7,5                            | —            | 7,5                            | —                                   |

**ENDGÜLTIGE KAUFPREISALLOKATION MORTON SALT (FORTSETZUNG)**

TAB: 5.9.2

|                                                  | Buchwerte zum Erwerbszeitpunkt | Anpassungen  | Zeitwerte zum Erwerbszeitpunkt | Delta zu den vorläufigen Zeitwerten |
|--------------------------------------------------|--------------------------------|--------------|--------------------------------|-------------------------------------|
| in Mio. €                                        |                                |              |                                |                                     |
| Verbindlichkeiten aus Lieferungen und Leistungen | 41,0                           | —            | 41,0                           | —                                   |
| Sonstige Verbindlichkeiten                       | 15,4                           | —            | 15,4                           | —                                   |
| Steuerverbindlichkeiten aus Ertragsteuern        | 2,9                            | —            | 2,9                            | 0,3                                 |
| Rückstellungen                                   | 40,3                           | —            | 40,3                           | —                                   |
| <b>Kurzfristiges Fremdkapital</b>                | <b>107,1</b>                   | <b>—</b>     | <b>107,1</b>                   | <b>0,3</b>                          |
| <b>PASSIVA</b>                                   | <b>436,7</b>                   | <b>231,7</b> | <b>668,4</b>                   | <b>4,4</b>                          |
| Erworbenes Nettovermögen                         | 321,8                          | 347,4        | 669,2                          | -2,8                                |
| Geschäfts- oder Firmenwert                       |                                |              | 457,6                          | 15,4                                |
| <b>Gesamtkaufpreis</b>                           |                                |              | <b>1.126,8</b>                 | <b>12,6</b>                         |

Die Anpassungen der vorläufigen Kaufpreisallokation betreffen im Wesentlichen die Anpassungen der Pensionsrückstellungen aufgrund der Berücksichtigung von Rentensteigerungstrends sowie Anpassungen der latenten Steuern. Zudem ergaben sich aus einer Neuordnung der Anlagenklassen Verschiebungen zwischen den einzelnen Kategorien des Anlagevermögens.

Aus der Gegenüberstellung der Anschaffungskosten des Erwerbs und des neu bewerteten Nettovermögens resultiert ein Geschäfts- oder Firmenwert (Goodwill) von 457,6 Mio. €. Dieser resultiert im Wesentlichen aus nicht einzeln aktivierbaren Vermögenswerten, wie der geografischen Lage der Rohsalzlagertstätten, den regionalen Marktanteilen, dem Logistiknetzwerk sowie dem Mitarbeiterstamm (Workforce). Ferner ist der Goodwill auf Synergien aus dem gemeinsamen Vertrieb mit der SPL-Gruppe und damit verbundenen Marktchancen zurückzuführen. Die Höhe des Goodwills wird wesentlich durch die Bildung latenter Steuern im Rahmen der Neubewertung der Vermögenswerte und Schulden beeinflusst.

Korrespondierend zur Anpassung der Kaufpreisallokation wurden auch die Bilanzwerte der K+S GRUPPE zum 31. Dezember 2009 angepasst. Diese weichen aufgrund von Währungskurs-



schwankungen leicht von den Anpassungsbeträgen der Kaufpreisallokation zum 1. Oktober 2009 ab. Auf die Angabe der Bilanz zum 1. Januar 2009 wurde verzichtet, da diese Werte durch die Anpassung der Kaufpreisallokation nicht verändert wurden.

| <b>ANPASSUNGEN BILANZ K+S GRUPPE</b>                      |                |             |                |
|-----------------------------------------------------------|----------------|-------------|----------------|
|                                                           | TAB: 5.9.3     |             |                |
|                                                           | 2009 (alt)     | Anpassungen | 2009 (neu)     |
| in Mio. €                                                 |                |             |                |
| Immaterielle Vermögenswerte                               | 915,3          | 17,1        | 932,4          |
| – davon Goodwill aus Unternehmenserwerben                 | 548,0          | 15,5        | 563,5          |
| Sachanlagen                                               | 1.728,3        | –2,7        | 1.725,6        |
| Als Finanzinvestition gehaltene Immobilien                | 7,9            | –           | 7,9            |
| Finanzanlagen                                             | 22,4           | –           | 22,4           |
| Forderungen und sonstige Vermögenswerte                   | 264,3          | –9,8        | 254,5          |
| Latente Steuern                                           | 32,7           | –           | 32,7           |
| Steuererstattungsansprüche aus Ertragsteuern              | 0,5            | –           | 0,5            |
| <b>Langfristige Vermögenswerte</b>                        | <b>2.971,4</b> | <b>4,6</b>  | <b>2.976,0</b> |
| Vorräte                                                   | 680,4          | –           | 680,4          |
| Forderungen aus Lieferungen und Leistungen                | 849,6          | –           | 849,6          |
| Übrige Forderungen und Vermögenswerte                     | 152,2          | –           | 152,2          |
| – davon derivative Finanzinstrumente                      | 19,6           | –           | 19,6           |
| Steuererstattungsansprüche aus Ertragsteuern              | 29,8           | –           | 29,8           |
| Flüssige Mittel                                           | 529,1          | –           | 529,1          |
| <b>Kurzfristige Vermögenswerte</b>                        | <b>2.241,1</b> | <b>–</b>    | <b>2.241,1</b> |
| <b>AKTIVA</b>                                             | <b>5.212,5</b> | <b>4,6</b>  | <b>5.217,1</b> |
| Gezeichnetes Kapital                                      | 191,4          | –           | 191,4          |
| Kapitalrücklage                                           | 648,8          | –           | 648,8          |
| Andere Rücklagen und Bilanzgewinn                         | 1.252,6        | –           | 1.252,6        |
| Anteile anderer Gesellschafter                            | 1,8            | –           | 1,8            |
| <b>Eigenkapital</b>                                       | <b>2.094,6</b> | <b>–</b>    | <b>2.094,6</b> |
| Finanzverbindlichkeiten                                   | 1.146,4        | –           | 1.146,4        |
| Übrige Verbindlichkeiten                                  | 18,6           | –           | 18,6           |
| – davon derivative Finanzinstrumente                      | 4,5            | –           | 4,5            |
| Rückstellungen für Pensionen und ähnliche Verpflichtungen | 181,9          | 12,4        | 194,3          |
| Rückstellungen für bergbauliche Verpflichtungen           | 419,2          | –           | 419,2          |
| Sonstige Rückstellungen                                   | 220,1          | –           | 220,1          |
| Latente Steuern                                           | 245,2          | –8,1        | 237,1          |

#### ANPASSUNGEN BILANZ K+S GRUPPE (FORTSETZUNG)

TAB: 5.9.3

|                                                  | 2009 (alt)     | Anpassungen | 2009 (neu)     |
|--------------------------------------------------|----------------|-------------|----------------|
| in Mio. €                                        |                |             |                |
| <b>Langfristiges Fremdkapital</b>                | <b>2.231,4</b> | <b>4,3</b>  | <b>2.235,7</b> |
| Finanzverbindlichkeiten                          | 120,5          | –           | 120,5          |
| Verbindlichkeiten aus Lieferungen und Leistungen | 346,9          | –           | 346,9          |
| Sonstige Verbindlichkeiten                       | 77,4           | –           | 77,4           |
| – davon derivative Finanzinstrumente             | 3,3            | –           | 3,3            |
| Steuerverbindlichkeiten aus Ertragsteuern        | 41,6           | 0,3         | 41,9           |
| Rückstellungen                                   | 300,1          | –           | 300,1          |
| <b>Kurzfristiges Fremdkapital</b>                | <b>886,5</b>   | <b>0,3</b>  | <b>886,8</b>   |
| <b>PASSIVA</b>                                   | <b>5.212,5</b> | <b>4,6</b>  | <b>5.217,1</b> |

Die Gewinn- und Verlustrechnung des Jahres 2009 blieb unverändert. Anpassungen aufgrund der endgültigen Kaufpreisallokation waren nicht erforderlich, weil diese betragsmäßig nur zu unwesentlichen Änderungen der Gewinn- und Verlustrechnung geführt hätten. MORTON SALT hat im Jahr 2009 (1. Oktober 2009 bis 31. Dezember 2009) wie folgt zur Ergebnisrechnung der K+S GRUPPE beigetragen:

#### GEWINN- UND VERLUSTRECHNUNG MORTON SALT (4. QUARTAL 2009)

TAB: 5.9.4

| in Mio. €             |       |
|-----------------------|-------|
| Umsatz                | 237,6 |
| EBIT                  | 9,8   |
| Finanzergebnis        | –15,8 |
| Ergebnis vor Steuern  | –6,0  |
| Tatsächliche Steuern  | –14,2 |
| Latente Steuern       | 21,5  |
| Ergebnis nach Steuern | 1,3   |

Umsätze und Ergebnisse für das Vorjahr unter der Annahme, dass der Erwerb der MORTON GRUPPE bereits zu Beginn des Jahres 2009 stattgefunden hätte, konnten nicht ermittelt werden, da für den Zeitraum vor dem 1. Oktober 2009 keine verlässlichen IFRS-Werte vorlagen.

## AKQUISITION POTASH ONE

Die K+S CANADA HOLDINGS INC., eine 100%ige Tochtergesellschaft der K+S AKTIENGESELLSCHAFT, hat am 21. Januar 2011 im Rahmen eines öffentlichen Übernahmeangebots Kontrolle über 81,6% der Anteile der POTASH ONE INC. (Vancouver, Kanada) erlangt. Der in bar gezahlte Kaufpreis betrug 263,2 Mio. €. Anfang Februar wurden weitere 9,3% der Anteile zu einem Preis von 30,1 Mio. € in bar erworben, sodass K+S zum Bilanzaufstellungszeitpunkt 90,9% der POTASH-ONE-Aktien hält. Die verbleibenden ausstehenden POTASH-ONE-Aktien (9,1%) sollen durch ein Ausschlussverfahren im Rahmen des CANADA BUSINESS CORPORATIONS ACT erworben werden. Mitte Mai 2011 sollte die vollständige Übernahme von POTASH ONE erfolgt sein. Bis zum Erwerbszeitpunkt (21. Januar 2011) sind akquisitionsbezogene Nebenkosten in Höhe von 3,7 Mio. € angefallen, die aufwandswirksam erfasst wurden (Ausweis im Wesentlichen als sonstiger betrieblicher Aufwand); davon entfallen 3,3 Mio. € auf das Geschäftsjahr 2010.

/ WEITERE INFORMATION ZUR AKQUISITION VON POTASH ONE können dem Nachtragsbericht auf Seite 145 entnommen werden.

POTASH ONE besitzt mehrere Kali-Explorationslizenzen in der kanadischen Provinz Saskatchewan einschließlich des Legacy Projekts – ein fortgeschrittenes Greenfield-Projekt zur Errichtung eines Solbetriebs. Der Erwerb von POTASH ONE ermöglicht es, in rohstoffreiche und kostengünstige Lagerstätten zu investieren, die eigenen Kalikapazitäten zu erhöhen und mittel- bis langfristig am Marktwachstum teilzuhaben.

Im Vorfeld der Akquisition hat POTASH ONE am 24. November 2010 für nominal 30 Mio. CAD eine Wandelschuldverschreibung ausgegeben, die von K+S CANADA HOLDINGS INC. vollständig gezeichnet wurde. Die Einnahmen aus dieser Schuldverschreibung dienen der Finanzierung von Wasserversorgungseinrichtungen für das Legacy Projekt. Mit dieser Finanzierungsmaßnahme war POTASH ONE in der Lage, eine Verzögerung der Entwicklung ihres Legacy Projekts zu vermeiden. Die Wandelanleihe (ohne Wandlungsrecht) wird im Abschluss der K+S GRUPPE unter den übrigen kurzfristigen Forderungen und Vermögenswerten ausgewiesen und weist zum 31. Dezember einen Wert von 20,2 Mio. € auf; das separat als Derivat in den übrigen kurzfristigen Forderungen und Vermögenswerten ausgewiesene Wandlungsrecht ist zum Bilanzstichtag mit 2,8 Mio. € bewertet.

Die Höhe der im Rahmen der Erstkonsolidierung anzusetzenden Vermögenswerte und Schulden kann erst nach der noch durchzuführenden Kaufpreisallokation ermittelt werden;

wesentlicher Vermögenswert der Gesellschaft ist das o.g. Legacy Projekt. Ein für Steuerzwecke abzugsfähiger Geschäfts- oder Firmenwert entsteht voraussichtlich nicht.

## KONSOLIDIERUNGSMETHODEN

Die Abschlüsse der einbezogenen Gesellschaften sind zum Bilanzstichtag des Konzernabschlusses aufgestellt. Die in den Konzernabschluss übernommenen Vermögenswerte und Schulden der einbezogenen Gesellschaften werden einheitlich nach den hier und in den folgenden Anmerkungen beschriebenen Grundsätzen bilanziert und bewertet.

Umsätze, Aufwendungen und Erträge zwischen den einbezogenen Tochtergesellschaften werden voll eliminiert, soweit sie während der Zugehörigkeit der betreffenden Gesellschaften zur K+S GRUPPE entstanden sind. Ebenso werden Forderungen und Verbindlichkeiten zwischen den einbezogenen Gesellschaften sowie Zwischenergebnisse aus Lieferungen und Leistungen zwischen den einbezogenen Tochtergesellschaften, soweit sie nicht von untergeordneter Bedeutung sind, eliminiert.

Bei der Kapitalkonsolidierung werden die Anschaffungswerte der Beteiligungen mit dem auf sie entfallenden neu bewerteten Eigenkapital zum Zeitpunkt des Erwerbs verrechnet. Nach der Zuordnung zu Vermögenswerten und Schulden verbleibende aktive Unterschiedsbeträge werden als Goodwill bilanziert. Passive Unterschiedsbeträge aus der Kapitalkonsolidierung werden unmittelbar ertragswirksam aufgelöst.

## BILANZIERUNGS- UND BEWERTUNGSGRUNDSÄTZE

### ERFASSUNG VON ERTRÄGEN UND AUFWENDUNGEN

Die Umsatzerlöse beinhalten Verkäufe von Produkten und Dienstleistungen, vermindert um Erlösschmälerungen. Umsatzerlöse aus dem Verkauf von Produkten werden ab dem Zeitpunkt des Gefahrenübergangs ausgewiesen. Dienstleistungen werden nach erbrachter Leistung als Umsatz ausgewiesen. Darüber hinaus muss in beiden Fällen die Zahlung hinreichend wahrscheinlich sein. Sonstige Erträge, wie beispielsweise aus Zinsen oder Dividenden, werden zu dem Zeitpunkt periodengerecht erfasst, ab dem ein vertraglicher bzw. rechtlicher Anspruch besteht.

Betriebliche Aufwendungen werden mit Inanspruchnahme der Leistung bzw. zum Zeitpunkt ihrer Verursachung ergebniswirksam erfasst.

### IMMATERIELLE VERMÖGENSWERTE

Entgeltlich erworbene immaterielle Vermögenswerte werden mit den Anschaffungskosten angesetzt. Selbsterstellte immaterielle Vermögenswerte werden mit den auf sie entfallenden Entwicklungsausgaben aktiviert, sofern der Zufluss eines wirtschaftlichen Nutzens wahrscheinlich ist und die Kosten des Vermögenswerts zuverlässig ermittelbar sind. Eine Aktivierung von Fremdkapitalzinsen wird bei qualifizierten Vermögenswerten vorgenommen.

Immaterielle Vermögenswerte werden, sofern ihre Nutzungsdauer bestimmbar ist, planmäßig linear abgeschrieben; bei einer unbestimmten Nutzungsdauer wird keine planmäßige Abschreibung vorgenommen. Beim Goodwill wird von einer unbestimmten Nutzungsdauer ausgegangen. Im Rahmen der planmäßigen Abschreibungen werden folgende Nutzungsdauern zugrunde gelegt:

| <b>NUTZUNGSDAUERN FÜR IMMATERIELLE VERMÖGENSGEGENSTÄNDE<br/>MIT BESTIMMTER NUTZUNGSDAUER</b> |  | TAB: 5.9.5 |
|----------------------------------------------------------------------------------------------|--|------------|
| in Jahren                                                                                    |  |            |
| Hafenkonzessionen                                                                            |  | 250        |
| Marken                                                                                       |  | 5–15       |
| Kundenbeziehungen                                                                            |  | 5–20       |
| Übrige immaterielle Vermögenswerte                                                           |  | 2–10       |

Bei einer Wertminderung werden außerplanmäßige Abschreibungen vorgenommen. Entfallen die Gründe für die außerplanmäßige Abschreibung, erfolgt eine entsprechende Zuschreibung, wobei die fortgeführten Buchwerte nicht überschritten werden dürfen. Ein für den Goodwill erfasster Wertminderungsaufwand wird nicht aufgeholt.

Die Werthaltigkeit der Goodwills wird regelmäßig überprüft. Sofern erforderlich, wird eine entsprechende Wertberichtigung vorgenommen. Ein etwaiger Wertberichtigungsbedarf wird gemäß IAS 36 durch einen Vergleich mit den diskontierten erwarteten zukünftigen Cashflows aus den Zahlungsmittel generierenden Einheiten ermittelt, denen die entsprechenden Goodwill-Beträge zugeordnet sind.

Die Erstbewertung von CO<sub>2</sub>-Emissionsrechten erfolgt zu Anschaffungskosten. Unentgeltlich zugeteilte Rechte werden demnach mit einem Wert von Null, entgeltlich erworbene Rechte zum jeweiligen Anschaffungswert aktiviert. Sinkt der Stichtagswert unter den Anschaffungswert, wird im Rahmen einer Werthaltigkeitsprüfung der Buchwert der die Emissionsrechte haltenden Zahlungsmittel generierenden Einheit mit dem Nutzungswert dieser Einheit verglichen.

### SACHANLAGEN

Bei Sachanlagen erfolgt die Bilanzierung zu Anschaffungs- bzw. Herstellungskosten, vermindert um planmäßige, nutzungsbedingte Abschreibungen. Die Anschaffungs- bzw. Herstellungskosten umfassen auch künftige Rekultivierungsaufwendungen. Bei bestimmten qualifizierten Vermögenswerten werden Fremdkapitalzinsen aktiviert. Gehen Wertminderungen über die bereits vorgenommenen nutzungsbedingten Abschreibungen hinaus, erfolgt eine außerplanmäßige Abschreibung; diese wird als sonstiger betrieblicher Aufwand erfasst. Die Ermittlung solcher Wertverluste („impairment losses“) erfolgt gemäß IAS 36 durch den Vergleich mit den diskontierten erwarteten zukünftigen Cashflows der betreffenden Vermögenswerte. Sofern den betreffenden Vermögenswerten keine eigenen Cashflows zugeordnet werden können, werden stattdessen die Cashflows der entsprechenden Zahlungsmittel generierenden Einheit zum Vergleich herangezogen. Bei Fortfall der Gründe für vorgenommene außerplanmäßige Abschreibungen werden entsprechende Zuschreibungen vorgenommen.

Strecken und Grubenbaue werden unter den Sachanlagen aktiviert.

Wenn Sachanlagen verkauft oder stillgelegt werden, wird der Gewinn oder Verlust aus der Differenz zwischen dem Verkaufserlös und dem Restbuchwert unter den sonstigen betrieblichen Erträgen bzw. Aufwendungen erfasst.

Die Abschreibungen auf Sachanlagen werden nach der linearen Methode vorgenommen und richten sich nach den betriebsgewöhnlichen Nutzungsdauern. Den planmäßigen Abschreibungen liegen die folgenden konzerneinheitlichen Nutzungsdauern zugrunde:

**NUTZUNGSDAUERN FÜR SACHANLAGEN**

TAB: 5.9.6

| in Jahren                                          |           |
|----------------------------------------------------|-----------|
| Salzvorkommen                                      | 19 – 250  |
| Strecken und Grubenbaue                            | 5 – 125   |
| Bauten                                             | 14 – 33 ½ |
| Technische Anlagen und Maschinen                   | 4 – 25    |
| Andere Anlagen, Betriebs- und Geschäftsausstattung | 3 – 10    |

**FINANZIERUNGSLEASING**

Ein Leasingverhältnis ist eine Vereinbarung, bei der der Leasinggeber dem Leasingnehmer gegen eine Zahlung oder eine Reihe von Zahlungen das Recht auf Nutzung eines Vermögenswerts für einen vereinbarten Zeitraum überträgt. Finanzierungsleasing liegt vor, wenn dem Leasingnehmer im Wesentlichen alle mit dem Eigentum des Vermögenswerts verbundenen Chancen und Risiken übertragen werden. Ist dies der Fall, aktiviert der Leasingnehmer den Vermögenswert zu seinem Zeitwert oder zum Barwert der Mindestleasingzahlungen, sofern dieser Wert niedriger ist. In gleicher Höhe ist eine Leasingverbindlichkeit zu passivieren. Die Abschreibung des Vermögenswerts unterscheidet sich grundsätzlich nicht von der Vorgehensweise bei vergleichbaren Vermögenswerten.

**ALS FINANZINVESTITION GEHALTENE IMMOBILIEN**

Bei den als Finanzinvestition gehaltenen Immobilien handelt es sich überwiegend um vermietete Objekte. Sie werden mit den fortgeführten Anschaffungs- bzw. Herstellungskosten, vermindert um lineare planmäßige, nutzungsbedingte Abschreibungen, bilanziert. Die zugrunde gelegten Nutzungsdauern liegen bei 50 Jahren. Erträge aus der Veräußerung von als Finanzinvestition gehaltenen Immobilien werden im Finanzergebnis erfasst.

**FINANZINSTRUMENTE**

Finanzinstrumente sind Verträge, die bei einem Vertragspartner zur Entstehung eines finanziellen Vermögenswerts und beim anderen zu einer finanziellen Verbindlichkeit oder einem Eigenkapitalinstrument führen. Grundsätzlich werden finanzielle Vermögenswerte und finanzielle Verbindlichkeiten getrennt von einander (unsaldiert) ausgewiesen. Die finanziellen Vermögenswerte umfassen hauptsächlich flüssige Mittel, Forderungen aus Lieferungen und Leistungen, sonstige Forderungen, Wertpapiere, Finanzinvestitionen sowie derivative Finanzinstrumente mit positivem Marktwert. Zu den finanziellen Verbindlichkeiten zählen insbesondere Verbindlichkeiten aus Lieferungen und Leistungen, Finanzverbindlichkeiten,

sonstige Verbindlichkeiten sowie derivative Finanzinstrumente mit negativem Marktwert. Der erstmalige Ansatz von Finanzinstrumenten erfolgt zum beizulegenden Zeitwert, sobald das bilanzierende Unternehmen Vertragspartner eines Finanzinstruments wird. Die dem Erwerb direkt zuzurechnenden Transaktionskosten werden bei der Ermittlung des Buchwerts dann berücksichtigt, wenn die Finanzinstrumente in der Folgebewertung nicht erfolgswirksam zum beizulegenden Zeitwert bewertet werden.

Für die Folgebewertung ist die Zuordnung der Finanzinstrumente in eine der folgenden in IAS 39 definierten Kategorien ausschlaggebend:

**KREDITE UND FORDERUNGEN**

In dieser Kategorie werden hauptsächlich Forderungen aus Lieferungen und Leistungen, sonstige Forderungen, Ausleihungen und flüssige Mittel erfasst. Die in der Bilanz ausgewiesene Position flüssige Mittel setzt sich im Wesentlichen aus Schecks, Kassenbeständen und Bankguthaben zusammen. Zudem fallen hierunter Wertpapiere mit einer Laufzeit von weniger als drei Monaten, die keinen wesentlichen Wertschwankungen unterliegen.

Ausleihungen werden grundsätzlich zu Anschaffungskosten bewertet. Unverzinsliche oder niedrig verzinsliche Darlehen werden zum Barwert angesetzt. Erkennbaren Risiken wird durch die Vornahme außerplanmäßiger Abschreibungen Rechnung getragen.

Die anderen dieser Kategorie zugeordneten finanziellen Vermögenswerte werden nach dem erstmaligen Ansatz zu fortgeführten Anschaffungskosten unter Anwendung der Effektivzinsmethode abzüglich Wertminderungen bewertet. Unverzinsliche bzw. niedrig verzinsliche Forderungen mit einer Laufzeit von mehr als drei Monaten werden abgezinst. Erforderliche Wertminderungen orientieren sich am erwarteten Ausfallrisiko und werden auf separaten Wertberichtigungskonten erfasst. Forderungen werden ausgebucht, wenn sie beglichen oder uneinbringlich werden. Sonstige Vermögenswerte werden zum Zeitpunkt der Veräußerung bzw. bei fehlender Werthaltigkeit ausgebucht.

**ERFOLGSWIRKSAM ZUM BEIZULEGENDEN ZEITWERT BILANZIERTE FINANZIELLE VERMÖGENSWERTE**

Dieser Kategorie werden zu Handelszwecken gehaltene Wertpapiere („held for trading“) zugeordnet, die mit der Absicht der kurzfristigen Weiterveräußerung erworben wurden. Auch Derivate mit positivem Marktwert werden als zu Handelszwecken gehalten kategorisiert, es

sei denn, sie sind in eine Sicherungsbeziehung gemäß IAS 39 eingebunden. Die Bewertung erfolgt zum beizulegenden Zeitwert. Wertänderungen werden ergebniswirksam erfasst. Die Ausbuchung von Wertpapieren erfolgt nach der Veräußerung am Erfüllungstag.

#### ZUR VERÄUSSERUNG VERFÜGBARE FINANZIELLE VERMÖGENSWERTE

Diese Kategorie umfasst alle finanziellen Vermögenswerte, die keiner der vorgenannten Kategorien zugeordnet wurden. Wertpapiere werden grundsätzlich als zur Veräußerung verfügbar („available for sale“) kategorisiert, es sei denn, es wird aufgrund einer expliziten Zweckbestimmung eine andere Kategorisierung notwendig. Die Erstbewertung erfolgt am Erfüllungstag des Kaufs. Eigenkapitalinstrumente wie z.B. Anteile an (nicht konsolidierten) verbundenen Unternehmen sowie gehaltene Aktien an börsennotierten Unternehmen fallen ebenfalls unter diese Kategorie.

Grundsätzlich werden Finanzinstrumente dieser Kategorie zum beizulegenden Zeitwert folgebewertet. Die bei der Folgebewertung entstehenden Änderungen des beizulegenden Zeitwerts werden als unrealisierte Gewinne und Verluste ergebnisneutral in der Neubewertungsrücklage erfasst. Erst zum Zeitpunkt der Veräußerung erfolgt eine ergebniswirksame Erfassung der realisierten Gewinne bzw. Verluste. Liegen am Bilanzstichtag objektive Hinweise für eine dauerhafte Wertminderung vor, ist eine außerplanmäßige Abschreibung auf den beizulegenden Zeitwert vorzunehmen. Der in der Neubewertungsrücklage erfasste Betrag ist ergebnisneutral auszubuchen. Spätere Wertaufholungen erfolgen ergebnisneutral.

Sofern für Finanzinstrumente keine aktiven Märkte existieren, mit deren Hilfe die beizulegenden Zeitwerte verlässlich ermittelt werden können, erfolgt die Bewertung zu Anschaffungskosten. Dies ist bei Anteilen an (nicht konsolidierten) verbundenen Unternehmen und Beteiligungen der Fall. Einer dauerhaften Wertminderung wird hier durch erfolgswirksame außerplanmäßige Abschreibungen auf den niedrigeren Wert Rechnung getragen. Diese Wertminderungen dürfen nicht rückgängig gemacht werden. Die Ausbuchung von Anteilen bzw. Beteiligungen erfolgt bei einer Veräußerung an eine konzernfremde Partei. Wertpapiere werden nach der Veräußerung am Erfüllungstag ausgebucht.

#### ZU FORTGEFÜHRTEN ANSCHAFFUNGSKOSTEN BILANZIERTER FINANZIELLE VERBINDLICHKEITEN

Sämtliche finanzielle Verbindlichkeiten, mit Ausnahme der derivativen Finanzinstrumente, werden zu fortgeführten Anschaffungskosten unter Anwendung der Effektivzinsmethode

bewertet. Die Ausbuchung der Verbindlichkeiten erfolgt zu dem Zeitpunkt, an dem die Verbindlichkeit beglichen wird oder der Grund für die Bildung der Verbindlichkeit wegfällt.

#### ERFOLGSWIRKSAM ZUM BEIZULEGENDEN ZEITWERT BILANZIERTER FINANZIELLE VERBINDLICHKEITEN

In diese Kategorie fallen derivative Finanzinstrumente mit negativem Marktwert, die grundsätzlich als zu Handelszwecken gehalten kategorisiert werden. Von dieser Regelung ausgeschlossen sind Derivate, die in eine Sicherungsbeziehung gemäß IAS 39 eingebunden sind.

#### DERIVATE

Sicherungsbeziehungen zwischen Derivaten und Grundgeschäften werden nur für einen geringen Teil der Derivate hergestellt. Die Bewertung der Derivate erfolgt zum jeweiligen Marktwert. Die Marktwertveränderungen werden erfolgswirksam in der Gewinn- und Verlustrechnung erfasst. Die Ausbuchung der Derivate erfolgt am Erfüllungstag.

#### VORRÄTE

Unter den Vorräten sind gemäß IAS 2 diejenigen Vermögenswerte ausgewiesen, die zum Verkauf im normalen Geschäftsgang vorgesehen sind (fertige Erzeugnisse und Waren), die sich in der Herstellung für den Verkauf befinden (unfertige Erzeugnisse) oder die im Rahmen der Herstellung oder Erbringung von Dienstleistungen verbraucht werden (Roh-, Hilfs- und Betriebsstoffe).

Die Bewertung der Vorräte erfolgt auf Basis der durchschnittlichen Anschaffungs- bzw. Herstellungskosten oder zum niedrigeren Nettoveräußerungspreis. Die Herstellungskosten enthalten neben den Einzelkosten angemessene Teile der fixen und variablen Material- und Fertigungsgemeinkosten, soweit sie im Zusammenhang mit dem Herstellungsvorgang anfallen. Dies gilt analog für Kosten der allgemeinen Verwaltung, Aufwendungen für Altersversorgung und Unterstützung sowie sonstige soziale Aufwendungen. Fremdkapitalzinsen werden nicht einbezogen. Der Nettoveräußerungspreis bestimmt sich als geschätzter Verkaufspreis abzüglich der noch anfallenden Kosten bis zur Fertigstellung und der notwendigen Vertriebskosten.

#### RÜCKSTELLUNGEN FÜR PENSIONEN UND ÄHNLICHE VERPFLICHTUNGEN

Die Pensionsrückstellungen für Mitarbeiter und Pensionäre in Deutschland werden unter Anwendung versicherungsmathematischer Grundsätze nach dem Anwartschaftsbarwertverfahren (Projected Unit Credit-Methode) ermittelt. Der Rechnungszins wird auf Grundlage



der am Bilanzstichtag erzielten Renditen für erstrangige, festverzinsliche Industriefinanzierungen ermittelt, wobei die Laufzeit der Anleihen der voraussichtlichen Fristigkeit der Pensionsverpflichtungen entspricht.

Die Pensionsverpflichtungen ausländischer Gesellschaften werden nach vergleichbaren Grundsätzen und unter Berücksichtigung länderspezifischer Besonderheiten berechnet. Soweit Planvermögen vorliegt, erfolgt eine Saldierung dieses Vermögens mit den Pensionsrückstellungen.

#### **BERGBAULICHE UND ÜBRIGE RÜCKSTELLUNGEN**

Rückstellungen werden in Höhe der erwarteten Inanspruchnahme für gegenwärtige Verpflichtungen gegenüber Dritten gebildet, die aus einem vergangenen Ereignis resultieren. Die Inanspruchnahme muss eher wahrscheinlich als unwahrscheinlich und die Höhe der Verpflichtungen verlässlich schätzbar sein. Langfristige Rückstellungen mit einer Restlaufzeit von über einem Jahr werden unter Berücksichtigung künftiger Kostensteigerungen mit einem fristenadäquaten Kapitalmarktzins abgezinst, soweit der Zinseffekt von wesentlicher Bedeutung ist.

#### **LATENTE STEUERN**

Die Ermittlung der latenten Steuern erfolgt gemäß IAS 12 auf der Grundlage der international üblichen bilanzorientierten Verbindlichkeitsmethode (Liability-Methode). Danach werden Steuerabgrenzungsposten für sämtliche temporären Differenzen zwischen den steuerlichen Wertansätzen und den Wertansätzen in der Konzernbilanz sowie für steuerliche Verlustvorträge gebildet. Aktive latente Steuern werden jedoch nur berücksichtigt, soweit die Möglichkeit der Realisierung hinreichend konkretisiert ist. Die Bewertung der latenten Steuern erfolgt mit den Steuersätzen, die nach der derzeitigen Rechtslage künftig im wahrscheinlichen Zeitpunkt der Umkehr der temporären Differenzen gelten werden. Die Auswirkungen von Steuergesetzesänderungen auf aktive und passive latente Steuern werden in der Periode, in der die materiellen Wirksamkeitsvoraussetzungen der Gesetzesänderung vorliegen, ergebniswirksam berücksichtigt. Eine Abzinsung aktiver und passiver latenter Steuern wird entsprechend den Regelungen des IAS 12 nicht vorgenommen. Latente Steueransprüche und latente Steuerschulden werden nach Fristigkeiten innerhalb einzelner Gesellschaften saldiert.

#### **UNTERNEHMENSERWERBE**

Die Bilanzierung eines Unternehmenszusammenschlusses erfolgt nach der Erwerbsmethode. Im Rahmen der Neubewertung des erworbenen Unternehmens werden sämtliche stille Reserven und stille Lasten des übernommenen Unternehmens aufgedeckt und Vermögenswerte, Schulden und Eventualverbindlichkeiten mit ihrem beizulegenden Zeitwert angesetzt. Ein hieraus resultierender positiver Differenzbetrag zu den Anschaffungskosten des erworbenen Unternehmens wird als Goodwill aktiviert.

#### **ERMESSENSENTSCHEIDUNGEN UND SCHÄTZUNGEN**

##### **ERMESSENSENTSCHEIDUNGEN BEI DER ANWENDUNG DER BILANZIERUNGS- UND BEWERTUNGSMETHODEN**

Langfristige immaterielle Vermögenswerte, Sachanlagen und als Finanzinvestition gehaltene Immobilien werden in der Bilanz zu fortgeführten Anschaffungskosten angesetzt. Von der ebenfalls zulässigen Möglichkeit, diese zum beizulegenden Zeitwert anzusetzen, wird kein Gebrauch gemacht.

Wertpapiere werden grundsätzlich als zur Veräußerung verfügbar klassifiziert, sodass die zu bilanzierenden Änderungen der beizulegenden Zeitwerte erfolgsneutral im Eigenkapital erfasst werden. Sofern Wertpapiere als erfolgswirksam zum beizulegenden Zeitwert klassifiziert werden, fließen die Änderungen der beizulegenden Zeitwerte insoweit unmittelbar in das Periodenergebnis ein.

##### **SCHÄTZUNGEN UND PRÄMISSEN BEI DER ANWENDUNG DER BILANZIERUNGS- UND BEWERTUNGSMETHODEN**

Die Ansätze im IFRS-Abschluss beruhen dem Grunde und der Höhe nach zum Teil auf Schätzungen und der Festlegung bestimmter Prämissen. Dies ist insbesondere notwendig bei

- + der Bestimmung der Nutzungsdauern des abnutzbaren Anlagevermögens,
- + der Festlegung der Bewertungsannahmen und der zukünftigen Ergebnisse im Rahmen von Werthaltigkeitstests, insbesondere für bilanzierte Goodwills,
- + der Bestimmung des Nettoveräußerungspreises des Vorratsvermögens,
- + der Bestimmung der für die Bewertung von Pensionsrückstellungen notwendigen Parameter (Rechnungszinssatz, künftige Entwicklung der Löhne / Gehälter und Renten, erwartete Rendite des Planvermögens),

- + der Bestimmung von Höhe, Erfüllungszeitpunkten und Rechnungszinssätzen für die Bewertung bergbaulicher Rückstellungen,
- + der Wahl der Parameter im Rahmen der modellgestützten Bewertung der Derivate (z.B. Annahmen hinsichtlich der Volatilität und des Zinssatzes),
- + der Bestimmung der Nutzbarkeit von steuerlichen Verlustvorträgen sowie
- + der Bestimmung des beizulegenden Zeitwerts von im Rahmen eines Unternehmenszusammenschlusses erworbenen immateriellen Vermögenswerten, Sachanlagen und Schulden sowie der Bestimmung der Nutzungsdauer der erworbenen immateriellen Vermögenswerte und Sachanlagen.

Trotz sorgfältigster Schätzung kann die tatsächliche Entwicklung von den Annahmen abweichen.

## WÄHRUNGSUMRECHNUNG

In den Einzelabschlüssen der Konzerngesellschaften werden sämtliche Forderungen und Verbindlichkeiten in fremden Währungen mit dem Kurs am Bilanzstichtag bewertet. Sicherungsgeschäfte werden zu ihren jeweiligen Marktwerten angesetzt.

Die Jahresabschlüsse ausländischer Konzerngesellschaften werden gemäß IAS 21 nach dem Konzept der funktionalen Währung in Euro umgerechnet. Alle Gesellschaften betreiben ihr Geschäft in finanzieller, wirtschaftlicher und organisatorischer Hinsicht selbstständig. Die funktionale Währung entspricht im Regelfall der lokalen Währung. Vermögenswerte und Schulden werden zum Kurs am Bilanzstichtag umgerechnet. Die Umrechnung von Aufwendungen und Erträgen erfolgt in 2010 erstmalig zu Quartalsdurchschnittskursen. Bislang wurden Aufwendungen und Erträge zum Jahresdurchschnittskurs umgerechnet.

Bei elf Gesellschaften wird abweichend von der lokalen Währung der US-Dollar als funktionale Währung verwendet, da diese Gesellschaften ihre Zahlungsmittelzuflüsse bzw. -abflüsse überwiegend in dieser Währung generieren. Die Verwendung des US-Dollars erfolgt bei den Gesellschaften: COMPANIA MINERA PUNTA DE LOBOS LTDA., EMPRESA DE SERVICIOS LTDA., EMPRESA MARITIMA S.A., INVERSIONES COLUMBUS LTDA., INVERSIONES EMPREMAR LTDA., K+S FINANCE BELGIUM BVBA, MORTON BAHAMAS LTD., SERVICIOS MARITIMOS PATILLOS S.A., SERVICIOS PORTUARIOS PATILLOS S.A., TRANSPORTE POR CONTAINERS S.A. und SOCIEDAD PUNTA DE LOBOS S.A.

Die sich gegenüber den Stichtagskursen des Vorjahres ergebenden erfolgsneutralen Unterschiedsbeträge werden im Eigenkapital gesondert als Unterschiede aus der Währungsumrechnung ausgewiesen. Der Saldo dieser Umrechnungsdifferenzen gegenüber dem Vorjahr betrug 148,8 Mio. €. Scheiden Konzernunternehmen aus dem Konsolidierungskreis aus, wird die betreffende Währungsumrechnungsdifferenz erfolgswirksam aufgelöst.

Im Berichtsjahr wurden Umrechnungsdifferenzen in Höhe von 30,6 Mio. € (Vorjahr: –8,6 Mio. €) erfolgswirksam erfasst, die im Wesentlichen in den sonstigen betrieblichen Erträgen bzw. Aufwendungen ausgewiesen wurden.

Für die Umrechnung der wesentlichen Währungen im Konzern wurden folgende Wechselkurse für einen Euro zugrunde gelegt:

### WECHSELKURSE

TAB: 5.9.7

|                            |                              |                              |                              |                              | 2010                    |                          | 2009                    |                          |
|----------------------------|------------------------------|------------------------------|------------------------------|------------------------------|-------------------------|--------------------------|-------------------------|--------------------------|
|                            | Quartalsdurchschnittskurs Q1 | Quartalsdurchschnittskurs Q2 | Quartalsdurchschnittskurs Q3 | Quartalsdurchschnittskurs Q4 | Jahresdurchschnittskurs | Stichtagskurs zum 31.12. | Jahresdurchschnittskurs | Stichtagskurs zum 31.12. |
| je 1 €                     |                              |                              |                              |                              |                         |                          |                         |                          |
| US-Dollar (USD)            | 1,383                        | 1,271                        | 1,291                        | 1,358                        | 1,326                   | 1,336                    | 1,395                   | 1,441                    |
| Kanadischer Dollar (CAD)   | 1,438                        | 1,305                        | 1,342                        | 1,376                        | 1,365                   | 1,332                    | 1,585                   | 1,513                    |
| Schweizer Franken (CHF)    | 1,463                        | 1,409                        | 1,332                        | 1,323                        | 1,380                   | 1,250                    | 1,510                   | 1,484                    |
| Brasilianischer Real (BRL) | 2,492                        | 2,276                        | 2,259                        | 2,304                        | 2,331                   | 2,218                    | 2,767                   | 2,511                    |
| Chilenischer Peso (CLP)    | 717,424                      | 674,321                      | 659,122                      | 652,156                      | 675,288                 | 625,342                  | 776,661                 | 731,032                  |
| Mexikanischer Peso (MXN)   | 17,656                       | 15,958                       | 16,521                       | 16,821                       | 16,737                  | 16,548                   | 18,799                  | 18,922                   |
| Britisches Pfund (GBP)     | 0,888                        | 0,852                        | 0,833                        | 0,859                        | 0,858                   | 0,861                    | 0,891                   | 0,888                    |

## AUSWIRKUNGEN NEUER RECHNUNGSLEGUNGSSTANDARDS UND INTERPRETATIONEN

### NEUE RECHNUNGSLEGUNGSSTANDARDS UND INTERPRETATIONEN

TAB: 5.9.8

| Standard/Interpretation    |                                                                                    | Zeitpunkt verpflichtende Anwendung <sup>1</sup> | Endorsement <sup>2</sup> (bis 31.12.2010) |
|----------------------------|------------------------------------------------------------------------------------|-------------------------------------------------|-------------------------------------------|
| Änderung IAS 27            | Konzern- und separate Einzelabschlüsse nach IFRS                                   | 1.7.2009                                        | ja                                        |
| Änderung IAS 39            | Finanzinstrumente: Ansatz und Bewertung: Qualifizierende gesicherte Grundgeschäfte | 1.7.2009                                        | ja                                        |
| Änderung IAS 39 / IFRIC 9  | Eingebettete Derivate                                                              | 30.6.2009                                       | ja                                        |
| Änderung Improvements 2009 | Sammelstandard zur Änderung mehrerer IFRS                                          | 1.7.2009                                        | ja                                        |
| Änderung IFRS 1            | Erstmalige Anwendung der IFRS: Zusätzliche Annahmen                                | 1.1.2010                                        | ja                                        |
| Änderung IFRS 2            | Bilanzierung anteilsbasierter Vergütungen im Konzern, die in bar erfüllt werden    | 1.1.2010                                        | ja                                        |
| Neu IFRS 3                 | Unternehmenszusammenschlüsse                                                       | 1.7.2009                                        | ja                                        |
| Neu IFRIC 17               | Sachdividenden an Eigentümer                                                       | 1.7.2009                                        | ja                                        |
| Neu IFRIC 18               | Übertragung von Vermögenswerten von Kunden                                         | 1.7.2009                                        | ja                                        |

<sup>1</sup> Anwendung auf die erste Berichtsperiode eines Geschäftsjahres, das an diesem Tag oder danach beginnt.

<sup>2</sup> Übernahme der IFRS-Standards bzw. -Interpretationen durch die EU-Kommission.

### IAS 27 „KONZERN- UND SEPARATE EINZELABSCHLÜSSE NACH IFRS“

Mit den Änderungen in IAS 27 werden im Konzernabschluss die Abbildungsregeln bei Veränderung der Beteiligungshöhe sowie Ende der Beherrschung des Tochterunternehmens konkretisiert. Nunmehr sind Beteiligungsveränderungen erfolgsneutral als Eigenkapitaltransaktion abzubilden. Bei Ende der Beherrschung ist der Endkonsolidierungserfolg ergebniswirksam zu erfassen. Eine Erstanwendung der Neuregelung des IAS 27 wird entsprechende Auswirkungen auf die Bilanzierung von künftigen Beteiligungsveränderungen haben.

### IMPROVEMENTS 2009

Der Standard mit dem Titel „Improvements to IFRS“ fasst eine Vielzahl von kleineren Änderungen an bestehenden Standards zusammen. Die Änderungen haben keinen Einfluss auf den Konzernabschluss 2010 der K+S GRUPPE.

### IFRS 3 „UNTERNEHMENSZUSAMMENSCHLÜSSE“

In IFRS 3 wird hinsichtlich der Bilanzierung von nicht-beherrschenden Anteilen ein Wahlrecht zur Bewertung zum beizulegenden Zeitwert oder dem anteilig identifizierbaren Nettovermögens eingeführt. Ebenfalls neu geregelt sind die Vorgehensweise bei sukzessivem Anteilerwerb sowie die Erfassung des beizulegenden Zeitwerts bedingter Gegenleistungen. Zudem sind Anschaffungsnebenkosten des Erwerbs nicht mehr Bestandteil der Anschaffungskosten, sondern ergebniswirksam zu erfassen. Eine Erstanwendung der Neuregelung des IFRS 3 wird entsprechende Auswirkungen auf die Bilanzierung von künftigen Unternehmenszusammenschlüssen haben.

Die weiteren neuen Rechnungslegungsstandards und Interpretationen sind nicht von Relevanz für den Konzernabschluss 2010 der K+S GRUPPE.

## NEUE, ABER NOCH NICHT ANGEWANDTE RECHNUNGSLEGUNGSSTANDARDS UND INTERPRETATIONEN

Die folgenden Rechnungslegungsstandards und Interpretationen wurden bis zum Bilanzstichtag vom IASB veröffentlicht, sind aber von der K+S GRUPPE erst zu einem späteren Zeitpunkt verpflichtend anzuwenden.

| NEUE, ABER NOCH NICHT ANGEWANDTE RECHNUNGSLEGUNGSSTANDARDS UND INTERPRETATIONEN |                   | TAB: 5.9.9                                                            |                                           |      |
|---------------------------------------------------------------------------------|-------------------|-----------------------------------------------------------------------|-------------------------------------------|------|
| Standard/Interpretation                                                         |                   | Zeitpunkt verpflichtende Anwendung <sup>1</sup>                       | Endorsement <sup>2</sup> (bis 31.12.2010) |      |
| Änderung                                                                        | IAS 12            | Rückgewinnung der zugrunde liegenden Vermögenswerte                   | 1.1.2012                                  | nein |
| Änderung                                                                        | IAS 24            | Angaben zu nahestehenden Unternehmen und Personen                     | 1.1.2011                                  | ja   |
| Änderung                                                                        | IAS 32            | Klassifizierung von Bezugsrechten                                     | 1.2.2010                                  | ja   |
| Änderung                                                                        | Improvements 2010 | Sammelstandard zur Änderung mehrerer IFRS                             | 1.7.2010                                  | nein |
| Änderung                                                                        | IFRS 1            | Ausnahmeregelung für IFRS 7 – Vergleichsangaben für IFRS-Erstanwender | 1.7.2010                                  | ja   |
| Änderung                                                                        | IFRS 1            | Umstellungszeitpunkte für IFRS-Erstanwender                           | 1.7.2011                                  | nein |
| Änderung                                                                        | IFRS 1            | Starke Hochinflation                                                  | 1.7.2011                                  | nein |
| Änderung                                                                        | IFRS 7            | Angaben bei der Übertragung finanzieller Vermögenswerte               | 1.7.2011                                  | nein |
| Neu                                                                             | IFRS 9            | Finanzinstrumente                                                     | 1.1.2013                                  | nein |
| Änderung                                                                        | IFRIC 14          | Vorauszahlungen im Rahmen von Mindestfinanzierungsvorschriften        | 1.1.2011                                  | ja   |
| Neu                                                                             | IFRIC 19          | Tilgung finanzieller Verbindlichkeiten mit Eigenkapitalinstrumenten   | 1.7.2010                                  | ja   |

<sup>1</sup> Anwendung auf die erste Berichtsperiode eines Geschäftsjahres, das an diesem Tag oder danach beginnt.

<sup>2</sup> Übernahme der IFRS-Standards bzw. -Interpretationen durch die EU-Kommission.

### IMPROVEMENTS 2010

Der Standard mit dem Titel „Improvements to IFRS“ fasst eine Vielzahl von kleineren Änderungen an bestehenden Standards zusammen. Die Auswirkungen der Improvements auf den Konzernabschluss der K+S GRUPPE werden derzeit geprüft.

### IFRS 7 „FINANZINSTRUMENTE: ANGABEN“

Die Änderungen sehen zusätzliche Angabepflichten bei der Ausbuchung von Vermögenswerten vor. Die Auswirkungen der Änderungen des IFRS 7 auf den Konzernabschluss der K+S GRUPPE werden derzeit geprüft.

### IFRS 9 „FINANZINSTRUMENTE“

IFRS 9 verfolgt das Ziel, IAS 39 vollständig zu ersetzen. Die Umsetzung erfolgt in drei Phasen. Die im November 2009 veröffentlichte Phase 1 hat die Klassifizierung und Bewertung von finanziellen Vermögenswerten und Verbindlichkeiten zum Inhalt. Phase 2 beschäftigt sich mit der Wertminderung von finanziellen Vermögenswerten und Verbindlichkeiten. In Phase 3 wird die bilanzielle Behandlung von Hedge Accounting überarbeitet. Die Auswirkungen des IFRS 9 auf den Konzernabschluss der K+S GRUPPE werden derzeit geprüft.

Die weiteren Rechnungslegungsstandards und Interpretationen haben aus heutiger Sicht keine Auswirkungen auf den Konzernabschluss der K+S GRUPPE.

### ERLÄUTERUNGEN ZUR GEWINN- UND VERLUSTRECHNUNG UND GESAMTERGEBNISRECHNUNG

Die Gewinn- und Verlustrechnung sowie die Gesamtergebnisrechnung sind auf Seite 162 abgebildet.

Die K+S GRUPPE sichert Kursrisiken aus US-Dollar-Zahlungseingängen sowie Risiken aus künftigen Frachtratensteigerungen durch den Einsatz verschiedener Derivate ab; zudem werden verstärkt ab dem vierten Quartal 2009 Risiken gesichert, die sich aus der Umrechnung der zukünftigen Ergebnisse von Fremdwährungsgesellschaften in die Konzernwährung Euro ergeben (Translationsrisiken). Die Sicherungsstrategie wird in der Anmerkung (18) näher erläutert. Zwischen den Derivaten und den beschriebenen Grundgeschäften werden keine Sicherungsbeziehungen gemäß IAS 39 gebildet, sodass die Marktwertveränderungen der ausstehenden Derivate zu jedem Bilanzstichtag ergebniswirksam in der Gewinn- und Verlustrechnung zu erfassen sind. Des Weiteren ergeben sich Ergebniswirkungen aus der Ausübung, dem Verkauf oder dem Verfall von Sicherungsderivaten. Sämtliche Ergebniseffekte, die aus der Sicherung von künftigen Zahlungspositionen aus operativer Geschäftstätigkeit

bzw. aus der Sicherung zukünftiger Translationsrisiken resultieren, werden in einer einzigen Ergebniszeile in der Gewinn- und Verlustrechnung zusammengefasst („Ergebnis aus operativen, antizipativen Sicherungsgeschäften“).

Die Bezeichnungen „operativ“ und „antizipativ“ charakterisieren dabei das Abstellen auf Grundgeschäfte, die in zukünftigen Perioden zu EBIT I-wirksamen Effekten führen (z.B. Zahlungseingänge in US-Dollar, Auszahlungen für Frachten, Umrechnung von Ergebnissen in funktionaler Fremdwährung in Euro). In den „Sonstigen betrieblichen Erträgen“ bzw. „Sonstigen betrieblichen Aufwendungen“ werden nur noch solche Ergebniseffekte ausgewiesen, die aus der Sicherung bereits bestehender Fremdwährungsforderungen resultieren (z.B. Sicherung von USD-Forderungen gegen Währungsschwankungen mittels eines USD/EUR-Termingeschäfts). Sicherungsgeschäfte des Finanzierungsbereichs werden im Finanzergebnis ausgewiesen.

Das operative Ergebnis EBIT I, das als zentrale Steuerungsgröße der K+S GRUPPE fungiert, wird in einer separaten Überleitungsrechnung unterhalb der Gewinn- und Verlustrechnung dargestellt. Dabei wird in einem ersten Schritt zunächst das Ergebnis nach operativen Sicherungsgeschäften (EBIT II) um das Ergebnis aus operativen, antizipativen Sicherungsgeschäften korrigiert. Das EBIT II beinhaltet sämtliche Ergebnisse aus operativen Sicherungsgeschäften, d.h. sowohl stichtagsbedingte Bewertungseffekte als auch Ergebnisse aus realisierten Derivaten. Bereinigt man das EBIT II um das Ergebnis aus operativen, antizipativen Sicherungsgeschäften, so erhält man als gedankliche Zwischensumme ein Ergebnis ohne Berücksichtigung jeglicher antizipativer Sicherungsmaßnahmen. Diese Zwischensumme ist wiederum in einem zweiten Schritt um das realisierte Ergebnis aus operativen, antizipativen Sicherungsgeschäften zu korrigieren. Das realisierte Sicherungsergebnis entspricht dem Ausübungswert des Derivats zum Zeitpunkt der Fälligkeit (Differenz zwischen Kassakurs und Sicherungskurs), im Falle von Optionsgeschäften abzüglich der gezahlten Prämien. Marktwertveränderungen der noch ausstehenden operativen, antizipativen Derivate werden hierbei nicht berücksichtigt, sodass das EBIT I den operativen Erfolg frei von stichtagsbezogenen Marktwertschwankungen wiedergibt.

### (1) UMSATZERLÖSE

Die Umsatzerlöse der K+S GRUPPE betragen 4.993,8 Mio. € (Vorjahr: 3.573,8 Mio. €) und resultieren in Höhe von 4.830,8 Mio. € (Vorjahr: 3.423,5 Mio. €) aus dem Verkauf von Gütern und

in Höhe von 163,0 Mio. € (Vorjahr: 150,3 Mio. €) aus der Erbringung von Dienstleistungen. Die Aufteilung der Umsatzerlöse nach Geschäftsbereichen sowie die intersegmentären Umsätze sind bei den Segmentinformationen auf den Seiten 172 f. dargestellt. Die regionale Verteilung der Umsatzerlöse ist bei den Erläuterungen zur Segmentberichterstattung unter Anmerkung (39) angegeben.

### (2) SONSTIGE BETRIEBLICHE ERTRÄGE

In den sonstigen betrieblichen Erträgen sind folgende wesentliche Posten enthalten:

| <b>SONSTIGE BETRIEBLICHE ERTRÄGE</b>                   |              | TAB: 5.9.10  |  |
|--------------------------------------------------------|--------------|--------------|--|
| in Mio. €                                              | 2010         | 2009         |  |
| Gewinne aus Kursdifferenzen                            | 77,0         | 54,2         |  |
| Auflösungen von Rückstellungen                         | 68,6         | 50,9         |  |
| Erhaltene Entschädigungen und Erstattungen             | 23,8         | 10,0         |  |
| Auflösungen von Wertberichtigungen für Forderungen     | 3,4          | 17,9         |  |
| Erträge aus der Ausbuchung von Vorratsvermögen         | 3,1          | 8,2          |  |
| Erträge aus Vermietung und Verpachtung                 | 2,0          | 1,8          |  |
| – davon aus als Finanzinvestition gehaltene Immobilien | 1,3          | 1,3          |  |
| Übrige Erträge                                         | 28,2         | 11,5         |  |
| <b>Sonstige betriebliche Erträge</b>                   | <b>206,1</b> | <b>154,5</b> |  |



**(3) SONSTIGE BETRIEBLICHE AUFWENDUNGEN**

In den sonstigen betrieblichen Aufwendungen sind folgende wesentliche Posten enthalten:

| <b>SONSTIGE BETRIEBLICHE AUFWENDUNGEN</b>                               |              | TAB: 5.9.11  |  |
|-------------------------------------------------------------------------|--------------|--------------|--|
|                                                                         | 2010         | 2009         |  |
| in Mio. €                                                               |              |              |  |
| Verluste aus Kursdifferenzen                                            | 69,7         | 62,0         |  |
| Zuführungen/Verbräuche übrige Rückstellungen                            | 19,8         | 20,9         |  |
| Abschreibungen                                                          | 15,6         | 3,9          |  |
| Zeitfremder Aufwand                                                     | 13,2         | 67,2         |  |
| Aufwendungen für Beratungen, Gutachten und Rechtsanwaltshonorare        | 11,2         | 7,3          |  |
| Aufwendungen für Altersteilzeit                                         | 9,7          | 30,2         |  |
| Schadenfälle                                                            | 9,0          | 2,6          |  |
| Verluste aus dem Abgang von Gegenständen des Anlagevermögens            | 6,5          | 2,5          |  |
| Wertberichtigungen auf Forderungen aus Lieferungen und Leistungen       | 5,2          | 3,9          |  |
| Aufwendungen/Erstattungen für stillgelegte Werke und Verwahrung Merkers | 4,2          | 16,5         |  |
| Investitionsnebenkosten                                                 | 3,5          | 3,3          |  |
| Aufwendungen für als Finanzinvestition gehaltene vermietete Immobilien  | 2,0          | 2,1          |  |
| Übrige Aufwendungen                                                     | 39,4         | 30,9         |  |
| <b>Sonstige betriebliche Aufwendungen</b>                               | <b>209,0</b> | <b>253,3</b> |  |

Die Position „Abschreibungen“ umfasst im Wesentlichen außerplanmäßige Abschreibungen auf technische Anlagen und Kavernen. Der Aufwand für Schadenfälle beinhaltet Schadenersatzansprüche aus dem Auftausalzgeschäft sowie sonstige Schadenfälle.

**(4) BETEILIGUNGSERGEBNIS**

| <b>BETEILIGUNGSERGEBNIS</b>                                        |            | TAB: 5.9.12 |  |
|--------------------------------------------------------------------|------------|-------------|--|
|                                                                    | 2010       | 2009        |  |
| in Mio. €                                                          |            |             |  |
| Erträge aus Ausschüttungen von Beteiligungen und Gewinnabführungen | 4,0        | 3,3         |  |
| Ergebnis aus dem Abgang von Beteiligungen                          | 0,8        | 0,1         |  |
| Zuschreibungen/Abschreibungen auf Beteiligungen                    | –          | –2,5        |  |
| <b>Beteiligungsergebnis</b>                                        | <b>4,8</b> | <b>0,9</b>  |  |

**(5) ERGEBNIS AUS OPERATIVEN, ANTIZIPATIVEN SICHERUNGSGESCHÄFTEN**

| <b>ERGEBNIS AUS OPERATIVEN, ANTIZIPATIVEN SICHERUNGSGESCHÄFTEN</b>                 |              | TAB: 5.9.13  |  |
|------------------------------------------------------------------------------------|--------------|--------------|--|
|                                                                                    | 2010         | 2009         |  |
| in Mio. €                                                                          |              |              |  |
| Ergebnis aus erfüllten, verkauften oder verfallenen Devisensicherungsgeschäften    | –15,5        | –21,3        |  |
| – davon positive Ergebnisbeiträge                                                  | 2,4          | 9,9          |  |
| – davon negative Ergebnisbeiträge                                                  | –17,9        | –31,2        |  |
| Ergebnis aus erfüllten Energiepreissicherungsgeschäften                            | –            | –4,9         |  |
| Ergebnis aus erfüllten Frachtratensicherungsgeschäften                             | –1,3         | –            |  |
| <b>Ergebnis aus erfüllten, verkauften oder verfallenen Sicherungsgeschäften</b>    | <b>–16,8</b> | <b>–26,2</b> |  |
| Marktwertveränderungen noch nicht fälliger Devisensicherungsgeschäfte              | –1,8         | –10,8        |  |
| – davon positive Marktwertveränderungen                                            | 8,4          | 1,7          |  |
| – davon negative Marktwertveränderungen                                            | –10,2        | –12,5        |  |
| Marktwertveränderungen noch nicht fälliger Frachtratensicherungsgeschäfte          | 1,0          | 1,1          |  |
| <b>Ergebnis aus Marktwertveränderungen noch nicht fälliger Sicherungsgeschäfte</b> | <b>–0,8</b>  | <b>–9,7</b>  |  |
| <b>Ergebnis aus operativen, antizipativen Sicherungsgeschäften</b>                 | <b>–17,6</b> | <b>–35,9</b> |  |

Die Position „Ergebnis aus erfüllten, verkauften oder verfallenen Sicherungsgeschäften“ enthält alle Ergebniseffekte, die aus der Ausübung/Erfüllung, dem Verkauf oder dem Verfall von operativen, antizipativen Sicherungsgeschäften resultieren. Die Position „Ergebnis aus Marktwertveränderungen noch nicht fälliger Sicherungsgeschäfte“ zeigt die Marktwertveränderungen von ausstehenden Derivaten, die der Sicherung von zukünftigen Zahlungspositionen bzw. zukünftigen Translationsrisiken aus operativen Geschäftstätigkeiten dienen (für weitere Informationen siehe ‚Erläuterungen zur Gewinn- und Verlustrechnung und Gesamtergebnisrechnung‘ auf den Seiten 184 ff.).

**(6) ZINSERGEBNIS**

| ZINSERGEBNIS                                                  | TAB: 5.9.14   |              |
|---------------------------------------------------------------|---------------|--------------|
|                                                               | 2010          | 2009         |
| in Mio. €                                                     |               |              |
| Zinsen von Kreditinstituten                                   | 4,0           | 1,2          |
| Zinsen und ähnliche Erträge                                   | 3,6           | 3,5          |
| <b>Zinserträge</b>                                            | <b>7,6</b>    | <b>4,7</b>   |
| Zinsanteil aus der Bewertung von bergbaulichen Rückstellungen | -44,4         | -8,6         |
| Zinsanteil aus der in 2009 begebenen Anleihe                  | -37,5         | -10,1        |
| Zinsanteil in den Zuführungen zu Pensionsrückstellungen       | -7,6          | -7,6         |
| Zinsanteil in den Zuführungen zu Jubiläumsrückstellungen      | -1,1          | -1,1         |
| Zinseffekt aus der Aktivierung von Fremdkapitalzinsen         | 0,9           | 0,4          |
| Übrige Zinsen und ähnliche Aufwendungen                       | -44,5         | -34,7        |
| <b>Zinsaufwendungen</b>                                       | <b>-134,2</b> | <b>-61,7</b> |
| <b>Zinsergebnis</b>                                           | <b>-126,6</b> | <b>-57,0</b> |

Im Geschäftsjahr 2010 wurden Fremdkapitalzinsen in Höhe von 0,9 Mio. € (Vorjahr: 0,4 Mio. €) im Sachanlagevermögen aktiviert (Finanzierungskostensatz: 5 %, Vorjahr: 4 %).

Der „Zinsanteil aus der Bewertung von bergbaulichen Rückstellungen“ setzt sich als Saldo folgender Positionen zusammen:

| ZINSANTEIL BERGBAULICHER RÜCKSTELLUNGEN                                           | TAB: 5.9.15  |             |
|-----------------------------------------------------------------------------------|--------------|-------------|
|                                                                                   | 2010         | 2009        |
| in Mio. €                                                                         |              |             |
| Zinseffekt aus der Änderung des Abzinsungssatzes der bergbaulichen Rückstellungen | -23,0        | –           |
| Erhöhung der bergbaulichen Rückstellungen aufgrund des Zeitablaufs („Aufzinsung“) | -21,9        | -20,3       |
| Zinseffekt aus der Auflösung von bergbaulichen Rückstellungen                     | 0,5          | 11,7        |
| <b>Zinsanteil aus der Bewertung von bergbaulichen Rückstellungen</b>              | <b>-44,4</b> | <b>-8,6</b> |

Der „Zinsanteil in den Zuführungen zu Pensionsrückstellungen“ umfasst Zinsaufwendungen („Aufzinsung“), Planerträge sowie die Tilgung versicherungsmathematischer Verluste.

**(7) SONSTIGES FINANZERGEBNIS**

| SONSTIGES FINANZERGEBNIS                                                    | TAB: 5.9.16 |              |
|-----------------------------------------------------------------------------|-------------|--------------|
|                                                                             | 2010        | 2009         |
| in Mio. €                                                                   |             |              |
| Ergebnis aus der Realisierung finanzieller Vermögenswerte/Verbindlichkeiten | -1,0        | -57,5        |
| Ergebnis aus der Bewertung finanzieller Vermögenswerte/Verbindlichkeiten    | 4,1         | -0,9         |
| <b>Sonstiges Finanzergebnis</b>                                             | <b>3,1</b>  | <b>-58,4</b> |

Im Ergebnis aus der Realisierung finanzieller Vermögenswerte/Verbindlichkeiten des Vorjahres ist ein Aufwand in Höhe von 59,2 Mio. € aus Geschäften zur Absicherung des USD-Kaufpreises von MORTON SALT gegen Währungsschwankungen enthalten, für die keine Hedge-Beziehung i.S.d. IAS 39 gebildet wurde.

**(8) STEUERN VOM EINKOMMEN UND VOM ERTRAG**

| STEUERN VOM EINKOMMEN UND VOM ERTRAG        | TAB: 5.9.17  |             |
|---------------------------------------------|--------------|-------------|
|                                             | 2010         | 2009        |
| in Mio. €                                   |              |             |
| Laufende Steuern                            | 179,2        | 38,3        |
| – in Deutschland                            | 136,2        | 12,8        |
| – im Ausland                                | 43,0         | 25,5        |
| Latente Steuern                             | -20,6        | -8,7        |
| – in Deutschland                            | -2,1         | 6,9         |
| – im Ausland                                | -18,5        | -15,6       |
| – davon aus Verlustvorträgen                | 4,7          | 6,8         |
| <b>Steuern vom Einkommen und vom Ertrag</b> | <b>158,6</b> | <b>29,6</b> |

Für die Berechnung der inländischen latenten Steuern wurde ein Steuersatz in Höhe von 28,2 % (Vorjahr: 27,9 %) zugrunde gelegt. Neben der Körperschaftsteuer von 15,0 % und dem Solidaritätszuschlag von 5,5 % wurde der durchschnittliche Gewerbesteuersatz von 12,4 % (Vorjahr: 12,1 %) berücksichtigt. Latente Steuern im Ausland werden mit den jeweiligen nationalen Thesaurierungsertragsteuersätzen berechnet.

In der nachfolgenden Tabelle wird eine Überleitung vom erwarteten zum tatsächlichen Steueraufwand vorgenommen. Für die Berechnung des erwarteten Ertragsteueraufwands wurde ein inländischer Konzernsteuersatz von 28,2 % (Vorjahr: 27,9 %) zugrunde gelegt.

| <b>ÜBERLEITUNGSRECHNUNG STEUERN VOM EINKOMMEN UND VOM ERTRAG</b> TAB: 5.9.18              |              |              |
|-------------------------------------------------------------------------------------------|--------------|--------------|
|                                                                                           | 2010         | 2009         |
| in Mio. €                                                                                 |              |              |
| Ergebnis vor Steuern                                                                      | 608,0        | 126,4        |
| <b>Erwarteter Ertragsteueraufwand (28,2% Konzernsteuersatz; Vorjahr: 27,9%)</b>           | <b>171,5</b> | <b>35,3</b>  |
| Veränderungen des erwarteten Steueraufwands:                                              |              |              |
| Steuerminderungen aufgrund steuerfreier Erträge und sonstiger Posten                      |              |              |
| – Steuerfreie Beteiligungserträge und Veräußerungsgewinne                                 | –1,1         | –0,6         |
| – sonstige steuerfreie Erträge                                                            | –20,6        | –8,9         |
| Hinzurechnungen/Kürzungen für Gewerbesteuer                                               | 1,9          | 1,0          |
| Steuermehrungen aufgrund steuerlich nicht abzugsfähiger Aufwendungen und sonstiger Posten | 6,1          | 2,9          |
| Wertberichtigungen/Nichtansatz aktiver latenter Steuern                                   | 10,4         | 4,5          |
| Effekte aus Steuersatzdifferenzen                                                         | –10,4        | –4,1         |
| Steuern für frühere Jahre                                                                 | –0,1         | –0,1         |
| Sonstige Effekte                                                                          | 0,9          | –0,4         |
| <b>Tatsächlicher Steueraufwand</b>                                                        | <b>158,6</b> | <b>29,6</b>  |
| <b>Steuerquote</b>                                                                        | <b>26,1%</b> | <b>23,4%</b> |

## (9) MATERIALAUFWAND

| <b>MATERIALAUFWAND</b> TAB: 5.9.19                                      |                |                |
|-------------------------------------------------------------------------|----------------|----------------|
|                                                                         | 2010           | 2009           |
| in Mio. €                                                               |                |                |
| Aufwendungen für Roh-, Hilfs- und Betriebsstoffe und für bezogene Waren | 1.288,2        | 1.012,9        |
| Aufwendungen für bezogene Leistungen                                    | 427,8          | 331,8          |
| Energiekosten                                                           | 265,8          | 210,7          |
| <b>Materialaufwand</b>                                                  | <b>1.981,8</b> | <b>1.555,4</b> |

## (10) PERSONALAUFWAND/ARBEITNEHMER

| <b>PERSONALAUFWAND</b> TAB: 5.9.20 |                |              |
|------------------------------------|----------------|--------------|
|                                    | 2010           | 2009         |
| in Mio. €                          |                |              |
| Löhne und Gehälter                 | 826,7          | 593,1        |
| Soziale Abgaben                    | 166,4          | 146,4        |
| Altersversorgung                   | 26,2           | 16,9         |
| <b>Personalaufwand</b>             | <b>1.019,3</b> | <b>756,4</b> |

Die K+S GRUPPE hat im Jahr 2010 erstmals ein kennzahlenbasiertes „Long Term Incentive“ (LTI)-Programm eingeführt. Dieses beruht auf einer mehrjährigen Bemessungsgrundlage nach Maßgabe der erzielten Wertbeiträge. Für die aufgrund der Umstellung der variablen Vergütungskomponente mit langfristiger Anreizwirkung von einer zweijährigen auf eine vierjährige Laufzeit entstehenden Zuflusslücken in den Jahren 2012 und 2013 wurde das neue LTI-Programm virtuell bereits in den Jahren 2008 und 2009 mit jeweils einer Tranche gestartet. Im Jahr 2010 wurden für das LTI-Programm 29,2 Mio. € Personalaufwand als Zuführung zu den Rückstellungen erfasst.

/ WEITERE INFORMATION ZUM PERSONALAUFWAND finden Sie im Kapitel ‚Mitarbeiter‘ des Lageberichts. Informationen zum „Long Term Incentive“-Programm finden Sie im Vergütungsbericht auf den Seiten 31 ff.

Im Rahmen des auslaufenden Aktienoptionsprogramms konnten der Vorstand sowie bestimmte Führungskräfte einen Teil ihrer erfolgsabhängigen Vergütung für ein Basisinvestment in K+S-Aktien verwenden. Mit dem Erwerb und dem Halten dieser Basisaktien erhalten die Teilnehmer virtuelle Optionen, bei denen im Fall der Ausübung eine Barauszahlung erfolgt. Die Höhe der Barauszahlung bestimmt sich nach der Überperformance der K+S-Aktie gegenüber dem Referenzindex (bis 19. September 2008 MDAX, ab 22. September 2008 DAX); sie ist auf maximal 25 % Überperformance begrenzt. Für die Ausübung der Optionen besteht eine Sperrfrist von zwei Jahren; die Gesamtlaufzeit der Optionen beträgt maximal fünf Jahre.

Als Personalaufwand wurden im Jahr 2010 Zahlungen für ausgeübte Optionen in Höhe von 13,6 Mio. € (Vorjahr: 16,0 Mio. €) erfasst. Der Aufwand wurde teilweise durch den Verbrauch von Rückstellungen neutralisiert. Für die am Bilanzstichtag noch nicht ausgeübten Optionen wird eine Rückstellung gebildet (siehe Anmerkung (26)).

Im Rahmen des Belegschaftsaktienprogramms haben Mitarbeiter der κ+s GRUPPE die Möglichkeit, κ+s-Aktien mit einem Kursabschlag zu erwerben. Die Belegschaftsaktien sind mit einer einjährigen Sperrfrist versehen. Die Bewertung erfolgt zum beizulegenden Zeitwert. Für das im Jahr 2010 beschlossene Belegschaftsaktienprogramm entstanden Aufwendungen in Höhe von 1,4 Mio. € (Vorjahr: 1,5 Mio. €). Für die Ausgabe kostenloser Bonusaktien im Zusammenhang mit früheren Belegschaftsaktienprogrammen entstand im Jahr 2010 ein Personalaufwand in Höhe von 0,1 Mio. € (Vorjahr: 0,9 Mio. €).

Die Aufwendungen für Altersversorgung enthalten nicht den Zinsanteil in den Zuführungen zu Pensionsrückstellungen. Dieser wird als Zinsaufwand im Zinsergebnis ausgewiesen.

Die Personalaufwendungen enthalten periodenfremde Beträge in Höhe von 2,8 Mio. €.

#### ARBEITNEHMER EINSCHLIESSLICH BEFRISTET BESCHÄFTIGTER

TAB: 5.9.21

|                          | 2010          | 2009          |
|--------------------------|---------------|---------------|
| Jahresdurchschnitt (FTE) |               |               |
| Inland                   | 10.207        | 10.228        |
| Ausland                  | 4.961         | 2.816         |
| <b>Gesamt</b>            | <b>15.168</b> | <b>13.044</b> |
| – davon Auszubildende    | 563           | 557           |

#### (11) ERGEBNIS JE AKTIE

##### ERGEBNIS JE AKTIE

TAB: 5.9.22

|                                                                            | 2010         | 2009        |
|----------------------------------------------------------------------------|--------------|-------------|
| in Mio. €                                                                  |              |             |
| <b>Konzernergebnis nach Steuern und Anteilen Dritter</b>                   | <b>448,6</b> | <b>96,4</b> |
| ± Ergebnis aus operativen, antizipativen Sicherungsgeschäften              | 17,6         | 35,9        |
| ± realisiertes Ergebnis aus operativen, antizipativen Sicherungsgeschäften | -22,2        | -39,8       |
| Eliminierung daraus resultierender latenter bzw. zahlungswirksamer Steuern | 1,3          | 1,1         |
| <b>Konzernergebnis, bereinigt<sup>1</sup></b>                              | <b>445,3</b> | <b>93,6</b> |
| Durchschnittliche Anzahl Aktien (in Mio. Stück)                            | 191,34       | 166,15      |
| Ergebnis je Aktie (in €)                                                   | 2,33         | 0,58        |
| Ergebnis je Aktie, bereinigt (in €) <sup>1</sup>                           | 2,33         | 0,56        |

<sup>1</sup> Die bereinigten Kennzahlen beinhalten lediglich das realisierte Ergebnis aus operativen, antizipativen Sicherungsgeschäften der jeweiligen Berichtsperiode. Die Marktwertveränderungen der noch ausstehenden operativen, antizipativen Sicherungsgeschäfte werden hingegen in den bereinigten Ergebnissen nicht berücksichtigt (siehe auch 'Erläuterungen zur Gewinn- und Verlustrechnung und Gesamtergebnisrechnung' auf den Seiten 184 ff.). Ebenso werden darauf entfallende Effekte auf latente und zahlungswirksame Steuern eliminiert; Steuersatz 2010: 28,2% (2009: 27,9%).

Das Ergebnis je Aktie ist nach IAS 33 ausgehend vom Konzernergebnis zu ermitteln. Aufgrund der begrenzten wirtschaftlichen Aussagekraft des unbereinigten Konzernergebnisses weisen wir zusätzlich ein bereinigtes Konzernergebnis aus, das nur das realisierte Ergebnis aus operativen, antizipativen Sicherungsgeschäften der jeweiligen Berichtsperiode enthält. Marktwertveränderungen der noch ausstehenden operativen, antizipativen Sicherungsgeschäfte werden hierbei nicht berücksichtigt, sodass das bereinigte Konzernergebnis den Erfolg frei von stichtagsbezogenen Marktwertschwankungen dieser Derivate wiedergibt. Des Weiteren werden auch die aus der Bereinigung resultierenden Effekte auf die latenten und zahlungswirksamen Steuern eliminiert.

Das unverwässerte, bereinigte Ergebnis je Aktie ist der Quotient aus dem bereinigten Konzernergebnis nach Steuern und Anteilen Dritter und der gewichteten durchschnittlichen Anzahl ausstehender Aktien. Da bei κ+s derzeit keine der Bedingungen erfüllt ist, die zu einer Verwässerung des Ergebnisses je Aktie führen könnten, entspricht das unverwässerte Ergebnis je Aktie dem verwässerten Ergebnis je Aktie. Im Ergebnis je Aktie waren weder auf-gegebene Geschäftsbereiche noch Bilanzierungsänderungen gesondert zu berücksichtigen.

Im Falle einer Ausnutzung des genehmigten Kapitals (siehe Anmerkung (20)) könnten die Ergebnisse je Aktie in Zukunft potenziell verwässert werden.

## ERLÄUTERUNGEN ZUR BILANZ

Die Bilanz ist auf der Seite 164 abgebildet. Die Entwicklung der Bruttobuchwerte und Abschreibungen der einzelnen Posten des Anlagevermögens ist gesondert auf den Seiten 166 f. dargestellt.

### (12) IMMATERIELLE VERMÖGENSWERTE

Die Abschreibungen des Geschäftsjahres sind entsprechend der Nutzung der betreffenden Vermögenswerte in der Gewinn- und Verlustrechnung unter folgenden Positionen ausgewiesen:

- + Herstellungskosten
- + Vertriebskosten
- + allgemeine Verwaltungskosten
- + Forschungs- und Entwicklungskosten
- + sonstige betriebliche Aufwendungen

Die in der Konzernbilanz ausgewiesenen Goodwills aus Unternehmenserwerben sind den folgenden Zahlungsmittel generierenden Einheiten (ZGE) zugeordnet:

| <b>AUFTEILUNG GOODWILL NACH ZAHLUNGSMITTEL<br/>GENERIERENDEN EINHEITEN</b> | TAB: 5.9.23  |              |
|----------------------------------------------------------------------------|--------------|--------------|
|                                                                            | 2010         | 2009         |
| in Mio. €                                                                  |              |              |
| ZGE Salz Amerika                                                           | 601,4        | 549,6        |
| ZGE Salz Europa                                                            | 13,3         | 13,3         |
| ZGE Stickstoffdüngemittel                                                  | 0,6          | 0,6          |
| <b>Goodwill Gesamt</b>                                                     | <b>615,3</b> | <b>563,5</b> |

Der Geschäftsbereich Salz wird in die Zahlungsmittel generierenden Einheiten Salz Amerika und Salz Europa unterteilt. Der aus der Akquisition von MORTON SALT resultierende Goodwill wurde der ZGE Salz Amerika zugeordnet; die Vorjahreszahlen wurden nach der endgültigen

Kaufpreisallokation angepasst. Weitere Erläuterungen finden sich unter ‚Endgültige Kaufpreisallokation MORTON SALT und Anpassung Vorjahreszahlen‘ auf den Seiten 174 ff. Der Anstieg der der ZGE Salz Amerika zugeordneten Goodwills beruht allein auf Effekten aus der stichtagsbezogenen Währungsumrechnung.

Im Rahmen der Prüfung der Werthaltigkeit der Goodwills wurden die Restbuchwerte der jeweiligen Zahlungsmittel generierenden Einheiten mit deren Nutzungswert verglichen. Bei der Ermittlung der Nutzungswerte wurden die Barwerte der künftigen Cashflows der Geschäftsbereiche unter der Prämisse der fortlaufenden Nutzung zugrunde gelegt. Die Prognose der Cashflows stützt sich auf die aktuellen mittelfristigen Planungen der K+S GRUPPE bzw. der jeweiligen Geschäftsbereiche. Die wesentlichen Prämissen der mittelfristigen Planungen basieren weitgehend auf eigenen Erfahrungswerten. Der Prognosezeitraum umfasst die Jahre 2011 bis 2013; darüber hinaus wurde zum Ausgleich der Inflation bei den Kosten und Umsätzen eine Wachstumsrate der nominellen Cashflows von 2,0 % (Vorjahr: 2,0 %) angenommen.

Folgende Abzinsungssätze wurden zum Ende des Geschäftsjahres verwendet:

|                           | 2010        |              | 2009        |              |
|---------------------------|-------------|--------------|-------------|--------------|
|                           | vor Steuern | nach Steuern | vor Steuern | nach Steuern |
| Zinssätze in %            |             |              |             |              |
| ZGE Salz Amerika          | 9,5         | 7,0          | 10,1        | 7,6          |
| ZGE Salz Europa           | 9,5         | 7,0          | 10,1        | 7,6          |
| ZGE Stickstoffdüngemittel | 9,5         | 7,0          | 10,1        | 7,6          |

Die Zinssätze der Zahlungsmittel generierenden Einheiten entsprechen dem gewichteten Kapitalkostensatz der K+S GRUPPE vor bzw. nach Steuern.

Der am Ende des Geschäftsjahres 2010 durchgeführte Werthaltigkeitstest bestätigte die Werthaltigkeit der bestehenden Goodwills. Nach unserer Einschätzung würden realistische Veränderungen der Grundannahmen, auf denen die Bestimmung des Nutzungswerts basiert, nicht dazu führen, dass der Buchwert der Zahlungsmittel generierenden Einheit deren Nutzungswert übersteigt.



Neben dem Goodwill wurden zum 31. Dezember 2010 folgende immaterielle Vermögenswerte ausgewiesen:

| <b>IMMATERIELLE VERMÖGENSWERTE ZUM 31.12.</b>      |              | TAB: 5.9.25  |  |
|----------------------------------------------------|--------------|--------------|--|
| in Mio. €                                          | 2010         | 2009         |  |
| Kundenbeziehungen                                  | 186,0        | 194,9        |  |
| Marken                                             | 109,4        | 103,4        |  |
| Hafenkonzessionen                                  | 30,2         | 28,2         |  |
| Emissionsrechte                                    | 9,6          | 0,1          |  |
| Selbsterstellte immaterielle Vermögenswerte        | 6,4          | 6,4          |  |
| Geleistete Anzahlungen                             | 5,1          | 2,8          |  |
| Übrige immaterielle Vermögenswerte                 | 37,7         | 33,1         |  |
| <b>Immaterielle Vermögenswerte (ohne Goodwill)</b> | <b>384,4</b> | <b>368,9</b> |  |

Im Rahmen der anlassbezogenen Prüfung der Werthaltigkeit der immateriellen Vermögenswerte mit bestimmter Nutzungsdauer wurden die Restbuchwerte der jeweiligen Vermögenswerte mit ihrem Nutzungswert zum Bilanzstichtag verglichen. Die am Ende des Geschäftsjahres 2010 durchgeführten Werthaltigkeitstests ergaben einen Wertminderungsbedarf in Höhe von 0,1 Mio. € (Vorjahr: 0,7 Mio. €), der in den sonstigen betrieblichen Aufwendungen erfasst wurde.

Markenrechte in Höhe von 100,2 Mio. € (Vorjahr: 92,3 Mio. €) sind aufgrund ihres Bekanntheitsgrads in den relevanten Absatzmärkten sowie ihrer strategischen Relevanz als Vermögenswerte mit unbestimmter Nutzungsdauer einzuordnen.

Der jährlich durchzuführende Wertminderungstest der Markenrechte mit unbestimmter Nutzungsdauer erfolgte durch Vergleich der Nutzungswerte der Marken mit den Buchwerten. Die Bestimmung des Nutzungswertes wurde auf Basis der relief-from-royalty-Methode vorgenommen, die den Markenwert aus den ersparten Lizenzaufwendungen ableitet. Dazu wurden aus der Unternehmensplanung die markenspezifischen Umsätze für die Jahre 2011 bis 2014 ermittelt; für den Zeitraum ab dem Jahr 2015 wurde eine jährlich Wachstumsrate von 2,0 % (Vorjahr: 2,0 %) unterstellt. Die anzuwendenden Lizenzpreise der Marken wurden aus Drittvergleichen abgeleitet. Durch Diskontierung der ersparten Lizenzaufwendungen mit einem risikoadjustierten Nachsteuerzinssatz von 10,0 % (Vorjahr: 11,0 %) wurde anschließend

der Nutzungswert berechnet. Der auf dieser Basis durchgeführte Wertminderungstest der Marken zum Ende des Geschäftsjahres 2010 hat zu keinem Wertminderungsaufwand geführt.

### (13) ALS FINANZINVESTITION GEHALTENE IMMOBILIEN

Zum 31. Dezember 2010 betragen die beizulegenden Zeitwerte der als Finanzinvestition gehaltenen Immobilien 26,8 Mio. € (Vorjahr: 27,2 Mio. €). Die beizulegenden Zeitwerte wurden durch interne Fachabteilungen unter Berücksichtigung lokaler Marktgegebenheiten geschätzt. Bei der Wertermittlung wurden insbesondere die lokalen Bodenrichtwerte berücksichtigt; teilweise wurde auch auf externe Wertgutachten zurückgegriffen.

### (14) FINANZANLAGEN

Die Position betrifft in Höhe von 22,5 Mio. € (Vorjahr: 20,3 Mio. €) Anteile an verbundenen Unternehmen, Ausleihungen an verbundene Unternehmen sowie Beteiligungen. In Höhe von 1,6 Mio. € (Vorjahr: 2,1 Mio. €) handelt es sich um sonstige Ausleihungen (im Wesentlichen Darlehen an Mitarbeiter) und andere Finanzanlagen. Die effektiven jährlichen Zinssätze betragen zwischen 0 und 6,25 % und die restliche Zinsbindungsdauer liegt zwischen einem und 20 Jahren.

Das maximale Ausfallrisiko zum Bilanzstichtag entspricht dem in der Bilanz angesetzten Betrag. Konkrete Anhaltspunkte für mögliche Ausfälle liegen nicht vor. Es bestehen keine erheblichen Ausfallrisikokonzentrationen.

**(15) LATENTE STEUERN**

Auf Ansatz- und Bewertungsunterschiede bei den einzelnen Bilanzposten und auf steuerliche Verlustvorräge entfallen die folgenden bilanzierten aktiven und passiven latenten Steuern:

| <b>LATENTE STEUERN</b>                  |                        | TAB: 5.9.26  |                         |              |  |
|-----------------------------------------|------------------------|--------------|-------------------------|--------------|--|
|                                         | Aktive latente Steuern |              | Passive latente Steuern |              |  |
|                                         | 2010                   | 2009         | 2010                    | 2009         |  |
| in Mio. €                               |                        |              |                         |              |  |
| Immaterielle Vermögenswerte             | 7,8                    | 6,0          | 121,7                   | 122,8        |  |
| Sachanlagen                             | 1,5                    | 1,9          | 234,0                   | 215,9        |  |
| Finanzanlagen                           | 8,8                    | 13,3         | 1,3                     | 0,9          |  |
| Vorräte                                 | 3,1                    | 4,9          | 14,7                    | 24,5         |  |
| Forderungen und sonstige Vermögenswerte | 3,9                    | 8,3          | 23,5                    | 107,1        |  |
| – davon derivative Finanzinstrumente    | 2,1                    | –            | 1,3                     | 1,2          |  |
| Rückstellungen                          | 111,5                  | 139,9        | 5,6                     | 4,0          |  |
| Verbindlichkeiten                       | 19,3                   | 56,6         | 0,8                     | 6,7          |  |
| <b>Bruttobetrag</b>                     | <b>155,9</b>           | <b>230,9</b> | <b>401,6</b>            | <b>481,9</b> |  |
| – davon langfristig                     | 133,3                  | 191,6        | 374,3                   | 441,7        |  |
| Steuerliche Verlustvorräge              | 33,5                   | 37,0         | –                       | –            |  |
| Wertberichtigungen                      | –4,0                   | –1,8         | –                       | –            |  |
| Konsolidierungen                        | 17,7                   | 0,4          | 5,3                     | –11,0        |  |
| Saldierungen                            | –145,3                 | –233,8       | –145,3                  | –233,8       |  |
| <b>Bilanzansatz (Nettobetrag)</b>       | <b>57,8</b>            | <b>32,7</b>  | <b>261,6</b>            | <b>237,1</b> |  |

Insgesamt wurde in Höhe von 20,4 Mio. € (Vorjahr: 10,3 Mio. €) auf die Aktivierung aktiver latenter Steuern verzichtet, da die Nutzung der zugrunde liegenden Verlustvorräge bzw. die Realisierung von zu versteuernden Einkommen als nicht wahrscheinlich angesehen wird. Die zugrunde liegenden Verlustvorräge betragen 151,4 Mio. € (Vorjahr: 111,7 Mio. €).

Im Berichtsjahr wurden auf die Währungsumrechnung entfallende latente Steuern in Höhe von –2,7 Mio. € (Vorjahr: 7,1 Mio. €) im erfolgsneutralen Ergebnis erfasst.

Der Bilanzansatz der latenten Steuern hat sich vom 31. Dezember 2009 auf den 31. Dezember 2010 um 0,6 Mio. € (aktive latente Steuern: 25,1 Mio. €, passive latente Steuern: 24,5 Mio. €) verändert. Unter Berücksichtigung der im Berichtsjahr erfolgsneutral verrechneten laten-

ten Steuern (–2,7 Mio. €) und der Effekte aus der Währungsumrechnung (–17,3 Mio. €) ergibt sich der in der Gewinn- und Verlustrechnung ausgewiesene latente Steuerertrag in Höhe von 20,6 Mio. €.

Temporäre Unterschiede in Höhe von 490,6 Mio. € (Vorjahr: 174,0 Mio. €) stehen in Zusammenhang mit Anteilen an Tochterunternehmen, sodass wegen IAS 12.39 auf diese Differenzen keine passiven latenten Steuern gebildet werden dürfen.

**(16) VORRÄTE**

| <b>VORRÄTE</b>                              |           | TAB: 5.9.27 |              |              |
|---------------------------------------------|-----------|-------------|--------------|--------------|
|                                             |           |             | 2010         | 2009         |
|                                             | in Mio. € |             |              |              |
| Roh-, Hilfs- und Betriebsstoffe             |           |             | 172,9        | 164,6        |
| Unfertige Erzeugnisse, unfertige Leistungen |           |             | 25,7         | 28,1         |
| Fertige Erzeugnisse und Waren               |           |             | 530,1        | 477,3        |
| Geleistete Anzahlungen                      |           |             | 11,5         | 10,4         |
| <b>Vorräte</b>                              |           |             | <b>740,2</b> | <b>680,4</b> |

Vorräte in Höhe von 39,9 Mio. € (Vorjahr: 151,0 Mio. €) wurden zum Nettoveräußerungswert angesetzt. In der Berichtsperiode wurden Wertminderungen wegen des Ansatzes zum Nettoveräußerungswert in Höhe von 9,8 Mio. € (Vorjahr: 34,7 Mio. €) vorgenommen.

**(17) FORDERUNGEN UND SONSTIGE VERMÖGENSWERTE**

| <b>FORDERUNGEN UND SONSTIGE VERMÖGENSWERTE</b>  |                |                                      |                |                                      |
|-------------------------------------------------|----------------|--------------------------------------|----------------|--------------------------------------|
|                                                 | TAB: 5.9.28    |                                      |                |                                      |
|                                                 | 2010           | davon<br>Restlaufzeit<br>über 1 Jahr | 2009           | davon<br>Restlaufzeit<br>über 1 Jahr |
| in Mio. €                                       |                |                                      |                |                                      |
| Forderungen aus Lieferungen und Leistungen      | 949,8          | —                                    | 849,6          | —                                    |
| Forderungen gegen verbundene Unternehmen        | 17,0           | —                                    | 8,7            | —                                    |
| Sonstige Vermögenswerte                         | 200,3          | 43,0                                 | 398,0          | 254,5                                |
| – davon derivative Finanzinstrumente            | 41,8           | 6,4                                  | 19,6           | —                                    |
| – davon Wandelschuldverschreibung Potash One    | 20,2           | —                                    | —              | —                                    |
| – davon Erstattungsanspruch Anleihe Morton Salt | 18,9           | 18,9                                 | 114,2          | 113,2                                |
| <b>Forderungen und sonstige Vermögenswerte</b>  | <b>1.167,1</b> | <b>43,0</b>                          | <b>1.256,3</b> | <b>254,5</b>                         |

Die Wertberichtigungen haben sich wie folgt entwickelt:

| <b>WERTBERICHTIGUNGEN</b>        |             |             |
|----------------------------------|-------------|-------------|
|                                  | TAB: 5.9.29 |             |
|                                  | 2010        | 2009        |
| in Mio. €                        |             |             |
| Stand am 1. Januar               | 36,1        | 38,3        |
| Veränderung Konsolidierungskreis | —           | 2,6         |
| Zuführung                        | 8,0         | 16,3        |
| Auflösung                        | 3,8         | 13,1        |
| Verbrauch                        | 4,3         | 8,0         |
| <b>Stand am 31. Dezember</b>     | <b>36,0</b> | <b>36,1</b> |

Für den Forderungsbestand aus Lieferungen und Leistungen wurden zum 31. Dezember 2010 Wertberichtigungen in Höhe von 24,9 Mio. € (Vorjahr: 24,5 Mio. €) ausgewiesen. 11,1 Mio. € (Vorjahr: 11,6 Mio. €) resultieren aus Wertberichtigungen auf übrige Forderungen und sonstige Vermögenswerte. Die Wertminderungen beruhen auf Erwartungen für das Ausfallrisiko. Soweit Forderungen eine Restlaufzeit von mehr als drei Monaten aufweisen, werden

sie basierend auf den Geldmarktsätzen zum Bilanzstichtag abgezinst. Insoweit unterliegen die Forderungen einem zinsbedingten Risiko und damit einer Änderung des beizulegenden Zeitwerts.

Zum 31. Dezember 2010 wurden Abzinsungen für un- bzw. unterverzinsliche Forderungen in Höhe von 0,2 Mio. € (Vorjahr: 0,3 Mio. €) vorgenommen.

Die folgende Tabelle gibt Informationen über das Ausmaß der in den Positionen „Forderungen aus Lieferungen und Leistungen“ sowie „Übrige Forderungen und nicht derivative finanzielle Vermögenswerte“ enthaltenen Ausfallrisiken.

| <b>AUSFALLRISIKEN</b>                                              |             |                                                                          |                                                                        |                        |                            |                |
|--------------------------------------------------------------------|-------------|--------------------------------------------------------------------------|------------------------------------------------------------------------|------------------------|----------------------------|----------------|
|                                                                    | TAB: 5.9.30 |                                                                          |                                                                        |                        |                            |                |
|                                                                    | Buchwert    | davon zum<br>Stichtag<br>weder<br>überfällig<br>noch wert-<br>berichtigt | davon zum Stichtag nicht wertberichtigt,<br>allerdings überfällig seit |                        |                            |                |
|                                                                    |             |                                                                          | < 30 Tagen                                                             | > 31 und<br>< 90 Tagen | > 91 und<br>< 180<br>Tagen | > 180<br>Tagen |
| in Mio. €                                                          |             |                                                                          |                                                                        |                        |                            |                |
| <b>2010</b>                                                        |             |                                                                          |                                                                        |                        |                            |                |
| Forderungen aus Lieferungen und Leistungen                         | 949,8       | 760,3                                                                    | 44,7                                                                   | 10,7                   | 0,1                        | 2,1            |
| Übrige Forderungen und nicht derivative finanzielle Vermögenswerte | 148,6       | 131,1                                                                    | 3,6                                                                    | 0,4                    | 0,1                        | 0,1            |
| <b>2009</b>                                                        |             |                                                                          |                                                                        |                        |                            |                |
| Forderungen aus Lieferungen und Leistungen                         | 849,6       | 572,9                                                                    | 22,3                                                                   | 8,3                    | 3,9                        | 1,4            |
| Übrige Forderungen und nicht derivative finanzielle Vermögenswerte | 363,1       | 305,9                                                                    | 3,2                                                                    | 1,4                    | 1,7                        | 1,0            |

Zum 31. Dezember 2010 bestanden in unwesentlichem Maße Forderungen aus Lieferungen und Leistungen, bei denen die Vertragsbedingungen neu verhandelt wurden und die ansonsten wertberichtigt oder überfällig wären.

Das Forderungsmanagement ist darauf ausgelegt, alle Außenstände pünktlich und vollständig einzuziehen sowie den Verlust von Forderungen zu vermeiden. Die Fakturierung erfolgt tagesaktuell und die Fakturdaten werden online auf die Debitorenkonten übertragen. Die laufende Überwachung der Außenstände erfolgt systemunterstützt entsprechend den mit den Kunden vereinbarten Zahlungszielen. Diese belaufen sich überwiegend auf 10 bis 180 Tage; auf bestimmten Märkten sind auch längere Zahlungsziele üblich. Rückständige Zahlungen werden in regelmäßigen zweiwöchigen Intervallen angemahnt.

Unter dem Ausfallrisiko wird das Risiko verstanden, dass Vertragspartner ihren vertraglichen Zahlungsverpflichtungen nicht nachkommen. Kundenforderungen werden weitestgehend durch entsprechende Versicherungen und anderweitige Sicherungsinstrumente gegen dieses Risiko abgesichert. Hierdurch wird erreicht, dass bei einem eventuellen Forderungsausfall nur ein geringer Teilverlust entsteht. Kunden, für die eine Sicherung nicht zu erreichen ist, unterliegen einer internen Bonitätsprüfung. Wesentliche Risikokonzentrationen bei den Forderungen bestehen nicht.

Das maximale Ausfallrisiko der Forderungen und sonstigen Vermögenswerte wird durch den in der Bilanz ausgewiesenen Buchwert wiedergegeben. Am 31. Dezember 2010 betrug die maximale Ausfallsumme für den sehr unwahrscheinlichen gleichzeitigen Ausfall aller ungesicherten Forderungen 210,9 Mio. € (Vorjahr: 181,1 Mio. €).

### (18) DERIVATIVE FINANZINSTRUMENTE

Das Währungs- und Zinsmanagement wird für alle Konzerngesellschaften zentral vorgenommen. Dies gilt auch für den Einsatz derivativer Finanzinstrumente, z.B. solcher, die die Begrenzung bestimmter Kosten zum Ziel haben. Der Einsatz derivativer Finanzinstrumente ist durch Leitlinien und Verfahrensanweisungen geregelt. Eine strikte Funktionstrennung von Handel, Abwicklung und Kontrolle ist sichergestellt. Die derivativen Finanzinstrumente werden nur mit Banken guter Bonität gehandelt, die mit geeigneten Instrumenten fortlaufend überwacht wird. Als Teil des Managements des Ausfallrisikos ist der Gesamtbestand an derivativen Finanzinstrumenten grundsätzlich auf mehrere Banken verteilt. Die Höhe des Ausfallrisikos beschränkt sich maximal auf die aktivische Bilanzposition der Derivate.

Das Zinsmanagement verfolgt das Ziel, Risiken aus steigenden Zinsbelastungen durch Veränderungen des allgemeinen Zinsniveaus zu begrenzen. Hierzu sind aktuell keine Gegensteu-

erungsmaßnahmen erforderlich, da die Finanzverbindlichkeiten (Anleihe) nahezu komplett einen festen Zinssatz aufweisen.

Der Einsatz von Derivaten zur Währungssicherung verfolgt das Ziel, Risiken, die für die operative Geschäftstätigkeit aus Wechselkursänderungen resultieren können, zu begrenzen. Die wesentlichen Wechselkursrisiken bestehen gegenüber dem US-Dollar sowie in geringem Umfang gegenüber dem kanadischen Dollar, dem britischen Pfund sowie dem chilenischen Peso. Sicherungsgeschäfte werden auf fakturierte Forderungen und auf erwartete Nettopositionen auf der Grundlage geplanter Umsätze abgeschlossen. Die Nettopositionen werden hierbei anhand der Erlös- und Kostenplanung unter Anwendung von Sicherheitsabschlägen bestimmt und fortlaufend aktualisiert, um Über- oder Untersicherungen zu vermeiden. Im Rahmen der Translationssicherung geplanter Ergebnisse erfolgt die Bestimmung der Nettoposition ausgehend vom EBIT I in analoger Weise.

Die Laufzeit der eingesetzten Sicherungsgeschäfte kann für die Absicherung erwarteter Positionen sowie im Rahmen der Translationssicherung bis zu drei Jahre betragen. Ziel ist eine „worst-case“-Absicherung, die gleichzeitig eine Wahrnehmung möglicher Chancen aus der Marktentwicklung zulässt. Hierzu werden schwerpunktmäßig einfache Optionen (Plain Vanilla-Optionen) sowie teilweise Compound-Optionen eingesetzt. Die Compound-Optionen bestehen aus einer Option auf eine einfache Option, die zu einem späteren Zeitpunkt gegen einen festgelegten Betrag erworben werden kann. Für einen Teilbereich der optional abgesicherten Position wird die Partizipation an einer günstigen Marktentwicklung durch den Verkauf von einfachen Optionen begrenzt. Neben dem selektiven Einsatz von Termingeschäften dient dies u.a. der Reduzierung der Prämienaufwendungen. Die Laufzeiten der Sicherungsgeschäfte auf fakturierte Forderungen betragen entsprechend den vereinbarten Zahlungszielen weniger als ein Jahr.

Die beschriebenen Sicherungsgeschäfte auf erwartete Nettopositionen kommen im Geschäftsbereich Kali- und Magnesiumprodukte für US-Dollar-Positionen zum Einsatz. Sicherungsgeschäfte für Translationsrisiken aus geplanten Ergebnissen werden für den Geschäftsbereich Salz abgeschlossen. Sicherungsgeschäfte, die sich auf fakturierte Forderungen beziehen, werden in den Geschäftsbereichen Kali- und Magnesiumprodukte und Stickstoffdüngemittel sowie Salz abgeschlossen.

Für die Absicherung von Frachtraten für die Jahre 2010 bis 2013 wurden selektiv Festgeschäfte (sog. Swaps) abgeschlossen, die einen Differenzausgleich zwischen den vereinbarten Festpreisen und den Marktpreisen bei jeweiliger Fälligkeit vorsehen. Basis hierfür ist der „Baltic Panamax Index“.

Je nach Markteinschätzung werden selektiv auch Derivate eingesetzt, die auf die Begrenzung von Energiekostensteigerungen abzielen. Hierbei kommen grundsätzlich Optionen und Swaps auf Basis des Ölpreises (Fuel Oil) zum Einsatz. Zum 31. Dezember 2010 bestanden keine Sicherungsgeschäfte mehr.

Der Handel mit allen vorgenannten Derivaten erfolgt ausschließlich im OTC-Geschäft. Bei Devisentermingeschäften erfolgt aufgrund der Transparenz des Markts, nach Vergleich mit den Interbankenkonditionen über ein Referenzsystem, der Abschluss direkt mit einer Bank. Für den Handel mit Optionen liegt ein derartig transparenter Markt nicht vor. Daher werden bei allen wesentlichen Optionsgeschäften Quotierungen von mehreren Banken eingeholt, um das Geschäft mit der am besten quotierenden Bank abschließen zu können.

Bei Devisentermingeschäften besteht ein Marktwertisiko zum jeweiligen Stichtag; diesem stehen jedoch gegenläufige Effekte aus der währungsbedingten Forderungsbewertung gegenüber.

Die ermittelten Marktwerte entsprechen dem Wert bei vorzeitiger fiktiver Auflösung zum Bilanzstichtag. Die Ermittlung erfolgt auf Basis anerkannter, von den Marktteilnehmern üblicherweise angewandter finanzmathematischer Methoden. Diesen Berechnungen liegen insbesondere die folgenden am Bilanzstichtag geltenden Parameter zugrunde:

- + die Devisenkassakurse der betreffenden Währungen,
- + die vereinbarten Sicherungs- bzw. Ausübungskurse,
- + die gehandelten Volatilitäten, d.h. die erwartete Schwankungsbreite der betreffenden Devisenkurse und
- + das Zinsniveau der betreffenden Währungen.

IAS 39 sieht die Möglichkeit vor, Sicherungsbeziehungen zwischen Grundgeschäften und derivativen Finanzinstrumenten zu bilden. Hierauf wird jedoch grundsätzlich verzichtet (siehe ‚Erläuterungen zur Gewinn- und Verlustrechnung und Gesamtergebnisrechnung‘ auf den Seiten 184 ff.).

Am 31. Dezember 2010 bestanden folgende derivativen Devisenfinanzgeschäfte:

| <b>DERIVATIVE DEISENFINANZGESCHÄFTE</b> |                                | TAB: 5.9.31            |                                |                        |
|-----------------------------------------|--------------------------------|------------------------|--------------------------------|------------------------|
|                                         | 2010                           |                        | 2009                           |                        |
|                                         | Nominal-<br>werte <sup>1</sup> | Beizuleg.<br>Zeitwerte | Nominal-<br>werte <sup>1</sup> | Beizuleg.<br>Zeitwerte |
| in Mio. €                               |                                |                        |                                |                        |
| Devisentermingeschäfte GBP in 2010      |                                |                        |                                |                        |
| – davon mit Fälligkeit in 2010          | –                              | –                      | 2,8                            | –                      |
| – davon mit Fälligkeit in 2011          | 8,6                            | 0,1                    | –                              | –                      |
| Devisentermingeschäfte USD/CLP in 2010  |                                |                        |                                |                        |
| – davon mit Fälligkeit in 2011          | 14,4                           | 0,2                    | –                              | –                      |
| Devisentermingeschäfte USD              |                                |                        |                                |                        |
| – davon mit Fälligkeit in 2010          | –                              | –                      | 60,7                           | –0,5                   |
| – davon mit Fälligkeit in 2011          | 243,8                          | 2,1                    | –                              | –                      |
| Gekaufte einfache Devisenoptionen USD   |                                |                        |                                |                        |
| – davon mit Fälligkeit in 2010          | –                              | –                      | 569,6                          | 19,2                   |
| – davon mit Fälligkeit in 2011          | 629,7                          | 27,3                   | –                              | –                      |
| – davon mit Fälligkeit in 2012          | 131,2                          | 6,4                    | –                              | –                      |
| Verkaufte einfache Devisenoptionen USD  |                                |                        |                                |                        |
| – davon mit Fälligkeit in 2010          | –                              | –                      | 70,2                           | –1,2                   |
| – davon mit Fälligkeit in 2011          | 485,5                          | –4,4                   | –                              | –                      |
| – davon mit Fälligkeit in 2012          | 147,3                          | –4,6                   | –                              | –                      |
| <b>Devisengeschäfte insgesamt</b>       | <b>1.660,5</b>                 | <b>27,1</b>            | <b>703,3</b>                   | <b>17,5</b>            |

<sup>1</sup> Umgerechnet in Euro mit gewichteten Sicherungskursen.

Im Folgenden wird dargestellt, wie sich die vorgenannten Marktwerte unter Annahme eines anderen Wechselkurses zum Bilanzstichtag entwickelt hätten:

Die zur Sicherung operativer USD-Eingänge eingesetzten einfachen Optionen hätten sich bei einer Änderung der Kassakurse am Bilanzstichtag um  $\pm 10\%$  wie folgt verändert:

Bei einem Kurs von 1,20258 USD/EUR ( $-10\%$ ) hätte sich der ausgewiesene Marktwert um 67,9 Mio. € verringert. Bei 1,46982 USD/EUR ( $+10\%$ ) wäre der Marktwert um 76,0 Mio. € gestiegen. Der im Vorjahr ausgewiesene Marktwert hätte sich bei einem Kurs von 1,2965 USD/EUR

(–10 %) um 26,4 Mio. € verringert. Bei 1,5847 USD/EUR (+10 %) wäre der Marktwert des Vorjahres um 46,5 Mio. € gestiegen.

Die zur Absicherung von Frachten eingesetzten Swaps bestanden zum Bilanzstichtag mit einem Nominal von 540 Charterdays auf den „Baltic Panamax Index“ und einem beizulegenden Zeitwert von –5,2 Mio. €. Bei einer Kursänderung des Referenzindexes für die Frachtersicherung um ± 10 % hätte sich der Marktwert um 0,6 Mio. € erhöht bzw. verringert.

Die genannten Marktwertveränderungen hätten zu einer entsprechenden Erhöhung bzw. Verringerung des unbereinigten Konzernergebnisses vor Steuern sowie des Eigenkapitals geführt.

#### **(19) EIGENKAPITAL**

Die Entwicklung der einzelnen Posten des Eigenkapitals ist gesondert auf der Seite 165 dargestellt.

#### **(20) GEZEICHNETES KAPITAL**

Das gezeichnete Kapital der K+S AKTIENGESELLSCHAFT beträgt 191,4 Mio. € und ist in 191,4 Mio. nennwertlose Inhaber-Stückaktien eingeteilt. Im Geschäftsjahr 2010 befanden sich durchschnittlich 191,34 Mio. (Vorjahr: 166,15 Mio.) Stückaktien im Umlauf.

Mit Beschluss der Hauptversammlung vom 14. Mai 2008 wurde der Vorstand ermächtigt, mit Zustimmung des Aufsichtsrats das Grundkapital der K+S AKTIENGESELLSCHAFT bis zum 9. Mai 2011 gegen Bar- oder Sacheinlage einmal oder mehrmals, insgesamt jedoch um höchstens 82,5 Mio. € durch Ausgabe von höchstens 82,5 Mio. neuen, auf den Inhaber lautenden Stückaktien zu erhöhen (Genehmigtes Kapital). Im Zuge der Kapitalerhöhung wurde durch Beschluss des Aufsichtsrats vom 25. November 2009 die Höhe des genehmigten Kapitals angepasst. Der Vorstand ist nunmehr ermächtigt, mit Zustimmung des Aufsichtsrats das Grundkapital der K+S AKTIENGESELLSCHAFT bis zum 9. Mai 2011 gegen Bar- oder Sacheinlage einmal oder mehrmals, insgesamt jedoch um höchstens 56,1 Mio. € durch Ausgabe von höchstens 56,1 Mio. neuen, auf den Inhaber lautenden Stückaktien zu erhöhen (Genehmigtes Kapital).

Bei Durchführung einer Kapitalerhöhung ist den Aktionären grundsätzlich ein Bezugsrecht einzuräumen. Der Vorstand kann mit Zustimmung des Aufsichtsrats das gesetzliche Bezugsrecht der Aktionäre in den folgenden Fällen ausschließen, und zwar insgesamt bis zu einem anteiligen Betrag des Grundkapitals von 41,25 Mio. € (entsprechend 41,25 Mio. Stückaktien):

- + für Spitzenbeträge, die infolge des Bezugsrechts entstehen;
- + bei Kapitalerhöhungen gegen Bareinlagen, wenn die Kapitalerhöhung 10 % des Grundkapitals nicht übersteigt und der Ausgabebetrag für die neuen Aktien den maßgeblichen Börsenpreis nicht wesentlich unterschreitet; als maßgeblicher Börsenpreis gilt dabei der gewichtete Durchschnitt der Börsenpreise der Aktien im Computer-Handelssystem XETRA (oder eines an dessen Stelle tretenden, funktional vergleichbaren Nachfolgesystems) während der letzten zehn Börsentage vor Zeichnung der neuen Aktien;
- + bei Kapitalerhöhungen gegen Sacheinlagen, wenn die neuen Aktien beim Erwerb eines Unternehmens oder einer Unternehmensbeteiligung als Gegenleistung eingesetzt werden sollen.

Der Vorstand ist ferner ermächtigt, mit Zustimmung des Aufsichtsrats die weiteren Einzelheiten einer Kapitalerhöhung aus dem genehmigten Kapital festzulegen.

Entsprechend dem Beschluss der Hauptversammlung vom 11. Mai 2010 wurde der Vorstand ermächtigt, bis zum 10. Mai 2015 eigene Aktien bis zu 10 % des Grundkapitals zu erwerben. Der Erwerb erfolgt über die Börse oder mittels eines an alle Aktionäre gerichteten öffentlichen Kaufangebots. Im Falle des Erwerbs über die Börse darf der von der Gesellschaft gezahlte Kaufpreis je Aktie (ohne Erwerbsnebenkosten) den maßgeblichen Börsenpreis um nicht mehr als 10 % über- oder unterschreiten. Im Falle eines an alle Aktionäre gerichteten öffentlichen Kaufangebots darf der angebotene Kaufpreis je Aktie (ohne Erwerbsnebenkosten) den maßgeblichen Börsenpreis um nicht mehr als 10 % über- oder unterschreiten.

Die Verwendung der Aktien, die aufgrund der beschriebenen Ermächtigung oder einer früher von der Hauptversammlung nach § 71 Abs. 1 Nr. 8 AktG erteilten Ermächtigung erworben wurden, erfolgt gemäß den im Hauptversammlungsbeschluss genannten Zwecken. Mit der Ermächtigung vom 11. Mai 2010 wurde die auf der Hauptversammlung vom 13. Mai 2009 erteilte Ermächtigung zum Erwerb eigener Aktien aufgehoben. Im Geschäftsjahr 2010 hat die K+S AKTIENGESELLSCHAFT von der Ermächtigung keinen Gebrauch gemacht.



**GEZEICHNETES KAPITAL**

TAB: 5.9.32

|                                  | im Umlauf<br>befindliche aus-<br>stehende Aktien | Gezeichnetes<br>Kapital |
|----------------------------------|--------------------------------------------------|-------------------------|
| in Mio. €                        |                                                  |                         |
| 31.12.2008                       | 165,0                                            | 165,0                   |
| Kapitalerhöhung gegen Bareinlage | 26,4                                             | 26,4                    |
| 31.12.2009                       | 191,4                                            | 191,4                   |
| <b>31.12.2010</b>                | <b>191,4</b>                                     | <b>191,4</b>            |

**(21) ANDERE RÜCKLAGEN UND BILANZGEWINN**

In der Konzernbilanz werden andere Rücklagen und der Bilanzgewinn in einer Position zusammengefasst. Die Entwicklung der Gewinnrücklagen einschließlich Bilanzgewinn und der Rücklage für Unterschiedsbeträge aus der Währungsumrechnung wird in der Entwicklung des Eigenkapitals gesondert dargestellt.

Für die Ausschüttung der Dividende ist der Jahresabschluss der K+S AKTIENGESELLSCHAFT maßgebend, der nach deutschem Handelsrecht aufgestellt wird. Es ist beabsichtigt, der Hauptversammlung vorzuschlagen, eine Dividende von 1,00 € pro Stückaktie (Vorjahr: 0,20 €), d. h. insgesamt 191,4 Mio. € (Vorjahr: 38,3 Mio. €), an die Aktionäre auszuschütten. Zum Bilanzstichtag ergibt sich folgender Bilanzgewinn im Einzelabschluss der K+S AKTIENGESELLSCHAFT:

**BILANZGEWINN K+S AKTIENGESELLSCHAFT**

TAB: 5.9.33

|                                                            | 2010         | 2009        |
|------------------------------------------------------------|--------------|-------------|
| in Mio. €                                                  |              |             |
| Bilanzgewinn K+S Aktiengesellschaft am 1. Januar           | 46,2         | 399,4       |
| Dividendenausschüttung für das Vorjahr                     | -38,3        | -396,0      |
| Jahresüberschuss K+S Aktiengesellschaft                    | 217,8        | 42,8        |
| <b>Bilanzgewinn K+S Aktiengesellschaft am 31. Dezember</b> | <b>225,7</b> | <b>46,2</b> |

**(22) ANGABEN ZUM KAPITALMANAGEMENT****KAPITALMANAGEMENT**

TAB: 5.9.34

|                            | 2010           | 2009           |
|----------------------------|----------------|----------------|
| in Mio. €                  |                |                |
| Eigenkapital               | 2.651,6        | 2.094,6        |
| Langfristiges Fremdkapital | 1.919,1        | 2.235,7        |
| Kurzfristiges Fremdkapital | 1.003,0        | 886,8          |
| <b>Bilanzsumme</b>         | <b>5.573,7</b> | <b>5.217,1</b> |
| Eigenkapitalquote          | 47,6%          | 40,1%          |
| Fremdkapitalquote          | 52,4%          | 59,9%          |

Das Eigenkapital ist im Vergleich zum Vorjahr um 557,0 Mio. € angestiegen. Die Erhöhung des Eigenkapitals beruht im Wesentlichen auf dem positiven Konzernergebnis des Geschäftsjahres 2010 (nach Steuern und Anteilen Dritter) in Höhe von 448,6 Mio. €; dem steht die im Mai 2010 erfolgte Dividendenausschüttung in Höhe von 38,3 Mio. € gegenüber. Des Weiteren waren erfolgsneutrale Veränderungen des Eigenkapitals zu berücksichtigen, die aus der Währungsumrechnung von Tochterunternehmen in funktionaler Fremdwährung resultieren (im Wesentlichen us-Dollar und kanadische Dollar). Der Rückgang des langfristigen Fremdkapitals ist im Wesentlichen auf die Tilgung von Finanzverbindlichkeiten zurückzuführen.

Potenzielle Maßnahmen zur Beeinflussung der Kapitalstruktur können sowohl das Eigenkapital (z. B. durch Kapitalerhöhung, Aktienrückkauf, Dividendenausschüttung) als auch das Fremdkapital (z. B. durch Kreditaufnahme/-tilgung) betreffen. Der zum 31. Dezember 2010 erreichte Wert der Eigenkapitalquote übertrifft unseren Zielkorridor von ca. 35 bis 45 %.

**(23) RÜCKSTELLUNGEN**

Die Entwicklung der Rückstellungen ist gesondert auf den Seiten 170 f. dargestellt.

**(24) RÜCKSTELLUNGEN FÜR PENSIONEN UND ÄHNLICHE VERPFLICHTUNGEN**

Die Rückstellungen für Pensionen und ähnliche Verpflichtungen setzen sich aus folgenden Positionen zusammen:

| <b>RÜCKSTELLUNGEN FÜR PENSIONEN UND ÄHNLICHE VERPFLICHTUNGEN</b> |              | TAB: 5.9.35  |  |
|------------------------------------------------------------------|--------------|--------------|--|
|                                                                  | 2010         | 2009         |  |
| in Mio. €                                                        |              |              |  |
| Rückstellungen für Pensionszusagen                               | 114,7        | 136,0        |  |
| Rückstellungen für sonstige pensionsähnliche Leistungszusagen    | 70,1         | 58,3         |  |
| <b>Rückstellungen für Pensionen und ähnliche Verpflichtungen</b> | <b>184,8</b> | <b>194,3</b> |  |

Die Vorjahreszahlen wurden aufgrund der endgültigen Kaufpreisallokation von MORTON SALT angepasst. Weitere Erläuterungen finden sich unter ‚Endgültige Kaufpreisallokation MORTON SALT und Anpassung Vorjahreszahlen‘ auf den Seiten 174 ff.

Die Rückstellungen für Pensionszusagen betreffen in Höhe von 78,0 Mio. € (Vorjahr: 87,7 Mio. €) Altersversorgungssysteme im Inland. Dabei handelt es sich im Wesentlichen um Direktzusagen aus mittlerweile geschlossenen Versorgungssystemen. Der überwiegende Teil der inländischen Verpflichtungen betrifft Pensionäre. Im europäischen Ausland bestanden zum Bilanzstichtag weitere Rückstellungen für Pensionszusagen in Höhe von 3,2 Mio. € (Vorjahr: 3,4 Mio. €).

Des Weiteren bestehen Pensionszusagen sowie pensionsähnliche Leistungszusagen in den USA, Kanada und auf den Bahamas. Die Höhe der Pensionszusagen hängt u. a. vom Einkommen und der Dauer der Beschäftigung ab. Zum 31. Dezember 2010 wurden hierfür Rückstellungen in Höhe von 33,5 Mio. € (Vorjahr: 44,9 Mio. €) gebildet. Die pensionsähnlichen Leistungszusagen umfassen im Wesentlichen Leistungen für Krankheitskosten und Lebensversicherungen. Die Rückstellungen für diese Zusagen am 31. Dezember 2010 betragen 70,1 Mio. € (Vorjahr: 58,3 Mio. €).

Die Höhe der Rückstellungen für Pensionen und ähnliche Verpflichtungen wird als versicherungsmathematischer Barwert der erdienten Versorgungsansprüche (Anwartschaftsbarwert) berechnet. Ein Teil der inländischen Versorgungsansprüche ist über externes Planvermögen im Rahmen eines Contractual Trust Arrangements (CTA) finanziert. Des Weiteren sind die

Pensionszusagen in Kanada und auf den Bahamas ebenfalls teilweise mit Planvermögen ausfinanziert. Bei der Berechnung der Rückstellungen für Pensionen und ähnliche Verpflichtungen zum Bilanzstichtag wurden folgende Bewertungsannahmen getroffen:

| <b>VERSICHERUNGSMATHEMATISCHE ANNAHMEN<br/>BEWERTUNG VERSORGUNGSZUSAGEN</b> |        | TAB: 5.9.36 |        |         |  |
|-----------------------------------------------------------------------------|--------|-------------|--------|---------|--|
|                                                                             | 2010   |             | 2009   |         |  |
|                                                                             | Inland | Ausland     | Inland | Ausland |  |
| in %, gewichteter Durchschnitt                                              |        |             |        |         |  |
| <b>Pensionszusagen</b>                                                      |        |             |        |         |  |
| Rechnungszins                                                               | 4,9    | 5,2         | 5,3    | 6,1     |  |
| Erwartete jährliche Einkommenssteigerung                                    | 1,8    | 3,6         | 1,8    | 4,0     |  |
| Erwartete jährliche Rentensteigerung                                        | 1,5    | 1,2         | 1,5    | 1,0     |  |
| <b>Sonstige pensionsähnliche Leistungszusagen</b>                           |        |             |        |         |  |
| Rechnungszins                                                               | –      | 5,3         | –      | 6,0     |  |

Für die Ermittlung des Pensionsaufwands des aktuellen Geschäftsjahrs wurden die folgenden – zum Ende des vergangenen Geschäftsjahrs festgelegten – versicherungsmathematischen Annahmen verwendet:

| <b>VERSICHERUNGSMATHEMATISCHE ANNAHMEN<br/>AUFWAND VERSORGUNGSZUSAGEN</b> |        | TAB: 5.9.37 |        |         |  |
|---------------------------------------------------------------------------|--------|-------------|--------|---------|--|
|                                                                           | 2010   |             | 2009   |         |  |
|                                                                           | Inland | Ausland     | Inland | Ausland |  |
| in %, gewichteter Durchschnitt                                            |        |             |        |         |  |
| <b>Pensionszusagen</b>                                                    |        |             |        |         |  |
| Rechnungszins                                                             | 5,3    | 6,1         | 5,3    | 6,1     |  |
| Erwartete jährliche Einkommenssteigerung                                  | 1,8    | 4,0         | 1,8    | 4,0     |  |
| Erwartete jährliche Rentensteigerung                                      | 1,5    | 1,0         | 1,5    | 1,0     |  |
| Erwartete Rendite des Planvermögens                                       | 6,0    | 8,0         | 6,0    | 8,0     |  |
| <b>Sonstige pensionsähnliche Leistungszusagen</b>                         |        |             |        |         |  |
| Rechnungszins                                                             | –      | 6,0         | –      | 6,0     |  |

Bei den pensionsähnlichen Zusagen für gesundheitsfürsorgliche Leistungen wurden zudem folgende – im Zeitablauf fallende – jährliche Kostensteigerungen unterstellt:

- + Kanada: 8,3 % / 5,0 % ab 2015 (Vorjahr: 9,0 % / 5,0 % ab 2015)
- + USA: 6,0 % / 5,0 % ab 2012 (Vorjahr: 7,0 % / 5,0 % ab 2012)
- + Bahamas: 4,5 % (Vorjahr: 4,5 %)

Die erwartete Rendite des Planvermögens basiert auf den erwarteten langfristigen Erträgen aus den zu Beginn des Geschäftsjahres im Planvermögen enthaltenen Wertpapieren unter Berücksichtigung etwaiger Neudotierungen. Hierbei werden u. a. die Allokation des Planvermögens auf die einzelnen Asset-Klassen, die Zins- und Dividendenerwartungen sowie die aktuellen ökonomischen Rahmenbedingungen berücksichtigt. Zum Ende des Geschäftsjahres 2010 ergibt sich folgende Aufteilung des Planvermögens:

**AUFTEILUNG PLANVERMÖGEN NACH VERMÖGENSKATEGORIEN** TAB: 5.9.38

|                                     | 2010         |              |              | 2009         |             |              |
|-------------------------------------|--------------|--------------|--------------|--------------|-------------|--------------|
|                                     | gesamt       | Inland       | Ausland      | gesamt       | Inland      | Ausland      |
| in Mio. €                           |              |              |              |              |             |              |
| Anleihen                            | 100,6        | 60,6         | 40,0         | 86,8         | 53,3        | 33,5         |
| Aktien                              | 127,8        | 34,1         | 93,7         | 114,7        | 37,3        | 77,4         |
| Flüssige Mittel und Sonstiges       | 11,8         | 11,6         | 0,2          | 8,1          | 7,0         | 1,1          |
| <b>Planvermögen am 31. Dezember</b> | <b>240,2</b> | <b>106,3</b> | <b>133,9</b> | <b>209,6</b> | <b>97,6</b> | <b>112,0</b> |

Die Position „Flüssige Mittel und Sonstiges“ umfasst u. a. verpfändete Rückdeckungsversicherungen.

Versicherungsmathematische Gewinne bzw. Verluste werden nur in der Gewinn- und Verlustrechnung erfasst, sofern sie den 10 %-Korridor übersteigen (Maximum aus 10 % des Verpflichtungsumfanges und 10 % des Planvermögens). Der übersteigende Betrag wird ergebniswirksam über die durchschnittliche Restdienstzeit der Aktiven verteilt.

Die nachfolgenden Tabellen zeigen die Entwicklung des Anwartschaftsbarwerts und des Planvermögens:

**ENTWICKLUNG ANWARTSCHAFTSBARWERT** TAB: 5.9.39

|                                                     | 2010         |              |              | 2009         |              |              |
|-----------------------------------------------------|--------------|--------------|--------------|--------------|--------------|--------------|
|                                                     | gesamt       | Inland       | Ausland      | gesamt       | Inland       | Ausland      |
| in Mio. €                                           |              |              |              |              |              |              |
| Anwartschaftsbarwert am 1. Januar                   | 406,7        | 188,5        | 218,2        | 196,1        | 193,4        | 2,7          |
| Änderungen des Konsolidierungskreises               | –            | –            | –            | 205,8        | –            | 205,8        |
| Dienstzeitaufwand                                   | 9,5          | 2,4          | 7,1          | 4,2          | 1,6          | 2,6          |
| Zinsaufwand                                         | 23,3         | 9,6          | 13,7         | 12,9         | 9,9          | 3,0          |
| Plananpassungen/Planabgeltungen                     | –16,0        | 1,6          | –17,6        | –0,3         | –            | –0,3         |
| Pensionszahlungen                                   | –23,1        | –15,0        | –8,1         | –16,9        | –15,5        | –1,4         |
| Versicherungsmathematische Gewinne (-)/Verluste (+) | 24,6         | 8,3          | 16,3         | –0,9         | –0,9         | –            |
| Wechselkursänderungen                               | 27,7         | –            | 27,7         | 5,8          | –            | 5,8          |
| <b>Anwartschaftsbarwert am 31. Dezember</b>         | <b>452,7</b> | <b>195,4</b> | <b>257,3</b> | <b>406,7</b> | <b>188,5</b> | <b>218,2</b> |

Die versicherungsmathematischen Verluste der Berichtsperiode in Höhe von 24,6 Mio. € resultieren im Wesentlichen aus der Verringerung des Rechnungszinses.

**ENTWICKLUNG PLANVERMÖGEN** TAB: 5.9.40

|                                                           | 2010         |              |              | 2009         |             |              |
|-----------------------------------------------------------|--------------|--------------|--------------|--------------|-------------|--------------|
|                                                           | gesamt       | Inland       | Ausland      | gesamt       | Inland      | Ausland      |
| in Mio. €                                                 |              |              |              |              |             |              |
| Planvermögen am 1. Januar                                 | 209,6        | 97,6         | 112,0        | 81,1         | 81,1        | –            |
| Änderungen des Konsolidierungskreises                     | –            | –            | –            | 106,3        | –           | 106,3        |
| Erwartete Erträge aus dem Planvermögen                    | 15,7         | 5,9          | 9,8          | 7,0          | 4,9         | 2,1          |
| Abweichung zwischen erwarteten und tatsächlichen Erträgen | –1,2         | –0,6         | –0,6         | 15,7         | 15,4        | 0,3          |
| Beiträge des Arbeitgebers                                 | 4,4          | –            | 4,4          | 1,0          | –           | 1,0          |
| Erfassung Rückdeckungsversicherungen                      | 6,5          | 6,5          | –            | –            | –           | –            |
| Pensionszahlungen                                         | –9,8         | –3,1         | –6,7         | –4,9         | –3,8        | –1,1         |
| Wechselkursänderungen                                     | 15,0         | –            | 15,0         | 3,4          | –           | 3,4          |
| <b>Planvermögen am 31. Dezember</b>                       | <b>240,2</b> | <b>106,3</b> | <b>133,9</b> | <b>209,6</b> | <b>97,6</b> | <b>112,0</b> |

Zur Überleitung auf die Bilanzwerte ist der Anwartschaftsbarwert mit dem Planvermögen zu saldieren und um die noch nicht erfassten versicherungsmathematischen Gewinne bzw. Verluste zu korrigieren.

**ÜBERLEITUNG BILANZWERTE PENSIONEN**

TAB: 5.9.41

|                                                                    | 2010         |             |              | 2009         |             |              |
|--------------------------------------------------------------------|--------------|-------------|--------------|--------------|-------------|--------------|
|                                                                    | gesamt       | Inland      | Ausland      | gesamt       | Inland      | Ausland      |
| in Mio. €                                                          |              |             |              |              |             |              |
| Anwartschaftsbarwert am 31. Dezember                               | 452,7        | 195,4       | 257,3        | 406,7        | 188,5       | 218,2        |
| – davon vollständig durch Planvermögen gedeckt                     | 29,1         | 29,1        | –            | 30,1         | 30,1        | –            |
| – davon teilweise durch Planvermögen gedeckt                       | 288,5        | 105,2       | 183,3        | 245,8        | 104,4       | 141,4        |
| Planvermögen am 31. Dezember                                       | 240,2        | 106,3       | 133,9        | 209,6        | 97,6        | 112,0        |
| <b>Finanzierungsstatus</b>                                         | <b>212,5</b> | <b>89,1</b> | <b>123,4</b> | <b>197,1</b> | <b>90,9</b> | <b>106,2</b> |
| Nicht erfasste versicherungsmathematische Gewinne (+)/Verluste (-) | -34,0        | -17,4       | -16,6        | -8,2         | -8,5        | 0,3          |
| <b>Bilanzwerte am 31. Dezember</b>                                 | <b>178,5</b> | <b>71,7</b> | <b>106,8</b> | <b>188,9</b> | <b>82,4</b> | <b>106,5</b> |
| – davon Rückstellungen für Pensionen (+)                           | 184,8        | 78,0        | 106,8        | 194,3        | 87,8        | 106,5        |
| – davon Vermögenswert (-)                                          | -6,3         | -6,3        | –            | -5,4         | -5,4        | –            |

Der Pensionsaufwand aus den leistungsorientierten Versorgungszusagen setzt sich wie folgt zusammen:

**PENSIONS-AUFWAND AUS LEISTUNGSORIENTIERTEN VERSORGUNGSZUSAGEN**

TAB: 5.9.42

|                                              | 2010       |            |             | 2009        |            |            |
|----------------------------------------------|------------|------------|-------------|-------------|------------|------------|
|                                              | gesamt     | Inland     | Ausland     | gesamt      | Inland     | Ausland    |
| in Mio. €                                    |            |            |             |             |            |            |
| Dienstzeitaufwand                            | 9,5        | 2,4        | 7,1         | 4,2         | 1,6        | 2,6        |
| Zinsaufwand                                  | 23,3       | 9,6        | 13,7        | 12,9        | 9,9        | 3,0        |
| Plananpassungen/Planabgeltungen              | -16,0      | 1,6        | -17,6       | -0,3        | –          | -0,3       |
| Tilgung versicherungsmathematischer Verluste | –          | –          | –           | 1,7         | 1,7        | –          |
| Erwarteter Ertrag aus dem Planvermögen       | -15,7      | -5,9       | -9,8        | -7,0        | -4,9       | -2,1       |
| <b>Pensionsaufwand</b>                       | <b>1,1</b> | <b>7,7</b> | <b>-6,6</b> | <b>11,5</b> | <b>8,3</b> | <b>3,2</b> |

Der Dienstzeitaufwand wird entsprechend der Zuordnung der Mitarbeiter in der Gewinn- und Verlustrechnung unter folgenden Positionen ausgewiesen:

- + Herstellungskosten
- + Vertriebskosten
- + allgemeine Verwaltungskosten
- + Forschungs- und Entwicklungskosten
- + sonstige betriebliche Aufwendungen

Der Zinsaufwand, die erwarteten Erträge aus dem Planvermögen sowie die Tilgung der versicherungsmathematischen Gewinne und Verluste werden im Zinsergebnis erfasst. Rückstellungsaufösungen aus Plananpassungen/Planabgeltungen werden als sonstiger betrieblicher Ertrag ausgewiesen.

Im Zeitablauf ergibt sich folgende Entwicklung der Pensionsverpflichtungen und des Planvermögens:

**ENTWICKLUNG ANWARTSCHAFTSBARWERT UND PLANVERMÖGEN**

TAB: 5.9.43

|                                                                 | 2010         | 2009         | 2008         | 2007         | 2006         |
|-----------------------------------------------------------------|--------------|--------------|--------------|--------------|--------------|
|                                                                 | in Mio. €    |              |              |              |              |
| Anwartschaftsbarwert am 31. Dezember                            | 452,7        | 406,7        | 196,2        | 208,5        | 202,6        |
| Planvermögen am 31. Dezember                                    | 240,2        | 209,6        | 81,1         | 80,4         | 82,3         |
| <b>Unterdeckung (+)/Überdeckung (-)</b>                         | <b>212,5</b> | <b>197,1</b> | <b>115,1</b> | <b>128,1</b> | <b>120,3</b> |
| Erfahrungsbedingte Gewinne (+)/Verluste (-) aus Verpflichtungen | 0,3          | 0,9          | -6,7         | -3,7         | 1,7          |
| Sonstige Gewinne (+)/Verluste (-) aus Verpflichtungen           | -24,9        | –            | 13,8         | -4,1         | –            |
| Erfahrungsbedingte Gewinne (+)/Verluste (-) aus Planvermögen    | -1,2         | 15,7         | -27,7        | -3,2         | -0,5         |

Eine Veränderung des angenommenen Kostentrends der pensionsähnlichen Zusagen für gesundheitsfürsorgliche Leistungen würde zu folgenden Effekten führen:

**SENSITIVITÄT GESUNDHEITSFÜRSORGLICHE LEISTUNGSZUSAGEN**

TAB: 5.9.44

|                                            | Veränderung um 1 %-Punkt |              |
|--------------------------------------------|--------------------------|--------------|
|                                            | Erhöhung                 | Verringerung |
| in Mio. €                                  |                          |              |
| Effekt auf den Dienstzeit- und Zinsaufwand | 0,9                      | -0,7         |
| Effekt auf den Anwartschaftsbarwert        | 11,3                     | -8,9         |

Im Geschäftsjahr 2011 ist aus Pensions- und pensionsähnlichen Zusagen ein Zahlungsmitteleabfluss in Höhe von 25,6 Mio. € zu erwarten. Dieser umfasst Dotierungen an das Planvermögen sowie Rentenzahlungen, die nicht durch entsprechende Erstattungen aus dem Planvermögen gedeckt sind.

Darüber hinaus bestehen weitere Altersversorgungssysteme, für die keine Rückstellungen zu bilden sind, da mit Zahlung der Beiträge keine weiteren Leistungsverpflichtungen bestehen (beitragsorientierte Pläne). Diese umfassen sowohl allein arbeitgeberfinanzierte Leistungen als auch Zuschüsse für Entgeltumwandlungen der Arbeitnehmer.

Im Rahmen der inzwischen geschlossenen zusätzlichen Versorgung über die BASF-Pensionskasse leisten Arbeitgeber und Mitarbeiter Beiträge. Dieser Versorgungsweg ist als gemeinschaftlicher Plan mehrerer Arbeitgeber i.S.v. IAS 19.29 zu qualifizieren. Der Plan ist grundsätzlich als leistungsorientiert einzustufen. Da zuverlässige Informationen über Planvermögen und Verpflichtungen nur für die Pensionskasse insgesamt vorliegen und nicht für die auf die K+S GRUPPE entfallenden Anteile, liegen keine ausreichenden Informationen für eine Bilanzierung des Plans vor. Deshalb wird dieser Plan gemäß IAS 19.30 als beitragsorientiert behandelt.

Insgesamt ergibt sich für die Berichtsperiode folgender Altersversorgungsaufwand:

**AUFWAND ALTERSVERSORGUNG**

TAB: 5.9.45

|                                                | 2010        |            |             | 2009        |             |            |
|------------------------------------------------|-------------|------------|-------------|-------------|-------------|------------|
|                                                | gesamt      | Inland     | Ausland     | gesamt      | Inland      | Ausland    |
| in Mio. €                                      |             |            |             |             |             |            |
| Aufwand beitragsorientierte Pläne              | 16,7        | 5,0        | 11,7        | 12,7        | 10,8        | 1,9        |
| Dienstzeitaufwand leistungsorientierte Zusagen | 9,5         | 2,4        | 7,1         | 4,2         | 1,6         | 2,6        |
| <b>Aufwand Altersversorgung</b>                | <b>26,2</b> | <b>7,4</b> | <b>18,8</b> | <b>16,9</b> | <b>12,4</b> | <b>4,5</b> |

Zudem wurden Beiträge in Höhe von 88,8 Mio. € (Vorjahr: 84,2 Mio. €) an staatliche Rentenversicherungsträger geleistet.

**(25) RÜCKSTELLUNGEN FÜR BERGBAULICHE VERPFLICHTUNGEN****RÜCKSTELLUNGEN FÜR BERGBAULICHE VERPFLICHTUNGEN**

TAB: 5.9.46

|                                    | 2010         |                   | 2009         |                   |
|------------------------------------|--------------|-------------------|--------------|-------------------|
|                                    | gesamt       | davon kurzfristig | gesamt       | davon kurzfristig |
| in Mio. €                          |              |                   |              |                   |
| Gruben- und Schachtverfüllung      | 261,9        | 7,3               | 226,2        | 7,1               |
| Haldenverwahrung                   | 165,7        | –                 | 119,7        | –                 |
| Bergschäden                        | 49,3         | –                 | 33,5         | –                 |
| Rückbau                            | 48,8         | –                 | 38,7         | –                 |
| Sonstige                           | 10,0         | –                 | 8,2          | –                 |
| <b>Bergbauliche Rückstellungen</b> | <b>535,7</b> | <b>7,3</b>        | <b>426,3</b> | <b>7,1</b>        |

Rückstellungen für bergbauliche Verpflichtungen sind aufgrund gesetzlicher, vertraglicher sowie behördlicher Auflagen zu bilden und umfassen im Wesentlichen Verpflichtungen zur Verfüllung von Gruben und Schächten sowie die Verpflichtung zur Haldenverwahrung. Außerdem bestehen Rückstellungen für Bergschädenwagnisse und Rückbauverpflichtungen.

Die bergbaulichen Verpflichtungen basieren auf gesetzlichen Regelungen wie dem Bundesberggesetz und werden vor allem in Betriebsplänen und wasserrechtlichen Erlaubnisbescheiden konkretisiert. Im Rahmen dieser überwiegend öffentlich-rechtlichen Verpflichtungen sind die Sicherung der Tagesoberfläche und Rekultivierungsmaßnahmen erforderlich. Bergschäden können durch den untertägigen Abbau und die damit verbundene Absenkung der Erdoberfläche oder aufgrund von Schäden im Zusammenhang mit dem Produktionsprozess durch Staub oder Versalzung entstehen. Durch die Rückstellungen sind die erkennbaren Verpflichtungen zur Wiedernutzbarmachung sowie die Verpflichtungen aus verursachten bzw. bereits eingetretenen Bergschäden berücksichtigt.

Die Höhe der zu bildenden Rückstellungen basiert auf den erwarteten Aufwendungen bzw. den geschätzten Schadenersatzleistungen. Bergbaubedingte Rückstellungen sind überwiegend langfristige Rückstellungen, die auf Basis der zukünftig erwarteten Aufwendungen mit

dem auf den Bilanzstichtag abgezinsten Erfüllungsbetrag bilanziert werden. Dabei wird für die K+S GRUPPE eine künftige Preissteigerung in Höhe von 1,5 % zugrunde gelegt. Der Abzinsungsfaktor für die bergbaulichen Verpflichtungen in den EU-Ländern beträgt 4,7 % (Vorjahr: 5,6 %). Als Abzinsungsfaktor für die bergbaulichen Verpflichtungen der in 2009 erstmalig konsolidierten Gesellschaften der MORTON-Gruppe wird ein Zinssatz von 5,1 % (USA, Vorjahr: 5,8 %) bzw. 5,3 % (Kanada, Vorjahr: 6,2 %) verwendet. Aus der Anpassung des Diskontierungszinssatzes im Geschäftsjahr 2010 resultierte eine Erhöhung der bergbaulichen Rückstellungen in Höhe von 81,0 Mio. €. Die erwarteten Erfüllungszeitpunkte sind im Wesentlichen abhängig von der wirtschaftlichen Restnutzungsdauer der Standorte. Die Verpflichtungen reichen teilweise weit über das Jahr 2050 hinaus.

Die Zuführung zu den bergbaulichen Rückstellungen im Berichtsjahr in Höhe von 121,0 Mio. € (Vorjahr: 37,8 Mio. €) beruht neben der Zinssatzanpassung im Wesentlichen auf der jährlichen Aufzinsung der Rückstellungen, der Bildung von zusätzlichen Rückstellungen für bergbauliche Risiken sowie der Neubewertung von bestehenden Rückstellungen.

Mit der Inanspruchnahme von bergbaulichen Rückstellungen in Höhe von 6,7 Mio. € (Vorjahr: 8,4 Mio. €) wurde der Verpflichtung zur Verwahrung von Altstandorten Rechnung getragen. Weiterhin handelt es sich auch um Aufwendungen im Zusammenhang mit Bergschadenswagnissen.

Die Rückstellungsaufösungen in Höhe von 7,3 Mio. € (Vorjahr: 9,6 Mio. €) resultieren im Wesentlichen aus einer Verringerung einzelner erwarteter Verpflichtungen.

## (26) LANGFRISTIGE PERSONALVERPFLICHTUNGEN

| LANGFRISTIGE PERSONALVERPFLICHTUNGEN              |             | TAB: 5.9.47 |  |
|---------------------------------------------------|-------------|-------------|--|
|                                                   | 2010        | 2009        |  |
| in Mio. €                                         |             |             |  |
| Rückstellungen für Long Term Incentives           | 29,2        | —           |  |
| Rückstellungen für Altersteilzeit                 | 26,5        | 37,1        |  |
| Rückstellungen für Jubiläumsgelder                | 24,0        | 23,0        |  |
| Rückstellungen für Aktienoptionen                 | 5,7         | 8,3         |  |
| Sonstige langfristige Personalverpflichtungen     | 10,9        | 4,2         |  |
| <b>Summe langfristige Personalverpflichtungen</b> | <b>96,3</b> | <b>72,6</b> |  |

Die Bilanzierung der Rückstellung des kennzahlenbasierten „Long Term Incentive“-Programms erfolgt nach dem Anwartschaftsbarwertverfahren. Versicherungsmathematische Gewinne bzw. Verluste werden ergebniswirksam erfasst. Bei der Ermittlung wird ein Rechnungszins von 2,1 % zugrunde gelegt. Für die aufgrund der Umstellung der variablen Vergütungskomponente mit langfristiger Anreizwirkung von einer zweijährigen auf eine vierjährige Laufzeit entstehenden Zuflusslücken in den Jahren 2012 und 2013 wurde das neue LTI-Programm virtuell bereits in den Jahren 2008 und 2009 mit jeweils einer Tranche gestartet. / WEITERE INFORMATION ZUM „LONG TERM INCENTIVE“-PROGRAMM finden Sie im Vergütungsbericht auf den Seiten 31 ff.

Die Rückstellungen für Altersteilzeit berücksichtigen Verpflichtungen aus abgeschlossenen Altersteilzeitverträgen. Bei der Bewertung werden sowohl Erfüllungsrückstände (Differenz zwischen dem Wert der vollen Arbeitsleistung und des Altersteilzeitentgelts zuzüglich der anfallenden Arbeitgeberanteile zur Sozialversicherung) als auch Aufstockungsbeträge zum Altersteilzeitentgelt und zu den Beiträgen der gesetzlichen Rentenversicherung erfasst. Der Ansatz erfolgt zum Barwert mittels eines Rechnungszinses von 4,9 % (Vorjahr: 5,3 %) bei einer erwarteten jährlichen Einkommenssteigerung von 1,8 % (Vorjahr: 1,8 %). Die zum Bilanzstichtag bestehenden Altersteilzeitverpflichtungen in Höhe von 58,4 Mio. € (Vorjahr: 66,1 Mio. €) wurden mit Planvermögen in Höhe von 31,9 Mio. € (Vorjahr: 29,0 Mio. €) saldiert. Das Planvermögen besteht in Form eines Contractual Trust Arrangements (CTA) und dient der Sicherung der im Rahmen der Altersteilzeitvereinbarungen fälligen Leistungen an die Arbeitnehmer.

Die Rückstellungen für Jubiläumsgelder werden für künftige Zahlungen anlässlich des 25-jährigen, 40-jährigen oder 50-jährigen Dienstjubiläums gebildet. Die Bewertung erfolgt nach der Projected-Unit-Credit-Methode. Der Berechnung wurden ein Rechnungszins von 4,9 % (Vorjahr: 5,3 %) sowie eine erwartete jährliche Einkommenssteigerung von 1,8 % (Vorjahr: 1,8 %) zugrunde gelegt.

Die Rückstellungen für das Aktienoptionsprogramm betreffen in bar abzugeltende virtuelle Aktienoptionen. Der Bestand dieser Optionen setzte sich zu Beginn der Berichtsperiode wie folgt zusammen:



**BESTAND VIRTUELLER AKTIONSOPTIONEN ZU BEGINN DER BERICHTSPERIODE** TAB: 5.9.48

| Anzahl Optionen  | erstmalig ausübbar | Verfall  | beizulegender Zeitwert in Mio. € | Rückstellung in Mio. € |
|------------------|--------------------|----------|----------------------------------|------------------------|
| 12.840           | Mai 2008           | Mai 2011 | —                                | —                      |
| 54.580           | Mai 2009           | Mai 2012 | 0,3                              | 0,3                    |
| 1.475.600        | Mai 2010           | Mai 2013 | 7,6                              | 6,3                    |
| 2.458.800        | Mai 2011           | Mai 2014 | 5,0                              | 1,7                    |
| <b>4.001.820</b> |                    |          | <b>12,9</b>                      | <b>8,3</b>             |

Im Geschäftsjahr 2010 wurden 1.432.320 Optionen, die erstmalig im Mai 2010 ausübbar waren, von berechtigten Mitarbeitern ausgeübt, 150.000 Optionen sind vorzeitig verfallen.

Für die bestehenden Optionen wurden im Geschäftsjahr 2010 Aufwendungen aus Rückstellungszuführungen in Höhe von 3,9 Mio. € erfasst. Die Auszahlung im Geschäftsjahr in Höhe von 13,6 Mio. € führte zu einem Rückstellungsverbrauch in Höhe von 6,3 Mio. €.

Das Aktienoptionsprogramm wurde im Geschäftsjahr 2010 durch ein kennzahlenbasierendes langfristiges Vergütungssystem (Long Term Incentive) ersetzt, dadurch konnten die Mitarbeiter keine weiteren Optionen erwerben.

Zum 31. Dezember 2010 betrug der Bestand der virtuellen Aktienoptionen:

**BESTAND VIRTUELLER AKTIONSOPTIONEN 31.12.2010** TAB: 5.9.49

| Anzahl Optionen  | erstmalig ausübbar | Verfall  | beizulegender Zeitwert in Mio. € | Rückstellung in Mio. € |
|------------------|--------------------|----------|----------------------------------|------------------------|
| 7.200            | Mai 2009           | Mai 2012 | —                                | —                      |
| 4.800            | Mai 2010           | Mai 2013 | 0,1                              | 0,1                    |
| 2.407.500        | Mai 2011           | Mai 2014 | 6,7                              | 5,6                    |
| <b>2.419.500</b> |                    |          | <b>6,8</b>                       | <b>5,7</b>             |

Der beizulegende Zeitwert der ausübaren Optionen betrug zum 31. Dezember 2010 0,1 Mio. €. Als beizulegender Zeitwert der erstmalig im Mai 2009 ausübaren Optionen wurde der innere Wert herangezogen, da die erreichte Performance dieser Optionen bereits weit über der maximal vergüteten Kappungsgrenze von 25 % liegt. Der beizulegende Zeitwert der erstmalig im Mai 2010 sowie im Mai 2011 ausübaren Optionen wurde auf Basis eines mehrperi-

odischen Binomialmodells ermittelt. Dabei werden der Kurs der κ+s-Aktie und der Stand des DAX am Bewertungsstichtag sowie die historische Volatilität der κ+s-Aktie gegenüber dem DAX zugrunde gelegt. Die historische Volatilität der Überperformance wurde auf Basis der Kursdaten der letzten 250 Handelstage ermittelt, da dieser Zeitraum der am Bilanzstichtag erwarteten durchschnittlichen Optionslaufzeit entspricht. Die auf diese Weise ermittelte Volatilität betrug bei dem im Mai 2013 verfallenden Optionsprogramm 20,66 % (Vorjahr: 38,21 %), bei dem im Mai 2014 verfallenden Optionsprogramm 20,86 % (Vorjahr: 38,74 %). Der Berechnung wurde ein Basiskurs der κ+s-Aktie von 46,51 € (Verfall Mai 2013) bzw. 37,79 € (Verfall Mai 2014) zugrunde gelegt. Als risikoloser Zinssatz wurden 0,75 % unterstellt. Die erwartete Fluktuation wurde nicht berücksichtigt, da dies keinen wesentlichen Einfluss auf die Höhe des Werts der Option hat. Erwartete Dividenden bleiben ebenfalls unberücksichtigt, da diese bei der Ermittlung der für den Vorteil aus der Optionsausübung relevanten Performance der κ+s-Aktie berücksichtigt werden. Der Ansatz der Rückstellungen erfolgt anteilig über den Zeitraum der zweijährigen Ausübungssperrfrist. Zur allgemeinen Beschreibung des Aktienoptionsprogramms siehe Anmerkung (10).

**(27) SONSTIGE UMWELTVERPFLICHTUNGEN**

Die folgende Tabelle fasst die mit der Akquisition von MORTON SALT verbundenen sonstigen Umweltverpflichtungen zusammen:

**UMWELTVERPFLICHTUNGEN MORTON SALT** TAB: 5.9.50

|                                                                | 2010     | 2009         |
|----------------------------------------------------------------|----------|--------------|
| in Mio. €                                                      |          |              |
| Umweltverpflichtungen Chemiestandorte (langfristig)            | —        | 104,9        |
| Umweltverpflichtungen Chemiestandorte (kurzfristig)            | —        | 13,2         |
| <b>Sonstige Umweltverpflichtungen Chemiestandorte (gesamt)</b> | <b>—</b> | <b>118,1</b> |
| – bilanzierte Erstattungsansprüche                             | —        | 117,3        |

Die im Jahre 2009 übernommenen Umweltverpflichtungen resultierten aus der früheren Chemietätigkeit von MORTON SALT, die mit Erwerb der Gesellschaft auf die κ+s GRUPPE übergegangen waren. Dabei handelte es sich beispielsweise um Verpflichtungen zur Beseitigung von Grundwasser- und Bodenschäden. Da von Seiten des Veräußerers ROHM & HAAS nur unzureichende Informationen hinsichtlich des Verpflichtungsumfangs erhältlich waren, wurden Umweltsachverständige mit der Erstellung entsprechender Gutachten beauftragt.

Aus diesen Gutachten wurde eine Prognose der künftigen Zahlungsmittelabflüsse abgeleitet, die mittels eines gewichteten Durchschnittszinssatzes von 5,0 % in den anzusetzenden Rückstellungsbetrag zum 31. Dezember 2009 überführt wurden. Die erwarteten Zahlungsmittelabflüsse erstreckten sich über einen Zeitraum von bis zu 30 Jahren. Da auch die Umwelt-sachverständigen nur über eingeschränkte Informationen verfügten, war sowohl die Schätzung der Höhe als auch der Fälligkeit des Zahlungsmittelabflusses mit entsprechenden Unsicherheiten verbunden.

Mit der Akquisition von MORTON SALT sollten nur die Salzaktivitäten der Gesellschaft übernommen werden. Daher wurden bereits vor dem Vollzug der Transaktion am 1. Oktober 2009 bestimmte nicht zum Salzgeschäft gehörende Bereiche auf eine Tochtergesellschaft des Veräußerers übertragen. Des Weiteren hatte die K+S AKTIENGESELLSCHAFT gemäß Kaufvertrag das Recht, frühestens 13 Monate nach dem Vollzug des Kaufvertrags (Closing), also ab dem 1. November 2010, alle dem Salzgeschäft zuzuordnenden Vermögenswerte und Schulden von MORTON SALT (einschließlich der im Salzgeschäft tätigen Tochtergesellschaften) auf eine andere Gesellschaft der K+S GRUPPE zu übertragen und nachfolgend MORTON SALT an den Veräußerer zurückzuübertragen. Dieses Recht wurde zum 1. November 2010 ausgeübt, sodass der Veräußerer für etwaige bei MORTON SALT verbliebene Verpflichtungen, die nicht dem erworbenen Salzgeschäft zuzuordnen sind, wieder unmittelbar haftet.

Mit der Ausübung des Rückübertragungsrechts wurden die bis dahin bilanzierten Umweltverpflichtungen sowie die korrespondierenden Erstattungsansprüche ausgebucht.

### (28) KURZFRISTIGE RÜCKSTELLUNGEN

Die Verpflichtungen aus Verkaufsgeschäften betreffen vor allem Rabatte und Preisnachlässe; aus Einkaufsverträgen resultieren Rückstellungen für ausstehende Rechnungen. Die kurzfristigen Personalverpflichtungen enthalten im Wesentlichen Rückstellungen für die erfolgsabhängige Vergütung der Arbeitnehmer sowie Rückstellungen für ausstehenden Urlaub und Freischichten.

### (29) FINANZIELLE VERBINDLICHKEITEN

Die folgende Tabelle zeigt die Liquiditätsanalyse der finanziellen Verbindlichkeiten in Form der vertraglich vereinbarten undiskontierten Zahlungsströme.

#### LIQUIDITÄTSANALYSE NICHT DERIVATIVER FINANZIELLER VERBINDLICHKEITEN 2010

TAB: 5.9.51

|                                                           | Cashflows        |                |                          |                                          |                           |
|-----------------------------------------------------------|------------------|----------------|--------------------------|------------------------------------------|---------------------------|
|                                                           | 2010<br>Buchwert | 2010<br>gesamt | Restlaufzeit<br>< 1 Jahr | Restlaufzeit<br>> 1 Jahr u.<br>< 5 Jahre | Restlaufzeit<br>> 5 Jahre |
| in Mio. €                                                 |                  |                |                          |                                          |                           |
| Finanzverbindlichkeiten                                   | 786,6            | 843,7          | 29,7                     | 790,4                                    | 23,6                      |
| – davon Anleihen                                          | 764,1            | 819,5          | 11,0                     | 785,8                                    | 22,7                      |
| – davon Verbindlichkeiten<br>ggü. Kreditinstituten        | 22,5             | 24,0           | 18,6                     | 4,6                                      | 0,8                       |
| Verbindlichkeiten aus<br>Lieferungen und Leistungen       | 511,2            | 511,2          | 510,8                    | 0,4                                      | –                         |
| Verbindlichkeiten gegenüber<br>verbundenen Unternehmen    | 12,6             | 12,6           | 12,6                     | –                                        | –                         |
| Sonstige Verbindlichkeiten                                | 51,7             | 51,7           | 33,9                     | 16,6                                     | 1,2                       |
| <b>Nicht derivative finanzielle<br/>Verbindlichkeiten</b> | <b>1.362,1</b>   | <b>1.419,2</b> | <b>587,0</b>             | <b>807,4</b>                             | <b>24,8</b>               |

#### LIQUIDITÄTSANALYSE NICHT DERIVATIVER FINANZIELLER VERBINDLICHKEITEN 2009

TAB: 5.9.52

|                                                           | Cashflows        |                |                          |                                          |                           |
|-----------------------------------------------------------|------------------|----------------|--------------------------|------------------------------------------|---------------------------|
|                                                           | 2009<br>Buchwert | 2009<br>gesamt | Restlaufzeit<br>< 1 Jahr | Restlaufzeit<br>> 1 Jahr u.<br>< 5 Jahre | Restlaufzeit<br>> 5 Jahre |
| in Mio. €                                                 |                  |                |                          |                                          |                           |
| Finanzverbindlichkeiten                                   | 1.266,9          | 1.607,3        | 172,3                    | 1.276,3                                  | 158,7                     |
| – davon Anleihen                                          | 857,7            | 1.158,4        | 38,9                     | 962,5                                    | 157,0                     |
| – davon Verbindlichkeiten<br>ggü. Kreditinstituten        | 409,2            | 449,0          | 133,4                    | 313,9                                    | 1,7                       |
| Verbindlichkeiten aus<br>Lieferungen und Leistungen       | 346,9            | 346,9          | 346,6                    | 0,3                                      | –                         |
| Verbindlichkeiten gegenüber<br>verbundenen Unternehmen    | 8,7              | 8,7            | 8,7                      | –                                        | –                         |
| Sonstige Verbindlichkeiten                                | 60,3             | 60,3           | 46,7                     | 13,0                                     | 0,6                       |
| <b>Nicht derivative finanzielle<br/>Verbindlichkeiten</b> | <b>1.682,8</b>   | <b>2.023,2</b> | <b>574,3</b>             | <b>1.289,6</b>                           | <b>159,3</b>              |

Die Finanzverbindlichkeiten zum Bilanzstichtag betreffen im Wesentlichen die K+S AKTIENGESELLSCHAFT und resultieren aus der im September 2009 mit einem Volumen von 750,0

Mio. € begebenen Anleihe, die mit einem festen Zinssatz von 5,0% und einer Laufzeit von fünf Jahren ausgestattet ist.

/ WEITERE INFORMATION ZU DER ANLEIHE finden Sie im Kapitel ‚K+S am Kapitalmarkt‘ des Lageberichts.

Zudem wurde die im Vorjahr im Rahmen der Akquisition von MORTON SALT übernommene USD-Anleihe mit einem ausstehenden Betrag von 145,2 Mio. USD seitens ROHM & HAAS teilweise zurückgekauft. Damit verbleibt ein Restbestand von 22,6 Mio. USD mit einer Fälligkeit in 2020. Daraus resultierende Zins- und Tilgungsbeiträge sind durch ROHM & HAAS zu leisten und vertraglich durch eine Bankgarantie gedeckt. Die aus dieser vertraglichen Konstruktion resultierenden Erstattungsansprüche für Zins- und Tilgungsbeträge werden unter der Position „Forderungen und sonstige Vermögenswerte“ im lang- bzw. kurzfristigen Bereich ausgewiesen.

Die Zinsbindungen sind mit Ausnahme der begebenen Anleihe grundsätzlich kurzfristig und betragen maximal zwölf Monate. Insofern bestehen zinsbedingte Cashflow-Risiken aus möglichen Zinsanpassungen. Die Effektivzinssätze orientieren sich an den Zinssätzen der betreffenden Währungen (Euro, US-Dollar, kanadischer Dollar, brasilianischer Real, chilenischer Peso) zuzüglich marktgerechter Aufschläge.

Die Liquiditätssteuerung erfolgt über ein gruppenweites Cashpool-System durch die zentrale Treasury-Einheit. Der Liquiditätsbedarf wird grundsätzlich über die Liquiditätsplanung ermittelt und ist über flüssige Mittel und zugesagte Kreditlinien gedeckt. Neben einer bis Juli 2015 laufenden Konsortialkreditlinie über 800 Mio. € bestehen derzeit nicht in Anspruch genommene bilaterale Rahmenkreditvereinbarungen.

/ WEITERE INFORMATION ZU LIQUIDITÄTSRISIKEN finden Sie im Risikobericht auf den Seiten 143 f.

Die folgende Tabelle zeigt die Liquiditätsanalyse des Konzerns für derivative Finanzinstrumente. Die Tabelle basiert auf undiskontierten Nettoszahlungsströmen für derivative Finanzinstrumente, die netto ausgeglichen werden, und undiskontierten Bruttozahlungströmen für derivative Finanzinstrumente, die brutto ausgeglichen werden.

#### LIQUIDITÄTSANALYSE DERIVATIVER FINANZINSTRUMENTE 2010

TAB: 5.9.53

|                              | 2010<br>Buchwert | 2010<br>gesamt | Restlaufzeit<br>< 1 Jahr | Restlaufzeit<br>< 1 Jahr u.<br>< 5 Jahre | Restlaufzeit<br>> 5 Jahre |
|------------------------------|------------------|----------------|--------------------------|------------------------------------------|---------------------------|
| in Mio. €                    |                  |                |                          |                                          |                           |
| <b>Nettoerfüllung</b>        |                  |                |                          |                                          |                           |
| Frachtderivate               | 5,2              | 5,3            | 1,9                      | 3,4                                      | —                         |
| <b>Bruttoerfüllung</b>       |                  |                |                          |                                          |                           |
| Devisenderivate <sup>1</sup> | -2,4             | -2,4           | -2,4                     | —                                        | —                         |
| Zahlungsverpflichtung        |                  | 284,9          | 284,9                    | —                                        | —                         |
| Zahlungsanspruch             |                  | -287,3         | -287,3                   | —                                        | —                         |

<sup>1</sup> Die verkauften einfachen Devisenoptionen weisen zum Stichtag keinen inneren Wert auf und verursachen auf dieser Basis keinen Zahlungsstrom.

#### LIQUIDITÄTSANALYSE DERIVATIVER FINANZINSTRUMENTE 2009

TAB: 5.9.54

|                              | 2009<br>Buchwert | 2009<br>gesamt | Restlaufzeit<br>< 1 Jahr | Restlaufzeit<br>< 1 Jahr u.<br>< 5 Jahre | Restlaufzeit<br>> 5 Jahre |
|------------------------------|------------------|----------------|--------------------------|------------------------------------------|---------------------------|
| in Mio. €                    |                  |                |                          |                                          |                           |
| <b>Nettoerfüllung</b>        |                  |                |                          |                                          |                           |
| Frachtderivate               | 5,7              | 6,0            | 1,3                      | 4,7                                      | —                         |
| <b>Bruttoerfüllung</b>       |                  |                |                          |                                          |                           |
| Devisenderivate <sup>1</sup> | 0,6              | 0,5            | 0,5                      | —                                        | —                         |
| Zahlungsverpflichtung        |                  | 117,9          | 117,9                    | —                                        | —                         |
| Zahlungsanspruch             |                  | -117,4         | -117,4                   | —                                        | —                         |

<sup>1</sup> Die verkauften einfachen Devisenoptionen weisen zum Stichtag keinen inneren Wert auf und verursachen auf dieser Basis keinen Zahlungsstrom.

### (30) WEITERE ANGABEN ZU FINANZINSTRUMENTEN

Die folgende Tabelle stellt die Buchwerte und beizulegenden Zeitwerte der Finanzinstrumente des Konzerns dar:

## WEITERE ANGABEN ZU FINANZINSTRUMENTEN

TAB: 5.9.55

|                                                                          | Bewertungs-<br>kategorie<br>nach IAS 39                                              | 2010         |                                | 2009           |                                |
|--------------------------------------------------------------------------|--------------------------------------------------------------------------------------|--------------|--------------------------------|----------------|--------------------------------|
|                                                                          |                                                                                      | Buchwert     | beizule-<br>gender<br>Zeitwert | Buchwert       | beizule-<br>gender<br>Zeitwert |
| in Mio. €                                                                |                                                                                      |              |                                |                |                                |
| Anteile an verbundenen<br>Unternehmen und Beteiligungen                  | Zur Veräußerung<br>verfügbar                                                         | 22,3         | 22,3                           | 20,1           | 20,1                           |
| Ausleihungen                                                             | Kredite und<br>Forderungen                                                           | 1,8          | 1,8                            | 2,3            | 2,3                            |
| <b>Finanzanlagen</b>                                                     |                                                                                      | <b>24,1</b>  | <b>24,1</b>                    | <b>22,4</b>    | <b>22,4</b>                    |
| <b>Forderungen aus Lieferungen<br/>und Leistungen</b>                    | <b>Kredite und<br/>Forderungen</b>                                                   | <b>949,8</b> | <b>949,8</b>                   | <b>849,6</b>   | <b>849,6</b>                   |
| Übrige Forderungen und<br>nicht derivative finanzielle<br>Vermögenswerte | Kredite und<br>Forderungen                                                           | 148,6        | 148,6                          | 363,1          | 363,1                          |
| Derivate                                                                 | Zu Handelszwecken<br>gehalten                                                        | 41,8         | 41,8                           | 19,6           | 19,6                           |
| Andere Vermögenswerte <sup>1</sup>                                       | —                                                                                    | 27,0         | 27,0                           | 24,0           | 24,0                           |
| <b>Sonstige Forderungen<br/>und Vermögenswerte</b>                       |                                                                                      | <b>217,3</b> | <b>217,3</b>                   | <b>406,7</b>   | <b>416,5</b>                   |
| <b>Flüssige Mittel</b>                                                   | <b>Kredite und<br/>Forderungen</b>                                                   | <b>748,4</b> | <b>748,4</b>                   | <b>529,1</b>   | <b>529,1</b>                   |
| <b>Finanzverbindlichkeiten</b>                                           | <b>Finanzielle<br/>Verbindlichkeiten<br/>zu fortgeführten<br/>Anschaffungskosten</b> | <b>786,6</b> | <b>844,9</b>                   | <b>1.266,9</b> | <b>1.318,1</b>                 |
| <b>Verbindlichkeiten aus<br/>Lieferungen und Leistungen</b>              | <b>Finanzielle<br/>Verbindlichkeiten<br/>zu fortgeführten<br/>Anschaffungskosten</b> | <b>511,2</b> | <b>511,2</b>                   | <b>346,9</b>   | <b>346,9</b>                   |
| Sonstige nicht derivative<br>finanzielle Verbindlichkeiten               | Finanzielle<br>Verbindlichkeiten<br>zu fortgeführten<br>Anschaffungskosten           | 49,5         | 49,5                           | 60,2           | 60,2                           |
| Derivate                                                                 | Zu Handelszwecken<br>gehalten                                                        | 17,1         | 17,1                           | 7,8            | 7,8                            |
| Verbindlichkeiten aus<br>Finanzierungsleasing                            | —                                                                                    | 7,0          | 7,0                            | 8,9            | 8,9                            |
| Andere Verbindlichkeiten                                                 | —                                                                                    | 35,9         | 35,9                           | 19,2           | 19,2                           |
| <b>Übrige und sonstige<br/>Verbindlichkeiten</b>                         |                                                                                      | <b>109,5</b> | <b>109,5</b>                   | <b>96,0</b>    | <b>96,0</b>                    |

<sup>1</sup> Diese Position beinhaltet überwiegend sonstige Verrechnungskonten.

Die Buchwerte der Finanzinstrumente, aggregiert nach den Bewertungskategorien des IAS 39, stellen sich wie folgt dar:

BUCHWERTE DER FINANZINSTRUMENTE  
AGGREGIERT NACH BEWERTUNGSKATEGORIEN

TAB: 5.9.56

|                                                                   | 2010    | 2009    |
|-------------------------------------------------------------------|---------|---------|
| in Mio. €                                                         |         |         |
| Zur Veräußerung verfügbare finanzielle Vermögenswerte             | 22,3    | 20,1    |
| Kredite und Forderungen                                           | 1.848,6 | 1.744,1 |
| Zu Handelszwecken gehaltene finanzielle Vermögenswerte            | 41,7    | 19,6    |
| Finanzielle Verbindlichkeiten zu fortgeführten Anschaffungskosten | 1.347,4 | 1.674,0 |
| Zu Handelszwecken gehaltene finanzielle Verbindlichkeiten         | 17,1    | 7,8     |

Die beizulegenden Zeitwerte der Finanzinstrumente wurden grundsätzlich basierend auf den am Bilanzstichtag verfügbaren Marktinformationen ermittelt und sind einer Stufe der Fair-Value-Hierarchie zuzuordnen.

Bei Finanzinstrumenten der Stufe 1 erfolgt die Bewertung auf Basis quotierter Preise auf aktiven Märkten für identische Vermögenswerte und Verbindlichkeiten. Innerhalb der Stufe 2 wird die Bewertung der Finanzinstrumente auf Basis von Inputfaktoren, die aus beobachtbaren Marktdaten ableitbar sind, oder anhand von Marktpreisen für ähnliche Instrumente durchgeführt. Finanzinstrumente der Stufe 3 werden auf Basis von Inputfaktoren, die nicht aus beobachtbaren Marktdaten ableitbar sind, bewertet. Zum 31. Dezember 2010 sind zu Handelszwecken gehaltene finanzielle Vermögenswerte in Höhe von 41,7 Mio. € (Vorjahr: 19,6 Mio. €) und zu Handelszwecken gehaltene finanzielle Verbindlichkeiten in Höhe von 17,1 Mio. € (Vorjahr: 7,8 Mio. €) der Stufe 2 der Fair-Value-Hierarchie zuzuordnen. Finanzinstrumente der Stufen 1 und 3 der Fair-Value-Hierarchie liegen nicht vor.

Für die zu Anschaffungskosten bewerteten Eigenkapitalinstrumente ist eine verlässliche Bestimmung des beizulegenden Zeitwerts aufgrund fehlender aktiver Märkte nicht möglich. Hierbei handelt es sich um Anteile an (nicht konsolidierten) Tochterunternehmen, Gemeinschaftsunternehmen, assoziierten Unternehmen und Beteiligungen. Es wird davon ausgegangen, dass die Buchwerte am Bilanzstichtag den beizulegenden Zeitwerten entsprechen.

Bei Forderungen aus Lieferungen und Leistungen, sonstigen Forderungen und nicht derivativen Vermögenswerten sowie Flüssigen Mitteln entsprechen die Buchwerte aufgrund der überwiegend kurzen Laufzeiten dieser Instrumente den beizulegenden Zeitwerten.

Bei Finanzverbindlichkeiten, Verbindlichkeiten aus Lieferungen und Leistungen sowie sonstigen nicht derivativen und anderen Verbindlichkeiten wird aufgrund der überwiegend kurzen Laufzeiten davon ausgegangen, dass die Buchwerte dieser Instrumente den beizulegenden Zeitwerten entsprechen. Für langfristige Finanzverbindlichkeiten wurde der beizulegende Zeitwert als Barwert der zukünftigen Zahlungsströme bzw. aus Marktpreisen ermittelt. Zur Diskontierung werden marktübliche Zinssätze, bezogen auf die entsprechende Fristigkeit, verwendet.

Für die Ausleihungen und Verbindlichkeiten aus Finanzierungsleasing wird aufgrund unwesentlicher Abweichungen von Markt- und Kalkulationszinssatz davon ausgegangen, dass die Buchwerte den beizulegenden Zeitwerten entsprechen.

Die folgende Tabelle stellt die aus Finanzinstrumenten resultierenden Nettoergebnisse dar:

| <b>NETTOERGEBNIS AUS FINANZINSTRUMENTEN</b>                                  |       | TAB: 5.9.57 |  |
|------------------------------------------------------------------------------|-------|-------------|--|
|                                                                              | 2010  | 2009        |  |
| in Mio. €                                                                    |       |             |  |
| Zur Veräußerung verfügbare finanzielle Vermögenswerte                        | 5,0   | 1,3         |  |
| Kredite und Forderungen                                                      | 31,1  | 1,7         |  |
| Zu Handelszwecken gehaltene finanzielle Vermögenswerte und Verbindlichkeiten | -16,5 | 4,9         |  |
| Finanzielle Verbindlichkeiten zu fortgeführten Anschaffungskosten            | -1,5  | 3,8         |  |

Das Nettoergebnis aus zur Veräußerung verfügbaren finanziellen Vermögenswerten umfasst im Wesentlichen Gewinne oder Verluste aus Beteiligungen.

Das Nettoergebnis aus Krediten und Forderungen enthält hauptsächlich Effekte aus der Währungsumrechnung sowie Änderungen in den Wertberichtigungen.

Das Nettoergebnis aus zu Handelszwecken gehaltenen finanziellen Vermögenswerten und Verbindlichkeiten beinhaltet überwiegend Marktwertänderungen derivativer Finanzinstrumente. Zudem sind Zinserträge und -aufwendungen dieser Finanzinstrumente enthalten.

Das Nettoergebnis aus zu fortgeführten Anschaffungskosten bewerteten Verbindlichkeiten besteht überwiegend aus Effekten der Währungsumrechnung.

Die Gesamtzinserträge und -aufwendungen für finanzielle Vermögenswerte und Verbindlichkeiten, die nicht erfolgswirksam zum beizulegenden Zeitwert bewertet werden, stellen sich wie folgt dar:

| <b>ZINSERGEBNIS AUS FINANZINSTRUMENTEN</b> |       | TAB: 5.9.58 |  |
|--------------------------------------------|-------|-------------|--|
|                                            | 2010  | 2009        |  |
| in Mio. €                                  |       |             |  |
| Zinserträge                                | 7,2   | 4,1         |  |
| Zinsaufwendungen                           | -76,9 | -44,1       |  |

Für die im Zinsergebnis enthaltenen Zinserträge und Zinsaufwendungen aus Finanzinstrumenten lässt sich folgende Sensitivität ermitteln: Bei einer angenommenen Veränderung des Zinsniveaus um 1 Prozentpunkt hätte sich das Zinsergebnis um 3,2 Mio. € verschlechtert bzw. um 5,7 Mio. € verbessert (Vorjahr: ± 4,1 Mio. €).

Neben Forderungen und Verbindlichkeiten in der Konzernwährung Euro bestehen auch Positionen in Fremdwährungen. Wäre der Euro gegenüber den Fremdwährungen (überwiegend US-Dollar) um 10 % stärker bzw. schwächer geworden, hätte sich eine ergebniswirksame Veränderung des beizulegenden Zeitwerts der saldierten Position aus Fremdwährungsforderungen und -verbindlichkeiten um ± 19,8 Mio. € (Vorjahr: ± 19,4 Mio. €) ergeben.

### (31) EVENTUALSCHULDEN

In der K+S GRUPPE bestehen im Rahmen ihrer allgemeinen Geschäftstätigkeit verschiedene Risiken, für die Rückstellungen gebildet wurden, sofern die Voraussetzungen erfüllt sind. Darüber hinaus bestehen keine weiteren Risiken, die zum Ausweis von Eventualschulden führen würden.

**(32) SONSTIGE FINANZIELLE VERPFLICHTUNGEN**

| <b>SONSTIGE FINANZIELLE VERPFLICHTUNGEN</b>                  |              | TAB: 5.9.59  |  |
|--------------------------------------------------------------|--------------|--------------|--|
| in Mio. €                                                    | 2010         | 2009         |  |
| Verpflichtungen aus noch nicht abgeschlossenen Investitionen | 59,8         | 45,2         |  |
| Verpflichtungen aus Operating-Leasing                        |              |              |  |
| – fällig im Folgejahr                                        | 20,6         | 24,0         |  |
| – fällig im 2. bis 5. Jahr                                   | 43,9         | 46,5         |  |
| – fällig nach 5 Jahren                                       | 17,5         | 15,0         |  |
| <b>Sonstige finanzielle Verpflichtungen</b>                  | <b>141,8</b> | <b>130,7</b> |  |

Operating-Leasingverträge bestehen beispielsweise für Gegenstände der Betriebs- und Geschäftsausstattung und für Personenkraftwagen. Diese Vermögenswerte sind aufgrund der vertraglichen Vereinbarungen nicht im Anlagevermögen zu bilanzieren. Der Aufwand aus Operating-Leasing belief sich im Jahr 2010 auf 45,0 Mio. € (Vorjahr: 22,6 Mio. €). Die zum 31. Dezember 2010 bestehenden Verbindlichkeiten und sonstigen finanziellen Verpflichtungen aus Finanzierungsleasing sind aus Konzernsicht als unwesentlich zu bezeichnen.

**ERLÄUTERUNGEN ZUR SEGMENTBERICHTERSTATTUNG**

Die Segmentberichterstattung ist auf den Seiten 172 f. dargestellt.

**(33) SEGMENTABGRENZUNG**

Die Segmentabgrenzung erfolgt produktorientiert. Dies entspricht der internen Organisations- und Berichtsstruktur der K+S GRUPPE.

Im Segment Kali- und Magnesiumprodukte sind die Produktion und Vermarktung von Kalidüngemitteln und Düngemittelspezialitäten sowie Kali- und Magnesiumverbindungen für technische, gewerbliche und pharmazeutische Anwendungen zusammengefasst.

Das Segment Stickstoffdüngemittel konzentriert sich mit der K+S NITROGEN auf die Vermarktung und den Handel von stickstoffhaltigen Düngemitteln für Großverbraucher in der Landwirtschaft und Spezialkulturen. Der EXPERT-Bereich der COMPO umfasst die Bereiche Fertigation, Zierpflanzen und Öffentliches Grün. Im Consumerbereich bietet COMPO ein breites Angebot qualitativ hochwertiger Blumenerden, Spezialdünger und Pflanzenschutzprodukte an.

Das Segment Salz umfasst die Produktion und die Vermarktung von Speisesalz, Gewerbe- und Industriesalzen, Auftausalz sowie Natriumchlorid-Sole.

Im Segment Ergänzende Geschäftsbereiche sind neben Recyclingaktivitäten und der Entsorgung bzw. Verwertung von Abfällen in Kali- bzw. Steinsalzbergwerken sowie der Granulierung von CATSAN® weitere für die K+S GRUPPE wichtige Aktivitäten gebündelt. Mit der KALITRANSPORT GESELLSCHAFT MBH und deren Tochtergesellschaften verfügt die K+S GRUPPE über einen eigenen Logistik-Dienstleister. Die CHEMISCHE FABRIK KALK GMBH handelt mit verschiedenen Basischemikalien.

Die für die Ermittlung der Segmentinformationen angewandten Bilanzierungs- und Bewertungsmethoden stimmen grundsätzlich mit den Bilanzierungs- und Bewertungsgrundsätzen der K+S GRUPPE überein.

**(34) GRUNDSÄTZE DER ZUORDNUNG VON SEGMENTVERMÖGEN UND -SCHULDEN**

Vermögenswerte, Rückstellungen und Verbindlichkeiten werden entsprechend ihrer Nutzung bzw. Entstehung den Segmenten zugeordnet. Bei Nutzung durch bzw. Entstehung in mehreren Segmenten erfolgt eine Zuordnung auf Basis angemessener Schlüssel.

Finanzanlagen (außer Beteiligungen) sowie langfristige Finanzverbindlichkeiten werden den Segmenten nicht zugeordnet.

**(35) GRUNDSÄTZE DER ZUORDNUNG VON SEGMENTERGEBNISSEN**

Die Daten für die Ermittlung der Segmentergebnisse werden durch das interne Rechnungswesen anhand von Gewinn- und Verlustrechnungen nach dem Gesamtkostenverfahren (interne Berichtsstruktur der K+S GRUPPE) ermittelt. Die Gewinn- und Verlustrechnungen der einbezogenen Gesellschaften werden den Segmenten im Rahmen der Profit-Center-Rechnungen zugeordnet.



Als wichtigste interne Ergebnisgröße und als Indikator für die Ertragskraft hat der Vorstand der K+S GRUPPE in seiner Funktion als oberstes Entscheidungsgremium das operative Ergebnis EBIT I bestimmt. Neben der Nichtberücksichtigung des Zinsergebnisses und des Steueraufwands wird auch auf die Einbeziehung der sonstigen Erträge und Aufwendungen des Finanzergebnisses verzichtet. In das EBIT I fließt zudem nur das realisierte Ergebnis aus operativen, antizipativen Sicherungsgeschäften ein (siehe ‚Erläuterungen zur Gewinn- und Verlustrechnung und Gesamtergebnisrechnung‘ auf den Seiten 184 ff.).

Die Darstellung der Ergebnisse der Geschäftsbereiche erfolgt auf konsolidierter Basis. Intra-segmentäre Liefer- und Leistungsbeziehungen werden konsolidiert.

### **(36) GRUNDSÄTZE FÜR DIE VERRECHNUNGSPREISE ZWISCHEN SEGMENTEN**

Für Lieferungen und Leistungen zwischen Segmenten werden Verrechnungspreise festgelegt, welche in der jeweiligen konkreten Situation und unter gleichen Umständen von einem fremden Dritten zu zahlen wären. Art und Höhe der Abrechnung bestimmen sich nach Wert und Umfang der Lieferungen oder Leistungen unter Berücksichtigung der zugrunde liegenden Rechtsbeziehung. Die Methoden zur Bestimmung der Verrechnungspreise werden zeitnah dokumentiert und kontinuierlich beibehalten. Bei der Bestimmung von Verrechnungspreisen für Lieferungen kann die Preisvergleichsmethode, die Wiederverkaufspreismethode, die Kostenaufschlagsmethode oder eine Kombination dieser Methoden angewendet werden. Dabei wird die Methode gewählt, die den Verhältnissen am nächsten kommt, unter denen sich auf vergleichbaren Märkten Fremdpreise bilden.

### **(37) ZUSÄTZLICHE SEGMENTANGABEN**

#### **GESCHÄFTSBEREICH KALI- UND MAGNESIUMPRODUKTE**

Für nicht in Anspruch genommene Verpflichtungen aus dem Jahr 2009 wurden Rückstellungen im Geschäftsbereich Kali- und Magnesiumprodukte in Höhe von 22,1 Mio. € (Vorjahr 14,4 Mio. €) aufgelöst. In der Berichtsperiode fielen für Rabattzahlungen für das Geschäftsjahr 2009 periodenfremde Aufwendungen in Höhe von 2,2 Mio. € (Vorjahr 18,7 Mio. €) an. Der Geschäftsbereich Kali- und Magnesiumprodukte verzeichnete eine außerplanmäßige Abschreibung von 6,4 Mio. € die im sonstigen betrieblichen Aufwand ausgewiesen wurde. Im Vorjahr wurde eine außerplanmäßige Beteiligungsabschreibung in Höhe von 1,1 Mio. € vorgenommen.

#### **GESCHÄFTSBEREICH STICKSTOFFDÜNGEMITTEL**

In der Berichtsperiode wurden im Geschäftsbereich Stickstoffdüngemittel Wertminderungen für Vorräte in Höhe von 8,5 Mio. € (Vorjahr 23,1 Mio. €) vorgenommen. Für nicht in Anspruch genommene Verpflichtungen aus dem Jahr 2009 wurden Rückstellungen in Höhe von 23,8 Mio. € (Vorjahr: 29,8 Mio. €) aufgelöst. Gutschriften von Lieferanten für das Geschäftsjahr 2009 führten zu periodenfremden Erträgen in Höhe von 11,6 Mio. € (Vorjahr: Nachbelastungen von Lieferanten führten zu periodenfremden Aufwendungen in Höhe von 15,0 Mio. €). Am Ende des Geschäftsjahres 2010 durchgeführte Werthaltigkeitstests ergaben im Geschäftsbereich Stickstoffdüngemittel einen Wertminderungsaufwand in Höhe von 0,2 Mio. €, der in den sonstigen betrieblichen Aufwendungen erfasst wurde (Vorjahr: 2,2 Mio. €, davon wurden 0,8 Mio. € in den sonstigen betrieblichen Aufwendungen und 1,4 Mio. € im Beteiligungsergebnis ausgewiesen).

#### **GESCHÄFTSBEREICH SALZ**

Im Geschäftsbereich Salz wurden in der Berichtsperiode für nicht in Anspruch genommene Verpflichtungen Rückstellungen in Höhe von 21,8 Mio. € (Vorjahr: 3,5 Mio. €) aufgelöst. Im Berichtsjahr fielen außerplanmäßige Abschreibungen in Höhe von 6,3 Mio. € an (Vorjahr: 0 Mio. €), die im sonstigen betrieblichen Aufwand ausgewiesen wurden.

**(38) ERLÄUTERUNG DER ÜBERLEITUNGSPPOSITIONEN**

Die Überleitungen der Segmentzahlen auf die Abschlusszahlen der K+S GRUPPE betreffen Positionen, die den Zentralfunktionen zugerechnet werden, sowie konsolidierungsbedingte Effekte. Die wesentlichen Positionen sind:

| <b>ÜBERLEITUNG SEGMENTZAHLEN</b>             |                | TAB: 5.9.60    |  |
|----------------------------------------------|----------------|----------------|--|
|                                              | 2010           | 2009           |  |
| in Mio. €                                    |                |                |  |
| <b>Überleitung Segmentergebnisse</b>         |                |                |  |
| Konsolidierungsbedingte Effekte              | -0,2           | -0,6           |  |
| Ergebnis der Zentralfunktionen               | -63,8          | -40,6          |  |
|                                              | <b>-64,0</b>   | <b>-41,2</b>   |  |
| <b>Überleitung Segmentvermögen</b>           |                |                |  |
| Anlagevermögen                               | 51,3           | 51,4           |  |
| Aktive latente Steuern                       | 57,8           | 32,7           |  |
| Marktwerte Derivate                          | 0,1            | -5,4           |  |
| Steuererstattungsansprüche aus Ertragsteuern | 25,0           | 30,3           |  |
| Übrige Forderungen                           | 69,2           | 281,8          |  |
| Geld und Geldanlagen                         | 671,2          | 425,7          |  |
| Konsolidierungsbedingte Effekte              | -938,6         | -420,7         |  |
|                                              | <b>-64,0</b>   | <b>395,8</b>   |  |
| <b>Überleitung Segmentschulden</b>           |                |                |  |
| Rückstellungen für Pensionen u. Ähnliches    | 21,1           | 33,4           |  |
| Sonstige Rückstellungen                      | 55,8           | 169,4          |  |
| Passive latente Steuern                      | 261,6          | 237,1          |  |
| Marktwerte Derivate                          | 2,7            | 6,5            |  |
| Finanzverbindlichkeiten                      | 786,6          | 1.259,9        |  |
| Übrige Verbindlichkeiten                     | 20,0           | 25,9           |  |
| Steuerverbindlichkeiten aus Ertragsteuern    | 82,4           | 41,9           |  |
| Konsolidierungsbedingte Effekte              | -76,7          | -130,0         |  |
|                                              | <b>1.153,5</b> | <b>1.644,1</b> |  |

**(39) REGIONALE UMSATZVERTEILUNG**

Die Umsatzerlöse gliedern sich nach Regionen wie folgt:

| <b>REGIONALE UMSATZVERTEILUNG</b> |                | TAB: 5.9.61    |  |
|-----------------------------------|----------------|----------------|--|
|                                   | 2010           | 2009           |  |
| in Mio. €                         |                |                |  |
| Inland                            | 897,7          | 642,4          |  |
| Übriges Europa                    | 1.725,6        | 1.253,8        |  |
| Übersee                           | 2.370,5        | 1.677,6        |  |
| – davon Brasilien                 | 408,5          | 371,9          |  |
| – davon USA                       | 932,7          | 486,7          |  |
| <b>Gesamtumsatz</b>               | <b>4.993,8</b> | <b>3.573,8</b> |  |

Die Zuordnung orientiert sich nach dem Sitz der Kunden. In den Geschäftsjahren 2009 und 2010 entfielen auf keinen Einzelkunden mehr als 10 % der Gesamterlöse.

**(40) REGIONALE VERTEILUNG DES VERMÖGENS**

Das Vermögen der K+S GRUPPE, bereinigt um Ertragsteuerforderungen und aktive latente Steuern, gliedert sich nach Regionen wie folgt:

| <b>REGIONALE VERTEILUNG DES VERMÖGENS</b> |                | TAB: 5.9.62    |  |
|-------------------------------------------|----------------|----------------|--|
|                                           | 2010           | 2009           |  |
| in Mio. €                                 |                |                |  |
| Inland                                    | 2.488,2        | 2.243,1        |  |
| Übriges Europa                            | 440,7          | 329,9          |  |
| Übersee                                   | 2.562,0        | 2.581,1        |  |
| <b>Gesamtvermögen</b>                     | <b>5.490,9</b> | <b>5.154,1</b> |  |

Die Zuordnung wird nach dem Standort des betreffenden Vermögens vorgenommen.

**(41) REGIONALE VERTEILUNG DER INVESTITIONEN**

Die Investitionen in immaterielle Vermögenswerte und Sachanlagen gliedern sich nach Regionen wie folgt:

| <b>REGIONALE VERTEILUNG DER INVESTITIONEN</b> |              |              | TAB: 5.9.63 |
|-----------------------------------------------|--------------|--------------|-------------|
|                                               | 2010         | 2009         |             |
| in Mio. €                                     |              |              |             |
| Inland                                        | 130,6        | 137,8        |             |
| Übriges Europa                                | 5,5          | 5,4          |             |
| Übersee                                       | 64,9         | 34,4         |             |
| <b>Gesamtinvestitionen</b>                    | <b>201,0</b> | <b>177,6</b> |             |

Die Zuordnung erfolgt nach dem Standort des betreffenden Vermögens.

**ERLÄUTERUNGEN ZUR KAPITALFLUSSRECHNUNG**

Die Kapitalflussrechnung ist auf der Seite 163 dargestellt.

**(42) AUSZAHLUNGEN FÜR DEN ERWERB KONSOLIDierter UNTERNEHMEN**

Die Position Auszahlungen für den Erwerb konsolidierter Unternehmen betrifft die Ausgaben für die im Vorjahr erworbenen Anteile an Gesellschaften:

| <b>AUSZAHLUNGEN FÜR DEN ERWERB KONSOLIDierter UNTERNEHMEN</b> |          |                | TAB: 5.9.64 |
|---------------------------------------------------------------|----------|----------------|-------------|
|                                                               | 2010     | 2009           |             |
| in Mio. €                                                     |          |                |             |
| Kaufpreis                                                     | –        | 1.084,0        |             |
| Erworbenes Zahlungsmittel                                     | –        | –9,0           |             |
| Kurssicherungskosten                                          | –        | 87,9           |             |
| Anschaffungsnebenkosten                                       | –        | 14,0           |             |
| <b>Auszahlungen für den Erwerb konsolidierter Unternehmen</b> | <b>–</b> | <b>1.176,9</b> |             |

**(43) NETTOFINANZMITTELBESTAND**

| <b>NETTOFINANZMITTELBESTAND</b>                    |              |              | TAB: 5.9.65 |
|----------------------------------------------------|--------------|--------------|-------------|
|                                                    | 2010         | 2009         |             |
| in Mio. €                                          |              |              |             |
| Flüssige Mittel                                    | 748,4        | 529,1        |             |
| Von verbundenen Unternehmen hereingenommene Gelder | –7,8         | –5,6         |             |
| Kontokorrentkredite gegenüber Kreditinstituten     | –            | –3,4         |             |
| <b>Nettofinanzmittelbestand</b>                    | <b>740,6</b> | <b>520,1</b> |             |

**SONSTIGE ANGABEN****HONORAR FÜR DEN ABSCHLUSSPRÜFER**

| <b>HONORAR FÜR DEN ABSCHLUSSPRÜFER</b> |            |            | TAB: 5.9.66 |
|----------------------------------------|------------|------------|-------------|
|                                        | 2010       | 2009       |             |
| in Mio. €                              |            |            |             |
| Abschlussprüfungsleistung              | 1,0        | 0,9        |             |
| Andere Bestätigungsleistungen          | –          | 0,7        |             |
| Sonstige Leistungen                    | 0,1        | 0,1        |             |
| <b>Honorar für den Abschlussprüfer</b> | <b>1,1</b> | <b>1,7</b> |             |

Die Abschlussprüfungsleistungen umfassen die Prüfung des Konzernabschlusses und der Jahresabschlüsse der einbezogenen inländischen Gesellschaften. In den sonstigen Leistungen sind Beratungskosten für Einzelprojekte enthalten.

## ZUWENDUNGEN DER ÖFFENTLICHEN HAND

| ZUWENDUNGEN DER ÖFFENTLICHEN HAND        |            | TAB: 5.9.67 |  |
|------------------------------------------|------------|-------------|--|
|                                          | 2010       | 2009        |  |
| in Mio. €                                |            |             |  |
| Investitionszulagen                      | 0,6        | 2,4         |  |
| Investitionszuschüsse                    | 1,8        | 4,6         |  |
| Erfolgsbezogene Zuwendungen              | 4,7        | 11,9        |  |
| <b>Zuwendungen der öffentlichen Hand</b> | <b>7,1</b> | <b>18,9</b> |  |

Die erfassten Investitionszulagen betreffen Beträge, die nach dem Investitionszulagengesetz für Investitionen im Fördergebiet der Bundesrepublik Deutschland gewährt wurden. Investitionszuschüsse wurden im Rahmen der Förderung der regionalen Wirtschaftsstruktur und für bestimmte Verkehrsprojekte innerhalb der Bundesrepublik Deutschland gewährt. Investitionszulagen und -zuschüsse werden von den Buchwerten der betreffenden Vermögenswerte abgesetzt.

Bei den erfolgsbezogenen Zuwendungen handelt es sich um Leistungen der Bundesagentur für Arbeit nach dem Altersteilzeitgesetz sowie Erstattungen der vom Arbeitgeber zu tragenden Aufwendungen zur Sozialversicherung im Zusammenhang mit dem Kurzarbeitergeld.

### NAHESTEHENDE UNTERNEHMEN UND PERSONEN

Neben den in den Konzernabschluss einbezogenen Tochterunternehmen steht die K+S GRUPPE mit weiteren nahestehenden Unternehmen in Beziehungen; hierzu zählen nicht konsolidierte Tochterunternehmen, Gemeinschaftsunternehmen sowie Unternehmen, auf die die K+S GRUPPE einen maßgeblichen Einfluss ausüben kann (assoziierte Unternehmen). Eine vollständige Übersicht aller nahestehenden Unternehmen kann der Zusammenstellung des gesamten Beteiligungsbesitzes (Anteilsbesitzliste) auf den Seiten 214 ff. entnommen werden.

Die folgende Tabelle zeigt die in der Berichtsperiode erfolgten Transaktionen der K+S GRUPPE mit nicht konsolidierten Tochterunternehmen. Die Abwicklung der Geschäfte erfolgte zu marktüblichen Konditionen.

## TRANSAKTIONEN MIT NICHT KONSOLIDierten TOCHTERUNTERNEHMEN

TAB: 5.9.68

|                                                  | 2010 | 2009 |
|--------------------------------------------------|------|------|
| in Mio. €                                        |      |      |
| Umsätze aus Lieferungen und Leistungen           | 67,1 | 45,7 |
| Empfangene Lieferungen und Leistungen            | 25,8 | 19,9 |
| Erträge aus Ausschüttungen und Gewinnabführungen | 4,0  | 3,3  |
| Sonstige Erträge                                 | 1,1  | 0,6  |
| Sonstige Aufwendungen                            | 1,5  | 1,4  |

Die Umsätze aus Lieferungen und Leistungen resultieren im Wesentlichen aus Warenverkäufen von konsolidierten Gesellschaften an ausländische Vertriebsgesellschaften. Die empfangenen Lieferungen und Leistungen betreffen im Wesentlichen Sprengstofflieferungen einer inländischen Tochtergesellschaft sowie Provisionen, die von ausländischen Vertriebsgesellschaften in Rechnung gestellt wurden.

Am 31. Dezember 2010 wurden folgende ausstehende Salden mit nicht konsolidierten Tochterunternehmen ausgewiesen:

| SALDEN MIT NICHT KONSOLIDierten TOCHTERUNTERNEHMEN  |      | TAB: 5.9.69 |  |
|-----------------------------------------------------|------|-------------|--|
|                                                     | 2010 | 2009        |  |
| in Mio. €                                           |      |             |  |
| Forderungen gegen verbundene Unternehmen            | 17,0 | 8,7         |  |
| Verbindlichkeiten gegenüber verbundenen Unternehmen | 12,6 | 8,7         |  |
| – davon aus Bankverkehr                             | 7,8  | 5,6         |  |

Zum Bilanzstichtag bestanden keine Wertberichtigungen auf Forderungen gegen verbundene Unternehmen (Vorjahr: 0 Mio. €). Ausfallversicherungen für Forderungen gegen Tochtergesellschaften existieren nicht. Die Forderungen und Verbindlichkeiten aus Bankverkehr resultieren aus der zentralen Aufnahme bzw. Anlage liquider Mittel bei der K+S AKTIENGESELLSCHAFT (Cash-Pooling). Ausleihungen an nahestehende Unternehmen bestehen in Höhe von 0,3 Mio. € (Vorjahr: 0,3 Mio. €), darauf entfallen Wertberichtigungen in Höhe von 0,1 Mio. € (Vorjahr: 0,1 Mio. €).

Transaktionen der K+S GRUPPE mit Gemeinschaftsunternehmen und assoziierten Unternehmen sind aus Konzernsicht als unwesentlich zu bezeichnen.

Nahestehende Personen sind definiert als Personen, die für die Planung, Leitung und Überwachung eines Unternehmens verantwortlich sind. Hierzu zählen der Vorstand und der Aufsichtsrat. Die Vergütung der nahestehenden Personen ist im nachfolgenden Abschnitt sowie im Vergütungsbericht dargestellt. Weitere wesentliche Transaktionen mit nahestehenden Personen fanden nicht statt.

#### GESAMTBEZÜGE DES AUFSICHTSRATS UND DES VORSTANDS

| GESAMTBEZÜGE DES AUFSICHTSRATS UND DES VORSTANDS                                            |             | TAB: 5.9.70 |  |
|---------------------------------------------------------------------------------------------|-------------|-------------|--|
|                                                                                             | 2010        | 2009        |  |
| in Mio. €                                                                                   |             |             |  |
| <b>Gesamtbezüge des Aufsichtsrats</b>                                                       | <b>1,4</b>  | <b>1,1</b>  |  |
| – davon fix                                                                                 | 1,1         | 1,1         |  |
| – davon erfolgsbezogen                                                                      | 0,3         | –           |  |
| <b>Gesamtbezüge des Vorstands</b>                                                           | <b>5,8</b>  | <b>7,0</b>  |  |
| – davon fix                                                                                 | 2,2         | 2,1         |  |
| – davon erfolgsbezogen                                                                      | 3,6         | 1,7         |  |
| – davon gewährte Optionsrechte                                                              | –           | 3,2         |  |
| <b>Gesamtbezüge früherer Mitglieder des Vorstands und ihrer Hinterbliebenen</b>             | <b>1,0</b>  | <b>2,3</b>  |  |
| <b>Pensionsrückstellungen für frühere Mitglieder des Vorstands und ihre Hinterbliebenen</b> | <b>11,9</b> | <b>12,5</b> |  |

Die Gesamtbezüge des Vorstands betrafen im Berichtsjahr fünf Vorstandsmitglieder, die jeweils zwölf Monate im Amt waren. Im Vorjahr waren vier Vorstandsmitglieder zwölf Monate und ein Vorstandsmitglied sieben Monate im Amt.

Das Vergütungssystem des Vorstands setzt sich aus folgenden Komponenten zusammen:

- + laufende monatliche Bezüge (Fixgehalt); hinzugerechnet werden Sachbezüge
- + erfolgsbezogene Einmalvergütung; die Tantieme bestimmt sich nach der Gesamtkapitalrendite und einer persönlichen Leistungskomponente und wird im jeweils folgenden Geschäftsjahr ausgezahlt (Vorjahreszahlen gemäß tatsächlicher Tantiemenzahlung angepasst)

- + Gewährung von Aktienoptionen (Vorjahreszahlen angepasst, da sich diese auf die Zahlungen aus Optionsausübung bezogen)

Die Darstellung der individualisierten Bezüge der Vorstandsmitglieder für das Geschäftsjahr 2010 erfolgt im Vergütungsbericht des Corporate-Governance-Berichts auf Seite 33; der Vergütungsbericht ist auch Bestandteil des Lageberichts.

#### BETEILIGUNGEN AN DER K+S AKTIENGESELLSCHAFT

Im Jahr 2010 gab es keine wesentlichen Veränderungen der Aktionärsstruktur. Nach Meldung gemäß § 21 WpHG besitzt die MERITUS TRUST COMPANY LIMITED, Bermuda, über die EUROCHEM GROUP SE und ihr zuzurechnende Tochterunternehmen knapp 15 % der Aktien. MERITUS hält treuhänderisch Industriebeteiligungen von Andrey Melnichenko. Die BASF SE, Ludwigshafen, hält weiterhin etwas über 10 % unserer Aktien. Nachdem BLACKROCK INC., New York, USA uns am 2. September 2010 zunächst mitgeteilt hatte, dass sie die Schwelle von 3 % unterschritten habe, veröffentlichte das Unternehmen am 13. September 2010 wieder eine Überschreitung dieser Schwelle und einen Anteilsbesitz von 3,63 %. Am 26. November 2010 wurden wir von AXA S.A., Paris, Frankreich darüber informiert, dass sie 3,06 % der K+S-Aktien halte.

#### ENTSPRECHENSERKLÄRUNG ZUM CORPORATE GOVERNANCE KODEX

Die Entsprechenserklärung gemäß § 161 AktG zu den Empfehlungen der „Regierungskommission Deutscher Corporate Governance Kodex“ ist für 2009/2010 von Vorstand und Aufsichtsrat der K+S AKTIENGESELLSCHAFT abgegeben und den Aktionären im Finanzbericht 2009 und im Internetauftritt der K+S GRUPPE ([www.k-plus-s.com](http://www.k-plus-s.com)) zugänglich gemacht worden. Die Entsprechenserklärung 2010/2011 ist ebenfalls dauerhaft auf der K+S-Homepage und im Finanzbericht 2010 auf Seite 21 veröffentlicht.

## ANTEILSBESITZLISTE GEMÄSS § 313 HGB

## ANTEILSBESITZLISTE GEMÄSS § 313 HGB TAB: 5.9.71

|                                                                               | Sitz der Gesellschaft    |             | Anteile<br>am Kapital | Anteil<br>Stimmrechte |
|-------------------------------------------------------------------------------|--------------------------|-------------|-----------------------|-----------------------|
| in %; per 31.12.2010                                                          |                          |             |                       |                       |
| <b>Voll konsolidierte inländische Tochterunternehmen (21 Gesellschaften)</b>  |                          |             |                       |                       |
| K+S Aktiengesellschaft                                                        | Kassel                   | Deutschland | —                     | —                     |
| Chemische Fabrik Kalk GmbH                                                    | Köln                     | Deutschland | 100,00                | 100,00                |
| COMPO Gesellschaft mbH & Co. KG <sup>1</sup>                                  | Münster                  | Deutschland | 100,00                | 100,00                |
| Deutscher Straßen-Dienst GmbH                                                 | Hannover                 | Deutschland | 100,00                | 100,00                |
| esco – european salt company GmbH & Co. KG <sup>1</sup>                       | Hannover                 | Deutschland | 100,00                | 100,00                |
| esco international GmbH                                                       | Hannover                 | Deutschland | 100,00                | 100,00                |
| fertiva GmbH <sup>2</sup>                                                     | Mannheim                 | Deutschland | 100,00                | 100,00                |
| German Bulk Chartering GmbH <sup>2</sup>                                      | Hamburg                  | Deutschland | 100,00                | 100,00                |
| K+S Baustoffrecycling GmbH <sup>2</sup>                                       | Sehnde                   | Deutschland | 100,00                | 100,00                |
| K+S Beteiligungs GmbH <sup>2</sup>                                            | Kassel                   | Deutschland | 100,00                | 100,00                |
| K+S Entsorgung GmbH <sup>2</sup>                                              | Kassel                   | Deutschland | 100,00                | 100,00                |
| K+S IT-Services GmbH <sup>2</sup>                                             | Kassel                   | Deutschland | 100,00                | 100,00                |
| K+S KALI GmbH <sup>2</sup>                                                    | Kassel                   | Deutschland | 100,00                | 100,00                |
| K+S Nitrogen GmbH <sup>2</sup>                                                | Mannheim                 | Deutschland | 100,00                | 100,00                |
| K+S Salz GmbH <sup>2</sup>                                                    | Hannover                 | Deutschland | 100,00                | 100,00                |
| Kali-Transport Gesellschaft mbH <sup>2</sup>                                  | Hamburg                  | Deutschland | 100,00                | 100,00                |
| Kali-Union Verwaltungsgesellschaft mbH <sup>2</sup>                           | Kassel                   | Deutschland | 100,00                | 100,00                |
| park GmbH                                                                     | Reckling-<br>hausen      | Deutschland | 100,00                | 100,00                |
| Torf- und Humuswerk Gnarrenburg GmbH                                          | Gnarrenburg              | Deutschland | 100,00                | 100,00                |
| Torf- und Humuswerk Uchte GmbH                                                | Uchte                    | Deutschland | 100,00                | 100,00                |
| UBT See- und Hafen-Spedition GmbH Rostock <sup>2</sup>                        | Rostock                  | Deutschland | 100,00                | 100,00                |
| <b>Voll konsolidierte ausländische Tochterunternehmen (60 Gesellschaften)</b> |                          |             |                       |                       |
| Canadian Brine Ltd.                                                           | Pointe Claire,<br>Québec | Kanada      | 100,00                | 100,00                |
| Canadian Salt Finance Company                                                 | Halifax,<br>Nova Scotia  | Kanada      | 100,00                | 100,00                |
| Canadian Salt Holding Company                                                 | Halifax,<br>Nova Scotia  | Kanada      | 100,00                | 100,00                |
| Compania Minera Punta de Lobos Ltda.                                          | Santiago<br>de Chile     | Chile       | 99,64                 | 100,00                |

## ANTEILSBESITZLISTE GEMÄSS § 313 HGB (FORTSETZUNG) TAB: 5.9.71

|                                                       | Sitz der Gesellschaft   |             | Anteile<br>am Kapital | Anteil<br>Stimmrechte |
|-------------------------------------------------------|-------------------------|-------------|-----------------------|-----------------------|
| in %; per 31.12.2010                                  |                         |             |                       |                       |
| COMPO Austria GmbH                                    | Wien                    | Österreich  | 100,00                | 100,00                |
| COMPO Benelux N.V.                                    | Deinze                  | Belgien     | 100,00                | 100,00                |
| COMPO do Brasil S.A.                                  | Guaratinguetá           | Brasilien   | 100,00                | 100,00                |
| COMPO Horticulture et Jardin S.A.S.                   | Roche-lez-<br>Beaupré   | Frankreich  | 100,00                | 100,00                |
| COMPO Jardin AG                                       | Allschwil               | Schweiz     | 100,00                | 100,00                |
| Empresa de Servicios Ltda.                            | Santiago<br>de Chile    | Chile       | 99,64                 | 100,00                |
| Empresa Maritima S.A.                                 | Santiago<br>de Chile    | Chile       | 48,67                 | 99,59                 |
| esco benelux N.V.                                     | Diegem                  | Belgien     | 100,00                | 100,00                |
| esco france S.A.S.                                    | Levallois-<br>Perret    | Frankreich  | 100,00                | 100,00                |
| esco Holding France S.A.S.                            | Dombasle<br>sur Meurthe | Frankreich  | 100,00                | 100,00                |
| esco Spain S.L.                                       | Barcelona               | Spanien     | 100,00                | 100,00                |
| Fertilizantes COMPO AGRO Chile Ltda.                  | Santiago<br>de Chile    | Chile       | 100,00                | 100,00                |
| Frisia Zout B.V.                                      | Harlingen               | Niederlande | 100,00                | 100,00                |
| GLC Trucking Co. Inc.                                 | Chicago                 | USA         | 100,00                | 100,00                |
| Glendale Salt Development LLC                         | Chicago                 | USA         | 100,00                | 100,00                |
| Inagua General Store Ltd.                             | Chicago                 | USA         | 100,00                | 100,00                |
| Inagua Transports Inc.                                | Chicago                 | USA         | 100,00                | 100,00                |
| Inversiones Columbus Ltda.                            | Santiago<br>de Chile    | Chile       | 2,00                  | 100,00                |
| Inversiones Empremar Ltda.                            | Santiago<br>de Chile    | Chile       | 48,87                 | 100,00                |
| Inversiones K+S Sal de Chile Ltda.                    | Santiago<br>de Chile    | Chile       | 100,00                | 100,00                |
| Inversiones y Prospecciones<br>Mineras Tarapacá Ltda. | Santiago<br>de Chile    | Chile       | 100,00                | 100,00                |
| International Salt Company LLC                        | Clarks Summit           | USA         | 100,00                | 100,00                |
| K plus S Española S.L.                                | Barcelona               | Spanien     | 100,00                | 100,00                |
| K+S Agricultura S.p.A.                                | Cesano<br>Maderno       | Italien     | 100,00                | 100,00                |



## ANTEILSBESITZLISTE GEMÄSS § 313 HGB (FORTSETZUNG)

TAB: 5.9.71

|                                                | Sitz der Gesellschaft |              | Anteile<br>am Kapital | Anteil<br>Stimmrechte |
|------------------------------------------------|-----------------------|--------------|-----------------------|-----------------------|
| in %; per 31.12.2010                           |                       |              |                       |                       |
| K+S Agro México S.A. de C.V.                   | Mexiko-City           | Mexiko       | 100,00                | 100,00                |
| K+S Argentina S.R.L.                           | Buenos Aires          | Argentinien  | 100,00                | 100,00                |
| K+S Canada Holdings Inc.                       | Vancouver             | Kanada       | 100,00                | 100,00                |
| K+S Finance Belgium BVBA                       | Diegem                | Belgien      | 100,00                | 100,00                |
| K+S Finance Ltd.                               | St. Julians           | Malta        | 100,00                | 100,00                |
| K+S France S.A.S.                              | Roche-lez-Beaupré     | Frankreich   | 100,00                | 100,00                |
| K+S Hellas S.A.                                | Marousi               | Griechenland | 100,00                | 100,00                |
| K+S Investments Ltd.                           | St. Julians           | Malta        | 100,00                | 100,00                |
| K+S KALI Atlantique S.A.S.                     | Pré en Pail           | Frankreich   | 100,00                | 100,00                |
| K+S KALI du Roure S.A.S.                       | Le Teil               | Frankreich   | 100,00                | 100,00                |
| K+S KALI France S.A.S.                         | Reims                 | Frankreich   | 100,00                | 100,00                |
| K+S KALI Rodez S.A.S.                          | Onet le Château       | Frankreich   | 97,45                 | 97,45                 |
| K+S KALI Wittenheim S.A.S.                     | Wittenheim            | Frankreich   | 100,00                | 100,00                |
| K+S Mining Argentina S.A.                      | Buenos Aires          | Argentinien  | 100,00                | 100,00                |
| K+S Montana Holdings LLC                       | Chicago               | USA          | 100,00                | 100,00                |
| K+S North America Corporation                  | New York              | USA          | 100,00                | 100,00                |
| K+S North America Salt Holdings LLC            | Chicago               | USA          | 100,00                | 100,00                |
| K+S Salt of the Americas Holding B.V.          | Harlingen             | Niederlande  | 100,00                | 100,00                |
| Montana US Parent Inc.                         | Chicago               | USA          | 100,00                | 100,00                |
| Morton Bahamas Ltd.                            | Chicago               | USA          | 100,00                | 100,00                |
| Morton Salt Inc.                               | Chicago               | USA          | 100,00                | 100,00                |
| Navigation Sonamar Inc.                        | Pointe Claire, Québec | Kanada       | 100,00                | 100,00                |
| Salines Cérébos et de Bayonne S.A.S.           | Levallois-Perret      | Frankreich   | 100,00                | 100,00                |
| Salina Diamante Branco Ltda.                   | Rio de Janeiro        | Brasilien    | 100,00                | 100,00                |
| Servicios Maritimos Patillos S.A. <sup>3</sup> | Santiago de Chile     | Chile        | 49,82                 | 50,00                 |
| Servicios Portuarios Patillos S.A.             | Santiago de Chile     | Chile        | 99,53                 | 99,89                 |
| Sociedad Punta de Lobos S.A.                   | Santiago de Chile     | Chile        | 99,64                 | 99,64                 |

## ANTEILSBESITZLISTE GEMÄSS § 313 HGB (FORTSETZUNG)

TAB: 5.9.71

|                                                                                            | Sitz der Gesellschaft |              | Anteile<br>am Kapital | Anteil<br>Stimmrechte |
|--------------------------------------------------------------------------------------------|-----------------------|--------------|-----------------------|-----------------------|
| in %; per 31.12.2010                                                                       |                       |              |                       |                       |
| SPL USA LLC                                                                                | Clarks Summit         | USA          | 100,00                | 100,00                |
| The Canadian Salt Company Limited                                                          | Pointe Claire, Québec | Kanada       | 100,00                | 100,00                |
| Transporte por Containers S.A.                                                             | Santiago de Chile     | Chile        | 48,04                 | 98,71                 |
| VATEL Companhia de Produtos Alimentares S.A.                                               | Alverca               | Portugal     | 100,00                | 100,00                |
| Weeks Island Landowner LLC                                                                 | Chicago               | USA          | 100,00                | 100,00                |
| <b>Nicht konsolidierte inländische Tochterunternehmen (16 Gesellschaften)<sup>4</sup></b>  |                       |              |                       |                       |
| 1. K+S Verwaltungs GmbH                                                                    | Kassel                | Deutschland  | 100,00                | 100,00                |
| 1. K+S Verwaltungs GmbH & Co. Erwerbs KG                                                   | Kassel                | Deutschland  | 100,00                | 100,00                |
| 3. K+S Verwaltungs GmbH & Co. Erwerbs KG                                                   | Kassel                | Deutschland  | 100,00                | 100,00                |
| Algoflash GmbH Düngemittel                                                                 | Kassel                | Deutschland  | 100,00                | 100,00                |
| Beienrode Bergwerks-GmbH                                                                   | Kassel                | Deutschland  | 89,80                 | 89,80                 |
| COMPO Verwaltungsgesellschaft mbH                                                          | Münster               | Deutschland  | 100,00                | 100,00                |
| esco Verwaltungs GmbH                                                                      | Hannover              | Deutschland  | 100,00                | 100,00                |
| Ickenroth GmbH                                                                             | Staudt                | Deutschland  | 100,00                | 100,00                |
| K+S AN-Institut Verwaltungsgesellschaft mbH                                                | Kassel                | Deutschland  | 100,00                | 100,00                |
| K+S Consulting GmbH                                                                        | Kassel                | Deutschland  | 100,00                | 100,00                |
| K+S Versicherungsvermittlung GmbH                                                          | Kassel                | Deutschland  | 100,00                | 100,00                |
| MS „Butes“ Schifffahrts GmbH & Co. KG                                                      | Haren                 | Deutschland  | 82,35                 | 82,35                 |
| MS „Echion“ Schifffahrts GmbH & Co. KG                                                     | Haren                 | Deutschland  | 82,35                 | 82,35                 |
| MSW-Chemie GmbH                                                                            | Langelshiem           | Deutschland  | 68,50                 | 68,50                 |
| Verlagsgesellschaft für Ackerbau mbH                                                       | Kassel                | Deutschland  | 100,00                | 100,00                |
| Wohnbau Salzdetfurth GmbH                                                                  | Bad Salzdetfurth      | Deutschland  | 100,00                | 100,00                |
| <b>Nicht konsolidierte ausländische Tochterunternehmen (25 Gesellschaften)<sup>4</sup></b> |                       |              |                       |                       |
| Algoflash Kabushiki Kaisha                                                                 | Tokio                 | Japan        | 100,00                | 100,00                |
| COMPO Hellas S.A.                                                                          | Maroussi              | Griechenland | 100,00                | 100,00                |
| esco Nordic AB                                                                             | Göteborg              | Schweden     | 100,00                | 100,00                |

## ANTEILSBESITZLISTE GEMÄSS § 313 HGB (FORTSETZUNG)

TAB: 5.9.71

|                                                              | Sitz der Gesellschaft |                     | Anteile<br>am Kapital | Anteil<br>Stimmrechte |
|--------------------------------------------------------------|-----------------------|---------------------|-----------------------|-----------------------|
| in %; per 31.12.2010                                         |                       |                     |                       |                       |
| Imperial Thermal Products, Inc.                              | Chicago               | USA                 | 100,00                | 100,00                |
| K plus S Iberia S.L.                                         | Barcelona             | Spanien             | 100,00                | 100,00                |
| K+S Asia Pacific Pte. Ltd.                                   | Singapur              | Singapur            | 100,00                | 100,00                |
| K+S Benelux B.V.                                             | Breda                 | Niederlande         | 100,00                | 100,00                |
| K+S Brasileira Fertilizantes e<br>Produtos Industriais Ltda. | São Paulo             | Brasilien           | 100,00                | 100,00                |
| K+S CZ a.s.                                                  | Prag                  | Tschechien          | 100,00                | 100,00                |
| K+S Denmark Holding ApS                                      | Kopenhagen            | Dänemark            | 100,00                | 100,00                |
| K+S Entsorgung (Schweiz) AG                                  | Delémont              | Schweiz             | 100,00                | 100,00                |
| K+S Gübre ve Endüstri Ürünleri<br>San. ve Tic. Ltd. Sti.     | Istanbul              | Türkei              | 100,00                | 100,00                |
| K+S Italia S. r. L.                                          | Verona                | Italien             | 100,00                | 100,00                |
| K+S Nitrogen France S.A.S.                                   | Levallois-<br>Perret  | Frankreich          | 100,00                | 100,00                |
| K+S Polska Sp. z o.o.                                        | Poznan                | Polen               | 100,00                | 100,00                |
| K+S UK & Eire Ltd.                                           | Hertford              | Groß-<br>britannien | 100,00                | 100,00                |
| Kali (U.K.) Ltd.                                             | Hertford              | Groß-<br>britannien | 100,00                | 100,00                |
| Kali AG                                                      | Frauenkappeln         | Schweiz             | 100,00                | 100,00                |
| Kali-Importen A/S                                            | Kopenhagen            | Dänemark            | 100,00                | 100,00                |
| OOO K+S Rus                                                  | Moskau                | Russ.<br>Föderation | 100,00                | 100,00                |
| Potash Company of Canada (1998) Ltd.                         | Toronto               | Kanada              | 100,00                | 100,00                |
| Potash S.A. (Pty) Ltd.                                       | Johannesburg          | Südafrika           | 100,00                | 100,00                |
| Saleable – Importacao e Exportacao Ltda.                     | Lissabon              | Portugal            | 100,00                | 100,00                |
| Serveis de Mexico S.A. de C.V.                               | Mexiko-City           | Mexiko              | 100,00                | 100,00                |
| Shenzhen K+S Trading Co. Ltd.                                | Shenzhen              | China               | 100,00                | 100,00                |

## ANTEILSBESITZLISTE GEMÄSS § 313 HGB (FORTSETZUNG)

TAB: 5.9.71

|                                                                                            | Sitz der Gesellschaft |             | Anteile<br>am Kapital | Anteil<br>Stimmrechte |
|--------------------------------------------------------------------------------------------|-----------------------|-------------|-----------------------|-----------------------|
| in %; per 31.12.2010                                                                       |                       |             |                       |                       |
| <b>Assoziierte Unternehmen und Gemeinschaftsunternehmen (8 Gesellschaften)<sup>5</sup></b> |                       |             |                       |                       |
| Börde Container Feeder GmbH                                                                | Haldensleben          | Deutschland | 33,30                 | 33,30                 |
| Ecuatoiana de Sal y Productos Quimicos C.A.                                                | Guayaquil             | Ecuador     | 50,00                 | 50,00                 |
| Morton China National Salt<br>(Shanghai) Salt Co., Ltd.                                    | Shanghai              | China       | 45,00                 | 45,00                 |
| MS „Melas“ Schiffahrts GmbH & Co. KG                                                       | Haren                 | Deutschland | 38,90                 | 38,90                 |
| MS „Peelus“ Schiffahrts GmbH & Co. KG                                                      | Haren                 | Deutschland | 30,20                 | 30,20                 |
| SIA Livanu Kudras Fabrika                                                                  | Livani                | Lettland    | 28,72                 | 28,72                 |
| Société des Engrais de Berry au Bac S.A.                                                   | Reims                 | Frankreich  | 34,00                 | 34,00                 |
| Werra Kombi Terminal<br>Betriebsgesellschaft mbH                                           | Philippsthal          | Deutschland | 50,00                 | 50,00                 |
| <b>Sonstige Beteiligungen (16 Gesellschaften)<sup>6</sup></b>                              |                       |             |                       |                       |
| Fachschule f. Wirtschaft und<br>Technik Gem. GmbH                                          | Clausthal             | Deutschland | 9,40                  | 9,40                  |
| Hubwoo.com S.A.                                                                            | Paris                 | Frankreich  | 0,04                  | 0,04                  |
| Lehrter Wohnungsbau GmbH                                                                   | Lehrte                | Deutschland | 6,70                  | 6,70                  |
| MS „Basalt“ Schiffahrts GmbH & Co. KG                                                      | Haren                 | Deutschland | 12,00                 | 12,00                 |
| MS „Dolomit“ Schiffahrts GmbH & Co. KG                                                     | Haren                 | Deutschland | 11,90                 | 11,90                 |
| MS „Granit“ Schiffahrts GmbH & Co. KG                                                      | Haren                 | Deutschland | 12,00                 | 12,00                 |
| MS „Lava“ Schiffahrts GmbH & Co. KG                                                        | Haren                 | Deutschland | 11,50                 | 11,50                 |
| MS „Magma“ Schiffahrts GmbH & Co. KG                                                       | Haren                 | Deutschland | 11,90                 | 11,90                 |
| MS „Marmor“ Schiffahrts GmbH & Co. KG                                                      | Haren                 | Deutschland | 11,40                 | 11,40                 |
| MS „Paganini“ Schiffahrts GmbH & Co. KG                                                    | Haren                 | Deutschland | 12,10                 | 12,10                 |
| MS „Telamon“ Schiffahrts GmbH & Co. KG                                                     | Haren                 | Deutschland | 10,70                 | 10,70                 |
| MS „Theseus“ Schiffahrts GmbH & Co. KG                                                     | Haren                 | Deutschland | 10,70                 | 10,70                 |
| Nieders. Gesellschaft zur Endablagerung<br>von Sonderabfall mbH                            | Hannover              | Deutschland | 0,10                  | 0,10                  |
| PHH Personaldienstleistung GmbH                                                            | Hamburg               | Deutschland | 2,60                  | 2,60                  |
| Poldergemeinschaft Hohe Schaar                                                             | Hamburg               | Deutschland | 8,66                  | 8,66                  |
| Zoll Pool Hafen Hamburg AG                                                                 | Hamburg               | Deutschland | 1,96                  | 1,96                  |

<sup>1</sup> Inanspruchnahme der Befreiungsvorschrift nach § 264b HGB.<sup>2</sup> Inanspruchnahme der Befreiungsvorschrift nach § 264 Abs. 3 HGB.<sup>3</sup> Vollkonsolidierung aufgrund beherrschenden Einflusses (u. a. Mehrheit der Mitglieder des Geschäftsführungsorgans).<sup>4</sup> Keine Konsolidierung aufgrund untergeordneter Bedeutung.<sup>5</sup> Verzicht auf Equity-Methode aufgrund untergeordneter Bedeutung.<sup>6</sup> Verzicht auf Angabe der Höhe des Eigenkapitals und des Ergebnisses des letzten Geschäftsjahres aufgrund untergeordneter Bedeutung.

**MITGLIEDER DES AUFSICHTSRATS**

Eine Aufstellung der Mitglieder des Aufsichtsrats und seiner Ausschüsse befindet sich im Corporate-Governance-Kapitel auf den Seiten 27 ff.; diese Aufstellung ist auch Bestandteil des Konzernanhangs.

**MITGLIEDER DES VORSTANDS**

Eine Aufstellung der Mitglieder des Vorstands und seiner Zuständigkeiten befindet sich im Corporate-Governance-Kapitel auf den Seiten 26 f.; diese Aufstellung ist auch Bestandteil des Konzernanhangs.

Kassel, 1. März 2011

K+S AKTIENGESELLSCHAFT  
DER VORSTAND

## WEITERE INFORMATIONEN

### INFORMATIONEN ÜBER ROHSTOFFLAGERSTÄTTEN

Dieser Abschnitt enthält eine Übersicht der Rohstofflagerstätten, -reserven und -ressourcen der K+S GRUPPE, unterteilt in den Geschäftsbereich Kali- und Magnesiumprodukte sowie den Geschäftsbereich Salz. Die genutzten Lagerstätten befinden sich in unserem Eigentum oder wir verfügen über entsprechende Aufsuchungs- und Gewinnungsrechte bzw. Bewilligungen, die den Abbau bzw. die Solung der angegebenen Rohstoffvorräte rechtlich absichern.

### GESCHÄFTSBEREICH KALI- UND MAGNESIUMPRODUKTE

#### VORRÄTE

Die angegebenen gewinnbaren Vorräte (unter Berücksichtigung von zu erwartenden Abbau- und Verlaubungsverlusten) wurden zuletzt zum 31. Dezember 2010 ermittelt und sind mit den internationalen Bezeichnungen „proven“ und „probable reserves“ vergleichbar. Die nachstehende Tabelle zeigt die gewinnbaren Vorräte an Kaliumchlorid (KCl) und Magnesiumsulfat/Kieserit ( $MgSO_4 \cdot xH_2O$ ), die Förderung des Jahres 2010 sowie die theoretische Lebensdauer der einzelnen Bergwerke in Deutschland; es werden gerundete Zahlen ausgewiesen. Auf Basis dieser Daten ergibt sich für den Geschäftsbereich Kali- und Magnesiumprodukte rechnerisch eine theoretische Lebensdauer der Bergwerke von rund 38 Jahren (gewichteter Durchschnitt). Eine zukünftig abweichende tatsächliche Förderung würde zu einer veränderten theoretischen Lebensdauer führen.

VORRÄTE GESCHÄFTSBEREICH KALI- UND MAGNESIUMPRODUKTE TAB: 6.0.1

|                     | Gewinnbare Vorräte    |                               |                            |                                 | Förderung 2010 |                               | Theoretische Lebensdauer in Jahren; Basis $K_2O$ 2010 |
|---------------------|-----------------------|-------------------------------|----------------------------|---------------------------------|----------------|-------------------------------|-------------------------------------------------------|
|                     | Rohsalz in Mio. t eff | in Mio. t $K_2O$ <sup>1</sup> | in Mio. t KCl <sup>1</sup> | in Mio. t Kieserit <sup>2</sup> | in Mio. t eff  | in Mio. t $K_2O$ <sup>1</sup> |                                                       |
| Bergwerk            |                       |                               |                            |                                 |                |                               |                                                       |
| Neuhof-Ellers       | 104,3                 | 9,2                           | 14,5                       | 19,3                            | 3,59           | 0,38                          | 24                                                    |
| Sigmundshall        | 31,0                  | 3,8                           | 6,1                        | 5,2                             | 2,21           | 0,28                          | 8 <sup>3</sup>                                        |
| Verbundwerk         |                       |                               |                            |                                 |                |                               |                                                       |
| Hattorf-Wintershall | 697,3                 | 59,4                          | 94,0                       | 92,8                            | 15,62          | 1,30                          | 45                                                    |
| Unterbreizbach      | 94,2                  | 20,1                          | 31,8                       | 7,5                             | 2,44           | 0,60                          | 33                                                    |
| Zielitz             | 464,0                 | 57,4                          | 90,8                       | —                               | 10,81          | 1,29                          | 44                                                    |

<sup>1</sup> Kaliumoxid ( $K_2O$ ) ist eine übliche, chemische Umrechnungsgröße für Kaliumverbindungen, 100 % Kaliumchlorid (KCl) entsprechen 63,17 %  $K_2O$ .

<sup>2</sup> Kieserit ( $MgSO_4 \cdot xH_2O$ ) ist ein nutzbares Magnesiummineral in Kalilagerstätten. Andere magnesiumsulfathaltige Minerale werden verfahrensbedingt nur untergeordnet verwertet.

<sup>3</sup> Die theoretische Lebensdauer des Bergwerks Sigmundshall wird ausschließlich durch die Vorratsmenge an Sylvinit bestimmt.

#### RESSOURCEN

Für den Geschäftsbereich Kali- und Magnesiumprodukte bestehen zusätzlich Ressourcen. Hierunter werden mögliche Vorräte (Kategorie c2) und Vorräte, für die eine wirtschaftliche Gewinnung noch nicht nachgewiesen ist (Außerbilanzvorräte) erfasst. Beide sind nach internationalem Standard mit sogenannten „mineral resources“ in etwa vergleichbar. Es handelt sich um bisher nicht genutzte Kaliflöße oder um Berechtigungsfelder, in denen Ressourcen aufgrund geophysikalischer Erkundungen bzw. Tagesbohrungen sowie durch geologische Analogieschlüsse ausgewiesen werden können. Diese potenziellen Gewinnungsfelder schließen überwiegend an bestehende an und gehören der K+S GRUPPE oder es existiert ein Vorkaufsrecht.

Der Geschäftsbereich Kali- und Magnesiumprodukte verfügt in Deutschland über rund 1.250 Mio. t Rohsalz als gewinnbare Ressourcen; auch diese Angabe berücksichtigt bereits Abbau- und Verlaubungsverluste. Hieraus könnte sich eine Lebensdauerverlängerung einzelner Werke ergeben.

## POTASH ONE

POTASH ONE besitzt mehrere Kali-Explorationslizenzen in der kanadischen Provinz Saskatchewan und verfügt im Konzessionsgebiet KLSA 009 mit seinem Legacy-Projekt über ein weit entwickeltes Greenfieldprojekt, in dem auf Basis einer vorliegenden Machbarkeitsstudie Kaliumchlorid über Solungsbergbau gewonnen werden kann. Die folgenden Angaben beziehen sich allein auf das Konzessionsgebiet KLSA 009 (ehemals Explorationslizenz KP 289). Die Reserven und Ressourcen sind in Mio. t Kaliumchlorid als verkaufsfertiges Endprodukt angegeben, wobei bereits die entsprechenden Abzüge für Verluste bei der Gewinnung und der Aufbereitung berücksichtigt sind.

### VORRÄTE UND RESSOURCEN POTASH ONE

TAB: 6.0.2

|                                                               |                                      | in Mio. t KCl | % KCl | % K <sub>2</sub> O |
|---------------------------------------------------------------|--------------------------------------|---------------|-------|--------------------|
| Vorräte <sup>1,2</sup><br>(Proven und Probable Reserves)      | Legacy Projektgebiet                 | 135,8         | 28,9  | 18,3               |
| Ressourcen <sup>1</sup><br>(Indicated und Inferred Resources) | Legacy Projektgebiet<br>und KLSA 009 | 940           | 26,9  | 17,0               |

<sup>1</sup> Die Ermittlung der Vorratszahlen erfolgte durch Agapito Associates Inc., Grand Junction, Colorado, in Zusammenarbeit mit North Rim Exploration Ltd., Saskatoon, Saskatchewan. Die technischen Berichte zur Vorratermittlung wurden gemäß den Anforderungen des kanadischen Standards NI 43-101 der „Canadian Securities Regulators“ erstellt.

<sup>2</sup> Durch die Überführung der Explorationslizenz (KP 289) in eine Gewinnungskonzession (KLSA 009) stehen zusätzliche 1.150 Acres (ca. 4,7 km<sup>2</sup>) an Land mit Gewinnungsrechten zur Verfügung, die weitere Vorräte in der Größenordnung von 24,5 Mio. t KCl Produkt beinhalten. Eine offizielle Aktualisierung der Vorratermittlung durch die oben genannten unabhängigen Gutachter mit Einbeziehung dieser zusätzlichen Mengen ist vorgesehen.

## GESCHÄFTSBEREICH SALZ

### VORRÄTE

Die angegebenen gewinnbaren Vorräte (unter Berücksichtigung von zu erwartenden Abbau- und Vertaubungsverlusten) wurden zuletzt zum 31. Dezember 2010 ermittelt und sind mit den internationalen Bezeichnungen „proven“ und „probable reserves“ vergleichbar. Die nachstehenden Tabellen zeigen die gewinnbaren Salzvorräte, die durchschnittliche Förderung der Bergwerke, Tagebaue und Solfelder im Zeitraum 2001 bis 2010 sowie die theoretische Lebensdauer der einzelnen Standorte; es werden gerundete Zahlen ausgewiesen. Auf Basis dieser Daten ergibt sich rechnerisch eine theoretische Lebensdauer der Standorte für ESCO von rund 56 Jahren und für MORTON SALT von rund 38 Jahren (jeweils gewichteter Durchschnitt, ohne Solarsalzgewinnung). Eine zukünftig abweichende tatsächliche Förderung würde zu einer veränderten theoretischen Lebensdauer führen.

### VORRÄTE ESCO UND SPL

TAB: 6.0.3

| Standort                           | Produktionsweise             | Vorräte<br>in Mio. t | Ø-Förderung<br>2001–2010<br>in Mio. t | Theoretische<br>Lebensdauer<br>in Jahren |
|------------------------------------|------------------------------|----------------------|---------------------------------------|------------------------------------------|
| Bernburg, Deutschland              | Bergwerk                     | 40,3                 | 1,90                                  | 21                                       |
| Borth, Deutschland                 | Bergwerk                     | 42,6                 | 1,61                                  | 27                                       |
| Braunschweig-Lüneburg, Deutschland | Bergwerk                     | 21,8                 | 0,68                                  | 32                                       |
| Bernburg-Gnetsch, Deutschland      | Solbetrieb                   | 21,3                 | 0,25                                  | 85                                       |
| Harlingen, Niederlande             | Solbetrieb                   | 8,0                  | 1,00                                  | 8                                        |
| Tarapacá, Chile                    | Tagebau                      | 569,0                | 7,00                                  | 81                                       |
| Rio Grande do Norte, Brasilien     | Solarsalzgewinnung<br>(Meer) | ∞                    | 0,50                                  | ∞                                        |

### VORRÄTE MORTON SALT

TAB: 6.0.4

| Standort              | Produktionsweise                         | Vorräte<br>in Mio. t | Ø-Förderung<br>2001–2010<br>in Mio. t | Theoretische<br>Lebensdauer<br>in Jahren |
|-----------------------|------------------------------------------|----------------------|---------------------------------------|------------------------------------------|
| Fairport, USA         | Bergwerk                                 | 57,0                 | 1,18                                  | 48                                       |
| Grand Saline, USA     | Bergwerk                                 | 60,0                 | 0,31                                  | 197                                      |
| Mines Seleine, Kanada | Bergwerk                                 | 40,0                 | 1,53                                  | 26                                       |
| Ojibway, Kanada       | Bergwerk                                 | 48,5                 | 2,62                                  | 18                                       |
| Pugwash, Kanada       | Bergwerk                                 | 33,5                 | 1,19                                  | 28                                       |
| Weeks Island, USA     | Bergwerk                                 | 72,5                 | 1,44                                  | 50                                       |
| Glendale, USA         | Solbetrieb                               | 9,5                  | 0,12                                  | 79                                       |
| Grand Saline, USA     | Solbetrieb                               | 4,5                  | 0,06                                  | 77                                       |
| Hutchinson, USA       | Solbetrieb                               | 18,5                 | 0,33                                  | 56                                       |
| Lindbergh, Kanada     | Solbetrieb                               | 10,0                 | 0,13                                  | 77                                       |
| Manistee, USA         | Solbetrieb                               | 7,0                  | 0,28                                  | 26                                       |
| Rittman, USA          | Solbetrieb                               | 9,0                  | 0,51                                  | 18                                       |
| Silver Springs, USA   | Solbetrieb                               | 16,0                 | 0,34                                  | 47                                       |
| Windsor, Kanada       | Solbetrieb                               | 5,0                  | 0,23                                  | 23                                       |
| Grantsville, USA      | Solarsalzgewinnung<br>(Great Salt Lakes) | ∞                    | 0,59                                  | ∞                                        |
| Inagua, Bahamas       | Solarsalzgewinnung<br>(Meer)             | ∞                    | 0,95                                  | ∞                                        |

**RESSOURCEN**

Für den Geschäftsbereich Salz bestehen zusätzlich Ressourcen. Hierunter werden mögliche Vorräte (Kategorie c2) und Vorräte, für die eine wirtschaftliche Gewinnung noch nicht nachgewiesen ist (Außerbilanzvorräte), erfasst. Beide sind nach internationalem Standard mit sogenannten „mineral resources“ in etwa vergleichbar. Es handelt sich um Berechtigungsfelder, in denen Ressourcen aufgrund geophysikalischer Erkundungen bzw. Tagesbohrungen sowie durch geologische Analogieschlüsse ausgewiesen werden können. Diese potenziellen Gewinnungsfelder schließen teilweise an bestehende an und gehören der K+S GRUPPE oder wir verfügen über eine Bewilligung zur Gewinnung.

Als gewinnbare Ressourcen können rund 300 Mio. t an Steinsalz in Europa sowie weit mehr als 500 Mio. t in Südamerika unter Berücksichtigung von Abbau- und Verarbeitungsverlusten ausgewiesen werden. Hieraus könnte sich eine Lebensdauerverlängerung einzelner Werke ergeben. Auch MORTON SALT verfügt über entsprechende Ressourcen, ein Ausweis nach dem Standard der K+S GRUPPE wird voraussichtlich ab dem Jahr 2011 erfolgen.



## DEFINITION VERWENDETER FINANZKENNZAHLEN

|                                      |                                                                                                                                                                                      |                      |                                                                                                                                                                                                          |
|--------------------------------------|--------------------------------------------------------------------------------------------------------------------------------------------------------------------------------------|----------------------|----------------------------------------------------------------------------------------------------------------------------------------------------------------------------------------------------------|
| ANLAGENDECKUNGSGRAD I                | = $\frac{\text{Eigenkapital}}{\text{Operatives Anlagevermögen}}$                                                                                                                     | VALUE ADDED          | = $(\text{ROCE} - \text{gewichteter durchschnittlicher Kapitalkostensatz vor Steuern}) \times (\text{operatives Anlagevermögen}^2 + \text{Working Capital}^2)$                                           |
| ANLAGENDECKUNGSGRAD II               | = $\frac{\text{Eigenkapital} + \text{langfristiges Fremdkapital}}{\text{Operatives Anlagevermögen}}$                                                                                 | VERSCHULDUNGSGRAD I  | = $\frac{\text{Verbindlichkeiten gegenüber Kreditinstituten}}{\text{Eigenkapital}}$                                                                                                                      |
| BUCHWERT JE AKTIE                    | = $\frac{\text{Eigenkapital}}{\text{Gesamtanzahl Aktien am 31.12.}}$                                                                                                                 | VERSCHULDUNGSGRAD II | = $\frac{\text{Nettoverschuldung}}{\text{Eigenkapital}}$                                                                                                                                                 |
| EIGENKAPITALRENDITE                  | = $\frac{\text{Bereinigtes Konzernergebnis nach Steuern}^1}{\text{Bereinigtes Eigenkapital}^{1,2}}$                                                                                  | WORKING CAPITAL      | = $\text{Vorräte} + \text{Forderungen und übrige Vermögenswerte}^4 - \text{kurzfristige Rückstellungen} - \text{Verbindlichkeiten aus Lieferungen und Leistungen} - \text{sonstige Verbindlichkeiten}^4$ |
| ENTERPRISE VALUE                     | = Marktkapitalisierung + Nettoverschuldung                                                                                                                                           |                      |                                                                                                                                                                                                          |
| GESAMTKAPITALRENDITE                 | = $\frac{\text{Bereinigtes Ergebnis vor Steuern}^1 + \text{Zinsaufwand}}{\text{Bereinigte Bilanzsumme}^{1,2,3}}$                                                                     |                      |                                                                                                                                                                                                          |
| LIQUIDITÄTSGRAD I                    | = $\frac{\text{Flüssige Mittel} + \text{kurzfristige Wertpapiere}}{\text{Kurzfristiges Fremdkapital}}$                                                                               |                      |                                                                                                                                                                                                          |
| LIQUIDITÄTSGRAD II                   | = $\frac{\text{Flüssige Mittel} + \text{kurzfristige Wertpapiere} + \text{kurzfristige Forderungen}}{\text{Kurzfristiges Fremdkapital}}$                                             |                      |                                                                                                                                                                                                          |
| LIQUIDITÄTSGRAD III                  | = $\frac{\text{Kurzfristige Vermögenswerte}}{\text{Kurzfristiges Fremdkapital}}$                                                                                                     |                      |                                                                                                                                                                                                          |
| NETTOFINANZ-<br>VERBINDLICHKEITEN    | = Finanzverbindlichkeiten – flüssige Mittel – Wertpapiere                                                                                                                            |                      |                                                                                                                                                                                                          |
| NETTOVERSCHULDUNG                    | = Finanzverbindlichkeiten + Rückstellungen für Pensionen und ähnliche Verpflichtungen + langfristige Rückstellungen für bergbauliche Verpflichtungen – flüssige Mittel – Wertpapiere |                      |                                                                                                                                                                                                          |
| OPERATIVES<br>ANLAGEVERMÖGEN         | = Immaterielle Vermögenswerte + Sachanlagen + Anteile an verbundenen Unternehmen + Beteiligungen                                                                                     |                      |                                                                                                                                                                                                          |
| RETURN ON CAPITAL<br>EMPLOYED (ROCE) | = $\frac{\text{Operatives Ergebnis (EBIT I)}}{\text{Operatives Anlagevermögen}^2 + \text{Working Capital}^{2,3}}$                                                                    |                      |                                                                                                                                                                                                          |
| RETURN ON INVESTMENT (ROI)           | = $\frac{\text{Operatives Ergebnis (EBIT I)}}{\text{Auszahlungen für den Erwerb konsolidierter Unternehmen}}$                                                                        |                      |                                                                                                                                                                                                          |
| UMSATZRENDITE                        | = $\frac{\text{Bereinigtes Konzernergebnis}^1}{\text{Umsatz}}$                                                                                                                       |                      |                                                                                                                                                                                                          |

<sup>1</sup> Bereinigt um die Effekte der Marktwertveränderungen aus operativen, antizipativen Sicherungsgeschäften; beim bereinigten Konzernergebnis wurden ferner die daraus resultierenden Steuereffekte eliminiert.

<sup>2</sup> Jahresdurchschnitt.

<sup>3</sup> Bereinigt um Erstattungsansprüche und korrespondierende Verpflichtungen.

<sup>4</sup> Ohne Marktwerte operativer, antizipativer Sicherungsgeschäfte sowie nicht operativer Derivate, jedoch einschließlich gezahlter Prämien für operativ genutzte Derivate; ohne Forderungen bzw. Verbindlichkeiten aus Geldanlagen; bereinigt um Erstattungsansprüche und CTA-Planvermögensüberschüssen.

## GLOSSAR

|                                |                                                                                                                                                                                                                                                                                                                                                                                      |                      |                                                                                                                                                                                                                                                                                                                                                                                                                                                                                                                                                                                                                                                                                                                             |
|--------------------------------|--------------------------------------------------------------------------------------------------------------------------------------------------------------------------------------------------------------------------------------------------------------------------------------------------------------------------------------------------------------------------------------|----------------------|-----------------------------------------------------------------------------------------------------------------------------------------------------------------------------------------------------------------------------------------------------------------------------------------------------------------------------------------------------------------------------------------------------------------------------------------------------------------------------------------------------------------------------------------------------------------------------------------------------------------------------------------------------------------------------------------------------------------------------|
| <b>AMMONSULFAT</b>             | ist ein schwefelhaltiges Stickstoffdüngemittel, das als Nebenprodukt bei der Caprolactam-Herstellung in der chemischen Industrie anfällt. Ammonsulfat wird in der Landwirtschaft sowie als Rohstoff für die Mehrnährstoffdüngerindustrie eingesetzt.                                                                                                                                 | <b>DUE DILIGENCE</b> | bezeichnet die „gebotene Sorgfalt“, mit der im Vorfeld einer Akquisition geprüft wird, und umfasst die Durchführung einer detaillierten Analyse, insbesondere der geologischen, technischen, (umwelt-) rechtlichen, steuerlichen und finanziellen Rahmenbedingungen, eines Akquisitionsobjekts. Dabei werden die Analyseergebnisse aus den vom Zielunternehmen zur Verfügung gestellten Unternehmensdaten genutzt. Ziel ist es, mit der Akquisition verbundene Risiken aufzudecken bzw. zu begrenzen.                                                                                                                                                                                                                       |
| <b>ANFAHRTSKURVE</b>           | beschreibt die zur Verfügung stehenden Mengen im Zeitablauf bis zum Erreichen der maximal geplanten Produktionskapazität während der Errichtung eines Bergwerks sowie der Produktionsanlage über Tage.                                                                                                                                                                               | <b>EBIT I</b>        | Das operative Ergebnis <b>EBIT I</b> beinhaltet das realisierte Sicherungsergebnis der jeweiligen Berichtsperiode aus den zur Sicherung künftiger Zahlungspositionen (im Wesentlichen Umsätze in US-Dollar) bzw. künftiger Translationsrisiken eingesetzten operativen Derivaten. Das realisierte Sicherungsergebnis entspricht dem Ausübungswert des Derivats zum Zeitpunkt der Fälligkeit (Differenz zwischen Kassakurs und Sicherungskurs), im Falle von Optionsgeschäften abzüglich der gezahlten Prämien. Die Marktwertveränderungen der noch ausstehenden operativen, antizipativen Sicherungsgeschäfte werden hingegen gesondert im Ergebnis nach operativen Sicherungsgeschäften ( <b>EBIT II</b> ) berücksichtigt. |
| <b>CASHFLOW</b>                | Saldo der Zahlungsein- und -ausgänge während eines Berichtszeitraums.                                                                                                                                                                                                                                                                                                                | <b>EBIT II</b>       | Nach <b>IFRS</b> werden die Marktwertveränderungen aus Sicherungsgeschäften in der Gewinn- und Verlustrechnung ausgewiesen. Das <b>EBIT II</b> beinhaltet sämtliche Ergebnisse aus operativen Sicherungsgeschäften, d. h. sowohl stichtagsbedingte Bewertungseffekte als auch Ergebnisse aus realisierten operativen Sicherungsderivaten. Sicherungsgeschäfte des Finanzierungsbereichs werden im Finanzergebnis ausgewiesen, sofern keine erfolgsneutrale Abbildung als Cashflow Hedge vorgenommen wird.                                                                                                                                                                                                                   |
| <b>CHLORALKALI-ELEKTROLYSE</b> | Bei der Chloralkali-Elektrolyse werden durch das Zersetzen des Grundstoffs Natriumchlorid mit Hilfe von elektrischem Strom Chlor, Natronlauge und Wasserstoff erzeugt. Alternativ wird durch die Verwendung von Kaliumchlorid Kalilauge produziert. Die wichtigen Grundchemikalien Chlor, Natronlauge, Wasserstoff und Kalilauge bilden die Basis für zahlreiche chemische Produkte. |                      |                                                                                                                                                                                                                                                                                                                                                                                                                                                                                                                                                                                                                                                                                                                             |
| <b>COMPLIANCE</b>              | (Regelkonformität) bezeichnet die Einhaltung der Gesetze, der unternehmensinternen Regelungen und Richtlinien sowie der vom Unternehmen anerkannten regulatorischen Standards. Ein Compliance-System soll Haftungs-, Straf- und Bußgeldrisiken sowie sonstige finanzielle Nachteile für das Unternehmen vermeiden und eine positive Reputation in der Öffentlichkeit sicherstellen.  |                      |                                                                                                                                                                                                                                                                                                                                                                                                                                                                                                                                                                                                                                                                                                                             |

|                                                   |                                                                                                                                                                                                                                                                                                                                                                                                                                                                          |                      |                                                                                                                                                                                                                                                                                                        |
|---------------------------------------------------|--------------------------------------------------------------------------------------------------------------------------------------------------------------------------------------------------------------------------------------------------------------------------------------------------------------------------------------------------------------------------------------------------------------------------------------------------------------------------|----------------------|--------------------------------------------------------------------------------------------------------------------------------------------------------------------------------------------------------------------------------------------------------------------------------------------------------|
| ELEKTROSTATISCHES AUFBEREITUNGS-VERFAHREN (ESTA®) | ist ein trockenes Aufbereitungsverfahren, bei dem die einzelnen Elemente des Rohsalzes unterschiedlich aufgeladen werden und anschließend mit Hilfe eines Spannungsfelds in Natriumchlorid auf der einen sowie Kaliumchlorid und Kieserit auf der anderen Seite getrennt werden. Im Vergleich zu den klassischen, nassen Aufbereitungsverfahren ist es deutlich günstiger im Energieverbrauch und der Anfall von flüssigen Produktionsrückständen ist deutlich geringer. | FLOTATION            | Produktionsverfahren, das Steinsalz und Kali bzw. Kieserit ohne Wärmezufuhr aus dem Rohsalz trennt. Das Grundprinzip des Verfahrens beruht darauf, dass in ein Rohsalzgemisch in einer gesättigten Salzlösung Luft eingeblasen wird, sodass die Wertstoffe aufschwimmen und abgeschöpft werden können. |
| ENTEC®-DÜNGEMITTEL                                | sind stickstoffhaltige Mineraldünger, die einen Stabilisator enthalten, der die Umwandlung von Ammoniumstickstoff in Nitrat verzögert. Dadurch wird die Stickstofffreisetzung dem Pflanzenbedarf angepasst und die Düngungseffizienz durch die Vermeidung von Nitratverlusten erhöht.                                                                                                                                                                                    | FREEFLOAT            | (Streubesitz) Anzahl der Aktien, die sich nicht im Eigentum von Großaktionären befinden, die mehr als 5 % der Aktien einer Gesellschaft besitzen (Ausnahme: Aktien im Besitz von Investmentgesellschaften oder Vermögensverwaltern).                                                                   |
| ENTERPRISE VALUE                                  | (Unternehmenswert) ist eine von Finanzanalysten häufig verwendete Kennzahl zur Ermittlung des Wertes eines Unternehmens. Der Enterprise Value wird häufig zu anderen Kennzahlen (z.B. Umsatz, EBITDA, EBIT) in Relation gesetzt, sodass sich sogenannte Enterprise-Value-Multiplikatoren ergeben.                                                                                                                                                                        | GRANULAT-HERSTELLUNG | bezeichnet die Herstellung von streufähigen Düngerkörnern, die mit einem landwirtschaftlichen Düngerstreuer ausgebracht werden können.                                                                                                                                                                 |
| FINANCIAL COVENANTS                               | sind vertraglich vereinbarte Kennzahlen und Abreden, die zwischen einem Kreditgeber und -nehmer für die Laufzeit eines Kredits vereinbart werden. Die Nichteinhaltung kann zu Sanktionen bzw. einem außerordentlichen Kündigungsrecht führen.                                                                                                                                                                                                                            | K <sub>2</sub> O     | (Kaliumoxid) ist eine chemische Recheneinheit zum schnellen Vergleich des Kaliumgehalts von Düngemitteln, in denen Kalium in verschiedenen Bindungsformen vorliegt, beispielsweise als Kaliumchlorid, Kaliumsulfat oder Kaliumnitrat.                                                                  |
| FIXKOSTEN-DEGRESSION                              | bezeichnet die Abnahme der Stückkosten bei einer zunehmenden Produktionsmenge, da sich die Fixkosten auf eine höhere Produktionsmenge verteilen.                                                                                                                                                                                                                                                                                                                         | KALIUMCHLORID        | natürliches Kalium-Salz, das in Meerwasser, Salzseen sowie Salzlagerstätten vorkommt.                                                                                                                                                                                                                  |

|                                            |                                                                                                                                                                                                                                                                                                                                                                                                                                                                                                                                                                                                                                                                                                                                                                 |                                                    |                                                                                                                                                                                                                                                                                                                                                                                                                                           |
|--------------------------------------------|-----------------------------------------------------------------------------------------------------------------------------------------------------------------------------------------------------------------------------------------------------------------------------------------------------------------------------------------------------------------------------------------------------------------------------------------------------------------------------------------------------------------------------------------------------------------------------------------------------------------------------------------------------------------------------------------------------------------------------------------------------------------|----------------------------------------------------|-------------------------------------------------------------------------------------------------------------------------------------------------------------------------------------------------------------------------------------------------------------------------------------------------------------------------------------------------------------------------------------------------------------------------------------------|
| <b>KAPITALKOSTEN</b>                       | auch wacc (Weighted Average Cost of Capital); bezeichnet die Opportunitätskosten, die Eigen- und/oder Fremdkapitalgebern durch das dem Unternehmen zur Verfügung gestellte Kapital entstehen. Der gewichtete, durchschnittliche Kapitalkostensatz ergibt sich als Summe des Verzinsungsanspruchs der Eigenkapitalgeber auf den Eigenkapitalanteil sowie der Fremdkapitalverzinsung auf den verzinslichen Fremdkapitalanteil am Gesamtkapital. Da es sich um eine Nachsteuerbetrachtung handelt, wird der durchschnittliche Fremdkapitalzins um die Unternehmenssteuerquote reduziert.                                                                                                                                                                           | <b>MEHRNÄHRSTOFF-DÜNGER</b>                        | enthalten mehr als einen Nährstoff, i.d.R. Stickstoff, Phosphor und Kalium sowie – je nach Bedarf und Anwendung – Magnesium, Schwefel oder auch Spurenelemente. Durch die Zusammenführung der Rohstoffe im Produktionsprozess und die anschließende Granulierung enthält jedes einzelne Düngerkorn stets die exakt gleiche Nährstoffzusammensetzung; somit wird eine gleichmäßige Ausbringung der Nährstoffe auf dem Feld sichergestellt. |
| <b>KAUFPREIS-ALLOKATION</b>                | (Purchase Price Allocation) Verteilung der Anschaffungskosten aus einem Unternehmenserwerb auf die erworbenen Vermögenswerte, Schulden und Eventualschulden.                                                                                                                                                                                                                                                                                                                                                                                                                                                                                                                                                                                                    | <b>MISCHANLAGEN</b>                                | (Bulk Blender) Mischdüngeranlagen, in denen verschiedene Nährstoffe zusammengeführt werden.                                                                                                                                                                                                                                                                                                                                               |
| <b>KIESERIT</b>                            | Mineralischer Bestandteil des Rohsalzes mit den wasserlöslichen Mineralien Magnesium und Schwefel.                                                                                                                                                                                                                                                                                                                                                                                                                                                                                                                                                                                                                                                              | <b>NATRIUMCHLORID</b>                              | Steinsalz, Kochsalz (NaCl)                                                                                                                                                                                                                                                                                                                                                                                                                |
| <b>LIQUIDITÄTSGRADE</b>                    | geben Auskunft darüber, in wie weit die kurzfristigen Zahlungsverpflichtungen durch liquide Mittel, kurzfristige Forderungen bzw. das Umlaufvermögen gedeckt sind.                                                                                                                                                                                                                                                                                                                                                                                                                                                                                                                                                                                              | <b>NITRIFIKATIONS-INHIBITOR</b>                    | Ammonium-Stabilisator, der die Umwandlung von Ammoniumstickstoff zu auswaschungsgefährdetem Nitratstickstoff verzögert.                                                                                                                                                                                                                                                                                                                   |
| <b>MASSNAHMEN-PAKET ZUM GEWÄSSERSCHUTZ</b> | auch 360-Mio.-€-Maßnahmenpaket, Werra-Maßnahmenpaket; wurde im Oktober 2008 von K+S vorgelegt, um Umwelteinflüsse weiter zu vermindern und die K+S-Produktionsstandorte im hessisch-thüringischen Kalirevier langfristig zu sichern. Es bildet die wesentliche technische Grundlage für das im Jahr 2009 vorgelegte Integrierte Maßnahmenkonzept (IMK), das aus dem öffentlich-rechtlichen Vertrag der K+S GRUPPE mit den Ländern Hessen und Thüringen hervorgegangen ist. Die geplante Umsetzung der bis zum Jahr 2015 vorgesehenen Einzelmaßnahmen zum Grundwasser- und Gewässerschutz wird zu einer Halbierung der anfallenden Salzabwassermenge führen. Die mit dem Maßnahmenpaket verbundenen Investitionen belaufen sich auf insgesamt bis zu 360 Mio. €. | <b>OPERATIVE, ANTIZIPATIVE SICHERUNGSGESCHÄFTE</b> | Zur Sicherung künftiger Währungspositionen (im Wesentlichen US-Dollar) bzw. künftiger Translationsrisiken setzen wir operative Derivate in der Form von Optionen sowie Termingeschäften ein (s. auch Transaktions- sowie Translationsrisiken).                                                                                                                                                                                            |
|                                            |                                                                                                                                                                                                                                                                                                                                                                                                                                                                                                                                                                                                                                                                                                                                                                 | <b>PLATTENDOLOMIT</b>                              | Im Zechstein gebildete poröse, aufnahmefähige Kalksteinschicht in gut 500 Metern Tiefe.                                                                                                                                                                                                                                                                                                                                                   |
|                                            |                                                                                                                                                                                                                                                                                                                                                                                                                                                                                                                                                                                                                                                                                                                                                                 | <b>RATING</b>                                      | beschreibt die Einschätzung der Fähigkeit eines Unternehmens, zukünftig seine Zins- sowie Tilgungsverbindlichkeiten termingerecht zu erfüllen. Es wird von einer Ratingagentur, z. B. MOODY's oder STANDARD & POOR's, in Form standardisierter Einstufungen vergeben.                                                                                                                                                                     |
|                                            |                                                                                                                                                                                                                                                                                                                                                                                                                                                                                                                                                                                                                                                                                                                                                                 | <b>SIEDESALZ</b>                                   | Die Herstellung von Siedesalz erfolgt durch Eindampfung gesättigter Sole, wobei das Natriumchlorid auskristallisiert wird.                                                                                                                                                                                                                                                                                                                |

|                         |                                                                                                                                                                                                                                                                                                                                                                                                                                                                                                                                                                                                                         |                        |                                                                                                                                                                                                                                                                                                                                                                                                                                                                 |
|-------------------------|-------------------------------------------------------------------------------------------------------------------------------------------------------------------------------------------------------------------------------------------------------------------------------------------------------------------------------------------------------------------------------------------------------------------------------------------------------------------------------------------------------------------------------------------------------------------------------------------------------------------------|------------------------|-----------------------------------------------------------------------------------------------------------------------------------------------------------------------------------------------------------------------------------------------------------------------------------------------------------------------------------------------------------------------------------------------------------------------------------------------------------------|
| SOLE                    | Wässrige Steinsalzlösung. Natürliche Sole wird durch Anbohrung unterirdischer Solevorkommen oder durch kontrollierte Bohrlochsolung gewonnen und auch durch Auflösen von bergmännisch gewonnenem Steinsalz hergestellt.                                                                                                                                                                                                                                                                                                                                                                                                 | VALUE ADDED            | (Mehrwert) Diese Kennzahl basiert auf dem Ansatz, dass ein Unternehmen dann einen Mehrwert für den Investor schafft, wenn die Rendite auf das durchschnittlich gebundene Kapital die zugrunde liegenden Kapitalkosten übersteigt. Multipliziert man diese Überrendite mit dem durchschnittlich gebundenen Kapital (Jahresdurchschnitt des operativen Anlagevermögens + Working Capital), ergibt sich der im Berichtsjahr geschaffene Mehrwert des Unternehmens. |
| SOLUNGSBERGBAU          | (Solbetrieb, Lösungsbergbau) bezeichnet die Gewinnung von lösefähigen (Salz-)Gesteinen (z.B. Sylvinit oder Steinsalz) durch Einleiten von Wasser oder (Salz-)Lösungen in Bohrungen, wobei Hohlräume (Kavernen) entstehen. Die Solungsbergbautechnologie erlaubt – sofern die Lagerstättegegebenheit ein solches Verfahren zulässt – gegenüber konventionellen Abbauverfahren eine schnellere Produktionsaufnahme, eine flexiblere Anfahrtskurve der Produktion sowie den Abbau tiefer liegender Lagerstätten. Außerdem fällt das Verhältnis von Rohsalz zu festen sowie flüssigen Produktionsrückständen günstiger aus. | WASSERENTHÄRTUNGSSALZE | entfernen Härtebildner wie Kalzium und Magnesium durch ein Ionenaustauschverfahren aus dem Wasser. Weiches Wasser ist für zahlreiche industrielle Prozesse, aber auch in privaten Haushalten, erforderlich bzw. von Vorteil.                                                                                                                                                                                                                                    |
| STICKSTOFF-EINZELDÜNGER | ist ein Dünger, der als Hauptbestandteil nur Stickstoff enthält. Von K+S NITROGEN werden u. a. die Stickstoffeinzeldünger Kalkammonsalpeter (KAS), Ammonsulfatsalpeter (ASS®) sowie Ammonsulfatsalpeter mit Bor (ASS BOR®) angeboten.                                                                                                                                                                                                                                                                                                                                                                                   |                        |                                                                                                                                                                                                                                                                                                                                                                                                                                                                 |
| SUPPLY-CHAIN-MANAGEMENT | Bezeichnet die gruppenweite Planung, Steuerung und Koordination der gesamten Wertschöpfungskette (Beschaffung, Produktion und Logistik).                                                                                                                                                                                                                                                                                                                                                                                                                                                                                |                        |                                                                                                                                                                                                                                                                                                                                                                                                                                                                 |
| TRANSAKTIONS-RISIKO     | entsteht aus einer Transaktion in Fremdwährung, die in die Konzernwährung umgetauscht werden soll, und ist somit ein zahlungswirksames Risiko.                                                                                                                                                                                                                                                                                                                                                                                                                                                                          |                        |                                                                                                                                                                                                                                                                                                                                                                                                                                                                 |
| TRANSLATIONS-RISIKO     | entsteht aus der Umrechnung von Ergebnis-, Cashflow- oder Bilanzpositionen zu unterschiedlichen Perioden bzw. Stichtagen, die in einer anderen Währung als der Konzernwährung anfallen. Es handelt sich somit um ein nicht zahlungswirksames Risiko.                                                                                                                                                                                                                                                                                                                                                                    |                        |                                                                                                                                                                                                                                                                                                                                                                                                                                                                 |

**ABBILDUNGSVERZEICHNIS**

|                                                                                           |     |                                                                                                       |     |
|-------------------------------------------------------------------------------------------|-----|-------------------------------------------------------------------------------------------------------|-----|
| <b>2 K+S AM KAPITALMARKT</b>                                                              |     | ABB: 4.5.2 EUR/USD-Entwicklung versus CAD/USD und RUB/USD                                             | 102 |
| ABB: 2.1.1 Wertentwicklung der K+S-Aktie im Vergleich zu DAX, DJ STOXX 600 und MSCI World | 13  | ABB: 4.5.3 Gewinndynamik bei Weizen in Deutschland                                                    | 104 |
| ABB: 2.1.2 Monatliche Höchst-, Tiefst- und Durchschnittskurse der K+S-Aktie               | 13  | ABB: 4.6.1 Umsatz nach Geschäftsbereichen                                                             | 108 |
| ABB: 2.1.3 Marktkapitalisierung der K+S Aktiengesellschaft                                | 14  | ABB: 4.6.2 Umsatz nach Regionen                                                                       | 108 |
| ABB: 2.1.4 Wertentwicklung der K+S-Aktie im Vergleich zu Wettbewerbern                    | 14  | ABB: 4.6.3 EBITDA-Marge                                                                               | 109 |
| ABB: 2.1.5 Wertentwicklung K+S-Depot                                                      | 15  | ABB: 4.6.4 EBIT-Marge                                                                                 | 110 |
| ABB: 2.1.6 Aktionärsstruktur per 28.02.2011                                               | 15  | ABB: 4.6.5 Umsatzrendite                                                                              | 112 |
| ABB: 2.1.7 Dividende je K+S-Aktie                                                         | 17  | ABB: 4.7.1 Passiva                                                                                    | 115 |
|                                                                                           |     | ABB: 4.7.2 Investitionen im Vergleich zu Abschreibungen und Cashflow aus laufender Geschäftstätigkeit | 118 |
| <b>3 CORPORATE GOVERNANCE</b>                                                             |     | ABB: 4.8.1 Aktiva                                                                                     | 120 |
| ABB: 3.4.1 LTI-Programm 2010                                                              | 32  | ABB: 4.10.1 Kali- und Magnesiumprodukte – Umsatz nach Regionen                                        | 123 |
|                                                                                           |     | ABB: 4.10.2 Kali- und Magnesiumprodukte – Umsatz nach Produktgruppen                                  | 123 |
| <b>4 KONZERNLAGEBERICHT</b>                                                               |     | ABB: 4.10.3 Stickstoffdüngemittel – Umsatz nach Regionen                                              | 125 |
| ABB: 4.1.1 Geschäftsfelder und Organisationsstruktur                                      | 77  | ABB: 4.10.4 Stickstoffdüngemittel – Umsatz nach Bereichen                                             | 125 |
| ABB: 4.2.1 Strategie Kali- und Magnesiumprodukte                                          | 89  | ABB: 4.10.5 Salz – Umsatz nach Regionen                                                               | 126 |
| ABB: 4.2.2 Strategie Salz                                                                 | 89  | ABB: 4.10.6 Salz – Umsatz nach Produktgruppen                                                         | 126 |
| ABB: 4.2.3 Finanzielle Performance-Kennzahlen der K+S GRUPPE                              | 92  | ABB: 4.10.7 Ergänzende Geschäftsbereiche – Umsatz nach Regionen                                       | 129 |
| ABB: 4.3.1 Mitarbeiter nach Regionen per 31. Dezember 2010                                | 93  | ABB: 4.10.8 Ergänzende Geschäftsbereiche – Umsatz nach Bereichen                                      | 129 |
| ABB: 4.3.2 Altersstruktur                                                                 | 94  | ABB: 4.11.1 Fälligkeitsprofil der Finanzverbindlichkeiten                                             | 144 |
| ABB: 4.4.1 Qualifikationsstruktur im Bereich Forschung und Entwicklung                    | 99  | ABB: 4.13.1 Anbaufläche und Ertrag je Hektar bei Getreide                                             | 150 |
| ABB: 4.4.2 Berufsgruppen im Bereich Forschung und Entwicklung                             | 99  | ABB: 4.13.2 Produktionsüberschuss/-defizit und Stocks-to-use-ratios bei Getreide                      | 150 |
| ABB: 4.5.1 Preisentwicklung von Agrarprodukten                                            | 102 | ABB: 4.13.3 Risiko für globales Defizit bei Getreide in 2011/12                                       | 151 |
|                                                                                           |     | ABB: 4.13.4 Futures für Agrarprodukte                                                                 | 151 |
|                                                                                           |     | ABB: 4.13.5 Weltkalikapazität, -produktion und -absatz                                                | 152 |

**TABELLENVERZEICHNIS**

|                                                                                           |     |
|-------------------------------------------------------------------------------------------|-----|
| <b>2 K+S AM KAPITALMARKT</b>                                                              |     |
| TAB: 2.0.1 Kapitalmarktkennzahlen                                                         | 11  |
| TAB: 2.1.1 Performance                                                                    | 12  |
| <b>3 CORPORATE GOVERNANCE</b>                                                             |     |
| TAB: 3.1.1 Directors' Dealings Vorstandsmitglieder                                        | 25  |
| TAB: 3.1.2 Directors' Dealings Aufsichtsratsmitglieder                                    | 25  |
| TAB: 3.4.1 Beispielrechnung für die Jahresvergütung eines ordentlichen Vorstandsmitglieds | 31  |
| TAB: 3.4.2 Vergütung des Vorstands                                                        | 33  |
| TAB: 3.4.3 Vergütung mit langfristiger Anreizwirkung                                      | 34  |
| TAB: 3.4.4 Pensionen                                                                      | 35  |
| TAB: 3.4.5 Vergütung des Aufsichtsrats                                                    | 36  |
| <b>4 KONZERNLAGEBERICHT</b>                                                               |     |
| TAB: 4.1.1 Bedeutende Standorte der K+S GRUPPE                                            | 83  |
| TAB: 4.3.1 Mitarbeiter nach Geschäftsbereichen                                            | 93  |
| TAB: 4.3.2 Ausbildungskennzahlen                                                          | 94  |
| TAB: 4.3.3 Weiterbildungskennzahlen                                                       | 95  |
| TAB: 4.4.1 Forschungskosten                                                               | 98  |
| TAB: 4.4.2 Forschungskennzahlen                                                           | 98  |
| TAB: 4.5.1 Prozentuale Veränderung des Bruttoinlandsprodukts                              | 101 |
| TAB: 4.5.2 Soll-/Ist-Vergleich                                                            | 106 |
| TAB: 4.6.1 Abweichungsanalyse                                                             | 107 |
| TAB: 4.6.2 Umsatz nach Geschäftsbereichen                                                 | 108 |
| TAB: 4.6.3 EBITDA nach Geschäftsbereichen                                                 | 109 |
| TAB: 4.6.4 EBIT I nach Geschäftsbereichen                                                 | 110 |
| TAB: 4.6.5 Herleitung des bereinigten Konzernergebnisses                                  | 112 |



|              |                                                                        |     |                           |                                                                                   |                                      |             |                                                                  |     |
|--------------|------------------------------------------------------------------------|-----|---------------------------|-----------------------------------------------------------------------------------|--------------------------------------|-------------|------------------------------------------------------------------|-----|
| TAB: 4.6.6   | Konzernergebnis und Ergebnis je Aktie                                  | 112 | <b>5 KONZERNABSCHLUSS</b> | TAB: 5.9.17                                                                       | Steuern vom Einkommen und vom Ertrag | 187         |                                                                  |     |
| TAB: 4.6.7   | Mehrperiodenübersicht der Margen- und Renditekennzahlen                | 113 | TAB: 5.2.1                | Gewinn- und verlustrechnung                                                       | 162                                  | TAB: 5.9.18 | Überleitungsrechnung Steuern vom Einkommen und vom Ertrag        | 188 |
| TAB: 4.7.1   | Kennzahlen zur Steuerung der Kapitalstruktur                           | 114 | TAB: 5.2.2                | Gesamtergebnisrechnung                                                            | 162                                  | TAB: 5.9.19 | Materialaufwand                                                  | 188 |
| TAB: 4.7.2   | Geschäftsbereich Kali- und Magnesiumprodukte                           | 115 | TAB: 5.2.3                | Überleitung zum EBIT I                                                            | 162                                  | TAB: 5.9.20 | Personalaufwand                                                  | 188 |
| TAB: 4.7.3   | Mehrperiodenübersicht der Finanzlage                                   | 116 | TAB: 5.3.1                | Kapitalflussrechnung                                                              | 163                                  | TAB: 5.9.21 | Arbeitnehmer einschliesslich befristet Beschäftigter             | 189 |
| TAB: 4.7.4   | Investitionen nach Geschäftsbereichen                                  | 117 | TAB: 5.4.1                | Bilanz                                                                            | 164                                  | TAB: 5.9.22 | Ergebnis je Aktie                                                | 189 |
| TAB: 4.7.5   | Cashflowübersicht                                                      | 118 | TAB: 5.5.1                | Entwicklung des Eigenkapitals                                                     | 165                                  | TAB: 5.9.23 | Aufteilung Goodwill nach Zahlungsmittel generierenden Einheiten  | 190 |
| TAB: 4.8.1   | Mehrperiodenübersicht zur Vermögenslage                                | 120 | TAB: 5.6.1                | Entwicklung des Anlagevermögens 2010                                              | 166                                  | TAB: 5.9.24 | Abzinsungssätze Werthaltigkeitstest                              | 190 |
| TAB: 4.10.1  | Abweichungsanalyse Kali- und Magnesiumprodukte                         | 122 | TAB: 5.6.2                | Entwicklung des Anlagevermögens 2009                                              | 168                                  | TAB: 5.9.25 | Immaterielle Vermögenswerte zum 31.12.                           | 191 |
| TAB: 4.10.3  | Entwicklung der Umsätze, Absätze und Durchschnittspreise nach Regionen | 122 | TAB: 5.7.1                | Entwicklung der Rückstellungen                                                    | 170                                  | TAB: 5.9.26 | Latente Steuern                                                  | 192 |
| TAB: 4.10.2  | Geschäftsbereich Kali- und Magnesiumprodukte                           | 123 | TAB: 5.8.1                | Segmentberichterstattung                                                          | 172                                  | TAB: 5.9.27 | Vorräte                                                          | 192 |
| TAB: 4.10.4  | Abweichungsanalyse Stickstoffdüngemittel                               | 124 | TAB: 5.9.1                | Endgültiger Kaufpreis MORTON SALT                                                 | 175                                  | TAB: 5.9.28 | Forderungen und sonstige Vermögenswerte                          | 193 |
| TAB: 4.10.5  | Geschäftsbereich Stickstoffdüngemittel                                 | 125 | TAB: 5.9.2                | Endgültige Kaufpreisallokation MORTON SALT                                        | 175                                  | TAB: 5.9.29 | Wertberichtigungen                                               | 193 |
| TAB: 4.10.6  | Abweichungsanalyse Salz                                                | 126 | TAB: 5.9.3                | Anpassungen Bilanz K+S GRUPPE                                                     | 176                                  | TAB: 5.9.30 | Ausfallrisiken                                                   | 193 |
| TAB: 4.10.7  | Geschäftsbereich Salz                                                  | 126 | TAB: 5.9.4                | Gewinn- und Verlustrechnung MORTON SALT (4. Quartal 2009)                         | 176                                  | TAB: 5.9.31 | Derivative Devisenfinanzgeschäfte                                | 195 |
| TAB: 4.10.8  | Entwicklung der Umsätze, Absätze und Durchschnittspreise               | 127 | TAB: 5.9.5                | Nutzungsdauern für immaterielle Vermögensgegenstände mit bestimmter Nutzungsdauer | 178                                  | TAB: 5.9.32 | Gezeichnetes Kapital                                             | 197 |
| TAB: 4.10.9  | Abweichungsanalyse Ergänzende Geschäftsbereiche                        | 128 | TAB: 5.9.6                | Nutzungsdauern für Sachanlagen                                                    | 179                                  | TAB: 5.9.33 | Bilanzgewinn                                                     | 197 |
| TAB: 4.10.10 | Ergänzende Geschäftsbereiche                                           | 129 | TAB: 5.9.7                | Wechselkurse                                                                      | 182                                  | TAB: 5.9.34 | K+S AKTIENGESELLSCHAFT Kapitalmanagement                         | 197 |
| TAB: 4.11.1  | Übersicht der Unternehmensrisiken                                      | 133 | TAB: 5.9.8                | Neue Rechnungslegungsstandards und Interpretationen                               | 183                                  | TAB: 5.9.35 | Rückstellungen für Pensionen und ähnliche Verpflichtungen        | 198 |
| TAB: 4.11.2  | Entwicklung der Kreditratings                                          | 145 | TAB: 5.9.9                | Neue, aber noch nicht angewandte Rechnungslegungsstandards und Interpretationen   | 184                                  | TAB: 5.9.36 | Versicherungsmathematische Annahmen Bewertung Versorgungszusagen | 198 |
| TAB: 4.13.1  | Prozentuale Veränderung des Bruttoinlandsprodukts                      | 149 | TAB: 5.9.10               | Sonstige betriebliche Erträge                                                     | 185                                  | TAB: 5.9.37 | Versicherungsmathematische Annahmen Aufwand Versorgungszusagen   | 198 |
| TAB: 4.13.2  | Dividendenentwicklung                                                  | 157 | TAB: 5.9.11               | Sonstige betriebliche Aufwendungen                                                | 186                                  | TAB: 5.9.38 | Aufteilung Planvermögen nach Vermögenskategorien                 | 199 |
| TAB: 4.13.3  | Tabellarische Übersicht der beschriebenen Umsatz- und Ergebnistrends   | 159 | TAB: 5.9.12               | Beteiligungsergebnis                                                              | 186                                  | TAB: 5.9.39 | Entwicklung Anwartschaftsbarwert                                 | 199 |
|              |                                                                        |     | TAB: 5.9.13               | Ergebnis aus operativen, antizipativen Sicherungsgeschäften                       | 186                                  | TAB: 5.9.40 | Entwicklung Planvermögen                                         | 199 |
|              |                                                                        |     | TAB: 5.9.14               | Zinsergebnis                                                                      | 187                                  | TAB: 5.9.41 | Überleitung Bilanzwerte Pensionen                                | 200 |
|              |                                                                        |     | TAB: 5.9.15               | Zinsanteil bergbaulicher Rückstellungen                                           | 187                                  |             |                                                                  |     |
|              |                                                                        |     | TAB: 5.9.16               | Sonstiges Finanzergebnis                                                          | 187                                  |             |                                                                  |     |

|             |                                                                          |     |             |                                                           |     |
|-------------|--------------------------------------------------------------------------|-----|-------------|-----------------------------------------------------------|-----|
| TAB: 5.9.42 | Pensionsaufwand aus leistungsorientierten Versorgungszusagen             | 200 | TAB: 5.9.64 | Auszahlungen für den Erwerb konsolidierter Unternehmen    | 211 |
| TAB: 5.9.43 | Entwicklung anwartschaftsbarwert und Planvermögen                        | 200 | TAB: 5.9.65 | Nettofinanzmittelbestand                                  | 211 |
| TAB: 5.9.44 | Sensitivität gesundheitsfürsorgliche Leistungszusagen                    | 201 | TAB: 5.9.66 | Honorar für den Abschlussprüfer                           | 211 |
| TAB: 5.9.45 | Aufwand Altersversorgung                                                 | 201 | TAB: 5.9.67 | Zuwendungen der öffentlichen Hand                         | 212 |
| TAB: 5.9.46 | Rückstellungen für bergbauliche Verpflichtungen                          | 201 | TAB: 5.9.68 | Transaktionen mit nicht konsolidierten Tochterunternehmen | 212 |
| TAB: 5.9.47 | Langfristige Personalverpflichtungen                                     | 202 | TAB: 5.9.69 | Salden mit nicht konsolidierten Tochterunternehmen        | 212 |
| TAB: 5.9.48 | Bestand virtueller Aktienoptionen zu Beginn der Berichtsperiode          | 203 | TAB: 5.9.70 | Gesamtbezüge des Aufsichtsrats und des Vorstands          | 213 |
| TAB: 5.9.49 | Bestand virtueller Aktienoptionen 31.12.2010                             | 203 | TAB: 5.9.71 | Anteilsbesitzliste gemäss § 313 HGB                       | 214 |
| TAB: 5.9.50 | Umweltverpflichtungen MORTON SALT                                        | 203 | TAB: 6.0.1  | Vorräte Geschäftsbereich Kali- und Magnesiumprodukte      | 218 |
| TAB: 5.9.51 | Liquiditätsanalyse nicht derivativer finanzieller Verbindlichkeiten 2010 | 204 | TAB: 6.0.2  | Vorräte und Ressourcen POTASH ONE                         | 219 |
| TAB: 5.9.52 | Liquiditätsanalyse nicht derivativer finanzieller Verbindlichkeiten 2009 | 204 | TAB: 6.0.3  | Vorräte ESCO und SPL                                      | 219 |
| TAB: 5.9.53 | Liquiditätsanalyse derivativer Finanzinstrumente 2010                    | 205 | TAB: 6.0.4  | Vorräte MORTON SALT                                       | 219 |
| TAB: 5.9.54 | Liquiditätsanalyse derivativer Finanzinstrumente 2009                    | 205 | TAB: 6.0.5  | Termine                                                   | 230 |
| TAB: 5.9.55 | Weitere Angaben zu Finanzinstrumenten                                    | 206 |             |                                                           |     |
| TAB: 5.9.56 | Buchwerte der Finanzinstrumente aggregiert nach Bewertungskategorien     | 206 |             |                                                           |     |
| TAB: 5.9.57 | Nettoergebnis aus Finanzinstrumenten                                     | 207 |             |                                                           |     |
| TAB: 5.9.58 | Zinsergebnis aus Finanzinstrumenten                                      | 207 |             |                                                           |     |
| TAB: 5.9.59 | Sonstige finanzielle Verpflichtungen                                     | 208 |             |                                                           |     |
| TAB: 5.9.60 | Überleitung Segmentzahlen                                                | 210 |             |                                                           |     |
| TAB: 5.9.61 | Regionale Umsatzverteilung                                               | 210 |             |                                                           |     |
| TAB: 5.9.62 | Regionale Verteilung des Vermögens                                       | 210 |             |                                                           |     |
| TAB: 5.9.63 | Regionale Verteilung der Investitionen                                   | 211 |             |                                                           |     |

## STICHWORTVERZEICHNIS

|                              |                         |
|------------------------------|-------------------------|
| <b>A</b>                     |                         |
| Absatzmärkte                 | 78, 80, 81, 82, 146     |
| Abschreibungen               | 106, 110, 118, 128, 155 |
| Agrarpreise                  | 102, 151                |
| Aktie                        | 12                      |
| Aktionärsstruktur            | 15                      |
| Ammonsulfat                  | 79, 124, 222            |
| Anleihe                      | 17                      |
| Aufsichtsrat                 | 6, 27                   |
| Auftausalz                   | 104, 127, 152           |
| Ausbildung                   | 94, 148                 |
| Ausblick                     | 153, 158                |
| Ausschüsse                   | 23, 30                  |
| <b>B</b>                     |                         |
| Bergbauliche Rückstellungen  | 112, 119, 181, 187, 201 |
| Bestätigungsvermerk          | 161                     |
| Bilanz                       | 115, 119, 164           |
| Branchensituation            | 103, 149                |
| <b>C</b>                     |                         |
| Cashflow                     | 118, 119, 163, 222      |
| CFK                          | 81                      |
| Chancen                      | 130, 157                |
| Compliance                   | 21, 141, 222            |
| COMPo-Consumergeschäft       | 79, 124, 156            |
| Corporate Governance         | 21                      |
| <b>D</b>                     |                         |
| Derivative Finanzinstrumente | 194                     |
| Directors' Dealings          | 25                      |
| Dividende                    | 16, 156, 197            |
| Dividendenpolitik            | 16, 157                 |
| Düngemittelmarkt             | 103, 149                |
| Düngemittelspezialitäten     | 78, 122                 |
| <b>E</b>                     |                         |
| EBITDA-Marge                 | 109, 114                |
| EBIT-Marge                   | 110, 114                |

|                                                          |                                |                                   |                            |                          |                                   |
|----------------------------------------------------------|--------------------------------|-----------------------------------|----------------------------|--------------------------|-----------------------------------|
| Eigenkapital                                             | 115, 164, 165, 197             | Kapitalflussrechnung              | 163, 119                   | <b>S</b>                 |                                   |
| Eigenkapitalquote                                        | 115, 155                       | Kapitalkosten                     | 91, 223                    | Saisonalität             | 107, 117, 134                     |
| Eigenkapitalrendite                                      | 92, 114, 221                   | Kapitalstruktur                   | 114, 197                   | Salz                     | 80, 88, 104, 118, 125, 152, 154   |
| EMPREMAR                                                 | 80, 127                        | Konzernergebnis                   | 112, 154, 189              | Salzmarkt                | 81, 104, 152                      |
| Energiekosten                                            | 103, 107, 109, 139, 158        | Konzernsteuerquote                | 113, 154                   | Segmentberichterstattung | 172                               |
| Entsorgung und Recycling                                 | 81, 128, 156                   | KTG                               | 81                         | Speisesalz               | 80, 104, 126, 152                 |
| Entsprechenserklärung                                    | 21                             | <b>L</b>                          |                            | SPL                      | 80, 146, 219                      |
| Ergänzende Geschäftsbereiche                             | 81, 119, 128, 155, 156         | Liquidität                        | 119, 143, 221              | Standorte                | 83                                |
| Ergebnis je Aktie                                        | 113, 189                       | Logistik                          | 81, 119, 128               | Steuern                  | 113, 154, 187, 192                |
| Ergebnis vor Zinsen, Steuern und Abschreibungen (EBITDA) | 109                            | Long Term Incentive-Programm      | 31, 83, 188, 202           | Stickstoffdüngemittel    | 79, 103, 118, 124, 154, 156       |
| Erklärung zur Unternehmensführung                        | 21                             | Marktkapitalisierung              | 14                         | Stickstoffeinzeldünger   | 79, 124, 225                      |
| ESCO                                                     | 80, 219                        | Mehrnährstoffdünger               | 79, 124, 224               | Strategie                | 87                                |
| Expert                                                   | 79, 124, 154                   | Mission                           | 3                          | <b>T</b>                 |                                   |
| <b>F</b>                                                 |                                | Mitarbeiter                       | 92, 148                    | Tierhygieneprodukte      | 82, 128                           |
| Finanzergebnis                                           | 112, 143, 154                  | MORTON SALT                       | 80, 92, 125, 153, 174, 203 | <b>U</b>                 |                                   |
| Forschung und Entwicklung                                | 95, 147                        | <b>N</b>                          |                            | Umsatz                   | 107, 153, 159, 162, 185, 210      |
| Frachtkosten                                             | 107, 109, 140, 153, 158        | Nettoverschuldung                 | 119, 155, 221              | Umsatzrendite            | 112, 114, 221                     |
| <b>G</b>                                                 |                                | <b>O</b>                          |                            | Unternehmenssteuerung    | 89                                |
| Gesamtkapitalrendite                                     | 31, 36, 92, 114, 221           | Operatives Ergebnis (EBIT I)      | 110, 154, 159, 162, 222    | us-Dollar                | 102, 115, 142, 153, 158, 182, 194 |
| Gewerbesalz                                              | 81, 104, 127, 152              | Optionsprogramm                   | 34                         | <b>V</b>                 |                                   |
| Gewinn- und Verlustrechnung                              | 162                            | Organisationsstruktur             | 77                         | Vergütung                | 31, 213                           |
| <b>H</b>                                                 |                                | <b>P</b>                          |                            | Vertriebskosten          | 111                               |
| Hauptversammlung                                         | 22                             | Pensionsrückstellungen            | 112, 119, 180, 198         | Verwaltungskosten        | 111                               |
| <b>I</b>                                                 |                                | Personalaufwand                   | 93, 107, 109, 148, 188     | Vision                   | 3                                 |
| Industrieprodukte                                        | 78, 123                        | Personalentwicklung               | 94                         | Vorstand                 | 4, 22, 26, 31                     |
| Industriesalz                                            | 81, 105, 127, 152              | POTASH ONE                        | 145, 177                   | Vorsteuerergebnis        | 113                               |
| Investitionen                                            | 117, 155, 211                  | <b>R</b>                          |                            | <b>W</b>                 |                                   |
| <b>K</b>                                                 |                                | Rating                            | 17, 144, 224               | Weiterbildung            | 95, 148                           |
| Kali- und Magnesiumprodukte                              | 78, 88, 98, 103, 118, 122, 154 | Research-Coverage                 | 17                         | Weltkalikapazitäten      | 152                               |
| Kaliumchlorid                                            | 78, 103, 122, 218, 223         | Return on Capital Employed (ROCE) | 91, 92, 221                | <b>Z</b>                 |                                   |
|                                                          |                                | Risiken                           | 129                        | Ziele                    | 91                                |
|                                                          |                                | Risikomanagementsystem            | 130                        |                          |                                   |
|                                                          |                                | Rückstellungen                    | 116, 170, 180              |                          |                                   |

## FINANZKALENDER

| TERMINE                                                 | TAB: 6.0.5        |
|---------------------------------------------------------|-------------------|
| 2011/2012                                               |                   |
| Hauptversammlung, Kassel                                | 11. Mai 2011      |
| Quartalsfinanzbericht zum 31. März 2011                 | 11. Mai 2011      |
| Dividendenausschüttung                                  | 12. Mai 2011      |
| Halbjahresfinanzbericht zum 30. Juni 2011               | 11. August 2011   |
| Quartalsfinanzbericht zum 30. September 2011            | 10. November 2011 |
| Bericht über den Geschäftsverlauf 2011                  | 15. März 2012     |
| Bilanzpresse- und Analystenkonferenz, Frankfurt am Main | 15. März 2012     |

## KONTAKT

### K+S Aktiengesellschaft

Bertha-von-Suttner-Str. 7

34131 Kassel

Tel.: 0561/9301-0

Fax: 0561/9301-1753

Internet: [www.k-plus-s.com](http://www.k-plus-s.com)

### Investor Relations

Tel.: 0561/9301-1100

Fax: 0561/9301-2425

E-Mail: [investor-relations@k-plus-s.com](mailto:investor-relations@k-plus-s.com)

### Kommunikation

Tel.: 0561/9301-1722

Fax: 0561/9301-1666

E-Mail: [pr@k-plus-s.com](mailto:pr@k-plus-s.com)

Dieser Bericht wurde am 10. März 2011 veröffentlicht.

## IMPRESSUM

### Redaktion/Text

K+S-Investor Relations

### Konzeption und Gestaltung

HEISTERS & PARTNER,

Corporate & Brand Communication, Mainz

### Fotografie

K+S, Oscar van de Beek

### Lithografie

Recom GmbH & Co. KG, Stuttgart

### Druck

Eberl Print GmbH, Immenstadt

Dieser Geschäftsbericht ist auch in englischer Sprache erhältlich. Im Zweifelsfall ist die deutsche Version maßgeblich.

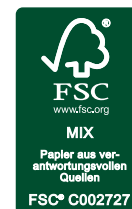

Mit dem fsc®-Warenzeichen werden Holzprodukte ausgezeichnet, die aus verantwortungsvoll bewirtschafteten Wäldern stammen, unabhängig zertifiziert nach den strengen Richtlinien des Forest Stewardship Council®.

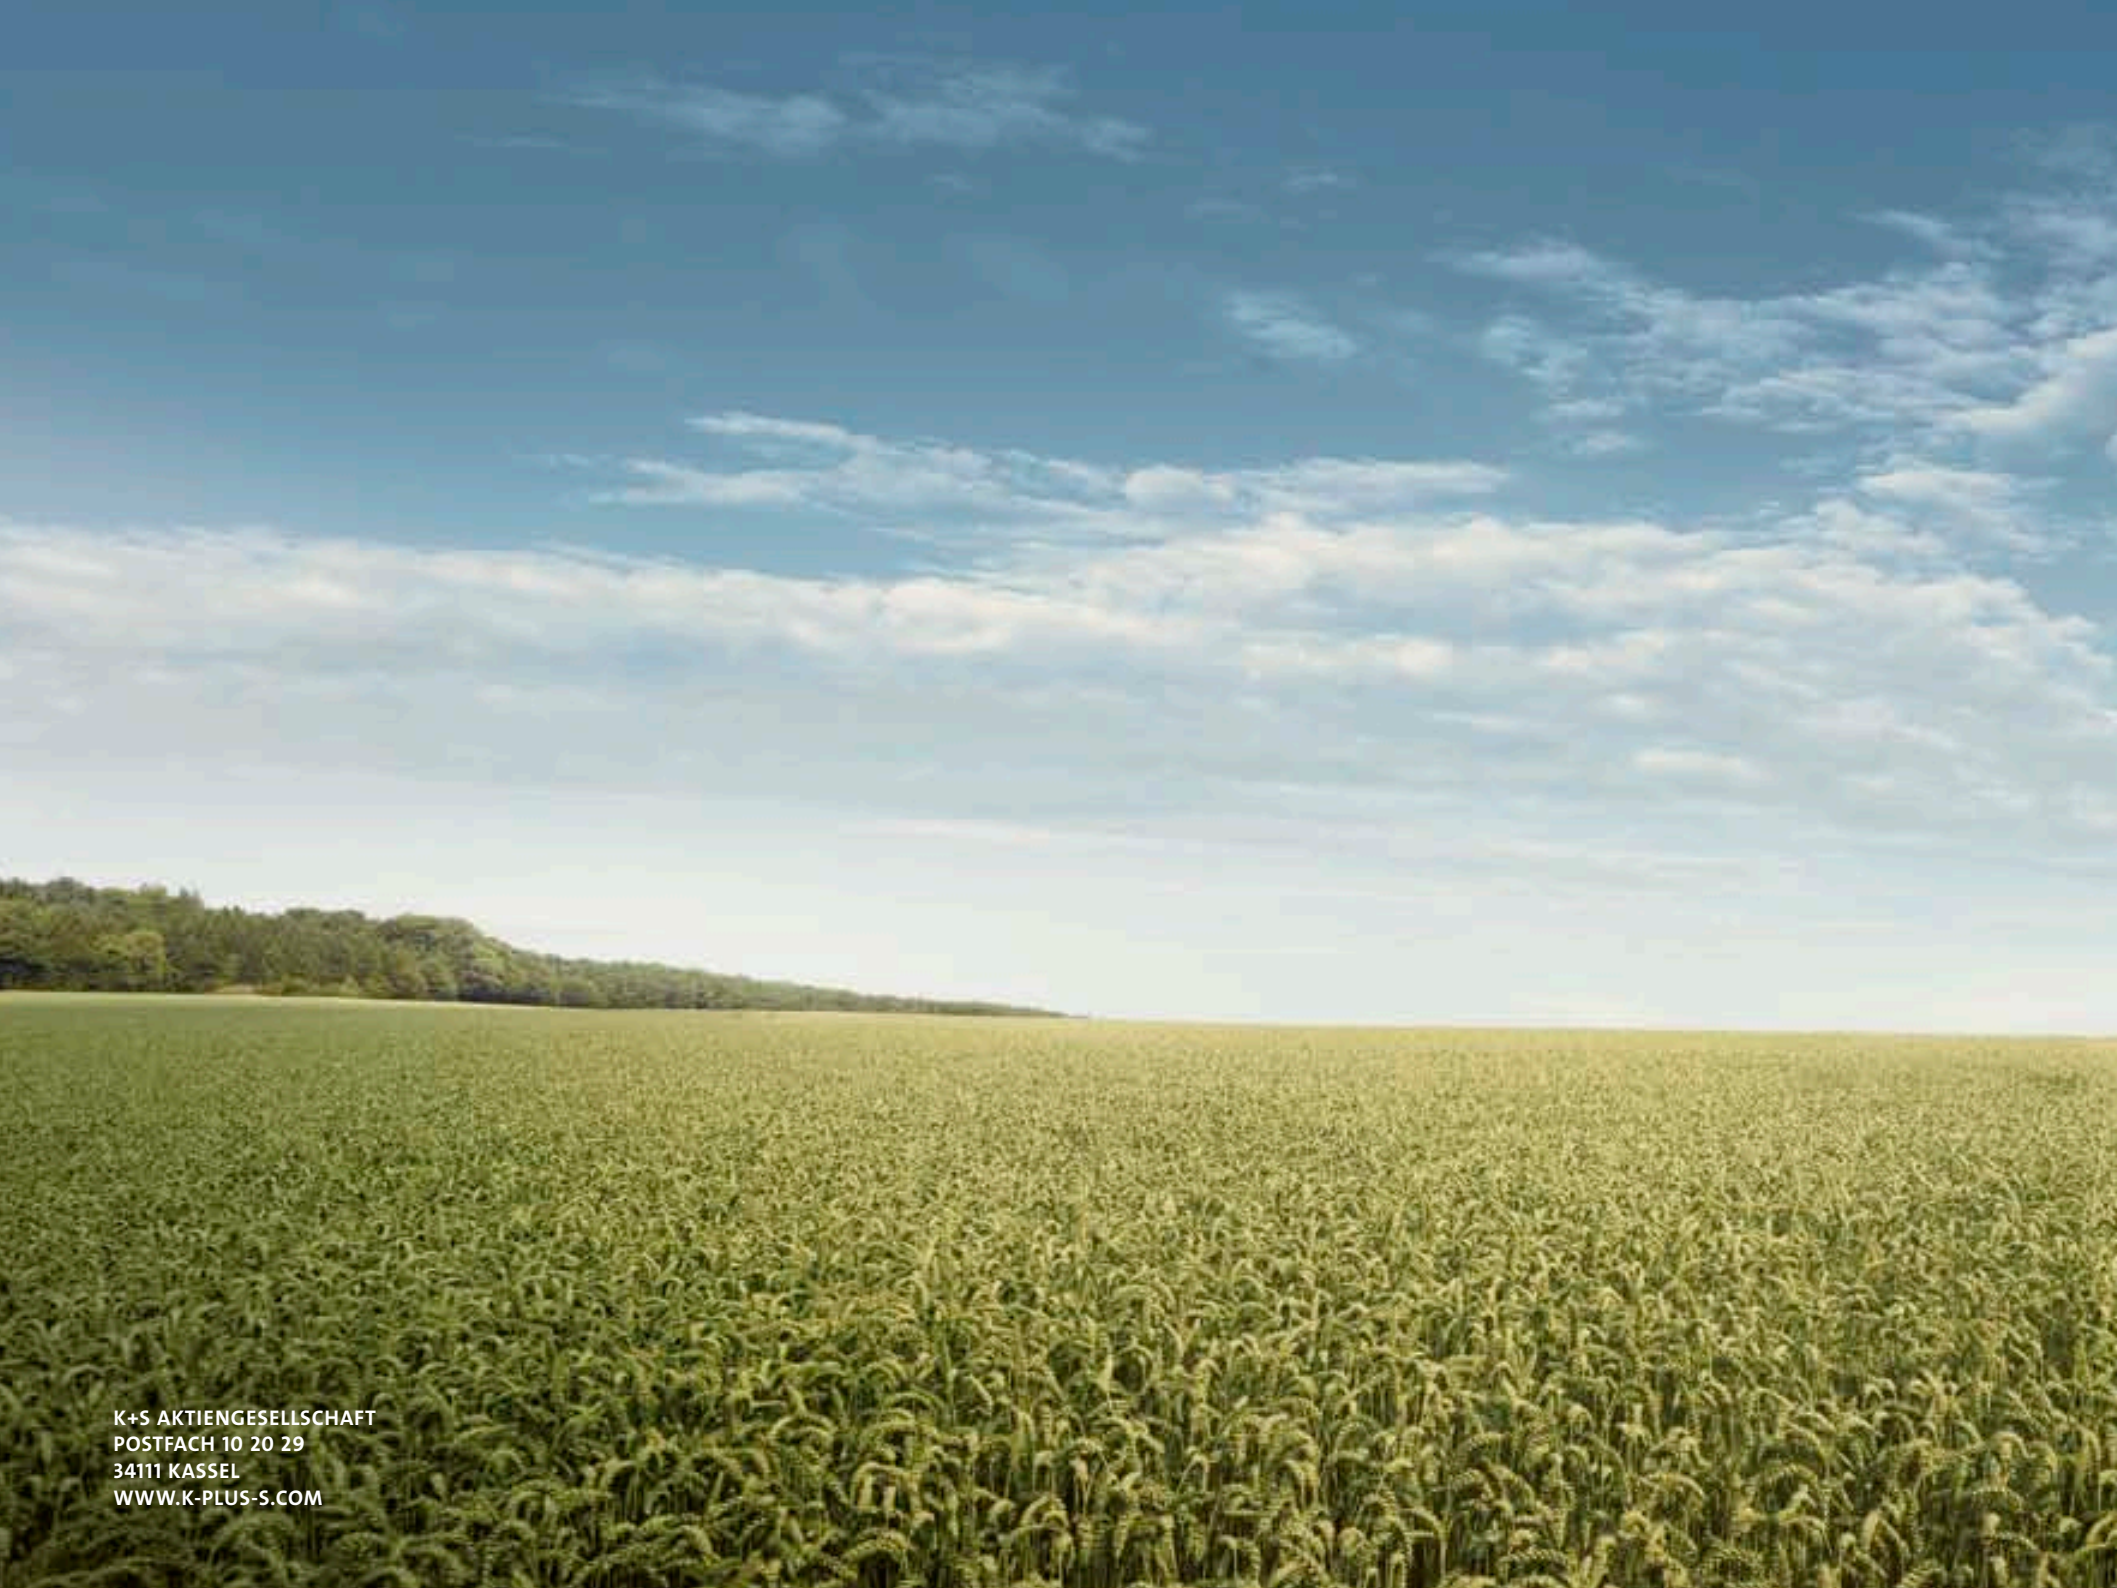

K+S AKTIENGESELLSCHAFT  
POSTFACH 10 20 29  
34111 KASSEL  
[WWW.K-PLUS-S.COM](http://WWW.K-PLUS-S.COM)
