# Supplementary material
Source: publisher site journal article supplement (https://www.degruyterbrill.com/publication/isbn/9783110432879/downloadAsset/9783110432879_Elektronischer_Anhang_2.zip)
Supplement: Supplementary file 66 [file K+S Unternehmens- und Nachhaltigkeitsbericht 2010.pdf › Korpustexte/Korpustexte pdf/K+S/K+S GB 2010/K+S Unternehmens- und Nachhaltigkeitsbericht 2010.pdf]

# NACHHALTIG WACHSEN

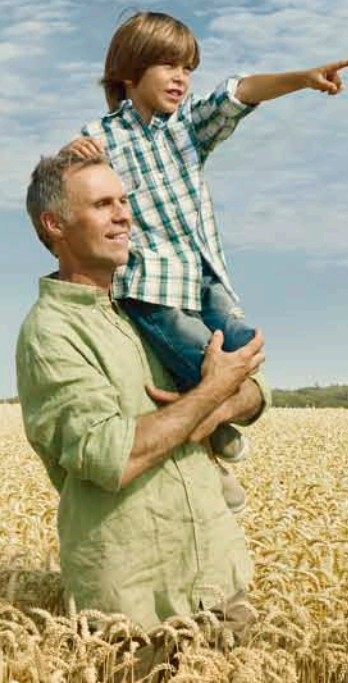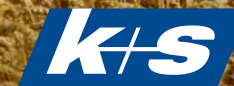

Wachstum erleben.



**ZEHNJAHRESÜBERSICHT DER K+S GRUPPE**

|                                                          |          | 2010    | 2009    | 2008    | 2007    | 2006               | 2005    | 2004    | 2003    | 2002    | 2001    |
|----------------------------------------------------------|----------|---------|---------|---------|---------|--------------------|---------|---------|---------|---------|---------|
|                                                          |          | IFRS    | IFRS    | IFRS    | IFRS    | IFRS               | IFRS    | IFRS    | HGB     | HGB     | HGB     |
| <b>Umsatz, Ergebnis, Cashflow</b>                        |          |         |         |         |         |                    |         |         |         |         |         |
| Umsatz                                                   | Mio. €   | 4.993,8 | 3.573,8 | 4.794,4 | 3.344,1 | 2.957,7            | 2.815,7 | 2.538,6 | 2.287,8 | 2.258,5 | 2.179,4 |
| Ergebnis vor Zinsen, Steuern und Abschreibungen (EBITDA) | Mio. €   | 975,2   | 411,8   | 1.484,4 | 413,9   | 401,1              | 383,1   | 289,5   | 223,7   | 240,1   | 248,4   |
| Operatives Ergebnis (EBIT I)                             | Mio. €   | 726,9   | 238,0   | 1.342,7 | 285,7   | 278,0              | 250,9   | 162,9   | 115,7   | 132,8   | 120,6   |
| Ergebnis nach operativen Sicherungsgeschäften (EBIT II)  | Mio. €   | 731,5   | 241,9   | 1.192,3 | -106,9  | 361,6              | 271,7   | 136,5   | —       | —       | —       |
| Ergebnis vor Ertragsteuern                               | Mio. €   | 608,0   | 126,5   | 1.199,1 | -142,6  | 341,5              | 259,6   | 123,4   | 111,6   | 113,9   | 121,1   |
| Ergebnis vor Ertragsteuern, bereinigt <sup>1</sup>       | Mio. €   | 603,4   | 122,6   | 1.349,5 | 250,0   | 257,9              | 238,8   | 149,9   | —       | —       | —       |
| Konzernergebnis                                          | Mio. €   | 448,6   | 96,4    | 870,9   | -93,3   | 228,9 <sup>2</sup> | 174,4   | 86,8    | 101,3   | 103,8   | 118,3   |
| Konzernergebnis, bereinigt <sup>1</sup>                  | Mio. €   | 445,3   | 93,6    | 979,3   | 175,3   | 176,2 <sup>2</sup> | 161,3   | 103,5   | —       | —       | —       |
| Brutto-Cashflow                                          | Mio. €   | 830,2   | 323,9   | 1.177,9 | 372,1   | 342,7              | 341,5   | 274,1   | 209,1   | 216,9   | 224,6   |
| Investitionen <sup>3</sup>                               | Mio. €   | 201,0   | 177,6   | 197,5   | 171,6   | 130,5              | 107,1   | 131,9   | 126,6   | 129,0   | 157,9   |
| Abschreibungen <sup>3</sup>                              | Mio. €   | 248,3   | 173,8   | 141,7   | 128,2   | 123,1              | 132,2   | 126,6   | 108,0   | 107,3   | 127,8   |
| Working Capital                                          | Mio. €   | 959,4   | 970,5   | 962,3   | 570,6   | 603,1              | 456,4   | 333,1   | 250,9   | 300,5   | 262,1   |
| <b>Bilanz</b>                                            |          |         |         |         |         |                    |         |         |         |         |         |
| Eigenkapital <sup>4</sup>                                | Mio. €   | 2.651,6 | 2.094,6 | 1.718,3 | 931,8   | 1.124,3            | 942,1   | 880,6   | 584,9   | 558,8   | 516,8   |
| Sachanlagen, immaterielles Vermögen                      | Mio. €   | 2.803,3 | 2.658,0 | 1.426,9 | 1.297,3 | 1.271,6            | 874,1   | 883,3   | 659,8   | 598,6   | 592,4   |
| Nettoverschuldung                                        | Mio. €   | 732,5   | 1.351,3 | 570,0   | 1.085,1 | 718,3              | 321,4   | 340,5   | 220,5   | 262,7   | 180,7   |
| Bilanzsumme                                              | Mio. €   | 5.573,7 | 5.217,1 | 3.473,8 | 2.964,8 | 2.830,9            | 2.259,1 | 2.147,7 | 1.754,5 | 1.666,7 | 1.601,0 |
| <b>Mitarbeiter</b>                                       |          |         |         |         |         |                    |         |         |         |         |         |
| Mitarbeiter per 31.12. <sup>5</sup>                      | Anzahl   | 15.241  | 15.208  | 12.368  | 12.033  | 11.873             | 11.012  | 10.988  | 10.554  | 10.536  | 10.178  |
| – davon Auszubildende                                    | Anzahl   | 647     | 642     | 615     | 614     | 620                | 591     | 591     | 550     | 542     | 533     |
| Mitarbeiter im Durchschnitt <sup>5</sup>                 | Anzahl   | 15.168  | 13.044  | 12.214  | 11.959  | 11.392             | 11.017  | 11.068  | 10.541  | 10.439  | 10.278  |
| Personalaufwand <sup>6</sup>                             | Mio. €   | 1.019,3 | 756,4   | 738,5   | 687,3   | 663,5              | 671,1   | 613,3   | 562,7   | 531,2   | 522,6   |
| <b>Kennzahlen</b>                                        |          |         |         |         |         |                    |         |         |         |         |         |
| Ergebnis je Aktie, bereinigt <sup>1</sup>                | €        | 2,33    | 0,56    | 5,94    | 1,06    | 1,07 <sup>2</sup>  | 0,95    | 0,61    | 0,61    | 0,61    | 0,68    |
| Dividende je Aktie <sup>7</sup>                          | €        | 1,00    | 0,20    | 2,40    | 0,50    | 0,50               | 0,45    | 0,33    | 0,25    | 0,25    | 0,25    |
| Dividendenrendite <sup>7</sup>                           | %        | 1,8     | 0,5     | 6,0     | 1,2     | 2,4                | 3,5     | 3,3     | 4,6     | 5,8     | 4,6     |
| EBITDA-Marge                                             | %        | 19,5    | 11,5    | 31,0    | 12,4    | 13,6               | 13,6    | 11,4    | 9,8     | 10,6    | 11,4    |
| EBIT-Marge                                               | %        | 14,6    | 6,7     | 28,0    | 8,5     | 9,4                | 8,9     | 6,4     | 5,1     | 5,9     | 5,5     |
| Umsatzrendite                                            | %        | 8,9     | 2,6     | 20,4    | 5,2     | 6,0 <sup>2</sup>   | 5,7     | 4,1     | 2,8     | 4,6     | 5,4     |
| Return on Capital Employed (ROCE)                        | %        | 20,9    | 9,3     | 64,0    | 15,5    | 17,4               | 19,5    | 14,2    | 12,7    | 14,7    | 14,1    |
| Gesamtkapitalrendite                                     | %        | 14,7    | 6,9     | 44,9    | 11,0    | 12,3               | 12,7    | 9,1     | 7,2     | 7,7     | 8,5     |
| Eigenkapitalrendite nach Steuern                         | %        | 18,7    | 8,4     | 68,6    | 16,1    | 17,7 <sup>2</sup>  | 17,8    | 12,1    | 17,3    | 18,6    | 22,9    |
| Buchwert je Aktie                                        | €        | 13,85   | 10,94   | 10,41   | 5,65    | 6,81               | 5,54    | 5,18    | 3,44    | 3,10    | 2,87    |
| Brutto-Cashflow je Aktie                                 | €        | 4,34    | 1,95    | 7,14    | 2,25    | 2,08               | 2,02    | 1,61    | 1,25    | 1,27    | 1,30    |
| <b>Aktie</b>                                             |          |         |         |         |         |                    |         |         |         |         |         |
| Schlusskurs per 31.12. <sup>8</sup>                      | XETRA, € | 56,36   | 39,99   | 39,97   | 40,69   | 20,55              | 12,76   | 9,78    | 5,44    | 4,33    | 5,48    |
| Marktkapitalisierung                                     | Mrd. €   | 10,8    | 7,7     | 6,6     | 6,7     | 3,4                | 2,1     | 1,7     | 0,9     | 0,8     | 1,0     |
| Enterprise Value per 31.12.                              | Mrd. €   | 11,5    | 9,0     | 7,2     | 7,8     | 4,1                | 2,4     | 2,0     | 0,9     | 0,8     | 1,0     |
| Gesamtanzahl Aktien per 31.12.                           | Mio.     | 191,40  | 191,40  | 165,00  | 165,00  | 165,00             | 170,00  | 170,00  | 170,00  | 180,00  | 180,00  |
| Ausstehende Aktien per 31.12. <sup>9</sup>               | Mio.     | 191,40  | 191,40  | 165,00  | 165,00  | 165,00             | 165,00  | 170,00  | 170,00  | 166,08  | 173,20  |
| Durchschnittliche Anzahl Aktien <sup>10</sup>            | Mio.     | 191,34  | 166,15  | 164,95  | 164,94  | 164,96             | 169,24  | 170,00  | 167,08  | 171,28  | 173,60  |

## GESCHÄFTSBEREICHE IM ÜBERBLICK

### KALI- UND MAGNESIUMPRODUKTE

|                      | 2010    | 2009    | 2008    | 2007    | 2006    |
|----------------------|---------|---------|---------|---------|---------|
| in Mio. €            |         |         |         |         |         |
| Umsatz               | 1.844,7 | 1.421,7 | 2.397,4 | 1.407,9 | 1.238,9 |
| EBITDA               | 567,1   | 317,2   | 1.286,3 | 255,1   | 235,7   |
| EBIT I               | 475,9   | 231,7   | 1.203,2 | 177,9   | 158,6   |
| Investitionen        | 96,9    | 107,4   | 111,1   | 79,7    | 83,8    |
| Mitarbeiter (Anzahl) | 7.900   | 7.818   | 7.845   | 7.672   | 7.601   |

In sechs Bergwerken werden Kali- und Magnesiumrohsalze gewonnen. Hieraus stellen wir eine Vielzahl von Düngemitteln her; außerdem verarbeiten wir unsere Rohstoffe zu Produkten für industrielle Anwendungen, zu hochreinen Kalium- und Magnesiumsalzen für die Pharma-, Kosmetik- und Lebensmittelindustrie sowie zu Bestandteilen von Futtermitteln.

### SALZ

|                      | 2010    | 2009    | 2008  | 2007  | 2006  |
|----------------------|---------|---------|-------|-------|-------|
| in Mio. €            |         |         |       |       |       |
| Umsatz               | 1.728,7 | 1.014,6 | 618,6 | 545,1 | 485,8 |
| EBITDA               | 369,7   | 200,3   | 77,6  | 76,5  | 92,0  |
| EBIT I               | 238,1   | 140,4   | 45,2  | 47,8  | 67,6  |
| Investitionen        | 79,0    | 48,0    | 58,6  | 47,9  | 21,2  |
| Mitarbeiter (Anzahl) | 5.235   | 5.279   | 2.394 | 2.294 | 2.194 |

Salzprodukte von höchster Reinheit und Qualität werden als Speise-, Gewerbe- und Industriesalze sowie als Auftausalz im Winterdienst für die Sicherheit im Straßenverkehr eingesetzt. Produziert wird in Deutschland und in anderen westeuropäischen Ländern sowie in Nord- und Südamerika.

### STICKSTOFFDÜNGEMITTEL

|                      | 2010    | 2009    | 2008    | 2007    | 2006    |
|----------------------|---------|---------|---------|---------|---------|
| in Mio. €            |         |         |         |         |         |
| Umsatz               | 1.286,2 | 1.016,2 | 1.652,4 | 1.265,4 | 1.108,6 |
| EBITDA               | 67,4    | -94,4   | 133,9   | 68,2    | 56,5    |
| EBIT I               | 55,7    | -108,1  | 121,4   | 57,3    | 45,9    |
| Investitionen        | 12,9    | 11,2    | 10,7    | 16,8    | 12,1    |
| Mitarbeiter (Anzahl) | 1.226   | 1.249   | 1.318   | 1.311   | 1.321   |

Der Geschäftsbereich Stickstoffdüngemittel vertreibt Felddünger für nahezu alle landwirtschaftlichen Kulturen. Außerdem werden neben Produkten für den Garten- und Hausbereich, die Pflanzenpflege und den Pflanzenschutz, Spezialdüngemittel für kommunale Grünflächen, Golfplätze, Baumschulbetriebe, den Gartenbau und verschiedene Sonderkulturen angeboten.

### ERGÄNZENDE GESCHÄFTSBEREICHE

|                      | 2010  | 2009  | 2008  | 2007  | 2006  |
|----------------------|-------|-------|-------|-------|-------|
| in Mio. €            |       |       |       |       |       |
| Umsatz               | 133,7 | 120,7 | 125,3 | 125,1 | 123,9 |
| EBITDA               | 27,7  | 21,7  | 31,2  | 42,4  | 41,8  |
| EBIT I               | 21,2  | 15,2  | 25,1  | 37,7  | 37,1  |
| Investitionen        | 4,2   | 4,6   | 10,0  | 17,2  | 7,7   |
| Mitarbeiter (Anzahl) | 280   | 278   | 285   | 273   | 306   |

Unter dem Begriff „Ergänzende Geschäftsbereiche“ sind neben Recyclingaktivitäten und der Entsorgung von Abfällen in Kali- bzw. Steinsalzbergwerken sowie der Granulierung von CATSAN® weitere für die K+S Gruppe wichtige Aktivitäten gebündelt. Mit der Kali-Transport Gesellschaft mbH (KTG) in Hamburg verfügt die K+S Gruppe über einen eigenen Logistik-Dienstleister. Die Chemische Fabrik Kalk GmbH (CFK) handelt mit verschiedenen Basischemikalien.

### ← Fußnoten zur Zehnjahresübersicht

<sup>1</sup> Die bereinigten Kennzahlen beinhalten unverändert lediglich das realisierte Ergebnis aus operativen, antizipativen Sicherungsgeschäften der jeweiligen Berichtsperiode. Die Marktwertveränderungen der noch ausstehenden, operativen, antizipativen Sicherungsgeschäfte werden hingegen in den bereinigten Ergebnissen nicht berücksichtigt. Ebenso werden darauf entfallende Effekte auf latente und zahlungswirksame Steuern eliminiert; Steuersatz 2010: 28,2 % (2009: 27,9 %).

<sup>2</sup> Ohne einmaligen latenten Steuerertrag von 41,9 Mio. € bzw. 0,25 € je Aktie.

<sup>3</sup> Zahlungswirksame Investitionen in bzw. Abschreibungen auf Sachanlagen, immaterielle Vermögenswerte.

<sup>4</sup> Bis einschl. 2003: Inkl. 50 % Sonderposten mit Rücklageanteil und Unterschiedsbetrag aus der Kapitalkonsolidierung.

<sup>5</sup> FTE: Vollzeitäquivalente; Teilzeitstellen werden entsprechend ihrem jeweiligen Arbeitszeitanteil gewichtet.

Die Bezeichnung Mitarbeiter gilt für Frauen und Männer gleichermaßen und ist deshalb als geschlechtsneutral anzusehen.

<sup>6</sup> Der Personalaufwand enthält auch Aufwendungen für Altersteilzeit und Vorruhestand.

<sup>7</sup> Im Jahr 2010 entspricht die Angabe dem Dividendenvorschlag; Dividendenrendite bezogen auf Jahresschlusskurs.

<sup>8</sup> Der Kurs der K+S-Aktie handelt seit der Kapitalerhöhung im Dezember 2009 ex Bezugsrecht. Historische Werte wurden nicht angepasst.

<sup>9</sup> Gesamtanzahl Aktien abzgl. des Bestands der von K+S am Stichtag gehaltenen eigenen Aktien.

<sup>10</sup> Gesamtanzahl Aktien abzgl. des durchschnittlichen Bestands der von K+S gehaltenen eigenen Aktien.

← TITELBILD

K+S BIETET EIN UMFASSENDES LEISTUNGSANGEBOT FÜR LAND-  
WIRTSCHAFT, INDUSTRIE UND PRIVATE VERBRAUCHER,  
DAS IN NAHEZU ALLEN BEREICHEN DES TÄGLICHEN LEBENS  
GRUNDLAGEN FÜR WACHSTUM SCHAFFT.

## VORWORT

KASSEL, 1. MÄRZ 2011

*Liebe Leserinnen und Leser,*

Wir haben unserem diesjährigen Bericht den Titel „Nachhaltig wachsen“ gegeben. Doch Wachstum allein um des Wachstums willen ist für uns kein Ziel. Als Rohstoffunternehmen denken und handeln wir langfristig. Unsere Strategie ist auf nachhaltiges wirtschaftliches und Werte schaffendes Wachstum ausgerichtet – im Interesse aller unserer Stakeholder.

### ERFREULICHE GESCHÄFTSENTWICKLUNG IM JAHR 2010

Im Vergleich zur recht niedrigen Ausgangsbasis des von der Finanz- und Wirtschaftskrise belasteten Jahres 2009 zeigte der Geschäftsverlauf im Jahr 2010 eine sehr erfreuliche Entwicklung, die sich die meisten von uns vor einem Jahr sicher kaum vorzustellen wagten. Die K+S GRUPPE erwirtschaftete im Jahr 2010 einen Umsatz von 5,0 Mrd. €; ein Anstieg gegenüber dem Vorjahr von 40 %.

Das bereinigte operative Ergebnis EBIT I erreichte 727 Mio. € und hat sich in etwa verdreifacht.

Diese positive Geschäftsentwicklung führen wir im Wesentlichen auf drei Aspekte zurück:

- + Im Kerngeschäftsfeld Düngemittel gab es zu Beginn des Jahres 2010 einen großen Nachholbedarf der Handelsstufe, um sehr niedrige Lagerbestände im Vorfeld der Frühjahrssaison wiederaufzufüllen. Zusätzlich kehrte auch die Landwirtschaft zu einem nachhaltigen Verbrauchsverhalten zurück. Denn der stark reduzierte Düngemittleinsatz im Jahr 2009 hatte zu relativ niedrigen Nährstoffgehalten in den Böden und damit zu erhöhten Ertragsrisiken für die kommenden Ernten geführt. Der in der zweiten Jahreshälfte einsetzende starke Anstieg der internationalen Getreidepreise und die damit einhergehende verbesserte Einkommenssituation der Landwirte begünstigte die Düngemittelnachfrage dann noch zusätzlich.

- + Im Geschäftsbereich Salz stand die reibungslose Integration des zum 1. Oktober 2009 erworbenen nordamerikanischen Salzproduzenten MORTON SALT im Vordergrund – eine Vielzahl von Projektteams hat hier ausgezeichnete Arbeit geleistet. Ich freue mich, dass MORTON SALT ab dem ersten Tag der Zugehörigkeit zur K+S GRUPPE, Quartal für Quartal, deutlich positive Wertbeiträge liefert.
- + Wir haben sowohl zu Beginn als auch am Ende des Jahres 2010 in Europa einen Winter erlebt, wie es ihn in puncto Intensität lange nicht mehr gegeben hat. Unsere europäische Salztochter ESCO verkaufte im vergangenen Jahr mehr als das Doppelte der üblichen Auftausalzmenge. Dieser Kraftakt war nur zu meistern aufgrund der über die Jahre immer flexibleren und den Saisoneffekten immer besser Rechnung tragenden Auftausalzproduktion in unseren europäischen Werken, den gelebten Synergien zwischen der Salz- und Kaliproduktion sowie dem sich neben Europa mittlerweile auf Süd- und Nordamerika erstreckenden Produktionsnetzwerk.

#### AUSBAU UNSERER KALIKAPAZITÄTEN

Die Weichen für die erfolgreiche Fortführung unseres Wachstumskurses haben wir schon gestellt: Im Zuge unserer Strategie, die den Ausbau der Kalikapazitäten und die Verlängerung der durchschnittlichen Lebensdauer der Bergwerke vorsieht, haben wir zu Beginn dieses Jahres die kanadische POTASH ONE übernommen. Nun können und werden wir in Saskatchewan ein neues Kaliwerk errichten, das ab 2015 erste Produkte liefern soll. Darüber hinaus wird das neue Rohstoffvorkommen zusammen mit unseren bestehenden inländischen Kalibergwerken unsere internationale Wettbewerbsfähigkeit deutlich stärken und im Ergebnis der gesamten K+S GRUPPE in Europa und Übersee zu Gute kommen!

#### MASSNAHMENPAKET ZUM GRUNDWASSER- UND GEWÄSSERSCHUTZ IN UMSETZUNG

Auch im abgelaufenen Jahr hat uns unser Maßnahmenpaket zum Grundwasser- und Gewässerschutz an Werra und Weser intensiv beschäftigt. Wir werden in den nächsten fünf Jahren rund 360 Mio. € in die Verbesserung der Gewässerqualität investieren und gehen damit aus heutiger Sicht an die Grenzen des technisch Sinnvollen und wirtschaftlich Vertretbaren.

Bereits seit dem Jahr 2008 arbeitet ein K+S-Projektteam aus Ingenieuren, Technikern, Wissenschaftlern und Betriebswirten an den Vorbereitungen für die Umsetzung der umfangreichen Maßnahmen. Erste Projekte sind beantragt und zum Teil bereits genehmigt. Um die für uns unbedingt erforderliche Planungssicherheit für diese Investitionen zu haben, streben wir an, im ersten Quartal 2011 die Abstimmung des Integrierten Maßnahmenkonzepts (IMK) mit den Ländern Hessen und Thüringen abzuschließen.

Da wir derzeit eine langfristige Genehmigung unseres Konzepts nicht als gesichert annehmen können – die dauerhafte lokale Entsorgung wird von einigen Seiten in Frage gestellt – haben wir uns aus Gründen vorausschauender Sorgfalt entschlossen, auch Genehmigungsanträge für standortferne Entsorgungswege vorzubereiten.

Dies geschieht ungeachtet des Umstandes, dass die mit den Ländern Hessen und Thüringen definierten und vom Runden Tisch akzeptierten Prüfkriterien für Fernleitungen heute weder objektiv noch aus Sicht des Unternehmens erfüllt sind. Dies muss aber der Fall sein, bevor eine Entscheidung über den Bau einer Fernleitung getroffen werden kann – eine solche Entscheidung ist mit der Vorbereitung der Anträge also nicht verbunden. Gleichwohl können Sie sich darauf verlassen, dass wir die Antragsverfahren vorurteilsfrei, ergebnisoffen und mit derselben Sorgfalt bearbeiten, wie die Anträge zur Umsetzung des IMK.

#### ZUGANG ZU ROHSTOFFEN: GÜTERABWÄGUNG ERFORDERLICH

Auch an anderer Stelle beobachten wir, dass Unternehmen, die in Deutschland Rohstoffe abbauen, einen schweren Stand haben. Die Rohstoffgewinnung sollte mit anderen Flächennutzungen und den Kategorien des Natur- und Umweltschutzes in ausgewogener Weise in Einklang stehen. In den vergangenen Jahren sahen wir in Deutschland allerdings den Zugang zu Lagerstätten durch Schutzgebietsausweisungen und Überplanung mit anderen Nutzungen behindert oder versperrt, weil insbesondere dem Naturschutz ohne ausreichende Güterabwägung der Vorrang gegenüber einer Rohstoffgewinnung eingeräumt wurde. Nun setzt sich in der Politik immer mehr die

Erkenntnis durch, wie wichtig heimische Rohstoffe sind. Zum Glück: Denn um auch zukünftig aus deutschen Lagerstätten Rohstoffe gewinnen und verarbeiten zu können, bedarf es geeigneter Rahmenbedingungen!

#### DEN DEMOGRAFISCHEN WANDEL GESTALTEN

Der demografische und gesellschaftspolitische Wandel in Europa und Nordamerika stellt auch für uns eine besondere Herausforderung dar. Vor dem Hintergrund des zusätzlichen Personalbedarfs aufgrund des weiteren Wachstums unserer Gruppe müssen wir nicht nur genügend qualifizierte Nachwuchskräfte rekrutieren, sondern auch durch gezielte Weiterbildung, entsprechend angepasste Arbeitsbedingungen und ein leistungsfähiges Gesundheitsmanagement die Voraussetzungen schaffen, um Arbeitsfähigkeit, Qualifikation und Motivation unserer Mitarbeiter zu erhalten. Wir wollen ein Unternehmen sein, das es allen Beschäftigten ermöglicht, über ihr gesamtes Erwerbsleben leistungsfähig und gesund zu bleiben!

#### WESENTLICHE HANDLUNGSFELDER FÜR NACHHALTIGE ENTWICKLUNG DEFINIERT

Im Jahr 2010 haben wir in einer internen Materialitätsanalyse unsere wesentlichen Handlungsfelder für eine nachhaltige Entwicklung definiert, sie auf Chancen und Risiken überprüft und deren Bedeutung für unsere Stakeholder unseren Einflussmöglichkeiten gegenübergestellt. Da sich unser Umfeld und die Rahmenbedingungen für unser Geschäft beständig verändern, wollen wir diese Analyse jährlich auf ihre Gültigkeit überprüfen und laden auch Sie als unsere Stakeholder zum Dialog ein.



Tag für Tag erleben wir, dass das Unternehmenswachstum und unser Erfolg zu großen Teilen auf dem Engagement, dem unternehmerischen Gespür und dem bemerkenswerten Teamgeist unserer Mitarbeiter beruhen. Ihnen allen möchte ich auch im Namen meiner Vorstandskollegen herzlich danken.

Auch unseren Aktionären und allen unseren Partnern danke ich für ihr Vertrauen, die Unterstützung und den offenen Dialog im vergangenen Geschäftsjahr.

*Ihr Norbert Steiner*

NORBERT STEINER  
VORSITZENDER DES VORSTANDS

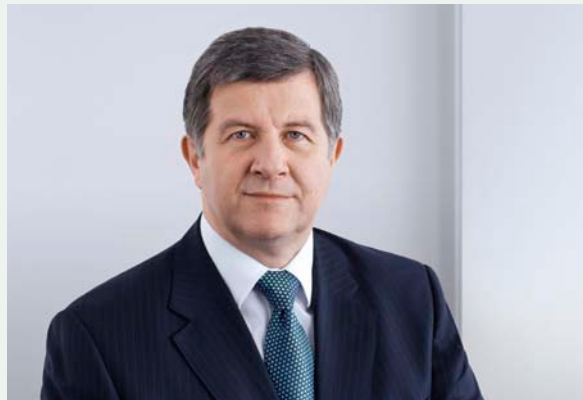



|   |                                    |    |
|---|------------------------------------|----|
| ← | Zehnjahresübersicht der K+S GRUPPE | U3 |
| ← | Geschäftsbereiche im Überblick     | U4 |
| ← | Vorwort                            |    |
|   | Der Vorstand                       | 2  |

## 1 NACHHALTIGE UNTERNEHMENSFÜHRUNG

|     |                                 |    |
|-----|---------------------------------|----|
| 1.1 | Unser Selbstverständnis         | 5  |
| 1.2 | Unsere Handlungsfelder          | 6  |
| 1.3 | Unsere Nachhaltigkeitsstrategie | 12 |
| 1.4 | Unsere Managementsysteme        | 12 |
| 1.5 | Stakeholderdialog               | 14 |
| 1.6 | Unsere Ziele                    | 16 |

## NACHHALTIG WACHSEN

|                                |    |
|--------------------------------|----|
| WACHSTUM BRAUCHT EINSATZ       | 20 |
| WACHSTUM BRAUCHT RESSOURCEN    | 24 |
| WACHSTUM BRAUCHT PERSPEKTIVEN  | 28 |
| WACHSTUM BRAUCHT KNOW-HOW      | 32 |
| WACHSTUM BRAUCHT ZUKUNFT       | 36 |
| WACHSTUM BRAUCHT GLEICHGEWICHT | 40 |
| WACHSTUM BRAUCHT LÖSUNGEN      | 44 |
| WACHSTUM BRAUCHT MINERALIEN    | 48 |

## 2 DIE K+S GRUPPE

|     |                              |    |
|-----|------------------------------|----|
| 2.1 | Geschäftsfeld Düngemittel    | 53 |
| 2.2 | Geschäftsfeld Salz           | 59 |
| 2.3 | Ergänzende Geschäftsbereiche | 63 |
| 2.4 | Unsere Standorte             | 65 |

## 3 PRODUKTVERANTWORTUNG

|     |                              |    |
|-----|------------------------------|----|
| 3.1 | Gesicherte Qualität          | 69 |
| 3.2 | Messbare Kundenzufriedenheit | 69 |
| 3.3 | Forschung und Entwicklung    | 70 |
| 3.4 | Düngemittel                  | 72 |
| 3.5 | Salz                         | 74 |
| 3.6 | Entsorgung und Recycling     | 77 |

## 4 ÖKONOMIE

|     |                                 |    |
|-----|---------------------------------|----|
| 4.1 | Geschäftliche Rahmenbedingungen | 81 |
| 4.2 | Umsatz und Ergebnis             | 81 |
| 4.3 | K+S-Aktie                       | 85 |

## 5 ÖKOLOGIE

|     |                                              |    |
|-----|----------------------------------------------|----|
| 5.1 | Wirtschaftlichkeit und Umweltverträglichkeit | 89 |
| 5.2 | Kaliproduktion und Gewässerschutz            | 89 |
| 5.3 | Effiziente Energienutzung und Klimaschutz    | 94 |
| 5.4 | Rekultivierung und Naturschutz               | 97 |
| 5.5 | Kennzahlen und Erläuterungen                 | 99 |

## 6 SOZIALE VERANTWORTUNG

|      |                                                      |     |
|------|------------------------------------------------------|-----|
| 6.1  | Vorausschauende Personalpolitik                      | 107 |
| 6.2  | Unsere Mitarbeiter                                   | 108 |
| 6.3  | Betriebliches Gesundheitsmanagement                  | 110 |
| 6.4  | Arbeitssicherheit                                    | 112 |
| 6.5  | Flexible Arbeitszeitmodelle                          | 114 |
| 6.6  | Führungskultur                                       | 116 |
| 6.7  | Beteiligung am Unternehmenserfolg und Altersvorsorge | 116 |
| 6.8  | Ausbildung                                           | 118 |
| 6.9  | Personalentwicklung                                  | 119 |
| 6.10 | Austausch von Wissen und Erfahrung                   | 121 |
| 6.11 | Mitbestimmung                                        | 122 |
| 6.12 | Verantwortung in der Lieferkette                     | 123 |
| 6.13 | Gesellschaftliches Engagement                        | 125 |

### WEITERE INFORMATIONEN

|                                    |     |
|------------------------------------|-----|
| GRI-Richtlinien                    | 128 |
| Glossar                            | 133 |
| Abbildungsverzeichnis              | 135 |
| Tabellenverzeichnis                | 136 |
| Stichwortverzeichnis               | 136 |
| Finanzkalender, Kontakt, Impressum | 138 |

## INHALT

## DER VORSTAND

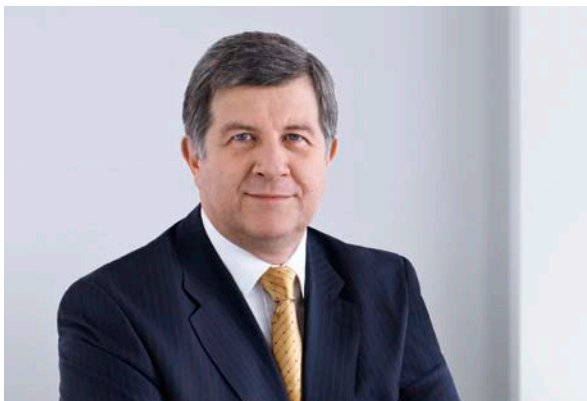

**NORBERT STEINER**  
JURIST, VORSTANDSVORSITZENDER

wurde 1954 in Siegen geboren. Nach dem Studium der Rechtswissenschaften in Heidelberg und seinem Referendariat im Bezirk des Oberlandesgerichts Karlsruhe nahm er 1983 seine Berufstätigkeit in der Steuerabteilung der BASF AG auf, deren Unterabteilung Zölle und Verbrauchssteuern er ab 1988 leitete. Im Jahr 1993 übernahm er die Leitung des Bereichs Recht, Steuern und Versicherungen der K+S AKTIENGESELLSCHAFT. Im Mai 2000 wurde Norbert Steiner Mitglied des Vorstands, im Januar 2006 stellvertretender Vorsitzender und am 1. Juli 2007 Vorstandsvorsitzender der K+S AKTIENGESELLSCHAFT. In seiner Verantwortung liegen der Geschäftsbereich Salz, die Bereiche Unternehmensentwicklung und Controlling, Recht/Compliance, Investor Relations, Kommunikation sowie Internationale HR-Koordination.

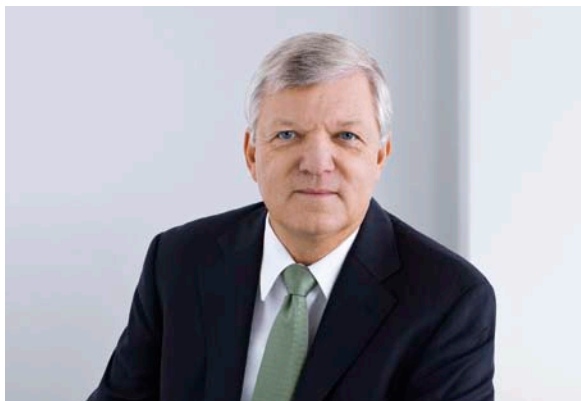

**JOACHIM FELKER**  
INDUSTRIEKAUFMANN

wurde 1952 in Bad Godesberg geboren. Nach seinem Abitur im Jahr 1974 absolvierte er eine Ausbildung zum Industriekaufmann bei der BASF AG und arbeitete dort als Wirtschaftsassistent. Von 1980 bis 1999 hatte er mehrere Management- und Marketingpositionen innerhalb des BASF-Konzerns inne, u. a. in Asien. Zuletzt war er als Abteilungsleiter des Bereichs Düngemittel tätig. Seit dem Jahr 2000 ist Joachim Felker in der K+S GRUPPE tätig, zunächst als Geschäftsführer der FERTIVA GMBH und ab 2003 als Mitglied der Geschäftsführung der K+S KALI GMBH. Im Oktober 2005 wurde er Mitglied des Vorstands der K+S AKTIENGESELLSCHAFT. Er ist zuständig für die Geschäftsbereiche Kali- und Magnesiumprodukte sowie Stickstoffdüngemittel.

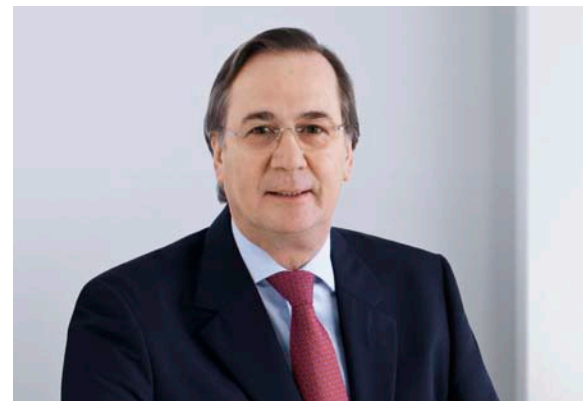

**GERD GRIMMIG**  
DIPLOM-INGENIEUR

wurde 1953 in Freden geboren. Nach seinem Bergbaustudium an der TU Clausthal war er in den Grubenbetrieben verschiedener Werke und im Bereich Bergbau der Hauptverwaltung der KALI UND SALZ AG (heute K+S AKTIENGESELLSCHAFT) tätig. Von 1990 bis 1996 hatte er verschiedene Werksleiterpositionen im Bereich Bergbau inne. Von Januar 1997 bis September 2001 war Gerd Grimmig Geschäftsführer der KALI UND SALZ GMBH und zuständig für das Ressort Bergbau. Seit Oktober 2000 ist er Mitglied des Vorstands der K+S AKTIENGESELLSCHAFT. In seiner Verantwortung liegen die Bereiche Bergbau, Geologie, Technik/Energie, Forschung und Entwicklung, Umwelt, Arbeitssicherheit, Qualitätsmanagement, Inaktive Werke, Entsorgung und Recycling, Tierhygieneprodukte, MSW CHEMIE und Consulting.

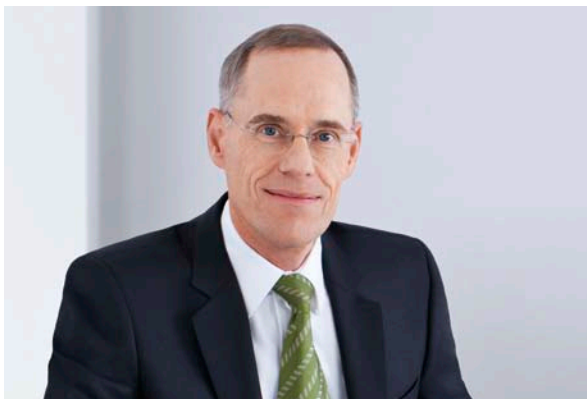

**DR. THOMAS NÖCKER**  
JURIST

---

wurde 1958 in Neukirchen-Vluyn geboren. Nach seinem Studium der Rechtswissenschaften und anschließender Promotion in Münster absolvierte er seine Referendarzeit u. a. in Düsseldorf und Montreal, Kanada. 1991 nahm er seine berufliche Tätigkeit bei der RAG AG auf, für die er in verschiedenen Funktionen tätig war. Im Anschluss daran wurde er 1998 zum Mitglied des Vorstands der RAG SAARBERG AG berufen und war dort für die Bereiche Personal, Recht sowie IT-Management/Organisation zuständig. Seit August 2003 ist Dr. Thomas Nöcker Mitglied des Vorstands der K+S AKTIENGESELLSCHAFT. Er ist Arbeitsdirektor und zuständig für Personal, IT-Services, Organisations- und Projektmanagement, Immobilienmanagement, Wissensmanagement, Gesundheitsmanagement, Logistik sowie Handelsgeschäfte (CFK).

---

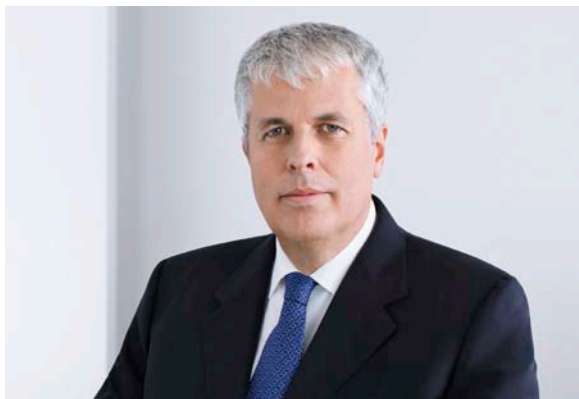

**JAN PETER NONNENKAMP**  
DIPLOM-ÖKONOM

---

wurde 1963 in Bremen geboren. Nach Beendigung seiner Ausbildung zum Bankkaufmann schloss er 1990 sein Studium der Wirtschaftswissenschaften an der Privaten Universität Witten/Herdecke ab. Anschließend war er in Unternehmen der Konsum- und Investitionsgüterindustrie, u. a. bei der FIELMANN AG sowie der LEOPOLD KOSTAL GMBH & CO. KG, in verschiedenen Finanzfunktionen tätig. Zuletzt verantwortete er seit 2004 als Vorstandsmitglied bei KNORR-BREMSE AG die Bereiche Finanzen, Bilanzierung und Steuern. Seit 1. Juni 2009 ist er als Mitglied des Vorstands der K+S AKTIENGESELLSCHAFT verantwortlich für die Bereiche Finanzen und Rechnungswesen, Einkauf, Material- und Lagerwirtschaft, Steuern, Revision und Versicherungen.

---

Weitere Informationen zu den Mitgliedern des Vorstands, ihren Zuständigkeiten und Mandaten finden Sie im Finanzbericht 2010 auf den Seiten 26 f.



## NACHHALTIGE UNTERNEHMENSFÜHRUNG

STRATEGIE DER K+S GRUPPE SIEHT WACHSTUM insbesondere in den Geschäftsbereichen Kali- und Magnesiumprodukte sowie Salz vor / Wesentliche Handlungsfelder für nachhaltige Entwicklung in Materialitätsanalyse definiert / Strategie ist auf nachhaltiges wirtschaftliches und Werte schaffendes Handeln ausgelegt / Stakeholderdialoge erhöhen gesellschaftliche Akzeptanz unseres Handelns

# 1

---

|     |                                 |    |
|-----|---------------------------------|----|
| 1.1 | Unser Selbstverständnis         | 5  |
| 1.2 | Unsere Handlungsfelder          | 6  |
| 1.3 | Unsere Nachhaltigkeitsstrategie | 12 |
| 1.4 | Unsere Managementsysteme        | 12 |
| 1.5 | Stakeholderdialoge              | 14 |
| 1.6 | Unsere Ziele                    | 16 |

## 1.1 UNSER SELBSTVERSTÄNDNIS

K+S gehört weltweit zur Spitzengruppe der Anbieter von Standard- und Spezialdüngemitteln; im Salzgeschäft sind wir mit Standorten in Europa sowie Nord- und Südamerika der führende Hersteller in der Welt.

### UNSERE VISION: QUELLE FÜR WACHSTUM UND LEBEN DURCH NÄHRSTOFFE UND MINERALIEN

Durch Akquisitionen im Düngemittel- und im Salzgeschäft hat sich K+S im vergangenen Jahrzehnt tiefgreifend verändert. Wir haben neue Märkte, Produkte und strategische Optionen hinzugewonnen. Gleichzeitig haben andere Firmenkulturen und Denkweisen das Unternehmen bereichert. Eines allerdings zieht sich wie ein roter Faden durch unsere erfolgreiche Unternehmensgeschichte: Seit mehr als 100 Jahren fördern und veredeln wir Rohstoffe. Auch zukünftig wird der Rohstoff- und rohstoffnahe Bereich die Basis unseres Wachstums sein. Anspruch, Entwicklung und Zielsetzung unseres Unternehmens spiegeln sich in unserer Vision wider.

Die Quelle steht für den natürlichen Ursprung unserer Rohsalze – das Ziel bleibt die Herstellung einer Produktpalette, die Grundlagen für Wachstum und Leben schafft. Die Nährstoffe in unseren Düngemitteln sorgen für reiche Ernten und leisten damit einen Beitrag zur Ernährung der wachsenden Weltbevölkerung, und

unsere Salze und Mineralien sind der Grundstoff für viele lebenswichtige und -bereichernde Produkte und Anwendungen.

Aus unserer Vision haben wir die Mission abgeleitet, in der wir uns zum nachhaltigen Wirtschaften bekennen.

### UNSERE MISSION

Wir wollen auf der Basis unserer Grundwerte:

- + Rohstoffe fördern und veredeln und mit unseren Produkten und Leistungen Ernährung, Gesundheit und Lebensqualität verbessern
- + in den Märkten führende Positionen einnehmen
- + für unsere Kunden der bevorzugte Partner sein
- + unsere Rohstoff- und Produktionsbasis stärken und weltweit ausbauen
- + durch die Entwicklung neuer Produkte und effizienterer Verfahren die Wertschöpfung weiter erhöhen
- + einen fairen Ausgleich von wirtschaftlichen, ökologischen und sozialen Belangen erreichen
- + für unsere Stakeholder nachhaltig Werte schaffen und Verantwortung in der Gesellschaft übernehmen
- + für Mitarbeiter aus aller Welt ein attraktiver Arbeitgeber sein

Unsere Grundwerte, Verhaltensgrundsätze sowie unsere Führungsleitlinien sind unter [www.k-plus-s.com/de/vision-und-werte/](http://www.k-plus-s.com/de/vision-und-werte/) veröffentlicht. / **ABB: 1.1.1**

### VISION-MISSION-STRATEGIE

ABB: 1.1.1

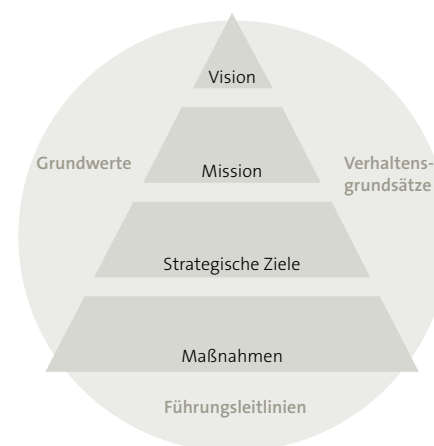

### MEILENSTEINE 2010

Vision und Mission folgend sieht die Strategie der K+S GRUPPE vor, insbesondere in den Geschäftsbereichen Kali- und Magnesiumprodukte sowie Salz weiter zu wachsen. Daher haben wir unsere Managementressourcen und finanziellen Mittel hierauf fokussiert. Im Jahr 2010 haben wir:

- + die Integration von MORTON SALT in die K+S GRUPPE vorangetrieben,
- + ein Übernahmeangebot für POTASH ONE (Kanada) vorgelegt (Anfang 2011 haben wir die Gesellschaft übernommen siehe Seite 53),

- + die Arbeiten für die Erstellung einer Machbarkeitsstudie zur möglichen Wiederaufnahme der Förderung im Reservebergwerk Siegfried-Giesen (Niedersachsen) begonnen. Das Angebot zum Erwerb des Bergwerkseigentums des 1991 geschlossenen Kaliwerks Roßleben (Thüringen) besteht fort,
- + im Rahmen der Prüfung einer Veräußerung von COMPO das Konzept für die gesellschaftsrechtliche und unternehmerische Herauslösung aus der K+S GRUPPE erarbeitet (siehe Seite 56).

#### MEGATRENDS IN IHRER BEDEUTUNG FÜR K+S

ABB: 1.2.1

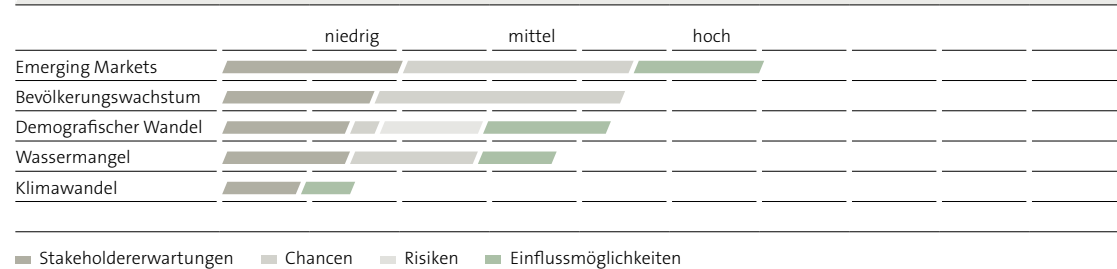

## 1.2 UNSERE HANDLUNGSFELDER

Im Jahr 2010 haben wir in einer internen Materialitätsanalyse erstmals unsere wesentlichen Handlungsfelder für eine nachhaltige Entwicklung definiert, sie auf Chancen und Risiken überprüft und ihre Bedeutung für unsere Stakeholder unseren Einflussmöglichkeiten gegenübergestellt. Unsere Handlungsfelder leiten sich aus Vision/Mission und Unternehmensstrategie, aus den globalen Megatrends und aus Managementthemen ab. Von Mitarbeitern, Kunden, Behörden, NGO sowie aus unserer Verbandsarbeit erhalten wir konkrete Hinweise, was von uns als weltweit agierendem Rohstoffunternehmen erwartet wird. Eigene Analysen ergänzen dieses Bild.

Da sich unser Umfeld und die Rahmenbedingungen für unser Geschäft beständig verändern, werden wir diese

Analyse jährlich auf ihre Gültigkeit überprüfen und dazu auch den Dialog mit unseren Stakeholdern nutzen.

Ein Handlungsfeld ist für uns wesentlich, wenn es eines oder mehrere der folgenden Kriterien erfüllt:

- + Es beeinflusst unser unternehmerisches Handeln gegenwärtig oder zukünftig in hohem Maße,
- + es ist für unsere Stakeholder sehr wichtig,
- + wir sind in der Lage, Einfluss zu nehmen.

Die ermittelten Handlungsfelder haben wir nach ihrer Bedeutung sowohl für die Stakeholder als auch für unser Unternehmen in Balkendiagrammen aufbereitet und in einer Matrix mit Kurzbeschreibung versehen. /TAB: 1.2.1

#### HANDLUNGSFELDER AUS MEGATRENDS

/ ABB: 1.2.1

##### EMERGING MARKETS

Die Nachfrage nach Düngemitteln wird erheblich durch das Wirtschaftswachstum sowie die wirtschaftliche Entwicklung und die damit einhergehenden steigenden Lebensstandards in den relevanten Märkten beeinflusst. In Schwellenländern wie China und Indien gelangen mehr und mehr Menschen zu Wohlstand, die Ernährungsgewohnheiten ändern sich und der Kalorienverbrauch pro Kopf nimmt weiter zu. Die Nachfrage nach qualitativ höherwertigeren Lebensmitteln steigt, insbesondere nach Fleisch- und Milchprodukten. Je mehr dieser Produkte auf dem Speisezetteln stehen, desto mehr Futtermittel für die Tiere müssen auf den begrenzt zur Verfügung stehenden Ackerflächen produziert werden. Daher dürfte die Nachfrage nach unseren Düngemitteln sowohl in Europa als auch auf Überseemärkten in den kommenden Jahren ansteigen. Die Wachstumsra-

MATRIX HANDLUNGSFELDER

TAB: 1.2.1

|                                                     | Chancen                                                                                           | Risiken                                                                   | Stakeholdererwartungen                                                                   | Einflussmöglichkeiten von K+S                                                                                 |
|-----------------------------------------------------|---------------------------------------------------------------------------------------------------|---------------------------------------------------------------------------|------------------------------------------------------------------------------------------|---------------------------------------------------------------------------------------------------------------|
| <b>Megatrends</b>                                   |                                                                                                   |                                                                           |                                                                                          |                                                                                                               |
| Emerging Markets                                    | Veränderte Ernährungsgewohnheiten / höherer Konsum                                                | —                                                                         | Beitrag zur Entwicklung der Landwirtschaft                                               | Ausbau Vertrieb und Logistik in Schwellenländern / Vermittlung von Kenntnissen über ausgewogene Düngung       |
| Bevölkerungswachstum                                | Erhöhung der landwirtschaftlichen Produktion um 70 % bis 2050                                     | —                                                                         | Beitrag zur Ernährung der wachsenden Weltbevölkerung                                     | —                                                                                                             |
| Demografischer Wandel                               | —                                                                                                 | Nachwuchskräftemangel / alternde Belegschaft / altersbedingte Fluktuation | Entsprechende Arbeitsbedingungen schaffen                                                | Aus- / Weiterbildung, Gesundheitsmanagement, Frauenförderung, flexible Arbeitszeitmodelle                     |
| Wassermangel                                        | Verstärkte Nachfrage nach Flüssig- und Blattdüngern                                               | —                                                                         | Reduktion des hohen Wasserverbrauchs der Landwirtschaft                                  | Forschung, um Wassernutzungseffizienz von Pflanze und Boden zu erhöhen                                        |
| Klimawandel                                         | —                                                                                                 | —                                                                         | Verminderung der klimarelevanten Emissionen aus der Produktion                           | Selbstverpflichtung zum Klimaschutz                                                                           |
| <b>Managementthemen</b>                             |                                                                                                   |                                                                           |                                                                                          |                                                                                                               |
| Know-how-Transfer                                   | Beratungsleistung zeichnet K+S aus, Mitarbeiterkompetenzen tragen zum wirtschaftlichen Erfolg bei | —                                                                         | Weitergabe von Wissen und Erfahrung an Nachwuchskräfte, Kunden, Lehre und Forschung      | Schulung unserer Partner und Kunden, KVP, internationale Mitarbeitertransfers                                 |
| Arbeit und Gesundheit                               | Leistungsfähige, motivierte Mitarbeiter über die gesamte Dauer des Erwerbslebens                  | —                                                                         | Hohe Arbeitssicherheitsanforderungen im Bergbau                                          | Effektives Arbeitssicherheits- und Gesundheitsmanagement                                                      |
| Biodiversität                                       | Beitrag zum Erhalt der Artenvielfalt                                                              | Weitere Zunahme von Umweltauflagen                                        | Gleichrangigkeit von Arten- / Naturschutz und Rohstoffgewinnung                          | Maßnahmenpaket zum Gewässerschutz / Ausgleichsmaßnahmen / Abdeckung von Rückstandshalden                      |
| Compliance                                          | Verbesserung des Ansehens bei allen Stakeholdern                                                  | Compliance-Verstöße von Mitarbeitern, finanzielle Nachteile               | Gute Corporate Governance                                                                | Schulung der Mitarbeiter in Compliance-relevanten Themen / Verfolgung und Ahndung von Verstößen               |
| Energieeffizienz                                    | Entlastung im Emissionshandel                                                                     | —                                                                         | Reduzierung des Energieverbrauchs in der gesamten Wertschöpfungskette                    | Energieeffizienzpotenziale weitgehend ausgenutzt                                                              |
| <b>Spezifische Nachhaltigkeitsherausforderungen</b> |                                                                                                   |                                                                           |                                                                                          |                                                                                                               |
| Rohstoffversorgung                                  | Erschließung neuer Vorkommen weltweit                                                             | Kritische Rahmenbedingungen für die Rohstoffwirtschaft in Deutschland     | Gleichrangigkeit von Umwelt- / Naturschutz und Rohstoffgewinnung                         | Entscheidung für Akquisitions- und Kooperationsprojekte                                                       |
| Gewässerschutz                                      | Sicherung der Produktion durch Investitionen in den Gewässerschutz                                | Einschränkung von Betriebsgenehmigungen / hohe Investitionen              | Gleichrangigkeit von Umwelt- / Naturschutz und Rohstoffgewinnung / Soziale Verantwortung | Halbierung des anfallenden Salzwassers durch Investitionen in den Gewässerschutz (360-Mio.- €-Maßnahmenpaket) |
| Agrarpreise                                         | Hohes Preisniveau ermöglicht entsprechende Ertragsperspektiven                                    | Schwankende Preise erschweren Planungssicherheit                          | Faire Preise, keine „künstliche“ Verknappung von Produkten                               | —                                                                                                             |
| Verknappung der Ackerflächen                        | Ausgleich von Anbauflächenverlusten durch effizientere Bewirtschaftung der bestehenden Flächen    | —                                                                         | Beitrag zur Ernährung der wachsenden Weltbevölkerung trotz verknappter Ackerflächen      | Beratung über ausgewogene Düngung                                                                             |

ten der Überseemärkte Südamerika und Südostasien sollten dabei mittel- bis langfristig stärker zulegen. Wir gehen davon aus, in diesen Regionen künftig gut ein Drittel unserer Düngemittel zu verkaufen.

/ SIEHE KNOW-HOW-TRANSFER, Seite 9

Auch der Verbrauch von Gewerbe- und Industriesalz wird von Wirtschaftswachstum und Industrialisierung in den Schwellenländern getrieben. Durch unsere chilenische Salztöchter SPL profitieren wir seit dem Jahr 2006 von den Wachstumsraten in Südamerika und sind gut aufgestellt, um unsere Vertriebsaktivitäten auch in Richtung der asiatischen Märkte auszubauen.

### BEVÖLKERUNGSWACHSTUM

Die Vereinten Nationen schätzen, dass zur Mitte des 21. Jahrhunderts mehr als neun Milliarden Menschen auf der Erde leben werden. Dies bietet den Anbietern von Düngemitteln große Chancen, da die landwirtschaftliche Produktion nach jüngsten Schätzungen bis 2050 um 70 % steigen muss, um weitere 2,3 Milliarden Menschen ernähren zu können. Unsere mineralischen Düngemittel leisten dabei einen notwendigen Beitrag zum effizienten und ertragreichen Anbau, um die Weltbevölkerung mit mehr und besseren Nahrungsmitteln zu versorgen.

### DEMOGRAFISCHER WANDEL

Der demografische und gesellschaftspolitische Wandel in Europa und Nordamerika stellt eine besondere Herausforderung dar: Entgegen der bisherigen insbesondere in Europa anzutreffenden Praxis der Vorruhestandsregelungen und Altersteilzeitmodelle gibt es in

der zukünftigen Arbeitswelt durchschnittlich ältere Belegschaften. Durch gezielte Weiterbildung, angepasste Arbeitsbedingungen und ein leistungsfähiges Gesundheitsmanagement wollen wir Arbeitsfähigkeit, Qualifikation und Motivation unserer Mitarbeiter erhalten. Wir wollen eine Unternehmenskultur gestalten, die es allen Beschäftigten ermöglicht, über ihr gesamtes Erwerbsleben leistungsfähig und gesund zu bleiben.

Außerdem rechnen wir mit einer stärkeren altersbedingten Fluktuation. Um Engpässe bei der Gewinnung qualifizierter Schul-/Hochschulabsolventen sowie bei der Besetzung von Führungspositionen zu vermeiden, müssen wir Personalmarketing, Personalrekrutierung und unser Ausbildungsengagement verstärken.

Voraussetzung für die erfolgreiche Gestaltung des demografischen Wandels ist eine sorgfältige Analyse der Altersstruktur unserer Belegschaften und der Bevölkerungsentwicklung im Umfeld unserer Standorte, mit der wir im Jahr 2010 begonnen haben (siehe Seite 107).

### WASSERMANGEL

Effiziente Wassernutzung ist ein Schlüsselthema der nachhaltigen Entwicklung. Sollten sich aufgrund klimatischer Veränderungen Wüsten und Steppen weiter ausbreiten, könnten nach Schätzungen der Vereinten Nationen bis zum Jahr 2025 fast zwei Milliarden Menschen in Gebieten mit absolutem Wassermangel leben. Dies könnte auch auf die dortige Landwirtschaft erhebliche Auswirkungen haben, denn das meiste Wasser – etwa 70 % des weltweiten Verbrauchs – wird für den Anbau

von Nahrungsmitteln verwendet. Hält der gegenwärtige Trend an, wird Wasser in den nächsten 50 Jahren zum wichtigsten Engpassfaktor der Landwirtschaft.

K+S forscht intensiv, um die Wassernutzungseffizienz von Pflanze und Boden zu verbessern. Erste Forschungsergebnisse belegen, dass sich eine regelmäßige Kali- und Magnesiumdüngung positiv auf den Wasserhaushalt der Pflanzen auswirkt und eine bessere Ausnutzung des zur Verfügung stehenden Wassers ermöglicht.

Unter trockenen Bedingungen kommt der Flüssig- und Blattdüngung eine steigende Bedeutung zu, denn die Pflanze kann Nährstoffe kaum aufnehmen, wenn der Boden ausgetrocknet ist. Werden Dünger und Wasser hingegen kombiniert ausgebracht (Fertigation), sind die Nährstoffe für die Pflanzen besser verfügbar. Daher sehen wir in diesem Produktsegment neue Chancen für unser Geschäft (siehe Seite 74).

/ SIEHE VERKNAPPUNG DER ACKERFLÄCHE, Seite 12

### KLIMAWANDEL

Die Ernährungs- und Landwirtschaftsorganisation der Vereinten Nationen (FAO) kommt zu dem Ergebnis, dass der vorhergesagte Anstieg der Durchschnittstemperatur – je nach Modell zwischen 1 und 2,5 °C bis 2030 – die Anbaubedingungen weltweit beeinträchtigen wird. Sollte sich dies bewahrheiten, könnten in der nördlichen Hemisphäre, beispielsweise in Skandinavien oder in Sibirien, mit steigenden Temperaturen auch die Chancen steigen, Nutzpflanzen anzubauen, die bisher nur in südlicheren Regionen kultiviert werden konnten. In



südlichen Hemisphären hingegen würden klimatische Veränderungen wie höhere Temperaturen, steigende Meeresspiegel, Trockenheit und die damit verbundene zunehmende Bodenversalzung die bisherigen Anbaubedingungen für die Landwirtschaft beeinflussen und die zur Verfügung stehende Anbaufläche durch Erosion oder Überflutung verringern. Insgesamt bewerten wir die damit verbunden Chancen und Risiken für unser Geschäft aber als gering.

/ SIEHE VERKNAPPUNG VON ACKERFLÄCHE, Seite 12

Gemäß FAO ist zu erwarten, dass die Anzahl der Tage mit Temperaturen um den Gefrierpunkt steigt, während die Anzahl der Tage mit strengem Frost abnimmt. Auftausalz wird bei Temperaturen um den Gefrierpunkt am stärksten nachgefragt. Daher gehen wir davon aus, dass die prognostizierten klimatischen Veränderungen mittelfristig keine negativen Auswirkungen auf unser Auftausalzgeschäft haben werden.

Die deutsche Industrie wird weiterhin erhebliche Beiträge zum Klimaschutz leisten. Als Partner der zwischen Bundesregierung und deutscher Wirtschaft vereinbarten Selbstverpflichtung zum Klimaschutz haben wir uns im Jahr 2008 das Ziel gesetzt, bis zum Jahr 2012 die spezifischen CO<sub>2</sub>-Emissionen auf 28 kg/t und die absoluten CO<sub>2</sub>-Emissionen auf 1,1 Mio. t pro Jahr zu senken (siehe Seite 95).

/ SIEHE ENERGIEEFFIZIENZ, Seite 10

#### NACHHALTIGKEITSBEZOGENE MANAGEMENTTHEMEN IN IHRER BEDEUTUNG FÜR K+S

ABB: 1.2.2

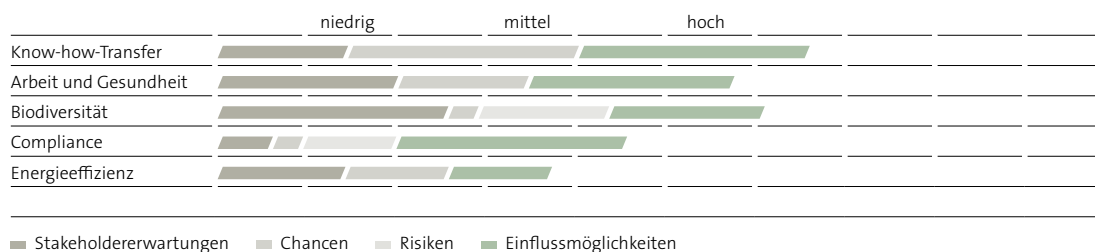

#### HANDLUNGSFELDER AUS MANAGEMENTTHEMEN

/ ABB: 1.2.2

##### KNOW-HOW-TRANSFER

Mit der zunehmenden Internationalisierung des Unternehmens und immer komplexeren Aufgabenstellungen steigen die Anforderungen an unsere Mitarbeiter stetig. Neben der gezielten Aus- und Weiterbildung ist es entscheidend, das Bewusstsein unserer Mitarbeiter für unternehmensspezifisch wichtige Erkenntnisse zu schärfen und das im Unternehmen vorhandene Wissen noch besser zu erfassen, zu nutzen und zu sichern. Hierzu nutzen wir auch das Ideenmanagement. Ebenso fördert die Versetzung von Mitarbeitern zu anderen in- und verstärkt auch ausländischen Gruppengesellschaften die Zusammenarbeit in der K+S GRUPPE, gewährleistet den Know-how-Transfer und stärkt die fachliche und interkulturelle Kompetenz unserer Mitarbeiter (siehe Seite 119).

Wir sehen es als unsere Aufgabe an, mit unserer landwirtschaftlichen Kompetenz eine auf die Bedürfnisse von Mensch und Umwelt abgestimmte Düngeberatung zu erarbeiten. Insbesondere in Schwellen- und Entwicklungsländern trägt unsere landwirtschaftliche Anwendungsberatung zum Know-how-Transfer bei. Nach unserer Einschätzung haben diese Regionen bei besserer Anwendung des Konzepts der ausgewogenen Düngung ein deutlich größeres Ertragspotenzial. In diesem Sinne schulen wir die Verkaufsberater der Partner vor Ort sowie die Verantwortlichen auf den Plantagen und unterstützen lokale Behörden und Ausbildungseinrichtungen mit Informationsmaterialien (siehe Seite 73).

##### ARBEIT UND GESUNDHEIT

Unsere Mitarbeiter vor arbeitsbedingten Gefahren zu schützen und ihre Gesundheit durch präventive Maßnahmen zu erhalten, hat hohe Priorität bei K+S. Wir arbeiten, zum Teil gemeinsam mit den zuständigen Behörden und den Berufsgenossenschaften, daran, die

im Vergleich mit anderen Industrieunternehmen sehr niedrigen Unfallzahlen noch weiter zu vermindern. Auch mit einem betrieblichen Gesundheitsmanagement tragen wir dazu bei, dass unsere Mitarbeiter über die gesamte Dauer ihres Erwerbslebens leistungsfähig und motiviert bleiben (siehe Seite 110 ff.).

#### BIODIVERSITÄT

Die Gewinnung und Aufbereitung von Rohsalzen ist weltweit untrennbar mit der Notwendigkeit der Entsorgung von festen und flüssigen Rückständen verbunden. Den Flächenverbrauch durch unsere Halden gleichen wir durch vielfältige Maßnahmen zum Naturschutz und zum Erhalt der Artenvielfalt aus. Außerdem führen wir verschiedene Projekte zur Abdeckung von Rückstandshalden durch, um die Haldenwässer zu reduzieren (siehe Seite 97).

Die derzeit anfallenden Salzabwassermengen unseres Kaliwerks Werra wollen wir im Rahmen unseres integrierten Maßnahmenkonzepts bis spätestens zum Jahr 2015 halbieren (siehe Seite 90).

/ SIEHE GEWÄSSER- UND GRUNDWASSERSCHUTZ, Seite 11

#### COMPLIANCE

Die Einhaltung von geltendem Recht, Unternehmensrichtlinien und vom Unternehmen anerkannten regulatorischen Standards ist integrierter Bestandteil unserer Unternehmenskultur und damit Aufgabe und Verpflichtung eines jeden Mitarbeiters. Zur Sicherstellung regelkonformen Verhaltens haben wir ein konzernweites Compliance-Programm eingeführt, welches u. a. Mitar-

beiterschulungen zu den Risikofeldern Kartell-/Wettbewerbsrecht und Anti-Korruption vorsieht. Schwerwiegende Verstöße durch einzelne Mitarbeiter, die eine wesentliche Wirkung auf die Ertrags-, Finanz- und Vermögenslage haben könnten, halten wir für unwahrscheinlich (siehe Seite 12).

#### ENERGIEEFFIZIENZ

Unser Programm zur Reduzierung der Kohlendioxid-Emissionen besteht aus mehreren Bausteinen: Wir nutzen die Beste zur Verfügung stehende Kraftwerks-Technologie (Kraft-Wärme-Kopplung), wir optimieren unsere energiesparenden Produktionsverfahren und wir reduzieren den Energieverbrauch in der gesamten Wertschöpfungskette. So liegt der Nutzungsgrad unserer deutschen Kraftwerke inzwischen bei über 90 %. Die Standorte arbeiten somit in der Nähe der theoretisch erzielbaren Energieeffizienz, sodass sich nach heutigem Stand der Technik selbst durch weitere Investitionen kaum noch spürbare Emissionsminderungen erreichen lassen (siehe Seite 94).

#### HANDLUNGSFELDER AUS K+S-SPEZIFISCHEN HERAUSFORDERUNGEN

/ ABB: 1.2.3

#### ROHSTOFFVERSORGUNG

Nach der durch die Finanzkrise ausgelösten Kaufzurückhaltung bei Düngemitteln im Jahr 2009 war 2010 von einer höheren, sich normalisierenden Nachfrage geprägt. Bei deutlich rückläufigen Lagerbeständen erreichte

die Kapazitätsauslastung der meisten Kaliproduzenten in Jahr 2010 bereits wieder ein relativ hohes Niveau. Mittelfristig erwarten wir bei Kalium und Magnesium ein Nachfragewachstum von 3 bis 5 % pro Jahr. Zur Sicherung unserer Rohstoffbasis wollen wir unsere Kapazitäten ausbauen und prüfen hierzu weltweit Akquisitions- und Kooperationsprojekte.

- + Anfang 2011 haben wir die kanadische POTASH ONE übernommen und uns damit eine Reihe von Kali-Explorationslizenzen gesichert. Das planerisch am weitesten fortgeschrittene Greenfield-Projekt „Legacy“ soll mit Investitionen von insgesamt rund 2,5 Mrd. USD für eine Produktionskapazität von mindestens 2,7 Mio. t Kaliumchlorid pro Jahr ausgebaut werden. Wir rechnen mit ersten zur Verfügung stehenden Mengen ab dem Jahr 2015 (siehe Seite 53).
- + Bereits im Herbst 2008 haben wir offiziell unser Interesse am Erwerb des Bergwerkseigentums des 1991 geschlossenen Kaliwerks Roßleben (Thüringen) erklärt. Für die Nutzung der Lagerstätte haben wir ein tragfähiges Konzept vorgelegt, das alle technischen Möglichkeiten für eine umweltverträgliche Kaliproduktion berücksichtigt. Die Verhandlungen ruhen zurzeit auf Wunsch der Eigentümerin; sie sollen im Frühjahr 2011 wieder aufgenommen werden.
- + Außerdem haben wir damit begonnen, für das 1987 geschlossene und seither als Reservebergwerk geführte Kaliwerk Siegfried-Giesen (Niedersachsen) die geologischen, technischen und wirtschaftlichen Aspekte einer möglichen Wiederaufnahme der För-

## SPEZIFISCHE NACHHALTIGKEITSHERAUSFORDERUNGEN IN IHRER BEDEUTUNG FÜR K+S

ABB: 1.2.3

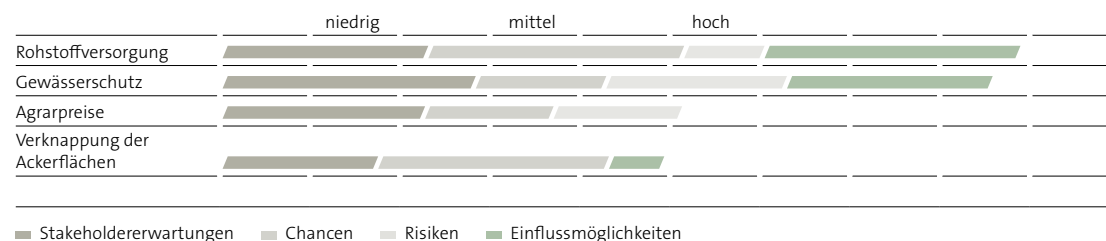

derung zu prüfen. Die Machbarkeitsstudie soll voraussichtlich im Sommer 2011 vorliegen.

Um auch zukünftig aus deutschen Lagerstätten Rohstoffe zu gewinnen und zu verarbeiten, bedarf es geeigneter Rahmenbedingungen. Die Rohstoffgewinnung sollte mit anderen Flächennutzungen und den Kategorien des Natur- und Umweltschutzes in ausgewogener Weise in Einklang stehen. Mehr und mehr sehen wir in Deutschland allerdings den Zugang zu Lagerstätten durch Schutzgebietsausweisungen und Überplanung mit anderen Nutzungen behindert oder versperrt, weil insbesondere dem Naturschutz ohne ausreichende Güterabwägung der Vorrang gegenüber einer Rohstoffgewinnung eingeräumt wird.

### GEWÄSSER- UND GRUNDWASSERSCHUTZ

Im Geschäftsbereich Kali- und Magnesiumprodukte entstehen flüssige Rückstände (Salzabwässer) sowohl aus der laufenden Produktion als auch durch Niederschläge auf die Rückstandshalden. Im Rahmen bestehender

Genehmigungen werden die Rückstände in Flüsse eingeleitet und in unterirdischen Gesteinsschichten (Plattendolomit) versenkt.

Im Jahr 2009 haben wir in Übereinstimmung mit einer öffentlich-rechtlichen Vereinbarung mit den Ländern Thüringen und Hessen unsere Gesamtstrategie zur Verminderung von Umweltbelastungen und ein darauf aufbauendes Integriertes Maßnahmenkonzept (IMK) vorgelegt. Das IMK beschreibt detailliert die geplante Umsetzung der bis zum Jahr 2015 vorgesehenen Einzelmaßnahmen zum Grundwasser- und Gewässerschutz.

K+S strebt an, im ersten Quartal 2011 die Abstimmung des IMK mit den Ländern Hessen und Thüringen abzuschließen, um dem Unternehmen die erforderliche Planungssicherheit für die damit verbundenen Investitionen von bis zu 360 Mio. € zu geben.

Das derzeit anfallende Salzabwasser soll mit Fertigstellung der ersten Anlagen weiter reduziert und schritt-

weise bis Ende 2015 auf 7 Mio. m<sup>3</sup> im Jahr halbiert werden. Dies ermöglicht es dann auch, den Chloridgrenzwert und den Härtegrad – eine biologisch besonders relevante Größe – jeweils um rund ein Drittel zu senken.

Da die dauerhafte lokale Entsorgung der Salzabwässer von einigen Seiten in Frage gestellt wird, kann eine langfristige Genehmigung des beschriebenen Konzepts nicht als gesichert angenommen werden. Deshalb hat sich K+S aus Gründen vorausschauender Sorgfalt entschlossen, parallel zur Umsetzung der lokalen Maßnahmen auch Genehmigungsanträge für standortferne Entsorgungswege, d.h. Fernleitungen zur Oberweser und zur Nordsee, vorzubereiten.

Dies geschieht ungeachtet des Umstands, dass die mit den Ländern Hessen und Thüringen definierten und vom Runden Tisch akzeptierten Prüfkriterien für Fernleitungen heute weder objektiv noch aus Sicht des Unternehmens erfüllt sind. Dies muss aber der Fall sein, bevor eine Entscheidung über den Bau einer Fernleitung getroffen werden kann – eine solche Entscheidung ist mit der Vorbereitung der Anträge also nicht verbunden (siehe Seite 89).

### AGRARPREISE

Vor allem unsere Düngemittel können erheblichen Schwankungen in Nachfrage und Preis unterliegen. Äußere Einflüsse, auf deren Eintreten oder Ausbleiben wir in aller Regel keinen Einfluss haben, können die Nachfrage nach unseren Produkten auf den relevanten Absatzmärkten stark beeinflussen und/oder zu

einem Druck auf das Preisniveau führen. Zu diesen Einflüssen zählen etwa weltweite oder regionale Konjunkturschwankungen, sinkende Weltmarktpreise von wichtigen Agrarerzeugnissen, der Markteintritt neuer Anbieter, eine Konzentration auf der Nachfrageseite sowie eine bewusste Kaufzurückhaltung unserer Kunden. Derartige negative Einflüsse waren auch die Gründe für die stark gesunkene Düngemittelnachfrage im Jahr 2009 und den korrespondierenden Preisverfall bei Düngemitteln. Da aber globale Trends die Nachfrage nach Düngemitteln stützen, sehen wir langfristig positive Entwicklungsmöglichkeiten.

#### VERKNAPPUNG VON ACKERFLÄCHE

Die zur Verfügung stehenden Ackerflächen nehmen weltweit unter anderem durch Verstädterung, Erosion und Überschwemmungen weiter ab. Standen im Jahr 1970 noch 0,38 Hektar landwirtschaftliche Fläche pro Kopf zur Verfügung, werden es im Jahr 2050 voraussichtlich nur noch 0,18 Hektar sein. Nennenswerte geeignete Bodenreserven sind in vielen Teilen der Welt nicht mehr vorhanden. Als realistische Option bleibt die Steigerung der Produktivität auf den bereits bestehenden Ackerflächen durch Nutzung von fortschrittlichen Anbaumethoden, einer ausgewogenen Mineraldüngung und widerstandsfähiger Sorten, um die steigende Nachfrage nach Nahrungsmitteln zu bedienen (siehe Seite 72).

/ SIEHE KLIMAWANDEL, Seite 8

### 1.3 UNSERE NACHHALTIGKEITSSTRATEGIE

Als Rohstoffunternehmen ist unsere Strategie nicht auf die Verfolgung kurzfristiger Renditeziele ausgerichtet, sondern auf nachhaltiges wirtschaftliches und Wertschaffendes Handeln – im Interesse aller unserer Stakeholder.

Der Begriff der Nachhaltigkeit ist eng mit unserer Geschäftstätigkeit verknüpft. Wir sind uns der Verantwortung bewusst, die mit der Nutzung von natürlichen Ressourcen verbunden ist: Nur wenn wir sorgsam und effizient mit unseren Ressourcen umgehen, den Stand der Technik berücksichtigen, die unvermeidbaren Eingriffe in die Natur so gering wie möglich halten, unsere Mitarbeiter nach bestem Wissen fördern und jungen Menschen eine fundierte Ausbildung geben, sind wir zukunftsfähig.

Unsere Nachhaltigkeitsstrategie leitet sich aus unseren Handlungsfeldern ab. Nachhaltiges und gesellschaftlich verantwortliches Handeln heißt für uns, frühzeitig Antworten auf neue Herausforderungen zu finden. Dies erfordert neben innovativen Lösungen in allen Bereichen der Wertschöpfungskette und der aufmerksamen Beobachtung und Bewertung globaler Megatrends effiziente Managementsysteme sowie den konstruktiven Dialog mit unseren Stakeholdern. Die gruppenweite Steuerung dieser Strategie obliegt dem Vorstand.

#### LEITBILD FÜR VERANTWORTLICHES HANDELN IN DER WIRTSCHAFT

Die K+S GRUPPE hat sich der Initiative „Leitbild für verantwortliches Handeln in der Wirtschaft“ angeschlossen, die von mehreren Großunternehmen sowie weiteren familiengeführten und mittelständischen Unternehmen im November 2010 ins Leben gerufen wurde. Das Leitbild untermauert, dass sich Werte- und Erfolgsorientierung in der Wirtschaft nicht ausschließen, sondern zwei Seiten derselben Medaille sind.

Alle teilnehmenden Unternehmen bekennen sich mit dem Leitbild nicht nur zu verantwortlichem unternehmerischen Handeln, sondern beziehen auch konkret Stellung zu den Herausforderungen und Widersprüchen, die sich im marktwirtschaftlichen Wettbewerb immer wieder ergeben. Damit soll der gesellschaftliche Diskurs auf eine realistische, am Unternehmensalltag orientierte Ebene gebracht werden, die ethische Wertvorstellungen und Fakten gleichermaßen berücksichtigt. Weitere Informationen unter: [www.verantwortlich-handeln.com](http://www.verantwortlich-handeln.com)

### 1.4 UNSERE MANAGEMENTSYSTEME

#### COMPLIANCE

Unser Compliance-System schafft die organisatorischen Voraussetzungen dafür, dass das jeweils geltende Recht, unsere internen Regelungen und Richtlinien sowie die vom Unternehmen anerkannten regulatorischen Standards konzernweit bekannt sind und ihre Einhaltung überwacht werden kann.

Mit der Koordinierung und Dokumentation der konzernweiten Compliance-Aktivitäten hat der Vorstand

einen Chief Compliance Officer (cco) betraut, der direkt dem Vorstandsvorsitzenden unterstellt ist. Er leitet den zentralen Compliance-Ausschuss, dem die Compliance-Beauftragten der Holding und der Geschäftsbereiche sowie die Leiter von Holdingseinheiten angehören, die Compliance-relevante Aufgaben wahrnehmen (z. B. Revision, Risikomanagement, Recht, Personal, Umweltschutz / Arbeitssicherheit / Qualitätsmanagement). Wesentliche Compliance-Verstöße werden an den cco berichtet; dieser berichtet dem Vorstand.

Die Compliance-Verantwortung liegt bei den operativ Verantwortlichen in den Geschäftsbereichen und Holdingseinheiten. Sie geben jährlich eine Compliance-Erklärung ab und werden beratend und koordinierend durch die Compliance-Beauftragten unterstützt.

Der Prüfungsausschuss des Aufsichtsrats befasst sich regelmäßig mit der Funktionsfähigkeit des Compliance-Systems der K+S GRUPPE.

Jeder Mitarbeiter wird mit den konzernweit geltenden Grundwerten und Verhaltensgrundsätzen (Code of Conduct) sowie den sich daraus ableitenden Unternehmensrichtlinien vertraut gemacht. Zu speziellen Themen finden Pflichtschulungen für (potenziell) betroffene Mitarbeiter statt (z. B. Kartellrecht, Antikorruption, Umweltschutz- / Arbeitssicherheitsrecht). Der Schulungsrahmen wird zentral konzipiert und vor Ort um länderspezifische bzw. regionale Besonderheiten ergänzt. Mitarbeitern, die Führungsverantwortung neu übernehmen, wird ein erweitertes Einführungsprogramm angebo-

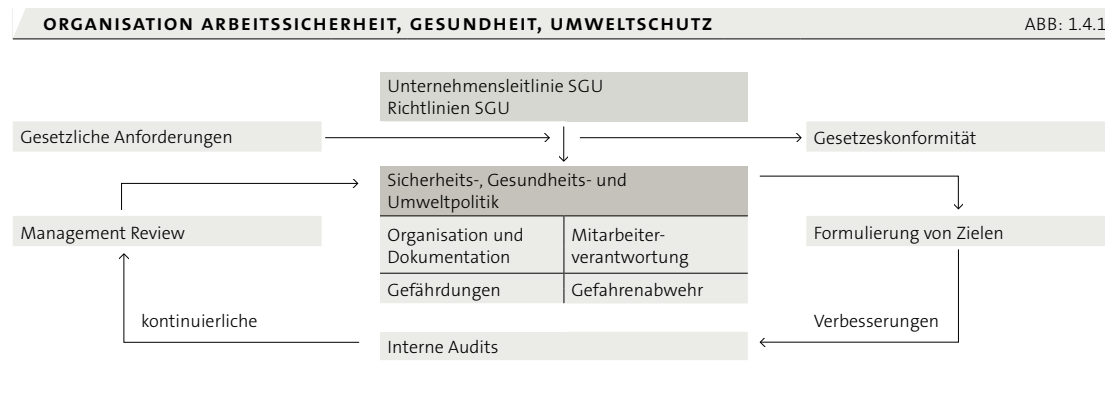

ten, welches u. a. auch eine Schulung in grundlegenden Rechts- und Compliance-Angelegenheiten beinhaltet.

Die Mitarbeiter haben die Möglichkeit, sich über interne Helplines Rat in Compliance-relevanten Angelegenheiten zu holen. Außerdem haben wir externe Hotlines (Ombudsleute) zur Beratung und – wenn gewünscht, auch anonymen – Meldung von Verstößen eingerichtet. Compliance-Verstöße werden konsequent verfolgt und geahndet.

#### ARBEITSSICHERHEIT, GESUNDHEIT UND UMWELTSCHUTZ

Unsere Unternehmensleitlinie Sicherheit, Gesundheit, Umweltschutz ist die verbindliche Handlungsgrundlage

für alle Mitarbeiter. Aus ihr leitet sich die Sicherheits-, Gesundheits- und Umweltpolitik von K+S ab.

[/ www.k-plus-s.com/de/pdf/leitlinie.pdf](http://www.k-plus-s.com/de/pdf/leitlinie.pdf)

Die Organisation der für uns gleichrangigen Belange Sicherheit, Gesundheit, Umweltschutz ruht auf drei Säulen:

1. Der „Gemeinsame Ausschuss für Sicherheit, Gesundheit, Umwelt“ ist paritätisch besetzt mit Führungskräften und Arbeitnehmervertretern und wird von einem Vorstandsmitglied geleitet. Der Ausschuss hat koordinierende Funktion, regt Verbesserungen und Investitionen an und wertet regelmäßig betriebliche Ereignisse aus.
2. Die Holdingseinheit Umwelt, Arbeitssicherheit und Qualitätsmanagement koordiniert die geschäftsereichsübergreifenden Aktivitäten und bietet der dritten Säule fachliche Unterstützung.



3. Die Ausschüsse auf den Standorten sind mit den Werksleitungen, den Managementteams, den jeweiligen Fachkräften und Beauftragten sowie Mitgliedern des Betriebsrats besetzt. / **ABB: 1.4.1**  
/ **WEITERE INFORMATIONEN ZUR ARBEITSSICHERHEIT,**  
Seite 112

## QUALITÄTSMANAGEMENT

Unsere Unternehmensleitlinie Qualitätsmanagement ist die verbindliche Handlungsgrundlage für alle Mitarbeiter. Qualitätsmanagement ist bei K+S Führungsaufgabe in allen Verantwortungsbereichen. Es bezieht jeden Mitarbeiter an seinem Arbeitsplatz ein und verwirklicht das Prinzip der Fehlervermeidung anstelle der nachträglichen Fehlerbehebung.

[www.k-plus-s.com/de/pdf/leitlinie-qm.pdf](http://www.k-plus-s.com/de/pdf/leitlinie-qm.pdf)

Wir haben auf Grundlage der DIN EN ISO 9001 ein Qualitätsmanagement-System aufgebaut. Mehr als 80 % aller Produktionsstandorte verfügen zumindest in Teilbereichen über ein QM-Zertifikat nach ISO 9001:2000. Im Jahr 2010 waren 45 % unserer Mitarbeiter in zertifizierten Bereichen tätig.

Unser Ziel ist es, die Sicherheit und Umweltverträglichkeit unserer Produkte in allen Phasen der Wertschöpfungskette ständig weiter zu verbessern – von der Förderung unserer Rohstoffe über Produktion und Distribution bis hin zur Anwendung. Die K+S GRUPPE verfügt über eine breite Palette an Zertifikaten, die den hohen Standard

unserer Produktionsstätten und Herstellverfahren dokumentieren.

/ **AKTUELLE AUFLISTUNG UNSERER ZERTIFIKATE** unter  
[www.k-plus-s.com/de/produktverantwortung](http://www.k-plus-s.com/de/produktverantwortung)

## 1.5 STAKEHOLDERDIALOGE

Eine wichtige Voraussetzung für den Betrieb unserer Standorte ist die gesellschaftliche Akzeptanz unseres Handelns. Dem Dialog mit unseren Partnern kommt dabei eine wichtige Rolle zu, daher ist er in unseren Grundwerten verankert. Der Austausch ist notwendig, um die Anliegen anderer zu verstehen, unser Handeln immer wieder auf den Prüfstand zu stellen und gegebenenfalls alternative Lösungen zu entwickeln.

Zu unseren Stakeholdern zählen wir Aktionäre und Investoren, Behörden/Politik und Verbände, Lehre/Forschung, Geschäftspartner und Lieferanten, Kunden, Mitarbeiter, Sozialpartner, Nachbarn sowie NGO.

Von der konzernweiten Betreuung internationaler Mitgliedschaften bis hin zum kommunalen Engagement im Umfeld unserer Standorte überall auf der Welt – die Vielschichtigkeit und Komplexität unserer Stakeholderdialoge bedingt, dass unsere Unternehmenseinheiten und Regionalgesellschaften eine wichtige Rolle dabei übernehmen. Sie stehen in engem und regelmäßigem Kontakt mit den jeweiligen Interessengruppen – und zwar überall dort, wo wir als Unternehmen aktiv sind.

## AUSGEWÄHLTE STAKEHOLDERDIALOGE:

### RUNDER TISCH „GEWÄSSERSCHUTZ WERRA/WESER UND KALIPRODUKTION“

Am Runden Tisch „Gewässerschutz Werra/Weser und Kaliproduktion“ haben auf Initiative der Länder Hessen und Thüringen sowie K+S zwischen März 2008 und Februar 2010 Werra-Anrainer, Wirtschaft, Politik, Verwaltung und Verbände über langfristige Lösungen zur Verbesserung der Gewässerqualität beraten. Insgesamt 16 Mal haben sich die Teilnehmer des Runden Tisches getroffen und eine Vielzahl an Maßnahmen für den Umgang mit salzhaltigen Abwässern geprüft. Außerdem wurden externe Vorschläge bewertet und eine Reihe von Expertisen in Auftrag gegeben. Auf seiner vorerst letzten Sitzung am 9. Februar 2010 hatte der Runde Tisch seine Empfehlung ausgesprochen.

Wir haben uns dafür eingesetzt, den Runden Tisch als Dialog- und Informationsplattform fortzusetzen. Mit Erfolg: Für das 2. Quartal 2011 ist ein erstes Treffen vorgesehen. Wir wollen am Runden Tisch das Thema Gewässerschutz ganzheitlich betrachten. Denn der Rückgang der Salzbelastung während der letzten Dekade hat den Blick auch auf weitere Belastungsgrößen gelenkt: u. a. hohe Nährstoffgehalte (Phosphor und Stickstoff), strukturelle Defizite durch Uferbegradigungen und Staustufen und nicht ausreichend geklärte Abwässer.

/ [www.runder-tisch-werra.de](http://www.runder-tisch-werra.de)

### AKTIONÄRE UND INVESTOREN

Mit unserer Investor Relations-Arbeit wollen wir umfassend, zeitnah und möglichst objektiv über unsere Strategie sowie über alle kapitalmarktrelevanten Geschehnisse rund um die K+S GRUPPE informieren. Dazu dienen unsere jährliche Analystenkonferenz in Frankfurt, Capital Market Days, Salesforce Briefings sowie 43 allein im vergangenen Jahr durchgeführte Roadshows in Europa, Nordamerika, Japan und Singapur. Darüber hinaus führten wir zahlreiche Einzelgespräche und Telefonkonferenzen mit Investoren. Zusätzlich intensivieren wir den Kontakt zu Privataktionären durch die Teilnahme an Börsentagen und Aktienforen.

/ SIEHE AUCH Finanzbericht, Seite 17

### KUNDEN

Alle Geschäftsbereiche befragen in regelmäßigen Abständen ihre Kunden zur Produktqualität und den damit verbundenen Prozessen und Dienstleistungen. Neben Zufriedenheitsanalysen liefern uns persönliche Gespräche sowie die Reklamationsstatistik konkrete Ansatzpunkte für weitere Verbesserungen (Siehe Seite 69).

### LEHRE UND FORSCHUNG

Bei der Entwicklung und Verbesserung von Produkten und Nährstoffkombinationen kooperieren wir mit Universitäten und Hochschulen, um beispielsweise Erkenntnisse der Grundlagenforschung in die Düng Praxis umzusetzen. Den Hochschulen wiederum eröffnen wir auf diese Weise die Möglichkeit, mit aktuellem Praxisbezug zu forschen. Im Jahr 2010 haben wir gemeinsam mit der Universität Göttingen ein Institut

gegründet, das sich der praxisorientierten Forschung auf dem Gebiet der Pflanzenernährung widmen wird (Siehe Seite 71).

### NACHBARN

Die gute Nachbarschaft mit den Standortgemeinden ist uns sehr wichtig. Daher pflegen wir einen offenen, konstruktiven Dialog mit den Mandatsträgern auf Kommunal-, Landes- und Bundesebene. Wir sind uns unserer Verantwortung als Arbeitgeber in zum Teil strukturschwachen Regionen bewusst. Die Anliegen einzelner Stakeholder nehmen wir ernst und bemühen uns um einvernehmliche Lösungen.

### BEHÖRDEN/POLITIK UND VERBÄNDE

Den Dialog mit Politik und Behörden führt unser Arbeitgeberverband vks über unsere Verbindungsbüros in Berlin und Brüssel. Gesetzesvorhaben der EU-Institutionen begleiten wir auch über die Mitgliedschaft bei EUROMINES und EUSALT. Über das Gremium „Sozialer Dialog Bergbau“, in dem die europäischen Bergbauverbände und die Arbeitnehmerorganisation des europäischen Bergbaus vertreten sind, werden gemeinsame Stellungnahmen der Sozialpartner an die EU-Kommission abgegeben. Auch auf nationaler Ebene engagieren wir uns in Verbänden.

/ ÜBERBLICK ÜBER UNSERE MITGLIEDSCHAFTEN unter [www.k-plus-s.com/gesellschaft/mitgliedschaften](http://www.k-plus-s.com/gesellschaft/mitgliedschaften)

### SOZIALPARTNER

In der K+S GRUPPE ist die Beziehung zwischen dem Unternehmen und den Betriebsräten sowie den Gewerk-

schaften durch eine langjährige und vertrauensvolle Zusammenarbeit geprägt (Siehe Seite 122).

## 1.6 UNSERE ZIELE

| UNSERE ZIELE                                                  |                                                                                                                      |                       |                                                                                                                               | TAB: 1.6.1 |
|---------------------------------------------------------------|----------------------------------------------------------------------------------------------------------------------|-----------------------|-------------------------------------------------------------------------------------------------------------------------------|------------|
| Ziel                                                          | Maßnahme                                                                                                             | Termin/Zielerreichung | Status/Kommentar                                                                                                              |            |
| <b>Geschäft</b>                                               |                                                                                                                      |                       |                                                                                                                               |            |
| Ausbau der strategischen Geschäftsfelder Düngemittel und Salz | Integration von Morton Salt in die K+S Gruppe                                                                        | kontinuierlich        | Integration auf funktionaler Ebene abgeschlossen; Eingliederung auf operativer Ebene vorangetrieben                           |            |
|                                                               | Übernahme von Potash One                                                                                             | Q1/2011               | Errichtung eines Kaliwerks bis 2015                                                                                           |            |
|                                                               | Prüfung der Wiederaufnahme der Förderung im Reservebergwerk Siegfried-Giesen                                         | Sommer 2011           | Machbarkeitsstudie in Arbeit                                                                                                  |            |
|                                                               | Angebot zum Erwerb des Bergwerkseigentums sowie von Grundstücksflächen des stillgelegten Kaliwerks Roßleben          | 2011                  | Verhandlungen sollen im Frühjahr 2011 wieder aufgenommen werden                                                               |            |
|                                                               | Prüfung der Veräußerung von COMPO                                                                                    | bis Sommer 2011       | Konzept für eine mögliche gesellschaftsrechtliche und unternehmerische Herauslösung von COMPO erarbeitet                      |            |
| Ausbau des ausgewogenen Regionalportfolios                    | Reduzierung saisonaler und regionaler Nachfrageschwankungen bei Düngemitteln                                         | kontinuierlich        | Ausbau der Marktpresenz in Überseemärkten und Erschließung neuer attraktiver Absatzmärkte in Wachstumsregionen                |            |
|                                                               | Verminderung der Abhängigkeit von der regionalen Volatilität des Auftausalzgeschäfts                                 | erreicht              | Morton Salt sichert uns den Zugang zu neuen in der Regel weniger schwankungsanfälligen Auftausalzmärkten                      |            |
| <b>Produktverantwortung</b>                                   |                                                                                                                      |                       |                                                                                                                               |            |
| Entwicklung zukunfts-fähiger Produkte                         | Ausbau der Produktparte Fertigation                                                                                  | kontinuierlich        | Optimierung des Produktportfolios/ neue Produkte für Fertigationssysteme                                                      |            |
|                                                               | Ausbau der Produktparte Hochreine Salze                                                                              | kontinuierlich        | Neue Produktionsanlage am Standort Zielitz                                                                                    |            |
| <b>Umwelt</b>                                                 |                                                                                                                      |                       |                                                                                                                               |            |
| Gewässerschutz                                                | Halbierung des Salzabwasseraufkommens und der Salzfracht im hessisch-thüringischen Kalirevier auf 7 Mio. m³ pro Jahr | 2015                  | Vorbereitungen zur Umsetzung des Maßnahmenpakets in Höhe von 360 Mio. € zu Gewässerschutz und Standortsicherung abgeschlossen |            |
|                                                               | Verminderung des spezifischen Wassereinsatzes auf unter 4 m³/t Produkt                                               | 2014                  | 2010: 4,6 m³/t Produkt                                                                                                        |            |
|                                                               | Stabilisierung der Salzabwassereinleitung bei 0,3 m³/t Produkt                                                       | 2015                  | 2010: 0,3 m³/t Produkt                                                                                                        |            |
| Klimaschutz                                                   | Senkung der CO <sub>2</sub> -Emissionen auf 45 kg/t Produkt                                                          | 2014                  | 2010: 48 m³/t Produkt                                                                                                         |            |
|                                                               | Verminderung des spezifischen Energieverbrauchs auf unter 250 kWh/t Produkt                                          | 2014                  | 2010: 263 kWh/t Produkt                                                                                                       |            |
|                                                               | Einsparung von 80.000 t CO <sub>2</sub> pro Jahr durch Kraftwerksmodernisierung am Standort Hattorf                  | 2012                  | Baubeginn im Herbst 2010                                                                                                      |            |
|                                                               | Nutzung von Abwärme aus produktionsfremden Prozessen am Standort Harlingen                                           | 2011                  | Grundsteinlegung für Ersatzbrennstoffanlage im Mai 2009                                                                       |            |

## UNSERE ZIELE (FORTSETZUNG)

TAB: 1.6.1

| Ziel                                                                   | Maßnahme                                                                                                               | Termin / Zielerreichung | Status / Kommentar                                      |
|------------------------------------------------------------------------|------------------------------------------------------------------------------------------------------------------------|-------------------------|---------------------------------------------------------|
| Abfallvermeidung                                                       | Stabilisierung des spezifischen Abfallaufkommens bei 2,5 kg/t Produkt                                                  | 2014                    | 2010: 2,5 kg/t Produkt                                  |
| <b>Mitarbeiter</b>                                                     |                                                                                                                        |                         |                                                         |
| Internationalen Know-how-Transfer ausbauen und Gruppengedanken stärken | Anzahl der internationalen Mitarbeiter-Transfers erhöhen                                                               | kontinuierlich          | 2010: gruppenweit 38 Expatriates (2009: 30 Expatriates) |
| Bewältigung des demografischen Wandels                                 | Demografieanalyse durchführen                                                                                          | 2011                    | Vorbereitungen laufen                                   |
|                                                                        | Pro Jahr mindestens 160 Ausbildungsplätze bereitstellen                                                                | ab 2011                 | Ausbildungsquote 2010: 6,2%; Übernahmequote 2010: 90 %  |
|                                                                        | Personalmarketing intensivieren und stärker auf Zielgruppen ausrichten                                                 | 2011                    | Konzepte für unterschiedliche Zielgruppen entwickelt    |
|                                                                        | Investitionen in Fort- und Weiterbildung um mindestens ein Drittel erhöhen                                             | ab 2011                 | 2010: 12,2 Mio. €                                       |
| Gesundheitsschutz und Arbeitssicherheit                                | Aufbau einer „Mediathek Arbeitssicherheit“                                                                             | 2011                    | Download aus dem Mitarbeiterportal                      |
|                                                                        | „International Safety Report“                                                                                          | 2011                    | Erste gruppenweit vergleichbare Unfallstatistik         |
|                                                                        | Gruppenweites Gesundheitsmanagement durch Verbindlichkeit für Handlungsfelder, Aufgaben und Zuständigkeiten optimieren | 2011                    | Leitfaden wird erarbeitet                               |
|                                                                        |                                                                                                                        |                         |                                                         |

DIE K+S GRUPPE IST AUF LANGFRISTIGES UND NACHHALTIGES WACHSTUM AUSGERICHTET. DABEI STREBEN WIR EINEN FAIREN AUSGLEICH VON WIRTSCHAFTLICHEN, ÖKOLOGISCHEN UND SOZIALEN BELANGEN AN. WIR GEHEN SORGSAM MIT UNSEREN RESSOURCEN UM, HALTEN UNVERMEIDBARE EINGRIFFE IN DIE NATUR SO GERING WIE MÖGLICH, FÖRDERN UNSERE MITARBEITER UND GEBEN JUNGEN MENSCHEN EINE FUNDIERTE AUSBILDUNG – DAMIT SIND WIR ZUKUNFTSFÄHIG.



# NACHHALTIG WACHSEN

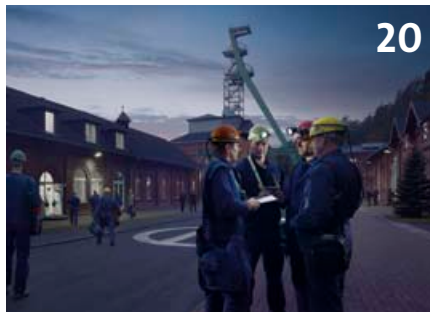

20

WACHSTUM BRAUCHT EINSATZ

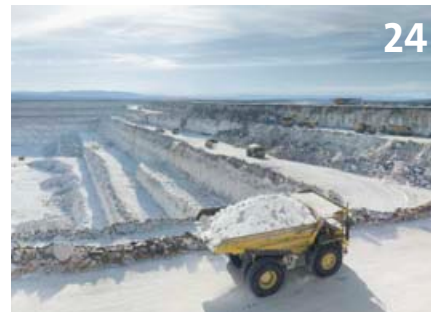

24

WACHSTUM BRAUCHT RESSOURCEN

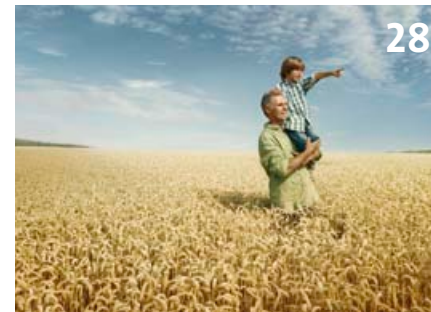

28

WACHSTUM BRAUCHT PERSPEKTIVEN

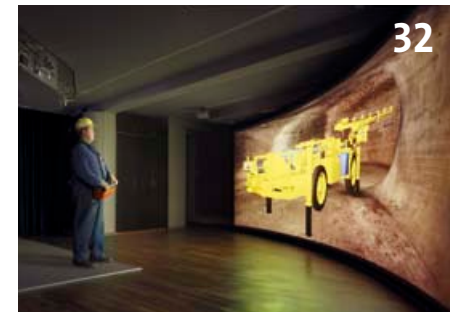

32

WACHSTUM BRAUCHT KNOW-HOW

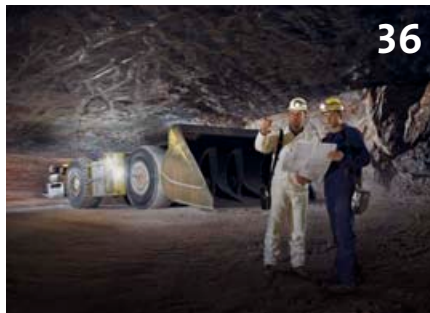

36

WACHSTUM BRAUCHT ZUKUNFT

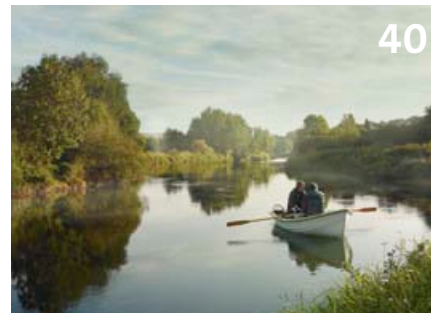

40

WACHSTUM BRAUCHT GLEICHGEWICHT

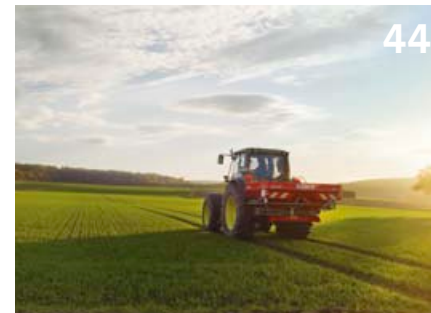

44

WACHSTUM BRAUCHT LÖSUNGEN

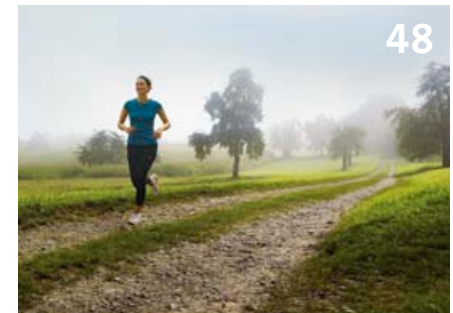

48

WACHSTUM BRAUCHT MINERALIEN

# WACHSTUM BRAUCHT EINSATZ

*Schicht für Schicht fahren unsere Bergleute nach unter Tage, wo sie wertvolle Rohstoffe gewinnen. Seit mehr als einem Jahrhundert verkörpern sie die traditionellen Werte Zuverlässigkeit, Teamgeist und Vertrauen. Mit ihrem Einsatz bereiten sie die Grundlage für unser erfolgreiches Wachstum und das unserer Kunden und Partner.*

UNSERE MITARBEITER SIND UNSER WICHTIGSTES KAPITAL, DENN  
NUR GEMEINSAM ERREICHEN WIR MEHR: UNSERE BERGLEUTE SETZEN  
SICH TAG FÜR TAG FÜR DAS WACHSTUM IHRER K+S EIN.



## STETER ANSTIEG DER MITARBEITERANZAHL

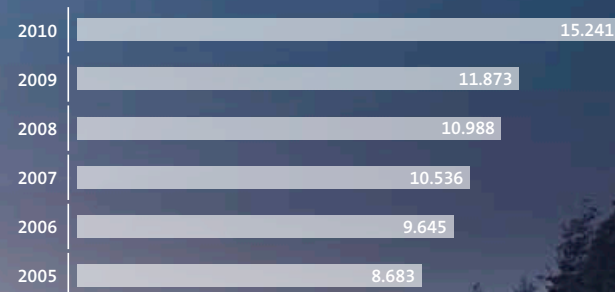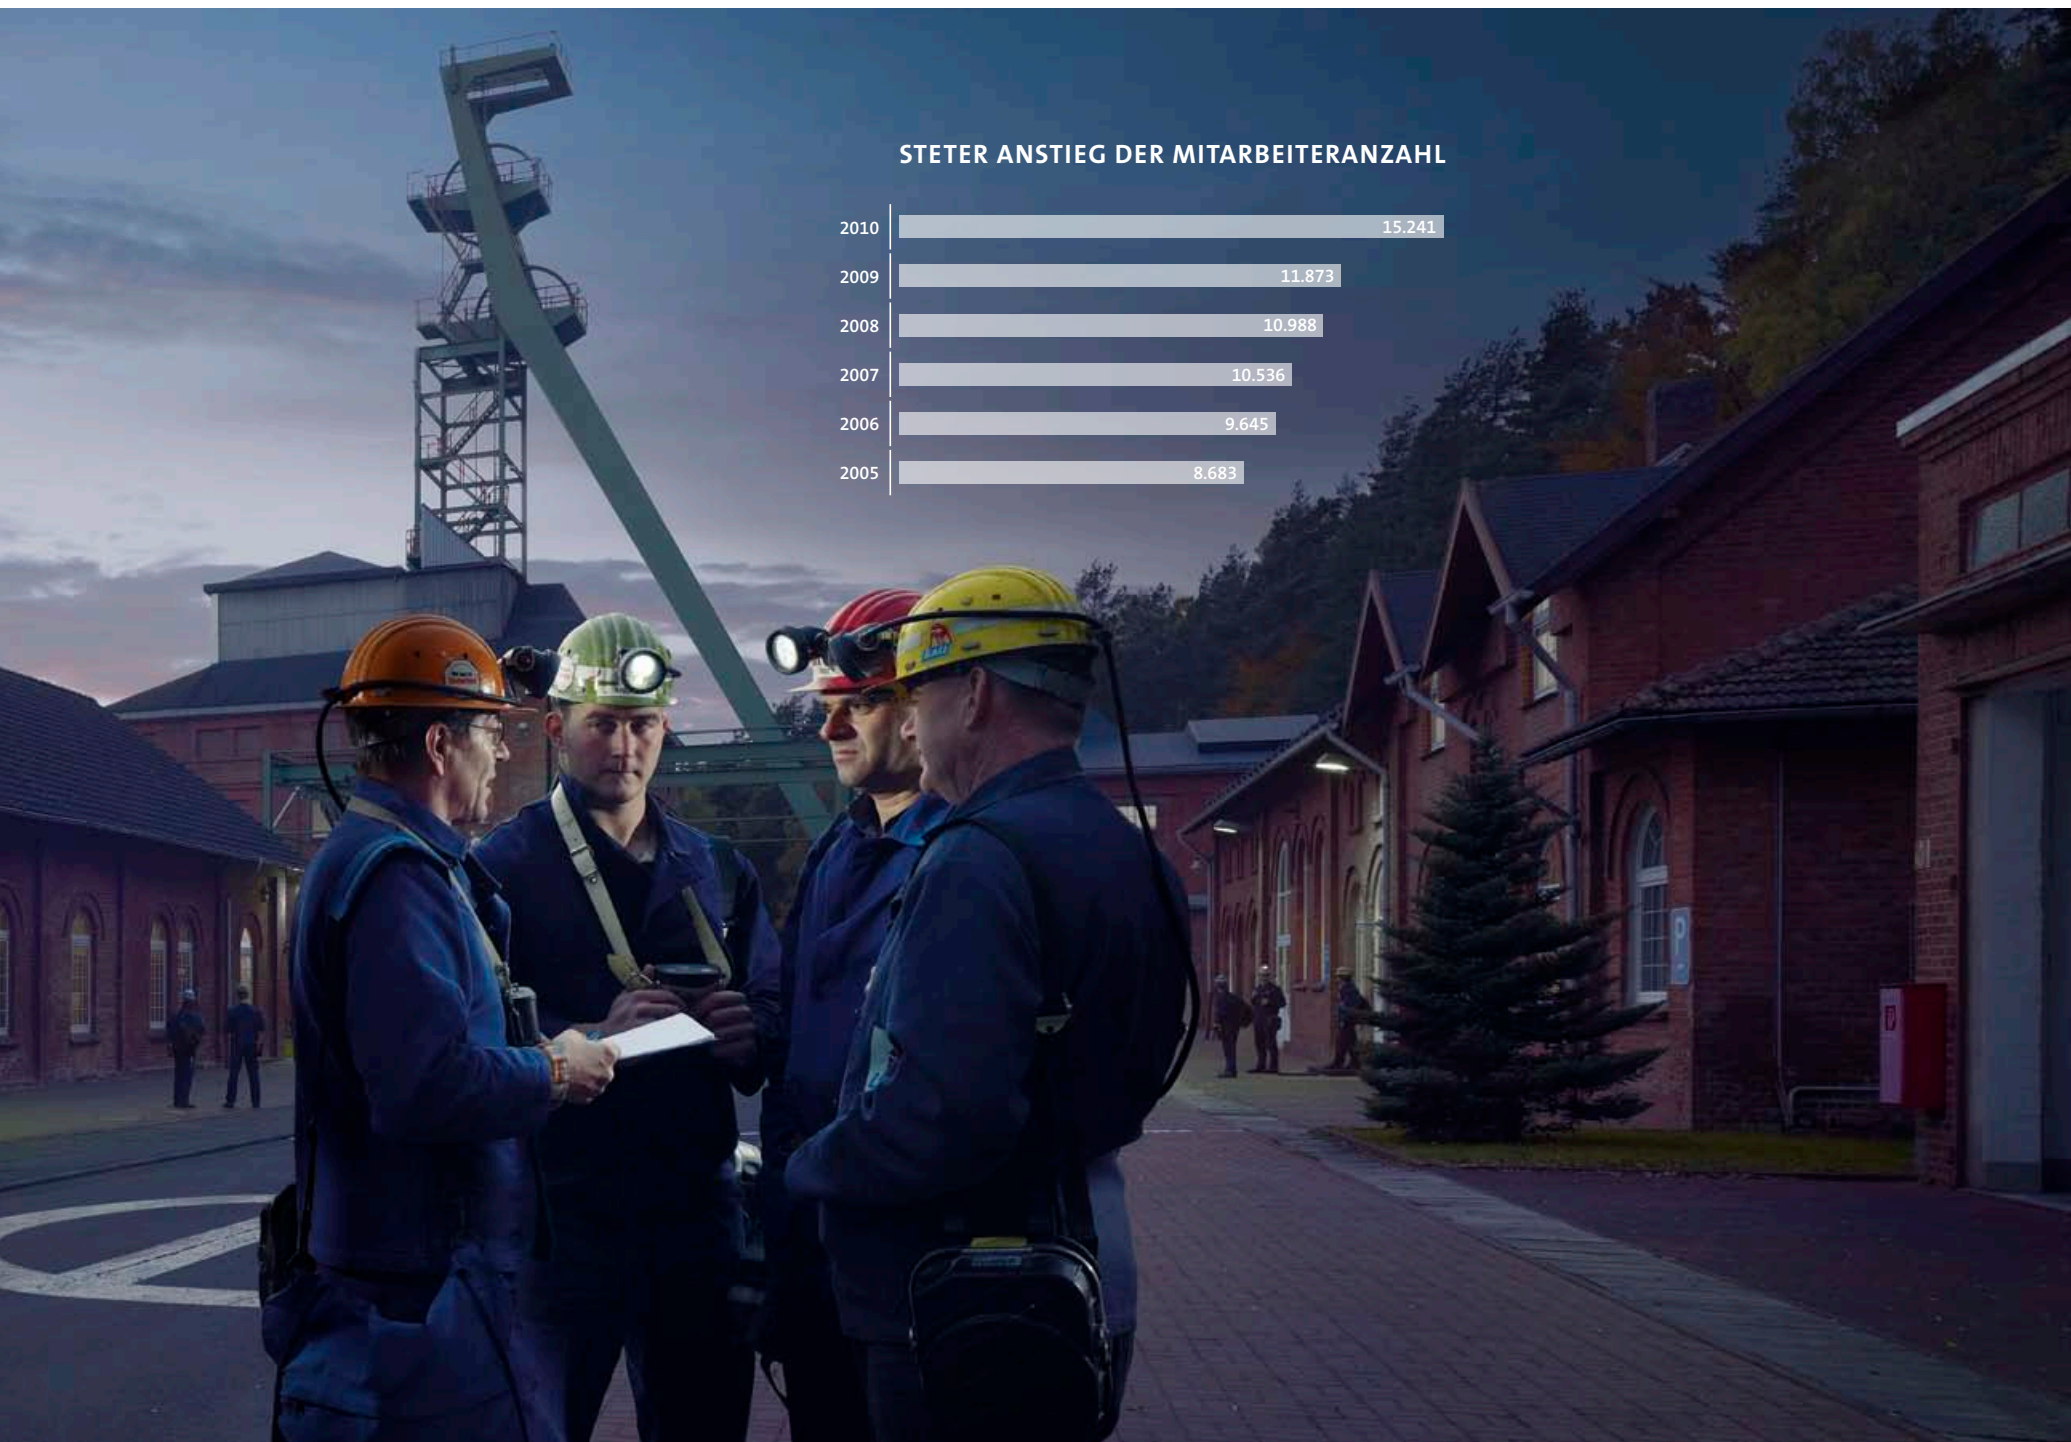

WIR STÜTZEN UNSER GESUNDES UND NACHHALTIGES UNTERNEHMENS-  
WACHSTUM AUF KOMPETENTE UND MOTIVIERTE MENSCHEN, MIT DENEN  
WIR LANGFRISTIG UND VERTRAUENSVOLL ZUSAMMENARBEITEN. UNSERE  
MITARBEITER NEHMEN JEDEN TAG DIE HERAUSFORDERUNG AN, GEMEINSAM  
MIT UNS DIE ZUKUNFT ZU GESTALTEN.

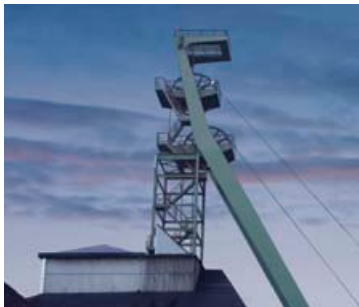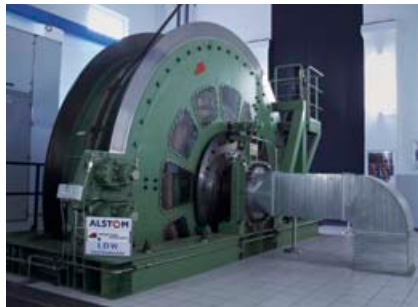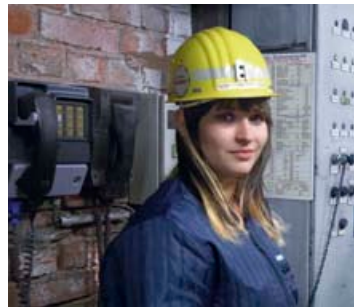

#### HOCHQUALIFIZIERTE BERGLEUTE UNTER TAGE

„Glück auf!“ – das ist der Gruß, den sich alle Bergleute kurz vor der Fahrt im Förderkorb zurufen. „Glück auf!“ – dann geht es in rasender Geschwindigkeit mehrere hundert Meter in die Tiefe, dorthin, wo die mineralischen Schätze der Erde lagern. Dabei ist dieser Gruß mehr als nur der Wunsch nach einer gesunden Wiederkehr: Er beschwört auch eine reiche Ausbeute beim Erkunden und Abbauen der wertvollen Rohsalze. Jeder Mitarbeiter hat seinen eigenen Aufgabenbereich, gut erkennbar an den verschiedenen farbigen Schutzhelmen: In Deutschland tragen Aufsichten und Steiger weiße Helme, die Schlosser haben eine blaue, die Elektriker eine grüne Kopfbedeckung. Die Kumpels, die das Rohsalz gewinnen, tragen gelbe Helme. Die Männer, die sich um alle Sicherheitsfragen kümmern, tragen orangefarbene Helme. Und für den Fall der Fälle kommen die leuchtend roten Helme zum Einsatz: Sie sind das Erkennungszeichen für die Grubenwehr. Unter Tage geht die Fahrt über Salzpisten und führt durch ein weitverzweigtes Labyrinth von Strecken bis zu den Arbeitsplätzen. Das Bild des Bergmanns mit Hacke und Schaufel gehört schon seit langem der Vergangenheit an. Die Arbeit im Kali- und Steinsalzbergbau ist heute vom Einsatz computergesteuerter Großmaschinen geprägt. Alle Arbeiten unter Tage bauen aufeinander auf; jeder einzelne Handgriff muss sitzen. Jeder ist an seinem Arbeitsplatz ein Spezialist, der seine Aufgaben alleine löst.

Letztlich aber begreifen sich alle als Team, das nur im Zusammenwirken Erfolg hat und die erforderliche Menge Salz zutage fördern kann.

#### GELEBTE TRADITION AUF DEM NEUESTEN STAND DES WISSENS

Unsere Bergleute leben aus ihrer Tradition heraus wichtige Werte: Zuverlässigkeit, Teamgeist und gegenseitiges Vertrauen. K+S steht für diese Werte, sie übernimmt Verantwortung für ihre Mitarbeiter, investiert in Sicherheit, Gesundheit und in sichere Arbeitsplätze. In einem ständigen Verbesserungsprozess optimieren wir Qualität und Rentabilität von Prozessen unter Beteiligung der Mitarbeiter. Durch Versetzung von Mitarbeitern zu anderen in- und verstärkt auch ausländischen Gruppengesellschaften fördern wir die Zusammenarbeit in unserer Gruppe, gewährleisten den Know-how-Transfer und stärken die fachliche und interkulturelle Kompetenz. Mit ihrer Arbeit auf hohem technischem Niveau leisten die Frauen und Männer täglich einen wichtigen Beitrag zur Versorgungssicherheit mit natürlichen Rohstoffen.

#### EINZIGARTIGE PRODUKTE AUS NATÜRLICHEN ROHSTOFFEN

Wir bauen in unseren Bergwerken in 500 bis 1.400 Meter Tiefe Kali- und Steinsalze ab, die wir aufbereiten, veredeln und weltweit vermarkten – unsere Wertschöpfungstiefe ist enorm. Dabei greifen wir auf über 100

Jahre Wissen und Erfahrung zurück. Auf Basis unserer einzigartigen Kali- und Magnesiumlagerstätten bieten wir unseren Kunden eine Produktpalette, die in dieser Vielfalt von keinem anderen Kaliproduzenten weltweit angeboten wird. Die Nährstoffe in unseren Düngemitteln sorgen für reiche Ernten und leisten damit einen wichtigen Beitrag zur Ernährung der wachsenden Weltbevölkerung. Unsere Salze und Mineralien sind der Grundstoff für viele lebenswichtige und -bereichernde Produkte und Anwendungen. Noch bis zum Jahr 1999 war K+S ein Kali- und Salzproduzent, der seine Rohstoffe ausschließlich aus deutschen Lagerstätten gewonnen hat. Durch Akquisitionen im Düngemittel- und im Salzgeschäft sind wir im vergangenen Jahrzehnt – vor allem international – stark gewachsen.

Wir wissen: Auch durch den Einsatz, das Wissen und die verkörperte Expertise unserer Belegschaft in Deutschland, Europa und der Welt gehören wir heute zur Spitzengruppe der Anbieter von Standard- und Spezialdüngemitteln; im Salzgeschäft sind wir der führende Hersteller in der Welt. Heute setzen sich mehr als 15.000 Mitarbeiter Tag für Tag für das weitere Wachstum ihrer K+S GRUPPE ein.

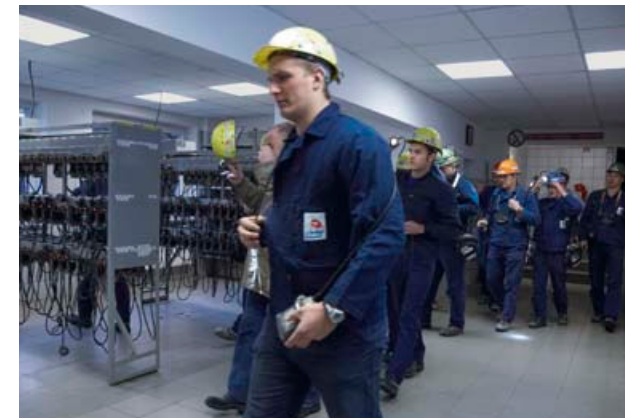

Die Bergleute machen sich im Umkleidebereich, der Kaue, für ihren Einsatz unter Tage bereit. In der Lampenstube legen sie sich die Selbstretter um. Mit dem Förderkorb geht es anschließend mehrere hundert Meter in die Tiefe.



# WACHSTUM BRAUCHT RESSOURCEN

---

*Die K+S Gruppe kann auf enorme Ressourcen an hochwertigen Salzen in Deutschland, Süd- und Nordamerika zurückgreifen. Das Salz wird sowohl bergmännisch unter Tage als auch im Tagebau und als Meersalz gewonnen.*

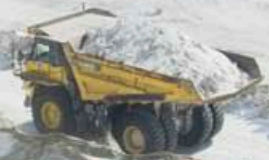



## AUSBAU DER WELTWEITEN SALZKAPAZITÄTEN

KAPAZITÄT IN MIO. T  
(FESTSALZ UND SALZ IN SOLE)

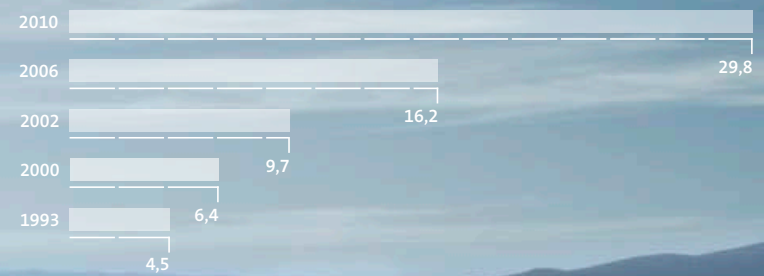

AUF EINER GRÖSSE VON MEHR ALS 500 KM<sup>2</sup> GIBT ES IN DER CHILENISCHEN TARAPACÁ-WÜSTE SALZ SO WEIT DAS AUGE REICHT. DIE CHARAKTERISTISCHEN STUFEN IM SALZGESTEIN ENTSTEHEN DURCH DIE ABBAUWEISE IM TAGEBAU, BEI DER DER ROHSTOFF ABGESPRENGT WIRD.



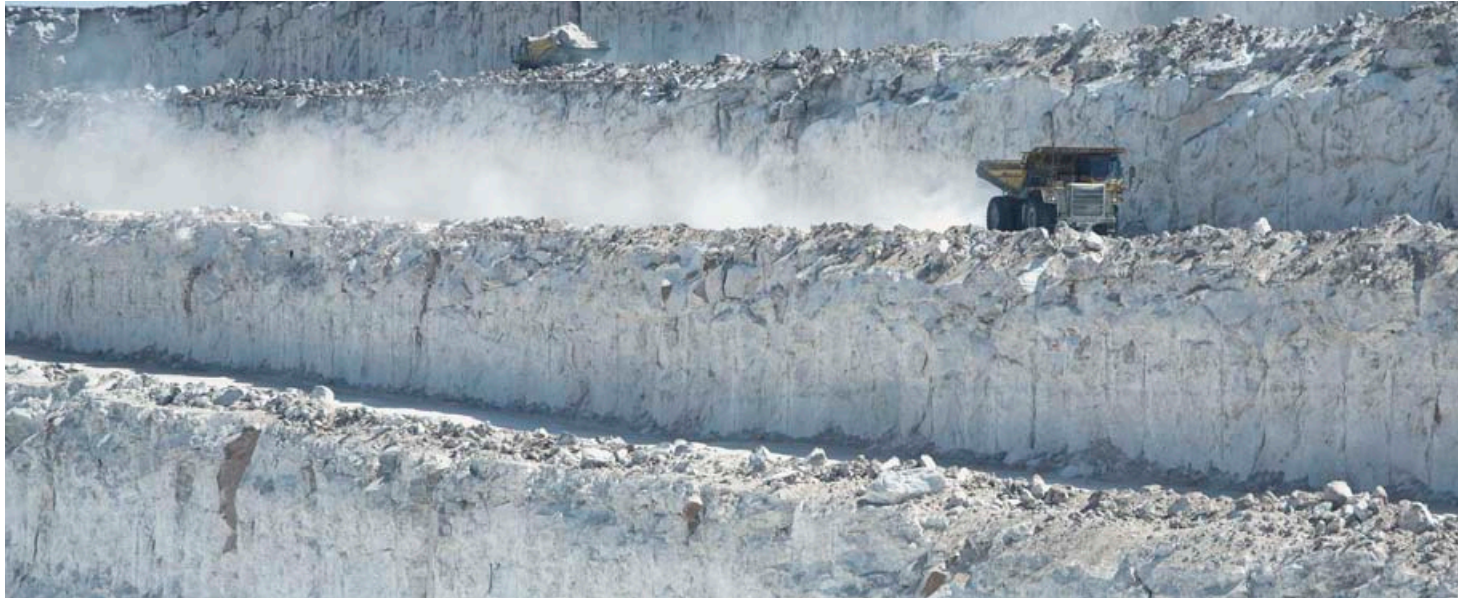

*In der chilenischen Tarapacá-Wüste wird das Rohsalz im Tagebau gewonnen. Allein diese Vorräte reichen aus, um die Weltbevölkerung für mehrere hundert Jahre mit Salz zu versorgen.*

VOR ZWEIFINHALB MILLIONEN JAHREN VERDUNSTETEN GEGEN ENDE DER LETZTEN EISZEIT SALZHALTIGE GEWÄSSER UND KRISTALLISIERTEN SICH ZU GEWALTIGEN SALZSCHICHTEN AUS. DANK MODERNER ABBAUTECHNIK MACHEN WIR DIESES HOCHWERTIGE STEINSALZ FÜR DIE WEITERVERARBEITUNG ZU EINER VIELZAHL VON SALZPRODUKTEN NUTZBAR.



## SALZ – UNVERZICHTBARER ROHSTOFF FÜR MENSCH UND INDUSTRIE

Salz ist ein elementarer Bestandteil des Lebens. Es war in der Vergangenheit so wertvoll, dass man es bis heute auch als „Weißes Gold“ bezeichnet. Schon in der Antike bei den Griechen galt Salz als Geschenk der Götter. Wegen seines Wertes diente es den Römern zeitweise sogar als Zahlungsmittel. Salz ist aus unserem Leben nicht wegzudenken, es ist lebensnotwendig und für die menschliche Ernährung überaus wichtig. Es dient der Gesundheit, zum Würzen, Färben, Konservieren und vielen weiteren Anwendungszwecken. Es ist für die Sicherheit im Straßenverkehr unverzichtbar. Nur mit Salz ist beispielsweise die Produktion von Kunststoffen, von Glas und Papier möglich.

Unsere Rohstoffreserven sind enorm, denn wir können auf reiche Abbaustätten in Deutschland, Süd- und Nordamerika zurückgreifen. K+S ist heute mit einer Produktionskapazität von rund 30 Mio. Tonnen Salz der weltweit führende Produzent. Besonders ökonomisch lässt sich der Rohstoff gewinnen, wenn er sich, wie in der chilenischen Salzwüste, relativ dicht an der Erdoberfläche befindet. Entstanden sind diese kilometerweiten Vorkommen durch die Verdunstung früherer salzhaltiger Gewässer. Unser Abbauggebiet in der Tarapacá-Wüste, einer der trockensten Regionen der Erde, besitzt eine Größe von mehr als 500 km<sup>2</sup>, das entspricht einer Fläche von mehr als 70.000 Fußballfeldern. Bis zu 70 m mächtig ist hier die nutzbare Salzschicht. Das Salz wird im Tagebau abgesprengt und mit großen Kippern abtransportiert. Der Weg zu den Aufbereitungsanlagen führt über die Sohlen im Tagebau und danach über planierte Straßen. Mit Hilfe von Brechern, robusten Stahlwalzen, wird das Mineral dann weiter zerkleinert. Auch logistisch sind wir in diesem Teil der Welt bestens aufgestellt: Unser Tiefseehafen Puerto Patillos mit seinen Bela-

dungsanlagen liegt nicht weit vom Tagebau entfernt. Damit kann die wertvolle Fracht mit Hilfe der firmeneigenen Reederei EMPREMAR ohne großen Zeitverlust unmittelbar verschifft werden. Durch unsere chilenische Salztochter SPL profitieren wir von den Wachstumsraten in Südamerika und wollen bei entsprechenden Rahmenbedingungen unsere Vertriebsaktivitäten in Richtung der asiatischen Märkte ausbauen. Denn auch der Verbrauch von Gewerbe- und Industriesalz wird von Wirtschaftswachstum und Industrialisierung in den Schwellenländern getrieben.

## ROHSTOFF- UND PRODUKTIONS BASIS STÄRKEN UND WELTWEIT AUSBAUEN

Mit dem Zukauf der US-amerikanischen MORTON SALT, dem größten Hersteller von Speise-, Gewerbe- und Auftausalzen in Nordamerika, im Jahr 2009 hat die K+S GRUPPE die Synergien zwischen den verschiedenen Lagerstätten weiter verstärkt: Das sich neben Europa mittlerweile auf Süd- und Nordamerika erstreckende Produktionsnetzwerk machte in diesem Winter 15 Schiffslieferungen mit Auftausalz für Europa von unseren Standorten in Chile und den Bahamas möglich.

Wir haben in den letzten zehn Jahren nicht nur einfach den größten Salzproduzenten, sondern vor allem den im Hinblick auf das Produkt- und Länderportfolio am breitesten aufgestellten Salzproduzenten der Welt geschaffen. Damit verfügen wir über die Ressourcen, die für künftiges Wachstum gebraucht werden.

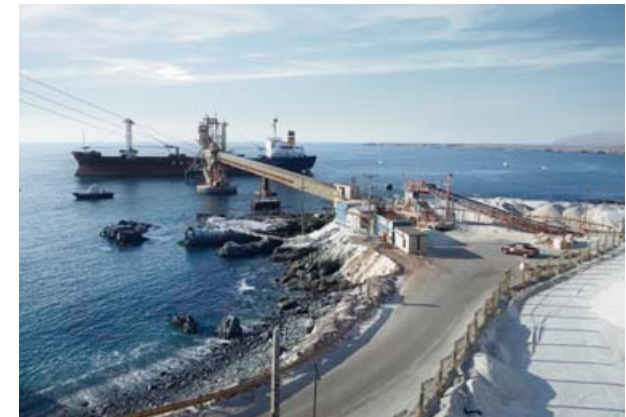

In unmittelbarer Umgebung unseres Abbaugebietes in Chile liegt unser Hafen. Mit dem eigenen Beladeterminale kann das geförderte Salz schnell in alle Welt verschifft werden. Ein logistischer Vorteil, von dem unsere Kunden profitieren.



# WACHSTUM BRAUCHT PERSPEKTIVEN

---

*Mit unseren Düngemitteln bieten wir Landwirten optimale Voraussetzungen für ein ertragreiches Wachstum und liefern Lösungen für den weltweit steigenden Anspruch an die Qualität der Nahrungsmittel.*



## WACHSENDE BEVÖLKERUNGSZAHLEN – SCHRUMPFENDE ACKERFLÄCHEN

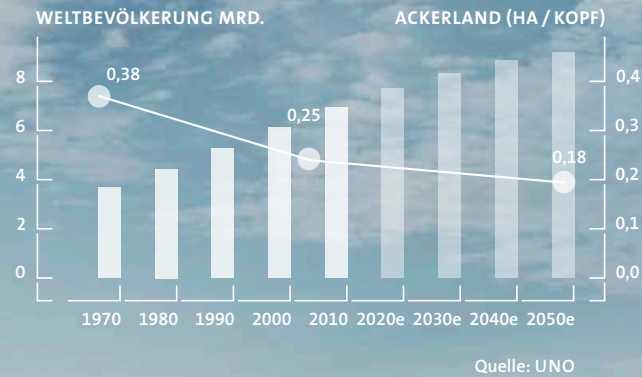

DAS GOLDGELBE WEIZENFELD VERSPRICHT EINE REICHE ERNTE. GETREIDE HAT WIE AUCH ANDERE AGRARROHSTOFFE EINE AUSSICHTSREICHE PERSPEKTIVE, DA DIE NACHFRAGE NACH GUTER QUALITÄT WELTWEIT STEIGT.



WIR SIND PARTNER DER LANDWIRTE WELTWEIT UND HELFEN IHNEN BEI IHREN HERAUSFORDERUNGEN: DIE AGRARWIRTSCHAFT MUSS KÜNFTIG NICHT NUR MEHR MENSCHEN ERNÄHREN, SIE MUSS SICH AUCH IN ANBAUGEBIETEN AUF VERÄNDERTE KLIMATISCHE BEDINGUNGEN EINSTELLEN.

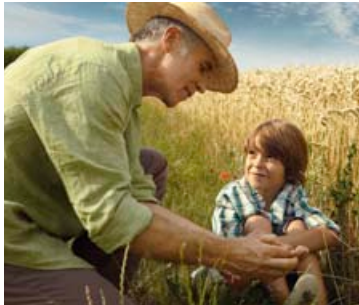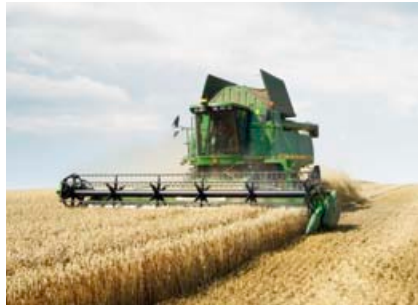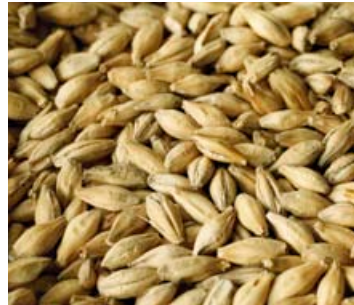

#### **DIE RICHTIGE DÜNGUNG LEISTET EINEN WICHTIGEN BEITRAG ZUR WELTWEITEN ERNÄHRUNG**

Ein Weizenfeld voller goldgelber reifer Ähren ist ein wunderschöner Anblick. Er lässt uns innehalten, und der Blick schweift in die Ferne. Der Mensch hat gesät und erntet nun die Mühen seiner Arbeit. κ+s unterstützt den Landwirt dabei, die Qualität seiner Ernten nachhaltig zu erhöhen und damit die Ernährung der Bevölkerung zu sichern. Die Investitionen in leistungsfähige Düngemittel und nachhaltige Beratung zahlen sich aus, da der Bedarf an Getreide und anderen Agrarrohstoffen unaufhörlich zunimmt. Mit jedem Tag wächst die Weltbevölkerung: Bis zum Jahr 2050 sollen mehr als neun Milliarden Menschen auf der Erde leben. Nach jüngsten Schätzungen muss die landwirtschaftliche Produktion bis 2050 um 70 Prozent steigen, um die Menschheit ernähren zu können.

Zudem ändern sich auch die Essgewohnheiten vieler Menschen in Schwellenländern wie Indien und China: Durch den steigenden Wohlstand werden vermehrt Fleisch- und Milchprodukte konsumiert. Während in Westeuropa der Fleischkonsum in den vergangenen 30 Jahren im Wesentlichen gleich geblieben ist, ist er in Asien um mehr als das Dreifache gewachsen. Das dafür notwendige Nutztier benötigt Futtermittel in großen Mengen – beispielsweise werden zur Erzeugung von einem Kilo Rindfleisch bis zu acht Kilo Futter-

mittel benötigt – sodass die landwirtschaftliche Produktion vor zusätzlichen Herausforderungen steht. Leider können die Anbauflächen nur sehr begrenzt erweitert werden, denn nennenswerte geeignete Bodenreserven sind in vielen Teilen der Welt nicht mehr vorhanden. Als realistische Option bleibt die Steigerung der Produktivität auf den bereits bestehenden Ackerflächen durch Nutzung von fortschrittlichen Anbaumethoden, einer ausgewogenen Mineraldüngung und widerstandsfähiger Sorten, um die steigende Nachfrage nach Nahrungsmitteln zu bedienen. Die K+S GRUPPE kann mit ihren kalium-, magnesium- und stickstoffhaltigen Düngemitteln einen wichtigen Beitrag zur Versorgungssicherheit leisten.

#### WIR HELFEN DEN LANDWIRTEN BEI IHREN HERAUSFORDERUNGEN WELTWEIT

In vielen Regionen der Erde stehen die Landwirte vor besonders schwierigen Herausforderungen: Sollten sich aufgrund klimatischer Veränderungen Wüsten und Steppen weiter ausbreiten, könnten nach Schätzungen der Vereinten Nationen bis zum Jahr 2025 fast zwei Milliarden Menschen in Gebieten mit absolutem Wassermangel leben. Hält der gegenwärtige Trend an, wird Wasser in den nächsten 50 Jahren also zum wichtigsten Engpassfaktor der Landwirtschaft. Jeder Tropfen sollte daher von den Pflanzen maximal genutzt werden können. Genau hier setzen wir mit unseren Forschungen an.

Neueste Forschungsergebnisse belegen, dass sich eine regelmäßige Kalium- und Magnesiumdüngung positiv auf den Wasserhaushalt der Pflanzen auswirkt. Die Pflanzen bildeten auch ein größeres, besser verzweigtes Wurzelsystem, das tiefere und damit feuchtere Bodenschichten erreichte. Dies ist gleichbedeutend mit einem höheren Ertrag je Flächeneinheit.

Dies alles macht deutlich, dass der optimale Einsatz von Düngemitteln bei der landwirtschaftlichen Produktion entscheidend für den Ertrag und damit für den wirtschaftlichen Erfolg ist. Damit leisten wir nicht nur einen Beitrag zur Welternährung, sondern festigen auch die Lebensgrundlage der Bauern. Mehr noch: Wir helfen mit Rat und Tat den Landwirten, damit sie auch in Zukunft von den aussichtsreichen Perspektiven profitieren können. Insbesondere in Schwellen- und Entwicklungsländern trägt unsere landwirtschaftliche Anwendungsberatung zum Know-how-Transfer bei. Nach unserer Einschätzung haben diese Regionen bei besserer Anwendung des Konzepts der ausgewogenen Düngung ein deutlich größeres Ertragspotenzial.

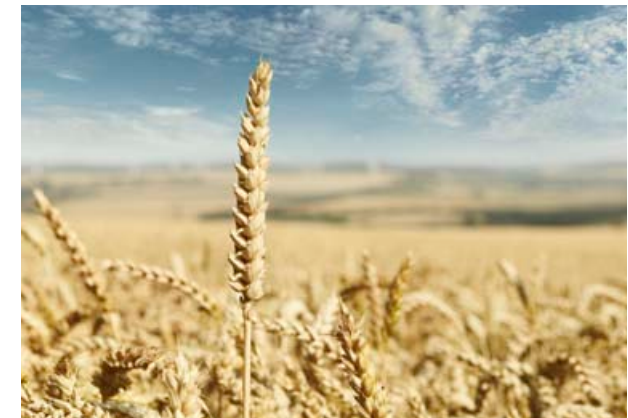

Mit Hilfe unserer Kalidüngemittel erhöht sich die Wassernutzungseffizienz von Kulturpflanzen nachhaltig. So können wir dazu beitragen, dass wichtige Nutzpflanzen auch unter schwierigen Bedingungen wie Wassermangel noch hohe Erträge bringen können.

# WACHSTUM BRAUCHT KNOW-HOW

---

*Die Rohstoffgewinnung stellt höchste Anforderungen an die Fähigkeiten und das Know-how unserer Mitarbeiter. Deshalb legen wir großen Wert auf eine intensive Fort- und Weiterbildung. So sichern wir auch in Zukunft die Qualität und Zuverlässigkeit unserer Prozesse und Produkte.*

WEITERBILDUNG MIT MODERNSTER COMPUTERTECHNIK: MIT HILFE EINER VIRTUELLEN 3D-SCHULUNGSUMGEBUNG TRAINIEREN DIE BOHRHAUER EINE SICHERE UND VORAUSSCHAUENDE MASCHINENBEDIENUNG.

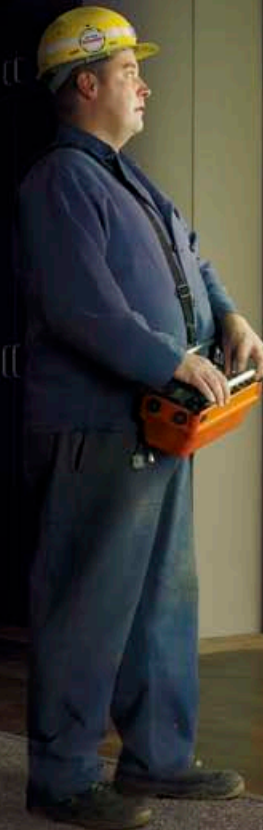



## VIELFÄLTIGE WEITERBILDUNG 2010

ANZAHL DER MASSNAHMEN

FACHWISSEN UND -KÖNNEN

2.507

BEFÄHIGUNGSNACHWEISE

2.180

SOZIAL- UND FÜHRUNGSKOMPETENZ

2.001

IT-QUALIFIZIERUNG

716

METHODENWISSEN UND -KÖNNEN

678

UNTERNEHMERISCHE KOMPETENZ

271

JEDER MITARBEITER IST EIN SPEZIALIST FÜR SEINE AUFGABE ÜBER ODER UNTER TAGE. ZIELGERICHTETE WEITERBILDUNGEN GEBEN UNSERER BELEGSCHAFT DAS GUTE GEFÜHL, DASS IHR WISSEN STÄNDIG AUF DEM NEUESTEN STAND DER TECHNIK IST. DAHER HABEN WIR IM JAHR 2010 ÜBER 12 MIO. € IN FÖRDERPROGRAMME UND QUALIFIZIERUNGEN INVESTIERT.

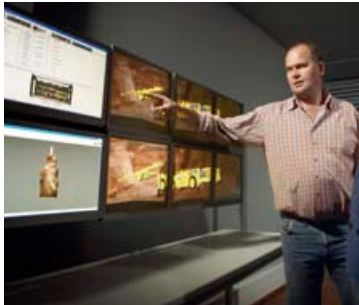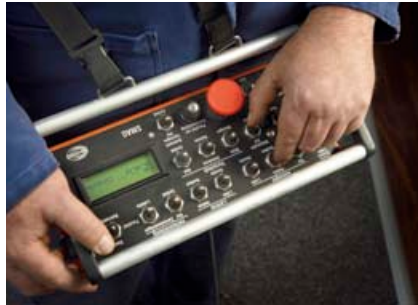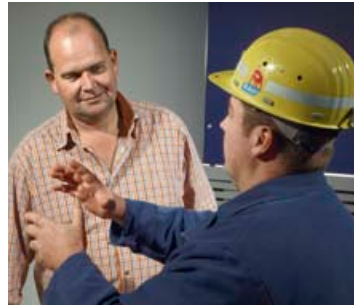

#### UNSERE MITARBEITER SIND UNSER KOSTBARSTES KAPITAL

K+S ist ein Rohstoffunternehmen mit über 100-jähriger Erfahrung. Dass wir den technisch anspruchsvollen Abbau unserer natürlichen Rohsalze so erfolgreich meistern, liegt auch an der fundierten Ausbildung und konsequenten Weiterbildung unserer Mitarbeiter. „Eine Investition in Wissen bringt noch immer die besten Zinsen!“, wusste bereits Benjamin Franklin. Ohne die Kenntnisse und Fähigkeiten der K+S-Mitarbeiter wäre eine solche Leistung nicht möglich. Der richtige Arbeiter am richtigen Ort ist eine wichtige Grundlage, um auch zukünftig wettbewerbs- und innovationsstark zu bleiben. K+S setzt auf eine bedarfsorientierte und gezielte Weiterbildung; Mitarbeiter und Vorgesetzte ermitteln regelmäßig gemeinsam den entsprechenden Bedarf. Wir bieten fachspezifische, fachübergreifende sowie IT- und Sprachschulungen an. Unmittelbare Unterstützung bei neuen und komplexen Aufgabenstellungen erhalten die Mitarbeiter durch begleitende Bildungsmaßnahmen, die besonders von den erfahrenen Altersgruppen sehr gut angenommen werden. So waren im vergangenen Jahr mehr als 50 Prozent der Teilnehmer an Weiterbildungsmaßnahmen über 40 Jahre alt.

Unsere Mitarbeiter im Untertage-Betrieb qualifizierten sich traditionell im Umgang mit der Großgerätetechnik. Bei diesen Schulungen kommt auch modernste Compu-



tertechnik zum Einsatz: Simulatoren unterstützen seit 2007 an zwei Standorten die Aus- und Weiterbildung am Bohrwagenbedienstand. Der Sprenglochbohrwagen – die mit Abstand anspruchsvollste Maschine in der Gewinnungskette unter Tage – steht am Anfang des Gewinnungsprozesses in den Kali- und Salzbergwerken. Um diesen zu beherrschen, bedarf es einer guten Ausbildung. Mit dem Simulator lassen sich alle Funktionen eines Bohrwagens unter Berücksichtigung standortspezifischer Besonderheiten darstellen.

#### SICHERHEIT GEHT VOR

Der große Vorteil: Lärm, Steinfall, Staub und Hitze – Faktoren, die bisher den Ausbildungserfolg beeinflusst haben – spielen im klimatisierten Schulungsraum keine Rolle. In diesem virtuellen Umfeld können die räumliche Vorstellungskraft und eine vorausschauende Maschinenbedienung im Bohrprozess quasi unter Praxisbedingungen trainiert werden. Außerdem erleben die Nutzer dieser Trainingsanlage die wechselseitigen Reaktionen auf das umgebende Gebirge aus erster Hand. Während der Bohrhauer in der Realität nur bis zum Stoß sieht, erkennt er in der Computeranimation, wie die Bohrung auf den folgenden sieben Metern im Gestein verläuft.

Die alte Weisheit „Hinter der Hacke ist es duster“ wird durch das Öffnen des virtuellen Fensters widerlegt. In der Realität treiben die Bergleute unter Tage mit Hoch-

leistungsbohrern Löcher in das Gestein, um die Rohsalze abzusprengen. Doch die Fernsteuerung dieses meterlangen High-Tech-Boliden erfordert im höchsten Maße Fingerspitzengefühl, denn es kommt auf jeden Millimeter an. Das Lernen an echten Maschinen ist also besonders in der Anfangsphase eine Herausforderung. Ein Bohrwagenfahrer benötigt bei herkömmlicher Ausbildung durchschnittlich fünf Jahre Erfahrung, um den Job in allen Facetten perfekt zu beherrschen.

#### HOHE INVESTITIONEN IN FORT- UND WEITERBILDUNGSMASSNAHMEN

In Fort- und Weiterbildungsmaßnahmen haben wir im Jahr 2010 über 12 Mio. € investiert. Unsere Mitarbeiter absolvierten 8.353 Qualifizierungsmaßnahmen. Damit lag die durchschnittliche Anzahl an Trainingsstunden pro Jahr und Mitarbeiter bei 13,7 Stunden. Die K+S GRUPPE sorgt mit ihren Maßnahmen für Kompetenz und Sicherheit und stellt sich den Herausforderungen, die Gewinnung, Verarbeitung und Nutzbarmachung einzigartiger Rohstoffe mit sich bringen – denn Wachstum braucht Know-how.

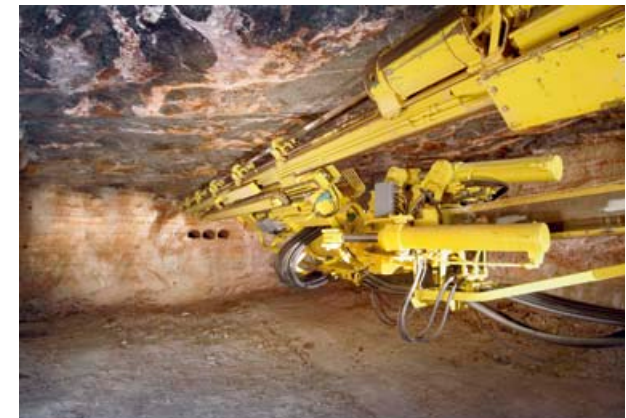

Mit dem Bohrwagen bohrt ein Bergmann Löcher sieben Meter tief ins Gestein, um die anschließende Absprengung des Rohsalzes vorzubereiten. Das Gerät arbeitet mit höchster Präzision, um die Sprenglöcher im gleichen Abstand anzulegen.

# WACHSTUM BRAUCHT ZUKUNFT

---

*Wir bilden junge Menschen in 15 verschiedenen Berufen an 15 Standorten in Deutschland aus. Unsere Mitarbeiter geben ihr Wissen und ihre Erfahrung an die nächste Generation weiter, fördern Talente und bereiten so den Boden für unser zukünftiges Wachstum.*

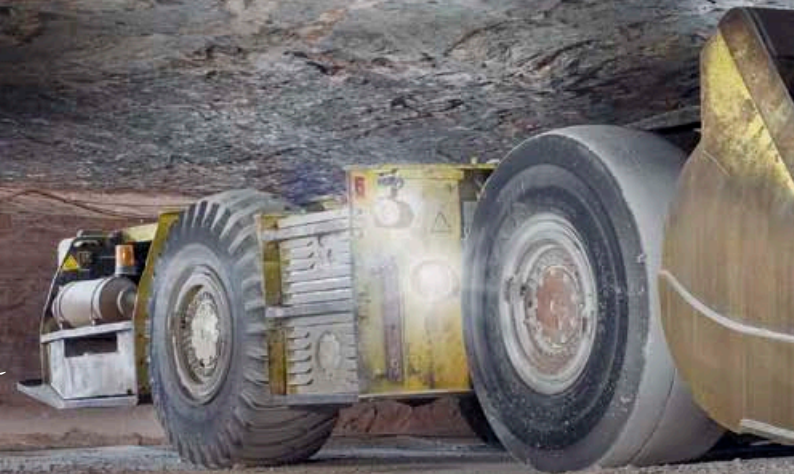

DIE K+S GRUPPE LEGT HOHEN WERT AUF EINE PRAXISORIENTIERTE  
AUSBILDUNG. NACH EINER GUTEN ABSCHLUSSPRÜFUNG SIND  
DIE CHANCEN AUF EINEN FESTEN ARBEITSPLATZ HOCH: RUND 90% DER  
Auszubildenden wurden in den letzten Jahren übernommen.



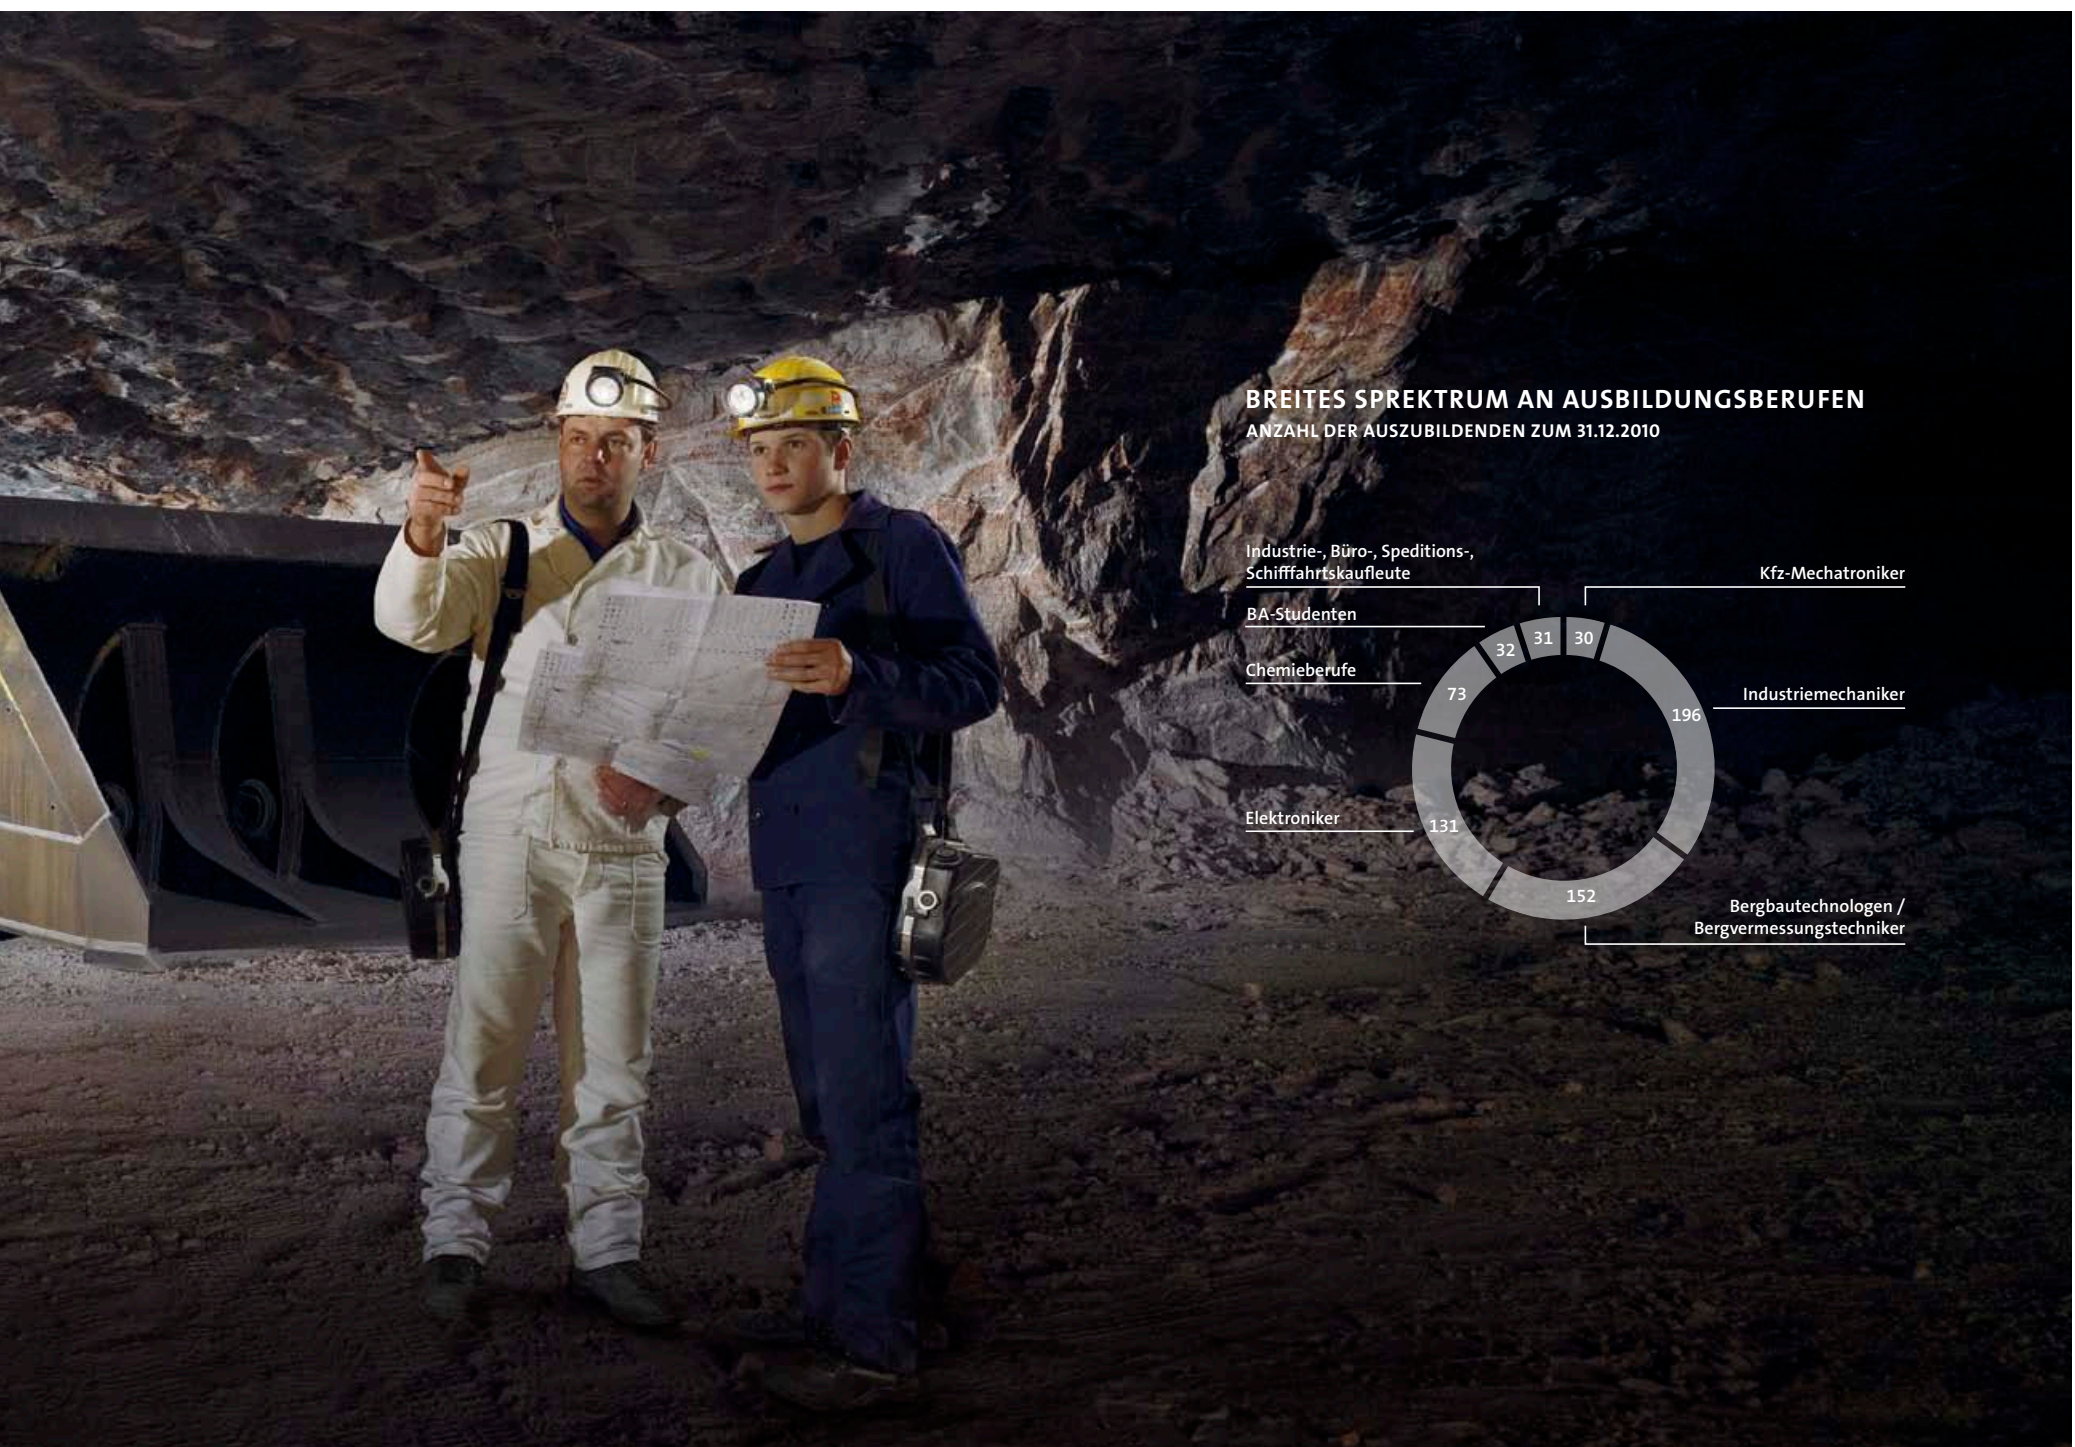

## BREITES SPREKTRUM AN AUSBILDUNGSBERUFEN

ANZAHL DER AUSZUBILDENDEN ZUM 31.12.2010

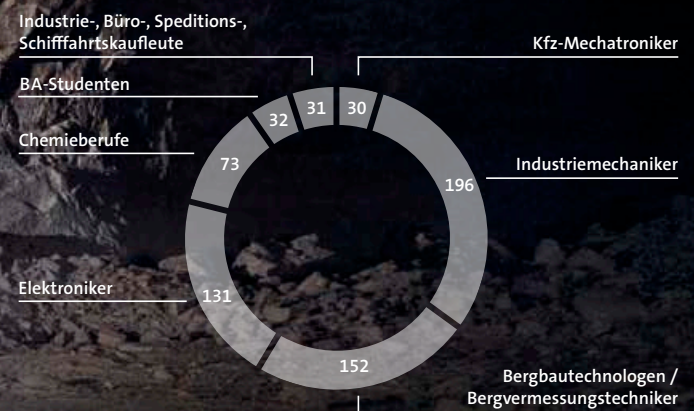

WIR BIETEN JUNGEN MENSCHEN 15 BERUFE AN, DIE DIE UNTERSCHIEDLICHSTEN INTERESSEN FÖRDERN UND FÄHIGKEITEN AUSBILDEN: VOM BERGBAU-TECHNOLOGEN, ELEKTRONIKER, INDUSTRIEMECHANIKER UND CHEMIKANTEN BIS HIN ZU KAUFMÄNNISCHEN BERUFEN. ZUDEM BESTeht DIE MÖGLICHKEIT, STUDIUM UND AUSBILDUNG MITEINANDER ZU VERBINDEN.

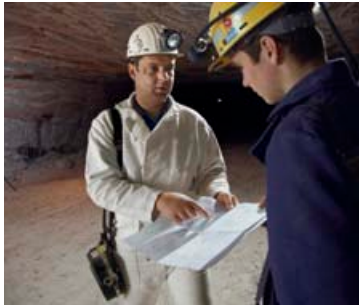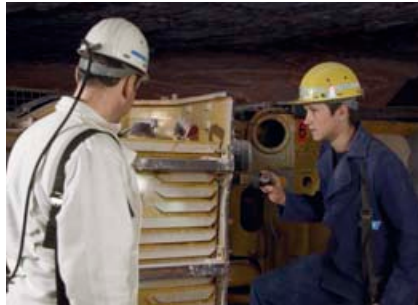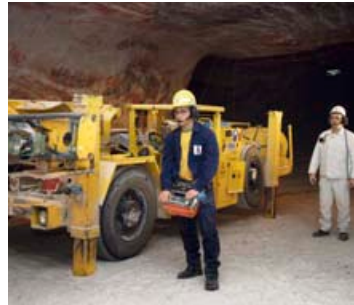

#### ATTRAKTIVE PRAXISORIENTIERTE AUSBILDUNG BEI K+S

Fabian Ommert, angehender Bergbautechnologe im hessischen Kaliwerk Neuhoof-Ellers, hat seinen Traumberuf gefunden: „Hier kann ich meine Faszination für große Maschinen und mein Interesse an der ‚etwas anderen‘ Arbeitsumgebung mit meinem Wunsch nach guten Übernahmechancen verbinden. Vom ersten Tag an habe ich die Erfahrung gemacht, dass sich Teamgeist und eigenverantwortliches Handeln nicht ausschließen.“ Dieses Gemeinschaftsgefühl erlebt er täglich im Untertage-Betrieb. Die Auszubildenden bedienen hochkomplexe Maschinen und technische Einrichtungen. Sie erfüllen eine Reihe unterschiedlicher Aufgaben im gesamten Gewinnungszyklus: Vom Bohren und Befüllen der Sprenglöcher über den Abtransport des Rohsalzes bis hin zum Sichern der Strecken sind sie gefragt. Die praxisorientierte Ausbildung junger Menschen ist für die K+S GRUPPE eine wichtige und nachhaltige Investition in die Zukunft, denn wir wollen auch zukünftig unsere qualifizierten Fachkräfte vorwiegend aus den eigenen Reihen gewinnen. Den Zuspruch zu unserem Konzept belegen die aktuellen Zahlen: Zum 31. Dezember 2010 bereiteten sich bei uns im Inland 645 junge Menschen auf ihren Berufsstart vor. Damit lag die Ausbildungsquote zum Jahresende bei 6,2 Prozent. Unsere Auszubildenden werden intensiv auf Zwischen- und Abschlussprüfungen vorbereitet. Dies geschieht im gewerblichen



Bereich in eigenen Lehrwerkstätten und Ausbildungszentren. Im kaufmännischen Bereich durchlaufen die Auszubildenden unterschiedliche Fachbereiche, um die Abläufe und Prozesse im Unternehmen kennenzulernen. Neben unternehmensinternen Seminaren nutzen wir auch externe Prüfungsvorbereitungen, um unseren Nachwuchs fit zu machen. Bei erfolgreich bestandener Abschlussprüfung und guten Leistungen während der Ausbildung stehen die Chancen auf einen Arbeitsplatz sehr gut. In den letzten Jahren haben wir 90 % der Auszubildenden übernommen, denn wir orientieren uns bei der Zahl der Einstellung der Berufsanfänger eng an unserem Bedarf an Fachkräften.

#### HOHE ZUFRIEDENHEIT UNSERER AUSZUBILDENDEN

Erstmalig sind unsere Auszubildenden nach ihrer Zufriedenheit befragt worden – rund 300 Azubis beteiligten sich. Fast 90 Prozent der Befragten sind stolz darauf, bei K+S zu lernen und wollen nach Abschluss der Ausbildung gerne bei uns bleiben. Die große Mehrheit der Befragten bezeichnet den Umgang miteinander als freundlich und bestätigt ein Klima der Solidarität und gegenseitigen Unterstützung. Positiv bewertet wurden auch die Ausbildungsarbeit der Betriebe, die Bedingungen am Arbeitsplatz und die bereitgestellten Arbeitsmittel. Zudem begrüßen wir es, dass wir nun auch Frauen unter Tage ausbilden können. Diese Arbeitsplätze waren

in Deutschland aufgrund von gesetzlichen Bestimmungen weitgehend männlichen Arbeitnehmern vorbehalten; erst im Frühjahr 2009 hat der Gesetzgeber diese Vorschrift ersatzlos gestrichen. So begannen im September 2010 die ersten beiden weiblichen Bergleute Deutschlands im Werk Werra ihre Ausbildung als Bergbautechnologinnen. Dazu Sarah Lipp, eine der Auszubildenden: „Als ich gehört habe, dass ich nun auch als Frau einen Bergbauberuf erlernen kann, habe ich mich sofort beworben.“

#### AUSBILDUNG ALS NACHHALTIGE INVESTITION IN DIE ZUKUNFT

Für K+S ist die Berufsausbildung eine wichtige Investition in die Zukunft – auch im Hinblick auf den demografischen Wandel. Die Ausbildungsaktivitäten sind auch Teil unserer gesellschaftlichen Verantwortung: In den zum Teil strukturschwachen Regionen ist die K+S GRUPPE oft der wichtigste Arbeitgeber. Wir bekennen uns zum Standort Deutschland, der als wettbewerbsfähiger Industriestandort gut ausgebildeten Fachkräftenachwuchs braucht. Als international agierender Konzern erleben wir Tag für Tag, dass nachhaltiges Wachstum zu großen Teilen auf dem Engagement unserer Mitarbeiter beruht. So setzen wir auf Auszubildende, die mit uns gemeinsam die Herausforderungen der Zukunft meistern.

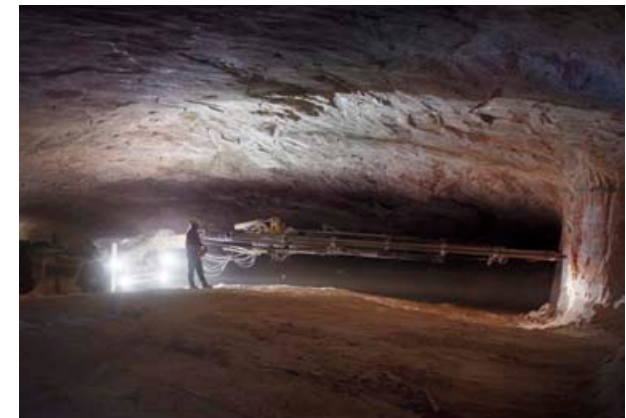

Die K+S Gruppe bietet eine einzigartige Arbeitswelt für unsere Bergleute. Die Arbeit unter Tage, wie hier am computergesteuerten Bohrwagen, ist geprägt durch die aus der Bergbaukultur gelebten Werte: Zuverlässigkeit, Teamgeist und Vertrauen.

# WACHSTUM BRAUCHT GLEICHGEWICHT

*Nachhaltigkeit im Kali- und Steinsalzbergbau bedeutet für uns, wirtschaftliches Handeln in Einklang mit ökologischen und sozialen Interessen zu bringen und kontinuierlich in moderne und umweltschonende Technologien zu investieren.*

## DEUTLICHER RÜCKGANG DES SALZWASSERAUFKOMMENS IN DER WERRA

SALZWASSERMENGE IN MIO. M<sup>3</sup>

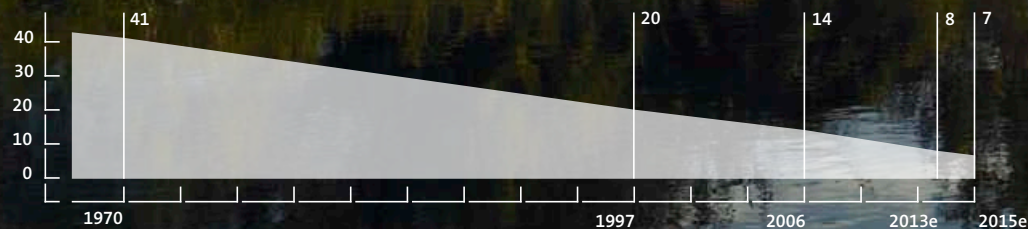



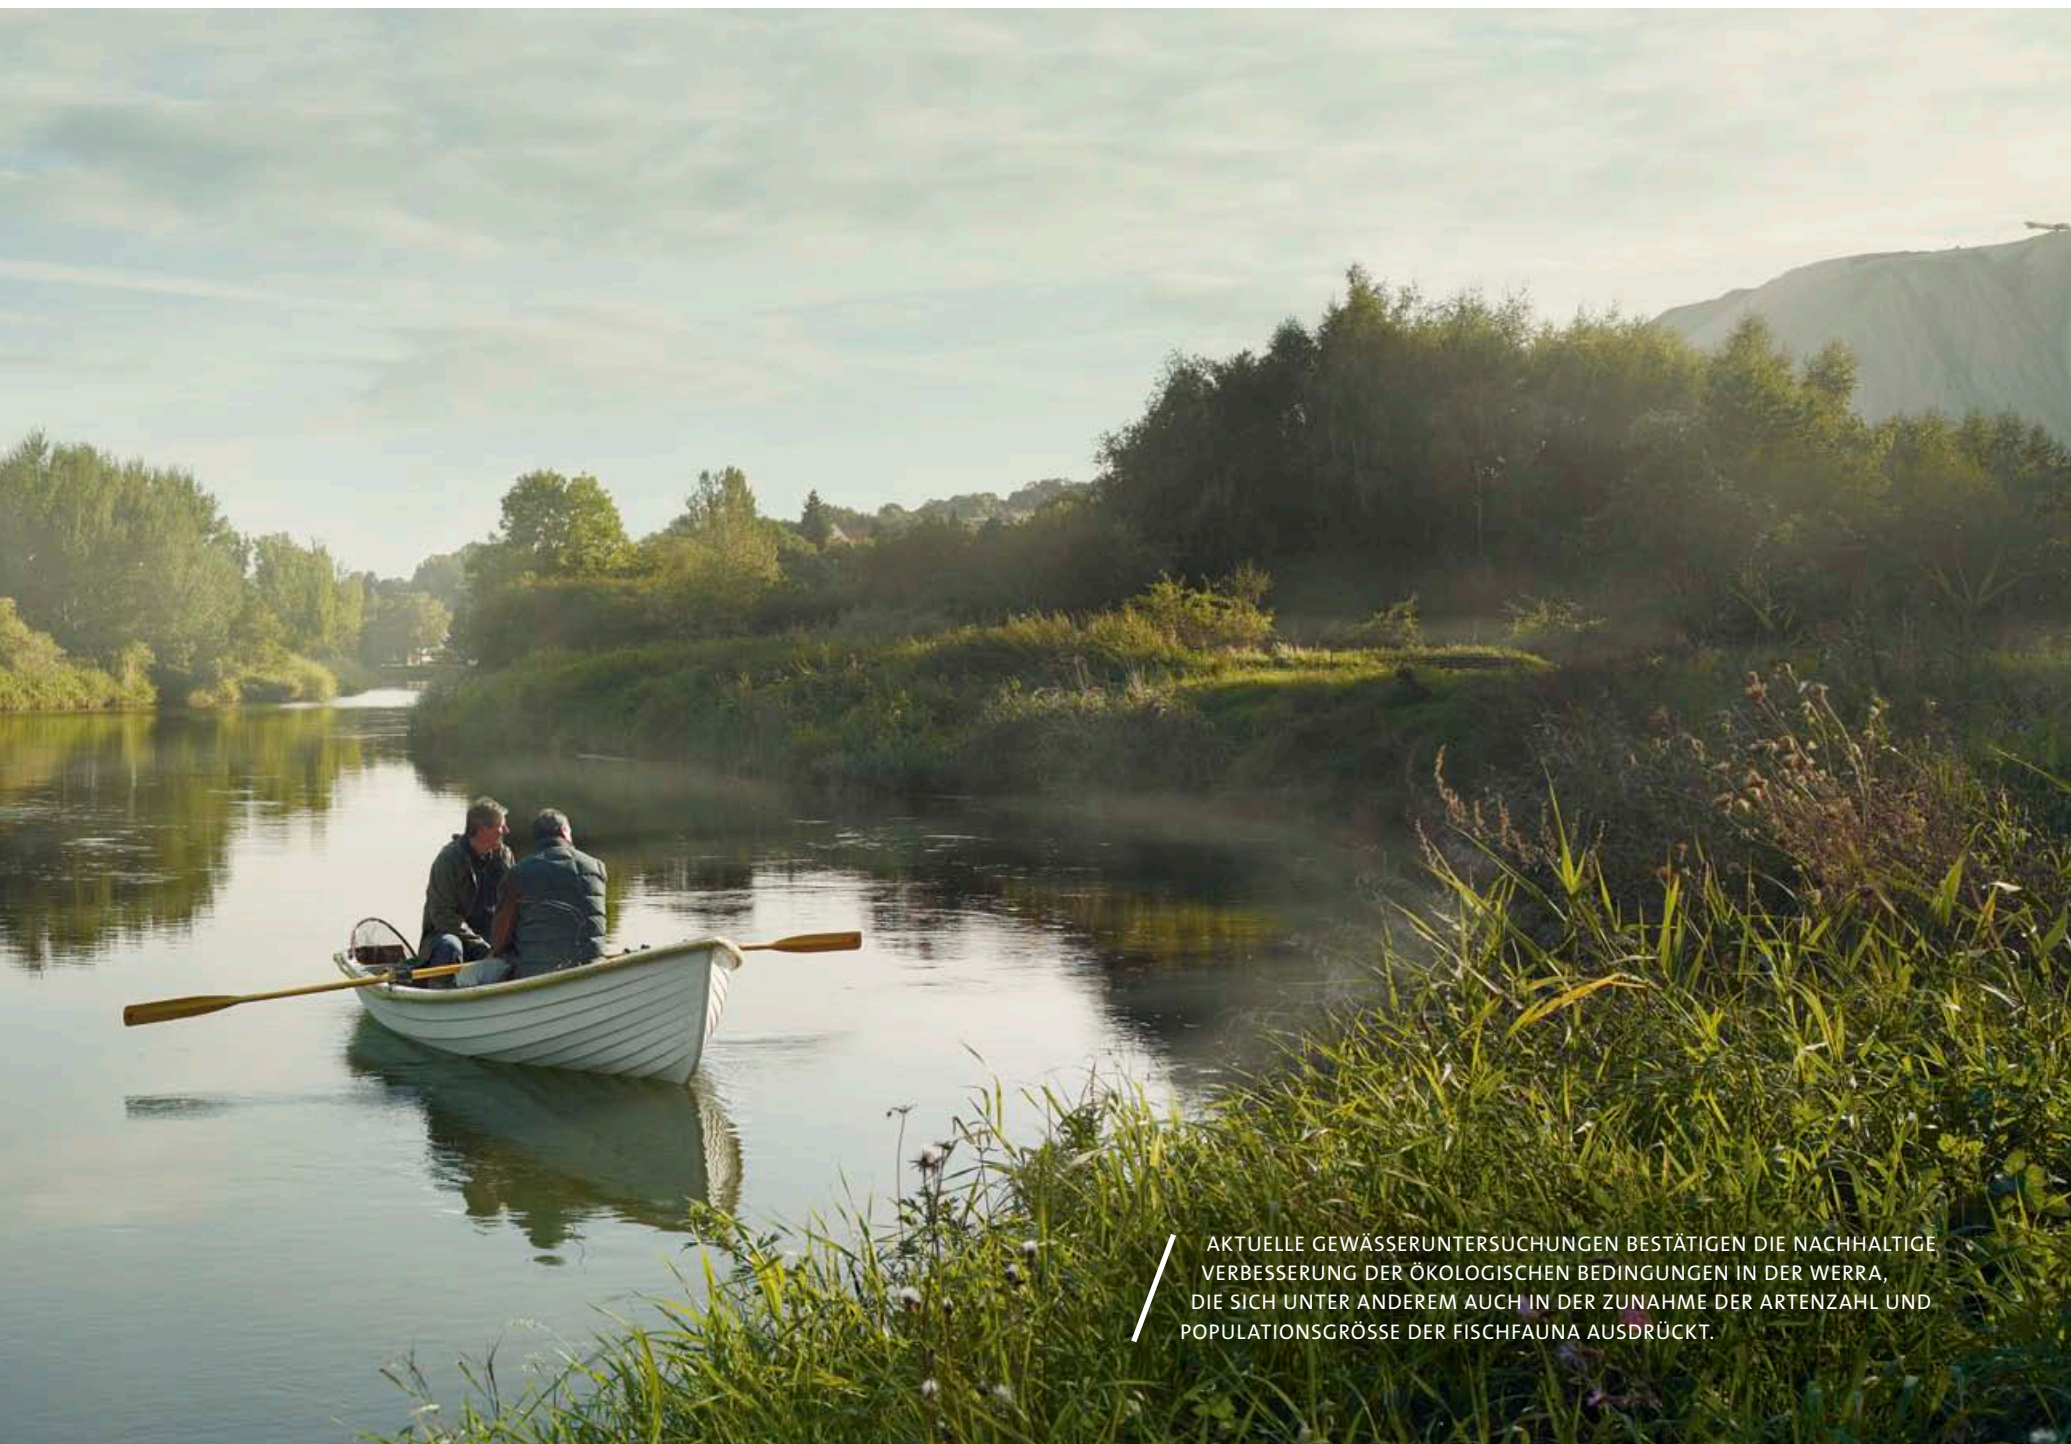

AKTUELLE GEWÄSSERUNTERSUCHUNGEN BESTÄTIGEN DIE NACHHALTIGE VERBESSERUNG DER ÖKOLOGISCHEN BEDINGUNGEN IN DER WERRA, DIE SICH UNTER ANDEREM AUCH IN DER ZUNAHME DER ARTENZAHL UND POPULATIONSGRÖSSE DER FISCHFAUNA AUSDRÜCKT.



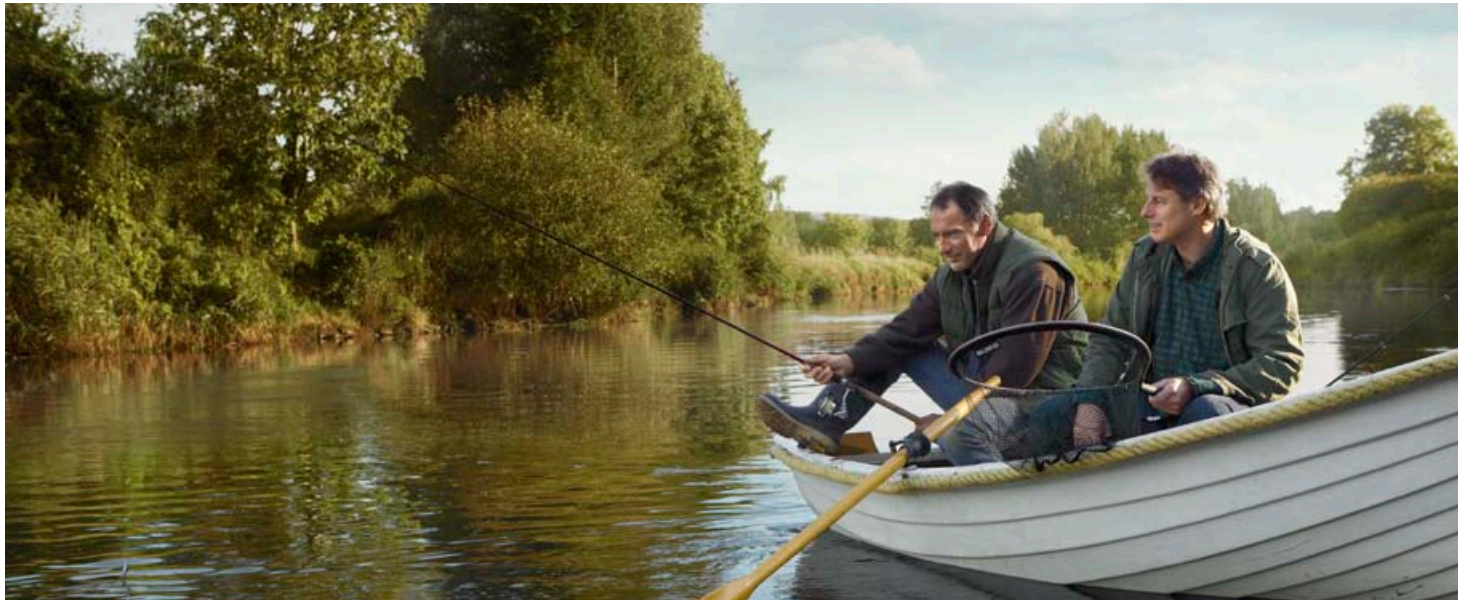

*Die K+S Gruppe strebt einen fairen Ausgleich von wirtschaftlichen, ökologischen und sozialen Belangen an – damit wir auch in Zukunft für Rohstoffsicherheit und eine gesunde Umwelt Sorge tragen können.*

IM TÄGLICHEN UMGANG MIT DEN NATÜRLICHEN RESSOURCEN DER ERDE STELLEN WIR UNS DER VERANTWORTUNG, UM DIE BEDÜRFNISSE VON MENSCH UND NATUR IN EINKLANG ZU BRINGEN. WIR WERDEN WEITER DARAN ARBEITEN, DIE UNVERMEIDBAREN EINGRIFFE IN DIE NATUR SO GERING WIE MÖGLICH ZU HALTEN.



## VERANTWORTUNG ÜBERNEHMEN HEISST FÜR UNS NACHHALTIGES HANDELN

K+S ist sich der Verantwortung bewusst, die mit der Nutzung von natürlichen Ressourcen verbunden ist. Nachhaltigkeit im Kali- und Steinsalzbergbau bedeutet auch, die Ziele Wirtschaftlichkeit, Umweltverträglichkeit und soziale Verantwortung aufeinander abzustimmen. Die Grundlage unseres wirtschaftlichen Erfolgs steht daher in engem Zusammenhang mit dem effizienten Einsatz aller uns in der Wertschöpfungskette zur Verfügung stehenden Stoffe und Materialien. Unser Ziel ist es, die unvermeidbaren Eingriffe in die Natur so gering wie möglich zu halten. Die K+S GRUPPE setzt deshalb moderne Explorations- und Gewinnungsverfahren ein und entwickelt die eingesetzte Verfahrenstechnik ständig weiter. Dadurch haben wir den spezifischen Rohstoff- und Energieeinsatz in den vergangenen Jahren und Jahrzehnten kontinuierlich reduziert. Wir optimieren unsere Verfahren, um die Umweltauswirkungen weiter zu verringern und die Wettbewerbskraft unserer Standorte zu stärken.

In den kommenden fünf Jahren wollen wir bis zu 360 Mio. € in die weitere Verbesserung der Gewässer- und Grundwasserqualität investieren. Wir gehen damit aus heutiger Sicht an die Grenzen des technisch Sinnvollen und wirtschaftlich Vertretbaren. Wir bringen ökonomische Interessen und ökologische Anforderungen dann noch besser in Einklang und werden unserer unternehmerischen Verantwortung für die Sicherung tausender Arbeitsplätze in der Kaliindustrie gerecht. Durch das umfangreiche Maßnahmenpaket zum Gewässerschutz sollen die Salzabwassermenge halbiert und die Chlorid- und Härtegrenzwerte um ein Drittel reduziert werden. Das Ergebnis: Die Weser wird nördlich von Bad Karlshafen nahezu wieder zu einem Fluss mit Süßwasserqualität. Bei Bremen wird die Weser, bezogen auf den Salzgehalt, Trinkwasserqualität haben.

Die nachhaltige Wiederbelebung der Werra, die eindeutig auf die seit dem Jahr 2000 wirksame Senkung und Vergleichmäßigung der Salzwassereinleitung zurückzuführen ist, wird sich weiter fortsetzen. Dies zeigen auch die im Sommer und Herbst 2010 durchgeführten Jungfischuntersuchungen in der Werra. Im Vergleich zu früheren Erhebungen wurde eine nachhaltige Verbesserung der ökologischen Bedingungen nachgewiesen, die sich auch in einer erhöhten Artenzahl und Populationsgröße der Fischfauna ausdrückt. Die Untersuchungen zeigen aber auch, dass sich neben den unbestrittenen Auswirkungen der Salzwassereinleitung sowohl in der Werra wie auch in der Weser die weiteren auf den Gewässerzustand wirkenden Belastungsfaktoren immer deutlicher bemerkbar machen. Daher plädieren wir dafür, das Thema Gewässerschutz ganzheitlich zu betrachten.

Die K+S GRUPPE wird die intensive Forschung und Entwicklung fortsetzen. Unsere wegweisenden Neuerungen in der Produktion haben den Stand der Technik in der Aufbereitung von Kalisalzen markiert. Sie setzen damit weltweit Maßstäbe für den Wettbewerb.

Es ist unser Ziel, die Kaliproduktion in Hessen und Thüringen auf dem heutigen Produktionsniveau im Sinne eines nachhaltigen wirtschaftlichen Handelns und eines schonenden Umgangs mit der Umwelt für die künftigen Jahrzehnte fortzusetzen und zu sichern. Durch die Realisation des Maßnahmenpakets verbessert die K+S GRUPPE nicht nur den Umweltschutz, sondern sichert auch langfristig Arbeitsplätze.

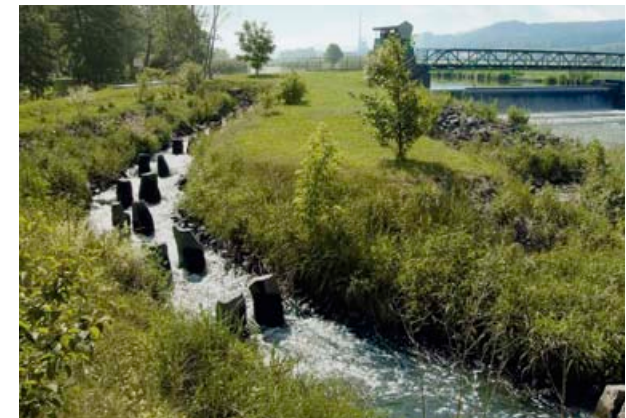

Die kontinuierliche Verbesserung der Gewässerqualität der Werra in den vergangenen Jahrzehnten ist deutlich zu sehen: Die ökologischen Bedingungen haben sich nachweislich verbessert, wie sich anhand von mehr Fischarten und größeren Populationen im Gewässer feststellen lässt.

# WACHSTUM BRAUCHT LÖSUNGEN

---

*Damit Pflanzen gedeihen, brauchen sie Sonnenlicht, Wasser und Mineralien. Um die bedarfsgerechte Versorgung der Pflanze mit Nährstoffen sicherzustellen, hält die K+S Gruppe eine auf jede Kulturpflanze angepasste Düngerezeptur bereit.*

NUR WENIGE BÖDEN DIESER ERDE SIND SO GUT MIT NÄHRSTOFFEN  
VERSORGT, DASS MAN ÜBER LÄNGERE ZEIT HOHE ERTRÄGE OHNE  
DÜNGUNG ERZIELEN KANN.



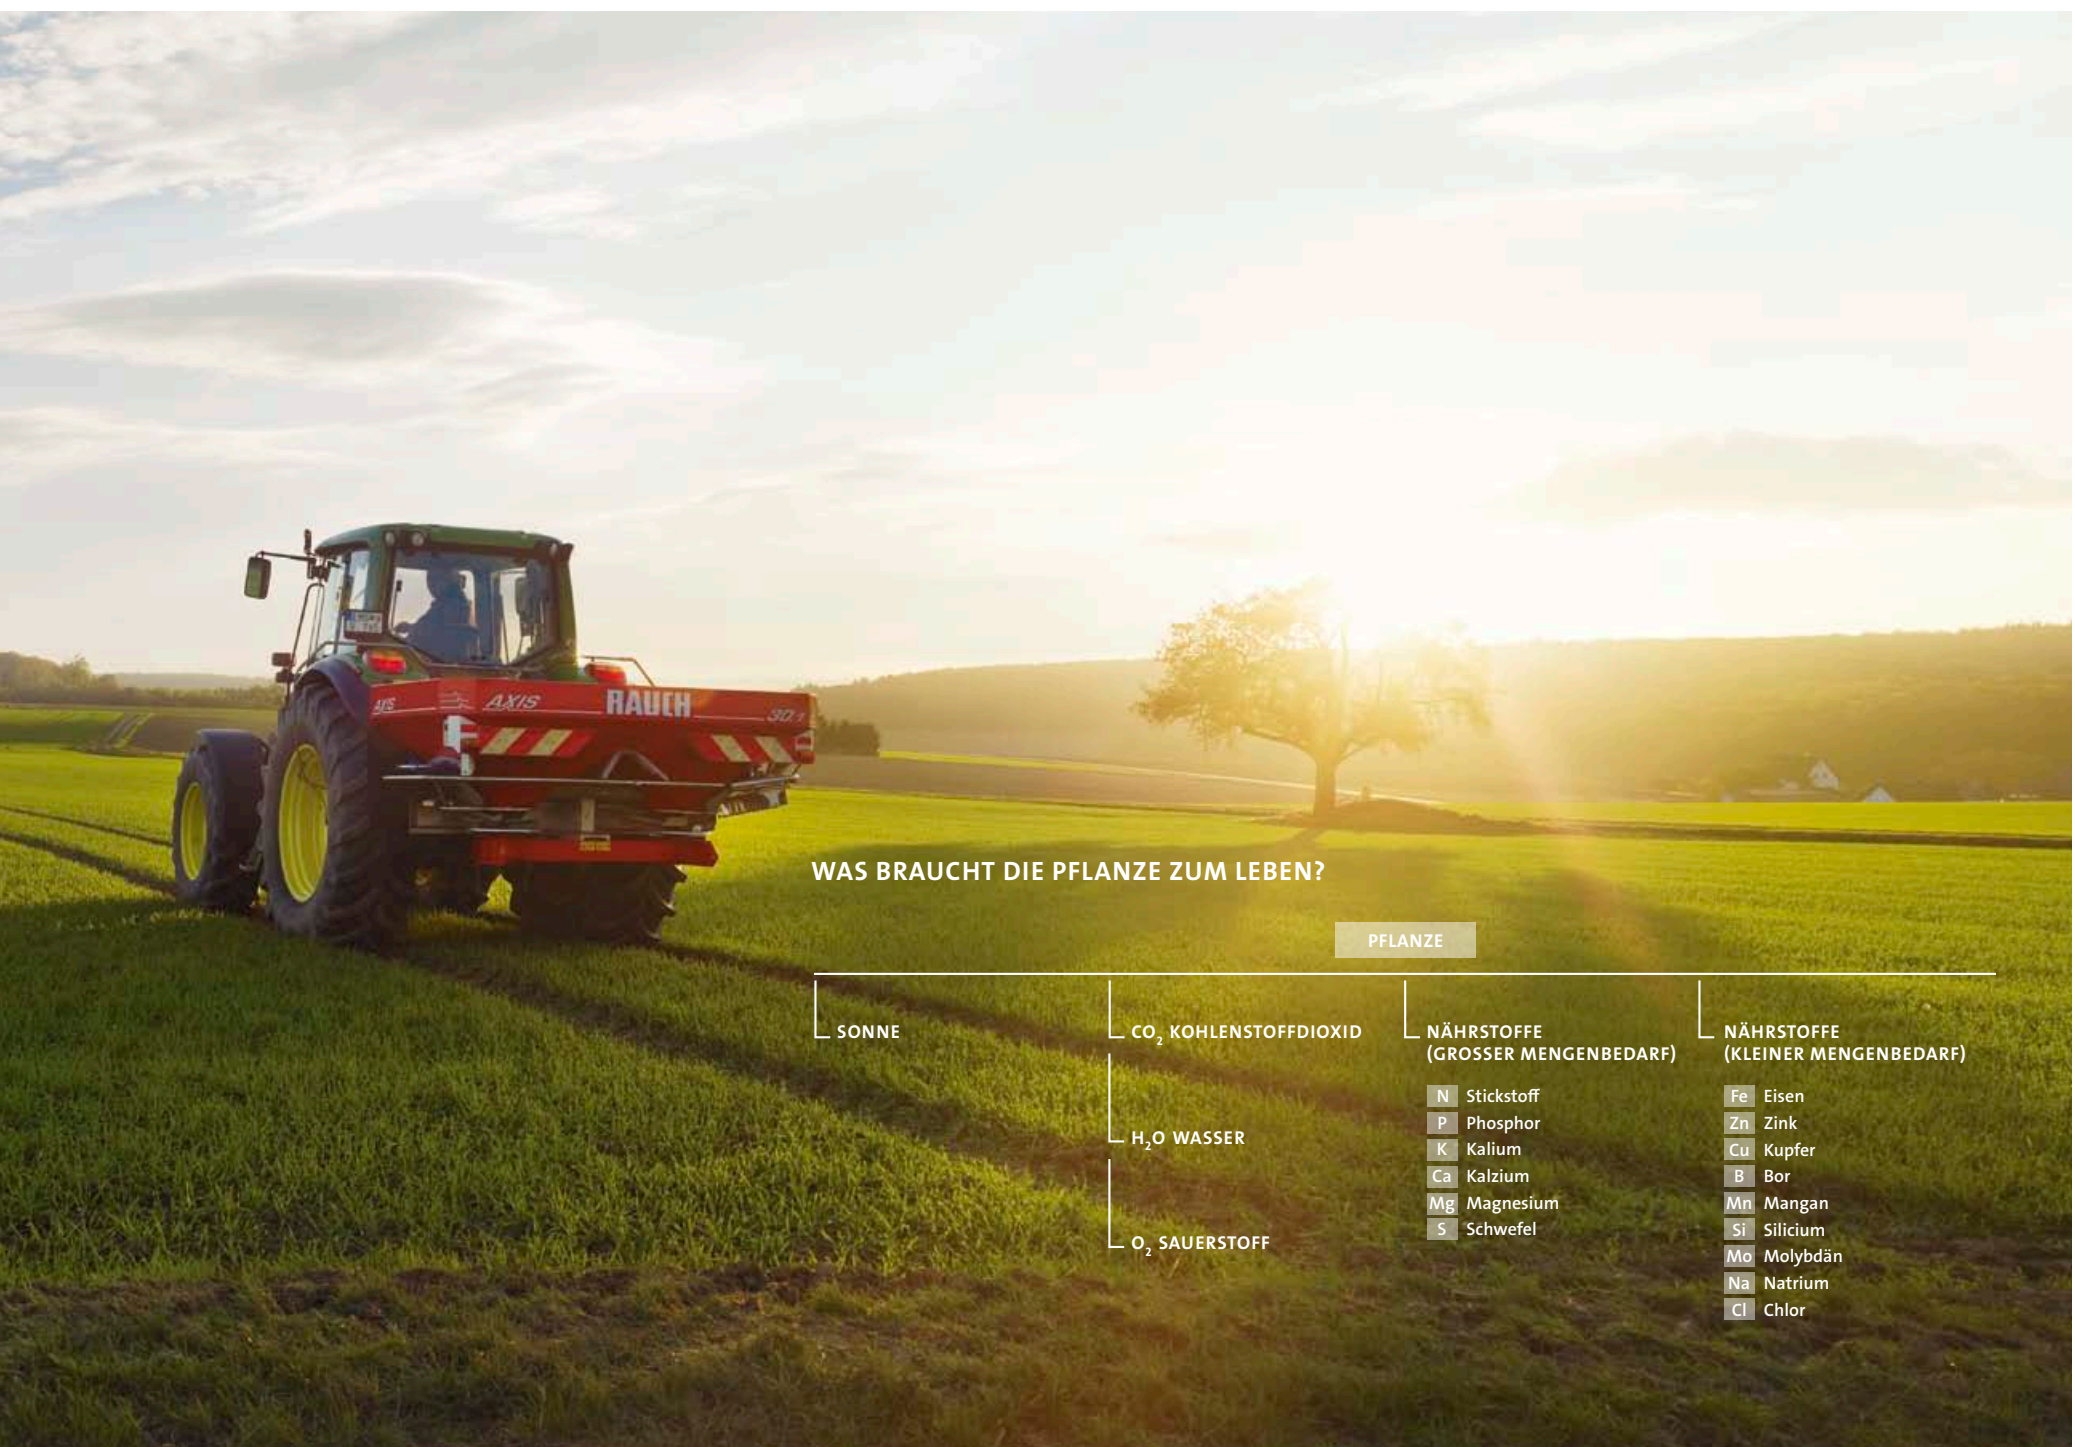

WAS BRAUCHT DIE PFLANZE ZUM LEBEN?

PFLANZE

| SONNE | CO <sub>2</sub> KOHLENSTOFFDIOXID | NÄHRSTOFFE<br>(GROSSER MENGENBEDARF)                                                                                                                                                              | NÄHRSTOFFE<br>(KLEINER MENGENBEDARF)                                                                                                                                                                                                                                                |
|-------|-----------------------------------|---------------------------------------------------------------------------------------------------------------------------------------------------------------------------------------------------|-------------------------------------------------------------------------------------------------------------------------------------------------------------------------------------------------------------------------------------------------------------------------------------|
|       | H <sub>2</sub> O WASSER           | <div><div>N</div>Stickstoff</div> <div><div>P</div>Phosphor</div> <div><div>K</div>Kalium</div> <div><div>Ca</div>Kalzium</div> <div><div>Mg</div>Magnesium</div> <div><div>S</div>Schwefel</div> | <div><div>Fe</div>Eisen</div> <div><div>Zn</div>Zink</div> <div><div>Cu</div>Kupfer</div> <div><div>B</div>Bor</div> <div><div>Mn</div>Mangan</div> <div><div>Si</div>Silicium</div> <div><div>Mo</div>Molybdän</div> <div><div>Na</div>Natrium</div> <div><div>Cl</div>Chlor</div> |
|       | O <sub>2</sub> SAUERSTOFF         |                                                                                                                                                                                                   |                                                                                                                                                                                                                                                                                     |

IN UNSEREN PRODUKTEN STECKT MEHR ALS MAN IHNEN AUF DEN ERSTEN BLICK ANSIEHT: WIR GEBEN UNSERE ERFAHRUNGEN UND KENNTNISSE AUS FORSCHUNG UND FELDVERSUCHEN AN UNSERE PARTNER WEITER, UM DIE LANDWIRTSCHAFTLICHE VERSORGUNG AUF DAUER ZU UNTERSTÜTZEN.

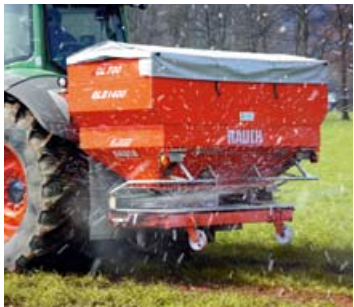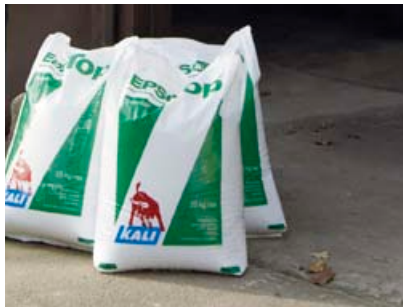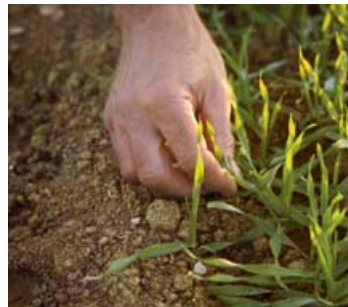

#### MASSGESCHNEIDERTE LÖSUNGEN VON K+S

Justus von Liebig fand bereits in der ersten Hälfte des 19. Jahrhunderts heraus, dass die mit der Ernte entzogenen Nährstoffe – vor allem Stickstoff, Phosphor und Kalium – durch Düngemittel dem Boden wieder zugeführt werden müssen, um den Nährstoffkreislauf zu schließen. Aber damit nicht genug, denn weiter stellte er fest: Die Nährstoffe sind nicht substituierbar. Nur eine pflanzengerechte Zusammensetzung der zugeführten Nährstoffe gewährleistet ein gutes Pflanzenwachstum. Der Ertrag einer Pflanze wird dabei durch denjenigen Nährstoff bestimmt, der in der geringsten Menge zur Verfügung steht. Diese Erkenntnis nannte er das „Gesetz des Minimums“.

Fachberatung tut also not, wenn man dauerhaft reiche Ernten einfahren möchte. Diese Lücke schließen wir mit den Anwendungsberatern vor Ort bei den Landwirten. K+S-Anwendungsberater Dr. Hans-Peter König ist selbst immer wieder begeistert, wenn ihm die neuesten Forschungsergebnisse von den Versuchsfeldern vorliegen. Denn damit kann er auf die vielfältigen Fragen der Landwirte noch besser eingehen. So empfiehlt er den Kartoffelbauern nach aktuellen Erkenntnissen eine Düngung mit Kalium und Magnesium, die sowohl den Knollenertrag als auch die Qualität fördert. Die Kartoffel gehört zu den sogenannten „Nährstoffzehrern“, das heißt, sie hat einen hohen Nährstoffbedarf.

### UMFASSENDE SERVICE FÜR UNSERE KUNDEN

Auch bei anderen landwirtschaftlichen Anwendungen können unsere Berater kompetenten Rat geben. Sie wissen: Jede Kultur hat ihre spezifischen Anforderungen an Düngermenge, Nährstoffform und Düngungszeitpunkt, abhängig von Bodenbeschaffenheit und Klima. Dieses Fachwissen, das auch durch Vorträge und regelmäßige Newsletter weitergegeben wird, ist nicht nur bei den Landwirten gefragt: Auch Hobbygärtner rufen bei der telefonischen Sprechstunde an und wollen kompetenten Rat beim Anbau ihrer Obst- und Gemüsekulturen in ihrem Schrebergarten. „Natürlich gebe ich auch da gerne Auskunft und helfe weiter“, schmunzelt der Profi. Gern verweist er auch auf den „κ+s-Düngermanager“, die kostenlose, interaktive Beratungssoftware, mit der die Kunden ihre Düngungsplanung effizient selbst durchführen können.

Weltweit liefern die Berater den Kunden wichtige Informationen und Innovationen rund um die Nährstoffe Stickstoff, Kalium, Magnesium, Schwefel, Natrium und Phosphor sowie Spurenelemente. In einem Netz von bis zu 250 Feldversuchen rund um den Erdball erarbeiten wir gemeinsam mit Kooperationspartnern aus Wissenschaft und Forschung neue Erkenntnisse über eine optimale Pflanzenernährung. Dabei sensibilisieren unsere Agronomen Bauern weltweit auch für relevante Fragestellungen, wie das ausgewogene Düngen: Wie kann

man mit bedarfsgerechtem Aufwand optimale Erträge erzielen? Und: Welches Verhältnis der zugeführten Nährstoffe ist für meine Pflanzen wirklich ausgewogen?

### VORSPRUNG DURCH EIGENE FORSCHUNGEN

Der praxisorientierten Forschung auf dem Gebiet der Pflanzenernährung widmet sich auch ein neues gemeinsames Institut von κ+s und der Universität Göttingen. Es soll als Schnittstelle zwischen Wissenschaft und Praxis aktuelle Fragen aufgreifen, vorhandenes Wissen bündeln und neue Erkenntnisse an die landwirtschaftliche Praxis weitergeben. Die Wissenschaftler am Institut werden beispielsweise erforschen, welchen Beitrag ein intelligentes Düngemanagement zur Bewältigung der globalen Herausforderungen leisten kann und hierfür Lösungsansätze und Methoden entwickeln. Gleichzeitig wollen sie Lösungen für einen wirkungsvollen Wissenstransfer von der Forschung bis hin zum Landwirt finden, insbesondere in den Schwellen- und Entwicklungsländern. So geben wir Tag für Tag unser über 100 Jahre gewachsenes Know-how weiter, damit unsere Anwendungsberater wie Dr. Hans-Peter König mit ihren fundierten Ratschlägen auch weiterhin für satte Ernteerträge sorgen können.

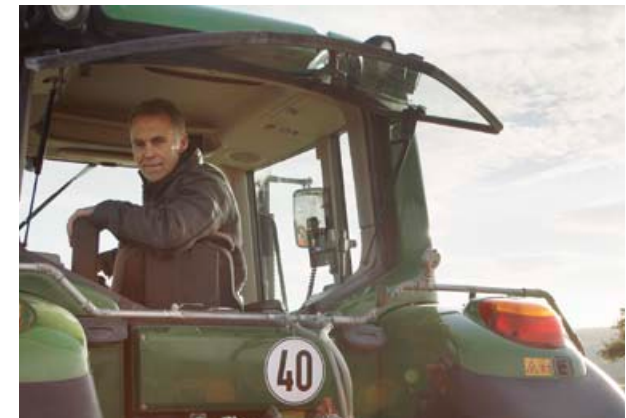

Die K+S Gruppe setzt mit ihrer Beratung auf individuelle Lösungen. So kann der Landwirt mit unseren spezialisierten Produkten besser auf die Nährstoffbedürfnisse seiner unterschiedlichen Kulturpflanzen eingehen.



# WACHSTUM BRAUCHT MINERALIEN

*Spurenelemente und Mineralien sind lebensnotwendig. Mit unseren Produkten unterstützen wir eine gesunde, ausgewogene Ernährung und tragen zur Gesundheit der Menschen bei.*

## SPURENELEMENTE, MINERALIEN UND HOCHREINE SALZE

ABSATZMENGEN IN TSD. T

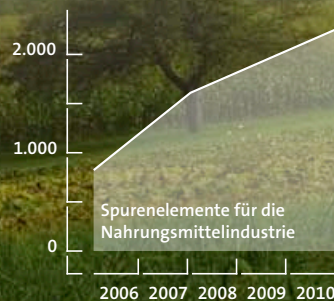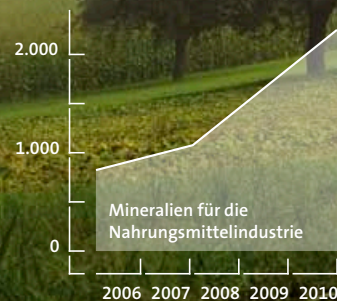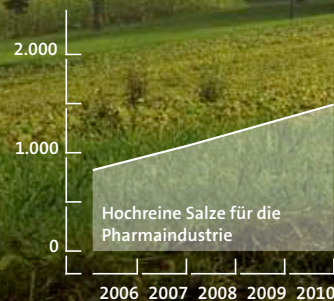



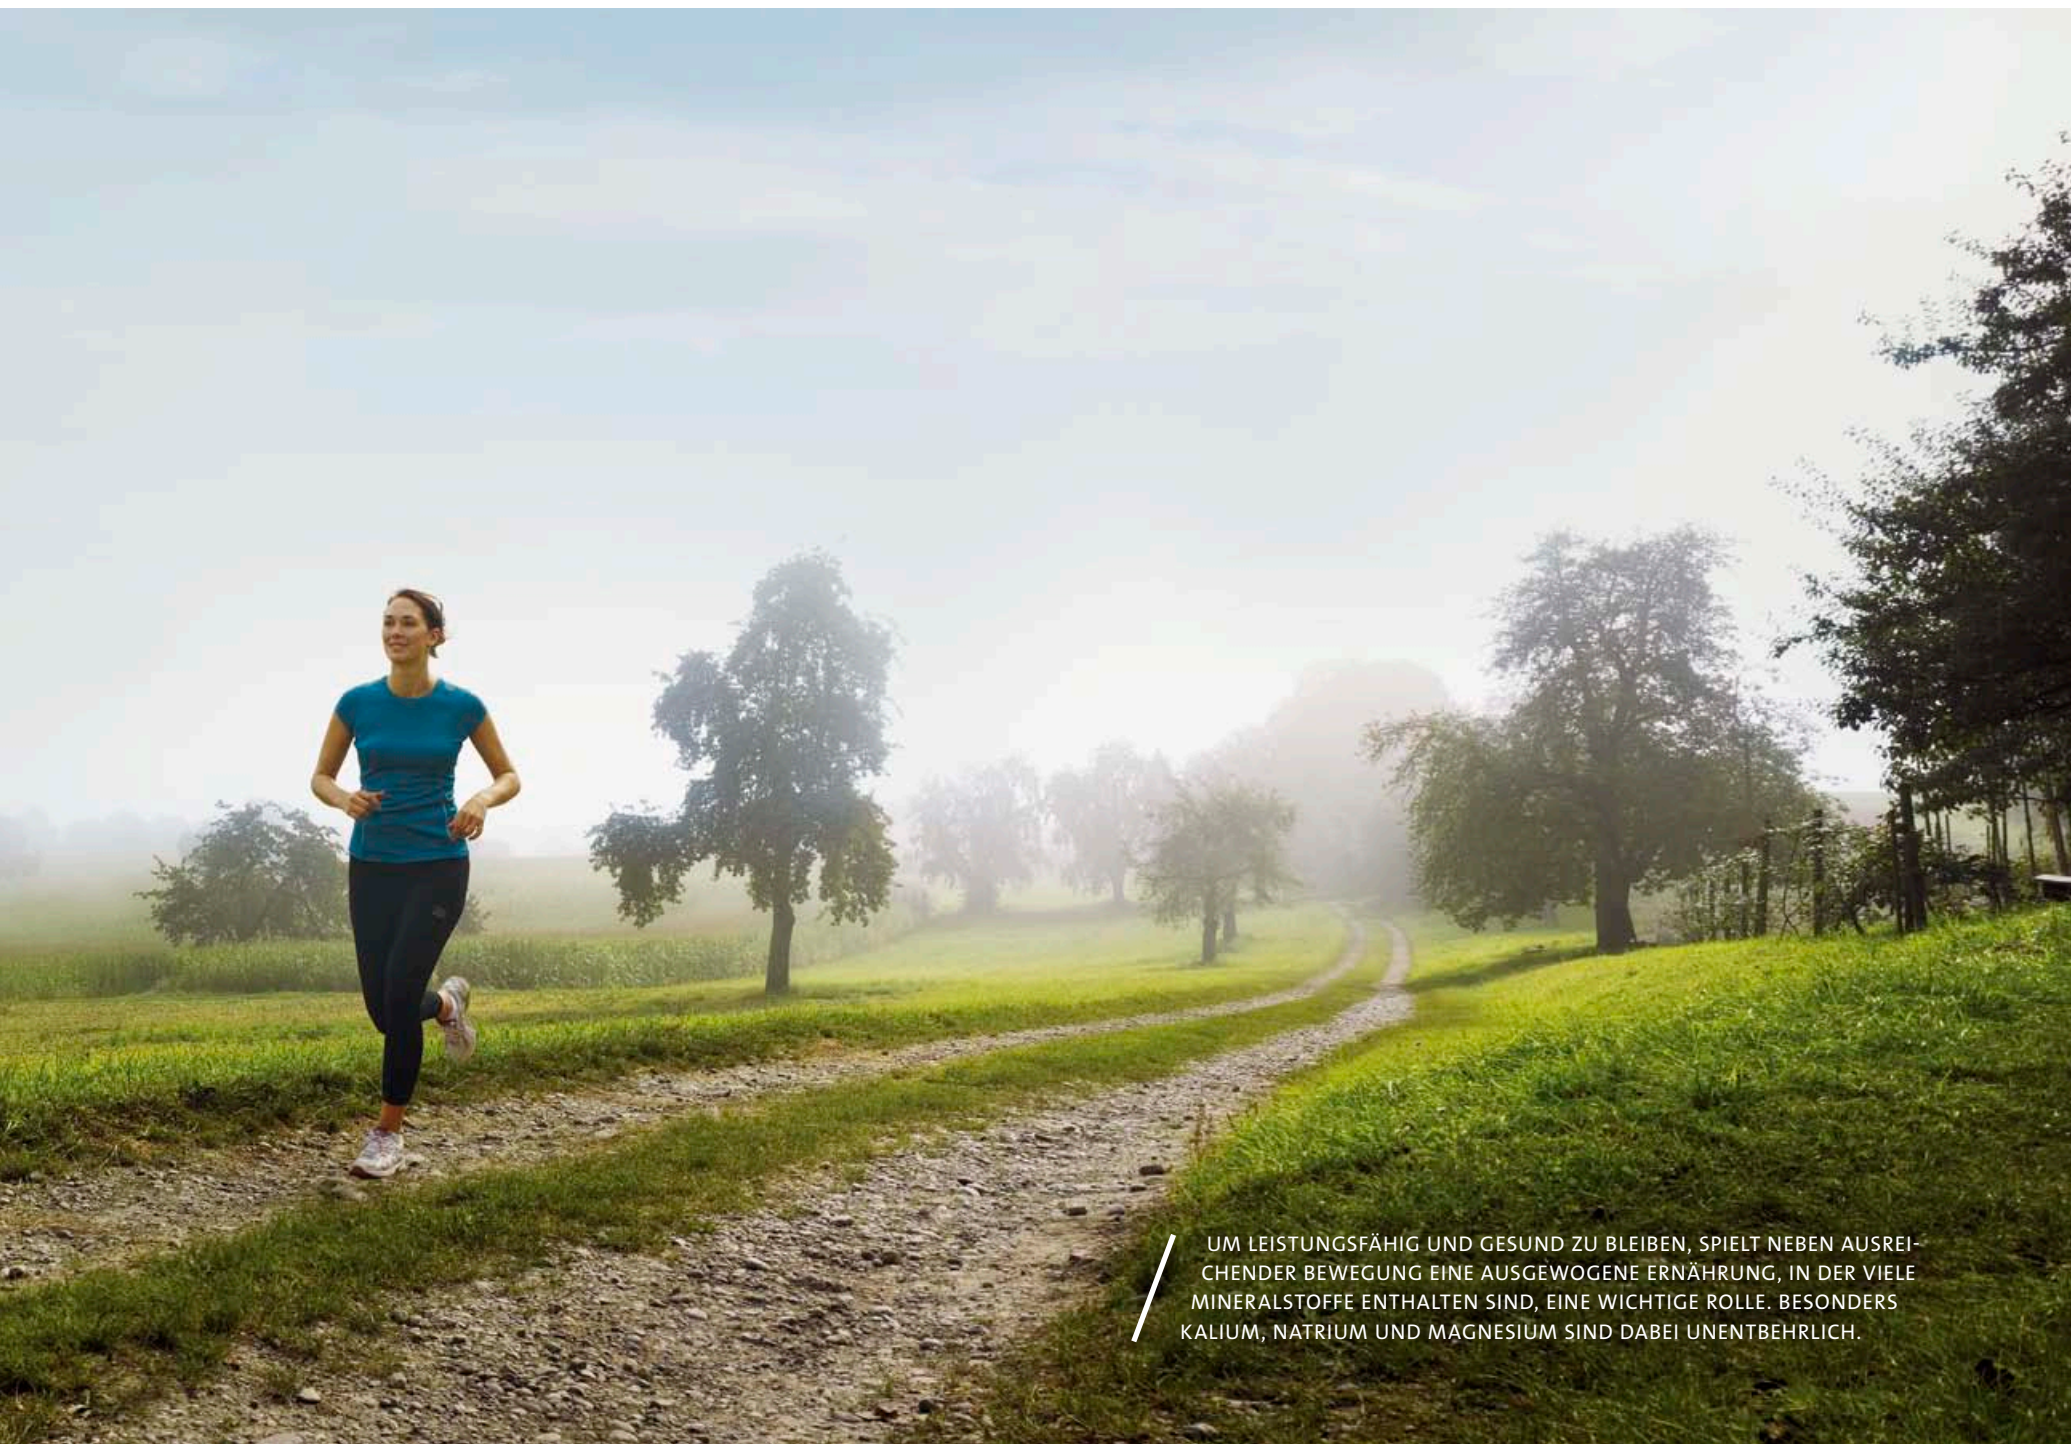

UM LEISTUNGSFÄHIG UND GESUND ZU BLEIBEN, SPIELT NEBEN AUSREICHENDER BEWEGUNG EINE AUSGEWOGENE ERNÄHRUNG, IN DER VIELE MINERALSTOFFE ENTHALTEN SIND, EINE WICHTIGE ROLLE. BESONDERS KALIUM, NATRIUM UND MAGNESIUM SIND DABEI UNENTBEHRICH.

MINERALIEN LEISTEN IM KÖRPER WICHTIGE AUFGABEN WIE EINEN GEREGLTEN WASSERHAUSHALT, FUNKTIONIERENDE MUSKELN UND EINEN GESUNDEN STOFFWECHSEL. KALIUM, MAGNESIUM UND NATRIUM SIND DABEI WAHRE MULTITALENTE FÜR DEN MENSCHEN.

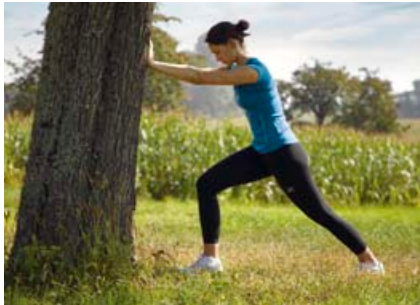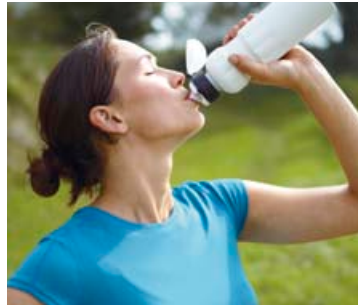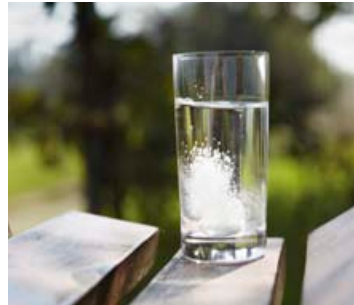

#### UNENTBEHRLICHE MINERALIEN

Unsere Mineralien Kalium, Magnesium und Natrium leisten einen wichtigen Beitrag für ein aktives und bewusstes Leben. Jeder kann etwas für seine Gesundheit tun, indem er sich ausgewogen ernährt und ausreichend bewegt. Mit Sportarten wie dem Joggen in der freien Natur tut man sich etwas Gutes und entspannt dabei: Regelmäßiges und vernünftiges Lauftraining stärkt das Herz-Kreislauf-System, kräftigt die Muskulatur, senkt die Blutfettwerte und hilft Stress abzubauen. Doch der Körper verliert beim Schwitzen unentbehrliche Mineralien, die dem Körper wieder zugeführt werden müssen: Darunter sind auch Kalium und Natrium. Diese Mineralien sind lebensnotwendig für den menschlichen Organismus. Als Elektrolyte sorgen sie dafür, dass unser Wasserhaushalt ausgeglichen ist.

#### KALIUM FÜR STOFFWECHSEL UND NERVEN

Kalium regelt lebenswichtige Stoffwechselvorgänge und spielt eine zentrale Rolle bei der Steuerung von Nerven und Muskeln. Mit einer ausgewogenen Ernährung, in der viel Obst und Gemüse vorkommt, wird der tägliche Kaliumbedarf normalerweise gedeckt, doch bei erhöhtem Bedarf kann Kalium auch mit Nahrungsergänzungsmitteln aufgenommen werden. Im Zusammenwirken mit Natrium und Calcium reguliert Kalium den Blutdruck und wirkt sich positiv auf die Herzmuskel-tätigkeit sowie die Muskel- und Nervenzellen aus. Fer-



ner spielt Kalium vor allem bei isotonischen Getränken und anspruchsvoller Sportlernahrung eine wichtige Rolle, weil es die optimale Ausnutzung aufgenommener Kohlehydrate unterstützt und so Leistungssteigerungen ermöglicht. Mit angereicherten Kau- oder Brausetabletten kann der erschöpfte Mineralienvorrat schnell wieder aufgefüllt werden. Außerdem kommt Kaliumchlorid als Zusatzstoff in Fertigprodukten und Gewürzen zum Einsatz.

#### **SALZ UND MAGNESIUM – WAHRE MULTITALENTE**

Für unsere Körperfunktion ist der Konsum von Salz unentbehrlich. Es regelt den Flüssigkeitshaushalt, schützt den Körper vor Übersäuerung und fördert den Knochenaufbau. Äußerlich angewendet unterstützt Salz die Heilung von Haut-, Atemwegs- oder Gelenkbeschwerden, wird aber auch bei verschiedenen Allergieformen, Schlaflosigkeit und Kopfschmerzen erfolgreich eingesetzt. Bei Asthma und Bronchitis ist das Inhalieren mit Salzsole dem Heilungsprozess förderlich, denn es wirkt entzündungshemmend und antibakteriell. Auch als Badezusatz wirkt Salz wahre Wunder: Ein Bad im Meersalzwasser ist bei Schuppenflechte, Neurodermitis und Ekzemen sehr wohltuend. Weiter können rheumatische Beschwerden, Muskelkrämpfe und Rückenschmerzen gelindert werden, denn die über die Haut aufgenommenen Stoffe wirken auch leicht schmerzstillend. Regelmäßige Salzbäder dienen zum Entspannen bei Nervosität und Erschöpfung.

Auch als Träger wichtiger Nährstoffe leistet Salz einen Beitrag zu einer ausgewogenen Ernährung, denn beim täglichen Würzen hilft jodiertes Speisesalz, dem Jodmangel bequem und ganz nebenbei wirksam vorzubeugen. Jod ist wichtig für den Körper, denn es ist vor allem für die Bildung von Schilddrüsenhormonen zuständig und unterstützt den Stoffwechsel. Gleich doppelten Nutzen hat zusätzlich fluoridiertes Speisesalz: Fluorid härtet den Zahnschmelz und dient nachweislich der Kariesprophylaxe. Im Pharmabereich findet unser hochreines Natriumchlorid bei Infusionslösungen und im Dialysebereich Anwendung. Man sieht: Ohne Kalium und Natrium würde es uns also an körperlicher und geistiger Fitness fehlen. Der Mineralstoff Magnesium ist ebenso ein lebenswichtiges Multitalent, denn wissenschaftliche Studien zeigen, dass sich vielfältige Erscheinungen wie Wadenkrämpfe, Herzprobleme, Muskelprobleme und Migräne erfolgreich mit Magnesiumpräparaten behandeln lassen können. Dieses Mineral erfüllt viele Funktionen im Körper, wie die Reizübertragung vom Nerv zum Muskel, den Knochenaufbau und das Nervensystem. Der Körper kann Magnesium nicht selbst produzieren, daher muss es bedarfsgerecht mit der Nahrung oder zusätzlich eingenommen werden.

So leistet die K+S GRUPPE mit den von uns nutzbar gemachten Mineralien Kalium und Natrium einen wichtigen Beitrag zu einem gesunden Leben.

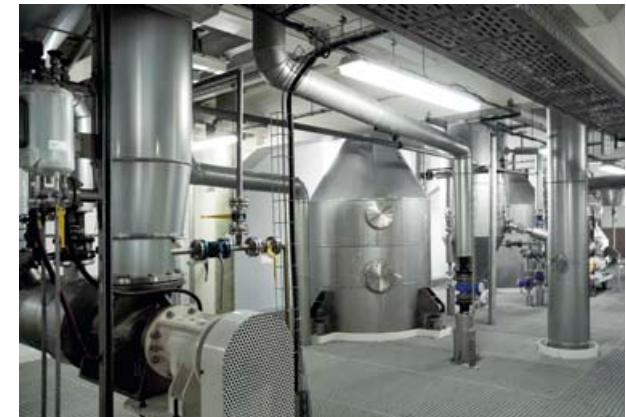

Mit reinen Kalium- und Magnesiumsalzen stellen wir viele Produkte für die hohen Anforderungen der Pharma-, Kosmetik- und Lebensmittelindustrie bereit. Modernste Prozesssteuerung und unser Qualitätsmanagement gewährleisten höchste Qualität.

## DIE K+S GRUPPE

WACHSTUMSSTRATEGIE IM GESCHÄFTSFELD DÜNGEMITTEL sieht den Ausbau der Kalikapazitäten und die Verlängerung der durchschnittlichen Lebensdauer der Bergwerke vor / Übernahme der kanadischen POTASH ONE; Errichtung eines neuen Kaliwerks, das ab 2015 erste Produkte liefern soll / Prüfung einer möglichen Veräußerung von COMPO / K+S ist mit einer Produktionskapazität von 30 Mio. t Salz der weltweit führende Produzent

# 2

---

|     |                              |    |
|-----|------------------------------|----|
| 2.1 | Geschäftsfeld Düngemittel    | 53 |
| 2.2 | Geschäftsfeld Salz           | 59 |
| 2.3 | Ergänzende Geschäftsbereiche | 63 |
| 2.4 | Unsere Standorte             | 65 |

## 2.1 GESCHÄFTSFELD DÜNGEMITTEL

Unser Geschäftsfeld Düngemittel umfasst die Geschäftsbereiche Kali- und Magnesiumprodukte sowie Stickstoffdüngemittel. Vision und Mission (siehe Seite 5) folgend sieht die Strategie der K+S GRUPPE vor, insbesondere in den Geschäftsbereichen Kali- und Magnesiumprodukte sowie Salz (siehe Seite 59) zu wachsen. Denn auch zukünftig soll der Rohstoff- und rohstoffnahe Bereich die Basis unseres Wachstums sein. Gemäß dieser Strategie möchten wir künftig unsere Managementressourcen und finanziellen Mittel hauptsächlich auf diese Bereiche fokussieren und prüfen daher im Bereich Stickstoff die Veräußerung der COMPO. Um unsere Kalikapazitäten auszubauen, haben wir Anfang 2011 die kanadische POTASH ONE übernommen, die eine Reihe von Kali-Explorationslizenzen besitzt.

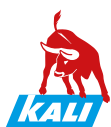

### GESCHÄFTSBEREICH KALI- UND MAGNESIUMPRODUKTE

Der Geschäftsbereich Kali- und Magnesiumprodukte gewinnt durch die K+S KALI GMBH in sechs Bergwerken in Deutschland Kali- und Magnesiumrohsalze für eine jährliche Produktionsleistung bei Volllauslastung von bis zu 7,5 Mio. t Ware. Wir sind weltweit der viertgrößte Kaliproduzent und in Europa der führende Anbieter. / ABB: 2.1.1 / [www.kali-gmbh.com](http://www.kali-gmbh.com)

### NEUES KALIVORKOMMEN STÄRKT INTERNATIONALE WETTBEWERBSFÄHIGKEIT

Im Zuge unserer Wachstumsstrategie, die den Ausbau der Kalikapazitäten und die Verlängerung der durchschnittlichen Lebensdauer der Bergwerke vorsieht, haben wir Anfang 2011 die kanadische POTASH ONE übernommen. POTASH ONE besitzt mehrere Kali-Explorationslizenzen in der kanadischen Provinz Saskatchewan einschließlich des Legacy Projekts – ein fortgeschrittenes Greenfield-Projekt zur Errichtung eines

Kaliwerks, dessen Rohsalze durch Aussolung gewonnen werden sollen. Wir erwarten eine Produktionskapazität von mindestens 2,7 Mio. t Kaliumchlorid pro Jahr und rechnen mit ersten zur Verfügung stehenden Mengen ab dem Jahr 2015. Das Investitionsvolumen umfasst rund 2,5 Mrd. US-Dollar und es werden 300 hoch qualifizierte Arbeitsplätze geschaffen.

Das neue Kalivorkommen wird zusammen mit unseren bestehenden inländischen Kalibergwerken unsere inter-

#### ANBIETERSTRUKTUR AM WELTKALIMARKT

ABB: 2.1.1

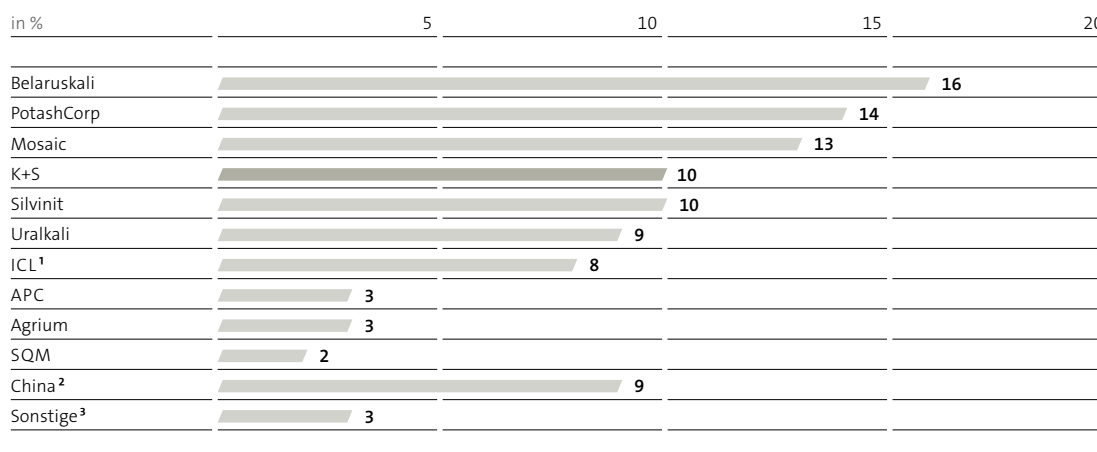

Jahr 2010 (HS); einschl. Kaliumsulfat und Kalisorten mit niedrigerem K<sub>2</sub>O-Gehalt

Quellen: IFA, K+S

<sup>1</sup> DSW, Iberpotash, CPL.

<sup>2</sup> Mehr als 20 Produzenten.

<sup>3</sup> Intrepid, Vale, Compass.



ationale Wettbewerbsfähigkeit stärken und im Ergebnis der gesamten K+S GRUPPE in Europa und Übersee zugute kommen.

#### DIE KOMPETENZ IN KALIUM UND MAGNESIUM

Die Kernkompetenzen des Geschäftsbereichs liegen in der Gewinnung, Veredelung und Vermarktung komplexer Rohsalze. Auf Basis der einzigartigen Rohstoffzusammensetzung unserer Lagerstätten bieten wir eine Produktpalette, die in dieser Vielfalt von keinem anderen Kaliproduzenten weltweit angeboten wird. Durch unsere kali-, magnesium- und schwefelhaltigen Spezialitäten unterscheiden wir uns deutlich vom Wettbewerb

und nehmen bei diesen Düngemitteln weltweit eine Spitzenposition ein. Auch mit den Produkten für industrielle, technische und pharmazeutische Anwendungen gehören wir zu den leistungsstärksten Anbietern weltweit; besonders stark sind wir in Europa.

/ ABB: 2.1.2, 2.1.3

#### KALIUMCHLORID – EIN UNIVERSELL EINSETZBARES DÜNGEMITTEL

Kaliumchlorid ist das umsatzstärkste Produkt. Der universelle Einzeldünger wird weltweit bei großen Anbau-

kulturen wie Getreide, Mais, Reis und Sojabohnen eingesetzt. Kaliumchlorid-Granulat wird entweder mit Düngerstreuern auf den Äckern ausgebracht oder in Mischdüngeranlagen (Bulk Blender) mit anderen Einzeldüngern nach verschiedenen Rezepturen gemischt. Feinkörniges Kaliumchlorid verkaufen wir als Rohstoff an die Mehrnährstoffdünger-Industrie.

#### DÜNGEMITTELSPEZIALITÄTEN MIT UNTERSCHIEDLICHEN NÄHRSTOFFREZEPTUREN

Unsere Düngemittelspezialitäten werden vor allem in Kulturen eingesetzt, die neben Kalium- auch einen erhöhten Magnesium- und Schwefelbedarf haben, zum Beispiel Raps oder Kartoffeln. KALISOP® (Kaliumsulfat), PATENTKALI®, KIESERIT® und EPSO TOP® werden bevorzugt bei chloridempfindlichen Sonderkulturen wie Zitrusfrüchten, Wein und Gemüse angewandt. Unsere EPSO-Produktfamilie sowie SOLUMOP®, SOLUSOP® und HORTISUL® eignen sich insbesondere für die Flüssigdüngung, der angesichts klimatischer Veränderungen mit längeren Trockenperioden eine wachsende Bedeutung zukommt.

Die Produktion von THOMASKALI® und PATENT-PK® haben wir im vergangenen Jahr eingestellt und diese Produkte aus unserem Portfolio genommen.

#### INDUSTRIEPRODUKTE MIT VIELFÄLTIGEN ANWENDUNGSMÖGLICHKEITEN

Unsere breite Palette an Kalium- und Magnesiumprodukten für industrielle Anwendungen ist in verschiedenen Reinheitsstufen und speziellen Körnungen erhältlich. Kaliumchlorid kommt beispielsweise in der Chloralkali-Elektrolyse, der chemischen Industrie, bei der

UMSATZ NACH REGIONEN

ABB: 2.1.2

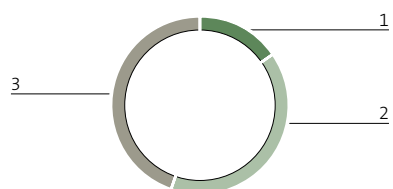

|                  | 2010 | 2009 |
|------------------|------|------|
| in %             |      |      |
| 1 Inland         | 15,5 | 12,3 |
| 2 Übriges Europa | 40,0 | 31,6 |
| 3 Übersee        | 44,5 | 56,1 |

UMSATZ NACH PRODUKTGRUPPEN

ABB: 2.1.3

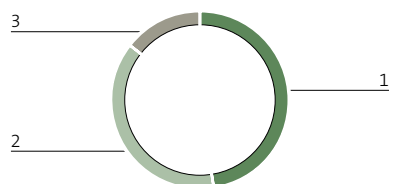

|                            | 2010 | 2009 |
|----------------------------|------|------|
| in %                       |      |      |
| 1 Kaliumchlorid            | 47,7 | 46,7 |
| 2 Düngemittelspezialitäten | 38,0 | 32,4 |
| 3 Industrieprodukte        | 14,3 | 20,9 |

Herstellung von Glas und Kunststoff, in der Mineralölindustrie sowie in metallurgischen Prozessen zum Einsatz. Unsere Magnesiumsulfate unterstützen in der Zellstoffindustrie die umweltfreundliche Sauerstoffbleiche, als Inhaltsstoff von Waschmitteln schützen sie die Fasern, und auch in der Biotechnologie und beim Kunststoffrecycling werden sie genutzt.

#### HEALTH CARE & FOOD MIT WACHSENDEN POTENZIAL

Mit unseren hochreinen Kalium- und Magnesiumsalzen – zertifiziert nach international anerkannten Standards – stellen wir Produkte für die besonders hohen Anforderungen der Pharma-, Kosmetik- und Lebensmittelindustrie bereit. Hochreines Kalium wird in Infusions- und Dialyselösungen eingesetzt und ist unverzichtbar für die Herstellung von Antibiotika und Insulin. Die Lebensmittelindustrie nutzt unser Kaliumchlorid der Marke KALISEL zur Herstellung von Nahrungsergänzungsmitteln, für Sportlernahrung sowie Fertigsuppen und -soßen. Die Stärken dieses hochreinen Produkts liegen darin, dass sich mit ihm der Anteil an Natriumchlorid in der Nahrung reduzieren lässt und es gleichzeitig die Lebensmittel mit weiteren wichtigen Mineralien anreichert.

#### FUTTERMITTEL IN ZERTIFIZIERTER QUALITÄT

Unter dem Markennamen KASA® produzieren wir für die Mischfutterindustrie hochwertige Kaliumchloride und Magnesiumsulfate für die Fütterung diverser Nutztiere. Alle Futtermittel sind gemäß EU-Recht für die Tierhaltung im ökologischen Landbau zugelassen.

/ TAB: 2.1.1

#### HAUPTPRODUKTE UND ANWENDUNGSBEREICHE K+S KALI GMBH

TAB: 2.1.1

|                                                                         |                                                                                                        |
|-------------------------------------------------------------------------|--------------------------------------------------------------------------------------------------------|
| <b>Kaliumchlorid</b>                                                    |                                                                                                        |
| 60er Kali                                                               | Universell einsetzbar in allen chloridunempfindlichen Kulturen und bei allen Bodenarten                |
| <b>Düngemittel-Spezialitäten (Kalium, Magnesium, Natrium, Schwefel)</b> |                                                                                                        |
| Korn-Kali®                                                              | Spezielle Nährstoffkombination für nahezu alle Pflanzenkulturen                                        |
| Magnesia-Kainit®                                                        | Grünland und Feldfutterbau                                                                             |
| Patentkali®                                                             | Chloridempfindliche Kulturen (z. B. Kartoffeln, Obst, Gemüse)                                          |
| KALISOP®                                                                | Chloridempfindliche Kulturen (z. B. Obst, Gemüse, Tabak)                                               |
| ESTA Kieserit®                                                          | Magnesium- und Schwefeldüngemittel für alle Kulturen                                                   |
| EPSO Top® (Epsom salt)                                                  | Blattdüngung, Flüssigdüngung, Fertigation                                                              |
| EPSO Microtop®                                                          | Blattdüngung, Flüssigdüngung, Fertigation                                                              |
| EPSO Combitop®                                                          | Blattdüngung, Flüssigdüngung, Fertigation                                                              |
| Solumop®, Solusop®, Hortisul®                                           | Blattdüngung, Flüssigdüngung, Fertigation                                                              |
| <b>Industrieprodukte</b>                                                |                                                                                                        |
| Kaliumchlorid ca. 99 % KCl                                              | Chemische Industrie (z. B. Elektrolyse)                                                                |
| Kaliumchlorid ca. 97 % KCl                                              | Metallurgie (Schmelz- u. Lössalze, Salzbaden)                                                          |
| Kaliumchlorid ca. 96 % KCl                                              | Öl- und Gasexploration (Bohrspüllösung)                                                                |
| Kaliumsulfat ab 95 % K <sub>2</sub> SO <sub>4</sub>                     | Baustoffindustrie, sonstige industrielle Anwendungen                                                   |
| Magnesiumchlorid / -sulfat                                              | Zellstoff-, Waschmittel-, und Kunststoffindustrie, Pharmaindustrie, Düngemittelindustrie, Aufbaumittel |
| <b>Health Care &amp; Food</b>                                           |                                                                                                        |
| Hochreine Salze                                                         | Pharma- und Lebensmittelindustrie                                                                      |
| KaliSel                                                                 | Kaliumchlorid für die Lebensmittelindustrie                                                            |
| <b>Futtermittel</b>                                                     |                                                                                                        |
| KaSa® K99                                                               | Futtermittel                                                                                           |
| KaSa® Mag49 + KaSa® Mag98                                               | Futtermittel                                                                                           |

## GESCHÄFTSBEREICH STICKSTOFFDÜNGEMITTEL

Im Geschäftsbereich Stickstoffdüngemittel sind die Stickstoffaktivitäten der K+S GRUPPE gebündelt. Unsere Gruppengesellschaft K+S NITROGEN ist einer der führenden Anbieter von stickstoffhaltigen Düngemitteln mit klarer Konzentration auf Großverbraucher in der Landwirtschaft und in Spezialkulturen. COMPO fokussiert sich im Expert-Bereich auf die Segmente Fertigation, Zierpflanzen und Öffentliches Grün. Im Consumerbereich bietet COMPO ein breites Angebot qualitativ hochwertiger Blumenerden, Spezialdünger, Rasensamen und Pflanzenschutzprodukte an. / ABB: 2.1.4, 2.1.5 / [www.ks-nitrogen.com](http://www.ks-nitrogen.com) / [www.compo.com](http://www.compo.com)

### HERAUSLÖSUNG VON COMPO AUS DER K+S GRUPPE

Die Entscheidung, eine mögliche Veräußerung der COMPO zu prüfen, fiel im Juni 2010. Ein Ergebnis sollte Mitte des Jahres 2011 vorliegen. Das Konzept für eine unternehmerische und gesellschaftsrechtliche Herauslösung (Carve-Out) der COMPO aus der K+S GRUPPE wurde bis Ende letzten Jahres erarbeitet. Hierbei wurden sämtliche Schnittstellen der COMPO innerhalb der K+S GRUPPE identifiziert und darauf aufbauend ein Konzept zur Trennung der gemeinsamen Vertriebs- und Dienstleistungsplattformen erstellt. Es bezieht sich sowohl auf die IT-Infrastruktur als auch auf die Sicherstellung der übrigen Betriebsprozesse nach einer möglichen Veräußerung der COMPO.

### UMSATZ NACH REGIONEN

ABB: 2.1.4

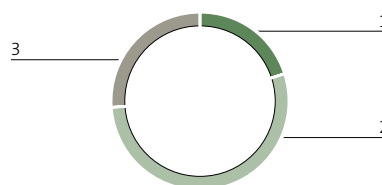

|                  | 2010 | 2009 |
|------------------|------|------|
| in %             |      |      |
| 1 Inland         | 20,0 | 18,6 |
| 2 Übriges Europa | 54,1 | 54,8 |
| 3 Übersee        | 25,9 | 26,6 |

### UMSATZ NACH BEREICHEN

ABB: 2.1.5

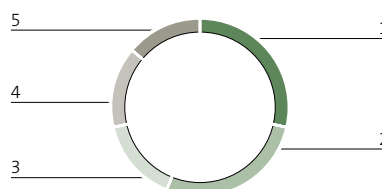

|                          | 2010 | 2009 |
|--------------------------|------|------|
| in %                     |      |      |
| 1 Mehrnährstoffdünger    | 28,7 | 28,6 |
| 2 Stickstoffeinzeldünger | 27,6 | 25,5 |
| 3 Consumer               | 15,2 | 20,4 |
| 4 Expert                 | 14,8 | 12,2 |
| 5 Ammonsulfat            | 13,7 | 13,3 |

**K+S nitrogen**

### K+S NITROGEN VERMARKTET GANZE BANDBREITE STICKSTOFFHALTIGER DÜNGEMITTEL

K+S NITROGEN vermarktet von BASF exklusiv produzierte Dünger sowie solche anderer ausgesuchter Lieferanten. Die Produkte für den Einsatz im Acker-, Gemüse-, Obst- und Weinbau umfassen die ganze Bandbreite stickstoffhaltiger Düngemittel.

### MEHRNÄHRSTOFFDÜNGER – EIN AUSGEWOGENER MIX

Die Mehrnährstoffdünger enthalten neben Stickstoff die Nährstoffe Kalium und Phosphat sowie – je nach Bedarf und Anwendung – Magnesium, Schwefel oder auch Spurenelemente. Die Rohstoffe werden im Produktionsprozess in flüssigem oder angelöstem Zustand zusammengeführt und anschließend granuliert. Dadurch ist stets die exakt gleiche Nährstoffzusammensetzung jedes einzelnen Düngerkorns für die kontrol-



lierte, gleichmäßige Ausbringung auf dem Feld sichergestellt. Die kaliumchloridhaltigen Mehrnährstoffdünger der Marke NITROPHOSKA® werden in Ackerbaukulturen wie Getreide oder Mais eingesetzt. Kaliumsulfathaltige NITROPHOSKA®-Sorten werden für chloridempfindliche Obst-, Wein- und Gemüsekulturen empfohlen.

#### BESONDERE STICKSTOFFEFFIZIENZ

Die stickstoffstabilisierenden ENTEC®-Düngemittel zeichnen sich durch ihre Stickstoffeffizienz aus und reduzieren im Vergleich zu traditionellen Produkten die

Anzahl der notwendigen Düngergaben. ENTEC® findet sowohl im Ackerbau Anwendung als auch in Sonderkulturen, wie Obst-, Wein- und Gemüse.

#### BEDARFSGERECHTE STICKSTOFFERNÄHRUNG

Der Stickstoffeinzeldünger Kalkammonsalpeter kann in allen landwirtschaftlichen Kulturen eingesetzt werden. Für schwefelbedürftige Kulturen wie Raps eignet sich besonders Ammonsulfatsalpeter (ass), für borbedürftige Kulturen, wie Zuckerrüben, Ammonsulfatsalpeter mit Bor (ass bor).

#### FÜHREND MIT AMMONSULFAT

K+S NITROGEN ist weltweit einer der führenden Anbieter des schwefelhaltigen Stickstoffdüngemittels Ammonsulfat, das als Nebenprodukt bei der Caprolactam-Herstellung in der chemischen Industrie anfällt. Feinkristallines Ammonsulfat wird in Europa überwiegend als Rohstoff in der Düngemittelproduktion eingesetzt; in Übersee bringen es die Landwirte direkt auf die Felder aus. GRANAMMON®, ein grobkörniges Ammonsulfat, eignet sich sowohl zur Direktanwendung in der Landwirtschaft als auch als Komponente in Mischanlagen (Bulk Blender). / TAB: 2.1.2

#### HAUPTPRODUKTE UND ANWENDUNGSBEREICHE K+S NITROGEN

TAB: 2.1.2

##### Mehrnährstoffdünger

|                               |                                                                                                         |
|-------------------------------|---------------------------------------------------------------------------------------------------------|
| ENTEC®-NPK S                  | Stabilisierte NPK-Dünger für chlorid- und salzempfindliche Sonderkulturen im Obst-, Wein- und Gemüsebau |
| ENTEC®-NPK C                  | Stabilisierte NPK-Dünger auf Basis von Kaliumchlorid für alle sonstigen Feldkulturen                    |
| ENTEC®-NP                     | Stabilisierter NP-Dünger für alle Kulturen in Kombination mit Kali-Einzeldüngern                        |
| Nitrophoska® s (sulfathaltig) | NPK-Dünger für chlorid- und salzempfindliche Kulturen im Gemüse-, Wein- und Obstbau                     |
| Nitrophoska® C                | NPK-Dünger auf Basis Kaliumchlorid für alle sonstigen Feldkulturen                                      |
| Nitrophos®                    | NP-Formulierung für alle Kulturen in Kombination mit Kali-Einzeldüngern                                 |

##### Stickstoffeinzeldünger

|                           |                                                            |
|---------------------------|------------------------------------------------------------|
| Kalkammonsalpeter         | alle Kulturen                                              |
| Ammonnitrat               | alle Kulturen                                              |
| Ammonsulfatsalpeter (ass) | alle Kulturen (Stickstoff-Schwefeldünger)                  |
| ENTEC® 26                 | Stabilisierter Stickstoff-Schwefeldünger für alle Kulturen |

##### Ammonsulfat

|                             |                                                                             |
|-----------------------------|-----------------------------------------------------------------------------|
| Ammonsulfat                 | Landwirtschaft, Rohstoff für Mehrnährstoffdünger-Industrie und Bulk Blender |
| Granammon® (grobkristallin) | Landwirtschaft, Komponente für Bulk Blender                                 |

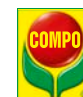

#### COMPO EXPERT MIT BREITEM PRODUKTPORTFOLIO

COMPO EXPERT führt ein umfangreiches Sortiment innovativer Spezialdüngemittel und bietet damit professionellen Anwendern Lösungen für die Bereiche Baumschule, Öffentliches Grün, Golf und Zierpflanzenbau, für den Obst- und Weinbau sowie für die Landwirtschaft und den Gemüsebau.

#### STICKSTOFFSTABILISIERENDE UND UMHÜLLTE DÜNGER

Der granulierte sulfathaltige Dünger BLAUKORN® und der Mehrnährstoffdünger NOVATEC® kommen in Baumschulen, Gartenbau und Sonderkulturen zum Einsatz. Bei NOVATEC® handelt es sich um ein stickstoffstabi-

HAUPTPRODUKTE UND ANWENDUNGSBEREICHE COMPO

TAB: 2.1.3

| Consumer-Marken          | Markenartikel für Haus und Garten                                                                                                     |
|--------------------------|---------------------------------------------------------------------------------------------------------------------------------------|
| COMPO, Algoflash®        | Komplettes Sortiment an Blumenerden, Blumen- und Gartenpflege (Dünger, Rasensamen) sowie Pflanzenschutz                               |
| Gesal®, Sem®, Gardiflor® | Blumenerden, Blumen- und Gartenpflege (Dünger) sowie Pflanzenschutz für ausgewählte Länder und Vertriebskanäle                        |
| Expert-Produkte          | Spezialprodukte zum Einsatz als Betriebsmittel                                                                                        |
| Blaukorn®                | Granulierte sulfathaltige Dünger für Baumschulen, Gartenbau und Sonderkulturen                                                        |
| NovaTec®                 | Stabilisierte Mehrnährstoffdünger für Baumschulen, Gartenbau und Sonderkulturen                                                       |
| NovaTec Solub®           | Für Nährsalze in der Fertigation                                                                                                      |
| Floranid®                | Langzeitdünger für Rasen, Sportplätze, Öffentliches Grün und Spezialanwendungen in anderen Kulturen                                   |
| Basacote®                | Umhüllter Langzeitdünger für Baumschulen, Zierpflanzen, Öffentliches Grün, Forstwirtschaft und Spezialanwendungen in anderen Kulturen |
| Hakaphos®/Kamasol®       | Wasserlösliche Salze/Flüssigdünger für Fertigation in Sonderkulturen                                                                  |
| Fetrilon®                | Spurennährstoffdünger                                                                                                                 |

lisierendes Produkt, das sich durch seine Stickstoffeffizienz auszeichnet und im Vergleich zu traditionellen Produkten die Anzahl der notwendigen Düngergaben reduziert. Der vollumhüllte Langzeitdünger BASACOTE® für den Baumschul- und Zierpflanzenbereich garantiert die gleichmäßige Nährstoffversorgung der Pflanzen für einen Zeitraum von bis zu zwölf Monaten. Für intensiv genutzte Sportrasenflächen, wie Golf- oder Fußballplätze, eignet sich insbesondere der Langzeitdünger FLORANID®.

#### GUT POSITIONIERT MIT BEWÄSSERUNGSDÜNGERN

In dem vor allem in Südeuropa und Lateinamerika stark wachsenden Segment der Bewässerungsdünger ist COMPO Expert mit den Produkten HAKAPHOS®, KAMASOL® und NOVATEC SOLUB® gut positioniert. Durch die kombinierte Ausbringung von Dünger und Wasser, auch Fertigation genannt, können die Nährstoffzufuhr besser reguliert und die Nährstoffe während der gesamten Wachstumsperiode gleichmäßiger ausgebracht werden. Die Bedeutung der Fertigation nimmt insbesondere in den Regionen zu, in denen Wasser ein begrenzender Faktor für die landwirtschaftliche Produktion ist. Hochwertige Blatt- und Spurennährstoffdünger, beispielsweise FETRILON®, runden das Sortiment ab.

#### STARKE MARKEN FÜR HAUS UND GARTEN

Im Consumerbereich bietet COMPO ein breites Angebot qualitativ hochwertiger Blumenerden, Spezialdünger und Pflanzenschutzprodukte an.

Die wichtigste Produktgruppe ist Blumenerde. In Europa werden die hochwertigen Erden überwiegend unter den Marken COMPO SANA® und ALGOFLASH® vertrieben. Sie sind je nach Pflanzentyp mit Gärtnerhumus, Tonmineralien sowie Langzeitdünger und wichtigen Spurennährstoffen veredelt.

Im Sortiment Düngemittel werden Flüssig-, Rasen- und Gartendünger sowie Nährsalze der Marken COMPO® und ALGOFLASH® vermarktet. Dazu gehören auch Langzeitdünger für eine bequeme und wirkungsvolle Nährstoffversorgung: Eine einzige Düngung reicht für eine ganze Garten-Saison. Die Produktreihe COMPO NATURDÜNGER mit Guano ist für den ökologischen Landbau zugelassen. Auch COMPO NATURABELL®, ALGOFLASH ACTIVASOL® und SEM NATURASOL® gehören zum Segment der organisch/biologischen Produkte.

Pflanzenschutzprodukte ergänzen das Produktsortiment. In exklusiver Zusammenarbeit mit SYNGENTA, einem der weltweit führenden Hersteller von Pflanzenschutzmitteln, wurde beispielsweise das Insektizidstäbchen AXORIS® entwickelt. / TAB: 2.1.3

## 2.2 GESCHÄFTSFELD SALZ

Zum Geschäftsfeld Salz gehören der europäische Produzent ESCO – EUROPEAN SALT COMPANY, der südamerikanische Anbieter SOCIEDAD PUNTA DE LOBOS sowie MORTON SALT mit Produktionsstätten in den USA und Kanada. K+S ist mit einer Produktionskapazität von rund 30 Mio. t Salz der weltweit führende Produzent. / ABB: 2.2.1, 2.2.2 / [www.esco-salt.com](http://www.esco-salt.com) / [www.spl.cl](http://www.spl.cl) / [www.morton-salt.com](http://www.morton-salt.com)

### UNSERE SALZSTRATEGIE

Ursprünglich war das deutsche Salzgeschäft von K+S auf Auftau-, Gewerbe- und Speisesalz fokussiert. Mit dem Erwerb der niederländischen FRISIA ZOUT, dem ersten ausländischen Engagement im Geschäftsbereich Salz, haben wir uns im Jahr 2000 mit Produkten für die chemische Industrie verstärkt. Der nächste große Schritt erfolgte im Jahr 2002: Gemeinsam mit der belgischen SOLVAY wurde das Joint Venture „ESCO – EUROPEAN SALT COMPANY“ gegründet. Seit Sommer 2004 ist K+S alleiniger Eigentümer der ESCO – und damit der führende Salzhersteller in Europa. Im Juni 2006 ist K+S als Salzproduzent auch außerhalb Europas aktiv geworden. Der Erwerb der chilenischen SOCIEDAD PUNTA DE LOBOS (SPL), des größten Salzproduzenten in Südamerika, stellte einen weiteren wichtigen Schritt zur Stärkung unseres Produkt- und Leistungsprogramms dar. Damit war K+S auch in den Märkten Lateinamerikas und in ausgewählten Regionen der USA mit Salzprodukten präsent. Der Erwerb von MORTON SALT im Jahr 2009 ist der bisher letzte Schritt in der konsequenten Umsetzung unserer Salzstrategie, die nicht nur auf organisches, sondern auch auf externes Wachstum ausgerichtet ist.

### UMSETZUNG UNSERER SALZSTRATEGIE

ABB: 2.2.1

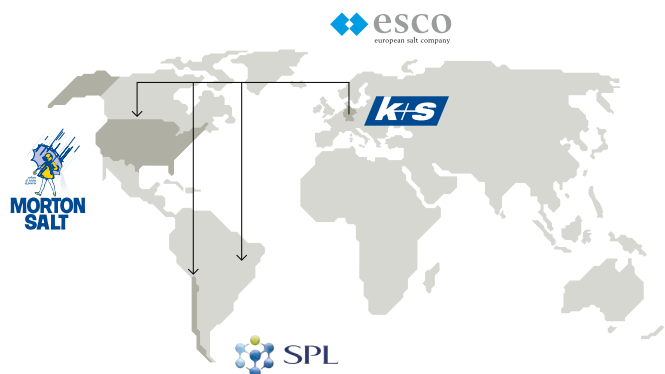

#### Highlights Europa

- + Ursprünglich starke Ausrichtung des europäischen Salzgeschäfts auf Auftau- und Gewebesalz
- + Ergänzung um Industriesalz durch Übernahme von Frisia Zout (NL)
- + Führender europäischer Salzhersteller durch Akquisition des Solvay-Salzgeschäfts

#### Highlights Südamerika

- + Übernahme der SPL, des größten Salzproduzenten in Südamerika
- + Markteintritt in die USA und Lateinamerika
- + Expansionspotenzial nach Asien

#### Highlights USA

- + Übernahme von Morton Salt, dem führenden Salzhersteller in Nordamerika

### DIE GRÖSSTEN SALZANBIETER WELTWEIT

ABB: 2.2.2

| Kapazität in Mio. t              | 5 | 10 | 15 | 20 | 25 | 30 | 35   |
|----------------------------------|---|----|----|----|----|----|------|
| K+S (D)                          |   |    |    |    |    |    | 29,8 |
| China National Salt Ind. (China) |   |    |    |    |    |    | 18,7 |
| Compass Minerals (USA)           |   |    |    |    |    |    | 14,0 |
| Cargill (USA)                    |   |    |    |    |    |    | 14,0 |
| Dampier Salt (AUS)               |   |    |    |    |    |    | 9,0  |
| Artyomsol (Ukraine)              |   |    |    |    |    |    | 7,5  |
| Exportadora del Sal (MEX)        |   |    |    |    |    |    | 7,0  |
| Südsalz (D)                      |   |    |    |    |    |    | 5,3  |
| Salins Group (F)                 |   |    |    |    |    |    | 4,1  |
| Mitsui & Co. (AUS)               |   |    |    |    |    |    | 3,8  |
| Akzo (NL)                        |   |    |    |    |    |    | 3,6  |

(Festsalz und Salz in Sole; ohne Eigenbedarf)

Quelle: Roskill, K+S 2010



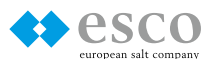

### ESCO – EUROPEAN SALT COMPANY IST GRÖSSTER SALZPRODUZENT EUROPAS

ESCO betreibt drei Steinsalzbergwerke, zwei Solbetriebe sowie mehrere Siedesalzanlagen und ist der größte Salzanbieter in Europa. Der Reinheitsgrad unseres untertägig gewonnenen Salzes ist mit bis zu 99% sehr hoch und nimmt im europäischen Wettbewerb einen Spitzenplatz ein. Die Produktionskapazität von ESCO liegt bei rund 9,7 Mio. t Festsalz und Salz in Sole pro Jahr.

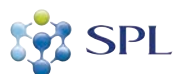

### SOCIEDAD PUNTA DE LOBOS BIETET SALZ FÜR DIE NÄCHSTEN JAHRHUNDERTE

Die SOCIEDAD PUNTA DE LOBOS gewinnt im Salar Grande der chilenischen Tarapacá-Wüste im kostengünstigen Tagebau Steinsalz. Die hervorragende Qualität des Rohsalzes erlaubt die Weiterverarbeitung zu Spezialprodukten für eine Vielzahl von Anwendungen. Die Salzreserven dieser Lagerstätte reichen aus, um die Weltbevölkerung für mehrere hundert Jahre mit Salz zu versorgen. Die Produktions- und Verladekapazität im unternehmenseigenen Tiefseehafen beträgt 6,5 Mio. t pro Jahr. Im Nordosten von Brasilien betreibt die Tochtergesellschaft SALINAS DIAMANTE BRANCO eine Meeressalzanlage mit 0,5 Mio. t Jahreskapazität.

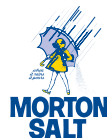

### MORTON SALT IST EINER DER GRÖSSTEN PRODUZENTEN IN NORDAMERIKA

MORTON SALT verfügt in den USA und Kanada über eine große Anzahl kundennaher Produktionsstandorte (sechs Steinsalzbergwerke, sieben Solar- sowie zehn Siedesalzanlagen) und betreibt ein landesweites Vertriebsnetzwerk mit mehr als 120 Lagerhäusern und Distributionszentren. MORTON SALT ist einer der führenden Produzenten von Consumer-, Gewerbe- und Auftausalzen in Nordamerika. Die Produktionskapazität beträgt rund 13 Mio. t Festsalz pro Jahr. / ABB: 2.2.3, 2.2.4

### BREITES PRODUKTPORTFOLIO

#### SPEISESALZE – EIN LEBENSWICHTIGER MINERALSTOFF

Ausgangsprodukte für die breite Palette unserer Speisesalze sind hochreine Siedesalze, aber auch hochwertige Steinsalze in naturbelassener Form. Unsere Speisesalzmarken sind bei den Konsumenten gut eingeführt: In den USA sind die Produkte mit dem berühmten UMBRELLA-GIRL die bekannteste Marke, in Kanada ist WINDSOR CASTLE® und in Chile SAL LOBOS® führend, in Frankreich nimmt CÉRÉBOS® den zweiten Platz ein und in Portugal ist VATEL® die führende Tafelsalzmarke. ESCO-Speisesalz wird vor allem unter einer Reihe von Handelsmarken vertrieben.

Mit BALANCE® Salz, BIOSAL LIGHT® sowie SALT BALANCE® und LITE SALT™ haben wir auch natriumreduzierte Produkte im Programm, die sich an Verbraucher richten, die sich bewusst natriumarm ernähren möchten.

Speise- und Pökelsalze sind Geschmacksträger und dienen als Konservierungsstoff bei der Herstellung von Fleisch- und Wurstwaren, Brot und Käse.

#### GEWERBESALZ – EIN ROHSTOFF MIT VIELFÄLTIGEN ANWENDUNGSMÖGLICHKEITEN

Gewerbesalze werden beispielsweise in Färbereien, in der Textilindustrie, bei der Futtermittelproduktion, in der

#### DAS UMBRELLA-GIRL

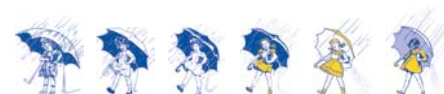

Die Produkte mit dem berühmten UMBRELLA-GIRL sind in den USA die bekannteste Speisesalzmarke. Das kleine Mädchen, das unter dem Motto „When it rains it pours“® im Regen Salz streut, erschien zum ersten Mal im Jahr 1914 auf einer Salzpackung und begleitet seitdem die Speisesalze – mittlerweile in der sechsten Version. Das Motto sollte ursprünglich die Kunden darauf aufmerksam machen, dass MORTON-Salz dank des innovativen Antibackmittels selbst bei feuchter Witterung nicht klumpt, sondern rieselt. Unter [www.mortonsalt.com/heritage/mug.html](http://www.mortonsalt.com/heritage/mug.html) erfahren Sie, wie sich die Marke in den vergangenen 100 Jahren weiterentwickelt hat.

## UMSATZ NACH REGIONEN

ABB: 2.2.3

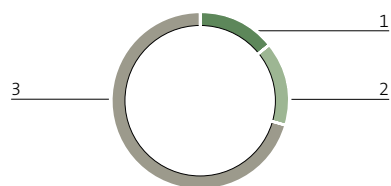

|                  | 2010 | 2009 |
|------------------|------|------|
| in %             |      |      |
| 1 Inland         | 14,3 | 17,6 |
| 2 Übriges Europa | 15,4 | 22,3 |
| 3 Übersee        | 70,3 | 60,1 |

## UMSATZ NACH PRODUKTGRUPPEN

ABB: 2.2.4

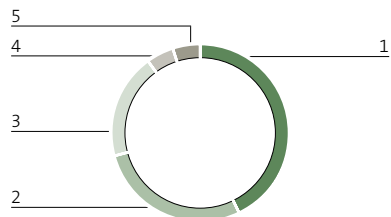

|                 | 2010 | 2009 |
|-----------------|------|------|
| in %            |      |      |
| 1 Auftausalz    | 42,8 | 49,0 |
| 2 Gewerbesalz   | 28,3 | 23,6 |
| 3 Speisesalz    | 19,0 | 14,9 |
| 4 Industriesalz | 5,0  | 6,2  |
| 5 Sonstiges     | 4,9  | 6,3  |

Fischkonservierung und in Bohrspülungen für die Erdöl- und Erdgasförderung eingesetzt. Ein weiterer wichtiger Anwendungszweck ist die Wasserenthärtung: Die bekannten MORTON PELLETS mit dem patentierten System SAVER® sind das führende Produkt in den USA und die ESCO-Regeneriersalze AXAL® und REGENIT® sind in Europa führend. Zur Desinfektion von Schwimmbädern dient das MORTON-POOL-SALZ. Pharmasalze sind Bestandteil von Infusions- und Dialyselösungen sowie

von Medikamenten. Salzlecksteine für Zucht- und Wildtiere vermarktet ESCO unter dem Namen SOLSEL®.

#### INDUSTRIESALZ – UNENTBEHRlich FÜR DIE CHEMISCHE INDUSTRIE

Industriesalz ist einer der wichtigsten Rohstoffe der chemischen Industrie. In Elektrolyseanlagen wird es zu Chlor, Natronlauge und Wasserstoff gespalten. Zum Endverbraucher gelangt es zum Beispiel als Polyvinylchlorid (PVC), einem Kunststoff aus dem Fußbodenbeläge,

Fensterprofile, Rohrsysteme und Industrieverpackungen entstehen.

#### AUFTAUSALZ – DAS SICHERHEITSPRODUKT IM STRASSENWINTERDIENST

Winterdienste, öffentliche und private Straßenbauverwaltungen sowie gewerbliche Großverbraucher beziehen Auftaumittel von ESCO, MORTON SALT und SPL. Neben trockenem Auftausalz bieten wir Feuchtsalz an, das unter bestimmten Bedingungen eine verbesserte Auftauwirkung bringt. MORTON SALT hat u.a. mit SAFE-T-POWER® ein Produkt im Angebot, das bis – 31°C wirkt. Für private Haushalte bieten wir in Europa die seit Jahrzehnten bewährten ESCO-Auftausalze in Kleinpäckungen an, in den USA und Kanada sind BLIZZARD WIZARD® und HALITE® sowie ACTION MELT® und SAFE-T-PLUS® bekannte Verbraucher-Marken. Außerdem produzieren wir unter Lizenz ICE-B-GONE®, ein Auftaumittel für tiefe Temperaturen mit stark verminderter korrosiver Wirkung.

#### SOLE UND SONSTIGE GESCHÄFTE RUNDEN DAS SORTIMENT AB

Während Natriumchloridsole in unserer Siedesalzproduktion sowie in der chemischen Industrie als Rohstoff eingesetzt wird, dient Magnesiumchloridlösung hauptsächlich als Komponente von Feuchtauftaumitteln im Winterdienst. ESCO bietet am Standort Bernburg als Dienstleistung auch Flüssiggas-Kavernenspeicherung an. / TAB: 2.2.1 – 2.2.3

**HAUPTPRODUKTE UND  
ANWENDUNGSBEREICHE ESCO**

TAB: 2.2.1

|                                         |                                                                                   |
|-----------------------------------------|-----------------------------------------------------------------------------------|
| <b>Speisesalze</b>                      |                                                                                   |
| Sonnensalz®, Cérébos®, Vatel®, Balance® | Private Haushalte                                                                 |
| Brezelsalz                              | Nahrungsmittelindustrie                                                           |
| Pökelsalz                               | Nahrungsmittelindustrie (Fleisch- / Wurstwaren)                                   |
| Sonstige Speisesalze                    | Nahrungsmittelindustrie (z. B. Brot, Käse, Konserven)                             |
| <b>Gewerbesalze</b>                     |                                                                                   |
| Axal®, Regenit®                         | Wasserenthärtung                                                                  |
| Geschirrspülersalz                      | Private Haushalte                                                                 |
| Salzlecksteine SOLSEL®                  | Tierernährung                                                                     |
| Futtermittelsalz                        | Tierernährung                                                                     |
| Fischereisalz                           | Fischkonservierung                                                                |
| Häutesalz                               | Gerbereien                                                                        |
| Pharmasalz                              | Infusionen und Dialyselösungen, Medikamente                                       |
| Sonstige Gewerbesalze                   | z. B. Bohrspülungen, Färbereien, Lederverarbeitung, Tonwaren                      |
| <b>Industriesalze</b>                   |                                                                                   |
| Industriesalz                           | Chemische Industrie                                                               |
| <b>Auftaumittel</b>                     |                                                                                   |
| Auftausalz, Magnesiumchlorid-Lösung     | Winterdienst, öffentliche Straßenbauverwaltung, Streumittel für private Haushalte |

**HAUPTPRODUKTE UND  
ANWENDUNGSBEREICHE SPL**

TAB: 2.2.2

|                                                                                         |                                             |
|-----------------------------------------------------------------------------------------|---------------------------------------------|
| <b>Speisesalze</b>                                                                      |                                             |
| Sal Lobos®, Marina®                                                                     | Private Haushalte                           |
| Biosal Light® (50 % bzw. 66 % weniger Natrium)                                          | Nahrungsmittelindustrie                     |
| Biosal Panadera (25 % weniger Natrium)                                                  | Backwarenindustrie                          |
| Gewürzsalze                                                                             | Nahrungsmittelindustrie                     |
| Sonstige Speisesalze                                                                    | Nahrungsmittelindustrie                     |
| <b>Badesalz</b>                                                                         |                                             |
| Termasal®                                                                               | Private Haushalte                           |
| <b>Gewerbesalze</b>                                                                     |                                             |
| Blusal®, Super Salt®                                                                    | Wasserenthärtung                            |
| Premium Salz Granulat                                                                   | Wasserenthärtung                            |
| Pharmasalz                                                                              | Infusionen und Dialyselösungen, Medikamente |
| Sonstige Gewerbesalze                                                                   | z. B. Textilindustrie                       |
| <b>Industriesalze</b>                                                                   |                                             |
| Industriesalz                                                                           | Chemische Industrie                         |
| <b>Auftaumittel</b>                                                                     |                                             |
| Auftausalz, Magnesiumchlorid-Lösung                                                     | Winterdienst                                |
| Blizzard Wizard® Ice Melt, Auftausalz mit Korrosionsinhibitor (Lizenzmarke Ice-B-Gone®) | Winterdienst                                |
| C-FORCE® Calciumchlorid Halite                                                          | Streumittel für private Haushalte           |

**HAUPTPRODUKTE UND  
ANWENDUNGSBEREICHE MORTON SALT**

TAB: 2.2.3

|                                                                                                                                                       |                                               |
|-------------------------------------------------------------------------------------------------------------------------------------------------------|-----------------------------------------------|
| <b>Speisesalze</b>                                                                                                                                    |                                               |
| Morton® & Windsor® Table Salt                                                                                                                         | Private Haushalte                             |
| Morton® & Windsor® Sea Salt                                                                                                                           | Private Haushalte                             |
| Salt Balance®, (25 % weniger Natrium), Morton® Lite Salt™ & Windsor® Half Salt™ (50 % weniger Natrium)                                                | Private Haushalte                             |
| Nature's Seasons®, Season-All®                                                                                                                        | Private Haushalte                             |
| Weitere Spezialitäten wie Popcorn-Salz, koscheres Salz, Eiscreme-Salz                                                                                 | Nahrungsmittelindustrie                       |
| Sonstige Speisesalze                                                                                                                                  | Nahrungsmittelindustrie                       |
| <b>Gewerbesalze</b>                                                                                                                                   |                                               |
| Morton® & Windsor® System Saver®, Morton® & Windsor® Rust Remover                                                                                     | Wasserenthärtung                              |
| Morton® Solar Salt                                                                                                                                    | Wasserenthärtung                              |
| Morton® Advanced Formula Pool Salt                                                                                                                    | Private Haushalte und Großhändler             |
| Morton® & Windsor® Professional's Choice™ Pool Salt                                                                                                   | Private Haushalte und Großhändler             |
| <b>Auftaumittel</b>                                                                                                                                   |                                               |
| Auftausalz, Magnesiumchlorid-Lösung                                                                                                                   | Winterdienst                                  |
| Morton® Ice Melter, Morton® & Windsor® Safe-T-Salt®                                                                                                   | Winterdienst                                  |
| Morton® & Windsor® Action Melt®, Morton® & Windsor® Safe-T-Plus®, Morton® Safe-T-Power™ (wirksam bis -31 °C), Windsor® Calcium Chloride, Windsor® Ice | Streumittel für private Haushalte und Gewerbe |



## 2.3 ERGÄNZENDE GESCHÄFTSBEREICHE

In den Ergänzenden Geschäftsbereichen sind neben der Entsorgung bzw. Verwertung von Abfällen und den Recyclingaktivitäten sowie der Granulierung von CATSAN® weitere Aktivitäten der K+S GRUPPE gebündelt. Mit der KALI-TRANSPORT GESELLSCHAFT MBH (KTG) in Hamburg verfügt die K+S GRUPPE über einen eigenen Logistik-Dienstleister. Die CHEMISCHE FABRIK KALK GMBH (CFK) handelt mit verschiedenen Basischemikalien. / ABB: 2.3.1, 2.3.2

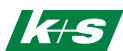

### ENTSORGUNG UND RECYCLING

Der Geschäftsbereich Entsorgung und Recycling nutzt die durch die Rohsalzgewinnung entstandenen untertägigen Hohlräume zur langzeitsicheren Beseitigung und Verwertung von Abfällen und greift dabei auf die vorhandene Infrastruktur der aktiven Kali- bzw. Salzbergwerke zurück. / [www.ks-entsorgung.com](http://www.ks-entsorgung.com)

#### STARKE MARKTPPOSITIONEN IN DEUTSCHLAND UND EUROPA

Über die K+S ENTSORGUNG GMBH ist der Geschäftsbereich in Europa bei der untertägigen, langzeitsicheren Entsorgung von belasteten Abfällen mengen- und umsatzmäßig der größte Dienstleister und technologisch führend. Der Markt ist sehr umkämpft; mit beson-

#### UMSATZ NACH REGIONEN

ABB: 2.3.1

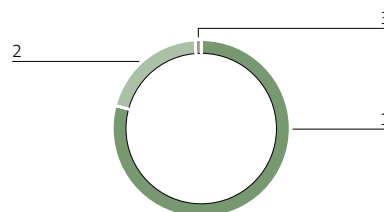

|                  | 2010 | 2009 |
|------------------|------|------|
| in %             |      |      |
| 1 Inland         | 97,9 | 81,8 |
| 2 Übriges Europa | 20,0 | 18,1 |
| 3 Übersee        | 0,1  | 0,1  |

#### UMSATZ NACH BEREICHEN

ABB: 2.3.2

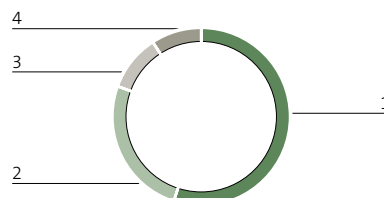

|                            | 2010 | 2009 |
|----------------------------|------|------|
| in %                       |      |      |
| 1 Entsorgung und Recycling | 55,2 | 55,7 |
| 2 Tierhygieneprodukte      | 25,6 | 27,3 |
| 3 Logistik                 | 10,2 | 10,3 |
| 4 Handel                   | 9,0  | 6,7  |

ders kundenorientierten Entsorgungslösungen verteidigen wir unsere Position erfolgreich. Unsere Kernmärkte liegen in West- und Mitteleuropa. Die osteuropäischen Staaten bieten Potenzial, da die Nachfrage nach EU-konformen, untertägigen Entsorgungslösungen für Abfälle steigt.

#### ABFÄLLE DAUERHAFT UND SICHER DER BIOSPHÄRE ENTZOGEN

Der Geschäftsbereich Entsorgung und Recycling betreibt zwei Untertagedeponien. Die dort eingelagerten Abfälle werden der Biosphäre dauerhaft entzogen – eine Leistung, die keine übertägige Deponie erbringen kann. Bei Bedarf können wir die Abfälle wieder auslagern, um die enthaltenen Wertstoffe zu recyceln. Sowohl die Situation an den Rohstoffmärkten als auch neue Aufbereitungsverfahren haben zu einer deutlichen Belebung der Wiederauslagerung geführt, beispielsweise von

ursprünglich PCB-belasteten Transformatoren, deren Kupfer- und Stahlteile recycelt werden.

#### **RÜCKSTÄNDE AUS DER RAUCHGASREINIGUNG WERDEN UNTER TAGE VERWERTET**

Weiterhin betreiben wir fünf Anlagen zur Verwertung von Abfällen unter Tage. Abfälle werden hier zur Verfüllung von Hohlräumen verwendet. Neben anderen Stoffen sind Rückstände aus der Rauchgasreinigung gut geeignet für die untertägige Verwertung. Das Verbot der Deponierung von unbehandelten Siedlungs- und Gewerbeabfällen führt dazu, dass ein Teil dieser Abfälle in Müll- und Ersatzbrennstoffanlagen verbrannt wird und somit vermehrt Rückstände aus der Rauchgasreinigung anfallen.

#### **RECYCLING: ÖKOLOGISCH SINNVOLL**

Außerdem vermarktet der Geschäftsbereich hochwertige Schmelzsalze aus der Kaliproduktion, die beim Schmelzen von Aluminiumschrott eingesetzt werden. Die bei diesem Prozess entstehende Salzschlacke wird von uns zurückgenommen und in unserer REKAL®-Anlage vollständig verwertet; das aus der Salzschlacke extrahierte Aluminiumgranulat wird dem Wertstoffkreislauf wieder zugeführt. Beim Recycling von Salzschlacken zählen wir in Deutschland und Europa zu den führenden Anbietern. In einer weiteren Anlage werden Boden und Bauschutt aufbereitet. Ein großer Teil des Materials wird für die Rekultivierung einer Kali-Rückstandshalde verwendet und bildet dort die Grundlage für das Wachstum von Pflanzen. Daneben werden auch Sekundärbaustoffe für den Straßen- und Tiefbau erzeugt.

### **LOGISTIK**

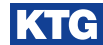

#### **EFFIZIENTE LOGISTIK HAT STRATEGISCHE BEDEUTUNG**

Die K+S GRUPPE hat im Jahr 2010 ein Transportvolumen von 62,8 Mio. t bewegt. Mit der KALI-TRANSPORT GESELLSCHAFT MBH (KTG) in Hamburg und deren Tochtergesellschaften sowie der chilenischen EMPREMAR verfügen wir über zwei eigene Logistikdienstleister. Der Betrieb des Kalikais in Hamburg, eine der größten Umschlaganlagen für Schüttgutexporte in Europa, ist Kerngeschäft der KTG und für den Geschäftsbereich Kali- und Magnesiumprodukte von strategischer Bedeutung. Über die Reederei EMPREMAR wird die gesamte Seelogistik für die SPL-Gruppe abgewickelt. Mit sechs eigenen Schiffen werden die süd- und nordamerikanischen Märkte mit Salz und Produkten Dritter beliefert.

[/www.kali-transport.com](http://www.kali-transport.com) / [www.ubtnet.com](http://www.ubtnet.com)

#### **KTG STEUERT CONTAINERGESCHÄFT**

Das Containergeschäft der K+S GRUPPE wird von Hamburg aus gesteuert, inklusive der Vortransporte von unseren deutschen Produktionsstandorten zu den Verladeterminals. Hier haben wir kostengünstige Systeme entwickelt, um die umweltfreundlichen Verkehrsträger Bahn und Binnenschiff verstärkt zu nutzen. Über die ebenfalls in Hamburg ansässige Tochtergesellschaft GERMAN BULK CHARTERING (GBC) werden Schiffsbefrachtungen für Konzerngesellschaften und Dritte abgewickelt. Außerdem sind KTG bzw. ihre Tochter UNITED

BULK TRANSPORT SEE- UND HAFEN-SPEDITION GMBH (UBT) u.a. in Hamburg, Rostock, Wismar als Seehafen-speditoren und Schiffsagenten für 800 bis 1.000 Schiffe jährlich tätig.

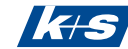

#### **TIERHYGIENEPRODUKTE**

An unserem Standort Salzdetfurth granulieren wir für die Firma MARS die Tierhygieneprodukte CATSAN und THOMAS. Hierfür werden vorhandene Anlagen und weite Teile der Infrastruktur eines stillgelegten Kaliwerks erfolgreich genutzt.

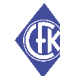

#### **HANDELSGESCHÄFTE (CFK)**

Die CHEMISCHE FABRIK KALK (CFK) handelt mit verschiedenen Basischemikalien. Dazu zählen unter anderem Natronlauge, Salpetersäure, Natriumcarbonat (Soda) sowie Calcium- und Magnesiumchlorid. Zu den Kunden der CFK gehören namhafte europäische Chemiefirmen, Glashütten, Metallverarbeiter, Waschmittelproduzenten, Brauereien sowie Städte und Kommunen, die Calcium- oder Magnesiumchlorid für den Winterdienst verwenden. [/ www.cfk-gmbh.de](http://www.cfk-gmbh.de)

## 2.4 UNSERE STANDORTE

Unsere Produktionsstandorte liegen – bedingt durch die Lagerstätten der Geschäftsbereiche Kali- und Magnesiumprodukte sowie Salz – in Europa, insbesondere in Deutschland, in Südamerika sowie in den USA und Kanada. 67,8 % unserer Mitarbeiter sind in Deutschland und 5,7 % unserer Mitarbeiter in anderen europäischen Ländern beschäftigt. Der Anteil der Mitarbeiter in Übersee beträgt 26,5 %. Mit unserem effizienten und kundennahen Vertriebsnetz sind wir weltweit aktiv. In den meisten Zielmärkten haben wir den Vertrieb über Mehrbereichsgesellschaften organisiert – das eröffnet Synergien und garantiert eine kompetente Kundenansprache.

/ ABB: 2.4.1 – 2.4.3

### UNSERE STANDORTE IN DEUTSCHLAND

ABB: 2.4.1

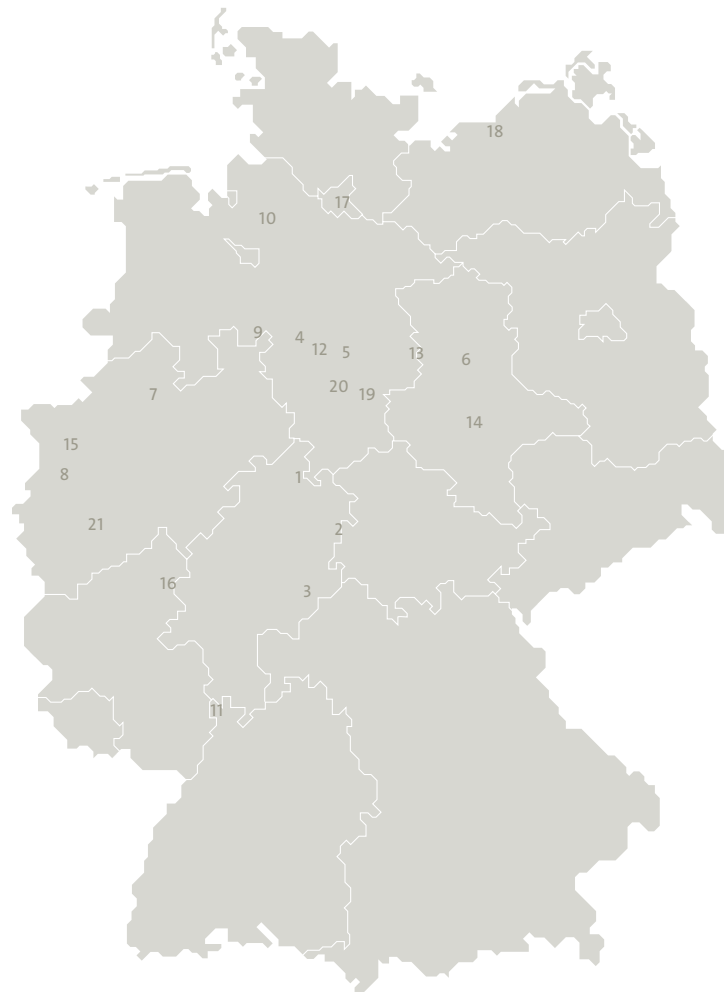

|    |                                                             |  |
|----|-------------------------------------------------------------|--|
| 1  | Kassel                                                      |  |
|    | Heringen ☞/<br>Philippsthal ☞/Unter-<br>breizbach ☞/Merkers |  |
| 2  | Neuhof ☞                                                    |  |
| 3  | Wunstorf-Bokeloh ☞                                          |  |
| 4  | Sehnde-Ilten                                                |  |
| 5  | Zielitz ☞                                                   |  |
| 6  | Münster                                                     |  |
| 7  | Krefeld                                                     |  |
| 8  | Uchte                                                       |  |
| 9  | Gnarrenburg                                                 |  |
| 10 | Mannheim                                                    |  |
| 11 | Hannover                                                    |  |
| 12 | Grasleben ☞                                                 |  |
| 13 | Bernburg ☞                                                  |  |
| 14 | Rheinberg ☞                                                 |  |
| 15 | Staudt                                                      |  |
| 16 | Hamburg                                                     |  |
| 17 | Rostock                                                     |  |
| 18 | Langelshiem                                                 |  |
| 19 | Bad Salzdetfurth                                            |  |
| 20 | Köln                                                        |  |
| 21 |                                                             |  |

- K+S Aktiengesellschaft
- Geschäftsfeld Düngemittel
- Kali- und Magnesiumprodukte
- Geschäftsfeld Düngemittel
- Stickstoffdüngemittel
- Geschäftsfeld Salz
- esco, SPL, Morton Salt
- Ergänzende Geschäftsbereiche
- ☞ Kali- und Steinsalz-Bergbau



## UNSERE STANDORTE IN EUROPA

ABB: 2.4.2

|                                  |   |                                 |   |
|----------------------------------|---|---------------------------------|---|
| Frankreich                       |   | Schweiz                         |   |
| 22 Reims                         | ■ | 39 Frauenkappelen               | ■ |
| 23 Wittenheim                    | ■ | 40 Allschwil                    | ■ |
| 24 Le Teil                       | ■ | Niederlande                     |   |
| 25 Sainte Radegonde              | ■ | 41 Breda                        | ■ |
| 26 Roche-lez-Beaupré             | ■ | 42 Harlingen                    | ■ |
| 27 Château Renault               | ■ | Belgien                         |   |
| 28 Levallois-Perret <sup>1</sup> | ■ | 43 Deinze                       | ■ |
| 29 Dombasle                      | ■ | 44 Brüssel                      | ■ |
| Italien                          |   | Großbritannien                  |   |
| 30 Verona <sup>1</sup>           | ■ | 45 Hertford <sup>1</sup>        | ■ |
| 31 Cesano Maderno                | ■ | Schweden                        |   |
| 32 Ravenna                       | ■ | 46 Göteborg <sup>1</sup>        | ■ |
| Spanien                          |   | Lettland                        |   |
| 33 Barcelona <sup>1</sup>        | ■ | 47 Livani                       | ■ |
| 34 La Vall d'Uixó                | ■ | Tschechische Republik           |   |
| 35 Torrelavega                   | ■ | 48 Prag <sup>1</sup>            | ■ |
| Portugal                         |   | Polen                           |   |
| 36 Povoá/Alverca                 | ■ | 49 Poznań <sup>1</sup>          | ■ |
| 37 Olhão                         | ■ | Österreich                      |   |
| 38 Lissabon                      | ■ | 50 Wien                         | ■ |
|                                  |   | Griechenland                    |   |
|                                  |   | 51 Marousi/Korinth <sup>1</sup> | ■ |
|                                  |   | Türkei                          |   |
|                                  |   | 52 Istanbul <sup>1</sup>        | ■ |
|                                  |   | Russland                        |   |
|                                  |   | 53 Moskau                       | ■ |

- K+S Aktiengesellschaft
- Geschäftsfeld Düngemittel
- Kali- und Magnesiumprodukte
- Geschäftsfeld Düngemittel
- Stickstoffdüngemittel
- Geschäftsfeld Salz
- esco, SPL, Morton Salt
- Ergänzende Geschäftsbereiche

<sup>1</sup> Mehrbereichsgesellschaften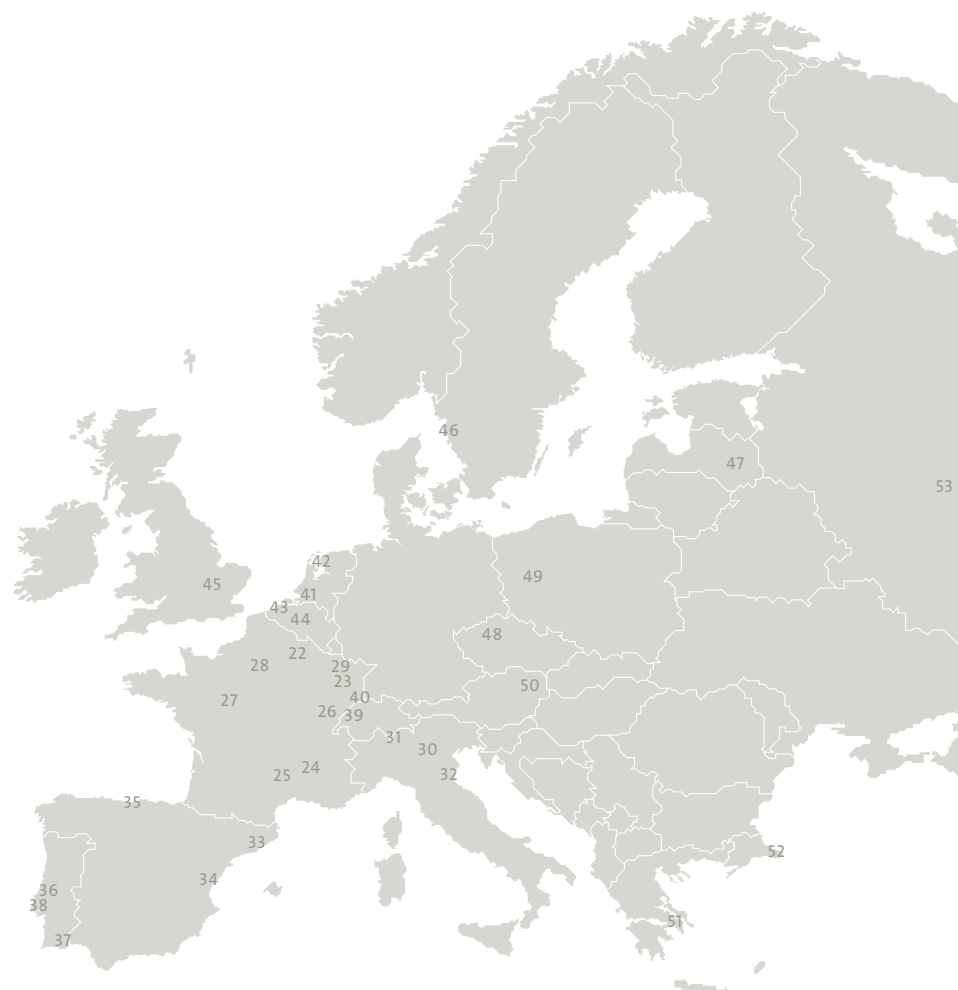

## UNSERE STANDORTE IN AMERIKA

ABB: 2.4.3

## Nordamerika

## USA

|    |                       |   |
|----|-----------------------|---|
| 54 | New York <sup>1</sup> | ■ |
| 55 | Clarks Summit         | ■ |
| 56 | Newark                | ■ |
| 57 | Long Beach            | ■ |
| 58 | Grantsville ☞         | ■ |
| 59 | Glendale              | ■ |
| 60 | Grand Saline          | ■ |
| 61 | Hutchinson            | ■ |
| 62 | Weeks Island ☞        | ■ |
| 63 | St. Paul              | ■ |
| 64 | Chicago               | ■ |
| 65 | Port Canaveral        | ■ |
| 66 | Cincinnati            | ■ |
| 67 | Rittman               | ■ |
| 68 | Windsor               | ■ |
| 69 | Manistee              | ■ |
| 70 | Inagua                | ■ |
| 71 | Fairport ☞            | ■ |
| 72 | Silver Springs        | ■ |
| 73 | Perth Amboy           | ■ |

## Kanada

|    |                 |   |
|----|-----------------|---|
| 74 | Lindbergh       | ■ |
| 75 | Regina          | ■ |
| 76 | Ojibway ☞       | ■ |
| 77 | Mines Seleine ☞ | ■ |
| 78 | Pugwash ☞       | ■ |

## Mexiko

|    |                          |   |
|----|--------------------------|---|
| 79 | Mexico City <sup>1</sup> | ■ |
|----|--------------------------|---|

## Südamerika

## Brasilien

|    |                        |   |
|----|------------------------|---|
| 80 | São Paulo <sup>1</sup> | ■ |
| 81 | Florianópolis          | ■ |
| 82 | Natal                  | ■ |
| 83 | Galinhas               | ■ |
| 84 | Rio Grande             | ■ |

## Chile

|    |                   |   |
|----|-------------------|---|
| 85 | Santiago de Chile | ■ |
| 86 | Iquique ☞         | ■ |

## Argentinien

|    |                           |   |
|----|---------------------------|---|
| 87 | Buenos Aires <sup>1</sup> | ■ |
|----|---------------------------|---|

Asien<sup>2</sup>

## Singapur

|    |                       |   |
|----|-----------------------|---|
| 88 | Singapur <sup>1</sup> | ■ |
|----|-----------------------|---|

## China

|    |                       |   |
|----|-----------------------|---|
| 89 | Shenzhen <sup>1</sup> | ■ |
|----|-----------------------|---|

- K+S Aktiengesellschaft
- Geschäftsfeld Düngemittel
- Kali- und Magnesiumprodukte
- Geschäftsfeld Düngemittel
- Stickstoffdüngemittel
- Geschäftsfeld Salz
- esco, SPL, Morton Salt
- Ergänzende Geschäftsbereiche

☞ Kali- und Steinsalz Bergbau

<sup>1</sup> Mehrbereichsgesellschaften<sup>2</sup> Nicht auf Karte dargestellt.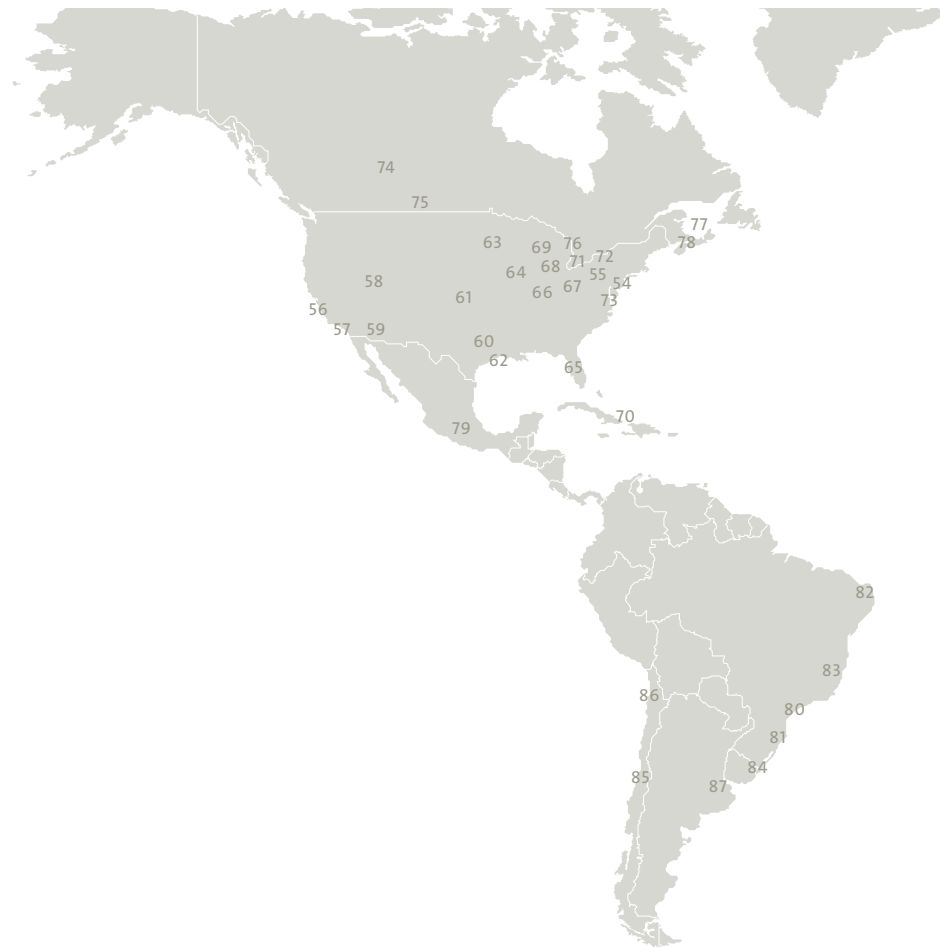

## PRODUKTVERANTWORTUNG

MARKT- UND ZUFRIEDENHEITSANALYSEN sowie Auditierungen durch Kunden liefern gute Ergebnisse und konkrete Ansätze für weitere Verbesserungen / REACH: Insgesamt 26 registrierpflichtige Stoffe vorregistriert / Neues gemeinsames Institut von κ+s und Universität Göttingen widmet sich Forschung auf dem Gebiet der Pflanzenernährung / κ+s betreut rund 250 Feldversuche rund um den Erdball / Feuchtsalztechnologie ist effektivste und umweltfreundlichste Methode im Winterdienst

# 3

---

|     |                              |    |
|-----|------------------------------|----|
| 3.1 | Gesicherte Qualität          | 69 |
| 3.2 | Messbare Kundenzufriedenheit | 69 |
| 3.3 | Forschung und Entwicklung    | 70 |
| 3.4 | Düngemittel                  | 72 |
| 3.5 | Salz                         | 74 |
| 3.6 | Entsorgung und Recycling     | 77 |

### 3.1 GESICHERTE QUALITÄT

Wir fördern und veredeln hochwertige mineralische Rohstoffe und wollen mit unseren Produkten und Leistungen Ernährung, Gesundheit sowie Lebensqualität verbessern. Es ist für uns selbstverständlich, sämtliche Produkte auf mögliche Risiken für Gesundheit, Sicherheit, Umwelt und Qualität zu überprüfen und dafür zu sorgen, dass sie bei verantwortungsvoller und sachgerechter Nutzung sicher für Mensch und Umwelt sind (zum Qualitätsmanagementsystem siehe Seite 13).

Unser Ziel ist es, die Sicherheit und Umweltverträglichkeit unserer Produkte in allen Phasen der Wertschöpfungskette ständig weiter zu verbessern – von der Förderung unserer Rohstoffe über Produktion und Distribution bis hin zur Anwendung.

/ ÜBERSICHT ÜBER UNSERE QM-ZERTIFIKATE unter [www.k-plus-s.com/de/produktverantwortung/](http://www.k-plus-s.com/de/produktverantwortung/)

### 3.2 MESSBARE KUNDENZUFRIEDENHEIT

Der Dialog mit unseren Kunden trägt dazu bei, Vertrauen zu schaffen und zu sichern. Alle Geschäftsbereiche holen in regelmäßigen Abständen die Meinung ihrer Kunden zur Produktqualität und den sie betreffenden Prozessen und Dienstleistungen ein. Neben Zufriedenheitsanalysen liefern uns persönliche Gespräche

sowie die Reklamationsstatistik konkrete Ansatzpunkte für weitere Verbesserungen.

#### BEFRAGUNGEN UND ANALYSEN

- + K+S NITROGEN hat auf den DLG-Feldtagen mit Hilfe qualitativer Kunden-Interviews den Erfolg ihrer ENTEC®-Werbekampagne „Bauernweisheiten“ untersucht. Das erfreuliche Ergebnis: Die Kampagne weist hohe Erinnerungs- und Sympathiewerte auf. Zwei der Motive haben sich als besonders werbewirksam herausgestellt und werden daher verstärkt eingesetzt.
- + COMPO hat die Rasendünger-Linie Floranid® sowie ihre Rasensamen-Linie im Rahmen einer qualitativen und quantitativen Studie auf ihre generelle Akzeptanz überprüft und erfragt, ob die Produktvorteile, wie die außergewöhnlich schnelle Keimung der Rasensaat, vom Verbraucher als solche wahrgenommen werden. Die Ergebnisse werden zurzeit ausgewertet.
- + Die brasilianische SPL-Tochter SALINAS DIAMANTE BRANCO (SDB) hat sich in Sachen Kundenzufriedenheit feste Ziele gesteckt: eine mindestens 90 %ige Kundenzufriedenheit und nicht mehr als 30 Reklamationen pro Jahr. Während im Jahr 2008 noch insgesamt 42 Beschwerden eingegangen waren, verzeichnete SDB im Jahr 2010 nur noch 30 Beschwerden. Der Meersalzproduzent hatte das Jahr 2009 zur Ursachenforschung genutzt und gezielte Verbesserungen eingeleitet. So wurde ein Call Center eingerichtet, um den Kundenservice zu verbessern, und die Qualitäts-

kontrolle verstärkt, insbesondere die Prüfung des Korngrößenspektrums.

- + MORTON SALT führt in regelmäßigen Abständen quantitative und qualitative Marktanalysen durch, um Bekanntheit und Ansehen der Marke MORTON® zu überprüfen. Auch die jüngste Analyse hat bestätigt, dass die Marke nicht nur bekannter ist als Wettbewerbsprodukte, sondern auch beliebter – und zwar sowohl bei den Speisesalzen als auch bei den Produkten zur Wasserenthärtung sowie den Auftaumitteln. Diese Ergebnisse sind hilfreich, um den Handel vom Potenzial neuer Produkte zu überzeugen und um die entsprechenden Verkaufsflächen in den Verbrauchermärkten zu erhalten.
- + Die K+S ENTSORGUNG führt alle vier Jahre eine Kundenzufriedenheitsanalyse durch. Im vergangenen Jahr befragte die K+S-Tochter bereits zum dritten Mal alle Kunden zu ihrer Zufriedenheit mit der kompletten Dienstleistungskette – von der Angebotserstellung bis zur Rechnungslegung. Fast 99 % der Kunden zeigten sich zufrieden bis sehr zufrieden. Die Qualität der Entsorgungslösungen sowie die Kompetenz, Freundlichkeit und Erreichbarkeit der Mitarbeiter bewerteten sie besonders positiv. Auch im direkten Vergleich zum Wettbewerb schnitt die K+S ENTSORGUNG besser ab. Insbesondere bei der Beratungskompetenz wurden deutlich bessere Bewertungen erreicht.



### AUDITIERUNGEN DURCH KUNDEN

Ver mehrt führen Kunden selbst Audits auf unseren Produktionsstandorten durch, die wir mit guten Ergebnissen bestehen. Im Jahr 2010 sind Standorte der K+S KALI GMBH unter anderem von den Firmen GAMBRO, STADA, DSM NUTRITIONAL, NESTLÉ und CARGILL auditiert worden. Bei COMPO überzeugten sich beispielsweise CARREFOUR und bei ESCO die Unternehmen B. BRAUN MEDICAL, MCDONALD'S, CARREFOUR und SACHSEN MILCH von der hohen Qualität der Prozesse. SPL wurde unter anderem von NESTLÉ, ARAMARK sowie FRUTOS DEL MAIPO auditiert und MORTON SALT von MERCK, GAMBRO, PROCTER & GAMBLE, GLAXO-SMITH KLINE und HEINZ FOODS.

### PRODUCT STEWARDSHIP

K+S NITROGEN und COMPO beteiligen sich am Product Stewardship-Programm der EUROPEAN FERTILIZER MANUFACTURERS ASSOCIATION (EFMA). Dieses Programm soll gewährleisten, dass:

- + Mineraldünger, einschließlich ihrer Rohstoffe und Zwischenprodukte, sicher hergestellt, verarbeitet, gelagert, transportiert und angewendet werden,
- + Mineraldünger den gesellschaftlichen Anforderungen an die Erzeugung sicherer Lebens- und Futtermittel Rechnung tragen.

Beim Audit im Jahr 2008 haben die im Product Stewardship eingebundenen Partner BASF, COMPO und K+S NITROGEN die von der EFMA gestellten Anforderungen mit

### MORTON SALT VON WALMART AUSGEZEICHNET

Als eines von vier Unternehmen ist MORTON SALT im Jahr 2010 von WALMART mit dem „Supplier Collaboration Award“ ausgezeichnet worden. Das Unternehmen hat die Auszeichnung für die zuverlässige Lief erleistung im Bereich abgepackte Auftausalze im letzten Winter erhalten.

96 % überdurchschnittlich gut erfüllt. Insbesondere in den Bereichen Distribution sowie Marketing und Vertrieb konnten im Vergleich zum vorherigen Audit noch einmal Verbesserungen erzielt werden. / [www.efma.org](http://www.efma.org)

### REACH: K+S HAT DOSSIERS EINGEREICHT

K+S hatte im Jahr 2009 im Zuge der neuen Chemikalienverordnung REACH insgesamt 26 registrierpflichtige Stoffe, beispielsweise phosphathaltige Düngemittel, bei der EUROPÄISCHEN AGENTUR FÜR CHEMISCHE STOFFE (EChA) in Helsinki vorregistriert. Für 16 dieser Stoffe mit einer Jahres-Produktionsmenge von jeweils mehr als 1.000 t haben wir fristgerecht bis zum 30. November 2010 die entsprechenden Dossiers eingereicht. Aufgrund des erheblichen Aufwandes wurde hierbei – wie von der EChA vorgesehen – mit anderen Unternehmen zusammengearbeitet, die den gleichen Stoff registrieren lassen. Die EChA überprüft die Dossiers zurzeit auf ihre Vollständigkeit. Gibt es keine Beanstandungen, gilt die Registrierung als akzeptiert und die jeweilige Registrierungsnummer wird vergeben.

Sechs weitere Stoffe mit einer Jahres-Produktionsmenge von 100 bis 1.000 t werden wir bis Mai 2013 registrieren lassen. Vier Stoffe, die wir vorsorglich vorregistriert hatten, sind mittlerweile für uns nicht mehr relevant. / [www.echa.europa.eu](http://www.echa.europa.eu)

## 3.3 FORSCHUNG UND ENTWICKLUNG

Auch bei neuen Forschungsprojekten und in der Produktentwicklung werden die Grundsätze des nachhaltigen und gesellschaftlich verantwortlichen Wirtschaftens von Anfang an berücksichtigt. Wir überprüfen kontinuierlich unsere Produktionsverfahren hinsichtlich des nachhaltigen Einsatzes der uns zur Verfügung stehenden Ressourcen, entwickeln unsere Verfahren weiter und testen neue Technologien und Materialien für die Verbesserung der Prozesse.

### K+S-FORSCHUNGSINSTITUT

Wir betreiben in Deutschland ein eigenes Forschungsinstitut mit den Schwerpunkten Aufbereitung, Verfahrenstechnik und Analytik. Rund 60 Wissenschaftler, Ingenieure und Techniker arbeiten nicht nur auf dem Gebiet der Grundlagenforschung, sondern vor allem auch an Produkt- und Verfahrensentwicklungen. Naturwissenschaftliche Nachwuchskräfte werden im K+S-Forschungsinstitut auf ihren ersten praktischen Einsatz

in den Fabrikbetrieben vorbereitet und mit den speziellen Anforderungen ihres zukünftigen Arbeitsgebiets vertraut gemacht.

### AN-INSTITUT FÜR ANGEWANDTE PFLANZENERNÄHRUNG

Der praxisorientierten Forschung auf dem Gebiet der Pflanzenernährung widmet sich ein neues gemeinsames Institut der Universität Göttingen und der K+S KALI GMBH. Das An-Institut für angewandte Pflanzenernährung (INSTITUTE OF APPLIED PLANT NUTRITION – IAPN) soll als Schnittstelle zwischen Wissenschaft und Praxis aktuelle Fragen aufgreifen, vorhandenes Wissen bündeln und neue Erkenntnisse an die landwirtschaftliche Praxis weitergeben. Die Wissenschaftler am Institut wollen beispielsweise erforschen, welchen Beitrag ein intelligentes Düngemanagement zur Bewältigung der globalen Herausforderungen leisten kann und hierfür Lösungsansätze und Methoden entwickeln. Gleichzeitig wollen sie Lösungen für einen wirkungsvollen Wissenstransfer von der Forschung bis hin zum Landwirt finden, insbesondere in den Schwellen- und Entwicklungsländern.

Träger des Instituts ist eine neu gegründete Tochtergesellschaft der K+S KALI GMBH. Die Stellenausstattung des IAPN umfasst zunächst eine Juniorprofessur, eine Doktorandenstelle und eine technische Kraft. Darüber hinaus finanziert die K+S KALI GMBH einmalig ein

Startkapital für das Institut und gewährt zusätzliche Forschungsmittel für konkrete Projekte.

### MORTON SALT RESEARCH LABORATORY

In den USA betreibt MORTON SALT ein eigenes zentrales Forschungslabor in Elgin, Illinois. Die zehn Mitarbeiter arbeiten eng mit den Laboren auf den Standorten, aber auch mit externen Forschungseinrichtungen zusammen. Zu ihren Aufgaben gehören die Neu- und Weiterentwicklung von Produkten, die Analyse von Stoffen und Prozessen sowie Materialtests. Darüber hinaus berät das Forschungslabor Kunden bei speziellen Fragestellungen, unterstützt bei der Umsetzung behördlicher bzw. gesetzlicher Vorgaben und führt Weiterbildungen für Mitarbeiter durch.

### ZUSAMMENARBEIT MIT LEHRE UND FORSCHUNG

Spezielle Forschungsprojekte werden in Kooperation mit mehreren Hoch- und Fachhochschulen umgesetzt. Erkenntnisse der Grundlagenforschung gelangen auf diese Weise in unsere Unternehmenspraxis. Den Hochschulen wiederum eröffnet sich die Möglichkeit, mit aktuellem Praxisbezug zu forschen.

So ist es das Ziel eines Gemeinschaftsprojekts der K+S KALI GMBH und Doktoranden der Universitäten Halle, Gießen und Kiel, die Wassernutzungseffizienz von Boden und Pflanze zu verbessern. Grundsätzlich gilt: Nur ausgewogen ernährte Pflanzen können das vorhandene Wasser optimal nutzen. Darüber hinaus hat Kalium aber einen ganz spezifischen Einfluss: Böden

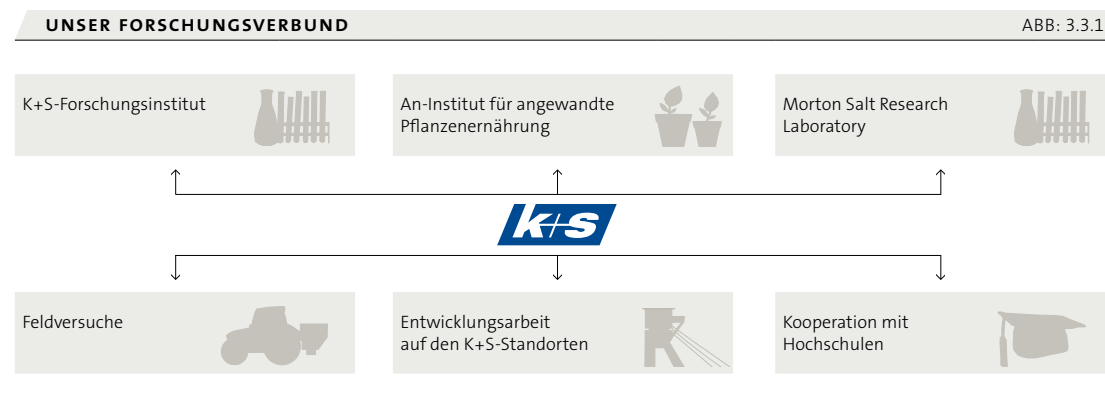

können bei regelmäßiger Kali- und Magnesiumdüngung mehr Wasser speichern. Zusätzlich ist ein positiver Effekt auf die Wurzelbildung erkennbar – und starke Wurzeln können zusätzliche Wasserreserven erschließen. Das Projekt hat auch erste Hinweise darauf erbracht, dass sich bei einer erhöhten Kaliumversorgung der Stoffwechsel von Pflanzen besser an Trockenbedingungen anpassen und daher effizienter mit Wasser umgehen kann. Diesem Aspekt wollen wir zukünftig verstärkte Aufmerksamkeit widmen.

K+S NITROGEN hat in Zusammenarbeit mit der FH Weihenstephan (Institut Pflanzenbau) ein Projekt zur Bewertung verschiedener Stickstoffdüngungsstrategien unter besonderer Berücksichtigung des Einsatzes stabilerer Dünger durchgeführt. Zielsetzung ist es, weitere Erkenntnisse über den Wirkmechanismus von ENTEC®-Düngern hinsichtlich des Pflanzenwachstums zu erhalten. Die Ergebnisse stehen noch aus. Außerdem hat K+S NITROGEN die FH Weihenstephan bei der Konzeption einer Marktforschungsstudie (Einsatz stickstoffstabilerer Dünger in der Landwirtschaft in Deutschland) fachlich unterstützt und kann im Gegenzug die ausgewerteten Ergebnisse für ihre Vertriebs- und Marketingaktivitäten nutzen.

Die K+S KALI GMBH beteiligt sich darüber hinaus an internationalen Forschungsprogrammen von Organisationen wie IPI, HARVESTPLUS und IPNI. Hier werden Kapazitäten und Fachwissen gebündelt, um komplexe Fragestellungen global beantworten zu können.

/ ABB: 3.3.1

#### PRODUKTENTWICKLUNG NACH DIN EN ISO 9001

Die Produktentwicklung erfolgt bei K+S nach DIN EN ISO 9001. In mehrjährigen Versuchen werden Neuprodukte zunächst praxisnah geprüft. Wir arbeiten an der Zusammensetzung, bis wir sicher sind, dass das Produkt den gewünschten Nutzen erzielt und weder Kundengesundheit noch Umwelt beeinträchtigt. Bei bestimmten Produkten führt die Bundesanstalt für Materialforschung vor der Markteinführung umfangreiche Tests durch und stuft das Produkt dementsprechend ein. Die Produktsicherheit wird spätestens alle zehn Jahre neu untersucht.

#### UMFANGREICHE PRODUKTINFORMATIONEN

Art und Umfang unserer Produktinformationen richten sich nach nationalen bzw. internationalen Rechtsvorschriften (z.B. Düngemittelverordnung und Lebensmittelkennzeichnungsrecht). Gruppenweit stehen zu unseren Produkten relevante Sicherheitsinformationen in Produktdatenbanken sowie laufend aktualisierte Sicherheitsdatenblätter bereit. Auch unsere Verpackungen überprüfen wir kontinuierlich, um immer den aktuellen Informationsstand zu gewährleisten.

### 3.4 DÜNGEMITTEL

Wir bieten unseren Kunden die wichtigen Pflanzennährstoffe Kalium, Stickstoff, Phosphat, Magnesium, Schwefel sowie Spurennährstoffe an. Nur durch eine gezielte und ausgewogene Düngung mit diesen Nährstoffen ist es möglich, den weltweit steigenden Bedarf nach Agrarprodukten zu decken (siehe hierzu Megatrends Seite 6). Wir entwickeln unsere Produkte und Nährstoffkombinationen beständig weiter, um sie noch besser auf die spezifischen Anforderungen einzelner Pflanzenkulturen abzustimmen und um unseren Kunden – auch im Hinblick auf die prognostizierten klimatischen Veränderungen – innovative Lösungen zur Effizienz- und Ertragssteigerung anzubieten.

#### 250 FELDVERSUCHE RUND UM DEN ERDBALL

Feldversuche sind unverzichtbar für unsere erfolgreiche Arbeit. Die gewonnenen Erkenntnisse erlauben eine gezielte, standortgerechte Bewertung von Nährstoffform, Düngermenge und Düngungszeitpunkt. Die K+S KALI GMBH, K+S NITROGEN und COMPO betreuen zurzeit rund 250 Feldversuche rund um den Erdball.  
/ ABB: 3.4.1

Der Versuchsaufbau erfolgt in der Regel in Zusammenarbeit mit lokalen Universitäten und wissenschaftlichen Instituten. Diese erhalten das Publikationsrecht sowie finanzielle Unterstützung für Graduierungsarbeiten und Promotionen. Viele Versuche finden direkt bei

Landwirten statt, die vom Erkenntnisgewinn unmittelbar profitieren.

### ANWENDUNGSBERATUNG FÜR EINE GUTE FACHLICHE PRAXIS

Auf Basis unserer Forschungsaktivitäten und Feldversuche erstellen wir individuelle Düngungsempfehlungen für unsere Kunden, die Voraussetzungen für eine „gute fachliche Praxis“ sind, wie sie beispielsweise im Bundesbodenschutzgesetz (BBodSchG) gefordert wird. Bewährt hat sich die kostenlose, interaktive Beratungssoftware,

#### BEST PRACTICE IM ÖLPALMENANBAU

Die K+S KALI GMBH führt auf einer Plantage im Nordwesten von Kolumbien ein Projekt zur Einführung eines Best Practice Managements (BPM) im Ölpalmenanbau durch. Dieses BPM besteht aus 30 unterschiedlichen, erprobten Maßnahmen, die alle zusammengekommen das Anbauverfahren verbessern. Neben der Düngung sind dies beispielsweise Sortenwahl, Bodenbearbeitung, Pflanzenschutzmittel, Wassermanagement und Ernteverfahren. Die K+S-Tochter hatte das BPM bereits auf einer Ölpalmen-Plantage in Südostasien umgesetzt, mit einem deutlichen Ertragsanstieg für den Landwirt. Das BPM basiert auf umfangreichen Forschungen mehrerer renommierter Institute, deren Vertreter der K+S KALI GMBH auch beim Projekt in Kolumbien beratend zur Seite stehen. Neben dem Plantagen-Management sind auch die Plantagenarbeiter selbst eingebunden. Je besser der Know-how-Transfer zwischen Unternehmen, Lehre und den Experten vor Ort funktioniert, desto nachhaltiger ist das Projektergebnis.

#### FELDVERSUCHE NACH LÄNDERN

ABB: 3.4.1

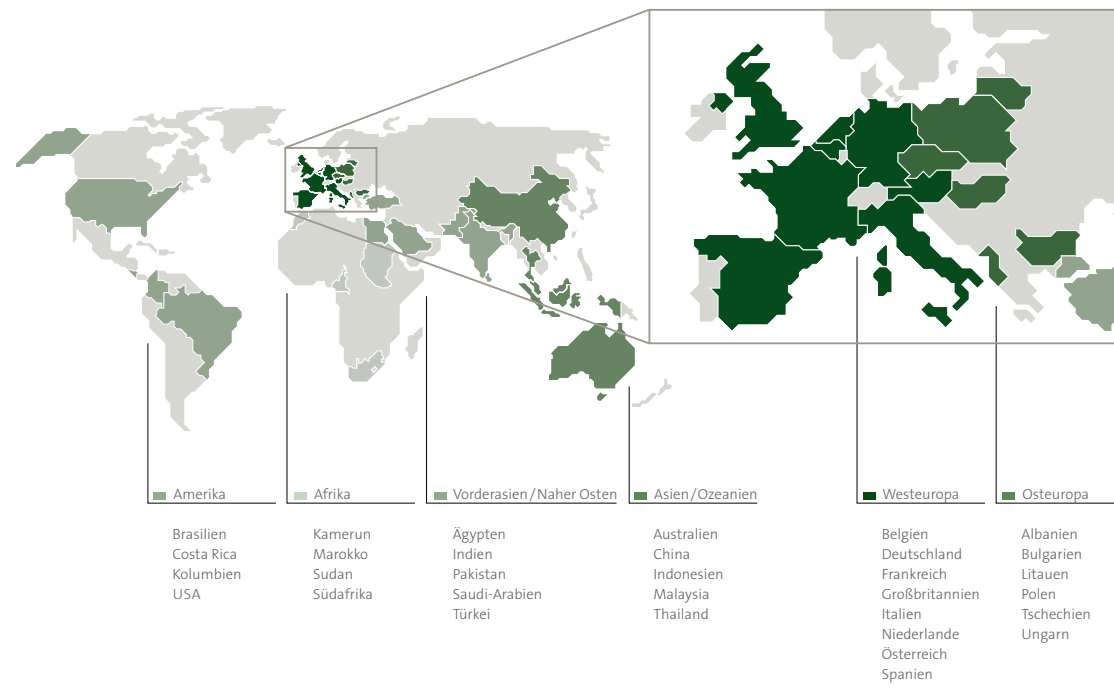

mit der die Kunden der K+S KALI GMBH und der K+S NITROGEN ihre Düngungsplanung sehr effizient durchführen können.

Auch in Schwellen- und Entwicklungsländern trägt unsere landwirtschaftliche Anwendungsberatung zum Know-how-Transfer bei. In diesen Regionen ist der sachgerechte Düngemiteinsatz meist weniger umfassend

regelt als in Europa. Nach unserer Einschätzung verfügen die Länder bei stärkerer Anwendung der „balanced fertilization“ allerdings über ein großes Ertragspotenzial. K+S schult daher die Verkaufsberater der Partner vor Ort sowie die Verantwortlichen auf den Plantagen und unterstützt lokale Behörden und Ausbildungseinrichtungen mit Informationsmaterialien.



Zukünftig wollen wir beim Thema Know-how-Transfer verstärkt mit der DEUTSCHEN GESELLSCHAFT FÜR INTERNATIONALE ZUSAMMENARBEIT (GIZ) kooperieren.

### **FLÜSSIGDÜNGUNG (FERTIGATION) KOMMT WACHSENDE BEDEUTUNG ZU**

Fertigation und Blattdüngern kommt angesichts der prognostizierten klimatischen Veränderungen eine wachsende Bedeutung zu. Denn die Pflanze kann die enthaltenen Nährstoffe kaum aufnehmen, wenn der Boden ausgetrocknet ist. Die Folge: Sinkende Erträge trotz eines gut gedüngten Bodens. Werden Dünger und Wasser jedoch kombiniert (Fertigation), ist die Nährstoffzufuhr besser zu regulieren und die Nährstoffe werden während der gesamten Wachstumsperiode gleichmäßiger von der Pflanze aufgenommen. Innerhalb der letzten fünf Jahre ist weltweit die mittels Fertigation gedüngte Fläche um 40 % gewachsen. K+S ist mit Produkten der K+S KALI GMBH (EPSO®-Familie, SOLUMOP®, SOLUSOP® und HORTISUL®) sowie von COMPO (HAKAPHOS®, KAMASOL® und NOVATEC SOLUB®) in diesem zukunfts-trächtigen Segment gut positioniert.

### **DÜNGUNG DURCH GRENZWERTE GEREGLT**

Unsere Kali- und Magnesiumdüngemittel sind Naturprodukte, die zum Großteil nach EU-Recht für den ökologischen Landbau zugelassen sind und von denen – wie auch von unseren Stickstoffdüngemitteln – bei fach-

gerechter Anwendung keine Gefahren für die Umwelt ausgehen.

### **SICHERHEITSDATENBLÄTTER KLÄREN AUF**

Gelangen durch unsachgemäße Anwendung und Lagerung oder bei Transportunfällen hohe Konzentrationen von Kalidüngemitteln in Wasser oder Boden, kann dies zu Salzschäden führen. Werden Stickstoffdüngemittel unsachgemäß verwendet, kann dies zur Überdüngung führen und Auswirkungen auf den Nitratgehalt im Trinkwasser haben. Darüber klären wir unsere Kunden auf und stellen Sicherheitsdatenblätter zur Verfügung, in denen die jeweils bei Lagerung und Transport zu treffenden Sicherheitsmaßnahmen beschrieben sind.

### **EINSATZ VON STICKSTOFFSTABILISIERENDEN DÜNGEMITTELN VERRINGERT LACHGAS-EMISSION**

Auch bei einer fachgerechten Anwendung von Stickstoffdüngemitteln lässt sich die Freisetzung des klimarelevanten Lachgases nicht völlig verhindern. K+S NITROGEN und COMPO haben stickstoffstabilisierende Düngemittel im Angebot, die mit einem Nitrifikationshemmer versehen sind. Dieser sorgt dafür, dass der enthaltene Ammonium-Stickstoff von den Bodenbakterien langsamer zu Nitrat-Stickstoff umgewandelt wird, wodurch eine bessere Stickstoffnutzung der Pflanzen erzielt wird und die Lachgas-Emissionen um bis zu 50 % reduziert werden können.

COMPO und K+S NITROGEN überprüfen in enger Zusammenarbeit mit der BASF bei neuen Produktlinien systematisch mögliche Auswasch- sowie gasförmige Stick-

stoffverluste. In einer Ökoeffizienz-Analyse ist ENTEC®, ein stickstoffstabilisierendes Produkt der K+S NITROGEN, in einer Fruchtfolge von drei Jahren mit zwei Wettbewerbsprodukten ohne Nitrifikationshemmer verglichen worden. Das Ergebnis zeigt, dass beim Einsatz von ENTEC® die Ausnutzung des Stickstoffes deutlich höher ist und damit die Verluste niedriger sind als bei den herkömmlichen Vergleichsprodukten.

## **3.5 SALZ**

Salz ist ein allgegenwärtiges Element unseres Lebens. Es dient der Gesundheit, zum Würzen, Färben und Konservieren und vielen weiteren Anwendungszwecken. Es ist für die Sicherheit im Straßenverkehr unverzichtbar und wichtiger Bestandteil für die Produktion von Glas, Papier und Kunststoff. Kurz: Ohne Salz ist unser Leben nicht vorstellbar.

### **UNVERZICHTBAR FÜR DEN MENSCHLICHEN ORGANISMUS**

Salz ist für den menschlichen Organismus lebenswichtig. Denn Salz bildet in Verbindung mit Wasser die Basis für zahlreiche Stoffwechselvorgänge: Indem es unseren Elektrolyt- und Flüssigkeitshaushalt regelt, können notwendige Nährstoffe im Körper gelöst und verbrauchte Substanzen ausgeschieden werden. Auch bei der Steuerung von Nerven und Muskeln spielt Salz eine zen-

trale Rolle. Darüber hinaus ist ausreichender Salzverzehr eine Voraussetzung für geistige und körperliche Fitness. Nicht zuletzt ist Natrium für den Knochenaufbau bedeutsam, während Chlorid – als wesentlicher Bestandteil der Magensäure – an den Verdauungsprozessen beteiligt ist.

#### BLUTHOCHDRUCK UND SALZKONSUM HÄNGEN NUR SELTEN ZUSAMMEN

Im Zusammenhang mit der Zivilisationskrankheit Bluthochdruck ist auch der Salzkonsum in die Schlagzeilen geraten. Es wird häufig zu einem sparsamen Umgang geraten, um krankhaft hohem Blutdruck (Hypertonie) vorzubeugen oder den Blutdruck gar zu senken. Aktuelle Studien der „Cochrane Collaboration“ belegen allerdings, dass der Blutdruck bei strikt salzarmer Kost im Durchschnitt nur sehr wenig sinkt. Auch das Institut für Qualität und Wirtschaftlichkeit im Gesundheitswesen (IQWiG), das sich bei seinem Urteil auf eine umfassende Analyse der verfügbaren Literatur und Studien stützt, hält es für nicht erwiesen, dass eine salzarme

Ernährung den Folgekomplikationen von Bluthochdruck entgegenwirkt.

Der Grund für den geringen Zusammenhang zwischen Blutdruck und Salzaufnahme: Übersteigt die Aufnahme den Bedarf, scheidet ein gesunder Körper das überflüssige Salz in aller Regel über die Nieren wieder aus. Dieser einfache Zusammenhang ist seit langem bekannt, wird aber selten gewürdigt.

[/www.cochrane.org](http://www.cochrane.org), [www.vks-kalisalz.de/anwendung-gesundheit.html](http://www.vks-kalisalz.de/anwendung-gesundheit.html)

[/www.eusalt.com/salt\\_and\\_body/salt\\_and\\_physiology.html](http://www.eusalt.com/salt_and_body/salt_and_physiology.html)  
[/www.saltinstitute.org/Issues-in-focus/Food-salt-health](http://www.saltinstitute.org/Issues-in-focus/Food-salt-health)

#### SPEISESALZE FÜR EINE BEWUSSTE ERNÄHRUNG UND DOSIERUNG

Ungeachtet der oben beschriebenen medizinischen Tatsachen haben wir mit **BALANCE®** Salz, **BIOSAL LIGHT®**, **SALT BALANCE®** sowie **LITE SALT™** natriumreduzierte Produkte im Programm, die sich an Verbraucher richten, die bewusst auf Salz, aber nicht auf vollen Geschmack verzichten wollen. Für eine ausgewogene mineralstoffreiche Ernährung ist der Natriumchlorid-Anteil gesenkt und durch die wertvollen Mineralien Kalium und Magnesium ersetzt worden.

#### AUFKLÄRUNG ÜBER DIE WIRKWEISE VON SALZ

esco unterstützt Verbände und Multiplikatoren, die über die Wirkweise von Salz informieren. SPL engagiert sich in einer Kommission, die mit Unterstützung des chilenischen Gesundheitsministeriums die Bevölkerung über einen maßvollen und gesunden Salzver-

zehr aufklärt. **MORTON SALT** hat im Jahr 2010 die „Salt Savvy“-Kampagne gestartet, in der sie zu einer bewussten Salzverwendung aufruft, die nicht auf Kosten des Geschmacks gehen muss. **MORTON SALT** regt an, häufiger mit frischen Produkten zu kochen statt Fertiggerichte zu kaufen, bei Fertiggerichten auf die Inhaltsstoffe zu achten und das Essen vor dem automatischen Nachsalzen zu probieren.

#### MIT FLUOR UND JOD VORBEUGEN

Unser Speisesalz wird als Träger für die Wirkstoffe Jod und Fluor verwendet. Damit unterstützen wir die Bemühungen von WHO, UNICEF und nationalen Organisationen zur Vorbeugung von Mangelkrankheiten. Als Mitglied des Arbeitskreises Jodmangel informiert esco Bevölkerung und Vertreter des öffentlichen Gesundheitswesens über Verbreitung und Folgen des Jodmangels in Deutschland sowie über Vorbeugemöglichkeiten. **MORTON SALT** gehört dem „Iodine Network“ an, einer Organisation, die Schwellen- und Entwicklungsländer bei der Bekämpfung von Jodmangelkrankheiten unterstützt. [/www.iodinenetwork.net](http://www.iodinenetwork.net)

Fluorid kann vor Zahnkaries schützen und den Zahnschmelz härten. Als Mitglied des Deutschen Arbeitskreises für Zahnheilkunde trägt esco durch interdisziplinäre Zusammenarbeit mit Zahn- und Kinderärzten und dem öffentlichen Gesundheitswesen zur Verhütung von Karies bei.

[/www.vks-kalisalz.de/anwendung-jodsalt\\_fluorid.html](http://www.vks-kalisalz.de/anwendung-jodsalt_fluorid.html)

#### CÉRÉBOS®-SALZ ERHÄLT BESTE TESTNOTE

Das Mineralsalz **SEL ÉQUILIBRE CÉRÉBOS®** – die französische Variante des **BALANCE®** Salz – ist von einem bekannten französischen Verbrauchermagazin als eine der besten Innovationen im Salzmarkt ausgezeichnet worden und hat in der Kategorie „Mineralsalzmischungen mit reduziertem Natriumgehalt“ die beste Testnote erhalten.

### DOSIERTER UND KONTROLLIERTER EINSATZ VON AUFTAUMITTELN

Der Einsatz von Auftaumitteln im Winterdienst hat sich seit vielen Jahrzehnten bewährt. Mehrere unabhängige Studien belegen, dass es zu Auftausalz weder wirtschaftliche noch ökologische Alternativen gibt, um die Sicherheit auf Straßen und Autobahnen zu gewährleisten. Zum Beispiel kam das Ökoinstitut Freiburg nach einer vergleichenden Untersuchung zwischen abstumpfenden Streustoffen und Auftausalz zu dem Ergebnis, dass Auftausalz – ausgebracht mit dem modernen Feuchtsalzverfahren – die umweltverträglichste und effektivste Methode im Winterdienst ist. Diese Technik, bei der ein Gemisch aus 70 % Trockensalz und 30 % Sole ausgebracht wird, ermöglicht die Reduzierung der Ausbringungsmenge an Auftausalz bei gleichzeitig verbesserter Auftauwirkung und damit höherer Sicherheit auf unseren Straßen. / ABB: 3.5.1

Auftausalz kann durch das enthaltene Chlorid Pflanzen schädigen und Grund- und Oberflächenwasser versalzen. Außerdem können die Metallteile von Verkehrsmitteln sowie die Verkehrsinfrastruktur einer verstärkten Korrosion ausgesetzt sein. Durch die Feuchtsalztechnologie, eine verbesserte Streutechnik, genauere Wettervorhersagemodelle und den verstärkten Einsatz von Messsensoren ist es gelungen, die potenziell schädliche Wirkung von Auftausalz zu minimieren.

[/www.vks-kalisalz.de/anwendung-winterdienst.html](http://www.vks-kalisalz.de/anwendung-winterdienst.html)

### STETE REDUZIERUNG DER AUSGEBRACHTEN STREUSALZMENGEN

ABB: 3.5.1

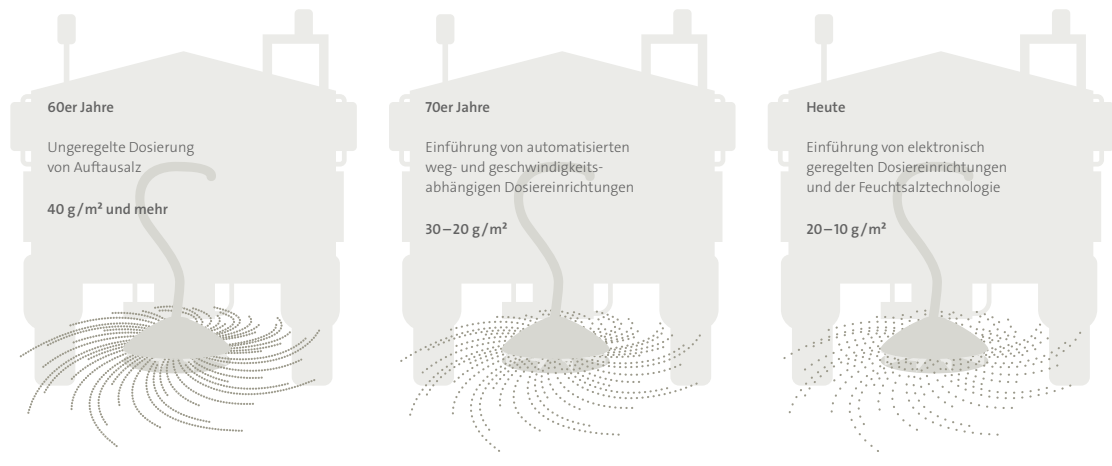

### KLIMATISCHE VERÄNDERUNGEN

Es ist zu erwarten, dass zukünftig die Anzahl der Tage mit Temperaturen um den Gefrierpunkt steigt, während die Anzahl der Tage mit strengem Frost abnimmt. Auftausalz wird bei Temperaturen um den Gefrierpunkt am stärksten nachgefragt. Daher gehen wir davon aus, dass prognostizierte klimatische Veränderungen mittelfristig keine Auswirkungen auf unser Auftausalzgeschäft haben.

### FEUCHTSALZTECHNOLOGIE IST STAND DER TECHNIK

In Deutschland und Skandinavien gilt die Feuchtsalztechnologie als Stand der Technik; 80 bis 90 % des von esco lose verkauften Auftausalzes wird mit dieser Methode ausgebracht. Im übrigen Europa ist das Bild uneinheitlich: Dort, wo der Investitionsaufwand für die Feuchtsalztechnologie die Budgetmöglichkeiten überschreitet, wird noch Trockensalz gestreut. Außerdem sind die topografischen und klimatischen Anforderungen, die historische Entwicklung des Winterdienstes vor Ort sowie die jeweiligen Umweltstandards ausschlaggebend.

Gleichwohl herrscht auf europäischer Ebene ein reger Informationsaustausch über Best Practices im Winterdienst. So hat es sich das europäische Forschungsprojekt COST 353 zum Ziel gesetzt, europaweit einheitliche Standards für Winterdienst und Verkehrssicherheit zu empfehlen. Im Abschlussbericht ist festgehalten, dass der Einsatz von Auftausalz europaweit die wirtschaftlichste und ökologischste Alternative ist. Der Bericht empfiehlt die Ausweitung der Feuchtsalztechnologie.

[/www.cost.esf.org/domains\\_actions/tud/Actions/Winter\\_Service\\_Strategies](http://www.cost.esf.org/domains_actions/tud/Actions/Winter_Service_Strategies)

#### NEUESTER TREND: VORBEUGENDE STREUUNG MIT SOLE

Auch in den USA und Kanada ist die Methode verbreitet, Auftausalz mit Sole anzuweichen. Es gibt jedoch keinen verbindlichen Standard für die Zusammensetzung des Produkts, sodass abhängig vom Kunden und den winterlichen Bedingungen unterschiedlichste Mischungen zum Einsatz kommen. MORTON SALT schätzt, dass sich der Anteil der feuchten Auftaumittel in den nächsten Jahren weiter erhöhen wird, da die nordamerikanischen Kunden verstärkt Produkte nachfragen, die eine verbesserte Wirksamkeit bei geringerer Umweltbelastung vorweisen. Außerdem verbreitet sich der Trend zur vorbeugenden Streuung mit Sole. Hierbei wird im Vorfeld von angekündigter Überfrierender Nässe Lösung auf den Straßen aufgebracht und so eine Vereisung verhindert oder zumindest verzögert.

Dieser Winterdienst-Trend wird zurzeit auch in Skandinavien erprobt: Dort haben Tests zu der Empfehlung

geführt, im Rahmen der vorbeugenden Streuung bei bestimmten Wetterlagen Sole einzusetzen. Ziel hierbei ist es, bei hoher Fahrgeschwindigkeit die Salzlösung in der geringstmöglichen Konzentration so gleichmäßig auf die Fahrbahn auszubringen, dass diese durchgehend benetzt ist. Diese Technik kann sich als eine wertvolle Ergänzung zur Feuchtsalzstreuung herausstellen, die bei bereits vorhandener Straßenglätte und Schneefall nach wie vor das Optimum im Winterdienst darstellt.

Esco verfolgt aufmerksam diese Entwicklung, die allerdings mit erheblichen Investitionen in Streu- und Lager-technik verbunden sein wird, und wird ihre Produkt- und Vertriebspolitik gegebenenfalls entsprechend ausrichten.

### 3.6 ENTSORGUNG UND RECYCLING

Der Geschäftsbereich Entsorgung und Recycling nutzt die durch die Rohsalzgewinnung entstandenen untertägigen Hohlräume zur langzeitsicheren Beseitigung und Verwertung von Abfällen und greift dabei auf die vorhandene Infrastruktur der aktiven deutschen Kali- bzw. Salzbergwerke zurück. Es werden zwei Untertage-Deponien (jährliche Kapazität 270.000 t) und fünf Anlagen zur Verwertung unter Tage (jährliche Kapazität 650.000 t) betrieben.

#### ABFÄLLE WERDEN DAUERHAFT DER BIOSPHÄRE ENTZOGEN

Die genutzten Salzlagerstätten sind gas- sowie flüssigkeitsdicht und sicher von den grundwasserführenden Schichten getrennt. Durch eine Kombination von geologischen und technischen Barrieren erreichen wir die höchstmögliche Sicherheit. Die Abfälle werden der Biosphäre dauerhaft entzogen. / ABB:3.6.2

Die Verwertungsanlagen sind nach Bergrecht zugelassen, die Deponien nach Abfallrecht genehmigt. Alle Betriebe entsprechen den Vorgaben der EU-Gesetzgebung und der Deponie- beziehungsweise der Versatzverordnung. Im Rahmen der aufwändigen Genehmigungsverfahren wurde in mehreren Gutachten die geologische, hydrogeologische, bergtechnische und geomechanische Eignung der Standorte nachgewiesen. Die Betriebe werden regelmäßig durch staatliche Aufsichtsbehörden kontrolliert, sie sind als Entsorgungsfachbetriebe und nach DIN ISO 9001:2000 zertifiziert.

#### UNTERTÄGIGE BESEITIGUNG VON ABFÄLLEN

Für die untertägige Beseitigung in den Deponien eignen sich anorganische toxische Abfälle, die weder explosionsgefährlich, leicht entzündlich, radioaktiv, ausgasend noch selbstgänglich brennbar sein dürfen. Außerdem werden keine freien Flüssigkeiten eingelagert, und die Stoffe dürfen nicht reaktionsfähig mit dem Salzgestein sein. In Frage kommen daher beispielsweise Verbrennungsrückstände, arsen- oder quecksilberhaltige Abfälle sowie kontaminierte Böden und Bauschutt.



SCHEMATISCHE DARSTELLUNG EINER UNTERTAGE-DEPONIE

ABB: 3.6.1

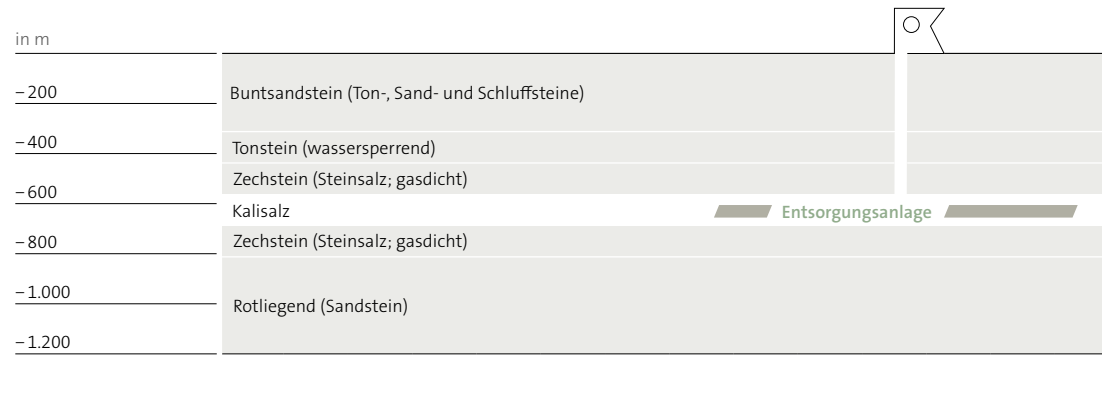

Die Abfälle werden in Big-Bags oder in Fässern und Containern aus Stahlblech verpackt. Ist die Einlagerung in einer Kammer abgeschlossen, wird sie durch eine Mauer oder einen Salzwall verschlossen und damit von anderen Stoffgruppen getrennt. Nach Beendigung des Betriebes werden die zugehörigen Schächte wasserdicht und langzeitsicher nach dem Stand der Technik verschlossen.

Die genehmigten Einlagerungshohlräume beider Untertage-Deponien reichen bei den derzeitigen Einlagerungsmengen für mehrere Jahrzehnte aus. Aufgrund des Kaliabbaus entstehen kontinuierlich weitere Hohlräume, die nach Erweiterung der entsprechenden Genehmigung ebenfalls für die Abfalleinlagerung genutzt werden können.

#### VERWERTUNG VON ABFÄLLEN

Im Gegensatz zur Beseitigung ist bei der Verwertung die Nutzung des Abfalls das Ziel. Zugelassene bergbau-fremde Abfälle werden hier zur Verfüllung dafür geeigneter Hohlräume verwendet. Durch spezielle Techniken und die besonderen bauphysikalischen Eigenschaften der Abfallstoffe wird eine Stützwirkung erreicht, die die Stabilität der Hohlräume über extrem lange Zeiträume sichert. Für die untertägige Verwertung geeignet sind beispielsweise Klärschlammverbrennungsaschen, Filterstäube aus der Rauchgasreinigung von Hausmüll- und Sonderabfallverbrennungsanlagen, verunreinigte Böden und Bauschutt sowie Eindampfdruckstände von Deponiesickerwässern.



## ÖKONOMIE

**NACHHOLEFFEKTE UND NORMALISIERUNG** der weltweiten Düngemittelmärkte führen zu deutlich stärkerer Nachfrage und hoher Auslastung der Kapazitäten / Starkes Salzgeschäft aufgrund eines sehr hohen Auftausalzabsatzes in Europa sowie erstmalig ganzjähriger Einbeziehung von MORTON SALT / Konzernumsatz um 40 % auf 5,0 Mrd. € gestiegen / Operatives Ergebnis EBIT I erreichte 727 Mio. € – eine Verdreifachung gegenüber dem Wert des Vorjahres / K+S GRUPPE mit attraktiven Perspektiven / K+S-Aktie legte im Jahr 2010 um 40,9 % zu

# 4

---

|     |                                 |    |
|-----|---------------------------------|----|
| 4.1 | Geschäftliche Rahmenbedingungen | 81 |
| 4.2 | Umsatz und Ergebnis             | 81 |
| 4.3 | K+S-Aktie                       | 85 |

## 4.1 GESCHÄFTLICHE RAHMENBEDINGUNGEN

### GESCHÄFTSFELD DÜNGEMITTEL

Das Geschäftsjahr 2010 war gegenüber dem Vorjahr von einer sich normalisierenden und damit deutlich höheren Nachfrage nach Düngemitteln geprägt. Zu Beginn des Berichtsjahres stieg die Nachfrage des Handels auf der Nordhalbkugel wieder erheblich an, um die nach der Kaufzurückhaltung des Vorjahres sehr niedrigen Düngemittellagerbestände im Vorfeld der Frühjahrssaison wieder aufzufüllen. Auch die Landwirtschaft kehrte weitgehend zu einem nachhaltigen Verbrauchsverhalten zurück.

Angesichts eines stark reduzierten Düngemiteleinsatzes im Jahr 2009 und der daraus – infolge niedriger Nährstoffgehalte in den Böden – resultierenden Risiken für die Ertragspotenziale der kommenden Ernten erhöhte die Landwirtschaft den Düngemiteleinsatz weltweit wieder deutlich. Der in der zweiten Jahreshälfte einsetzende starke Anstieg der internationalen Getreidepreise und die damit einhergehende verbesserte Einkommenssituation der Landwirte begünstigte die Düngemittelnachfrage dann noch zusätzlich.

### GESCHÄFTSFELD SALZ

Der außergewöhnliche und flächendeckende Winter in Europa führte im ersten Quartal und im Dezember zu einer sehr hohen Nachfrage, die auch bei maximaler Ausnutzung der verfügbaren lokalen Produktionskapazitäten und trotz erhöhter Importe aus Übersee nicht vollständig bedient werden konnte. Während der Winter in den USA im ersten Quartal relativ normal verlief, herrschte in Kanada eine sehr milde Witterung. Ein relativ später Wintereinbruch sorgte im vierten Quartal dafür, dass die Nachfrage sich gegenüber einem schwachen Vorjahresquartal zwar verbesserte, jedoch trotzdem unterdurchschnittlich verlief.

Bei Industriesalzen normalisierte sich die Nachfrage in Europa im Umfeld einer sich verstetigenden wirtschaftlichen Erholung; dies traf jedoch noch nicht auf den nordamerikanischen Markt zu. Im südamerikanischen Industriesalzmarkt erhöhte sich der Wettbewerbsdruck infolge des Erdbebens sowie der Belastung der Kunden durch höhere Energiekosten.

Die Nachfrage nach Speise- und Gewerbesalz zeigt sich im Berichtsjahr relativ stabil.

## 4.2 UMSATZ UND ERGEBNIS

### UMSATZ MIT 5,0 MRD. € UM 40 % ÜBER VORJAHRESNIVEAU

Im Geschäftsjahr 2010 haben wir einen Umsatz von 4.993,8 Mio. € erzielt, dieser lag um 40 % über dem Wert des Vorjahres. Unterjährig lässt sich an den Quartalsumsätzen eine gewisse Saisonalität erkennen; so fällt das erste Quartal tendenziell am stärksten und das dritte Quartal am schwächsten aus. Bei einer mengenmäßigen Betrachtung profitiert das erste Quartal im Geschäftsfeld Düngemittel üblicherweise von der einsetzenden Frühjahrsdüngung in Europa; im dritten Quartal erfolgt zwar die Herbstdüngung, allerdings ist diese absatzmäßig weniger bedeutend. Das Auftausalzgeschäft konzentriert sich in der Regel auf das erste und vierte Quartal eines Jahres, während im zweiten und dritten Quartal Voreinlagerungen zu in der Regel günstigeren Preisen stattfinden.

Der Umsatzanstieg im Jahr 2010 ist insbesondere auf positive Mengen- und Konsolidierungseffekte zurückzuführen, die negative Preiseffekte mehr als ausgleichen konnten. Die Geschäftsbereiche Kali- und Magnesiumprodukte sowie Stickstoffdüngemittel erzielten kräftige Umsatzzuwächse, da sich die Düngemittelnachfrage im Berichtsjahr deutlich erhöht hat. Im Geschäftsbereich Salz wirkten sich sowohl die ganzjährige Konsolidierung von MORTON SALT als auch ein hoher Auftausalz-



## UMSATZ NACH GESCHÄFTSBEREICHEN

ABB: 4.2.1

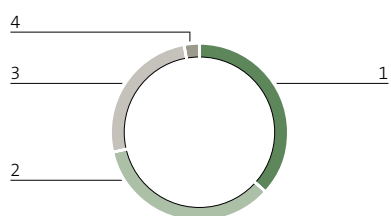

|                                | 2010 | 2009 |
|--------------------------------|------|------|
| in %                           |      |      |
| 1 Kali- und Magnesiumprodukte  | 36,9 | 39,8 |
| 2 Stickstoffdüngemittel        | 25,8 | 28,4 |
| 3 Salz                         | 34,6 | 28,4 |
| 4 Ergänzende Geschäftsbereiche | 2,7  | 3,4  |

## UMSATZ NACH REGIONEN

ABB: 4.2.2

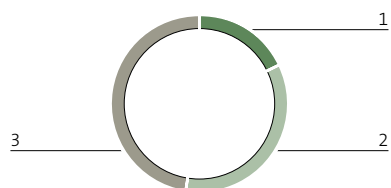

|                  | 2010 | 2009 |
|------------------|------|------|
| in %             |      |      |
| 1 Inland         | 18,0 | 18,0 |
| 2 Übriges Europa | 34,5 | 35,1 |
| 3 Übersee        | 47,5 | 46,9 |

absatz im ersten und vierten Quartal positiv auf den Umsatz aus.

Mit knapp 37 % war der Geschäftsbereich Kali- und Magnesiumprodukte der umsatzstärkste Geschäftsbereich der K+S GRUPPE, gefolgt von Salz und Stickstoffdüngemitteln. / ABB: 4.2.1

In Europa erzielten wir einen Umsatz von 2,6 Mrd. € (+38 %). Damit entfielen rund 53 % des Gesamtumsatzes auf diese Region. Die Akquisition von MORTON SALT hat dazu beigetragen, dass sich die regionale Verteilung des Gruppenumsatzes mittlerweile sehr ausgewogen auf Europa und Übersee verteilt: Der Umsatz in den Überseemärkten stieg um 41 % auf insgesamt 2,4 Mrd. € auf rund 47 % des Gesamtumsatzes. / ABB: 4.2.2

## ENTWICKLUNG AUSGEWÄHLTER KOSTENARTEN

Die gestiegene Produktionsleistung sowie die erstmals ganzjährige Konsolidierung von MORTON SALT führten im Vergleich zum Jahr 2009 zu einem Umsatzzanstieg von rund 40 %. Beide Effekte wirkten sich auch deutlich in der Entwicklung der Gesamtkosten aus. Die wichtigsten Kostenarten haben sich wie folgt entwickelt: Der Personalaufwand der K+S GRUPPE ist mit 1,02 Mrd. € gegenüber dem Vorjahr um 35 % gestiegen. Die Materialkosten, gemessen am Umsatz etwa 25 %, erhöhten sich konsolidierungs- und mengenbedingt um etwa 27 % auf 1,29 Mrd. €. Die Frachtkosten, gemessen am Umsatz etwa 15 %, stiegen konsolidierungs- und mengenbedingt sowie aufgrund gestiegener Frachtraten etwas stärker als der Umsatz um 51 % auf 790,0 Mio. €. Die Energiekosten, etwa 5 % des Umsatzes, erhöhten sich vor allem mengen- und konsolidierungsbedingt um 26 % auf 265,8 Mio. €.

## OPERATIVES ERGEBNIS EBIT I DEUTLICH GESTIEGEN

Die Steuerungsgröße der K+S GRUPPE, das operative Ergebnis EBIT I, stieg um 488,9 Mio. € bzw. 205 % auf 726,9 Mio. € (2009: 238,0 Mio. €). Während die Geschäftsbereiche Kali- und Magnesiumprodukte sowie Stickstoffdüngemittel ihre Ergebnisse aufgrund der im gesamten Jahr 2010 deutlich höheren Nachfrage nach Düngemitteln steigerten, ist das gute Ergebnis des Geschäftsbe-

reichs Salz sowohl auf einen positiven Konsolidierungseffekt als auch auf ein überdurchschnittliches Auftausalzgeschäft in Europa im ersten und vierten Quartal zurückzuführen.

### ERGEBNIS NACH OPERATIVEN SICHERUNGSGESCHÄFTEN EBIT II DEUTLICH GESTIEGEN

Das Ergebnis nach operativen Sicherungsgeschäften (EBIT II) erreichte im Berichtsjahr 731,5 Mio. € nach 241,9 Mio. € im Vorjahr. Dabei wurde das EBIT II durch Ergebniseffekte aus operativen, antizipativen Sicherungsgeschäften in Höhe von 4,6 Mio. € begünstigt (2009: +3,9 Mio. €). Dieser Betrag entspricht dem Teil des Ergebnisses aus operativen, antizipativen Sicherungsgeschäften, der noch nicht als realisiertes Ergebnis im EBIT I erfasst wurde. Nach IFRS werden die Marktwertveränderungen aus Sicherungsgeschäften in der Gewinn- und Verlustrechnung ausgewiesen.

### KONZERNERGEBNIS UND BEREINIGTES KONZERNERGEBNIS NACH STEUERN STARK GESTIEGEN

Das Konzernergebnis nach Steuern und Anteilen Dritter lag im Berichtsjahr bei 448,6 Mio. € (2009: 96,4 Mio. €). Für die Berechnung des erwarteten Ertragsteueraufwands wurde ein inländischer Konzernsteuersatz von 28,2 % zugrunde gelegt (Vorjahr: 27,9 %). Im Jahr 2010 fiel

ein Steueraufwand von insgesamt 158,6 Mio. € (2009: 29,6 Mio. €) an; dieser beinhaltet einen latenten und damit nicht zahlungswirksamen Steuerertrag von 20,6 Mio. € (2009: Steuerertrag 8,7 Mio. €).

Zur besseren Vergleichbarkeit weisen wir zusätzlich ein bereinigtes Konzernergebnis aus, das nur das realisierte Ergebnis aus operativen, antizipativen Sicherungsgeschäften der jeweiligen Berichtsperiode enthält. Das bereinigte Konzernergebnis lag mit 445,3 Mio. € um 351,7 Mio. € über dem Wert des Vorjahres (2009: 93,6 Mio. €). Die wesentliche Ursache hierfür war das stark gestiegene operative Ergebnis. Die bereinigte Konzernsteuerquote betrug im Berichtsjahr 26,2 % nach 23,6 % im Vorjahr.

### WERTSCHÖPFUNG

Die Wertschöpfungsrechnung stellt die Differenz zwischen der von Unternehmen erbrachten Leistung und dem Wert der benötigten Vorleistungen dar. Mit der Verteilungsrechnung werden die Anteile der am Wertschöpfungsprozess Beteiligten – Mitarbeiter, Unternehmen, Darlehensgeber, Aktionäre und die Öffentliche Hand – ausgewiesen.

Im Jahr 2010 betrug die Wertschöpfung der K+S GRUPPE 1.683,8 Mio. € (Vorjahr: 942,6 Mio. €). Auf unsere Mitarbeiter entfiel davon in Form von Löhnen und Gehältern, sozialen Abgaben und Aufwendungen für die Altersvor-

#### WERTSCHÖPFUNG ERMITTLUNG TAB: 4.2.1

|                                             | 2010           | 2009         |
|---------------------------------------------|----------------|--------------|
| in Mio. €                                   |                |              |
| Umsatzerlöse                                | 4.993,8        | 3.573,8      |
| Unternehmensleistung                        | 5.270,9        | 3.630,6      |
| Abzügl. Summe der Aufwendungen <sup>1</sup> | 3.338,7        | 2.514,2      |
| Abzügl. Abschreibungen                      | 248,4          | 173,8        |
| <b>Wertschöpfung bereinigt</b>              | <b>1.683,8</b> | <b>942,6</b> |

<sup>1</sup> Bereinigt um den Effekt der Marktwertveränderungen aus Sicherungsgeschäften.

#### WERTSCHÖPFUNG VERTEILUNG TAB: 4.2.2

|                                | 2010           | 2009         |
|--------------------------------|----------------|--------------|
| in Tsd. €                      |                |              |
| Mitarbeiter                    | 1.019,3        | 756,4        |
| Öffentliche Hand <sup>1</sup>  | 160,7          | 28,8         |
| Darlehensgeber                 | 58,5           | 63,8         |
| Aktionäre                      | 191,4          | 38,3         |
| Unternehmen                    | 253,9          | 55,3         |
| <b>Wertschöpfung bereinigt</b> | <b>1.683,8</b> | <b>942,6</b> |

<sup>1</sup> Bereinigt um den latenten Steuerbetrag auf den Marktwerteffekt aus Sicherungsgeschäften.

sorge mit rund 1.019,3 Mio. € der größte Teil. Die Öffentliche Hand war mit 160,7 Mio. € und die Darlehensgeber mit 58,5 Mio. € beteiligt. Es ist geplant, an unsere Aktionäre eine Dividende von 1,00 € je Aktie, insgesamt 191,4 Mio. €, auszuschütten. Die restlichen 253,9 Mio. € verbleiben zur inneren Stärkung in der Unternehmensgruppe.

/ TAB: 4.2.1, 4.2.2

**KENNZAHLEN K+S GRUPPE**

TAB: 4.2.3

|                                 | 2010    | 2009    | %       |
|---------------------------------|---------|---------|---------|
| in Mio. €                       |         |         |         |
| Umsatz                          | 4.993,8 | 3.573,8 | + 39,7  |
| Operatives Ergebnis EBIT I      | 726,9   | 238,0   | + 205,4 |
| Konzernergebnis, bereinigt      | 445,3   | 93,6    | + 375,7 |
| Investitionen                   | 201,0   | 177,6   | + 13,2  |
| Mitarbeiter (Angaben in Anzahl) | 15.241  | 15.208  | + 0,2   |

**INVESTITIONEN**

Im Jahr 2010 investierte die K+S GRUPPE insgesamt 201,0 Mio. €; davon entfielen 49,2 Mio. € auf MORTON SALT. Bereinigt um den Effekt der Konsolidierung von MORTON SALT lag das Investitionsvolumen in etwa auf dem Niveau des Vorjahres.

Bei den Investitionsausgaben ist eine gewisse Saisonalität zu erkennen; die Umsetzung der Investitionsvorhaben erfolgt in der Regel überwiegend im dritten und vierten Quartal, da wir die dann stattfindenden Produktionspausen für die Durchführung größerer Investitionsvorhaben nutzen.

Am Jahresende bestanden wirtschaftliche Investitionsverpflichtungen in Höhe von 59,8 Mio. €; diese beziehen sich auf noch nicht abgeschlossene Investitionsvorhaben aus dem Jahr 2010. 145,5 Mio. € bzw. knapp 72 % der getätigten Investitionen entfielen auf Ersatz- und Pro-

duktionssicherungsmaßnahmen; diese lagen deutlich unter den Abschreibungen in Höhe von 248,3 Mio. €.

/ TAB: 4.2.3 / WEITERE DETAILS ZU UNSEREN FINANZ-KENNZAHLEN entnehmen Sie bitte unserem Finanzbericht 2010.

**AUSBLICK****K+S GRUPPE MIT ATTRAKTIVEN PERSPEKTIVEN**

Vor dem Hintergrund der sich zum Jahresende und im Verlauf des ersten Quartals 2011 abzeichnenden positiven Nachfrage- und Preistendenzen dürfte der Umsatz der K+S GRUPPE im Geschäftsjahr 2011 gegenüber dem Vorjahr spürbar ansteigen. Während wir im Geschäftsbereich Kali- und Magnesiumprodukte von einer spürbaren und im Geschäftsbereich Stickstoffdüngemittel von einer deutlichen Umsatzsteigerung ausgehen, erwarten wir im Geschäftsbereich Salz ein stabiles Umsatzniveau.

Das operative Ergebnis EBIT I sollte im Geschäftsjahr 2011 im Vergleich zum Vorjahreswert deutlich zulegen.

Dies hängt in erster Linie mit dem zu erwartenden deutlich höheren Ergebnis im Geschäftsbereich Kali- und Magnesiumprodukte sowie einer moderaten Verbesserung des operativen Ergebnisses im Geschäftsbereich Stickstoffdüngemittel zusammen. Das operative Ergebnis des Geschäftsbereichs Salz dürfte hingegen moderat zurückgehen.

Das bereinigte Konzernergebnis nach Steuern sollte der operativen Ergebnisentwicklung folgend im Jahr 2011 ebenfalls deutlich höher ausfallen.

**GESCHÄFTSFELD DÜNGEMITTEL**

Eine jährlich um rund 80 Millionen Menschen wachsende Weltbevölkerung sowie veränderte Ernährungsgewohnheiten hin zu einem höheren Fleischkonsum und nicht zuletzt eine steigende Bedeutung von nachwachsenden Rohstoffen zur Bioenergieerzeugung erhöhen den weltweiten Bedarf an Agrarrohstoffen.

Im Jahr 2011 sollte die Düngemittelnachfrage vor allem aufgrund der wahrscheinlich nicht nur vorübergehend positiven Entwicklung der Agrarpreise weiter ansteigen. Die daraus resultierenden attraktiveren Ertragsperspektiven der Landwirtschaft sollten ausreichenden Anreiz bieten, den Ertrag je Hektar durch einen höheren Düngemittelleinsatz zu steigern. Vor diesem Hintergrund ist sowohl bei Kali- und Magnesiumprodukten als auch Stickstoffdüngemitteln mit einer weltweit hohen Auslastung der jeweils vorhandenen Produktionskapazitäten zu rechnen. Daher gehen wir im Gesamtjahr 2011 von einem Weltkaliabsatz von rund 57 bis 60 Mio. t

(2010e: rund 57 Mio. t) aus; damit sollte das Absatzniveau von vor der Finanz- und Wirtschaftskrise wieder erreicht werden und von diesem Niveau ausgehend in den kommenden Jahren wieder mit 3 bis 5 % p.a. wachsen. K+S sollte daran als weltweit viertgrößter Einzelproduzent mit einem Marktanteil von mehr als 10 % teilhaben.

#### GESCHÄFTSFELD SALZ

Auch in den kommenden Jahren wird die Branchen- und Wettbewerbssituation vom anhaltenden Konsolidierungsprozess der europäischen Salzindustrie geprägt sein. Abhängig vom Frachtkostenniveau könnte sich die wettbewerbsintensive Marktsituation für die europäischen Produzenten auch durch steigende Importe aus Nicht-EU-Ländern verschärfen. Als Europas größter Salzproduzent sind wir für die in diesem Marktumfeld entstehenden Herausforderungen gut gerüstet.

Mit dem chilenischen Salzproduzenten SPL haben wir eine sehr gute Ausgangsposition, um am dynamischen Wachstum der süd- und mittelamerikanischen Märkte teilzuhaben.

Nach der Akquisition von MORTON SALT haben wir im Bereich der Auftausalze Zugang zu neuen Märkten mit in der Regel weniger schwankungsanfälligem Wintergeschäft in Nordamerika. Auch in den Segmenten Gewerbe- und Speisesalz gehört Nordamerika nun zu den bedeutendsten Absatzregionen. MORTON SALT verfügt mit den Marken UMBRELLA GIRL® und WINDSOR CASTLE® über in den USA und in Kanada im Consumergeschäft sehr gut positionierte Marken, die uns den verstärkten Absatz höhermargiger Spezialprodukte ermöglichen sollten.

WERTENTWICKLUNG DER K+S-AKTIE IM VERGLEICH ZU DAX, DJ STOXX 600 UND MSCI WORLD ABB: 4.3.1

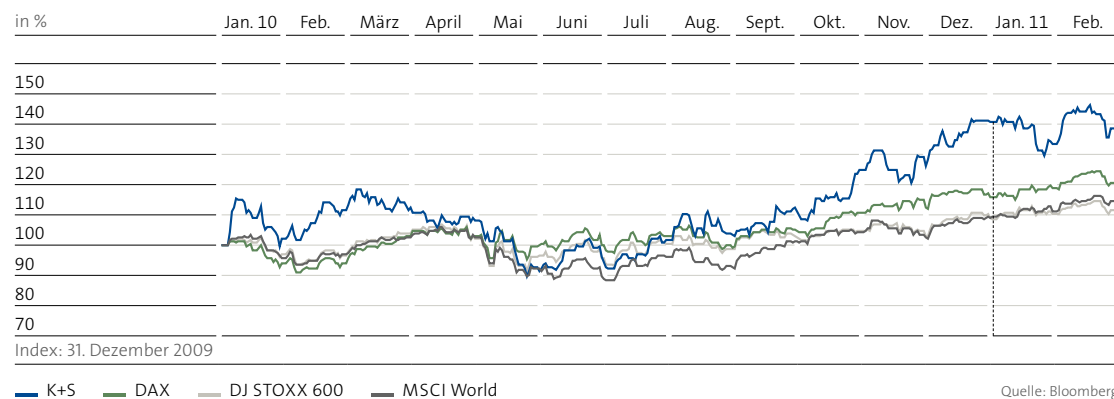

Unter der Annahme durchschnittlicher Witterungsverhältnisse sollte sich in Europa die Nachfrage nach Auftausalz im Jahr 2011 nach dem Spitzenjahr 2010 wieder entsprechend reduzieren, während sich die Nachfrage nach Auftausalz in Nordamerika etwas erhöhen sollte.

Während die Nachfrage in den Segmenten Speise- und Gewerbesalz in Europa, den USA und Kanada im kommenden Jahr stabil bleiben sollte, sollte der südamerikanische Gewerbe- und Speisesalzmarkt im Einklang mit der dortigen Bevölkerungsentwicklung stetig wachsen.

Die Nachfrage der Chemieindustrie für Industriesalz sollte auf allen unseren Absatzmärkten moderat steigen.

#### 4.3 K+S-AKTIE

##### K+S-AKTIEPERFORMANCE BETRÄGT AUF JAHRESSICHT 40,9 %

Der Schlusskurs des Jahres 2010 lag mit 56,36 € deutlich über dem Kurs von 39,99 € am Ende des Vorjahres. Die Kursentwicklung verlief zunächst sehr positiv, wurde aber in den Sommermonaten durch ein allgemein schwaches Umfeld auf den Aktienmärkten sowie die bis Mitte des Jahres noch rückläufige Preisentwicklung von Agrarrohstoffen vorübergehend leicht gedämpft; ab August setzte dann eine starke Erholung der K+S-Aktie ein.



Folgende wichtige Ereignisse beeinflussten den Kursverlauf im Jahr 2010:

- + Zu Beginn des Jahres notierte die K+S-Aktie bei rund 40 €. Unterstützt durch positive Analystenkommentare zu den Perspektiven des Düngemittelgeschäfts im Jahr 2010 stieg die Aktie bis Anfang März auch aufgrund eines günstigen Marktumfelds sowie der kalten Witterung in Europa auf 47 €. Nach der Veröffentlichung der Zahlen zum Geschäftsjahr 2009 am 11. März, die im Rahmen der Erwartungen lagen, bewegte sich der K+S-Aktienkurs bis Ende April zunächst seitwärts.
- + Die am 11. Mai veröffentlichten Zahlen konnten die Erwartungen der Analysten zwar übertreffen; der vorsichtige Ausblick der K+S GRUPPE bewegte jedoch einige Analysten dazu, ihre Schätzungen zu reduzieren. Die Aktie schloss in einem insgesamt schwachen Aktienmarktumfeld am 25. Mai auf ihrem Jahrestief bei 35,94 €.
- + Anfang Juni wirkten sich die von K+S angekündigte Erhöhung des Preises für granuliertes Kaliumchlorid um 8 auf 305 €/t sowie die Mitteilung, den Verkauf von COMPO innerhalb eines Jahres zu prüfen, positiv auf den K+S-Aktienkurs aus, der bis auf 41 € stieg. Anfang August befand sich die K+S-Aktie in einem starken Aufwärtstrend und profitierte vor allem von steigenden Preisen für Agrarprodukte.
- + Im Rahmen der Veröffentlichung der Zahlen zum zweiten Quartal am 12. August hob K+S die Absatzprognose für Kali- und Magnesiumprodukte erneut an und gab wieder einen quantitativen Umsatz- und Ergebnisausblick. Die Annahme eines im Ver-

gleich zum ersten Halbjahr leicht niedrigeren Durchschnittspreises für das Kali- und Magnesium-Produktportfolio für die zweite Jahreshälfte führte zur Anpassung einiger Analystenschätzungen und einem leichten Dämpfer auf den K+S-Aktienkurs.

- + Das am 17. August veröffentlichte Übernahmeangebot des britisch-australischen Bergbaukonzerns BHP BILLITON für den kanadischen Kaliproduzenten POTASHCORP lenkte die Aufmerksamkeit der Marktteilnehmer auf die nachhaltige Attraktivität des Kalimarktes und nährte Spekulationen über mögliche weitere Übernahmen in der Düngemittelbranche.
- + Die K+S-Aktie profitierte in den folgenden Wochen darüber hinaus von einer generell positiven Stimmung am Aktienmarkt sowie den anhaltend steigenden Agrarpreisen. Damit einhergehend kündigte POTASHCORP Preiserhöhungen für granuliertes Kaliumchlorid für den amerikanischen Markt und BPC für Asien und Brasilien an.
- + Die im Rahmen einer Ad-hoc-Mitteilung vorab am 2. November veröffentlichten Ergebnisse zum dritten Quartal, welche die Konsenserwartungen zum Teil deutlich übertrafen, sowie die gleichzeitige Anhebung der Ergebnisprognose führten zu einem weiteren Anstieg der K+S-Aktie.
- + Diese Entwicklung wurde Ende November durch die von K+S beabsichtigte freundliche Übernahme des kanadischen Kali-Explorations- und Entwicklungsunternehmens POTASH ONE zusätzlich unterstützt, welche im Rahmen der Wachstumsstrategie mittelfristig zu einem Ausbau der Kalikapazitäten der K+S GRUPPE sowie der Verlängerung der durch-

schnittlichen Lebensdauer der Bergwerke führen wird.

- + Zum Jahresende erhielt die Aktie schließlich weiteren Rückenwind durch die von K+S angekündigte Erhöhung des Preises für granuliertes Kaliumchlorid um weitere 18 €/t auf 335 €/t in Europa sowie den frühen Wintereinbruch in Europa und schloss am 31. Dezember bei 56,36 € mit einem Plus von 40,9 % im Vergleich zum Jahresende 2009 (39,99 €). Berücksichtigt man die im Mai 2010 gezahlte Dividende, so betrug der Wertzuwachs insgesamt 41,4 %.

#### **K+S-AKTIENKURS TENDIERT ZU BEGINN DES JAHRES 2011 SEITWÄRTS**

Das Jahr 2011 begann für die K+S-Aktie mit einer Seitwärtsbewegung. Die K+S-Aktie notierte am 28. Februar 2011 mit rund 56 € in etwa auf dem Niveau zum Jahresende 2010. Der DAX stieg in diesem Zeitraum um rund 5 %. / ABB: 4.3.1

#### **DIVIDENDENVORSCHLAG MIT 1,00 € DEUTLICH HÖHER ALS IM VORJAHR**

Wir verfolgen eine grundsätzlich ertragsorientierte Dividendenpolitik. Mit dieser Maßgabe bildet eine Ausschüttungsquote von 40 bis 50 % des bereinigten Konzernergebnisses die Grundlage für die von Vorstand und Aufsichtsrat zu bestimmende Höhe der künftigen Dividendenvorschläge. Der Vorstand wird der Haupt-

versammlung daher vorschlagen, die Dividende für das abgelaufene Geschäftsjahr entsprechend dem deutlich gestiegenen Ergebnis anzuheben und 1,00 € je Aktie auszuschütten.

nen. Weiterhin gehen wir davon aus, dass rund 20 % der Aktien von überwiegend inländischen Privatanlegern gehalten werden. Davon entfällt schätzungsweise rund 1 % der Aktien auf K+S-Mitarbeiter. / ABB: 4.3.2

### AKTIONÄRSSTRUKTUR MIT HOHEM STREUBESITZ

Nach der Streubesitzdefinition der DEUTSCHEN BÖRSE AG beträgt der Freefloat unverändert knapp 75 %. Eine im Oktober 2010 von einem externen Dienstleister durchgeführte Aktionärsidentifikation ergab darüber hinaus, dass jenseits des Festbesitzes knapp 19 % der ausstehenden Aktien auf inländische institutionelle Investoren entfallen und gut 35 % auf ausländische Institutio-

**AKTIONÄRSSTRUKTUR PER 28.02.2011** ABB: 4.3.2

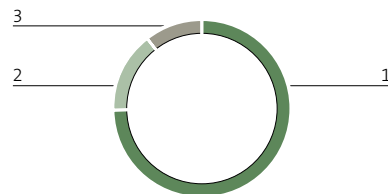

|                                 | 2010 | 2009 |
|---------------------------------|------|------|
| in %                            |      |      |
| 1 Freefloat                     | 74,8 | 74,7 |
| 2 Meritus Trust Company Limited | 14,9 | 15,0 |
| 3 BASF SE                       | 10,3 | 10,3 |

## ÖKOLOGIE

K+S INVESTIERT IN DEN NÄCHSTEN FÜNF JAHREN 360 MIO. € in den Gewässer- und Grundwasserschutz / Erste Projekte des Maßnahmenpakets sind beantragt und bereits genehmigt worden / Genehmigungsanträge für standortferne Entsorgungswege in Vorbereitung / K+S in Carbon Performance Leadership Index aufgenommen / Selbstverpflichtung zum Klimaschutz zielt auf Senkung der CO<sub>2</sub>-Emissionen / Bisher bereits 130 Mio. € in Rückbau stillgelegter Standorte investiert

# 5

---

|     |                                              |    |
|-----|----------------------------------------------|----|
| 5.1 | Wirtschaftlichkeit und Umweltverträglichkeit | 89 |
| 5.2 | Kaliproduktion und Gewässerschutz            | 89 |
| 5.3 | Effiziente Energienutzung und Klimaschutz    | 94 |
| 5.4 | Rekultivierung und Naturschutz               | 97 |
| 5.5 | Kennzahlen und Erläuterungen                 | 99 |

## 5.1 WIRTSCHAFTLICHKEIT UND UMWELTVERTRÄGLICHKEIT

K+S ist sich der besonderen Verantwortung bewusst, die mit der Nutzung von natürlichen Ressourcen verbunden ist. Nachhaltigkeit im Kali- und Steinsalzbergbau bedeutet, die Ziele Wirtschaftlichkeit, Umweltverträglichkeit und soziale Verantwortung aufeinander abzustimmen. Die Grundlage unseres wirtschaftlichen Erfolges steht daher in engem Zusammenhang mit dem effizienten Einsatz aller uns in der Wertschöpfungskette zur Verfügung stehenden Rohstoffe und Materialien.

Unser Ziel ist es, die unvermeidbaren Eingriffe in die Natur so gering wie möglich zu halten. Wir setzen deshalb moderne Explorations- und Gewinnungsverfahren ein und entwickeln unsere Verfahrenstechnik laufend weiter. Dadurch haben wir den spezifischen Roh-

stoff- und Energieeinsatz in den vergangenen Jahren und Jahrzehnten kontinuierlich reduziert. Wir optimieren unsere Verfahren, um Produktionsrückstände noch weiter zu verringern und die internationale Wettbewerbsfähigkeit unserer Standorte zu erhalten und zu stärken.

## 5.2 KALIPRODUKTION UND GEWÄSSERSCHUTZ

Wir gewinnen unter Tage kali- und magnesiumhaltige Rohsalze, die wir in komplexen und mehrstufigen Aufbereitungs- und Veredelungsprozessen zu hochwertigen Mineraldüngern und Industrieprodukten verarbeiten. Der Abbau in Deutschland ist lagerstättenbedingt zum Teil technisch deutlich anspruchsvoller als der unserer

Wettbewerber im Ausland. Da nur wir in unseren Lagerstätten neben Kalium (13 bis 27 % Kaliumchlorid) auch über Magnesium und Schwefel (11 bis 27 % Magnesiumsulfat) verfügen, können wir neben dem Standarddünger Kaliumchlorid eine Reihe von Spezialitäten für die Landwirtschaft und vielfältige industrielle Anwendungen herstellen.

### SPEZIFISCHE AUFBEREITUNG – ABHÄNGIG VOM ROHSALZTYP

Die Kaliproduktion ist weltweit untrennbar mit der Notwendigkeit der Entsorgung von festen und flüssigen Rückständen verbunden. Wir haben das Ziel, die mit der Rückstandsentsorgung verbundenen Umweltauswirkungen so gering wie möglich zu halten.

Da das Rohsalz auch nicht weiter verwertbare Salze enthält, müssen diese von den genannten Wertstoffen getrennt und als Rückstand entsorgt werden. Je nach Standort kommen dafür die Verfahren Heißverlösung, Flotation und in Verbindung mit beiden die elektrostatische Trennung (ESTA-Verfahren) zum Einsatz. Während die ersten beiden Verfahren nicht ohne den Einsatz von Wasser auskommen, handelt es sich bei der elektrostatischen Trennung um einen trockenen Prozess. Die Rückstände aus der Produktion fallen entweder in fester Form oder als flüssige Rückstände (Salzabwässer) an. Die festen Rückstände, die im Wesentlichen aus derzeit nicht verwertbarem Steinsalz bestehen, halden wir auf oder verbringen sie wieder in die Gruben nach unter Tage.

ENTSORGUNG FESTER/FLÜSSIGER RÜCKSTÄNDE

ABB: 5.2.1

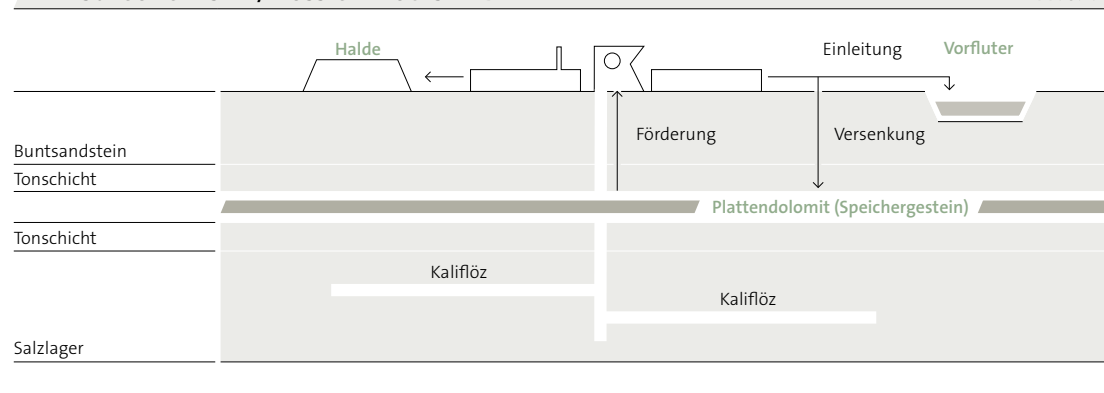



Die flüssigen Produktionsrückstände und salzhaltigen Wässer, die durch Niederschläge auf unseren Halden entstehen, entsorgen wir im Rahmen bestehender Genehmigungen über die Einleitung in Fließgewässer und über die Versenkung in tiefere Gesteinsschichten, den so genannten Plattendolomit. / ABB: 5.2.1

### **RUNDER TISCH „GEWÄSSERSCHUTZ UND KALIPRODUKTION“**

Die öffentliche und politische Diskussion um die Salzabwassereinleitung in die Werra führte im Jahr 2008 zur Bildung des Runden Tisches für „Gewässerschutz Werra/Weser und Kaliproduktion“. Dieser wurde von den Ländern Thüringen und Hessen gemeinsam mit k+s ins Leben gerufen. Es sollten nachhaltige Lösungsvorschläge zur Verbesserung der Wasserqualität in Werra und Weser erarbeitet werden. Die Kriterien, Ziele und Instrumente der Europäischen Wasserrahmenrichtlinie waren ebenso angemessen zu berücksichtigen, wie die wirtschaftlichen Interessen der Region und die Sicherung der dort betroffenen Arbeitsplätze.

#### **QUERVERWEIS**

Nähere Einzelheiten zu den bisherigen Maßnahmen zur Senkung der Salzabwassermengen aus der Produktion sowie der Verringerung der Salzfracht, siehe Unternehmens- und Nachhaltigkeitsbericht 2008: Seite 46 ff. bzw. 2009, Seite 73 ff.

### **MASSNAHMENPAKET ZUM GEWÄSSERSCHUTZ**

Bereits im Oktober 2008 legten wir unser „Maßnahmenpaket zum Gewässerschutz“ vor und schlossen mit den Ländern Hessen und Thüringen eine öffentlich-rechtliche Vereinbarung mit dem Ziel, die Kaliproduktion im hessisch-thüringischen Kalirevier langfristig zu sichern und die Umweltauswirkungen weiter zu reduzieren.

### **GESAMTSTRATEGIE ZEIGT KLARE PERSPEKTIVE AUF**

Im Mai 2009 haben wir in Übereinstimmung mit dieser Vereinbarung unsere Gesamtstrategie zur Verminderung von Umweltbelastungen vorgelegt. Diese zeigt auf, wie eine weitere Halbierung des Salzabwasservolumens erreicht und die bisherige Versenkung der Salzabwässer bis zum Jahr 2015 in Hessen beendet werden kann. Außerdem öffnet sie den Weg hin zu einer weiteren Absenkung der für die Einleitung in die Werra heute bestehenden Grenzwerte um rund ein Drittel.

### **INTEGRIERTES MASSNAHMENKONZEPT**

Auf Grundlage der Gesamtstrategie haben wir im Oktober 2009 unser Integriertes Maßnahmenkonzept (IMK) vorgelegt. Es beschreibt detailliert die geplante Umsetzung der vorgesehenen Einzelmaßnahmen zum Grundwasser- und Gewässerschutz einschließlich der Neuen

Integrierten Salzabwassersteuerung sowie die Prüfung weiterer Maßnahmen.

Wir streben an, im ersten Quartal 2011 die Abstimmung des IMK mit den Ländern Hessen und Thüringen abzuschließen, um die erforderliche Planungssicherheit für die damit verbundenen Investitionen zu haben.

### **INVESTITIONEN VON BIS ZU 360 MIO. €**

Die Investitionen in die Verbesserung der Gewässerqualität sollen sich in den nächsten fünf Jahren auf insgesamt rund 360 Mio. € belaufen. Wir gehen damit aus heutiger Sicht an die Grenzen des technisch Sinnvollen und wirtschaftlich Vertretbaren. Wir bringen damit ökonomische Interessen und ökologische Anforderungen noch besser in Einklang und werden unserer unternehmerischen Verantwortung für die Sicherung tausender Arbeitsplätze in der Kaliindustrie gerecht.

### **HALBIERUNG DES ANFALLENDEN SALZABWASSERS**

Die lokalen Vermeidungs- und Verwertungsmaßnahmen des IMK beziehen innovative Verfahren ein, die bislang von keinem anderen Kaliproduzenten weltweit großtechnisch eingesetzt werden. In den nächsten fünf Jahren können damit neben der Halbierung der Salzabwasser-Menge die Chlorid- und Härtegrenzwerte im Flusssystem Werra/Weser um rund ein Drittel reduziert werden. Diese Umweltziele schließen die Salzabwässer des Standorts Neuhoof-Ellers auch künftig ein.

Das heißt, dass sich die nachhaltige Wiederbelebung der Werra, die eindeutig auf die seit dem Jahr 2000 wirk-same Reduzierung und Vergleichmäßigung der Salzwassereinleitung zurückzuführen ist, weiter fortsetzen wird.

Das Ergebnis: Die Weser wird nördlich von Bad Karlshafen nahezu wieder zu einem Fluss mit Süßwasserquali-tät. Bei Bremen wird die Weser, bezogen auf den Salzgehalt, Trinkwasserqualität haben. / ABB: 5.2.2

Darüber hinaus ist es ein wesentliches Ziel unseres Konzepts, die bisherige Versenkung zu beenden. Wir werden zukünftig noch kalium- und magnesiumhaltige Salzabwässer in den Plattendolomit einleiten, aber ein höhe-res Volumen an natriumreichen Salzabwässern aus dem Plattendolomit rückfördern. Diese Bewirtschaftung wird im Plattendolomit auf Dauer zu einer Entlastung führen.

### ERSTE GENEHMIGUNGSANTRÄGE GESTELLT

Bereits seit der Veröffentlichung des Maßnahmenpa-kets zum Gewässerschutz im Jahr 2008 arbeitet ein κ+s-Projektteam aus Ingenieuren, Technikern, Wissen-schaftlern und Betriebswirten an den Vorbereitungen für die Umsetzung der umfangreichen Grundwasser- und Gewässerschutz-Maßnahmen. Nachdem bereits im Jahr 2010 der Salzabwasserverbund zwischen Hessen und Thüringen genehmigt und hergestellt worden ist, sind jetzt die Umgestaltung der Kieseritproduktion am Standort Hattorf (Hessen) und des Produktionsprozesses am Standort Unterbreizbach (Thüringen) bei den zuständigen Behörden beantragt und zum Teil bereits genehmigt worden. Mit diesen beiden Projekten und

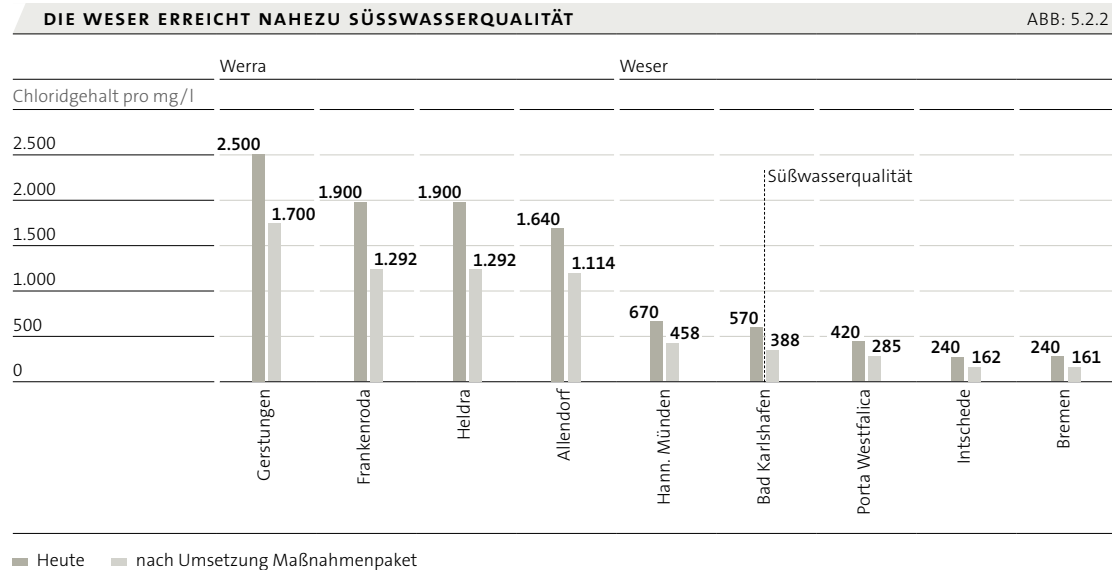

den bisher schon erreichten Verbesserungen werden bereits rund 90 % der in den nächsten fünf Jahren beab-sichtigten Abwassereinsparung von 7 Mio. m<sup>3</sup> erreicht. Weitere Genehmigungsanträge werden folgen.

### MASSNAHMEN ZUM GEWÄSSERSCHUTZ UND EFFEKTE

#### SOFORTMASSNAHMEN BIS ENDE 2011

- + Länderübergreifender Salzabwasserverbund in Betrieb: Durch den Salzabwasserverbund können die Einleitung in den Plattendolomit (Versenkung) und

die Einleitung in die Werra noch besser auf einan-der abgestimmt werden, sodass in Summe weniger Salzabwasser versenkt werden muss und die Werra gleichzeitig von Kalium- und Magnesiumeinträgen entlastet wird.

- + Umstellung von Produktionsprozessen zur Salzwassereinsparung: Durch eine Vielzahl von Einzelmaß-nahmen an den Standorten des Werks Werra, wie die Rückführung von Salzabwasser in den Prozess-kreislauf, gelang es, die Produktionsprozesse weiter zu verbessern und das Salzabwasservolumen wei-ter zu senken.

- + Ausbau der Rückförderung aus dem Plattendolomit: Mit dem Ausbau der Rückförderung kann zukünftig der Plattendolomit von salzhaltigem Grundwasser entlastet werden.
- = Senkung des Salzabwasservolumens von 14 Mio. m<sup>3</sup> auf 12 Mio. m<sup>3</sup> im Jahr

#### MASSNAHMEN BIS ENDE 2013<sup>1</sup>

- + Kalte Vorzersetzung (KVZ) von Carnallit
- + Erhöhung der Dickstoffanlagenkapazität am Standort Unterbreizbach (Thüringen)
- + Erweiterung der Eindampfkapazität am Standort Wintershall (Hessen): Am Standort Unterbreizbach wird wegen der sich ändernden Rohsalzqualität eine Anlage zur kalten Vorzersetzung von Carnallit gebaut und der Heißlöseprozess an das zukünftig zu verarbeitende Salz angepasst. Die dabei im Prozess noch entstehenden Salzlösungen werden teils in Unterbreizbach in einer weiteren Dickstoffanlage unter Tage und teils am Standort Wintershall verwertet. Zur Eindampfung der Salzabwässer in Wintershall wird u. a. die Eindampfkapazität zur Herstellung verkaufsfähiger MgCl<sub>2</sub>-Lösung erweitert. Somit werden die in Unterbreizbach entstehenden Prozessabwässer vollständig verwertet. Eine direkte Einleitung oder Versenkung dieser Wässer entfällt damit zukünftig.
- + Umstellung der Kieseritgewinnung vom Waschverfahren auf das trockene ESTA-Verfahren am Standort Hattorf (Hessen): Am Standort Hattorf entstehen dadurch ca. 3,5 Mio. m<sup>3</sup> weniger Salzabwasser. Die bis-

her ca. 1 Mio. t Salz, die im Salzabwasser gelöst waren, werden dann als fester Rückstand entsorgt. Mit dieser Maßnahme und der vollständigen Verwertung der Prozesswässer vom Standort Unterbreizbach sowie den bisher erzielten Verbesserungen werden bereits rund 90 % der in den nächsten fünf Jahren insgesamt beabsichtigten Salzabwassereinsparung erreicht.

- = Senkung des Salzabwasservolumens von 12 Mio. m<sup>3</sup> auf 8 Mio. m<sup>3</sup> im Jahr

Die im IMK am Standort Unterbreizbach ursprünglich vorgesehene Anlage zum Eindampfen von Magnesiumchlorid-Lösung wird nicht mehr benötigt, weil die zukünftig erwartete Rohsalzqualität eine Anpassung des Aufbereitungsverfahrens erlaubte. Durch neue Explorationstechnik war es möglich, für einen deutlich längeren Zeitraum als bisher Aussagen über die Verteilung der Wertstoffe im Rohsalz zu erlangen. Sie zeigen, dass in den nächsten Jahren bei weiterhin hohem Kaliumchlorid-Anteil der Gehalt an Magnesiumchlorid im Rohsalz dauerhaft erheblich zurückgehen wird. Die deshalb zukünftig in wesentlich geringerem Umfang als bisher entstehende Magnesiumchlorid-Lösung kann im Werksverbund verwertet und verkauft werden.

#### MASSNAHMEN BIS ENDE 2015<sup>1</sup>

- + Bau einer Tiefkühlanlage für Salzlösungen am Standort Hattorf: Am Standort Hattorf kann durch Abkühlen eines Teilstroms von Salzlösungen von einer Temperatur von ca. 30 ° auf –10 °C der Gehalt an kaliumchlorid- und magnesiumsulfathaltigem Feststoff auskristallisiert werden; somit halbieren wir die Kon-

zentration von Kaliumchlorid und Magnesiumsulfat in diesem Teilstrom der Salzlösung. Der auskristallisierte Feststoff wird in weiteren Prozessschritten in ein vermarktbare Produkt überführt.

- + Weiterentwicklung der Kieserit-Flotation am Standort Wintershall: Die Weiterentwicklung verbessert die Wertstoffgewinnung und senkt gleichzeitig erheblich das Salzabwasseraufkommen. Mit dieser Maßnahme senken wir das Salzabwasservolumen am Standort Wintershall um ca. 1 Mio. m<sup>3</sup> und können zusätzliche Mengen an Magnesiumsulfat produzieren.

- = Senkung des Salzabwasservolumens von 8 Mio. m<sup>3</sup> auf rund 7 Mio. m<sup>3</sup> im Jahr

#### ANTRÄGE FÜR SALZWASSER-FERNLEITUNGEN IN VORBEREITUNG

Da die dauerhafte lokale Entsorgung von einigen Seiten in Frage gestellt wird, können wir derzeit eine langfristige Genehmigung unseres Konzepts nicht als gesichert annehmen.

Deshalb haben wir uns aus Gründen vorausschauender Sorgfalt entschlossen, parallel zur Umsetzung der lokalen Maßnahmen auch Genehmigungsanträge für standortferne Entsorgungswege, d. h. Fernleitungen zur Oberweser und zur Nordsee, vorzubereiten. Dies geschieht ungeachtet des Umstandes, dass die mit den Ländern Hessen und Thüringen definierten und vom Runden Tisch akzeptierten Prüfkriterien für Fernleitungen heute

<sup>1</sup> In Abhängigkeit von der Abstimmung des IMK.

### PRÜFKRITERIEN FÜR FERNLEITUNGEN

- + Der gemeinsame politische Wille auf Landes- und Bundesebene muss gegeben und dokumentiert sein.
- + Bau und Betrieb der Fernleitung sowie die Einleitung von Salzlösungen müssen langfristig genehmigungsfähig sein.
- + Die Maßnahme muss ökologisch sinnvoll sein – gemessen an den Gewässerklassenkriterien der Europäischen Wasserrahmenrichtlinie.
- + Bau und Betrieb einer Leitung müssen wirtschaftlich zumutbar und verhältnismäßig sein.

weder objektiv noch aus Sicht des Unternehmens erfüllt sind. Dies muss aber der Fall sein, bevor eine Entscheidung über den Bau einer Fernleitung getroffen werden kann – eine solche Entscheidung ist mit der Vorbereitung der Anträge also nicht verbunden.

Gleichwohl werden wir die Antragsverfahren vorurteilsfrei, ergebnisoffen und mit derselben Sorgfalt bearbeiten wie die Anträge zur Umsetzung des IMK.

### NEUE WASSERRECHTLICHE ERLAUBNISSE BEANTRAGT

Da Vorbereitung, Bearbeitung und Prüfung der Anträge für die möglichen Entsorgungsvarianten einen erheblichen Zeitraum in Anspruch nehmen werden, beantragen wir gleichzeitig die erforderlichen wasserrechtlichen Erlaubnisse, um die geregelte lokale Entsorgung

durch Versenkung und Einleitung und damit die Produktion des Werks Werra über das Jahr 2011 bzw. 2012 hinaus fortsetzen zu können.

In der öffentlich-rechtlichen Vereinbarung ist vorgesehen, die bisher erteilten Genehmigungen durch eine längerfristige, integrale wasserrechtliche Erlaubnis abzulösen. Diese soll auch die notwendige Investitionssicherheit für das IMK geben.

### PLANFESTSTELLUNG SALZWASSERLEITUNG NEUHOF-PHILIPPSTHAL BEANTRAGT

Im Juni 2010 haben wir die überarbeiteten und aktualisierten Antragsunterlagen für die Einleitung des Planfeststellungsverfahrens für den Bau einer Salzwasserleitung von NeuhoF nach Philippsthal beim Regierungspräsidium Kassel eingereicht. Bei der anschließenden öffentlichen Auslegung sind alle Werra- und Weser-Anrainerkommunen bis hinauf nach Bremen berücksichtigt worden. Zurzeit werden die eingegangenen Einwände durch das Regierungspräsidium Kassel gesichtet und für den Erörterungstermin vorbereitet, der voraussichtlich im Herbst 2011 stattfindet.

Die Antragsunterlagen belegen, dass der Transport des Salzwassers über eine Rohrleitung sowie die Entsorgung im Bereich des Werks Werra der ökologisch vorteilhafteste Weg ist. Bereits in der Vorbereitung des Antrages waren alle technisch vernünftigen Entsorgungsvarianten von Experten geprüft worden. Die einzelnen Fach-

gutachten zeigten, dass Alternativen zur Pipeline entweder keine nachhaltige Lösung darstellen, technisch nicht realisierbar sind oder schwerwiegende ökologische Nachteile mit sich bringen. Dies trifft insbesondere auch auf die derzeit noch als Interims-Lösung erforderlichen LKW-Transporte zu, die mit CO<sub>2</sub>-Emissionen und anderen Begleiterscheinungen des Schwerlastverkehrs das regionale Umfeld erheblich in Anspruch nehmen.

### DIE EUROPÄISCHE WASSERRAHMENRICHTLINIE (WRRL)

Die Europäische Wasserrahmenrichtlinie (WRRL) wurde 1997 von der Europäischen Kommission als verbindlicher Ordnungsrahmen für die Wasserpolitik der Mitgliedsstaaten beschlossen und trat im Jahr 2000 in Kraft. Ziele sind unter anderem: Sicherung beziehungsweise Erreichen eines guten Zustands aller Gewässer sowie ein wirksames Flussgebietsmanagement. Als späteste Frist für die Erreichung der Gewässerqualitätsziele nennt die WRRL das Jahr 2027. Allerdings können und müssen die Behörden unter Umständen dauerhaft weniger strenge Ziele festlegen, wenn die Erreichung eines guten ökologischen Zustands unmöglich ist, mit unverhältnismäßig hohem Aufwand verbunden wäre oder wenn die Erreichung der Ziele mit nachteiligen ökologischen Auswirkungen an anderer Stelle erkaufte würden. Die WRRL gibt keine Grenzwerte vor. Sie will einen Ausgleich zwischen anspruchsvollen Bewirtschaftungszielen und den Belangen der auf die Gewässernutzung angewiesenen Industrie (siehe Artikel 4 Absatz 5 WRRL).



## FORTSETZUNG DES RUNDEN TISCHES

Angesichts der positiven Erfahrungen mit dem Runden Tisch haben auch wir uns dafür eingesetzt, ihn als Dialog- und Informationsplattform fortzusetzen. Mit Erfolg: Für das 2. Quartal 2011 ist das nächste Treffen des Gremiums vorgesehen. Das Ziel ist es weiterhin, das Thema Gewässerschutz ganzheitlich zu betrachten. Denn der Rückgang der Salzbelastung während der letzten Dekade und die insoweit geplanten Maßnahmen haben den Blick auf weitere Belastungsgrößen gelenkt: u. a. hohe Nährstoffgehalte (Phosphor und Stickstoff), strukturelle Defizite durch Uferbegradigungen und Staustufen und nicht ausreichend geklärte Abwässer.

### GEWÄSSERMONITORING BELEGT POSITIVEN TREND

Aktuelle Ergebnisse langjähriger Gewässeruntersuchungen bestätigen, dass sich die dynamische Verbesserung der ökologischen Bedingungen in Werra und Weser weiter fortsetzt. Sowohl bei Wasserpflanzen als auch bei Kleintieren stellten die Wissenschaftler im Vergleich zu den Vorjahren in der Werra positive Entwicklungen fest. Auch bei den Fischen ist eine Zunahme der Artenzahl und Artendichte sowie der Populationsgröße zu verzeichnen. Die Untersuchungen zeigen aber auch, dass sich neben den unbestrittenen Auswirkungen der Salzwassereinleitung sowohl in der Werra wie auch in der Weser die weiteren auf den Gewässerzustand wirkenden Belastungsfaktoren immer deutlicher bemerkbar machen. Siehe ausführliche Monitoring-Berichte unter [www.k-plus-s.com/de/umwelt/gewaesserschutz/monitoring.html](http://www.k-plus-s.com/de/umwelt/gewaesserschutz/monitoring.html)

## 5.3 EFFIZIENTE ENERGIENUTZUNG UND KLIMASCHUTZ

### KLIMASCHUTZ ALS ÖKOLOGISCHE UND ÖKONOMISCHE HERAUSFORDERUNG

K+S nimmt den Klimaschutz als ökologische und ökonomische Herausforderung sehr ernst. Wissenschaft, Politik und Gesellschaft sind gefordert, die vorhandenen Ressourcen effizienter zu nutzen und den weiteren Anstieg von Treibhausgasen zu bremsen.

### K+S IN CPLI AUFGENOMMEN

Das „Carbon Disclosure Project“ zeigt, dass Energieeffizienz und Klimaschutz auch auf den internationalen Finanzmärkten keine Randthemen mehr sind. Durchgeführt wird diese Umfrage im Namen von weltweit 385 institutionellen Investoren mit einem Gesamtanlagevermögen von 57 Billionen US-Dollar. K+S ist im Jahr 2010 erstmals in den Carbon Performance Leadership Index (CPLI) aufgenommen worden. Der CPLI umfasst 30 deutsche Unternehmen, die sich durch besondere Transparenz in der Berichterstattung zum Klimaschutz auszeichnen.

[/https://www.cdproject.net/CDPResults/CDP-2010-Germany-Report.pdf](https://www.cdproject.net/CDPResults/CDP-2010-Germany-Report.pdf)

### PROGRAMM ZUR ENERGIEEFFIZIENZ UND REDUZIERUNG DER CO<sub>2</sub>-EMISSIONEN

Unser Programm zur weiteren Reduzierung der Kohlendioxid-Emissionen an den Standorten der Geschäftsbereiche Kali- und Magnesiumprodukte sowie Salz besteht aus folgenden Bausteinen:

- + Nutzung der besten zur Verfügung stehenden Kraftwerks-Technologie (Kraft-Wärme-Kopplung auf den Standorten des Geschäftsbereichs Kali- und Magnesiumprodukte)
- + Optimierung unserer energiesparenden Produktionsverfahren
- + Rückgewinnung und Nutzung von Abwärme in Produktionsanlagen und Kraftwerken
- + Reduzierung des Energieverbrauchs in der gesamten Wertschöpfungskette

Die für den Betrieb unserer Kraftwerke, Trocknungsanlagen und Siedesalzanlagen erforderliche Energie – Strom und Dampf – wird fast ausschließlich auf Erdgasbasis erzeugt.

### INTERNATIONAL SPITZE BEI ENERGIEEFFIZIENZ

#### GESCHÄFTSBEREICH KALI- UND MAGNESIUMPRODUKTE

Sechs unserer sieben Kaliwerke verfügen über eigene Kraftwerke, die mit modernsten Anlagen zur Kraft-Wärme-Kopplung (KWK) ausgestattet sind. An den

Standorten Neuhof-Ellers und Zielitz sowie im Verbundwerk Werra wird zudem die Brennwerttechnik in industriellem Maßstab angewendet. Dank erfolgreicher Optimierungsmaßnahmen liegt der Nutzungsgrad unserer Kraftwerke inzwischen bei über 90 %. Die Standorte arbeiten somit in der Nähe der theoretisch erzielbaren Energieeffizienz, sodass sich nach heutigem Stand der Technik selbst durch weitere Investitionen kaum noch spürbare Emissionsminderungen erreichen lassen. / **ABB: 5.3.1**

#### SELBSTVERPFLICHTUNG ZUM KLIMASCHUTZ

Als Partner der zwischen Bundesregierung und deutscher Wirtschaft vereinbarten Selbstverpflichtung zum Klimaschutz haben wir uns im Jahr 2008 das Ziel gesetzt, bis zum Jahr 2012 die spezifischen CO<sub>2</sub>-Emissionen auf 28 kg/t und die absoluten CO<sub>2</sub>-Emissionen auf 1,1 Mio. t pro Jahr zu senken.

Bis zum Jahr 2005 hatten wir die spezifischen CO<sub>2</sub>-Emissionen bereits von 91,4 kg/t verarbeitetes Rohsalz (Basisjahr 1990) auf 29,4 kg/t vermindert; dies entspricht einer Minderung von 68 %. Die jährlichen CO<sub>2</sub>-Emissionen verminderten sich bis zum Jahr 2005 absolut von 4,76 Mio. t auf 1,15 Mio. t pro Jahr; dies entspricht einer Minderung von rund 76 %.

Die jährlichen Fortschrittsberichte der Verbände und Unternehmen werden vom Rheinisch-Westfälischen Institut für Wirtschaftsforschung (RWI) geprüft und in Fortschrittsberichten für die Bundesregierung verarbeitet. / **TAB: 5.3.1**

#### ENERGIEEFFIZIENZ IM VERGLEICH

ABB: 5.3.1

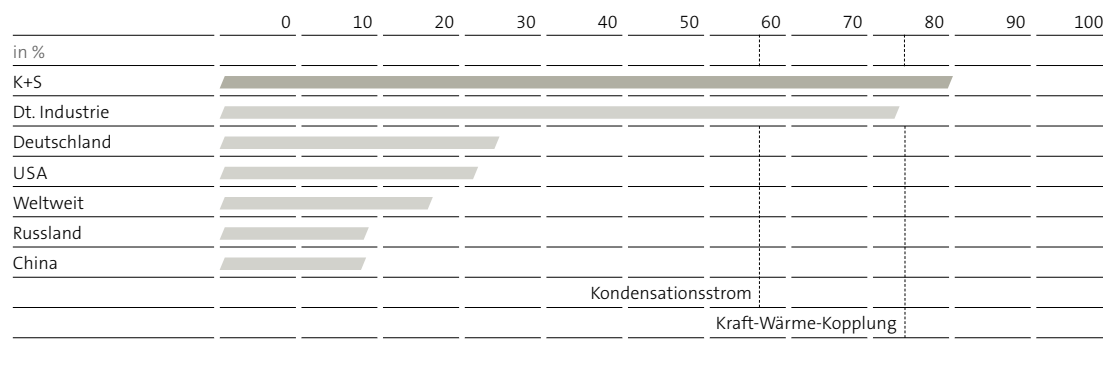

#### SELBSTVERPFLICHTUNG DER KALIINDUSTRIE (BASISJAHR 1990)

TAB: 5.3.1

| Spezifisches Ziel |                                                                                                                                              |
|-------------------|----------------------------------------------------------------------------------------------------------------------------------------------|
| Bis 2005          | Verringerung der spezifischen CO <sub>2</sub> -Emissionen um 66 % auf 31 kg CO <sub>2</sub> /t Rohsalzverarbeitung (Ziel 1996 erreicht)      |
| Bis 2012          | Verringerung der spezifischen CO <sub>2</sub> -Emissionen um 69 % auf 28 kg CO <sub>2</sub> /t Rohsalzverarbeitung                           |
| Absolutes Ziel    |                                                                                                                                              |
| Bis 2005          | Verringerung der absoluten CO <sub>2</sub> -Emissionen um 78 % auf 1,05 Mio. t CO <sub>2</sub> pro Jahr (2005 Verringerung um 76 % erreicht) |
| Bis 2012          | Verringerung der absoluten CO <sub>2</sub> -Emissionen um 77 % auf 1,1 Mio. t CO <sub>2</sub> pro Jahr                                       |

#### INVESTITIONSPROJEKTE ZUR MINDERUNG DER CO<sub>2</sub>-EMISSIONEN IN DEUTSCHLAND

- + In Zusammenarbeit mit E.ON modernisieren wir zurzeit am Standort Hattorf die werkseigene Energieversorgung. Die neue 30-Megawatt-Gasturbine produziert zukünftig 25 Megawatt zusätzlichen „KWK-STROM“, der Braun- bzw. Steinkohlestrom ersetzt, wodurch jährlich 80.000 t CO<sub>2</sub> eingespart werden. Außerdem erhöht sich der Nutzungsgrad des Kraftwerks weiter und der Standort Hattorf wird stromautark.
- + Um den Eigenstromanteil weiter – auf etwa 83 % – zu erhöhen und uns damit von externer Energieversorgung weitgehend abzukoppeln, haben wir auf unserem Werk Zielitz eine neue 30-Megawatt-Dampfturbine errichtet. Auch der Wirkungsgrad – die Strom-

ausbeute pro durchgesetzter Tonne Dampf – wurde wesentlich verbessert. Dadurch werden jährlich 7.300 t CO<sub>2</sub> eingespart.

#### GESCHÄFTSBEREICH SALZ

Die Produktionskapazität des Geschäftsbereichs Salz beläuft sich auf knapp 30 Mio. t Salz. Davon entfallen 70 % bzw. 21 Mio. t auf bergmännisch gewonnenes Steinsalz, 4,7 Mio. t auf Siedesalz, 2,4 Mio. t auf Solarsalz und 1,7 Mio. t auf Salz, das in Sole enthalten ist.

Das energieintensivste Verfahren ist die Herstellung von Siedesalz, weil dabei große Mengen Wasser verdampft werden müssen. Dazu wird Sole in geschlossene Verdampfergefäße geleitet, wo sie bei Temperaturen zwischen 50 bis 150 °C eingedampft wird und das Natriumchlorid auskristallisiert. Dabei ist der Prozess soweit optimiert, dass durch Wärmerückgewinnung und mehrstufige Eindampfapparate, die teilweise im Vakuum betrieben werden, die höchstmögliche Energienutzung erreicht wird.

Die Aufbereitung von Steinsalz erfolgt durch Brechen, Mahlen und Sieben. Meer- bzw. Solarsalz wird gewonnen, indem Salzwasser durch Sonneneinstrahlung verdunstet.

#### INVESTITION IN NEUE TECHNIKEN ZUR EMISSIONSMINDERUNG

In den USA werden zurzeit drei von 10 Siedesalzanlagen statt mit Erdgas noch mit Kohle betrieben. An diesen drei Standorten hat MORTON SALT in den vergan-

genen fünf Jahren mehr als 20 Mio. US-Dollar in neue Techniken zur Emissionsminderung investiert. Dadurch konnten die Feinstaubemissionen um über 30 % und die Stickoxidemissionen um über 20 % gesenkt werden.

#### DAMPF AUS ERSATZBRENNSTOFFANLAGE

Voraussichtlich ab Mitte 2011 werden wir an unserem niederländischen Salz-Standort in Harlingen Dampf aus einer Ersatzbrennstoffanlage beziehen. Nach der Grundsteinlegung im Mai 2009 schreitet die Errichtung der Anlage durch den niederländischen Betreiber OMRIN planmäßig voran. Die direkten, produktionsbedingten CO<sub>2</sub>-Emissionen unseres Standorts reduzieren sich auf null; CO<sub>2</sub>-Emissionen fallen allerdings beim Betreiber OMRIN an.

#### EMISSIONSHANDEL

##### REDUKTION DER TREIBHAUSGASE IST DAS ZIEL

Der Emissionshandel ist eines der Instrumente, die das Kyoto-Protokoll aus dem Jahr 1997 zur Reduktion der Treibhausgase vorsieht. Im Jahr 2005 ist das europäische System zum Handel mit Emissionszertifikaten in Kraft getreten. Unternehmen, die mehr CO<sub>2</sub> emittieren, als die ihnen zugeteilten Emissionsrechte erlauben, können wählen, ob sie in Emissionsminderungsprojekte investieren oder Zertifikate zur Emissionsberechtigung auf dem Markt zukaufen.

#### ZWEITE HANDELSPERIODE LÄUFT

Im Januar 2008 startete die zweite Handelsperiode im Emissionshandel. Weiterhin sind 16 Anlagen<sup>1</sup> der K+S GRUPPE emissionshandelspflichtig. Bei der Zuteilung von Emissionsrechten nach dem Benchmark-System wird in Deutschland die Energieeffizienz der einzelnen Anlagen jedoch nicht vollumfänglich berücksichtigt. Stattdessen werden Anlagen der Energiewirtschaft pauschal mit einer prozentualen Minderungsverpflichtung belegt. Dies trifft insbesondere effiziente Energieerzeugungsanlagen der Industrie, wie unsere Kraftwerke, die dank der Kraft-Wärme-Kopplung bereits einen Wirkungsgrad von über 90 % besitzen. So angewendet, verfehlt der Emissionshandel den gewollten Lenkungseffekt und führt zu ungerechtfertigten Kostenbelastungen.

#### DRITTE HANDELSPERIODE IN VORBEREITUNG

Derzeitig bereitet die EU-Kommission die Rahmenbedingungen für die dritte Handelsperiode vor (2013–2020). Hierzu wurde bereits im Dezember 2008 eine EU-Emissionshandelsrichtlinie verabschiedet. Zwar sind zum jetzigen Zeitpunkt noch nicht alle Inhalte festgeschrieben, jedoch gehen wir davon aus, dass die Erfüllung der ambitionierten EU-Klimaschutzziele eine große Herausforderung für die europäische Industrie und somit auch für K+S sein wird.

<sup>1</sup> Wir kalkulieren unsere Emissionen auf Basis der EU-Monitoring-Leitlinien aus dem Jahr 2007. Die Emissionen der Anlagen, die am Emissionshandel teilnehmen, werden von externen Prüfungsorganisationen (envicert GmbH und TÜV Thüringen e.V.) verifiziert.

## 5.4 REKULTIVIERUNG UND NATURSCHUTZ

### RÜCKSTANDSHALDEN IM LANDSCHAFTSBILD

Auf den Standorten des Geschäftsbereichs Kali- und Magnesiumprodukte halten wir feste Produktionsrückstände auf, die im Wesentlichen durch die Anwendung der ESTA-Technologie entstehen. Wir sind uns bewusst, dass der Flächenverbrauch und die salzhaltigen Abwässer, die durch Niederschläge auf die Halden entstehen, Eingriffe in die Natur und das Landschaftsbild sind. Die Halden unserer Kaliwerke nehmen eine Fläche von ungefähr 500 Hektar ein.

Eingriffe in Natur und Landschaft durch die Halden gleichen wir durch vielfältige Maßnahmen zum Naturschutz und zur Erhaltung der Artenvielfalt aus. Außerdem führen wir eine Reihe von Projekten zur Abdeckung von Rückstandshalden durch, mit dem Ziel, die Haldenwässer zu reduzieren. Bereits seit dem Jahr 1983 erforschen wir beispielsweise in Kooperation mit der Universität Kassel Begrünungsprogramme für Rückstandshalden. Nach der vollständigen Abdeckung und Begrünung kann Niederschlagswasser nicht mehr an die Rückstände gelangen und die Entstehung von salzhaltigen Haldenwässern wird vermieden.

### PROJEKTE ZUR ABDECKUNG UND BEGRÜNUNG

- + Am Standort des ehemaligen Kaliwerks Friedrichshall in Sehnde wird eine Anlage zum Recycling von Baustoffen betrieben, um die Halde abzudecken und

zu begrünen. Die Halde wird – abhängig von den zur Verfügung stehenden Mengen an Abdeckungsmaterialien – in 15 bis 25 Jahren komplett abgedeckt sein.

- + Auf einer kleinen Halde am Standort Wintershall wird im Rahmen eines Begrünungsprogramms das Entstehen natürlicher Vegetation gefördert. Im Gegensatz zu den meisten Großhalden, auf denen u. a. aufgrund der aus Salz bestehenden Oberfläche keine Bepflanzung möglich ist, besteht die Oberfläche dieser Halde aus dem schwerlöslichen Gipsmineral Anhydrit, das kaum noch Steinsalz enthält. In Zukunft soll auf dem Gelände ein Sekundärbiotop entstehen.
- + Weitere Verfahren zur Abdeckung von Rückstandshalden, die bei positiven Ergebnissen eventuell auch für Großhalden geeignet sind, werden derzeit vorbereitet und sollen anschließend erprobt werden. Es ist allerdings kaum zu erwarten, dass in absehbarer Zeit Großhalden umfänglich abgedeckt werden können.

### UMFANGREICHE AUSGLEICHSMASSENNAHMEN

In Deutschland sind Ausgleichsmaßnahmen fester Bestandteil eines Genehmigungsbescheides für eine Haldenerweiterung und mit den zuständigen Naturschutzbehörden abgestimmt. Auch Naturschutzverbände haben die Möglichkeit, den Behörden Projekte vorzuschlagen. Es gilt der Grundsatz: Durch die Ausgleichsmaßnahmen muss mehr naturnahe Fläche neu geschaffen werden, als durch Bau oder Erweiterung verloren geht. Häufige Maßnahmen sind: Pflanzung von Gehölzstreifen und Streuobstwiesen, Erst- und Wiederaufforstung von Waldstücken sowie Renaturierung von Bachläufen. Um die Artenvielfalt zu schützen, werden

unterschiedliche Bäume und Sträucher gepflanzt, sodass Biotop für seltene Tierarten entstehen können.

Im Jahr 2010 haben wir die Halde am Standort Zielitz um 4,5 Hektar erweitert und im Gegenzug durch Ausgleichs- und Ersatzmaßnahmen 21 Hektar naturnahe Fläche neu geschaffen. Dazu gehören unter anderem die Erstaufforstung eines Eichenmischwaldes (11,6 Hektar) und die ökologische Aufwertung eines Gewässers (5 Hektar).

### SALZABBAU IN DER CHILENISCHEN WÜSTE

In Chile bauen wir Steinsalz in einer der trockensten Regionen der Erde ab, der Tarapacá-Wüste. Der Tagebau umfasst circa 100 Hektar. Nach Stilllegung eines Abbaubereichs werden wir auf Basis der Abbaugenehmigung die Anlagen sowie eventuelle Altlasten entfernen und die Ränder durch eine Angleichung der Höhenunterschiede sichern; eine komplette Verfüllung wird nicht notwendig sein. Die Rekultivierung spielt in dieser Region eine untergeordnete Rolle, da dort kaum Flora und Fauna existieren.

### SOLARSALZGEWINNUNG

Bei entsprechenden klimatischen Voraussetzungen nutzen wir auch die Kraft der Sonne zur Salzgewinnung. Das durch Sonnenenergie gewonnene feste Natriumchlorid bezeichnet man als Solarsalz. Hierzu zählt auch das aus verdunstetem Meerwasser gewonnene Meer-salz.



Bei dieser Methode wird Salzwasser in abgetrennte Verdunstungsbecken gepumpt. Nach mehreren Monaten der Sonneneinstrahlung kann das auskristallisierte Natriumchlorid schließlich als mehrere Zentimeter dicke Salzschiicht geerntet werden. Wir gewinnen Solarsalz in Brasilien, am Großen Salzsee in Utah/USA und auf den Bahamas.

In Brasilien und auf den Bahamas wird Meerwasser mit einer Konzentration von 35 Gramm Salz pro Liter verarbeitet. Zuerst werden 80 bis 90 % des Wassers verdunstet, sodass die Salzkonzentration bei 300 Gramm pro Liter liegt; dies geschieht in den Konzentrationsbecken, die circa 90 % der gesamten Standortfläche einnehmen. Anschließend kann das Natriumchlorid aus den Kristallisationsbecken gewonnen werden, die die restliche Fläche einnehmen. Unser Standort in Brasilien ist 2.500 Hektar groß, auf den Bahamas sind es 12.200 Hektar.

#### **WELTGRÖSSTE FLAMINGO-KOLONIE SIEDELT AN K+S-STANDORT**

Flache Verdunstungsbecken können zur Erhöhung der Artenvielfalt beitragen. Bestes Beispiel hierfür ist die Solarsalzgewinnung auf den Bahamas. MORTON SALT hat dort in Zusammenarbeit mit dem Bahamas National Trust und dem Inagua National Park die Wiedersiedlung von Flamingos (West Indian Pink Flamingo) gefördert. Gab es dort im Jahr 1950 nur noch 1.000 Flamingos, werden mittlerweile wieder über 50.000 Vögel gezählt – die größte Kolonie der Welt. Die in den Becken lebenden Garnelen sind die Hauptnahrungsquelle der Vögel.

Die Sole aus dem Großen Salzsee hat bereits eine Konzentration von circa 150 Gramm Salz pro Liter, daher wird wesentlich weniger Fläche für die Vorkonzentration benötigt als beim Verdunsten von Meersalz. Angesichts dieser hohen Salzkonzentrationen ist im Großen Salzsee – abgesehen von Salinenkrebsen – keine Gewässerökologie vorhanden.

#### **TORFGEWINNUNG UND RENATURIERUNG**

Grundsätzlich ist in Deutschland die Torfgewinnung nur in bereits durch den Menschen genutzten Bereichen zugelassen. Um den Torf für die Blumenerdenproduktion der COMPO zu gewinnen, lagern wir nach der Trockenlegung den auf dem Torf befindlichen Boden samt den darin enthaltenen speziellen Samen um. Nach Gewinnung des Torfs erfolgt eine Renaturierung des jeweiligen Moorabschnitts, indem der zwischengelagerte Boden wieder aufgebracht, die Flächen wieder vernässt und so die Voraussetzungen für eine natürliche Regeneration geschaffen werden. Diese Renaturierung wird durch Experten der Fachbehörden sowie wissenschaftliche Untersuchungen begleitet. Im Ergebnis entwickelt sich nach kurzer Zeit eine für unberührte Hochmoorlandschaften typische Flora und Fauna. Insbesondere siedeln sich seltene Tier- und Pflanzenarten an, die in den gleichen Arealen vor der Torfgewinnung häufig nicht mehr anzutreffen waren. Die Renaturierungsmaßnahmen entsprechen der EU-Vogelschutzrichtlinie sowie der Flora/Fauna/Habitat-Richtlinie. Die renatu-

rierten Flächen sind auch Bestandteil des europäischen Schutzgebietssystems „Natura 2000“.

Außerdem unterstützt COMPO in Deutschland und Frankreich Forschungsprojekte mit dem Ziel, Ersatzprodukte für natürlichen Torf zu finden. Eine Alternative könnte Sphagnum sein, das als Feuchtgebietspflanze Hauptbestandteil des Torfs ist, eine andere die Verwendung von kompostierten Baumrinden oder pflanzlichen Abfällen.

Das genehmigte Torfabbaugelände am Standort Uchte ist 630 Hektar groß, aktuell im Abbau befinden sich 180 Hektar, 20 Hektar wurden im Jahr 2010 renaturiert. Am Standort Gnarrenburg ist die Gewinnung auf 585 Hektar zugelassen, wovon zurzeit 336 Hektar genutzt werden; 20 Hektar wurden im Jahr 2010 renaturiert.

#### **RÜCKBAU UND SANIERUNG STILLGELEGTER STANDORTE**

##### **PROGRAMM ZUR NACHSORGE INAKTIVER WERKE IN DEUTSCHLAND**

Bereits Ende der 1990er Jahre haben wir für den gezielten Rückbau stillgelegter Standorte ein langjähriges Programm aufgelegt. Unser Ziel war und ist es, die Nachsorge inaktiver Werke in Deutschland strukturiert zu bearbeiten. Die Kosten dafür belaufen sich bislang auf insgesamt über 130 Mio. €. Zum Betreuungsbereich gehören 28 Altstandorte in Niedersachsen sowie einer in Nordrhein-Westfalen und einer in Baden-Württemberg.

#### FLUTUNG VON GRUBENHOHLRÄUMEN

Für jeden Standort erfolgt gemäß Bundesberggesetz und in Abstimmung mit den Naturschutzbehörden sowie den örtlichen Gemeindevertretern eine sorgfältige Abwägung, ob und wie vorhandene Einrichtungen weiter genutzt werden können. Ist die sinnvolle Nachnutzung der Bergwerke nicht möglich, sind wir verpflichtet, die Grubenhohlräume der in Niedersachsen liegenden Kalibergwerke mit „steiler Lagerung“ zu fluten. Anschließend werden die Schächte mit Hartgesteinsmaterial zur Sicherung der Tagesoberflächen verfüllt, die oberirdischen Flächen untersucht und eventuelle Altlasten beseitigt. Zurzeit werden in Niedersachsen sieben Standorte „verwahrt“; bei 18 Standorten ist dies bereits abgeschlossen. Weitere Verwahrungsarbeiten werden wir im Jahr 2011 abschließen.

#### BETREUUNG VON KALI-ALTHALDEN

Zusätzlich werden 37 Althalden in Niedersachsen und zwei in Baden-Württemberg betreut. Davon sind zurzeit 16 begrünt und weitere sechs befinden sich in Begrünung. Sechs Halden wurden bisher abgetragen und eine teilweise zurückgebaut.

#### BEISPIELE FÜR GELUNGENE NACHNUTZUNG:

- + Im Werk Salzdetfurth mussten wir die Kaliproduktion im Jahr 1992 einstellen. Eine zum MARS-Konzern gehörende Gesellschaft entschied im Jahr 1993, die komplette CATSAN-Produktion nach Salzdetfurth zu verlagern, nachdem sie zuvor von dort lediglich einen Rohstoff bezogen hatte. Seit dem Jahr 1995 ist ein wei-

teres Unternehmen auf dem Werksgelände angesiedelt, das ein Vorprodukt für Katzenstreu produziert.

- + Im ehemaligen Kalibergwerk Merkers haben wir im Jahr 1991 ein Besucherbergwerk eröffnet. Neben dem Einblick in ein modernes Bergbauunternehmen gibt es Wissenswertes über die Geschichte, die Entwicklung und die Tradition des Kalibergbaus zu erfahren. Die Konzerte im ehemaligen Großbunker sowie diverse sportliche Veranstaltungen stoßen auf reges Besucherinteresse. Im Jahr 2010 haben wir rund 78.000 Besucher verzeichnet.

/ [www.erlebnisbergwerk.de](http://www.erlebnisbergwerk.de)

#### STANDORTSPEZIFISCHE NACHSORGEPLÄNE FÜR US-AMERIKANISCHE STANDORTE

MORTON SALT hat in den letzten 30 Jahren keinen Standort geschlossen, daher stehen zurzeit keinerlei Rückbau- bzw. Verwahrungsarbeiten an.

Für alle aktiven Standorte gibt es detaillierte Pläne, wie im Falle einer Standortschließung die Nachsorge ablaufen wird – der Umfang der Maßnahmen ist abhängig von der Gewinnungsart. Grundsätzlich gilt: verursachte Umweltschäden sind zu beheben und Altlasten zu entsorgen. Darüber hinaus sind beispielsweise Standorte, die Solution Mining betreiben, im Rahmen des Grundwasserschutzes verpflichtet, die Technik komplett rückzubauen und die Bohrlöcher abzudichten. Für den Solar-salz-Standort am Großen Salzsee wiederum gilt es, nach Schließung den Ursprungszustand weitgehend wiederherzustellen.

## 5.5 KENNZAHLEN UND ERLÄUTERUNGEN

### INVESTITIONEN UND BETRIEBSKOSTEN

Die direkten Investitionen in den Umweltschutz beliefen sich im Jahr 2010 auf 28,2 Mio. €; dies ist im Vergleich zum Vorjahr eine Steigerung um 53 %. Sie ist vornehmlich auf das Maßnahmenpaket zum Grundwasser- und Gewässerschutz sowie Investitionen im Kraftwerksbereich zurückzuführen. Die Betriebskosten für den Umweltschutz sind hauptsächlich aufgrund der gestiegenen Aufwendungen im Geschäftsbereich Kali- und Magnesiumprodukte im Vergleich zum Vorjahr um 31 % auf 146,2 Mio. € gestiegen. / TAB: 5.5.1, 5.5.2

### MATERIALVERBRAUCH

Im Jahr 2010 haben wir insgesamt 64,8 Mio.t Rohstoffe sowie 87.300 t Hilfsstoffe und 33.300 t Betriebsstoffe eingesetzt.

Davon entfielen 63,2 Mio. t auf Rohsalze und 1,6 Mio. t auf organische Rohstoffe wie Torf, Erden, Komposte sowie eingesetzte mineralische Düngemittel und Spurennährstoffe. Unsere Hilfsstoffe sind im Wesentlichen Prozesschemikalien und Konditionierungsmittel (Staubbindemittel und Antibackmittel). Betriebsstoffe sind die für den Betrieb der Produktionseinrichtungen und Fahrzeuge erforderlichen Stoffe, vor allem Fette, Öle und Kraftstoffe. Im Jahr 2010 verbrauchten wir insgesamt 1.538 t Öle, 138 t Fette und 40 Mio.l Dieselmotorkraftstoffe.

**INVESTITIONEN IN DEN UMWELTSCHUTZ <sup>1</sup>**

TAB: 5.5.1

|                  | 2010        | 2009        | %          |
|------------------|-------------|-------------|------------|
| in Mio. €        |             |             |            |
| <b>Gesamt</b>    | <b>28,2</b> | <b>18,4</b> | <b>+53</b> |
| Gewässerschutz   | 15,2        | 8,8         | +73        |
| Luftreinhaltung  | 11,1        | 7,5         | +48        |
| Abfallwirtschaft | 1,8         | 2,0         | -10        |
| Naturschutz      | 0,1         | 0,1         | 0          |

**BETRIEBSKOSTEN FÜR DEN UMWELTSCHUTZ**

TAB: 5.5.2

|                  | 2010         | 2009 <sup>1</sup> | %          |
|------------------|--------------|-------------------|------------|
| in Mio. €        |              |                   |            |
| <b>Gesamt</b>    | <b>146,2</b> | <b>111,9</b>      | <b>+31</b> |
| Gewässerschutz   | 94,0         | 76,6              | +23        |
| Luftreinhaltung  | 28,9         | 18,4              | +57        |
| Abfallwirtschaft | 8,8          | 9,8               | -10        |
| Naturschutz      | 1,1          | 1,1               | 0          |
| Sonstige         | 13,4         | 6,0               | +123       |

<sup>1</sup> Ohne Morton Salt.**RECYCELTE MATERIALIEN**

Im Rahmen der Blumenerdeproduktion bei COMPO haben wir im vergangenen Jahr 40.110 t kompostierte Grünabfälle eingesetzt.

Am Standort Sigmundshall stellen wir das Schmelzsalz MONTANAL für den Einsatz in der Sekundäraluminiumindustrie her. Die beim Aluminium-Schmelzprozess entstehende Salzschlacke wird in der REKAL-Anlage auf-

gearbeitet und zu 100 % verwertet. Im Recyclingprozess fallen Aluminiumgranulat, das an die metallurgische Industrie verkauft wird, sowie die Düngemittel Kaliumchlorid und Ammonsulfat an, die wir ebenfalls vermarkten. Ein während des Recyclingprozesses entstehendes Gasgemisch setzen wir in der Kaliproduktion des Standortes als Ersatz für Erdgas ein. Mit dem verbleibenden Rückstand wird die Halde abgedeckt, um sie anschließend zu begrünen.

**ENERGIEVERBRAUCH**

In Jahr 2010 betrug der Energieverbrauch insgesamt 9.051 GWh (Vorjahr: 5.029 GWh). Der spezifische Energieverbrauch je produzierter Tonne Produkt lag bei 263 kWh/t Produkt (Vorjahr: 283 kWh/t Produkt). Hiervon entfielen 6.256 GWh auf Erd- bzw. Flüssiggas, 91 GWh auf leichtes und schweres Heizöl, 1.119 GWh auf Kohle, 1.042 GWh auf von extern bezogenen Dampf und 541 GWh auf Fremdstrom. Wir haben 109 GWh Strom in das öffentliche Netz eingespeist. Aufgrund der im Vergleich zum Vorjahr höheren Produktion in Europa ist der Energieverbrauch um ein Drittel gestiegen. Hauptsächlich ist die erhebliche Zunahme des absoluten Energieverbrauchs auf die erstmalige Einbeziehung von MORTON SALT zurückzuführen.

Der Energieverbrauch je Tonne hergestellter Ware konnte in den letzten Jahren immer weiter vermindert werden. Wir haben uns im Jahr 2009 das Ziel gesetzt, den spezifischen Energieverbrauch bis zum Jahr 2014 auf unter 270 kWh/t Ware zu vermindern. Dieses Ziel wurde mit 263 kWh/t bereits in 2010 erreicht, wofür allerdings die Einbeziehung von MORTON SALT mit einem im Vergleich zur gesamten Gruppe niedrigeren Energieverbrauch von 222 kWh/t verantwortlich ist. Dieser Wert ist auch auf die Nutzung von Sonnenenergie zur Soleeindampfung in den USA zurückzuführen. Unter Berücksichtigung dieser neuen Situation sehen wir eine realistische Chance auf eine weitere Senkung des spezifischen Energieverbrauchs auf ca. 250 kWh/t im Jahr 2014. / ABB: 5.5.1

**SPEZIFISCHER ENERGIEVERBRAUCH**

ABB: 5.5.1

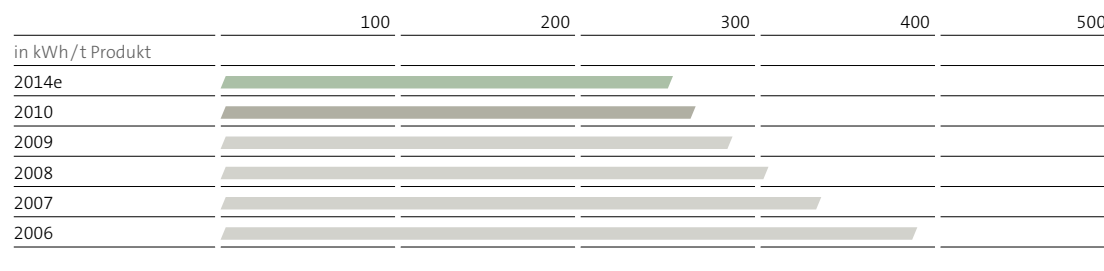**SPEZIFISCHER KOHLENDIOXIDAUSSTOSS**

ABB: 5.5.2

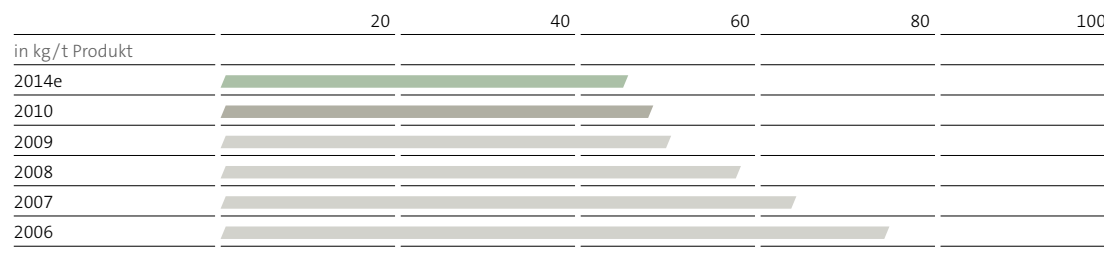**EMISSIONEN**

Die CO<sub>2</sub>-Emissionen im Jahr 2010 betrugen 1,6 Mio. t (Vorjahr: 0,88 Mio. t). Der Kohlendioxidausstoß je produzierter Tonne Ware lag bei 48 kg/t Produkt (Vorjahr: 50 kg/t Produkt). Weitere Emissionen: 2.502 t NO<sub>2</sub> (Vorjahr: 1.541 t) und 6.023 t SO<sub>2</sub> (Vorjahr: 36 t SO<sub>2</sub>). Der Ausstoß je produzierter Tonne Ware lag bei 73 g/t NO<sub>2</sub> (Vorjahr:

87 g/t NO<sub>2</sub>) und 175 g/t SO<sub>2</sub> Produkt (Vorjahr: 2 g/t SO<sub>2</sub> Produkt). Im Vergleich zum Vorjahr ergab sich somit bei allen Schadstoffen eine deutliche absolute Erhöhung, was vornehmlich auf die erstmalige Einbeziehung von MORTON SALT zurückzuführen ist.

Entgegen unserer ursprünglichen Schätzung, die CO<sub>2</sub>-Emissionen je Tonne Produkt bis zum Jahr 2014 nicht weiter unter die Schwelle von 50 kg/t vermindern zu können, gelang eine weitere geringfügige Reduzierung sowohl mit als auch ohne Berücksichtigung des Effektes von MORTON SALT. Dies ist auf eine weitere Steigerung der Energieeffizienz unserer Anlagen zurückzuführen. Für das Jahr 2014 können wir somit unser Ziel für die CO<sub>2</sub>-Emissionen auf ca. 45 kg/t weiter senken.

/ ABB: 5.5.2

Der spezifische Schwefeldioxydausstoß bewegt sich ohne Berücksichtigung von MORTON SALT in dem betrachteten Fünfjahreszeitraum in einen Bereich von 2,0 bis 2,2 g/t und ist somit konstant. Der erhebliche Anstieg auf 175 g/t in 2010 ist auf die Verfeuerung von Kohle und schwerem Heizöl mit höheren Schwefelgehalten auf Standorten von MORTON SALT zurückzuführen, was auch die beobachtete Zunahme des Salzsäure-Ausstoßes von 2 g/t in 2009 auf 8 g/t in 2010 erklärt. Eine Prognose bis zum Jahr 2014 lässt sich für den Schwefeldioxyd-Ausstoß zum jetzigen Zeitpunkt nicht abgeben.

In unseren Kühleinrichtungen sind Kälteflüssigkeiten im geschlossenen Kreislauf enthalten, sodass keine ozonabbauenden Substanzen freigesetzt werden. Andere ozonabbauende Substanzen setzen wir nicht ein.

**WASSEREINSATZ**

Im Jahr 2010 haben wir 160 Mio. m<sup>3</sup> Wasser eingesetzt (Vorjahr: 76 Mio. m<sup>3</sup> Wasser). Der spezifische Wassereinsatz stieg durch die erstmalige Einbeziehung von



**SPEZIFISCHER WASSERVERBRAUCH**

ABB: 5.5.3

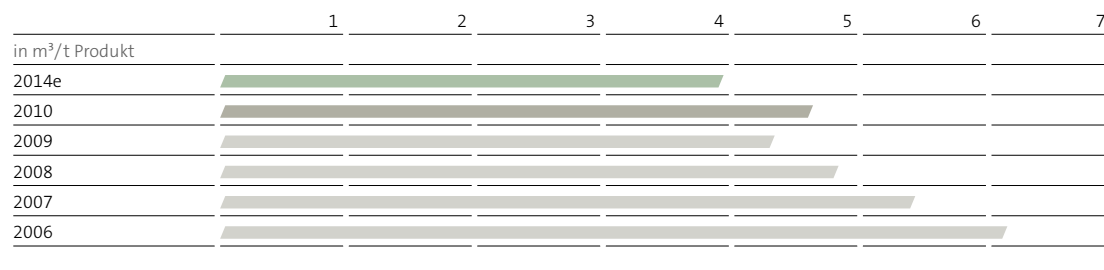

9,5 Mio. m³ bzw. 0,5 m³/t Produkt). Hiervon haben wir 9,4 Mio. m³ bzw. 0,3 m³/t Produkt in Gewässer eingeleitet (Vorjahr: 7,5 Mio. m³ bzw. 0,4 m³/t Produkt) und 4,3 Mio. m³ bzw. 0,1 m³/t Produkt versenkt (Vorjahr: 2,0 Mio. m³ bzw. 0,1 m³/t Produkt).

Damit ist die absolute Menge der Salzabwässer sowohl aufgrund des wieder erhöhten Produktionsvolumens als auch aufgrund der erstmaligen Einbeziehung von MORTON SALT gestiegen. Die spezifischen Mengen sind gleich geblieben (Versenkung) oder konnten weiter verringert werden (Einleitung).

**SALZABWASSERVERSENKUNG UND -EINLEITUNG**

ABB: 5.5.4

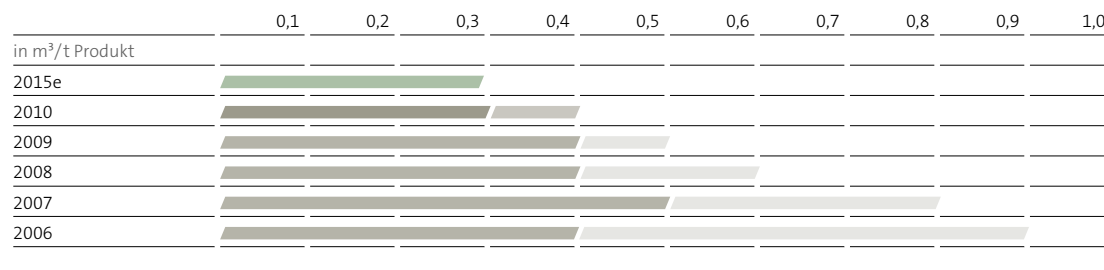

Salzabwassereinleitung    Salzabwasserversenkung

Unter der Voraussetzung, dass wir die Maßnahmen zum Gewässerschutz im hessisch-thüringischen Kalirevier bis zum Jahr 2015 umgesetzt und die damit verbundenen anspruchsvollen Ziele (Halbierung des jährlichen Salzabwasseraufkommens aus der dortigen Kaliproduktion auf 7 Mio. m³) verwirklicht haben, sollte eine Zielgröße für die Einleitung in Gewässer von 0,3 m³/t im Jahr 2015 möglich sein. / ABB: 5.5.4

Als Kühlwasser setzen wir nahezu ausschließlich Flusswasser ein. Dieses wird chemisch nicht verändert, sondern erfährt lediglich eine Temperaturerhöhung und wird dem Gewässer anschließend wieder zugeführt. Sofern ein nicht wieder verwendbarer Überschuss von Spül-, Siel- und Reinigungswasser entsteht, wird er unter Berücksichtigung der wasserrechtlichen Erlaubnisse in das Gewässer eingeleitet.

MORTON SALT von 4,3 m³/t auf 4,6 m³/t geringfügig an. Bis 2014 wollen wir eine Senkung auf unter 4 m³/t Ware erreichen, d.h. eine weitere Verminderung um mehr als 10 %. / ABB: 5.5.3

**ABWÄSSER**

Die Menge der Salzabwässer belief sich im Jahr 2010 auf insgesamt 13,7 Mio. m³ bzw. 0,4 m³/t Produkt (Vorjahr¹:

¹ Kurzarbeitsbedingt ist eine geringe Produktionsmenge angefallen.

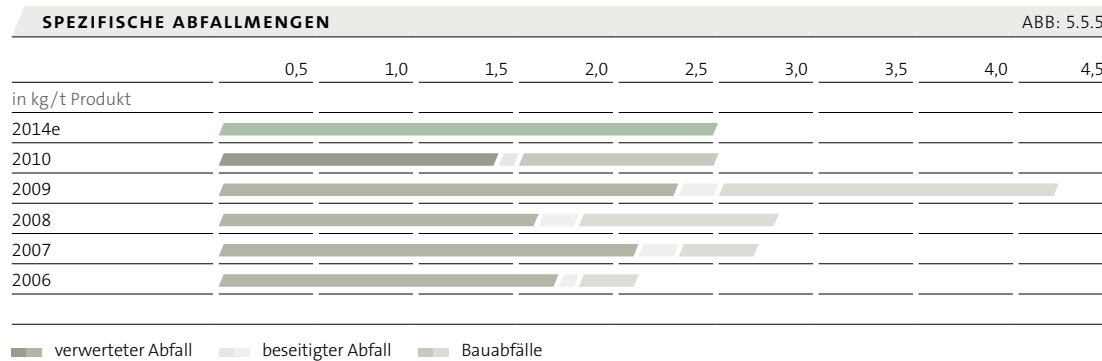

### VERWERTUNG VON ABFÄLLEN

Auf unseren Standorten fallen Abfälle an, die dem Kreislaufwirtschafts- und Abfallgesetz unterliegen. Hauptsächlich sind dies Verpackungsmaterialien, Stahlschrott, gebrauchte Öle und Fette, Lösungsmittel und Bauabfälle. Im Jahr 2010 fielen insgesamt 85.600 t an Abfällen an, was einer spezifischen Abfallmenge von 2,5 kg/t Produkt entspricht. Davon wurden 82.400 t verwertet, der Anteil an Bauschutt nahezu vollständig. 3.200 t Abfälle wurden beseitigt.

Die spezifische Abfallmenge zeigt im Fünfjahreszeitraum ab 2006 mit schwankenden Mengen zwischen 2,7 bis 4,2 kg/t keine einheitliche Tendenz. Dies ist im Wesentlichen auf Baumaßnahmen zurückzuführen, die unabhängig von den hergestellten Produkten diskontinuierlich durchgeführt werden. Sofern Investitionen und Baumaßnahmen im Jahr 2014 keinen besonders

hohen Umfang annehmen, erwarten wir auch weiterhin ein spezifisches Abfallaufkommen von 2,5 kg Abfall/t Produkt, wie auch bereits im vergangenen Jahr prognostiziert. / **ABB: 5.5.5**

## UMWELTSACHBILANZ

| SPEZIFISCHE DATEN                     |                           | TAB: 5.5.3        |      |      |                   |      |
|---------------------------------------|---------------------------|-------------------|------|------|-------------------|------|
|                                       |                           | 2010 <sup>1</sup> | 2009 | 2008 | 2007 <sup>2</sup> | 2006 |
| <b>Einfuhr</b>                        |                           |                   |      |      |                   |      |
| Eingesetzte Rohstoffe                 | t/t Produkt               | 1,9               | 2,1  | 2,4  | 2,6               | 2,8  |
| Energie, gesamt                       | kWh/t Produkt             | 263               | 283  | 304  | 333               | 387  |
| Wasser, gesamt                        | m <sup>3</sup> /t Produkt | 4,6               | 4,3  | 4,8  | 5,4               | 6,1  |
| Betriebsstoffe                        | kg/t Produkt              | 1                 | 1,4  | 1,3  | 1,3               | 1,1  |
| Hilfsstoffe                           | kg/t Produkt              | 2,5               | 3,2  | 3,7  | 4,1               | 4,5  |
| <b>Ausfuhr</b>                        |                           |                   |      |      |                   |      |
| Produkte                              | Mio. t                    | 34,5              | 17,8 | 21,6 | 20,2              | 17,4 |
| Kohlendioxid                          | kg/t Produkt              | 48                | 50   | 58   | 64                | 74   |
| Kohlenmonoxid                         | g/t Produkt               | 17                | 19   | 34   | 19                | 19   |
| Stickoxide, als NO <sub>2</sub>       | g/t Produkt               | 73                | 87   | 84   | 92                | 98   |
| Schwefeldioxid                        | g/t Produkt               | 175               | 2    | 2    | 2                 | 2    |
| Salzsäure                             | g/t Produkt               | 8                 | 2    | 2    | 2                 | 2    |
| Ammoniak                              | g/t Produkt               | 0                 | 0    | 0    | 0                 | 0    |
| Staub                                 | g/t Produkt               | 16                | 5    | 5    | 5                 | 6    |
| Bauabfälle                            | kg/t Produkt              | 1                 | 1,7  | 1,0  | 0,4               | 0,3  |
| Verwerteter Abfall,<br>ohne Bauabfall | kg/t Produkt              | 1,4               | 2,3  | 1,6  | 2,1               | 1,7  |
| Beseitigter Abfall,<br>ohne Bauabfall | kg/t Produkt              | 0,1               | 0,2  | 0,2  | 0,2               | 0,1  |
| Sonderabfall, ohne Bauabfall          | kg/t Produkt              | 0,1               | 0,2  | 0,1  | 0,1               | 0,3  |
| Aufgehalteter Rückstand               | t/t Produkt               | 0,8               | 0,9  | 1,2  | 1,4               | 1,4  |
| Versatz                               | t/t Produkt               | 0                 | 0,1  | 0,1  | 0,1               | 0,2  |
| Kühlwasser                            | m <sup>3</sup> /t Produkt | 4,7               | 5,2  | 5,3  | 6,0               | 6,7  |
| Salzabwassereinleitung                | m <sup>3</sup> /t Produkt | 0,3               | 0,4  | 0,4  | 0,5               | 0,4  |
| Salzabwasserversenkung                | m <sup>3</sup> /t Produkt | 0,1               | 0,1  | 0,2  | 0,3               | 0,5  |

<sup>1</sup> Ab 2010 einschließlich Morton Salt.<sup>2</sup> Ab 2007 einschließlich SPL, SDB und ISCO.

| ABSOLUTE DATEN                        |                     | TAB: 5.5.4        |       |       |                   |       |
|---------------------------------------|---------------------|-------------------|-------|-------|-------------------|-------|
|                                       |                     | 2010 <sup>1</sup> | 2009  | 2008  | 2007 <sup>2</sup> | 2006  |
| <b>Einfuhr</b>                        |                     |                   |       |       |                   |       |
| Eingesetzte Rohstoffe                 | Mio. t              | 64,8              | 37,0  | 51,6  | 52,8              | 47,8  |
| Energie, gesamt                       | GWh                 | 9.051             | 5.029 | 6.547 | 6.712             | 6.708 |
| Wasser, gesamt                        | Mio. m <sup>3</sup> | 160,0             | 76,3  | 104,1 | 108,0             | 106,7 |
| Betriebsstoffe                        | 1.000 t             | 33,3              | 24,6  | 28,3  | 26,9              | 19,2  |
| Hilfsstoffe                           | 1.000 t             | 87,3              | 56,3  | 79,9  | 81,8              | 77,6  |
| <b>Ausfuhr</b>                        |                     |                   |       |       |                   |       |
| Produkte                              | Mio. t              | 34,5              | 17,8  | 21,6  | 20,2              | 17,4  |
| Kohlendioxid                          | 1.000 t             | 1.648             | 884   | 1.244 | 1.286             | 1.287 |
| Kohlenmonoxid                         | t                   | 577               | 331   | 743   | 386               | 326   |
| Stickoxide, als NO <sub>2</sub>       | t                   | 2.502             | 1.541 | 1.806 | 1.862             | 1.694 |
| Schwefeldioxid                        | t                   | 6.023             | 36    | 45    | 40                | 39    |
| Salzsäure                             | t                   | 265               | 34    | 46    | 44                | 35    |
| Ammoniak                              | t                   | 14                | 7     | 8     | 8                 | 8     |
| Staub                                 | t                   | 561               | 83    | 107   | 110               | 109   |
| Bauabfälle                            | 1.000 t             | 35,4              | 29,7  | 22,1  | 8,6               | 6,0   |
| Verwerteter Abfall,<br>ohne Bauabfall | 1.000 t             | 47                | 40,2  | 35,3  | 43,0              | 29,4  |
| Beseitigter Abfall,<br>ohne Bauabfall | 1.000 t             | 3,2               | 3,4   | 3,3   | 3,1               | 2,2   |
| Sonderabfall, ohne Bauabfall          | 1.000 t             | 4,8               | 3,2   | 2,4   | 3,0               | 4,7   |
| Aufgehalteter Rückstand               | Mio. t              | 27,4              | 16,3  | 26,8  | 27,3              | 24,2  |
| Versatz                               | Mio. t              | 1,6               | 1,1   | 1,7   | 1,9               | 2,6   |
| Kühlwasser                            | Mio. m <sup>3</sup> | 163,5             | 92,9  | 115,1 | 121,0             | 117,0 |
| Salzabwassereinleitung                | Mio. m <sup>3</sup> | 9,4               | 7,5   | 8,1   | 10,6              | 6,7   |
| Salzabwasserversenkung                | Mio. m <sup>3</sup> | 4,3               | 2,0   | 5,4   | 5,6               | 7,8   |

<sup>1</sup> Ab 2010 einschließlich Morton Salt.<sup>2</sup> Ab 2007 einschließlich SPL, SDB und ISCO.





## SOZIALE VERANTWORTUNG

ANALYSE DER SPEZIFISCHEN ALTERSSTRUKTUREN unserer Belegschaften und der demografischen Gegebenheiten im Umfeld / Arbeitsunfälle auf niedrigem Niveau gehalten; Kennziffer „Arbeitsunfälle je einer Million geleisteter Arbeitsstunden“ erreicht neuen Tiefststand / Ausbildungsquote weiterhin auf hohem Niveau; Investitionen in Weiterbildung gestiegen / Konzept zur Logistikdienstleister-Bewertung überarbeitet und jetzt global einsetzbar / K+S engagiert sich für Jugendsport, Kultur, Wissenschaft und für sozial schwache Familien

# 6

---

|     |                                                      |     |
|-----|------------------------------------------------------|-----|
| 6.1 | Vorausschauende Personalpolitik                      | 107 |
| 6.2 | Unsere Mitarbeiter                                   | 108 |
| 6.3 | Betriebliches Gesundheitsmanagement                  | 110 |
| 6.4 | Arbeitssicherheit                                    | 112 |
| 6.5 | Flexible Arbeitszeitmodelle                          | 114 |
| 6.6 | Führungskultur                                       | 116 |
| 6.7 | Beteiligung am Unternehmenserfolg und Altersvorsorge | 116 |

|      |                                    |     |
|------|------------------------------------|-----|
| 6.8  | Ausbildung                         | 118 |
| 6.9  | Personalentwicklung                | 119 |
| 6.10 | Austausch von Wissen und Erfahrung | 121 |
| 6.11 | Mitbestimmung                      | 122 |
| 6.12 | Verantwortung in der Lieferkette   | 123 |
| 6.13 | Gesellschaftliches Engagement      | 125 |

## 6.1 VORAUSSCHAUENDE PERSONALPOLITIK

Mit einer vorausschauenden Personalpolitik unterstützen wir die Erreichung der strategischen Ziele der K+S GRUPPE. Wir wollen für Mitarbeiter aus aller Welt ein attraktiver Arbeitgeber sein.

K+S bietet eine leistungsorientierte Vergütung sowie umfangreiche Weiterbildungs- und internationale Entwicklungsmöglichkeiten, da auch zukünftig Fach- und Führungspositionen vorwiegend aus den eigenen Reihen besetzt werden sollen. Gute Ideen, Innovationsgeist und Engagement sind uns mehr wert als man in Zahlen ausdrücken kann: Wir unterstützen unsere Mitarbeiter dabei, ihre beruflichen Entwicklungsmöglichkeiten mit ihrer persönlichen Lebensplanung in Einklang zu bringen.

### ECKSTEINE DES PERSONALMANAGEMENTS

- + gruppenweite, geschäftsbereichsübergreifende Nachfolgeplanung
- + bedarfsorientierte Berufsausbildung
- + gezielte Fort- und Weiterbildung
- + leistungsfähiges Gesundheitsmanagement
- + verstärkte Förderung der Vereinbarkeit von Beruf und Familie
- + zielgruppenspezifisches Personalmarketing und Rekrutierung

### DEN DEMOGRAFISCHEN WANDEL GESTALTEN

Der demografische und gesellschaftspolitische Wandel in Europa und Nordamerika stellt auch für K+S eine besondere Herausforderung dar. Die Lebenserwartung der Menschen steigt weiter, die Geburtenrate jedoch stagniert. Bereits jetzt ist ein Mangel an Fachkräften erkennbar.

Das bedeutet, dass es entgegen der bisherigen insbesondere in Deutschland anzutreffenden Praxis der Vorruhestandsregelungen und Altersteilzeitmodelle in der zukünftigen Arbeitswelt durchschnittlich ältere Belegschaften geben wird. Die Menschen müssen und wollen auch länger arbeiten.

Vor dem Hintergrund der bei K+S anstehenden altersbedingten Abgänge sowie des zusätzlichen Personalbedarfs aufgrund des weiteren Wachstums unserer Gruppe müssen zum einen genügend qualifizierte Nachwuchskräfte rekrutiert und zum anderen durch gezielte Weiterbildung, entsprechend angepasste Arbeitsbedingungen und ein leistungsfähiges Gesundheitsmanagement die Voraussetzungen geschaffen werden, um Arbeitsfähigkeit, Qualifikation und Motivation unserer Mitarbeiter zu erhalten. Wir wollen eine Unternehmenskultur gestalten, die es allen Beschäftigten ermöglicht, über ihr gesamtes Erwerbsleben leistungsfähig und gesund zu bleiben!

### ANALYSE VON ALTERSSTRUKTUREN UND UMFELD

Im Jahr 2010 haben wir mit einer Analyse der spezifischen Altersstruktur unserer Belegschaften in Deutschland und der demografischen Entwicklungen im Umfeld begonnen. Während auf den Standorten des Tarifgebiets Chemie (K+S NITROGEN und COMPO) diese Analyse bereits abgeschlossen ist, läuft sie zurzeit noch auf den Standorten im Tarifgebiet Kali- und Steinsalz (alle anderen deutschen K+S-Gesellschaften). Im Jahr 2011 soll zwischen dem Arbeitgeberverband VKS und der IG BCE ein Tarifvertrag „Lebensarbeitszeit und Demografie“ abgeschlossen werden, der unter anderem die Einführung von Zeitwertkonten vorsieht.

In den USA gibt es kein festgeschriebenes Rentenalter. Die meisten unserer amerikanischen und auch kanadischen Mitarbeiter gehen zwischen dem 62. und 65. Lebensjahr in Rente. Daran wird sich nach unserer Einschätzung auch in den nächsten Jahrzehnten nichts ändern, sodass wir dort nicht mit durchschnittlich älteren Belegschaften rechnen.

## 6.2 UNSERE MITARBEITER

### MITARBEITERANZAHL GLEICH GEBLIEBEN

Am 31. Dezember 2010 waren in der K+S GRUPPE insgesamt 15.241 Mitarbeiter beschäftigt. Gegenüber dem Vorjahr (15.208 Mitarbeiter) ist die Anzahl damit in etwa gleich geblieben. Während die Mitarbeiterzahl in den Geschäftsbereichen Stickstoffdüngemittel (– 24 Mitarbeiter) und Salz (– 44 Mitarbeiter) jeweils leicht zurückging, wurde im Geschäftsbereich Kali- und Magnesiumprodukte begonnen, die Belegschaft zur Wiedererreicherung der Volllauslastung der Jahreskapazität zu erhöhen (+ 83 Mitarbeiter).

Der Mitarbeiterrückgang im Geschäftsbereich Stickstoffdüngemittel steht noch in Zusammenhang mit der Zusammenführung der Aktivitäten der fertiva mit Teilen des COMPO-Profigeschäfts zur K+S NITROGEN im Jahr 2009. / SIEHE BERICHT 2009, Seite 94

Im Geschäftsbereich Salz stehen einem Mitarbeiterzuwachs in Deutschland – bedingt durch die starke Nachfrage nach Auftausalz – Personalreduzierungen in Kanada und Frankreich gegenüber. / TAB: 6.2.1

### REORGANISATION BEI SALINES CÉRÉBOS ET DE BAYONNE

Zum 30. September 2010 hatte die ESCO-Tochter SALINES CÉRÉBOS ET DE BAYONNE (SCB) die Produktion und Konfektionierung von Siedesalz am französischen Stand-

ort Bayonne eingestellt. Die Schließung ist das Ergebnis eines Reorganisationsprojekts zur Sicherung der Wettbewerbsfähigkeit der SCB. Produktion und Konfektionierung wurden auf andere ESCO-Standorte innerhalb und außerhalb Frankreichs verlagert. Ziel dieser Umstrukturierung ist es, die Produktionskapazitäten zu optimieren und die Wettbewerbsfähigkeit der Produkte zu stärken, insbesondere des Tafelsalzsoriments CÉRÉBOS.

Mit der Schließung ging der Abbau von rund 65 Arbeitsplätzen einher. Um diesen möglichst sozialverträglich zu gestalten, hat SCB für die betroffenen Mitarbeiter individuelle Lösungen erarbeitet, etwa in Form von Weiterbeschäftigungsangeboten innerhalb der K+S GRUPPE oder durch Maßnahmen zur Eingliederung in den Arbeitsmarkt. Darüber hinaus wurden in einem Sozialplan Regelungen zur Berechnung von Abfindungen festgelegt, die über das gesetzliche Maß hinausgehen.

#### MITARBEITER<sup>1</sup> NACH GESCHÄFTSBEREICHEN

TAB: 6.2.1

|                              | 2010          | 2009          |
|------------------------------|---------------|---------------|
| in Mio. €                    |               |               |
| Kali- und Magnesiumprodukte  | 7.900         | 7.818         |
| Stickstoffdüngemittel        | 1.226         | 1.249         |
| Salz                         | 5.235         | 5.279         |
| Ergänzende Geschäftsbereiche | 280           | 278           |
| Holdingeinheiten             | 600           | 584           |
| <b>Insgesamt</b>             | <b>15.241</b> | <b>15.208</b> |

<sup>1</sup> Die Anzahl der Mitarbeiter wird auf der Basis von Vollzeitäquivalenten (FTE – Full Time Equivalents) ermittelt, das heißt, Teilzeitstellen werden entsprechend ihrem Arbeitszeitanteil gewichtet.

### PERSONALAUFWAND DEUTLICH GESTIEGEN

Im Jahr 2010 lag der Personalaufwand der K+S GRUPPE bei 1.019,3 Mio. € und damit erwartungsgemäß deutlich über dem Niveau des Vorjahres (2009: 756,4 Mio. €). Der Anstieg ist insbesondere auf die ganzjährige Einbeziehung von MORTON SALT, eine aufgrund des gestiegenen Ergebnisses höhere erfolgsabhängige Vergütung, Tarifierhöhungen sowie den Wegfall des Kurzarbeit zurückzuführen. Der Anteil variabler Vergütungen im Personalaufwand betrug im vergangenen Jahr 95,3 Mio. € bzw. rund 9 % (2009: 60,2 Mio. € bzw. knapp 8 %).

Im Jahr 2010 zahlten wir insgesamt 826,7 Mio. € an Löhnen und Gehältern (+ 39 %) sowie 166,4 Mio. € Sozialabgaben (+ 14 %). Die Aufwendungen für die betriebliche Altersversorgung in Deutschland betrugen im Berichtsjahr 26,2 Mio. € und lagen damit um 9,3 Mio. € über dem Wert des Vorjahres. Der Personalaufwand je Mitarbeiter betrug im Berichtsjahr 67.205 € (Vorjahr: 57.989 €) und ist damit um rund 16 % gestiegen.

### HOHER ANTEIL AN MÄNNLICHEN ARBEITNEHMERN

Bedingt durch die Bergwerksbetriebe der Geschäftsbereiche Kali- und Magnesiumprodukte sowie Salz hat K+S einen hohen Anteil an gewerblichen Arbeitsplätzen unter Tage. Diese Arbeitsplätze waren in Deutschland aufgrund von gesetzlichen Bestimmungen (§ 64a BBergG) weitgehend männlichen Arbeitnehmern vorbehalten; erst im Frühjahr 2009 hat der Gesetzgeber die

Vorschrift ersatzlos gestrichen. Dies kommt dem Bestreben von K+S entgegen, mehr Frauen für technische Berufe zu interessieren. Seit Sommer 2010 bilden wir in Deutschland die ersten Bergbautechnologinnen aus.

Der Anteil der weiblichen Beschäftigten in der K+S GRUPPE beträgt 11 %; an Verwaltungsstandorten durchschnittlich 40 %. Der Anteil der weiblichen Führungskräfte liegt bei 7 %.

### STARKE VERBUNDENHEIT MIT DEM UNTERNEHMEN

Die Fluktuationsrate benennt das Verhältnis der Personalabgänge zur durchschnittlichen Belegschaftsstärke. Sie beträgt 4,3 %, die auf Eigenkündigung basierende Fluktuation liegt bei 1,3 %. Die durchschnittliche Unternehmenszugehörigkeit beträgt 18 Jahre. Beides dokumentiert die hohe Verbundenheit der Mitarbeiter mit dem Unternehmen. Unsere Mitarbeiter sind im Durchschnitt 43 Jahre alt. / ABB: 6.2.1, 6.2.2

Die Krankenquote Deutschland lag im Jahr 2010 mit 5,8 % leicht über dem Vorjahr (5,3 %).

### INTEGRATION FÖRDERN

Der Anteil der schwerbehinderten Mitarbeiter an der Belegschaft betrug im Jahr 2010 in Deutschland 7,5 %. Damit liegen wir deutlich über dem Bundesdurchschnitt.

#### BELEGSCHAFTSSTRUKTUR

ABB: 6.2.1

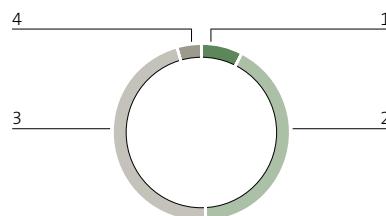

| in %                                  | 2010 |
|---------------------------------------|------|
| 1 AT (außer Tarif)                    | 7,7  |
| 2 Angestellte (Gehaltstarif)          | 41,3 |
| 3 Gewerbliche Mitarbeiter (Lohntarif) | 46,8 |
| 4 Auszubildende                       | 4,2  |

#### ALTERSSTRUKTUR

ABB: 6.2.2

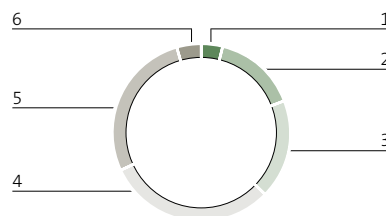

| in %              | 2010 |
|-------------------|------|
| 1 bis 20 Jahre    | 3,9  |
| 2 21 bis 30 Jahre | 15,3 |
| 3 31 bis 40 Jahre | 18,2 |
| 4 41 bis 50 Jahre | 30,7 |
| 5 51 bis 60 Jahre | 27,7 |
| 6 über 60 Jahre   | 4,2  |

schnitt. In enger Zusammenarbeit mit den zuständigen Behörden sowie unseren Schwerbehindertenvertretungen schaffen wir behindertengerechte Arbeitsplätze und fördern die Integration dieser Mitarbeiter. Die Interessen der schwerbehinderten Mitarbeiter auf den deutschen Standorten vertreten 14 Vertrauenspersonen. Sie sind das Bindeglied zwischen Unternehmen und Integrationsämtern.

### ZWEI DRITTEL DER MITARBEITER ARBEITEN IN DEUTSCHLAND

Zwei Drittel unserer Mitarbeiter sind in Deutschland beschäftigt (Schwerpunkt: Hessen; 30,9 % an der Gesamtbelegschaft der K+S GRUPPE). 5,6 % unserer Mitarbeiter arbeiten in anderen europäischen Ländern (Schwerpunkt: Frankreich; 3 % an der Gesamtbelegschaft).

der K+S GRUPPE). Der Anteil der Mitarbeiter in Übersee beträgt 26,5 % (Schwerpunkt: USA; 13,2 % an der Gesamtbelegschaft der K+S GRUPPE). / TAB: 6.2.2

| MITARBEITER <sup>1,2</sup> NACH LÄNDERN |               | TAB: 6.2.2    |
|-----------------------------------------|---------------|---------------|
|                                         | 2010          | 2009          |
| Argentinien                             | 16            | 18            |
| Bahamas                                 | 139           | 161           |
| Belgien                                 | 52            | 51            |
| Brasilien                               | 272           | 280           |
| Chile                                   | 728           | 709           |
| Deutschland                             | 10.354        | 10.198        |
| Frankreich                              | 458           | 553           |
| Griechenland                            | 46            | 41            |
| Italien                                 | 65            | 63            |
| Kanada                                  | 819           | 845           |
| Malta                                   | 1             | 1             |
| Mexiko                                  | 24            | 23            |
| Niederlande                             | 73            | 72            |
| Österreich                              | 13            | 15            |
| Portugal                                | 46            | 50            |
| Schweiz                                 | 14            | 13            |
| Spanien                                 | 86            | 87            |
| USA                                     | 2.035         | 2.028         |
| <b>Insgesamt</b>                        | <b>15.241</b> | <b>15.208</b> |

<sup>1</sup> Nur konsolidierte Gesellschaften.

<sup>2</sup> Nicht enthalten sind: ruhende Arbeitsverhältnisse, Entsandte und geringfügig Beschäftigte.

## 6.3 BETRIEBLICHES GESUNDHEITSMANAGEMENT

Das Betriebliche Gesundheitsmanagement (BGM) hat sich mit einer Vielzahl standortindividueller Aktivitäten zum festen Baustein der K+S-Unternehmenskultur entwickelt. Mit einem nachhaltigen Betrieblichen Gesundheitsmanagement wollen wir langfristig Arbeitsfähigkeit, Leistungsbereitschaft und Motivation unserer Mitarbeiter erhalten bzw. verbessern.

### STÄRKERE VERNETZUNG

Im Jahr 2009 hat der Koordinatorenkreis BGM seine Arbeit aufgenommen. Mitglieder sind vorerst die Gesundheitsbeauftragten der deutschen Standorte, die Gesundheitskoordinatorin sowie der leitende Werkarzt der K+S GRUPPE. Der Arbeitskreis versteht sich als Plattform für Informations-, Wissens- und Best-Practice-Transfer; seine Mitglieder bringen ihre Erfahrung und Kompetenz aus der betrieblichen Gesundheitsarbeit ein. Das Gremium arbeitet eng mit dem medizinischen Dienst, Betriebsräten, Suchtbeauftragten sowie Krankenkassen und Berufsgenossenschaften zusammen.

### SYSTEMATISCHER AUSBAU

Um das Gesundheitsmanagement zu einem ganzheitlichen System auszubauen, wurde im Jahr 2010 ein Leitfaden entwickelt, der Handlungsfelder, Aufgaben und

Zuständigkeiten des BGM mit der notwendigen Verbindlichkeit versieht und 2011 in Kraft treten soll. Für ein kontinuierliches Monitoring hat der Koordinatorenkreis einen Gesundheitsbericht konzipiert. Kennzahlen sollen nicht nur die Transparenz erhöhen, sondern mittelfristig auch die positiven Effekte des BGM nachweisen.

Im Jahr 2011 ist ein erster Austausch mit MORTON SALT und SPL geplant, um ein gemeinsames Verständnis für die Inhalte und Ziele eines gruppenweit koordinierten BGM zu schaffen.

### GESUNDHEITSMANAGEMENT IST FÜHRUNGSAUFGABE

Wichtig sind Akzeptanz und aktive Unterstützung durch alle Hierarchieebenen: Ganzheitliches Gesundheitsmanagement ist Führungsaufgabe! Wir wollen unsere Beschäftigten für das Thema Gesundheit gewinnen und die Gesundheitskompetenz der Mitarbeiter, insbesondere der Führungskräfte, erhöhen. Durch zielgerichtete Weiterbildungsangebote werden wir das Bewusstsein für ergonomische Zusammenhänge und gesundheitliche Gefährdungen verstärken, gesundheitsgerechte Verhaltensweisen vermitteln und die Bereitschaft zur Verhaltensänderung fördern. Auch die Wechselwirkung zwischen Gesundheit, Leistungsbereitschaft und Führungsverhalten wird thematisiert.



## UNSERE HANDLUNGSFELDER

### 1. ARBEITSMEDIZINISCHE VORSORGE

Unsere deutschen, us-amerikanisch/kanadischen sowie chilenisch/brasilianischen Standorte haben – abgestimmt auf die jeweiligen gesetzlichen Gegebenheiten – umfangreiche Überwachungsprogramme bzw. Arbeitsplatz- und Gefährdungsanalysen eingeführt, um Gesundheitsstörungen frühzeitig zu erkennen und das Risiko von Berufskrankheiten oder arbeitsbedingten Gesundheitsgefahren zu minimieren.

Diese Programme beinhalten Lärm-, Emissions- und Partikelmessungen, medizinische Vorsorgeuntersuchungen und Vorgaben für individuelle Schutzausrüstungen sowie vorbeugende Maßnahmen gegen chronische Schäden am Bewegungsapparat.

Im Jahr 2010 haben die Mediziner in Deutschland 12.877 Untersuchungen vorgenommen; 12.349 davon ergaben keinerlei gesundheitliche Bedenken für die Tätigkeit am Arbeitsplatz. In lediglich 33 Fällen ergaben sich dauernde gesundheitliche Bedenken. Die Untersuchungsbefunde zeigen ein überdurchschnittlich gutes Ergebnis im Vergleich zu anderen Bergbaubetrieben sowie der übrigen gewerblichen Wirtschaft.

#### GERINGE GEFAHR EINER BERUFSBEDINGTEN ERKRANKUNG

Im Jahr 2009<sup>1</sup> haben wir für den deutschen Kali- und Steinsalzbergbau und Salinen 64 Verdachtsfälle auf eine Berufskrankheit verzeichnet, vier neue Rentenfälle wur-

#### KEINE GESUNDHEITLICHEN BEEINTRÄCHTIGUNGEN DURCH DME UND STICKOXIDE

Im Rahmen einer Zehn-Jahres-Studie haben K+S-Mediziner in Deutschland 60.000 Vorsorgeuntersuchungen durchgeführt, bei denen die Lunge auf toxisch wirkende Substanzen untersucht wurde. Im untertägigen Kali- und Steinsalzbergbau können insoweit Dieselmotoremissionen (DME) sowie Stickstoffoxide (NO und NO<sub>2</sub>) und Kohlenmonoxid (CO) relevant werden, die durch die sprengtechnische Gewinnung von Rohsalzen freigesetzt werden. Bei dieser regelmäßigen Vorsorge wurden keine Erkrankungen der Lunge, für die die Tätigkeit unter Tage ursächlich ist, festgestellt. Unsere Ergebnisse werden bestätigt durch das Institut für Gefahrstoff-Forschung der Berufsgenossenschaft.

den anerkannt. Im Vergleich zur Gesamtzahl der Verdachtsfälle im Bergbau im Jahr 2009 (mehr als 3.000) zeigt dies, dass im Salzbergbau die Gefahr einer berufsbedingten Erkrankung eher gering ist. Bei den anerkannten Berufskrankheiten handelt es sich in den meisten Fällen um Erkrankungen des Bewegungsapparats und des Gehörs.

SPL hat zehn Verdachtsfälle auf eine Berufskrankheit gemeldet, acht Fälle wurden bestätigt. Bei MORTON SALT gab es im Jahr 2010 keinen Fall einer Berufskrankheit.

### 2. BETRIEBLICHE GESUNDHEITSFÖRDERUNG

An unseren Standorten im In- und Ausland sind Maßnahmen zur Gesundheitsförderung, Gesundheitstage sowie themenbezogene Informationsveranstaltungen

fest verankert. Die Angebote reichen von Darmkrebsvorsorge über Ernährungsberatung, Nichtraucherprogramme, Entspannungs- und Stressbewältigungstechniken bis hin zu Kursen zur Rückengesundheit und diversen Sportarten. Wir beobachten ein steigendes Interesse der Mitarbeiter, insbesondere am Thema Ernährung.

Bei MORTON SALT hat sich in diesem Zusammenhang die Ausgabe von „Balanced Safety Scorecards“ bewährt. Jährlich erhält jeder Standort eine Liste mit Maßnahmen, die für die Belegschaft durchzuführen sind.

### 3. BETRIEBLICHES EINGLIEDERUNGSMANAGEMENT

Mit unserem Betrieblichen Eingliederungsmanagement (BEM) unterstützen wir die Mitarbeiter aktiv beim Erhalt ihrer Gesundheit und Arbeitsfähigkeit. Nach wiederholter oder langfristiger Krankheit fördert BEM ganz individuell die Beschäftigungsfähigkeit des Mitarbeiters, unterstützt den Wiedereingliederungsprozess und beugt einer erneuten Arbeitsunfähigkeit vor. Wir sind überzeugt, dass BEM insbesondere angesichts längerer Lebensarbeitszeiten zunehmend an Bedeutung gewinnen wird.

### 4. SUCHTPRÄVENTION

Der Anteil von Mitarbeitern mit Alkohol- und anderen Suchtmittelproblemen in Produktions- und Dienstleis-

<sup>1</sup> Verdachtsfälle auf eine Berufskrankheit können für 2010 bis Ende Februar 2011 gemeldet werden; abschließende Zahlen für 2010 liegen erst im Mai 2011 vor.

tungsbetrieben beträgt statistisch zwischen 5 und 10 %. An diesem Thema kommen auch wir bei K+S nicht vorbei. Wir haben ein Suchtmittelverbot ausgesprochen und das Verhalten im Umgang mit Betroffenen am Arbeitsplatz verbindlich geregelt. Der Präventionsgedanke steht bei uns im Vordergrund: Wir setzen auf Aufklärung, verantwortliches Handeln, auf Unterstützung und Hilfeleistung. Mit frühzeitiger Bereitschaft zur Intervention und durch verantwortliches Handeln unserer Führungskräfte wollen wir suchtbefallenen Problemen konsequent entgegensteuern.

Eine wichtige Rolle kommt dabei den Suchtbeauftragten auf unseren Standorten zu. Als ehrenamtliche Vertrauenspersonen und Ansprechpartner bieten sie Information und Unterstützung; sie sind für ihre anspruchsvolle Aufgabe entsprechend geschult worden. Damit Führungsverantwortliche im betrieblichen Alltag frühzeitig und kompetent reagieren können, vermittelt ein neues Seminar entsprechendes Basiswissen. Die enge Zusammenarbeit zwischen Führungskräften und Suchtbeauftragten ist der beste Weg für eine erfolgreiche Prävention.

## 6.4 ARBEITSSICHERHEIT

Unsere Mitarbeiter vor arbeitsbedingten Gefahren zu schützen und ihre Gesundheit durch präventive Maßnahmen zu erhalten, hat oberste Priorität bei K+S. Es ist

unser Ziel, die im Vergleich mit anderen Industrieunternehmen sehr niedrigen Unfallzahlen noch weiter zu vermindern. Daran arbeiten wir, zum Teil gemeinsam mit den zuständigen Behörden und den Berufsgenossenschaften (Nähere Einzelheiten zur Arbeitssicherheitsorganisation siehe Seite 13).

### PRÄVENTION DURCH WEITERBILDUNG

Jeder Mitarbeiter hat bei seiner Arbeit Verantwortung für die Sicherheit zu übernehmen – für sich selbst und seine Kollegen. Von unseren Führungskräften erwarten wir, dass sie für ihre Mitarbeiter Vorbild sind.

Wir fördern das Sicherheitsbewusstsein unserer Mitarbeiter durch regelmäßige betriebliche Unterweisungen und Schulungen. Im Jahr 2011 werden wir damit beginnen, unsere Fachkräfte verstärkt in der Unfallereignis- und Ursachenanalyse zu schulen. In diesem Zusammenhang wollen wir auch die gruppenweite Kommunikation besonderer Ereignisse und Unfälle beziehungsweise deren Prävention fördern.

Dem wichtigen Thema Prävention widmet sich auch die neue „Gateways to Safety“-Initiative von MORTON SALT. Ziel ist es, durch verschiedene Schulungsmaßnahmen das Bewusstsein der Mitarbeiter für die mit der eigenen Tätigkeit verknüpften Gefahrenpotenziale zu schärfen und dazu anzuregen, entsprechende Vorsorgemaßnahmen zu ergreifen.

Neue Unterweisungshilfen, die in Zusammenarbeit mit der Berufsgenossenschaft Rohstoffe und Chemische Industrie (BG RC1) entwickelt wurden, klären über Unfallschwerpunkte am Arbeitsplatz auf und demonstrieren vorbildliches Verhalten. Eine DVD über die Gefahren von gebirgsgebundenem CO<sub>2</sub> wird bereits genutzt. Eine weitere DVD wird im Jahr 2011 fertiggestellt; diese behandelt den sicheren Fahrzeugeinsatz im Kali- und Salzbergbau mit Beispielen zum Risiko- und Sicherheitsverhalten.

Die in der Gruppe vorhandenen Schulungsmedien werden ab dem Jahr 2011 über die neue „Mediathek Arbeitssicherheit“ im K+S-Portal zum Download angeboten. Dies soll zukünftig ein auf allen Standorten einheitlich hohes Schulungsniveau gewährleisten.

### VERKEHRSSICHERHEIT UNTER TAGE

Auf den Standorten der K+S KALI GMBH und der ESCO haben wir bereits im Jahr 2009 damit begonnen, alle Geländewagen im untertägigen Einsatz mit Höhen- und Kippbegrenzungsbügeln nachzurüsten. Sollte es zu Unfällen kommen, sind die Insassen jetzt noch besser vor Verletzungen geschützt. Um die Verkehrssicherheit weiter zu erhöhen, werden spezielle Fahrsicherheitstrainings durchgeführt, es gibt verstärkt Fahrzeugkontrollen unter Tage und stark frequentierte untertägige Fußwege sind besser gekennzeichnet worden.

## EINHEITLICHER BERICHTSSTANDARD IN UMSETZUNG

Nachdem der länderübergreifende Dialog mit den Fachleuten für Umweltschutz und Arbeitssicherheit auf den europäischen Standorten etabliert ist, haben wir im Jahr 2010 auch SPL und MORTON SALT in dieses Netzwerk eingegliedert. Das erste wichtige Projekt des vergrößerten Netzwerks ist die Einführung eines gruppenweit einheitlichen Arbeitssicherheits-Reportings ab dem Jahr 2011. Die national vorgegebenen Unfallstatistiken in den USA/Kanada sowie Chile/Brasilien unterscheiden sich deutlich vom europäischen Verfahren. Ein einheitlicher Standard wird daher vergleichbare Unfallkennzahlen liefern und auch dazu beitragen, Maßnahmen zur Arbeitssicherheit und den Austausch von „Best Practices“ besser zu steuern.

## ARBEITSUNFÄLLE AUF NIEDRIGEM NIVEAU GEHALTEN

Im Jahr 2010 mussten wir auf unseren europäischen Standorten 69 Arbeitsunfälle verzeichnen (Vorjahr: 67). Die durchschnittliche Ausfallzeit pro Arbeitsunfall lag bei 25,0 Tagen (Vorjahr: 32,0). Unfallschwerpunkt waren mit einem Anteil von knapp 36 % die sogenannten „Mechanischen Einwirkungen“ wie Quetschungen, Schlägeinwirkungen, gefolgt von Stolpern, Umknicken und Ausrutschen mit einem Anteil von rund 18 %. Die Anzahl der Wegeunfälle ist von 26 auf 39 gestiegen. Wir

haben 6 Unfälle von Mitarbeitern von Fremdfirmen verzeichnet (Vorjahr: 1).

Im Jahr 2010 lag die Kennziffer „Arbeitsunfälle je einer Million geleisteter Arbeitsstunden“ bezogen auf alle europäischen Standorte bei 3,6 (Vorjahr: 4,4<sup>1</sup>).

/ ABB: 6.4.1

Bei SPL in Chile haben wir 10 Unfälle (Vorjahr: 16) verzeichnet, das sind 2,3 Arbeitsunfälle je einer Million geleisteter Arbeitsstunden. Damit liegt SPL deutlich unter dem Durchschnitt der chilenischen Industrie (7,0). Bei der brasilianischen SPL-Tochter SDB gab es 12 Unfälle (Vorjahr: 12); das sind 5,0 Arbeitsunfälle je einer Million geleisteter Arbeitsstunden. Auch unsere amerikanische Tochter MORTON SALT beweist mit nur 8 Unfällen (Vor-

<sup>1</sup> Im Jahr 2009 ist kurzarbeitsbedingt eine geringere Anzahl an Arbeitsstunden angefallen.

### KALIWERK NEUHOF-ELLERS IST „SICHER MIT SYSTEM“

Als erster deutscher Standort der K+S GRUPPE hat das Kaliwerk Neuhoof-Ellers seine Arbeitssicherheitsorganisation von der Berufsgenossenschaft Rohstoffe und chemische Industrie (BG RCI) bewerten lassen und das Gütesiegel „Sicher mit System“ erhalten. Die Auszeichnung ist bis zum Jahr 2013 gültig, anschließend muss neu auditiert werden.

jahr: 9) den hohen Standard ihrer Arbeitssicherheitsmaßnahmen und liegt mit 1,13 Arbeitsunfällen je einer Million geleisteter Arbeitsstunden deutlich unter dem Durchschnitt der US-amerikanischen Industrie (6,5).

Es gab gruppenweit keinen Unfall mit tödlichem Ausgang.

ARBEITSUNFÄLLE JE 1 MIO. GELEISTETER ARBEITSSTUNDEN

ABB: 6.4.1

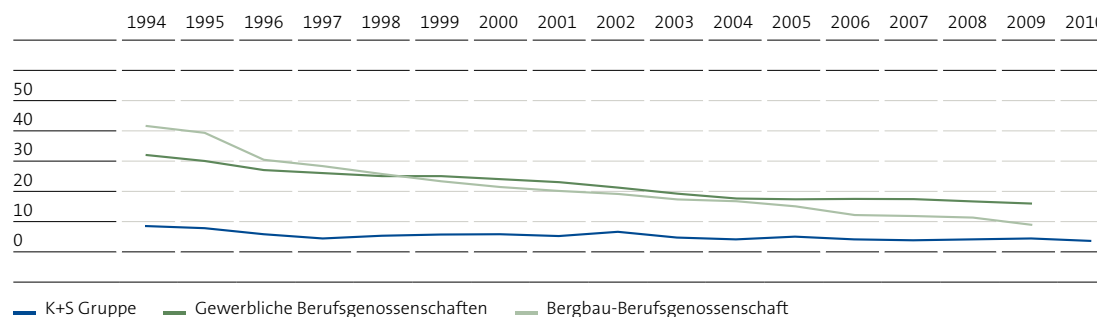

### INTERNE AUDITS GEBEN MEHR SICHERHEIT

Durch interne Audits überprüfen wir die Wirksamkeit unserer Maßnahmen hinsichtlich Umweltschutz und Arbeitssicherheit. Die europäischen Produktionsstandorte werden in einem Drei-Jahres-Rhythmus auditiert. Im Jahr 2010 haben wir dies auf 14 Standorten getan; für 2011 sind 15 Auditierungen geplant. Das Audit-Programm von MORTON SALT schreibt die Auditierung der amerikanischen und kanadischen Standorte sogar im Zwei-Jahres-Rhythmus vor. Im Jahr 2010 wurden keine schwerwiegenden Verstöße gegen Gesetze oder interne Standards festgestellt.

Unser Auditverfahren (sowohl Europa als auch USA) basiert auf den Vorgaben der EN ISO 19011 (2002) und ist in einer internen Verfahrensanweisung geregelt. Der jährliche Auditplan wird von der Facheinheit erarbeitet und vom zuständigen Vorstandsmitglied in Kraft gesetzt. Eventuelle Abweichungen von den Standards

#### AUSZEICHNUNG FÜR MORTON SALT

MORTON SALT ist eines von nur sieben us-amerikanischen Unternehmen, das für besonders hohe Standards bei der Arbeitssicherheit und Gesundheitsvorsorge ausgezeichnet wurde. Das Zertifikat des us-Arbeitsministeriums wurde im Rahmen der VPP-Sicherheitskonferenz verliehen. VPP steht für Voluntary Protection Program und ist eine landesweite freiwillige Qualitätsinitiative, die auf hohe Standards bei Sicherheitsmaßnahmen und Gesundheit in Unternehmen abzielt.

sowie daraus abgeleitete Korrekturmaßnahmen werden protokolliert und verfolgt.

## 6.5 FLEXIBLE ARBEITSZEITMODELLE

Die Arbeitszeiten in der K+S GRUPPE richten sich nach den jeweiligen nationalen Gegebenheiten. Die durchschnittliche Arbeitszeit unserer Mitarbeiter in Deutschland und in den USA beträgt 40 Wochenstunden. Während unsere Mitarbeiter in Frankreich durchschnittlich 35 Stunden in der Woche arbeiten, liegt die Wochenarbeitszeit in Chile bei 45 und in Brasilien bei 44 Stunden.

Unsere Arbeitszeitmodelle orientieren sich an den Erfordernissen der Produktionsabläufe und zeichnen sich durch eine hohe Flexibilität aus. Die produzierenden Standorte arbeiten im ein-, zwei- oder dreischichtigen Betrieb sowie in vollkontinuierlichen Schichtsystemen (drei Schichten am Tag; sieben Tage pro Woche). Für die Mitarbeiter auf den Produktionsstandorten von ESCO und COMPO bestehen Jahresarbeitszeitkonten (insgesamt 6 % unserer Belegschaft), sodass wir flexibel auf saisonale Nachfragespitzen reagieren können. Die Mitarbeiter bauen in den Monaten mit hoher Produktion Zeitguthaben auf, die sie dann außerhalb der Saison ausgleichen können.

### ZUKUNFTSKONZEPT 2016 SICHERT DIE DEUTSCHEN STANDORTE

Am 31. Dezember 2010 endeten die im Jahr 2004 (Geschäftsbereich Kali- und Magnesiumprodukte) bzw. im Jahr 2008 (ESCO) getroffenen Vereinbarungen zur stärkeren Flexibilisierung der Arbeitszeit, verbunden mit der Einführung der 40-Stunden-Woche. Die Anschlussregelung – das „Zukunftskonzept 2016“ – ist im Januar 2011 mit einer Laufzeit bis Ende Dezember 2016 in Kraft getreten. Es sieht vor, dass die bisherigen Regelungen zur Arbeitszeit und Vergütung (40-Stunden-Woche) fortgeführt und die Mitarbeiter weiterhin am wirtschaftlichen Erfolg beteiligt werden. Das Zukunftskonzept bekennt sich dazu, an den deutschen Standorten festzuhalten und die für eine erfolgreiche Tätigkeit erforderlichen Investitionen und Mittel bereitzustellen. Außerdem sollen unter anderem die Maßnahmen zur Mitarbeiterqualifizierung ausgebaut und jährlich mindestens 160 Ausbildungsplätze bereitgestellt werden.

### KURZARBEIT ERMÖGLICHTE DEN ERHALT DER ARBEITSPLÄTZE

Auf die Zurückhaltung beim Bezug von Kalidüngemitteln im Jahr 2009 hatten wir im Geschäftsbereich Kali- und Magnesiumprodukte mit Produktionskürzungen und Kurzarbeit reagiert. Während im Jahr 2009 rund 88 % der Mitarbeiter auf den deutschen Standorten des Geschäftsbereichs kurz gearbeitet haben, waren im Jahr 2010 lediglich im Januar noch 8 % dieser Mitarbeiter von Kurzarbeit betroffen. Dieses Instrument hat uns den Erhalt der Arbeitsplätze in wirtschaftlich schwierigen Zeiten ermöglicht.

Die Mehrarbeitsquote lag gruppenweit im Jahr 2010 bei 2,0 % (Vorjahr: 1,3 %). Der Anstieg liegt an der höheren Produktionsauslastung im Geschäftsbereich Kali- und Magnesiumprodukte.

### VERTRAUENSARBEITSZEIT UND TEILZEIT

Circa 9 % unserer Belegschaft – alle außertariflichen Mitarbeiter in Deutschland sowie die tariflichen Mitarbeiter an den Standorten Kassel, Mannheim, Hannover sowie im κ+s-Forschungsinstitut in Heringen – haben Vertrauensarbeitszeit. Dieses Arbeitszeitmodell richtet sich nach dem tatsächlich anfallenden Arbeitsvolumen und stärkt die Eigenverantwortung der Mitarbeiter. Außerdem ermöglicht es die bessere Vereinbarkeit von Beruf und Familie bzw. Freizeit.

Zurzeit sind etwa 2 % unserer Mitarbeiter in Teilzeit beschäftigt. Diese relativ geringe Quote ist der Tatsache geschuldet, dass überwiegend Frauen Teilzeit in Anspruch nehmen, der Anteil der Frauen an der Gesamtbelegschaft aber nur 11 % beträgt.

### ELTERNZEIT UND FÖRDERUNG DES WIEDEREINSTIEGS

Seit Einführung der neuen Elternzeit-Regelung in Deutschland beobachten wir, dass Mitarbeiter, die Elternzeit nutzen, im Durchschnitt bereits nach einem Jahr wieder in den Beruf zurückkehren. Auch nehmen

mehr Väter Elternzeit in Anspruch. Wir begrüßen diese Entwicklung sehr und fördern die Mitarbeiter mit familienfreundlichen Maßnahmen wie individuellen Teilzeitmodellen, zusätzlichen Freistellungszeiten für Betreuungsnotfälle, Weiterbildungsangeboten in der Elternzeit und nicht zuletzt unserer betriebseigenen Kindertagesstätte am Standort Kassel.

Um den Wiedereinstieg der Mütter in ihren Beruf zu fördern, sind Unternehmen in Chile und Brasilien mit mehr als 20 weiblichen Arbeitnehmern verpflichtet, entweder innerbetrieblich ein Krippensystem zu organisieren oder den Aufenthalt der Mitarbeiterkinder in einer staatlich anerkannten Krippe über zwei Jahre zu finanzieren. Wir haben uns an diesen Standorten für die Finanzierung von außerbetrieblichen Krippenplätzen entschieden. Da Privatschulen mit flexiblen Betreuungsangeboten in Chile sehr verbreitet sind, die Schulgebühren jedoch für viele Familien eine hohe Belastung darstellen, tragen wir einen Teil der Matrikelgebühren von Mitarbeiterkindern.

In den USA gelten die Bestimmungen des Family Medical leave Act. Sie beinhalten bei bestimmten medizinisch begründeten Auszeiten, zu denen auch die Geburt eines Kindes zählt, eine Jobgarantie. In Kanada sorgt für diesen Fall der Employment Insurance Act für Job- und Einkommensgarantie. Von diesen gesetzlichen Bestimmungen abgesehen, bieten wir zur Förderung des schnellen Wiedereinstiegs von jungen Müttern nach individueller Absprache flexible Arbeitszeiten, komprimierte Arbeitswochen oder Telearbeit an.

### DIE GLÜCKSKINDER

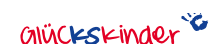

Im August 2009 haben wir in Kassel die betriebsnahe Kindertagesstätte „Glückskinder“ für Kinder von Mitarbeitern im Alter von sechs Monaten bis sechs Jahren eröffnet. Die flexiblen Betreuungszeiten ermöglichen unseren Mitarbeitern eine gute Vereinbarkeit von Beruf und Familie. Im pädagogischen Konzept des Trägers EDUCCARE wird der Vorschulzeit als prägende Bildungszeit eine hohe Bedeutung beigemessen und der Nachwuchs u.a. durch spielerischen Fremdsprachenerwerb sowie Experimente, die den Forschergeist wecken sollen, gefördert. Durch Kooperationen mit zwei weiteren Kasseler Unternehmen haben die Glückskinder bereits Zuwachs bekommen. Zurzeit besuchen 50 Kinder die Einrichtung. ([www.kita-glueckskinder.de](http://www.kita-glueckskinder.de))

### LEIH- UND ZEITARBEIT

Im Jahresdurchschnitt haben wir in Deutschland 414 Arbeitnehmer im Rahmen der Arbeitnehmerüberlassung beschäftigt. Gegenüber dem Vorjahr (Ø 276 Arbeitnehmerüberlassungen) ist dies zwar ein deutlicher Anstieg, allerdings ist das Jahr 2009 aufgrund der Kurzarbeit nicht zum Vergleich geeignet. Wir haben im Jahr 2010 wieder das Niveau des Jahres 2008 (Ø 425 Arbeitnehmerüberlassungen) erreicht. κ+s arbeitet im Rahmen der Arbeitnehmerüberlassung ausschließlich mit Zeitarbeitsfirmen zusammen, welche die Tarifverträge der Zeitarbeitsbranche (GZ, BZA und IG BCE) anwenden. Die Entgeltpraxis richtet sich nach den vorgenannten Tarifverträgen.



## 6.6 FÜHRUNGSKULTUR

Unsere Führungskultur basiert auf gegenseitigem Vertrauen. Wir wollen Veränderungen aktiv gestalten und unsere Mitarbeiter fördern – aber auch fordern. Wir sind überzeugt, dass die Vielfalt unserer Mitarbeiter ein wirtschaftlicher Erfolgsfaktor ist. Niemand wird wegen seiner Rasse, seiner Hautfarbe, seiner Abstammung, seines Glaubens, seines Geschlechts, seines Alters oder aus sonstigen Gründen begünstigt, benachteiligt oder belastet; dazu bekennen wir uns in unserem Verhaltenskodex.

Wir sind Mitunterzeichner der „Charta der Vielfalt“ unter der Schirmherrschaft von Bundeskanzlerin Dr. Angela Merkel.

[/www.charta-der-vielfalt.de](http://www.charta-der-vielfalt.de)

### FÜHRUNGSLEITLINIEN GEBEN ORIENTIERUNG

Im Jahr 2009 haben wir neue Führungsleitlinien verabschiedet und unsere Führungskräfte in deren praktischer Anwendung geschult. Die Leitlinien sind Grundlage für unsere Personalentwicklungsprozesse, geben den Führungskräften eine Orientierung, welches Verhalten in unserem Unternehmen gewünscht ist und den Mitarbeitern die Gewissheit, dass Führung bei K+S an festen Grundsätzen ausgerichtet ist – unabhängig vom jeweiligen Vorgesetzten.

**/ UNSERE FÜHRUNGSLEITLINIEN** haben wir veröffentlicht unter [www.k-plus-s.com/de/vision-und-werte/fuehrungsleitlinien.html](http://www.k-plus-s.com/de/vision-und-werte/fuehrungsleitlinien.html)

Wir haben auf allen deutschen Standorten Beschwerdestellen gemäß § 13 des Allgemeinen Gleichbehandlungsgesetzes (AGG) eingerichtet. Im Jahr 2010 verzeichneten wir zwei Beschwerden. Wir sind diesen nachgegangen und konnten jeweils einvernehmliche Lösungen erreichen.

## 6.7 BETEILIGUNG AM UNTERNEHMENSERFOLG UND ALTERSVORSORGE

Wir wollen, dass unsere Mitarbeiter unternehmerisch denken und handeln. Dies können wir unterstützen, indem wir sie auch materiell am Unternehmenserfolg beteiligen. Dadurch verstärken wir ihr Interesse am wirtschaftlichen Erfolg sowie an der Aktienkursentwicklung und binden sie langfristig an unser Unternehmen. Unser Vergütungssystem besteht in Deutschland aus drei Komponenten:

- + Tariflohn bzw. Fixgehalt
- + Erfolgsbeteiligung in Form variabler Vergütung
- + Kapitalbeteiligung über Belegschaftsaktien

### VARIABLES VERGÜTUNGSSYSTEM

Unser variables Vergütungssystem trägt auch zur Risikominderung im Falle vorübergehender Ertragsrückgänge bei, denn der Personalaufwand passt sich in einem gewissen Umfang automatisch an die Ertragslage

des Unternehmens an. Wir halten die so gewonnene Flexibilität für unverzichtbar, da wir sowohl die Wirtschaftlichkeit als auch die sozialpolitische Verantwortung für unsere Arbeitsplätze im Auge haben.

Die Auszahlung der variablen Vergütung für Tarifmitarbeiter erfolgt in zwei Teilbeträgen: Der erste Teil wird im November des laufenden Jahres gewährt, den zweiten Teil zahlen wir im April des Folgejahres nach Vorlage des Jahresabschlusses. Die Höhe des zweiten Teils ist abhängig vom Unternehmenserfolg der K+S GRUPPE.

Außertarifliche Angestellte honorieren wir nach einem Vergütungssystem, das neben dem Unternehmenserfolg auch die über Zielvereinbarungen definierte persönliche Leistung berücksichtigt. In einem jährlichen Gespräch bewerten Mitarbeiter und Vorgesetzter die erreichten Ziele und Arbeitsergebnisse, besprechen die beruflichen Entwicklungs- und Fördermöglichkeiten und vereinbaren die Ziele für das Folgejahr.

Die Vergütungssysteme unserer Auslandsgesellschaften entsprechen den jeweiligen landesspezifischen Rechtsvorschriften. Allerdings hat K+S gruppenweit Mindeststandards bezüglich Höhe und Anpassung der Vergütung definiert. Funktionen, die dem deutschen außertariflichen Bereich entsprechen, werden analog dem deutschen Prinzip vergütet. Zurzeit führen wir für unsere Führungskräfte eine gruppenweit einheitliche Vergütungssystematik ein.

## NACHFRAGE NACH BELEGSCHAFTSAKTIE

Auch im Jahr 2010 haben wir den Mitarbeitern der beteiligten inländischen Gruppengesellschaften Belegschaftsaktien zu attraktiven Konditionen angeboten. 40 % der Mitarbeiter haben das Angebot angenommen; ausgegeben wurden 170.000 Aktien. Der Wert dieser Maßnahmen betrug insgesamt 1,3 Mio. € (einschließlich Arbeitgeberaufwand zur Sozialversicherung).

Erstmals haben wir auch den Mitarbeitern unserer europäischen Gruppengesellschaften ein Belegschaftsaktienprogramm angeboten.

## BETRIEBLICHE ALTERSVORSORGE FÜR DEUTSCHE GRUPPENGESellschaften

Wir können die schrittweise Absenkung der gesetzlichen Grundversorgung in der Altersrente nicht ausgleichen. Doch wir unterstützen unsere Mitarbeiter aktiv bei der Sicherung des Lebensstandards im Alter, indem wir im Rahmen unserer betrieblichen Altersvorsorge verschiedene Möglichkeiten zur individuellen Vorsorge anbieten.

Jeder Mitarbeiter der teilnehmenden Gruppengesellschaften erhält eine Arbeitgeberförderung von 13 % des Betrags, den er aus seinem sozialversicherungspflichtigen Entgelt in eines der bei K+S angebotenen Modelle zur betrieblichen Altersvorsorge einzahlt. K+S hat im

Jahr 2010 insgesamt 4,5 Mio. € für die betriebliche Altersvorsorge aufgewendet.

## UNSERE ANGEBOTE

### K+S VORSORGEPLUS

Die Grundversorgung der K+S VORSORGEPLUS gilt für diejenigen Mitarbeiter, die nicht in der Knappschaft rentenversichert sind und keine andere arbeitgeberfinanzierte Altersvorsorge haben. K+S leistet für diese Mitarbeiter zusätzliche Arbeitgeberbeiträge. Die Zusatzversorgung der K+S VORSORGEPLUS steht allen Mitarbeitern in Deutschland offen, die sich durch eigene, gleichbleibende Monatsbeiträge im Rahmen der Entgeltumwandlung eine zusätzliche Altersabsicherung schaffen wollen. 1.588 Mitarbeiter haben dieses Angebot im Jahr 2010 wahrgenommen.

### CHEMIE PENSIONS FONDS

In den Chemie Pensionsfonds können jährlich unterschiedliche Beiträge aus Einmalzahlungen im Rahmen einer Entgeltumwandlung eingezahlt werden. 1.204 Mitarbeiter haben im vergangenen Jahr diese Möglichkeit genutzt.

### DIREKTVERSICHERUNG (GUD)

In die GUD können jährlich Beiträge aus Einmalzahlungen im Rahmen einer Entgeltumwandlung eingebracht werden. 411 Mitarbeiter zahlten im Jahr 2010 in die Direktversicherung ein.

## WAISENVERSORGUNG

Bereits seit dem Jahr 2007 können auch die Kinder von verstorbenen Mitarbeitern eine Beihilfe aus der K+S VORSORGEPLUS erhalten. Mit dieser freiwilligen Leistung wollen wir unserer sozialen Verantwortung gerecht werden und ihnen vor allem eine Starthilfe für eine möglichst gute Ausbildung geben. Die Zahlung der Beihilfen und deren Höhe sind abhängig von der individuellen Einkommenssituation der betroffenen Familie.

## BETRIEBLICHE ALTERSVORSORGE FÜR AMERIKANISCHE GRUPPENGESellschaften

Das Altersvorsorge-Programm für außertarifliche Mitarbeiter (vergleichbar Deutschland) der US-amerikanischen Gesellschaften MORTON SALT und ISCO besteht aus einem beitragsorientierten Vorsorgesparplan, der vorwiegend vom Arbeitnehmer finanziert wird und seitens des Arbeitgebers gefördert wird. Zusätzlich bietet MORTON SALT eine rein arbeitgeberfinanzierte, beitragsorientierte Altersvorsorge an.

Die Tarifmitarbeiter (analog Deutschland) in den USA (MORTON und ISCO) können ebenfalls in den arbeitnehmerfinanzierten Vorsorgesparplan einzahlen und erhalten entsprechende Förderung. MORTON SALT bietet seinen tariflichen sowie außertariflichen Mitarbeitern in Kanada und auf den Bahamas eine leistungsorientierte Betriebsrente an, allerdings wird auch hier die schrittweise Überführung in einen beitragsorientierten Vorsorgesparplan angestrebt.

Während sich in Chile staatliche und private Rentensysteme ergänzen, kennt Brasilien nur ein staatliches Rentensystem. Wir bieten in Chile keine betriebliche Altersvorsorge an, beraten aber unsere Mitarbeiter bei der Auswahl der zur persönlichen Situation passenden Altersvorsorge.

## 6.8 AUSBILDUNG

Für K+S ist die Berufsausbildung eine wichtige Investition in die Zukunft – auch im Hinblick auf den demografischen Wandel. Unsere Ausbildungsaktivitäten sind auch Teil unserer gesellschaftlichen Verantwortung als Arbeitgeber in zum Teil strukturschwachen Regionen und ein Bekenntnis zum Standort Deutschland, der als wettbewerbsfähiger Industriestandort gut ausgebildeten Fachkräftenachwuchs braucht.

Wir beschreiben hier nur unser deutsches Ausbildungssystem, da an unseren ausländischen Standorten die duale Ausbildung kaum verbreitet ist.

### AUSBILDUNGSQUOTE AUF HOHEM NIVEAU

Zum 31. Dezember 2010 bereiteten sich bei K+S im Inland 645 junge Menschen auf 15 Standorten in 15 Ausbildungsberufen auf ihren Berufsstart vor. Damit lag die Ausbildungsquote zum Jahresende bei 6,2 % (Vorjahr: 6,3 %).

/ TAB: 6.8.1

In den kaufmännischen, chemischen und IT-Berufen halten sich weibliche und männliche Auszubildende die Waage. In den gewerblich-technischen Berufen ist der Anteil der männlichen Auszubildenden höher. Nach der Abschlussprüfung hat der Berufsnachwuchs bei entsprechenden Leistungen sehr gute Chancen auf einen festen Arbeitsplatz. Wir haben in den vergangenen Jahren rund 90 % der Auszubildenden übernommen.

Insgesamt haben wir 14,8 Mio. € in die Ausbildung investiert (Vorjahr: 13,5 Mio. €). Die Erhöhung resultiert im Wesentlichen aus höheren tariflichen Ausbildungsvergütungen.

/ UNSERE AUSBILDUNGSAKTIVITÄTEN unter  
[www.k-plus-s.com/de/ausbildung/](http://www.k-plus-s.com/de/ausbildung/)

### AUSBILDUNGSMARKETING VERSTÄRKT

Insbesondere unsere Ausbildungsplätze für Bergbautechnologen und Elektroniker für Betriebstechnik sind seit einigen Jahren schwerer zu besetzen. Dies liegt zwar auch an der mangelnden Eignung einiger Bewerber, aber hauptsächlich an der geringeren Anzahl an Bewerbungen.

Daher haben wir im Jahr 2010 unser Ausbildungsmarketing weiter verstärkt. Unsere Standorte pflegen traditionell gute Kontakte zu den Schulen im Umfeld. Durch Vortragsveranstaltungen, Berufsinformationstage und Lehrerfortbildungen wollen wir möglichst frühzeitig das Interesse von Schülern für K+S wecken und gleichzeitig ein klares Bild der angebotenen Ausbildungsberufe sowie der damit verbundenen Anforderungen vermitteln. Ausgebaut haben wir auch unsere Verbindun-

| AUSBILDUNGSQUOTE K+S INLAND  |            |            |            |            |            |
|------------------------------|------------|------------|------------|------------|------------|
|                              | 2010       | 2009       | 2008       | 2007       | 2006       |
| Mitarbeiter in FTE am 31.12. | 10.354     | 10.198     | 10.230     | 10.032     | 9.991      |
| davon Auszubildende          | 645        | 649        | 610        | 607        | 620        |
| <b>Ausbildungsquote in %</b> | <b>6,2</b> | <b>6,3</b> | <b>6,0</b> | <b>6,1</b> | <b>6,2</b> |

### AZUBI-UMFRAGE LIEFERT TOP-ERGEBNISSE

Erstmals sind die Auszubildenden in Deutschland nach ihrer Zufriedenheit befragt worden – rund 300 Azubis beteiligten sich. Fast 90% der Befragten sind stolz darauf, bei K+S zu lernen und wollen nach Abschluss der Ausbildung gerne bei K+S bleiben. Die große Mehrheit der Befragten bezeichnet den Umgang miteinander als freundlich und bestätigt ein Klima der Solidarität und gegenseitigen Unterstützung. Positiv bewertet wurden auch die Ausbildungsarbeit der Betriebe, die Bedingungen am Arbeitsplatz und die bereitgestellten Arbeitsmittel.

gen zu den Industrie- und Handelskammern sowie den Agenturen für Arbeit.

### FÜR TECHNIK UND WISSENSCHAFT BEGEISTERN

Wir wollen Kinder und Jugendliche bei der beruflichen Orientierung unterstützen und sie für naturwissenschaftlich/technische Berufe begeistern. Im Jahr 2010 hat das Werk Bernburg in Zusammenarbeit mit der Agentur für Arbeit das Projekt „Mitarbeiter für einen Tag“ gestartet. Schüler der fünften und sechsten Klasse erhielten die Möglichkeit, unter fachlicher Begleitung Berufsbilder kennenzulernen, um diese im Anschluss ihren Mitschülern zu erklären.

### FORSCHERKLASSE FÜR FÜNFTKLÄSSLER

Wir setzen uns für die Verbesserung des naturwissenschaftlichen Unterrichts ein und plädieren für einen höheren Praxisbezug. So bietet die Werratschule in Heringen in Kooperation mit κ+s die Doppelqualifizierung Abitur und CTA-Ausbildung (Chemisch-Technische

#### WERK WERRA VON BUNDESAGENTUR FÜR ARBEIT AUSGEZEICHNET

Die Agentur für Arbeit Bad Hersfeld hat im vergangenen Jahr das Werk Werra mit dem Ausbildungszertifikat der Bundesagentur für Arbeit ausgezeichnet. Die herausragenden Prüfungsergebnisse der Auszubildenden sowie die hohe Übernahmequote waren dafür ausschlaggebend. Mit dem Ausbildungszertifikat werden jedes Jahr Unternehmen ausgezeichnet, die sich im besonderen Maße für die betriebliche Berufsausbildung engagieren.

Assistenz) sowie eine Forscherklasse für Schüler ab der fünften Klasse an, die von κ+s finanziell gefördert wird.

## 6.9 PERSONALENTWICKLUNG

Unsere systematische und bedarfsorientierte Personalentwicklung hat zum Ziel, auch zukünftig Fach- und Führungspositionen vorrangig aus dem eigenen Reihen zu besetzen. Vor dem Hintergrund der anstehenden altersbedingten Abgänge sowie des zusätzlichen Personalbedarfs aufgrund des weiteren Wachstums der κ+s GRUPPE müssen genügend qualifizierte Nachwuchskräfte rekrutiert und die Mitarbeiter rechtzeitig auf wachsende bzw. wechselnde Anforderungen vorbereitet werden.

Der Aufwand für die Personalentwicklung belief sich auf rund 12,3 Mio. € (2009: 9,7 Mio. €). Davon entfielen 8,6 Mio. € auf Weiterbildungs- (2009: 6,3 Mio. €) und 3,6 Mio. € auf Fortbildungsmaßnahmen (2009: 3,3 Mio. €). Für das Personalmarketing haben wir 72.500 € (2009: 96.000 € wegen vermehrter Anzeigenschaltung) ausgegeben.

### GRUPPENWEITE NACHFOLGEPLANUNG

Im regelmäßigen Turnus treffen sich die drei Personalkommissionen, um eine gruppenweite und geschäftsreichsübergreifende Nachfolgeplanung für das In- und

Ausland sicherzustellen und die hierfür erforderlichen Personalentwicklungsmaßnahmen frühzeitig einzuleiten.

Durch Versetzung von Mitarbeitern zu ausländischen Gruppengesellschaften fördern wir gezielt die Zusammenarbeit in der κ+s GRUPPE. So gewährleisten wir den Know-how-Transfer und stärken die fachliche und interkulturelle Kompetenz unserer Mitarbeiter. Für das Jahr 2010 verzeichnen wir 38 Expatriates (2009: 30); zukünftig wollen wir ihre Anzahl weiter erhöhen.

### PERSONALMARKETING INTENSIVIERT

Das Interesse von Hochschulabsolventen und Fachkräften an unserem Unternehmen ist durch die Aufnahme von κ+s in den DAX im Herbst 2008 deutlich gestiegen. Auch bei unseren Auftritten auf Hochschulmessen verzeichnen wir eine Zunahme der Bekanntheit. Im Jahr 2010 haben wir uns auf elf Messen präsentiert und die Kontakte zu Hochschulen mit bergbaulichem bzw. technischem Schwerpunkt ausgebaut.

### INGENIEURNACHWUCHS IST GEFRAGT

Angesichts eines spürbaren Fachkräftebedarfs in Deutschland, insbesondere beim Ingenieurwachstum, ist die Rekrutierung auch im Jahr 2011 für κ+s ein Topthema. Wir werden gezielt um Techniker, Projektleiter und Ingenieure werben. Gefragt sind vor allem Hochschulabsolventen der Fachrichtungen Maschinenbau, Elektro-, Energie- und Kraftwerkstechnik, Bergbau,

Chemie, Verfahrenstechnik, aber auch der Betriebswirtschaft.

### STIPENDIEN UND PRAKTIKA

Rund 300 junge Menschen nutzen jedes Jahr die Möglichkeit, unser Unternehmen durch ein Praktikum oder im Rahmen einer Diplomarbeit kennenzulernen. Wir besetzen grundsätzlich keine Vollzeitstellen mit Praktikanten und „vertrösten“ keinen Hochschulabsolventen, der sich auf eine feste Stelle beworben hat, mit einem Praktikum. Unsere Praktika dienen vornehmlich zur beruflichen Orientierung während der Ausbildungsphase. Wir zahlen den Praktikanten eine adäquate Aufwandsentschädigung. Daher führen wir das Gütesiegel der Initiative „Fair Company“ des Job- und Wirtschafts magazins Junge Karriere.

[/www.karriere.de/beruf/fair-company/](http://www.karriere.de/beruf/fair-company/)

Seit dem Wintersemester 2008/09 bieten wir das Stipendienprogramm „K+S min(d)ing“ an. Wir fördern ausgewählte Studenten mit 1.000 € brutto pro Semester für insgesamt zwei Semester. Innerhalb dieser Zeit absolvieren sie ein dreimonatiges Praktikum oder eine Werkstudententätigkeit bei K+S.

[/www.k-plus-s.com/de/perspektiven-und-einstieg/studenten/stipendien.html](http://www.k-plus-s.com/de/perspektiven-und-einstieg/studenten/stipendien.html)

### STIFTUNG DER DEUTSCHEN WIRTSCHAFT

Als Mitgliedsunternehmen der Stiftung der deutschen Wirtschaft (SDW) wollen wir den studentischen und wissenschaftlichen Nachwuchs fördern und begleiten. Über verschiedene Kooperationsmöglichkeiten kommen

#### ANZAHL ABSOLVIERTER WEITERBILDUNGSMASSNAHMEN

ABB: 6.9.1

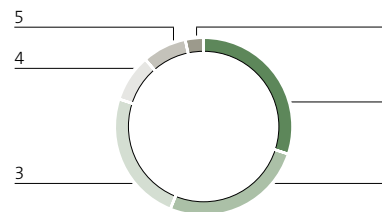

|                                 | 2010         |
|---------------------------------|--------------|
| 1 Fachwissen und -können        | 2.507        |
| 2 Befähigungsnachweise          | 2.180        |
| 3 Sozial- und Führungskompetenz | 2.001        |
| 4 IT-Qualifizierung             | 716          |
| 5 Methodenwissen und -können    | 678          |
| 6 Unternehmerische Kompetenz    | 271          |
| <b>Gesamt</b>                   | <b>8.353</b> |

#### TEILNAHMEN AN WEITERBILDUNGSMASSNAHMEN NACH ALTERSGRUPPEN

ABB: 6.9.2

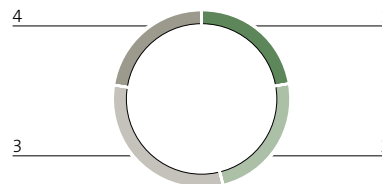

|                   | 2010         |
|-------------------|--------------|
| 1 bis 29 Jahre    | 1.875        |
| 2 30 bis 39 Jahre | 1.999        |
| 3 40 bis 49 Jahre | 2.622        |
| 4 über 50 Jahre   | 1.857        |
| <b>Gesamt</b>     | <b>8.353</b> |

wir mit vielversprechenden jungen Leuten in Kontakt. Zudem können wir über eine Karrierebörse offene Stellen anbieten. [/www.sdw.org/](http://www.sdw.org/)

### FORT- UND WEITERBILDUNG

#### GUTE PERSPEKTIVEN FÜR GEWERBLICHE MITARBEITER

Vielversprechenden Mitarbeitern aus technischen, bergmännischen und Produktionsbereichen ermöglichen wir eine Fortbildung zum Techniker oder eine darauf aufbauende Qualifizierung mit der Perspektive einer



Führungslaufbahn. Unser Hauptpartner ist die Fachschule für Wirtschaft und Technik (FWT) in Clausthal-Zellerfeld. Derzeit absolvieren 80 Mitarbeiter das zweite Jahr ihrer Techniker Ausbildung.

### BREITES WEITERBILDUNGSANGEBOT

In Jahres- oder Mitarbeitergesprächen ermitteln Mitarbeiter und Vorgesetzte gemeinsam den Weiterbildungsbedarf. Die K+S GRUPPE bietet neben gesetzlich vorgeschriebenen Weiterbildungsmaßnahmen auch fachspezifische, fachübergreifende sowie IT- und Sprachschulungen an. Unmittelbare Unterstützung bei neuen und komplexen Aufgabenstellungen erhalten die Mitarbeiter durch begleitende Bildungsmaßnahmen.

Wir fördern nicht nur den Nachwuchs, sondern auch unsere erfahrenen Mitarbeiter, um ihr Know-how während des gesamten Berufslebens zu erweitern. So waren im vergangenen Jahr mehr als 54 % der Teilnehmer an Weiterbildungsmaßnahmen über 40 Jahre alt.

Im Jahr 2010 haben unsere Mitarbeiter insgesamt 8.353 Weiterbildungsmaßnahmen absolviert (Vorjahr: 6.977). Damit lag die durchschnittliche Anzahl an Trainingsstunden pro Jahr und Mitarbeiter bei 13,7 Stunden.

/ ABB: 6.9.1, 6.9.2

### VORSCHLÄGE UND IDEEN – ENTWICKLUNG BIS 2010

ABB: 6.10.1

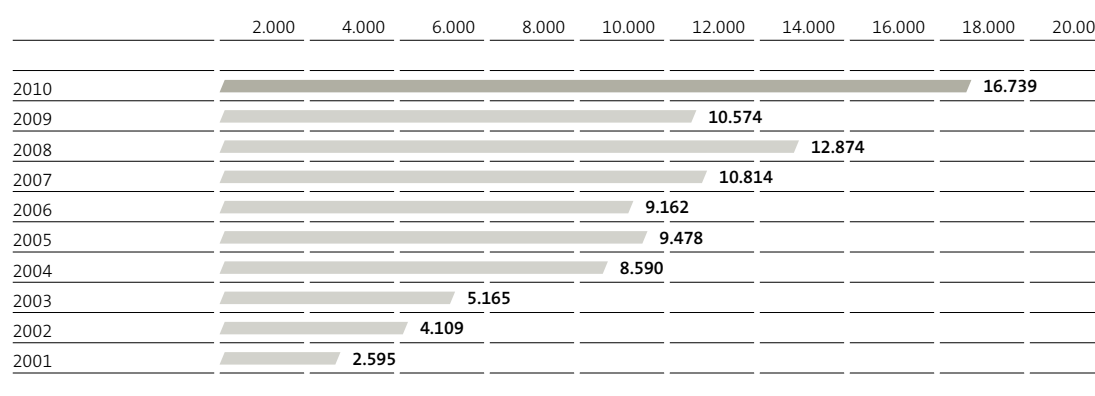

## 6.10 AUSTAUSCH VON WISSEN UND ERFAHRUNG

Mit unserem Ideenmanagement / KVP<sup>1</sup> optimieren wir die Qualität und Rentabilität von Prozessen und Produkten unter Beteiligung aller Mitarbeiter. Dabei fördern und fordern unsere Führungskräfte die Mitarbeiter sowohl individuell als auch in Teamarbeit. Wir schärfen auf diese Weise das Bewusstsein unserer Mitarbeiter für unternehmensspezifisch wichtige Erkenntnisse und Notwendigkeiten. Außerdem wollen wir das im Unternehmen existierende Mitarbeiterwissen noch besser erfassen, nutzen und sichern.

### ANZAHL DER VORSCHLÄGE STARK GESTIEGEN

Für das vergangene Jahr verzeichnen wir bei den eingereichten Verbesserungsvorschlägen einen deutlichen Anstieg. Mit 16.739 Vorschlägen (Vorjahr: 10.574) ist die Anzahl um 58 % gestiegen. / ABB: 6.10.1

Dies führen wir im Wesentlichen auf folgende Faktoren zurück:

- + Intensive Führungsarbeit
- + Vertrauenszuwachs und Motivation der Mitarbeiter durch KVP-Arbeit auch während der Kurzarbeitsphasen in 2009 sowie Wegfall der Kurzarbeit in 2010

<sup>1</sup> Kontinuierlicher Verbesserungsprozess.

- + Ideeneinreichung online von zu Hause über unser SAP-Portal sowie verbesserte Suchfunktion über Ideenbrowser
- + Attraktivität unserer Sachwerte im Prämienshop

Die Mitarbeiterbeteiligung lag mit 57 % ebenfalls deutlich über dem Vorjahresniveau. Mit 1.661 Vorschlägen pro 1.000 Mitarbeiter (Vorjahr: 1.045) erreicht K+S eine Quote, die deutlich über dem Durchschnitt der Unternehmen in Deutschland liegt. Der im Jahr 2010 geneigte Wirtschaftlichkeitseffekt beträgt 6,2 Mio. € (Vorjahr: 7,0 Mio. €). Für das Jahr 2011 haben wir uns vorgenommen, das Niveau des vergangenen Jahres zu halten oder sogar leicht zu steigern. Dafür wollen wir mit allen Führungskräften in einer guten Kommunikationskultur weiter intensiv arbeiten.

## 6.11 MITBESTIMMUNG

Mitbestimmung heißt für uns, die Mitarbeitervertretungen in wesentliche Entscheidungen rechtzeitig mit einzubeziehen. Denn wir sind davon überzeugt, dass informierte Mitarbeiter besser motiviert und eher bereit sind, auch schwierige Entscheidungen mitzutragen und dass folglich deren Umsetzung schneller und vor allem effizienter erfolgt. Mitbestimmung fördert und fordert die Übernahme von Verantwortung, und zwar nicht mit einer kurzfristigen, sondern mit einer mittel- und langfristigen Perspektive.

### BETRIEBSRÄTE SIND TRÄGER DER MITBESTIMMUNG

Die Träger der betrieblichen Mitbestimmung bei K+S in Deutschland sind 20 gewählte Betriebsräte mit insgesamt 177 Mitgliedern. Nach den Betriebsratswahlen im Frühjahr 2010 wurde die Tätigkeit neu strukturiert. Oberstes Gremium der Arbeitnehmervertretungen ist jetzt der Gesamtbetriebsrat, der von vier Unternehmensausschüssen und neun themenbezogenen Ausschüssen unterstützt wird. Einen Konzernbetriebsrat gibt es in dieser neuen Struktur nicht mehr. Ziel der Neustrukturierung war es, das bisherige Nebeneinander von zwei Gesamtbetriebsräten und des Konzernbetriebsrats durch eine effizientere Organisation abzulösen. Entscheidungsprozesse können jetzt schneller und effektiver durchgeführt werden.

### HOHER ORGANISATIONSGRAD

In der K+S GRUPPE ist die Beziehung zwischen dem Unternehmen und den Betriebsräten sowie der Industriegewerkschaft Bergbau, Chemie, Energie (IG BCE) durch eine langjährige und vertrauensvolle Zusammenarbeit geprägt. Circa 85 % unserer Mitarbeiter in Deutschland sind gewerkschaftlich organisiert.

Auch an unseren Standorten außerhalb Deutschlands haben die Arbeitnehmervertreter Konsultations-, Informations- und Beratungsrechte in wirtschaftlichen und organisatorischen Angelegenheiten sowie Mitbestim-

### STATEMENT DES GESAMTBETRIEBSRATS-VORSITZENDEN DER K+S GRUPPE

„Mit den Betriebsratswahlen im Jahr 2010 haben Betriebsräte, IG BCE und das Unternehmen eine neue, flexiblere Betriebsratsstruktur vereinbart. Damit sind wir Betriebsräte in der Lage, schneller und effizienter auf sich ständig verändernde Rahmenbedingungen eingehen zu können. Dank der hohen Einsatzbereitschaft und Flexibilität unserer Beschäftigten war K+S im Geschäftsjahr 2010 in der Lage, auf die schnell wachsende Nachfrage in den Märkten zu reagieren. Dafür möchte ich mich bei unseren Beschäftigten, den Betriebsräten und den Vertrauensleuten ganz herzlich bedanken.

Mit der Akquisition von POTASH ONE wird die Position unseres Unternehmens nachhaltig gestärkt. Aber auch unsere Mitarbeiterinnen und Mitarbeiter tragen ihren Teil zur nachhaltigen Stärkung der Konkurrenzfähigkeit von K+S bei.

Das zwischen Gesamtbetriebsrat, IG BCE und K+S vereinbarte „Zukunftskonzept 2016“ gibt dem Unternehmen die notwendige Flexibilität und den Beschäftigten eine höhere Arbeitsplatzsicherheit. Darüber hinaus wurde die Zahl der Auszubildenden auf hohem Niveau festgeschrieben und unsere Kolleginnen und Kollegen haben – bei entsprechendem Unternehmenserfolg – die Chance auf eine zusätzliche Ergebnisbeteiligung.

Um auf den demografischen Wandel noch besser vorbereitet zu sein, haben Gesamtbetriebsrat und K+S vereinbart, bedarfsorientiert eigene Mitarbeiter bei ihrer Bachelor- und Masterausbildung zu fördern.“

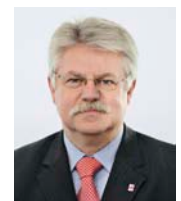

Klaus Krüger,  
Gesamtbetriebsratsvorsitzender der K+S Gruppe

mungsrechte in sozialen Belangen. In Chile tritt eine große Anzahl von kleinen Gewerkschaften als Verhandlungsgemeinschaft gegenüber dem Unternehmen auf. Circa 50 % unserer chilenischen Mitarbeiter sind gewerkschaftlich organisiert. Die Mitarbeiter von MORTON SALT werden von neun verschiedenen Gewerkschaften mit Sitz in den USA, in Kanada und auf den Bahamas vertreten. Rund zwei Drittel der Mitarbeiter sind gewerkschaftlich organisiert.

## 6.12 VERANTWORTUNG IN DER LIEFERKETTE

Die Beziehungen zu unseren Dienstleistern sind geprägt durch ein offenes und faires Miteinander. Wir wählen unsere Lieferanten und Transportdienstleister nicht nur nach wirtschaftlichen Kriterien aus, sondern erwarten, dass sie die Menschenrechte und die international anerkannten Arbeitsstandards nach den Kernarbeitsnormen der ILO (International Labor Organisation) beachten. Wir beziehen soweit wie möglich alle Partner in der Lieferkette in einen systematischen, IT-gestützten Auswahlprozess ein.

### TRANSPARENTE ELEKTRONISCHE AUSSCHREIBUNGEN

Frühzeitig haben wir erkannt, dass die Beschaffung via Internet das Einkaufsgeschäft in Zukunft entschei-

dend mitgestalten wird; bereits vor zehn Jahren haben wir erste elektronische Einkaufsprozesse aufgebaut. Heute werden auch Transportdienstleistungen für Binnenschiff und LKW in einem transparenten Verfahren online ausgeschrieben.

Unsere Einkaufsleitlinien, die allgemeinen Transportbedingungen sowie weitere wichtige Informationen für unsere Lieferanten und interessierte Anbieter haben wir auf unserem Beschaffungsportal und unserem Logistikportal veröffentlicht.

[/www.emaks.de](http://www.emaks.de) / <https://scm.k-plus-s.com>

### SYSTEMATISCHER AUSWAHLPROZESS

#### LIEFERANTEN

Unser Beurteilungssystem für Lieferanten ist transparent, weltweit nutzbar und eine wichtige Entscheidungsgrundlage, auf der wir langfristige und risikoarme Partnerschaften aufbauen. Anhand definierter Kriterien beurteilen wir den gesamten Beschaffungsprozess von der Anfrage über die Lieferung der Leistung bis zur Abrechnung. Im System werden außerdem Qualitäts- und Umweltstandards (Produktqualität, Etikettierung/Kennzeichnung, Umweltschutz bei Erstellung/Transport) sowie Sicherheitsstandards (technische Ausrüstung, Schutz- und Arbeitskleidung, Sicherheit am Arbeitsplatz) der Lieferanten bewertet.

Ergänzt wird diese Beurteilung durch die Selbsteinschätzung, die jeder neue Lieferant abgeben muss – sie dient auch der Sensibilisierung für unsere Standards.

Sollte es einmal zu einer Negativbeurteilung kommen, werden die unternehmensinternen Beteiligten in der Lieferkette sofort benachrichtigt. So können wir rechtzeitig Maßnahmen einleiten bzw. gegebenenfalls bestehende Verträge kündigen.

Bei der Vergabe von Aufträgen können wir uns nicht ausschließlich auf regionale Anbieter beschränken. Aufgrund logistischer Vorteile sowie der genauen Kenntnisse unserer Anforderungen und Anlagen können sich allerdings regionale Anbieter, mit denen wir über Jahre partnerschaftlich zusammenarbeiten, im Wettbewerb mit größeren überregionalen Anbietern gut behaupten.

99 % unserer Vertragspartner stammen aus OECD-Staaten<sup>1</sup>.

#### AUDITIERUNG VON STRATEGISCHEN LIEFERANTEN

Rund 4 % unserer Lieferanten sind als strategisch wichtig eingestuft und werden von uns regelmäßig auditiert. Eine Leistung (Ware oder Dienstleistung) gilt bei uns als strategisch wichtig, wenn sie für den Wertschöpfungsprozess wesentlich ist und gleichzeitig nur von wenigen Anbietern erbracht werden kann. Im Jahr 2010 haben wir sechs Lieferanten auditiert.

<sup>1</sup> Organisation für Wirtschaftliche Zusammenarbeit und Entwicklung.

### ENTWICKLUNGSPARTNERSCHAFTEN

Mit einigen Lieferanten, vor allem aus dem Spezialmaschinenbau, unterhalten wir Entwicklungspartnerschaften. Beispielsweise entwickeln wir die Fahrlader für den Untertage-Betrieb gemeinsam mit GHH FAHRZEUGE GMBH, die Bohrwagen mit SMAG und die Spezialmaschinen für die Infrastruktur unter Tage mit der BAT BOHR- UND ANLAGENTECHNIK GMBH stetig weiter, um sie veränderten Lagerstättenverhältnissen anzupassen.

### LOGISTIKDIENSTLEISTER

Die langfristige Frachtraumsicherung hat für K+S strategische Bedeutung. Ein großer Anteil unseres internationalen Transportvolumens wird von Dienstleistern befördert, mit denen wir langjährige Partnerschaften unterhalten. Unsere Kunden erwarten, dass die bestellten Produkte in der gewünschten Qualität und Menge pünktlich geliefert werden. In den Jahren 2009 und 2010 haben wir unser Konzept zur systematischen Dienstleistungsbewertung überarbeitet und werden es ab 2011 auch global einsetzen können. Diese Beurteilung erfasst u.a. Sicherheit und Eignung der Transportmittel, Qualität der Dokumente, Termintreue und Transportschäden.

### EINKAUFSVOLUMEN

Der Kali- und Steinsalzbergbau zeichnet sich durch eine sehr hohe Wertschöpfungstiefe aus. Wir bereiten die von uns geförderten natürlichen Rohstoffe mit verschiedenen mehrstufigen Trennverfahren zu einer breiten Palette von Produkten auf. Stoffe, die in unsere Produk-

### TRANSPORTMENGEN NACH VERKEHRSTRÄGERN <sup>1</sup>

ABB: 6.12.1

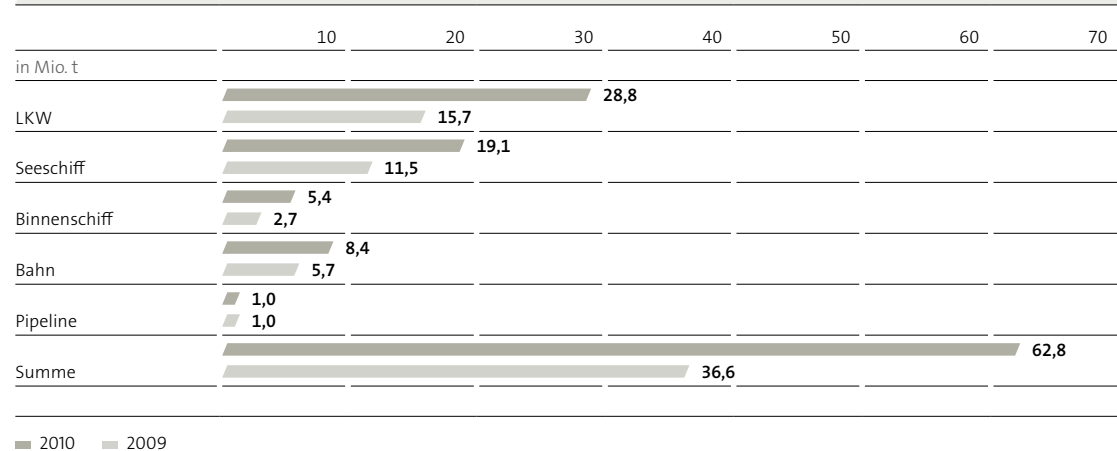

<sup>1</sup> In der Logistiktonnage sind Doppelzählungen aufgrund von Transportketten (z. B. Bahn auf Binnenschiff auf Seeschiff) enthalten. Nicht enthalten ist Fremdgeschäft der K+S Gruppe für Drittkunden. 2009 ohne Morton Salt.

### TRANSPORTUNFÄLLE <sup>1</sup> NACH GESCHÄFTSBEREICHEN

TAB: 6.12.1

|                              | Anzahl | Personenschaden | Umweltschaden |
|------------------------------|--------|-----------------|---------------|
| Kali- und Magnesiumprodukte  | 0      | 0               | 0             |
| Stickstoffdüngemittel        | 1      | 0               | 0             |
| Salz                         | 18     | 10              | 0             |
| davon esco                   | 1      | 0               | 0             |
| SPL <sup>2</sup>             | 16     | 10              | 0             |
| Morton Salt                  | 1      | 0               | 0             |
| Ergänzende Geschäftsbereiche | 1      | 0               | 0             |

<sup>1</sup> Bei allen Unfällen handelte es sich um LKW-Unfälle.

<sup>2</sup> Diese Unfälle sind auf schwierige Straßenverhältnisse in Südamerika zurückzuführen.

tion bzw. in unsere Produkte eingehen, stellen daher nur einen geringen Anteil des Einkaufsvolumens. K+S hat im Jahr 2010 bei über 6.000 Lieferanten Roh- Hilfs- und Betriebsstoffe, technische Güter sowie Dienstleistungen für rund 2,0 Mrd. € eingekauft.

## TRANSPORTVOLUMEN

Die K+S GRUPPE hat im Jahr 2010 ein Transportvolumen von 62,8 Mio. t bewegt. Wir lasten alle Verkehrsträger bestmöglich unter Nutzung ihrer individuellen Vorteile aus. Davon profitieren nicht nur wir als Auftraggeber, sondern gleichermaßen auch unsere Kunden sowie unsere Partner aus der Logistikbranche.

Soweit möglich verlagern wir unsere Transporte von der Straße auf die umweltfreundlicheren Schienen- und Wasserwege. Beispielhaft sind hier die erfolgreichen Logistikkonzepte „Baltic Train“ (Schiene) und „Börde Container Feeder“ (Binnenschiff) unserer Logistiktochter KTG genannt.

Bereits seit dem Jahr 2007 arbeiten wir mit dem SHORT SEA SHIPPING INLAND WATERWAY PROMOTION CENTER (SPC) zusammen. Als neutrale Plattform entwickelt SPC im Dialog mit Politik, Industrie, Handel und Spediteuren Logistikkösungen in Deutschland und Europa. In 2010 wurden in Zusammenarbeit mit SPC Möglichkeiten zur weiteren Verlagerung von LKW-Transporten auf den Seeweg analysiert.

Durch die Einbeziehung von MORTON SALT ist das Transportvolumen um 65 % gestiegen. Der hohe Anteil an LKW-Verkehren im Jahr 2010 resultiert aus dem starken Absatz von Auftausalz. Im Jahr 2010 mussten wir 20 Transportunfälle verzeichnen / ABB: 6.12.1 / TAB: 6.12.1

## NEUES CONTAINER-TERMINAL

In der Nähe des Werks Werra haben wir im Jahr 2010 das Werra-Kombi-Terminal in Betrieb genommen. Mit dem neuen Containerterminal steigern wir die Effizienz beim Transport von Kali- und Magnesiumprodukten vom Kaliwerk Werra zu den Seehäfen Hamburg und Bremerhaven. Das Terminal wird dreimal wöchentlich mit Container-Ganzzügen von „Baltic Train“ angefahren. Das Terminal steht auch externen Verladern offen. Pro Jahr sparen wir rund 500.000 Straßenkilometer ein, da der Transport der Container per LKW vom Werk Werra zu einem weiter entfernten Terminal wegfällt.

## INTERNATIONALISIERUNG SCHREITET VORAN

Die weitere Internationalisierung unseres Unternehmens bringt auch Herausforderungen für die Logistik mit sich. Im Jahr 2010 haben wir die Logistikstrukturen in Nordamerika kritisch überprüft und reorganisiert. Die regionalen Zuständigkeiten innerhalb des Geschäftsbereichs Salz sind jetzt klar geregelt und Entscheidungen zur Straffung der Supply-Chain-Organisation getroffen.

## 6.13 GESELLSCHAFTLICHES ENGAGEMENT

Gesellschaftliches Engagement ist als wichtiger Teil unserer Unternehmenskultur in unserem Verhaltenskodex verankert und spiegelt sich in unserem täglichen Handeln wider. Wir sind uns unserer Verantwortung als wichtiger Arbeitgeber in zum Teil strukturschwachen Regionen bewusst. Wir leben in guter Nachbarschaft mit den Standortgemeinden und wollen einen positiven Beitrag zur gesellschaftlichen Entwicklung im Umfeld leisten.

Wir legen Wert darauf, dass unsere Mittel effizient sowie zielgerichtet eingesetzt werden und treffen genaue Absprachen mit den Projektverantwortlichen. Schwerpunkte unseres Engagements sind die Bereiche Sport, Soziales, Kunst und Kultur sowie Wissenschaft.

## SPENDEN UND SPONSORING

Gemäß unseren Richtlinien spenden wir für wissenschaftliche, mildtätige und gemeinnützige Zwecke in Übereinstimmung mit den geltenden Gesetzen und den internen Bestimmungen. Spenden an politische Parteien sowie ihnen nahestehende oder zugehörige Organisationen oder Personen werden von uns nicht geleistet. Das Anbieten und Gewähren von Geldbeträgen im Zusammenhang mit geschäftlichen oder behördlichen Entscheidungen ist bei uns verboten. Auch sind unsere Mitarbeiter angehalten, private Interessen strikt



von denen des Unternehmens zu trennen. Im Jahr 2010 hat K+S rund 1.1 Mio. € gespendet.

#### **HILFE FÜR DIE OPFER VON NATURKATASTROPHEN**

- + Bei dem schweren Erdbeben vor der chilenischen Küste im Februar vergangenen Jahres sind glücklicherweise keine Mitarbeiter der K+S GRUPPE zu Schaden gekommen. Allerdings wurden Gebäude und Anlagen an zwei SPL-Standorten im Süden Chiles stark in Mitleidenschaft gezogen. SPL hat gespendet um die Folgen des Bebens für die betroffenen Menschen zu mildern.
- + Für die Opfer des schweren Erdbebens auf Haiti im Januar 2010 hat K+S im Rahmen der Spendenaktion des Deutschen Bauernverbandes e.V. und der Deutschen Welthungerhilfe e.V. 100.000 € zur Verfügung gestellt.

#### **JUGENDSPORTFÖRDERUNG**

- + K+S ist ein engagierter Förderer des Jugendsports. Wir rüsten den Nachwuchs in den Sportvereinen im Umfeld unserer Standorte mit Sportbekleidung aus – ein sichtbares Zeichen der Verbundenheit von K+S mit den Gemeinden, aus denen unsere Mitarbeiter stammen. Im Jahr 2010 haben wir wieder rund 50 Jugendmannschaften unterstützt.

#### **KULTURFÖRDERUNG**

- + Die K+S KALI GMBH ist im Jahr 2009 eine mehrjährige Kulturpartnerschaft mit den Bad Hersfelder Festpie-

len eingegangen. Die Bühne zieht etwa 100.000 Besucher jedes Jahr im Sommer in die Stadt.

- + Außerdem hat K+S im Jahr 2010 unter anderem die „Kasseler Museumsnacht“, das „Programm Kinderkultur“, das Technik Museum Kassel, das Kalibergbau-Museum Heringen und die „Kasseler Musiktage“ unterstützt.

#### **SOZIALES**

- + Seit dem Jahr 2007 unterstützt K+S das Projekt „Kinder für Nordhessen“. Mit dieser Initiative sollen Kinder, die in schwierigen sozialen und wirtschaftlichen Verhältnissen leben, besonders gefördert werden. Wir wollen die Rahmenbedingungen für benachteiligte Kinder verbessern, damit sie sich stärker auf den Unterricht konzentrieren können. Je mehr Kinder in Nordhessen gefördert und damit für die eigenverantwortliche Gestaltung ihrer Zukunft gewonnen werden, desto besser stehen die Chancen, diese Region zu stärken.
- + Auch K+S NITROGEN engagiert sich insbesondere für Kinder aus sozial schwachen Familien. Seit 2008 ist die K+S-Tochter Patin des Kinder- und Jugendheims St. Joseph in Mannheim/Käfertal. Im Jahr 2010 unterstützte sie beispielsweise auch das Musical-Projekt „Stark gegen Gewalt“ an einer Haupt- und Realschule in Mannheim, die Familiengenosenschaft der Metropolregion Rhein Neckar, den Verein „Kinder am Rande der Stadt“ und den Mittagstisch einer Mannheimer Hauptschule.
- + ESCO unterstützt seit 2007 die Aktion „Sonnenstrahl“, die Schüler an Hannoveraner Brennpunktschulen mit

gesundem Frühstück und einem warmen Mittagessen versorgt sowie Hausaufgabenhilfe und Nachmittagsbetreuung anbietet.

- + MORTON SALT engagiert sich bei „United Way“, einer Organisation die US-amerikanische Kommunen bei der Wahrnehmung ihrer Fürsorgepflichten unterstützt. Darüber hinaus spendet das Unternehmen für Suppenküchen und andere wohltätige Zwecke.

#### **WISSENSCHAFT**

- + Die K+S KALI GMBH hat ein gemeinsames Institut mit der Universität Göttingen gegründet, das sich der praxisorientierten Forschung auf dem Gebiet der Pflanzenernährung widmet. Die Stellenausstattung umfasst zunächst eine Juniorprofessur, eine Doktorandenstelle und eine technische Kraft. Darüber hinaus finanziert die K+S KALI GMBH einmalig ein Startkapital für das Institut und gewährt zusätzliche Forschungsmittel für konkrete Projekte (siehe auch Seite 71).
- + Zusammen mit fünf anderen Unternehmen aus der Region Kassel hat K+S der Universität Kassel eine Professur für den Themenbereich Personal- und Change-management gestiftet. Die Unternehmen finanzieren die Professur seit dem Jahr 2007 für einen Zeitraum von fünf Jahren.
- + Außerdem hat K+S das „Jahr der Chemie“ der Universität Göttingen sowie den „Förderpreis der Agrarwirtschaft 2010“ und den „Wilhelm-Rimpau-Preis 2010“ gesponsort.



## WEITERE INFORMATIONEN

### GRI-RICHTLINIEN

Die Richtlinien der Global Reporting Initiative (GRI) sind ein international anerkannter Leitfaden für die Nachhaltigkeitsberichterstattung. Sie schlagen Berichterstattungsprinzipien und spezifische Inhalte vor, mit dem Ziel, die Vergleichbarkeit von Unternehmensberichten zu erhöhen und die Qualität und Detailgenauigkeit der Berichte zu verbessern. Zwar sind diese Richtlinien auf alle Unternehmen anwendbar, können aber nicht den spezifischen Anforderungen einzelner Wirtschaftszweige wie auch denen der Düngemittel- und Salzindustrie Rechnung tragen. Daher haben wir uns so weit wie möglich an den Richtlinien orientiert, jedoch darüber hinaus auch speziell für die K+S GRUPPE relevante Aspekte in die Berichterstattung einbezogen. Den Erfüllungsgrad der GRI-Richtlinien schätzen wir selbst mit (B) ein.

| GRI-ELEMENT                    | ERLÄUTERUNG                                    | SEITE                      |
|--------------------------------|------------------------------------------------|----------------------------|
| <b>1. Vision und Strategie</b> |                                                |                            |
| 1.1                            | Stellungnahme des Vorstands                    | 1<br>(Brief)               |
| 1.2                            | Chancen, Risiken und Einflüsse                 | 6                          |
| <b>2. Organisationsprofil</b>  |                                                |                            |
| 2.1                            | Name der berichterstattenden Organisation      | Die K+S Aktiengesellschaft |
| 2.2                            | Bedeutende Produkte und Dienstleistungen       | Die K+S Gruppe 52          |
| 2.3                            | Betriebsstruktur der Organisation              | Aktiengesellschaft         |
| 2.4                            | Sitz der Unternehmensleitung                   | Kassel, Deutschland        |
| 2.5                            | Länder, in denen das Unternehmen vertreten ist | Unsere Standorte 85        |
| 2.6                            | Art der Eigentumsstrukturen                    | Die K+S-Aktie 85           |
| 2.7                            | Art der bedienten Märkte                       | Die K+S Gruppe 52          |

| GRI-ELEMENT                  | ERLÄUTERUNG                                                                              | SEITE                                                                                                                                                                                                                             |
|------------------------------|------------------------------------------------------------------------------------------|-----------------------------------------------------------------------------------------------------------------------------------------------------------------------------------------------------------------------------------|
| 2.8                          | Umfang der berichterstattenden Organisation                                              | Anzahl der Mitarbeiter: 15.241<br>Erstellte Produkte: 37 Mio. t<br>Umsatz: 4.993,8 Mio. €<br>Kapitalisierung:<br>2.651,6 € Eigenkapital<br>1.003,0 Mio. € Langfristiges Fremdkapital<br>1.003,0 Mio. € Kurzfristiges Fremdkapital |
| 2.9                          | Wesentliche Änderungen im Vergleich zum letzten Bericht                                  | Erstmalige ganzjährige Einbeziehung von Morton Salt                                                                                                                                                                               |
| 2.10                         | Im Berichtszeitraum erhaltene Preise/Auszeichnungen                                      | Auszeichnungen für Arbeitssicherheit 114<br>Auszeichnung für Ausbildungsengagement 119<br>Auszeichnungen für IR-Arbeit siehe Finanzbericht 2010, S. 18                                                                            |
| <b>3. Berichtsabgrenzung</b> |                                                                                          |                                                                                                                                                                                                                                   |
| <b>Berichtsprofil</b>        |                                                                                          |                                                                                                                                                                                                                                   |
| 3.1                          | Berichtszeitraum                                                                         | Das Jahr 2010                                                                                                                                                                                                                     |
| 3.2                          | Datum des letzten Berichts                                                               | März 2010                                                                                                                                                                                                                         |
| 3.3                          | Reporting Cycle                                                                          | Jährlich                                                                                                                                                                                                                          |
| 3.4                          | Ansprechpartner                                                                          | Impressum 138                                                                                                                                                                                                                     |
| <b>Umfang des Berichts</b>   |                                                                                          |                                                                                                                                                                                                                                   |
| 3.5                          | Vorgehen bei der Entscheidung für die Berichtsinhalte                                    | Wir orientieren uns an den GRI-Richtlinien.                                                                                                                                                                                       |
| 3.6                          | Grenzen des Berichts                                                                     | Gruppenweite Berichterstattung                                                                                                                                                                                                    |
| 3.7                          | Angaben, falls der Bericht nicht alle Unternehmensaktivitäten erfasst                    | Nur konsolidierte Gesellschaften werden in der Berichterstattung erfasst.                                                                                                                                                         |
| 3.8                          | Vergleichbarkeit der Berichterstattung zum Vorjahr                                       | Berichterstattung ist vergleichbar.                                                                                                                                                                                               |
| 3.9                          | Methoden der Datenerhebung                                                               | Neben den aktuellen Kennzahlen bieten wir in der Regel den Vergleich zum Vorjahr. In der Umweltberichterstattung decken wir einen Zeitraum von fünf Jahren ab.                                                                    |
| 3.10                         | Veränderte Darstellung eines Sachverhalts im Vergleich zum letzten Bericht               | Keine Änderung eines Sachverhalts                                                                                                                                                                                                 |
| 3.11                         | Abweichungen von in früheren Jahren verwendeten Messverfahren, Berichtsabgrenzungen usw. | Keine Abweichungen                                                                                                                                                                                                                |

| GRI-ELEMENT                                                      | ERLÄUTERUNG                                                                                                         | SEITE                                                                                                                                                                                                                                                                                                                                                                                                                  |
|------------------------------------------------------------------|---------------------------------------------------------------------------------------------------------------------|------------------------------------------------------------------------------------------------------------------------------------------------------------------------------------------------------------------------------------------------------------------------------------------------------------------------------------------------------------------------------------------------------------------------|
| <b>GRI-Index</b>                                                 |                                                                                                                     |                                                                                                                                                                                                                                                                                                                                                                                                                        |
| 3.12                                                             | Tabellarische Auflistung der GRI-Kriterien                                                                          | GRI-Richtlinien                                                                                                                                                                                                                                                                                                                                                                                                        |
| <b>Externe Prüfung</b>                                           |                                                                                                                     |                                                                                                                                                                                                                                                                                                                                                                                                                        |
| 3.13                                                             | Externe Verifizierung des Berichts                                                                                  | Der Bericht ist nicht von dritter Seite geprüft worden.                                                                                                                                                                                                                                                                                                                                                                |
| <b>4. Governance-Strukturen, Verpflichtungen und Engagements</b> |                                                                                                                     |                                                                                                                                                                                                                                                                                                                                                                                                                        |
| <b>Governance</b>                                                |                                                                                                                     |                                                                                                                                                                                                                                                                                                                                                                                                                        |
| 4.1                                                              | Governance-Strukturen innerhalb der Organisation                                                                    | Siehe Finanzbericht 2010, Corporate Governance, S. 20 ff.                                                                                                                                                                                                                                                                                                                                                              |
| 4.2                                                              | Angabe, ob der Vorstandsvorsitzende Position im operativen Management innehat                                       | Siehe Finanzbericht 2010, Corporate Governance, S. 20 ff.                                                                                                                                                                                                                                                                                                                                                              |
| 4.3                                                              | Unabhängige Mitglieder des höchsten Führungsgremiums                                                                | Für K+S nicht zutreffend (keine „Unitary board structure“)                                                                                                                                                                                                                                                                                                                                                             |
| 4.4                                                              | Mechanismen für Aktionäre, dem Vorstand/Aufsichtsrat Empfehlungen zu übermitteln                                    | Die Mitarbeiter unserer Investor Relations stehen für alle Aktionärsanfragen stets zur Verfügung. Institutionelle Investoren können sich auch im persönlichen Gespräch mit dem Vorstand informieren. Auf der Hauptversammlung entscheiden die Aktionäre durch die Ausübung ihres Stimmrechts über grundlegende Angelegenheiten der K+S Aktiengesellschaft. Jeder Aktionär kann hierzu Anfragen und Anträge einbringen. |
| 4.5                                                              | Beziehungen zwischen Vorstandsboni und Zielerfüllung                                                                | Siehe Finanzbericht 2010, Corporate Governance, S. 20 ff.                                                                                                                                                                                                                                                                                                                                                              |
| 4.6                                                              | Mechanismen, damit Interessenkonflikte im Vorstand/Aufsichtsrat vermieden werden                                    | Siehe Finanzbericht 2010, Corporate Governance, S. 20 ff.                                                                                                                                                                                                                                                                                                                                                              |
| 4.7                                                              | Verfahren zur Bestimmung der Expertise von Vorständen/Aufsichtsräten bei der Formulierung der Unternehmensstrategie | Keine Angaben                                                                                                                                                                                                                                                                                                                                                                                                          |
| 4.8                                                              | Mission Statement und Code of Conduct                                                                               | Vision/Mission Verhaltenskodex unter <a href="http://www.k-plus-s.com/de/vision-und-werte/">www.k-plus-s.com/de/vision-und-werte/</a> 5                                                                                                                                                                                                                                                                                |
| 4.9                                                              | Überwachung der nachhaltigen Unternehmensleistung und Identifizierung und Überwachung von Risiken und Chancen       | Materialitätsanalyse Siehe Finanzbericht 2010, Risikobericht, S. 129 ff. 6                                                                                                                                                                                                                                                                                                                                             |
| 4.10                                                             | Beurteilung der Leistung von Vorstand/Aufsichtsrat hinsichtlich ökonomischer, ökologischer und sozialer Leistung    | Siehe Finanzbericht 2010, Corporate Governance, S. 129 ff.                                                                                                                                                                                                                                                                                                                                                             |

| GRI-ELEMENT                                      | ERLÄUTERUNG                                                                                                | SEITE                                                                                                                                                                                                                                |
|--------------------------------------------------|------------------------------------------------------------------------------------------------------------|--------------------------------------------------------------------------------------------------------------------------------------------------------------------------------------------------------------------------------------|
| <b>Verpflichtungen (externe Initiativen)</b>     |                                                                                                            |                                                                                                                                                                                                                                      |
| 4.11                                             | Identifizierung und Überwachung von Risiken und Chancen (Vorsorgeprinzip)                                  | Materialitätsanalyse Siehe Finanzbericht 2010, Risikobericht, S. 129 ff. 6                                                                                                                                                           |
| 4.12                                             | Freiwillige Vereinbarungen, Prinzipien oder Initiativen                                                    | Leitbild für verantwortliches Handeln in der Wirtschaft<br>Product Stewardship<br>Maßnahmenpaket zum Gewässerschutz<br>Selbstverpflichtung zum Klimaschutz<br>Fair Company<br>Charta der Vielfalt 12<br>70<br>90<br>95<br>120<br>110 |
| 4.13                                             | Mitgliedschaft in Industrievereinigungen und Verbänden                                                     | <a href="http://www.k-plus-s.com/de/gesellschaft/mitgliedschaften.html">www.k-plus-s.com/de/gesellschaft/mitgliedschaften.html</a>                                                                                                   |
| <b>Einbindung von Stakeholdern</b>               |                                                                                                            |                                                                                                                                                                                                                                      |
| 4.14                                             | Liste der Stakeholder                                                                                      | Stakeholderdialog 14                                                                                                                                                                                                                 |
| 4.15                                             | Grundlagen zur Identifikation und Auswahl bedeutender Stakeholder                                          | Stakeholderdialog 14                                                                                                                                                                                                                 |
| 4.16                                             | Ansätze für Stakeholderkonsultationen                                                                      | Stakeholderdialog 14                                                                                                                                                                                                                 |
| 4.17                                             | Art der durch Stakeholderkonsultationen generierten Informationen und die Reaktion des Unternehmens darauf | Stakeholderdialog<br>Produktverantwortung 14<br>68                                                                                                                                                                                   |
| <b>5. Leistungsindikatoren (Kernindikatoren)</b> |                                                                                                            |                                                                                                                                                                                                                                      |
| <b>Ökonomische Leistungsindikatoren</b>          |                                                                                                            |                                                                                                                                                                                                                                      |
| <b>Wirtschaftliche Leistung</b>                  |                                                                                                            |                                                                                                                                                                                                                                      |
| EC 1                                             | Erwirtschafteter und verteilter Wert                                                                       | Wertschöpfung 83                                                                                                                                                                                                                     |
| EC 2                                             | Ökonomische Auswirkungen, Risiken und Chancen des Klimawandels                                             | Materialitätsanalyse, S. 6<br>Produktverantwortung 68                                                                                                                                                                                |
| EC 3                                             | Pensionsrückstellungen / Altersvorsorge                                                                    | Personalaufwand<br>Betriebliche Altersvorsorge 118<br>116                                                                                                                                                                            |
| EC 4                                             | Subventionen oder andere finanzielle Unterstützung durch die Regierung                                     | K+S erhält keine Subventionen. Bund und Länder vergeben allerdings Investitionsfördermittel an K+S.                                                                                                                                  |

| GRI-ELEMENT                                                                                                                  | ERLÄUTERUNG                                                                                                                                                                                       | SEITE     |
|------------------------------------------------------------------------------------------------------------------------------|---------------------------------------------------------------------------------------------------------------------------------------------------------------------------------------------------|-----------|
| <b>Marktpresenz</b>                                                                                                          |                                                                                                                                                                                                   |           |
| EC 6 Spendenpraxis an lokale Zulieferer                                                                                      | Spenden und Sponsoring                                                                                                                                                                            | 125       |
| EC 7 Vorgehen bei der Einstellung lokaler Arbeitskräfte und lokaler Führungskräfteanteil bei wichtigen Tochtergesellschaften | Keine Angabe                                                                                                                                                                                      |           |
| <b>Indirekte ökonomische Auswirkungen</b>                                                                                    |                                                                                                                                                                                                   |           |
| EC 8 Infrastruktur-Investitionen                                                                                             | Maßnahmenpaket zum Gewässerschutz                                                                                                                                                                 | 90        |
| <b>Ökologische Leistungsindikatoren</b>                                                                                      |                                                                                                                                                                                                   |           |
| <b>Materialverbrauch</b>                                                                                                     |                                                                                                                                                                                                   |           |
| EN 1 Materialverbrauch                                                                                                       | Materialverbrauch                                                                                                                                                                                 | 99        |
| EN 2 Anteil recyceltes Material am gesamten Materialverbrauch                                                                | Recycelte Materialien                                                                                                                                                                             | 100       |
| <b>Energieverbrauch</b>                                                                                                      |                                                                                                                                                                                                   |           |
| EN 3 Direkter Energieverbrauch nach Energiequellen                                                                           | Energieverbrauch                                                                                                                                                                                  | 100       |
| EN 4 Indirekter Energieverbrauch nach Energiequellen                                                                         | Energieverbrauch                                                                                                                                                                                  | 100       |
| <b>Wasserverbrauch</b>                                                                                                       |                                                                                                                                                                                                   |           |
| EN 8 Wasserverbrauch nach Herkunft                                                                                           | Wassereinsatz                                                                                                                                                                                     | 101       |
| <b>Biodiversität</b>                                                                                                         |                                                                                                                                                                                                   |           |
| EN 11 Lage und Größe von Grundbesitz mit hoher Biodiversität                                                                 | Rekultivierung und Naturschutz                                                                                                                                                                    | 97        |
| EN 12 Auswirkungen auf die Biodiversität                                                                                     | Rekultivierung und Naturschutz                                                                                                                                                                    | 97        |
| <b>Emissionen, Abwässer und Abfälle</b>                                                                                      |                                                                                                                                                                                                   |           |
| EN 16 Direkte und indirekte Emissionen von klimarelevanten Gasen                                                             | CH <sub>4</sub> , N <sub>2</sub> O, FCKW und SF <sub>6</sub> werden nicht emittiert. Zu den CO <sub>2</sub> -Emissionen siehe Emissionshandel                                                     | 101<br>96 |
| EN 17 Weitere indirekte Emissionen von klimarelevanten Gasen                                                                 | CH <sub>4</sub> , N <sub>2</sub> O, FCKW und SF <sub>6</sub> werden nicht emittiert.                                                                                                              |           |
| EN 19 Ozonabbauende Substanzen                                                                                               | Ozonabbauende Substanzen werden von uns nicht eingesetzt. Wir verfügen über Kühleinrichtungen, die durch Fremdfirmen gewartet werden und Kälteflüssigkeiten im geschlossenen Kreislauf enthalten. |           |
| EN 20 Nox/Sox und andere Luftemissionen                                                                                      | Emissionen                                                                                                                                                                                        | 101       |
| EN 21 Abwassereinleitungen                                                                                                   | Abwässer                                                                                                                                                                                          | 102       |
| EN 22 Abfallmengen                                                                                                           | Verwertung von Abfällen                                                                                                                                                                           | 102       |

| GRI-ELEMENT                                                                                      | ERLÄUTERUNG                                                                                                                                                                                                                                                                                                                                                                                                                                                                                                                                                                                                                               | SEITE |
|--------------------------------------------------------------------------------------------------|-------------------------------------------------------------------------------------------------------------------------------------------------------------------------------------------------------------------------------------------------------------------------------------------------------------------------------------------------------------------------------------------------------------------------------------------------------------------------------------------------------------------------------------------------------------------------------------------------------------------------------------------|-------|
| EN 23 Freisetzung von Chemikalien, Ölen, Kraftstoffen                                            | Die Freisetzung von Kraftstoffen erfolgt als Verbrennungsprodukte CO <sub>2</sub> , Wasser und Rußpartikel. Öle werden außer in geringem Maße über die Abgase nicht freigesetzt. Die bei den Produktions- und Konfektionierungsprozessen verwendeten Hilfsstoffe verbleiben auf dem Produkt, im festen Rückstand und im Abwasser oder werden bei der Produkttrocknung thermisch zersetzt. Aufgrund der geringen eingesetzten Mengen verbleiben diese jedoch nur im ppm-Bereich in den jeweiligen Strömen. Insofern entspricht die eingesetzte Menge an den entsprechenden Hilfsstoffen (83.900 t) näherungsweise der freigesetzten Menge. |       |
| <b>Produkte und Dienstleistungen</b>                                                             |                                                                                                                                                                                                                                                                                                                                                                                                                                                                                                                                                                                                                                           |       |
| EN 26 Initiativen, um umweltrelevante Auswirkungen von Produkten und Dienstleistungen zu mildern | Produktverantwortung                                                                                                                                                                                                                                                                                                                                                                                                                                                                                                                                                                                                                      | 68    |
| EN 27 Am Ende ihres Produktlebens in den Kreislauf rückführbare Produkte                         | Unsere Düngemittel, Pflanzenpflege- und Salzprodukte werden in der Agrarwirtschaft, der Industrie und in privaten Haushalten eingesetzt und verbraucht.                                                                                                                                                                                                                                                                                                                                                                                                                                                                                   |       |
| <b>Compliance</b>                                                                                |                                                                                                                                                                                                                                                                                                                                                                                                                                                                                                                                                                                                                                           |       |
| EN 28 Fälle von Strafzahlungen für Verstöße gegen Umweltrecht                                    | Es liegen keine Fälle vor.                                                                                                                                                                                                                                                                                                                                                                                                                                                                                                                                                                                                                |       |
| <b>Übersicht (add)</b>                                                                           |                                                                                                                                                                                                                                                                                                                                                                                                                                                                                                                                                                                                                                           |       |
| EN 30 Investitionen in den Umweltschutz und Betriebskosten für den Umweltschutz nach Art         | Investitionen und Betriebskosten                                                                                                                                                                                                                                                                                                                                                                                                                                                                                                                                                                                                          | 99    |
| <b>Gesellschaftliche/soziale Leistungsindikatoren</b>                                            |                                                                                                                                                                                                                                                                                                                                                                                                                                                                                                                                                                                                                                           |       |
| <b>Arbeitspraxis und Arbeitsqualität</b>                                                         |                                                                                                                                                                                                                                                                                                                                                                                                                                                                                                                                                                                                                                           |       |
| <b>Beschäftigung</b>                                                                             |                                                                                                                                                                                                                                                                                                                                                                                                                                                                                                                                                                                                                                           |       |
| LA 1 Belegschaft nach Struktur und Region                                                        | Unsere Mitarbeiter                                                                                                                                                                                                                                                                                                                                                                                                                                                                                                                                                                                                                        | 108   |
| LA 2 Fluktuation nach Altersgruppen, Geschlecht und Region                                       | Unsere Mitarbeiter                                                                                                                                                                                                                                                                                                                                                                                                                                                                                                                                                                                                                        | 108   |
| <b>Arbeitnehmer/Management-Beziehungen</b>                                                       |                                                                                                                                                                                                                                                                                                                                                                                                                                                                                                                                                                                                                                           |       |
| LA 4 Prozentsatz der durch Gewerkschaften vertretenen Angestellten                               | Mitbestimmung                                                                                                                                                                                                                                                                                                                                                                                                                                                                                                                                                                                                                             | 122   |



| GRI-ELEMENT                              | ERLÄUTERUNG                                                                                                            | SEITE                                                                                                                                                                                                                                                                                                                                                                             |
|------------------------------------------|------------------------------------------------------------------------------------------------------------------------|-----------------------------------------------------------------------------------------------------------------------------------------------------------------------------------------------------------------------------------------------------------------------------------------------------------------------------------------------------------------------------------|
| LA 5                                     | Kündigungsfristen, Konsultations- und Verhandlungsverfahren                                                            | K+S richtet sich streng nach den geltenden gesetzlichen Bestimmungen, die sich aus dem Betriebsverfassungsgesetz ergeben. Die Führungskräfte werden durch den Beratungskreis Führungskräfte (BkF), der dem Sprecherausschuss entspricht, vertreten. Darüber hinaus werden die Mitarbeiter durch Publikationen und auf Betriebsversammlungen informiert. Siehe auch: Mitbestimmung |
| <b>Arbeitssicherheit und Gesundheit</b>  |                                                                                                                        |                                                                                                                                                                                                                                                                                                                                                                                   |
| LA 7                                     | Kennzahlen zu Verletzungen, arbeitsbedingten Erkrankungen, verlorenen Arbeitstagen und Abwesenheit nach Regionen       | Betriebsunfälle 113<br>Arbeitsmedizinische Vorsorge 111                                                                                                                                                                                                                                                                                                                           |
| LA 8                                     | Beratung und Vorsorge für Angestellte und deren Familien bei schwerwiegenden Krankheiten                               | Keine Angaben                                                                                                                                                                                                                                                                                                                                                                     |
| <b>Weiterbildung</b>                     |                                                                                                                        |                                                                                                                                                                                                                                                                                                                                                                                   |
| LA 10                                    | Durchschnittliche Anzahl von Weiterbildungsstunden pro Mitarbeiter und Mitarbeiterkategorie pro Jahr                   | Breites Weiterbildungsangebot 121                                                                                                                                                                                                                                                                                                                                                 |
| <b>Gleichstellung/Gleichberechtigung</b> |                                                                                                                        |                                                                                                                                                                                                                                                                                                                                                                                   |
| LA 13                                    | Zusammensetzung von Vorstand / Aufsichtsrat/oberem Management und der Mitarbeiter nach Geschlecht, Alter, Minderheiten | Der Aufsichtsrat besteht aus 16 Mitgliedern, darunter eine Frau, und ist gemäß dem deutschen Mitbestimmungsgesetz zu gleichen Teilen mit Aktionärs- und Arbeitnehmervertretern besetzt. Der Vorstand besteht aus fünf Mitgliedern. Siehe auch: Unsere Mitarbeiter 108                                                                                                             |
| LA 14                                    | Verhältnis der Gehälter von männlichen Arbeitnehmern zu denen von weiblichen Arbeitnehmern nach Mitarbeiterkategorien  | Bei gleichen Tätigkeiten wird entsprechend den tarifvertraglichen Regelungen gleiches Entgelt bezahlt.                                                                                                                                                                                                                                                                            |
| <b>Menschenrechte</b>                    |                                                                                                                        |                                                                                                                                                                                                                                                                                                                                                                                   |
| <b>Investitions- und Vorsorgepraxis</b>  |                                                                                                                        |                                                                                                                                                                                                                                                                                                                                                                                   |
| HR 1                                     | Beachtung der Menschenrechte bei Investitionen                                                                         | Verhaltenskodex<br>www.k-plus-s.com/de/vision-und-werte/verhaltenkodex.html                                                                                                                                                                                                                                                                                                       |
| HR 2                                     | Einhaltung der Menschenrechte bei Zulieferern und Vertragsnehmern                                                      | Lieferkette 123<br>Verhaltenskodex<br>www.k-plus-s.com/de/vision-und-werte/grundwerte.html                                                                                                                                                                                                                                                                                        |
| <b>Antidiskriminierung</b>               |                                                                                                                        |                                                                                                                                                                                                                                                                                                                                                                                   |
| HR 4                                     | Diskriminierende Vorfälle und erfolgte Maßnahmen                                                                       | Compliance 12<br>Beschwerdestellen AGG 116                                                                                                                                                                                                                                                                                                                                        |

| GRI-ELEMENT                  | ERLÄUTERUNG                                                                                                         | SEITE                                                                             |
|------------------------------|---------------------------------------------------------------------------------------------------------------------|-----------------------------------------------------------------------------------|
| <b>Gewerkschaftsfreiheit</b> |                                                                                                                     |                                                                                   |
| HR 5                         | Standorte, an denen die Gewerkschaftsfreiheit gefährdet ist                                                         | Mitbestimmung 122                                                                 |
| <b>Kinderarbeit</b>          |                                                                                                                     |                                                                                   |
| HR 6                         | Standorte, an denen die Gefahr von Kinderarbeit besteht, und ergriffene Gegenmaßnahmen                              | Verhaltenskodex<br>www.k-plus-s.com/de/vision-und-werte/verhaltenkodex.html       |
| HR 7                         | Standorte, an denen die Gefahr von Zwangsarbeit besteht, und ergriffene Gegenmaßnahmen                              | Verhaltenskodex<br>www.k-plus-s.com/de/vision-und-werte/verhaltenkodex.html       |
| <b>Gesellschaft</b>          |                                                                                                                     |                                                                                   |
| <b>Gemeinschaft</b>          |                                                                                                                     |                                                                                   |
| SO 1                         | Programme, um Einflüsse von Projekten/Entscheidungen auf die Gemeinschaft/Gesellschaft einzuschätzen und zu managen | Verhaltenskodex<br>www.k-plus-s.com/de/about/grundwerte/                          |
| <b>Korruption</b>            |                                                                                                                     |                                                                                   |
| SO 2                         | Geschäftsbereiche, die auf Risiken bezüglich Korruption überprüft worden sind                                       | Verhaltenskodex<br>www.k-plus-s.com/de/about/grundwerte/                          |
| SO 3                         | Prozentsatz der Belegschaft, die in der Anti-Korruptionspolitik geschult ist                                        | Compliance 12                                                                     |
| SO 4                         | Maßnahmen, die in Korruptionsfällen ergriffen worden sind                                                           | Compliance 12                                                                     |
| <b>Öffentliche Ordnung</b>   |                                                                                                                     |                                                                                   |
| SO 5                         | Teilnahme an der Entwicklung der öffentlichen Ordnung und Lobbying                                                  | Stakeholderdialoge<br>www.k-plus-s.com/de/nachhaltigkeit/mitgliedschaften.html 14 |
| <b>Fairer Wettbewerb</b>     |                                                                                                                     |                                                                                   |
| SO 7                         | Eingaben gegen unfairen Wettbewerb und Monopolbildung                                                               | Es liegen keine Fälle vor.                                                        |
| <b>Compliance</b>            |                                                                                                                     |                                                                                   |
| SO 8                         | Strafzahlungen und Sanktionen für den Verstoß gegen Gesetze und Richtlinien                                         | Es liegen keine Fälle vor.                                                        |

|      | GRI-ELEMENT                                                                                                                                      | ERLÄUTERUNG                | SEITE |
|------|--------------------------------------------------------------------------------------------------------------------------------------------------|----------------------------|-------|
|      | <b>Produktverantwortung</b>                                                                                                                      |                            |       |
|      | <b>Kundengesundheit und -sicherheit</b>                                                                                                          |                            |       |
| PR 1 | Untersuchung einzelner Produktlebensphasen bezüglich Auswirkungen auf Kundengesundheit und -sicherheit und Prozentsatz der untersuchten Produkte | Produktverantwortung       | 68    |
|      | <b>Produktinformationen und -labelling</b>                                                                                                       |                            |       |
| PR 3 | Produkte und Dienstleistungen, für die es rechtliche Informationsanforderungen gibt                                                              | Produktverantwortung       | 68    |
|      | <b>Marketing</b>                                                                                                                                 |                            |       |
| PR 6 | Grundsätze/Verfahren für die Ausrichtung der Marketingkommunikation, von Werbung und Sponsoring an gesetzlichen oder freiwilligen Richtlinien    | Spenden und Sponsoring     | 125   |
|      | <b>Compliance</b>                                                                                                                                |                            |       |
| PR 9 | Strafzahlungen für den Verstoß gegen Gesetze und Richtlinien in Zusammenhang mit Bereitstellung und Nutzung der Produkte                         | Es liegen keine Fälle vor. |       |

## GLOSSAR

|                     |                                                                                                                                                                                                                                                                                                                                                                                                                                                                      |                       |                                                                                                                                                                                                                                                                                                        |
|---------------------|----------------------------------------------------------------------------------------------------------------------------------------------------------------------------------------------------------------------------------------------------------------------------------------------------------------------------------------------------------------------------------------------------------------------------------------------------------------------|-----------------------|--------------------------------------------------------------------------------------------------------------------------------------------------------------------------------------------------------------------------------------------------------------------------------------------------------|
| <b>BULK BLENDER</b> | Betreiber von Mischdüngeranlagen.                                                                                                                                                                                                                                                                                                                                                                                                                                    | <b>FLOTATION</b>      | Produktionsverfahren, das Steinsalz und Kali bzw. Kieserit ohne Wärmezufuhr aus dem Rohsalz trennt. Das Grundprinzip des Verfahrens beruht darauf, dass in ein Rohsalzgemisch in einer gesättigten Salzlösung Luft eingeblasen wird, sodass die Wertstoffe aufschwimmen und abgeschöpft werden können. |
| <b>CARNALLIT</b>    | Doppelsalz aus Kaliumchlorid und Magnesiumchlorid, benannt nach Berghauptmann Rudolph von Carnall.                                                                                                                                                                                                                                                                                                                                                                   | <b>FREEFLOAT</b>      | Streubesitz. Anzahl der Aktien, die sich nicht im Eigentum von Großaktionären befinden, die mehr als 5 % der Aktien einer Gesellschaft besitzen (Ausnahme: Aktien im Besitz von Investmentgesellschaften und Vermögensverwaltern).                                                                     |
| <b>DIVIDENDE</b>    | Teil des Bilanzgewinns, der an die Aktionäre ausgeschüttet wird.                                                                                                                                                                                                                                                                                                                                                                                                     | <b>GRI</b>            | „Global Reporting Initiative“, weltweit etablierter Standard für die Nachhaltigkeitsberichterstattung.                                                                                                                                                                                                 |
| <b>EBIT I</b>       | Das operative Ergebnis (EBIT I) beinhaltet das realisierte Sicherungsergebnis der jeweiligen Berichtsperiode aus den zur Sicherung künftiger Zahlungspositionen (im Wesentlichen Umsätze in US-Dollar) bzw. künftiger Translationsrisiken eingesetzten operativen Derivaten.                                                                                                                                                                                         | <b>HEISSVERLÖSUNG</b> | Produktionsverfahren, das auf temperaturabhängigem Löseverhalten basiert. Während sich Steinsalz in Wasser unabhängig von dessen Temperatur gleichermaßen gut löst, steigt die Löslichkeit von Kaliumchlorid mit der Temperatur.                                                                       |
| <b>EBIT II</b>      | Nach IFRS werden die Marktwertveränderungen aus Sicherungsgeschäften in der Gewinn- und Verlustrechnung ausgewiesen. Das EBIT II beinhaltet sämtliche Ergebnisse aus operativen Sicherungsgeschäften, d.h. sowohl stichtagsbedingte Bewertungseffekte als auch Ergebnisse aus realisierten operativen Sicherungsderivaten.                                                                                                                                           | <b>IFRS</b>           | „International Financial Reporting Standard“, ein Standard für die Rechnungslegung von Unternehmen, der die Vergleichbarkeit der Abschlüsse kapitalmarktorientierter Unternehmen weltweit erleichtert.                                                                                                 |
| <b>ELEKTROLYSE</b>  | Zersetzen einer gelösten oder geschmolzenen Verbindung mithilfe des elektrischen Stroms.                                                                                                                                                                                                                                                                                                                                                                             | <b>K<sub>2</sub>O</b> | (Kaliumoxid) ist eine chemische Recheneinheit zum schnellen Vergleich des Kaliumgehalts von Düngemitteln, in denen Kalium in verschiedenen Bindungsformen vorliegt, beispielsweise als Kaliumchlorid, Kaliumsulfat oder Kaliumnitrat.                                                                  |
| <b>ESTA®</b>        | Ein trockenes Aufbereitungsverfahren, bei dem die einzelnen Elemente des Rohsalzes unterschiedlich aufgeladen werden und anschließend mit Hilfe eines Spannungsfelds in Natriumchlorid auf der einen sowie Kaliumchlorid und Kieserit auf der anderen Seite getrennt werden. Im Vergleich zu den klassischen, nassen Aufbereitungsverfahren ist es deutlich günstiger im Energieverbrauch und der Anfall von flüssigen Produktionsrückständen ist deutlich geringer. | <b>KIESERIT</b>       | Mineralischer Bestandteil des Rohsalzes mit den wasserlöslichen Mineralien Magnesium und Schwefel.                                                                                                                                                                                                     |
| <b>FERTIGATION</b>  | Düngung über das Bewässerungssystem (Nährstoffaufnahme über die Wurzeln).                                                                                                                                                                                                                                                                                                                                                                                            |                       |                                                                                                                                                                                                                                                                                                        |

|                                      |                                                                                                                                                                                                                         |                   |                                                                                                                                                                                                                                                                       |
|--------------------------------------|-------------------------------------------------------------------------------------------------------------------------------------------------------------------------------------------------------------------------|-------------------|-----------------------------------------------------------------------------------------------------------------------------------------------------------------------------------------------------------------------------------------------------------------------|
| <b>KOHLENDIOXID (CO<sub>2</sub>)</b> | Chemische Verbindung aus Kohlenstoff und Sauerstoff. Es entsteht bei der Verbrennung von kohlenstoffhaltigen Brennstoffen bzw. fossilen Energieträgern.                                                                 | <b>STICKSTOFF</b> | Da Pflanzen den gasförmigen Stickstoff der Luft nicht unmittelbar nutzen können, wird dieser mit dem Haber-Bosch-Verfahren unter hohem Druck und mit hoher Temperatur mit Wasserstoff zu Ammoniak verbunden. Ammoniak ist ein Bestandteil von Stickstoffdüngemitteln. |
| <b>KRAFT-WÄRME-KOPPLUNG</b>          | KWK-Anlagen erzielen durch die gleichzeitige Abgabe von Strom und Wärme einen sehr viel höheren Nutzungsgrad als herkömmliche Wärmekraftwerke.                                                                          |                   |                                                                                                                                                                                                                                                                       |
| <b>KVP</b>                           | Kontinuierlicher Verbesserungsprozess.                                                                                                                                                                                  | <b>TORF</b>       | Ein organischer Stoff, der in Mooren entsteht. Er bildet sich aus nicht oder nur unvollständig zersetzter pflanzlicher Substanz. Torf wird unter anderem in der Blumenerdenproduktion eingesetzt.                                                                     |
| <b>NITRIFIKATIONS-INHIBITOR</b>      | Ammonium-Stabilisator, der die Umwandlung von Ammoniumstickstoff zu auswaschungsgefährdetem Nitratstickstoff verzögert.                                                                                                 | <b>VERSENKUNG</b> | Verfahren, um Abwässer im Plattendolomit zu entsorgen.                                                                                                                                                                                                                |
| <b>PLATTENDOLOMIT</b>                | Im Zechstein gebildete poröse, aufnahmefähige Kalksteinschicht in gut 500 Metern Tiefe.                                                                                                                                 |                   |                                                                                                                                                                                                                                                                       |
| <b>SALZLAGERSTÄTTE</b>               | Natürliches Vorkommen von Salzen, bildet sich vor allem durch Verdunstung von Meerwasser, enthält meist verschiedene Salze.                                                                                             |                   |                                                                                                                                                                                                                                                                       |
| <b>SIEDESALZ</b>                     | Die Herstellung von Siedesalz erfolgt durch Eindampfung gesättigter Sole, wobei das NaCl auskristallisiert.                                                                                                             |                   |                                                                                                                                                                                                                                                                       |
| <b>SOLE</b>                          | Wässrige Steinsalzlösung. Natürliche Sole wird durch Anbohrung unterirdischer Solevorkommen oder durch kontrollierte Bohrlochsolung gewonnen und auch durch Auflösen von bergmännisch gewonnenem Steinsalz hergestellt. |                   |                                                                                                                                                                                                                                                                       |
| <b>STEINSALZ</b>                     | Natriumchlorid, Kochsalz (NaCl).                                                                                                                                                                                        |                   |                                                                                                                                                                                                                                                                       |

## ABBILDUNGSVERZEICHNIS

### 1 NACHHALTIGE UNTERNEHMENSFÜHRUNG

|            |                                                                         |    |
|------------|-------------------------------------------------------------------------|----|
| ABB: 1.1.1 | Vision-Mission-Strategie                                                | 5  |
| ABB: 1.2.1 | Megatrends in ihrer Bedeutung für K+S                                   | 6  |
| ABB: 1.2.2 | Nachhaltigkeitsbezogene Managementthemen in ihrer Bedeutung für K+S     | 9  |
| ABB: 1.2.3 | Spezifische Nachhaltigkeitsherausforderungen in ihrer Bedeutung für K+S | 11 |
| ABB: 1.4.1 | Organisation Arbeitssicherheit, Gesundheit, Umweltschutz                | 13 |

### 2 DIE K+S GRUPPE

|            |                                                         |    |
|------------|---------------------------------------------------------|----|
| ABB: 2.1.1 | Anbieterstruktur am Weltkalimarkt                       | 53 |
| ABB: 2.1.2 | Kali- und Magnesiumprodukte: Umsatz nach Regionen       | 54 |
| ABB: 2.1.3 | Kali- und Magnesiumprodukte: Umsatz nach Produktgruppen | 54 |
| ABB: 2.1.4 | Stickstoffdüngemittel: Umsatz nach Regionen             | 56 |
| ABB: 2.1.5 | Stickstoffdüngemittel: Umsatz nach Bereichen            | 56 |
| ABB: 2.2.1 | Umsetzung unserer Salzstrategie                         | 59 |
| ABB: 2.2.2 | Die größten Salzanbieter weltweit                       | 59 |
| ABB: 2.2.3 | Salz: Umsatz nach Regionen                              | 61 |
| ABB: 2.2.4 | Salz: Umsatz nach Produktgruppen                        | 61 |
| ABB: 2.3.1 | Ergänzende Geschäftsbereiche: Umsatz nach Regionen      | 63 |
| ABB: 2.3.2 | Ergänzende Geschäftsbereiche: Umsatz nach Bereichen     | 63 |
| ABB: 2.4.1 | Unsere Standorte in Deutschland                         | 65 |
| ABB: 2.4.2 | Unsere Standorte in Europa                              | 66 |
| ABB: 2.4.3 | Unsere Standorte in Amerika und Asien                   | 67 |

### 3 PRODUKTVERANTWORTUNG

|            |                                                     |    |
|------------|-----------------------------------------------------|----|
| ABB: 3.3.1 | Unser Forschungsverbund                             | 71 |
| ABB: 3.4.1 | Feldversuche nach Ländern                           | 73 |
| ABB: 3.5.1 | Stete Reduzierung der ausgebrachten Streusalzmengen | 76 |
| ABB: 3.6.1 | Schematische Darstellung einer Untertage-Deponie    | 78 |

### 4 ÖKONOMIE

|            |                                                                                |    |
|------------|--------------------------------------------------------------------------------|----|
| ABB: 4.2.1 | Umsatz nach Geschäftsbereichen                                                 | 82 |
| ABB: 4.2.2 | Umsatz nach Regionen                                                           | 82 |
| ABB: 4.2.3 | Kennzahlen K+S GRUPPE                                                          | 84 |
| ABB: 4.3.1 | Wertentwicklung der K+S-Aktie im Vergleich zu DAX, DJ STOXX 600 und MSCI WORLD | 85 |
| ABB: 4.3.2 | Aktionärsstruktur per 28.02.2011                                               | 86 |

### 5 ÖKOLOGIE

|            |                                             |     |
|------------|---------------------------------------------|-----|
| ABB: 5.2.1 | Entsorgung fester/lüssiger Rückstände       | 89  |
| ABB: 5.2.2 | Die Weser erreicht nahezu Süßwasserqualität | 91  |
| ABB: 5.3.1 | Energieeffizienz im Vergleich               | 95  |
| ABB: 5.5.1 | Spezifischer Energieverbrauch               | 101 |
| ABB: 5.5.2 | Spezifischer Kohlendioxidausstoß            | 101 |
| ABB: 5.5.3 | Spezifischer Wasserverbrauch                | 102 |
| ABB: 5.5.4 | Salzwasserversenkung und -einleitung        | 102 |
| ABB: 5.5.5 | Spezifische Abfallmengen                    | 103 |
| ABB: 5.6.1 | Umweltsachbilanz: Spezifische Daten         | 104 |
| ABB: 5.6.2 | Umweltsachbilanz: Absolute Daten            | 104 |

### 6 SOZIALE VERANTWORTUNG

|             |                                                          |     |
|-------------|----------------------------------------------------------|-----|
| ABB: 6.2.1  | Belegschaftsstruktur                                     | 109 |
| ABB: 6.2.2  | Altersstruktur                                           | 109 |
| ABB: 6.4.1  | Arbeitsunfälle je 1 Mio. geleisteter Arbeitsstunden      | 113 |
| ABB: 6.9.1  | Anzahl absolvierter Weiterbildungsmaßnahmen              | 120 |
| ABB: 6.9.2  | Teilnahmen an Weiterbildungsmaßnahmen nach Altersgruppen | 120 |
| ABB: 6.10.1 | Vorschläge und Ideen – Entwicklung bis 2010              | 121 |
| ABB: 6.12.1 | Transportmengen nach Verkehrsträgern                     | 124 |



**TABELLENVERZEICHNIS****1 NACHHALTIGE UNTERNEHMENSFÜHRUNG**

|            |                        |        |
|------------|------------------------|--------|
| TAB: 1.2.2 | Matrix Handlungsfelder | 7      |
| TAB: 1.6.1 | Unsere Ziele           | 16, 17 |

**2 DIE K+S GRUPPE**

|            |                                                    |    |
|------------|----------------------------------------------------|----|
| TAB: 2.1.1 | Hauptprodukte und Anwendungsbereiche K+S KALI GMBH | 55 |
| TAB: 2.1.2 | Hauptprodukte und Anwendungsbereiche K+S NITROGEN  | 57 |
| TAB: 2.1.3 | Hauptprodukte und Anwendungsbereiche COMPO         | 58 |
| TAB: 2.2.1 | Hauptprodukte und Anwendungsbereiche ESCO          | 62 |
| TAB: 2.2.2 | Hauptprodukte und Anwendungsbereiche SPL           | 62 |
| TAB: 2.2.3 | Hauptprodukte und Anwendungsbereiche MORTON SALT   | 62 |

**4 ÖKONOMIE**

|            |                          |    |
|------------|--------------------------|----|
| TAB: 4.2.1 | Wertschöpfung Ermittlung | 83 |
| TAB: 4.2.2 | Wertschöpfung Verteilung | 83 |
| TAB: 4.2.3 | Kennzahlen K+S GRUPPE    | 84 |

**5 ÖKOLOGIE**

|            |                                                        |     |
|------------|--------------------------------------------------------|-----|
| TAB: 5.3.1 | Selbstverpflichtung der Kaliindustrie (Basisjahr 1990) | 95  |
| TAB: 5.5.1 | Investitionen in den Umweltschutz                      | 100 |
| TAB: 5.5.2 | Betriebskosten für den Umweltschutz                    | 100 |

**6 SOZIALE VERANTWORTUNG**

|             |                                          |     |
|-------------|------------------------------------------|-----|
| TAB: 6.2.1  | Mitarbeiter nach Geschäftsbereichen      | 108 |
| TAB: 6.2.2  | Mitarbeiter nach Ländern                 | 110 |
| TAB: 6.8.1  | Ausbildungsquote K+S Inland              | 118 |
| TAB: 6.12.1 | Transportunfälle nach Geschäftsbereichen | 124 |
| TAB: 7.0.1  | Termine                                  | 138 |

**STICHWORTVERZEICHNIS****A**

|                   |        |
|-------------------|--------|
| AGG               | 165    |
| Aktie             | 85     |
| Aktionärsstruktur | 86     |
| Altersvorsorge    | 116    |
| An-Institut       | 71     |
| Arbeitssicherheit | 112    |
| Arbeitsunfälle    | 113    |
| Auftausalz        | 61, 71 |
| Ausbildung        | 118    |

**B**

|                      |     |
|----------------------|-----|
| Berufskrankheiten    | 111 |
| Bevölkerungswachstum | 8   |
| Biodiversität        | 97  |

**C**

|                             |    |
|-----------------------------|----|
| Carbon Disclosure Project   | 94 |
| CATSAN                      | 64 |
| CFK                         | 64 |
| CO <sub>2</sub> -Emissionen | 94 |
| Compliance                  | 12 |
| COMPO                       | 57 |

**D**

|                       |        |
|-----------------------|--------|
| Demografischer Wandel | 107    |
| Dividende             | 87     |
| Düngemittel           | 53, 72 |

**E**

|                          |        |
|--------------------------|--------|
| EBIT I                   | 82     |
| EBIT II                  | 83     |
| Emerging Markets         | 6      |
| Emissionshandel          | 96     |
| Energieeffizienz         | 94     |
| Entsorgung und Recycling | 63, 77 |
| ESCO                     | 60     |
| ESTA-Verfahren           | 89     |

|                                  |     |                                    |     |                             |        |                  |     |
|----------------------------------|-----|------------------------------------|-----|-----------------------------|--------|------------------|-----|
| <b>F</b>                         |     | <b>K+S KALI GMBH</b>               |     | <b>Q</b>                    |        | <b>W</b>         |     |
| Feldversuche                     | 72  | K+S NITROGEN GMBH                  | 56  | Qualitätsmanagement         | 14     | Wassermangel     | 8   |
| Fernleitung                      | 92  | KTG                                | 64  |                             |        | Weiterbildung    | 120 |
| Fertigation                      | 74  | Kundenzufriedenheit                | 69  | <b>R</b>                    |        | Welternährung    | 8   |
| Flüssigdüngung                   | 74  | Kurzarbeit                         | 114 | REACH                       | 70     | Wertschöpfung    | 83  |
| Forschung                        | 70  | KVP                                | 121 | Recycling                   | 63, 77 | WINDSOR SALT     | 60  |
| Führungsleitlinien               | 116 |                                    |     | Rohstoffversorgung          | 10     |                  |     |
|                                  |     | <b>L</b>                           |     | Rückstandshalden            | 97     | <b>Z</b>         |     |
| <b>G</b>                         |     | Lieferkette                        | 123 | Runder Tisch                | 90, 94 | Zertifizierungen | 69  |
| Gesamtstrategie zur Verminderung |     | Logistik                           | 64  |                             |        | Ziele            | 16  |
| von Umweltbelastungen            | 90  |                                    |     | <b>S</b>                    |        |                  |     |
| Gesundheitsmanagement            | 110 | <b>M</b>                           |     | Salz                        | 59, 74 |                  |     |
| Gewässerschutz                   | 89  | Maßnahmenpaket                     | 90  | Salzhaltige Abwässer        | 89     |                  |     |
| Gewerbesalz                      | 60  | Materialitätsanalyse               | 6   | Solarsalzgewinnung          | 97     |                  |     |
| GlücksKinder                     | 115 | Meersalzgewinnung                  | 92  | Speisesalz                  | 60, 74 |                  |     |
| GRI-Richtlinien                  | 128 | Megatrends                         | 6   | Spenden                     | 125    |                  |     |
| Grundwerte                       | 5   | Mehrnährstoffdünger                | 56  | SPL                         | 60     |                  |     |
|                                  |     | Mission                            | 5   | Sponsoring                  | 125    |                  |     |
| <b>H</b>                         |     | Mitarbeiter                        | 108 | Stakeholder                 | 14     |                  |     |
| Handlungsfelder                  | 6   | Mitbestimmung                      | 122 | Standorte                   | 65     |                  |     |
| Hochreine Salze                  | 55  | MORTON SALT                        | 60  | Stickstoffdüngemittel       | 56     |                  |     |
|                                  |     |                                    |     |                             |        |                  |     |
| <b>I</b>                         |     | <b>N</b>                           |     | <b>T</b>                    |        |                  |     |
| Industrieprodukte                | 54  | Nachhaltigkeitsstrategie           | 12  | Transportvolumen            | 124    |                  |     |
| Industriesalz                    | 61  | Natriumchlorid                     | 74  | Transportunfälle            | 124    |                  |     |
| Integriertes Maßnahmenkonzept    | 90  | Naturschutz                        | 97  |                             |        |                  |     |
| Investitionen                    | 84  |                                    |     | <b>U</b>                    |        |                  |     |
|                                  |     | <b>O</b>                           |     | Umbrella Girl               | 60     |                  |     |
| <b>K</b>                         |     | Öffentlich-Rechtliche Vereinbarung | 90  | Umsatz                      | 81     |                  |     |
| Kaliumchlorid                    | 54  |                                    |     | Umweltschutz                | 89     |                  |     |
| Kaliumsulfat                     | 54  | <b>P</b>                           |     |                             |        |                  |     |
| Kali- und Magnesiumprodukte      | 53  | Personalaufwand                    | 108 | <b>V</b>                    |        |                  |     |
| Kieserit                         | 54  | Pflanzenschutz                     | 58  | Vereinbarkeit Beruf/Familie | 115    |                  |     |
| Klimaschutz                      | 94  | POTASH ONE                         | 53  | Vergütungssysteme           | 116    |                  |     |
| Klimawandel                      | 8   | Product Stewardship                | 70  | Verhaltenskodex             | 5      |                  |     |
| Know-how-Transfer                | 9   | Produkte                           | 52  | Versenkung                  | 102    |                  |     |
| Konzernergebnis                  | 83  | Produktionsrückstände              | 89  | Vision                      | 5      |                  |     |
| Krankenquote                     | 109 |                                    |     | Vorstand                    | 2      |                  |     |
| K+S-Forschungsinstitut           | 70  |                                    |     |                             |        |                  |     |

## FINANZKALENDER

| TERMINE                                                 | TAB: 7.0.1        |
|---------------------------------------------------------|-------------------|
|                                                         | 2011/2012         |
| Hauptversammlung, Kassel                                | 11. Mai 2011      |
| Quartalsfinanzbericht zum 31. März 2011                 | 11. Mai 2011      |
| Dividendenausschüttung                                  | 12. Mai 2011      |
| Halbjahresfinanzbericht zum 30. Juni 2011               | 11. August 2011   |
| Quartalsfinanzbericht zum 30. September 2011            | 10. November 2011 |
| Bericht über den Geschäftsverlauf 2011                  | 15. März 2012     |
| Bilanzpresse- und Analystenkonferenz, Frankfurt am Main | 15. März 2012     |

## KONTAKT

### K+S Aktiengesellschaft

Bertha-von-Suttner-Str. 7  
34131 Kassel  
Tel.: 0561/9301-0  
Fax: 0561/9301-1753  
Internet: [www.k-plus-s.com](http://www.k-plus-s.com)

### Kommunikation

Tel.: 0561/9301-1262  
Fax: 0561/9301-1666  
E-Mail: [pr@k-plus-s.com](mailto:pr@k-plus-s.com)

### Investor Relations

Tel.: 0561/9301-1100  
Fax: 0561/9301-2425  
E-Mail: [investor-relations@k-plus-s.com](mailto:investor-relations@k-plus-s.com)

Dieser Bericht wurde am 10. März 2011 veröffentlicht.

Dieser Unternehmens-/Nachhaltigkeitsbericht ist auch in englischer Sprache erhältlich. Im Zweifelsfall ist die deutsche Version maßgeblich.

## IMPRESSUM

### Redaktion/Text

Katja Seeger  
Kommunikation  
Tel.: 0561/9301-1322  
Fax: 0561/9301-1666  
E-Mail: [katja.seeger@k-plus-s.com](mailto:katja.seeger@k-plus-s.com)

### Konzeption und Gestaltung

HEISTERS & PARTNER,  
Corporate & Brand Communication, Mainz

### Fotografie

K+S, Oscar van de Beek

### Lithografie

Recom GmbH & Co. KG, Stuttgart

### Druck

Eberl Print GmbH, Immenstadt

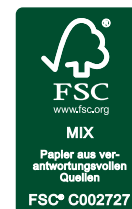

Mit dem FSC®-Warenzeichen werden Holzprodukte ausgezeichnet, die aus verantwortungsvoll bewirtschafteten Wäldern stammen, unabhängig zertifiziert nach den strengen Richtlinien des Forest Stewardship Council®.



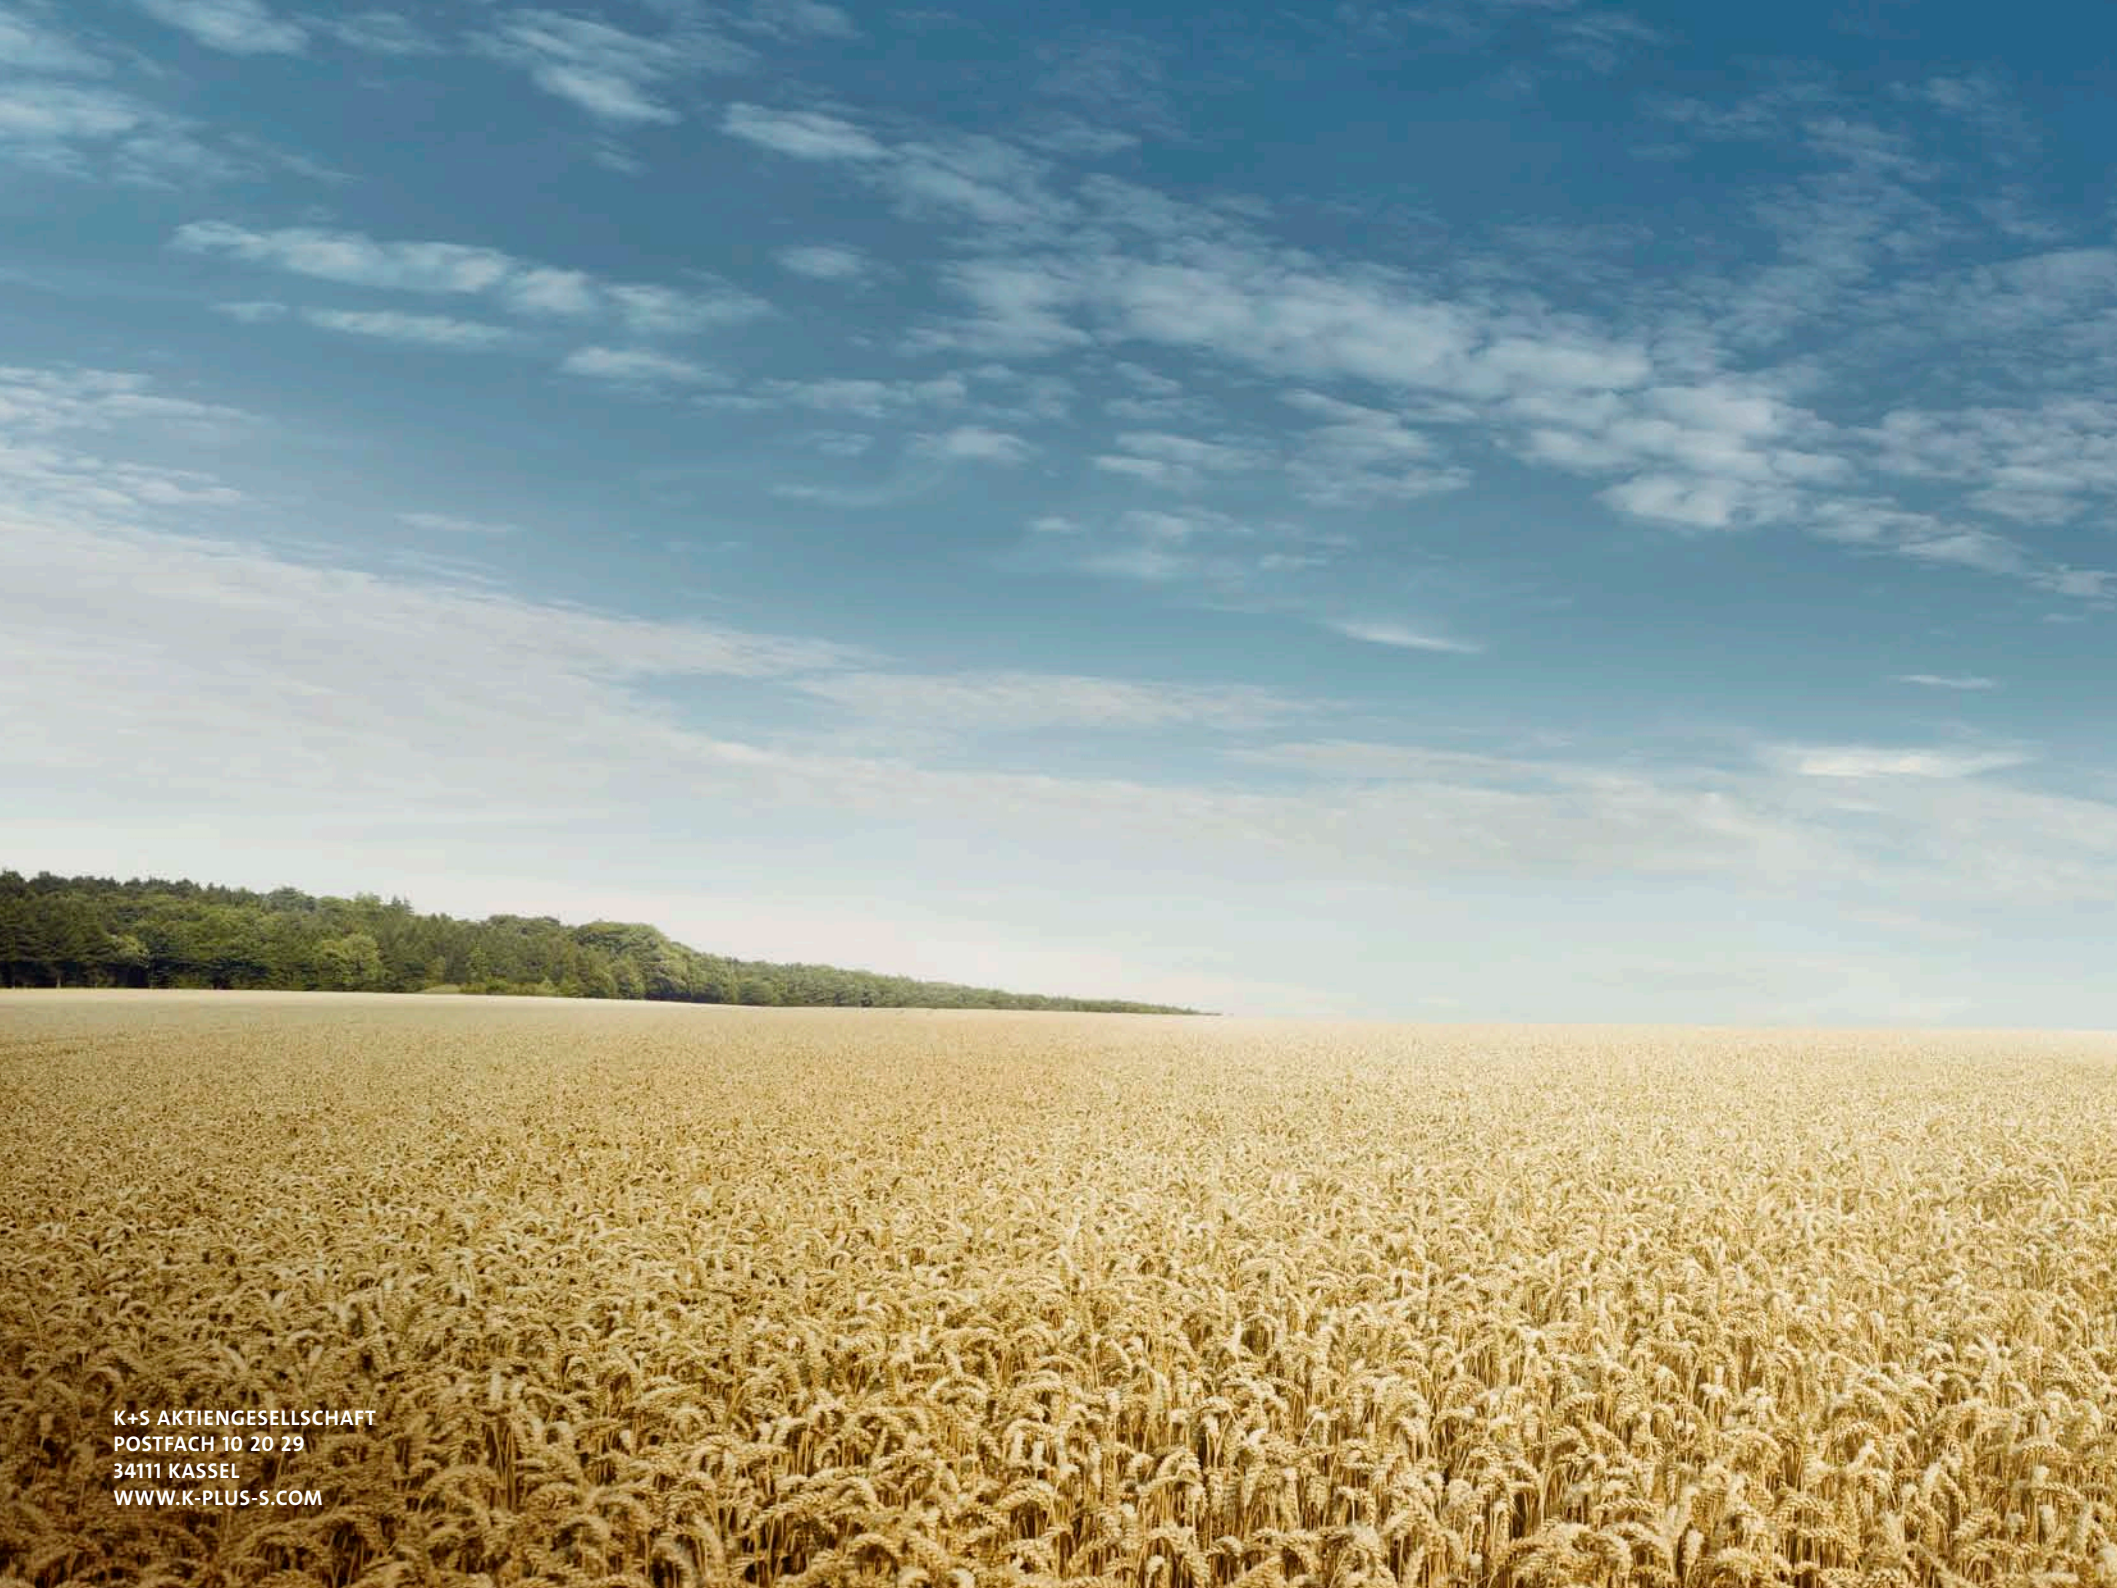

K+S AKTIENGESELLSCHAFT  
POSTFACH 10 20 29  
34111 KASSEL  
[WWW.K-PLUS-S.COM](http://WWW.K-PLUS-S.COM)
