# Supplementary material
Source: publisher site journal article supplement (https://www.degruyterbrill.com/publication/isbn/9783110432879/downloadAsset/9783110432879_Elektronischer_Anhang_2.zip)
Supplement: Supplementary file 67 [file K+S Grundwerte.pdf › Korpustexte/Korpustexte pdf/K+S/K+S Grundwerte.pdf]

# Grundwerte

Unsere Grundwerte geben den Rahmen für unser Verhalten und unsere Entscheidungen vor und sind Orientierung für unser unternehmerisches Handeln.

## Nachhaltiger Erfolg

Nachhaltiger Erfolg ist Ziel unserer Aktivitäten und Grundwert zugleich. Wir schaffen Werte für unsere Stakeholder und übernehmen dabei aktiv Verantwortung gegenüber Mensch, Gesellschaft und Natur. Wir nehmen Chancen wahr und gehen dabei mit Risiken sorgfältig um.

## Gesellschaftliche Verantwortung

Wir sind davon überzeugt, dass gesellschaftliche Verantwortung ein unverzichtbarer Faktor für den langfristigen Erfolg unseres Unternehmens ist. Wir respektieren und unterstützen die Einhaltung der international anerkannten Menschenrechte und lehnen jegliche Form von Zwangs- und Kinderarbeit ab. Wir respektieren die gewerkschaftliche Vereinigungsfreiheit und das Recht auf Tarifverhandlungen. Wir vergüten unsere Mitarbeiter marktgerecht und leistungsbezogen auf der Basis von Gehaltsstrukturen, die sich am wirtschaftlichen Erfolg orientieren.

## Respekt und Fairness im Umgang mit Geschäftspartnern und Mitarbeitern

Unseren Geschäftspartnern begegnen wir als faire Vertragspartner. Vorgesetzte und Mitarbeiter stehen sich aufgeschlossen gegenüber und schaffen eine Arbeitsatmosphäre, die einen offenen Gedankenaustausch und einen vertrauensvollen Umgang miteinander ermöglicht. Chancengleichheit und die Ablehnung jeglicher Form von Diskriminierung sind für uns selbstverständlich.

## Förderung der persönlichen und fachlichen Kompetenz unserer Mitarbeiter

Wir fördern die persönliche und fachliche Kompetenz unserer Mitarbeiter. Wir ermutigen unsere Mitarbeiter, ihre Kreativität für den gemeinsamen Erfolg des Unternehmens und seiner Stakeholder einzubringen.

## Transparenz

Wir suchen den aktiven Dialog mit unseren Partnern und unserem Umfeld. Unseren Mitarbeitern, den Aktionären, dem Kapitalmarkt und den Medien stellen wir regelmäßig umfassende, wahrheitsgetreue und verständliche Informationen zur Verfügung.

## Integrität

Wir handeln im Einklang mit den Gesetzen der Länder, in denen wir tätig sind. Wir achten die Regeln des freien Wettbewerbs. Korruption in jeder Form wird von uns nicht toleriert. Wir vermeiden Interessenkollisionen und schützen Firmeneigentum gegen jedweden Missbrauch.
