# Supplementary material
Source: publisher site journal article supplement (https://www.degruyterbrill.com/publication/isbn/9783110432879/downloadAsset/9783110432879_Elektronischer_Anhang_2.zip)
Supplement: Supplementary file 68 [file K+S Mission.pdf › Korpustexte/Korpustexte pdf/K+S/K+S Mission.pdf]

# Mission

Wir wollen auf der Basis unserer Grundwerte

- Rohstoffe fördern, veredeln und mit unseren Produkten und Leistungen Ernährung, Gesundheit sowie Lebensqualität verbessern
- In den Märkten führende Positionen einnehmen
- Für unsere Kunden der bevorzugte Partner sein
- Unsere Rohstoff- und Produktionsbasis weltweit stärken und weltweit ausbauen
- Durch die Entwicklung neuer Produkte und effizienterer Verfahren die Wertschöpfung weiter erhöhen
- Einen fairen Ausgleich von wirtschaftlichen, ökologischen und sozialen Belangen erreichen
- Für unsere Stakeholder nachhaltig Werte schaffen und Verantwortung in der Gesellschaft übernehmen
- Für Mitarbeiter aus aller Welt ein attraktiver Arbeitgeber sein

<http://www.k-plus-s.com/de/vision-und-werte/mission.html>
