# Supplementary material
Source: publisher site journal article supplement (https://www.degruyterbrill.com/publication/isbn/9783110432879/downloadAsset/9783110432879_Elektronischer_Anhang_2.zip)
Supplement: Supplementary file 69 [file K+S Vision und Werte.pdf › Korpustexte/Korpustexte pdf/K+S/K+S Vision und Werte.pdf]

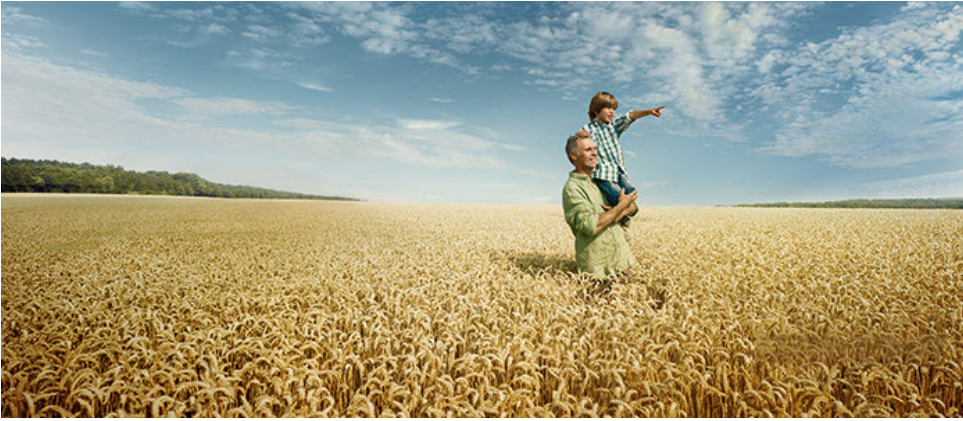

## Vision und Werte

**Unsere Vision und Mission stecken den Rahmen für unsere Geschäftstätigkeit und die strategische Ausrichtung der Gruppe ab und sollen unseren Mitarbeitern, Aktionären, Fremdkapitalgebern, Kunden, Lieferanten und der Öffentlichkeit die Grundlage für unser Denken und Handeln erläutern.**

Durch Akquisitionen im Düngemittel- und im Salzgeschäft hat sich K+S im vergangenen Jahrzehnt tiefgreifend verändert. Wir haben neue Märkte, Produkte und strategische Optionen hinzu gewonnen. Gleichzeitig haben andere Firmenkulturen und Denkweisen das Unternehmen bereichert. Eines allerdings zieht sich wie ein roter Faden durch unsere erfolgreiche Unternehmensgeschichte: Seit 125 Jahren fördern und veredeln wir Rohstoffe – unsere Wertschöpfungstiefe ist enorm. Auch zukünftig soll der Rohstoff- und rohstoffnahe Bereich die Basis unseres Wachstums sein. Dies haben wir als unsere Vision formuliert:

**Quelle für Wachstum und Leben durch Nährstoffe und Mineralien**
