# Supplementary material
Source: publisher site journal article supplement (https://www.degruyterbrill.com/publication/isbn/9783110432879/downloadAsset/9783110432879_Elektronischer_Anhang_2.zip)
Supplement: Supplementary file 70 [file Linde Der Linde Spirit.pdf › Korpustexte/Korpustexte pdf/Linde/Linde Der Linde Spirit.pdf]

# Der Linde Spirit

Unsere Unternehmenskultur verbindet uns.

Bei der Linde Group verbinden wir eine lange Tradition mit dem Streben nach ständiger Verbesserung, Innovation und Hochleistung. Unsere Vision ist es, der weltweit führende Gase- und Engineering Konzern zu sein, dessen Mitarbeiter höchste Wertschätzung genießen und die die Welt verändern. Neben unseren Werten und Grundsätzen sind Leistungsorientierung und Personalentwicklung tief in unserer Unternehmenskultur verankert. Bei Linde ist jeder Einzelne bestrebt, unsere gemeinsame Vision zu erreichen und die Werte und Grundsätze, die wir uns gesetzt haben, Tag für Tag zu leben. Dies gilt auch in Bezug auf die Beachtung unseres Verhaltenskodexes und Compliance zu jeder Zeit. Wir begegnen uns gegenseitig und unserer Umwelt mit Integrität und Respekt. Sicherheit und Nachhaltigkeit sind daher von höchster Priorität für uns, da wir weder Menschen noch Umwelt schaden und unserer Verantwortung als Unternehmen gerecht werden möchten.

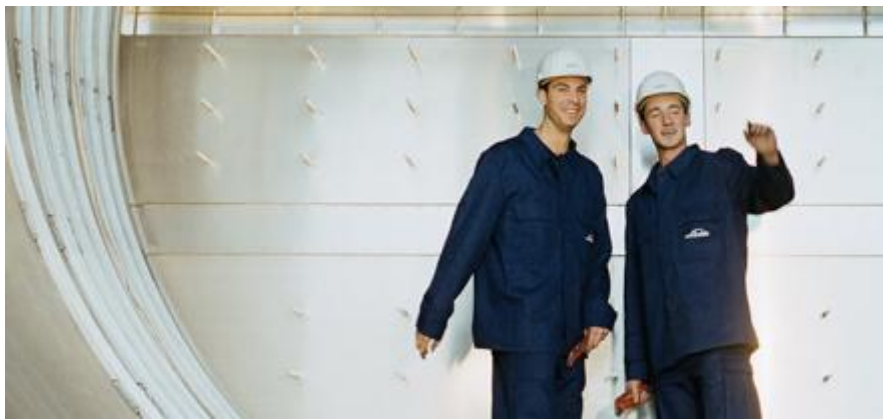

## Unsere Werte

|                                   |                                                               |
|-----------------------------------|---------------------------------------------------------------|
| <b>Passion to excel</b>           | Mit Leidenschaft Herausragendes leisten.                      |
| <b>Innovating for customers</b>   | Innovationen für unsere Kunden schaffen.                      |
| <b>Empowering people</b>          | Uns gegenseitig fördern und fordern, bestärken und vertrauen. |
| <b>Thriving through diversity</b> | Erfolg durch Vielfalt.                                        |

## Unsere Grundprinzipien

|                       |                                                                                                             |
|-----------------------|-------------------------------------------------------------------------------------------------------------|
| <b>Sicherheit</b>     | Wir möchten den Menschen nicht schaden.                                                                     |
| <b>Integrität</b>     | Wir handeln moralisch, ehrlich und fair.                                                                    |
| <b>Nachhaltigkeit</b> | Wir orientieren uns am heutigen Erfolg und erkennen auch unsere Verantwortung für künftige Generationen an. |
| <b>Respekt</b>        | Jeder Mensch sollte mit Respekt behandelt werden.                                                           |

[http://www.the-linde-group.com/de/about\\_the\\_linde\\_group/the\\_linde\\_spirit/index.html](http://www.the-linde-group.com/de/about_the_linde_group/the_linde_spirit/index.html)
