# Supplementary material
Source: publisher site journal article supplement (https://www.degruyterbrill.com/publication/isbn/9783110432879/downloadAsset/9783110432879_Elektronischer_Anhang_2.zip)
Supplement: Supplementary file 71 [file Linde GB 2010.pdf › Korpustexte/Korpustexte pdf/Linde/Linde GB 2010.pdf]

Das Linde Annual 2010.

# Stetig besser.

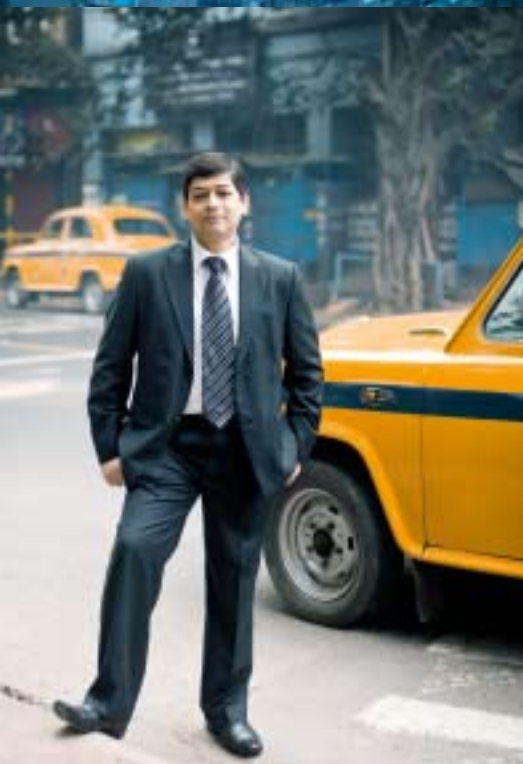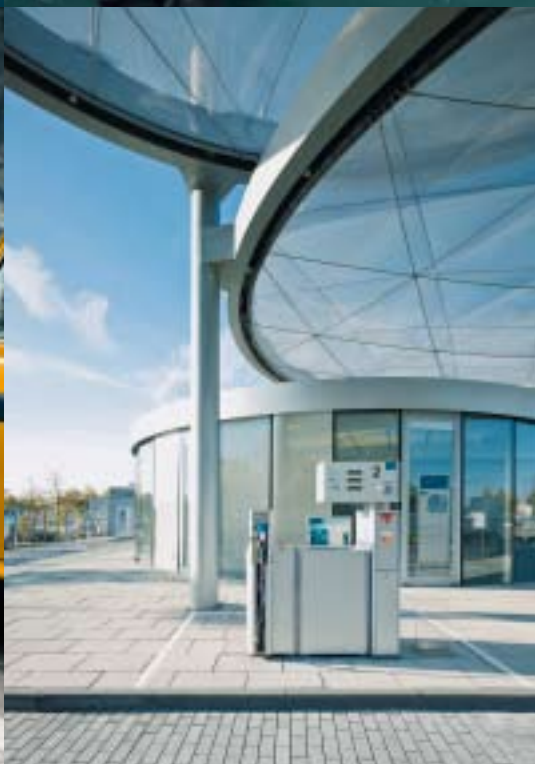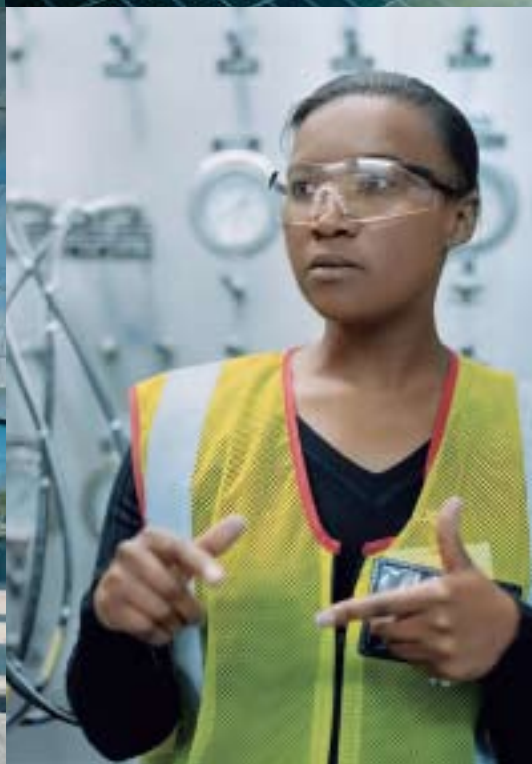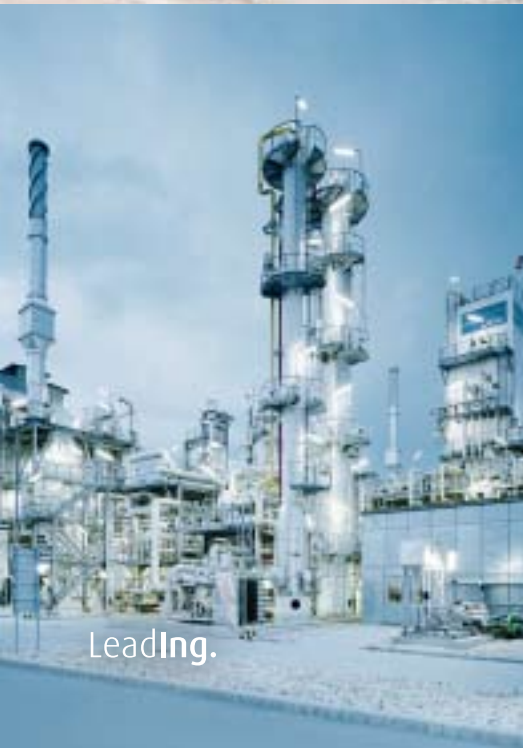

LeadIng.

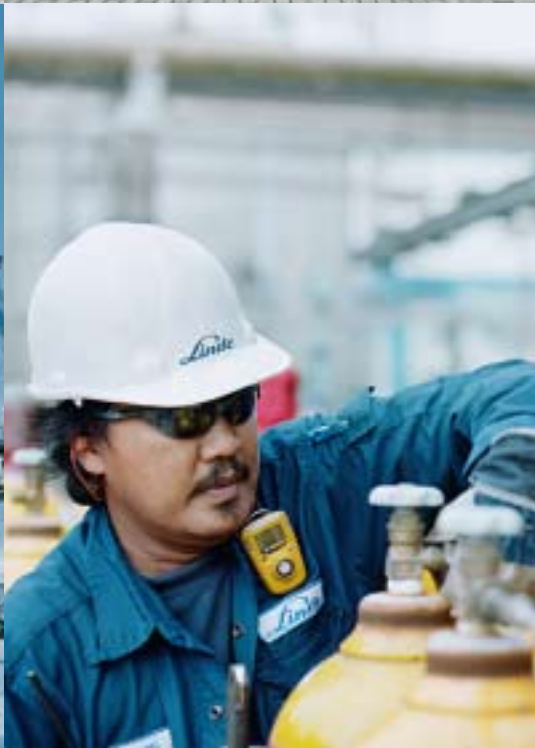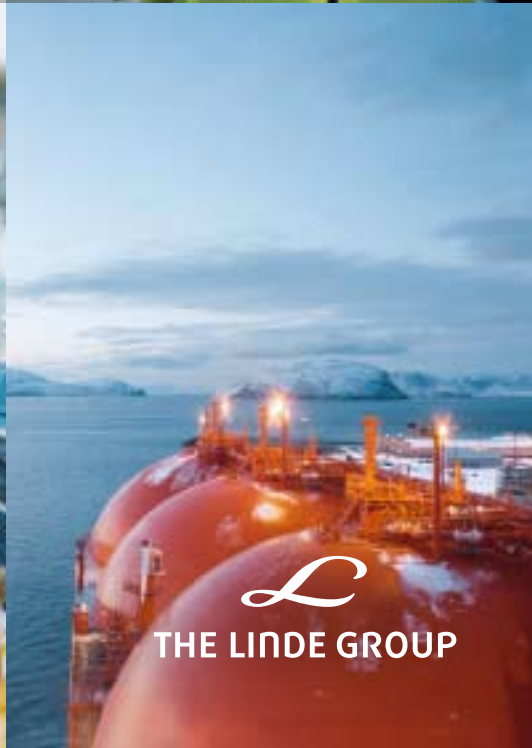

  
THE LINDE GROUP

## Die Linde Welt

Die Gases Division gliedert sich innerhalb der vier operativen Segmente Westeuropa, Amerika, Asien & Osteuropa sowie Südpazifik & Afrika in neun Regional Business Units (RBUs). Darüber hinaus umfasst die Gases Division die beiden Global Business Units (GBUs) Healthcare (Medizinische Gase) und Tonnage (On-site) sowie die

zwei Business Areas (BAs) Merchant & Packaged Gases (Flüssig- und Flaschengase) und Electronics (Elektronikgase).

Die Engineering Division ist mit ihren Produktbereichen Olefin-Anlagen, Erdgas-Anlagen, Luftzerlegungs-Anlagen sowie Wasserstoff- und Synthesegas-Anlagen weltweit tätig.

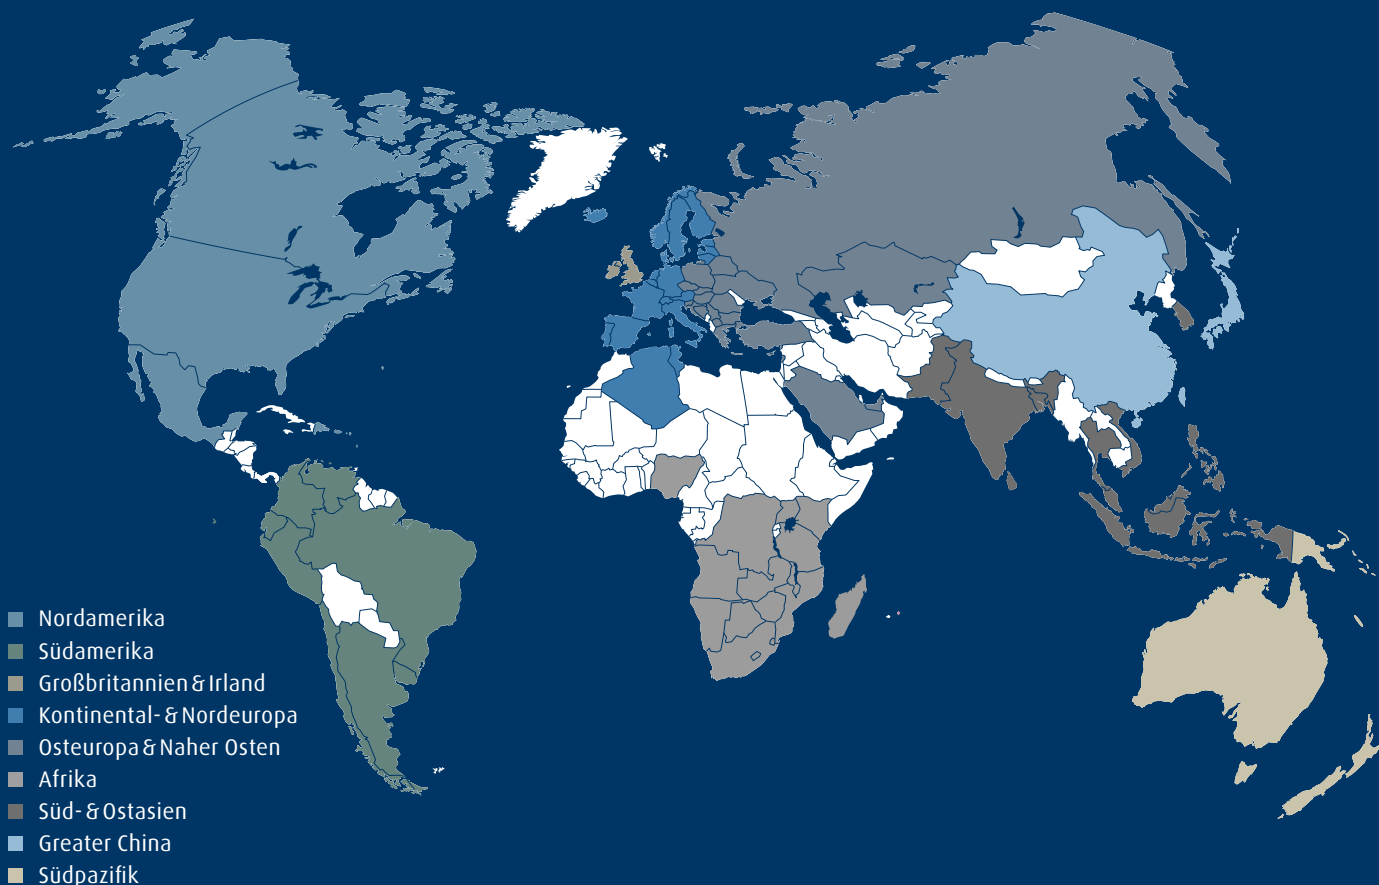

## Kundensegmente der Gases Division

Eine breite und ausgewogene Kundenbasis sorgt für Stabilität.

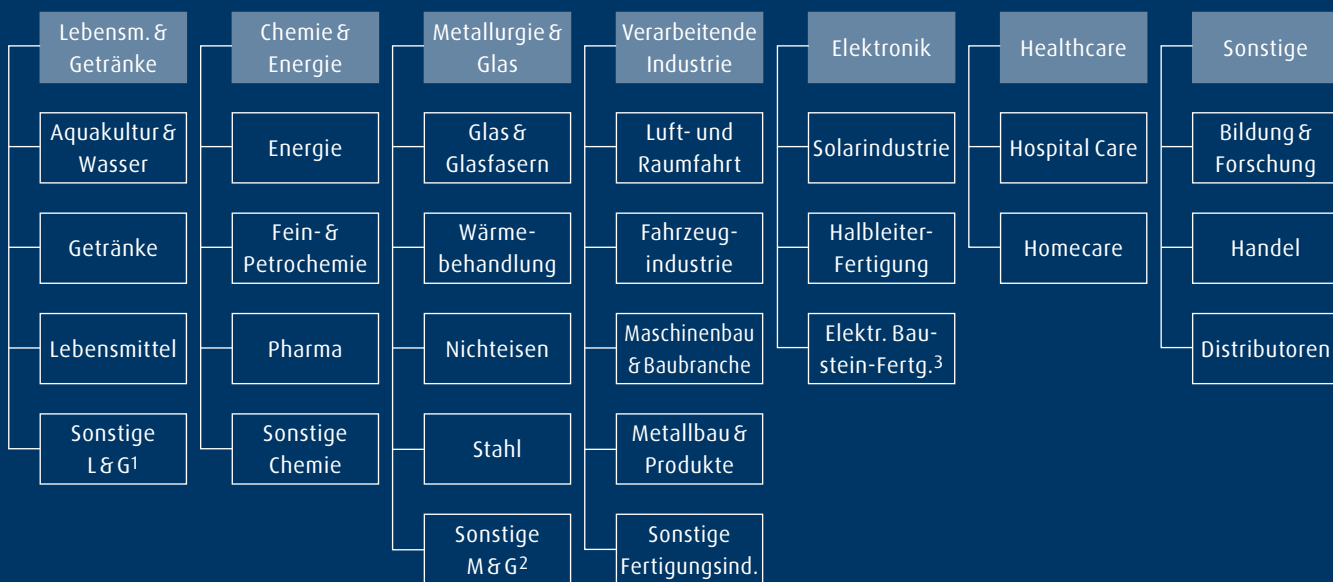

<sup>1</sup> Lebensmittel & Getränke.

<sup>2</sup> Metallurgie & Glas.

<sup>3</sup> Elektronische Baustein-Fertigung.

## Unternehmensprofil

### The Linde Group

The Linde Group ist ein weltweit führendes Gase- und Engineeringunternehmen, das mit rund 48.500 Mitarbeitern in mehr als 100 Ländern vertreten ist und im Geschäftsjahr 2010 einen Umsatz von 12,868 Mrd. EUR erzielt hat. Die Strategie der Linde Group ist auf ertragsorientiertes und nachhaltiges Wachstum ausgerichtet. Der gezielte Ausbau des internationalen Geschäfts mit zukunftsweisenden Produkten und Dienstleistungen steht dabei im Mittelpunkt. Linde handelt verantwortlich gegenüber Aktionären, Geschäftspartnern, Mitarbeitern, der Gesellschaft und der Umwelt – weltweit, in jedem Geschäftsbereich, jeder Region und an jedem Standort. Linde entwickelt Technologien und Produkte, die Kundennutzen mit einem Beitrag zur nachhaltigen Entwicklung verbinden.

### Organisation

Das Unternehmen ist in drei Divisionen aufgeteilt: Gases und Engineering (Kerndivisionen) sowie Gist (Logistikdienstleistungen). Die größte Division Gases gliedert sich innerhalb der vier operativen Segmente Westeuropa, Amerika, Asien & Osteuropa sowie Südpazifik & Afrika in neun Regional Business Units (RBUs). Darüber hinaus umfasst die Gases Division die beiden Global Business Units (GBUs) Healthcare (Medizinische Gase) und Tonnage (On-site) sowie die zwei Business Areas (BAs) Merchant & Packaged Gases (Flüssig- und Flaschengase) und Electronics (Elektronikgase).

### Gases Division

Die Linde Group nimmt im internationalen Gasemarkt eine weltweit führende Position ein. Das Unternehmen bietet eine breite Palette an Druck- und Flüssiggasen sowie Chemikalien und ist damit ein wichtiger und verlässlicher Partner für unterschiedlichste Industrien. Gase von Linde werden beispielsweise im Energiesektor, in der Stahlproduktion, der Chemieverarbeitung, dem Umweltschutz, dem Schweißen sowie in der Lebensmittelverarbeitung, der Glasproduktion und der Elektronik eingesetzt. Darüber hinaus baut das Unternehmen die Sparte Healthcare, das Geschäft mit medizinischen Gasen, konsequent aus und ist zudem in der Weiterentwicklung der umweltfreundlichen Wasserstoff-Technologie weltweit führend.

### Engineering Division

Lindes Engineering Division ist mit der Fokussierung auf die zukunfts-trächtigen Marktbereiche Olefin-Anlagen, Erdgas-Anlagen, Luftzerlegungs-Anlagen sowie Wasserstoff- und Synthesegas-Anlagen weltweit erfolgreich. Im Unterschied zu fast allen Wettbewerbern kann das Unternehmen bei der Planung, der Projektierung und dem Bau von schlüsselfertigen Industrie-Anlagen auf eigenes, umfassendes verfahrenstechnisches Know-how zurückgreifen. Linde Anlagen werden für Projekte in den verschiedensten Bereichen eingesetzt: in der Petrochemie und der chemischen Industrie, bei Raffinerien und Düngemittelfabriken, für die Gewinnung von Luftgasen, zur Erzeugung von Wasserstoff und Synthesegasen, zur Erdgasbehandlung sowie für die pharmazeutische Industrie.

## Linde in Zahlen

| in Mio. €                                             | Januar bis Dezember |         |                       |
|-------------------------------------------------------|---------------------|---------|-----------------------|
|                                                       | 2010                | 2009    | Veränderung           |
|                                                       |                     |         |                       |
| Aktie                                                 |                     |         |                       |
| Schlusskurs                                           | € 113,55            | 84,16   | 34,9 %                |
| Höchstkurs                                            | € 115,30            | 87,95   | 31,1 %                |
| Tiefstkurs                                            | € 76,70             | 49,66   | 54,5 %                |
| Marktkapitalisierung (zum Jahresschlusskurs)          | 19.337              | 14.215  | 36,0 %                |
| Angepasstes Ergebnis je Aktie <sup>1</sup>            | € 6,89              | 4,58    | 50,4 %                |
| Ergebnis je Aktie – unverwässert                      | € 5,94              | 3,51    | 69,2 %                |
| Anzahl ausstehender Aktien (in Tsd. Stück)            | 170.297             | 168.907 | 0,8 %                 |
| Umsatz                                                | 12.868              | 11.211  | 14,8 %                |
| Operatives Ergebnis <sup>2</sup>                      | 2.925               | 2.385   | 22,6 %                |
| Operative Marge                                       | 22,7 %              | 21,3 %  | + 140 bp <sup>3</sup> |
| EBIT vor Abschreibung auf aufgedeckte stille Reserven | 1.933               | 1.460   | 32,4 %                |
| Ergebnis nach Steuern                                 | 1.064               | 653     | 62,9 %                |
| Anzahl der Mitarbeiter                                | 48.430              | 47.731  | 1,5 %                 |
| Gases Division                                        |                     |         |                       |
| Umsatz                                                | 10.228              | 8.932   | 14,5 %                |
| Operatives Ergebnis                                   | 2.766               | 2.378   | 16,3 %                |
| Operative Marge                                       | 27,0 %              | 26,6 %  | + 40 bp <sup>3</sup>  |
| Engineering Division                                  |                     |         |                       |
| Umsatz                                                | 2.461               | 2.311   | 6,5 %                 |
| Operatives Ergebnis                                   | 271                 | 210     | 29,0 %                |
| Operative Marge                                       | 11,0 %              | 9,1 %   | + 190 bp <sup>3</sup> |

<sup>1</sup> Bereinigt um die Einflüsse der Kaufpreisallokation.

<sup>2</sup> EBITDA inklusive des anteiligen Ergebnisses aus assoziierten Unternehmen und Joint Ventures.

<sup>3</sup> Basispunkte.



## Unsere Unternehmenswerte

*Passion to excel.*

Mit Leidenschaft Herausragendes leisten.

*Innovating for customers.*

Innovationen für unsere Kunden schaffen.

*Empowering people.*

Uns gegenseitig fördern und fordern, bestärken und vertrauen.

*Thriving through diversity.*

Erfolg durch Vielfalt.

## Unsere Vision

*Wir werden das weltweit führende Gase- und Engineeringunternehmen sein, dessen Mitarbeiter höchste Wertschätzung genießen und das innovative Lösungen bietet, die die Welt verändern.*

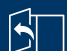

# Stetig besser.

Die Welt sucht Antworten. Lebens- und Arbeitsbedingungen verändern sich ständig. Globale Herausforderungen wie der Klimawandel, der steigende Energiebedarf oder die demografische Entwicklung erfordern Lösungen – auch von international tätigen Unternehmen. Deshalb haben wir im Linde Annual 2010 nachgefragt: Welchen Beitrag kann ein innovativer Technologiekonzern leisten, um diese gesamtgesellschaftlichen Aufgaben zu meistern und dabei zugleich nachhaltig erfolgreich zu wirtschaften? Die Antworten sind so vielfältig und verschieden wie die Menschen, die sie geben. Dennoch vermitteln sie eine gemeinsame Haltung: den Anspruch, stetig besser zu werden.

# Inhalt

## Vorderer Umschlag

- U2 Unsere Unternehmenswerte
- U2 Unsere Vision
- U3 Die Linde Welt
- U3 Kundensegmente  
der Gases Division
- U4 Unternehmensprofil
- U4 Linde in Zahlen

## Hinterer Umschlag

- U5/U7 Jahresrückblick
- U6 Glossar

#### 04 1. Mitarbeiter

### „Was treibt uns an, unser Bestes zu geben?“

- 06 Interview: „Die Kunden müssen sich auf uns verlassen können.“
- 12 Interview: „Ich kann etwas verändern.“
- 14 Kompetent und engagiert.
- 18 Wissenswertes.

#### 20 2. Technologie und Produkte

### „Wodurch wird ein Produkt wertvoll?“

- 22 Interview: „Linde ist ein Partner, nicht nur ein Lieferant.“
- 26 Interview: „Wir verkaufen mehr als nur Moleküle.“
- 30 Qualität schafft Vertrauen.
- 34 Wissenswertes.

#### 36 3. Umwelt und Ressourcen

### „Wie geht man behutsam mit Umwelt und Ressourcen um?“

- 38 Interview: „Wir werden unsere Chancen nutzen.“
- 42 Interview: „Der Wasserstoff in Spartanburg ist rundum grün.“
- 48 Energie und Chemie ohne Nebenwirkungen.
- 52 Wissenswertes.

#### 54 4. Gesellschaftliche Verantwortung

### „Kann ein globales Unternehmen ein guter Nachbar sein?“

- 56 Interview: „Das Bildungsengagement von Linde hat Vorbildcharakter.“
- 60 Interview: „Wir geben benachteiligten Kindern eine Chance.“
- 62 Nachbarschaft verpflichtet.
- 66 Wissenswertes.

#### 68 5. Unternehmerisches Handeln

### „Ist Erfolg planbar?“

- 70 Interview mit Prof. Dr.-Ing. Wolfgang Reitzle:  
„Wir entwickeln Linde zu einem exzellenten Unternehmen.“
- 74 Interview mit Dr.-Ing. Aldo Belloni:  
„Es gibt nichts, was sich nicht noch weiter verbessern ließe.“
- 76 Interview mit J. Kent Masters:  
„Unsere Mitarbeiter genießen höchste Wertschätzung.“
- 78 Interview mit Georg Denoke:  
„Wir schaffen uns den Spielraum für weiteres Wachstum.“

- 80 Impressum
- 80 Kontakt



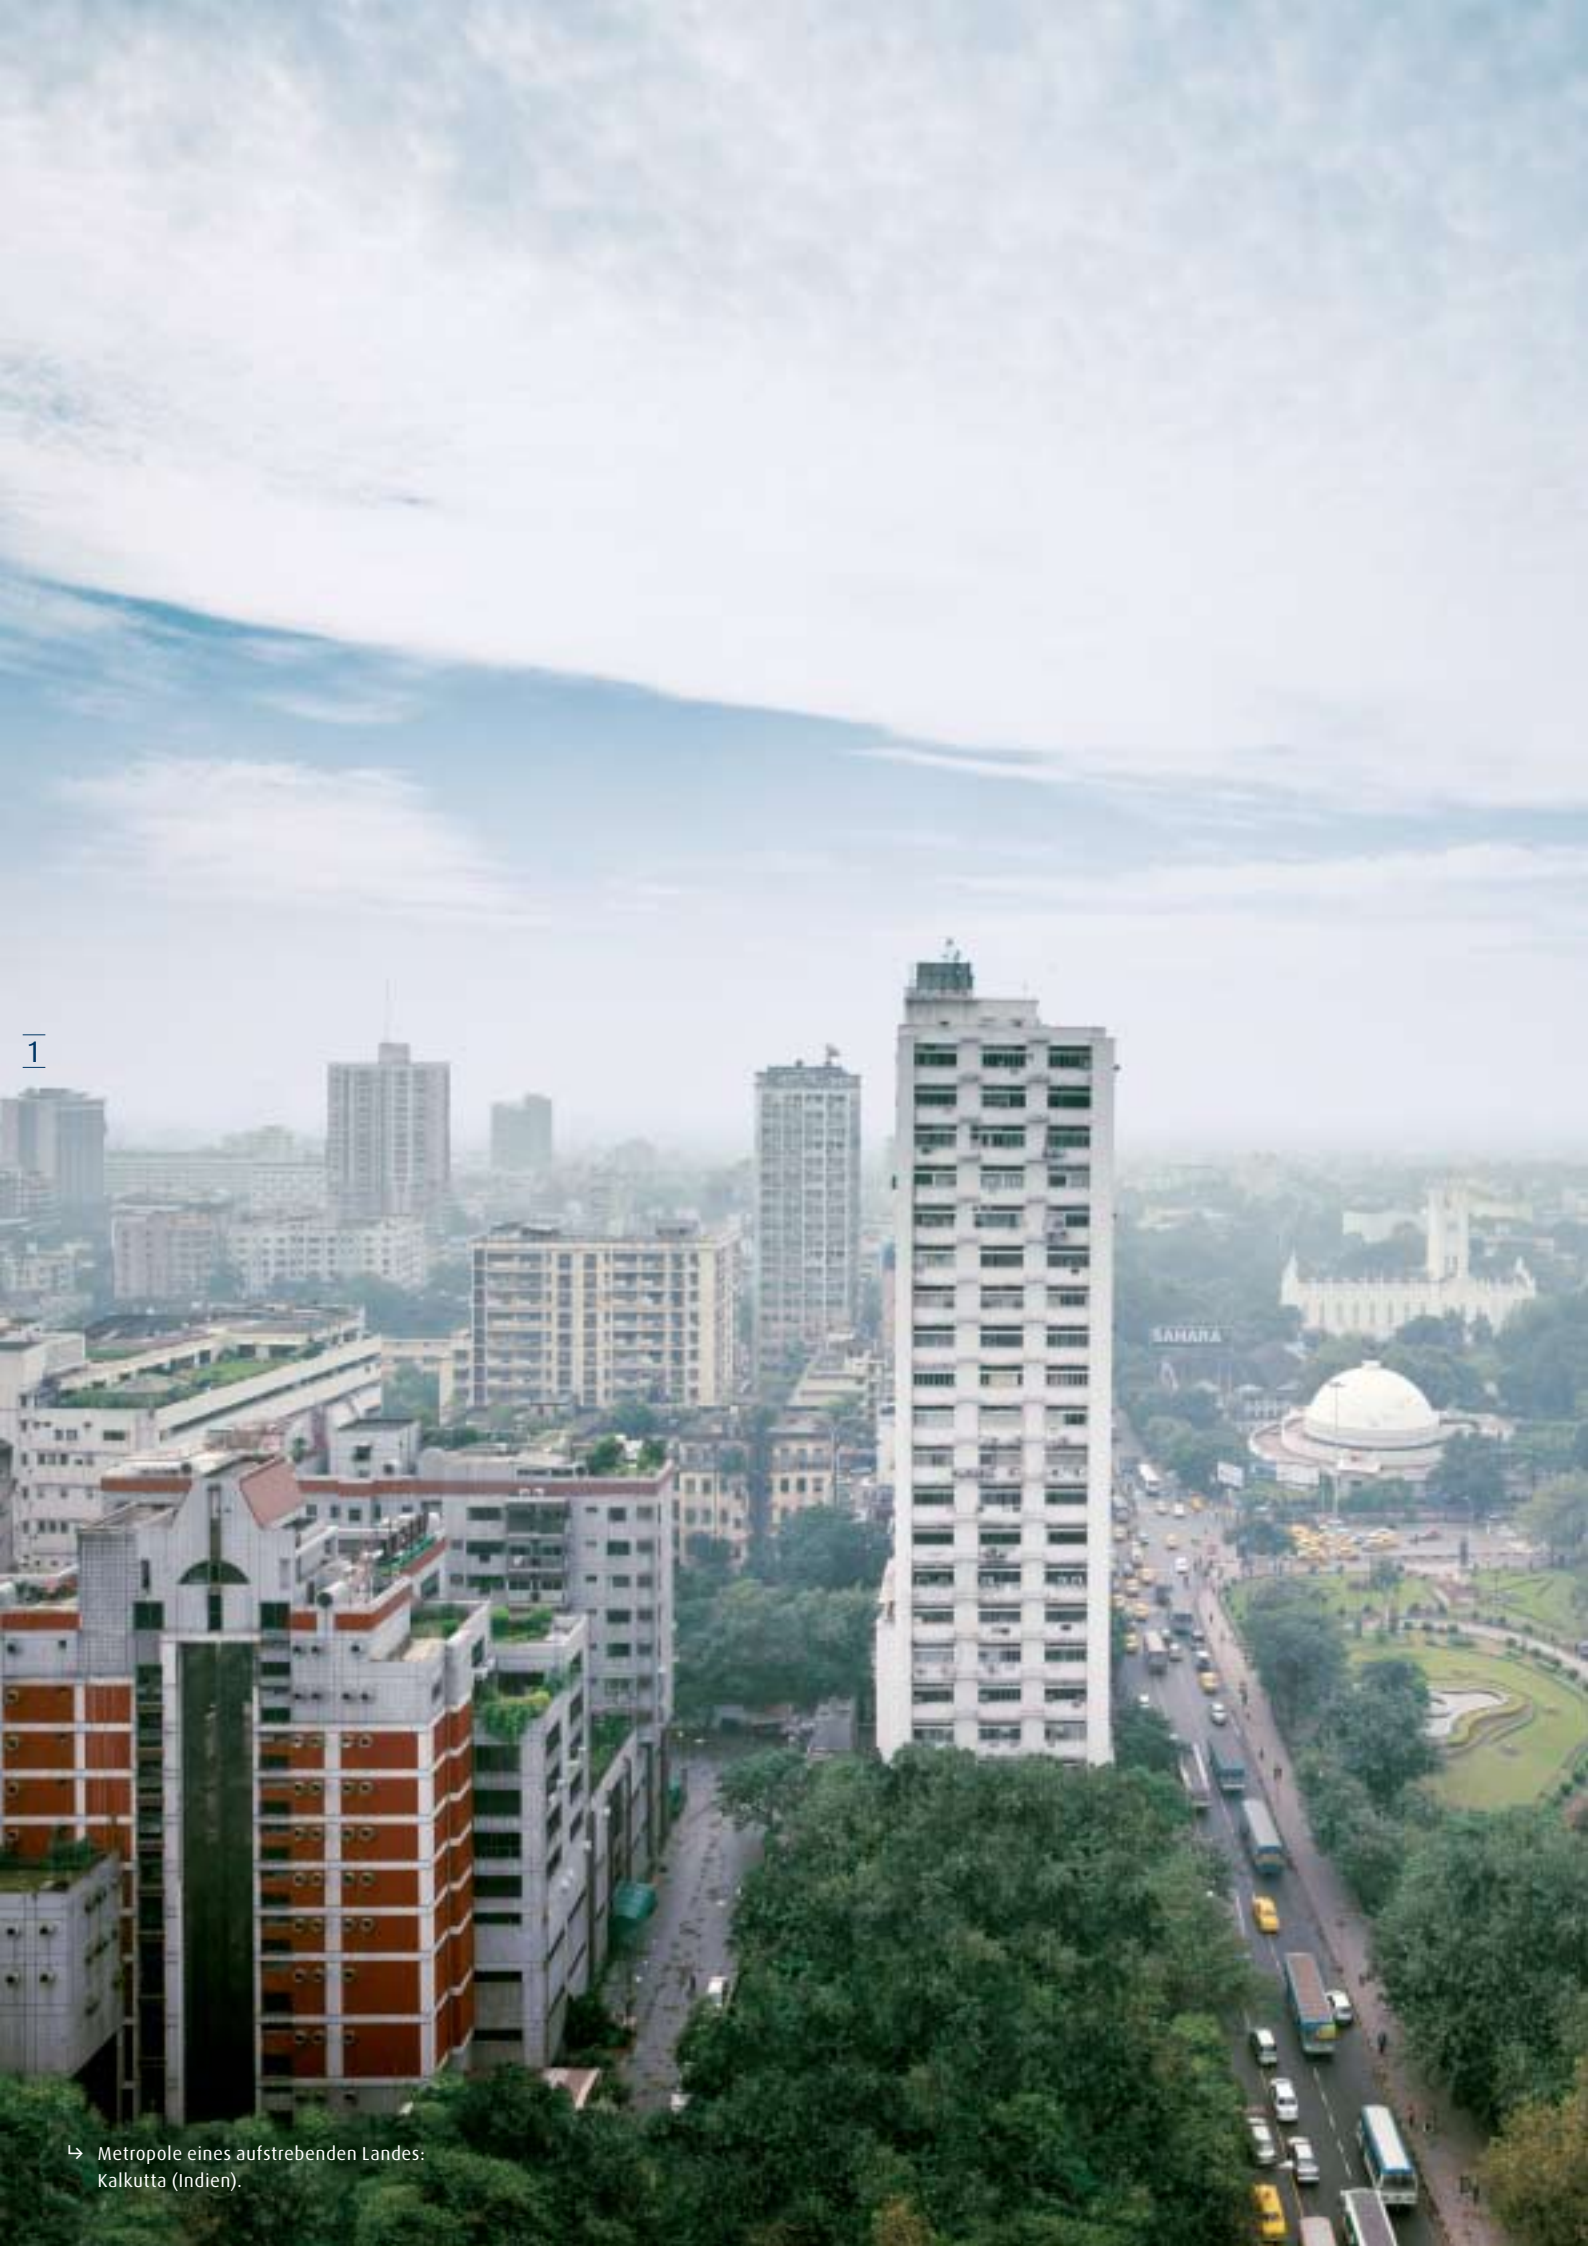

1

↳ Metropole eines aufstrebenden Landes:  
Kalkutta (Indien).





## 1. Mitarbeiter

„Was treibt uns an,  
unser Bestes zu  
geben?“

Für die einen ist es die Herausforderung  
eines internationalen Großprojekts.  
Für die anderen die Gewissheit, jederzeit  
etwas bewegen zu können. Alle gemein-  
sam setzen sich für den Erfolg ihres Unter-  
nehmens ein.

## „Die Kunden müssen sich auf uns verlassen können.“

Moloy Banerjee, zuständig für Lindes Gasengeschäft in Indien, und Andrew Mole, Projektleiter bei Linde Engineering, wissen, worauf es bei internationalen Großprojekten ankommt: auf eine fein abgestimmte, konzernweite Zusammenarbeit über Ländergrenzen hinweg.

Linde errichtet derzeit in Jamshedpur im Rahmen eines Langzeit-Versorgungsvertrags mit Tata Steel die größte Luftzerlegungs-Anlage Indiens. Worauf kommt es bei diesem anspruchsvollen Projekt an? Wie gehen Sie konkret vor?

↳ **Banerjee:** Wir, und das sind in diesem Fall die Kollegen hier in Indien, unsere Kollegen aus den Divisionen Gases und Engineering in Deutschland sowie unsere Auftraggeber bei Tata, haben uns zunächst folgende Frage gestellt: Wie können wir das Stahlwerk von Tata am zuverlässigsten und wirtschaftlichsten mit den notwendigen Gasen versorgen? Wir haben uns schließlich für ein Gesamtkonzept entschieden, bei dem wir die bestehenden Anlagen am Standort übernommen und durch neue Kapazitäten erweitert haben. Diese Integration von vorhandenen und neuen Anlagen war ausschlaggebend für den Vertragsabschluss.

↳ **Mole:** Bereits in dieser frühen Phase wurden die federführenden Kollegen Moloy Banerjee und Joe Dunn von unseren Ingenieuren unterstützt. Wir wollten von Beginn an sicherstellen, dass bei diesem Großprojekt alles stimmt: die Bedarfsermittlung beim Kunden, die Technologie, die Kalkulation, die Zeitplanung und die Koordination. Tata ist ein wichtiger und langjähriger Kunde, der sich auf uns verlassen können muss, das ist unser Anspruch. →

↳ Linde errichtet in Jamshedpur die größte Luftzerlegungs-Anlage Indiens.



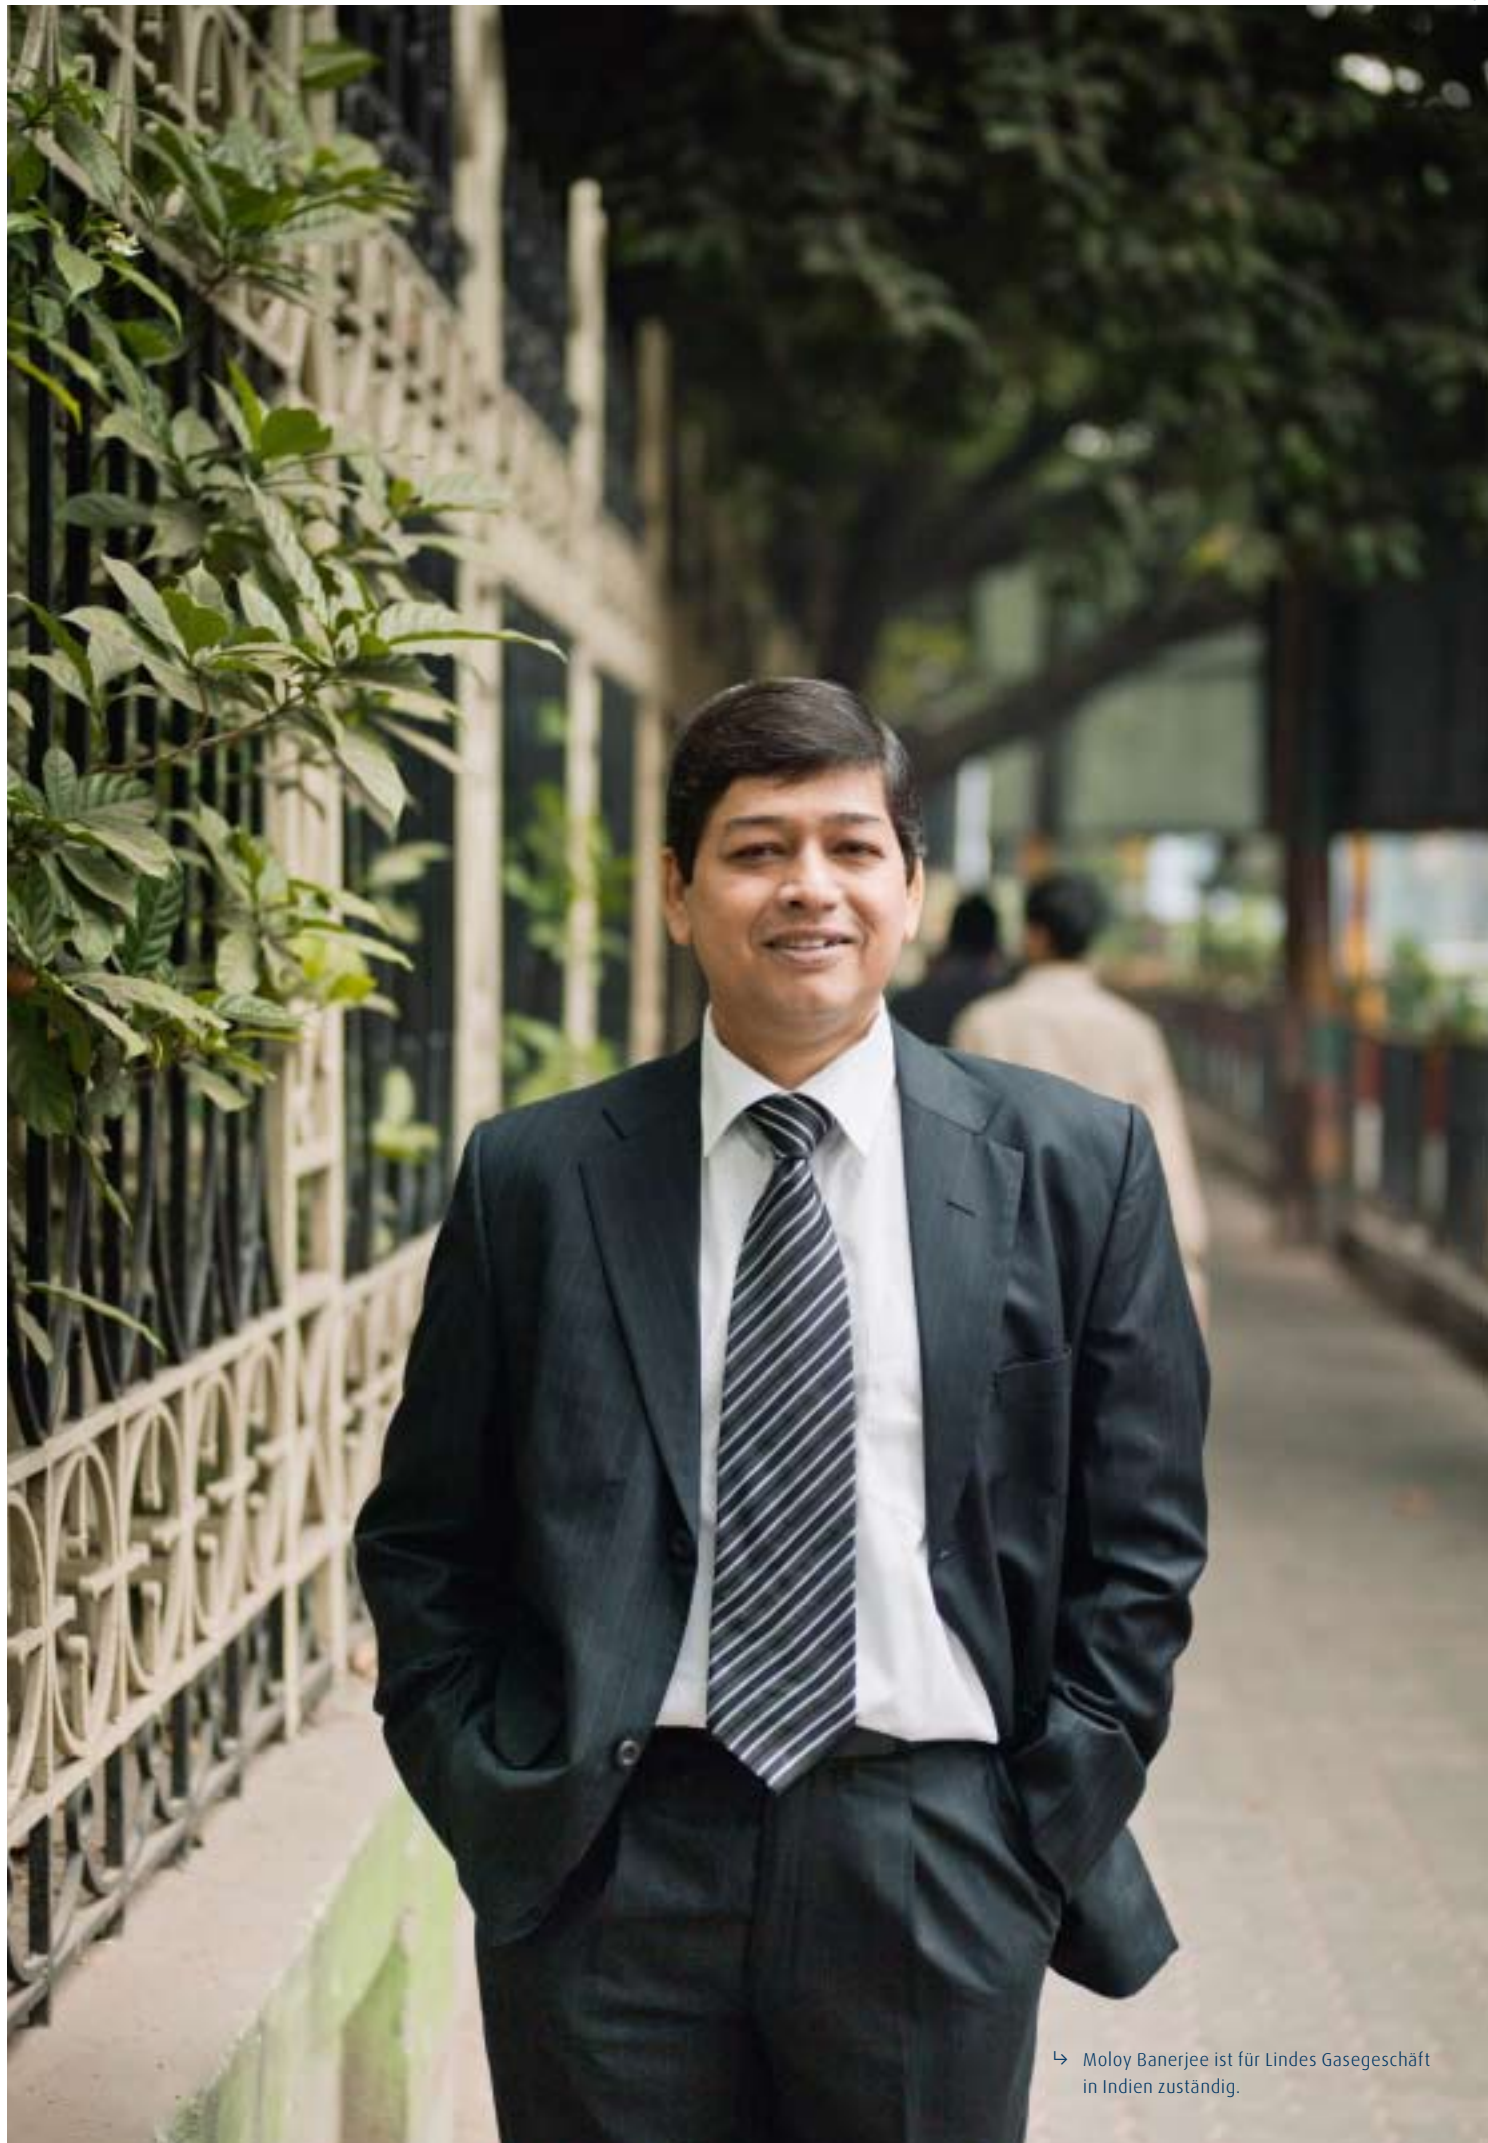

↳ Moloy Banerjee ist für Lindes Gasgeschäft in Indien zuständig.



↳ Andrew Mole ist Projektleiter bei Linde Engineering und koordiniert die Zusammenarbeit zwischen den Anlagenbauexperten und den Fachleuten aus dem Gasgeschäft.

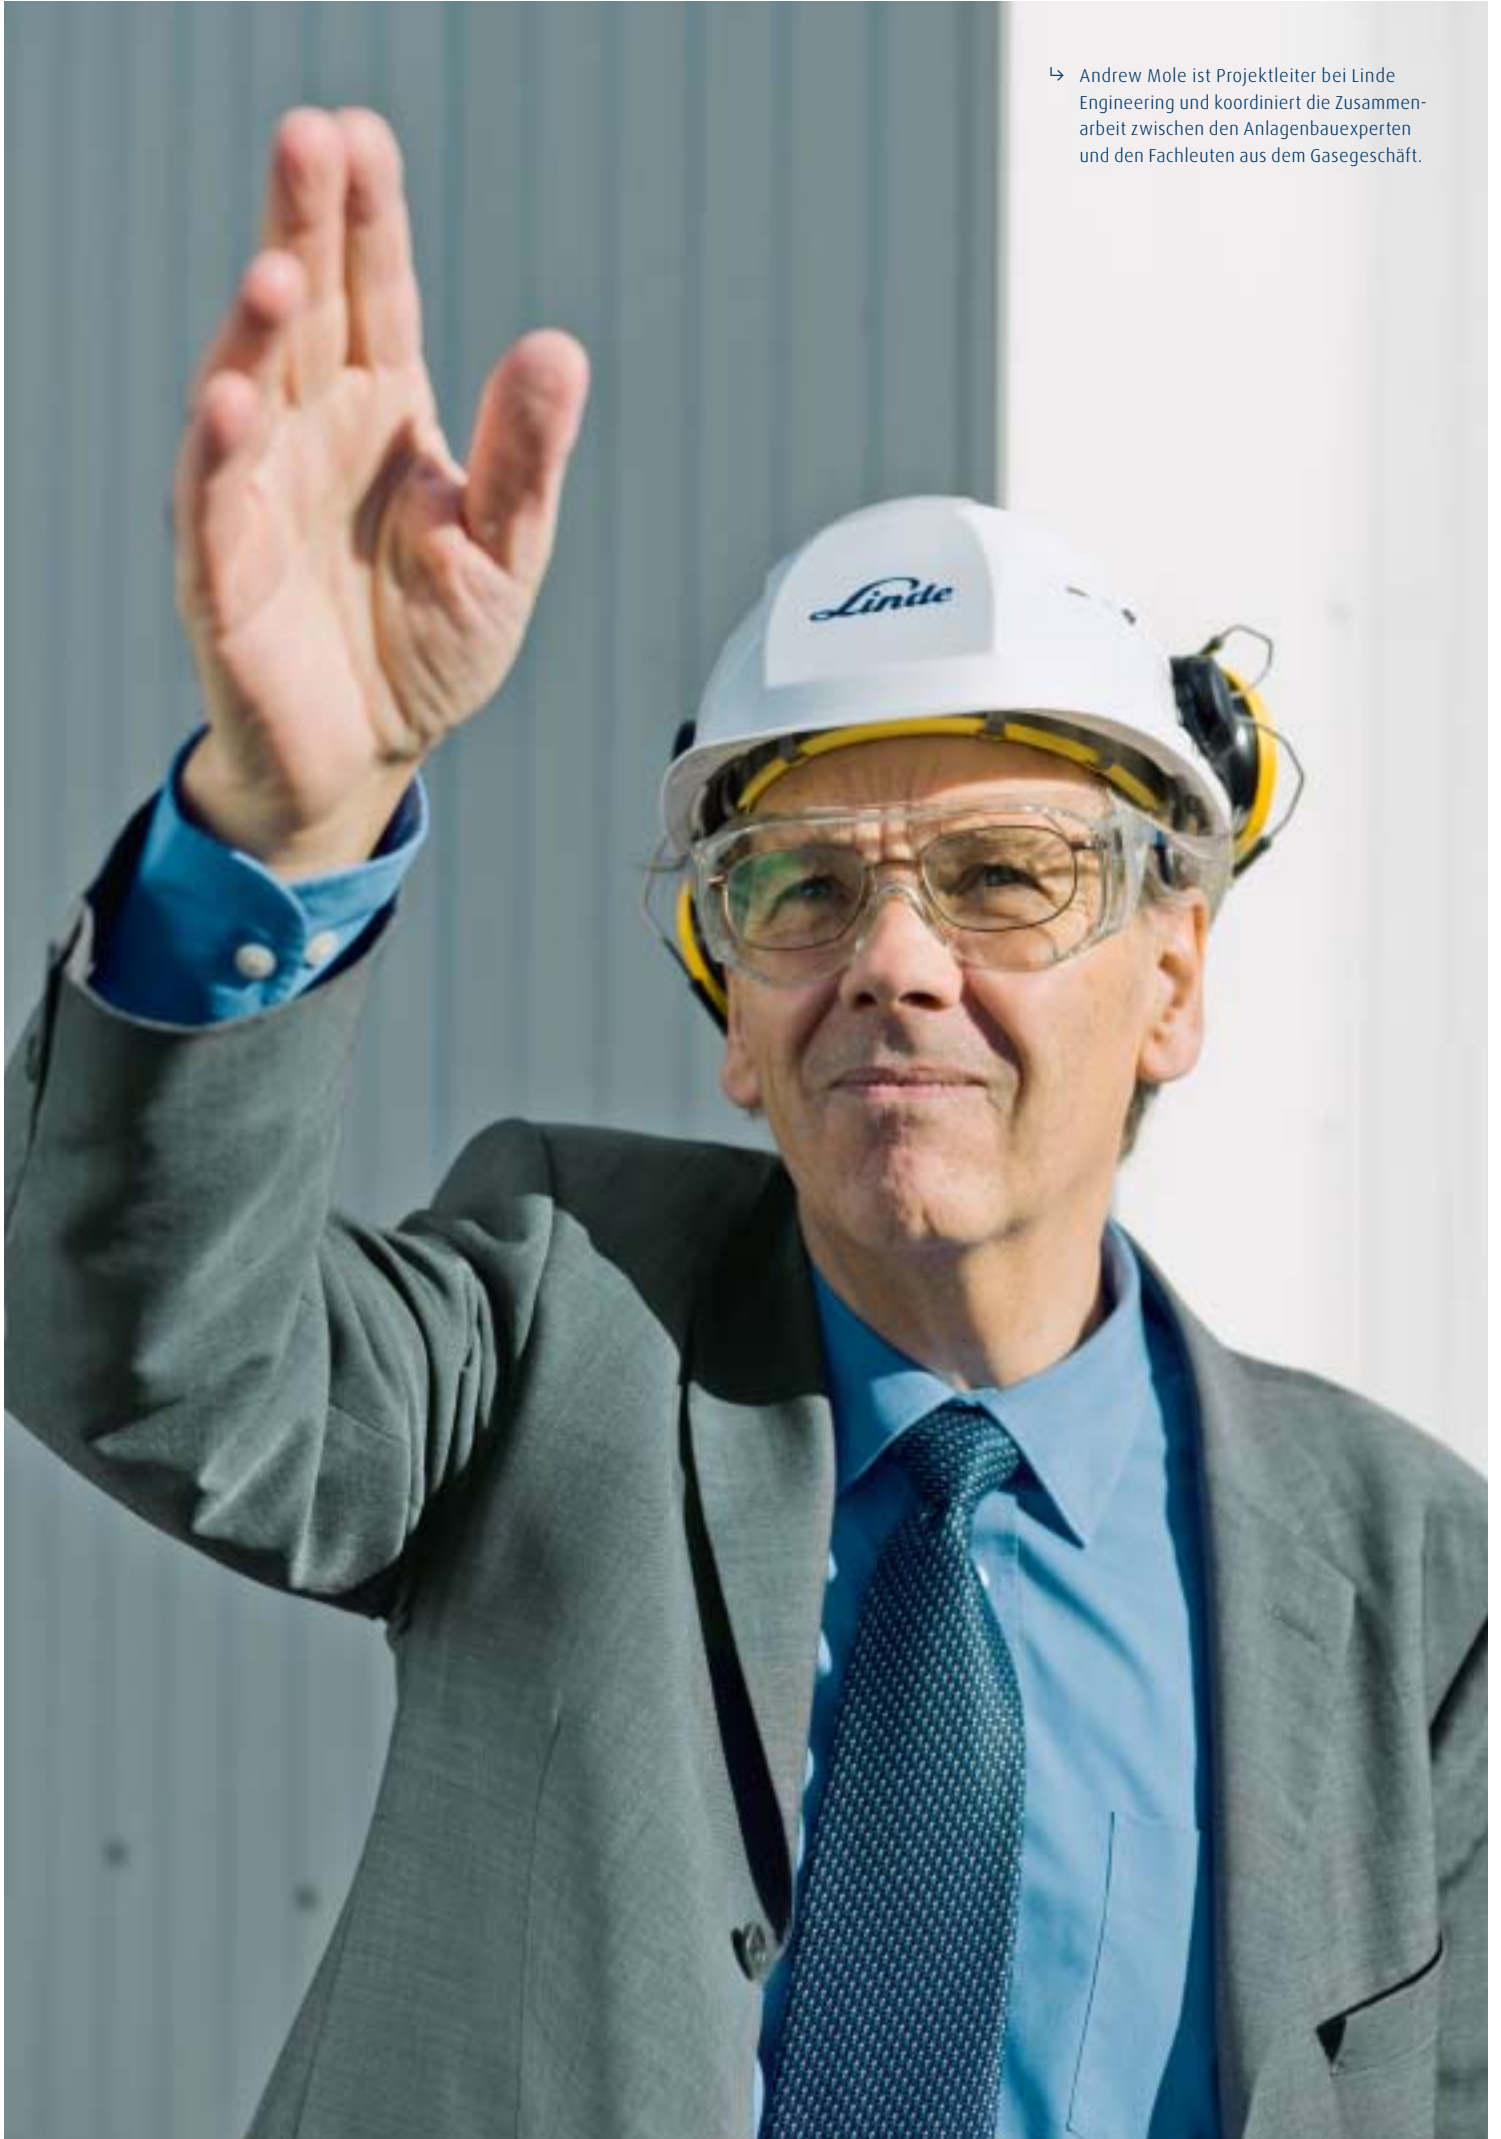

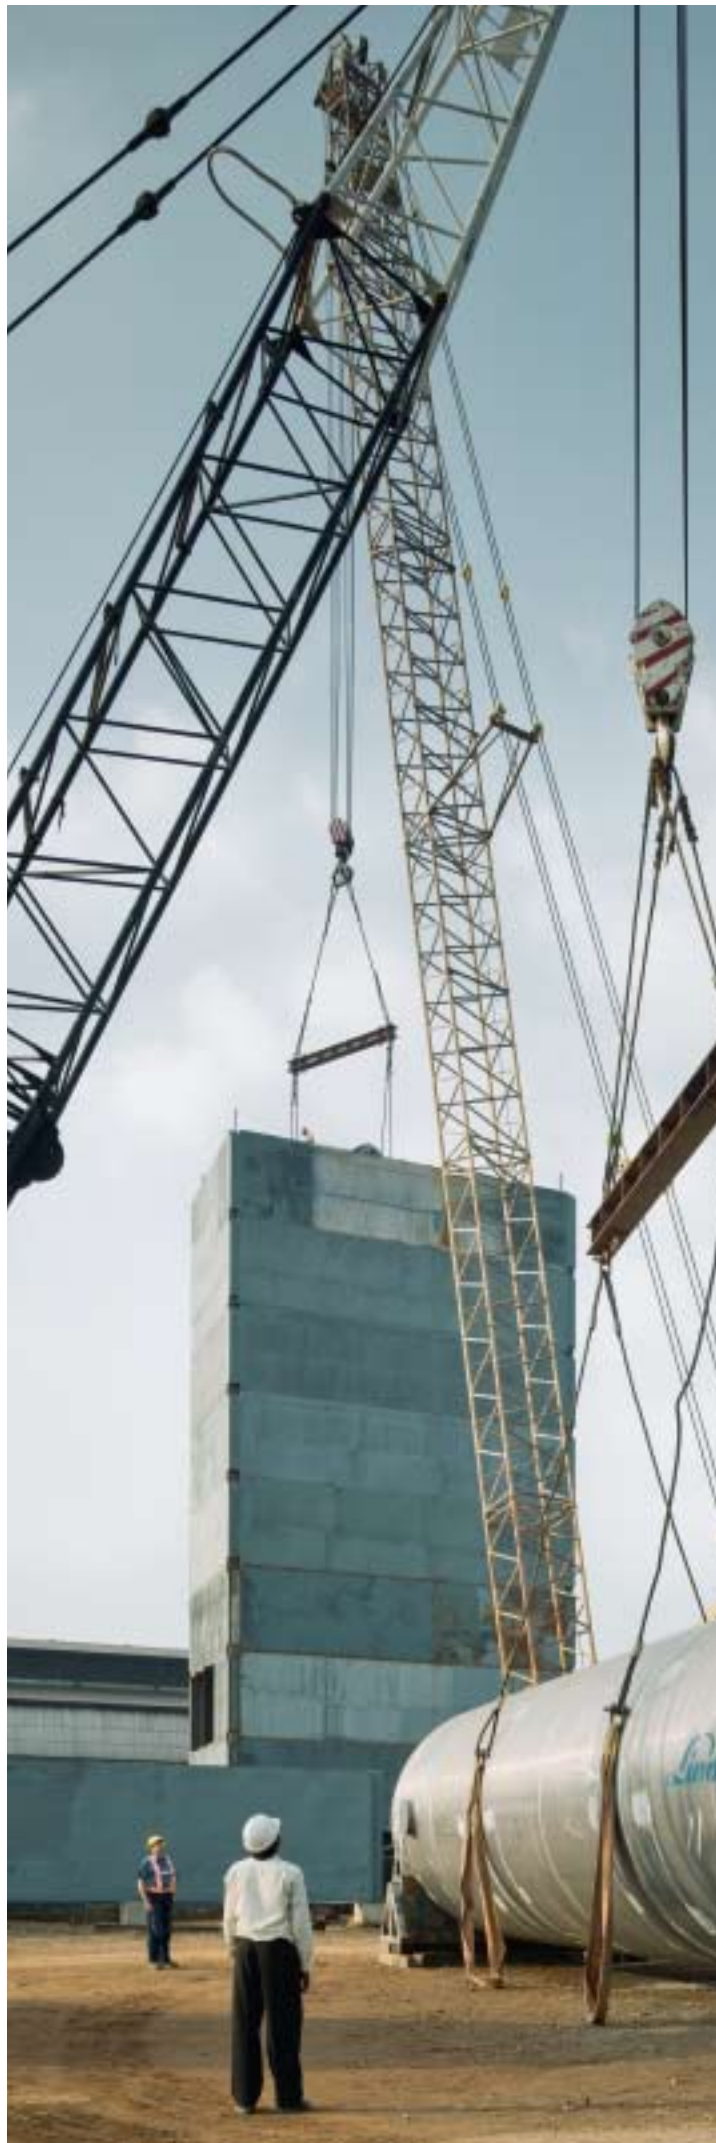

Herr Mole, Sie koordinieren bei diesem Projekt die Zusammenarbeit zwischen den Anlagenbauexperten und den Fachleuten aus dem Gasgeschäft. Welche Besonderheiten gibt es bei der Luftzerlegungs-Anlage von Jamshedpur?

↳ Mole: Die wichtigste Besonderheit ist, dass wir bei diesem Projekt eng mit der Project Engineering Division von BOC India zusammengearbeitet haben, um einen möglichst hohen lokalen Wertschöpfungsanteil zu erreichen. Letztlich wurden rund 50 Prozent der vertraglichen Leistungen in Indien erbracht.

**Macht diese Vereinbarung die Aufgabe schwieriger?**

↳ Mole: Nein, im Gegenteil. Niemand kann die Anforderungen unseres Kunden besser einschätzen als unsere Kollegen vor Ort in Indien. Zudem wären einige Bauteile schlichtweg zu groß gewesen für den Transport nach Indien. Eine echte Herausforderung war es hingegen, die konzernweiten Standards, die wir im Rahmen unseres LINEX™-Konzepts (siehe Glossar) für große Luftzerlegungs-Anlagen definiert haben, mit den individuellen Anforderungen von Tata in Einklang zu bringen – und zwar innerhalb einer engen Angebotsfrist. Das ist wie bei einem Staffellauf: Man muss schnell laufen und den Stab sauber übergeben.

**Wie gestaltet sich die Zusammenarbeit zwischen den einzelnen Bereichen des Konzerns in der Praxis? Beispielsweise zwischen den Anlagenbauexperten in Deutschland und in Indien?**

↳ Mole: Die Zusammenarbeit lief und läuft reibungslos. Dazu muss man auch wissen, dass Linde und BOC India, heute Tochtergesellschaft des Konzerns, auf eine gemeinsame Vergangenheit im Anlagenbau zurückblicken: Schon vor dem aktuellen Projekt haben wir als Partner 14 andere Anlagen zusammen entwickelt und gebaut. Diese Erfahrung hilft uns jetzt in Jamshedpur. Hier kommt es mehr denn je auf eine sehr detaillierte und fein abgestimmte Planung sowie auf einen lückenlosen Know-how-Transfer an.

**Wie stellt man dies sicher?**

↳ Mole: Indem man viel miteinander spricht. Um keine Planungs-lücken entstehen zu lassen und Doppelarbeit zu vermeiden, haben wir uns noch vor dem eigentlichen Projektstart viele Male in München zusammengesetzt. Ich war dreimal in unserem indischen Büro, zudem sind indische Ingenieure regelmäßig nach Schalchen (Deutschland) und Dalian (China) gereist, um sich dort mit den Kollegen abzustimmen. Um das Bild vom Staffellauf noch einmal aufzugreifen: Dank dieser gut organisierten Abläufe und auf der Grundlage gegenseitigen Vertrauens hat jeder Stabwechsel sehr gut funktioniert. →

↳ Die neue Luftzerlegungs-Anlage wird ein Referenzprojekt für die gesamte Region Südostasien.



↳ Echtes Teamwork: Linde Mitarbeiter  
auf der Baustelle in Jamshedpur.

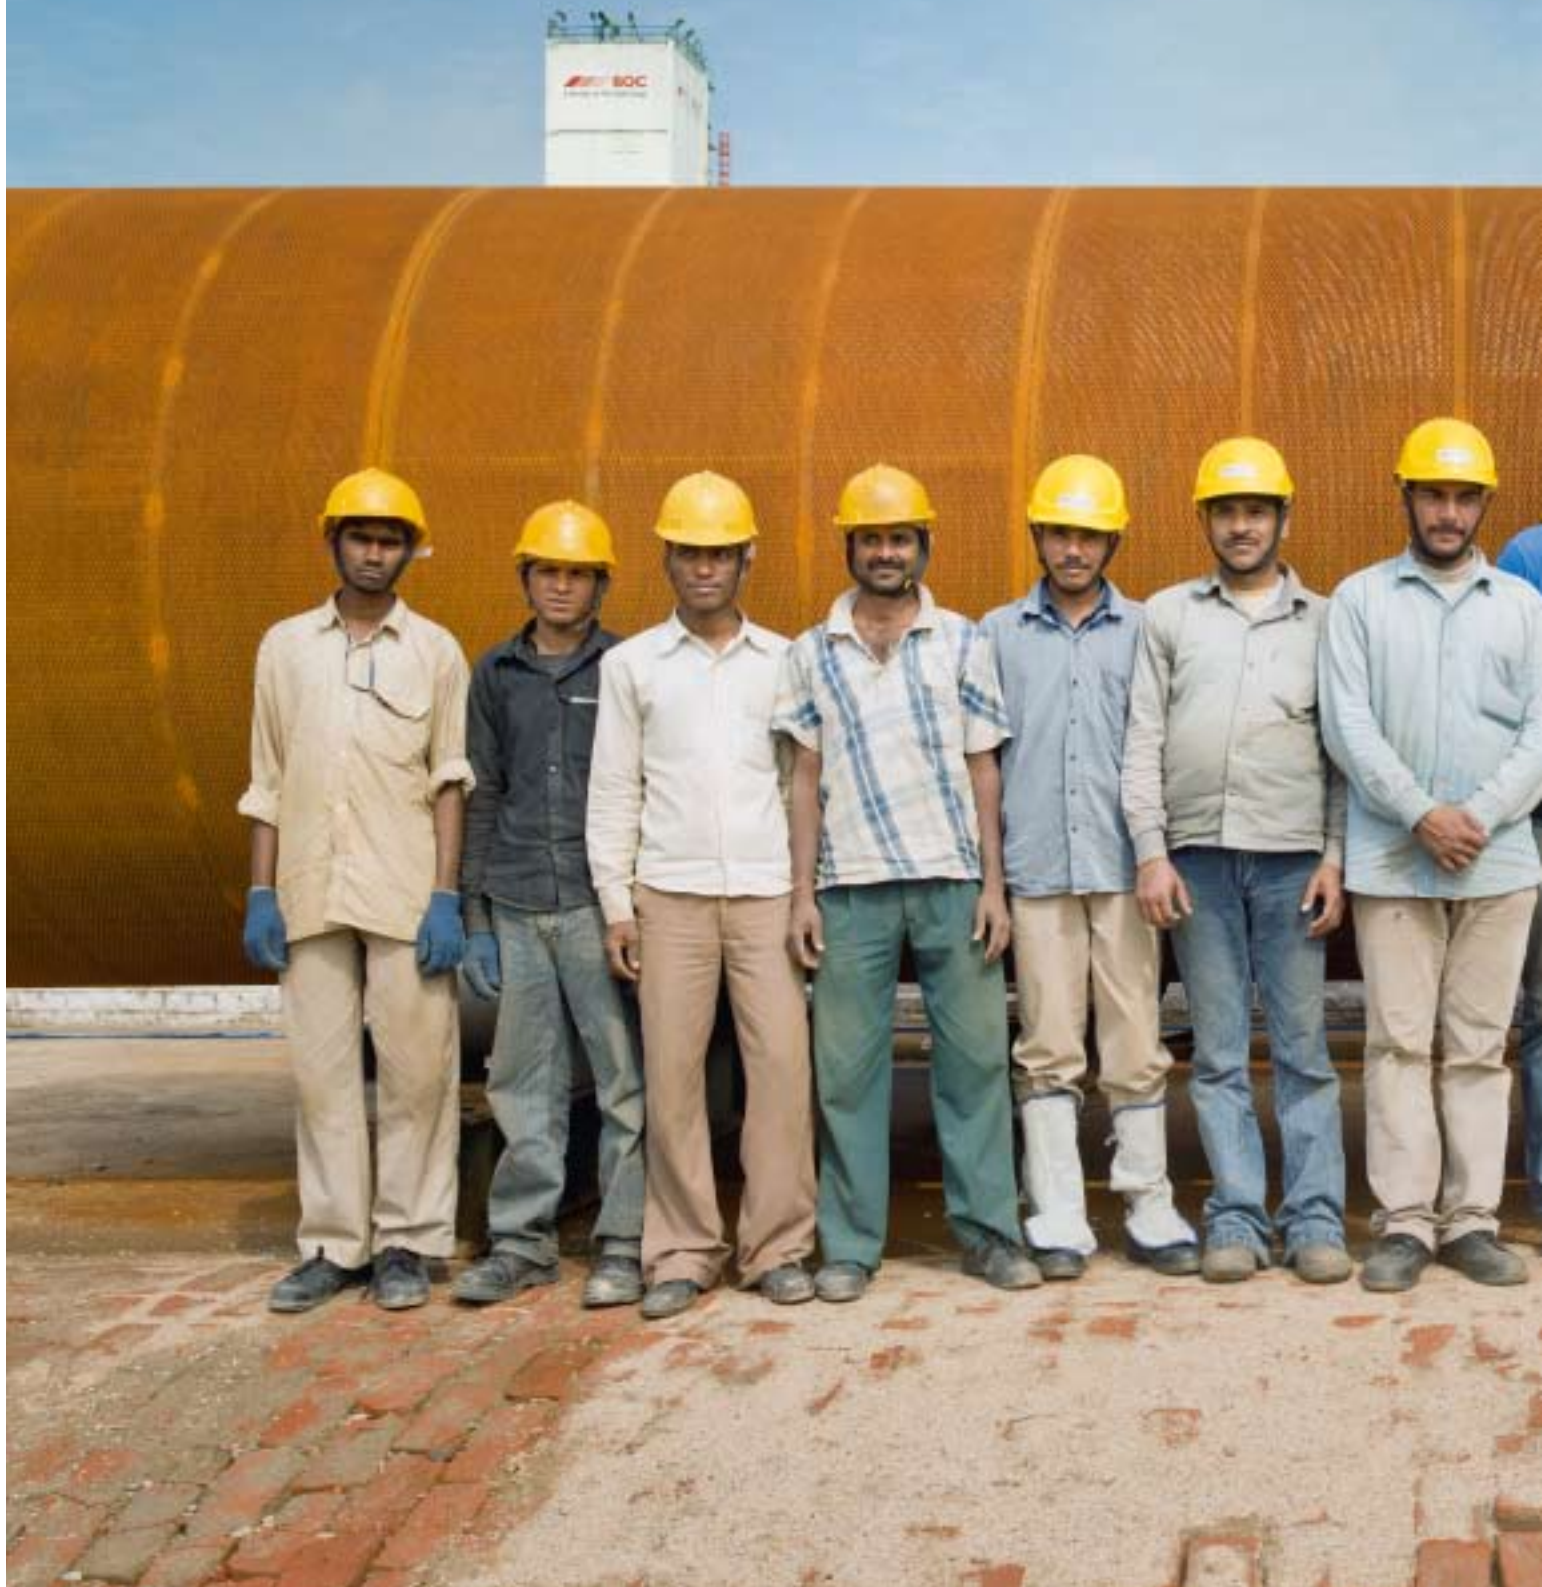



Herr Banerjee, BOC India pflegt seit Jahren enge geschäftliche Kontakte zu Tata. Hat diese langjährige Kundenbeziehung geholfen, den Großauftrag in Jamshedpur zu gewinnen?

↳ Banerjee: Ja, mit Sicherheit. Die geschäftlichen Verbindungen zwischen BOC India und Tata Steel reichen fast 50 Jahre zurück. In den frühen 1980er Jahren lieferte BOC zwei Luftzerlegungs-Anlagen, die von Tata betrieben wurden. 1997 folgte Indiens erster Langzeit-Versorgungsvertrag, für den BOC India eine eigene Luftzerlegungs-Anlage zur Versorgung des Tata-Stahlwerks in Jamshedpur errichtete. Deshalb haben wir uns gute Chancen ausgerechnet, als Tata im Jahr 2007 die Erweiterung der Gaseversorgung am Standort ausschrieb. Und tatsächlich konnten wir ja unseren Kunden mit einem Komplettangebot überzeugen, wodurch wir unsere Beziehungen zu Tata nochmals intensiviert haben.

Welche Bedeutung hat dieses Projekt für Linde in Indien?

↳ Banerjee: Die Luftzerlegungs-Anlage in Jamshedpur ist ein Referenzprojekt, nicht nur für Indien, sondern für die ganze Region Südostasien. Wir beweisen damit, wie gut die Zusammenarbeit zwischen unseren Teams in Deutschland und in Asien funktioniert und welche Kosten- und Zeitvorteile wir zum Vorteil unserer Kunden durch die Standardisierung bestimmter Prozesse und Bauteile auch bei großen Anlagen erzielen können.

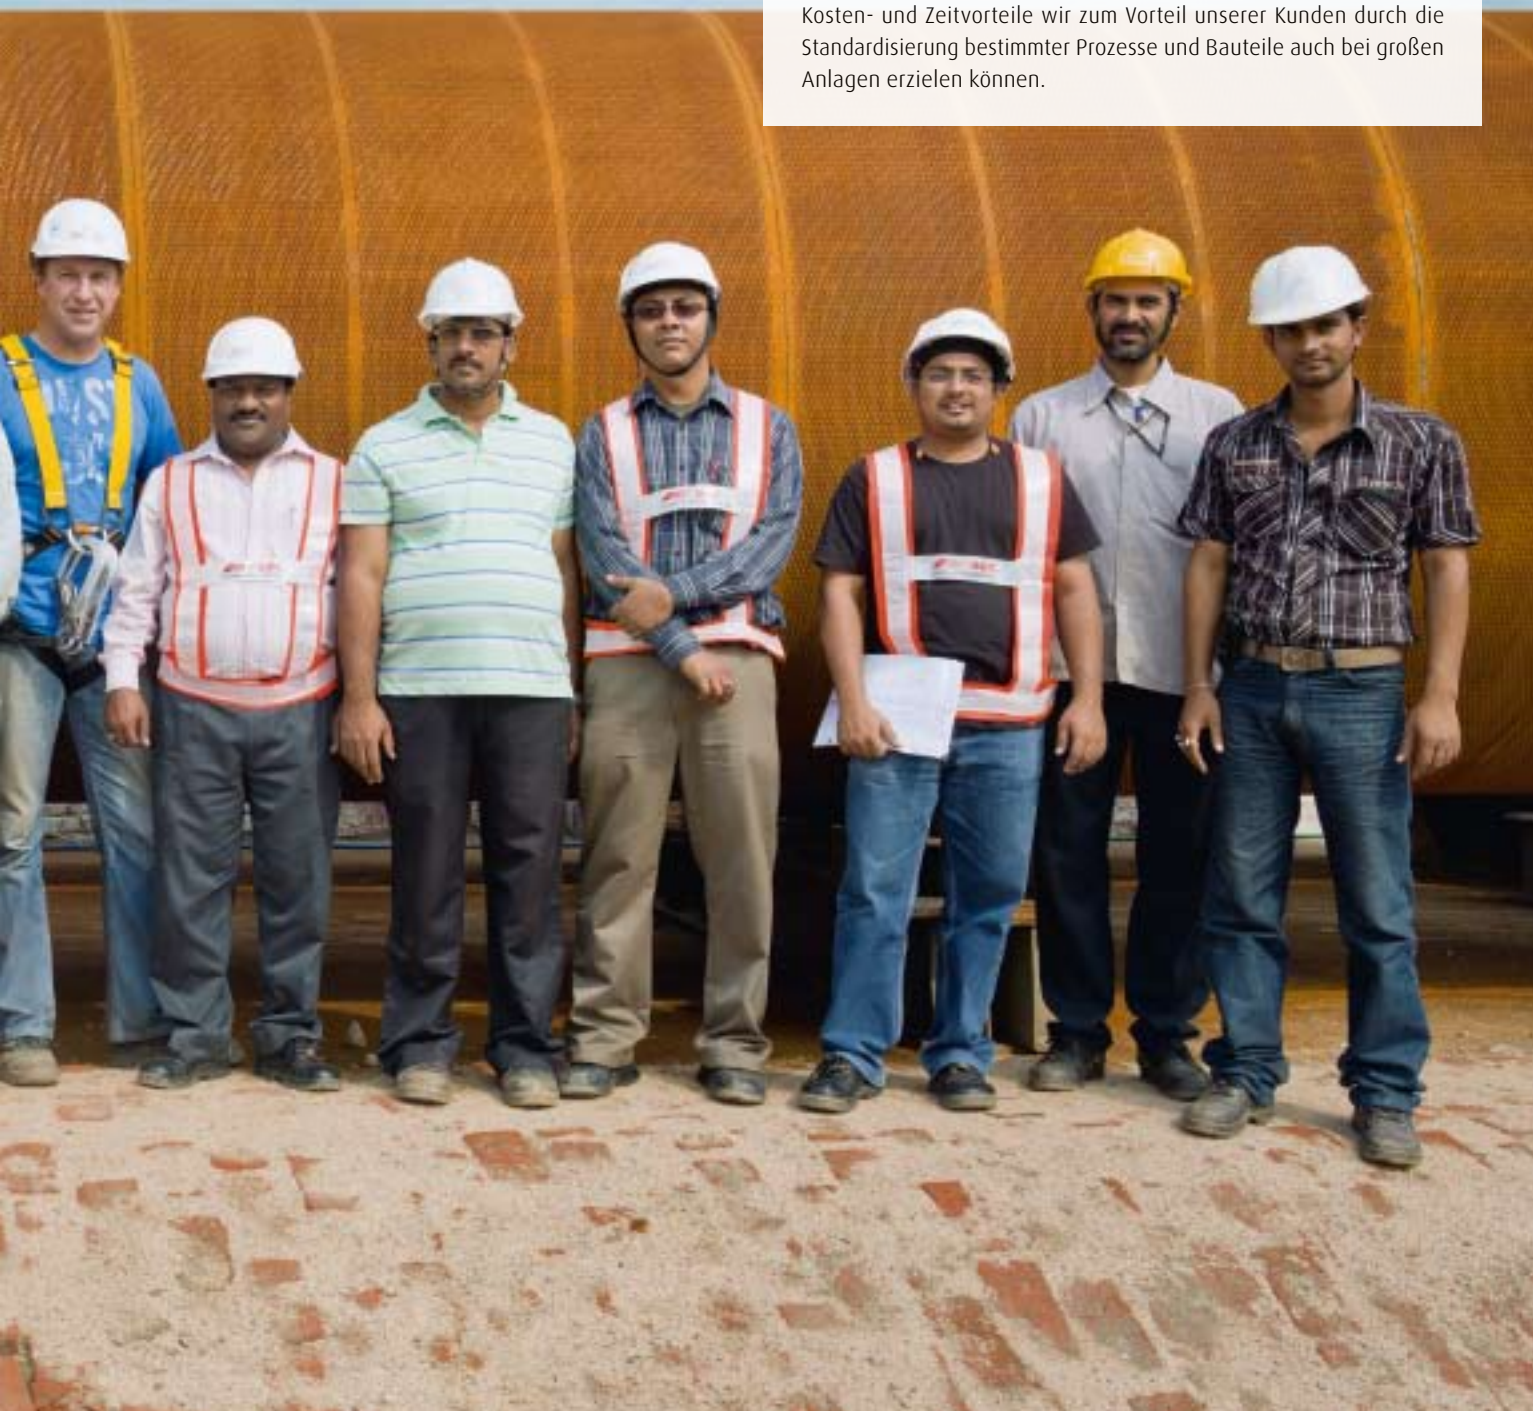

# „Ich kann etwas verändern.“

Sapna Sood ist im Bereich Konzernstrategie an der Umsetzung des ganzheitlichen Effizienzsteigerungsprogramms von Linde beteiligt. Im Interview erklärt sie, was ihr an der Linde Unternehmenskultur gefällt.

In einem global aufgestellten Konzern wie Linde sind internationale Karrieren keine Seltenheit. Trotzdem hat sicherlich nicht jeder so viele unterschiedliche Stationen vorzuweisen wie Sie ...

↳ Das mag sein. Tatsächlich war ich schon in vier Kontinenten für unser Unternehmen tätig: in Australien, in den USA, in Singapur, und in meiner jetzigen Funktion arbeite ich in Deutschland.

Wie kam es zu dieser abwechslungsreichen Laufbahn?

↳ Das Wichtigste war, dass das Unternehmen mir stets die Möglichkeit geboten hat, mich auch neben meinen täglichen Aufgaben weiterzuentwickeln. Als ich nach meinem Ingenieurstudium bei BOC (heute Tochtergesellschaft des Linde Konzerns, Anmerkung der Redaktion) in Australien eingestiegen bin, konnte ich direkt an einem so genannten Graduate Programme teilnehmen, einer Personalentwicklungsmaßnahme für Berufseinsteiger mit Studienabschluss. Später habe ich dann am meisten von unserem Global Leadership Development Circle (GLDC) profitiert. Dieses Programm richtet sich an angehende Führungskräfte.

Was war das Besondere daran?

↳ Das GLDC war herausfordernd und inspirierend zugleich: Wir mussten unsere Fähigkeiten bei der Lösung einer konkreten Aufgabenstellung unter Beweis stellen und die Ergebnisse vor dem Vorstand präsentieren. Das war anspruchsvoll, zumal die Aufgaben meist aus fachfremden Bereichen stammten. Außergewöhnlich waren auch die Seminarveranstaltungen über Strategie, Finanzen und Führung, bei denen Linde mit der Oxford University zusammenarbeitet. So haben wir etwa über Kreativität und Innovation am Beispiel Leonardo da Vincis diskutiert. →

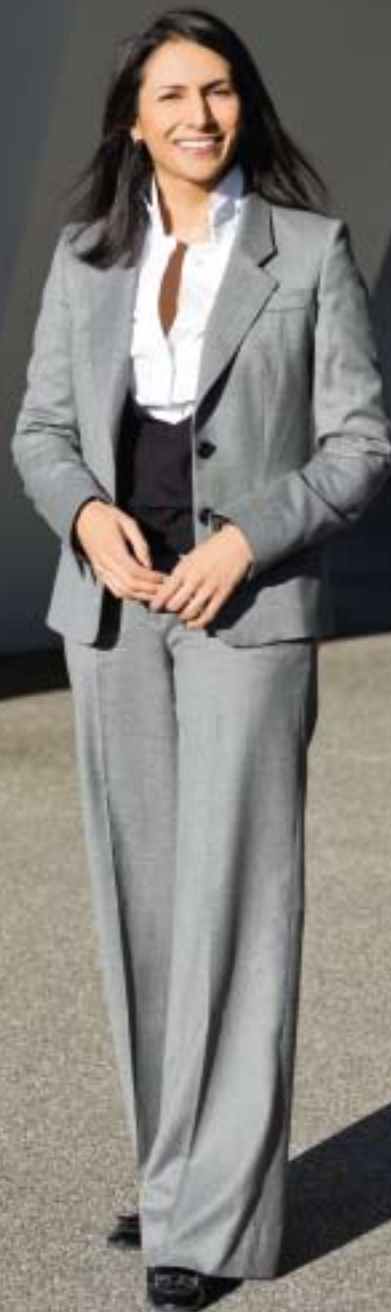



#### Wie viele Kollegen haben an dem Programm teilgenommen?

↳ Wir waren etwa 40 Kolleginnen und Kollegen, international gemischt, aus der gesamten Linde Welt. Dieses Gruppenerlebnis war für mich eine tolle Erfahrung. Zudem empfand ich es als ein großes Privileg, dass sich alle Mitglieder des Vorstands so viel Zeit für uns genommen haben, wir konnten uns sehr offen austauschen.

#### Was treibt Sie persönlich an, Ihr Bestes zu geben?

↳ Zunächst einmal muss ich sagen: Die Gasewelt ist faszinierend. Durch diese Vielfalt von möglichen Anwendungen erhält man Einblicke in unterschiedliche Märkte, Branchen, Verfahren und Produktwelten. Darüber hinaus motiviert mich die Kombination aus sportlicher Leistungsorientierung und Wertschätzung, die ich bei Linde erfahren habe. Egal, wo und in welcher Funktion ich bisher in unserem Unternehmen tätig war – ich wusste stets: Ich kann etwas verändern. Ich kann einen Beitrag dazu leisten, noch bessere Wege und Lösungen zu finden.

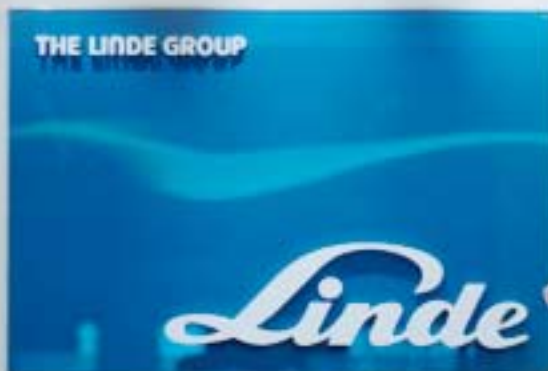

↳ Ein internationales Umfeld – charakteristisch für die Unternehmenskultur bei Linde.



# Kompetent und engagiert.

Qualifizierte und motivierte Mitarbeiter sind entscheidend für den nachhaltigen Erfolg eines Unternehmens. Linde bietet seinen Mitarbeitern anspruchsvolle Aufgaben in einem internationalen Umfeld und ausgewählte Programme zur beruflichen und persönlichen Weiterentwicklung. Diese Programme sind auf die individuellen Fähigkeiten und Potenziale und die jeweilige Funktion zugeschnitten – damit sich jeder Einzelne im Sinne des Ganzen einbringen kann.

## H

### Herausforderung Großprojekt

Wie wichtig die Verbindung aus professionellem Können, praktischer Erfahrung, interkultureller Kompetenz sowie Kooperations- und Führungsfähigkeit für den Erfolg eines Projekts ist, zeigt sich bei der Konzeption und Errichtung von großen Industrie-Anlagen.

Dabei kommt es nicht nur darauf an, die für die jeweiligen Kundenanforderungen passenden Technologien zu entwickeln und den termingerechten Einkauf der Materialien, Bauteile und Aggregate sicherzustellen. Ebenso wichtig ist es, die zahlreichen Partner und Zulieferer, die Logistik sowie die Personalplanung bis zur Inbetriebnahme der Anlage zu koordinieren. Dies erfordert eine enge und reibungslose Zusammenarbeit der beteiligten Teams – über Bereichs- und Ländergrenzen hinweg.

Wie derartige Herausforderungen bewältigt werden können, beweist Linde derzeit beispielhaft bei zwei anspruchsvollen Projekten: beim Bau einer großen Luftzerlegungs-Anlage im indischen Jamshedpur (siehe Interview Seite 06) und in Katar, wo das Unternehmen im Auftrag von Shell GTL Ltd. den weltweit größten Komplex von Luftzerlegungs-Anlagen errichtet hat (Pearl GTL). Die Inbetriebnahme dieser insgesamt acht Anlagen, die in Summe

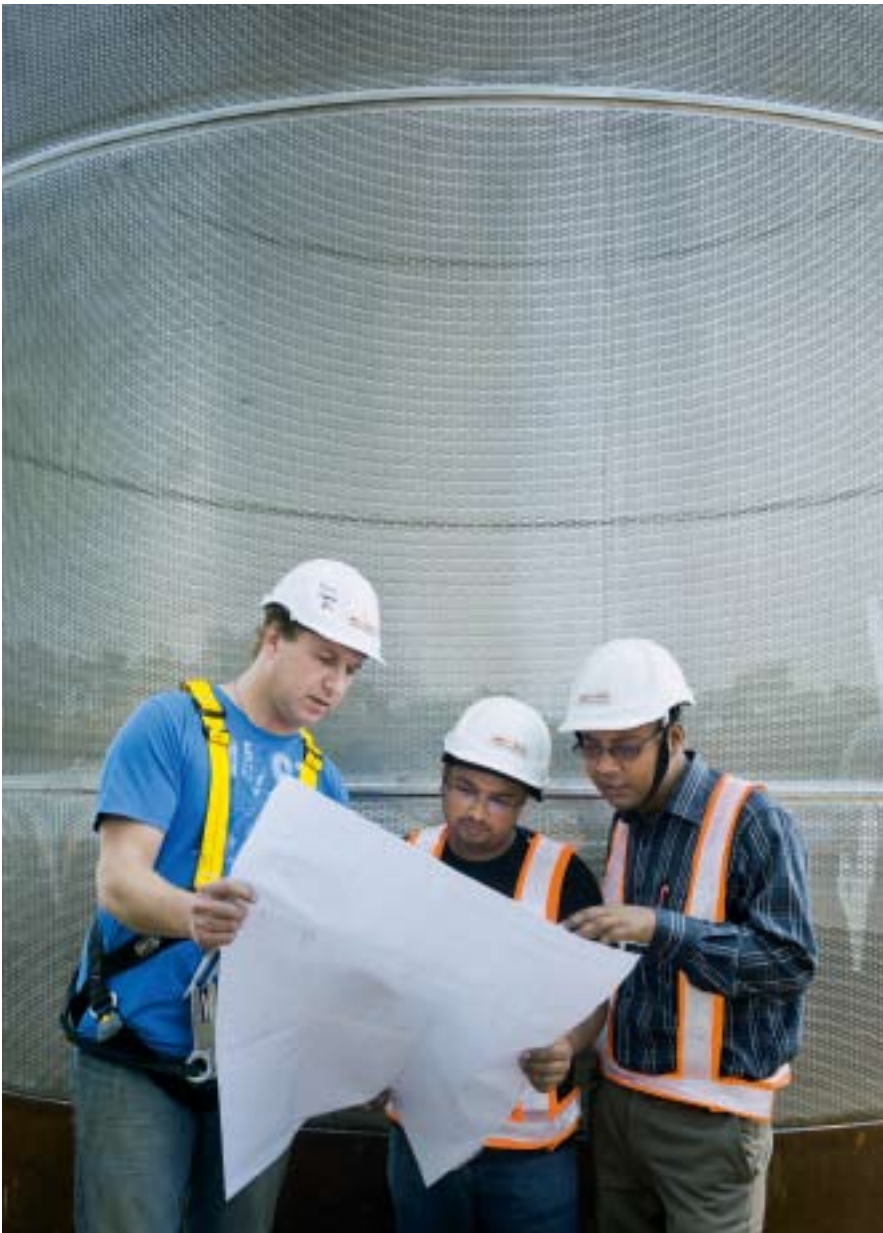

↳ Bei Großprojekten unerlässlich: die detaillierte Abstimmung vor Ort.

860.000 Kubikmeter Sauerstoff pro Stunde produzieren werden, soll im laufenden Jahr 2011 erfolgen. Der Sauerstoff wird zur Herstellung von flüssigen Kraftstoffen aus Erdgas benötigt (GTL = Gas-to-Liquids; siehe Glossar).

## Eine internationale Karriere

Ralf Forster begleitet als Baustellenkaufmann für Linde das Großprojekt vor Ort in Katar. Er kümmert sich in dieser Funktion jedoch nicht nur um die finanziellen Angelegenheiten mit dem Baukontraktor, sondern auch um die Arbeitsabläufe auf der riesigen Baustelle in Ras Laffan Industrial City. Eine komplexe Aufgabe, denn neben den rund 190 internationalen Linde Mitarbeitern mussten zudem zeitweise bis zu 4.000 Arbeiter, Ingenieure und andere Fachkräfte koordiniert werden. „Es geht darum, eine Herausforderung zu meistern und einen wichtigen Beitrag für unser Unternehmen zu leisten“, sagt Forster.

Dazu zählt für Forster auch der intensive Austausch mit den beteiligten Fachbereichen in Lindes Engineering-Zentrale in Deutschland. „Nur durch diese regelmäßigen Gespräche und die enge Abstimmung untereinander können wir unser Projekt sauber umsetzen.“ Am liebsten ist der Kaufmann aber dort, wo alles zusammenfließt: „Wenn man sieht, wie ein Luftzerleger montiert wird und wir unseren Ruf als verlässlicher Partner damit erneut bestätigen können, macht das schon ein bisschen stolz.“

Internationale Einsätze sind für Forster in seinen bisher 21 Jahren bei Linde kein Neuland. Ende der 90er Jahre betreute er ein Projekt in Südafrika, danach ging es für die Errichtung einer Ethylen-Anlage nach Abu Dhabi. In vielfacher Hinsicht außergewöhnlich war Forsters Aufgabe bei der nächsten Auslandsstation: Er begleitete den Bau der größten europäischen Erdgasverflüssigungs-Anlage auf der Insel Melkøya vor Hammerfest in Nordnorwegen. Auch hier organisierte Forster die Vertragsabwicklung mit dem Kunden, den Personaleinsatz und die Unterbringung der bis zu 3.500 Fachkräfte und Montagearbeiter, darunter zu Spitzenzeiten 210 Linde Mitarbeiter und rund 100 Experten des Auftraggebers Statoil.

„Das Besondere an Hammerfest war, dass ich mich auf die spezifischen Gewohnheiten und Eigenarten von Menschen aus bis zu 64 Nationen einstellen musste“, erzählt er. „Aber genau das macht den meisten Spaß: die Zusammenarbeit mit Kolleginnen und Kollegen aus den verschiedensten Teilen der Welt.“ Seit Forster in Katar tätig ist, vertritt Claudia Gebert das Unternehmen für das Projekt in Hammerfest. Auch mit seiner Nachfolgerin führt er einen stetigen Erfahrungsaustausch.

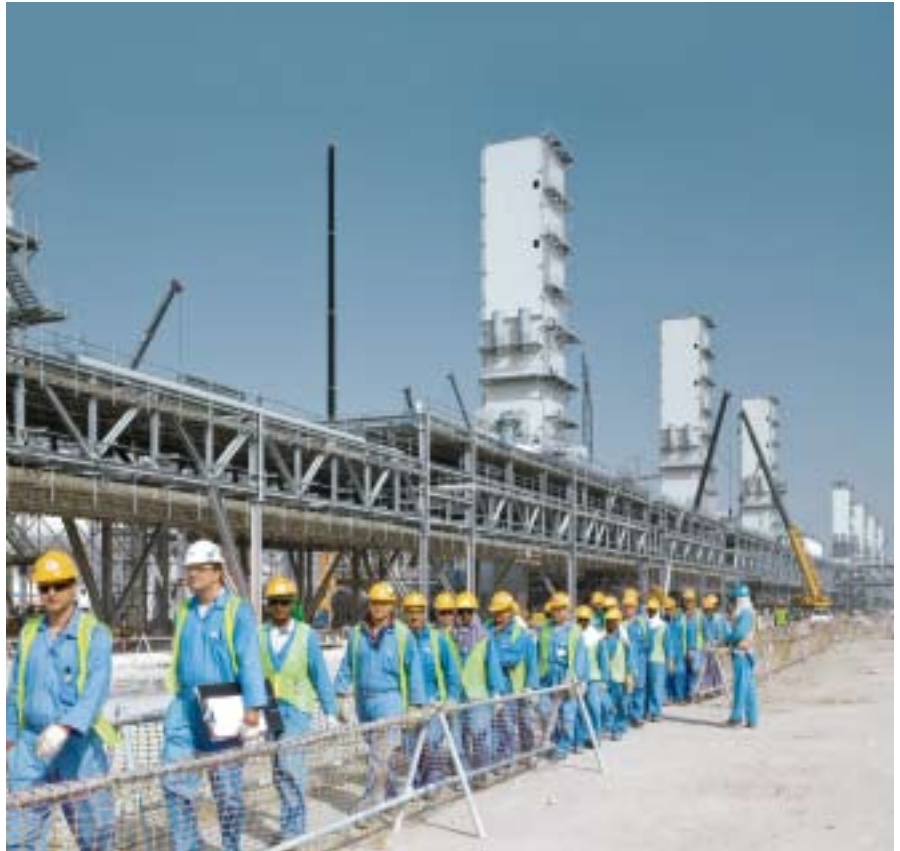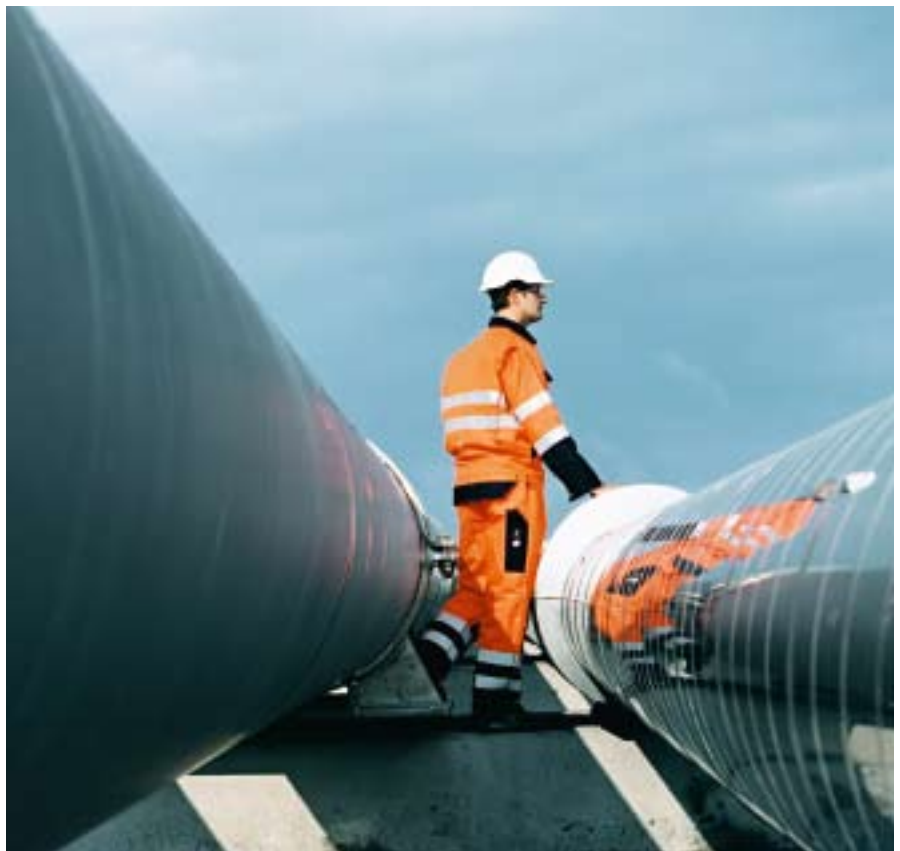

↳ (oben) In Katar hat Linde den weltweit größten Komplex von Luftzerlegungs-Anlagen errichtet.

↳ (unten) Ralf Forster begleitete für Linde den Bau der größten Erdgasverflüssigungs-Anlage Europas in Hammerfest (Nordnorwegen).

## Know-how-Transfer im Tandem

Für einen Technologie-Konzern wie Linde ist es wichtig, das durch die Mitarbeiter über die Jahre gesammelte Wissen im Unternehmen zu bewahren. Lindes Engineering Division setzt dazu auf ein System der Wissensweitergabe und Vertiefung von Fachkenntnissen, das über zwei Jahrzehnte gewachsen ist. Kernpunkt dieses Ansatzes ist ein so genanntes Tandem: Dabei bilden jeweils ein erfahrener und ein jüngerer Mitarbeiter ein Team, das gemeinsam ein Fachgebiet betreut. Mit der Weitergabe des umfassenden Wissens durch ältere Mitarbeiter in der täglichen Arbeit können deren Nachfolger zügig in verantwortungsvolle Aufgaben hineinwachsen.

Dieses Expertenduo tauscht nicht nur seine Kenntnisse und Erfahrungen untereinander aus, sondern nimmt auch regelmäßig an Fachkongressen teil. Somit wird sichergestellt, dass Linde auf den für das Unternehmen relevanten Gebieten stets auf dem neuesten Stand von Wissenschaft und Technik ist.

## KQP – der kontinuierliche Qualifikationsprozess

Die Linde Gases Division hat für die stetige Weiterentwicklung ihrer Mitarbeiter in Deutschland einen strukturierten kontinuierlichen Qualifikationsprozess (KQP) für sämtliche Funktionen des Unternehmensbereichs eingeführt. Das Programm erstreckt sich über mehrere Jahre und ist in fünf Phasen aufgeteilt. Zunächst werden die übergreifenden strategischen Ziele vermittelt und die unterschiedlichen Aufgabenbereiche beschrieben. In einem nächsten Schritt erlernen die Teilnehmer durch gezielte Schulungen die Kenntnisse und Fertigkeiten, die für die jeweilige Aufgabe erforderlich sind. Das jährliche Mitarbeitergespräch gewährleistet die Kontinuität in der Umsetzung und bildet die Grundlage für etwaige Anpassungen und Verbesserungen. Bei erfolgreichem Abschluss des Programms erhält jeder Mitarbeiter ein Zertifikat, das seine Eignung für die jeweilige Funktion bestätigt.

## Fördern und fordern

Einmal jährlich führt Linde in Zusammenarbeit mit der University of Oxford den Global Leadership Development Circle (GLDC) durch. Das Programm erstreckt sich über mehrere Monate und umfasst drei mehrtägige Unterrichtsmodule, in denen die Themenfelder Unternehmensstrategie, Finanzen und Wirtschaft sowie Führung behandelt werden. In den dazwischen liegenden Wochen arbeiten die Teilnehmer – zusätzlich zu ihrer eigentlichen beruflichen Tätigkeit – an konkreten Aufgabenstellungen aus der Unternehmenswirklichkeit (siehe auch Interview Seite 12).

Mit dem Global Talent Circle richtet sich Linde an die jungen Potenzialträger im Unternehmen. Im Mittelpunkt des Lehrplans stehen auch hier die Fächer strategisches Denken, Finanzmanagement, unternehmerisches Handeln und Führungsfähigkeit.

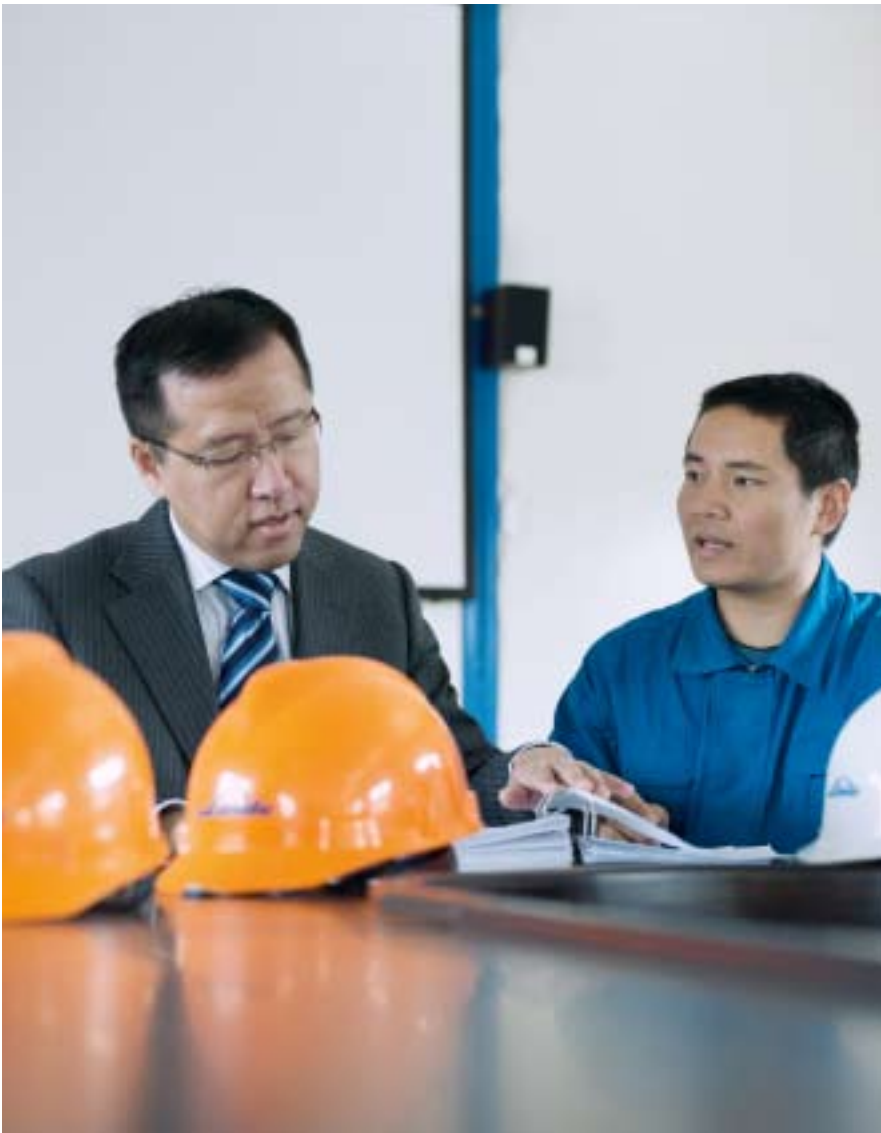



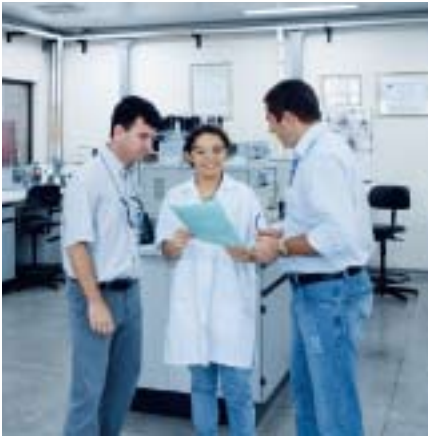

↳ Mit Teamwork zum Erfolg: Mitarbeiter im Zylinder-Füllwerk in Jundiaí bei São Paulo (Brasilien).

Der KQP bietet sowohl für den einzelnen Mitarbeiter wie für das Unternehmen viele Vorteile: Die Harmonisierung der Geschäftsprozesse wird durch die Ausrichtung an einheitlichen Tätigkeitsbeschreibungen vorangetrieben. Dies erleichtert auch die Integration von Tochtergesellschaften. Zudem profitieren die Mitarbeiter von der objektiven und transparenten Einstufung ihrer individuellen Leistung. Die Zertifizierung ist ein wichtiger Nachweis über Qualifikationsstandards – auch gegenüber Kunden. Sie eröffnet talentierten Mitarbeiterinnen und Mitarbeitern zudem weitere Entwicklungsmöglichkeiten im Unternehmen.

## Linde University – gezielte Führungskräfteentwicklung

Unter dem Dach der Linde University hat das Unternehmen ein internationales Trainingsprogramm für die Führungskräfteentwicklung und das Talent Management eingerichtet. Derzeit bietet Linde auf Konzernebene drei Qualifizierungsmaßnahmen an, die sich an Führungskräfte unterschiedlicher Hierarchieebenen richten: das Global Leadership Programme (obere Führungskräfte), den Global Leadership Development Circle (mittleres Management) sowie sowohl, einen globalen, als auch regionale Talent Circle (Führungsnachwuchs). Die jeweiligen Lehrpläne umfassen sowohl Präsenzunterricht als auch onlinebasierte, interaktive Lernprogramme sowie Projektarbeit.

Linde setzt dabei auf die Zusammenarbeit mit international führenden Business Schools und bindet zudem das Top-Management ein. Damit gewährleistet das Unternehmen einen engen Praxisbezug.

Charakteristisch für die Programme der Linde University: Das Teilnehmerfeld ist stets bereichsübergreifend und international zusammengesetzt und bietet damit beste Voraussetzungen für den Aufbau von informellen Netzwerken innerhalb des Unternehmens.

## Erfindergeist fördern

Seit 2006 fördert Linde den Erfindergeist und die Kreativität seiner Mitarbeiter durch die so genannten Patent & Innovation Awards. Mit dieser Auszeichnung würdigt das Unternehmen alljährlich die jeweils besten Neuentwicklungen in den Kategorien „Technologische Erfindung“, „Kommerzielle Erfindung“ und „Unternehmensinnovation“. Im Jahr 2010 wurden neun herausragende Patente prämiert. Der Linde Innovators Club zählt inzwischen mehr als 100 Mitglieder.

Linde hat im vergangenen Jahr zur Absicherung der haus-eigenen Innovationen konzernweit 232 Erfindungen zum Patent angemeldet. Damit sind die Technologien des Unternehmens derzeit durch insgesamt 2.788 Patente geschützt.

# Wissenswertes.

## Linde Kompetenz weltweit gefragt.

Verteilung der Projekte von Linde Engineering nach Regionen.  
Auftragseingang 2008–2010. Auftragswert ab 10 Mio. EUR.

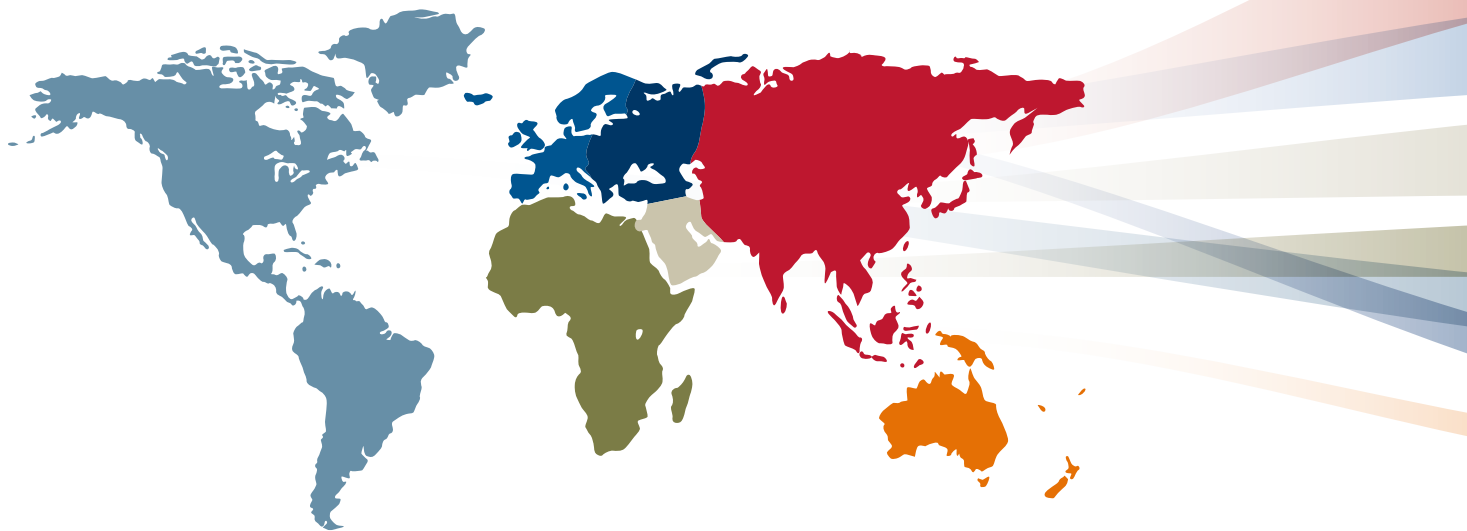

## Loyale Linde Mitarbeiter.

Durchschnittliche Betriebszugehörigkeit von Mitarbeitern der Linde Group in Jahren im Vergleich zu verschiedenen nationalen/regionalen Durchschnittswerten.

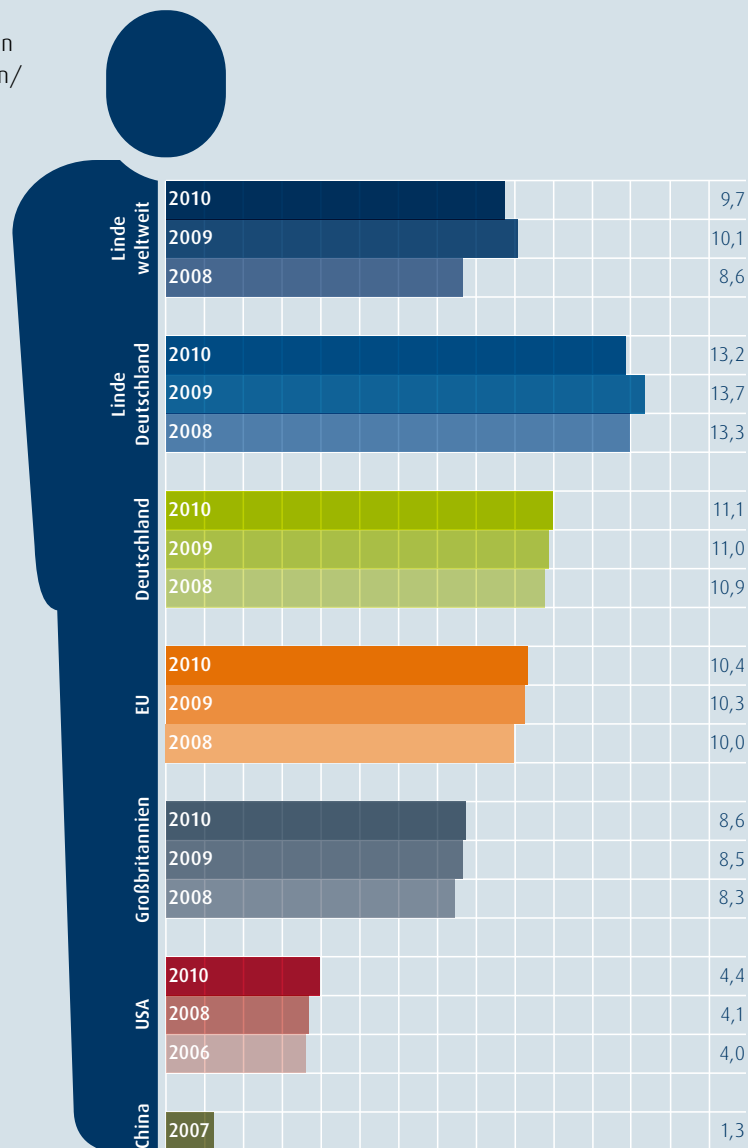

Quelle: Linde AG, 2010. Andere Quellen: Eurostat, BLS, News Release, „Employer Tenure in 2010“.

30 %

17 %

16 %

11 %

11 %

9 %

5 %

**ASIEN:** Benxi (CHN) · Changwu (CHN) · Chah Pan (CHN) · Ningdong (CHN) · Erdos Yankuang (CHN) · Laiwu (CHN) · Wujing (CHN) · Nanjing (CHN) · Taiyuan (CHN) · Jimunai (CHN) · Urumqi (CHN) · Zhang Jia Gang (CHN) · Jamshedpur (IND) · Talaja (IND) · Orissa (IND) · Rourkela (IND) · Mumbai (IND) · Barauni (IND) · Hospet (IND) · Duburi (IND) · Dahej (IND) · Hwasung (KOR) · Ulsan (KOR) · Pasir Gudang (MYS) · Kaohsiung (TWN) · Taichung (TWN) · Temirtau (KAZ)

**WESTEUROPA:** Leuna (DEU) · Nünchritz (DEU) · Duisburg (DEU) · Schwedt (DEU) · Bernburg (DEU) · Motherwell (GBR) · Scunthorpe (GBR) · Milazzo (ITA) · Piombino (ITA) · Hammerfest (NOR) · Sines (PRT) · Sagunto (ESP) · Cartagena (ESP) · Nynäshamn (SWE) · Basel (CHE)

**NAHER OSTEN:** Haifa (ISR) · Ras Laffan (QAT) · Al-Jubail (SAU) · Abu Dhabi (ARE) · Ruwais (ARE) · Mirfa (ARE)

**AFRIKA:** Reghaia (DZA) · Sukhna (EGY) · Helwan (EGY) · Suez (EGY) · Pretoria (ZAF) · Secunda (ZAF) · Sasolburg (ZAF)

**AMERIKA:** McMurray (CAN) · Poza Rica (MEX) · Mount Vernon (USA) · Houston (USA) · Deer Park (USA) · Garden Creek (USA) · Tulsa (USA) · Resende (BRA) · Puerto La Cruz (VEN) · El Tablazo (VEN)

**OSTEUROPA:** Kazincbarcika (HUN) · Galati (ROU) · Constanta (ROU) · Moskau (RUS) · Vorsino (RUS) · Novy Urengoy (RUS) · Nowokuibyschewsk (RUS) · Tobolsk (RUS) · Jekaterinburg (RUS)

**OZEANIEN:** Gladstone (AUS) · Dandenong (AUS) · Karratha (AUS)

Quelle: Linde AG, 2010.

### Kulturelle Unterschiede.

Visualisierung einer internationalen Studie über Motivationsfaktoren im Arbeitsalltag.

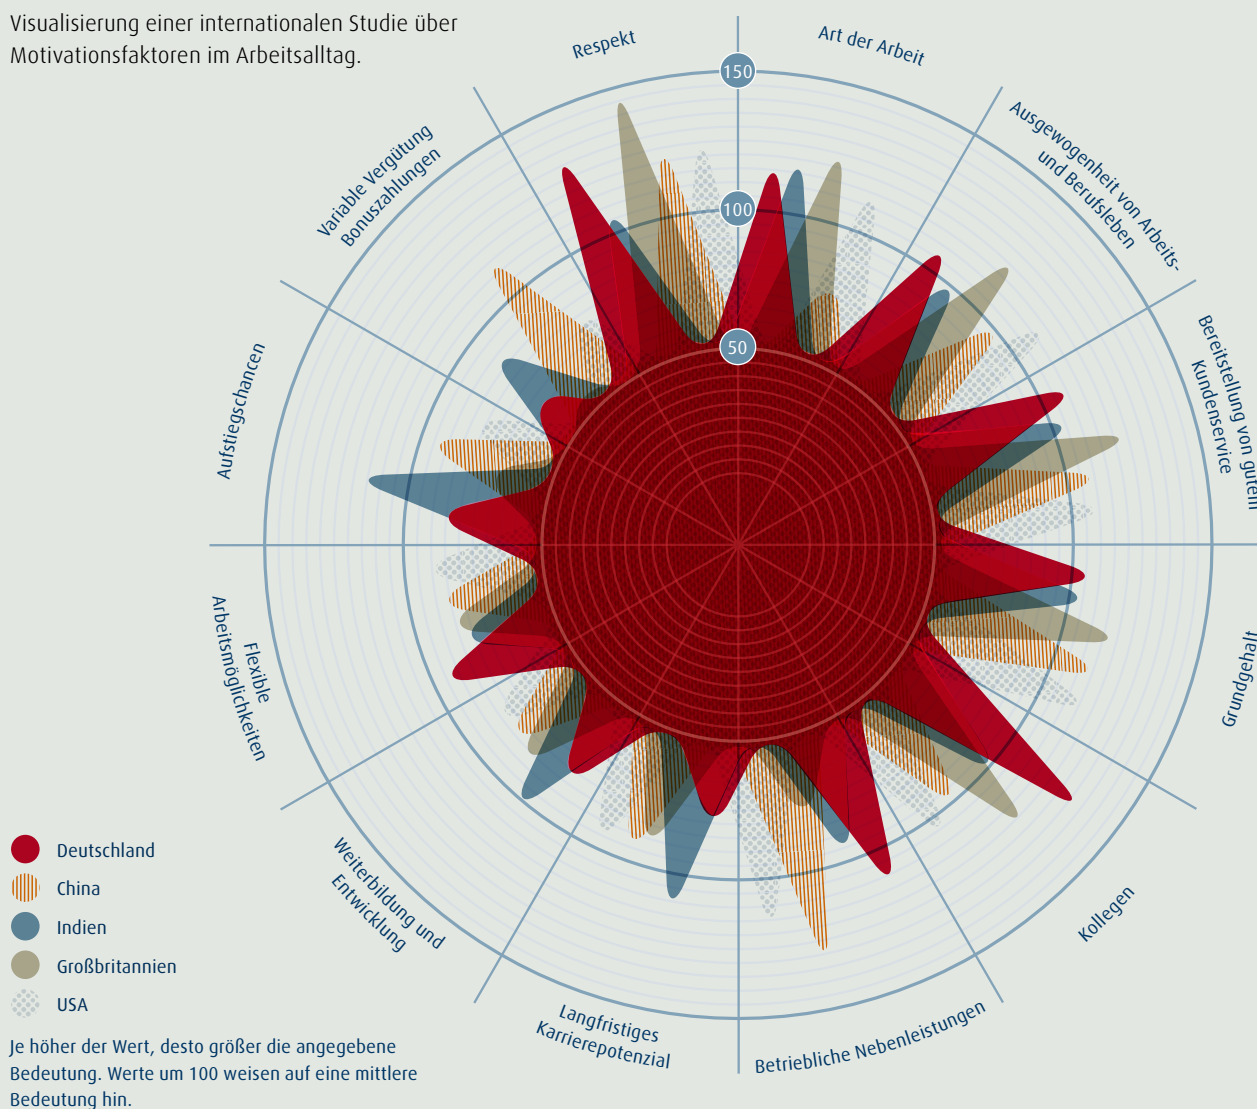

Quelle: Mercer-Studie „Engaging employees to drive global business success“, 2007.



↳ Wachstumsmarkt Südamerika:  
Quito (Ecuador).

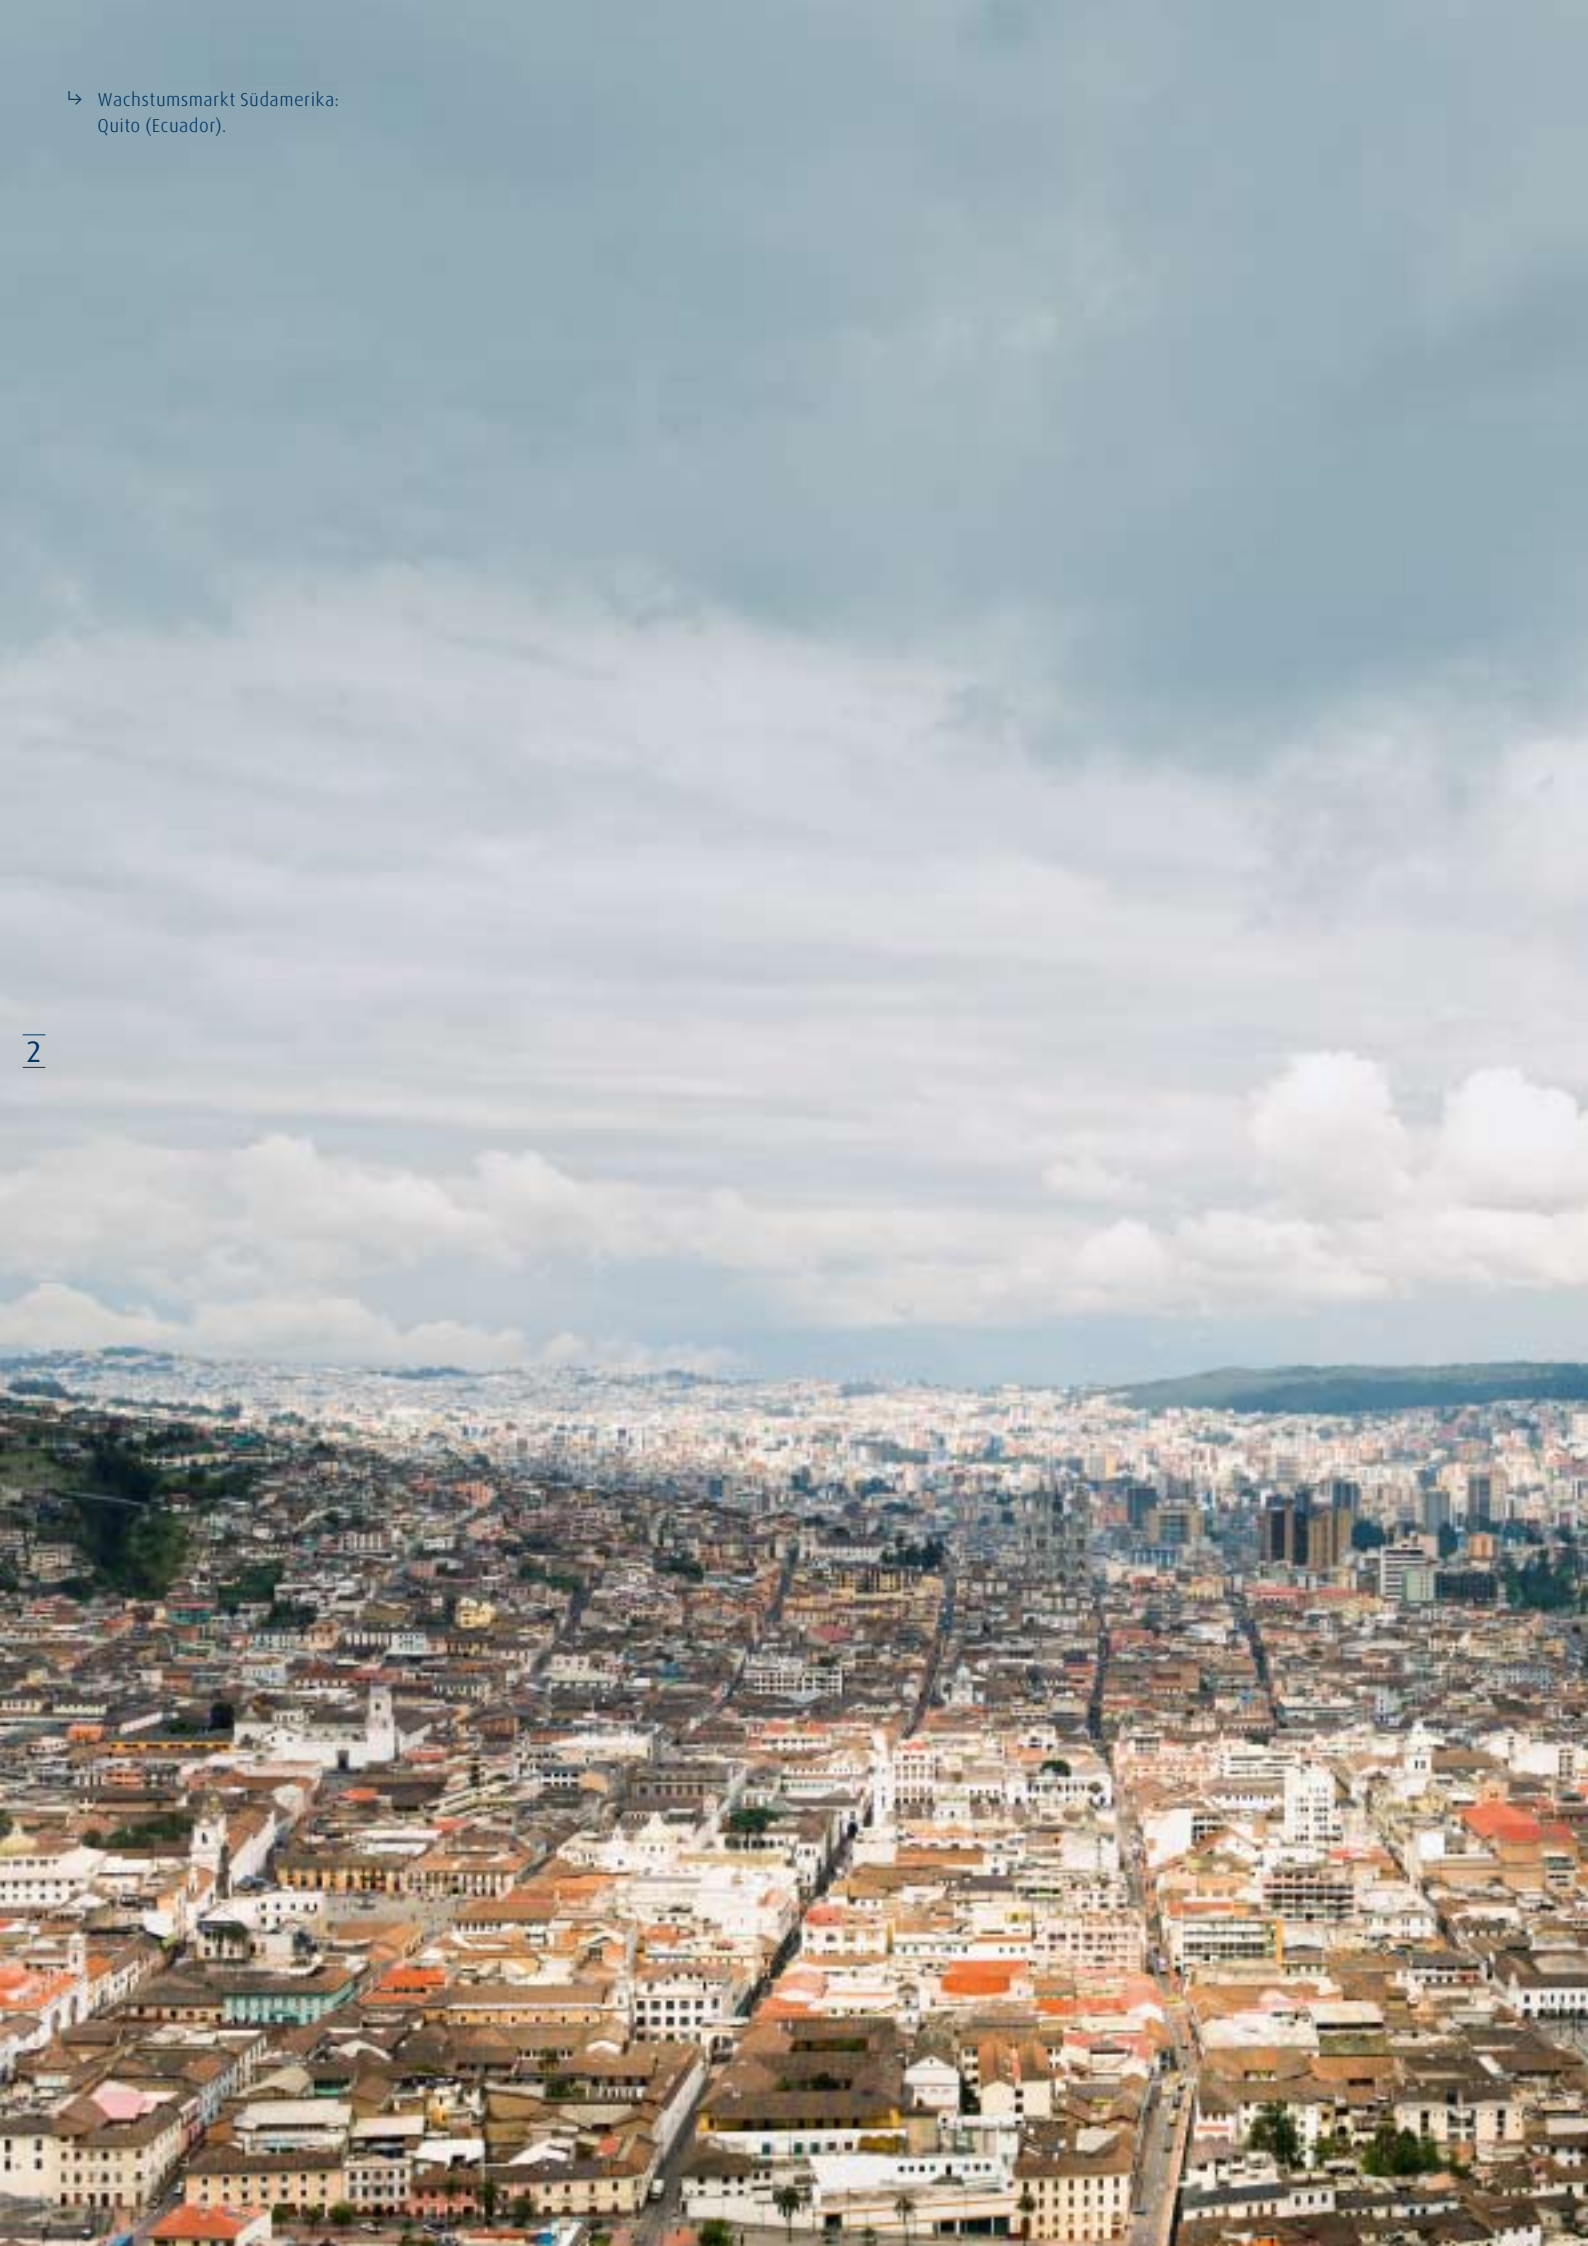



An aerial photograph of a densely populated city, likely Medellín, Colombia, showing a mix of modern high-rise buildings and traditional low-rise structures. The city is nestled in a valley with hills in the background under a cloudy sky. A semi-transparent blue rectangle is overlaid on the upper portion of the image, containing white text.

## 2. Technologie und Produkte

# „Wodurch wird ein Produkt wertvoll?“

Qualitativ hochwertig soll es sein, zuverlässig und sicher in der Anwendung. Doch ein gutes Produkt bietet noch mehr: eine Kundenbeziehung, die auf Vertrauen basiert.



## „Linde ist ein Partner, nicht nur ein Lieferant.“

Dr. Francisco López ist Leiter der Clínica Pichincha in Quito, Ecuador, und ein langjähriger Linde Kunde. Im Interview erläutert er, was er bei der Versorgung mit medizinischen Gasen von einem Unternehmen erwartet.

Herr Dr. López, Ihre Klinik vertraut bei der Versorgung mit medizinischen Gasen auf die Produkte und Serviceleistungen von Linde. Welche Anforderungen stellen Sie an Ihren Lieferanten?

↳ Wir Ärzte müssen uns darauf verlassen können, dass die medizinischen Gase, die wir zur Behandlung unserer Patienten einsetzen, von höchster Qualität und Reinheit sind. Wenn es um Menschenleben geht, können wir keine Kompromisse machen und uns mit dem zweitbesten Medikament zufriedengeben. Dies gilt ebenso für die technische Ausrüstung zur Versorgung unserer Patienten.

Eine Frage des Vertrauens?

↳ Ja, absolut. Und dieses Vertrauen muss über die Jahre wachsen. Ich arbeite mit Linde, beziehungsweise mit AGA, die ja schon längst zum Linde Konzern gehört, bereits seit 25 Jahren zusammen. Ich habe seitdem immer nur positive Erfahrungen gemacht. Linde bietet uns Verlässlichkeit und Sicherheit. →

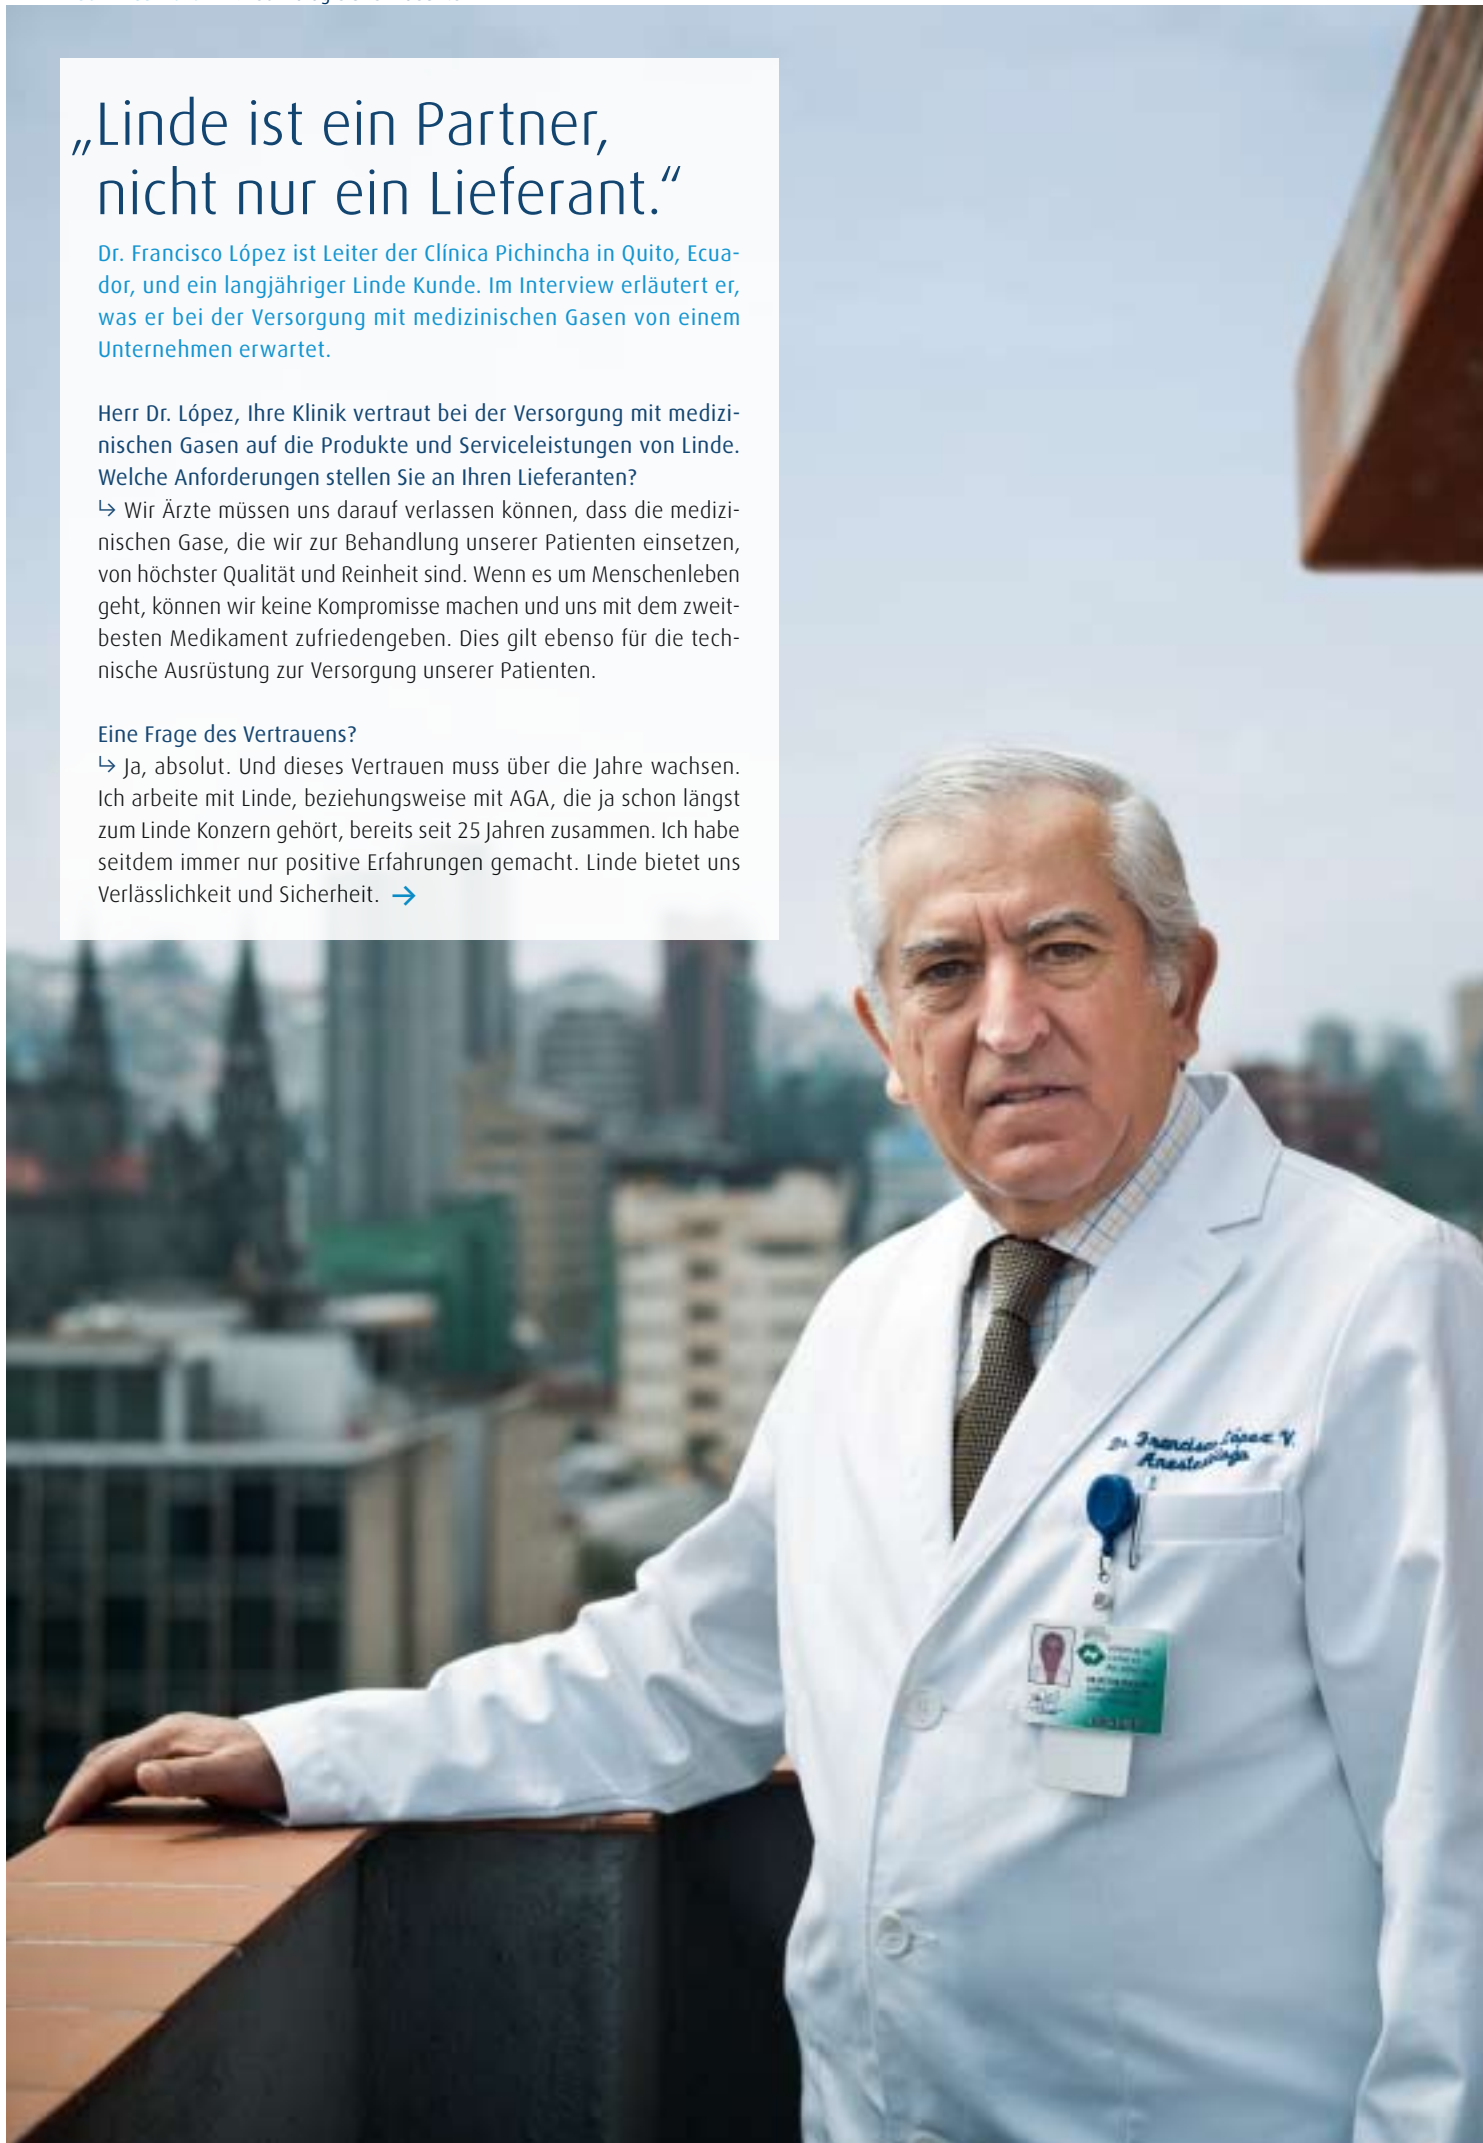

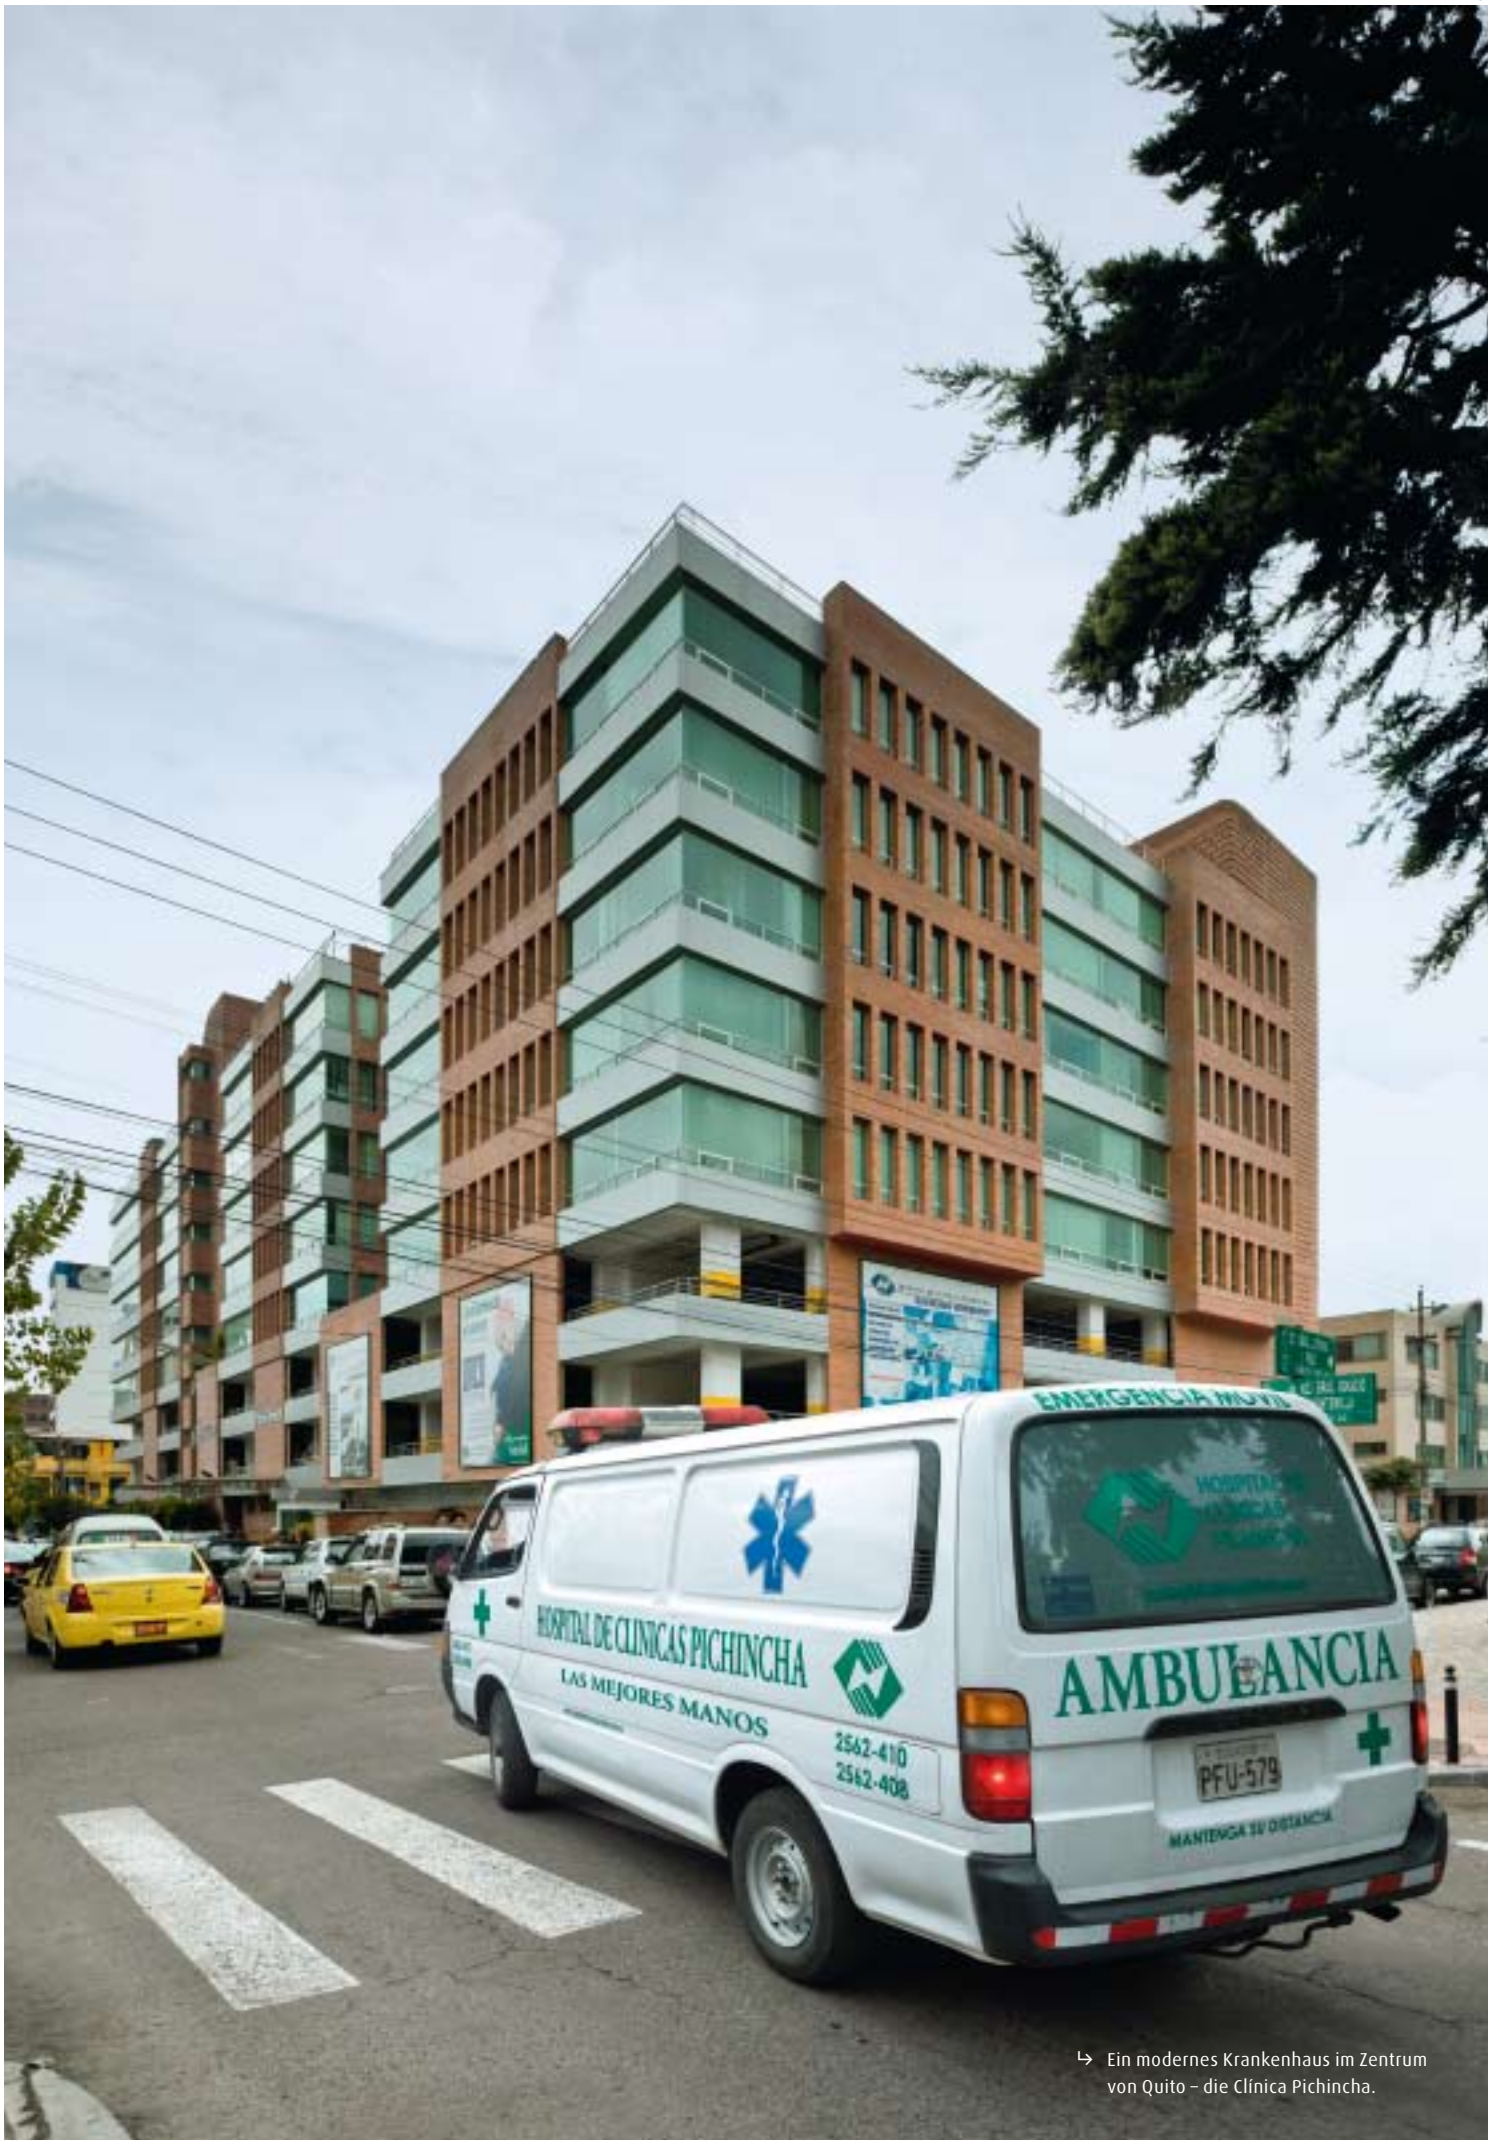

↳ Ein modernes Krankenhaus im Zentrum von Quito – die Clínica Pichincha.



### Gilt dies auch für die Service- und Beratungsleistungen?

↳ Das ist ein weiterer ganz wichtiger Punkt. In Notfällen darf es keine Verzögerungen, Ausfälle oder sonstigen Pannen geben, da müssen kompetente Fachkräfte sofort einsatzbereit sein. Nur so können wir unseren Patienten die bestmögliche Versorgung bieten.

Ich darf sagen: Mit Linde funktioniert dies sehr gut. Das Unternehmen ist ein Partner, nicht nur ein Lieferant.

### Was ist das Besondere an dieser Partnerschaft?

↳ Wir haben bei Linde Ansprechpartner, die sofort zur Verfügung stehen, sobald man sie braucht, und deren Rat uns und unseren Patienten hilft. Sie machen sich unser Anliegen zu eigen, übernehmen Verantwortung und stellen Sicherheit über alles.

### Das hört sich nach einer Partnerschaft mit Zukunft an ...

↳ Ja, wir werden unsere erfolgreiche Zusammenarbeit weiter fortsetzen. Erst kürzlich haben wir in unserem Krankenhaus einen neuen Operationssaal eingerichtet. Linde hat uns dafür die neueste Anwendungstechnik zur Versorgung mit medizinischen Gasen geliefert und kümmert sich auch um die regelmäßige Wartung. Wir sind sehr zufrieden.

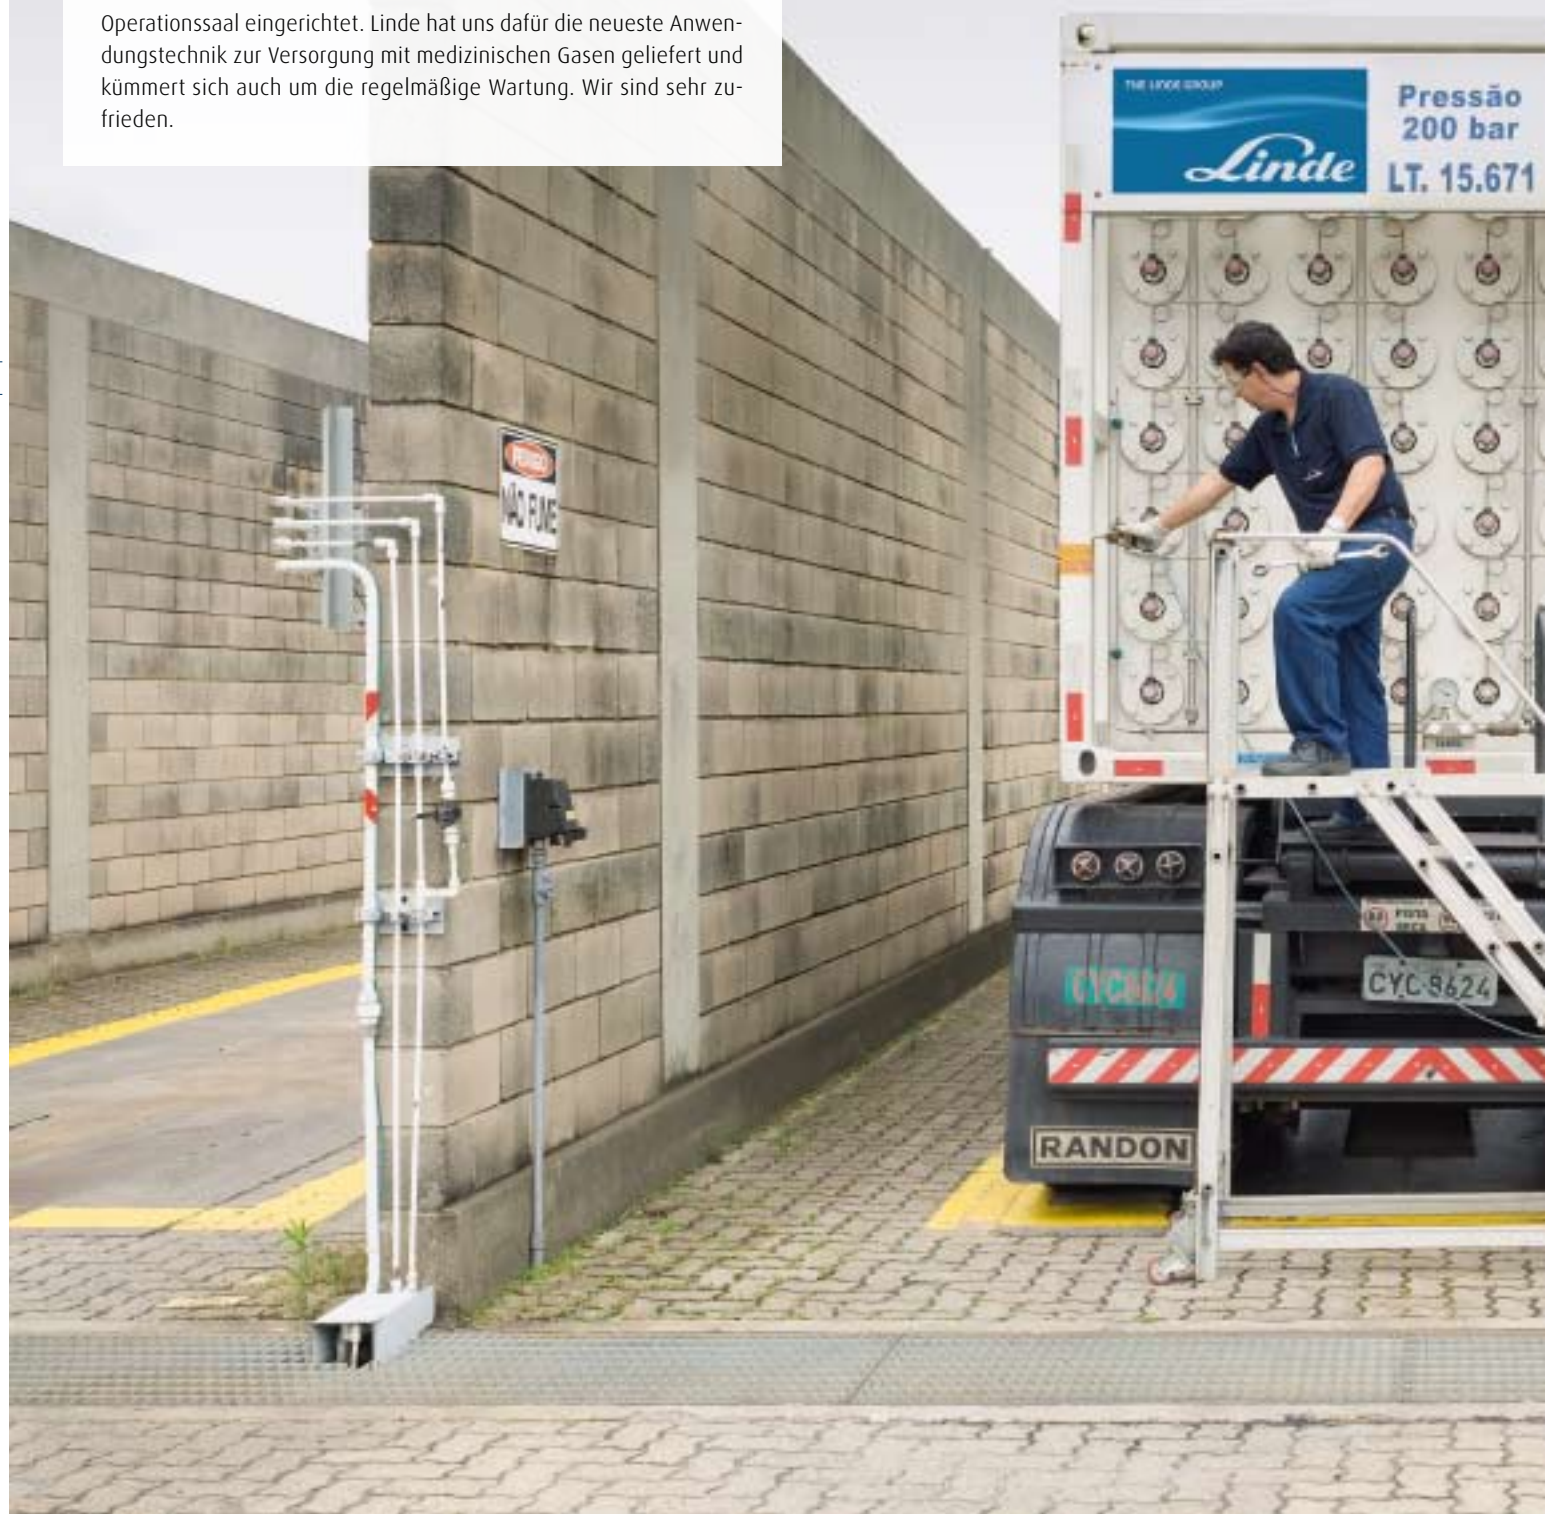

- ↳ Nicht nur bei medizinischen Gasen hat Sicherheit höchste Priorität, auch die Versorgung mit Wasserstoff muss reibungslos funktionieren, wie hier in Brasilien.

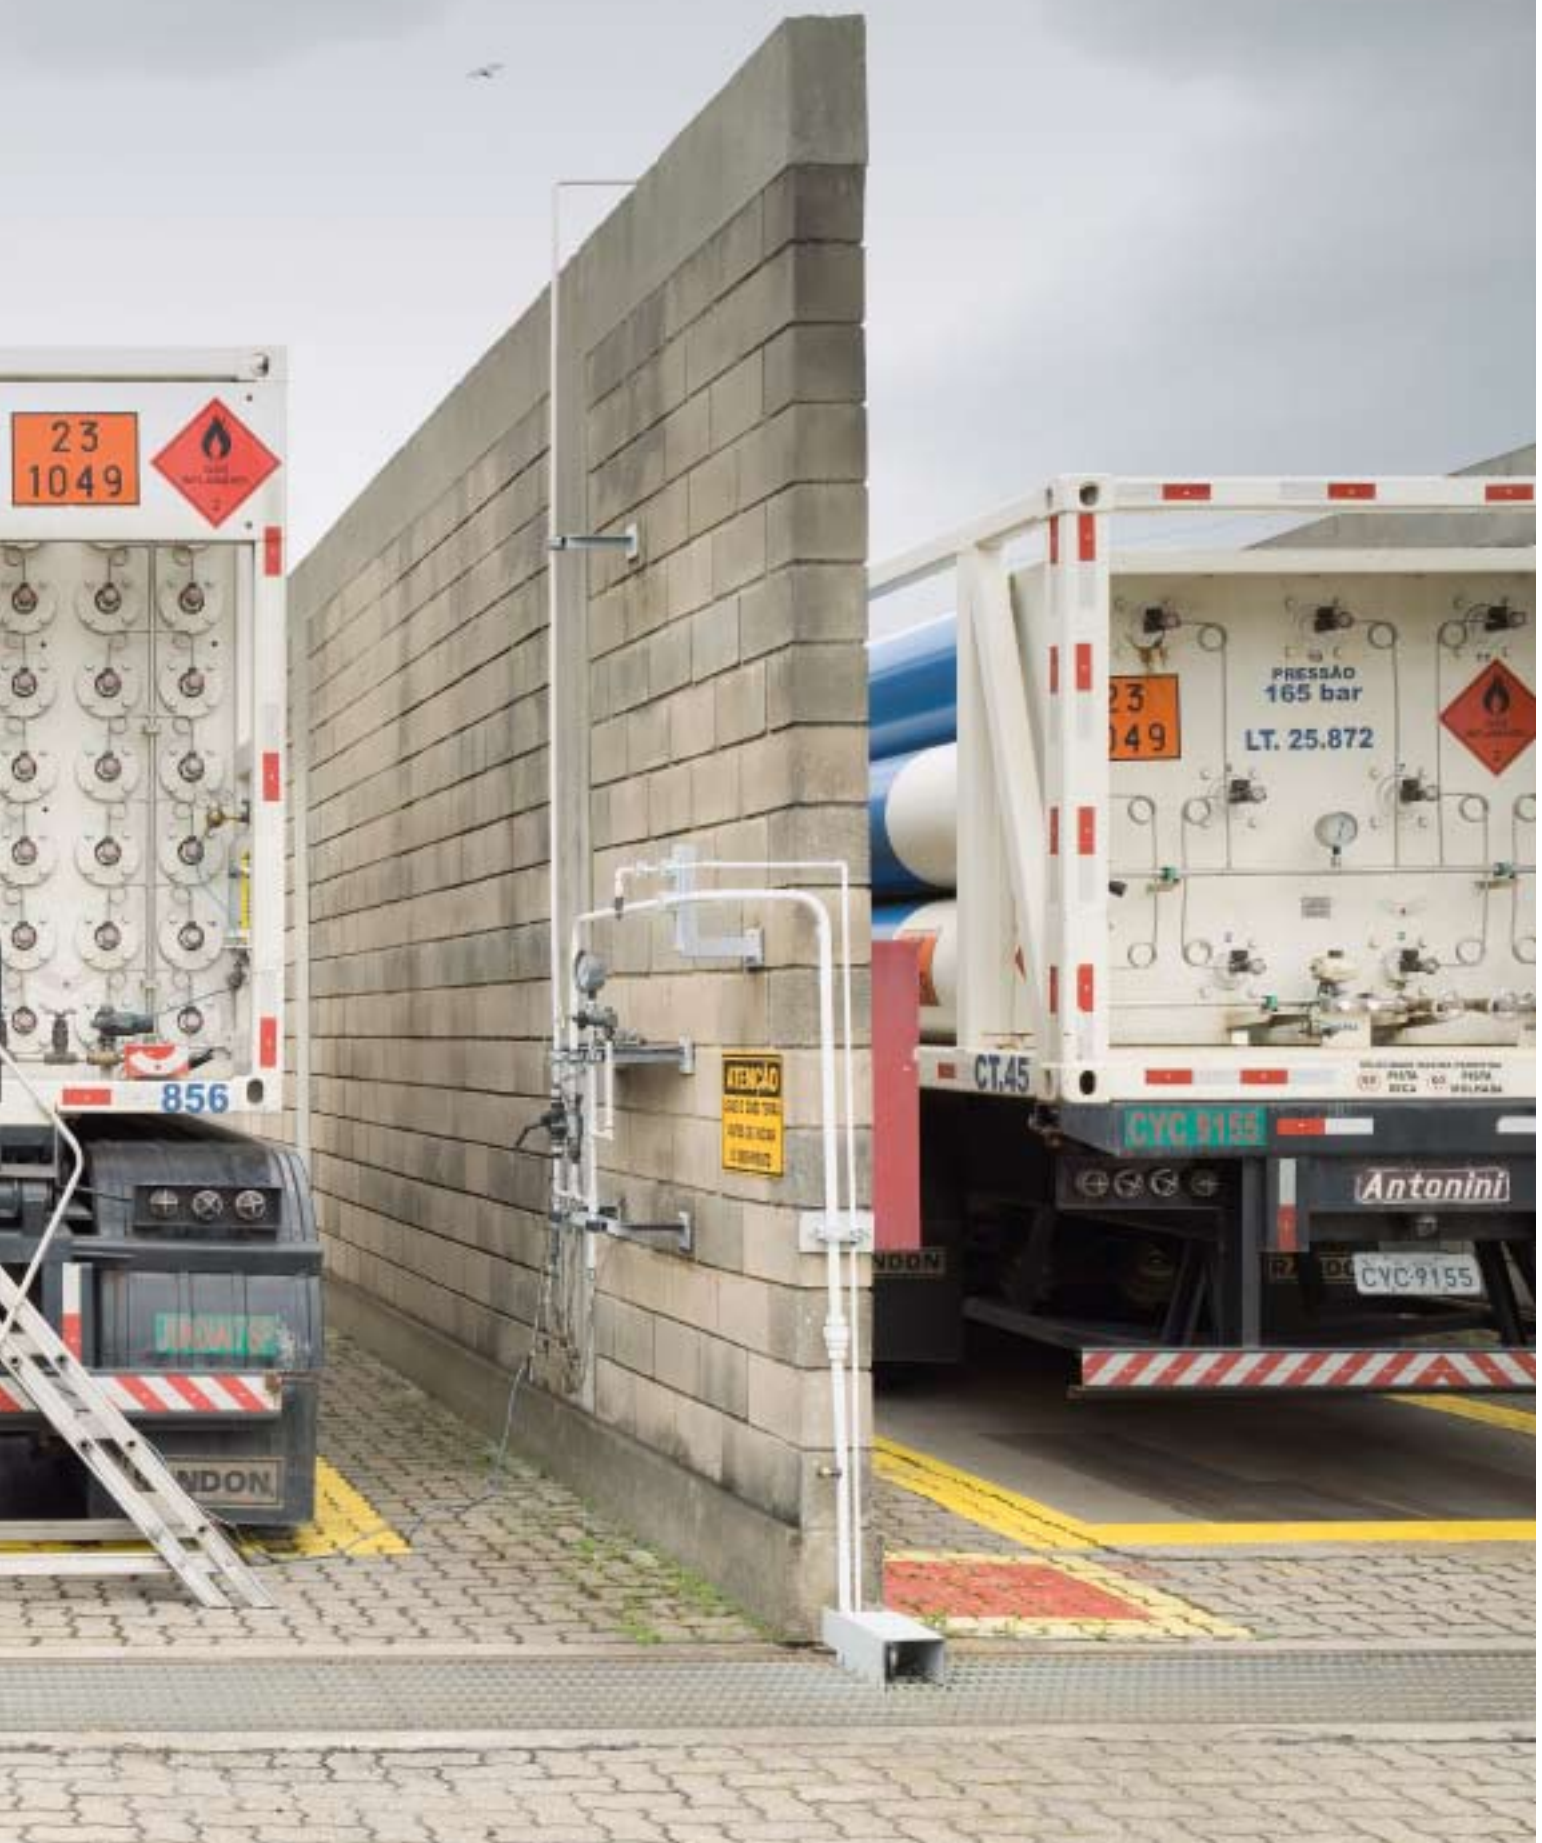



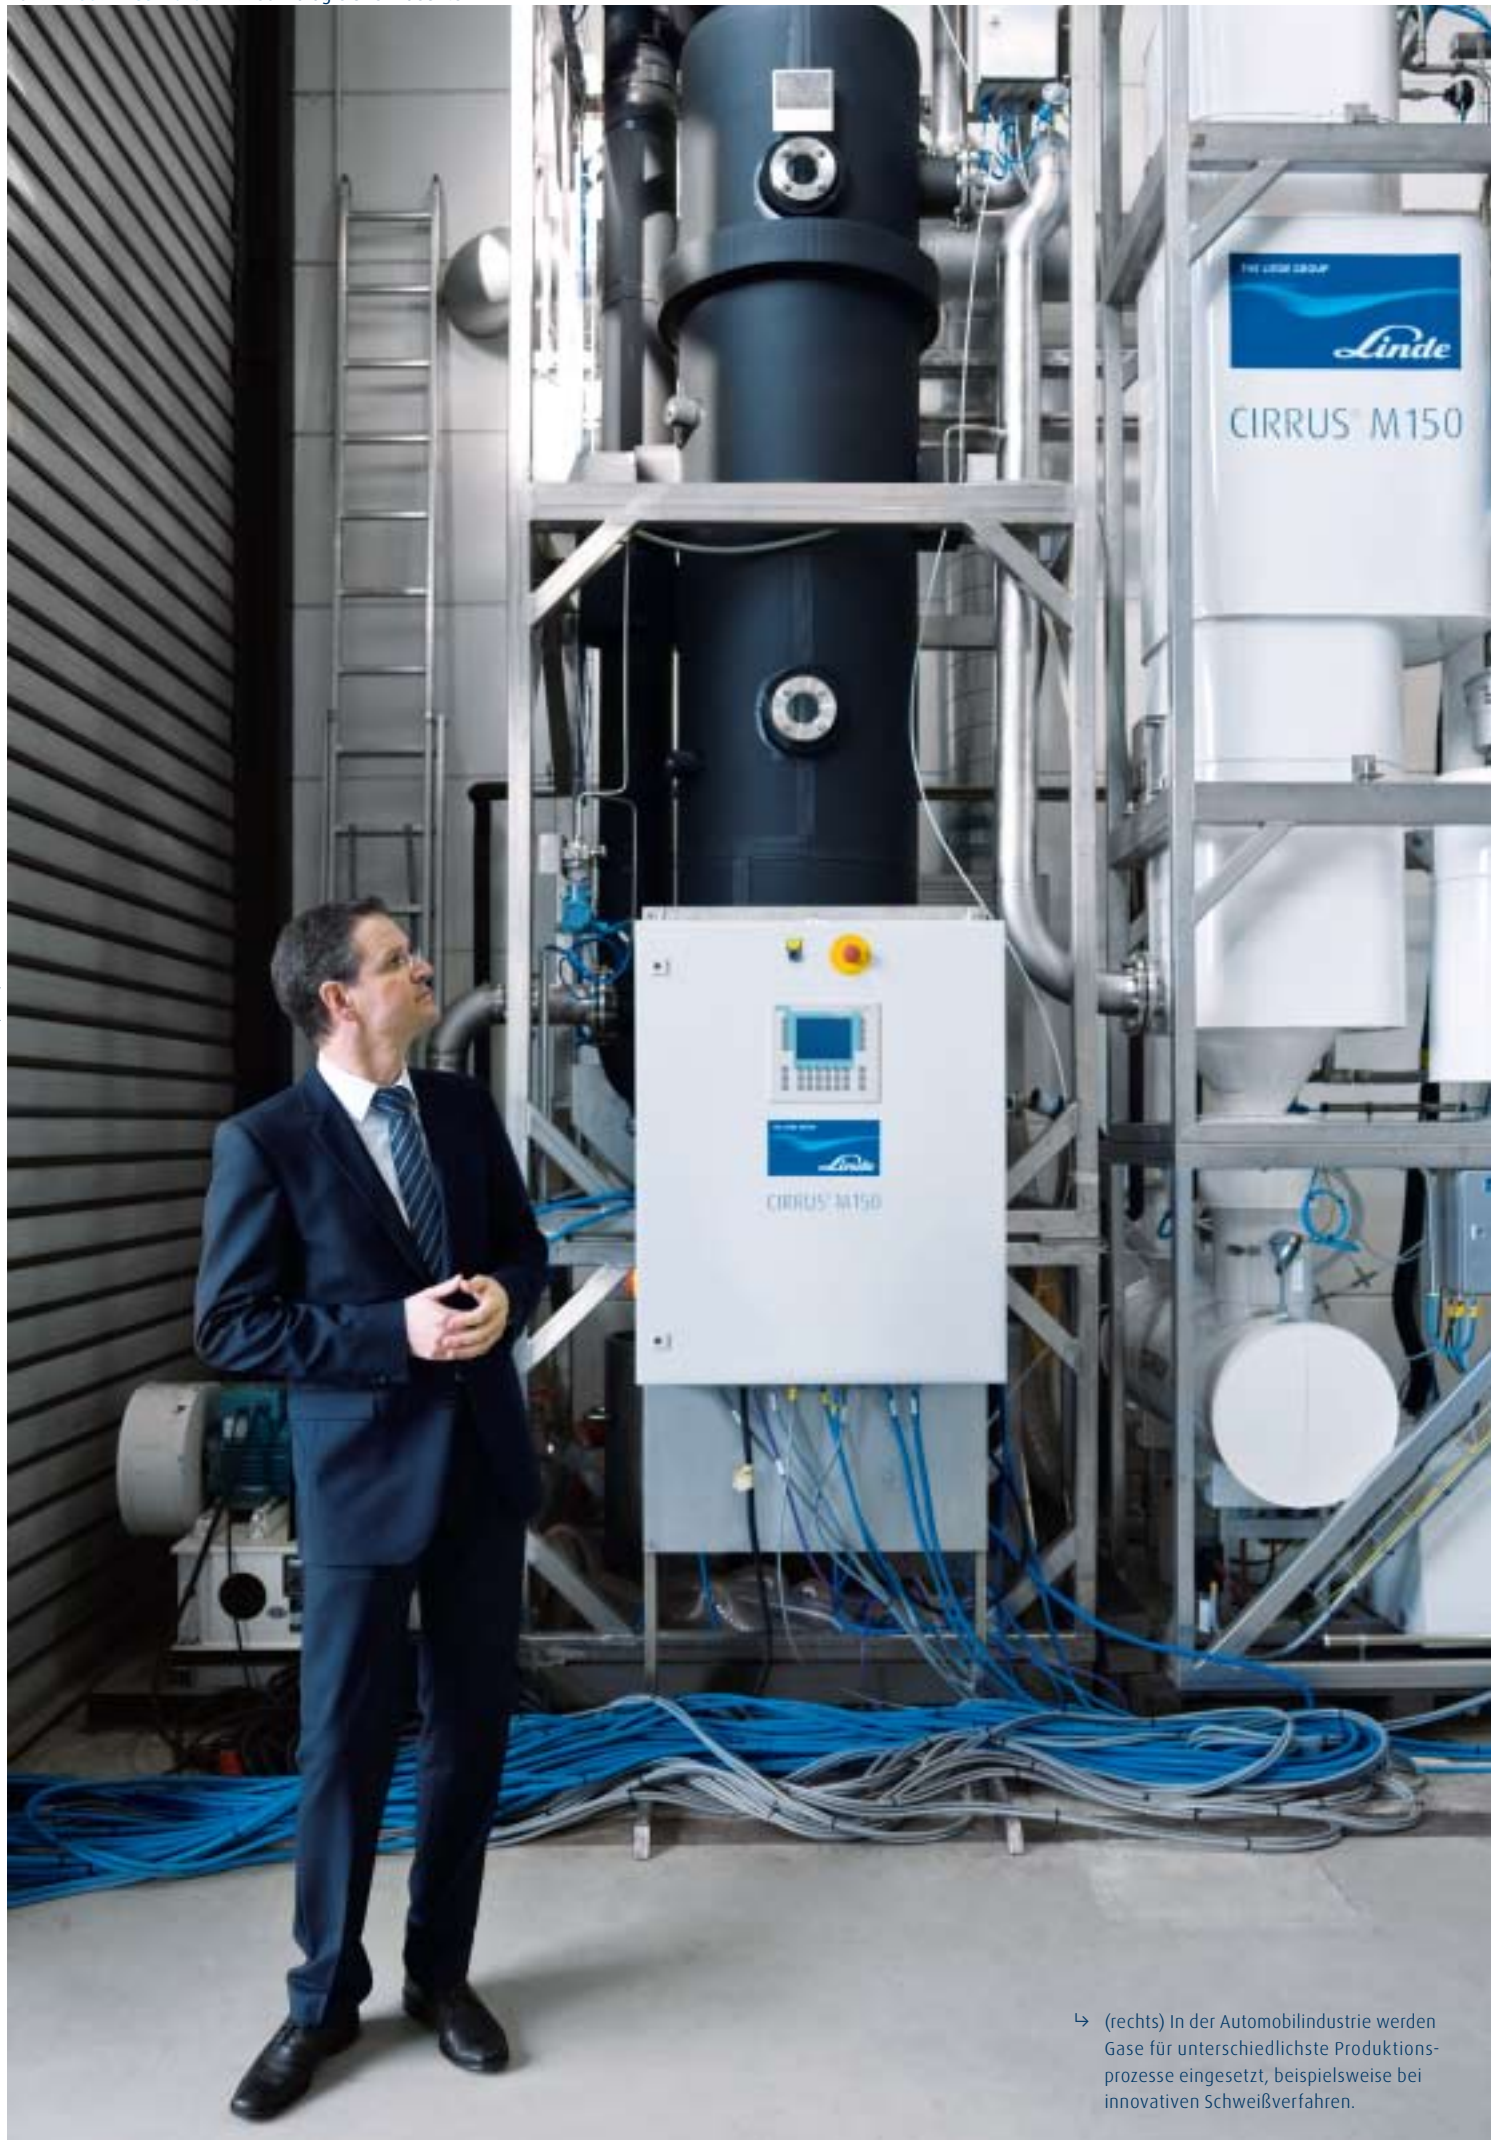

↳ (rechts) In der Automobilindustrie werden Gase für unterschiedlichste Produktionsprozesse eingesetzt, beispielsweise bei innovativen Schweißverfahren.



# „Wir verkaufen mehr als nur Moleküle.“

In seiner Funktion als Leiter des Bereichs Prozessindustrie treibt Volker Häckh die Forschungs- und Entwicklungsaktivitäten von Linde weltweit voran. Im Interview erklärt er, worauf es bei der Erschließung neuer Anwendungsbereiche besonders ankommt.

Herr Häckh, wie werden aus Sauerstoff, Stickstoff oder Wasserstoff – alles Elemente der Atmosphäre – wertvolle Produkte?

↳ Entscheidend ist, wie und wofür man diese Gase anwendet. Wir verkaufen mehr als nur Moleküle. Wir analysieren die Prozesse der Herstellung und Bearbeitung von Materialien, zum Beispiel von Stahl, Glas, Aluminium, von Lebensmitteln oder von Öl in der Raffinerie. Wir entwickeln mit unseren Gasen Anwendungen, mit denen unsere Kunden ihre Produktion effizienter gestalten, die Qualität ihrer Produkte verbessern und ihre Wirtschaftlichkeit insgesamt steigern können. Mit jedem neuen Anwendungsgebiet eröffnen wir neue Märkte – ohne große Investitionen, nur mit unseren Köpfen.

Wie stellen Sie sicher, dass Sie mit Ihren Ideen die wirklich zukunfts-trächtigen Bereiche treffen?

↳ Wir konzentrieren uns auf die globalen Megatrends, die für unser Unternehmen relevant sind. Das sind vor allem die Bereiche Energie und Umwelt sowie Gesundheit. Wir berücksichtigen aber auch aktuelle Entwicklungen wie etwa in der Lebensmittelindustrie. Hier greifen die Verbraucher verstärkt zu so genannten Convenience-Produkten, die schnell und einfach zubereitet werden können. →

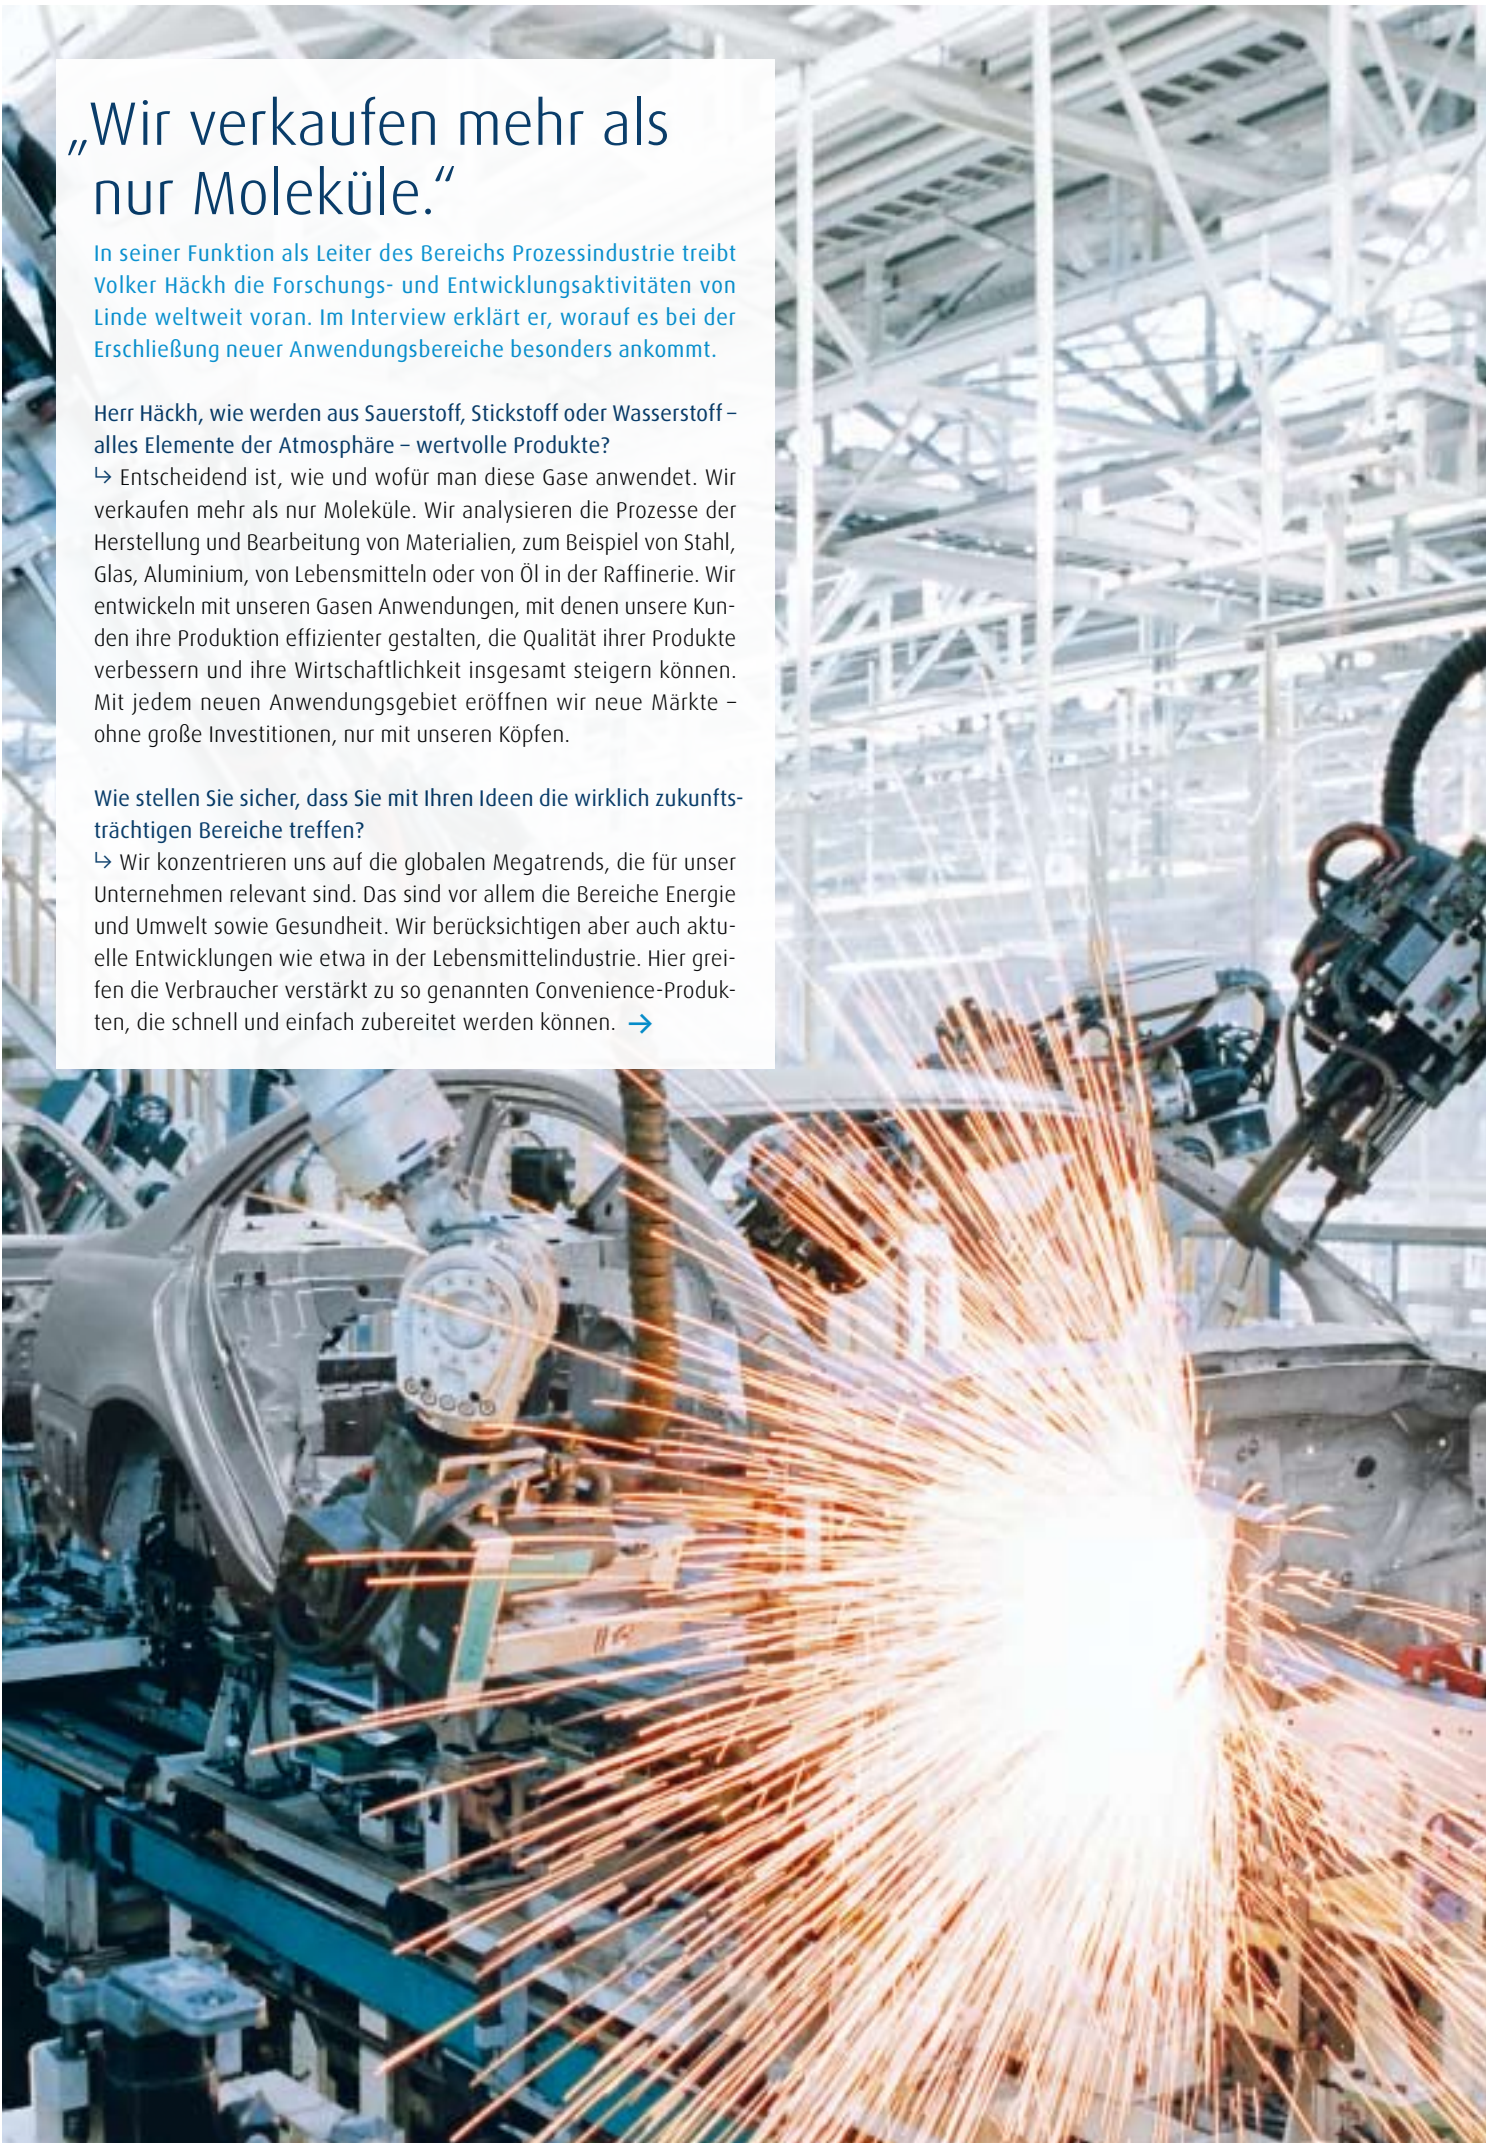



- ↳ Linde betreibt in den zukunftssträchtigen Regionen der Welt eigene Forschungs- und Entwicklungszentren, zum Beispiel in China.

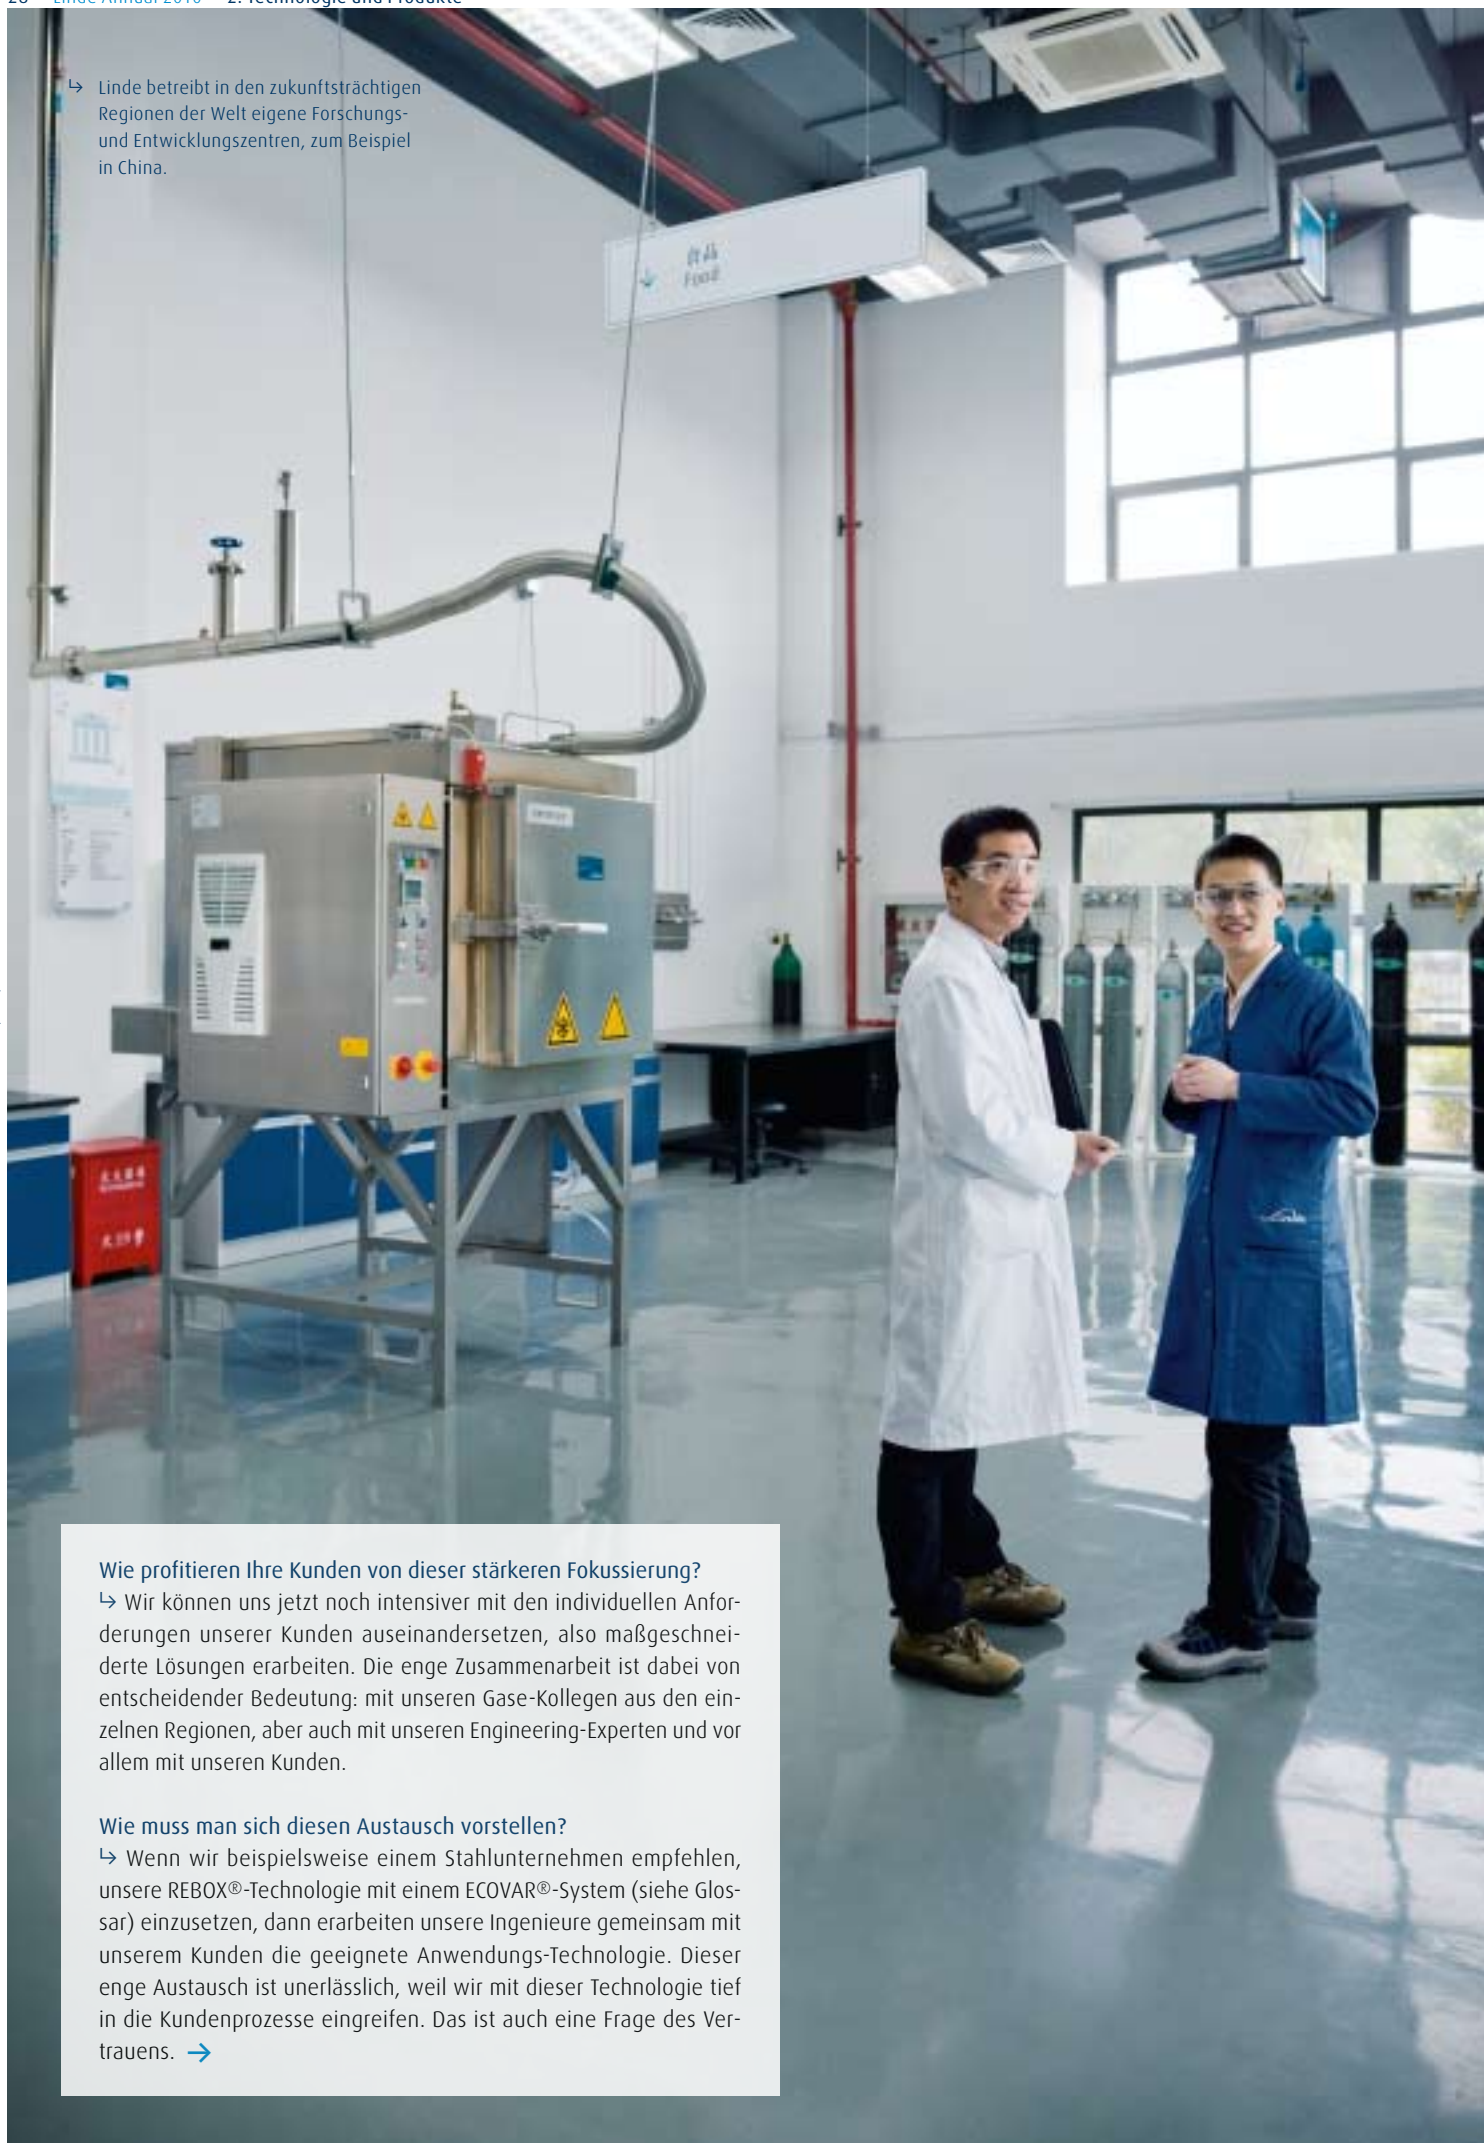

#### Wie profitieren Ihre Kunden von dieser stärkeren Fokussierung?

↳ Wir können uns jetzt noch intensiver mit den individuellen Anforderungen unserer Kunden auseinandersetzen, also maßgeschneiderte Lösungen erarbeiten. Die enge Zusammenarbeit ist dabei von entscheidender Bedeutung: mit unseren Gase-Kollegen aus den einzelnen Regionen, aber auch mit unseren Engineering-Experten und vor allem mit unseren Kunden.

#### Wie muss man sich diesen Austausch vorstellen?

↳ Wenn wir beispielsweise einem Stahlunternehmen empfehlen, unsere REBOX®-Technologie mit einem ECOVAR®-System (siehe Glossar) einzusetzen, dann erarbeiten unsere Ingenieure gemeinsam mit unserem Kunden die geeignete Anwendungs-Technologie. Dieser enge Austausch ist unerlässlich, weil wir mit dieser Technologie tief in die Kundenprozesse eingreifen. Das ist auch eine Frage des Vertrauens. →



#### Wie wächst dieses Vertrauen?

↳ Durch die Qualität unserer Arbeit, mit der wir einen echten Mehrwert bieten. Unsere Kunden profitieren davon, wenn wir sie beispielsweise auf künftige Markttrends hinweisen und ihnen neue Technologien und Verfahren empfehlen.

#### Zum Beispiel?

↳ Nehmen wir das Thema Hot Forming, das in der Automobilindustrie eine zunehmend wichtige Rolle spielt. Bei diesem Verfahren wird ein Karosseriebauteil in einem Prozessschritt formgebend bearbeitet und gleichzeitig zu einer höheren Festigkeit veredelt. Die B-Säule eines Pkw beispielsweise muss an unterschiedlichen Stellen unterschiedliche Eigenschaften haben: An einer Stelle muss sie Verformungsenergie aufnehmen, an einer anderen besonders steif sein. Das wird heute direkt in der Presse durch unterschiedliche Glühzustände und Materialverbindungen gemacht.

#### Und dabei helfen Gase?

↳ Die Gase werden zum Aufheizen benötigt. Das Bauteil muss der gewünschten Eigenschaft entsprechend unterschiedlich stark erhitzt werden. Dabei gehen wir mit der Flamme direkt auf bestimmte Stellen des Bauteils und heizen diese auf die jeweils erforderliche Temperatur auf.

#### Welche neuen Trends stehen bei den Anwendungs-Technologien derzeit besonders im Blickpunkt?

↳ Neue und hocheffiziente Werkstoffe werden immer wichtiger. Wir arbeiten zum Beispiel an einem besonders dünnen und kostengünstigen Glas für Sonnenkollektoren. In einem anderen Projekt haben wir ein Verfahren entwickelt, das die Oberfläche von Stahl poröser und dadurch größer macht.

#### Welche Vorteile bietet das?

↳ Durch die größere Oberfläche kann beispielsweise Wärme besser übertragen werden. Diese besondere Form der Oberflächenbehandlung könnte auch im medizinischen Bereich neue Einsatzfelder eröffnen, unsere Healthcare-Kollegen prüfen dies derzeit.

#### Die Anwendungstechnik ist also ein Impulsgeber für den gesamten Konzern?

↳ Ja, so verstehen wir unsere Rolle. Nur wenn wir innovativ bleiben, können wir uns von unseren Wettbewerbern absetzen. Deshalb investieren wir in unser anwendungstechnisches Know-how verstärkt auch in den aufstrebenden Märkten Asiens.

↳ Linde Spezialgase ermöglichen eine umweltfreundliche Produktion von Solarzellen.

# Qualität schafft Vertrauen.

Qualität, Sicherheit und Zuverlässigkeit sind für Linde die wichtigsten Kriterien für Produkte, Technologien und Dienstleistungen. Sie bilden die Grundlage für vertrauensvolle Kundenbeziehungen – und damit die Voraussetzung für eine nachhaltig erfolgreiche Geschäftsentwicklung in allen Bereichen.

# U

## Umfassendes Gaseangebot für Kliniken

Diese Kriterien stets aufs Neue zu erfüllen, ist etwa im Geschäft mit medizinischen Gasen unerlässlich. Medizinische Gase leisten einen wesentlichen Beitrag bei der Therapie und der Diagnostik von Erkrankungen. Sie werden täglich eingesetzt – von der Notfallmedizin über die Chirurgie bis hin zur Intensivmedizin. Dabei kommt es nicht nur auf eine gleich bleibend hohe Qualität in Bezug auf die Reinheit der Gase an. Um Ärzte und medizinisches Personal bestmöglich zu unterstützen, ist darüber hinaus ein reibungsloses Zusammenwirken von Gasen, technischer Ausrüstung und den dazugehörigen Dienstleistungen notwendig.

Diesen hohen Anforderungen trägt Linde unter anderem mit seinen QI Medical Gas Services Rechnung (QI steht für Quality Improvement = Qualitätssteigerung). Dieses Angebot, das sich an Krankenhäuser richtet, umfasst das gesamte System der Versorgung mit medizinischen Gasen. Es reicht von der Planung des Gase-Belieferungskonzepts über die garantierte Notfallbelieferung, das Instandhaltungsmanagement sowie die laufende Überwachung bis hin zur Schulung des Personals.

## Hohe Anforderungen an medizinische Gase

Die Qualitätsstandards, die medizinische Gase erfüllen müssen, steigen stetig. In vielen Ländern werden an diese Produkte die gleich hohen Maßstäbe angelegt, die auch für andere Pharmazeutika gelten. So hat zum Beispiel die brasilianische Gesundheitsbehörde ANVISA im Jahr 2009 eine entsprechende Verordnung erlassen.

Linde passt derzeit seine Anlagen und Abfüllstationen in der Region an die neuen Richtlinien an. Diese Maßnahmen, die bis Ende 2011 abgeschlossen sein werden, sind mit Investitionen von 6 Mio. EUR verbunden. Von 2015 an werden – der neuen Regelung entsprechend – in Brasilien nur noch die Unternehmen eine Zulassung als Lieferanten medizinischer Gase bekommen, deren Anlagen nach den neuen Standards zertifiziert sind.

## REMEO® auf Erfolgskurs

In Kolumbien hat Linde das Geschäft mit dem Pflegekonzept REMEO® im Berichtsjahr weiter ausgebaut und eine zweite Station für Patienten eröffnet, die über einen längeren Zeitraum künstlich beatmet werden müssen. Die REMEO®-Center verbinden medizinische Sicherheit mit hohem Komfort für die Patienten. Sie verkürzen den Aufenthalt auf einer Intensivstation im Krankenhaus und bieten den Betroffenen eine professionelle Versorgung in wohnlicher Umgebung.

Linde plant, dieses erfolgreiche Pflegeangebot Schritt für Schritt auch auf andere

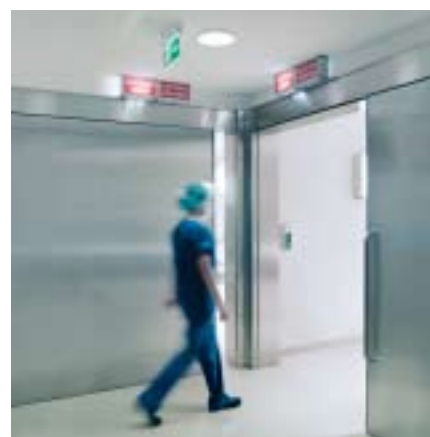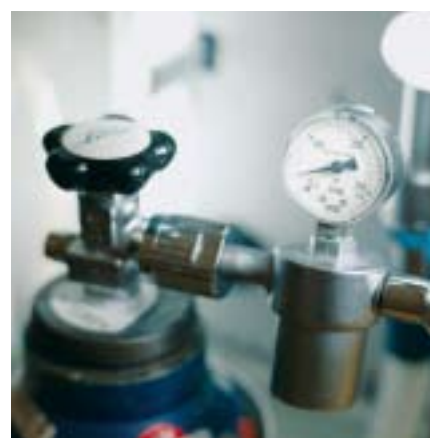

↳ In Krankenhäusern unverzichtbar: medizinische Gase mit der passenden technischen Ausstattung.



südamerikanische Länder zu übertragen. Um den Auf- und Ausbau einer entsprechenden Organisation zu beschleunigen und eine hervorragende Betreuung in den REMEO®-Einrichtungen zu gewährleisten, hat Linde im vergangenen Geschäftsjahr in Bogotá (Kolumbien) Mitarbeiter aus der gesamten Region Südamerika intensiv geschult.

## F & E: Megatrends im Blickpunkt

Im Bereich der Industriegase konzentriert sich Linde darauf, bestehende Anwendungs-Technologien kontinuierlich zu verbessern und neue Einsatzgebiete zu erschließen. Bei seinen Forschungs- und Entwicklungsaktivitäten (F & E) stehen für das Unternehmen sechs relevante Megatrends im Blickpunkt: umweltschonende Verfahren, effiziente Industrieprozesse, saubere Energiegewinnung, gesunde Ernährung und Convenience Food (siehe Glossar), geografische und demografische Verlagerung sowie Hochleistungswerkstoffe.

Unter dieser Maßgabe hat Linde im Geschäft mit Flaschen- und Flüssiggasen alle laufenden Projekte unter die Lupe genommen und das F & E-Portfolio neu geordnet. Dabei war und ist es das übergeordnete Ziel des Unternehmens, seinen Kunden einen Mehrwert zu bieten, die Kosteneffizienz zu steigern und seine Position als bevorzugter Partner in den aufstrebenden Volkswirtschaften weiter zu stärken.

## Schweißen: verbesserte Verfahren

Auf dem Gebiet der Metallverarbeitung treibt Linde unter anderem die Verbesserung von schweißtechnischen Prozessen weiter voran. Dazu beteiligt sich Linde – neben anderen renommierten Industrieunternehmen und Forschungseinrichtungen – in Großbritannien an dem mehrjährigen F & E-Projekt MALCO (Creating Opportunities for the Manufacture of Lightweight Components). Dieses Projekt zielt auf die Verringerung von Spannungen und die Vermeidung von Verzug beim Schweißen von Metallkomponenten in Leichtbauweise.

Im Rahmen ihrer Forschungsarbeiten haben die Entwicklungspartner im vergangenen Jahr ein neues Schweißverfahren erprobt und zur industriellen Reife gebracht, bei dem eine CO<sub>2</sub>-Kühltechnik von Linde zum Einsatz kommt. Dieses System zum Schweißen von dünnen Blechen löst das Problem der Materialverzerrung unter Hitze – ein wirtschaftlich wichtiger Aspekt zum Beispiel für die Automobilindustrie, weil die Verwendung leichter Materialien das Fahrzeuggewicht senkt und damit dazu beiträgt, auch den Kraft-

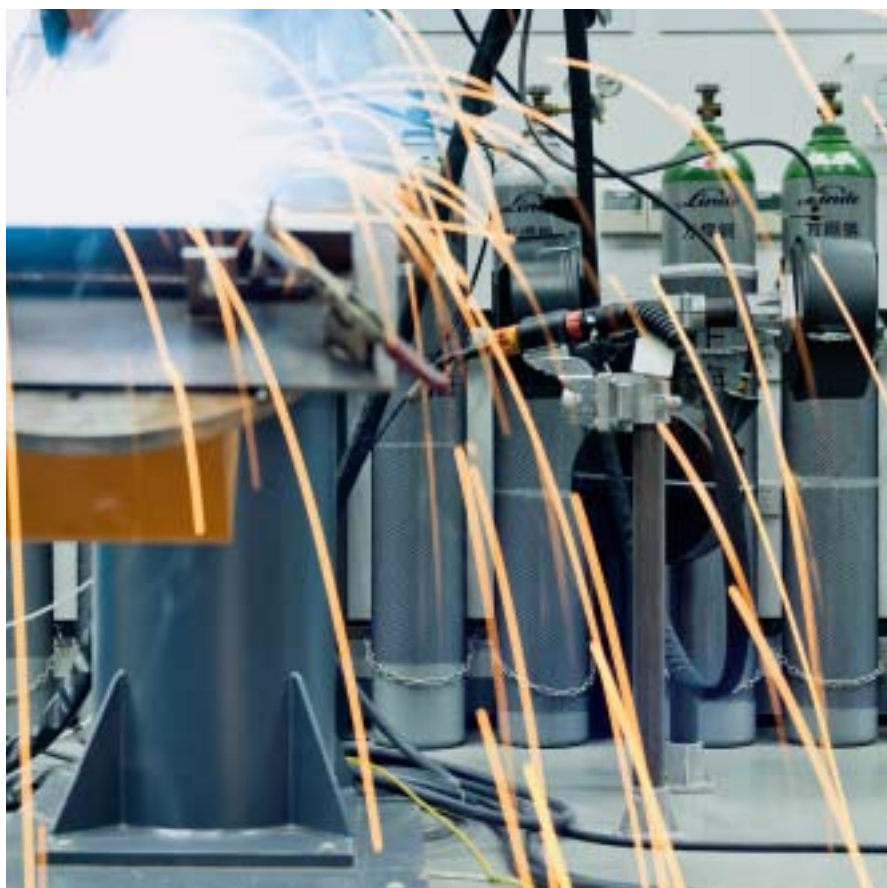

↳ Linde treibt die Verbesserung von schweißtechnischen Prozessen weiter voran – mit technischen Gasen.

stoffverbrauch und die Emissionen zu reduzieren.

Das so genannte Flammrichten ist ein weiteres Verfahren, schweißtechnisch bedingte Verformungen bei dünnen Stählen zu korrigieren. Linde verfügt auf diesem Gebiet über umfassende Kompetenzen und vermittelt dieses Wissen seinen Kunden und Nachwuchskräften. Das Unternehmen hat das Lehrangebot in seinem Anwendungstechnischen Zentrum in Hamburg erweitert und bietet Aus- und Weiterbildungskurse im Flammrichten an, die vom DVS (Deutscher Verband für Schweißen) zertifiziert sind.

## REBOX®: energieeffiziente Produktion

Nicht erst bei der Verarbeitung von Stahl, sondern bereits bei dessen Herstellung haben technische Gase einen erheblichen Einfluss auf die Qualität, die Kosten und die Umweltverträglichkeit der Produktionsprozesse.

Ein besonders effizientes Verfahren hat Linde in diesem Zusammenhang mit dem so genannten REBOX®-Oxyfuel-System (siehe Glossar) entwickelt. Dabei wird in den Verbrennungsprozessen in Industrieöfen Sauerstoff anstelle von Luft genutzt. Auf diese Weise steigt die Verbrennungseffizienz, zudem wird

die Hitze gleichmäßiger verteilt. Durch den Einsatz dieser Technologie können die Stahlproduzenten ihre Energiekosten deutlich senken und die CO<sub>2</sub>-Emissionen um 25 bis 50 Prozent reduzieren.

Auch im vergangenen Jahr konnte Linde mit dem REBOX®-Verfahren wichtige Geschäftserfolge erzielen.

So erhielt das Unternehmen vom schwedischen Stahlproduzenten SSAB den Auftrag für die Lieferung eines großen REBOX®-Oxyfuel-Systems für dessen Stahlwerk am Standort Borlänge (Schweden). Zusammen mit der bereits im Jahr 2009 installierten, kleineren Anlage entsteht hier das weltweit größte Oxyfuel-Verbrennungssystem in einem Warmofen überhaupt.

Mit dem Stahlunternehmen Taiyuan Iron and Steel Company (TISCO), China, hat Linde Ende 2010 ebenfalls einen Vertrag über die Lieferung von Sauerstoff für die zukünftigen REBOX®-Anwendungen abgeschlossen.

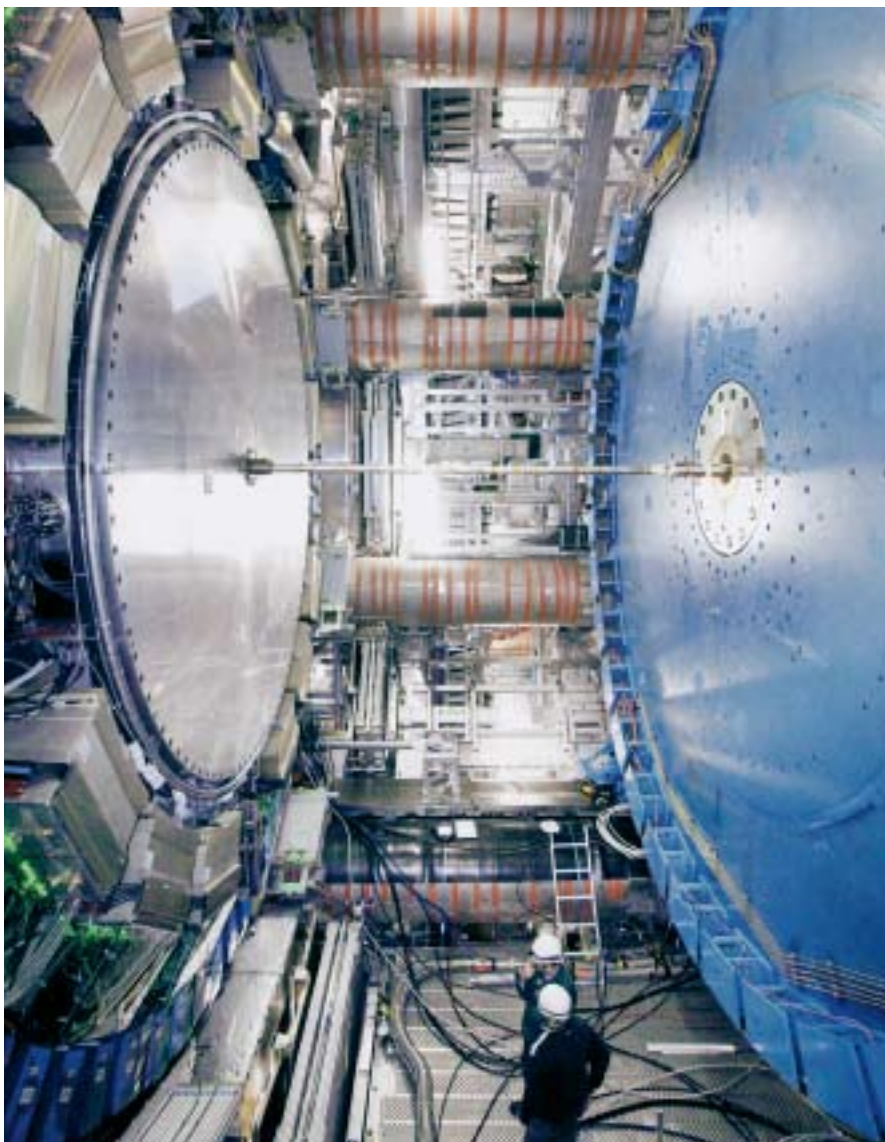

↳ Dem Urknall auf der Spur: Im europäischen Kernforschungszentrum (CERN) bei Genf (Schweiz) kühlt flüssiges Helium die Magnetspulen, die den Protonenstrahl auf ihrer Kreisbahn halten.

## Langjährige Kundenbeziehungen

Verlässlich in der Versorgung, innovativ bei der Weiter- und Neuentwicklung von Verfahren und Prozessen – auf dieser Grundlage pflegt Linde Kundenbeziehungen, die über Jahrzehnte währen.

Beispiel ThyssenKrupp: Seit 1951 hat Linde für den Stahlproduzenten am Standort Duisburg (Deutschland) insgesamt zehn Luftzerlegungs-Anlagen errichtet, und die elfte ist bereits in Bau. Sie soll im dritten Quartal 2013 die Produktion starten und wird über eine Kapazität von bis zu 1.500 Tonnen Sauerstoff täglich verfügen. Seit 1998 ist Linde für die komplette Luftgaseversorgung des Stahlwerks in Duisburg verantwortlich. ThyssenKrupp produziert dort jährlich fast 15 Millionen Tonnen Rohstahl und fertigt vor allem hochwertige Qualitätsflachstahlprodukte, unter anderem für die Automobilindustrie.

Eine weitere Jahrzehnte alte Verbindung besteht mit dem bedeutendsten englischen

Stahlstandort Scunthorpe, wo vor mehr als 50 Jahren der erste Luftzerleger von BOC errichtet wurde. Als jüngstes Projekt dieser traditionsreichen Beziehung hat Linde im Herbst 2010 hier für Tata eine neue, große Luftzerlegungs-Anlage mit einer Kapazität von 1.600 Tonnen Sauerstoff pro Tag in Betrieb genommen. Im Rahmen umfangreicher Modernisierungsmaßnahmen wird Linde zudem am selben Standort eine bestehende ältere Anlage erneuern.

Auch in der Lebensmittel- und Getränkeindustrie setzt Linde auf enge, tragfähige Kundenbeziehungen. Dabei geht es nicht nur um die zuverlässige Bereitstellung von Produkten wie etwa Kohlensäure, sondern zunehmend auch um Themenfelder wie Umweltschutz, Qualitätssicherung, Innovation und Mitarbeiterqualifikation.

So umfasst beispielsweise Lindes Zusammenarbeit mit den weltgroßen Getränkeherstellern auch die Wasserversorgung und -entsorgung oder die Anlagensicherheit bei den Abfüllern. Zudem definiert Linde gemeinsam

mit diesen Kunden konkrete Umweltziele, zum Beispiel für die Einsparung von Energie und Wasser.

## Helium: Vorsorge für steigende Nachfrage

Das Gas ist selten, die Nachfrage steigt, die Versorgungssicherheit muss dennoch gewährleistet sein – dieser Herausforderung stellt sich Linde im Markt für Helium und erweitert seine Bezugsquellen.

Im Mai 2010 schloss Linde mit den Eignern des neuen Heliumwerks 2 in Katar einen langfristigen Vertrag zur Abnahme des Edelgases nach Produktionsbeginn im Jahr 2013. Im Verbund mit der bestehenden Anlage Katar Helium 1 wird das erdgasreiche Emirat damit zum international führenden Heliumproduzenten aufsteigen. Linde wird rund 30 Prozent des gesamten in Katar produzierten Heliums beziehen, um seine global tätigen Kunden auch in Zukunft verlässlich beliefern zu können. Mit dem Projekt Katar Helium 2 entsteht die größte Anlage ihrer Art weltweit. Das Erdgas, aus dem das Helium gewonnen wird, stammt aus einem Erdgasfeld, das mit einem geschätzten Volumen von 25 Trillionen Kubikmetern als das derzeit ergiebigste der Erde gilt.

Neben den Quellen in Katar nutzt Linde zur Deckung seines Heliumbedarfs das Joint Venture Helison in Algerien, Produktionsstätten in den USA und, seit März 2010, auch die neue Produktionsstätte im australischen Darwin. Diese Anlage kann jährlich rund 4,3 Millionen Kubikmeter des Edelgases erzeugen – und damit die Nachfrage in Australien und Neuseeland bedienen. Zudem wird Linde von Darwin aus auch Helium in mehrere asiatische Märkte exportieren.

Dank seiner einzigartigen Eigenschaften – der Siedepunkt liegt unter minus 268°C – wird Helium in großen Mengen in der Medizintechnik, etwa als Kühlmittel in Kernspintomographen (siehe Glossar), bei der Herstellung von Glasfaserkabeln, in der Halbleiter- und Photovoltaikindustrie, in der Lasertechnik und als Auftriebsgas für Luftschiffe und Ballons eingesetzt.



## Vorrang für Sicherheit

Linde versteht Sicherheit umfassend: im Sinne von Versorgungssicherheit und Sicherheit in der Anwendung der Produkte, Verfahren und Anlagen für Kunden und Mitarbeiter.

Um auch auf diesem Gebiet einen möglichst hohen Standard zu erreichen, hat Linde seine SHEQ-Strategie (Safety, Health, Environment, Quality = Sicherheit, Gesundheit, Umweltschutz und Qualität) Anfang des Jahres 2010 überprüft und sich noch ehrgeizigere Ziele gesetzt.

Das Unternehmen hat klare Vorgaben für die Qualität der Anlagen, die Klassifizierung der Gefährdungspotenziale, die Lizenzierung und Kontrollen, Zuständigkeiten und Qualifikationen definiert, die die jeweiligen lokalen Gegebenheiten und Rechtsvorschriften berücksichtigen. Risiken durch den Betrieb von Linde Anlagen für Mitarbeiter, Anwohner oder benachbarte Unternehmen beispiels-

weise werden nach einem konzernweiten Managementsystem, dem so genannten Major Hazards Review Programme (MHRP), systematisch identifiziert und bewertet.

Auf regionaler Ebene hat Linde in seinem weltweiten Gasgeschäft weitere Programme zur Risikoprävention eingeführt, so genannte Major Accident Prevention Policies (MAPP), also Richtlinien zur Vorbeugung von Unfällen.

Bei der Planung und dem Bau von Anlagen sind die Faktoren Gesundheitsschutz, Sicherheit und Umweltschutz (engl.: Health, Safety, Environment, HSE) feste Bestandteile des Lastenheftes. Dabei spielen die so genannten Design-Reviews eine wichtige Rolle: Interdisziplinär zusammengestellte Teams überprüfen während der einzelnen Phasen eines Anlagenbauprojekts, ob alle Anforderungen hinsichtlich der genannten Kriterien erfüllt sind. In diese Untersuchungen bezieht Linde auch seine jeweiligen Lieferanten ein.

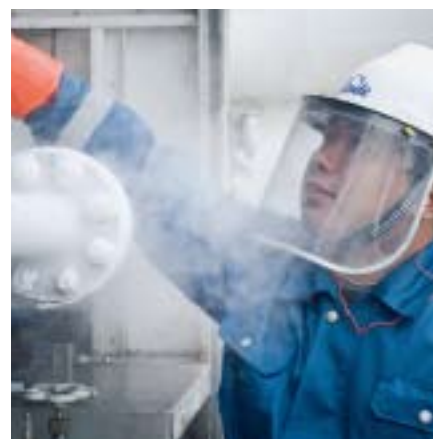

↳ Tankerbefüllung: sachgerechter Umgang mit Stickstoff.

## Linde Group Safety Award

Jedes Jahr zeichnet Linde Bestleistungen im Bereich Arbeitssicherheit mit einem Preis, dem Linde Group Safety Award, aus. Grundlage der Bewertung ist die Anzahl der Arbeitsstunden ohne unfallbedingte Ausfälle (LTI = Lost Time Injury) an den einzelnen Standorten. Die Auszeichnung wird in drei Kategorien vergeben: für den besten Standort oder Betrieb (Site Safety Award), für die beste Konzerngesellschaft (Company Safety Award) sowie für den größten Fortschritt bei der Reduzierung unfallbedingter Ausfälle (Improvement Award).

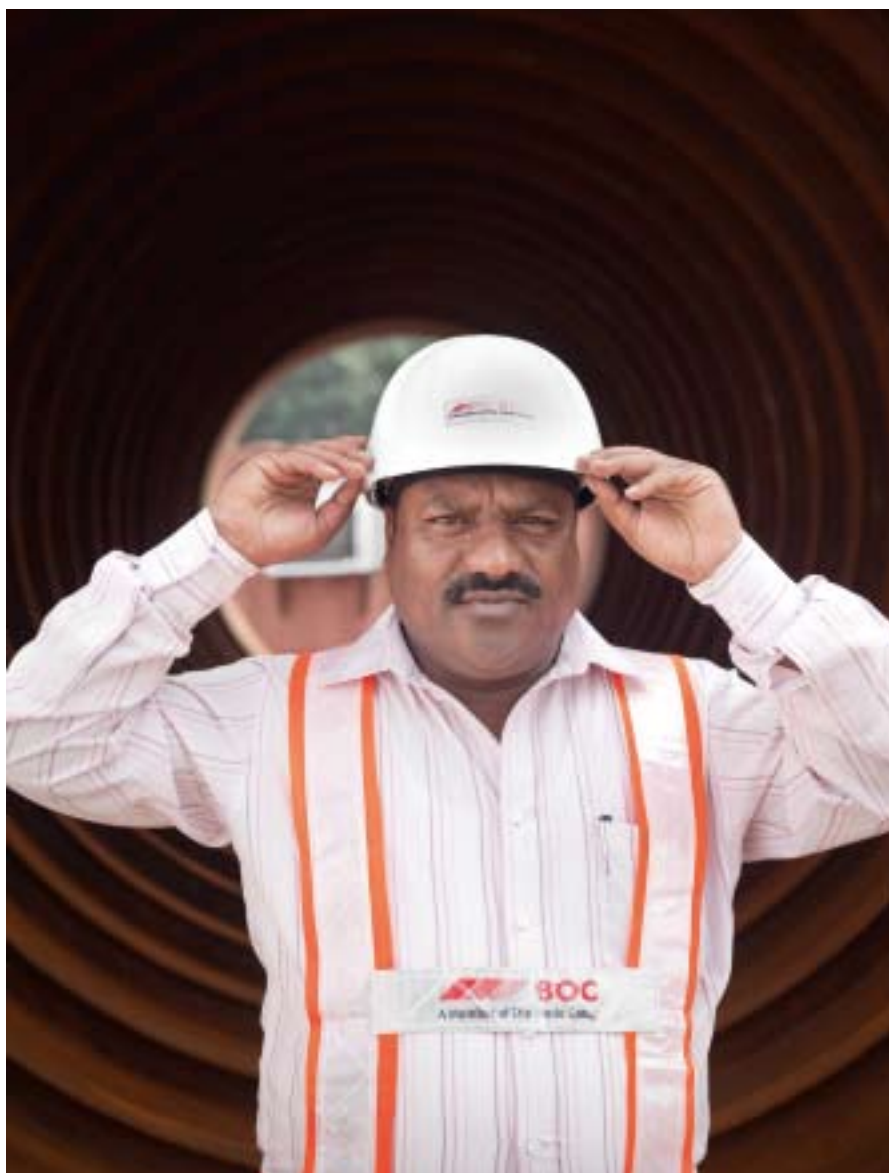

↳ Sicherheit beginnt mit der richtigen Ausrüstung: Linde Mitarbeiter Sunil Virma auf einer Baustelle in Jamshedpur (Indien).

## LIPROTECT®: sachgerechter Umgang mit Gasen

Unter dem Markennamen LIPROTECT® bietet Linde ein Sicherheits-Gesamtkonzept für die Betreiber von Gase-Anlagen an. Das Programm umfasst Schulungen, die auf die einzelbetrieblichen Anforderungen abgestimmt sind und sich an Fach- und Führungskräfte richten. Darüber hinaus enthält das Angebot eine umfangreiche Servicepalette rund um die Gasversorgung, die von der Gefährdungsbeurteilung über eine Zustands- und Konformitätsprüfung bis hin zur Wartung reicht. Abgerundet wird das Produkt durch Sicherheitszubehör wie Schutzbekleidung, Atem- und Augenschutz sowie Sicherheitshandschuhe für den Umgang mit tiefkalt verflüssigten Gasen.

Seit September 2010 führt Linde im Gasezentrum in Unterschleißheim bei München regelmäßig Fachschulungen für den sachgerechten und gefahrlosen Umgang mit Acetylen durch. In diesen Schulungen werden alle Grundlagen vermittelt, die notwendig sind, um eine Acetylen-Anlage sicher und zuverlässig betreiben zu können. Die Teilnahme an diesem Sicherheitsprogramm dient auch als Baustein für Zertifizierungen und Audits.

## Vorreiter in den USA

In den USA engagiert sich Linde beim Thema Sicherheit unter anderem als Sponsor eines Sicherheitstags für den Umgang mit Industriegasen auf dem Campus der Pennsylvania State University in DuBois, Pennsylvania. Die jüngste Veranstaltung für Kunden, Feuerwehren und Notfalldienste fand im Juli 2010 statt. Dabei stand der sichere Umgang mit tiefkalten und komprimierten Gasen im Blickpunkt.

Linde ist Mitglied und Unterstützer der American Chemistry Council's Responsibility Care Initiative und hat bereits zahlreiche Sicherheitsauszeichnungen gewonnen.

# Wissenswertes.

## Marke und Qualität der Kundenbeziehung sind entscheidend.

Ergebnis einer Linde Studie zu Kaufentscheidungsfaktoren bei Gasekunden.

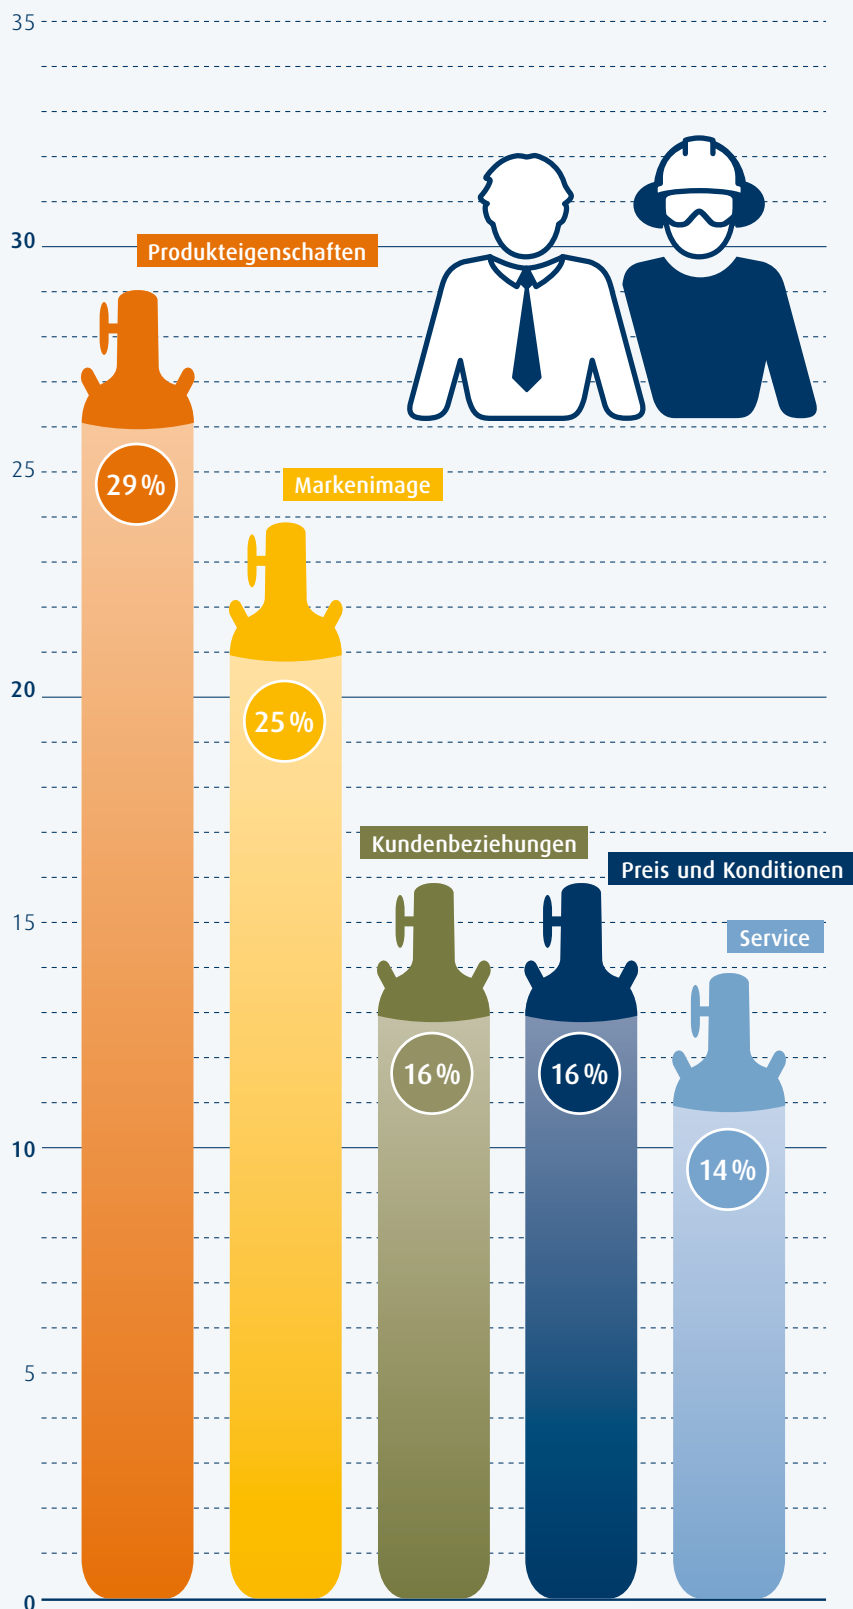

Quelle: Linde AG.



### Saubere Verbrennung mit Sauerstoff.

Reduktion von Brennstoffverbrauch und CO<sub>2</sub>-Emissionen durch das Oxyfuel-Verfahren.

CO<sub>2</sub>-Emissionen  
-25%  
bis  
-50%

Eine komplette Oxyfuel-Anlage erreicht bei der Wiedererwärmung von Stahlhalbzeug zum Walzen oder Schmieden eine Energieeffizienz von 80 Prozent, ein Luft-Kraftstoff-System lediglich 40–60 Prozent. Es entstehen keine Energieverluste durch den unproduktiven Stickstoff(N<sub>2</sub>)-Ballast. Dementsprechend sind Brennstoff-Einsparungen in Höhe von 25–50 Prozent möglich.

Quelle: Linde AG, 2010.

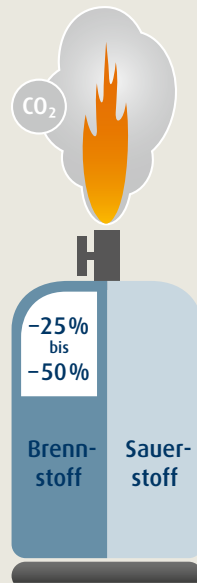

Verbrennung mit Sauerstoff  
(Oxyfuel)

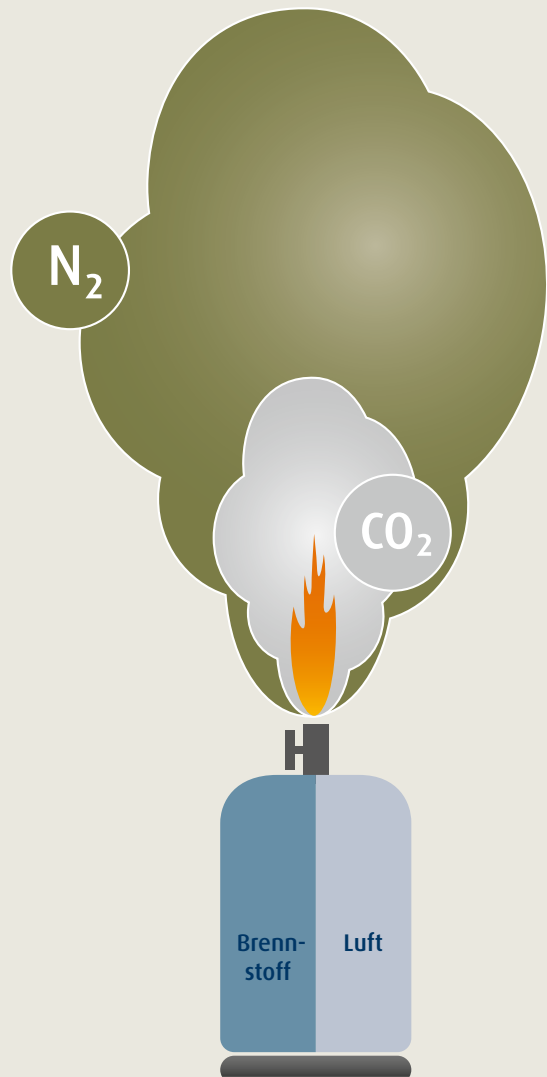

Konventionelle Verbrennung  
mit Luft

### Safety first – zu jeder Zeit, an jedem Ort.

Anzahl der Arbeitsunfälle je Millionen Arbeitsstunden (Lost Time Injury Rate – LTIR) von Mitarbeitern der Linde Group.

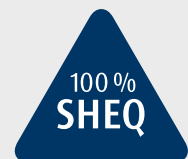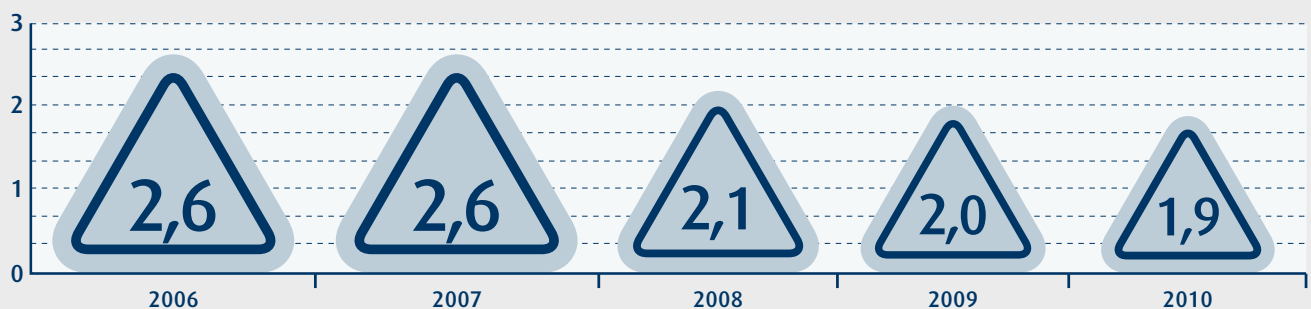

Quelle: Linde AG, 2010.

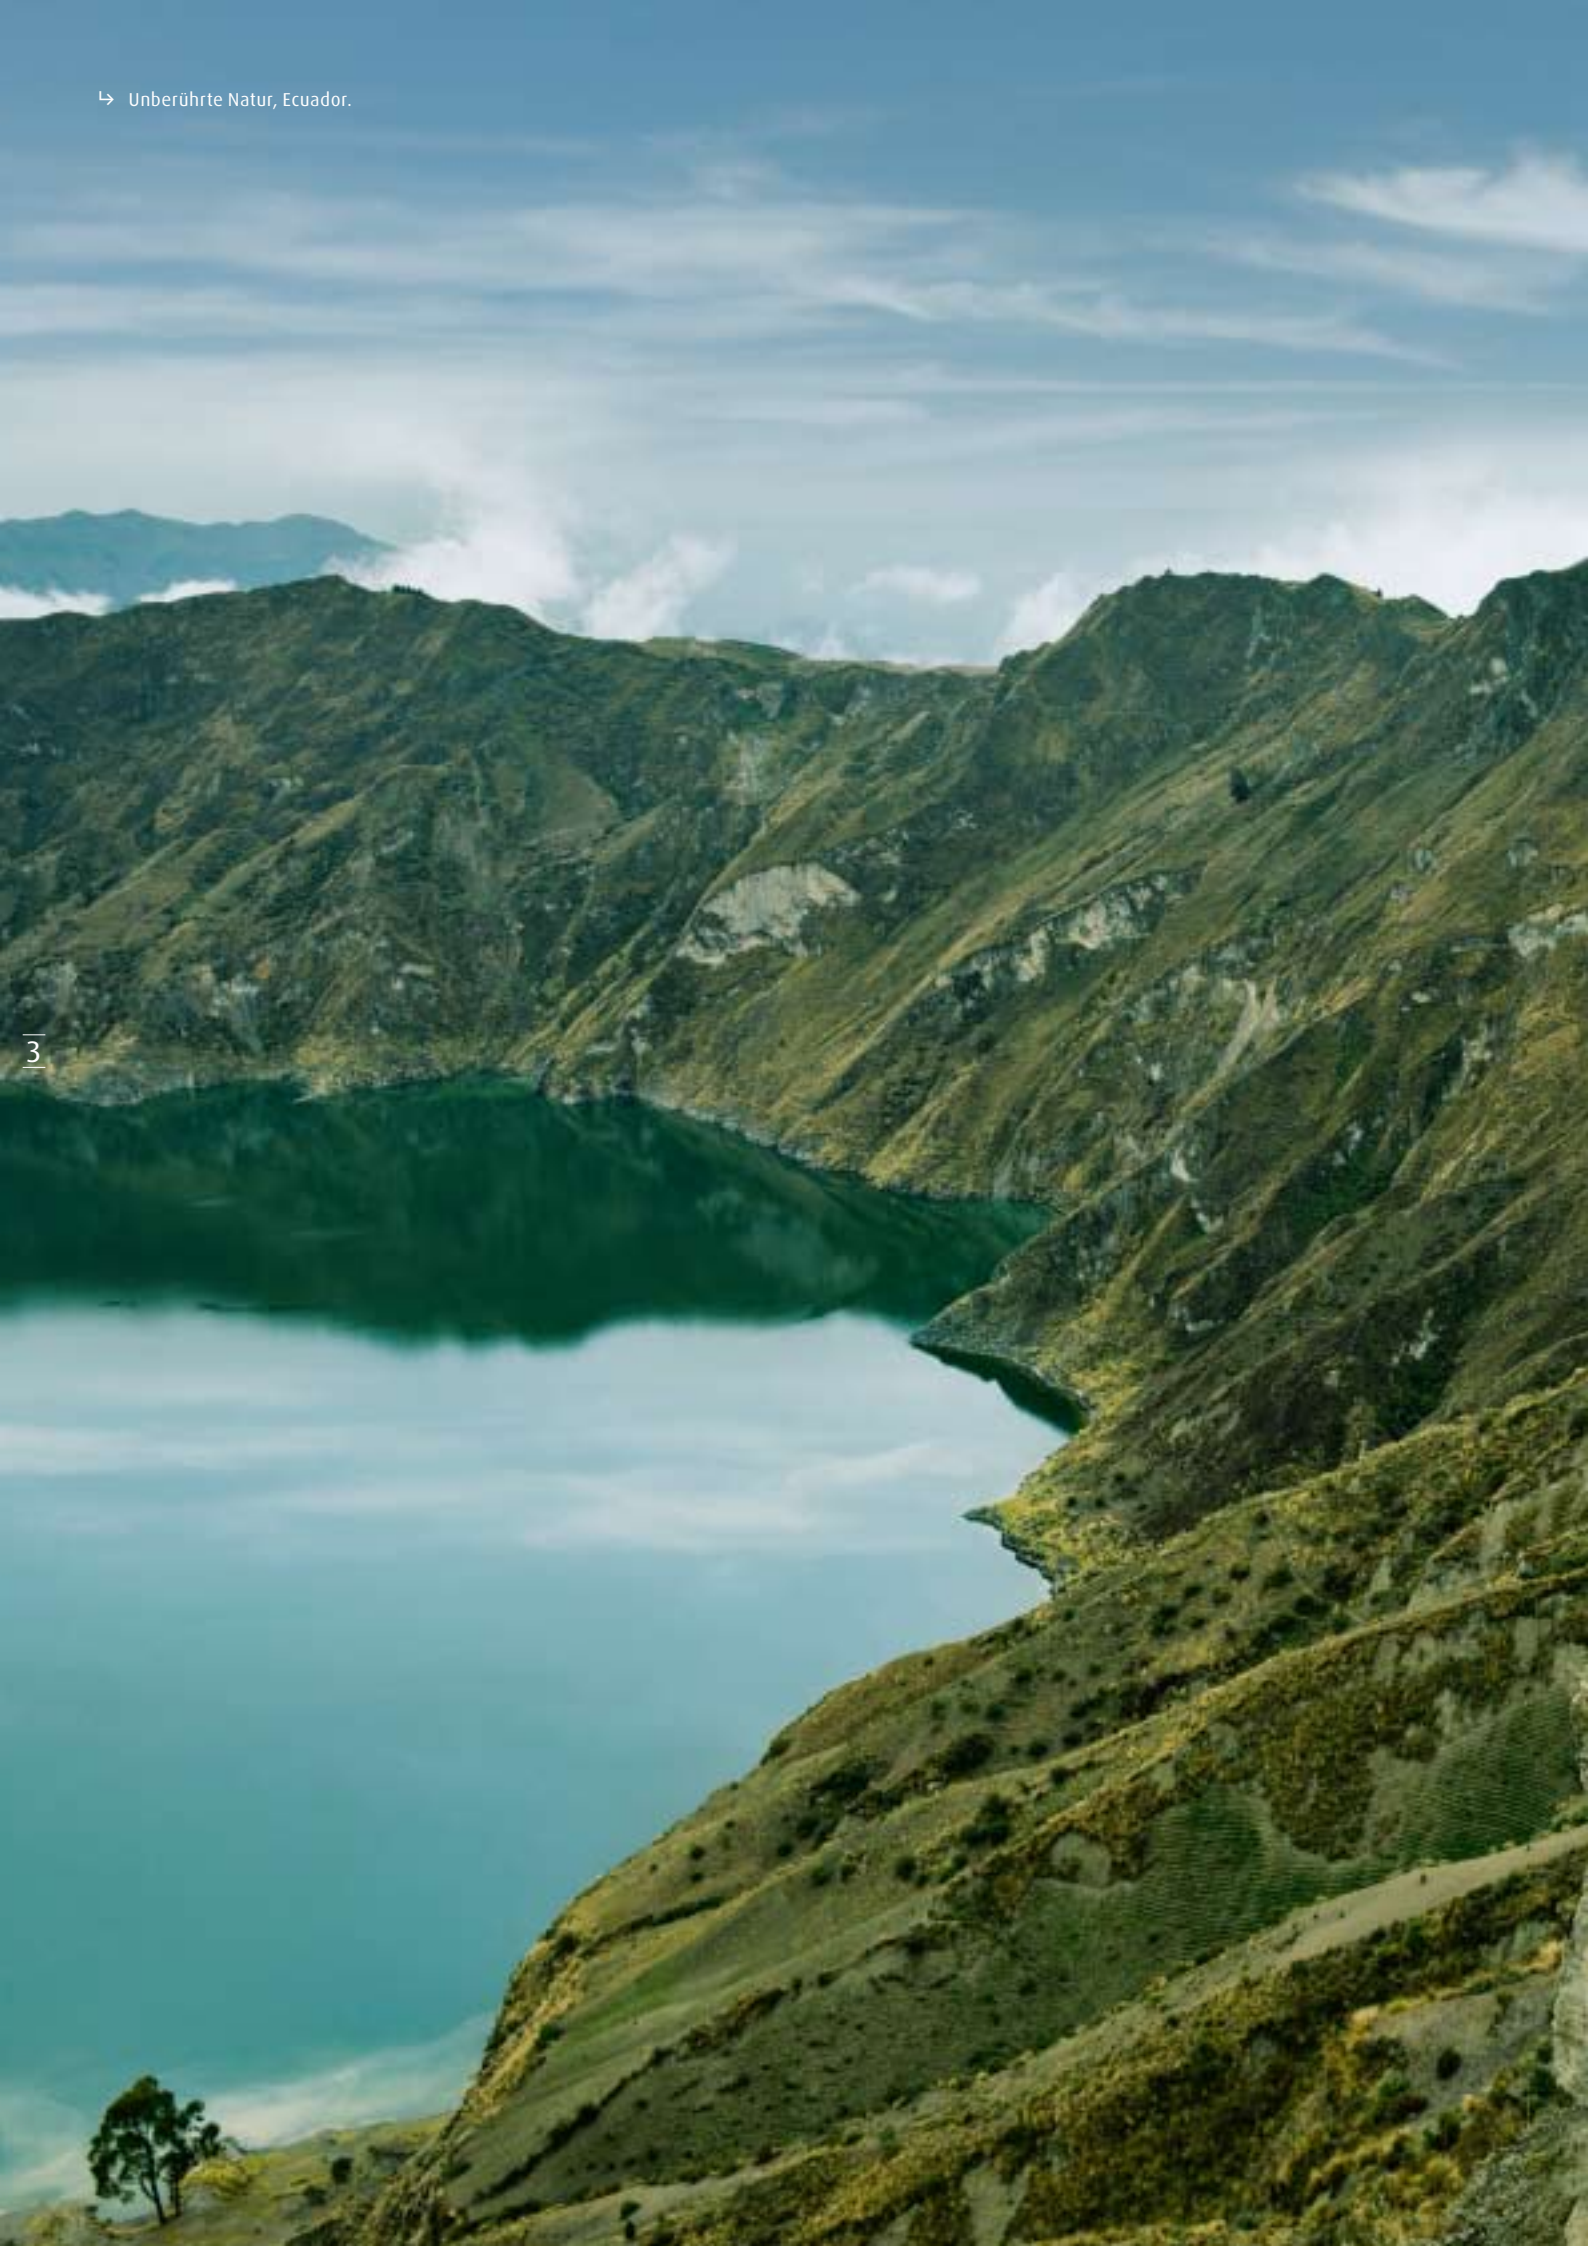



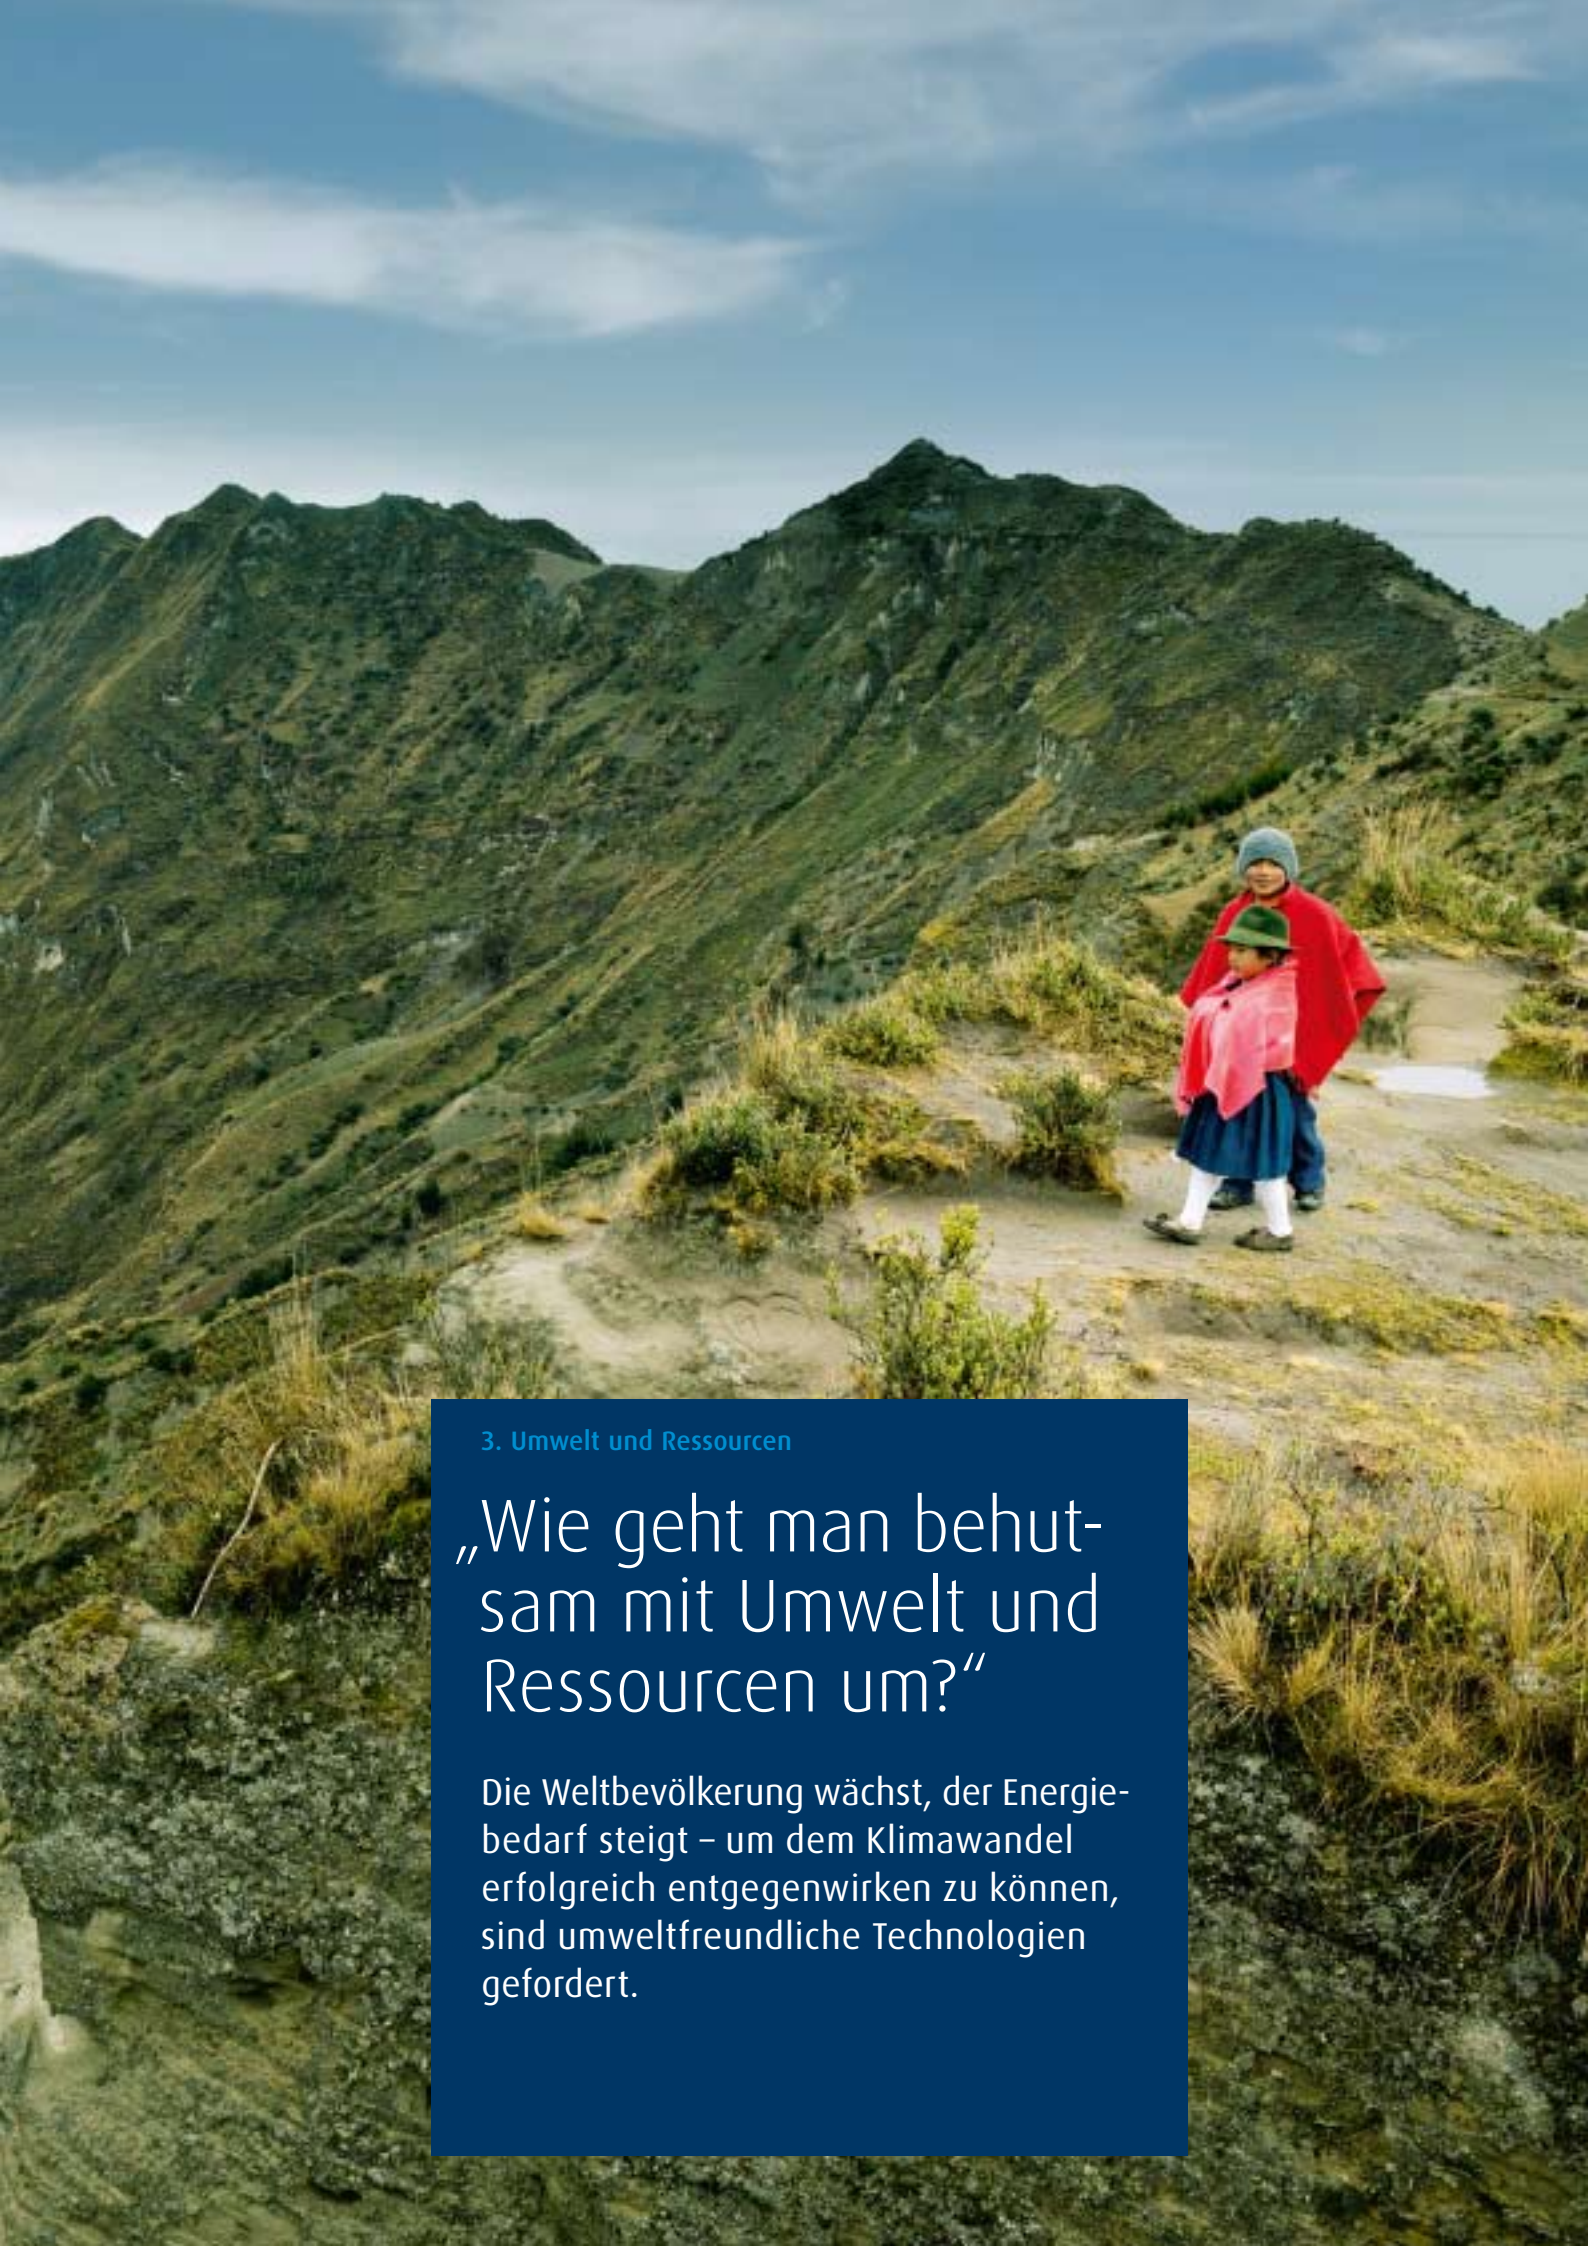

### 3. Umwelt und Ressourcen

„Wie geht man behutsam mit Umwelt und Ressourcen um?“

Die Weltbevölkerung wächst, der Energiebedarf steigt – um dem Klimawandel erfolgreich entgegenwirken zu können, sind umweltfreundliche Technologien gefordert.



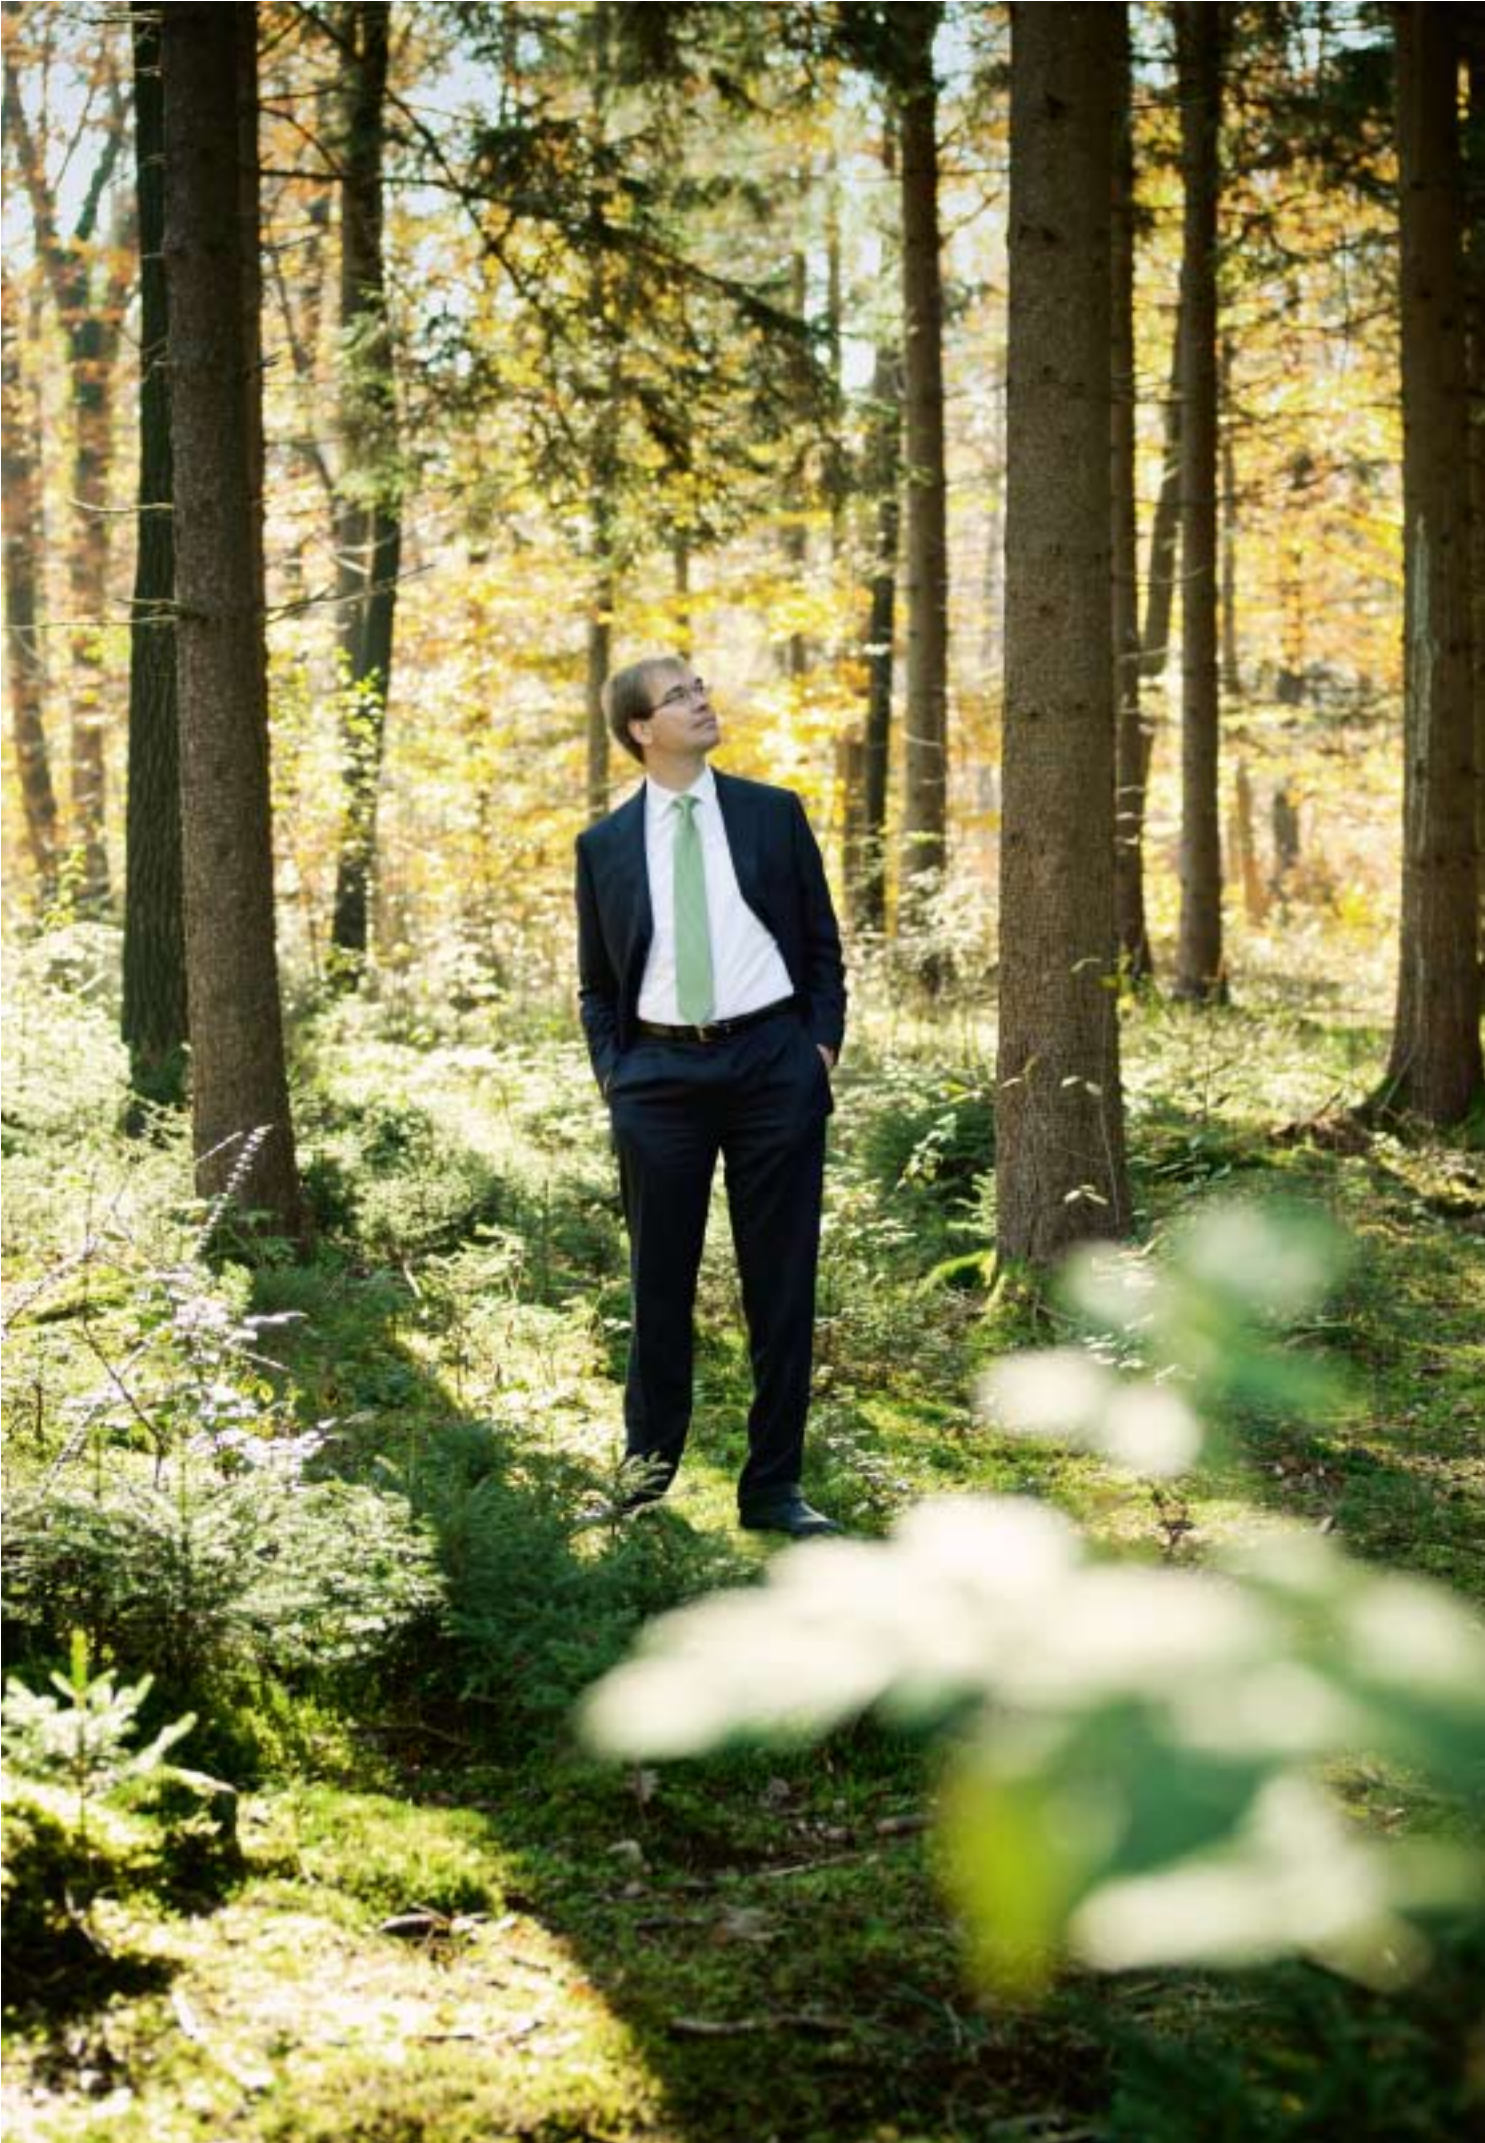



↳ Umweltfreundlich tanken: Lindes Wasserstoffzentrum in Unterschleißheim bei München.

## „Wir werden unsere Chancen nutzen.“

Dr. Andreas Opfermann, Leiter Clean Energy & Innovationsmanagement, sieht Linde im Wachstumsmarkt Energie gut aufgestellt.

Herr Opfermann, der Bereich Energie gilt als ein globaler Megatrend mit großem Potenzial. Worin liegen die Chancen für Linde? Welche Herausforderungen sind zu meistern?

↳ Energie ist ein Wachstumsmarkt. Die Experten erwarten, dass der weltweite Energieverbrauch in den kommenden 20 Jahren um 30 bis 40 Prozent steigen wird. Dieser Bedarf muss sicher und verlässlich gedeckt werden, und zwar zu wettbewerbsfähigen Kosten und möglichst umweltverträglich. Um dem Klimawandel erfolgreich entgegenwirken zu können, müssen wir die CO<sub>2</sub>-Emissionen deutlich senken.

Welchen Beitrag kann Linde dazu leisten?

↳ Wir verfügen über ein breites Portfolio an Technologien, die darauf abzielen, die fossilen Energieträger umweltfreundlicher als bisher nutzen und die CO<sub>2</sub>-Emissionen reduzieren zu können. Zudem treiben wir die Entwicklung von alternativen Treibstoffen und regenerativen Energien weiter voran. In all diesen Bereichen profitieren wir von unserer über 100 Jahre langen Erfahrung in der Optimierung thermodynamischer Verfahren. Bei vielen Technologie-Entwicklungen ist dieses Know-how eine wichtige Grundlage. →



Haben Sie ein paar Beispiele für diese technologische Kompetenz?

↳ Da wären etwa unsere Verfahren zur CO<sub>2</sub>-Abtrennung, -speicherung und -nutzung zu nennen, unsere Technologie für Erdgasverflüssigungs-Anlagen in allen Größenklassen oder auch unsere Prozesse zur effizienten Erschließung von Erdgas- oder Erdöllagerstätten. Und nicht zu vergessen: unsere Vorreiterrolle im Bereich Wasserstoff. Wir setzen Wasserstoff nicht nur zur Entschwefelung von Kraftstoffen ein, sondern werden zunehmend die weiteren Potenziale dieses umweltfreundlichen Energieträgers nutzen, beispielsweise als Treibstoff für eine emissionsfreie Mobilität.

Hat Linde mit diesem Technologie-Portfolio einen Wettbewerbsvorteil?

↳ Diese Breite und Tiefe in einem Portfolio über die gesamte Wertschöpfungskette hinweg kann keiner unserer Mitbewerber vorweisen. In allen genannten Bereichen entwickeln wir nicht nur die entsprechenden Verfahren und Technologien, sondern setzen diese auch um und können zudem als Betreiber entsprechender Anlagen auftreten.

Und diese Stärken wollen Sie jetzt noch besser ausspielen?

↳ Ja, und deshalb haben wir im Konzern die Clean Energy Group gegründet. Diese Einheit versteht sich als eine übergreifende Plattform für die Bündelung und Weiterentwicklung unserer Kompetenzen in den Bereichen Energie und Nachhaltigkeit. So bieten wir unseren Kunden die Stärken unserer Engineering Division und unserer Gases Division im Wachstumsmarkt „Saubere Energien“ aus einer Hand. Damit erreichen wir die Durchschlagskraft, die erforderlich ist, um unsere Chancen auf diesem zukunftssträchtigen Feld noch besser nutzen zu können.

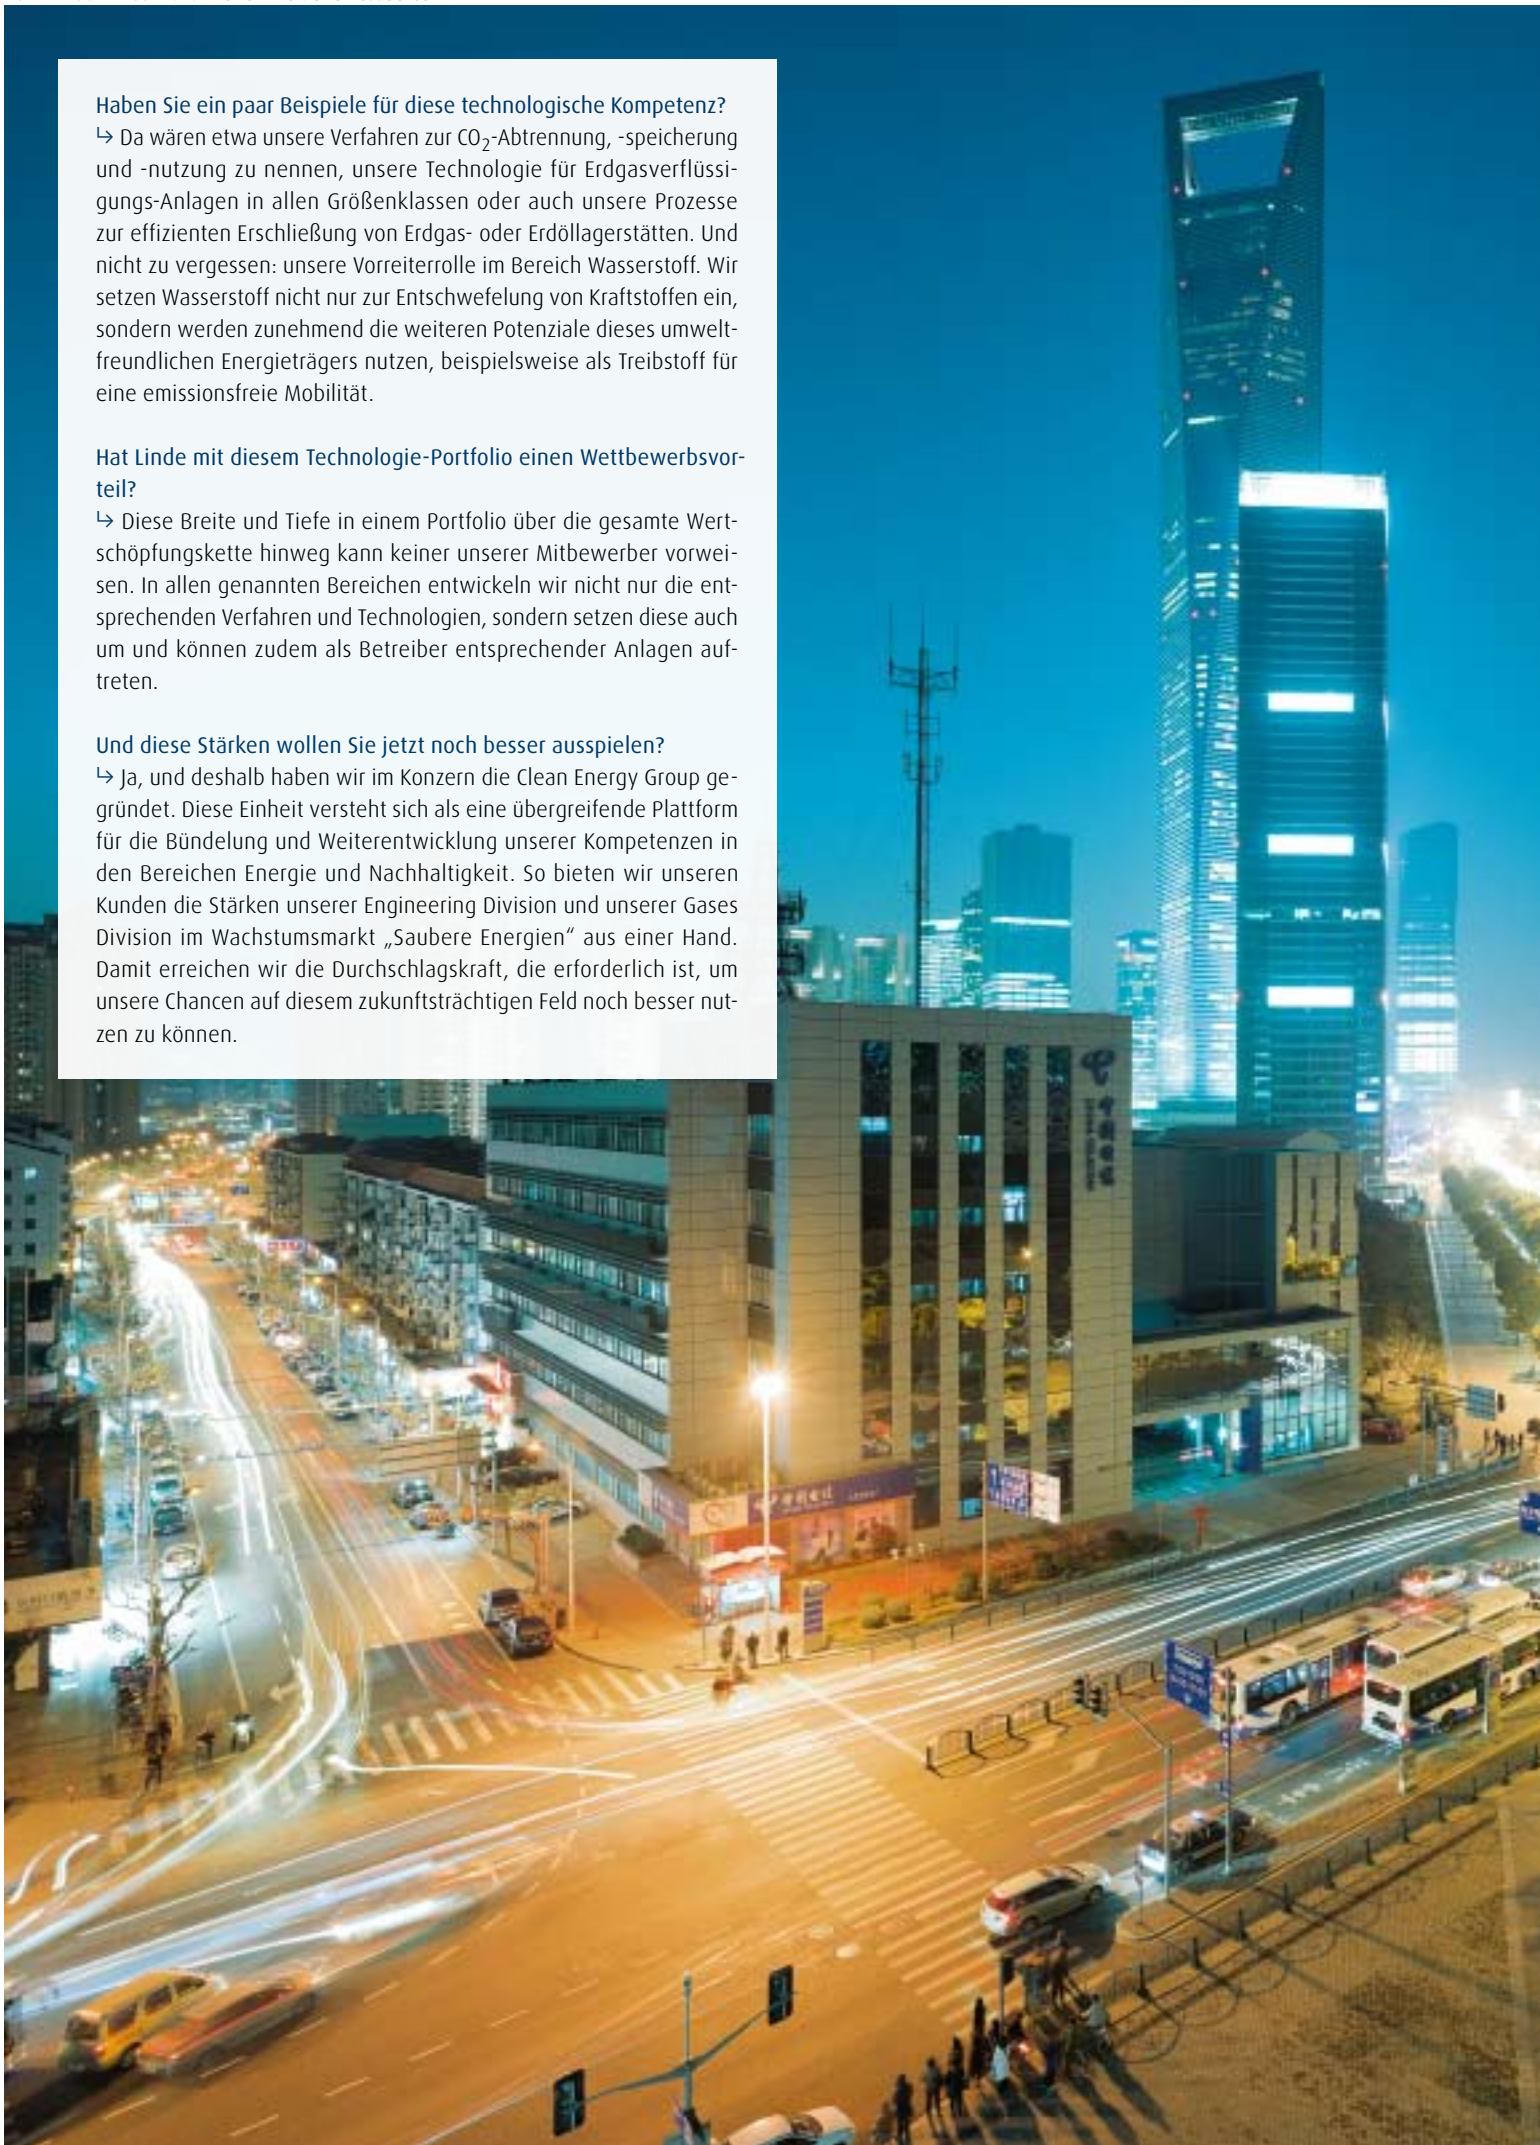



↳ Wachstum braucht Energie:  
Shanghai (China).

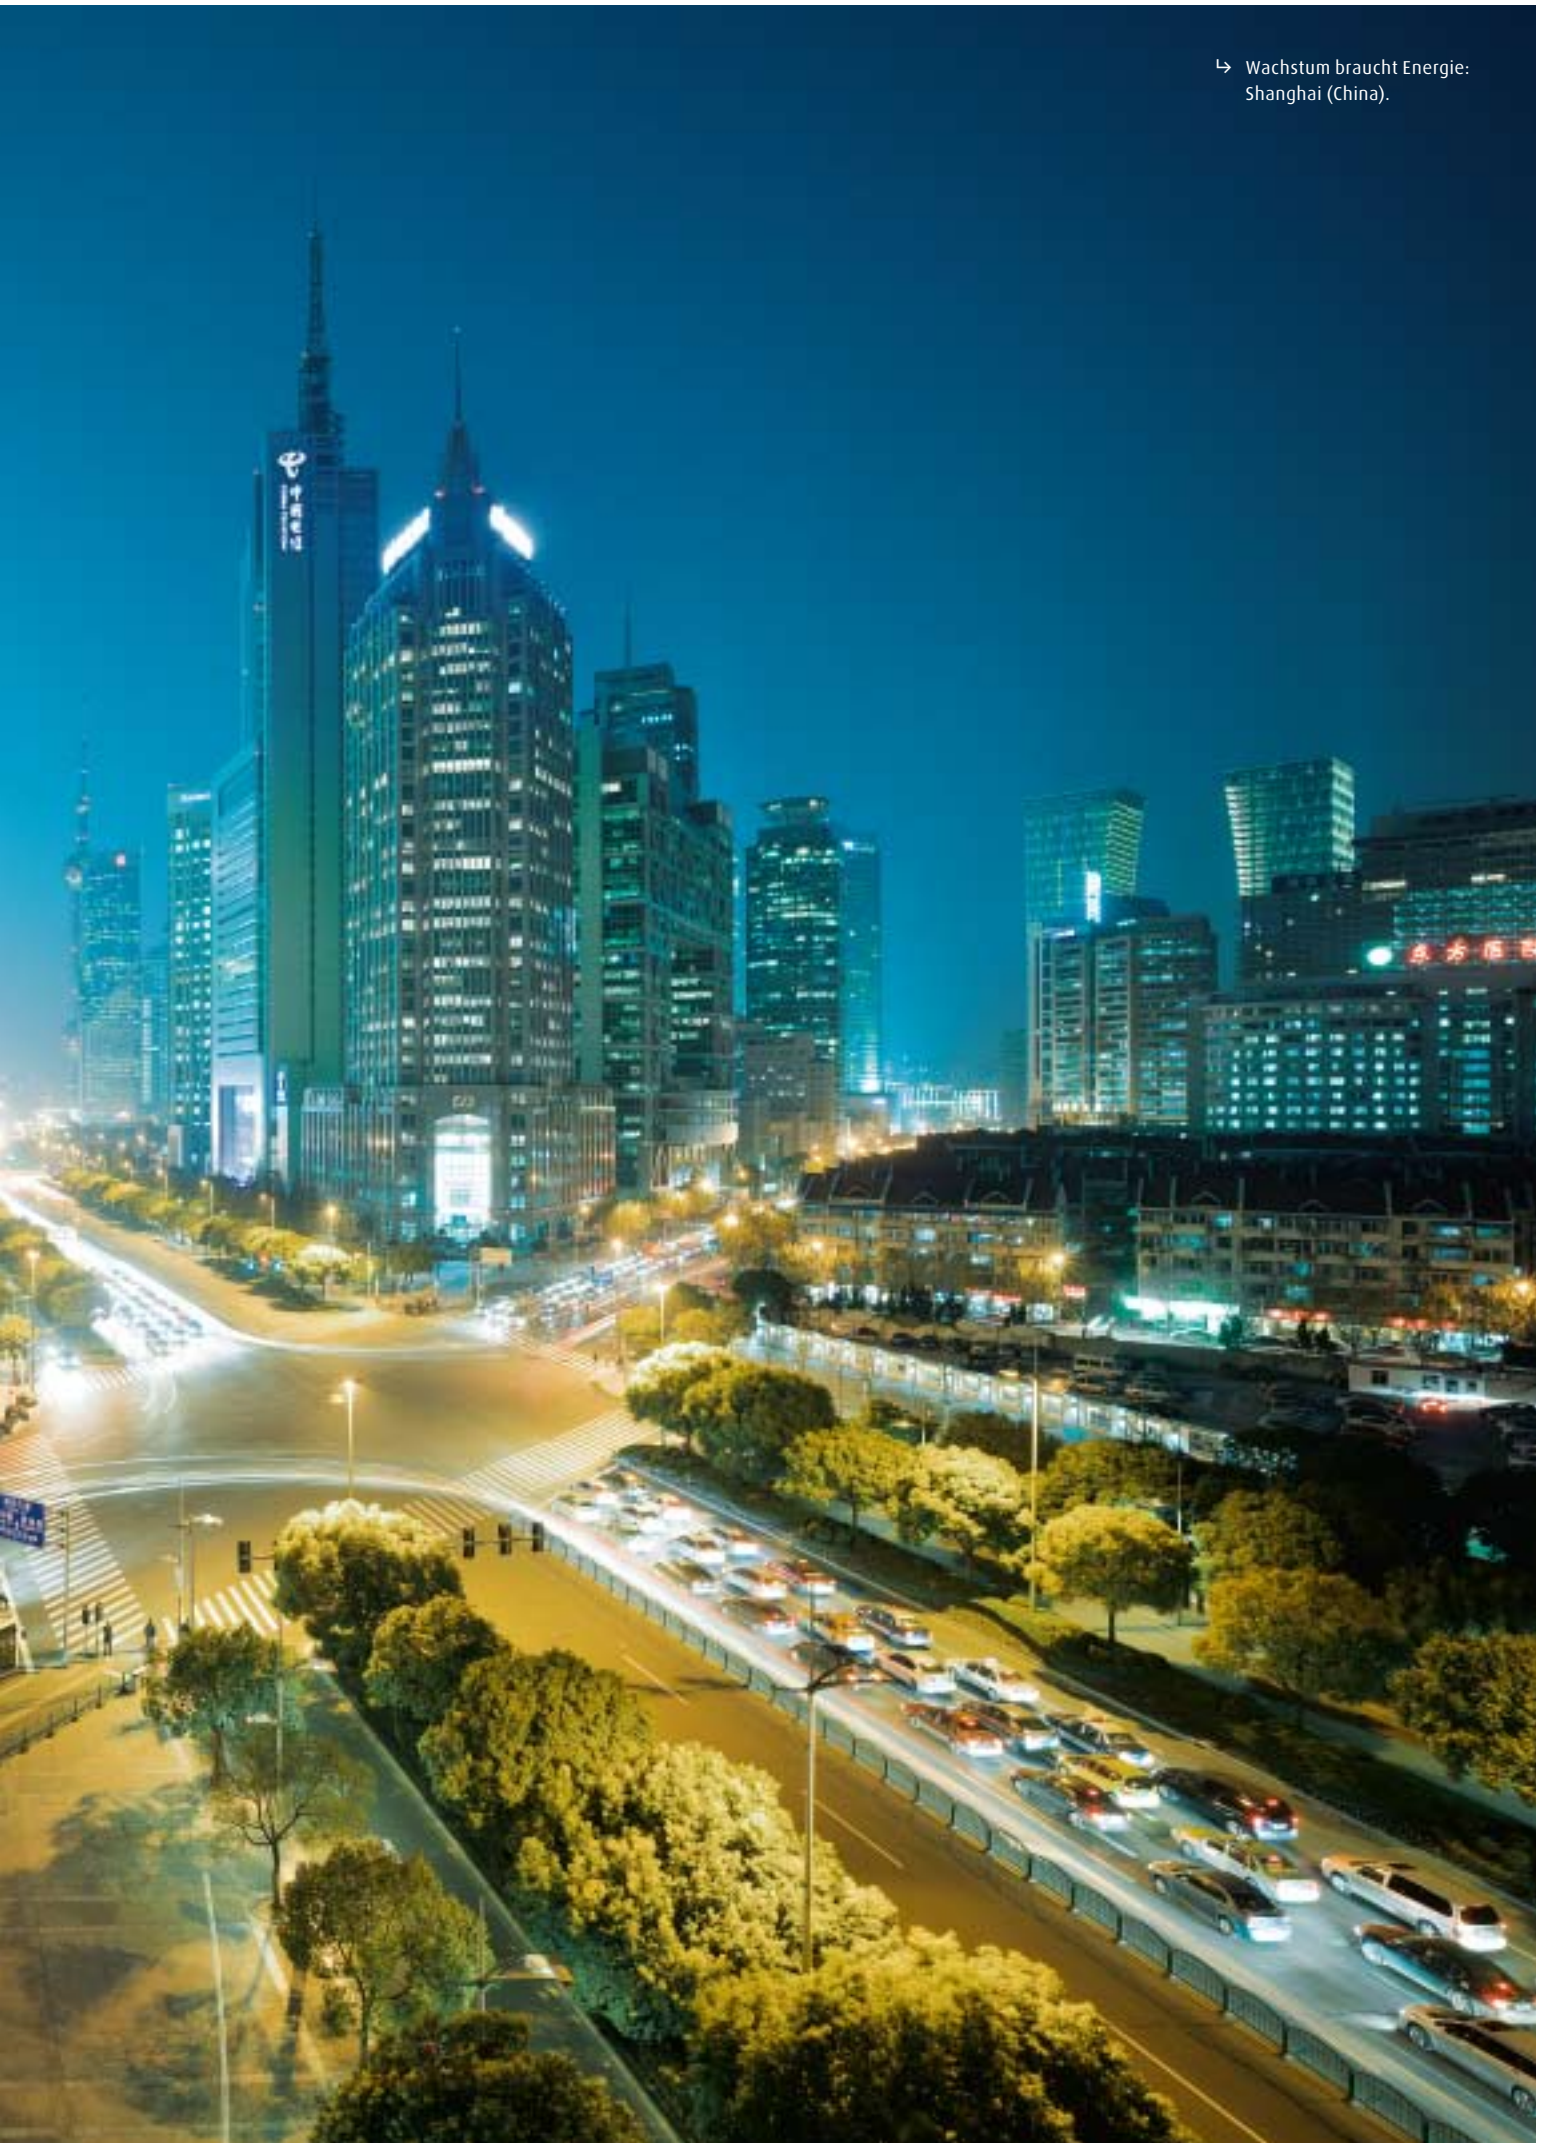



## „Der Wasserstoff in Spartanburg ist rundum grün.“

Dave Read, verantwortlich für Lindes US-Geschäft mit alternativen Kraftstoffen, setzt auf nachhaltig erzeugten Wasserstoff.

Linde versorgt die Gabelstapler, die im BMW-Werk Spartanburg, South Carolina (USA) zum Einsatz kommen, mit Wasserstoff. Warum ist BMW überhaupt von batteriebetriebenen Gabelstaplern zu Wasserstoff und Brennstoffzelle (siehe Glossar) gewechselt?

↳ Tatsächlich setzt BMW zum ersten Mal mit Wasserstoff betriebene Gabelstapler und Zugmaschinen in einem Werk ein. Das Unternehmen will seine Produktion eben so umweltfreundlich und energieeffizient wie möglich gestalten. Und da bietet Wasserstoff gegenüber der Batterie mehrere Vorteile: Für das Auftanken eines Gabelstaplers mit Wasserstoff braucht der Fahrer weniger als drei Minuten, das Austauschen der Batterie dauert hingegen zehn bis 20 Minuten. Brennstoffzellen verlieren gegen Ende ihrer Betriebszeit von acht bis zehn Stunden im Unterschied zur Batterie nicht an Leistung, sondern arbeiten bis zum Ende der Schicht mit voller Kraft. Zudem entstehen keine Kosten für die umweltgerechte Entsorgung von Bleibatterien. →



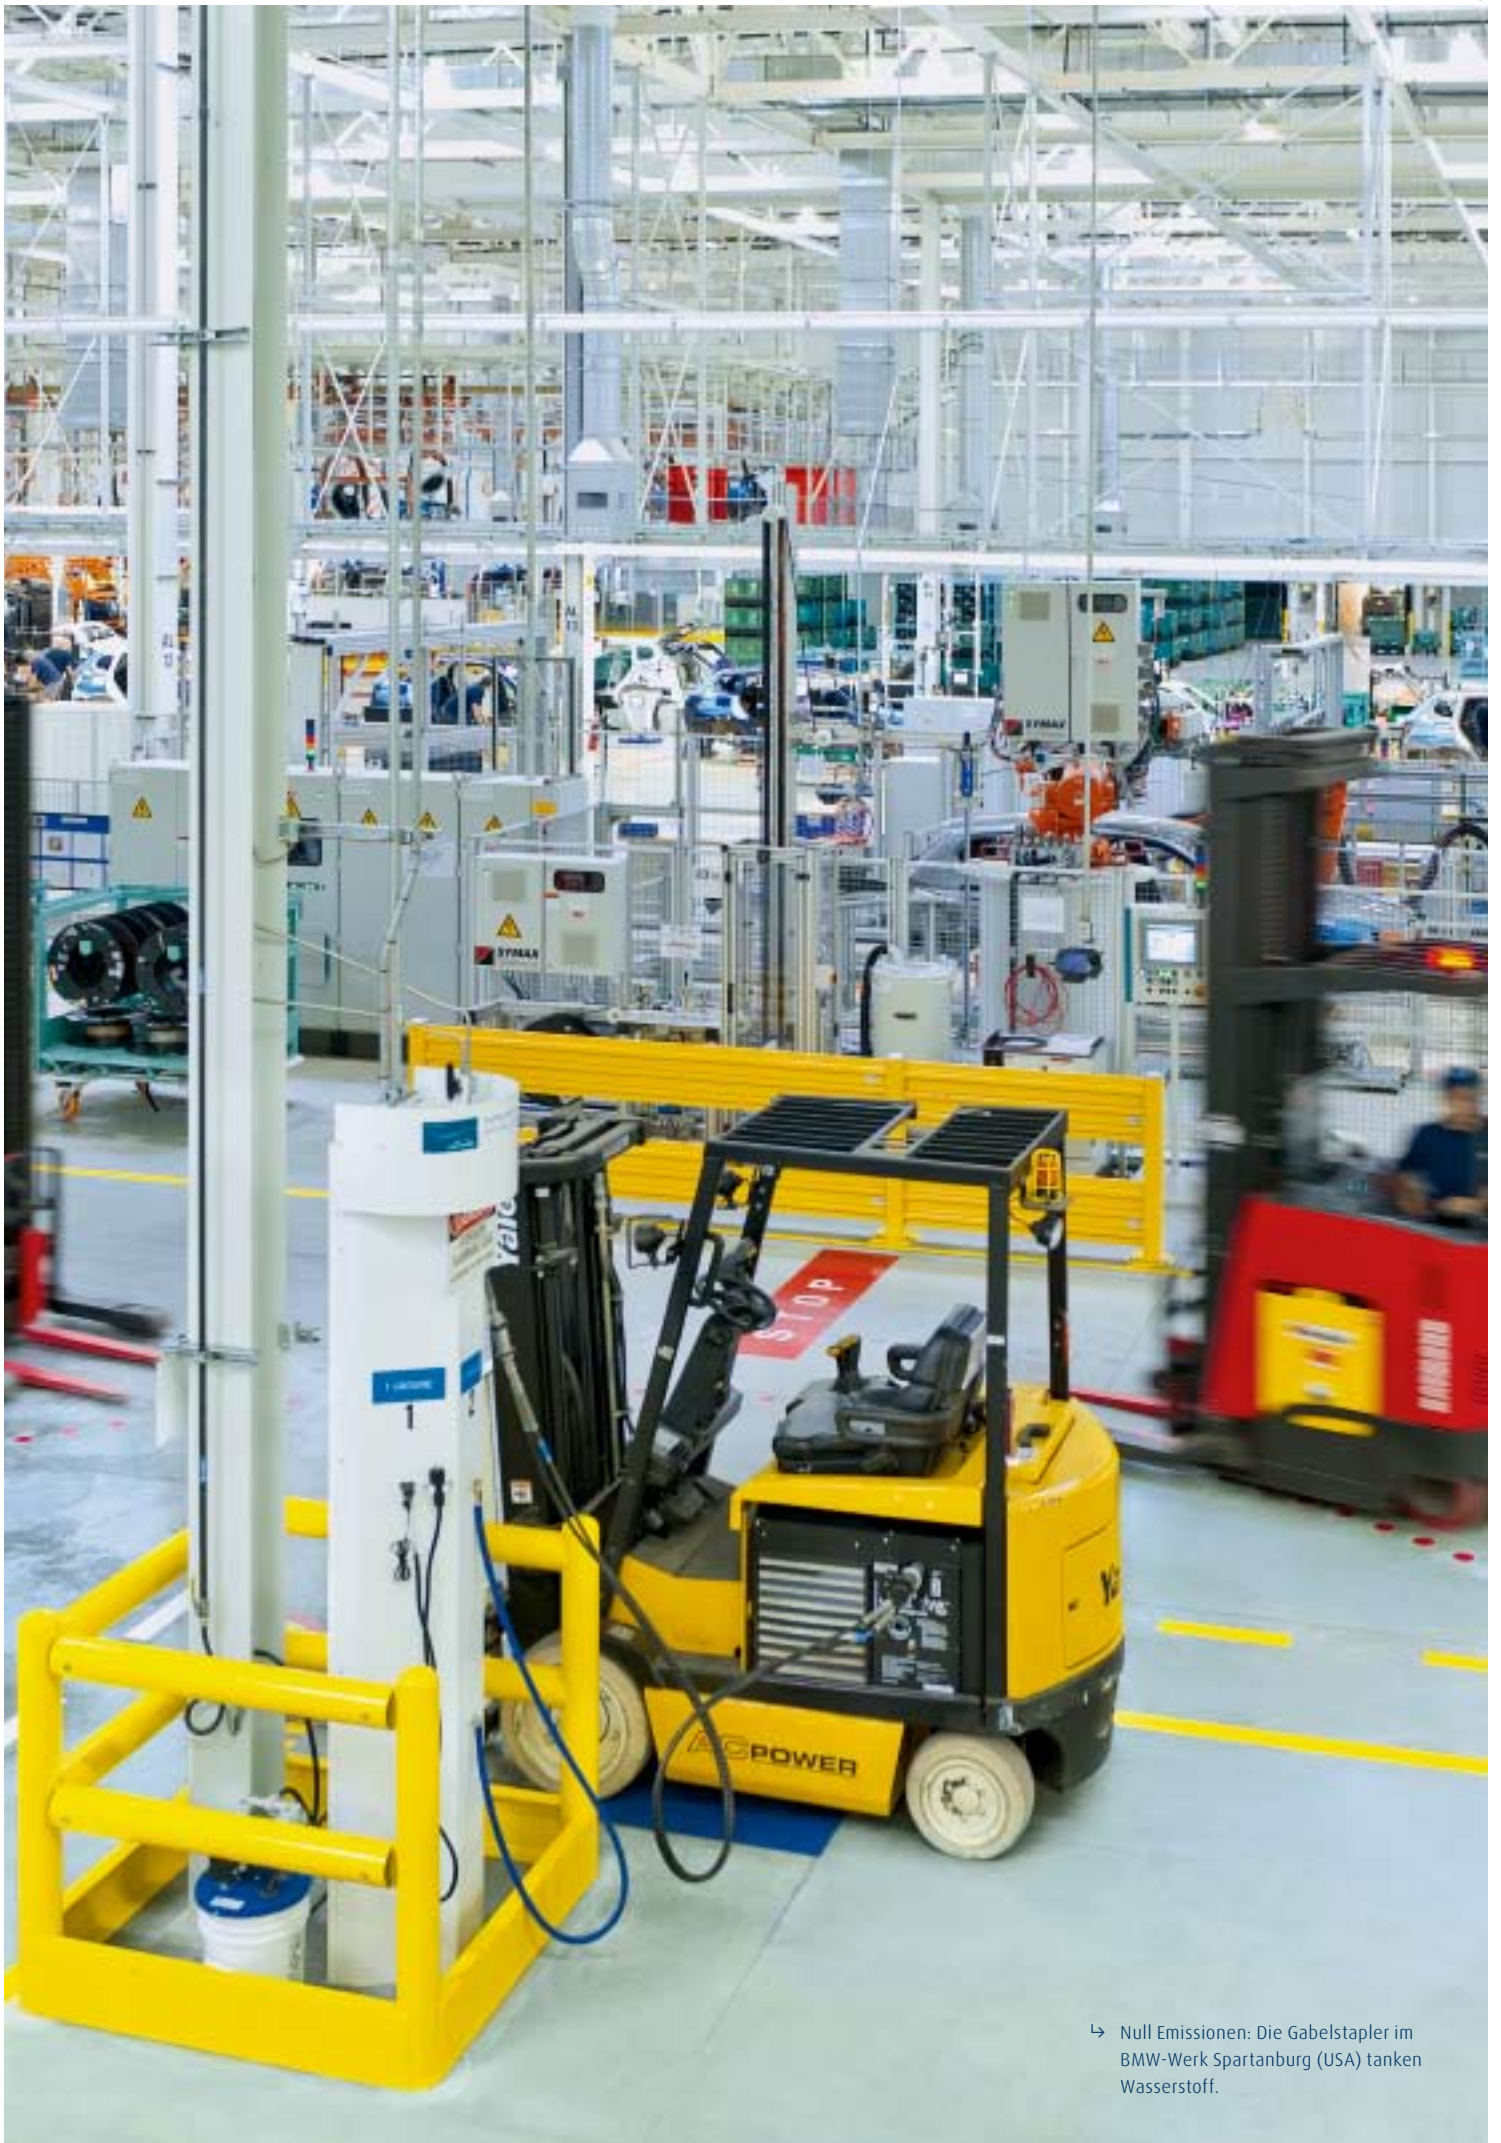

↳ Null Emissionen: Die Gabelstapler im BMW-Werk Spartanburg (USA) tanken Wasserstoff.



- ↳ Auch in Asien steigt die Nachfrage nach alternativen Antriebsquellen: Wasserstoff-Tankstelle in Shanghai.

#### Wie umweltfreundlich ist denn die Erzeugung des Wasserstoffs, der in Spartanburg verwendet wird?

↳ Der in Spartanburg eingesetzte Wasserstoff ist rundum „grün“. Er fällt als Nebenprodukt in einer Natriumchloratfabrik an. Wir reinigen, komprimieren und verflüssigen ihn mit Strom aus einem Wasserkraftwerk, also mit Strom aus einer erneuerbaren Energiequelle.

#### Linde liefert nicht nur den Wasserstoff, sondern hat auch die erforderlichen technischen Anlagen und Befüllungssysteme installiert. Gab es dafür einen besonderen Grund?

↳ BMW vertraut einfach unserer Kompetenz und unserer Technologie. Beim Tanksystem wird der so genannte ionische Kompressor (siehe Glossar) eingesetzt, der sich in Europa bereits vielfach bei Tankanlagen für Autos und Busse bewährt hat und nun auch in den USA eingeführt wird. Dieser innovative Kompressor markiert einen Entwicklungssprung in der Wasserstoff-Betankungs-Technologie: Er hat einen hohen Durchsatz, erfordert einen nur sehr geringen Wartungsaufwand und arbeitet sehr leise. Kurz gesagt: Damit lassen sich Fahrzeuge schnell und sicher betanken.

#### Wo steht Linde im Bereich Wasserstoff im Vergleich zum Wettbewerb?

↳ Wir sind Vorreiter bei der Weiterentwicklung von Wasserstoff als Energieträger. Wir verfügen über ein umfassendes Know-how in Fragen der Sicherheit, bei der Produktion, der Lagerung und beim Umgang mit Wasserstoff. Nicht von ungefähr haben wir bereits über 70 Wasserstoff-Tankstellen weltweit ausgerüstet – mehr als jedes andere Unternehmen.

#### Auch die Wasserstoff-Versorgung von Gabelstaplern ist für Linde nicht neu, oder?

↳ Nein, Linde hat bereits in der Vergangenheit Wasserstoff-Tankstellen für Gabelstaplerflotten geliefert, beispielsweise an Vertriebszentren großer Einzelhandels-, Getränke- und Lebensmittelunternehmen – auch in den USA.

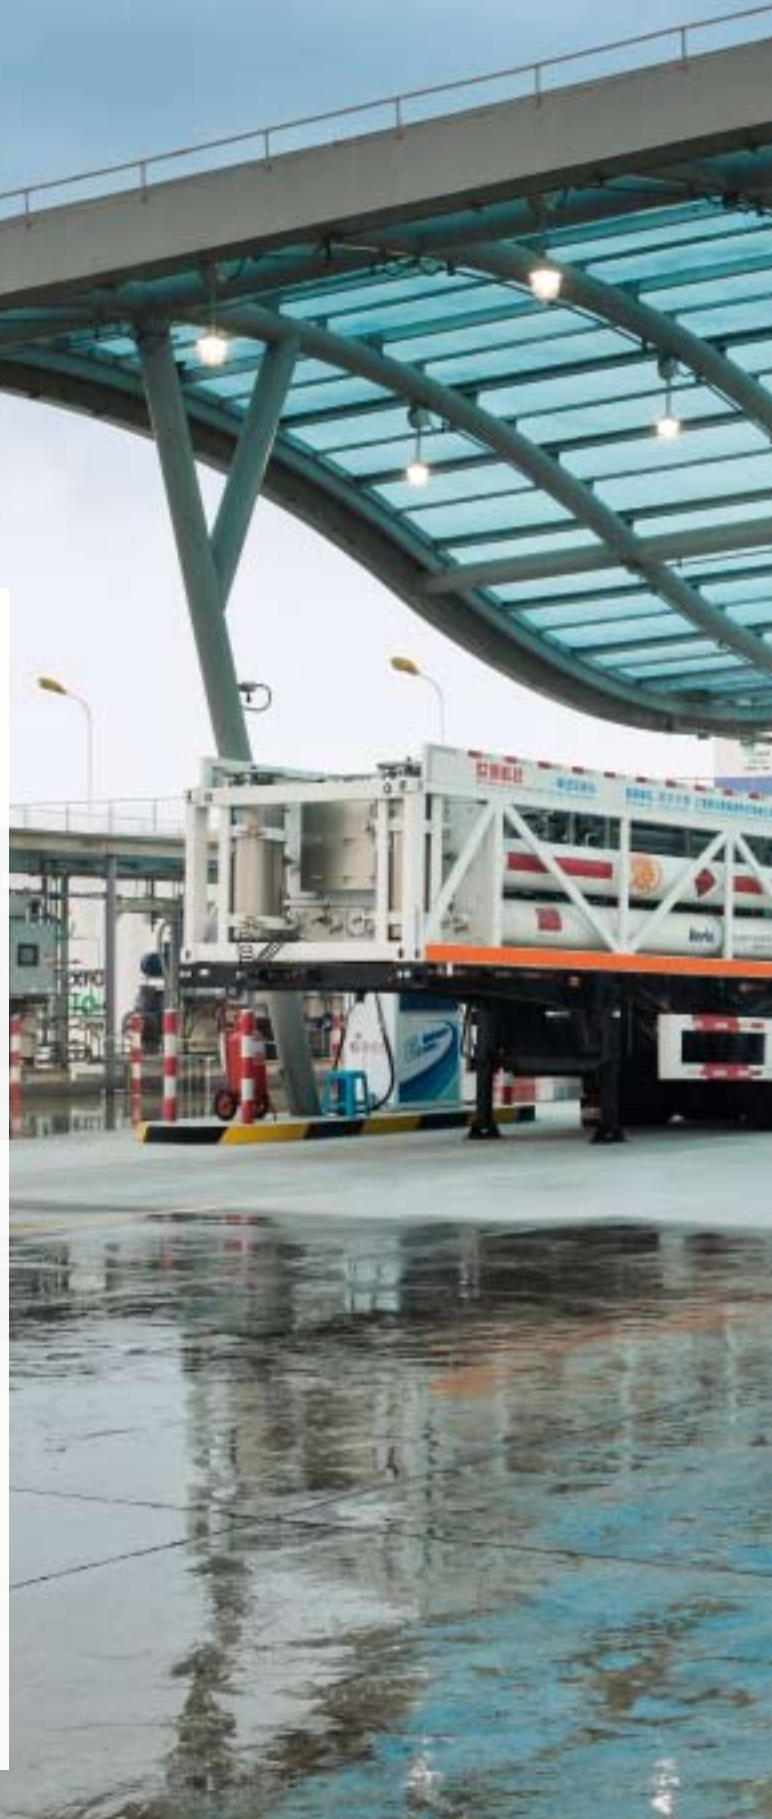



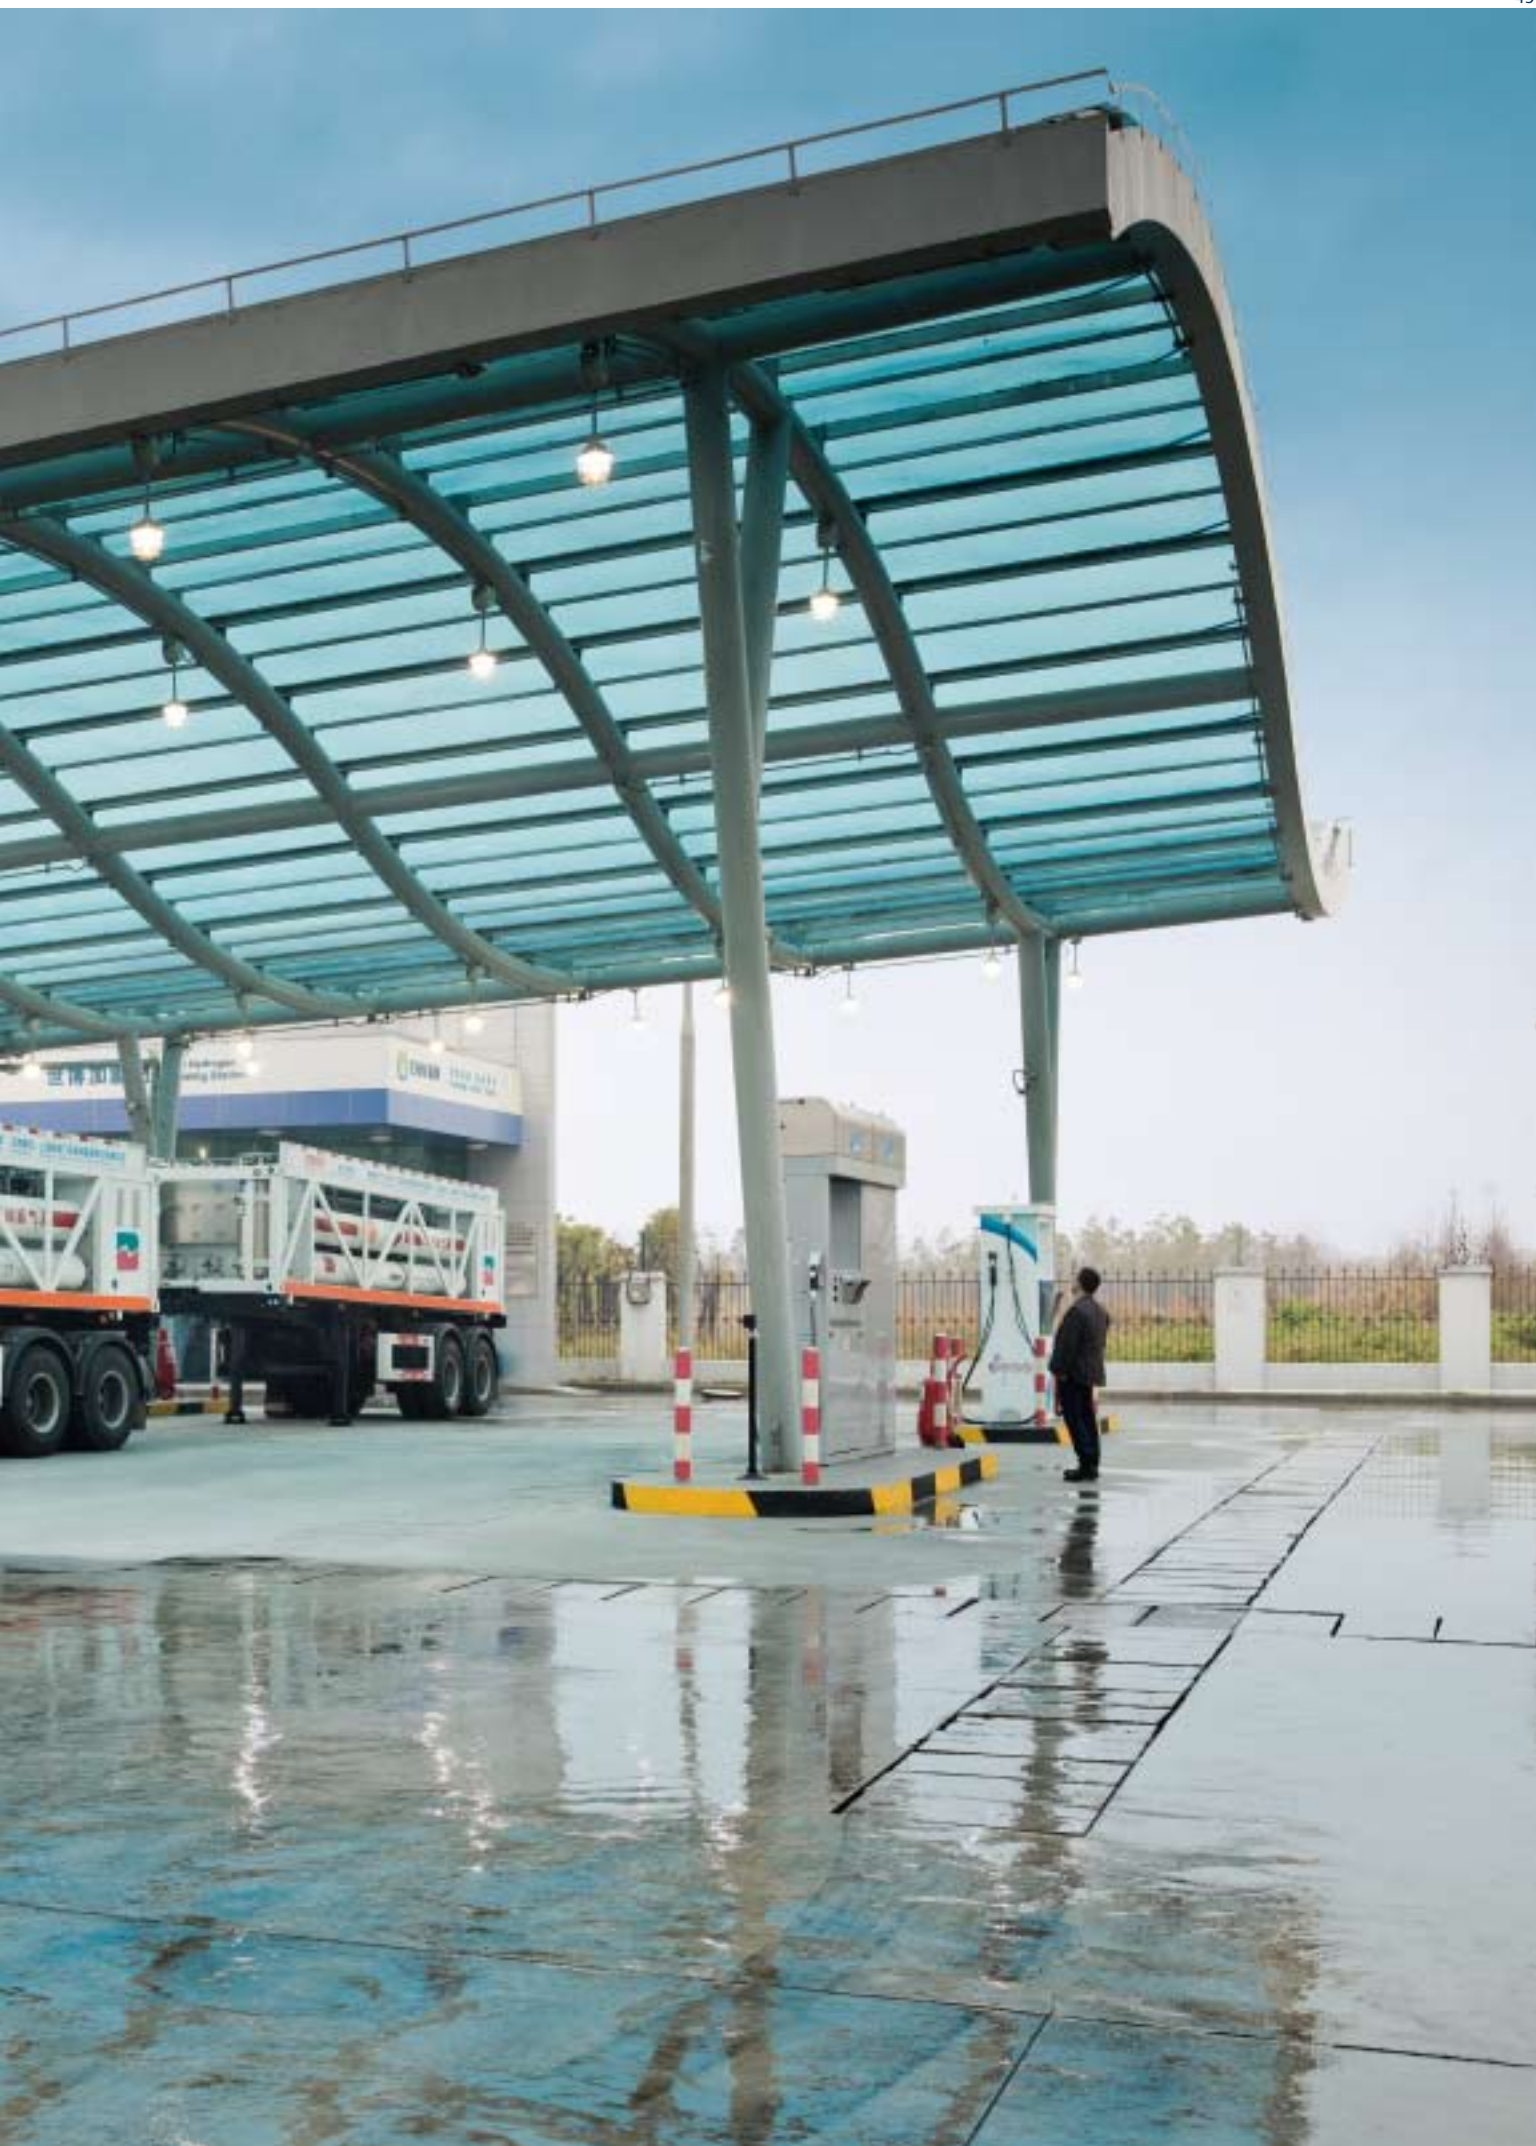



- ↳ Umweltfreundlicher als Benzin oder Diesel:  
Ein Tanker mit verflüssigtem Erdgas (LNG) ver-  
lässt Europas größte LNG-Anlage vor der Insel  
Melkøya bei Hammerfest (Nordnorwegen).

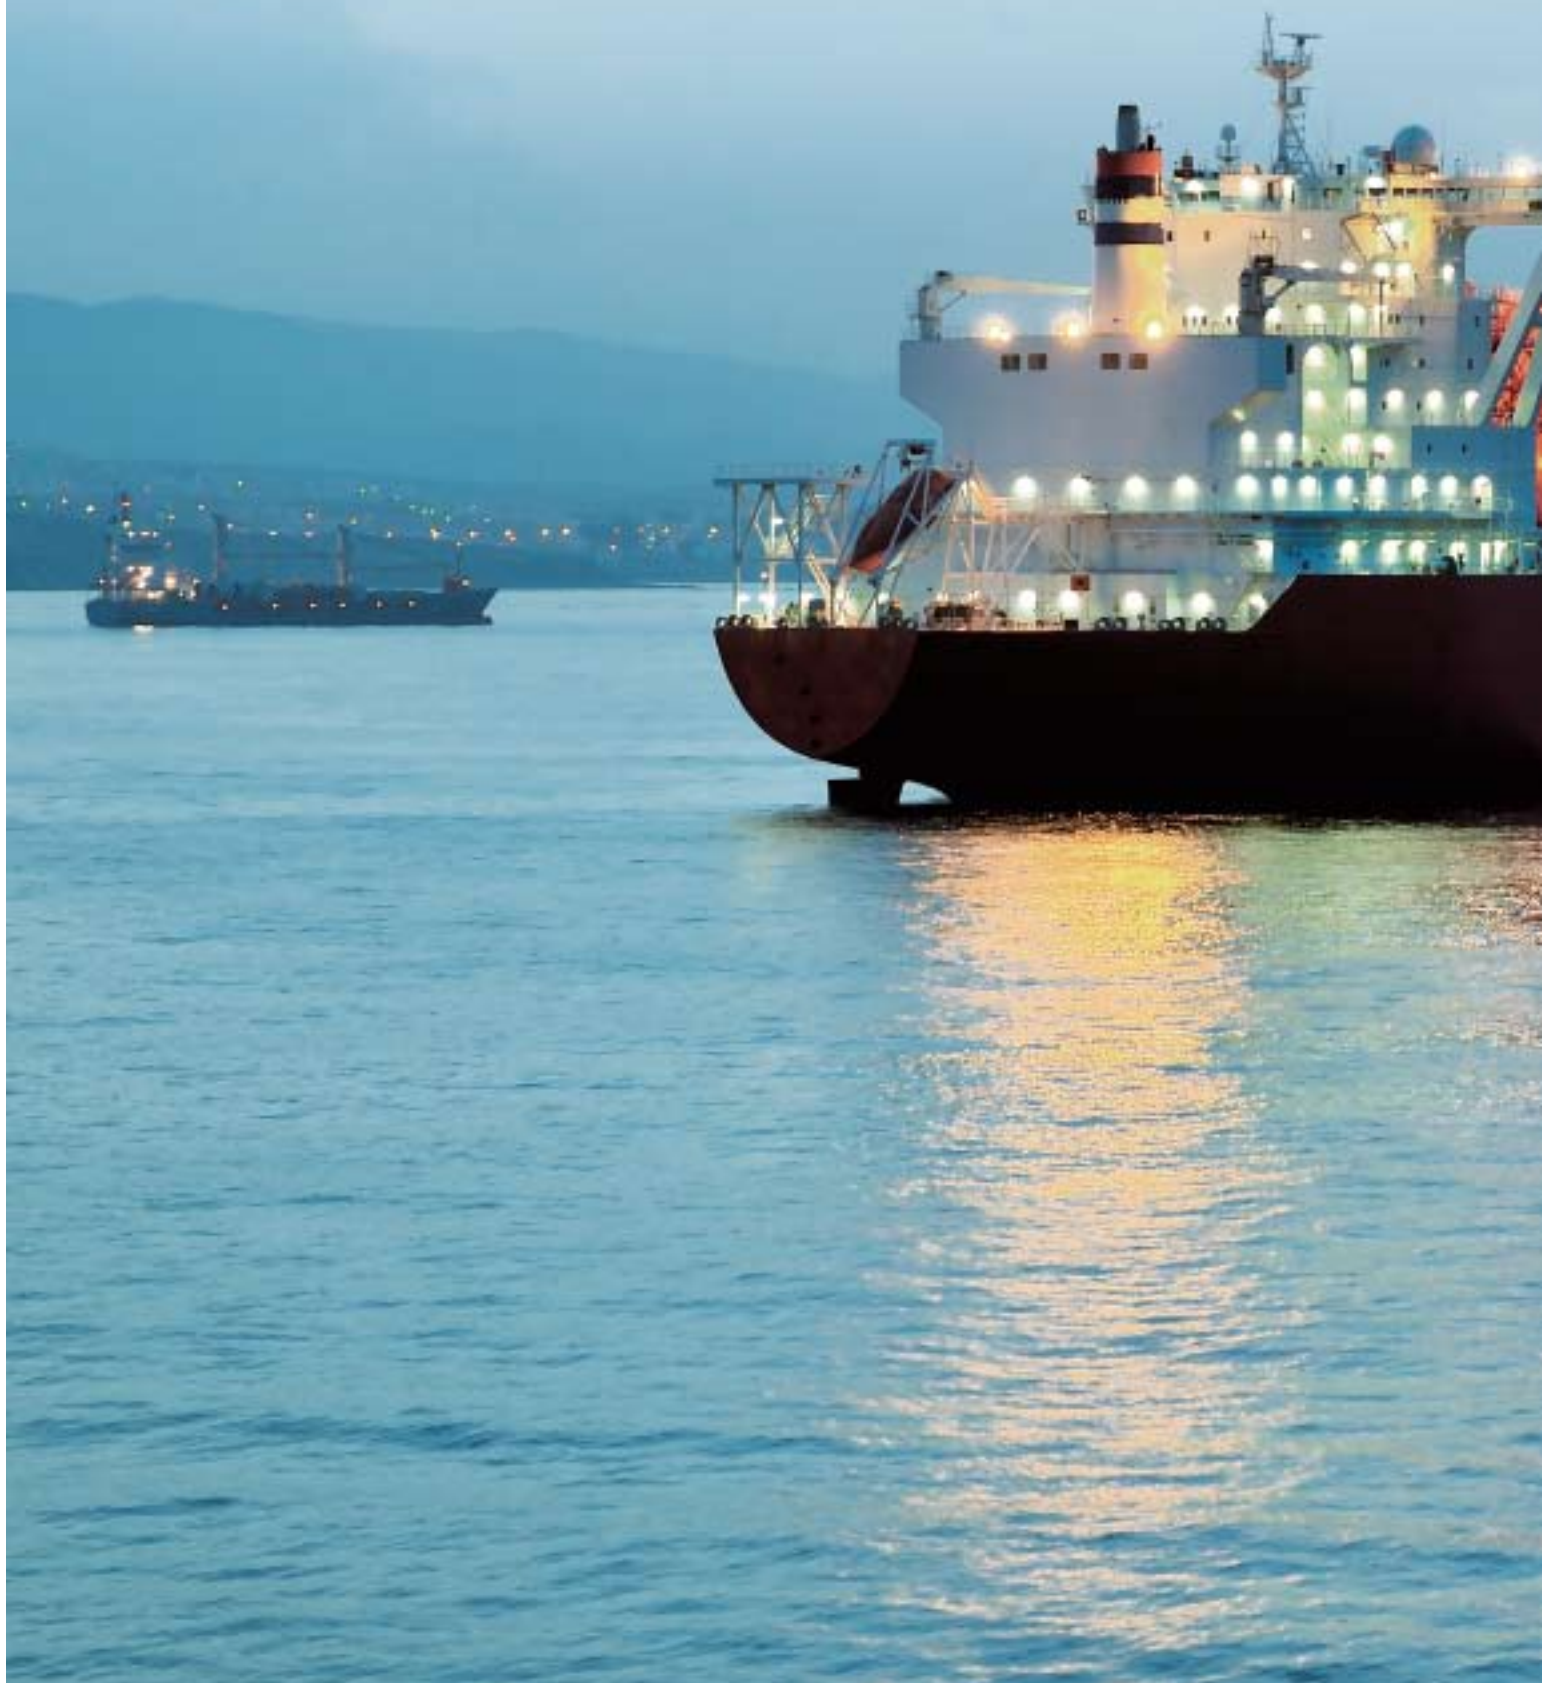



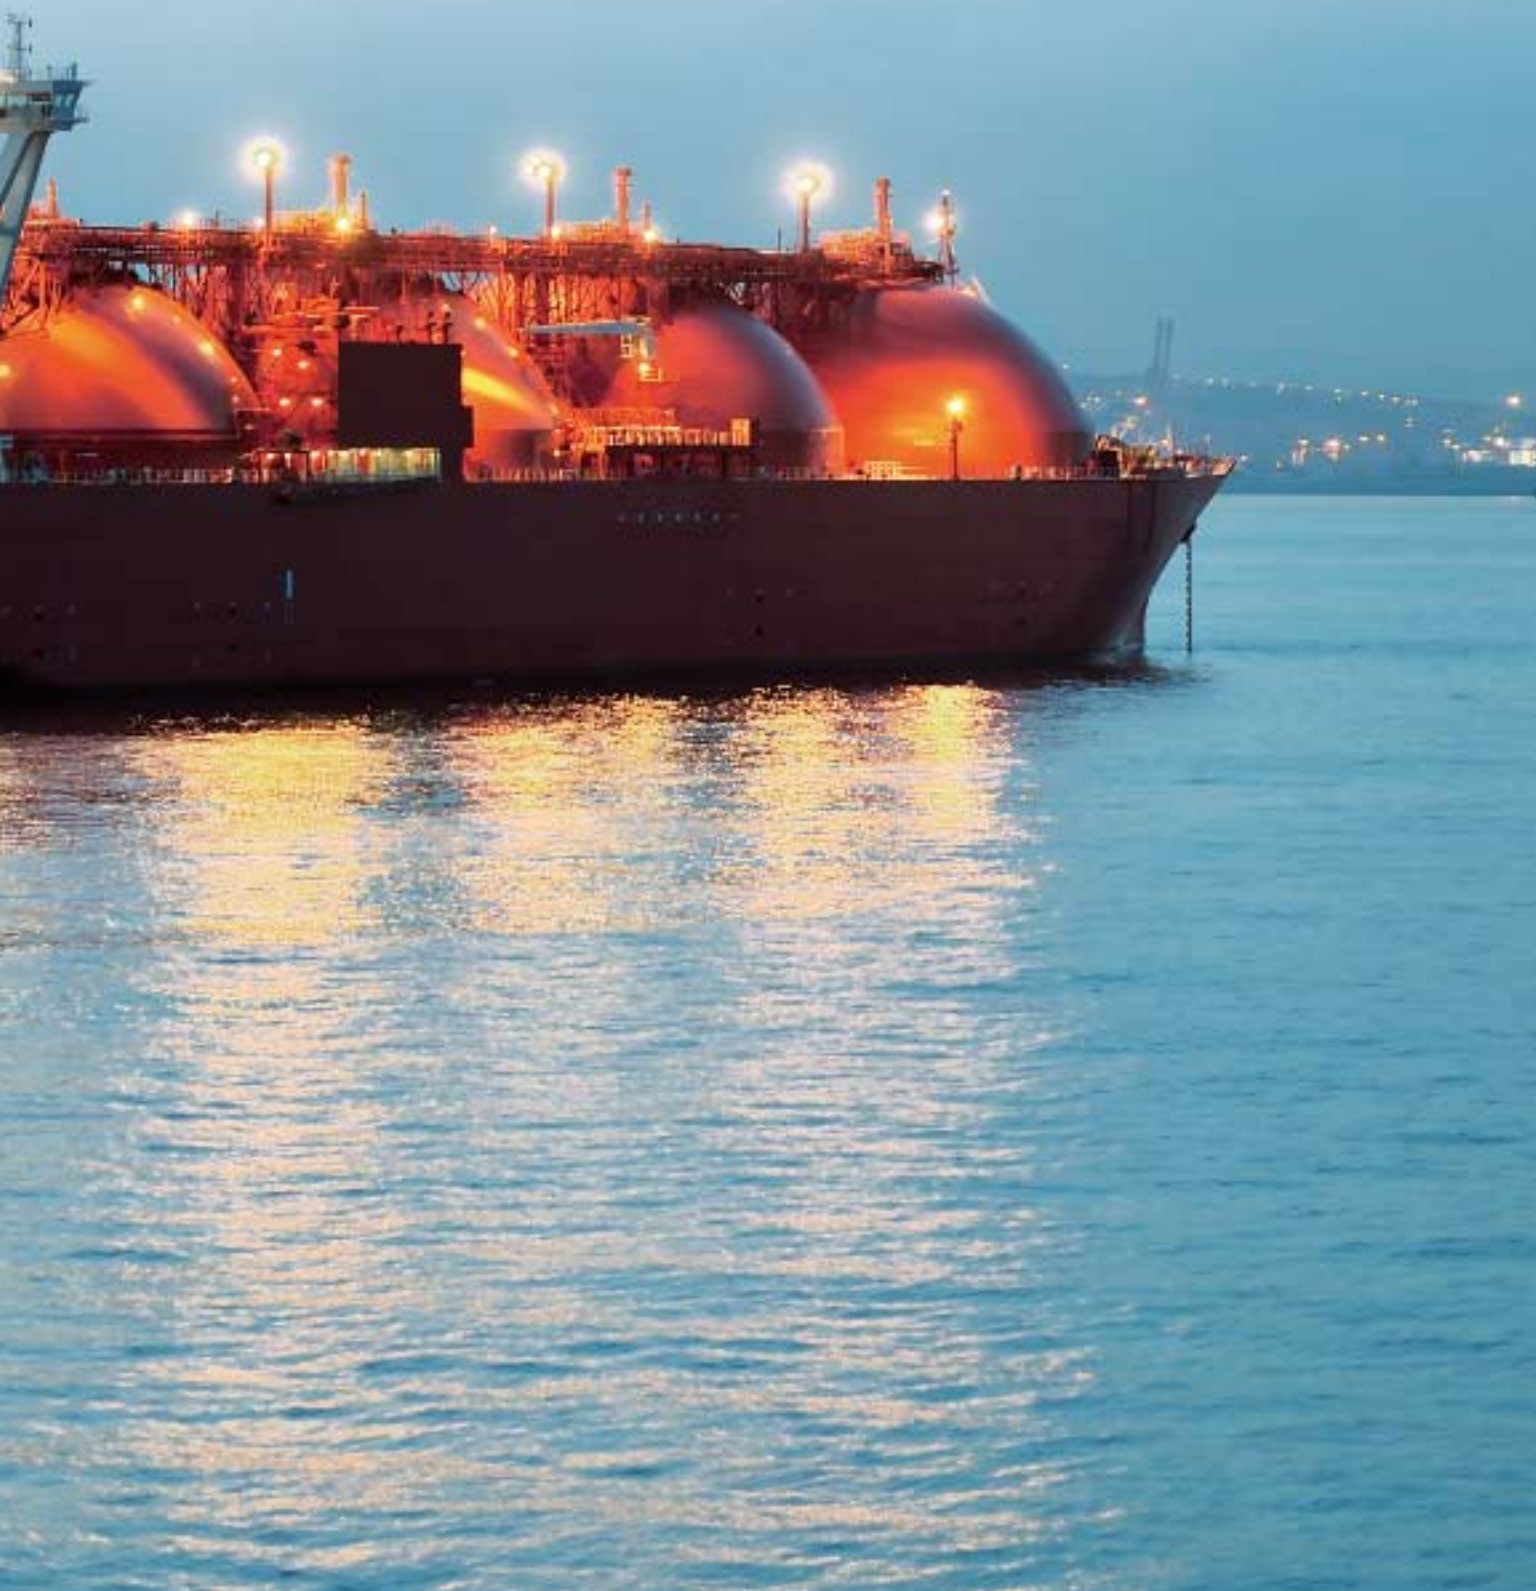

# Energie und Chemie ohne Nebenwirkungen.

Die Weltbevölkerung wächst und mit ihr die Nachfrage nach Energie. Es geht darum, den steigenden Energiebedarf zuverlässig zu decken und gleichzeitig die CO<sub>2</sub>-Emissionen deutlich zu senken. Linde trägt mit einer Reihe von innovativen Technologien dazu bei, diese Herausforderung zu meistern.

# E

## Europaweite Ziele

Die Europäische Union (EU) hat sich zum Ziel gesetzt, den CO<sub>2</sub>-Ausstoß bis zum Jahr 2020 EU-weit um 20 Prozent zu reduzieren. Um dieses Ziel zu erreichen, sind gemeinsame Anstrengungen von Politik, Gesellschaft und Industrie gefordert. Es geht für die Unternehmen zunehmend um die Entwicklung von umweltfreundlichen Technologien und Verfahren, die nachhaltiges Wachstum ermöglichen, unsere endlichen Ressourcen schonen und erneuerbare Energien wirtschaftlich nutzbar machen.

## Kompetenz beim Klimaschutz

Für Linde als Technologie-Unternehmen hat der Klimaschutz einen hohen Stellenwert:

- Gemeinsam mit Partnern und Kunden entwickelt und erprobt Linde Produkte und Verfahren, die dazu beitragen, Unternehmen und Privathaushalte mit Energie aus schadstoffarmer Produktion zu versorgen.
- Linde stellt Kraftwerksbetreibern und Raffinerien Technologien zur Verfügung, mit denen sie ihre Energieeffizienz steigern und umweltschädliche Emissionen vermindern oder ganz vermeiden können.

- Linde ist Vorreiter bei der Weiterentwicklung der Wasserstoff-Technologie. Das Unternehmen verfügt über die gesamte Technologie-Palette, die für eine funktionierende Wasserstoff-Wertschöpfungskette benötigt wird – von der Erzeugung bis zur Betankung. Linde nimmt seine Verantwortung wahr und setzt sich für den Aufbau einer flächendeckenden Infrastruktur zur Versorgung von Wasserstoff- und Brennstoffzellenfahrzeugen ein.
- Linde sorgt mittels Spezialgasen für eine umweltfreundliche Produktion von Solarzellen.
- Gemeinsam mit Partnern entwickelt und erprobt Linde Verfahren zur Herstellung von Biotreibstoffen aus regenerativen Energiequellen.

## Kohlendioxid im Visier

Die Umstellung auf eine nachhaltige Energieversorgung kann nicht von heute auf morgen

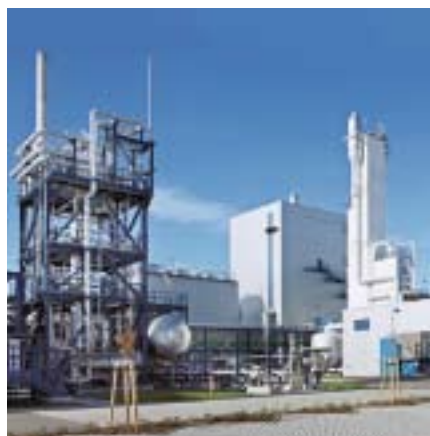

- ↳ Pilotprojekt zur Reinigung, Verdichtung und Speicherung von CO<sub>2</sub>: Vattenfall-Anlage in Schwarze Pumpe in Brandenburg (Deutschland).

erfolgen. Trotz aller Anstrengungen zum Ausbau erneuerbarer Energiequellen ist damit zu rechnen, dass noch etwa bis zum Jahr 2030 die Energieversorgung überwiegend aus fossilen Ressourcen erfolgen wird. So geht allein in China derzeit alle zwei Tage ein neues Kohlekraftwerk ans Netz.

Um den CO<sub>2</sub>-Ausstoß bestehender und künftiger Kohlekraftwerke so weit wie möglich zu verringern, bieten sich aus heutiger Sicht drei Verfahren an, bei denen Linde ein bewährter Technologie-Partner ist: die Rauchgasreinigung, also das Abscheiden von Kohlendioxid nach der Verbrennung (Post Combustion), das so genannte Pre Combustion-Konzept, bei dem das CO<sub>2</sub> vor der Verbrennung abgetrennt wird, sowie die Oxy-fuel-Technologie, bei der Kohle in einer Atmosphäre aus reinem Sauerstoff und CO<sub>2</sub> verbrennt. Dem dabei entstehenden Rauchgas wird der Wasserdampf durch Kondensation entzogen, so dass ein hochkonzentrierter CO<sub>2</sub>-Strom übrig bleibt. In einem nächsten Schritt kann das CO<sub>2</sub> dann gereinigt, verdichtet und schließlich gespeichert werden (Carbon Capture and Storage – CCS).

Dieses Verfahren erprobt derzeit der Energiekonzern Vattenfall gemeinsam mit Linde in einer Pilotanlage auf dem Gelände des Industrieparks Schwarze Pumpe in Brandenburg (Deutschland).

*„Mittel- und langfristig ist CCS unverzichtbar.“*

Ottmar Edenhofer, Chefökonom am Potsdam-Institut für Klimafolgenforschung und Mitglied des Weltklimarats

Im Sommer 2010 haben Vattenfall und Linde im Pilotkraftwerk Schwarze Pumpe darüber hinaus ein neues Konzept zur Entfernung von



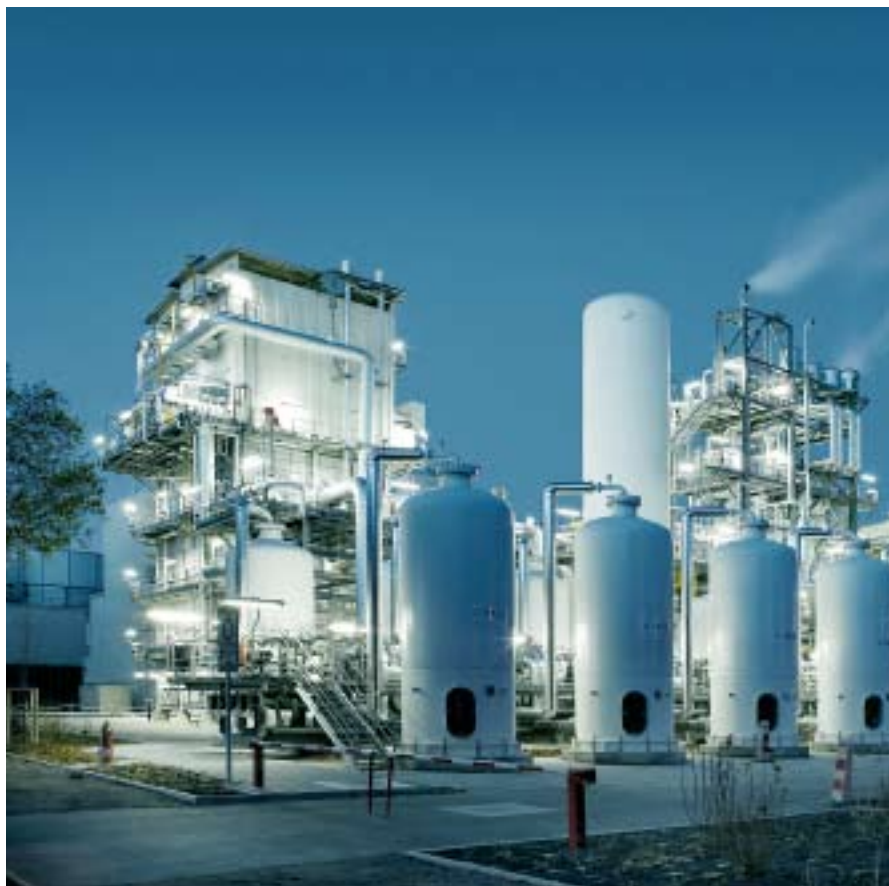

↳ Auch in der chemischen Industrie steigt der Bedarf an Wasserstoff. Bei BASF in Ludwigshafen (Deutschland) versorgt ein Verbundnetz die rund 90 Abnehmerbetriebe vor Ort.

## Auszeichnung für Technologie-Treiber

Die Initiative H<sub>2</sub> Mobility, an der auch Linde beteiligt ist, wurde von der International Partnership for Hydrogen and Fuel Cells in the Economy (IPHE) mit dem Excellence in Leadership Award ausgezeichnet. Der Preis wurde im Rahmen der World Hydrogen Energy Conference (WHEC) am 17. Mai 2010 in Essen übergeben. Ausgezeichnet mit dem Award der IPHE werden Institutionen und Initiativen, die die Wasserstoff- und Brennstoffzellen-Technologie in besonderem Maße vorantreiben.

Stick- und Schwefeloxiden aus Kraftwerksabgasen erfolgreich getestet. Das auf einer alkalischen Wäsche basierende Verfahren (LICONOX™) ist damit reif für die Markteinführung.

Seit 2009 betreibt RWE in Kooperation mit BASF und Linde in Niederaußem (Deutschland) ein Pilotprojekt zur CO<sub>2</sub>-Abscheidung aus Rauchgasen von Kohlekraftwerken (Post Combustion Capture). Im Rahmen dieser Aktivitäten haben die Partner im Jahr 2010 ein neues Mittel zum Auswaschen des CO<sub>2</sub> erfolgreich erprobt. Durch das neue Lösemittel konnte der Energieverbrauch um 22 Prozent reduziert werden – ein richtungsweisender Fortschritt, da alle Verfahren zur Abtrennung von Kohlendioxid in Kohlekraftwerken mit einem mehr oder minder erhöhten Energieeinsatz verbunden sind und damit den Wirkungsgrad der Kraftwerke senken.

Auf der Grundlage der Erfahrungen aus dem Pilotprojekt Niederaußem beabsichtigt RWE am Standort Eemshaven in Holland bis zum Jahr 2015 eine größere Demonstrationsanlage zur CO<sub>2</sub>-Abscheidung zu errichten. Bis 2020 soll das Verfahren der CO<sub>2</sub>-Wäsche Marktreife erreicht haben und dann mehr als 90 Prozent des Kohlendioxids aus den Rauchgasen von Kraftwerken entfernen.

In Kooperation mit verschiedenen Partnern und Universitäten beteiligt sich Linde an

Forschungsprojekten zur so genannten zweiten Generation von CO<sub>2</sub>-Abtrennverfahren. Ziel dieser Arbeiten ist es unter anderem, die Wirkungsgrade in Kraftwerksprozessen mit CO<sub>2</sub>-Abtrennung zu optimieren. Zu den vom Bundesministerium für Wirtschaft geförderten Projekten zählt auch der Oxyfuel-Prozess mit zirkulierender Wirbelschichtfeuerung.

Für dieses Verfahren haben Linde und RWE einen Rahmenvertrag zur Nutzung der von RWE entwickelten Technik zur Vortrocknung von Braunkohle abgeschlossen. Damit wird Linde Anbieter und Lieferant der Wirbelschichttrocknung mit interner Abwärmenutzung (WTA).

Mit der WTA-Technologie wird der Wassergehalt der Rohbraunkohle von mehr als 55 Prozent auf 12 Prozent gesenkt – und dies bei einer Temperatur von nur 110°C im Unterschied zu 1.000°C bei herkömmlichen Trocknungsprozessen. Außerdem wird die für die Trocknung der Kohle aufgewendete Wärme weitgehend zurückgewonnen und weitergenutzt.

Durch das WTA-Verfahren soll der Wirkungsgrad künftiger Braunkohlekraftwerke insgesamt um 10 Prozent auf annähernd 50 Prozent gesteigert werden. Damit ließe sich beispielsweise bei einem Kraftwerk mit 1.000 Megawatt Leistung der CO<sub>2</sub>-Ausstoß um bis zu eine Million Tonnen pro Jahr senken.

## Klimafreundlicher Kraftfahrzeugverkehr

Auch für die internationale Automobilindustrie gilt es, die CO<sub>2</sub>-Emissionen zu senken und die Ressourcen zu schonen. Neben der Entwicklung von batteriebetriebenen Fahrzeugen rückt bei der Elektromobilität die Brennstoffzelle immer stärker in den Fokus der Autobauer – und damit auch der umweltfreundliche Energieträger Wasserstoff (H<sub>2</sub>). So haben führende Industrieunternehmen im September 2009 eine Absichtserklärung unterzeichnet, die die Markteinführung von hunderttausenden Brennstoffzellenfahrzeugen von 2015 an vorsieht.

### Ausbau des Wasserstoff-Tankstellennetzes

Um die Verbreitung von wasserstoffbetriebenen Fahrzeugen zu unterstützen, ist es erforderlich, die entsprechende Infrastruktur aufzubauen. Deshalb hat sich die Initiative H<sub>2</sub> Mobility zum Ziel gesetzt, die Zahl der Wasserstoff-Tankstellen in Deutschland Schritt für Schritt zu erhöhen, um eine breite Markteinführung von Brennstoffzellenfahrzeugen von 2015 an zu ermöglichen. Gründungsmitglieder der H<sub>2</sub>-Mobility-Initiative sind Linde, Daimler, EnBW, OMV, Shell, TOTAL, Vattenfall und die Nationale Organisation Wasserstoff- und Brennstoffzellen-Technologie (NOW).

Auch die Clean Energy Partnership (CEP) setzt sich für die Kommerzialisierung von Wasserstoff als Kraftstoff der Zukunft ein und treibt die Erprobung von Fahrzeugen und Tankstellen unter realen Bedingungen voran. An der CEP sind derzeit neben Linde zwölf weitere Unternehmen beteiligt: die Berliner Verkehrsbetriebe (BVG), BMW, Daimler, Ford, GM/Opel, die Hamburger Hochbahn, Shell, Statoil, TOTAL, Toyota, Vattenfall Europe und Volkswagen.

Im Mai 2010 haben die CEP-Partner Linde, Statoil und TOTAL in Berlin eine zweite, hochmoderne Wasserstoff-Tankstelle eröffnet. Die neue Station bietet den umweltfreundlichen Treibstoff sowohl in flüssiger Form als auch gasförmig an. Linde liefert den flüssigen Wasserstoff, der vor Ort in hochisolierten Tanks gespeichert wird, sowie die Betankungstechnologie.

In Berlin entsteht derzeit eine weitere CEP-Wasserstoff-Tankstelle. Neben einem unterirdischen Speicher für flüssigen Wasserstoff stellt Linde bei diesem Projekt auch das neu entwickelte Kryopumpen-Betankungssystem bereit. Diese bislang leistungsstärkste Anlage in Europa wird bis Mitte 2011 in Betrieb gehen und die Betankung eines Fahrzeugs mit Hoch-

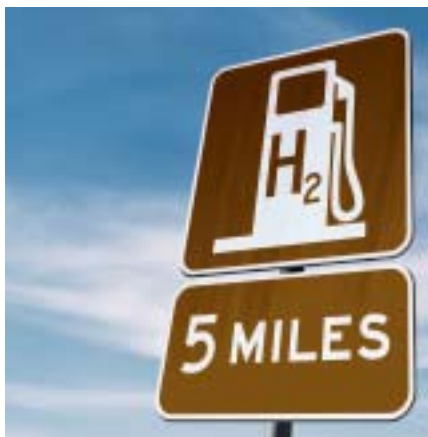

### Neue Wasserstoff-Tankstellen in Kalifornien

Im kalifornischen Emeryville errichtet Linde für den regionalen Omnibusbetreiber AC Transit eine Wasserstoff-Tankstelle für die Betankung von Brennstoffzellenbussen und -Pkw. Die Tankstelle verfügt über die neueste Linde-Technologie und bietet komprimierten gasförmigen Wasserstoff mit 350 bar und 700 bar Druck an. Der Wasserstoff wird im flüssigen Zustand angeliefert und vor Ort gespeichert. Außerdem erzeugt ein Elektrolyseur vor Ort rund 60 Kilogramm gasförmigen Wasserstoff pro Tag. Neben der Station in Emeryville wird Linde im Jahr 2011 eine weitere Wasserstoff-Tankstelle für AC Transit zur Versorgung eines Busdepots in Oakland ausrüsten.

druck-Wasserstoff bei 350 und 700 bar in lediglich drei Minuten ermöglichen.

Auch in der Hamburger HafenCity soll im Rahmen der CEP bis Mitte 2011 eine öffentliche Wasserstoff-Tankstelle des Energieversorgers Vattenfall ihren Betrieb aufnehmen. Die Kapazität der Tankstelle ist auf eine Flotte von 20 Linienbussen mit Brennstoffzellenantrieb ausgelegt und verfügt zusätzlich über eine Zapfsäule für Pkw. Damit wird dies die größte Wasserstoff-Tankstelle in Europa sein. Linde liefert die schlüsselfertige Anlage, die neben zwei Elektrolyseuren und Tanks für die Lagerung von gasförmigem Wasserstoff (CGH<sub>2</sub>) auch zwei ionische Kompressoren der neuesten Generation und die dazugehörigen Dispenser (siehe Glossar) für die Betankung mit 350 bar und 700 bar umfasst.

### „Grüner“ Wasserstoff

Selbst wenn Wasserstoff aus fossilen Rohstoffen wie Erdgas durch Dampfreformierung (siehe Glossar) erzeugt wird – die heute noch übliche Methode –, fallen bei seiner Nutzung als Kraftstoff für Brennstoffzellenfahrzeuge in der Gesamtbilanz rund 30 Prozent weniger CO<sub>2</sub>-Emissionen an als bei herkömmlichen Treibstoffen.

Lindes langfristiges Ziel ist es jedoch, Wasserstoff aus regenerativen Energien zu produzieren und damit einen durchweg nachhaltigen Energieträger bereitzustellen. Das Unternehmen arbeitet auf vielen Gebieten an entsprechenden Technologien. Am Linde Standort Leuna in Sachsen-Anhalt (Deutschland) hat Linde im Berichtsjahr eine Pilotanlage in Betrieb genommen, in der Wasserstoff aus Rohglycerin erzeugt wird. Das Glycerin entsteht als Nebenprodukt bei der Herstellung von Biodiesel aus Pflanzenölen. Zur Produktion des so genannten grünen Wasserstoffs nutzt Linde den selbst entwickelten Pyroreforming-Prozess. Bei diesem chemisch-thermischen Verfahren wird das entsalzte Rohglycerin unter hohem Druck und bei Temperaturen von mehreren Hundert Grad Celsius aufgespalten. Das dabei entstehende wasserstoffreiche Gas wird zur Reinigung und Verflüssigung in die vor Ort bestehenden Linde Wasserstoff-Anlagen eingespeist. Mit dem auf diese Weise gewonnenen „grünen“ Wasserstoff will das Unternehmen künftig unter anderem die neuen Wasserstoff-Tankstellen in Berlin und Hamburg versorgen.

Eine weitere Option zur Produktion von „grünem“ Wasserstoff ist die Vergasung von festen Biomasseabfallstoffen. Linde engagiert sich auf diesem Gebiet mit einem Partner und hat in diesem Jahr den Bau einer entsprechenden Pilotanlage unterstützt.



## Schwefelfreier Treibstoff

Das Industriegas Wasserstoff ist nicht nur ein sauberer Energieträger, sondern trägt auch maßgeblich dazu bei, die Umweltverträglichkeit von konventionellen fossilen Kraftstoffen zu verbessern. In Raffinerien dient das Gas vor allem dazu, Benzin und Diesel zu entschwefeln und damit bei deren Verbrennung die Emissionen zu reduzieren.

In diesem Marktsegment hat Linde in den USA im Jahr 2010 seine Position mit der Inbetriebnahme einer 22,5 Kilometer langen Wasserstoff-Pipeline weiter gestärkt. Die Pipeline verbindet die Shell-Raffinerie in Deer Park, Texas, mit den texanischen Wasserstoff-Anlagen von Linde in Clear Lake und LaPorte. Die Investitionen in dieses Projekt betrugen rund 50 Mio. USD.

Ökologische und ökonomische Vorteile gleichermaßen bietet Lindes SURE™-Technologie zur Rückgewinnung von Schwefel aus petrochemischen Prozessen unter Einsatz von Sauerstoff. Für dieses innovative Verfahren hat Linde im Berichtsjahr in China einen wichtigen Referenzkunden gewonnen: die Yangtze Petrochemical Corp. (YPC), eine Tochtergesellschaft der Sinopec Corporation. Das Unternehmen setzt SURE™ in seiner Raffinerie seit September 2010 ein, um die Rückgewinnung von Schwefel von derzeit 70.000 auf 100.000 Jahrestonnen zu steigern.

## LNG aus Kohleflözgas

Der Markt für verflüssigtes Erdgas (Liquefied Natural Gas, LNG) wächst – nicht zuletzt deshalb, weil der Kraftstoff LNG (siehe Glossar) im Vergleich zu herkömmlichem Diesel beim Verbrennungsprozess rund 20 Prozent weniger CO<sub>2</sub> freisetzt.

In Australien erzeugt Linde in Zusammenarbeit mit der Queensland Gas Company (QGC) jetzt erstmals LNG aus Kohleflözgas. Das Kohleflözgas wird von QGC geliefert und von Linde in einer neuen LNG-Anlage nahe Miles, Queensland, verflüssigt. Die Anlage soll täglich 50 Tonnen flüssiges Erdgas für die Betankung von Lastkraftwagen und für industrielle Einsatzzwecke produzieren. Diese Menge entspricht etwa 70.000 Liter Diesel. Die ersten Gaslieferungen sind für den Sommer 2011 vorgesehen.

Linde plant, an der Ostküste Australiens ein LNG-Tankstellennetz mit acht Stationen aufzubauen. Die Tankstationen sollen sowohl aus der neuen Anlage in Queensland als auch aus einer Verflüssigungs-Anlage in Tasmanien versorgt werden.

## EU-Studie bestätigt: Wasserstoff ist ein Schlüssel zu emissionsfreier Mobilität

Wasserstoffbetriebene Brennstoffzellenfahrzeuge werden ein wichtiger Bestandteil einer zukünftigen emissionsarmen Mobilität sein. Dies ist ein Ergebnis der bislang umfangreichsten europäischen Studie zu den Zukunftschancen verschiedener Antriebskonzepte im Individualverkehr. In einem mittleren Szenario geht die Studie davon aus, dass Brennstoffzellenfahrzeuge im Jahr 2050 einen Anteil von 25 Prozent am Fahrzeugbestand erreichen werden. Dazu sind bis 2020 Investitionen in Höhe von rund 3 Mrd. EUR in den Aufbau einer europaweiten Infrastruktur von Wasserstoff-Tankstellen notwendig.

Die Studie zeigt, dass Brennstoffzellenfahrzeuge im Vergleich zu batterieelektrischen Automobilen den Vorteil einer größeren Reichweite und einer kürzeren Betankungszeit haben. Somit sind Brennstoffzellen die am besten geeignete Antriebstechnik für die Reduzierung von CO<sub>2</sub>-Emissionen im mittleren und oberen Fahrzeugsegment. Dieses Segment umfasst etwa 50 Prozent aller Fahrzeuge und verursacht zurzeit rund 75 Prozent aller CO<sub>2</sub>-Emissionen im Straßenverkehr.

Bei einer Betrachtung der Gesamtkosten der Fahrzeugnutzung nähern sich alle Antriebskonzepte im Jahr 2025 deutlich an, wobei durch steuerliche Vergünstigungen oder Anreizsysteme dieser Zeitpunkt näher in die Gegenwart gerückt werden kann. Der Anteil der Wasserstoff-Infrastruktur an den Gesamtkosten beträgt nur rund 5 Prozent. Die komplette Studie findet man im Internet unter [www.zeroemissionvehicles.eu](http://www.zeroemissionvehicles.eu).

## Saubere Solarzellen

In der Photovoltaikindustrie ist ein deutlicher Trend zu kostengünstigeren und umweltschonenderen Produktionsverfahren erkennbar. Für die Hersteller von Solarzellen geht es darum, die so genannte Grid-Parität (siehe Glossar) zu erreichen und damit Solarstrom gegenüber anderen Energieträgern auch ohne Subventionen wettbewerbsfähig zu machen. Zudem ist es das Ziel der Branche, auch die „grüne Parität“ herzustellen – die Solarzellen und somit den Solarstrom also ohne jede Umweltbelastung zu produzieren. Deshalb ersetzen immer mehr Hersteller bei ihren Fertigungsprozessen das hoch klimaschädliche Reinigungsgas Stickstofftrifluorid ( $\text{NF}_3$ ) durch das umweltverträglichere Fluor ( $\text{F}_2$ ), das vor Ort wirtschaftlich von Linde Generatoren erzeugt werden kann. Insbesondere bei der Herstellung von Dünnschicht-Solarzellen (siehe Glossar) setzt sich diese Technologie weltweit zunehmend durch.

Für die Produktion von Silizium-Solarzellen hat Linde mit SPECTRA-F™ ein kostengünstiges Einstiegssystem für Fluor auf dem Markt eingeführt. Mit diesem Verfahren können die Solarzellenhersteller die Anwendung von Reinfluor im Labor- und Pilotmaßstab erproben.

## Fortschritte in der Biotechnologie

Auch auf dem Gebiet der Biotechnologie forscht Linde nach Verfahren und Anwendungsmöglichkeiten für die nachhaltige Erzeugung ressourcenschonender Produkte. Zu diesem Zweck errichtet das Unternehmen derzeit für die Fraunhofer-Gesellschaft IGB in Leuna das Chemisch-Biotechnologische Prozesszentrum (CBP). In dieser Einrichtung werden neue Verfahren der industriellen Biotechnologie aus der Forschung in den Pilotmaßstab überführt – und damit die Grundlagen für potenzielle großindustrielle Anwendungen gelegt.

Linde ist zudem an der Entwicklung und Konzeption moderner Bioraffinerien zur Herstellung von Chemiezwischenprodukten beteiligt. In diesen Anlagen werden biotechnologische Prozessschritte mit Methoden der klassischen Chemieproduktion umweltfreundlich und energieeffizient kombiniert.

Zum Beispiel treibt Linde die planerischen Grundlagen für die Grüne Bioraffinerie zur Herstellung von Biopolymeren auf Basis nachwachsender Rohstoffe in Brandenburg voran.

## Wissenswertes.

### Klimafaktor Mensch.

Treibhausgas-Emissionen an ausgewählten Beispielen in kg.

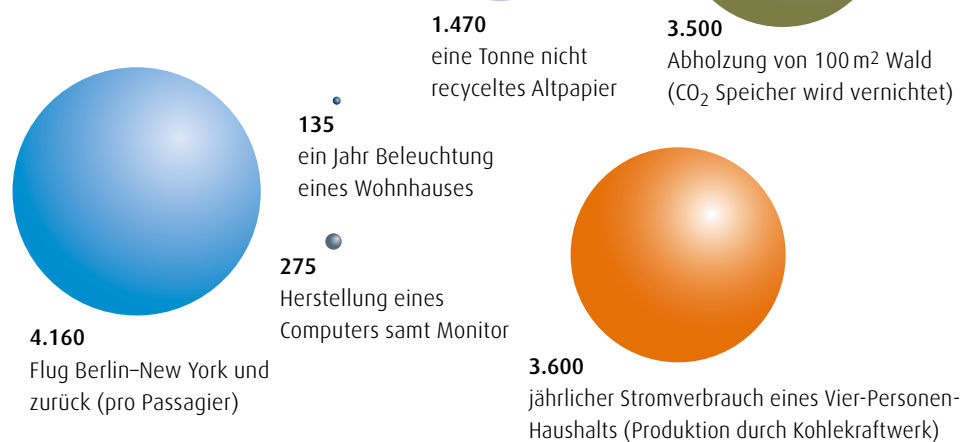

### Wachstumsmarkt Clean Energy.

Linde Aktivitäten im Bereich saubere Energie.

**Bessere Nutzung fossiler Ressourcen**  
Bestehende Wachstumsmärkte

**Erneuerbare Energie**  
Wachstumsmärkte in der Entwicklung

**CO<sub>2</sub>-Management**  
Zukünftige Wachstumsmärkte

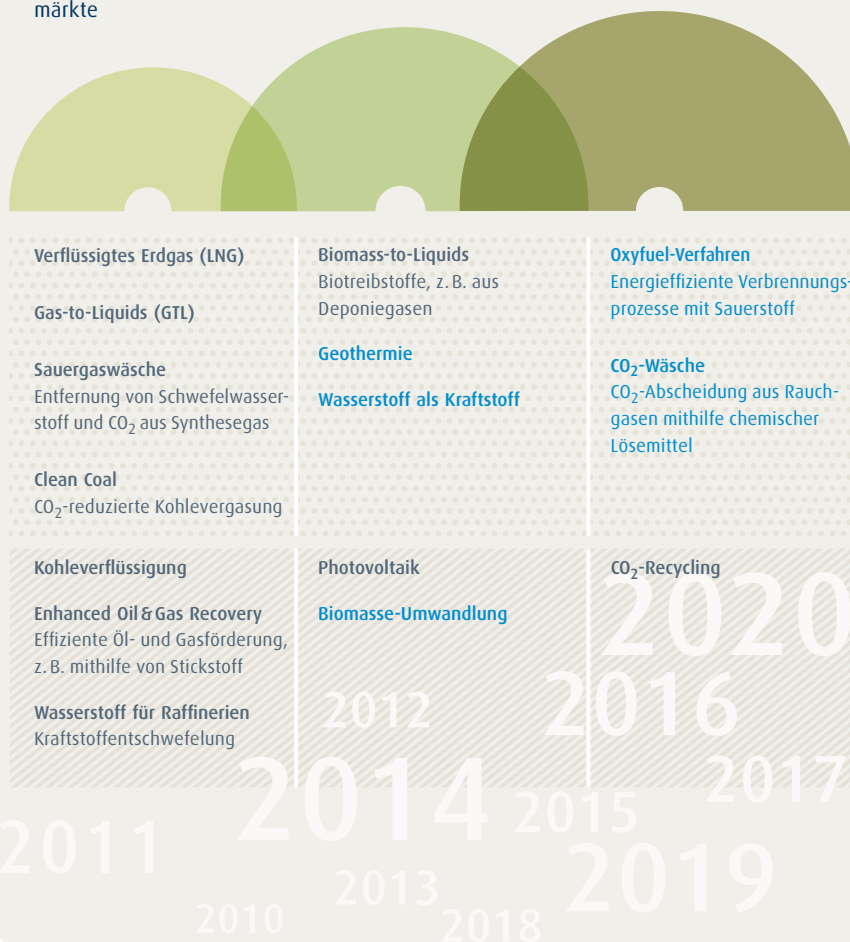

Geschäftsmodell:

Engineering  
Gaseversorgung

Entwicklungsstand:

Bestehendes Geschäft  
Pilotphase

Quelle: Linde AG, 2010.



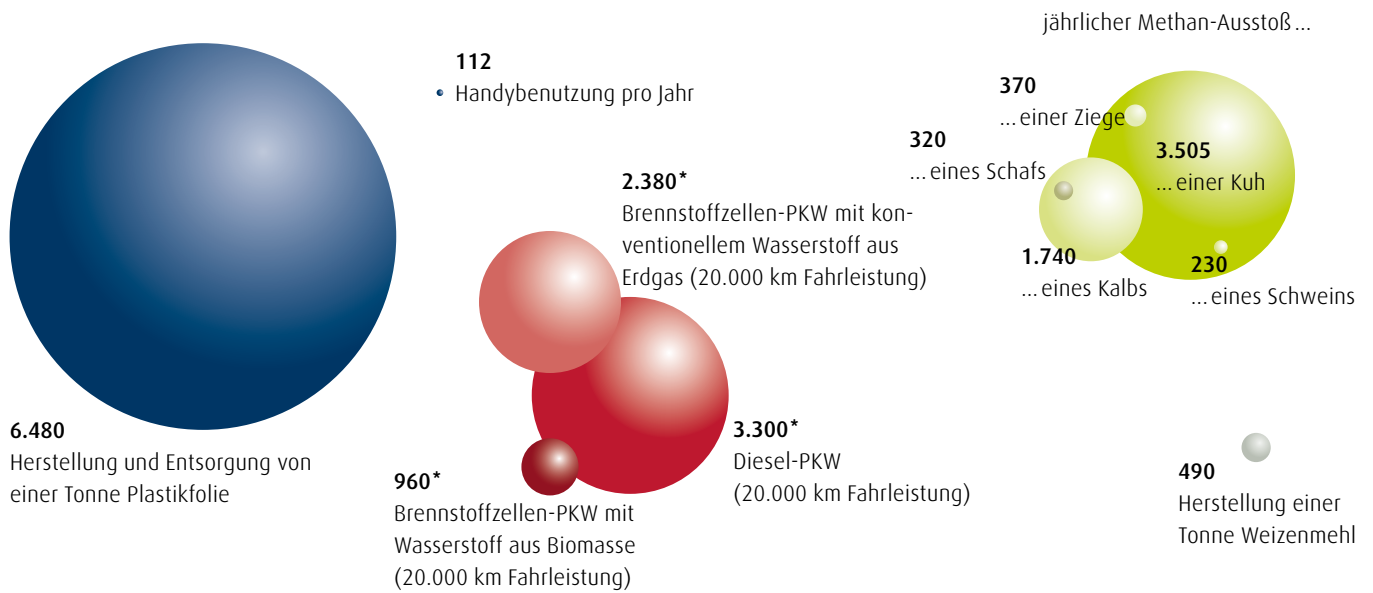

Quelle: Atlas der Globalisierung.

\* A portfolio of power-trains for Europe: a fact-based analysis, McKinsey & Company, 2010, und Linde AG.

### Wasserstoff und Brennstoffzellen auf der Überholspur.

Reichweite und CO<sub>2</sub>-Emissionen unterschiedlicher Antriebstechnologien, Prognose für 2050.

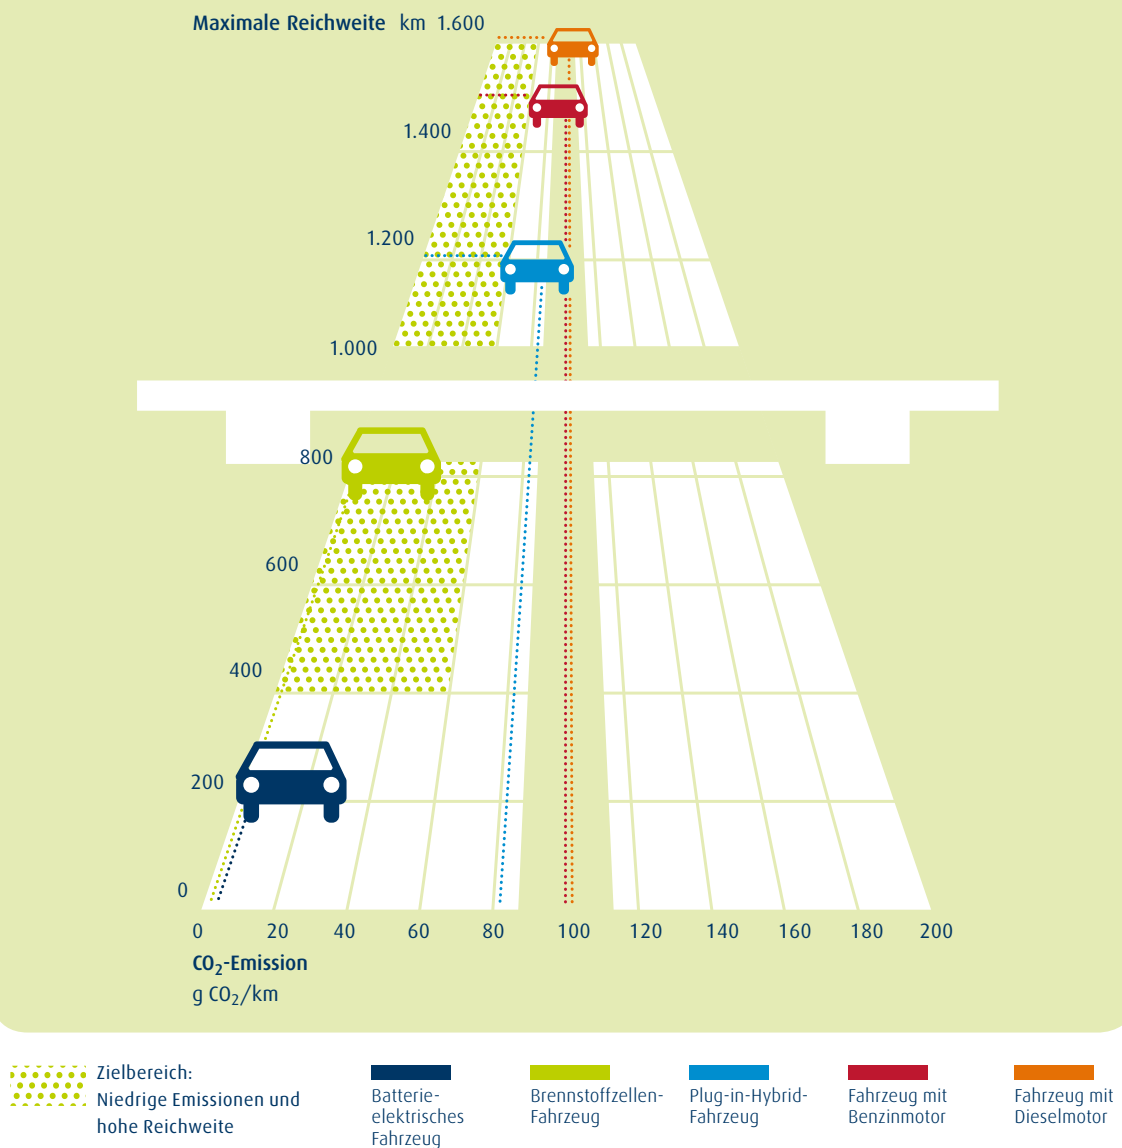

Quelle: A portfolio of power-trains for Europe: a fact-based analysis, McKinsey & Company, 2010.

↳ Manhattan, New York (USA):  
Globalität auf engem Raum.

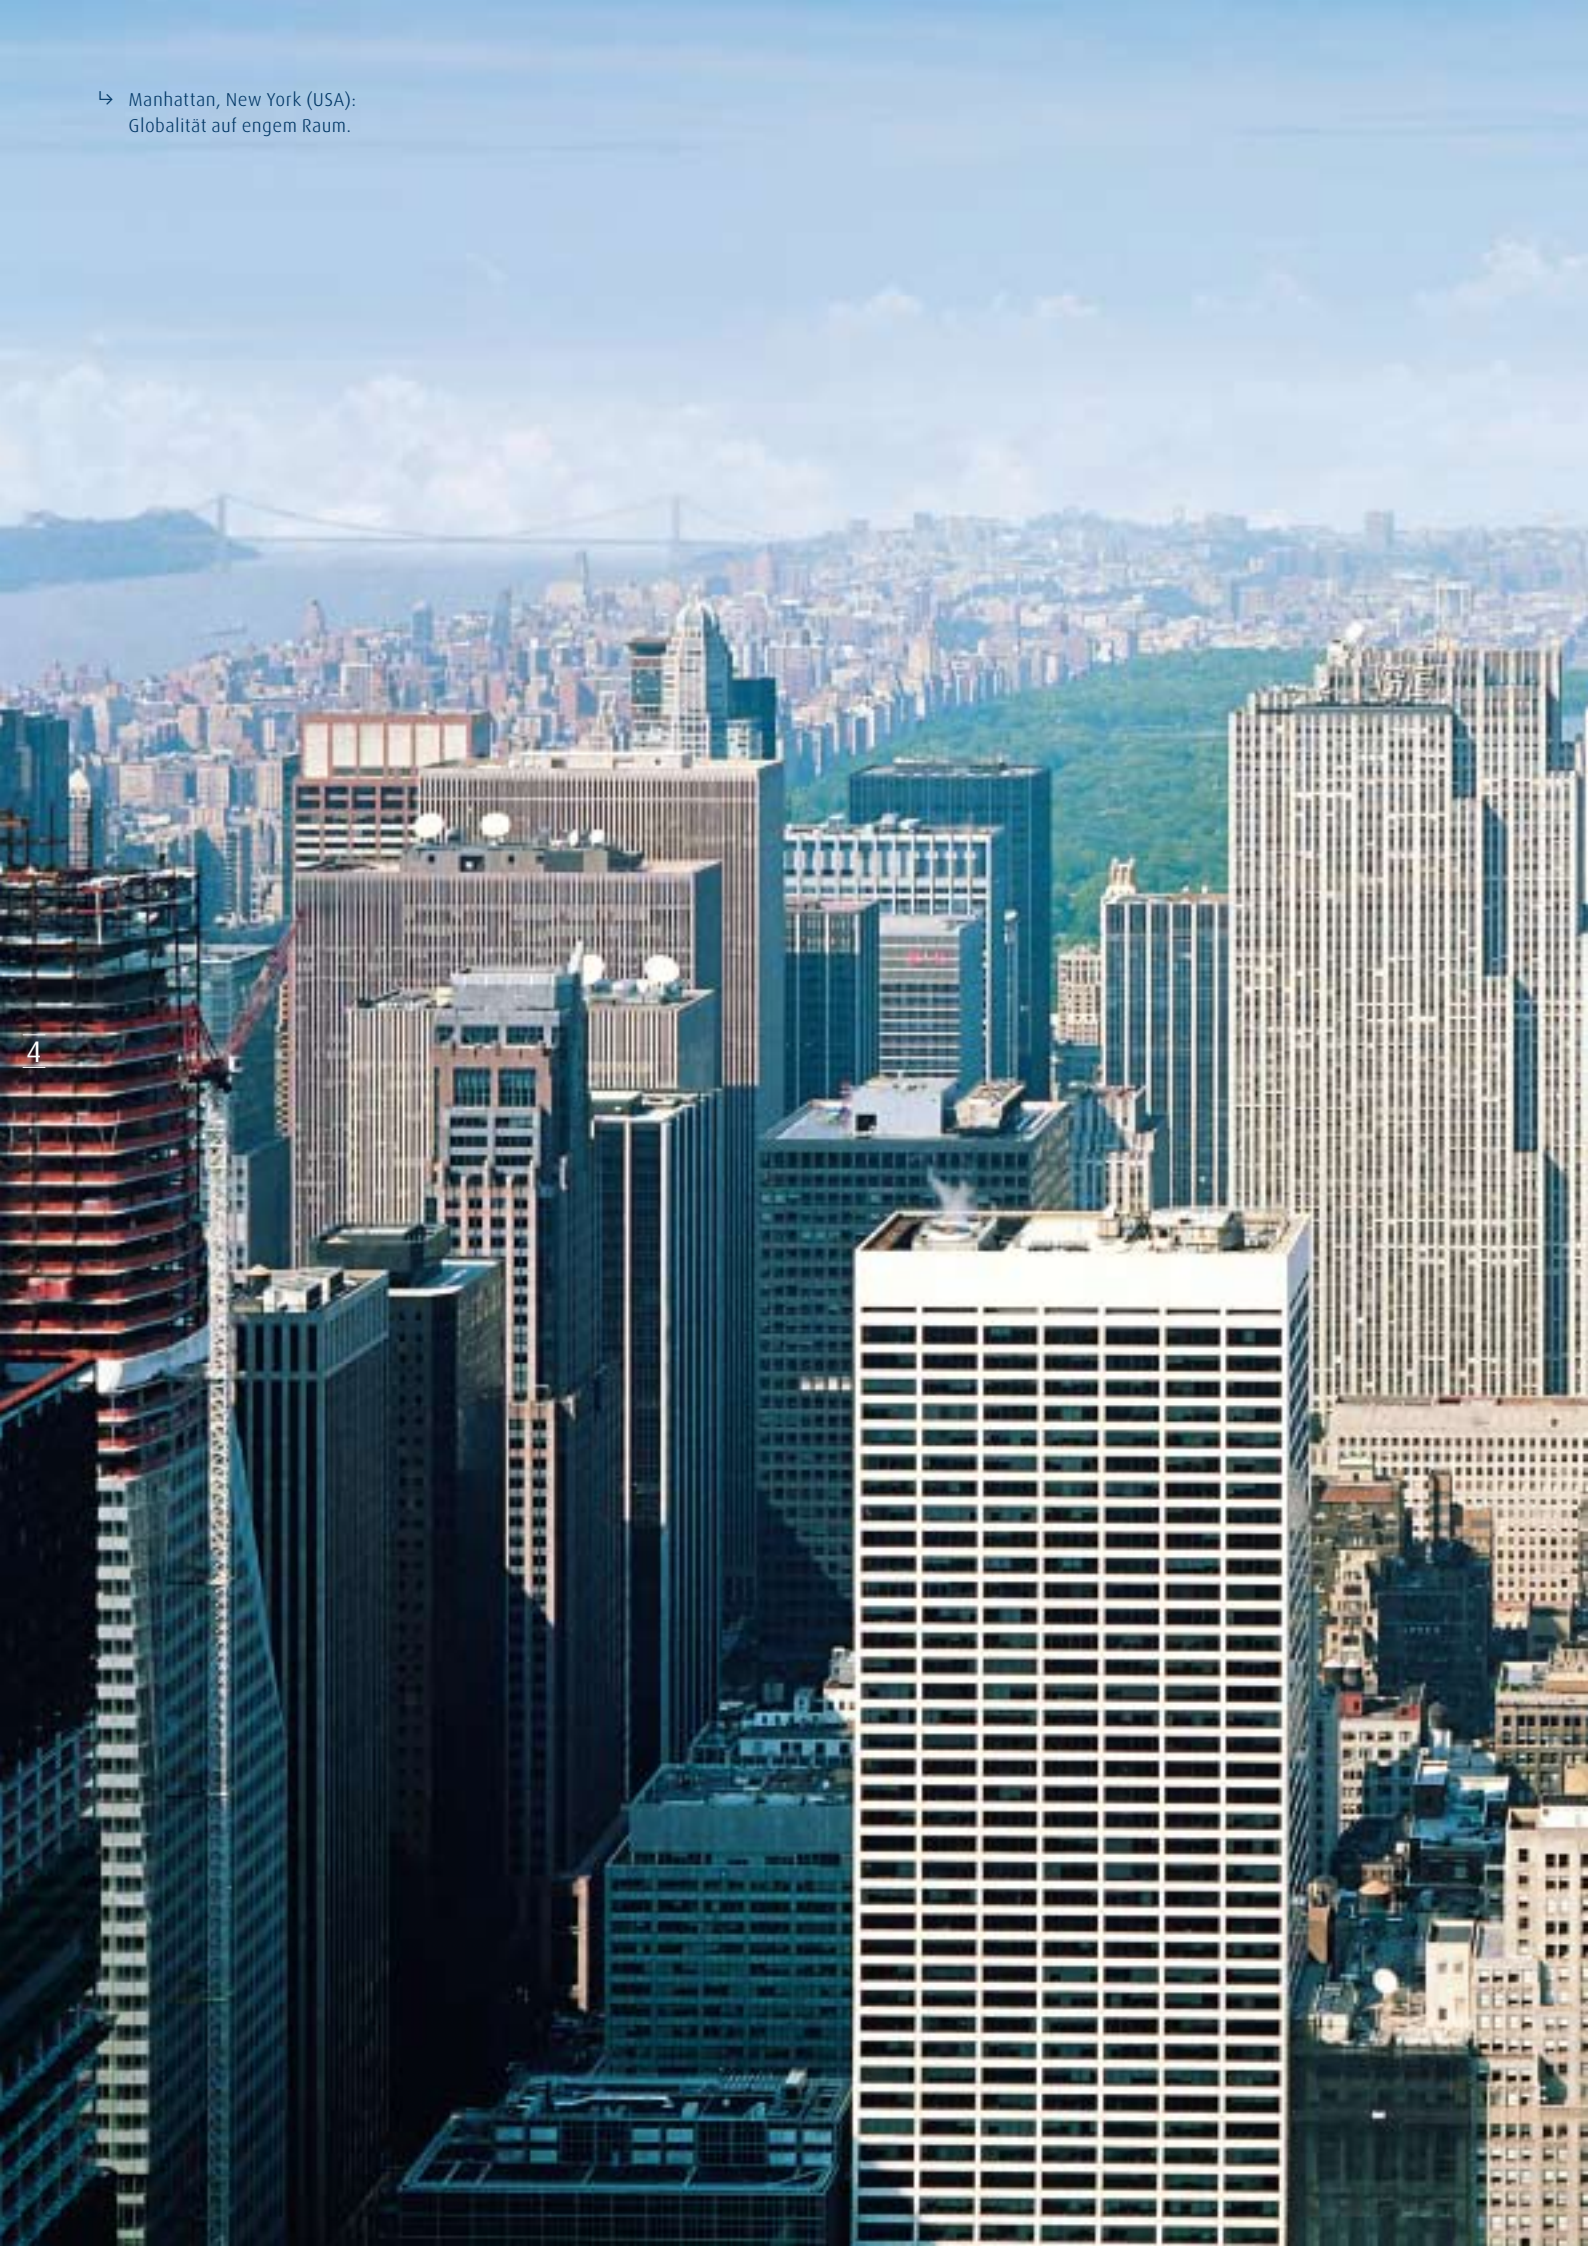





#### 4. Gesellschaftliche Verantwortung

„Kann ein globales Unternehmen ein guter Nachbar sein?“

Wer international tätig ist, muss seine gesellschaftliche Verantwortung über Ländergrenzen hinweg wahrnehmen. Linde engagiert sich vor allem in den Bereichen Bildung und Wissenschaft, Gesundheit und Umweltschutz – weltweit.



## „Das Bildungsengagement von Linde hat Vorbildcharakter.“

Die Gründung der Carl von Linde-Akademie an der Technischen Universität München (TUM) im Jahr 2004 wurde durch eine Stiftung der Linde Group ermöglicht. Prof. Dr. Klaus Mainzer, Direktor der Akademie, erläutert sein Konzept eines modernen Ingenieurstudiums.

Bereits Firmengründer Carl von Linde lehrte Ende des 19. Jahrhunderts an der Technischen Hochschule München, der heutigen TUM. Eine Partnerschaft zwischen Linde und TUM liegt da nahe.

↳ Ja, Carl von Linde war vor und während seiner unternehmerischen Tätigkeit Professor für theoretische Maschinenlehre an der heutigen TUM. Auch mehrere seiner Nachfahren sowie der heutige Linde Vorstandsvorsitzende studierten und promovierten hier. Wolfgang Reitzle hält heute als Honorarprofessor der Fakultät für Wirtschaftswissenschaften Gastvorlesungen an der TUM. Es besteht also tatsächlich ein langjähriger, intensiver Austausch zwischen den beiden Häusern. Trotzdem ist es nicht selbstverständlich, dass ein Unternehmen in diesem Ausmaß die Hochschullehre unterstützt. Insofern hat das Engagement von Linde Vorbildcharakter.

Seit den Zeiten Carl von Lindes ist das Wirtschaftsleben globaler und komplexer geworden. Was bedeutet dies für das Ingenieurstudium?

↳ Um in der zunehmend komplexen Wirtschaftswelt hervorragende Leistungen erbringen und Führungsaufgaben übernehmen zu können, reicht die klassische, hochspezialisierte Fachausbildung heute nicht mehr aus. Das Ausbildungskonzept der Carl von Linde-Akademie geht deshalb über die Lehre von technischem Fachwissen hinaus. An meinem Lehrstuhl für Philosophie und Wissenschaftstheorie werden zum Beispiel fachübergreifende Grundlagen in den Ingenieurwissenschaften vermittelt. Außerdem haben wir uns Interdisziplinarität und Interkulturalität auf die Fahne geschrieben. →

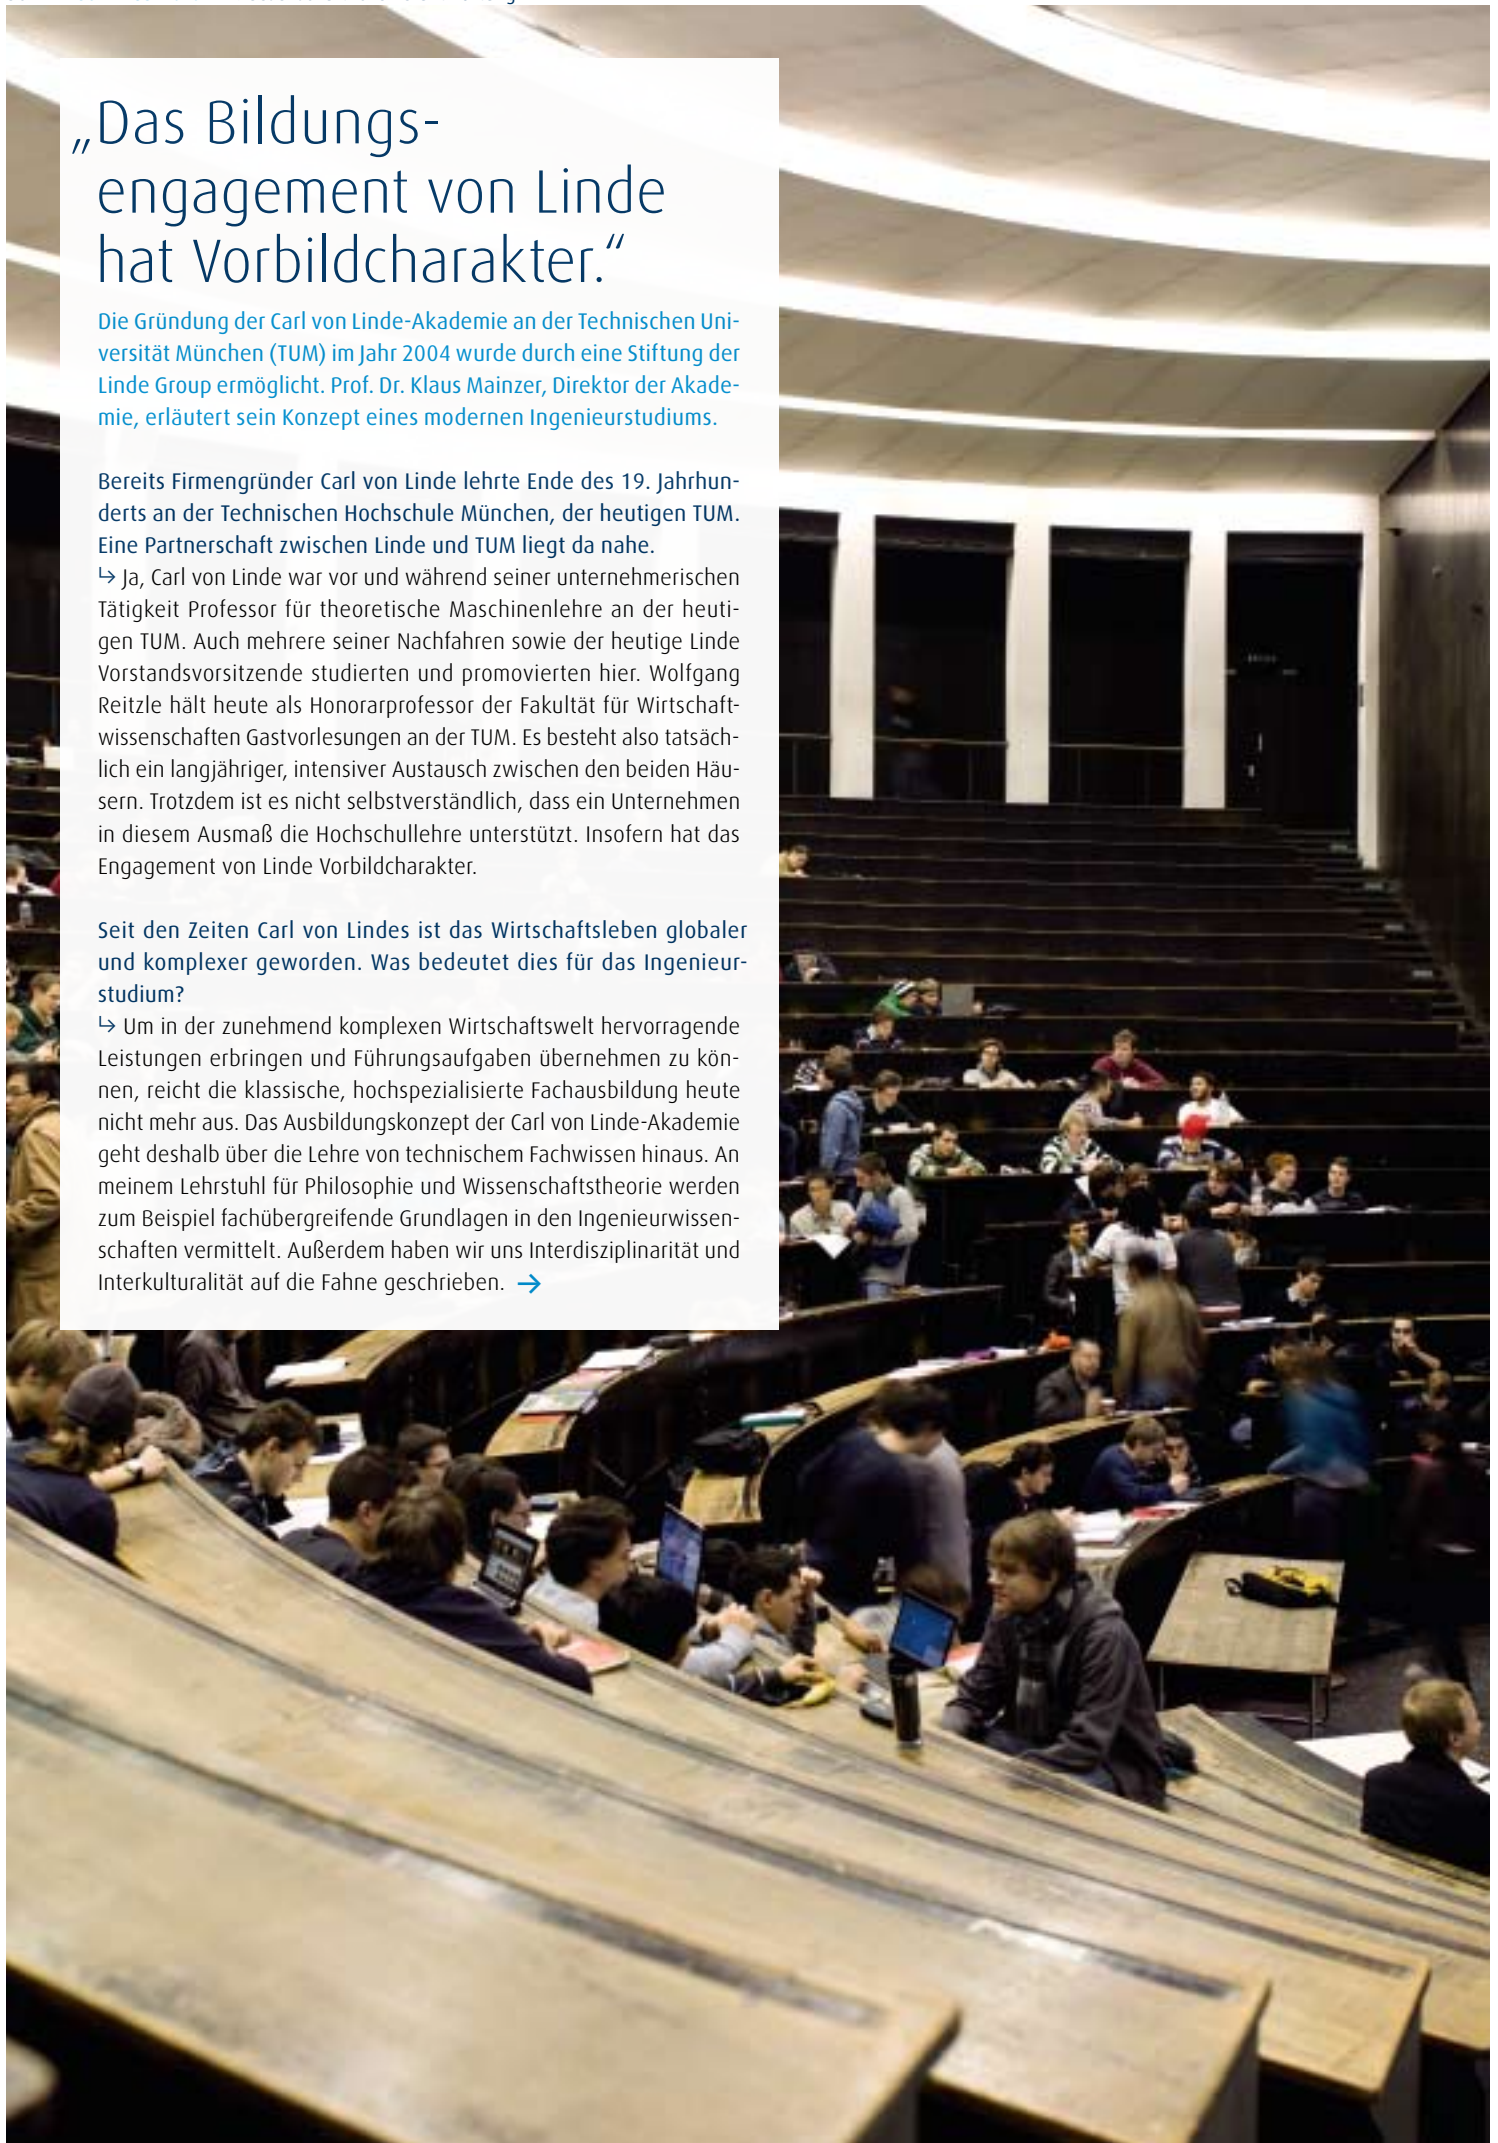



↳ (links) Studieren in der Tradition des Unternehmensgründers: Carl von Linde-Hörsaal an der Technischen Universität München.

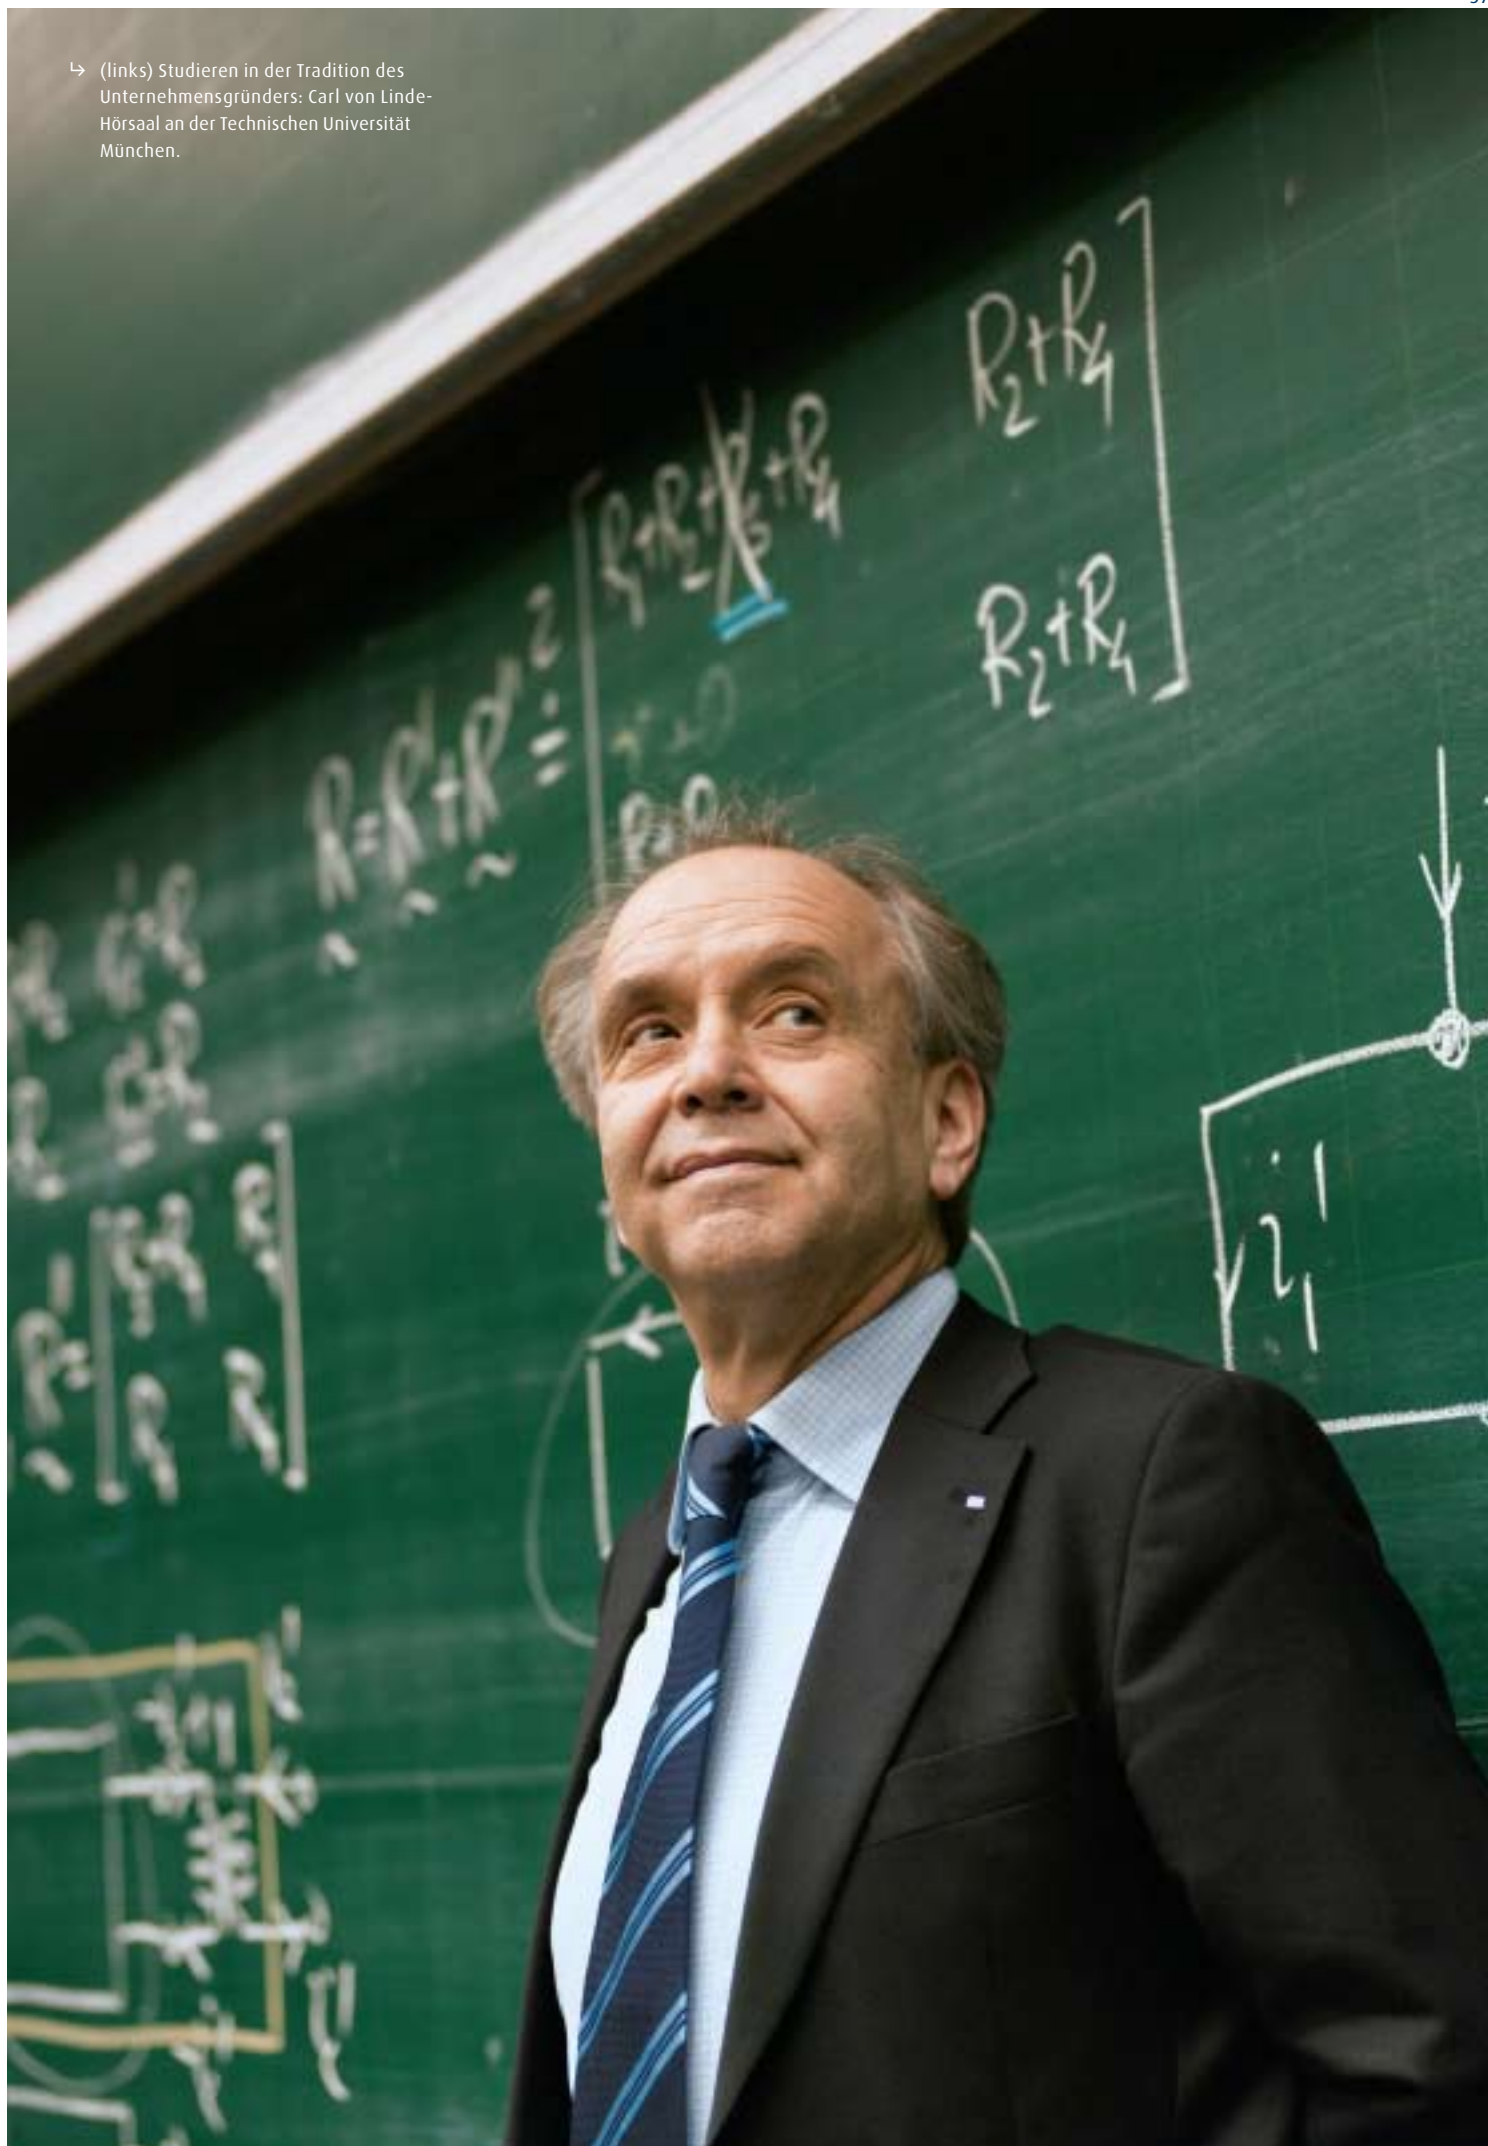

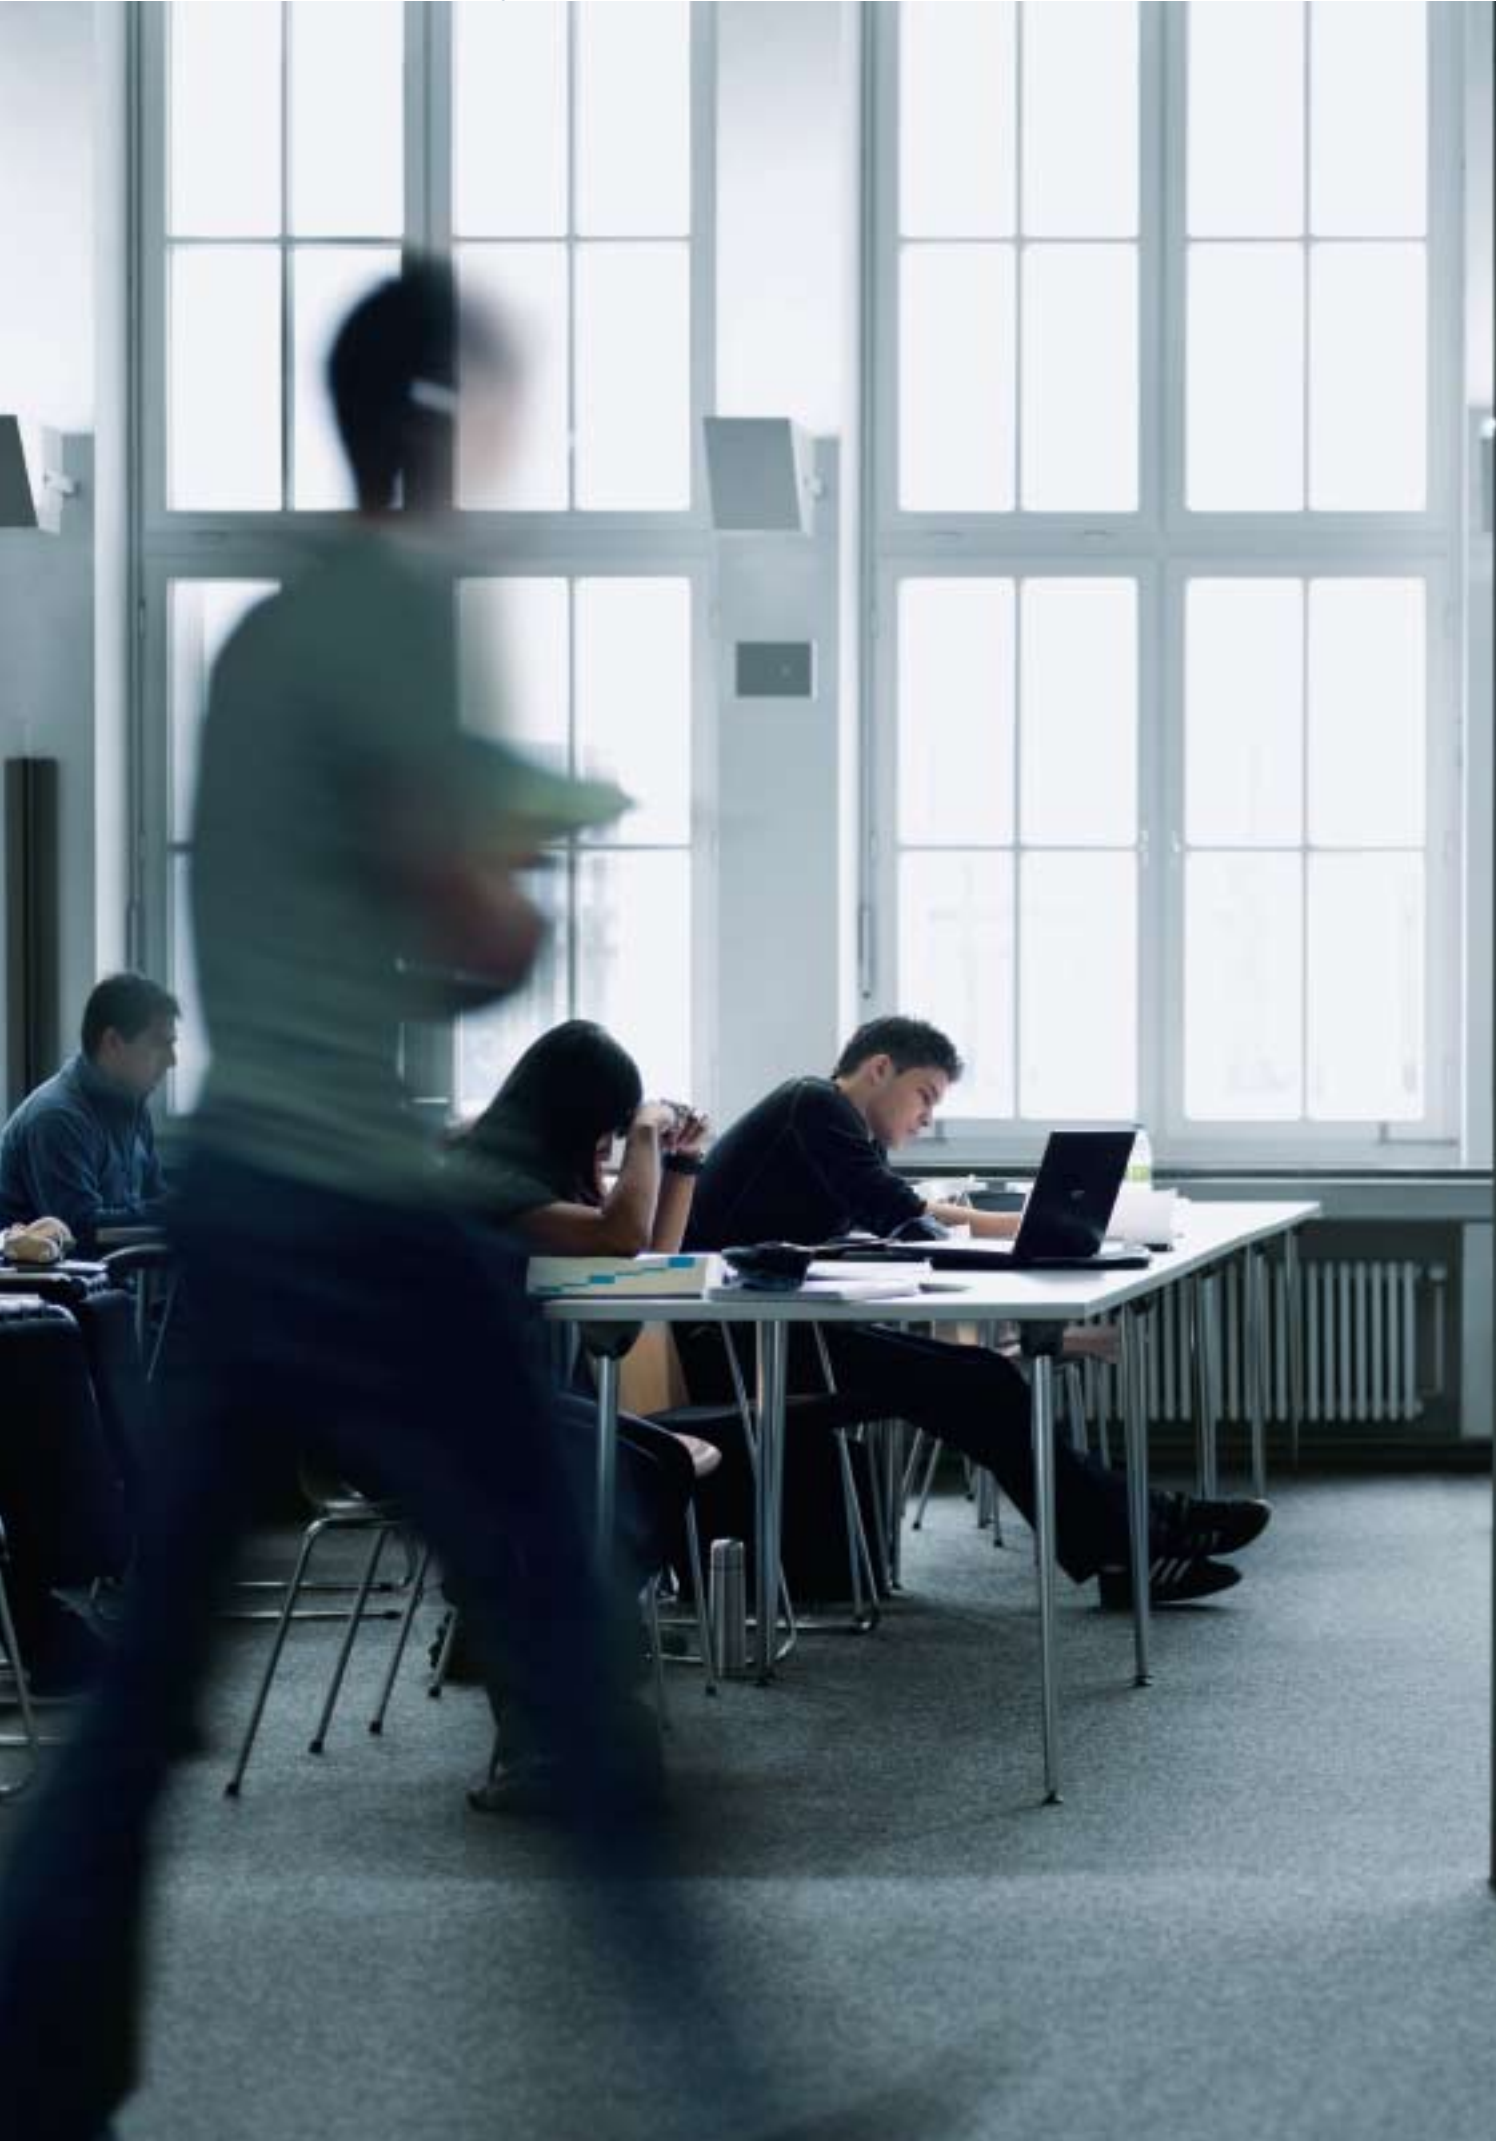



Was heißt das konkret? Mit welchem zusätzlichen Angebot machen Sie den Ingenieur Nachwuchs fit für künftige Herausforderungen?

↳ Wir bieten fachübergreifende Veranstaltungen mit herausragenden Dozentinnen und Dozenten an, die das Fachstudium sinnvoll ergänzen. In unserem Seminar „Kreativitätstechniken“ fördern wir etwa das vernetzte, interdisziplinäre Denken und Problemlösen. Im Bereich Kommunikation helfen wir den angehenden Ingenieurinnen und Ingenieuren, die Interaktion mit Absolventen anderer Studienrichtungen im Beruf zu optimieren. Darüber hinaus sensibilisieren wir sie für kulturelle Unterschiede, wie sie in internationalen Unternehmen heute gang und gäbe sind.

Wie beurteilen Sie die Zukunft der Carl von Linde-Akademie und die Partnerschaft mit dem Unternehmen Linde?

↳ Unser Verhältnis ist eindeutig eine Win-win-Situation: Dank des großzügigen Stiftungsfonds können wir erstklassige Dozentinnen und Dozenten auswählen, die wiederum zukünftige Ingenieurinnen und Ingenieure für eine spätere Tätigkeit im Unternehmen schulen und inspirieren. Derzeit erreichen wir über 2.000 Studierende pro Semester – mit steigender Tendenz. Unser Ausbildungskonzept entwickelt sich sogar zu einem Exportmodell: Wir haben bereits Anfragen von interessierten Bildungsträgern im Ausland erhalten.

↳ Mehr als 2.000 Studenten pro Semester lernen an der Carl von Linde-Akademie.



## „Wir geben benachteiligten Kindern eine Chance.“

Tintswalo Sono kümmert sich bei Lindes Tochtergesellschaft Afrox unter anderem um das freiwillige soziale Engagement der Mitarbeiter. Im Interview erklärt sie, wie wichtig dieser Einsatz ist – gerade für den afrikanischen Kontinent.

**Afrox beteiligt sich in Südafrika und in anderen Ländern des Kontinents an zahlreichen sozialen Projekten. Was sind die Gründe für dieses Engagement?**

↳ Als Unternehmen handeln wir nicht in einem gesellschaftsfreien Raum, sondern in einem sozialen Umfeld, das wir durch unsere Tätigkeit beeinflussen. Um erfolgreich zu sein, benötigt Afrox starke wirtschaftliche und soziale Strukturen. Wir wollen einen kleinen Beitrag dazu leisten, den Kontinent Afrika insgesamt weiterzuentwickeln.

**Welche Schwerpunkte setzen Sie dabei?**

↳ Ein Schwerpunkt unseres Engagements ist der Bereich Bildung und Ausbildung, denn der einzige Weg aus der Armut führt über eine gute Ausbildung. Mit unseren Spenden, für die wir jährlich 1 Prozent unseres Nachsteuergewinns bereitstellen, fördern wir beispielsweise benachteiligte Schüler in den Fächern Mathematik und Naturwissenschaften. Als führender Lieferant von Gasen und Schweißgeräten unterstützen wir zudem die Ausbildung zum Schweißer. Außerdem stellen wir Non-Profit-Organisationen Schweißgeräte, Industriegase und Autogas (LPG) zur Verfügung.

**Unterstützen Sie auch das freiwillige Engagement Ihrer Mitarbeiter?**

↳ Ja, mit unserem Community Involvement Programme, das von unseren Mitarbeitern getragen wird. Unsere Mitarbeiter leisten dabei einen freiwilligen, aktiven Beitrag zu Projekten in ihrem jeweiligen beruflichen oder privaten Umfeld. Sie setzen ihre Zeit und ihr Wissen für die Unterstützung verschiedener sozialer Einrichtungen, zum Beispiel Waisenhäuser und Kinderhilfszentren, ein. →

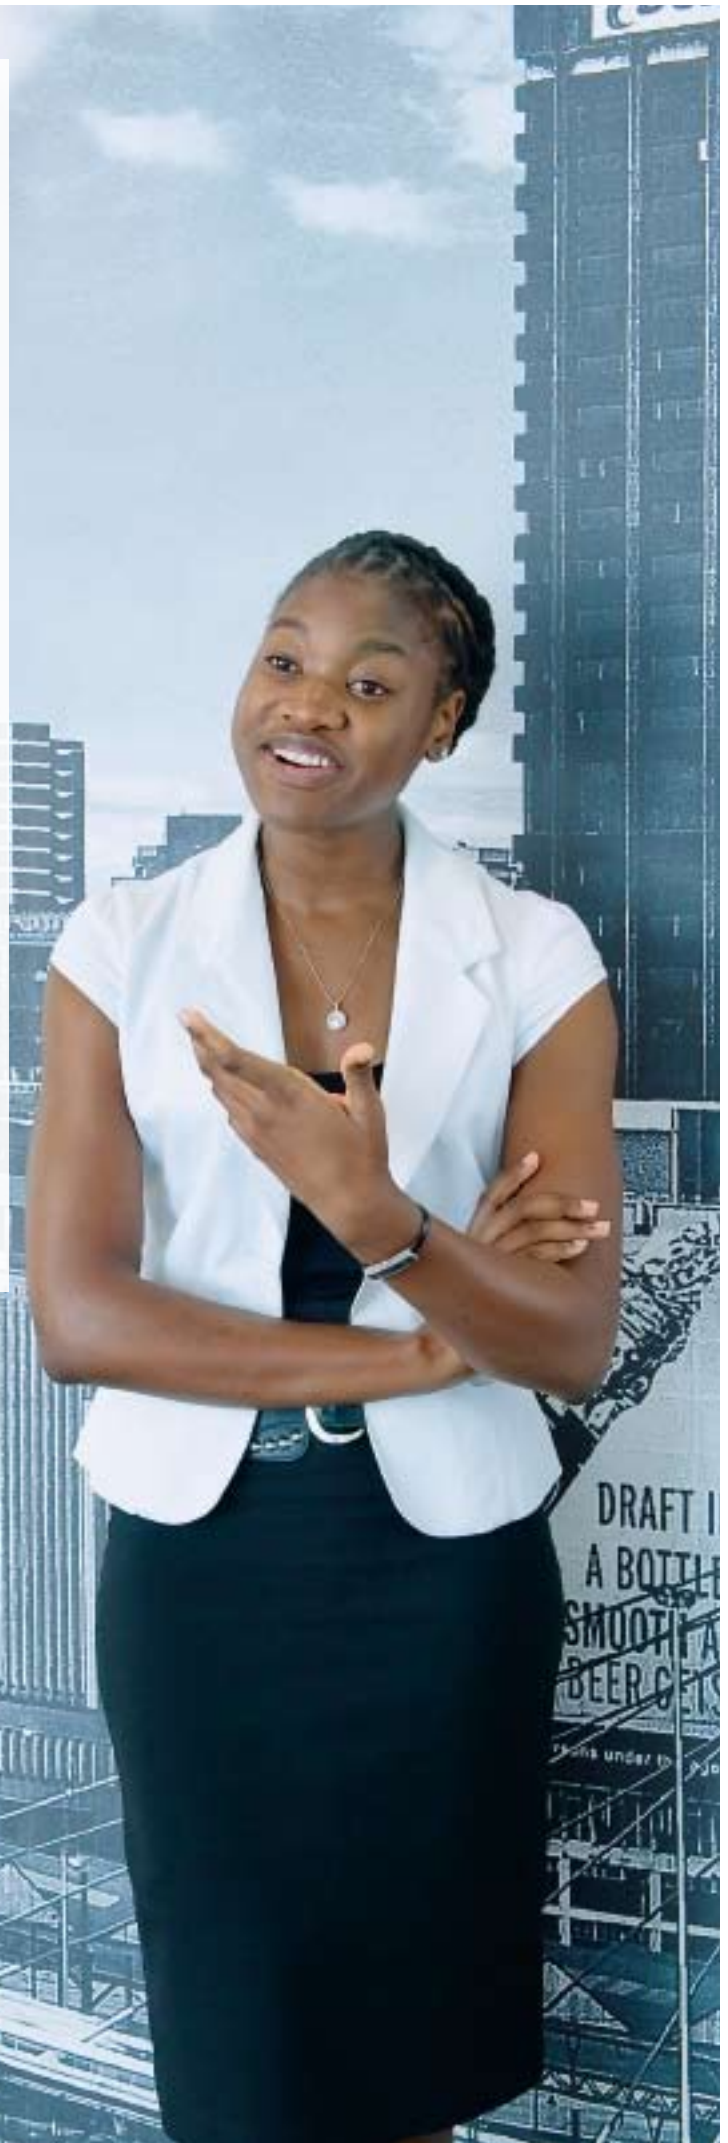



### Wie viele Projekte dieser Art unterstützen Sie derzeit?

↳ Zurzeit haben wir rund 80 Projekte im Programm, mit denen wir insgesamt über 7.000 Kindern helfen. Afrox unterstützt dabei auch einzelne Haushalte, in denen unsere Mitarbeiter freiwillige Hilfe leisten. Wir stehen zu 100 Prozent hinter dem persönlichen Einsatz unserer Mitarbeiter.

### Welche Projekte des Programms haben Sie persönlich am meisten beeindruckt?

↳ Wissen Sie, jedes einzelne Projekt, jeder Einsatz für eine gute Sache ist wichtig. Besonders gefreut habe ich mich beispielsweise darüber, dass wir in unsere Schule für Mathematik und Naturwissenschaften, die ursprünglich für ältere Schüler eingerichtet wurde, jetzt auch jüngere Kinder aus einer der ärmsten Gegenden Südafrikas aufnehmen können. Diesen Kindern bieten wir nun die Möglichkeit, an eine weiterführende Schule zu gehen – das war für sie bisher undenkbar. Unser Programm wurde sogar von den Vereinten Nationen als beispielhaft anerkannt.

### Und was hat es mit dem alljährlichen Bumbanani Day auf sich?

↳ An diesem Tag, den wir einmal im Jahr feiern, heißt es im wahren Sinne des Wortes: Wir packen es gemeinsam an (wörtliche Übersetzung von „Bumbanani“). Afrox-Mitarbeiter verbringen einen fröhlichen Tag mit dem Projekt oder der Einrichtung, die sie unterstützen. Auf diese Weise festigen wir zusätzlich unsere Verbundenheit mit der Gemeinschaft. Der Bumbanani Day wird von tausenden von Kindern und Mitarbeitern in ganz Afrika südlich der Sahara begangen.

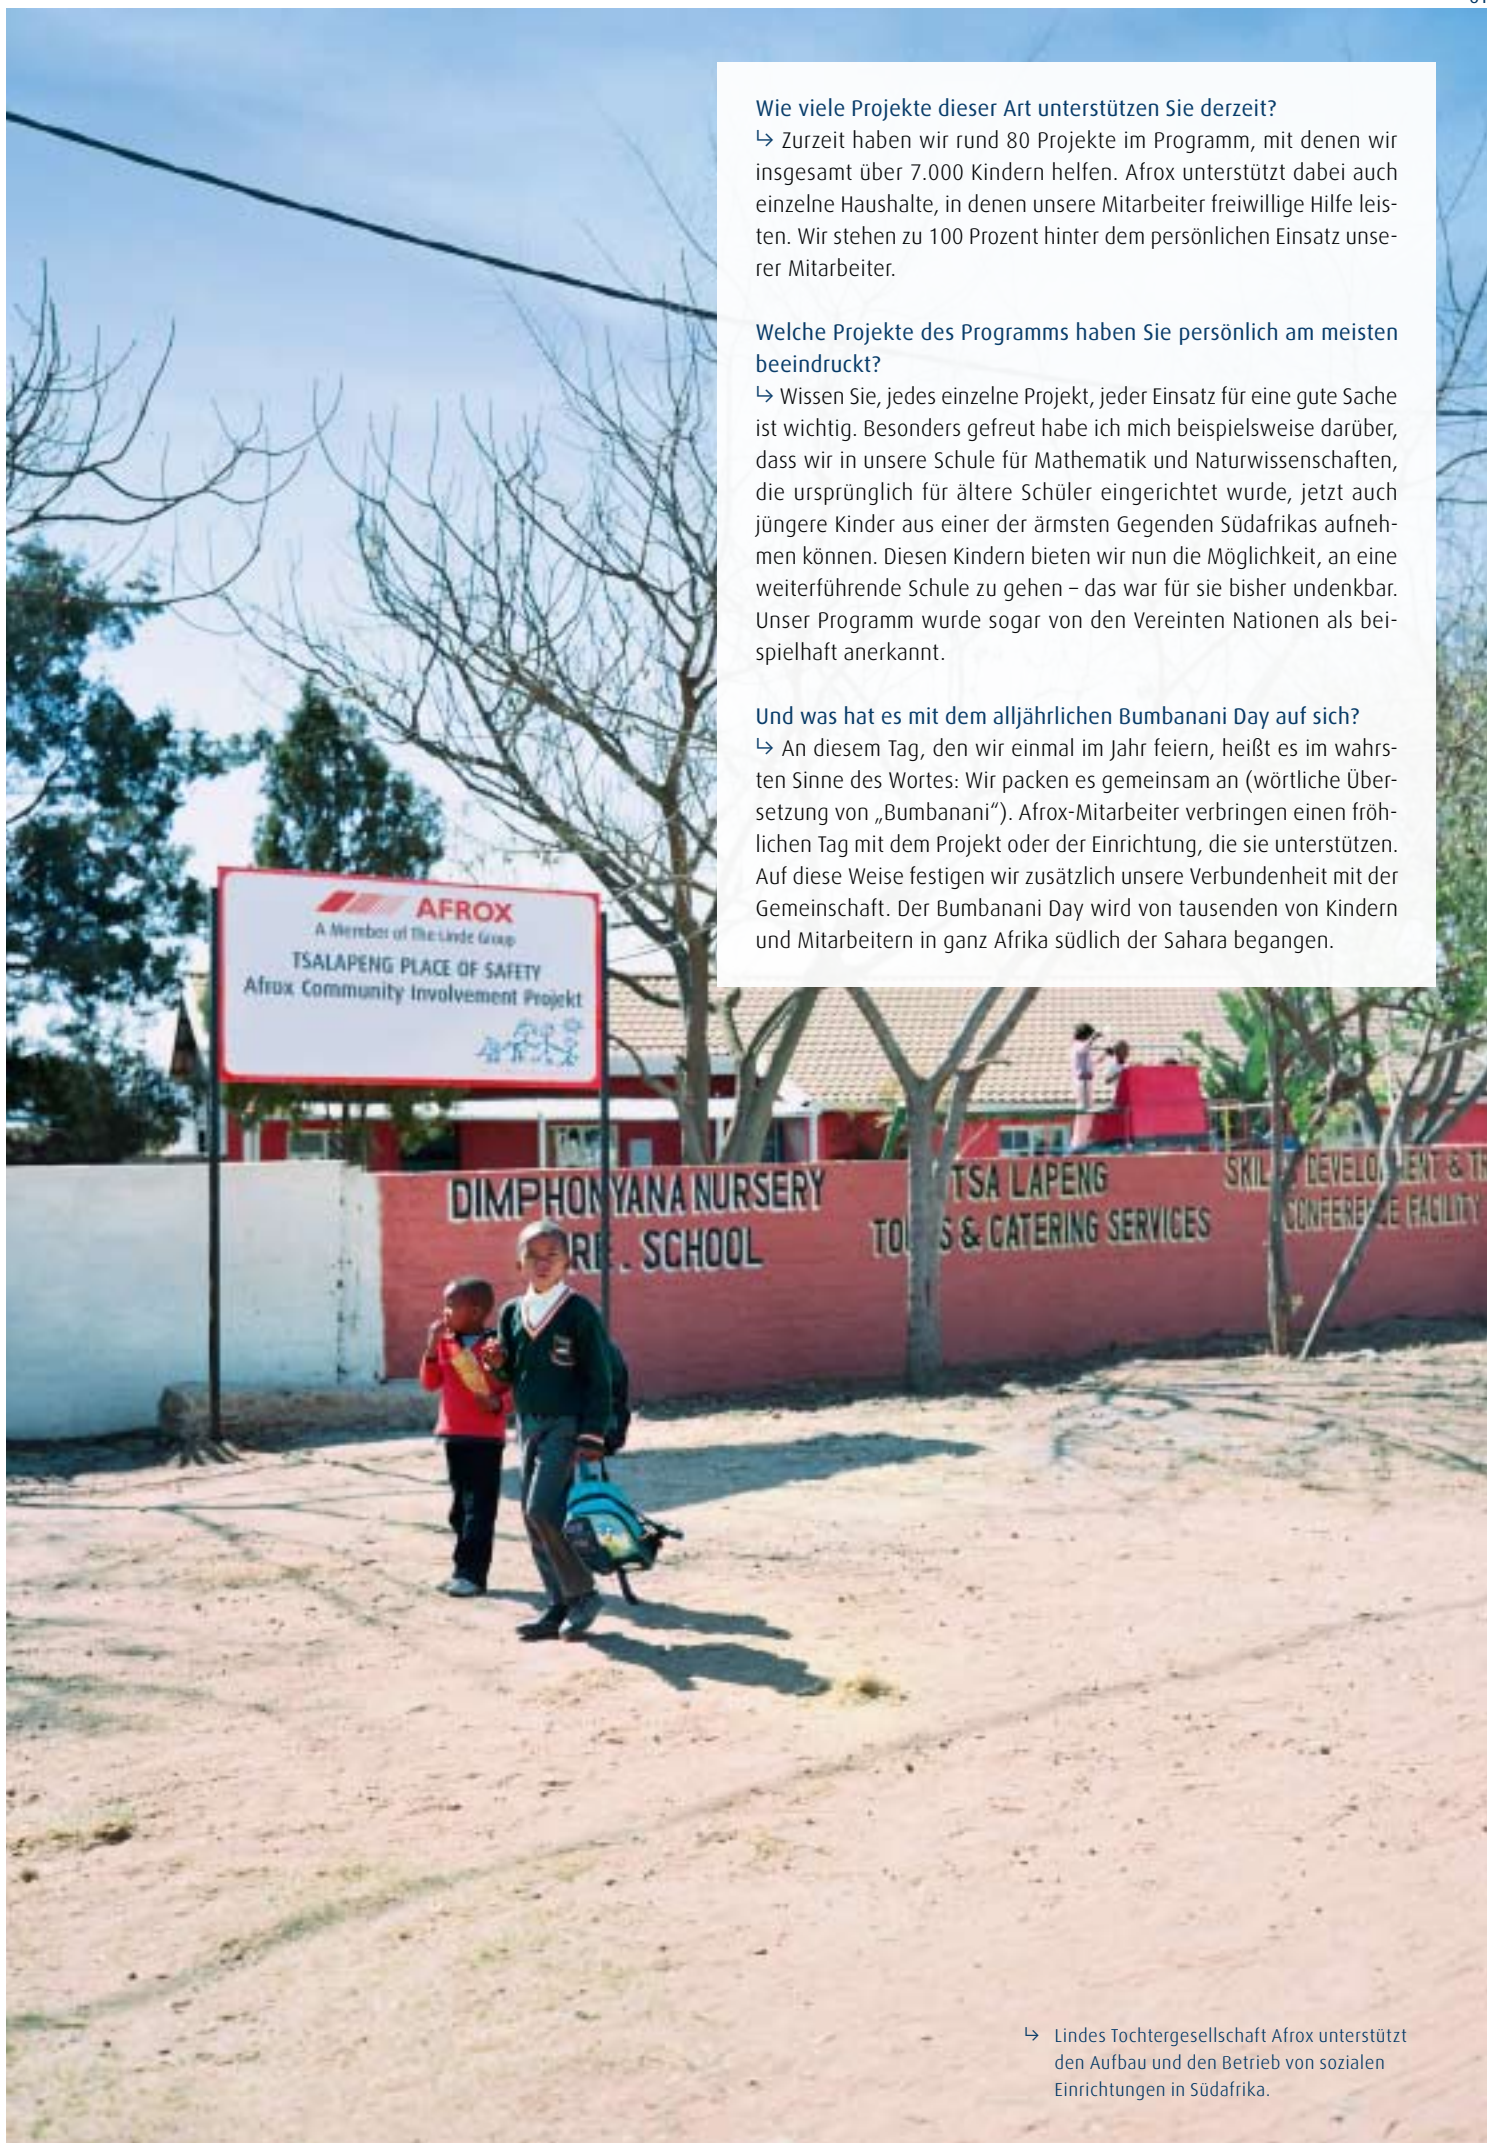

↳ Lindes Tochtergesellschaft Afrox unterstützt den Aufbau und den Betrieb von sozialen Einrichtungen in Südafrika.

# Nachbarschaft verpflichtet.

Linde ist weltweit in mehr als 100 Ländern vertreten. Diese globale Präsenz erfordert eine unternehmerische und gesellschaftliche Verantwortung, die über die Ländergrenzen hinausreicht. Linde engagiert sich überall dort, wo seine Mitarbeiter leben und arbeiten – egal in welchem Teil der Welt.

# B

## Bekenntnis zum Standort

Ein guter Nachbar zu sein, heißt für Linde, Verantwortung zu übernehmen: als Wirtschaftspartner, als attraktiver Arbeitgeber und als Mitglied der Gesellschaft, das aktiv zum sozialen Miteinander beiträgt. Weltweit engagieren sich Linde Gesellschaften für eine Vielzahl von Projekten, vor allem in den Bereichen Bildung und Wissenschaft, Soziales, Gesundheit, Umweltschutz, Kunst und Kultur oder Sport.

Einige Landesgesellschaften und große Standorte des Unternehmens feierten weltweit im Berichtsjahr 2010 ihr langjähriges Bestehen. Sie haben sich über Jahrzehnte als wichtiger Wirtschaftsfaktor bewährt, Verantwortung für die Ausbildung junger Menschen übernommen, regionale Projekte und Initiativen gefördert oder in Notzeiten Hilfe vor Ort geleistet.

Ein denkwürdiges Jubiläum beging Linde beispielsweise in Leuna (Sachsen-Anhalt, Deutschland). Vor 20 Jahren ließ sich das Unternehmen auf dem Gelände des ehemaligen Chemiekombinats VEB Leuna nieder – als einer der ersten Privatinvestoren nach der politischen Wende. Mit Investitionen von insgesamt rund 500 Mio. EUR entwickelte Linde den Standort über die vergangenen Jahre zu einem der größten und modernsten Gasezentren in Europa, 430 Arbeitsplätze und 35 Aus-

bildungsplätze entstanden dabei. Nicht zuletzt dieses Engagement gab für eine Reihe anderer Unternehmen den Ausschlag, sich ebenfalls am Chemiestandort Leuna anzusiedeln.

In Indien feierte die Linde Tochter BOC im vergangenen Jahr ihr 75-jähriges Bestehen mit einer besonderen Aktion im Bundesstaat Westbengalen: In Zusammenarbeit mit der lokalen NGO (Non-Governmental Organisation, Nichtregierungsorganisation) Mukti pflanzten freiwillige Helfer des Unternehmens im Mangrovenwaldgebiet Sundarbans (dt.: schöner Wald) 7.500 Bäume in Dörfern, die vom Zyklon Aila im Mai 2009 verwüstet worden waren.

## Soziales Engagement als Gemeinschaftsaufgabe

Gesellschaftliches Engagement hat für Linde viele Facetten – und viele Gesichter. Das Unternehmen unterstützt Partner mit langjähriger Erfahrung, etwa NGOs, bei deren Projekten und initiiert auch eigene soziale Programme. Linde unterstützt den freiwilligen Einsatz seiner Mitarbeiter in den jeweiligen Kommunen, etwa bei Hilfsprojekten für Kinder und Jugendliche oder Einsätzen nach Naturkatastrophen.

Bei Lindes Landesgesellschaft in Nordamerika hat beispielsweise die jährliche „Giving Campaign“ Tradition. In verschiedenen Aktionen sammeln dabei freiwillige Helfer Geld für wohltätige Zwecke und Organisationen, das Unternehmen verdoppelt die Summe durch „Matched Giving“ mit einem Firmenanteil. Mit steigendem Erfolg: Über 380.000 USD kamen 2010 zusammen – 12 Prozent mehr als 2009. Zudem beteiligte sich ein Drittel mehr Mitarbeiter als im Jahr zuvor an der Initiative.

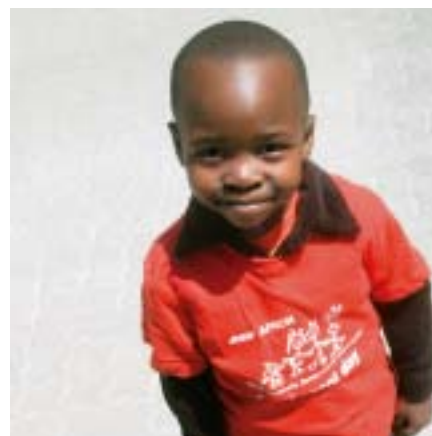

↳ (oben) Die Zukunft Afrikas: Linde engagiert sich für benachteiligte Kinder.

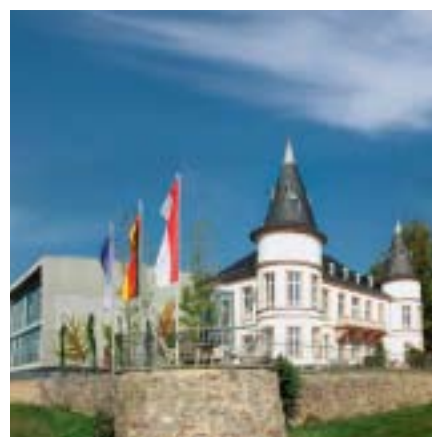

↳ (unten) Begabtenförderung: Linde unterstützt im Rahmen einer Public-private-Partnership das Oberstufengymnasium Schloss Hansenberg (Deutschland).



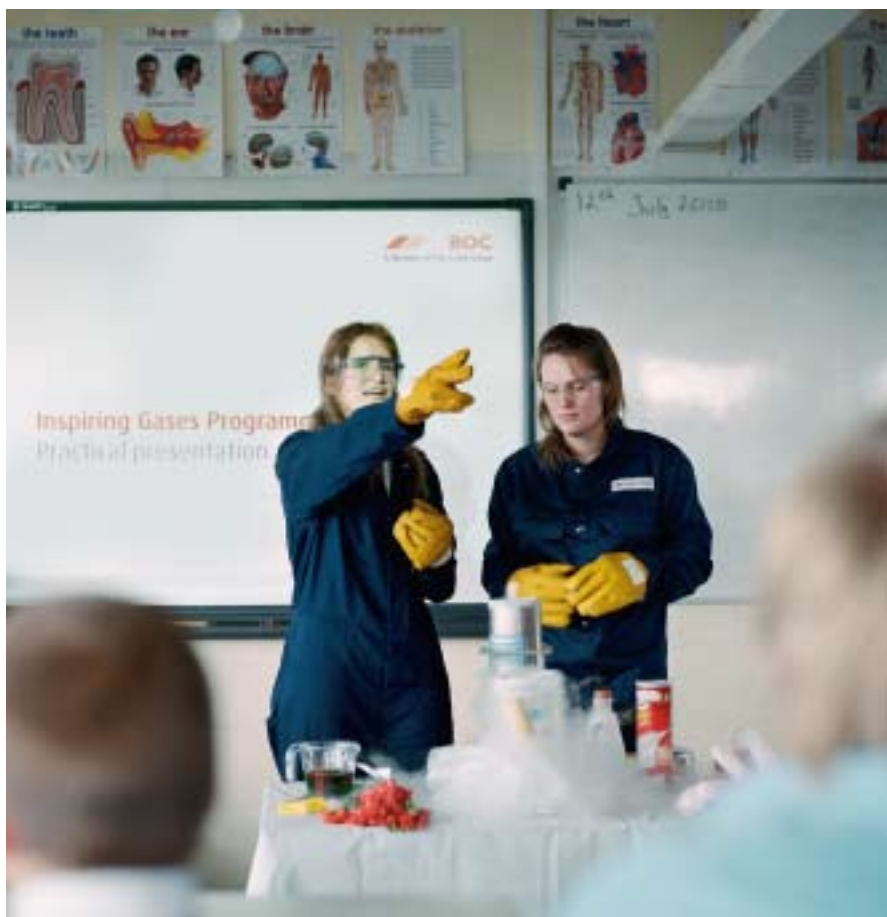

→ Engagement in der Schule: Mitarbeiterinnen von Lindes Tochtergesellschaft BOC stärken bei Jugendlichen das Interesse an Naturwissenschaften.

Bei der afrikanischen Tochtergesellschaft Afrox engagiert sich ein großer Anteil der Mitarbeiter im „Community Involvement Programme (CIP)“, dem regionalen Unternehmensprogramm für gesellschaftliches Engagement. Im Umfeld der verschiedenen Standorte von Afrox in Südafrika und mehreren anderen afrikanischen Ländern erfassen Mitarbeiter in Zusammenarbeit mit den lokalen Gemeinden die jeweiligen Anforderungen und richten ihre Hilfsaktionen danach aus. Im Vordergrund steht dabei vor allem die Unterstützung benachteiligter Kinder.

## Investitionen in Bildung, Wissenschaft und Forschung

Linde fördert insbesondere solche Projekte langfristig, die mit der Philosophie und Strategie des Unternehmens in Einklang stehen. Ein Schwerpunkt liegt auf Initiativen, die Bildung, Wissenschaft und Forschung unterstützen, und auf Projekten, bei denen Linde sein spezielles Know-how als Technologie-Konzern und Gasespezialist einbringen kann.

Ein Beispiel ist das Unternehmensprogramm „Inspiring Gases“ der Tochtergesellschaft BOC in Großbritannien. Die Initiative unterstützt Schulen und andere Bildungsein-

richtungen, um bei Jugendlichen das Interesse an Naturwissenschaften zu stärken – zum Beispiel mit Vorträgen und Seminaren zu den Eigenschaften und Anwendungen technischer Gase.

## Den Nachwuchs von morgen fördern

Zu Lindes Engagement für Bildung, Wissenschaft und Forschung gehören auch die Förderung besonders talentierter Jugendlicher und die Unterstützung von Hochschulen. Linde kooperiert mit mehreren deutschen Hochschulen in einzelnen Projekten oder bei gemeinsamen Forschungs- und Entwicklungsvorhaben.

Die Technische Universität München (TUM) vermittelt in der Carl von Linde-Akademie angehenden Ingenieuren, Informatikern und Naturwissenschaftlern geistes-, kultur- und sozialwissenschaftliches Wissen über die Grenzen einer rein technischen Qualifizierung hinaus. Auf dem Lehrplan der Akademie am Lehrstuhl für Philosophie und Wissenschaftstheorie stehen zum Beispiel fachübergreifende Veranstaltungen zu Ethik und Verantwortung. Ein weiteres Ziel der Carl von Linde-Akademie ist die Fortbildung von Lehrern in mathematisch-naturwissenschaftlichen Fächern. Den Aufbau

## In der Tradition von Carl von Linde

Das Deutsche Museum in München ist eines der größten naturwissenschaftlich-technischen Museen der Welt. Hier werden über 100.000 Objekte aufbewahrt und der Öffentlichkeit zugänglich gemacht, darunter viele Originale und Meisterwerke der Technikgeschichte. Um diese wertvollen Bestände zu erhalten, müssen die Räumlichkeiten saniert und an neueste technische Standards angepasst werden. Als Mitglied des Gründerkreises der „Zukunftsinitiative Deutsches Museum“ unterstützt Linde diese Maßnahmen über zehn Jahre hinweg mit einer Gesamtsumme von 5 Mio. EUR. Das Unternehmen steht damit in der Tradition Carl von Lindes, der als Gründungsmitglied des Deutschen Museums zu den maßgeblichen Förderern gehörte.

## HELP in Süd- und Ostasien

In der Region Süd- und Ostasien hat Linde einen Leitfaden entwickelt, um die vielfältigen Hilfs-, Sponsoring- und Umweltaktivitäten zu bündeln. Unter dem Motto „We want to HELP in leading efforts to bring about a better tomorrow“ (dt.: „Wir engagieren uns für eine bessere Zukunft“) haben das Unternehmen und seine Mitarbeiter in den Ländern der Region zahlreiche Initiativen gestartet. Diese umfassen medizinische Unterstützung, Beiträge zur besseren Bildung von Kindern und Jugendlichen, Hilfsleistungen bei Katastrophen und Maßnahmen zum Schutz der Umwelt. HELP steht für vier Themen, die einen besonderen Stellenwert für Linde haben: Healthcare (Gesundheit), Education (Bildung), Local Community-Development/-Assistance (lokales Engagement) und Protecting the Environment (Umweltschutz).

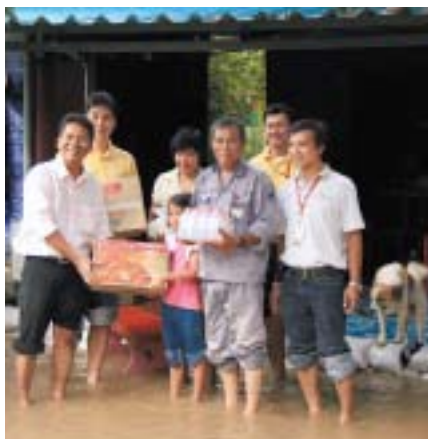

↳ Fluthilfe in Thailand: Mitarbeiter der Linde Tochtergesellschaft TIG verteilen gespendete Lebensmittel und Trinkwasser.

der Akademie förderte Linde mit einem Stiftungskapital von mehr als 8 Mio. EUR.

Einen besonderen Akzent setzt Linde in der Begabtenförderung durch sein Engagement im Rahmen einer Public-private-Partnership (siehe Glossar) bei der Internatsschule Schloss Hansenberg in Hessen (Deutschland). Die weiteren Partner dieses Oberstufengymnasiums für außergewöhnlich talentierte und motivierte Schüler sind das Land Hessen, die Commerzbank und die Robert Bosch Stiftung. Dabei geht es nicht nur um die finanzielle Ausstattung der Bildungseinrichtung, sondern auch um die praktische Begleitung des Lehrplans durch Praktika und Auslandsaufenthalte. Rund 200 Schüler werden derzeit in Schloss Hansenberg unterrichtet.

### Projekte für den Umweltschutz

Der Umweltschutz hat für Linde einen hohen Stellenwert. Dies zeigt sich sowohl bei den eigenen Produktionsabläufen und der Entwicklung umweltfreundlicher Produkte und Technologien als auch bei der Auswahl von Projekten, die das Unternehmen in diesem Bereich fördert.

So geht etwa das Umweltprogramm „Where There's Water“ in Neuseeland auf eine Initiative von Linde Mitarbeitern zurück. Das Projekt wird von der Umweltorganisation Water New Zealand betreut und von der Linde Landesorganisation finanziell unterstützt. Ziel von „Where There's Water“ ist ein aktiver Gewässerschutz.

Im Rahmen des so genannten HELP-Programms für Südostasien konzentriert sich Linde neben schneller medizinischer Hilfe in Notfällen und der Unterstützung von Ausbildungsprojekten auch auf Umweltprojekte. In Malaysia stand dabei im vergangenen Jahr ebenfalls der Wasserschutz im Blickpunkt: In der Freihandelszone Penang starteten Linde

und weitere Anrainerunternehmen ein groß angelegtes Programm zur Reinigung des benachbarten Flusses Parit MOX, benannt nach der Tochtergesellschaft Malaysian Oxygen (MOX). Die Unternehmen stellen die dafür erforderlichen biologischen Materialien zur Verfügung, ihre Mitarbeiter investieren ihre Freizeit, um tausende Lehmballen aus Roterde, Melasse, Biokompost und Bakterien zu formen. Auf diese Weise wird das Wasser biologisch gereinigt, der Algenwuchs gestoppt, die Entwicklung von Krankheitserregern unterdrückt und der Ammoniakgehalt des Gewässers reguliert.

### Schwerpunkt Medizin: Einsatz, der Leben rettet

Als führender Anbieter von medizinischen Gasen ist es das Selbstverständnis von Linde, im Rahmen seines gesellschaftlichen Engagements auch medizinische Projekte zu unterstützen.

Die gemeinnützige Ärztevereinigung INTERPLAST, die auf ehrenamtlicher Basis kostenlose chirurgische Eingriffe in Entwicklungsländern vornimmt, hat in den vergangenen 13 Jahren in insgesamt 520 Einsätzen mehr als 50.000 Patienten behandelt. Die meist mangelhafte Versorgungslage an den Einsatzorten stellt die Ärzte vor große Herausforderungen, beispielsweise wenn es darum geht, eine sichere Sauerstoffversorgung zu gewährleisten. Denn anders als in den Industrienationen der westlichen Welt ist in vielen Teilen der Entwicklungsländer die ständige Verfügbarkeit von Sauerstoff – dem weltweit am meisten verwendeten Arzneimittel – keine Selbstverständlichkeit. Deshalb können viele, vergleichsweise leichte Eingriffe wie das Schließen einer Lippen-Kiefer-Gaumenspalte nicht vorgenommen werden – mit gravierenden Folgen für die Gesundheit und die soziale Stellung der Betroffenen. Linde hat den humanitären Helfern von INTERPLAST im vergangenen Jahr die passende Ausrüstung für die Sauerstofferzeugung vor Ort zur Verfügung gestellt: neun mobile Sauerstoffkonzentratoren. Die Geräte kommen bei INTERPLAST-Einsätzen in Ecuador, Sierra Leone, Ruanda, Tansania und Nepal zum Einsatz.

Einer Mitarbeiterinitiative verdankt die Organisation Redkite (Roter Drache) die Unterstützung durch Lindes Landesgesellschaft in Australien. Redkite ist eine nationale karitative Einrichtung, die praktische und finanzielle Hilfe für krebserkrankte Kinder und deren Familien leistet. Linde hat sein langfristiges Engagement im vergangenen Jahr ausgeweitet und bietet seinen Mitarbeitern in Australien und Neuseeland nun die Möglich-



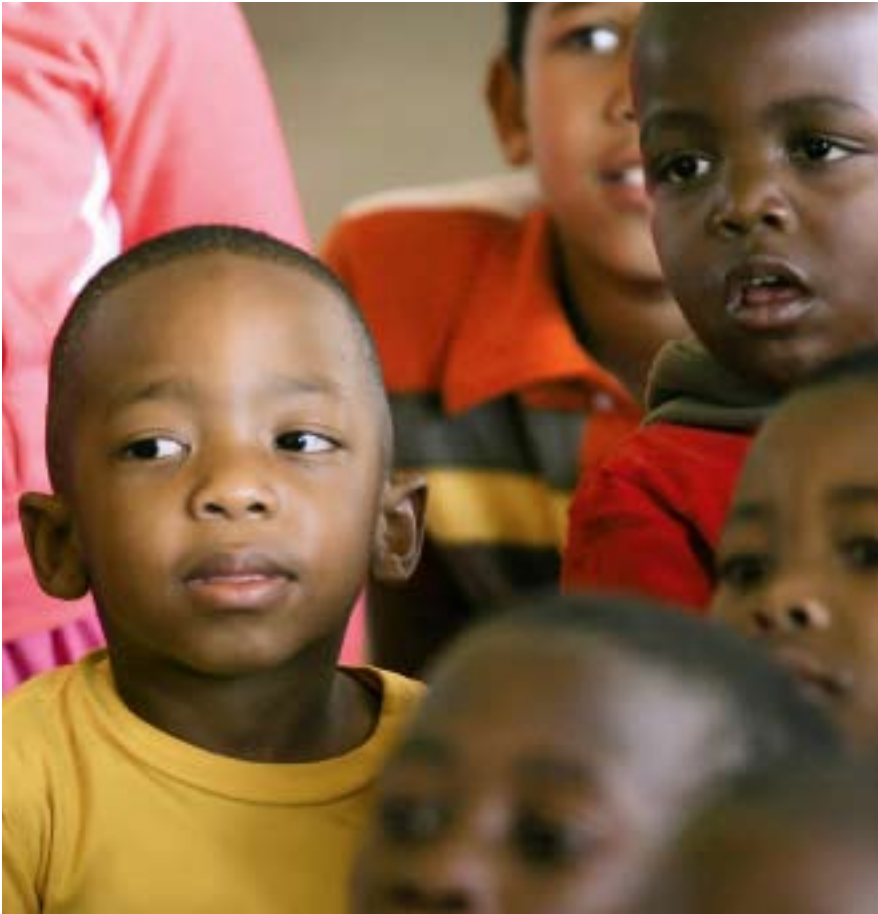

↳ Afrika braucht starke soziale Strukturen. Linde will dazu einen Beitrag leisten.

## Ein Heim für Waisen und verlassene Kinder

Das New Jerusalem Children's Home ist zwar nur eine kleine Sozialeinrichtung in der Nähe von Johannesburg (Südafrika), aber es hat ein großes Ziel: das beste Kinderheim in Afrika zu werden. Aufgenommen und betreut werden hier Waisen oder von ihren Eltern verlassene Kinder bis zum Alter von 16 Jahren. Unter ihnen sind viele missbrauchte, traumatisierte und verletzte Kinder, aber auch zahlreiche aidsinfizierte Jugendliche. Das im Jahr 2000 gegründete Institut wird vom Sozialministerium unterstützt, ist aber dennoch in großem Maße auf Spenden angewiesen. Dank dieser Zuwendungen steigt die Zahl der betreuten Kinder stetig an. Gegenwärtig sind dort 90 Kinder untergebracht. Das Haus ist Bestandteil eines landwirtschaftlichen Betriebs, der als Stiftung das finanzielle Rückgrat der gesamten Einrichtung bildet. Linde Process Plants, eine Tochtergesellschaft der Engineering Division mit Sitz in Johannesburg, hat im vergangenen Jahr begonnen, das Kinderheim New Jerusalem mit Spenden zu unterstützen.

keit, einen Teil ihres bezahlten Urlaubs (Kite-time) in Form einer Geldleistung an Redkite zu spenden.

## Spontane Hilfsaktionen in der Not

In Notsituationen gilt es vor allem, schnell und unbürokratisch Hilfe zu leisten – durch Geld, Sachspenden und den Einsatz vor Ort. Rasche Hilfe war im Jahr 2010 beispielsweise nach den starken Regenfällen in Südostasien nötig. Von der Flutkatastrophe waren auch Linde Mitarbeiter in Pakistan betroffen, deren Häuser schwer beschädigt oder gar ganz zerstört wurden. Hier leistete das Unternehmen schnelle Hilfe beim Wiederaufbau. Linde stellte zudem Geld zur Verfügung und gewährte Mitarbeitern, die freiwillige Nothilfe leisten wollten, bezahlten Urlaub. Darüber hinaus konnten zahlreiche Spenden der Mitarbeiter gesammelt werden. Insgesamt summierten sich die Spenden aus Pakistan und aus der Linde Zentrale für Süd- und Ostasien in Singapur auf rund 112.000 EUR. Das Geld floss an zwei örtliche Non-Profit-Organisationen für die unmittelbare Fluthilfe und für den Wiederaufbau in Pakistan.

In Thailand wurden durch Überflutungen im vergangenen Jahr 21 Provinzen verwüstet, 890.000 Menschen wurden obdachlos. Auch hier waren Linde Beschäftigte und ihre Familien betroffen. Das Unternehmen errichtete Unterkünfte in der Nähe des Firmengeländes und half mit Nahrungsmitteln, Trinkwasser und finanzieller Unterstützung. Auch betroffene Menschen in der Nachbarschaft des Unternehmens in der Provinz Saraburi erhielten Soforthilfe. Linde leistete darüber hinaus eine Unternehmensspende für den nationalen Fluthilfefonds, zudem organisierten Mitarbeiter an mehreren Standorten ein Projekt zur Sammlung von Geldspenden, Reis und Trockennahrungsmitteln für die Flutopfer.

Nach dem schweren Erdbeben in Haiti im Januar 2010 kooperierte Lindes Nordamerika-Gesellschaft unmittelbar nach der Katastrophe mit dem Amerikanischen Roten Kreuz und richtete eine Website für Mitarbeiterspenden ein. Es kam ein Betrag von mehr als 30.000 USD zusammen, den das Unternehmen auf über 60.000 USD aufstockte. Die Unternehmenszentrale in München unterstützte die Hilfsorganisationen vor Ort mit einem zusätzlichen Spendenbetrag in Höhe von 100.000 EUR.

# Wissenswertes.

## Nordamerika:

**Spendenkampagne.** Bei der jährlichen „Giving Campaign“ von Linde in Nordamerika sammeln Mitarbeiter 2010 erneut Geld für wohltätige Organisationen – das Unternehmen stockt die Summe auf (siehe Seite 62).

## USA:

**Fluthilfe rettet Häuser.** Linde Mitarbeiter helfen 2010 nach Überflutungen in Nashville und Middle Tennessee: durch persönlichen Einsatz, Spenden, medizinische Versorgung und den Einsatz eines Stromgenerators. Er ermöglicht rasche Reparaturarbeiten an von der Flut betroffenen Gebäuden: Mehr als 30 Familien können so den Abbruch ihres Hauses verhindern.

## Haiti:

**Katastrophenhilfe.** Nach dem verheerenden Erdbeben kooperiert Lindes Nordamerika-Gesellschaft mit dem Amerikanischen Roten Kreuz, um Spenden zu sammeln (siehe Seite 65).

## Großbritannien und Irland:

**Ein Netzwerk von „Wissenschafts-Botschaftern“.** Unter dem Motto „It's a Gas“ informieren Linde Experten der Regional Business Unit Großbritannien & Irland an Schulen und Universitäten über Anwendungen technischer Gase.

**Forscherdrang fördern.** Der „BOC Gases Challenge“ – ein Wettbewerb an weiterführenden Schulen in Großbritannien – soll Schüler motivieren, innovative Ideen im Bereich Chemietechnik zu entwickeln. Die jeweils besten Beiträge werden prämiert.

## Deutschland:

**Wissenschaftler von morgen begleiten.** Linde fördert die Carl von Linde-Akademie an der Technischen Universität München: Dort wird angehenden Ingenieuren, Informatikern und Naturwissenschaftlern geistes-, kultur- und sozialwissenschaftliches Wissen vermittelt.

**Wissenschaft zum Anfassen.** Carl von Linde war einer der Gründer des Deutschen Museums. Das Unternehmen mit seinem Namen zählt auch heute zu den Förderern des größten naturwissenschaftlich-technischen Museums der Welt.

**Attraktives Bildungsangebot.** Linde ist Partner und Förderer der Internatsschule Schloss Hansenberg, eines Oberstufengymnasiums für besonders motivierte und leistungsstarke Schülerinnen und Schüler.

## Chile:

**Freiwillige Helfer.** Nach dem Erdbeben in Chile vom Februar 2010, das rund eine halbe Million Wohnungen zerstört hat, leisten und organisieren engagierte Linde Mitarbeiter spontane Hilfe für die Betroffenen.

## Gesellschaftliches Engagement weltweit.

Auswahl von Linde Projekten in unterschiedlichen Regionen.

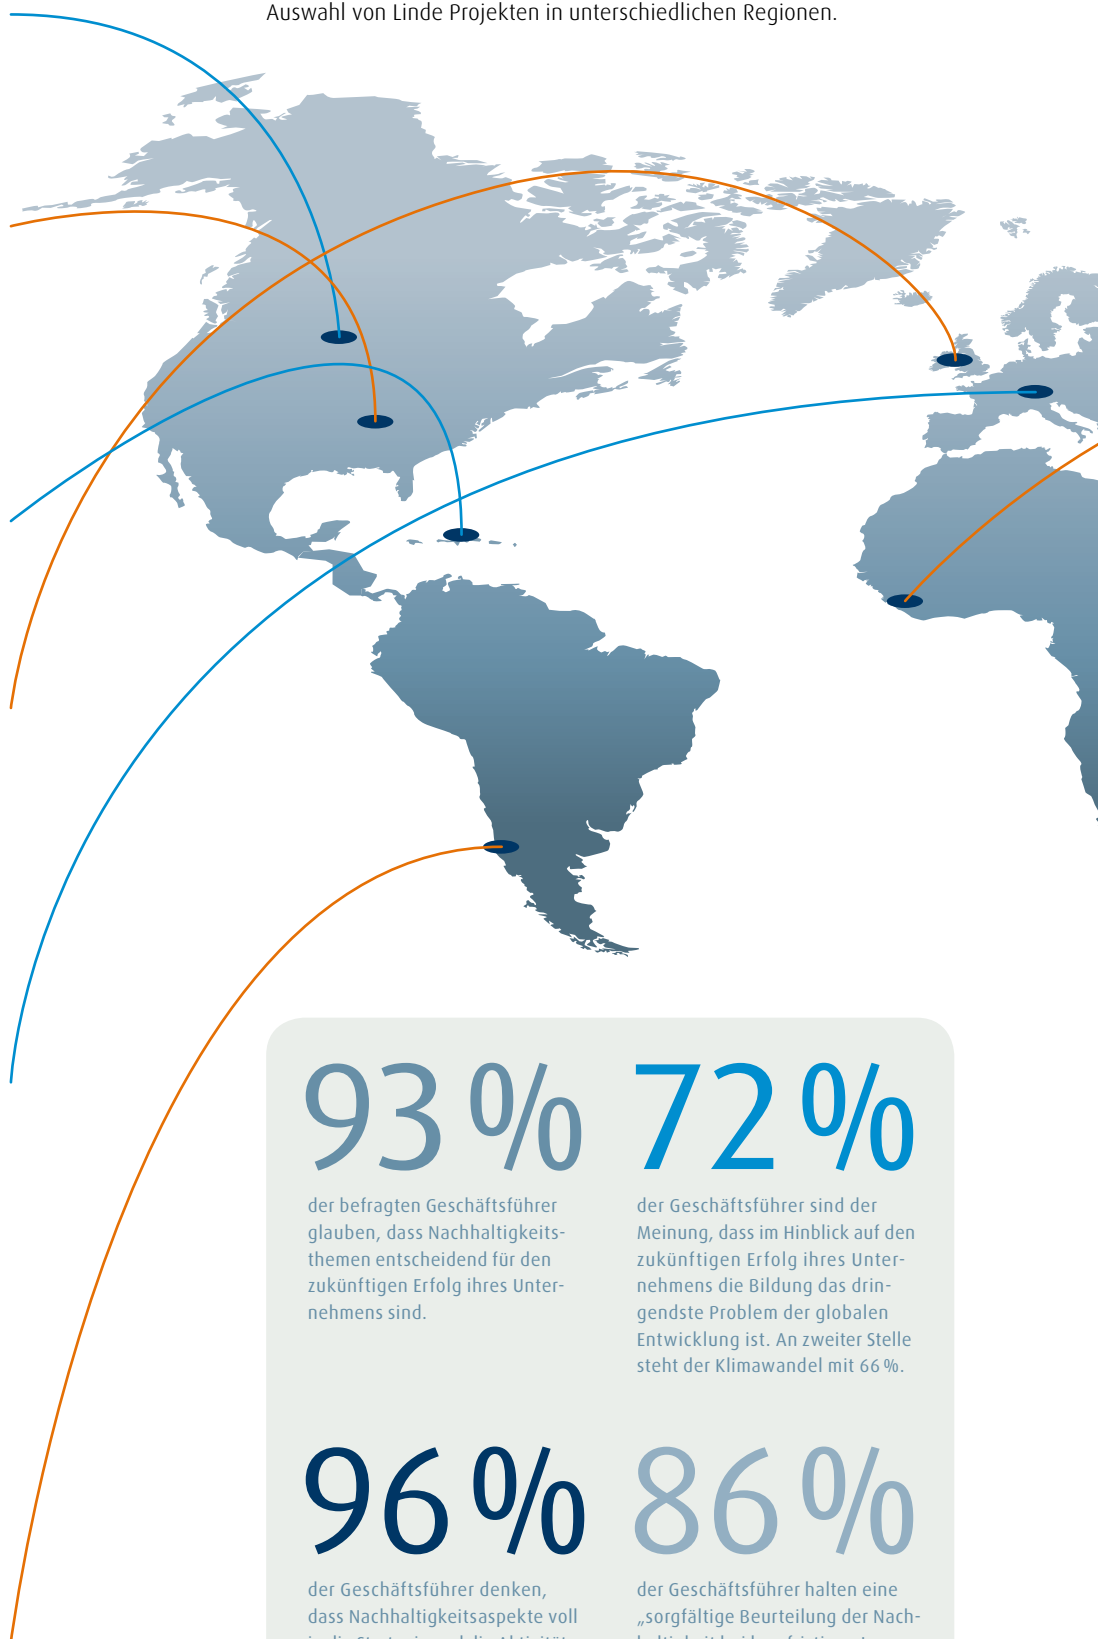

# 93 %

der befragten Geschäftsführer glauben, dass Nachhaltigkeits-themen entscheidend für den zukünftigen Erfolg ihres Unternehmens sind.

# 72 %

der Geschäftsführer sind der Meinung, dass im Hinblick auf den zukünftigen Erfolg ihres Unternehmens die Bildung das dringendste Problem der globalen Entwicklung ist. An zweiter Stelle steht der Klimawandel mit 66 %.

# 96 %

der Geschäftsführer denken, dass Nachhaltigkeitsaspekte voll in die Strategie und die Aktivitäten eines Unternehmens integriert werden sollten (gegenüber 72 % im Jahr 2007).

# 86 %

der Geschäftsführer halten eine „sorgfältige Beurteilung der Nachhaltigkeit bei langfristigen Investitionen durch die Investoren“ für wichtig, um eine Wende in Sachen Nachhaltigkeit zu erreichen.

Quelle: UN Global Compact-Accenture CEO Study, 2010.



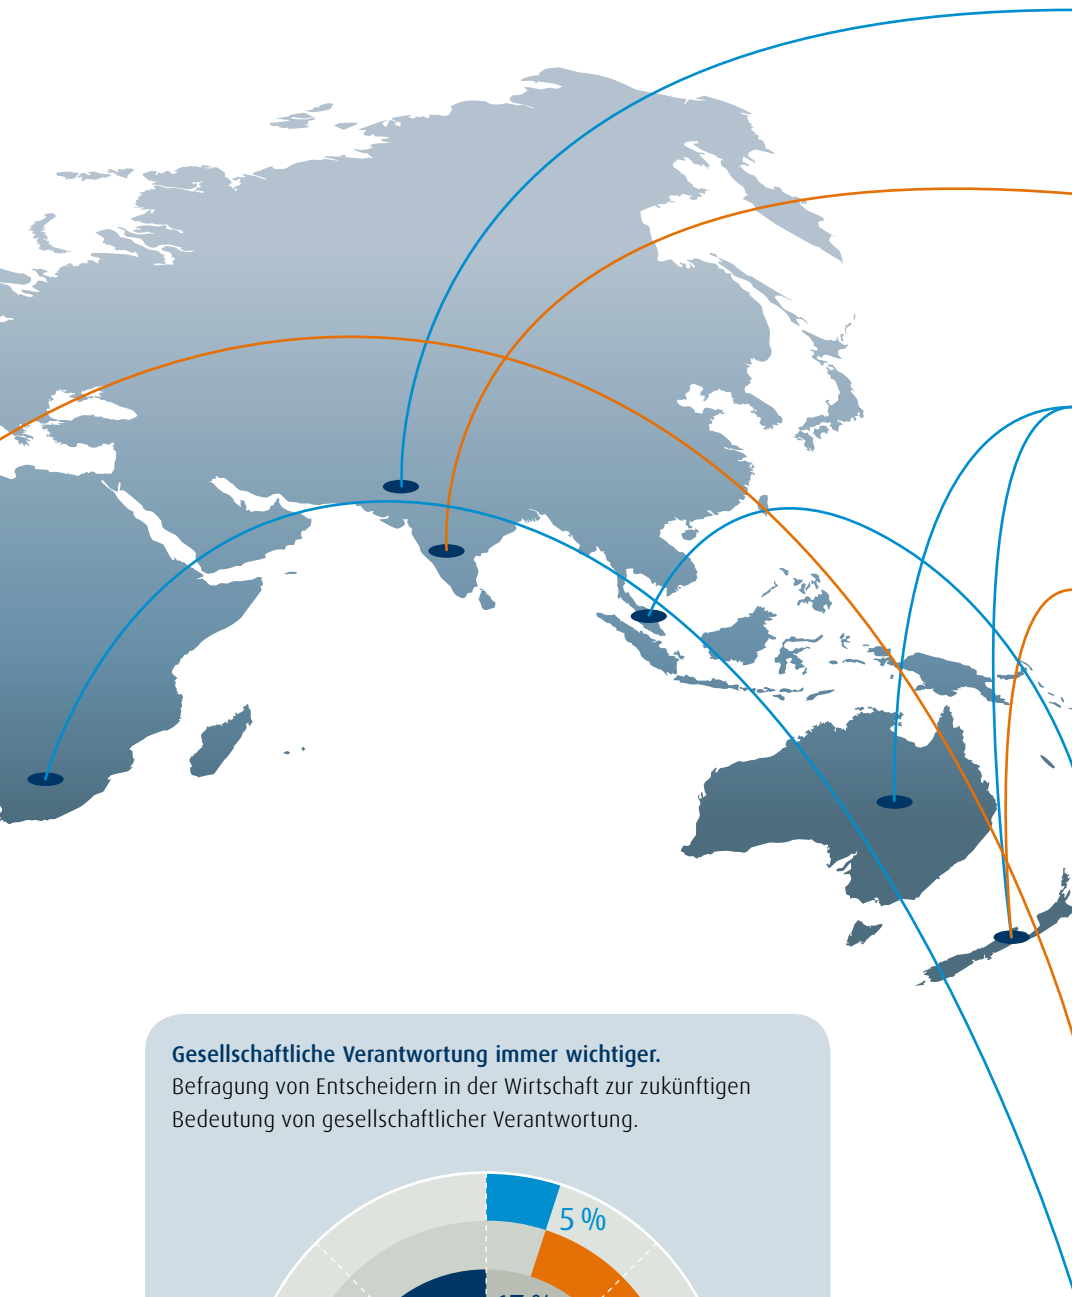

#### Pakistan:

**Hilfsmaßnahmen.** Mit finanzieller Unterstützung und persönlichem Einsatz helfen Linde Mitarbeiter und das Unternehmen nach der Flutkatastrophe 2010 in Pakistan (siehe Seite 65).

#### Indien:

**Hilfe für zerstörte Dörfer.** Gemeinsam mit einer regionalen NGO (dt.: Nicht-Regierungs-Organisation) pflanzen Mitarbeiter der Linde Tochter BOC 7.500 Bäume in Dörfern, die vom Zyklon Aila 2009 verwüstet worden waren (siehe Seite 62).

#### Australien und Neuseeland:

**„Roter Drachen“ für kranke Kinder.** In Australien und Neuseeland unterstützen Linde Mitarbeiter und Landesgesellschaften über die karitative Einrichtung Redkite krebserkrankte Kinder und ihre Familien (siehe Seite 64).

#### Neuseeland:

**Wasserschutz.** Auf eine Initiative von Linde Mitarbeitern geht das Umweltprogramm „Where There's Water“ in Neuseeland zurück. Gemeinsames Ziel der einzelnen Projekte ist der aktive Gewässerschutz (siehe Seite 64).

#### Malaysia:

**Sauberer Fluss.** Linde und weitere Anrainerunternehmen starten 2010 ein Programm zur Reinigung des Flusses Parit MOX: Die Unternehmen stellen Materialien zur Verfügung, Mitarbeiter investieren ihre Freizeit: Aus Rot-erde, Melasse, Biokompost und Bakterien formen sie tausende Lehmälle, die das Wasser biologisch reinigen (siehe Seite 64).

#### Sierra Leone:

**Humanitäre Hilfe mit Linde-Sauerstoff.** Im Krankenhaus der Ortschaft Lunsar gewährleisten zwei von Linde gespendete Sauerstoffkonzentratoren die Versorgung mit dem lebenswichtigen Gas. Allein während eines dreiwöchigen humanitären Operationseinsatzes konnten dadurch rund 130 chirurgische Eingriffe vorgenommen werden.

#### Südafrika:

**Jährliches Spendenbudget.** Die südafrikanische Linde Tochter Afrox spendet jährlich 1 Prozent ihres Gewinns.

**Mitarbeiter helfen Kindern.** Das Community Involvement Programme (CIP), eine Mitarbeiterinitiative der Linde Tochter Afrox, unterstützt Hilfsprojekte in Afrika. Im Fokus steht besonders die Unterstützung benachteiligter Kinder.

#### Gesellschaftliche Verantwortung immer wichtiger.

Befragung von Entscheidern in der Wirtschaft zur zukünftigen Bedeutung von gesellschaftlicher Verantwortung.

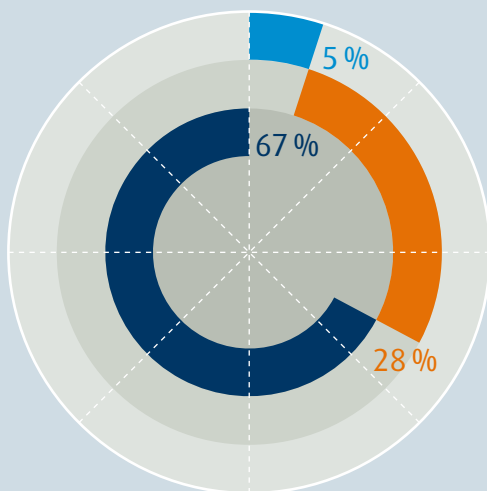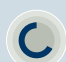

Größere Rolle

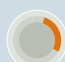

Unverändert

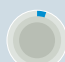

Geringere Rolle

Quelle: Die gesellschaftliche Verantwortung von Unternehmen, Bertelsmann Stiftung.

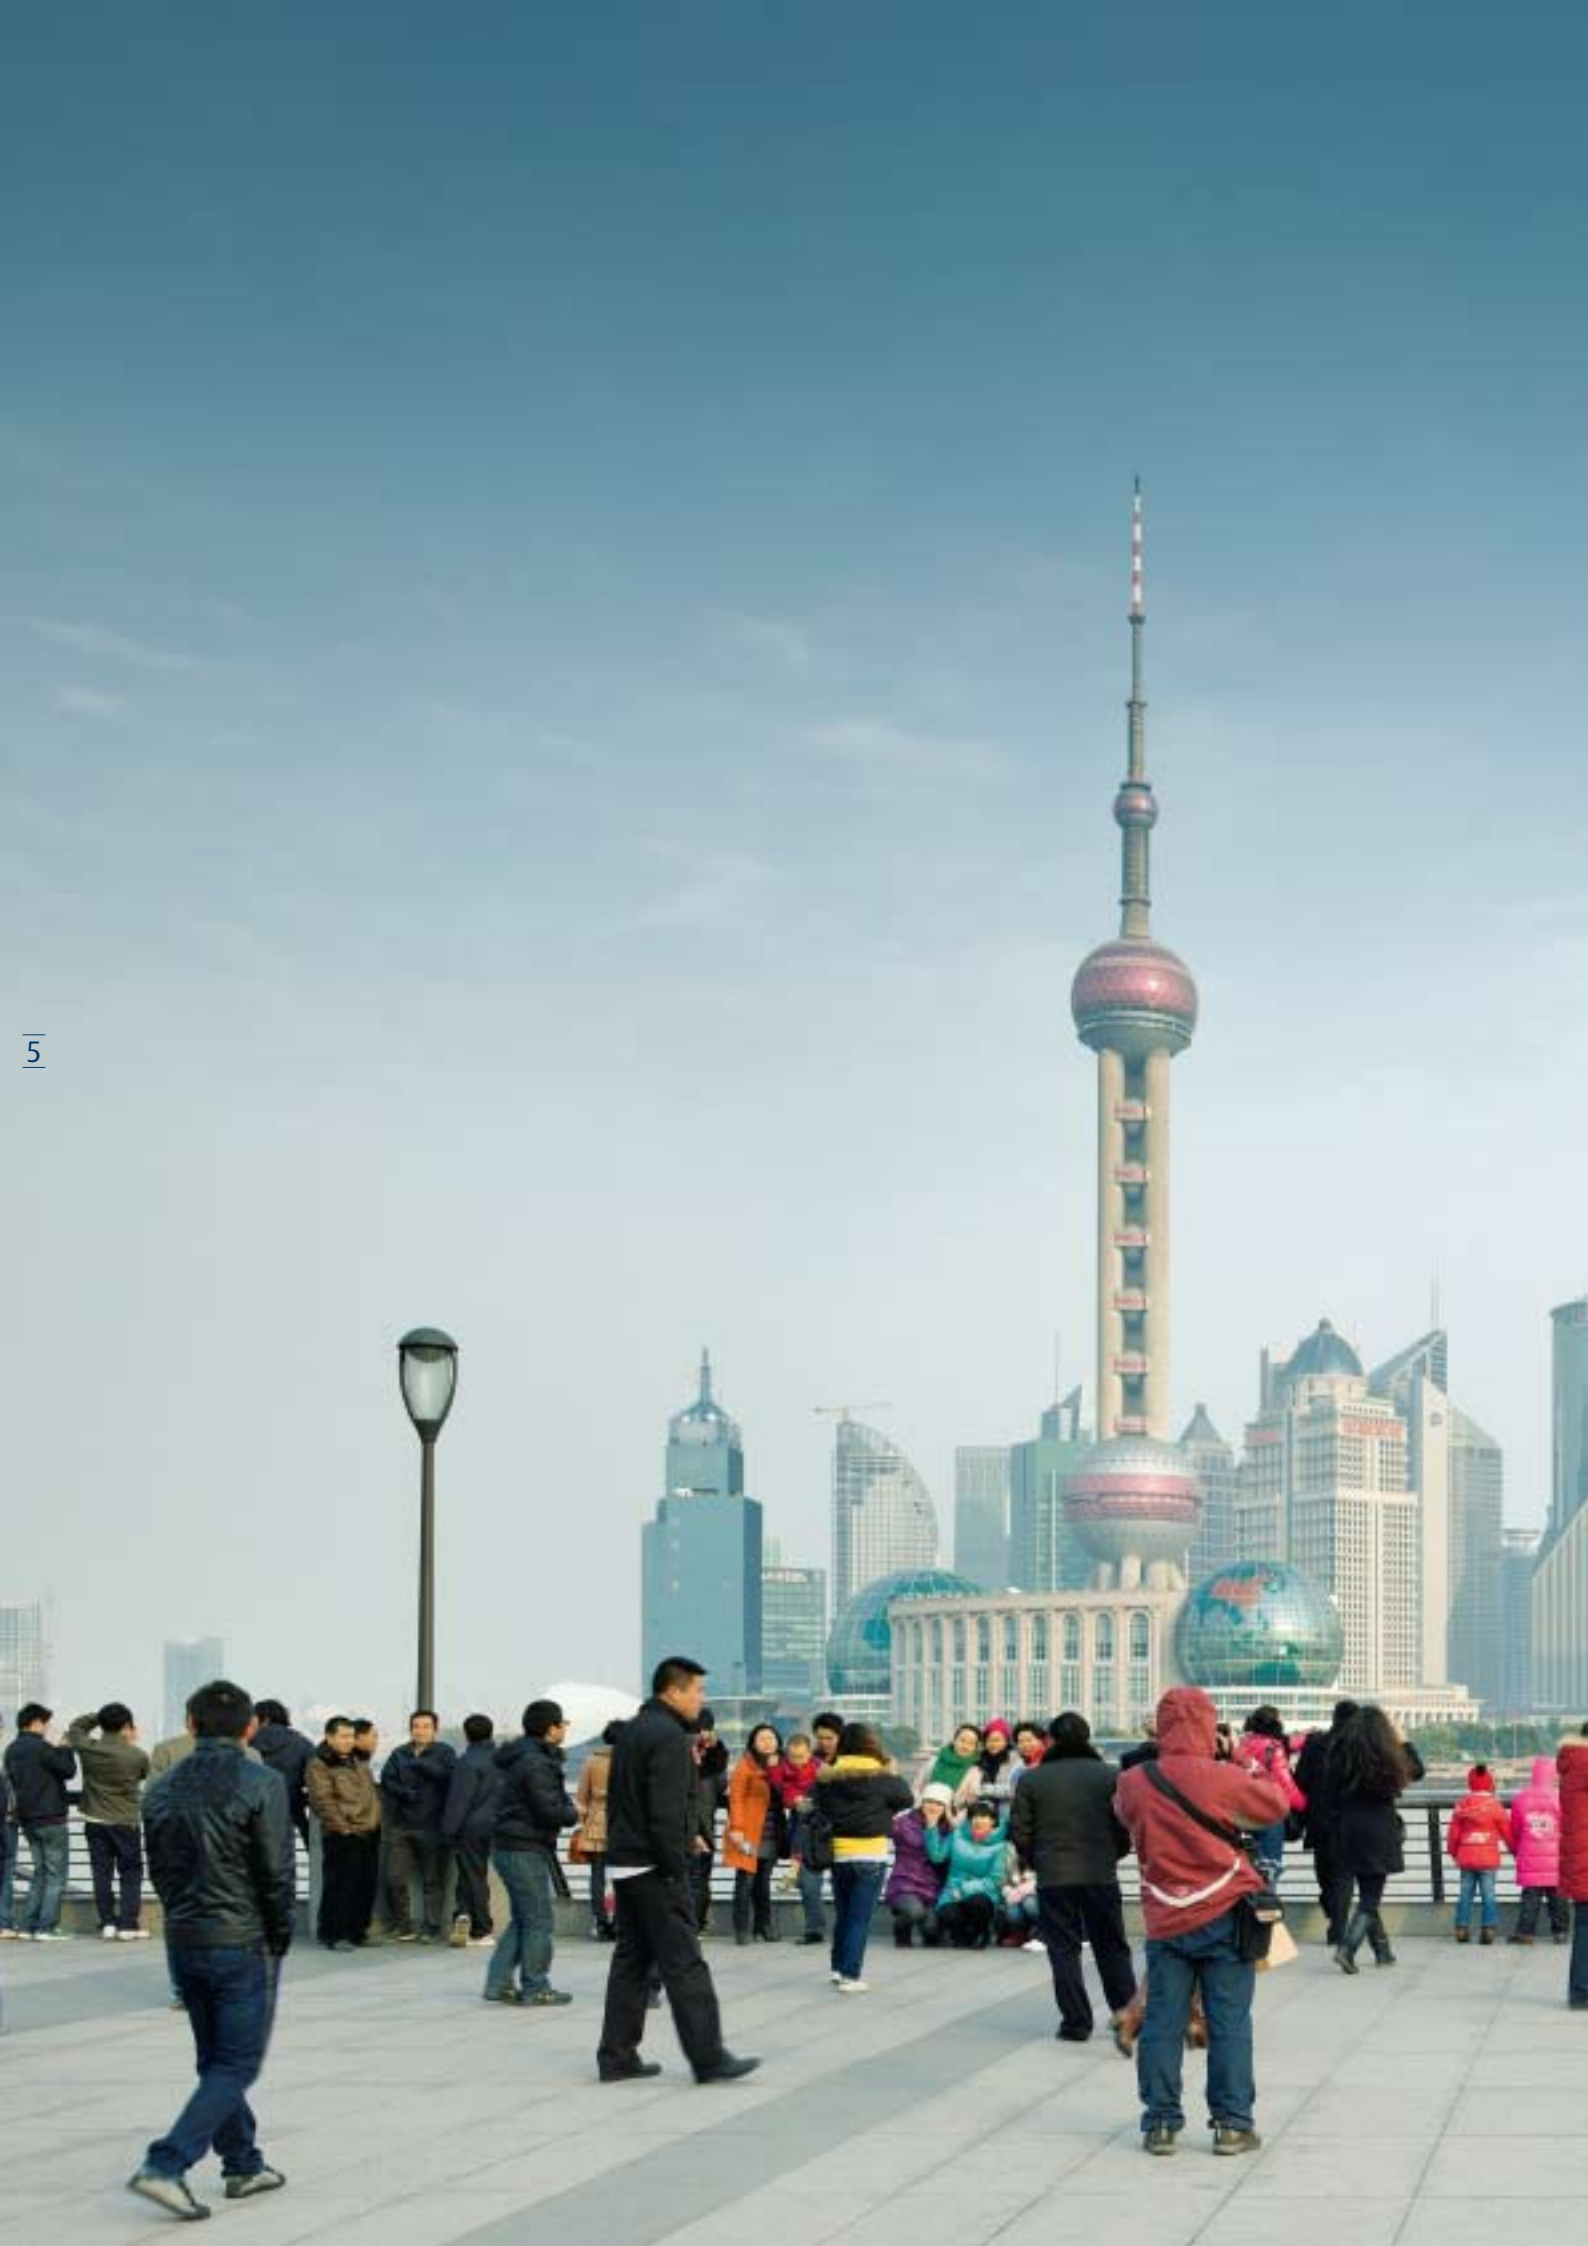



## „Ist Erfolg planbar?“

Der Erfolg eines Unternehmens ist von vielen Faktoren abhängig – von äußeren Einflüssen ebenso wie von internen Prozessen. Die Mitglieder des Vorstands der Linde AG erklären, wie sie ihr Unternehmen für eine nachhaltig erfolgreiche Zukunft rüsten.

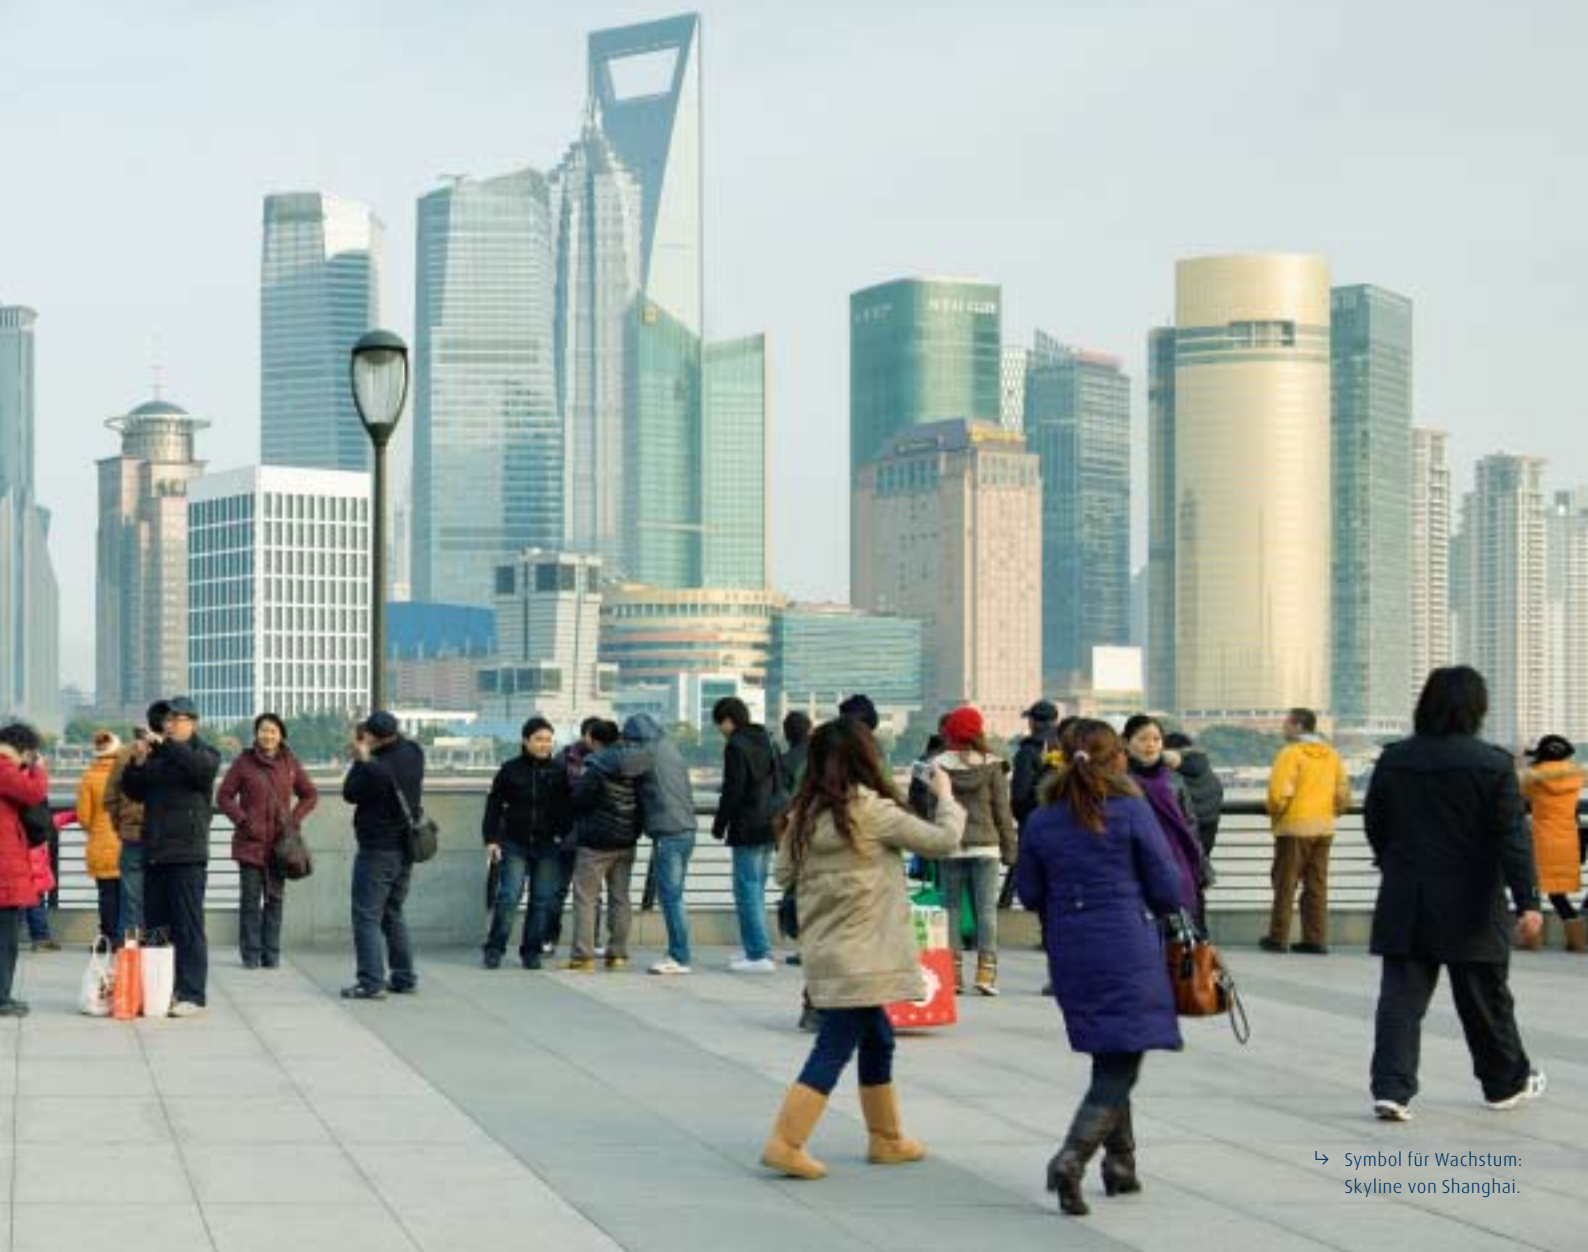

## „Wir entwickeln Linde zu einem exzellenten Unternehmen.“

Prof. Dr.-Ing. Wolfgang Reitzle, Vorsitzender des Vorstands der Linde AG

↳ Als führende Manager in einem Traditionsunternehmen wie Linde haben meine Kollegen und ich eine eindeutige Verpflichtung: Wir müssen alles dafür tun, dass sich unser Unternehmen nachhaltig erfolgreich entwickeln kann. Wir sind dafür verantwortlich, alle Dinge, die wir beeinflussen können, so auszurichten, dass unser Unternehmen seine Potenziale in vollem Umfang ausschöpfen kann.

Wir verfolgen ein ganzheitliches Konzept, mit dem wir unser Unternehmen in jeder Hinsicht noch leistungsfähiger machen. Es geht dabei nicht um Kostensenkung, es geht um Effizienzsteigerung. Unseren Ansatz prägen im Wesentlichen drei Faktoren: fein aufeinander abgestimmte Prozesse, ein hohes Maß an Standardisierung und die richtige Einstellung unserer Mitarbeiter, stets nach der besten Lösung zu suchen. Und das heißt, nach der besten Lösung für unsere Kunden, denn wir richten unsere Prozesse ganz eng an den Anforderungen unserer Kunden aus.

Dabei blicken wir über den Tellerrand unserer eigenen Industrie hinaus. Wenn es also beispielsweise um die Optimierung unserer Transportflotte geht, sind für uns die weltweit führenden Logistikunternehmen die Messlatte. →



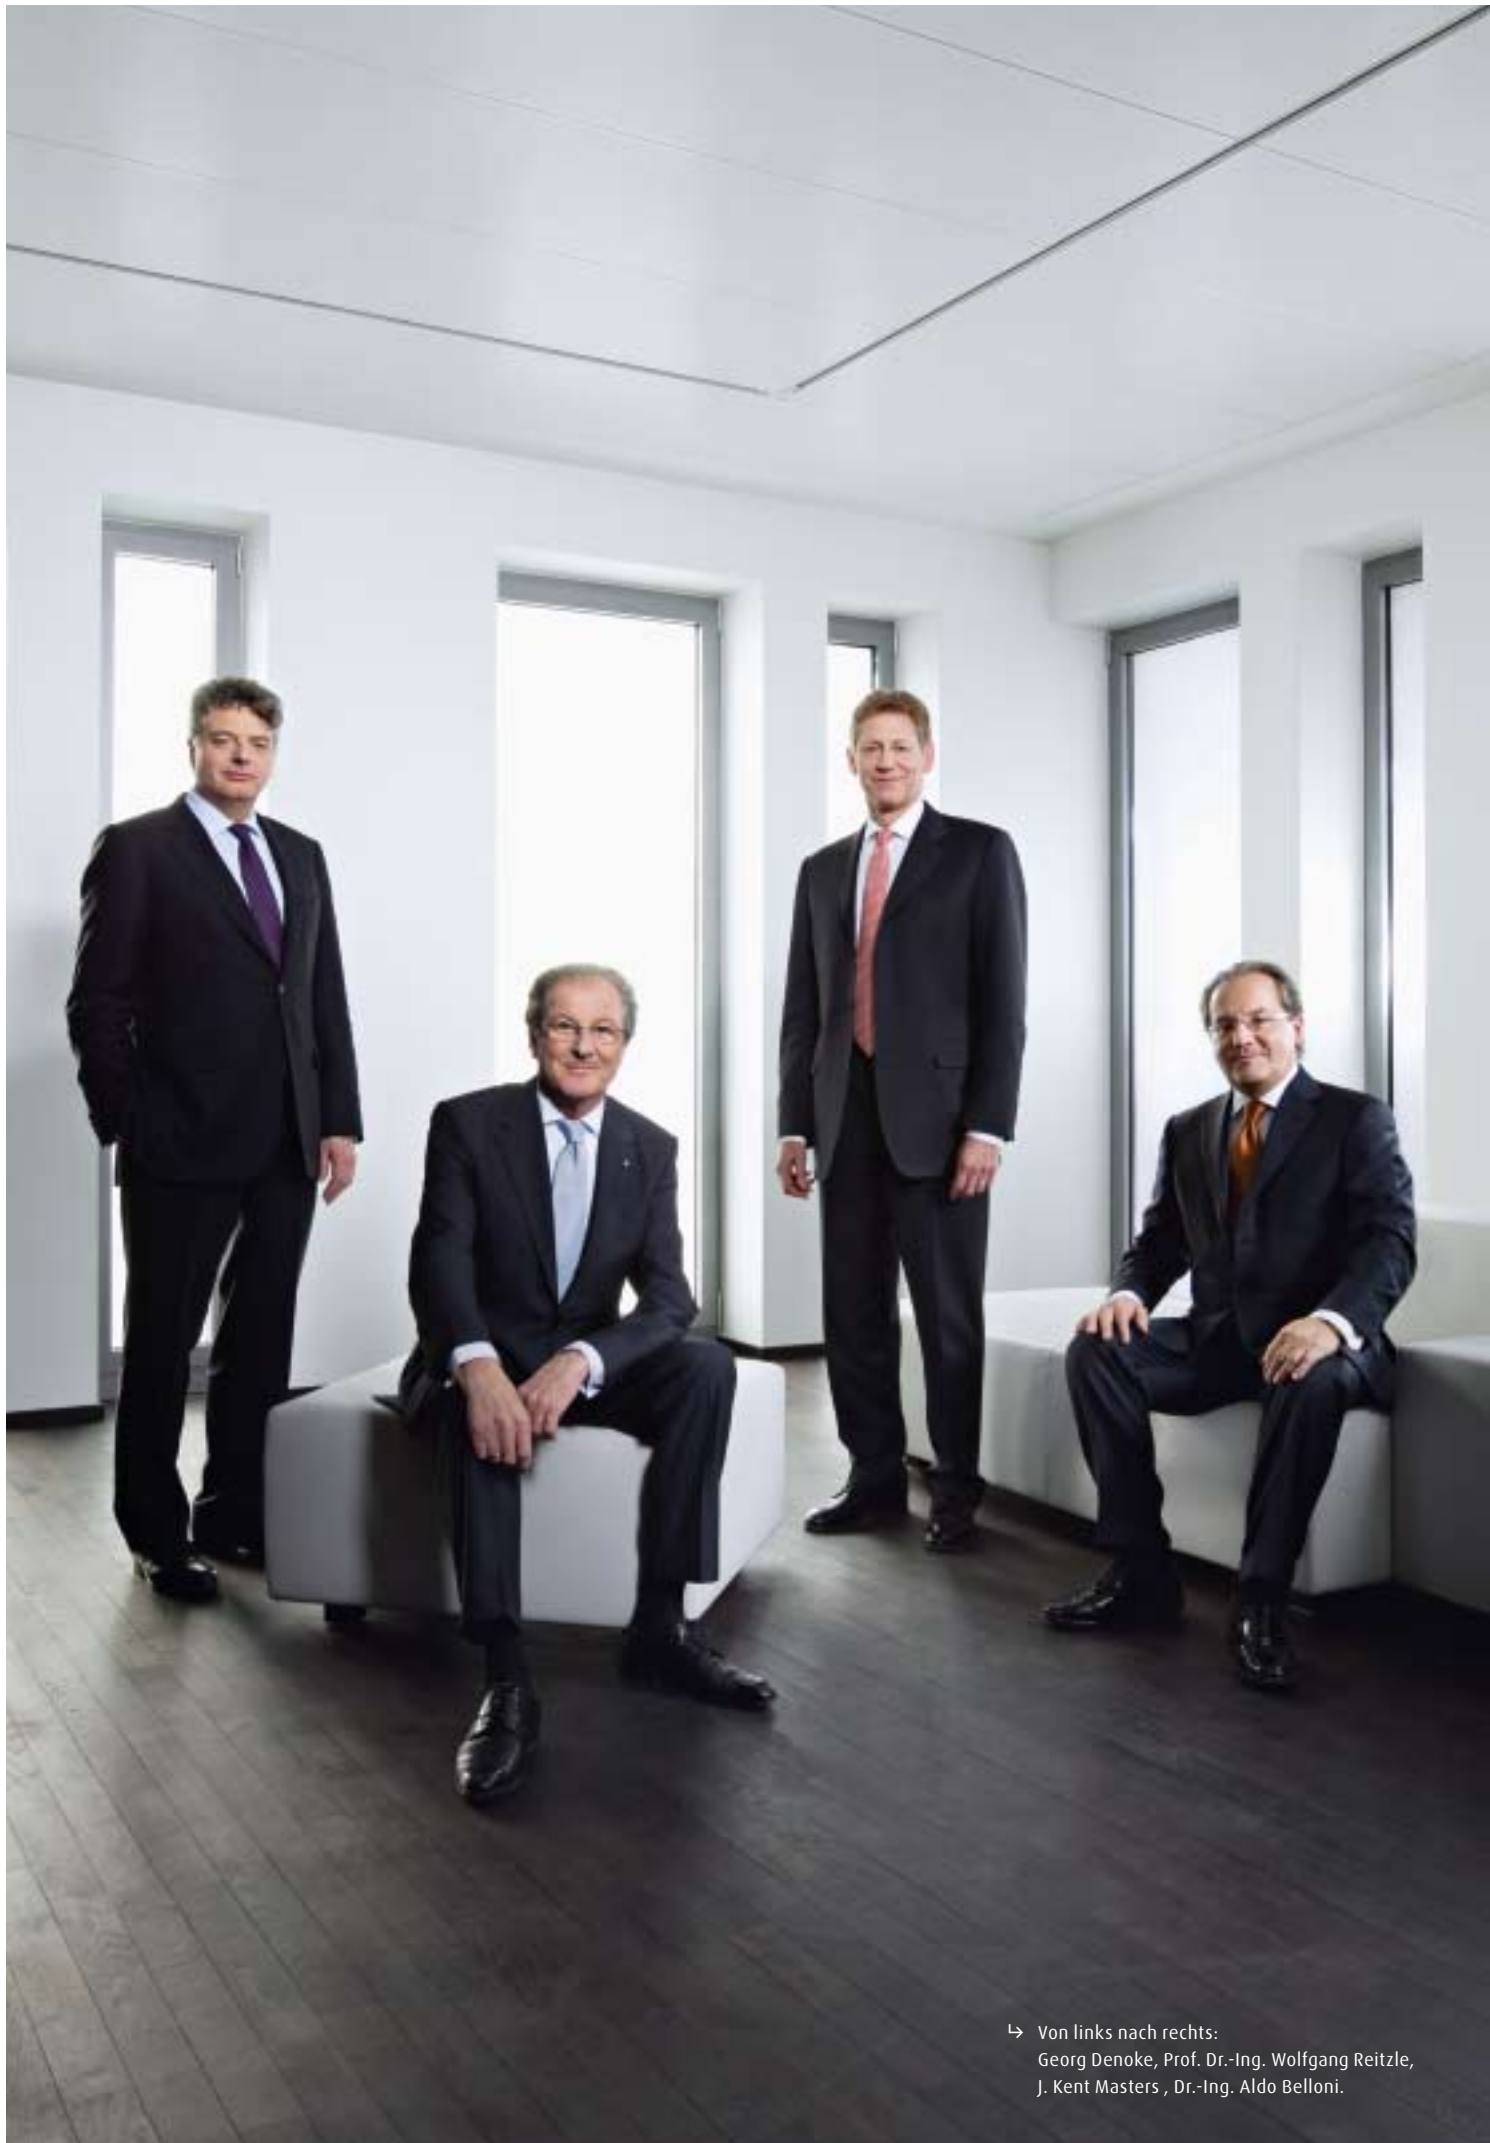

↳ Von links nach rechts:  
Georg Denoke, Prof. Dr.-Ing. Wolfgang Reitzle,  
J. Kent Masters , Dr.-Ing. Aldo Belloni.

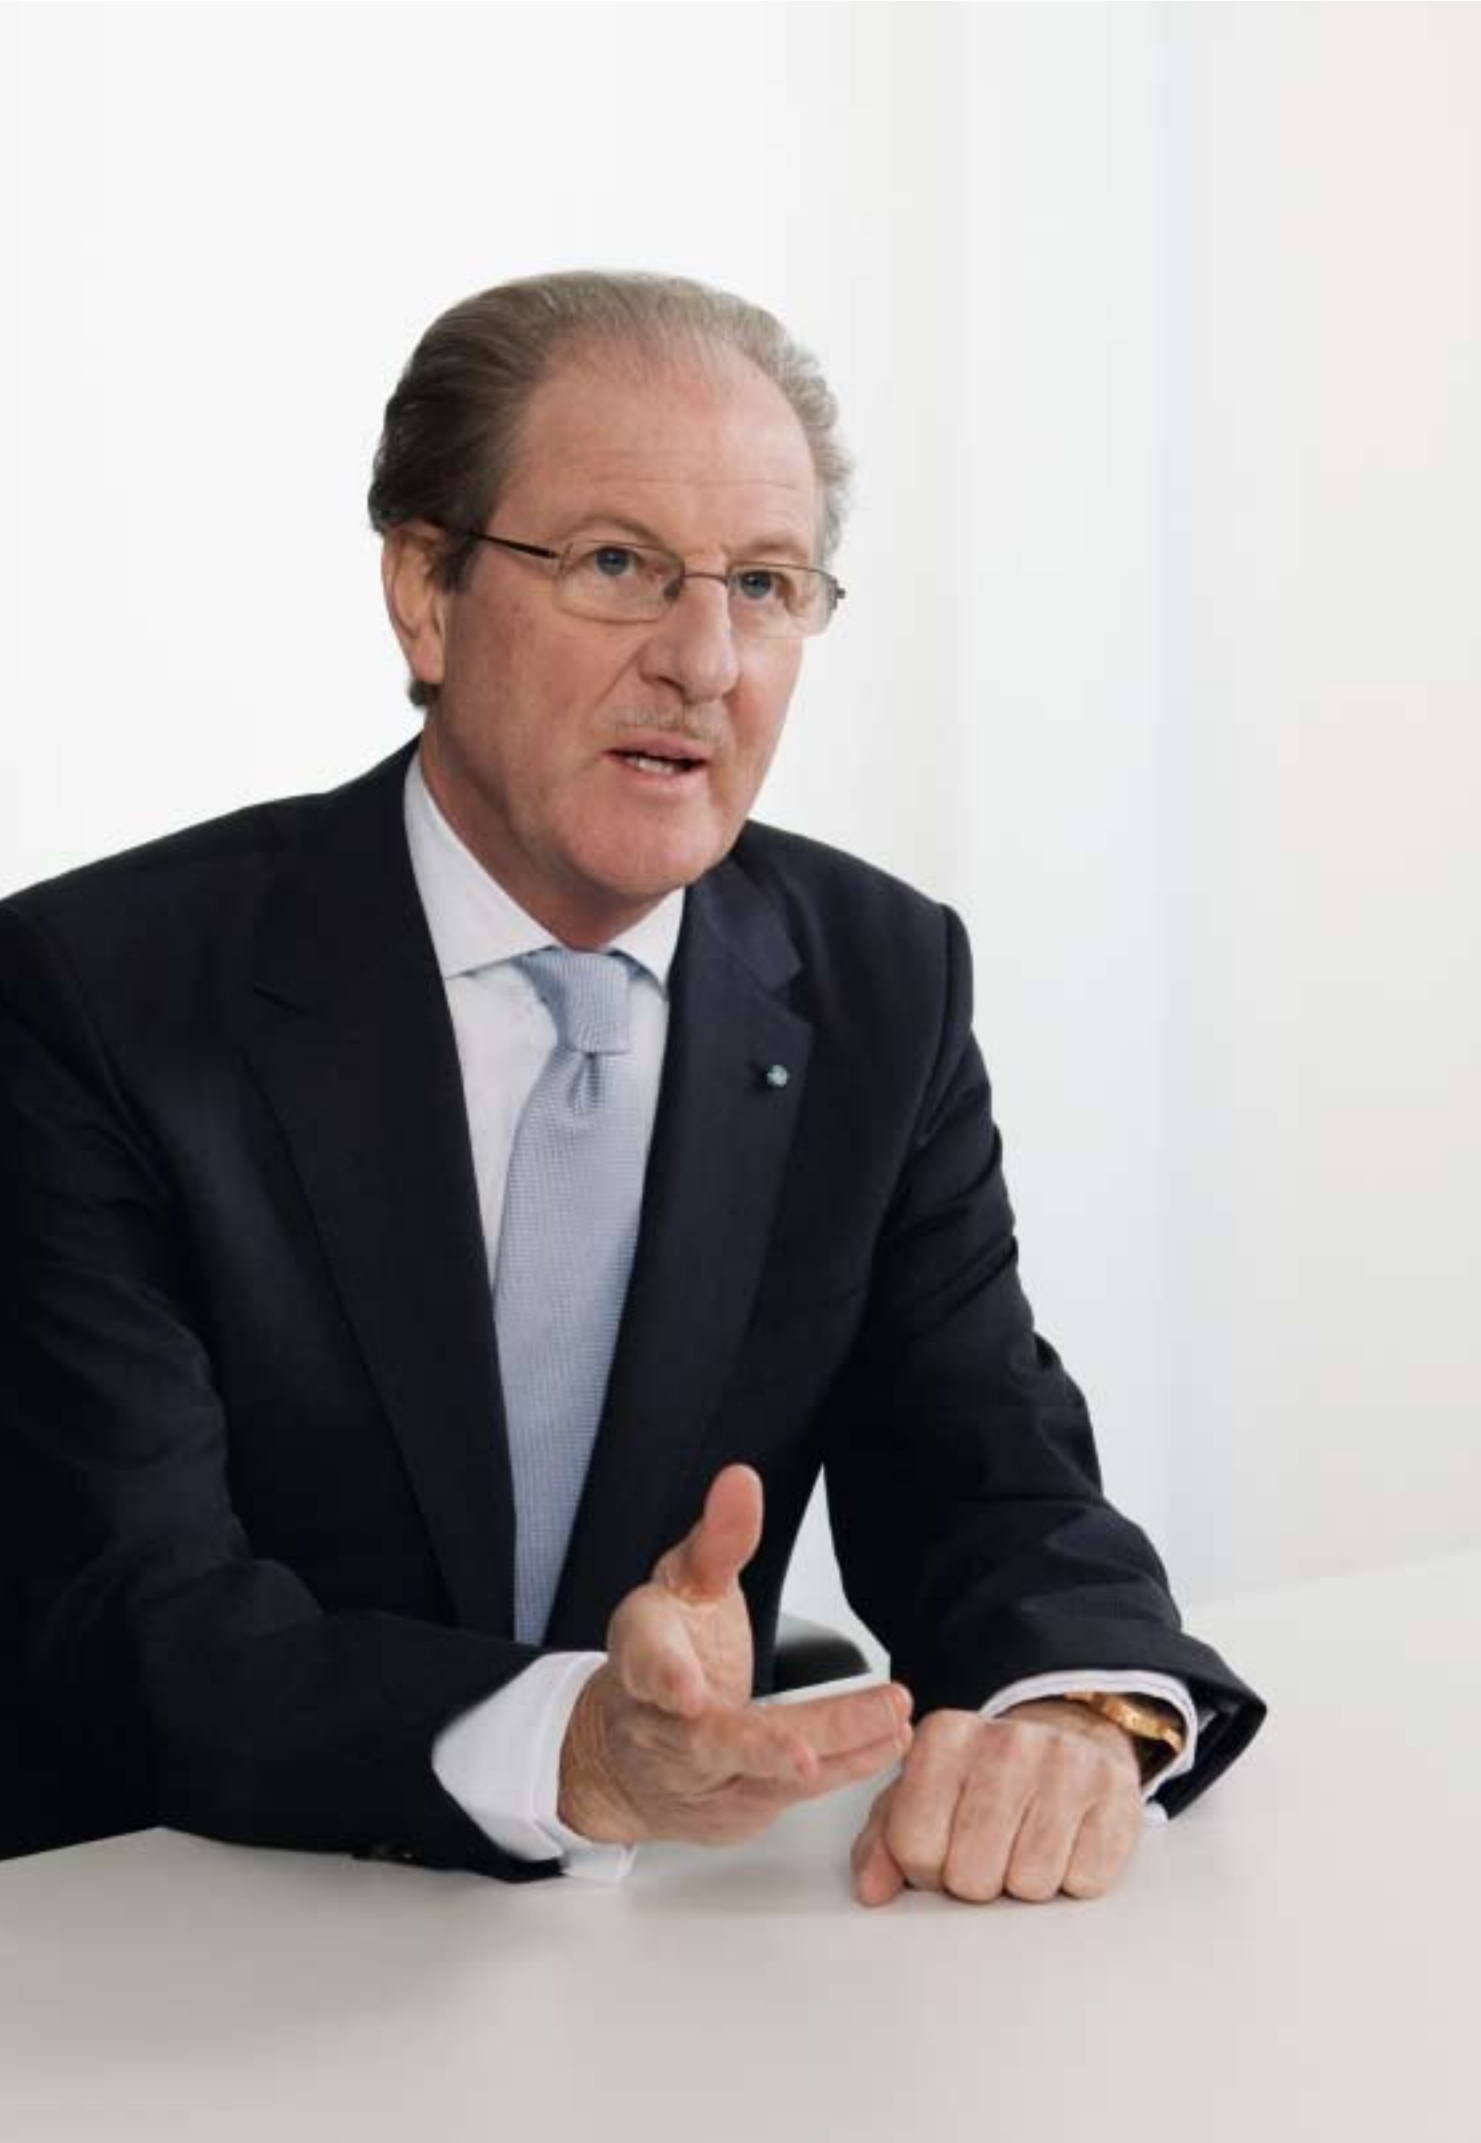



Wir synchronisieren und harmonisieren alle Prozesse mit unseren IT-Systemen. Diese Systeme werden wir in den nächsten Jahren Zug um Zug vereinheitlichen, bis wir schließlich nur noch ein standardisiertes IT-Template haben werden.

Unser Gesamtkonzept endet nicht zu einem bestimmten Stichtag, sondern setzt sich kontinuierlich fort. Wir werden die damit verbundene Haltung, die man vielleicht am besten als sportliche Leistungskultur der stetigen Verbesserung beschreiben kann, als den wesentlichen Baustein in unseren Unternehmenswerten verankern.

Damit schaffen wir eine stabile Grundlage für nachhaltiges profitables Wachstum. Wir werden an den langfristigen Megatrends – Energie, Umwelt, Gesundheit, Entwicklung in den aufstrebenden Volkswirtschaften – noch stärker partizipieren können als bisher. So liegt es ja sozusagen in unseren Genen, eine führende Rolle bei der sauberen Energiegewinnung zu übernehmen. Wir haben für jedes der möglichen Szenarien nach dem Erdölzeitalter die passenden Technologien, zudem verfügen wir über die nötige Expertise. Wir wissen, wie man Großprojekte effizient abwickelt, und können auf eine weltweit einzigartige Kombination aus Gas- und Engineering-Know-how bauen.

Ob wir nachhaltig von einem stabilen und breiten Wirtschaftswachstum unterstützt werden, kann niemand verlässlich vorhersagen. Darauf haben wir keinen Einfluss. Eines aber kann ich versichern: Gemeinsam werden wir Linde zu einem noch besseren Unternehmen machen. Wir werden Linde zu einem exzellenten Unternehmen mit einem unverwechselbaren Profil entwickeln, zu einem in jeder Hinsicht führenden und vorbildlichen Unternehmen.



# „Es gibt nichts, was sich nicht noch weiter verbessern ließe.“

Dr.-Ing. Aldo Belloni, Mitglied des Vorstands der Linde AG

↳ Exzellente Prozesse führen zu einem exzellenten Unternehmen. Diese Formel hat auch für unser Unternehmen Bestand. Der Schlüssel zu hervorragenden Abläufen und Prozessen liegt für uns in einem möglichst hohen Standardisierungsgrad. Deshalb entwickeln wir globale Standards, für die eine Richtschnur gilt: Unter dem Strich muss der gesamte Konzern davon profitieren. Für die Definition unserer globalen Standards haben wir einen kooperativen Ansatz gewählt. Das heißt, jede einzelne Führungskraft, jeder einzelne Mitarbeiter ist aufgerufen, sich einzubringen. Auf diese Weise können wir unser breites Wissen, das im gesamten Unternehmen vorhanden ist, bündeln und gezielt einsetzen.

Ein exzellentes Unternehmen muss sich ständig weiter verbessern. Dies gilt auch für bereits eingeführte neue Prozesse. Es gibt nichts, was sich nicht noch weiter optimieren ließe. Wir gehen dabei ganz pragmatisch vor, je nach Erfordernissen. Wir erproben die neu gesetzten Standards, überprüfen die Ergebnisse und nehmen – falls nötig – Anpassungen vor.

Ein Beispiel sind die Versorgungsketten in unserem Flüssig- und Flaschengasgeschäft. Hier erhöhen wir Schritt für Schritt den jeweiligen Standardisierungsgrad und behalten gleichzeitig die für uns wichtigsten Ziele im Blick: absolute Liefertreue und ein Höchstmaß an Sicherheit.

Oder nehmen Sie unser Engineering-Geschäft: Hier werden wir uns bei der Abwicklung von globalen, bereichs- und regionenübergreifenden Projekten noch weiter verbessern. Wir setzen dabei auf eine noch engere Verzahnung der beteiligten Teams und auf eine Straffung der jeweiligen technischen Spezifikationen.

↳ Prozesskompetenz im Einsatz:  
Die On-site-Anlage des Joint Ventures  
Shanghai HuaLin Industrial Gases  
(China) nutzt Synthesegas statt Erdgas.



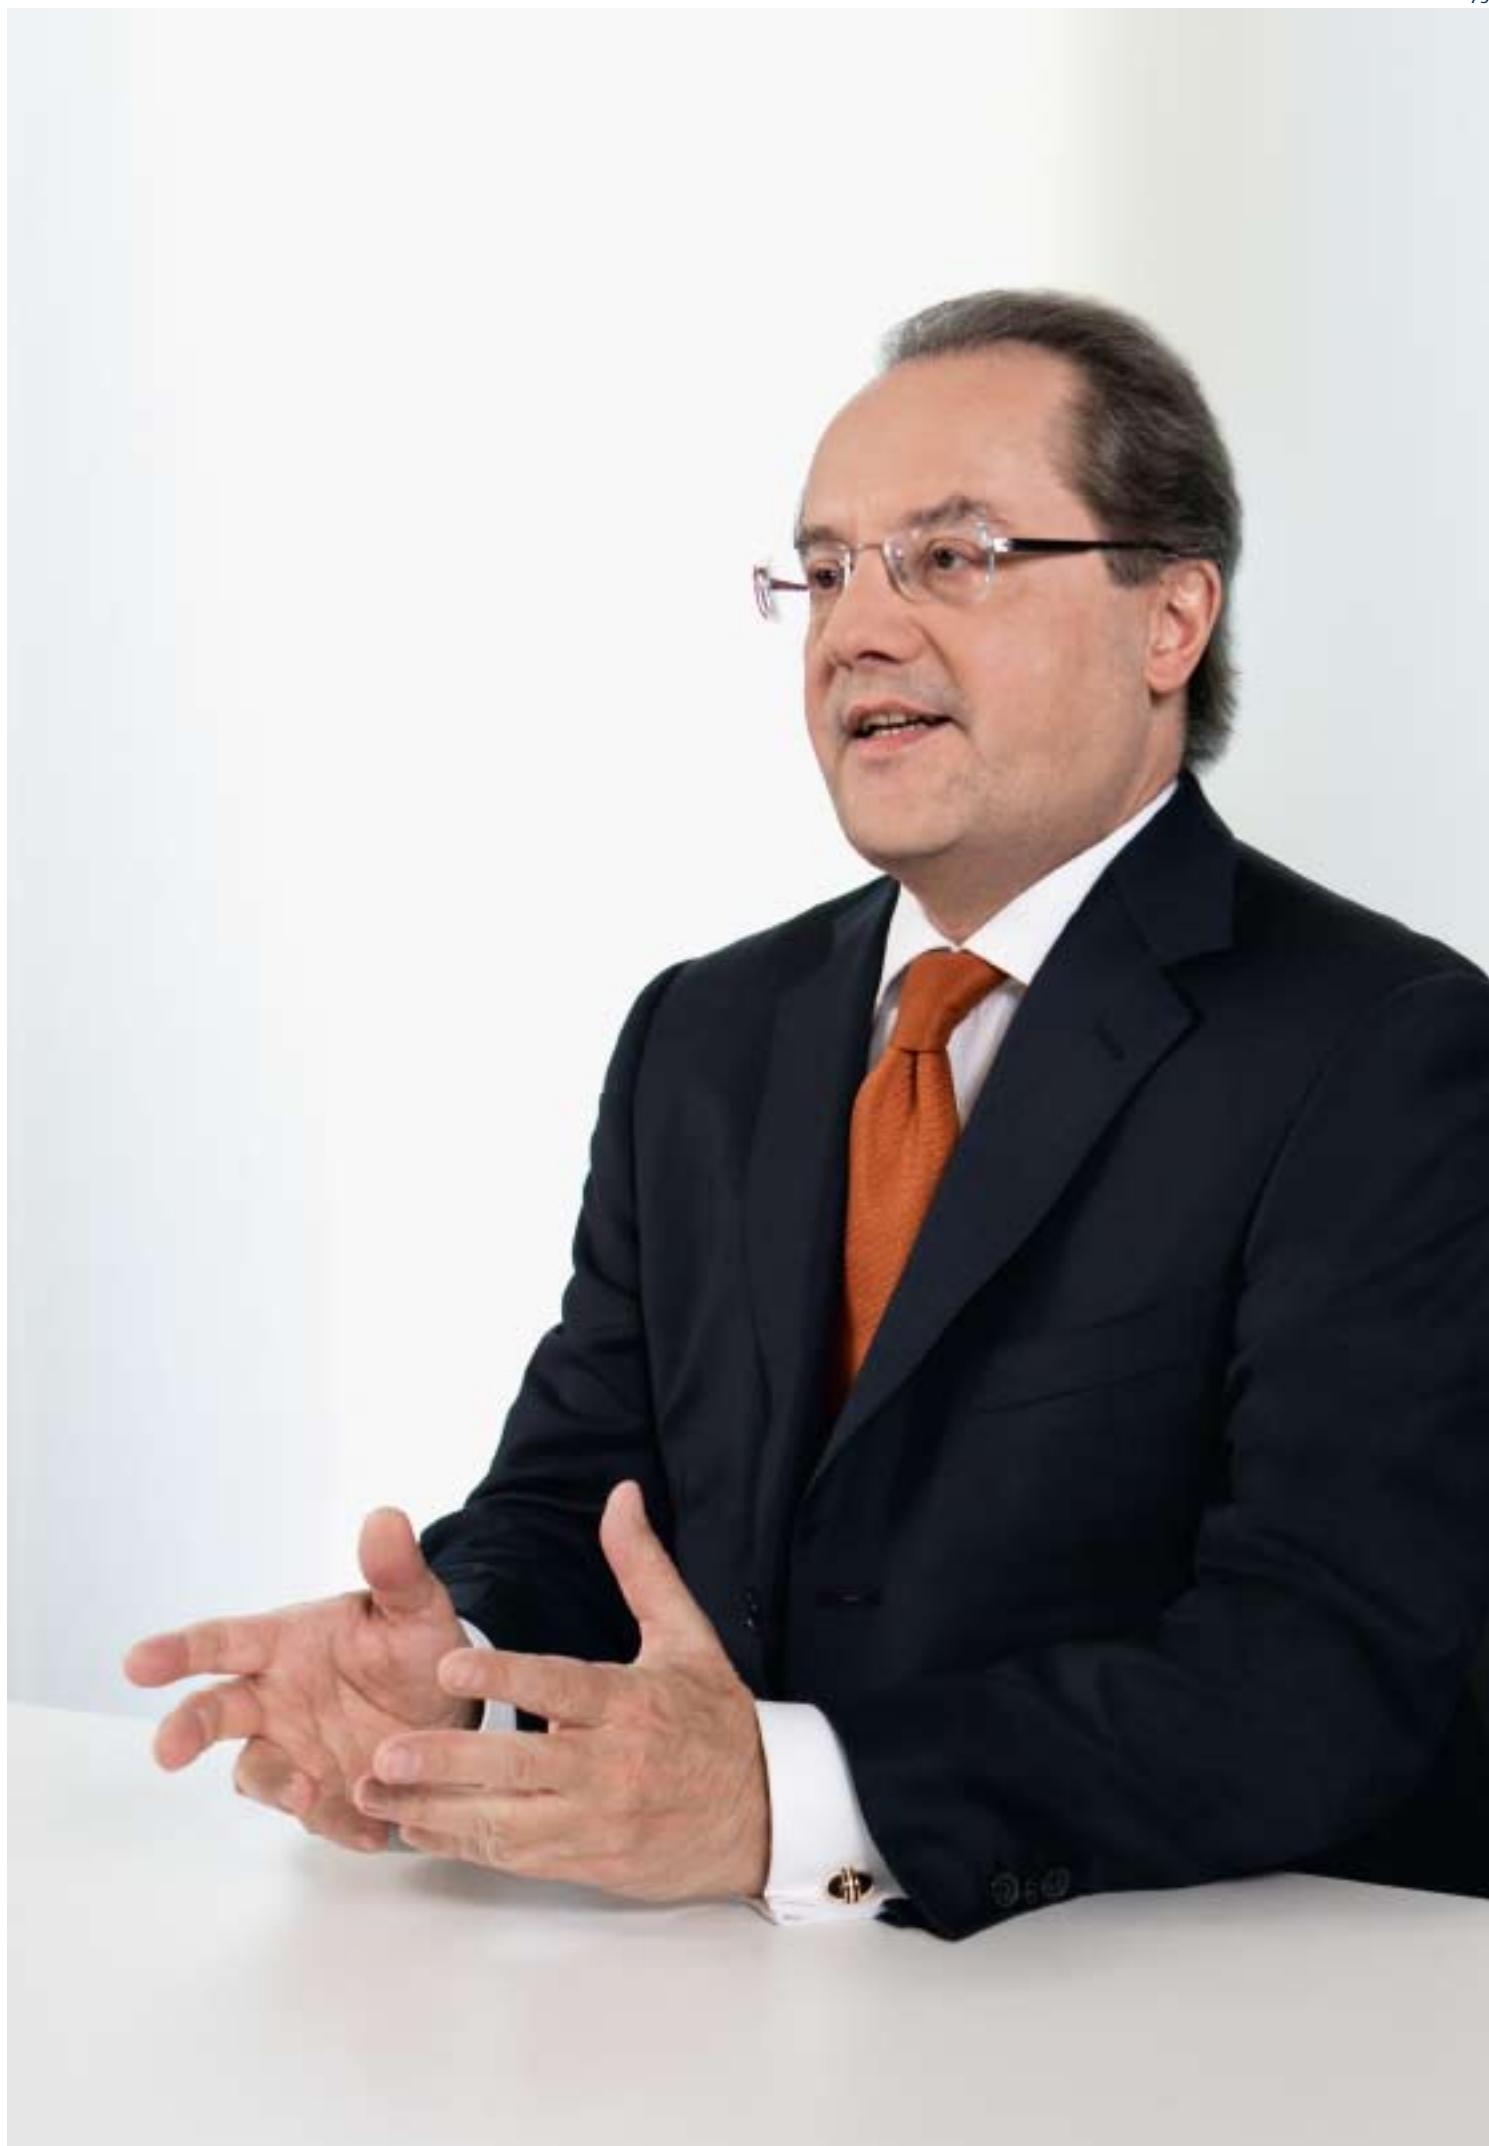

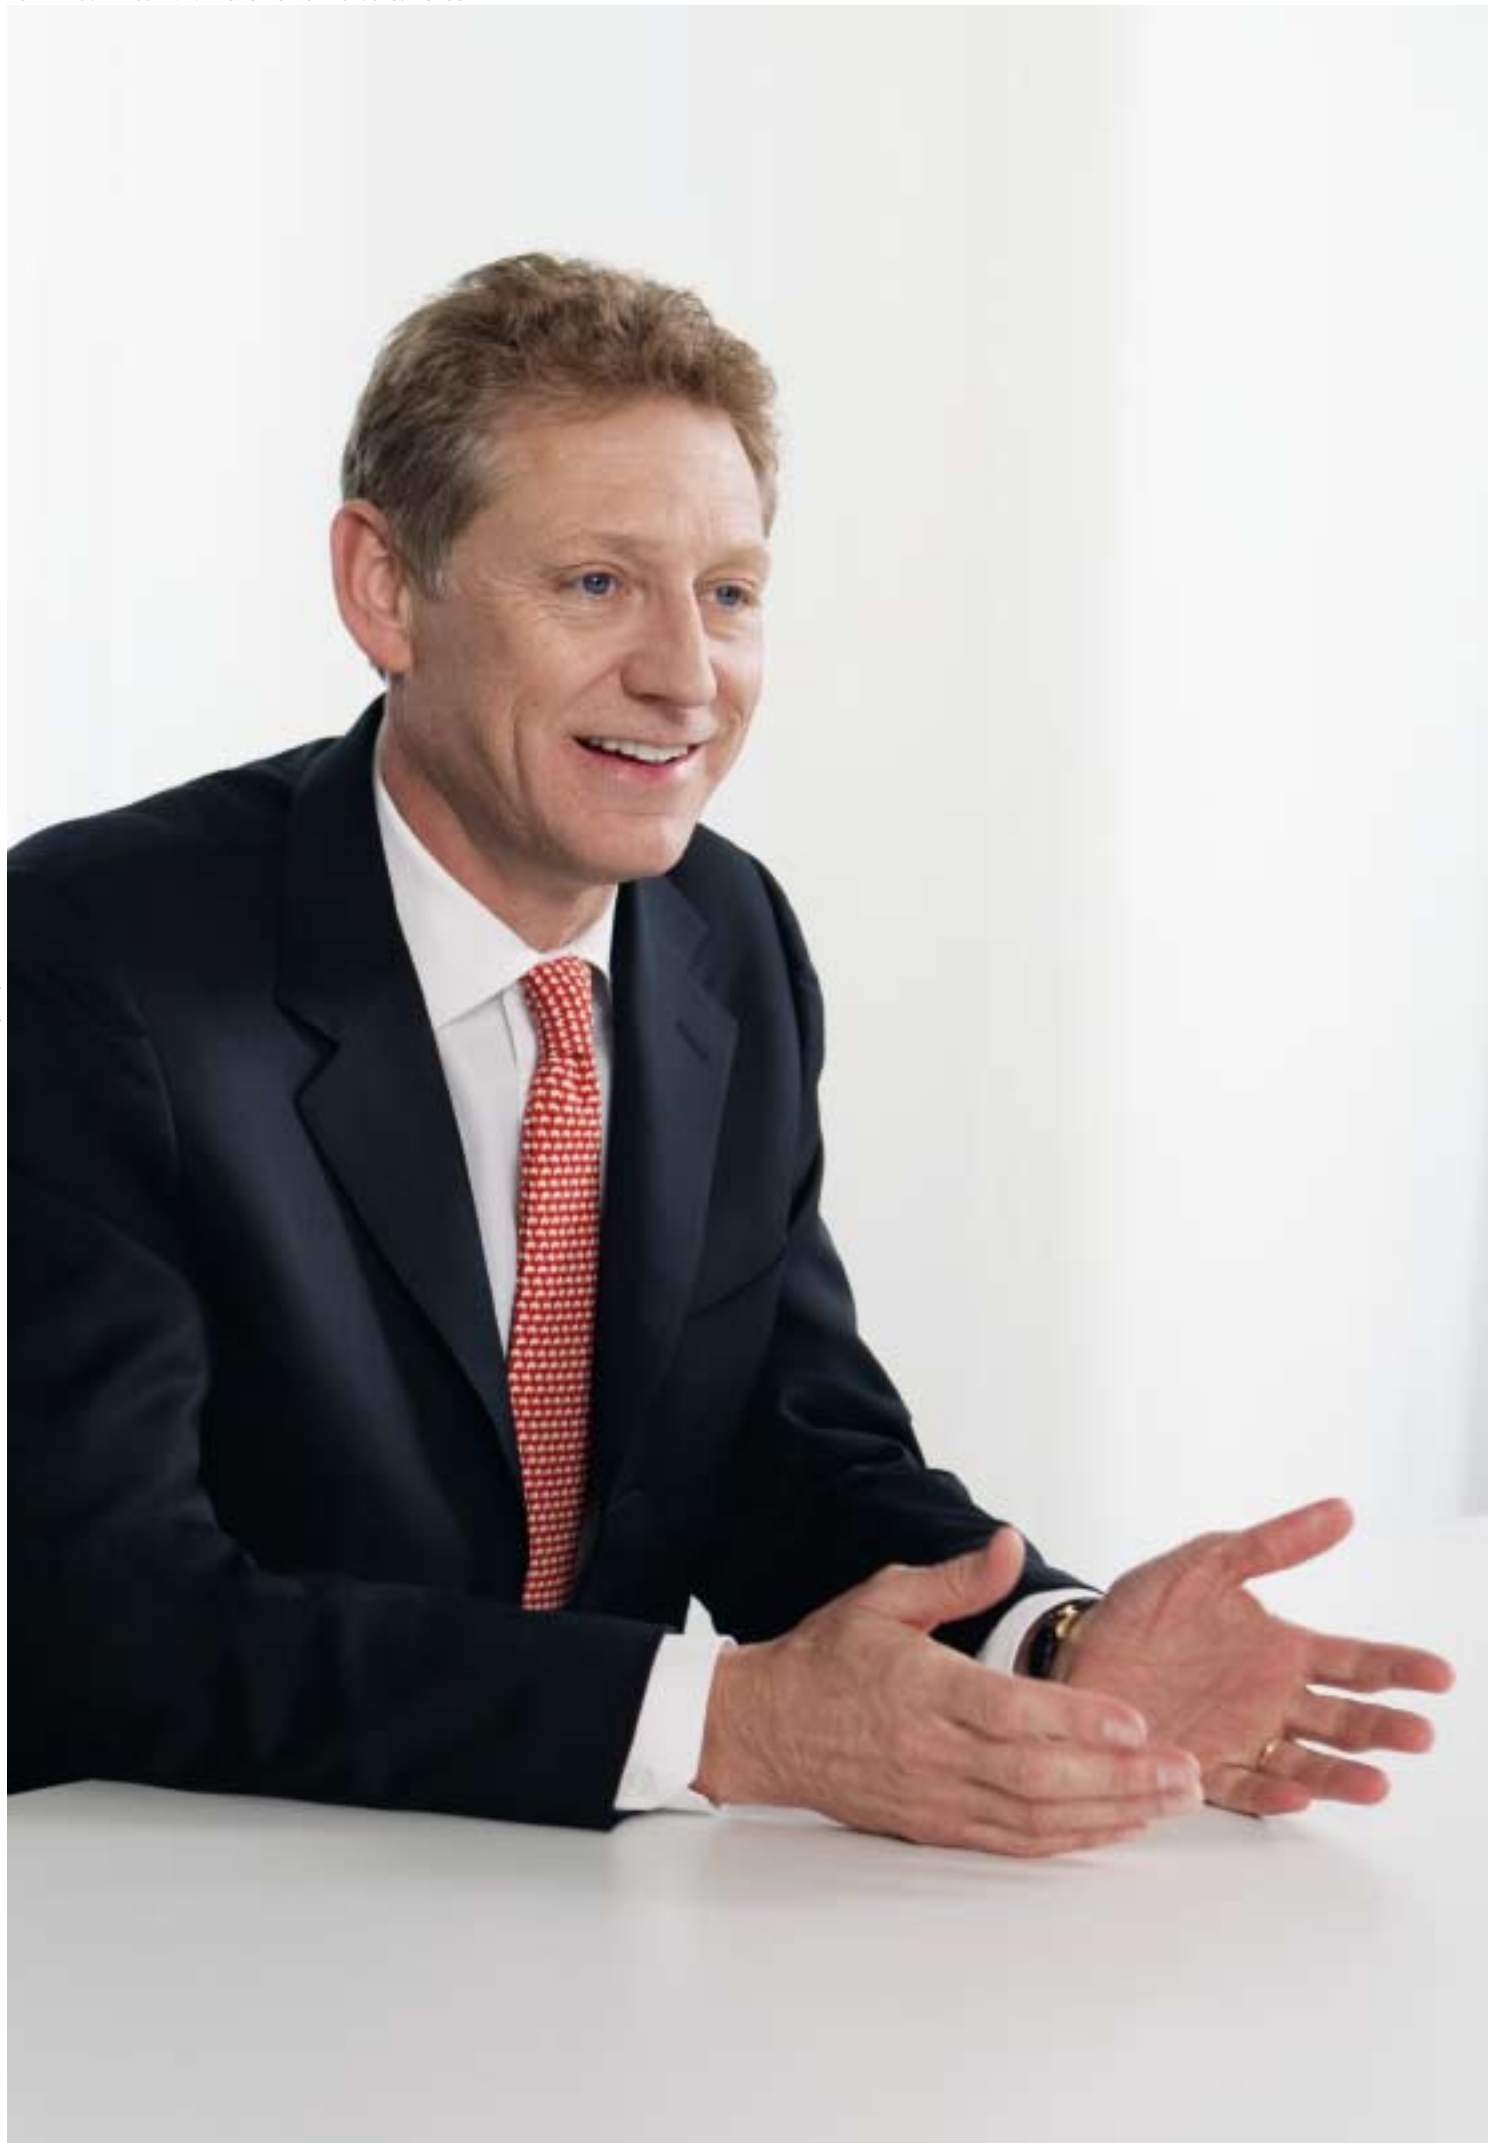



## „Unsere Mitarbeiter genießen höchste Wertschätzung.“

J. Kent Masters, Mitglied des Vorstands der Linde AG

↳ Der Erfolg eines Unternehmens steht und fällt mit der Qualität und der Motivation seiner Mitarbeiter. Deshalb ist es für uns so wichtig, die richtigen Mitarbeiter am richtigen Platz zu haben. Mitarbeiter, die alles, was sie selbst jeden Tag tun, permanent in einer positiven und konstruktiven Weise hinterfragen. Mitarbeiter, die über alle Kenntnisse und Kompetenzen verfügen, die ihre jeweilige Aufgabe erfordert. Mitarbeiter, die stolz darauf sind, bei Linde zu arbeiten.

Diese Einstellung ergibt sich nicht von alleine, diese Haltung muss wachsen, und sie muss von uns Führungskräften vorgelebt werden. Wir honorieren sehr gute Ergebnisse, ganz im Sinne unserer sportlichen Leistungskultur. Wir fördern die Zusammenarbeit über Bereichsgrenzen hinweg, wir setzen auf Einbindung, Wertschätzung und Motivation. Wir wollen, dass jeder Mitarbeiter erkennt, wie sich sein individueller Einsatz eingliedert ins Ganze, wie seine Leistung zum Unternehmenserfolg beiträgt.

Dazu muss man investieren – in seine Mitarbeiter. Wir bieten unseren Mitarbeitern vielfältige Möglichkeiten zur persönlichen Weiterentwicklung, unsere Programme sind exakt zugeschnitten auf die individuellen Qualifikationen und die unterschiedlichen Anforderungen der jeweiligen Funktion.

Nur auf diese Weise erfüllen wir nachhaltig unseren Anspruch, den wir in unserem Leitbild verankert haben: „Wir sind ein Unternehmen, dessen Mitarbeiter höchste Wertschätzung genießen.“

↳ Gemeinsam Ziele erreichen:  
Linde Mitarbeiter in Murray Hill,  
New Jersey (USA).



↳ Aufstrebender Finanzplatz:  
Das Stadtzentrum von Singapur.

## „Wir schaffen uns den Spielraum für weiteres Wachstum.“

Georg Denoke, CFO und Mitglied des Vorstands der Linde AG

↳ Es ist unser erklärtes Ziel, nachhaltig profitabel zu wachsen. Um dies zu erreichen, müssen wir tagtäglich entscheiden, wie wir die uns zur Verfügung stehenden Mittel am besten einsetzen und welche Geschäftsfelder wir besonders stärken wollen. Dabei gilt es, die richtige Balance zu finden zwischen Bereichen, in denen wir bereits sehr gut unterwegs sind, und neuen, zukunftssträchtigen Feldern. Beispiele hierfür sind die globalen Megatrends Energie, Umwelt und Gesundheit sowie der weitere Ausbau unserer starken Marktpositionen in den aufstrebenden Volkswirtschaften Asiens oder Südamerikas.

Um hier die richtige Wahl zu treffen, setzen wir auf ein strategisches Portfoliomanagement. Wir haben dazu verschiedene Investitionskategorien definiert und unsere Prioritäten – bezogen auf Regionen und Produktbereiche – festgelegt. Übergreifendes Ziel ist der Ausbau unseres Kerngeschäfts Industriegase. Zugleich erhalten wir uns die notwendige Flexibilität, um unsere Chancen bei den globalen Megatrends konsequent nutzen zu können. Hier werden wir unsere Investitionen weiter erhöhen.

Den dafür notwendigen Spielraum werden wir uns durch die angestrebte Verbesserung unserer Produktivität und durch die stetige Steigerung unseres Cash Flows verschaffen. Indem wir unsere Leistungsfähigkeit konzernweit Schritt für Schritt weiter erhöhen, sind wir in der Lage, aussichtsreiche Geschäftsmöglichkeiten zu erschließen und weiterhin profitabel zu wachsen.



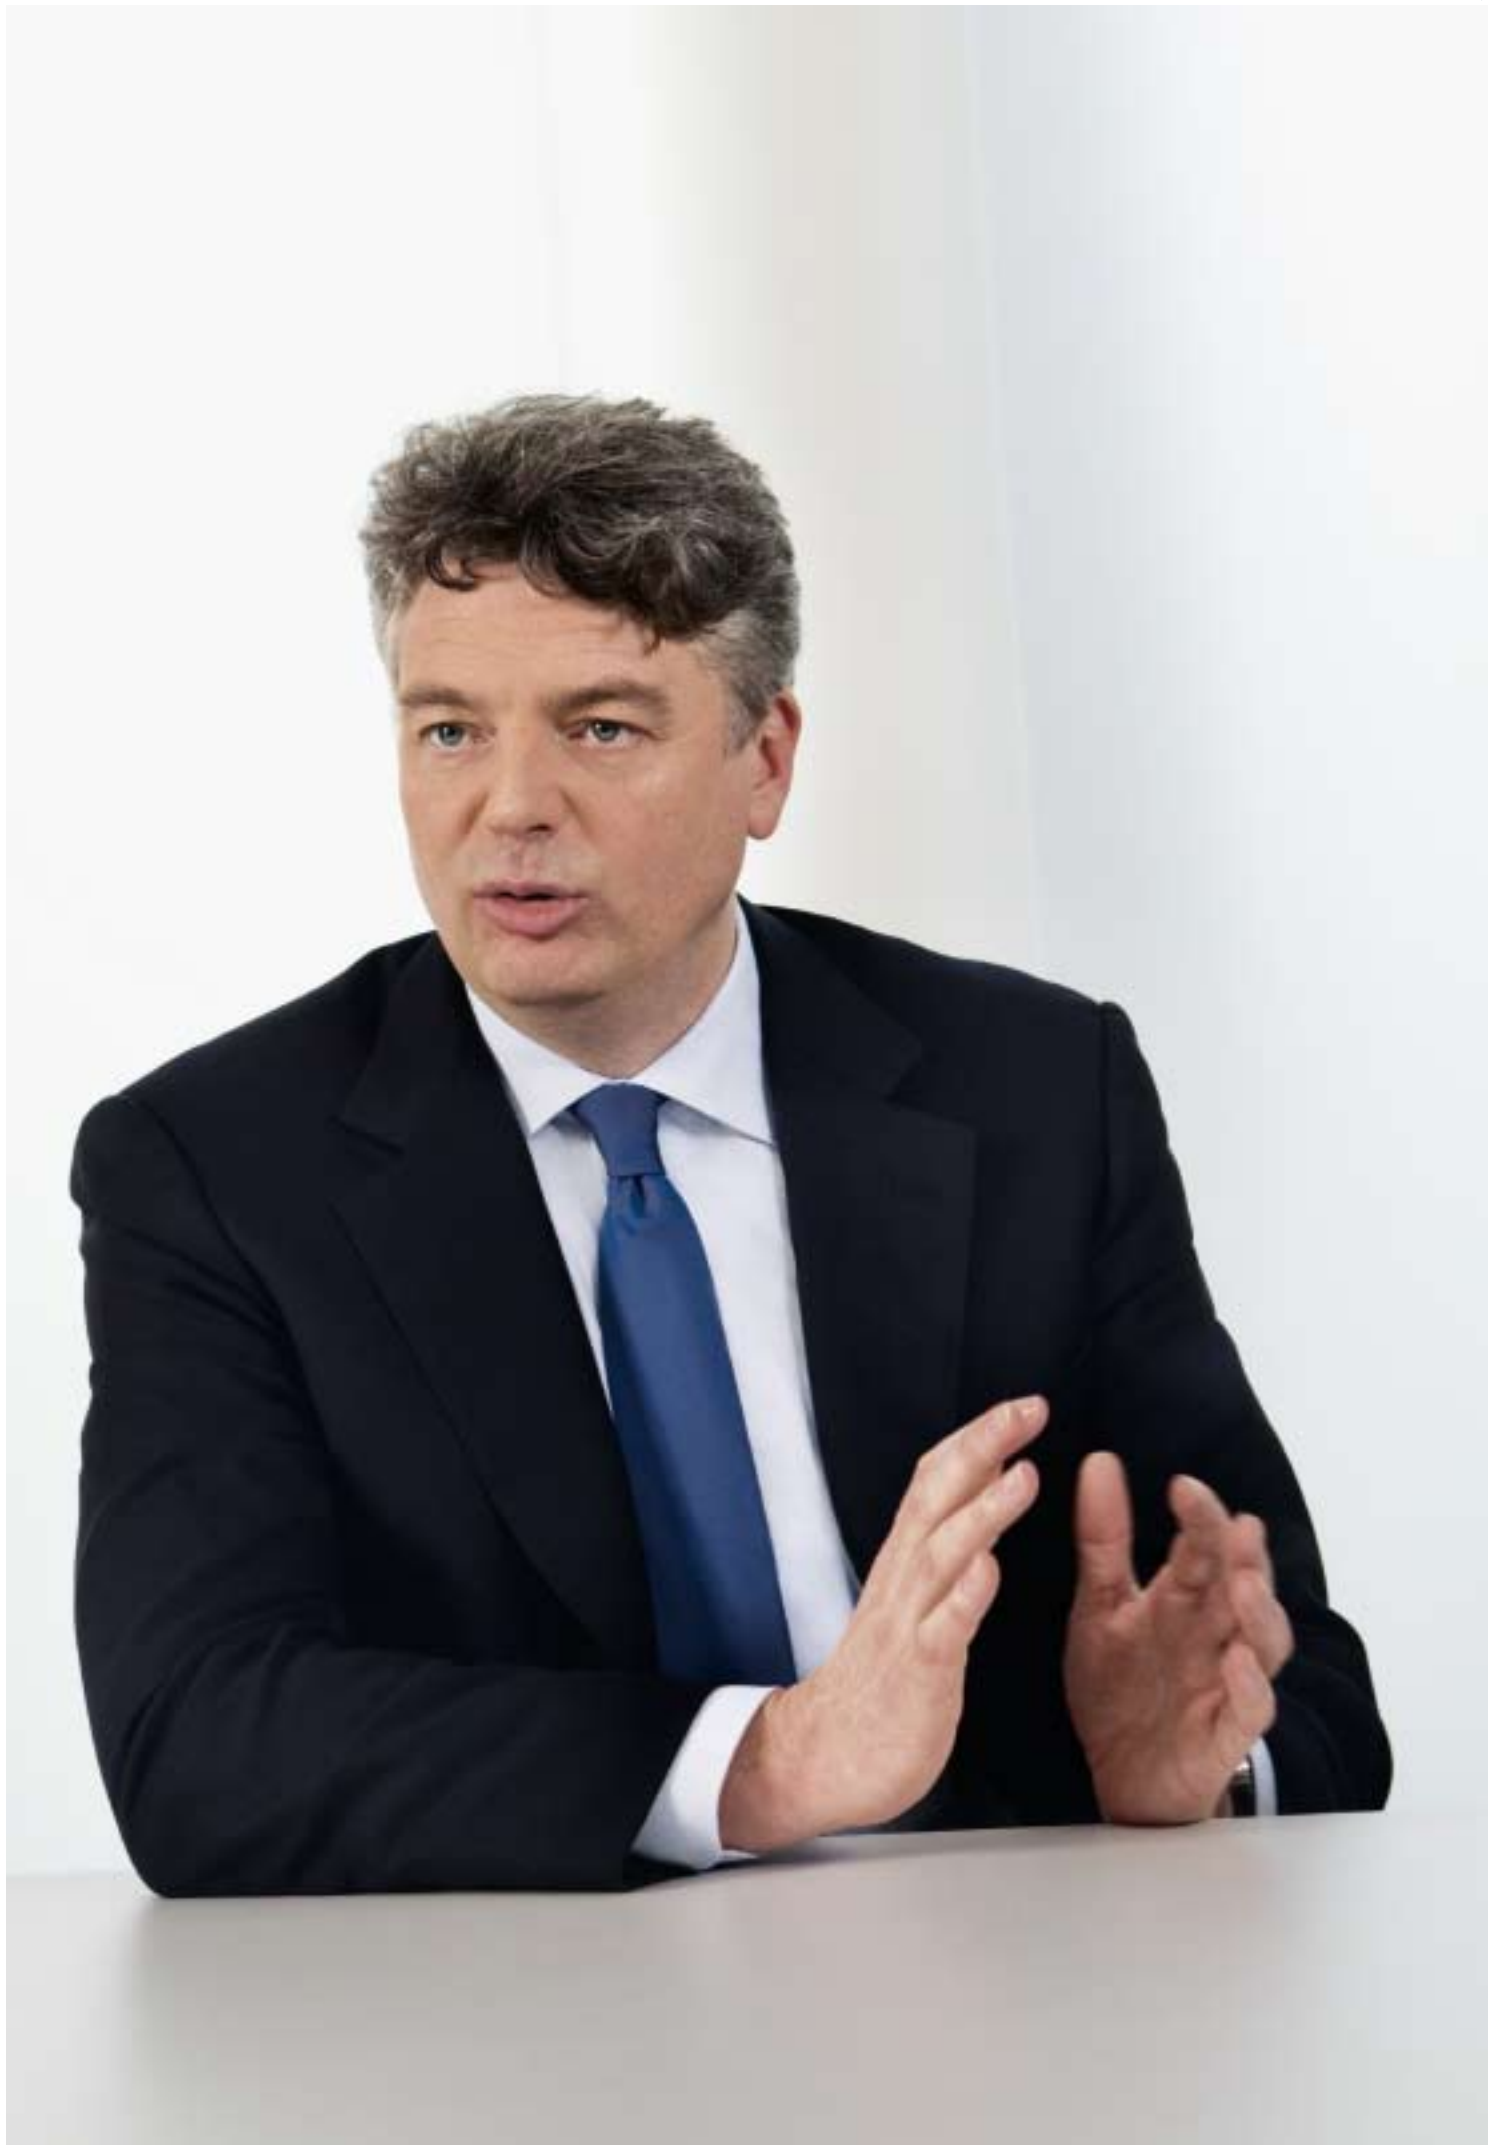

## Impressum

### Herausgeber

Linde AG  
Klosterhofstraße 1  
80331 München

### Gestaltung, Produktion, Satz und Lithografie

Peter Schmidt Group, Hamburg

### Texte

Linde AG

### Fotografie

Rüdiger Nehmzow, Umschlag-/Schubermotive sowie  
Seiten 02–03, 04–05, 06–07, 08–09, 10–11, 12–13,  
14–15, 16–17, 20–21, 22–23, 24–25, 26, 28–29,  
30–31, 33, 36–37, 38–39, 40–41, 44–45, 54–55,  
56–57, 58–59, 63, 68–69, 74 und 78  
Gideon Mendel, Seite 27  
Claudia Marcelloni (The Atlas Experiment), Seite 32  
Fred Rollison, Seiten 42–43  
Oleksandr Kalinichenko, Seiten 46–47  
Linde AG, Seiten 48, 50, 61 und 77  
Christian Liepe (BASF), Seite 49  
Mike Duff (Bastion Graphics), Seite 60  
Internatsschule Schloss Hansenberg, Seite 62 (unten)  
Samrereng Sukpisit, Seite 64  
Shaun Harris (Afrika Moves), Seiten 62 (oben) und 65  
Andreas Pohlmann, Seiten 70–71, 72–73, 75, 76 und 79

### Druck

Mediahaus Biering GmbH, München  
Gedruckt auf Circlesilk Premium White  
(100 Prozent Recyclingpapier, ausgezeichnet  
mit dem EU Ecolabel, Lizenznummer FR/11/003)

## Kontakt

### Linde AG

Klosterhofstraße 1  
80331 München  
Telefon 089.35757-01  
Telefax 089.35757-1075  
[www.linde.com](http://www.linde.com)

### Kommunikation

Telefon 089.35757-1321  
Telefax 089.35757-1398  
E-Mail [media@linde.com](mailto:media@linde.com)

### Investor Relations

Telefon 089.35757-1321  
Telefax 089.35757-1398  
E-Mail [investorrelations@linde.com](mailto:investorrelations@linde.com)

Das Linde Annual und der Finanzbericht des Linde Konzerns liegen in deutscher und englischer Sprache vor und sind zudem im Internet unter [www.linde.com](http://www.linde.com) als Download bereitgestellt. Unter derselben Adresse bieten wir Ihnen darüber hinaus eine interaktive Online-Version des Geschäftsberichts, der aus dem Finanzbericht des Linde Konzerns und dem Annual besteht.

Zusätzliches Informationsmaterial über Linde schicken wir Ihnen auf Anfrage gerne kostenlos zu.

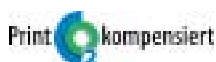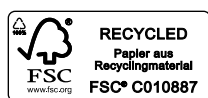



## Jahresrückblick

### JANUAR

↳ Linde legt ein Sponsored Level 1 American Depositary Receipt (ADR)-Programm in den USA auf. ADRs sind Hinterlegungsurkunden (Zertifikate), die in den USA stellvertretend für die zugrundeliegenden Aktien gehandelt werden. Die ADRs werden in den USA im Over-the-Counter(OTC)-Markt gehandelt. Dabei entsprechen zehn ADRs einer Linde Aktie.

↳ BOC Healthcare, Tochtergesellschaft des Linde Konzerns, schließt mit dem nationalen Gesundheitsdienst in Schottland (National Health Service Scotland) einen Vertrag über die Versorgung der Ambulanzdienste des Landes mit medizinischen Gasen. Die Vereinbarung umfasst die Lieferung von medizinischem Sauerstoff, des Gasegemisches ENTONOX® zur Schmerzlinderung sowie von Gaseversorgungssystemen. Insgesamt werden mehr als 160 Ambulanzstationen in ganz Schottland bedient.

### FEBRUAR

↳ Linde erhält einen Auftrag für eine LNG-Anlage mit einer Kapazität von 400.000 Jahrestonnen von der Xinjiang Ji Munai Guanghui Liquefied Natural Gas Development Co. Ltd. in China. Für diesen Kunden hatte Linde bereits im Jahr 2004 eine ähnliche LNG-Anlage erfolgreich in Betrieb genommen. Der Produktionsstart der neuen Anlage, die in der nord-westlichen Provinz Xinjiang errichtet wird, ist für Ende des Jahres 2011 zu erwarten.

↳ Linde und die Bosch Solar Energy AG bauen ihre Zusammenarbeit an der Produktionsstätte für kristalline Silizium-Solarzellen von Bosch in Arnstadt, Deutschland, aus. Im Rahmen der neuen Vereinbarung wird Linde die Solarzellenfabrik von Bosch mit den wichtigen Gasen Silan und Ammoniak versorgen. Bosch verfügt derzeit über drei Produktionsstätten im Raum Erfurt/Arnstadt, in denen sowohl Dünnschicht- als auch kristalline Silizium-Solarzellen gefertigt werden. Bei Volllastleistung erreichen alleine die kristallinen Werke eine Gesamtkapazität von 630 MWp (Megawatt peak). Das macht den Erfurter/Arnstädter Raum zu einem starken europäischen „Solar Cluster“, in dem Linde der führende Gaselieferant für alle Produktionslinien ist.

### MÄRZ

↳ In Darwin, Northern Territory, Australien, eröffnet Linde die weltweit erste Helium-Gewinnungs-Anlage in der südlichen Hemisphäre. Die Anlage verfügt über eine jährliche Produktionskapazität von 4,3 Millionen Kubikmeter Helium. Sie deckt nicht nur den Bedarf Australiens, sondern beliefert auch Neuseeland und mehrere asiatische Märkte. Das begehrte Edelgas wird unter anderem in der Produktion von Halbleitern, LCD-Bildschirmen und Glasfaserkabeln, in der Medizin sowie für den Auftrieb von Luftschiffen und Ballons verwendet.

↳ In Lahore beginnt Linde mit dem Bau der größten Luftzerlegungs-Anlage Pakistans und investiert hierfür rund 17 Mio. EUR. Die neue Anlage wird über eine Kapazität von 150 Tonnen pro Tag an flüssigen und gasförmigen Produkten (Sauerstoff, Stickstoff und Argon) verfügen und soll vor allem den wachsenden regionalen Markt in Nordpakistan versorgen. Die Fertigstellung des Luftzerlegers ist für das erste Halbjahr 2012 geplant. Aus der Anlage werden vor allem Kunden aus der Stahl-, Glas-, Lebensmittel-, Chemie-, Öl- und Gasindustrie sowie aus dem Medizinsektor beliefert.

### APRIL

↳ Linde gibt bekannt, dass seine Kunden in der Elektronik-Industrie die CO<sub>2</sub>-Emissionen im Jahr 2010 um eine Viertelmillion Tonnen reduzieren können, indem sie in ihren Produktionsprozessen Stickstofftrifluorid (NF<sub>3</sub>) durch vor Ort erzeugtes Fluor (F<sub>2</sub>) ersetzen. Diese CO<sub>2</sub>-Menge entspricht dem Jahresausstoß von 125.000 Mittelklasse-Pkws. Damit unterstreicht Linde sein Engagement, für die Hersteller von Solarzellen und Halbleitern Lösungen anzubieten, die ihnen dabei helfen, ihre Produkte nicht nur sehr wirtschaftlich, sondern vor allem nachhaltig zu erzeugen.

↳ Linde präsentiert in Großbritannien einen neuen mobilen 150-Watt-Generator, der von einer Wasserstoff-Brennstoffzelle betrieben wird. Der leise und umweltfreundliche Stromerzeuger „Hymera“ nutzt die chemische Reaktion von gasförmigem Wasserstoff mit Sauerstoff. Einzige „Emission“: Wasser.

↳ Die international führenden Rating-Agenturen Standard & Poor's (S & P) und Moody's setzen das Rating von Linde jeweils um eine Stufe herauf: S & P von BBB+ auf A- und Moody's von Baa1 auf A3.

### MAI

↳ Von dem weltweit größten Stahlunternehmen ArcelorMittal erhält Linde den Auftrag, eine große, hochmoderne Luftzerlegungs-Anlage (LZA) an dessen Standort in Temirtau, Kasachstan, zu errichten. Die On-site-Anlage, die erste große LZA Kasachstans, wird über eine Kapazität von 2.000 Tonnen pro Tag (tpd) verfügen. Die Inbetriebnahme ist für Mitte 2012 vorgesehen. Es ist die erste Luftzerlegungs-Anlage, die Linde für einen Kunden in Kasachstan baut und betreibt. Die Investition für die neue LZA beträgt rund 95 Mio. EUR. Mit dieser Investition tritt Linde in den aufstrebenden Markt Kasachstan ein.

↳ Linde baut die Gaseversorgung für das Stahlunternehmen Thyssen-Krupp Steel Europe an dessen größtem Produktionsstandort in Duisburg weiter aus. Im Zuge der Vereinbarung wird Linde in Duisburg-Ruhrort eine weitere große Luftzerlegungs-Anlage errichten. Die On-site-Anlage ist die elfte LZA, die Linde für den Kunden dort baut. Sie wird über eine Kapazität von 1.500 Tonnen Sauerstoff pro Tag (tpd) verfügen. Die Inbetriebnahme ist für das dritte Quartal 2012 vorgesehen. Die Investitionen für die neue LZA 11 und in bestehende Anlagen in Duisburg-Ruhrort betragen insgesamt rund 75 Mio. EUR.

↳ Zur weiteren Erhöhung der Finanzierungsflexibilität schließt Linde eine neue, fünfjährige revolving Kreditlinie in Höhe von 2,5 Mrd. EUR ab. Diese Kreditlinie ersetzt die ursprünglich bis Mai 2011 laufende 2 Mrd. EUR Kreditlinie aus dem Jahr 2006 sowie die im Juni 2009 abgeschlossene so genannte Forward-Start-Kreditlinie in Höhe von 1,6 Mrd. EUR.

### JUNI

↳ RWE Power und Linde unterzeichnen einen Rahmenvertrag zur Nutzung der von RWE Power entwickelten Technik zur Vortrocknung von Braunkohle. Damit wird die Linde-KCA-Dresden GmbH Anbieter und Lieferant für die von RWE Power entwickelte WTA-Technologie. WTA steht für Wirbelschichttrocknung mit interner Abwärmenutzung. Das Verfahren soll zukünftig in Braunkohlekraftwerken sowie für Kohlevergasungs- und -verflüssigungsprojekte eingesetzt werden, um eine energieeffizientere und CO<sub>2</sub>-reduzierte Strom- und Synthesegasgewinnung zu fördern.

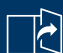

## Jahresrückblick

↳ Das kalifornische Transitunternehmen AC Transit beauftragt Linde mit dem Bau zweier Wasserstoff-Tankstellen in Emeryville und Oakland sowie mit der Bereitstellung des Wasserstoffs und entsprechender Betankungs-Technologie. Das Busunternehmen transportiert Fahrgäste zwischen 13 Städten in der San Francisco Bay Area. Die Betankungskapazität ist ausreichend, um zwölf Busse und bis zu 20 Brennstoffzellen-Pkw mit Wasserstoff zu betanken.

### JULI

↳ Im Chemie-Industriepark Nanjing (Provinz Jiangsu) in China gewinnt Linde zwei neue Aufträge zur Gaseversorgung der Yangtze Petrochemical Company Limited (YPC) und der Dynamic Chemical Company Limited. Um die Belieferung sicherzustellen, wird Linde rund 24 Mio. EUR in den Ausbau seiner dort bestehenden Gase-Infrastruktur investieren. Hierfür wird Linde in Nanjing unter anderem eine neue Luftzerlegungs-Anlage errichten, die neben den Kunden im Industriepark auch den regionalen Markt mit Flüssigprodukten bedient.

### AUGUST

↳ Linde baut seine Kohlendioxid(CO<sub>2</sub>)-Versorgungsinfrastruktur an verschiedenen Standorten in Malaysia und in den USA weiter aus: So investiert das Unternehmen in Malaysia rund 15 Mio. EUR in den Bau einer neuen CO<sub>2</sub>-Anlage in Terengganu. Nach ihrer Inbetriebnahme Ende 2011 wird dies Malaysias größte Anlage zur Produktion von hochreinem CO<sub>2</sub> mit einer Kapazität von 200 Tonnen pro Tag sein. Die Investition stärkt Lindes Position als führender Industriegase- und CO<sub>2</sub>-Anbieter des Landes.

↳ In Fulton, New York, USA, nimmt Linde eine neue CO<sub>2</sub>-Reinigungs- und -Verflüssigungs-Anlage mit einer Kapazität von 600 Tagedestonnen in Betrieb. Das Roh-CO<sub>2</sub> stammt von einem benachbarten Chemieunternehmen, bei dem das Gas als Nebenprodukt bei der Ethanolherstellung anfällt. Das hochreine CO<sub>2</sub> wird vorwiegend in der Getränke- und Lebensmittelindustrie eingesetzt und muss hohen Qualitätsanforderungen genügen.

↳ Auch im Linde Elektronikgaswerk in Medford, Oregon, USA, startet eine CO<sub>2</sub>-Reinigungs-Anlage mit der Produktion. Die Anlage erzeugt hochreines Kohlendioxid (über 99,9997 Prozent) für verschiedene Anwendungen in der Halbleiter- und Elektronikindustrie.

### SEPTEMBER

↳ Linde weiht in Scunthorpe, Großbritannien, eine neue große Luftzerlegungs-Anlage offiziell ein. Die Anlage verfügt über eine Kapazität von 1.600 Tonnen Sauerstoff pro Tag und versorgt das dortige Stahlwerk des Kunden Tata Steel langfristig per Rohrleitung mit gasförmigem Sauerstoff. Von Tata hat Linde darüber hinaus einen Auftrag zur Modernisierung einer bestehenden Luftzerlegungs-Anlage am selben Standort erhalten.

↳ Seit 2009 erproben RWE, Linde und BASF eine neuartige Technologie zur Abtrennung von Kohlendioxid (CO<sub>2</sub>) aus Rauchgasen in einer Pilotanlage am RWE-Kraftwerk Niederaußem bei Köln. Jetzt liegen die Ergebnisse des Praxistests vor: Verglichen mit heute üblichen Prozessen lässt sich der Energieaufwand mit der innovativen Technologie unter Einsatz neuartiger chemischer Lösemittel für die CO<sub>2</sub>-Abscheidung um etwa 20 Prozent senken.

### OKTOBER

↳ Linde wird vom Stahlunternehmen Taiyuan Iron & Steel Company Limited (TISCO) beauftragt, an dessen Produktionsstandort in Taiyuan in der nordchinesischen Provinz Shanxi zwei neue große Luftzerlegungs-Anlagen (LZA) zu errichten. Der Vertrag ist mit Investitionen von insgesamt rund 100 Mio. EUR verbunden. Das Projekt wird über das gemeinsame Gase-Joint-Venture BOC-TISCO Gases, an dem Linde und TISCO mit jeweils 50 Prozent beteiligt sind, realisiert. Die beiden neuen LZA werden von Lindes Engineering Division für BOC-TISCO Gases gebaut. Sie werden über eine Produktionskapazität von jeweils 2.000 Tonnen gasförmigem Sauerstoff pro Tag (tpd) verfügen und damit zu den größten und modernsten LZA in China zählen.

↳ Linde versorgt die Gabelstaplerflotte im BMW-Werk Spartanburg, South Carolina, mit Wasserstoff. Über 85 Flurförderzeuge, die die Montagelinien mit Fahrzeugkomponenten beschicken, werden schrittweise von Batterie- auf Brennstoffzellenbetrieb umgerüstet. Durch den Wasserstoff-Antrieb arbeitet dieser Teil der innerbetrieblichen Logistik von BMW künftig komplett emissionsfrei. Es handelt sich dabei um eines der größten Wasserstoff-Projekte dieser Art und es zeigt, welches Potenzial Wasserstoff-Anwendungen in der Intralogistik haben.

### NOVEMBER

↳ Wasserstoffbetriebene Brennstoffzellen-Fahrzeuge werden ein wichtiger Bestandteil einer zukünftigen emissionsarmen Mobilität sein. Dies ist ein Ergebnis der bislang umfangreichsten europäischen Studie zu den Zukunftschancen verschiedener Antriebskonzepte im Individualverkehr, die am 8. November in Brüssel vorgestellt wurde.<sup>1</sup> Linde hat gemeinsam mit 29 Unternehmen und Organisationen aus den Bereichen Automobilbau, Mineralöl, Energieerzeugung und Gase umfangreiche Daten zur Verfügung gestellt. Die Studie greift das Ziel der EU-Kommission und der G8-Staaten auf, den CO<sub>2</sub>-Gesamtausstoß bis 2050 um 80 Prozent, im Straßenverkehrssektor sogar um 95 Prozent zu reduzieren.

↳ Linde baut die Gaseversorgung für GCL-Poly Energy Holdings, Chinas führenden Hersteller von polykristallinem Reinstsilizium (Polysilizium), weiter aus und investiert hierfür 15 Mio. EUR. Polysilizium wird vor allem in der Solarindustrie genutzt. Die neue Vereinbarung sieht den Bau weiterer Produktions- und Versorgungseinrichtungen für hochreinen Wasserstoff (H<sub>2</sub>) im Xuzhou Industrial Park vor. Mit den beiden neuen Produktions-Anlagen, die Mitte 2011 in Betrieb gehen sollen, wird sich die Wasserstoff-Kapazität verdoppeln.

### DEZEMBER

↳ In Europas größter Erdgasverflüssigungs-Anlage Hammerfest LNG – auf der Insel Melkøya, 800 km nördlich des Polarkreises nahe Hammerfest in Norwegen gelegen – wird der einhundertste LNG-Tanker beladen. Die Großanlage hatte Anfang 2008 ihren kommerziellen Betrieb aufgenommen und produziert nun mit einer Leistung von bis zu 104 Prozent der Designkapazität. Ein Leistungstest wird nach der turnusmäßigen Überprüfung im zweiten Quartal 2011 durchgeführt, um die Betriebsleistung abschließend zu bestätigen. Mit der erfolgreichen Entwicklung und Realisierung dieser LNG-Technologie im Großanlagenmaßstab hat Linde seine universell einsetzbare europäische Technologie-Alternative im LNG-Markt etabliert. Melkøya ist für Linde sowohl aus technischer als auch aus strategischer Sicht ein wertvolles Referenzprojekt.

<sup>1</sup> Quelle: A portfolio of power-trains for Europe: a fact-based analysis, McKinsey & Company, 2010.



## Glossar

### → Brennstoffzelle

Ein System, in dem Wasserstoff und Sauerstoff ohne Flamme (kalte Verbrennung) zu Wasser reagieren, wobei sich elektrische Energie mit hoher Ausbeute entnehmen lässt. Brennstoffzellen verwandeln also chemische Energie in elektrischen Strom.

### → Convenience Food

Übersetzt bedeutet Convenience Food „Bequemes Essen“. Unter diesem Begriff werden vorverarbeitete Nahrungsmittel und Mahlzeitenkomponenten sowie komplette Fertigmahlzeiten, zum Beispiel Gemüse/Salat, Päckchensuppen, Fertigsaucen, Tiefkühlkost, Pizza, Mikrowellengerichte, etc. zusammengefasst. Convenience Food wird den Bedürfnissen der Verbraucher insofern gerecht, als ihnen Arbeitsschritte abgenommen werden und die Zubereitung der Mahlzeiten damit beschleunigt wird.

### → Dampfreformierung

Ein Verfahren zur Herstellung von Synthesegas, einer Mischung von Kohlenstoffmonoxid und Wasserstoff aus kohlenstoffhaltigen Energieträgern wie Erdgas, Leichtbenzin, Methanol, Biogas oder Biomasse.

### → Dispenser

Zapfsäule einer (Wasserstoff-)Tankstelle inklusive Füllschlauch und Betankungskupplung.

### → Dünnschicht-Solarzellen

Solarzellen aus extrem dünnen Schichten, die teures Silizium einsparen und so die Produktionskosten deutlich reduzieren können.

### → ECOVAR®-System

Produktname von Linde beim On-site-Geschäft, also der Versorgung mit Industriegasen aus Anlagen, die beim Kunden vor Ort installiert werden. ECOVAR®-Systeme ermöglichen eine hohe Kosteneffizienz. Dank modularer Bauweise und standardisiertem Anlagendesign lassen sich nicht nur die Entwicklungs-, Herstellungs- und Installationskosten deutlich reduzieren. Auch der Wartungsaufwand und der Verbrauch von Betriebsmitteln – vor allem von elektrischer Energie und Wasser – sinken deutlich. ECOVAR®-Systeme bieten somit eine besonders wirtschaftliche, flexible, zuverlässige und umweltfreundliche Gaseversorgung.

### → Fischer-Tropsch-Synthese

Verfahren zur Herstellung von synthetischen Kraftstoffen. Der Rohstoff für die Fischer-Tropsch-Synthese (FTS) ist Synthesegas, eine Mischung aus Kohlenmonoxid und Wasserstoff. Das Synthesegas kann aus Kohle oder Erdgas (und auch aus Erdölfraktionen wie Schweröl) erzeugt werden und ist – gegebenenfalls nach Reinigung – völlig schwefelfrei. Damit sind auch die in der nachfolgenden FTS erzeugten Kraftstoffe frei von Verunreinigungen.

### → Grid-Parität

Begriff aus der Energiebranche, der sich mit „Netzeleichwertigkeit“ übersetzen lässt. Die Grid-Parität wird dann erreicht, wenn Strom aus einer Photovoltaik-Anlage oder anderen erneuerbaren Energiequellen zum gleichen Preis im Netz angeboten werden kann wie konventioneller Strom z. B. aus Kohlekraftwerken.

### → Gas-to-Liquids (GTL)

Im GTL-Verfahren wird Erdgas durch Zufuhr von Sauerstoff und Wasserdampf zu Synthesegas und dieses wird dann in einer Fischer-Tropsch-Synthese zu Kohlenwasserstoffen umgewandelt.

### → Ionischer Kompressor

Ionische Kompressoren markieren einen Entwicklungssprung bei der Gaseverdichtung. Statt eines festen Kompressionskolbens wird eine ionische Flüssigkeit verwendet: ein organisches Salz, das im gewünschten Temperaturbereich flüssig ist und sich wie ein Festkörper verhält. Das neuartige Bauprinzip ermöglicht eine nahezu isotherme Verdichtung. Dies führt zu deutlich kürzeren Betankungszeiten. So dauert die Betankung eines Busses mit dem von Linde entwickelten ionischen Tanksystem MF-50 nur sechs Minuten. Das MF-90-Pkw-Tanksystem füllt den Tank eines Fahrzeugs binnen drei Minuten für eine Reichweite von 400 bis 600 Kilometern.

### → Kernspintomograph

Ein medizinisches Gerät zur Darstellung von Strukturen im Inneren des Körpers. Dieses bildgebende Verfahren wird auch Magnetresonanztomographie (MR, MRT) genannt. Mit einer MRT kann man Schnittbilder des menschlichen Körpers erzeugen. MRT nutzt magnetische Felder, keine Röntgenstrahlen. Die gelegentlich verwendete Abkürzung MRI stammt vom englischen Fachbegriff Magnetic Resonance Imaging.

### → LINEX™-Konzept

Produktlinienkonzept von Linde für große Luftzerlegungs-Anlagen zur Vor-Ort-Versorgung von Großkunden mit Luftgasen und des jeweiligen regionalen Gasmarktes mit Flüssiggasen.

### → LNG

Liquefied Natural Gas. Verflüssigtes Erdgas, das aufgrund der großen Energiedichte, des konstanten Brennerts und der hohen Reinheit als zukunfts-trächtiger Kraftstoff gilt.

### → Public-private-Partnership

Public-private-Partnership ist eine Kooperationsform von öffentlicher Verwaltung und privaten Wirtschaftsunternehmen, nach denen der Staat die ihm auferlegten Aufgaben in Zusammenarbeit mit Wirtschaftsunternehmen ausführt bzw. die Aufgaben gänzlich auf die Wirtschaftsunternehmen überträgt.

### → REBOX®-Technologie

Gaseanwendungssystem von Linde für die Stahlindustrie. REBOX®-Oxyfuel-Lösungen sind derzeit weltweit in rund 110 Glüh- und Aufwärmöfen der Stahlindustrie im Einsatz. Durch den Einsatz von reinem Sauerstoff anstelle von Luft wird die Verbrennung und die Wärmeübertragung im Ofen effizienter. Auf diese Weise lässt sich der Durchsatz erhöhen und der Brennstoffverbrauch sowie die Emissionen senken.

### → Synthesegas (bzw. Syngas)

Eine Mischung aus Kohlenmonoxid (CO) und Wasserstoff (H<sub>2</sub>); Syngas dient der Erzeugung synthetischer Kraftstoffe und anderer Produkte wie z. B. Wasserstoff, Ammoniak und Methanol. Die Herstellung kann prinzipiell aus festen, flüssigen oder gasförmigen Ausgangsstoffen erfolgen.

**Herausgeber**

**Linde AG**

Klosterhofstraße 1

80331 München

Telefon 089.35757-01

Telefax 089.35757-1075

[www.linde.com](http://www.linde.com)
