# Supplementary material
Source: publisher site journal article supplement (https://www.degruyterbrill.com/publication/isbn/9783110432879/downloadAsset/9783110432879_Elektronischer_Anhang_2.zip)
Supplement: Supplementary file 72 [file MAN GB 2010.pdf › Korpustexte/Korpustexte pdf/MAN/MAN GB 2010.pdf]

Engineering the Future –  
since 1758.

**MAN SE**

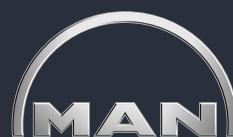

## Auf einen Blick

| Mio €                                                                                                            | 2010          | 2009          | Veränderungen in %            |
|------------------------------------------------------------------------------------------------------------------|---------------|---------------|-------------------------------|
| <b>Auftragseingang</b>                                                                                           | <b>15 072</b> | <b>9 860</b>  | <b>53</b>                     |
| Inland                                                                                                           | 3 489         | 2 388         | 46                            |
| Ausland                                                                                                          | 11 583        | 7 472         | 55                            |
| <b>Umsatz</b>                                                                                                    | <b>14 675</b> | <b>12 026</b> | <b>22</b>                     |
| Inland                                                                                                           | 3 058         | 2 751         | 11                            |
| Ausland                                                                                                          | 11 617        | 9 275         | 25                            |
| <b>Auftragsbestand<sup>1</sup></b>                                                                               | <b>7 025</b>  | <b>7 422</b>  | <b>- 5</b>                    |
| <b>Mitarbeiter (Anzahl)<sup>1,2</sup></b>                                                                        | <b>47 669</b> | <b>47 743</b> | <b>0</b>                      |
| davon Leiharbeiternehmer                                                                                         | 1 976         | 1 643         | 20                            |
| Inland                                                                                                           | 27 354        | 26 768        | 2                             |
| Ausland                                                                                                          | 20 315        | 20 975        | - 3                           |
|                                                                                                                  |               |               | <b>Veränderungen in Mio €</b> |
| Operatives Ergebnis                                                                                              | 1 035         | 504           | 531                           |
| Ergebniseffekte aus Kaufpreisallokationen                                                                        | - 109         | - 62          | - 47                          |
| Ergebnis aus Sondervorgängen                                                                                     | 357           | - 656         | 1 013                         |
| Ergebnis vor Steuern (EBT)                                                                                       | 1 125         | - 331         | 1 456                         |
| Ergebnis nach Steuern                                                                                            | 722           | - 258         | 980                           |
| Ergebnis je Aktie der fortgeführten Bereiche in €                                                                | 5,30          | - 2,69        | 7,99                          |
| Ergebnis je Aktie der fortgeführten Bereiche ohne Effekte aus Kaufpreisallokationen und ohne Sondervorgänge in € | 3,38          | 1,47          | 1,91                          |
| Ausschüttung je Aktie in € <sup>3</sup>                                                                          | 2,00          | 0,25          | 1,75                          |
| Umsatzrendite ROS in %                                                                                           | 7,1           | 4,2           | -                             |
| ROCE in % <sup>4</sup>                                                                                           | 17,4          | 8,8           | -                             |
| Ergebnis aufgebener Geschäftsbereiche                                                                            | - 65          | 126           | - 191                         |
| Investitionen                                                                                                    | 396           | 2 303         | - 1 907                       |
| Abschreibungen und Wertminderungen langfristiger Vermögenswerte                                                  | 467           | 804           | 337                           |
| Wertaufholungen Beteiligungen nach der Equity-Methode                                                            | 357           | -             | 357                           |
| F&E-Ausgaben                                                                                                     | 626           | 504           | 122                           |
| Cash Earnings                                                                                                    | 815           | 396           | 419                           |
| Cashflow aus der Geschäftstätigkeit                                                                              | 1 427         | 1 462         | - 35                          |
| Cashflow aus der Investitionstätigkeit                                                                           | - 374         | - 2 584       | 2 210                         |
| Free Cashflow                                                                                                    | 1 053         | - 1 122       | 2 175                         |
| davon aus Akquisitionen und Desinvestitionen                                                                     | - 7           | - 2 249       | 2 242                         |
| Flüssige Mittel <sup>1</sup>                                                                                     | 1 057         | 502           | 555                           |
| Nettoverschuldung <sup>1</sup>                                                                                   | - 1 778       | - 2 634       | 856                           |
| Eigenkapital <sup>1</sup>                                                                                        | 5 990         | 5 129         | 861                           |

<sup>1</sup> Stichtagswert am 31. Dezember 2010 im Vergleich zum 31. Dezember 2009

<sup>2</sup> Einschließlich Leiharbeitnehmern

<sup>3</sup> 2010: Dividendenvorschlag

<sup>4</sup> CE-Definition 2010 angepasst, Wertpapiere und Flüssige Mittel zusätzlich als Abzugskapital berücksichtigt (Vorjahr vergleichbar angepasst)

Die Zahlen zu Auftragslage, Umsatz, Ergebnis und Cashflow beinhalten für MAN Latin America keine Werte für das 1. Quartal 2009.

Die MAN Gruppe

Die MAN Gruppe ist eines der führenden europäischen Industrieunternehmen im Bereich Transport-Related Engineering mit jährlich rund 14,7 Mrd € Umsatz (2010). MAN ist Anbieter von Lkw, Bussen, Dieselmotoren, Turbomaschinen sowie Spezialgetrieben und beschäftigt weltweit rund 47 700 Mitarbeiter\*. Die MAN-Unternehmensbereiche halten führende Positionen auf ihren Märkten. Die MAN SE, München, ist Mitglied im Deutschen Aktienindex Dax der 30 führenden deutschen Aktiengesellschaften.

|                      |                                                                                    |                                                                                    |                                                                                     |                                                                                      |
|----------------------|------------------------------------------------------------------------------------|------------------------------------------------------------------------------------|-------------------------------------------------------------------------------------|--------------------------------------------------------------------------------------|
|                      | MAN SE                                                                             |                                                                                    |                                                                                     |                                                                                      |
| Geschäftsfelder      | Commercial Vehicles                                                                |                                                                                    | Power Engineering                                                                   |                                                                                      |
| Unternehmensbereiche | MAN Truck & Bus**                                                                  | MAN Latin America                                                                  | MAN Diesel & Turbo                                                                  | Renk (76,0%)                                                                         |
|                      |  |  |  |  |
| Beteiligungen        | Sinotruk (25 % + 1 Aktie), Scania (17,4 %***)                                      |                                                                                    |                                                                                     |                                                                                      |

\* Zur Vereinfachung wird in diesem Bericht der Begriff „Mitarbeiter“ verwendet; er steht stellvertretend für Mitarbeiterinnen und Mitarbeiter.

\*\* Bis 28. Dezember 2010 MAN Nutzfahrzeuge

\*\*\* Stimmrechte

# Commercial Vehicles

## MAN Truck & Bus

ist das größte Unternehmen der MAN Gruppe und einer der führenden Anbieter von Nutzfahrzeugen und Transportlösungen.

- Lkw von 7,5 bis 44 t Gesamtgewicht
- Schwere Sonderfahrzeuge bis 250 t Zuggesamtgewicht
- Stadt-, Überland- und Reisebusse sowie Bus-Chassis
- Industrie-, Marine- sowie On- und Offroadmotoren
- Umfangreiche Dienstleistungen rund ums Fahrzeug

| Mio €                                             | 2010   | 2009   |
|---------------------------------------------------|--------|--------|
| Auftragseingang                                   | 8 023  | 5 224  |
| Umsatz                                            | 7 446  | 6 395  |
| Operatives Ergebnis                               | 158    | - 91   |
| Mitarbeiter (Anzahl am 31. Dezember) <sup>1</sup> | 31 284 | 31 519 |
| Umsatzrendite ROS (%)                             | 2,1    | - 1,4  |

<sup>1</sup> Einschließlich Leiharbeitnehmern

## MAN Latin America

ist der größte Lastwagenhersteller in Lateinamerika, Marktführer für Lastwagen in Brasilien und führender Anbieter von Nutzfahrzeugen sowie Bus-Chassis für Wachstumsmärkte mit einer der weltweit fortschrittlichsten Produktionsstätten für Lkw und Busse.

- Lkw von 5 bis 57 t für jeden Einsatz
- Chassis für Stadt- und Überlandbusse für jeden Einsatz

| Mio €                                             | 2010  | 2009  |
|---------------------------------------------------|-------|-------|
| Auftragseingang                                   | 3 140 | 1 412 |
| Umsatz                                            | 3 140 | 1 412 |
| Operatives Ergebnis                               | 370   | 142   |
| Mitarbeiter (Anzahl am 31. Dezember) <sup>1</sup> | 1 736 | 1 510 |
| Umsatzrendite ROS (%)                             | 11,8  | 10,1  |

<sup>1</sup> Einschließlich Leiharbeitnehmern

# Power Engineering

## MAN Diesel & Turbo

ist weltweit führender Anbieter von Großdieselmotoren für maritime und stationäre Anwendungen und gehört zudem zu den drei führenden Anbietern von Turbomaschinen auf dem Weltmarkt.

- Großmotoren (Diesel, Diesel/Gas, Gas) für den Einsatz in Schiffen und Kraftwerken
- Bordstromaggregate, Abgas-Turbolader und Propulsionssysteme
- Turnkey-Dieselmotoren und Kraftwerkskomponenten
- Umfassendes Produktprogramm an Kompressoren, Turbinen und chemischen Reaktoren
- Komplette Turbomaschinenstränge für die Öl- und Gasindustrie, Prozessindustrie sowie zur Stromerzeugung
- Prüfzentren für Einzelmaschinen und komplette Maschinensätze mit Gewichten bis zu 1 000 t
- Weltweit umfangreiche Aftersales-Dienstleistungen für das gesamte Produktprogramm unter der Marke MAN PrimeServ
- Betrieb und Wartung von Dieselmotoren unter der Marke MAN PowerManagement

| Mio €                                             | 2010   | 2009   |
|---------------------------------------------------|--------|--------|
| Auftragseingang                                   | 3 475  | 2 936  |
| Umsatz                                            | 3 766  | 3 796  |
| Operatives Ergebnis                               | 439    | 500    |
| Mitarbeiter (Anzahl am 31. Dezember) <sup>1</sup> | 12 455 | 12 511 |
| Umsatzrendite ROS (%)                             | 11,7   | 13,2   |

<sup>1</sup> Einschließlich Leiharbeitnehmern

## Renk

ist ein weltweit anerkannter Hersteller von hochwertigen Spezialgetrieben, Komponenten der Antriebstechnik sowie Prüfsystemen.

- Fahrzeuggetriebe für mittlere und schwere Kettenfahrzeuge
- Spezialgetriebe für maritime und stationäre Sonderanwendungen
- Standardgetriebe vor allem für die Handelsschifffahrt, industrielle Anwendungen und Windenergie
- Weltmarktführer bei Elektromaschinenlagern, Gleitlagern und Industriekupplungen
- Schlüsselfertige Prüfsysteme für die Automobil-, Eisenbahn- und Luftfahrtindustrie sowie Prüfsysteme für Windenergieanlagen

| Mio €                                             | 2010  | 2009  |
|---------------------------------------------------|-------|-------|
| Auftragseingang                                   | 525   | 294   |
| Umsatz                                            | 403   | 474   |
| Operatives Ergebnis                               | 52    | 66    |
| Mitarbeiter (Anzahl am 31. Dezember) <sup>1</sup> | 1 882 | 1 903 |
| Umsatzrendite ROS (%)                             | 12,9  | 13,9  |

<sup>1</sup> Einschließlich Leiharbeitnehmern

# Einleitung<sup>1</sup>

## Gestärkt nach der Krise

### Performance

Mit der weltweiten wirtschaftlichen Erholung Umsatzsteigerung um 22 % auf 14,7 Mrd €, Verdoppelung des Operativen Ergebnisses auf 1 035 Mio € und Erhöhung der Umsatzrendite ROS auf 7,1 %. Der Auftragseingang stieg um 53 % und belegt die ausgezeichnete Entwicklung in allen Bereichen.

### Wachstumsregionen

Weiteres internationales Wachstum mit Schwerpunkt auf den BRIC-Ländern: Rekordergebnisse in Brasilien, schrittweise Umsetzung der strategischen Partnerschaft in China.

### Technologieführerschaft

MAN als Erfinderunternehmen auf der IAA Nutzfahrzeuge 2010 und auf der Schiffsmesse SMM, den wichtigsten Leitmessen seiner Geschäftsfelder: Designstudie Concept S Truck sorgte für internationales Aufsehen, neue Technik für Großdieselmotoren zielt schon heute auf die Emissionsvorgaben des Jahres 2016.

### Ausblick 2011

Umsatzsteigerung im Geschäftsfeld Commercial Vehicles um 10 bis 15 %, wegen langsamerer Erholung der Märkte bei Power Engineering leichter Umsatzrückgang um bis zu 5 %. Konsequente Fortsetzung der internationalen Wachstumsstrategie, gleichzeitig weitergehende Flexibilisierung der Kostenstrukturen. MAN Gruppe: Anstieg des Umsatzes um 7 bis 10 % und der Umsatzrendite um 1 %-Punkt.



**01**  
**An die Aktionäre**  
Seite 04–23

**02**  
**Die MAN-Welt**  
Seite 24–51

**03**  
**Konzernlagebericht**  
Seite 52–119

**04**  
**Konzernabschluss**  
Seite 120–190

## Umschlag

|     |                                  |
|-----|----------------------------------|
| I   | Titel                            |
| II  | Auf einen Blick                  |
| III | Die MAN Gruppe                   |
| V   | MAN Konzern Sechsjahresübersicht |
| VII | Impressum                        |

## 01 An die Aktionäre

### Seite 04 – 23

|    |                           |
|----|---------------------------|
| 06 | Brief an die Aktionäre    |
| 08 | Bericht des Aufsichtsrats |
| 12 | Management Board          |
| 14 | Die Aktie                 |
| 16 | Corporate Governance      |

## 02 Die MAN-Welt

### Seite 24 – 51

|    |                                          |
|----|------------------------------------------|
| 26 | MAN-Produktionsstandorte                 |
| 28 | Strategie & Stärken                      |
| 30 | Jahresbericht der MAN SE                 |
| 32 | Commercial Vehicles – Transporteffizienz |
| 36 | Commercial Vehicles – Reisekomfort       |
| 40 | Commercial Vehicles – Hybridtechnik      |
| 44 | Power Engineering – Welthandel           |
| 48 | Power Engineering – Abfallverwertung     |

## 03 Konzernlagebericht

### Seite 52 – 119

|     |                                                 |
|-----|-------------------------------------------------|
| 54  | Highlights                                      |
| 55  | Geschäftstätigkeit und Strategie der MAN Gruppe |
| 59  | Geschäftsverlauf und Ertragslage                |
| 68  | Finanzlage                                      |
| 80  | Forschung und Entwicklung                       |
| 84  | Investitionen                                   |
| 85  | Beschaffung                                     |
| 86  | Mitarbeiter                                     |
| 89  | Corporate Responsibility                        |
| 92  | Die Bereiche im Einzelnen                       |
| 106 | Risikobericht und Ausblick                      |

## 04 Konzernabschluss

### Seite 120 – 190

|     |                                                        |
|-----|--------------------------------------------------------|
| 123 | MAN Konzern Gewinn- und Verlustrechnung                |
| 124 | MAN Konzern Überleitung zum Gesamtergebnis der Periode |
| 125 | MAN Konzern Bilanz                                     |
| 126 | MAN Konzern Kapitalflussrechnung                       |
| 127 | MAN Konzern Entwicklung des Eigenkapitals              |
| 128 | MAN Konzernanhang                                      |

## Weitere Informationen

### Seite 191 – 200

|     |                                          |
|-----|------------------------------------------|
| 191 | Versicherung der gesetzlichen Vertreter  |
| 192 | Bestätigungsvermerk des Abschlussprüfers |
| 196 | Glossar                                  |
| 198 | Stichwortverzeichnis                     |
| 200 | Finanzterminkalender                     |

**01**  
**An die Aktionäre**  
Seite 04–23

**02**  
**Die MAN-Welt**  
Seite 24–51

**03**  
**Konzernlagebericht**  
Seite 52–119

**04**  
**Konzernabschluss**  
Seite 120–190



|    |                           |
|----|---------------------------|
| 06 | Brief an die Aktionäre    |
| 08 | Bericht des Aufsichtsrats |
| 12 | Management Board          |
| 14 | Die Aktie                 |
| 16 | Corporate Governance      |

## NUTZFAHRZEUGMARKT BRIC-STAATEN

### Brasilien wird zum Zugpferd

Der Aufschwung beim Absatz von Lkw und Bussen geht in den nächsten Jahren verstärkt von den BRIC-Ländern (Brasilien, Russland, Indien, China) aus.

Quelle: MAN BRIC-Handbook, Stand 11/2010

\* Nicht lineare Darstellung

Marktvolumen (Stückzahlen)

2007  
 2009  
 2010  
 2015

Wachstumsrate (Durchschnitt pro Jahr)

2007–2015 in Prozent

#### Marktwachstum für Lkw über sechs Tonnen Gesamtgewicht

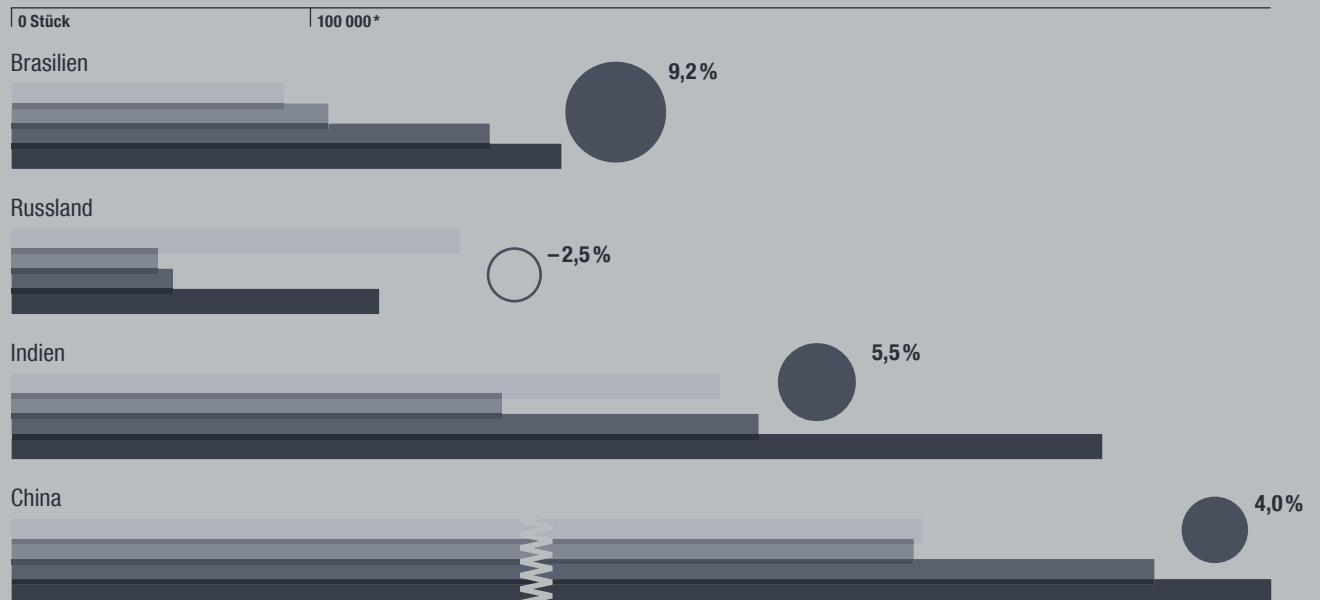

#### Marktwachstum für Busse über sechs Tonnen Gesamtgewicht

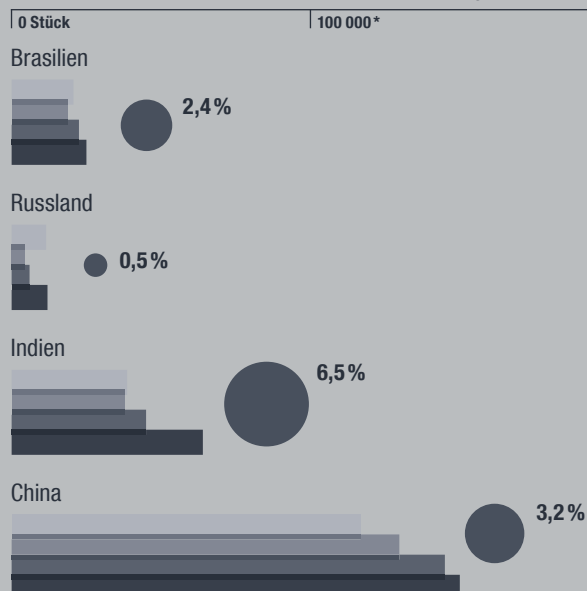

# An die Aktionäre

## Brief an die Aktionäre

Sehr geehrte Damen und Herren,

2010 war ein sehr gutes Jahr für die MAN Gruppe. Den Rückenwind der weltweiten wirtschaftlichen Erholung haben wir genutzt, um unser Geschäft auszuweiten und unsere Internationalisierungsstrategie konsequent voranzutreiben. Nachdem ich Ihnen im Geschäftsbericht 2009 an dieser Stelle über ein schwieriges Jahr berichtet habe, freue ich mich, Ihnen für das Geschäftsjahr 2010 wieder sehr positive Nachrichten über Ihr Unternehmen übermitteln zu können: MAN ist gestärkt aus der Krise hervorgegangen. Für 2010 legen wir eine Erfolgsbilanz vor und setzen damit ein Zeichen für unsere Kompetenz und Wettbewerbsstärke.

Der Konzern hat sich in allen Bereichen ausgezeichnet entwickelt, was deutlich aus unseren Kennzahlen hervorgeht: Der Auftragseingang der MAN Gruppe erreichte mit 15,1 Mrd Euro ein Plus von 53 % im Vergleich zum Vorjahr. Das Operative Ergebnis konnte auf 1 035 Mio Euro gesteigert werden, das entspricht einer Verdoppelung gegenüber 2009. Deutlicher Ausdruck der Trendwende ist auch der Umsatz, der um 22 % auf 14,7 Mrd Euro gestiegen ist. Die Umsatzrendite erhöhte sich von 4,2 % auf 7,1 %.

Im Geschäftsfeld Commercial Vehicles lag der Auftragseingang aufgrund der steigenden Nachfrage im europäischen Nutzfahrzeuggeschäft und des anhaltenden Booms in Brasilien mit 11,2 Mrd Euro 68 % über dem Vorjahr. Im Geschäftsjahr 2010 haben wir mehr als 120 000 Lkw und Busse verkauft. Mit einem Jahresumsatz von 10,6 Mrd Euro verzeichnete Commercial Vehicles einen Anstieg von 36 % und erzielte ein Operatives Ergebnis von 528 Mio Euro. Die Umsatzrendite steigerte sich von 0,7 % auf 5,0 %.

Auch die Auftragseingänge im Geschäftsfeld Power Engineering konnten 2010 mit 4,0 Mrd Euro einen starken Anstieg (+24 %) verzeichnen. Der Umsatz lag mit 4,2 Mrd Euro leicht unter dem Vorjahresniveau (4,3 Mrd Euro). Power Engineering erwirtschaftete ein Operatives Ergebnis von 491 Mio Euro, die Umsatzrendite lag mit 11,8 % weiterhin im zweistelligen Bereich.

Diese Zahlen zeigen: Die MAN Gruppe hat sich in den vergangenen Jahren eine hervorragende Position erarbeitet, sich auf Innovation und Wachstum ausgerichtet und sich als starkes und zukunftsfähiges Unternehmen gezeigt. Über die wesentlichen Fortschritte möchte ich Sie an dieser Stelle informieren.

Wir haben unsere Präsenz in den wichtigsten Wachstumsregionen deutlich verstärkt und unsere Marktpositionen ausgebaut. MAN ist auf allen fünf Kontinenten vertreten und setzt auf weiteres internationales Wachstum mit Schwerpunkt auf den BRIC-Ländern. Schon heute verkauft MAN jeden zweiten Schwer-Lkw und einen noch größeren Anteil an Bussen in einem der BRIC-Staaten. Den Erfolg der Strategie sehen wir auch 2010: MAN Latin America erzielte bei Umsatz und Ertrag Rekordergebnisse.

Europa ist weiterhin der wichtigste Markt für MAN. Premiumprodukte und eine hohe Servicequalität sichern uns vor allem im Nutzfahrzeuggeschäft große Marktanteile. Die europäischen Standorte tragen mit ihrer Entwicklungs- und Fertigungskompetenz wesentlich dazu bei, die Technologieführerschaft in unseren Geschäftsfeldern dauerhaft zu sichern.

Dass wir auf die technologischen Herausforderungen der Zukunft sehr gut vorbereitet sind, haben wir 2010 auch auf den wichtigsten Leitmesse unserer Geschäftsfelder, der IAA Nutzfahrzeuge in Hannover und der Schiffmesse SMM in Hamburg, gezeigt. MAN ist ein Erfinderunternehmen. Wir wissen darüber hinaus aber auch, wie man neue Märkte entwickelt und erschließt. Diese beständige Innovations- und Wandlungsfähigkeit hat uns zu einem Vorreiter in der Transport- und Energieindustrie gemacht.

Mit ihrer Kompetenz und mit ihrer außerordentlichen Flexibilität und Solidarität haben unsere Mitarbeiterinnen und Mitarbeiter 2010 zum Erfolg von MAN beigetragen. So konnten wir im vergangenen Jahr gemeinsam eine schwierige Phase hinter uns lassen und die Kurzarbeit in so gut wie allen Bereichen beenden. Für diese besondere Leistung möchte ich dem MAN-Team an dieser Stelle danken.

Im vergangenen Jahr haben wir außerdem unsere Compliance-Organisation weiter aufgebaut. MAN steht kompromisslos für saubere Geschäfte, denn wir können nur erfolgreich sein, wenn wir durch Qualität und Leistung überzeugen. Ein Meilenstein ist auch unsere neue Corporate-Responsibility-Strategie, die wir im September 2010 vorgestellt haben. Damit unterstreichen wir unser strategisches Bestreben, Ökonomie, Ökologie und soziale Aspekte in Einklang zu bringen. Mit unserer viel beachteten Markenkampagne „MAN kann“ haben wir deutlich gemacht, dass wir nicht nur ein traditionsreiches, sondern gleichzeitig auch ein modernes und fortschrittliches Unternehmen sind.

„Die MAN Gruppe hat sich  
in den vergangenen Jahren  
eine hervorragende Position  
erarbeitet.“

## „Wir sehen weiterhin in allen Bereichen Chancen für ein profitables und nachhaltiges Wachstum.“

Auch in Zukunft gilt es, den Herausforderungen der Globalisierung und dem technologischen Wandel zu begegnen. MAN ist ein Unternehmen, das mit seinen Innovationen Marktentwicklungen gestaltet und prägt. Dies treiben wir mit unserer Strategie der Internationalisierung und Fokussierung voran.

Es ist sinnvoll, diese Aufgaben nicht im Alleingang zu meistern, sondern mit einem starken Partner, um Synergien zu nutzen und gemeinsam schlagkräftiger zu sein. Deswegen sprechen wir mit Scania über eine Zusammenarbeit, wie Sie im vergangenen Jahr erfahren haben. MAN und Scania sind starke, traditionsreiche und sehr innovative Unternehmen. Wir glauben, dass beide Seiten einander sehr gut ergänzen – sowohl mit Blick auf die Produktpalette und deren Entwicklungsmöglichkeiten als auch mit Blick auf die Märkte, in denen wir tätig sind. Wir bringen zwei der stärksten Marken im Nutzfahrzeugmarkt zusammen und können gegenseitig von unseren Fähigkeiten und Erfahrungen profitieren.

MAN hat sich in den vergangenen Jahren erfolgreich auf Commercial Vehicles und Power Engineering spezialisiert. Beide Geschäftsfelder nutzen das anhaltende und starke Wachstum in wirtschaftlich aufstrebenden Ländern, das mit einem steigenden Transport- und Energiebedarf einhergeht. Insgesamt gehen wir für 2011 von einer sich fortsetzenden wirtschaftlichen Erholung aus und sehen auch mittel- bis langfristig weiterhin in allen Bereichen Chancen für ein profitables und nachhaltiges Wachstum. Für die MAN Gruppe erwarten wir 2011 eine Umsatzsteigerung im oberen einstelligen Prozentbereich und eine Umsatzrendite um 8%.

Sehr geehrte Aktionärinnen und Aktionäre, ich danke Ihnen, dass Sie uns im vergangenen Jahr Ihr Vertrauen geschenkt haben, und freue mich, wenn Sie uns auch in Zukunft verbunden bleiben.

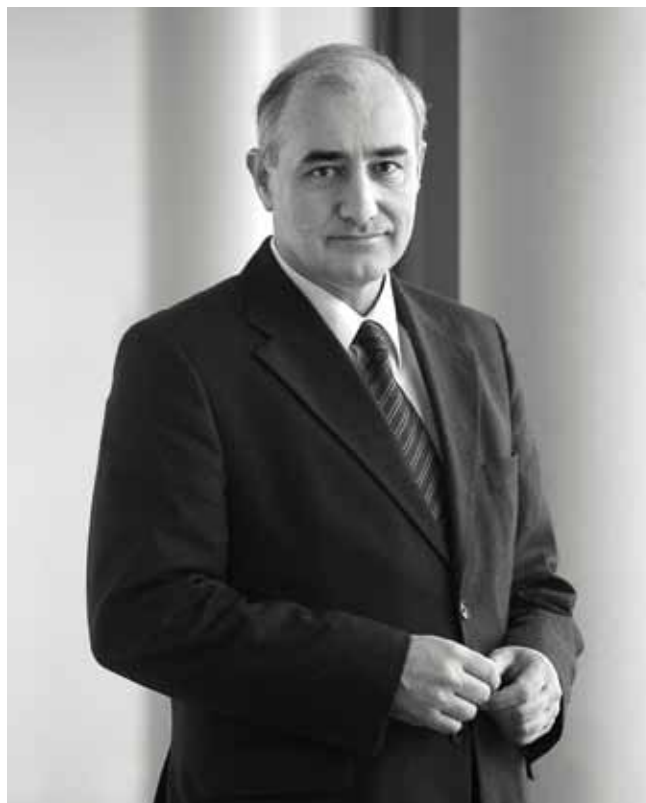

**Dr.-Ing. Georg Pachta-Reyhofen**  
Sprecher des Vorstands MAN SE und  
MAN Truck & Bus AG

A handwritten signature in black ink, appearing to read 'Pachta'.

**Dr.-Ing. Georg Pachta-Reyhofen**  
Vorstandssprecher der MAN Gruppe

# An die Aktionäre

## Bericht des Aufsichtsrats

Sehr geehrte Damen und Herren,

auch während des vergangenen Geschäftsjahres nahm der Aufsichtsrat die ihm nach Gesetz, Satzung und Geschäftsordnung obliegenden Aufgaben wahr. So berieten wir den Vorstand regelmäßig bei der Leitung des Unternehmens und überwachten seine Tätigkeit. Auch vergewisserten wir uns u.a. darüber, dass der Vorstand ein wirkungsvolles und leistungsfähiges Compliance-System und Risikomanagementsystem für den MAN Konzern eingerichtet und weiter verbessert hat.

Der Vorstand informierte den Aufsichtsrat regelmäßig schriftlich und mündlich zeitnah und umfassend über die Geschäftsentwicklung und relevante Geschäftsereignisse sowie über die Unternehmensplanung und Abweichungen des Geschäftsverlaufs von der Planung nebst deren Ursachen.

Die Berichterstattung des Vorstands umfasste ferner die Strategie der MAN Gruppe und den Stand der Umsetzung strategischer Vorhaben.

In Fragen und Entscheidungen von wesentlicher Bedeutung für den MAN Konzern war der Aufsichtsrat stets beratend eingebunden.

In regelmäßigen Gesprächen mit dem Sprecher des Vorstands beriet ich mich auch außerhalb der Aufsichtsratssitzungen über unternehmensrelevante Fragen und Themenstellungen, z. B. über die Geschäftsentwicklung und strategische Vorhaben sowie Themen des Risikomanagements einschließlich Compliance-Themen.

Im Geschäftsjahr 2010 trat der Aufsichtsrat zu fünf ordentlichen Sitzungen und einer konstituierenden Sitzung zusammen. Die durchschnittliche Teilnahmequote an den Aufsichtsratssitzungen lag bei 97 %. Alle Mitglieder haben an mehr als der Hälfte der Sitzungen teilgenommen.

In einem Fall wurde im schriftlichen Verfahren beschlossen.

### Schwerpunkte der Tätigkeit der Ausschüsse im Berichtsjahr

Der Aufsichtsrat hat zwei – mit jeweils drei Vertretern der Anteilseigner und drei Vertretern der Arbeitnehmer – paritätisch besetzte Ausschüsse, das **Präsidium** und den **Prüfungsausschuss**, sowie den nur aus Anteilseignervertretern bestehenden **Nominierungsausschuss** gebildet.

Wesentliche Aufgabenstellung der Ausschüsse ist die Vorbereitung der Beschlussfassungen im Plenum. In einzelnen Fällen sind Entscheidungsbefugnisse bzw. Aufgaben des Aufsichtsrats auf die Ausschüsse übertragen.

Der Nominierungsausschuss hat die Aufgabe, Kandidaten für Aufsichtsratsmandate zu identifizieren und dem Aufsichtsrat für dessen Wahlvorschläge an die Hauptversammlung geeignete Kandidaten vorzuschlagen – in dieser Funktion bilden die Anteilseignervertreter im Präsidium den **Nominierungsausschuss**.

Den Vorsitz im Prüfungsausschuss hat Herr Rupert Stadler inne, den Vorsitz im Präsidium führt stets der Aufsichtsratsvorsitzende. Herr Stadler und ich haben in den Aufsichtsratssitzungen regelmäßig über die Arbeit der Ausschüsse berichtet.

Die personelle Zusammensetzung der Ausschüsse zum Jahresende 2010 ist der Aufstellung auf Seite 190 zu entnehmen.

Das **Präsidium** tagte im Jahr 2010 insgesamt fünfmal.

Es befasste sich insbesondere mit allen wesentlichen Themen der jeweils folgenden Sitzungen des Plenums und bereitete die Beschlussfassungen im Aufsichtsrat vor.

Der **Prüfungsausschuss** hielt im Berichtsjahr insgesamt sieben Sitzungen ab.

Auf der Grundlage einer Ausschreibung bereitete der Prüfungsausschuss den Vorschlag des Aufsichtsrats an die Hauptversammlung vor, die PricewaterhouseCoopers Aktiengesellschaft, Wirtschaftsprüfungsgesellschaft, München („PwC“), zum Abschlussprüfer für das Geschäftsjahr 2010 zu wählen.

Darüber hinaus beschäftigte sich der Ausschuss mit der Auftragserteilung an PwC zur Prüfung der Jahresabschlüsse für 2010 und mit den Prüfungsschwerpunkten 2010 sowie mit der Unabhängigkeitserklärung des Abschlussprüfers gem. Ziff. 7.2.1 des Deutschen Corporate Governance Kodex.

Der Prüfungsausschuss befasste sich ferner eingehend mit Fragen der Rechnungslegung und mit den Jahresabschlüssen der MAN SE und des MAN Konzerns sowie den Prüfungsberichten der Abschlussprüfer.

Auf Veranlassung des Prüfungsausschusses führte PwC ein Review des Zwischenabschlusses der MAN Gruppe zum 30. Juni 2010 durch; hieraus ergaben sich keine Beanstandungen. Der Ausschuss hat die Ergebnisse des Review eingehend mit den Wirtschaftsprüfern diskutiert.

Auch 2010 befasste sich der Prüfungsausschuss mit dem Prüfungsplan der MAN-Revision, mit dem Risikomanagement und der Risikolage sowie mit der weiteren Optimierung des Internen Kontrollsystems der MAN Gruppe.

Die Quartalsfinanzberichte erörterte der Ausschuss regelmäßig vor deren Veröffentlichung mit dem Vorstand.

Auch die aktuelle Geschäftsentwicklung in der MAN Gruppe, der Stand der Unternehmensplanung, Finanzierungsthemen sowie kaufmännische Fragen im Zusammenhang mit anstehenden Beschlüssen des Plenums über größere Transaktionen wurden regelmäßig im Prüfungsausschuss erörtert.

Einen weiteren wesentlichen Schwerpunkt der Arbeit des Prüfungsausschusses bildete auch im vergangenen Jahr der Komplex Compliance. Unter anderem begleitete der Ausschuss die Maßnahmen zur weiteren Verbesserung des Compliance-Systems in der MAN Gruppe.

Die für die Nominierung von Aufsichtsratskandidaten zuständigen Mitglieder des Präsidiums traten im Berichtsjahr als **Nominierungsausschuss** einmal zusammen. Aufgrund der Mandatsniederlegung von Herrn Stefan W. Ropers wurde die Ergänzungswahl eines Vertreters der Anteilseigner in den Aufsichtsrat erforderlich, s. u.

### Themen im Aufsichtsratsplenum

Gegenstand regelmäßiger Beratungen im Plenum waren v. a. die Auftrags-, Umsatz-, Ergebnis- und Beschäftigungsentwicklung in der MAN Gruppe sowie wesentliche strategische Vorhaben wie z. B. Beteiligungs- und Desinvestitionsprojekte.

Ferner befassten wir uns laufend und ausführlich mit Fragen der Compliance. Der MAN Chief Compliance Officer berichtet in unseren Sitzungen regelmäßig über Compliance-Themen, u. a. über den weiteren Ausbau der Compliance-Organisation und die weitere Optimierung des Compliance-Systems in der MAN Gruppe sowie über die Ergebnisse von Compliance-Untersuchungen.

Zu den 2010 abgehaltenen Sitzungen des Aufsichtsrats wird festgehalten:

Am **12. Februar 2010** befasste sich der Aufsichtsrat schwerpunktmäßig mit dem Jahresabschluss 2009 sowie der Abstimmung der Agenda und der Beschlussvorschläge für die Hauptversammlung 2010.

Gegenstand unserer Beratungen und der Beschlussfassung waren ferner Änderungen der Struktur der Vorstandsvergütung aufgrund des Gesetzes zur Angemessenheit der Vorstandsvergütung (VorstAG) sowie die Festlegung der individuellen Vorstandsgrundvergütungen.

Über die ab dem Geschäftsjahr 2010 anzuwendende Systematik für die Berechnung der Vorstandstantiemen beschlossen wir im Juni 2010 im schriftlichen Verfahren.

Einzelheiten zum Vergütungssystem für Vorstände und zur konkreten Höhe der Vorstandsbezüge sind dem Vergütungsbericht für das Jahr 2010 zu entnehmen, s. S. 21 ff.

Darüber hinaus erläuterte uns der Vorstand am 12. Februar den Stand diverser strategischer Projekte, z. B. der Zusammenarbeit mit dem chinesischen Nutzfahrzeughersteller Sinotruk, an dem MAN SE mit „25 % plus eine Aktie“ beteiligt ist.

Im Fokus unserer Beratungen am **1. April 2010** standen u. a. der Geschäftsverlauf in der MAN Gruppe sowie Themen der Hauptversammlung 2010.

Im Anschluss an die Hauptversammlung, mit deren Ablauf Herr Stefan W. Ropers aus dem Aufsichtsrat und Prüfungsausschuss ausgeschieden ist, wählten wir noch am 1. April 2010 in einer konstituierenden Sitzung Herrn Dr.-Ing. Ekkehard D. Schulz in den Prüfungsausschuss.

Am **2. Juli 2010** beschlossen wir die erneute Bestellung von Herrn Dr. Pachta-Reyhofen zum Mitglied und Sprecher des Vorstands für den Zeitraum ab dem 1. Juli 2011 bis zum 30. Juni 2016.

Ferner beschäftigten wir uns u. a. mit unternehmensstrategischen Themen. So stimmten wir dem Verkauf der MAN Turbo S.r.L. De Pretto/Italien, einer Beteiligung der MAN Diesel & Turbo SE, an die Selink S.p.A. zu.

Darüber hinaus beschlossen wir über die konkrete Beauftragung von PwC mit der Prüfung der Jahresabschlüsse 2010 sowie des Risikofrüherkennungssystems der MAN SE.

Am **10. September 2010** befassten wir uns eingehend mit dem Stand der Veräußerung der restlichen 30 %igen MAN-Beteiligung an Ferrostaal an die International Petroleum Investment Company (IPIC), Abu Dhabi. 2009 hatte IPIC 70 % der Anteile an Ferrostaal von MAN erworben und MAN eine Put-Option zur Veräußerung der restlichen Anteile von 30 % eingeräumt. MAN hat diese Put-Option Anfang 2010 ausgeübt. IPIC hat jedoch unter Verweis auf staatsanwaltschaftliche Ermittlungen bei Ferrostaal wegen Korruptionsverdachts den Vollzug der Option bisher verweigert und eine Schiedsklage gegen die MAN SE eingereicht.

Am **12. November 2010** beschäftigten wir uns u. a. mit strategischen Themen und der Entwicklung wesentlicher Beteiligungen der MAN Gruppe.

So waren auch der Stand des Desinvestments Ferrostaal sowie der Kooperation MAN/Scania Gegenstand der Erörterungen.

Darüber hinaus stellte uns der Vorstand die Unternehmensplanung 2011 bis 2013 für die MAN Gruppe vor.

Wir befassten uns am 12. November des Weiteren mit der Frage von Schadensersatzansprüchen gegen ehemalige Mitglieder des Vorstands im Zusammenhang mit den Korruptionsvorwürfen gegen MAN-Mitarbeiter bzw. MAN-Organen.

#### **Corporate Governance und Entsprechenserklärung**

Vorstand und Aufsichtsrat gaben im Dezember 2010 die jährliche Entsprechenserklärung nach § 161 AktG ab. Danach hat die MAN SE den Empfehlungen des Deutschen Corporate Governance Kodex nach Maßgabe der Entsprechenserklärungen vom Dezember 2009 bzw. Februar 2010 im Berichtsjahr entsprochen und wird den Empfehlungen des Kodex in der aktuell geltenden Fassung vom 26. Mai 2010 mit lediglich einer Ausnahme entsprechen. Im Hinblick auf die Anzahl der von Herrn Dr.-Ing. Ekkehard D. Schulz gehaltenen Aufsichtsratsmandate wich die MAN SE temporär vom Kodex ab. Einzelheiten hierzu sind der auf der Internetseite der MAN Gruppe, [www.man.eu](http://www.man.eu), veröffentlichten Entsprechenserklärung zu entnehmen.

Interessenkonflikte von Mitgliedern des Aufsichtsrats i. S. d. Ziff. 5.5 des Deutschen Corporate Governance Kodex sind im Berichtsjahr nicht aufgetreten. Entscheidungen zum Thema Kooperation MAN/Scania standen nicht an, der Aufsichtsrat hat lediglich einen Bericht des Vorstands zur Kenntnis genommen.

Weitergehende Informationen zur Corporate Governance bei MAN finden Sie in unserem Corporate-Governance-Bericht.

#### **Prüfung des Jahres- und Konzernabschlusses 2010**

Entsprechend unserem Vorschlag wählte die Hauptversammlung am 1. April 2010 PwC zum Abschlussprüfer für das Geschäftsjahr 2010.

Der Aufsichtsrat erteilte PwC auf Basis der Empfehlungen des Prüfungsausschusses den konkreten Prüfauftrag und legte die Prüfungsschwerpunkte für 2010 fest.

Der Abschlussprüfer bestätigte den nach den Regeln des HGB aufgestellten Jahresabschluss der MAN SE für das Geschäftsjahr

2010 nebst Lagebericht und erteilte einen uneingeschränkten Bestätigungsvermerk.

Auch das Risikomanagementsystem der MAN SE war Gegenstand der Prüfungen. PwC stellte fest, dass der Vorstand seinen Pflichten aus § 91 Abs. 2 AktG nachgekommen ist.

Der Konzernabschluss 2010 der MAN SE wurde gem. § 315a HGB auf der Grundlage der internationalen Rechnungslegungsstandards IFRS aufgestellt. Der Abschlussprüfer versah auch den Konzernabschluss und den Konzernlagebericht mit einem uneingeschränkten Bestätigungsvermerk.

Die Untersuchungen von PwC erstreckten sich u.a. auf die für das Berichtsjahr festgelegten Prüfungsschwerpunkte, z.B. die Umsetzung der Anforderungen des BilMoG im MAN Konzern.

Die Prüfungsberichte von PwC und die Abschlussunterlagen gingen den Mitgliedern des Aufsichtsrats rechtzeitig zu und wurden sowohl in der Bilanzaufsichtsratssitzung am 18. März 2011 als auch in der vorangegangenen Bilanzsitzung des Prüfungsausschusses erörtert. Die Abschlussprüfer nahmen an der Beratung über den Jahresabschluss und den Konzernabschluss in beiden Gremien teil. Sie berichteten über die wesentlichen Ergebnisse ihrer Prüfungen und standen dem Prüfungsausschuss bzw. dem Aufsichtsrat für ergänzende Fragen und Auskünfte zur Verfügung. Nach eigener Prüfung des Jahresabschlusses, des Konzernabschlusses sowie der Lageberichte für die MAN SE und den Konzern stimmten wir dem Ergebnis der Prüfung durch den Abschlussprüfer zu und billigten gemäß der Empfehlung des Prüfungsausschusses den Jahresabschluss und den Konzernabschluss. Einwendungen waren nicht zu erheben. Der Jahresabschluss ist damit festgestellt.

Dem Vorschlag des Vorstands für die Verwendung des Bilanzgewinns schließen wir uns nach eingehender Erörterung, u.a. der Finanz- und Investitionsplanung des MAN Konzerns, an.

#### **Veränderungen in der Besetzung des Aufsichtsrats und Vorstandspersonalien**

Mit Wirkung zum Ablauf der Hauptversammlung am 1. April 2010 haben Herr Ropers sein Amt im Aufsichtsrat und Herr Dr. Thomas Kremer, der zum Ersatzmitglied für alle Anteilseignervertreter im Aufsichtsrat gewählt ist, seine Ersatzmitgliedschaft für Herrn Ropers niedergelegt. Wir danken Herrn Ropers für seine Arbeit im Aufsichtsrat und im Prüfungsausschuss.

Die Hauptversammlung wählte Herrn Ulf Berkenhagen, Mitglied des Vorstands der Audi AG, für die verbleibende Amtszeit in den Aufsichtsrat.

Herr Dr. Kremer wurde als Ersatzmitglied auch für Herrn Berkenhagen gewählt.

Die Amtszeit des derzeit amtierenden, ersten Aufsichtsrats der MAN SE läuft bis zur Beendigung der ordentlichen Hauptversammlung am 27./28. Juni 2011.

Am 12. November 2010 ernannte der Aufsichtsrat die im Dezember 2009 zunächst zu stellvertretenden Mitgliedern des Vorstands der MAN SE gewählten Herren Frank H. Lutz und Klaus Stahlmann jeweils mit Wirkung ab dem 1. Januar 2011 zu ordentlichen Mitgliedern des Vorstands.

Herr Stahlmann hat sein Amt mit Wirkung zum 21. Februar 2011 niedergelegt. Der Aufsichtsrat hat dem zugestimmt.

Der Aufsichtsrat dankt den Mitgliedern der Vorstände und Geschäftsführungen sowie den Mitarbeitern der Unternehmen der MAN Gruppe für ihre Leistungen und ihren tatkräftigen Einsatz. Den Vertretungen der Mitarbeiter danken wir für ihre sachliche und konstruktive Zusammenarbeit im Interesse unserer Gesellschaft.

Für den Aufsichtsrat:

München, den 18. März 2011



**Hon.-Prof. Dr. techn. h.c. Dipl.-Ing. ETH Ferdinand K. Piëch**  
Der Vorsitzende des Aufsichtsrats



# An die Aktionäre

## Management Board

**Antonio Roberto Cortes**  
Geschäftsführer  
MAN Latin America, 55 Jahre

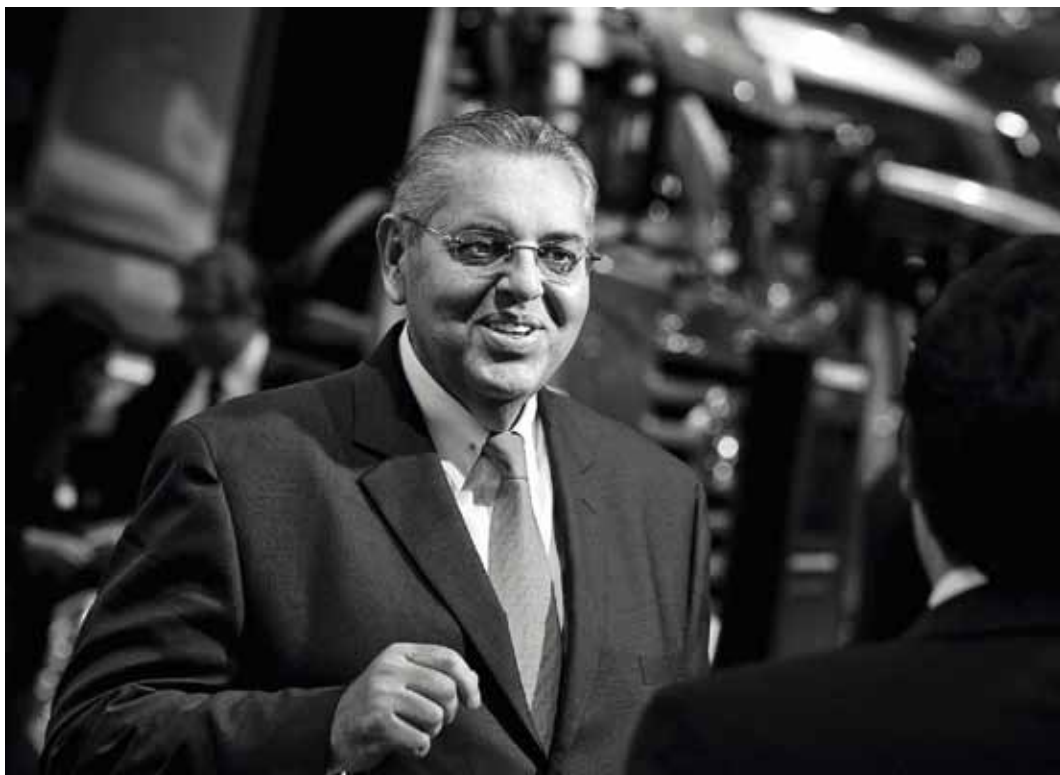

**Dr.-Ing. Georg Pachta-Reyhofen**  
Sprecher des Vorstands MAN SE und  
MAN Truck & Bus, 55 Jahre

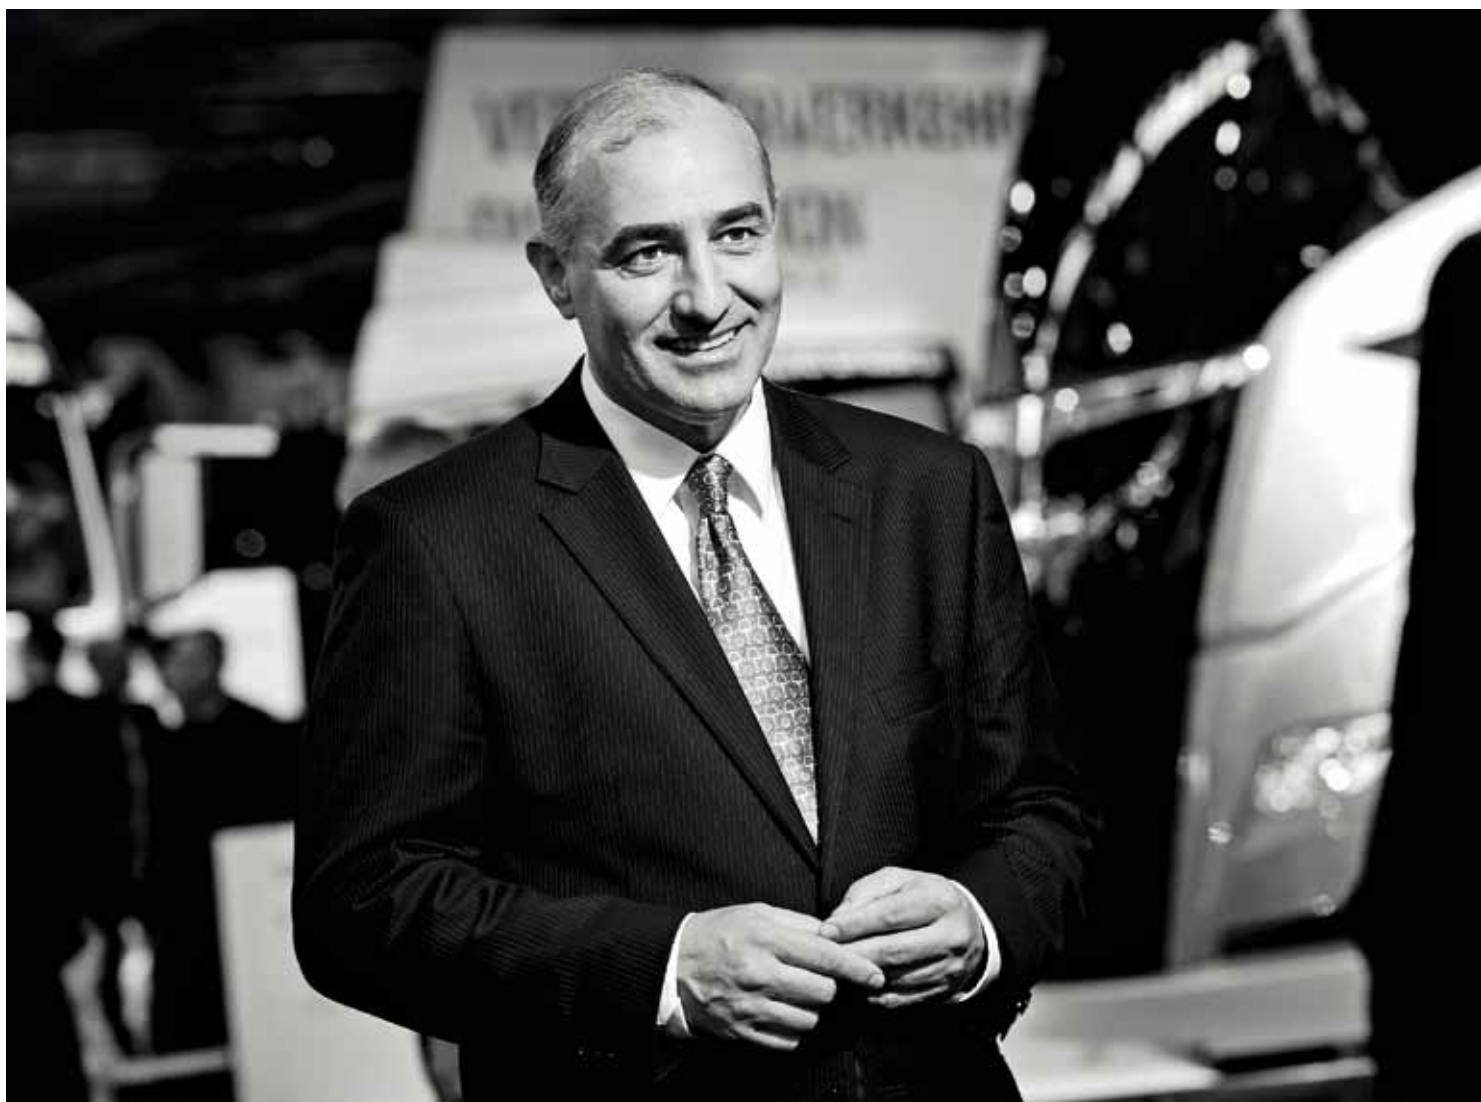



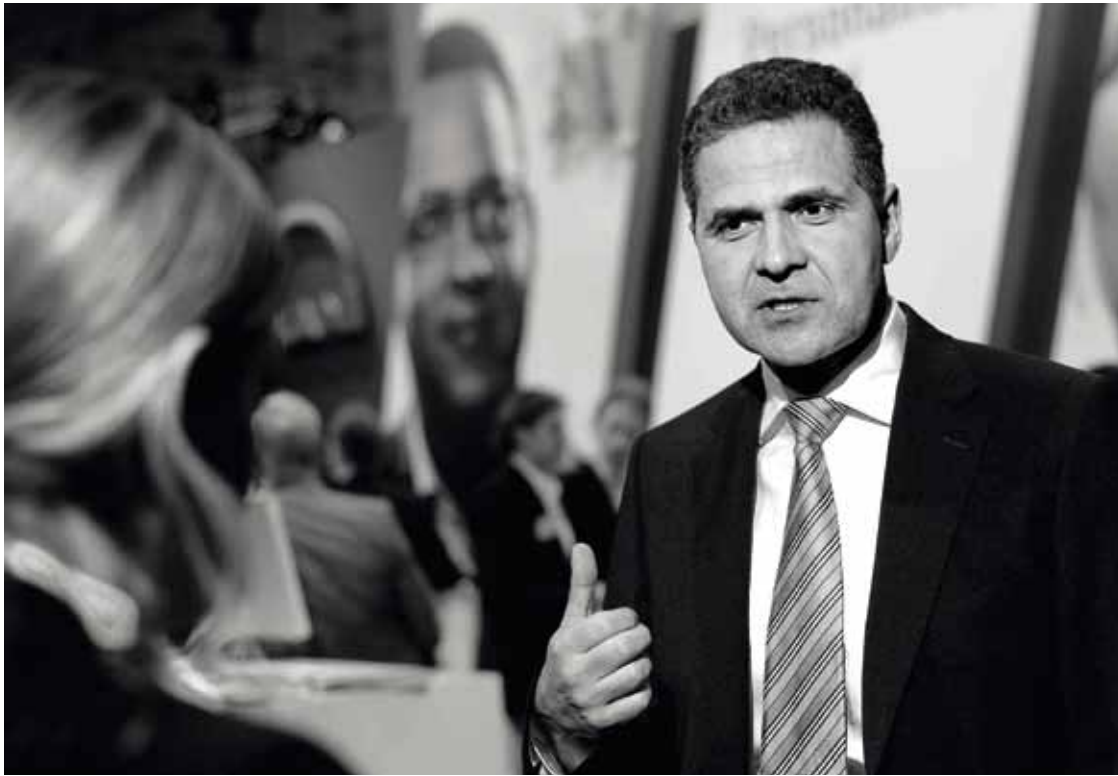

**Jörg Schwitalla**  
Chief Human Resources Officer  
MAN SE, 50 Jahre

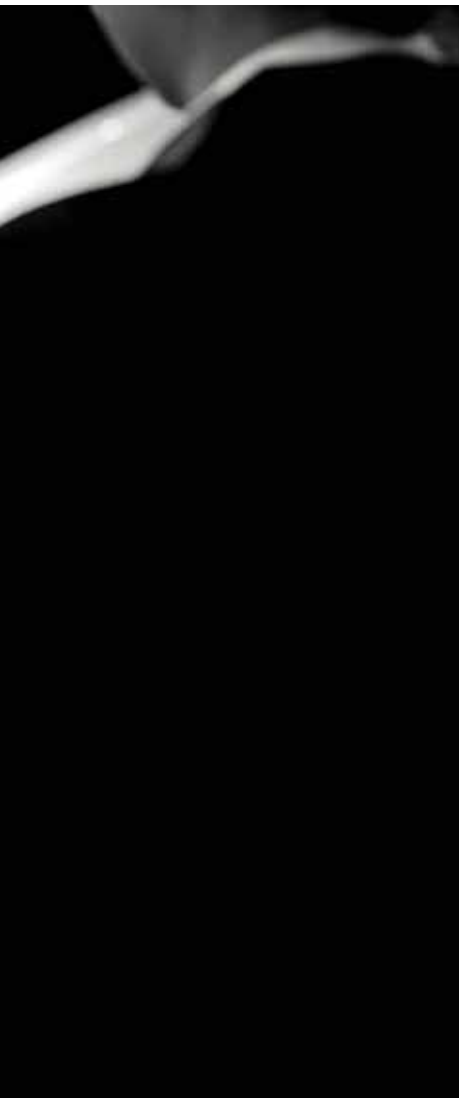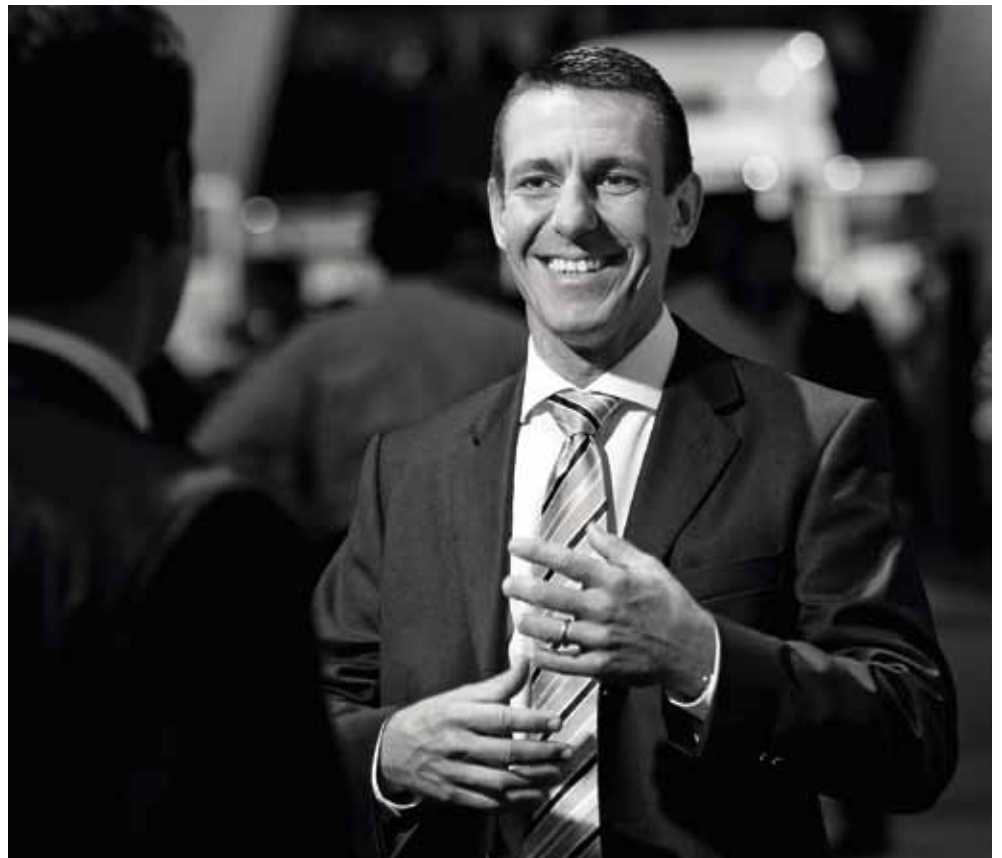

**Frank H. Lutz**  
Chief Financial Officer  
MAN SE, 42 Jahre

# An die Aktionäre

## Die Aktie

### MAN-Aktie

**Die MAN-Aktienperformance war im Jahr 2010 überdurchschnittlich. Die MAN-Aktie war der viertbeste Wert im Dax und konnte im abgelaufenen Jahr eine Gesamtrendite von rund 64 % erzielen.**

#### Kennzahlen der MAN-Stammaktie

| €                                                         | 2010    | 2009    |
|-----------------------------------------------------------|---------|---------|
| Ergebnis je Aktie in € <sup>1</sup>                       | 5,30    | - 2,69  |
| Bardividende je Aktie in € <sup>2</sup>                   | 2,00    | 0,25    |
| Marktkapitalisierung (Stand 31.12.) <sup>3</sup> in Mio € | 12 898  | 7 923   |
| Schlusskurs in €                                          | 88,99   | 54,44   |
| Höchster Kurs in €                                        | 96,44   | 61,23   |
| Niedrigster Kurs in €                                     | 47,99   | 30,31   |
| Dividendenrendite <sup>4</sup> in %                       | 2,2     | 0,5     |
| Gesamtrendite <sup>5</sup> in %                           | 64,0    | 46,6    |
| Anzahl in Tsd Stück <sup>6</sup>                          | 140 974 | 140 974 |
| Rendite Dax in %                                          | 16,1    | 23,9    |
| Rendite DJ Euro Stoxx in %                                | 2,7     | 27,6    |

<sup>1</sup> Ergebnis je Aktie ohne Sondervorgänge und ohne Effekte aus Kaufpreisallokationen: 3,38 €

<sup>2</sup> 2010: Dividendenvorschlag

<sup>3</sup> Grundlage: 140 974 350 Stammaktien und 6 065 650 Vorzugsaktien

<sup>4</sup> Bardividende bezogen auf den Schlusskurs am 31.12.

<sup>5</sup> Bei Reinvestition der Bardividende am Monatsultimo nach der Hauptversammlung

<sup>6</sup> Nur Stammaktien

Quelle: Bloomberg

#### Sehr starkes Börsenjahr

Die weltweiten Aktienindizes konnten im Jahr 2010 deutlich zulegen. Dies ist vor allem darauf zurückzuführen, dass im abgelaufenen Jahr eine kräftige Konjunkturerholung stattgefunden hat.

Der deutsche Aktienindex Dax erzielte in diesem starken konjunkturellen Umfeld über das Gesamtjahr eine gute Performance. Der Index schloss zu Jahresende bei 6914 Punkten, was einer Jahresperformance von ca. 16 % entspricht.

#### Hervorragende Performance der MAN-Aktie

Die MAN-Stammaktie entwickelte sich in einem Umfeld, in dem vor allem zyklische Aktienwerte von der deutlichen konjunkturellen Erholung profitierten, besser als der Vergleichsindex Dax.

#### MAN-Stammaktie versus Dax Dezember 2009 – Dezember 2010

Indizierte Werte, 31. Dezember 2009 = 1,00

MAN-Stammaktie — Deutscher Aktienindex —

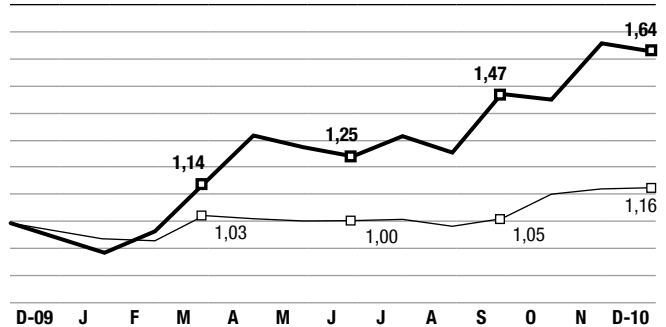

Stand: Dezember 2009 – Dezember 2010

Quelle: Bloomberg

Die MAN-Stammaktie erzielte in dem Zeitraum Januar bis Dezember 2010, ausgehend von einem Schlusskurs von 54,44 € am 31. Dezember 2009, einen Kursgewinn von 34,55 € oder rund 64 % auf 88,99 € am 31. Dezember 2010. Der deutsche Leitindex Dax konnte seit Jahresbeginn rund 16 % auf 6914 Punkte am 31. Dezember 2010 zulegen.

#### Marktkapitalisierung MAN

Die Marktkapitalisierung folgte der guten Kursentwicklung im Geschäftsjahr 2010 und legte von ca. 8 Mrd € auf knapp 13 Mrd € zu. Nach der Indexsystematik der Deutschen Börse, bei der ausschließlich der Streubesitz der liquidesten Aktiengattung des Unternehmens bei der Berechnung der Marktkapitalisierung berücksichtigt wird (im Falle der MAN-Stammaktie entspricht dies einem Streubesitz von 70,1 %), belegte MAN am 31. Dezember 2010 Rang 19, nach Platz 25 im Vorjahr.

Der Börsenumsatz der MAN-Stammaktie war im abgelaufenen Geschäftsjahr mit rund 16 Mrd € deutlich höher als im Vorjahr (13 Mrd €). Hier belegte MAN unverändert zum Vorjahr Rang 19 im Dax.

## Dividende

Auch für das Jahr 2010 möchte die MAN Gruppe ihre Aktionäre unter Berücksichtigung des wirtschaftlichen Umfelds in angemessener Höhe am Unternehmenserfolg partizipieren lassen, weshalb die Dividende für dieses Jahr höher ausfallen wird als für 2009. Eine feste Größe zur Ausschüttungshöhe gibt es nicht, generell strebt die MAN Gruppe eine Quote von 30 bis 60 % des Ergebnisses nach Steuern an.

Für das Geschäftsjahr 2010 schlagen Vorstand und Aufsichtsrat der diesjährigen Hauptversammlung daher vor, eine Dividende in Höhe von 2,00 € auszuzahlen. Bezogen auf den Schlusskurs der Stammaktie zum 31. Dezember 2010 von 88,99 € entspricht dies einer Dividendenrendite von 2,2 %.

## Intensiver und vertrauensvoller Dialog mit Investoren und Analysten

Im Rahmen von Gesprächen auf Roadshows, Konferenzen sowie im Corporate Center in München vertiefte MAN seine Kontakte mit Investoren und Analysten im Jahr 2010 weiter.

Zur Verbreiterung der internationalen Aktionärsbasis unternahm MAN im Jahr 2010 verstärkte Anstrengungen. So hat die MAN Gruppe beispielsweise die Kapitalmarktkommunikation in Japan über Konferenzen und Roadshows weiter ausgebaut. Zudem wurde erstmals in der MAN-Geschichte ein Capital Market Day in Brasilien durchgeführt. Am 16. und 17. September 2010 konnten sich über 60 Analysten und Investoren über die Strategien, Aktivitäten und Produkte von MAN am Unternehmensstandort Resende (MAN Latin America) sowie in Rio de Janeiro informieren. Das gesamte MAN-Management Board stand in Brasilien den Investoren und Analysten Rede und Antwort. Diese Veranstaltung, an der erstmals auch brasilianische Fonds teilnahmen, weckte das Interesse und die Aufmerksamkeit südamerikanischer Investoren für die MAN Gruppe und legte den Grundstein für eine nachhaltige Kommunikation mit dieser Interessengruppe. Das durchweg positive Feedback der Teilnehmer am Capital Market Day bestätigt den Anspruch der MAN Gruppe, den Dialog mit den Kapitalmarktteilnehmern stetig zu vertiefen und auszubauen.

Ein weiteres Highlight im abgelaufenen Geschäftsjahr war die Investoren- und Analystenveranstaltung auf der Messe IAA Nutzfahrzeuge in Hannover. Neben einer ausführlichen Standführung wurden die Teilnehmer im Rahmen von Präsentationen sowie einer Q&A-Runde umfassend über die neuesten Entwicklungen der Nutzfahrzeugindustrie sowie der MAN Gruppe informiert.

## Verbreiterung der internationalen Investorenbasis

Regelmäßig durchgeführte Aktionärsidentifizierungen ermöglichen der MAN Gruppe eine effektive Kommunikation mit den Investoren. Bei der letzten Befragung im Sommer 2010 konnten über 85 % der Halter von Stamm- und Vorzugsaktien von MAN ermittelt werden. Gemäß dieser Befragung werden rund 42 % des Aktienkapitals von ausländischen Investoren gehalten. Als besonderen Erfolg des Jahres 2010 wertet MAN, dass das Unternehmen im Vergleich zum Vorjahr durch mehr Konferenzen und Roadshows die japanische Investorenbasis um über 50 % vergrößern konnte. Großbritannien und die USA stellen bei der internationalen Investorenbasis wie bereits in den Vorjahren die am stärksten vertretenen Länder dar. Größter Einzelaktionär ist die Volkswagen AG, Wolfsburg. Das Unternehmen hat einen Stimmrechtsanteil von 29,9 % an der MAN SE.

### Aktionärsstruktur nach Sitz\*

%

#### 42 Ausländische institutionelle Aktionäre

#### 29 Volkswagen AG

#### 14 Nicht veröffentlichungspflichtige Aktionäre

#### 15 Inländische institutionelle Aktionäre

\*Grundlage: 140 974 350 Stammaktien und 6 065 650 Vorzugsaktien; Stand: Juli 2010  
Quelle: IPREO

## Basisinformationen zur MAN-Aktie

Die Aktien der MAN SE werden an der deutschen elektronischen Börsenhandelsplattform Xetra sowie an allen sieben deutschen Börsen gehandelt.

Das Grundkapital der MAN SE besteht aus 147 040 000 nennwertlosen Stückaktien, davon sind 140 974 350 Stammaktien (96 %) und 6 065 650 Vorzugsaktien (4 %).

MAN ist Mitglied des deutschen Leitindex Dax, der die Performance der 30 führenden Unternehmen misst und somit das Marktsegment der deutschen „Blue Chips“ abbildet.

Die MAN-Aktie ist in weiteren namhaften Börsenindizes gelistet, unter anderem im HDax, CDax, Euro Stoxx®, Stoxx® Europe 600 und Euro Stoxx® TMI Industrial Goods & Services.

Weitere Informationen zur MAN-Aktie und zu den Investor-Relations-Aktivitäten erhalten Sie unter [www.man.eu/investoren](http://www.man.eu/investoren) oder per E-Mail [investor.relations@man.eu](mailto:investor.relations@man.eu). Natürlich können Sie uns auch telefonisch unter +49. 89. 36098-334 erreichen.

|                        | ISIN-Code    | Wertpapier-Kennnummer | Reuters-Kürzel              | Bloomberg-Kürzel           |
|------------------------|--------------|-----------------------|-----------------------------|----------------------------|
| Stammaktie             | DE0005937007 | 593700                | Xetra-Handel<br>MANG.DE     | Xetra-Handel<br>MAN GY     |
|                        |              |                       | Börse Frankfurt<br>MANG.F   | Börse Frankfurt<br>MAN GR  |
| Vorzugsaktie           | DE0005937031 | 593703                | Xetra-Handel<br>MANG_p.DE   | Xetra-Handel<br>MAN3 GY    |
|                        |              |                       | Börse Frankfurt<br>MANG_p.F | Börse Frankfurt<br>MAN3 GR |
| Anleihe<br>MAN SE 2013 | XS0429607640 | A0ZQPG                | 0#DE042960764=              | Xetra-Handel<br>MANGR Corp |
| Anleihe<br>MAN SE 2016 | XS0429612566 | A0ZQPH                | 0#DE042961256=              | Xetra-Handel<br>MANGR Corp |

# An die Aktionäre

## Corporate Governance

Die Führung und Kontrolle des Unternehmens ist bei MAN darauf ausgerichtet, im Einklang mit den Prinzipien der sozialen Marktwirtschaft für eine nachhaltige Wertschöpfung und ein angemessenes Ergebnis zu sorgen.

Die Unternehmensführung wird durch die geltenden Gesetze, insbesondere die gesellschaftsrechtlichen Vorschriften, unsere Satzung und interne Regelungen sowie durch internationale und national anerkannte Standards guter und verantwortungsvoller Unternehmensführung bestimmt. Der Deutsche Corporate Governance Kodex (nachfolgend: „DCGK“) stellt die für MAN geltenden aktienrechtlichen Vorschriften dar und gibt Verhaltensempfehlungen und Anregungen für die Corporate Governance entsprechend den anerkannten Standards. Diese waren für MAN als Aktiengesellschaft bis zum 19. Mai 2009 anwendbar und gelten ab diesem Zeitpunkt, zu dem die formwechselnde Umwandlung der MAN AG in eine Societas Europaea (nachfolgend: „SE“) nach Zustimmung der Hauptversammlung am 3. April 2009 und Eintragung im Handelsregister wirksam wurde, für die MAN SE als Europäische Gesellschaft weiter.

Ergänzend gilt das Führungsprinzip „Industrial Governance“. Dieses konkretisiert die Verantwortung für die Konzernleitung durch die MAN SE und die Verantwortlichkeit der Unternehmensbereiche. Sie ist im Internet dargestellt und unter [www.man.eu/MAN/de/Investor\\_Relations/Strategie/](http://www.man.eu/MAN/de/Investor_Relations/Strategie/) zugänglich. Die Compliance und ethischen Leitlinien, die für die MAN Gruppe gelten, sind in unserem in diesem Jahr überarbeiteten Code of Conduct (zugänglich unter [www.man.eu/MAN/de/Unternehmen/Management/Code\\_of\\_Conduct](http://www.man.eu/MAN/de/Unternehmen/Management/Code_of_Conduct)) niedergelegt. Durch Konzernrichtlinien sind die Führungsgrundsätze konkretisiert.

### Corporate Governance bei MAN<sup>1</sup>

Sowohl der Vorstand als auch der Aufsichtsrat von MAN haben sich eingehend mit dem Corporate-Governance-System beschäftigt. Sie sind sich bewusst, dass gute und transparente Corporate Governance, die sowohl nationalen als auch internationalen Standards folgt, für eine verantwortungsbewusste und langfristig ausgerichtete Unternehmensführung von wesentlicher Bedeutung ist. Die Gremien haben sich mit der Erfüllung der Vorgaben des DCGK, insbesondere mit den neuen Anforderungen vom 26. Mai 2010, eingehend beschäftigt.

### Entsprechenserklärung

Vorstand und Aufsichtsrat haben im Dezember 2010 folgende Entsprechenserklärung abgegeben:

*„Die MAN SE hat den Empfehlungen der „Regierungskommission Deutscher Corporate Governance Kodex“ nach Maßgabe ihrer Entsprechenserklärungen vom Februar 2010 bzw. Dezember 2009 entsprochen und wird den Empfehlungen gemäß Deutschem Corporate Governance Kodex (DCGK) i. d. F. vom 26. Mai 2010 entsprechen – dies allerdings mit der folgenden Einschränkung:*

*Der Empfehlung in Ziffer 5.4.5 der Kodex-Fassung vom 26. Mai 2010 wird für den Zeitraum von deren Inkrafttreten am 2. Juli 2010 bis zum Ablauf der Hauptversammlung der ThyssenKrupp AG am 21. Januar 2011 nicht uneingeschränkt gefolgt.*

*Die temporäre Abweichung von der Empfehlung in Ziffer 5.4.5 ergibt sich daraus, dass Herr Dr.-Ing. Ekkehard D. Schulz, Vorsitzender des Vorstands der ThyssenKrupp AG, konzernexterne Aufsichtsratsmandate in drei börsennotierten Gesellschaften (MAN SE, Bayer AG und RWE AG) und darüber hinaus in einer nicht börsennotierten Gesellschaft mit vergleichbaren Anforderungen (AXA Konzern AG) innehat.*

*Herr Dr. Schulz wird allerdings mit Ablauf der Hauptversammlung der ThyssenKrupp AG am 21. Januar 2011 aus dem Vorstand der ThyssenKrupp AG ausscheiden.*

*Im Hinblick auf die einerseits langjährige Mitgliedschaft von Herrn Dr. Schulz im Aufsichtsrat der MAN SE und auf die andererseits baldige Beendigung seines Vorstandsmandats bei der ThyssenKrupp AG erscheint eine zeitlich befristete Abweichung von der Kodexempfehlung in Ziffer 5.4.5 angemessen.“*

<sup>1</sup> Zugleich »Corporate Governance Bericht« von Vorstand und Aufsichtsrat gemäß Ziffer 3.10 des Deutschen Corporate Governance Kodex in der Fassung vom 26. Mai 2010

Auch Vorstand und Aufsichtsrat des börsennotierten Tochterunternehmens Renk Aktiengesellschaft in Augsburg haben eine Entsprechenserklärung abgegeben, die auf der Internetseite unter [www.renk.eu](http://www.renk.eu) veröffentlicht ist.

Nachfolgend wird zu wesentlichen Empfehlungen und Anregungen des DCGK, insbesondere unter Berücksichtigung der Neuerungen, weitergehend Stellung genommen und die mit der Entsprechenserklärung offengelegte Abweichung von einer Empfehlung erläutert.

#### **Förderung der Aktionärsrechte und Transparenz**

Auf unserer Internetseite [www.man.eu/MAN/de/Investor\\_Relations/](http://www.man.eu/MAN/de/Investor_Relations/) sowie mittels Finanzpublikationen und Kapitalmarktkonferenzen bieten wir unseren in- und ausländischen Aktionären sowie anderen Interessierten die Möglichkeit, sich ein aktuelles und authentisches Bild von unserem Unternehmen zu machen und sich über die praktizierte Corporate Governance zu informieren. Wir publizieren zudem auf unserer Internetseite unverzüglich nach Erscheinen (vgl. Ziff. 6.3 DCGK) Geschäftsberichte, Zwischenberichte sowie einen Kalender mit allen anstehenden Finanzterminen. Ebenfalls auf der Internetseite befindet sich das nach § 10 des Wertpapierprospektgesetzes (WpPG) zu erstellende jährliche Dokument, in dem alle relevanten Unternehmensinformationen des vorangegangenen Kalenderjahrs zusammengestellt sind.

Entsprechend dem Gleichbehandlungsgrundsatz sichern wir allen Aktionären unseres Unternehmens gleiche Informationen zu.

#### **Hauptversammlung**

Die Hauptversammlung ist die Plattform für die Aktionäre von MAN zur Stimmrechtsausübung, zur Informationsbeschaffung und zum Dialog mit Vorstand und Aufsichtsrat.

Organisation und Durchführung der jährlichen Hauptversammlung erfolgen bei der MAN SE mit dem Ziel, sämtliche Aktionäre vor und während der Hauptversammlung zügig, umfassend und effektiv zu informieren. Die Einberufung der Hauptversammlung wird im elektronischen Bundesanzeiger veröffentlicht und ist unseren Aktionären und allen sonstigen Interessierten über die Internetseite von MAN einschließlich aller Berichte und Vorlagen für die Hauptversammlung zugänglich. Zudem übermitteln wir die Unterlagen den interessierten Aktionären und anderen, soweit sie zustimmen, auf elektronischem Weg und durch die Einräumung der Möglichkeit zum Download von unserer Internetseite.

Sollten Aktionäre an der Hauptversammlung nicht teilnehmen, so besteht neben der Möglichkeit zur Bevollmächtigung eines Kreditinstituts, von Aktionärsvereinigungen oder anderen Personen das Angebot, einen Mitarbeiter von MAN als Stimmrechtsvertreter auf schriftlichem oder elektronischem Wege zu bevollmächtigen.

Um allen Aktionären und der interessierten Öffentlichkeit die Verfolgung der Hauptversammlung zu ermöglichen, wird diese live und in vollem Umfang im Internet übertragen.

#### **Vorstand und Aufsichtsrat**

Die MAN SE hat eine duale Struktur mit Vorstand und Aufsichtsrat. Beide Organe arbeiten zum Wohl des Unternehmens eng zusammen und sind bestrebt, den Wert des Unternehmens für die Aktionäre nachhaltig zu steigern.

Der Vorstand, der aktuell aus vier Mitgliedern besteht, nimmt eigenverantwortlich die geschäftsleitenden und operativen Aufgaben wahr. Seine Verantwortungsbereiche erstrecken sich insbesondere auf die strategische Ausrichtung des Konzerns. Er stimmt diese mit dem Aufsichtsrat ab. Er ist ferner für die zielorientierte und aktive Steuerung sowie die zentrale Finanzierung der Gruppe, die Förderung und den Einsatz von Führungskräften sowie die Aufstellung der Quartals- und Jahresabschlüsse verantwortlich und sorgt für die Einhaltung von Rechtsvorschriften, behördlichen Regelungen und den unternehmensinternen Richtlinien (Compliance).

Die verschiedenen Aufgabengebiete sind den einzelnen Vorstandsressorts im Rahmen des Geschäftsverteilungsplans zugeordnet. Im Plenum behandelt der Vorstand alle wesentlichen Entscheidungen und Maßnahmen; die dem Gesamtvorstand vorbehaltenen Entscheidungen und Maßnahmen ergeben sich aus den Festlegungen in der Geschäftsordnung des Vorstands. Sitzungen des Gesamtvorstands finden mindestens einmal im Monat und zusätzlich bei Bedarf statt. Der Vorstand berichtet an den Aufsichtsrat. Bei Entscheidungen von grundlegender Bedeutung bindet er den Aufsichtsrat mit ein. Der Vorstand sorgt außerdem für eine offene und transparente Unternehmenskommunikation.

Der Aufsichtsrat hat demgegenüber überwachende und beratende Funktionen. Bei wesentlichen Geschäftsvorgängen ist die Zustimmung des Aufsichtsrats erforderlich. Der Aufsichtsrat der MAN SE ist paritätisch besetzt und setzt sich aus acht durch die Hauptversammlung gewählten Aufsichtsratsvertretern und acht im Rahmen der Verhandlungen mit dem besonderen Verhandlungsgremium bestellten Arbeitnehmervertretern zusammen. Zur Zusammensetzung des Aufsichtsrats der MAN SE und der gebildeten Ausschüsse sowie zur Aufgabenerfüllung und Zusammenarbeit mit dem Vorstand wird ergänzend auf den Bericht des Aufsichtsrats bzw. den Anhang zum Jahresabschluss verwiesen.

Kein Aufsichtsratsmitglied übte oder übt Organfunktionen oder Beratungsaufgaben bei wesentlichen Wettbewerbern von MAN aus. So werden insbesondere – wie in der Entsprechenserklärung vom Dezember 2009 klargestellt – bei dem für MAN wesentlichen Wettbewerber Scania keine Organfunktionen wahrgenommen, sondern nur bei dessen Mehrheitsgesellschafterin, der Volkswagen AG (Prof. Dr. Piëch, Aufsichtsratsvorsitzender, und Rupert Stadler, Mitglied des Vorstands), und der von dieser abhängigen Audi AG (Rupert Stadler, Vorstandsvorsitzender, und seit 1. April 2010 Ulf Berkenhagen, Mitglied des Vorstands), die aus Sicht von MAN keine wesentlichen Wettbewerber sind.

Die „Regierungskommission Deutscher Corporate Governance Kodex“ hat am 26. Mai 2010 diverse Änderungen des Kodex beschlossen. Sie will mit ihren Empfehlungen insbesondere den Anteil von Frauen in Führungsfunktionen und Gremien börsennotierter Unternehmen erhöhen und dem Kriterium der Vielfalt (Diversity) Rechnung tragen.

Der Vorstand hat in seiner Sitzung am 26. Oktober 2010 die hierfür erforderlichen Ziele definiert und einen umfangreichen Maßnahmenkatalog beschlossen.

Der Aufsichtsrat von MAN wird bei der Zusammensetzung des Vorstands auch auf das Kriterium der Vielfalt achten und dabei insbesondere eine angemessene Berücksichtigung von Frauen anstreben.

Die Zusammensetzung des Aufsichtsrats betreffend, hat der Aufsichtsrat in seiner Sitzung am 12. November 2010 Folgendes beschlossen:

Der Aufsichtsrat der MAN SE strebt angesichts des betriebenen Unternehmensgegenstands, der Größe der Gesellschaft und des Anteils der internationalen Geschäftstätigkeit als Ziel eine Zusammensetzung des Aufsichtsrats an, die die folgenden Elemente berücksichtigt:

- mindestens zwei Aufsichtsratssitze, wovon ein Sitz auf die Anteilseignerseite entfällt, für Personen, die in besonderem Maße das Kriterium der Internationalität verkörpern;
- mindestens zwei Aufsichtsratssitze auf Anteilseignerseite für Personen, die weder eine Beratungs- oder Organfunktion bei Kunden, Lieferanten, Kreditgebern oder sonstigen Geschäftspartnern des MAN Konzerns wahrnehmen, noch in einer einen Interessenkonflikt begründenden geschäftlichen oder persönlichen Beziehung zur MAN SE oder zu deren Vorstand stehen;
- mindestens zwei Aufsichtsratsmandate für Frauen, wovon mindestens ein Sitz auf die Anteilseignerseite entfällt.

Wahlvorschläge des Aufsichtsrats an die zuständigen Wahlgremien sollen die vorgenannten Ziele berücksichtigen. Es sollen demzufolge bei Wahlvorschlägen in der Regel keine Personen berücksichtigt werden, die im Zeitpunkt der Wahl das 70. Lebensjahr vollendet haben.

Ab dem 2. Juli 2010 (Zeitpunkt des Inkrafttretens der Kodex-Fassung vom 26. Mai 2010) war der MAN-Aufsichtsrat, zumindest temporär, nicht kodexkonform besetzt.



Herr Dr.-Ing. Ekkehard D. Schulz, Vorsitzender des Vorstands der ThyssenKrupp AG, hat konzernexterne Aufsichtsratsmandate in drei börsennotierten Gesellschaften (MAN SE, Bayer AG und RWE AG) und darüber hinaus in einer nicht börsennotierten Gesellschaft mit vergleichbaren Anforderungen (AXA Konzern AG) inne.

Herr Dr. Schulz ist allerdings mit Ablauf der ThyssenKrupp-Hauptversammlung am 21. Januar 2011 aus dem Vorstand der ThyssenKrupp AG ausgeschieden.

Im Hinblick auf die einerseits langjährige Mitgliedschaft von Herrn Dr. Schulz im MAN-Aufsichtsrat (sowie in den Aufsichtsgremien der weiteren o. a. Gesellschaften) und auf die andererseits baldige Beendigung seines Vorstandsmandats bei der ThyssenKrupp AG erschien eine zeitlich befristete Abweichung von der Kodexempfehlung in Ziffer 5.4.5 angemessen.

Beachtet wurde die Empfehlung des Kodex, dass dem Aufsichtsrat nicht mehr als zwei ehemalige Vorstandsmitglieder angehören sollen; im Aufsichtsrat ist derzeit ein ehemaliges Vorstandsmitglied.

Seit Inkrafttreten der Kodex-Fassung vom 26. Mai 2010 haben keine Aufsichtsratswahlen stattgefunden.

Interessenkonflikte wurden im Berichtsjahr weder von Vorstands- noch von Aufsichtsratsmitgliedern angezeigt. Die vom Aufsichtsrat getroffene Festlegung zur Altersgrenze für Vorstandsmitglieder, die eine Beendigung des Mandats nach dem 62. Lebensjahr mit der Option auf Mandatsverlängerungen bis maximal zum Ablauf des 65. Lebensjahres vorsieht, wurde eingehalten. Zudem wurde die festgelegte Regelaltersgrenze von 70 für Aufsichtsratsmitglieder beachtet. Lediglich der Aufsichtsratsvorsitzende und ein weiteres Aufsichtsratsmitglied haben das 70. Lebensjahr überschritten.

Berater und sonstige Dienstleistungs- und Werkverträge zwischen Mitgliedern der Verwaltung und der Gesellschaft bestanden im Berichtsjahr nicht. Nebentätigkeiten von Vorstandsmitgliedern hat der Aufsichtsrat nur im Hinblick auf externe Aufsichtsratsmandate und Geschäftsführungstätigkeiten bei Konzerngesellschaften zugestimmt. Die Gesellschaft hat eine Vermögensschadenhaftpflichtversicherung (D&O-Versicherung) entsprechend den Anforderungen des Gesetzes zur Angemessenheit der Vorstandsvergütung (VorstAG) vom 31. Juli 2009 und des DCGK abgeschlossen.

## Compliance/Risikomanagement

Der Vorstand der MAN SE hat im Rahmen seiner durch den DCGK vorgegebenen Verantwortung für Compliance zum 1. Januar 2010 einen neuen Bereich Compliance eingerichtet. Dieser Bereich, der dem Chief Compliance Officer („CCO“) unterstellt ist, trägt die Verantwortung für die Entwicklung und Umsetzung eines konzern-einheitlichen Integritäts- und Compliance-Programms mit den Schwerpunkten auf den Bereichen Korruptionsbekämpfung, Kartellrechtsverstöße und Datenschutz. Der Compliance-Bereich besteht zum einen aus dem zentralen Corporate Compliance Office in der MAN SE und zum anderen aus der Compliance-Organisation in den Teilkonzernen. Die vom CCO entwickelten zentralen Compliance-Maßnahmen werden durch die Compliance-Mitarbeiter der Teilkonzerne dezentral weltweit einheitlich umgesetzt. Alle Mitarbeiter der Compliance-Organisation unterstehen dem CCO, der regelmäßig an den Vorstand der MAN SE und an den Prüfungsausschuss des Aufsichtsrats berichtet.

Zu den wesentlichen Compliance-Maßnahmen, die der Compliance-Bereich im Berichtszeitraum entwickelt und umgesetzt hat, zählen die folgenden:

- Im Berichtszeitraum wurde ein konzernweites Compliance Risk Assessment durchgeführt. Ziel hiervon war die Identifizierung von möglichen Compliance-Risiken der objektiven Geschäftsmodelle der Unternehmensgruppe. Aus den Ergebnissen des Compliance Risk Assessment wurden u. a. der Aufbau der Compliance-Organisation, das auf MAN zugeschnittene Compliance-Programm sowie weitere Maßnahmen zur Vermeidung von Compliance-Risiken abgeleitet.
- Der bestehende Code of Conduct wurde grundlegend überarbeitet, und neue Richtlinien zur Vorbeugung von Korruptionsrisiken wurden erlassen (Richtlinie zum Umgang mit Geschenken, Bewirtungen und Einladungen; Richtlinie zur Einschaltung von Businesspartnern; Richtlinie zu Spenden und Sponsoringmaßnahmen).

- Um Korruptionsrisiken im Umgang mit vertriebsunterstützenden Geschäftspartnern (insbesondere Beratern und Vermittlern) besser einschätzen und so weit wie möglich ausschalten zu können, hat der Compliance-Bereich gemeinsam mit Mitarbeitern aus dem Vertrieb eine webbasierte Applikation, das sog. Business Partner Approval Tool, entwickelt, mit deren Hilfe die Integrität solcher Geschäftspartner systematisch überprüft werden kann.
- Im Februar 2010 wurde der Compliance Helpdesk eingerichtet, an den sich alle Mitarbeiter mit Compliance-relevanten Fragen wenden können. Zudem führt der Compliance-Bereich weltweit Compliance Awareness Trainings als Präsenzschiulung für sämtliche Mitarbeiter durch, die in ihrer täglichen Arbeit Compliance-Risiken ausgesetzt sein können. Schwerpunkt der Trainings ist die Vermittlung von Basiswissen zu den Themen Antikorruption und Kartellrechtsverstöße.
- Compliance-Verstöße werden bei MAN nicht toleriert. Hinweise auf mögliche Verstöße werden eingehend untersucht und im Rahmen der arbeitsrechtlich zulässigen Sanktionsmöglichkeiten geahndet. Die Erkenntnisse aus der Aufklärung von Compliance-Verstößen nutzt die Compliance-Abteilung, um etwaige Defizite des Compliance-Programms zu analysieren und dieses entsprechend anzupassen und kontinuierlich zu verbessern.

Eine ausführliche Darstellung der MAN-Compliance-Organisation und der im Berichtszeitraum umgesetzten Compliance-Maßnahmen findet sich im Konzernlagebericht.

Die Risiken aus Compliance-Verstößen sowie andere Unternehmensrisiken wurden im Rahmen des Risikomanagementsystems beurteilt und von Vorstand und Aufsichtsrat, insbesondere dem Prüfungsausschuss, eingehend behandelt. Auf die Darstellung des Risikomanagementsystems bei MAN sowie den Risikobericht im Lagebericht wird verwiesen.

#### **Meldepflichtige Wertpapiergeschäfte**

Gemäß § 15a des Wertpapierhandelsgesetzes müssen Personen mit Führungsaufgaben und bestimmte nahe stehende Personen über den Kauf und Verkauf von MAN-Aktien und sich auf diese beziehende Finanzinstrumente dem Emittenten und der Bundesanstalt für Finanzdienstleistungsaufsicht (BaFin) berichten. Im Geschäftsjahr 2010 wurde keine Transaktion gemeldet. Mitteilungen werden ggf. auf der Internetseite unter [www.man.eu/MAN/de/Investor\\_Relations/Corporate\\_Governance/Meldepflichtige\\_Wertpapiergeschaeft/](http://www.man.eu/MAN/de/Investor_Relations/Corporate_Governance/Meldepflichtige_Wertpapiergeschaeft/) veröffentlicht.

Der direkte und indirekte Besitz von Aktien oder von sich auf Aktien beziehenden Derivaten von Vorstands- und Aufsichtsratsmitgliedern hat nach den vorliegenden Meldungen in keinem Einzelfall und auch nicht in Summe den Schwellenwert von 1 % der ausgegebenen Aktien überschritten.

#### **Rechnungslegung**

Der jährliche Konzernabschluss der MAN Gruppe wird vom Vorstand auf Grundlage der „International Financial Reporting Standards“ (IFRS), der Einzelabschluss der MAN SE gemäß den Vorschriften des Handelsgesetzbuchs (HGB) aufgestellt. Die Abschlüsse werden vom Aufsichtsrat geprüft und gebilligt. Sämtliche Fristen zur Veröffentlichung von Abschlüssen und Zwischenberichten wurden im Berichtsjahr eingehalten. Entsprechend der in Ziffer 7.1.2 im Jahre 2008 neu gefassten Empfehlung des DCGK, werden die Halbjahres- und Quartalsberichte bei MAN vom Prüfungsausschuss vor der Veröffentlichung mit dem Vorstand erörtert.



### Abschlussprüfung

Der Aufsichtsrat hat im Berichtsjahr die PricewaterhouseCoopers Aktiengesellschaft Wirtschaftsprüfungsgesellschaft („PwC“), München, zum Abschlussprüfer vorgeschlagen, die Hauptversammlung ist diesem Vorschlag gefolgt. Die PwC hat ihre Unabhängigkeit gegenüber dem Prüfungsausschuss von MAN bestätigt. Es wurde des Weiteren vereinbart, dass Abschluss- und Befangenheitsgründe, die während der Prüfung auftreten könnten, unverzüglich dem Vorsitzenden des Prüfungsausschusses gemeldet werden, soweit diese nicht unverzüglich beseitigt werden konnten.

## Vergütungsbericht für das Geschäftsjahr 2010<sup>2</sup>

### Vergütungen der Mitglieder des Vorstands im Jahr 2010

Seit dem Inkrafttreten des Gesetzes zur Angemessenheit der Vorstandsvergütung (VorstAG) vom 31. Juli 2009 ist das Gesamtplenar des Aufsichtsrats für die Festsetzung der Gesamtvergütung der einzelnen Vorstandsmitglieder zuständig. Entscheidungen des Aufsichtsrats über die Festsetzung der Gesamtvergütung von einzelnen Vorstandsmitgliedern werden bei der MAN SE vom Präsidium des Aufsichtsrats vorbereitet und vorgeschlagen. Auf Vorschlag des Präsidiums wird auch die Struktur des Vergütungssystems für den Vorstand regelmäßig im Aufsichtsratsplenar beraten sowie – entsprechend der Empfehlung des Deutschen Corporate Governance Kodex (DCGK; Ziffer 4.2.2.) – ein Vergütungssystem beschlossen und regelmäßig überprüft. Über das derzeit gültige Vergütungssystem hat der Aufsichtsrat in seiner Sitzung am 12. Februar 2010 sowie – hinsichtlich der Bemessung der Tantieme – im schriftlichen Verfahren im Juni 2010 beschlossen.

Zielsetzung und Aufgabe ist die Festlegung von angemessenen Vergütungen. Kriterien hierfür bilden insbesondere die Aufgaben des jeweiligen Vorstandsmitglieds, seine persönliche Leistung, die wirtschaftliche Lage, der Erfolg und die Zukunftsaussichten des Unternehmens sowie die Üblichkeit der Vergütung unter Berücksichtigung seines Vergleichsumfelds und der Vergütungsstruktur, die ansonsten bei MAN gilt.

### Vergütungsstruktur und -bestandteile

Die Vergütung für die Vorstandsmitglieder setzt sich aus erfolgsunabhängigen Gehalts- und Sachleistungen sowie Versorgungsbeiträgen und aus erfolgsbezogenen Komponenten zusammen. Die erfolgsbezogenen, variablen Vergütungsteile bestehen aus an den geschäftlichen Erfolg gebundenen Komponenten und aus Komponenten mit langfristiger Anreizwirkung und Risikocharakter.

- Die feste Vergütung wird als monatliches Gehalt geleistet. Hinzu kommen Sachbezüge, die insbesondere die Gestellung eines Dienstwagens und die Bereitstellung eines Fahrers für Dienstfahrten sowie die Übernahme von Versicherungsprämien umfassen. Eine Überprüfung und ggf. Anpassung der festen Vergütung erfolgt regelmäßig unter Berücksichtigung der allgemeinen Gehaltsentwicklung und des Verantwortungsbereichs des jeweiligen Vorstandsmitglieds.

- Die auf den geschäftlichen Erfolg ausgerichtete variable Vergütung (Tantieme) orientiert sich jeweils hälftig an zwei Faktoren.

Eine Hälfte der Tantieme errechnet sich aus dem Return on Capital Employed (ROCE) der MAN Gruppe abzüglich der durchschnittlichen Kapitalkosten (Weighted Average Cost of Capital, WACC). Diesem Faktor liegt eine Durchschnittsbetrachtung des betreffenden und des jeweils folgenden Geschäftsjahres zugrunde. Aus einem Vergleich dieses Durchschnittswerts mit dem vereinbarten Zielwert errechnet sich der Zielerreichungsgrad.

Die andere Hälfte der Tantieme wird aus dem Faktor Return on Equity (vor Steuern) ermittelt. Der Istwert des betreffenden Geschäftsjahres wird mit dem vereinbarten Zielwert verglichen und daraus der Zielerreichungsgrad ermittelt. 50 % des sich daraus ergebenden Tantiemeanteils werden gemäß dem MAN-Aktien-Programm in Aktien mit einer Haltefrist von vier Jahren ausbezahlt (siehe unten).

Die Tantieme ist in der Höhe beschränkt und kommt nur dann zur Auszahlung, wenn die Gesellschaft einen Return on Sales (ROS) von mehr als 2 % erreicht.

- Die auf den langfristigen Unternehmenserfolg ausgerichtete Komponente wird seit 2005 in Form des MAN-Aktien-Programms gewährt. Im Rahmen dieses Programms erhalten die Vorstände jährlich steuerpflichtige Barzuwendungen in Höhe von 50 % der festen Vergütung. Die Hälfte des Zuwendungsvolumens ist in Stammaktien der MAN SE anzulegen. Der Erwerb und die Verwahrung der Aktien erfolgen zentral durch die MAN SE im Namen und für Rechnung der Vorstandsmitglieder. Über erworbene Ak-

<sup>2</sup>Der Vergütungsbericht ist Teil des Konzernlageberichts im Sinne von § 315 HGB.

ten kann nach Ablauf einer Sperrfrist von vier Jahren frei verfügt werden. Während der Sperrfrist dürfen die Aktien nicht veräußert, beliehen oder kursgesichert werden. Bei Übertritt in den Ruhestand sowie bei Ausscheiden aus der MAN Gruppe endet die Sperrfrist spätestens ein Jahr nach dem Tag des Ausscheidens.

- Die Versorgungsansprüche der Vorstandsmitglieder umfassen Alters-, Invaliditäts- und Hinterbliebenenversorgung. Anwartschaften werden im Rahmen eines beitragsorientierten, fondsakkessorischen Versorgungssystems aufgebaut. Die MAN SE zahlt jährlich einen Beitrag in Höhe von 20 % der festen Vergütung und der im Geschäftsjahr geleisteten Tantieme in einen MAN-Fonds ein. Optional sind zusätzliche Eigenbeiträge durch Brutto-Entgeltumwandlung möglich. Die geleisteten Beiträge und ihre Verzinsung werden auf individuellen Kapitalkonten geführt. Der aufgelaufene Saldo des Kapitalkontos wird entsprechend der Performance ausgewählter Kapitalmarktindizes verzinst, deren Gewichtung altersabhängig ist. Die Beiträge und ihre Verzinsung sowie ggf. eine darüber hinaus vom Fonds erzielte Verzinsung ergeben das zur Verfügung stehende Kapital. Im Versorgungsfall wird das Guthaben auf dem Kapitalkonto, mindestens die Summe der geleisteten Beiträge, wahlweise als Einmalbetrag, als Zahlung in Raten oder verrentet ausgezahlt. Bei Invalidität oder im Todesfall wird der aufgelaufene Kontenstand, mindestens aber ein Kapital in Höhe des Vierfachen der festen Jahresvergütung und Tantieme, ausgezahlt.

#### **Vergütung der Vorstandsmitglieder 2010**

Insgesamt belief sich die Vergütung der aktiven Mitglieder des Vorstands für ihre Tätigkeit im Geschäftsjahr 2010 auf 10 549 T€ zzgl. 656 T€ für Altersversorgung (Vorjahr: 4 270 T€ zzgl. 1 437 T€ für Altersversorgung). Einzelheiten ergeben sich in individualisierter Form unter Angabe der erfolgsunabhängigen, erfolgsabhängigen und Komponenten mit langfristiger Anreizwirkung aus der unter Anmerkung 34 des Anhangs zum Konzernabschluss abgedruckten Aufstellung, auf die verwiesen wird.

Zusätzlich wurden im Geschäftsjahr 2010 an im Geschäftsjahr 2009 ausgeschiedene Vorstände Abfindungen von insgesamt 7 142 T€ gezahlt. Hierfür wurden bereits im Geschäftsjahr 2009 entsprechende Rückstellungen gebildet. Auch diese Positionen sind unter der vorgenannten Anmerkung des Anhangs näher dargestellt.

#### **Besondere dienstvertragliche Regelungen**

Im Fall einer vorzeitigen Beendigung einer Bestellung ohne wichtigen Grund und auf Veranlassung der Gesellschaft erhält das betroffene Mitglied des Vorstands aufgrund einer ab 2010 geltenden Regelung die feste Vergütung, die Tantieme, die Zuschüsse zu Versicherungen sowie die Beiträge zum Versorgungssystem bis zum Ende der regulären Amtszeit, maximal aber für zwei Jahre. Einkünfte aus anderweitigen Tätigkeiten werden angerechnet; die Bezugsbasis zur Berechnung der Höhe der Beiträge zum Versorgungssystem ermäßigt sich dementsprechend. Für die Berechnung der nach Ausscheiden des Vorstandsmitglieds als Abfindung fortgezählten Tantieme wird auf das abgelaufene Geschäftsjahr und auf die voraussichtliche Tantieme für das laufende Geschäftsjahr abgestellt.

Bei Beendigung einer Bestellung auf Veranlassung eines Mitglieds des Vorstands – dies ist unter Einhaltung einer Kündigungsfrist von 18 Monaten ohne Angabe von Gründen möglich – werden Leistungen lediglich bis zum Ablauf der Kündigungsfrist gewährt. Besondere Change-of-Control-Regelungen sind nicht vorgesehen.

### Vergütungen der Mitglieder des Aufsichtsrats

Die Struktur sowie die Höhe der Vergütung des Aufsichtsrats wird durch die Hauptversammlung festgelegt und ist in § 12 der Satzung geregelt. Sie orientiert sich an den Aufgaben und der Verantwortung der Aufsichtsratsmitglieder sowie am wirtschaftlichen Erfolg des Konzerns.

Die jährliche Vergütung besteht aus folgenden Bestandteilen:

- einem Grundbetrag (feste Vergütung) von 35 T€;
- einer variablen Vergütung (Tantieme). Diese bemisst sich nach dem tatsächlich erzielten Ergebnis pro Aktie gemäß Konzernabschluss. Die variable Vergütung beläuft sich auf 175 Euro für je 0,01 Euro Ergebnis je Aktie, das über 0,50 Euro hinausgeht. Sie ist auf das Zweifache des Grundbetrags beschränkt.

Zusätzliche Vergütungen werden für den Vorsitz und stellvertretenden Vorsitz im Aufsichtsrat sowie für die Mitgliedschaft und den Vorsitz in Aufsichtsratsausschüssen gewährt. Dem Aufsichtsratsvorsitzenden steht der zweifache und seinen Stellvertretern der anderthalbfache Betrag der festen und variablen Vergütung zu. Für die Tätigkeit im Prüfungsausschuss bzw. im Präsidium des Aufsichtsrats wird Ausschussmitgliedern jeweils eine zusätzliche Vergütung von 50 %, für den Vorsitzenden von 100 % des Grundbetrags gewährt.

Seit der in der Hauptversammlung am 1. April 2010 beschlossenen Satzungsänderung erhalten die Mitglieder des Aufsichtsrats zusätzlich für Sitzungen des Aufsichtsrats oder von Ausschüssen des Aufsichtsrats, in denen sie anwesend sind, ein Sitzungsgeld in Höhe von jeweils 500 Euro.

Zudem werden Auslagen der Mitglieder des Aufsichtsrats erstattet.

Vergütungen und Auslagenersatz, die der Umsatzsteuer unterliegen, werden zuzüglich Umsatzsteuer gezahlt, wenn diese gesondert in Rechnung gestellt wird.

Auf eine am langfristigen Unternehmenserfolg ausgerichtete Vergütungskomponente ist, da Erfolgsbeiträge praktisch kaum messbar sind, bei den Aufsichtsratsvergütungen verzichtet worden. Von der entsprechenden Anregung des Kodex (Ziffer 5.4.6) wird damit abgewichen.

Die Vergütung des ersten Aufsichtsrats (einer SE) steht nach z. T. in der Rechtsliteratur vertretener Auffassung unter dem Vorbehalt der Zustimmung der Hauptversammlung, die vorsorglich zum Ende der satzungsmäßigen ersten Amtszeit des Aufsichtsrats in der Hauptversammlung 2011 eingeholt werden soll.

### Vergütung der Aufsichtsratsmitglieder 2010

Die insgesamt an die Mitglieder des Aufsichtsrats für 2010 zu zahlenden Vergütungen belaufen sich auf 2 183 T€ (Vorjahr 941 T€). Mitgliedern des Aufsichtsrats der MAN SE wurden zudem für Aufsichtsratsmandate bei Konzerngesellschaften für das Geschäftsjahr 2010 Vergütungen in Höhe von insgesamt 68 T€ (Vorjahr 39 T€) gewährt. Eine individualisierte Aufstellung über die Bezüge der Aufsichtsratsmitglieder, die dem Aufsichtsrat im Jahr 2010 angehört haben, findet sich unter Anmerkung 35 des Anhangs zum Konzernabschluss, auf die verwiesen wird.

### Sonstiges

Darüber hinaus haben Aufsichtsratsmitglieder im Berichtsjahr keine weiteren Vergütungen bzw. Vorteile für persönlich erbrachte Leistungen, insbesondere Beratungs- und Vermittlungsleistungen, erhalten.

Frühere Aufsichtsratsmitglieder, die vor dem 1. Januar 2010 aus dem Aufsichtsrat ausgeschieden sind, erhalten keine Vergütungen.

**01**  
An die Aktionäre  
Seite 04–23

**02**  
Die MAN-Welt  
Seite 24–51

**03**  
Konzernlagebericht  
Seite 52–119

**04**  
Konzernabschluss  
Seite 120–190

|    |                                          |
|----|------------------------------------------|
| 26 | MAN-Produktionsstandorte                 |
| 28 | Strategie & Stärken                      |
| 30 | Jahresbericht der MAN SE                 |
| 32 | Commercial Vehicles – Transporteffizienz |
| 36 | Commercial Vehicles – Reisekomfort       |
| 40 | Commercial Vehicles – Hybridtechnik      |
| 44 | Power Engineering – Welthandel           |
| 48 | Power Engineering – Abfallverwertung     |

## Die Zukunft des Transports

2010 erarbeitete MAN in Kooperation mit „The Economist“ eine weltweite Studie zur Zukunft des Transports. MAN wollte wissen, wo die internationale Transport- und Logistikbranche den größten Handlungsbedarf sieht. Dazu wurden in Kooperation mit der Economist Intelligence Unit 220 leitende Angestellte von Unternehmen dieser Branche aus zehn Ländern befragt. Die Studie „Keeping traffic flowing, Transport efficiency to 2030“ steht auf der Website [www.man.eu](http://www.man.eu) zum Download zur Verfügung.

### VERKEHRSTRÄGER STRASSENNETZ

#### Qualität der Infrastruktur

Deutschland verfügt im weltweiten Vergleich der Verkehrssituation in zehn Ländern über die leistungsfähigste Verkehrsinfrastruktur.

10,0: besonders gut, 0: besonders schlecht

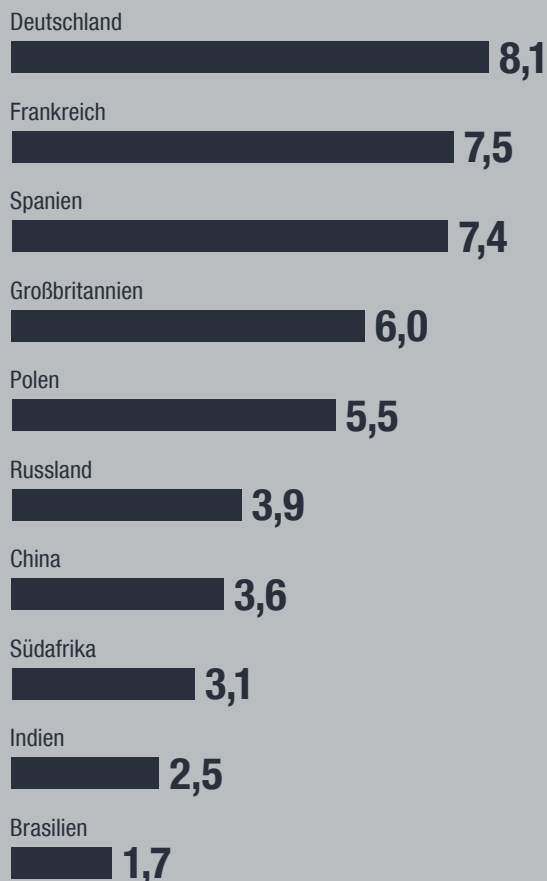

### LOGISTISCHE HERAUSFORDERUNG

#### Investition und Wachstum

In welchem Maße stimmen Sie mit folgender Aussage in Bezug auf Ihr Unternehmen überein?  
„Die Verfügbarkeit und Qualität einer Infrastruktur für den Transport beeinflusst, wo wir unser Geschäft ansiedeln und ausweiten.“

\* Die Prozentangaben sind gerundet. Deshalb ist die Gesamtsumme nicht genau 100.

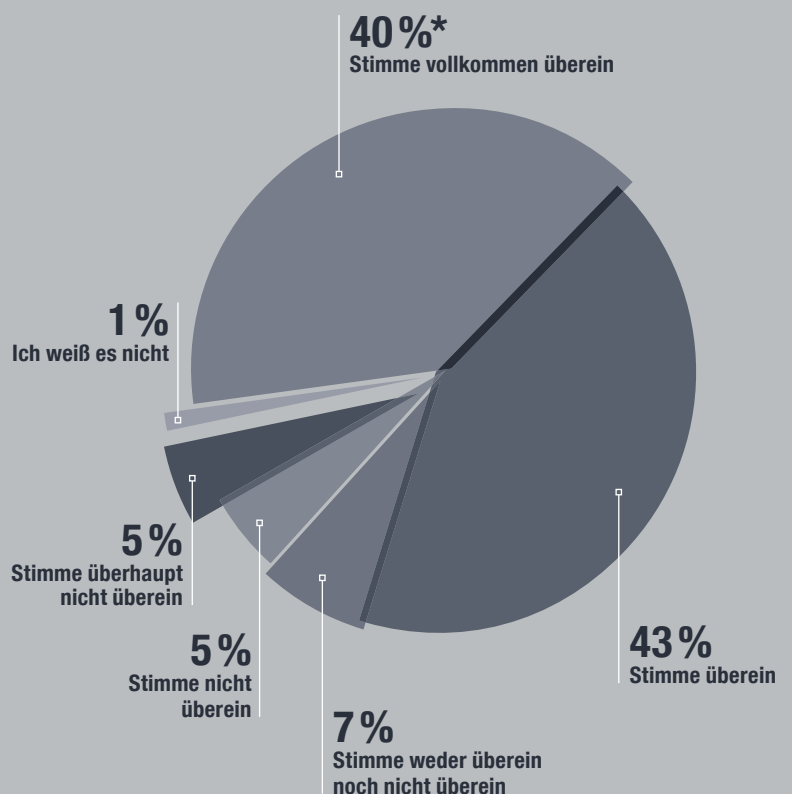

# Die MAN-Welt

## MAN-Produktionsstandorte

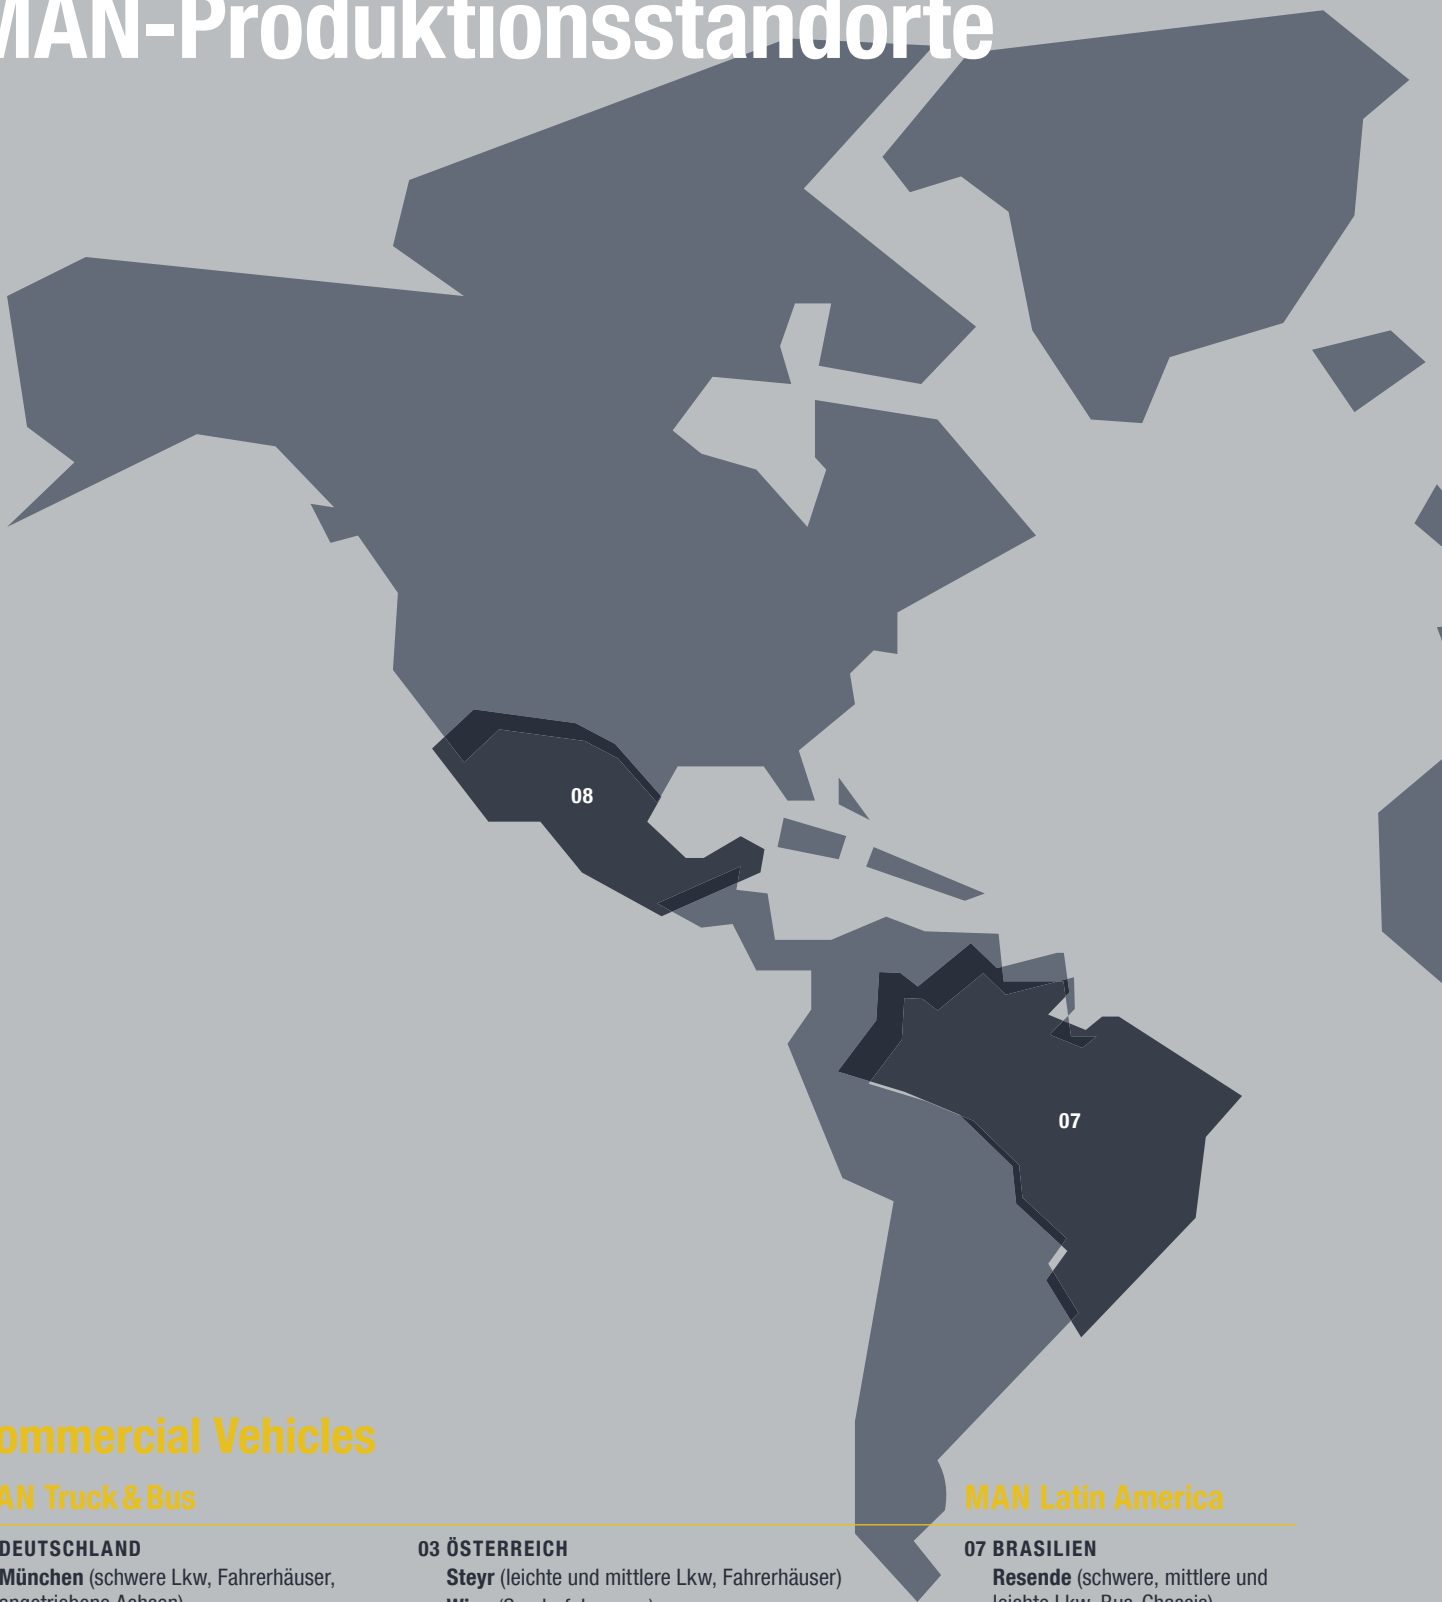

### Commercial Vehicles

#### MAN Truck & Bus

##### 01 DEUTSCHLAND

**München** (schwere Lkw, Fahrerhäuser, angetriebene Achsen)

**Nürnberg** (Motoren)

**Plauen** (Premiumreisebusse, Linien- und Reisedoppeldecker)

**Salzgitter** (schwere Lkw, Bus-Chassis und Komponenten)

##### 02 INDIEN

**Pithampur** (schwere Lkw)

##### 03 ÖSTERREICH

**Steyr** (leichte und mittlere Lkw, Fahrerhäuser)

**Wien** (Sonderfahrzeuge)

##### 04 POLEN

**Krakow** (schwere Lkw)

**Poznan** (Stadtbusse, Überlandbusse, Bodengruppen)

**Starachowice** (Rohbau für Stadtbusse, Überlandbusse und Bodengruppen)

##### 05 SÜDAFRIKA

**Olifantsfontein** (Überland- und Linienbusse)

**Pinetown** (schwere, mittlere und leichte Lkw, Bus-Chassis)

##### 06 TÜRKEI

**Ankara** (Reisebusse, Überland- und Linienbusse)

#### MAN Latin America

##### 07 BRASILIEN

**Resende** (schwere, mittlere und leichte Lkw, Bus-Chassis)

##### 08 MEXIKO

**Querétaro** (Bus- und Lkw-Montage)

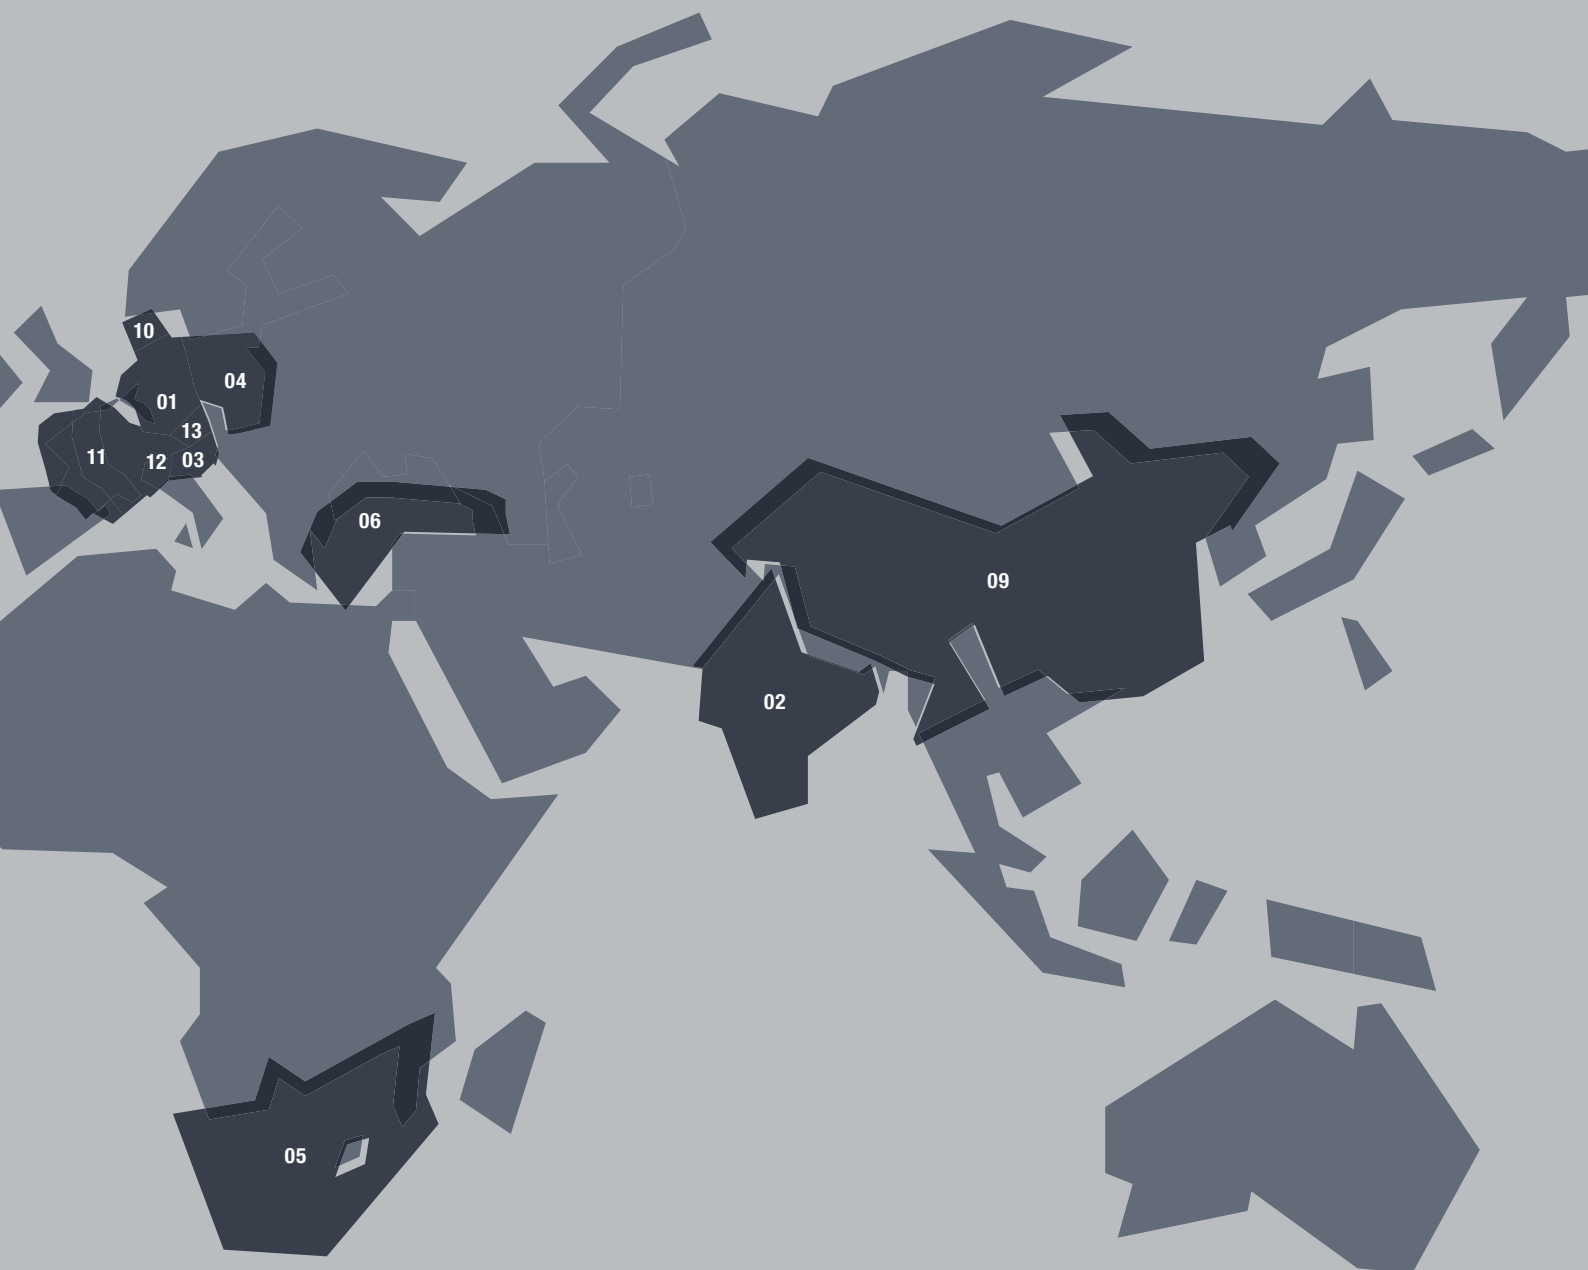

## Power Engineering

### MAN Diesel & Turbo

#### 01 DEUTSCHLAND

**Augsburg** (Großdieselmotoren, Turbolader)  
**Berlin** (Kompressoren)  
**Deggendorf** (chemische Reaktoren, Spezialapparate)  
**Hamburg** (Dampfturbinen)  
**Oberhausen** (Kompressoren, Gas- und Dampfturbinen)

#### 02 INDIEN

**Aurangabad** (Großdieselmotoren)

#### 09 CHINA

**Changzhou** (Kompressoren)  
**Shanghai** (Turbolader für Großdieselmotoren)

#### 10 DÄNEMARK

**Frederikshavn** (Propulsionssysteme)  
**Kopenhagen** (Ersatzteile für Großdieselmotoren)

#### 11 FRANKREICH

**Saint-Nazaire** (Großdieselmotoren)

#### 12 SCHWEIZ

**Zürich** (Kompressoren, Vakuumgebläse)

#### 13 TSCHECHIEN

**Velká Bíteš** (Turbolader für Großdieselmotoren)

### Renk

#### 01 DEUTSCHLAND

**Augsburg** (Getriebe, Testsysteme)  
**Hannover** (Gleitlager, Kupplungen)  
**Rheine** (Getriebe, Kupplungen)

# Die MAN-Welt

## Strategie & Stärken

### Konzentration auf Transport und Energie

MAN legt mit den Produkten Nutzfahrzeuge, Turbomaschinen, Dieselmotoren und Getriebe den Schwerpunkt auf Marktsegmente mit nachhaltigen globalen Wachstumschancen in den Geschäftsfeldern Commercial Vehicles und Power Engineering.

### Technologieführerschaft

Kontinuierliche Investitionen in Forschung und Entwicklung sichern MAN die Technologieführerschaft als strategischen Erfolgsfaktor: Künftige Anforderungen werden frühzeitig erkannt und in neue wegweisende Lösungen umgesetzt.

### Profitables internationales Wachstum

MAN ist auf allen fünf Kontinenten vertreten und setzt auf weiteres internationales Wachstum mit Schwerpunkt auf den BRIC-Ländern. Kooperationen nutzen Verbundvorteile in Einkauf und Entwicklung.

### Nachhaltige Wertschöpfung

MAN ist sich der Verantwortung für Umwelt, Mitarbeiter und Gesellschaft bewusst. Diese unternehmerische Verantwortung kommt in allen Elementen der Unternehmensstrategie zum Tragen und ermöglicht eine nachhaltige Wertschöpfung.

### Industrial Governance

Mit einem effizienten Industrial-Governance-System regelt MAN, wie Aufgaben und Verantwortung zwischen der Zentrale der MAN Gruppe und den Bereichen verteilt sind. Es setzt auf eine Balance von zentraler strategischer Steuerung mit übergreifenden Shared Services und dezentralen operativen Funktionen sowie auf eine moderne Führungskultur. Das Fundament dafür sind die gemeinsamen grundlegenden Werte für die Marke und Kultur von MAN.



## MAN-SERVICESTÜTZPUNKTE

### Weltweit im Dienst des Kunden

Bestmögliche Dienstleistung für die Kunden vor Ort, das garantiert MAN mit einem dichten Netz an Servicestützpunkten und dem hohen technischen Know-how seiner Mitarbeiter – rund um den Globus. Für Lkw und Busse genauso wie für Turbomaschinen und Schiffsdiesel.

MAN Truck & Bus

**1 400**  
Stützpunkte

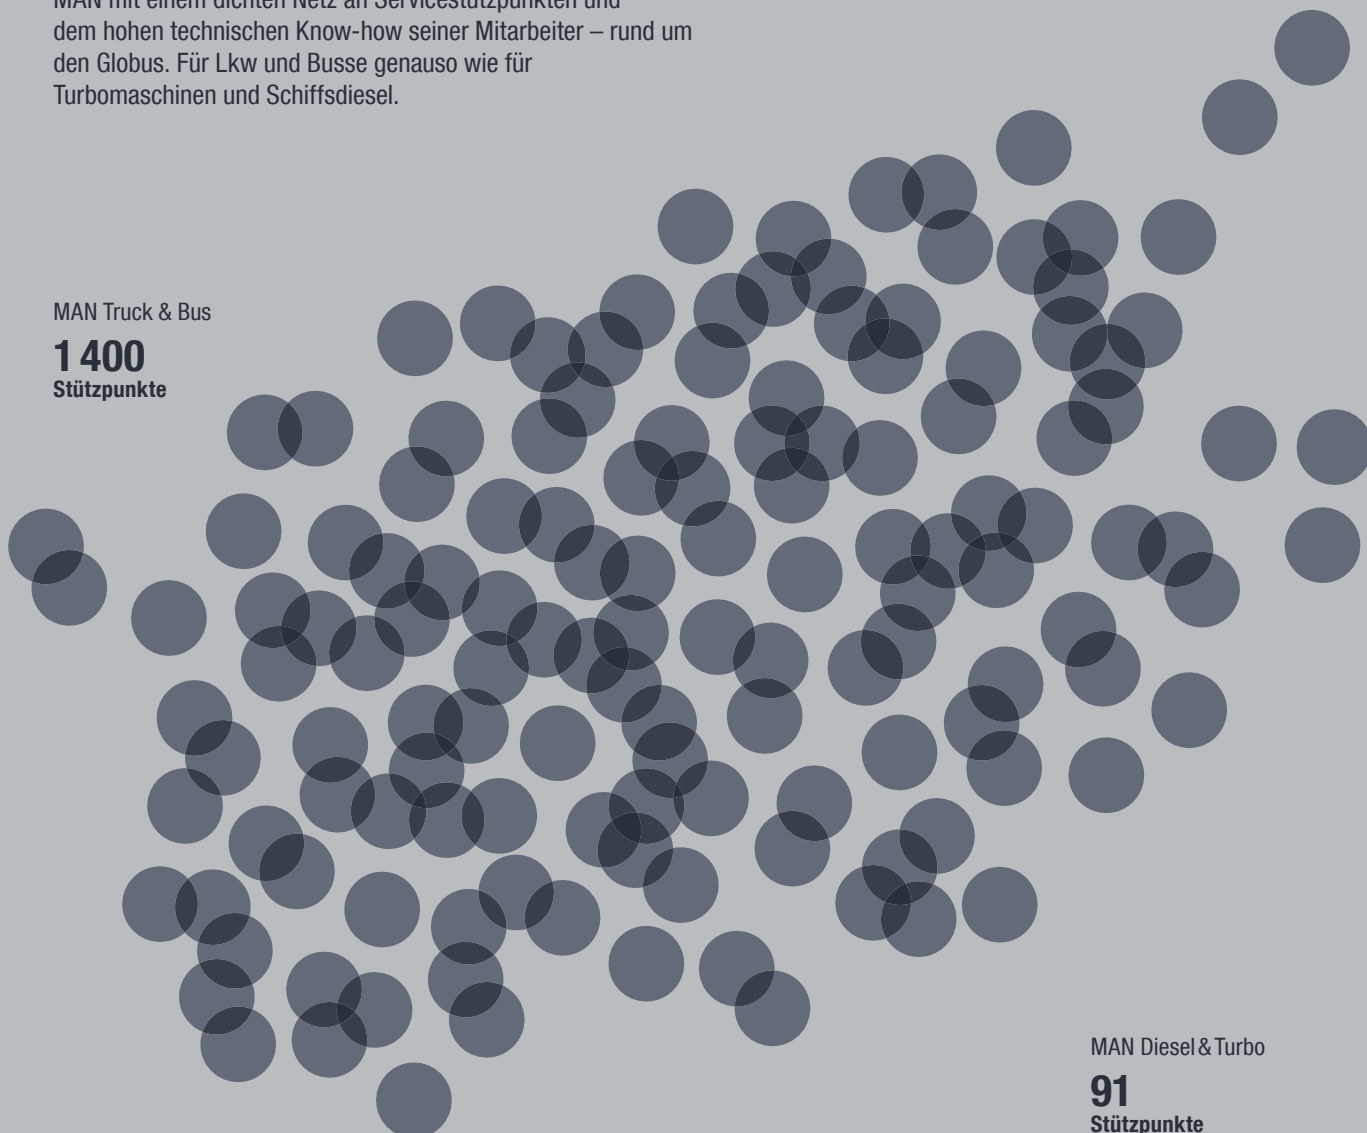

MAN Diesel & Turbo

**91**  
Stützpunkte

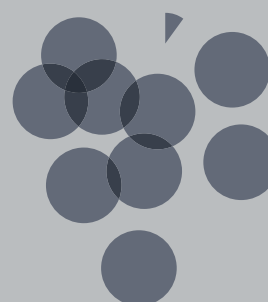

MAN Latin America

**145**  
Stützpunkte

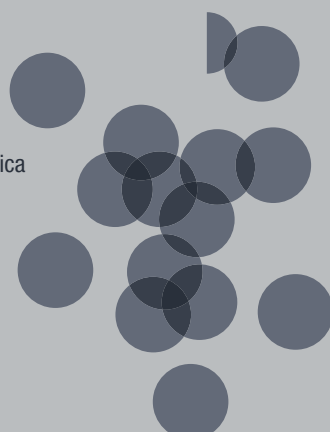

# Die MAN-Welt

## Jahresbericht der MAN SE

### Rückblick auf das Jahr 2010

**2010 war für MAN vom wirtschaftlichen Aufwärtstrend geprägt. Die Geschäftszahlen erholten sich, technische Neuerungen und die Einführung eines Nachhaltigkeitsmanagements verstärkten den Erfolg.**

#### 1. Quartal

##### EIB und MAN vereinbaren Darlehen für umweltfreundliche Technologien

Die Europäische Investitionsbank (EIB), Luxemburg, und die MAN Gruppe schließen einen Darlehensvertrag über 300 Millionen Euro zur Forschungsförderung im Bereich Nutzfahrzeuge. Die Mittel dienen der Entwicklung und Markteinführung von emissionsreduzierten und verbrauchsoptimierten Antrieben für Lkw und Busse.

##### MAN Latin America fährt Produktion hoch

MAN Latin America baut seine Kapazität im brasilianischen Werk Resende aus und führt ab März eine dritte Schicht ein. Die Kapazität wird auf jährlich 72.000 Lkw und Bus-Chassis erhöht. Damit wird auf die steigende Nachfrage nach Nutzfahrzeugen in Lateinamerika und insbesondere in Brasilien reagiert.

##### Fusion zur MAN Diesel & Turbo SE vollzogen

Die angekündigte Fusion der MAN Diesel SE und der MAN Turbo AG zur MAN Diesel & Turbo SE mit Sitz in Augsburg wird im März durch einen entsprechenden Eintrag im Handelsregister vollzogen. Damit ist der Zusammenschluss der beiden ehemaligen MAN-Schwesterunternehmen wirksam.

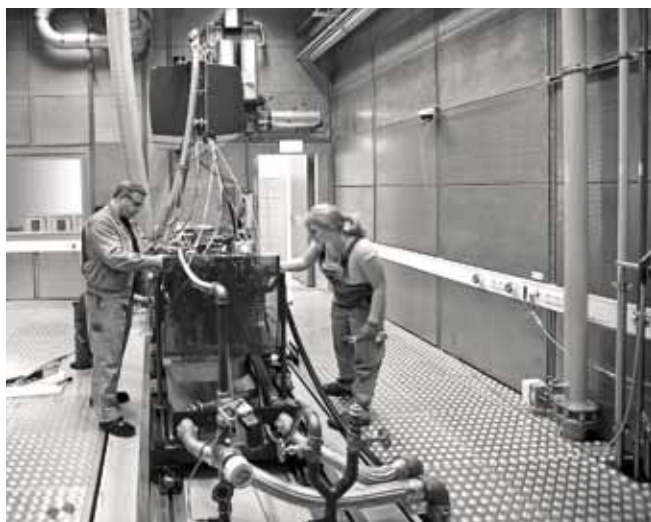

#### 2. Quartal

##### MAN-Hauptversammlung 2010

MAN-Vorstandssprecher Dr. Georg Pachta-Reyhofen berichtet auf der Hauptversammlung 2010 in München, dass MAN trotz der sehr schwierigen wirtschaftlichen Lage ein Operatives Ergebnis von einer halben Milliarde Euro erzielte und auch der Geschäftsbereich Commercial Vehicles schwarze Zahlen geschrieben hat.

##### MAN eröffnet neues Motoren-Entwicklungszentrum in Nürnberg (Bild links unten)

Mit einem neuen Entwicklungszentrum am Standort Nürnberg baut MAN Nutzfahrzeuge seine Position als Technologieführer bei Nutzfahrzeug- und Industriemotoren weiter aus. In dem neuen Gebäude entstanden auf einer Fläche von rund 10.000 Quadratmetern 16 Motorenprüfstände, ein Fahrzeugprüfstand, Entwicklungslabors und Arbeitsplätze für 150 Mitarbeiter.

##### Rheinmetall MAN Military Vehicles GmbH gegründet

Die MAN Nutzfahrzeuge AG und die Rheinmetall AG gründen ein gemeinsames Unternehmen für militärisch genutzte Radfahrzeuge. An dem neuen Unternehmen mit Sitz in München, das als Rheinmetall MAN Military Vehicles GmbH (RMMV) firmiert, sind Rheinmetall mit 51 Prozent und MAN Nutzfahrzeuge mit 49 Prozent beteiligt.

##### München setzt ersten Hybrid-Stadtbus von MAN ein

Die Münchner Verkehrsgesellschaft (MVG) stellt den ersten MAN Lion's City Hybrid in Dienst. München ist damit die erste europäische Metropole, die den neuen MAN Lion's City Hybrid im Linienbetrieb einsetzt. Er verbraucht bis zu 30 Prozent weniger Kraftstoff als ein konventioneller Stadtbus.

**In den neuen Prüfständen von MAN Truck & Bus in Nürnberg werden Motoren für die weltweit unterschiedlichen Umweltstandards optimiert und zertifiziert.**

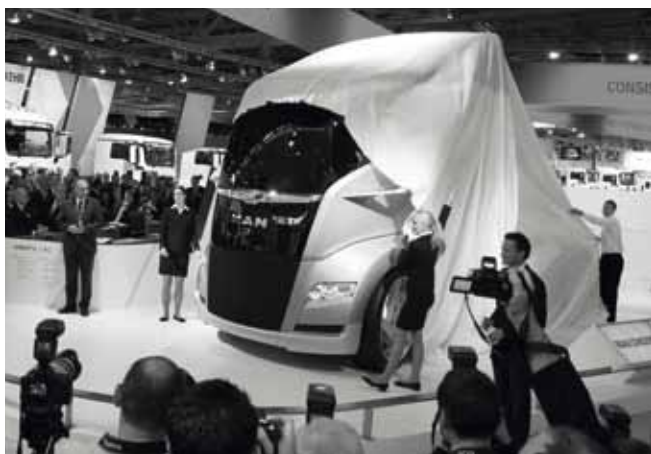

Auf der IAA Nutzfahrzeuge in Hannover enthüllte MAN die Lkw-Studie Concept S. Die stromlinienförmige Gestaltung spart bis zu 25 Prozent Kraftstoff.

### 3. Quartal

#### MAN-Aufsichtsrat verlängert Vertrag von Dr. Georg Pachta-Reyhofen um fünf Jahre

Der Aufsichtsrat der MAN SE verlängert im Juli die Bestellung von Dr. Georg Pachta-Reyhofen als Vorstandssprecher der MAN SE um fünf Jahre bis zum 30. Juni 2016. Dr. Pachta-Reyhofen ist seit 1. Juli 2006 Vorstandsmitglied der MAN SE und seit 1. Januar 2010 zugleich Sprecher des Vorstands der MAN SE und der MAN Nutzfahrzeuge AG.

#### MAN-Markenkampagne (Bild rechts unten)

Im August startet MAN die Marken- und Innovationskampagne „MAN kann“ mit TV-Spots, Anzeigen in Tages- und Wirtschaftspresse, im Internet sowie auf Plakaten. Ziel der Kampagne ist es, die Innovationskraft von MAN überraschend und glaubwürdig darzustellen. Jedes Motiv ist mit einer ungewöhnlichen Frage überschrieben, auf die die Antwort lautet: MAN kann.

#### MAN steigt bei fünf Bundesligateams ein

Zum Start der Bundesligasaison 2010/2011 schließt MAN mit fünf Fußball-Erstligisten Partnerschaften ab: Das Unternehmen steigt beim FC Bayern München, Hamburger SV, VfL Wolfsburg, dem 1. FC Kaiserslautern und bei Borussia Dortmund als exklusiver Nutzfahrzeugpartner ein. Damit fahren insgesamt neun von 18 Bundesligisten MAN-Mannschaftsbusse.

#### Auftritt auf den Leitmessen IAA und SMM (Bild oben)

Mit der Designstudie MAN Concept S sorgt MAN auf der IAA Nutzfahrzeuge für Furore: Sie zeigt, dass durch Aerodynamik eine drastische Verbrauchs- und CO<sub>2</sub>-Reduzierung bei Diesel-Lkw möglich ist. Auf der weltweit wichtigsten Schifffahrtsmesse SMM beweist MAN Diesel & Turbo, dass sich bereits heute die für das Jahr 2016 für küstennahe Gebiete geforderten, äußerst strengen Emissionsvorgaben „Tier III“ der International Maritime Organization (IMO) erfüllen lassen.

#### Strategie für Corporate Responsibility

In dem Strategiebericht „Unsere Verantwortung“ legt MAN die Ziele und Pläne der Corporate Responsibility (CR) dar. Nach der Einrichtung einer zentralen, gruppenweiten Funktion für CR Anfang 2010 wird somit der Ansatz der nachhaltigen Wertschöpfung als fester Bestandteil der Unternehmensstrategie mit konkreten Meilensteinen umgesetzt und transparent gemacht.

### 4. Quartal

#### Aufnahme in den Klimaschutzindex des Carbon Disclosure Project

Die internationale Investorengruppe Carbon Disclosure Project nimmt MAN erstmals in den Carbon Disclosure Leadership Index (CDLI) deutscher Unternehmen auf. Der CDLI enthält ausschließlich Unternehmen, die sich durch eine besonders transparente und detaillierte Berichterstattung über den Umgang mit den Chancen und Risiken des Klimawandels auszeichnen.

#### Neuer Code of Conduct

MAN fasst die Compliance-Grundsätze des Unternehmens in einem aktualisierten Leitfaden „Code of Conduct“ zusammen. Er wird in allen relevanten Sprachen weltweit an die Mitarbeiter verteilt und soll sicherstellen, dass weder einzelne Mitarbeiter noch MAN als Unternehmen in der Geschäftstätigkeit mit Gesetzen, Verordnungen oder ethischen Standards in Konflikt geraten.

#### Aus MAN Nutzfahrzeuge wird MAN Truck & Bus

Die erfolgreiche internationale Wachstumsstrategie der MAN Nutzfahrzeuge AG soll sich künftig auch im Namen des Unternehmens widerspiegeln. Aus diesem Grund firmiert der Nutzfahrzeughersteller um und trägt ab dem 28. Dezember 2010 den Namen MAN Truck & Bus AG. Die Umfirmierung vereinheitlicht den internationalen Markenauftritt und verbessert die Wahrnehmbarkeit des Unternehmens.

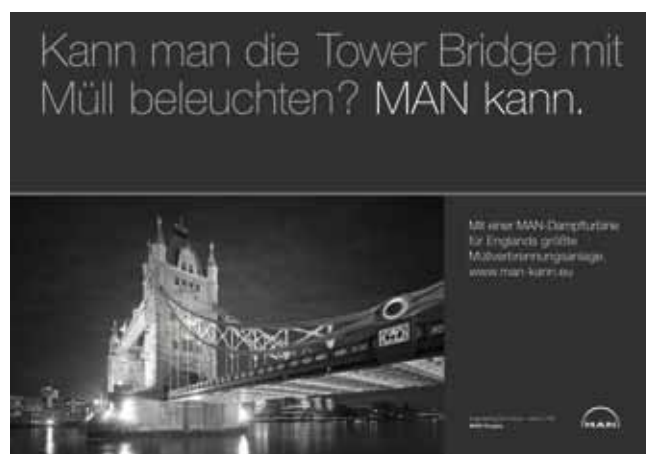

Die Kampagne „MAN kann“ präsentiert Innovationen der MAN Gruppe.



# Commercial Vehicles

## Efficiency of the future

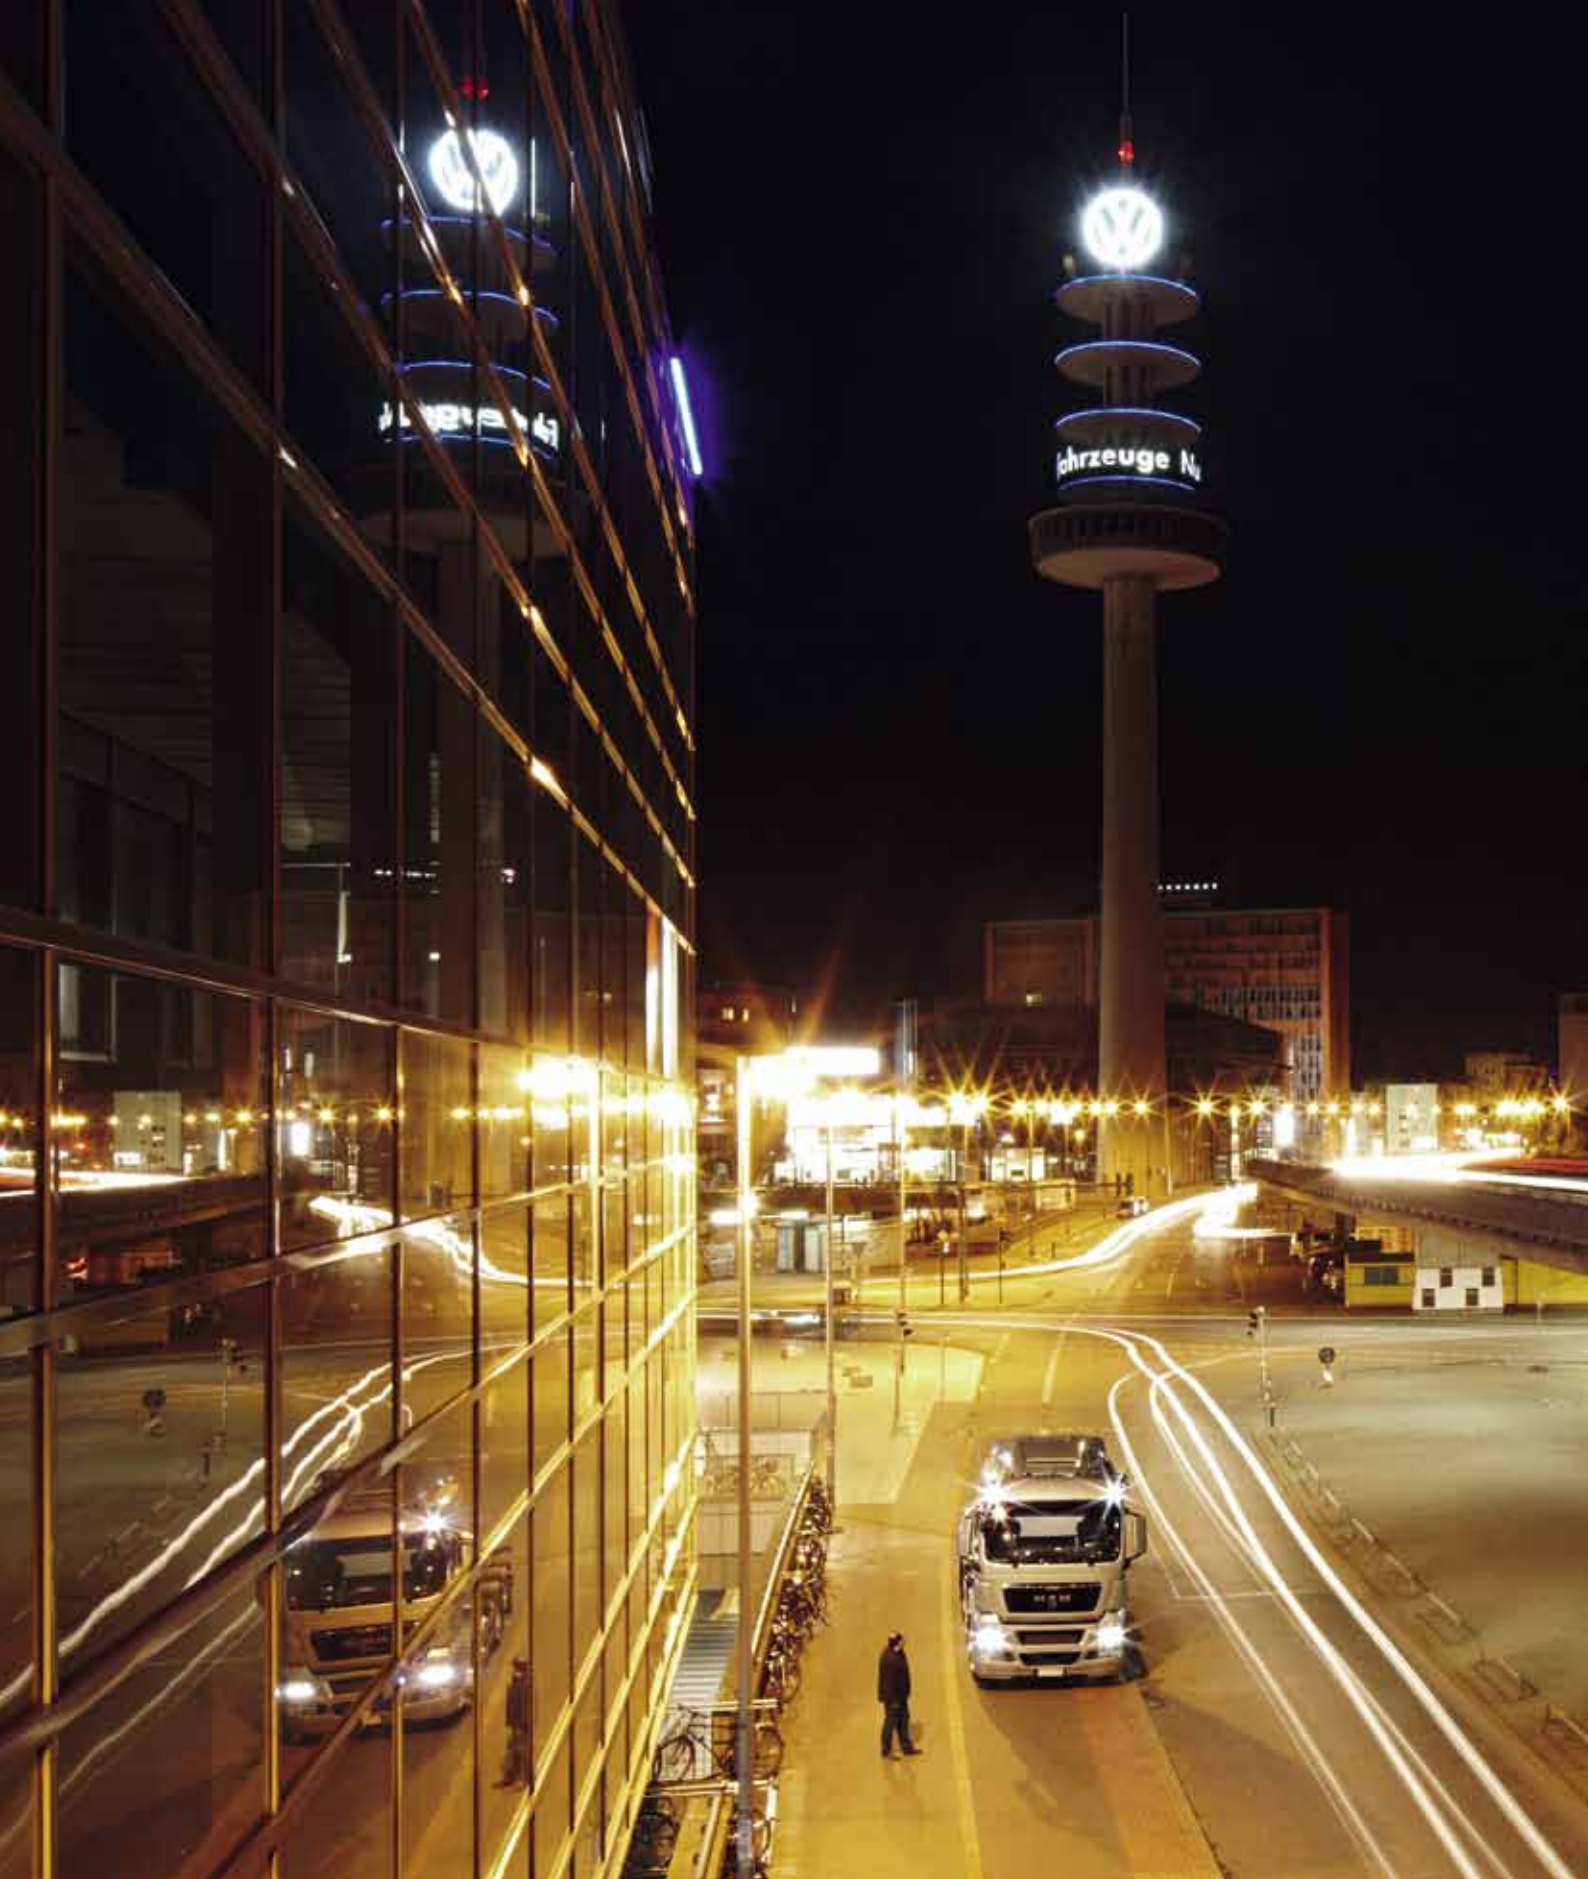

Kann man den Verbrauch von Trucks um 25 % senken? MAN kann.

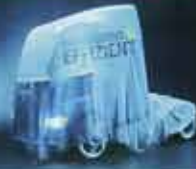

MAN auf der IAA Futurezone  
27.-30.8.2010, Hall 11, Stand B14

Engineering the future - since 1758.  
[www.man-trucks.de](http://www.man-trucks.de)

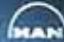

Windschnittige Lastzüge verbrauchen weniger Sprit. So reduziert die Aerodynamik der MAN-Studie Concept S den Kraftstoffverbrauch um ein Viertel.



# Commercial Vehicles

## Efficiency of the future

**Spediteur Thomas Baumgarten kalkuliert die Effizienz seiner MAN-Trucks auf Cent pro Kilometer.**

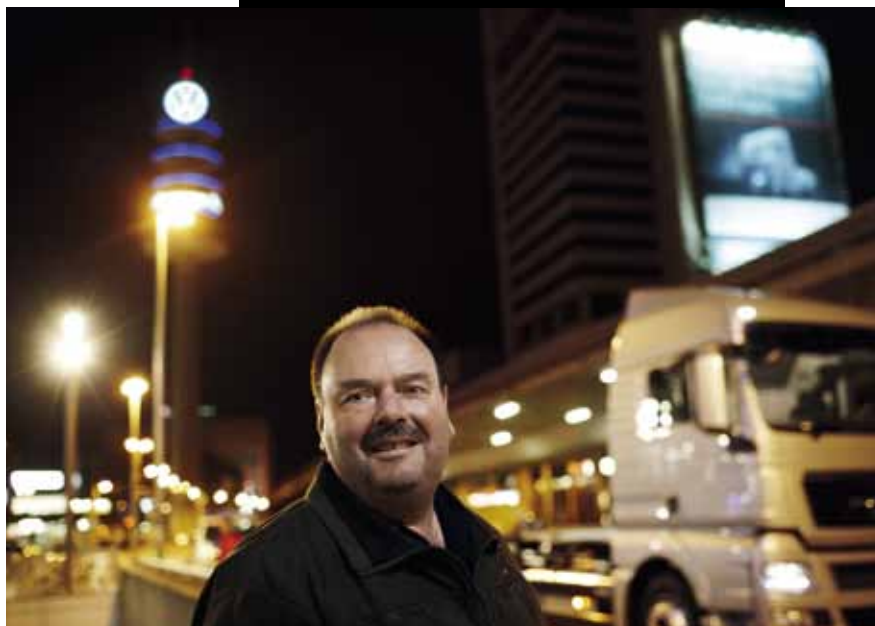

den Spediteur. „Heute brauchen Dieselmotoren auf der Grundlage strenger Umweltrichtlinien rund 40 Prozent weniger Kraftstoff als noch im Jahr 1970“, sagt Dr. Georg Pachta-Reyhofen, Sprecher des Vorstands MAN Truck & Bus. Und der Fortschritt geht weiter. Anlässlich der IAA in Hannover stellte MAN die spektakuläre Lkw-Studie Concept S vor. Dank einer neuen strömungsgünstigen Silhouette reduziert sie den Kraftstoffverbrauch und die CO<sub>2</sub>-Emissionen um bis zu 25 Prozent.

**Aktive Treiber einer** immer höheren Transporteffizienz sind bei MAN auch viele andere Innovationen: zum Beispiel das mitdenkende TipMatic-Getriebe, der zuschaltbare Vorderradantrieb MAN HydroDrive oder Telematiksysteme, die dem Fahrer in Echtzeit Tipps für eine wirtschaftliche Fahrweise geben. „Wie High-

„Nein, der Winter dort ist nicht so wie hier!“ Wenn Thomas Baumgarten in Hannover in seinen MAN TGX steigt, ist er gerüstet wie für eine Polarexpedition: Proviant für einige Tage, eine Schaufel, zwei Telefone. „In Skandinavien weißt du nie, was kommt: Blitzeis, Schneeverwehungen ... Sicher ist sicher – bei 40 Grad minus und einer Strecke von rund 1 500 Kilometern“, sagt der 48-Jährige. Gemeinsam mit seinem Bruder Andreas betreibt er in Pattensen, nahe Hannover, eine Spedition. Von November bis April ermöglichen sie seit nunmehr 14 Jahren mit ihrer Auto-transporterflotte eine Art Linienverkehr für die Automobil- und Zulieferindustrie von Norddeutschland nach Schweden und Finnland. Für unterschiedliche Marken beliefern sie am Polarkreis Testzentren mit Fahrzeugen. Das Fahrverhalten im Winter, Motoren, Getriebe, Bremsen, Elektronik,

## „Transporteffizienz ist das Maß der Dinge für unser Unternehmen.“

Thomas Baumgarten, Spediteur

Reifen – es gibt fast nichts, was dort nicht unter extremen Bedingungen auf Herz und Nieren geprüft wird. Die hohen Ansprüche, die der polare Winter an die Testfahrzeuge stellt, bewegen auch den Spediteur, wenn es um seine Lkw-Flotte geht. „Transporteffizienz“, so Baumgarten, „ist das Maß der Dinge für unser Unternehmen.“

**MAN setzt dazu** beispielsweise mit dem TGX EfficientLine auf die Senkung der Gesamtbetriebskosten (kurz: TCO, Total Cost of Ownership). Die Sattelzugmaschine verbraucht in dieser Ausstattung auf 100 Kilometer bis zu drei Liter Diesel weniger. Bei einer jährlichen Laufleistung von 150 000 Kilometern und einer Nutzungsdauer von vier Jahren ergibt sich eine Ersparnis von bis zu 18 000 Liter Diesel und 47 Tonnen CO<sub>2</sub>. Das überzeugt

tech arbeitet, ist auf meinen langen Touren durch den polaren Winter immer wieder überraschend“, meint Spediteur Thomas Baumgarten. „Das Gefühl sagt: Flott geht es voran mit niedrigen Gängen und hohen Drehzahlen. Aber es ist gerade umgekehrt: Effiziente Technologie bringt niedertourig immer bessere Leistung, auch beim Kosten sparen.“ Das freut den Spediteur und Trucker Baumgarten. Er ist bestens gerüstet. Die Polarexpedition kann beginnen.

## EINSPARPOTENZIAL

**Wirtschaftlichkeit und Effizienz im Blick**

Im harten Wettbewerb der Transport- und Logistikbranche gilt: Die Gesamtkosten vom Kauf bis zum Verkauf des Fahrzeugs zählen. Die Reduzierung des Kraftstoffverbrauchs ist daher ein wesentlicher Stellhebel für effizientes Business.

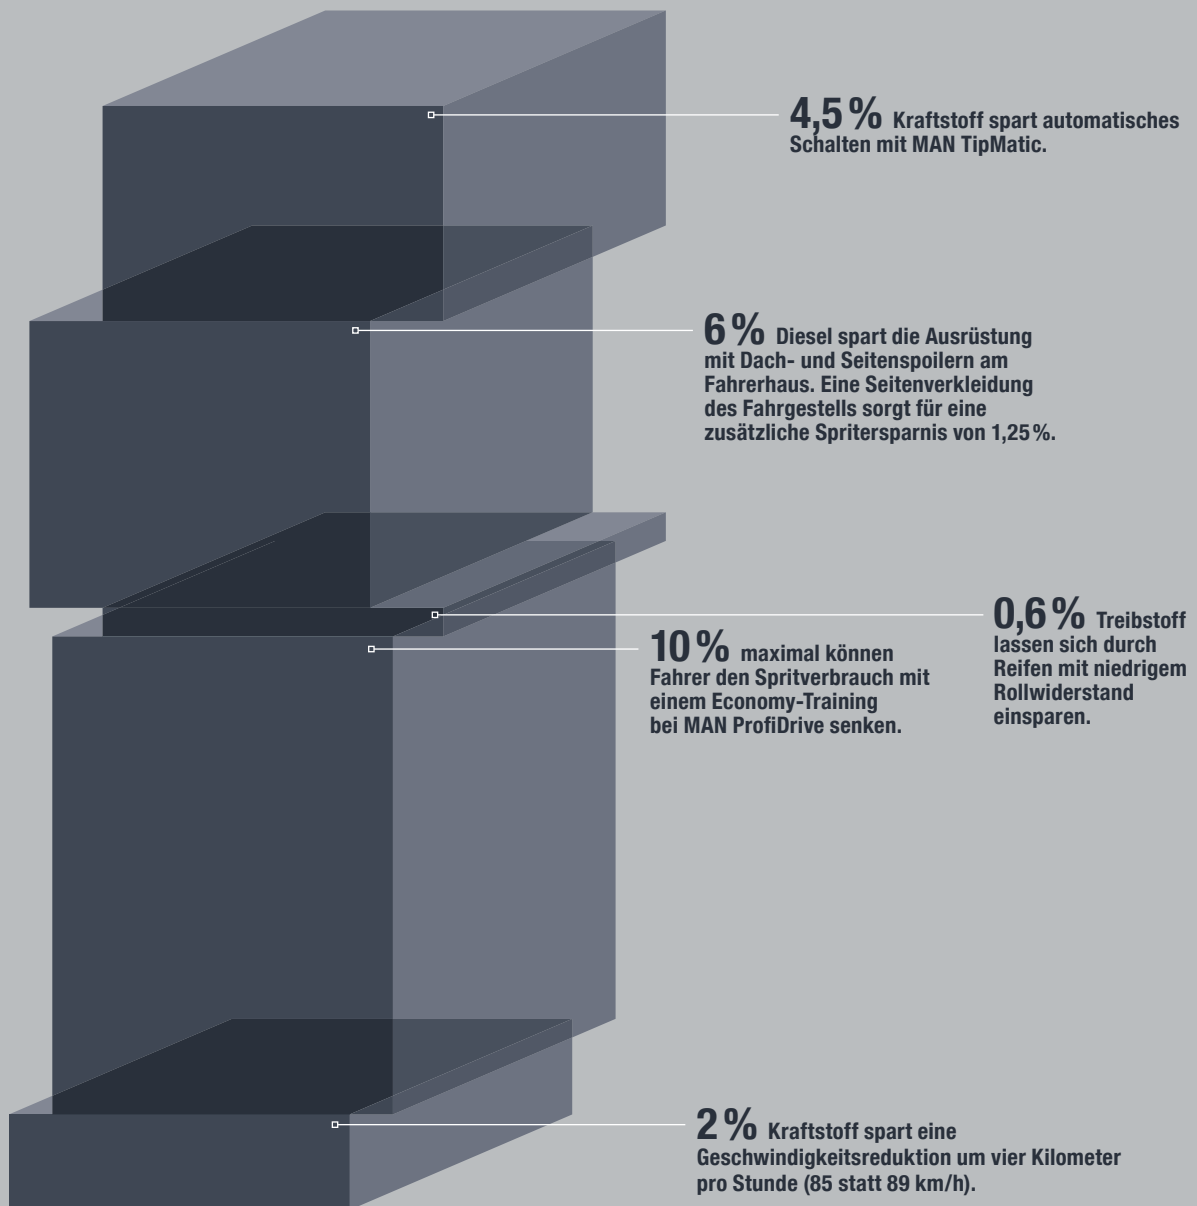

Prozentangaben sind Durchschnittswerte.

# Commercial Vehicles

## Mobility of the future

Busse von MAN bringen weltweit nicht nur zahlreiche Spitzen-Fußballmannschaften wie den FC Bayern in die Stadien – auch der Kickernachwuchs schätzt diesen Komfort.

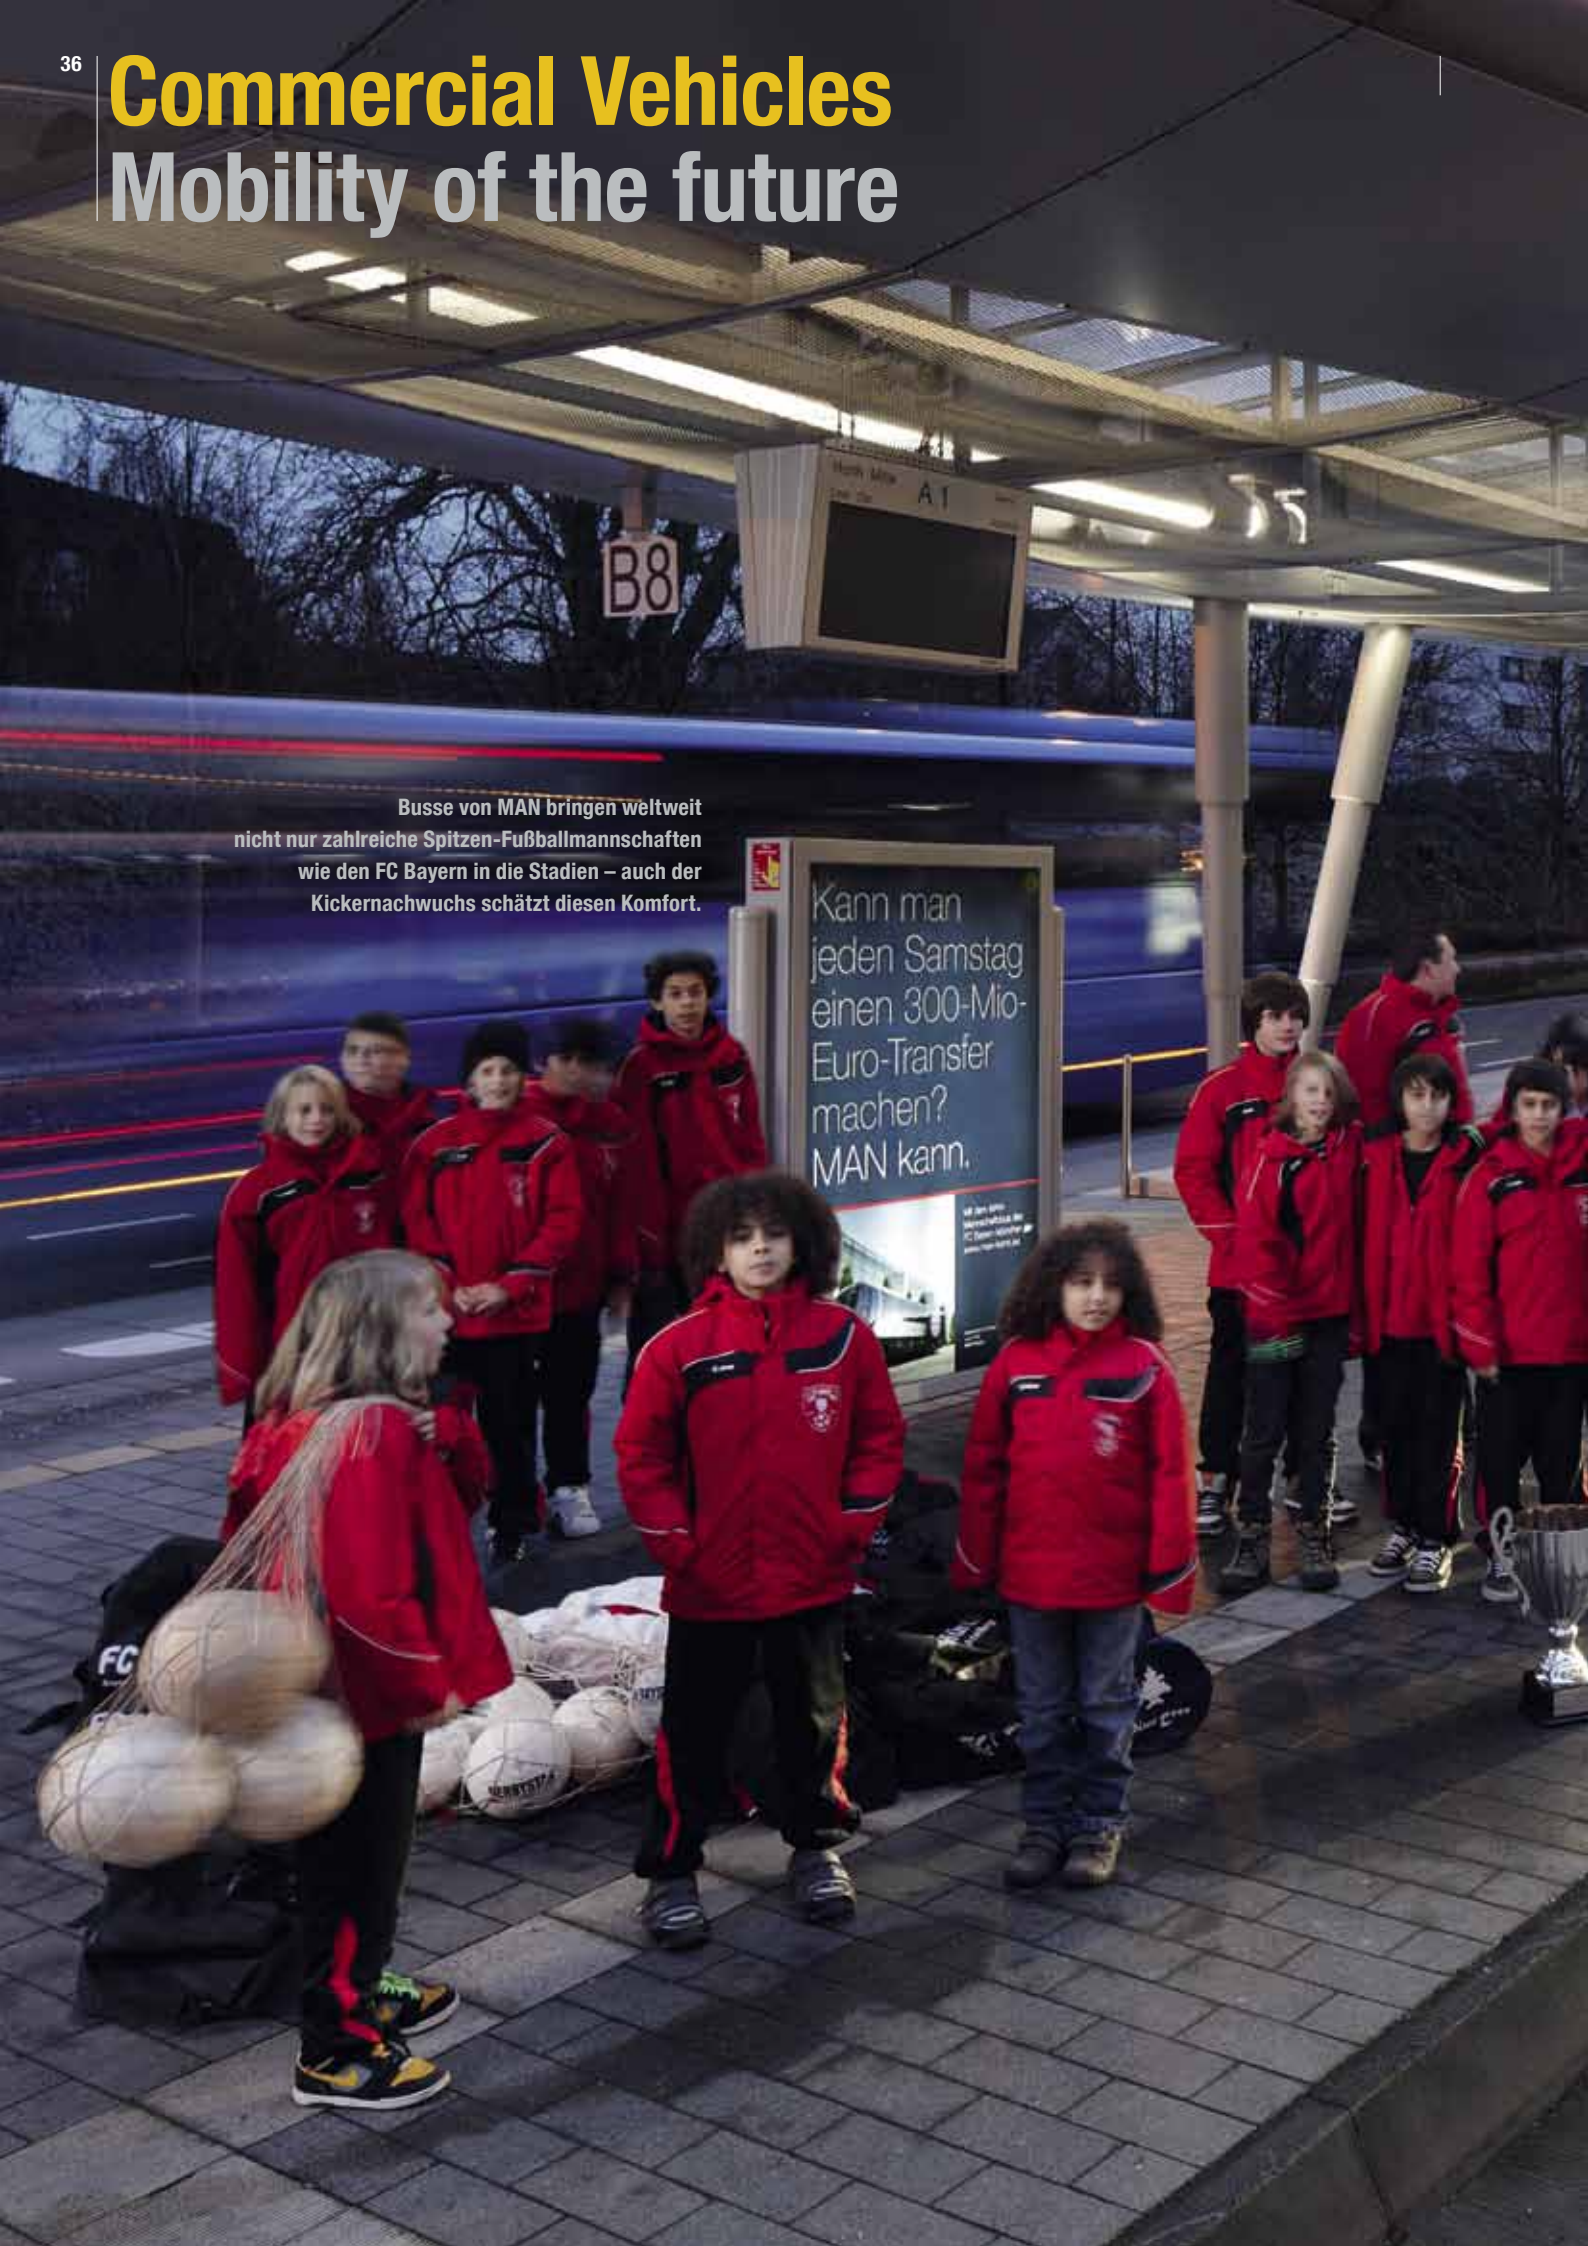



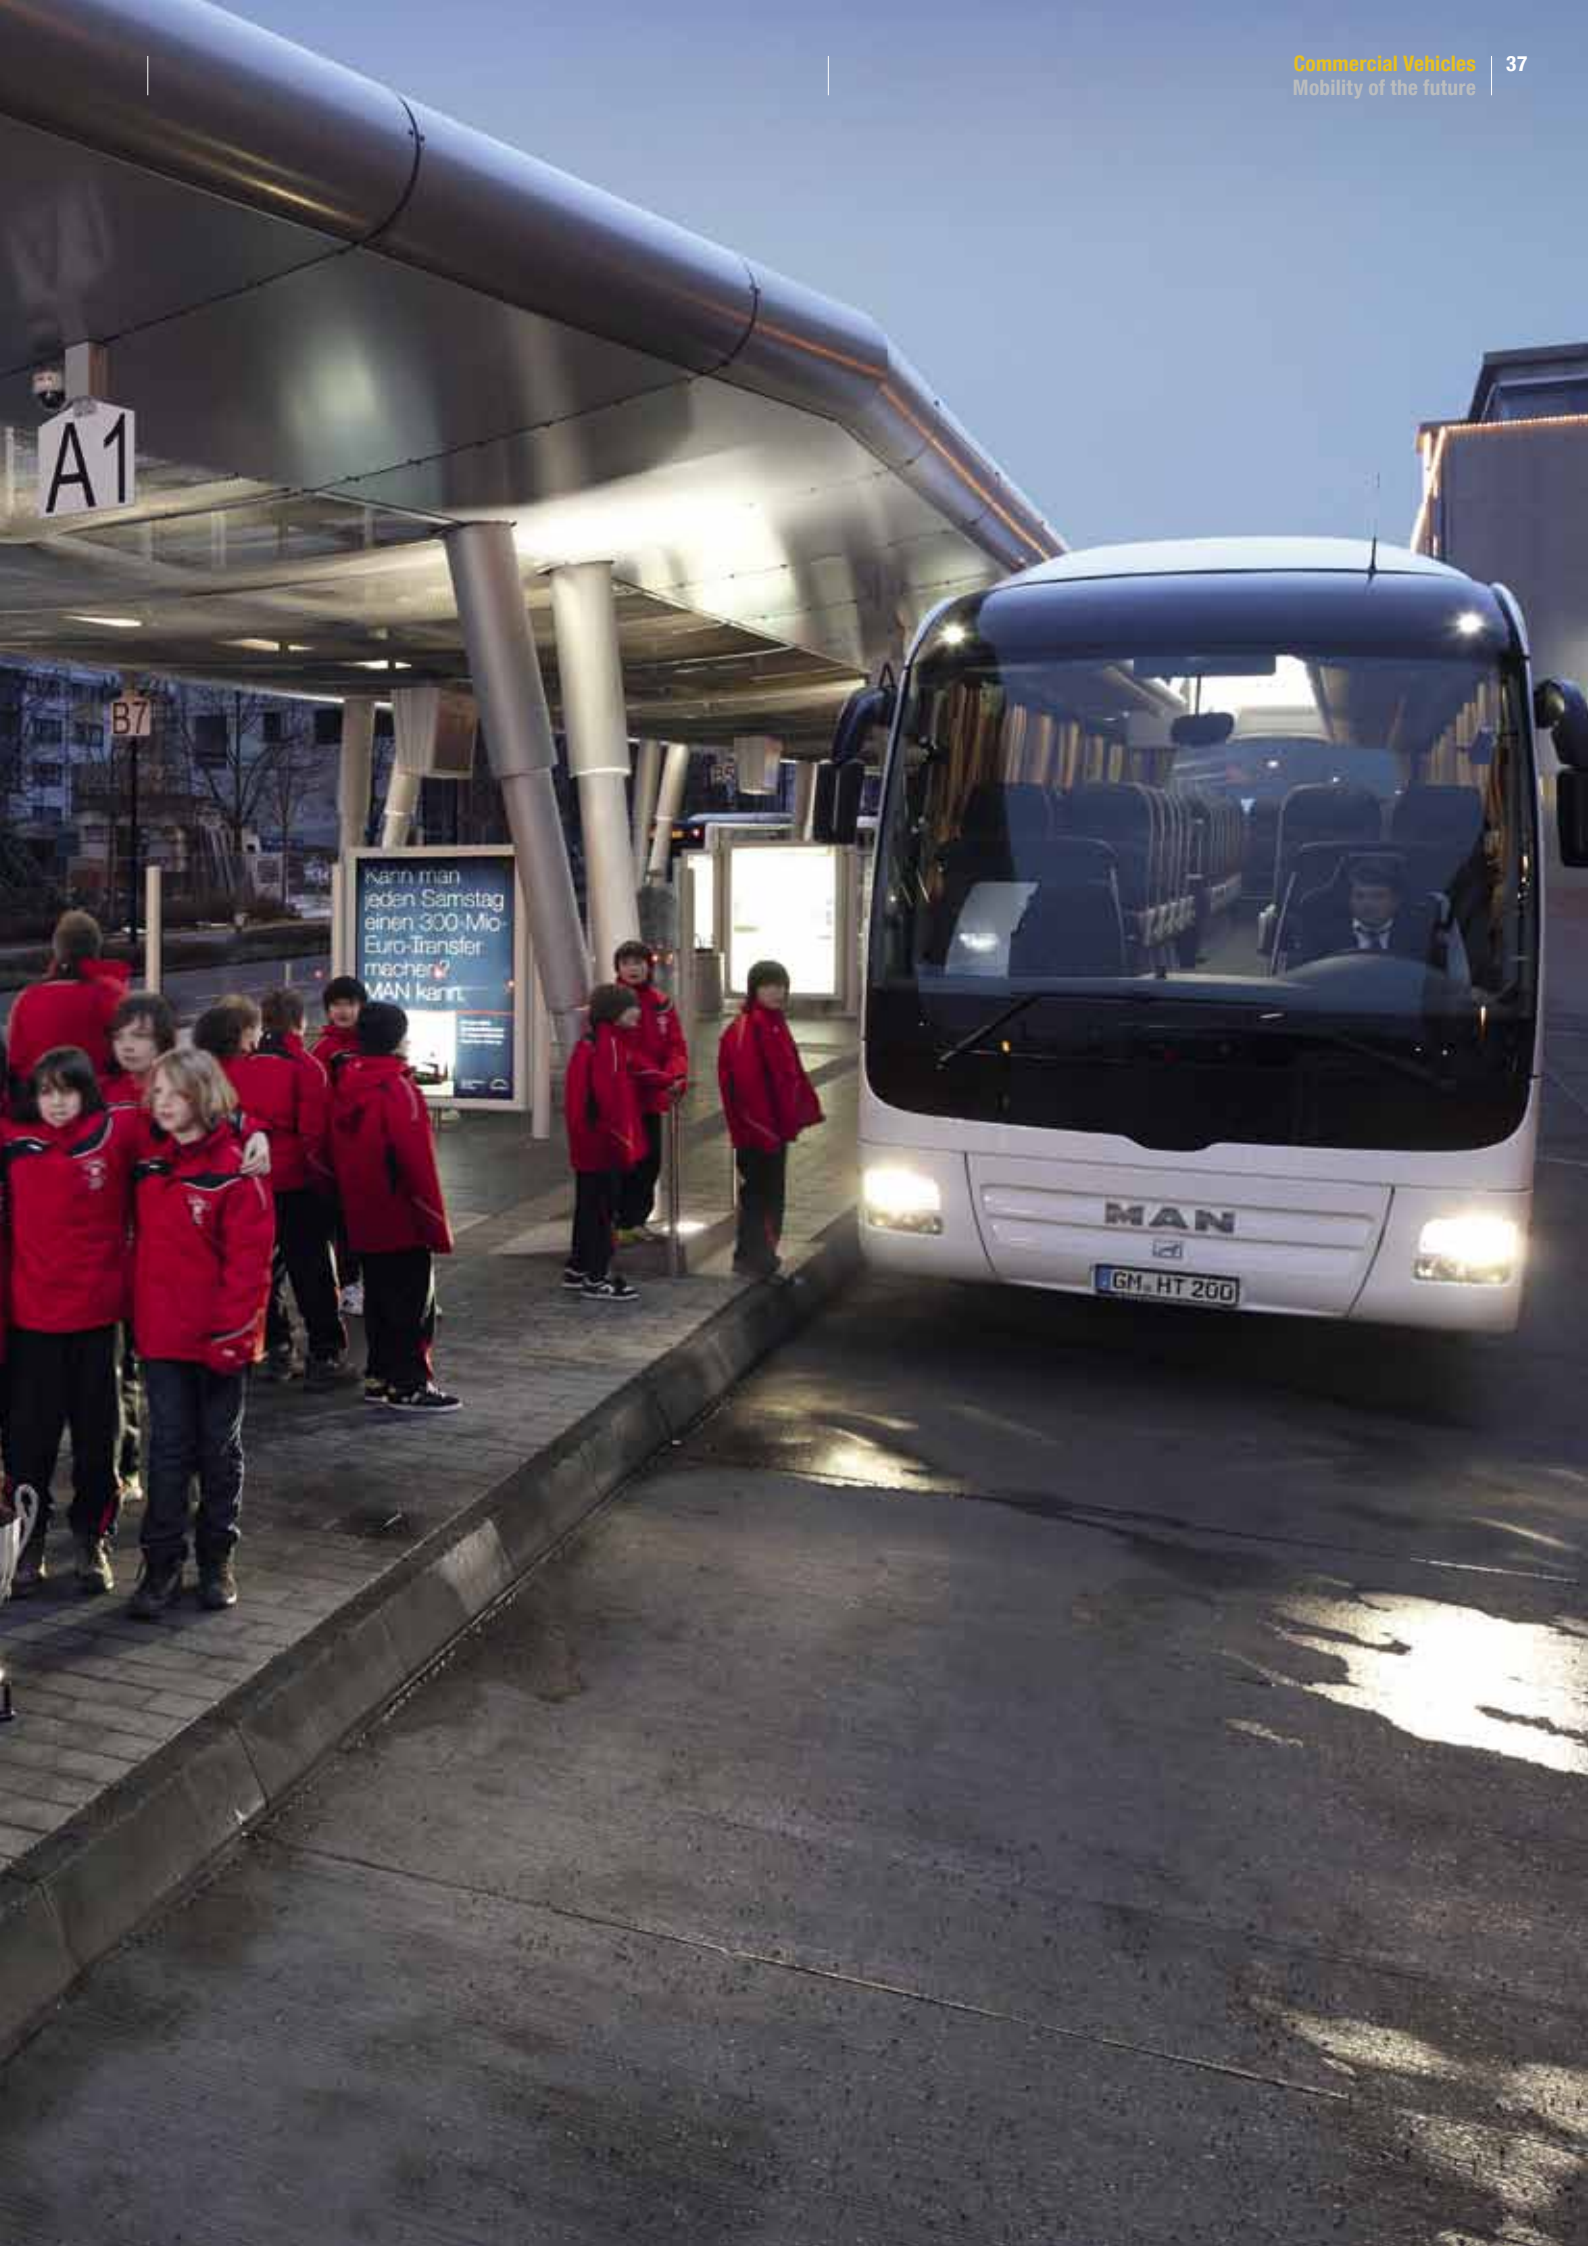

# Commercial Vehicles

## Mobility of the future

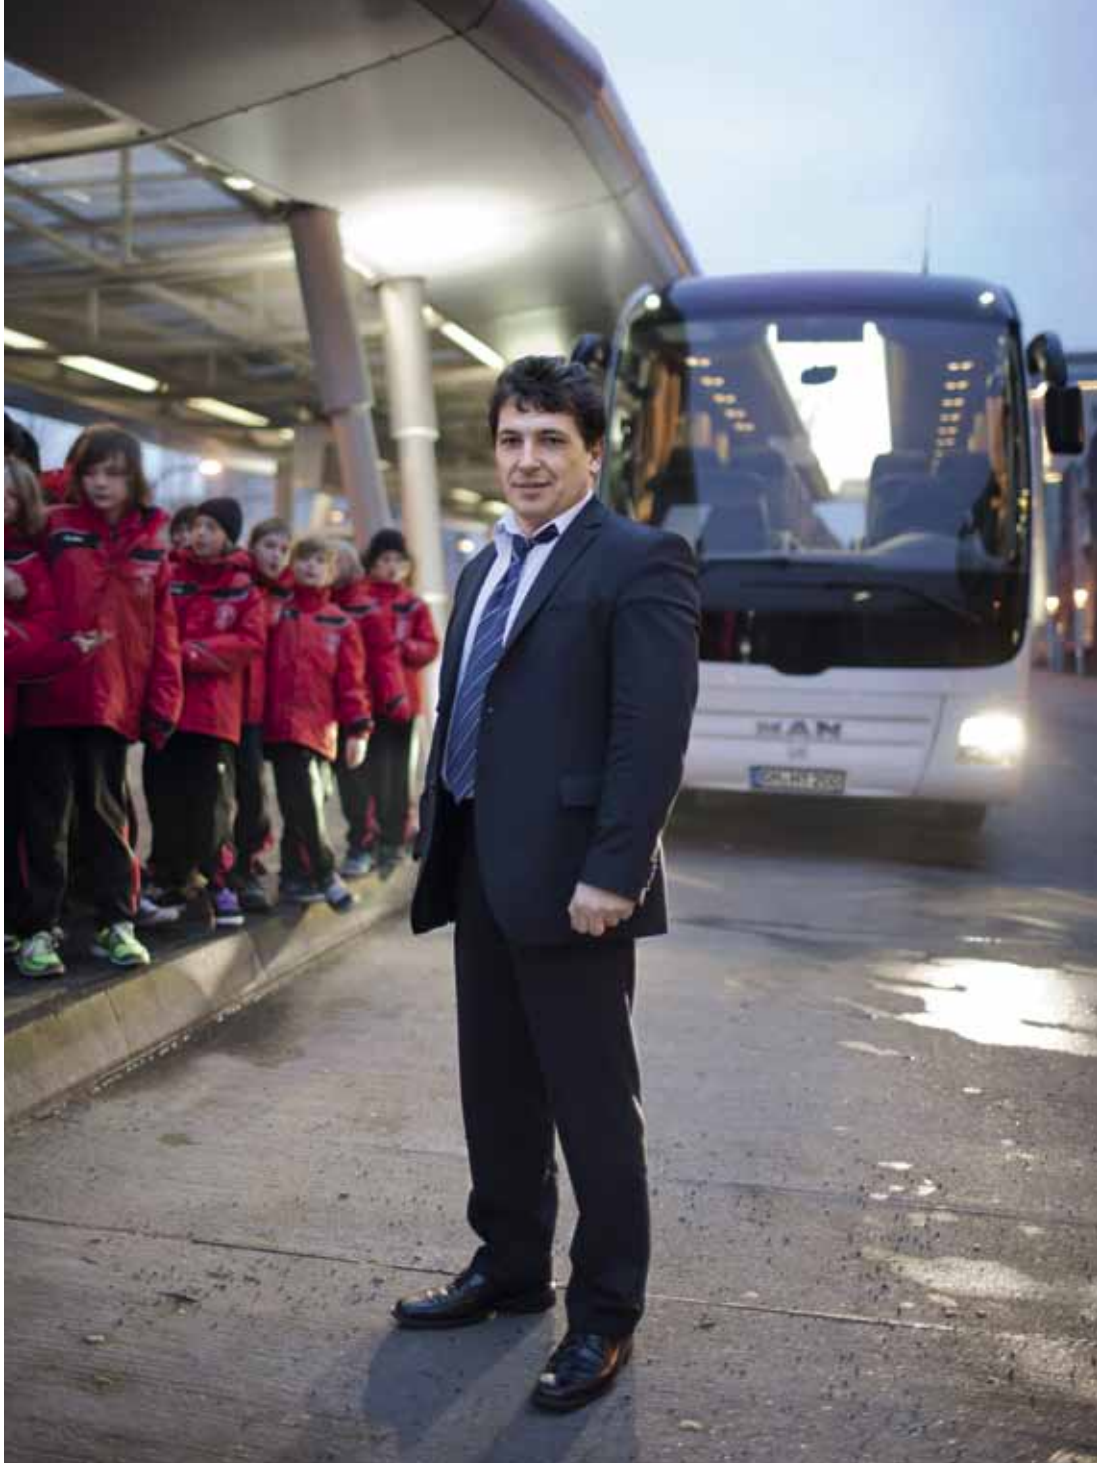

„Die Kinder freuen sich, wenn ein toller Film über den Bordfernseher läuft.“

Steffen Groß, Reisebusfahrer



**Ein Sack Flöhe ist nichts** gegen die Mannschaft D1. Die kleinen Kicker des FC Hürth sind ganz kribbelig: Es geht zum Turnier nach Jülich. Eigentlich sind die Jungs so aufgedreht, dass sie am liebsten mit dem Ball am Fuß die rund 50 Kilometer hinter sich bringen würden. Aber Trainer Christian Schulzki hat sich für eine komfortablere Variante entschieden: Wie die Profis reisen die Elf- bis Zwölfjährigen mit dem MAN Lion's Coach an. Die Taschen sind schnell im Gepäckraum verstaut, und schon haben Marius, Malte, Nicki, Felix & Co. den Reisebus für sich erobert. Für Steffen Groß vom Busunternehmen Hofacker Touristik aus Reichshof-Heidelberg bei Gummersbach sind die Kleinen angenehme Passagiere. Seit 16 Jahren fährt der 46-Jährige Reisebusse durch ganz Europa. Er kennt die unterschiedlichen Bedürfnisse seiner Fahrgäste. Die Kinder sind zwar laut, aber unkompliziert. „Sie haben ihre Stullen und Getränke im Rucksack dabei und freuen sich, wenn ein toller Film über den Bordfernseher läuft“, weiß Steffen Groß.

**Dabei hat das MAN-Flaggschiff Lion's Coach** höchsten Komfort auf kurzen und langen Reisen zu bieten. Im Fußball wissen das längst die großen Vorbilder der Hürther Kinder zu schätzen. Seit 2010 fahren fünf weitere Bundesligateams mit diesem „Rolling Home“ in die Stadien: der FC Bayern, der Hamburger SV, der VfL Wolfsburg, der 1. FC Kaiserslautern und Borussia Dortmund. „Nur wenn unsere Spieler entspannt am

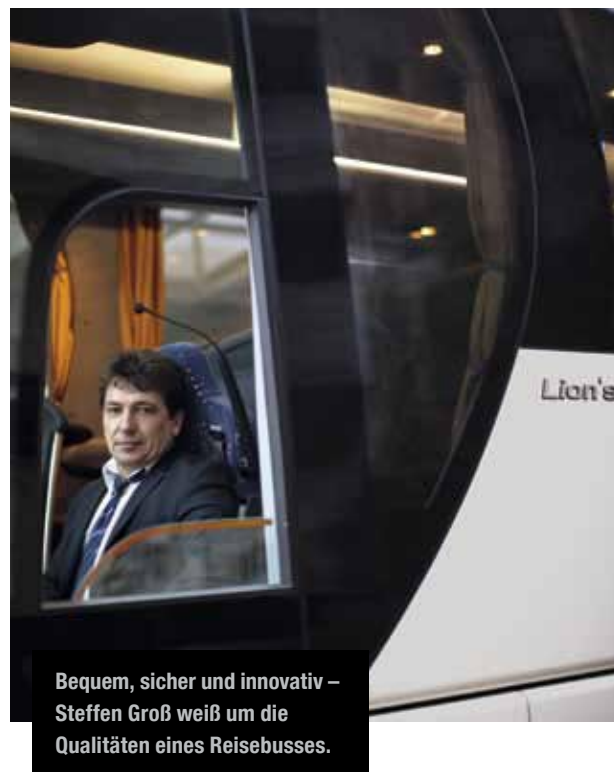

Ziel ankommen, können sie auch Bestleistungen auf dem Rasen bringen“, begründet FC-Bayern-Präsident Uli Hoeneß die Entscheidung für MAN.

**Die Bayern setzen dabei auf das Premiummodell** Lion's Coach L Supreme. Der Bus ist ausgestattet mit einem Spurassistenten (LGS), der das korrekte Einhalten der Fahrspur überwacht, sowie ABS und ESP, automatisiertem TipMatic-Schaltgetriebe sowie Front- und Rückfahrkameras. Die Innenausstattung glänzt mit 30 Ledersitzen, versenkbaren Tischen mit elektrisch verstellbaren Beinauflagen, Satelliten-TV, DVD-Anlage und vier 19-Zoll-Flachbildschirmen sowie WLAN. Über den Spielern leuchtet ein Sternenfirmament aus 500 Leuchtdioden. Höchster Fahrkomfort liegt im Trend auf dem Reisebusmarkt: „Diese Fortbewegungsform bietet den Fahrgästen eine Mikrowelt, in der alles stimmt“, sagt Richard Eberhardt, Präsident des Bustouristikverbands RDA. „Kurzum: rollende Wohlfühlwelten mit ausreichendem Sitzabstand und großzügiger Gepäckbeförderung.“

**Komfort kommt auch gut** beim Fahrer an. Steffen Groß jedenfalls schwärmt auf dem Weg nach Jülich von seinem Lion's Coach: „Das Cockpit ist großzügig, bietet beste Beinfreiheit und mit den Panoramascheiben optimalen Durchblick. Und mit dem neuen Fahrwerk hat der Bus eine super Laufruhe.“ Die Laufruhe ist kurz vor Jülich deutlich vernehmbar. Die Kicker von der Hürther D1 sind eingeschlafen. Jetzt nicht stören: Sie träumen von Toren und dem großen Turniersieg.

## ENERGIEVERGLEICH VERKEHRSMITTEL Saubere auf der Überholspur

Der Reisebus ist die Nummer eins in puncto Umweltschutz.

So hat der Bus im Vergleich zum Auto, zum Flugzeug und selbst zur Bahn mit ihren 0,9 Litern Diesel – pro 100 Kilometer und Fahrgast bei voller Auslastung – mit Abstand den geringsten Kraftstoffverbrauch. Und damit auch den geringsten CO<sub>2</sub>-Ausstoß.

Quelle: ifeu-Institut 2009

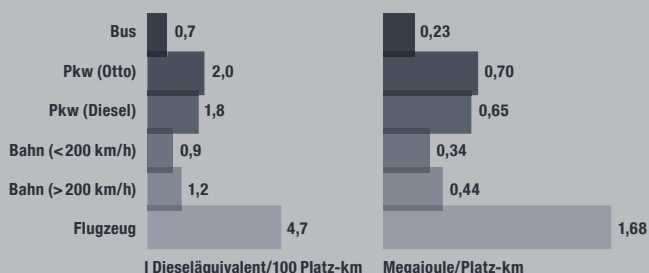

# Commercial Vehicles

## Innovation of the future

A photograph of a MAN Lion's City Hybrid bus at night. The bus is dark-colored with yellow accents. The destination sign above the windshield displays 'Universität' in yellow. A passenger is visible through the window, reading a magazine. The bus is moving on a city street, with blurred lights in the background. The text 'HYBRID' is visible on the side of the bus.

Bremsen, anfahren, bremsen –  
dem MAN Lion's City Hybrid ist  
Stadtverkehr gerade recht.  
Denn Bremsenergie wandelt er  
einfach in Elektrizität um.



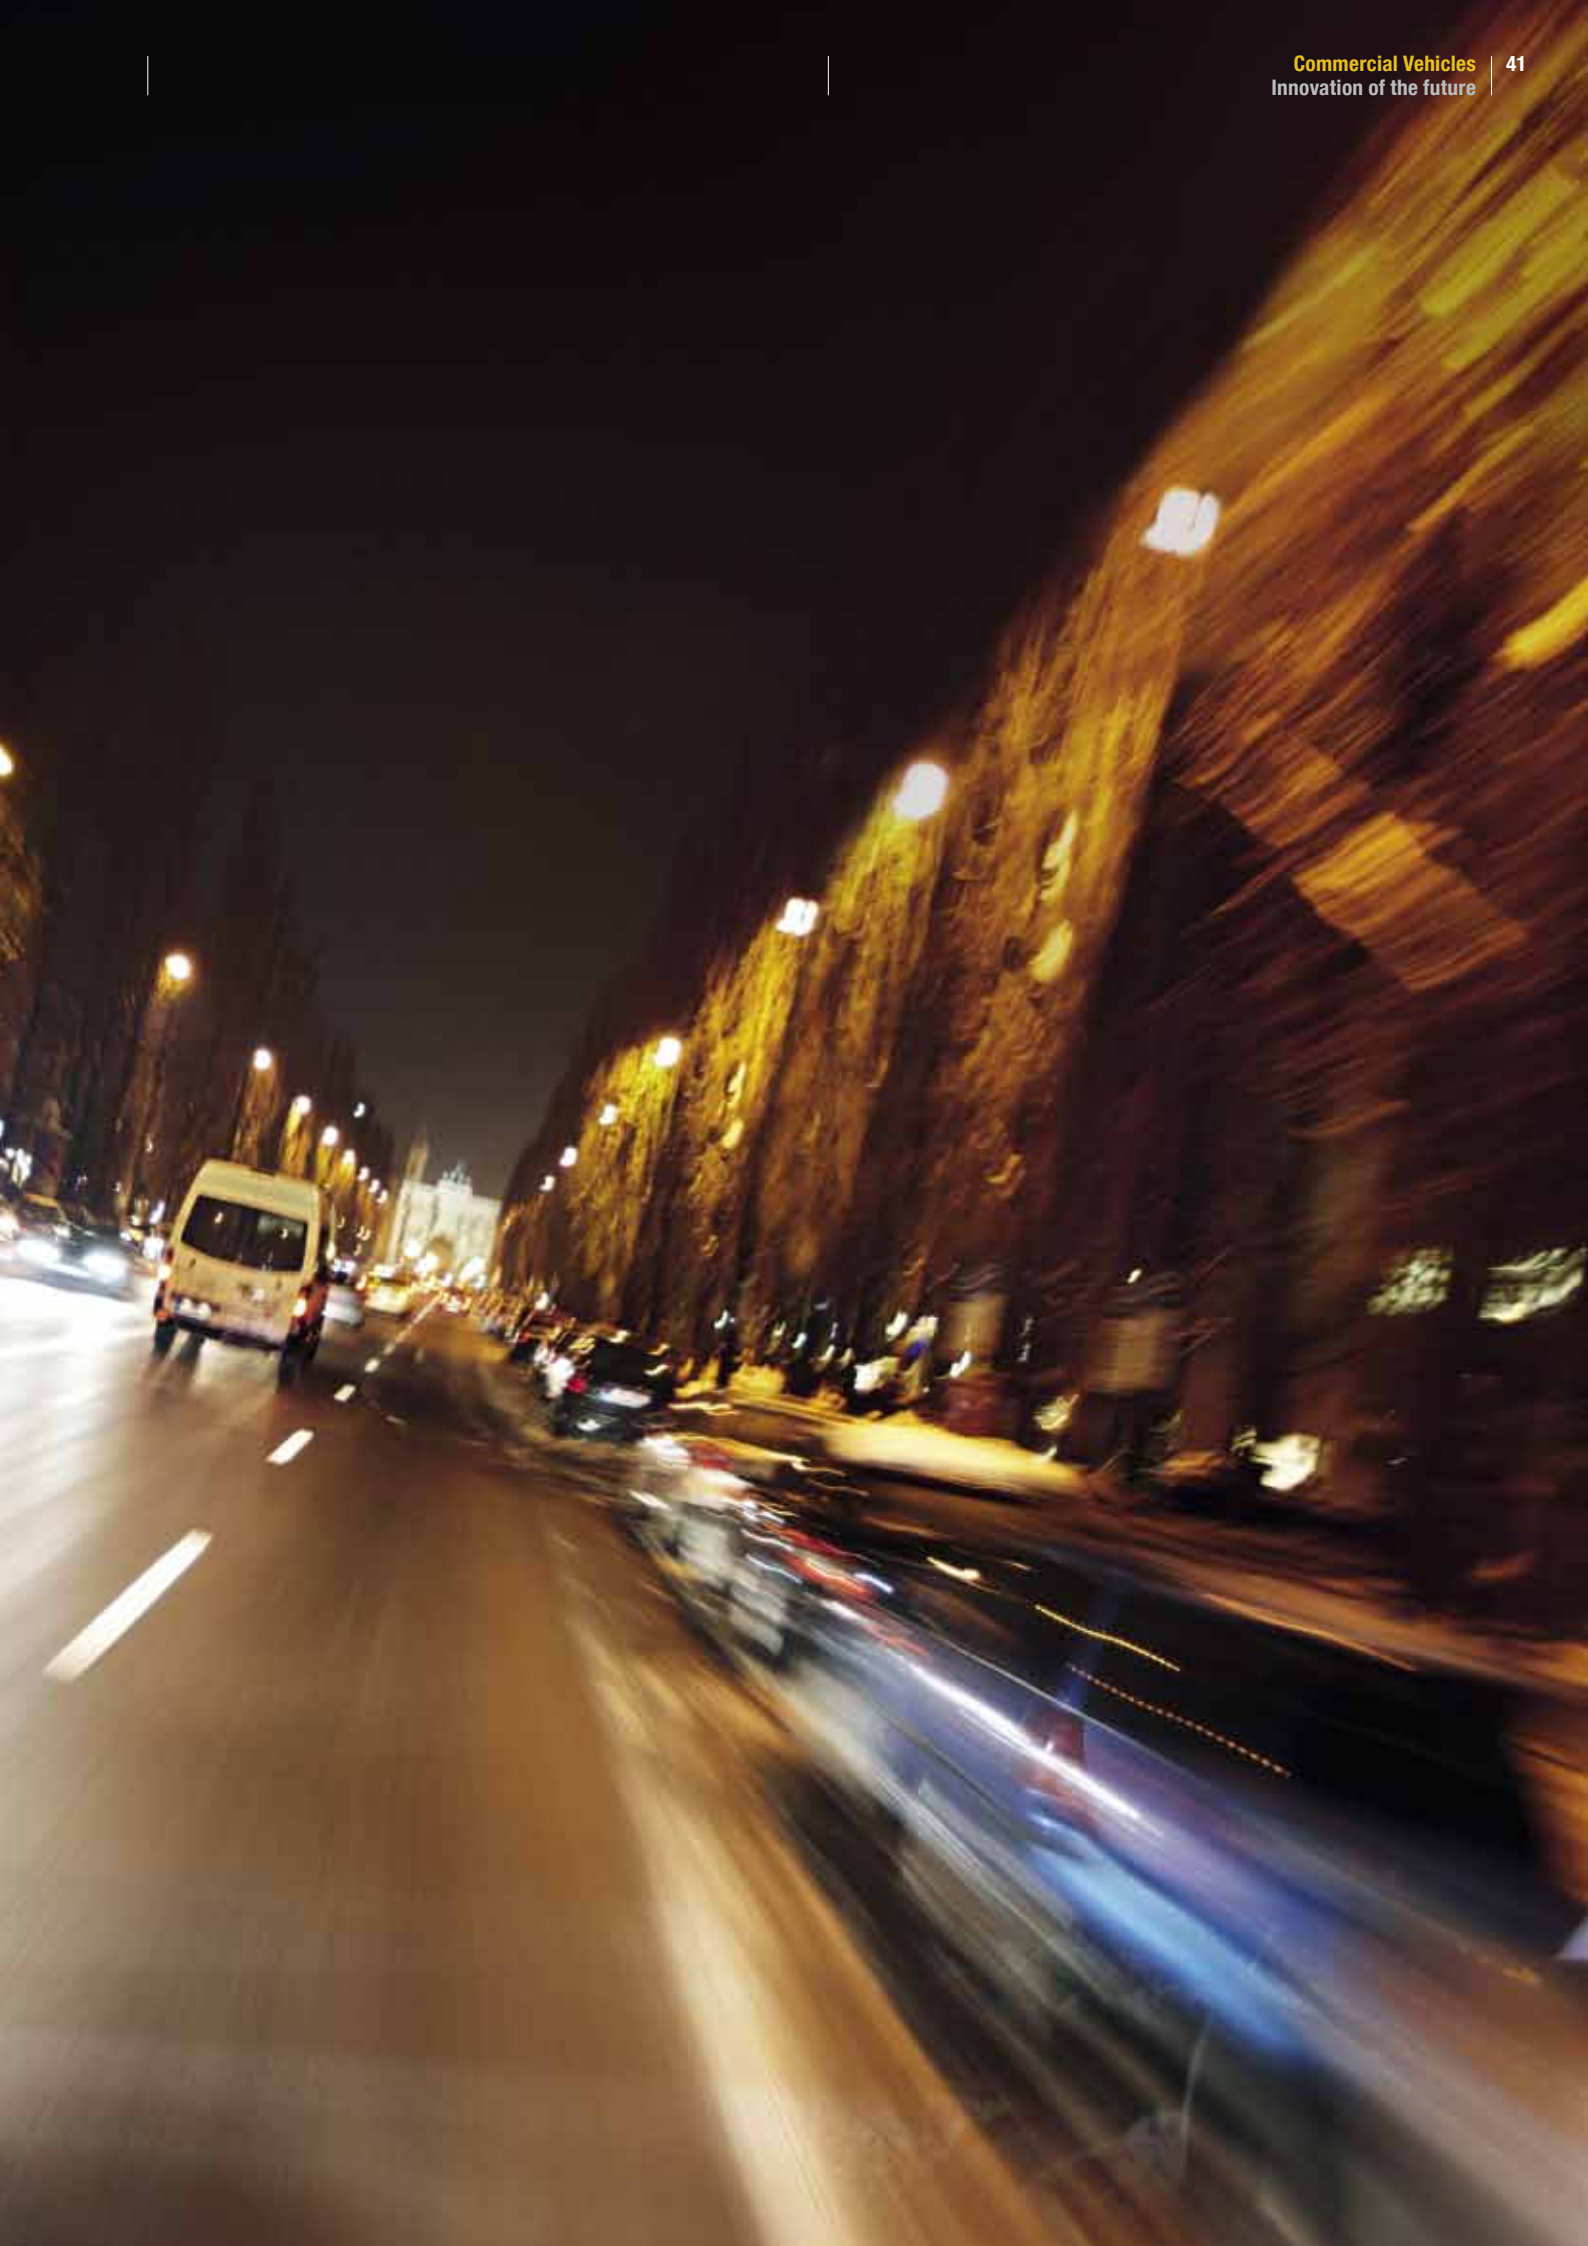

# Commercial Vehicles

## Innovation of the future

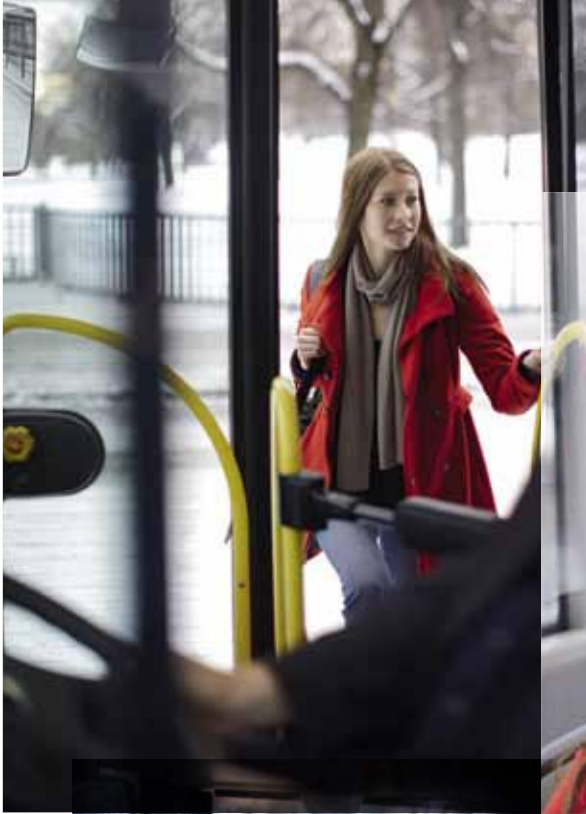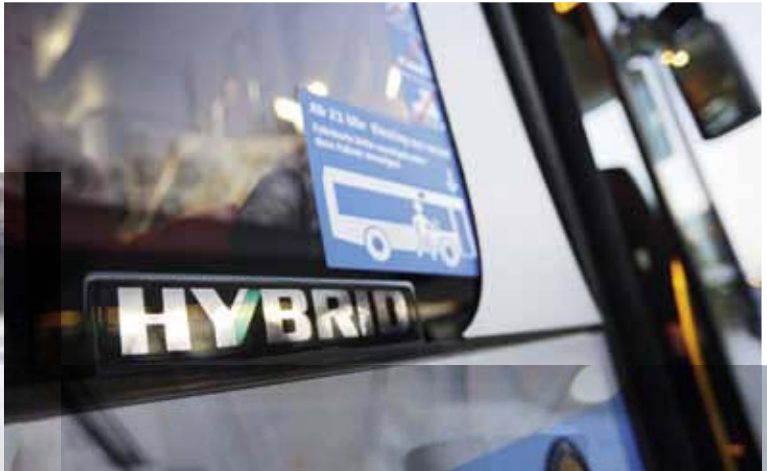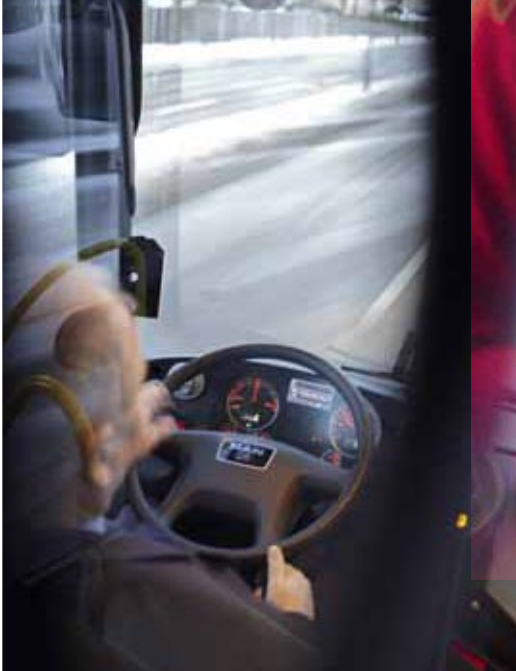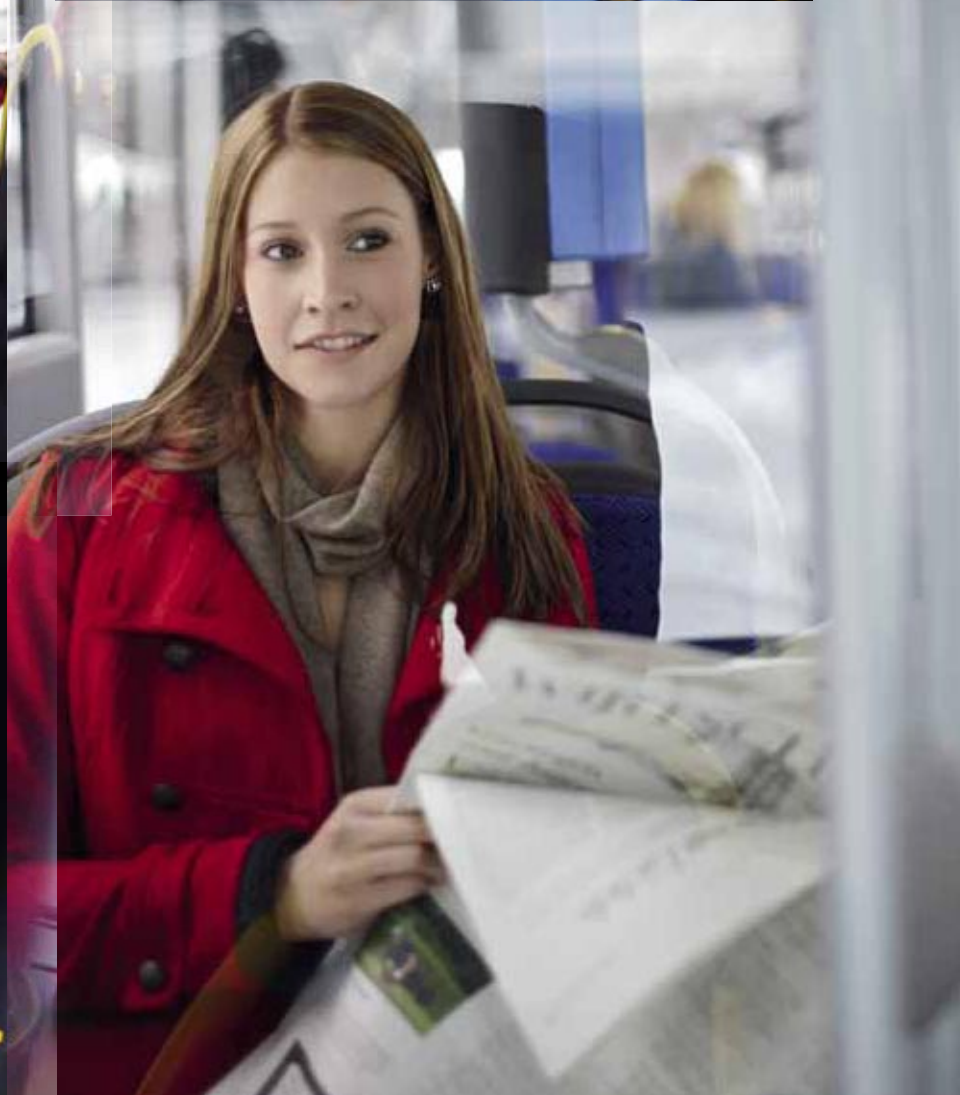

Sauber unterwegs: Der MAN Lion's City Hybrid verlässt die Haltestelle praktisch geräusch- und abgasfrei.

## „Man muss lernen, mit Gas- und Bremspedal strategisch zu fahren.“

Peter Nortz, Hybridbusfahrer

**Noch ein schneller Blick** in die Zeitung und dann ab in die Betriebswirtschaft-Vorlesung. Johanna Heyden fährt mit der Münchner Linie 154 zur Ludwig-Maximilians-Universität. Fast hätte sie an der Leopoldstraße das Aussteigen vergessen, denn nahezu geräuschlos fährt der Bus die Haltestelle an. Als erstes Modell seiner Art ist dieser MAN Lion's City Hybrid bei den Münchner Verkehrsbetrieben im Linienverkehr unterwegs.

**Bereits seit 1975** – einer Zeit, als kaum jemand die Notwendigkeit alternativer Antriebe sah – beschäftigen sich MAN-Ingenieure mit dem Hybrid. Die bei jedem Abbremsen frei werdende Energie zurückzugewinnen, in elektrischen Strom zu wandeln und zu speichern, erwies sich lange Zeit vor allem wegen der Kosten und der sehr begrenzten Lebensdauer der Akkus als unwirtschaftlich. Deshalb entschied sich MAN für einen innovativen Weg: Beim Lion's City Hybrid kommen Ultracaps genannte Hochleistungskondensatoren als Energiespeicher zum Einsatz. Sie sind platzsparend auf dem Dach untergebracht, arbeiten nahezu wartungsfrei, sind deutlich leichter als Batteriepacks und haben eine Betriebslebensdauer von bis zu zwölf Jahren.

**Peter Nortz verbindet** mit der neuen Technologie ein ganz besonderes Fahrgefühl. Der ehemalige Verkehrsmeister der Stadt München zählt zu den ersten zehn Fahrern, die für den neuen Bus geschult wurden. „Ein wunderbares Fahrgefühl“, schwärmt er. Das beinahe lautlose Gleiten bietet einen ganz eigenen Komfort. Die Fahrgäste, so Nortz, müssten sich daran allerdings oft erst gewöhnen. „Viele schauen an den Haltestellen ganz verdattert, dass auf einmal ihr Bus schon da steht.“ Das Konzept sei wie geschaffen für

den Stadtverkehr. Nirgendwo müssen Fahrzeuge häufiger bis zum Stillstand abbremsen als im innerstädtischen Linienverkehr. Und folglich beschleunigen sie auch nirgends so oft aus dem Stand heraus. Dabei kann der Lion's City Hybrid mehrere Hundert Meter rein elektrisch und emissionsfrei anfahren, bis er bei zunehmendem Leistungsbedarf automatisch den Verbrennungsmotor zuschaltet. Intelligentes Energiemanagement wie die Start-Stopp-Automatik des Motors sorgt für zusätzliche Effizienz. Insgesamt spart der Lion's City Hybrid im Vergleich zu einem konventionell betriebenen Stadtbus bis zu 30 Prozent Kraftstoff. Das sind bis zu 10000 Liter Diesel jährlich.

„**Doch beim Fahren ist** Zehenspitzengefühl gefragt“, stellt Busfahrer Nortz fest. „Man muss lernen, mit Gas- und Bremspedal strategisch zu fahren, um im grünen Bereich mit optimalem Energieeinsatz unterwegs zu sein.“ Viele Fahrer glaubten noch immer, dass der dieselektrische Motor zu schwach sei. „Das stimmt überhaupt nicht“, versichert Nortz. „Der Lion's City Hybrid ist kraftvoll und zieht auch aus den unteren Drehzahlbereichen wunderbar heraus.“

**An der Haltestelle Universität** öffnet Nortz die Türen. Der Bus steht still, sein Motor hat sich ausgeschaltet. Johanna Heyden steigt aus und nickt ihrem Fahrer zu. Dann macht sie sich auf den Weg in ihre BWL-Vorlesung. Kostenrechnung steht hier auf dem Stundenplan. Die Linie 154 hat ihr schon einmal vorgemacht, wie Wirtschaftlichkeit von morgen mit umweltfreundlichen und innovativen Ideen in Fahrt kommt.

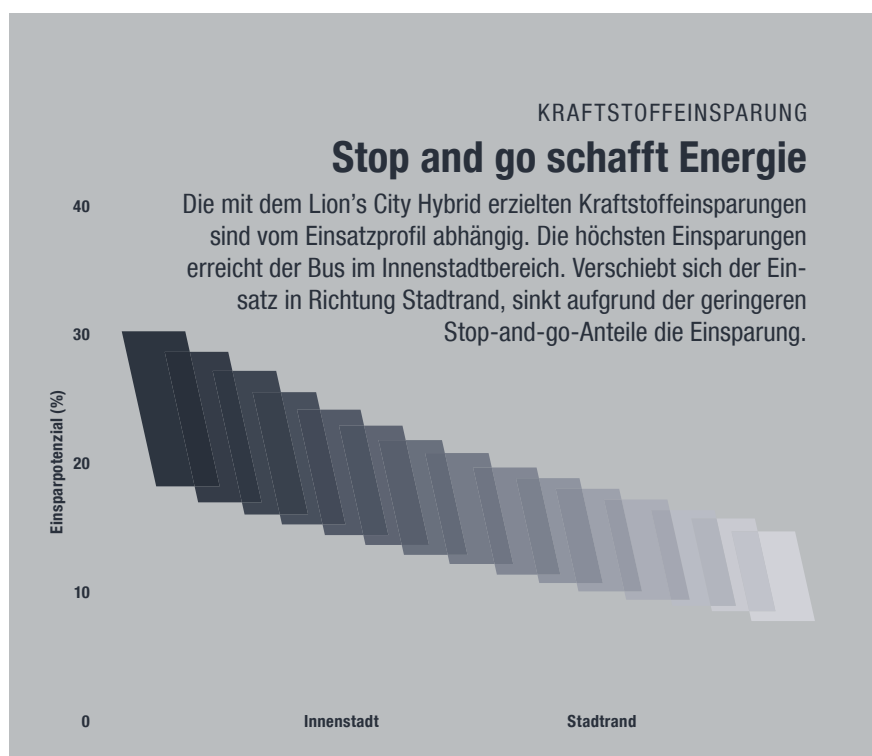



# Power Engineering

## Transport of the future

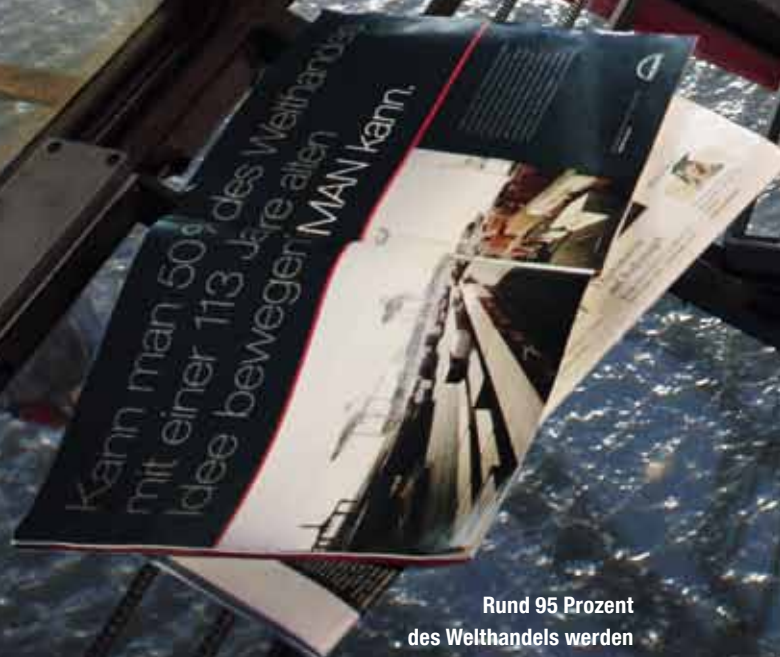

Rund 95 Prozent  
des Welthandels werden  
per Schiff abgewickelt – jedes  
zweite fährt mit einem  
MAN-Schiffsdieselmotor.



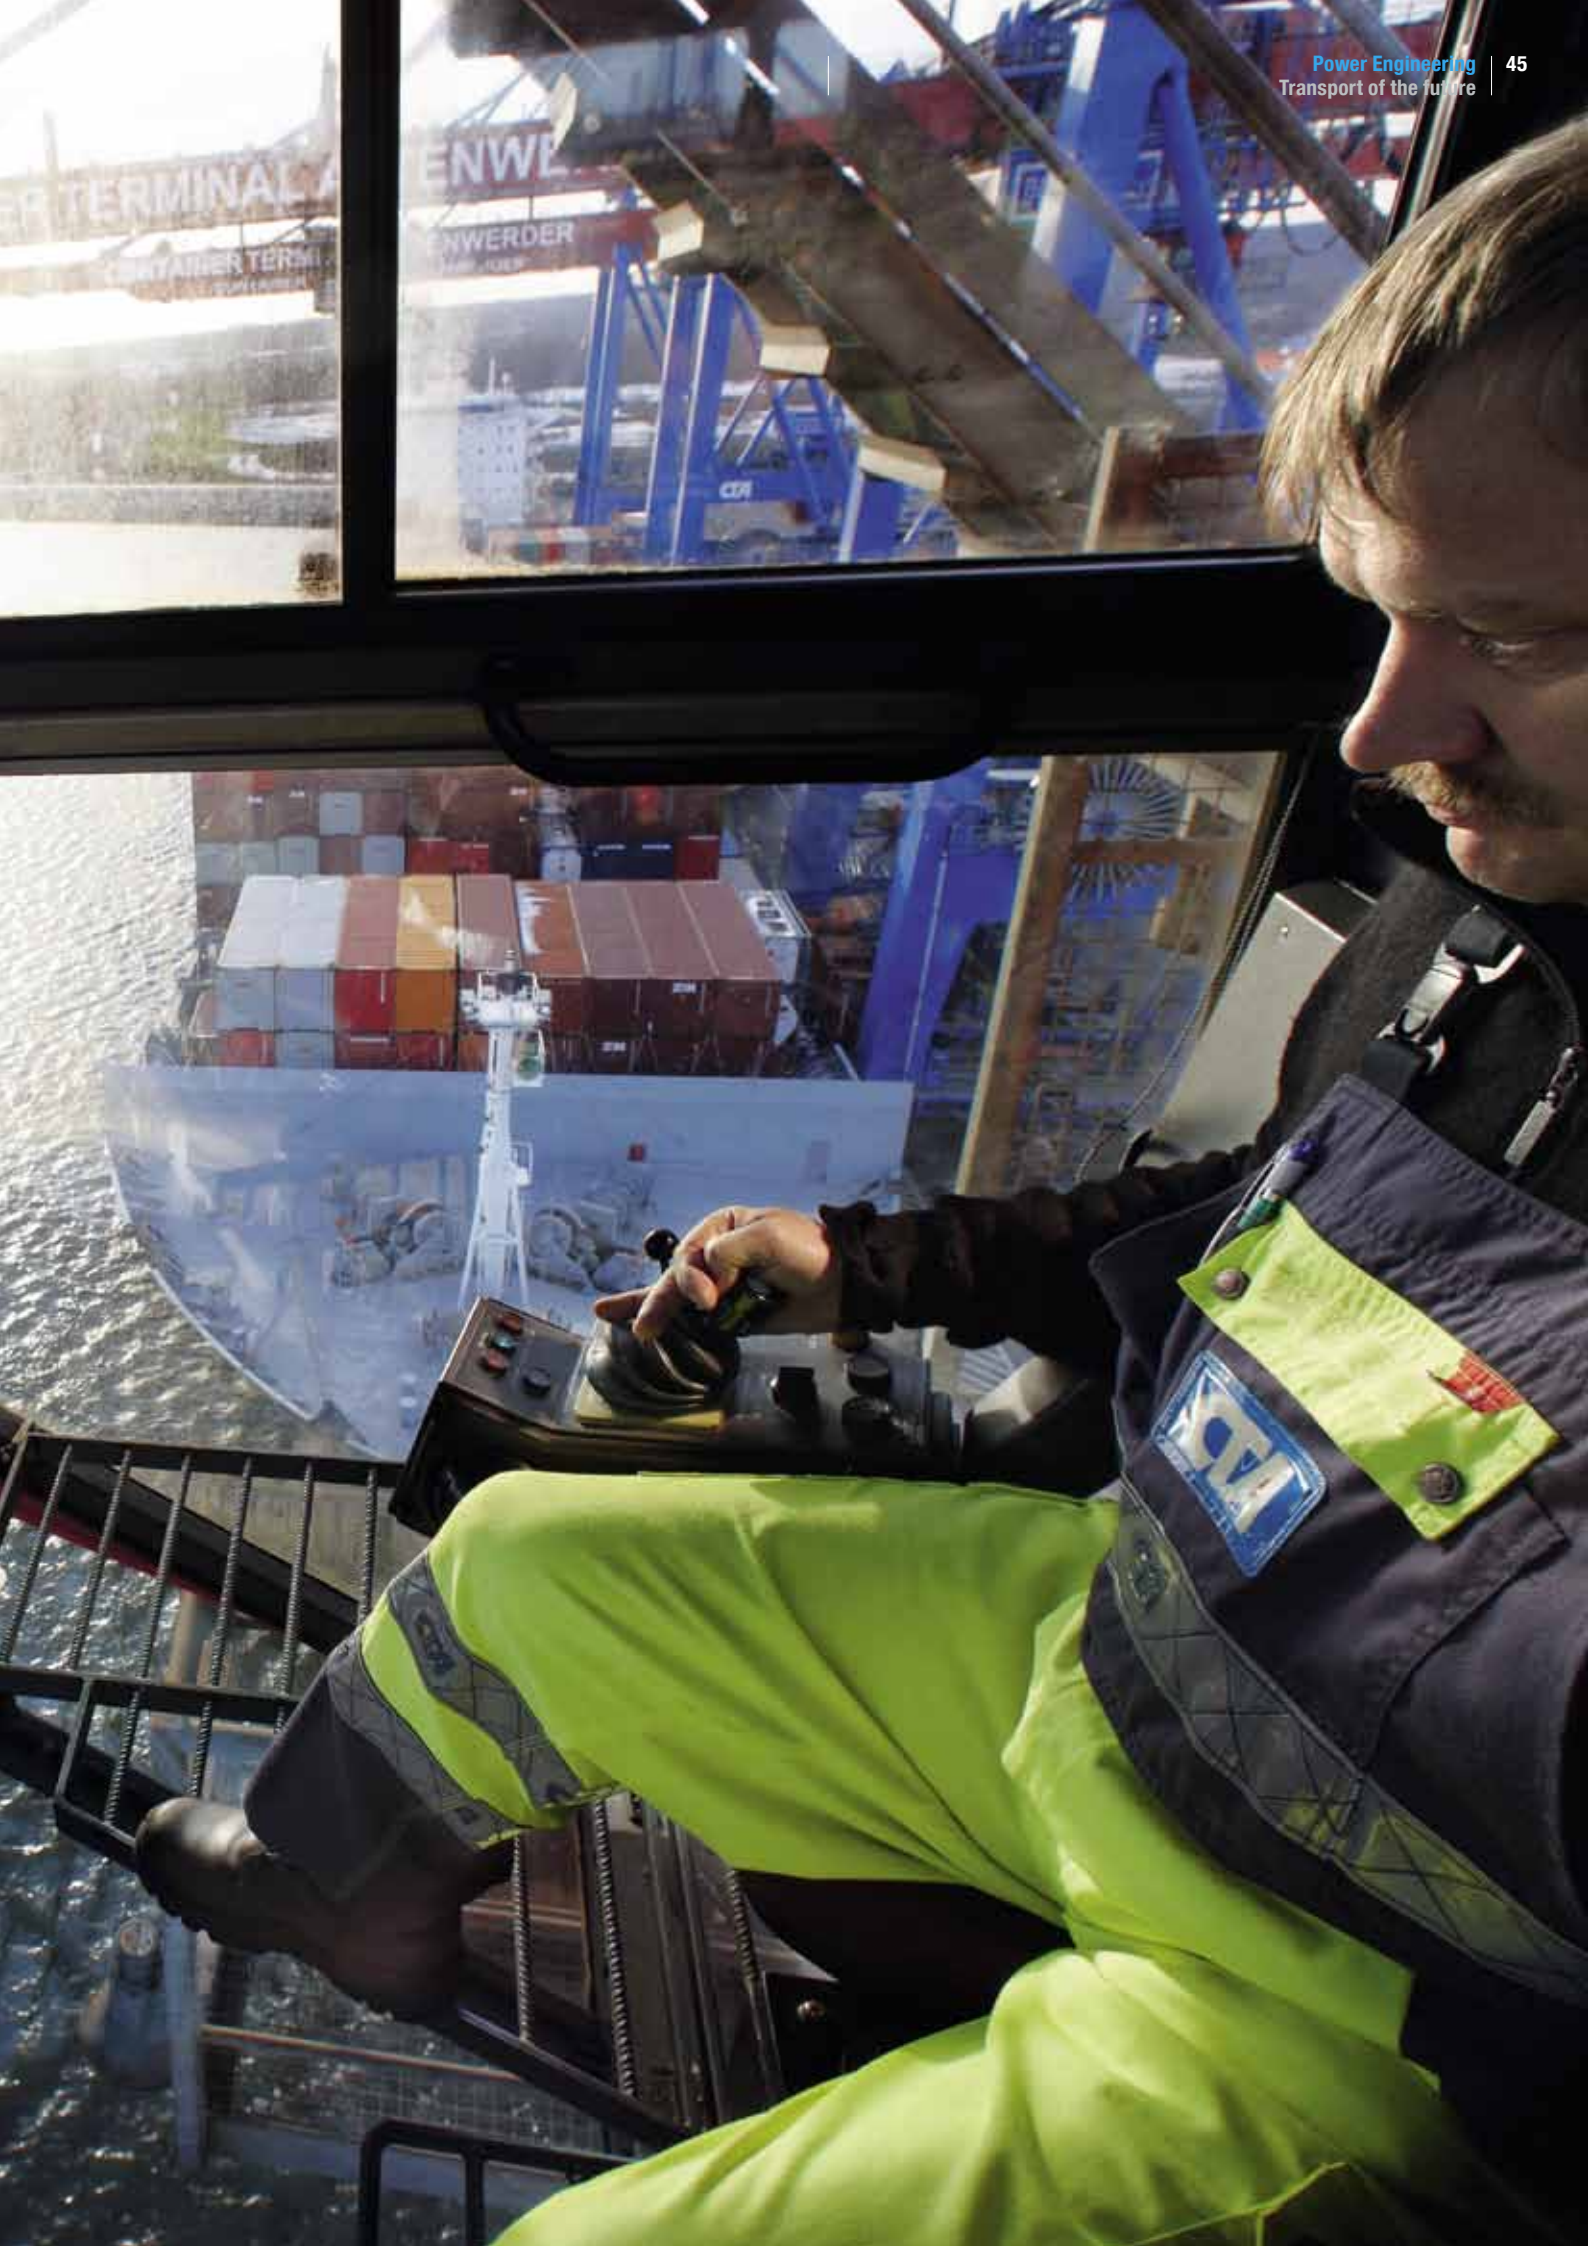



# Power Engineering

## Transport of the future

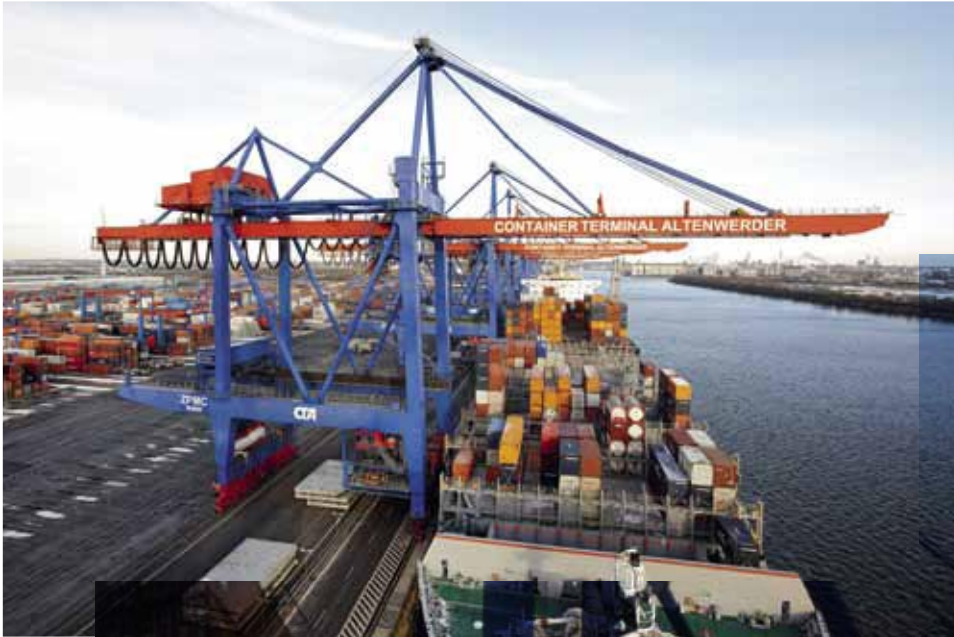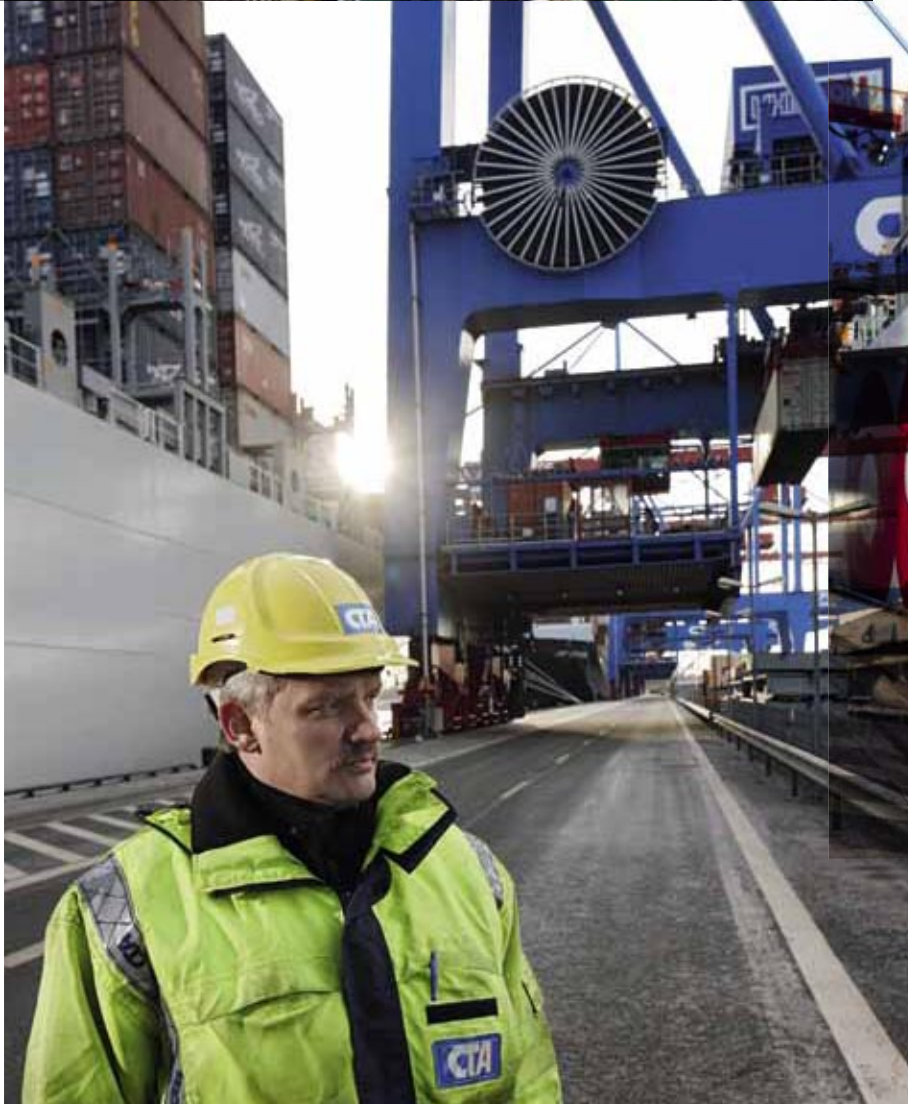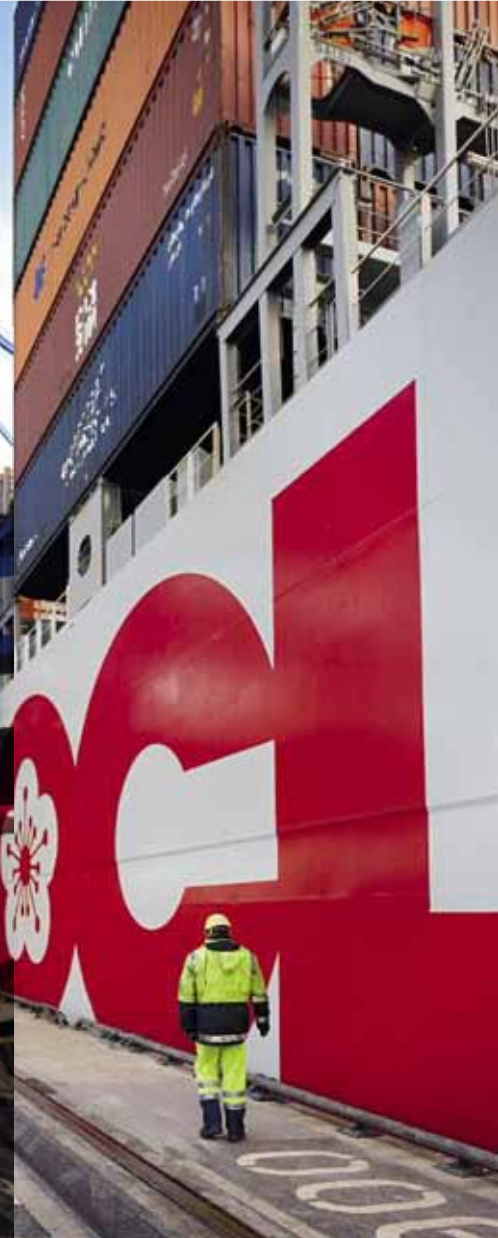

Volle Kraft voraus: Hendrik Külß freut sich über die positiven Konjunkturimpulse.

# „Die Wirtschaft hat Fahrt aufgenommen. Der Hafen boomt wieder.“

Hendrik Külß, Hafenarbeiter

**Der Welthandel kommt bei** Hendrik Külß direkt vorgefahren. Der 51-jährige Containerbrückenfahrer hat Brückenaufsicht am CTA, dem HHLA Container Terminal Altenwerder in Hamburg. Von seiner Containerbrücke in rund 40 Meter Höhe über dem Ballinkai löscht und lädt er an einem der modernsten Umschlagplätze der Welt Frachtschiffe aus aller Herren Länder. Es herrscht Hochbetrieb am Terminal. Bis zu drei Handelsschiffe machen hier pro Tag fest, und zwar große „Pötte“, wie Külß feststellt. Bis zu 350 Meter lang und 44 Meter breit. Sie haben Platz für rund 9000 Container. Es gibt also viel zu tun für die Mannschaften. Rund um die Uhr, sieben Tage in der Woche.

„**Die Wirtschaft hat** Fahrt aufgenommen. Der Hafen boomt wieder“, freut sich Külß. Er lässt den „Spreader“, einen Teleskoprahmen zum Aufnehmen von Containern, in den Laderaum hinabsinken, um damit die nächste Frachtbox zu greifen. Im Krisenjahr 2009 geschah das zwar seltener. Nur vier bis fünf Schiffe machten da am Ballinkai fest – pro Woche. Doch das Umschlagtempo am Schiff nahm sogar in der Krise weiter zu – die immer größeren Schiffe wollen ihre Kostenvorteile nicht durch längere Liegezeiten in den Häfen verlieren. Die Krise hat die globalen Entwicklungslinien nicht verschoben: Das Wachstum der Weltwirtschaft und die Zunahme der Weltbevölkerung erzeugen weiter ständig steigende Warenströme. Auf dem Seeweg wickeln Containerschiffe, Tanker und Massengutfrachter rund 95 Prozent des transkontinentalen Warentransports ab. Im Schiffsverkehr werden im globalen Warenstrom jährlich fast acht Milliarden Tonnen Güter transportiert.

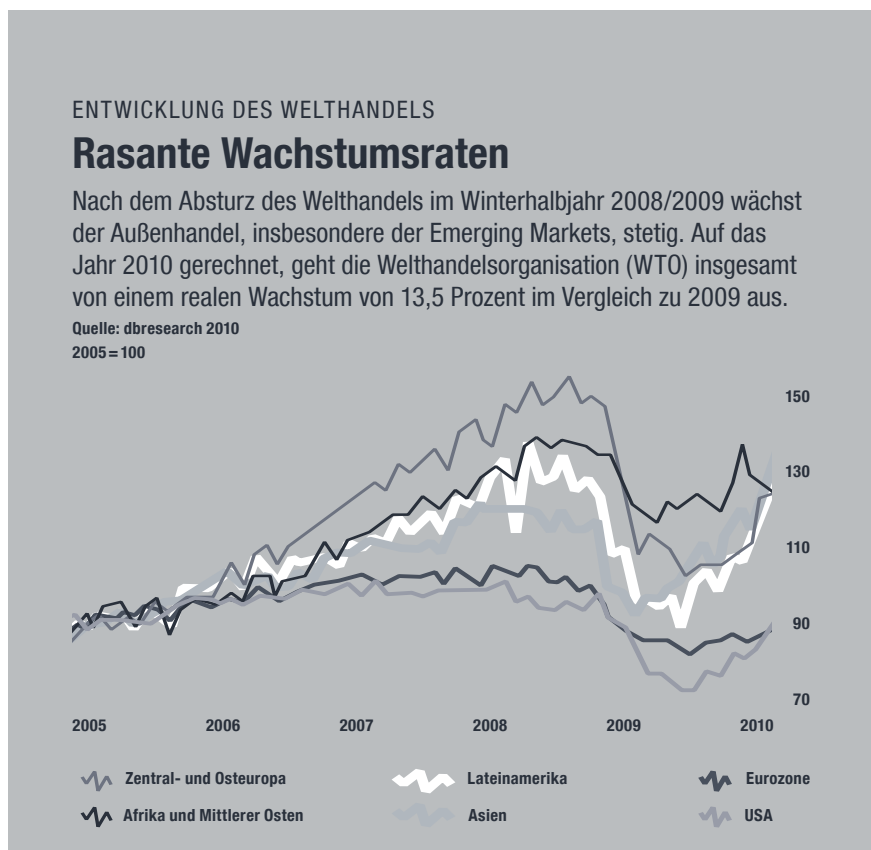

**Über die Hälfte** aller neu gebauten Dieselmotoren für Seeschiffe stammen von MAN Diesel & Turbo. Die Zwei- und Viertaktmotoren sind dabei dank fortschrittlicher Technik sauberer als je zuvor. Und die Anforderungen steigen weiter. Bis 2016, so will es die International Maritime Organization (IMO), müssen die Stickstoffemissionen in der Schifffahrt um 80 Prozent reduziert werden. Um hohe Ökostandards einzuhalten, bringt MAN Diesel & Turbo selbst jahrzehntealte Motoren mithilfe sogenannter Retrofits, die unter der Aftersales-Marke MAN PrimeServ angeboten werden, auf den neuesten Stand der Technik. Darüber hinaus weisen die Dual-Fuel-Motoren von MAN Diesel & Turbo dem ökologischen Fortschritt den See-

weg. So geht heute bei vielen Flüssiggastankern das abdampfende Gas aus den Ladungstanks nicht verloren, sondern wird energieeffizient für den Betrieb des Antriebsmotors verwendet.

**Gute Aussichten auch** für Hendrik Külß am Ballinkai. Er ist schließlich selbst bis 1979 zur See gefahren und verbindet daher mit solchen neuen Schiffsantrieben das Gefühl eines weiteren maritimen Aufbruchs. Dieser, da ist er sich sicher, sorgt dafür, dass der Welthandel auch weiterhin unter seiner Containerbrücke haltmacht. Zum Laden und Löschen.



# Power Engineering

## Energy of the future

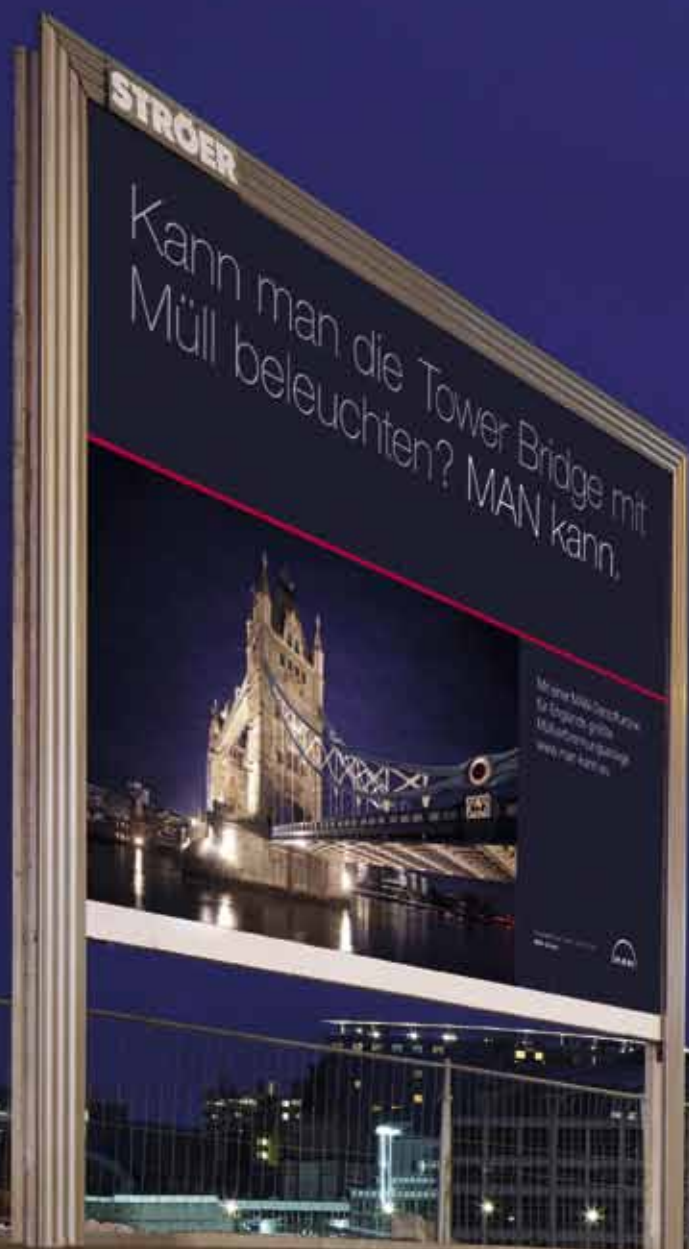

Dampfturbinen von MAN Diesel & Turbo erzeugen aus den energiereichen Teilen des Mülls wie Papier, Kunststoffen, Textilien oder Hölzern elektrische Energie.

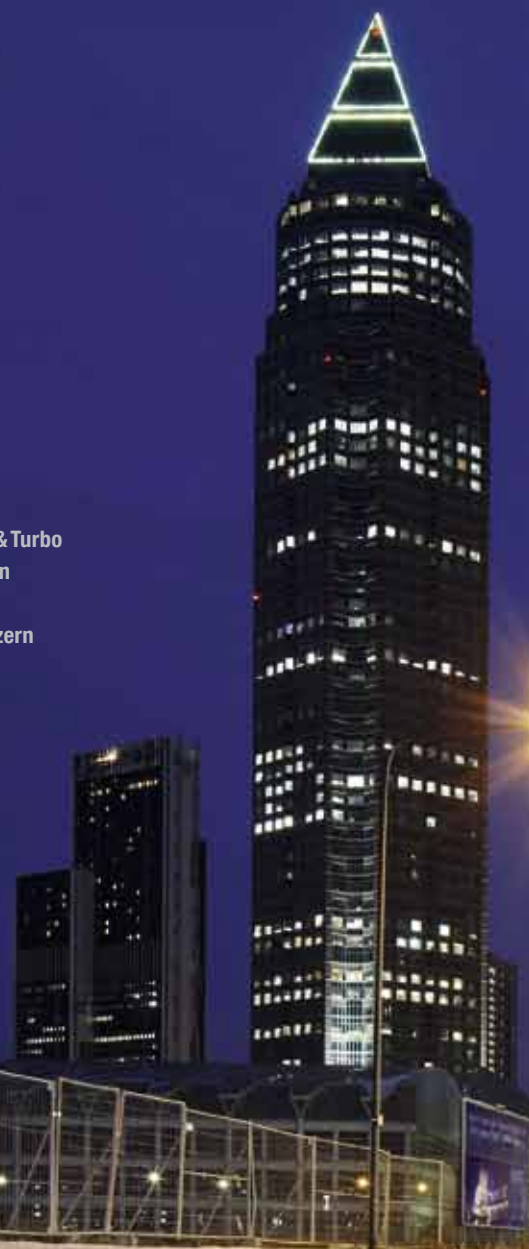



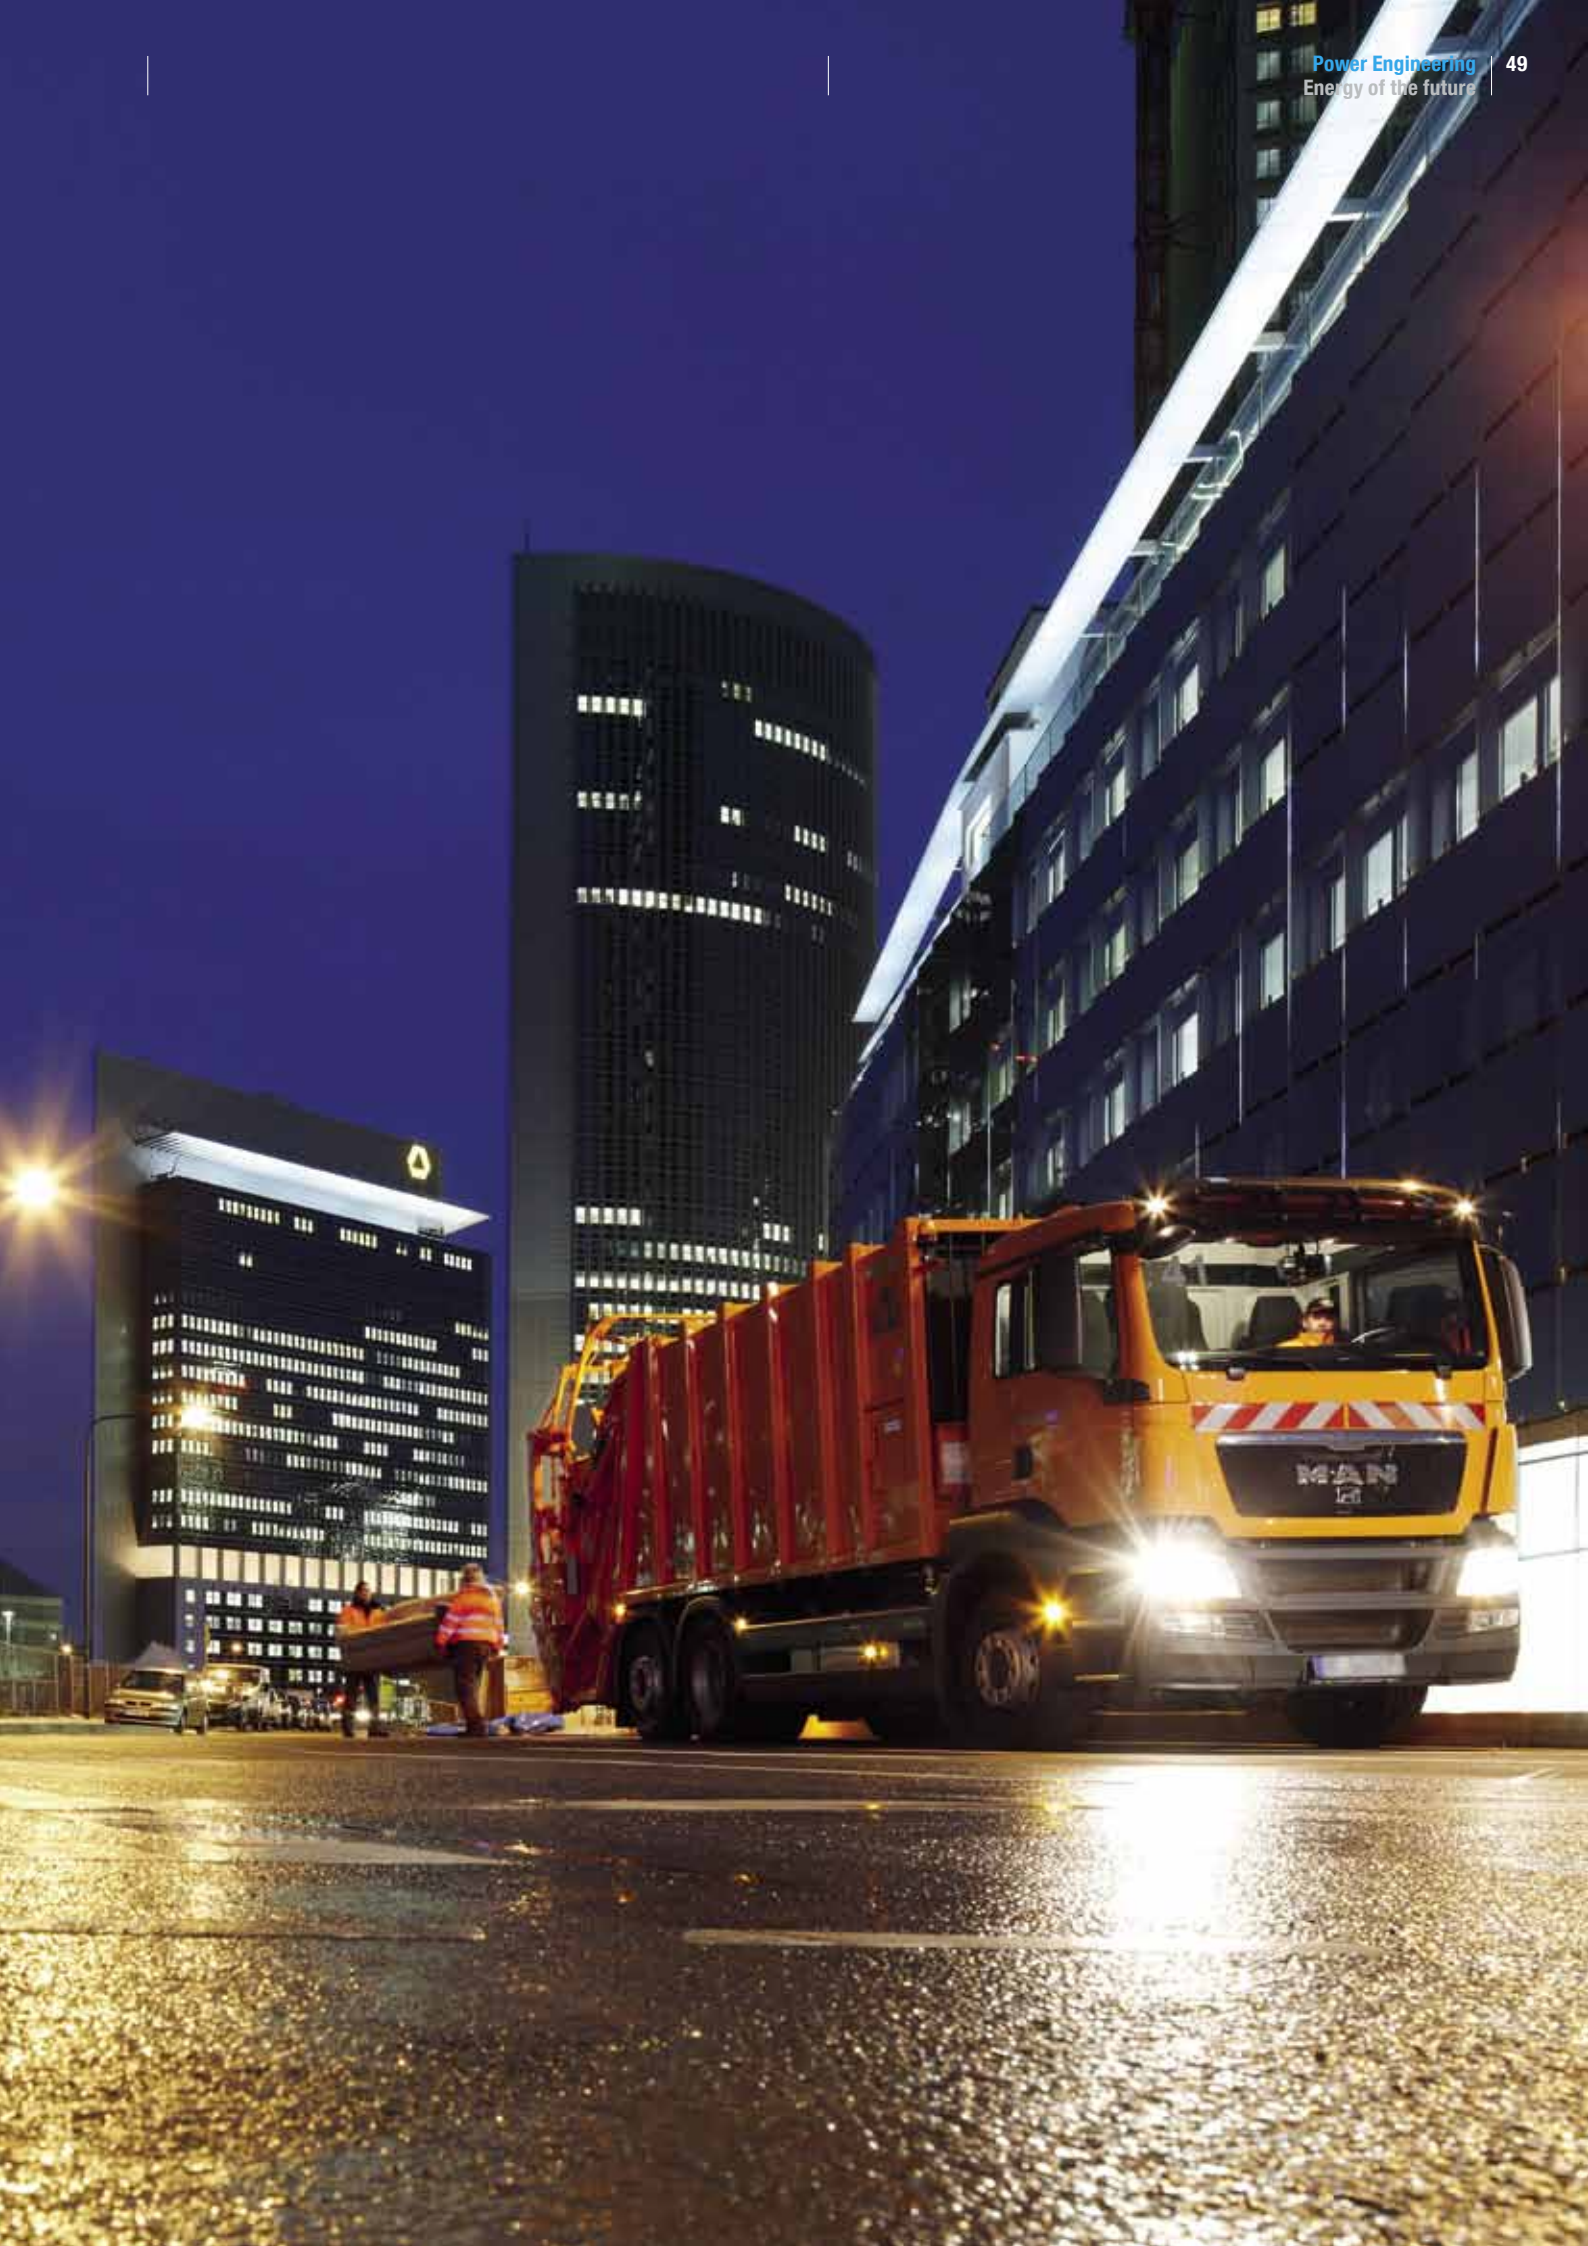

# Power Engineering

## Energy of the future

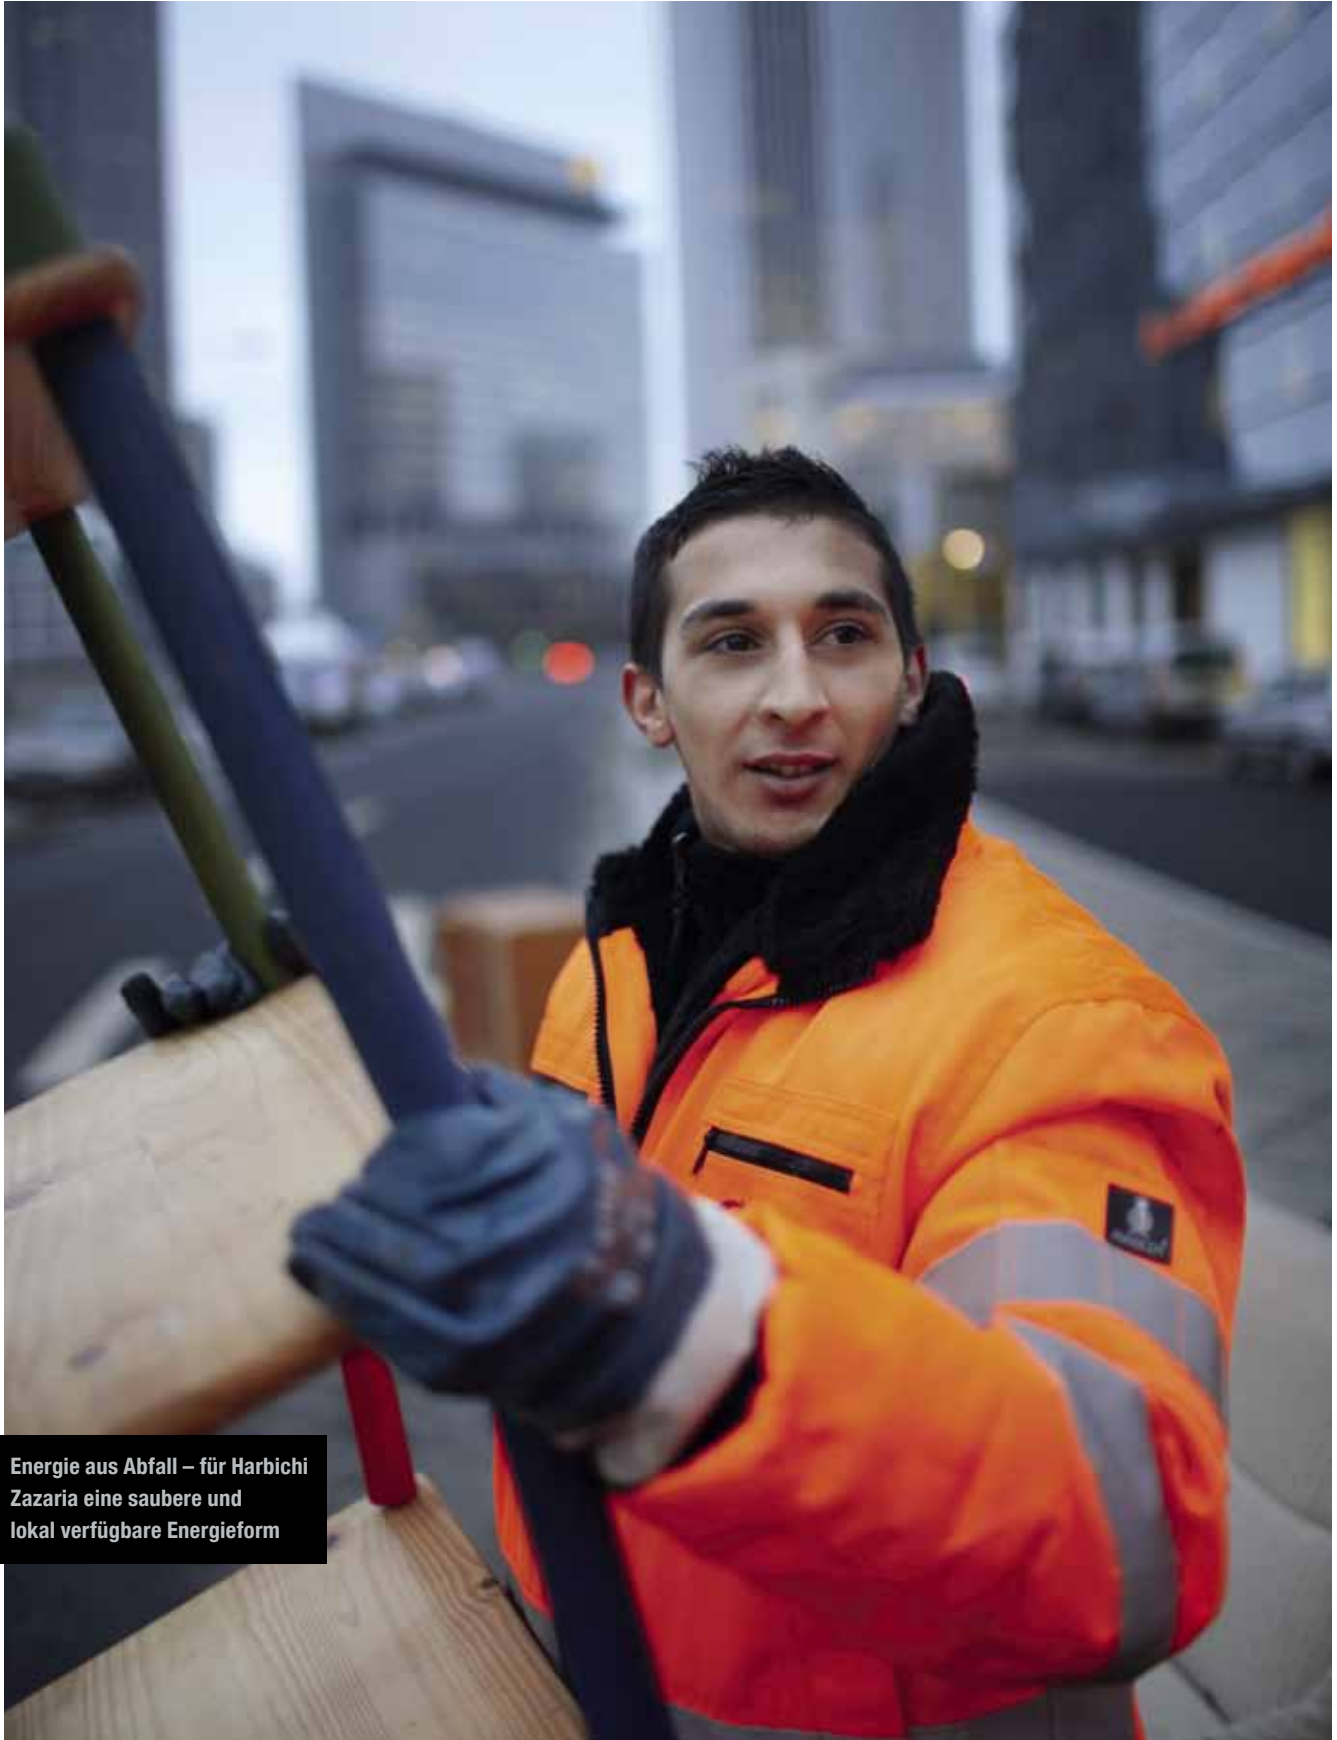

Energie aus Abfall – für Harbichi  
Zazaria eine saubere und  
lokal verfügbare Energieform



# „Wir sortieren möglichst alle Abfälle und trennen diese nach Wertstoffen.“

Harbichi Zazaria, Müllarbeiter

**Es ist nass, kalt und früh am Morgen.** Frankfurt schläft noch. Harbichi Zazaria ist allerdings längst hellwach. Der junge Marokkaner steuert mit seinem Team eine Wohnanlage in der Innenstadt an. Sperrmüll steht auf dem Programm. Zazaria sammelt für den Verein Werkstatt Frankfurt Wertstoffe. Das Sozialunternehmen, das arbeitslose Menschen für den Wiedereinstieg ins Berufsleben qualifiziert, hat sich vor allem auf Elektrogeräte und Möbel spezialisiert. Seit 1989 sammelt das Unternehmen mit rund 300 Mitarbeitern pro Jahr etwa 7 000 Tonnen Abfälle. „Wir demontieren und sortieren möglichst alle Abfälle und trennen diese nach Wertstoffen“, so Zazaria. Besonders interessant seien neben Holz auch Metalle wie Kupfer, Eisenschrott oder Aluminium. „Der Rest sind brennbare Abfälle für die thermische Verwertung im Müllheizkraftwerk, wo Fernwärme und Strom erzeugt werden“, sagt Christian Jungk, Leiter Recyclingzentrum Frankfurt.

**Lange galten** Müllverbrennungsanlagen als Giftschleudern. Doch Filtersysteme und die Technik haben sich längst weiterentwickelt. „Waste-to-Energy“ heißt das Konzept, mit dem auch hier in Frankfurt aus Abfall Strom und Wärme erzeugt werden. Dampfturbinen von MAN Diesel & Turbo sorgen dabei für eine effiziente

Kraft-Wärme-Kopplung. „Der Energiemix der Zukunft wird sich verändern“, erklärt Dr. Hans-O. Jeske, Vorstandsmitglied von MAN Diesel & Turbo. „Bei der Effizienzsteigerung im Einsatz von Energie können wir mit unseren Produkten einen wertvollen Beitrag leisten.“ Dampfturbinen von MAN Diesel & Turbo erreichen heute schon einen Wirkungsgrad von bis zu 27 Prozent. „Wenn noch Fernwärme für die Beheizung von Wohnungen und Gebäuden ausgekoppelt wird, kann der Wirkungsgrad der Anlage bei der Brennstoffnutzung sogar erheblich gesteigert werden und liegt dann über denen moderner Kohlekraftwerke“, unterstreicht Jeske.

**Intelligente Abfallwirtschaft** nach dem Prinzip „Waste-to-Energy“ ist gesellschaftlich, politisch und ökologisch geboten. Denn EU-weit gibt es noch große Unterschiede bei der Entsorgung des Abfalls. So werden in Deutschland bereits 48 Prozent der kommunalen Abfälle recycelt, bevor sie in der Verbrennung landen. Zum Vergleich: In Frankreich sind es 18, in Italien elf Prozent. Nach der neuen EU-Deponierichtlinie dürfen nach einem Stufenplan bis 2016 nur 35 Prozent des energiereichen Hausmülls deponiert werden, 65 Prozent müssen verbrannt, dem Recycling oder der Kompostierung zugeführt werden. Branchenkenner erwarten daher ein boomendes Geschäft für die Hersteller von Müllverbrennungsanlagen und deren Komponentenzulieferer.

**In Frankfurt beginnt** der Morgen zu dämmern. Zazaria und seine Kollegen haben den Sperrmüll bereits aufgeladen. Ihr Müllfahrzeug ist nun auf dem Weg zur weiteren Verwertung. Das frühe Aufstehen für die Wertstoffe lohnt sich für den jungen Marokkaner. Seine Fahrten führen direkt in die Zukunft der Energieerzeugung.

## KOMMUNALES ABFALLAUFGKOMMEN IN DER EU

### Was passiert mit dem Müll?

Rund 500 Kilogramm Abfälle pro Person und Jahr landen in Europa in den diversen Mülltonnen. Spitzenreiter sind die Dänen mit 802 Kilo Abfall, den in diesem Fall vorbildlichen letzten Platz nehmen die Tschechen mit 306 Kilo ein. Unterschiede gibt es auch bei der Abfallbehandlung: Den höchsten Anteil der Verbrennung hat Dänemark, die höchste Recyclingrate hat Deutschland, und in Bulgarien wird Müll bislang zu 100 Prozent auf Deponien gelagert.

Quelle: Eurostat 2009

EU insgesamt  
524 kg/Person

Bulgarien  
467 kg/Person

Dänemark  
802 kg/Person

Deutschland  
581 kg/Person

Tschechische Republik  
306 kg/Person

■ Deponierung ■ Verbrennung ■ Recycling ■ Kompostierung

**01**  
An die Aktionäre  
Seite 04–23

**02**  
Die MAN-Welt  
Seite 24–51

**03**  
Konzernlagebericht  
Seite 52–119

**04**  
Konzernabschluss  
Seite 120–190



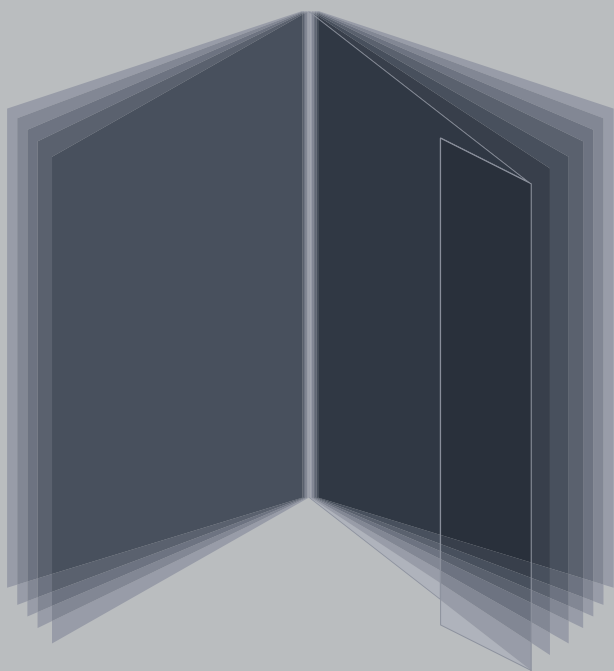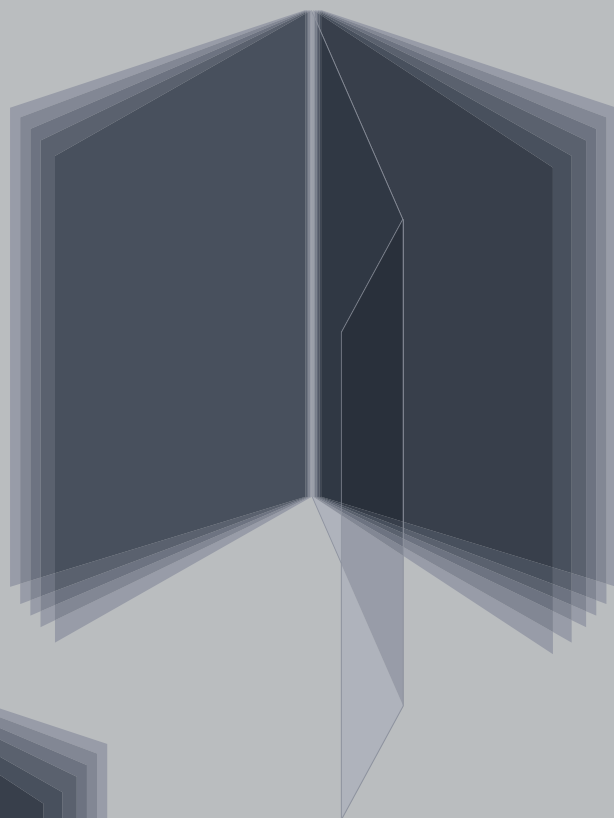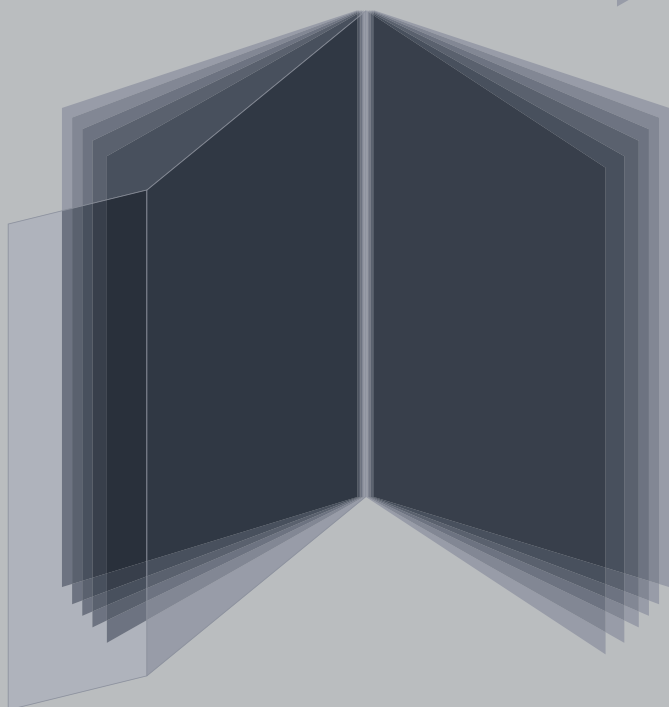

## Informationen mit einem Griff

Der Ausklapper verbessert die Übersicht im MAN-Geschäftsbericht. Einfach Klapper aufschlagen, die ganze Seite umblättern, und schon ermöglicht ein Index mit Seitenzahlen den schnellen Zugriff auf die gewünschten Informationen.

# 03

## Konzernlagebericht

für das Geschäftsjahr 1. Januar  
bis 31. Dezember 2010

Seite 52 – 119

|     |                                                                                                           |
|-----|-----------------------------------------------------------------------------------------------------------|
| 54  | Highlights                                                                                                |
| 55  | Geschäftstätigkeit und Strategie der MAN Gruppe                                                           |
| 55  | Die MAN Gruppe                                                                                            |
| 55  | Überblick über die Bereiche                                                                               |
| 56  | Strategie und Stärken der MAN Gruppe                                                                      |
| 58  | Desinvestitionen                                                                                          |
| 59  | Geschäftsverlauf und Ertragslage                                                                          |
| 59  | Wirtschaftliches Umfeld                                                                                   |
| 59  | Deutliche Erholung des Geschäfts                                                                          |
| 60  | Auftragslage                                                                                              |
| 63  | Operatives Ergebnis                                                                                       |
| 64  | Gewinn- und Verlustrechnung                                                                               |
| 64  | Überleitung zum Ergebnis nach Steuern                                                                     |
| 65  | Steuerungssystem und Wertmanagement                                                                       |
| 68  | Finanzlage                                                                                                |
| 68  | Grundsätze und Ziele des Finanzmanagements                                                                |
| 68  | Cashflow                                                                                                  |
| 71  | Finanzierung der MAN Gruppe                                                                               |
| 72  | Vermögens- und Kapitalstruktur                                                                            |
| 74  | Grundkapital, Genehmigtes und Bedingtes Kapital, Erwerb eigener Aktien                                    |
| 74  | Angaben nach § 289 Abs. 4 und 315 Abs. 4 HGB<br>sowie erläuternder Bericht gemäß § 176 Abs. 1 Satz 1 AktG |
| 80  | Forschung und Entwicklung                                                                                 |
| 84  | Investitionen                                                                                             |
| 85  | Beschaffung                                                                                               |
| 86  | Mitarbeiter                                                                                               |
| 89  | Corporate Responsibility                                                                                  |
| 92  | Die Bereiche im Einzelnen                                                                                 |
| 93  | MAN Truck & Bus                                                                                           |
| 96  | MAN Latin America                                                                                         |
| 98  | MAN Diesel & Turbo                                                                                        |
| 103 | Renk                                                                                                      |
| 104 | Sonstige/Konsolidierung                                                                                   |
| 105 | Abschluss der MAN SE                                                                                      |
| 106 | Risikobericht und Ausblick                                                                                |
| 106 | Risikomanagement                                                                                          |
| 108 | Rechnungslegungsbezogenes Risikomanagementsystem<br>und internes Kontrollsystem                           |
| 109 | Chancen und Risiken                                                                                       |
| 113 | Rechtsstreitigkeiten/Rechtliche Verfahren                                                                 |
| 113 | Compliance                                                                                                |
| 116 | Ausblick                                                                                                  |
| 119 | Ereignisse nach dem Bilanzstichtag                                                                        |

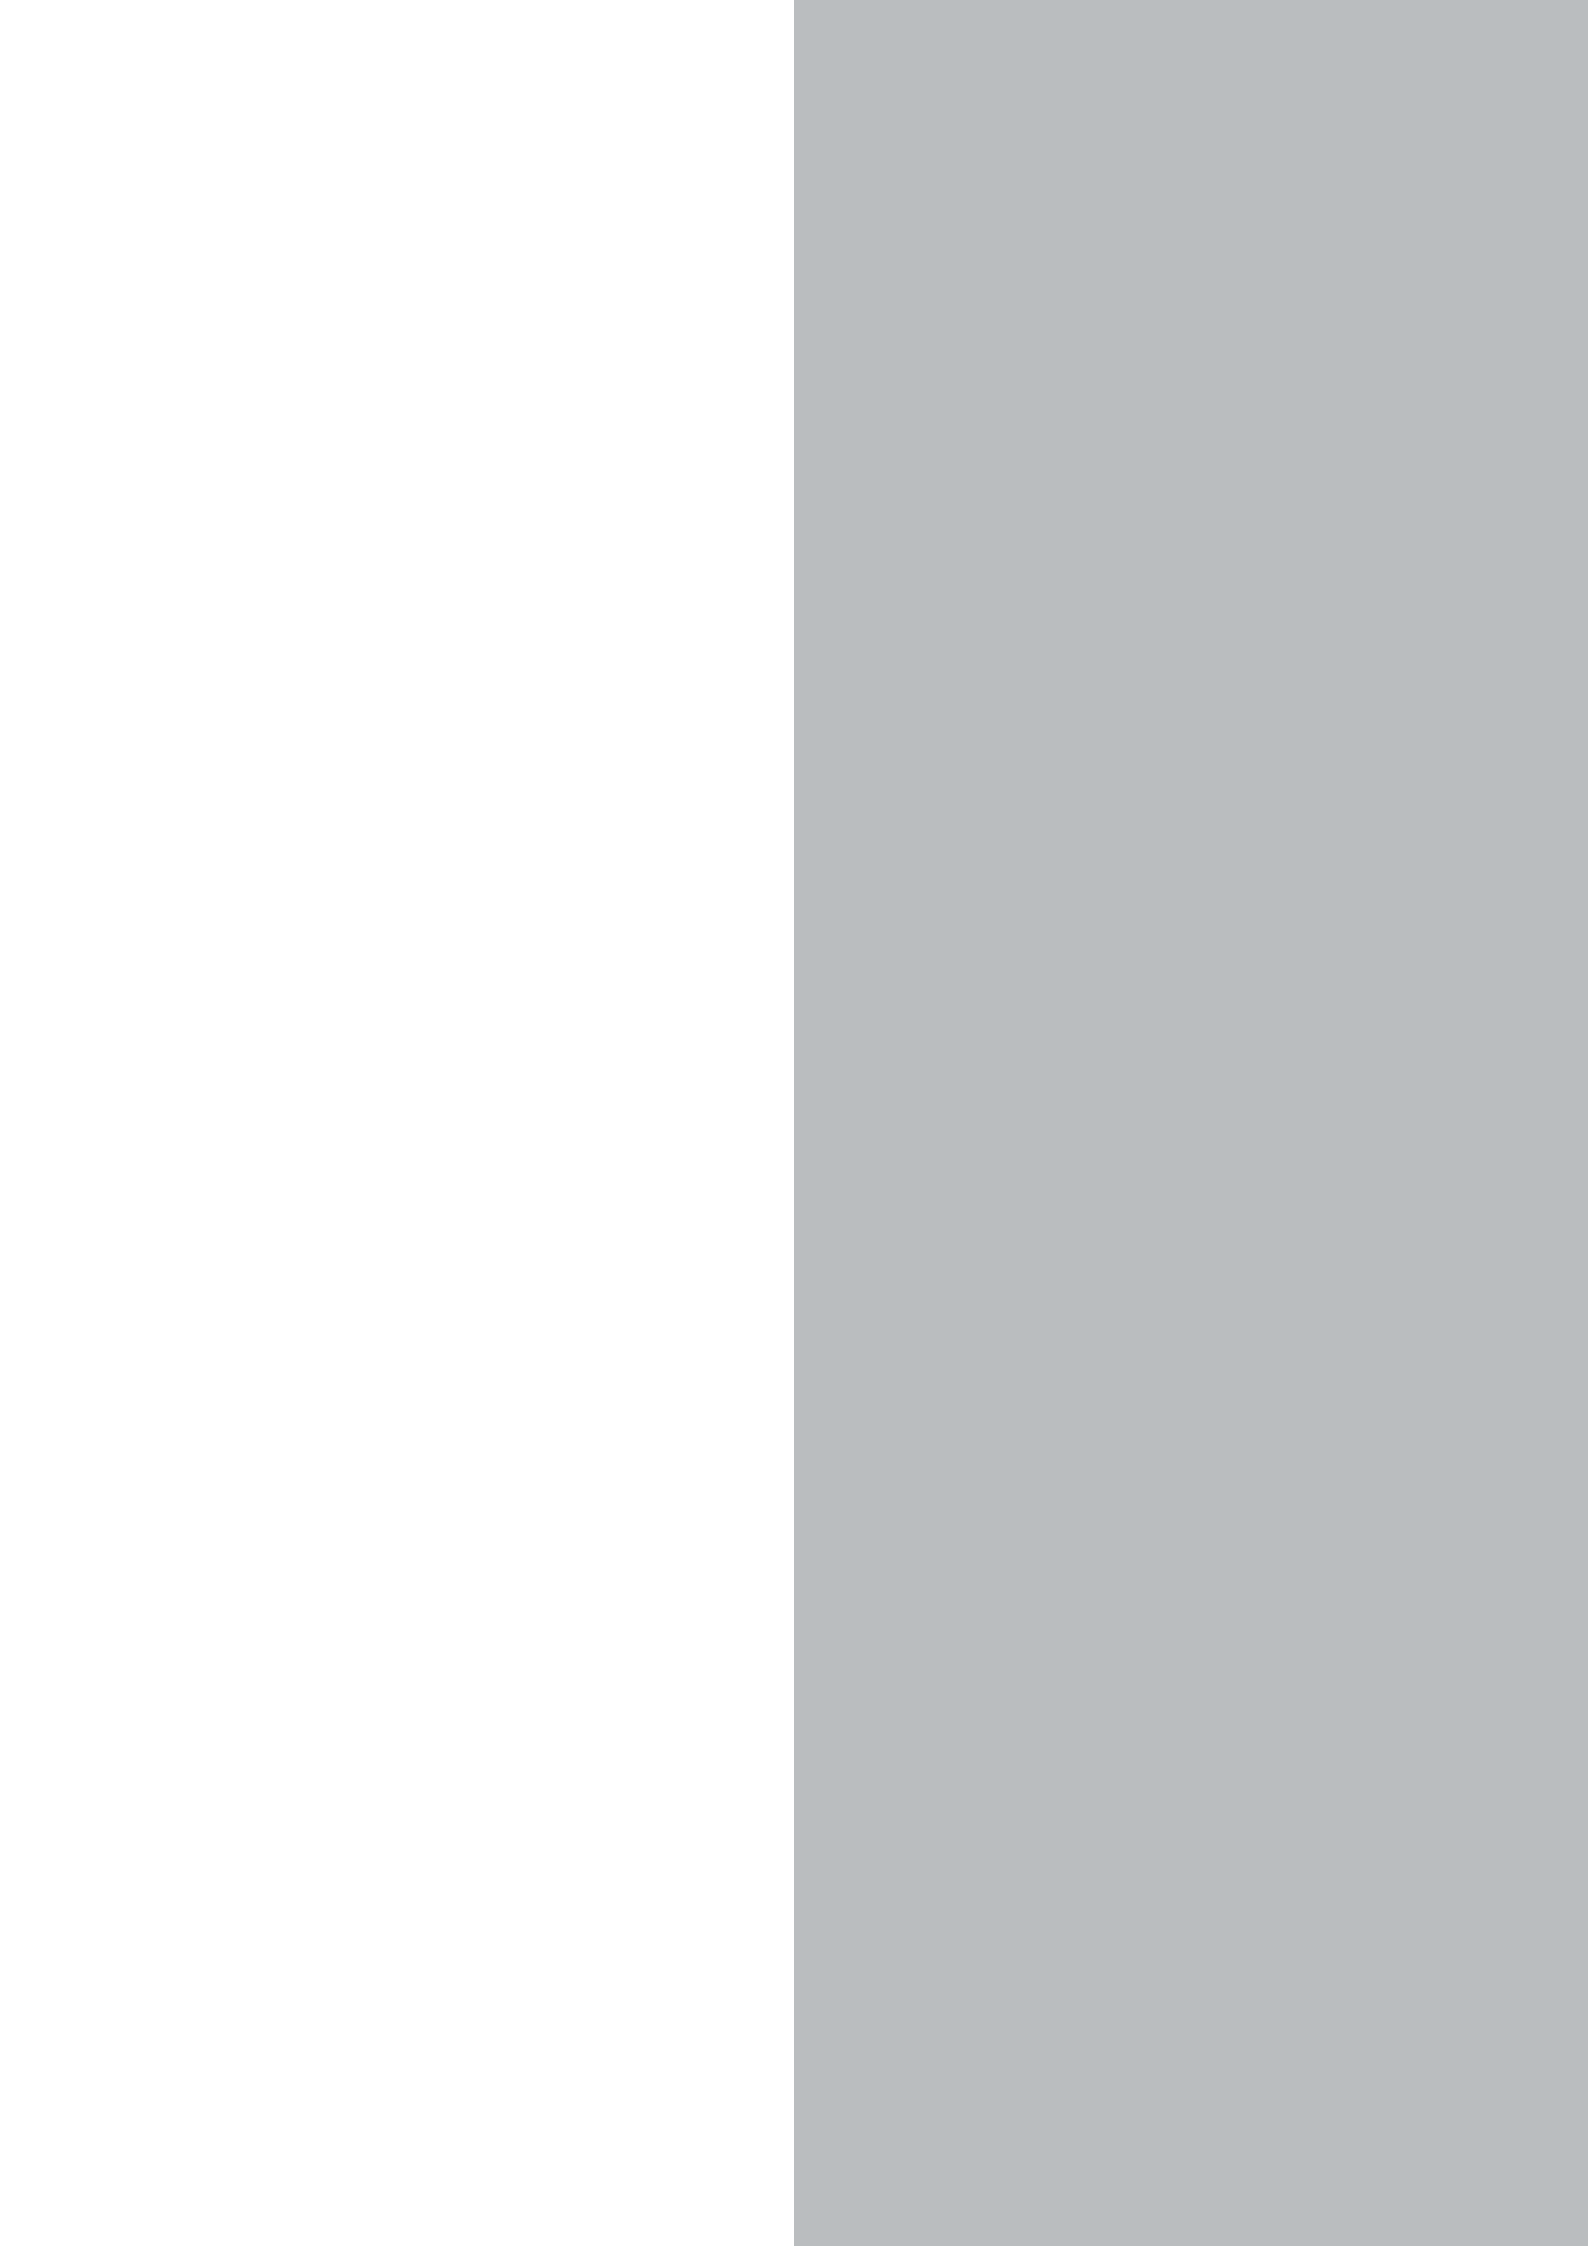

# Konzernlagebericht

## Highlights 2010

### Fokussierung auf Transport und Energie erfolgreich, Operatives Ergebnis verdoppelt

- Auftragseingang mit 15,1 Mrd € gegenüber Vorjahr deutlich gesteigert (+ 53 %)
- Umsatzzuwachs um 22 % auf 14,7 Mrd € (12,0 Mrd €) in einem sich aufhellenden konjunkturellen Umfeld
- Operatives Ergebnis mit 1 035 Mio € (504 Mio €) über den Erwartungen
- Umsatzrendite ROS 7,1 % (4,2 %); Kapitalrendite ROCE 17,4 % (8,8 %)
- Free Cashflow 1,1 Mrd €, Nettoverschuldung sinkt auf unter 1,8 Mrd €
- Ergebnis je Aktie der fortgeführten Bereiche 5,30 € (–2,69 €), ohne Ergebnis aus Sondervorgängen und ohne Effekte aus Kaufpreisallokationen 3,38 € (1,47 €)
- Dividendenvorschlag: Anhebung auf 2,00 € je Aktie (0,25 €)

### Ausblick 2011

- Umsatzsteigerung im Geschäftsfeld Commercial Vehicles von 10 bis 15 % angestrebt
- Power Engineering: Umsatzrückgang bis zu 5 % möglich
- Verbesserung des ROS um 1 %-Punkt
- Konsequente Fortsetzung der Internationalisierungsstrategie
- Fokus auf Effizienzsteigerungen, Kostendisziplin und Cashflow-Verbesserung

# Konzernlagebericht

## Geschäftstätigkeit und Strategie der MAN Gruppe

### Die MAN Gruppe

Die MAN Gruppe ist mit der Konzentration auf Transport und Energie einer der führenden Engineering-Konzerne in Europa. Im Jahr 2009 wurde die MAN Aktiengesellschaft in eine Europäische Gesellschaft (SE) umgewandelt und firmiert nunmehr unter MAN SE. Der Fokussierungsprozess auf die Bereiche Commercial Vehicles und Power Engineering wurde durch die mehrheitliche Veräußerung der MAN Ferrostaal AG und den Erwerb von MAN Latin America im Jahr 2009 abgeschlossen.

Die MAN-Unternehmen gehören in ihren jeweiligen Märkten zu den Top Drei der Anbieter. Der Konzern ist mit rund 47 700 Mitarbeitern in 150 Ländern und den Unternehmen MAN Truck & Bus (vormals MAN Nutzfahrzeuge), MAN Latin America, MAN Diesel & Turbo und Renk aktiv. An der Spitze der MAN Gruppe steht die MAN SE als Konzernzentrale. Die MAN Gruppe erreichte 2010 Umsatzerlöse von 14,7 Mrd € und ein Operatives Ergebnis von 1 035 Mio €.

### Überblick über die Bereiche

#### Geschäftsfeld Commercial Vehicles

MAN Truck & Bus ist einer der führenden Hersteller von Nutzfahrzeugen in Europa, mit Produktionsstätten in vier europäischen Ländern sowie in Indien. Die Produktpalette reicht von Lkw mit einem Gesamtgewicht von 7,5 bis 44 t für jeden Einsatzbereich, Sonderfahrzeugen bis 250 t Zuggesamtgewicht sowie Omnibussen und Reisebussen bis hin zu Diesel- und Gasmotoren für On- und Off-Highway-Anwendungen. Die MAN Finance International GmbH, München, und ihre zugeordneten Landesgesellschaften (MAN Finance), bieten Nutzfahrzeugkunden Finanzierungslösungen an, insbesondere Leasing. Diese Tätigkeiten werden durch ein internationales Vertriebs- und Servicenetzwerk unterstützt. Die Umsatzerlöse von MAN Truck & Bus beliefen sich auf 7,4 Mrd €, das Operative Ergebnis auf 158 Mio €.

MAN Latin America ist der größte Lastwagenproduzent Brasiliens und dort Marktführer bei Lkw mit einem zulässigen Gesamtgewicht größer als 5 t. MAN Latin America produziert seit 1996 in

Resende Lkw und Busse. Die Fahrzeuge werden insbesondere in Lateinamerika und Afrika verkauft. Im gesamten Jahr 2010 wurden 65 630 Lkw und Busse ausgeliefert. Das Unternehmen verfügt über ein flächendeckendes Verkaufs- und Servicenetz in Brasilien und den Nachbarländern. Im Werk Resende, einem modularen Produktionsverbund, arbeiten MAN Latin America-Mitarbeiter und Partner-Zulieferer zusammen. Die Umsatzerlöse erreichten 2010 3,1 Mrd €, das Operative Ergebnis 370 Mio € bei insgesamt 6 149 Mitarbeitern.

Seit dem 2. Halbjahr 2009 hält die MAN SE 25 % plus eine Aktie des Kapitals an der Sinotruk Ltd., Hongkong/China, als strategischer Investor und hat eine Vereinbarung über eine langfristige strategische Partnerschaft mit Sinotruk geschlossen. Die Partnerschaft kombiniert die fortschrittliche Technologie und das Know-how von MAN sowie Sinotrucks bestehende Produktionsstätten, die lokale Expertise und das weitreichende Vertriebsnetz in China. Als Teil der Vereinbarung lizenziert MAN an Sinotruk die TGA-Lkw-Technologie, inklusive Motoren, Fahrzeuggestellen und Achsen als Basis für die Produktion einer neuen schweren Lkw-Reihe.

#### Geschäftsfeld Power Engineering

MAN Diesel und MAN Turbo haben im 1. Halbjahr 2010 unter dem Namen MAN Diesel & Turbo zu einem gemeinsamen Unternehmen fusioniert, um im Bereich der Energieerzeugung durch neue Produktpakete zusätzliches Wachstumspotenzial zu erschließen. Das Unternehmen ist einer der weltweit führenden Entwickler und Hersteller von großen Dieselmotoren, Turbokompressoren, Industrieturbinen und chemischen Reaktorsystemen.

MAN Diesel & Turbo verfügt über eine starke Marktposition, sowohl bei der Entwicklung von Zweitakt-Dieselmotoren für Antriebssysteme in großen Schiffen als auch bei der Herstellung von Viertakt-Dieselmotoren, die als Antrieb in kleineren Schiffen und in Kraftwerken zur Energieerzeugung eingesetzt werden. Während die Zweitaktmotoren von Lizenznehmern hergestellt werden, produziert MAN Diesel & Turbo den Großteil seiner Viertaktmotoren an Standorten in Deutschland und Frankreich. Des Weiteren bietet das Unternehmen eine vollständige Palette von Turbomaschinen für verschiedene Industriezweige an, z. B. für die Öl- und Gasindustrie, für Raffinerien, für die chemische Industrie sowie für die Erzeugung von Industriegasen und Strom. Hinzu kommt ein umfassendes Servicegeschäft. Im Jahr 2010 erreichten die Umsatzerlöse von MAN Diesel & Turbo 3,8 Mrd €, das Operative Ergebnis belief sich auf 439 Mio €.

Renk ist ein börsennotiertes Tochterunternehmen der MAN SE und weltweit tätiger Hersteller von Getrieben und Antriebstechnik. MAN hält 76 % am Kapital der Gesellschaft. Renk ist Weltmarktführer bei Getrieben für Kettenfahrzeuge und bei Elektromaschinen-Lagern. Auch bei Schiffs- und Industriegetrieben nimmt Renk führende Positionen ein. Das Produktportfolio von Renk umfasst Fahrzeuggetriebe, Antriebselemente (Gleitlager und Kupplungen), Sonderantriebstechnik (Industrie- und Schiffsgetriebe) und allgemeine Antriebstechnik (Industrie- und Schiffsgetriebe, Kupplungen). Darüber hinaus werden Prüfsysteme hergestellt, die in den Bereichen Entwicklung, Produktion und Qualitätssicherung hauptsächlich in der Automobil-, Eisenbahn- und Luftfahrtindustrie eingesetzt werden. 2010 erreichten die Umsatzerlöse von Renk 0,4 Mrd €, das Operative Ergebnis 52 Mio €.

## Strategie und Stärken der MAN Gruppe

### Erfolgreich aus der Krise fahren

Alle Signale deuten darauf hin, dass die gesamtwirtschaftliche Krise überwunden ist. Längerfristige Prognosen werden immer schwieriger, sodass sich MAN, wie die gesamte Branche, auf eine hohe Volatilität einstellen und dementsprechend flexibel agieren muss. Im Laufe einer über 250-jährigen Unternehmensgeschichte hat MAN jedoch vielfach bewiesen, dass das Unternehmen mit Unsicherheiten umgehen und sich auf Neues einstellen kann. MAN verfolgt dabei eine klare Strategie, die auf profitables internationales Wachstum, Technologieführerschaft, Kundenorientierung, nachhaltige Wertschöpfung und die Konzentration auf Transport und Energie fokussiert.

### Profitables internationales Wachstum

Europa ist weiterhin der wichtigste Markt und somit das Rückgrat für MAN. Premiumprodukte und eine ausgezeichnete Servicequalität sichern MAN vor allem im Nutzfahrzeuggeschäft hohe Marktanteile in dieser Region. Die Standorte in Westeuropa tragen mit ihrer Entwicklungskompetenz wesentlich dazu bei, die Technologieführerschaft in unseren Geschäftsfeldern dauerhaft zu sichern.

Doch ungeachtet der schwierigen Marktsituation in den vergangenen beiden Jahren verfolgt MAN weiterhin für Commercial Vehicles die festgelegte internationale Wachstumsstrategie. Mittelfristig wird der Transportbedarf insbesondere in den sogenannten BRIC-Staaten Brasilien, Russland, Indien und China weiter deutlich steigen und der Ausbau der Infrastruktur in diesen Ländern weiter voranschreiten. Entsprechend steigt mittelfristig die Nachfrage nach Lkw und Bussen. Zusammen repräsentieren diese Länder ca. 50 % der Weltbevölkerung, während ihr Anteil an der globalen Wirtschaftsleistung heute nur rund 14 % beträgt. Die überdurchschnittlichen jährlichen Wachstumsraten zwischen 5 und 10 % zeigen die Dynamik dieser Ökonomien. Schon heute verkauft MAN jeden zweiten Schwer-Lkw und einen noch größeren Anteil an Bussen in einem der BRIC-Staaten.

Neben Indien und China, wo MAN Diesel & Turbo bereits stark vertreten ist, bietet der brasilianische Markt aufgrund der schnell wachsenden Öl- und Gasindustrie viele Chancen für die Produkte von MAN Diesel & Turbo. Die brasilianischen Pläne zum Aufbau einer eigenen Werftindustrie und Ethanolproduktion aus Zuckerrohr könnten für die Produkte von MAN Diesel & Turbo in Zukunft ein wesentliches Geschäftsvolumen bieten.

### Technologieführerschaft

Technologieführerschaft ist für MAN ein strategischer Erfolgsfaktor. Beständige Innovations- und Wandlungsfähigkeit hat MAN zu einem Vorreiter in der Transport- und Energieindustrie gemacht. Das Unternehmen setzt Trends, indem künftige Anforderungen frühzeitig erkannt und kompetent in nachhaltige Lösungen umgesetzt werden.

So präsentierte MAN auf der Messe IAA Nutzfahrzeuge 2010 die wegweisende Lkw-Studie Concept S, die in ihrem visionären Ansatz mit dem konventionellen Lkw-Design bricht. Allein mit der Aerodynamik, die auf dem hohen Niveau der Pkw-Industrie angekommen ist, sind im Lkw-Fernverkehr Einsparungen von bis zu 25 % im Kraftstoffverbrauch und bei den CO<sub>2</sub>-Emissionen im Vergleich zu konventionell konstruierten Lkw möglich.

»The Green Ship of the Future«, ein Projekt, welches 2008 von MAN Diesel & Turbo gemeinsam mit der dänischen Reederei A.P. Møller-Mærsk Group, Odense Steel Shipyard und Aalborg Industries ins Leben gerufen worden ist, hat mittlerweile 15 Partner und den International Environmental Award erhalten. Oberstes Ziel der Initiative »The Green Ship of the Future« ist es, neue Technologien aufzuzeigen und zu entwickeln, um wesentliche Emissionsminderungen bei Schiffen zu erreichen. Die Reduzierung von CO<sub>2</sub>-Emissionen um 30 % und von Oxiden aus Stickstoff und Schwefel um 90 % ist dabei das herausfordernde Ziel. Die Initiative wurde von der Organisation Sustainable Shipping mit dem Internationalen Environmental Award für die umweltfreundlichste Transportinitiative ausgezeichnet.

Der Anspruch von MAN ist, über die gesamte Lebensdauer der Produkte der wirtschaftlichste Anbieter zu sein und dabei auch die Kosten für Umwelt und Gesellschaft zu berücksichtigen. Technologieführerschaft ist eine wesentliche Voraussetzung für dieses ambitionierte Ziel.

### Kundenorientierung

Die MAN Gruppe stellt die Anforderungen und Erwartungen der Kunden in den Mittelpunkt ihres unternehmerischen Handelns. Höchste Qualität und damit Zuverlässigkeit und Wirtschaftlichkeit sind Ansprüche, die alle Produkte und Dienstleistungen über ihren gesamten Lebenszyklus begleiten. MAN Truck & Bus bietet mit dem Programm »Konsequent Effizient« dem Kunden ein optimiertes Paket aus Fahrzeug, Wartung und Dienstleistungen mit flexiblen Miet-, Leasing- und Finanzierungsoptionen an. MAN Truck & Bus ermöglicht Transportunternehmern, mit einem breiten Angebot an Dienstleistungen den Fuhrpark optimal auszurichten. Nach Zielgruppen differenzierte Serviceverträge machen Kosten auf den Cent und Kilometer transparent. Optimal gewartete Fahrzeuge stellen jederzeit die Erledigung von Transportaufträgen sicher und steigern den Wiederverkaufswert.

Auf den Kunden zugeschnittene Service- und After-Sales-Konzepte sind wesentlicher Baustein der MAN-Strategie. Auf der Messe IAA Nutzfahrzeuge 2010 präsentierte MAN beispielsweise das neue Konzept MAN Service Complete. Dieses Konzept stellt sicher, dass bei einem Werkstattaufenthalt in einem MAN-Servicebetrieb nicht nur die Reparatur- und Wartungsarbeiten am Lkw, sondern gleichzeitig auch an Auflieger, Anhänger und Aufbauten erledigt werden. Um noch näher am Kunden zu sein, hat sich MAN Diesel & Turbo den kontinuierlichen Ausbau des Servicenetzes PrimeServ als strategisches Ziel gesetzt. Der Bereich After Sales von MAN Diesel & Turbo zeichnet sich bei den Dieselmotoren durch eine große Flottenabdeckung aus, während bei den Turbokompressoren der Bereich Retrofit, also die Modernisierung bestehender Produktionsanlagen, Vorreiter ist.

### Nachhaltige Wertschöpfung

MAN bekennt sich zu einer nachhaltigen Unternehmensführung, die ein umfassendes und strategisches Management aller an das Unternehmen gerichteten Ansprüche in den Bereichen Ökonomie, Umwelt und Soziales umfasst.

Die ökonomische Wertschöpfung ist für MAN von zentraler Bedeutung und spiegelt sich durch die Erreichung anspruchsvoller Ziele bei der Umsatzrendite und der Rendite auf das eingesetzte Kapital wider. Insbesondere ist die Stabilität in der Renditeerzielung von hoher Wichtigkeit – hier setzt MAN auf den nachhaltigen Ausbau von Service- und Dienstleistungsstrukturen. Gegenüber den Mitarbeitern setzt MAN auf eine verantwortungsvolle Personalpolitik. Hier steht der einzelne Mitarbeiter im Vordergrund – MAN legt besonderen Wert auf eine individuelle Förderung und kontinuierliche Weiterentwicklung. Das Unternehmen unterstützt dabei insbesondere Mitarbeiter, die Initiative zeigen und bereit sind, Verantwortung zu übernehmen. Wer zeigt, dass er gern Herausforderungen annimmt, erhält bei MAN schnell eigene Gestaltungsräume. Leistungsträger können mit ihren Aufgaben wachsen und ihre fachliche und soziale Kompetenz gleichermaßen einsetzen.

Der Schutz der Umwelt und der schonende Umgang mit natürlichen Ressourcen sind wesentliche Voraussetzungen, um langfristig erfolgreich wirtschaften zu können. Als Technologieführer leistet MAN durch umwelt- und klimafreundliche Produkte sowie Produktionsprozesse einen positiven Beitrag für Umwelt und Gesellschaft.

Nachhaltige Transport- und Energielösungen, die ökologische und ökonomische Anforderungen vereinen, sind für MAN der Schlüssel zu einer erfolgreichen Produktpolitik. Für weitere Informationen siehe »Corporate Responsibility«.

Das freie Spiel der Kräfte im Wettbewerb und eine verantwortungsvolle Unternehmensführung sind für MAN wesentliche Stellhebel für eine nachhaltige Unternehmensentwicklung. Dabei werden Verstöße gegen Gesetze und Richtlinien nicht geduldet und konsequent verfolgt.

### Konzentration auf Transport und Energie

MAN hat sich in den vergangenen Jahren erfolgreich auf die Geschäftsfelder Commercial Vehicles und Power Engineering spezialisiert. Beide Geschäftsfelder profitieren langfristig überproportional vom starken Wachstum in wirtschaftlich aufstrebenden Ländern, das mit einem steigenden Transport- und Energiebedarf einhergeht.

Im Geschäftsfeld Commercial Vehicles ist MAN einer der führenden Anbieter der internationalen Fahrzeugindustrie und bietet weltweit auf den jeweiligen Markt ausgerichtete Produkte und Dienstleistungen an. MAN Truck & Bus expandiert vom Kernmarkt Westeuropa in die Wachstumsmärkte Osteuropas und Asiens. MAN Latin America verfügt als brasilianischer Marktführer über eine moderne Produktion und ein umfassendes Verkaufs- und Servicenetzwerk in den aufstrebenden lateinamerikanischen Märkten. Mit diesen beiden Unternehmen verfügt die MAN Gruppe über die Kompetenz, sowohl Premiummärkte als auch Schwellenländer mit spezifischen Produkten erfolgreich abzudecken. Die Beteiligung an Sinotruk, der Nummer Zwei auf dem chinesischen Markt für schwere Lkw, ermöglicht darüber hinaus die direkte Teilhabe an der Marktentwicklung in China, dem weltweit größten und am schnellsten wachsenden Nutzfahrzeugmarkt. In dieser strategischen Partnerschaft werden die Partner ein neues Produkt unter einer neuen Marke für Schwellenländer und Wachstumsmärkte entwickeln und 2011 in den Markt einführen.

Power Engineering als zweites strategisches Geschäftsfeld von MAN stellt eine wirtschaftlich sinnvolle Form der Diversifizierung und ein adäquates Gegengewicht zum Nutzfahrzeuggeschäft dar. MAN Diesel & Turbo ist der weltweit führende Anbieter von Diesel-Großmotoren für den Einsatz in Schiffen und Kraftwerken sowie auf die Entwicklung und den Bau von Kompressoren, Gas- und Dampfturbinen spezialisiert. Die erfolgreiche Fusion beider Bereiche ermöglicht MAN, den Kunden neue Produktpakete anzubieten, wie z. B. schlüsselfertige DCC-Kraftwerke (Diesel Combined Cycle = kombiniertes Diesel-Turbinen-Kraftwerk) oder Abwärme-Rückgewinnungssysteme für maritime Anwendungen. Ergänzt wird diese Einheit durch Renk, einen weltweit anerkannten Produzenten von hochwertigen Spezialgetrieben.

### Desinvestitionen

Am 25. März 2009 übertrug MAN 70 % der Anteile an der Ferrostaal AG, Essen (Ferrostaal), an die International Petroleum Investment Company, Abu Dhabi/V.A.E. (IPIC). Der Preis für 100 % der Anteile an Ferrostaal beträgt ca. 700 Mio € und ist abhängig von der zwischen MAN und IPIC vereinbarten Option zum Kauf und Verkauf der restlichen Anteile. Die vertraglich vereinbarte Put-Option betreffend die verbleibende 30-%-Beteiligung an Ferrostaal wurde von MAN Anfang Januar 2010 ausgeübt. Der Vollzug der Transaktion wurde vom Käufer u. a. mit Verweis auf die derzeit bei Ferrostaal laufenden staatsanwaltschaftlichen Untersuchungen verweigert. Ende September 2010 wurde MAN darüber hinaus von IPIC über die Erhebung einer Schiedsklage auf Rückabwicklung der Ferrostaal-Transaktion sowie zusätzlich Schadensersatz informiert. Die Schiedsklage wurde MAN am 18. Oktober 2010 zuge stellt. MAN analysiert die genauen Inhalte der Klage und bereitet die Schiedsklageerwidern vor.

Für weitere Informationen siehe »Rechtsstreitigkeiten/Rechtliche Verfahren« und »Konzernanhang«.



# Konzernlagebericht

## Geschäftsverlauf und Ertragslage 2010

### Wirtschaftliches Umfeld

Die weltweite wirtschaftliche Erholung war kennzeichnend für das Geschäftsjahr 2010. Nachdem die globale Wirtschaftsleistung im Jahr 2009 infolge der internationalen Wirtschafts- und Finanzkrise um 0,6 % gesunken war, geht der IWF für 2010 von einem Wachstum von 4,8 % aus.

Trotz des insgesamt beobachtbaren Aufwärtstrends in der Weltwirtschaft hat sich das konjunkturelle Tempo etwas verringert, da die vom Lagerzyklus und den fiskalischen Impulsen ausgehende Schubwirkung nachgelassen hat. In den meisten fortgeschrittenen Volkswirtschaften trägt die Kombination aus schwachen Arbeitsmarktaussichten, anhaltendem Abbau der Fremdverschuldung und verhaltenem Verbrauchervertrauen ebenfalls zur Verlangsamung der Konjunktur bei. Das Wachstum in den Schwellenländern ist nach wie vor robust, hat sich allerdings zuletzt ebenfalls leicht abgeschwächt.

In den Ländern Lateinamerikas hat sich die schon im Jahresverlauf beobachtete kräftige wirtschaftliche Erholung bis zum Jahresende fortgesetzt. Besonders in dem für MAN bedeutenden Markt Brasilien führten u. a. hohe Unternehmensinvestitionen, eine steigende Industrieproduktion und ein kräftiger privater Konsum zu einem erwarteten Anstieg des Bruttoinlandsprodukts von 7,6 %.

Die Wirtschaftsleistung der aufstrebenden Volkswirtschaften Asiens für das 3. Quartal 2010 bestätigt deren nachhaltige und robuste Entwicklung, obwohl sich das Expansionstempo gegenüber dem 2. Vierteljahr etwas verringert hat. In einer Reihe von Ländern ist die private Inlandsnachfrage nun eindeutig zur wichtigsten Triebkraft geworden. In China verlangsamte sich das jährliche Wachstum des realen Bruttoinlandsprodukts im 3. Quartal 2010 weiter auf 9,6 %, verglichen mit 11,9 % im 1. Vierteljahr und 10,3 % im 2. Vierteljahr. Dieser leichte Rückgang mindert die bestehende Gefahr einer konjunkturellen Überhitzung. Das Wachstum wird zunehmend von

den privaten Investitionen und dem Außenbeitrag beflügelt, während die staatlichen Hilfsmaßnahmen allmählich zurückgenommen werden.

Die Wirtschaft des Euro-Währungsgebiets befindet sich seit Mitte 2009 auf einem Wachstumskurs. Im 2. Quartal 2010 war ein Anstieg um 1,0 % zu verzeichnen, welcher unter anderem auf eine Ausweitung der Bruttoanlageinvestitionen um 1,5 % gegenüber dem Vorquartal zurückzuführen ist. Diese konjunkturelle Grunddynamik hat sich auch im 2. Halbjahr fortgesetzt, weshalb ein Gesamtwachstum von 1,7 % für 2010 erwartet wird. Die anhaltende weltwirtschaftliche Erholung wird weiter einen positiven Einfluss auf die Nachfrage nach Exportgütern des Eurogebiets haben. Zugleich dürfte die Binnennachfrage des privaten Sektors, gestützt durch den geldpolitischen Kurs und die zur Wiederherstellung der Funktionsfähigkeit des Finanzsystems ergriffenen Maßnahmen, zum Wachstum beitragen. Für Deutschland rechnet der IWF mit einem Anstieg des realen Bruttoinlandsprodukts um 3,3 % im Jahr 2010, im Wesentlichen getragen durch hohe Exporte.

### Deutliche Erholung des Geschäfts

Die Geschäftsentwicklung 2010 war durch die konjunkturelle Erholung geprägt. Der Auftragseingang der MAN Gruppe verbesserte sich um 53 %. Der Umsatz stieg um 22 %, insbesondere infolge der Erholung im Nutzfahrzeuggeschäft. Das Operative Ergebnis konnte auf 1 035 Mio € gesteigert werden. Dies entspricht einer Verdoppelung gegenüber 2009. Die Umsatzrendite erhöhte sich von 4,2 % auf 7,1 %.

## Auftragslage

Die konjunkturellen Rahmenbedingungen haben sich 2010 nachhaltig verbessert, was sich positiv auf die Transport- und Energiemärkte auswirkte. Das europäische Nutzfahrzeuggeschäft erholte sich schneller als erwartet. In Brasilien führte die Nachfrage zu einem Rekordjahr in der Unternehmensgeschichte. Der Geschäftsverlauf bei Power Engineering ist noch durch die Abarbeitung des hohen Auftragsbestands aus Vorjahren geprägt. Trotz eines Anstiegs im Auftragseingang um 18 % lag der Umsatz bei MAN Diesel & Turbo im Geschäftsjahr 2010 weiterhin über dem Auftragseingang. Obwohl sich der Auftragseingang insgesamt sehr gut entwickelte, ergab sich daher für die MAN Gruppe ein Auftragsbestand zum Ende des Geschäftsjahres von 7,0 Mrd €, 5 % unter Vorjahresbestand (7,4 Mrd €).

### Signifikante Steigerung des Auftragseingangs

Die Erholung der Weltwirtschaft bedingte einen Anstieg der Auftragseingänge in allen Bereichen. Mit einem Auftragseingangsvolumen der MAN Gruppe von 15,1 Mrd € wurde der Vorjahreswert (9,9 Mrd €) um 53 % überschritten und erreichte damit wieder das durchschnittliche Niveau der Vergangenheit. Das hohe Auftragsvolumen kurz vor der Krise konnte jedoch noch nicht erreicht werden. Der Auftragseingang für Commercial Vehicles lag aufgrund der steigenden Nachfrage im europäischen Nutzfahrzeuggeschäft und des anhaltenden Booms in Brasilien 68 % über dem Vorjahr. Auch die Auftragseingänge im Geschäftsfeld Power Engineering konnten nach dem Jahr 2009 mit 24 % wieder eine steigende Tendenz verzeichnen. Die eingegangenen Großaufträge der MAN Gruppe lagen im Geschäftsjahr 2010 mit 0,9 Mrd € nur leicht über dem Vorjahr (0,8 Mrd €).

Die Belebung des Auftragseingangs zeigte sich gleichermaßen im Inland wie im Ausland. Gegenüber dem hohen Vorjahresniveau stiegen die ausländischen Bestellungen um 55 % auf 11,6 Mrd €. Die Inlandsbestellungen nahmen um 46 % auf 3,5 Mrd € zu. Der Auslandsanteil lag mit 77 % leicht über dem Vorjahr.

Im Vergleich zum Vorjahr stiegen die Bestellungen in Europa um 50 %. Die Hauptabsatzländer sind Deutschland mit 3,5 Mrd €, Großbritannien mit 0,8 Mrd €, Frankreich mit 0,5 Mrd € und Russland mit 0,5 Mrd €. In Russland konnten die Auftragseingänge vervierfacht werden, und in Großbritannien wurde ein Anstieg von 82 % erzielt. Im Jahr 2010 verringerte sich der Anteil der Bestellungen in Europa um 2 % auf 56 % der gesamten Auftragseingänge der MAN Gruppe. Europa bleibt damit die wichtigste Region für die MAN Gruppe, gefolgt von Amerika mit 27 % und Asien mit einem Anteil von 13 %.

Die Bestelleingänge im amerikanischen Markt steigerten sich von 1,9 Mrd € im Vorjahr auf 4,0 Mrd €. Davon entfielen 3,2 Mrd € bzw. 81 % auf Brasilien (71 % im Vorjahr). Dazu trug der Bereich MAN Latin America 2,9 Mrd € (89 %) bei, dessen Auftragseingänge im Geschäftsjahr 2010 um mehr als zwei Drittel stiegen. Auch in Asien konnten die Bestellungen um 19 % auf 1,9 Mrd € gesteigert werden. 1,3 Mrd € davon entfielen auf MAN Diesel & Turbo, das 33 % seines Auftragseingangs in China erzielte.

#### Auftragseingang nach Geschäftsfeldern Mio €

|                         | 2010          | %          | 2009         | %          |
|-------------------------|---------------|------------|--------------|------------|
| Commercial Vehicles     | 11 163        | 74         | 6 636        | 67         |
| Power Engineering       | 4 000         | 26         | 3 230        | 33         |
| Sonstige/Konsolidierung | – 91          | –          | – 6          | –          |
| <b>MAN Gruppe</b>       | <b>15 072</b> | <b>100</b> | <b>9 860</b> | <b>100</b> |

#### Auftragseingang nach Regionen Mio €

|                             | 2010          | %          | 2009         | %          |
|-----------------------------|---------------|------------|--------------|------------|
| Bundesrepublik Deutschland  | 3 489         | 23         | 2 388        | 24         |
| Übrige EU-Länder            | 3 829         | 25         | 2 736        | 28         |
| Sonstige europäische Länder | 1 181         | 8          | 559          | 6          |
| Asien                       | 1 908         | 13         | 1 607        | 16         |
| Amerika                     | 4 003         | 27         | 1 931        | 20         |
| Afrika                      | 591           | 4          | 485          | 5          |
| Australien und Ozeanien     | 71            | 0          | 154          | 1          |
| <b>MAN Gruppe</b>           | <b>15 072</b> | <b>100</b> | <b>9 860</b> | <b>100</b> |

**Auftragseingang: Entwicklung der letzten 5 Jahre**  
Mrd €

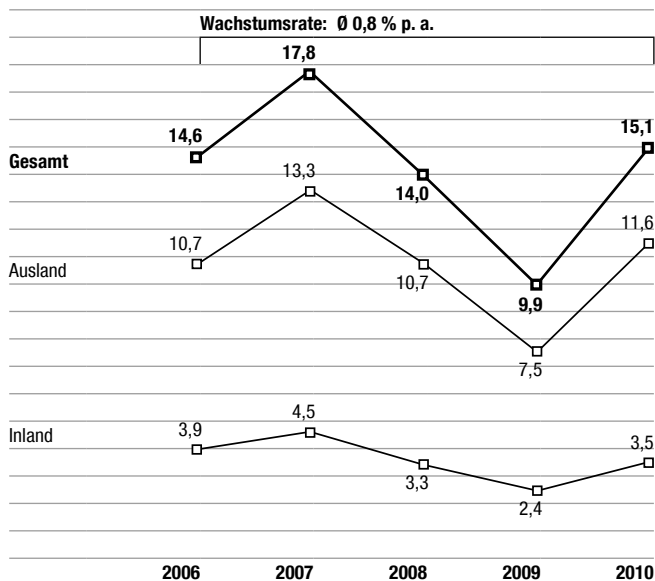

Für alle Jahre vergleichbare Werte ohne aufgeführte Geschäftsbereiche

### Stabilisierung im Auftragsbestand

Die Erholung des Auftragseingangs führte 2010 dazu, dass die Auftragseingänge wieder leicht über dem Umsatz lagen. Abgesehen von einzelnen Stornierungen konnte dadurch der Rückgang im Auftragsbestand stabilisiert werden und lag mit 7,0 Mrd € nur leicht unter dem Niveau des Vorjahres. Insbesondere im Geschäftsfeld Commercial Vehicles konnte eine Steigerung des Auftragsbestands um 5 % gegenüber 2009 verzeichnet werden. Rückläufig war weiterhin die Entwicklung bei Power Engineering mit –11 % gegenüber dem Vorjahr. Der Auftragsbestand von Power Engineering ist jedoch noch höher als der Jahresumsatz und hat eine Reichweite von in etwa einem Jahr.

**Auftragsbestand: Entwicklung der letzten 5 Jahre**  
Mrd €

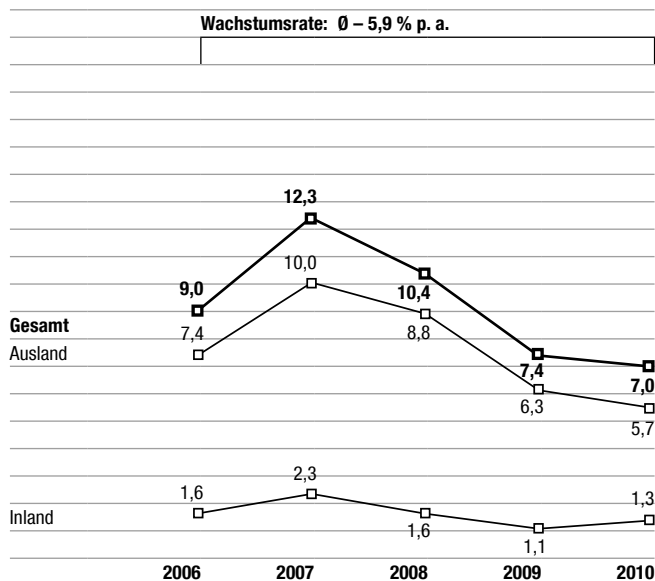

Für alle Jahre vergleichbare Werte ohne aufgeführte Geschäftsbereiche

### Kontinuierliche Steigerung des Umsatzes

Der Umsatz der MAN Gruppe stieg 2010 kontinuierlich von Quartal zu Quartal. Allein im letzten Quartal lag der Umsatz um 11,4 % über dem Vorquartal und erreichte damit im Geschäftsjahr insgesamt 14,7 Mrd €, das heißt 22 % mehr als 2009. Den deutlichsten Anstieg verzeichnete mit 36 % Commercial Vehicles bei einem Jahresumsatz von 10,6 Mrd €. Hervorzuheben ist der Beitrag von MAN Latin America, das mit 3,1 Mrd € das stärkste Geschäftsjahr seiner Unternehmensgeschichte abschließen konnte. Bei MAN Truck & Bus machte sich die weltweite Erholung der Nutzfahrzeugbranche bemerkbar und führte zu einem Umsatzanstieg von 16 % auf 7,4 Mrd €. Dabei konnte im volumenmäßig größten Segment der Schwere Lkw ein Anstieg von 26 % erreicht werden. Der Busumsatz hat sich 2010 gegenüber dem Vorjahr nochmals um 10 % auf 1,2 Mrd € (1,3 Mrd €) verringert. Das Geschäftsfeld Power Engineering konnte 2010 einen Umsatz von 4,2 Mrd € erwirtschaften und lag damit leicht unter dem Vorjahresniveau von 4,3 Mrd €. MAN Diesel & Turbo trug dazu mit einem Umsatz von

3,8 Mrd € bei und Renk mit 0,4 Mrd €. Der Umsatz von MAN Diesel & Turbo lag damit auf dem Niveau des Vorjahres. Darin wirkten eine Verbesserung des Geschäftsbereichs Power Plants um 39 % und gegenläufig ein Rückgang von 13 % im Geschäftsbereich Engines & Marine Systems bedingt durch den weiterhin schwachen Schiffsneubau.

Die Inlandsumsätze der MAN Gruppe stiegen gegenüber dem Vorjahr um 11 % auf 3,0 Mrd €. Etwa 84 % des Inlandsatzes entfallen nach wie vor auf MAN Truck & Bus, das 34 % seines Umsatzes in Deutschland erzielte. Der Inlandsanteil bei Power Engineering belief sich auf 12 % und verringerte sich bei MAN Diesel & Turbo um 8 % gegenüber dem Vorjahr insbesondere im Geschäftsbereich Turbomachinery. Die ausländischen Umsätze, welche bei Power Engineering 88 % ausmachen, lagen 2010 auf dem Niveau des Vorjahres.

Der Auslandsumsatz der gesamten MAN Gruppe stieg 2010 im Vergleich zum Vorjahr um 25 % auf 11,6 Mrd €. Damit betrug der Auslandsanteil am Umsatz 79 % im abgelaufenen Geschäftsjahr nach 77 % im Vorjahr.

In den europäischen Märkten stieg der Umsatz im Jahr 2010 um 7 % auf 7,9 Mrd €, der Anteil der europäischen Umsätze am Gesamtumsatz belief sich auf 54 % (62 % im Vorjahr). Der Anteil des amerikanischen Marktes erhöhte sich im Jahr 2010 auf 27 % bzw. 3,9 Mrd €. Davon entfielen 3,1 Mrd € bzw. 80 % auf MAN Latin America, das 93 % seines Umsatzes auf dem brasilianischen Markt erzielte. Der Umsatz im brasilianischen Markt hat sich gegenüber dem vergleichbaren Vorjahr um mehr als zwei Drittel auf 2,9 Mrd € gesteigert. In Asien stieg der Umsatz der MAN Gruppe um 7 % auf 2,1 Mrd €. Davon entfielen 0,6 Mrd € auf China, hauptsächlich durch MAN Diesel & Turbo. Der Umsatzanteil Asiens am Gesamtumsatz erreichte 14 %.

Der Umsatz der MAN Gruppe konnte nach dem konjunkturellen Einbruch im Vorjahr das durchschnittliche Niveau der letzten fünf Jahre übertreffen und sogar fast das hohe Niveau von 14,9 Mrd € des Jahres 2008 erreichen. In diesem Fünfjahres-Zeitraum stieg der Umsatz insgesamt von 11,7 Mrd € auf 14,7 Mrd €. Damit ist die MAN Gruppe zwischen 2006 und 2010 im Durchschnitt mit jährlich 5,9 % gewachsen.

#### Umsatz nach Geschäftsfeldern Mio €

|                         | 2010          | %          | 2009          | %          |
|-------------------------|---------------|------------|---------------|------------|
| Commercial Vehicles     | 10 586        | 72         | 7 807         | 65         |
| Power Engineering       | 4 169         | 28         | 4 270         | 35         |
| Sonstige/Konsolidierung | - 80          | -          | - 51          | -          |
| <b>MAN Gruppe</b>       | <b>14 675</b> | <b>100</b> | <b>12 026</b> | <b>100</b> |

#### Umsatz nach Regionen Mio €

|                             | 2010          | %          | 2009          | %          |
|-----------------------------|---------------|------------|---------------|------------|
| Bundesrepublik Deutschland  | 3 058         | 21         | 2 751         | 23         |
| Übrige EU-Länder            | 3 777         | 26         | 3 812         | 32         |
| Sonstige europäische Länder | 1 092         | 7          | 854           | 7          |
| Asien                       | 2 106         | 14         | 1 973         | 16         |
| Amerika                     | 3 906         | 27         | 1 945         | 16         |
| Afrika                      | 618           | 4          | 571           | 5          |
| Australien und Ozeanien     | 118           | 1          | 120           | 1          |
| <b>MAN Gruppe</b>           | <b>14 675</b> | <b>100</b> | <b>12 026</b> | <b>100</b> |

#### Umsatz: Entwicklung der letzten 5 Jahre Mrd €

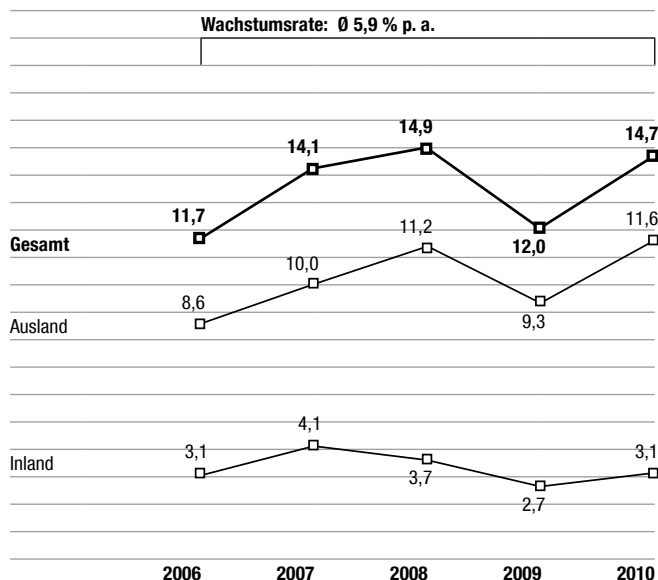

Für alle Jahre vergleichbare Werte ohne aufgeführte Geschäftsbereiche

## Operatives Ergebnis

Die MAN Gruppe erreichte im Geschäftsjahr 2010 ein Operatives Ergebnis von 1 035 Mio € und konnte damit wieder die Milliarden-grenze überschreiten. Die Verdoppelung gegenüber dem Vorjahr ist durch das Geschäftsfeld Commercial Vehicles bedingt, das sich nach dem Einbruch vor allem des europäischen Nutzfahrzeug-marktes deutlich erholen konnte.

Im Geschäftsjahr 2010 wurde im Geschäftsfeld Commercial Vehicles ein Operatives Ergebnis von 528 Mio € erzielt. MAN Latin America trug dazu 370 Mio € bei und konnte sich auf vergleichbarer Basis gegenüber dem Vorjahr mehr als verdoppeln. Dabei ist berücksichtigt, dass MAN Latin America im Vorjahr erst ab dem 2. Quartal in der MAN Gruppe konsolidiert wurde. Das Operative Ergebnis des europäischen Nutzfahrzeuggeschäfts verbesserte sich analog zur Branchenentwicklung auf 158 Mio € (–91 Mio €). Darin wirkten mit –49 Mio € Belastungen aus dem Finanzdienstleistungsgeschäft. Diese verschlechterten sich um 7 Mio € gegenüber dem Vorjahr (–42 Mio €) infolge der immer noch hohen Risikokosten. Das operative Geschäft von MAN Truck & Bus konnte im Geschäftsbereich Lkw um 280 Mio € verbessert werden. Der Geschäftsbereich Bus blieb mit einem Ergebnis von 18 Mio € volumen- und durch den Produktmix bedingt um 22 Mio € hinter dem Ergebnis des Vorjahres zurück.

Im Geschäftsfeld Power Engineering wurde ein Operatives Ergebnis von 491 Mio € erwirtschaftet. Das Operative Ergebnis von MAN Diesel & Turbo ging um 61 Mio € auf 439 Mio € zurück (–12 %). Hier wirkten Kostenüberschreitungen und Vorsorgen sowie Aufwendungen für den Aufbau des Geschäftsbereichs Power Plants. Renk lag mit 52 Mio € um 14 Mio € unter dem Vorjahr (66 Mio €). In Sonstige/Konsolidierung sind neben der MAN SE und ihren Shared-Service-Gesellschaften die anteiligen Ergebnisse der Beteiligungen an der Scania AB, Sinotruk Ltd. und der manroland AG sowie die Konsolidierungsposten zwischen den Bereichen der MAN Gruppe enthalten. Die Geschäftsvolumina und Ergebnisbeiträge dieser Beteiligungen stiegen vor dem Hintergrund der allgemeinen konjunkturellen Entwicklung entsprechend. Insbesondere der Ergebnisbeitrag von Scania lag 95 Mio € über dem Vorjahr. Zusätzlich wirkte mit 29 Mio € die erst im 4. Quartal 2009 erworbene Beteiligung an Sinotruk.

### Operatives Ergebnis nach Geschäftsfeldern

| Mio €                   | 2010         | 2009       |
|-------------------------|--------------|------------|
| Commercial Vehicles     | 528          | 51         |
| Power Engineering       | 491          | 566        |
| Sonstige/Konsolidierung | 16           | – 113      |
| <b>MAN Gruppe</b>       | <b>1 035</b> | <b>504</b> |

Nach dem deutlichen konjunkturellen Einbruch im Vorjahr konnte das Ergebnis der MAN Gruppe 2010 verdoppelt werden. Damit wurde im Rahmen der konjunkturellen Erholung beim Operativen Ergebnis wieder ein gutes Niveau erreicht. Die überhitzten Märkte in den Boomjahren 2007/2008 mit ihren außergewöhnlichen Ergebnissen sind nur bedingt als Vergleichsmaßstab geeignet.

### Operatives Ergebnis: Entwicklung der letzten 5 Jahre

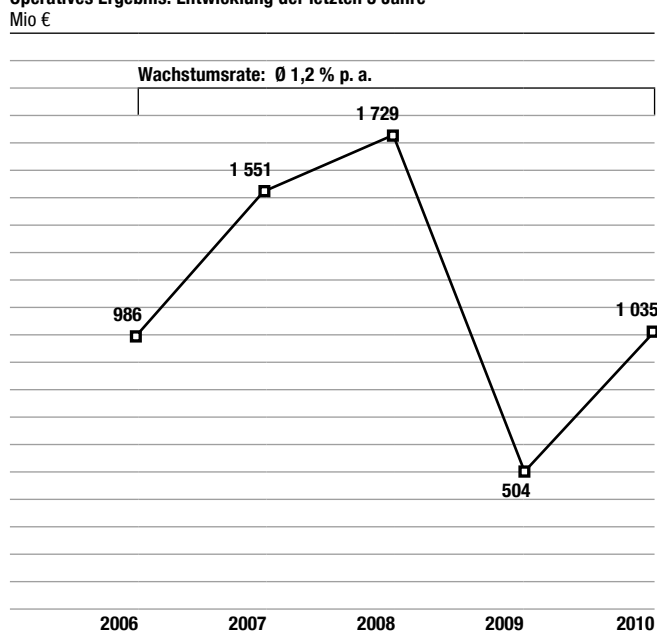

Für alle Jahre vergleichbare Werte ohne aufgeführte Geschäftsbereiche

Eine ausführliche Berichterstattung über den Geschäftsverlauf und die Ergebnisentwicklung der MAN-Unternehmen enthält der Lagebericht im Abschnitt »Die Bereiche im Einzelnen«.

## Gewinn- und Verlustrechnung

| Mio €                                           | 2010     | %      | 2009    | %      |
|-------------------------------------------------|----------|--------|---------|--------|
| Umsatzerlöse                                    | 14 675   | 100,0  | 12 026  | 100,0  |
| Umsatzkosten                                    | - 11 400 | - 77,7 | - 9 455 | - 78,6 |
| Bruttoergebnis vom Umsatz                       | 3 275    | 22,3   | 2 571   | 21,4   |
| Sonstige betriebliche Erträge                   | 516      | 3,5    | 532     | 4,4    |
| Vertriebskosten <sup>1</sup>                    | - 997    | - 6,8  | - 807   | - 6,7  |
| Allgemeine Verwaltungskosten <sup>1</sup>       | - 740    | - 5,0  | - 631   | - 5,2  |
| Sonstige betriebliche Aufwendungen <sup>2</sup> | - 1 142  | - 7,8  | - 1 091 | - 9,1  |
| Beteiligungsergebnis <sup>1/2</sup>             | 123      | 0,8    | - 70    | - 0,6  |
| Operatives Ergebnis                             | 1 035    | 7,1    | 504     | 4,2    |

<sup>1</sup> Wert nach Umgliederung von - 109 Mio € Vertriebskosten/Verwaltungskosten/Beteiligungsergebnis (- 62 Mio € von Vertriebs-/Verwaltungskosten) in die Ergebniseffekte aus Kaufpreisallokationen

<sup>2</sup> Wert nach Umgliederung von 357 Mio € Beteiligungsergebnis (- 656 Mio € von Aufwendungen/Beteiligungsergebnis) in das Ergebnis aus Sondervorgängen

Der Umsatz ist 2010 gegenüber dem Vorjahr um 22 % gestiegen, die Umsatzkosten haben sich im Wesentlichen durch die bessere Auslastung im Geschäftsfeld Commercial Vehicles nur unterproportional erhöht. Dadurch stieg das Bruttoergebnis vom Umsatz um 704 Mio € auf 22,3 % und liegt damit deutlich über dem Niveau des Vorjahres. Die Vertriebskosten haben sich absatzbedingt gegenüber dem Vorjahreszeitraum um 24 % auf 997 Mio € erhöht. Bei den Verwaltungskosten konnte der Anstieg mit 17 % auf 740 Mio € geringert gehalten werden.

Die Sonstigen betrieblichen Erträge lagen mit 516 Mio € leicht unter dem Vorjahreswert von 532 Mio €. Diesen stehen Sonstige betriebliche Aufwendungen von 1 142 Mio € gegenüber.

Der Anstieg des Beteiligungsergebnisses auf 123 Mio € resultiert vorwiegend aus den höheren Equity-Ergebnissen von Scania (99 Mio €) und Sinotruk (29 Mio €).

## Überleitung zum Ergebnis nach Steuern

| Mio €                                             | 2010         | 2009         |
|---------------------------------------------------|--------------|--------------|
| <b>Operatives Ergebnis</b>                        | <b>1 035</b> | <b>504</b>   |
| Ergebniseffekte aus Kaufpreisallokationen         | - 109        | - 62         |
| Ergebnis aus Sondervorgängen                      | 357          | - 656        |
| Zinsergebnis                                      | - 158        | - 117        |
| <b>Ergebnis vor Steuern</b>                       | <b>1 125</b> | <b>- 331</b> |
| Ertragsteuern                                     | - 338        | - 53         |
| Ergebnis aufgebener Geschäftsbereiche             | - 65         | 126          |
| <b>Ergebnis nach Steuern</b>                      | <b>722</b>   | <b>- 258</b> |
| Ergebnis je Aktie der fortgeführten Bereiche in € | 5,30         | - 2,69       |
| Ausschüttung je Aktie in €                        | 2,00         | 0,25         |

Das Ergebnis vor Steuern der MAN Gruppe belief sich 2010 auf 1 125 Mio € (- 331 Mio €). Darin wirkten die Ergebnisse aus der Kaufpreisallokation im Rahmen des 2009 erfolgten Erwerbs von MAN Latin America mit - 99 Mio € sowie aus der Ende 2009 erworbenen Beteiligung an Sinotruk mit - 10 Mio €. Zur langfristig besseren Vergleichbarkeit sind die Ergebniseffekte aus Kaufpreisallokationen nicht Bestandteil des Operativen Ergebnisses.

Das Ergebnis aus Sondervorgängen resultiert in voller Höhe aus der Wertaufholung der Beteiligung an Scania. Im Vorjahr betrug das Ergebnis aus Sondervorgängen - 656 Mio €. Neben der Abwertung der Scania-Anteile wirkten darin die Zahlungen für die Bußgeldbescheide von insgesamt 150,6 Mio € infolge der staatsanwaltschaftlichen Ermittlungen wegen des Verdachts unzulässiger Provisionszahlungen sowie die Kosten für die interne Untersuchung und Abfindungen in Höhe von 70 Mio €. Darüber hinaus belasteten das Sonderergebnis Restrukturierungsaufwendungen für MAN Diesel & Turbo für die Einstellung der Motorenproduktion am dänischen Standort Frederikshavn sowie außergewöhnliche Belastungen im Zusammenhang mit dem Nutzfahrzeugmarkt in Russland.

Das Zinsergebnis von - 158 Mio € enthält neben den Zinsen aus Bankguthaben und -verbindlichkeiten auch den Zinssaldo aus Pensionen. Die Verschlechterung des Zinssaldos um 41 Mio € resultiert aus höheren Zinsaufwendungen für die Anleihe zur Finanzierung des Erwerbs von MAN Latin America. Des Weiteren wirken im Zinsergebnis im Geschäftsjahr 2010 Steuerzinsaufwendungen in Höhe von 22 Mio €.



Der Steueraufwand der MAN Gruppe stieg ergebnisbedingt um 285 Mio € auf 338 Mio €. Die Steuerquote beträgt 30,0 % (–16,0 %). Sie ergibt sich aus den jeweiligen Steuersätzen der in- und ausländischen Konzernunternehmen, aus aperiodischen Steuern und aus steuerfreien Erträgen. Maßgeblich für die negative Steuerquote im Vorjahr waren die steuerlich nicht wirksamen Abwertungen auf Beteiligungen.

Aufgrund der von IPIC im Zusammenhang mit der Veräußerung von Ferrostaal angestregten Schiedsklage wurden die vertraglich maximal möglichen Gewährleistungen und Garantien zurückgestellt und belasten das Ergebnis aufgegebenen Geschäftsbereiche. Im Vorjahr resultierte das Ergebnis aufgegebenen Geschäftsbereiche mit 126 Mio € im Wesentlichen aus der Veräußerung von 70 % der Anteile an Ferrostaal.

Das Ergebnis nach Steuern der MAN Gruppe erreichte 722 Mio € und lag damit 980 Mio € über dem Vorjahresfehlbetrag von 258 Mio €. Das Ergebnis je Aktie der fortgeführten Bereiche stieg von –2,69 € auf 5,30 €. Bereinigt um das Ergebnis aus Sondervorgängen und ohne Kaufpreisallokationen verbesserte sich das Ergebnis je Aktie von 1,47 € auf 3,38 €.

Vor dem Hintergrund der deutlichen Ergebnisverbesserung schlagen Vorstand und Aufsichtsrat der MAN SE der Hauptversammlung die Ausschüttung einer Dividende von 2,00 € je dividendenberechtigter Aktie (0,25 €) vor.

## Steuerungssystem und Wertmanagement

Die wichtigsten finanziellen Steuerungsgrößen in der MAN Gruppe sind die Umsatzrendite »Return on Sales« (ROS), die das Operative Ergebnis auf die Umsatzerlöse bezieht, sowie die Kapitalrendite »Return on Capital Employed« (ROCE), die das Operative Ergebnis in Beziehung zum Jahresdurchschnitt des Capital Employed setzt. Auf diesen primären Kennzahlen beruhen die Performance-Ziele für die Gruppe im Ganzen sowie für ihre Bereiche.

Ergänzend zu diesen Steuerungsgrößen wird beginnend mit dem Geschäftsjahr 2010 die Eigenkapitalrendite »Return on Equity before Tax« (ROE) als eine weitere Profitabilitätskennzahl verwendet. Diese wird nur auf Gruppenebene berechnet und fließt in die Ermittlung der variablen Vergütung des Vorstands der MAN SE ein. Die Eigenkapitalrendite wird als Quotient aus dem Ergebnis vor Steuern und dem durchschnittlichen Eigenkapital der MAN Gruppe definiert.

Neben ROS war die ergebnisabhängige Vergütung der Führungskräfte bisher wesentlich durch den Wertbeitrag MAN Value Added (MVA) bestimmt. Diese finanzielle Größe, die sich aus der Differenz zwischen dem Operativen Ergebnis und den Kapitalkosten errechnete, wird ab dem Geschäftsjahr 2010 nicht mehr für Steuerungszwecke herangezogen. Stattdessen wird für die MAN Gruppe als Komponente der erfolgsbezogenen Vergütung die modifizierte Größe »Delta zu Kapitalkostensatz« (ROCE – WACC) eingeführt, die der Differenz zwischen dem ROCE und dem Kapitalkostensatz Weighted Average Cost of Capital (WACC) entspricht.

Im Juni 2010 hat der Aufsichtsrat der MAN SE die Vergütungsbestandteile für die Mitglieder des Vorstands der MAN SE insoweit geändert, dass die auf den geschäftlichen Erfolg ausgerichtete, einmal jährlich gezahlte Tantieme nicht mehr abhängig vom bisher verwendeten Wertbeitrag der MAN Gruppe errechnet wird. Stattdessen wird die Zielerreichung anhand der neu eingeführten Größe »Delta zu Kapitalkostensatz« sowie – nur für diesen Personenkreis – der ebenso neuen Kennzahl ROE bestimmt. Für die Zielerreichung aus dem Faktor »Delta zu Kapitalkostensatz« wird

für Mitglieder des Vorstands ein Durchschnittswert über zwei Jahre herangezogen. Die Auszahlung der Tantieme aus dem Faktor ROE erfolgt zu 50 % in Aktien.

### Renditeziele

Die MAN Gruppe strebt über einen Geschäftszyklus einen ROS von 8,5 % an sowie einen ROCE, der über dem Kapitalkostensatz von 10 % liegt. Im Geschäftsfeld Commercial Vehicles wird eine Umsatzrendite von 8,0 % und bei Power Engineering von 9,0 % angestrebt. Für alle vorgegebenen ROS-Werte wird eine Bandbreite von +/- 2 %-Punkten festgelegt.

### Operatives Ergebnis

Die Ergebnisgröße für die Berechnung des ROS und damit auch für die Beurteilung und die Steuerung der Ertragslage eines Bereichs ist das Operative Ergebnis. Das Operative Ergebnis entspricht in der Regel dem Ergebnis vor Zinsen und Steuern (EBIT). Ergebniseffekte im Zusammenhang mit Kaufpreisallokationen sowie in Einzelfällen Sondervorgänge werden bei der Ermittlung des Operativen Ergebnisses bereinigt. Bei den Sondervorgängen handelt es sich um Aufwendungen und Erträge, die dem Anlass und der Höhe nach bedeutend sind und nicht aus dem operativen Geschäft stammen. 2010 hatte MAN ein positives Ergebnis aus Sondervorgängen in Höhe von insgesamt 357 Mio € zu verzeichnen, das im EBIT, nicht aber im Operativen Ergebnis wirkte. 2009 wurde ein negatives Ergebnis aus Sondervorgängen von 656 Mio € ausgewiesen.

### Umsatzrendite ROS

| %                   | 2010       | 2009       |
|---------------------|------------|------------|
| Commercial Vehicles | 5,0        | 0,7        |
| Power Engineering   | 11,8       | 13,3       |
| <b>MAN Gruppe</b>   | <b>7,1</b> | <b>4,2</b> |

Die MAN Gruppe erzielte 2010 eine Umsatzrendite von 7,1 % (4,2 %) und konnte damit die positiven Effekte der Konjunkturerholung der Weltmärkte nutzen. Im Bereich MAN Truck & Bus wurde ein ROS in Höhe von 2,1 % erwirtschaftet, während MAN Latin America einen ROS von 11,8 % erzielte. MAN Diesel & Turbo konnte eine Umsatzrendite von 11,7 % und Renk einen ROS von 12,9 % erreichen.

### Kapitalrendite ROCE

| Mio €                                                                    | 2010         | 2009         |
|--------------------------------------------------------------------------|--------------|--------------|
| <b>Eigenkapital</b>                                                      | <b>5 990</b> | <b>5 129</b> |
| Pensionen <sup>1</sup>                                                   | 226          | 160          |
| Finanzverbindlichkeiten <sup>1</sup>                                     | 2 849        | 3 270        |
|                                                                          | <b>9 065</b> | <b>8 559</b> |
| Nicht durch Eigenkapital von MAN Finance finanziertes Volumen            | - 2 075      | - 1 990      |
| Wertpapiere und Flüssige Mittel                                          | - 1 071      | - 636        |
| <b>Capital Employed der MAN Gruppe am 31. Dezember<sup>2</sup></b>       | <b>5 919</b> | <b>5 933</b> |
| <b>Capital Employed der MAN Gruppe im Jahresdurchschnitt<sup>2</sup></b> | <b>5 933</b> | <b>5 933</b> |
| <b>Operatives Ergebnis<sup>3</sup></b>                                   | <b>1 035</b> | <b>524</b>   |
| <b>ROCE in %</b>                                                         | <b>17,4</b>  | <b>8,8</b>   |

<sup>1</sup> 2009 einschl. aufgegebenen Geschäftsbereiche

<sup>2</sup> CE-Definition 2010 angepasst, Wertpapiere und Flüssige Mittel zusätzlich als Abzugskapital berücksichtigt (Vorjahr vergleichbar angepasst)

<sup>3</sup> 2009 einschl. Operatives Ergebnis aufgegebenen Geschäftsbereiche von 20 Mio €

Die Kapitalrendite ROCE setzt das Operative Ergebnis in Beziehung zum Jahresdurchschnitt des Capital Employed. Das Capital Employed der MAN Gruppe wird von der Finanzierungsseite abgeleitet. Es setzt sich zusammen aus dem Eigenkapital, den Pensionsrückstellungen und den Finanzverbindlichkeiten der MAN Gruppe, vermindert um die Wertpapiere, die Flüssigen Mittel und das nicht durch Eigenkapital von MAN Finance gedeckte Finanzierungsgeschäft (Leasing). In der Ergebnisgröße werden auch die Operativen

Ergebnisse der aufgegebenen Geschäftsbereiche bis zum Zeitpunkt des Verkaufs berücksichtigt, da diese Aktivitäten ebenfalls aus Konzernkapital finanziert werden.

Für die Bereiche wird das Capital Employed von der Vermögensseite ermittelt. Es umfasst für das Industrielle Geschäft alle Aktiva mit Ausnahme von Finanzmitteln und Steueransprüchen, vermindert um alle Rückstellungen und Verbindlichkeiten mit Ausnahme der Finanzverbindlichkeiten, der Pensionsrückstellungen und der Steuern. Aus Unternehmenserwerben entstandene Effekte im Zusammenhang mit abschreibbaren materiellen und immateriellen Vermögenswerten werden bei der Ermittlung des Capital Employed zusätzlich eliminiert. Erhaltene Anzahlungen werden als Abzugskapital nur berücksichtigt, soweit sie im Rahmen der Auftragsabwicklung bereits verwendet sind.

Die Kapitalrendite ROCE der MAN Gruppe verbesserte sich von 8,8 % im Vorjahr auf 17,4 %.

### Kapitalkosten WACC

Der Kapitalkostensatz entspricht der erwarteten Mindestrendite der Investoren für das zur Verfügung gestellte Kapital und für das eingegangene Anlagerisiko. Er wird als WACC (Weighted Average Cost of Capital) ermittelt und errechnet sich als gewichteter Durchschnittswert aus dem Eigen- und Fremdkapitalkostensatz. Dabei wird der Eigenkapitalkostensatz entsprechend dem Capital-Asset-Pricing-Modell (CAPM) aus einem Zinssatz für langfristige, risikofreie Anlagen zuzüglich einer Risikoprämie für das spezifische Risiko der Anlage bestimmt. Auch dem Fremdkapitalkostensatz liegt der Zinssatz für risikofreie Anlagen zugrunde, zuzüglich eines Risikozuschlags für langfristige Industrieanlagen.

Der Kapitalkostensatz wird im Rahmen der Steuerungskennzahlen als Basis für die Festlegung der Anforderungen an die Kapitalrendite ROCE verwendet. Für das Geschäftsjahr 2010 wird ein Kapitalkostensatz von 10,0 % angesetzt. Die im Rahmen des variablen Vergütungsmodells des MAN SE-Vorstands neu eingeführte Größe »Delta zu Kapitalkostensatz«, welche zur Bewertung der Zielerreichung herangezogen wird und sich aus der Differenz von ROCE und WACC ergibt, liegt für 2010 bei 7,4 %.

### Eigenkapitalrendite ROE

Die Eigenkapitalrendite ROE setzt das Ergebnis vor Steuern in Beziehung zum Jahresdurchschnitt des Eigenkapitals.

| Mio €                                             | 2010        | 2009         |
|---------------------------------------------------|-------------|--------------|
| Eigenkapital der MAN Gruppe am 31. Dezember       | 5 990       | 5 129        |
| Eigenkapital der MAN Gruppe im Jahresdurchschnitt | 5 453       | 5 387        |
| Ergebnis vor Steuern (EBT) <sup>1</sup>           | 1 060       | – 191        |
| <b>ROE in %</b>                                   | <b>19,4</b> | <b>– 3,6</b> |

<sup>1</sup> Ergebnis vor Steuern unter zusätzlicher Berücksichtigung von Ergebniseffekten aufgegebener Geschäftsbereiche

Im Geschäftsjahr 2010 konnte die Eigenkapitalrendite ROE der MAN Gruppe von –3,6 % auf 19,4 % verbessert werden.

# Konzernlagebericht

## Finanzlage

### Grundsätze und Ziele des Finanzmanagements

Das Finanzmanagement der MAN Gruppe wird zentral durch die MAN SE wahrgenommen. Die MAN SE stellt finanzielle Ressourcen innerhalb des Konzerns zur Verfügung, sichert die finanzielle Unabhängigkeit und jederzeitige Liquidität und kommuniziert für die gesamte MAN Gruppe mit den Kapitalmärkten. Der Vorstand der MAN SE verantwortet für die MAN Gruppe die ordnungsgemäße Durchführung aller finanzwirtschaftlichen Transaktionen sowie den Einsatz eines geeigneten finanziellen Risikomanagementsystems.

Aufgaben und Ziele des Finanzmanagements sind die Sicherstellung jederzeitiger Liquidität, die Begrenzung finanzieller Risiken und die Steigerung des Unternehmenswerts.

Zur Sicherstellung jederzeitiger Liquidität werden geeignete Finanzierungsinstrumente, Garantiezusagen und andere Rahmenvereinbarungen eingesetzt, die den verlässlichen Zugang zu Fremd- und Eigenkapitalmärkten und Finanzinstitutionen ermöglichen. Wichtigstes Ziel dabei ist, dass der MAN Gruppe damit zu jeder Zeit der notwendige finanzielle Spielraum für die Finanzierung des operativen Geschäfts, der Investitionen sowie für gezieltes Wachstum zur Verfügung steht.

Bei der Begrenzung finanzwirtschaftlicher Risiken für den Unternehmenswert und die Ertragskraft liegt der Fokus auf der effizienten – vornehmlich über die Finanzmärkte – vorgenommenen Absicherung von Risiken aus Währungs- oder Rohstoffpreisschwankungen, Zinsänderungen sowie Bewertungsrisiken jeglicher Art. Darüber hinaus erfolgt ein aktives Management von Kontrahenten- und Länderrisiken sowie der erhaltenen Sicherheiten.

Insgesamt leistet das zentrale Finanzmanagement seinen Beitrag zur Steigerung des Unternehmenswerts, indem die Liquiditätsversorgung und die Kapitalstruktur der Gruppe dynamisch dem Bedarf angepasst werden, Finanzrisiken unter wirtschaftlichen Gesichtspunkten bestmöglich transferiert werden und eine effiziente Abwicklung dieser Aufgaben implementiert ist.

### Cashflow

Die Kapitalflussrechnung der MAN Gruppe ist im Abschlussteil im Kapitel »MAN Konzern Kapitalflussrechnung« wiedergegeben. Zur aussagefähigen Analyse der Finanzlage werden die Zahlen in das Industrielle Geschäft und in die Finanzdienstleistungen getrennt. Die Finanzdienstleistungen betreffen die Absatzfinanzierung von MAN Finance, im Wesentlichen durch Kundenleasing von Nutzfahrzeugen.

Die Analyse zeigt die Entwicklung der Nettoliquidität/-verschuldung. Die Nettoliquidität/-verschuldung ist die finanzielle Steuerungsgröße, die sich aus Flüssige Mittel und Wertpapiere abzüglich Finanzverbindlichkeiten ergibt.

| Mio €                                                                            |                |                |                        |                |                        |                |
|----------------------------------------------------------------------------------|----------------|----------------|------------------------|----------------|------------------------|----------------|
|                                                                                  | MAN Konzern    |                | Industrielles Geschäft |                | Finanzdienstleistungen |                |
|                                                                                  | 2010           | 2009           | 2010                   | 2009           | 2010                   | 2009           |
| <b>Nettoliquidität/-verschuldung zu Beginn des Geschäftsjahres</b>               | <b>- 2 634</b> | <b>- 1 631</b> | <b>- 822</b>           | <b>468</b>     | <b>- 1 812</b>         | <b>- 2 099</b> |
| Cash Earnings                                                                    | 815            | 396            | 861                    | 431            | - 46                   | - 35           |
| Veränderung Nettomittelbindung fortgeführter Bereiche                            | 612            | 964            | 641                    | 687            | - 29                   | 277            |
| Veränderung Nettomittelbindung aufgebener Bereiche                               | -              | 102            | -                      | 102            | -                      | -              |
| <b>Cashflow aus der Geschäftstätigkeit</b>                                       | <b>1 427</b>   | <b>1 462</b>   | <b>1 502</b>           | <b>1 220</b>   | <b>- 75</b>            | <b>242</b>     |
| Cashflow aus der Investitionstätigkeit fortgeführter Bereiche                    | - 371          | - 2 226        | - 385                  | - 2 225        | 14                     | - 1            |
| Cashflow aus der Investitionstätigkeit aufgebener Bereiche                       | - 3            | - 358          | - 3                    | - 358          | -                      | -              |
| <b>Cashflow aus der Investitionstätigkeit</b>                                    | <b>- 374</b>   | <b>- 2 584</b> | <b>- 388</b>           | <b>- 2 583</b> | <b>14</b>              | <b>- 1</b>     |
| <b>Free Cashflow</b>                                                             | <b>1 053</b>   | <b>- 1 122</b> | <b>1 114</b>           | <b>- 1 363</b> | <b>- 61</b>            | <b>241</b>     |
| <b>Cashflow aus der Finanzierungstätigkeit der Nettoliquidität/-verschuldung</b> | <b>- 40</b>    | <b>- 325</b>   | <b>- 71</b>            | <b>- 384</b>   | <b>31</b>              | <b>59</b>      |
| <b>Zahlungswirksame Veränderungen der Nettoliquidität/-verschuldung</b>          | <b>1 013</b>   | <b>- 1 447</b> | <b>1 043</b>           | <b>- 1 747</b> | <b>- 30</b>            | <b>300</b>     |
| Sonstige Veränderungen der Nettoliquidität/-verschuldung                         | - 157          | 241            | - 141                  | 254            | - 16                   | - 13           |
| Veränderung der Nettoliquidität/-verschuldung aufgebener Bereiche                | -              | 203            | -                      | 203            | -                      | -              |
| <b>Nettoliquidität/-verschuldung am Ende des Geschäftsjahres</b>                 | <b>- 1 778</b> | <b>- 2 634</b> | <b>80</b>              | <b>- 822</b>   | <b>- 1 858</b>         | <b>- 1 812</b> |

Die Cash Earnings der MAN Gruppe haben sich ergebnisbedingt auf 815 Mio € erhöht. Im Industriellen Geschäft wurde dabei ein Wert von 861 Mio € nach 431 Mio € im Vorjahr erwirtschaftet. Darüber hinaus verbesserte sich die Nettomittelbindung der MAN Gruppe um 612 Mio € (1 066 Mio €). Die Verbesserung der Nettomittelbindung ist auf einen deutlichen Rückgang der Vorräte, ein besseres Forderungsmanagement sowie volumenbedingt höhere Verbindlichkeiten zurückzuführen. Dies führte zu einem positiven Cashflow aus der Geschäftstätigkeit von 1 502 Mio € im Industriellen Geschäft und in der MAN Gruppe insgesamt von 1 427 Mio €.

Der Cashflow aus der Investitionstätigkeit betrug -374 Mio € nach -2 584 Mio € im Vorjahr. Im Jahr 2009 prägten der Erwerb von MAN Latin America sowie der Anteile an Sinotruk mit insgesamt -2,2 Mrd € den Cashflow aus der Investitionstätigkeit. Der um diese Portfoliomaßnahmen bereinigte Cashflow aus der Investitionstätigkeit des Vorjahres betrug -335 Mio €.

Die MAN Gruppe erwirtschaftete im abgelaufenen Geschäftsjahr einen Free Cashflow von 1 053 Mio €. Im Industriellen Geschäft wurde ein Free Cashflow von 1 114 Mio € nach -1 363 Mio € im Vorjahr erreicht.

Der Cashflow aus der Finanzierungstätigkeit enthält die Dividendenzahlung von 40 Mio € (297 Mio €).



**Free Cashflow nach Geschäftsfeldern**  
Mio €

|                         | <b>2010</b>  | <b>2009</b>    |
|-------------------------|--------------|----------------|
| Commercial Vehicles     | 552          | 792            |
| Power Engineering       | 763          | 138            |
| Sonstige/Konsolidierung | - 262        | - 2 052        |
| <b>MAN Gruppe</b>       | <b>1 053</b> | <b>- 1 122</b> |

Der Free Cashflow des Geschäftsfelds Commercial Vehicles erreichte 552 Mio €. Davon resultierten 484 Mio € aus dem operativen Nutzfahrzeuggeschäft von MAN Truck & Bus, wohingegen die Finanzdienstleistungen den Cashflow mit -61 Mio € belasteten. MAN Latin America erwirtschaftete 129 Mio € Free Cashflow. Während der Free Cashflow bei MAN Latin America nahezu auf dem Vorjahresniveau lag und im verbleibenden Nutzfahrzeuggeschäft 50 Mio € über dem Wert von 2009, hat sich bei den Finanzdienstleistungen der Free Cashflow um 302 Mio € verringert. Dies ist im Wesentlichen durch das angestiegene Finanzierungsvolumen infolge der wirtschaftlichen Erholung im Berichtsjahr bedingt.

Der Free Cashflow des Geschäftsfelds Power Engineering belief sich auf 763 Mio € und führte damit zu einer Verbesserung gegenüber 2009 um 625 Mio €. Dies ist im Wesentlichen auf den Bereich MAN Diesel & Turbo mit einer deutlichen Verbesserung der Nettomittelbindung um ca. 250 Mio €, insbesondere durch eine Reduktion der Vorräte, zurückzuführen.

Die Nettoverschuldung der MAN Gruppe hat sich, verglichen mit dem Vorjahreswert (-2 634 Mio €), um 856 Mio € auf -1 778 Mio € verringert. Dabei hat sich die Nettoverschuldung des Industriellen Geschäfts von -822 Mio € zum 31. Dezember 2009 um 902 Mio € auf +80 Mio € verbessert. Die Finanzdienstleistungen konnten die Nettoverschuldung aus der Refinanzierung ihres Geschäfts mit -1 858 Mio € auf dem Niveau des Vorjahres halten (-1 812 Mio €).

Die Nettoverschuldung der MAN Gruppe setzt sich zusammen aus Flüssigen Mitteln von 1 057 Mio € (502 Mio €) und Wertpapieren von 14 Mio € (134 Mio €) abzüglich Finanzverbindlichkeiten von 2 849 Mio € (3 270 Mio €). Der Anstieg der Flüssigen Mittel und Wertpapiere der MAN Gruppe gegenüber dem Vorjahr um 435 Mio € ist im Wesentlichen auf die positive Entwicklung des Free Cashflow zurückzuführen. Zusätzlich konnten die Finanzverbindlichkeiten um 421 Mio € gegenüber 2009 reduziert werden. Dies resultiert im Wesentlichen aus der Tilgung der fälligen Anleihe in Höhe von 240 Mio €, welche die MAN SE im Dezember 2003 über die MAN Financial Services plc, Swindon/Großbritannien, begeben hat, der Rückzahlung des variabel verzinslichen Anteils eines Schuldscheindarlehens in Höhe von 121 Mio € sowie aus weiteren gezielten Maßnahmen zur Reduzierung der Finanzverbindlichkeiten.

## Finanzierung der MAN Gruppe

Das operative Geschäft der MAN Gruppe konnte im Jahr 2010 in hohem Maße aus dem Cashflow aus der Geschäftstätigkeit finanziert werden. Für eine Finanzierung durch Fremdkapital besteht neben bilateralen Linien mit Finanzinstituten eine variabel verzinsliche syndizierte Kreditlinie über 1,5 Mrd. €, die von einem Konsortium von 23 Banken bis Dezember 2015 zugesagt ist. Diese Linie wurde im Dezember 2010 abgeschlossen und ersetzt die bis dahin existierende syndizierte Kreditlinie mit einer Laufzeit bis Dezember 2011, welche damit erloschen ist. Letztgenannte syndizierte Kreditlinie konnte bereits im Juli 2010 um 500 Mio € auf 1,5 Mrd € reduziert werden und wurde Zeit ihres Bestehens nie in Anspruch genommen. Ebenso ist die aktuell existierende Linie mit Laufzeit bis 2015 zum 31. Dezember 2010 nicht gezogen.

Einen weiteren Baustein der Konzernfinanzierung für die MAN Gruppe stellt der Zugang zum Kapitalmarkt dar. Hierfür hat die MAN SE im Jahr 2009 ein EMTN-Programm aufgelegt, bei dem aktuell 1,5 Mrd € durch die Emission einer Anleihe im Jahr 2009 in zwei Tranchen mit Laufzeiten bis 2013 bzw. 2016 und festem Zinskupon in Höhe von 5,375 % bzw. 7,25 % ausgenutzt sind. Eine Anleihe, welche die MAN SE im Dezember 2003 über die MAN Financial Services plc, Swindon/Großbritannien, begeben hat, wurde im Dezember 2010 bei Endfälligkeit in Höhe von 240 Mio € zurückgezahlt.

Im Oktober 2010 konnte vorzeitig der variable Teil eines Schuldscheindarlehens in Höhe von 121 Mio € zurückgeführt werden. Diese Tranche wurde bis zur Rückführung mit durchschnittlich 3,92 % p. a. verzinst. Der festverzinsliche Teil des Schuldscheindarlehens in Höhe von 49 Mio € und einem Zinssatz von 5,056 % mit einer Laufzeit bis 2012 existiert weiterhin. Darüber hinaus besteht ein Schuldscheindarlehen in Höhe von 30 Mio € mit Laufzeit bis 2019 (amortisierend), das mit 6,76 % fest verzinst wird.

Ferner nutzt die MAN Gruppe Asset-Backed-Finanzierungen, insbesondere zur Refinanzierung des Finanzdienstleistungsgeschäfts.

Standard & Poor's hat im April 2010 das Langfristrating für MAN von A- auf BBB+ mit stabilem Ausblick gesenkt und diese Einschätzung im Dezember 2010 nochmals bestätigt. Das von Moody's erhaltene Rating wurde im September 2010 unverändert mit A3 mit stabilem Ausblick bestätigt.

Die folgende Tabelle zeigt das derzeitige Kreditrating für MAN:

| Rating-Agentur    | langfristig | kurzfristig |
|-------------------|-------------|-------------|
| Standard & Poor's | BBB+/Stable | A-2         |
| Moody's           | A3/Stable   | P-2         |

Für Eigenkapitalfinanzierungen verfügt der Vorstand bei Zustimmung des Aufsichtsrats über Ermächtigungen, die von der Hauptversammlung der MAN SE erteilt wurden. Dazu gehört u. a. ein Genehmigtes Kapital von 188 Mio €, dies entspricht 50 % des Grundkapitals, das eine Kapitalerhöhung gegen Bareinlagen und/oder Sacheinlagen ermöglicht. Des Weiteren kann der Vorstand Wandel- oder Optionsschuldverschreibungen im Gesamtwert bis 2,5 Mrd € begeben. Zum weiteren Inhalt der Ermächtigungen siehe »Grundkapital, Genehmigtes und Bedingtes Kapital, Erwerb eigener Aktien«.

Wesentliche Vereinbarungen der Gesellschaft, die unter der Bedingung eines Kontrollwechsels infolge eines Übernahmeangebots stehen:

Bei der vereinbarten syndizierten Kreditlinie über 1,5 Mrd € kann jeder Konsorte die sofortige Rückzahlung seines Anteils verlangen, wenn eine oder mehrere natürliche oder juristische Personen (ausgenommen die Volkswagen AG oder eine mehrheitlich gehaltene direkte oder indirekte Tochtergesellschaft der Volkswagen AG), entweder einzeln oder gemeinschaftlich, die Kontrolle über die MAN SE oder die Mehrheit der Stimmrechte an der MAN SE erwerben.

Die emittierten Schuldscheindarlehen in Höhe von 79 Mio € können mit sofortiger Wirkung gekündigt werden, wenn eine oder mehrere Personen, die gemeinschaftlich handeln, die Mehrheit der Stimmrechte an der MAN SE erwerben.

Die Rückzahlung der Anleihe von 1,5 Mrd € kann dann gefordert werden, wenn eine oder mehrere Personen, die abgestimmt handeln, mehr als 50 % der Stimmrechte an der MAN SE erworben haben und es aufgrund dessen innerhalb von 120 Tagen zu einer Absenkung des Ratings in ein Non Investment Grade Rating kommt.

## Vermögens- und Kapitalstruktur

| Mio €                                            |               |               |                        |               |                        |              |
|--------------------------------------------------|---------------|---------------|------------------------|---------------|------------------------|--------------|
|                                                  | MAN Konzern   |               | Industrielles Geschäft |               | Finanzdienstleistungen |              |
|                                                  | 2010          | 2009          | 2010                   | 2009          | 2010                   | 2009         |
| Sachanlagen und Immaterielle Vermögenswerte      | 3 978         | 3 772         | 3 974                  | 3 766         | 4                      | 6            |
| Beteiligungen                                    | 2 136         | 1 723         | 2 131                  | 1 693         | 5                      | 30           |
| Vermietete Erzeugnisse                           | 1 755         | 1 433         | 1 111                  | 896           | 644                    | 537          |
| Steuern                                          | 1 292         | 989           | 1 264                  | 969           | 28                     | 20           |
| Vorräte                                          | 2 852         | 3 037         | 2 785                  | 2 989         | 67                     | 48           |
| Forderungen aus Lieferungen und Leistungen       | 2 265         | 2 202         | 1 936                  | 1 896         | 329                    | 306          |
| Forderungen aus »finance lease«                  | 1 050         | 1 096         | –                      | –             | 1 050                  | 1 096        |
| Zur Veräußerung bestimmte Vermögenswerte         | 139           | 139           | 139                    | 139           | –                      | –            |
| Übrige lang- und kurzfristige Vermögenswerte     | 893           | 868           | 859                    | 823           | 34                     | 45           |
| Finanzmittel                                     | 1 071         | 636           | 1 031                  | 589           | 40                     | 47           |
| <b>Aktiva</b>                                    | <b>17 431</b> | <b>15 895</b> | <b>15 230</b>          | <b>13 760</b> | <b>2 201</b>           | <b>2 135</b> |
| Eigenkapital                                     | 5 990         | 5 129         | 5 864                  | 4 984         | 126                    | 145          |
| Pensionen                                        | 226           | 160           | 225                    | 159           | 1                      | 1            |
| Finanzverbindlichkeiten                          | 2 849         | 3 270         | 1 993                  | 2 238         | 856                    | 1 032        |
| Interne Finanzierung                             | –             | –             | – 1 042                | – 827         | 1 042                  | 827          |
| Rückstellungen                                   | 2 118         | 1 860         | 2 114                  | 1 857         | 4                      | 3            |
| Erhaltene Anzahlungen                            | 762           | 913           | 759                    | 908           | 3                      | 5            |
| Steuern                                          | 1 383         | 1 116         | 1 351                  | 1 090         | 32                     | 26           |
| Verbindlichkeiten aus Lieferungen und Leistungen | 1 981         | 1 368         | 1 882                  | 1 319         | 99                     | 49           |
| Übrige lang- und kurzfristige Verbindlichkeiten  | 2 122         | 2 079         | 2 084                  | 2 032         | 38                     | 47           |
| <b>Passiva</b>                                   | <b>17 431</b> | <b>15 895</b> | <b>15 230</b>          | <b>13 760</b> | <b>2 201</b>           | <b>2 135</b> |

## Industrielles Geschäft

Nachdem 2009 der Schwerpunkt der Investitionen in der Akquisitionstätigkeit lag, wurde im Geschäftsjahr 2010 überwiegend in Sachanlagen und Immaterielle Vermögenswerte investiert. Im Mittelpunkt standen dabei Ersatz- und Erhaltungsinvestitionen sowie Maßnahmen zur Verbesserung der Produktivität und Qualität an verschiedenen Standorten. Der Anstieg der Beteiligungen um 438 Mio € erklärt sich hauptsächlich durch die Wertaufholung der Beteiligung an Scania in Höhe von 357 Mio €. Für weiterführende Informationen siehe »Konzernanhang«.

Der Anstieg um 215 Mio € der Position Vermietete Erzeugnisse resultiert vor allem aus der Erstkonsolidierung von EURO-Leasing. Für weiterführende Informationen siehe »Konzernanhang«. Die Veränderung gegenüber dem Vorjahr spiegelt gleichzeitig auch das im Jahresverlauf gestiegene Volumen von Verkäufen mit Rückkaufverpflichtungen bei MAN Truck & Bus wider.

Die Vorräte beliefen sich zum Geschäftsjahresende auf 2 785 Mio €. Der Rückgang vor allem bei den Neu- und Gebrauchtfahrzeugen ist auf die Erholung des Nutzfahrzeugmarkts in Europa zurückzuführen. Bei MAN Diesel & Turbo gingen die Vorräte aufgrund der Schließung der Produktion in Fredrikshavn sowie durch gezieltes Working Capital Management in dem Geschäftsbereich Engines & Marine Systems und im After-Sales-Geschäft zurück. Die erhaltenen Anzahlungen fielen um 149 Mio €. Diese Veränderung ist vor allem durch die Geschäftsentwicklung bei MAN Diesel & Turbo bedingt.

Die Finanzverbindlichkeiten reduzierten sich gegenüber dem Vorjahr um 245 Mio €. Dies resultiert im Wesentlichen aus der Rückzahlung des variabel verzinslichen Anteils eines Schuld-scheindarlehens in Höhe von 121 Mio € sowie aus weiteren Maßnahmen zur Reduzierung der Finanzverbindlichkeiten.

Die Verbindlichkeiten aus Lieferungen und Leistungen erhöhten sich volumenbedingt um 613 Mio € gegenüber dem Vorjahr.

Das Eigenkapital des Industriellen Geschäfts erhöhte sich gegenüber dem 31. Dezember 2009 um 880 Mio €. Die Veränderung ist hauptsächlich auf den 2010 entstandenen Gewinn zurückzuführen. Trotz des gleichzeitigen Anstiegs des Anlagevermögens, insbesondere durch die Wertaufholung für die Beteiligung an Scania, führte das höhere Eigenkapital zu einer Verbesserung der Deckung des

Anlagevermögens (Immaterielle Vermögenswerte, Sachanlagen und Beteiligungen) durch Eigenkapital um 5 %-Punkte (91 % auf 96 %). Die Eigenkapitalquote des Industriellen Geschäfts beläuft sich auf 38,5 % (36,2 %). In der MAN Gruppe insgesamt betragen die Anlagendeckung 98 % (93 %) und die Eigenkapitalquote 34,4 % (32,3 %).

## Finanzdienstleistungen

Bei den Finanzdienstleistungen hat sich die Bilanzsumme infolge des steigenden Geschäftsvolumens von 2,1 Mrd € auf 2,2 Mrd € erhöht. Die Refinanzierung erfolgt mit 856 Mio € (1 032 Mio €) extern und mit 1 042 Mio € (827 Mio €) konzernintern. Der Rückgang der externen Refinanzierung wurde maßgeblich durch die Rückzahlung der Anleihe der MAN Financial Services plc beeinflusst.

## Nicht bilanziertes Vermögen

Im Rahmen außerbilanzieller Finanzierungsinstrumente nutzen wir Forderungsprogramme, insbesondere zur Refinanzierung des Finanzdienstleistungsgeschäfts. Für weiterführende Informationen verweisen wir auf »Finanzierung der MAN Gruppe« sowie auf den »Konzernanhang«.

Neben dem in der Konzernbilanz ausgewiesenen Vermögen nutzt der Konzern auch nicht bilanzierungsfähige Vermögenswerte. Hierzu zählen unter anderem die Marke MAN als wichtiger Immaterieller Vermögenswert sowie selbst entwickelte Patente, das Know-how der Mitarbeiter und das Service- und Vertriebsnetz für Kunden. Die Aufwendungen hierfür sind Investitionen in die Zukunft und sichern den Markterfolg in den kommenden Jahren.

Für ausführliche Informationen im Zusammenhang mit verschiedenen nicht bilanzierten Vermögenswerten aus Miet-, Pacht- und Leasingverträgen siehe »Konzernanhang«.

## Grundkapital, Genehmigtes und Bedingtes Kapital, Erwerb eigener Aktien

Das Grundkapital der MAN SE beträgt unverändert 376 422 400 €. Es ist eingeteilt in 147 040 000 auf den Inhaber lautende, nennwertlose Stückaktien, die in 140 974 350 Stammaktien und 6 065 650 stimmrechtslose Vorzugsaktien unterteilt sind.

Weitere Angaben zum gezeichneten Kapital, den Aktiengattungen, den Ermächtigungen der Hauptversammlung zum Genehmigten Kapital 2010 und zur Ausgabe von Wandel- und Optionsschuldverschreibungen nebst dem in diesem Zusammenhang geschaffenen bedingten Kapital (Bedingtes Kapital 2010) sowie zu der im Berichtsjahr erteilten Ermächtigung zum Erwerb eigener Aktien sind in dem nachfolgenden Kapitel dargestellt.

## Angaben nach § 289 Abs. 4 und 315 Abs. 4 HGB sowie erläuternder Bericht gemäß § 176 Abs. 1 Satz 1 AktG

### Zusammensetzung des gezeichneten Kapitals, Aktiengattungen

Das Grundkapital der MAN SE beträgt unverändert 376 422 400 €. Es ist eingeteilt in 147 040 000 auf den Inhaber lautende, nennwertlose Stückaktien, auf die jeweils ein rechnerischer Anteil am Grundkapital von 2,56 € entfällt. Die Stückaktien sind gemäß § 4 Abs. 1 der Satzung unterteilt in 140 974 350 Stammaktien und 6 065 650 stimmrechtslose Vorzugsaktien. Sämtliche Aktien sind voll eingezahlt. Ein Anspruch der Aktionäre auf Verbriefung ist gem. § 4 Abs. 2 Satz 2 der Satzung ausgeschlossen.

Für alle Aktien besteht ein gleiches Gewinnbezugsrecht, dies mit der Maßgabe, dass aus dem Bilanzgewinn ein Vorzugsgewinnanteil von 0,11 € je Vorzugsaktie vorab an die Vorzugsaktionäre und weitere 0,11 € je Stammaktie nachrangig an die Stammaktionäre auszuschütten sind. Reicht der Bilanzgewinn zur Zahlung des Vorzugsgewinnanteils nicht aus, so sind die fehlenden Beträge ohne Zinsen aus dem Bilanzgewinn der folgenden Geschäftsjahre vor Verteilung eines Gewinnanteils an die Stammaktionäre nachzuzahlen.

Die Stammaktien sind stimmberechtigt. Den Vorzugsaktien steht grundsätzlich kein Stimmrecht zu. Dies gilt gemäß § 140 Abs. 2 AktG nicht, wenn der Vorzugsbetrag in einem Jahr nicht oder nicht vollständig gezahlt und der Rückstand im nächsten Jahr nicht neben dem vollen Vorzug dieses Jahres nachgezahlt wird. In diesem Fall haben die Vorzugsaktionäre ein Stimmrecht, bis die Rückstände nachgezahlt sind, und die Vorzugsaktien sind bei der Berechnung einer nach dem Gesetz oder der Satzung erforderlichen Kapitalmehrheit zu berücksichtigen. Den Vorzugsaktionären steht zudem ein Stimmrecht gemäß § 141 Abs. 1, Abs. 2 Satz 1 in Verbindung mit Abs. 3 AktG zu. Danach ist ein zustimmender Sonderbeschluss der Vorzugsaktionäre erforderlich, wenn ein



Beschluss der Hauptversammlung gefasst wird, durch den der Gewinnvorzug aufgehoben oder beschränkt wird oder der die Ausgabe von Vorzugsaktien vorsieht, die bei der Verteilung des Gewinns oder des Gesellschaftsvermögens den bestehenden Vorzugsaktien ohne Stimmrecht vorgehen oder gleichstehen.

Im Übrigen sind mit allen Aktien die gleichen Rechte und Pflichten verbunden.

#### Beschränkungen, die Stimmrechte oder die Übertragung der Aktien betreffen

Neben Beschränkungen des Stimmrechts für Vorzugsaktien und nach gesetzlichen Bestimmungen, etwa gemäß § 136 AktG, gibt es keine der MAN SE bekannten Stimmrechtsbeschränkungen. Entsprechendes gilt für die Übertragung von Aktien, dies mit der Ausnahme, dass für Aktien, die Vorstände, einzelne Geschäftsführer und sonstige Begünstigte der MAN-Unternehmen im Rahmen des MAN-Aktienprogramms (MAP) erhalten haben, Sperrfristen gelten. Zu Einzelheiten wird auf die Darstellung im Vergütungsbericht verwiesen.

#### Beteiligungen am Kapital, die 10 % der Stimmrechte überschreiten

Nach dem Wertpapierhandelsgesetz (WpHG) hat jeder Anleger, der durch Erwerb, Veräußerung oder auf sonstige Weise bestimmte Anteile an Stimmrechten der Gesellschaft erreicht, überschreitet oder unterschreitet, dies der Gesellschaft und der Bundesanstalt für Finanzdienstleistungsaufsicht mitzuteilen. Die insoweit relevanten Schwellenwerte betragen gemäß § 21 Abs. 1 WpHG 3 %, 5 %, 10 %, 15 %, 20 %, 25 %, 30 %, 50 % und 75 % der Stimmrechte an der Gesellschaft. Ein Verstoß gegen die Meldepflicht führt gemäß § 28 WpHG dazu, dass die entsprechenden Stimmrechte für die Zeit, für welche die Mitteilungspflichten nach § 21 Abs. 1 WpHG nicht erfüllt werden, nicht ausgeübt werden können.

Nach §§ 289 Abs. 4 Nr. 3, 315 Abs. 4 Nr. 3 HGB sind alle direkten und indirekten Beteiligungen anzugeben, die 10 % der Stimmrechte überschreiten.

Die Volkswagen Aktiengesellschaft hat der MAN SE (damals MAN Aktiengesellschaft) im Februar 2007 nach § 21 Abs. 1 Satz 1 WpHG mitgeteilt, dass der Stimmrechtsanteil der Volkswagen Aktiengesellschaft die Grenze von 25 % überschritten hat und zu diesem Zeitpunkt 29,9 % betrug. Des Weiteren haben uns die Porsche Automobil Holding SE sowie deren kontrollierende Gesellschafter im September 2008 nach § 21 Abs. 1 WpHG mitgeteilt, dass – aufgrund der Übernahme der Kontrolle über die Volkswagen AG durch die Porsche Automobil Holding SE – diese Beteiligung der Volkswagen AG von 29,9 % auch der Porsche Automobil Holding SE sowie deren kontrollierenden Gesellschaftern zugerechnet wird. Ferner haben wir im Jahr 2010 Mitteilungen nach § 21 Abs. 1 WpHG erhalten, dass der Stimmrechtsanteil der BlackRock, Inc. (und mit ihr verbundener Gesellschaften) die Schwelle von 3 % überschritten hat. Weitere bestehende direkte oder indirekte Beteiligungen am Kapital der Gesellschaft, die 10 % der Stimmrechte oder die relevanten Schwellen des WpHG überschreiten, oder Änderungen der genannten Beteiligungen wurden der MAN SE weder gemeldet, noch sind sie ihr bekannt.

#### Ernennung und Abberufung der Vorstandsmitglieder, Satzungsänderungen

Die Ernennung und Abberufung der Mitglieder des Vorstands der Gesellschaft sind in den Art. 39 Abs. 2, 46 SE-VO in Verbindung mit den §§ 84 und 85 AktG in Verbindung mit § 5 der Satzung geregelt. Danach hat der Vorstand aus mindestens zwei Personen zu bestehen. Der Aufsichtsrat ist zuständig und berechtigt, den Vorstand für einen Zeitraum von bis zu fünf Jahren zu bestellen und die Bestellung aus wichtigem Grund zu widerrufen. Einmalige oder mehrmalige Wiederbestellungen sind zulässig.

Für die Änderung der Satzung gilt Art. 59 Abs. 1 SE-VO in Verbindung mit den §§ 179 ff. AktG. Danach bedarf die Änderung der Satzung eines Beschlusses der Hauptversammlung mit einer Mehrheit von mindestens 3/4 des bei der Beschlussfassung vertretenen Grundkapitals. Nach § 10 Abs. 6 der Satzung ist der Aufsichtsrat befugt zu und beschließt über Änderungen der Satzung, die nur die Fassung der Satzung betreffen.

### Befugnisse des Vorstands, insbesondere zur Aktienausgabe und zum Aktienrückkauf

Die Befugnisse des Vorstands sind in Art. 39 SE-VO in Verbindung mit den §§ 77 ff. AktG in Verbindung mit § 6 der Satzung geregelt. Danach obliegt es dem Vorstand, die Gesellschaft in eigener Verantwortung zu leiten und die Gesellschaft gerichtlich sowie außergerichtlich zu vertreten.

Im Folgenden sind die Befugnisse des Vorstands zur Ausnutzung des Bedingten und Genehmigten Kapitals sowie zur Ausgabe bzw. zum Rückkauf von Aktien dargestellt. Von den entsprechenden Ermächtigungen wurde im Berichtsjahr kein Gebrauch gemacht.

### Genehmigtes Kapital 2010

Mit Wirksamkeit des Ermächtigungsbeschlusses der Hauptversammlung vom 1. April 2010 zur Schaffung des Genehmigten Kapitals 2010 wurde die mit Beschluss vom 3. Juni 2005 erteilte Ermächtigung zur Schaffung des Genehmigten Kapitals 2005, ergänzt durch Beschluss der Hauptversammlung vom 3. April 2009, ersetzt.

Durch Beschluss der ordentlichen Hauptversammlung vom 1. April 2010 wurde der Vorstand der Gesellschaft ermächtigt, mit Zustimmung des Aufsichtsrats das Grundkapital bis zum 31. März 2015 um bis zu 188 211 200 € (= 50 %) durch einmalige oder mehrmalige Ausgabe von auf den Inhaber lautenden Stammaktien gegen Bareinlagen und/oder gegen Sacheinlagen zu erhöhen (Genehmigtes Kapital 2010).

Den Aktionären ist grundsätzlich ein Bezugsrecht einzuräumen. Der Vorstand ist allerdings ermächtigt, mit Zustimmung des Aufsichtsrats das Bezugsrecht bei der Ausgabe von Aktien gegen Sacheinlagen zum Zwecke des Erwerbs von Unternehmen, Beteiligungen an Unternehmen oder wesentlichen Wirtschaftsgütern von Unternehmen auszuschließen. Bei Barkapitalerhöhungen ist der Vorstand mit Zustimmung des Aufsichtsrats ferner ermächtigt, das Bezugsrecht auszuschließen,

- (i) soweit es erforderlich ist, um den Gläubigern von Wandelschuldverschreibungen oder den Inhabern von Optionschuldverschreibungen, die von der Gesellschaft oder ihren Konzerngesellschaften ausgegeben wurden oder werden, ein Bezugsrecht auf neue Aktien in dem Umfang einzuräumen, wie es ihnen nach Ausübung ihres Wandlungs- oder Optionsrechts zustehen würde, hätten sie zuvor ihr Wandlungs- oder Optionsrecht ausgeübt bzw. im Falle der Wandlungspflicht die Wandlung vollzogen (Verwässerungsschutz); und/oder
- (ii) wenn der Ausgabebetrag der neuen Aktien den Börsenpreis um nicht mehr als 5 % unterschreitet und die gem. § 186 Abs. 3 Satz 4 AktG ausgegebenen Aktien insgesamt 10 % des Grundkapitals nicht überschreiten. Auf diese Begrenzung sind Aktien anzurechnen, die in direkter oder entsprechender Anwendung dieser Vorschrift aufgrund von anderen Ermächtigungen während der Laufzeit dieser Ermächtigungen bis zum Zeitpunkt ihrer Ausnutzung ausgegeben oder veräußert wurden. Auf die vorgenannte Zehnprozentgrenze sind ebenfalls Aktien anzurechnen, die aufgrund von zum Zeitpunkt der Ausnutzung entsprechend dieser Vorschrift ausgegebenen Schuldverschreibungen mit Wandlungs- oder Optionsrecht bzw. mit Wandlungspflichten ausgegeben wurden bzw. auszugeben sind; und/oder
- (iii) um etwaig benötigte Spitzenbeträge zur Abrundung des Kapitals zu verwerten; und/oder
- (iv) um hinsichtlich eines Teilbetrags des Genehmigten Kapitals 2010 von bis zu 4 000 000 € neue Aktien gegen Bareinlagen an Arbeitnehmer mit Führungsverantwortung (Führungskräfte) der Gesellschaft und/oder von Konzerngesellschaften auszugeben. Dabei kann auch vorgesehen werden, dass die zu leistende Einlage nach Maßgabe des § 204 Abs. 3 AktG gedeckt wird.

Die Ermächtigung ist – ohne Berücksichtigung der Ausgabe von Aktien unter Bezugsrechtsausschluss an Arbeitnehmer mit Führungsverantwortung – insoweit beschränkt, als nach Ausübung der Ermächtigung die Summe der unter Ausschluss des Bezugsrechts unter dem Genehmigten Kapital 2010 und/oder unter dem Bedingten Kapital 2010 ausgegebenen Aktien 20 % des zum Zeitpunkt des Wirksamwerdens der Ermächtigung bestehenden Grundkapitals (= 75 284 480 €) bzw. – falls dieser Wert geringer ist – des zum Zeitpunkt der Ausnutzung der Ermächtigung bestehenden Grundkapitals nicht übersteigen darf. Weitere Einzelheiten ergeben sich aus § 4 Abs. 4 der Satzung.

#### Ausgabe von Wandel- und/oder Optionsschuldverschreibungen, Bedingtes Kapital 2010

Mit Wirksamkeit des Ermächtigungsbeschlusses der Hauptversammlung vom 1. April 2010 zur Schaffung des Bedingten Kapitals 2010 zur Ausgabe von Wandel- und/oder Optionsschuldverschreibungen wurde die mit Beschluss vom 3. Juni 2005 erteilte Ermächtigung zur Schaffung des Bedingten Kapitals 2005, ergänzt durch Beschluss der Hauptversammlung vom 10. Mai 2007, ersetzt.

Durch Beschluss der Hauptversammlung vom 1. April 2010 wurde der Vorstand der Gesellschaft ermächtigt, mit Zustimmung des Aufsichtsrats bis zum 31. März 2015 einmalig oder mehrmals Wandel- und/oder Optionsschuldverschreibungen – nachstehend gemeinsam »Schuldverschreibungen« – der MAN SE im Gesamtbetrag von bis zu 2,5 Mrd € zu begeben und den Inhabern von Schuldverschreibungen Optionsrechte bzw. Wandlungsrechte zu gewähren bzw. Wandlungspflichten zu begründen, dies für neue, auf den Inhaber lautende Stammaktien der MAN SE mit einem anteiligen Betrag des Grundkapitals von bis zu 76 800 000 € (rund 20 %) nach näherer Maßgabe der Options- bzw. Wandlungsbedingungen. Die Schuldverschreibungen sind gegen Bareinlagen auszugeben.

Die Ermächtigung umfasst auch die Möglichkeit, für von anderen Konzerngesellschaften ausgegebene Schuldverschreibungen die Garantie zu übernehmen und zur Erfüllung der mit diesen Schuldverschreibungen eingeräumten Wandlungs- oder Optionsrechte bzw. Wandlungspflichten Aktien an der MAN SE zu gewähren. Die Ermächtigung umfasst weiterhin die Möglichkeit des Vorstands, mit Zustimmung des Aufsichtsrats die weiteren Bedingungen der Schuldverschreibungen, insbesondere Zinssatz, Ausgabekurs, Laufzeit und Stückelung, Bezugs- bzw. Umtauschverhältnis, Options- bzw. Wandlungspreis und Options- bzw. Wandlungszeitraum, festzulegen bzw. im Einvernehmen mit den Organen der ausgebenden Konzerngesellschaften festzulegen.

Die Schuldverschreibungen sind den Aktionären grundsätzlich zum Bezug anzubieten. Der Vorstand ist jedoch auch ermächtigt, mit Zustimmung des Aufsichtsrats das Bezugsrecht auszuschließen,

- (i) sofern der Ausgabepreis für die Schuldverschreibung ihren nach anerkannten finanzmathematischen Methoden ermittelten theoretischen Marktwert nicht wesentlich unterschreitet. Zudem gilt der Bezugsrechtsausschluss i.S.d. § 186 Abs. 3 Satz 4 AktG nur für Schuldverschreibungen mit Rechten auf Aktien, auf die ein anteiliger Betrag des Grundkapitals von insgesamt nicht mehr als 10 % des Grundkapitals entfällt. Auf diese Begrenzung sind Aktien anzurechnen, die in direkter oder entsprechender Anwendung dieser Vorschrift aufgrund von anderen Ermächtigungen während der Laufzeit dieser Ermächtigung bis zum Zeitpunkt ihrer Ausnutzung ausgegeben oder veräußert wurden bzw. auszugeben sind;
- (ii) soweit dies zum Ausgleich von Spitzenbeträgen erforderlich ist, die sich aufgrund des Bezugsverhältnisses ergeben;
- (iii) um den Inhabern von Schuldverschreibungen mit bestehenden Wandlungs-/Optionsrechten auf bzw. Pflichten zur Wandlung in Aktien der Gesellschaft zur Vermeidung von Verwässerungen des wirtschaftlichen Werts dieser Rechte ein Bezugsrecht in dem Umfang zu gewähren, wie es ihnen zustehen würde, hätten sie zuvor ihr Wandlungs- oder Optionsrecht ausgeübt bzw. im Falle der Wandlungspflicht die Wandlung vollzogen.

Die Ermächtigung zur Ausgabe von Schuldverschreibungen mit Wandlungs-/Optionsrechten bzw. Wandlungspflichten ist insoweit beschränkt, als nach Ausübung der Wandlungs-/Optionsrechte bzw. der Wandlungspflichten die Summe der unter Ausschluss des Bezugsrechts unter dem Bedingten Kapital 2010 auszugebenden und/oder dem Genehmigten Kapital 2010 – ohne Berücksichtigung der Ausgabe von Aktien unter Ausschluss des Bezugsrechts an Arbeitnehmer mit Führungsverantwortung – ausgegebenen Aktien 20 % des zum Zeitpunkt des Wirksamwerdens der Ermächtigung bestehenden Grundkapitals (= 75 284 480 €) bzw. – falls dieser Wert geringer ist – des zum Zeitpunkt der Ausnutzung der Ermächtigung bestehenden Grundkapitals nicht übersteigen darf.

Gleichzeitig wurde mit Beschluss der Hauptversammlung vom 1. April 2010 das Grundkapital um bis zu 76 800 000 €, eingeteilt in bis zu 30 000 000 Stück auf den Inhaber lautende Stammaktien, bedingt erhöht. Die bedingte Kapitalerhöhung wird nur insoweit durchgeführt, als die Inhaber von Schuldverschreibungen mit Wandlungs- oder Optionsrechten bzw. von Wandlungspflichten, die die MAN SE oder deren Konzerngesellschaften aufgrund des Ermächtigungsbeschlusses der Hauptversammlung vom 1. April 2010 gegen bar ausgegeben haben, von ihrem Wandlungs- oder Optionsrecht Gebrauch machen bzw. die Wandlungspflicht erfüllen und soweit nicht andere Erfüllungsformen zur Bedienung eingesetzt werden. Die neuen Aktien sind erstmalig für das Geschäftsjahr ihrer Ausgabe dividendenberechtigt (Bedingtes Kapital 2010).

### Aktienrückkauf

Mit Wirksamkeit des Ermächtigungsbeschlusses der Hauptversammlung vom 1. April 2010 zum Erwerb eigener Aktien wurde die mit Beschluss vom 3. April 2009 erteilte Ermächtigung zum Erwerb eigener Aktien ersetzt.

Mit Beschluss der Hauptversammlung vom 1. April 2010 wurde der Vorstand ermächtigt, bis zum 31. März 2015 mit Zustimmung des Aufsichtsrats einmal oder mehrmals Stammaktien und/oder Vorzugsaktien ohne Stimmrecht der Gesellschaft bis zu einem Anteil von insgesamt höchstens 10 % des Grundkapitals zu erwerben. Auf die aufgrund dieser Ermächtigung erworbenen Aktien dürfen zusammen mit anderen eigenen Aktien, die sich im Besitz der Gesellschaft befinden oder ihr nach §§ 71 d und 71 e AktG zuzurechnen sind, zu keinem Zeitpunkt mehr als 10 % des jeweiligen Grundkapitals entfallen. Der Erwerb kann auch durch andere Konzernunternehmen durchgeführt werden und/oder durch Dritte für Rechnung der MAN SE bzw. für Rechnung anderer Konzernunternehmen.

Der Erwerb darf über die Börse oder mittels eines an die Inhaber der entsprechenden Aktiengattung gerichteten öffentlichen Kaufangebots erfolgen. Im Falle des Erwerbs über die Börse darf der Erwerbspreis (ohne Erwerbsnebenkosten) den am Handelstag durch die Eröffnungsauktion ermittelten Kurs der jeweiligen Aktiengattung im Xetra-Handel (oder in einem vergleichbaren Nachfolgesystem) um nicht mehr als 10 % über- bzw. unterschreiten. Bei einem öffentlichen Kaufangebot dürfen der gebotene Kaufpreis oder die Grenzwerte der gebotenen Kaufpreisspanne je Aktie (ohne Erwerbsnebenkosten) den durchschnittlichen Schlusskurs der jeweiligen Aktiengattung im Xetra-Handel (oder in einem vergleichbaren Nachfolgesystem) an den drei Börsenhandelstagen vor dem Tag der öffentlichen Ankündigung des Angebots um nicht mehr als 10 % über- bzw. unterschreiten. Das Kaufangebot bzw. die Aufforderung zur Abgabe eines solchen Angebots kann weitere Bedingungen vorsehen. Sofern die gesamte Zeichnung das Volumen des Kaufangebots überschreitet, muss die Annahme nach Quoten erfolgen. Eine bevorrechtigte Annahme geringer Stückzahlen kann im rechtlich zulässigen Rahmen, maximal aber bis zu 100 Stück angedienter Aktien je Aktionär, vorgesehen werden. In den Angebotsbedingungen können weitere Einzelheiten und Bedingungen des Angebots festgelegt werden.

Der Vorstand wurde weiterhin ermächtigt, erworbene eigene Stammaktien mit Zustimmung des Aufsichtsrats in anderer Weise als durch Veräußerung über die Börse oder durch Angebot an alle Aktionäre unter Ausschluss des Bezugsrechts der Aktionäre zu allen gesetzlich zulässigen Zwecken zu verwenden. Dies gilt insbesondere auch,

- (i) wenn die erworbenen eigenen Stammaktien zu einem Preis veräußert werden, der den Börsenkurs nicht wesentlich unterschreitet; und/oder
- (ii) soweit diese als Gegenleistung im Rahmen eines Unternehmenszusammenschlusses oder für den Erwerb von Unternehmen oder Beteiligungen an Unternehmen oder von Wirtschaftsgütern von Unternehmen verwendet werden; und/oder
- (iii) soweit diese zur Erfüllung von Options- bzw. Wandlungsrechten oder von Wandlungspflichten, die von der Gesellschaft oder einer Konzerngesellschaft bei der Ausgabe von Schuldverschreibungen begründet wurden, verwendet werden. Insgesamt dürfen die aufgrund dieser Ermächtigung übertragenen Aktien 10 % des Grundkapitals nicht übersteigen, sofern sie zur Erfüllung von Wandel- und Optionsrechten bzw. von Wandlungspflichten, die in entsprechender Anwendung des § 186 Abs. 3 Satz 4 AktG begründet wurden, verwendet werden. Auf diese Begrenzung sind Aktien anzurechnen, die in direkter oder entsprechender Anwendung dieser Vorschrift während der Laufzeit dieser Ermächtigung bis zum Zeitpunkt der Verwendung ausgegeben oder veräußert wurden. Ebenfalls anzurechnen sind Aktien, die aufgrund von zum Zeitpunkt der Verwendung entsprechend dieser Vorschrift ausgegebenen Schuldverschreibungen mit Wandel- oder Optionsrechten bzw. mit Wandlungspflichten ausgegeben wurden bzw. auszugeben sind; und/oder
- (iv) soweit die eigenen Stammaktien zur Erfüllung von Zusagen von Aktientantiemen an Arbeitnehmer mit Führungsverantwortung (Führungskräfte) der Gesellschaft und/oder Konzernunternehmen verwendet werden.

Der Vorstand wurde durch Beschluss der Hauptversammlung vom 1. April 2010 ferner ermächtigt, die eigenen Stamm- und/oder Vorzugsaktien ohne Stimmrecht mit Zustimmung des Aufsichtsrats ohne weiteren Hauptversammlungsbeschluss einzuziehen.

#### Wesentliche Vereinbarungen der Gesellschaft, die unter der Bedingung eines Kontrollwechsels infolge eines Übernahmeangebots stehen

Wie oben im Kapitel »Finanzierung der MAN Gruppe« bereits erläutert, hat die MAN SE verschiedene wesentliche Vereinbarungen abgeschlossen, die unter der Bedingung eines Kontrollwechsels stehen.



Rechts: Neueste Turboladertechnik für Großdieselmotoren  
Links: Dampfturbine  
Unten: Topmodelle von MAN  
auf der IAA Nutzfahrzeuge 2010  
in Hannover

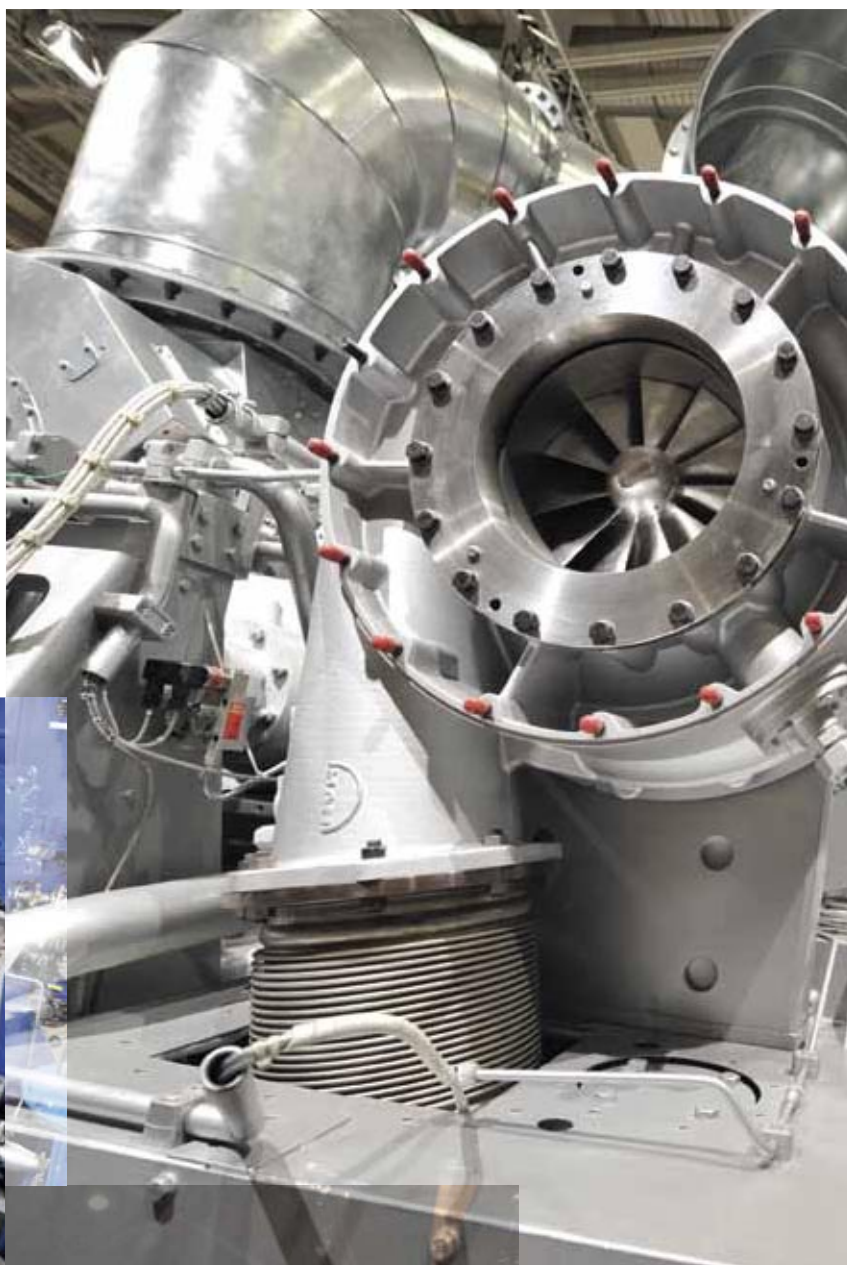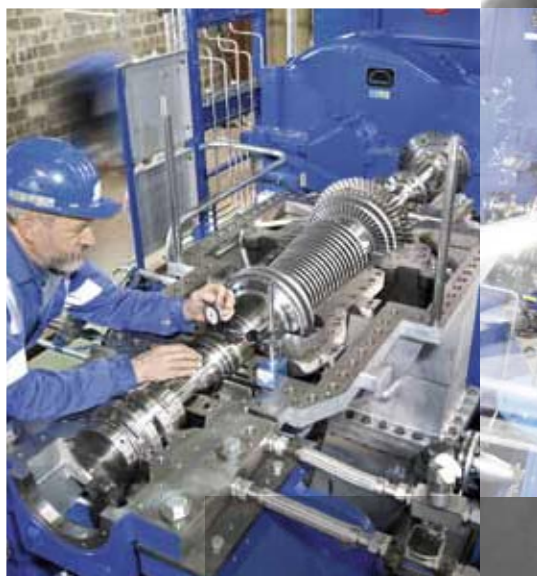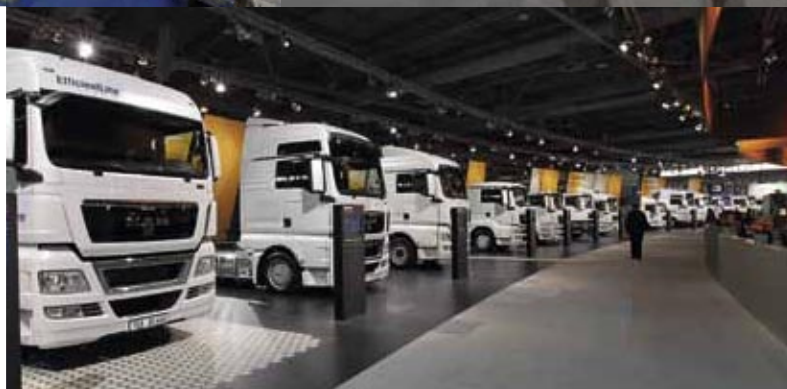

Der Anspruch auf Technologieführerschaft erfordert nachhaltige Aktivitäten im Bereich Forschung und Entwicklung (F&E). MAN richtet sich bei der Festlegung von künftigen F&E-Schwerpunkthemen stark an den Erfordernissen der Megatrends des Transport- und Energiesektors aus:

- Für die kommenden Jahre wird ein enormer Anstieg im Güterverkehr erwartet. So ist für den Zeitraum von 2010 bis 2025 ein Anstieg des Verkehrsaufkommens von schweren Lkw von 58 % prognostiziert. Durch den Anstieg im weltweiten Güterverkehr wird aber auch ein erhöhter Bedarf an Antrieben im Marinebereich erwartet.
- MAN wirkt aktiv an der Reduzierung von Schadstoffen und Emissionen mit. Ab dem Jahr 2014 wird zum Beispiel die geltende Abgasnorm für Lkw mit der Einführung von Euro VI in Europa erneut verschärft. Aber auch für Schiffsmotoren ist ein deutlicher Trend erkennbar. Seit 2010 gibt es für europäische Hafengebiete eine Richtlinie zur nahezu vollständigen Eliminierung schwefelhaltiger Emissionen, die ab 2015 schließlich auf alle europäischen Gewässer ausgeweitet werden soll.
- Mittel- und langfristig rechnet MAN mit weiter steigenden Transport- und Energiekosten, getrieben durch hohe Preise für Erdöl und andere Ressourcen.
- Auch wenn bereits die heute betriebene Lkw-Flotte über einen hohen Sicherheitsstandard verfügt, wird das Bedürfnis nach Verkehrssicherheit auch zukünftig stetig zunehmen.
- Der Trend, die Innenstädte zu entlasten, zeigt sich u. a. durch die Einführung von Umweltzonen.

Die Notwendigkeit der Verringerung des Ausstoßes von Treibhausgasen ist ein Ansporn für MAN, an alternativen Antrieben zu forschen und die Energieeffizienz seiner Produkte weiter an die physikalisch-technischen Grenzen zu treiben. So konnte nach mehrjähriger intensiver Forschung und Erprobung der Hybridantrieb als zukunftsweisender alternativer Antrieb im MAN Lion's City Hybrid-Bus zur Messe IAA Nutzfahrzeuge 2010 in Serie gehen. Dieser innovative Stadtbus steht für mehr Ökologie und Ökonomie und ist weitaus effizienter als der modernste Diesel-Stadtbus konventioneller Bauart. Der MAN Lion's City Hybrid verbraucht gegenüber einem Modell konventioneller Bauart bis zu ein Drittel weniger Kraftstoff und ermöglicht damit auch eine CO<sub>2</sub>-Reduktion von bis zu 30 %. Dabei wird die Bremsenergie mit einem sehr hohen Wirkungsgrad und mit äußerst geringen Verlusten zurückgewonnen, um ein abgasfreies und geräuscharmes Anfahren zu ermöglichen.

Im Lkw-Fernverkehr besteht das größte Einsparpotenzial in einer verbesserten Aerodynamik. MAN-eigene Studien zeigen, dass sich bei einer Standard-40-t-Sattelzugmaschine eine Einsparung von bis zu 25 % im Kraftstoffverbrauch und damit im CO<sub>2</sub>-Ausstoß durch eine neue, aerodynamische Formgebung von Zugmaschine und Auflieger realisieren lässt. Diese Größenordnungen wären in anderen Effizienzfeldern nicht oder nur unter immensem Aufwand erreichbar. Die Voraussetzung dafür wäre aber, dass die gesetzlichen Zulassungsbestimmungen innerhalb der EU teilweise geändert werden. MAN denkt über diese Grenzen hinaus und präsentierte bereits auf der Messe IAA Nutzfahrzeuge 2010 eine Lkw-Studie mit wegweisend neuem Design. Dieser MAN Concept S unterscheidet sich durch sein stromlinienförmiges Design vollständig vom kubischen Äußeren konventioneller Lkw. Mit einem Luftwiderstandsbeiwert (cW-Wert) von rund 0,3 erreicht der MAN Concept S aerodynamische Werte, die man sonst nur von modernen Pkw-Limousinen kennt.

Bei der Einsparung von Kraftstoffen und Emissionen blickt MAN aber auch über die Möglichkeiten der reinen Fahrzeug- und Antriebstechnik hinaus. Durch den gezielten Einsatz von Mitteln aus dem intelligenten Verkehrsmanagement (Car-to-Car-Kommunikation: Warnung vor Stauende, Hindernis; Verkehrsmanagement:

Steuerung der Geschwindigkeit gemäß Ampelphasen) erwartet MAN weitere Fortschritte. In Kooperation mit Partnern für ein effizientes Verkehrsmanagement strebt MAN eine intelligente Vernetzung von Verkehrsteilnehmern mit Leitsystemen an, die den Verkehr der Zukunft noch leistungsfähiger machen sollen.

Emissionsreduktion ist auch ein wesentliches Thema bei den Produkten des Geschäftsfelds Power Engineering. Hier steht die Reduzierung von Stickoxiden und Schwefelanteilen im Vordergrund. In Zusammenarbeit mit Partnern entwickelt MAN Systeme zur Filterung der Schadstoffe aus dem Abgas. Bei MAN-Großdieselmotoren setzt das Unternehmen wie beim Nutzfahrzeug auf eine duale Abgasstrategie. Die innermotorische Abgasrückführung eignet sich besonders für Schiffe, die sich größtenteils in Küstenregionen bewegen und strenge Abgasvorschriften erfüllen müssen. Bei der Technik Selective Catalytic Reduction werden die Abgase dagegen in einem Katalysator nachbehandelt, dabei wird der Ausstoß von Stickoxiden ( $\text{NO}_x$ ) reduziert. Bei diesem Verfahren verlassen nur Stickstoff und Wasserdampf den Schornstein.

Im Bereich Großdieselmotoren setzt MAN auch auf den Einsatz regenerativer Kraftstoffe wie z. B. Raps-, Sojabohnen- und Palmöl sowie Altfett (Frittierfett) oder tierische Fette. Diese Stoffe haben jedoch negative Auswirkungen auf die Lebenszeit der Einspritzsysteme sowie die Leistung des Motors. Im Vergleich zum bisherigen Schwerölbetrieb sind die Leistungen mit Biokraftstoffen um etwa 5 % geringer. Aus ethischen Gründen sollten für die thermische

und elektrische Energiegewinnung nur nachwachsende Rohstoffe zum Einsatz kommen, die nicht in direkter Konkurrenz zur Nahrungsmittelproduktion stehen. Jatropha, afrikanische Palme und spezielle Algen stehen daher derzeit im Fokus von Forschung und Entwicklung.

MAN Diesel & Turbo hat gemeinsam mit der dänischen Reederei A.P. Møller-Mærsk Group, Odense Steel Shipyard and Aalborg Industries 2008 die Initiative »The Green Ship of the Future« ins Leben gerufen. Das Projekt hat das Ziel, eine Reduzierung von  $\text{CO}_2$ -Emissionen um 30 % und von Oxiden aus Stickstoff und Schwefel um 90 % zu erreichen. Die Initiative setzt sowohl herkömmliche als auch neue Technologien ein. »The Green Ship of the Future« konzentriert sich vor allem auf die großen Zweitaktmotoren, wie sie z. B. in großen Übersee-Containerschiffen und Tankern zum Einsatz kommen. Die Initiative wurde von der Organisation Sustainable Shipping mit dem Internationalen Environmental Award für die umweltfreundlichste Transportinitiative ausgezeichnet.

Diese Aktivitäten zeigen, dass Nachhaltigkeit, Umweltschutz, Emissionsreduktion und Wirtschaftlichkeit schon lange zentrale Ziele von MAN sind. MAN-Produkte basieren vor allem auf einem innovativen Engineering und zeichnen sich damit über alle Unternehmensbereiche als dynamische und zuverlässige Spitzenprodukte im Premiumbereich aus. Die Offenheit für neue Konzepte war nicht nur bei der Entwicklung der aktuellen Produkte ein wesentlicher Erfolgsfaktor, sondern ist auch ein Garant für die Bewältigung neuer Herausforderungen und eine erfolgreiche Zukunft der MAN Gruppe.

Um der besonderen Bedeutung des Bereichs gerecht zu werden, investiert MAN jedes Jahr einen deutlichen Anteil des Umsatzes in F&E. Im Jahr 2010 waren dies 4,3 %, das entspricht 626 Mio €. Davon stammten 469 Mio € aus Eigenmitteln, das sind 75 % der F&E-Ausgaben.

Die Mittel für auftragsgebundene F&E-Aktivitäten sowie für öffentlich geförderte Projekte beliefen sich auf 157 Mio €. Rund 43 % der Eigenmittel wurden in die Grundlagenforschung und die Entwicklung neuer Produkte investiert.

Im Jahr 2010 waren 3 944 Mitarbeiter mit Forschungs- und Entwicklungsaufgaben beschäftigt, nach 3 791 im Vorjahr.

| Mio €                                                    | 2010       | 2009       |
|----------------------------------------------------------|------------|------------|
| <b>F&amp;E-Ausgaben</b>                                  | <b>626</b> | <b>504</b> |
| F&E-Ausgaben der produzierenden Bereiche in % vom Umsatz | 4,3        | 4,2        |
| F&E-Eigenmittel                                          | 469        | 382        |
| F&E-Mitarbeiter (Jahresdurchschnitt)                     | 3 944      | 3 791      |

#### F&E-Ausgaben nach Geschäftsfeldern

| Mio €               | 2010       | 2009       |
|---------------------|------------|------------|
| Commercial Vehicles | 328        | 237        |
| Power Engineering   | 313        | 267        |
| Konsolidierung      | - 15       | -          |
| <b>MAN Gruppe</b>   | <b>626</b> | <b>504</b> |

#### Forschung und Entwicklung: Entwicklung der letzten 5 Jahre Mio €

Wachstumsrate: Ø 12,3 % p. a.

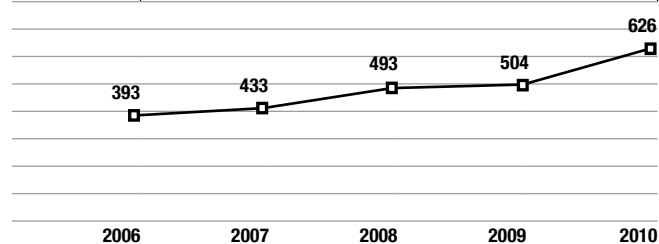

Für alle Jahre vergleichbare Werte ohne aufgeführte Geschäftsbereiche

Im Geschäftsjahr 2010 wurden Investitionen von 396 Mio € nach 2 303 Mio € im Vorjahr durchgeführt. Der hohe Vorjahreswert ist im Wesentlichen durch die Akquisitionen MAN Latin America und Sinotruk beeinflusst. Ohne Berücksichtigung von Akquisitionen hat MAN im Vorjahr 366 Mio € in Sachanlagen und Immaterielle Vermögenswerte investiert. Der Auslandsanteil bei den übrigen Investitionen lag mit 131 Mio € bei 33 %.

Im Geschäftsfeld Commercial Vehicles wurden 2010 283 Mio € nach 229 Mio € im Vorjahr investiert. MAN Truck & Bus nahm notwendige Ersatz- und Erhaltungsinvestitionen vor und investierte in Produktivitäts- und Qualitätsverbesserung, Erschließung von Wachstumspotenzialen und in die Entwicklung neuer Produkte (Euro VI). Der Schwerpunkt der Investitionstätigkeit lag auf den Standorten München und Nürnberg. Die Investitionen von MAN Latin America wurden durch die Abgasnorm Euro V, die technische Integration von Produkten und Komponenten mit MAN Truck & Bus und die Hebung der gemeinsamen Wachstumspotenziale durch das avisierte Cross Selling der Produkte sowie Investitionen in den Produktionsstandort Resende getrieben.

2010 wurden im Geschäftsfeld Power Engineering 108 Mio € nach 161 Mio € im Vorjahr investiert. MAN Diesel & Turbo nahm Ersatz- und Erhaltungsinvestitionen vor und investierte in die Effizienzsteigerung der Produktionsstandorte sowie das After-Sales-Netzwerk. Renk investierte im Wesentlichen in einen Prüfstand für Windkraftgetriebe am Standort Rheine.

| <b>Investitionen</b><br>Mio €                                   |             |              |
|-----------------------------------------------------------------|-------------|--------------|
|                                                                 | <b>2010</b> | <b>2009</b>  |
| in Sachanlagen und als Finanzinvestitionen gehaltene Immobilien | 235         | 283          |
| in Immaterielle Vermögenswerte                                  | 156         | 83           |
| in Beteiligungen                                                | 5           | 1 937        |
| <b>Gesamt</b>                                                   | <b>396</b>  | <b>2 303</b> |
| davon Erwerb MAN Latin America abzgl. Flüssige Mittel           | –           | 1 333        |
| davon Erwerb Sinotruk                                           | 1           | 567          |
| davon Erwerb Scania-Aktien                                      | –           | 4            |
| davon übrige Investitionen                                      | 395         | 399          |
| davon im Inland                                                 | 264         | 280          |
| davon im Ausland                                                | 131         | 119          |
| Abschreibungen <sup>1</sup>                                     | 368         | 360          |
| Investitionsquote in % <sup>2</sup>                             | 107         | 111          |

<sup>1</sup> Ohne Ergebniseffekte aus Kaufpreisallokationen (2010: 99 Mio €, 2009: 62 Mio €) und im Vorjahr ohne Abwertungen auf Beteiligungen von 382 Mio €

<sup>2</sup> Ohne Erwerb von MAN Latin America, Sinotruk und Scania-Aktien

| <b>Investitionen nach Geschäftsfeldern</b><br>Mio € |             |              |
|-----------------------------------------------------|-------------|--------------|
|                                                     | <b>2010</b> | <b>2009</b>  |
| Commercial Vehicles                                 | 283         | 229          |
| Power Engineering                                   | 108         | 161          |
| Sonstige/Konsolidierung                             | 5           | 1 913        |
| <b>MAN Gruppe</b>                                   | <b>396</b>  | <b>2 303</b> |

**Investitionen\* Entwicklung der letzten 5 Jahre**  
Mio €

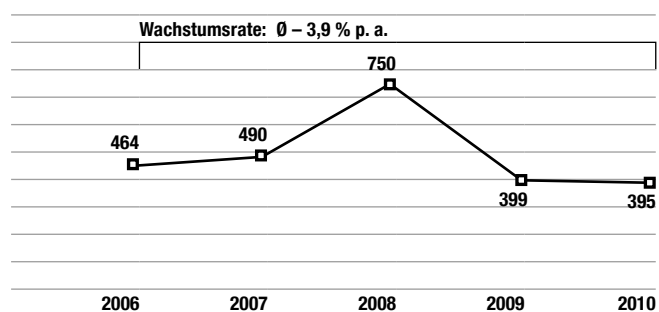

\* 2006 bis 2009 jeweils ohne Erwerb von Scania-Aktien,  
2009 und 2010 ohne Erwerb von MAN Latin America und Sinotruk

Für alle Jahre vergleichbare Werte ohne aufgeführte Geschäftsbereiche



| <b>Materialaufwand nach Geschäftsfeldern</b> |              |              |
|----------------------------------------------|--------------|--------------|
| Mio €                                        |              |              |
|                                              | <b>2010</b>  | <b>2009</b>  |
| Commercial Vehicles                          | 6 329        | 4 485        |
| Power Engineering                            | 1 853        | 1 949        |
| Sonstige/Konsolidierung                      | – 87         | – 98         |
| <b>MAN Gruppe</b>                            | <b>8 095</b> | <b>6 336</b> |

| <b>Materialaufwand</b>  |             |             |
|-------------------------|-------------|-------------|
| % des Umsatzes          |             |             |
|                         | <b>2010</b> | <b>2009</b> |
| Commercial Vehicles     | 60          | 57          |
| Power Engineering       | 44          | 46          |
| Sonstige/Konsolidierung | –           | –           |
| <b>MAN Gruppe</b>       | <b>55</b>   | <b>53</b>   |

Das Beschaffungsvolumen der MAN Gruppe liegt mit rund 8,1 Mrd € (6,3 Mrd €) bei etwa 55 % des Umsatzes. Einhergehend mit der internationalen Wachstumsstrategie von MAN in den BRIC-Staaten richtet der Einkauf seinen Fokus weiterhin auf globale Beschaffungsmärkte. Trotz konjunktureller Erholung der Weltwirtschaft, gekennzeichnet von steigender Nachfrage nach Rohstoffen und Vormaterialien und somit gestiegenen Preisen bei Lieferanten, konnte in den Einkaufsbereichen der MAN Gruppe 2010 das Vorjahres-Preisniveau weitestgehend gehalten werden.

Aufgrund des gestiegenen Insolvenzrisikos in der für MAN relevanten Zulieferindustrie ist die Auswahl und Überprüfung der Lieferanten von wesentlicher Bedeutung. In diesem weiterhin schwierigen Umfeld führt der Einkauf durch ein präventiv ausgerichtetes Monitoringsystem der Risiken eine kontinuierliche Überwachung der Lieferanten durch. Ziel ist die frühzeitige Einleitung von Maßnahmen zur Schadensverminderung.

Um Synergien durch Bündelungseffekte zu generieren, wird der nicht produktionsabhängige Bedarf ab einer definierten Wertgrenze durch einen konzernweiten Einkauf zentral und warengruppenbezogen beschafft. Category Manager decken das Markt-Know-how und das Fachwissen für die einzelnen Materialgruppen ab. Die MAN Gruppe tritt so geschlossen und daher stärker am Markt auf.

Die Einhaltung ordnungsgemäßer externer Beschaffungsvorgänge unter Ausnutzung der ökonomischen Marktchancen sowie die faire und nachhaltige Beziehung zu Lieferanten und Geschäftspartnern erfordern klare Regelungen. Aus diesem Grund wurden 2010 verbindliche Handlungsanweisungen und Grundsätze für die Beschaffung in Form einer gruppenweit gültigen Einkaufsrichtlinie definiert.

Die Produkte der MAN Gruppe sind Spitzenprodukte und als solche Garant für den Erfolg der MAN-Marken. Dahinter stehen Produkteigenschaften, die durch Zuverlässigkeit, Wirtschaftlichkeit und innovatives Design sowie durch technische Kompetenz, hohes Qualitäts- und Kostenbewusstsein erreicht werden. Solche Leistungen sind ohne erstklassige Partner aus der Zulieferindustrie nicht möglich. Der Bereich Nutzfahrzeuge würdigt diesen Leistungsbeitrag und zeichnet jährlich bis zu zehn Zulieferer mit dem »Trucknology® Supplier Award« aus.

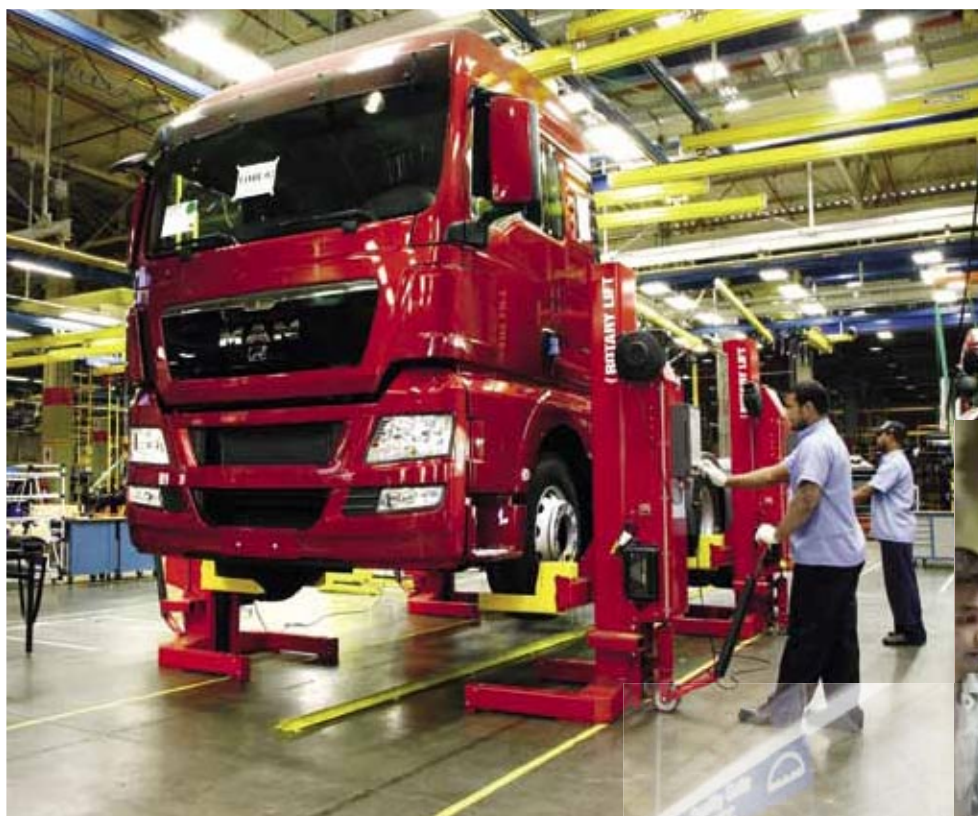

Oben: MAN TGX im brasilianischen Werk Resende  
Rechts: Am Prüfstand für Großdieselmotoren im Werk Augsburg  
Unten: Lkw-Fertigung in München

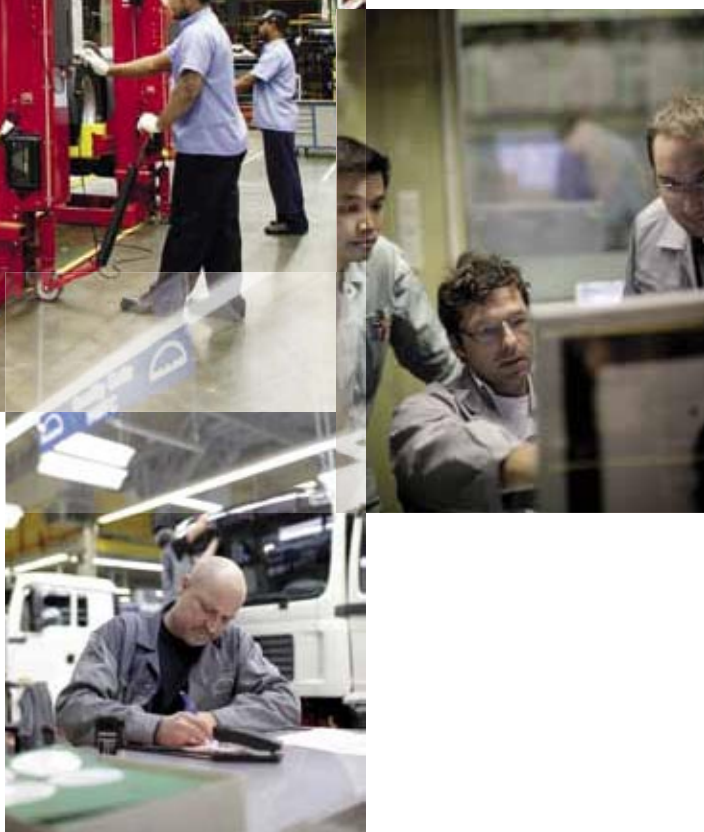

| Mitarbeiter am 31.12.* |               |               |
|------------------------|---------------|---------------|
|                        | 2010          | 2009          |
| Inland                 | 27 354        | 26 768        |
| Ausland                | 20 315        | 20 975        |
| <b>Gesamt</b>          | <b>47 669</b> | <b>47 743</b> |
| Auslandsanteil in %    | 43            | 44            |

| Mitarbeiter nach Geschäftsfeldern am 31.12.* |               |               |
|----------------------------------------------|---------------|---------------|
|                                              | 2010          | 2009          |
| Commercial Vehicles                          | 33 020        | 33 029        |
| Power Engineering                            | 14 337        | 14 414        |
| Sonstige                                     | 312           | 300           |
| <b>MAN Gruppe</b>                            | <b>47 669</b> | <b>47 743</b> |

\* Einschließlich Leiharbeitnehmern

### Zahl der Mitarbeiter

Die MAN Gruppe beschäftigte am 31. Dezember 2010 einschließlich Leiharbeitnehmern 47 669 Mitarbeiter und liegt damit nahezu auf dem Stand vom 31. Dezember 2009 (47 743). Bei den ausländischen Gesellschaften, bei denen die Mitarbeiterzahl um 660 (3 %) auf 20 315 abnahm, arbeiten 43 % (44 %) der Mitarbeiter. Bei den inländischen Gesellschaften waren am Jahresende 27 354 Personen beschäftigt, das sind 586 (2 %) mehr als ein Jahr zuvor. Am 31. Dezember 2010 waren in der MAN Gruppe 1 976 Leiharbeiter tätig. Gegenüber dem Vorjahr (1 643) ist dies ein Anstieg um 333 (20 %). Die Stammebelegschaft verminderte sich von 46 100 im Vorjahr um 407 auf 45 693 am 31. Dezember 2010. Die Zahl der befristeten Arbeitsverhältnisse lag mit 2 035 am 31. Dezember 2010 leicht über dem Vorjahr von 2 002.

### Leadership Culture – Kernqualitäten für erfolgreiche Mitarbeiterführung

Konzern, Führungskräfte und Mitarbeiter sind heute ständig mit neuen Herausforderungen konfrontiert: Allein für den Umgang mit einem sich durch die Wirtschafts- und Finanzkrise wandelnden Marktumfeld ist erfolgreiches Veränderungsmanagement erforderlich. Doch erst wenn Führungskräfte das Vertrauen ihrer Mitarbeiter haben, können sie Veränderungen erfolgreich kommunizieren und umsetzen.

Kernqualitäten für erfolgreiche Mitarbeiterführung bei MAN sind: Kompetenz, Transparenz, Commitment und Verhalten. Sie gelten weltweit. Die MAN Leadership Culture gibt allen Führungskräften eine klare Orientierung, auf welche Art sie dieses Arbeitsklima erreichen und wie sie sich selbst verhalten und entwickeln sollen. Ziel ist eine vertrauensvolle Führungskultur – die Basis für herausragende Leistungen eines jeden Mitarbeiters und damit für den Erfolg von MAN.

Die vier Führungsqualitäten werden seit 2010 im jährlichen Mitarbeitergespräch der MAN-Führungskräfte verankert, und deren Umsetzungsgrad wird gemessen.

### Qualifizierung Führungskräfte

MAN unterhält mit der Saïd Business School der University of Oxford sowie der WHU Otto Beisheim School of Management eine Partnerschaft, um innovative Management-Weiterbildung zu entwickeln. Das Unternehmen will damit sicherstellen, dass künftig MAN-Manager mit starkem strategischem Fokus für internationale Führungspositionen zur Verfügung stehen. Das Ergebnis der Kooperation sind das Executive Management Programme (EMP), das sich an obere Führungskräfte von MAN wendet, sowie das General Management Programme (GMP), das Potenzialträgern in Managementpositionen offensteht. Beide Programme tragen der Internationalisierung des Konzerns und den damit verbundenen Anforderungen an das Management Rechnung. Während der Weiterbildung werden die Teilnehmer von Mentoren und Coaches begleitet. Ein wichtiges Element der Programme ist zudem Projektarbeit.

Die European Foundation for Management Development (EFMD) hat die MAN Gruppe mit dem »EFMD Excellence in Practice Award 2010« in der Kategorie Executive Development ausgezeichnet.

### Betriebliche Altersversorgung

Eine über die gesetzlichen Rentensysteme hinausgehende Vorsorge ist für die Mitarbeiter der MAN Gruppe zur Sicherung des gewohnten Lebensstandards im Ruhestand in der Regel unverzichtbar. Die MAN Gruppe beteiligt sich daher an der Ruhestandsvorsorge ihrer Mitarbeiter durch die Gewährung landesspezifisch und marktgerecht ausgestalteter Pensionszusagen oder pensionsähnlicher Leistungen.

Inländische Mitarbeiter erhalten für die Zeit nach dem aktiven Erwerbsleben als eines der wesentlichen Elemente der Vergütungspolitik Leistungen aus einer modernen und attraktiven betrieblichen Altersversorgung, die eine verlässliche Zusatzversorgung im Ruhestand sowie einen Risikoschutz für Invalidität und Todesfall im aktiven Arbeitsverhältnis bietet. Die Mitarbeiter erhalten an ihre Bezüge gekoppelte Arbeitgeberbeiträge und haben darüber hinaus die Möglichkeit, durch – im Tariffbereich arbeitgebergeförderte – Entgeltumwandlungen zusätzlich Eigenvorsorge zu betreiben. Durch die arbeitgeber- und arbeitnehmerfinanzierten Beitragszahlungen sowie die am Kapitalmarkt erzielten Erträge aus der Kapitalanlage wird während des aktiven Dienstes ein Versorgungskapital aufgebaut, das im Ruhestand als Einmalkapital oder in Raten ausgezahlt wird. Im Rahmen der Kapitalanlage werden die Anlagerisiken der Mitarbeiter mit zunehmendem Alter sukzessive reduziert (Lifecycle-Konzept). Die Wertentwicklung des Versorgungskapitals ist unmittelbar an den Kapitalmarkt geknüpft und wird durch einen Korb von Indizes und sonstige geeignete Parameter bestimmt.

Ausländische Mitarbeiter erhalten je nach landesspezifischen Usancen marktübliche Beiträge zu von Dritten erteilten Versorgungszusagen oder Fondssparplänen bzw. Zusagen aus leistungsorientierten Pensionsplänen, die überwiegend noch auf die Gewährung lebenslanger Renten ausgerichtet sind.

### Kurzarbeit in der MAN Gruppe, insbesondere bei MAN Truck & Bus

In der 1. Jahreshälfte war insbesondere MAN Truck & Bus noch von den Folgen der Finanz- und Wirtschaftskrise betroffen. Jedoch konnte die seit 2009 eingesetzte Kurzarbeit im Geschäftsjahr 2010 kontinuierlich zurückgenommen werden. Seit der Jahresmitte waren die Standorte Steyr und Nürnberg wieder ausgelastet, und folglich wurde die Kurzarbeit beendet.

Zum Jahresende konnten auch die übrigen Werke und die Zentralbereiche die Kurzarbeit vollständig beenden. MAN Truck & Bus hat damit die Finanz- und Wirtschaftskrise erfolgreich hinter sich gelassen und ist – auch durch die in Kooperation mit der Bundesagentur für Arbeit durchgeführten Qualifizierungsmaßnahmen während der Kurzarbeit – mit einer gestärkten Belegschaft für die künftigen Aufgaben gut aufgestellt.

Als einer der führenden Engineering-Konzerne in Europa leistet die MAN Gruppe einen Wertbeitrag zum Umgang mit den globalen Herausforderungen wie Klimawandel, Globalisierung, demografische Entwicklung und Urbanisierung. Verstärkt werden diese Trends durch die rapide Zunahme der Weltbevölkerung. Ressourcen werden knapper, gleichzeitig wird der Klimawandel die Entwicklung neuer Energieversorgungslösungen und -strukturen weiter vorantreiben. Das Unternehmen rechnet damit, dass sich diese Entwicklungen in großem Maße auf die Transportsysteme, die Mobilitätsstrukturen und die Energieinfrastruktur auswirken werden. Deshalb leitet die MAN Gruppe daraus schon heute Anforderungen an künftige Antriebstechnologien ab. Auch in anderen Bereichen will sie Entwicklungen vorwegnehmen, beispielsweise durch das Aufgreifen der zunehmenden Transparenzanforderungen seitens der Investoren und Analysten sowie der Gesellschaft.

Die MAN Gruppe steht im Blickfeld verschiedenster Stakeholder-Gruppen: Kunden, Geschäftspartner, Mitarbeiter, Gesellschaft, Investoren und Analysten. Mithilfe eines Wertekanons und einer klaren Strategie geht das Unternehmen auf deren unterschiedliche Bedürfnisse ein, schafft einen Ausgleich und vermittelt bei Interessenkonflikten.

### Die Corporate-Responsibility-Strategie der MAN Gruppe

Mit dem strategischen Ziel der nachhaltigen Wertschöpfung bekennt sich die MAN Gruppe zu einer nachhaltigen Unternehmensführung, die an das Unternehmen gerichtete Ansprüche in den Bereichen Integration, Umwelt, Ökonomie und Menschen umfasst. Dies wurde nun in einer Strategie für den Umgang mit den beschriebenen Entwicklungen und den steigenden gesellschaftlichen Erwartungen an Unternehmen ausformuliert. Sie wurde im Juli 2010 vom Management Board der MAN SE beschlossen und in Kraft gesetzt.

Unternehmerische Verantwortung, Corporate Responsibility (CR), ist damit Teil der Unternehmens- und Führungskultur und unterstützt die Vision, Nummer Eins bei Commercial Vehicles und Power Engineering zu sein. Dauerhafter Wert und profitables Wachstum können nur geschaffen werden, wenn die MAN Gruppe ihre Verantwortung für die Umwelt sowie gegenüber den Stakeholdern wahrnimmt.

Die CR-Strategie der MAN Gruppe basiert auf einer guten Corporate Governance und schafft Mehrwert für die Gesellschaft. Die vier Dimensionen der CR-Strategie wurden durch Handlungsfelder konkretisiert, die für MAN als vordringlich gelten. Sie wurden vom MAN-Vorstand ebenso bekräftigt wie der CR-Fahrplan, der in allen vier Dimensionen konkrete Ziele bis zum Jahr 2015 definiert.

### Die Handlungsfelder

**Integration:** Der Wettbewerbsvorteil soll durch CR weiter ausgebaut werden. Dieses Ziel wird konkret unterstützt durch die Integration von CR in die Strategien der Bereiche sowie in die operativen Prozesse, in Aus- und Weiterbildung sowie durch einen systematischen Stakeholder-Dialog und eine offene Kommunikation.

Die CR-Strategie und deren Handlungsfelder trägt MAN aktiv an seine Mitarbeiter und Kunden heran. So stellte der Vorstand der MAN SE auf dem jährlichen Management Summit die Inhalte der CR-Strategie vor und diskutierte mit den rund 500 MAN-Führungskräften aus 50 Ländern deren Ziele. Für die Messe IAA Nutzfahrzeuge 2010 in Hannover wurden 400 Vertriebsmitarbeiter von MAN Truck & Bus aus den Vertriebsregionen Deutschland, West- und Osteuropa, Russland, Lateinamerika und Mittlerer Osten im Rahmen der Global Sales Trainings in CR geschult. Eine weltweite Befragung unter 400 Stakeholdern diente dazu, die Erwartungen der verschiedenen Anspruchsgruppen besser zu verstehen und in die CR-Strategie zu integrieren. Befragt wurden Mitarbeiter, Kunden, Zulieferer und Geschäftspartner in den Ländern, in denen MAN aktiv ist. Die Ergebnisse haben die Ausrichtung der CR-Strategie sowie ihre zentralen Handlungsfelder bestätigt und eine Einschätzung geliefert, welche Themen die Stakeholder als wesentlich für MAN erachten. Als größte Herausforderung nannten die Befragten die Schonung der Ressourcen und den Klimaschutz.



**Umwelt:** Um nachhaltige Transportkonzepte und eine zukunfts-sichere Energieversorgung zu ermöglichen, entwickelt die MAN Gruppe Lösungen für mehr Ressourceneffizienz und mehr Sicherheit. Dieses Ziel wird unterstützt durch eine – noch in Erarbeitung befindliche – gruppenweite Klimastrategie mit klaren Zielen, ein ressourceneffizientes Produkt- und Serviceportfolio sowie Ressourceneffizienz in Produktion und Verwaltung.

Für die Kunden von MAN spielt die Ressourceneffizienz der Produkte beim Kauf eine wichtige Rolle. Eine drastische Verbrauchs- und CO<sub>2</sub>-Reduzierung bei Diesel-Lkw ist möglich und kann auch schnell umgesetzt werden. Dies demonstriert eine Designstudie von MAN Truck & Bus, die auf der Messe IAA Nutzfahrzeuge 2010 erstmals gezeigt wurde. Allein durch seine aerodynamische Formgebung verbraucht der MAN Concept S – in Verbindung mit einem entsprechend modifizierten Trailer – bis zu 25 % weniger Kraftstoff als ein vergleichbarer, konventionell gestalteter 40-t-Sattelzug. Dies entspricht einer Reduzierung der CO<sub>2</sub>-Emissionen um 25 %. Ein weiteres alternatives Nutzfahrzeugkonzept, das zur CO<sub>2</sub>-Reduzierung beiträgt, sind Lang-Lkw. Hier wird MAN Truck & Bus am deutschlandweiten Feldversuch des Bundesverkehrsministeriums teilnehmen.

Im städtischen Verkehr sind Elektromobilität und Hybridtechnologie von besonderer Bedeutung. Der Lion's City Hybrid, der erste MAN-Bus mit Hybridantrieb, der seit Mai 2010 im Linienbetrieb in München und anderen europäischen Metropolen zum Einsatz kommt, verbraucht bis zu 30 % weniger Kraftstoff als ein konventioneller Stadtbus. Das entspricht einer CO<sub>2</sub>-Reduktion von bis zu 30 %. Damit leistet MAN einen Beitrag zum Klimaschutz und zur Entlastung der Innenstädte von Abgasen und Lärm. Außerdem lieferte MAN Latin America in diesem Jahr erstmals Lkw aus, die zu 100 % mit Biodiesel (B100) betrieben werden können. Bei einer Betankung mit reinem Biodiesel weisen die Dual-Fuel-Lkw eine Reduktion der CO<sub>2</sub>-Emission um bis zu 90 % auf.

MAN Diesel & Turbo trägt mit Wind-Diesel- und Dual-Fuel-Kraftwerken sowie »The Green Ship of the Future« zur Schonung endlicher Ressourcen und zur Reduktion von Treibhausgasen bei. Dieses Schiffsprojekt zielt auf eine CO<sub>2</sub>-Reduktion von 30 % ab, die Oxide aus Stickstoff und Schwefel sollen um 90 % gesenkt werden.

Ressourceneffizienz ist nicht nur bei der Nutzung der MAN-Produkte ein wichtiges Kriterium, sondern bereits bei der Produktion. Um eine ressourceneffiziente Herstellung sicherzustellen, haben die Bereiche bereits seit Längerem ein Umweltmanagementsystem eingeführt. Insgesamt sind 19 MAN-Standorte in Europa nach ISO 14001 zertifiziert. Gruppenweit sind zudem Managementsysteme eingeführt, die sich an OHSAS 18001 (Occupational Health and Safety Assessment Series) orientieren und die Arbeitssicherheit und den Gesundheitsschutz der Mitarbeiter gewährleisten.

**Ökonomie:** Der Unternehmenserfolg beruht darauf, nachhaltig Wert zu schaffen. Die MAN Gruppe sichert ihren dauerhaften Erfolg, indem sie in allen wichtigen Regionen und Produktsegmenten weltweit tätig ist. Dadurch schafft sie Mehrwert für alle Stakeholder. Nachhaltige Wertschöpfung wird unterstützt durch ein Risiko- und Krisenmanagement sowie ein Innovations- und Lieferantenmanagement.

Der Einkauf der MAN Gruppe hat zur Sicherstellung von Nachhaltigkeit und unternehmerischer Verantwortung in der Lieferkette in einer Einkaufsrichtlinie Grundsätze aufgestellt, die etwa die Einhaltung international anerkannter Menschen- und Arbeitnehmerrechte sowie den Schutz der Umwelt von den Lieferanten fordern.

**Menschen:** Internationalisierung und die demografische Entwicklung sind Treiber für Aktivitäten, die das Unternehmen international als attraktiven Arbeitgeber positionieren und durch die es die besten Köpfe gewinnt und bindet. Das Ziel, hervorragende Mitarbeiter zu haben, wird unterstützt durch Employer Branding und Talentmanagement, Förderung der Vielfalt sowie Arbeitssicherheit und Gesundheitsmanagement.

Im Dezember 2010 trat MAN dem Global Compact der Vereinten Nationen bei. Außerdem wurde eine internationale Rahmenvereinbarung mit dem Internationalen Metallgewerkschaftsbund und dem MAN-Betriebsrat ausgehandelt. Damit bekennt sich die MAN Gruppe zu Menschen- und Arbeitnehmerrechten. Zur Fachkräftesicherung wurde die Employer-Branding-Kampagne »Personalities Wanted« gestartet. So positioniert sich MAN langfristig als attraktiver Arbeitgeber. Junge Talente fördert das Unternehmen seit mehr als drei Jahren mit der Campus Initiative. Neben Stipendien bietet MAN den Studierenden der Technischen Universität München und der RWTH Aachen Einblicke in die Praxis durch Vorlesungsreihen und Projektarbeit.

### Die CR-Struktur der MAN Gruppe

Oberste Verantwortung für CR bei MAN trägt der Chief Human Resources Officer. Ihm direkt unterstellt ist der CR-Manager – eine Position, die Anfang 2010 neu geschaffen wurde. Seine Hauptaufgaben sind die Strategieentwicklung und -implementierung. Er agiert als zentrale Anlaufstelle für CR im Unternehmen und wird unterstützt durch das CR-Excellence-Team, in dem Experten aus der Unternehmensgruppe vertreten sind. Zu den Aufgaben des CR-Excellence-Teams gehören das CR-Reporting sowie das Controlling und Monitoring der Strategieumsetzung. Lenkungsausschuss für wichtige Entscheidungen im Hinblick auf CR ist der MAN-Vorstand.

### CR-Programme und -Reporting

Im CR-Fahrplan hat die MAN Gruppe festgelegt, welche Ziele wie und wann umgesetzt werden sollen. Für jedes Jahr werden daraus künftig Programme abgeleitet, die mit Verantwortlichkeiten und Terminen hinterlegt sind. Über die Zielerreichung sowie über die Entwicklung zentraler Leistungsindikatoren informiert ab Frühjahr 2011 ein jährlich erscheinender CR-Bericht. Bei dessen Erstellung richtet sich die MAN Gruppe an den international anerkannten Leitlinien der Global Reporting Initiative (GRI) aus und wird bereits Teile des Berichts für das Jahr 2010 von einer Wirtschaftsprüfungsgesellschaft prüfen lassen.

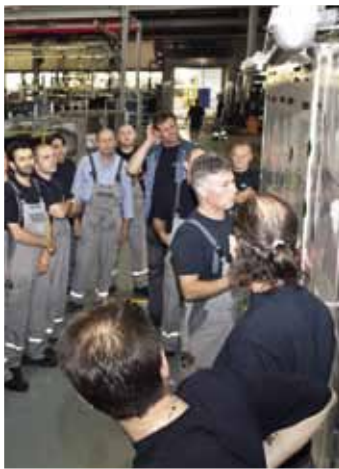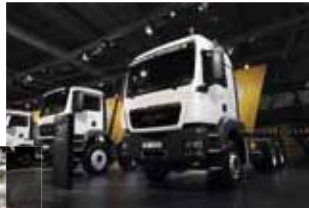

Links: Schulung von Mitarbeitern  
in der Produktion  
Oben: Auf der IAA Nutzfahrzeuge  
2010 in Hannover  
Unten: MAN Lion's City Hybrid

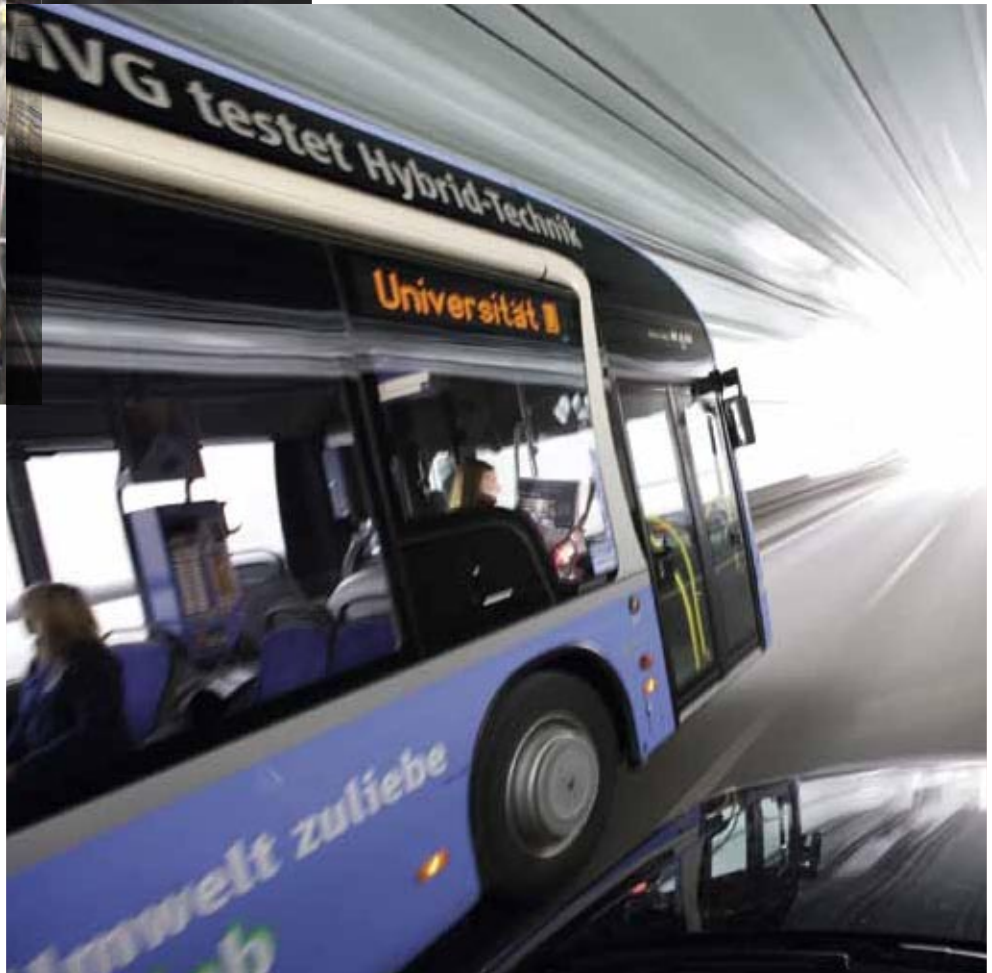

# Konzernlagebericht

## Die Bereiche im Einzelnen

### MAN Truck & Bus

Die Erholung des europäischen Nutzfahrzeugmarkts von den Auswirkungen der Finanz- und Wirtschaftskrise hat das Geschäftsjahr 2010 geprägt und bewirkte einen deutlichen Anstieg bei Auftragseingang, Umsatz und Ergebnis von MAN Truck & Bus.

Mit einem Auftragseingang von 8,0 Mrd € lag das Geschäftsjahr 2010 um 54 % über dem Vorjahresniveau (5,2 Mrd €). Der Umsatz stieg von 6,4 Mrd € im Vorjahr um 16 % auf 7,4 Mrd € im Jahr 2010. Infolge der Umsatzsteigerung und der damit verbesserten Kapazitätsauslastung sowie durch konsequente Kosteneinsparungen konnte ein positives Ergebnis von 158 Mio € (–91 Mio €) realisiert werden. Mit 85 Mio € war das 4. Quartal das ertragsstärkste des Jahres 2010. Dazu trug das operative Nutzfahrzeuggeschäft mit 103 Mio € bei.

| <b>MAN Truck &amp; Bus</b>       |             |             |
|----------------------------------|-------------|-------------|
| Mio €                            |             |             |
|                                  | <b>2010</b> | <b>2009</b> |
| Auftragseingang                  | 8 023       | 5 224       |
| davon Lkw                        | 6 865       | 4 210       |
| davon Bus                        | 1 158       | 1 014       |
| Auftragseingang (Anzahl)         | 67 393      | 37 984      |
| davon Lkw                        | 61 934      | 33 272      |
| davon Bus                        | 5 459       | 4 712       |
| Umsatz                           | 7 446       | 6 395       |
| davon Lkw                        | 6 279       | 5 091       |
| davon Bus                        | 1 167       | 1 304       |
| Absatz Fahrzeuge (Anzahl)        | 60 649      | 46 767      |
| davon Lkw                        | 55 166      | 40 535      |
| davon Bus                        | 5 483       | 6 232       |
| Mitarbeiter <sup>1</sup>         | 31 284      | 31 519      |
| Operatives Ergebnis <sup>2</sup> | 158         | – 91        |
| davon Lkw                        | 191         | – 89        |
| davon Bus                        | 18          | 40          |
| davon Finanzdienstleistungen     | – 49        | – 42        |
| Umsatzrendite ROS (%)            | 2,1         | – 1,4       |

<sup>1</sup> Einschl. Leiharbeitnehmern am 31.12.

<sup>2</sup> Davon –2 Mio € Konsolidierung zwischen Finanzdienstleistungen und Lkw/Bus im Jahr 2010

### Wirtschaftliches Umfeld

Der europäische Lkw-Markt erholte sich 2010 vom niedrigen Stand von rund 220 000 Einheiten im Jahr 2009 auf 235 000 Einheiten (+7 %). MAN Truck & Bus konnte den Marktanteil von 16,8 % bei Lkw über 6 t im Jahr 2010 halten. Den stärksten Zuwachs verzeichnete das Segment der Sattelzugmaschinen über 16 t. Der europäische Busmarkt ging auf 28 000 Einheiten zurück (–10 %). Der Marktanteil von MAN Truck & Bus verringerte sich von 14,8 % auf 13,3 %. Die Segmente Stadtbuss und Überlandbus verzeichneten hier die deutlichsten Rückgänge, während sich das Reisebusgeschäft erholen konnte.

### Geschäftsentwicklung

Der Geschäftsbereich Lkw konnte seinen Auftragseingang von 4,2 Mrd € im Vorjahr auf 6,9 Mrd € steigern. Die Zahl der bestellten Lkw stieg von 33 272 um 86 % auf 61 934. Die Auftragseingänge für Schwere Lkw erhöhten sich um 110 %. Besonders starke Zuwächse wurden in Großbritannien und Russland erzielt. Die Auftragssteigerung des Geschäftsbereichs Bus von 1,0 Mrd € auf 1,2 Mrd € im Jahr 2010 fiel mit 14 % gleichfalls erfreulich aus.

2010 lieferte MAN Truck & Bus 55 166 Lkw und 5 483 Busse aus und konnte damit im Zuge der konjunkturellen Erholung die Auslieferungen im Vergleich zum Vorjahr (40 535 Lkw, 6 232 Busse) um 30 % steigern. Der Umsatz betrug 7,4 Mrd € (6,4 Mrd €). Der Geschäftsbereich Lkw konnte den Umsatz um 23 % auf 6,3 Mrd € erhöhen, das Busgeschäft verzeichnete einen Umsatzrückgang um 10 % auf 1,2 Mrd €.

Das Produktionsprogramm konnte über die Rücknahme der Kurzarbeit flexibel der steigenden Nachfrage angepasst werden. So wurden 2010 gegenüber dem Vorjahr an den deutschen Standorten in der Produktion durchschnittlich 46 Tage (85 Tage) und im Verwaltungsbereich 18 Tage (39 Tage) kurzgearbeitet. Das 2008 eingeleitete Kostensenkungsprogramm wurde auch 2010 unvermindert fortgesetzt.

## Ergebnis

Mit dem höheren Volumen konnte das Operative Ergebnis nach –91 Mio € im Geschäftsjahr 2009 auf 158 Mio € gesteigert werden. Darin wirkten Erträge im Zusammenhang mit der Lizenzgewährung an Sinotruk in Höhe von 40 Mio €. Die Umsatzrendite betrug 2,1 % (–1,4 %).

Im Geschäftsbereich Lkw stieg das Operative Ergebnis um 280 Mio € auf 191 Mio €, die Umsatzrendite betrug damit 3,0 % (–1,7 %). Der Geschäftsbereich Bus blieb mit einem Ergebnis von 18 Mio € volumen- und durch den Produktmix bedingt um 22 Mio € hinter dem Ergebnis des Vorjahres zurück. Das Ergebnis der Finanzdienstleistung betrug –49 Mio € (–42 Mio €) infolge der immer noch hohen Risikokosten, insbesondere in Spanien, Italien und Russland, da diese Länder nach wie vor von den Auswirkungen der Finanzkrise stark betroffen sind.

## Mitarbeiter

Zum 31. Dezember 2010 beschäftigte MAN Truck & Bus 31 284 Mitarbeiter (31 519). In Deutschland waren 18 616 Beschäftigte tätig (18 309), im Ausland 12 668 (13 210). Zum 31. Dezember 2010 waren 2 178 Auszubildende (2 115) beschäftigt. Die Auszubildenden-Quote lag damit bei 6,7 %.

## Forschung und Entwicklung

Die Aufwendungen für Forschung und Entwicklung betrugen im Berichtsjahr 262 Mio € (211 Mio €), das entspricht 3,5 % (3,3 %) des Umsatzes. Im Jahresdurchschnitt arbeiteten weltweit 1 827 (1 769) Mitarbeiter in den Forschungs- und Entwicklungsabteilungen.

MAN Truck & Bus zählt im internationalen Markt zu den Technologieführern und behauptet diese Position dadurch, künftige Anforderungen frühzeitig zu erkennen und kompetent in neue wegweisende Lösungen und Produkte umzusetzen. Das laufende F&E-Programm setzte Schwerpunkte in die weitere Steigerung der Wirtschaftlichkeit und Umweltverträglichkeit von Nutzfahrzeugen. Insbesondere die Entwicklung von Euro-VI-Motoren zeigt sich dabei als konsequenter Schritt in Richtung Transporteffizienz und nachhaltige Mobilität. Auf der Messe IAA Nutzfahrzeuge 2010 in Hannover stellte MAN Truck & Bus zukunftsweisende Nutzfahrzeugkonzepte wie die Lkw-Studie Concept S vor, die international stark beachtet wurde.

Mit dem neuen Lion's City Hybrid-Bus stellte MAN Truck & Bus ein innovatives Konzept für mehr Umweltschutz und Wirtschaftlichkeit im Stadtverkehr vor. Der MAN-Hybridbus verbraucht bis zu 30 % weniger Kraftstoff und spart so bis zu 10 000 Liter Dieselmotorkraftstoff pro Jahr ein. Die Stadt München hat als erste europäische Metropole den MAN Lion's City Hybrid als Vorserienfahrzeug in Dienst gestellt. Weitere Busse dieses Typs sind in europäischen Großstädten im Einsatz.

Intelligente Verkehrsassistenzsysteme sollen künftig das Stau- und Unfallrisiko auf den Straßen deutlich senken. MAN Truck & Bus trieb 2010 unter Einsatz modernster Forschungsmethoden, wie dem gemeinsam mit dem Lehrstuhl für Kraftfahrzeugtechnik der Technischen Universität München entwickelten Fahrsimulator, die Entwicklung dieser Systeme zukunftsweisend voran. Hierbei standen die Erhöhung der aktiven Sicherheit für Fahrzeuge und Verkehrssysteme, die Entlastung des Fahrers durch unterstützende Assistenzsysteme und die effiziente Nutzung der vorhandenen Verkehrsinfrastruktur im Mittelpunkt der Forschungsaktivitäten.

## Investitionen

Mit einem Investitionsvolumen von 207 Mio € (205 Mio €) wurde insbesondere der Erneuerung der Produktpalette Rechnung getragen. Neben kontinuierlichen Investitionen in das Vertriebs- und Servicenetz flossen auch in die Produktionsstandorte wieder mehr Investitionsmittel. Am Standort München wurde im Bereich der Fahrerhauslackierung eine automatische Nahtabdichtstation errichtet. Mit neuen Prüfständen startete das Investitionsprojekt »Motoren-Entwicklungszentrum Nürnberg«. Im Frühjahr 2010 wurde am Standort München das neu errichtete Bus-Auslieferungszentrum in Betrieb genommen.



## Weitere Entwicklung

Die Auswirkungen der Finanz- und Wirtschaftskrise waren auch 2010 noch deutlich spürbar, allerdings zeichnete sich im Jahresverlauf eine nachhaltige Erholung auf dem Nutzfahrzeugmarkt ab. Diese Belebung wird auch 2011 zu weiter steigenden Produktions- und Absatzzahlen bei Lkw und Bussen gegenüber 2010 beitragen.

Der weltweite Absatz von Nutzfahrzeugen wird voraussichtlich bereits 2011 wieder das Vorkrisenniveau erreichen; in Westeuropa wird diese Erholung bis 2013 erwartet. Neue Absatzpotenziale ergeben sich vor allem in den BRIC-Märkten, auch wenn diese nicht mehr so dynamisch wachsen werden wie in der Vergangenheit. Der russische Markt war 2009 insbesondere aufgrund von Finanzierungsproblemen dramatisch eingebrochen; entsprechend setzt dort die Aufschwungphase etwas verspätet ein. Die Marktzuwächse in China werden zukünftig insbesondere durch eine steigende Nachfrage nach schweren Nutzfahrzeugen gekennzeichnet sein.

Im Hinblick auf die Marktanforderungen, die Nachfragepräferenzen und die allgemeine Preisakzeptanz zeigen sich auch zukünftig erhebliche Unterschiede zwischen den BRIC-Staaten und dem europäischen Marktumfeld. Während im europäischen Markt Innovation, Ausstattung und Kosten pro gefahrenen Kilometer die wesentlichen Erfolgstreiber für ein margenstarkes Geschäft bleiben, werden in den BRIC-Märkten weiterhin marktgerechte Low-Cost-Fahrzeuge nachgefragt.

Auch die Investitionen werden 2011 den verbesserten Rahmenbedingungen Rechnung tragen und die starke Marktposition und das international attraktive Produktportfolio bei Fahrzeugen und Dienstleistungen von MAN Truck & Bus sowie die langfristigen Wachstumsziele unterstützen.

Der Standort Plauen wird in den kommenden drei Jahren zu einem hochmodernen Produktionsstandort für exklusive Luxusreisebusse der Marke NEOPLAN ausgebaut. Mit einem Investitionsvolumen von 19 Mio € werden bis 2013 Modernisierungs- und Neubaumaßnahmen umgesetzt, die dem Premiumcharakter der Marke NEOPLAN Rechnung tragen.

Anfang Januar 2010 gab MAN Truck & Bus bekannt, einen Vertrag betreffend die Gründung eines gemeinsamen Unternehmens für militärisch genutzte Radfahrzeuge mit der Rheinmetall AG, Düsseldorf, unterzeichnet zu haben. An der neuen Gesellschaft ist Rheinmetall mit 51 % und MAN Truck & Bus mit 49 % beteiligt. Der Vollzug der ersten vertraglich vereinbarten Transaktionsstufe hat Anfang Mai 2010 stattgefunden. In diesem ersten Schritt wurden die Entwicklungs- und Vertriebsaktivitäten beider Unternehmen auf dem Gebiet der militärischen Radfahrzeuge unter dem Dach der neuen Gesellschaft zusammengeführt. Für den zweiten vertraglich vereinbarten Transaktionsschritt ist beabsichtigt, auch die Produktionskapazitäten beider Unternehmen voraussichtlich ab Anfang Januar 2012 im Gemeinschaftsunternehmen organisatorisch zu integrieren.

Am 28. Dezember 2010 wurde aus der MAN Nutzfahrzeuge AG die MAN Truck & Bus AG. Damit spiegelt sich die erfolgreiche internationale Wachstumsstrategie auch im Namen des Unternehmens wider.

Bei unverändert positiven konjunkturellen Rahmenbedingungen im Euroraum ist 2011 ein weiteres Umsatzwachstum um 15 % möglich. Das Management erwartet eine deutliche Steigerung des Operativen Ergebnisses, die Umsatzrendite wird deutlich über 5 % liegen.

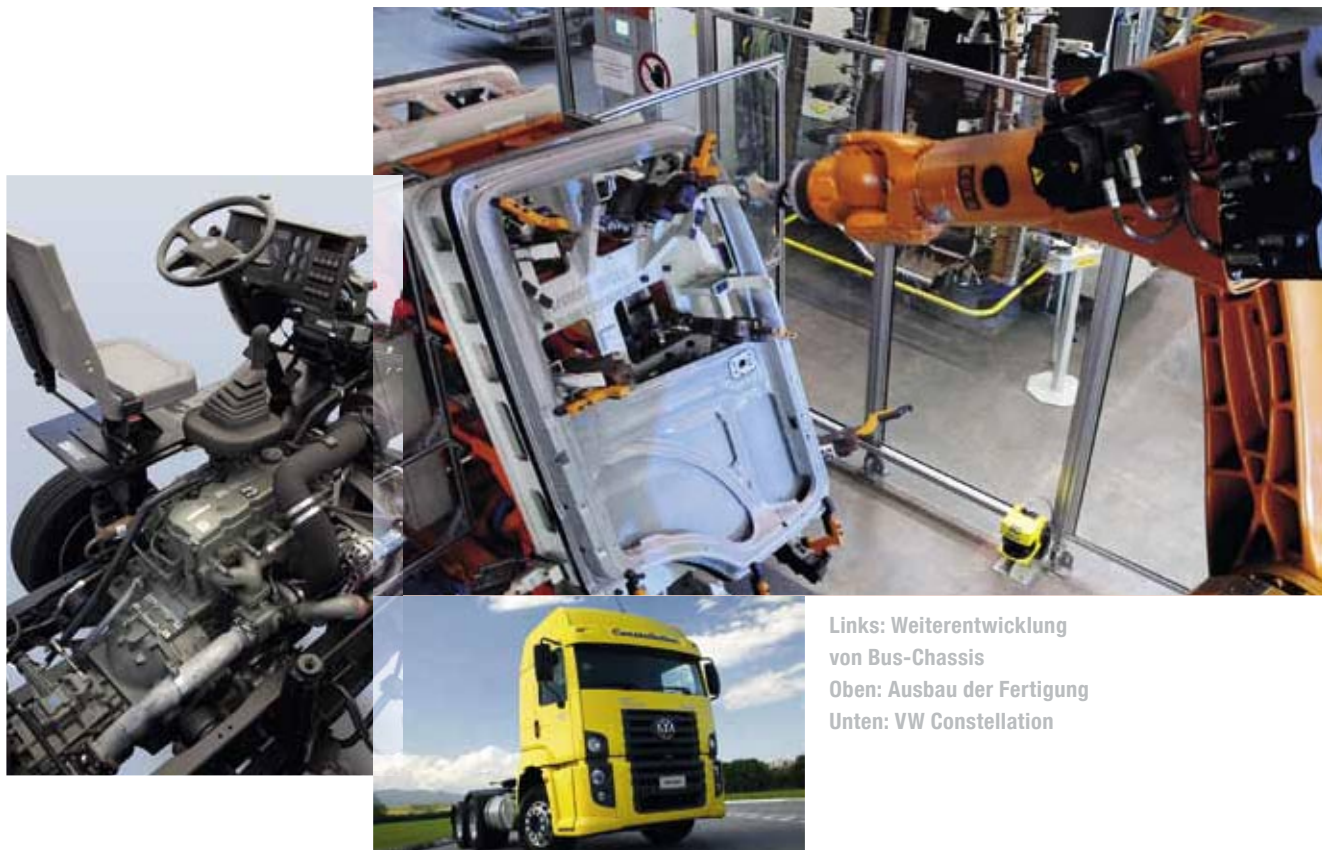

Links: Weiterentwicklung  
von Bus-Chassis  
Oben: Ausbau der Fertigung  
Unten: VW Constellation

## MAN Latin America

MAN Latin America erzielte 2010 einen Umsatz von 3,1 Mrd € und damit das beste Ergebnis in seiner Firmengeschichte. Die Einführung einer dritten Schicht in Resende ab dem 1. Quartal ermöglichte es, erfolgreich an dem Volumenwachstum zu partizipieren, das im Wesentlichen von lokalen Infrastrukturinvestitionen und staatlichen Anreizen, aber auch von der Erholung einiger latein-amerikanischer Exportmärkte getragen wurde.

### MAN Latin America<sup>1</sup> Mio €

|                           | 2010   | 2009   |
|---------------------------|--------|--------|
| Auftragseingang           | 3 140  | 1 412  |
| Auftragseingang (Anzahl)  | 65 630 | 35 842 |
| Umsatz                    | 3 140  | 1 412  |
| Absatz Fahrzeuge (Anzahl) | 65 630 | 35 842 |
| Mitarbeiter <sup>2</sup>  | 1 736  | 1 510  |
| Operatives Ergebnis       | 370    | 142    |
| Umsatzrendite ROS (%)     | 11,8   | 10,1   |

<sup>1</sup> Einbezogen ab 31. März 2009/1. April 2009. Die Zahlen 2009 zu Auftragslage, Umsatz, Ergebnis und Cashflow beinhalten für MAN Latin America keine Werte für das 1. Quartal 2009.

<sup>2</sup> Einschl. Leiharbeitnehmern am 31.12.

### Wirtschaftliches Umfeld

Die brasilianische Wirtschaft war von der globalen Wirtschaftskrise weniger betroffen als die meisten anderen großen Volkswirtschaften. Um eine schnelle und stabile Erholung in allen wichtigen Marktsegmenten und insbesondere in den Bereichen Automobil und Infrastruktur zu sichern, hat die brasilianische Regierung

verschiedene Fördermaßnahmen ergriffen. Zu den Anreizen zählten beispielsweise Steuersenkungen und vergünstigte Finanzierungen für Investitionsgüterausgaben. 2010 wuchs das Bruttoinlandsprodukt in Brasilien um 7,6 %.

Unter dem Einfluss des Konjunkturaufschwungs in Brasilien entwickelte sich der Lkw-Markt im Jahr 2010 auf insgesamt 160 309 Lkw (+43 %) und 30 593 Busse (+27 %). Das Exportvolumen in dem sich von der globalen Krise erholenden Markt für Lkw und Busse belief sich auf insgesamt 37 120 Fahrzeuge (+64 %), davon 22 565 Lkw (+74 %) und 14 555 Busse (+50 %).

### Geschäftsentwicklung

Aufgrund der starken Erholung des brasilianischen Markts konnte MAN Latin America 48 608 Lkw absetzen und damit das achte Jahr in Folge seine brasilianische Marktführerschaft bei Lkw ab 5 t und seinen Marktanteil von 29 % behaupten. Auch der brasilianische Busmarkt zeigte eine positive Entwicklung. Mit 8 691 abgesetzten Fahrzeugen erreichte MAN Latin America einen Marktanteil von 28 % und bestätigte somit die zweite Position im lokalen Markt.

In den Exportmärkten konnte MAN Latin America 8 331 Lkw und Bus-Chassis absetzen und die Marktführerschaft im Bereich Lkw-Exportgeschäfte mit einem Marktanteil von 29 % zum zweiten Mal in Folge sichern. Im Bereich Bus-Chassis wurde die zweite Position mit einem Exportanteil von knapp 11 % gefestigt.

Der Verkauf von insgesamt 65 630 Nutzfahrzeugen im Jahr 2010 führte zum besten Geschäftsjahr in der Unternehmensgeschichte.

### Ergebnis

Das Operative Ergebnis konnte überproportional zum Umsatz gesteigert werden. Es erreichte 370 Mio € (142 Mio €), was einer Umsatzrendite von 11,8 % entspricht.

### Mitarbeiter

MAN Latin America beschäftigte zum Jahresende 2010 insgesamt 1 736 Mitarbeiter. Außerdem befanden sich 4 413 Mitarbeiter auf den Gehaltslisten der Partner oder Dienstleister im Rahmen des Produktionsverbunds »Consortio Modular«.

### Investitionen, Forschung und Entwicklung

Ein Merkmal des »Consortio Modular«-Geschäftsmodells von MAN Latin America, bei dem die Partnerfirmen auch Zulieferer und Kapitalgeber sind, ist ein geringer Investitionsbedarf (<2,5 % des Umsatzes) und Kapitaleinsatz.

Die Forschungs- und Entwicklungsaufwendungen im Betrachtungszeitraum beliefen sich auf 66 Mio € oder 2,1 % des Umsatzvolumens. Im Bereich F&E arbeiteten im Schnitt 410 Mitarbeiter (inkl. Leiharbeitnehmern) und 110 Mitarbeiter von Dienstleistern.

Die Schwerpunkte der F&E-Aktivitäten lagen auf der Weiterentwicklung des für Schwellenländer marktspezifischen Produktportfolios im Bereich Lkw, der kundenspezifischen Anpassung von Bussen, effizienten Lösungen bezüglich alternativer Kraftstoffe, Emissionsreduzierung (Euro V) und Synergieprojekten im Hinblick auf MAN Truck & Bus, wie z. B. der Lokalisierung des Motors D08 und des Lkw MAN TGX sowie einer neuen gemeinsamen Niederfler-Busplattform. Mit der Entwicklung der Compressed Natural Gas (CNG) D08-Motoren für Stadtbusse bestätigte MAN Latin America die Technologieführerschaft bei energieeffizienten Hybridlösungen.

Mitte des Jahres hat MAN Latin America einen eigenen Busentwicklungsbereich aufgebaut, um den Ausbau in diesem wachsenden Segment zu unterstützen. Zu den ersten Ergebnissen zählte

der neue Niederflerbus, der an die aktuellen öffentlichen Nahverkehrskonzepte in den Großstädten angepasst ist. Des Weiteren wurden verschiedene kundenorientierte technische Modifikationen bei den bestehenden Baureihen sowie die Verbesserung des Getriebe- und Motorenprogramms durchgeführt.

### Weitere Entwicklung

Der Ausblick für 2011 ist positiv, gestützt durch beschlossene Investitionen in die Infrastruktur und die bekanntgegebene Verlängerung der Steuerbegünstigungen für den Kauf von Lkw bis zum 31.12.2011 in Brasilien, dem größten Markt von MAN Latin America. Das Ergebnis der Präsidentschaftswahl deutet auf die Kontinuität der bisherigen Wirtschaftspolitik hin. Einige Förderprogramme, darunter das Programm »Caminho da Escola«, für das MAN Latin America 2 233 Schulbusse im Jahr 2010 ausgeliefert hat, sowie das Programm »Pró-Caminhoneiro« zur Modernisierung von Lkw-Fuhrparks und verbesserte Finanzierungsmöglichkeiten sind zum größten Teil schon verlängert worden.

Verschiedene begünstigend wirkende Faktoren wie die Fußball-Weltmeisterschaft 2014, die Olympischen Spiele 2016 und die Erschließung neu entdeckter Erdölvorkommen werden zu einer erhöhten Nachfrage nach Lkw und Bussen in den nächsten Jahren führen. Zusätzlich werden Impulse durch den Erneuerungsbedarf bei der bestehenden überalterten Flotte von Transportfahrzeugen (Durchschnittsalter >16 Jahre) erwartet.

MAN Latin America wird sich weiter international verstärkt engagieren, vor allem in Entwicklungsländern. Zusätzliches Wachstumspotenzial wird im Exportbereich durch die Verbindung mit den weltweiten Geschäftsaktivitäten von MAN Truck & Bus, vor allem in Südafrika und Mexiko, gesehen.

Neue Geschäftschancen eröffnen sich durch die Einführung der TGX-Baureihe im Schwerlastbereich in Lateinamerika als Ergänzung der Produktpalette und mit der Integration der D08-Motoren von MAN in das bestehende Angebot. Weitere Wachstumsmöglichkeiten bietet der After-Sales-Bereich.

Unter der Voraussetzung eines sich weiterhin positiv entwickelnden Markts erwartet das Management für MAN Latin America ein Umsatzwachstum von bis zu 10 %. Die Umsatzrendite wird damit weiterhin im zweistelligen Bereich liegen. Dabei wird unterstellt, dass sich die Währungsrelationen nicht wesentlich verschieben.

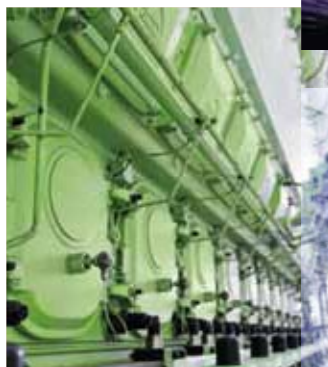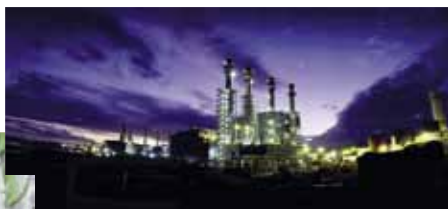

Links: Viertakt-Großdieselmotor  
Oben: Diesellochwerk  
Las Salinas auf Fuerteventura  
Unten: Zentrale von  
MAN Diesel & Turbo in Augsburg

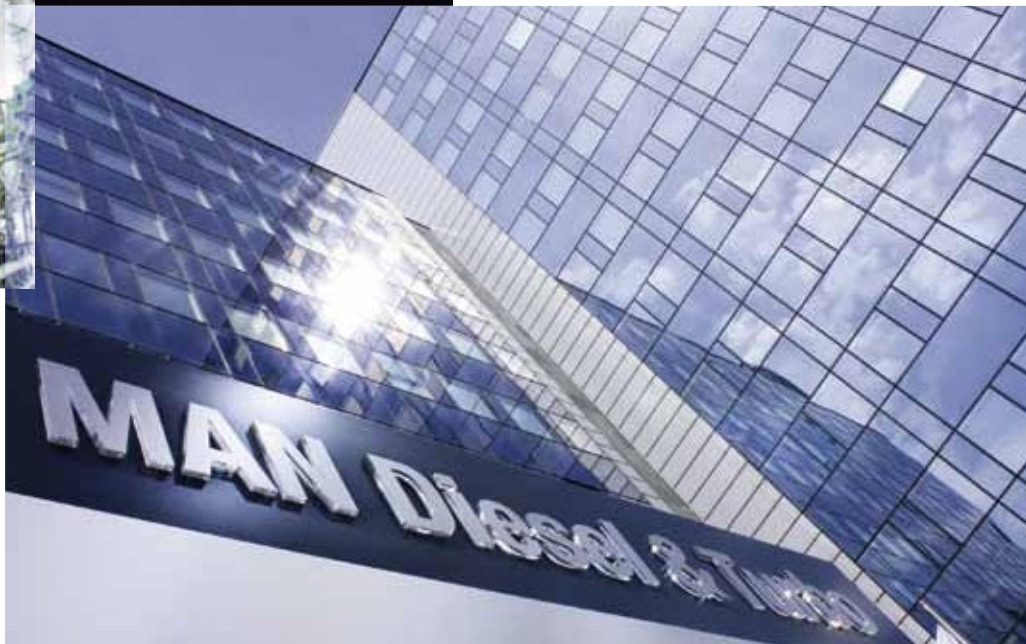

## MAN Diesel & Turbo

### MAN Diesel & Turbo Mio €

|                                | 2010   | 2009   |
|--------------------------------|--------|--------|
| Auftragseingang <sup>1</sup>   | 3 475  | 2 936  |
| davon Engines & Marine Systems | 1 525  | 1 110  |
| davon Power Plants             | 812    | 789    |
| davon Turbomachinery           | 1 138  | 1 038  |
| Umsatz <sup>1</sup>            | 3 766  | 3 796  |
| davon Engines & Marine Systems | 1 576  | 1 805  |
| davon Power Plants             | 839    | 606    |
| davon Turbomachinery           | 1 351  | 1 386  |
| Mitarbeiter <sup>2</sup>       | 12 455 | 12 511 |
| Operatives Ergebnis            | 439    | 500    |
| davon Engines & Marine Systems | 333    | 290    |
| davon Power Plants             | - 60   | 52     |
| davon Turbomachinery           | 166    | 158    |
| Umsatzrendite ROS (%)          | 11,7   | 13,2   |

<sup>1</sup> Inklusive Konsolidierung zwischen den Geschäftsbereichen Engines & Marine Systems, Power Plants und Turbomachinery

<sup>2</sup> Einschl. Leiharbeitnehmern am 31.12.

Die wirtschaftlichen Rahmenbedingungen haben sich im Geschäftsjahr 2010 verbessert. In der Folge konnte MAN Diesel & Turbo beim Auftragseingang mit 3,5 Mrd € den Vorjahreswert in Höhe von 2,9 Mrd € übertreffen (18 %), das Niveau aus der Zeit vor der Krise konnte jedoch nicht erreicht werden. Insbesondere im Geschäftsbereich Engines & Marine Systems hat die wieder anziehende Nachfrage nach Transportleistung noch nicht zu einer merklichen Steigerung bei eigenproduzierten Motoren geführt. Die Umsatzerlöse lagen mit 3,8 Mrd € in etwa auf Vorjahresniveau. Der Auftragsbestand ist aufgrund eines weiterhin unter dem Umsatz liegenden Auftragseingangs und aufgrund von Auftragsstornierungen auf 3,8 Mrd € (4,4 Mrd €) zurückgegangen. Das Operative Ergebnis verringerte sich von 500 Mio € auf 439 Mio €, die Umsatzrendite lag mit 11,7 % jedoch weiterhin auf gutem Niveau.

### Wirtschaftliches Umfeld

Nach dem Durchschreiten der Talsohle im Jahr 2009 hat sich die gesamtwirtschaftliche Erholung insbesondere in der zweiten Jahreshälfte 2010 weiter verstärkt. Ein hoher Konsum und neue Investitionen in den Schwellen- und Entwicklungsländern sorgten für einen starken Anstieg in der Produktion und dem weltweiten Handel. In den meisten entwickelten Volkswirtschaften hielten jedoch geringes Verbrauchervertrauen, zunehmende Arbeitslosigkeit und die hohe Staatsverschuldung den Konsum auf einem niedrigen Niveau. Das Wachstum in diesen Volkswirtschaften erreichte nur eine vergleichsweise niedrige Rate.



Der hohe Rohstoffbedarf in China führte zu einer sehr hohen Nachfrage nach Transportkapazitäten für Schüttgüter. Auch der Transport von Fertigprodukten zog wieder an. Dies wirkte sich positiv auf die Frachtraten aus und brachte viele Schiffe nach der temporären Stilllegung wieder in Fahrt. Das sogenannte »Slow Steaming« – das Fahren mit geringer Geschwindigkeit, um Außerbetriebsetzungen zu vermeiden – wird aufgrund steigender Kraftstoffpreise weiterhin verbreitet eingesetzt. Diese positiven Trends hatten in Verbindung mit nun gefallen Neubaupreisen eine überraschend hohe Bestelltätigkeit von Schüttgutfrachtern zur Folge. In der zweiten Jahreshälfte wurden dann nach langer Pause auch wieder Containerschiffe bestellt. Auch die Ordertätigkeit bei Spezialschiffen und im Offshore-Bereich hat zum Jahresende hin wieder angezogen. Nur der Markt mit Chemikalien- und Produktentankern ist noch von Überkapazitäten geprägt.

Der Energiesektor war ebenfalls geprägt durch die wieder erstarrende Konjunktur. Insbesondere in den Schwellen- und Entwicklungsländern wurden Investitionsentscheidungen für neue Stromerzeugungskapazitäten getätigt. Bedingt durch den starken Ausbau der Stromerzeugung aus erneuerbaren Energien mit schwankender Verfügbarkeit wie Wind- und Wasserkraft, stieg auch die Nachfrage nach Kraftwerken mit flexibler Stromerzeugung. Aufgrund der hohen Verfügbarkeit und der vergleichsweise niedrigen Emissionen von Gas waren auch die Investitionstätigkeiten bei erdgasbetriebenen Kraftwerken erfreulich hoch.

Die Nachfrage nach Kompressoren und Turbinen wurde zu Beginn des Jahres 2010 noch durch die weltweite Wirtschaftskrise bestimmt, im 2. Halbjahr konnte jedoch ein Anstieg des Geschäfts verzeichnet werden. Sowohl in Europa als auch in Asien verbesserte sich die Nachfrage deutlich. In den übrigen Regionen blieb der Absatz auf Vorjahresniveau, lediglich im Mittleren Osten konnte das durch Großprojekte beeinflusste hohe Volumen des Vorjahres nicht mehr erreicht werden.

## Geschäftsentwicklung

Die Nachfrage nach Handelsschiffen hat im Vergleich zu 2009 um 156 % zugenommen. Damit hat sich auch für MAN Diesel & Turbo ein wieder positiverer Auftragseingang von 16,4 Gigawatt (GW) für Zweitaktmotoren ergeben. Trotzdem nahm bei fast doppelt so hohen Ablieferungsraten das Auftragsbuch weiterhin ab.

Der Auftragseingang bei Viertakt-Mittelschnellläufern für Antriebsmotoren und Bordaggregate hat sich im Vergleich zum Vorjahr leicht erhöht. Von eigen- und lizenzproduzierten Motoren wurden insgesamt 2 028 Motoren mit 2 803 Megawatt (MW) verkauft. Auch im Offshore-Bereich konnten nicht viele neue Aufträge eingebucht werden. Dagegen konnte MAN Diesel & Turbo im Passagierschiffsegment bedeutende Aufträge erzielen, darunter die Antriebsmotoren für zwei neue Kreuzfahrtschiffe sowie die weltweit stärkste Antriebsanlage für eine RoPax-Fähre (Roll On/Roll Off-Passagierfähre) mit vier Motoren 12V48/60CR bei der tunesischen Reederei Cotunav. Auch bei Spezialanwendungen wie z. B. Schwimmbaggern und Navy konnten neue Aufträge gewonnen werden.

Trotz der nach wie vor schwierigen Marktsituation und des damit verbundenen verschärften Wettbewerbs gelang es MAN Diesel & Turbo insgesamt, die marktführende Stellung bei Schiffsmotoren weiter zu behaupten.

In Summe belief sich der Auftragseingang des Geschäftsbereichs Engines & Marine Systems auf 1 525 Mio € gegenüber 1 110 Mio € im Jahr 2009 (+37 %). Der Umsatz lag bei 1 576 Mio € und damit deutlich unter dem sehr hohen Vorjahreswert von 1 805 Mio € (–13 %).

Bei den Viertaktmotoren für Dieselmotoren hat der Auftrags- eingang im Berichtsjahr den Vorjahreswert deutlich übertroffen. Zusammen mit den Lizenzpartnern verkaufte MAN Diesel & Turbo insgesamt 197 Motoren mit 1 750 MW. Hervorzuheben ist insbesondere der Auftrag über 120 Motoren vom Typ 18V32/40 für sechs brasilianische Kraftwerke im Rahmen des Ausbauprogramms A-3. Unter anderem wurde auch ein weiteres Kraftwerk mit 184 MW für einen öffentlichen Stromversorger im karibischen Raum in Auftrag genommen. Der Auftragseingang im Geschäftsbereich Power Plants stieg damit über das Vorjahresniveau (789 Mio €) auf 812 Mio € (3 %). Auch der Umsatz hat sich mit der Abwicklung der guten Auftragseingänge der Vorjahre auf 839 Mio € (606 Mio €) erhöht (39 %).



Im Geschäftsbereich Turbomachinery konnte der Auftragseingang bei Turbomaschinen sowohl für Chemie-/Petrochemieanlagen und bei Düngemitteln als auch im Bereich Öl- und Gasindustrie gesteigert werden. Größtes Geschäftssegment blieb dabei die Öl- und Gasindustrie mit Anlagen zur Gasförderung, -speicherung und -verarbeitung. Der Vertrieb von Kompressorsträngen für Luftzerlegungsanlagen und Generator-Dampfturbinen für die Energieerzeugung waren weitere Schwerpunkte des Geschäfts. Wesentliche Großaufträge waren die Bestellungen von sechs Maschinensträngen für die Grundstoffindustrie in China. Im Neubau verschlechterte sich die Erlösqualität wegen des Preisdrucks aufgrund eines geringeren Vergabevolumens. Der Auftragseingang des Geschäftsbereichs lag mit 1 138 Mio € um 10 % über dem Vorjahr (1 038 Mio €). Das nach wie vor gute Umsatzvolumen von 1 351 Mio € konnte im Wesentlichen aus den hohen Auftragsbeständen zum Jahresbeginn erzielt werden, gegenüber dem Vorjahr (1 386 Mio €) errechnet sich ein leichter Rückgang um 2 %.

### Ergebnis

Das Operative Ergebnis von MAN Diesel & Turbo betrug im Berichtszeitraum 439 Mio €. Insbesondere aufgrund leicht gesunkener Umsatzerlöse sowie Kostenüberschreitungen, Vorsorgen und Aufwendungen für den Aufbau des Geschäftsbereichs Power Plants wurde das Niveau des Vorjahres (500 Mio €) nicht mehr erreicht. Die Umsatzrendite lag mit 11,7 % dennoch auf gutem Niveau.

### Mitarbeiter

Am 31. Dezember 2010 waren bei MAN Diesel & Turbo 12 455 Mitarbeiter inkl. Leiharbeitnehmern tätig (12 511). Dieser Rückgang ist insbesondere durch einen Personalabbau an den Standorten in Deutschland und Dänemark begründet.

### Investitionen

Das Investitionsvolumen wurde 2010 gegenüber dem Vorjahr insgesamt deutlich um 39 % reduziert.

Am Standort Augsburg lag ein Schwerpunkt im weiteren Umbau von Motorenprüfständen für den Serienbetrieb und die Entwicklung. Ferner wurde die Erneuerung von Teilen der Rohrfertigung

angestoßen, um dort nach modernsten arbeitsschutztechnischen sowie umweltrechtlichen Anforderungen fertigen zu können. Ein weiterer Investitionsschwerpunkt lag in der mechanischen Fertigung im Bereich der Einspritzsysteme, um diese Kernkompetenz weiter auszubauen. Parallel dazu erfolgten die ersten Baumaßnahmen für den neuen Betriebskindergarten.

Der Produktionsstandort Saint-Nazaire wurde weiter ausgebaut, um dort in Zukunft bis zu 50 Großdieselmotoren im Jahr montieren und testen zu können. In Kopenhagen wurde in die Einspritzfertigung investiert, und die notwendigen Schritte zum Bau einer PrimeServ-Akademie wurden eingeleitet.

An den Fertigungs- und Erprobungsstandorten in Oberhausen und in Zürich wurde in Maschinen und Einrichtungen investiert, um den Maschinenpark auf einem aktuellen und leistungsfähigen Stand zu halten. Ein Schwerpunkt, der auch in den kommenden Jahren verfolgt wird, war dabei die Investition in Erprobungsanlagen für die Neu- und Weiterentwicklung der Produkte.

Am Fertigungsstandort in China ging der Ausbau der Produktionsanlagen weiter und wird auch im kommenden Jahr fortgesetzt. Hier sollen Kapazitäten für die Herstellung von Komponenten für andere Geschäftsbereiche von MAN Diesel & Turbo aufgebaut werden.

Zur Erhöhung der weltweiten Präsenz von MAN Diesel & Turbo wurden im Jahr 2010 in Guatemala, Polen und Katar Service- und Vertriebsgesellschaften gegründet. Bestehende Stützpunkte in China, Großbritannien, Indien, Russland, Spanien und Südkorea wurden weiter ausgebaut.

### Forschung und Entwicklung

Auch während der Krisenjahre wurde bei MAN Diesel & Turbo kontinuierlich in zukünftige Produkte und Technologien investiert, um den Kunden auch in Zukunft optimale Produkte für die steigenden Anforderungen bezüglich Umweltverträglichkeit, Wirtschaftlichkeit und Zuverlässigkeit zu bieten.

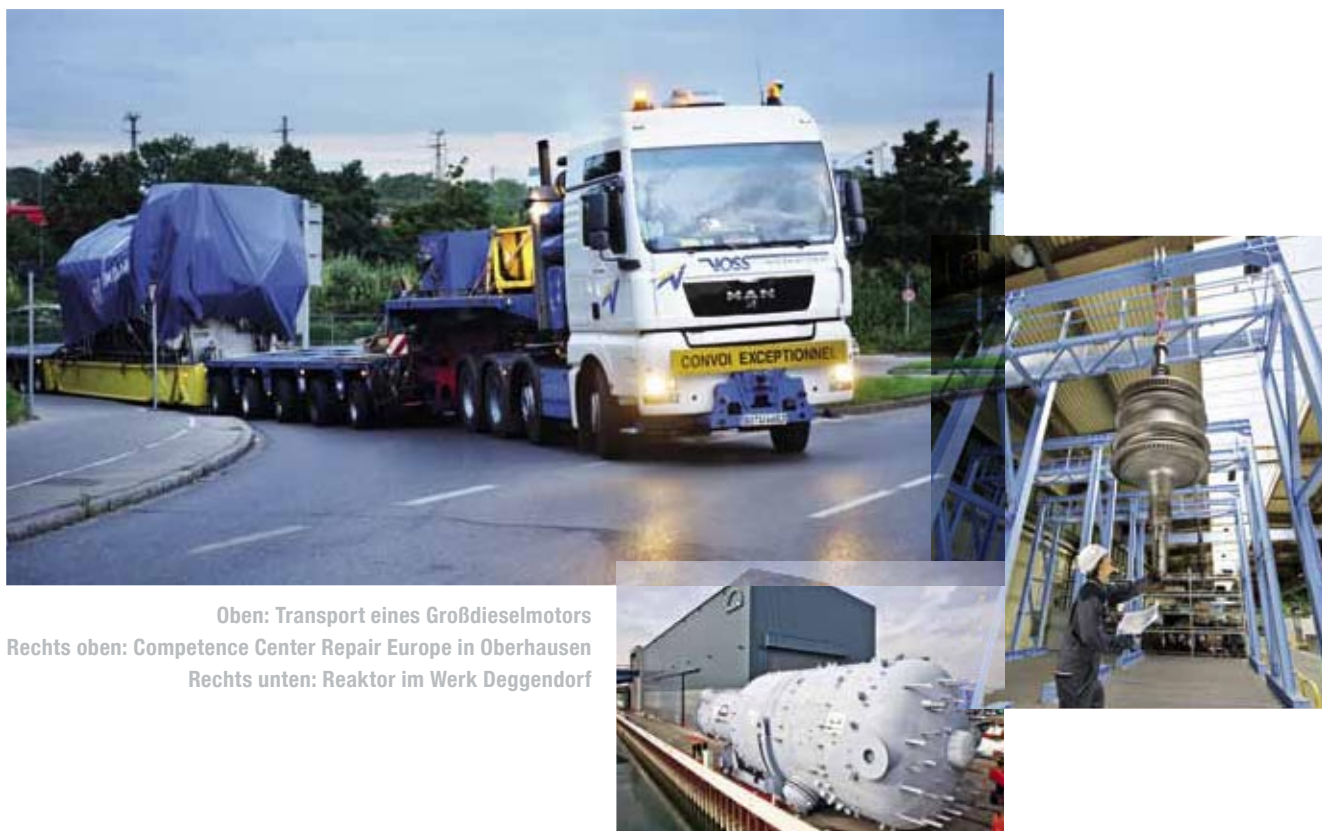

Oben: Transport eines Großdieselmotors

Rechts oben: Competence Center Repair Europe in Oberhausen

Rechts unten: Reaktor im Werk Deggendorf

So erfüllen alle Motoren von MAN Diesel & Turbo die ab 2011 geltende Emissionsrichtlinie Tier II. Bei den Zweitaktmotoren sind die für den chinesischen Markt entwickelten MC-C9-Motoren wichtige Neuerungen. Im Viertaktbereich wurde der Tier-II-fähige Motor 20V28/33D mit 10 MW als stärkster Motor seiner Klasse entwickelt. Dazu kamen die zwei neuen Motoren L- und V-32/44CR, die mit der für den anspruchsvollen Schwerölbetrieb gerüsteten Common-Rail-Technologie ausgestattet sind und damit bei jedem Lastpunkt optimale Verbrauchs- und Emissionswerte zeigen. Weiterhin wurden zahlreiche Fortschritte bei den Dual-Fuel-Motoren und auch den für die Zukunft immer wichtiger werdenden Gasmotoren erreicht. Daneben wird verstärkt an Zukunftsthemen wie Tier III gearbeitet. Neue Technologien zur Emissionssenkung sind bereits in der Erprobung und werden auch in Zusammenarbeit mit namhaften Industriepartnern erarbeitet.

Im Rahmen des fusionierten Unternehmens können nun noch besser auf die Kundenbedürfnisse angepasste Produkte angeboten werden. Ein Schwerpunkt sind Systeme mit Dieselmotoren und darauf abgestimmten, energieeffizienten Wärmerückgewinnungssystemen. Ein weiterer Wettbewerbsvorteil liegt darin, nun sowohl Gasmotoren als auch Gasturbinen aus einer Hand offerieren zu können.

Immer knapper werdende Öl- und Gasreserven führen zur Förderung dieser Rohstoffe unter schwierigen Umweltbedingungen. Große Wassertiefen (bis zu 3 000 m), unter Eis liegende Öl- und Gasfelder, arktische Temperaturen und sehr ungünstige Meeresbedingungen sowie zurückgehende Reservoirdrücke oder kleinere Vorkommen erfordern neue Verdichter- und Antriebstechnologien. Mit der konsequenten Weiterentwicklung des eigenen Hochfrequenzelektromotors hat MAN Diesel & Turbo im Geschäftsbereich Turbomachinery einen signifikanten Schritt in Richtung Subsea getan. Dieser 18-MW-Hochfrequenzmotor bildet die Basis für zukünftige Subsea- und Offshore-Anwendungen. Um diese neue, bahnbrechende Technologie zu qualifizieren, wurde in Zusammenarbeit mit einem namhaften Öl- und Gasproduzenten ein Qualifikationsprogramm gestartet, in dessen Rahmen der Prototyp mehr als 10 000 Betriebsstunden erfolgreich absolvierte.

Ein weiterer F&E-Schwerpunkt dieses Jahres waren der Bau und die Erprobung eines neuartigen Getriebeverdichterkonzepts für die Luftzerlegung mit der Zielsetzung, Prozesse im Sinne der Durchlaufzeiten optimal zu gestalten bzw. zu verkürzen. Im Bereich der CO<sub>2</sub>-Getriebeverdichter wurde mit der Entwicklung eines Komponentenprüfstands begonnen, der voraussichtlich 2011 seinen Betrieb aufnehmen wird. Mit dieser Versuchsanlage leistet MAN Diesel & Turbo einen wesentlichen Beitrag zum Klimaschutz. Zusätzlich wird im Zuge des Trends zu Green-/Biomass-Technologie auch die Entwicklung von Reaktoren zur Gas- und Biomasseverflüssigung vorangetrieben.

Der Kraftwerksbereich wird von der aktuellen »Green Power Initiative« geprägt. Im Vordergrund stehen solarthermische Kraftwerke, in denen Dampfturbinen mit Zwischenüberhitzung zum Einsatz kommen. MAN Diesel & Turbo hat für die Anlagen ein höchst flexibles, zweigehäusiges Turbinendesign entwickelt, das nicht nur hervorragende Wirkungsgrade für die Turbine selbst, sondern auch für den gesamten Prozess ermöglicht. Aufgrund dieser Leistung nimmt MAN Diesel & Turbo eine starke Position im Solar-Dampfturbinenmarkt ein.

In den Bereichen Luftzerlegung, Äthylen, Terephthalsäure und im Raffineriesektor verstärkt sich der bereits seit Jahren zu beobachtende Trend zu MEGA-Anlagengrößen weiter. Im abgelaufenen Geschäftsjahr wurde daher das umfangreiche Entwicklungsprogramm zum Vorstoß in neue Größen- und Leistungsdichteklassen in allen Teilbereichen – Axialkompressoren, Radialkompressoren, Getriebekompressoren und Dampfturbinen – intensiv vorangetrieben. Mit der Erprobung eines vollständig neu entwickelten und auf Luftfahrttechnologie basierenden Axialverdichters konnte ein überaus wichtiger Schritt in Richtung MEGA-Anlagen gemacht werden. Dieses neue Produkt soll bald in ersten Projekten zum Einsatz kommen und die Marktführerschaft in diesem Segment festigen.

### Weitere Entwicklung

Auch für kommendes Jahr wird in den Schwellen- und Entwicklungsländern ein weiterhin gesundes Wachstum erwartet. Die Nachfrage nach Rohstoffen wie Kohle, Erdöl oder Erdgas wird weiter anziehen und zu einem Preisanstieg führen. Diese Entwicklung wiederum, die insbesondere für Erdöl gilt, wird die Investitionstätigkeit in der Rohstoffindustrie positiv beeinflussen.

Die Schiffbaubranche wird sich nach Durchschreiten des Auftrags-tals in den Jahren 2009 und 2010 langsam erholen – früher als erwartet, jedoch auf deutlich niedrigerem Niveau als zu Zeiten der Boomperiode 2005 bis 2008. Der Preisdruck wird hoch bleiben, da die im Markt vorhandenen Überkapazitäten bei Containerschiffen und Massengutfrachtern noch nicht vollständig abgebaut sind. China wird auf seinem Weg, die weltgrößte Schiffbaunation zu werden, weiter voranschreiten. Das zunehmende Bevölkerungs- und Wirtschaftswachstum sowie eine sich entwickelnde konsumstarke Mittelschicht wird insbesondere in den Schwellen- und Entwicklungsländern für ein stetiges Wachstum der Nachfrage nach

Produkten sorgen, zu deren Entstehung MAN Diesel & Turbo mit seiner Angebotspalette für die Prozessindustrie einen wesentlichen Beitrag leistet. Damit einher geht eine steigende Energienachfrage in diesen Ländern, mit entsprechend positiven Auswirkungen auf den Aufbau neuer Stromversorgungskapazitäten. In den OECD-Ländern wird die zukünftige Nachfrage nach neuen Kraftwerken im Wesentlichen durch den Ersatz alter Kapazitäten getrieben werden. Um die Klimaschutzziele zu erreichen, ergeben sich dabei Chancen, verstärkt alternative Technologien, wie etwa die Solar-kraft, zum Einsatz zu bringen. Die Bedeutung von Erdgas bzw. LNG (Liquified Natural Gas) wird sowohl in der Schifffahrt als auch bei stationären Anwendungen weiter zunehmen.

Für das Geschäftsjahr 2011 erwartet MAN Diesel & Turbo einen Auftragseingang und einen Umsatz, die leicht unter den Werten der Berichtsperiode liegen. Die bisherigen Erwartungen gehen von einem Umsatzrückgang bis zu 5 % aus. Der Auftragsbestand wird sich erstmals seit Beginn des Schiffbaubooms auf ein Niveau einpendeln, das in etwa auf der Höhe des Umsatzes liegt. Das Ergebnis wird voraussichtlich etwas stärker zurückgehen als das Geschäftsvolumen, die Umsatzrendite wird jedoch im zweistelligen Bereich bleiben.

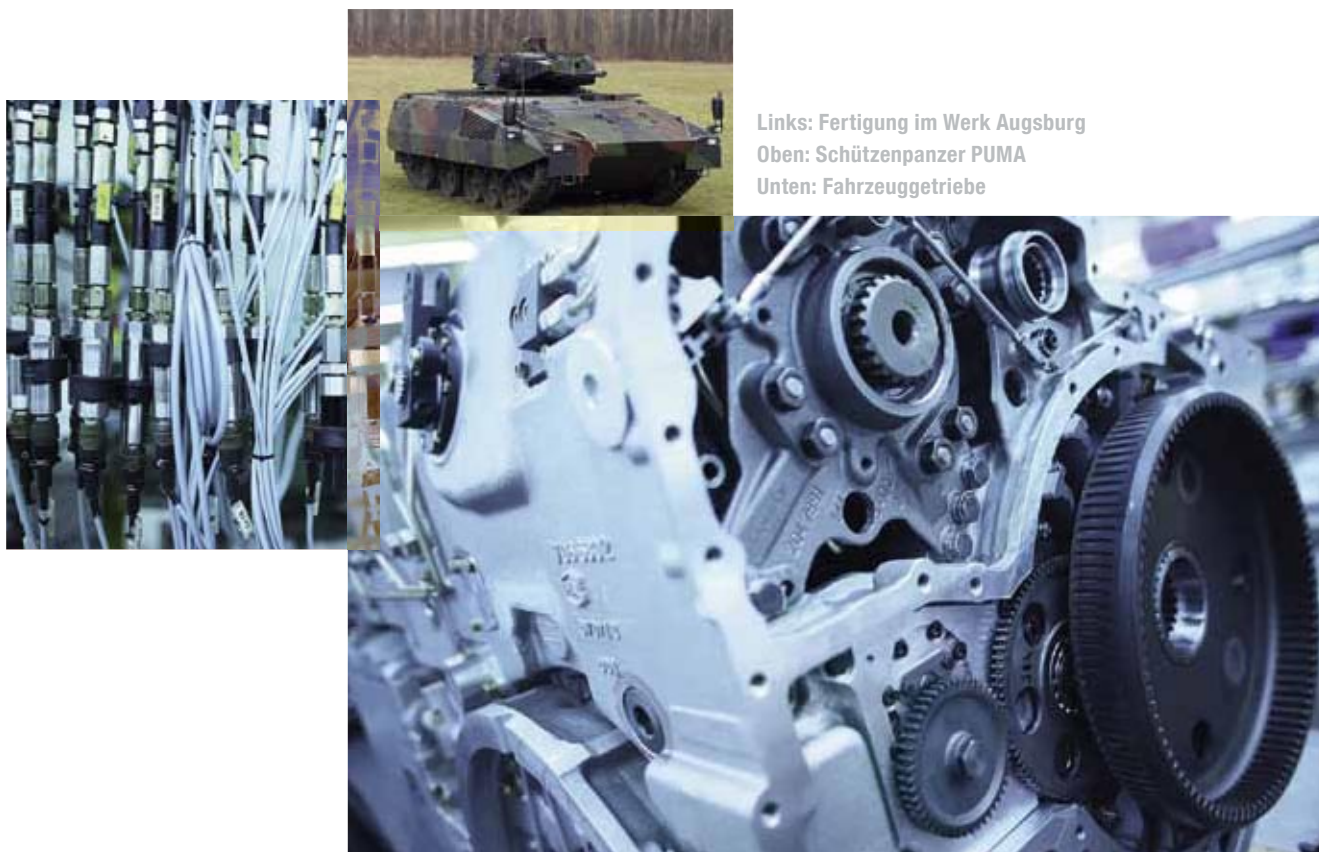

Links: Fertigung im Werk Augsburg  
Oben: Schützenpanzer PUMA  
Unten: Fahrzeuggetriebe

## Renk

| Renk<br>Mio €            | 2010  | 2009  |
|--------------------------|-------|-------|
| Auftragseingang          | 525   | 294   |
| Umsatz                   | 403   | 474   |
| Mitarbeiter <sup>1</sup> | 1 882 | 1 903 |
| Operatives Ergebnis      | 52    | 66    |
| Umsatzrendite ROS (%)    | 12,9  | 13,9  |

<sup>1</sup> Einschl. Leiharbeitnehmern am 31.12.

### Wirtschaftliches Umfeld

Das Geschäftsjahr 2010 war durch eine merkliche Belebung der Marktnachfrage gekennzeichnet, deren anhaltende Dynamik eine weitere Festigung der wirtschaftlichen Rahmenbedingungen für 2011 erwarten lässt.

### Geschäftsentwicklung

Der deutlichen Belebung der Bestellungen stand ein weiterhin rückläufiger Umsatz gegenüber. Diese Entwicklung ist dem Umstand geschuldet, dass ein wesentlicher Teil des Renk-Produktportfolios Durchlaufzeiten von mehr als zwölf Monaten hat und Neugetriebeaufträge im Fahrzeugbereich regelmäßig mit mehrjährigen Lieferfristen verbunden sind. Der aktuelle Anstieg im Auftragseingang wirkt also erst zeitversetzt in den Umsatzzahlen. Der Umsatzrückgang 2010 ist im Wesentlichen auf den niedrigen Auftragseingang des Vorjahres zurückzuführen.

Der Renk-Fahrzeuggetriebebereich erhielt den Großauftrag für den deutschen Schützenpanzer PUMA und die Bestellung für einen Versuchsprüfstand für Windkraftgetriebe der hohen Leistungs-kategorie. Der PUMA-Vertrag hat eine Laufzeit, die deutlich über 2015 hinausgeht.

Der Geschäftsbereich Gleitlager konnte bereits 2010 wieder ein stabiles, mit weiteren Wachstumsmöglichkeiten einhergehendes Geschäftsniveau erreichen. Diese positive Entwicklung wurde auf Grundlage ansteigender Kundenaufträge und der für diese Sparte charakteristischen kurzen Auftragsdurchlaufzeiten von wenigen Wochen ermöglicht.

Demgegenüber war die Marktbelebung bei Spezial- und Standardgetrieben eher verhalten. Die kommerzielle Schifffahrt zeigte noch keine nennenswerten Erholungsanzeichen, und die Märkte für Stationärgetriebe standen weiterhin unter hohem Wettbewerbsdruck.

### Ergebnis

Der mit 403 Mio € (474 Mio €) um 71 Mio € rückläufige Umsatz war die Haupteinflussgröße für das gleichfalls rückläufige Operative Ergebnis in Höhe von 52 Mio € (66 Mio €). Weitere nennenswerte Ergebnisbelastungen waren die vor allem im 1. Halbjahr 2010 noch spürbare Unterauslastung der Fertigungskapazitäten sowie Risikovorsorgen für Offshore-Windkraftgetriebe. Trotz dieser negativen Einflüsse konnte eine Umsatzrendite von 12,9 % (13,9 %) erzielt werden.



### Mitarbeiter

Zum 31.12.2010 waren in der Renk Gruppe 1 882 (1 903) Mitarbeiter beschäftigt. Hiervon entfielen auf deutsche Standorte 1 720 (1 747) Beschäftigte, im Ausland waren 162 Mitarbeiter (156) tätig.

### Investitionen, Forschung und Entwicklung

Investitionsschwerpunkt waren die maschinelle Komplettierung der neuen Fertigungshalle für Spezialgetriebe im Werk Augsburg mit Hochleistungs-Bearbeitungsmaschinen sowie der Aufbau eines Windgetriebe-Prüfstands im Werk Rheine in Vorbereitung der Serienfertigung von 5-MW-Windkraftgetrieben.

Entwicklungsschwerpunkte waren die Serienreife des PUMA-Getriebes sowie die Grundlagenentwicklung eines Getriebekonzepts zur Übertragung höchster Drehmomente.

### Weitere Entwicklung

Die erkennbare wirtschaftliche Erholung in den wesentlichen Renk-Marktsegmenten sollte sich, mit Ausnahme von Neubauten in der Handelsschifffahrt, 2011 fortsetzen. Insbesondere die Nachfrage nach Offshore-Windkraftgetrieben wird in den kommenden Jahren weiter zunehmen. Auch bei Kettenfahrzeuggetrieben sieht das Management gute Chancen für die Realisierung von Exportprojekten.

Auf Grundlage dieser Markteinschätzung erwartet Renk für das Geschäftsjahr 2011 ein Auftragseingangsvolumen auf dem hohen Niveau von 2010. In der Umsatzentwicklung ermöglichen lange Durchlaufzeiten und die mehrjährigen Lieferpläne bei Fahrzeuggetrieben erst ab 2012 eine Trendwende. Dies wird sich auch 2011 in einem voraussichtlich leichten Rückgang von Umsatz und Ergebnis widerspiegeln. Durch kontinuierliche Maßnahmen zur Kostenflexibilisierung sowie am Kundennutzen orientierte Weiterentwicklungen über das gesamte Produktspektrum wird Renk seine Spitzenstellung im Getriebebau absichern. Die Umsatzrendite wird weiterhin im zweistelligen Bereich erwartet.

## Sonstige/Konsolidierung

| Mio €                                       | 2010 | 2009  |
|---------------------------------------------|------|-------|
| Mitarbeiter <sup>1</sup>                    | 312  | 300   |
| davon MAN Shared Services                   | 93   | 122   |
| davon MAN SE                                | 219  | 178   |
| Operatives Ergebnis                         | 16   | – 113 |
| davon MAN SE und MAN Shared Services        | – 83 | – 63  |
| davon Beteiligung Scania AB (at equity)     | 99   | 4     |
| davon Beteiligung Sinotruk Ltd. (at equity) | 29   | –     |
| davon Beteiligung manroland AG (at equity)  | – 13 | – 53  |
| davon Konsolidierungen                      | – 16 | – 1   |

<sup>1</sup> Einschl. Leiharbeitnehmern am 31.12.

Unter »Sonstige/Konsolidierung« sind die direkt von der MAN SE gehaltenen Beteiligungen, die MAN SE und ihre Shared Services-Gesellschaften sowie die Konsolidierungsposten zwischen den Unternehmen der MAN Gruppe zusammengefasst.

Das Ergebnis der Zentrale und ihrer Shared Services-Gesellschaften belief sich 2010 auf –83 Mio € (–63 Mio €). Die Ergebnisverschlechterung gegenüber dem vergleichbaren Vorjahreszeitraum resultiert im Wesentlichen aus höheren Kosten für Rechtsberatung, Marketing und den Aufbau der Compliance-Organisation sowie höheren Bonifikationen infolge des besseren Unternehmensergebnisses. Das Equity-Ergebnis für Scania wirkte mit 99 Mio € und beinhaltet aufgrund des zeitlich versetzten Einbezugs das 4. Quartal 2009 sowie das Ergebnis der ersten neun Monate 2010 von Scania. Der geringe Ergebnisbeitrag im vergleichbaren Vorjahreszeitraum war im Wesentlichen in der konjunkturell schlechteren Ergebnissituation begründet. Die Ende 2009 erworbene Beteiligung am chinesischen Lkw-Hersteller Sinotruk wirkte mit einem Ergebnisbeitrag von 29 Mio €, was insbesondere auf ein ebenfalls gegenüber 2009 stark verbessertes Ergebnis zurückzuführen ist. Die Entwicklung der Beteiligung manroland ist mit –13 Mio € noch immer durch die schlechte Marktsituation der Druckmaschinenbranche geprägt.

Die höhere Ergebnisbelastung aus der Konsolidierung ist auf einen Anstieg der Eliminierung der Zwischengewinne infolge zunehmender konzerninterner Lieferungen und Leistungen insbesondere im Nutzfahrzeuggeschäft zurückzuführen.



## Abschluss der MAN SE

Nachfolgend wird der Jahresabschluss der MAN SE, der nach den deutschen handelsrechtlichen Vorschriften (HGB) erstellt ist, in einer Kurzfassung dargestellt. Der vollständige Jahresabschluss ist bei der MAN SE oder über das Internet [www.man.eu](http://www.man.eu) erhältlich.

### Ertragslage

| Mio €                                                | 2010       | 2009         |
|------------------------------------------------------|------------|--------------|
| Beteiligungsergebnis                                 | 276        | – 98         |
| Übriges Ergebnis vor Steuern                         | 361        | – 165        |
| <b>Ergebnis vor Steuern</b>                          | <b>637</b> | <b>– 263</b> |
| Ertragsteuern                                        | – 116      | – 35         |
| <b>Jahresüberschuss/-fehlbetrag</b>                  | <b>521</b> | <b>– 298</b> |
| Gewinnvortrag Vorjahr                                | 0          | 40           |
| Einstellung in (–)/ Entnahme aus (+) Gewinnrücklagen | – 225      | 295          |
| <b>Bilanzgewinn</b>                                  | <b>296</b> | <b>37</b>    |

Das Ergebnis vor Steuern der MAN SE ist im Berichtsjahr um 900 Mio € auf 637 Mio € gestiegen. Dies resultiert im Wesentlichen aus dem Gewinn der Verschmelzung der MAN B&W Diesel Beteiligungs GmbH und der MAN Maschinen- und Anlagenbau GmbH auf die MAN SE sowie der Zuschreibung des im letzten Geschäftsjahr abgewerteten Beteiligungsbuchwerts von Scania AB. Das übrige Ergebnis enthält die Verwaltungskosten, das Zinsergebnis und sonstige Erträge und Aufwendungen. Aufgrund des negativen steuerlichen Ergebnisses fielen 2010 wie auch 2009 keine inländischen laufenden Steuern an. Der Ertragsteueraufwand von – 116 Mio € resultiert im Wesentlichen aus aperiodischen Steuern.

Nach der Einstellung von 225 Mio € in die Gewinnrücklagen und einem Gewinnvortrag verbleibt ein Bilanzgewinn in Höhe von 296 Mio €. Vorstand und Aufsichtsrat der MAN SE schlagen der Hauptversammlung vor, den Bilanzgewinn von 296 Mio € (37 Mio €) zur Ausschüttung einer Dividende von 2,00 € je dividendenberechtigter Aktie (0,25 €) zu verwenden und den Restbetrag auf neue Rechnung vorzutragen.

### Vermögens- und Finanzlage

| Mio €                                       | 2010         | 2009         |
|---------------------------------------------|--------------|--------------|
| Anlagevermögen                              | 5 651        | 4 220        |
| Umlaufvermögen                              | 2 374        | 2 429        |
| <b>Bilanzsumme</b>                          | <b>8 025</b> | <b>6 649</b> |
| Eigenkapital                                | 2 311        | 1 828        |
| Finanzverbindlichkeiten                     | 4 886        | 4 174        |
| Übrige Verbindlichkeiten und Rückstellungen | 828          | 647          |
| <b>Bilanzsumme</b>                          | <b>8 025</b> | <b>6 649</b> |

Das Anlagevermögen betrifft vor allem Anteile an verbundenen Unternehmen.

Das Umlaufvermögen enthält im Wesentlichen die Forderungen aus dem Finanzverkehr und die Flüssigen Mittel, die aus der zentralen Finanzierung der Gruppe durch die MAN SE stammen. Auch die Finanzverbindlichkeiten stammen aus der zentralen Finanzierung der Gruppe durch die MAN SE.

### Sonstiges

Die Regelungen zur Ernennung und Abberufung der Mitglieder des Vorstands der MAN SE sowie über die Änderungen der Satzung entsprechen den gesetzlichen Vorschriften.

Die Grundzüge des Vergütungssystems für die Vorstände sowie für die Mitglieder des Aufsichtsrats sind im Vergütungsbericht erläutert; der Vergütungsbericht ist Teil des Lageberichts im Sinne von § 315 HGB. Die individualisierten Bezüge für die Mitglieder des Vorstands und des Aufsichtsrats werden in den Kapiteln »Vergütung des Vorstands« und »Vergütung des Aufsichtsrats« im »Konzernanhang« dargestellt. Am 31. Dezember 2010 beschäftigte die MAN SE 219 Mitarbeiter einschließlich Leiharbeitnehmern (Vorjahr 178).

# Konzernlagebericht

## Risikobericht und Ausblick

### Risikomanagement

Unternehmerisches Handeln ist ständig Risiken ausgesetzt. Die MAN Gruppe definiert Risiko als die Gefahr, dass Ereignisse oder Entscheidungen und Handlungen das Unternehmen daran hindern, definierte Ziele zu erreichen bzw. Strategien erfolgreich zu realisieren. Um Chancen auf den Märkten zu nutzen, geht das Unternehmen bewusst Risiken ein, wenn dadurch ein angemessener Beitrag zur Steigerung des Unternehmenswerts erwartet wird. Dazu ist ein wirksames, auf die Belange der Geschäftsaktivitäten ausgerichteter Risikomanagementsystem erforderlich.

Das Risikomanagement der MAN Gruppe ist ein untrennbarer Bestandteil der Unternehmenssteuerung und der Geschäftsprozesse. Die strategische Unternehmensplanung, das interne Berichtswesen, das interne Kontrollsystem und das Compliance-System bilden die Kernelemente des Risikomanagementsystems. Die strategische Unternehmensplanung soll u. a. gewährleisten, langfristige Risiken und Chancen frühzeitig zu identifizieren und einzuschätzen, um geeignete strukturelle Maßnahmen zu ergreifen. Das interne Berichtswesen ist auf allen Konzernebenen u. a. darauf ausgelegt, aktuelle und relevante Informationen über die Entwicklung der wesentlichen Risiken und die Wirksamkeit der Maßnahmen zur Risikobegrenzung frühzeitig zu liefern. Aufbauend auf der Risikoidentifikation steht die gezielte Überwachung und Steuerung von Risiken im Fokus des internen Kontrollsystems. Aufgabe des Compliance-Systems ist, das Management dabei zu unterstützen, frühzeitig Risiken aus Compliance-Themen zu erkennen und darauf zu reagieren. Es basiert auf einer Compliance-Organisation entsprechend der Struktur der MAN Gruppe sowie verschiedenen Prozessen und Steuerungsgremien zur Durchsetzung der Compliance-Anforderungen. Genauerer Aufbau und Wirkungsweise der Compliance-Organisation im Abschnitt »Compliance-System«.

Die Verantwortung für die Einrichtung und Aufrechterhaltung eines angemessenen und zielgerichteten Risikofrüherkennungssystems liegt beim Vorstand des MAN Konzerns. Der Vorstand hat Umfang und Ausrichtung des Risikomanagementsystems und internen Kontrollsystems in eigener Verantwortung anhand der unternehmensspezifischen Anforderungen definiert. Das Führungskonzept »Industrial Governance« sieht dezentrale Entscheidungsprozesse in der MAN Gruppe vor und folglich auch ein entsprechend organisiertes Risikomanagement. Das Management der Bereiche ist somit dafür verantwortlich, dass sämtliche Konzernunternehmen in das Risikomanagementsystem und interne Kontrollsystem eingebunden sind.

Die konzernweit gültige Richtlinie für Risikomanagement und internes Kontrollsystem enthält verbindliche Regelungen für die Identifikation, Analyse, Bewertung, Steuerung und Überwachung wesentlicher Risiken und Chancen sowie der internen Kontrollen innerhalb der MAN Gruppe und sorgt durch die darin formulierten Grundsätze und Prozesse für ein konzernweit einheitliches Verständnis des Risikomanagement- und internen Kontrollsystems. Für den Risikomanagementprozess und das interne Kontrollsystem sind Funktionen und Gremien etabliert, die auf Konzernebene und in den jeweiligen Bereichen gleichermaßen aufgebaut sind. So gibt es in den wesentlichen Gesellschaften des Konzerns Koordinatoren für Risiken und Kontrollen, die die kontinuierliche Weiterentwicklung und Verbesserung des Risikomanagementprozesses und des internen Kontrollsystems steuern. In den einzelnen Bereichen des Konzerns sind grundsätzlich fachbereichsübergreifende Risikoboards eingerichtet. Aufgabe der Risikoboards im Rahmen des Risikomanagements ist es, die aus den Fachbereichen gemeldeten Risiken zu beurteilen, zusätzliche Risiken zu identifizieren sowie Maßnahmen zur Minimierung der Risiken einzuleiten und zu überwachen. Zunächst werden die Risiken als kurzfristig, d. h. bis zu einem Jahr, oder als langfristig, d. h. bis zu drei Jahren, klassifiziert. Die Bewertung der Risiken erfolgt unter Berücksichtigung ihrer Eintrittswahrscheinlichkeit und Schadenshöhe gemäß einer Brutto- und Nettobewertung, wobei die Nettobewertung bereits risikomindernde Maßnahmen berücksichtigt. Zur Beurteilung der Wesentlichkeit einer solchen Nettobewertung wird das geplante Operative Ergebnis der jeweiligen organisatorischen Einheit herangezogen. Mittels einheitlich definierter Risikofelder können außerdem etwaige Risikokonzentrationen frühzeitig erkannt und

gehandhabt werden. Neben den Risiken werden auch Chancen, wesentliche Schwächen des internen Kontrollsystems und eingeleitete Maßnahmen der Gesellschaften kontinuierlich erhoben. Im Rahmen von Sitzungen des Konzern-Risikobords werden diese Risikoinformationen aus den Bereichen vierteljährlich mit dem Vorstand, der Konzernrevision sowie dem Konzerncontrolling analysiert und bewertet. Wenn erforderlich, werden weiterführende Maßnahmen zur Risikovermeidung bzw. Risikominderung festgelegt und nachgehalten, um das bestehende Risikomanagementsystem sowie das interne Kontrollsystem kontinuierlich weiterzuentwickeln und zu verbessern.

Die MAN Gruppe hat in den letzten Jahren das bestehende interne Kontrollsystem gemäß der Empfehlungen des Committee of Sponsoring Organizations of the Treadway Commission (COSO) strukturiert und konzernweit einheitlich dokumentiert, um so die Wirksamkeit der internen Kontrollen systematisch beurteilen zu können. Die Dokumentation umfasst sämtliche Standardgeschäftsprozesse sowie die darüber hinaus bekannten geschäftsspezifischen Risiken und alle erforderlichen Kontrollen der wesentlichen Gesellschaften der MAN Gruppe. Durch die regelmäßige Überprüfung des Kontrollsystems auf Vollständigkeit, geeignete Ausgestaltung sowie Effektivität der bestehenden Kontrollen soll sichergestellt werden, dass bestehende Regelungen zur Reduzierung von prozessualen und organisatorischen Risiken auf allen Ebenen innerhalb des MAN Konzerns eingehalten werden. Die internen Kontrollen richten sich auf die Begrenzung von Risiken wesentlicher Fehlaussagen in der Finanzberichterstattung,

von Risiken durch die Nichteinhaltung regulatorischer Normen bzw. durch betrügerische Handlungen sowie auf die Minimierung operativer/wirtschaftlicher Risiken (z. B. Vermögensgefährdungen durch unberechtigte operative Entscheidungen oder unberechtigt eingegangene Verpflichtungen). Das Kontrollumfeld sowie prozessübergreifende Kontrollen als Rahmen eines funktionsfähigen, operativen internen Kontrollsystems sind auf zentraler, übergreifender Ebene dokumentiert und werden regelmäßig im Hinblick auf deren Angemessenheit und Funktionsfähigkeit beurteilt. Über die Effektivität der internen Kontrollen sowie festgestellte Kontrollschwächen berichten die Verantwortlichen im Konzern-Risikobord dem Vorstand. Unterstützt wird die konzern einheitliche Dokumentation durch Abbildung der Kontrollstrukturen in einer Datenbanklösung. In dieser Datenbank sind die Kontrollen aller wesentlichen Gesellschaften der MAN Gruppe abgebildet. Die Relevanz der Gesellschaften wird jährlich anhand der Wesentlichkeit der Risikosituation auf Basis qualitativer und quantitativer Kriterien überprüft.

Die Konzernrevision kontrolliert im Rahmen ihrer Tätigkeit regelmäßig die Funktionsfähigkeit des Risikomanagementsystems und initiiert bei Bedarf entsprechende Maßnahmen. Zudem berücksichtigt sie bei der risikoorientierten Prüfung die Informationen aus der Risikoerhebung und prüft ggf. wesentliche Risikosachverhalte. Der Abschlussprüfer prüft das Risikofrüherkennungssystem auf seine Eignung, Entwicklungen, die den Fortbestand des Unternehmens gefährden könnten, frühzeitig zu erkennen. Die Wirksamkeit des internen Kontrollsystems auf Prozessebene wird von geeigneten internen Testern mindestens einmal jährlich sowie von der Konzernrevision in Stichproben überprüft. Des Weiteren wird dem Aufsichtsrat im Rahmen seiner regelmäßigen Prüfungsausschusssitzungen über die Risikolage sowie über wesentliche Schwächen des internen Kontrollsystems der MAN Gruppe berichtet. Dennoch garantiert auch ein angemessen und funktionsfähig eingerichtetes System keine absolute Sicherheit bezüglich Identifikation und Steuerung der Risiken.

## Rechnungslegungsbezogenes Risikomanagementsystem und internes Kontrollsystem

Generell umfassen das Risikomanagementsystem und hierin das interne Kontrollsystem auch die rechnungslegungsbezogenen Prozesse sowie sämtliche Risiken und Kontrollen im Hinblick auf die Rechnungslegung. Dies bezieht sich auf alle Teile des Risikomanagementsystems und internen Kontrollsystems, die den Konzernabschluss wesentlich beeinflussen können.

Ziel des Risikomanagementsystems im Hinblick auf die Rechnungslegungsprozesse ist die Identifizierung und Bewertung von Risiken, die dem Ziel der Regelungskonformität des Konzernabschlusses entgegenstehen können. Erkannte Risiken sind hinsichtlich ihres Einflusses auf den Konzernabschluss zu bewerten, ggf. auch durch Hinzuziehen externer Spezialisten. Die Zielsetzung des internen Kontrollsystems in diesem Zusammenhang ist, durch Implementierung von entsprechenden Kontrollen hinreichende Sicherheit zu gewährleisten, dass trotz der identifizierten Risiken der Konzernrechnungslegungsprozess im Einklang mit den International Financial Reporting Standards, dem HGB sowie anderen rechnungslegungsrelevanten Regelungen und Gesetzen erfolgt und zuverlässig ist.

Sowohl Risikomanagementsystem als auch internes Kontrollsystem umfassen alle für den Konzernabschluss wesentlichen Gesellschaften mit den für die Abschlusserstellung relevanten Prozessen. Die für die Rechnungslegung relevanten Kontrollen richten sich insbesondere auf Risiken wesentlicher Fehlaussagen in der Finanzberichterstattung. Die Einschätzung der Risiken bezüglich der Wesentlichkeit basiert auf der Eintrittswahrscheinlichkeit sowie der finanziellen Auswirkung auf Umsatz, EBIT oder Bilanzsumme.

Wesentliche Elemente zur Risikosteuerung und Kontrolle in der Rechnungslegung sind die klare Zuordnung von Verantwortlichkeiten und Kontrollen bei der Abschlusserstellung, transparente Vorgaben mittels Richtlinien zur Bilanzierung und Abschlusserstellung,

angemessene Zugriffsregelungen in den abschlussrelevanten EDV-Systemen sowie die eindeutige Regelung von Verantwortlichkeiten bei der Einbeziehung externer Spezialisten. Das Vier-Augen-Prinzip und die Funktionstrennung sind auch im Rechnungslegungsprozess wichtige Kontrollprinzipien.

Die identifizierten Risiken und entsprechend ergriffenen Maßnahmen werden im Rahmen der quartalsweisen Berichterstattung zum Risikoboard aktualisiert und an den Vorstand berichtet. Die Effektivität von internen Kontrollen im Hinblick auf die Rechnungslegung wird mindestens einmal jährlich vorwiegend im Rahmen des Abschlusserstellungsprozesses beurteilt. Neben der Konzernrevision nimmt, bezogen auf die rechnungslegungsrelevanten Prozesse, auch der Abschlussprüfer eine Beurteilung im Rahmen seiner Prüfungstätigkeit vor.

Der Abschlussprüfer ist im Rahmen seiner Abschlussprüfung zudem verpflichtet, dem Prüfungsausschuss des Aufsichtsrats über wesentliche rechnungslegungsrelevante Risiken oder Kontrollschwächen sowie sonstige im Rahmen seiner Prüfungstätigkeit erkannten wesentlichen Schwächen des Risikomanagementsystems und internen Kontrollsystems zu berichten.

## Chancen und Risiken

Die wesentlichen Chancen und Risiken, die erhebliche Auswirkungen auf die Vermögens-, Finanz- und Ertragslage haben können, sind im Folgenden entsprechend der Struktur des Risikomanagementsystems der MAN Gruppe dargestellt. Diese sind anhand der fünf Risikofelder Markt, Produkte, Prozesse, Mitarbeiter und Finanzen klassifiziert.

### Markt

MAN sieht für das Jahr 2011 sowie auch mittel- bis langfristig in allen Bereichen Chancen für ein profitables Wachstum in den Transport- und Energiemärkten. Aus heutiger Sicht lässt sich kein signifikantes Risiko für die MAN Gruppe erwarten. Die grundlegenden weltwirtschaftlichen Trends wie die anhaltende wirtschaftliche Entwicklung, verstärkte internationale Arbeitsteilung und daraus resultierend weltweit steigende Transportstrecken und -volumina, der Investitionsbedarf der Öl- und Gasindustrie sowie der Innovationsbedarf aufgrund der sich entwickelnden globalen Klimapolitik werden sich fortsetzen. Durch die Strategie, die Position der MAN Gruppe in den BRIC-Staaten als derzeitige und zukünftige Wachstumsmärkte deutlich zu stärken, weitet MAN das Absatzpotenzial aus und wirkt so regionalen Konjunkturrisiken entgegen. So kann MAN durch die Partnerschaft mit Sinotruk in China am starken chinesischen Wachstum für schwere Lkw teilhaben. In Brasilien kann MAN als Marktführer für Lkw ab 5 t vom konjunkturellen Wachstum profitieren. Trotz des positiv erwarteten Wachstumstrends existieren aber in einem Umfeld, das weiterhin von Unsicherheit geprägt ist, auch Abwärtsrisiken für die weltwirtschaftliche Aktivität. So besteht durch die insgesamt höhere Nachfrage nach Öl und sonstigen Rohstoffen die Gefahr von Preissteigerungen auf den Beschaffungsmärkten. Dies wirkt sich negativ auf die Marge aus, wenn es MAN nicht gelingt, Preissteigerungen im Einkauf über die Produktpreise weiterzugeben. Auch können sich Protektionismusbestrebungen nachteilig auf das erwartete Wachstum auswirken. MAN beobachtet und bewertet laufend und sorgfältig das politische, rechtliche, soziale und finanzwirtschaftliche Umfeld, um die daraus resultierenden Chancen und Risiken rechtzeitig in die strategischen und operativen Entscheidungen einbeziehen zu können.

### Produkte

Als Spitzenanbieter im Technologiebereich ist es der Anspruch der MAN Gruppe, technologisch und wirtschaftlich führende Produkte zu entwickeln und in ausgezeichneter Qualität auf den Markt zu bringen. Ein Verzicht auf diesen Anspruch würde ein nicht zu verantwortendes Risiko für die Marktposition darstellen. Allerdings sind mit der Markteinführung neuer Produkte Konzept- und Marktrisiken verbunden. Diesen wird mit einer sorgfältigen strategischen Planung begegnet, die die Entwicklung im Markt- und Unternehmensumfeld analysiert. Mit der daraus resultierenden Produktplanung werden die umfangreichen Forschungs- und Entwicklungsaktivitäten gesteuert. Die Aufwendungen für Forschung und Entwicklung liegen seit vielen Jahren in einer Größenordnung von 3 bis 4 % des Umsatzes. Die Einführung von Motoren mit der Abgasnorm Euro V bei MAN Truck & Bus (ab dem Jahr 2012 bei MAN Latin America) sowie bei MAN Diesel & Turbo die Einführung der Technologie Diesel Combined Cycle im Rahmen von stationären Dieselmotoren, die zu einer um 10 bis 15 % höheren Effizienz führt, zeigen beispielhaft, dass diese Risiken gemeistert werden können.

Für bereits auf dem Markt eingeführte Produkte bestehen Risiken hinsichtlich der von Kunden erwarteten Qualität. Mangelhafte Qualität kann zu Garantie-, Gewährleistungs- und Kulanzkosten führen, aber auch langfristig zu Verlusten von Marktanteilen oder niedrigeren Produktmargen. Im Extremfall sind Ansprüche aus Produkthaftung und Schadensersatz vorstellbar. Die Identifizierung und Eingrenzung dieser Risiken beginnt für die MAN Gruppe bereits in der Produktentstehung. Ein standardisierter Produktentstehungsprozess stellt sicher, dass nur funktionierende und sichere Produktkonzepte zur weiteren Entwicklung gelangen. Lieferanten und durch diese gelieferte Produkte müssen zur Wahrung des hohen Qualitätsanspruchs ein strenges Freigabeverfahren bestehen. Nach Produktionsanlauf sorgen festgelegte Qualitätssicherungsmaßnahmen innerhalb des Produktionsprozesses dafür, dass Herstellungsfehler rechtzeitig erkannt und abgestellt werden. Auch in der Nutzungsphase werden gemeinsam mit den Servicebetrieben alle auftretenden Fehler gemeldet, ausgewertet und abgestellt.



Aus lang laufenden Kundenverträgen ergeben sich zusätzliche Risiken: Änderungen der politischen oder wirtschaftlichen Rahmenbedingungen in einem Markt können Mehraufwendungen bei der Abwicklung von Großprojekten zur Folge haben. Bei MAN Truck & Bus stellen Rückkaufverpflichtungen ein Risiko dar, falls die am Markt künftig erzielbaren Gebrauchtwagenerlöse sich gegenüber den Erwartungen bei Vertragsabschluss wesentlich verändern. Im Projektgeschäft bestehen Risiken aus Garantien oder Bürgschaftsverpflichtungen. Diese sind aber häufig durch Drittbürgschaften oder, im Falle von Anzahlungsbürgschaften, durch erhaltene Anzahlungen von Kunden gedeckt. Durch intensive Prüfungen vor und nach der Bürgschaftsvergabe werden Ausfälle gering gehalten. Das weiter stark ansteigende Turnkey-Geschäft von MAN Diesel & Turbo, bei dem MAN als Generalunternehmer schlüsselfertige Dieselmotorenwerke liefert, beinhaltet besondere Risiken im Rahmen der termingerechten und ordnungsgemäßen Leistungserstellung der Sublieferanten und damit für MAN Diesel & Turbo selbst. Diesem Risiko trägt das Unternehmen durch ein geeignetes Projektcontrolling über sämtliche Projektphasen Rechnung.

### Prozesse

Die MAN Gruppe begreift die ständige Optimierung der Geschäftsprozesse in Entwicklung, Einkauf, Produktion, Vertrieb und Verwaltung als eine zentrale und laufende Aufgabe. So werden die Zulieferer präventiv und fortlaufend überwacht, um mögliche Lieferverzögerungen oder Lieferantenausfälle frühzeitig zu erkennen und in ihren Auswirkungen zu verringern. Mangelhafte Prozesse in diesen Bereichen führen zu überhöhten Aufwendungen und über eine zu hohe Mittelbindung zu Finanzierungsrisiken. Darüber hinaus führen überhöhte Vorräte regelmäßig zu erhöhten Verlustrisiken durch Schwund oder Verschrottung, überhöhte Forderungen erhöhen hingegen das Ausfallrisiko. MAN treibt mit Nachdruck und Konsequenz eine reduzierte Mittelbindung durch die Verbesserung der dahinterliegenden Prozesse systematisch voran.

In der Abwicklung von Großprojekten erwachsen spezielle Risiken, zu denen Mängel bei der Vertragsgestaltung, Fehler in der Auftragskalkulation, veränderte wirtschaftliche und technische

Bedingungen nach Vertragsabschluss und unzureichende Leistungen von Unterauftragnehmern der Konsortialpartner zählen. Die MAN Gruppe minimiert diese Risiken durch ein umfassendes Projekt- und Auftragscontrolling. So setzt beispielsweise MAN Diesel & Turbo im Wachstumsfeld Power Plants ein systematisches und umfassendes Risikomanagement schon in der Angebotsphase ein. Während der Projektrealisierung werden die Kalkulationen und die Risikobewertungen laufend überprüft und angepasst. In regelmäßigen Projektreviews werden erforderliche Maßnahmen festgelegt und verfolgt. Großprojekte werden zusätzlich von den Bereichen Controlling und Finance der MAN SE bewertet und dem Vorstand der MAN SE zur Genehmigung vorgelegt. Bereits genehmigte und laufende Aufträge, die deutlich von der geplanten Entwicklung abweichen, werden als kritische Aufträge in einem besonderen Berichtswesen verfolgt und dem Vorstand der MAN SE vorgelegt.

Die Geschäftsprozesse der MAN Gruppe werden wie bei jedem modernen Unternehmen stark durch Informationstechnologie unterstützt. Neben den damit verbundenen Effizienzgewinnen entstehen daraus aber auch Risiken. Teile der Infrastruktur können durch Unfälle, Katastrophen oder technische Störungen ausfallen und damit verschiedenste Geschäftsprozesse beeinträchtigen oder vollständig zum Erliegen bringen. Außerdem besteht die Gefahr des unberechtigten Zugriffs, Diebstahls oder der Vernichtung von betrieblichen Informationen und Daten. Der hieraus entstehende finanzielle Schaden und Imageverlust kann einzelne MAN-Gesellschaften oder sogar die gesamte MAN Gruppe treffen.

Um die vier Hauptanforderungen der Informationssicherheit, nämlich Verfügbarkeit, Integrität, Vertraulichkeit und Authentizität, zur Verringerung bzw. Vermeidung von Risiken zu erfüllen, werden moderne Hard- und Softwaretechnologien sowie effektive IT-Organisations- und Kontrollmechanismen zur Unterstützung der Businessprozesse eingesetzt. Insbesondere durch die Zentralisierung und Outsourcing des IT-Betriebs und die konsequente Einführung von IT-Service-Managementprozessen gemäß ITIL (IT Infrastructure Library – Organisationsstandard für IT-Prozesse) sowie in zunehmendem Maße eine Organisation der Informationssicherheit nach dem international anerkannten Sicherheitsstandard ISO 27001 hat die MAN Gruppe die Transparenz und Betriebssicherheit der IT-Infrastruktur gegenüber dem bis Mitte 2009 rein MAN-intern abgebildeten IT-Betrieb deutlich verbessert.

Eine entscheidende Rolle kommt dem internen Kontrollsystem zu, welches darauf ausgerichtet ist, in allen Geschäftsprozessen die Einhaltung der relevanten Regelwerke sicherzustellen und somit zum Vermögensschutz und zur Reduzierung von Risiken beizutragen. Im Hinblick auf die Rechnungslegung liegt der Schwerpunkt auf der Optimierung des Abschlusserstellungsprozesses, um die vollständige, zeitnahe und richtige Verarbeitung sämtlicher Transaktionen und Geschäftsvorfälle zu gewährleisten.

### Mitarbeiter

Einen wesentlichen Erfolgsfaktor von MAN stellen hoch qualifizierte Fach- und Führungskräfte dar, die mit MAN-Produkten technologische Standards setzen. Chancen für die MAN Gruppe liegen in der Qualifizierung, der internationalen Ausrichtung und der Innovationsfähigkeit der Mitarbeiter, die kontinuierlich verbesserte und zukunftsweisende Produkte, Dienstleistungen und Prozesse entwickeln. Risiken bestehen darin, Schlüsselpositionen nicht entsprechend den zukünftigen Anforderungen besetzen zu können. Hierzu bedarf es eines ganzheitlichen Talentmanagements, um hoch qualifizierte Nachwuchskräfte bei MAN zu identifizieren. Mit vielfältigen Aktivitäten im Personalmarketing ist es MAN gelungen, exzellente Fach- und Führungskräfte an das Unternehmen zu binden. Die Teilnahme an Rankings trägt dazu bei, MAN als attraktiven Arbeitgeber zu positionieren und damit weltweit auf die benötigten Fach- und Führungskräfte zurückgreifen zu können. Die Nachbesetzung von Führungspositionen aus den eigenen Reihen wird durch eine systematische Nachfolgeplanung unterstützt. Im Rahmen der Internationalisierungsstrategie der MAN Gruppe wird sich auch in Zukunft die Weiterbildung von Fach- und Führungskräften u. a. auf die Stärkung der interkulturellen Kompetenz konzentrieren.

### Finanzen

Die MAN Gruppe ist als weltweit tätiger Konzern Finanzmarktrisiken ausgesetzt. Diesen wird mit organisatorischen Maßnahmen in Verbindung mit der Verwendung von geeigneten Finanzinstru-

menten begegnet. Die Finanzierungsaufgaben der MAN Gruppe und ihrer operativen Gesellschaften werden zentral von der MAN SE wahrgenommen.

Für kurzfristige Finanzierungserfordernisse müssen der MAN Gruppe ausreichende Liquiditätsreserven zur Verfügung stehen. Grundlage der Disposition ist eine detaillierte Finanzplanung, die in der MAN Gruppe auf drei Ebenen durchgeführt wird. Im Rahmen der Unternehmensplanung wird die Liquiditäts- und Finanzierungslage für den Planungshorizont von drei Jahren prognostiziert. In den vierteljährlichen Vorschauen wird revolvierend die Liquiditätsentwicklung für die nächsten vier Quartale geplant. Dazu kommt eine Drei-Monats-Feinplanung, in welcher der kurzfristige Liquiditätsbedarf abgeschätzt wird.

Bei der Anlage etwaiger Liquiditätsreserven besteht grundsätzlich das Risiko, dass Anlagen aufgrund der Zahlungsunfähigkeit einer Bank oder eines Wertpapieremittenten ausfallen. Aus diesem Grund achtet MAN auf eine konservative Anlage der Liquiditätsreserven und auf eine Risikostreuung durch Aufteilung der Anlagen auf mehrere Finanzinstitute und Emittenten. Es werden weitestgehend nur renommierte Finanzinstitute mit ausgezeichneter Bonität (Investment Grade) berücksichtigt.

Beim Management von Währungs- und Zinsänderungsrisiken beschränkt sich MAN auf die Verwendung marktgängiger Instrumente, die zur Sicherung von bestehenden Grundgeschäften und teilweise für geplante Umsätze genutzt werden. Derivate und sonstige Sicherungsgeschäfte werden in der Regel über die zentrale Finanzabteilung des Konzerns abgeschlossen und unterliegen strengen internen Kontrollen. Sollten devisenrechtliche Bestimmungen einen Abschluss durch die zentrale Finanzabteilung nicht ermöglichen, erfolgt der Abschluss im Namen und auf Rechnung der jeweiligen Konzerngesellschaft.

Wechselkursänderungen können sowohl Preise für Güter und Dienstleistungen als auch Ergebnismargen beeinflussen. In der MAN Gruppe werden grundsätzlich alle fest kontrahierten Kundenaufträge, eigene Bestellungen sowie sonstige Transaktionen gegen Währungsrisiken abgesichert. Zudem gibt es Sicherungsmaßnahmen für geplante Umsätze aus dem Seriengeschäft und für

Kundenprojekte mit hoher Abschlusswahrscheinlichkeit. Trotz dieser Sicherungsmaßnahmen verbleibt ein Restrisiko, falls Umsatzzahlungen in Höhe und Zeitpunkt von der Planung abweichen.

Ein weiteres Währungsrisiko besteht aber auch in der durch Währungskurse veränderten Kaufkraft des Kunden, welches MAN nicht absichert. Die Abwertung einer Währung kann kurzfristig zu Einbußen in den betroffenen Absatzgebieten führen. Langfristig versucht MAN, durch ständige Verbesserung der Produktivität und geografische Diversifikation, unabhängig von den aktuellen Währungskursen, konkurrenzfähige Produkte und Leistungen anzubieten.

Negative Effekte können sich auch aus geänderten Zinssätzen ergeben. Um den damit verbundenen Risiken zu begegnen, werden Zinssicherungsgeschäfte abgeschlossen. Dies gilt insbesondere für die Kundenfinanzierungen, die regelmäßig zu festen Zinsen abgeschlossen werden. Grundsätzlich verwendet MAN originäre oder derivative Finanzinstrumente ausschließlich für Zwecke des Risikomanagements. Ziel des Einsatzes aller Sicherungsmaßnahmen ist jeweils, das wirtschaftliche Risiko gegenüber Währungs- und Zinsänderungsrisiken auf ein Minimum zu reduzieren. Zur Risikoberichterstattung über die Verwendung von Finanzinstrumenten verweisen wir auf den »Konzernanhang«, Anmerkung (30/31).

Für die Herstellung der Produkte werden beträchtliche Mengen an Rohstoffen benötigt. Aus den Preisentwicklungen auf den Rohstoffmärkten oder Preisgleitklauseln bei Lieferantenverträgen können sich Risiken für das Operative Ergebnis ergeben. In der Regel wird diesen Risiken durch langfristige Lieferverträge oder Preisgleitklauseln bei Abnehmerverträgen begegnet. Sollten Abnehmerverträge eine Preisgleitklausel nicht vorsehen, können gezielte Rohstoffpreissicherungen eingesetzt werden.

Wesentliche strategische Risiken sind im Zusammenhang mit einer Veränderung des Beteiligungsportfolios möglich. So können aus Akquisitionen Risiken entstehen, wenn sich die dem jeweiligen Kaufpreis zugrunde liegenden Annahmen, beispielsweise hinsichtlich erzielbarer Synergien, nicht realisieren lassen. Gleichzeitig beinhalten Desinvestitionsmaßnahmen das Risiko, dass bestimmte Geschäftsaktivitäten nicht wie geplant veräußert werden können.

Für eventuelle Risiken im Zusammenhang mit der Ferrostaal-Transaktion wird auch auf die Anmerkung »Desinvestitionen« sowie auf den »Konzernanhang« verwiesen.

Aufgrund von Akquisitionen können sich ferner die erforderlichen Finanzierungsstrukturen der MAN Gruppe verändern, sodass potenziell höhere Finanzierungskosten bzw. ein potenziell eingeschränkter finanzieller Spielraum entstehen können.

Kontrahenten- und Länderrisiken werden durch sorgfältige Auswahl der Geschäftsfälle und -partner, außerdem durch geeignete Vertrags- und Zahlungsbedingungen reduziert. Verbleibende Risiken werden entsprechend der Bonität der Schuldner klassifiziert und über dokumentären Zahlungsverkehr (Akkreditive) und erhaltene Avale an Banken oder durch Kreditausfallversicherungen an Versicherungsunternehmen weitgehend übertragen. Dennoch bestehen im Bereich der Kundenfinanzierung, dem Leasing- und Bankgeschäft inhärente Bonitäts- und Kreditrisiken, die nicht absicherbar sind und nur durch vorherige detaillierte Bonitätsprüfung und laufendes Kreditmanagement eingegrenzt werden können. Die Bereitstellung von Avalen erfolgt zentral durch die MAN SE, um eine einheitliche und restriktive Vergabe zu gewährleisten. Besonderer Wert wird darauf gelegt, durch Vertragsgestaltung und Abwicklung eine ungerechtfertigte Inanspruchnahme möglichst auszuschließen.

Die leistungsorientierten Pensionsverpflichtungen der MAN Gruppe sind zur Reduzierung der inhärenten finanzwirtschaftlichen Risiken und im Ausland auch aufgrund gesetzlicher Vorgaben weitgehend durch vom Betriebsvermögen separiertes Pensionsvermögen gedeckt. Das Pensionsvermögen wird unter angemessener Beachtung der Cashflow-Struktur der Pensionsverbindlichkeiten auf Basis konservativer Anlagerichtlinien (Prudent Investor) von externen Investmentmanagern angelegt. Der Marktwert des Pensionsvermögens unterliegt üblichen, insbesondere aus veränderten Zinsniveaus und Aktienkursen resultierenden Schwankungen. Dabei werden zinsinduzierte Veränderungen teilweise durch eine gegenläufige Entwicklung des Anwartschaftsbarwerts der Pensionsverpflichtungen kompensiert. Bei der Bewertung von Pensionsverbindlichkeiten sind zudem biometrische Risiken, im Wesentlichen Lebenserwartung bzw. Invalidität oder Tod während des aktiven Erwerbslebens, zu berücksichtigen. Dem Trend einer sich laufend erhöhenden Lebenserwartung wurde für aktive

Mitarbeiter im Inland durch die Umstellung von Renten- auf Kapitalleistung gefolgt. In Großbritannien wurden alle leistungsorientierten Pensionspläne in den vergangenen Jahren für Neueintritte geschlossen.

#### Beurteilung zur Risikosituation des Konzerns

Auf Basis des von der MAN Gruppe etablierten Risikomanagementsystems stellt der Vorstand fest, dass zum jetzigen Zeitpunkt keine Risiken erkennbar sind, die zu einer dauerhaften und wesentlichen Beeinträchtigung der Vermögens-, Finanz- und Ertragslage der MAN Gruppe führen könnten. Das eingeführte Risikomanagementsystem sowie die damit im Zusammenhang stehenden organisatorischen Maßnahmen erlauben es dem Vorstand, Risiken zeitnah zu erfahren, um adäquate Maßnahmen einzuleiten.

Risikomanagement ist eine dauerhafte und unablässige Aktivität des Unternehmens und unterliegt selbstverständlich einer ständigen Entwicklung. Das bedeutet für MAN, dass das Risikomanagementsystem und das interne Kontrollsystem auch zukünftig weiter optimiert und an veränderte Umfeldbedingungen angepasst werden. Der Fokus der Aktivitäten im Jahr 2011 wird angesichts der positiveren, aber teilweise noch immer unsicheren, konjunkturellen Entwicklung nach wie vor auf dem Management der finanziellen Risiken, der Marktrisiken sowie der Produktrisiken liegen.

## Rechtsstreitigkeiten/ Rechtliche Verfahren

Für Informationen im Zusammenhang mit »Rechtsstreitigkeiten/Rechtliche Verfahren« siehe »Desinvestitionen«, »Ereignisse nach dem Bilanzstichtag« und »Konzernanhang«.

## Compliance

Im Berichtszeitraum hat MAN das im Juli 2009 aufgesetzte 5-Punkte-Programm zur Verbesserung der Korruptionsabwehr durch den Aufbau einer eigenständigen Compliance-Organisation und die Einführung effektiver Compliance-Maßnahmen weiter umgesetzt und damit ersetzt. Das MAN-Compliance-Programm wurde unter Berücksichtigung der Struktur, der Besonderheiten und der Bedürfnisse der MAN Gruppe individuell für MAN entwickelt.

#### Compliance-Organisation

Zum 1. Januar 2010 hat MAN einen neuen Compliance-Bereich eingerichtet, zu dessen Aufgaben neben der Korruptionsbekämpfung auch die Verhinderung bzw. Aufdeckung von Verstößen in den Bereichen Kartellrecht und Datenschutz gehören. Der Bereich wird vom Chief Compliance Officer geleitet, der unmittelbar an den Sprecher des Vorstands der MAN SE und fachlich an den Prüfungsausschuss des Aufsichtsrats berichtet. Der Compliance-Bereich umfasst zurzeit 30 Mitarbeiter und befindet sich weiterhin im Aufbau. 20 Mitarbeiter gehören dem in der MAN SE angesiedelten Corporate Compliance Office an, das für die Konzeption und Weiterentwicklung des MAN-Compliance-Systems sowie für konzernübergreifende Compliance-Themen verantwortlich ist. Zehn Mitarbeiter sind in der Compliance-Beratung in den Teilkonzernen tätig. So hat jeder Teilkonzern einen Compliance Officer, der durch Compliance Manager in verschiedenen Geschäftseinheiten bzw. Vertriebsregionen unterstützt wird. Die Compliance Officer der Teilkonzerne berichten unmittelbar an den Chief Compliance Officer der MAN SE, die Compliance Manager wiederum unmittelbar an den zuständigen Compliance Officer. Neben der intensiven Beratungsfunktion der Compliance-Mitarbeiter in den Teilkonzernen

sind diese für die Umsetzung der zentral definierten Compliance-Maßnahmen in den jeweiligen Geschäftseinheiten bzw. Vertriebsregionen weltweit zuständig. Im Berichtszeitraum hat das Compliance Steering Committee insgesamt 14 Mal getagt. Hier hat der Chief Compliance Officer den Gesamtvorstand der MAN SE sowie die Leiter der anderen Fachbereiche über den Fortschritt des Aufbaus der Compliance-Organisation sowie der Einführung neuer Compliance-Maßnahmen informiert und weitere Schritte abgestimmt.

### Compliance Risk Assessment

Im 1. Quartal 2010 führte der Compliance-Bereich ein konzernweites Compliance Risk Assessment durch. Ziel war die Identifizierung von möglichen Compliance-Risiken der Geschäftsmodelle der Geschäftsbereiche bzw. Vertriebsregionen in allen Teilkonzernen. Aus den Ergebnissen des Compliance Risk Assessment wurden u. a. sowohl die Struktur als auch die Dimensionierung der Compliance-Organisation, das auf die Bedürfnisse der MAN zugeschnittene Compliance-Programm sowie weitere Maßnahmen zur Vermeidung von Compliance-Risiken abgeleitet.

### Code of Conduct und Compliance-Richtlinien

Im Berichtszeitraum hat MAN einen neuen Code of Conduct und Compliance-Richtlinien zur gezielten Vorbeugung von Korruptionsstraftaten erlassen.

Der neue Code of Conduct ersetzt den Code of Conduct aus dem Jahr 2006 und richtet sich gezielt an die Mitarbeiter von MAN. Er konkretisiert die Unternehmenswerte von MAN (zuverlässig, innovativ, dynamisch und offen) und gibt für Situationen, in denen die Mitarbeiter besonders auf verantwortungsvolles Handeln achten müssen, konkrete und verbindliche Leitlinien vor. Anhand von Beispielen beschreibt er, wie mit Konfliktsituationen im alltäglichen Geschäft umgegangen werden kann. Der Code of Conduct ist in elf Sprachen verfügbar und wurde an alle Mitarbeiter im Konzern verteilt. Der Code of Conduct ist auch im Intranet und Internet verfügbar.

Im Mai 2010 hat MAN eine Richtlinie zum Umgang mit Geschenken, Bewirtungen und Einladungen erlassen, um sicherzustellen, dass sich derartige Zuwendungen im Rahmen des Angemessenen bewegen und nicht zur Beeinflussung von Geschäftspartnern oder Behörden eingesetzt werden. Im August 2010 folgte eine Richtlinie zur Einschaltung von sogenannten Business Partnern. Diese Richtlinie stellt Vorgaben für die Beauftragung von Vermittlern, Vertretern, Beratern oder anderen vertriebsunterstützend tätigen Geschäftspartnern auf. Durch konkrete Prozessschritte bei der Überprüfung der Business Partner (mittels einer webbasierten Prüfungsapplikation, siehe dazu unten), der Vertragsgestaltung, der Dokumentation der Geschäftsbeziehung sowie der Auszahlung der Vergütung soll sichergestellt werden, dass solche Business Partner nicht die von MAN gezahlte Vergütung als Korruptionsmittel einsetzen. Schließlich hat MAN im September 2010 eine Richtlinie zum Umgang mit Spenden und Sponsoring-Maßnahmen verabschiedet. Alle diese Richtlinien gelten konzernweit und unmittelbar.



### Compliance-Trainings

Der Compliance-Bereich hat im Berichtszeitraum über 4000 Mitarbeiter weltweit in Präsenztrainings zu Compliance-Themen geschult. Als Auftaktveranstaltung zu diesen Schulungsmaßnahmen fand im Juni 2010 ein ganztägiger Compliance Summit für ca. 200 Führungskräfte unter Teilnahme aller Vorstände der MAN SE und der Teilkonzerne statt. Das Top-Management wurde über die Einführung und den Aufbau der Compliance-Organisation informiert, für das Thema Compliance sensibilisiert und verpflichtet, bei der Implementierung von Compliance im gesamten Konzern aktiv mitzuwirken. Es folgten insgesamt 166 mehrstündige Compliance Awareness Trainings in Deutschland und im Ausland (Brasilien, China, Dänemark, Frankreich, Mexiko, Norwegen, Polen, Schweiz und Südafrika), in denen Mitarbeitern, die potenziell Compliance-Risiken ausgesetzt sind, die MAN-Compliance-Organisation vorgestellt und Basiswissen zu den Themen Antikorruption und Kartellrecht vermittelt wurde. Diese Compliance Awareness Trainings werden im Geschäftsjahr 2011 weiter fortgesetzt.

### Compliance Helpdesk

Im Februar 2010 hat der Compliance-Bereich ein Compliance Helpdesk eingerichtet, bei dem Mitarbeiter Fragen rund um das Thema Compliance telefonisch oder per E-Mail stellen können. Im Berichtszeitraum sind insgesamt über 1 100 Fragen beim Compliance Helpdesk eingegangen und beantwortet worden.

### Business Partner Approval Tool

Die Richtlinie zur Einschaltung von Business Partnern schreibt verbindlich die Anwendung des sogenannten Business Partner Approval Tools vor, einer webbasierten Applikation, mit der schnell, transparent und umfassend die Integrität eines Business Partners überprüft und eine Zusammenarbeit mit ihm freigegeben werden kann. Das Business Partner Approval Tool wurde im Berichtszeitraum von der Compliance-Organisation in Zusammenarbeit mit Vertriebsmitarbeitern entwickelt und ist seit September 2010 an den ersten Standorten im Einsatz. Es wurden nahezu 500 Vertriebsmitarbeiter im Berichtszeitraum zur Anwendung dieses Tools in vier Ländern (Deutschland, Österreich, Russland, Schweiz) geschult. Die Einführung des Tools sowie Schulungen an weiteren Standorten werden im Geschäftsjahr 2011 weiter fortgesetzt.

### Hinweise zu Compliance-Verstößen

Compliance-Verstöße werden von MAN nicht toleriert. Innerhalb des Compliance-Bereichs gibt es eine Abteilung, die Hinweise zu Compliance-Verstößen, ggf. mit Unterstützung der Revision oder involvierten Fachabteilungen, untersucht. Aufgedeckte Verstöße werden im Rahmen der arbeitsrechtlich zulässigen Sanktionsmöglichkeiten geahndet. Im Einzelfall wird auch die zuständige staatliche Ermittlungsbehörde über den Verstoß informiert. Die Erkenntnisse aus der Aufklärung der Compliance-Verstöße werden genutzt, um das Compliance-System kontinuierlich zu verbessern. Derzeit können Mitarbeiter Compliance-Verstöße intern (beim Vorgesetzten, der Compliance-, der Personal- oder Rechtsabteilung) oder extern bei einem Ombudsman melden. Anfang 2011 wird MAN darüber hinaus ein webbasiertes Hinweisgeberportal in elf verschiedenen Sprachen einführen, bei dem alle Mitarbeiter von MAN sowie Dritte schwerwiegende Compliance-Verstöße vertraulich in der jeweiligen Landessprache melden können.

### Anti-Korruptions-Organisationen

MAN führt Gespräche mit verschiedenen Anti-Korruptions-Organisationen, um die internationalen Anforderungen an eine effektive Compliance-Organisation zu erfüllen und in gemeinsamen Projekten Korruptionsprävention zu betreiben. Seit September 2010 ist MAN Mitglied von Transparency International, einer nicht staatlichen Einrichtung, die sich dem Kampf gegen Korruption widmet.

## Ausblick

### Erholung der weltweiten Konjunktur; aufwärts mit weniger Schwung

Das Management geht davon aus, dass sich die weltweite konjunkturelle Erholung im Jahr 2011 fortsetzt und sich dies weiter positiv auf die Transport- und Energiemärkte auswirken wird. Für die nächsten beiden Jahre wird eine Fortsetzung der wirtschaftlichen Erholung erwartet, wobei sich die seit dem 2. Halbjahr 2010 abzeichnende Verlangsamung in der ersten Jahreshälfte 2011 fortsetzen wird. Dabei wird insbesondere der Einfluss konjunkturstimulierender Maßnahmen aus den Industrieländern zurückgehen. Für die Industrienationen wird ein langsames Wachstum als 2010 erwartet, welches auch auf die Schwellenländer ausstrahlt und deren Exportdynamik bremst. Dies führt nach den Prognosen von IHS Global Insight zu einer leichten Abschwächung des weltweiten Wachstums gegenüber 2010 auf 3,3 % im Jahr 2011, aber zu einer erneuten leichten Belebung auf 3,7 % im Jahr 2012. Dabei wird für die BRIC-Staaten insbesondere 2011 ein dreimal so hohes Wachstum wie für die Industrienationen unterstellt. Ein schwacher Dollar und das Wachstum in den Entwicklungsländern werden sich positiv auf den Export auswirken.

Im Geschäftsfeld Commercial Vehicles ist in den BRIC-Staaten in den kommenden Jahren ein überdurchschnittliches Nachfrageplus zu erwarten. Der russische Nutzfahrzeugmarkt, der in den vergangenen Jahren eine tiefe Krise durchlief, wird voraussichtlich vor allem aufgrund steigender Nachfrage im Energiesektor in den nächsten beiden Jahren jährlich durchschnittlich um 35 % wachsen. Märkte wie Indien und China, die aufgrund von Steuervergünstigungen auf Neufahrzeugkäufe boomten, werden sich von den erreichten Rekordniveaus leicht verbessern. China wird dabei mit Abstand weiterhin weltgrößter Markt für schwere Lkw bleiben. Der brasilianische Markt für Nutzfahrzeuge blieb während der Finanzkrise relativ stabil und sollte in den kommenden Jahren im einstelligen Prozentbereich wachsen, solange die derzeit günstigen Finanzierungsbedingungen unverändert bleiben. Weltweit wird der Absatz schwerer Nutzfahrzeuge 2011 weiter steigen; der VDA erwartet ein Wachstum von 8 %.

In der Schiffbaubranche wird aufgrund von noch vorhandenen Überkapazitäten, unter anderem bei Containerschiffen und Massengutfrachtern, der Preisdruck in den kommenden Quartalen weiter hoch bleiben. In den kommenden Jahren wird daher nur mit leichten Zuwachsraten im Bereich der Marinemotoren gerechnet. Insbesondere China wird auf seinem Weg zur weltgrößten Schiffbaunation kontinuierlich voranschreiten und wesentlichen Anteil am Wachstum haben. Im Geschäftsbereich Turbomachinery wird für die kommenden Jahre ein kontinuierliches moderates Wachstum erwartet. Derzeit wichtige Märkte für das Öl- und Gasgeschäft sind insbesondere China, der Nahe Osten und Brasilien. Die zukünftige Nachfrage in Europa nach neuen Kraftwerken wird im Wesentlichen durch den Ersatz alter Kapazitäten getrieben werden. Um die Klimaschutzziele zu erreichen, ergeben sich dabei Chancen, verstärkt alternative Technologien, wie etwa die Solarenergie, zum Einsatz zu bringen. Die Bedeutung von Erdgas bzw. LNG (Liquified Natural Gas) wird sowohl in der Schifffahrt als auch bei stationären Anwendungen weiter zunehmen.

Die Erholung in den USA und Europa wird sich 2011 zunächst abschwächen und dann im Jahresverlauf wieder kräftiger werden. Das Institut für Weltwirtschaft (IfW) prognostiziert für die USA eine Wachstumsrate von 2,5 % für 2011 und unterstreicht damit die Erwartung, dass der weitere Aufschwung in den USA gedämpfter verlaufen wird. Im Vergleich dazu betrug das Wirtschaftswachstum 2,8 % im Jahr 2010.

Für den Euroraum ist die Prognose für 2011 recht gespalten. Das heterogene Bild ist zum einen durch ein anhaltendes realwirtschaftliches Wachstum von Deutschland, Belgien und Niederlande geprägt und zum anderen durch die von der Schuldenkrise betroffenen Länder Griechenland, Portugal und Spanien. Die Wachstumsunterschiede zwischen den Euro-Ländern werden weiterhin groß sein. Die europäische Geldpolitik hat derzeit kaum Möglichkeiten, die Konjunktur kurzfristig anzukurbeln; die Zinsen liegen bereits auf sehr niedrigem Niveau, die Geldmärkte sind gut mit Liquidität versorgt. Es wird momentan damit gerechnet, dass sich die Inflation 2011 bei knapp 2 % einpendeln wird. Insgesamt wird die Ende 2010 eingetretene Abschwächung der Konjunktur für die erste Jahreshälfte anhalten und erst gegen Ende 2011 überwunden sein. Das IfW rechnet für das Bruttoinlandsprodukt 2011 mit 1,3 % Wachstum. Insgesamt wird der Euroraum den krisenbedingten Rückgang der Produktion erst im Verlauf des Jahres 2012 aufholen. Im Geschäftsfeld Commercial Vehicles rechnet MAN im

Zeitraum 2011 bis 2013 in allen europäischen Regionen mit einem Wachstum des Lkw-Markts. Während sich die Nachfrage in den Peripherieländern aufgrund der vorhandenen wirtschaftlichen Probleme nur langsam erholt, sollte die Nachfrage nach schweren Lkw in Deutschland deutlich schneller steigen. Für 2011 wird in diesem Segment gemäß VDA bereits ein Zuwachs von 14 % erwartet. Der europäische Busmarkt verzeichnete in der Krise einen weit weniger starken Einbruch als der Lkw-Markt. Für 2011 und 2012 wird im europäischen Raum insgesamt wieder mit einem leichten Marktzuwachs gerechnet.

Der Konjunkturaufschwung in Deutschland wird sich 2011 fortsetzen. Das IfW geht von einem Anstieg des Bruttoinlandsprodukts für 2011 von 2,3 % und für 2012 von 1,3 % aus. Wie Ende 2010 bereits erkennbar war, werden neben der Inlandsnachfrage und den Investitionen im nächsten Jahr auch die Auslandsnachfrage und der private Konsum zunehmen. Allerdings zeichnet sich ein wesentlich moderateres Tempo als 2010 ab. In diesem und im nächsten Jahr wird die Investitionstätigkeit angesichts steigender Kapazitätsauslastung und günstiger Finanzierungsbedingungen weiter zulegen.

Brasilien ist nach wie vor ein Wachstumsmotor in Lateinamerika, wird sich aber gegenüber 2010 im Wachstum abschwächen. In den nächsten Jahren wird ein durchschnittliches Wachstum von 5 % erwartet, was u. a. aus Investitionen im Vorfeld der Fußball-WM 2014 und der Olympischen Spiele 2016 resultieren wird. So dürften insbesondere im Bereich Infrastruktur umfangreiche Investitionen stattfinden. Sofern die massiven Kapitalimporte auch in Zukunft fortbestehen, bleibt der Aufwertungsdruck des Real weiterhin ein Risiko für die Exportindustrie. Nach bisherigen Erwartungen der brasilianischen Zentralbank soll die Inflationsrate in den nächsten beiden Jahren auf dem Niveau von 5 % liegen.

Die indische Wirtschaft wird ihre hohe Wachstumsrate von ca. 9 % voraussichtlich auch in den nächsten beiden Jahren nahezu beibehalten können. Auch in den übrigen ostasiatischen Schwellenländern wird sich die Abschwächung der konjunkturellen Dynamik nach den hohen Wachstumsraten Anfang 2010 fortsetzen.

Dämpfend werden die mittlerweile restriktivere Geldpolitik und das rückläufige Expansionstempo Chinas als Hauptabnehmer der Vorleistungsgüter wirken.

Trotz dieses erwarteten Wachstumstrends der Weltwirtschaft ist sich das Management in seinen Entscheidungen bewusst, dass in einem von Unsicherheit geprägten Umfeld auch Abwärtsrisiken für die weltwirtschaftliche Aktivität existieren. Es bestehen weiterhin Risiken bezüglich des Auftretens neuerlicher Spannungen an den Finanzmärkten, erneuter Preissteigerungen bei Öl und sonstigen Rohstoffen, Protektionismusbestrebungen sowie der Möglichkeit einer ungeordneten Korrektur globaler Ungleichgewichte, deren Eintritt sich nachteilig auf das derzeitige Wachstum auswirken könnte. Die MAN Gruppe verfolgt kontinuierlich die weitere wirtschaftliche Entwicklung und wird bei einer Verschlechterung der wirtschaftlichen Lage umgehend ergänzende Maßnahmen ergreifen, sollte dies erforderlich werden.

## Renditen, Ergebnis

Für 2011 geht die MAN Gruppe von einer sich fortsetzenden wirtschaftlichen Erholung aus. Für das Geschäftsfeld Commercial Vehicles wird von einer Umsatzsteigerung von 10 bis 15 % ausgegangen. Unter dieser Voraussetzung erwartet das Management eine Umsatzrendite in der Größenordnung von 7 %. Für Power Engineering wird 2011 ein Umsatzrückgang bis zu 5 % erwartet. Die Umsatzrendite wird weiterhin im zweistelligen Bereich bleiben. Für die MAN Gruppe wird gegenwärtig von einer Umsatzsteigerung von 7 bis 10 % ausgegangen. Die Umsatzrendite wird sich damit um 1 %-Punkt verbessern. Das Zinsergebnis und die Steuerquote werden im Jahr 2011 auf vergleichbarem Niveau bleiben.

Im Jahr 2012 wird sich bei Commercial Vehicles der Umsatzanstieg bedingt durch internationales Wachstum fortsetzen, aber moderater ausfallen. Damit sollte die Umsatzrendite dann deutlich über 7 % liegen. Im Geschäftsfeld Power Engineering wird von einer langsamen Erholung im Schiffneubau ausgegangen, die sich 2012 nur im Auftrageingang niederschlagen wird. Umsatz und ROS werden auf stabilem Niveau bleiben. Das Umsatzwachstum der MAN Gruppe wird sich nach derzeitiger Einschätzung des Managements 2012 im einstelligen Bereich bewegen. Dabei wird davon ausgegangen, dass sich das Ergebnis etwas mehr steigern wird, sodass eine Umsatzrendite von mindestens 8 % erreicht werden kann.

### Langfristig angelegte Wachstumsstrategie

Die MAN Gruppe wird ihre Wachstumsstrategie auch in Zukunft insbesondere in den BRIC-Ländern konsequent fortsetzen. Ein weiteres Augenmerk liegt auf der weitergehenden Flexibilisierung der Kostenstrukturen. Falls notwendig, schließt MAN auch entsprechende Kapazitätsanpassungen nicht aus, damit Konjunkturschwankungen und damit verbundenen Auswirkungen auf die Nachfrage wirksam begegnet werden kann.

Im Geschäftsfeld Commercial Vehicles ist eine zentrale Aufgabe das konsequente internationale Wachstum und die Hebung von Synergiepotenzialen. Die wesentlichen Wachstumsregionen von MAN Truck & Bus sind neben den BRIC-Staaten die Wachstumsmärkte in Asien. MAN Latin America verfügt als brasilianischer Marktführer bereits heute über ein umfassendes Verkaufs- und Servicenetzwerk. Im Fokus steht hier, ebenso wie in der strategischen Partnerschaft mit dem chinesischen Lkw-Hersteller Sinotruk, Schwellenländer mit spezifischen Produkten erfolgreich abzudecken.

Durch die Fusion von MAN Diesel & Turbo kann zukünftig besser auf die Kundenwünsche durch bedarfsgerechte Produkte eingegangen und können Synergien aus der gemeinsamen Nutzung der bestehenden Infrastruktur gehoben werden. Mit dem Angebot von Produktpaketen wird zukünftig der Markt für Energieerzeugung noch intensiver bearbeitet. In allen Unternehmen wird neben dem Ausbau des Neugeschäfts die Stärkung des After-Sales-Bereichs unter der Marke »MAN PrimeServ« ein weiterer Schwerpunkt bleiben. Auch hier gilt es, ein interessantes Gesamtpaket aus einem technologisch führenden Produkt und dem passenden Service anzubieten.

Seit Mitte 2010 besteht eine Vereinbarung mit dem Nutzfahrzeughersteller Scania über eine Kooperation bei Einkaufs- und Technikthemen, die keinen wesentlichen Markenbezug haben. Zunächst liegt der Fokus auf einer definierten Anzahl von Einkaufs- und Entwicklungsprojekten. Derzeit untersucht das Management beider Unternehmen die rechtlichen Möglichkeiten einer weitergehenden Zusammenarbeit. Eine engere Verflechtung ist nur sinnvoll, wenn beide Unternehmen davon profitieren – insbesondere Mitarbeiter, Kunden und Aktionäre von MAN und Scania.

### Investitionen, Forschung und Entwicklung, Beschaffung

Das primäre Ziel der Investitionen wird 2011 die Sicherung des langfristigen Erfolgs der MAN Gruppe sein. Das sind im Wesentlichen weiterhin Investitionen in die laufende Modernisierung der Fertigungsstätten, notwendige Ersatzinvestitionen sowie der weitere Ausbau des Service- und Vertriebsnetzes in der gesamten MAN Gruppe. Portfoliomaßnahmen wird das Management bei sich bietender Gelegenheit nutzen.

Forschung und Entwicklung haben für die MAN Gruppe eine elementare Bedeutung, weil das Unternehmen nur mit technologisch führenden Lösungen die Anforderungen der Kunden und der Gesetzgeber erfüllen kann. Die F&E-Bemühungen sind streng darauf ausgerichtet, den Kunden Wettbewerbsvorteile zu verschaffen. Die F&E-Schwerpunkte sind weiterhin die Fortentwicklung der Nutzfahrzeug- und Dieselmotoren mit Blick auf Leistung, Verbrauch und Abgasnormen, die Weiterentwicklung der Lkw- und Busmodelle sowie die Fortentwicklung des Produktprogramms im Geschäftsfeld Power Engineering. Für die Jahre 2011 und 2012 werden die F&E-Anstrengungen weiter intensiviert und damit einhergehend der Aufwand für Forschung und Entwicklung leicht steigen. Ziel ist es, durch F&E die technologische Position zu erhalten und auszubauen.

Einhergehend mit der internationalen Wachstumsstrategie richtet der Einkauf seinen Fokus weiterhin auf die globalen Beschaffungsmärkte. Zur Gewährleistung der Nachhaltigkeit der Einkaufserfolge und der Erzielung weiterer Synergien wird der nicht produktionsabhängige Bedarf durch einen konzernweiten Einkauf zentral und warengruppenbezogen beschafft. Basis erfolgreicher und effizienter Beschaffung ist auch zukünftig ein kontinuierliches Monitoring der Lieferantenbeziehungen im Rahmen des präventiv ausgerichteten Risikomanagementsystems durch den Einkauf. Der Materialaufwand wird sich 2011 und 2012 weitgehend parallel zum Umsatz entwickeln.

### Cashflow

Aufgrund der konjunkturellen Rahmenbedingungen wird ein besonderes Augenmerk auf dem Cash-Management liegen. Dies wird durch das konzernweite Working-Capital-Optimierungsprogramm unterstützt. Die Nachhaltigkeit von Maßnahmen zur Reduzierung von Vorräten und Forderungen gewinnt an Bedeutung, wenn es zu einer Erholung der Märkte und damit zu einer verbesserten Nachfrage kommt. Die Finanzierungsstruktur der MAN Gruppe ist darauf

ausgerichtet, einen wirtschaftlich sinnvollen Mix aus operativem Cashflow und externer Finanzierung anzustreben. Die Platzierung der Unternehmensanleihe im Jahr 2009 mit einem Gesamtvolumen von 1,5 Mrd € mit Laufzeiten von vier und sieben Jahren trägt zur Sicherung der langfristigen finanziellen Stabilität bei.

Für 2011 sind aufgrund der aktuellen Lage – bis auf lokale Finanzierungen in Emerging-Market-Ländern und der Refinanzierung des Finanzdienstleistungsgeschäfts über Asset-Backed-Finanzierungen – keine wesentlichen Finanzierungsmaßnahmen geplant.

Die Nettoverschuldung für das kommende Jahr wird dem Niveau von 2010 entsprechen, beeinflusst durch positiven Cashflow im Industriegeschäft. Eine gleichzeitige Ausweitung der Absatzfinanzierung wird die Reduzierung der Nettoverschuldung verlangsamen.

Auch für das Jahr 2010 möchte die MAN Gruppe ihre Aktionäre unter Berücksichtigung des wirtschaftlichen Umfelds in angemessener Höhe am Unternehmenserfolg partizipieren lassen, weshalb die Dividende für dieses Jahr höher ausfallen wird als für 2009. Eine feste Größe zur Ausschüttungshöhe gibt es nicht, generell strebt die MAN Gruppe eine Quote von 30 bis 60 % des Ergebnisses nach Steuern an.

#### Mitarbeiter

Die Anzahl der Mitarbeiter wird in der MAN Gruppe in den nächsten beiden Jahren auf dem derzeitigen Niveau bleiben.

#### Hinweis auf Unsicherheiten im Ausblick

Die zuvor beschriebenen zukunftsgerichteten Aussagen und Informationen beruhen auf heutigen Erwartungen und bestimmten Annahmen. Sie bergen daher eine Reihe von Risiken und Ungewissheiten. Eine Vielzahl von Faktoren, von denen zahlreiche außerhalb des Einflussbereichs der MAN Gruppe liegen, beeinflussen die Geschäftsaktivitäten und deren Ergebnis. Diese Faktoren könnten dazu führen, dass die tatsächlichen Leistungen und Ergebnisse des MAN Konzerns wesentlich von denjenigen abweichen, über die zukunftsgerichtete Aussagen gemacht wurden.

## Ereignisse nach dem Bilanzstichtag

Am 5. Januar 2011 übte MAN das Barausgleichsrecht im Zusammenhang mit der Kaufoption betreffend 1,5 % des Kapitals bzw. 2,8 % der ausstehenden Stimmrechte von Scania aus. Die Transaktion führte zu einem Barausgleich in Höhe von 29 Mio €, der MAN am 7. Januar 2011 zugeflossen ist. Gleichzeitig verlor MAN den Zugriff auf mehr als 20 % der Stimmrechte von Scania, sodass die Beteiligung an Scania nach dem 5. Januar 2011 nicht mehr nach der Equity-Methode, sondern als Finanzbeteiligung bilanziert wird. Der erstmalige Ansatz dieser Beteiligung erfolgt zum beizulegenden Zeitwert am 5. Januar 2011 und beträgt 1 815 Mio €. Aus der Umklassifizierung ergibt sich im 1. Quartal 2011 ein Gewinn von ca. 455 Mio €.

Vom 18. bis 20. Januar 2011 fand bei MAN eine Durchsuchung durch die Europäische Kommission wegen des Verdachts eines möglichen Kartellverstoßes im Nutzfahrzeugbereich statt. MAN hat der Europäischen Kommission umfassende Kooperation zur rückhaltlosen Aufklärung zugesichert. MAN toleriert keine Compliance-Verstöße. Weder Korruption noch Wettbewerbsverstöße werden von MAN geduldet, gefördert oder akzeptiert.





01  
An die Aktionäre  
Seite 04–23

02  
Die MAN-Welt  
Seite 24–51

03  
Konzernlagebericht  
Seite 52–119

04  
Konzernabschluss  
Seite 120–190

## MARKTPOTENZIAL SOLARTHERMIE

**Stromerzeugung durch Sonnenkraft**

Nach Expertenschätzungen wird der Anteil solarthermisch erzeugter Elektrizität am Strommix weltweit zunehmen, in sonnenreichen Ländern wie Australien um bis zu 40 Prozent. Das eröffnet große Marktchancen für solarthermische Kraftwerke.

Quelle: International Energy Agency (IEA), Annual Report 2009

■ 2020 ■ 2030 ■ 2040 ■ 2050

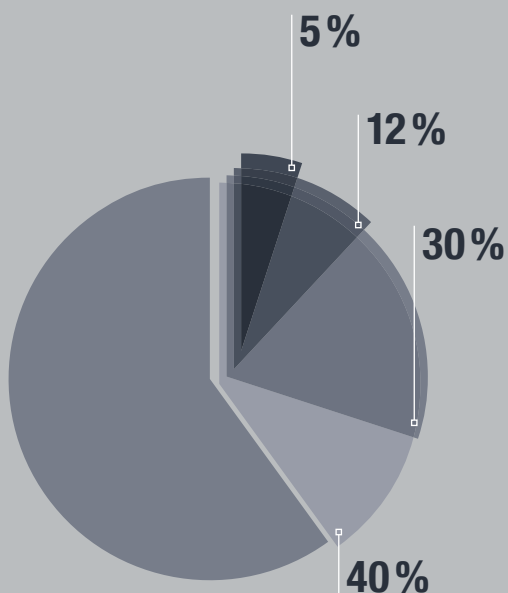

Australien, Zentralasien, Chile,  
Indien (Gujarat, Rajasthan),  
Mexiko, Naher Osten,  
Nordafrika, Peru, Südafrika,  
USA (Südwesten)

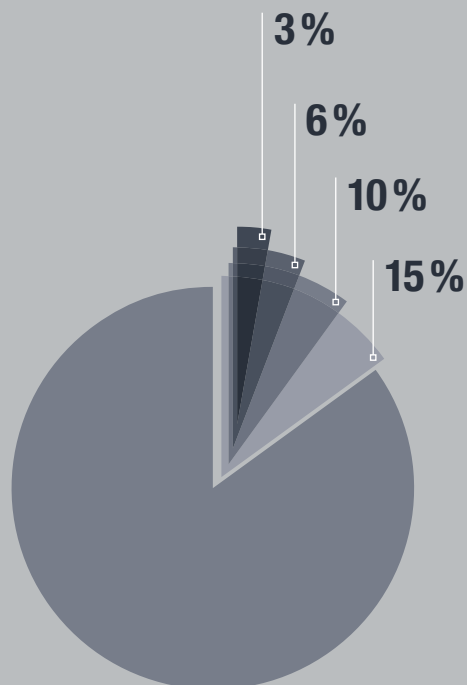

Europa (z. T. Solarstromimporte), Türkei

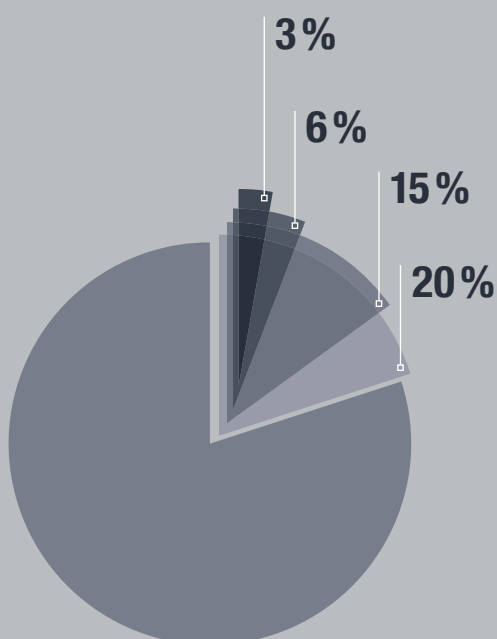

USA (übrige Teile)

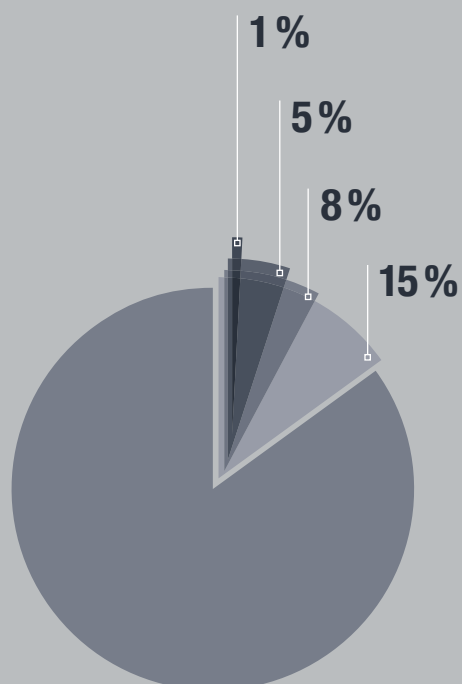

Afrika (übrige Teile), Brasilien,  
Indien (übrige Teile)

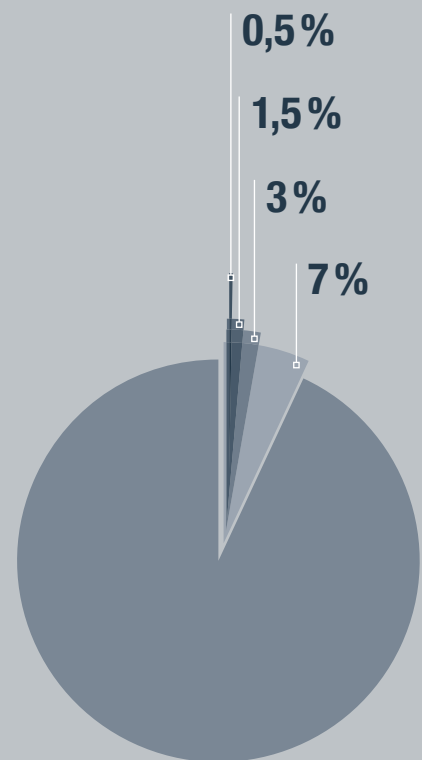

Indonesien (z. T. Solarstromimporte)

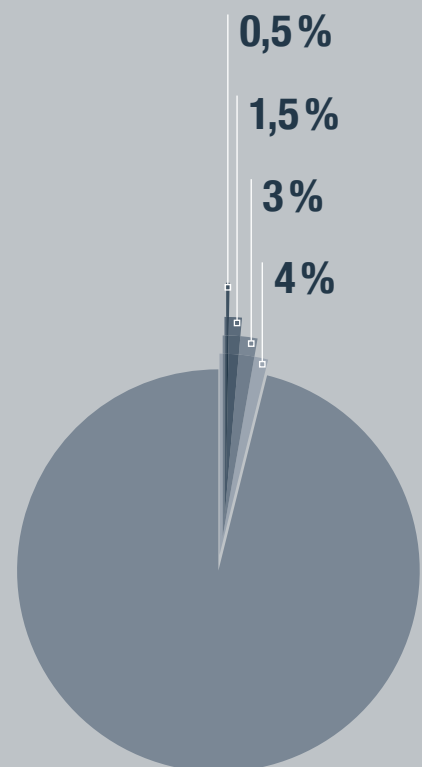

China, Russland (z. T. Solarstromimporte)

# 04 Konzernabschluss

für das Geschäftsjahr 1. Januar  
bis 31. Dezember 2010

Seite 120–190

|     |                                                           |
|-----|-----------------------------------------------------------|
| 123 | MAN Konzern Gewinn- und Verlustrechnung                   |
| 124 | MAN Konzern Überleitung zum Gesamtergebnis der Periode    |
| 125 | MAN Konzern Bilanz                                        |
| 126 | MAN Konzern Kapitalflussrechnung                          |
| 127 | MAN Konzern Entwicklung des Eigenkapitals                 |
| 128 | MAN Konzernanhang                                         |
| 128 | Grundlagen des Konzernabschlusses                         |
| 128 | 01 Allgemeine Grundlagen                                  |
| 128 | 02 Konsolidierung und Bewertung von Beteiligungen         |
| 130 | 03 Bilanzierungsgrundsätze                                |
| 138 | 04 Kapitalflussrechnung                                   |
| 138 | 05 Änderungen von Rechnungslegungsvorschriften            |
| 139 | 06 Akquisitionen/Desinvestitionen                         |
| 141 | Erläuterungen zur Gewinn- und Verlustrechnung             |
| 141 | 07 Sonstige betriebliche Erträge                          |
| 141 | 08 Sonstige betriebliche Aufwendungen                     |
| 142 | 09 Zinsergebnis                                           |
| 142 | 10 Ertragsteuern                                          |
| 143 | 11 Ergebnis je Aktie                                      |
| 144 | 12 Sonstige Angaben zur Gewinn- und Verlustrechnung       |
| 144 | 13 Gesamtvergütung für die Tätigkeit des Abschlussprüfers |
| 145 | Erläuterungen zur Bilanz                                  |
| 145 | 14 Immaterielle Vermögenswerte                            |
| 146 | 15 Sachanlagen                                            |
| 147 | 16 Nach der Equity-Methode bilanzierte Beteiligungen      |
| 148 | 17 Vermietete Erzeugnisse                                 |
| 148 | 18 Forderungen aus »finance lease«                        |
| 149 | 19 Vorräte                                                |
| 149 | 20 Forderungen aus Lieferungen und Leistungen             |
| 150 | 21 Sonstige Vermögenswerte                                |
| 150 | 22 Eigenkapital                                           |
| 155 | 23 Finanzverbindlichkeiten                                |
| 156 | 24 Pensionen                                              |
| 160 | 25 Sonstige Rückstellungen                                |
| 161 | 26 Sonstige Verbindlichkeiten                             |
| 162 | Sonstige Angaben                                          |
| 162 | 27 Rechtsstreitigkeiten/Rechtliche Verfahren              |
| 163 | 28 Eventualverbindlichkeiten                              |
| 163 | 29 Sonstige finanzielle Verpflichtungen                   |
| 163 | 30 Zusätzliche Informationen über Finanzinstrumente       |
| 167 | 31 Derivative Finanzinstrumente und Sicherungsstrategien  |
| 175 | 32 Aktienbasierte Vergütungen                             |
| 176 | 33 Beziehungen zu nahe stehenden Unternehmen und Personen |
| 176 | 34 Vergütung des Vorstands                                |
| 178 | 35 Vergütung des Aufsichtsrats                            |
| 180 | 36 Corporate Governance Kodex                             |
| 180 | 37 Ereignisse nach dem Bilanzstichtag                     |
| 180 | 38 Segmentberichterstattung                               |
| 185 | Anteilsbesitz zum 31.12.2010                              |
| 189 | Mitgliedschaften in anderen Kontrollgremien               |







# Konzernabschluss

## MAN Konzern

### Gewinn- und Verlustrechnung

#### MAN Konzern Gewinn- und Verlustrechnung

Mio €

|                                                                                                                | Anhang | MAN Konzern  |               | Industrielles Geschäft<br>(ungeprüfte Zusatzinformationen) |              | Finanzdienstleistungen<br>(ungeprüfte Zusatzinformationen) |             |
|----------------------------------------------------------------------------------------------------------------|--------|--------------|---------------|------------------------------------------------------------|--------------|------------------------------------------------------------|-------------|
|                                                                                                                |        | 2010         | 2009          | 2010                                                       | 2009         | 2010                                                       | 2009        |
| Umsatzerlöse                                                                                                   |        | 14 675       | 12 026        | 14 675                                                     | 12 026       | –                                                          | –           |
| Umsatzkosten                                                                                                   |        | – 11 400     | – 9 455       | – 11 400                                                   | – 9 455      | –                                                          | –           |
| <b>Bruttoergebnis vom Umsatz</b>                                                                               |        | <b>3 275</b> | <b>2 571</b>  | <b>3 275</b>                                               | <b>2 571</b> | –                                                          | –           |
| Sonstige betriebliche Erträge                                                                                  | [7]    | 516          | 532           | 332                                                        | 331          | 184                                                        | 201         |
| Vertriebskosten                                                                                                |        | – 1 095      | – 868         | – 1 084                                                    | – 860        | – 11                                                       | – 8         |
| Allgemeine Verwaltungskosten                                                                                   |        | – 741        | – 632         | – 714                                                      | – 609        | – 27                                                       | – 23        |
| Sonstige betriebliche Aufwendungen                                                                             | [8]    | – 1 142      | – 1 365       | – 948                                                      | – 1 159      | – 194                                                      | – 206       |
| Ergebnis von nach der<br>Equity-Methode bilanzierten Beteiligungen                                             | [16]   | 112          | – 66          | 113                                                        | – 60         | – 1                                                        | – 6         |
| Wertaufholungen und Wertminderungen auf nach der<br>Equity-Methode bilanzierte Beteiligungen                   | [16]   | 357          | – 382         | 357                                                        | – 382        | –                                                          | –           |
| Ergebnis aus Finanzbeteiligungen                                                                               |        | 1            | – 4           | 1                                                          | – 4          | –                                                          | –           |
| <b>Ergebnis vor Zinsen und Steuern</b>                                                                         |        | <b>1 283</b> | <b>– 214</b>  | <b>1 332</b>                                               | <b>– 172</b> | <b>– 49</b>                                                | <b>– 42</b> |
| Zinserträge                                                                                                    | [9]    | 59           | 49            | 58                                                         | 49           | 1                                                          | 0           |
| Zinsaufwendungen                                                                                               | [9]    | – 217        | – 166         | – 216                                                      | – 166        | – 1                                                        | 0           |
| <b>Ergebnis vor Steuern</b>                                                                                    |        | <b>1 125</b> | <b>– 331</b>  | <b>1 174</b>                                               | <b>– 289</b> | <b>– 49</b>                                                | <b>– 42</b> |
| Ertragsteuern                                                                                                  | [10]   | – 338        | – 53          | – 342                                                      | – 49         | 4                                                          | – 4         |
| Ergebnis aufgebener Geschäftsbereiche                                                                          | [6]    | – 65         | 126           | – 65                                                       | 126          | –                                                          | –           |
| <b>Ergebnis nach Steuern</b>                                                                                   |        | <b>722</b>   | <b>– 258</b>  | <b>767</b>                                                 | <b>– 212</b> | <b>– 45</b>                                                | <b>– 46</b> |
| davon Minderheitsanteile                                                                                       |        | 9            | 12            | 9                                                          | 12           | –                                                          | 0           |
| <b>davon Aktionäre der MAN SE</b>                                                                              |        | <b>713</b>   | <b>– 270</b>  | <b>758</b>                                                 | <b>– 224</b> | <b>– 45</b>                                                | <b>– 46</b> |
| <b>Ergebnis je Aktie der fortgeführten<br/>Bereiche (verwässert/unverwässert) in €</b>                         | [11]   | <b>5,30</b>  | <b>– 2,69</b> |                                                            |              |                                                            |             |
| <b>Ergebnis je Aktie der fortgeführten und nicht<br/>fortgeführten Bereiche (verwässert/unverwässert) in €</b> | [11]   | <b>4,85</b>  | <b>– 1,84</b> |                                                            |              |                                                            |             |

# Konzernabschluss

## MAN Konzern Überleitung zum Gesamtergebnis der Periode

### MAN Konzern Überleitung zum Gesamtergebnis der Periode

| Mio €                                                                                                                                 | Anhang  | 2010       | 2009         |
|---------------------------------------------------------------------------------------------------------------------------------------|---------|------------|--------------|
| <b>Ergebnis nach Steuern</b>                                                                                                          |         | <b>722</b> | <b>– 258</b> |
| Unterschiedsbetrag aus der Währungsumrechnung                                                                                         |         | 257        | 320          |
| Veränderung der Marktwerte von derivativen Finanzinstrumenten                                                                         | [30/31] | – 54       | 60           |
| Versicherungsmathematische Verluste aus Pensionen                                                                                     | [24]    | – 50       | – 112        |
| Versicherungsmathematische Gewinne aus Abfertigungsrückstellungen                                                                     |         | 2          | 8            |
| Direkt im Eigenkapital erfasste Erträge und Aufwendungen, Gewinne und Verluste von nach der Equity-Methode bilanzierten Beteiligungen | [16]    | – 6        | 23           |
| Abgrenzung latenter Steuern                                                                                                           |         | 39         | 7            |
| <b>Direkt im Eigenkapital erfasste Erträge und Aufwendungen, Gewinne und Verluste</b>                                                 |         | <b>188</b> | <b>306</b>   |
| <b>Gesamtergebnis</b>                                                                                                                 |         | <b>910</b> | <b>48</b>    |
| davon Minderheitsanteile                                                                                                              |         | 9          | 12           |
| <b>davon Aktionäre der MAN SE</b>                                                                                                     |         | <b>901</b> | <b>36</b>    |

Siehe auch die weiteren Erläuterungen zum Eigenkapital, Anmerkung (22)

# Konzernabschluss

## MAN Konzern Bilanz

### MAN Konzern Bilanz/Aktiva

| Mio €                                             |        |               |               |                                                            |               |                                                            |              |
|---------------------------------------------------|--------|---------------|---------------|------------------------------------------------------------|---------------|------------------------------------------------------------|--------------|
|                                                   | Anhang | MAN Konzern   |               | Industrielles Geschäft<br>(ungeprüfte Zusatzinformationen) |               | Finanzdienstleistungen<br>(ungeprüfte Zusatzinformationen) |              |
|                                                   |        | 31.12.2010    | 31.12.2009    | 31.12.2010                                                 | 31.12.2009    | 31.12.2010                                                 | 31.12.2009   |
| Immaterielle Vermögenswerte                       | [14]   | 1 914         | 1 662         | 1 912                                                      | 1 658         | 2                                                          | 4            |
| Sachanlagen                                       | [15]   | 2 064         | 2 110         | 2 062                                                      | 2 108         | 2                                                          | 2            |
| Nach der Equity-Methode bilanzierte Beteiligungen | [16]   | 2 085         | 1 630         | 2 080                                                      | 1 625         | 5                                                          | 5            |
| Finanzbeteiligungen                               |        | 51            | 93            | 51                                                         | 68            | –                                                          | 25           |
| Vermietete Erzeugnisse                            | [17]   | 1 755         | 1 433         | 1 111                                                      | 896           | 644                                                        | 537          |
| Langfristige Forderungen aus »finance lease«      | [18]   | 703           | 738           | –                                                          | –             | 703                                                        | 738          |
| Aktive latente Steuern                            | [10]   | 1 159         | 877           | 1 132                                                      | 858           | 27                                                         | 19           |
| Sonstige langfristige Vermögenswerte              | [21]   | 180           | 118           | 174                                                        | 110           | 6                                                          | 8            |
| <b>Langfristige Vermögenswerte</b>                |        | <b>9 911</b>  | <b>8 661</b>  | <b>8 522</b>                                               | <b>7 323</b>  | <b>1 389</b>                                               | <b>1 338</b> |
| Vorräte                                           | [19]   | 2 852         | 3 037         | 2 785                                                      | 2 989         | 67                                                         | 48           |
| Forderungen aus Lieferungen und Leistungen        | [20]   | 2 265         | 2 202         | 1 936                                                      | 1 896         | 329                                                        | 306          |
| Kurzfristige Forderungen aus »finance lease«      | [18]   | 347           | 358           | –                                                          | –             | 347                                                        | 358          |
| Forderungen aus laufenden Steuern                 |        | 133           | 112           | 132                                                        | 111           | 1                                                          | 1            |
| Zur Veräußerung bestimmte Vermögenswerte          | [6]    | 139           | 139           | 139                                                        | 139           | –                                                          | –            |
| Sonstige kurzfristige Vermögenswerte              | [21]   | 713           | 750           | 685                                                        | 713           | 28                                                         | 37           |
| Wertpapiere                                       |        | 14            | 134           | 14                                                         | 134           | –                                                          | –            |
| Flüssige Mittel                                   |        | 1 057         | 502           | 1 017                                                      | 455           | 40                                                         | 47           |
| <b>Kurzfristige Vermögenswerte</b>                |        | <b>7 520</b>  | <b>7 234</b>  | <b>6 708</b>                                               | <b>6 437</b>  | <b>812</b>                                                 | <b>797</b>   |
|                                                   |        | <b>17 431</b> | <b>15 895</b> | <b>15 230</b>                                              | <b>13 760</b> | <b>2 201</b>                                               | <b>2 135</b> |

### MAN Konzern Bilanz/Passiva

| Mio €                                                    |        |               |               |                                                            |               |                                                            |              |
|----------------------------------------------------------|--------|---------------|---------------|------------------------------------------------------------|---------------|------------------------------------------------------------|--------------|
|                                                          | Anhang | MAN Konzern   |               | Industrielles Geschäft<br>(ungeprüfte Zusatzinformationen) |               | Finanzdienstleistungen<br>(ungeprüfte Zusatzinformationen) |              |
|                                                          |        | 31.12.2010    | 31.12.2009    | 31.12.2010                                                 | 31.12.2009    | 31.12.2010                                                 | 31.12.2009   |
| Gezeichnetes Kapital                                     |        | 376           | 376           |                                                            |               |                                                            |              |
| Kapitalrücklage                                          |        | 795           | 795           |                                                            |               |                                                            |              |
| Gewinnrücklagen                                          |        | 4 483         | 3 816         |                                                            |               |                                                            |              |
| Eigenkapital aus nicht realisierten Gewinnen/Verlusten   |        | 280           | 92            |                                                            |               |                                                            |              |
| <b>Eigenkapital der Aktionäre der MAN SE</b>             |        | <b>5 934</b>  | <b>5 079</b>  | <b>5 808</b>                                               | <b>4 934</b>  | <b>126</b>                                                 | <b>145</b>   |
| Minderheitsanteile                                       |        | 56            | 50            | 56                                                         | 50            | 0                                                          | 0            |
| <b>Eigenkapital</b>                                      | [22]   | <b>5 990</b>  | <b>5 129</b>  | <b>5 864</b>                                               | <b>4 984</b>  | <b>126</b>                                                 | <b>145</b>   |
| Langfristige Finanzverbindlichkeiten                     | [23]   | 1 983         | 2 230         | 1 838                                                      | 2 032         | 145                                                        | 198          |
| Pensionen                                                | [24]   | 226           | 160           | 225                                                        | 159           | 1                                                          | 1            |
| Passive latente Steuern                                  | [10]   | 849           | 622           | 817                                                        | 597           | 32                                                         | 25           |
| Sonstige langfristige Rückstellungen                     | [25]   | 675           | 547           | 675                                                        | 547           | 0                                                          | 0            |
| Sonstige langfristige Verbindlichkeiten                  | [26]   | 722           | 714           | 722                                                        | 713           | 0                                                          | 1            |
| <b>Langfristige Verbindlichkeiten und Rückstellungen</b> |        | <b>4 455</b>  | <b>4 273</b>  | <b>4 277</b>                                               | <b>4 048</b>  | <b>178</b>                                                 | <b>225</b>   |
| Kurzfristige Finanzverbindlichkeiten                     | [23]   | 866           | 1 040         | 155                                                        | 206           | 711                                                        | 834          |
| Interne Finanzierung                                     |        | –             | –             | – 1 042                                                    | – 827         | 1 042                                                      | 827          |
| Verbindlichkeiten aus Lieferungen und Leistungen         |        | 1 981         | 1 368         | 1 882                                                      | 1 319         | 99                                                         | 49           |
| Erhaltene Anzahlungen                                    |        | 762           | 913           | 759                                                        | 908           | 3                                                          | 5            |
| Kurzfristige Verbindlichkeiten aus laufenden Steuern     |        | 534           | 494           | 534                                                        | 493           | 0                                                          | 1            |
| Sonstige kurzfristige Rückstellungen                     | [25]   | 1 443         | 1 313         | 1 439                                                      | 1 310         | 4                                                          | 3            |
| Sonstige kurzfristige Verbindlichkeiten                  | [26]   | 1 400         | 1 365         | 1 362                                                      | 1 319         | 38                                                         | 46           |
| <b>Kurzfristige Verbindlichkeiten und Rückstellungen</b> |        | <b>6 986</b>  | <b>6 493</b>  | <b>5 089</b>                                               | <b>4 728</b>  | <b>1 897</b>                                               | <b>1 765</b> |
|                                                          |        | <b>17 431</b> | <b>15 895</b> | <b>15 230</b>                                              | <b>13 760</b> | <b>2 201</b>                                               | <b>2 135</b> |

# Konzernabschluss

## MAN Konzern Kapitalflussrechnung

### MAN Konzern Kapitalflussrechnung

| Mio €                                                                                                                                                                                 | MAN Konzern  |                | Industrielles Geschäft<br>(ungeprüfte<br>Zusatzinformationen) |                | Finanzdienstleistungen<br>(ungeprüfte<br>Zusatzinformationen) |              |
|---------------------------------------------------------------------------------------------------------------------------------------------------------------------------------------|--------------|----------------|---------------------------------------------------------------|----------------|---------------------------------------------------------------|--------------|
|                                                                                                                                                                                       | 2010         | 2009           | 2010                                                          | 2009           | 2010                                                          | 2009         |
| Ergebnis vor Steuern                                                                                                                                                                  | 1 125        | - 331          | 1 174                                                         | - 289          | - 49                                                          | - 42         |
| Laufende Steuern                                                                                                                                                                      | - 336        | - 210          | - 335                                                         | - 209          | - 1                                                           | - 1          |
| Cash Earnings aufgegebenen Geschäftsbereiche                                                                                                                                          | -            | 11             | -                                                             | 11             | -                                                             | -            |
| Abschreibungen und Wertminderungen Langfristiger Vermögenswerte (außer Vermietete Erzeugnisse und Wertminderungen auf nach der Equity-Methode bilanzierte Beteiligungen) <sup>1</sup> | 467          | 422            | 464                                                           | 420            | 3                                                             | 2            |
| Veränderung der Pensionen                                                                                                                                                             | 15           | 31             | 15                                                            | 31             | 0                                                             | 0            |
| Ergebnis von nach der Equity-Methode bilanzierten Beteiligungen                                                                                                                       | - 112        | 66             | - 113                                                         | 60             | 1                                                             | 6            |
| Erhaltene Dividenden von nach der Equity-Methode bilanzierten Beteiligungen                                                                                                           | 15           | 25             | 15                                                            | 25             | -                                                             | -            |
| Wertaufholungen und Wertminderungen auf nach der Equity-Methode bilanzierte Beteiligungen                                                                                             | - 357        | 382            | - 357                                                         | 382            | -                                                             | -            |
| Sonstige zahlungsunwirksame Aufwendungen und Erlöse                                                                                                                                   | - 2          | -              | - 2                                                           | -              | -                                                             | -            |
| <b>Cash Earnings</b>                                                                                                                                                                  | <b>815</b>   | <b>396</b>     | <b>861</b>                                                    | <b>431</b>     | <b>- 46</b>                                                   | <b>- 35</b>  |
| Veränderung der Vorräte                                                                                                                                                               | 254          | 405            | 273                                                           | 366            | - 19                                                          | 39           |
| Veränderung der Erhaltenen Anzahlungen                                                                                                                                                | - 184        | - 221          | - 181                                                         | - 221          | - 3                                                           | 0            |
| Veränderung der Forderungen aus Lieferungen und Leistungen und »finance lease«                                                                                                        | 43           | 1 209          | 14                                                            | 932            | 29                                                            | 277          |
| Veränderung der Verbindlichkeiten aus Lieferungen und Leistungen                                                                                                                      | 492          | - 352          | 442                                                           | - 273          | 50                                                            | - 79         |
| Veränderung der Vermieteten Erzeugnisse                                                                                                                                               | - 121        | 148            | - 15                                                          | 147            | - 106                                                         | 1            |
| Veränderung der Kundenzahlungen für Vermietete Erzeugnisse                                                                                                                            | - 14         | - 178          | - 14                                                          | - 178          | -                                                             | -            |
| Veränderung der Steuerforderungen und -verbindlichkeiten                                                                                                                              | 22           | 51             | 22                                                            | 51             | 0                                                             | 0            |
| Veränderung der Sonstigen Rückstellungen                                                                                                                                              | 182          | - 19           | 182                                                           | - 18           | 0                                                             | - 1          |
| Veränderung der Sonstigen Vermögenswerte                                                                                                                                              | - 19         | 91             | - 24                                                          | 48             | 5                                                             | 43           |
| Veränderung der Sonstigen Verbindlichkeiten                                                                                                                                           | - 36         | - 130          | - 51                                                          | - 129          | 15                                                            | - 1          |
| Veränderung aufgegebenen Geschäftsbereiche                                                                                                                                            | -            | 102            | -                                                             | 102            | -                                                             | -            |
| Eliminierung Ergebnis aus Anlagenabgängen                                                                                                                                             | - 7          | - 11           | - 7                                                           | - 11           | -                                                             | -            |
| Sonstige Veränderungen des Nettoumlaufvermögens                                                                                                                                       | 0            | - 29           | 0                                                             | - 27           | 0                                                             | - 2          |
| <b>Cashflow aus der Geschäftstätigkeit</b>                                                                                                                                            | <b>1 427</b> | <b>1 462</b>   | <b>1 502</b>                                                  | <b>1 220</b>   | <b>- 75</b>                                                   | <b>242</b>   |
| Investitionen in Sachanlagen, in als Finanzinvestitionen gehaltene Immobilien und Immaterielle Vermögenswerte                                                                         | - 391        | - 366          | - 390                                                         | - 365          | - 1                                                           | - 1          |
| Investitionen in Beteiligungen                                                                                                                                                        | - 4          | - 600          | - 4                                                           | - 600          | -                                                             | -            |
| Erwerb von Tochterunternehmen abzüglich Flüssiger Mittel                                                                                                                              | - 1          | - 1 337        | - 1                                                           | - 1 337        | -                                                             | -            |
| Erlöse aus Anlagenabgängen                                                                                                                                                            | 25           | 77             | 10                                                            | 77             | 15                                                            | 0            |
| Cashflow aus der Investitionstätigkeit aufgegebenen Geschäftsbereiche                                                                                                                 | -            | - 9            | -                                                             | - 9            | -                                                             | -            |
| Verkauf von Geschäftseinheiten abzüglich abgegebener Flüssiger Mittel                                                                                                                 | - 3          | - 349          | - 3                                                           | - 349          | -                                                             | -            |
| <b>Cashflow aus der Investitionstätigkeit</b>                                                                                                                                         | <b>- 374</b> | <b>- 2 584</b> | <b>- 388</b>                                                  | <b>- 2 583</b> | <b>14</b>                                                     | <b>- 1</b>   |
| <b>Free Cashflow aus der Geschäfts- und Investitionstätigkeit</b>                                                                                                                     | <b>1 053</b> | <b>- 1 122</b> | <b>1 114</b>                                                  | <b>- 1 363</b> | <b>- 61</b>                                                   | <b>241</b>   |
| Interne Ausschüttungen                                                                                                                                                                | -            | -              | - 31                                                          | - 61           | 31                                                            | 61           |
| Dividendenzahlungen                                                                                                                                                                   | - 40         | - 297          | - 40                                                          | - 297          | -                                                             | -            |
| Veränderung von Wertpapieren                                                                                                                                                          | 130          | 298            | 130                                                           | 298            | -                                                             | -            |
| Aufnahme von Anleihen und Schuldscheindarlehen                                                                                                                                        | -            | 1 730          | -                                                             | 1 730          | -                                                             | -            |
| Rückzahlung von Anleihen und Schuldscheindarlehen                                                                                                                                     | - 411        | - 30           | - 171                                                         | - 30           | - 240                                                         | -            |
| Aufnahme von Darlehen                                                                                                                                                                 | 21           | 107            | 21                                                            | 107            | -                                                             | -            |
| Rückzahlung von Darlehen und syndizierten Krediten                                                                                                                                    | - 131        | - 400          | - 131                                                         | - 400          | -                                                             | -            |
| Veränderung von übrigen Finanzverbindlichkeiten                                                                                                                                       | - 129        | - 111          | - 177                                                         | - 82           | 48                                                            | - 29         |
| Veränderung interne Finanzierung                                                                                                                                                      | -            | -              | - 214                                                         | 252            | 214                                                           | - 252        |
| Sonderdotierung Pensionsfonds                                                                                                                                                         | -            | - 28           | -                                                             | - 27           | -                                                             | - 1          |
| Cashflow aus der Finanzierungstätigkeit aufgegebenen Geschäftsbereiche                                                                                                                | -            | - 5            | -                                                             | - 5            | -                                                             | -            |
| <b>Cashflow aus der Finanzierungstätigkeit</b>                                                                                                                                        | <b>- 560</b> | <b>1 264</b>   | <b>- 613</b>                                                  | <b>1 485</b>   | <b>53</b>                                                     | <b>- 221</b> |
| <b>Zahlungswirksame Veränderung der Flüssigen Mittel</b>                                                                                                                              | <b>493</b>   | <b>142</b>     | <b>501</b>                                                    | <b>122</b>     | <b>- 8</b>                                                    | <b>20</b>    |
| <b>Flüssige Mittel zu Beginn des Geschäftsjahres</b>                                                                                                                                  | <b>502</b>   | <b>105</b>     | <b>455</b>                                                    | <b>78</b>      | <b>47</b>                                                     | <b>27</b>    |
| Veränderung der in der Bilanz gesondert ausgewiesenen Flüssigen Mittel der aufgegebenen Geschäftsbereiche                                                                             | -            | 223            | -                                                             | 223            | -                                                             | -            |
| Konsolidierungsbedingte Veränderung der Flüssigen Mittel                                                                                                                              | 12           | 2              | 12                                                            | 2              | -                                                             | 0            |
| Wechselkursbedingte Veränderung der Flüssigen Mittel                                                                                                                                  | 50           | 30             | 49                                                            | 30             | 1                                                             | 0            |
| <b>Flüssige Mittel am Ende des Geschäftsjahres</b>                                                                                                                                    | <b>1 057</b> | <b>502</b>     | <b>1 017</b>                                                  | <b>455</b>     | <b>40</b>                                                     | <b>47</b>    |

<sup>1</sup> Immaterielle Vermögenswerte, Sachanlagen und Beteiligungen

Der Cashflow aus der Geschäftstätigkeit für fortgeführte Bereiche enthält Zinseinzahlungen in Höhe von 59 Mio € (Vorjahr 49 Mio €), Zinsauszahlungen in Höhe von 252 Mio € (Vorjahr 213 Mio €), gezahlte Ertragsteuern in Höhe von 311 Mio € (Vorjahr 143 Mio €) und erhaltene Dividenden von Beteiligungen in Höhe von 15 Mio € (Vorjahr 25 Mio €).



# Konzernabschluss

## MAN Konzern Entwicklung des Eigenkapitals

### MAN Konzern Entwicklung des Eigenkapitals

Mio €

|                                                                                         | Gezeichnetes<br>Kapital | Kapital-<br>rücklage | Gewinn-<br>rücklagen | Direkt im<br>Eigenkapital<br>erfasste<br>Erträge und<br>Aufwendungen,<br>Gewinne<br>und Verluste | Anteil der<br>MAN-Aktionäre | Minderheits-<br>anteile | Gesamt       |
|-----------------------------------------------------------------------------------------|-------------------------|----------------------|----------------------|--------------------------------------------------------------------------------------------------|-----------------------------|-------------------------|--------------|
| <b>Stand am 31. Dezember 2008</b>                                                       | <b>376</b>              | <b>795</b>           | <b>4 447</b>         | <b>- 263</b>                                                                                     | <b>5 355</b>                | <b>41</b>               | <b>5 396</b> |
| Ergebnis nach Steuern                                                                   | –                       | –                    | – 270                | –                                                                                                | – 270                       | 12                      | – 258        |
| Direkt im Eigenkapital<br>erfasste Erträge<br>und Aufwendungen,<br>Gewinne und Verluste | –                       | –                    | –                    | 306                                                                                              | 306                         | 0                       | 306          |
| Gesamtergebnis                                                                          | –                       | –                    | – 270                | 306                                                                                              | 36                          | 12                      | 48           |
| Dividendenzahlung                                                                       | –                       | –                    | – 294                | –                                                                                                | – 294                       | – 3                     | – 297        |
| Übrige Veränderungen                                                                    | –                       | –                    | – 67                 | 49                                                                                               | – 18                        | 0                       | – 18         |
| <b>Stand am 31. Dezember 2009</b>                                                       | <b>376</b>              | <b>795</b>           | <b>3 816</b>         | <b>92</b>                                                                                        | <b>5 079</b>                | <b>50</b>               | <b>5 129</b> |
| Ergebnis nach Steuern                                                                   | –                       | –                    | 713                  | –                                                                                                | 713                         | 9                       | 722          |
| Direkt im Eigenkapital<br>erfasste Erträge<br>und Aufwendungen,<br>Gewinne und Verluste | –                       | –                    | –                    | 188                                                                                              | 188                         | 0                       | 188          |
| Gesamtergebnis                                                                          | –                       | –                    | 713                  | 188                                                                                              | 901                         | 9                       | 910          |
| Dividendenzahlung                                                                       | –                       | –                    | – 37                 | –                                                                                                | – 37                        | – 3                     | – 40         |
| Übrige Veränderungen                                                                    | –                       | –                    | – 9                  | –                                                                                                | – 9                         | 0                       | – 9          |
| <b>Stand am 31. Dezember 2010</b>                                                       | <b>376</b>              | <b>795</b>           | <b>4 483</b>         | <b>280</b>                                                                                       | <b>5 934</b>                | <b>56</b>               | <b>5 990</b> |

Siehe auch die weiteren Erläuterungen zum Eigenkapital, Anmerkung (22)

# Konzernabschluss

## MAN Konzernanhang

### Grundlagen des Konzernabschlusses

#### 1 Allgemeine Grundlagen

Die MAN SE (im Folgenden MAN oder MAN SE) ist eine börsennotierte Kapitalgesellschaft mit Sitz in München. Die MAN Gruppe ist einer der führenden Engineering-Konzerne in Europa mit den vier Bereichen MAN Truck & Bus (vormals MAN Nutzfahrzeuge), MAN Latin America, MAN Diesel & Turbo und Renk, einem Jahresumsatz von 14,7 Mrd € (Vorjahr 12,0 Mrd €) und weltweit rund 47 700 Mitarbeitern, davon ca. 2 000 Leiharbeitnehmer (Vorjahr rund 47 700 Mitarbeiter, davon ca. 1 600 Leiharbeitnehmer).

Der vorliegende Konzernabschluss der MAN SE für das Geschäftsjahr vom 1. Januar bis 31. Dezember 2010 wurde unter Anwendung von § 315 a Abs. 1 Handelsgesetzbuch (HGB) im Einklang mit den International Financial Reporting Standards (IFRS) des International Accounting Standards Board (IASB) erstellt, wie sie gemäß der Verordnung Nr. 1606/2002 des Europäischen Parlaments und des Rates über die Anwendung Internationaler Rechnungslegungsstandards in der Europäischen Union anzuwenden sind. Er wurde am 27. Januar 2011 aufgestellt und durch Beschluss des Vorstands zur Vorlage an den Aufsichtsrat freigegeben.

Um einen besseren Einblick in die Vermögens-, Finanz- und Ertragslage der MAN Gruppe zu ermöglichen, ist der Konzernabschluss um eine Unterteilung der Zahlen in das Industrielle Geschäft und die Finanzdienstleistungen ergänzt. Das Industrielle Geschäft umfasst alle Unternehmen der MAN Gruppe mit Ausnahme von MAN Finance. MAN Finance betreibt in der MAN Gruppe im Wesentlichen das Absatzfinanzierungsgeschäft für MAN Truck & Bus und ist als Finanzdienstleistungen dargestellt. Die Eliminierungen von konzerninternen Geschäften zwischen dem Industriellen Geschäft und den Finanzdienstleistungen sind zur Vereinfachung dem Industriellen Geschäft zugeordnet. Die Aufteilung in Industrielles Geschäft und Finanzdienstleistungen stellt nur eine Zusatzinformation dar und ist daher ungeprüft.

Der Konzernabschluss ist in der Berichtswährung Euro aufgestellt. Alle Beträge werden in Millionen Euro (Mio €) angegeben, soweit nichts anderes vermerkt ist.

#### 2 Konsolidierung und Bewertung von Beteiligungen

##### a) Beteiligungen

Die Beteiligungen der MAN SE umfassen Tochterunternehmen, Gemeinschaftsunternehmen, assoziierte Unternehmen und Finanzbeteiligungen.

Tochterunternehmen sind diejenigen Beteiligungen, bei denen die MAN SE die Finanz- und Geschäftspolitik gemäß Satzung, Unternehmensvertrag oder vertraglicher Vereinbarung beherrschen kann. Dies beruht bei nahezu allen derartigen Beteiligungen auf der Mehrheit der Stimmrechte, die die MAN SE direkt oder indirekt hält. Objektgesellschaften ohne Stimmrechtsmehrheit der MAN SE werden konsolidiert, wenn diese Gesellschaften bei wirtschaftlicher Betrachtung von der MAN SE beherrscht werden.

Gemeinschaftsunternehmen sind Beteiligungen, die von der MAN SE zusammen mit einem oder mehreren Partnern gemeinschaftlich geführt werden. Gemeinschaftliche Führung setzt eine vertragliche Vereinbarung voraus.

Beteiligungen, bei denen die MAN SE einen maßgeblichen Einfluss durch Mitwirkung an der Finanz- und Geschäftspolitik ausüben kann, sind assoziierte Unternehmen. Maßgeblicher Einfluss wird grundsätzlich angenommen, wenn ein Stimmrechtsanteil von 20 % bis 50 % gegeben ist. Finanzbeteiligungen sind alle übrigen Beteiligungen.

##### b) Konsolidierungskreis

###### Einbezogene Gesellschaften

In den Konzernabschluss werden neben der MAN SE alle Tochterunternehmen im Wege der Konsolidierung einbezogen. Tochterunternehmen, die im Laufe des Geschäftsjahres erworben wurden, sind ab dem Zeitpunkt des Übergangs der Beherrschung über die Finanz- und Geschäftspolitik einbezogen. Gesellschaften, die im Laufe des Geschäftsjahres veräußert wurden, sind ab der Beendigung der Beherrschung über die Finanz- und Geschäftspolitik nicht mehr einbezogen.

| Anzahl der einbezogenen Gesellschaften    |           |           |            |
|-------------------------------------------|-----------|-----------|------------|
|                                           | Inland    | Ausland   | Gesamt     |
| <b>Einbezogen zum 31. Dezember 2009</b>   | <b>31</b> | <b>74</b> | <b>105</b> |
| Erstmals einbezogen im Geschäftsjahr 2010 | 4         | 18        | 22         |
| Ausgeschieden im Geschäftsjahr 2010       | 4         | 3         | 7          |
| <b>Einbezogen zum 31. Dezember 2010</b>   | <b>31</b> | <b>89</b> | <b>120</b> |

Die Beteiligung an der EURO-Leasing GmbH, Sittensen (EURO-Leasing), wird seit dem 1. Januar 2010 vollkonsolidiert. Für weitere Informationen siehe Anmerkung (6). Weitere Veränderungen des Konsolidierungskreises ergaben sich aus Erstkonsolidierungen von Neugründungen bzw. bestehenden Gesellschaften, die nun ihr operatives Geschäft aufgenommen haben. Bei sonstigen ausgeschiedenen Gesellschaften handelt es sich im Wesentlichen um konzerninterne Verschmelzungen. Die Auswirkungen der Änderungen im Konsolidierungskreis auf den Konzernabschluss sind unwesentlich.

Die Aufstellung über den Anteilsbesitz des MAN Konzerns im Sinne von § 313 (2) HGB ist auf den Seiten 185 ff. aufgeführt.

Aufwendungen, Erträge, Forderungen und Verbindlichkeiten zwischen den einbezogenen Gesellschaften sowie Zwischenergebnisse aus konzerninternen Lieferungen von Vorräten und von Langfristigen Vermögenswerten werden eliminiert. Auf ergebniswirksame Konsolidierungsvorgänge werden latente Steuern abgegrenzt. Finanzielle Verbindlichkeiten aus dem MAN-konzerninternen Finanzverkehr sind auf Ebene der einbezogenen Gesellschaften grundsätzlich in den kurzfristigen Finanzverbindlichkeiten enthalten.

#### Unternehmenszusammenschlüsse

Unternehmenszusammenschlüsse werden nach der Erwerbsmethode bilanziert. Bei der Erstkonsolidierung werden die identifizierten Vermögenswerte, Schulden und Eventualverbindlichkeiten des erworbenen Unternehmens mit ihrem beizulegenden Zeitwert angesetzt. Ein danach verbleibender positiver Unterschiedsbetrag zwischen den Anschaffungskosten für das erworbene Unternehmen und dem anteiligen neu bewerteten Eigenkapital wird dem jeweiligen Bereich der MAN Gruppe als zahlungsmittelgenerierende Einheit zugeordnet und als Geschäftswert gesondert bilanziert. Der Bereich einschließlich des zugeordneten Geschäftswerts wird mindestens einmal jährlich auf seine

Werthaltigkeit überprüft, ggf. wird eine Wertminderung auf den erzielbaren Betrag vorgenommen. Im Falle der Veräußerung eines Tochterunternehmens wird der zurechenbare Geschäftswert bei der Ermittlung des Veräußerungsergebnisses berücksichtigt.

#### c) Nach der Equity-Methode bilanzierte Beteiligungen

Zu den nach der Equity-Methode bilanzierten Beteiligungen zählen assoziierte Unternehmen und Gemeinschaftsunternehmen. Die erstmalige Bewertung von assoziierten Unternehmen und Gemeinschaftsunternehmen erfolgt zu Anschaffungskosten. Für die Folgebewertung wird der Anteil der MAN Gruppe an den nach dem Erwerb erwirtschafteten Gewinnen und Verlusten ergebniswirksam erfasst. Die übrigen Veränderungen im Eigenkapital von assoziierten Unternehmen und Gemeinschaftsunternehmen wie Währungsanpassungen werden erfolgsneutral bilanziert. Zwischenergebnisse aus Geschäften von Konzernunternehmen mit assoziierten Unternehmen und Gemeinschaftsunternehmen werden anteilig im Ergebnis der Konzernunternehmen zurückgenommen. Gibt es Anhaltspunkte für eine Wertminderung einer nach der Equity-Methode bilanzierten Beteiligung, wird für sie ein Werthaltigkeitstest durchgeführt und ggf. eine Wertminderung ergebniswirksam erfasst.

Geschäftswerte, die aus dem Erwerb eines assoziierten Unternehmens oder eines Gemeinschaftsunternehmens entstehen, sind in den Beteiligungsbuchwerten der assoziierten Unternehmen bzw. Gemeinschaftsunternehmen enthalten.

#### d) Finanzbeteiligungen

Finanzbeteiligungen, für die ein notierter Marktpreis oder ein verlässlich bestimmbarer beizulegender Zeitwert vorliegt, werden zu diesem Wert bewertet. Finanzinvestitionen in Eigenkapitalinstrumente, die der Kategorie zur Veräußerung verfügbar zugeordnet werden, für die allerdings kein notierter Preis auf einem aktiven Markt vorliegt und deren beizulegender Zeitwert nicht verlässlich ermittelt werden kann, sind von der Bewertung mit dem Fair Value ausgenommen. Diese Finanzbeteiligungen werden zu Anschaffungskosten bewertet. Gibt es Anhaltspunkte für eine Wertminderung einer zu Anschaffungskosten bilanzierten Finanzbeteiligung, wird für sie ein Werthaltigkeitstest durchgeführt und ggf. eine Wertminderung ergebniswirksam erfasst.

### e) Währungsumrechnung

Geschäftsvorfälle in fremder Währung werden mit den relevanten Fremdwährungskursen zum Transaktionszeitpunkt umgerechnet. In Folgeperioden werden die monetären Vermögenswerte und Schulden zum Stichtagskurs bewertet, die Umrechnungsdifferenzen werden ergebniswirksam erfasst. Nicht monetäre Posten, die zu historischen Anschaffungs- oder Herstellungskosten in einer Fremdwährung bewertet wurden, werden mit dem Kurs am Tag des Geschäftsvorfalles umgerechnet.

Die Abschlüsse von Tochterunternehmen und assoziierten Unternehmen aus Ländern außerhalb des Euroraums werden nach dem Konzept der funktionalen Währung umgerechnet. Für die Tochterunternehmen richtet sich die funktionale Währung nach deren primärem Wirtschaftsumfeld und entspricht fast immer der jeweiligen Landeswährung. Für einzelne Tochterunternehmen ist die funktionale Währung abweichend zur Landeswährung Euro.

Die Umrechnung der Abschlüsse erfolgt nach der modifizierten Stichtagskursmethode, nach der die Posten der Bilanz mit Ausnahme des Eigenkapitals zum Kurs am Bilanzstichtag, die Posten der Gewinn- und Verlustrechnung zum Jahresdurchschnittskurs umgerechnet werden. Der Jahresdurchschnittskurs wird grundsätzlich aus Monatsdurchschnittskursen errechnet. Das Eigenkapital wird mit historischen Kursen umgerechnet.

In der Darstellung der Entwicklung von Vermögenswerten, Rückstellungen und Eigenkapital werden der Stand zu Beginn und am Ende des Geschäftsjahres sowie die Veränderung des Konsolidierungskreises zum jeweiligen Stichtagskurs umgerechnet. Die übrigen Posten werden zum Jahresdurchschnittskurs umgerechnet. Unterschiede aus der Währungsumrechnung der Bilanzposten gegenüber der Umrechnung des Vorjahres werden erfolgsneutral behandelt. Im Fall des Verkaufs eines Tochterunternehmens werden solche Umrechnungsdifferenzen ergebniswirksam erfasst.

#### Die Wechselkurse der wichtigsten Währungen betragen in €

|                            | Stichtagskurs |            | Durchschnittskurs |          |
|----------------------------|---------------|------------|-------------------|----------|
|                            | 31.12.2010    | 31.12.2009 | 2010              | 2009     |
| US-Dollar                  | 1,3362        | 1,4406     | 1,3250            | 1,3943   |
| Pfund Sterling             | 0,8608        | 0,8881     | 0,8572            | 0,8927   |
| Dänische Krone             | 7,4535        | 7,4418     | 7,4473            | 7,4465   |
| Schweizer Franken          | 1,2504        | 1,4836     | 1,3797            | 1,5077   |
| Schwedische Krone          | 8,9655        | 10,2520    | 9,5462            | 10,6132  |
| Polnischer Zloty           | 3,9750        | 4,1045     | 4,0103            | 4,3490   |
| Russischer Rubel           | 40,8200       | 43,1540    | 40,3190           | 44,2226  |
| Brasilianischer Real       | 2,2177        | 2,5113     | 2,3357            | 2,7947   |
| Chinesischer Yuan Renminbi | 8,8220        | 9,8350     | 8,9699            | 9,5229   |
| Indische Rupie             | 59,7580       | 67,0400    | 60,5615           | 67,4032  |
| Japanischer Yen            | 108,6500      | 133,1600   | 116,2804          | 130,3358 |
| Südafrikanischer Rand      | 8,8625        | 10,6660    | 9,7329            | 11,6207  |

### 3 Bilanzierungsgrundsätze

Die Aufstellung des Konzernabschlusses erfolgt mit Ausnahme bestimmter Finanzinstrumente, die zum beizulegenden Zeitwert bewertet werden, auf Basis der Anschaffungs- und Herstellungskosten. Der Konzernabschluss basiert auf den nach MAN-konzernerneinheitlichen Bilanzierungs- und Bewertungsmethoden erstellten Abschlüssen der MAN SE und der einbezogenen Tochterunternehmen.

#### a) Umsatzrealisierung

Umsatzerlöse werden zu dem Zeitpunkt realisiert, zu dem die Erzeugnisse oder Waren geliefert bzw. die Leistungen erbracht worden sind und der Gefahrenübergang an den Kunden stattgefunden hat. Die Höhe der Umsatzerlöse muss verlässlich bestimmbar sein, und von der Einbringlichkeit der Forderung muss ausgegangen werden können. Skonti, Kundenboni und Rabatte vermindern die Umsatzerlöse.

Bei kundenspezifischen Fertigungsaufträgen werden Umsätze nach dem Leistungsfortschritt (»percentage of completion method«) erfasst, siehe hierzu im Einzelnen die Erläuterungen zu kundenspezifischen Fertigungsaufträgen, Anmerkung (i).

Verkäufe, bei denen ein Konzernunternehmen eine Rückkaufverpflichtung zu einem vorab festgelegten Wert eingeht, werden nicht sofort in voller Höhe als Umsatz realisiert, sondern verteilt über den Zeitraum bis zur Rückgabe im Umsatz ausgewiesen und als »operating lease« bilanziert.

Umfasst der Verkauf von Produkten einen bestimmbaren Teilbetrag für künftige Dienstleistungen (Mehrkomponentenverträge), werden die darauf entfallenden Umsatzerlöse abgegrenzt und entsprechend der erbrachten Leistung über die Vertragslaufzeit erfolgswirksam realisiert.

#### b) Betriebliche Aufwendungen und Erträge

Betriebliche Aufwendungen werden mit Inanspruchnahme der Leistung, Aufwendungen für Werbung und Absatzförderung sowie sonstige absatzbezogene Aufwendungen zum Zeitpunkt ihres Anfalls als Aufwand erfasst. Die Umsatzkosten umfassen die Herstellungskosten der verkauften Erzeugnisse sowie die Anschaffungskosten der verkauften Handelswaren. Zu den Herstellungskosten gehören neben den direkt zurechenbaren Material- und Fertigungseinzelkosten auch fertigungsbedingte Gemeinkosten einschließlich der Abschreibungen auf die Produktionsanlagen. Rückstellungen für Gewährleistung werden zum Zeitpunkt des Verkaufs der Produkte gebildet. Aufwendungen für Forschung werden sofort ergebniswirksam erfasst. Zinsen und sonstige Fremdkapitalkosten werden grundsätzlich als Aufwand der Periode erfasst, mit Ausnahme von Fremdkapitalkosten, die als Bestandteil der Anschaffungs- und Herstellungskosten von qualifizierten Vermögenswerten aktiviert werden.

Die Erlöse der Finanzdienstleistungen aus »finance lease« und aus »operating lease« werden in den Sonstigen betrieblichen Erträgen ausgewiesen. Korrespondierend werden die Zinsaufwendungen aus der Refinanzierung des Leasingvermögens in den Sonstigen betrieblichen Aufwendungen ausgewiesen.

#### c) Immaterielle Vermögenswerte

Einzelne erworbene Immaterielle Vermögenswerte werden zu Anschaffungskosten angesetzt. Immaterielle Vermögenswerte, die im Zuge eines Unternehmenserwerbs übernommen wurden, werden mit ihrem beizulegenden Zeitwert zum Erwerbszeitpunkt bewertet.

Haben die Immateriellen Vermögenswerte eine bestimmbare Nutzungsdauer, werden sie über den Zeitraum ihrer Nutzung linear abgeschrieben. Die Abschreibungsdauer beträgt für Software überwiegend drei bis acht Jahre. Bei Lizenzen und ähnlichen Rechten erfolgt die Abschreibung entsprechend den vertraglichen Nutzungsdauern. Ist keine Nutzungsdauer bestimmbar, erfolgt keine planmäßige Abschreibung. Stattdessen werden die Immateriellen Vermögenswerte mindestens einmal jährlich einem Wertminderungstest unterzogen, ggf. wird eine Wertminderung vorgenommen.

Die Aufwendungen für die Entwicklung neuer Produkte und Baureihen werden aktiviert, wenn die Produkte bzw. Baureihen technisch und wirtschaftlich realisierbar sind, für eine eigene Nutzung oder die Vermarktung vorgesehen sind, die Aufwendungen zuverlässig bewertbar sind und ausreichende Ressourcen zur Fertigstellung des Entwicklungsprojekts zur Verfügung stehen. Entwicklungsaufwendungen, welche diese Kriterien nicht erfüllen, sowie alle Forschungsaufwendungen werden sofort ergebniswirksam erfasst. Ab dem Zeitpunkt der Markteinführung werden die aktivierten Entwicklungskosten abgeschrieben. Die Abschreibung erfolgt linear über in der Regel fünf bis sieben Jahre, im Bereich MAN Diesel & Turbo über zehn Jahre. Solange ein Entwicklungsprojekt nicht abgeschlossen ist, erfolgt mindestens einmal jährlich eine Überprüfung der Werthaltigkeit der aufgelaufenen aktivierten Beträge.

#### d) Sachanlagen

Sachanlagen werden zu historischen Anschaffungs- oder Herstellungskosten bewertet, vermindert um Abschreibungen und ggf. auch Wertminderungen. Die Herstellungskosten selbst erstellter Sachanlagen umfassen die direkt zurechenbaren Produktionskosten, anteilige Produktionsgemeinkosten sowie auf den Herstellungszeitraum entfallende Fremdkapitalzinsen. Sofern Sachanlagen aus wesentlichen identifizierbaren Komponenten mit jeweils unterschiedlichen Nutzungsdauern bestehen, werden diese Komponenten separat bilanziert und abgeschrieben.

Aufwendungen für Instandhaltungen und Reparaturen werden ergebniswirksam erfasst, soweit sie nicht aktivierungspflichtig sind.



Sachanlagen werden linear über die voraussichtliche Nutzungsdauer abgeschrieben. Den Abschreibungen liegen konzerneinheitlich festgelegte Nutzungsdauern zugrunde: Gebäude (10 bis 50 Jahre), Grundstückseinrichtungen (5 bis 33 Jahre), Technische Anlagen und Maschinen (3 bis 33 Jahre), Andere Anlagen, Betriebs- und Geschäftsausstattung (3 bis 25 Jahre).

#### e) Als Finanzinvestitionen gehaltene Immobilien

Als Finanzinvestitionen gehaltene Immobilien umfassen Grundstücke und Gebäude, die zur Erzielung von Mieteinnahmen und/oder zum Zwecke der Wertsteigerung gehalten werden. Sie werden analog zu Sachanlagen zu fortgeschriebenen Anschaffungskosten bilanziert und linear über die voraussichtliche Nutzungsdauer – sofern es sich nicht um Grundstücke handelt – abgeschrieben. Die Restnutzungsdauern der als Finanzinvestitionen gehaltenen Immobilien liegen im Wesentlichen zwischen 5 und 25 Jahren. Der beizulegende Zeitwert dieser Immobilien wird im Anhang angegeben, siehe Anmerkung (15). Er wird in der Regel durch interne Gutachten (auf Basis anerkannter Bewertungsmethoden) ermittelt. Aus Wesentlichkeitsgesichtspunkten werden die Angaben zu den als Finanzinvestitionen gehaltenen Immobilien mit den Sachanlagen zusammengefasst.

#### f) Leasing, Vermietete Erzeugnisse

Bei Leasingtransaktionen über Sachanlagen (Investitionsleasing) treten Unternehmen der MAN Gruppe als Leasingnehmer auf. Tragen Unternehmen der MAN Gruppe als Leasingnehmer alle wesentlichen Chancen und Risiken aus der Nutzung des Leasinggegenstandes, wird der Leasingvertrag als »finance lease« behandelt. In diesen Fällen aktiviert der Leasingnehmer das Leasingobjekt in Höhe des Barwerts der Mindestleasingzahlungen oder in Höhe des beizulegenden Zeitwerts des Leasingobjekts, sofern dieser Wert niedriger ist. In der Folge wird der Leasinggegenstand über die geschätzte Nutzungsdauer oder die kürzere Vertragslaufzeit abgeschrieben. Zugleich wird eine entsprechende Finanzverbindlichkeit angesetzt, die in der Folgezeit nach der Effektivzinsmethode getilgt und fortgeschrieben wird. Alle übrigen Leasingverträge, bei denen die Unternehmen der MAN Gruppe als Leasingnehmer auftreten, werden als »operating lease« behandelt, die Leasingraten werden als Aufwand erfasst.

Bei Leasingtransaktionen über Vermietete Erzeugnisse (Absatzfinanzierung) treten Unternehmen von MAN Finance als Leasinggeber auf. Diese Verträge können abhängig von ihrem Inhalt »finance lease« oder »operating lease« sein. Verträge, bei denen MAN Finance das Erzeugnis nach Ablauf des Leasingvertrags behält, werden ebenso wie Verkäufe von Erzeugnissen, die mit einer Rückkaufverpflichtung verkauft sind, in der MAN Gruppe als »operating lease« bilanziert. Das Leasingobjekt wird zu Herstellungskosten bewertet und entsprechend der Laufzeit des Leasingvertrags bzw. bis zur Rücknahme linear auf die Restwerte abgeschrieben.

#### g) Wertminderungen

Wenn Anhaltspunkte dafür vorliegen, dass die Buchwerte von Immateriellen Vermögenswerten, Sachanlagen, nach der Equity-Methode bilanzierten Beteiligungen, zu Anschaffungskosten bilanzierten Finanzbeteiligungen oder von Vermieteten Erzeugnissen wertgemindert sein könnten, wird ein Wertminderungstest durchgeführt. Für Immaterielle Vermögenswerte mit unbegrenzten Nutzungsdauern, aktivierte Entwicklungskosten sowie den Goodwill wird der Wertminderungstest mindestens einmal jährlich durchgeführt. In diesem Fall wird der erzielbare Betrag des betreffenden Vermögenswerts ermittelt, um den Umfang einer ggf. vorzunehmenden Wertminderung zu bestimmen. Der erzielbare Betrag entspricht dem höheren Wert aus dem beizulegenden Zeitwert abzüglich Veräußerungskosten oder dem Nutzungswert. Der Nutzungswert entspricht dem Barwert der erwarteten Cashflows. Als Diskontierungssatz wird ein den Marktbedingungen entsprechender Zinssatz vor Steuern verwendet. Sofern kein erzielbarer Betrag für einen einzelnen Vermögenswert ermittelt werden kann, wird der erzielbare Betrag für die kleinste identifizierbare Gruppe von Vermögenswerten (zahlungsmittelgenerierende Einheit) bestimmt, der der betreffende Vermögenswert zugeordnet werden kann. Der Goodwill wird zu Wertminderungszwecken jeweils der kleinsten Goodwill-tragenden zahlungsmittelgenerierenden Einheit zugeordnet. Ist der erzielbare Betrag eines Vermögenswerts niedriger als der Buchwert, erfolgt eine sofortige ergebniswirksame Wertminderung des Vermögenswerts, die entweder gesondert oder in den Sonstigen betrieblichen Aufwendungen erfasst wird.

Ergibt sich für einen Vermögenswert oder eine Zahlungsmittelgenerierende Einheit nach einer vorgenommenen Wertminderung zu einem späteren Zeitpunkt ein höherer erzielbarer Betrag, erfolgt eine Wertaufholung maximal bis auf die fortgeführten Anschaffungs- und Herstellungskosten, die sich ohne die Wertminderung ergeben hätten. Die Wertaufholung erfolgt ergebniswirksam und wird entweder gesondert oder in den Sonstigen betrieblichen Erträgen erfasst. Die Wertaufholung eines zuvor abgeschriebenen Goodwill ist nicht zulässig.

#### h) Vorräte

Vorräte werden zu Anschaffungs- oder Herstellungskosten oder zum niedrigeren Nettoveräußerungswert bewertet. Die Herstellungskosten umfassen die direkt zurechenbaren Produktionskosten und anteilige fixe und variable Produktionsgemeinkosten. Die zugerechneten Gemeinkosten sind überwiegend auf Basis der üblichen Kapazitätsauslastung ermittelt. Vertriebskosten und Kosten der allgemeinen Verwaltung werden nicht aktiviert. Rohstoffe und Handelswaren werden zu durchschnittlichen Anschaffungskosten bewertet.

#### i) Kundenspezifische Fertigungsaufträge

Kundenspezifische Fertigungsaufträge werden nach ihrem Leistungsfortschritt (»percentage of completion method«) bilanziert. Nach dieser Methode werden anteilige Umsatzerlöse und Umsatzkosten entsprechend dem am Bilanzstichtag erreichten Leistungsfortschritt ausgewiesen. Grundlage sind die mit dem Kunden vereinbarten Auftragserlöse und die erwarteten Auftragskosten. Der Grad der Fertigstellung errechnet sich in der Regel aus dem Anteil der bis zum Bilanzstichtag angefallenen Auftragskosten an den insgesamt erwarteten Auftragskosten (»cost to cost method«). In einigen Einzelfällen, insbesondere wenn es sich um neuartige und komplexe Aufträge handelt, wird der Leistungsfortschritt anhand vertraglich vereinbarter Meilensteine (»milestone method«) festgelegt. Sofern das Ergebnis eines kundenspezifischen Fertigungsauftrags noch nicht ausreichend sicher ist, wird der Erlös nur in Höhe der angefallenen Auftragskosten erfasst (»zero profit method«). In der Bilanz werden die nach der »percentage of completion method« verumsatzten Auftragsteile nach Abzug erhaltener Anzahlungen in den Forderungen aus Lieferungen und Leistungen erfasst.

Erwartete Verluste aus kundenspezifischen Fertigungsaufträgen werden sofort in voller Höhe als Aufwand bilanziert, indem aktivierte Vermögenswerte wertberichtigt und darüber hinaus auch Rückstellungen gebildet werden.

#### j) Originäre Finanzinstrumente

Zu den originären Finanzinstrumenten gehören insbesondere Forderungen an Kunden, Ausleihungen, Finanzbeteiligungen, Wertpapiere und Flüssige Mittel sowie Finanzverbindlichkeiten und Verbindlichkeiten aus Lieferungen und Leistungen. Die Bilanzierung originärer Finanzinstrumente erfolgt grundsätzlich am Handelstag. Bei erstmaliger Erfassung werden die originären Finanzinstrumente mit ihrem beizulegenden Zeitwert angesetzt. Bei der Erstbewertung entspricht der beizulegende Zeitwert grundsätzlich dem Transaktionspreis, d. h. der hingegebenen oder der empfangenen Gegenleistung.

Nach dem erstmaligen Ansatz werden die originären Finanzinstrumente je nach der Kategorie, zu der sie gehören, entweder mit ihrem beizulegenden Zeitwert oder mit ihren fortgeführten Anschaffungskosten bewertet.

Kredite und Forderungen, die nicht zu Handelszwecken gehalten werden, werden grundsätzlich zu fortgeführten Anschaffungskosten, abzüglich der Wertminderungen, bilanziert. Wertminderungen werden vorgenommen, wenn objektive Hinweise hierfür vorliegen. Diese Kategorie umfasst in der MAN Gruppe vor allem Forderungen an Kunden, übrige Forderungen und Ausleihungen. Unverzinsliche und niedrig verzinsliche Forderungen mit einer Restlaufzeit von mehr als zwölf Monaten werden abgezinst.

Finanzinstrumente, die weder bis zur Endfälligkeit noch für spekulative Zwecke gehalten werden und die zu keiner anderen genannten Kategorie gehören, sind den zur Veräußerung verfügbaren finanziellen Vermögenswerten zuzuordnen. Zur Veräußerung verfügbare finanzielle Vermögenswerte werden zum beizulegenden Zeitwert bewertet. In diese Kategorie fallen in der MAN Gruppe vor allem Wertpapiere und Finanzbeteiligungen. Der Unterschied zwischen den Anschaffungskosten und dem beizulegenden Zeitwert wird ergebnisneutral behandelt und unter Berücksichtigung latenter Steuern im Eigenkapital aus nicht realisierten Gewinnen und Verlusten erfasst. Liegt der beizulegende Zeitwert dauerhaft oder wesentlich unter dem Buchwert, so wird die Wertminderung ergebniswirksam erfasst.

Bei Wertpapieren ist der beizulegende Zeitwert in der Regel ein Börsenkurs. Finanzbeteiligungen, die über keinen notierten Marktpreis verfügen und bei denen der beizulegende Zeitwert nicht verlässlich bestimmt werden kann, werden zu Anschaffungskosten bewertet. Wenn Anhaltspunkte für eine Wertminderung vorliegen, wird ein Werthaltigkeitstest durchgeführt und ggf. eine Wertminderung ergebniswirksam erfasst.

Bis zur Endfälligkeit zu haltende Finanzinvestitionen werden mit ihren fortgeführten Anschaffungskosten bewertet. In der MAN Gruppe wird von dieser Kategorisierung jedoch grundsätzlich kein Gebrauch gemacht. Gleiches gilt für die Fair Value Option.

Finanzielle Verbindlichkeiten werden in der Folgebewertung mit Ausnahme der derivativen Finanzinstrumente zu fortgeführten Anschaffungskosten bewertet.

#### k) Derivative Finanzinstrumente

In der MAN Gruppe werden derivative Finanzinstrumente eingesetzt, um Risiken aus Fremdwährungs-, Zins- und sonstigen Preisänderungsrisiken, die vor allem aus der laufenden Geschäftstätigkeit resultieren können, entgegenzuwirken. Derivative Finanzinstrumente werden bei ihrer erstmaligen Erfassung und an jedem folgenden Bilanzstichtag zum beizulegenden Zeitwert bilanziert. Die Bilanzierung derivativer Finanzinstrumente erfolgt grundsätzlich am Handelstag.

Der beizulegende Zeitwert entspricht bei börsennotierten Derivaten deren positivem oder negativem Marktwert, ggf. unter Berücksichtigung des Kontrahentenrisikos. Liegen keine quotierten Marktpreise vor, werden die beizulegenden Zeitwerte auf Basis der am Bilanzstichtag bestehenden Konditionen, wie z. B. Zinssätze oder Devisenkurse, und mithilfe anerkannter Modelle, wie z. B. Discounted-Cashflow-Modellen oder Optionspreismodellen, berechnet.

Die Erfassung von Gewinnen und Verlusten aus der Bewertung zum beizulegenden Zeitwert hängt von der Klassifizierung des Derivats ab.

Derivative Finanzinstrumente, die nicht in eine wirksame Sicherungsbeziehung gemäß IAS 39 einbezogen sind, sind den zu Handelszwecken gehaltenen Vermögenswerten zuzuordnen und

werden ergebniswirksam zum beizulegenden Zeitwert bewertet. Soweit kein Marktwert vorhanden ist, wird der beizulegende Zeitwert mithilfe adäquater Bewertungsverfahren, wie z. B. Discounted-Cashflow-Methoden, ermittelt.

Wenn die Voraussetzungen des IAS 39 zur Bilanzierung gemäß den Vorschriften zum Hedge Accounting erfüllt sind, designiert und dokumentiert MAN die Sicherungsbeziehung ab diesem Zeitpunkt entweder als Fair Value Hedge oder als Cashflow Hedge.

Bei einem Fair Value Hedge werden die bilanzierten Vermögenswerte und Verbindlichkeiten oder bilanzunwirksame feste Verpflichtungen gegen mögliche Schwankungen des beizulegenden Zeitwerts gesichert. Die Veränderungen des beizulegenden Zeitwerts des derivativen Finanzinstruments und des dazu gehörenden Grundgeschäfts werden bei einem Fair Value Hedge ergebniswirksam erfasst. Im Falle eines perfekten Hedge gleichen sich die ergebniswirksam erfassten Wertschwankungen des derivativen Finanzinstruments und des Grundgeschäfts nahezu aus.

Bei einem Cashflow Hedge werden die bilanzierten Vermögenswerte und Verbindlichkeiten, die bilanzunwirksamen festen Verpflichtungen sowie mit hoher Wahrscheinlichkeit erwartete zukünftige Transaktionen gegen das Risiko schwankender Zahlungsströme gesichert. Der effektive Teil der Veränderung des beizulegenden Zeitwerts des derivativen Finanzinstruments wird bei einem Cashflow Hedge zuerst ergebnisneutral behandelt und nach Abzug latenter Steuern im Eigenkapital aus nicht realisierten Gewinnen und Verlusten erfasst. Sobald das abgesicherte Grundgeschäft ergebniswirksam wird, erfolgt bei Verkaufstransaktionen die Umgliederung des anteiligen Eigenkapitals in die Umsatzerlöse. Sofern die Absicherung später in dem Ansatz eines nicht finanziellen Vermögenswerts resultiert (Einkaufstransaktion), verändern die bislang im Eigenkapital erfassten Bewertungseffekte des Derivats den Wertansatz des abgesicherten nicht finanziellen Vermögenswerts. Der ineffektive Teil der Veränderung des beizulegenden Zeitwerts wird sofort ergebniswirksam berücksichtigt. Wenn das Sicherungsinstrument ausläuft, verkauft, beendet oder ausgeübt wird oder die Sicherungsbeziehung nicht mehr besteht, allerdings trotzdem mit dem Eintritt der geplanten Transaktion gerechnet wird, verbleiben die bis dahin aus diesem Sicherungsinstrument aufgelaufenen nicht realisierten Gewinne/Verluste im Eigenkapital und werden gemäß obiger Erläuterungen ergebniswirksam erfasst, wenn das abgesicherte Grundgeschäft die Gewinn- und Verlustrechnung beeinflusst. Falls der Eintritt des ursprünglich abgesicherten Grundgeschäfts nicht mehr erwartet wird, werden die bis

dahin innerhalb des Eigenkapitals ausgewiesenen kumulierten, nicht realisierten Gewinne und Verluste ebenfalls ergebniswirksam erfasst.

Zur Sicherungsstrategie in der MAN Gruppe und zu den Volumina am Bilanzstichtag siehe Anmerkung (31).

### l) Latente Steuern

Aktive und passive latente Steuern werden für temporäre Differenzen zwischen den steuerlichen und den bilanziellen Wertansätzen sowie aus ergebniswirksamen Konsolidierungsvorgängen und für Steuergutschriften und steuerliche Verlustvorträge abgegrenzt. Die Bewertung der latenten Steuern erfolgt zu dem am Bilanzstichtag für Veranlagungszeiträume ab 2010 gültigen oder mit hoher Wahrscheinlichkeit zur Anwendung kommenden Steuersatz, im Inland in Höhe von 31,58 % (Vorjahr 31,58 %).

Aktive latente Steuern werden nur in dem Umfang angesetzt, in dem zu versteuerndes Einkommen für die Nutzung der abzugsfähigen temporären Differenzen wahrscheinlich zur Verfügung stehen wird.

Veränderungen der latenten Steuern in der Bilanz führen grundsätzlich zu latentem Steueraufwand bzw. -ertrag. Soweit die Veränderung latenter Steuern aus Sachverhalten resultiert, die direkt im Eigenkapital erfasst wurden, wird auch die Veränderung der latenten Steuern direkt im Eigenkapital berücksichtigt.

### m) Pensionen

Pensionsverpflichtungen aus leistungsorientierten Plänen werden nach dem versicherungsmathematischen Anwartschaftsbarwertverfahren (»projected unit credit method«) ermittelt. Dabei werden die zukünftigen Verpflichtungen (»defined benefit obligation«) auf der Grundlage der zum Bilanzstichtag anteilig erworbenen Leistungsansprüche bewertet und auf ihren Barwert abgezinst. Bei der Bewertung werden Annahmen über die zukünftige Entwicklung bestimmter Parameter, die sich auf die künftige Leistungshöhe auswirken, berücksichtigt. Abweichungen zwischen den getroffenen Annahmen und den tatsächlich eingetretenen Entwicklungen

oder Änderungen von versicherungsmathematischen Annahmen können zu versicherungsmathematischen Gewinnen und Verlusten führen. Diese werden unter Berücksichtigung latenter Steuern erfolgsneutral im Eigenkapital erfasst und in der Zusammenfassung aller im Eigenkapital erfassten Erträge und Aufwendungen dargestellt.

Die Pensionsrückstellungen sind um den beizulegenden Zeitwert des zur Deckung der Versorgungsverpflichtungen bestehenden Planvermögens vermindert. Zu Einzelheiten der Bewertung siehe Anmerkung (24). Soweit das Planvermögen die Verpflichtung übersteigt, wird dieser Überhang nur insoweit als sonstiger Vermögenswert angesetzt, wie hieraus eine Rückvergütung aus dem Plan oder eine Reduzierung künftiger Beiträge resultiert.

Der Dienstzeitaufwand, der die im Geschäftsjahr gemäß Leistungsplan hinzuerworbenen Ansprüche der aktiven Arbeitnehmer repräsentiert, wird innerhalb der Funktionskosten ausgewiesen. Der im Netto-Pensionsaufwand enthaltene Zinsaufwand und der erwartete Kapitalertrag des Planvermögens werden im Zinsergebnis berücksichtigt.

Zahlungen für beitragsorientierte Pläne werden ergebniswirksam innerhalb der Funktionskosten erfasst.

### n) Sonstige Rückstellungen

Die Sonstigen Rückstellungen werden für alle erkennbaren Risiken und ungewissen Verpflichtungen gebildet, die aus Ereignissen der Vergangenheit resultieren, die wahrscheinlich zu einer künftigen wirtschaftlichen Belastung führen werden und deren Höhe verlässlich geschätzt werden kann. Die Bewertung erfolgt in Höhe des Betrags, der zur Erfüllung der Verpflichtungen bei bestmöglicher Schätzung notwendig ist. Sofern der Zinseffekt wesentlich ist, wird die Rückstellung mit dem am Bilanzstichtag gültigen Marktzins abgezinst. Eine mit einer Rückstellung zusammenhängende erwartete Erstattung Dritter wird als separater Vermögenswert aktiviert, wenn ihre Realisation so gut wie sicher ist.

Die Bilanzierung der Rückstellungen wird regelmäßig überprüft und bei neuen Erkenntnissen oder geänderten Umständen angepasst. Resultiert aus einer geänderten Einschätzung eine Reduzierung des Verpflichtungsumfangs, wird die Rückstellung anteilig aufgelöst und der Ertrag in den Funktionsbereichen erfasst, die ursprünglich bei der Bildung der Rückstellung mit dem Aufwand belastet waren.

Rückstellungen für Gewährleistungen werden zum Zeitpunkt des Verkaufs der betreffenden Erzeugnisse oder der Erbringung der entsprechenden Dienstleistung gebildet. Die Bewertung basiert vorrangig auf historischen Erfahrungswerten. Für bekannte Schäden werden darüber hinaus Einzelrückstellungen gebildet. Rückstellungen für Restrukturierungsmaßnahmen werden gebildet, soweit ein detaillierter, formaler Restrukturierungsplan erstellt und dieser den betroffenen Parteien mitgeteilt worden ist. Rückstellungen für ausstehende Kosten und für übrige geschäftsbezogene Verpflichtungen sind auf der Basis der noch zu erbringenden Leistungen bewertet, in der Regel in Höhe voraussichtlich noch anfallender Herstellungskosten. Rückstellungen für drohende Verluste aus belastenden Verträgen werden gebildet, wenn der aus dem Vertrag resultierende erwartete wirtschaftliche Nutzen geringer ist als die zur Vertragserfüllung unvermeidbaren Kosten.

#### o) Zur Veräußerung bestimmte langfristige Vermögenswerte und aufgegebenen Geschäftsbereiche

Hierunter fallen einzelne langfristige Vermögenswerte oder Gruppen von Vermögenswerten sowie direkt mit ihnen in Verbindung stehende Schulden (Veräußerungsgruppe), wenn deren Buchwerte hauptsächlich durch Veräußerung und nicht durch betriebliche Nutzung realisiert werden sollen.

Langfristige Vermögenswerte, die einzeln oder zusammen in einer Veräußerungsgruppe als »zur Veräußerung bestimmt« klassifiziert sind, werden in der Bilanz in separaten Posten ausgewiesen. Die Bewertung erfolgt zum niedrigeren Betrag aus Buchwert und beizulegendem Zeitwert abzüglich Veräußerungskosten; eine planmäßige Abschreibung wird nicht mehr vorgenommen. Im Falle einer späteren Erhöhung des beizulegenden Zeitwerts abzüglich Veräußerungskosten erfolgt eine entsprechende Wertaufholung. Die Wertaufholung ist auf die zuvor für die jeweiligen Vermögenswerte erfassten Wertminderungen begrenzt.

Bei einem aufgegebenen Geschäftsbereich handelt es sich um einen Unternehmensteil, der ein wesentliches Geschäftsfeld der MAN Gruppe darstellt und zur Veräußerung bestimmt ist oder veräußert wurde. Die Vermögenswerte und Schulden von einem aufgegebenen Geschäftsbereich werden bis zum Abschluss des Verkaufs in der Bilanz als »zur Veräußerung bestimmt« ausgewiesen und mit dem niedrigeren Wert aus Buchwert und beizulegendem Zeitwert abzüglich Veräußerungskosten bewertet. Das Ergebnis aus dieser Bewertung, die Gewinne und Verluste aus der

Veräußerung sowie das Ergebnis aus der laufenden Geschäftstätigkeit des aufgegebenen Geschäftsbereichs werden in der Gewinn- und Verlustrechnung gesondert als »Ergebnis aufgegebenen Geschäftsbereiche« ausgewiesen. Die Gewinn- und Verlustrechnung der Vorperiode wird entsprechend angepasst. In der Kapitalflussrechnung sind die aufgegebenen Geschäftsbereiche jeweils gesondert dargestellt und im Anhang erläutert. Auch hier werden die Vorjahreswerte entsprechend angepasst.

#### p) Abschlussdarstellung

Die Darstellung in der Bilanz unterscheidet zwischen kurz- und langfristigen Vermögenswerten und Schulden. Vermögenswerte und Schulden werden als kurzfristig klassifiziert, wenn sie innerhalb eines Jahres oder innerhalb eines längeren Geschäftszyklus fällig werden. Aktive und passive latente Steuern sowie Vermögenswerte und Rückstellungen aus leistungsorientierten Pensionsplänen werden als langfristige Posten dargestellt. Die Konzern Gewinn- und Verlustrechnung wird nach dem Umsatzkostenverfahren aufgestellt.

#### q) Vorjahresinformationen

Einzelne Vorjahresdaten sind aus Gründen der besseren Vergleichbarkeit an die aktuelle Darstellung angepasst worden.

#### r) Schätzungen und Ermessensspielräume

Die Aufstellung des Konzernabschlusses erfordert bei einigen Sachverhalten einen gewissen Grad von Einschätzungen und Ermessensentscheidungen. Die vorgenommenen Schätzungen wurden auf der Basis von Erfahrungswerten und weiteren relevanten Faktoren unter Berücksichtigung der Prämisse der Unternehmensfortführung vorgenommen. Alle Schätzungen und Annahmen werden nach bestem Wissen und Gewissen getroffen, um ein den tatsächlichen Verhältnissen entsprechendes Bild der Vermögens-, Finanz- und Ertragslage des Konzerns zu vermitteln. Bestehende Unsicherheiten werden bei der Wertermittlung angemessen berücksichtigt, dennoch können zukünftige Ereignisse von den Schätzungen abweichen. Die Einschätzungen und Annahmen werden laufend überprüft.

Bei folgenden Sachverhalten sind die zum Bilanzstichtag getroffenen Annahmen von besonderer Bedeutung:

Die mindestens einmal jährlich durchgeführte Überprüfung der Goodwills auf Wertminderungen erfordert u. a. die Prognose von künftigen Cashflows sowie deren Diskontierung. Dabei liegen den Cashflows Prognosen zugrunde, die auf vom Management genehmigten Finanzplänen aufbauen. Weitere wesentliche Prämissen bilden die gewichteten durchschnittlichen Kapitalkosten sowie die Steuersätze. Werden immaterielle Vermögenswerte, Sachanlagen, nach der Equity-Methode bilanzierte Beteiligungen, zu Anschaffungskosten bilanzierte Finanzbeteiligungen oder vermietete Erzeugnisse auf Wertminderungen getestet, ist die Bestimmung des erzielbaren Betrags der Vermögenswerte gleichermaßen mit Schätzungen des Managements verbunden. Eventuelle Wertaufholungen in späteren Perioden erfordern ebenso umfangreiche Prognosen und Schätzungen. Für weitere Informationen betreffend die wesentlichen Wertminderungen und Wertaufholungen in den Geschäftsjahren 2010 und 2009 siehe insbesondere Anmerkung (16).

Bestimmte Konzerngesellschaften, insbesondere innerhalb des Bereichs MAN Diesel & Turbo, bilanzieren einen Teil ihrer Fertigungsaufträge nach der »percentage of completion method«. Die Erfassung der Umsatzerlöse erfolgt hierbei in Abhängigkeit vom Leistungsfortschritt. Bei dieser Methode kommt es besonders auf die sorgfältige Einschätzung des Fertigstellungsgrades an. Je nachdem, welche Methodik verwendet wird, um den Leistungsfortschritt zu bestimmen, zählen die Auftragserlöse, die Gesamtauftragskosten, die noch bis zur Fertigstellung anfallenden Kosten, die Auftragsrisiken und andere Einschätzungen zu den maßgeblichen Schätzgrößen. Das Management der operativen Bereiche überprüft kontinuierlich die Einschätzungen im Zusammenhang mit solchen Fertigungsaufträgen und passt diese ggf. an.

Die Bewertung von Pensionen und ähnlichen Verpflichtungen erfolgt auf Basis von versicherungsmathematischen Verfahren. Diese Bewertungen beruhen vor allem auf Annahmen über die Abzinsungsfaktoren, die erwartete Rendite des Planvermögens, Gehalts- und Rententrends sowie die Lebenserwartungen. Diese versicherungsmathematischen Annahmen können aufgrund von veränderten Markt- und Wirtschaftsbedingungen erheblich von den tatsächlichen Entwicklungen abweichen und deshalb zu einer wesentlichen Veränderung der Pensions- und ähnlicher Verpflichtungen führen.

Da der Konzern in zahlreichen Ländern operativ tätig ist, unterliegt er in einer Vielzahl von Steuerhoheiten den unterschiedlichsten Steuergesetzen. Dabei sind für jedes Besteuerungssubjekt die erwarteten tatsächlichen Ertragsteuern sowie die aktiven und passiven latenten Steuern zu ermitteln. Dieses erfordert unter anderem Annahmen über die Auslegung komplexer Steuervorschriften sowie die Möglichkeit, im Rahmen der jeweiligen Steuerart und Steuerjurisdiktion ausreichendes zu versteuerndes Einkommen zu erzielen. Weichen diese Annahmen vom tatsächlichen Ausgang solcher steuerlichen Unwägbarkeiten ab, können sich Auswirkungen auf den Steueraufwand sowie die latenten Steuern ergeben.

Die Bewertung von sonstigen Rückstellungen und vergleichbaren Verpflichtungen ist in Abhängigkeit vom jeweils zugrunde liegenden Geschäftsvorfall teilweise komplex und in erheblichem Maß mit Schätzungen verbunden. Die vom Management getroffenen Annahmen bezüglich des Eintritts sowie der möglichen Höhe der Inanspruchnahme basieren u. a. auf Erfahrungswerten, verfügbaren technischen Daten, Einschätzungen von Kostenentwicklungen und potenziellen Gewährleistungsfällen sowie möglichen Verwertungserlösen. Die Sonstigen Rückstellungen beinhalten auch Vorsorgen für mögliche Belastungen aus Rückkaufverpflichtungen, bei denen die MAN Gruppe ihren Kunden bestimmte Rückkaufwerte garantiert. In Abhängigkeit vom Umfang der Ausübung der Rückgaberechte sowie der Entwicklung der Wiederverwertungspreise können die tatsächlich eintretenden Belastungen von der angesetzten Rückstellung abweichen. Rechtsstreitigkeiten und andere rechtliche Verfahren werfen gleichzeitig komplexe rechtliche Fragestellungen auf und sind mit zahlreichen Schwierigkeiten und Unsicherheiten verbunden. Eine Rückstellung wird hierfür gebildet, wenn es wahrscheinlich ist, dass im Zusammenhang mit diesen Verfahren eine Verpflichtung entstanden ist, die wahrscheinlich zu zukünftigen Mittelabflüssen führen wird und hinsichtlich der Höhe verlässlich schätzbar ist. Die Beurteilung, ob zum Stichtag eine gegenwärtige Verpflichtung als Ergebnis eines Ereignisses in der Vergangenheit besteht, ob ein zukünftiger Mittelabfluss wahrscheinlich und die Verpflichtung verlässlich schätzbar ist, erfordert erhebliches Ermessen und umfangreiche Schätzungen durch das Management. Zukünftige Ereignisse und Entwicklungen sowie Veränderungen von Schätzungen und Prämissen können zu einem künftigen Zeitpunkt zu einer geänderten Beurteilung führen. Zusätzliche Aufwendungen, die eine wesentliche Wirkung auf die Vermögens-, Finanz- und Ertragslage von MAN haben können, können somit nicht vollständig ausgeschlossen werden. Für weitere Informationen siehe Anmerkungen (6) und (27).



## 4 Kapitalflussrechnung

In der Kapitalflussrechnung sind die Zahlungsströme in die Bereiche Cashflow aus der Geschäftstätigkeit, Cashflow aus der Investitionstätigkeit und Cashflow aus der Finanzierungstätigkeit aufgeteilt. Auswirkungen aus Veränderungen des Konsolidierungskreises und der Wechselkurse sind in den jeweiligen Positionen eliminiert. Die auf Änderungen der Wechselkurse beruhende Veränderung der Flüssigen Mittel ist gesondert ausgewiesen. Die Ermittlung des Cashflows aus der Geschäftstätigkeit erfolgt nach der indirekten Methode.

Im Cashflow aus der Geschäftstätigkeit sind die nicht zahlungswirksamen operativen Aufwendungen und Erträge sowie das Ergebnis aus Anlagenabgängen eliminiert. Die Veränderung der Vermieteten Erzeugnisse und der hierfür erhaltenen Kundenzahlungen ist dem Cashflow aus der Geschäftstätigkeit zugeordnet.

Der Cashflow aus der Investitionstätigkeit enthält die zahlungswirksamen Investitionen in Sachanlagen, in Immaterielle Vermögenswerte und in Beteiligungen. Einzahlungen aus dem Verkauf von Sachanlagen, Immateriellen Vermögenswerten, Beteiligungen und aufgegebenen Geschäftsbereichen werden gegengerechnet. Die Auszahlungen für den Erwerb von Tochterunternehmen sind um die übernommenen Flüssigen Mittel vermindert.

Der Cashflow aus der Finanzierungstätigkeit setzt sich zusammen aus folgenden zahlungswirksamen Transaktionen: Dividendenzahlungen, Einzahlungen und Auszahlungen bei Wertpapieren, Aufnahmen und Tilgungen von Finanzverbindlichkeiten und Dotierungen der Pensionsfonds.

Die in der Kapitalflussrechnung betrachteten Flüssigen Mittel entsprechen der Bilanzposition Flüssige Mittel. Die Flüssigen Mittel enthalten die Guthaben bei Kreditinstituten sowie äußerst liquide Finanzinvestitionen mit temporärem Charakter, die nur unwesentlichen Wertschwankungsrisiken unterliegen. In den Segmenten werden Forderungen aus dem MAN-konzerninternen Finanzverkehr ebenso als Flüssige Mittel ausgewiesen.

Die Werte betreffend aufgegebene Geschäftsbereiche sind in den Cashflows aus der Geschäftstätigkeit, aus der Investitionstätigkeit sowie aus der Finanzierungstätigkeit jeweils gesondert ausgewiesen.

## 5 Änderungen von Rechnungslegungsvorschriften

### a) Erstmalig angewandte Vorschriften

Am 10. Januar 2008 hat das IASB IFRS 3 »Unternehmenszusammenschlüsse (IFRS 3 (2008))« veröffentlicht. In IFRS 3 (2008) wird die Anwendung der Erwerbsmethode bei Unternehmenszusammenschlüssen neu geregelt. Wesentliche Neuerungen betreffen die Bewertung von Minderheitsanteilen, die Erfassung von sukzessiven Unternehmenserwerben und die Behandlung von bedingten Kaufpreisanteilen und Anschaffungsnebenkosten. Nach der Neuregelung kann die Bewertung von Minderheitsanteilen entweder zum beizulegenden Zeitwert (Full-Goodwill-Methode) oder zum beizulegenden Zeitwert des anteiligen identifizierbaren Nettovermögens erfolgen. Bei sukzessiven Unternehmenserwerben ist eine erfolgswirksame Neubewertung von zum Zeitpunkt des Beherrschungsübergangs gehaltenen Anteilen vorgesehen. Eine Anpassung bedingter Kaufpreisbestandteile, die zum Zeitpunkt des Erwerbs als Verbindlichkeit ausgewiesen werden, ist zukünftig erfolgswirksam zu erfassen. Anschaffungsnebenkosten werden zum Zeitpunkt ihres Entstehens als Aufwand erfasst. MAN wendet IFRS 3 (2008) seit dem 1. Januar 2010 an.

Ebenfalls am 10. Januar 2008 hat das IASB IAS 27 »Konzern- und separate Einzelabschlüsse nach IFRS (IAS 27 (2008))« veröffentlicht. Wesentliche Änderungen des IAS 27 (2008) betreffen die Bilanzierung von Transaktionen, bei denen ein Unternehmen weiterhin die Beherrschung behält, sowie Transaktionen, bei denen die Beherrschung untergeht. Transaktionen, die nicht zu einem Beherrschungsverlust führen, sind erfolgsneutral als Eigenkapitaltransaktion zu erfassen. Verbleibende Anteile sind zum Zeitpunkt des Beherrschungsverlusts zum beizulegenden Zeitwert zu bewerten. Bei Minderheitsanteilen ist der Ausweis von Negativsalden zulässig, d. h. Verluste werden zukünftig unbegrenzt beteiligungsproportional zugerechnet. MAN wendet IAS 27 (2008) seit dem 1. Januar 2010 an.

Das IASB hat weitere Verlautbarungen veröffentlicht, die für MAN erstmals im Geschäftsjahr 2010 anzuwenden waren. Diese umgesetzten Rechnungslegungsverlautbarungen haben keinen wesentlichen Einfluss auf den Konzernabschluss von MAN.

#### b) Neu herausgegebene und von der EU übernommene Vorschriften, die nicht vorzeitig angewandt werden

Im November 2009 hat das IASB Änderungen an IAS 24 »Angaben über Beziehungen zu nahe stehenden Unternehmen und Personen« beschlossen. Zum einen werden in dem geänderten Standard staatlich kontrollierte Unternehmen unter bestimmten Voraussetzungen von der Verpflichtung ausgenommen, Transaktionen mit anderen staatlich kontrollierten Unternehmen als related party transactions anzugeben. Zum anderen wurde die Definition nahe stehender Unternehmen und Personen überarbeitet, wodurch die Verständlichkeit erhöht und bestehende Inkonsistenzen in der bisherigen Version des IAS 24 beseitigt wurden. Für die MAN Gruppe ergibt sich aus der überarbeiteten Definition eine Erweiterung des Kreises nahe stehender Unternehmen. Neben der Volkswagen Aktiengesellschaft (Volkswagen AG), die aufgrund ihrer Beteiligung maßgeblichen Einfluss auf die MAN SE ausübt, gelten unter dem geänderten Standard auch von der Volkswagen AG beherrschte sowie gemeinschaftlich beherrschte Unternehmen als nahe stehende Unternehmen aus Sicht von MAN. MAN wendet die Änderungen ab dem Geschäftsjahr 2011 an.

Das IASB hat eine Reihe weiterer Verlautbarungen veröffentlicht. Das Unternehmen bewertet noch die möglichen Auswirkungen dieser Verlautbarungen auf den Konzernabschluss. Es ist jedoch nicht zu erwarten, dass diese Vorschriften einen wesentlichen Einfluss auf den Konzernabschluss von MAN haben werden.

## 6 Akquisitionen/Desinvestitionen

#### a) Akquisitionen

Im Geschäftsjahr 2010 wurden keine Akquisitionen getätigt, die einzeln oder in Summe wesentlich sind.

Im März 2009 vollzog MAN die Akquisition des Unternehmens Volkswagen Caminhões e Ônibus Indústria e Comércio de Veículos Comerciais Ltda., São Paulo/Brasilien (VW Truck & Bus), von der Volkswagen AG. Mit dem Erwerb erreichte MAN eine führende Stellung im brasilianischen Nutzfahrzeugmarkt. Das zum 31. März 2009 konsolidierte Unternehmen wird als gesonderter Bereich mit dem Namen MAN Latin America geführt. Die Anschaffungskosten (einschließlich übernommener Zahlungsmittel und Schulden) belaufen sich auf einen Wert von 1 339 Mio €. Die

Gesellschaft wurde in die Konzern Gewinn- und Verlustrechnung seit dem 1. April 2009 einbezogen. Die Kaufpreisallokation wurde zwischenzeitlich abgeschlossen und ist gegenüber dem 31. Dezember 2009 nahezu unverändert geblieben. Ausgehend von der endgültigen Kaufpreisallokation sind aus der Akquisition 625 Mio € abschreibbare Immaterielle Vermögenswerte entstanden. Zusätzlich wurden 497 Mio € als Geschäftswerte ausgewiesen. Von den 625 Mio € Immateriellen Vermögenswerten entfallen 189 Mio € auf marketingbezogene Vermögenswerte mit einer gewichteten durchschnittlichen Nutzungsdauer von 5,0 Jahren und 436 Mio € auf kundenbezogene Vermögenswerte mit einer gewichteten durchschnittlichen Nutzungsdauer von 18,7 Jahren. MAN erwartet, die aus der Transaktion entstandenen Geschäftswerte steuerlich nutzen zu können. Im Zusammenhang mit dem Erwerb von VW Truck & Bus im Geschäftsjahr 2009 wurden im Juni 2010 und im Oktober 2010 zwei weitere Zahlungen in Höhe von 39 Mio € bzw. 69 Mio € an die Volkswagen AG geleistet. Diese Zahlungen stellen vertraglich vorgesehene Abrechnungen für Vorgänge betreffend den Zeitraum vor dem Erwerbszeitpunkt dar. Für weiterführende Informationen siehe auch Anmerkung (33).

Im Oktober 2009 wurde die Transaktion zum Erwerb von 25 % plus einer Aktie an dem chinesischen Lkw-Hersteller Sinotruk Ltd., Hongkong/China (Sinotruk), für 567 Mio € abgeschlossen. Die Kaufpreisallokation wurde im 3. Quartal 2010 abgeschlossen. MAN setzt damit gezielt das internationale Wachstum mit Fokus auf die BRIC-Märkte fort. Als Teil der Vereinbarung lizenziert MAN an Sinotruk die TGA Lkw-Technologie, inklusive Motoren, Fahrzeuggestellen und Achsen. Gemeinsames Ziel ist die Entwicklung einer neuen schweren Lkw-Reihe. MAN hat die Möglichkeit, wesentlichen Einfluss auf die Geschäfts- und Finanzpolitik von Sinotruk auszuüben. Der Anteil an Sinotruk wird nach der Equity-Methode bilanziert. Für weiterführende Informationen siehe Anmerkungen (16) und (33).

Zur Unterstützung der Wachstumsstrategie von MAN Truck & Bus hatte MAN Anfang 2008 die Produktpalette auf Fahrzeugvermietung ausgeweitet. Damals erwarb die MAN Finance International GmbH, München (MAN Finance International), im Rahmen einer Kapitalerhöhung einen Anteil von 25,13 % an der EURO-Leasing GmbH, Sittensen (EURO-Leasing). Der Anteil an EURO-Leasing wurde Ende Dezember 2009 im Rahmen einer Kapitalerhöhung

(Zeichnung durch MAN Truck & Bus) auf 50,13 % erhöht. Der ursprünglich von MAN Finance International gehaltene Anteil wurde Anfang 2010 auf MAN Truck & Bus übertragen. Die Gesellschaft wird ab dem 1. Januar 2010 bei MAN Truck & Bus vollkonsolidiert. Die Kaufpreisallokation wurde im 4. Quartal 2010 abgeschlossen.

### b) Desinvestitionen

Am 25. März 2009 übertrug MAN 70 % der Anteile an der Ferrostaal AG, Essen (Ferrostaal), an die International Petroleum Investment Company, Abu Dhabi/V.A.E. (IPIC). Der Preis für 100 % der Anteile an Ferrostaal beträgt ca. 700 Mio € und ist abhängig von der zwischen MAN und IPIC vereinbarten Option zum Kauf und Verkauf der restlichen Anteile. Die vertraglich vereinbarte Put-Option betreffend die verbleibende 30-%-Beteiligung an Ferrostaal wurde von MAN Anfang Januar 2010 ausgeübt. Der Vollzug der Transaktion wurde vom Käufer u. a. mit Verweis auf die derzeit bei Ferrostaal laufenden staatsanwaltschaftlichen Untersuchungen verweigert. Ende September 2010 wurde MAN darüber hinaus von IPIC über die Erhebung einer Schiedsklage auf Rückabwicklung der Ferrostaal-Transaktion sowie zusätzlich Schadensersatz informiert. Die Schiedsklage wurde MAN am 18. Oktober 2010 zugestellt. MAN analysiert die genauen Inhalte der Klage und bereitet die Schiedsklageerwidlung vor. Für weitere Informationen siehe auch Anmerkung (27).

Die Beteiligung an Ferrostaal wird bis zum Abschluss der Transaktion als »zur Veräußerung bestimmt« ausgewiesen und nicht nach der Equity-Methode bilanziert.

Die Ergebnisse von Ferrostaal werden in der Konzern Gewinn- und Verlustrechnung für alle berichteten Perioden als aufgegebene Geschäftsbereiche dargestellt. Aus der Transaktion im März 2009 ergab sich ein vorläufiger Gewinn – nach Abzug von verkaufsbezogenen Aufwendungen – in Höhe von 105 Mio €, der im Ergebnis aufgegebener Geschäftsbereiche ausgewiesen wird. Aufgrund der von IPIC im Zusammenhang mit der Veräußerung von Ferrostaal angestregten Schiedsklage wurde im 4. Quartal 2010 die Rückstellung für Gewährleistungen und Garantien erhöht, sodass zum 31. Dezember 2010 die maximal möglichen vertraglichen Gewährleistungen und Garantien zurückgestellt wurden. Der Effekt aus der zusätzlichen Dotierung der Rückstellungen war nicht steuerwirksam und wurde mit – 76 Mio € im Ergebnis aufgegebener Geschäftsbe-

reiche ausgewiesen. Die Konzern Gewinn- und Verlustrechnung für den Berichtszeitraum 1. Januar 2010 bis 31. Dezember 2010 enthält darüber hinaus keine weiteren Ergebnisse aus Ferrostaal.

Die Nettoergebnisse aus Ferrostaal, die im Geschäftsjahr 2009 in der Konzern Gewinn- und Verlustrechnung ausgewiesen wurden, stellen sich wie folgt dar:

Berichtszeitraum 1. Januar bis 31. Dezember

| Mio €                                                              | 2009       |
|--------------------------------------------------------------------|------------|
| Umsatzerlöse                                                       | 435        |
| Kosten, Aufwendungen und Erträge                                   | – 412      |
| Ertragsteuern                                                      | – 13       |
| Laufendes Ergebnis der aufgegebenen Geschäftsbereiche nach Steuern | 10         |
| Ergebnis der Veräußerung                                           | 105        |
| <b>Ergebnis aufgegebener Geschäftsbereiche</b>                     | <b>115</b> |

Der Cashflow aus der Investitionstätigkeit beinhaltet im Geschäftsjahr 2010 – 7 Mio € Cashflows der aufgegebenen Geschäftsbereiche im Zusammenhang mit der Ferrostaal-Transaktion. Dieser Betrag wurde in der Position »Verkauf von Geschäftseinheiten abzüglich abgegebener Flüssiger Mittel« berichtet.

Die Cashflows der aufgegebenen Geschäftsbereiche setzten sich im Geschäftsjahr 2009 wie folgt zusammen:

Berichtszeitraum 1. Januar bis 31. Dezember

| Mio €                                                                         | 2009       |
|-------------------------------------------------------------------------------|------------|
| Cash Earnings                                                                 | 11         |
| Veränderung aufgegebener Geschäftsbereiche                                    | 102        |
| <b>Cashflow aus der Geschäftstätigkeit</b>                                    | <b>113</b> |
| Cashflow aus der Investitionstätigkeit                                        | – 9        |
| Verkauf aufgegebener Geschäftsbereiche abzüglich abgegebener Flüssiger Mittel | – 349      |
| Cashflow aus der Finanzierungstätigkeit                                       | – 5        |

## Erläuterungen zur Gewinn- und Verlustrechnung

### 7 Sonstige betriebliche Erträge

| Mio €                                                                    | 2010       | 2009       |
|--------------------------------------------------------------------------|------------|------------|
| Erträge aus Finanzdienstleistungen                                       | 150        | 186        |
| Erträge aus Finanzinstrumenten                                           | 115        | 128        |
| Erträge aus sonstigen Lieferungen und Leistungen                         | 50         | 25         |
| Erträge aus dem Abgang von Sachanlagen und Immateriellen Vermögenswerten | 10         | 21         |
| Übrige Erträge                                                           | 191        | 172        |
|                                                                          | <b>516</b> | <b>532</b> |

Die Erträge aus Finanzdienstleistungen zeigen die Erlöse aus den Geschäften von MAN Finance.

Die Erträge aus Finanzinstrumenten resultieren im Wesentlichen aus der Bewertung von Fremdwährungspositionen sowie der Sicherung von Währungs- und Zinsrisiken. Um den Einblick in die Ertragslage zu verbessern, werden die Effekte aus der Währungsumrechnung als Nettogröße dargestellt.

### 8 Sonstige betriebliche Aufwendungen

| Mio €                                   | 2010         | 2009         |
|-----------------------------------------|--------------|--------------|
| Forschung und Entwicklung               | 373          | 365          |
| Aufwendungen aus Finanzdienstleistungen | 100          | 114          |
| Wertminderungen auf Vorräte             | 94           | 208          |
| Wertberichtigungen auf Forderungen      | 84           | 113          |
| Rechts-, Prüfungs- und Beratungskosten  | 70           | 14           |
| Aufwendungen aus Finanzinstrumenten     | 39           | 81           |
| Aufwendungen aus Sondervorgängen        | –            | 274          |
| Übrige Aufwendungen                     | 382          | 196          |
|                                         | <b>1 142</b> | <b>1 365</b> |

Die Sonstigen betrieblichen Aufwendungen umfassen die nicht den Funktionskosten, insbesondere den Umsatzkosten, zugeordneten Aufwendungen. Die Aufwendungen für Forschung und Entwicklung (F&E) enthalten nur den Teil der F&E-Ausgaben, der nicht zu den auftragsbezogenen Herstellungskosten und nicht zu den aktivierten Entwicklungskosten gehört. Die auf die aktivierten Entwicklungskosten entfallenden Abschreibungen werden ebenfalls in den Sonstigen betrieblichen Aufwendungen gezeigt.

Die Aufwendungen aus Finanzinstrumenten und Finanzdienstleistungen korrespondieren mit den Sonstigen betrieblichen Erträgen.

Die Aufwendungen aus Sondervorgängen enthalten für 2009 Belastungen im Zusammenhang mit den staatsanwaltschaftlichen Ermittlungen wegen des Verdachts unzulässiger Provisionszahlungen. Anfang Dezember 2009 ergingen Bußgeldbescheide von insgesamt 150,6 Mio € gegen die MAN Nutzfahrzeuge AG (nunmehr MAN Truck & Bus AG) und gegen die ehemalige MAN Turbo AG. Die in diesem Zusammenhang durchgeführten internen Untersuchungen durch unabhängige Rechtsanwälte, Wirtschaftsprüfer und Steuerexperten verursachten Aufwendungen in Höhe von 50 Mio €. Für Abfindungen für ausgeschiedene Vorstandsmitglieder und leitende Angestellte beinhalten die Aufwendungen für Sondervorgänge insgesamt 20 Mio €. Darüber hinaus fielen im ehemaligen Bereich MAN Diesel Restrukturierungsaufwendungen von 23 Mio € für die geplante Einstellung der Motorenproduktion am dänischen Standort Frederikshavn an. Ferner beinhalten die Aufwendungen aus Sondervorgängen mit 30 Mio € außergewöhnliche Belastungen im Zusammenhang mit dem damals nahezu vollständig zum Erliegen gekommenen Nutzfahrzeugmarkt in Russland.

In den übrigen Aufwendungen sind für den Geschäftsbereich Power Plants von MAN Diesel & Turbo im nennenswerten Umfang Aufwendungen für Kostenüberschreitungen und Vorsorgen für Projekte sowie Aufwendungen für den Aufbau dieses Geschäftsbereichs enthalten.

## 9 Zinsergebnis

| Mio €                                                                | 2010         | 2009         |
|----------------------------------------------------------------------|--------------|--------------|
| Zinsen und ähnliche Erträge                                          | 59           | 49           |
| Zinsen und ähnliche Aufwendungen                                     | – 252        | – 213        |
| Zinsanteil in der Zuführung zu den Pensionsrückstellungen            | – 89         | – 87         |
| Ergebnis aus Fondsvermögen CTA                                       | 76           | 73           |
| Abzüglich in Sonstige betriebliche Aufwendungen umgegliederte Zinsen | 48           | 61           |
|                                                                      | <b>– 158</b> | <b>– 117</b> |

Die Verschlechterung des Zinsergebnisses um 41 Mio € resultiert aus der im Vorjahr erfolgten Finanzierung des Erwerbs von MAN Latin America sowie der Transaktion zum Erwerb von 25 % plus einer Aktie an Sinotruk. Die Zinsen und ähnliche Aufwendungen im Geschäftsjahr 2010 enthalten darüber hinaus Steuerzinsaufwendungen in Höhe von 22 Mio €.

Die in die Sonstigen betrieblichen Aufwendungen umgegliederten Zinsaufwendungen von 48 Mio € (Vorjahr 61 Mio €) betreffen die Refinanzierung des Leasingvermögens von MAN Finance.

## 10 Ertragsteuern

Der ausgewiesene Steueraufwand teilt sich wie folgt auf:

| Mio €                   | 2010       | 2009      |
|-------------------------|------------|-----------|
| <b>Laufende Steuern</b> |            |           |
| Deutschland             | 128        | 55        |
| Ausland                 | 208        | 155       |
| <b>Latente Steuern</b>  |            |           |
| Deutschland             | – 28       | – 133     |
| Ausland                 | 30         | – 24      |
|                         | <b>338</b> | <b>53</b> |

Der für das abgelaufene Geschäftsjahr 2010 erwartete Steueraufwand ergibt sich aus der Anwendung des für den Veranlagungszeitraum 2010 gültigen Inlandsteuersatzes von 31,58 % (wie Vorjahr) auf das Ergebnis vor Steuern. Der Steuersatz berücksichtigt die Gewerbeertragsteuer (15,75 %), die Körperschaftsteuer (15,0 %) und den Solidaritätszuschlag (5,5 % der Körperschaftsteuer). Aus Steuersatzänderungen im Ausland ergaben sich im Geschäftsjahr 2010 (wie im Vorjahr) keine wesentlichen Auswirkungen auf den Gesamteueraufwand.

Bei inländischen Gesellschaften sind derzeit aktive latente Steuern auf Verlustvorträge für Körperschaftsteuer und Gewerbesteuer in Höhe von 193 Mio € angesetzt (Vorjahr inklusive Zinsvortrag aus nicht abziehbaren Zinsaufwendungen gemäß § 4 h EStG in Verbindung mit § 8 a KStG 131 Mio €). Bei ausländischen Gesellschaften sind für deren landesrechtliche Steuern latente Steuern von 33 Mio € (Vorjahr 30 Mio €) aktiviert. Von den aktivierten latenten Steuern entfallen 213 Mio € (Vorjahr 190 Mio €) auf Gesellschaften, die im laufenden Jahr oder im Vorjahr steuerliche Verluste erzielt haben und bei denen zukünftige Gewinne erwartet werden, die über steuerpflichtige Erträge, die sich aus der Umkehrung von zu versteuernden temporären Differenzen ergeben, hinausgehen. Zum 31. Dezember 2010 werden für bestehende steuerliche Verlustvorträge von 83 Mio € sowie temporäre Differenzen in Höhe von 36 Mio € (im Vorjahr entfielen 50 Mio € auf Verlustvorträge sowie 58 Mio € auf temporäre Differenzen) aufgrund geringer Realisationsmöglichkeiten keine aktiven latenten Steuern angesetzt. Verlustvorträge in Höhe von 59 Mio €, für die keine aktiven latenten Steuern angesetzt wurden, unterliegen einer zeitlich begrenzten Nutzbarkeit. Die diesbezüglichen Verfallsdaten erstrecken sich auf den Zeitraum von 2011 bis 2020.

Für aufgelaufene Ergebnisse bei Tochterunternehmen und assoziierten Unternehmen in Höhe von 48 Mio € (Vorjahr 74 Mio €) wurden im Geschäftsjahr 2010 keine latenten Steuern gebildet.

#### Überleitung vom erwarteten zum tatsächlichen Steueraufwand Mio €

|                                                                                                                                                    | 2010       | %           | 2009      | %             |
|----------------------------------------------------------------------------------------------------------------------------------------------------|------------|-------------|-----------|---------------|
| Ergebnis vor Steuern                                                                                                                               | 1 125      | 100,0       | – 331     | 100,0         |
| Erwarteter Steueraufwand                                                                                                                           | 355        | 31,6        | – 104     | 31,6          |
| Steuerfreie Erträge                                                                                                                                | – 5        | – 0,4       | – 6       | 1,8           |
| Unterschiede zu ausländischen Steuersätzen                                                                                                         | – 14       | – 1,2       | – 28      | 8,3           |
| Nach der Equity-Methode bilanzierte Beteiligungen                                                                                                  | – 145      | – 12,9      | 142       | – 42,9        |
| Nutzung von Verlustvorträgen und temporären Unterschieden, die in Vorjahren nicht aktiviert wurden, sowie Wertaufholung auf aktive latente Steuern | – 2        | – 0,2       | –         | –             |
| Wertberichtigung auf aktive latente Steuern                                                                                                        | 6          | 0,5         | 3         | – 0,9         |
| Steuern für Vorjahre                                                                                                                               | 97         | 8,6         | 26        | – 7,8         |
| Nicht abzugsfähige Aufwendungen                                                                                                                    | 46         | 4,0         | 18        | – 5,5         |
| Sonstiges                                                                                                                                          | 0          | 0           | 2         | – 0,6         |
| <b>Tatsächlicher Steueraufwand</b>                                                                                                                 | <b>338</b> | <b>30,0</b> | <b>53</b> | <b>– 16,0</b> |

Die aktiven und passiven latenten Steuern verteilen sich auf folgende Positionen:

| Mio €                                   | Aktive latente Steuern |            | Passive latente Steuern |            |
|-----------------------------------------|------------------------|------------|-------------------------|------------|
|                                         | 31.12.2010             | 31.12.2009 | 31.12.2010              | 31.12.2009 |
| Immaterielle Vermögenswerte             | 15                     | 32         | 219                     | 155        |
| Sachanlagen                             | 26                     | 23         | 112                     | 104        |
| Vorräte                                 | 88                     | 62         | 107                     | 75         |
| Forderungen und Sonstige Vermögenswerte | 93                     | 73         | 188                     | 175        |
| Pensionen                               | 77                     | 56         | 10                      | 17         |
| Sonstige Rückstellungen                 | 401                    | 301        | 58                      | 14         |
| Sonstige Verbindlichkeiten              | 233                    | 169        | 152                     | 67         |
| Verlustvorträge/<br>Zinsvortrag         | 226                    | 161        | –                       | –          |
| Sonstiges                               | –                      | –          | 3                       | 15         |
|                                         | <b>1 159</b>           | <b>877</b> | <b>849</b>              | <b>622</b> |

## 11 Ergebnis je Aktie

Mio € (wenn nicht anders angegeben)

|                                                                                           | 2010        | 2009          |
|-------------------------------------------------------------------------------------------|-------------|---------------|
| Ergebnis nach Steuern<br>(Anteil der Aktionäre der MAN SE)                                | 713         | – 270         |
| darin Ergebnis aufgebener Geschäftsbereiche                                               | – 65        | 126           |
| <b>Ergebnis der fortgeführten Geschäftsbereiche<br/>(Anteil der Aktionäre der MAN SE)</b> | <b>778</b>  | <b>– 396</b>  |
| Im Umlauf befindliche Aktien<br>(gewichteter Durchschnitt, in Mio Stück)                  | 147,0       | 147,0         |
| <b>Ergebnis je Aktie der fortgeführten Bereiche<br/>(verwässert/unverwässert) in €</b>    | <b>5,30</b> | <b>– 2,69</b> |

Das Ergebnis je Aktie ist aus dem Konzernergebnis nach Steuern der fortgeführten Geschäftsbereiche und der Zahl der im Jahresdurchschnitt in Umlauf befindlichen Aktien ermittelt. Dabei sind sowohl die Stammaktien als auch die Vorzugsaktien berücksichtigt, da beide Aktiengattungen bezüglich ihrer Ergebnisanteile 2010 wie im Vorjahr gleichberechtigt sind.

Unter dem 2010 eingeführten Aktienprogramm für Führungskräfte wurden im April 2010 72 472 Aktien der MAN SE bedingt zugesagt. Für weitere Informationen siehe Anmerkung (32). In die Berechnung des verwässerten Ergebnisses je Aktie für das Geschäftsjahr 2010 fließt daraus ein Effekt von 7 818 Aktien. Unter Berücksichtigung des potenziellen Verwässerungseffekts im Zusammenhang mit diesen zugesagten Aktien stimmt das verwässerte Ergebnis je Aktie mit dem unverwässerten Ergebnis je Aktie im Berichtszeitraum 1. Januar bis 31. Dezember 2010 überein.

Weder zum 31. Dezember 2010 noch zum 31. Dezember 2009 waren Optionen auf Aktien ausstehend, die den Gewinn pro Aktie verwässern. Im Falle der Ausübung des bedingten Kapitals der MAN SE werden in Zukunft Verwässerungen eintreten.

Das Ergebnis je Aktie aus den aufgegebenen Geschäftsbereichen (verwässert/unverwässert) betrug – 0,45 € (Vorjahr 0,85 €).



## 12 Sonstige Angaben zur Gewinn- und Verlustrechnung

### Materialaufwendungen Mio €

|                                                                         | 2010         | 2009         |
|-------------------------------------------------------------------------|--------------|--------------|
| Aufwendungen für Roh-, Hilfs- und Betriebsstoffe und für bezogene Waren | 7 076        | 5 411        |
| Aufwendungen für bezogene Leistungen                                    | 1 019        | 925          |
|                                                                         | <b>8 095</b> | <b>6 336</b> |

### Leasingzahlungen aus »operating lease«-Verhältnissen Mio €

|  | 2010       | 2009       |
|--|------------|------------|
|  | <b>124</b> | <b>103</b> |

### Personalaufwand Mio €

|                                                                         | 2010         | 2009         |
|-------------------------------------------------------------------------|--------------|--------------|
| Löhne und Gehälter                                                      | 2 187        | 2 010        |
| Soziale Abgaben und Aufwendungen für Altersversorgung und Unterstützung | 462          | 454          |
|                                                                         | <b>2 649</b> | <b>2 464</b> |

Die Aufwendungen für die Altersversorgung betragen 191 Mio € (Vorjahr 193 Mio €), davon 130 Mio € (Vorjahr 124 Mio €) für gesetzliche Rentenversicherungen. Sie sind in den jeweiligen Funktionskosten berücksichtigt. Die erwarteten Erträge aus dem Planvermögen und der Zinsanteil in der Zuführung zu den Pensionsrückstellungen werden im Zinsergebnis ausgewiesen.

### Anzahl der Mitarbeiter im Durchschnitt des Geschäftsjahres

|                     | 2010          | 2009          |
|---------------------|---------------|---------------|
| Commercial Vehicles | 32 077        | 33 244        |
| Power Engineering   | 13 504        | 13 703        |
| Sonstige            | 304           | 418           |
|                     | <b>45 885</b> | <b>47 365</b> |

### Abschreibungen Mio €

|                                 | 2010       | 2009       |
|---------------------------------|------------|------------|
| auf Immaterielle Vermögenswerte | 158        | 132        |
| auf Sachanlagen                 | 298        | 282        |
|                                 | <b>456</b> | <b>414</b> |

### Wertminderungen Mio €

|                                                                                            | 2010      | 2009       |
|--------------------------------------------------------------------------------------------|-----------|------------|
| auf Immaterielle Vermögenswerte                                                            | 2         | –          |
| auf Sachanlagen                                                                            | 9         | 7          |
| auf Finanzbeteiligungen und nach der Equity-Methode bilanzierte Beteiligungen <sup>1</sup> | 0         | 383        |
|                                                                                            | <b>11</b> | <b>390</b> |

<sup>1</sup> Für weiterführende Informationen siehe Anmerkung (16)

## 13 Gesamtvergütung für die Tätigkeit des Abschlussprüfers

Der Aufsichtsrat hat im Berichtsjahr die PricewaterhouseCoopers Aktiengesellschaft Wirtschaftsprüfungsgesellschaft, München (PwC), zum Abschlussprüfer vorgeschlagen, die Hauptversammlung ist am 1. April 2010 diesem Vorschlag gefolgt. PwC löste damit die KPMG AG Wirtschaftsprüfungsgesellschaft (KPMG) ab.

Die nachfolgende Tabelle enthält die berechneten Honorare für Tätigkeiten des Abschlussprüfers PwC sowie Gesellschaften des internationalen PwC-Netzwerks im Geschäftsjahr 2010 und für KPMG und ihre verbundenen Unternehmen im Geschäftsjahr 2009:

| Mio €                                            | 2010       | 2009        |
|--------------------------------------------------|------------|-------------|
| Abschlussprüfung                                 | 3,2        | 4,5         |
| Sonstige Bestätigungs- oder Bewertungsleistungen | 0,1        | 2,8         |
| Steuerberatungsleistungen                        | 0,4        | 0,8         |
| Honorarnebenkosten                               | 0,1        | 0,5         |
| Prüferische Durchsicht von Zwischenabschlüssen   | 0,2        | 0,4         |
| Sonstige Leistungen                              | 1,2        | 2,4         |
|                                                  | <b>5,2</b> | <b>11,4</b> |

Die berechneten Honorare für Tätigkeiten des Abschlussprüfers PwC und den verbundenen deutschen Unternehmen beliefen sich im Geschäftsjahr 2010 auf insgesamt 2,6 Mio €. Davon sind der Abschlussprüfung 1,2 Mio €, den sonstigen Leistungen 1,2 Mio € und der prüferischen Durchsicht von Zwischenabschlüssen 0,2 Mio € zuzuordnen.

## Erläuterungen zur Bilanz

### 14 Immaterielle Vermögenswerte

| Mio €                                                      |                                                                                             |                                 |                |                             |
|------------------------------------------------------------|---------------------------------------------------------------------------------------------|---------------------------------|----------------|-----------------------------|
|                                                            | Lizenzen, Software, ähnliche Rechte sowie Kundenbeziehungen, Markennamen und sonstige Werte | Aktiviertete Entwicklungskosten | Geschäftswerte | Immaterielle Vermögenswerte |
| Bruttobuchwert am 1. Januar 2009                           | 158                                                                                         | 502                             | 165            | 825                         |
| Kumulierte Abschreibungen und Wertminderungen              | - 76                                                                                        | - 305                           | - 93           | - 474                       |
| <b>Stand am 1. Januar 2009</b>                             | <b>82</b>                                                                                   | <b>197</b>                      | <b>72</b>      | <b>351</b>                  |
| Veränderung des Konsolidierungskreises/Unternehmenserwerbe | 629                                                                                         | 30                              | 473            | 1 132                       |
| Zugänge                                                    | 16                                                                                          | 68                              | -              | 84                          |
| Umbuchungen                                                | 3                                                                                           | 0                               | -              | 3                           |
| Abgänge                                                    | - 3                                                                                         | - 1                             | 0              | - 4                         |
| Abschreibungen                                             | - 81                                                                                        | - 51                            | -              | - 132                       |
| Währungsanpassung                                          | 137                                                                                         | 7                               | 84             | 228                         |
| <b>Stand am 31. Dezember 2009</b>                          | <b>783</b>                                                                                  | <b>250</b>                      | <b>629</b>     | <b>1 662</b>                |
| Bruttobuchwert am 31. Dezember 2009                        | 917                                                                                         | 605                             | 722            | 2 244                       |
| Kumulierte Abschreibungen und Wertminderungen              | - 134                                                                                       | - 355                           | - 93           | - 582                       |
| <b>Stand am 1. Januar 2010</b>                             | <b>783</b>                                                                                  | <b>250</b>                      | <b>629</b>     | <b>1 662</b>                |
| Veränderung des Konsolidierungskreises/Unternehmenserwerbe | 14                                                                                          | -                               | 74             | 88                          |
| Zugänge                                                    | 16                                                                                          | 140                             | -              | 156                         |
| Umbuchungen                                                | 0                                                                                           | -                               | -              | 0                           |
| Abgänge                                                    | - 1                                                                                         | 0                               | -              | - 1                         |
| Abschreibungen                                             | - 114                                                                                       | - 44                            | -              | - 158                       |
| Wertminderung                                              | - 2                                                                                         | -                               | -              | - 2                         |
| Währungsanpassung                                          | 90                                                                                          | 9                               | 70             | 169                         |
| <b>Stand am 31. Dezember 2010</b>                          | <b>786</b>                                                                                  | <b>355</b>                      | <b>773</b>     | <b>1 914</b>                |
| Bruttobuchwert am 31. Dezember 2010                        | 1 034                                                                                       | 749                             | 868            | 2 651                       |
| Kumulierte Abschreibungen und Wertminderungen              | - 248                                                                                       | - 394                           | - 95           | - 737                       |

Die fremdbezogenen Lizenzen, Software, ähnliche Rechte und Werte sowie die aktivierten Entwicklungskosten haben bestimmbare Nutzungsdauern. Die Abschreibungen auf Lizenzen, Software, ähnliche Rechte sowie Kundenbeziehungen, Markennamen und sonstige Werte betrugen 114 Mio € (Vorjahr 81 Mio €) und sind in den Funktionskosten, insbesondere in den Umsatzkosten und Vertriebskosten, enthalten. Die Abschreibungen auf aktivierte Entwicklungskosten beliefen sich auf 44 Mio € (Vorjahr 51 Mio €). Für weiterführende Informationen siehe Anmerkung (8).

| Aufgliederung der Geschäftswerte<br>Mio € |            |            |
|-------------------------------------------|------------|------------|
|                                           | 31.12.2010 | 31.12.2009 |
| MAN Truck & Bus                           | 44         | 4          |
| MAN Latin America                         | 647        | 548        |
| MAN Diesel & Turbo                        | 82         | 77         |
|                                           | <b>773</b> | <b>629</b> |

Die Geschäftswerte sind den oben genannten Bereichen zugeordnet.

Die Werthaltigkeit der Geschäftswerte wird mindestens einmal jährlich getestet, indem die Buchwerte der dem jeweiligen Geschäftswert zugrunde liegenden Einheiten mit dem Nutzungswert verglichen werden. Der Nutzungswert wird nach der Discounted-Cashflow-Methode ermittelt. Ausgangspunkt hierfür ist die aktuelle Dreijahresplanung für den jeweiligen Bereich.

Zu den wesentlichen Planungsprämissen gehören vor allem die erwartete Marktentwicklung in Relation zu der Entwicklung von MAN, die Entwicklung wesentlicher Fertigungs- und sonstiger Kosten, die Entwicklung im After-Sales-Bereich sowie der Abzinsungsfaktor. Bei der Festlegung der Annahmen werden sowohl allgemeine Marktprognosen, aktuelle Entwicklungen wie auch historische Erfahrungen berücksichtigt. Die langfristigen Wachstumsraten spiegeln geschäfts- und länderspezifische Gegebenheiten wider. Die in den Geschäftsjahren 2010 und 2009 herangezogenen langfristigen Wachstumsraten betragen maximal 2 %.

Die Cashflows werden für jeden Bereich, dem ein Geschäftswert zugeordnet ist, individuell auf Basis der Umsatz- und Kostenplanung prognostiziert. Die Abzinsung erfolgt zum WACC vor Steuern von 10,0 % (Vorjahr 10,5 %). Insbesondere für MAN Latin America wird eine risikoadäquate Anpassung der Annahmen und Schätzungen für die Ermittlung der Kapitalkosten vorgenommen. Diese Risikoadjustierung, die überwiegend aus der Berücksichtigung von Länderrisiken resultiert, führt für MAN Latin America zu einem WACC vor Steuern von 14,0 %.

Eine Wertminderung eines Geschäftswerts liegt vor, wenn der Nutzungswert kleiner ist als der Buchwert des Bereichs. Für 2010 und 2009 wurde kein Wertminderungsbedarf der bilanzierten Geschäftswerte ermittelt.

## 15 Sachanlagen

| Mio €                                                      |                         |                                  |                                                    |                                           |              |
|------------------------------------------------------------|-------------------------|----------------------------------|----------------------------------------------------|-------------------------------------------|--------------|
|                                                            | Grundstücke und Gebäude | Technische Anlagen und Maschinen | Andere Anlagen, Betriebs- und Geschäftsausstattung | Geleistete Anzahlungen und Anlagen im Bau | Sachanlagen  |
| Bruttobuchwert am 1. Januar 2009                           | 1 590                   | 1 835                            | 961                                                | 187                                       | 4 573        |
| Kumulierte Abschreibungen und Wertminderungen              | – 752                   | – 1 191                          | – 716                                              | –                                         | – 2 659      |
| <b>Stand am 1. Januar 2009</b>                             | <b>838</b>              | <b>644</b>                       | <b>245</b>                                         | <b>187</b>                                | <b>1 914</b> |
| Veränderung des Konsolidierungskreises/Unternehmenserwerbe | 43                      | 114                              | 48                                                 | 3                                         | 208          |
| Zugänge                                                    | 39                      | 110                              | 63                                                 | 70                                        | 282          |
| Umbuchungen                                                | 82                      | 74                               | 20                                                 | – 179                                     | – 3          |
| Abgänge                                                    | – 13                    | – 7                              | – 32                                               | – 2                                       | – 54         |
| Abschreibungen                                             | – 49                    | – 155                            | – 77                                               | – 1                                       | – 282        |
| Wertminderungen                                            | – 3                     | – 2                              | – 2                                                | –                                         | – 7          |
| Währungsanpassung                                          | 15                      | 24                               | 11                                                 | 2                                         | 52           |
| <b>Stand am 31. Dezember 2009</b>                          | <b>952</b>              | <b>802</b>                       | <b>276</b>                                         | <b>80</b>                                 | <b>2 110</b> |
| Bruttobuchwert am 31. Dezember 2009                        | 1 725                   | 1 964                            | 999                                                | 80                                        | 4 768        |
| Kumulierte Abschreibungen und Wertminderungen              | – 773                   | – 1 162                          | – 723                                              | –                                         | – 2 658      |
| <b>Stand am 1. Januar 2010</b>                             | <b>952</b>              | <b>802</b>                       | <b>276</b>                                         | <b>80</b>                                 | <b>2 110</b> |
| Veränderung des Konsolidierungskreises/Unternehmenserwerbe | 4                       | – 4                              | 0                                                  | 1                                         | 1            |
| Zugänge                                                    | 23                      | 74                               | 65                                                 | 73                                        | 235          |
| Umbuchungen                                                | 17                      | 42                               | 6                                                  | – 65                                      | 0            |
| Abgänge                                                    | – 7                     | – 4                              | – 7                                                | 0                                         | – 18         |
| Abschreibungen                                             | – 52                    | – 159                            | – 87                                               | –                                         | – 298        |
| Wertminderung                                              | – 3                     | – 6                              | –                                                  | –                                         | – 9          |
| Währungsanpassung                                          | 12                      | 21                               | 9                                                  | 1                                         | 43           |
| <b>Stand am 31. Dezember 2010</b>                          | <b>946</b>              | <b>766</b>                       | <b>262</b>                                         | <b>90</b>                                 | <b>2 064</b> |
| Bruttobuchwert am 31. Dezember 2010                        | 1 765                   | 2 029                            | 1 038                                              | 90                                        | 4 922        |
| Kumulierte Abschreibungen und Wertminderungen              | – 819                   | – 1 263                          | – 776                                              | –                                         | – 2 858      |

Die Abschreibungen auf Sachanlagen betrugen 298 Mio € (Vorjahr 282 Mio €). Sie sind in den Funktionskosten, insbesondere in den Umsatzkosten, enthalten.

### Als Finanzinvestitionen gehaltene Immobilien

Der Buchwert der als Finanzinvestitionen gehaltenen Immobilien betrug zum 31. Dezember 2010 11 Mio € (Vorjahr 15 Mio €), im Vergleich zu den beizulegenden Zeitwerten in Höhe von 42 Mio € (Vorjahr 48 Mio €).

## 16 Nach der Equity-Methode bilanzierte Beteiligungen

### Assoziierte Unternehmen

Die bedeutendsten nach der Equity-Methode bilanzierten Beteiligungen sind zum 31. Dezember 2010 die assoziierten Unternehmen Scania AB (Scania) und Sinotruk. Die Anteile am assoziierten Unternehmen Roland Holding GmbH, München (Roland), sowie am Gemeinschaftsunternehmen MAN FORCE TRUCKS werden ebenso nach der Equity-Methode bilanziert.

#### Scania

Durch den Erwerb einer Kaufoption betreffend 1,5 % des Kapitals bzw. 2,8 % der ausstehenden Stimmrechte von Scania im Dezember 2008 erlangte MAN Zugriff auf mehr als 20 % der Stimmrechte von Scania. MAN konnte die Option bis zum 5. Januar 2011 ausüben. Die Anteile an Scania wurden seit dem 31. Dezember 2008 nach der Equity-Methode bilanziert. Für weiterführende Informationen im Zusammenhang mit der Kaufoption betreffend 1,5 % des Kapitals bzw. 2,8 % der ausstehenden Stimmrechte von Scania sowie mit der hiermit verbundenen bilanziellen Konsequenz wird auf Anmerkung (37) verwiesen.

Der Kapitalanteil an Scania betrug zum 31. Dezember 2010 13,35 % (Vorjahr 13,35 %), der Stimmrechtsanteil 17,37 % (Vorjahr 17,37 %).

Die Beteiligung an Scania wurde im 4. Quartal 2009 auf Wertminderung getestet. Die Überprüfung wurde im Wesentlichen durch die 2009 stark rückläufigen Geschäfts- und Ergebniszahlen ausgelöst. Gleichzeitig wurde nur eine langsame und schwache Erholung von der Krise erwartet. Diese Faktoren führten dazu, dass die Cashflow-Prognosen und insbesondere die zu erwartenden Mittelzuflüsse der Beteiligung zum Zeitpunkt der Überprüfung auf Wertminderung durch eine erhöhte Unsicherheit belastet waren. Der auf Basis dieser zu erwartenden Mittelzuflüsse ermittelte Nutzungswert lag im Dezember 2009 nicht über dem beizulegenden Zeitwert abzüglich Verkaufskosten, errechnet auf Basis des Börsenkurses. Hieraus ergab sich im 4. Quartal 2009 ein Wertminderungsaufwand in

Höhe von 357 Mio €, der unter »Wertaufholungen und Wertminderungen auf nach der Equity-Methode bilanzierte Beteiligungen« erfasst wurde. Die wirtschaftliche Entwicklung im Geschäftsjahr 2010 lieferte substanzielle Hinweise dafür, dass der ursprünglich erfasste Wertminderungsaufwand nicht länger bestand oder sich verringert haben konnte. Besonders hervorzuheben sind der signifikante Anstieg des Marktwerts sowie die deutlich verbesserte wirtschaftliche Ertragskraft der Beteiligung. Da sowohl der Nutzungswert als auch der Marktwert der Beteiligung den Buchwert überstiegen, der bestimmt worden wäre, wenn im Geschäftsjahr 2009 kein Wertminderungsaufwand erfasst worden wäre, wurde im 4. Quartal 2010 eine Wertaufholung in Höhe der ursprünglich vorgenommenen Wertminderung von 357 Mio € vorgenommen. Diese Wertaufholung wurde unter »Wertaufholungen und Wertminderungen auf nach der Equity-Methode bilanzierte Beteiligungen« erfasst.

Die Anwendung der Equity-Methode und die zusätzliche Berücksichtigung der Wertminderung im Geschäftsjahr 2009 bzw. der Wertaufholung im Geschäftsjahr 2010 führten zum 31. Dezember 2010 zu einem Buchwert der Beteiligung an Scania von 1 397 Mio € (Vorjahr 958 Mio €). Der Börsenwert der Anteile an Scania betrug zum 31. Dezember 2010, bezogen auf den 13,35 %-igen Kapitalanteil, 1 815 Mio € (Vorjahr 958 Mio €). Zusammenfassende Finanzinformationen für Scania (auf 100 %-Basis und somit nicht angepasst an den von MAN gehaltenen Kapitalanteil) sind in der folgenden Tabelle enthalten.

| Mio €                                    | 2010   | 2009  |
|------------------------------------------|--------|-------|
| Vermögenswerte <sup>1</sup>              | 10 272 | 9 667 |
| Schulden <sup>1</sup>                    | 7 276  | 7 511 |
| Umsatzerlöse <sup>2</sup>                | 7 802  | 5 611 |
| Ergebnis nach Ertragsteuern <sup>2</sup> | 745    | 88    |

<sup>1</sup> Die Angaben betreffen jeweils den Bilanzstichtag 30. September.

<sup>2</sup> Geschäftsjahr 2010: Die Angaben betreffen den Zeitraum 1. Oktober 2009 bis 30. September 2010.  
Geschäftsjahr 2009: Die Angaben betreffen den Zeitraum 1. Oktober 2008 bis 30. September 2009.

### Sinotruk

Der Anteil an Sinotruk ist seit Oktober 2009 in den »Nach der Equity-Methode bilanzierten Beteiligungen« enthalten. Durch die Anwendung der Equity-Methode unter Beachtung von lokalen Kapitalmarktvorschriften hinsichtlich Veröffentlichung von Finanzinformationen für die Beteiligung enthält die Konzern Gewinn- und Verlustrechnung im Geschäftsjahr 2010 die anteiligen Ergebnisse von Sinotruk für den Zeitraum Oktober 2009 bis 30. Juni 2010. Die Konzern Gewinn- und Verlustrechnung im Geschäftsjahr 2009 enthält keine anteiligen Ergebnisse von Sinotruk. Die Kaufpreisallokation wurde im 3. Quartal 2010 abgeschlossen. Der Börsenwert der Anteile an Sinotruk betrug zum 31. Dezember 2010, bezogen auf den 25 %-igen Kapitalanteil, 532 Mio € (Vorjahr 560 Mio €). Zusammenfassende Finanzinformationen für Sinotruk (auf 100-%-Basis und somit nicht angepasst an den von MAN gehaltenen Kapitalanteil) sind in der folgenden Tabelle zur Information enthalten. Für weiterführende Informationen zu Sinotruk siehe Anmerkungen (6) und (33).

| Mio €                                    | 2010  | 2009  |
|------------------------------------------|-------|-------|
| Vermögenswerte <sup>1</sup>              | 5 732 | 3 582 |
| Schulden <sup>1</sup>                    | 3 453 | 2 245 |
| Umsatzerlöse <sup>2</sup>                | 3 818 | 1 551 |
| Ergebnis nach Ertragsteuern <sup>2</sup> | 176   | 61    |

<sup>1</sup> Geschäftsjahr 2010: Die Angaben betreffen den Bilanzstichtag 30. Juni 2010.  
Geschäftsjahr 2009: Die Angaben betreffen den Bilanzstichtag 30. Juni 2009.

<sup>2</sup> Geschäftsjahr 2010: Die Angaben betreffen den Zeitraum 1. Juli 2009 bis 30. Juni 2010.  
Geschäftsjahr 2009: Die Angaben betreffen den Zeitraum 1. Januar 2009 bis 30. Juni 2009.

### Roland

Die bilanziell nicht erfassten Verluste von Roland betragen –35 Mio € kumuliert.

Die nachfolgende Tabelle enthält zusammenfassende Finanzinformationen für die übrigen assoziierten Unternehmen, wobei sich die Angaben jeweils auf 100 % und nicht auf den Konzernanteil an den assoziierten Unternehmen beziehen:

| Mio €                                    | 2010  | 2009  |
|------------------------------------------|-------|-------|
| Vermögenswerte                           | 1 930 | 1 940 |
| Schulden                                 | 1 664 | 1 550 |
| Umsatzerlöse <sup>1</sup>                | 2 019 | 2 115 |
| Ergebnis nach Ertragsteuern <sup>1</sup> | – 135 | – 174 |

<sup>1</sup> 12 Monate

### 17 Vermietete Erzeugnisse

| Mio €                                                          | 2010         | 2009         |
|----------------------------------------------------------------|--------------|--------------|
| Bruttobuchwert am 1. Januar                                    | 1 976        | 2 197        |
| Kumulierte Abschreibungen                                      | – 543        | – 634        |
| <b>Stand am 1. Januar</b>                                      | <b>1 433</b> | <b>1 563</b> |
| Veränderung des Konsolidierungskreises/<br>Unternehmenserwerbe | 180          | –            |
| Zugänge                                                        | 833          | 440          |
| Abgänge                                                        | – 197        | – 154        |
| Abschreibungen                                                 | – 509        | – 434        |
| Währungsanpassung                                              | 15           | 18           |
| <b>Stand am 31. Dezember</b>                                   | <b>1 755</b> | <b>1 433</b> |
| Bruttobuchwert am 31. Dezember                                 | 2 699        | 1 976        |
| Kumulierte Abschreibungen                                      | – 944        | – 543        |

Die Vermieteten Erzeugnisse betreffen Nutzfahrzeuge, die auf Basis von »operating lease«-Verträgen an Kunden vermietet oder mit Rückgabeoption an Kunden verkauft sind. Der Anstieg der Position im Vergleich zum Vorjahr resultiert vor allem aus der Erstkonsolidierung der EURO-Leasing.

| Künftige Erlöse aus nicht kündbaren »operating lease«-Verträgen |              |            |
|-----------------------------------------------------------------|--------------|------------|
| Mio €                                                           | 31.12.2010   | 31.12.2009 |
| Fällig innerhalb eines Jahres                                   | 406          | 309        |
| Fällig nach mehr als einem bis fünf Jahren                      | 569          | 438        |
| Fällig nach mehr als fünf Jahren                                | 34           | 41         |
|                                                                 | <b>1 009</b> | <b>788</b> |

Bei Verkäufen mit Rückgabeoption sind als künftige Erlöse die bis zum Zeitpunkt der erwarteten Rückgabe noch zu vereinnahmenden Kundenzahlungen angesetzt.

### 18 Forderungen aus »finance lease«

| Mio €                                        | 31.12.2010 | 31.12.2009 |
|----------------------------------------------|------------|------------|
| Langfristige Forderungen aus »finance lease« | 703        | 738        |
| Kurzfristige Forderungen aus »finance lease« | 347        | 358        |

Die Forderungen aus »finance lease« betreffen Leasingverträge über Nutzfahrzeuge. Die Bruttoinvestitionen zeigen die Summe der Leasingraten bis zum Ablauf des Leasingvertrags zuzüglich des nicht garantierten Restwerts des Fahrzeugs am Ende des Leasingvertrags. Der Barwert ergibt sich nach Abzinsung auf Basis des im Leasingvertrag kalkulierten Zinssatzes.

| Bruttoinvestitionen »finance lease«        |              |              |
|--------------------------------------------|--------------|--------------|
| Mio €                                      |              |              |
|                                            | 31.12.2010   | 31.12.2009   |
| Fällig innerhalb eines Jahres              | 465          | 457          |
| Fällig nach mehr als einem bis fünf Jahren | 784          | 828          |
| Fällig nach mehr als fünf Jahren           | 22           | 28           |
|                                            | <b>1 271</b> | <b>1 313</b> |

Der Barwert der ausstehenden Mindestleasingzahlungen der Forderungen aus »finance lease« setzt sich nach Laufzeiten wie folgt zusammen:

| Mio €                                      |              |              |
|--------------------------------------------|--------------|--------------|
|                                            | 31.12.2010   | 31.12.2009   |
| Fällig innerhalb eines Jahres              | 343          | 347          |
| Fällig nach mehr als einem bis fünf Jahren | 673          | 714          |
| Fällig nach mehr als fünf Jahren           | 18           | 24           |
|                                            | <b>1 034</b> | <b>1 085</b> |

Überleitung der Bruttoinvestitionen zum Barwert der Mindestleasingzahlungen:

| Mio €                                        |              |              |
|----------------------------------------------|--------------|--------------|
|                                              | 31.12.2010   | 31.12.2009   |
| Bruttoinvestitionen in »finance lease«       | 1 271        | 1 313        |
| Abzinsung                                    | – 133        | – 147        |
| Wertberichtigungen                           | – 88         | – 70         |
| <b>Nettoinvestitionen in »finance lease«</b> | <b>1 050</b> | <b>1 096</b> |
| davon nicht garantierter Restwert            | – 16         | – 11         |
| <b>Mindestleasingzahlungen</b>               | <b>1 034</b> | <b>1 085</b> |

Die Wertberichtigungen auf Forderungen aus »finance lease« haben sich wie folgt entwickelt:

| Mio €                                         |           |           |
|-----------------------------------------------|-----------|-----------|
|                                               | 2010      | 2009      |
| <b>Stand am 1. Januar</b>                     | <b>70</b> | <b>28</b> |
| Zuführungen                                   | 49        | 56        |
| Inanspruchnahmen                              | – 23      | – 9       |
| Auflösungen                                   | – 11      | – 4       |
| Wechselkurseffekte und sonstige Veränderungen | 3         | – 1       |
| <b>Stand am 31. Dezember</b>                  | <b>88</b> | <b>70</b> |

## 19 Vorräte

| Mio €                             |              |              |
|-----------------------------------|--------------|--------------|
|                                   | 31.12.2010   | 31.12.2009   |
| Roh-, Hilfs- und Betriebsstoffe   | 470          | 515          |
| Unfertige und fertige Erzeugnisse | 1 823        | 2 089        |
| Waren                             | 419          | 280          |
| Geleistete Anzahlungen            | 140          | 153          |
|                                   | <b>2 852</b> | <b>3 037</b> |

Der Verbrauch von Vorräten in Höhe von 7 076 Mio € (Vorjahr 5 411 Mio €) ist innerhalb der Umsatzkosten der Berichtsperiode erfasst worden. Von den Vorräten waren 880 Mio € (Vorjahr 1 116 Mio €) zum Nettoveräußerungswert aktiviert. Der Aufwand aus der Wertminderung betrug 94 Mio € (Vorjahr 208 Mio €).

## 20 Forderungen aus Lieferungen und Leistungen

| Mio €                                                           |              |              |
|-----------------------------------------------------------------|--------------|--------------|
|                                                                 | 31.12.2010   | 31.12.2009   |
| Forderungen an Kunden                                           | 1 941        | 1 828        |
| Künftige Forderungen aus kundenspezifischen Fertigungsaufträgen | 138          | 214          |
| Forderungen an Beteiligungen                                    | 186          | 160          |
|                                                                 | <b>2 265</b> | <b>2 202</b> |

Von den Forderungen haben 171 Mio € (Vorjahr 175 Mio €) eine Restlaufzeit von über einem Jahr, davon 1 Mio € (Vorjahr 9 Mio €) von über fünf Jahren. Der Rest von 2 094 Mio € (Vorjahr 2 027 Mio €) hat eine Restlaufzeit von unter einem Jahr.

Die Wertberichtigungen auf Forderungen an Kunden, künftige Forderungen aus kundenspezifischen Fertigungsaufträgen und gegenüber Beteiligungen sowie auf sonstige Forderungen haben sich wie folgt entwickelt:

| Mio €                                         |            |            |
|-----------------------------------------------|------------|------------|
|                                               | 2010       | 2009       |
| <b>Stand am 1. Januar</b>                     | <b>129</b> | <b>90</b>  |
| Zuführungen                                   | 46         | 70         |
| Inanspruchnahmen                              | – 13       | – 13       |
| Auflösungen                                   | – 24       | – 20       |
| Wechselkurseffekte und sonstige Veränderungen | 2          | 2          |
| <b>Stand am 31. Dezember</b>                  | <b>140</b> | <b>129</b> |



In Abhängigkeit von den Marktgegebenheiten und dem Liquiditätsbedarf werden bestimmte Umfänge an Forderungen, vor allem zur Refinanzierung der Finanzdienstleistungen, verkauft. Sofern wesentliche Chancen und Risiken im Zusammenhang mit den Forderungen bei der MAN Gruppe verbleiben, werden diese weiterhin in der Bilanz ausgewiesen. Zum Stichtag betrug ihr Buchwert 55 Mio € (Vorjahr 103 Mio €). Die korrespondierenden Verbindlichkeiten sind in den Finanzverbindlichkeiten enthalten, siehe Anmerkung (23).

Die nach der »percentage of completion method« bilanzierten künftigen Forderungen aus kundenspezifischen Fertigungsaufträgen ermitteln sich wie folgt:

| Mio €                                                                                        | 31.12.2010   | 31.12.2009   |
|----------------------------------------------------------------------------------------------|--------------|--------------|
| Herstellungskosten und anteiliges Auftragsergebnis der kundenspezifischen Fertigungsaufträge | 1 959        | 1 880        |
| davon mit Kunden abgerechnete Leistungen                                                     | – 510        | – 689        |
| <b>Künftige Forderungen vor Erhaltenen Anzahlungen</b>                                       | <b>1 449</b> | <b>1 191</b> |
| Erhaltene Anzahlungen                                                                        | – 1 311      | – 977        |
|                                                                                              | <b>138</b>   | <b>214</b>   |

Weitere erhaltene Anzahlungen für kundenspezifische Fertigungsaufträge in Höhe von 463 Mio € (Vorjahr 592 Mio €), für die noch keine Herstellungskosten angefallen sind, werden in den Verbindlichkeiten ausgewiesen.

Der Umsatz aus kundenspezifischen Fertigungsaufträgen belief sich auf 1 139 Mio € (Vorjahr 1 112 Mio €). Die mit den Kunden abgerechneten Aufträge und Teilaufträge werden in den Forderungen an Kunden ausgewiesen.

## 21 Sonstige Vermögenswerte

| Mio €                                              | 31.12.2010 | 31.12.2009 |
|----------------------------------------------------|------------|------------|
| Derivative Finanzinstrumente                       | 257        | 284        |
| Forderungen aus Umsatzsteuer                       | 106        | 138        |
| Forderungen aus übrigen Steuern                    | 93         | 51         |
| Abgrenzung periodenfremder Zahlungen               | 75         | 67         |
| Darlehen und andere Forderungen an Dritte          | 60         | 63         |
| Sonstige langfristige Forderungen an Beteiligungen | 34         | –          |
| Forderungen aus Finanzverkehr mit Beteiligungen    | 21         | 21         |
| Vorschüsse und Verrechnungskonten                  | 20         | 11         |
| Deckungskapital Rückdeckungsversicherung           | 10         | 23         |
| Übrige Vermögenswerte                              | 217        | 210        |
|                                                    | <b>893</b> | <b>868</b> |

Die Sonstigen Vermögenswerte sind in folgenden Bilanzposten ausgewiesen:

| Mio €                                | 31.12.2010 | 31.12.2009 |
|--------------------------------------|------------|------------|
| Sonstige langfristige Vermögenswerte | 180        | 118        |
| Sonstige kurzfristige Vermögenswerte | 713        | 750        |

Derivative Finanzinstrumente sind zum beizulegenden Zeitwert angesetzt. Sie dienen größtenteils zur Sicherung von Währungsrisiken in Kundenaufträgen sowie sonstigen Fremdwährungspositionen.

Von den Sonstigen Vermögenswerten haben 187 Mio € (Vorjahr 136 Mio €) eine Restlaufzeit von über einem Jahr, davon 24 Mio € (Vorjahr 33 Mio €) von über fünf Jahren. Der Rest von 706 Mio € (Vorjahr 732 Mio €) hat eine Restlaufzeit von unter einem Jahr.

## 22 Eigenkapital

### a) Grundkapital, Rechte zu Kapitalmaßnahmen

Das Grundkapital der MAN SE beträgt unverändert 376 422 400 €. Es ist eingeteilt in 147 040 000 auf den Inhaber lautende, nennwertlose Stückaktien, auf die jeweils ein rechnerischer Anteil am Grundkapital von 2,56 € entfällt. Die Stückaktien sind gemäß § 4 Abs. 1 der Satzung unterteilt in 140 974 350 Stammaktien und 6 065 650 stimmrechtslose Vorzugsaktien. Sämtliche Aktien sind voll eingezahlt. Ein Anspruch der Aktionäre auf Verbriefung ist gemäß § 4 Abs. 2 Satz 2 der Satzung ausgeschlossen.

Für alle Aktien besteht ein gleiches Gewinnbezugsrecht, dies mit der Maßgabe, dass aus dem Bilanzgewinn ein Vorzugsgewinnanteil von 0,11 € je Vorzugsaktie vorab an die Vorzugsaktionäre und weitere 0,11 € je Stammaktie nachrangig an die Stammaktionäre auszuschütten sind. Reicht der Bilanzgewinn zur Zahlung des Vorzugsgewinnanteils nicht aus, so sind die fehlenden Beträge ohne Zinsen aus dem Bilanzgewinn der folgenden Geschäftsjahre vor Verteilung eines Gewinnanteils an die Stammaktionäre nachzuzahlen.

Die Stammaktien sind stimmberechtigt. Den Vorzugsaktien steht grundsätzlich kein Stimmrecht zu. Dies gilt gemäß § 140 Abs. 2 AktG nicht, wenn der Vorzugsbetrag in einem Jahr nicht oder nicht vollständig gezahlt und der Rückstand im nächsten Jahr nicht neben dem vollen Vorzug dieses Jahres nachgezahlt wird. In diesem Fall haben die Vorzugsaktionäre ein Stimmrecht, bis die Rückstände nachgezahlt sind, und die Vorzugsaktien sind bei der Berechnung einer nach dem Gesetz oder der Satzung erforderlichen Kapitalmehrheit zu berücksichtigen. Den Vorzugsaktionären steht zudem ein Stimmrecht gemäß § 141 Abs. 1, Abs. 2 Satz 1 in Verbindung mit Abs. 3 AktG zu. Danach ist ein zustimmender Sonderbeschluss der Vorzugsaktionäre erforderlich, wenn ein Beschluss der Hauptversammlung gefasst wird, durch den der Gewinnvorzug aufgehoben oder beschränkt wird oder der die Ausgabe von Vorzugsaktien vorsieht, die bei der Verteilung des Gewinns oder des Gesellschaftsvermögens den bestehenden Vorzugsaktien ohne Stimmrecht vorgehen oder gleichstehen.

Im Übrigen sind mit allen Aktien die gleichen Rechte und Pflichten verbunden.

#### Genehmigtes Kapital 2010

Mit Wirksamkeit des Ermächtigungsbeschlusses der Hauptversammlung vom 1. April 2010 zur Schaffung des Genehmigten Kapitals 2010 wurde die mit Beschluss vom 3. Juni 2005 erteilte Ermächtigung zur Schaffung des Genehmigten Kapitals 2005, ergänzt durch Beschluss der Hauptversammlung vom 3. April 2009, ersetzt.

Durch Beschluss der ordentlichen Hauptversammlung vom 1. April 2010 wurde der Vorstand der Gesellschaft ermächtigt, mit Zustimmung des Aufsichtsrats das Grundkapital bis zum 31. März 2015 um bis zu 188 211 200 € (= 50 %) durch einmalige oder mehrmalige Ausgabe von auf den Inhaber lautenden Stammaktien gegen Bareinlagen und/oder gegen Sacheinlagen zu erhöhen (Genehmigtes Kapital 2010).

Den Aktionären ist grundsätzlich ein Bezugsrecht einzuräumen. Der Vorstand ist allerdings ermächtigt, mit Zustimmung des Aufsichtsrats das Bezugsrecht bei der Ausgabe von Aktien gegen Sacheinlagen zum Zwecke des Erwerbs von Unternehmen, Beteiligungen an Unternehmen oder wesentlichen Wirtschaftsgütern von Unternehmen auszuschließen. Bei Barkapitalerhöhungen ist der Vorstand mit Zustimmung des Aufsichtsrats ferner ermächtigt, das Bezugsrecht auszuschließen,

- (i) soweit es erforderlich ist, um den Gläubigern von Wandelschuldverschreibungen oder den Inhabern von Optionschuldverschreibungen, die von der Gesellschaft oder ihren Konzerngesellschaften ausgegeben wurden oder werden, ein Bezugsrecht auf neue Aktien in dem Umfang einzuräumen, wie es ihnen nach Ausübung ihres Wandlungs- oder Optionsrechts zustehen würde, hätten sie zuvor ihr Wandlungs- oder Optionsrecht ausgeübt bzw. im Falle der Wandlungspflicht die Wandlung vollzogen (Verwässerungsschutz); und/oder
- (ii) wenn der Ausgabebetrag der neuen Aktien den Börsenpreis um nicht mehr als 5 % unterschreitet und die gem. § 186 Abs. 3 Satz 4 AktG ausgegebenen Aktien insgesamt 10 % des Grundkapitals nicht überschreiten. Auf diese Begrenzung sind Aktien anzurechnen, die in direkter oder entsprechender Anwendung dieser Vorschrift aufgrund von anderen Ermächtigungen während der Laufzeit dieser Ermächtigungen bis zum Zeitpunkt ihrer Ausnutzung ausgegeben oder veräußert wurden. Auf die vorgenannte Zehnprozentgrenze sind ebenfalls Aktien anzurechnen, die aufgrund von zum Zeitpunkt der Ausnutzung entsprechend dieser Vorschrift ausgegebenen Schuldverschreibungen mit Wandlungs- oder Optionsrecht bzw. mit Wandlungspflichten ausgegeben wurden bzw. auszugeben sind; und/oder
- (iii) um etwaig benötigte Spitzenbeträge zur Abrundung des Kapitals zu verwerten; und/oder
- (iv) um hinsichtlich eines Teilbetrags des Genehmigten Kapitals 2010 von bis zu 4 000 000 € neue Aktien gegen Bareinlagen an Arbeitnehmer mit Führungsverantwortung (Führungskräfte) der Gesellschaft und/oder von Konzerngesellschaften auszugeben. Dabei kann auch vorgesehen werden, dass die zu leistende Einlage nach Maßgabe des § 204 Abs. 3 AktG gedeckt wird.

Die Ermächtigung ist – ohne Berücksichtigung der Ausgabe von Aktien unter Bezugsrechtsausschluss an Arbeitnehmer mit Führungsverantwortung – insoweit beschränkt, als nach Ausübung der Ermächtigung die Summe der unter Ausschluss des Bezugsrechts unter dem Genehmigten Kapital 2010 und/oder unter dem Bedingten Kapital 2010 ausgegebenen Aktien 20 % des zum Zeitpunkt des Wirksamwerdens der Ermächtigung bestehenden Grundkapitals (= 75 284 480 €) bzw. – falls dieser Wert geringer ist – des zum Zeitpunkt der Ausnutzung der Ermächtigung bestehenden Grundkapitals nicht übersteigen darf. Weitere Einzelheiten ergeben sich aus § 4 Abs. 4 der Satzung.

#### Ausgabe von Wandel- und/oder Optionsschuldverschreibungen, Bedingtes Kapital 2010

Mit Wirksamkeit des Ermächtigungsbeschlusses der Hauptversammlung vom 1. April 2010 zur Schaffung des Bedingten Kapitals 2010 zur Ausgabe von Wandel- und/oder Optionsschuldverschreibungen wurde die mit Beschluss vom 3. Juni 2005 erteilte Ermächtigung zur Schaffung des Bedingten Kapitals 2005, ergänzt durch Beschluss der Hauptversammlung vom 10. Mai 2007, ersetzt.

Durch Beschluss der Hauptversammlung vom 1. April 2010 wurde der Vorstand der Gesellschaft ermächtigt, mit Zustimmung des Aufsichtsrats bis zum 31. März 2015 einmalig oder mehrmals Wandel- und/oder Optionsschuldverschreibungen – nachstehend gemeinsam »Schuldverschreibungen« – der MAN SE im Gesamtbetrag von bis zu 2,5 Mrd € zu begeben und den Inhabern von Schuldverschreibungen Optionsrechte bzw. Wandlungsrechte zu gewähren bzw. Wandlungspflichten zu begründen, dies für neue, auf den Inhaber lautende Stammaktien der MAN SE mit einem anteiligen Betrag des Grundkapitals von bis zu 76 800 000 € (rund 20 %) nach näherer Maßgabe der Options- bzw. Wandlungsbedingungen. Die Schuldverschreibungen sind gegen Bareinlagen auszugeben.

Die Ermächtigung umfasst auch die Möglichkeit, für von anderen Konzerngesellschaften ausgegebene Schuldverschreibungen die Garantie zu übernehmen und zur Erfüllung der mit diesen Schuldverschreibungen eingeräumten Wandlungs- oder Optionsrechte bzw. Wandlungspflichten Aktien an der MAN SE zu gewähren. Die Ermächtigung umfasst weiterhin die Möglichkeit des Vorstands, mit Zustimmung des Aufsichtsrats die weiteren Bedingungen der Schuldverschreibungen, insbesondere Zinssatz, Ausgabekurs, Laufzeit und Stückelung, Bezugs- bzw. Umtauschverhältnis,

Options- bzw. Wandlungspreis und Options- bzw. Wandlungszeitraum, festzulegen bzw. im Einvernehmen mit den Organen der ausgebenden Konzerngesellschaften festzulegen.

Die Schuldverschreibungen sind den Aktionären grundsätzlich zum Bezug anzubieten. Der Vorstand ist jedoch auch ermächtigt, mit Zustimmung des Aufsichtsrats das Bezugsrecht auszuschließen,

- (i) sofern der Ausgabepreis für die Schuldverschreibung ihren nach anerkannten finanzmathematischen Methoden ermittelten theoretischen Marktwert nicht wesentlich unterschreitet. Zudem gilt der Bezugsrechtsausschluss i.S.d. § 86 Abs. 3 Satz 4 AktG nur für Schuldverschreibungen mit Rechten auf Aktien, auf die ein anteiliger Betrag des Grundkapitals von insgesamt nicht mehr als 10 % des Grundkapitals entfällt. Auf diese Begrenzung sind Aktien anzurechnen, die in direkter oder entsprechender Anwendung dieser Vorschrift aufgrund von anderen Ermächtigungen während der Laufzeit dieser Ermächtigung bis zum Zeitpunkt ihrer Ausnutzung ausgegeben oder veräußert wurden bzw. auszugeben sind;
- (ii) soweit dies zum Ausgleich von Spitzenbeträgen erforderlich ist, die sich aufgrund des Bezugsverhältnisses ergeben;
- (iii) um den Inhabern von Schuldverschreibungen mit bestehenden Wandlungs-/Optionsrechten auf bzw. Pflichten zur Wandlung in Aktien der Gesellschaft zur Vermeidung von Verwässerungen des wirtschaftlichen Werts dieser Rechte ein Bezugsrecht in dem Umfang zu gewähren, wie es ihnen zustehen würde, hätten sie zuvor ihr Wandlungs- oder Optionsrecht ausgeübt bzw. im Falle der Wandlungspflicht die Wandlung vollzogen.

Die Ermächtigung zur Ausgabe von Schuldverschreibungen mit Wandlungs-/Optionsrechten bzw. Wandlungspflichten ist insoweit beschränkt, als nach Ausübung der Wandlungs-/Optionsrechte bzw. der Wandlungspflichten die Summe der unter Ausschluss des Bezugsrechts unter dem Bedingten Kapital 2010 auszugebenden und/oder dem Genehmigten Kapital 2010 – ohne Berücksichtigung der Ausgabe von Aktien unter Ausschluss des Bezugsrechts an Arbeitnehmer mit Führungsverantwortung – ausgegebenen Aktien 20 % des zum Zeitpunkt des Wirksamwerdens der Ermächtigung bestehenden Grundkapitals (= 75 284 480 €) bzw. – falls dieser Wert geringer ist – des zum Zeitpunkt der Ausnutzung der Ermächtigung bestehenden Grundkapitals nicht übersteigen darf.

Gleichzeitig wurde mit Beschluss der Hauptversammlung vom 1. April 2010 das Grundkapital um bis zu 76 800 000 €, eingeteilt in bis zu 30 000 000 Stück auf den Inhaber lautende Stammaktien, bedingt erhöht. Die bedingte Kapitalerhöhung wird nur insoweit durchgeführt, als die Inhaber von Schuldverschreibungen mit Wandlungs- oder Optionsrechten bzw. von Wandlungspflichten, die die MAN SE oder deren Konzerngesellschaften aufgrund des Ermächtigungsbeschlusses der Hauptversammlung vom 1. April 2010 gegen bar ausgegeben haben, von ihrem Wandlungs- oder Optionsrecht Gebrauch machen bzw. die Wandlungspflicht erfüllen, und soweit nicht andere Erfüllungsformen zur Bedienung eingesetzt werden. Die neuen Aktien sind erstmalig für das Geschäftsjahr ihrer Ausgabe dividendenberechtigt (Bedingtes Kapital 2010).

#### Aktienrückkauf

Mit Wirksamkeit des Ermächtigungsbeschlusses der Hauptversammlung vom 1. April 2010 zum Erwerb eigener Aktien wurde die mit Beschluss vom 3. April 2009 erteilte Ermächtigung zum Erwerb eigener Aktien ersetzt.

Mit Beschluss der Hauptversammlung vom 1. April 2010 wurde der Vorstand ermächtigt, bis zum 31. März 2015 mit Zustimmung des Aufsichtsrats einmal oder mehrmals Stammaktien und/oder Vorzugsaktien ohne Stimmrecht der Gesellschaft bis zu einem Anteil von insgesamt höchstens 10 % des Grundkapitals zu erwerben. Auf die aufgrund dieser Ermächtigung erworbenen Aktien dürfen zusammen mit anderen eigenen Aktien, die sich im Besitz der Gesellschaft befinden oder ihr nach §§ 71 d und 71 e AktG zuzurechnen sind, zu keinem Zeitpunkt mehr als 10 % des jeweiligen Grundkapitals entfallen. Der Erwerb kann auch durch andere Konzernunternehmen durchgeführt werden und/oder durch Dritte für Rechnung der MAN SE bzw. für Rechnung anderer Konzernunternehmen.

Der Erwerb darf über die Börse oder mittels eines an die Inhaber der entsprechenden Aktiengattung gerichteten öffentlichen Kaufangebots erfolgen. Im Falle des Erwerbs über die Börse darf der Erwerbspreis (ohne Erwerbsnebenkosten) den am Handelstag durch die Eröffnungsauktion ermittelten Kurs der jeweiligen Aktiengattung im Xetra-Handel (oder in einem vergleichbaren Nachfolgesystem) um nicht mehr als 10 % über- bzw. unterschreiten. Bei einem öffentlichen Kaufangebot dürfen der gebotene Kaufpreis oder die Grenzwerte der gebotenen Kaufpreisspanne je Aktie (ohne Erwerbsnebenkosten) den durchschnittlichen Schlusskurs der jeweiligen Aktiengattung im Xetra-Handel (oder in einem vergleichbaren Nachfolgesystem) an den drei Börsenhandelstagen vor dem Tag der öffentlichen Ankündigung des Angebots um nicht mehr als 10 % über- bzw. unterschreiten. Das Kaufangebot bzw.

die Aufforderung zur Abgabe eines solchen Angebots kann weitere Bedingungen vorsehen. Sofern die gesamte Zeichnung das Volumen des Kaufangebots überschreitet, muss die Annahme nach Quoten erfolgen. Eine bevorrechtigte Annahme geringer Stückzahlen kann im rechtlich zulässigen Rahmen, maximal aber bis zu 100 Stück angedienter Aktien je Aktionär, vorgesehen werden. In den Angebotsbedingungen können weitere Einzelheiten und Bedingungen des Angebots festgelegt werden.

Der Vorstand wurde weiterhin ermächtigt, erworbene eigene Stammaktien mit Zustimmung des Aufsichtsrats in anderer Weise als durch Veräußerung über die Börse oder durch Angebot an alle Aktionäre unter Ausschluss des Bezugsrechts der Aktionäre zu allen gesetzlich zulässigen Zwecken zu verwenden. Dies gilt insbesondere auch,

- (i) wenn die erworbenen eigenen Stammaktien zu einem Preis veräußert werden, der den Börsenkurs nicht wesentlich unterschreitet; und/oder
- (ii) soweit diese als Gegenleistung im Rahmen eines Unternehmenszusammenschlusses oder für den Erwerb von Unternehmen oder Beteiligungen an Unternehmen oder von Wirtschaftsgütern von Unternehmen verwendet werden; und/oder
- (iii) soweit diese zur Erfüllung von Options- bzw. Wandlungsrechten oder von Wandlungspflichten, die von der Gesellschaft oder einer Konzerngesellschaft bei der Ausgabe von Schuldverschreibungen begründet wurden, verwendet werden. Insgesamt dürfen die aufgrund dieser Ermächtigung übertragenen Aktien 10 % des Grundkapitals nicht übersteigen, sofern sie zur Erfüllung von Wandel- und Optionsrechten bzw. von Wandlungspflichten, die in entsprechender Anwendung des § 186 Abs. 3 Satz 4 AktG begründet wurden, verwendet werden. Auf diese Begrenzung sind Aktien anzurechnen, die in direkter oder entsprechender Anwendung dieser Vorschrift während der Laufzeit dieser Ermächtigung bis zum Zeitpunkt der Verwendung ausgegeben oder veräußert wurden. Ebenfalls anzurechnen sind Aktien, die aufgrund von zum Zeitpunkt der Verwendung entsprechend dieser Vorschrift ausgegebenen Schuldverschreibungen mit Wandel- oder Optionsrechten bzw. mit Wandlungspflichten ausgegeben wurden bzw. auszugeben sind; und/oder
- (iv) soweit die eigenen Stammaktien zur Erfüllung von Zusagen von Aktientantiemen an Arbeitnehmer mit Führungsverantwortung (Führungskräfte) der Gesellschaft und/oder Konzernunternehmen verwendet werden.

Der Vorstand wurde durch Beschluss der Hauptversammlung vom 1. April 2010 ferner ermächtigt, die eigenen Stamm- und/oder Vorzugsaktien ohne Stimmrecht mit Zustimmung des Aufsichtsrats ohne weiteren Hauptversammlungsbeschluss einzuziehen.

**Wesentliche Vereinbarungen der Gesellschaft, die unter der Bedingung eines Kontrollwechsels infolge eines Übernahmeangebots stehen**

Wie in der Anmerkung (23) erläutert, hat die MAN SE verschiedene wesentliche Vereinbarungen abgeschlossen, die unter der Bedingung eines Kontrollwechsels stehen.

**b) Beteiligungen an der MAN SE**

Die Volkswagen Aktiengesellschaft hat der MAN SE (damals MAN Aktiengesellschaft) im Februar 2007 nach § 21 Abs. 1 Satz 1 WpHG mitgeteilt, dass der Stimmrechtsanteil der Volkswagen Aktiengesellschaft die Grenze von 25 % überschritten hat und zu diesem Zeitpunkt 29,9 % betrug. Des Weiteren haben uns die Porsche Automobil Holding SE sowie deren kontrollierende Gesellschafter im September 2008 nach § 21 Abs. 1 WpHG mitgeteilt, dass – aufgrund der Übernahme der Kontrolle über die Volkswagen AG durch die Porsche Automobil Holding SE – diese Beteiligung der Volkswagen AG von 29,9 % auch der Porsche Automobil Holding SE sowie deren kontrollierenden Gesellschaften zugerechnet wird. Ferner haben wir im Jahr 2010 Mitteilungen nach § 21 Abs. 1 WpHG erhalten, dass der Stimmrechtsanteil der BlackRock Inc. (und mit ihr verbundener Gesellschaften) die Schwelle von 3 % überschritten hat. Weitere bestehende direkte oder indirekte Beteiligungen am Kapital der Gesellschaft, die 10 % der Stimmrechte oder die relevanten Schwellen des WpHG überschreiten, oder Änderungen der genannten Beteiligungen wurden der MAN SE weder gemeldet noch sind sie ihr bekannt.

**c) Rücklagen**

Die Kapitalrücklage der MAN SE stammt aus Agiobeträgen bei Kapitalerhöhungen und der Umwandlung von Vorzugsaktien in Stammaktien. Die Gewinnrücklagen der MAN Gruppe enthalten die Gewinnrücklagen der MAN SE in Höhe von 844 Mio € (Vorjahr 619 Mio €) und den Bilanzgewinn der MAN SE in Höhe von 296 Mio € (Vorjahr 37 Mio €). Darüber hinaus enthalten sie die bei

Tochterunternehmen thesaurierten Gewinne und Verluste und die Unterschiede aus der Bilanzierung im Konzern im Gegensatz zum landesrechtlichen Abschluss.

Der Vorstand und der Aufsichtsrat der MAN SE werden der Hauptversammlung die Gesamtausschüttung einer Dividende von 2,00 € je dividendenberechtigter Aktie (Vorjahr 0,25 €) vorschlagen. Das vorgeschlagene Ausschüttungsvolumen beträgt hiermit 294 Mio € (Vorjahr 37 Mio €).

**d) Direkt im Eigenkapital erfasste Erträge und Aufwendungen, Gewinne und Verluste**

| Mio €                                                                                                                                 |            |                                                           |            |                                                           |
|---------------------------------------------------------------------------------------------------------------------------------------|------------|-----------------------------------------------------------|------------|-----------------------------------------------------------|
|                                                                                                                                       | 31.12.2010 | davon von<br>aufge-<br>gebenen<br>Geschäfts-<br>bereichen | 31.12.2009 | davon von<br>aufge-<br>gebenen<br>Geschäfts-<br>bereichen |
| Unterschiedsbetrag aus der Währungsumrechnung                                                                                         | 484        | – 9                                                       | 227        | – 9                                                       |
| Marktbewertung derivativer Finanzinstrumente                                                                                          | 10         | –                                                         | 64         | –                                                         |
| Versicherungsmathematische Verluste aus Pensionen                                                                                     | – 282      | –                                                         | – 232      | –                                                         |
| Versicherungsmathematische Verluste aus Abfertigungsrückstellungen                                                                    | – 16       | –                                                         | – 18       | –                                                         |
| Direkt im Eigenkapital erfasste Erträge und Aufwendungen, Gewinne und Verluste von nach der Equity-Methode bilanzierten Beteiligungen | 16         | –                                                         | 22         | –                                                         |
| Abgrenzung latenter Steuern                                                                                                           | 68         | –                                                         | 29         | –                                                         |
|                                                                                                                                       | <b>280</b> | <b>– 9</b>                                                | <b>92</b>  | <b>– 9</b>                                                |

Von den abgegrenzten latenten Steuern von 68 Mio € (Vorjahr 29 Mio €) entfallen 66 Mio € auf die versicherungsmathematischen Verluste aus Pensionen (Vorjahr 47 Mio €), – 2 Mio € (Vorjahr – 22 Mio €) auf die Bewertung derivativer Finanzinstrumente und 4 Mio € (Vorjahr 4 Mio €) auf die versicherungsmathematischen Verluste aus Abfertigungsrückstellungen.

**e) Minderheitsanteile**

Die Minderheitsanteile resultieren überwiegend aus der Renk Aktiengesellschaft, Augsburg, an der MAN einen Kapitalanteil von 76 % hält.

## f) Kapitalmanagement

Die wichtigsten Ziele des Kapitalmanagements der MAN SE sind die nachhaltige Steigerung des Unternehmenswerts und die Sicherung der Liquidität sowie der Kreditwürdigkeit des Konzerns. Hierzu tragen die Reduzierung der Kapitalkosten und die Verbesserung des Cashflows aus der Finanzierungstätigkeit ebenso bei wie die Optimierung der Kapitalstruktur und ein effektives Risikomanagement.

Zur Messung und zur Steuerung der Geschäftsaktivitäten sowie zur Optimierung der Kapitalallokation im Konzern verwendete die MAN SE bisher den MAN Value Added. Dieser wird ab dem Jahr 2010 nicht mehr zu Steuerungszwecken herangezogen. Stattdessen wird die modifizierte Größe »Delta zu Kapitalkostensatz« (ROCE – WACC) eingeführt, die der Differenz zwischen ROCE und dem Kapitalkostensatz Weighted Average Cost of Capital (WACC) entspricht.

Standard & Poor's hat im April 2010 das Langfristrating für MAN von A- auf BBB+ mit stabilem Ausblick gesenkt und diese Einschätzung nochmals im Dezember 2010 bestätigt. Das von Moody's erhaltene Rating wurde im September 2010 unverändert mit A3 mit stabilem Ausblick bestätigt.

Das Steuerungsrelevante Gesamtkapital des Konzerns besteht aus dem Eigenkapital, den Pensionen und den Finanzverbindlichkeiten.

| Mio €                   | 31.12.2010   | 31.12.2009   |
|-------------------------|--------------|--------------|
| Eigenkapital            | 5 990        | 5 129        |
| Pensionsverpflichtungen | 226          | 160          |
| Finanzverbindlichkeiten | 2 849        | 3 270        |
| <b>Gesamtkapital</b>    | <b>9 065</b> | <b>8 559</b> |

Im Geschäftsjahr 2010 stieg das Eigenkapital gegenüber dem Vorjahr um 17 %. Dies resultierte primär aus dem deutlich verbesserten Jahresergebnis. Die Pensionsverpflichtungen stiegen aufgrund versicherungsmathematischer Verluste gegenüber dem Vorjahr um 41 %, die versicherungsmathematischen Verluste resultieren in erster Linie aus einem niedrigeren Diskontierungszinssatz. Die Finanzverbindlichkeiten sanken um 13 % aufgrund der Tilgung diverser Finanzverbindlichkeiten. Insgesamt führte dies im Geschäftsjahr 2010 zu einer Erhöhung des Gesamtkapitals um 506 Mio € bzw. 6 %.

Die MAN SE unterliegt keinen satzungsmäßigen Kapitalerfordernissen.

## 23 Finanzverbindlichkeiten

| Mio €                                                      | 31.12.2010   | 31.12.2009   |
|------------------------------------------------------------|--------------|--------------|
| Anleihen                                                   | 1 494        | 1 738        |
| Verbindlichkeiten gegenüber Kreditinstituten und Sonstigen | 721          | 956          |
| Strukturierte Finanzierungen                               | 634          | 576          |
|                                                            | <b>2 849</b> | <b>3 270</b> |

Die Finanzverbindlichkeiten sind in folgenden Bilanzposten ausgewiesen:

| Mio €                                | 31.12.2010 | 31.12.2009 |
|--------------------------------------|------------|------------|
| Langfristige Finanzverbindlichkeiten |            |            |
| Restlaufzeit über ein Jahr           | 1 983      | 2 230      |
| davon: Restlaufzeit über fünf Jahre  | 512        | 520        |
| Kurzfristige Finanzverbindlichkeiten |            |            |
| Restlaufzeit bis ein Jahr            | 866        | 1 040      |

Zur Finanzierung der geplanten Scania-Akquisition hat die MAN SE am 17. September 2006 mit einem Bankenkonsortium eine Vereinbarung über eine Kreditlinie in Höhe von 11 Mrd € abgeschlossen. Aus diesem Kreditrahmen wurde für den Erwerb von Scania-Aktien bis zum 31. Dezember 2006 eine Tranche mit 1 170 Mio € in Anspruch genommen. Nach Rücknahme des öffentlichen Angebots zum Erwerb der Scania-Aktien am 23. Januar 2007 ist der nicht in Anspruch genommene Teil des Kreditrahmens erloschen. Zum 17. September 2009 wurde die letzte aus dem Kreditrahmen in Anspruch genommene Tranche in Höhe von 400 Mio € vollständig getilgt. Diese wurde im Jahr 2009 mit durchschnittlich 1,53 % p. a. variabel verzinst. Damit war bereits zum 31. Dezember 2009 der Kreditrahmen endgültig erloschen.

Für den Kauf von VW Truck & Bus in Brasilien wurde als Überbrückungsfinanzierung zunächst eine Kreditlinie, bestehend aus drei Tranchen, in Höhe von 2,0 Mrd € mit zehn Banken arrangiert. Hiervon wurden im März 2009 1,5 Mrd € in Anspruch genommen. Ende März 2009 platzierte die MAN SE ein Schuldscheindarlehen in Höhe von 200 Mio € mit Laufzeit bis 2012, das zur teilweisen Rückzahlung des Überbrückungskredits genutzt wurde. Dieses Schuldscheindarlehen bestand aus einem festverzinslichen Teil in Höhe von 49 Mio € und einem Zinssatz von 5,056 % und einer variabel verzinslichen Tranche in Höhe von 151 Mio €. Im Verlauf des Jahres 2009 wurden 30 Mio € des variabel verzinslichen Teils getilgt und durch einen weiteren Schuldschein in Höhe von 30 Mio € mit Laufzeit bis 2019 (amortisierend) ersetzt. Dieser wird mit 6,76 % fest verzinst. Vollständig zurückgezahlt wurde der Überbrückungskredit schließlich im Mai 2009 aus den Erlösen einer Eurobond-Anleihe, die in zwei Tranchen mit Laufzeiten



von vier und sieben Jahren und festem Zinskupon in Höhe von 5,375 % bzw. 7,25 % mit einem Gesamtvolumen von 1,5 Mrd € durch die MAN SE emittiert wurde. Hierfür hatte die MAN SE zuvor ein EMTN-Programm aufgelegt, das es erlaubt, bei vorhandener Dokumentation regelmäßig und gegebenenfalls auch kurzfristig Wertpapiere im Fremdkapitalbereich zu begeben. Der nicht in Anspruch genommene Teil der Überbrückungskreditzusage in Höhe von 500 Mio € wurde schließlich im Verlauf des Jahres 2009 storniert. Darüber hinaus konnte im Oktober 2010 der restliche Teil des variabel verzinsten Schuldscheindarlehens in Höhe von 121 Mio € vorzeitig zurückgeführt werden. Diese Tranche wurde bis zur Rückführung mit durchschnittlich 3,92 % p. a. verzinst.

Zum 31. Dezember 2010 betrug der Buchwert der Schuldscheindarlehen 79 Mio €. Der Buchwert der Eurobond-Tranche mit Laufzeit bis 20. Mai 2013 betrug 997 Mio € und ihr Marktwert 1 068 Mio €. Für die Tranche mit Laufzeit bis 20. Mai 2016 belief sich der Buchwert auf 497 Mio € und der Marktwert auf 590 Mio €.

Im Dezember 2003 hat MAN Financial Services plc, Swindon/Großbritannien, eine Anleihe mit einem Volumen von 300 Mio € begeben. Die Anleihe wurde mit 5,375 % verzinst. Per 27. November 2007 hat die Emittentin nominal 60 Mio € dieser Anleihe zurückgekauft. Im Dezember 2010 wurde die verbleibende Anleihe bei Endfälligkeit in Höhe von 240 Mio € zurückgezahlt.

In den strukturierten Finanzierungen sind 55 Mio € (Vorjahr 104 Mio €) Verbindlichkeiten im Zusammenhang mit Forderungsverkäufen enthalten. Ferner nutzt die MAN Gruppe Asset-Backed-Finanzierungen, insbesondere zur Refinanzierung des Finanzdienstleistungsgeschäfts. In den kurzfristigen Finanzverbindlichkeiten sind Asset-Backed-Finanzierungen in Höhe von 411 Mio € (Vorjahr 235 Mio €) enthalten, bei denen die Finanzierung des amortisierenden Bestandsportfolios bis zum Laufzeitende gesichert ist.

Die Verbindlichkeiten gegenüber Kreditinstituten sind überwiegend variabel verzinst.

Die Besicherung von Verbindlichkeiten ist in der MAN Gruppe grundsätzlich nicht vorgesehen.

Wesentliche Vereinbarungen der Gesellschaft, die unter der Bedingung eines Kontrollwechsels infolge eines Übernahmeangebots stehen:

Bei der vereinbarten syndizierten Kreditlinie über 1,5 Mrd € kann jeder Konsorte die sofortige Rückzahlung seines Anteils verlangen, wenn eine oder mehrere natürliche oder juristische Personen (ausgenommen die Volkswagen AG oder eine mehrheitlich gehaltene direkte oder indirekte Tochtergesellschaft der Volkswagen AG), entweder einzeln oder gemeinschaftlich, die Kontrolle über die MAN SE oder die Mehrheit der Stimmrechte an der MAN SE erwerben.

Die emittierten Schuldscheindarlehen in Höhe von 79 Mio € können mit sofortiger Wirkung gekündigt werden, wenn eine oder mehrere Personen, die gemeinschaftlich handeln, die Mehrheit der Stimmrechte an der MAN SE erwerben.

Die Rückzahlung der 1,5-Mrd-€-Anleihe kann dann gefordert werden, wenn eine oder mehrere Personen, die abgestimmt handeln, mehr als 50 % der Stimmrechte an der MAN SE erworben haben und es aufgrund dessen innerhalb von 120 Tagen zu einer Absenkung des Ratings in ein Non Investment Grade Rating kommt.

## 24 Pensionen

Die Rückstellungen für Pensionen teilen sich wie folgt auf:

| <b>Zusammensetzung Finanzierungsstatus und Pensionsrückstellungen</b>                          |                |                |                |                |                |
|------------------------------------------------------------------------------------------------|----------------|----------------|----------------|----------------|----------------|
| Mio €                                                                                          | 31.12.<br>2010 | 31.12.<br>2009 | 31.12.<br>2008 | 31.12.<br>2007 | 31.12.<br>2006 |
| Nicht fondsfinanzierte leistungsorientierte Verpflichtung                                      | 14             | 22             | 46             | 69             | 319            |
| Fondsfinanzierte leistungsorientierte Verpflichtung                                            | 1 859          | 1 716          | 1 695          | 1 828          | 1 705          |
| <b>Leistungsorientierte Verpflichtungen gesamt</b>                                             | <b>1 873</b>   | <b>1 738</b>   | <b>1 741</b>   | <b>1 897</b>   | <b>2 024</b>   |
| Planvermögen zum Zeitwert                                                                      | - 1 647        | - 1 579        | - 1 652        | - 1 790        | - 1 079        |
| <b>Finanzierungsstatus am 31. Dezember</b>                                                     | <b>226</b>     | <b>159</b>     | <b>89</b>      | <b>107</b>     | <b>945</b>     |
| Vermögenswerte aus überdeckten Pensionsplänen                                                  | 0              | 1              | 19             | 18             | -              |
| Nicht als Vermögenswert angesetzter Teil des Planvermögens                                     | -              | -              | -              | 7              | 1              |
| Umklassifizierung in »Schulden im Zusammenhang mit zur Veräußerung bestimmten Vermögenswerten« | -              | -              | - 34           | -              | -              |
| <b>Pensionsrückstellungen am 31. Dezember</b>                                                  | <b>226</b>     | <b>160</b>     | <b>74</b>      | <b>132</b>     | <b>946</b>     |
| davon Inland                                                                                   | 173            | 107            | 39             | 120            | 929            |
| davon Ausland                                                                                  | 53             | 53             | 35             | 12             | 17             |

#### a) Pensionspläne

Die MAN Gruppe gewährt ihren inländischen Mitarbeitern für die Zeit nach dem aktiven Erwerbsleben Leistungen der betrieblichen Altersversorgung. Diese bietet eine Zusatzversorgung im Ruhestand sowie einen Risikoschutz für Invalidität und Todesfall im aktiven Arbeitsverhältnis.

Im Rahmen der aktuellen Versorgungswerke der MAN Gruppe, dem MAN Ergebnisbeteiligungs- und Vorsorgeplan bzw. dem Kapitalkontenplan für Leitende Angestellte, Geschäftsführer und Vorstände, erhalten die aktiven Mitarbeiter an ihre Bezüge gekoppelte Arbeitgeberbeiträge und haben darüber hinaus die Möglichkeit, durch – im Tarifbereich arbeitgebergeförderte – Entgeltumwandlungen zusätzlich Eigenvorsorge zu betreiben. Durch die arbeitgeber- und arbeitnehmerfinanzierten Beitragszahlungen sowie die am Kapitalmarkt erzielten Erträge aus der Kapitalanlage wird während des aktiven Diensts ein Versorgungskapital aufgebaut, das im Ruhestand als Einmalkapital oder in Raten ausgezahlt wird oder in bestimmten Fällen verrentet werden kann. Im Rahmen der Kapitalanlage werden die Anlagerisiken der Mitarbeiter mit zunehmendem Alter sukzessive reduziert (Lifecycle-Konzept). Die Wertentwicklung des Versorgungskapitals ist unmittelbar an den Kapitalmarkt geknüpft und wird durch einen Korb von Indizes und sonstiger geeigneter Parameter bestimmt.

Ehemalige Mitarbeiter, Rentner oder mit unverfallbaren Ansprüchen ausgeschiedene Mitarbeiter haben Versorgungszusagen aus einer Vielzahl alter Versorgungswerke, die überwiegend auf die Gewährung lebenslanger Rentenzahlungen ausgerichtet sind. Ausländischen Mitarbeitern werden Altersversorgungsleistungen entsprechend den landesspezifischen Gegebenheiten in Form von leistungs- oder beitragsorientierten Pensionsplänen gewährt. Mitarbeiter in Großbritannien, in der Schweiz und in Brasilien erhalten Versorgungsleistungen aus leistungsorientierten, fondsfinanzierten Pensionsplänen. Die Pensionspläne in Großbritannien sind für Neueintritte geschlossen. In Frankreich, Österreich und Polen bestehen leistungsorientierte, rückstellungsfinanzierte Pensionspläne mit geringem Verpflichtungsumfang.

Beitragsorientierte Pensionspläne werden u. a. in den USA und in Großbritannien unterhalten.

#### b) Kapitaldeckung

Das inländische Pensionsvermögen der MAN Gruppe wird durch den MAN Pension Trust e. V. bzw. die MAN Pensionsfonds AG verwaltet. Dieses Vermögen ist unwiderruflich dem Zugriff der Konzerngesellschaften entzogen und darf ausschließlich für laufende Versorgungsleistungen oder für Ansprüche der Mitarbeiter im Insolvenzfall verwendet werden. Die ordnungsgemäße Verwaltung und Verwendung des Treuhandvermögens wird von unternehmensfremden Treuhändern überwacht. Die MAN Pensionsfonds AG unterliegt zudem der Überwachung durch die Bundesanstalt für Finanzdienstleistungsaufsicht. Das Pensionsvermögen wird durch professionelle Investmentmanager nach vom Anlageausschuss der MAN SE vorgegebenen Anlagerichtlinien investiert. Der Erwerb von der MAN SE oder einer Konzerngesellschaft begebenen Wertpapieren sowie Investments in eigengenutzte Immobilien sind unzulässig. Das Pensionsvermögen wird in Großbritannien in zwei konzerneigenen Pensionsfonds unter der Aufsicht von Treuhändern (Trustees), in der Schweiz durch überbetriebliche Versorgungseinrichtungen und in Brasilien in einem mit einem anderen Konzern unterhaltenen Pensionsplan verwaltet. Das Pensionsvermögen wird ebenfalls durch professionelle Investmentmanager investiert. Die Anlagerichtlinien werden durch Trustee Boards bzw. die hierfür bei überbetrieblichen Versorgungswerken zuständigen Gremien vorgegeben.

Grundsätzlich erfolgen Dotierungen des Pensionsvermögens in Höhe des zur Erfüllung der landesspezifischen Minimalerfordernisse notwendigen Betrags. Im Inland besteht grundsätzlich keine Verpflichtung zu laufenden Einzahlungen in das Pensionsvermögen. Ziel ist jedoch, Dotierungen in Höhe der laufenden Arbeitgeber- und Arbeitnehmerbeiträge vorzunehmen. Im Jahr 2011 werden Dotierungen für Arbeitgeberbeiträge in Höhe von 52 Mio € für die inländischen und 14 Mio € für die ausländischen leistungsorientierten Pensionspläne erwartet.

#### Portfolio der Fondsanlagen

| Mio €               | Deutschland  |              | Ausland     |             | Gesamt       |              |
|---------------------|--------------|--------------|-------------|-------------|--------------|--------------|
|                     | 31.12. 2010  | 31.12. 2009  | 31.12. 2010 | 31.12. 2009 | 31.12. 2010  | 31.12. 2009  |
| Renten              | 1 021        | 1 035        | 209         | 196         | 1 230        | 1 231        |
| Aktien              | 197          | 162          | 146         | 128         | 343          | 290          |
| Immobilien          | –            | –            | 33          | 31          | 33           | 31           |
| Sonstiges           | –            | –            | 41          | 27          | 41           | 27           |
| <b>Planvermögen</b> | <b>1 218</b> | <b>1 197</b> | <b>429</b>  | <b>382</b>  | <b>1 647</b> | <b>1 579</b> |

Vom ausländischen Planvermögen entfielen 230 Mio € auf Großbritannien, 168 Mio € auf die Schweiz und 31 Mio € auf Brasilien. Die Rendite des Planvermögens lag in Deutschland bei 4,6 %, in Großbritannien bei 8,3 %, in der Schweiz bei 2,5 % und in Brasilien bei 10,3 %.

#### c) Finanzierungsstatus

##### Entwicklung des Anwartschaftsbarwerts

| Mio €                                                | Deutschland  |              | Ausland    |            | Gesamt       |              |
|------------------------------------------------------|--------------|--------------|------------|------------|--------------|--------------|
|                                                      | 2010         | 2009         | 2010       | 2009       | 2010         | 2009         |
| Anwartschaftsbarwert am 1. Januar                    | 1 304        | 1 398        | 434        | 343        | 1 738        | 1 741        |
| Veränderung des Konsolidierungskreises               | – 1          | – 255        | 0          | 16         | – 1          | – 239        |
| Laufender Dienstzeitaufwand                          | 38           | 36           | 12         | 10         | 50           | 46           |
| Zinsaufwand                                          | 66           | 67           | 23         | 20         | 89           | 87           |
| Nachzuverrechnender Dienstzeitaufwand                | –            | 7            | 0          | – 4        | 0            | 3            |
| Versicherungs-mathematische Verluste (+)/Gewinne (–) | 53           | 117          | – 2        | 47         | 51           | 164          |
| Pensionszahlungen                                    | – 71         | – 70         | – 33       | – 24       | – 104        | – 94         |
| Beiträge durch die Berechtigten                      | 2            | 4            | 7          | 6          | 9            | 10           |
| Währungsanpassung, Sonstiges                         | –            | 0            | 41         | 20         | 41           | 20           |
| <b>Anwartschaftsbarwert am 31. Dezember</b>          | <b>1 391</b> | <b>1 304</b> | <b>482</b> | <b>434</b> | <b>1 873</b> | <b>1 738</b> |

#### Entwicklung des Planvermögens

Mio €

|                                                                              | Deutschland  |              | Ausland    |            | Gesamt       |              |
|------------------------------------------------------------------------------|--------------|--------------|------------|------------|--------------|--------------|
|                                                                              | 2010         | 2009         | 2010       | 2009       | 2010         | 2009         |
| Planvermögen am 1. Januar                                                    | 1 197        | 1 337        | 382        | 315        | 1 579        | 1 652        |
| Veränderung des Konsolidierungskreises                                       | –            | – 206        | –          | 16         | –            | – 190        |
| Erwartete Erträge des Planvermögens                                          | 55           | 54           | 21         | 19         | 76           | 73           |
| Unterschied zwischen erwarteten und tatsächlichen Erträgen des Planvermögens | – 1          | 34           | 2          | 18         | 1            | 52           |
| Laufende Beiträge durch die Arbeitgeber                                      | 28           | 10           | 13         | 12         | 41           | 22           |
| Sonderdotierung durch die Arbeitgeber                                        | –            | 27           | –          | 1          | –            | 28           |
| Beiträge durch die Berechtigten                                              | 2            | 1            | 7          | 6          | 9            | 7            |
| Pensionszahlungen                                                            | – 63         | – 60         | – 33       | – 24       | – 96         | – 84         |
| Währungsanpassung, Sonstiges                                                 | –            | –            | 37         | 19         | 37           | 19           |
| <b>Planvermögen am 31. Dezember</b>                                          | <b>1 218</b> | <b>1 197</b> | <b>429</b> | <b>382</b> | <b>1 647</b> | <b>1 579</b> |

Bei der Ermittlung des Anwartschaftsbarwerts und des Planvermögens sind bei den wesentlichen Pensionsplänen folgende Parameter zugrunde gelegt:

| %                                   | Deutschland |             | Ausland    |            |
|-------------------------------------|-------------|-------------|------------|------------|
|                                     | 31.12.2010  | 31.12.2009  | 31.12.2010 | 31.12.2009 |
| Diskontierungszinssatz              | 5,0         | 5,25        | 2,4 – 10,2 | 3,0 – 10,6 |
| Rententrend                         | 2,0         | 2,0         | 0,0 – 4,25 | 0,25 – 4,0 |
| Gehaltstrend                        | 2,75        | 2,75        | 0,5 – 6,45 | 1,5 – 5,6  |
| Erwartete Erträge des Planvermögens | 4,15 – 5,25 | 4,52 – 5,02 | 3,0 – 9,69 | 3,0 – 11,3 |

Die Diskontierungszinssätze spiegeln die Renditen am Bilanzstichtag für erstrangige Industrieanleihen oder Regierungsanleihen mit entsprechender Laufzeit und in entsprechender Währung wider. Die biometrischen Rechnungsgrundlagen für die Pensionen in Deutschland basieren unverändert auf den Richttafeln 2005 G von Prof. Dr. Klaus Heubeck.

Die erwartete Rendite des Planvermögens wird im Inland auf Basis des Zinssatzes für Bundesanleihen mit korrespondierenden Laufzeiten zuzüglich üblicher, der Portfoliostruktur entsprechender Risikozuschläge ermittelt. Für das ausländische Planvermögen erfolgt die Ermittlung durch die jeweils zuständigen Aktuarien.

#### d) Aufwendungen aus Pensionsverpflichtungen

Die Aufwendungen aus Pensionsverpflichtungen setzen sich wie folgt zusammen:

| Mio €                                 | 2010      | 2009      |
|---------------------------------------|-----------|-----------|
| Laufender Dienstzeitaufwand           | 50        | 46        |
| Nachzuverrechnender Dienstzeitaufwand | 0         | 3         |
| Zinsaufwand                           | 89        | 87        |
| Erwarteter Ertrag aus Planvermögen    | – 76      | – 73      |
|                                       | <b>63</b> | <b>63</b> |

#### e) Im Eigenkapital verrechnete Gewinne und Verluste

| Mio €                                                                       | 2010       | 2009       |
|-----------------------------------------------------------------------------|------------|------------|
| <b>Versicherungsmathematische Gewinne (–)/ Verluste (+) am 1. Januar</b>    | <b>232</b> | <b>160</b> |
| Veränderung des Konsolidierungskreises                                      | –          | – 40       |
| Veränderung im Geschäftsjahr                                                | 50         | 112        |
| Währungsanpassung, Sonstiges                                                | 3          | –          |
| <b>Versicherungsmathematische Gewinne (–)/ Verluste (+) am 31. Dezember</b> | <b>285</b> | <b>232</b> |

#### f) Erfahrungsbedingte Anpassungen

Die erfahrungsbedingten Anpassungen, das bedeutet die Abweichungen zwischen der gemäß den versicherungsmathematischen Annahmen berechneten und der tatsächlichen Entwicklung der Verpflichtungen und Vermögenswerte, stellen sich wie folgt dar:

|                                                                   | 2010   | 2009   | 2008     | 2007     | 2006     |
|-------------------------------------------------------------------|--------|--------|----------|----------|----------|
| <b>Unterschiede zwischen erwartetem und tatsächlichem Verlauf</b> |        |        |          |          |          |
| in % des Barwerts                                                 | 0,64 % | 0,46 % | 0,11 %   | – 0,95 % | – 0,25 % |
| in % des Fair Value des Planvermögens                             | 0,06 % | 3,29 % | – 8,72 % | – 0,84 % | – 0,28 % |

## 25 Sonstige Rückstellungen

| Mio €                                       |                     |                                                      |                      |              |              |            |                     |
|---------------------------------------------|---------------------|------------------------------------------------------|----------------------|--------------|--------------|------------|---------------------|
|                                             | Stand<br>31.12.2009 | Veränderung<br>Konsolidie-<br>rungskreis,<br>Währung | Inanspruch-<br>nahme | Zuführungen  | Auflösungen  | Aufzinsung | Stand<br>31.12.2010 |
| Gewährleistungen                            | 636                 | 20                                                   | – 154                | 327          | – 85         | 7          | 751                 |
| Ausstehende Kosten                          | 185                 | 2                                                    | – 81                 | 108          | – 18         | 0          | 196                 |
| Übrige geschäftsbezogene<br>Verpflichtungen | 344                 | 14                                                   | – 111                | 421          | – 43         | –          | 625                 |
| Verpflichtungen gegenüber<br>Mitarbeitern   | 223                 | 2                                                    | – 47                 | 54           | – 4          | 3          | 231                 |
| Übrige sonstige Rückstellungen              | 472                 | 28                                                   | – 241                | 107          | – 51         | –          | 315                 |
|                                             | <b>1 860</b>        | <b>66</b>                                            | <b>– 634</b>         | <b>1 017</b> | <b>– 201</b> | <b>10</b>  | <b>2 118</b>        |

Die Sonstigen Rückstellungen sind in folgenden Bilanzposten ausgewiesen:

| Mio €                                         |             |              |             |              |
|-----------------------------------------------|-------------|--------------|-------------|--------------|
|                                               | 31.12.2010  |              | 31.12.2009  |              |
|                                               | langfristig | kurzfristig  | langfristig | kurzfristig  |
| Gewährleistungen                              | 428         | 323          | 326         | 310          |
| Ausstehende Kosten                            | 32          | 164          | 32          | 153          |
| Übrige geschäfts-<br>bezogene Verpflichtungen | 5           | 620          | 5           | 339          |
| Verpflichtungen<br>gegenüber Mitarbeitern     | 208         | 23           | 177         | 46           |
| Übrige sonstige<br>Rückstellungen             | 2           | 313          | 7           | 465          |
|                                               | <b>675</b>  | <b>1 443</b> | <b>547</b>  | <b>1 313</b> |

Die Rückstellungen für Gewährleistungen bestehen für gesetzliche und vertragliche Garantieverpflichtungen sowie für Kulanz gegenüber Kunden. Der Zeitpunkt der Inanspruchnahme der Rückstellungen für Gewährleistungen ist abhängig vom Eintreten des Gewährleistungsanspruchs und kann sich über den gesamten Garantie- und Kulanzzeitraum erstrecken. Die Rückstellungen für ausstehende Kosten sind für noch zu erbringende Leistungen für abgerechnete Kundenaufträge und Auftragsteile sowie für Verpflichtungen aus Wartungs- und Serviceverträgen gebildet. Die Übrigen geschäftsbezogenen Verpflichtungen betreffen unter anderem Rückstellungen für drohende Verluste aus belastenden Verträgen.

Die Verpflichtungen gegenüber Mitarbeitern bestehen für Jubiläen, Abfindungen und Altersteilzeit sowie für gesetzliche Leistungen aus Anlass der Beendigung eines Arbeitsverhältnisses.

In den Zuführungen zu Rückstellungen für Gewährleistungsrisiken und in den Zuführungen zu Rückstellungen für übrige geschäftsbezogene Verpflichtungen spiegeln sich auch die im Geschäftsfeld Power Engineering gebildeten Risikovorsorgen wider.

## 26 Sonstige Verbindlichkeiten

| Mio €                                                                         | 31.12.2010   | 31.12.2009   |
|-------------------------------------------------------------------------------|--------------|--------------|
| Noch nicht als Ertrag vereinnahmte Kundenzahlungen für Vermietete Erzeugnisse | 1 138        | 1 136        |
| Verbindlichkeiten aus dem Personalbereich                                     | 331          | 276          |
| Verbindlichkeiten aus übrigen Steuern                                         | 176          | 168          |
| Derivative Finanzinstrumente                                                  | 139          | 151          |
| Verbindlichkeiten aus Finanzverkehr mit Beteiligungen                         | 60           | 56           |
| Abgrenzung periodenfremder Zahlungen                                          | 44           | 43           |
| Übrige sonstige Verbindlichkeiten                                             | 234          | 249          |
|                                                                               | <b>2 122</b> | <b>2 079</b> |

Die noch nicht als Ertrag vereinnahmten Kundenzahlungen für Vermietete Erzeugnisse stammen aus Verkäufen von Nutzfahrzeugen, die aufgrund einer Rückkaufverpflichtung als »operating lease« bilanziert werden.

Die Verbindlichkeiten aus dem Personalbereich betreffen die am Bilanzstichtag noch nicht gezahlten Löhne, Gehälter und Sozialabgaben, die Abgrenzung von noch nicht genommenem Urlaub sowie Jahressonderzahlungen.

Die Sonstigen Verbindlichkeiten enthalten u. a. den negativen Marktwert von derivativen Finanzinstrumenten. Da sie größtenteils zur Sicherung von Währungsrisiken in Kundenaufträgen dienen, stehen ihnen insoweit gegenläufige Effekte in den Bilanzpositionen der Grundgeschäfte gegenüber.

Die Sonstigen Verbindlichkeiten sind in folgenden Bilanzposten ausgewiesen:

| Mio €                                   | 31.12.2010 | 31.12.2009 |
|-----------------------------------------|------------|------------|
| Sonstige langfristige Verbindlichkeiten | 722        | 714        |
| Sonstige kurzfristige Verbindlichkeiten | 1 400      | 1 365      |

Von den Sonstigen langfristigen Verbindlichkeiten haben 56 Mio € (Vorjahr 69 Mio €) eine Restlaufzeit von über fünf Jahren.



## Sonstige Angaben

### 27 Rechtsstreitigkeiten/Rechtliche Verfahren

Wie berichtet, erließen die Staatsanwaltschaft München I am 10. Dezember 2009 einen Bußgeldbescheid in Höhe von 75,3 Mio € gegen die MAN Nutzfahrzeuge AG (nunmehr MAN Truck & Bus AG) sowie das Landgericht München I in Höhe von 75,3 Mio € gegen die ehemalige MAN Turbo AG. Mit der Zahlung des Gesamtbetrags in Höhe von 150,6 Mio € im Dezember 2009 waren die Ermittlungen der Staatsanwaltschaft gegen Gesellschaften des MAN Konzerns beendet.

Mit den Steuerbehörden verständigten sich die von den Ermittlungen betroffenen Gesellschaften des MAN Konzerns auf Nachzahlungen für steuerlich kritische Zahlungen mit einem Nachzahlungsbetrag in Höhe von rund 20 Mio €. Davon unberührt bleiben die Ermittlungen gegen Einzelpersonen und gegen Verantwortliche der aus dem MAN-Konzernverbund ausgeschiedenen MAN Ferrostaal AG (nunmehr Ferrostaal AG).

MAN trennte sich infolge der Korruptionsvorwürfe von rund 20 Mitarbeitern und prüft, ob gegen einzelne Personen Schadensersatz geltend gemacht wird.

Die internen Untersuchungen ergaben, dass Mitarbeiter des Teilkonzerns MAN Truck & Bus und des ehemaligen Teilkonzerns MAN Turbo (siehe Anmerkung (38)) gegen gesetzliche und interne Vorschriften verstoßen hatten, indem sie verdächtige Zahlungen an Berater und Vermittler leisteten. Im Inlandsvertrieb von MAN Truck & Bus wurde die Möglichkeit zur Zahlung sogenannter

Gelegenheitsprovisionen missbraucht. Nach 2006 nahm die Zahl der verdächtigen Zahlungen stark ab. Die große Mehrzahl der Mitarbeiter handelte Compliance-konform.

Der Aufsichtsrat nahm in seiner Sitzung vom 11. Dezember 2009 den Abschlussbericht der beauftragten Anwaltskanzleien zustimmend zur Kenntnis und erklärte damit die interne Aufarbeitung in der Folge des Verfahrensabschlusses durch die Ermittlungsbehörden für beendet. Der Aufsichtsrat sah sich darin bestärkt, die rasche und vollständige Aufklärung in einem besonders großen Umfang im Geschäftsjahr 2009 vorangetrieben zu haben.

Im Geschäftsjahr 2010 haben sich für MAN keine wesentlichen Entwicklungen ergeben. Für Informationen betreffend Ferrostaal wird auch auf die Anmerkung »Akquisitionen und Desinvestitionen« verwiesen.

#### Sonstige Verfahren

Die britische Kartellbehörde (Office of Fair Trading) hat eine Untersuchung zu möglichen Preisabsprachen/Kartellverstößen bei verschiedenen, auf dem britischen Nutzfahrzeugmarkt tätigen Unternehmen eingeleitet. Im Zusammenhang mit dieser Untersuchung erhielt auch MAN im September 2010 ein Auskunftersuchen. MAN kooperiert mit der britischen Kartellbehörde.

Im Zusammenhang mit ihren konzernweiten Geschäftstätigkeiten ist MAN zusätzlich zu den oben beschriebenen Sachverhalten mit verschiedenen Rechtsstreitigkeiten und rechtlichen Verfahren konfrontiert. Obwohl in solchen Fällen eventuelle negative Entscheidungen wesentliche Auswirkungen auf die Ergebnisse in einer Berichtsperiode haben könnten, geht MAN nicht davon aus, dass durch diese wesentliche negative Auswirkungen auf die Vermögens-, Finanz- und Ertragslage von MAN entstehen können.

Für Informationen im Zusammenhang mit den Durchsuchungen durch die Europäische Kommission wegen des Verdachts eines möglichen Kartellverstoßes im Nutzfahrzeugbereich siehe Anmerkung (37).

Angaben gem. IAS 37 »Rückstellungen, Eventualschulden und Eventualforderungen« werden zu bestimmten Rechtsstreitigkeiten nicht gemacht, sofern das Unternehmen zu dem Schluss kommt, dass diese Angaben das Ergebnis des jeweiligen rechtlichen Verfahrens ernsthaft beeinträchtigen könnten.

## 28 Eventualverbindlichkeiten

| Mio €                                 | 31.12.2010 | 31.12.2009 |
|---------------------------------------|------------|------------|
| Verpflichtungen aus Bürgschaften      | 218        | 483        |
| Verpflichtungen aus Rückkaufgarantien | 216        | 191        |

Die Verpflichtungen aus Bürgschaften betreffen hauptsächlich Avale für Liefer- und Leistungsverpflichtungen von Beteiligungen, von ehemaligen Beteiligungen und von anderen Unternehmen. Ursächlich für den Rückgang im Vergleich zum Vorjahr ist die planmäßige Reduzierung von Avalen für Altgeschäfte aufgrund des Ablaufs der Gewährleistungszeiten. Innerhalb der Verpflichtungen aus Bürgschaften beläuft sich die insgesamt mögliche bedingte Haftung für Ferrostaal auf maximal 189 Mio € (Vorjahr 408 Mio €). Für diese MAN-Bürgschaften für Ferrostaal liegen größtenteils Freistellungen durch die IPIC, abhängig vom Entstehungszeitpunkt der Bürgschaft, vor.

Für Verbindlichkeiten von Kunden gegenüber Finanzierungsgesellschaften, die den Erwerb von Konzernserzeugnissen durch Dritte finanzieren, bestehen branchenübliche Rückkaufgarantien. Diese betreffen Nutzfahrzeuge mit 216 Mio € (Vorjahr 191 Mio €).

Die Bemessung der angegebenen Eventualverbindlichkeiten erfolgt in der Regel in der Höhe, in der MAN maximal in Anspruch genommen werden kann. Etwaige Rückgriffsansprüche werden nicht in Abzug gebracht.

MAN Finance hat anteilige Nachschusspflichten bei Verlusten eines assoziierten Unternehmens.

Das Bestellobligo für den Erwerb von Sachanlagevermögen betrug zum Stichtag 108 Mio € (Vorjahr 81 Mio €).

## 29 Sonstige finanzielle Verpflichtungen

Sonstige finanzielle Verpflichtungen bestehen aus Miet-, Pacht- und Leasingverträgen. Die künftigen Miet-, Pacht- und Leasingzahlungen aus »operating lease«-Verträgen haben bis zum Ablauf der Mindestlaufzeit der Verträge folgende Fälligkeiten:

| Mio €                                      | 31.12.2010 | 31.12.2009 |
|--------------------------------------------|------------|------------|
| Investitionsleasing                        |            |            |
| Fällig innerhalb eines Jahres              | 29         | 22         |
| Fällig nach mehr als einem bis fünf Jahren | 44         | 38         |
| Fällig nach mehr als fünf Jahren           | 4          | 6          |
|                                            | <b>77</b>  | <b>66</b>  |
| Verpflichtungen aus Miete und Pacht        |            |            |
| Fällig innerhalb eines Jahres              | 108        | 136        |
| Fällig nach mehr als einem bis fünf Jahren | 243        | 240        |
| Fällig nach mehr als fünf Jahren           | 308        | 283        |
|                                            | <b>659</b> | <b>659</b> |

Die Verpflichtungen aus Miete und Pacht beinhalten den Verkauf von Leasingfahrzeugen aus dem Bestand der MAN Finance an die Hannover Mobilien Leasing GmbH. Diesen Verpflichtungen stehen künftige Erlöse aus Untermietverhältnissen (sublease) in Höhe von 20 Mio € (Vorjahr 62 Mio €) gegenüber.

Einzelne Vorjahresdaten in der zuvor dargestellten Tabelle wurden angepasst.

## 30 Zusätzliche Informationen über Finanzinstrumente

Der folgende Abschnitt enthält weitere Angaben über die Bedeutung von Finanzinstrumenten sowie über einzelne Posten der Bilanz bzw. der Gewinn- und Verlustrechnung, die Finanzinstrumente betreffen.

Nachfolgende Tabelle zeigt die Buchwerte, die Bewertungskategorien nach Klassen, die beizulegenden Zeitwerte und die Fair-Value-Hierarchie im Anwendungsbereich des IFRS 7 zum 31. Dezember 2010:

| Mio €                                                                |          |                                       |                                   |                        |                       |
|----------------------------------------------------------------------|----------|---------------------------------------|-----------------------------------|------------------------|-----------------------|
|                                                                      | Buchwert | Davon im Anwendungsbereich des IFRS 7 | Bewertungskategorie gemäß IAS 39* | Beizulegender Zeitwert | Fair-Value-Hierarchie |
| <b>Aktiva</b>                                                        |          |                                       |                                   |                        |                       |
| Finanzbeteiligungen                                                  | 51       | 51                                    | AfS                               | 51                     | n/a                   |
| Lang- und kurzfristige Forderungen aus »finance lease«               | 1 050    | 1 050                                 | n/a                               | 1 040                  | –                     |
| Sonstige lang- und kurzfristige Vermögenswerte                       | 893      | 440                                   |                                   |                        | –                     |
| Übrige finanzielle Vermögenswerte                                    | 440      | 440                                   |                                   | 440                    | –                     |
| zur Veräußerung verfügbar                                            | 9        | 9                                     | AfS                               | 9                      | n/a                   |
| erfolgswirksam zum beizulegenden Zeitwert bewertet                   | 160      | 160                                   | aFV                               | 160                    | Stufe 2               |
| derivative Finanzinstrumente mit Hedge-Beziehung                     | 97       | 97                                    | n/a                               | 97                     | Stufe 2               |
| sonstige Vermögenswerte                                              | 174      | 174                                   | LaR                               | 174                    | –                     |
| Nicht in den Anwendungsbereich des IFRS 7 fallende Vermögenswerte    | 453      | –                                     | n/a                               | –                      | –                     |
| Forderungen aus Lieferungen und Leistungen                           | 2 265    | 2 265                                 | LaR                               | 2 264                  | –                     |
| Wertpapiere                                                          | 14       | 14                                    | AfS                               | 14                     | n/a                   |
| Flüssige Mittel                                                      | 1 057    | 1 057                                 | n/a                               | 1 057                  | –                     |
| <b>Passiva</b>                                                       |          |                                       |                                   |                        |                       |
| Lang- und kurzfristige Finanzverbindlichkeiten                       | 2 849    | 2 849                                 | OL                                | 3 013                  | –                     |
| Sonstige lang- und kurzfristige Verbindlichkeiten                    | 2 122    | 268                                   |                                   |                        | –                     |
| Übrige finanzielle Verbindlichkeiten                                 | 268      | 268                                   |                                   | 268                    | –                     |
| erfolgswirksam zum beizulegenden Zeitwert bewertet                   | 110      | 110                                   | aFV                               | 110                    | Stufe 2               |
| derivative Finanzinstrumente mit Hedge-Beziehung                     | 29       | 29                                    | n/a                               | 29                     | Stufe 2               |
| sonstige Verbindlichkeiten                                           | 129      | 129                                   | OL                                | 129                    | –                     |
| Nicht in den Anwendungsbereich des IFRS 7 fallende Verbindlichkeiten | 1 854    | –                                     | n/a                               | –                      | –                     |
| Verbindlichkeiten aus Lieferungen und Leistungen                     | 1 981    | 1 981                                 | OL                                | 1 981                  | –                     |

\* AfS: zur Veräußerung verfügbare finanzielle Vermögenswerte (available for sale financial assets);  
 LaR: Kredite und Forderungen (loans and receivables);  
 aFV: erfolgswirksam zum beizulegenden Zeitwert bewertet (at fair value through profit or loss);  
 OL: zu Anschaffungskosten bewertete finanzielle Verbindlichkeiten  
 (other financial liabilities measured at amortized cost);  
 n/a: nicht anwendbar

Nachfolgende Tabelle zeigt die Buchwerte, die Bewertungskategorien nach Klassen, die beizulegenden Zeitwerte und die Fair-Value-Hierarchie im Anwendungsbereich des IFRS 7 zum 31. Dezember 2009:

| Mio €                                                                |          |                                       |                                   |                        |                       |
|----------------------------------------------------------------------|----------|---------------------------------------|-----------------------------------|------------------------|-----------------------|
|                                                                      | Buchwert | Davon im Anwendungsbereich des IFRS 7 | Bewertungskategorie gemäß IAS 39* | Beizulegender Zeitwert | Fair-Value-Hierarchie |
| <b>Aktiva</b>                                                        |          |                                       |                                   |                        |                       |
| Finanzbeteiligungen                                                  | 93       | 93                                    | AfS                               | 93                     | n/a                   |
| Lang- und kurzfristige Forderungen aus »finance lease«               | 1 096    | 1 096                                 | n/a                               | 1 073                  | –                     |
| Sonstige lang- und kurzfristige Vermögenswerte                       | 868      | 455                                   |                                   |                        | –                     |
| Übrige finanzielle Vermögenswerte                                    | 455      | 455                                   |                                   | 455                    | –                     |
| zur Veräußerung verfügbar                                            | 15       | 15                                    | AfS                               | 15                     | n/a                   |
| erfolgswirksam zum beizulegenden Zeitwert bewertet                   | 149      | 149                                   | aFV                               | 149                    | Stufe 2               |
| derivative Finanzinstrumente mit Hedge-Beziehung                     | 135      | 135                                   | n/a                               | 135                    | Stufe 2               |
| sonstige Vermögenswerte                                              | 156      | 156                                   | LaR                               | 156                    | –                     |
| Nicht in den Anwendungsbereich des IFRS 7 fallende Vermögenswerte    | 413      | –                                     | n/a                               | –                      | –                     |
| Forderungen aus Lieferungen und Leistungen                           | 2 202    | 2 202                                 | LaR                               | 2 200                  | –                     |
| Wertpapiere                                                          | 134      | 134                                   | AfS                               | 134                    | n/a                   |
| Flüssige Mittel                                                      | 502      | 502                                   | n/a                               | 502                    | –                     |
| <b>Passiva</b>                                                       |          |                                       |                                   |                        |                       |
| Lang- und kurzfristige Finanzverbindlichkeiten                       | 3 270    | 3 270                                 | OL                                | 3 419                  | –                     |
| Sonstige lang- und kurzfristige Verbindlichkeiten                    | 2 079    | 286                                   |                                   |                        | –                     |
| Übrige finanzielle Verbindlichkeiten                                 | 286      | 286                                   |                                   | 286                    | –                     |
| erfolgswirksam zum beizulegenden Zeitwert bewertet                   | 138      | 138                                   | aFV                               | 138                    | Stufe 2               |
| derivative Finanzinstrumente mit Hedge-Beziehung                     | 13       | 13                                    | n/a                               | 13                     | Stufe 2               |
| sonstige Verbindlichkeiten                                           | 135      | 135                                   | OL                                | 135                    | –                     |
| Nicht in den Anwendungsbereich des IFRS 7 fallende Verbindlichkeiten | 1 793    | –                                     | n/a                               | –                      | –                     |
| Verbindlichkeiten aus Lieferungen und Leistungen                     | 1 368    | 1 368                                 | OL                                | 1 368                  | –                     |

\* AfS: zur Veräußerung verfügbare finanzielle Vermögenswerte (available for sale financial assets);  
LaR: Kredite und Forderungen (loans and receivables);  
aFV: erfolgswirksam zum beizulegenden Zeitwert bewertet (at fair value through profit or loss);  
OL: zu Anschaffungskosten bewertete finanzielle Verbindlichkeiten  
(other financial liabilities measured at amortized cost);  
n/a: nicht anwendbar

Die kumulierten Buchwerte der Finanzinstrumente, gegliedert nach den Bewertungskategorien des IAS 39, stellen sich wie folgt dar:

| Bewertungskategorie gemäß IAS 39 |            |         |            |         |
|----------------------------------|------------|---------|------------|---------|
| Mio €                            |            |         |            |         |
|                                  | 31.12.2010 |         | 31.12.2009 |         |
|                                  | Aktiva     | Passiva | Aktiva     | Passiva |
| AfS                              | 74         | –       | 242        | –       |
| aFV                              | 160        | 110     | 149        | 138     |
| LaR                              | 2 439      | –       | 2 358      | –       |
| OL                               | –          | 4 959   | –          | 4 773   |

Die beizulegenden Zeitwerte wurden auf Basis der am Abschlussstichtag zur Verfügung stehenden Marktkonditionen sowie der nachstehend beschriebenen Bewertungsmethoden ermittelt und spiegeln die Preise, zu denen eine Partei die Rechte und/oder Pflichten aus diesen Finanzinstrumenten von einer unabhängigen anderen Partei übernehmen würde, wider. Bei den zur Anwendung kommenden Bewertungsmethoden kam es zu keinen wesentlichen Änderungen gegenüber dem Vorjahr.

Flüssige Mittel, Forderungen aus Lieferungen und Leistungen, sonstige finanzielle Vermögenswerte, Verbindlichkeiten aus Lieferungen und Leistungen sowie übrige finanzielle Verbindlichkeiten haben überwiegend eine kurze Restlaufzeit. Daher entsprechen deren Buchwerte zum Abschlussstichtag näherungsweise dem beizulegenden Zeitwert. Darüber hinaus werden Forderungen aus Lieferungen und Leistungen, wenn objektive Hinweise vorliegen, einer angemessenen Wertminderung unterzogen.

Die beizulegenden Zeitwerte von Forderungen aus »finance lease« entsprechen den Barwerten der mit den Vermögenswerten verbundenen Zahlungen unter Berücksichtigung der jeweils aktuellen Zinsparameter, welche markt- und partnerbezogene Veränderungen der Konditionen und Erwartungen reflektieren.

Die beizulegenden Zeitwerte von börsennotierten Anleihen basieren auf den Kursnotierungen zum Bilanzstichtag. Die beizulegenden Zeitwerte von nicht börsennotierten Anleihen, festverzinslichen Verbindlichkeiten gegenüber Kreditinstituten und sonstigen Finanzschulden werden als Barwerte der mit den Schulden verbundenen Zahlungen unter Zugrundelegung von marktüblichen Zinssätzen, bezogen auf die entsprechende Fristigkeit, ermittelt.

In den zur Veräußerung verfügbaren finanziellen Vermögenswerten sind Eigenkapitalinstrumente und Festgeldanlagen in Höhe von 74 Mio € (Vorjahr 242 Mio €) enthalten, die zu Anschaffungskosten bewertet werden. Hierbei handelt es sich um Anlagen und Anteile nicht börsennotierter Unternehmen, für die infolge nicht zuverlässig bestimmbarer Cashflows auf eine Bewertung mittels Diskontierung von erwarteten Cashflows verzichtet wurde. Für die Anteile nicht börsennotierter Unternehmen sind keine notierten Marktwerte verfügbar, da kein aktiver Markt für diese Anteile besteht. Derzeit besteht keine Veräußerungsabsicht dieser Anteile.

Für derivative Finanzinstrumente ohne Optionskomponente, insbesondere Devisentermin- und Zinstauschgeschäfte, werden zukünftige Zahlungsströme anhand von Terminkurven ermittelt. Der beizulegende Zeitwert dieser Instrumente entspricht den diskontierten Zahlungsströmen. Die Optionen auf Währungspaare oder Zinssätze werden auf der Basis von marktüblichen Optionspreismodellen, d. h. verallgemeinerten Black-Scholes-Formeln, bewertet.

Fair-Value-Hierarchie:

Die Bestimmung und der Ausweis der beizulegenden Zeitwerte der Finanzinstrumente orientieren sich an einer Fair-Value-Hierarchie, die die Bedeutung der für die Bewertung verwendeten Inputdaten berücksichtigt und sich wie folgt gliedert:

- Stufe 1: auf aktiven Märkten notierte (unverändert übernommene) Preise für identische Vermögenswerte und Verbindlichkeiten
- Stufe 2: für den Vermögenswert oder die Verbindlichkeit entweder direkt (als Preise) oder indirekt (in Ableitung von Preisen) beobachtbare Inputdaten, die keine notierten Preise nach Stufe 1 darstellen
- Stufe 3: herangezogene Inputdaten, die nicht auf beobachtbaren Marktdaten für die Bewertung des Vermögenswerts und der Verbindlichkeit basieren (nicht beobachtbare Inputdaten)

Im Geschäftsjahr 2010 und 2009 gab es keine Umgliederungen zwischen Stufe 1 und Stufe 2 bei der Bewertung der beizulegenden Zeitwerte, und es wurden keine Umgliederungen in oder aus Stufe 3 in Bezug auf die Bewertung der beizulegenden Zeitwerte vorgenommen.

Die Nettogewinne und -verluste aus Finanzinstrumenten sind in folgender Tabelle dargestellt:

| Mio €                                                                                  | 2010  | 2009  |
|----------------------------------------------------------------------------------------|-------|-------|
| Kredite und Forderungen                                                                | – 101 | – 120 |
| Zur Veräußerung verfügbare finanzielle Vermögenswerte                                  | 1     | – 4   |
| Zu Anschaffungskosten bewertete finanzielle Verbindlichkeiten                          | – 2   | 14    |
| Erfolgswirksam zum Zeitwert bewertete finanzielle Vermögenswerte und Verbindlichkeiten | 104   | 61    |

Die Nettogewinne bzw. -verluste aus Krediten und Forderungen beinhalten im Wesentlichen Veränderungen in den Wertberichtigungen, Erträge aus Zahlungseingängen sowie Währungsumrechnungen und Wertaufholungen.

Die Nettogewinne bzw. -verluste aus zur Veräußerung verfügbaren finanziellen Vermögenswerten umfassen vor allem das Ergebnis aus der Bewertung von Finanzbeteiligungen. Im Geschäftsjahr 2010 wurden diesbezüglich weder unrealisierte Gewinne oder Verluste aus zur Veräußerung verfügbaren finanziellen Vermögenswerten direkt im Eigenkapital erfasst, noch wurden Beträge aus dem Eigenkapital entnommen und ergebniswirksam ausgewiesen.

Die Nettogewinne bzw. -verluste aus zu Anschaffungskosten bewerteten finanziellen Verbindlichkeiten setzen sich vor allem aus Währungsumrechnungen sowie Erträgen aus der Ausbuchung von Verbindlichkeiten zusammen.

Das Währungsergebnis aus den vorgenannten Positionen beläuft sich auf –26 Mio € (Vorjahr –32 Mio €).

Die Nettogewinne bzw. -verluste aus erfolgswirksam zum Zeitwert bewerteten finanziellen Vermögenswerten und Verbindlichkeiten enthalten Marktwertänderungen der derivativen Finanzinstrumente, für die kein Hedge Accounting angewendet wird.

Die im Zusammenhang mit finanziellen Vermögenswerten und finanziellen Verbindlichkeiten erzielten Zinserträge und -aufwendungen stellen sich wie folgt dar:

| Mio €            | 2010  | 2009  |
|------------------|-------|-------|
| Zinserträge      | 252   | 296   |
| Zinsaufwendungen | – 325 | – 327 |

Zinserträge auf wertgeminderte finanzielle Vermögenswerte sind aufgrund des zumeist kurzfristig zu erwartenden Zahlungseingangs von untergeordneter Bedeutung. Zinserträge in Höhe von 242 Mio € (Vorjahr 286 Mio €) und Zinsaufwendungen in Höhe von 280 Mio € (Vorjahr 282 Mio €) betreffen Posten, die nicht erfolgswirksam zum beizulegenden Zeitwert bewertet werden.

### 31 Derivative Finanzinstrumente und Sicherungsstrategien

Die MAN Gruppe unterliegt in nicht unerheblichem Maße Währungs- und Zinsänderungsrisiken, für deren Identifizierung, Quantifizierung und Begrenzung ein gruppenweites Risikomanagementsystem besteht.

#### a) Risikomanagement

Die Gesellschaften der MAN Gruppe sichern ihre Zins- und Währungsrisiken zu marktgerechten Konditionen grundsätzlich über das zentrale Konzern-Treasury der MAN SE. Zum Einsatz kommen originäre und derivative Finanzinstrumente. Die Bilanzierung der Finanzinstrumente erfolgt am Handelstag.



Die Risikopositionen des Konzern-Treasury werden unter Berücksichtigung vorgegebener Risikogrenzen extern bei Banken gesichert. Der Abschluss von Sicherungsgeschäften erfolgt nach einheitlichen Richtlinien unter angemessener Berücksichtigung des KonTraG (Gesetz zur Kontrolle und Transparenz im Unternehmensbereich) sowie der für Banken geltenden Anforderungen an das Risikomanagement. Er unterliegt einer strengen Überwachung, die insbesondere durch eine strikte Funktionstrennung in Handel, Abwicklung und Kontrolle gewährleistet ist.

Dem Vorstand und dem Aufsichtsrat wird regelmäßig über die Zinsrisiko- und Währungspositionen der MAN Gruppe berichtet. Die Einhaltung der Richtlinien wird durch die interne Revision geprüft.

#### b) Währungsrisiko

Die internationale Ausrichtung der MAN Gruppe bringt eine Vielzahl von Zahlungsströmen in unterschiedlichen Währungen mit sich. Für jede MAN-Gesellschaft ergibt sich dann ein Währungsrisiko, wenn sie Geschäfte mit internationalen Vertragspartnern abschließt und daraus in der Zukunft Zahlungsströme entstehen, die nicht der funktionalen Währung der jeweiligen MAN-Gesellschaft entsprechen. Um die Auswirkungen von Wechselkursschwankungen zu reduzieren, quantifiziert die MAN SE fortlaufend das Wechselkursrisiko und sichert alle wesentlichen Risiken vor allem durch den Einsatz von Devisentermingeschäften und Devisenoptionen laufend ab. In Ländern, deren devisenrechtliche Bestimmungen eine direkte Absicherung durch die MAN SE nicht ermöglichen – insbesondere Brasilien –, erfolgt der Abschluss der Fremdwährungsderivate durch die MAN SE im Namen und auf Rechnung der jeweiligen Konzerngesellschaft.

In der MAN Gruppe werden grundsätzlich alle fest kontrahierten Kundenaufträge, eigene Bestellungen sowie Forderungen und Verbindlichkeiten in Fremdwährung gesichert. Zudem erfolgen Sicherungsmaßnahmen für geplante Fremdwährungsumsätze aus dem Seriengeschäft im Rahmen definierter Sicherungsreichweiten und fallweise für Kundenprojekte mit hoher Abschlusswahrscheinlichkeit.

Zum Bilanzstichtag bestanden Fremdwährungsabsicherungen in allen wesentlichen europäischen Währungen sowie in US-Dollar, kanadischen Dollar und japanischen Yen und in weiteren Währungen der Regionen Lateinamerika, Asien und Afrika. Die Bilanzierung der Sicherungsbeziehungen erfolgt sowohl mittels Cashflow Hedges als auch mittels Fair Value Hedges. Währungen mit einer hohen Korrelation zum Euro, wie z. B. die dänische Krone, werden nur in Einzelfällen gesichert. Beteiligungen oder eigenkapitalähnliche Darlehen in Fremdwährung unterliegen fallweise einer Sicherung.

Wird die Sensitivitätsanalyse unter Berücksichtigung von fest kontrahierten Transaktionen und geplanten Transaktionen (ökonomische Sicht) durchgeführt und würden sich alle Fremdwährungen gegenüber dem Euro um 10 % auf- bzw. abwerten, ergäben sich folgende Chancen (positive Werte) bzw. Risiken (negative Werte). Dabei beziehen sich die geplanten Transaktionen auf die Absicherung von Umsatzerlösen in Fremdwährungen, mit deren Realisierung mit hoher Wahrscheinlichkeit gerechnet wird. Die vom Management getroffenen Annahmen bezüglich der Wahrscheinlichkeit für die Umsatzrealisierung basieren unter anderem auf Erfahrungswerten, und die Sicherungsreichweiten sind MAN-geschäftstypisch.

| Mio €                           | 31.12.2010 |        | 31.12.2009 |        |
|---------------------------------|------------|--------|------------|--------|
|                                 | + 10 %     | – 10 % | + 10 %     | – 10 % |
| fest kontrahierte Transaktionen | + 2        | – 2    | + 2        | – 2    |
| geplante Transaktionen          | + 4        | – 4    | + 1        | – 1    |

Auch wenn eine vollständige Absicherung aller Fremdwährungspositionen angestrebt wird, ergeben sich stichtagsbedingt offene Währungspositionen, wie z. B. in der Währung britisches Pfund.

Werden die in die Sensitivitätsanalyse einfließenden Geschäfte gemäß IFRS 7 auf originäre und derivative Finanzinstrumente eingeschränkt, erscheinen die Währungspositionen nicht mehr weitgehend geschlossen wie zuvor beschrieben. Bei einer hypothetischen Aufwertung/Abwertung der jeweiligen funktionalen Währungen gegenüber den übrigen Währungen um 10 % ergäben sich folgende Effekte auf die direkt im Eigenkapital erfassten Erträge und Aufwendungen und das Periodenergebnis.

| Mio €                          |              |        |                  |        |              |        |                  |        |
|--------------------------------|--------------|--------|------------------|--------|--------------|--------|------------------|--------|
| Währungsrelation               | 31.12.2010   |        |                  |        | 31.12.2009   |        |                  |        |
|                                | Eigenkapital |        | Periodenergebnis |        | Eigenkapital |        | Periodenergebnis |        |
|                                | + 10 %       | – 10 % | + 10 %           | – 10 % | + 10 %       | – 10 % | + 10 %           | – 10 % |
| Euro/britisches Pfund          | 8            | – 8    | 52               | – 52   | 10           | – 10   | 56               | – 56   |
| Euro/US-Dollar                 | 18           | – 15   | 18               | – 18   | 20           | – 19   | 39               | – 39   |
| Euro/Schweizer Franken         | – 15         | 15     | 2                | – 2    | – 8          | 8      | – 20             | 20     |
| Euro/dänische Krone            | 0            | 0      | – 10             | 10     | 0            | 0      | – 25             | 25     |
| Euro/japanischer Yen           | 0            | 0      | – 5              | 5      | 0            | 0      | – 8              | 8      |
| Brasilianischer Real/US-Dollar | 5            | – 5    | – 2              | 2      | 19           | – 19   | – 2              | 2      |
| Euro/russischer Rubel          | 0            | 0      | – 3              | 3      | 0            | 0      | – 18             | 18     |
| Schweizer Franken/US-Dollar    | 1            | – 1    | 0                | 0      | 3            | – 3    | – 20             | 20     |

Im Zusammenhang mit Cashflow Hedges wurden im Laufe des Geschäftsjahres Verluste von 16 Mio € (Vorjahr Gewinne von 21 Mio €) aus dem Eigenkapital in das Periodenergebnis umgegliedert. Ferner wurde in den Sonstigen betrieblichen Erträgen und Sonstigen betrieblichen Aufwendungen insgesamt ein Verlust in Höhe von 1 Mio € (Vorjahr Verlust von 13 Mio €) umgegliedert, da das jeweilige Grundgeschäft das ursprünglich geplante Volumen nicht erreicht hat. Im Geschäftsjahr 2010 sind netto unrealisierte Verluste aus der Bewertung von Derivaten in Höhe von 40 Mio € (Vorjahr Gewinne von 49 Mio €) im Eigenkapital erfasst worden.

Sofern die Ergebnisse des retrospektiven Effektivitätstests im Cashflow Hedge Accounting auf das Vorliegen einer von 100 % abweichenden Effektivität hinweisen, aber noch innerhalb der Effektivitätsbandbreite von 80 bis 125 % liegen, werden die dadurch entstehenden Ineffektivitäten in den Sonstigen betrieblichen Aufwendungen und Sonstigen betrieblichen Erträgen erfasst. Für das abgelaufene Geschäftsjahr betraf dies Ineffektivitäten von insgesamt – 1 506 T€ (Vorjahr 355 T€).

Die maximale Restlaufzeit der Cashflow-Sicherungen für zukünftige Transaktionen beträgt zum Geschäftsjahresende 2010 47 Monate. Für 34 % der abgesicherten zukünftigen Transaktionen wird mit einem Eintritt und somit einer Auswirkung auf das Periodenergebnis im 1. Quartal 2011 gerechnet. Weitere 48 % der geplanten Transaktionen werden voraussichtlich bis Ende 2011 durchgeführt.

Als Folge der vorzeitigen Beendigung von Cashflow Hedges ergaben sich im Geschäftsjahr 2010 Erträge von 3 Mio € (Vorjahr Erträge 8 Mio €), da mit dem Eintritt der gesicherten Transaktion (z. B. aufgrund von kundenseitigen Auftragsstornierungen) nicht mehr gerechnet wurde.

Bei Fair Value Hedges betrugen die Aufwendungen aus den Sicherungsinstrumenten 44 Mio € (Vorjahr 56 Mio €). Die Erträge aus den dazugehörigen Grundgeschäften beliefen sich auf 40 Mio € (Vorjahr 57 Mio €).

### c) Zinsänderungsrisiko

Aufgrund der Liquiditätsbeschaffung und -anlage hält die MAN Gruppe zinssensitive Vermögenswerte und Verbindlichkeiten. Die zinssensitiven Vermögenswerte resultieren im Wesentlichen aus Kundenfinanzierungen, insbesondere Leasingverträgen, die überwiegend mit festen Zinssätzen abgeschlossen werden. Zinssensitive Finanzschulden bestanden zum Bilanzstichtag vor allem in Form von festverzinslichen Euro-Anleihen sowie sonstigen, fest und variabel verzinslichen Finanzverbindlichkeiten.

Zinssensitive Finanzinstrumente unterliegen einem Zinsänderungsrisiko, und zwar entweder in der Form eines Marktwerttrisikos oder eines Cashflow-Risikos. Dabei misst das Marktwertrisiko die Sensitivität des Wertansatzes eines Finanzinstruments in Abhängigkeit vom Marktzinsniveau. Das Cashflow-Risiko dagegen beschreibt das Ausmaß der Veränderung künftiger Zinszahlungen in Abhängigkeit von der Zinsentwicklung.

Ziel des Zinsrisikomanagements ist es, die Zinsrisiken aus dem operativen Geschäft weitgehend zu eliminieren. MAN schließt Sicherungen zur Begrenzung der aus originären Finanzinstrumenten

resultierenden Risiken ab, fallweise auch für geplante Kundengeschäfte mit hoher Auftragswahrscheinlichkeit. Zinsänderungsrisiken werden in der MAN Gruppe mittels Sensitivitätsanalysen zentral analysiert und gesteuert. Diesen Zinssensitivitätsanalysen liegen dabei folgende Annahmen zugrunde:

Bei originären Finanzinstrumenten, die variabel verzinslich sind, sowie Zinsderivaten, die nicht in eine Sicherungsbeziehung nach IAS 39 eingebunden sind, wirken sich Marktzinssatzänderungen auf die künftigen Zinszahlungen aus; sie gehen demzufolge in die Berechnung des Cashflow-Risikos bzw. Marktwerttrisikos ein.

Keinem Zinsänderungsrisiko unterliegen originäre Finanzinstrumente mit fester Verzinsung, die zu fortgeführten Anschaffungskosten bewertet werden, sowie die im Rahmen eines Fair Value Hedges bilanzierten festverzinslichen Finanzinstrumente bzw. Sicherungsinstrumente, da sich hierbei die zinsbedingten Wertänderungen von Grund- und Sicherungsgeschäft nahezu vollständig in derselben Periode in der Gewinn- und Verlustrechnung ausgleichen.

Zur Berechnung der Zinssensitivität wird eine parallele Verschiebung der Zinskurve um jeweils 100 Basispunkte (Bp) unterstellt. Hieraus würden sich folgende Chancen (positive Werte) bzw. Risiken (negative Werte) ergeben:

| Mio €                                                               | 31.12.2010 |          | 31.12.2009 |          |
|---------------------------------------------------------------------|------------|----------|------------|----------|
|                                                                     | + 100 Bp   | - 100 Bp | + 100 Bp   | - 100 Bp |
| variabel verzinsliche originäre Finanzinstrumente (Cashflow-Risiko) | - 3        | + 3      | - 15       | + 15     |
| derivative Finanzinstrumente (Marktwertrisiko)                      | + 26       | - 26     | + 14       | - 14     |

Die Ergebniseffekte aus der Zinssensitivitätsanalyse würden vollständig im Periodenergebnis wirken.

Um die aus den originären Finanzinstrumenten resultierenden Zinsrisiken zu begrenzen, werden unter anderem derivative Finanzinstrumente wie Zinsswaps, Forward Swaps sowie gegebenenfalls Caps und Floors etc. eingesetzt; Volumen und Laufzeiten werden dabei an der Tilgungsstruktur der vorgegebenen Kundenportfolios bzw. der Finanzschuld sowie am angestrebten Sicherungsgrad ausgerichtet.

Sofern mittels der eingesetzten Derivate nicht die Risiken aus einzelnen Finanzinstrumenten, sondern eines Portfolios abgesichert werden, erfüllt diese Sicherungsstrategie nicht die Voraussetzungen für die Bilanzierung einer Sicherungsbeziehung nach IAS 39. Dennoch werden die Zinsrisiken wirtschaftlich abgesichert.

#### d) Rohstoffpreisrisiko

MAN ist dem Risiko der Änderung von Rohstoffpreisen sowie deren Verfügbarkeit, d. h. dem Beschaffungsrisiko der Rohstoffe, ausgesetzt, dies sowohl im Zusammenhang mit der Beschaffung von Produktionsmitteln als auch von Energie (Strom, Gas, Öl etc.).

Neben Fixpreisabsprachen mit Lieferanten oder Preisgleitklauseln bei Abnahmerverträgen gewinnt die Möglichkeit, Preisrisiken mittels geeigneter derivativer Finanzinstrumente zu sichern, immer mehr an Bedeutung. Ein Vorteil dieser Preisabsicherungen an den Finanzmärkten ist, dass sowohl Zeitpunkt der Sicherung als auch Sicherungsreichweiten und Umfang im Ermessen von MAN und nicht in Abhängigkeit von Lieferverträgen stehen. Bei MAN bestanden im Jahr 2010 keine Rohstoffderivate. Allerdings ist der Einsatz dieser Instrumente im Geschäftsjahr 2011 geplant.

#### e) Kreditrisiko

Das Kreditrisiko beschreibt aus Sicht der MAN Gruppe die Gefahr, dass ein Vertragspartner seinen vertraglichen Verpflichtungen nicht nachkommt und damit einen finanziellen Verlust verursacht. Das Kreditrisiko umfasst dabei sowohl das unmittelbare Ausfallrisiko als auch die Gefahr einer Bonitätsverschlechterung, verbunden mit der Möglichkeit der Konzentration einzelner Risiken.

Aufgrund ihres operativen Geschäfts bzw. ihrer Finanzierungs- und Leasingaktivitäten ist die MAN Gruppe Kreditrisiken ausgesetzt. Das maximale Kreditrisiko wird durch den Buchwert der in der Bilanz angesetzten finanziellen Vermögenswerte, siehe Anmerkung (30), wiedergegeben. Die Minimierung der Kreditrisiken und die Ermittlung der Risikovorsorgen erfolgen vor allem durch folgende Maßnahmen:

Durch das zentrale Cash Management wird die Liquiditätsverwaltung und -anlage zentralisiert. Bei der zentralen Anlage von flüssigen Mitteln werden die Finanzinstitute und Anlageformen sorgfältig ausgewählt. Hierbei steht eine sicherheitsorientierte Anlagestrategie im Vordergrund.

Um das Ausfallrisiko derivativer Finanzinstrumente zu reduzieren, werden diese ausschließlich mit renommierten Finanzinstituten mit ausgezeichneter Bonität (Investment Grade) abgeschlossen.

Im operativen Geschäft werden dezentral Länder- bzw. Kontrahentenrisiken fortlaufend bewertet und darauf aufbauend Sicherheitsgrade und -formen festgelegt. Die Außenstände werden fortlaufend dezentral überwacht. Ausfallrisiken wird mittels Wertberichtigungen Rechnung getragen. Das Kreditrisiko wird durch verschiedene, ggf. länderspezifische Sicherungsformen begrenzt. Hierbei kommen z. B. Akkreditive, Kreditversicherungen, Bürgschaften, Garantien, Eigentumsvorbehalte sowie Kundenanzahlungen zum Einsatz. Im Projektgeschäft wird das Ausfallrisiko durch Anzahlungen und die Einforderung von Sicherheiten minimiert.

Für das Kreditrisiko in Zusammenhang mit dem operativen Geschäft wird durch die MAN Gruppe eine angemessene Risikovorsorge gebildet. Hierzu erfolgt eine fortlaufende Überprüfung sämtlicher Forderungen, und bei objektiven Hinweisen auf Ausfälle oder sonstige Vertragsstörungen werden Wertberichtigungen gebildet. Die Bewertung wesentlicher Einzelforderungen sowie von Forderungen, deren Einbringlichkeit gefährdet ist, wird auf individueller Basis durchgeführt. Im Jahr 2010 wurden bei Forderungen mit einem

Volumen von 1 Mio € die Vertragskonditionen (z. B. verlängerte Zahlungsziele) angepasst. Unter Berücksichtigung länderspezifischer Risiken und gegebenenfalls erhaltener Sicherheiten werden die übrigen Forderungen zu Gruppen gleichartiger Verträge zusammengefasst und deren Wertberichtigungsbedarf beurteilt.

In Bezug auf die Finanzierungs- und Leasingaktivitäten erfolgt die Überwachung des Kreditrisikos auf Basis des kreditrisikobehafteten Portfolios. Die Überwachung der Kreditwürdigkeit der Kunden erfolgt fortlaufend durch Einstufung in Risikoklassen. Dieser Einstufung liegen Informationen der lokalen MAN Finance-Gesellschaften sowie Informationen von externen Standardinformationsquellen zugrunde. Durch den Verkauf von Teilen des Forderungsportfolios ohne Rückgriffsmöglichkeit wird das maximale Kreditrisiko zusätzlich begrenzt. Sicherheiten bestehen zudem in der Regel durch die Sicherungsübereignung des finanzierten Fahrzeugs und ggf. durch Anzahlungen von Kunden.

Für das Kreditrisiko in Zusammenhang mit den Finanzierungs- und Leasingaktivitäten wird durch die MAN Gruppe eine angemessene Risikovorsorge gebildet. Sofern bei Einzelverträgen Vertragsstörungen auftreten, werden entweder Maßnahmen zur Anpassung der bestehenden Vertragsverhältnisse an die wirtschaftliche Situation des Kunden oder zur Wiederinbesitznahme des finanzierten Gegenstands eingeleitet. Zum 31. Dezember 2010 bestanden insgesamt 2 357 Verträge mit einem ausstehenden Forderungsvolumen von 107 Mio €, deren Zahlungsbedingungen angepasst wurden. Die Anpassung von Vertragsbedingungen erfolgt nur, wenn die Liquiditätsprobleme des Kunden als vorübergehend eingestuft werden und sich die Risikoerwartung von MAN Finance langfristig verbessert. Ferner werden bei Vorliegen bestimmter Kriterien kundenspezifische Risikovorsorgen gebildet, welche die erwarteten Verluste aufgrund der Uneinbringlichkeit von Raten, eines möglichen Verwertungsverlusts aus der Vermarktung des finanzierten Gegenstands sowie sonstige im Rahmen einer vorzeitigen Vertragsbeendigung zu erwartende Aufwendungen abdecken. Bei der Bemessung der Risikovorsorge werden der geschätzte Marktwert der als Sicherheit dienenden finanzierten Gegenstände ebenso wie erhaltene Anzahlungen und sonstige Sicherheiten berücksichtigt. Darüber hinaus werden in Abhängigkeit bestimmter Indikatoren Risikovorsorgen auf Gruppenbasis gebildet, deren Höhe vor allem auf Basis der tatsächlichen Ausfälle der jüngsten Vergangenheit bestimmt wird.

Folgende Tabelle enthält Informationen zu den überfälligen finanziellen Vermögenswerten, die nicht einzelwertgemindert sind:

| Mio €                                                                                  | 31.12.2010                                 |                                 |                                   | 31.12.2009                                 |                                 |                                   |
|----------------------------------------------------------------------------------------|--------------------------------------------|---------------------------------|-----------------------------------|--------------------------------------------|---------------------------------|-----------------------------------|
|                                                                                        | Forderungen aus Lieferungen und Leistungen | Forderungen aus »finance lease« | Übrige finanzielle Vermögenswerte | Forderungen aus Lieferungen und Leistungen | Forderungen aus »finance lease« | Übrige finanzielle Vermögenswerte |
| bis 30 Tage                                                                            | 212                                        | 5                               | 0                                 | 250                                        | 6                               | 0                                 |
| 31 – 90 Tage                                                                           | 116                                        | 4                               | –                                 | 160                                        | 8                               | 0                                 |
| 91 – 180 Tage                                                                          | 69                                         | 2                               | –                                 | 101                                        | 9                               | –                                 |
| 181 Tage – 1 Jahr                                                                      | 50                                         | 3                               | –                                 | 47                                         | 3                               | –                                 |
| größer als 1 Jahr                                                                      | 34                                         | 7                               | –                                 | 30                                         | 1                               | 0                                 |
| Summe der überfälligen finanziellen Vermögenswerte, die nicht einzelwertgemindert sind | 481                                        | 21                              | 0                                 | 588                                        | 27                              | 0                                 |
| Weder wertgemindert noch überfällige finanzielle Vermögenswerte                        | 1 784                                      | 1 029                           | 440                               | 1 614                                      | 1 069                           | 455                               |
| Buchwerte                                                                              | 2 265                                      | 1 050                           | 440                               | 2 202                                      | 1 096                           | 455                               |

Um die Kreditrisiken aus diesen Forderungen und aus nicht überfälligen Forderungen abzudecken, werden basierend auf historischen Erfahrungswerten Wertminderungsaufwendungen auf Gruppenebene gebildet.

Hinsichtlich der weder einzelwertgeminderten noch in Zahlungsverzug befindlichen Forderungen und übrigen finanziellen Vermögenswerten deuten zum Abschlussstichtag keine Anzeichen darauf hin, dass Zahlungsausfälle eintreten werden.

#### f) Liquiditätsrisiko

Das Liquiditätsrisiko beschreibt die Gefahr, dass finanzielle Verpflichtungen nicht in ausreichendem Maß erfüllt werden können.

Um dieses Risiko zu begrenzen, verfügt die MAN Gruppe über ein effektives Finanzmanagement, bei dem die Mittelzuflüsse und -abflüsse sowie Fälligkeiten fortlaufend überwacht und gesteuert werden. Die Generierung liquider Mittel erfolgt vorrangig durch das operative Geschäft sowie durch externe Finanzierungen. Das Finanzmanagement für die operativen Bereiche erfolgt im Wesentlichen zentral im Rahmen eines Liquiditätsbündelungsprozesses. Durch die tägliche Zusammenführung von liquiden Mitteln werden Liquiditätsüberhänge und -anforderungen sowohl der Konzerneinzelgesellschaften als auch der MAN Gruppe entsprechend den jeweiligen Bedürfnissen gesteuert. Zur externen Finanzierung werden die sich an den Finanzmärkten bietenden Möglichkeiten fortlaufend verfolgt, um die finanzielle Flexibilität der MAN Gruppe zu sichern und unangemessene Refinanzierungsrisiken zu begrenzen. Weitere Informationen zu den bestehenden kurz- und langfristigen externen Finanzierungen sowie zu den wesentlichen Vereinbarungen in Bezug auf einen Kontrollwechsel finden sich unter Anmerkung (23). Mittelabflüsse resultieren im Wesentlichen aus der Finanzierung des Working Capital, Investitionen und der Deckung

des Finanzbedarfs des Leasing- und Absatzfinanzierungsgeschäfts. Das Management wird regelmäßig über Mittelzuflüsse und -abflüsse und Finanzierungsquellen informiert.

Gemäß den Anforderungen des IFRS 7 beschränkt sich die Darstellung der folgenden Tabelle auf die undiskontierten Zahlungsmittelabflüsse aufgrund der vertraglich fixierten Zins- und Tilgungszahlungen für originäre finanzielle Verbindlichkeiten sowie der derivativen Finanzinstrumente mit einem negativen Marktwert. Bei derivativen Finanzinstrumenten mit Bruttoerfüllung wurde nicht nur der Zahlungsmittelabfluss, sondern auch der bei der Glattstellung des Derivats stattfindende Zahlungsmittelzufluss in die Analyse einbezogen, um Verzerrungen der Darstellung zu vermeiden. Ist der Fälligkeitstermin nicht fixiert, wird die Verbindlichkeit auf den frühesten Fälligkeitstermin bezogen. Zinszahlungen mit variabler Verzinsung werden entsprechend den Konditionen zum Stichtag berücksichtigt. Im Wesentlichen wird davon ausgegangen, dass die Zahlungsmittelabflüsse nicht früher als dargestellt eintreten werden.



| Mio €                                                                             |                               |                                            |                                  |                               |                                            |                                  |
|-----------------------------------------------------------------------------------|-------------------------------|--------------------------------------------|----------------------------------|-------------------------------|--------------------------------------------|----------------------------------|
|                                                                                   | 31.12.2010                    |                                            |                                  |                               |                                            | 31.12.2009                       |
|                                                                                   | Fällig innerhalb eines Jahres | Fällig nach mehr als einem bis fünf Jahren | Fällig nach mehr als fünf Jahren | Fällig innerhalb eines Jahres | Fällig nach mehr als einem bis fünf Jahren | Fällig nach mehr als fünf Jahren |
| Zahlungsmittelabflüsse aus originären finanziellen Verbindlichkeiten              | 3 096                         | 1 707                                      | 541                              | 2 757                         | 2 009                                      | 579                              |
| davon Finanzverbindlichkeiten                                                     | 997                           | 1 700                                      | 537                              | 1 266                         | 2 002                                      | 574                              |
| davon Verbindlichkeiten aus Lieferungen und Leistungen                            | 1 978                         | 3                                          | 0                                | 1 365                         | 3                                          | 0                                |
| davon übrige finanzielle Verbindlichkeiten                                        | 121                           | 4                                          | 4                                | 126                           | 4                                          | 5                                |
| Zahlungsmittelabflüsse aus derivativen Finanzinstrumenten mit negativem Marktwert | 90                            | 41                                         | 12                               | 93                            | 57                                         | 8                                |
| davon mit Bruttoerfüllung                                                         | 61                            | 23                                         | 4                                | 54                            | 33                                         | –                                |
| davon mit Nettoerfüllung                                                          | 29                            | 18                                         | 8                                | 39                            | 24                                         | 8                                |
| Potenzielle Zahlungsmittelabflüsse aus Eventualverbindlichkeiten <sup>1</sup>     | 434                           | –                                          | –                                | 674                           | –                                          | –                                |
| davon für Verpflichtungen aus Bürgschaften                                        | 218                           | –                                          | –                                | 483                           | –                                          | –                                |
| davon für Verpflichtungen aus Rückkaufgarantien                                   | 216                           | –                                          | –                                | 191                           | –                                          | –                                |

<sup>1</sup> Verpflichtungen aus Bürgschaften bestehen für Avale aus Lieferungs- und Leistungsverpflichtungen. Verpflichtungen aus branchenüblichen Rückkaufgarantien bestehen gegenüber Finanzierungsgesellschaften, die den Erwerb von Konzernergebnissen durch Dritte finanzieren. Es werden die maximal möglichen Zahlungsmittelabflüsse dargestellt. Die Beträge werden als im ersten Jahr fällig angenommen.

Es besteht eine fest zugesagte syndizierte Kreditlinie bei Banken in Höhe von 1,5 Mrd € (Vorjahr 2,0 Mrd €), die zum Bilanzstichtag nicht in Anspruch genommen wurde. Ferner verfügt MAN über bilaterale Kreditlinien bei Finanzinstituten in Höhe von 1,2 Mrd € (Vorjahr 1,4 Mrd €), von denen 430 Mio € (Vorjahr 578 Mio €) ausgenutzt waren.

### g) Zusammensetzung der Sicherungsinstrumente nach Art des Sicherungszusammenhangs

Die nachfolgende Tabelle beinhaltet die beizulegenden Zeitwerte von Sicherungsinstrumenten. Diese beziehen sich im Wesentlichen auf Devisentermingeschäfte:

| Mio €            | 31.12.2010              |                         | 31.12.2009              |                         |
|------------------|-------------------------|-------------------------|-------------------------|-------------------------|
|                  | mit positivem Marktwert | mit negativem Marktwert | mit positivem Marktwert | mit negativem Marktwert |
| Fair Value Hedge | 46                      | 2                       | 81                      | 1                       |
| Cashflow Hedge   | 51                      | 27                      | 54                      | 12                      |
|                  | <b>97</b>               | <b>29</b>               | <b>135</b>              | <b>13</b>               |

## 32 Aktienbasierte Vergütungen

Die aktienbasierte Vergütung der Vorstände und Geschäftsführungen sowie sonstiger Begünstigter der MAN-Unternehmen basiert auf dem seit 2005 aufgelegten MAN-Aktien-Programm (MAP). Im Rahmen des MAP erhalten die Begünstigten steuerpflichtige Barzuwendungen unter der Auflage, für 50 % des Zuwendungsvolumens Stammaktien der MAN SE zu erwerben. Der Erwerb und die Verwahrung der Aktien erfolgen zentral durch die MAN SE im Namen und für Rechnung der Begünstigten. Über die erworbenen Aktien können die MAP-Teilnehmer nach Ablauf einer Sperrfrist von vier Jahren (drei Jahren für Aktienerwerbe bis einschließlich 2009) frei verfügen. Während der Sperrfrist dürfen die Aktien nicht veräußert, beliehen oder kursgesichert werden. Bei Übertritt in den Ruhestand sowie bei Ausscheiden aus der MAN Gruppe aus anderen Gründen verkürzt sich die Sperrfrist auf ein Jahr ab dem Tag des Ausscheidens.

Außerdem haben die Vorstände der MAN SE beginnend mit dem Geschäftsjahr 2010 25 % der auf dem Faktor ROE (»Return on Equity before Tax«) basierenden variablen Vergütung entsprechend den Bedingungen des MAP zum Erwerb von Stammaktien der MAN SE zu verwenden (Aktien-Tantieme); die Sperrfrist für erworbene Aktien ist auf vier Jahre festgelegt. Im Geschäftsjahr 2009 hatten alle Begünstigten entsprechend den Bedingungen des MAP 16,67 % der jährlichen variablen Vergütung (Tantieme) zum Erwerb von Stammaktien der MAN SE zusätzlich zu verwenden (Aktien-Tantieme); die Sperrfrist für erworbene Aktien war auf zwei Jahre festgelegt.

Im Geschäftsjahr 2010 haben die Begünstigten im Rahmen des MAP 2010 insgesamt 18 541 (Vorjahr 39 947) MAN-Stammaktien zu einem Durchschnittspreis von 69,53 € (Vorjahr 43,26 €) erhalten. Die Auszahlungen hierfür beliefen sich auf 1 289 T€ (Vorjahr 1 728 T€). Derjenige Teil der variablen Vergütung, der für den Erwerb von MAN-Stammaktien zu verwenden ist, beläuft sich auf 833 T€ (Vorjahr 437 T€). Dies entspricht auf Basis eines Schlusskurses zum 31. Dezember 2010 von 88,99 € (Vorjahr 54,44 €) 9 354 MAN-Stammaktien (Vorjahr 8 031). Der Gesamtaufwand aus dem MAP 2010 bzw. der entsprechend den Bedingungen des MAP zu verwendenden variablen Vergütung beläuft sich auf 4 242 T€ (Vorjahr 4 343 T€). Für die im Jahr 2011 zu tätigen Aktienkäufe wurden entsprechende Rückstellungen gebildet.

Im Geschäftsjahr 2010 haben die Vorstände im Rahmen des MAP 2010 insgesamt 7 987 (Vorjahr 15 883) MAN-Stammaktien zu einem Durchschnittspreis von 69,53 € (Vorjahr 42,96 €) erhalten. Die Auszahlungen hierfür beliefen sich auf 555 T€ (Vorjahr 682 T€). Derjenige Teil der variablen Vergütung, der für das Geschäftsjahr 2010 für den Erwerb von MAN-Stammaktien zu verwenden ist, beläuft sich auf 833 T€. Dieser Wert entspricht auf Basis eines Schlusskurses zum 31. Dezember 2010 von 88,99 € 9 354 MAN-Stammaktien. Für das Geschäftsjahr 2009 erhielten die Vorstandsmitglieder keine variable Aktien-Tantieme (für weitere Informationen siehe Anmerkung (34)). Der Gesamtaufwand aus dem MAP 2010 bzw. der entsprechend den Bedingungen des MAP zu verwendenden variablen Vergütung beläuft sich auf 2 775 T€ (Vorjahr 1 365 T€).

Unter dem 2010 eingeführten Aktienprogramm für Führungskräfte (MAP FK) wurden im April 2010 72 472 Aktien der MAN SE bedingt zugesagt. Der Vorstand der MAN SE sagt Führungskräften diskretionär bedingt zu, an einem späteren Termin Aktien der MAN SE ohne eine eigene nennenswerte Zuzahlung zu erhalten. Die Entscheidung darüber, ob das MAP FK durchgeführt wird und somit Aktien der MAN SE bedingt zugesagt werden, trifft der Vorstand der MAN SE jährlich neu. Die Durchführung des MAP FK ist in der Regel an vorab vom Vorstand der MAN SE zu definierende Zielsetzungen und Bedingungen geknüpft. Nach Ablauf einer Sperrfrist überträgt die MAN SE die zugesagten Aktien der MAN SE auf ein vom Begünstigten zu benennendes Depot. Die Sperrfrist für zugesagte Aktien beträgt vier Jahre. Im Geschäftsjahr 2010 beträgt der Aufwand aus dem MAP FK 0,8 Mio €.

### 33 Beziehungen zu nahe stehenden Unternehmen und Personen

Die Volkswagen AG ist gemäß Mitteilung nach § 21 WpHG Abs. 1 Satz 1 vom Februar 2007 mit 29,9 % an der MAN SE beteiligt. Im Geschäftsjahr 2010 wurden Leistungen in Höhe von 26 Mio € (Vorjahr 21 Mio €) von der Volkswagen AG bezogen. Hieraus bestehen zum 31. Dezember 2010 Verbindlichkeiten von 5 Mio € (Vorjahr 4 Mio €) gegenüber der Volkswagen AG.

Darüber hinaus wurde 2008 von der Volkswagen AG eine Kaufoption über Scania-Anteile erworben, siehe Anmerkungen (16) und (37). Betreffend den Erwerb von VW Truck & Bus von der Volkswagen AG im Geschäftsjahr 2009, siehe Anmerkung (6).

Nahe stehende Unternehmen von wesentlicher Bedeutung sind für die MAN Gruppe die assoziierten Unternehmen sowie Gemeinschaftsunternehmen, mit denen Transaktionen aus dem normalen Lieferungs- und Leistungsaustausch resultieren. Die nachfolgende Tabelle zeigt den Umfang der Beziehungen.

| Mio €               | 31.12.2010 | 31.12.2009 |
|---------------------|------------|------------|
| Umsatzerlöse        | 536        | 512        |
| Sonstige Erträge    | 4          | 33         |
| Bezogene Leistungen | 161        | 106        |
| Forderungen         | 171        | 109        |
| Verbindlichkeiten   | 35         | 41         |

In den Umsatzerlösen wirken mit 43 Mio € Erträge, die im Zusammenhang mit der Vereinbarung mit Sinotruk bezüglich Lizenzierung von TGA Lkw-Technologie, inklusive Motoren, Fahrzeuggestellen und Achsen vereinnahmt wurden. Dabei entstandene Zwischen Gewinne wurden eliminiert. Für weiterführende Informationen siehe Anmerkungen (6) und (16).

Die Umsatzerlöse enthalten 43 Mio € im Zusammenhang mit Lieferungen und Leistungen aus Geschäftsvorfällen mit Ferrostaal. Für weiterführende Informationen siehe Anmerkung (6).

Bezüglich der gemäß IAS 24 angabepflichtigen Transaktionen zu nahe stehenden Personen siehe die folgenden Anmerkungen (34) und (35).

### 34 Vergütung des Vorstands

Die Mitglieder des Vorstands wurden wie folgt vergütet:

| T €                                                                     | 2010          | 2009         |
|-------------------------------------------------------------------------|---------------|--------------|
| <b>Zum 31. Dezember 2010 amtierende Vorstandsmitglieder<sup>1</sup></b> |               |              |
| Feste Vergütung                                                         | 2 355         | 863          |
| Variable Bar-Tantieme                                                   | 5 482         | 0            |
| Variable Aktien-Tantieme und MAP <sup>3</sup>                           | 2 712         | 405          |
| Aufwand für Altersversorgung                                            | 656           | 339          |
| <b>Ehemalige Vorstandsmitglieder<sup>2</sup></b>                        |               |              |
| Feste Vergütung                                                         | –             | 2 042        |
| Variable Bar-Tantieme                                                   | –             | 0            |
| Variable Aktien-Tantieme und MAP <sup>3</sup>                           | –             | 960          |
| Aufwand für Altersversorgung                                            | –             | 1 098        |
| <b>Gesamt</b>                                                           | <b>11 205</b> | <b>5 707</b> |

<sup>1</sup> Dr.-Ing. Georg Pachta-Reyhofen (Sprecher des Vorstands), Frank H. Lutz seit 11. Dezember 2009, Jörg Schwitalla seit 19. Mai 2009, Klaus Stahlmann seit 1. Januar 2010

<sup>2</sup> Dipl.-Ing. Håkan Samuelsson (ehemaliger Vorstandsvorsitzender) bis 23. November 2009, Prof. Dr. h.c. Karlheinz Hornung bis 11. Dezember 2009, Dr. jur. Matthias Mitscherlich bis 25. März 2009, Dipl.-Ökonom Anton Weinmann bis 30. November 2009

<sup>3</sup> 2009: nur MAP (für weitere Informationen siehe Anmerkung (32))

Die variable Bar-Tantieme im Geschäftsjahr 2010 beinhaltet eine Sonderzahlung für Herrn Dr.-Ing. Georg Pachta-Reyhofen in Höhe von 400 T€ sowie für Herrn Jörg Schwitalla in Höhe von 150 T€.

Auf die vier im Geschäftsjahr 2009 ausgeschiedenen Vorstandsmitglieder entfielen zusätzlich Abfindungen von insgesamt 21 064 T€ (davon 2 541 T€ für Altersversorgung). Diese Abfindungsleistungen betreffen Dipl.-Ing. Håkan Samuelsson mit insgesamt 7 323 T€, Prof. Dr. h.c. Karlheinz Hornung mit insgesamt 4 494 T€, Dipl.-Ökonom Anton Weinmann mit insgesamt 4 839 T€ sowie Dr. jur. Matthias Mitscherlich mit 4 408 T€. Im Geschäftsjahr 2009 wurden bereits 4 408 T€ für Herrn Dr. jur. Matthias Mitscherlich sowie 604 T€ für die anderen drei ausgeschiedenen Vorstandsmitglieder bezahlt. Im Geschäftsjahr 2010 wurden für diese drei ausgeschiedenen Vorstandsmitglieder zusätzlich 7 142 T€ bezahlt. Für die darüber hinaus zugesagten Abfindungsleistungen wurden entsprechende Rückstellungen gebildet.

Zum 31. Dezember 2010 betrug der Barwert der Versorgungsverpflichtungen gegenüber den zum Jahresende amtierenden Vorstandsmitgliedern 3 222 T€ (Vorjahr 2 008 T€). Der Aufwand aus der Dotierung der Rückstellung betrug 2010 insgesamt 656 T€ (Vorjahr 1 997 T€), davon 536 T€ (Vorjahr 1 437 T€) für den Dienstzeitanteil und 120 T€ (Vorjahr 560 T€) für den Zinsanteil. In dem Aufwand aus der Dotierung der Rückstellung für das Geschäftsjahr 2009 sind zeitanteilig bis zum Zeitpunkt des Ausscheidens aus dem Vorstand sowohl der Dienstzeit- als auch der Zinsaufwand

für die 2009 ausgeschiedenen Vorstandsmitglieder enthalten. Der »Aufwand für Altersversorgung« beinhaltet den aus Pensionsrückstellungen resultierenden Dienstzeitaufwand.

Die Versorgungsbezüge ehemaliger Vorstandsmitglieder, einschließlich der im ersten Jahr nach Beendigung des Vertrags und Übertritt in den Ruhestand geleisteten Bezüge, sowie ihrer Hinterbliebenen beliefen sich zum 31. Dezember 2010 auf 3 181 T€ (Vorjahr 3 367 T€). Für Pensionsverpflichtungen gegenüber ehemaligen Mitgliedern des Vorstands und ihren Hinterbliebenen sind zum 31. Dezember 2010 insgesamt 47 130 T€ (Vorjahr 47 792 T€) zurückgestellt.

Die Mitglieder des Vorstands einschließlich ihrer Mitgliedschaften in anderen gesetzlich zu bildenden Aufsichtsräten und vergleichbaren Kontrollgremien sind auf den Seiten 189 f., weitere Einzelheiten zu Vergütungsstruktur bzw. deren Bestandteilen sind auf den Seiten 21 ff. des Geschäftsberichts angegeben.

Die individualisierten Bezüge der Mitglieder des Vorstands ergeben sich aus nachfolgender Tabelle:

#### Vergütung des Vorstands 2010 (2009)

| T €                                                                                   |                                |                            |                                               |                              |                                 |                                            |
|---------------------------------------------------------------------------------------|--------------------------------|----------------------------|-----------------------------------------------|------------------------------|---------------------------------|--------------------------------------------|
|                                                                                       | Feste Vergütung                | Variable Bar-Tantieme      | Variable Aktien-Tantieme und MAP <sup>1</sup> | Aufwand für Altersversorgung | Gesamt                          | im Geschäfts-jahr erdiente Aktien in Stück |
| <b>Zum 31. Dezember 2010 amtierende Vorstandsmitglieder</b>                           |                                |                            |                                               |                              |                                 |                                            |
| Dr.-Ing. Georg Pachta-Reyhofen (Sprecher des Vorstands)                               | 734<br>(548)                   | 1 955<br>(0)               | 855<br>(257)                                  | 321<br>(241)                 | 3 856<br>(1 046)                | 2 518<br>(2 995)                           |
| Frank H. Lutz (seit 11. Dezember 2009)                                                | 529<br>(–)                     | 1 111<br>(0)               | 611<br>(–)                                    | 88<br>(67)                   | 2 339<br>(67)                   | 1 799<br>(–)                               |
| Jörg Schwitalla (seit 19. Mai 2009)                                                   | 551<br>(315)                   | 1 305<br>(0)               | 635<br>(148)                                  | 146<br>(31)                  | 2 637<br>(494)                  | 1 871<br>(1 721 <sup>2</sup> )             |
| Klaus Stahlmann (seit 1. Januar 2010)                                                 | 541<br>(–)                     | 1 111<br>(–)               | 611<br>(–)                                    | 110<br>(–)                   | 2 373<br>(–)                    | 1 799<br>(–)                               |
| <b>Ehemalige Vorstandsmitglieder</b>                                                  |                                |                            |                                               |                              |                                 |                                            |
| Dipl.-Ing. Håkan Samuelsson (ehemaliger Vorstandsvorsitzender, bis 23. November 2009) | –<br>(795)                     | –<br>(0)                   | –<br>(425)                                    | –<br>(402)                   | –<br>(1 622)                    | –<br>(4 944)                               |
| Prof. Dr. h.c. Karlheinz Hornung (bis 11. Dezember 2009)                              | –<br>(533)                     | –<br>(0)                   | –<br>(257)                                    | –<br>(239)                   | –<br>(1 029)                    | –<br>(2 995)                               |
| Dr. jur. Matthias Mitscherlich (bis 25. März 2009)                                    | –<br>(137)                     | –<br>(0)                   | –<br>(0)                                      | –<br>(229)                   | –<br>(366)                      | –<br>(0)                                   |
| Dipl.-Ökonom Anton Weinmann (bis 30. November 2009)                                   | –<br>(577)                     | –<br>(0)                   | –<br>(278)                                    | –<br>(228)                   | –<br>(1 083)                    | –<br>(3 228)                               |
| <b>Gesamt</b>                                                                         | <b>2 355</b><br><b>(2 905)</b> | <b>5 482</b><br><b>(0)</b> | <b>2 712</b><br><b>(1 365)</b>                | <b>656</b><br><b>(1 437)</b> | <b>11 205</b><br><b>(5 707)</b> | <b>7 987</b><br><b>(15 883)</b>            |

<sup>1</sup> 2009: nur MAP (für weitere Informationen siehe Anmerkung (32))

<sup>2</sup> Zeitannteil entsprechend der Tätigkeit als Vorstandsmitglied

Die Anschaffungskosten für die im Geschäftsjahr erworbenen Aktien sind in den Beträgen zur variablen Aktien-Tantieme und MAP enthalten.

## 35 Vergütung des Aufsichtsrats

Die Aufsichtsratsvergütung setzt sich wie folgt zusammen:

| T €                                        |              |            |
|--------------------------------------------|--------------|------------|
|                                            | 2010         | 2009       |
| Feste Vergütung                            | 630          | 675        |
| Variable Vergütung                         | 1 260        | 0          |
| Vergütung für die Tätigkeit in Ausschüssen | 245          | 266        |
| Sitzungsgelder                             | 48           | –          |
| <b>Gesamt</b>                              | <b>2 183</b> | <b>941</b> |

Die Mitglieder des Aufsichtsrats einschließlich ihrer Mitgliedschaften in anderen gesetzlich zu bildenden Aufsichtsräten und vergleichbaren Kontrollgremien sind auf den Seiten 189 f., weitere Einzelheiten zu Vergütungsstruktur bzw. deren Bestandteilen sind auf der Seite 23 des Geschäftsberichts angegeben.

Die individualisierten Bezüge der aktiven Mitglieder des Aufsichtsrats ergeben sich aus nachfolgender Tabelle:

| Vergütung des Aufsichtsrats<br>T €                                             |                            |                 |                    |                                        |                |              |             |
|--------------------------------------------------------------------------------|----------------------------|-----------------|--------------------|----------------------------------------|----------------|--------------|-------------|
| Name                                                                           | Zeitraum der Zugehörigkeit | Feste Vergütung | Variable Vergütung | Vergütung für Tätigkeit in Ausschüssen | Sitzungsgelder | Gesamt 2010  | Gesamt 2009 |
| Hon.-Prof. Dr. techn. h.c. Dipl.-Ing. ETH Ferdinand K. Piëch, Vorsitzender     | ganzjährig                 | 70              | 140                | 35                                     | 0              | 245          | 118         |
| Thomas Otto, stellv. Vorsitzender                                              | ganzjährig                 | 53              | 105                | 35                                     | 6              | 199          | 90          |
| Prof. Dr.-Ing. Dr.-Ing. E.h. Dr. h.c. Ekkehard D. Schulz, stellv. Vorsitzender | ganzjährig                 | 53              | 105                | 30                                     | 4              | 192          | 77          |
| Michael Behrendt                                                               | ganzjährig                 | 35              | 70                 | 35                                     | 4              | 144          | 77          |
| Marek Berdychowski                                                             | ganzjährig                 | 35              | 70                 | 0                                      | 2              | 107          | 22          |
| Ulf Berkenhagen                                                                | 01.04.2010 bis 31.12.2010  | 26              | 52                 | 0                                      | 2              | 80           | 0           |
| Detlef Dirks                                                                   | ganzjährig                 | 35              | 70                 | 0                                      | 2              | 107          | 35          |
| Jürgen Dorn                                                                    | ganzjährig                 | 35              | 70                 | 35                                     | 6              | 146          | 72          |
| Dr. jur. Heiner Hasford                                                        | ganzjährig                 | 35              | 70                 | 0                                      | 2              | 107          | 35          |
| Jürgen Kerner                                                                  | ganzjährig                 | 35              | 70                 | 0                                      | 2              | 107          | 35          |
| Prof. Dr. rer. pol. Renate Köcher                                              | ganzjährig                 | 35              | 70                 | 0                                      | 2              | 107          | 35          |
| Gerhard Kreutzer                                                               | ganzjährig                 | 35              | 70                 | 35                                     | 6              | 146          | 57          |
| Nicola Lopopolo                                                                | ganzjährig                 | 35              | 70                 | 0                                      | 2              | 107          | 35          |
| Dipl.-Kfm. Stefan W. Ropers                                                    | bis 01.04.2010             | 8               | 18                 | 5                                      | 0              | 31           | 53          |
| Dr.-Ing. E.h. Rudolf Rupprecht                                                 | ganzjährig                 | 35              | 70                 | 0                                      | 2              | 107          | 35          |
| Erich Schwarz                                                                  | ganzjährig                 | 35              | 70                 | 0                                      | 2              | 107          | 22          |
| Rupert Stadler                                                                 | ganzjährig                 | 35              | 70                 | 35                                     | 4              | 144          | 70          |
| Im Jahr 2009 ausgeschiedene Mitglieder                                         |                            |                 |                    |                                        |                |              | 73          |
| <b>Gesamt 2010</b>                                                             |                            | <b>630</b>      | <b>1 260</b>       | <b>245</b>                             | <b>48</b>      | <b>2 183</b> | –           |
| <b>Gesamt 2009</b>                                                             |                            | <b>675</b>      | <b>0</b>           | <b>266</b>                             | –              | –            | <b>941</b>  |

Für die Mitgliedschaft in Aufsichtsräten von anderen Gesellschaften der MAN Gruppe erhielten Herr Dorn 10 T€ (Vorjahr 10 T€), Herr Kerner 8 T€ (Vorjahr 5 T€), Herr Kreutzer 8 T€ (Vorjahr 0 T€), Herr Loos 0 T€ (Vorjahr 3 T€), Herr Otto 21 T€ (Vorjahr 21 T€) und Herr Stadler 21 T€ (Vorjahr 0 T€).

Die Auslagenerstattungen für die Teilnahme an Aufsichtsratssitzungen sowie Ausschusssitzungen betrugen im Geschäftsjahr 35 T€ (Vorjahr 111 T€).



## 36 Corporate Governance Kodex

---

Vorstand und Aufsichtsrat der MAN SE haben im Dezember 2010 gemäß § 161 AktG ihre jährliche Entsprechenserklärung abgegeben. Die gemeinsame Entsprechenserklärung von Vorstand und Aufsichtsrat ist auf der Internetseite der MAN Gruppe [www.man.eu](http://www.man.eu) veröffentlicht.

Auch Vorstand und Aufsichtsrat des börsennotierten Tochterunternehmens Renk Aktiengesellschaft in Augsburg haben eine Entsprechenserklärung abgegeben, die auf der Internetseite unter [www.renk.biz](http://www.renk.biz) veröffentlicht ist.

## 37 Ereignisse nach dem Bilanzstichtag

---

Am 5. Januar 2011 übte MAN das Barausgleichsrecht im Zusammenhang mit der Kaufoption betreffend 1,5 % des Kapitals bzw. 2,8 % der ausstehenden Stimmrechte von Scania aus. Die Transaktion führte zu einem Barausgleich in Höhe von 29 Mio €, der MAN am 7. Januar 2011 zugeflossen ist. Gleichzeitig verlor MAN den Zugriff auf mehr als 20 % der Stimmrechte von Scania, sodass die Beteiligung an Scania nach dem 5. Januar 2011 nicht mehr nach der Equity-Methode gemäß IAS 28, sondern als zur Veräußerung verfügbarer finanzieller Vermögenswert gemäß IAS 39 bilanziert wird. Der erstmalige Ansatz dieser Finanzbeteiligung erfolgt zum beizulegenden Zeitwert am 5. Januar 2011 und beträgt 1 815 Mio €. Aus der Umklassifizierung ergibt sich im 1. Quartal 2011 ein Gewinn von ca. 455 Mio €.

Vom 18. bis 20. Januar 2011 fand bei MAN eine Durchsuchung durch die Europäische Kommission wegen des Verdachts eines möglichen Kartellverstoßes im Nutzfahrzeugbereich statt. MAN hat der Europäischen Kommission umfassende Kooperation zur rückhaltlosen Aufklärung zugesichert. MAN toleriert keine Compliance-Verstöße. Weder Korruption noch Wettbewerbsverstöße werden von MAN geduldet, gefördert oder akzeptiert.

## 38 Segmentberichterstattung

---

Die ehemaligen Bereiche MAN Diesel und MAN Turbo sind im Geschäftsjahr 2010 zu dem Bereich MAN Diesel & Turbo zusammengelegt worden. Beginnend mit dem 1. Quartal 2010 wird die Industriebeteiligung Renk ebenso als eigenständiger Bereich gesteuert. Dementsprechend werden die Aktivitäten der MAN Gruppe beginnend mit dem 1. Quartal 2010 in die berichtspflichtigen Segmente MAN Truck & Bus, MAN Latin America, MAN Diesel & Turbo und die Industriebeteiligung Renk aufgeteilt. Die Vorjahreszahlen wurden an das neue Berichtsformat angepasst. Im Hinblick auf Entscheidungen über die Allokation von Ressourcen und auf die Bewertung der Ertragskraft werden die Ergebnisse dieser Segmente regelmäßig von dem Vorstand der MAN SE in seiner Funktion als verantwortliche Unternehmensinstanz überprüft. Unter »Sonstige/Konsolidierung und Überleitung« ist vorwiegend die MAN-Zentrale dargestellt. Gesellschaften ohne operatives Geschäft sowie die nach der Equity-Methode bilanzierten Beteiligungen an Scania, Sinotruk und Roland sind der Zentrale zugeordnet.

Beschreibung der berichtspflichtigen Segmente:

**MAN Truck & Bus** expandiert vom Kernmarkt Westeuropa in die Wachstumsmärkte Osteuropas und Asiens.

**MAN Latin America** verfügt als brasilianischer Marktführer über ein umfassendes Verkaufs- und Servicenetzwerk in den aufstrebenden lateinamerikanischen Märkten.

**MAN Diesel & Turbo** ist weltweit führend bei großen Schiffsdieseln und Stationärmotoren und verfügt gleichzeitig über eine signifikante Produktpalette für Turbomaschinen.

**Renk** ist ein weltweit anerkannter Hersteller von hochwertigen Spezialgetrieben, Komponenten der Antriebstechnik sowie Prüfsystemen.

Die Geschäftstätigkeit von MAN ist auf zwei Geschäftsfelder konzentriert: **Commercial Vehicles** mit MAN Truck & Bus und MAN Latin America sowie **Power Engineering** mit MAN Diesel & Turbo und Renk. Im Nutzfahrzeuggeschäft ist MAN einer der führenden Anbieter der internationalen Fahrzeugindustrie und bietet weltweit kundenorientierte Produkte und Dienstleistungen an. Das Geschäftsfeld Power Engineering ist das zweite strategische Geschäftsfeld von MAN und stellt ein adäquates Gegengewicht zu Commercial Vehicles dar.

Die Segmentinformationen stellen die fortgeführten Bereiche dar. Entsprechend schließen die Segmentangaben der aktuellen und der Vorperiode die entsprechenden Informationen für aufgegebene Geschäftsbereiche, die in dem Konzernabschluss enthalten sind, aus. Für weiterführende Informationen zu aufgegebenen Geschäftsbereichen siehe auch Anmerkung (6).

Die Ergebnisgröße für die Beurteilung der Ertragslage eines Segments ist das Operative Ergebnis. Das Operative Ergebnis entspricht in der Regel dem Ergebnis vor Zinsen und Steuern (EBIT). Um eine bessere Beurteilung der operativen Geschäftstätigkeit langfristig zu ermöglichen, werden Effekte im Zusammenhang mit materiellen und immateriellen Vermögenswerten aus Unternehmenserwerben und Erwerben von nach der Equity-Methode bilanzierten Beteiligungen aus dem Operativen Ergebnis eliminiert. In Einzelfällen werden ebenfalls Sondervorgänge bereinigt. Dabei handelt es sich um Aufwendungen und Erträge, die dem Anlass und der Höhe nach bedeutend sind und nicht aus dem operativen Geschäft stammen.

Die Segmentvermögenswerte und -schulden entsprechen den Summen der Vermögenswerte bzw. Schulden der einzelnen Geschäftsbereiche. Die »Nettoliquidität/-verschuldung« stellt die finanzielle Steuerungsgröße dar, die sich aus »Flüssige Mittel« und »Wertpapiere« abzüglich »Finanzverbindlichkeiten« ergibt.

Die Segmentinformationen sind in Übereinstimmung mit den Ausweis- und Bewertungsmethoden, die bei der Aufstellung des Konzernabschlusses angewandt wurden, ermittelt. Die Umsätze zwischen den Segmenten erfolgen zu marktüblichen Preisen. Die Abschreibungen betreffen die den einzelnen Unternehmensbereichen zugeordneten immateriellen Vermögenswerte, Sachanlagen, als Finanzinvestition gehaltene Immobilien und Beteiligungen (ohne Vermietete Erzeugnisse). Zu der Kennzahl ROS siehe Konzernlagebericht »Steuerungssystem und Wertmanagement«.

Die nachfolgende Tabelle enthält segmentbezogene Informationen sowie eine Überleitung vom Operativen Ergebnis auf das Ergebnis vor Steuern und von der Nettoliquidität/-verschuldung auf den Free Cashflow.

## Segmentinformationen

| Mio €                                                                                        |                                      |                |                   |              |                                  |                |
|----------------------------------------------------------------------------------------------|--------------------------------------|----------------|-------------------|--------------|----------------------------------|----------------|
|                                                                                              | Commercial Vehicles                  |                |                   |              |                                  |                |
|                                                                                              | MAN Truck & Bus<br>inkl. MAN Finance |                | MAN Latin America |              | Commercial Vehicles <sup>2</sup> |                |
|                                                                                              | 2010                                 | 2009           | 2010              | 2009         | 2010                             | 2009           |
| <b>Auftragseingang der Bereiche<sup>1</sup></b>                                              | <b>8 023</b>                         | <b>5 224</b>   | <b>3 140</b>      | <b>1 412</b> | <b>11 163</b>                    | <b>6 636</b>   |
| davon Inland                                                                                 | 2 864                                | 2 043          | –                 | –            | 2 864                            | 2 043          |
| davon Ausland                                                                                | 5 159                                | 3 181          | 3 140             | 1 412        | 8 299                            | 4 593          |
| Auftragseingang zwischen den Bereichen                                                       | – 61                                 | – 5            | – 6               | –            | – 67                             | – 5            |
| Auftragseingang Konzern                                                                      | 7 962                                | 5 219          | 3 134             | 1 412        | 11 096                           | 6 631          |
| <b>Umsatz der Bereiche</b>                                                                   | <b>7 446</b>                         | <b>6 395</b>   | <b>3 140</b>      | <b>1 412</b> | <b>10 586</b>                    | <b>7 807</b>   |
| davon Inland                                                                                 | 2 566                                | 2 175          | –                 | –            | 2 566                            | 2 175          |
| davon Ausland                                                                                | 4 880                                | 4 220          | 3 140             | 1 412        | 8 020                            | 5 632          |
| Umsatz zwischen den Bereichen                                                                | – 53                                 | – 11           | – 6               | –            | – 59                             | – 11           |
| Umsatz Konzern                                                                               | 7 393                                | 6 384          | 3 134             | 1 412        | 10 527                           | 7 796          |
| <b>Auftragsbestand 31. Dezember 2010 und 31. Dezember 2009</b>                               | <b>2 742</b>                         | <b>2 603</b>   | <b>–</b>          | <b>–</b>     | <b>2 742</b>                     | <b>2 603</b>   |
| <b>Gesamtvermögen 31. Dezember 2010 und 31. Dezember 2009</b>                                | <b>8 188</b>                         | <b>7 967</b>   | <b>3 201</b>      | <b>2 556</b> | <b>11 389</b>                    | <b>10 523</b>  |
| davon Vorräte                                                                                | 1 395                                | 1 600          | 316               | 133          | 1 711                            | 1 733          |
| davon Forderungen aus Lieferungen und Leistungen und »finance lease«                         | 2 371                                | 2 273          | 238               | 199          | 2 609                            | 2 472          |
| davon Flüssige Mittel und Wertpapiere                                                        | 89                                   | 87             | 492               | 399          | 581                              | 486            |
| <b>Segmentsschulden 31. Dezember 2010 und 31. Dezember 2009</b>                              | <b>5 706</b>                         | <b>5 676</b>   | <b>1 456</b>      | <b>1 104</b> | <b>7 162</b>                     | <b>6 780</b>   |
| davon Verbindlichkeiten aus Lieferungen und Leistungen                                       | 964                                  | 588            | 393               | 203          | 1 357                            | 791            |
| <b>Operatives Ergebnis</b>                                                                   | <b>158</b>                           | <b>– 91</b>    | <b>370</b>        | <b>142</b>   | <b>528</b>                       | <b>51</b>      |
| Ergebniseffekte aus Kaufpreisallokationen                                                    | –                                    | –              | – 99              | – 62         | – 99                             | – 62           |
| Ergebnis aus Sondervorgängen                                                                 | –                                    | – 111          | –                 | –            | –                                | – 111          |
| <b>Ergebnis vor Zinsen und Steuern (EBIT)</b>                                                | <b>158</b>                           | <b>– 202</b>   | <b>271</b>        | <b>80</b>    | <b>429</b>                       | <b>– 122</b>   |
| Zinsergebnis                                                                                 | – 32                                 | – 56           | – 17              | 8            | – 49                             | – 48           |
| <b>Ergebnis vor Steuern fortgeführter Geschäftsbereiche (EBT)</b>                            | <b>126</b>                           | <b>– 258</b>   | <b>254</b>        | <b>88</b>    | <b>380</b>                       | <b>– 170</b>   |
| <b>Ergebnis vor Zinsen, Steuern, Abschreibungen (EBITDA) fortgeführter Geschäftsbereiche</b> | <b>375</b>                           | <b>23</b>      | <b>409</b>        | <b>168</b>   | <b>784</b>                       | <b>191</b>     |
| davon Abschreibungen                                                                         | – 216                                | – 225          | – 138             | – 88         | – 354                            | – 313          |
| davon Wertminderungen                                                                        | – 1                                  | 0              | –                 | –            | – 1                              | 0              |
| davon Wertaufholungen Beteiligungen nach der Equity-Methode                                  | –                                    | –              | –                 | –            | –                                | –              |
| <b>Nettoliiquidität/-verschuldung</b>                                                        | <b>– 1 618</b>                       | <b>– 2 001</b> | <b>254</b>        | <b>181</b>   | <b>– 1 364</b>                   | <b>– 1 820</b> |
| Überleitung zum Free Cashflow                                                                | – 2 041                              | – 2 675        | 125               | 63           | – 1 916                          | – 2 612        |
| <b>Free Cashflow</b>                                                                         | <b>423</b>                           | <b>674</b>     | <b>129</b>        | <b>118</b>   | <b>552</b>                       | <b>792</b>     |
| davon Cashflow aus der Geschäftstätigkeit                                                    | 622                                  | 849            | 201               | 140          | 823                              | 989            |
| davon Cashflow aus der Investitionstätigkeit                                                 | – 199                                | – 175          | – 72              | – 22         | – 271                            | – 197          |
| <b>Investitionen</b>                                                                         | <b>207</b>                           | <b>205</b>     | <b>76</b>         | <b>24</b>    | <b>283</b>                       | <b>229</b>     |
| Zusätzliche Informationen nach Segmenten:                                                    |                                      |                |                   |              |                                  |                |
| <b>Mitarbeiter inkl. Leiharbeitnehmern 31. Dezember 2010 und 31. Dezember 2009 (Anzahl)</b>  | <b>31 284</b>                        | <b>31 519</b>  | <b>1 736</b>      | <b>1 510</b> | <b>33 020</b>                    | <b>33 029</b>  |
| davon Inland                                                                                 | 18 616                               | 18 309         | –                 | –            | 18 616                           | 18 309         |
| davon Ausland                                                                                | 12 668                               | 13 210         | 1 736             | 1 510        | 14 404                           | 14 720         |
| <b>Mitarbeiter 31. Dezember 2010 und 31. Dezember 2009 (Anzahl)</b>                          | <b>30 460</b>                        | <b>30 782</b>  | <b>1 736</b>      | <b>1 510</b> | <b>32 196</b>                    | <b>32 292</b>  |
| <b>Kennzahlen</b>                                                                            |                                      |                |                   |              |                                  |                |
| Umsatzrendite ROS (%)                                                                        | 2,1                                  | – 1,4          | 11,8              | 10,1         | 5,0                              | 0,7            |

<sup>1</sup> Diese ergänzende Information zum Auftragseingang wird auf freiwilliger Basis berichtet und ist nicht Teil des geprüften Konzernabschlusses.<sup>2</sup> Bruttodarstellung ohne Konsolidierungseffekte<sup>3</sup> Zentrale: MAN SE, Shared Services und Holdinggesellschaften

| Power Engineering  |        |       |       |        |                                |         |         |                       |         |              |         |         |         |      | Sonstige/Konsolidierung und Überleitung |      |      |  |  |  |  |  |  |  |  |  |  |  |  | Gruppe |  |
|--------------------|--------|-------|-------|--------|--------------------------------|---------|---------|-----------------------|---------|--------------|---------|---------|---------|------|-----------------------------------------|------|------|--|--|--|--|--|--|--|--|--|--|--|--|--------|--|
| MAN Diesel & Turbo |        |       | Renk  |        | Power Engineering <sup>2</sup> |         |         | Zentrale <sup>3</sup> |         | Kons./Überl. |         | Gesamt  |         |      |                                         |      |      |  |  |  |  |  |  |  |  |  |  |  |  |        |  |
| 2010               | 2009   | 2010  | 2009  | 2010   | 2009                           | 2010    | 2009    | 2010                  | 2009    | 2010         | 2009    | 2010    | 2009    | 2010 | 2009                                    | 2010 | 2009 |  |  |  |  |  |  |  |  |  |  |  |  |        |  |
| 3 475              | 2 936  | 525   | 294   | 4 000  | 3 230                          | 42      | 122     | - 133                 | - 128   | - 91         | - 6     | 15 072  | 9 860   |      |                                         |      |      |  |  |  |  |  |  |  |  |  |  |  |  |        |  |
| 393                | 247    | 262   | 97    | 655    | 344                            | 42      | 122     | - 72                  | - 121   | - 30         | 1       | 3 489   | 2 388   |      |                                         |      |      |  |  |  |  |  |  |  |  |  |  |  |  |        |  |
| 3 082              | 2 689  | 263   | 197   | 3 345  | 2 886                          | -       | -       | - 61                  | - 7     | - 61         | - 7     | 11 583  | 7 472   |      |                                         |      |      |  |  |  |  |  |  |  |  |  |  |  |  |        |  |
| - 10               | - 4    | - 20  | - 11  | - 30   | - 15                           | - 36    | - 108   | 133                   | 128     | 97           | 20      | -       | -       |      |                                         |      |      |  |  |  |  |  |  |  |  |  |  |  |  |        |  |
| 3 465              | 2 932  | 505   | 283   | 3 970  | 3 215                          | 6       | 14      | -                     | -       | 6            | 14      | 15 072  | 9 860   |      |                                         |      |      |  |  |  |  |  |  |  |  |  |  |  |  |        |  |
| 3 766              | 3 796  | 403   | 474   | 4 169  | 4 270                          | 42      | 122     | - 122                 | - 173   | - 80         | - 51    | 14 675  | 12 026  |      |                                         |      |      |  |  |  |  |  |  |  |  |  |  |  |  |        |  |
| 397                | 432    | 120   | 173   | 517    | 605                            | 42      | 122     | - 67                  | - 151   | - 25         | - 29    | 3 058   | 2 751   |      |                                         |      |      |  |  |  |  |  |  |  |  |  |  |  |  |        |  |
| 3 369              | 3 364  | 283   | 301   | 3 652  | 3 665                          | -       | -       | - 55                  | - 22    | - 55         | - 22    | 11 617  | 9 275   |      |                                         |      |      |  |  |  |  |  |  |  |  |  |  |  |  |        |  |
| - 10               | - 20   | - 17  | - 32  | - 27   | - 52                           | - 36    | - 108   | 122                   | 171     | 86           | 63      | -       | -       |      |                                         |      |      |  |  |  |  |  |  |  |  |  |  |  |  |        |  |
| 3 756              | 3 776  | 386   | 442   | 4 142  | 4 218                          | 6       | 14      | -                     | - 2     | 6            | 12      | 14 675  | 12 026  |      |                                         |      |      |  |  |  |  |  |  |  |  |  |  |  |  |        |  |
| 3 793              | 4 422  | 522   | 415   | 4 315  | 4 837                          | -       | -       | - 32                  | - 18    | - 32         | - 18    | 7 025   | 7 422   |      |                                         |      |      |  |  |  |  |  |  |  |  |  |  |  |  |        |  |
| 3 428              | 3 008  | 419   | 393   | 3 847  | 3 401                          | 5 225   | 4 696   | - 3 030               | - 2 725 | 2 195        | 1 971   | 17 431  | 15 895  |      |                                         |      |      |  |  |  |  |  |  |  |  |  |  |  |  |        |  |
| 1 038              | 1 187  | 110   | 121   | 1 148  | 1 308                          | -       | 0       | - 7                   | - 4     | - 7          | - 4     | 2 852   | 3 037   |      |                                         |      |      |  |  |  |  |  |  |  |  |  |  |  |  |        |  |
| 678                | 744    | 73    | 93    | 751    | 837                            | 4       | 6       | - 49                  | - 17    | - 45         | - 11    | 3 315   | 3 298   |      |                                         |      |      |  |  |  |  |  |  |  |  |  |  |  |  |        |  |
| 867                | 350    | 100   | 53    | 967    | 403                            | 2 293   | 2 238   | - 2 770               | - 2 491 | - 477        | - 253   | 1 071   | 636     |      |                                         |      |      |  |  |  |  |  |  |  |  |  |  |  |  |        |  |
| 2 241              | 2 001  | 202   | 201   | 2 443  | 2 202                          | 4 806   | 4 429   | - 2 970               | - 2 645 | 1 836        | 1 784   | 11 441  | 10 766  |      |                                         |      |      |  |  |  |  |  |  |  |  |  |  |  |  |        |  |
| 611                | 534    | 35    | 38    | 646    | 572                            | 19      | 14      | - 41                  | - 9     | - 22         | 5       | 1 981   | 1 368   |      |                                         |      |      |  |  |  |  |  |  |  |  |  |  |  |  |        |  |
| 439                | 500    | 52    | 66    | 491    | 566                            | 32      | - 112   | - 16                  | - 1     | 16           | - 113   | 1 035   | 504     |      |                                         |      |      |  |  |  |  |  |  |  |  |  |  |  |  |        |  |
| -                  | -      | -     | -     | -      | -                              | - 10    | -       | -                     | -       | - 10         | -       | - 109   | - 62    |      |                                         |      |      |  |  |  |  |  |  |  |  |  |  |  |  |        |  |
| -                  | - 100  | -     | -     | -      | - 100                          | 357     | - 445   | -                     | -       | 357          | - 445   | 357     | - 656   |      |                                         |      |      |  |  |  |  |  |  |  |  |  |  |  |  |        |  |
| 439                | 400    | 52    | 66    | 491    | 466                            | 379     | - 557   | - 16                  | - 1     | 363          | - 558   | 1 283   | - 214   |      |                                         |      |      |  |  |  |  |  |  |  |  |  |  |  |  |        |  |
| 0                  | 0      | 0     | - 1   | 0      | - 1                            | - 109   | - 68    | 0                     | -       | - 109        | - 68    | - 158   | - 117   |      |                                         |      |      |  |  |  |  |  |  |  |  |  |  |  |  |        |  |
| 439                | 400    | 52    | 65    | 491    | 465                            | 270     | - 625   | - 16                  | - 1     | 254          | - 626   | 1 125   | - 331   |      |                                         |      |      |  |  |  |  |  |  |  |  |  |  |  |  |        |  |
| 522                | 474    | 65    | 77    | 587    | 551                            | 38      | - 151   | - 16                  | - 1     | 22           | - 152   | 1 393   | 590     |      |                                         |      |      |  |  |  |  |  |  |  |  |  |  |  |  |        |  |
| - 76               | - 67   | - 13  | - 11  | - 89   | - 78                           | - 13    | - 23    | -                     | -       | - 13         | - 23    | - 456   | - 41    |      |                                         |      |      |  |  |  |  |  |  |  |  |  |  |  |  |        |  |
| - 7                | - 7    | -     | -     | - 7    | - 7                            | - 3     | - 383   | -                     | -       | - 3          | - 383   | - 11    | - 390   |      |                                         |      |      |  |  |  |  |  |  |  |  |  |  |  |  |        |  |
| -                  | -      | -     | -     | -      | -                              | 357     | -       | -                     | -       | 357          | -       | 357     | -       |      |                                         |      |      |  |  |  |  |  |  |  |  |  |  |  |  |        |  |
| 845                | 334    | 99    | 53    | 944    | 387                            | - 1 358 | - 1 201 | -                     | 0       | - 1 358      | - 1 201 | - 1 778 | - 2 634 |      |                                         |      |      |  |  |  |  |  |  |  |  |  |  |  |  |        |  |
| 141                | 238    | 40    | 11    | 181    | 249                            | - 1 237 | 1 155   | 141                   | - 304   | - 1 096      | 851     | - 2 831 | - 1 512 |      |                                         |      |      |  |  |  |  |  |  |  |  |  |  |  |  |        |  |
| 704                | 96     | 59    | 42    | 763    | 138                            | - 121   | - 2 356 | - 141                 | 304     | - 262        | - 2 052 | 1 053   | - 1 122 |      |                                         |      |      |  |  |  |  |  |  |  |  |  |  |  |  |        |  |
| 779                | 229    | 81    | 62    | 860    | 291                            | - 118   | - 272   | - 138                 | 454     | - 256        | 182     | 1 427   | 1 462   |      |                                         |      |      |  |  |  |  |  |  |  |  |  |  |  |  |        |  |
| - 75               | - 133  | - 22  | - 20  | - 97   | - 153                          | - 3     | - 2 084 | - 3                   | - 150   | - 6          | - 2 234 | - 374   | - 2 584 |      |                                         |      |      |  |  |  |  |  |  |  |  |  |  |  |  |        |  |
| 85                 | 141    | 23    | 20    | 108    | 161                            | 5       | 1 916   | 0                     | - 3     | 5            | 1 913   | 396     | 2 303   |      |                                         |      |      |  |  |  |  |  |  |  |  |  |  |  |  |        |  |
| 12 455             | 12 511 | 1 882 | 1 903 | 14 337 | 14 414                         | 312     | 300     | -                     | -       | 312          | 300     | 47 669  | 47 743  |      |                                         |      |      |  |  |  |  |  |  |  |  |  |  |  |  |        |  |
| 6 709              | 6 415  | 1 720 | 1 747 | 8 429  | 8 162                          | 309     | 297     | -                     | -       | 309          | 297     | 27 354  | 26 768  |      |                                         |      |      |  |  |  |  |  |  |  |  |  |  |  |  |        |  |
| 5 746              | 6 096  | 162   | 156   | 5 908  | 6 252                          | 3       | 3       | -                     | -       | 3            | 3       | 20 315  | 20 975  |      |                                         |      |      |  |  |  |  |  |  |  |  |  |  |  |  |        |  |
| 11 373             | 11 641 | 1 814 | 1 868 | 13 187 | 13 509                         | 310     | 299     | -                     | -       | 310          | 299     | 45 693  | 46 100  |      |                                         |      |      |  |  |  |  |  |  |  |  |  |  |  |  |        |  |
| 11,7               | 13,2   | 12,9  | 13,9  | 11,8   | 13,3                           | -       | -       | -                     | -       | -            | -       | 7,1     | 4,2     |      |                                         |      |      |  |  |  |  |  |  |  |  |  |  |  |  |        |  |

## Segmentinformationen nach Regionen

| Mio €                                                                               | Deutschland | Übriges Europa | Übrige Regionen <sup>1</sup> | Gesamt |
|-------------------------------------------------------------------------------------|-------------|----------------|------------------------------|--------|
| <b>2010</b>                                                                         |             |                |                              |        |
| Langfristiges Vermögen (ohne Finanzinstrumente und Latente Steuern) am 31. Dezember | 3 060       | 1 698          | 1 858                        | 6 616  |
| Investitionen                                                                       | 264         | 58             | 74                           | 396    |
| Umsatz                                                                              | 3 058       | 4 869          | 6 748                        | 14 675 |
| Mitarbeiter 31. Dezember (Anzahl)                                                   | 26 046      | 15 407         | 4 240                        | 45 693 |
| Mitarbeiter<br>inkl. Leiharbeitnehmern 31. Dezember (Anzahl)                        | 27 354      | 15 757         | 4 558                        | 47 669 |
| <b>2009</b>                                                                         |             |                |                              |        |
| Langfristiges Vermögen (ohne Finanzinstrumente und Latente Steuern) am 31. Dezember | 2 709       | 1 683          | 1 669                        | 6 061  |
| Investitionen                                                                       | 280         | 87             | 1 936                        | 2 303  |
| Umsatz                                                                              | 2 751       | 4 666          | 4 609                        | 12 026 |
| Mitarbeiter 31. Dezember (Anzahl)                                                   | 25 962      | 16 433         | 3 705                        | 46 100 |
| Mitarbeiter<br>inkl. Leiharbeitnehmern 31. Dezember                                 | 26 768      | 16 891         | 4 084                        | 47 743 |

<sup>1</sup> Ausführliche Segmentinformationen bezüglich MAN Latin America sind in der Tabelle »Segmentberichterstattung« enthalten.

### Anteilsbesitz zum 31.12.2010

|                                                                                                | Höhe des Anteils am Kapital |
|------------------------------------------------------------------------------------------------|-----------------------------|
| <b>1. Vollkonsolidierte Gesellschaften mit Befreiung nach § 264 Abs. 3 HGB und § 264 b HGB</b> |                             |
| MAN Truck & Bus AG, München                                                                    | 100,00 %                    |
| MAN Vermietungs GmbH, München                                                                  | 100,00 %                    |
| MAN Leasing GmbH & Co. Epsilon KG, München                                                     | 100,00 %                    |
| MAN Truck & Bus Deutschland GmbH, München                                                      | 100,00 %                    |
| MAN Grundstücksgesellschaft mbH & Co. Beta KG, München                                         | 100,00 %                    |
| MAN Grundstücksgesellschaft mbH & Co. Alpha KG, München                                        | 100,00 %                    |
| MAN Logistik GmbH, Salzgitter                                                                  | 100,00 %                    |
| NEOPLAN Bus GmbH, Plauen                                                                       | 100,00 %                    |
| GETAS Verwaltung GmbH & Co. Objekt Augsburg KG, Pullach i. Isartal                             | 100,00 %                    |
| MAN Diesel & Turbo SE, Augsburg                                                                | 100,00 %                    |
| Rostock Diesel Service GmbH, Rostock                                                           | 100,00 %                    |
| MAN Grundstücksges. mbH & Co. Werk Deggendorf DWE KG, Deggendorf                               | 100,00 %                    |
| MAN HR Services GmbH, München                                                                  | 100,00 %                    |
| MAN Versicherungsvermittlung GmbH, München                                                     | 100,00 %                    |
| MAN Roland Beteiligungs GmbH, München                                                          | 100,00 %                    |
| MAN IT Services GmbH, München                                                                  | 100,00 %                    |
| MAN Immobilien GmbH, München                                                                   | 100,00 %                    |
| GETAS Verwaltung GmbH & Co. Objekt Offenbach KG, Pullach i. Isartal                            | 100,00 %                    |
| GETAS Verwaltung GmbH & Co. Objekt Verwaltung Nürnberg KG, Pullach i. Isartal                  | 100,00 %                    |
| GETAS Verwaltung GmbH & Co. Objekt Ausbildungszentrum KG, Pullach i. Isartal                   | 100,00 %                    |
| MAN Ferrostaal Beteiligungs GmbH, München                                                      | 100,00 %                    |
| MAN GHH Immobilien GmbH, Oberhausen                                                            | 100,00 %                    |
| MAN Financial Services GmbH, München                                                           | 100,00 %                    |
| MAN Finance International GmbH, München                                                        | 100,00 %                    |
| MAN Asset Finance GmbH, München                                                                | 100,00 %                    |
| <b>2. Übrige vollkonsolidierte Gesellschaften</b>                                              |                             |
| MAN Trucks Sp. z o.o., Niepolomice/Polen                                                       | 100,00 %                    |
| MAN Accounting Center Sp. z o.o., Poznan (Posen)/Polen                                         | 100,00 %                    |
| MAN Nutzfahrzeuge Vertrieb Süd AG, Wien/Österreich                                             | 100,00 %                    |
| MAN Bus Sp. z o.o., Tarnowo Podgórne/Polen                                                     | 100,00 %                    |
| MAN Truck & Bus Polska Sp. z o.o., Nadarzyn/Polen                                              | 100,00 %                    |
| ERF Limited, Middlewich/Großbritannien                                                         | 100,00 %                    |
| MAN Iberia S.A.U., Coslada (Madrid)/Spanien                                                    | 100,00 %                    |
| EURO-Leasing GmbH, Sittensen                                                                   | 50,13 %                     |
| Euro-Leasing A/S, Padborg/Dänemark                                                             | 100,00 %                    |
| EURO-LEASING Sp. z o.o., Szczecin/Polen                                                        | 100,00 %                    |
| EURO-Leasing Hellas E.P.E. Thessaloniki/Griechenland                                           | 90,00 %                     |
| Oy Klappstein AB, Helsinki/Finnland                                                            | 100,00 %                    |
| Klappstein Nutzfahrzeuge Verwaltungs GmbH, Sittensen                                           | 100,00 %                    |
| Truck Rental Solutions GmbH, Sittensen                                                         | 100,00 %                    |
| Truck Rental Solutions Hungaria Kft., Budapest/Ungarn                                          | 100,00 %                    |
| Truck Rental Solutions Cesko, spol.sr.o., Prag/Tschechien                                      | 100,00 %                    |
| Truck Rental Solutions Slovensko, Spol.sr.o., Dolná Poruba/Slowakei                            | 100,00 %                    |
| Truck Rental Solutions Polska Sp. z o.o., Kolbaskowo/Polen                                     | 100,00 %                    |
| Truck Rental Solutions Austria GmbH, Wien/Österreich                                           | 100,00 %                    |
| MAN Last og Bus A/S, Glostrup/Dänemark                                                         | 100,00 %                    |
| TOV MAN Truck & Bus Ukraine, Kiew/Ukraine                                                      | 100,00 %                    |
| MAN Automotive (South Africa) (Pty.) Ltd., Johannesburg/Südafrika                              | 100,00 %                    |
| MAN Truck & Bus (S.A.) (Pty.) Ltd., Johannesburg/Südafrika                                     | 100,00 %                    |
| MAN Centurion Truck & Bus (Pty) Ltd t/a, Centurion/Südafrika                                   | 70,00 %                     |
| MAN Bus & Coach (Pty.) Ltd., Olifantsfontein/Südafrika                                         | 100,00 %                    |
| MAN Nutzfahrzeuge Immobilien GesmbH, Wien/Österreich                                           | 100,00 %                    |
| MAN Hellas Truck & Bus S.A., Peristeri-Athen/Griechenland                                      | 100,00 %                    |
| MAN Engines & Components Inc., Pompano Beach/USA                                               | 100,00 %                    |
| MAN Nutzfahrzeuge (Schweiz) AG, Otelfingen/Schweiz                                             | 100,00 %                    |
| MAN Nutzfahrzeuge Österreich AG, Steyr/Österreich                                              | 100,00 %                    |
| MAN Vehiculos Industriales (España) S.A.U., Coslada (Madrid)/Spanien                           | 100,00 %                    |
| MAN Truck & Bus UK Limited, Swindon (Wiltshire)/Großbritannien                                 | 100,00 %                    |



|                                                                               | Höhe des Anteils am Kapital |
|-------------------------------------------------------------------------------|-----------------------------|
| SA Trucks Ltd., Bristol/Großbritannien                                        | 100,00 %                    |
| MAN Last og Buss A/S, Lorenskog/Norwegen                                      | 100,00 %                    |
| MAN Nutzfahrzeuge Österreich Holding, Steyr/Österreich                        | 99,99 %                     |
| MAN užitková vozidla Česká republika spol. s r.o., Cestlice/Tschechien        | 100,00 %                    |
| MAN Gospodarska vozila Slovenija d.o.o., Ljubljana/Slowenien                  | 100,00 %                    |
| MAN Kamion és Busz Kereskedelmi Kft., Dunaharaszti/Ungarn                     | 100,00 %                    |
| MAN Türkiye A.S., Akyurt Ankara/Türkei                                        | 99,99 %                     |
| MAN Kamyon ve Otobüs Ticaret A.S., Ankara/Türkei                              | 100,00 %                    |
| MAN Veículos Industriais (Portugal) S.U. Lda., Algés (Lissabon)/Portugal      | 100,00 %                    |
| IPECAS-Gestao de Imoveis S.A., Algés (Lissabon)/Portugal                      | 100,00 %                    |
| MAN Porto – Comércio de Veículos, S.A., Porto/Portugal                        | 76,00 %                     |
| MAN užitkové vozidlá Slovakia, s.r.o., Bratislava/Slowakei                    | 100,00 %                    |
| MAN Avtomobili Rossiya, Moskau/Russische Föderation                           | 100,00 %                    |
| MAN Turbo (UK) Limited, London/Großbritannien                                 | 100,00 %                    |
| MAN Diesel & Turbo Schweiz AG, Zürich/Schweiz                                 | 100,00 %                    |
| MAN Diesel & Turbo South Africa (Pty) Ltd., Elandsfontein/Südafrika           | 100,00 %                    |
| MAN Turbo (Changzhou) Co. Ltd., Changzhou/China                               | 100,00 %                    |
| MAN Diesel & Turbo Australia Pty. Ltd., North Ryde/Australien                 | 100,00 %                    |
| MAN Diesel & Turbo UK Ltd., Stockport/Großbritannien                          | 100,00 %                    |
| MAN Diesel India Ltd., Aurangabad/Indien                                      | 73,44 %                     |
| MAN Diesel & Turbo Canada Ltd., Oakville/Kanada                               | 100,00 %                    |
| MAN Diesel & Turbo Pakistan (Private) Limited, Lahore/Pakistan                | 100,00 %                    |
| MAN Diesel & Turbo Operations Pakistan (Private) Ltd., Lahore/Pakistan        | 100,00 %                    |
| MAN Diesel & Turbo France SAS, St. Nazaire (Villepinte)/Frankreich            | 100,00 %                    |
| MAN Diesel & Turbo Singapore Pte. Ltd., Singapur/Singapur                     | 100,00 %                    |
| MAN Diesel & Turbo Hong Kong Ltd., Hongkong/China                             | 100,00 %                    |
| MAN Diesel & Turbo Benelux B.V., Schiedam/Niederlande                         | 100,00 %                    |
| MAN Diesel & Turbo Benelux N.V., Antwerpen/Belgien                            | 100,00 %                    |
| MAN Diesel & Turbo North America Inc., Woodbridge/USA                         | 100,00 %                    |
| MAN Diesel & Turbo Korea Ltd., Pusan/Korea                                    | 100,00 %                    |
| PBS Turbo s.r.o., Velká Bíteš/Tschechien                                      | 100,00 %                    |
| MAN Diesel & Turbo Middle East (LLC), Dubai/Vereinigte Arabische Emirate      | 100,00 %                    |
| Société de Mécanique de Précision de l'Aubois, Jouet/Frankreich               | 100,00 %                    |
| MAN Diesel Shanghai Co. Ltd., Shanghai/China                                  | 100,00 %                    |
| MAN Turbo India Pvt. Ltd., Baroda (Vadodara)/Indien                           | 100,00 %                    |
| MAN Turbo Trading (Shanghai) Co., Ltd., Shanghai/China                        | 100,00 %                    |
| Renk Aktiengesellschaft, Augsburg                                             | 76,00 %                     |
| RENK Corporation, Duncan/USA                                                  | 100,00 %                    |
| RENK-MAAG GmbH, Winterthur/Schweiz                                            | 100,00 %                    |
| RENK Test System GmbH, Augsburg                                               | 100,00 %                    |
| RENK LABECO Test Systems Corporation, Mooresville/USA                         | 100,00 %                    |
| Société d'Equipements Systèmes et Mécanismes, Saint-Ouen-l'Aumône/Frankreich  | 100,00 %                    |
| MAN Finance and Holding S.à r.l., Luxemburg/Luxemburg                         | 100,00 %                    |
| MAN Capital Corporation, New Jersey/USA                                       | 100,00 %                    |
| MAN Financial Services SpA, Dossobuono di Villafranca VR/Italien              | 100,00 %                    |
| MAN Financial Services SAS, Evry Cedex/Frankreich                             | 100,00 %                    |
| MAN Financial Services España S.L., Coslada (Madrid)/Spanien                  | 100,00 %                    |
| MAN Financial Services Tüketici Finansmanı A.S., Ankara/Türkei                | 99,99 %                     |
| MAN Financial Services GesmbH, Eugendorf/Österreich                           | 100,00 %                    |
| MAN Financial Services OOO, Moskau/Russische Föderation                       | 100,00 %                    |
| MAN Financial Services Portugal, Unipessoal, Lda, Lissabon/Portugal           | 100,00 %                    |
| MAN Credit società finanziaria S.r.l., Dossobuono di Villafranca VR/Italien   | 100,00 %                    |
| MAN Financial Services Poland Sp. z o.o., Nadarzyn/Polen                      | 100,00 %                    |
| MAN Location & Services S.A.S., Evry Cedex/Frankreich                         | 100,00 %                    |
| Trucknology S.A., Luxemburg/Luxemburg                                         | 0,00 % <sup>1</sup>         |
| MANTAB Holdings, London/Großbritannien                                        | 0,00 % <sup>1</sup>         |
| MANTAB Funding Limited, London/Großbritannien                                 | 0,00 % <sup>1</sup>         |
| MANTAB Assets Limited, London/Großbritannien                                  | 0,00 % <sup>1</sup>         |
| MANTAB Trucks Limited, London/Großbritannien                                  | 0,00 % <sup>1</sup>         |
| MAN Financial Services plc, Swindon (Wiltshire)/Großbritannien                | 100,00 %                    |
| MAN Truck&Bus Mexico S.A. de C.V., El Marques/Mexico                          | 100,00 %                    |
| MAN Latin America Indústria e Comércio de Veículos Ltda., São Paulo/Brasilien | 100,00 %                    |

|                                                                           | Höhe des Anteils am Kapital |
|---------------------------------------------------------------------------|-----------------------------|
| <b>3. Nicht konsolidierte Gesellschaften ( § 296 Abs. 2 HGB )</b>         |                             |
| MAN Personal Services GmbH, Dachau                                        | 100,00 %                    |
| MAN Verwaltungs-Gesellschaft mbH, München                                 | 100,00 %                    |
| MAN Service und Support GmbH, München                                     | 100,00 %                    |
| MAN Truck & Bus Asia Pacific Co., Ltd., Bangkok/Thailand                  | 99,99 %                     |
| MAN Truck and Bus pvt. Ltd., Mumbai/Indien                                | 99,00 %                     |
| MAN Truck & Bus Sdn. Bhd., Rawang/Malaysia                                | 70,00 %                     |
| MAN Truck & Bus (Korea) Limited, Seoul/Südkorea                           | 100,00 %                    |
| MAN ERF Ireland Properties Limited, Dublin/Irland                         | 100,00 %                    |
| ERF (Holdings) plc, Swindon/Großbritannien                                | 100,00 %                    |
| MAN Truck & Bus (China), Beijing/China                                    | 100,00 %                    |
| MAN Truck & Bus Kasakhstan LLP, Almaty/Kasachstan                         | 100,00 %                    |
| MAN Properties (Pinetown) (Pty.) Ltd., Pinetown/Südafrika                 | 100,00 %                    |
| MAN Properties (Midrand) (Pty.) Ltd., Midrand/Südafrika                   | 100,00 %                    |
| MAN Properties (Pty.) Ltd., Johannesburg/Südafrika                        | 100,00 %                    |
| LKW Komponenten s.r.o., Bánovce nad Bebravou/Slowakei                     | 100,00 %                    |
| MAN IT Services Österreich GesmbH, Steyr/Österreich                       | 100,00 %                    |
| MAN Lastbilar och Bussar AB, Kungens Kurva/Schweden                       | 100,00 %                    |
| MAN Middle East FZCO – MN-Subdivision, Dubai/Vereinigte Arabische Emirate | 50,00 %                     |
| Railway Mine & Plantation Equipment Ltd., London/Großbritannien           | 100,00 %                    |
| MAN International Limited, London/Großbritannien                          | 100,00 %                    |
| MAN Turbo (UK) Ltd., London/Großbritannien                                | 100,00 %                    |
| tcu Turbo Charger GmbH, Augsburg                                          | 100,00 %                    |
| Aumonta GmbH, Augsburg                                                    | 100,00 %                    |
| MAN Diesel Turbochargers Shanghai Co. Ltd., Shanghai/China                | 100,00 %                    |
| Mirrlees Blackstone Ltd., Stockport/Großbritannien                        | 100,00 %                    |
| MAN Diesel Malaysia Sdn. Bhd., Kuala Lumpur/Malaysia                      | 100,00 %                    |
| Fifty Two Ltd., Stockport/Großbritannien                                  | 100,00 %                    |
| Ruston & Hornsby Ltd., Stockport/Großbritannien                           | 100,00 %                    |
| Paxman Diesels Ltd., Stockport/Großbritannien                             | 100,00 %                    |
| MAN B&W Diesel Services Ltd., Stockport/Großbritannien                    | 100,00 %                    |
| MAN B&W Diesel Electrical Services Ltd., Essex/Großbritannien             | 100,00 %                    |
| Ruston Diesels Ltd., Stockport/Großbritannien                             | 100,00 %                    |
| MAN Diesel Power India Pvt. Ltd., Navi Mumbai/Indien                      | 50,00 %                     |
| MAN Diesel ve Turbo Satis Servis Limited Sirketi, Istanbul/Türkei         | 100,00 %                    |
| MAN Diesel South Africa (Proprietary) Limited, Kapstadt/Südafrika         | 100,00 %                    |
| MAN Diesel & Turbo Kenya Ltd., Nairobi/Kenia                              | 100,00 %                    |
| Metalock Denmark A/S, Kopenhagen/Dänemark                                 | 100,00 %                    |
| MAN Diesel & Turbo Poland Sp. z o.o., Gdansk/Polen                        | 100,00 %                    |
| MAN Diesel & Turbo Sverige AB, Göteborg/Schweden                          | 100,00 %                    |
| MAN Diesel & Turbo España S.A.U., Madrid/Spanien                          | 100,00 %                    |
| Caribbean Power Application, S.L., Madrid/Spanien                         | 100,00 %                    |
| MAN Diesel & Turbo Brasil Ltda., Rio de Janeiro/Brasilien                 | 100,00 %                    |
| MAN Diesel & Turbo Italia s.r.l., Genua/Italien                           | 100,00 %                    |
| MAN Diesel & Turbo Chile Limitada, Valparaíso/Chile                       | 100,00 %                    |
| XESTORMAN, Unipessoal, Lda, Lissabon/Portugal                             | 100,00 %                    |
| MAN Diesel & Turbo Bulgaria EOOD, Varna/Bulgarien                         | 100,00 %                    |
| MAN Diesel & Turbo Costa Rica Limitada, San Jose/Costa Rica               | 100,00 %                    |
| MAN Diesel & Turbo Japan Ltd., Kobe/Japan                                 | 100,00 %                    |
| MAN Diesel & Turbo Norge A/S, Oslo/Norwegen                               | 100,00 %                    |
| MAN Iran Power Sherkate Sahami Khass, Teheran/Iran                        | 96,00 %                     |
| MAN Diesel & Turbo Hellas Ltd., Piraeus/Griechenland                      | 100,00 %                    |
| MAN Diesel & Turbo Panama Enterprises Inc., Panama-Stadt/Panama           | 100,00 %                    |
| MAN Diesel & Turbo Russia Ltd., Moskau/Russische Föderation               | 100,00 %                    |

|                                                                                                         | Höhe des Anteils am Kapital |
|---------------------------------------------------------------------------------------------------------|-----------------------------|
| MAN Diesel & Turbo Latvia SIA, Riga/Lettland                                                            | 100,00 %                    |
| MAN Diesel Saudi Arabia L. L. C., Jeddah/Saudi-Arabien                                                  | 90,00 %                     |
| Centrales Diesel Export, Villepinte/Frankreich                                                          | 100,00 %                    |
| MAN Diesel & Turbo Philippines Inc., Manila/Philippinen                                                 | 100,00 %                    |
| MAN Diesel & Turbo Canarias S.L., Las Palmas (Canary Island)/Spanien                                    | 100,00 %                    |
| MAN Diesel & Turbo Guatemala Ltda., Guatemala City/Guatemala                                            | 100,00 %                    |
| MAN Diesel & Turbo Argentina S.A., Buenos Aires/Argentinien                                             | 100,00 %                    |
| PT MAN Diesel & Turbo Indonesia, Jakarta/Indonesien                                                     | 92,62 %                     |
| MAN Diesel & Turbo Malaysia Sdn. Bhd., Kuala Lumpur/Malaysia                                            | 49,00 %                     |
| Gulf Turbo Services LLC, Doha/Katar                                                                     | 55,00 %                     |
| RENK (UK) Ltd., London/Großbritannien                                                                   | 100,00 %                    |
| COFICAL RENK Mancais do Brasil LTDA, Guaramirim/Brasilien                                               | 98,00 %                     |
| RENK Transmisyon Sanayi A.S., Istanbul/Türkei                                                           | 55,00 %                     |
| MAN Grundstücksgesellschaft mbH, Oberhausen                                                             | 100,00 %                    |
| MAN Unterstützungskasse GmbH, München                                                                   | 100,00 %                    |
| MAN Leasing GmbH & Co. Gamma KG, München                                                                | 100,00 %                    |
| MBC Mobile Bridges Corp., Houston, Texas/USA                                                            | 100,00 %                    |
| Ortan Verwaltung GmbH & Co. Objekt Karlsfeld KG, Pöcking                                                | 100,00 %                    |
| MAN Grundstücksgesellschaft mbH & Co. Objekt Heilbronn KG, Oberhausen                                   | 100,00 %                    |
| <b>4. Sonstige Gesellschaften</b>                                                                       |                             |
| <b>A. At Equity bilanzierte Unternehmen</b>                                                             |                             |
| <b>A1. Gemeinschaftsunternehmen</b>                                                                     |                             |
| MAN FORCE TRUCKS Private Limited, Akurdi/Indien                                                         | 50,00 %                     |
| MAN Financial Services SA (Pty) Ltd, Johannesburg/Südafrika                                             | 50,00 %                     |
| <b>A2. Assoziierte Unternehmen</b>                                                                      |                             |
| Hörmann Automotive Components GmbH & Co. KG, Gustavsborg                                                | 40,00 %                     |
| OOO EURO-Leasing RUS, Rjasan/Russische Föderation                                                       | 60,00 %                     |
| MAN Region West B.V., Vianen/Niederlande                                                                | 50,00 %                     |
| JV MAN AUTO – Uzbekistan Limited Liability Company, Samarkand City/Usbekistan                           | 49,00 %                     |
| Rheinmetall MAN Military Vehicles GmbH, München                                                         | 49,00 %                     |
| Atlas Power Ltd., Karachi/Pakistan                                                                      | 33,54 %                     |
| Roland Holding GmbH, München                                                                            | 22,83 % <sup>2</sup>        |
| Scania AB, Södertälje/Schweden                                                                          | 13,35 % <sup>3</sup>        |
| Sinotruk (Hong Kong) Limited, Hongkong/China                                                            | 25,00 %                     |
| Ferrostaal Aktiengesellschaft, Essen                                                                    | 30,00 % <sup>4</sup>        |
| <b>B. At Cost bilanzierte Unternehmen</b>                                                               |                             |
| Kosiga KG, Pullach i. Isartal                                                                           | 47,50 %                     |
| FFK Fahrzeugservice Försch GmbH, Kronach                                                                | 30,00 %                     |
| Coburger Nutzfahrzeuge Service GmbH, Coburg                                                             | 30,00 %                     |
| MAN VW Truck en Bus (Nederland) B.V., Leusden/Niederlande                                               | 26,00 %                     |
| Neoplan Ghana Ltd., Kumasi/Ghana                                                                        | 45,00 %                     |
| Obermeier Trailertechnik GmbH, Egeln-Nord                                                               | 24,00 %                     |
| PosernConnect GmbH, Sittensen                                                                           | 49,00 %                     |
| Grundstücksverwaltungsgesellschaft EURO-Leasing GmbH, Matthias Hinnens und Helge Richter GbR, Sittensen | 50,00 %                     |
| Scavino S.r.l., Alba/Italien                                                                            | 30,00 %                     |
| De Pretto Industrie S.r.l., Schio/Italien                                                               | 51,00 %                     |
| MTC Marine Training Center Hamburg GmbH, Hamburg                                                        | 24,80 %                     |
| RENK U.A.E. LLC, Abu Dhabi/Vereinigte Arabische Emirate                                                 | 49,00 %                     |
| Verwaltungsgesellschaft Wasseraffingen mbH, Aalen                                                       | 50,00 %                     |

<sup>1</sup> Konsolidierte Zweckgesellschaft mit einem Anteil am Kapital von 0,00 %<sup>2</sup> Stimmrechtsquote 32,82 %<sup>3</sup> Stimmrechtsquote 17,37 %<sup>4</sup> Als zur Veräußerung bestimmt ausgewiesen

### Aufsichtsrat – Mitgliedschaften in anderen Kontrollgremien

**Hon.-Prof. Dr. techn. h. c. Dipl.-Ing. ETH Ferdinand K. Piëch**  
Salzburg/Österreich,  
Vorsitzender des Aufsichtsrats

<sup>1</sup> Volkswagen AG (Vors.)  
AUDI AG  
Dr. Ing. h. c. F. Porsche AG  
Porsche Automobil Holding SE

<sup>3</sup> Porsche Austria GmbH  
Porsche Ges.m.b.H.  
Porsche Holding GmbH  
Porsche Retail GmbH

**Thomas Otto\***

Ottweiler,  
Gewerkschaftssekretär der IG Metall  
stellv. Vorsitzender des Aufsichtsrats

<sup>1</sup> MAN Diesel&Turbo SE  
MAN Truck&Bus AG  
MAN Truck&Bus Deutschland GmbH

**Prof. Dr.-Ing. Dr.-Ing. E.h. Dr. h.c. Ekkehard D. Schulz**  
Düsseldorf,  
ehem. Vorsitzender des Vorstands der ThyssenKrupp AG  
stellv. Vorsitzender des Aufsichtsrats

<sup>1</sup> AXA Konzern AG  
Bayer AG  
RWE AG  
ThyssenKrupp AG

**Michael Behrendt**

Hamburg,  
Vorsitzender des Vorstands der Hapag-Lloyd AG

<sup>1</sup> Barmenia Allgemeine Versicherungs-AG  
Barmenia Krankenversicherung a. G. (stellv. Vors.)  
Barmenia Lebensversicherung a. G. (stellv. Vors.)  
Esso Deutschland GmbH  
ExxonMobil C. E. Holding GmbH  
Hamburgische Staatsoper GmbH

**Marek Berdychowski\***

Tarnowo, Podgórze/Polen,  
stellv. Vorsitzender der Gewerkschaft Metalowcy  
bei MAN Bus Sp. z. o.o., Werk Tarnowo, Podgórze, sowie  
Betriebsrat der MAN Bus Sp.z o.o., Werk Tarnowo, Podgórze

**Ulf Berkenhagen**

Wolfsburg,  
Mitglied des Vorstands der AUDI AG  
(seit 01.04.2010 Mitglied des Aufsichtsrats)

<sup>2</sup> quattro GmbH

<sup>4</sup> AUDI HUNGARIA MOTOR Kft., Győr (stellv. Vors.)

**Detlef Dirks\***

Augsburg,  
Vorsitzender des Betriebsrats der MAN Diesel&Turbo SE,  
Werk Augsburg

**Jürgen Dorn\***

München,  
Vorsitzender des Konzernbetriebsrats der MAN SE  
sowie des SE-Betriebsrats

<sup>1</sup> MAN Truck&Bus AG (stellv. Vors.)

**Dr. jur. Heiner Hasford**

München,  
ehem. Mitglied des Vorstands der  
Münchener Rückversicherungs-Gesellschaft AG

<sup>1</sup> D.A.S. Deutscher Automobil Schutz Allgemeine  
Rechtsschutz-Versicherungs-AG  
ERGO Versicherungsgruppe AG  
Nürnberger Beteiligungs-AG

**Jürgen Kerner\***

Augsburg,  
1. Bevollmächtigter der IG Metall Augsburg

<sup>1</sup> Eurocopter Deutschland GmbH  
KUKA AG  
MAN Diesel&Turbo SE  
manroland AG  
Premium Aerotec GmbH

**Prof. Dr. rer. pol. Renate Köcher**

Konstanz,  
Geschäftsführerin des Instituts für Demoskopie Allensbach

<sup>1</sup> Allianz SE  
BMW AG  
Infineon Technologies AG

**Gerhard Kreutzer\***

Oberhausen,  
stellv. Vorsitzender des Konzernbetriebsrats der MAN SE  
sowie des SE-Betriebsrats

<sup>1</sup> MAN Diesel&Turbo SE

**Nicola Lopopolo\***

Hannover,  
Vorsitzender des Betriebsrats der Renk AG,  
Werk Hannover

**Dipl.-Kfm. Stefan W. Ropers**

München,  
Mitglied des Vorstands der Bayerischen Landesbank  
(bis 01.04.2010 Mitglied des Aufsichtsrats)

<sup>1</sup> KG Allgemeine Leasing GmbH & Co. KG (stellv. Vors.)

<sup>2</sup> BayernInvest Kapitalanlagegesellschaft mbH (stellv. Vors.)  
BayernLB Equity Management GmbH (stellv. Vors.)

**Dr.-Ing. E.h. Rudolf Rupprecht**

Augsburg,  
ehem. Vorsitzender des Vorstands der MAN AG

<sup>1</sup> Demag Cranes AG  
Salzgitter AG

**Erich Schwarz\***

Steyr/Österreich,  
Zentralbetriebsratsvorsitzender der MAN Nutzfahrzeuge  
Österreich AG sowie stellv. Vorsitzender des SE-Betriebsrats

<sup>3</sup> MAN Nutzfahrzeuge Österreich AG

**Rupert Stadler**

Ingolstadt,  
Vorsitzender des Vorstands der AUDI AG

<sup>1</sup> FC Bayern München AG

MAN Truck & Bus AG (Vors.)

<sup>4</sup> Automobili Lamborghini Holding S.p.A. (Vors.)

Italdesign Giugiaro S.p.A.

VOLKSWAGEN GROUP ITALIA S.P.A. (Vors.)

## Ausschüsse des Aufsichtsrats der MAN SE

**Präsidium**

Hon.-Prof. Dr. techn. h. c. Dipl.-Ing. ETH Ferdinand K. Piëch (Vors.)

Michael Behrendt

Jürgen Dorn

Gerhard Kreutzer

Thomas Otto

Prof. Dr.-Ing. Dr.-Ing. E. h. Dr. h. c. Ekkehard D. Schulz

**Prüfungsausschuss**

Rupert Stadler (Vors.)

Thomas Otto (stellv. Vors.)

Michael Behrendt

Jürgen Dorn

Gerhard Kreutzer

Prof. Dr.-Ing. Dr.-Ing. E. h. Dr. h. c. Ekkehard D. Schulz

**Nominierungsausschuss**

Hon.-Prof. Dr. techn. h. c. Dipl.-Ing. ETH Ferdinand K. Piëch

Michael Behrendt

Prof. Dr.-Ing. Dr.-Ing. E. h. Dr. h. c. Ekkehard D. Schulz

## Vorstand – Mitgliedschaften in anderen Kontrollgremien

**Dr.-Ing. Georg Pachta-Reyhofen**

Niederpöcking,  
Sprecher des Vorstands

<sup>1</sup> Rheinmetall MAN Military Vehicles GmbH

<sup>2</sup> MAN Diesel & Turbo SE (Vors.)

<sup>3</sup> Sinotruk (Hongkong) Ltd.

<sup>4</sup> MAN Latin America Indústria e Comércio de Veículos Ltda. (Vors.)

**Frank H. Lutz**

München

<sup>1</sup> Ferrostaal AG  
manroland AG

<sup>2</sup> MAN Diesel & Turbo SE  
MAN Pensionsfonds AG (Vors.)  
MAN Truck & Bus AG  
Renk AG (Vors.)

<sup>3</sup> Börse München

<sup>4</sup> MAN Capital Corporation, USA (Vors.)  
MAN Latin America Indústria e Comércio de Veículos Ltda.

**Jörg Schwitalla**

Besigheim

<sup>2</sup> MAN Diesel & Turbo SE  
MAN Pensionsfonds AG  
MAN Truck & Bus AG

<sup>3</sup> Sinotruk (Hongkong) Ltd.

<sup>4</sup> MAN Latin America Indústria e Comércio de Veículos Ltda.

**Dipl.-Wirtsch.-Ing. Klaus Stahlmann**

Kempfen

<sup>1</sup> manroland AG

<sup>2</sup> Renk AG (stellv. Vors.)

## Vorstände und Geschäftsführung Konzernunternehmen

**MAN Truck & Bus AG**

München

Dr.-Ing. Georg Pachta-Reyhofen

Sprecher des Vorstands

Karl Gadesmann

Dr. Frank Hiller

Dipl.-Ing. Bernd Maierhofer

Dipl.-Ing. Lars Wrebo

**MAN Latin America Indústria e Comércio de Veículos Ltda.**

São Paulo

Antonio Roberto Cortes

Vorsitzender

Helmut Dieter Hümmerich

**MAN Diesel & Turbo SE**

Augsburg

Dipl.-Wirtsch.-Ing. Klaus Stahlmann

Sprecher des Vorstands

Jan Gurander

Dr.-Ing. Hans-O. Jeske

Dr.-Ing. Stephan Timmermann

**Renk AG**

Augsburg

Dipl.-Ing. (FH) Florian Hofbauer

Sprecher des Vorstands

Ulrich Sauter

\* Von der Belegschaft gewählt

Stand: 27. Januar 2011 bzw. Datum des Ausscheidens

<sup>1</sup> Mitgliedschaften in Aufsichtsräten bei inländischen Gesellschaften

<sup>2</sup> Mitgliedschaften in Aufsichtsräten bei inländischen Gesellschaften, Konzernmandate

<sup>3</sup> Mitgliedschaften in vergleichbaren in- und ausländischen Kontrollgremien

<sup>4</sup> Mitgliedschaften in vergleichbaren in- und ausländischen Kontrollgremien, Konzernmandate

# Weitere Informationen

## Versicherung der gesetzlichen Vertreter

Wir versichern nach bestem Wissen, dass gemäß den anzuwendenden Rechnungslegungsgrundsätzen der Konzernabschluss ein den tatsächlichen Verhältnissen entsprechendes Bild der Vermögens-, Finanz- und Ertragslage des Konzerns vermittelt und im Konzernlagebericht der Geschäftsverlauf einschließlich des Geschäftsergebnisses und die Lage des Konzerns so dargestellt sind, dass ein den tatsächlichen Verhältnissen entsprechendes Bild vermittelt wird sowie die wesentlichen Chancen und Risiken der voraussichtlichen Entwicklung des Konzerns beschrieben sind.

München, den 27. Januar 2011

**MAN SE**

Der Vorstand

**Dr. Georg Pachta-Reyhofen**  
Sprecher des Vorstands

**Frank H. Lutz**  
Vorstand Finanzen

**Jörg Schwitalla**  
Mitglied des Vorstands

**Klaus Stahlmann**  
Mitglied des Vorstands



# Weitere Informationen

## Bestätigungsvermerk des Abschlussprüfers

Wir haben den von der MAN SE, München, aufgestellten Konzernabschluss – bestehend aus Gewinn- und Verlustrechnung, Überleitung zum Gesamtergebnis der Periode, Bilanz, Kapitalflussrechnung, Entwicklung des Eigenkapitals und Anhang – sowie den Konzernlagebericht für das Geschäftsjahr vom 1. Januar bis 31. Dezember 2010 geprüft. Die Aufstellung von Konzernabschluss und Konzernlagebericht nach den IFRS, wie sie in der EU anzuwenden sind, und den ergänzend nach § 315 a Abs. 1 HGB anzuwendenden handelsrechtlichen Vorschriften liegt in der Verantwortung des Vorstands der Gesellschaft. Unsere Aufgabe ist es, auf der Grundlage der von uns durchgeführten Prüfung eine Beurteilung über den Konzernabschluss und den Konzernlagebericht abzugeben.

Wir haben unsere Konzernabschlussprüfung nach § 317 HGB unter Beachtung der vom Institut der Wirtschaftsprüfer (IDW) festgestellten deutschen Grundsätze ordnungsmäßiger Abschlussprüfung vorgenommen. Danach ist die Prüfung so zu planen und durchzuführen, dass Unrichtigkeiten und Verstöße, die sich auf die Darstellung des durch den Konzernabschluss unter Beachtung der anzuwendenden Rechnungslegungsvorschriften und durch den Konzernlagebericht vermittelten Bildes der Vermögens-, Finanz- und Ertragslage wesentlich auswirken, mit hinreichender Sicherheit erkannt werden. Bei der Festlegung der Prüfungshandlungen werden die Kenntnisse über die Geschäftstätigkeit und über das wirtschaftliche und rechtliche Umfeld des Konzerns sowie die Erwartungen über mögliche Fehler berücksichtigt. Im Rahmen der Prüfung werden die Wirksamkeit des rechnungslegungsbezogenen internen Kontrollsystems sowie Nachweise für die Angaben im Konzernabschluss und Konzernlagebericht überwiegend auf der Basis von Stichproben beurteilt. Die Prüfung umfasst die Beurteilung der Jahresabschlüsse der in den Konzernabschluss einbezogenen Unternehmen, der Abgrenzung des Konsolidierungskreises, der angewandten Bilanzierungs- und Konsolidierungsgrundsätze und der wesentlichen Einschätzungen des Vorstands sowie die Würdigung der Gesamtdarstellung des Konzernabschlusses und des Konzernlageberichts. Wir sind der Auffassung, dass unsere Prüfung eine hinreichend sichere Grundlage für unsere Beurteilung bildet.

Unsere Prüfung hat zu keinen Einwendungen geführt.

Nach unserer Beurteilung aufgrund der bei der Prüfung gewonnenen Erkenntnisse entspricht der Konzernabschluss den IFRS, wie sie in der EU anzuwenden sind, und den ergänzend nach § 315 a Abs. 1 HGB anzuwendenden handelsrechtlichen Vorschriften und vermittelt unter Beachtung dieser Vorschriften ein den tatsächlichen Verhältnissen entsprechendes Bild der Vermögens-, Finanz- und Ertragslage des Konzerns. Der Konzernlagebericht steht in Einklang mit dem Konzernabschluss, vermittelt insgesamt ein zutreffendes Bild von der Lage des Konzerns und stellt die Chancen und Risiken der zukünftigen Entwicklung zutreffend dar.

München, den 28. Januar 2011

**PricewaterhouseCoopers**  
**Aktiengesellschaft**  
**Wirtschaftsprüfungsgesellschaft**

**Dr. Jan Konerding**  
Wirtschaftsprüfer

**Petra Justenhoven**  
Wirtschaftsprüferin

# Weitere Informationen

## Ungeprüfte Zusatzinformationen: Quartalsübersicht

### Ungeprüfte Zusatzinformationen: Quartalsübersicht (1/3)

| Mio €                                               |                |               |               |               |               |                |               |               |               |               |
|-----------------------------------------------------|----------------|---------------|---------------|---------------|---------------|----------------|---------------|---------------|---------------|---------------|
|                                                     | 2010           |               |               |               |               | 2009           |               |               |               |               |
|                                                     | Gesamt<br>2010 | Q 4           | Q 3           | Q 2           | Q 1           | Gesamt<br>2009 | Q 4           | Q 3           | Q 2           | Q 1           |
| <b>Auftragseingang nach Bereichen</b>               |                |               |               |               |               |                |               |               |               |               |
| MAN Truck & Bus                                     | 8 023          | 2 351         | 2 018         | 1 961         | 1 693         | 5 224          | 1 360         | 1 203         | 1 296         | 1 365         |
| MAN Latin America                                   | 3 140          | 768           | 840           | 816           | 716           | 1 412          | 571           | 453           | 388           | –             |
| Commercial Vehicles                                 | 11 163         | 3 119         | 2 858         | 2 777         | 2 409         | 6 636          | 1 931         | 1 656         | 1 684         | 1 365         |
| MAN Diesel & Turbo                                  | 3 475          | 911           | 797           | 735           | 1 032         | 2 936          | 632           | 918           | 523           | 863           |
| Renk                                                | 525            | 86            | 87            | 242           | 110           | 294            | 70            | 84            | 72            | 68            |
| Power Engineering                                   | 4 000          | 997           | 884           | 977           | 1 142         | 3 230          | 702           | 1 002         | 595           | 931           |
| Sonstige/Konsolidierung                             | – 91           | – 28          | – 26          | – 9           | – 28          | – 6            | 2             | – 1           | – 1           | – 6           |
| <b>Auftragseingang</b>                              | <b>15 072</b>  | <b>4 088</b>  | <b>3 716</b>  | <b>3 745</b>  | <b>3 523</b>  | <b>9 860</b>   | <b>2 635</b>  | <b>2 657</b>  | <b>2 278</b>  | <b>2 290</b>  |
| <b>Auftragseingang Commercial Vehicles (Anzahl)</b> | <b>133 023</b> | <b>35 611</b> | <b>34 207</b> | <b>33 426</b> | <b>29 779</b> | <b>73 826</b>  | <b>22 479</b> | <b>20 468</b> | <b>20 179</b> | <b>10 700</b> |
| davon MAN Truck & Bus                               | 67 393         | 20 445        | 16 731        | 16 678        | 13 539        | 37 984         | 9 601         | 8 443         | 9 240         | 10 700        |
| davon MAN Latin America                             | 65 630         | 15 166        | 17 476        | 16 748        | 16 240        | 35 842         | 12 878        | 12 025        | 10 939        | –             |
| <b>Umsatz nach Bereichen</b>                        |                |               |               |               |               |                |               |               |               |               |
| MAN Truck & Bus                                     | 7 446          | 2 255         | 1 903         | 1 834         | 1 454         | 6 395          | 1 574         | 1 565         | 1 641         | 1 615         |
| MAN Latin America                                   | 3 140          | 768           | 840           | 816           | 716           | 1 412          | 571           | 453           | 388           | –             |
| Commercial Vehicles                                 | 10 586         | 3 023         | 2 743         | 2 650         | 2 170         | 7 807          | 2 145         | 2 018         | 2 029         | 1 615         |
| MAN Diesel & Turbo                                  | 3 766          | 1 073         | 935           | 894           | 864           | 3 796          | 989           | 984           | 962           | 861           |
| Renk                                                | 403            | 115           | 100           | 78            | 110           | 474            | 126           | 106           | 131           | 111           |
| Power Engineering                                   | 4 169          | 1 188         | 1 035         | 972           | 974           | 4 270          | 1 115         | 1 090         | 1 093         | 972           |
| Sonstige/Konsolidierung                             | – 80           | – 27          | – 21          | – 10          | – 22          | – 51           | – 4           | – 4           | – 12          | – 31          |
| <b>Umsatz</b>                                       | <b>14 675</b>  | <b>4 184</b>  | <b>3 757</b>  | <b>3 612</b>  | <b>3 122</b>  | <b>12 026</b>  | <b>3 256</b>  | <b>3 104</b>  | <b>3 110</b>  | <b>2 556</b>  |
| <b>Absatz Commercial Vehicles (Anzahl)</b>          | <b>126 279</b> | <b>35 124</b> | <b>33 681</b> | <b>31 479</b> | <b>25 995</b> | <b>82 609</b>  | <b>24 165</b> | <b>23 159</b> | <b>23 078</b> | <b>12 207</b> |
| davon MAN Truck & Bus                               | 60 649         | 19 958        | 16 205        | 14 731        | 9 755         | 46 767         | 11 287        | 11 134        | 12 139        | 12 207        |
| davon MAN Latin America                             | 65 630         | 15 166        | 17 476        | 16 748        | 16 240        | 35 842         | 12 878        | 12 025        | 10 939        | –             |
| <b>Auftragsbestand<sup>1</sup></b>                  | <b>7 025</b>   | <b>7 025</b>  | <b>7 371</b>  | <b>7 706</b>  | <b>7 720</b>  | <b>7 422</b>   | <b>7 422</b>  | <b>8 160</b>  | <b>8 661</b>  | <b>9 662</b>  |

<sup>1</sup> Stichtagswert

Diese Informationen werden auf freiwilliger Basis berichtet und sind nicht Teil des geprüften Konzernabschlusses.

## Ungeprüfte Zusatzinformationen: Quartalsübersicht (2/3)

| Mio €                                                           |                |                |                |                |                |                |                |                |                |                |
|-----------------------------------------------------------------|----------------|----------------|----------------|----------------|----------------|----------------|----------------|----------------|----------------|----------------|
|                                                                 | 2010           |                |                |                |                | 2009           |                |                |                |                |
|                                                                 | Gesamt<br>2010 | Q 4            | Q 3            | Q 2            | Q 1            | Gesamt<br>2009 | Q 4            | Q 3            | Q 2            | Q 1            |
| <b>Operatives Ergebnis nach Bereichen</b>                       |                |                |                |                |                |                |                |                |                |                |
| MAN Truck & Bus                                                 | 158            | 85             | 59             | 71             | - 57           | - 91           | - 32           | - 42           | - 22           | 5              |
| MAN Latin America                                               | 370            | 112            | 92             | 96             | 70             | 142            | 65             | 42             | 35             | -              |
| Commercial Vehicles                                             | 528            | 197            | 151            | 167            | 13             | 51             | 33             | 0              | 13             | 5              |
| MAN Diesel & Turbo                                              | 439            | 107            | 112            | 118            | 102            | 500            | 126            | 129            | 128            | 117            |
| Renk                                                            | 52             | 10             | 17             | 9              | 16             | 66             | 19             | 14             | 18             | 15             |
| Power Engineering                                               | 491            | 117            | 129            | 127            | 118            | 566            | 145            | 143            | 146            | 132            |
| Sonstige/Konsolidierung                                         | 16             | - 7            | 44             | - 18           | - 3            | - 113          | - 52           | - 9            | - 15           | - 37           |
| <b>Operatives Ergebnis</b>                                      | <b>1 035</b>   | <b>307</b>     | <b>324</b>     | <b>276</b>     | <b>128</b>     | <b>504</b>     | <b>126</b>     | <b>134</b>     | <b>144</b>     | <b>100</b>     |
| Ergebniseffekte aus Kaufpreisallokationen                       | - 109          | - 26           | - 35           | - 25           | - 23           | - 62           | - 22           | - 40           | -              | -              |
| Ergebnis aus Sondervorgängen                                    | 357            | 357            | -              | -              | -              | - 656          | - 563          | - 22           | - 61           | - 10           |
| <b>Ergebnis vor Zinsen und Steuern (EBIT)</b>                   | <b>1 283</b>   | <b>638</b>     | <b>289</b>     | <b>251</b>     | <b>105</b>     | <b>- 214</b>   | <b>- 459</b>   | <b>72</b>      | <b>83</b>      | <b>90</b>      |
| Abschreibungen und Wertminderungen langfristiger Vermögenswerte | 467            | 135            | 110            | 113            | 109            | 804            | 509            | 129            | 88             | 78             |
| Wertaufholungen Beteiligungen nach der Equity-Methode           | - 357          | - 357          | -              | -              | -              | -              | -              | -              | -              | -              |
| <b>Ergebnis vor Zinsen, Steuern, Abschreibungen (EBITDA)</b>    | <b>1 393</b>   | <b>416</b>     | <b>399</b>     | <b>364</b>     | <b>214</b>     | <b>590</b>     | <b>50</b>      | <b>201</b>     | <b>171</b>     | <b>168</b>     |
| <b>Ergebnis vor Steuern (EBT)</b>                               | <b>1 125</b>   | <b>584</b>     | <b>256</b>     | <b>216</b>     | <b>69</b>      | <b>- 331</b>   | <b>- 486</b>   | <b>37</b>      | <b>38</b>      | <b>80</b>      |
| Ertragsteuern                                                   | - 338          | - 177          | - 76           | - 65           | - 20           | - 53           | 13             | - 31           | - 11           | - 24           |
| Ergebnis aufgebener Geschäftsbereiche                           | - 65           | - 65           | -              | -              | -              | 126            | 1              | -              | -              | 125            |
| <b>Ergebnis nach Steuern</b>                                    | <b>722</b>     | <b>342</b>     | <b>180</b>     | <b>151</b>     | <b>49</b>      | <b>- 258</b>   | <b>- 472</b>   | <b>6</b>       | <b>27</b>      | <b>181</b>     |
| <b>ROS (%)</b>                                                  | <b>7,1</b>     | <b>7,3</b>     | <b>8,6</b>     | <b>7,7</b>     | <b>4,1</b>     | <b>4,2</b>     | <b>3,9</b>     | <b>4,3</b>     | <b>4,6</b>     | <b>3,9</b>     |
| MAN Truck & Bus                                                 | 2,1            | 3,8            | 3,1            | 3,9            | - 3,9          | - 1,4          | - 2,0          | - 2,7          | - 1,3          | 0,3            |
| MAN Latin America                                               | 11,8           | 14,6           | 11,0           | 11,8           | 9,7            | 10,1           | 11,5           | 9,1            | 9,1            | -              |
| Commercial Vehicles                                             | 5,0            | 6,5            | 5,5            | 6,3            | 0,6            | 0,7            | 1,6            | - 0,1          | 0,7            | 0,3            |
| MAN Diesel & Turbo                                              | 11,7           | 10,0           | 11,9           | 13,3           | 11,8           | 13,2           | 12,8           | 13,1           | 13,4           | 13,5           |
| Renk                                                            | 12,9           | 8,7            | 16,9           | 11,5           | 14,5           | 13,9           | 15,2           | 13,1           | 13,8           | 13,5           |
| Power Engineering                                               | 11,8           | 9,9            | 12,4           | 13,1           | 12,1           | 13,3           | 13,1           | 13,1           | 13,5           | 13,5           |
| Cash Earnings                                                   | 815            | 182            | 239            | 304            | 90             | 396            | - 28           | 91             | 175            | 158            |
| Cashflow aus der Geschäftstätigkeit                             | 1 427          | 475            | 242            | 211            | 499            | 1 462          | 504            | 559            | 258            | 141            |
| Cashflow aus der Investitionstätigkeit                          | - 374          | - 176          | - 77           | - 79           | - 42           | - 2 584        | - 709          | - 25           | - 76           | - 1 774        |
| <b>Free Cashflow</b>                                            | <b>1 053</b>   | <b>299</b>     | <b>165</b>     | <b>132</b>     | <b>457</b>     | <b>- 1 122</b> | <b>- 205</b>   | <b>534</b>     | <b>182</b>     | <b>- 1 633</b> |
| <b>Nettoverschuldung<sup>1</sup></b>                            | <b>- 1 778</b> | <b>- 1 778</b> | <b>- 2 083</b> | <b>- 2 252</b> | <b>- 2 345</b> | <b>- 2 634</b> | <b>- 2 634</b> | <b>- 2 385</b> | <b>- 2 955</b> | <b>- 2 831</b> |

<sup>1</sup> Stichtagswert

Diese Informationen werden auf freiwilliger Basis berichtet und sind nicht Teil des geprüften Konzernabschlusses.

### Ungeprüfte Zusatzinformationen: Quartalsübersicht (3/3)

| Mio €                                                                                                                    |                |        |        |        |        |                |        |        |        |        |
|--------------------------------------------------------------------------------------------------------------------------|----------------|--------|--------|--------|--------|----------------|--------|--------|--------|--------|
|                                                                                                                          | 2010           |        |        |        |        | 2009           |        |        |        |        |
|                                                                                                                          | Gesamt<br>2010 | Q 4    | Q 3    | Q 2    | Q 1    | Gesamt<br>2009 | Q 4    | Q 3    | Q 2    | Q 1    |
| ROCE (%) <sup>2</sup>                                                                                                    | 17,4           | 20,7   | 21,6   | 18,6   | 8,7    | 8,8            | 8,5    | 8,8    | 9,3    | 8,7    |
| ROE (%) <sup>3</sup>                                                                                                     | 19,4           | 36,1   | 18,6   | 16,1   | 5,3    | - 3,6          | - 36,4 | 2,8    | 2,8    | 16,2   |
| Mitarbeiter (Anzahl) <sup>1/4</sup>                                                                                      | 47 669         | 47 669 | 47 787 | 47 559 | 47 750 | 47 743         | 47 743 | 48 621 | 49 472 | 50 722 |
| davon Leiharbeiternehmer                                                                                                 | 1 976          | 1 976  | 2 225  | 2 099  | 1 864  | 1 643          | 1 643  | 1 734  | 1 738  | 1 925  |
| <b>Kapitalmarktorientierte Informationen</b>                                                                             |                |        |        |        |        |                |        |        |        |        |
| Ergebnis je Aktie der fortgeführten Bereiche in (€)                                                                      | 5,30           | 2,72   | 1,21   | 1,05   | 0,32   | - 2,69         | - 3,23 | 0,02   | 0,15   | 0,37   |
| Ergebnis je Aktie der fortgeführten Bereiche<br>ohne Effekte aus Kaufpreisallokationen und<br>ohne Sondervorgänge in (€) | 3,38           | 0,40   | 1,40   | 1,15   | 0,43   | 1,47           | 0,30   | 0,32   | 0,44   | 0,41   |
| <b>MAN-Aktienkurs<sup>5</sup></b>                                                                                        |                |        |        |        |        |                |        |        |        |        |
| Höchst                                                                                                                   | 96,44          | 96,44  | 81,10  | 72,81  | 63,45  | 61,23          | 60,96  | 61,23  | 50,29  | 41,78  |
| Tiefst                                                                                                                   | 47,99          | 77,21  | 65,39  | 62,35  | 47,99  | 30,31          | 52,10  | 40,47  | 35,10  | 30,31  |
| Quartalsende                                                                                                             | 88,99          | 88,99  | 79,96  | 67,95  | 61,98  | 54,44          | 54,44  | 56,40  | 43,70  | 32,80  |
| <b>Performance der MAN-Aktie (%)</b>                                                                                     |                |        |        |        |        |                |        |        |        |        |
| Performance der MAN-Aktie <sup>6</sup>                                                                                   | 63,5           | 63,5   | 46,9   | 24,8   | 13,9   | 40,6           | 40,6   | 45,7   | 12,9   | - 15,3 |
| Performance des Dax <sup>®6</sup>                                                                                        | 16,1           | 16,1   | 4,6    | 0,1    | 3,3    | 23,9           | 23,9   | 18,0   | 0,0    | - 15,1 |

<sup>1</sup> Stichtagswert

<sup>2</sup> CE-Definition im Jahr 2010 angepasst, Wertpapiere und Flüssige Mittel zusätzlich als Abzugskapital berücksichtigt (Vorjahr vergleichbar angepasst)

<sup>3</sup> ROE unter Berücksichtigung von Ergebniseffekten aufgebener Geschäftsbereiche

<sup>4</sup> Einschließlich Leiharbeitnehmern

<sup>5</sup> Xetra-Schlusskurse, Frankfurt

<sup>6</sup> Kumulativ im Vergleich zum Schlusskurs des Vorjahres

Diese Informationen werden auf freiwilliger Basis berichtet und sind nicht Teil des geprüften Konzernabschlusses.

# Weitere Informationen

## Glossar

### Anlagendeckung

Kennzahl für die Deckung des Anlagevermögens (Immaterielle Vermögenswerte, Sachanlagen und Beteiligungen) durch Eigenkapital.

### Capital Employed (CE)

Das Capital Employed der MAN Gruppe wird von der Finanzierungsseite abgeleitet. Es setzt sich zusammen aus dem Eigenkapital, den Pensionsrückstellungen und den Finanzverbindlichkeiten der MAN Gruppe, vermindert um die Wertpapiere, die Flüssigen Mittel und das nicht durch Eigenkapital von MAN Finance gedeckte Finanzierungsgeschäft (Leasing). In der Ergebnisgröße werden auch die Operativen Ergebnisse der aufgegebenen Geschäftsbereiche bis zum Zeitpunkt des Verkaufs berücksichtigt, da diese Aktivitäten ebenfalls aus Konzernkapital finanziert werden. Für die Bereiche wird das Capital Employed von der Vermögensseite ermittelt. Es umfasst für das Industrielle Geschäft alle Aktiva mit Ausnahme von Finanzmitteln und Steueransprüchen, vermindert um alle Rückstellungen und Verbindlichkeiten mit Ausnahme der Finanzverbindlichkeiten, der Pensionsrückstellungen und der Steuern. Aus Unternehmenserwerben entstandene Effekte im Zusammenhang mit abschreibbaren materiellen und immateriellen Vermögenswerten werden bei der Ermittlung des Capital Employed zusätzlich eliminiert. Erhaltene Anzahlungen werden als Abzugskapital nur berücksichtigt, soweit sie im Rahmen der Auftragsabwicklung bereits verwendet sind.

### Cash Earnings

Die Cash Earnings sind ein Maßstab für den Cash-Zufluss bzw. -Abfluss aus dem Operativen Ergebnis. Sie ergeben sich als Saldo aus dem Operativen Ergebnis, den Zinsen, Steuern (ohne latente Steuern), Abschreibungen, Wertminderungen, Wertaufholungen sowie sonstigen nicht zahlungswirksamen Aufwendungen und Erträgen.

### Contractual Trust Arrangement (CTA)

Treuhandmodell für die Finanzierung von Pensionsrückstellungen. Im Rahmen des CTA überträgt das Unternehmen sicherungshalber für die Erfüllung seiner Pensionsverpflichtungen Vermögen auf einen unabhängigen und rechtlich selbstständigen Treuhänder.

### COSO (Committee of Sponsoring Organizations of the Treadway Commission)

Rahmenwerk zu RMS (Enterprise Risk Management) und IKS (Internal Control)

### Derivate/derivative Finanzinstrumente

Finanzinstrumente, deren Wert sich im Wesentlichen vom Preis und den Preisschwankungen/-erwartungen eines zugrunde liegenden Basiswerts (z. B. Aktien, Devisen, Zinspapiere) ableitet.

### Eigenkapital aus nicht realisierten Gewinnen/Verlusten

Das Eigenkapital aus nicht realisierten Gewinnen/Verlusten ist eine besondere Kategorie innerhalb des Eigenkapitals. Sie enthält die in der Bilanz berücksichtigten, aber noch nicht im Ergebnis realisierten Gewinne und Verluste, insbesondere aus der Bewertung von Wertpapieren und Kurssicherungsgeschäften zum Marktwert sowie der Veränderung versicherungsmathematischer Gewinne und Verluste aus Pensionen, nach Berücksichtigung latenter Steuern.

### Eigenkapitalquote

Sie gibt den Anteil des Eigenkapitals am Gesamtkapital an.

### Equity-Methode

Verfahren zur Berücksichtigung von Beteiligungsgesellschaften, die nicht auf Basis einer Vollkonsolidierung mit allen Aktiva und Passiva in den Konzernabschluss einbezogen werden und auf deren Finanz- und Geschäftspolitik ein maßgeblicher Einfluss ausgeübt wird. Hierbei wird der Beteiligungsbuchwert um die Entwicklung des anteiligen Eigenkapitals der Beteiligung fortgeschrieben. Diese Veränderung geht in der Regel in die Gewinn- und Verlustrechnung der Eigentümergesellschaft ein.

### Free Cashflow

Cashflow aus der Geschäftstätigkeit zuzüglich Cashflow aus Investitionstätigkeit. Der Free Cashflow verdeutlicht, wie viele finanzielle Mittel das Unternehmen im Geschäftsjahr erwirtschaftet hat.

### Funktionskosten

Funktionskosten sind Umsatzkosten, Vertriebskosten und allgemeine Verwaltungskosten.

### International Financial Reporting Standards (IFRS)

International gültige Rechnungslegungsnormen, die eine vergleichbare Bilanzierung und Publizität gewährleisten sollen. Sie werden von einem internationalen privatrechtlichen Gremium, dem »International Accounting Standards Board« (IASB), erstellt. Die IFRS umfassen auch die noch gültigen »International Accounting Standards« (IAS).

### Marktwert

Er entspricht dem beizulegenden Zeitwert, d. h. dem Betrag, zu dem zwischen sachverständigen, vertragswilligen und voneinander unabhängigen Geschäftspartnern ein Vermögenswert getauscht oder eine Schuld beglichen werden könnte.

### Nettoliiquidität/-verschuldung

Die Nettoliiquidität/-verschuldung ist eine finanzielle Steuerungsgröße und setzt sich aus Flüssigen Mitteln und Wertpapieren abzüglich Finanzverbindlichkeiten zusammen.

### Operatives Ergebnis

Ergebnisgröße für die Berechnung des ROS und damit auch für die Beurteilung und die Steuerung der Ertragslage von Bereichen der MAN Gruppe. Das Operative Ergebnis entspricht in der Regel dem Ergebnis vor Zinsen und Steuern (EBIT). Ergebniseffekte im Zusammenhang mit Kaufpreisallokationen sowie in Einzelfällen Sondervorgänge werden bei der Ermittlung des Operativen Ergebnisses bereinigt. Bei den Sondervorgängen handelt es sich um Aufwendungen und Erträge, die dem Anlass und der Höhe nach bedeutend sind und nicht aus dem operativen Geschäft stammen.  
*Operatives Ergebnis = EBIT ± Sondervorgänge + Ergebniseffekte aus Kaufpreisallokationen*

### Option

Vereinbarungen, bei denen der Käufer berechtigt, aber nicht verpflichtet ist, den zugrunde liegenden Vermögensgegenstand zu einem in der Zukunft liegenden Zeitpunkt für einen vorab festgelegten Preis zu erwerben (Call-Option) oder zu veräußern (Put-Option). Hingegen ist der Verkäufer der Option zur Abgabe bzw. zum Kauf des Vermögensgegenstandes verpflichtet und erhält für die Bereitstellung der Optionsrechte in der Regel eine Prämie.

### Percentage of Completion Method (p.o.c.)

Bilanzierungsmethode der Umsatz- und Gewinnrealisierung nach dem Leistungsfortschritt gemäß IAS 11. Sie ist auf kundenspezifische Fertigungsaufträge anzuwenden, bei denen Gesamterlöse, Gesamtkosten und Fertigstellungsgrad zuverlässig ermittelt werden können. Ein Erfolgsbeitrag fällt bereits nach Maßgabe des Leistungsfortschritts an, auch wenn der Auftrag noch nicht vollständig fertiggestellt und mit dem Kunden abgerechnet ist.

### Projected Unit Credit Method

Methode zur Bewertung von Pensionsverpflichtungen gemäß IAS 19, bei der zusätzlich zu den am Stichtag rechtskräftig erworbenen Rentenbeträgen und Anwartschaften auch die künftig zu erwartenden Steigerungen von Gehältern und Renten berücksichtigt werden.

### Rating

Einschätzung der Bonität eines Unternehmens, die von unabhängigen Ratingagenturen auf Basis einer genauen Unternehmensanalyse vergeben wird. Das Rating wird durch Bewertungsstufen ausgedrückt, die durch die verschiedenen Ratingagenturen unterschiedlich definiert werden.

### ROCE Return on Capital Employed

Kapitalrendite, die das Operative Ergebnis ins Verhältnis zum Jahresdurchschnitt des Capital Employed setzt.

$$ROCE = \frac{\text{Operatives Ergebnis}}{CE}$$

### ROE Return on Equity

Die Eigenkapitalrendite ROE setzt das Ergebnis vor Steuern in Beziehung zum Jahresdurchschnitt des Eigenkapitals.

$$ROE = \frac{\text{Ergebnis vor Steuern}}{\text{Eigenkapital MAN Gruppe}}$$

### ROS

Return on Sales: die Umsatzrendite, die das Operative Ergebnis ins Verhältnis zum Umsatz setzt.

$$ROS = \frac{\text{Operatives Ergebnis}}{\text{Umsatzerlöse}}$$

### Swap

Vereinbarung zweier Vertragsparteien über den Austausch von Zahlungsströmen über eine bestimmte Zeitspanne. Wichtige Beispiele sind Währungsswaps, bei denen auf unterschiedliche Währungen lautende Kapitalbeträge getauscht werden, und Zinsswaps, die üblicherweise den Tausch von fixen und variablen Zinszahlungen derselben Währung vorsehen.

### Syndizierte Kreditlinie

Von einem Bankenkonsortium verbindlich zugesagte Kreditlinie.

### WACC

Weighted Average Cost of Capital: Bezeichnung für die durchschnittlich gewichteten Kapitalkosten. Für die MAN Gruppe sind sie für Steuerungs zwecke langfristig festgelegt und betragen 10 % vor Steuern.



# Weitere Informationen

## Stichwortverzeichnis

### A

|                               |            |
|-------------------------------|------------|
| Abschluss der MAN SE          | 105        |
| Abschreibungen                | 144 ff.    |
| Akquisitionen                 | 139 f.     |
| Aktie                         | 14 f.      |
| Aktionärsstruktur             | 15         |
| Anleihe                       | 71, 155 f. |
| Auftragsbestand               | 60 f., 182 |
| Auftragseingang               | 6, 60 f.   |
| Aufsichtsrat                  | 189 f.     |
| Aufgegebene Geschäftsbereiche | 136, 140   |
| Ausblick                      | 116 ff.    |

### B

|                           |                 |
|---------------------------|-----------------|
| Bereiche                  | 92 ff., 180 ff. |
| Bericht des Aufsichtsrats | 8 ff.           |
| Beschaffung               | 85              |
| Beteiligungen             | 147 f.          |
| Bilanz                    | 125             |
| Brief an die Aktionäre    | 6 f.            |

### C

|                          |                           |
|--------------------------|---------------------------|
| Cashflow                 | 68 f., 118 f., 126        |
| Compliance               | 6, 9, 19 f., 106, 113 ff. |
| Corporate Governance     | 10, 16 ff., 180           |
| Corporate Responsibility | 89 ff.                    |
| Commercial Vehicles      | 6 f., 26 f., 55, 182      |

### D

|                     |                |
|---------------------|----------------|
| Desinvestitionen    | 58, 140        |
| Dividende           | 14 f., 65, 154 |
| Directors' Dealings | 20             |

### E

|                                           |                                   |
|-------------------------------------------|-----------------------------------|
| Eigenkapital                              | 65 ff., 71 ff., 125, 127, 150 ff. |
| Eigenkapitalrendite (ROE)                 | 65 ff.                            |
| Ergebnis                                  | 143                               |
| Ergebnisse aufgegebener Geschäftsbereiche | 140                               |
| Ertragsteuern                             | 142 f.                            |

### F

|                                            |             |
|--------------------------------------------|-------------|
| Finanzbeteiligungen                        | 129, 164 f. |
| Finanzierung                               | 71          |
| Finanzlage                                 | 68 ff.      |
| Finanzverbindlichkeiten                    | 155 f.      |
| Finanztermine                              | 200         |
| Forderungen aus Lieferungen und Leistungen | 149 f.      |
| Forschung & Entwicklung                    | 81 ff.      |

### G

|                             |                           |
|-----------------------------|---------------------------|
| Gewinn- und Verlustrechnung | 64, 123, 141 ff., 163 ff. |
|-----------------------------|---------------------------|

### I

|                             |            |
|-----------------------------|------------|
| Immaterielle Vermögenswerte | 131, 145   |
| Immobilien                  | 84, 146    |
| Investitionen               | 84, 118 f. |
| Investor Relations          | 14 f.      |

### K

|                                |                  |
|--------------------------------|------------------|
| Kapitalflussrechnung           | 68 ff., 126, 138 |
| Kapitalkosten WACC             | 67               |
| Kapitalrendite ROCE            | 66 f.            |
| Kaufpreisallokation            | 64 f., 139 f.    |
| Kursentwicklung                | 14               |
| Kurzfristige Verbindlichkeiten | 161, 164         |

### L

|                                      |        |
|--------------------------------------|--------|
| Langfristige Finanzverbindlichkeiten | 155 f. |
|--------------------------------------|--------|

## M

|                    |            |
|--------------------|------------|
| MAN Diesel & Turbo | 98 ff.     |
| MAN Latin America  | 96 f.      |
| MAN Truck & Bus    | 92 ff.     |
| Mitarbeiter        | 86 f., 144 |
| MVA                | 65         |

## N

|                |        |
|----------------|--------|
| Nachhaltigkeit | 89 ff. |
|----------------|--------|

## O

|                     |        |
|---------------------|--------|
| Operatives Ergebnis | 63, 66 |
|---------------------|--------|

## P

|                   |                              |
|-------------------|------------------------------|
| Pensionen         | 156 f.                       |
| Power Engineering | 6 f., 27, 55 f., 98 ff., 183 |

## R

|                  |                               |
|------------------|-------------------------------|
| Rating           | 71                            |
| Renk             | 103 f.                        |
| Risikomanagement | 8 ff., 19 f., 106 ff., 167 f. |
| ROCE             | 66 f.                         |
| ROE              | 65 ff.                        |
| ROS              | 21, 65 f.                     |
| Rücklagen        | 154                           |
| Rückstellungen   | 135 ff., 156, 160             |

## S

|                                    |                                             |
|------------------------------------|---------------------------------------------|
| Sachanlagen                        | 131 f., 146                                 |
| Scania                             | 7, 64, 73, 84, 104, 118, 119, 147, 176, 180 |
| Sechsjahresübersicht               | IV                                          |
| Segmentberichterstattung           | 180 ff.                                     |
| Sonstige betriebliche Aufwendungen | 141                                         |
| Sonstige betriebliche Erträge      | 141                                         |
| Sonstige Verbindlichkeiten         | 161                                         |
| Sonstige Vermögenswerte            | 150                                         |
| Steuern                            | 135, 142 f.                                 |
| Strategie                          | 28, 56 ff.                                  |

## U

|                   |                 |
|-------------------|-----------------|
| Umsatz            | 6 f., 55, 61 f. |
| Umsatzrendite ROS | 21, 65 f.       |

## V

|                                |               |
|--------------------------------|---------------|
| Vergütung des Aufsichtsrats    | 23, 178 f.    |
| Vergütung des Vorstands        | 21 f., 176 f. |
| Vermietete Erzeugnisse         | 132, 148      |
| Vermögens- und Kapitalstruktur | 72 f.         |
| Vorräte                        | 72, 149       |
| Vorstand                       | 12 f., 190    |

## W

|                    |                  |
|--------------------|------------------|
| Wertminderungen    | 132 f., 144, 147 |
| Wertbeitrag (MVA)  | 65               |
| Wertberichtigungen | 141, 149         |

## Z

|                                          |     |
|------------------------------------------|-----|
| Zinsen                                   | 142 |
| Zur Veräußerung bestimmte Vermögenswerte | 136 |

# Weitere Informationen

## Finanzterminkalender

**Finanzterminkalender (voraussichtlich\*)**

|                                         |                  |
|-----------------------------------------|------------------|
| Hauptversammlung zum Geschäftsjahr 2010 | 27. Juni 2011    |
| Bericht zum 1. Quartal 2011             | 3. Mai 2011      |
| Halbjahresbericht                       | 28. Juli 2011    |
| Bericht zum 3. Quartal 2011             | 2. November 2011 |
| Bericht zum 1. Quartal 2012             | 3. Mai 2012      |
| Halbjahresbericht                       | 31. Juli 2012    |

\* Aktuelle Informationen auf der MAN-Website unter [www.man.eu/MAN/de/Investor\\_Relations/](http://www.man.eu/MAN/de/Investor_Relations/)

**Veröffentlichungstag Geschäftsbericht 2010**

21. März 2011

## MAN Konzern Sechsjahresübersicht

| Mio €                                                   | 2010          | 2009          | 2008          | 2007          | 2006          | 2005          |
|---------------------------------------------------------|---------------|---------------|---------------|---------------|---------------|---------------|
| <b>Auftragseingang</b>                                  | <b>15 072</b> | <b>9 860</b>  | <b>14 033</b> | <b>17 818</b> | <b>16 567</b> | <b>14 338</b> |
| davon Inland                                            | 3 489         | 2 388         | 3 306         | 4 549         | 4 151         | 3 373         |
| davon Ausland                                           | 11 583        | 7 472         | 10 727        | 13 269        | 12 416        | 10 965        |
| <b>Auftragseingang nach Bereichen</b>                   |               |               |               |               |               |               |
| MAN Truck & Bus                                         | 8 023         | 5 224         | 9 130         | 12 684        | 10 103        | 9 434         |
| MAN Latin America                                       | 3 140         | 1 412         | –             | –             | –             | –             |
| MAN Diesel & Turbo                                      | 3 475         | 2 936         | 4 515         | 4 825         | 4 117         | 3 053         |
| Renk                                                    | 525           | 294           | 443           | 439           | 417           | 314           |
| Sonstige/Konsolidierung                                 | – 91          | – 6           | – 55          | – 130         | 1 930         | 1 537         |
| <b>Umsatz</b>                                           | <b>14 675</b> | <b>12 026</b> | <b>14 945</b> | <b>14 063</b> | <b>13 049</b> | <b>11 379</b> |
| davon Inland                                            | 3 058         | 2 751         | 3 704         | 4 073         | 3 394         | 3 103         |
| davon Ausland                                           | 11 617        | 9 275         | 11 241        | 9 990         | 9 655         | 8 276         |
| <b>Umsatz nach Bereichen</b>                            |               |               |               |               |               |               |
| MAN Truck & Bus                                         | 7 446         | 6 395         | 10 610        | 10 410        | 8 685         | 7 377         |
| MAN Latin America                                       | 3 140         | 1 412         | –             | –             | –             | –             |
| MAN Diesel & Turbo                                      | 3 766         | 3 796         | 3 870         | 3 286         | 2 709         | 2 360         |
| Renk                                                    | 403           | 474           | 527           | 430           | 356           | 307           |
| Sonstige/Konsolidierung                                 | – 80          | – 51          | – 62          | – 63          | 1 299         | 1 335         |
| <b>Auftragsbestand <sup>1</sup></b>                     | <b>7 025</b>  | <b>7 422</b>  | <b>10 416</b> | <b>12 335</b> | <b>11 298</b> | <b>8 496</b>  |
| davon aus dem Inland                                    | 1 264         | 1 107         | 1 626         | 2 331         | 1 820         | 1 422         |
| davon aus dem Ausland                                   | 5 761         | 6 315         | 8 790         | 10 004        | 9 478         | 7 074         |
| <b>Mitarbeiter inkl. Leiharbeitnehmern <sup>1</sup></b> | <b>47 669</b> | <b>47 743</b> | <b>51 321</b> | <b>50 399</b> | <b>53 715</b> | <b>51 412</b> |
| davon bei Inlandsgesellschaften                         | 27 354        | 26 768        | 28 753        | 28 963        | 31 368        | 30 275        |
| davon bei Auslandsgesellschaften                        | 20 315        | 20 975        | 22 568        | 21 436        | 22 347        | 21 137        |
| <b>Leiharbeitnehmer <sup>1</sup></b>                    | <b>1 976</b>  | <b>1 643</b>  | <b>2 197</b>  | <b>3 519</b>  | <b>3 425</b>  | <b>2 251</b>  |
| <b>Mitarbeiter <sup>1</sup></b>                         | <b>45 693</b> | <b>46 100</b> | <b>49 124</b> | <b>46 880</b> | <b>50 290</b> | <b>49 161</b> |
| <b>Mitarbeiter im Jahresdurchschnitt</b>                | <b>45 885</b> | <b>47 365</b> | <b>48 787</b> | <b>47 128</b> | <b>49 994</b> | <b>49 770</b> |
| <b>Zahlen zur MAN-Aktie</b>                             |               |               |               |               |               |               |
| Stammaktien (in €) <sup>1</sup>                         | 88,99         | 54,44         | 38,72         | 113,80        | 68,46         | 45,08         |
| Stammaktien Jahreshöchstkurs (in €)                     | 96,44         | 61,23         | 110,91        | 123,73        | 74,00         | 45,24         |
| Stammaktien Jahrestiefstkurs (in €)                     | 47,99         | 30,31         | 27,78         | 68,46         | 44,36         | 29,00         |
| Stammaktien Kurs-Gewinn-Verhältnis <sup>1,2</sup>       | 16,8          | –             | 5,0           | 15,7          | 13,6          | 16,4          |
| Vorzugsaktien (in €) <sup>1</sup>                       | 58,21         | 41,00         | 43,05         | 108,65        | 63,35         | 41,00         |
| Vorzugsaktien Jahreshöchstkurs (in €)                   | 62,24         | 49,95         | 110,00        | 117,39        | 69,78         | 41,00         |
| Vorzugsaktien Jahrestiefstkurs (in €)                   | 38,02         | 35,45         | 32,56         | 62,69         | 40,35         | 25,44         |
| Vorzugsaktien Kurs-Gewinn-Verhältnis <sup>1,2</sup>     | 11,0          | –             | 5,5           | 14,9          | 12,5          | 14,9          |
| Dividende je Aktie (in €)                               | 2,00          | 0,25          | 2,00          | 3,15          | 2,00          | 1,35          |
| Ergebnis je Aktie nach IAS 33 (in €) <sup>2</sup>       | 5,30          | – 2,69        | 7,76          | 7,27          | 5,05          | 2,75          |
| Cash Earnings je Aktie (in €)                           | 5,46          | 2,52          | 10,43         | 10,52         | 6,40          | 5,90          |
| Eigenkapital je Aktie (in €)                            | 37,60         | 35,50         | 35,70         | 30,30         | 22,90         | 19,50         |

Hinweis zur Vergleichbarkeit:

Die Zahlen enthalten in Sonstige bis 2006 die Industriedienstleistungen.

<sup>1</sup> Am 31. Dezember

<sup>2</sup> Für fortgeführte Bereiche

| Mio €                                                        |               |               |               |               |               |               |
|--------------------------------------------------------------|---------------|---------------|---------------|---------------|---------------|---------------|
|                                                              | 2010          | 2009          | 2008          | 2007          | 2006          | 2005          |
| Langfristige Vermögenswerte <sup>1</sup>                     | 9 911         | 8 661         | 6 010         | 6 891         | 6 998         | 5 689         |
| Vorräte                                                      | 2 852         | 3 037         | 3 275         | 3 279         | 3 032         | 3 453         |
| Sonstige kurzfristige Vermögenswerte <sup>1</sup>            | 3 597         | 3 561         | 7 140         | 4 471         | 4 054         | 3 819         |
| Wertpapiere und Flüssige Mittel                              | 1 071         | 636           | 105           | 1 520         | 1 162         | 1 191         |
| Eigenkapital                                                 | 5 990         | 5 129         | 5 396         | 5 177         | 3 779         | 3 025         |
| Pensionen                                                    | 226           | 160           | 74            | 132           | 946           | 1 499         |
| Langfristige und kurzfristige Finanzverbindlichkeiten        | 2 849         | 3 270         | 1 736         | 1 967         | 2 108         | 1 018         |
| Erhaltene Anzahlungen                                        | 762           | 913           | 1 099         | 2 031         | 1 557         | 1 740         |
| Übrige Verbindlichkeiten und Rückstellungen                  | 7 604         | 6 423         | 8 225         | 6 854         | 6 856         | 6 870         |
| <b>Gesamtvermögen/Gesamtkapital</b>                          | <b>17 431</b> | <b>15 895</b> | <b>16 530</b> | <b>16 161</b> | <b>15 246</b> | <b>14 152</b> |
| <b>Umsatzerlöse</b>                                          | <b>14 675</b> | <b>12 026</b> | <b>14 945</b> | <b>14 063</b> | <b>13 049</b> | <b>11 379</b> |
| Umsatzkosten <sup>2</sup>                                    | – 11 400      | – 9 455       | – 11 243      | – 10 722      | – 10 161      | – 8 943       |
| <b>Bruttoergebnis vom Umsatz</b>                             | <b>3 275</b>  | <b>2 571</b>  | <b>3 702</b>  | <b>3 341</b>  | <b>2 888</b>  | <b>2 436</b>  |
| Übrige Aufwendungen und Erträge <sup>3</sup>                 | – 2 240       | – 2 067       | – 1 973       | – 1 790       | – 1 783       | – 1 762       |
| <b>Operatives Ergebnis<sup>4</sup></b>                       | <b>1 035</b>  | <b>504</b>    | <b>1 729</b>  | <b>1 551</b>  | <b>1 105</b>  | <b>674</b>    |
| Ergebniseffekte aus Kaufpreisallokationen                    | – 109         | – 62          | –             | –             | –             | –             |
| Ergebnis aus Sondervorgängen                                 | 357           | – 656         | –106          | 183           | –             | – 37          |
| Zinsergebnis                                                 | – 158         | – 117         | 20            | – 55          | – 82          | – 62          |
| <b>Ergebnis vor Steuern</b>                                  | <b>1 125</b>  | <b>– 331</b>  | <b>1 643</b>  | <b>1 679</b>  | <b>1 023</b>  | <b>575</b>    |
| Steuern                                                      | – 338         | – 53          | – 488         | – 600         | – 273         | – 160         |
| Ergebnis aufgegebenen Geschäftsbereiche                      | – 65          | 126           | 92            | 146           | 175           | 57            |
| <b>Ergebnis nach Steuern</b>                                 | <b>722</b>    | <b>– 258</b>  | <b>1 247</b>  | <b>1 225</b>  | <b>925</b>    | <b>472</b>    |
| Minderheitsanteile                                           | – 9           | – 12          | – 14          | – 9           | – 7           | – 10          |
| Entnahmen aus/Einstellung in Rücklagen                       | – 419         | 307           | – 939         | – 753         | – 624         | – 263         |
| <b>Dividendensumme der MAN SE</b>                            | <b>294</b>    | <b>37</b>     | <b>294</b>    | <b>463</b>    | <b>294</b>    | <b>199</b>    |
| <b>Ergebnis vor Zinsen, Steuern, Abschreibungen (EBITDA)</b> | <b>1 393</b>  | <b>590</b>    | <b>1 947</b>  | <b>2 131</b>  | <b>1 433</b>  | <b>972</b>    |
| Abschreibungen und Wertminderungen                           |               |               |               |               |               |               |
| langfristiger Vermögenswerte                                 | – 467         | – 804         | – 324         | – 397         | – 328         | – 335         |
| Wertaufholungen Beteiligungen nach der Equity-Methode        | 357           | –             | –             | –             | –             | –             |
| <b>Ergebnis vor Zinsen und Steuern (EBIT)</b>                | <b>1 283</b>  | <b>– 214</b>  | <b>1 623</b>  | <b>1 734</b>  | <b>1 105</b>  | <b>637</b>    |
| <b>Investitionen und Finanzierung</b>                        |               |               |               |               |               |               |
| in Sachanlagen und Immat. Vermögenswerte                     | 391           | 366           | 603           | 459           | 446           | 376           |
| in Beteiligungen                                             | 5             | 1 937         | 270           | 259           | 1 214         | 28            |
| Ausgaben für Forschung und Entwicklung                       | 626           | 504           | 493           | 433           | 396           | 385           |
| Cash Earnings                                                | 815           | 396           | 1 619         | 1 661         | 963           | 876           |
| Cashflow aus der Geschäftstätigkeit                          | 1 427         | 1 462         | 137           | 2 109         | 777           | 1 267         |
| Cashflow aus der Investitionstätigkeit                       | – 374         | – 2 584       | – 707         | – 426         | – 1 329       | – 378         |
| Free Cashflow                                                | 1 053         | – 1 122       | – 570         | 1 683         | – 552         | 889           |
| <b>Kennzahlen</b>                                            |               |               |               |               |               |               |
| Umsatzrendite ROS (%)                                        | 7,1           | 4,2           | 11,6          | 11,0          | 8,5           | 5,9           |
| ROCE (%) <sup>5</sup>                                        | 17,4          | 8,8           | 40,2          | 31,9          | 28,0          | 19,1          |

Hinweis zur Vergleichbarkeit:  
Die Zahlen enthalten bis 2006 die Industriedienstleistungen.

<sup>1</sup> Ab 2009 geänderter Ausweis Forderungen aus »finance lease«

<sup>2</sup> 2008 Wert nach Umgliederung von – 61 Mio € (2007 – 35 Mio €) Umsatzkosten in das Ergebnis aus Sondervorgängen

<sup>3</sup> Einschl. Zinsergebnis Finanzdienstleistungen

<sup>4</sup> Ab 2005 Ausweis Drucksysteme und Stahlgeschäft und ab 2007 Industriedienstleistungen als aufgegebene Geschäftsbereiche

<sup>5</sup> CE-Definition 2010 angepasst, Wertpapiere und Flüssige Mittel zusätzlich als Abzugskapital berücksichtigt (Vorjahr vergleichbar angepasst)

## **Impressum**

### **Herausgeber**

MAN SE  
Corporate Communications  
Ungererstraße 69  
80805 München  
[www.man.eu](http://www.man.eu)

### **Investor Relations**

Telefon: +49. 89. 36098-334  
Fax: +49. 89. 36098-68334  
[investor.relations@man.eu](mailto:investor.relations@man.eu)

### **Corporate Communications**

Telefon: +49. 89. 36098-111  
Fax: +49. 89. 36098-382  
[presse@man.eu](mailto:presse@man.eu)

### **Redaktion**

Inés Gutiérrez

### **Verlag**

Burda Creative Group GmbH  
Konrad-Zuse-Platz 11  
81829 München  
Telefon: +49. 89. 30620-0  
Fax: +49. 89. 30620-100  
[www.burdayukom.de](http://www.burdayukom.de)

### **Bildnachweise**

S. 12–13 Reichel & Vogt  
S. 32–50, 92 Hauke Dressler

### **Druck**

Pinsker Druck und Medien GmbH  
Pinskerstraße 1  
84048 Mainburg

### **Copyright**

© 2011 bei MAN SE und  
Burda Creative Group GmbH



**Geschäftsbericht 2010**

**MAN SE**

Ungererstraße 69  
80805 München

Telefon: +49. 89. 360980  
Fax: +49. 89. 36098-250  
[www.man.eu](http://www.man.eu)
