# Supplementary material
Source: publisher site journal article supplement (https://www.degruyterbrill.com/publication/isbn/9783110432879/downloadAsset/9783110432879_Elektronischer_Anhang_2.zip)
Supplement: Supplementary file 73 [file MAN Unternehmensleitbild.pdf › Korpustexte/Korpustexte pdf/MAN/MAN Unternehmensleitbild.pdf]

# Unternehmensleitbild

Engineering the Future – since 1758.

**MAN Gruppe**

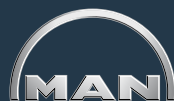



---

## INHALTSVERZEICHNIS

---

|                                            |           |
|--------------------------------------------|-----------|
| <b>Vorwort .....</b>                       | <b>5</b>  |
| <b>MAN Porträt .....</b>                   | <b>6</b>  |
| <b>MAN Leitlinien .....</b>                | <b>8</b>  |
| · Verantwortung gegenüber dem Kunden       | 10        |
| · Verantwortung gegenüber dem Kapitalgeber | 12        |
| · Verantwortung gegenüber dem Mitarbeiter  | 14        |
| · Verantwortung gegenüber der Gesellschaft | 16        |
| · Code of Conduct                          | 18        |
| <b>Kontakt .....</b>                       | <b>19</b> |

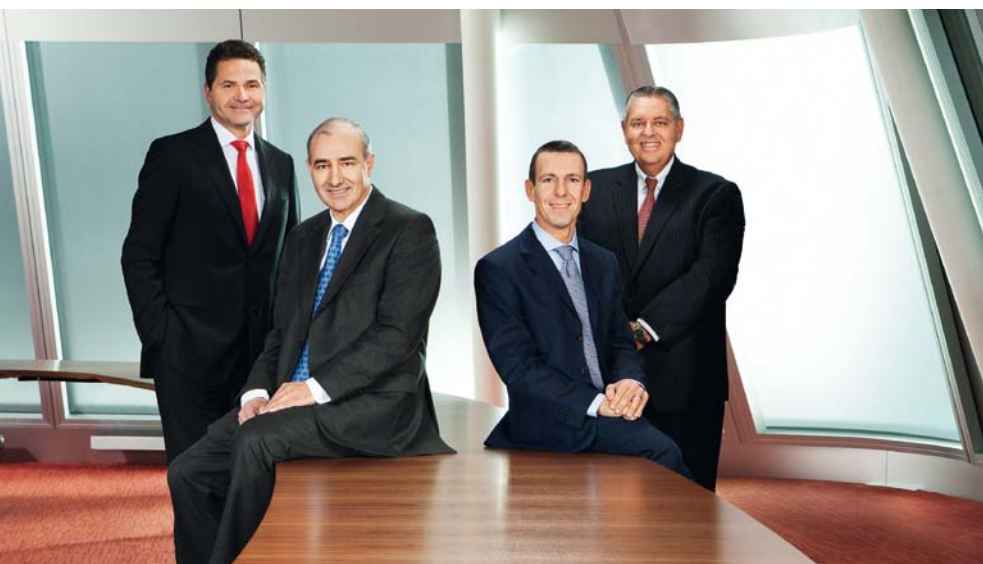

**Dr.-Ing. Georg Pachta-Reyhofen**  
Sprecher des Vorstands MAN SE  
und MAN Nutzfahrzeuge AG

**Frank H. Lutz**  
Chief Financial  
Officer MAN SE

**Jörg Schwitalla**  
Chief Human Resources  
Officer MAN SE

**Antonio Roberto Cortes**  
Geschäftsführer  
MAN Latin America

---

## VORWORT

---

Basis unseres Handelns als Unternehmen und Mitarbeiter der MAN Gruppe ist unser Leitbild. Den darin beschriebenen Grundsätzen sind wir verpflichtet. Die zentralen Werte der MAN Gruppe zuverlässig, innovativ, dynamisch und offen sind für uns verbindlich – unabhängig vom technologischen und wirtschaftlichen, politischen und gesellschaftlichen Wandel, den MAN schon seit über 250 Jahre erfolgreich mitgestaltet. Dieser Wandel verlangt von uns ein Höchstmaß an Flexibilität und eine offene und dynamische Unternehmenskultur, aber auch Verantwortungsbewusstsein und Integrität.

Teil unserer Unternehmensstrategie ist Corporate Responsibility: MAN wird nur erfolgreich sein, wenn wir unsere Verantwortung als Unternehmen wahrnehmen. Wir sind Kunden und Geschäftspartnern genauso verbunden wie unseren Kapitalgebern und Mitarbeitern sowie der Gesellschaft – weltweit. Das Leitbild und die Gesetze bilden die Basis für unseren Code of Conduct, der verbindliche Leitlinien für das Handeln jedes Mitarbeiters der MAN Gruppe vorgibt. Leitbild und Code of Conduct sind der rechtliche und ethische Rahmen unseres unternehmerischen Handelns.

**Dr. Georg Pachta-Reyhofen, Frank H. Lutz,  
Jörg Schwitalla und Roberto Cortes**  
Management Board der MAN SE  
November 2010

---

## MAN PORTRÄT

---

### Unser Unternehmen

Die MAN Gruppe gehört zu den weltweit führenden Herstellern von Investitionsgütern im Bereich Commercial Vehicles und Power Engineering. Das Unternehmen ist Systemanbieter von Nutzfahrzeugen, Dieselmotoren, Turbomaschinen und Spezialgetrieben und stellt Technologien für globale, zukunftsorientierte Wachstumsmärkte bereit:

- Transport
- Umwelt
- Energie

### Tradition und Innovation

Die Wurzeln der heutigen MAN Gruppe sind die frühere Maschinenfabrik Augsburg-Nürnberg und der Gutehoffnungshütte Actienverein, der seinen Ursprung in der 1758 im Ruhrgebiet gegründeten St. Antony-Hütte hat. MAN blickt damit auf über 250 Jahre Unternehmensgeschichte zurück. Mit seiner Innovationskraft hat das Unternehmen den technischen Wandel forciert, mit seinen Produkten, Dienstleistungen und Ideen gestaltet es die Zukunft. Gleichzeitig hat die MAN Gruppe ständig ihre unternehmerische Kompetenz global ausgebaut. Nur so konnte und wird sie weiterhin die wirtschaftlichen, technologischen und sozialen Herausforderungen erfolgreich bewältigen. Die Fähigkeit, den Kunden

immer zuverlässige und innovative Leistungen zu bieten und die Unternehmensstruktur den veränderten Rahmenbedingungen offen und dynamisch anzupassen, sichert MAN langfristigen Erfolg.

### Unsere Strategie

Die Fokussierung auf die beiden Geschäftsfelder Commercial Vehicles und Power Engineering ermöglicht profitables Wachstum in den Zukunftsmärkten Transport, Umwelt und Energie. Dazu hat die MAN Gruppe die strategische Führung ihrer Unternehmen zentralisiert, gleichzeitig deren operative Eigenverantwortung gestärkt. Jeder Bereich muss sich am besten Wettbewerber seiner Branche messen und sich in der Gruppe weiterentwickeln. Quersubventionen sind ausgeschlossen. Die wesentlichen Säulen der zentralen Führung sind Strategie und Struktur, Leadership Supply und Performance-Controlling – Compliance und Corporate Responsibility geben den ethischen und gesellschaftlichen Rahmen vor. Die Vision der MAN Gruppe zeigt die Marschrichtung vor: Hervorragende Mitarbeiter, Kundenorientierung sowie erstklassige Produkte und Dienstleistungen machen uns zur Nummer eins bei Commercial Vehicles und Power Engineering.

---

## MAN LEITLINIEN

---

### Auf einen Blick

#### **Verantwortung gegenüber dem Kunden:**

Wir machen die Ziele unserer Kunden zu unseren Zielen.

Wir hören unseren Kunden zu und erfüllen ihre Anforderungen.

Wir messen uns am Erfolg unserer Kunden durch unsere Produkte und Dienstleistungen.

#### **Verantwortung gegenüber dem Kapitalgeber:**

Wir setzen uns attraktive nachhaltige Renditeziele.

Wir bauen unsere marktführende Position in den beiden Kerngeschäften gezielt aus.

Wir sichern unseren Erfolg von morgen durch Forschung und Entwicklung von heute.



**Verantwortung gegenüber dem Mitarbeiter:**

Führen bei MAN heißt, Verantwortung für Menschen zu übernehmen.

Wir fordern und fördern unsere Mitarbeiter durch klare Ziele sowie verantwortungsvolle Aufgaben.

Wir pflegen Fairness, Toleranz und Chancengleichheit.

**Verantwortung gegenüber der Gesellschaft:**

Wir übernehmen unternehmerische Verantwortung für Umwelt, Mitarbeiter und Gesellschaft.

Wir orientieren uns an den Prinzipien der Nachhaltigkeit.

Wir achten die Würde des Menschen.

## **Verantwortung** gegenüber dem Kunden

### **Wir machen die Ziele unserer Kunden zu unseren Zielen.**

Als Anbieter von Investitionsgütern und Dienstleistungen richten wir uns an den Zielen unserer Kunden aus. Innovative Lösungen, dynamische Ausführung, zuverlässiges Handeln und offene Kommunikation mit unseren Partnern lassen Kundenerwartungen und -ziele Wirklichkeit werden. Engagement ist für uns selbstverständlich.

### **Wir hören unseren Kunden zu und erfüllen ihre Anforderungen.**

Kundenorientierung beginnt für uns mit aufmerksamem Zuhören. So erkennen wir frühzeitig die Anforderungen unserer Kunden und wissen, was sie von uns erwarten. Wir unterstützen unsere Kunden partnerschaftlich durch maßgeschneiderte Lösungen und hochwertige, zuverlässige Produkte, die Umwelt und Ressourcen schonen, sowie durch einen umfassenden schnellen Service.

**Wir messen uns am Erfolg unserer Kunden durch unsere Produkte und Dienstleistungen.**

Der Erfolg unserer Kunden ist unsere Herausforderung. Wir arbeiten konsequent marktorientiert. Mit innovativen, wirtschaftlichen, sicheren und qualitativ hochwertigen Systemen erfüllen wir die Ansprüche unserer Kunden. Langfristige, auf Vertrauen basierende Kundenbeziehungen tragen unser Geschäft. Wir bieten partnerschaftliche Begleitung von der Planung und Finanzierung bis hin zum Betrieb unserer Anlagen und Produkte. Im Wettbewerb vertrauen wir darauf, dass wir unsere Kunden allein durch die Qualität unserer Produkte und Leistungen nachhaltig überzeugen können. Indem wir Werte für unsere Kunden schaffen, steigern wir auch den Wert unseres Unternehmens.

## **Verantwortung**

### **gegenüber dem Kapitalgeber**

#### **Wir setzen uns attraktive, nachhaltige Renditeziele.**

Wir steuern unsere Unternehmensgruppe wertorientiert und nachhaltig. Mit klaren Renditezielen stellen wir uns den Erwartungen unserer Kapitalgeber. Den Erfolg des gesamten Unternehmens sowie jedes unserer Bereiche messen wir an diesen ehrgeizigen Zielvorgaben. Die Transparenz unseres Unternehmens findet ihren Niederschlag in der kontinuierlichen Information über die wirtschaftliche Lage unserer Geschäftsbereiche sowie im Corporate-Responsibility-Bericht, der Auskunft gibt über die nachhaltige Effizienz von Produkten und Produktion der MAN Gruppe. Vertrauen und Offenheit sind die Grundlage unserer Unternehmens- und Finanzkommunikation.

#### **Wir bauen unsere marktführende Position in den Kerngeschäften gezielt aus.**

Profitables Wachstum erreichen wir durch Stärkung unserer globalen Marktstellung. In unseren Geschäftsfeldern Commercial Vehicles und Power Engineering haben wir führende

Positionen. Unser Ziel ist es, diese weiter auszubauen. Dabei fokussieren wir wachstumsstarke Geschäftsfelder aus den Bereichen Transport, Umwelt und Energie. Diese stärken wir durch geeignete Akquisitionen mit Erfolg versprechenden Synergie- und Renditepotenzialen.

**Wir sichern unseren Erfolg von morgen durch  
Forschung und Entwicklung von heute.**

Schnelle Veränderungen und technischer Fortschritt verkürzen die Lebenszyklen technischer Produkte. Die Entwicklung neuer und die Weiterentwicklung unserer bestehenden Produkte, Prozesse und Leistungen sowie die ständige Verbesserung der Zuverlässigkeit sehen wir als unsere vorrangigste Aufgabe für die Zukunftssicherung der MAN Gruppe. Dies schlägt sich nieder in kontinuierlichen Investitionen und Aufwendungen für Forschung und Entwicklung.

## **Verantwortung** gegenüber dem Mitarbeiter

### **Führen bei MAN heißt, Verantwortung für Menschen zu übernehmen.**

Die MAN Leadership Culture zeichnet sich durch vier Führungsqualitäten aus: Kompetenz, Transparenz, Einsatz und Verhalten. Unsere Führungskräfte sind offen für neue Ideen, wollen mit ihrem Team ehrgeizige Ziele erreichen, ihre Kunden und ihren Markt verstehen. Sie hören ihren Mitarbeitern zu, geben ihnen offenes, konkretes und direktes Feedback und erklären Hintergründe. MAN Führungskräfte leben Engagement, lebenslanges Lernen, Leidenschaft, Verständnis und Akzeptanz vor. Sie sind glaubwürdig und konsequent. Diese Kultur kennzeichnet auch die Zusammenarbeit mit den Arbeitnehmervertretungen weltweit.

### **Wir fordern und fördern unsere Mitarbeiter durch klare Ziele sowie verantwortungsvolle Aufgaben.**

Vom ersten Tag an tragen MAN-Mitarbeiter zum Erfolg des Unternehmens bei. Ihre Motivation und ihre Innovationskraft sind Basis unseres unternehmerischen Erfolgs. Das Wissen und die Erfahrungen unserer Mitarbeiter sind

unsere wichtigste Ressource. Wir investieren in ihre Qualifikation und den Aufbau von Kompetenzen. Dies ist auch die Grundlage unserer Leadership Supply: Mitarbeiter, die sich durch eine hohe fachliche, unternehmerische und soziale Kompetenz auszeichnen, bereiten wir intensiv auf ihre Aufgabe als Führungskraft bei MAN vor. So gewährleisten wir die Zukunftsfähigkeit unserer Unternehmensgruppe. Zudem stellen wir durch verschiedene Programme sicher, dass unsere Mitarbeiter auch am wirtschaftlichen Erfolg der MAN Gruppe teilhaben.

### **Wir pflegen Fairness, Toleranz und Chancengleichheit.**

Alle Mitarbeiter sind uns in ihrer Unterschiedlichkeit gleich wichtig, unabhängig von Nationalität, Kultur, Religion, Alter oder Geschlecht. Als weltweit tätige Unternehmensgruppe profitieren wir von dieser Unterschiedlichkeit und begegnen unseren Mitarbeitern mit Offenheit, Verständnis und Toleranz. Deren Vielfalt an Perspektiven, Talenten und Erfahrungen stellt ein großes Potenzial an Kreativität bereit, das wir im Sinne des Unternehmens aktiv fördern.

## **Verantwortung** gegenüber der Gesellschaft

### **Wir übernehmen unternehmerische Verantwortung für Umwelt, Mitarbeiter und Gesellschaft.**

Wir nutzen den freien und fairen Wettbewerb als Rahmen unserer unternehmerischen Aktivitäten. Die Werte der demokratischen Ordnung sind die Grundlage unseres Handelns. Als weltweiter Corporate Citizen in einer globalisierten Welt erfüllen wir an allen unseren Standorten unsere gesellschaftlichen Pflichten und übernehmen bewusst Verantwortung für Umwelt, Mitarbeiter und Gesellschaft. Wir verstehen uns als Teil der Gesellschaft, in der wir unternehmerisch aktiv sind. Wir fördern – im Rahmen unserer Möglichkeiten – deren Entwicklung lokal und regional. Die gesellschaftliche Akzeptanz unserer vielfältigen Tätigkeiten ist die Voraussetzung für unseren langfristigen und nachhaltigen Erfolg. Unternehmerische Verantwortung, Corporate Responsibility, ist Teil unserer Strategie.



**Wir orientieren uns an den Prinzipien der Nachhaltigkeit.**

Die Knappheit der Ressourcen und die Verantwortung für zukünftige Generationen verpflichten uns als Hersteller von Produkten im Transport- und Energiebereich besonders zur Nachhaltigkeit. Wir sorgen dafür, dass unsere Produkte und Herstellprozesse den Bedingungen einer nachhaltigen Entwicklung entsprechen. Bereits bei der Produktentwicklung achten wir darauf, dass bei Herstellung, Nutzung und Entsorgung unserer Produkte möglichst geringe Umweltbelastungen entstehen und Ressourcen geschont werden. In unserem regelmäßig erscheinenden Corporate-Responsibility-Bericht geben wir detailliert über einzelne Entwicklungen Auskunft.

**Wir achten die Würde des Menschen.**

Das Recht des Menschen auf ein Leben in Würde und Freiheit achten wir bei all unseren weltweiten Aktivitäten. Die MAN Gruppe ist diesem Grundsatz verpflichtet.

## Code of Conduct

Im Code of Conduct haben wir verbindliche Leitlinien für das Verhalten aller Mitarbeiter festgelegt. Dieser Verhaltenskodex soll die in diesem Leitbild beschriebenen Rahmenbedingungen unseres Handelns konkretisieren und für unsere tägliche Arbeit nutzbar machen.

Der Code of Conduct dient unseren Mitarbeitern als Orientierung – er weist die Mitarbeiter auf die Themenbereiche hin, die besondere Risiken beinhalten, und zeigt anhand von Beispielsfällen, wie der Mitarbeiter mit diesen Risiken umgehen kann. Er stellt klar, dass Verstöße gegen den Code of Conduct nicht toleriert werden können.

Ziel der Leitlinien ist es, allen Mitarbeitern bei rechtlichen und ethischen Herausforderungen eine Entscheidungshilfe an die Hand zu geben und richtiges Verhalten zu fördern. Damit stärken wir das Vertrauen in die Leistung und Integrität der MAN Gruppe.

MAN hat eine effektive und nachhaltige Compliance-Organisation aufgebaut. MAN-Mitarbeiter finden Hilfe rund um Fragen zu Richtlinien und ihrer Auslegung bei den Compliance-Verantwortlichen in den Unternehmen der MAN Gruppe sowie beim Compliance Helpdesk.

Der komplette Code of Conduct ist im MAN Intranet abrufbar: **<http://man-inside.eu>** > MAN Gruppe > Compliance > Code of Conduct.

## **Kontakt**

### **Unternehmensleitbild**

MAN SE

Ungererstr. 69

80805 München

Telefon +49. 89. 36098-0

[www.man.eu](http://www.man.eu)

### **Code of Conduct**

Compliance Helpdesk

[compliance.helpdesk@man.eu](mailto:compliance.helpdesk@man.eu)

Telefon +49. 89. 3609-555

## **MAN SE**

Ungererstr. 69

80805 München

Telefon +49. 89. 36098-0

Telefax +49. 89. 36098-250

[www.man.eu](http://www.man.eu)
