# Supplementary material
Source: publisher site journal article supplement (https://www.degruyterbrill.com/publication/isbn/9783110432879/downloadAsset/9783110432879_Elektronischer_Anhang_2.zip)
Supplement: Supplementary file 75 [file Merck GB 2010.pdf › Korpustexte/Korpustexte pdf/Merck/Merck GB 2010.pdf]

GESCHÄFTSBERICHT  
2010

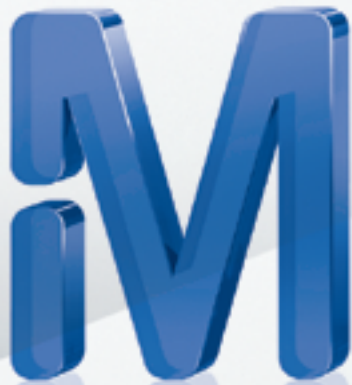

## WICHTIGE EREIGNISSE 2010

- 3 Das war 2010

## DAS UNTERNEHMEN MERCK

- 4 Der Weg von Merck
- 5 Zum globalen börsennotierten Unternehmen
- 7 Merck heute
- 7 Die Zukunft

## AN DIE AKTIONÄRE

- 8 Brief von Karl-Ludwig Kley
- 12 Die Geschäftsleitung

## LAGEBERICHT 2010

- 15 Gesamtwirtschaftliche Situation
- 17 Ertrags-, Finanz- und Vermögenslage
- 30 Corporate Responsibility
- 39 Merck am Kapitalmarkt
- 47 Merck Serono
- 63 Consumer Health Care
- 69 Merck Millipore
- 77 Performance Materials
- 84 Konzernkosten und Sonstiges
- 86 Risikobericht
- 95 Prognosebericht
- 106 Ereignisse nach dem Bilanzstichtag

## CORPORATE GOVERNANCE

- 108 Erklärung zur Unternehmensführung
- 128 Bericht des Aufsichtsrats
- 131 Ziele des Aufsichtsrats für seine Zusammensetzung

## KONZERNABSCHLUSS DER MERCK-GRUPPE 2010

- 134 Gewinn- und Verlustrechnung
- 135 Bilanz
- 136 Segmentbericht
- 138 Kapitalflussrechnung
- 139 Free Cash Flow
- 139 Gesamtergebnisrechnung
- 140 Eigenkapitalveränderungsrechnung
- 141 Anhang

## HINWEISE

- 209 Versicherung der gesetzlichen Vertreter
- 210 Bestätigungsvermerk des Abschlussprüfers
- 212 Glossar
- 217 Geschäftsentwicklung 2001 – 2010
- 219 Termine 2011
- 219 Service
- Impressum

## MERCK AUF EINEN BLICK

### Wichtige Kennzahlen des Jahres 2010

| in Mio EUR                                                    | Pharma  | Chemie   | Konzern-<br>kosten und<br>Sonstiges | Gesamt   | Verände-<br>rung in % |
|---------------------------------------------------------------|---------|----------|-------------------------------------|----------|-----------------------|
| Gesamterlöse                                                  | 6.225,5 | 3.065,1  | –                                   | 9.290,6  | 19,9                  |
| Bruttoergebnis                                                | 5.109,7 | 1.795,5  | –                                   | 6.905,2  | 20,8                  |
| Forschungs- und Entwicklungskosten                            | 1.192,0 | 205,1    | –                                   | 1.397,1  | 3,9                   |
| Operatives Ergebnis                                           | 579,0   | 624,0    | –89,5                               | 1.113,5  | 71,6                  |
| Sondermaßnahmen                                               | 68,6    | –1,0     | –68,4                               | –0,8     | –97,3                 |
| Ergebnis vor Zinsen und Steuern (EBIT)                        | 647,6   | 623,0    | –157,9                              | 1.112,7  | 79,2                  |
| EBIT vor Abschreibungen und Wertberichtigungen (EBITDA)       | 1.603,7 | 1.007,5  | –154,3                              | 2.456,9  | 51,2                  |
| Umsatzrendite in % (ROS:<br>Operatives Ergebnis/Gesamterlöse) | 9,3     | 20,4     | –                                   | 12,0     |                       |
| Free Cash Flow                                                | 1.343,6 | –4.129,7 | –736,4                              | –3.522,5 | –                     |
| Basis Free Cash Flow                                          | 1.353,3 | 812,2    | –495,7                              | 1.669,8  | 96,1                  |

### Gesamterlöse nach Unternehmensbereichen\*

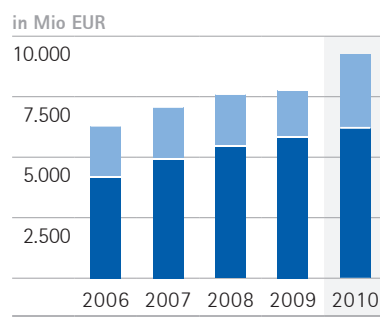

\*ohne Konzernkosten und Sonstiges

■ Pharma ■ Chemie

### Operatives Ergebnis nach Unternehmensbereichen

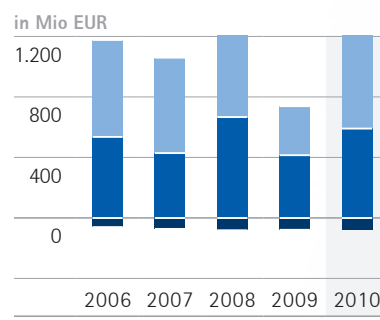

■ Pharma ■ Chemie ■ Konzernkosten und Sonstiges

Das Pharma-, Chemie- und Life-Science-Geschäft von Merck ist in vier Sparten gegliedert: Merck Serono, Consumer Health Care, Merck Millipore und Performance Materials. Merck beschäftigt über 40.000 Mitarbeiter und ist weltweit in 67 Ländern tätig.

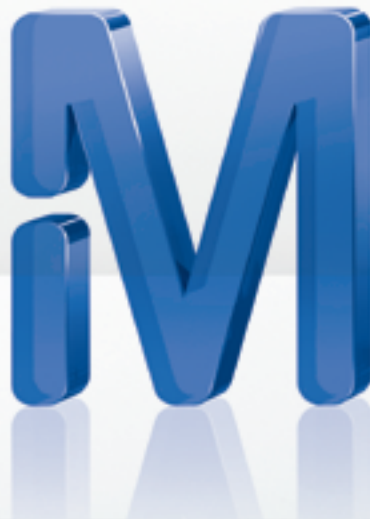

Merck  
Serono

Consumer  
Health Care

Merck  
Millipore

Performance  
Materials

## WICHTIGE EREIGNISSE 2010

---

2010 war für Merck ein ereignisreiches und unter dem Strich auch sehr gutes Geschäftsjahr. Wir sind unseren Merck-Weg gegangen, der auf den Grundsätzen „Bewahren. Verändern. Wachsen.“ basiert – und hatten damit Erfolg.

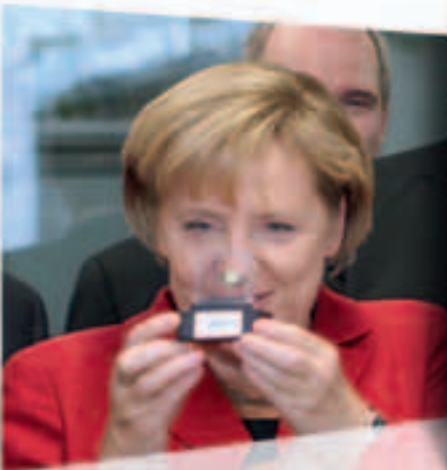

Faszinierende OLED-Technologie – auch für die deutsche Bundeskanzlerin Angela Merkel.

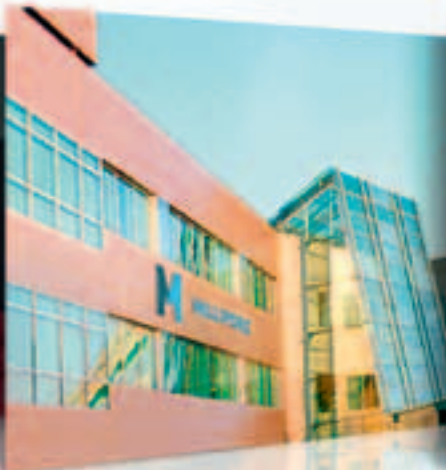

Führendes Life-Science-Unternehmen – mit der Akquisition von Millipore gelingt Merck ein strategischer Schachzug.

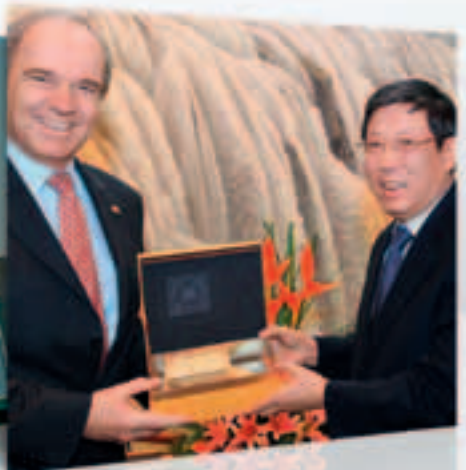

China, Markt der Zukunft – 2010 tätigt Merck eine wichtige Investition in ein neues Forschungszentrum.

## DAS WAR 2010

### **Merck übernimmt das amerikanischen Life-Science-Unternehmen Millipore.**

Am 28. Februar verkündet Merck die Transaktion, die 5,1 Mrd EUR kostet. Juristisch vollzogen wird die Übernahme am 14. Juli. Erster Tag der neuen, mit Teilen der ehemaligen Sparte „Performance & Life Science Materials“ verschmolzenen Organisation unter ihrem neuen Marktauftritt ist der 1. Januar 2011. Der Vorsitzende der Geschäftsleitung, Karl-Ludwig Kley, sagt dazu: „Indem wir Millipores Expertise in den Bereichen Bioscience und Bioprocess mit unserer Erfahrung im Geschäft mit Life-Science-Kunden bündeln, können wir das enorme Potenzial unseres Chemiegeschäftes realisieren.“ Auch Analysten sehen in der Akquisition einen guten strategischen Schachzug.

**Das Vertrauen der Finanzmärkte in Merck** spiegelt sich in der erfolgreichen Emission einer Euro-Anleihe zur Finanzierung der Millipore-Akquisition wider. Das Volumen von 3,2 Mrd EUR – die größte Euro-Anleihen-Emission eines deutschen Unternehmens in 2010 – wird in einem eher schwierigen Marktumfeld in verschiedenen Tranchen platziert.

**China ist für Merck ein Zukunftsmarkt.** 2010 baut das Unternehmen seine Präsenz in dem Land stark aus. 2000 Mitarbeiter steigern die Umsätze um über 30 %. In Peking wird ein Entwicklungsstandort etabliert, um lokale klinische Studien vor Ort koordinieren zu können – über 200 hochqualifizierte Arbeitsplätze sollen entstehen.

**Ein Wechselbad der Gefühle durchlebt Merck** mit dem neuen Multiple-Sklerose-Medikament Cladribin: Zulassungen in Russland und Australien, Wiederaufnahme des Verfahrens in den USA und ablehnende Zulassungsempfehlung durch das Beratungsgremium der europäischen Zulassungsbehörde EMA. Noch im 1. Quartal 2011 werden die Würfel für die weitere Zukunft des Medikamentes in den USA fallen.

**Merck ist Pionier bei der LED- und OLED-Entwicklung.** Zur Stärkung der Position nimmt das neue Material Research Center am Standort Darmstadt seine Arbeit auf. Investitionskosten: 50 Mio EUR. Zur Einweihung am 23. September ist auch die deutsche Bundeskanzlerin Angela Merkel anwesend. Im Foyer des Gebäudes steht das weltweit größte OLED-Display – eine Fläche von fast neun Quadratmetern für gestochen scharfe Präsentationen.

**Eine richtungsweisende Kooperation mit Sanofi-Aventis** wird am 17. Dezember bekannt gegeben. Die Vereinbarung sieht eine weltweite Forschungs- und Entwicklungszusammenarbeit in der Onkologie vor. Hierbei sollen neue, experimentelle Wirkstoffkombinationen, die spezifische Signalwege in Krebszellen blockieren können, untersucht werden. Merck erhofft sich neue, zielgerichtete Krebstherapien mit hohem therapeutischem Potenzial.

## DAS UNTERNEHMEN MERCK

---

Bei Merck sind Pharma, Chemie und Life-Science unter einem Dach vereint. Wir sind davon überzeugt, dass der Markt in diesen Bereichen Forschungserfolge und technologischen Fortschritt mit attraktiven Margen belohnen wird. Wir konzentrieren uns auf Spezialitäten. Der Wettbewerb über den Preis allein und das Massengeschäft sind nicht unsere Welt.

### DER WEG VON MERCK

Mit einer Apotheke fängt 1668 alles an. Die Engel-Apotheke, die sich bis heute im Familienbesitz befindet, ist die Keimzelle von Merck. Wie seine Berufsgenossen bereitet der Apotheker Friedrich Jacob Merck alle Arzneien selbst zu. Die „pharmazeutische Kunst“ wird damals noch eher handwerklich betrieben.

1816 – einige Apothekergenerationen später – übernimmt Emanuel Merck die väterliche Apotheke und leitet 1827 den Übergang vom Handwerk zur industriellen Produktion ein. Im Labor gelingt ihm die Extraktion von Alkaloiden, hochwirksamen Pflanzeninhaltsstoffen, denen wegen ihrer medizinischen Wirkung die Aufmerksamkeit der Wissenschaft gilt. 1860 verkauft die Firma bereits über 800 organische und anorganische Substanzen, darunter viele, die noch heute im Labor verwendet werden.

Die Wurzeln der Flüssigkristalle – eine der herausragenden Erfolgsgeschichten von Merck – reichen zurück bis in das Jahr 1904. Jahrzehntlang bleiben sie eine Laborkuriosität und ihr Verkauf ein Teil des Laborgeschäfts.

Die 2007 von Merck übernommene Serono beginnt ebenfalls mit der Extraktion von Wirkstoffen. 1906 gründet Cesare Serono in Rom dazu das „Istituto Farmacologico Serono“ und entwickelt eine neue Technik zur Herstellung von Lecithin aus Eidotter. 1949 gelingt es erstmals, reines Gonadotropin aus Urin zu isolieren. Gonadotropin spielt bei der Fortpflanzung eine wichtige Rolle. Mit dessen rekombinanter Produktion verwandelt sich Serono in ein Biotech-Unternehmen.

## ZUM GLOBALEN BÖRSENNOTIERTEN UNTERNEHMEN

Erste Geschäftsbeziehungen ins europäische Ausland knüpft Merck bereits um 1820. Seit 1900 unterhält das Unternehmen Geschäftsbeziehungen auf allen Kontinenten.

In den USA gründet Georg (später „George“) Merck, ein Enkel von Emanuel Merck, 1891 die Handelsgesellschaft Merck & Co. Infolge des Ersten Weltkriegs verliert die Darmstädter Firma im Rahmen des „Trading with the Enemy Act“ von 1917 alle Anteile. George Merck kann seinen Anteil zurückerwerben. Er wird Präsident der „public company“ Merck & Co. Heute sind beide Unternehmen nicht mehr miteinander verbunden. Die amerikanische Firma Merck & Co. besitzt die Namensrechte in Nordamerika. In der übrigen Welt hat das Darmstädter Unternehmen das alleinige Recht zur Führung des Namens Merck, in den USA und Kanada firmiert es unter EMD, den Initialen von Emanuel Merck, Darmstadt.

Käufe und Verkäufe von Geschäften spielen eine wichtige Rolle bei Merck. Ein entscheidendes Engagement ist seit 1972 die 50%ige Beteiligung an der italienischen Bracco-Gruppe, die neben Kontrastmitteln und eigenen pharmazeutischen Produkten auch die gesamte Produktpalette von Merck in Italien vertreibt und einen bedeutenden Beitrag zur Ertragskraft von Merck leistet. Im Jahr 1991 übernimmt Merck die „Société Lyonnaise Industrielle Pharmaceutique“ (Lipha).

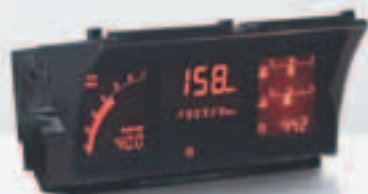

Merck ist Marktführer bei den Flüssigkristallen. Bereits im Auto-Armaturenbrett von 1983 kommen sie zum Einsatz.



Mitte der 1990er-Jahre wird das Selbstmedikationsgeschäft um die englische Seven Seas und die französische Monot erweitert. Zur gleichen Zeit erreicht Merck mit dem Erwerb der englischen Amerpharm eine kritische Masse im Generikageschäft. Die Übernahme einer ganzen Reihe von Labordistributoren wird 1999 mit dem Kauf des amerikanischen Labordistributions-Unternehmens VWR Scientific Products abgeschlossen.

Um diese Akquisitionen finanziell absichern zu können, geht Merck 1995 an den Kapitalmarkt. Die Merck KGaA gibt 26 % ihrer Anteile an Kommanditaktionäre aus. Die Familie Merck hält danach über den Komplementär E. Merck die restlichen 74 %. Nach einer Kapitalerhöhung im Jahr 2007 verschieben sich die Anteile leicht auf das heutige Verhältnis von 30 zu 70.

Die erste Hälfte des zu Ende gegangenen Jahrzehnts ist von Verkäufen und Ausstiegen geprägt. 2000 trennt sich Merck von der Bracco-Beteiligung und der Vitaminchemie, 2004 von der Labor-distribution und den Elektronikchemikalien. 2006 ist Merck schuldenfrei.

2007 wird der Hebel auf Wachstum umgelegt. Merck übernimmt das Schweizer Biopharmazie-unternehmen Serono. Mit einem Kaufpreis von 10,3 Mrd EUR ist dies die mit Abstand größte Akquisition, die Merck jemals getätigt hat. Da im gleichen Jahr das Generikageschäft für 4,9 Mrd EUR verkauft wird, kann die Verschuldung bis Jahresende unter 1 Mrd EUR gesenkt werden. Nur drei Jahre später schultert Merck die nächste Großakquisition: Für 5,1 Mrd EUR wird Millipore über-nommen. Die dafür aufgelegte Anleihe in Höhe von 3,2 Mrd EUR ist die größte Euro-Anleihe eines deutschen Unternehmens im Jahr 2010. Ebenfalls 2010 beschließt Merck, sich von zwei Randgeschäften, dem auf Frauengesundheit spezialisierten Unternehmen Thérax sowie dem auf Pflanzenwachstum ausgerichteten Agrargeschäft von Crop Bioscience zu trennen.

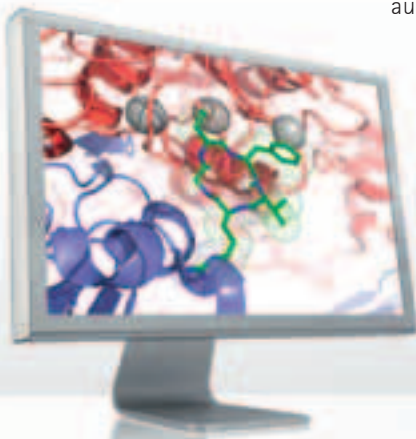

Merck entwickelt zielgerichtete  
Krebstherapien, z. B. das Molekül  
Cilengitide (grün), hier an seinem  
molekularen Ziel gebunden.

## MERCK HEUTE

Merck verfolgt ein Geschäftsmodell, dessen Ziel es ist, Werte für seine Anteilseigner zu schaffen. Nach der Übernahme von Millipore verfügen wir über ein Portfolio mit ausgeglichener Risikostreuung, das auf Kernkompetenzen in drei Geschäften mit Synergiepotenzial beruht: Pharma, Chemie und Life-Science. Das operative Geschäft führt Merck in vier Sparten: Merck Serono, Consumer Health Care, Merck Millipore und Performance Materials.

Die Sparte Merck Serono vertreibt verschreibungspflichtige Arzneimittel. Sie erforscht, entwickelt und produziert sowohl chemische als auch biologische Moleküle. Merck hat eine starke Stellung auf dem Gebiet der neurodegenerativen Krankheiten und Krebserkrankungen. Daneben werden Fruchtbarkeitsprodukte – bei denen wir Weltmarktführer sind – und Wachstumshormone sowie ein großes Portfolio von klassischen Produkten vermarktet, insbesondere für Herz-Kreislauf- und Stoffwechselerkrankungen.

Die Sparte Consumer Health Care bietet Selbstmedikationsprodukte für die Gesundheitsvorsorge und die Behandlung von leichten Erkrankungen an.

Merck ist die weltweite Nummer eins im Markt für Flüssigkristalle. Neben dem Geschäft mit Materialien für Displays befasst sich die Sparte Performance Materials mit Materialien für eine energiesparende Beleuchtung mit LEDs (lichtemittierenden Dioden) und OLEDs (organischen LEDs). Auch Pigmente für die Kunststoff-, Druck- und Lackindustrie sowie für kosmetische Anwendungen sind wichtige Bestandteile des Portfolios von Performance Materials. Die Sparte ist Marktführer bei den Perlglanz-Effektpigmenten, einer hochspezialisierten Nische des Pigmentmarkts.

2010 wird das amerikanische Life Science-Unternehmen Millipore übernommen, das 1954 von Jack Bush gegründet wurde. Ursprungsgeschäft von Millipore war die Filtertechnik für die Wasseraufbereitung und für Labore. Damit schafft das Unternehmen den Durchbruch in aller Welt. Später kommen weitere Geschäftsfelder wie Bioprozessverfahren oder bioanalytische Services für die Pharmaindustrie hinzu, die Millipore zu einem der weltweit führenden Life-Science-Unternehmen machen.

Mit Millipore gehört Merck nun zu den führenden Life-Science-Unternehmen. Die Sparte Merck Millipore umfasst Produkte für die Life-Science-Forschung wie Assays, Biomarker und „Target Solutions“ sowie Bioprozessverfahren, Laborwasseraufbereitungssysteme und Laborfiltration. Außerdem beliefert die Sparte vorzugsweise regulierte Märkte mit Spezialchemikalien, zum Beispiel die Pharma-, Kosmetik- und Lebensmittelindustrie. Analytische und wissenschaftliche Laboratorien beziehen unsere Reagenzien und Testkits. Insgesamt befinden sich mehr als 40.000 Produkte und Verfahren im Merck-Millipore-Portfolio.

## DIE ZUKUNFT

Auch in Zukunft wird sich Merck in seinen Pharma-, Chemie und Life-Science-Geschäften auf Spezialitäten konzentrieren und dabei Synergien erzeugen. Wir werden auch weiterhin große Beträge in Forschung und Entwicklung investieren und sowohl organisch, als auch durch Akquisitionen wachsen. An unserer sehr soliden Finanzpolitik werden wir festhalten.

## BRIEF VON KARL-LUDWIG KLEY

„Wir haben den Anspruch,  
das Unternehmen zu sein, bei dem  
Freude an der Arbeit und  
Innovationskraft zusammenfinden.“  
Karl-Ludwig Kley

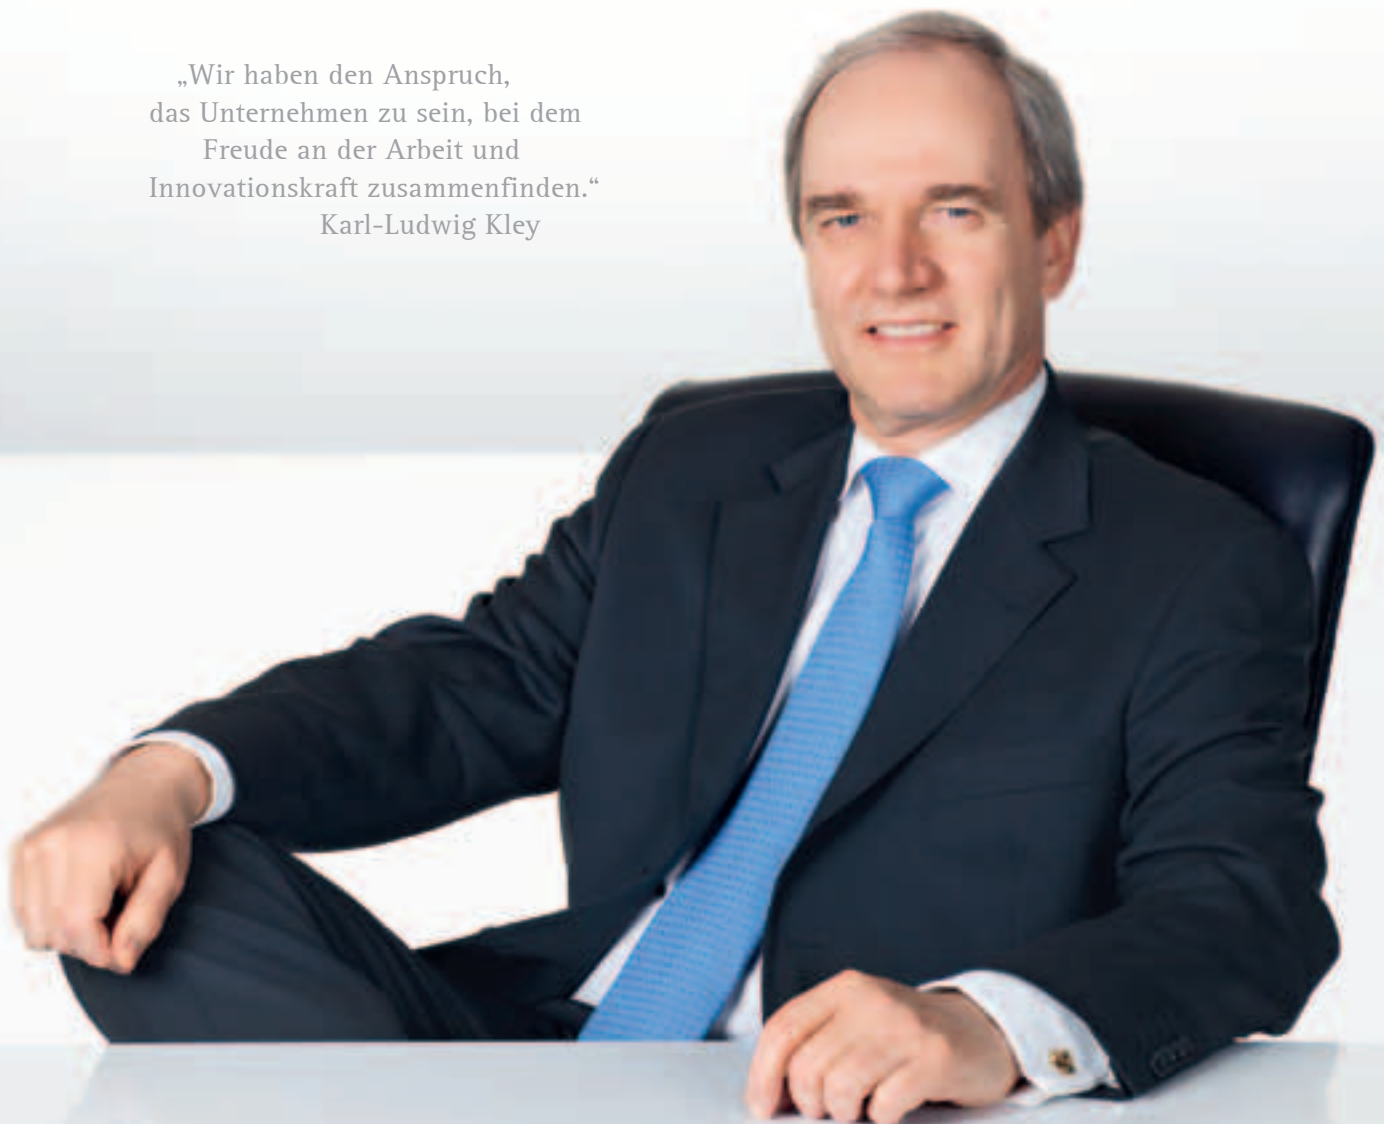

*Liebe Aktionäre, liebe Freunde,*

2010 haben wir die Transformation von Merck zu einem führenden Innovations- und Hochtechnologieunternehmen weiter vorangetrieben und dabei wichtige Meilensteine erreicht.

Wir haben die wirtschaftliche Leistungsfähigkeit von Merck nach dem Krisenjahr 2009 eindrucksvoll unter Beweis gestellt. Unsere Gesamterlöse stiegen um 20 % auf den Rekordwert von 9,3 Mrd EUR. Das operative Ergebnis verbesserte sich sogar um 72 % auf 1,1 Mrd EUR. Der um Akquisitionen bereinigte Free Cash Flow überschritt mit fast 1,7 Mrd EUR erstmals und überaus deutlich die Milliarden-Schwelle. Das Ergebnis nach Steuern liegt um 70 % über Vorjahr. Angesichts dieser Zahlen werden wir der Hauptversammlung am 8. April vorschlagen, die Dividende auf 1,25 EUR pro Aktie zu erhöhen.

Mit der Akquisition von Millipore und der Kombination unserer Geschäfte sind wir zu einem weltweit führenden Partner der Life-Science-Industrie geworden. Unser Portfolio reicht von Laborchemikalien bis zu Komplettlösungen zur Herstellung von biopharmazeutischen Arzneimitteln und verhilft unseren Kunden zu Erfolgen in Forschung, Entwicklung und Produktion. Zugleich erschließen wir Möglichkeiten, Synergien mit unseren bestehenden Geschäften zu realisieren sowie neue Gebiete in Angriff zu nehmen.

Auch in der Geschäftsleitung haben wir die Weichen für die Zukunft gestellt. Stefan Oschmann hat zum 1. Januar 2011 als Verantwortlicher für das Pharmageschäft die Nachfolge von Elmar Schnee angetreten, der das Unternehmen verlassen hat. Auch an dieser Stelle geht mein Dank an Herrn Schnee, der die Integration von Merck Serono entscheidend geprägt und viel dazu beigetragen hat, dass wir das Geschäft von einer guten Basis aus weiterentwickeln können. In die Geschäftsleitung eintreten werden weiterhin Kai Beckmann, der zum 1. April das neu geschaffene Personalressort übernehmen wird, sowie Matthias Zachert, der zum 1. Juni 2011 die Nachfolge von Michael Becker als das für Finanzen zuständige Geschäftsleitungsmitglied antritt. Mit diesem neu aufgestellten Team schaffen wir hervorragende Voraussetzungen dafür, nun ein neues und erfolgreiches Kapitel der einzigartigen Merck-Geschichte aufzuschlagen.

Wir können das Unternehmen von der wirtschaftlich robusten und innovationsstarken Basis des Jahres 2010 aus weiterentwickeln.

Merck Serono, unsere Sparte für innovative, verschreibungspflichtige Medikamente, verzeichnete ein über dem Marktdurchschnitt liegendes Umsatzplus von 8,3 %. Anhaltend erfolgreich waren die beiden größten Produkte Rebif® (+8,6 % auf fast 1.700 Mio EUR) und Erbitux® (+18 % auf 820 Mio EUR). Die bereinigte Umsatzrendite belief sich auf 22 %. Wir haben

aber nicht alle Ziele erreicht. So hat sich das wissenschaftliche Beratungsgremium der europäischen Behörde European Medicines Agency (EMA) abschließend gegen die Zulassung von Cladribin-Tabletten zur Behandlung von Multipler Sklerose ausgesprochen. In den USA müssen wir noch auf das Ergebnis der behördlichen Prüfung warten.

Unser Selbstmedikationsgeschäft führen wir in der Sparte Consumer Health Care, die ihren Wachstumskurs fortgesetzt hat – abgesehen von unserem noch im Aufbau befindlichen Geschäft in China. Die dortigen Restrukturierungsmaßnahmen dämpften nicht nur das Umsatzwachstum, sondern schlugen auch auf die Rentabilität durch.

Seit Juli 2010 konsolidieren wir unser Life-Science-Geschäft einschließlich der akquirierten Millipore in der neuen Sparte Merck Millipore. Trotz der laufenden Integrationsarbeit konnten wir die Umsätze deutlich steigern. Die um die Akquisition bereinigte Umsatzrendite betrug fast 19 %.

Die Sparte Performance Materials, in der wir unsere Materialiengeschäfte neu zusammengefasst haben, blickt auf ein sehr erfolgreiches Jahr zurück. Sie war mit einem Umsatzplus von 38 % unser größter Wachstumstreiber. Die Flüssigkristalle überschritten erstmals die Umsatzschwelle von 1 Mrd EUR, die Umsatzrendite der Sparte erreichte 42 %.

Auch regional waren wir erfolgreich. So erzielten wir in Asien, unserer zweitgrößten Region hinter Europa, mit einem Zuwachs von 37 % einen Umsatz von 2,3 Mrd EUR. In den USA stiegen die Umsätze auf 1,4 Mrd EUR – ein Plus von 32 %.

Wir blicken optimistisch in die Zukunft. Natürlich erwarten wir weitere Auswirkungen der weltweiten Finanz-, Wirtschafts- und Schuldenkrise, denn wichtige Volkswirtschaften sind derzeit noch weit von ihrer Stabilität und Dynamik früherer Tage entfernt. Auch der Finanzsektor bleibt verwundbar. Trotz aller dieser Risiken gehen wir aber für 2011 von einer positiven Wirtschaftsentwicklung aus. Für uns erwarten wir ein Wachstum der Gesamterlöse in einer Größenordnung von 13 % – 18 %. Das operative Ergebnis wollen wir zwischen 35 % und 45 % steigern.

Vor allem aber liegt unser Augenmerk darauf, Ihr Unternehmen strategisch weiterzuentwickeln:

Aufbauend auf unserer starken Position bei den Display-Materialien werden wir neue Gebiete und neue Technologien in Angriff nehmen. Nachdem wir zuletzt mit IPS, VA und PS-VA immer bessere Flüssigkristall-Technologien für schnellere und schärfere Bilder bei geringerem Energieverbrauch entwickelten, arbeiten wir heute schon an möglichen Nachfolgetechnologien.

Parallel dazu wollen wir uns auch in neuen Gebieten als Materiallieferant etablieren. Dazu gehören innovative Leuchtstoffe auf LED- und OLED-Basis, Materialien für die Energiespeicherung im Automobilbereich oder auch Produkte für die Photovoltaikindustrie, die in Solarzellen der nächsten Generation eingesetzt werden.

Mit Merck Millipore streben wir eine führende Rolle als Life-Science-Anbieter an. So etwa im biopharmazeutischen Markt, der hochrentabel ist und derzeit mit 12 % pro Jahr wächst. Kennzeichnend für die Prozesse in der modernen Biotech-Produktion ist die Zusammenarbeit mit Kunden bereits in Forschungs- und Entwicklungsprogrammen, wo wir unsere kombinierte Chemie-/Pharma-Expertise in Innovation ummünzen können. Und das zum Nutzen unserer Kunden, die – ist der Produktionsprozess für ein Medikament zugelassen – mit einem bewährten Lieferanten auch den gemeinsamen langfristigen Erfolg suchen.

Bei Merck Serono fokussieren wir uns auf Facharzt-Therapiegebiete mit hohem medizinischem Bedarf. Unsere Forschungsaktivitäten haben drei Schwerpunkte: Onkologie, neurodegenerative Erkrankungen sowie rheumatische Indikationen. Parallel zur Entwicklung von spezifischen Therapien wollen wir konsequent Methoden der Patientenstratifizierung einsetzen: Wir werden noch stärker der Frage nachgehen, bei welchen Patientengruppen unsere Medikamente wirken und wie sich die Wirksamkeit von Therapien für einzelne Patienten vorhersagen lässt.

Wir haben den Anspruch, das Unternehmen zu sein, bei dem Freude an der Arbeit und Innovationskraft zusammenfinden. Denn das macht Merck aus: Ein inspirierendes und motivierendes Arbeitsumfeld, in dem jeder die Chance hat, außergewöhnliche Leistungen zu vollbringen und sich gleichzeitig weiterzuentwickeln.

Und deshalb engagieren sich unsere über 40.000 Mitarbeiterinnen und Mitarbeiter tatkräftig zum Nutzen der Kunden und des Unternehmens. Ihnen, unseren Anteilseignern und Kunden, gehört unser Dank für die Unterstützung und das Vertrauen. Meine Kollegen in der Geschäftsleitung und ich werden auch weiterhin alles daran setzen, dieses Vertrauen Tag für Tag aufs Neue zu rechtfertigen.

Th  
Karl-Ludwig Hey



## DIE GESCHÄFTSLEITUNG

### Karl-Ludwig Kley

Vorsitzender  
der Geschäftsleitung

Jahrgang 1951, Jurist

von März 2004 bis Juni 2006  
im Aufsichtsrat und im  
Gesellschafterrat von Merck,  
seit September 2006 bei Merck  
und in der Geschäftsleitung

Zuständigkeit für gruppenweite  
Funktionen:  
Information Services; Personal  
(global); Recht und Compli-  
ance; Patente; Revision und  
Risikomanagement; Strategische  
Planung; Inhouse Consulting;  
Unternehmenskommunikation;  
Umweltschutz, Gesundheit und  
Sicherheit

### Michael Becker

Chief Financial Officer

Jahrgang 1948, Jurist

seit 1998 bei Merck,  
seit Januar 2000  
in der Geschäftsleitung

Zuständigkeit für gruppenweite  
Funktionen:  
Rechnungswesen und Controlling;  
Finanzen; Steuern; Versicherungen;  
Mergers and Acquisitions; Investor  
Relations; Einkauf

### Stefan Oschmann

Leiter des Unternehmensbereichs  
Pharma

Jahrgang 1957, Veterinärmediziner

seit 2011 bei Merck in der  
Geschäftsleitung

Zuständigkeit für gruppenweite  
Funktionen:  
Unternehmensbereich Pharma

Regionale Zuständigkeit:  
Europa; USA (Pharma); Kanada;  
Latein- und Zentralamerika; Afrika;  
Mittlerer Osten

**Bis Ende 2010:**  
**Elmar Schnee**

### Bernd Reckmann

Leiter des Unternehmens-  
bereichs Chemie

Jahrgang 1955, Biochemiker

seit 1986 bei Merck,  
seit Januar 2007  
in der Geschäftsleitung

Zuständigkeit für gruppenweite  
Funktionen:  
Unternehmensbereich Chemie

Regionale Zuständigkeit:  
Deutschland (inklusive Personal);  
Werkleitung Darmstadt und  
Gernsheim; Asien; USA (Chemie);  
Russland; Australien; Neuseeland

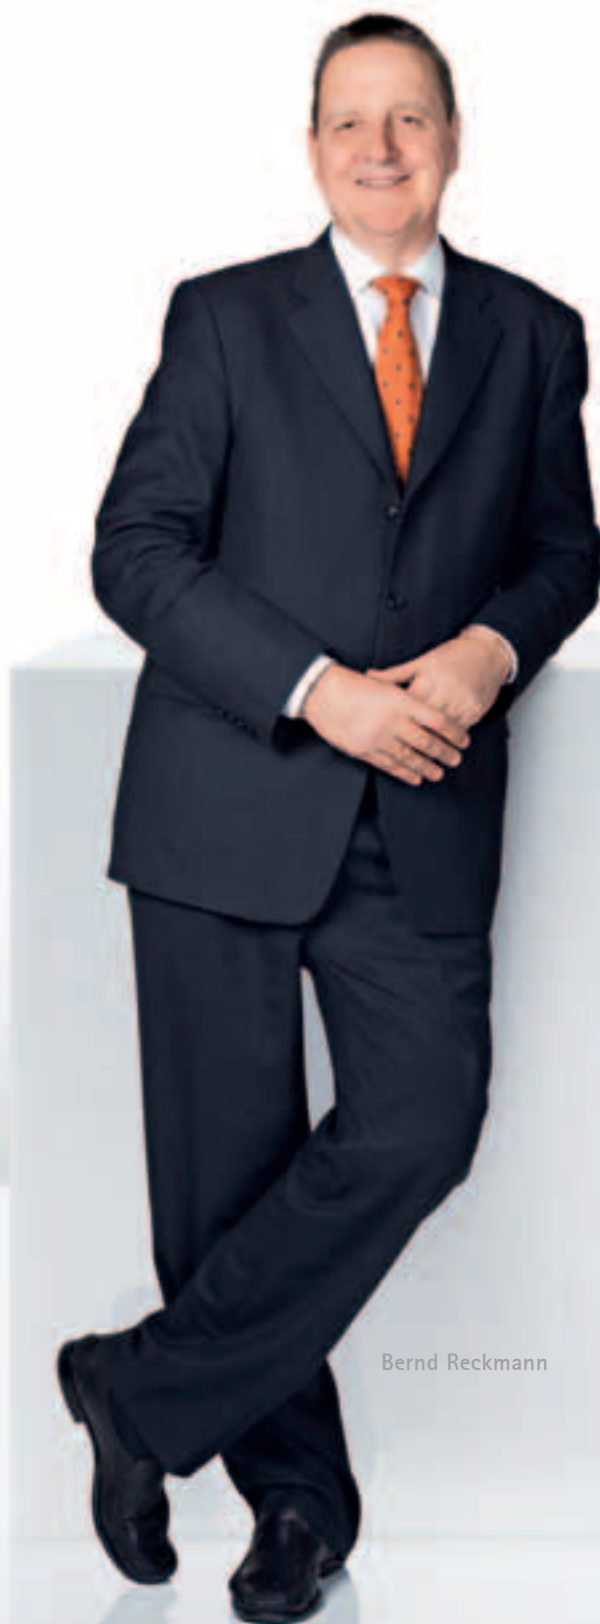

Bernd Reckmann

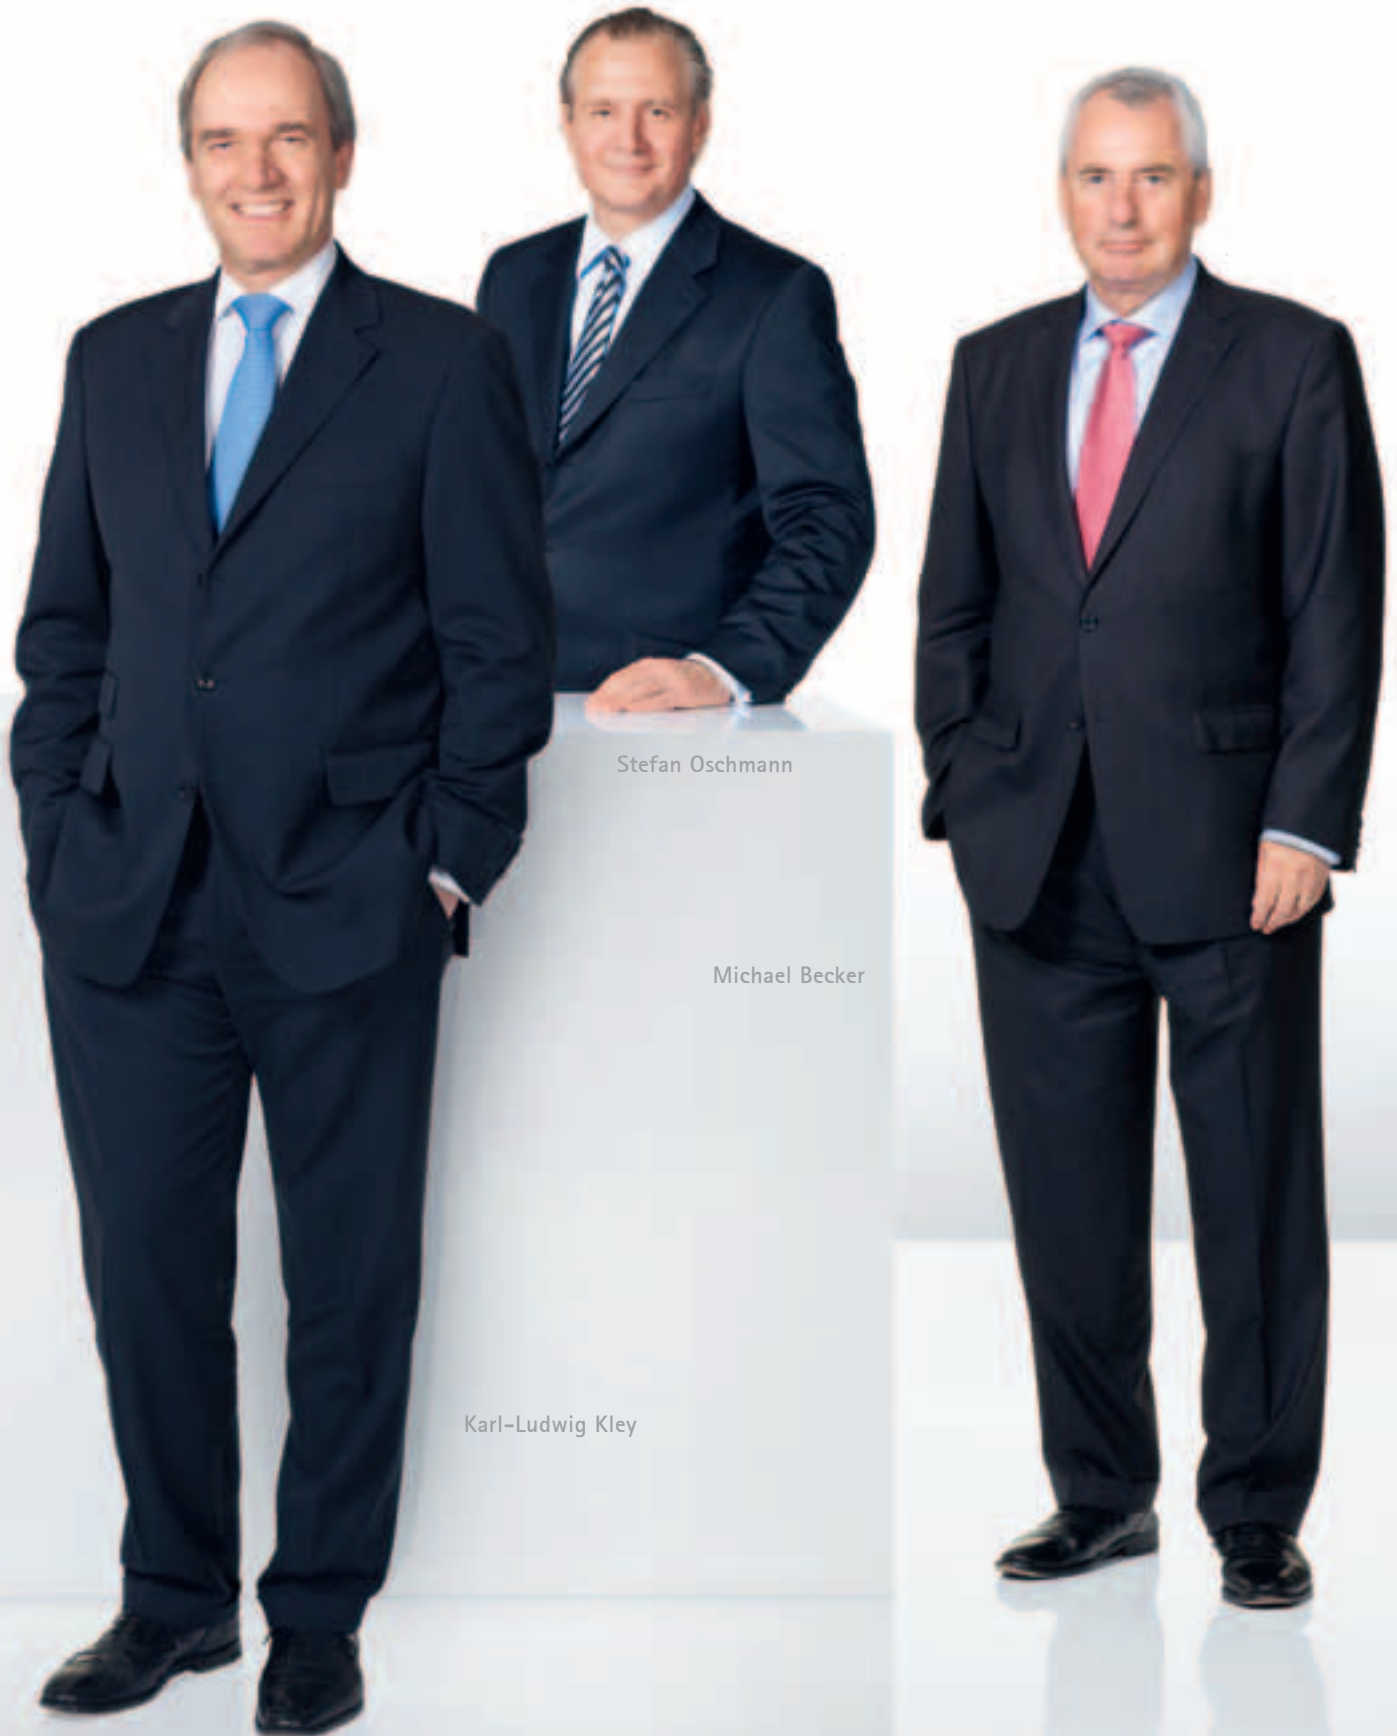

Stefan Oschmann

Michael Becker

Karl-Ludwig Kley



## LAGEBERICHT DER MERCK-GRUPPE 2010

---

|     |                                     |
|-----|-------------------------------------|
| 15  | Gesamtwirtschaftliche Situation     |
| 17  | Ertrags-, Finanz- und Vermögenslage |
| 30  | Corporate Responsibility            |
| 39  | Merck am Kapitalmarkt               |
| 47  | Merck Serono                        |
| 63  | Consumer Health Care                |
| 69  | Merck Millipore                     |
| 77  | Performance Materials               |
| 84  | Konzernkosten und Sonstiges         |
| 86  | Risikobericht                       |
| 95  | Prognosebericht                     |
| 106 | Ereignisse nach dem Bilanzstichtag  |

## GESAMTWIRTSCHAFTLICHE SITUATION

Die Konjunktur hat sich von der tiefsten Krise seit dem Zweiten Weltkrieg wieder erholt. Im Pharmabereich sind die Schwellenländer auf dem Vormarsch. Die chemische Industrie – und hier vor allem die deutsche – verzeichnete ein außerordentlich gutes Jahr 2010.

### Weltwirtschaft kommt wieder in Schwung – Unsicherheit bleibt

Die Organisation für wirtschaftliche Zusammenarbeit und Entwicklung (OECD) berichtet von einem Wirtschaftswachstum ihrer 34 Mitgliedsstaaten von 2,8 % im Jahr 2010. Die größte Volkswirtschaft, die USA, verzeichnete dabei ein Wachstum des Brutto-Inlandsprodukts (BIP) um 2,7 %, während die Staaten der Eurowährungszone um 1,7 % zulegen und Japan auf ein Wachstum von 3,7 % zurückblicken kann. Positiv erwähnt die OECD, dass die stark gestiegenen Unternehmensgewinne reinvestiert worden sind. Negativ dagegen machten sich die erneut fallenden Immobilienpreise in den USA sowie zunehmende Spannungen an den Devisenmärkten bemerkbar.

Der Internationale Währungsfonds (IWF), der über die Entwicklung des Weltwirtschaftswachstums berichtet, errechnet für das Jahr 2010 eine Steigerung um 4,8 %. Die Industrieländer verzeichneten demzufolge einen BIP-Anstieg um 2,7 %, wobei allerdings die Industrieproduktion noch beachtlich unter dem Niveau vor der Krise liegt. Dagegen erreichten die so genannten aufstrebenden und sich entwickelnden Länder einen BIP-Anstieg um 7,1 %. Darunter befinden sich auch die BRIC-Staaten genannten Länder China (+10,5 %), Indien (+9,7 %), Brasilien (+7,5 %) und Russland (+4 %).

Der IWF bewertet das erreichte weltweite Wachstum als eher schwach, da sich die weltweite Wirtschaft noch von der tiefsten Rezession seit dem Zweiten Weltkrieg erholt. China hingegen konnte mit von der Regierung gesetzten Anreizen eine Erholung erreichen, die sich selbst trägt, vor allem durch die Nachfrage aus dem privaten Sektor. Allerdings registrieren Ökonomen in Teilen Chinas Spekulationen an den Immobilienmärkten mit der Folge möglicher Korrekturen. Die Erholung in Lateinamerika wird nach IWF angeführt von Brasilien, zeige aber derzeit Anzeichen möglicher Überhitzung.

Trotz der Markterholung nach der Krise bleiben Unsicherheiten

Der IWF sieht die Stabilität der Finanzmärkte eher kritisch. Nach Ansicht der Organisation ist sie schon in der ersten Jahreshälfte 2010 zurückgegangen und die Unsicherheit nimmt zu. Zunehmende Spannungen im internationalen Währungsgefüge sowie die expansive Geldpolitik der USA bergen Risiken. Insgesamt hat sich laut IWF ab dem dritten Quartal 2010 die wirtschaftliche Erholung verlangsamt. Unsicherheiten waren und sind die private Nachfrage sowie die Auswirkungen des Endes staatlich gesetzter wirtschaftlicher Anreize. Die Inflation lag im Jahr 2010 in den Industriestaaten unter 1,5 % und in den Volkswirtschaften der Schwellenländer bei 5,75 %.

Ein Drittel des weltweiten  
Pharmaumsatzes kommt  
aus den USA

### Pharmamärkte der Industrieländer mit immer mehr Gegenwind

Das Pharma-Marktforschungsunternehmen IMS Health berichtet von weltweiten Pharma-Umsätzen im Jahr 2010 von etwa 840 Mrd USD, was einem Wachstum von etwa 4,5 % entspricht. Die Umsätze im weltweit größten Markt, den USA, lagen bei 310 Mrd USD. Die eher reifen Märkte der Industriestaaten wuchsen nicht mehr besonders stark, wozu auch Gesundheitsreformen z. B. in Frankreich, Spanien und Griechenland beitrugen.

Märkte mit hohen Wachstumsraten waren dagegen die BRIC-Länder Brasilien, Rußland, Indien, China, aber auch die Türkei und Indonesien. Die aufstrebenden Staaten waren im Jahr 2010 bereits für 42 % des weltweiten Wachstums der Pharmamärkte verantwortlich.

Nach IMS-Angaben wird es zunehmend schwieriger, neue Präparate auf den Markt zu bringen und die Investitionen zu amortisieren. In einigen Ländern, darunter Spanien, Italien und China, gewinnen darüber hinaus regionale oder gar lokale Behörden deutlich an Mitspracherecht neben nationalen Behörden. Damit verlängert sich nach Einschätzung von IMS die Zeit bis zur Markteinführung, falls es überhaupt noch dazu kommt.

### Chemische Industrie verzeichnet starkes Wachstum

Nach Angaben des europäischen Branchenverbandes CEFIC (Conseil Européen de l'Industrie Chimique) wuchs die chemische Industrie in Europa im Jahr 2010 um 10 % im Vergleich zum krisenbedingt schwachen Jahr 2009. Deutschland war der Wachstumsmotor der europäischen chemischen Industrie, doch hat der gesamte Industriezweig das Vorkrisenniveau von 2007 noch nicht wieder erreicht. Weltweit betrug 2009 das Umsatzvolumen 1.871 Mrd EUR. Die 27 EU-Staaten hatten daran mit 449 Mrd EUR lediglich einen Anteil von 24 %. Deutschland hält mit 25,5 % des Umsatzes die Spitzenposition in Europa. Asien liegt weltweit auf Platz eins mit 834 Mrd EUR, angeführt von China mit 416 Mrd EUR. 26 % des europäischen Chemieumsatzes entfällt auf Spezialchemikalien, wozu auch die Produkte von Merck zählen. So genannte Chemikalien für Verbraucher, darunter ebenfalls Merck-Produkte, machen nach der CEFIC-Erhebung 14 % des europäischen Chemieumsatzes aus. (Zahlen für 2010 liegen erst nach Drucklegung dieses Berichtes vor).

Nach Verbandsangaben hat sich das Wachstum zum Jahresende hin wieder abgeschwächt, da wirtschaftliche Anreize in einigen Länder auslaufen. Laut CEFIC war die Nachfrage aus nicht-europäischen Staaten der Hauptwachstumstreiber.

Für Deutschland errechnet der Verband der Chemischen Industrie (VCI) ein Wachstum von knapp 18 % auf 170 Mrd EUR. Die VCI-Mitgliedsunternehmen, etwa 1600 an der Zahl, investierten 6,4 Mrd EUR in Sachanlagen und gaben fast 9,4 Mrd EUR für Forschung und Entwicklung aus. Für den größten Markt, die USA, beziffert der dortige Chemieverband American Chemical Council (ACC) das Volumen für 2010 auf gut 670 Mrd USD. Dabei war der Export eine wichtige Größe mit einem Handelsbilanzüberschuss von 3,7 Mrd USD, verglichen mit einem Defizit von 100 Mio USD im Vorjahr. Die Produktion in Schwellenländern ist laut ACC im Jahr 2010 um 12 % gestiegen.

## ERTRAGS-, FINANZ- UND VERMÖGENSLAGE

Die Akquisition von Millipore prägt den Konzernabschluss. Sie hilft uns, Merck als Life-Science-Unternehmen zu positionieren.

### 2010: Ein erfolg- und ereignisreiches Geschäftsjahr

Die Ertrags-, Finanz- und Vermögenslage hat sich im Geschäftsjahr 2010 sehr erfreulich entwickelt. Nach dem Kauf der Schweizer Serono im Jahr 2007 im Unternehmensbereich Pharma tätigten wir im Jahr 2010 mit dem Kauf der Millipore Corporation, USA, nun auch im Unternehmensbereich Chemie eine Großakquisition. Dieser Zukauf prägt den vorliegenden Konzernabschluss stark. In der Ergebnisrechnung sind die Millipore-Gesellschaften seit Juli für das zweite Halbjahr 2010 mit ihren Erlösen und Aufwendungen enthalten. Außerdem sind die Aufwendungen aus der Kaufpreisallokation sowie einmalige Transaktions- und Integrationskosten berücksichtigt. Die Produktsätze der Merck-Gruppe haben sich im Geschäftsjahr um 21 % auf 8.929 Mio EUR erhöht. Die Lizenz- und Provisionserlöse liegen mit –2 % leicht unter dem Vorjahresniveau. Die Gesamterlöse – also die Summe aus Produktsätzen sowie Lizenz- und Provisionserlösen – erhöhten sich um 20 % auf 9.291 Mio EUR. Dieser starke Anstieg steht im Zusammenhang mit dem Kauf von Millipore. Aber auch organisch, d. h. um den Akquisitionseffekt und die Währungseinflüsse bereinigt, wuchs unser Geschäft um erfreuliche 7,9 %.

Organisches Wachstum der Merck-Gruppe beträgt 7,9 %

#### Gesamterlöse nach Unternehmensbereichen

in Mio EUR

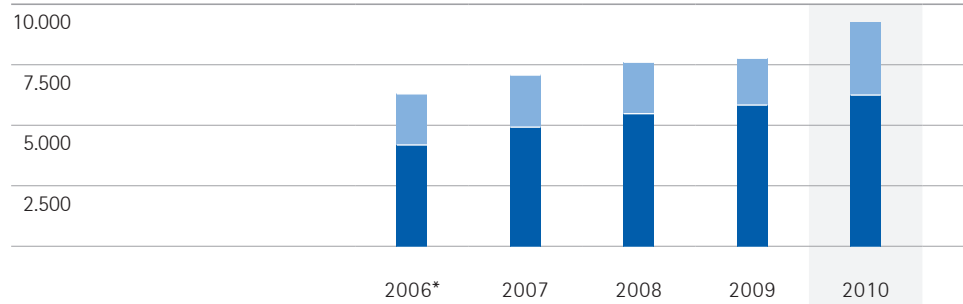

\*inklusive Generics

■ Chemie ■ Pharma

Die Herstellungskosten haben sich um 18 % erhöht. Die mit der Akquisition von Millipore übernommenen Vorräte wurden im Zuge der Kaufpreisallokation bereits mit dem Marktwert, basierend auf erzielbaren Verkaufserlösen, angesetzt und damit um 86 Mio EUR höher bewertet. Dieser Betrag wurde im 2. Halbjahr 2010 vollständig in den Herstellungskosten aufwandswirksam berücksichtigt und belastete damit die Bruttomarge einmalig. Insgesamt wuchs die Bruttomarge um 21 %. Die Marketing- und Vertriebskosten stiegen mit 20 % relativ stark, da im Vergleich zum Vorjahr nun auch die Kosten der Millipore-Gesellschaften für ein halbes Jahr enthalten sind. Ohne die Akquisition und ohne Währungskurseinflüsse belief sich der Anstieg auf 7,9 %.

Wegen der zunehmenden Bedeutung der Lizenz- und Provisionsaufwendungen weisen wir diese separat unterhalb der Marketing- und Vertriebskosten aus. Der Kostenanstieg um 15 % ist umsatzabhängig und steht im Zusammenhang mit der positiven Entwicklung bei unseren Merck-Serono-Produkten Rebif® und Erbitux®. Das Lizenz- und Provisionsergebnis fasst zum einen die in den Gesamterlösen enthaltenen Lizenz- und Provisionserträge und zum anderen auf der Aufwandsseite die für Vertriebslizenzen und in geringerem Umfang für Produktionslizenzen enthaltenen Beträge zusammen und stellt sich wie folgt dar:

#### Lizenz- und Provisionsergebnis nach Sparten im Jahr 2010

| in Mio EUR        | Gesamt      | Merck<br>Serono | Consumer<br>Health Care | Merck<br>Millipore | Performance<br>Materials | Konzern-<br>kosten und<br>Sonstiges |
|-------------------|-------------|-----------------|-------------------------|--------------------|--------------------------|-------------------------------------|
| Lizenzaufwand     | -183        | -163            | -                       | -7                 | -13                      | -                                   |
| Lizenz Erlöse     | 340         | 323             | 2                       | 7                  | 8                        | -                                   |
| <b>Gesamt</b>     | <b>157</b>  | <b>160</b>      | <b>2</b>                | <b>-</b>           | <b>-5</b>                | <b>-</b>                            |
| Provisionsaufwand | -297        | -293            | -                       | -3                 | -1                       | -                                   |
| Provisions Erlöse | 22          | 22              | -                       | -                  | -                        | -                                   |
| <b>Gesamt</b>     | <b>-275</b> | <b>-271</b>     | <b>-</b>                | <b>-3</b>          | <b>-1</b>                | <b>-</b>                            |

#### Lizenz- und Provisionsergebnis nach Sparten im Jahr 2009

| in Mio EUR        | Gesamt      | Merck<br>Serono | Consumer<br>Health Care | Merck<br>Millipore | Performance<br>Materials | Konzern-<br>kosten und<br>Sonstiges |
|-------------------|-------------|-----------------|-------------------------|--------------------|--------------------------|-------------------------------------|
| Lizenzaufwand     | -172        | -151            | -1                      | -3                 | -17                      | -                                   |
| Lizenz Erlöse     | 345         | 328             | 2                       | 7                  | 8                        | -                                   |
| <b>Gesamt</b>     | <b>173</b>  | <b>177</b>      | <b>1</b>                | <b>4</b>           | <b>-9</b>                | <b>-</b>                            |
| Provisionsaufwand | -257        | -253            | -                       | -3                 | -1                       | -                                   |
| Provisions Erlöse | 24          | 23              | -                       | 1                  | -                        | -                                   |
| <b>Gesamt</b>     | <b>-233</b> | <b>-230</b>     | <b>-</b>                | <b>-2</b>          | <b>-1</b>                | <b>-</b>                            |

Der deutliche Anstieg der Verwaltungskosten um 12 % beruhte hauptsächlich auf der erstmaligen Berücksichtigung der Millipore-Gesellschaften, die im Vorjahr noch nicht enthalten waren, sowie auf Währungskurseffekten. Organisch stiegen die Verwaltungskosten nur um 1,9 %. Die Position „Sonstige betriebliche Aufwendungen und Erträge“ liegt mit einem Aufwandssaldo von 390 Mio EUR leicht (-18 Mio EUR) über dem Vorjahresaufwand. Während im Vorjahr um rund 80 Mio EUR höhere Aufwendungen im Zusammenhang mit der Zuführung von Rückstellungen für Rechtsstreitigkeiten enthalten waren, wird das laufende Jahr durch Transaktions- und Integrationskosten für Millipore in Höhe von insgesamt 87 Mio EUR belastet. Dabei entfielen auf die Transaktionskosten 31 Mio EUR, die wegen geänderter IFRS-Bilanzierungsvorschriften nicht mehr als Bestandteil des Kaufpreises aktiviert, sondern direkt in der Gewinn- und Verlustrechnung berücksichtigt werden. Die Position wird außerdem durch höhere Wertminderungen auf immaterielle Vermögenswerte und Sachanlagen belastet. Insgesamt betragen die Wertmin-

derungen 66 Mio EUR. Diese stehen überwiegend mit der Einstellung von Forschungsprojekten und Forschungsk Kooperationen in Verbindung, aber auch mit veränderten Marktbedingungen, welche niedrigere Umsätze als bislang angenommen erwarten lassen. Bei den Währungskursdifferenzen wurden im Berichtsjahr 25 Mio EUR Kursgewinne gebucht, während das Vorjahr durch Kursverluste in Höhe von –7 Mio EUR belastet war.

Die Forschungs- und Entwicklungskosten stiegen um 3,9 % auf 1.397 Mio EUR. Dies entspricht einer auf die Gesamterlöse bezogenen Forschungsquote von 15 % (Vorjahr 17 %).

#### Forschung und Entwicklung nach Unternehmensbereichen

in Mio EUR

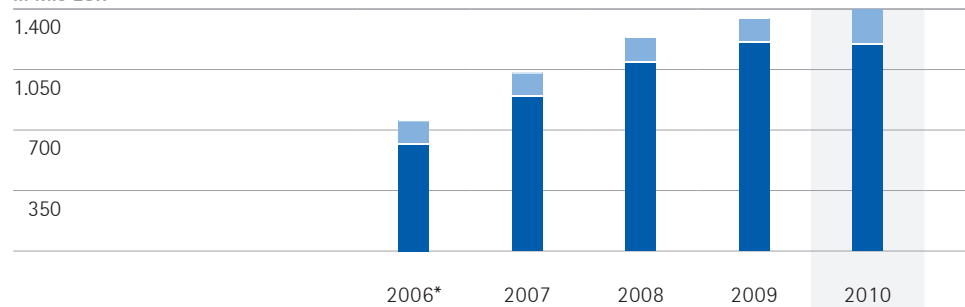

\*inklusive Generics

■ Chemie ■ Pharma

Die Abschreibungen auf immaterielle Vermögenswerte, die bisher im Wesentlichen solche für die immateriellen Vermögenswerte aus der Kaufpreisallokation für Serono enthielten, umfassen nun auch die Abschreibungen auf die im Rahmen der Kaufpreisallokation für Millipore identifizierten immateriellen Vermögenswerte. Dies sind hauptsächlich Kundenbeziehungen, Technologien und Namens- sowie Markenrechte, die über einen Zeitraum von 8 bis 17 Jahren planmäßig abgeschrieben werden. Die Abschreibungen stiegen dadurch deutlich an und belaufen sich für die Sparte Merck Millipore auf 96 Mio EUR. Die Position enthält aber auch Aufwendungen für Wertminderungen für immaterielle Vermögenswerte, die aus der früheren Kaufpreisallokation von Serono hervorgegangen sind. Wegen einer Neueinschätzung des Umsatzpotenzials für Sabinamid haben wir eine Wertminderung in Höhe von 134 Mio EUR auf einen Restbuchwert von 63 Mio EUR vorgenommen. Grundlage der Neueinschätzung sind die Ergebnisse einer Phase-III-Studie, die von unserem Kooperationspartner Newron durchgeführt wurde. Sie führen zu einer Neueinschätzung des Marktpotentials insbesondere in Hinblick auf erreichbare Anwendungsgebiete. Zusätzlich berücksichtigt die Bewertung eine Verzögerung im Projektverlauf und einen Anstieg der Forschungs- und Entwicklungskosten aufgrund von erhöhten Anforderungen der Zulassungsbehörden.

Insgesamt beläuft sich das Operative Ergebnis der Merck-Gruppe auf 1.113 Mio EUR. Dies entspricht einem Anstieg um 72 % gegenüber dem Vorjahr.

Starkes Wachstum des Operativen  
Ergebnisses um 72 %

**Operatives Ergebnis nach Unternehmensbereichen**

in Mio EUR

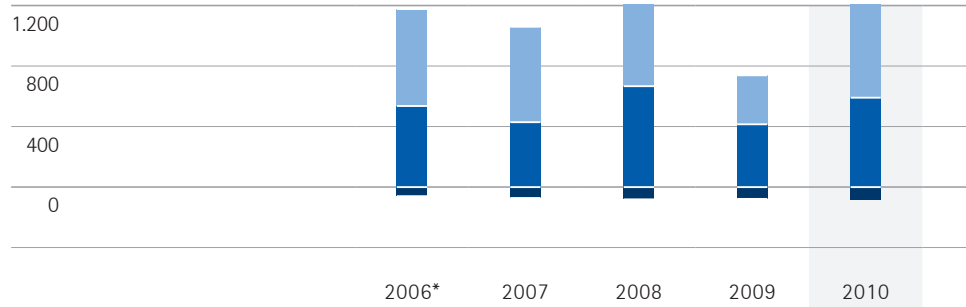

\*inklusive Generics

Chemie Pharma Konzernkosten und Sonstiges

**Sondermaßnahmen: Veräußerungsgewinn und Kosten für Rechtsstreitigkeiten**

In den Sondermaßnahmen wurde der Gewinn aus dem Verkauf von Théramex in Höhe von 69 Mio EUR ausgewiesen. Weitere Erläuterungen hierzu befinden sich im Anhang bei den Angaben zum Konsolidierungskreis.

Im Zusammenhang mit dem Rechtsrisiko, für unsere frühere Tochtergesellschaft Dey Inc. USA bestimmte Preisinformationen falsch berichtet zu haben, erfolgte im Geschäftsjahr eine Vergleichszahlung an das US Department of Justice. Die hieraus resultierenden Aufwendungen von 67 Mio EUR wurden als Sondermaßnahmen gebucht. Obwohl die Gesellschaft Dey Inc. im Rahmen des Verkaufs des Generika-Geschäftes 2007 an Mylan Inc., USA, übertragen wurde, haftet Merck gegenüber Mylan weiterhin für die Kosten dieses Rechtsstreits.

Weitere Aufwendungen in Höhe von 1 Mio EUR beziehen sich auf den Verkauf des Geschäfts mit Elektronikchemikalien im Jahr 2005 und beinhalten eine Kaufpreiserstattung an den damaligen Käufer für nachträglich entrichtete Steuern.

Ferner sind 1 Mio EUR Transaktionskosten für den geplanten Verkauf des Crop-Bioscience-Geschäfts enthalten. Ein Abschluss der Transaktion wird vorbehaltlich der Zustimmung der Kartellbehörden für 2011 erwartet.

Ergebnis nach Steuern  
um 70% gesteigert

**Starker Anstieg des Ergebnisses nach Steuern**

Das Finanzergebnis wies einen Aufwandssaldo von 252 Mio EUR gegenüber 134 Mio EUR im Vorjahr aus. Der deutliche Anstieg war im Wesentlichen auf die Zinsaufwendungen für die Finanzierung der Millipore-Akquisition zurückzuführen.

Die um die Sondermaßnahmen bereinigte Steuerquote beträgt 25,3% gegenüber 21,6% im Vorjahr. Dabei ist zu berücksichtigen, dass im Vorjahr für die Steuerquote günstige Einmaleffekte aus der Aktivierung latenter Steuern auf Verlustvorträge gebucht wurden. Das Ergebnis nach Steuern beträgt 642 Mio EUR und liegt damit 70% über Vorjahr.

### Ergebnis vor und nach Steuern

in Mio EUR

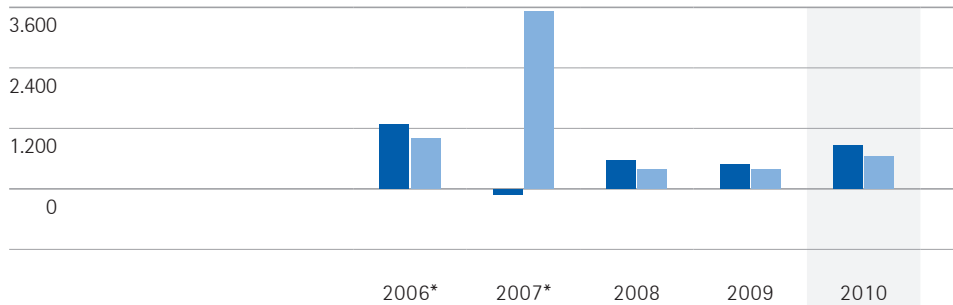

\*inklusive Generics

■ Ergebnis vor Steuern ■ Ergebnis nach Steuern

### Dividendenvorschlag

Merck erhöht Dividende  
auf 1,25 EUR

Wir schlagen der Hauptversammlung am 8. April 2011 vor, die Dividende von 1,00 EUR auf 1,25 EUR je Aktie zu erhöhen.

### Gutes Wachstum im Unternehmensbereich Pharma

Der Unternehmensbereich Pharma mit seinen beiden Sparten Merck Serono und Consumer Health Care steigerte seine Gesamterlöse im Jahr 2010 um 7,1 % auf 6.225 Mio EUR. Dabei stiegen die Gesamterlöse der Sparte Merck Serono um 7,6 % und die der Sparte Consumer Health Care um 1,1 %.

### Pharma | Gesamterlöse nach Sparten

in Mio EUR / % an den Gesamterlösen

|   |                      |       |      |
|---|----------------------|-------|------|
| 1 | Merck Serono         | 5.754 | 92 % |
| 2 | Consumer Health Care | 472   | 8 %  |

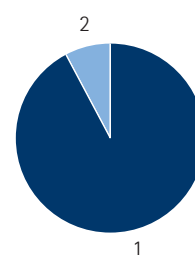

Auch beim Operativen Ergebnis konnte der Unternehmensbereich Pharma einen Zuwachs verzeichnen – um 44 % auf 579 Mio EUR. Zurückzuführen ist dieser allerdings ausschließlich auf die Entwicklung der Sparte Merck Serono (+ 59 %). Die Sparte Consumer Health Care blieb beim Operativen Ergebnis unter dem Vorjahr (– 71 %) (siehe dazu auch Seite 62).

Der Unternehmensbereich Pharma erwirtschaftete insgesamt 67 % der Gesamterlöse und 48 % des Operativen Ergebnisses der Merck-Gruppe (ohne Konzernkosten und Sonstiges). Die Umsatzrendite stieg von 6,9 % auf 9,3 %.



### Pharma | Operatives Ergebnis nach Sparten

in Mio EUR / % am Gesamtergebnis

|   |                      |     |      |
|---|----------------------|-----|------|
| 1 | Merck Serono         | 565 | 98 % |
| 2 | Consumer Health Care | 14  | 2 %  |

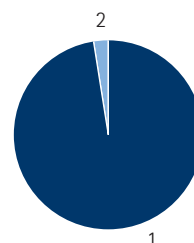

### Unternehmensbereich Chemie – um fast 60 % gewachsen

Der Unternehmensbereich Chemie mit seinen beiden Sparten Merck Millipore und Performance Materials konnte seine Gesamterlöse deutlich um 58 % auf 3.065 Mio EUR steigern. Dabei entwickelten sich beide Sparten sehr erfreulich – Merck Millipores Gesamterlöse stiegen um 81 % und die von Performance Materials um 38 %. Bei der Sparte Merck Millipore ist allerdings zu beachten, dass die Millipore-Gesellschaften erst seit Juli 2010 und damit nur für ein halbes Jahr im Abschluss enthalten sind. Organisch, d. h. um Akquisitions- und Währungseinflüsse bereinigt, stiegen die Gesamterlöse des Unternehmensbereichs Chemie um 17 %.

### Chemie | Gesamterlöse nach Sparten

in Mio EUR / % an den Gesamterlösen

|   |                       |       |      |
|---|-----------------------|-------|------|
| 1 | Merck Millipore       | 1.681 | 55 % |
| 2 | Performance Materials | 1.384 | 45 % |

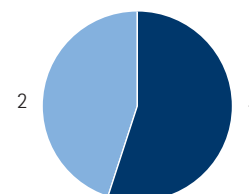

Hervorragende Ergebnisse bei  
Flüssigkristallen und Pigmenten

Das Operative Ergebnis des Unternehmensbereichs Chemie erhöhte sich um 92 % auf 624 Mio EUR – trotz der Belastungen für die Kosten der Integration von Millipore (87 Mio EUR), der einmaligen Verbuchung der im Rahmen der Kaufpreisallokation für Millipore zugerechneten Marktwerte im Vorratsvermögen (86 Mio EUR) sowie der Abschreibung auf immaterielle Vermögenswerte (96 Mio EUR). Dabei entfällt auf die Sparte Merck Millipore wegen der erwähnten Einmalbelastungen im Jahr 2010 ein Ergebnismrückgang um 59 %. Bei der Sparte Performance Materials stammt der erhebliche Ergebniszuwachs um 166 % aus den Geschäftseinheiten Liquid Crystals sowie Pigments.

### Chemie | Operatives Ergebnis nach Sparten

in Mio EUR / % am Gesamtergebnis

|                         |     |      |
|-------------------------|-----|------|
| 1 Merck Millipore       | 44  | 7 %  |
| 2 Performance Materials | 580 | 93 % |

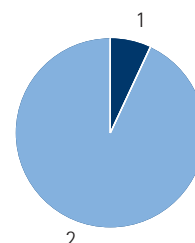

Der Unternehmensbereich Chemie erwirtschaftete insgesamt 33 % der Gesamterlöse und 52 % des Operativen Ergebnisses der Merck-Gruppe (ohne Konzernkosten und Sonstiges). Die Umsatzrendite stieg von 16,8 % auf 20,4 %.

### Wachstum nach Quartalen

#### Gesamterlöse nach Quartalen

| in Mio EUR                  | 1. Quartal   | 2. Quartal   | 3. Quartal   | 4. Quartal   | 2010         | 2009         |
|-----------------------------|--------------|--------------|--------------|--------------|--------------|--------------|
| <b>Gesamt</b>               | <b>2.099</b> | <b>2.208</b> | <b>2.438</b> | <b>2.546</b> | <b>9.291</b> | <b>7.747</b> |
| Pharma                      | 1.514        | 1.564        | 1.518        | 1.628        | 6.225        | 5.812        |
| Chemie                      | 585          | 644          | 919          | 918          | 3.065        | 1.935        |
| Konzernkosten und Sonstiges | –            | –            | –            | –            | –            | –            |

#### Komponenten des Wachstums der Gesamterlöse nach Quartalen

| in %                        | 1. Quartal  | 2. Quartal  | 3. Quartal  | 4. Quartal  | 2010        | 2009       |
|-----------------------------|-------------|-------------|-------------|-------------|-------------|------------|
| Organisches Wachstum        | 13,2        | 10,7        | 3,5         | 4,5         | 7,9         | 2,2        |
| Pharma                      | 7,0         | 6,8         | 1,6         | 4,1         | 4,9         | 7,0        |
| Chemie                      | 33,4        | 22,0        | 8,7         | 5,9         | 16,9        | –9,5       |
| Währungseffekte             | –0,5        | 4,7         | 5,3         | 4,8         | 3,7         | –0,2       |
| Akquisitionen/Veräußerungen | 0,2         | 0,2         | 16,2        | 16,1        | 8,4         | –          |
| <b>Gesamt</b>               | <b>12,9</b> | <b>15,6</b> | <b>25,0</b> | <b>25,5</b> | <b>19,9</b> | <b>2,1</b> |

### Regionen: Europa weiterhin umsatzstärkste Region

Die Umsätze nach Regionen wiesen folgende Verteilung auf: Europa ist mit einem Anteil von 42 % weiterhin unser größter Absatzmarkt, gefolgt von Asien (26 %), Nordamerika (17 %) und Lateinamerika (12 %).

Umsatzwachstum von 10 %  
in Deutschland

Europa erzielte mit 3.747 Mio EUR einen Umsatzzuwachs von 11 %. Innerhalb Europas ist Deutschland das umsatzstärkste Land, gefolgt von Frankreich und Italien. Der Umsatz in Deutschland wuchs in 2010 um 10 % auf 779 Mio EUR.

In Europa liegt im Unternehmensbereich Pharma Frankreich vorn, gefolgt von Deutschland und Italien. Während die Pharma-Umsätze in Italien zulegten und in Deutschland stagnierten, war in Frankreich ein Rückgang zu verzeichnen.

**Merck-Gruppe | Umsatzerlöse nach Regionen**

in Mio EUR

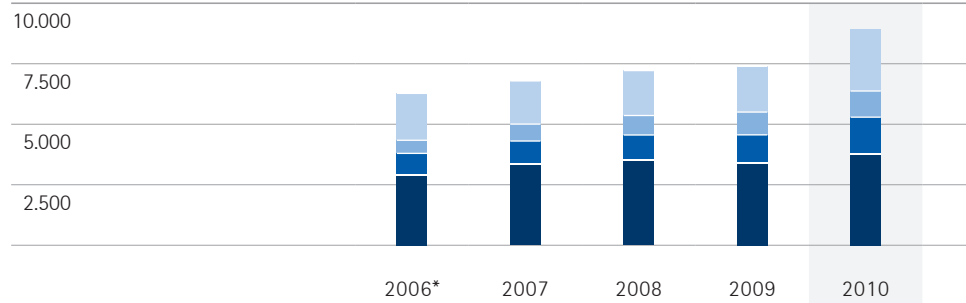

\*inklusive Generics

■ Europa ■ Nordamerika ■ Lateinamerika ■ Asien, Afrika, Australien

**Fokus auf die asiatischen Märkte**

Asien ist mit einem Umsatz von 2.305 Mio EUR unsere zweitstärkste Region und gewinnt mit einem Wachstum von 37 % zunehmend an Gewicht. In Asien ist Taiwan mit 589 Mio EUR das umsatzstärkste Land unserer Gruppe. Dort stiegen die Umsätze vor allem bedingt durch das Geschäft mit Flüssigkristallen im Vergleich zu einem schwachen Jahr 2009 um 75 %. Das Chemiegeschäft hat in diesem Land einen Umsatzanteil von 94 %, zum größten Teil aus dem Geschäft mit Flüssigkristallen.

Unsere Nummer zwei auf dem asiatischen Markt ist Japan, wo ein Umsatzwachstum von 57 % auf 468 Mio EUR zu verzeichnen war. Die Umsatzerlöse entfallen hier zu ca. 40 % auf den Unternehmensbereich Pharma und zu ca. 60 % auf die Chemie. Beide Bereiche realisierten Umsatzzuwächse in unterschiedlicher Größenordnung von 39 % beziehungsweise 71 %.

Der drittgrößte asiatische Markt ist für uns Südkorea mit einem Wachstum von 3,9 % auf 360 Mio EUR. Der Schwerpunkt liegt hier auf dem Chemiegeschäft mit einem Umsatzanteil von 89 %.

Der erklärte Wachstumsmarkt China liegt zurzeit mit 240 Mio EUR Umsatz auf dem vierten Rang innerhalb Asiens, dort konnte eine Steigerung von 26 % erzielt werden. Die Umsätze verteilen sich in etwa hälftig auf die Unternehmensbereiche Pharma und Chemie. Auf China folgt der Absatzmarkt Indien, wo die Umsätze um 38 % auf 156 Mio EUR gesteigert werden konnten. Zu diesem Wachstum trugen Pharma zu 27 % und Chemie zu 73 % bei.

In der Region Nordamerika konnte Merck die Umsätze im Jahr 2010 auf 1.530 Mio EUR ausbauen, diese wuchsen damit um 31 %. Mit 1.403 Mio EUR (+ 31 %) wurden über 90 % der Umsätze dieser Region in den USA generiert, sie verteilen sich zu ca. 70 % auf den Unternehmensbereich Pharma und zu ca. 30 % auf die Chemie. Dieses Verhältnis wird sich auf Grund der in der Jahresmitte 2010 getätigten Akquisition von Millipore weiter zu Gunsten der Chemie verschieben.

In der Region Lateinamerika stellt Brasilien den weitaus größten Absatzmarkt für uns dar, gefolgt von Mexiko. Brasilien ist neben Indien und China einer unserer erklärten Wachstumsmärkte. Der Umsatz konnte im Jahr 2010 dort um 37 % auf 359 Mio EUR gesteigert werden, in etwa 80 % der Umsätze entfielen auf den Unternehmensbereich Pharma.

**Akquisitionen: Stärkung der Chemie durch Millipore**

Merck hat am 14. Juli 2010 die Akquisition der Millipore Corporation, eines führenden Life-Science-Unternehmens mit Sitz in Billerica, Massachusetts, USA, abgeschlossen. Die Erstkonsoolidierung der Millipore-Gesellschaften in den Merck-Konzernabschluss erfolgte entsprechend.

Die Transaktion hatte ein Gesamtvolumen von 5.137 Mio EUR. Darin enthalten sind Zahlungen in Höhe von 4.612 Mio EUR für die ausstehenden Anteile sowie bestehende Optionen aus Aktienoptionsprogrammen und Zahlungen in Höhe von 525 Mio EUR für den Rückkauf einer ausstehenden Wandelanleihe von Millipore.

Merck gab am 28. Februar 2010 sein Übernahmeangebot aller ausstehenden Millipore-Aktien für 107 USD pro Aktie in bar bekannt. Der Abschluss folgte nach Zustimmung der Millipore-Aktionäre auf einer außerordentlichen Hauptversammlung am 3. Juni 2010 sowie nach der Erfüllung aller weiteren Bedingungen – etwa der Genehmigung durch die Kartellbehörden in den USA und Europa. Am 26. Juli 2010 wurde das Delisting von Millipore von der New York Stock Exchange wirksam. Ebenfalls am 26. Juli 2010 wurde die Deregistrierung bei der amerikanischen Securities and Exchange Commission (SEC) beantragt. Die Wirksamkeit der Deregistrierung ist am 13. Oktober 2010 eingetreten.

### **Bilanz durch Millipore-Akquisition geprägt**

Eigenkapitalquote bei 46%

Die Bilanzsumme der Merck-Gruppe belief sich zum 31. Dezember 2010 auf 22.388 Mio EUR. Dies entspricht einem Anstieg um 5.675 Mio EUR oder 34% gegenüber dem 31. Dezember 2009. Die Bilanzstruktur war vor allem durch die Akquisition von Millipore und deren Finanzierung geprägt. Zur Finanzierung der Akquisition wurde im Berichtsjahr eine Anleihe in mehreren Tranchen im Gesamtvolumen von 3,2 Mrd EUR begeben. Die Eigenkapitalquote sank von 56,9% am Anfang des Jahres auf 46,3% zum 31. Dezember 2010. Im Eigenkapital selbst wirkten sich neben dem Ergebnis nach Steuern in Höhe von 642 Mio EUR positive Währungseffekte aus der Entwicklung der Fremdwährungen gegenüber dem Euro mit 841 Mio EUR erhöhend aus. Im Zuge der Kaufpreisallokation für die Millipore-Akquisition wurden die erworbenen Vermögenswerte, Verbindlichkeiten und Eventualverpflichtungen in der Bilanz mit den beizulegenden Zeitwerten angesetzt. Dies führte vor allem bei den immateriellen Vermögenswerten zu einem Anstieg um rund 5.264 Mio EUR. Darin enthalten ist der aus der Transaktion resultierende Goodwill in Höhe von 2.704 Mio EUR. Die im Rahmen der Kaufpreisallokation vorgenommenen Anpassungen an beizulegende Zeitwerte sind – außer für die Bilanzierung des Vorratsvermögens zum Erstkonsolidierungszeitpunkt – noch als vorläufig zu betrachten. Infolge der Akquisition stieg die Nettoverschuldung zum 31. Dezember auf rund 4.484 Mio EUR. Vor allem durch die positive Entwicklung des Cash Flows konnte die Nettoverschuldung seit der Akquisition im Verlauf des zweiten Halbjahres bereits wieder zurückgeführt werden. Wegen der erhöhten Verschuldung durch die Millipore-Akquisition passten die beiden Rating-Agenturen Standard & Poor's und Moody's ihre Ratings an. Während Standard & Poor's am 2. März 2010 ein Rating von BBB+ mit stabilem Ausblick (zuvor: A-) vergab, passte Moody's am 16. Juli 2010 sein Rating von A3 vor der Akquisition auf Baa2 (Ausblick stabil) an. Im Vorjahr haben wir damit begonnen, die Pensionsrückstellungen der Merck KGaA mit dafür vorgesehenen finanziellen Vermögenswerten langfristig zu unterlegen. Dies ist auf Dauer angelegt und soll kontinuierlich erweitert werden. Zum Bilanzstichtag wurden entsprechend 217 Mio EUR separat in der Bilanz als langfristige Finanzanlage ausgewiesen.

Zum Stichtag werden die Aktivitäten des Crop-Bioscience-Geschäfts nach der Bekanntgabe der geplanten Veräußerung an Novozymes A/S, Dänemark, als zur Veräußerung gehaltene Vermögenswerte und Verbindlichkeiten ausgewiesen. Die Aktivitäten der Thérámex-Gruppe wurden per Ende Dezember entkonsolidiert. Der vereinbarte Kaufpreis in Höhe von rund 270 Mio EUR ist als Forderung ausgewiesen.

Bereinigter Basis Free Cash Flow  
verdoppelt

### Gute Geschäftsentwicklung spiegelt sich im Basis Free Cash Flow

Der Free Cash Flow der Merck-Gruppe wurde im Geschäftsjahr 2010 ebenfalls stark durch die Akquisition von Millipore geprägt. Er belief sich auf –3.522 Mio EUR im Vergleich zu 812 Mio EUR im Jahr 2009. Der um Akquisitions- und Veräußerungseffekte bereinigte Basis Free Cash Flow stieg dagegen von 852 Mio EUR im Vorjahr auf 1.670 Mio EUR und damit um 96%. Dieser Anstieg geht zum einen auf die im Vorjahresvergleich stark verbesserte Entwicklung im Chemiegeschäft zurück. Der Beitrag dieses Unternehmensbereichs zum Basis Free Cash Flow stieg von 432 Mio EUR im Vorjahr auf 812 Mio EUR im nun abgeschlossenen Geschäftsjahr und damit um 88%. Der Unternehmensbereich Pharma steuerte im Vergleich zum Vorjahr mit 1.353 Mio EUR einen um 48% höheren Basis Free Cash Flow bei, was ebenfalls wesentlich auf die gute Geschäftsentwicklung zurückgeht.

Der Basis Free Cash Flow im Segment Konzernkosten und Sonstiges, in dem unter anderem die Zahlungsströme für Zinsen und Steuern abgebildet werden, betrug –496 Mio EUR und blieb damit im Vergleich zum Vorjahr nahezu konstant. Cash-Flow-mindernd wirkten Zahlungen in Höhe von 241 Mio EUR im Zusammenhang mit den Vorwürfen gegen unsere frühere Tochtergesellschaft Dey Inc., USA, bestimmte Preisinformationen falsch berichtet zu haben. Davon beziehen sich 215 Mio EUR auf den Vergleich mit dem US Department of Justice. Obwohl die Gesellschaft Dey Inc. im Rahmen des Verkaufs des Generika-Geschäftes 2007 an Mylan Inc., USA, übertragen wurde, haftet Merck gegenüber Mylan weiterhin für die Kosten dieses Rechtsstreits. Der Gesamteffekt wird im Segment Konzernkosten und Sonstiges gezeigt und als Veräußerungseffekt aus dem Generika-Geschäft für Zwecke des Basis Free Cash Flows bereinigt.

### Free Cash Flow und Basis Free Cash Flow

in Mio EUR

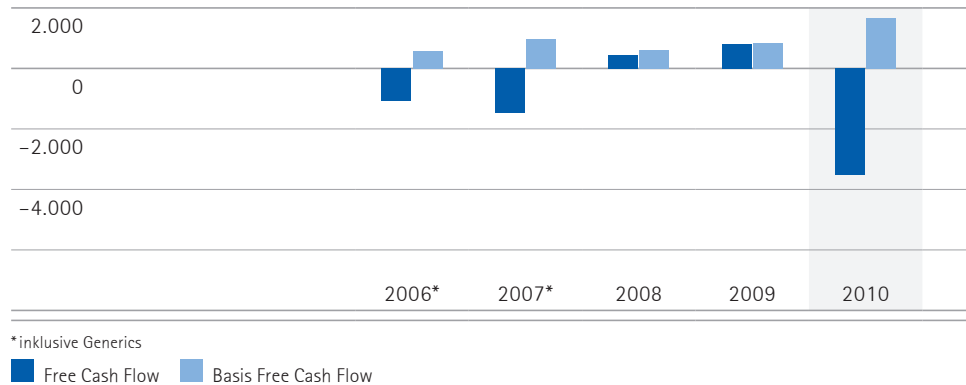

### Investitionen: Konsolidierung nach Jahren der Steigerung

Im Jahr 2010 investierte Merck insgesamt 396 Mio EUR in Sachanlagen, was einen Rückgang um 71 Mio EUR oder 15 % gegenüber dem Vorjahr bedeutet. Ebenso wie in den Vorjahren investierten wir 2010 überdurchschnittlich viel, etwa für den Ausbau der Produktion biologischer Pharmawirkstoffe in der Schweiz. Damit betrug die auf die Gesamterlöse bezogene Investitionsquote 2010 insgesamt 4,3 % gegenüber 6,0 % im Vorjahreszeitraum.

Drei Viertel der Investitionen  
in Europa

Unter den getätigten Investitionen machten solche mit einem Einzelvolumen größer als 1 Mio EUR mehr als zwei Drittel aus. Regional entfielen 77 % auf Europa mit Schwerpunkten in Deutschland und der Schweiz. In Deutschland investierte Merck 140 Mio EUR in den Neu- und Ausbau unter anderem von Produktionskapazitäten sowie von Einrichtungen für F&E, insbesondere an den beiden größten Produktionsstandorten Darmstadt und Gernsheim. In der Schweiz belief sich die Investitionssumme auf 109 Mio EUR, wovon der Großteil für den Ausbau der Produktion von biologischen Arzneimitteln verwendet wurde.

In Nordamerika investierten wir 57 Mio EUR auf, vor allem für den Ausbau der Pharmaforschung in Boston, und in Lateinamerika 13 Mio EUR. Die Gesellschaften in Asien erreichten insgesamt ein Investitionsvolumen von 20 Mio EUR mit Schwerpunkten in Japan, Taiwan, China, Indien und Südkorea, insbesondere für den Unternehmensbereich Chemie.

Der Unternehmensbereich Pharma investierte 255 Mio EUR, wobei der überwiegende Teil auf die Sparte Merck Serono entfiel. Schwerpunkt der Investitionen ist, wie auch in den Vorjahren, der Ausbau der biotechnologischen Produktionskapazitäten in Corsier-sur-Vevey, Schweiz, welches auch 2010 das größte Einzelprojekt aller Investitionen der Merck-Gruppe darstellte. Etwa 20 % der Pharma-Investitionen betrafen den Stammsitz in Darmstadt.

### Investitionen in Sachanlagen

in Mio EUR

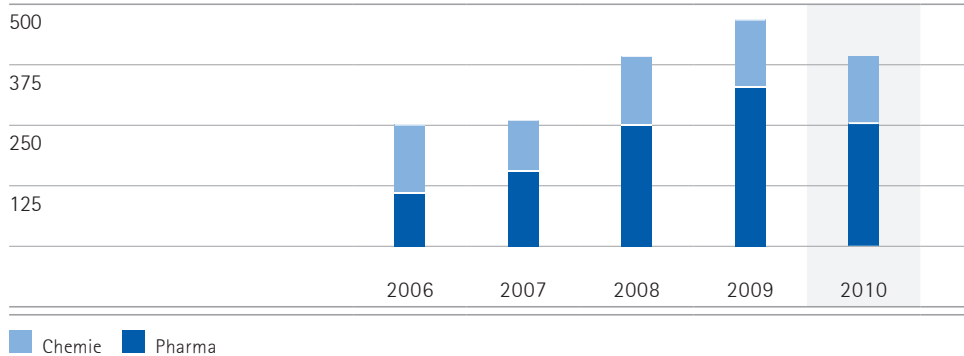

Die Investitionen in Sachanlagen betrugen im Unternehmensbereich Chemie 139 Mio EUR, wovon auf die Sparte Merck Millipore 80 Mio EUR und auf die Sparte Performance Materials 59 Mio EUR entfielen. Performance Materials investierte größtenteils an den Hauptstandorten Darmstadt und Gernsheim, und zwar in den Ausbau und die Modernisierung bestehender Produktionsanlagen, in die Verbesserung der Infrastruktur und in Forschungsgebäude. Der Investitionsschwerpunkt der neuen Sparte Merck Millipore lag ebenfalls in Darmstadt und Gernsheim. Etwa 28 Mio EUR der gesamten Merck-Millipore-Investitionen entfielen auf die vormaligen Millipore-Gesellschaften, die seit Juli 2010 konsolidiert sind.

### Steuerungskennzahlen der Merck-Gruppe

Unsere beiden führenden Kennzahlen sind die Umsatzrendite ROS (Return on Sales) – das Verhältnis des Operativen Ergebnisses zu den Gesamterlösen – und der auf die Gesamterlöse bezogene Basis Free Cash Flow FCR (Free Cash Flow on Revenues). Mit diesen Kennzahlen steuern die Sparten ihr Geschäft, und basierend darauf treffen wir kurz- und langfristige interne Zielvereinbarungen. Der ROS stieg von 8,4 % im Vorjahr auf 12,0 % im Berichtsjahr. Hierin drückt sich die verbesserte Gesamtgeschäftslage mit deutlich gestiegenen Gesamterlösen aus. Der FCR entwickelte sich ebenfalls der guten Geschäftsentwicklung folgend positiv und stieg von 11 % im Jahr 2009 auf nun 18 %. Den Durchschnitt, also das arithmetische Mittel, aus den beiden Kennzahlen ROS und FCR bezeichnen wir als „Merck Business Target“ (MBT): Es wird für erfolgsabhängige kurz- und langfristige Vergütungssysteme herangezogen und betrug 15 % gegenüber 9,7 % im Vorjahr. Beide Kennzahlen, ROS und FCR, sind im Anhang zum Konzernabschluss im Segmentbericht nach Sparten ab Seite 136 f. dargestellt. Beim EBITDA werden definitionsgemäß die Abschreibungen und Wertminderungen des Anlagevermögens dem Ergebnis wieder gutgeschrieben. Für Merck ist das EBITDA ebenfalls eine wichtige Kennzahl. Seit der Serono-Akquisition belasten reguläre Abschreibungen auf immaterielle Vermögenswerte das Operative Ergebnis. Durch die Millipore-Akquisition stiegen diese Abschreibungen in 2010 weiter an. Liegen zudem noch hohe außerplanmäßige Abschreibungen vor, spiegeln EBIT oder Operatives Ergebnis allein nicht die tatsächliche Ertragskraft des Geschäfts wider. Das EBITDA stieg im Geschäftsjahr um fast die Hälfte von 1.625 Mio EUR auf 2.457 Mio EUR.

EBITDA stark verbessert

### Wertschöpfung

Die Wertschöpfung ist eine Messgröße für die wirtschaftliche Leistungskraft eines Unternehmens und zeigt an, wie die Unternehmensleistung entsteht und wofür sie verwendet wird. Unsere Unternehmensleistung, d. h. die Summe aus Gesamterlösen, sonstigen Erträgen und Finanzerträgen, lag 2010 bei 9.552 Mio EUR. Abzüglich des Materialaufwands sowie sonstiger Fremdleistungen und Aufwendungen ergab sich eine Brutto-Wertschöpfung von 5.008 Mio EUR. Nach Abzug von Abschreibungen blieb eine Netto-Wertschöpfung von 3.750 Mio EUR. Mit 69 % kam das Gros davon den Mitarbeitern in Form von Personalaufwendungen in Höhe von 2.597 Mio EUR zugute. Die Finanzaufwendungen stiegen vor dem Hintergrund erhöhter Finanzierungskosten für den Millipore-Erwerb im Vergleich zum Vorjahr auf 291 Mio EUR an. Bedingt durch das höhere Ergebnis vor Steuern stiegen auch die Ertragsteuern deutlich auf 220 Mio EUR an. Das Ergebnis nach Steuern konnte mit 642 Mio EUR den Vorjahreswert von 377 Mio EUR deutlich übertreffen.

**Entstehungsrechnung**

| in Mio EUR                            | 2010         | 2009         |
|---------------------------------------|--------------|--------------|
| Gesamterlöse                          | 9.291        | 7.747        |
| Sonstige Erträge                      | 221          | 135          |
| Finanzerträge                         | 40           | 36           |
| <b>Unternehmensleistung</b>           | <b>9.552</b> | <b>7.918</b> |
| Materialaufwand                       | -1.246       | -1.052       |
| Sonstige Fremdleistungen/Aufwendungen | -3.298       | -3.075       |
| <b>Brutto-Wertschöpfung</b>           | <b>5.008</b> | <b>3.791</b> |
| Abschreibungen                        | -1.258       | -1.004       |
| <b>Netto-Wertschöpfung</b>            | <b>3.750</b> | <b>2.787</b> |

**Verteilungsrechnung**

| in Mio EUR                 | 2010         | 2009         |
|----------------------------|--------------|--------------|
| Personalaufwand            | 2.597        | 2.129        |
| Finanzaufwendungen         | 291          | 171          |
| Ertragsteuern              | 220          | 110          |
| Ergebnis nach Steuern      | 642          | 377          |
| <b>Netto-Wertschöpfung</b> | <b>3.750</b> | <b>2.787</b> |

**Zusammenfassende Bewertung**

Das Geschäftsjahr 2010 brachte für Merck eine insgesamt sehr erfreuliche Geschäftsentwicklung. Seit Beginn des Jahres verzeichneten wir gestiegene Gesamterlöse gegenüber den Vorjahresquartalen. Vor allem der Chemiebereich konnte von einem verbesserten wirtschaftlichen Umfeld profitieren. Daneben trug die Akquisition von Millipore zur Steigerung der Gesamterlöse bei. Das Ergebnis des Bereichs erhöhte sich trotz der verbuchten Kosten für die Integration von Millipore und trotz der Belastungen aus der Kaufpreisallokation deutlich. Im Pharmabereich belasteten wiederum im vierten Quartal Einmalaufwendungen aus der Wertminderung immaterieller Vermögenswerte.

Die Bilanzrelationen und Finanzkennzahlen von Merck sind in 2010 vor allem durch die Akquisition von Millipore beeinflusst. Auf der Aktivseite der Bilanz schlugen sich insbesondere die zugegangenen immateriellen Vermögenswerte mit einem Anstieg von über 5 Mrd Euro nieder. Dem entgegen stehen im Wesentlichen – neben den verbuchten latenten Steuern aus der Kaufpreisallokation – die für die Finanzierung der Akquisition aufgenommenen Fremdmittel. Durch die gute Cash-Flow-Entwicklung konnte die Nettofinanzverschuldung des Konzerns seit der Akquisition bereits wieder reduziert werden.



## CORPORATE RESPONSIBILITY

**Wir übernehmen Verantwortung für unsere Mitarbeiter, unsere Produkte und für die Umwelt. Und wir übernehmen Verantwortung in der Gesellschaft. Denn nicht nur Eigentum, sondern auch unternehmerischer Erfolg verpflichtet.**

Verantwortung gehört zu den Grundprinzipien der Unternehmensführung

Die Verankerung und das Management von verantwortlichem Handeln im Unternehmen gehören bei Merck zu den Grundprinzipien der Unternehmensführung. Die Geschäftsleitung als oberstes Führungsgremium befasst sich mindestens zweimal jährlich mit übergreifenden Themen der Corporate Responsibility. Zu diesen Themen gehören im Berichtszeitraum beispielsweise die Treibhausgas-Emissionen, der Zugang zu Arzneimitteln, die Überwachung der Lieferkette sowie die besondere Verantwortung, die Merck als forschendes Unternehmen hat. Letzteres führte unter anderem zur Verabschiedung von Richtlinien zur Stammzellforschung und zum Umgang mit der Nanotechnologie. Im November 2010 hat Merck das Leitbild „Verantwortliches Handeln in der Wirtschaft“ unterzeichnet, eine Initiative von Unternehmen der deutschen Wirtschaft, die sich zum Ziel gesetzt hat, überprüfbare Standards beispielsweise zu fairem Wettbewerb, Sozialpartnerschaft, Leistungsprinzip und Nachhaltigkeit fest in den beteiligten Unternehmen zu verankern.

Merck ist im FTSE4Good-Index vertreten, einem führenden internationalen Aktien-Index für nachhaltiges Investieren. Kriterien für die Aufnahme in diesen Index beinhalten beispielsweise den Schutz der Umwelt sowie die Einhaltung und Unterstützung der Menschenrechte.

Im Rahmen einer Wesentlichkeitsanalyse hat Merck die für das Unternehmen wichtigsten Nachhaltigkeitsthemen identifiziert und priorisiert. Die Ergebnisse der Analyse haben Einfluß auf die Auswahl der CR-Aktivitäten und der Schwerpunktthemen, die sowohl auf den folgenden Seiten als auch im alle zwei Jahre erscheinenden, umfangreichen Corporate-Responsibility-Bericht und auf der Webseite von Merck beschrieben werden. In die Analyse wurden die Perspektiven verschiedener Interessengruppen einbezogen, zu denen beispielsweise Mitarbeiter, Geschäftspartner, Nachbarn von Standorten oder Investoren gehören.

## MITARBEITER

Zum 31. Dezember 2010 hatte unser Unternehmen 40.562 Mitarbeiter und damit 7.500 Beschäftigte mehr als im Jahr zuvor. Merck war in 67 Ländern mit insgesamt 236 Gesellschaften vertreten; 70 Produktionsstandorte verteilen sich auf 26 Länder.

Die Veränderung der Mitarbeiterzahl ist im Wesentlichen durch die Akquisition des Life-Science-Unternehmens Millipore bedingt, die Merck im Juli 2010 vollzogen hat. In folgenden Ländern gab es Zuwächse der Belegschaft im drei- und vierstelligen Bereich, die im Zusammenhang mit dieser Akquisition stehen: In den USA kamen 2.712 Mitarbeiter von Millipore zu Merck, in Frankreich 1.323, in Irland 484, in Indien 272, in Japan 204, in China 188, in den Niederlanden 153 und in Brasilien 105.

In Deutschland erhöhte sich die Zahl der Beschäftigten um 436 auf insgesamt 10.340 – der Zuwachs verteilt sich auf die Forschung & Entwicklung der Sparte Merck Serono, die Chemie-

produktion, den Aufbau einer globalen Einkaufsorganisation sowie die Übernahme der Millipore-Mitarbeiter in Deutschland. Bei Merck Serono in China erhöhte sich die Zahl der Beschäftigten um 333 auf insgesamt 1.230, da die Sparte dort ein neues Forschungszentrum eröffnet und ihre Vertriebs- und Marketingaktivitäten verstärkt hat.

Im Werk Darmstadt, dem größten Standort der Merck-Gruppe, befanden sich 512 junge Menschen in der Ausbildung in insgesamt 19 verschiedenen Berufsfeldern.

#### Anzahl der Mitarbeiter zum 31. Dezember 2010

|                             |        |      |
|-----------------------------|--------|------|
| 1 Europa                    | 21.679 | 53 % |
| 2 Nordamerika               | 4.909  | 12 % |
| 3 Lateinamerika             | 4.546  | 11 % |
| 4 Asien, Afrika, Australien | 9.428  | 23 % |

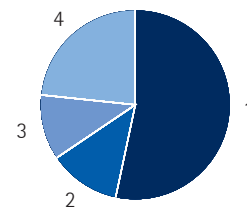

#### Integration der Millipore-Mitarbeiter

Im Vordergrund der Übernahme von Millipore durch Merck steht die Möglichkeit, sich im attraktiven Markt der Life-Science-Industrie stärker zu positionieren und gleichzeitig die geografische Ausrichtung zu erweitern. Deshalb sind das Know-how und die Expertise der Millipore-Mitarbeiter sowie deren Engagement entscheidend für den Erfolg dieses Geschäfts. Von Beginn des Integrationsprozesses an wurde bei der Besetzung der Positionen darauf geachtet, dass die Management-Teams der neu gebildeten Sparte Merck Millipore das Know-how beider Unternehmen optimal nutzen können. Wichtige Elemente des Integrationsprozesses waren darüber hinaus auch eine regelmäßige und offene Kommunikation, Aktivitäten im Rahmen des Change Managements unter Berücksichtigung der spezifischen Unternehmenskulturen sowie die Ausarbeitung von Konzepten, um die Mitarbeiter an das Unternehmen zu binden.

#### KERNTHEMEN UNSERER INTERNATIONALEN PERSONALARBEIT

##### Langfristige Bindung von Talenten an das Unternehmen

Merck als integriertes und globales Unternehmen hat weltweit einheitliche Human Resources-Programme implementiert, beispielsweise den „Performance Management Process“, die „Global Rewards Policy“ sowie den „Talent & Succession Management Process“. Ziele sind dabei die Entwicklung einer auf der gemeinsamen strategischen Ausrichtung des Unternehmens basierenden Leistungskultur, eine leistungs- und marktgerechte Vergütung, die Besetzung von Positionen mit den richtigen Mitarbeitern und die langfristige Bindung von Talenten an das Unternehmen. Seit Herbst 2010 positioniert sich Merck auf dem globalen Arbeitsmarkt mit dem Leitspruch „Make great things happen“. Damit wird potenziellen Bewerbern vermittelt, was Merck ausmacht: ein inspirierendes und motivierendes Arbeitsumfeld, in dem Innovationen gedeihen und jeder die Chance hat, seine Ideen und sein Engagement zum Nutzen der Kunden und des Unternehmens einzubringen und sich dabei selbst weiterzuentwickeln.

Individuelle Entwicklungspläne  
haben hohe Priorität

### Performance Management

Performance Management ist von entscheidender Bedeutung dafür, den Unternehmenserfolg zu fördern und die Potenziale der Mitarbeiter zu erkennen und zu entwickeln. Wichtige Elemente dieses Prozesses sind klare Zielsetzungen, ein differenziertes Feedback im Leistungsmanagement, eine transparente Leistungseinschätzung und die Ausarbeitung von individuellen Entwicklungsplänen. Merck hat 2009 mit der schrittweisen Einführung des weltweit einheitlichen Performance-Management-Prozesses begonnen, an dem derzeit rund 7.100 Mitarbeiter teilnehmen. In den Prozess werden weitere Mitarbeitergruppen, insbesondere auch die durch Millipore neu hinzugekommenen Beschäftigten, schrittweise einbezogen. Ende 2011 sollen insgesamt rund 21.000 Mitarbeiter am Performance-Management-Prozess teilnehmen.

### Global Rewards Policy

Die Richtlinien zur Vergütungsstruktur beschreiben die Prinzipien, nach denen Mitarbeiter abhängig von ihrer Leistung, ihren Fähigkeiten und den Gegebenheiten im jeweiligen Arbeitsmarkt vergütet werden. Die „Global Rewards Policy“ gilt für alle Merck-Gesellschaften weltweit und gewährleistet eine systematische Gestaltung der Vergütung.

### Karrierechancen

Merck möchte seinen Talenten die Chance auf eine interessante Karriere sowie zur steten persönlichen und beruflichen Weiterentwicklung im Unternehmen bieten. Mit dem „Talent & Succession Management Process“ und dem „Expert Talent Process“ verfügt das Unternehmen über zwei systematische Prozesse, mit denen solche Mitarbeiter identifiziert und gezielt gefördert werden, die Potenzial für Führungspositionen oder eine Expertenlaufbahn haben. Mit diesen Programmen ist Merck in der Lage, Führungspositionen richtig zu besetzen und gleichzeitig Talente im Unternehmen zu halten. Im Jahr 2010 wurden 76% der Beförderungen in Führungspositionen mit internen Kandidaten vollzogen.

### Umfrage zum Mitarbeiterengagement

Motivierte und engagierte Mitarbeiter sind unser wichtigstes Kapital. Merck möchte seinen Beschäftigten einen angemessenen Rahmen bieten, innerhalb dessen sie ihren individuellen Beitrag zum Erfolg des Unternehmens am besten leisten können. Um die richtigen Voraussetzungen dafür schaffen zu können, führt Merck regelmäßig eine konzernweite Mitarbeiterbefragung durch, bei der die Beschäftigten ihre Einschätzung zu Merck als Arbeitgeber, zu ihrer Motivation und Identifikation mit dem Unternehmen sowie ihre Bedürfnisse äußern können. Die Resultate fließen in Maßnahmen ein, mit denen Merck die Rahmenbedingungen kontinuierlich verbessern will. An der letzten Umfrage, die Anfang 2010 in 28 Sprachen durchgeführt wurde, nahmen 84% der Beschäftigten teil. Die Gesamtergebnisse belegen, dass sich die Mehrheit der Beschäftigten stark mit Merck identifiziert und sich engagiert für seinen Erfolg einsetzt. In allen elf abgefragten Themenfeldern gab es im Vergleich zum Vorjahr Verbesserungen, und in sieben Themenfeldern hat Merck besser abgeschnitten als die „Global High Performing Companies“ – eine branchenübergreifende Gruppe von Unternehmen, die sowohl aufgrund ihrer herausragenden Finanzergebnisse als auch aufgrund des hohen Engagements ihrer Beschäftigten als besonders leistungstark gelten.

### Arbeitssicherheit weiter erhöht

Bei der Unfallprävention und Arbeitssicherheit konnten wir bei dem wichtigsten Indikator, der „Lost Time Injury Rate“ (LTIR), große Fortschritte bei der Senkung der Unfallrate erzielen. Diese international maßgebliche Kennzahl beschreibt die Anzahl der Arbeitsunfälle mit Arbeitszeitausfall bezogen auf eine Million Arbeitsstunden. Merck hat sich zum Ziel gesetzt, die „Lost Time Injury Rate“ (LTIR) bis zum Jahr 2015 auf 2,5 zu senken. Um dies zu erreichen, haben wir unter anderem das Programm „Safety Behavior Change“ ins Leben gerufen, um das Sicherheitsbewusstsein jedes einzelnen Mitarbeiters zu schärfen. Wir führen verstärkt Schulungen für EHS-Verantwortliche (Environment, Health, Safety) durch, fördern die Eigenverantwortlichkeit unserer Mitarbeiter und unterstützen die vielseitigen lokalen Programme zur Arbeitssicherheit. Trotz unserer Anstrengungen, Unfälle zu verhindern, ereignete sich im Jahr 2010 ein Unfall mit Todesfolge – eine Außendienstmitarbeiterin starb in Kolumbien bei einem Autounfall an ihren Verletzungen.

#### Unfälle

|                   | 2006 | 2007 | 2008 | 2009 | 2010 |
|-------------------|------|------|------|------|------|
| LTIR              | 6,9  | 4,7  | 3,9  | 3,4  | 3,0  |
| Anzahl Todesfälle | 0    | 3    | 1    | 0    | 1    |

Nicht portfoliobereinigt; 2010 inkl. Merck Millipore

### VIELFALT IN DER BELEGSCHAFT

Als international tätiges Unternehmen strebt Merck ein ausgewogenes Verhältnis zwischen den verschiedenen Kulturen und Nationalitäten, den unterschiedlichen Altersgruppen sowie zwischen Frauen und Männern an. In der Überzeugung, dass die Vielfalt der Belegschaft zu besseren Teamleistungen führt und damit zum unternehmerischen Erfolg beiträgt, haben wir Maßnahmen implementiert, um diese Vielfalt nachhaltig zu verankern. Wir sind uns jedoch bewusst, dass wir die Maßnahmen weiterentwickeln müssen.

#### Geschlechterverhältnis

Der Frauenanteil in der Belegschaft liegt derzeit bei 43 %. Die Verteilung zwischen Mitarbeiterinnen und Mitarbeitern ist in den einzelnen Geschäftsbereichen, Funktionen und Regionen unterschiedlich ausgeprägt. Im Pharmabereich sind 47 % aller Beschäftigten weiblich, im Chemiebereich 33 % und in den Gruppenfunktionen 21 %. In Nordamerika sind 47 % aller Beschäftigten weiblich, in Europa 46 %, in Lateinamerika 43 % und in Asien 33 %. Der Frauenanteil in Forschung und Entwicklung ist mit 55 % am höchsten, gefolgt von 50 % in der Verwaltung. Am niedrigsten ist er mit 32 % in der Produktion und mit 28 % in den Infrastrukturbereichen. Merck hat sich zum Ziel gesetzt, den Anteil der Frauen überall dort zu erhöhen, wo diese unterrepräsentiert sind.

**Hohe Internationalität bei Merck****Internationalität**

74 % aller Mitarbeiter stammen aus Ländern außerhalb Deutschlands. Im Jahr 2008 – zu diesem Zeitpunkt haben wir diese Zahlen erstmals erhoben – waren es noch 70 %. Der Zuwachs liegt vor allem in der Ausweitung der Geschäfte in den USA, in Indien und in China begründet. Dabei gehört es zu unseren Grundprinzipien, Mitarbeiter aus den entsprechenden Ländern einzustellen und zu entwickeln. Die Entscheidung des Unternehmens, den Sitz der Sparte Merck Serono in Genf (Schweiz) und denjenigen der Sparte Merck Millipore in Billerica (USA) anzusiedeln, trägt ebenfalls zur Internationalität der Belegschaft bei, die wir weiter verstärken wollen.

**Konzepte für den demografischen Wandel****Altersstruktur**

Der demografische Wandel und die damit verbundene Alterung der Bevölkerung ist nicht in allen Ländern, in denen wir tätig sind, gleichermaßen spürbar. Wir müssen uns aber besonders in Deutschland, einigen anderen EU-Ländern sowie in den USA darauf einstellen. In diesen Ländern beträgt das durchschnittliche Alter unserer Mitarbeiter bereits mehr als 40 Jahre – und wir gehen davon aus, dass der Wert weiter ansteigt. In Europa begegnen wir diesen demografischen Herausforderungen mit verschiedenen Programmen. Dazu gehören auch die Anpassung der Arbeitsplätze an die Bedürfnisse von Älteren sowie der Aufbau eines Gesundheitsmanagements zur Erhaltung der Leistungsfähigkeit.

**Führungspositionen**

Eine ausbalancierte Vielfalt unter den leitenden Mitarbeitern verbessert nicht nur die beruflichen Aufstiegsmöglichkeiten für talentierte Mitarbeiter, sondern ist auch die Grundlage dafür, dass ein breites Erfahrungsspektrum genutzt und unternehmerische Entscheidungen möglichst differenziert getroffen werden.

Der Anteil der Frauen in Führungspositionen – im bei Merck vor zwei Jahren eingeführten „Global-Grading“-System sind dies Positionen mit einem Grade 14 und höher – beträgt über das gesamte Unternehmen berechnet derzeit 22 % (ohne die Mitarbeiter, die durch die Akquisition von Millipore zu Merck kamen – für diese ist das Global-Grading-System noch nicht implementiert). In den Tochtergesellschaften ist er höher als in der Zentrale in Darmstadt, ebenso ist er im Pharmabereich höher als im Chemiebereich. Bestimmte Gruppenfunktionen wie beispielsweise IT haben in den Führungspositionen eine niedrigere Frauenquote. Das Unternehmen hat sich zum Ziel gesetzt, den Frauenanteil in Führungspositionen weiter zu erhöhen. Neben bereits vorhandenen lokalen Maßnahmen wie beispielsweise dem „Cross-Company-Mentoring“-Programm und der Schaffung von Möglichkeiten zur besseren Vereinbarkeit von Karriere und Familie wollen wir im Laufe des nächsten Jahres weitere Konzepte entwickeln. Wir haben uns als Ziel gesetzt, den Anteil der weiblichen Führungskräfte bis zum Jahr 2016 auf 25 - 30 % zu steigern. Diese Zielgröße wird möglicherweise durch lokale oder bereichsspezifische Werte ergänzt. Zugleich wurde die Funktion des Chief Diversity Officers geschaffen, um die Umsetzung zu unterstützen.

57 % der Managementpositionen wird von Führungskräften bekleidet, die eine andere als die deutsche Nationalität haben – insgesamt sind in diesen Positionen 55 verschiedene Nationalitäten vertreten. Die Internationalität der Führungsebenen entspricht der globalen Ausrichtung unserer Geschäftstätigkeit.

## VERANTWORTUNG FÜR PRODUKTE UND UMWELT

### Wesentlichkeitsanalyse zeigt Nachhaltigkeitsthemen auf

Im Rahmen einer Wesentlichkeitsanalyse haben wir für unser Chemie- und Pharmageschäft wichtige Nachhaltigkeitsthemen identifiziert. In beiden Unternehmensbereichen ist die Verantwortung für die Produkte der Kern unserer Unternehmensverantwortung. Zu den bereichsübergreifenden Themen gehören beispielsweise Nachhaltigkeit in der Lieferkette und Nutzung der Nanotechnologie. Spezifische Themen sind beispielsweise bei Pharma Transparenz bei der Forschung, Bio-Ethik, Tierversuche und Zugang zu Arzneimitteln. Unser Ziel ist es, neben der Entwicklung effizienter und sicherer Arzneimittel auch den Zugang zu Arzneimitteln für Menschen, die sie benötigen, zu sichern – zum Beispiel durch eine Reihe von Initiativen und Spendenprogrammen in Entwicklungs- und Schwellenländern sowie Forschungsprojekten. In der Chemie zählen Produktsicherheit, der Umgang mit Risiken, die von Produkten ausgehen können, sowie Ressourceneffizienz zu den wichtigsten Themen.

### REACH und GHS: Herausforderungen zu Chancen machen

Wir sehen es als eine zentrale Verpflichtung an, dass von unseren Produkten bei sachgerechter Nutzung keine Gefahr ausgeht. Bereits bei der Entwicklung von neuen Produkten legen wir Wert auf Nachhaltigkeitsaspekte für deren gesamten Lebenszyklus. Die umfangreiche Dokumentation der Produkteigenschaften und die Erfüllung aller rechtlichen Vorgaben nimmt für uns einen hohen Stellenwert ein.

REACH – Vorgaben als  
Chance verstehen

Bei der schrittweisen Umsetzung der EU-Verordnung REACH (Registration, Evaluation, Authorisation and Restriction of Chemicals), die mit hohen regulatorischen Herausforderungen verbunden ist, haben wir erneut große Fortschritte gemacht. Unser Motto lautet hier „Turning Challenges into Opportunities“ („Herausforderungen zu Chancen machen“), indem wir durch unsere Fachexpertise auch für unsere Kunden einen Mehrwert bieten.

REACH ist grob in drei Phasen unterteilt: Je nach der produzierten Menge eines Stoffs ist eine Registrierung bis 2010, 2013 oder 2018 erforderlich. Merck hat bis zum Ende der ersten Frist am 1. Dezember 2010 insgesamt rund 100 Stoffe registriert – neben den Pflichtstoffen auch bereits Stoffe späterer Phasen.

### Anforderungen effizient ins operative Geschäft umgesetzt

Neben der Erfüllung von Rechtspflichten übernimmt Merck eine Vorreiterrolle in regulatorischen Fragestellungen

Aus dem weltweit harmonisierten System zur Einstufung und Kennzeichnung von Chemikalien (GHS) entstand die europäische CLP-Verordnung (Classification, Labelling and Packaging of Substances and Mixtures). Diese haben wir sehr schnell umgesetzt: Im Februar 2009 haben wir die erste CLP-etikettierte Ware an Kunden ausgeliefert. Im September 2010 konnten für alle Stoffe und einige Gemische alle CLP-Informationen für den neuen Chemikalienkatalog bereitgestellt werden. Neben der Neueinstufung und -kennzeichnung von Chemikalien hat die EU kurzfristig auch Format und Inhalte der dazugehörigen Sicherheitsdatenblätter neu definiert. Fristgerecht zum 1. Dezember 2010 haben wir alle Stoffe mit den geforderten neuen Sicherheitsdatenblättern in den Amtssprachen der EU versorgt.

Zusätzlich zur Erfüllung unserer Rechtspflichten haben wir umfangreiche Informationsmaterialien (Broschüren, Poster, online-Kurse) im Internet bereit gestellt und Kunden in Seminaren geschult. Dies stärkt die Vorreiterrolle von Merck in regulatorischen Fragestellungen und dokumentiert unsere kundenzentrierte Sichtweise.

### „Design for Sustainability“

In der Sparte Merck Millipore ist der Grundsatz des „Design for Sustainability“ („für Nachhaltigkeit entwickelt“) ein Beispiel für nachhaltige Produktentwicklung. Das fängt bei der Produktion und Verpackung an, geht über die Ressourcenschonung im täglichen Gebrauch der Produkte beim Kunden (zum Beispiel bei Laborgeräten) bis hin zu deren Entsorgung beziehungsweise Recyclingmöglichkeiten. Ein Beispiel dafür sind die Filtereinheiten und Bioreaktoren der Mobius®-Produktreihe für die biopharmazeutische Produktion.

### Strategische Allianz mit der GLZ in Südostasien

Für Merck endet die Produktverantwortung nicht mit dem Verkauf. Die Rücknahme und umweltgerechte Entsorgung von Chemikalien- und Verpackungsabfällen gehört zur unternehmerischen Verantwortung. Gemeinsam mit der Gesellschaft für Internationale Zusammenarbeit (GIZ) setzt sich Merck zum Beispiel für ein verbessertes Chemikalienmanagement in Thailand, Indonesien und auf den Philippinen ein und will dort Umweltbewusstsein und den Umgang mit Chemikalien verbessern. Basis des Projekts ist das Retrologistik®-Konzept, die geregelte Rücknahme und sichere Entsorgung von Verpackungsabfällen wie etwa entleerten Chemikalienflaschen.

### Nanotechnologie: Unternehmensweite Richtlinien

Wie die Chancen, so verdienen auch die Risiken der Nanotechnologie unsere Aufmerksamkeit. Wir folgen dem Prinzip der Vorsorge und nehmen Fragen zur Sicherheit von Nanomaterialien ernst. Bei der Herstellung und Verarbeitung der Produkte achten wir streng auf die Einhaltung aller gesetzlichen und darüber hinaus geltenden Standards. Dazu gehören etwa die Leitfäden der Bundesanstalt für Arbeitsschutz und Arbeitsmedizin sowie des Verbandes der Chemischen Industrie in Deutschland. Wir haben unsere gruppenweit gültigen Richtlinien zum Umgang mit Nanomaterialien um die für unser Pharmageschäft relevanten Aspekte ergänzt.

### ISO 14001: Gruppenzertifikat bestätigt

Alle Merck-Produkte kommen von  
zertifizierten Standorten

Im Jahr 2009 hat Merck das Umweltmanagementsystem aller Produktionsstandorte nach dem internationalen Standard ISO 14001 zertifizieren lassen. Dieses weltweit gültige Gruppenzertifikat wurde 2010 durch das jährliche Erhaltungs-Audit bestätigt. Damit stammen alle von Merck hergestellten Produkte von zertifizierten Standorten.

### Ausgaben für Umweltschutz

Unsere Aufwendungen für Umweltschutz, Gesundheit und Sicherheit beliefen sich im Jahr 2010 auf insgesamt 140 Mio EUR. Darin enthalten sind Abschreibungen auf Investitionen und laufende Kosten.

### Treibhausgas-Emissionen bis 2020 um 20% senken

Unser Ziel bleibt, unsere gesamten – direkten und indirekten – Treibhausgas-Emissionen bis zum Jahr 2020 um 20% zu senken, gemessen am Stand von 2006. Unter direkten Emissionen versteht man Emissionen, die das Unternehmen selbst durch die Verbrennung von fossilen Energieträgern zur Dampf- oder Stromerzeugung oder im Rahmen der Produktionsprozesse freisetzt. Indirekte Emissionen sind Emissionen, die zugekaufte Energien – etwa Strom, Dampf oder Fernwärme – bei ihrer Herstellung freigesetzt haben.

**Energie**

|                            | 2006 | 2007 | 2008 | 2009 | 2010 |
|----------------------------|------|------|------|------|------|
| Energieverbrauch (in GWh)  | 1489 | 1492 | 1480 | 1352 | 1474 |
| <b>Eingekaufte Energie</b> |      |      |      |      |      |
| Gas (in Mio. m³)           | 77,9 | 75,8 | 79,0 | 72,7 | 78,2 |
| Leichtes Heizöl (in kt)    | 7,8  | 9,5  | 8,8  | 6,7  | 8,6  |
| Schweres Heizöl (in kt)    | 0,7  | 0,9  | 0,6  | 0,2  | 0,3  |
| Elektrizität (in GWh)      | 533  | 536  | 513  | 472  | 511  |

Portfoliobereinigt in Übereinstimmung mit dem Greenhouse Gas Protocol; 2006–2010 inklusive Merck Millipore

**CO<sub>2</sub>eq-Emissionen (eq=Äquivalente)**

| Emissionen in kt                        | 2006 | 2007 | 2008 | 2009 | 2010 |
|-----------------------------------------|------|------|------|------|------|
| Direkte CO <sub>2</sub> eq-Emissionen   | 321  | 374  | 307  | 304  | 352  |
| Indirekte CO <sub>2</sub> eq-Emissionen | 232  | 237  | 221  | 201  | 222  |
| Gesamte CO <sub>2</sub> eq-Emissionen   | 553  | 611  | 528  | 505  | 574  |

Portfoliobereinigt in Übereinstimmung mit dem Greenhouse Gas Protocol; 2006–2010 inklusive Merck Millipore

**Neues Klimaschutzprogramm**

Unter dem Namen EDISON hat Merck 2009 ein neues Klimaschutzprogramm gestartet. Es bündelt systematisch alle Aktivitäten der Merck-Gruppe in Richtung Klimaschutz und Energieeffizienz. Ziel ist, den Energieverbrauch und damit die Kosten zu senken, die Ressourcen zu schonen und die Umwelt zu schützen. Dabei wird der Schwerpunkt auf die größten Treibhausgas-Emittenten gelegt: In den vergangenen Jahren haben 15 Standorte ungefähr 80% der Gesamtemissionen der Merck-Gruppe verursacht. Zu den größten dieser Emittenten gehören die Standorte Darmstadt und Gernsheim. Speziell geschulte Fachleute für Energie-, Bau-, Klima- oder Elektrotechnik sind dabei, systematisch die größten Verbraucher zu analysieren und konkrete Maßnahmen zur Energieeinsparung zu empfehlen.

Weltweite Energiespar-Audits  
gestartet

Bei diesem Projekt geht es jedoch nicht nur um die deutschen Standorte: Weltweit werden der Energieverbrauch und die Treibhausgasemissionen unter die Lupe genommen. So fanden bereits Energiespar-Audits in den Werken Onahama und Atsugi (Japan) statt. Im Werk Norwood in den USA wurden komplett neue Heizkessel und Prozess-Kühlanlagen installiert, die es dem Standort ermöglichen, sich mit einer wesentlich verbesserten Klimabilanz in die Gesamtziele der Merck-Gruppe einzufügen. Der Merck-Serono-Standort Bari, der wie die bereits genannten Standorte zu den 15 größten Emittenten der Merck-Gruppe zählt, erhielt die Zertifizierung nach der Energiemanagement-Norm EN 16001.

**Sonnenenergie nutzen**

An mehreren Standorten innerhalb der Merck-Gruppe wird bereits Photovoltaik zur Energieerzeugung genutzt. Hier hat unsere Sparte Merck Millipore eine Vorreiterrolle mit den Standorten Billerica, Bedford (USA) und Molsheim (Frankreich), wo Solarenergie einen Teil des Energiebedarfs deckt.



Neben den Treibhausgas-Emissionen werden in der Merck-Gruppe auch andere Luftemissionen erfasst. Der gruppenweite Ausstoß dieser Stoffe ist insgesamt eher gering.

#### Luftemissionen

| Emissionen in kt                  | 2006 | 2007 | 2008 | 2009 | 2010 |
|-----------------------------------|------|------|------|------|------|
| VOC (Volatile Organic Compounds)* | 1,8  | 1,9  | 1,9  | 0,2  | 0,2  |
| Stickoxide                        | 0,3  | 0,2  | 0,2  | 0,1  | 0,1  |
| Schwefeldioxid                    | 0,07 | 0,03 | 0,05 | 0,03 | 0,03 |
| Staub                             | 0,02 | 0,02 | 0,02 | 0,02 | 0,02 |

Nicht portfoliobereinigt; 2010 inklusive Merck Millipore  
\*Leichtflüchtige organische Verbindungen

## VERANTWORTUNG IN DER GESELLSCHAFT

Unser gesellschaftliches Engagement gliedert sich in lokale gemeinnützige Projekte, die von den Merck-Gesellschaften in eigener Regie umgesetzt werden, und in Projekte mit internationaler Ausrichtung. Dazu gehören das „Merck-Praziquantel-Spendenprogramm“, der „Global Pharma Health Fund (GPHF)“ und die „Philharmonie Merck“.

#### Praziquantel-Spendenprogramm: Bekämpfung der Bilharziose

2007 haben wir mit der Weltgesundheitsorganisation WHO eine Partnerschaft geschlossen, um die Bilharziose bei afrikanischen Kindern zu bekämpfen. Im Rahmen der Partnerschaft stellt Merck binnen zehn Jahren 200 Millionen Tabletten Cesol® 600 mit dem Wirkstoff Praziquantel kostenlos bereit. Diese Tabletten ermöglichen die Behandlung von 27 Millionen Kindern. Nach Malaria ist die durch Würmer verursachte Bilharziose die in Afrika am weitesten verbreitete Tropenkrankheit, unter der vor allem Kinder zu leiden haben. Im Jahr 2010 wurden im Rahmen dieser Partnerschaft 3,8 Millionen Kinder behandelt.

#### Global Pharma Health Fund: Schutz vor gefälschten Arzneimitteln

Kampf gegen gefälschte  
Arzneimittel

Der von Merck unterstützte Global Pharma Health Fund (GPHF) bekämpft Arzneimittelfälschungen in Entwicklungs- und Schwellenländern. Nach Schätzungen der WHO sind bis zu 30 % der weltweit angebotenen Arzneimittel gefälscht oder qualitativ minderwertig. Besonders die Länder Afrikas und Asiens sind davon betroffen, da es dort keine wirksame staatliche Arzneimittelkontrolle gibt. Um Fälschungen wirksam zu erkennen und rechtzeitig aus dem Verkehr zu ziehen, sind Ende des Jahres 2010 394 mobile Kompaktlabore, die „GPHF-Minilabs“, in über 70 Ländern im Einsatz. Mit diesen lassen sich Wirkstoffe von Arzneimitteln innerhalb kürzester Zeit identifizieren und minderwertige oder unwirksame Arzneimittel sofort aufspüren.

#### Philharmonie Merck: Kulturförderung

Die Philharmonie Merck ist Teil unseres kulturellen Engagements. Das Projektorchester mit bis zu 80 professionellen Musikern und einem breit gefächerten Programm ist nicht nur ein fester Bestandteil des kulturellen Lebens im Umfeld der Unternehmenszentrale Darmstadt, sondern unternimmt auch internationale Konzertreisen. Spezielle Veranstaltungen für Kinder und Jugendliche sowie die Zusammenarbeit mit Schulen sollen jungen Menschen einen Zugang zur klassischen Musik ermöglichen.

## MERCK AM KAPITALMARKT

**Merck-Aktien-Kurs mit deutlichen Schwankungen. 3,2 Mrd EUR Anleihe erfolgreich platziert.**

### Erholung an den Aktienmärkten hält an

Im Verlauf des Jahres 2010 setzte sich die in der ersten Hälfte des Vorjahres begonnene Erholung an den internationalen Aktienmärkten fort. Hierzu trugen neben einer sich weiter erholenden Weltwirtschaft maßgeblich die anhaltend niedrigen Leitzinsen der führenden internationalen Zentralbanken sowie eine expansive Geldpolitik insbesondere der USA bei. Allerdings führten Nachwirkungen der 2008 eskalierten, weltweiten Bankenkrise zu teilweise dramatischen Entwicklungen der Staatshaushalte einer Reihe von Mitgliedstaaten der Euro-Zone, die deren Anleihen erheblich verteuerten und die Europäische Zentralbank schließlich zur Vergabe von Bürgschaften in beispiellosem Umfang zwangen. Auswirkungen hatte dies auch auf die Entwicklung der europäischen Gemeinschaftswährung, die sich gegenüber allen internationalen Leitwährungen teilweise deutlich verbilligte. Erheblich stabiler präsentierte sich hingegen der Markt für Unternehmensanleihen, der von großer Nachfrage auch bei vergleichsweise niedrigem Kupon geprägt war.

### Merck-Aktie 2010 im Vergleich zum DAX® und zum Bloomberg-Europe-Pharmaceuticals-Index

in %

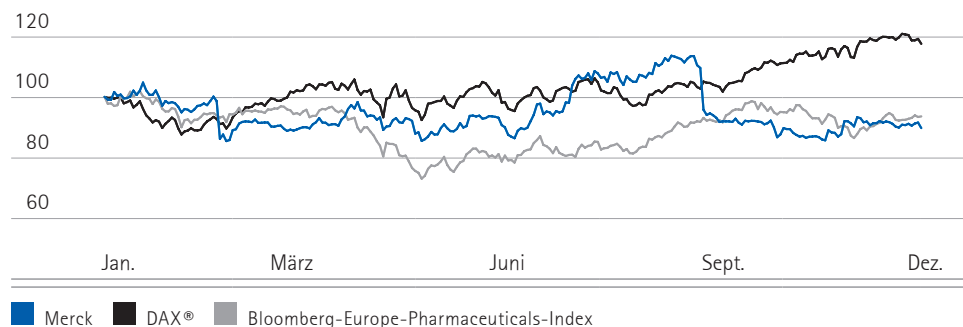

### Starker DAX®, schwacher Pharma-Index

Angeführt vom Aktienindex DAX®, in dem die 30 nach Streubesitz-Marktkapitalisierung und Handelsumsatz größten deutschen Aktiengesellschaften zusammengefasst sind und der zu Jahresbeginn auf deutlich über 6.000 Punkte kletterte, startete der deutsche Aktienmarkt freundlich in das neue Jahr. Aufkommende Sorgen über Bonität und Liquidität mehrerer EU-Mitgliedsstaaten – insbesondere Griechenlands und Irlands – trübten zwar im Jahresverlauf mehrfach die Marktstimmung teilweise deutlich ein, doch zeigten sich Eingriffe der europäischen Währungshüter stets geeignet, um die Marktteilnehmer zu beruhigen. So korrigierte der DAX® zunächst am 5. Februar 2010 auf das Jahrestief von 5.434 Punkten, erreichte am 21. Dezember 2010 sein Jahreshoch bei 7.078 Punkten und schloss am 31. Dezember mit

DAX® am Jahresende bei  
7000 Punkten

6.914 Punkten. Auf Jahressicht bedeutet dies einen Zuwachs von 16%. Die Entwicklung des BEUPHRM-Index (Bloomberg-Europe-Pharmaceuticals-Index), in dem 22 ausgewählte europäische Pharmaunternehmen zusammengefasst sind, unterscheidet sich hiervon hingegen signifikant. So wurde der Jahreshöchststand mit 103,44 Punkten bereits am 19. Januar 2010 erreicht, während der Jahrestiefststand am 25. Mai 2010 mit 81,59 Punkten markiert wurde. Hierzu trugen vor allem Kursrückgänge der Index-Schwergewichte AstraZeneca, GlaxoSmithKline, Novartis und Sanofi-Aventis bei, die zusammen deutlich mehr als die Hälfte des Indexgewichts ausmachen. Zwar konnte der BEUPHRM diese Verluste bis zum 15. Oktober 2010 mit einem Stand von 100,98 Punkten wieder nahezu ausgleichen, doch blieb er bis Jahresende (Stand 31. Dezember: 97,13 Punkte) mit einem Minus von 3,4% erheblich hinter der Entwicklung des DAX® zurück.

#### Auf und Ab der Merck-Aktie

Von der sich im Jahresverlauf weiter aufhellenden Stimmung am deutschen Aktienmarkt konnten die Aktien von Merck nicht profitieren. Die Kursentwicklung verlief zwar im Jahresverlauf in einem durchaus dynamischen Bereich zwischen 57 und 73 EUR, doch notierte die Aktie gegenüber dem Stand vom Jahresbeginn (65,21 EUR) am Jahresschluss mit 59,85 EUR um 8,2% schwächer. Der Kursverlauf war zu weiten Teilen von der Entwicklung am deutschen Aktienmarkt entkoppelt.

So nahm der Markt den erstmals am Tage der Veröffentlichung des Jahresergebnisses 2009 gegebenen und der schwierigen Vorjahresentwicklung geschuldeten vorsichtigen Ausblick für das Jahr 2010 sowie den gegenüber dem Vorjahr von 1,50 EUR auf 1,00 EUR verringerten Dividendenvorschlag mit Enttäuschung auf. An diesem Tag (23. Februar 2010) schloss die Merck-Aktie mit einem mehr als 10-prozentigen Kursverlust und lag zwei Tage später mit 57,62 EUR auf ihrem Jahrestiefststand. Im Zuge der Bekanntgabe der Akquisition von Millipore stieg die Notierung der Merck-Aktie am 1. März 2010 um 2,9%. Erst jedoch in Folge der deutlichen Anhebung der Jahresprognose am 29. Juli 2010 mit Veröffentlichung der Ergebnisse zum 2. Quartal etablierte sich wieder ein Kursniveau oberhalb von 67 EUR, das am 10. September 2010 bei 72,28 EUR sein Maximum erreichte. Nur drei Tage später überraschte das wissenschaftliche Komitee CHMP der europäischen Zulassungsbehörde EMA Mediziner und Aktionäre mit der Entscheidung, Cladribin-Tabletten nicht für die Zulassung zur Behandlung gegen Multiple Sklerose zu empfehlen. Als Reaktion verlor die Merck-Aktie am 24. September 2010 knapp über 10% ihres Wertes. Der in der Folge anhaltende Verkaufsdruck führte bis zum 17. November 2010 zu einem Kursrückgang auf 57,75 EUR, von wo aus sich die Aktie – bedingt auch durch Neuigkeiten zum US-Zulassungsverfahren von Egrifta™ (Tesamorelin) – bis Jahresende wieder etwas bis auf 59,85 EUR erholen konnte.

EMA-Ablehnung von Cladribin-  
Tabletten drückt Aktienkurs

**Kennzahlen zur Aktie<sup>1</sup>**

|                                                                                 | 2010   | 2009   |
|---------------------------------------------------------------------------------|--------|--------|
| Ergebnis je Aktie nach Steuern und Fremddanteilen (in EUR)                      | 2,91   | 1,68   |
| Dividende in EUR                                                                | 1,25   | 1,00   |
| Jahreshöchstkurs in EUR (10.09.2010/01.07.2009)                                 | 72,28  | 74,37  |
| Jahrestiefstkurs in EUR (25.02.2010/06.03.2009)                                 | 57,62  | 57,24  |
| Jahresendkurs in EUR                                                            | 59,85  | 65,16  |
| Tatsächliche Anzahl der Aktien in Mio Stück (zum Jahresende)                    | 64,6   | 64,6   |
| Theoretische Gesamtanzahl <sup>2</sup> der Aktien in Mio Stück (zum Jahresende) | 217,4  | 217,4  |
| Börsenkapitalisierung <sup>3</sup> in Mio EUR (zum Jahresende)                  | 13.011 | 14.165 |

<sup>1</sup> Kursrelevante Angaben beziehen sich auf den jeweiligen Tagesendstand im Xetra®-Handel an der Frankfurter Börse.

<sup>2</sup> Die Ermittlung einer „theoretischen Aktienzahl“ ergibt sich daraus, dass das Komplementärkapital nicht in Aktien verbriefte ist. Da das Grundkapital in Höhe von 168,0 Mio EUR zum 31. Dezember 2010 in eine Aktienzahl von 64,6 Mio Stück unterteilt war, ergab sich bei analoger Berechnung eine theoretische Aktienzahl von 152,8 Mio für das Komplementärkapital von 397,2 Mio EUR.

<sup>3</sup> Bezogen auf die theoretische Anzahl der Aktien am 31. Dezember 2010.

**Fast 600.000 Aktien täglich gehandelt**

Im Jahr 2010 wurden über die Handelsplattformen der Deutschen Börse täglich im Durchschnitt rund 574.000 Merck-Aktien gehandelt. Der mit mehr als 4,4 Mio gehandelten Stücken mit weitem Abstand umsatzstärkste Tag war hierbei der 23. Februar 2010, der Tag der Veröffentlichung des Jahresergebnisses 2009 und des Ausblicks auf das Geschäftsjahr 2010. Allgemein ist die Handelbarkeit – ausgedrückt durch die Liquidität bzw. den Handelsumsatz – von Aktien eine wichtige Kennziffer, die nicht nur das Kaufverhalten von Investoren beeinflusst, sondern auch neben dem Streubesitz ein wesentliches Kriterium bei der Zusammensetzung der Aktienindizes darstellt. Mit 3.868 Mio EUR belegte die Merck-Aktie auf der Rangliste der nach Streubesitz-Marktkapitalisierung größten deutschen DAX®-Unternehmen zum Jahresende Position 32 sowie mit 9.226 Mio EUR Position 28 gemessen am Handelsvolumen der vergangenen 12 Monate.

**Zunehmend Investoren aus Deutschland**

Im Rahmen der im Oktober 2010 durchgeführten Erhebung zur Aktionärsstruktur identifizierten wir rund 76% der im Streubesitz bei institutionellen Anlegern befindlichen Inhaberaktien. Die Studie gibt zum einen Aufschluss über die geografische Verteilung der institutionellen Aktionäre und zum anderen über die Klassifizierung der jeweiligen institutionellen Investorentypen. Wie auch in den Vorjahren wurde der größte Anteil an Merck-Aktien von institutionellen US-Investoren gehalten. Allerdings reduzierte sich der Anteil amerikanischer Aktionäre von 53 % im Vorjahr auf 49 % in 2010. Hingegen haben deutsche institutionelle Investoren wesentliche Positionen aufgebaut auf jetzt 12 % gegenüber 9 % im Jahr 2009. In der Rangfolge lagen die USA damit weiterhin weit vor Großbritannien mit 13 % und Deutschland. Bei der Verteilung nach Investorentypen nahm der Anteil der wert- und wachstumsorientierten Anleger leicht zu. Der Anteil der indexorientierten Investoren stieg um 7 %-Punkte auf jetzt 19 %.

Steigende Popularität  
bei deutschen Investoren

### Identifizierte Investoren nach Regionen

in %

|                   |      |
|-------------------|------|
| 1 USA             | 49 % |
| 2 Großbritannien  | 13 % |
| 3 Deutschland     | 12 % |
| 4 Rest von Europa | 9 %  |
| 5 Frankreich      | 5 %  |
| 6 Rest der Welt   | 8 %  |

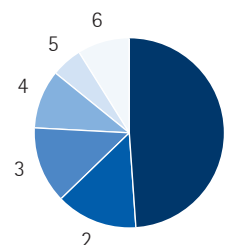

Quelle: Thomson Reuters (Stand September 2010)

### Identifizierte Investoren nach Typ

in %

|                                     |      |
|-------------------------------------|------|
| 1 wertorientiert                    | 36 % |
| 2 wachstumsorientiert               | 32 % |
| 3 Index                             | 19 % |
| 4 GARP (Growth at reasonable price) | 9 %  |
| 5 Sonstige                          | 4 %  |

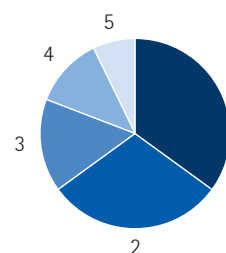

Quelle: Aktiörsbefragung (Stand Oktober 2010)

Zum 31. Dezember 2010 hatten folgende Aktionäre dem Unternehmen gemäß Wertpapierhandelsgesetz ihren Aktienbestand gemeldet:

- 5 % – 10 % Barclays PLC, London (Großbritannien)
- 5 % – 10 % BlackRock Inc., New York (USA)
- 5 % – 10 % Capital Research and Management Company, Los Angeles (USA)
- 5 % – 10 % Sun Life Financial Inc. Toronto (Kanada)
- 5 % – 10 % Templeton Global Advisors Ltd., Nassau (Bahamas)
- 3 % – 5 % Capital World Growth and Income Fund, Inc., Los Angeles (USA)
- 3 % – 5 % Deutsche Bank, Frankfurt (Deutschland)
- 3 % – 5 % Fidelity International Ltd., Hamilton (Bermuda)

### Fast 60 % der Aktien auf der Hauptversammlung

Auf der Hauptversammlung am 9. April 2010 in Frankfurt waren von insgesamt 64.621.126 ausstehenden Aktien 37.624.121 Aktien vertreten. Dies entspricht einer Quote von 58,22 % anwesendem Grundkapital. Mit Ausnahme der Tagesordnungspunkte 4 und 5, in denen über die Entlastung der Geschäftsleitung und des Aufsichtsrats Beschluss gefasst wurde und die jeweils 56 % Ja-Stimmen erhielten, entfielen auf die weiteren fünf Tagesordnungspunkte jeweils mehr als 99 % Ja-Stimmen. Weitere Details hierzu sind auf unserer Internetseite unter <http://www.merck.de/investoren> zu finden.

### Umfangreiche Aktivitäten von Investor Relations

Im Verlauf des Jahres 2010 nahmen die Geschäftsleitung und das Investor-Relations-Team an insgesamt 13 Investorenkonferenzen in Frankfurt, London, Los Angeles, München, New York, Paris und San Francisco teil. Darüber hinaus wurden im Rahmen von 23 Roadshows Investoren in den wichtigsten Finanzzentren der USA und Europas besucht, an drei Terminen internationale Investorengruppen in Darmstadt empfangen sowie an drei weiteren Tagen intensive Gespräche mit den Vertriebsmitarbeitern ausgewählter Banken geführt („Equity Sales Briefings“). Insgesamt wurde dabei eine Vielzahl von Einzelgesprächen geführt. Erstmals seit 2007 organisierten wir im September in London und in New York Investoren- und Analystenveranstaltungen. Dabei erläuterte die Geschäftsleitung ausführlich die Geschäfts- und Finanzstrategien von Merck.

### Blick der Analysten auf Merck

Analysten positiv  
zur Merck-Aktie eingestellt

Im abgelaufenen Geschäftsjahr wurde die Merck-Aktie von 40 Banken und Analystenhäusern regelmäßig kommentiert und bewertet. Dabei sah die Analystenschaft zum Ende des Jahres ein faires Kursziel der Aktie bei im Durchschnitt 67,44 EUR, wobei 16 Analysten die Merck-Aktie zum Kauf, 17 zum Halten und 6 zum Verkaufen empfahlen. Weitere Details hierzu sind auf unserer Internetseite unter <http://www.merck.de/investoren> zu finden.

### Im FTSE4Good-Index

Nachhaltigkeit ist für uns der unternehmerische Kompass, der Merck über Jahrhunderte den Weg gewiesen hat. Unter Nachhaltigkeit verstehen wir dabei das nach ethischen Gesichtspunkten aufeinander abgestimmte Handeln nach ökonomischen, ökologischen und sozialen Interessen aller am Bestehen von Merck beteiligter Gruppen wie beispielsweise unserer Kunden, Lieferanten, Mitarbeiter und Eigentümer. Unsere Anstrengungen in diesen Bereichen werden fortlaufend auch von kapitalmarktnahen, unabhängigen Instituten analysiert und bewertet. So wurde die Merck-Aktie bereits 2008 in den FTSE4Good-Index aufgenommen, in dem besonders nachhaltig wirtschaftende Unternehmen zusammengefasst sind. Darüber hinaus ist die Merck-Aktie Teil des DAX® Global Sarasin Sustainability Germany Index.

### Kapital und Aktie

Das gezeichnete Kapital der Gesellschaft ist zum Bilanzstichtag in 64.621.125 auf den Inhaber lautende Stückaktien ohne Nennbetrag sowie eine Namensaktie eingeteilt. Der Inhaber der Namensaktie ist die E. Merck Beteiligungen KG. Sie ist berechtigt und verpflichtet, ein Drittel der Aufsichtsratsmitglieder der Kommanditaktionäre in den Aufsichtsrat zu entsenden. Das Entsendungsrecht besteht nicht, sofern der Inhaber der Namensaktie ein persönlich haftender Gesellschafter ist. Die Übertragung der Namensaktie bedarf der Zustimmung der Gesellschaft. Über die Erteilung der Zustimmung entscheidet die persönlich haftende Gesellschafterin mit Kapitalanteil, E. Merck KG, nach freiem Ermessen.

Die Satzung von Merck sieht vor, dass die persönlich haftenden Gesellschafter ohne Kapitalanteil, die die Geschäftsleitung bilden, durch die E. Merck KG mit Zustimmung der einfachen Mehrheit der anderen persönlich haftenden Gesellschafter aufgenommen werden. Persönlich haftender Gesellschafter ohne Kapitalanteil kann nur sein, wer zugleich persönlich haftender Gesellschafter der E. Merck KG ist. Darüber hinaus können in die Geschäftsleitung auf Vorschlag der E. Merck KG und mit Zustimmung aller persönlich haftenden Gesellschafter ohne Kapitalanteil weitere Personen aufgenommen werden, die nicht persönlich haftender Gesellschafter ohne Kapitalanteil sind.

Die Satzung kann durch einen Beschluss der Hauptversammlung geändert werden, der der Zustimmung der persönlich haftenden Gesellschafter bedarf. Die Beschlüsse der Hauptversammlung werden – soweit nicht zwingende gesetzliche Vorschriften entgegenstehen – mit einfacher Mehrheit der abgegebenen Stimmen gefasst. Soweit das Gesetz außer der Stimmenmehrheit eine Kapitalmehrheit vorschreibt, werden sie auch mit der einfachen Mehrheit des bei der Beschlussfassung vertretenen Grundkapitals gefasst. Die Satzung umfasst ein genehmigtes Kapital. Die Geschäftsleitung ist ermächtigt, mit Zustimmung des Aufsichtsrats sowie der E. Merck KG das Grundkapital bis zum 3. April 2014 um bis zu insgesamt 56.521.124,19 EUR durch ein- oder mehrmalige Ausgabe neuer Aktien gegen Bar- oder Sacheinlage zu erhöhen. Eine Ermächtigung zum Erwerb eigener Aktien besteht bei der Gesellschaft nicht.

Die Gesellschaft unterhält keine wesentlichen Vereinbarungen, die unter der Bedingung eines Kontrollwechsels infolge eines Übernahmeangebots stehen, und keine Entschädigungsvereinbarungen, die für den Fall eines Übernahmeangebots mit den Mitgliedern der Geschäftsleitung oder den Arbeitnehmern getroffen sind.

### Erfolgreiche Merck-Anleihe

Aufgrund der Akquisition von Millipore war das abgelaufene Geschäftsjahr von umfangreichen Finanzierungsmaßnahmen geprägt. Ein wesentlicher Baustein der Akquisitionsfinanzierung war eine Anleihe-Emission in Höhe von 3,2 Mrd EUR. Dies stellt die größte Euro-Anleihe-Transaktion eines deutschen Unternehmens in Europa im Jahr 2010 dar.

Durch den Emissionszeitpunkt im März profitierte Merck von attraktiven Konditionen. Zur Diversifikation der Investorengruppen wurde die Emission aufgrund der sehr großen Nachfrage in drei Tranchen mit unterschiedlichen Fälligkeiten gegliedert. So fügen sich die Fälligkeiten gut in das gesamte Anleiheprofil von Merck ein.

Die erste Tranche hat eine originäre Laufzeit von zwei Jahren. Das Volumen beträgt 500 Mio EUR und weist einen Kupon von 2,125 % auf. Die weiteren beiden Tranchen belaufen sich jeweils auf einen Betrag von 1.350 Mio EUR. Eine dieser Tranchen läuft bis zum März 2015 und weist einen Kupon von 3,375 % auf; die andere weist eine Laufzeit von insgesamt 10 Jahren auf und verfügt über einen Kupon von 4,500 %.

Da die Finanzierungsmaßnahmen zur Millipore-Akquisition zu einer erhöhten Verschuldung führten, haben die beiden Rating-Agenturen Standard & Poor's sowie Moody's das Rating angepasst. Während Standard & Poor's am 2. März 2010 ein Rating von BBB+ mit stabilem Ausblick (zuvor A-) vergab, hat Moody's das Rating am 16. Juli 2010 von einem Rating von A3 vor der Akquisition auf Baa2 (Ausblick stabil) angepasst.

Die Finanzierungsmaßnahmen haben gezeigt, dass Merck ein geschätzter Emittent am Kapitalmarkt ist. Auch in Zukunft wird der Fremdkapitalmarkt für Merck einen wesentlichen Bestandteil der Konzernfinanzierung darstellen.

Merck – ein geschätzter  
Emittent am Anleihenmarkt



Rebismart™, die elektronische Injektions-  
hilfe zur Selbstverabreichung von Rebif®,  
ist einfach und komfortabel anzuwenden.

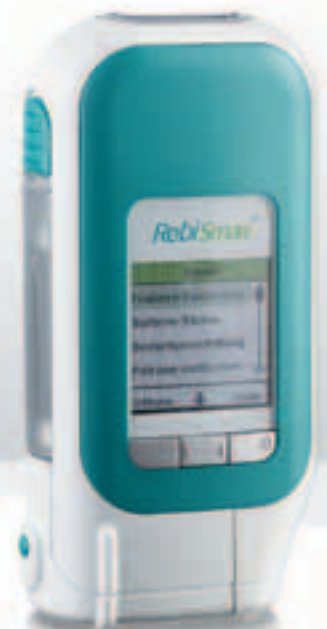

## MERCK SERONO

---

Merck Serono ist die größte Sparte von Merck. Sie vertreibt innovative, verschreibungspflichtige Medikamente chemischen und biotechnologischen Ursprungs. Ihre führenden Marken bietet die Sparte in rund 150 Ländern an. Merck Serono engagiert sich in Therapiegebieten mit hohem Spezialisierungsgrad wie neurodegenerative Erkrankungen, Onkologie, Fruchtbarkeit, Endokrinologie sowie Rheumatologie.

### WICHTIGSTE PRODUKTE DER THERAPIEGEBIETE

- Onkologie: Erbitux® (solide Tumore)
- Neurodegenerative Erkrankungen: Rebif®, Movectro® (Multiple Sklerose)
- Fruchtbarkeit: Gonal-f®, Pergoveris™, Luveris®, Ovitrelle®, Crinone®, Cetrotide® (unerfüllter Kinderwunsch)
- Endokrinologie: Saizen® (Wachstumshormonstörungen), Serostim® (HIV-bedingter Gewichtsverlust), Kuvan® (Stoffwechselstörung Hyperphenylalaninämie), Egrifta™ (HIV-bedingte Fettverteilungsstörung)
- CardioMetabolic Care: Concor®-Familie (Herz-Kreislauf-Erkrankungen), Glucophage®-Familie (Typ-2-Diabetes), Euthyrox® (Schilddrüsenerkrankungen)

### EREIGNISSE 2010

- Umsatzerlöse von Erbitux® steigen um 18 % auf 820 Mio EUR, Rebif® legt um 8,6 % auf 1.668 Mio EUR zu
- Zulassung von Cladribin-Tabletten in Russland und Australien als weltweit erstes krankheitsmodifizierendes Medikament zur oralen Behandlung der Multiplen Sklerose (Handelsname Movectro®)
- Keine Empfehlung für Cladribin-Tabletten durch das wissenschaftliche Komitee der europäischen Arzneimittelbehörde EMA im Januar 2011. In den USA hat die FDA den Antrag zur Prüfung angenommen, eine Entscheidung der Behörde erwarten wir bis Ende Februar 2011
- Die japanische Arzneimittelbehörde hat den Einsatz von Erbitux® in Kombination mit Chemotherapie zur Erstlinienbehandlung von metastasiertem Darmkrebs (KRAS-Wildtyp-Tumore) erweitert
- Nach einem vermuteten, unerwarteten, schweren Nebenwirkungsfall hatten wir im März alle Studien mit der Krebs-Immuntherapie Stimuvax® zeitweise ausgesetzt. Wir haben im Juni die Phase-III-Studien bei nichtkleinzelligem Lungenkrebs wieder aufgenommen
- Zulassung von Egrifta™ in den USA zur Reduzierung von überschüssigem Bauchfett bei HIV-Patienten mit Lipodystrophie

## WACHSTUM DANK BIOTECH-MEDIKAMENTEN ERFREULICH

Die Umsatzerlöse von Merck Serono wuchsen deutlich stärker als der prognostizierte Durchschnitt der Pharmabranche. Fast zwei Drittel dieses Wachstums geht auf unsere Biopharmazeutika Rebif® und Erbitux® zurück.

61 % der Umsatzerlöse mit den fünf umsatzstärksten Biopharmazeutika

Im Jahr 2010 konnte die Sparte Merck Serono ihre Gesamterlöse um 7,6 % auf 5.754 Mio EUR steigern. Die Umsatzerlöse stiegen um 8,3 %, wobei zu diesem Wachstum positive Währungseffekte von 2,6 % beitrugen. Erneut beruhte dieses im Vergleich mit dem Branchenschnitt, der vom Marktforschungsinstitut IMS Health auf 4 bis 5 % geschätzt wird, gute Wachstum vor allem auf dem Erfolg unserer Biopharmazeutika. Mit unseren fünf umsatzstärksten Biopharmazeutika – Rebif®, Erbitux®, Gonal-f®, Saizen® und Serostim® – erwirtschafteten wir 3.288 Mio EUR. Das entspricht 61 % unserer Umsatzerlöse. Umsatzstärkstes Produkt mit einem Plus von 8,6 % auf 1.668 Mio EUR war wiederum Rebif®, ein Medikament zur Behandlung von schubförmiger Multipler Sklerose. Erbitux®, unser zielgerichtetes Krebstherapeutikum, steigerte seinen Umsatz erneut zweistellig – um 18 % auf 820 Mio EUR. Seit März ist Erbitux® im wichtigen Markt Japan nun für den erweiterten Einsatz in Kombination mit Chemotherapie zur Erstlinienbehandlung von metastasiertem Darmkrebs vom KRAS-Wildtyp zugelassen. Als weltweit erstes orales krankheitsmodifizierendes Medikament zur Behandlung der schubförmigen Multiplen Sklerose wurden Cladribin-Tabletten (Handelsname Movectro®) im Juli in Russland zugelassen, im September dann auch in Australien. Im November erteilte die US-amerikanische Arzneimittelbehörde die Zulassung für Egrifta™ (Tesamorelin zur Injektion) für die Reduzierung von Fettgewebe im Bauchraum von HIV-Patienten mit Lipodystrophie.

### Führende fünf Arzneimittel nach Umsatzerlösen 2010

in Mio EUR / in % der Spartenumsätze

|                       |       |      |
|-----------------------|-------|------|
| 1 Rebif®              | 1.668 | 31 % |
| 2 Erbitux®            | 820   | 15 % |
| 3 Gonal-f®            | 504   | 9 %  |
| 4 Concor®-Familie     | 373   | 7 %  |
| 5 Glucophage®-Familie | 316   | 6 %  |
| 6 Andere Produkte     | 1.727 | 32 % |

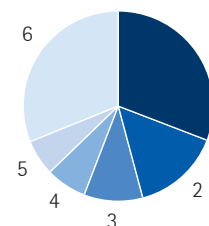

Die Lizenz- und Provisionserlöse lagen mit 344 Mio EUR leicht unter Vorjahresniveau. Im Vergleich zu 2009 konnten wir das Bruttoergebnis um 6,9 % auf 4.793 Mio EUR erhöhen. Getrieben von starken Währungskurseinflüssen und Investitionen in neue Produkte und aufstrebende Märkte wie China lagen unsere Marketing- und Vertriebskosten um 10 % höher als 2009. Die Forschungs- und Entwicklungskosten sanken leicht um 1,4 % auf 1.167 Mio EUR. Die Einmalaufwendungen lagen insgesamt unter Vorjahresniveau, größter Einzeleffekt war die außerordentliche Abschreibung auf Safinamid (siehe Seite 19). Insgesamt verbesserte sich das Operative Ergebnis um 59 % auf 565 Mio EUR. Die Umsatzrendite (ROS) steigerte sich im Jahr 2010 auf 9,8 %. Der Basis Free Cash Flow wuchs um 51 % auf 1.308 Mio EUR.

**Merck Serono | Kennzahlen**

| in Mio EUR           | 2010  | 2009  | Δ in % |
|----------------------|-------|-------|--------|
| Gesamterlöse         | 5.754 | 5.345 | 7,6    |
| Bruttoergebnis       | 4.793 | 4.485 | 6,9    |
| F&E-Kosten           | 1.167 | 1.184 | -1,4   |
| Operatives Ergebnis  | 565   | 355   | 59     |
| Sondermaßnahmen      | 69    | -40   | -      |
| Free Cash Flow       | 1.298 | 864   | 50     |
| Basis Free Cash Flow | 1.308 | 867   | 51     |
| ROS in %             | 9,8   | 6,6   |        |

**Region Asien, Afrika, Australien als Wachstumstreiber**

Die umsatzstärkste Region der Sparte war auch 2010 Europa. Hier wurde knapp die Hälfte des Spartenumsatzes erzielt. Die Umsatzerlöse in Europa stiegen um 2,9 % auf 2.632 Mio EUR. Unser größter europäischer Markt war Frankreich mit Umsatzerlösen von 514 Mio EUR. Dort ging der Umsatz um 3,5 % zurück, wozu Konkurrenz durch Generika bei den Produkten aus dem Bereich CardioMetabolic Care beitrug. Die Umsätze im zweitgrößten Markt Deutschland stagnierten in Folge einer restriktiven Gesundheitspolitik bei 497 Mio EUR (+0,1 %). Italien und Spanien lagen mit 308 Mio EUR bzw. 294 Mio EUR und einem Umsatzplus von 7,1 % bzw. 1,8 % annähernd gleichauf. Kleinere Märkte mit starkem Wachstum waren beispielsweise Russland und die Türkei mit einem Plus von 36 % bzw. 16 %, während in Griechenland aufgrund der Auswirkungen der Finanzkrise auf den Gesundheitssektor die Umsatzerlöse um 13 % zurückgingen.

**Merck Serono | Umsatzerlöse nach Regionen**

in Mio EUR / in % der Spartenumsätze

|                             |       |      |
|-----------------------------|-------|------|
| 1 Europa                    | 2.632 | 49 % |
| 2 Nordamerika               | 1.035 | 19 % |
| 3 Lateinamerika             | 809   | 15 % |
| 4 Asien, Afrika, Australien | 932   | 17 % |

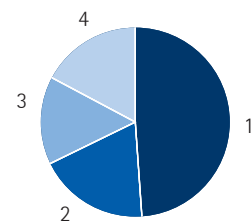**Zweistelliges Umsatzwachstum  
in Lateinamerika**

In Nordamerika wuchsen die Umsätze um 9,4 % auf 1.035 Mio EUR, hauptsächlich dank des guten Abschneidens von Rebif® und positiver Währungskurseinflüsse. In Lateinamerika legten die Umsatzerlöse um 14 % auf 809 Mio EUR zu. Ein Plus von 36 % auf 286 Mio EUR verzeichneten wir in Brasilien, unserem größten Markt in dieser Region. Mexiko und Argentinien wuchsen ebenfalls erfreulich um 22 % bzw. 44 %, während Venezuela aufgrund starker Währungseffekte 54 % verlor. Die Region Asien, Afrika, Australien war mit einer Steigerung der Umsatzerlöse um 20 % auf 932 Mio EUR der geographische Wachstumstreiber der Sparte. Unser größter Markt in dieser Region war Japan. Dort konnten wir unsere Umsatzerlöse dank des Erfolgs von Erbitux® um 39 % auf 177 Mio EUR steigern. Mit einem Umsatz von 126 Mio EUR (+2,4 %) war China unser zweitgrößter Markt. In Indien erreichten wir mit 66 Mio EUR einen Zuwachs von 18 %. Südafrika legte um 52 % auf 39 Mio EUR zu, Australien um 18 % auf 60 Mio EUR.

**Unsere Aktivitäten in den Therapiegebieten**

|                                           | Forschung | Entwicklung | Vermarktung |
|-------------------------------------------|-----------|-------------|-------------|
| Onkologie                                 | ■         | ■           | ■           |
| Neurodegenerative Erkrankungen            | ■         | ■           | ■           |
| Rheumatologie                             | ■         | ■           |             |
| Fruchtbarkeit                             | ■         | ■           | ■           |
| Endokrinologie                            |           | ■           | ■           |
| CardioMetabolic Care und Allgemeinmedizin |           |             | ■           |

**ONKOLOGIE**

Unser zielgerichtetes Krebsmedikament Erbitux® (Cetuximab) ist in allen Therapielinien in Kombination mit Chemotherapie oder als Monotherapie für vorbehandelte Patienten bei metastasiertem Darmkrebs (mCRC) mit KRAS-Wildtyp-Tumoren, die den epidermalen Wachstumsfaktorrezeptor (EGFR) an der Zelloberfläche aufweisen, zugelassen. Zudem ist der monoklonale Antikörper ein Standard in der Erstlinientherapie von rezidiviertem und/oder metastasiertem Kopf- und Halskrebs (SCCHN) in Kombination mit platinbasierter Chemotherapie sowie in Kombination mit Strahlentherapie zur Behandlung von lokal fortgeschrittenen Kopf- und Halstumoren. Erbitux® ist heute für die Behandlung von Darmkrebs in 86 Ländern und für die Behandlung von Kopf- und Halskrebs in 82 Ländern zugelassen. Zusätzliche Indikationen untersuchen wir in weiteren Studien. Die Umsatzerlöse von Erbitux® stiegen im Jahr 2010 um 18% auf 820 Mio EUR. Somit wurde der Wachstumskurs ungebrochen fortgesetzt.

Erbitux® in Kombination mit Chemotherapie in Japan für alle Therapielinien zur Darmkrebsbehandlung verfügbar

**Zulassungen in Japan, Australien und der Schweiz**

In Japan kann Erbitux® nun auch in Kombination mit Chemotherapie in der Erstlinienbehandlung von EGFR-exprimierendem, inoperablem, fortgeschrittenem oder rezidivierendem Darmkrebs vom KRAS-Wildtyp eingesetzt werden. Die Erweiterung der Produktinformation wurde von der Zulassungsbehörde Pharmaceutical and Medical Devices Agency (PMDA) im März 2010 genehmigt, nachdem Merck Daten der Phase-III-Studie CRYSTAL eingereicht hatte. Somit ist Erbitux® in Kombination mit Chemotherapie in Japan für alle Therapielinien zur Behandlung von Darmkrebs verfügbar.

In Australien hat die Zulassungsbehörde Therapeutic Goods Administration (TGA) im März 2010 Erbitux® in Kombination mit Chemotherapie in der Erstlinienbehandlung von metastasiertem Darmkrebs mit KRAS-Wildtyp-Tumoren zugelassen. Des Weiteren steht Erbitux® auch als Erstlinien-Behandlungsoption bei metastasiertem Darmkrebs des KRAS-Wildtyps in der Schweiz zur Verfügung. Die zuständige Zulassungsbehörde Swissmedic hatte im September 2010 die Zulassung erteilt.

**Erbitux® Therapiestandard bei metastasiertem Darmkrebs vom KRAS-Wildtyp**

Merck ist eines der führenden Unternehmen in der innovativen, personalisierten Krebstherapie. Unsere Forschung ist darauf fokussiert, Biomarker zu identifizieren, die es ermöglichen, die Patienten auszuwählen, die am meisten von einem Arzneimittel profitieren – so wie es mit dem KRAS-Wildtyp-Status von Tumoren bei Patienten mit metastasiertem Darmkrebs für Erbitux® möglich ist. Eine internationale Umfrage hat 2010 belegt, dass sich die KRAS-Mutationsanalyse

schnell zu einem festen Bestandteil des Therapiemanagements bei mCRC entwickelt. Des Weiteren zeigt die Studie, dass Erbitux® ein neuer Standard in der Darmkrebs-Therapie bei bestätigtem KRAS-Wildtyp ist. Der Anteil der Patienten, bei denen der Test durchgeführt wird, um zu bestimmen, ob sie von einer personalisierten Therapie wie Erbitux® profitieren können, ist deutlich gestiegen. Im Jahr 2008 lag er bei 2,5%, Anfang 2010 bei 66%. Die Ergebnisse zeigen auch, dass 73% der Ärzte in Europa den KRAS-Test routinemäßig zum Zeitpunkt der Diagnose von metastasiertem Darmkrebs durchführten.

Zwei Umfragen, deren Ergebnisse ebenfalls im Jahr 2010 vorgestellt wurden, haben ergeben, dass Erbitux® sich zu einem Standard in der Behandlung von Kopf- und Halskrebs entwickelt – sowohl bei lokal fortgeschrittenem als auch rezidiertem und/oder metastasiertem Kopf- und Halskrebs. In letzterer Indikation hatte die Umfrage unter 256 Spezialisten in Frankreich, Deutschland, Italien und Spanien ergeben, dass eine Erbitux®-basierte Kombinationstherapie bei annähernd 60% der Fälle in der Erstlinientherapie zum Einsatz kam.

## NEURODEGENERATIVE ERKRANKUNGEN

In der Geschäftseinheit Neurodegenerative Erkrankungen bieten wir mit Rebif® (Interferon beta-1a) eines der führenden Medikamente zur Behandlung der schubförmig verlaufenden Multiplen Sklerose (MS) an. Schätzungen zufolge leiden weltweit rund 2 Millionen Menschen an MS. Aufgrund seiner erwiesenen Wirksamkeit und eines günstigen Nutzen-Risiko-Profiles gehört Rebif® zur Basistherapie der MS und ist in mehr als 90 Ländern zugelassen. Im Jahr 2010 stiegen die Umsatzerlöse von Rebif® um 8,6% auf 1.668 Mio EUR. Das rekombinante Protein war somit erneut das umsatzstärkste Produkt von Merck und blieb das führende MS-Medikament außerhalb der USA. In Europa erzielte Rebif® bei solidem Wachstum von 6,2% mit 752 Mio EUR den größten Umsatz. Die größten Märkte waren Deutschland und Italien, wo wir Wachstumsraten von 6,0% bzw. 8,5% verzeichneten. Die Region Nordamerika blieb mit Umsatzerlösen von 751 Mio EUR unser zweitgrößter Markt für Rebif®. Das Wachstum dort betrug 11% gegenüber dem Vorjahr. In Lateinamerika stiegen die Umsatzerlöse um 12% auf 108 Mio EUR. In der Region Asien, Afrika, Australien betrug das Wachstumsplus 2,2%.

Die serumfreie Formulierung von Rebif® mit verbesserter Injektionsverträglichkeit ist mittlerweile in rund 40 Ländern erhältlich, darunter alle Länder der Europäischen Union, Australien, Kanada und die Schweiz sowie eine Reihe von Ländern in Asien, Lateinamerika, Afrika und dem Mittleren Osten. In den USA dauern die Diskussionen mit der FDA über eine mögliche Zulassung an. Unsere Palette benutzerfreundlicher Applikationshilfen für die einfache, komfortable und auf individuelle Bedürfnisse zugeschnittene Selbstverabreichung von Rebif® haben wir um Rebidose™ erweitert. Diese mit Rebif® vorgefüllte Einweg-Injektionshilfe („Pen“) wurde in der Europäischen Union und Australien zugelassen. Unser 2009 eingeführtes elektronisches Injektionsgerät Rebismart™, das erste seiner Art im Bereich MS, ist bislang in über 20 Ländern erhältlich, darunter Kanada und viele EU-Länder.

### **Movectro® in Russland und Australien zur oralen MS-Behandlung zugelassen**

Im Juli erteilte das russische Gesundheitsministerium die Marktzulassung für Cladribin-Tabletten zur Behandlung der schubförmigen Multiplen Sklerose – dies war die weltweit erste behördliche Zulassung für ein orales krankheitsmodifizierendes MS-Medikament. Im September folgte die Zulassung in Australien. Cladribin-Tabletten sind seit Ende des Jahres in beiden Ländern unter

Weltweit erste Zulassung für ein  
orales krankheitsmodifizierendes  
Medikament zur MS-Behandlung

dem Handelsnamen Movectro® erhältlich. Die Zulassungen wurden gestützt von den Ergebnissen der CLARITY-Studie, an der 1.326 Patienten mit schubförmiger MS teilgenommen hatten. Die im renommierten „New England Journal of Medicine“ veröffentlichten Studienergebnisse zeigen, dass die Kurzzeitbehandlung mit Cladribin-Tabletten die Schubrate, das Risiko eines Fortschreitens der Behinderung sowie die mittels Kernspintomographie messbare Krankheitsaktivität nach 96 Wochen signifikant verringert.

Merck hat Zulassungsanträge für Cladribin-Tabletten eingereicht, die rund 40 Länder weltweit abdecken. In den USA reichten wir den Zulassungsantrag im Juni erneut ein. Im Juli nahm die Behörde den Antrag an und gewährte die Behandlung im Rahmen eines beschleunigten Zulassungsverfahrens. Im November teilte uns die FDA mit, dass sie die Frist zur Prüfung unseres Antrags um drei Monate bis zum 28. Februar 2011 verlängert hat. Die FDA verlängerte die Frist, um mehr Zeit für eine vollständige Prüfung zusätzlich eingereichter Informationen zu haben. Das wissenschaftliche Komitee CHMP der europäischen Arzneimittelbehörde EMA gab im September eine negative Stellungnahme zum Antrag auf Marktzulassung für Cladribin-Tabletten ab. Da wir vom großen Potenzial von Cladribin-Tabletten als neue Therapieoption für Multiple-Sklerose-Patienten überzeugt sind, legten wir gegen diese Entscheidung Einspruch ein und beantragten eine erneute Prüfung. Im Januar 2011 bestätigte das CHMP sein negatives Votum endgültig.

## FRUCHTBARKEIT

In wichtigen Wachstums-  
märkten legten die  
Umsatzerlöse zweistellig zu

Mit ihrem Portfolio an Medikamenten zur Behandlung der Unfruchtbarkeit ist die Sparte Merck Serono weltweit führend. Als einziges Unternehmen bieten wir Ärzten und Patienten rekombinante Versionen der drei für die Behandlung der Unfruchtbarkeit wichtigsten Sexualhormone an. Die Umsatzerlöse in der Geschäftseinheit Fruchtbarkeit stiegen im Jahr 2010 um 6,6% auf 657 Mio EUR. Europa blieb unser wichtigster Markt. Hier erwirtschafteten wir fast die Hälfte der Umsatzerlöse, die leicht über dem Vorjahresniveau dieser Region lagen. In Asien, Afrika, Australien und Lateinamerika entwickelte sich der Umsatz mit zweistelligen Wachstumsraten erfreulich, während wir in Nordamerika eine geringfügige Steigerung verzeichneten.

### Gonal-f® wächst weiterhin

Gonal-f® (Follitropin alfa zur Injektion) ist eine rekombinante Form des körpereigenen follikelstimulierenden Hormons. Es ist in über 100 Ländern zugelassen und das weltweit führende Präparat zur Behandlung der Unfruchtbarkeit bei Frauen. Die Injektionshilfe Gonal-f®-Pen zur Selbstverabreichung von Gonal-f® ist in über 90 Ländern erhältlich, darunter in den wichtigsten EU-Ländern, den USA und Japan. Die Umsatzerlöse von Gonal-f® stiegen um 3,7% auf 504 Mio EUR, hauptsächlich getragen von starkem Wachstum um 15% in der Region Asien, Afrika, Australien. Zum Umsatzplus in dieser Region trugen positive Währungseffekte mehr als die Hälfte bei. In Japan war Gonal-f® 2009 auch für die Behandlung von unfruchtbaren Frauen mit unregelmäßigem oder ausbleibendem Eisprung zugelassen worden. Dies zeigte sich 2010 in einem sehr starken Umsatzanstieg. In Nordamerika blieben die Gonal-f®-Umsätze in einem schrumpfenden und umkämpften Markt auf Vorjahresniveau. In Europa, wo wir fast die Hälfte unserer Umsatzerlöse mit Gonal-f® erwirtschafteten, konnten wir trotz anhaltenden Kostendrucks im Gesundheitssektor den Negativtrend des Vorjahres stoppen und den Umsatz auf dem Niveau von 2009 halten. In Italien, unserem größten europäischen Markt für dieses Produkt,

blieben die Umsatzerlöse genauso stabil wie in unserem zweitgrößten Markt Frankreich. Spanien ist der drittgrößte europäische Markt, der hauptsächlich von Selbstzahlern getragen wird. Sie spürten weiterhin die Folgen der Wirtschaftskrise, der Gonal-f®-Umsatz ging um 4,3 % zurück. Erfreulich schnitt Gonal-f® hingegen in Großbritannien ab: Die Umsätze wuchsen, hauptsächlich organisch, stark und lagen um 31 % über Vorjahr. Zur Stimulation der Eibläschenreifung bei unfruchtbaren Frauen, die an einem starken Mangel an luteinisierendem Hormon und follikelstimulierendem Hormon leiden, wird unser rekombinantes Kombinationspräparat Pergoveris™ eingesetzt. Es ermöglicht erstmals die gleichzeitige Gabe der beiden für die Eierstockstimulation entscheidenden Hormone durch subkutane Injektion. Die weltweiten Umsatzerlöse, fast ausschließlich in Europa erzielt, stiegen um 8,4 % auf 32 Mio EUR, vor allem dank eines Wachstums von 50 % in Frankreich. Ovidrel®/Ovitrelle® ist eine rekombinante Version des natürlich vorkommenden Hormons hCG. Es wird zur Stimulation der Follikelreifung und zum Auslösen des Eisprungs eingesetzt und erzielte ein starkes Umsatzplus von 21 % auf 45 Mio EUR, getragen von gutem Wachstum in allen Regionen. Auch Cetrotide®, ein zur Verhinderung eines vorzeitigen Eisprungs eingesetzter Antagonist des Hormons GnRH, wuchs mit 23 % auf 38 Mio EUR erfreulich.

#### Fördermittel für innovative Fertilitäts-Forschungsprojekte vergeben

Rund 1 Mio EUR für die Förderung von Projekten aus der angewandten Fruchtbarkeitsforschung

Im Juni 2010 gab Merck Serono die ersten Empfänger von Fördermitteln des „Grant for Fertility Innovation“ bekannt. Wir haben dieses Programm für Innovationen auf dem Gebiet der Fruchtbarkeit entwickelt, um die medizinische Forschung auf diesem Gebiet zu fördern. Rund 1 Mio EUR wurden auf fünf innovative Projekte aus der angewandten Fruchtbarkeitsforschung verteilt, die Paaren mit unerfülltem Kinderwunsch bessere Chancen eröffnen sollen. Im selben Monat stellten wir die Ergebnisse der größten internationalen Studie zum Verständnis der Entscheidungsprozesse von Paaren mit Kinderwunsch vor. Die Resultate können helfen, unterschiedliche Reproduktionsraten zu erklären, und zeigen Hindernisse auf, die unfruchtbare Paare möglicherweise davon abhalten, ärztliche Hilfe in Anspruch zu nehmen. An der gemeinsam mit der Universität von Cardiff in Wales entwickelten Befragung hatten über 10.000 Frauen und Männer aus 18 Ländern teilgenommen.

## ENDOKRINOLOGIE

Elektronischer Autoinjektor Easypod™ für die Selbstverabreichung von Saizen® nun auch in China erhältlich

Die spezialisierten Medikamente und anwendungsfreundlichen Injektionshilfen der Geschäftseinheit Endokrinologie können das Leben von Patienten mit Hormon- und Stoffwechselstörungen verbessern. Die Umsatzerlöse stiegen um 21 % auf 317 Mio EUR, basierend auf starkem Wachstum in allen Regionen. Unser umsatzstärkstes Endokrinologie-Produkt ist das rekombinante menschliche Wachstumshormon Saizen®. Es ist in 79 Ländern zur Therapie eines oder mehrerer der Krankheitsbilder Wachstumshormonmangel bei Kindern und Erwachsenen, Turner-Syndrom und Minderwuchs bei Kindern aufgrund chronischen Nierenversagens oder zur Behandlung untergewichtiger Neugeborener zugelassen. Schätzungen zufolge leiden weltweit 330.000 Kinder an Wachstumshormonmangel, außerdem allein in Europa 90.000 Erwachsene. Saizen® verzeichnete Umsatzerlöse von 226 Mio EUR – ein deutliches Plus von 18 %. In Europa und Nordamerika erzielten wir die größten Umsätze mit dem Hormon; in Lateinamerika und Asien, Afrika, Australien war das Wachstum, auch organisch, deutlich zweistellig. Der anhaltende Erfolg von Saizen® wurde durch die hohe Akzeptanz unserer elektronischen Injektionshilfe Easypod™



begünstigt, die mittlerweile in rund 40 Ländern erhältlich ist, darunter seit Juli 2010 auch in China. Um Saizen® noch anwendungsfreundlicher zu machen, haben wir eine gebrauchsfertige Flüssigformulierung entwickelt, die die Aufbereitung des Pulvers für die Injektion überflüssig macht. Saizen®-Lösung zur Injektion wurde im April in Kanada zugelassen. In der Europäischen Union wurde im Oktober ein dezentralisiertes Verfahren abgeschlossen, das in den kommenden Monaten nationale Zulassungen in 18 Mitgliedsstaaten ermöglicht. Um eine Anpassung an die individuellen Bedürfnisse der Patienten zu gewährleisten, wird die neue Formulierung in Kartuschen mit 6, 12 und 20 mg erhältlich sein, die für die exklusive Verwendung mit Easypod™ und unserer nadelfreien Applikationshilfe Cool.click™2 entwickelt wurden.

Mit Kuvan® (Sapropterin) zur Behandlung der Hyperphenylalaninämie, verursacht durch die angeborene Stoffwechselstörung Phenylketonurie (PKU) oder einen Mangel am wichtigen Koenzym Tetrahydrobiopterin (BH<sub>4</sub>), bieten wir seit 2009 das erste Medikament für diese seltene Krankheit in Europa an. Dort sind Schätzungen zufolge rund 50.000 Menschen betroffen, 20 bis 50% der PKU-Patienten könnten von einer Behandlung mit Kuvan® profitieren. Kuvan® wird von Merck Serono in rund 30 Ländern vertrieben. 2010 erfolgten Marktzulassungen in der Schweiz, Kroatien und außerhalb Europas, darunter in Australien, China (nur für BH<sub>4</sub>-Mangel), Israel, Mexiko und Venezuela. Die weltweiten Umsatzerlöse stiegen auf 20 Mio EUR.

#### Marktzulassung von Egrifta™ in den USA

Erstes von der FDA zugelassenes  
Medikament zur Verringerung  
überschüssigen Bauchfetts bei HIV-  
Patienten mit Lipodystrophie

Unser Medikament Serostim® wird in den USA zur Behandlung von Auszehrung bei AIDS eingesetzt, von der schätzungsweise bis zu 8% aller HIV-Infizierten betroffen sind. Die Umsatzerlöse von Serostim® stiegen um 8,1% auf 70 Mio EUR.

Für das Arzneimittel Egrifta™ (Tesamorelin zur Injektion) hat die US-Arzneimittelbehörde FDA im November die Zulassung als erste und bislang einzige Therapie zur Verringerung überschüssigen Bauchfetts bei HIV-infizierten Patienten mit Lipodystrophie erteilt. Egrifta™ wurde vom kanadischen Biopharmazieunternehmen Theratechnologies entwickelt und wird in den USA exklusiv von unserer Tochtergesellschaft EMD Serono vermarktet werden.

### CARDIOMETABOLIC CARE UND ALLGEMEINMEDIZIN

CardioMetabolic-Care-Produkte  
bauen ihre Stellung auf vielen wich-  
tigen Wachstumsmärkten aus

Unsere Arzneimittel zur Behandlung von Diabetes, Herz-Kreislauf-Erkrankungen und Schilddrüsenerkrankungen sowie sonstige Produkte und regionale Spezialitäten fassen wir in der Geschäftseinheit CardioMetabolic Care und Allgemeinmedizin zusammen. Die Wechselbeziehungen zwischen vielen chronischen Herz-Kreislauf- und Stoffwechselerkrankungen sind Ursachen vieler Krankheitsbilder, die eine integrierte Behandlung erfordern. Wir arbeiten an der Verbesserung unserer Produkte – etwa durch neue Darreichungsformen oder Dosierungen.

Die Umsatzerlöse der Geschäftseinheit wuchsen um 4,4% auf 1.888 Mio EUR. In vielen dynamischen Märkten bauten wir unsere Stellung aus. So ist Merck mit seinen CardioMetabolic-Care-Produkten in Lateinamerika oder Asien eines der am schnellsten wachsenden Pharmaunternehmen. In Lateinamerika sind wir unter den 15 größten Pharmaunternehmen. Negativ machten sich Preissenkungen in Europa und Konkurrenz durch Generika in unserem umsatzstärksten Land Frankreich bemerkbar. Insgesamt wogen Zuwächse bei den Diabetes- und den Schilddrüsenerkrankungen Rückgänge bei den Betablocker-Präparaten mehr als auf.

**Concor®: Stark in Wachstumsmärkten, harte Konkurrenz in Europa**

Die Markenprodukte der Concor®-Familie mit dem Wirkstoff Bisoprolol erzielten Umsatzerlöse von 373 Mio EUR. Im Vergleich zum Vorjahr entsprach das einem Minus von 5,3 %. Ein Grund war die Generika-Konkurrenz in Frankreich, wo die Umsatzerlöse um 35 % auf 62 Mio EUR fielen. Dabei bleibt Bisoprolol mit Produkten wie beispielsweise Lodoz® und Concor® COR in unserem diesbezüglich größten Markt Europa weiterhin der führende Betablocker.

In unserem wichtigsten lateinamerikanischen Markt Venezuela sanken die Umsatzerlöse inflationsbedingt um 50 % auf 11 Mio EUR.

Dagegen sind die Concor®-Markenprodukte in Wachstumsmärkten erfolgreich. So legten die Umsatzerlöse in der Region Afrika, Asien, Australien um 30 % auf 98 Mio EUR zu.

**Die Glucophage®-Produktfamilie bleibt auf Wachstumskurs**

Sieben Millionen Patienten behandeln Diabetes mit oralen Metformin-Präparaten von Merck Serono

Weltweit leiden rund 285 Millionen Menschen an Typ-2-Diabetes – Tendenz steigend. Über sieben Millionen Patienten weltweit behandeln heute ihren Diabetes mit unseren oralen Metformin-Präparaten. Zur Erstbehandlung ist dieser Wirkstoff, enthalten in unserem Präparat Glucophage®, nach wie vor der „Goldstandard“.

Die Markenprodukte der Glucophage®-Familie erzielten Umsatzerlöse in Höhe von 316 Mio EUR – ein Plus von 8,4 %. Dabei wurden leichte Umsatzrückgänge in Europa durch zweistelliges Wachstum in den Märkten Lateinamerikas und Asiens mehr als ausgeglichen. In Lateinamerika ist Glucophage® Nummer 1 auf dem Diabetes-Markt und wuchs im Jahr 2010 zudem mit 34 % um 6 Prozentpunkte schneller als der Markt – gerechnet in US-Dollar. Zusätzlich waren neue Produktvarianten ungebrochen erfolgreich. So konnte Glucophage XR® – für das wir die Dosierung 1000 mg im Jahr 2009 eingeführt hatten – um 21 % auf 69 Mio EUR zulegen. Mit Glucovance® 1000mg/5mg, einer Kombination aus den Wirkstoffen Metformin und Glibenclamid, haben wir mit der Einführung einer neuen Dosierung begonnen.

**Gutes Wachstum unserer Schilddrüsenpräparate**

Bei Medikamenten zur Behandlung von Fehlfunktionen der Schilddrüse ist Merck größter Anbieter weltweit. Die Umsatzerlöse dieser Präparate wuchsen um 7,6 % auf 170 Mio EUR. Trotz Generika-Konkurrenz sanken die Umsatzerlöse in Europa nur um 1,3 %. Dagegen stiegen die Umsatzerlöse in Lateinamerika um 30 % deutlich und wuchsen in Asien, Afrika, Australien um 3,9 %. Die Umsatzerlöse unseres wichtigsten Produkts, des Schilddrüsenhormons Euthyrox®, stiegen um 7,7 % auf 148 Mio EUR. In ungefähr 90 Ländern weltweit werden rund 15 Millionen Patienten mit Euthyrox® behandelt.

Mehr als 300 Millionen Menschen weltweit leiden an einer Unterfunktion der Schilddrüse, kaum 20 % davon werden behandelt. Wir wollen informieren und eine optimale Behandlung fördern. Im Mai haben wir daher zusammen mit der Internationalen Schilddrüsenvereinigung unsere zweite große Kampagne gestartet. In 45 Ländern haben Aktionen stattgefunden.

**Sonstige Produkte regional stark**

Dank der guten Wettbewerbsposition in wichtigen Märkten außerhalb Europas erzielten unsere sonstigen Produkte, teilweise nur regional verkauft, Umsatzerlöse von 977 Mio EUR. Das entspricht einem Plus von 5,4 %.

## FORSCHUNG & ENTWICKLUNG

Die Ausgaben für Forschung und Entwicklung blieben im Jahr 2010 mit 1.167 Mio EUR leicht unter Vorjahresniveau (–1,4%). Diese Reduktion ist zum einen auf Verzögerungen bei den Projekten Stimuvax® und Cladribin-Tabletten zurückzuführen, zum anderen ist es uns gelungen, durch Effizienzsteigerungsmaßnahmen die Kostenstrukturen insgesamt zu optimieren.

Wir investierten rund 20% der Gesamterlöse der Sparte Merck Serono in Forschung & Entwicklung, womit wir uns innerhalb der Pharmaindustrie auf einem überdurchschnittlich hohen Niveau befinden. Dies ist vor allem durch die große Anzahl von kostenintensiven Studien der letzten Phase der klinischen Prüfung begründet. Die Pipeline umfasst derzeit neun Projekte mit klinischen Studien der Phase III, sieben der Phase II und sechs der Phase I.

Unsere Aktivitäten haben drei Schwerpunkte: Zum Ersten Onkologie, wo wir nach neuen Therapien für Darmkrebs, Lungenkrebs, Kopf- und Halskrebs, Hirntumore, Brustkrebs oder Magenkrebs suchen; zum Zweiten neurodegenerative Erkrankungen, wo wir an neuen Therapien für Multiple Sklerose, die Parkinson-Krankheit sowie die Alzheimer-Krankheit arbeiten; sowie drittens rheumatische Indikationen wie die Autoimmunerkrankung Lupus Erythematoses oder Arthrose. Daneben betreiben wir weiterhin Forschung auf dem Gebiet der Fruchtbarkeit. Insgesamt arbeiteten Ende des Jahres rund 3.000 Mitarbeiter für die Sparte im Bereich F&E.

Die wichtigsten Forschungszentren bleiben Darmstadt, Genf und Boston. Zusätzlich bauen wir den Standort Peking aus, um den asiatischen Raum abzudecken, regionale klinische Studien zu erleichtern und lokale Allianzen zu entwickeln. Bis 2013 wenden wir dafür 150 Mio EUR auf und schaffen über 200 qualifizierte Arbeitsplätze. Planmäßig sind die Ausbauarbeiten am Standort Billerica abgeschlossen, wo wir 65 Mio USD investiert haben.

### Herausforderungen in Netzwerken und Partnerschaften begegnen

Generika-Konkurrenz, Gesundheitsreformen, Preisdruck, gestiegene zulassungsrechtliche Anforderungen an Sicherheit und nachgewiesenen Nutzen neuer Medikamente sind einige der Trends, die F&E im Pharmaumfeld vor Herausforderungen stellen. Wir wollen nachhaltigen Erfolg auch unter sich rasch ändernden Rahmenbedingungen sicherstellen. Essenzielle Teile dieser Strategie sind die Fokussierung auf Facharzt-Therapiegebiete mit hohem medizinischem Bedarf, die konsequente Implementierung von Behandlungsformen, die auf spezifische Patientengruppen angepasst sind (Patientenstratifizierung), um die Wirksamkeit von Therapien für einzelne Patienten voraussagen zu können, und die Arbeit mit Partnern. Im Jahr 2010 haben wir strategische Kooperationen und die Beteiligung an Netzwerken konsequent weiter ausgebaut.

In F&E setzen wir weiterhin sowohl auf unsere Expertise für kleine Moleküle als auch für Biopharmazeutika. Daneben prüfen wir neue potenzielle Wirkstoffklassen, die neuartige Therapien ermöglichen könnten. So sind wir mit dem belgischen Unternehmen Ablynx eine Vereinbarung zur gemeinsamen Entwicklung von Nanobodies® für den Einsatz in der Rheumatologie eingegangen. Nanobodies® sind von Antikörpern abgeleitete therapeutische Proteine, die die Vorteile konventioneller Antikörper mit wichtigen Eigenschaften niedermolekularer Medikamente verbinden.

Im Bereich der neurodegenerativen Erkrankungen haben wir eine exklusive Partnerschaft mit Fast Forward – einer Tochterfirma der US-amerikanischen Multiple-Sklerose-Gesellschaft – etabliert. Im Jahr 2010 wurden vier Empfänger von Fördermitteln benannt. Die Fördermittel, die in die USA, nach Neuseeland und Großbritannien fließen, belaufen sich zunächst auf fast 1,5 Mio USD. Sie werden eingesetzt, um innovative Projekte der Multiple-Sklerose-Forschung voranzutreiben. Zudem sind wir mit dem Institut für Experimentelle Neurologie (INSPE) und

Fördermittel für innovative Projekte  
der Multiple-Sklerose-Forschung

## Status unserer innovativen Wirkstoffe

| Therapiefeld                                                   | Wirkstoff                                                            | Indikation                                                                                                                 | Status                  |
|----------------------------------------------------------------|----------------------------------------------------------------------|----------------------------------------------------------------------------------------------------------------------------|-------------------------|
| Onkologie                                                      | Erbitux® (Cetuximab, monoklonaler Anti-EGFR-Antikörper) <sup>1</sup> | adjuvante Therapie des Darmkrebses <sup>2</sup>                                                                            | Phase III               |
|                                                                |                                                                      | Magenkrebs                                                                                                                 | Phase III               |
|                                                                | Cilengitide (Integrin-Inhibitor)                                     | Glioblastom (Hirntumor)                                                                                                    | Phase III               |
|                                                                | Stimuvax® (Krebs-Immuntherapie) <sup>3</sup>                         | nicht-kleinzelliger Lungenkrebs (NSCLC)                                                                                    | Phase III               |
|                                                                | Erbitux®                                                             | Brustkrebs                                                                                                                 | Phase II                |
|                                                                | Cilengitide                                                          | Kopf- und Halskrebs (SCCHN)                                                                                                | Phase II                |
|                                                                |                                                                      | nicht-kleinzelliger Lungenkrebs (NSCLC)                                                                                    | Phase II                |
|                                                                | monoklonaler Anti-Integrin-Antikörper (DI17E6)                       | Darmkrebs                                                                                                                  | Phase II                |
|                                                                | TLR9-Immunmodulator (IMO–2055) <sup>4</sup>                          | Kopf- und Halskrebs (SCCHN)                                                                                                | Phase II                |
|                                                                | MEK-Inhibitor (AS703026/ MSC1936369B)                                | solide Tumore und hämatologische Erkrankungen                                                                              | Phase I                 |
| c-Met-Kinase-Inhibitoren (EMD1214063, EMD1204831) <sup>5</sup> | solide Tumore                                                        | Phase I                                                                                                                    |                         |
| Neurodegenerative Erkrankungen                                 | serumfreie Rebif®-Formulierung                                       | schubförmig verlaufende Formen der Multiplen Sklerose (MS)                                                                 | USA: eingereicht        |
|                                                                |                                                                      | Klinisch Isoliertes Syndrom (CIS)                                                                                          | Phase III               |
|                                                                | Cladribin-Tabletten                                                  | schubförmig verlaufende Formen der MS; Russland und Australien: zugelassen, USA: Zulassungsantrag eingereicht <sup>6</sup> | zugelassen/ eingereicht |
|                                                                |                                                                      | Klinisch Isoliertes Syndrom (CIS)                                                                                          | Phase III               |
|                                                                | Safinamid <sup>7</sup>                                               | Parkinson-Krankheit im Frühstadium                                                                                         | Phase III               |
|                                                                |                                                                      | Parkinson-Krankheit im mittleren bis späten Stadium                                                                        | Phase III               |
|                                                                | Immuntoleranz-Therapeutikum (ATX-MS-1467) <sup>8</sup>               | schubförmig verlaufende Formen der MS                                                                                      | Phase I                 |
|                                                                | Interferon beta-1a mit verzögerter Freisetzung <sup>9</sup>          | schubförmig verlaufende Formen der MS                                                                                      | Phase I                 |
| Rheumatologie                                                  | Atacicept (Anti-BLYS-/Anti-APRIL-Fusionsprotein) <sup>10</sup>       | Systemischer Lupus Erythematoses (SLE)                                                                                     | Phase III               |
|                                                                | Fibroblasten-Wachstumsfaktor 18 <sup>10</sup>                        | verletzungsbedingte Knorpelschäden                                                                                         | Phase II                |
|                                                                |                                                                      | Arthrose                                                                                                                   | Phase I                 |
| Endokrinologie                                                 | Wachstumshormon mit Langzeitwirkung (ARX 201) <sup>11</sup>          | Wachstumshormonmangel                                                                                                      | Phase II                |

<sup>1</sup> Entwickelt zusammen mit ImClone LLC: Erbitux® ist eine Marke von ImClone LLC, einer hundertprozentigen Tochtergesellschaft von Eli Lilly & Co.

<sup>2</sup> Studie geleitet und koordiniert von der Fédération Franco-phonie de Cancérologie Digestive (FFCD)

<sup>3</sup> Exklusive weltweite Lizenzrechte erworben von Oncothyreon Inc.

<sup>4</sup> Einlizenziert von Idera Pharmaceuticals, Inc.

<sup>5</sup> Zusammenarbeit mit dem M. D. Anderson Cancer Center

<sup>6</sup> Negatives CHMP-Votum zum Antrag auf Marktzulassung in der EU im Januar 2011 endgültig bestätigt

<sup>7</sup> Zusammenarbeit mit Newron Pharmaceuticals S.p.A.

<sup>8</sup> Zusammenarbeit mit Apitope Technology (Bristol) Ltd.

<sup>9</sup> Zusammenarbeit mit Flamel Technologies S.A.

<sup>10</sup> Einlizenziert von ZymoGenetics, Inc., einer hundertprozentigen Tochtergesellschaft von Bristol-Myers Squibb Company

<sup>11</sup> Zusammenarbeit mit Ambrx, Inc.

NSCLC: Non-small cell lung cancer (nicht-kleinzelliges Lungenkarzinom)

SCCHN: Squamous cell carcinoma of the head and neck (lokal fortgeschrittene Plattenepithelkarzinome des Kopfes und Halses)

CIS: Clinically Isolated Syndrome (Klinisch Isoliertes Syndrom)

der Abteilung für Neurologie des San Raffaele Scientific Institute aus Mailand eine strategische Zusammenarbeit eingegangen. Ziel der Kooperation ist, klinische Forschungsprojekte im Bereich der neurodegenerativen Erkrankungen unter Verwendung neuer Modelle und Technologien voranzutreiben.

„Merck Serono Ventures“ ist der Name unseres unternehmenseigenen Risikokapitalfonds. 2010 ist er in die Förderung zweier hochinnovativer Biotechnologie-Unternehmen eingestiegen. Ein Partner ist das Unternehmen f-Star aus Wien, das sich mit der Erforschung und Entwicklung von modifizierten Antikörpern beschäftigt. Die jüngste Partnerschaft ist jene mit dem Unternehmen Auxogyn aus San Francisco, das ein nicht-invasives Instrument für die Frühbewertung der embryonalen Lebensfähigkeit bei der künstlichen Befruchtung entwickelt. Zudem eröffnet die interne Zusammenarbeit mit Merck Millipore neue Perspektiven. Synergien sind beispielsweise bei begleitenden Diagnostika, in der Systembiologie, bei neuen Methoden zur gezielten Verabreichung von Biopharmazeutika oder bei der Suche nach neuen Wegen in der biotechnologischen Produktion möglich.

Neue Daten zur Therapie mit Erbitux® in der Erstlinientherapie von metastasiertem Darmkrebs

#### **Forschung und Entwicklung: Weitere Perspektiven für Erbitux®**

Weitere Analysen der Phase-III-Studie CRYSTAL haben den therapeutischen Wert von Erbitux® erneut belegt. Neue Daten zeigen, dass Patienten mit metastasiertem Darmkrebs (mCRC) vom KRAS-Wildtyp, bei denen während einer Erbitux®-basierten Erstlinientherapie ein frühzeitiges Schrumpfen des Tumors beobachtet wurde, im Mittel 28,3 Monate lebten – ein Gesamtüberleben, das bisher noch nie gezeigt werden konnte. Ebenfalls in Phase III der klinischen Entwicklung sind die EXPAND-Studie bei Magenkrebs sowie die Studie PETACC-8, die Erbitux® als adjuvante Therapie bei Darmkrebs untersucht.

Erste Ergebnisse der randomisierten Phase-II-Studie BALI-1 haben Hinweise auf das therapeutische Potenzial von Erbitux® bei Brustkrebs geliefert. So hatte eine Behandlung mit Erbitux® in Kombination mit Chemotherapie bei metastasiertem dreifach rezeptornegativem Brustkrebs (TNBC, triple negative breast cancer) positive Resultate gezeigt. Bei Patientinnen, die zusätzlich zur Chemotherapie mit Erbitux® behandelt worden waren, hatte sich das mittlere progressionsfreie Überleben mehr als verdoppelt. Auch wenn sich das Tumoransprechen nahezu verdoppelte, so wurde doch der primäre Endpunkt der Studie, die Ansprechrate, nicht erreicht. TNBC ist eine aggressive, schwer behandelbare Erkrankung mit hoher Wahrscheinlichkeit für einen Rückfall und Metastasierung.

#### **Stimuvax®: Studienprogramm fortgesetzt, Hürden erfolgreich überwunden**

Im Juni hat Merck das Studienprogramm mit Stimuvax® (liposomaler Impfstoff BLP25) bei Patienten mit nicht-kleinzelligem Lungenkrebs (NSCLC), einschließlich der Phase-III-Studien START und INSPIRE, fortgesetzt. Die Behandlung und die Rekrutierung von Patienten wurden nach Genehmigung der lokalen Behörden und klinischer Ethikkomitees wieder aufgenommen. Dies wurde ermöglicht durch die Entscheidung der US-amerikanischen Arzneimittelzulassungsbehörde Food and Drug Administration (FDA), die Aussetzung der Studien teilweise aufzuheben und die Fortführung der START-Studie zu genehmigen. Dagegen blieb die Aussetzung der Phase-III-Studie STRIDE bei Patientinnen mit fortgeschrittenem Brustkrebs durch die FDA weiterhin bestehen. Merck Serono hat entschieden, diese Studie einzustellen.

Nach einem vermuteten, unerwarteten, schweren Nebenwirkungsfall waren die Studien im März 2010 durch die FDA ausgesetzt worden. Ein Patient, der an einer explorativen Phase-II-Studie mit der Krebs-Immuntherapie bei einer Form von Knochenmarkkrebs (Multiples Myelom)

teilnahm, war an einer Gehirnentzündung erkrankt. Seit 2007 untersuchen wir in der START-Studie die Wirksamkeit und Sicherheit der Therapie mit Stimuvax® bei Patienten mit inoperablem nicht-kleinzelligem Lungenkarzinom im Stadium III. Die Entscheidung, die Studie durchzuführen, gründete auf den Ergebnissen einer randomisierten Phase-IIb-Studie. Hier hatte Stimuvax® bei einer Untergruppe von Patienten mit lokoregionalem, nicht-kleinzelligem Lungenkrebs des Stadiums IIIb einen Anstieg des Gesamtüberlebens von 13,3 Monaten in der Kontrollgruppe auf 30,6 Monate in der behandelten Gruppe gezeigt. Im Jahr 2009 haben wir in Asien die Phase-III-Studie INSPIRE in der Indikation NSCLC initiiert. Sollten die Phase-III-Studien erfolgreich abgeschlossen werden, könnte diese Krebs-Immuntherapie eine wichtige Rolle in der Behandlung von Lungenkrebs-Patienten spielen, deren Therapieoptionen derzeit noch eingeschränkt sind.

#### **Langzeitergebnisse aus Cilengitide-Studie an Glioblastom-Patienten**

Cilengitide ist der erste so genannte Integrin-Inhibitor, der in der Onkologie die Phase III in der Entwicklung erreicht hat. In der Studie CENTRIC untersuchen wir diesen Wirkstoff bei Glioblastom (GBM), der aggressivsten Form von Hirntumoren. Es wird angenommen, dass Integrin-Inhibitoren zielgerichtet auf Krebszellen und die Blutgefäße wirken, die den Tumor versorgen und das Wachstum der Krebszellen fördern. Im Jahr 2010 wurden Langzeitdaten einer randomisierten Phase-II-Studie mit zwei unterschiedlichen Cilengitide-Dosierungen beim rezidiertem Glioblastom publiziert. Sie haben gezeigt, dass 37 % der Patienten, die die höhere Cilengitide-Dosierung (2000 mg) erhielten, nach einem Jahr am Leben waren. Die derzeitige Prognose für Patienten mit rezidiertem Glioblastom ist dagegen mit einem mittleren Gesamtüberleben von vier bis sieben Monaten und einer Ein-Jahres-Überlebensrate von etwa 20 % schlecht.

#### **Pipeline: Alle Ressourcen für aussichtsreiche Projekte**

Nachhaltig hohes Engagement  
in der Onkologie-Forschung und  
-Entwicklung

Merck Serono bleibt seinem hohen Engagement in der Onkologie-Forschung und -Entwicklung verpflichtet. Unser Ziel ist, Patienten mit hohem medizinischem Bedarf in verschiedenen Indikationen zusätzliche Therapieoptionen anzubieten. Ein wichtiger Schritt auf diesem Weg ist die Ende 2010 vereinbarte weltweite Forschungs- und Entwicklungskollaboration mit Sanofi-Aventis. Sie erlaubt die wechselseitige Untersuchung experimenteller Wirkstoffkombinationen. Eingeschlossen sind der MEK-Inhibitor von Merck sowie zwei frühe Entwicklungssubstanzen des Partners. Wir untersuchen derzeit drei Wirkstoffe in Phase-I-Studien bei soliden Tumoren und hämatologischen Indikationen. Des Weiteren laufen fünf Phase-II-Studien in den Indikationen Brustkrebs, Kopf- und Halskrebs, nicht-kleinzelliger Lungenkrebs sowie Darmkrebs. Da wir in der Pipeline über eine Vielzahl von Substanzen mit hohem therapeutischem Potenzial verfügen, bleiben wir bestrebt, die Projekte voranzutreiben, die den nachhaltigsten Erfolg versprechen. Umgekehrt wollen wir solche Projekte frühzeitig beenden oder abgeben, die weniger erfolgversprechend sind. So stellen wir sicher, unsere Ressourcen zum Wohl der Patienten einzusetzen und die Risiken für unser Unternehmen zu kontrollieren. Im Jahr 2010 haben wir vier Onkologie-Projekte in frühen Phasen eingestellt: In Phase-I-Studien den Aurora-Kinase-Inhibitor sowie den monoklonalen Antikörper Sonepcizumab und in Phase II das Immunzytokin Tucotuzomab CelmoLeukin und den monoklonalen Antikörper Adecatumumab.

Rebif® verlängerte bei CIS-Patienten  
Zeitspanne bis zum Ausbruch von  
klinisch gesicherter MS signifikant

### Wirksamkeit von Rebif® bei Klinisch Isoliertem Syndrom belegt

In unserem Therapiegebiet Neurodegenerative Erkrankungen suchen wir nach neuartigen Therapien für Multiple Sklerose (MS) und die Parkinson-Krankheit – beides Indikationen mit hohem ungedecktem medizinischem Bedarf. In der zweijährigen Phase-III-Studie REFLEX mit über 500 Teilnehmern haben wir untersucht, ob Patienten mit Klinisch Isoliertem Syndrom (CIS, Clinically Isolated Syndrome), bei denen das Risiko des Ausbruchs von MS besteht, von einer Behandlung mit der serumfreien Formulierung von Rebif® profitieren können. Bei diesen Patienten ist bislang nur ein einzelner MS-artiger Vorfall wie Seh- oder Empfindungsstörungen aufgetreten. Zudem sind in der Kernspintomographie charakteristische Läsionen sichtbar, die auf ein hohes Risiko für den Übergang zu einer klinisch eindeutigen Multiplen Sklerose hinweisen. Eine gesicherte Diagnose liegt in diesem Frühstadium jedoch noch nicht vor. Die im Oktober abgeschlossene Studie hat ihren primären Endpunkt erreicht: Rebif® verlängerte die Zeitspanne bis zum Ausbruch von MS bei dieser Patientengruppe signifikant. Derzeit läuft die auf drei Jahre angelegte, doppelblinde Anschlussstudie REFLEXION zur Bereitstellung von Langzeit-Daten.

### Weiterentwicklung von Cladribin-Tabletten vorangeschritten

Mit Cladribin-Tabletten entwickelt die Sparte Merck Serono ein Medikament für die orale Kurzzeit-Therapie der schubförmig verlaufenden Multiplen Sklerose. 2010 erhielten wir Marktzulassungen in Russland und Australien, in der EU wurde unser Zulassungsantrag abgelehnt, in den USA ist er derzeit in Prüfung (siehe Seite 51). Das klinische Entwicklungsprogramm für Cladribin-Tabletten ist darauf ausgelegt, die möglichen therapeutischen Wirkungen von Cladribin-Tabletten auf die verschiedenen Stadien der Krankheit zu erfassen. Nach erfolgreichem Abschluss der CLARITY-Studie läuft derzeit eine auf zwei Jahre ausgelegte Anschlussstudie mit rund 800 Patienten. Sie soll Daten zur langfristigen Sicherheit und Wirksamkeit von Cladribin-Tabletten als Monotherapie bei schubförmiger MS liefern. In der zweijährigen Phase-III-Studie ORACLE-MS werden Cladribin-Tabletten als Monotherapie für Patienten mit CIS geprüft. Im November konnten wir die Rekrutierung der über 600 Studienteilnehmer abschließen. In der Phase-II-Studie ONWARD untersuchen wir die Sicherheit und Verträglichkeit von Cladribin-Tabletten als Zusatztherapie zur etablierten Behandlung mit Interferon beta.

Safinamid-Studie verfehlt Endpunkt,  
bestätigt aber Effekt auf motorische  
Funktionen sowie Sicherheitsprofil

### Langzeitstudie mit Safinamid bei Parkinson-Krankheit im Spätstadium abgeschlossen

Als oral verabreichte Zusatztherapie zur Behandlung der Parkinson-Krankheit, von der allein in den Industrieländern schätzungsweise drei Millionen Menschen betroffen sind, entwickeln wir Safinamid gemeinsam mit unserem Partner Newron für verschiedene Stadien der Erkrankung. Eine erste Phase-III-Studie mit Safinamid als Begleittherapie zur Standardmedikation Levodopa bei Parkinson-Patienten im fortgeschrittenen Krankheitsstadium (Studie 016) hatten wir 2009 erfolgreich abgeschlossen: Die motorischen Funktionen und Aktivitäten des täglichen Lebens verbesserten sich bei den mit Safinamid behandelten Patienten im Vergleich zur Placebo-Gruppe signifikant. Eine über 18 Monate laufende Anschlussstudie (Studie 018) sollte Daten zur langfristigen Wirksamkeit und Sicherheit von Safinamid in dieser Indikation liefern. Die Ergebnisse dieser Langzeitstudie gaben wir im November 2010 bekannt: Der primäre Endpunkt, die mittlere Veränderung im Grad der Bewegungsstörungen (Dyskinesien) nach 24-monatiger Behandlung, wurde nicht erreicht. Daher haben wir eine Neueinschätzung des Umsatzpotenzials von Safinamid vorgenommen und eine außerordentliche Abschreibung verbucht (siehe Seite 19). Dagegen waren die Ergebnisse der Analyse des wichtigsten sekundären Endpunkts konsistent mit dem in Studie 016 beobachteten Effekt auf die motorischen Funktionen. Darüber

hinaus bestätigen die Ergebnisse der Studie 018 das Sicherheitsprofil von Safinamid. Mit SETTLE läuft eine weitere Phase-III-Studie in dieser Indikation. Bei Parkinson-Patienten im Frühstadium untersuchen wir Safinamid in der Phase-III-Studie MOTION als Begleittherapie zur Behandlung mit einem Dopamin-Agonisten.

#### **Erfolgswahrscheinlichkeit nach künstlicher Befruchtung erhöhen**

Mit unserer Forschung und Entwicklung auf dem Gebiet der Fruchtbarkeit wollen wir Paare in jeder Phase des Reproduktionszyklus bei der Erfüllung ihres Kinderwunsches unterstützen – von der Follikelentwicklung bis zur frühen Schwangerschaft. Die innovativen Präparate und Applikationshilfen sollen so bequem wie möglich anzuwenden sein und die Chancen auf eine Schwangerschaft erhöhen. So wollen wir unsere führende Stellung bei der Behandlung der Unfruchtbarkeit weiter ausbauen. Wir stellen Medikamente, Technologien und unterstützende Dienstleistungen in den Mittelpunkt unserer Forschungsaktivitäten, um die Erfolgswahrscheinlichkeit nach einer In-vitro-Fertilisation (IVF) und so letztlich die Zahl der Geburten zu steigern.

#### **Rheumatologische Indikationen im Fokus**

Im Bereich der Autoimmun- und Entzündungskrankheiten haben wir unseren Fokus auf rheumatologische Erkrankungen gerichtet und unser Therapiegebiet entsprechend umbenannt. In Forschung und Entwicklung konzentrieren wir uns dabei auf Moleküle, die an wichtigen Mechanismen der Entstehung dieser Erkrankungen beteiligt sind. Für die Behandlung der entzündlich-rheumatischen Erkrankung Systemischer Lupus Erythematoses (SLE) entwickeln wir das rekombinante Protein Atacept. Dieser neuartige Wirkstoff blockiert die beiden Faktoren APRIL und BlyS, die das Immunsystem beeinflussen. Sie sind wichtig für Überleben und Ausbreitung von solchen weißen Blutkörperchen (Lymphozyten), die eine abnormale Reaktion des Immunsystems gegen körpereigenes Gewebe auslösen. SLE ist eine chronische Autoimmunerkrankung, die hauptsächlich Frauen betrifft und derzeit noch nicht geheilt werden kann. Gegenwärtig führen wir eine Studie der Phase II/III mit Atacept bei SLE durch. Lupusnephritis (LN) ist eine besonders schwere Form von SLE, bei der die Nieren betroffen sind. Wir überarbeiten derzeit den Plan für die klinische Entwicklung von Atacept in dieser Indikation, nachdem wir 2008 eine Studie der Phase II/III eingestellt hatten.

Phase-II-Studie mit FGF 18 in neuer Indikation, der Behandlung von Knorpelschäden im Knie, gestartet

Dank seines neuartigen Wirkmechanismus könnte der Fibroblasten-Wachstumsfaktor 18 (FGF 18) das erste krankheitsmodifizierende Medikament gegen Arthrose und für die Reparatur von verletzungsbedingten Knorpelschäden werden. In Laborexperimenten wurde gezeigt, dass FGF 18 den Wiederaufbau defekter Gelenkknorpel stimuliert. FGF 18 könnte die Heilung degenerativer Gelenkerkrankungen unterstützen. Bei Patienten mit Kniegelenksarthrose haben wir eine Phase-I-Studie erfolgreich abgeschlossen, eine weitere klinische Studie bei Arthrose dauert an. Die Wirksamkeit von FGF 18 bei der Behandlung von Knorpelschäden im Knie untersuchen wir in einer Phase-II-Studie, die wir 2010 gestartet haben.

#### **Forschung und Entwicklung zu Wachstumsstörungen und Stoffwechselerkrankungen**

Ziel unserer endokrinologischen Forschung und Entwicklung ist es, Patienten mit Wachstumsstörungen und Stoffwechselerkrankungen neue Therapieoptionen oder verbesserte Versionen etablierter Produkte zur Verfügung stellen zu können – durch eigene Entwicklungsarbeit oder Zusammenarbeit mit Partnern. Jüngste Beispiele sind Egrifta™ (Tesamorelin zur Injektion) zur Reduzierung von überschüssigem Bauchfett bei HIV-Patienten mit Lipodystrophie und die Entwicklung einer Flüssigformulierung von Saizen® zur Injektion.



Die Umsätze der bewährten Nasivin®-Produktreihe wuchsen im Jahr 2010 um 23% auf 52 Mio EUR.

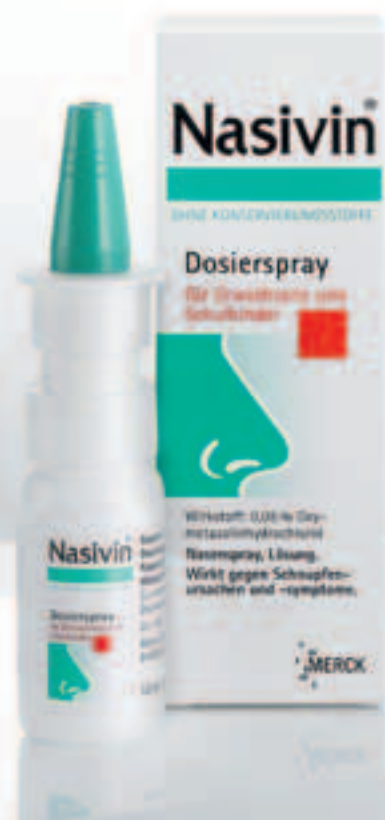

## CONSUMER HEALTH CARE

---

Unsere Sparte Consumer Health Care bietet hochwertige Selbstmedikationsprodukte für die Gesundheitsvorsorge und für die eigenverantwortliche Behandlung von leichten Erkrankungen. Zu ihrem Sortiment zählen globale, wissenschaftlich fundierte Markenprodukte, denen die Konsumenten vertrauen. Consumer Health Care ist in vielen Ländern in Europa, Amerika, Asien und Afrika vertreten.

### WICHTIGSTE PRODUKTE

- Für die Beweglichkeit: Produkte zur Stärkung der Gelenke und Schmerzlinderung mit den Marken Seven Seas®, Flexagil®, Kytta®
- Für den täglichen Gesundheitsschutz: probiotische Multivitaminpräparate der Produktreihen Bion® und Multibionta®; Vitamine und Mineralien mit Marken wie Cebion® und Diabion®
- Für die Gesundheit von Frauen und Kindern: Femibion®, Präparate mit Folsäure und Metafolin® für Frauen, zum Beispiel in der Schwangerschaft und Stillzeit; Kidabion® (Haliborange®), eine Vitaminpräparat-Reihe für Kinder
- Bei Erkältungsbeschwerden: Schnupfenmittel Nasivin® (Iliadin®); Grippemittel Sedalmerck®

### EREIGNISSE 2010

- Wachstum stabilisiert, in vielen Ländern deutlich über Marktwachstum
- Weitere Stärkung unserer strategischen Marken, zweistelliges Umsatzwachstum bei Femibion®, Bion®, Seven Seas® und Nasivin®
- Femibion®: Wachstumstreiber Polen, Deutschland und Frankreich
- Bion®-Produktfamilie: Starke Zuwächse in Frankreich, Belgien und Chile
- Nasivin®: Starkes Umsatzwachstum in Polen, Russland, Südafrika und Indien
- Forschung und Entwicklung weiter ausgebaut
- Höhere Aufwendungen durch Restrukturierungsmaßnahmen in China, außerordentliche Abschreibungen in Mexiko sowie einen Lagerbrand in Großbritannien
- Negative Währungseffekte in Venezuela, einem der größten lateinamerikanischen Märkte der Sparte; positive Effekte in Mexiko, Großbritannien und Indonesien

## SOLIDE UMSATZENTWICKLUNG

Die Sparte Consumer Health Care hat ihren Wachstumskurs stabilisiert und konnte in ihrem Hauptmarkt Westeuropa gemeinsam mit dem Markt wachsen. Die weltweiten Umsätze unserer strategischen Marken haben sich erfreulich entwickelt und verzeichneten Zuwächse im zweistelligen Bereich.

### Vier Gesundheitsthemen im Fokus

#### Konsumenten vertrauen Merck

Consumer Health Care hat sich auf Produkte zur Selbstmedikation spezialisiert. Im Fokus stehen die vier Gesundheitsthemen Erkältungsbeschwerden, Beweglichkeit, Gesundheitsschutz für jeden Tag sowie Gesundheit für Frauen und Kinder. Den Vertrieb der Produkte übernehmen in der Regel die Apotheken, in manchen Ländern und speziellen Märkten sind es auch Handelsketten, Drogerien oder der Versandhandel. Dabei bauen wir auf unsere bekannten Marken und das Vertrauen, das ihnen die Konsumenten zum Teil schon seit Jahrzehnten bezüglich Qualität und Wirksamkeit entgegenbringen.

#### Consumer Health Care | Kennzahlen

| in Mio EUR           | 2010 | 2009 | Δ in % |
|----------------------|------|------|--------|
| Gesamterlöse         | 472  | 467  | 1,1    |
| Bruttoergebnis       | 317  | 319  | -0,8   |
| F&E-Kosten           | 25   | 19   | 28     |
| Operatives Ergebnis  | 14   | 48   | -71    |
| Sondermaßnahmen      | -    | -    | -      |
| Free Cash Flow       | 45   | 49   | -7     |
| Basis Free Cash Flow | 45   | 49   | -7     |
| ROS in %             | 2,9  | 10,3 |        |

### In vielen Ländern über dem durchschnittlichen Marktwachstum

#### Fokusländer entwickeln sich gut

Die Gesamterlöse der Sparte Consumer Health Care stiegen im Jahr 2010 um 1,1 % auf 472 Mio EUR. Damit haben wir ein stabiles Wachstum erreicht und sind in unserem Hauptmarkt Westeuropa gemeinsam mit dem Markt gewachsen. Organisch konnten wir weltweit um 2,6 % wachsen, in vielen Ländern lagen wir über dem durchschnittlichen Marktwachstum. Unsere Strategie setzt auf starke Marken und regionale Expansion, unsere Fokusländer entwickelten sich bis auf wenige Ausnahmen gut.

In einem wichtigen Markt, Venezuela, machten sich negative Währungseffekte bemerkbar. In China führten wir im 3. und 4. Quartal umfangreiche Restrukturierungsmaßnahmen durch. Dadurch, dass wir außerhalb der vier wichtigsten Städte Peking, Shanghai, Guangzhou und Shenzhen zu schnell expandierten, ergaben sich große Lagerbestände, die nicht an die Endverbraucher abverkauft werden konnten. Im Rahmen unserer Kooperation mit der Chinese Medical Doctors Association war geplant, unser Produkt Diabion® in den wichtigen Kliniken des Landes anzubieten. Allerdings erhielten wir nicht die behördliche Genehmigung, die den Ärzten eine Verschreibung dieses Produktes ermöglicht hätte. Um die Effekte in China bereinigt, lag das organische Umsatzwachstum der Sparte sogar bei 5,2 %.

### Forschung und Entwicklung ausgebaut

Das Operative Ergebnis der Sparte Consumer Health Care sank um 71 % auf 14 Mio EUR. Beim ROS erreichten wir 2,9 % gegenüber 10,3 % im Vorjahr. Der Basis Free Cash Flow lag bei 45 Mio EUR, ein Minus von 7 %. Zusätzlich zu den Ereignissen in China belasteten außerordentliche Abschreibungen in Mexiko das Operative Ergebnis. Außerdem verzeichneten wir Verluste aus einem Lagerbrand in Großbritannien. Die Ausgaben für Forschung und Entwicklung der Sparte beliefen sich auf 25 Mio EUR und lagen damit um 28 % über dem Vorjahreswert.

### Strategische Marken verzeichnen Zuwächse

Stärkstes Wachstum bei Femibion®

Die weltweiten Umsätze unserer fünf strategischen Marken haben sich mit nur einer Ausnahme erfreulich entwickelt und verzeichneten Zuwächse im zweistelligen Bereich. Die Marke Bion® erzielte ein Plus von 11 % auf weltweite Umsatzerlöse von 54 Mio EUR. Hier steuerte Frankreich mit 32 Mio EUR den Löwenanteil bei. Das Wachstum bei Femibion® lag sogar bei 24 %, inzwischen erzielen wir mit dieser Marke 41 Mio EUR Umsatz. Stärkste Märkte sind hier Deutschland und Polen, in jüngster Zeit meldet auch Frankreich starke Zuwächse. Seven Seas® verzeichnete ein leichtes Umsatzminus von 1,4 % in seinem britischen Kernmarkt, kam aber durch die positive Entwicklung in anderen Ländern auf ein Gesamt-Plus von 14 % auf 44 Mio EUR. Nasivin® wuchs um 23 % auf 52 Mio EUR, getrieben vor allem von der guten Entwicklung in Polen, Russland, Südafrika und Indien. Die Marke Kytta®, die vor allem in Deutschland vertrieben wird, verbuchte einen Rückgang von 21 % auf 15 Mio EUR. Die Entwicklung von Kytta in Deutschland ist durch überproportional steigende Werbeinvestitionen der Mitbewerber im Vergleich zum Vorjahr begründet.

### Führende fünf Markenprodukte nach Umsatzerlösen 2010

in Mio EUR / in % von den Gesamtumsätzen

|                   |     |      |
|-------------------|-----|------|
| 1 Bion®           | 54  | 11 % |
| 2 Nasivin®        | 52  | 11 % |
| 3 Seven Seas®     | 44  | 9 %  |
| 4 Femibion®       | 41  | 9 %  |
| 5 Cebion®         | 27  | 6 %  |
| 6 Andere Produkte | 252 | 54 % |

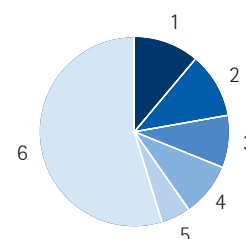

### Über zwei Drittel der Umsätze in Europa

Europa Region Nummer 1

Regional verteilen sich unsere Umsatzerlöse zu 71 % auf Europa, zu 17 % auf Lateinamerika sowie zu 12 % auf die Region Asien, Afrika, Australien. Europa bleibt damit unser wichtigster Markt mit Umsatzerlösen von 331 Mio EUR, einem Plus von 3,8 % gegenüber dem Vorjahreszeitraum.

### Frankreich größter Markt

Unser umsatzstärkstes Land ist weiterhin Frankreich mit 101 Mio EUR Umsatzerlösen, einem Plus von 1,8 % gegenüber dem Vorjahreszeitraum. Die Bion®-Familie konnte sich erneut sehr gut entwickeln und ihre Position als zweitgrößte Marke im französischen Selbstmedikationsmarkt und als Nummer eins bei den Nahrungsergänzungsmitteln festigen. Neu eingeführt

#### Apaisyl®-Produktreihe erweitert

wurde Femibion® Maman Active für die Gesundheit junger Mütter. Bei der in Frankreich sehr bekannten Apaisyl®-Produktreihe, die sich auf Mittel gegen Kopfläuse, Hautirritationen und Pilzkrankungen konzentriert, kamen neue Präparate gegen Nagelpilz, rissige Hände und Herpes hinzu. Ebenso wurde die Médiflor®-Reihe erweitert, unter anderem mit einem Mittel gegen Halsschmerzen.

#### Consumer Health Care | Umsatzerlöse nach Regionen

in Mio EUR / in % der Spartenumsätze

|                             |     |      |
|-----------------------------|-----|------|
| 1 Europa                    | 331 | 71 % |
| 2 Nordamerika               | 1   | 0 %  |
| 3 Lateinamerika             | 81  | 17 % |
| 4 Asien, Afrika, Australien | 57  | 12 % |

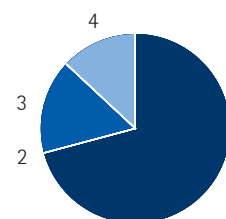

#### Femibion® klarer Marktführer in Deutschland

Deutschland, wo unsere deutsche Tochtergesellschaft Merck Selbstmedikation GmbH 2010 ihr 40-jähriges Bestehen feiern konnte, hat Großbritannien als unseren zweitwichtigsten Markt abgelöst. In Deutschland lagen die Umsatzerlöse bei 57 Mio EUR, ein Zuwachs von 1,7 %. Femibion®, vor 15 Jahren in Deutschland eingeführt, ist mit über 50 % Marktanteil klarer Marktführer in seinem Marktsegment und wuchs 2010 um 4,4 %. Hier wurde unter dem Dach von Femibion® das probiotische Präparat Flor Intim zum Schutz und Aufbau einer gesunden Vaginalflora eingeführt. Sehr gut entwickelten sich die Umsätze bei Cape June®, unserer Marke mit Diätprodukten für den Direktvertrieb über den Teleshoppingkanal QVC.

#### Schwieriges Umfeld in Großbritannien

In Großbritannien sanken die Umsatzerlöse in einem schwierigen Umfeld um 0,7 % auf 54 Mio EUR. Die Entwicklung von Femibion®, 2009 auf den Markt gebracht, verlief nicht so wie erhofft. Einen positiven Trend verzeichnete unsere Marke Lamberts Healthcare, die sich auf den Direktvertrieb von Nahrungsergänzungsmitteln spezialisiert hat und dabei verstärkt auf E-Commerce setzt. In Belgien blieben die Umsatzerlöse mit 27 Mio EUR auf hohem Niveau stabil. Ein sehr erfreuliches Wachstum verzeichnete Polen mit einem Plus von 18 % auf nunmehr 29 Mio EUR. Stark zulegen konnte Consumer Health Care auch in Russland, Ungarn, Österreich und der Türkei.

### Währungseffekte in Lateinamerika

In Lateinamerika ging der Gesamtumsatz um 9,6% auf 81 Mio EUR zurück. Der Grund dafür waren Währungsverluste in Venezuela, neben Mexiko einem unserer wichtigsten Märkte in Lateinamerika. Obwohl wir organisch um 30% wachsen konnten, sanken die Umsatzerlöse in Venezuela um 52%. Unsere guten Umsatzzuwächse beispielsweise in Mexiko (+7,1%), Brasilien (+14%) und Chile (+45%) konnten den Faktor Venezuela hinsichtlich des Gesamtumsatzes nicht ganz auffangen. Organisch konnten wir in der Region jedoch um 11% wachsen.

Um unsere Position in Lateinamerika auszubauen, ist in Brasilien ein neues Forschungs- und Entwicklungszentrum in Betrieb gegangen. Es dient als „R&D Hub“, also als Forschungs-Drehscheibe, für Brasilien und die benachbarten Länder. Ziel ist, regionale Lösungen für die erfolgreichen strategischen Marken von Consumer Health Care zu entwickeln. Das heißt, existierende Produkte und zukünftige Entwicklungen aus dem weltweiten Portfolio sollen an die regionalen Bedingungen und regulatorischen Vorgaben vor Ort angepasst werden.

### Asien: Wachstum in Hauptmärkten

In Asien sanken unsere Umsatzerlöse um 4,8%, verursacht durch die bereits beschriebene Entwicklung in China. In allen asiatischen Hauptmärkten konnten wir wachsen, zum Beispiel in Indonesien (+42%), außerdem in Indien (+42%) und Malaysia (+22%). In Indonesien konnte wir mit unserem dortigen Hauptprodukt Sangobion®, einem Präparat gegen Eisenmangel und Blutarmut für Kinder und Erwachsene, eine 35-jährige Präsenz auf dem Markt feiern. In den Philippinen verzeichneten wir ein Umsatzplus von 47%, Haupttreiber dafür war der erfolgreiche Start von Sangobion® im Direktvertrieb.

Der bei Weitem wichtigste Markt auf dem afrikanischen Kontinent, Südafrika, legte im Jahr 2010 nach stetigem Wachstum in den Vorjahren erneut sehr deutlich zu, und zwar um 29% auf 9,2 Mio EUR. Unsere Slow-Mag®-Reihe mit Magnesiumprodukten ist dort mit 70% Anteil klarer Marktführer. Mit SlowMag® Active+, einem Magnesiumpräparat mit Vitaminen, Ginseng, Guarana und Zink, haben wir diese Reihe erweitert.

### Forschung und Entwicklung

Aufwendungen für Forschung  
und Entwicklung steigen

Die 2009 begonnene Restrukturierung in der Forschung und Entwicklung wurde 2010 abgeschlossen. Im Rahmen unseres evidenz-basierten Ansatzes bei unseren Selbstmedikationsprodukten wurden die Investitionen in klinische Studien erhöht, um Indikationen zu erweitern (wie etwa im Falle von Kytta®), um erhöhte regulatorische Anforderungen zu erfüllen und unsere Aussagen zur gesundheitsfördernden Wirkung unserer Produkte dank der Studienergebnisse noch stärker zu untermauern. Auch im Bereich der Nahrungsergänzungsmittel steigen die regulatorischen Anforderungen auf EU-Ebene. Diese erfüllen wir durch breit angelegte Studien, zum Beispiel bei Bion®, Flexagil® und Femibion®.



Milli-Q®-Laborwasser- und  
Elix®-Reinigungssystem:  
Hochreines Wasser für die  
Forschungslabore in aller Welt.

## MERCK MILLIPORE

---

Mit der am 14. Juli 2010 abgeschlossenen Akquisition von Millipore und der damit verbundenen Schaffung der Sparte Merck Millipore entstand ein weltweit führender Partner für die Life-Science-Industrie. In der neuen Sparte wurden die Geschäfte von Millipore mit dem Großteil der Merck-Sparte Performance & Life Science Chemicals zusammengeführt. Merck Millipore umfasst drei Geschäftseinheiten: Bioscience vertreibt Produkte an Forschungslabore von Universitäten und Life-Science-Unternehmen, Lab Solutions beliefert den Life-Science-Markt und andere Industrien mit allgemeinen Laboranwendungen, und Process Solutions vermarktet Produkte für die Herstellung von chemischen und biopharmazeutischen Arzneimitteln. Alle drei Geschäftseinheiten steigerten ihre Gesamterlöse im Jahr 2010.

### WICHTIGSTE PRODUKTGRUPPEN

- Produkte für Anwendungen in der Proteinforschung und Zellbiologie, z. B. Multiplex-Immunoassay- und ELISA-Kits, Produkte für den Nachweis von Proteinen sowie Instrumente und Kits für die Durchflusszytometrie
- Laborchemikalien und Verbrauchsmaterialien für Forschungs-, Ausbildungs- und industrielle Zwecke in Organik, Anorganik, Chromatographie, Lebensmittel- und Umweltanalytik, Mikroskopie sowie Geräte für die Wasseraufreinigung, Verbrauchsmaterialien und Dienstleistungen für unterschiedliche Wasseraufreinigungsanforderungen
- Produkte für die Herstellung von biopharmazeutischen Arzneimitteln mit Klärfiltration, Reinigung, Virusabreicherung, Sterilfiltration, Prozessüberwachung und Prozessentwicklung von der Pilotphase bis zur Großproduktion

### EREIGNISSE 2010

- Millipore-Akquisition am 14. Juli abgeschlossen, Konsolidierung erstmals im 3. Quartal erfolgt, Integration nahezu abgeschlossen
- 2010 erwirtschaftete die Sparte Gesamterlöse von 1.681 Mio EUR und erzielte eine Umsatzrendite von 2,6 %
- Starkes Umsatzwachstum getragen von regionalen Zuwächsen in Nord- und Lateinamerika und Asien, der starken Nachfrage von Biotech-Kunden weltweit und der positiven Auswirkung von neuen Produkteinführungen
- Nahezu 40 Prozent ihrer Gesamterlöse erwirtschaftete die Sparte in Europa, dem größten Markt von Merck Millipore



## INNOVATIONSSTRATEGIE SCHREITET WEITER VORAN

Im Jahr 2010 trieb die Sparte ihre Innovationsstrategie mit der Einführung neuer Schlüsselprodukte wie beispielsweise dem Scepter™, dem weltweit ersten automatischen Zellzähler im Pipettenformat, weiter voran. Mit einem breitgefächerten Portfolio richtet sich Merck Millipore am wachsenden Bedarf nach integrierten und technisch anspruchsvolleren Tools für die Life-Science-Industrie aus.

2010 erzielte die Sparte Gesamterlöse von 1.681 Mio EUR, dies entspricht einem Zuwachs von 81 %. Merck Millipore ist mit seinen Erlösen und Aufwendungen seit Juli 2010 berücksichtigt. Das organische Wachstum der Sparte, also ohne Akquisitions-, aber auch ohne Währungseinflüsse, betrug 5,6 %.

### Merck Millipore | Umsatzerlöse nach Regionen

in Mio EUR / in % der Spartenumsätze

|                             |     |      |
|-----------------------------|-----|------|
| 1 Europa                    | 657 | 39 % |
| 2 Nordamerika               | 394 | 24 % |
| 3 Lateinamerika             | 157 | 9 %  |
| 4 Asien, Afrika, Australien | 465 | 28 % |

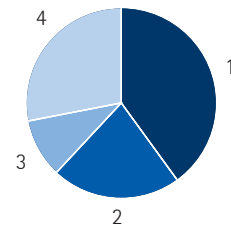

Mit der Neustrukturierung des Unternehmensbereich Chemie in Folge der Akquisition kann Merck eine führende Stellung in schnellwachsenden Märkten wie der Biotech-Industrie einnehmen

Nahezu 40 % ihrer Gesamterlöse erwirtschaftete die Sparte in Europa, dem größten Markt von Merck Millipore. In den anderen Regionen konnten nicht zuletzt durch die Akquisition zweistellige Zuwächse erzielt werden. Aber auch beim organischen Umsatzwachstum konnte die Sparte zulegen und wuchs in Asien sogar in zweistelliger Höhe.

Das operative Ergebnis der Sparte lag bei 44 Mio EUR, dies entsprach einem Rückgang um 58,7 % gegenüber dem Vorjahr. Dabei ist zu beachten, dass das Ergebnis 2010 durch Transaktions- und Integrationskosten in Höhe von 87 Mio EUR belastet war. Außerdem sind die Herstellungskosten und damit die Marge durch Einmalaufwendungen im Zusammenhang mit der Kaufpreisallokation für die übernommenen Vorräte von Millipore mit 86 Mio EUR belastet (siehe hierzu auch die Ausführungen im Kapitel „Ertrags-, Finanz- und Vermögenslage“).

Die Sparte hat zudem die laufenden Abschreibungen auf die erworbenen und im Zuge der Kaufpreisallokation angesetzten immateriellen Vermögenswerte getragen. Insgesamt beliefen sich die Abschreibungen auf das immaterielle Vermögen auf 96 Mio EUR und betrafen fast ausschließlich das zweite Halbjahr 2010.

**Merck Millipore | Kennzahlen**

| in Mio EUR           | 2010   | 2009 | Δ in % |
|----------------------|--------|------|--------|
| Gesamterlöse         | 1.681  | 929  | 81     |
| Bruttoergebnis       | 871    | 434  | 101    |
| F&E-Kosten           | 78     | 32   | 141    |
| Operatives Ergebnis  | 44     | 106  | -59    |
| Sondermaßnahmen      | -      | 11   | -      |
| Free Cash Flow       | -4.672 | 123  | -      |
| Basis Free Cash Flow | 263    | 128  | 106    |
| ROS in %             | 2,6    | 11,5 |        |

Die Umsatzrendite (ROS) der Sparte belief sich auf 2,6% gegenüber 11,5% im Vorjahr. Der Basis Free Cash Flow der Sparte belief sich auf 263 Mio EUR, im Jahr 2009 war er bei 128 Mio EUR gelegen.

**Starke Position in schnell wachsenden Märkten**

Mit der Neustrukturierung des Unternehmensbereichs Chemie in Folge der Akquisition kann Merck eine führende Stellung in margenstarken, schnell wachsenden Märkten einnehmen, z. B. in der Biotech-Industrie. Das Unternehmen ist Konjunkturzyklen nun noch weniger unterworfen. Die beständige, belastbare Ertragslage der Sparte Merck Millipore balanciert die Entwicklung des Flüssigkristallgeschäfts von Performance Materials sowie des Unternehmensbereichs Pharma aus. Die Sparte Merck Millipore – deutlich geprägt von Innovation, Markenprodukten und wettbewerbsfähiger Differenzierung – ist global als strategischer Lieferant in zunehmend wettbewerbsintensiveren Branchen aufgestellt.

**BIOSCIENCE****Für eine einfachere und effizientere Forschung**

Mit ihren Produkten für die Life-Science-Forschung in der Pharmaindustrie, in der Biotechnologie und an akademischen Forschungseinrichtungen erwirtschaftete die Geschäftseinheit Bioscience etwa 20% der Gesamterlöse der Sparte. Ihr Schwerpunkt liegt in der Bereitstellung von Lösungen, die dazu beitragen, die Life-Science-Forschung einfacher, effizienter und wirtschaftlicher zu machen.

Die Geschäftseinheit Bioscience unterstützt mit einer zunehmenden Zahl an Werkzeugen und Serviceleistungen Wissenschaftler, die daran arbeiten, komplexe biologische Systeme zu ergründen und neue therapeutische Zielmoleküle zu identifizieren und zu charakterisieren. Dies hilft den Wissenschaftlern dabei, den gestiegenen Ansprüchen gerecht zu werden: So steht die Pharmaforschung unter hohem Wettbewerbsdruck, schneller und präziser neue Arzneimittel suchen und identifizieren zu müssen.

Unser Ziel ist es daher, Produkte und Serviceleistungen anzubieten, die Forschungsprozesse vereinfachen und validierte integrierte Lösungen bieten. Die Produkte der Geschäftseinheit tragen zur Weiterentwicklung der Life-Science-Forschung in einer Vielzahl von Bereichen bei – von der neurowissenschaftlichen Forschung über die Erforschung von Infektionskrankheiten und metabolischen Störungen, die Onkologie, die Stammzellenforschung sowie die Erforschung von zellulärer Signaltransduktion und nukleären Funktionen bis zur Chromatinbiologie.

Mehrere tausend Produkte wurden für Anwendungen in der Proteinforschung und Zellbiologie entwickelt

### **Produkte für Proteinforschung und Zellbiologie**

Die Geschäftseinheit Bioscience vermarktet mehrere tausend Produkte, die vor allem für Anwendungen in der Proteinforschung und Zellbiologie bestimmt sind. Dazu gehören Geräte, Verbrauchsmaterialien, Reagenzien und Serviceleistungen, die eine bessere Erforschung von Krankheiten und biologischen Funktionen ermöglichen. Im Mittelpunkt stehen dabei Versuche mit biologischen Proben, z. B. Zellen, Proteinen und Nukleinsäuren. Außerdem bietet Merck Millipore eine Vielzahl von Testkits, die die Produktivität und Effizienz im Labor erhöhen, indem sie alle für die zuverlässige und reproduzierbare Durchführung eines bestimmten Versuchs erforderlichen Einwegprodukte, Reagenzien und Protokolle in einem Kit bereitstellen.

### **Wirkung von Arzneimitteln auf Protein-Biomarker messen**

Für die Proteinforschung bieten wir Multiplex-Immunoassay- und ELISA-Kits, Produkte für den Nachweis von Proteinen sowie Instrumente und Kits für die Durchflusszytometrie. Forscher nutzen unsere Multiplex-Immunoassay-Kits, um zu bestimmen, welche Proteine auf einen Krankheitszustand hinweisen können. So können die Wirkung eines Arzneimittels auf Protein-Biomarker gemessen und die Nebenwirkungen eines Präparats bestimmt werden. Mit der Entwicklung von Multiplex-Analyse-Kits, Reagenzien und Assays liefern wir wichtige Werkzeuge für die Forschungsfelder Immunologie, Entzündungserkrankungen und metabolische Erkrankungen (Diabetes, Adipositas, Herz-Kreislauf-Störungen).

### **Integriertes Angebot**

Die Geschäftseinheit Bioscience zielt verstärkt auf ein integriertes Angebot von Instrumenten, Reagenzien-Kits, validierten Protokollen sowie technischem Service. Ein Beispiel für diesen Ansatz ist das Gebiet der Durchflusszytometrie: Hier können Zellbiologen direkt an ihrem Arbeitsplatz von den Vorteilen dieser Analyseverfahren profitieren.

Eine große Herausforderung für unsere Kunden besteht darin, schneller aussichtsreiche Arzneimittelkandidaten aufzuspüren und sicherzustellen, dass diese in klinischen Studien oder nach Markteinführung keine unerwünschten oder unerwarteten Nebenwirkungen zeigen. Aus Effizienz- und Wirtschaftlichkeitserwägungen führen Kunden diese Forschungsarbeiten nicht selbst durch, sondern beauftragen die Geschäftseinheit Bioscience. Wir bieten Dienstleistungen zur Identifizierung neuer Zielmoleküle und erhalten Erkenntnisse, wie wir die Wirksamkeit von Arzneimitteln verbessern und gleichzeitig Nebenwirkungen vermeiden können.

Das Leistungsangebot von Merck Millipore ermöglicht Kunden ein besseres Verständnis der Sicherheit und Wirksamkeit von biologischen Arzneimitteln und Impfstoffen. Im Zuge der vermehrten Entwicklung biologischer Arzneimittel greifen Unternehmen auf unsere Expertise zurück, um die Wirksamkeit dieser Präparate zu bewerten.

Wir bieten unseren Kunden Zugang zu einem umfassenden Serviceportfolio für die Bewertung und Entwicklung derartiger Therapien – von der Arzneimittelforschung bis zur Markteinführung. Abgedeckt werden die Bereiche Biomarker-Analysen, Assay-Transfer/-Entwicklung, Validierung und Probenanalysen ebenso wie Pharmakokinetik, Toxikokinetik, Immunogenität, biologische Wirksamkeit sowie Impfleistungen.

## LAB SOLUTIONS

### Beitrag zu besten Leistungen in Wissenschaft und Analytik

Die Geschäftseinheit Lab Solutions beliefert eine Vielzahl unterschiedlicher Industrien mit Produkten für Laboratorien im Forschungs-, Analyse- und Klinikbereich. Sie erzielt etwa 40% der Gesamterlöse der Sparte und ist einer der führenden Anbieter von Laborchemikalien, Laborwassergeräten und Verbrauchsmaterialien. Merck Millipore verfügt über jahrelange Erfahrung in der Entwicklung von Verpackungskonzepten und Chemieverpackungen zum Schutz qualitativ hochwertiger Lösungsmittel bis zu ihrem Einsatz. Darüber hinaus ist die Sparte der führende Anbieter für Laborwasser und Technologien zur Wasseraufbereitung.

Für den Bereich der Anorganik bieten wir hochreine Reagenzien, z. B. Salze, Säuren, Ätzalkalien, Maßlösungen, Puffer, Referenzmaterialien für die instrumentelle Analytik und Produkte für die anorganische Spurenanalyse. Für die Organik stehen Basisprodukte für die Synthese zur Verfügung. Dazu zählen Bausteine, Reagenzien und Lösungsmittel, die am häufigsten in der organischen Synthese verwendet werden – vom Labor bis hin zu Massenprodukten.

Als Anbieter von Chromatographieprodukten treibt Merck Millipore auch die Entwicklung analytischer Trennverfahren voran. Der Produktschwerpunkt liegt auf der analytischen Hochleistungs-Flüssigchromatographie (HPLC) und auf Innovationen bei den monolithischen HPLC-Säulen der Marke Chromolith® für ultraschnelle Trennungen.

### **Hohe Anforderungen in der Lebensmittel- und Umweltanalytik**

Auf den wachsenden analytischen Bedarf haben wir unsere Testsysteme für die Lebensmittel-, Wasser- und Abwasseranalyse, Spektralphotometrie und Qualitätskontrolle zugeschnitten. Dazu gehören Produkte wie das Spektrophotometer Spectroquant® Pharo und das Spectroquant® Colorimeter Picco Cl2/O3/ClO2/CyA/pH sowie eine erweiterte Produktlinie von visuellen Sofort-Test-Kits wie die Merckoquant® Teststreifen.

Hinzu kommen visuelle Test-Kits, z. B. pH-Indikatorstäbchen und -papier, Aquamerck®, Microquant® und Aquaquant®, sowie Prüfgeräte wie Reflectoquant® und Turbiquant®. Die Produktpalette im Bereich der Mikroskopie ist auf die klassische Hämatologie, Zytologie, Histologie und Bakteriologie zugeschnitten. Laborbedarf und Produkte von Drittanbietern runden das Angebot für Labore in Forschung und Qualitätskontrolle sowie im analytischen und klinischen Bereich ab.

### **Kompetenzbereich Bio-Monitoring**

Zu den Kompetenzbereichen der Geschäftseinheit Lab Solutions zählt auch das Bio-Monitoring. Unsere Produkte unterstützen unsere Kunden in der Pharma- und Biopharma-Branche sowie der Lebensmittelindustrie dabei, mikrobiologische Verunreinigungen zu erkennen sowie Protein- und Zell-Analysen durchzuführen. Die Geschäftseinheit vertreibt darüber hinaus Membranen, Antikörper und andere diagnostische Reagenzien an Hersteller von Diagnostika- und medizinischen Geräten. Auch Getränkehersteller profitieren vom Einsatz der Bio-Monitoring-Produkte zur Erkennung von mikrobiologischer Kontamination durch Bakterien und Hefe.

Darüber hinaus konzentrieren wir uns auf die Weiterentwicklung von Technologien, die schneller und nachweisempfindlicher sind, so dass Arzneimittelhersteller Verunreinigungen zu einem früheren Zeitpunkt des Produktionsprozesses feststellen können. Mit diesen Produkten kann die Zeit zwischen Test und Ergebnis von Tagen oder Wochen auf Stunden verkürzt werden.

### **Geräte zur Wasseraufreinigung und Laborprodukte**

Als führender Anbieter von Laborwasseranwendungen bietet Merck Millipore zudem Geräte, Verbrauchsmaterialien und Dienstleistungen für unterschiedliche Wasseraufreinigungs-Anforderungen an. Sie ermöglichen die Filtrierung von Mikroorganismen, gelösten Gasen, anderen Partikeln oder organischen und anorganischen Verbindungen aus dem Wasser. Das ist wichtig, denn die Qualität des verwendeten Wassers beeinflusst die wissenschaftlichen Forschungsergebnisse entscheidend. Verunreinigtes Wasser kann das Ergebnis von wissenschaftlichen Experimenten nachhaltig beeinflussen. Die Anforderungen an die Qualität des Wassers hängen wesentlich von der Komplexität des wissenschaftlichen Experiments ab. Für komplexere Versuche benötigt man ultrareines Wasser.

## PROCESS SOLUTIONS

### Ressourcen bündeln

Die Geschäftseinheit Process Solutions liefert Produkte für die Herstellung von biopharmazeutischen Arzneimitteln. Sie erwirtschaftet etwa 40 % der Gesamterlöse der Sparte. Process Solutions unterstützt Pharma- und Biotechnologieunternehmen bei der sicheren und effizienten Entwicklung und Herstellung von Arzneistoffen. Durch die Bündelung der Ressourcen von Millipore und Merck können wir unser Produktangebot an integrierten Bioprozesstechnologien erweitern und Herstellern von Biopharmaka zugleich ein attraktives Spektrum an Entwicklungs- und regulatorischen Dienstleistungen bieten.

### Biologische Sicherheit

Die Geschäftseinheit unterstützt mit ihren Produkten die Klärfiltration, Reinigung, Virusabreicherung, Sterilfiltration, Prozessüberwachung und Prozessentwicklung von der Pilotphase bis zur Großproduktion. Das Portfolio trägt zur biologischen Sicherheit bei, z.B. mit Produkten für die Steril- und Virusfiltration oder mit Gerätesystemen für Downstream-Prozesse.

Mit Produkten und Dienstleistungen werden Entwickler und Hersteller von Biopharmaka unterstützt

Mit dem umfangreichen Angebot an Produkten und Dienstleistungen für die Aufreinigung, z.B. Ultrafiltration und Chromatographie, unterstützt Merck Millipore Biopharmaka-Entwickler und -Hersteller bei der effizienten und wirksamen Reinigung von Biopharmaka. Diese Produktreihe umfasst u.a. Pelicon® für die Tangentialflussfiltration, Millistak® Pod und Prostatik™ für die Klärfiltration sowie die ChromaSorb™- und ProSep®-Prozessmedien für die Chromatographie. Aus dem Chromatographiegeschäft von Merck wird das Portfolio an Reinigungsprodukten um Fractogel® und Eshmuno® ergänzt.

### Fortschrittliche Trennverfahren

Das Portfolio der Geschäftseinheit deckt sämtliche Bereiche der pharmazeutischen Produktion ab

Die Einwegprodukte der Mobius®-Linie verbinden als integrierte Lösungen fortschrittliche Trennverfahren und Einwegprodukte mit der Anwendungsexpertise und fachlichen Validierungsunterstützung von Merck Millipore. Bei den FlexReady-Lösungen von Mobius® handelt es sich um optimierte, ganzheitliche Einweglösungen, die die einsatzfertigen Gerätesysteme mit Mobius®-Flexware-Filtereinheiten verbinden.

Da zeitaufwändige Schritte für Reinigung, Sterilisation und Zusammenbau entfallen, reduziert der Bioreaktor Mobius® CellReady 3L – ein Einweg-Bioreaktor mit Rührtank – die für Glas-Bioreaktoren typischen Stillstandszeiten erheblich. Dadurch können Prozessentwicklungsingenieure ihre Zeit im Labor optimal nutzen und schneller zu Ergebnissen gelangen.

### Pharmazeutische Hilfsstoffe

Darüber hinaus deckt das Portfolio der Geschäftseinheit sämtliche Bereiche der pharmazeutischen Produktionskette ab. Neben regulierten Ausgangs- und Arzneimittelwirkstoffen werden unsere pharmazeutischen Rohstoffe z.B. aus der Produktlinie Parateck® als Hilfsstoffe bei der Herstellung von festen, halbfesten und flüssigen Formulierungen eingesetzt. Zusatzstoffe beispielsweise für Zellkulturen ergänzen das Angebot an Produkten und Dienstleistungen für den Upstream-Prozess. Das Produktprogramm der Hilfs- und Wirkstoffe für den pharmazeutischen Produktionsprozess ist bei Merck unter dem Namen Emprove® gebündelt.

Ultraflache Fernseher: Bessere  
Bildqualität, höhere Kontraste  
und weniger Energieverbrauch  
durch PS-VA-Technologie.

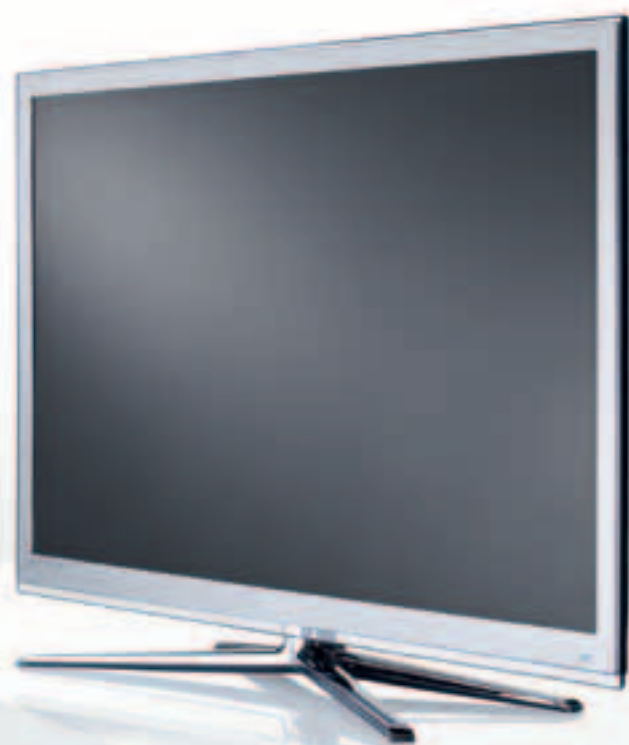

## PERFORMANCE MATERIALS

---

Flüssigkristalle von Merck kommen rund um den Globus zum Einsatz: In LCD-Fernsehern, Monitoren, Tablet-Computern, Notebooks, Mobiltelefonen oder Digitalkameras. Neben Hightech-Chemikalien und Materialien für Flüssigkristall-Bildschirme bietet die Sparte Performance Materials auch neue Beleuchtungs- und Displaytechnologien wie OLEDs sowie Effektpigmente für die Kunststoff-, Druck- und Lackindustrie. Unsere Pigmente finden zudem bei der Hautpflege und in der dekorativen Kosmetik Verwendung. Angesichts des Klimawandels und hoher Energiepreise befassen wir uns auch mit Wachstumsmärkten im Feld der erneuerbaren Energiequellen. Wir arbeiten daran, Sonnenenergie effizient zu nutzen oder entwickeln innovative Technologien für energiesparende LEDs.

### WICHTIGSTE PRODUKTE

- Icrystal® – Flüssigkristallmischungen für Displays
- Iriodin® – Perglanz-Pigment für vielfältige Farbeffekte

### WEITERE PRODUKTGRUPPEN

- Ixilux® – Materialien für OLEDs (organische lichtemittierende Dioden) in Displays und für innovative Beleuchtung
- Ishape® – effiziente und umweltfreundliche Hilfsmittel zur Strukturierung von Solarzellen und berührungsempfindlichen Bildschirmen (Touchscreen)
- Innovative Effektpigmente z.B. das Glitzereffekte erzeugende Xirallie®, die bei Lackierung, Verpackung und Produktdesign eingesetzt werden und die neben dekorativen auch sicherheitsrelevante Aspekte, wie zum Beispiel Marken- oder Fälschungsschutz, berücksichtigen

### EREIGNISSE 2010

- Wachsende Nachfrage nach High-Tech-Flüssigkristallen von Merck: Gesamterlöse steigen um 38 % gegenüber dem Vorjahr
- Technologieführer mit innovativen Flüssigkristallmischungen, beispielsweise der PS-VA-Technologie (Polymer Stabilized Vertical Alignment)
- Gesamterlöse der Geschäftseinheit Pigments um 37 % höher als im Krisenjahr 2009
- Produktionskapazitäten bei Flüssigkristallen und Pigmenten auf hohem Niveau ausgelastet
- Operatives Ergebnis von 218 Mio EUR auf 580 Mio EUR mehr als verdoppelt
- Neues Chemie-Forschungszentrum am Standort Darmstadt eingeweiht, mit 50 Mio EUR größte Einzelinvestition für Forschung und Entwicklung im Unternehmensbereich Chemie



## KRÄFTIG GESTÄRKT

In der neuen Sparte Performance Materials, die nach der am 14. Juli abgeschlossenen Akquisition des US-amerikanischen Life-Science-Unternehmens Millipore entstand, bündelt Merck seine Materialengeschäfte und -aktivitäten – aufgegliedert in die Geschäftseinheiten Liquid Crystals, Pigments und Cosmetics sowie den Bereich Advanced Technologies mit seinen Materialien für LEDs (Leuchtdioden) und Photovoltaik sowie weitere innovative Technologien.

Die Produktionskapazitäten sowohl bei den Flüssigkristallen als auch bei den Pigmenten waren auf hohem Niveau ausgelastet und spiegelten die Erholung vom Abschwung im Jahr 2009 wider. Die Gesamterlöse der Sparte stiegen 2010 um 38 % von 1.006 Mio EUR im Vorjahr auf 1.384 Mio EUR. Positive Währungseffekte trugen mit 9,7 % und organisches Wachstum mit 27 % zu dieser Steigerung bei. Mehr als 70 % ihrer Gesamterlöse erwirtschaftete die Sparte mit ihren Flüssigkristallen. Da das Bruttoergebnis mit 925 Mio EUR (2009: 478 Mio EUR) stärker stieg als die Aufwendungen, konnte sich das Operative Ergebnis der Sparte von 218 Mio EUR auf 580 Mio EUR mehr als verdoppeln. Die Umsatzrendite erhöhte sich von 21,7 % im Vorjahr auf 41,9 %. Der Basis Free Cash Flow lag bei 549 Mio EUR, im Jahr zuvor waren es 304 Mio EUR.

### Performance Materials | Kennzahlen

| in Mio EUR           | 2010  | 2009  | Δ in % |
|----------------------|-------|-------|--------|
| Gesamterlöse         | 1.384 | 1.006 | 38     |
| Bruttoergebnis       | 925   | 478   | 93     |
| F&E - Kosten         | 127   | 109   | 17     |
| Operatives Ergebnis  | 580   | 218   | 166    |
| Sondermaßnahmen      | -1    | 1     | -      |
| Free Cash Flow       | 542   | 288   | 88     |
| Basis Free Cash Flow | 549   | 304   | 81     |
| ROS in %             | 41,9  | 21,7  |        |

Das neue Chemie-Forschungszentrum in Darmstadt war mit 50 Mio EUR die größte Investition der Forschung und Entwicklung im Unternehmensbereich Chemie

Um unsere Führungsposition unter anderem bei Displaymaterialien zu verteidigen und auszubauen, investierten wir weiterhin in die Forschung und Entwicklung. Die F&E-Aufwendungen erhöhten sich 2010 von 109 Mio EUR im Vorjahr auf 127 Mio EUR. So wurde im September das neue Chemie-Forschungszentrum am Standort Darmstadt eingeweiht, mit 50 Mio EUR die größte Einzelinvestition der Forschung und Entwicklung im Unternehmensbereich Chemie. Auf rund 11.000 Quadratmetern Nutzfläche beherbergt es unter anderem Teile der Flüssigkristall- sowie die OLED-Forschung (organische lichtemittierende Dioden). Dort arbeiten unsere Forscher auch an Materialien für mobile Energiespeicher, beispielsweise für Fahrzeuge mit Hybrid- oder Elektroantrieb.

## LIQUID CRYSTALS

### Aufwärtstrend fortgesetzt

Die steigende Nachfrage nach High-Tech-Flüssigkristallen von Merck hat 2010 zu einem Anstieg der Gesamterlöse auf 1.013 Mio EUR geführt – 38 % mehr als im Jahr zuvor. Dass sich das weltweite Geschäft mit Flüssigkristall-Bildschirmen nach dem krisenbedingten Einbruch 2009 zügig erholte, zeigte auch die Quartalsentwicklung der Geschäftseinheit Liquid Crystals. Sie setzte 2010 ihren Aufwärtstrend weiter fort und erreichte im 2. Quartal mit einem Zuwachs von 50 % Rekorderlöse von 284 Mio EUR. Allein im ersten Halbjahr stiegen die Gesamterlöse gegenüber dem Vorjahreszeitraum um 63 % auf 523 Mio EUR, das Operative Ergebnis verbesserte sich um das Vierfache auf 263 Mio EUR. Im 3. und 4. Quartal ließen einsetzende Bestandskorrekturen auf dem LCD-Markt seitens der Displayhersteller, die ihre Produktion drosselten, sowie leicht unvorteilhafte Wechselkurse die Gesamterlöse etwas niedriger ausfallen. Diese befinden sich aber nach wie vor auf hohem Niveau.

### Performance Materials | Umsatzerlöse nach Regionen

in Mio EUR / in % der Spartenumsätze

|                             |       |      |
|-----------------------------|-------|------|
| 1 Europa                    | 127   | 9 %  |
| 2 Nordamerika               | 99    | 7 %  |
| 3 Lateinamerika             | 33    | 3 %  |
| 4 Asien, Afrika, Australien | 1.118 | 81 % |

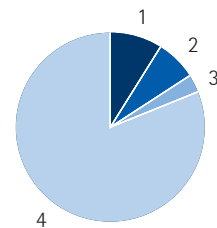

Neue Technologie wie LED-Hintergrundbeleuchtung, 3-D-Funktionalität sowie Internetfähigkeit prägen den Trend auf dem Fernsehmarkt

Das Marktforschungsinstitut DisplaySearch erwartet bis zum Jahr 2014 ein jährliches Liefervolumen von Flüssigkristall (LCD)-Fernsehern von über 268,8 Millionen Geräten. Die stärkere Nachfrage nach LCD-Geräten ist eng verknüpft mit neuen Technologien wie LED-Hintergrundbeleuchtung, 3-D-Funktionalität sowie Internetfähigkeit.

Die starke Nachfrage nach Flüssigkristallen auf PS-VA-Basis belebte das Geschäft maßgeblich

### Neue Display-Technologien weiter auf dem Vormarsch

Die insgesamt deutliche Steigerung der Gesamterlöse 2010 und die hohe Auslastung unserer LC-Produktion beruhte zum Großteil auf der starken Nachfrage nach Flüssigkristallen auf Basis der patentgeschützten PS-VA-Technologie (Polymer Stabilized Vertical Alignment), mit der Merck seine Technologieführerschaft weiter ausbauen konnte. Die technischen Vorteile von PS-VA sind neben einer besseren Bildqualität bei bewegten Bildern schnellere Schaltzeiten, höherer Kontrast und stärkere Helligkeit bei geringerem Energieverbrauch.

Die PS-VA-Technologie eröffnet den LCD-Herstellern neue Möglichkeiten, bisher unerreichte Bildschirm-Eigenschaften zu verwirklichen – wärmere und natürliche Farben, räumliche Darstellung, lebendigere Bewegungsabläufe. In Taiwan, Korea und Japan wird diese Technologie bereits in der Massenproduktion eingesetzt. Ist von LED-Fernsehern die Rede, ist damit lediglich die Hintergrundbeleuchtung durch LEDs (Lichtemittierende Dioden) gemeint, die den Kontrastwert von LCD-Fernsehern erhöht und den Energieverbrauch senkt. Die Bilddarstellung wird dadurch noch naturgetreuer. Einzelne Teile der beleuchteten Fläche, die ein tiefes Schwarz darstellen sollen, lassen sich separat dimmen oder ganz abschalten. Dadurch wird ein kontrastreicheres Bild ermöglicht. Auf diese Weise werden die Vorteile von LED und LCD kombiniert. Weitere wesentliche Vorteile liegen im niedrigen Energieverbrauch und der geringeren Gehäuse-tiefe der Flachbildschirme.

#### **Flüssigkristalle für 3-D-Fernseher und Tablet-PCs**

Darüber hinaus liefert Merck innovative Flüssigkristallmischungen, die unter anderem für 3-D-Fernseher und Bildschirme der immer populärer werdenden Tablet-PCs benötigt werden. Aber auch die Flüssigkristallmischungen für 3-D-Spezialbrillen, die für das 3-D-Fernsehen benötigt werden, sowie Leuchtstoffe der Marke isiphor® für die LED-Hintergrundbeleuchtung trugen zum positiven Geschäftsverlauf bei.

Des Weiteren arbeiten wir an reaktiven Mesogenen – polymerisierbaren Flüssigkristallen, die zum Beispiel als Material für optische Filme eingesetzt werden können. Sie tragen zur Verbesserung der Bildqualität und des Energieverbrauchs von 2-D- oder auch 3-D-Bildschirmen bei.

#### **Neues LC-Forschungszentrum in Korea**

Mit der Einweihung des „Advanced Technology Center“ in Poseung in Korea haben wir zusätzliche Möglichkeiten zur Erforschung und Entwicklung neuester Flüssigkristall-Technologien geschaffen und den Grundstein für weitere Innovationen gelegt. 11 Mio EUR haben wir in dieses Forschungszentrum investiert.

#### **OLED-Technologie schreitet zügig voran**

OLED-Technologie für  
energieeffizientere Lichtemission

Auch außerhalb der Flüssigkristalltechnologie beschäftigen sich unsere Forscher mit Materialien für innovative Displays. Hier stehen besonders die OLED-Materialien im Fokus der Entwicklung. Sie kommen bereits in Mobiltelefonen oder MP3-Geräten zur Anwendung. Zur Weiterentwicklung der OLED-Technologie engagieren wir uns verstärkt in Forschungs-Netzwerken. Um die Entwicklung „neuer Materialien für OLEDs aus Lösung“ (NEMO) dreht sich ein Projekt, in dem sich Merck als Konsortialführer gemeinsam mit Partnern aus Industrie und Wissenschaft engagiert. Ziel dieser vom deutschen Bundesministerium für Bildung und Forschung geförderten Kooperation ist die Entwicklung innovativer löslicher Materialien für den Einsatz in großflächigen OLED-Bauteilen, etwa für Flachbildschirme, elektronische Verkehrsschilder oder Beleuchtungssysteme. Eine OLED ist ein dünnfilmiges, leuchtendes Bauelement aus organischem, halbleitendem Material. Hergestellt auf Glasplatten oder flexiblen Substraten können OLED-Kacheln weißes Licht emittieren, das gleichmäßiger und energieeffizienter als das Licht von herkömmlichen Leuchtstofflampen ist. Es unterscheidet sich von anorganischen Leuchtdioden (LED) dadurch, dass Strom- und Leuchtdichte geringer und keine kristallinen Materialien erforderlich sind. Sie verbrauchen wenig Energie und bieten aus fast jedem Blickwinkel ein perfektes Bild. Die

OLED-Technologie ermöglicht durch die Verwendung ultradünner leuchtender Schichten die Herstellung einzigartiger, großflächiger, homogener Leuchtflächen mit einer Gesamtschichtdicke von nur wenigen Millimetern.

Im Vergleich zum heute gängigen Vakuum-Verdampfungsprozess sollen insbesondere die Skalierbarkeit, Strukturierbarkeit und Beschichtungseffizienz deutlich verbessert werden. Die NEMO-Projektpartner setzen dabei auf lösliche, phosphoreszierende Materialien für Rot-, Grün- und Blau-Anwendungen. Um zügig marktfähige Lösungen zu erreichen, werden parallel dazu verschiedene Injektions-, Transport- und Elektrodenmaterialien sowie Klebstoffe erforscht, bewertet und auf ihre Leistungsfähigkeit hin getestet. Außerdem arbeitet Merck als führender Hersteller von Hochleistungs-OLED-Materialien gemeinsam mit der Technischen Universität Braunschweig und dem US-Unternehmen Applied Materials in einem Projekt namens „Light InLine“ an Verfahren, die die Herstellkosten von Leuchten mit organischen Leuchtdioden (OLED) senken sollen.

### Schlüsseltechnologie Photovoltaik

Die Photovoltaik ist eine der Schlüsseltechnologien, wenn es um erneuerbare Energiequellen geht. Hier konzentriert sich Performance Materials auf die Entwicklung von Materialien und Drucktechnologien für die Herstellung von Solarzellen. In der isishape®-Reihe bieten wir den Herstellern von kristallinen Solarzellen schon heute druckbare Strukturierungsmaterialien an, die die Leistung der Zellen verbessern und umweltfreundliche Produktionsprozesse ermöglichen. Mit der Materialplattform lisicon® bieten wir unseren Kunden organische Halbleiter für flexible, robuste und gedruckte organische Solarzellen (OPV) an. Die Weiterentwicklung der Materialien ist entscheidend, um durch höhere Zell-Effizienzen den Zugang zu Massenmärkten zu ermöglichen.

Flexible Solarzellen – neue Ansätze  
in der Materialentwicklung

In diesem Zusammenhang verfolgt Merck in einem vom deutschen Forschungsministerium geförderten Entwicklungsprojekt gemeinsam mit anderen führenden Industrieunternehmen das Ziel, bis 2012 vollgedruckte, flexible Solarzellen mit mindestens 10 % Effizienz zu verwirklichen. In unserem englischen Forschungszentrum in Chilworth, Southampton, gehen wir intensiv diesen Fragestellungen nach.

Parallel arbeiten wir in Zusammenarbeit mit führenden Partnern weltweit an neuen Technologien, beispielsweise an farbstoffsensibilisierten Solarzellen. Sie ahmen den Prozess der Photosynthese in der Natur nach. Die in den farbstoffsensibilisierten Solarzellen befindlichen Elektrolyten basieren zunehmend auf der Nutzung ionischer Flüssigkeiten, bei deren Entwicklung und Herstellung Merck eine weltweit führende Rolle einnimmt. Der Einsatz von ionischen Flüssigkeiten eröffnet die Möglichkeit, sowohl starre als auch flexible Solarzellen mit hoher Effizienz und Stabilität herzustellen. Durch diese Besonderheit werden in der Zukunft viele neue Anwendungsgebiete entstehen.

### Wissenschaftliche Kooperationen

Gemeinsam mit der Albert-Ludwigs-Universität in Freiburg haben wir im November ein Projekt zur Entwicklung und Herstellung neuer Batterie-Materialien gestartet. Im gemeinsam betriebenen „Merck Battery Materials Lab“ sollen fundamental neue Leitsalze für Lithium-Ionen-Batterien für Hybrid- und Elektroautos entwickelt werden.

Mit solchen so genannten „Konzeptlaboren“ verfolgt Merck bereits seit 2006 einen neuen Ansatz, um leistungsfähige Kooperationen mit externen und internen Partnern sowie ein internationales

Forschungs- und Technologie-Netzwerk aufzubauen. Diese Konzeptlabore sind dabei ein wichtiger Bestandteil der zentralen Geschäftseinheit Advanced Technologies (AT) der Sparte Performance Materials, deren Aufgabe es ist, unter Nutzung neuer chancenreicher Technologien innovative Produkte bis zur Marktreife zu entwickeln.

Die Standorte der Konzeptlabore sind nach so genannten globalen „Hot Spots“ der akademischen Forschungslandschaft international auf die strategischen Wachstumsfelder der Chemie ausgerichtet. Unter systematischer Verwendung des internen Know-hows und der Kernkompetenzen von Merck werden dort die Voraussetzungen geschaffen, mit Unterstützung von externem Wissen und unter Berücksichtigung von Einlizenzierungs-, Kooperations- und Fördermöglichkeiten neue Technologien und innovative Produkte für das Chemiegeschäft von Merck zu entwickeln. Merck-Konzeptlabore befinden sich in Darmstadt, Heidelberg, Atsugi (Japan) und Boston (USA). Darüber hinaus arbeitet Merck in einem Netzwerk mit deutschen Unternehmen und Universitäten an Konzepten für die kostengünstige Massenproduktion von organischen elektronischen Schaltungen, Speichern und Sensoren, die Energiegewinnung durch organische Photovoltaik sowie die Senkung des Energieverbrauchs durch sparsamere organische Leuchtdioden. Zur Umsetzung des Projekts haben die Partner, die eine Schrittmacherposition einnehmen, eine gemeinsame Plattform gegründet: die InnovationLab GmbH mit Sitz in Heidelberg.

## PIGMENTS / COSMETICS

### Vom Nachfrageeinbruch erholt

Der Aufschwung ist auch der deutlich gestiegenen Nachfrage in der Automobilindustrie zu verdanken

Das Pigmentgeschäft hat sich von der weltweit schwachen Nachfrage im Jahr 2009 wieder kräftig erholt. Die Gesamterlöse der Geschäftseinheit Pigments lagen 2010 mit 325 Mio EUR um 37 % höher als im vorangegangenen Krisenjahr. Besonders hoch fielen die Gesamterlöse im 3. Quartal aus. Dieser Aufschwung ist der deutlich gestiegenen Nachfrage in der Automobilindustrie zu verdanken, die wieder auf das Niveau von vor der Wirtschaftskrise zurückkehrte oder dieses sogar übertraf. Mit Effektpigmenten für Autolacke ist Merck ein wichtiger Zulieferer der Branche.

Die nach längerer Zurückhaltung wieder erstarkte Nachfrage nach Konsumgütern und ein allgemein belebtes Konsumklima wirkten sich auch positiv auf das Geschäft mit Pigmenten für Kunststoffe, Druckerzeugnisse und Kosmetikprodukte aus. Positive Währungseffekte bescherten der Geschäftseinheit zusätzlichen Rückenwind.

Zudem konzentrieren wir unsere Innovationsanstrengungen weiterhin auf ertragsstarke Pigmente wie beispielsweise die Candurin®-Pigmente als Farbüberzug für Lebensmittel und Medikamente. Dazu kommt die Pyrisma™-Produktfamilie, die einen breiten Farbraum abdeckt und dabei intensive Effekte bietet.

### Produktionskapazitäten unter voller Auslastung

Die allgemein starke Auftragslage führte dazu, dass unsere Produktionskapazitäten seit März 2010 wieder unter voller Auslastung arbeiten. So haben wir einen Teil der klassischen Pigment-Produktion von Onahama in Japan nach Gernsheim in Deutschland verlagert, um am japanischen Standort die Kapazitäten für die Xyrallic®-Pigment-Produktion ausbauen zu können. Grund dafür ist die starke Nachfrage nach diesen Pigmenten aus Aluminiumoxidplättchen – speziell aus der Automobilindustrie.

Zudem haben wir am japanischen Standort Onahama im Oktober den Grundstein für den Bau einer neuen Anlage zur Herstellung von Meoxal™ gelegt. Die kommerzielle Produktion soll 2012 aufgenommen werden. Meoxal™ ist ein Effektpigment auf der Basis von mit Metalloxid beschichteten Aluminiumflocken. Es besitzt eine besondere Farbsättigung und hohe Deckkraft sowie ausgezeichnete Korrosionsbeständigkeit. Insbesondere aus der Auto- und Kosmetikindustrie wird eine hohe Nachfrage nach Meoxal™ erwartet.

Mit der abgeschlossenen Integration des führenden Anbieters von Effektpigmenten in China, der Suzhou Taizhu Technology Development, konnten wir zudem unsere Position auf dem schnell wachsenden chinesischen Markt weiter ausbauen. Durch die Übernahme im Jahr 2009 haben wir uns die Möglichkeit erschlossen, mit einer erweiterten Produktpalette verstärkt in das mittlere Preissegment vorzustoßen.

### Neue kosmetische Anwendungen

Das Portfolio funktioneller Füllstoffe für die Kosmetik wurde signifikant erweitert

Im Jahr 2010 hat Merck sein Portfolio sowohl bei funktionellen Füllstoffen für die Kosmetik als auch im Kerngeschäft Perlglanzpigmente signifikant erweitert. So hat Merck mit RonaCare® Cyclopeptid-5 das weltweit erste zyklische Peptid für die Kosmetikindustrie vorgestellt. Dank seines ringförmigen Designs weist der Wirkstoff eine hohe Stabilität auf und bewirkt eine gezielte, biologische Wirkung in der Haut. Das Peptid ist in der Lage, verlangsamte Reparaturprozesse der reiferen Haut wieder in Gang zu setzen und ihre natürliche Regeneration zu stimulieren. Linien und Falten werden bereits nach kurzer Anwendung reduziert. Geschmeidigkeit, Elastizität und Festigkeit nehmen deutlich zu. Dank seiner ringförmigen, molekularen Struktur garantiert das Peptid hohe Stabilität sowie eine optimale Aufnahme und gezielte, biologische Wirkung in der Haut.

### Kratzfeste Autolacke dank Nanotechnologie

Für zusätzliche Belebung sorgte das innovative Additiv Tivida™, das auf Nanotechnologie-Basis die Kratzfestigkeit von Autolacken erhöht. Das Additiv kann perfekt in die Struktur des Bindemittels eingebaut werden und so dessen Gerüst verändern: Das lösemittelbasierte Lacksystem wird durch die Nanopartikel härter und gleichzeitig durch die Vernetzung der polymeren Hülle mit dem Bindemittel elastischer. Der gewünschte Kratz-Schutz wird nicht nur bei neuen Lackschichten erzielt, sondern bleibt auch im Laufe der Benutzung erhalten. So können mit dem ersten Produkt der Markenfamilie, Tivida™ AS 1010, hochglänzende Oberflächen viel länger als bisher gegen leichte Alltagsverkratzungen geschützt werden – beispielsweise die meisten Klarlacke in der Automobilindustrie.

Für die Lasermarkierung von Kunststoffen bietet Merck mit Micabs®C 431 und Micabs®C 411 zwei neue Additive in Granulatform an. Sie sind schwermetallfrei und damit für die Laserbeschriftung von Lebensmittelverpackungen wie auch für die Herstellung von Spielzeugen zugelassen.

## KONZERNKOSTEN UND SONSTIGES

Das Segment Konzernkosten und Sonstiges besteht aus den Konzernverwaltungskosten, dem Finanzergebnis, Steuern sowie bestimmten Sondermaßnahmen, die nicht einzelnen Sparten zugeordnet sind.

Segment Konzernkosten durch  
Millipore-Akquisition beeinflusst

Die Konzernverwaltungskosten betreffen vorwiegend die Merck KGaA und umfassen typische Holdingfunktionen. Dazu gehören beispielsweise die zentralen Finanz- und Rechnungswesen- sowie Steuerbereiche und zentrale Einkaufs-, Kommunikations- oder Personal-Abteilungen – sofern ihre Leistungen nicht den Sparten zugeordnet werden können. Zu den Konzernkosten zählen auch die Aufwendungen für zentrale, nicht zugeordnete IT-Funktionen und so genannte Corporate-IT-Projekte im Zusammenhang mit dem Ausbau und zur Harmonisierung von IT-Systemen innerhalb der Merck-Gruppe.

Das Operative Ergebnis des Segments Konzernkosten und Sonstiges belief sich im Jahr 2010 auf –90 Mio EUR im Vergleich zu –78 Mio EUR im Vorjahr. Im Zusammenhang mit dem Rechtsrisiko, für unsere frühere Tochtergesellschaft Dey Inc USA bestimmte Preisinformationen falsch berichtet zu haben, resultierten Aufwendungen von 67 Mio EUR und wurden als Sondermaßnahmen im Segment Konzernkosten und Sonstiges gebucht. Obwohl die Gesellschaft Dey Inc. im Rahmen des Verkaufs des Generika-Geschäftes 2007 an Mylan Inc., USA, übertragen wurde, haftet Merck gegenüber Mylan weiterhin für die Kosten dieses Rechtsstreites.

Weitere Aufwendungen in Höhe von 1 Mio EUR beziehen sich auf den Verkauf des Geschäfts mit Elektronikchemikalien im Jahr 2005 und beinhalten eine Kaufpreiserstattung an den damaligen Käufer für nachträglich entrichtete Steuern. Dieser Aufwand wird ebenfalls als Sondermaßnahme im Segment Konzernkosten und Sonstiges ausgewiesen. Das Finanzergebnis lag 2010 bei –252 Mio EUR und verschlechterte sich im Wesentlichen wegen der gestiegenen Zinsaufwendungen im Zusammenhang mit der Finanzierung der Millipore-Akquisition gegenüber dem Vorjahreswert um 118 Mio EUR von –134 Mio EUR.

Die Steueraufwendungen in Höhe von –220 Mio EUR umfassen die Körperschaft- und Gewerbesteuern der inländischen Gesellschaften sowie vergleichbare Ertragsteuern der Gesellschaften im Ausland. Die Position enthält neben den effektiven Steuern auch latente Steuern, die die unterschiedlichen Wertansätze zwischen den Steuerbilanzen der Konzerngesellschaften und der Konzernbilanz berücksichtigen. Letztere resultieren überwiegend aus den Kaufpreisallokationen für Serono und Millipore.

Der Free Cash Flow lag 2010 bei –736 Mio EUR, der Vorjahreswert betrug –511 Mio EUR. Im Geschäftsjahr wurden insgesamt Zahlungen in Höhe von 241 Mio EUR (Vorjahr: 16 Mio EUR) geleistet, die im Zusammenhang mit bestehenden Rechtsrisiken aus dem Verkauf unserer früheren Generics-Tochtergesellschaft Dey Inc., USA, standen. Darin enthalten ist die Zahlung aus dem Vergleich mit dem US Department of Justice in Höhe von 215 Mio EUR. Die weiteren Zahlungen in Höhe von 26 Mio EUR beziehen sich auf Ausgleichszahlungen sowie Rechtsberatungskosten im Zusammenhang mit diesem Rechtsrisiko. Daneben sind im Free Cash Flow die Ausgaben für die Konzernverwaltung und die Zins- und Steuerzahlungen enthalten. Der um die Einflüsse aus dem Verkauf des Generikageschäfts bereinigte Basis Free Cash Flow des Segments erreichte –496 Mio EUR und blieb damit auf dem Niveau des Vorjahres.

#### Konzernkosten und Sonstiges | Kennzahlen

| in Mio EUR           | 2010 | 2009 | Δ in % |
|----------------------|------|------|--------|
| Gesamterlöse         | –    | –    | –      |
| Bruttoergebnis       | –    | –    | –      |
| F&E- Kosten          | –    | –    | –      |
| Operatives Ergebnis  | –90  | –78  | 14     |
| Sondermaßnahmen      | –68  | –    | –      |
| Free Cash Flow       | –736 | –511 | 44     |
| Basis Free Cash Flow | –496 | –496 | –      |



## RISIKOBERICHT

Mithilfe unseres unternehmensweiten Risikomanagements erkennen und kontrollieren wir Risiken. Derzeit sind uns keine für die Merck-Gruppe bestandsgefährdenden Risiken bekannt.

## RISIKO- UND CHANCENMANAGEMENT

Jede unternehmerische Entscheidung basiert auf der Abwägung von damit verbundenen Risiken und Chancen. Merck ist Teil einer komplexen, globalen Geschäftswelt und daher einer Vielzahl von externen und internen Risiken ausgesetzt. Ziel der Risikomanagement-Aktivitäten ist es, Risiken frühzeitig zu erkennen sowie sie zu bewerten, zu kontrollieren und zu bewältigen. Grundlage dafür ist ein unternehmensweiter Risikomanagementprozess, mit dem Risiken der Merck-Gruppe systematisch erhoben sowie transparent und vergleichbar dargestellt werden. Das Chancenmanagement der Merck-Gruppe wird auf Grundlage der Unternehmensstrategie in den operativen Geschäftseinheiten durchgeführt. In diesem Zusammenhang verweisen wir auf den Prognosebericht ab Seite 95.

Im unternehmensweiten Risikomanagementprozess sind Spartenleiter, Geschäftsführer von Merck-Gesellschaften und die Leiter der Zentralbereiche als Risikoverantwortliche definiert. Diese Risikoverantwortlichen bewerten halbjährlich ihre aktive Risikolage neu und melden ihr gesamtes Risikoportfolio in einem einheitlichen, unternehmensweiten Berichtssystem an den Risiko-Manager. Risiken werden dabei anhand ihres möglichen EBIT-Einflusses und ihrer Eintrittswahrscheinlichkeit bewertet. Weiterhin berichten die Verantwortlichen bestehende und geplante Maßnahmen zur Risikoabwehr und zur Schadensminimierung. Der Risiko-Manager überprüft und erstellt hieraus einen Risikobericht, der das aktuelle Risikoportfolio des Konzerns und der Einzelgesellschaften wiedergibt. Alle wesentlichen Aspekte des Risikomanagementprozesses sind in einer Konzernrichtlinie beschrieben. Geschäftsleitung, Aufsichtsrat und Finanzausschuss erhalten halbjährlich Risikoberichte. Signifikante Veränderungen der Einschätzung bereits bekannter Risiken sowie neue signifikante Risiken werden ad hoc berichtet.

## INTERNES KONTROLLSYSTEM FÜR DEN KONZERN-RECHNUNGSLEGUNGSPROZESS

Ziel des internen Kontrollsystems für den Rechnungslegungsprozess ist, durch die Implementierung von Kontrollen hinreichende Sicherheit zu gewähren, dass ein regelungskonformer Abschluss erstellt wird. Dieses System umfasst Maßnahmen, die eine vollständige, richtige und zeitnahe Übermittlung und Darstellung von Informationen gewährleisten sollen, die für die Aufstellung des Konzernabschlusses und des Konzernlageberichts der Merck-Gruppe relevant sind. Dabei unterliegt das Kontrollsystem der kontinuierlichen Weiterentwicklung und ist integraler Bestandteil der Rechnungslegungs- und Finanzberichterstattungsprozesse in allen relevanten lokalen Einheiten und den Merck-Gruppenfunktionen. Die Maßnahmen des internen Kontrollsystems für den Rechnungslegungsprozess sollen das Risiko einer materiellen Falschaussage im Konzernrechnungslegungsprozess der Merck-Gruppe minimieren.

### Wesentliche Instrumentarien

Das interne Kontrollsystem ist darauf ausgerichtet, die Ordnungsmäßigkeit des Konzernrechnungslegungsprozesses zu gewährleisten und die Implementierung interner Kontrollen zur Erstellung eines regelkonformen Konzernabschlusses mit hinreichender Sicherheit zu erfüllen. Der Zentralbereich Accounting und Controlling steuert die Aufstellung des Konzernabschlusses der Merck KGaA als Muttergesellschaft der Merck-Gruppe zentral. Dieser Bereich gibt die Anforderungen an die Berichterstattungsinhalte der Gesellschaften vor, die für alle Gesellschaften als Mindestanforderungen verpflichtend sind. Zugleich steuert und überwacht dieser Bereich die zeitlichen und prozessbezogenen Vorgaben im Konzernabschluss.

Basis für die Erstellung der lokalen Abschlüsse der Muttergesellschaft sowie der in- und ausländischen Tochtergesellschaften bilden die konzernweiten Bilanzierungsrichtlinien. Diese stehen über das Merck-Intranet allen Mitarbeitern der betroffenen Bereiche zur Verfügung. Ebenfalls unter Nutzung des Intranets werden sie zeitnah dem sich ändernden finanzregulatorischen Umfeld angepasst und gemäß den internen Berichterstattungsanforderungen aktualisiert. Teil der konzernweiten Richtlinien ist die Vorgabe, konzerninterne Geschäftsprozesse als Basis für eine korrekte Saldenabstimmung abzubilden. Zusätzliche Kontrollen sind im Konsolidierungsprozess implementiert.

Der Zentralbereich Accounting und Controlling verwaltet ebenfalls zeitnah Veränderungen der Beteiligungsstruktur zentral und passt den Konsolidierungskreis der Merck-Gruppe entsprechend an.

Die Einzelgesellschaften verfügen über ein lokales internes Kontrollsystem. Sofern die Finanzprozesse über Shared Service Center abgedeckt sind, findet zudem das interne Kontrollsystem der Shared Service Center Anwendung. Sie stellen die richtlinienkonforme Bilanzierung gemäß den Bilanzierungsrichtlinien nach IFRS und der Bilanzierungsrichtlinie der Merck-Gruppe sicher. Der Zentralbereich Accounting und Controlling steht den lokalen Ansprechpartnern während des gesamten Reportingprozesses unterstützend zur Verfügung. Der Bereich führt im Fall wichtiger Neuerungen bei Berichtsprozessen und bei IT-Anwendungen Schulungen der involvierten Mitarbeiter durch und gewährleistet so eine durchgängig hohe Qualität des Reportings.

Der Berichtsprozess von der Einzelgesellschaft bzw. über das Shared Service Center direkt an den Zentralbereich Accounting und Controlling stellt schnelle Berichtszyklen sicher. Die Validierung der berichteten Finanzzahlen der Tochtergesellschaften erfolgt vor Freigabe über einen dreistufigen Prozess zwischen der lokalen Finanzorganisation, dem Spartencontrolling und dem gruppenweiten Controlling. Finanzzahlen werden durch Vergleich mit Vorjahr und Budget auf Plausibilität und Inhalt geprüft.

Der Rechnungslegungsprozess ist über alle Ebenen so ausgerichtet, dass im Rahmen der durchgängigen Sicherstellung des Vier-Augen-Prinzips jederzeit eine klar definierte Aufgabentrennung und Zuordnung von Verantwortlichkeiten zwischen den am Rechnungslegungsprozess beteiligten Bereichen gewährleistet ist.

Bei der Bewertung von Bilanzpositionen existiert eine enge Kooperation mit dem Bereich Risikomanagement der Merck-Gruppe, um eventuelle Risiken bilanziell korrekt abzubilden. Bei Sonderthemen, wie beispielsweise der Bewertung von immateriellen Gütern oder Pensionsverpflichtungen, werden zudem, soweit erforderlich, externe Sachverständige hinzugezogen. Für den Konzernrechnungslegungsprozess setzt Merck weltweit einheitlich ein Standardsoftwaretool von SAP ein. Über ein detailliertes Berechtigungskonzept zur Sicherstellung aufgabengerechter Befugnisse und unter Beachtung von Funktionstrennungsprinzipien beinhaltet das System

sowohl die Berichterstattung der Einzelgesellschaft als auch die Konsolidierung des Konzernabschlusses. Die Übertragung der Finanzdaten erfolgt in verschlüsselter Form. Einem möglichen Datenverlust wird über festgelegte Systemsicherungsroutrinen vorgebeugt.

Für die Umsetzung ist das lokale Management der Einzelgesellschaften verantwortlich. Die Bestätigung der Effektivität des internen Kontrollsystems bei Merck in Bezug auf die Rechnungslegung und Ordnungsmäßigkeit der Finanzberichterstattung erfolgt durch den lokalen Geschäftsführer und Finanzleiter durch Zeichnung der Berichterstattung der Einzelgesellschaft.

Alle beschriebenen Strukturen und Prozesse unterliegen der regelmäßigen Prüfung der internen Revision, basierend auf einem jährlichen Prüfungsplan, der durch die Geschäftsleitung festgelegt wird. Die Ergebnisse dieser Prüfungen werden regelmäßig in den Sitzungen der Geschäftsleitung, des Aufsichtsrates und des Finanzausschusses behandelt.

Das interne Kontrollsystem bei Merck ermöglicht es, das Risiko von materiellen Falschaussagen in der Rechnungslegung auf ein Minimum zu reduzieren, jedoch kann kein internes Kontrollsystem, unabhängig von der Ausgestaltung, ein verbleibendes Restrisiko verhindern.

## GESCHÄFTSBEZOGENE RISIKEN

Merck integriert sein Risikomanagement in die Prozesse der kontinuierlichen Geschäftsplanung. Mögliche negative Entwicklungen, beispielsweise Änderungen der Kundennachfrage oder geänderte politische Rahmenbedingungen, werden im Risikobericht beschrieben und bewertet. Somit können wir bei von der Planung abweichenden Ereignissen frühzeitig Gegenmaßnahmen ergreifen. Risiken bei Investitionsvorhaben werden durch die Anwendung detaillierter Richtlinien gemindert.

### Politische und regulatorische Risiken

Als global operierendes Unternehmen sieht sich Merck politischen und regulatorischen Veränderungen in vielen Ländern und Märkten gegenüber. 2010 wurden im Arzneimittelumfeld zunehmend restriktive Vorgaben betreffend Preisbildung, Kostenerstattung und Zulassung für Arzneimittel getroffen. Wir gehen davon aus, dass in Zukunft weitere Veränderungen folgen werden. Diese können die Rentabilität unserer Produkte negativ beeinflussen sowie den Erfolg von Markteinführungen und Neuzulassungen gefährden. Eine enge Kommunikation mit Gesundheits- und Zulassungsbehörden dient als Maßnahme zur präventiven Risikoabwehr. Die Destabilisierung politischer Systeme und die mögliche Errichtung von Handelsschranken können zusammen mit währungspolitischen Veränderungen zu Absatzrückgang in bestimmten Ländern und Regionen führen. Durch Diversifikation hinsichtlich Produkten, Branchen und Regionen ist eine Abschwächung potenzieller negativer Auswirkungen möglich.

### Risiken der Forschung und Entwicklung

Innovation ist für Merck wesentlicher Bestandteil der Strategie der Unternehmensbereiche Pharma und Chemie. Forschungs- und Entwicklungsprojekte können sich verzögern, erwartete Budgets überschreiten oder anvisierte Ziele nicht erreichen. Für den Unternehmensbereich Pharma ist Forschung und Entwicklung von besonderer Bedeutung. Die Forschungs- und Entwicklungsprojekte werden daher durch Portfoliomanagement permanent überwacht. Im Zuge des Portfoliomanagements bewerten wir die Forschungsgebiete und alle Projekte in der

Entwicklungs-Pipeline regelmäßig und richten sie gegebenenfalls neu aus. Mitunter werden Entwicklungsprojekte erst nach hohen Investitionen in einer späten klinischen Phase abgebrochen. Entscheidungen – etwa beim Übergang in die nächste Phase der klinischen Entwicklung – werden so getroffen, dass Risiken so gering wie möglich gehalten werden. Es besteht weiterhin das Risiko, dass Zulassungsbehörden eine Zulassung nicht oder nur verzögert erteilen, welches Auswirkungen auf die Ertragslage haben kann. Derzeit befindet sich zum Beispiel unser orales Produkt zur Behandlung von Multipler Sklerose in der Endphase des Zulassungsprozesses durch die US-Zulassungsbehörde. Im September 2010 hatte die europäische Zulassungsbehörde die Zulassung abgelehnt. Gegen diese Entscheidung hatte Merck Widerspruch eingelegt, der im Januar 2011 negativ beschieden wurde. Weiterhin besteht die Gefahr, dass unerwünschte Nebenwirkungen unserer pharmazeutischen Produkte erst nach der Zulassung beziehungsweise Registrierung entdeckt werden und eine Einschränkung der Zulassung oder Rücknahme vom Markt zur Folge haben.

#### **Risiken der Qualität und Verfügbarkeit von Produkten**

Merck ist Produkthaftungsrisiken ausgesetzt, doch Qualitätskontrollen entlang der gesamten Wertschöpfungskette minimieren diese Risiken. Dies beginnt bereits bei der Qualifikation unserer Lieferanten. Umfassende Qualitätsanforderungen für Rohstoffe, fremdbezogene Halbfertigprodukte und auch Anlagen sind hier ebenso zu erwähnen wie langfristige strategische Partnerschaften bei versorgungs- oder preiskritischen Vorprodukten. Überbevorratung und damit verbundene mögliche Haltbarkeitsrisiken werden durch bedarfsgerechte Produktion vermieden. Aufgrund von zum Teil erheblichen Vorlaufzeiten in der Produktion kann dieses Risiko nicht völlig ausgeschlossen werden. Gesamterlöse und Ergebnis der Merck-Gruppe stützen sich auf eine Vielzahl pharmazeutischer und chemischer Produkte für verschiedene Branchen. Diese Diversifikation trägt zu einer Risikominderung bei, da sich die Märkte in ihrer Struktur und ihren Konjunkturzyklen unterscheiden. Sie ist auch Ausdruck der Merck-Strategie, ein integriertes Pharma- und Chemieunternehmen bleiben zu wollen.

### **FINANZRISIKEN**

Als international tätiges Unternehmen und durch seine Präsenz am Kapitalmarkt ist Merck verschiedenen Finanzrisiken ausgesetzt. Dies sind vor allem Liquiditäts-, Ausfall-, Währungs- und Marktpreisrisiken sowie Risiken von Veränderungen von Marktwerten materieller und immaterieller Vermögenswerte und Schwankungen bei der Bewertung der Pensionszusagen.

#### **Liquiditäts- und Finanzierungsrisiken**

Um den eigenen Fortbestand zu sichern, muss ein Unternehmen zu jedem Zeitpunkt seine fälligen Verpflichtungen aus operativer und finanzieller Tätigkeit erfüllen können. Eine zentrale, konzernweite Liquiditätssteuerung reduziert potenzielle Liquiditätsrisiken. Darüber hinaus steht uns mit der bis zum Jahr 2014 laufende „Syndicated Multicurrency Credit Facility“ eine Kreditlinie über 2 Mrd EUR zur Verfügung, die trotz des positiven operativen Cash Flows der Gruppe bei möglichen Liquiditätsengpässen die weitere Zahlungsfähigkeit von Merck sicherstellt. Da in unseren Kreditverträgen keine „Financial Covenants“ vereinbart wurden, sind diese kontrahierten Kreditzusagen auch bei schlechterer Bonität von Merck abrufbar. Zusätzlich hat Merck im

Geschäftsjahr 2009 ein „Debt-Issuance Program“ aufgesetzt, das den vertraglichen Rahmen für die Begebung von Anleihen darstellt. 2010 wurde das Volumen dieses Programms von bisher 5 Mrd EUR auf 10 Mrd EUR verdoppelt.

#### **Ausfallrisiken**

Ausfallrisiken entstehen sowohl im Zusammenhang mit finanziellen Anlagen, Aufnahmen und Finanzierungszusagen als auch bei operativen Forderungen. Durch die Finanzkrise haben sich die Ausfallrisiken für Forderungen im Euro-Raum zum Teil erhöht. Merck hat daher alle Positionen gegenüber den betroffenen Ländern überprüft und, sofern erforderlich, die Vorsorge für Ausfallrisiken angepasst. Merck minimiert diese Risiken durch die Streuung seiner Finanzpositionen und die damit verbundene aktive Steuerung seiner Handelspartner. Wesentliche Finanztransaktionen mit Kreditrisiko werden ausschließlich mit Banken guter Bonität und einem Mindestrating von A- der Rating-Agentur Standard & Poor's abgeschlossen. Darüber hinaus reduziert der große Bankenkreis von Merck – die bestehende Kreditlinie über 2 Mrd EUR wurde mit 17 Banken syndiziert – mögliche Verluste bei einem etwaigen Ausfall. Trotzdem kann dadurch der Ausfall einzelner Handelspartner, auch bei hervorragender Bonitätseinstufung, nicht grundsätzlich ausgeschlossen werden.

#### **Währungs- und Zinsrisiken**

Durch die internationale Geschäftstätigkeit in unterschiedlichen Währungs- und Zinsregionen ist Merck zwangsläufig auch Währungs- und Zinsrisiken unterworfen. Merck ist durch seine globale Konzernstruktur und den damit verbundenen Finanzgeschäften, operativen Forderungen und Verbindlichkeiten sowie erwarteten zukünftigen Zahlungsströmen aus Umsätzen und Kosten in Fremdwährung von Marktpreisrisiken betroffen. Wir nutzen Derivate, um Währungsrisiken beziehungsweise Finanzierungskosten zu minimieren, die durch Wechselkurs- oder Zinsschwankungen bedingt sind. Finanzgeschäfte, operative Außenstände und Verpflichtungen werden im Wesentlichen kursgesichert. In bestimmten Fällen sichert das Unternehmen zusätzlich erwartete Umsätze und künftig anfallende Kosten für einen Zeitraum von bis zu drei Jahren ab (Details finden sich im Anhang zum Konzernabschluss ab Seite 187 in den Anmerkungen [40] bis [42]).

#### **Marktpreis- und Marktwertrisiken**

Die Wertansätze einzelner Bilanzposten sind dem Risiko sich verändernder Markt- und Geschäftsverhältnisse und damit auch Änderungen der beizulegenden Zeitwerte ausgesetzt. Im Fall notwendiger Wertminderungen können sich signifikante Ergebnisbelastungen und Auswirkungen auf die Bilanzrelationen ergeben. Dies gilt insbesondere für die hohen immateriellen Vermögenswerte einschließlich der Firmenwerte, die durch die Akquisitionen von Serono im Jahr 2007 sowie von Millipore im Jahr 2010 deutlich an Bedeutung für den Konzern gewonnen haben (Details finden sich im Anhang zum Konzernabschluss ab Seite 167 in der Anmerkung [23]).

#### **Risiken im Zusammenhang mit Pensionszusagen**

Merck hat Verpflichtungen im Zusammenhang mit Pensionszusagen. Die Höhe des Barwertes dieser Versorgungsverpflichtungen kann sich durch Veränderungen relevanter Bewertungsparameter, zum Beispiel des Zinssatzes, der Gehaltssteigerungsrate oder der Sterbewahrscheinlichkeiten, wesentlich erhöhen oder verringern. Die Pensionsverpflichtungen werden regelmäßig,

mindestens jährlich, auf Basis extern erstellter versicherungsmathematischer Gutachten bewertet. Der größte Teil der Verpflichtungen ist durch die in der Bilanz ausgewiesenen Pensionsrückstellungen abgedeckt, während der kleinere Teil mit fondsfinanzierten Versorgungszusagen beziehungsweise mit zu diesem Zweck in der Bilanz ausgewiesenen langfristigen Geldanlagen unterlegt ist. Letztere beliefen sich 2010 auf 217 Mio EUR. Soweit Altersversorgungszusagen durch Planvermögen gedeckt sind, welches aus verzinslichen Wertpapieren, Aktien, Immobilien und anderen Vermögensanlagen besteht, können sich sinkende oder negative Renditen dieser Anlagen ungünstig auf den Wert des Planvermögens auswirken und somit weitere Zuführungen zu den Pensionsrückstellungen bedingen. Das Risiko von Marktwertschwankungen des Planvermögens wird durch eine diversifizierte Anlagestrategie reduziert.

#### **Einschätzung durch unabhängige Rating-Agenturen**

Der Kapitalmarkt nutzt Einschätzungen von Rating-Agenturen, um Fremdkapitalgeber bei der Beurteilung der Risikosituation eines Finanzinstruments zu unterstützen. Derzeit wird Merck von Standard & Poor's und Moody's bewertet. Bei Standard & Poor's hatte Merck im Dezember 2010 ein langfristiges Rating von BBB+ mit einem stabilen Ausblick. Moody's bewertete uns im Dezember 2010 mit einem langfristigen Rating Baa2 mit stabilem Ausblick. Damit bestätigten uns beide Agenturen ein solides Investment-Grade-Rating.

## **RECHTLICHE RISIKEN**

Merck ist Risiken aus Rechtsstreitigkeiten ausgesetzt. Dazu gehören insbesondere Risiken aus den Bereichen Produkthaftung, Wettbewerbs- und Kartellrecht, Pharmarecht, Patentrecht, Steuerrecht und Umweltschutz. Als forschendes Unternehmen besitzt Merck ein wertvolles Portfolio an gewerblichen Schutzrechten wie Patenten und Marken. Diese Schutzrechte können zum Ziel von Angriffen und Verletzungen werden.

Wir sind Partei in gerichtlichen Verfahren und behördlichen Ermittlungen, deren Ausgang derzeit nicht absehbar ist. Wir tragen auch weiterhin die Risiken aus gewissen Verfahren gegen Gesellschaften der Generics-Gruppe, die wir im Jahr 2007 an Mylan veräußert haben. So steht Merck weiter für die Risiken aus Fällen in den USA ein, die die Gestaltung von Preisen für Arzneimittel betreffen. Daneben ist die Sparte Merck Serono in einen Lizenzrechtsstreit in Israel und in eine Auseinandersetzung mit einem ehemaligen Vertriebspartner in Italien verwickelt. In den USA befindet sich unsere Tochtergesellschaft EMD Serono in Vergleichsverhandlungen sowohl mit dem Justizministerium als auch auf Bundesstaatenebene. Gegenstand dieser Vergleichsverhandlungen sind zivilrechtliche Ansprüche bezüglich des Vertriebs eines Produkts. In Deutschland ist Merck in ein kartellrechtliches Verfahren einbezogen, welches das exklusive Distributionsabkommen von Merck mit dem Laborgroßhändler VWR International betrifft.

Aufgrund einer Entscheidung des Bundeskartellamtes ist Merck verpflichtet, einige zum Laborgeschäft gehörende Produkte auch an andere Laborgroßhändler in Deutschland zu liefern. Das Unternehmen hat alle Maßnahmen zur Wahrung der eigenen Rechtsposition ergriffen. Generell ist Merck bestrebt, seine rechtlichen Risiken möglichst gering zu halten und zu kontrollieren. Wir haben die notwendigen Vorkehrungen getroffen, um Gefährdungen zu entdecken und gegebenenfalls unsere Rechte zu verteidigen. Risiken, die sich im Zusammenhang mit Rechtsstreitigkeiten ergeben, werden fortlaufend identifiziert, bewertet und kommuniziert. Für unsere Mitarbeiter ist weltweit ein „Compliance“-Programm gültig, das sie zur Einhaltung von Gesetzen und Richtlinien anhält, entsprechend schult und unterstützt. Kernstück des Programms ist unser Verhaltenskodex – der „Merck Code of Conduct“ –, der ethische Verhaltensrichtlinien festlegt. Er wird durch ein Schulungs- und Prüfungsprogramm, ein Hinweisgebersystem zur Meldung von Compliance-Verstößen („Speak Up Line“) sowie ein weltweites Netz von „Compliance Officers“ ergänzt. Soweit es möglich und sinnvoll ist, begrenzt das Unternehmen Haftungs- und Schadensrisiken durch Versicherungsschutz, dessen Art und Umfang fortlaufend aktuellen Anforderungen angepasst werden.

## RISIKEN IM PERSONALBEREICH

Der Erfolg von Merck wird maßgeblich durch die Kompetenz und das Engagement der Mitarbeiter beeinflusst. Dabei gestaltet es sich aufgrund intensiven Wettbewerbs, insbesondere im Pharmabereich, zunehmend schwierig, qualifizierte Fachkräfte zu rekrutieren und zu binden. Dieser Herausforderung begegnen wir durch vielfältige, international ausgerichtete Personalmarketing- und Entwicklungsmaßnahmen, die kontinuierlich weiterentwickelt werden. Fach- und Führungskräfte spricht Merck durch einen unternehmensübergreifend verankerten „Talent & Succession Management“-Prozess an und minimiert dadurch deren Fluktuation. Dieser Prozess unterstützt die Identifizierung von internen Talenten für Führungspositionen, vereinfacht die objektive Beurteilung und Entwicklung der Talente und beschleunigt somit die gezielte Mitarbeiterauswahl für offene Stellen über einen internen Talentpool. Kurzfristig auftretende Vakanzen steuern wir über klar definierte und angemessene Vertreterregelungen. Schlüsselfaktoren der Mitarbeiterbindung und -zufriedenheit werden mittels regelmäßiger, unternehmensweiter Mitarbeiterbefragungen identifiziert und ausgewertet. Aus den Ergebnissen leiten wir Maßnahmen ab, deren Wirksamkeit in den folgenden Umfragen überprüft wird. Um den Beitrag der Mitarbeiter zum Unternehmenserfolg besser zu erfassen, wurde ein für die gesamte Merck-Gruppe gültiges Leistungsmanagement-System eingeführt. Dieses soll eine konsistente Beurteilung erleichtern, inwieweit die persönlichen Ziele erreicht werden und in welchem Maß die Unternehmenswerte gelebt werden. Darauf aufbauend werden individuelle Personalentwicklungs-Maßnahmen identifiziert und umgesetzt. So stellen wir sicher, dass die Mitarbeiter zielgerichtet auf neue geschäftliche Herausforderungen vorbereitet werden und dass sie diese im Sinne des Unternehmens motiviert lösen können. Das eingeführte „Rewards Policy“-System ergänzt diesen Prozess, indem es sicherstellt, dass leistungsbezogene Vergütungsbestandteile unternehmensweit konsistent gehandhabt werden. Eine langfristige erfolgsabhängige Vergütungskomponente für berechnete Führungskräfte und Experten bietet der „Merck Long-Term Incentive Plan“ (Details siehe Anmerkung [32] Rückstellungen).

## RISIKEN DER INFORMATIONSTECHNOLOGIE

Die strategischen Ziele von Merck sind nicht ohne IT-Unterstützung zu erreichen. Nur mit einheitlichen Standards, Systemen und Prozessen gelangen die zukünftige Ausrichtung und die Globalisierung von Merck. Zeitnahe und flexible Reaktionen auf geänderte Marktentwicklungen, innovative Forschung, zuverlässige Produktion und rasche Belieferung der Kunden erfordert eine leistungsfähige und zuverlässige IT.

### Risiken durch Komplexität interner und externer Anforderungen

IT-Risiken mit Auswirkungen auf das Geschäftsergebnis entstehen, wenn Informationen nicht verfügbar oder fehlerhaft sind, ungewünscht veröffentlicht werden oder die abgebildeten Prozesse zu unflexibel, zu aufwändig oder gesetzeswidrig in IT-Systemen umgesetzt sind. Zu spät oder schlimmstenfalls nicht erkannte Sicherheitslücken oder unzureichende Notfallplanungen können schnell zu Vorfällen werden, die das gesamte Unternehmen betreffen. IT-Systeme, die die Erwartungen der Geschäftseinheiten nicht abbilden, können gegebenenfalls die wirtschaftliche Entwicklung von Unternehmen massiv behindern. Ungewollte Datenschutzverstöße aufgrund falscher oder fehlender Berechtigungsvergabe erzeugen eine negative Außenwirkung. Die immer stärker werdende Abhängigkeit von der IT sowie die zunehmende Vernetzung der IT-Landschaften in internationalen Unternehmen erfordern von Unternehmen hohe Aufwendungen für Wartung, Einbindung neuer Anwendungen oder gar Systeme sowie die Abbildung neuer Prozesse. Diese Entwicklung in Verbindung mit immer neuen nationalen wie internationalen gesetzlichen Anforderungen gestaltet die Datenverarbeitung zeitintensiv und kostspielig. Mit zunehmender Komplexität der IT-Landschaft steigen auch die potenziellen Risiken.

### Risiken durch externe Bedrohungen

Die allgemeine Gefährdungslage lässt zudem eine Professionalisierung der Bedrohungen weg von allgemeinen Viren hin zu gezielter Industriespionage und -sabotage erwarten.

Wesentliche potentielle IT-Risiko-Szenarien für Merck stellen der Ausfall der zentralen ERP-Systeme („Enterprise Resource Planning“) die Veröffentlichung von schützenswerten vertraulichen Daten aus der Forschung und Geschäftsentwicklung, die Manipulation von IT-Systemen in der chemischen Prozess-Steuerung sowie die Aberkennung von Medikamentenzulassung aufgrund mangelbehafteter Validierung relevanter IT-Systeme dar.

Die IT-Infrastruktur von Merck wurde zur Verbesserung der Service-Qualität bei gleichzeitiger Kostenoptimierung konsolidiert. Im Nachgang der Akquisition von Millipore erfolgt die Zusammenführung der Millipore-IT-Systeme mit den Merck-IT-Systemen in einem kontrollierten Integrationsprogramm.



### **Risikominimierungsstrategie**

Durch die redundante Auslegung von technischen Komponenten, Netzwerken und Standorten sowie eine geeignete und getestete Notfallvorsorge gewährleistet Merck auch bei Ausfall einzelner Komponenten die erforderliche Verfügbarkeit seiner geschäftskritischen Anwendungssysteme und den Zugriff auf geschäftsrelevante Daten. Für die gesamte Merck-Gruppe existieren Sicherheitsrichtlinien mit geeigneten organisatorischen, technischen und softwareseitigen Vorkehrungen für Zugangskontrolle, Zugriffsrechte, Viren- und Datenschutz. Die Einhaltung und Wirksamkeit dieser Maßnahmen wird kontinuierlich überwacht und durch die interne Revision und externe Auditoren überprüft. Ein dezidierter IT-Risiko-Management-Prozess stellt sicher, dass IT-Risiken evaluiert und angemessene Maßnahmen umgesetzt werden. Basierend auf diesen getroffenen Maßnahmen gehen wir davon aus, dass die Eintrittswahrscheinlichkeit eines schwerwiegenden IT-Risiko-Vorfalles gering ist.

### **UMWELT- UND SICHERHEITSRISIKEN**

Merck ist ein globales, produzierendes Unternehmen und ist Risiken von möglichen Schäden an Menschen, Gütern und Image ausgesetzt. Durch Auditierung, Beratung und Schulung beim Umwelt-, Arbeits- und Gesundheitsschutz minimieren wir die Risiken für Mensch und Umwelt. Merck plant systematisch die Durchführung von Audits sowohl in den eigenen Standorten als auch bei Lieferanten und Lohnherstellern. Diese vorbeugenden Maßnahmen aktualisieren wir stetig und sichern dadurch den Fortbestand von Anlagen und Sachwerten. Durch die Einhaltung hoher technischer Standards und unserer Verhaltensregeln sowie durch die Umsetzung aller rechtlichen Vorgaben im Umwelt-, Arbeits- und Gesundheitsschutz sorgen wir für den Erhalt unserer Güter und Werte.

### **EINSCHÄTZUNG DES MANAGEMENTS ZUR GESAMTRISIKOSITUATION**

Derzeit sind uns keine Risiken bekannt, die den Fortbestand der Merck-Gruppe gefährden könnten. Dies stellt dieser Risikobericht fest, der in Anwendung des Deutschen Rechnungslegungsstandards 5 verfasst wurde.

## PROGNOSEBERICHT

Die Geschäftsleitung geht für die beiden folgenden Jahre von einem Wachstum des Umsatzes und Operativen Ergebnisses für die Merck-Gruppe aus. Wir rechnen insgesamt mit einer guten Geschäftsentwicklung, können aber konjunkturelle Rückschläge in einzelnen Ländern, auch bedingt durch hohe Staatsverschuldungen, nicht ausschließen.

### Abweichungen der tatsächlichen Geschäftsentwicklung von der früher berichteten Prognose

Die Abweichungen der tatsächlichen Geschäftsentwicklung von der abgegebenen Prognose für das Jahr 2010 sind, pro Sparte und für die gesamte Gruppe, nachstehend aufgeführt:

| Abweichungen                           | Prognose<br>2010 | angepasste<br>Ist-Werte<br>2010* |
|----------------------------------------|------------------|----------------------------------|
| <b>Wachstum Gesamterlöse*</b>          |                  |                                  |
| Merck-Gruppe                           | 3 % – 7 %        | 12 %                             |
| Merck Serono                           | 2 % – 5 %        | 8 %                              |
| Consumer Health Care                   | 5 % – 10 %       | 1 %                              |
| Liquid Crystals*                       | 5 % – 10 %       | 38 %                             |
| Performance Et Life Science Chemicals* | 3 % – 8 %        | 17 %                             |
| <b>Wachstum Operatives Ergebnis*</b>   |                  |                                  |
| Merck-Gruppe                           | 20 % – 30 %      | 88 %                             |
| Merck Serono                           | 30 % – 40 %      | 59 %                             |
| Consumer Health Care                   | – 10 % – 0 %     | – 71 %                           |
| Liquid Crystals*                       | 15 % – 25 %      | 132 %                            |
| Performance Et Life Science Chemicals* | 15 % – 20 %      | 111 %                            |

\*Chemiesparten vergleichbar dargestellt, ohne Millipore

Bedingt durch die Millipore-Akquisition wurde der Unternehmensbereich Chemie im Jahr 2010 neu gegliedert. Daher erfolgt der Vergleich der Ergebnisse des Jahres 2010 mit der Prognose 2010 auf Basis der alten Segmentierung. Das erworbene Millipore-Geschäft wurde aus den Ist-Werten herausgerechnet. Alle hier aufgeführten Ist-Werte 2010 für die Sparten Liquid Crystals, Performance Et Life Science Chemicals und die Merck-Gruppe sind daher angepasst worden.

Merck konnte die abgegebene Prognose für das Jahr 2010 in einem sich verbessernden wirtschaftlichen Umfeld insgesamt übertreffen.

Im Geschäftsbericht 2009 prognostizierten wir für das Jahr 2010 ein Wachstum der Gesamterlöse für die Merck-Gruppe in einer Bandbreite von 3 % bis 7 %. Unsere Gesamterlöse legten um 12 % auf 8.650 Mio EUR zu. Beim Operativen Ergebnis konnten wir eine Steigerung von 88 % auf insgesamt 1.222 Mio EUR erreichen. In unserer Prognose sind wir von 20 % bis 30 % Steigerung ausgegangen.

Für die Sparte Merck Serono sind wir von einem Wachstum der Gesamterlöse um 2 % bis 5 % ausgegangen. Tatsächlich konnte die Sparte ihre Gesamterlöse 2010 um 8 % auf 5.754 Mio EUR steigern. Beim Operativen Ergebnis hatten wir ein Wachstum von 30 % bis 40 % erwartet. Hier erreichten wir eine Steigerung von 59 % auf 565 Mio EUR. Zu den Wachstumsraten trugen eine bessere Geschäftsentwicklung und auch günstigere Währungskurse bei. Auf der Kostenseite verfolgten wir ein effizienteres Ausgabenmanagement im Bereich Marketing und Vertrieb sowie Forschung und Entwicklung.

Für die Sparte Consumer Health Care haben wir ein Umsatzwachstum zwischen 5 % und 10 % erwartet. Tatsächlich betrug das Wachstum der Gesamterlöse nur 1 % auf 472 Mio EUR. Die Prognose für das Operative Ergebnis bewegte sich zwischen –10 % und 0 %. Die reale Entwicklung lag bei –71 % und ergab ein Operatives Ergebnis von 14 Mio EUR. Die Prognose wurde nicht erreicht, da sich die Geschäftsentwicklung in China und Mexiko sowie außerplanmäßige Abschreibungen negativ auswirkten.

Die Prognose für das Umsatzwachstum der früheren Sparte Liquid Crystals lag im Korridor zwischen 5 % und 10 %. Tatsächlich wurde ein Wachstum in Höhe von 38 % auf 1.013 Mio EUR erreicht. Beim Operativen Ergebnis sahen wir die Zielmarke bei einem Zuwachs von 15 % bis 25 %, die mit 132 % auf 527 Mio EUR für das Jahr 2010 überaus deutlich überschritten wurde. Die Gründe hierfür waren, dass die wirtschaftliche Erholung des Geschäfts wesentlich besser als erwartet verlief und darüber hinaus neue Technologien, insbesondere der PS-VA-Bereich, sowie eine günstige Währungskursentwicklung zu dieser Steigerung beitrugen.

Das Umsatzwachstum der früheren Sparte Performance & Life Science Chemicals sahen wir im Rahmen von plus 3 % bis 8 %. Es wurde aber ein Wachstum der Gesamterlöse in Höhe von 17 % auf 1.411 Mio EUR erreicht. Das Operative Ergebnis betrug 205 Mio EUR, was einer Steigerung von 111 % entspricht. Die Prognose von 15 % bis 20 % wurde damit erheblich übertroffen. Die Gründe hierfür liegen auch in dieser Sparte in einer guten Geschäftsentwicklung sowie günstigen Währungseinflüssen.

### Gesamtwirtschaftliche Entwicklung

Das wirtschaftliche Umfeld, in dem sich Merck bewegt, wird von der Organisation für wirtschaftliche Zusammenarbeit und Entwicklung (OECD) und dem Internationalen Währungsfond (IWF) für 2011 unterschiedlich eingeschätzt. Merck orientiert sich an den Vorhersagen der OECD.

Gemäß OECD-Prognose wächst in den 34 Mitgliedsstaaten im Jahr 2011 das Bruttoinlandsprodukt (BIP) um 2,3 % und 2012 um 2,8 %. Für die USA rechnet die Organisation dabei mit einem BIP-Wachstum im Jahr 2011 von 2,2 % und mit 3,1 % für 2012. Für den Euro-Währungsraum prognostiziert sie eine Zunahme des BIP um 1,7 % für 2011 bzw. um 2,0 % für 2012. Für Japan fallen die Prognosen etwas geringer aus. Sie liegen für das Jahr 2011 bei einem BIP-Anstieg von 1,7 % und für 2012 bei einem Plus von 1,3 %.

Die OECD sieht eine wirtschaftliche Erholung, die aber mit Risiken behaftet ist. Für eine nachhaltige Erholung von der Krise fordert die OECD, dass Regierungen sich umgehend mit der Konsolidierung der Staatsfinanzen beschäftigen müssen, um mehr Stabilität an den Finanzmärkten zu erreichen. Des Weiteren müsse der Ausstieg aus den unterschiedlichen Konjunkturprogrammen zum richtigen Zeitpunkt erfolgen. Die OECD erwartet die Rückkehr auf ein normales Zinsniveau erst ab der ersten Hälfte 2012, da sie von einem schwachen Wachstum in den USA und der Euro-Währungszone ausgeht. Ferner regt die OECD an, dass sich die Wirtschaftspolitik weg vom Krisenmanagement hin zu Krisenprävention ausrichten sollte. Die Wachstumsaussichten für Schwellenländer wie Brasilien, China oder Indien seien deutlich besser. Allerdings gebe es in Brasilien wie in China inflationären Druck, wohingegen Indien sein Steuerdefizit bekämpfen müsse.

Der IWF geht von einer BIP-Zunahme im Jahr 2011 für die Welt von 4,4 % aus, warnt aber vor zu geringer Nachfrage der Endverbraucher. Für entwickelte Länder nimmt er an, dass das BIP um 2,5 % im Jahr 2011 zunimmt (darunter USA: +3,0 %, Deutschland: +2,2 %, Japan: +1,6 %). Für aufstrebende Länder und Entwicklungsländer wird ein BIP-Wachstum im Jahr 2011 von 6,5 % vorhergesagt, darunter China mit 9,6 %, Indien mit 8,4 % und Russland mit 4,5 %. Das weltweite Wachstum für 2012 soll den IWF-Daten zufolge bei 4,5 % liegen. Die USA werden laut dieser Prognose mit 2,7 % geringer wachsen als in 2011, Deutschland mit 2,0 % ebenfalls geringfügig weniger als im Vorjahr und Japan mit 1,8 % ein wenig über 2011 zulegen. Russland (+4,4 %) und China (+9,5 %) blieben fast genau auf dem Niveau von 2011. Indien wird den vorliegenden Daten nach ein BIP-Anstieg von 8,0 % verzeichnen, was etwas weniger Wachstum bedeutet als im Jahr 2011. Risiken für 2011 sieht der IWF in der hohen Staatsverschuldung, der Volatilität und den nicht abgeschlossenen Reformen der Finanzmärkte und in der Finanzierung der Banken sowie auch in schwachen Immobilienmärkten in einigen Ländern. Zudem verharret, bedingt durch das vergleichsweise langsame Wachstum, in den Industrieländern die Arbeitslosigkeit auf hohem Niveau.

Wir gehen davon aus, dass wir auch zukünftig in bestimmten Ländern mit Unsicherheiten bei der gesamtwirtschaftlichen Entwicklung zu rechnen haben, und haben solche Unwägbarkeiten in unseren Prognosen berücksichtigt.

### Prognose für die Merck-Gruppe

Unsere Prognosen für Merck berücksichtigen die Risiko- und Chancenabwägungen des Unternehmens nach Maßgabe unserer operativen Planung und mittelfristigen Annahmen. Mögliche Akquisitionen, Verkäufe und Sondermaßnahmen dagegen sind nicht enthalten. Die Prognosen gehen von einer moderaten Energie- und Rohstoffpreisentwicklung sowie von steigenden Personalkosten aus. Da wir Spezialchemikalien herstellen, sind wir von der Entwicklung des Ölpreises weitgehend unabhängig. Insgesamt erwarten wir für unsere Geschäfte stabile Preise oder marktorientierte Preiserhöhungen und sehen uns in der Sparte Performance Materials einem signifikanten Preisdruck ausgesetzt. Auch im Pharmabereich sehen wir einen kontinuierlichen Preisdruck, insbesondere auf Grund der strukturellen Probleme der Gesundheitssysteme. Die prognostizierte Entwicklung der Gesamterlöse für die gesamte Merck-Gruppe mit ihren Sparten ist in der folgenden Tabelle dargestellt:

#### Gesamtübersicht 2010 – 2011

| in Mio EUR             | Gesamterlöse               |                    |
|------------------------|----------------------------|--------------------|
|                        | angepasste Ist-Werte 2010* | Prognose 2011      |
| Merck Serono           | 5.754                      | 5 % – 10 %         |
| Consumer Health Care   | 472                        | 7 % – 12 %         |
| Merck Millipore*       | 1.613                      | 51 % – 56 %        |
| Performance Materials* | 1.452                      | 2 % – 7 %          |
| <b>Merck-Gruppe</b>    | <b>9.291</b>               | <b>13 % – 18 %</b> |

\*Chemiesparten vergleichbar dargestellt.

Ab dem Jahr 2011 wird das Geschäftsfeld Cosmetics Actives in der Sparte Performance Materials geführt. Im berichteten Vorjahr hingegen war dieses Geschäftsfeld noch Teil der Sparte Merck Millipore. Die für diese Sparten prognostizierten Wachstumsraten in diesem Bericht basieren daher auf angepassten Ist-Werten für das Jahr 2010.

Vor dem Hintergrund der zu erwartenden gesamtwirtschaftlichen Entwicklung rechnet die Geschäftsleitung – ausgehend von den Gesamterlösen in Höhe von 9.291 Mio EUR im Jahr 2010 – mit einem Anstieg der Gesamterlöse für das Jahr 2011 in einer Spanne zwischen 13% und 18% und für das Jahr 2012 mit einem weiteren Wachstum. Die Geschäftsleitung geht weiter davon aus, dass das Operative Ergebnis der Gruppe von 1.113 Mio EUR im Jahr 2010 zwischen 35% und 45% in 2011 und in 2012 ebenfalls steigen wird. Auch das Ergebnis nach Steuern, ohne Berücksichtigung eventueller Sondermaßnahmen, wird sich in diesem Zeitraum verbessern.

Durch die Millipore-Akquisition hat sich unsere Verschuldung erhöht. Merck hatte 2010 eine Eigenkapitalquote von 46,3 % sowie Nettofinanzschulden in Höhe von 4.484 Mio EUR. Bei der Eigenkapitalquote erwarten wir einen leichten Anstieg auf hohem Niveau. Wir planen, in den nächsten Jahren die Verschuldung um rund 2 Mrd EUR zurückzuführen. Ausgehend von dem sehr hohen Basis Free Cash Flow in Höhe von 1.670 Mio EUR in 2010 gehen wir auch für die beiden folgenden Jahre von einem weiterhin hohen Basis Free Cash Flow aus. Falls es zu Zahlungen für Rechtsstreitigkeiten kommen sollte, würde der Basis Free Cash Flow negativ beeinflusst werden. Die Investitionen in Sachanlagen werden in den nächsten Jahren unterhalb des Niveaus von 2010 liegen. Ausgehend von einem Aufwand für Forschung und Entwicklung in Höhe von 1.397 Mio EUR im Jahr 2010, wird Merck auch in den Jahren 2011 und 2012 eine Forschungsquote von rund 14 % bis 15 % erreichen.

Merck verfügt über ein umfangreiches Risiko- und Chancenmanagement, das im Risikobericht beschrieben ist (siehe Seite 86 ff.). Bezogen auf den im Prognosebericht unterstellten Prognosezeitraum von zwei Jahren sehen wir im Wesentlichen geschäftsbezogene Chancen und Risiken. Durch die Diversifizierung und das breit angelegte Produktportfolio von Merck ergeben sich je Sparte sehr unterschiedliche Spektren wichtiger Chancen und Risiken. Erläuterungen hierzu finden sich bei den jeweiligen Sparten.

#### **Prognose für die Pharmabranche allgemein**

Der weltweite Pharmamarkt soll laut dem Marktforschungsinstitut IMS Health im Jahr 2011 um 5 % bis 7 % auf 880 Mrd USD zulegen. Die USA bleibt der weltgrößte Markt und soll gemäß IMS Health im Jahr 2011 um 3 % bis 5 % wachsen. Der japanische Markt, die Nr. 2 der Welt, wird 2011 nicht von den obligatorischen, staatlich verordneten Preiskürzungen betroffen sein, die alle zwei Jahre stattfinden. Daher kann dort von einem Wachstum von 5 % bis 7 % ausgegangen werden. China, nun der weltweit drittgrößte Pharmamarkt, wird nach IMS Health zwischen 25 % und 27 % wachsen und ein Volumen von rund 50 Mrd USD erreichen. Die fünf großen EU-Märkte (Deutschland, Frankreich, Italien, Spanien, Großbritannien) sollen zwischen 1 % und 3 % wachsen. Länder mit aufstrebenden Pharmamärkten, d. h. solchen, in denen die Regierungen die Gesundheitsausgaben intensivieren und in denen der Bedarf steigt, werden voraussichtlich ein Wachstum zwischen 15 % und 17 % auf 170 bis 180 Mrd USD erreichen. Zu diesen insgesamt 17 Ländern zählt IMS Health u. a. die BRIC-Staaten Brasilien, Russland, Indien und China.

IMS rechnet damit, dass bis zum Jahr 2014 der Weltpharmamarkt durchschnittlich pro Jahr um 5 % bis 8 % wachsen wird – und zwar auf ein Volumen von 1.130 Mrd USD bis 1.160 Mrd USD. Die fünf größten EU-Märkte sollen bis zum Jahr 2014 um 1 % bis 4 % (auf 170 Mrd USD bis 200 Mrd USD) zulegen, Japan zwischen 2 % und 5 % (auf 100 Mrd USD bis 130 Mrd USD) und die USA zwischen 3 % und 6 % (auf 360 Mrd USD bis 390 Mrd USD). Für die aufstrebenden 17 Pharmamärkte wird ein Wachstum ihrer Gesundheitsmärkte zwischen 14 % und 17 % (auf 260 Mrd USD bis 290 Mrd USD) prognostiziert.

Nach Therapiegebieten betrachtet, sieht IMS Health bis 2014 ein Wachstum von über 10 % unter anderem für Produkte zur Bekämpfung von Krebserkrankungen, gegen Multiple Sklerose sowie zur Behandlung von HIV sowie gegen Diabetes, da in diesen Gebieten viele neue Produkte auf dem Markt erwartet werden. Alleine für 2011 rechnen die Marktforscher mit der Markteinführung von fünf neuen Produkten mit Blockbuster-Potenzial (Produkte mit einem Umsatz von über einer Milliarde USD).

### **Prognose für die Sparte Merck Serono**

Für die Sparte Merck Serono rechnet die Geschäftsleitung 2011 mit einem Anstieg der Gesamterlöse – ausgehend von 5.754 Mio EUR im Jahr 2010 – in einem Korridor von 5 % bis 10 % und 2012 mit einem weiteren Wachstum. Beim Operativen Ergebnis wollen wir, ausgehend von 565 Mio EUR im Jahr 2010, ein deutliches Wachstum für 2011 und eine weitere Steigerung für 2012 erreichen. Der stärkere Anstieg im Vergleich zu den Gesamterlösen ist auf eine nur moderate Kostensteigerung, vor allem im Bereich Marketing und Vertrieb, zurückzuführen. Außerdem hatten 2010 hohe Wertberichtigungen das Operative Ergebnis belastet.

Als regelmäßig wiederkehrenden Aufwand enthält das Ergebnis die Abschreibungen auf die beigelegten Zeitwerte der immateriellen Vermögensgegenstände, welche durch die Serono-Akquisition angesetzt wurden. Die planmäßigen Abschreibungen werden für die Jahre 2011 und 2012 voraussichtlich jeweils rund 600 Mio EUR betragen.

In den folgenden Jahren werden die Kosten für Forschung und Entwicklung unverändert wieder bei der Zielmarke von 20 % der Gesamterlöse der Sparte Merck Serono liegen.

Für Merck sind die Märkte Krebstherapeutika und Multiple Sklerose sehr wichtig, da wir dort Patienten Behandlungsoptionen anbieten. Medikamente zur Behandlung von Krebserkrankungen bleiben nach Kalkulationen des Pharmadienleistungsunternehmens Evaluate Pharma nach wie vor das Gebiet mit den höchsten Umsatzzahlen. Der Anteil von Krebsmedikamenten am gesamten Pharmamarkt lag im Jahr 2009 bei 7,9 % und soll bis zum Jahr 2016 auf 8,8 % zunehmen; bei Umsätzen von dann deutlich über 70 Mrd USD. Medikamente zur Behandlung von Multipler Sklerose brachten es 2009 mit einem Volumen von 10 Mrd USD auf Rang 14. Hier sagt Evaluate Pharma einen jährlichen durchschnittlichen Anstieg bis 2016 um 3 % auf 12 Mrd USD vorher.

Der Anteil an Biotech-Produkten unter den 100 meistverkauften Pharmazeutika lag 2009 bei 31 %. Er soll bis 2016 auf 48 % ansteigen. Diese Zahl ist für Merck interessant, da bei uns schon jetzt über 50 % unseres Pharma-Umsatzes von Biotech-Produkten stammen.

Wichtige Chancen und Risiken für die Sparte Merck Serono sehen wir eng mit der erfolgreichen Einführung neuer Produkte verbunden:

Der Fokus für Merck Serono wird daher insbesondere auf den Markteinführungen der Cladribin-Tabletten liegen. Cladribin wurde in 2010 bereits in Russland und Australien zugelassen.

Für Europa hat das Committee for Medicinal Products for Human Use (CHMP) der European Medicines Agency (EMA) im September 2010 eine negative Stellungnahme zur Markteinführung abgegeben. Wir hatten bei der EMA Einspruch gegen die Entscheidung eingelegt, um eine erneute Prüfung des Antrags zu erreichen. Im Januar 2011 wurde die bisherige Einschätzung der EMA bestätigt und der Antrag auf Marktzulassung für Cladribin-Tabletten endgültig negativ beschieden. Dies wurde in unserer Prognose berücksichtigt. Nach der erneuten Einreichung unseres Antrags auf Zulassung für Cladribin-Tabletten bei der US-amerikanischen Zulassungsbehörde FDA (Food and Drug Administration) im Juni 2010 hat die FDA eine beschleunigte Prüfung des Antrags zugesagt. Im November 2010 hat die FDA den Prüfungszeitraum des Antrags um 3 Monate verlängert, so dass mit einer Entscheidung Ende Februar 2011 zu rechnen ist. Wir werden auch weiterhin darauf hinarbeiten, ein orales, krankheitsmodifizierendes Medikament für die Behandlung der schubförmigen Multiplen Sklerose bereitzustellen.

Daneben bietet auch das bestehende Geschäft Wachstumschancen. Diese liegen insbesondere in Märkten wie Asien, hier speziell China, aber auch Russland oder Lateinamerika sowie in einer Weiterentwicklung bestehender Produkte (Life-Cycle-Management), beispielsweise mit neuen Darreichungsformen.

Weitere Risiken in dieser Sparte bestehen auf Grund der hohen Staatsverschuldung in einigen Ländern und der damit einhergehenden beabsichtigten Senkung von Ausgaben im Gesundheitswesen, die zu Umsatzeinbußen führen können.

#### **Prognose für die Sparte Consumer Health Care**

Für die Sparte Consumer Health Care geht die Geschäftsleitung davon aus, dass die Gesamterlöse, basierend auf den Zahlen des Jahres 2010 in Höhe von 472 Mio EUR, 2011 zwischen 7 % und 12 % steigen werden und 2012 ebenfalls weiter wachsen können. Auf Basis des Operativen Ergebnisses von 2010 in Höhe von 14 Mio EUR wird ein deutliches Wachstum in 2011 angestrebt. In 2012 gehen wir ebenfalls von einer weiteren Steigerung aus. Die Verbesserung des Betriebsergebnisses ist auf eine erhöhte Marge und moderate Kostensteigerungen zurückzuführen. Aufgrund der schwierigen Geschäftsentwicklung in China und Mexiko lag die Sparte in 2010 mit dem Umsatz unter den Erwartungen. Neben diesen beiden Effekten beeinflussten weiterhin ein Lagerbrand in Großbritannien sowie außerplanmäßige Abschreibungen das Operative Ergebnis.

Die Marktforscher von Nicholas Hall rechnen für das Jahr 2011 mit einem weltweiten Wachstum der Schlüsselmärkte für rezeptfreie Medikamente von 4,8 %. Begründet wird dieses Wachstum mit einer weiteren Erholung der Märkte von dem Abwärtstrend, der auf die Wirtschaftskrise folgte. Die Experten schlüsseln diese Vorhersage in folgende Einzelmärkte auf: Das stärkste Wachstum sehen sie in Lateinamerika (8,8 %), gefolgt vom asiatisch-pazifischen Markt (7,9 %). Für Europa rechnen sie mit einem Zuwachs von 3,5 %, für Japan von lediglich 0,5 %.



Chancen sehen wir in einem sich verstärkenden Wachstumstrend, basierend auf der Fokussierung des Produktportfolios in den strategischen Marken. Diese sind im Premiumpreissegment angesiedelt und entwickeln sich gegenüber dem globalen OTC-Markt überdurchschnittlich. Unser regionaler Schwerpunkt liegt neben den überproportional wachsenden lateinamerikanischen Märkten nach wie vor in Europa. Risiken für das Geschäft bestehen in sich ändernden gesundheitspolitischen Rahmenbedingungen, welche sich negativ auf das Geschäft auswirken können.

#### **Prognose für die Chemiebranche allgemein**

Der europäische Branchenverband CEFIC (Conseil Européen de l'Industrie Chimique) erwartet für 2011 einen zu 2010 vergleichsweise moderaten Produktionszuwachs der europäischen Chemiebranche um 2,5%. Der Markt sei voller Unsicherheiten bezüglich der Entwicklung des Euro-Kurses und der US-amerikanischen Geldpolitik. Die hohe Nachfrage nach Chemikalien, vor allem aus dem asiatischen Raum, führe zu Preiserhöhungen von Grundchemikalien. Daher sind destabilisierende Preisspitzen zu befürchten, prognostiziert CEFIC. Zudem seien viele Staaten zu Sparkursen gezwungen. Ausgaben zur Stimulierung der Wirtschaft werden daher zurückgefahren bzw. ganz eingestellt.

Der deutsche Verband der Chemischen Industrie (VCI) erwartet für 2011 einen internationalen Produktionszuwachs um 2,5% und eine Zunahme des Umsatzes um 4% auf 177,4 Mrd EUR. Im Vergleich zum bisherigen Spitzenjahr 2007 der deutschen chemischen Industrie liegt bei den VCI-Prognosen die erwartete Produktion für 2010 um 0,6% und die Investitionen um 4,6% über dem bisherigen Höchststand.

#### **Prognose für die Sparte Merck Millipore**

Mit der Akquisition von Millipore haben wir ein erfolgreiches Geschäftsmodell für die Life-Science-Industrie etabliert, in der wir auch zukünftig eine starke Marktposition einnehmen werden. Die Geschäftsleitung rechnet für Merck Millipore, ausgehend von Gesamterlösen in Höhe von 1.613\* Mio EUR in 2010, mit einer Steigerung für das Jahr 2011 zwischen 51% und 56% und für das Jahr 2012 mit einem weiteren Wachstum. Basierend auf dem Operativen Ergebnis in Höhe von 48\* Mio EUR im Jahr 2010, soll dieses in 2011 deutlich wachsen und 2012 ebenfalls weiter steigen.

Die hohen Veränderungen in den Gesamterlösen und im Operativen Ergebnis sind dadurch bedingt, dass das bereits zum bestehenden Merck-Geschäft erworbene Millipore-Geschäft im Jahr 2010 nur für 6 Monate Berücksichtigung fand. Außerdem ist zu beachten, dass die mit der Akquisition übernommenen Vorräte im Zuge der Kaufpreisallokation bereits mit dem Marktwert angesetzt und damit um 86 Mio EUR höher bewertet wurden. Dieser Betrag wurde im 2. Halbjahr 2010 vollständig in den Herstellungskosten aufwandswirksam berücksichtigt und belastete damit die Bruttomarge einmalig. Im Ergebnis sind als regelmäßig wiederkehrender Aufwand die Abschreibungen auf die beigelegten Zeitwerte der immateriellen Vermögensgegenstände, welche durch die Millipore-Akquisition gebildet wurden, enthalten. Die planmäßigen Abschreibungen werden für die Jahre 2011 und 2012 voraussichtlich jeweils rund 200 Mio EUR betragen. Ferner wird für das Jahr 2011 mit weiteren Integrationskosten gerechnet.

\*an die neue Berichtsstruktur angepasster Wert.

Die neue Geschäftseinheit Merck Millipore Bioscience entwickelt Produkte, die zu einem schnelleren Verständnis von biologischen Zusammenhängen und der Entwicklung von Therapien führen. Das umfangreiche Produktportfolio von Merck Millipore ist gut positioniert, um im dynamischen Bioscience-Markt zu wachsen. Teile des Bioscience-Markts werden auch weiterhin Herausforderungen gegenüberstehen. Risiken für diese Sparte sehen wir insbesondere bedingt durch die Konsolidierung und Restrukturierung der Pharmazeutischen Industrie, aber auch auf Grund von ablaufendem Patentschutz sowie bei der Entwicklung neuer Produkte. Die Geschäftseinheit Lab Solutions bietet ein breites Portfolio an innovativen, hochwertigen und zuverlässigen Produkten an, die für allgemeine Laboranwendungen in verschiedensten Bereichen geeignet sind. Das Wachstum basiert auf ausgezeichneten Produkten und dem direkten Verkauf. Des Weiteren ergeben sich Chancen in China, Indien und Amerika, da wir in den nächsten Jahren hier mit dem Markt wachsen wollen. Für die neue Geschäftseinheit Process Solutions liegen die Chancen insbesondere im starken Umsatzwachstum und Produktportfolio unserer Kunden sowie unserer Produkte für die Chromatographie. Die bedeutendsten Risiken bestehen auf Grund des Kostendrucks im Bereich der Biopharmazeutischen Industrie und der Versorgung durch andere Lieferanten.

Insgesamt ist es unser Ziel, in einem unsicheren Marktumfeld durch ein breites Produktportfolio, die weltweite Ausrichtung des Geschäfts sowie die Nutzung der regionalen Stärken und die Aufdeckung von Synergien im Ergebnis deutlich zu wachsen.

#### **Prognose für die Sparte Performance Materials**

In der Sparte Performance Materials geht Merck davon aus, dass die Gesamterlöse von 1.452 Mio EUR\* im Jahr 2010 für 2011 in einer Bandbreite von 2 % bis 7 % und für das Jahr 2012 ebenfalls wachsen werden. Das Operative Ergebnis in Höhe von 576 Mio EUR\* wird voraussichtlich für das Jahr 2011 unverändert bleiben und 2012 weiter wachsen.

Diese Sparte liefert Spezialchemikalien und Materialien für Flüssigkristall-Bildschirme und neue Beleuchtungs- und Displaytechnologien wie OLEDs (organische lichtemittierende Dioden) sowie Effektpigmente für die Kunststoff-, Druck- und Lackindustrie. Die Merck-Pigmente finden auch bei der Hautpflege und in der dekorativen Kosmetik Verwendung. Zudem befasst sich die Sparte mit Wachstumsmärkten im Bereich der erneuerbaren Energien.

\*an die neue Berichtsstruktur angepasster Wert.

Display Search, ein Marktforschungsunternehmen für die Displayindustrie, sieht den Markt für Displays basierend auf Flüssigkristallen weiter wachsen. Der LCD-Markt wird angetrieben von der stark wachsenden Nachfrage nach Fernsehern und Notebooks in den aufstrebenden Volkswirtschaften Asiens sowie nach Endgeräten wie etwa Tablet-Computern. Die gesamte Fläche mit Flüssigkristall-Displays soll nach Meinung der Marktforscher von 2010 bis 2017 jährlich im Schnitt um 8 % zulegen. Dies beinhaltet u. a. Fernseher, Monitore und Notebooks. Für das Jahr 2011 erwartet Display Search, dass die Fläche an Flüssigkristall-Panels, verglichen mit 2010, um 11 % zunimmt. Bisher konzentriert sich die Produktion von Flachbildschirmen auf Korea und Taiwan, gefolgt mitinigem Abstand von Japan. Nach Erwartungen von Display Search wird China den dritten Rang aber Ende 2012 übernommen haben.

Da eine unserer Abnehmerbranchen die Hersteller von Autolacken sind, ist für uns die Entwicklung der Autoabsatzzahlen von Bedeutung. Die US-Marktforscher von CSM Automotive sehen den weltweiten Autoabsatz für PKW im Jahr 2011 um 11 % auf 61 Mio PKW wachsen. Damit wäre die Automobilindustrie wieder auf dem Niveau von 2008, würde aber das gute Jahr 2007 noch nicht wieder erreichen. Den Marktforschern zufolge wird der indische Markt im Jahr 2011 am stärksten zulegen, gefolgt von China, Brasilien und Südkorea. Das Marktforschungsinstitut JD Power erwartet weltweit für 2011 eine Produktion von 73 Mio PKW, was deutlich über den 70,4 Mio verkauften Fahrzeugen aus dem Spitzenjahr 2007 liegen würde. Doch werde das Wachstum nur aus aufstrebenden „Emerging Markets“ kommen. Marktforscher Polk rechnet mit einer weiteren Steigerung der Produktion auf 78 Mio PKW im Jahr 2012.

Euromonitor, ein für die Kosmetikbranche wichtiges Marktforschungsunternehmen, sieht den Bereich Körperpflege und Kosmetika im Jahr 2011 um 5,2 % auf ein Gesamtvolumen von 369 Mrd USD ansteigen und erwartet für 2012 ein Wachstum von 3,7 % verglichen mit 2011. Auch auf diesem Markt ist die Sparte Performance Materials tätig.

Weitere Chancen für die Geschäftseinheit Liquid Crystals liegen in einer besseren wirtschaftlichen Entwicklung der Displaymärkte. Für unsere PS-VA-Technologie rechnen wir in Folge wachsender Märkte mit erfreulichen Zuwachsraten. Zur Beibehaltung der Technologieführerschaft bei den Flüssigkristallen werden wir unsere F&E-Aktivitäten entsprechend intensivieren. Programme zur Steigerung der Effizienz in der Produktion tragen dazu bei, das Operative Ergebnis auf einem hohen Niveau zu halten. Risiken bestehen insbesondere in Folge des Preisdrucks im Bereich der LC-Materialien und auf Grund des möglichen Markteintritts neuer Wettbewerber. Wegen der bislang dominierenden Position von Merck könnten insbesondere im Bereich der PS-VA-Technologie Wettbewerber die Umsatz- und Ergebnisentwicklung negativ beeinflussen.

Die Geschäftseinheit Pigments und Cosmetics hat sich deutlich von der Krise erholt und wird auch in den nächsten Jahren wachsen. Das Portfolio wird weiterhin zu höherwertigen Produkten verlagert. Chancen und Risiken sind mit dem Wachstum insbesondere der Automobilindustrie verknüpft. Es gibt hier einen Trend zu hochwertigen Farben, in denen Merck überproportional stark vertreten ist. Weitere Chancen können sich ergeben, wenn sich der derzeitige Trend von silber-weißen und schwarzen Tönen in der Automobilindustrie wieder zu bunten Farben entwickeln sollte.

#### **Prognose für das Segment Konzernkosten und Sonstiges**

Das Segment Konzernkosten und Sonstiges enthält die Kosten der Konzernfunktionen. Dies sind unter anderen Kosten der internen Revision, der Rechts- und Steuerabteilung, Kosten für die Hauptversammlung etc. Steuern für die Merck-Gruppe werden hier ebenso ausgewiesen wie das Finanzergebnis. Das Operative Ergebnis wird, ausgehend von –90 Mio EUR im Jahr 2011, unverändert bleiben. Für das Jahr 2012 rechnen wir mit einem Kostenanstieg.

#### **Dividendenentwicklung**

Für das Jahr 2010 schlagen wir der Hauptversammlung eine Dividende von 1,25 Euro je Aktie vor. Aufgrund unserer Ergebniserwartung stellt Merck seinen Eigentümern – der Merck-Familie und den Aktionären – eine weiterhin ertragsorientierte Ausschüttung in Aussicht.

#### **Zusammenfassung**

Die Geschäftsleitung geht für die Merck-Gruppe in beiden Jahren von einem Wachstum bei Gesamterlösen und Operativem Ergebnis aus. Die höheren Finanzschulden der Merck-Gruppe, welche durch die Millipore-Akquisition entstanden sind, werden in den nächsten Jahren, auch auf Grund unseres hohen Free Cash Flows, stetig zurückgeführt. Dies wird auch weiterhin zu soliden Bilanzrelationen führen.

Die tatsächlichen Ergebnisse der Merck-Gruppe und ihrer Sparten können wesentlich von den Erwartungen über die voraussichtliche Entwicklung abweichen, wenn eine der hier genannten oder andere Unsicherheiten eintreten oder sich die den Aussagen zu Grund liegenden Planungsannahmen als unzutreffend erweisen.

## EREIGNISSE NACH DEM BILANZSTICHTAG

Im Januar 2011 wurde die bisherige Einschätzung des Committee for Medicinal Products for Human Use (CHMP) der European Medicines Agency (EMA) bestätigt und der Antrag auf Marktzulassung für Cladribin-Tabletten in Europa endgültig negativ beschieden.

Am 7. Februar 2011 wurde der Verkauf der Crop-Bioscience-Aktivitäten abgeschlossen. Bei einem Verkaufspreis von 208 Mio EUR ergibt sich voraussichtlich ein Veräußerungsgewinn in Höhe von rund 160 Mio EUR vor Steuern. Die Aktivitäten wurden zum Stichtag 31. Dezember 2010 im Konzernabschluß als zur Veräußerung gehaltene Vermögenswerte und Verbindlichkeiten ausgewiesen.

## CORPORATE GOVERNANCE

---

- 108 Erklärung zur Unternehmensführung
- 128 Bericht des Aufsichtsrats
- 131 Ziele des Aufsichtsrats für seine Zusammensetzung

## ERKLÄRUNG ZUR UNTERNEHMENSFÜHRUNG

Die Erklärung zur Unternehmensführung enthält die Entsprechenserklärung, relevante Angaben zu Unternehmensführungspraktiken, den Vergütungsbericht sowie eine Beschreibung der Arbeitsweise der Gremien.

## GEMEINSAMER BERICHT VON GESCHÄFTSLEITUNG UND AUFSICHTSRAT NACH ZIFFER 3.10 DES DEUTSCHEN CORPORATE-GOVERNANCE-KODEX INKLUSIVE ENTSPRECHENSERKLÄRUNG

Der Deutsche Corporate-Governance-Kodex ist ausschließlich an den Verhältnissen einer Aktiengesellschaft ausgerichtet. Die Merck KGaA hat sich entschieden, den Kodex sinngemäß so auf eine Kommanditgesellschaft auf Aktien anzuwenden, dass dem Interesse der Aktionäre gedient ist. Um den Aktionären den Vergleich mit den Verhältnissen bei anderen Unternehmen zu erleichtern, legen wir der Corporate Governance die Verhaltensempfehlungen der Kodex-Kommission zur Unternehmensleitung und -überwachung zugrunde und verzichten auf einen ebenfalls zulässigen eigenen Kodex. Den Empfehlungen des Kodex wurde in der Vergangenheit und wird in der Zukunft bei sinngemäßer Anwendung bis auf wenige Ausnahmen entsprochen. Zum besseren Verständnis erläutern wir im Folgenden generell die Gesellschaftsform KGaA und anschließend die spezifische Situation bei Merck, wobei wir auch auf die Hauptversammlung und die Aktionärsrechte eingehen.

### Die Kommanditgesellschaft auf Aktien

„Die Kommanditgesellschaft auf Aktien (KGaA) ist eine Gesellschaft mit eigener Rechtspersönlichkeit, bei der mindestens ein Gesellschafter den Gesellschaftsgläubigern unbeschränkt haftet (persönlich haftender Gesellschafter) und die übrigen an dem in Aktien zerlegten Grundkapital beteiligt sind, ohne persönlich für die Verbindlichkeiten der Gesellschaft zu haften (Kommanditaktionäre)“ (§ 278 Abs. 1 AktG). Es liegt also eine Mischform von Aktiengesellschaft und Kommanditgesellschaft mit Schwerpunkt im Aktienrecht vor. Prägende Unterschiede zur Aktiengesellschaft sind das Vorhandensein von persönlich haftenden Gesellschaftern, die grundsätzlich auch die Geschäfte führen, das Fehlen eines Vorstands und die Einschränkung der Rechte und Pflichten des Aufsichtsrats (siehe dazu auf Seite 124 f. die Beschreibung der Arbeitsweise des Aufsichtsrats). Auch hinsichtlich der Hauptversammlung ergeben sich Besonderheiten. So bedürfen zahlreiche ihrer Beschlüsse der Zustimmung der persönlich haftenden Gesellschafter (§ 285 Abs. 2 AktG), namentlich auch die Feststellung des Jahresabschlusses (§ 286 Abs. 1 AktG). Etliche der Verhaltensempfehlungen des auf Aktiengesellschaften zugeschnittenen Kodex sind daher generell auf eine KGaA nur entsprechend anwendbar.

### Die Merck KGaA

Am Gesamtkapital der Merck KGaA hält die persönlich haftende Gesellschafterin E. Merck KG rund 70 % (Kapitalanteil), die Kommanditaktionäre halten den in Aktien eingeteilten Rest (Grundkapital). Die E. Merck KG ist von der Geschäftsführung ausgeschlossen. Die persönlich haftenden Gesellschafter ohne Kapitalanteil (Geschäftsleitung) führen die Geschäfte. Dennoch hat die E. Merck KG aufgrund ihres hohen Kapitaleinsatzes und der unbeschränkten persönlichen Haftung ein großes Interesse an der Ordnungsmäßigkeit und Effizienz des Geschäftsbetriebs der Merck KGaA und übt entsprechenden Einfluss aus. Für eine weitere Harmonisierung der Interessen der Kommanditaktionäre und der E. Merck KG sorgt die Beteiligung der Merck KGaA am Ergebnis der E. Merck KG gemäß §§ 26 ff. der Satzung. Die E. Merck KG bestellt die Geschäftsleitung und beruft sie ab. Außerdem hat die E. Merck KG Gremien geschaffen, um – in Ergänzung zu den Kompetenzen und der Tätigkeit des Aufsichtsrats – die Kontrolle und Beratung der Geschäftsleitung sicherzustellen. Dies gilt vornehmlich für den Gesellschafterrat der E. Merck KG. Aufgrund der Vorschriften des Aktiengesetzes, der Satzung der Merck KGaA und der Geschäftsordnungen der verschiedenen Gremien bestehen bei der Merck KGaA Regeln für die Geschäftsleitung und deren Überwachung, die den Anforderungen des Kodex gerecht werden. Der vom Kodex beabsichtigte Schutz der Kapitalgeber, die das unternehmerische Risiko tragen, wird erreicht.

Dies verdeutlicht das nachfolgende Schaubild:

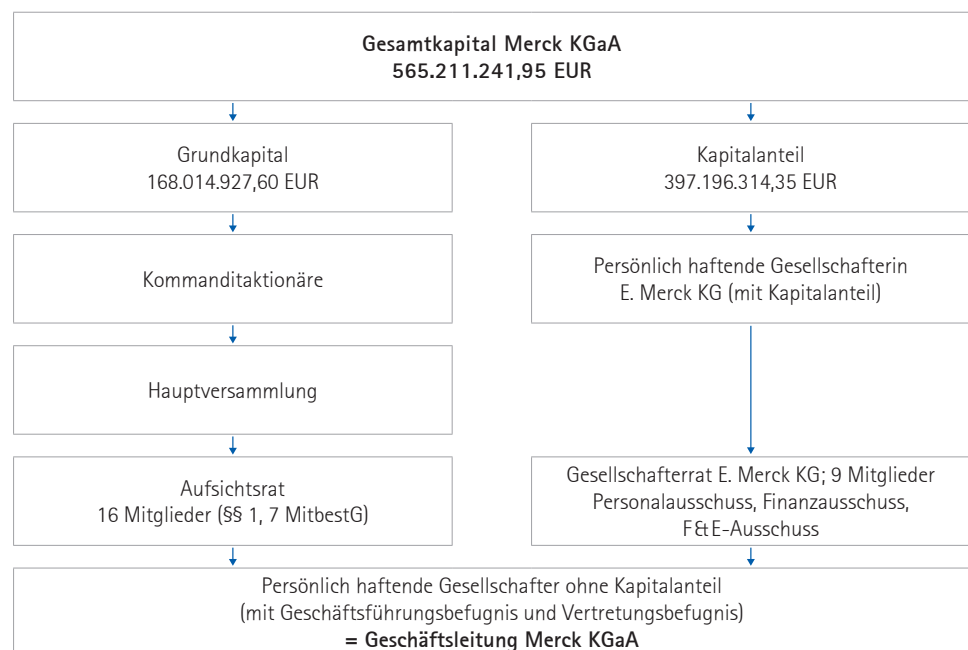



### Die Hauptversammlung der Merck KGaA

Die ordentliche Hauptversammlung findet in den ersten acht Monaten des Geschäftsjahres statt. Die 15. Hauptversammlung der Merck KGaA wurde am 9. April 2010 in Frankfurt am Main durchgeführt. Hier verzeichnete man mit einer Anwesenheit von 58,22 % des Grundkapitals eine stabile Kapitalpräsenz. Im Jahr zuvor hatte die Quote mit 59 % nur marginal höher gelegen. Nach § 21 Abs. 3 der Satzung der Gesellschaft sind der Jahresabschluss, der Lagebericht, der Bericht des Aufsichtsrats sowie der Vorschlag für die Verwendung des Bilanzgewinns der Hauptversammlung vorzulegen und in der Versammlung zu erläutern. Die ordentliche Hauptversammlung beschließt insbesondere über die Feststellung des Jahresabschlusses, die Verwendung des Bilanzgewinns, die Entlastung der Mitglieder der Geschäftsleitung und der Mitglieder des Aufsichtsrats sowie die Wahl des Abschlussprüfers. Gleichzeitig steht der Versammlung Beschlusskraft für Satzungsänderungen zu. Die Beschlüsse der Hauptversammlung bedürfen – mit Ausnahme der in § 285 Absatz 2 Satz 2 AktG aufgeführten Maßnahmen – der Zustimmung der persönlich haftenden Gesellschafter.

Sämtliche Dokumente und Informationen zu anstehenden Hauptversammlungen werden unter anderem auf unserer Website zugänglich gemacht. Außerdem wird die Hauptversammlung von Beginn bis zum Ende der Rede des Vorsitzenden der Geschäftsleitung live im Internet übertragen. Die einleitenden Reden des Vorsitzenden der Geschäftsleitung und des Aufsichtsratsvorsitzenden werden aufgezeichnet, um sie der interessierten Öffentlichkeit auch nach Ende der Versammlung jederzeit zur Verfügung zu stellen und so den hohen Anforderungen an Transparenz, die der Konzern an sich selbst richtet, Genüge zu tun.

### Aktionärsrechte

Die Aktionäre der Merck KGaA nehmen ihre Rechte in der Hauptversammlung wahr. Jede Merck-Aktie gewährt in der Hauptversammlung eine Stimme.

Die Aktionäre können ihr Stimmrecht persönlich, durch einen Bevollmächtigten oder einen Stimmrechtsvertreter der Gesellschaft ausüben. Besonderen Beschränkungen unterliegen Stimmrechte lediglich gemäß § 22 Absatz 5 der Satzung der Gesellschaft. Hiernach können persönlich haftende Gesellschafter, soweit sie Aktien besitzen, das Stimmrecht aus ihren Aktien nicht ausüben bei der Wahl und Abberufung des Aufsichtsrats, der Entlastung der Mitglieder der Geschäftsleitung und des Aufsichtsrats, der Wahl des Abschlussprüfers, der Bestellung von Sonderprüfern sowie der Beschlussfassung über Ersatzansprüche.

Auf der Website der Gesellschaft findet sich eine zusammenfassende Darstellung der Rechte der Aktionäre betreffend die Hauptversammlung.

### Abweichungen vom Corporate-Governance-Kodex

Folgende Abweichungen vom Corporate-Governance-Kodex liegen vor:

1. Bis zum 30. Juni 2010 unterhielt die Merck KGaA eine „Directors & Officers (D & O)“-Versicherung für ihre Geschäftsleitungs- und Aufsichtsratsmitglieder, die keinen Selbstbehalt gemäß § 93 Absatz 2 Satz 3 AktG und Ziffer 3.8 Abs. 2 und 3 DCGK aufwies. Die Gesellschaft hatte hierauf in der Vergangenheit verzichtet, weil D&O-Versicherungen mit dem geforderten Selbstbehalt nicht aktiv von der Versicherungswirtschaft angeboten wurden und der individuellen Vereinbarung eines Selbstbehalts kein wirtschaftlich erheblicher Prämiennachlass gegenübersteht.  
Die Merck KGaA hat mit Wirkung zum 1. Juli 2010 einen § 93 Absatz 2 Satz 3 AktG und Ziffer 3.8 Abs. 2 und 3 des Kodex entsprechenden Selbstbehalt eingeführt. Dieser berücksichtigt die vom DCGK aufgestellten Mindestanforderungen, da ein Selbstbehalt von mindestens 10% des Schadens bis mindestens zur Höhe des Eineinhalbfachen der festen jährlichen Vergütung des Geschäftsleitungs- bzw. Aufsichtsratsmitglieds vereinbart worden ist.
2. Entgegen Ziffer 5.4.1 S. 2 wird bei Vorschlägen für die Wahl von Aufsichtsratsmitgliedern keine Altersgrenze berücksichtigt. Das Alter der Aufsichtsratsmitglieder ist kein Kriterium für ihre Qualifikation und Kompetenz. Außerdem soll auf langjährige Erfahrung von Aufsichtsratsmitgliedern nicht verzichtet werden.

## VERGÜTUNGSBERICHT

(Ziffern 4.2.5 und 5.4.6 des Deutschen Corporate-Governance-Kodex)

Der Vergütungsbericht ist Teil des geprüften Konzernanhangs.

### Vergütung der Mitglieder der Geschäftsleitung der Merck KGaA

Die Mitglieder der Geschäftsleitung der Merck KGaA sind – anders als Vorstandsmitglieder von Aktiengesellschaften – keine angestellten Organmitglieder. Sie sind vielmehr persönlich haftende Gesellschafter sowohl der Merck KGaA als auch der Komplementärgesellschaft E. Merck KG und erhalten in dieser Funktion eine Gewinnvergütung von der E. Merck KG. Die Verpflichtung zur individualisierten Offenlegung der Vergütung von Vorständen börsennotierter Aktiengesellschaften gilt daher nicht für die Geschäftsleitung der Merck KGaA. Die nachfolgende Darstellung der Einzelvergütungen erfolgt deshalb auf freiwilliger Basis. Anders als bei börsennotierten Aktiengesellschaften entscheidet bei der Merck KGaA über die Höhe und Zusammensetzung der Vergütung nicht der Aufsichtsrat, sondern der Gesellschafterrat der E. Merck KG, der die Wahrnehmung seiner diesbezüglichen Rechte seinem Personalausschuss übertragen hat. Der Personalausschuss ist unter anderem für die folgenden Entscheidungen zuständig: Inhalt von Verträgen mit den Mitgliedern der Geschäftsleitung, Gewährung von Darlehen und Gehaltsvorschüssen, Genehmigung der Übernahme von Ehrenämtern, Mandaten und anderen nebenberuflichen Tätigkeiten sowie die Geschäftsverteilung innerhalb der Geschäftsleitung der Merck KGaA. Das vom Personalausschuss festgelegte Vergütungssystem für

die Mitglieder der Geschäftsleitung berücksichtigt verschiedene vergütungsrelevante Aspekte, unter anderem die Verantwortung der einzelnen Geschäftsleitungsmitglieder, ihre individuellen Leistungen, den Unternehmenserfolg sowie die Höhe der Vergütung von Geschäftsleitungs- und Vorstandsmitgliedern vergleichbarer Unternehmen. Der Personalausschuss lässt regelmäßig die Angemessenheit der Vergütung durch eine unabhängige Vergütungsberatung prüfen.

### Grundzüge des Vergütungssystems

Die Vergütung, die die Mitglieder der Geschäftsleitung der Merck KGaA erhalten, setzt sich aus fixen Bestandteilen, einer variablen Vergütung und Zuführungen zu den Pensionsrückstellungen zusammen. Hinzu kommen Sachbezüge und sonstige Leistungen.

### Fixe Vergütung

Die fixe Vergütung wird in zwölf gleich hohen Monatsraten ausgezahlt. Die folgende Tabelle gibt einen Überblick über die Höhe der fixen Vergütung für die Jahre 2009 und 2010:

#### Vergütung der Mitglieder der Geschäftsleitung der Merck KGaA

| in TEUR              | Fixe Vergütung |              |
|----------------------|----------------|--------------|
|                      | 2010           | 2009         |
| Dr. Karl-Ludwig Kley | 1.000          | 1.000        |
| Dr. Michael Becker   | 800            | 800          |
| Dr. Bernd Reckmann   | 750            | 750          |
| Elmar Schnee*        | 900            | 900          |
| <b>Gesamt</b>        | <b>3.450</b>   | <b>3.450</b> |

\*Die fixe Vergütung erhält Elmar Schnee von der Merck Serono S.A. in Genf, für seine Tätigkeit als Vorstandsvorsitzender der Gesellschaft.

### Variable Vergütung

Die variable Vergütung basiert auf dem rollierenden Drei-Jahres-Durchschnitt des Ergebnisses nach Steuern des E.-Merck-Konzerns. Außerordentliche Einflüsse, die mehr als 10% des Konzerngewinns betragen und die nicht vom Geschäftsleitungsmitglied zu vertreten sind, werden dabei eliminiert. Die Mitglieder der Geschäftsleitung erhalten vom so ermittelten Konzerngewinn einen individuell festgelegten Promillesatz. Der Personalausschuss kann darüber hinaus eine an der Erreichung qualitativer Ziele vereinbarte Einmalzahlung beschließen.

Die folgende Tabelle gibt einen Überblick über die Höhe der variablen Vergütung für die Jahre 2009 und 2010:

| in TEUR              | Variable Vergütung |              |
|----------------------|--------------------|--------------|
|                      | 2010*              | 2009**       |
| Dr. Karl-Ludwig Kley | 2.144              | 1.282        |
| Dr. Michael Becker   | 1.286              | 769          |
| Dr. Bernd Reckmann   | 1.072              | 641          |
| Elmar Schnee         | 1.715              | 1.025        |
| <b>Gesamt</b>        | <b>6.217</b>       | <b>3.717</b> |

\*Die variable Vergütung des laufenden Jahres basiert auf einer Hochrechnung, da bei Erstellung der Angaben das E. Merck-Konzernergebnis noch nicht feststand.

\*\*Die angegebene variable Vergütung des Vorjahres weicht von den im Vorjahr gemachten Angaben ab, da bei Erstellung der Angaben das E.-Merck-Konzernergebnis noch nicht feststand und daher hochgerechnet wurde.

### Gesamtvergütung

Danach ergibt sich folgende Gesamtvergütung der Mitglieder der Geschäftsleitung der Merck KGaA:

| in TEUR              | Fixe Vergütung |              | Variable Vergütung |              | Gesamt       |              |
|----------------------|----------------|--------------|--------------------|--------------|--------------|--------------|
|                      | 2010           | 2009         | 2010               | 2009         | 2010         | 2009         |
| Dr. Karl-Ludwig Kley | 1.000          | 1.000        | 2.144              | 1.282        | 3.144        | 2.282        |
| Dr. Michael Becker   | 800            | 800          | 1.286              | 769          | 2.086        | 1.569        |
| Dr. Bernd Reckmann   | 750            | 750          | 1.072              | 641          | 1.822        | 1.391        |
| Elmar Schnee         | 900            | 900          | 1.715              | 1.025        | 2.615        | 1.925        |
| <b>Gesamt</b>        | <b>3.450</b>   | <b>3.450</b> | <b>6.217</b>       | <b>3.717</b> | <b>9.667</b> | <b>7.167</b> |

### Pensionsrückstellungen

Die einzelvertraglichen Pensionszusagen gewähren den Mitgliedern der Geschäftsleitung einen Anspruch auf lebenslange Altersrente oder Hinterbliebenenversorgung im Falle des Erreichens einer individualvertraglich festgelegten Altersgrenze, der dauerhaften Arbeitsunfähigkeit und im Todesfall.

Die Höhe der Altersrente bestimmt sich nach einem prozentualen Anteil der ruhegehaltsfähigen Bezüge, die vom Personalausschuss festgelegt werden.

Die individuellen Werte sind in der folgenden Tabelle aufgeführt:

|                      | Ruhegehaltsfähige Bezüge<br>(in Tausend Euro) | Zugesagter Prozentsatz |
|----------------------|-----------------------------------------------|------------------------|
| Dr. Karl-Ludwig Kley | 790                                           | 70                     |
| Dr. Michael Becker   | 560                                           | 75                     |
| Dr. Bernd Reckmann   | 470                                           | 54                     |
| Elmar Schnee         | 570                                           | 46                     |

Der zugesagte Prozentsatz erhöht sich bis zum Eintritt in den Ruhestand bei Herrn Dr. Reckmann je Dienstjahr um 1 % auf bis zu 65 % und bei Herrn Schnee je Dienstjahr um 3 % auf bis zu 70 %.

Den Pensionsrückstellungen wurden im abgelaufenen Geschäftsjahr die folgenden Beträge zugeführt:

| in TEUR              | Zuführung zu den Pensionsrückstellungen |              | Höhe der Pensionsrückstellungen zum<br>31.12.2010 |
|----------------------|-----------------------------------------|--------------|---------------------------------------------------|
|                      | 2010                                    | 2009         |                                                   |
| Dr. Karl-Ludwig Kley | 2.162                                   | 1.890        | 6.966                                             |
| Dr. Michael Becker   | 1.216                                   | 1.218        | 6.055                                             |
| Dr. Bernd Reckmann   | 829                                     | 801          | 3.616                                             |
| Elmar Schnee         | 777                                     | 802          | 2.442                                             |
| <b>Gesamt</b>        | <b>4.984</b>                            | <b>4.711</b> | <b>19.079</b>                                     |

Die Hinterbliebenenversorgung gewährt dem Ehepartner eine lebenslange Hinterbliebenenrente in Höhe von 60 % der Pensionsansprüche, den unterhaltsberechtigten Kindern wird eine Halbwaisen- bzw. Vollwaisenrente maximal bis zum 25. Lebensjahr gewährt.

#### Leistungen im Fall der Beendigung der Tätigkeit als Geschäftsleitungsmitglied

Über die bestehenden Pensionszusagen hinaus bestehen keine weiteren Zusagen für den Fall der vorzeitigen Beendigung der Vertragsverhältnisse der Mitglieder der Geschäftsleitung.

**Sonstiges**

Die Mitglieder der Geschäftsleitung erhalten zusätzlich bestimmte Nebenleistungen, im Wesentlichen Beiträge zu Versicherungen sowie einen Dienstwagen mit Recht zur Privatnutzung. Diese Nebenleistungen sind von den Mitgliedern der Geschäftsleitung zu versteuern. Insgesamt belief sich der Wert der sonstigen Nebenleistungen auf 86 TEUR im Jahr 2010 (2009: 86 TEUR). Davon entfielen im Jahr 2010 auf Herrn Dr. Kley 29 TEUR (2009: 29 TEUR), auf Herrn Dr. Becker 24 TEUR (2009: 24 TEUR), auf Herrn Dr. Reckmann 26 TEUR (2009: 26 TEUR) und auf Herrn Schnee 7 TEUR (2009: 7 TEUR).

Die Mitglieder der Geschäftsleitung erhalten für die Übernahme von Mandaten in Konzerngesellschaften keine zusätzliche Vergütung.

Sollten die Mitglieder der Geschäftsleitung bei der Ausübung ihrer Tätigkeit für Vermögensschäden in Anspruch genommen werden, so ist dieses Haftungsrisiko unter bestimmten Voraussetzungen über eine D&O-Versicherung der Merck KGaA abgedeckt. Die D&O-Versicherung weist einen Selbstbehalt gemäß den gesetzlichen Vorgaben und den Empfehlungen des Deutschen Corporate-Governance-Kodex auf.

**Zahlungen an ehemalige Mitglieder der Geschäftsleitung und deren Hinterbliebene**

Die Pensionszahlungen an ehemalige Mitglieder der Geschäftsleitung bzw. deren Hinterbliebene beliefen sich im Geschäftsjahr 2010 auf 9.091 TEUR (2009: 7.764 TEUR). Für Pensionsansprüche dieses Personenkreises bestehen Pensionsrückstellungen in Höhe von insgesamt 90.082 TEUR (2009: 85.545 TEUR).

**Vergütung der Mitglieder des Aufsichtsrats der Merck KGaA**

Die Vergütung der Mitglieder des Aufsichtsrats ist in § 20 der Satzung der Merck KGaA geregelt. Die Aufsichtsratsmitglieder erhalten neben dem Ersatz ihrer Auslagen eine fixe und eine variable Vergütung.

Die fixe Vergütung beträgt 7.000 EUR jährlich. Der Vorsitzende erhält das Doppelte, der Stellvertreter das Eineinhalbfache dieses Betrags.

Außerdem erhalten die Mitglieder des Aufsichtsrats einen Betrag von 550 EUR für jedes von der Hauptversammlung beschlossene, über 6% des Grundkapitals hinausgehende Prozent der Dividende, bei Bruchteilen eines Prozentsatzes einen entsprechenden Teil. Dieser Betrag erhöht sich für den Vorsitzenden auf das Doppelte und für den Stellvertreter auf das Eineinhalbfache. Aufsichtsratsmitglieder, die nur während eines Teils des Geschäftsjahres dem Aufsichtsrat angehört haben, erhalten eine entsprechend geringere Vergütung. Die auf die Vergütung zu zahlende Umsatzsteuer wird von der Gesellschaft erstattet.

Die individuellen Werte lassen sich der folgenden Tabelle entnehmen:

#### Vergütung der Mitglieder des Aufsichtsrats der Merck KGaA

| in EUR                                                                                                   | Fixe Vergütung |                | Variable Vergütung |                | Gesamtvergütung |                |
|----------------------------------------------------------------------------------------------------------|----------------|----------------|--------------------|----------------|-----------------|----------------|
|                                                                                                          | 2010           | 2009           | 2010               | 2009           | 2010            | 2009           |
| Prof. Dr. Dr. h.c. Rolf Krebs <sup>1</sup><br>(Vorsitzender seit 01.07.2009,<br>zuvor normales Mitglied) | 14.000         | 10.500         | 46.288             | 26.779         | 60.288          | 37.279         |
| Heiner Wilhelm (Stellvertreter)                                                                          | 10.500         | 10.500         | 34.716             | 26.779         | 45.216          | 37.279         |
| Crocifissa Attardo<br>(seit 01.10.2009)                                                                  | 7.000          | 1.750          | 23.144             | 4.463          | 30.144          | 6.213          |
| Dr. Mechthild Auge<br>(seit 25.03.2009)                                                                  | 7.000          | 5.408          | 23.144             | 13.793         | 30.144          | 19.201         |
| Johannes Baillou <sup>4</sup>                                                                            | 7.000          | 7.000          | 23.144             | 17.853         | 30.144          | 24.853         |
| Frank Binder <sup>4</sup>                                                                                | 7.000          | 7.000          | 23.144             | 17.853         | 30.144          | 24.853         |
| Dr. Wolfgang Büchele <sup>2</sup><br>(seit 01.07.2009)                                                   | 7.000          | 3.500          | 23.144             | 8.926          | 30.144          | 12.426         |
| Michael Fletterich                                                                                       | 7.000          | 7.000          | 23.144             | 17.853         | 30.144          | 24.853         |
| Edeltraud Glänzer                                                                                        | 7.000          | 7.000          | 23.144             | 17.853         | 30.144          | 24.853         |
| Michaela Freifrau von Glenck <sup>5</sup>                                                                | 7.000          | 7.000          | 23.144             | 17.853         | 30.144          | 24.853         |
| Frieder Kaufmann                                                                                         | 7.000          | 7.000          | 23.144             | 17.853         | 30.144          | 24.853         |
| Dr. Hans-Jürgen Leuchs <sup>2</sup><br>(seit 01.07.2009)                                                 | 7.000          | 3.500          | 23.144             | 8.926          | 30.144          | 12.426         |
| Albrecht Merck <sup>3</sup>                                                                              | 7.000          | 7.000          | 23.144             | 17.853         | 30.144          | 24.853         |
| Dr. Karl-Heinz Scheider<br>(seit 25.03.2009)                                                             | 7.000          | 5.408          | 23.144             | 13.793         | 30.144          | 19.201         |
| Prof. Dr. Theo Siegert <sup>1</sup>                                                                      | 7.000          | 7.000          | 23.144             | 17.853         | 30.144          | 24.853         |
| Osman Ulusoy                                                                                             | 7.000          | 7.000          | 23.144             | 17.853         | 30.144          | 24.853         |
| Prof. Dr. Wilhelm Simson <sup>6</sup><br>(bis 30.06.2009, Vorsitzender)                                  | 0,0            | 7.000          | 0,0                | 17.853         | 0,0             | 24.853         |
| Dr. Daniele Bruns<br>(bis 24.03.2009)                                                                    | 0,0            | 1.591          | 0,0                | 4.060          | 0,0             | 5.651          |
| Claudia Flauaus<br>(bis 30.09.2009)                                                                      | 0,0            | 5.250          | 0,0                | 13.389         | 0,0             | 18.639         |
| Judith Delp<br>(bis 24.03.2009)                                                                          | 0,0            | 1.591          | 0,0                | 4.060          | 0,0             | 5.651          |
| Dr. Arend Oetker <sup>6</sup><br>(bis 30.06.2009)                                                        | 0,0            | 3.500          | 0,0                | 8.926          | 0,0             | 12.426         |
| <b>Gesamt</b>                                                                                            | <b>122.500</b> | <b>122.498</b> | <b>405.020</b>     | <b>312.424</b> | <b>527.520</b>  | <b>434.922</b> |

Die mit 1 gekennzeichneten Aufsichtsratsmitglieder haben als Mitglieder in Gremien der E. Merck KG für 2010 in dieser Funktion jeweils zusätzlich 150.000 EUR (2009: 120.000 EUR) erhalten.

Die mit 2 gekennzeichneten Aufsichtsratsmitglieder haben als Mitglieder in Gremien der E. Merck KG für 2010 in dieser Funktion jeweils zusätzlich 140.000 EUR (2009: 60.000 EUR) erhalten.

Die mit 3 gekennzeichneten Aufsichtsratsmitglieder haben als Mitglieder in Gremien der E. Merck KG für 2010 in dieser Funktion jeweils zusätzlich 120.000 EUR (2009: 120.000 EUR) erhalten.

Die mit 4 gekennzeichneten Aufsichtsratsmitglieder haben als Mitglieder in Gremien der E. Merck KG für 2010 in dieser Funktion jeweils zusätzlich 120.000 EUR (2009: 100.000 EUR) erhalten.

Die mit 5 gekennzeichneten Aufsichtsratsmitglieder haben als Mitglieder in Gremien der E. Merck KG für 2010 in dieser Funktion jeweils zusätzlich 80.000 EUR (2009: 80.000 EUR) erhalten.

Die mit 6 gekennzeichneten, 2009 ausgeschiedenen Aufsichtsratsmitglieder, die zugleich Mitglieder in den Gremien der E. Merck KG waren, haben für 2009 in dieser Funktion jeweils zusätzlich 60.000 EUR erhalten.

### Besitz, Erwerb oder Veräußerung von Aktien der Gesellschaft durch Mitglieder der Geschäftsleitung und des Aufsichtsrats

(Ziffer 6.6 des Deutschen Corporate-Governance-Kodex)

Zum 31. Dezember 2010 hielten die Mitglieder der Geschäftsleitung und des Aufsichtsrats 21.298 Aktien. Dieser Gesamtbesitz stellt weniger als 1 % der von der Merck KGaA ausgegebenen Aktien dar. Im Geschäftsjahr 2010 wurden der Merck KGaA folgende Transaktionen nach § 15a WpHG gemeldet:

| Datum der Transaktion | Name, Funktion                                                                                                                          | Art und Ort        | Finanzinstrument und ISIN                     | Anzahl | Kurs/Preis in EUR | Gesamt-volumen in EUR |
|-----------------------|-----------------------------------------------------------------------------------------------------------------------------------------|--------------------|-----------------------------------------------|--------|-------------------|-----------------------|
| 23.02.2010            | Dr. Hans-Jürgen Leuchs<br>Mitglied des Aufsichtsrates                                                                                   | Kauf über Xetra    | Inhaber-Aktien<br>Merck KGaA<br>DE 0006599905 | 1.000  | 60,20             | 60.200,00             |
| 07.05.2010            | Dr. Hans-Jürgen Leuchs<br>Mitglied des Aufsichtsrates                                                                                   | Verkauf über Xetra | Inhaber-Aktien<br>Merck KGaA<br>DE 0006599905 | 500    | 61,1173           | 30.558,65             |
| 27.09.2010            | Dr. Karl-Ludwig Kley<br>Vorsitzender der Geschäftsleitung                                                                               | Kauf über Xetra    | Inhaber-Aktien<br>Merck KGaA<br>DE 0006599905 | 780    | 62,52             | 48.765,60             |
| 27.09.2010            | Dr. Frank Stangenberg-Haverkamp<br>Stellvertretender Vorsitzender des Vorstands und persönlich haftender Gesellschafter der E. Merck KG | Kauf über Xetra    | Inhaber-Aktien<br>Merck KGaA<br>DE 0006599905 | 8.000  | 62,30568          | 498.445,44            |
| 05.10.2010            | Dr. Frank Stangenberg-Haverkamp<br>Stellvertretender Vorsitzender des Vorstands und persönlich haftender Gesellschafter der E. Merck KG | Kauf über Xetra    | Inhaber-Aktien<br>Merck KGaA<br>DE 0006599905 | 2.000  | 60,8225           | 121.645,00            |

Sämtliche Geschäfte werden auch auf der Website des Unternehmens unter [www.merck.de/investoren](http://www.merck.de/investoren) → Corporate Governance → Directors' Dealings veröffentlicht



## ANGABEN ZU UNTERNEHMENSFÜHRUNGSPRAKTIKEN

### Berichterstattung

Es ist das Ziel der Merck KGaA, aktuelle Informationen an alle Aktionäre, Medien, Finanzanalysten und die interessierte Öffentlichkeit weiterzugeben und hierdurch eine größtmögliche Transparenz zu schaffen. Deswegen tritt Merck zeitnah und über eine große Bandbreite von Kommunikationsplattformen mit allen Interessierten in einen Dialog über die Unternehmenslage und geschäftliche Veränderungen. Zu den Grundsätzen von Merck zählt die sachlich richtige, umfassende und faire Informationsversorgung.

Über die Website ([www.merck.de](http://www.merck.de)) als wichtigste Veröffentlichungsplattform lassen sich weltweit sowohl publizitätspflichtige als auch nicht-publizitätspflichtige Informationen abrufen. Neben einem ausführlichen Finanzkalender sind hier die Quartals- und Halbjahresfinanzberichte über einen Sechsjahreszeitraum mehrsprachig abrufbar. Es werden auf der Website außerdem Ad-hoc-Mitteilungen gemäß der gesetzlichen Vorgaben über Umstände und Tatsachen veröffentlicht, von denen eine Relevanz für den Börsenkurs der Merck-Aktie erwartet werden kann.

Eine weitere Plattform zum Dialog bieten regelmäßig stattfindende Pressekonferenzen, Investorenmeetings im Rahmen von Investorenkonferenzen sowie Roadshows. Auch die hierfür erstellten Unternehmenspräsentationen sind über die Website der Merck KGaA abrufbar. Ferner steht das Investor-Relations-Team privaten sowie institutionellen Investoren für weitere Auskünfte stets zur Verfügung.

Zur Gewährleistung einer größtmöglichen Transparenz sind alle Dokumente rund um die jährlich stattfindende Hauptversammlung über die Website zugänglich. Außerdem findet eine teilweise Liveübertragung der Hauptversammlung im Internet statt.

Auch im kommenden Geschäftsjahr werden wir weiterhin großen Wert darauf legen, alle relevanten Standards in der Kapitalmarktberichterstattung zu erfüllen.

### Umgang mit Insiderinformationen

Der ordnungsgemäße Umgang mit Insiderinformationen ist uns ein besonderes Anliegen. Das von uns eingerichtete Insiderkomitee prüft das Vorliegen von Insiderinformationen, sorgt für die Einhaltung der rechtlichen Pflichten und bereitet gegebenenfalls erforderliche Maßnahmen vor. Die Mitglieder des Insiderkomitees werden von der Geschäftsleitung eingesetzt; zumindest zwei Mitglieder gehören zu Corporate Legal & Compliance. Das Insiderkomitee trifft sich in regelmäßigen Abständen, tritt aber auch anlassbezogen zusammen, wenn dies erforderlich erscheint. Die Geschäftsleitung wird im Geschäftsjahr 2011 zum Zweck eines qualitativ hochwertigen Schutzes von Insiderinformationen eine weltweit im Konzern anwendbare interne Insider-

richtlinie erlassen. In dieser werden die Mitarbeiter zum einen über ihre insiderrechtlichen Pflichten informiert und es werden klare Handlungsanweisungen gegeben. Zudem wird die Tätigkeit des Insider-Komitees ausführlich beschrieben. Darüber hinaus ist auch in unserem alle Mitarbeiter verpflichtenden Verhaltenskodex ein ausdrücklicher, ausführlicher Hinweis auf das Verbot des Gebrauchs von Insiderinformationen enthalten. Alle Mitarbeiter werden im Rahmen der obligatorischen Schulungen zum Verhaltenskodex auch über die zentralen Vorgaben zum Insiderhandel geschult.

### **Rechnungslegung und Abschlussprüfung**

Die Merck KGaA stellt ihren Konzernabschluss und den Konzernlagebericht nach den International Financial Reporting Standards (IFRS), wie sie in der EU anzuwenden sind, und den ergänzend nach § 315a Abs. 1 HGB anzuwendenden handelsrechtlichen Bestimmungen sowie den ergänzenden Bestimmungen der Satzung auf.

Konzernabschluss und Konzernlagebericht werden von der Geschäftsleitung aufgestellt und von einem Abschlussprüfer unter Beachtung der vom Institut der Wirtschaftsprüfer (IDW) festgestellten Grundsätze ordnungsgemäßer Abschlussprüfung geprüft.

Der Aufsichtsrat hat die KPMG AG Wirtschaftsprüfungsgesellschaft, Berlin, mit der Prüfung des Konzernabschlusses und Konzernlageberichts für das Geschäftsjahr 2010 beauftragt. Interessenkonflikte wurden von beiden Seiten keine festgestellt. Ferner vereinbarte der Aufsichtsrat mit der KPMG AG, dass der Prüfer den Aufsichtsrat über während der Prüfung auftretende mögliche Ausschluss- und Befangenheitsgründe unverzüglich unterrichtet, soweit diese nicht umgehend beseitigt werden können. Daneben hat der Abschlussprüfer dem Aufsichtsrat über alle für die Aufgaben des Aufsichtsrats wesentlichen Feststellungen und Vorkommnisse unverzüglich zu berichten, die sich bei der Durchführung der Abschlussprüfung ergeben. Der Abschlussprüfer informiert den Aufsichtsrat bzw. vermerkt im Prüfungsbericht, wenn er bei Durchführung der Abschlussprüfung Tatsachen feststellt, die eine Unrichtigkeit der von Geschäftsleitung und Aufsichtsrat abgegebenen Erklärung zum DCGK ergeben. Mit dem Abschlussprüfer ist auch vereinbart, dass er zur Beurteilung, ob die Geschäftsleitung ihren Pflichten gemäß § 91 Abs. 2 AktG nachgekommen ist, seine Prüfung auch auf das im Unternehmen vorhandene Risikofrüherkennungssystem erstreckt. Des Weiteren hat der Abschlussprüfer das rechnungslegungsbezogene interne Kontrollsystem zu prüfen und zu beurteilen, soweit dies zur Beurteilung der Ordnungsmäßigkeit der Rechnungslegung erforderlich und zweckmäßig ist.

### Werte und Compliance

Entsprechend dem Leitbild „Wir bei Merck tun, was wir sagen, und daran lassen wir uns messen“ stützt sich Merck als Unternehmen auf die gemeinsamen Werte: Mut, Leistung, Verantwortung, Respekt, Integrität und Transparenz. Ausgehend von einer Unternehmenskultur, die die grundlegenden Unternehmenswerte in den Mittelpunkt unseres unternehmerischen Handelns stellt, leistet der Verhaltenskodex einen Beitrag, diese im täglichen Miteinander der verschiedenen am Geschäftsprozess Beteiligten umzusetzen.

Mit dem Verhaltenskodex hat Merck ein Regelwerk geschaffen, das Mitarbeitern von Merck helfen soll, verantwortungsbewusst zu handeln und in der täglichen Arbeit die richtigen Entscheidungen zu fällen. Der Verhaltenskodex erläutert die Grundsätze für den Umgang mit Geschäftspartnern, Gesellschaftern, Kollegen, Mitarbeitern und im gesellschaftlichen Umfeld. Damit unterstützt er alle Mitarbeiter, ethisch einwandfrei zu handeln – nicht nur im Umgang miteinander, sondern auch außerhalb des Unternehmens. Der Verhaltenskodex stellt damit gleichzeitig das zentrale Regelwerk unseres Compliance-Programmes dar.

Merck ist seit Jahrhunderten bestrebt, nach ethischen Grundsätzen und Werten zu handeln. Alle Arbeitnehmer sollen fair und unter Beachtung lokaler Gesetze und Richtlinien behandelt werden. Die Grundsätze dafür hat Merck in einer Sozialcharta festgelegt.

Compliance bedeutet für Merck die Einhaltung von gesetzlichen und unternehmensinternen Regelungen und den in den Unternehmenswerten festgelegten ethischen Grundprinzipien. Mit dem Verhaltenskodex und den verschiedenen bereichsspezifischen Compliance-Regeln werden die Werte in die tägliche Arbeits- und Geschäftspraxis integriert. Der Verhaltenskodex ist für alle Mitarbeiter, sowohl in der Zentrale als auch in den Landesgesellschaften verbindlich. Die Einhaltung des Verhaltenskodex wird durch die Compliance-Abteilung überwacht und durch entsprechende Audit- und Schulungsmaßnahmen gruppenweit unterstützt. Jeder Mitarbeiter ist aufgerufen, Compliance-Verstöße beim Vorgesetzten, der Rechts- oder Personalabteilung oder anderen Fachstellen anzusprechen.

Im Jahr 2002 hat Merck die Stelle eines Group Compliance Officers eingerichtet, der für die Aufstellung, Unterhaltung und Weiterentwicklung unseres weltweiten Compliance-Programms verantwortlich ist und durch die entsprechenden Maßnahmen unter anderem dazu beiträgt, das Risiko schwerwiegender Rechtsverletzungen etwa gegen Kartellrecht oder korruptionsrechtliche Vorschriften zu verringern. Die Rolle des Group Compliance Officers spiegelt sich in den Landesgesellschaften in den etwa 80 lokalen Compliance-Beauftragten wider, die in den Ländern für die Umsetzung der Compliance-Maßnahmen sorgen. Über dieses gruppenweite Netzwerk wird das globale Compliance-Programm gesteuert. Durch regelmäßige regionale und weltweite Compliance-Meetings wird der Informationsaustausch innerhalb des Netzwerks gefördert. Seit 2010 werden für die neu hinzugekommenen Compliance-Beauftragten so genannte Newcomer-Trainings durchgeführt, welche dem Aufbau einer Compliance-Expertise sowie der Stärkung des Miteinanders in der Compliance-Organisation dienen.

Einen hohen Stellenwert nehmen die regelmäßigen Compliance-Schulungen ein, welche sowohl mittels Präsenzveranstaltungen, als auch mit Hilfe webbasierter Trainings durchgeführt werden. Sie dienen dazu, Mitarbeitern und Management durch die Vermittlung verschiedener Schulungsinhalte zu den Themen Korruption, Kartell- und Wettbewerbsrecht, Compliance im Gesundheitswesen und Verhaltenskodex für die Folgen von Compliance-Verstößen zu sensibilisieren und Möglichkeiten aufzuzeigen, sie zu vermeiden. Durch Einrichtung eines zentralen Meldesystems (Speak-Up Line) können Mitarbeiter Compliance-Verstöße telefonisch oder mittels webbasierter Anwendung in ihrer jeweiligen Landessprache melden. Die Speak-Up Line steht kostenfrei und rund um die Uhr zur Verfügung. Eine zweiseitige Kommunikation ist – auch anonym – auf der Basis von Fallnummern möglich. Die eingegangenen Meldungen werden einzeln geprüft und bei Vorliegen eines Compliance-Verstoßes entsprechende korrigierende Maßnahmen eingeleitet und mit Hilfe konkreter Aktionspläne abgearbeitet. Falls erforderlich, werden auch entsprechende disziplinarische Maßnahmen getroffen, welche von einer einfachen Ermahnung bis zur Entlassung des Mitarbeiters reichen, der einen Compliance-Verstoß begangen hat.

In Zusammenarbeit mit der internen Revision überprüft die Compliance-Abteilung regelmäßig die Umsetzung der gruppenweiten Compliance-Maßnahmen in den Landesgesellschaften. Gegenstand der Prüfungen sind regelmäßig die lokale Compliance-Struktur, die eingeleiteten Compliance-Maßnahmen sowie das Vorhandensein entsprechender Compliance-Richtlinien und -Prozesse.

Die Compliance-Funktion berichtet regelmäßig an die Geschäftsleitung und informiert über den Status der Compliance-Aktivitäten, Compliance-Risiken, sowie schwerwiegende Compliance-Verstöße. Die Aufsichtsgremien werden von der Geschäftsleitung mindestens einmal jährlich über die wesentlichen Compliance-Sachverhalte unterrichtet.

### **Risiko- und Chancenmanagement**

Die Geschäftsleitung, der Aufsichtsrat und der Finanzausschuss werden regelmäßig über das aktuelle Risikoportfolio des Konzerns und der Einzelgesellschaften informiert. Weitergehende Informationen sind dem Risikobericht auf Seite 86 ff. zu entnehmen.

### **Vermeidung von Interessenkonflikten**

Sämtliche Mitglieder der Geschäftsleitung und des Aufsichtsrats der Merck KGaA sind im Rahmen ihrer Tätigkeit ausschließlich dem Unternehmensinteresse verpflichtet und verfolgen weder persönliche Interessen, noch gewähren sie Dritten ungerechtfertigte Vorteile.

Bevor ein Geschäftsleitungsmitglied Ehrenämter oder Mandate übernimmt oder eine andere nebenberufliche Tätigkeit aufnimmt, muss dies vom Personalausschuss des Gesellschafterrats der E. Merck KG genehmigt werden.

Der Vorsitzende der Geschäftsleitung, Dr. Karl-Ludwig Kley, und das für den Finanzbereich zuständige Mitglied der Geschäftsleitung, Dr. Michael Becker, sind zugleich Mitglieder des Vorstands der E. Merck KG. Interessenskonflikte entstehen hierdurch jedoch keine.

Der Aufsichtsrat legt in seinem Bericht an die Hauptversammlung aufgetretene Interessenskonflikte aus den Reihen des Aufsichtsrats und deren Behandlung offen. Berater- und sonstige Dienstleistungs- und Werkverträge eines Aufsichtsratsmitglieds mit Merck bedürfen der Zustimmung des Aufsichtsrats. Im Geschäftsjahr 2010 traten weder Interessenkonflikte auf, noch existierten Berater- und sonstige Dienstleistungs- und Werkverträge eines Aufsichtsratsmitglieds mit Merck.

### **Einhaltung von Arbeits- und Sozialstandards**

Merck hat sich in der Merck-Sozialcharta selbst hohe Sozialstandards gesetzt. Umweltvorsorge und Umweltschutz basieren bei Merck auf dem Denken in Kreisläufen und der Integration von Vorsorgemaßnahmen in die Prozess- und Verfahrensplanung. Unsere Environment, Health and Safety Policy mit den Grundsätzen und Strategien für Umwelt, Sicherheit und Gesundheit setzt die Leitlinien um, die nationale und internationale Verbände der chemischen Industrie in den Regeln zum Verantwortlichen Handeln (Responsible Care®) formuliert haben. Die vom Internationalen Chemieverband (ICCA) im Jahr 2006 erarbeitete neue Responsible Care® Global Charter betont noch stärker die umfassende Verantwortung für Produkte, Lieferketten und Gesellschaft. Merck hat diese erweiterte Fassung von Responsible Care® im Februar 2007 für die gesamte Gruppe unterzeichnet.

Eine Vielzahl von Richtlinien präzisiert, wie die Mitarbeiter und Standorte die Grundsätze in der täglichen Arbeit berücksichtigen müssen. Die Gruppenfunktion Environment, Health, Safety, Security & Quality steuert die weltweiten Aktivitäten zu Umwelt, Sicherheit und Gesundheit und sorgt für die Einhaltung von regulatorischen Vorgaben, Standards und Geschäftsanforderungen innerhalb des gesamten Unternehmens. Auf diese Weise werden konzernweit Risiken minimiert und kontinuierliche Verbesserungen in den Bereichen Umwelt, Gesundheit, Sicherheit und Qualität gefördert. In regelmäßigen Abständen werden zudem Berichte zur unternehmerischen Verantwortung veröffentlicht.

## ARBEITSWEISE VON GESCHÄFTSLEITUNG, AUFSICHTSRAT, GESELLSCHAFTERRAT UND SEINEN AUSSCHÜSSEN

### Mitglieder der Geschäftsleitung der Merck KGaA

Angaben zu Mitgliedschaften in gesetzlich zu bildenden Aufsichtsräten und vergleichbaren in- und ausländischen Kontrollgremien

(§ 285 Satz 1 Nr. 10 HGB iVm § 125 Abs. 1 Satz 5 AktG)

| Mitglieder                                               | Mitgliedschaften in<br>(a) anderen gesetzlich zu bildenden Aufsichtsräten und<br>(b) vergleichbaren in- und ausländischen Kontrollgremien<br>von Wirtschaftsunternehmen |
|----------------------------------------------------------|-------------------------------------------------------------------------------------------------------------------------------------------------------------------------|
| <b>Dr. Karl-Ludwig Kley</b><br>Darmstadt<br>Vorsitzender | (a) – Bertelsmann AG, Gütersloh<br>– BMW AG, München (stellv. Vorsitzender seit 18.05.2010)<br>– 1. FC Köln GmbH & Co KGaA, Köln (Vorsitzender)                         |
| <b>Dr. Michael Becker</b><br>Darmstadt                   | (b) – Bâloise Holding AG, Basel, Schweiz (seit 23.04.2010)                                                                                                              |
| <b>Dr. Bernd Reckmann</b><br>Seeheim-Jugenheim           | (b) – Millipore Corp., Billerica, USA (seit Juli 2010)<br>– Millipore Corp, Cidra, Puerto Rico (seit Juli 2010)                                                         |
| <b>Elmar Schnee</b><br>Darmstadt                         | (b) Member of the Board of Directors:<br>– ChemGenex Pharmaceuticals Ltd., Geelong, Australien<br>– Merck Serono S.A., Coinsins, Schweiz                                |
| <b>Dr. Stefan Oschmann</b><br>München / seit 1.1.2011    | keine Mandate                                                                                                                                                           |

Die persönlich haftenden Gesellschafter ohne Kapitalanteil (Geschäftsleitung) führen die Geschäfte nach Maßgabe der Gesetze, der Satzung und ihrer Geschäftsordnung. Sie werden durch die E. Merck KG mit Zustimmung der einfachen Mehrheit der anderen persönlich haftenden Gesellschafter aufgenommen. Die Mitglieder der Geschäftsleitung tragen gemeinsam die Verantwortung für die gesamte Geschäftsführung. Die Geschäftsleitung ist zuständig für die Aufstellung des Jahresabschlusses der Merck KGaA und der Quartals- und Halbjahresabschlüsse sowie des Jahresabschlusses des Konzerns. Die Geschäftsleitung sorgt ferner für die Einhaltung von Rechtsvorschriften, behördlichen Regelungen und der unternehmensintern geltenden Regelungen und wirkt auf deren Beachtung durch alle Gesellschaften der Merck-Gruppe hin.

Die Geschäftsleitung unterrichtet den Aufsichtsrat regelmäßig, zeitnah und umfassend über alle für das Unternehmen relevanten Fragen der Planung, der Geschäftsentwicklung, der Risikolage und des Risikomanagements. Weitere Einzelheiten regelt ein Beschluss des Aufsichtsrats über die Informations- und Berichtspflichten der Geschäftsleitung gegenüber dem Aufsichtsrat. Die Geschäftsleitung unterrichtet den Gesellschafterrat und den Aufsichtsrat mindestens vierteljährlich über den Gang der Geschäfte und die Lage des Unternehmens. Zusätzlich informiert die Geschäftsleitung die genannten Gremien mindestens einmal jährlich über die Jahresplanungen und die strategischen Konzepte des Unternehmens.

Die Geschäftsleitung fasst ihre Beschlüsse in Sitzungen, die in der Regel zweimal im Monat stattfinden.

## Aufsichtsrat

| Mitglieder                                                                                                                                | Mitgliedschaften in<br>(a) anderen gesetzlich zu bildenden Aufsichtsräten und<br>(b) vergleichbaren in- und ausländischen Kontrollgremien<br>von Wirtschaftsunternehmen                                                                                                                                |
|-------------------------------------------------------------------------------------------------------------------------------------------|--------------------------------------------------------------------------------------------------------------------------------------------------------------------------------------------------------------------------------------------------------------------------------------------------------|
| <b>Prof. Dr. Dr. h. c. Rolf Krebs</b><br>Mainz, Arzt im Ruhestand,<br>Vorsitzender                                                        | (a) – Epigenomics AG, Berlin (Vorsitzender)<br>– Ganymed Pharmaceuticals AG, Mainz (Vorsitzender)<br>– Merz GmbH & Co. KGaA, Frankfurt<br>– Senator GmbH & Co KGaA, Frankfurt<br>– Merz Pharmaceuticals GmbH, Frankfurt<br>(b) – Gesellschafterrat E. Merck KG, Darmstadt<br>– Air Liquide S.A., Paris |
| <b>Heiner Wilhelm</b><br>Reinheim, Vorsitzender des Betriebsrats<br>des Werks Darmstadt der Merck KGaA,<br>stellvertretender Vorsitzender | keine Mandate                                                                                                                                                                                                                                                                                          |
| <b>Crocifissa Attardo</b><br>Freigestelltes Mitglied des Betriebsrats<br>des Werkes Darmstadt der Merck KGaA                              | keine Mandate                                                                                                                                                                                                                                                                                          |
| <b>Dr. Mechthild Auge</b><br>Wehrheim, Projekt-Managerin für<br>Planung und Information Westeuropa                                        | keine Mandate                                                                                                                                                                                                                                                                                          |
| <b>Johannes Baillou</b><br>Wien, Unternehmer                                                                                              | (b) – Gesellschafterrat E. Merck KG, Darmstadt<br>(stellvertretender Vorsitzender)                                                                                                                                                                                                                     |
| <b>Frank Binder</b><br>Zürich, Unternehmer                                                                                                | (a) – Landbell AG für Rückhol-Systeme, Mainz (Vorsitzender)<br>(b) – Gesellschafterrat E. Merck KG, Darmstadt<br>– Verwaltungsrat BMR-Yachting AG, Zürich (Vorsitzender)<br>– Verwaltungsrat Athena AG, Zürich                                                                                         |
| <b>Dr. Wolfgang Büchele</b><br>Mannheim, Chief Executive Officer von<br>BorsodChem Zrt, Ungarn                                            | (b) – Gesellschafterrat E. Merck KG, Darmstadt<br>– BorsodChem Zrt, Kazincbarcika, Ungarn (Chairman of the Board)<br>– Kemira Oy, Helsinki, Finnland<br>– First Chemical Holding Kft, Budapest, Ungarn                                                                                                 |
| <b>Michael Fletterich</b><br>Gernsheim, Vorsitzender des Betriebsrats<br>des Werks Gernsheim der Merck KGaA                               | keine Mandate                                                                                                                                                                                                                                                                                          |
| <b>Edeltraud Glänzer</b><br>Wiesbaden, Mitglied des Hauptvorstands<br>bei der Industriegewerkschaft Bergbau,<br>Chemie, Energie (IG BCE)  | (a) – B. Braun Melsungen AG, Melsungen<br>– Solvay Deutschland GmbH, Hannover<br>(stellvertretende Vorsitzende)                                                                                                                                                                                        |
| <b>Michaela Freifrau von Glenck</b><br>Zürich, Pädagogin                                                                                  | keine Mandate                                                                                                                                                                                                                                                                                          |
| <b>Frieder Kaufmann</b><br>Roßdorf, freigestelltes Mitglied<br>des Betriebsrats des Werks<br>Darmstadt der Merck KGaA                     | keine Mandate                                                                                                                                                                                                                                                                                          |
| <b>Dr. Hans-Jürgen Leuchs</b><br>Cobham, Großbritannien<br>Diplom-Chemiker im Ruhestand                                                   | (a) – Zeton B.V., Enschede, Niederlande<br>– Zeton International Inc., Burlington ONT, Kanada (seit 03.11.10)<br>(b) – Gesellschafterrat E. Merck KG, Darmstadt                                                                                                                                        |
| <b>Albrecht Merck</b><br>Schriesheim, Kaufmann                                                                                            | (b) – Gesellschafterrat E. Merck KG, Darmstadt                                                                                                                                                                                                                                                         |
| <b>Dr. Karl-Heinz Scheider</b><br>Groß-Zimmern, Chemiker                                                                                  | keine Mandate                                                                                                                                                                                                                                                                                          |

| Mitglieder                                                                                                                | Mitgliedschaften in<br>(a) anderen gesetzlich zu bildenden Aufsichtsräten und<br>(b) vergleichbaren in- und ausländischen Kontrollgremien<br>von Wirtschaftsunternehmen                                                                            |
|---------------------------------------------------------------------------------------------------------------------------|----------------------------------------------------------------------------------------------------------------------------------------------------------------------------------------------------------------------------------------------------|
| <b>Prof. Dr. Theo Siegert</b><br>Düsseldorf, Geschäftsführender Gesellschafter bei de Haen Carstanjen & Söhne, Düsseldorf | (a) – Deutsche Bank AG, Frankfurt<br>– ERGO AG, Düsseldorf (bis 12.05.2010)<br>– E.ON AG, Düsseldorf<br>– Henkel AG & Co KGaA, Düsseldorf<br>(b) – Gesellschafterrat E. Merck KG, Darmstadt<br>– Verwaltungsrat DKSH Holding Ltd., Zürich, Schweiz |
| <b>Osman Ulusoy</b><br>Wiesbaden, Bezirksleiter bei der Industriegewerkschaft Bergbau, Chemie, Energie (IG BCE)           | (a) – Evonik Röhm GmbH, Darmstadt (stellvertretender Vorsitzender)                                                                                                                                                                                 |

Der Aufsichtsrat übt eine Kontrollfunktion aus. Er überwacht die Geschäftsleitung bei der Führung der Geschäfte. Gegenüber dem Aufsichtsrat einer Aktiengesellschaft hat der Aufsichtsrat einer KGaA eine eingeschränkte Funktion. Das basiert auf dem Umstand, dass die Geschäftsleitungsmitglieder in der persönlichen Haftung stehen und daher auch die Geschäftsführung allein verantworten sollen. Der Aufsichtsrat ist insbesondere nicht für die Bestellung und Abberufung von persönlich haftenden Gesellschaftern und für die Regelung von deren vertraglichen Bedingungen zuständig. Dafür zeichnet die E. Merck KG verantwortlich.

Der Aufsichtsrat besitzt auch nicht die Befugnis, eine Geschäftsordnung für die Geschäftsleitung oder einen Katalog zustimmungspflichtiger Geschäfte zu erlassen. Diese Kompetenzen liegen ebenfalls bei der E. Merck KG (§ 13 Abs. 3 Satz 1 und Abs. 4 Satz 1 der Satzung).

Die Tatsache, dass dem Aufsichtsrat keine direkten Einwirkungsmöglichkeiten auf die Geschäftsführung zustehen, führt allerdings weder zu einer Beschränkung seiner Informationsrechte noch seiner Prüfungspflichten. Der Aufsichtsrat muss die Geschäftsführung auf Rechtmäßigkeit, Ordnungsmäßigkeit, Zweckmäßigkeit und Wirtschaftlichkeit überprüfen. Dem Aufsichtsrat obliegt insbesondere die Aufgabe, die von der Geschäftsleitung spätestens vierteljährlich zu erstattenden Berichte über den Gang der Geschäfte – insbesondere den Umsatz und die Lage der Gesellschaft – zu überprüfen. Des Weiteren schafft er durch Beratung mit der Geschäftsleitung die Grundlage für eine Überwachung der Geschäftsführung durch den Aufsichtsrat gemäß § 111 Abs. 1 AktG.

Der Aufsichtsrat behandelt die Quartalsberichte und den Halbjahresabschluss und prüft den Jahresabschluss des Konzerns und den der Merck KGaA unter Berücksichtigung der Prüfungsberichte des Abschlussprüfers. Die Feststellung des Jahresabschlusses obliegt nicht dem Aufsichtsrat, sondern fällt in die Kompetenz der Hauptversammlung. Der Aufsichtsrat tagt in der Regel vier Mal im Jahr. Weitere Sitzungen können einberufen werden, wenn dies von einem Aufsichtsratsmitglied oder von der Geschäftsleitung verlangt wird. Die Beschlüsse des Aufsichtsrats werden grundsätzlich in Sitzungen gefasst. Auf Anordnung des Vorsitzenden ist eine Beschlussfassung ausnahmsweise auch auf anderen, in der Geschäftsordnung näher beschriebenen Wegen möglich. Die Mitglieder des Gesellschafterrats der E. Merck KG und des Aufsichtsrats können zu einer gemeinsamen Sitzung einberufen werden, wenn die Vorsitzenden der beiden Gremien dies vereinbaren.

Die Geschäftsordnung sieht vor, dass der Aufsichtsrat bei Bedarf Ausschüsse bilden kann. Der Aufsichtsrat verfügt derzeit über keine Ausschüsse. Angesichts der ohnehin limitierten Befugnisse des Aufsichtsrats erscheint eine weitere Unterteilung nicht sachgerecht.



### Gesellschafterrat der E. Merck KG

Ein Teil der Kompetenzen, die in einer Aktiengesellschaft beim Aufsichtsrat liegen, werden bei Merck von der E. Merck KG wahrgenommen. Dies gilt vor allem für den Gesellschafterrat der E. Merck KG. Daher sollen nachfolgend sowohl der Gesellschafterrat als auch die Zusammensetzung und Arbeitsweise seiner Ausschüsse beschrieben werden.

Der Gesellschafterrat hat neun Mitglieder:

| Mitglieder                                                                                                                                                              | Mitgliedschaft in<br>(a) gesetzlich zu bildenden Aufsichtsräten<br>(b) vergleichbaren in- und ausländischen<br>Kontrollgremien von Wirtschaftsunternehmen                                                                                                                                            |
|-------------------------------------------------------------------------------------------------------------------------------------------------------------------------|------------------------------------------------------------------------------------------------------------------------------------------------------------------------------------------------------------------------------------------------------------------------------------------------------|
| <b>Johannes Baillou</b><br>Wien, Unternehmer,<br>stellvertretender Vorsitzender                                                                                         | (a) – Aufsichtsrat der Merck KGaA, Darmstadt                                                                                                                                                                                                                                                         |
| <b>Jon Baumhauer</b><br>München, Vorsitzender des Vorstands und persönlich haftender Gesellschafter der E. Merck KG                                                     | keine Mandate                                                                                                                                                                                                                                                                                        |
| <b>Frank Binder</b><br>Zürich, Unternehmer                                                                                                                              | (a) – Aufsichtsrat der Merck KGaA, Darmstadt<br>– Landbell AG für Rückhol-Systeme, Mainz (Vorsitzender)<br>(b) – Verwaltungsrat BMR-Yachting AG, Zürich (Vorsitzender)<br>– Verwaltungsrat Athena AG, Zürich                                                                                         |
| <b>Dr. Wolfgang Büchele</b><br>Mannheim, Chief Executive Officer von BorsodChem Zrt, Ungarn                                                                             | (a) – Aufsichtsrat der Merck KGaA, Darmstadt<br>(b) – BorsodChem Zrt, Kazincbarcika, Ungarn (Chairman of the Board)<br>– Kemira Oy, Helsinki, Finnland<br>– First Chemical Holding Kft, Budapest, Ungarn                                                                                             |
| <b>Prof. Dr. Dr. h. c. Rolf Krebs</b><br>Mainz, Arzt im Ruhestand                                                                                                       | (a) – Aufsichtsrat der Merck KGaA, Darmstadt<br>– Epigenomics AG, Berlin (Vorsitzender)<br>– Ganymed Pharmaceuticals AG, Mainz (Vorsitzender)<br>– Merz GmbH & Co. KGaA, Frankfurt<br>– Senator GmbH & Co KGaA, Frankfurt<br>– Merz Pharmaceuticals GmbH, Frankfurt<br>(b) – Air Liquide S.A., Paris |
| <b>Dr. Hans-Jürgen Leuchs</b><br>Cobham, Großbritannien<br>Diplom-Chemiker im Ruhestand                                                                                 | (a) – Aufsichtsrat der Merck KGaA, Darmstadt<br>– Zeton B.V., Enschede, Niederlande<br>– Zeton International Inc., Burlington ONT, Kanada (seit 03.11.10)                                                                                                                                            |
| <b>Albrecht Merck</b><br>Schriesheim, Kaufmann                                                                                                                          | (a) – Aufsichtsrat der Merck KGaA, Darmstadt                                                                                                                                                                                                                                                         |
| <b>Prof. Dr. Theo Siegert</b><br>Düsseldorf, Geschäftsführender Gesellschafter bei de Haen Carstanjen & Söhne, Düsseldorf                                               | (a) – Aufsichtsrat der Merck KGaA, Darmstadt<br>– Deutsche Bank AG, Frankfurt<br>– ERGO AG, Düsseldorf (bis 12.05.2010)<br>– E.ON AG, Düsseldorf<br>– Henkel AG & Co KGaA, Düsseldorf<br>(b) – Verwaltungsrat DKSH Holding Ltd., Zürich, Schweiz                                                     |
| <b>Dr. Frank Stangenberg-Haverkamp</b><br>Darmstadt, stellvertretender Vorsitzender des Vorstands und persönlich haftender Gesellschafter der E. Merck KG, Vorsitzender | (a) – Fortas AG, Rösrath (Vorsitzender)<br>(b) – Travel Asset Group Ltd., Feltham, Großbritannien (Vorsitzender)                                                                                                                                                                                     |

Der Gesellschafterrat hat die Geschäftsführung der Geschäftsleitung zu überwachen. Er unterrichtet sich über die Angelegenheiten der Merck KGaA und kann zu diesem Zweck die Handelsbücher und sonstigen Unterlagen der Gesellschaft sowie die Vermögenswerte einsehen und prüfen. Der Gesellschafterrat wird nach Bedarf einberufen, tagt jedoch mindestens vier Mal im Jahr. Zu den Sitzungen des Gesellschafterrats werden die Mitglieder der Geschäftsleitung der Merck KGaA jeweils geladen, soweit der Gesellschafterrat im Einzelfall nicht etwas anderes beschließt. Die Mitglieder des Gesellschafterrats können zu einer gemeinsamen Sitzung mit dem Aufsichtsrat der Merck KGaA einberufen werden, wenn die Vorsitzenden der beiden Gremien dies vereinbaren. Der Gesellschafterrat kann die Wahrnehmung einzelner Aufgaben auf Ausschüsse übertragen. Zurzeit hat der Gesellschafterrat drei Ausschüsse eingerichtet: den Personalausschuss, den Finanzausschuss und den Forschungs- und Entwicklungsausschuss.

#### **Personalausschuss**

Der Personalausschuss hat vier Mitglieder. Dies sind Jon Baumhauer, Prof. Dr. Dr. h.c. Rolf Krebs, Prof. Dr. Theo Siegert und Dr. Frank Stangenberg-Haverkamp.

Der Personalausschuss wird nach Bedarf einberufen. An den Sitzungen des Personalausschusses nehmen auf Wunsch des Ausschusses Mitglieder der Geschäftsleitung der Merck KGaA teil. Diese haben nur eine beratende Stimme.

Der Personalausschuss ist unter anderem für folgende Entscheidungen betreffend Mitglieder und frühere Mitglieder der Geschäftsleitung zuständig: Inhalt von Dienstverträgen und Verträgen zur Altersversorgung, Gewährung von Darlehen und Gehaltsvorschüssen, Genehmigung der Übernahme von Ehrenämtern, Mandaten und anderen nebenberuflichen Tätigkeiten und Geschäftsverteilung innerhalb der Geschäftsleitung der Merck KGaA. Er entscheidet jeweils mit einfacher Mehrheit – bei Angelegenheiten, die den Vorsitzenden der Geschäftsleitung betreffen, ist Einstimmigkeit erforderlich. Der Personalausschuss informiert den Gesellschafterrat regelmäßig über seine Tätigkeit.

#### **Finanzausschuss**

Der Finanzausschuss hat vier Mitglieder. Dies sind Johannes Baillou, Dr. Wolfgang Büchele, Prof. Dr. Theo Siegert und Dr. Frank Stangenberg-Haverkamp.

Der Finanzausschuss hält mindestens vier Sitzungen pro Jahr ab, davon mindestens eine gemeinsam mit dem Wirtschaftsprüfer. Weitere Sitzungen werden nach Bedarf einberufen.

An den Sitzungen des Finanzausschusses nehmen auf Wunsch des Ausschusses Mitglieder der Geschäftsleitung der Merck KGaA teil. Dies gilt regelmäßig für den Vorsitzenden der Geschäftsleitung sowie das in der Geschäftsleitung für Finanzen zuständige Mitglied. Die teilnehmenden Geschäftsleitungsmitglieder haben nur eine beratende Stimme. Der Finanzausschuss ist unter anderem zuständig für Analyse und Diskussion des Jahresabschlusses und des dazugehörigen Prüfungsberichts des Abschlussprüfers sowie des Halbjahresberichts und der Quartalsberichte. Er beschäftigt sich außerdem mit der Ertrags-, Finanz-, Vermögens- und Liquiditätslage von Merck sowie mit Fragen der Rechnungslegung.

### **Forschungs- und Entwicklungsausschuss**

Der Forschungs- und Entwicklungsausschuss hat drei Mitglieder. Dies sind Prof. Dr. Dr. h.c. Rolf Krebs, Dr. Hans-Jürgen Leuchs und Dr. Frank Stangenberg-Haverkamp.

Der Forschungs- und Entwicklungsausschuss wird nach Bedarf einberufen, hält aber mindestens vier Sitzungen im Jahr ab. An den Sitzungen des Forschungs- und Entwicklungsausschusses nehmen auf Wunsch des Ausschusses Mitglieder der Geschäftsleitung der Merck KGaA teil. Dies gilt regelmäßig für den Vorsitzenden der Geschäftsleitung sowie für die in der Geschäftsleitung für Pharma und Chemie zuständigen Mitglieder. Die teilnehmenden Geschäftsleitungsmitglieder haben nur eine beratende Stimme. Der Forschungs- und Entwicklungsausschuss ist unter anderem zuständig für die Analyse und Diskussion der Pharma- sowie Chemie-Forschung. Die Unternehmensbereiche Pharma und Chemie tragen dem Forschungs- und Entwicklungsausschuss in gesonderten Sitzungen den Stand ihrer jeweiligen Forschung vor. Er beschäftigt sich eingehend mit dem Fortschrittsbericht der Pharmaforschung sowie den Entwicklungen der sich in den klinischen Phasen II sowie III befindlichen neuen Arzneimittel. Der Forschungs- und Entwicklungsausschuss berichtet dem Gesellschafterrat zweimal im Jahr über die gewonnenen Erkenntnisse in den abgehaltenen Sitzungen.

## **BERICHT DES AUFSICHTSRATS**

Der Aufsichtsrat hat auch im Geschäftsjahr 2010 die ihm nach Gesetz, Satzung und Geschäftsordnung obliegenden Aufgaben ordnungsgemäß wahrgenommen. Insbesondere hat der Aufsichtsrat die Arbeit der Geschäftsleitung sorgfältig und regelmäßig überwacht.

### **Zusammenarbeit mit der Geschäftsleitung**

Die Zusammenarbeit mit der Geschäftsleitung war durch einen intensiven und vertrauensvollen Austausch gekennzeichnet. Die Geschäftsleitung hat dem Aufsichtsrat im Geschäftsjahr 2010 regelmäßig schriftlich und mündlich über die geschäftliche Entwicklung der Merck KGaA sowie der Merck-Gruppe Bericht erstattet. Dem Aufsichtsrat wurden insbesondere die Markt- und Absatzsituation des Unternehmens vor dem Hintergrund der gesamtwirtschaftlichen Entwicklung, die finanzielle Lage der Gesellschaft und der Tochtergesellschaften, deren Ertragsentwicklung sowie die Unternehmensplanung dargelegt. Im Rahmen der quartalsmäßigen Berichterstattung wurden jeweils Umsatz und Ergebnis für die Merck-Gruppe insgesamt und in den Gliederungen nach Sparten und Regionen dargestellt. Auch außerhalb der Aufsichtsratssitzungen stand bzw. steht der Aufsichtsratsvorsitzende in regelmäßigem Informationsaustausch mit dem Vorsitzenden der Geschäftsleitung.

### **Schwerpunkthemen der Aufsichtsratssitzungen**

Der Aufsichtsrat trat im Geschäftsjahr 2010 zu insgesamt vier Sitzungen zusammen. In diesen Sitzungen hat der Aufsichtsrat die Berichte der Geschäftsleitung ausführlich diskutiert und gemeinsam mit der Geschäftsleitung die Entwicklung des Unternehmens sowie die strategischen Fragestellungen erörtert.

In der Sitzung vom 18. Februar 2010 befasste sich der Aufsichtsrat vornehmlich mit dem Jahres- und Konzernabschluss 2009. Die Geschäftsleitung berichtete über die Geschäftsentwicklung im Jahr 2009 und die Eckdaten des Jahresabschlusses 2009. Zudem berichtete der Wirtschaftsprüfer über die Prüfung der Abschlüsse. Schließlich verabschiedete der Aufsichtsrat die Beschlussvor-

schläge an die Hauptversammlung und beschloss die Erklärung zur Unternehmensführung mit der Entsprechenserklärung zum Deutschen Corporate-Governance-Kodex mit gemeinsamem Bericht von Geschäftsleitung und Aufsichtsrat.

In der Sitzung am 27. April 2010 lag der Schwerpunkt auf der aktuellen Geschäftsentwicklung. Insbesondere wurden die Auswirkungen der wirtschaftlichen Erholung auf das Chemie-Geschäft besprochen. Ferner ließ sich der Aufsichtsrat von der Geschäftsleitung über den aktuellen Stand der Millipore-Transaktion informieren.

Neben der erfreulichen Entwicklung des Geschäfts im ersten Halbjahr 2010 befasste sich der Aufsichtsrat in seiner Sitzung vom 28. Juli 2010 intensiv mit dem System der internen Revision sowie dem Risikomanagement des Unternehmens. Hierzu erstatteten der Leiter von Corporate Auditing sowie der Risk Manager des Unternehmens ihren jährlichen Bericht. Die Berichte sind ein Standardbestandteil der Sitzung im Juli jeden Jahres. Im Bereich des Risikomanagements konnten gewichtige Einzelrisiken identifiziert werden, über die sich der Aufsichtsrat detailliert berichten ließ. Bestandsgefährdende Risiken waren nicht erkennbar.

Die vierte Sitzung des Aufsichtsrats im Geschäftsjahr 2010 fand am 25. Oktober 2010 statt. Der Aufsichtsrat setzte sich in dieser Sitzung vornehmlich mit dem Bericht der Geschäftsleitung über die Geschäftsentwicklung im 3. Quartal 2010 auseinander. Daneben stellte der Leiter von Corporate Legal & Compliance dem Aufsichtsrat den Compliance-Bericht für das Jahr 2010 vor. Dieser Bericht ist ein Standardbestandteil der Sitzung im Oktober jeden Jahres. Des Weiteren informierte sich der Aufsichtsrat über die aktuellen Änderungen des Deutschen Corporate-Governance-Kodex und diskutierte die Ziele für seine Zusammensetzung.

### **Jahresabschluss**

Der Jahresabschluss der Merck KGaA, der Konzernabschluss der Merck-Gruppe sowie die Lageberichte für die Merck KGaA und die Merck-Gruppe sind unter Einbeziehung der Buchführung von der KPMG AG Wirtschaftsprüfungsgesellschaft geprüft worden. Der Jahresabschluss sowie der Lagebericht der Merck KGaA wurden mit einem uneingeschränkten Bestätigungsvermerk nach deutschen Prüfungsgrundsätzen versehen. Für den nach den Vorschriften der International Financial Reporting Standards aufgestellten Konzernabschluss hat der Abschlussprüfer den im Konzerngeschäftsbericht abgedruckten Bestätigungsvermerk gegeben. Ferner hat der Abschlussprüfer die Ermittlung der Beteiligung der Merck KGaA an dem Ergebnis der E. Merck KG gemäß § 27 Absatz 2 der Satzung geprüft. Der Jahresabschluss der Merck KGaA, der Konzernabschluss der Merck-Gruppe, die Lageberichte für die Merck KGaA und die Merck-Gruppe sowie der Vorschlag der Geschäftsleitung für die Verwendung des Bilanzgewinns sind dem Aufsichtsrat zusammen mit den Prüfungsberichten des Abschlussprüfers vorgelegt worden. Der Aufsichtsrat hat den Jahresabschluss der Merck KGaA, den Lagebericht der Merck KGaA, den Vorschlag für die Verwendung des Bilanzgewinns sowie den ihm nach § 27 Absatz 2 der Satzung vorgelegten Bericht des Abschlussprüfers gemäß § 14 Absatz 2 der Satzung auch seinerseits geprüft. Er hat ferner den Konzernabschluss der Merck-Gruppe und den Konzernlagebericht für die Merck-Gruppe geprüft sowie den Prüfungsbericht der KPMG AG Wirtschaftsprüfungsgesellschaft zur Kenntnis genommen.

An der Bilanzsitzung des Aufsichtsrats am 17. Februar 2011 haben zu dem betreffenden Tagesordnungspunkt auch die den Bestätigungsvermerk zu dem Jahresabschluss der Merck KGaA sowie zu dem Konzernabschluss der Merck-Gruppe unterzeichnenden Wirtschaftsprüfer teilgenommen und über ihre Prüfung berichtet. Der Aufsichtsrat nahm das Prüfungsergebnis der Abschlussprüfer zustimmend zur Kenntnis. Nach dem abschließenden Ergebnis seiner Prüfung hat der Aufsichts-

rat keine Einwände zu erheben und billigt hiernach den von der Geschäftsleitung aufgestellten Jahresabschluss und den Lagebericht der Merck KGaA, den Konzernabschluss der Merck-Gruppe und den Konzernlagebericht der Merck-Gruppe sowie den von dem Abschlussprüfer gemäß § 27 Absatz 2 der Satzung vorgelegten Bericht. Er erklärt sich mit dem Vorschlag für die Verwendung des Bilanzgewinns einverstanden.

### **Corporate Governance und Entsprechenserklärung**

Corporate Governance ist für den Aufsichtsrat eine Thematik mit hohem Stellenwert. Nach der eigenen Einschätzung gehört dem Aufsichtsrat eine ausreichende Anzahl von unabhängigen Mitgliedern an. Interessenskonflikte, wie durch den Deutschen Corporate-Governance-Kodex definiert, sind bei den Aufsichtsratsmitgliedern im vorliegenden Berichtsjahr nicht aufgetreten. Nach ausführlicher Befassung mit Corporate-Governance-Themen haben Geschäftsleitung und Aufsichtsrat am 8. Februar 2011 (Geschäftsleitung) bzw. am 17. Februar 2011 (Aufsichtsrat) die aktualisierte Entsprechenserklärung nach § 161 Aktiengesetz beschlossen und damit abgegeben. Die Erklärung ist auf der Website der Merck KGaA ([http://www.merck.de/de/investoren/corporate\\_governance/corporate\\_governance.html](http://www.merck.de/de/investoren/corporate_governance/corporate_governance.html)) dauerhaft zugänglich. Weitere Informationen zur Corporate Governance bei der Merck KGaA einschließlich der Vergütung von Geschäftsleitung und Aufsichtsrat enthält die Erklärung zur Unternehmensführung auf den Seiten 108 ff. des Geschäftsberichts.

### **Ausschüsse**

Der Aufsichtsrat der Merck KGaA verfügt derzeit wegen der gesellschaftsrechtlichen Besonderheiten, die sich für den Aufsichtsrat einer KGaA ergeben, und weil sich ein entsprechender Bedarf bisher nicht abgezeichnet hat, über keine Ausschüsse. Daher entfällt der Bericht über die Arbeit der Ausschüsse.

### **Personalia**

Alle Mitglieder des Aufsichtsrats nahmen 2010 mit nur wenigen Ausnahmen an den vier Sitzungen des Aufsichtsrates teil. Lediglich an der dritten Sitzung konnten Frau Edeltraud Glänzer und die Herren Dr. Karl-Heinz Scheider, Osman Ulusoy und Heiner Wilhelm entschuldigt nicht anwesend sein.

Personalentscheidungen oder Änderungen an der personellen Zusammensetzung des Aufsichtsrates waren 2010 nicht zu verzeichnen. Es fanden insbesondere keine Neuwahlen oder Gremienneubesetzungen oder -bildungen statt.

Darmstadt, den 17. Februar 2011  
Der Aufsichtsrat der Merck KGaA

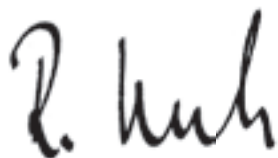

Prof. Dr. Dr. h.c. Rolf Krebs  
Vorsitzender

## ZIELE DES AUFSICHTSRATS FÜR SEINE ZUSAMMENSETZUNG

### Ausgangslage

Nach Ziffer 5.4.1 Abs. 2 und 3 des Deutschen Corporate-Governance-Kodex soll der Aufsichtsrat für seine Zusammensetzung konkrete Ziele benennen, die unter Beachtung der unternehmensspezifischen Situation die internationale Tätigkeit des Unternehmens, potenzielle Interessenskonflikte, eine festzulegende Altersgrenze für Aufsichtsratsmitglieder und Vielfalt (Diversity) berücksichtigen.

### Allgemeines zur Besetzung des Aufsichtsrats

Der Aufsichtsrat der Merck KGaA besteht aus 16 Mitgliedern, davon acht Vertretern der Anteilseigner und acht Vertretern der Arbeitnehmer. Die acht Vertreter der Arbeitnehmer werden nach den Vorgaben des Mitbestimmungsgesetzes von Delegierten der Arbeitnehmer gewählt und setzen sich aus sechs Arbeitnehmern des Unternehmens einschließlich eines leitenden Angestellten sowie zwei Vertretern der Gewerkschaften zusammen. Bei der Wahl der Delegierten sowie bei der Wahl der Vertreter der Arbeitnehmer in den Aufsichtsrat steht dem Aufsichtsrat kein gesetzliches Vorschlagsrecht zu. Von den acht Vertretern der Anteilseigner werden zwei aufgrund eines Entsendungsrechts der E.-Merck-Beteiligungen KG bestimmt. Auch bezüglich der Ausübung dieses Entsendungsrechts hat der Aufsichtsrat kein gesetzliches Vorschlagsrecht. Die übrigen sechs Vertreter der Anteilseigner werden von der Hauptversammlung gewählt. Der Aufsichtsrat hat der Hauptversammlung gemäß § 124 Abs. 3 Satz 1 Aktiengesetz Vorschläge zur Wahl von Aufsichtsratsmitgliedern zu unterbreiten, die der Mehrheit der Stimmen der Anteilseignervertreter im Aufsichtsrat bedürfen. Die Hauptversammlung ist an die Wahlvorschläge nicht gebunden. Die Besetzungsziele, die sich der Aufsichtsrat im Folgenden gibt, verstehen sich daher nicht als Vorgaben an die jeweils Wahlberechtigten bzw. Entsendungsberechtigten. Sie bringen vielmehr die vom amtierenden Aufsichtsrat im Hinblick auf seine Beratungs- und Überwachungstätigkeit angestrebten Ziele zum Ausdruck.

### Ziele des Aufsichtsrats für seine Zusammensetzung

Der Aufsichtsrat benennt gemäß Ziffer 5.4.1 des Deutschen Corporate-Governance-Kodex die folgenden Ziele für seine Zusammensetzung:

#### Kompetenz

An erster Stelle der Voraussetzungen für die Besetzung der Sitze im Aufsichtsrat stehen fachliche Qualifikation und persönliche Kompetenz. Der Aufsichtsrat wird diese Voraussetzungen, die für die Erfüllung seiner gesetzlichen Pflichten unabdingbar sind, bei Vorschlägen für die Wahl bzw. Entsendung von Aufsichtsratsmitgliedern stets in den Vordergrund stellen.

#### Vielfalt

Insgesamt verfolgt der Aufsichtsrat das Ziel, durch die Vielfalt seiner Mitglieder seiner Überwachungs- und Beratungsfunktion optimal gerecht zu werden. Zur Vielfalt zählen dabei insbesondere Internationalität sowie unterschiedliche Erfahrungshorizonte und Lebenswege. Auch der Anteil von Frauen im Aufsichtsrat wird unter Vielfalt eingeordnet. Bei der Vorbereitung der Wahlvorschläge bzw. der Vorschläge für Entsendungen soll im Einzelfall gewürdigt werden, inwiefern unterschiedliche, sich gegenseitig ergänzende fachliche Profile, Berufs- und Lebenserfahrung und eine angemessene Vertretung beider Geschlechter der Aufsichtsratsarbeit zugute kommen. Zudem wird der Aufsichtsrat die Geschäftsleitung dabei unterstützen, die Vielfalt im Unternehmen zu stärken.

**Kenntnis des Unternehmens**

Dem Aufsichtsrat sollen mindestens vier Mitglieder angehören, die über vertiefte Kenntnisse und Erfahrungen aus für das Unternehmen wichtigen Arbeitsgebieten verfügen, darunter mindestens je ein Experte für die Bereiche Pharma und Chemie.

**Führungserfahrung**

Dem Aufsichtsrat sollen mindestens drei Mitglieder angehören, die Erfahrung in der Führung oder Überwachung eines mittelgroßen oder großen Unternehmens haben.

**Familienunternehmen**

Dem Aufsichtsrat soll mindestens ein Mitglied angehören, das Erfahrung in der Führung mittelgroßer oder großer Familienunternehmen hat.

**Internationalität**

Dem Aufsichtsrat sollen mindestens drei Mitglieder angehören, die Geschäftserfahrung in den Hauptabsatzmärkten der Merck KGaA haben. Zurzeit sind die Hauptabsatzmärkte der Merck KGaA Europa, Amerika und Asien-Pazifik.

**Frauen im Aufsichtsrat**

Dem Aufsichtsrat der Merck KGaA gehören derzeit vier Frauen an. Dies entspricht einem Frauenanteil von 25%. Der Aufsichtsrat wird bei Nominierungen für die Wahlen in den Aufsichtsrat bzw. Vorschlägen für Entsendungen prüfen, ob der Frauenanteil mit geeigneten Kandidatinnen erhöht werden kann.

**Keine wesentlichen Interessenkonflikte**

Dem Aufsichtsrat sollen keine Personen angehören, die voraussichtlich einen nicht nur vorübergehenden Interessenkonflikt haben können. Daher sollen keine Personen zur Wahl bzw. Entsendung in den Aufsichtsrat vorgeschlagen werden, die gleichzeitig eine Organfunktion oder Beratungsaufgabe bei einem wesentlichen Wettbewerber des Unternehmens haben oder die aufgrund anderer Tätigkeit, z. B. Beratertätigkeit für bedeutende Vertragspartner des Unternehmens, potentiell in einen Interessenkonflikt geraten können. Außerdem befolgt der Aufsichtsrat die Vorgaben des Deutschen Corporate-Governance-Kodex zu Interessenkonflikten.

**Keine Altersgrenze**

Eine Altersgrenze für Aufsichtsratsmitglieder wird nicht festgelegt, da das Alter kein Kriterium für Qualifikation und Kompetenz ist. Außerdem soll auf langjährige Erfahrung von Aufsichtsratsmitgliedern nicht verzichtet werden.

Die Erreichung der vorgenannten Ziele soll unter Beachtung des jeweils geltenden Rechts im Rahmen von Nach- und Neuwahlen, Entsendungen sowie bei ggf. erforderlichen gerichtlichen Ersatzbestellungen zunächst bis 2015 weiterverfolgt werden. Alle Aufsichtsratsmitglieder werden entsprechend auf die jeweils Wahlberechtigten bzw. Entsendungsberechtigten einwirken. So wird auch der Aufsichtsrat der Hauptversammlung unter Berücksichtigung der vorgehend angeführten Kriterien und entsprechend seiner aktienrechtlichen Pflichten die nach seiner Einschätzung jeweils am besten geeigneten Kandidaten vorschlagen. Über den Stand der Umsetzung der Ziele wird der Aufsichtsrat jährlich im Geschäftsbericht informieren.

## KONZERNABSCHLUSS DER MERCK-GRUPPE 2010

---

|     |                                                      |
|-----|------------------------------------------------------|
| 134 | Gewinn- und Verlustrechnung der Merck-Gruppe         |
| 135 | Bilanz der Merck-Gruppe                              |
| 136 | Segmentbericht der Merck-Gruppe                      |
| 138 | Kapitalflussrechnung der Merck-Gruppe                |
| 139 | Free Cash Flow der Merck-Gruppe                      |
| 139 | Gesamtergebnisrechnung der Merck-Gruppe              |
| 140 | Eigenkapitalveränderungsrechnung<br>der Merck-Gruppe |
| 141 | <b>Anhang</b>                                        |
| 142 | Konsolidierungskreis                                 |
| 147 | Bilanzierungs- und Bewertungsgrundsätze              |
| 156 | Erläuterungen zur Gewinn- und Verlustrechnung        |
| 163 | Erläuterungen zur Bilanz                             |
| 183 | Erläuterungen zum Segmentbericht                     |
| 185 | Erläuterungen zur Kapitalflussrechnung               |
| 187 | Sonstige Erläuterungen                               |
| 201 | Anteilsbesitzliste                                   |



## GEWINN- UND VERLUSTRECHNUNG DER MERCK-GRUPPE

Erläuterungen zur Gewinn- und  
Verlustrechnung: ab Seite 156

| in Mio EUR                                                        | Anhang | 2010           | 2009           |
|-------------------------------------------------------------------|--------|----------------|----------------|
| <b>Umsatzerlöse</b>                                               | [1]    | <b>8.928,9</b> | <b>7.377,7</b> |
| Lizenz- und Provisionserlöse                                      | [2]    | 361,7          | 369,3          |
| <b>Gesamterlöse</b>                                               |        | <b>9.290,6</b> | <b>7.747,0</b> |
| Herstellungskosten                                                | [3]    | -2.385,4       | -2.029,3       |
| <b>Bruttoergebnis</b>                                             |        | <b>6.905,2</b> | <b>5.717,7</b> |
| Marketing- und Vertriebskosten*                                   | [4]    | -2.234,5       | -1.859,3       |
| Lizenz- und Provisionsaufwendungen*                               | [5]    | -477,0         | -413,0         |
| Verwaltungskosten                                                 | [6]    | -478,2         | -424,9         |
| Sonstige betriebliche Aufwendungen und Erträge                    | [7]    | -390,4         | -372,7         |
| Forschungs- und Entwicklungskosten                                | [8]    | -1.397,1       | -1.344,6       |
| Abschreibungen immaterieller Vermögenswerte                       | [9]    | -818,6         | -657,8         |
| Beteiligungsergebnis                                              | [10]   | 4,1            | 3,5            |
| <b>Operatives Ergebnis</b>                                        |        | <b>1.113,5</b> | <b>648,9</b>   |
| Sondermaßnahmen                                                   | [11]   | -0,8           | -28,0          |
| <b>Ergebnis vor Zinsen und Steuern (EBIT)</b>                     |        | <b>1.112,7</b> | <b>620,9</b>   |
| Finanzergebnis                                                    | [12]   | -251,6         | -134,5         |
| <b>Ergebnis vor Steuern</b>                                       |        | <b>861,1</b>   | <b>486,4</b>   |
| Ertragsteuern                                                     | [13]   | -219,6         | -109,7         |
| <b>Ergebnis nach Steuern</b>                                      |        | <b>641,5</b>   | <b>376,7</b>   |
| Nicht beherrschende Anteile                                       | [14]   | -9,4           | -10,4          |
| <b>Ergebnis nach Anteilen nicht beherrschender Gesellschafter</b> |        | <b>632,1</b>   | <b>366,3</b>   |
| <b>Ergebnis je Aktie (in EUR)</b>                                 | [15]   |                |                |
| unverwässert                                                      |        | 2,91           | 1,68           |
| verwässert                                                        |        | 2,91           | 1,68           |

\*Vorjahreswerte um Ausweis der Lizenz- und Provisionsaufwendungen angepasst

## BILANZ DER MERCK-GRUPPE

Erläuterungen zur  
Bilanz: ab Seite 163

| in Mio EUR                                                                      | Anhang | 31.12.2010      | 31.12.2009      |
|---------------------------------------------------------------------------------|--------|-----------------|-----------------|
| <b>Kurzfristige Vermögenswerte</b>                                              |        |                 |                 |
| Zahlungsmittel und Zahlungsmitteläquivalente                                    | [16]   | 943,7           | 541,4           |
| Wertpapiere und finanzielle Vermögenswerte                                      | [17]   | 55,6            | 1.503,2         |
| Forderungen aus Lieferungen und Leistungen                                      | [18]   | 2.296,3         | 1.788,7         |
| Vorräte                                                                         | [19]   | 1.673,5         | 1.367,9         |
| Übrige kurzfristige Vermögenswerte                                              | [20]   | 564,7           | 275,6           |
| Steuererstattungsansprüche                                                      | [21]   | 93,7            | 55,3            |
| Zur Veräußerung gehaltene Vermögenswerte                                        | [22]   | 36,7            | -               |
|                                                                                 |        | <b>5.664,2</b>  | <b>5.532,1</b>  |
| <b>Langfristige Vermögenswerte</b>                                              |        |                 |                 |
| Immaterielle Vermögenswerte                                                     | [23]   | 12.484,1        | 7.598,4         |
| Sachanlagen                                                                     | [24]   | 3.241,5         | 2.607,6         |
| Nach der Equity-Methode bilanzierte Finanzanlagen                               | [25]   | 5,0             | 1,6             |
| Langfristige Finanzanlagen                                                      | [26]   | 130,3           | 118,4           |
| Finanzanlagen zur Unterlegung von Pensionsverpflichtungen                       | [27]   | 216,9           | 209,6           |
| Übrige langfristige Vermögenswerte                                              | [20]   | 52,9            | 99,5            |
| Latente Steueransprüche                                                         | [13]   | 593,1           | 545,4           |
|                                                                                 |        | <b>16.723,8</b> | <b>11.180,5</b> |
| <b>Vermögenswerte</b>                                                           |        | <b>22.388,0</b> | <b>16.712,6</b> |
| <b>Kurzfristige Verbindlichkeiten</b>                                           |        |                 |                 |
| Kurzfristige Finanzschulden                                                     | [28]   | 356,1           | 705,2           |
| Verbindlichkeiten aus Lieferungen und Leistungen                                | [29]   | 1.200,1         | 935,7           |
| Übrige kurzfristige Verbindlichkeiten                                           | [30]   | 1.054,6         | 638,2           |
| Steuerschulden                                                                  | [31]   | 368,4           | 274,5           |
| Kurzfristige Rückstellungen                                                     | [32]   | 374,5           | 266,4           |
| Verbindlichkeiten im Zusammenhang mit zur Veräußerung gehaltener Vermögenswerte | [22]   | 5,9             | -               |
|                                                                                 |        | <b>3.359,6</b>  | <b>2.820,0</b>  |
| <b>Langfristige Verbindlichkeiten</b>                                           |        |                 |                 |
| Langfristige Finanzschulden                                                     | [28]   | 5.127,4         | 1.602,1         |
| Übrige langfristige Verbindlichkeiten                                           | [30]   | 42,9            | 16,9            |
| Langfristige Rückstellungen                                                     | [32]   | 524,2           | 685,0           |
| Rückstellungen für Pensionen und ähnliche Verpflichtungen                       | [33]   | 1.581,6         | 1.311,5         |
| Latente Steuerschulden                                                          | [13]   | 1.380,5         | 763,5           |
|                                                                                 |        | <b>8.656,6</b>  | <b>4.379,0</b>  |
| <b>Eigenkapital</b>                                                             | [34]   |                 |                 |
| Gesellschaftskapital                                                            |        | 565,2           | 565,2           |
| Rücklagen                                                                       |        | 8.484,2         | 8.318,7         |
| Direkt im Eigenkapital berücksichtigte Ergebnisse                               |        | 1.280,4         | 576,2           |
| <b>Eigenkapital der Anteilseigner der Obergesellschaft</b>                      |        | <b>10.329,8</b> | <b>9.460,1</b>  |
| Nicht beherrschende Anteile                                                     |        | 42,0            | 53,5            |
|                                                                                 |        | <b>10.371,8</b> | <b>9.513,6</b>  |
| <b>Schulden und Eigenkapital</b>                                                |        | <b>22.388,0</b> | <b>16.712,6</b> |

## SEGMENTBERICHT DER MERCK-GRUPPE

Bestandteil des Anhangs, Erläuterungen zum Segmentbericht: siehe ab Seite 183

| Informationen nach Unternehmensbereichen und Sparten | Merck Serono |          | Consumer Health Care |        | Pharma          |          |
|------------------------------------------------------|--------------|----------|----------------------|--------|-----------------|----------|
|                                                      | 2010         | 2009     | 2010                 | 2009   | 2010            | 2009     |
| in Mio EUR                                           |              |          |                      |        |                 |          |
| Umsatzerlöse                                         | 5.409,0      | 4.993,8  | 469,7                | 464,9  | <b>5.878,7</b>  | 5.458,7  |
| Lizenz- und Provisionserlöse                         | 344,5        | 351,1    | 2,3                  | 2,1    | <b>346,8</b>    | 353,2    |
| Gesamterlöse                                         | 5.753,5      | 5.344,9  | 472,0                | 467,0  | <b>6.225,5</b>  | 5.811,9  |
| Bruttoergebnis                                       | 4.792,8      | 4.485,5  | 316,9                | 319,5  | <b>5.109,7</b>  | 4.805,0  |
| Marketing und Vertriebskosten**                      | -1.451,4     | -1.316,1 | -235,9               | -211,9 | <b>-1.687,3</b> | -1.528,0 |
| Lizenz- und Provisionsaufwendungen**                 | -456,2       | -403,0   | -1,2                 | -1,5   | <b>-457,4</b>   | -404,5   |
| Verwaltungskosten                                    | -269,9       | -263,6   | -24,7                | -24,3  | <b>-294,6</b>   | -287,9   |
| Sonstige betriebliche Aufwendungen und Erträge       | -169,6       | -317,4   | -12,1                | -9,9   | <b>-181,7</b>   | -327,3   |
| Forschungs- und Entwicklungskosten                   | -1.167,1     | -1.183,6 | -24,9                | -19,5  | <b>-1.192,0</b> | -1.203,1 |
| Operatives Ergebnis                                  | 565,1        | 354,7    | 13,9                 | 48,3   | <b>579,0</b>    | 403,0    |
| Sondermaßnahmen                                      | 68,6         | -39,8    | -                    | -      | <b>68,6</b>     | -39,8    |
| Ergebnis vor Zinsen und Steuern (EBIT)               | 633,7        | 314,9    | 13,9                 | 48,3   | <b>647,6</b>    | 363,2    |
| Betriebsvermögen (netto)                             | 10.359,7     | 10.015,9 | 310,8                | 336,0  | <b>10.670,5</b> | 10.351,9 |
| Segmentverbindlichkeiten                             | -1.268,9     | -1.078,2 | -86,4                | -76,9  | <b>-1.355,3</b> | -1.155,1 |
| Investitionen in Sachanlagen                         | 247,7        | 317,2    | 6,9                  | 10,0   | <b>254,6</b>    | 327,2    |
| Investitionen in immaterielle Vermögenswerte         | 85,1         | 74,8     | 1,3                  | 1,4    | <b>86,4</b>     | 76,2     |
| Abschreibungen                                       | -766,5       | -749,6   | -11,6                | -9,5   | <b>-778,1</b>   | -759,1   |
| Wertminderungen                                      | -171,0       | -99,1    | -7,1                 | -      | <b>-178,1</b>   | -99,1    |
| Mittelfluss aus betrieblicher Tätigkeit              | 1.590,1      | 1.250,7  | 46,6                 | 58,0   | <b>1.636,7</b>  | 1.308,7  |
| Mittelfluss aus Investitionstätigkeit                | -292,0       | -386,3   | -1,1                 | -9,1   | <b>-293,1</b>   | -395,4   |
| Free Cash Flow                                       | 1.298,1      | 864,4    | 45,5                 | 48,9   | <b>1.343,6</b>  | 913,3    |
| Basis Free Cash Flow                                 | 1.307,8      | 866,8    | 45,5                 | 48,9   | <b>1.353,3</b>  | 915,7    |
| FCR in %                                             | 22,7         | 16,2     | 9,6                  | 10,5   | <b>21,7</b>     | 15,8     |
| ROS in %                                             | 9,8          | 6,6      | 2,9                  | 10,3   | <b>9,3</b>      | 6,9      |

\* Mit der Akquisition von Millipore wurde der Unternehmensbereich Chemie neu strukturiert. Die Vorjahreszahlen wurden entsprechend angepasst.

\*\* Vorjahreswerte um Ausweis der Lizenz- und Provisionsaufwendungen angepasst

| Informationen nach Ländern und Regionen | Deutschland |         | Frankreich |       | Schweiz |         | Übriges Europa |         |
|-----------------------------------------|-------------|---------|------------|-------|---------|---------|----------------|---------|
|                                         | 2010        | 2009    | 2010       | 2009  | 2010    | 2009    | 2010           | 2009    |
| in Mio EUR                              |             |         |            |       |         |         |                |         |
| Umsatzerlöse nach Sitz des Kunden       | 779,4       | 708,1   | 714,2      | 684,6 | 111,4   | 84,9    | 2.141,8        | 1.896,1 |
| Umsatzerlöse nach Sitz der Gesellschaft | 1.315,0     | 1.113,4 | 810,4      | 796,1 | 149,9   | 167,0   | 1.819,4        | 1.601,8 |
| Gesamterlöse                            | 1.333,2     | 1.137,5 | 821,6      | 806,0 | 364,6   | 388,8   | 1.836,3        | 1.619,1 |
| Immaterielle Vermögenswerte             | 184,0       | 180,0   | 343,9      | 217,7 | 6.701,0 | 6.648,2 | 2.452,1        | 209,8   |
| Sachanlagen                             | 1.088,5     | 1.113,5 | 140,0      | 82,4  | 987,3   | 815,7   | 399,5          | 238,6   |
| Forschungs- und Entwicklungskosten      | -649,7      | -636,4  | -49,4      | -46,3 | -566,4  | -553,4  | -32,8          | -37,1   |
| Mitarbeiter (Anzahl)                    | 10.340      | 9.904   | 2.916      | 1.985 | 2.407   | 2.275   | 6.016          | 4.412   |

| Merck Millipore* |        | Performance Materials* |         | Chemie          |         | Konzernkosten<br>und Sonstiges |          | Konzern         |          |
|------------------|--------|------------------------|---------|-----------------|---------|--------------------------------|----------|-----------------|----------|
| 2010             | 2009   | 2010                   | 2009    | 2010            | 2009    | 2010                           | 2009     | 2010            | 2009     |
| 1.673,5          | 921,2  | 1.376,7                | 997,8   | <b>3.050,2</b>  | 1.919,0 | –                              | –        | <b>8.928,9</b>  | 7.377,7  |
| 7,2              | 8,2    | 7,7                    | 7,9     | <b>14,9</b>     | 16,1    | –                              | –        | <b>361,7</b>    | 369,3    |
| 1.680,7          | 929,4  | 1.384,4                | 1.005,7 | <b>3.065,1</b>  | 1.935,1 | –                              | –        | <b>9.290,6</b>  | 7.747,0  |
| 871,0            | 434,5  | 924,5                  | 478,2   | <b>1.795,5</b>  | 912,7   | –                              | –        | <b>6.905,2</b>  | 5.717,7  |
| –427,7           | –231,8 | –116,6                 | –99,2   | <b>–544,3</b>   | –331,0  | –2,9                           | –0,3     | <b>–2.234,5</b> | –1.859,3 |
| –9,9             | –5,7   | –9,7                   | –2,8    | <b>–19,6</b>    | –8,5    | –                              | –        | <b>–477,0</b>   | –413,0   |
| –76,4            | –43,1  | –38,5                  | –35,8   | <b>–114,9</b>   | –78,9   | –68,7                          | –58,1    | <b>–478,2</b>   | –424,9   |
| –140,0           | –14,0  | –47,5                  | –8,1    | <b>–187,5</b>   | –22,1   | –21,2                          | –23,3    | <b>–390,4</b>   | –372,7   |
| –78,0            | –32,5  | –127,1                 | –109,0  | <b>–205,1</b>   | –141,5  | –                              | –        | <b>–1.397,1</b> | –1.344,6 |
| 44,0             | 106,5  | 580,0                  | 217,8   | <b>624,0</b>    | 324,3   | –89,5                          | –78,4    | <b>1.113,5</b>  | 648,9    |
| –                | 10,6   | –1,0                   | 1,2     | <b>–1,0</b>     | 11,8    | –68,4                          | –        | <b>–0,8</b>     | –28,0    |
| 44,0             | 117,1  | 579,0                  | 219,0   | <b>623,0</b>    | 336,1   | –157,9                         | –78,4    | <b>1.112,7</b>  | 620,9    |
| 6.486,7          | 781,2  | 1.238,6                | 1.176,2 | <b>7.725,3</b>  | 1.957,4 | 74,7                           | 37,4     | <b>18.470,5</b> | 12.346,7 |
| –374,3           | –111,5 | –153,9                 | –118,7  | <b>–528,2</b>   | –230,2  | –14,9                          | –15,7    | <b>–1.898,4</b> | –1.401,0 |
| 80,3             | 57,6   | 59,1                   | 82,1    | <b>139,4</b>    | 139,7   | 2,2                            | 0,4      | <b>396,2</b>    | 467,3    |
| 7,2              | 4,9    | 3,6                    | 7,5     | <b>10,8</b>     | 12,4    | 7,0                            | 8,0      | <b>104,2</b>    | 96,6     |
| –172,7           | –46,0  | –98,2                  | –87,6   | <b>–270,9</b>   | –133,6  | –3,2                           | –1,9     | <b>–1.052,2</b> | –894,6   |
| –11,0            | –1,4   | –16,4                  | –8,1    | <b>–27,4</b>    | –9,5    | –0,2                           | –0,8     | <b>–205,7</b>   | –109,4   |
| 252,7            | 174,7  | 610,4                  | 392,9   | <b>863,1</b>    | 567,6   | –717,2                         | –505,0   | <b>1.782,6</b>  | 1.371,3  |
| –4.924,6         | –52,1  | –68,2                  | –105,0  | <b>–4.992,8</b> | –157,1  | 1.403,5                        | –1.608,2 | <b>–3.882,4</b> | –2.160,7 |
| –4.671,9         | 122,6  | 542,2                  | 287,9   | <b>–4.129,7</b> | 410,5   | –736,4                         | –511,4   | <b>–3.522,5</b> | 812,4    |
| 263,4            | 127,7  | 548,8                  | 304,0   | <b>812,2</b>    | 431,7   | –495,7                         | –495,8   | <b>1.669,8</b>  | 851,6    |
| 15,7             | 13,7   | 39,6                   | 30,2    | <b>26,5</b>     | 22,3    | –                              | –        | <b>18,0</b>     | 11,0     |
| 2,6              | 11,5   | 41,9                   | 21,7    | <b>20,4</b>     | 16,8    | –                              | –        | <b>12,0</b>     | 8,4      |

| Nordamerika |         | Lateinamerika |       | Asien   |         | Afrika, Australien |       | Konzern         |          |
|-------------|---------|---------------|-------|---------|---------|--------------------|-------|-----------------|----------|
| 2010        | 2009    | 2010          | 2009  | 2010    | 2009    | 2010               | 2009  | 2010            | 2009     |
| 1.529,6     | 1.171,3 | 1.080,6       | 941,8 | 2.305,5 | 1.685,6 | 266,4              | 205,3 | <b>8.928,9</b>  | 7.377,7  |
| 1.512,6     | 1.146,0 | 1.054,0       | 923,2 | 2.114,9 | 1.520,8 | 152,7              | 109,4 | <b>8.928,9</b>  | 7.377,7  |
| 1.514,8     | 1.147,3 | 1.055,9       | 926,7 | 2.211,5 | 1.612,2 | 152,7              | 109,4 | <b>9.290,6</b>  | 7.747,0  |
| 2.537,9     | 120,2   | 15,4          | 13,6  | 249,2   | 208,7   | 0,6                | 0,2   | <b>12.484,1</b> | 7.598,4  |
| 358,6       | 116,1   | 79,7          | 79,3  | 181,1   | 156,2   | 6,8                | 5,8   | <b>3.241,5</b>  | 2.607,6  |
| –56,8       | –32,9   | –7,3          | –7,3  | –31,4   | –28,1   | –3,3               | –3,1  | <b>–1.397,1</b> | –1.344,6 |
| 4.909       | 2.051   | 4.546         | 4.272 | 8.681   | 7.462   | 747                | 701   | <b>40.562</b>   | 33.062   |

Erläuterungen zur Kapitalflussrechnung: ab Seite 185

## KAPITALFLUSSRECHNUNG DER MERCK-GRUPPE

| in Mio EUR                                                                                           | Anhang      | 2010            | 2009            |
|------------------------------------------------------------------------------------------------------|-------------|-----------------|-----------------|
| <b>Ergebnis nach Steuern</b>                                                                         |             | <b>641,5</b>    | <b>376,7</b>    |
| Abschreibungen/Wertminderungen/Zuschreibungen                                                        |             | 1.257,9         | 1.003,8         |
| Veränderungen der Vorräte                                                                            |             | 38,0            | 51,7            |
| Veränderungen der Forderungen aus Lieferungen und Leistungen                                         |             | -187,0          | -118,7          |
| Veränderungen der Verbindlichkeiten aus Lieferungen und Leistungen                                   |             | 117,5           | 92,7            |
| Veränderungen der Rückstellungen                                                                     |             | -73,6           | 156,9           |
| Veränderungen der übrigen Vermögenswerte und Verbindlichkeiten                                       |             | 97,8            | -179,6          |
| Neutralisierung Gewinne/Verluste aus Anlagenabgängen                                                 |             | -102,4          | -15,8           |
| Sonstige nicht zahlungswirksame Aufwendungen und Erträge                                             |             | -7,1            | 3,6             |
| <b>Mittelfluss aus betrieblicher Tätigkeit</b>                                                       | <b>[35]</b> | <b>1.782,6</b>  | <b>1.371,3</b>  |
| Investitionen in immaterielle Vermögenswerte                                                         |             | -104,2          | -96,6           |
| Investitionen in Sachanlagen                                                                         |             | -396,2          | -467,3          |
| Akquisitionen                                                                                        |             | -4.843,7        | -23,5           |
| Investitionen in Finanzanlagen                                                                       |             | -16,0           | -16,5           |
| Erlöse aus Anlagenabgängen                                                                           |             | 54,8            | 45,4            |
| Kauf/Verkauf von Wertpapieren                                                                        |             | 0,2             | -0,4            |
| Veränderungen der Finanzanlagen zur Unterlegung von Pensionsverpflichtungen                          |             | -8,6            | -201,3          |
| Veränderungen der übrigen finanziellen Vermögenswerte                                                |             | 1.431,3         | -1.400,5        |
| <b>Mittelfluss aus Investitionstätigkeit</b>                                                         | <b>[36]</b> | <b>-3.882,4</b> | <b>-2.160,7</b> |
| Dividendenzahlungen                                                                                  |             | -86,1           | -104,8          |
| Ergebnisabführungen an E. Merck KG und Rücklagenveränderung                                          |             | -261,1          | -177,8          |
| Veränderungen der Verbindlichkeiten gegenüber E. Merck KG                                            |             | 150,6           | -32,6           |
| Ausgegebene Anleihen                                                                                 |             | 3.181,7         | 976,1           |
| Rückzahlung von Anleihen                                                                             |             | -500,0          | -               |
| Neuaufnahme von übrigen kurz- und langfristigen Finanzschulden                                       |             | 84,4            | 7,6             |
| Tilgung von übrigen kurz- und langfristigen Finanzschulden                                           |             | -32,0           | -31,3           |
| <b>Mittelfluss aus Finanzierungstätigkeit</b>                                                        | <b>[37]</b> | <b>2.537,5</b>  | <b>637,2</b>    |
| <b>Veränderungen der Zahlungsmittel und Zahlungsmitteläquivalente</b>                                |             | <b>437,7</b>    | <b>-152,2</b>   |
| Veränderungen der Zahlungsmittel und Zahlungsmitteläquivalente durch Wechselkursveränderungen        |             | -34,2           | 0,9             |
| Zahlungsmittel und Zahlungsmitteläquivalente Stand 1.1.                                              |             | 541,4           | 692,7           |
| Zahlungsmittel und Zahlungsmitteläquivalente Stand 31.12.                                            |             | 944,9           | 541,4           |
| Abzüglich Zahlungsmittel und Zahlungsmitteläquivalente der zur Veräußerung gehaltenen Vermögenswerte |             | -1,2            | -               |
| <b>Zahlungsmittel und Zahlungsmitteläquivalente Stand 31.12. (Konzernbilanz)</b>                     | <b>[38]</b> | <b>943,7</b>    | <b>541,4</b>    |

## FREE CASH FLOW DER MERCK-GRUPPE

Bestandteil des Anhangs, Erläuterungen siehe ab Seite 185

| in Mio EUR                                     | Anhang | 2010            | 2009           |
|------------------------------------------------|--------|-----------------|----------------|
| <b>Mittelfluss aus betrieblicher Tätigkeit</b> |        | <b>1.782,6</b>  | <b>1.371,3</b> |
| Investitionen in immaterielle Vermögenswerte   |        | -104,2          | -96,6          |
| Investitionen in Sachanlagen                   |        | -396,2          | -467,3         |
| Akquisitionen                                  |        | -4.843,7        | -23,5          |
| Investitionen in Finanzanlagen                 |        | -16,0           | -16,5          |
| Erlöse aus Anlagenabgängen                     |        | 54,8            | 45,4           |
| Kauf/Verkauf von Wertpapieren                  |        | 0,2             | -0,4           |
| <b>Free Cash Flow</b>                          | [39]   | <b>-3.522,5</b> | <b>812,4</b>   |
| Akquisitionsbedingte Auszahlungen              |        | 4.941,9         | 23,5           |
| Auszahlungen im Zusammenhang mit Veräußerungen |        | 250,4           | 15,7           |
| <b>Basis Free Cash Flow</b>                    | [39]   | <b>1.669,8</b>  | <b>851,6</b>   |

## GESAMTERGEBNISRECHNUNG DER MERCK-GRUPPE

| in Mio EUR                                                                                                                     | Anhang | 2010           | 2009          |
|--------------------------------------------------------------------------------------------------------------------------------|--------|----------------|---------------|
| <b>Ergebnis nach Steuern</b>                                                                                                   |        | <b>641,5</b>   | <b>376,7</b>  |
| <b>Zur Veräußerung verfügbare finanzielle Vermögenswerte</b>                                                                   | [34]   |                |               |
| Anpassung an Marktwerte                                                                                                        |        | -6,5           | 37,9          |
| Umgliederung in die Ergebnisrechnung                                                                                           |        | -17,1          | -2,0          |
| Latente Steuereffekte                                                                                                          |        | 1,8            | -2,1          |
| Veränderung des im Eigenkapital erfassten Betrags                                                                              |        | <b>-21,8</b>   | <b>33,8</b>   |
| <b>Derivative Finanzinstrumente</b>                                                                                            | [34]   |                |               |
| Anpassung an Marktwerte                                                                                                        |        | -125,3         | 47,5          |
| Umgliederung in die Ergebnisrechnung                                                                                           |        | 17,2           | -64,8         |
| Umgliederung in Vermögenswerte                                                                                                 |        | -24,4          | -             |
| Latente Steuereffekte                                                                                                          |        | 23,9           | 0,7           |
| Veränderung des im Eigenkapital erfassten Betrags                                                                              |        | <b>-108,6</b>  | <b>-16,6</b>  |
| <b>Versicherungsmathematische Gewinne und Verluste aus leistungsorientierten Pensionszusagen und ähnlichen Verpflichtungen</b> | [33]   |                |               |
| Veränderung der versicherungsmathematischen Gewinne und Verluste                                                               |        | -170,7         | -178,1        |
| Latente Steuereffekte                                                                                                          |        | 28,5           | 40,3          |
| Veränderung des im Eigenkapital erfassten Betrags                                                                              |        | <b>-142,2</b>  | <b>-137,8</b> |
| <b>Unterschiedsbetrag aus der Währungsumrechnung</b>                                                                           | [34]   | <b>840,5</b>   | <b>-20,1</b>  |
| <b>Direkt im Eigenkapital berücksichtigtes Ergebnis (Summe)</b>                                                                |        | <b>567,9</b>   | <b>-140,7</b> |
| <b>Gesamtergebnis</b>                                                                                                          |        | <b>1.209,4</b> | <b>236,0</b>  |
| davon den Anteilseignern der Obergesellschaft zustehend                                                                        |        | 1.194,4        | 230,2         |
| davon nicht beherrschende Anteile                                                                                              |        | 15,0           | 5,8           |

# EIGENKAPITALVERÄNDERUNGSRECHNUNG DER MERCK-GRUPPE

Erläuterungen siehe Anmerkung [34] des Anhangs

| in Mio EUR                                                            | Gesellschaftskapital                   |                                       | Rücklagen                           |                                        |                                                                 | Direkt im<br>Eigenkapital<br>berück-<br>sichtigte<br>Ergebnisse | Eigen-<br>kapital der<br>Anteilseigner<br>der Oberge-<br>sellschaft | Nicht<br>beherr-<br>schende<br>Anteile | Eigenkapital    |
|-----------------------------------------------------------------------|----------------------------------------|---------------------------------------|-------------------------------------|----------------------------------------|-----------------------------------------------------------------|-----------------------------------------------------------------|---------------------------------------------------------------------|----------------------------------------|-----------------|
|                                                                       | Komplemen-<br>tärkapital<br>Merck KGaA | Gezeichnetes<br>Kapital<br>Merck KGaA | Kapital-<br>rücklagen<br>Merck KGaA | Gewinnrück-<br>lagen/Bilanz-<br>gewinn | Versiche-<br>rungsmathe-<br>matische<br>Gewinne und<br>Verluste |                                                                 |                                                                     |                                        |                 |
| <b>Stand 1.1.2009</b>                                                 | <b>397,2</b>                           | <b>168,0</b>                          | <b>3.813,7</b>                      | <b>4.642,3</b>                         | <b>-90,3</b>                                                    | <b>574,5</b>                                                    | <b>9.505,4</b>                                                      | <b>57,6</b>                            | <b>9.563,0</b>  |
| Ergebnis nach Steuern                                                 | -                                      | -                                     | -                                   | 366,3                                  | -                                                               | -                                                               | 366,3                                                               | 10,4                                   | 376,7           |
| Direkt im Eigenkapital<br>berücksichtigtes Ergebnis                   | -                                      | -                                     | -                                   | -                                      | -137,8                                                          | 1,7                                                             | -136,1                                                              | -4,6                                   | -140,7          |
| <b>Gesamtergebnis</b>                                                 | <b>-</b>                               | <b>-</b>                              | <b>-</b>                            | <b>366,3</b>                           | <b>-137,8</b>                                                   | <b>1,7</b>                                                      | <b>230,2</b>                                                        | <b>5,8</b>                             | <b>236,0</b>    |
| Dividendenzahlungen                                                   | -                                      | -                                     | -                                   | -96,9                                  | -                                                               | -                                                               | -96,9                                                               | -7,9                                   | -104,8          |
| Ergebnisabführung<br>E. Merck KG einschließlich<br>Rücklagenzuführung | -                                      | -                                     | -                                   | -177,8                                 | -                                                               | -                                                               | -177,8                                                              | -                                      | -177,8          |
| Veränderung Konsolidie-<br>rungskreis/Sonstiges                       | -                                      | -                                     | -                                   | -0,2                                   | -0,6                                                            | -                                                               | -0,8                                                                | -2,0                                   | -2,8            |
| <b>Stand 31.12.2009</b>                                               | <b>397,2</b>                           | <b>168,0</b>                          | <b>3.813,7</b>                      | <b>4.733,7</b>                         | <b>-228,7</b>                                                   | <b>576,2</b>                                                    | <b>9.460,1</b>                                                      | <b>53,5</b>                            | <b>9.513,6</b>  |
| <b>Stand 1.1.2010</b>                                                 | <b>397,2</b>                           | <b>168,0</b>                          | <b>3.813,7</b>                      | <b>4.733,7</b>                         | <b>-228,7</b>                                                   | <b>576,2</b>                                                    | <b>9.460,1</b>                                                      | <b>53,5</b>                            | <b>9.513,6</b>  |
| Ergebnis nach Steuern                                                 | -                                      | -                                     | -                                   | 632,1                                  | -                                                               | -                                                               | 632,1                                                               | 9,4                                    | 641,5           |
| Direkt im Eigenkapital<br>berücksichtigtes Ergebnis                   | -                                      | -                                     | -                                   | -                                      | -141,9                                                          | 704,2                                                           | 562,3                                                               | 5,6                                    | 567,9           |
| <b>Gesamtergebnis</b>                                                 | <b>-</b>                               | <b>-</b>                              | <b>-</b>                            | <b>632,1</b>                           | <b>-141,9</b>                                                   | <b>704,2</b>                                                    | <b>1.194,4</b>                                                      | <b>15,0</b>                            | <b>1.209,4</b>  |
| Dividendenzahlungen                                                   | -                                      | -                                     | -                                   | -64,6                                  | -                                                               | -                                                               | -64,6                                                               | -21,5                                  | -86,1           |
| Ergebnisabführung<br>E. Merck KG einschließlich<br>Rücklagenzuführung | -                                      | -                                     | -                                   | -261,1                                 | -                                                               | -                                                               | -261,1                                                              | -                                      | -261,1          |
| Veränderung Konsolidie-<br>rungskreis/Sonstiges                       | -                                      | -                                     | -                                   | 0,8                                    | 0,2                                                             | -                                                               | 1,0                                                                 | -5,0                                   | -4,0            |
| <b>Stand 31.12.2010</b>                                               | <b>397,2</b>                           | <b>168,0</b>                          | <b>3.813,7</b>                      | <b>5.040,9</b>                         | <b>-370,4</b>                                                   | <b>1.280,4</b>                                                  | <b>10.329,8</b>                                                     | <b>42,0</b>                            | <b>10.371,8</b> |

## ANHANG

### Unternehmensinformationen

Der vorliegende Konzernabschluss ist auf die das operative Geschäft der Merck-Gruppe führende Merck KGaA, Darmstadt, als Obergesellschaft aufgestellt. Gemäß den Vorschriften des Publizitätsgesetzes wird zusätzlich ein Konzernabschluss auf das oberste Mutterunternehmen, die E. Merck KG, den Komplementär der Merck KGaA, dessen Kapitalanteil am 31. Dezember 2010 bei 70,27 % lag, aufgestellt. Dieser schließt die Merck KGaA und ihre Tochtergesellschaften ein. Beide Abschlüsse werden beim elektronischen Bundesanzeiger eingereicht und sind danach unter [www.ebundesanzeiger.de](http://www.ebundesanzeiger.de) abrufbar.

### Grundlagen der Berichterstattung

Der Konzernabschluss der Merck-Gruppe ist nach einheitlichen Bilanzierungs- und Bewertungsgrundsätzen aufgestellt. Dabei finden gemäß § 315a HGB die am Abschlussstichtag gültigen und von der Europäischen Union anerkannten International Financial Reporting Standards (IFRS) des International Accounting Standards Board (IASB) und des IFRS Interpretations Committee Anwendung.

Folgende Änderungen von Standards sowie folgende Interpretationen gelten ab dem Geschäftsjahr 2010 verbindlich:

- Änderung des IAS 27 „Konzern- und separate Einzelabschlüsse“
- Änderung des IAS 39 „Finanzinstrumente: Ansatz und Bewertung: Geeignete Grundgeschäfte“
- Überarbeitete Fassung und nachfolgende Änderung des IFRS 1 „Erstmalige Anwendung der International Financial Reporting Standards“
- Änderung des IFRS 2 „Anteilsbasierte Vergütung“
- Überarbeitete Fassung des IFRS 3 „Unternehmenszusammenschlüsse“
- „Verbesserungen an den International Financial Reporting Standards“ (in der Fassung des IASB vom April 2009)
- IFRIC 12 „Dienstleistungskonzessionsvereinbarungen“
- IFRIC 15 „Verträge über die Errichtung von Immobilien“
- IFRIC 16 „Absicherung einer Nettoinvestition in einen ausländischen Geschäftsbetrieb“
- IFRIC 17 „Sachdividenden an Eigentümer“
- IFRIC 18 „Übertragung von Vermögenswerten durch einen Kunden“

Die überarbeitete Fassung des IFRS 3 fand Anwendung auf die Erstkonsolidierung von Millipore. Die wesentliche Folge hiervon war die aufwandswirksame Erfassung der Anschaffungsnebenkosten. Details zur Erstkonsolidierung von Millipore können dem Kapitel „Konsolidierungskreis“ entnommen werden. Die übrigen neuen Regelungen haben keine wesentlichen Auswirkungen auf den Konzernabschluss.



Folgende Änderungen von Standards sowie folgende Interpretation und folgende Änderung einer Interpretation gelten ab dem Geschäftsjahr 2011 verbindlich:

- Überarbeitete Fassung des IAS 24 „Angaben über Beziehungen zu nahestehenden Unternehmen und Personen“
- Änderung des IAS 32 „Finanzinstrumente: Darstellung – Einstufung von Bezugsrechten“
- Änderung des IFRS 1 „Erstmalige Anwendung der International Financial Reporting Standards: Begrenzte Befreiung erstmaliger Anwender von Vergleichsangaben nach IFRS 7“
- IFRIC 19 „Tilgung finanzieller Verbindlichkeiten durch Eigenkapitalinstrumente“
- Änderung des IFRIC 14 „IAS 19 – Die Begrenzung eines leistungsorientierten Vermögenswertes, Mindestdotierungsverpflichtungen und ihre Wechselwirkung“

Durch die neuen Regelungen erwarten wir aus heutiger Sicht keine wesentlichen Auswirkungen auf den Konzernabschluss.

Weiterhin wurden folgender Standard und folgende Änderungen von Standards vom International Accounting Standards Board (IASB) in englischer Sprache veröffentlicht und noch nicht von der EU anerkannt:

- IFRS 9 „Financial Instruments“
- Amendment to IAS 12 „Income taxes“
- Amendment to IFRS 1 „First-time Adoption of International Financial Reporting Standards“
- Amendment to IFRS 7 „Financial Instruments: Disclosures“
- „Improvements to International Financial Reporting Standards“ (in der Fassung des IASB vom Mai 2010)

Die Auswirkungen auf den Konzernabschluss durch den voraussichtlich ab 2013 anzuwendenden IFRS 9 werden zur Zeit untersucht. Durch die übrigen neuen Regelungen erwarten wir aus heutiger Sicht keine wesentlichen Auswirkungen auf den Konzernabschluss.

## KONSOLIDIERUNGSKREIS

Einschließlich der Obergesellschaft Merck KGaA, Darmstadt, werden im Abschluss der Merck-Gruppe 236 (Vorjahr: 176) in- und ausländische Gesellschaften vollkonsolidiert. 214 (Vorjahr: 154) dieser Gesellschaften haben ihren Sitz im Ausland. Aufgrund der Erstkonsolidierung von Millipore erhöhte sich die Anzahl der vollkonsolidierten Gesellschaften um 62. Zehn Gesellschaften wurden erstmals durch Neugründung oder wegen ihrer gestiegenen Bedeutung für die Merck-Gruppe in den Konzernabschluss einbezogen. Zwölf Gesellschaften wurden entkonsolidiert, davon vier durch Unternehmensverschmelzung, vier Gesellschaften wurden liquidiert und eine Gesellschaft wurde wegen untergeordneter Bedeutung entkonsolidiert. Ferner gingen drei Gesellschaften im Rahmen des Théraxem-Verkaufs ab. Anteilig werden derzeit keine Unternehmen einbezogen. Mit der Erstkonsolidierung von Millipore ist ein weiteres assoziiertes Unternehmen hinzugekommen, so dass nunmehr zwei Unternehmen nach der Equity-Methode bewertet werden.

Wegen untergeordneter Bedeutung werden 27 (Vorjahr: 32) Tochterunternehmen nicht konsolidiert. Die Auswirkungen der wegen untergeordneter Bedeutung nicht konsolidierten Tochterunternehmen auf Umsatzerlöse, Ergebnis nach Steuern, Vermögenswerte und Eigenkapital betragen weniger als 1 % bezogen auf die gesamte Merck-Gruppe. Die Anteile an wegen untergeordneter Bedeutung nicht konsolidierten Tochterunternehmen werden zu Anschaffungskosten bewertet und unter den langfristigen Finanzanlagen ausgewiesen. Die Aufstellung des Anteilsbesitzes der Merck-Gruppe ist in Anmerkung [54] dargestellt.

#### Akquisition von Millipore

Merck hat am 14. Juli 2010 erfolgreich die Akquisition von 100 % der Anteile an der Millipore Corporation, einem führenden Life-Science-Unternehmen mit Sitz in Billerica, Massachusetts, USA, abgeschlossen. Die Erstkonsolidierung der Millipore-Gesellschaften in den Merck Konzernabschluss erfolgte entsprechend. Der Zusammenschluss mit Millipore ermöglicht es, die gesamte Wertschöpfungskette für Pharma- und Biopharma-Kunden abzudecken. Durch das Angebot integrierter Lösungen, die über das bisher bestehende Chemieportfolio von Merck hinausgehen, eröffnen sich für Merck neue Wachstumsmöglichkeiten. Der Gesamtkaufpreis betrug 5.137,1 Mio EUR und wurde durch Barmittel beglichen. Er setzt sich zusammen aus der Zahlung in Höhe von 4.611,9 Mio EUR für die ausstehenden Anteile sowie bestehende Optionen aus Aktienoptionsprogrammen und der Zahlung in Höhe von 525,2 Mio EUR für den Rückkauf der ausstehenden Wandelanleihe der Millipore Corporation. Im Zusammenhang mit der Akquisition sind Anschaffungsnebenkosten in Höhe von 31,2 Mio EUR angefallen, die aufwandswirksam in den sonstigen betrieblichen Aufwendungen unter der Position „Projektkosten“ ausgewiesen wurden. Merck hatte am 28. Februar 2010 sein Übernahmeangebot aller ausstehenden Millipore-Aktien für 107 USD pro Aktie in bar bekannt gegeben. Der Abschluss folgt der Zustimmung der Millipore-Aktionäre auf einer außerordentlichen Hauptversammlung am 3. Juni 2010 sowie der Erfüllung aller weiteren Bedingungen – wie etwa der Genehmigung durch die Kartellbehörden in den USA und Europa. Am 26. Juli 2010 wurde das Delisting von Millipore von der New York Stock Exchange wirksam. Ebenfalls am 26. Juli 2010 wurde die Deregistrierung bei der amerikanischen Securities and Exchange Commission (SEC) beantragt. Die Wirksamkeit der Deregistrierung ist am 13. Oktober 2010 eingetreten.

Im Rahmen der in der nachfolgenden Übersicht dargestellten Kaufpreisaufteilung gemäß IFRS 3 wurden die erworbenen Vermögenswerte, Verbindlichkeiten und Eventualverpflichtungen in der Bilanz mit den beizulegenden Zeitwerten angesetzt:

| in Mio EUR                                                                                           | Beizulegender Zeitwert<br>zum Erwerbszeitpunkt |
|------------------------------------------------------------------------------------------------------|------------------------------------------------|
| <b>Kurzfristige Vermögenswerte</b>                                                                   |                                                |
| Zahlungsmittel und Zahlungsmitteläquivalente,<br>Wertpapiere und sonstige finanzielle Vermögenswerte | 300,0                                          |
| Vorräte                                                                                              | 265,5                                          |
| Forderungen                                                                                          | 257,0                                          |
| Sonstige kurzfristige Vermögenswerte                                                                 | 13,8                                           |
|                                                                                                      | <b>836,3</b>                                   |
| <b>Langfristige Vermögenswerte</b>                                                                   |                                                |
| Geschäfts- oder Firmenwerte                                                                          | 2.704,4                                        |
| Sonstige immaterielle Vermögenswerte                                                                 | 2.559,5                                        |
| Sachanlagen                                                                                          | 474,2                                          |
| Nach der Equity-Methode bilanzierte Finanzanlagen                                                    | 2,2                                            |
| Sonstige langfristige Vermögenswerte                                                                 | 3,2                                            |
| Latente Steueransprüche                                                                              | 96,3                                           |
|                                                                                                      | <b>5.839,8</b>                                 |
| <b>Vermögenswerte</b>                                                                                | <b>6.676,1</b>                                 |
| <b>Kurzfristige Verbindlichkeiten</b>                                                                |                                                |
| Kurzfristige Finanzschulden                                                                          | 574,8                                          |
| Sonstige kurzfristige Verbindlichkeiten                                                              | 341,7                                          |
|                                                                                                      | <b>916,5</b>                                   |
| <b>Langfristige Verbindlichkeiten</b>                                                                |                                                |
| Langfristige Finanzschulden                                                                          | 288,4                                          |
| Rückstellungen für Pensionen und ähnliche Verpflichtungen                                            | 54,9                                           |
| Sonstige langfristige Verbindlichkeiten                                                              | 20,3                                           |
| Latente Steuerschulden                                                                               | 790,2                                          |
|                                                                                                      | <b>1.153,8</b>                                 |
| <b>Verbindlichkeiten</b>                                                                             | <b>2.070,3</b>                                 |
| <b>Erworbenes Nettovermögen</b>                                                                      | <b>4.605,8</b>                                 |
| <b>Nicht beherrschende Anteile</b>                                                                   | <b>6,1</b>                                     |
| <b>Erworbenes Nettovermögen/Kaufpreis</b>                                                            | <b>4.611,9</b>                                 |
| <b>Eigenkapitalähnliche Kaufpreisbestandteile (Wandelanleihe)</b>                                    | <b>525,2</b>                                   |
| <b>Kaufpreis einschließlich Wandelanleihe</b>                                                        | <b>5.137,1</b>                                 |

Die größten Einflüsse aus der Kaufpreisallokation auf die Bilanz und die Gewinn- und Verlustrechnung ergeben sich aus der Anpassung der immateriellen Vermögenswerte und der Vorräte auf die beizulegenden Zeitwerte. Die immateriellen Vermögenswerte beinhalten im Wesentlichen die Bewertung der bestehenden Kundenbeziehungen, Technologien, Markenwerte sowie laufende Entwicklungsprojekte. Die nach der Akquisition von Millipore anfallende Abschreibung der immateriellen Vermögenswerte wird in der Gewinn- und Verlustrechnung in der Position „Abschreibungen immaterieller Vermögenswerte“ ausgewiesen. Darüber hinaus wurden die im Rahmen der Akquisition erworbenen Vorräte von Millipore um 85,8 Mio EUR auf die Zeitwerte angepasst. Da sich diese Vorräte bis zum 31. Dezember 2010 vollständig umgeschlagen haben, resultieren hieraus zusätzliche Herstellungskosten, die den mit den erworbenen Vorräten erzielten Umsätzen gegenüberstehen, so dass aus dem Verkauf der erworbenen Vorräte kein zusätzlicher Ergebnisbeitrag erzielt wurde.

Die Bruttobeträge der erworbenen Forderungen betrugen zum Erwerbszeitpunkt 259,7 Mio EUR. Die bestmögliche Schätzung der uneinbringlichen Forderungen belief sich auf 2,7 Mio EUR. Die ausgewiesenen passiven latenten Steuern stehen insbesondere im Zusammenhang mit der Aufwertung von immateriellen Vermögenswerten und Vorräten. Der verbleibende Unterschiedsbetrag zwischen dem Kaufpreis einschließlich Wandelanleihe in Höhe von 5.137,1 Mio EUR und beizulegenden Zeitwerten in Höhe von 2.432,7 Mio EUR wird als Geschäfts- oder Firmenwert ausgewiesen. Hierbei wurde der auf nicht beherrschende Anteile entfallende Geschäfts- oder Firmenwert nicht aktiviert. Der auf die Anteilseigner der Merck KGaA entfallende Geschäfts- oder Firmenwert beinhaltet im Wesentlichen nicht separierbare Werte für das Know-how des Mitarbeiterstamms, Zuwächse in Marktanteilen und Synergien aus der Zusammenführung beider Unternehmen und beläuft sich auf 2.704,4 Mio EUR. Synergien werden vor allem in den Bereichen der Verwaltung, Einkauf, Produktion sowie der Zusammenlegung bestimmter Landesgesellschaften erwartet. Die Zuordnung des Geschäfts- oder Firmenwertes auf die beiden wesentlichen Währungsräume US-Dollar und Euro erfolgt zu gleichen Teilen, da erwartet wird, dass die Synergien und die zukünftigen positiven Ergebnisbeiträge in etwa gleichmäßig auf diese Währungsräume entfallen. Die im Rahmen der Kaufpreisallokation vorgenommenen Anpassungen an beizulegende Zeitwerte sind zum 31. Dezember 2010 noch als vorläufig zu betrachten. Lediglich die Bilanzierung des Vorratsvermögens zum Erstkonsolidierungszeitpunkt ist vollständig durchgeführt. Bei allen anderen Bilanzpositionen sind noch nicht alle bilanzierungsrelevanten Analysen und Berechnungen abgeschlossen, so dass sich bei diesen Posten noch Anpassungen im nächsten Geschäftsjahr aufgrund neuer Erkenntnisse ergeben können.

Der Einfluss der Einbeziehung von Millipore auf die Gesamterlöse sowie das Operative Ergebnis betrug 640,4 Mio EUR beziehungsweise –20,8 Mio EUR. In diesem operativen Ergebnis wurden auch die Abschreibungen auf die im Rahmen der Kaufpreisallokation angefallenen Anpassungen der immateriellen Vermögenswerte sowie die höheren Herstellungskosten aufgrund der Anpassung der erworbenen Vorräte auf die beizulegenden Zeitwerte berücksichtigt. Zudem sind in 2010 Restrukturierungs- und Integrationskosten in Höhe von 87,3 Mio EUR angefallen.

Bei Einbeziehung von Millipore in den Konzernabschluss der Merck-Gruppe zum 1. Januar 2010 hätten sich für den Zeitraum 1. Januar bis 31. Dezember 2010 Gesamterlöse in Höhe von 9.974 Mio EUR sowie ein Ergebnis nach Steuern von 682 Mio EUR ergeben. Bei der Berechnung dieser Werte wurde unterstellt, dass die aus der Kaufpreisallokation angefallenen Anpassungen der Buchwerte identisch gewesen wären. Konsequenterweise sind die Abschreibungen der immateriellen Vermögenswerte für zwölf Monate enthalten. Die Anpassung der erworbenen Vorräte auf die beizulegenden Zeitwerte wurde – entsprechend der angenommenen Vorratumschlagsdauer – vollständig berücksichtigt. Die Angaben zur hypothetischen Einbeziehung der Millipore-Gruppe zum 1. Januar 2010 in den Konzernabschluss der Merck-Gruppe sind gemäß IFRS erforderlich und dienen lediglich Vergleichszwecken. Dieser Vergleich stellt nicht unbedingt die Entwicklung dar, die sich bei einem tatsächlichen Einbezug der Millipore-Gruppe zum 1. Januar 2010 ergeben hätte. Auch sind diese Aussagen nicht auf zukünftige Ereignisse und Ergebnisse gerichtet.

#### Weitere Akquisitionen

Ende Dezember 2010 hat Merck 100% der Anteile an der Beijing Skywing Technology Co., Ltd., Peking, China, übernommen. Bei dieser zur Sparte Merck Millipore gehörenden Akquisition handelt es sich um einen führenden Zulieferer für die Biopharmazeutika-Branche in China. Die Zahlung des Kaufpreises in Höhe von 13,6 Mio EUR erfolgt vereinbarungsgemäß in 2011, so dass in der Bilanz zum 31. Dezember 2010 eine entsprechende Verbindlichkeit ausgewiesen wurde. Die Erstkonsolidierung der Gesellschaft erfolgt im Geschäftsjahr 2011.

**Verkauf von Théramex**

Mit Vertrag vom 28. Oktober 2010 verkaufte Merck das in Monaco ansässige und auf Frauengesundheit und Gynäkologie spezialisierte Pharmaunternehmen Théramex an Asaph Farmaceutische Onderneming B.V., Teva Italia S.r.l. und Teva Pharmaceuticals Industries Ltd. (gemeinsam „Teva“). Teva übernahm alle Aktivitäten von Théramex einschließlich 100 % der Anteile an zwei Tochtergesellschaften für einen Betrag von 269,3 Mio EUR. Der Vertrag stand unter der aufschiebenden Bedingung, dass neben marktüblichen Closing-Bedingungen, insbesondere die Kartellfreigabe der beteiligten Kartellbehörden in den jeweiligen Ländern eingeholt werden. Als letzte Closing-Bedingung erfolgte am 20. Dezember 2010 die Genehmigung durch die französischen Kartellbehörden. Die Kaufpreiszahlung erfolgte vereinbarungsgemäß am 5. Januar 2011, so dass in der Bilanz zum 31. Dezember 2010 eine entsprechende Forderung ausgewiesen wurde. Der Verkauf umfasst auch die Vertriebsrechte für Théramex-Produkte in einer Reihe von Ländern, unter anderem Spanien und Brasilien. Merck Serono wird auch weiterhin Produkte von Théramex in bestimmten anderen Ländern vertreiben. Neben der Kaufpreiszahlung ist Merck berechtigt, gewisse leistungsabhängige Meilensteinzahlungen zu erhalten. Merck erzielte aus dem Verkauf einen Gewinn in Höhe von 68,6 Mio EUR, der in der Gewinn- und Verlustrechnung unter den Sondermaßnahmen ausgewiesen wurde. Das veräußerte Geschäft von Théramex trug im Jahr 2010 einen Umsatz von rund 84 Mio EUR zum Konzernumsatz bei.

Der Verkauf von Théramex wirkte sich auf die Konzernbilanz wie folgt aus:

| in Mio EUR                                       | 2010         |
|--------------------------------------------------|--------------|
| <b>Kurzfristige Vermögenswerte</b>               |              |
| Zahlungsmittel und Zahlungsmitteläquivalente     | 9,2          |
| Forderungen                                      | 15,8         |
| Vorräte                                          | 22,4         |
| Sonstige kurzfristige Vermögenswerte             | 2,0          |
|                                                  | <b>49,4</b>  |
| <b>Langfristige Vermögenswerte</b>               |              |
| Geschäfts- oder Firmenwerte                      | 159,0        |
| Sachanlagen                                      | 7,3          |
| Sonstige langfristige Vermögenswerte             | 1,5          |
|                                                  | <b>167,8</b> |
| <b>Vermögenswerte</b>                            | <b>217,2</b> |
| <b>Kurzfristige Verbindlichkeiten</b>            |              |
| Verbindlichkeiten aus Lieferungen und Leistungen | 10,6         |
| Sonstige kurzfristige Verbindlichkeiten          | 5,7          |
|                                                  | <b>16,3</b>  |
| <b>Langfristige Verbindlichkeiten</b>            | <b>8,3</b>   |
| <b>Verbindlichkeiten</b>                         | <b>24,6</b>  |
| <b>Nettovermögen</b>                             | <b>192,6</b> |
| <br>                                             |              |
| Verkaufspreis / Forderung                        | 269,3        |
| Gewinn vor Transaktionskosten                    | 76,7         |
| Transaktionskosten und sonstige Kosten           | 8,1          |
| <b>Gewinn aus der Veräußerung</b>                | <b>68,6</b>  |

## BILANZIERUNGS- UND BEWERTUNGSGRUNDSÄTZE

Die Bilanzierungs- und Bewertungsmethoden wurden – mit Ausnahme der im Folgenden beschriebenen Ausweisänderung – gegenüber dem Vorjahr beibehalten. Im Geschäftsjahr ist Merck dazu übergegangen, in der Gewinn- und Verlustrechnung die Lizenz- und Provisionsaufwendungen in einer separaten Position auszuweisen. Bisher wurden diese Aufwendungen in den Marketing- und Vertriebskosten ausgewiesen.

### Annahmen und Schätzungen

Die Aufstellung des Konzernabschlusses erfordert es, dass in einem bestimmten Umfang Annahmen getroffen und Schätzungen vorgenommen werden müssen. Dies hat insbesondere Auswirkungen auf die Höhe und den Ausweis der bilanzierten Vermögensgegenstände und Schulden sowie die Angaben zu Eventualverbindlichkeiten und die ausgewiesenen Erträge und Aufwendungen. Entsprechende Ermessensspielräume ergeben sich beispielsweise bei der Beurteilung der Werthaltigkeit von immateriellen Vermögenswerten und Gegenständen des Sachanlagevermögens sowie beim Ansatz und der Bewertung von Rückstellungen. Die Annahmen und Schätzungen basieren jeweils auf dem aktuellen Kenntnisstand und den aktuell verfügbaren Daten, jedoch können die tatsächlichen Ergebnisse von den erwarteten Werten abweichen und zu entsprechenden Anpassungen der Buchwerte der relevanten Vermögenswerte und Schulden führen. Die für die Erstellung des Konzernabschlusses relevanten Annahmen und Schätzungen werden kontinuierlich überprüft. Änderungen von Schätzungen werden in der Periode der Änderung und in späteren Perioden berücksichtigt, sofern die Änderung sowohl die Berichtsperiode als auch spätere Perioden betrifft. Die wesentlichen Annahmen und Parameter für die vorgenommenen Schätzungen sind im Anhang dargestellt.

### Konsolidierungsmethoden

Grundlage für den Konzernabschluss sind die nach einheitlichen Regeln unter Anwendung der IFRS zum 31. Dezember 2010 aufgestellten Jahresabschlüsse der in den Konzern einbezogenen Gesellschaften.

Die Kapitalkonsolidierung erfolgt gemäß IFRS 3 nach der Erwerbsmethode. Für die im Berichtsjahr erstmals einbezogenen Tochterunternehmen wurden die Wertansätze zum Erwerbszeitpunkt übernommen. Hierfür lagen entsprechende Abschlüsse vor. Danach entstandene Unterschiedsbeträge werden den Vermögenswerten und Schulden insoweit zugerechnet, als die beizulegenden Zeitwerte von den tatsächlichen in den Abschluss übernommenen Buchwerten abweichen. Ein verbleibender Unterschiedsbetrag wird als Geschäfts- oder Firmenwert in den immateriellen Vermögenswerten ausgewiesen, der anlassbezogen, mindestens aber jährlich, einem Impairment-Test unterworfen wird.

In Fällen, in denen nicht sämtliche Anteile einer Gesellschaft erworben werden, erfolgt die Bewertung der nicht beherrschenden Anteile zum anteiligen Buchwert.

Beim Kauf zusätzlicher Anteile nicht beherrschender Anteilseigner wird der Teil des Kaufpreises, der den Buchwert dieser Anteile übersteigt, direkt mit dem Eigenkapital verrechnet.

Die Anteile an assoziierten Unternehmen, bei denen Merck einen maßgeblichen Einfluss ausüben kann, werden – sofern sie wesentlich sind – gemäß IAS 28 nach der Equity-Methode bilanziert. Konzerninterne Umsätze, Aufwendungen und Erträge sowie alle Forderungen und Verbindlichkeiten zwischen den konsolidierten Gesellschaften werden eliminiert. Im Anlagevermögen und in den Vorräten enthaltene Effekte aus konzerninternen Lieferungen werden um die Zwischenergebnisse bereinigt. Entsprechend den Regelungen des IAS 12 werden latente Steuern auf diese Konsolidierungsvorgänge angesetzt.

#### Währungsumrechnung

Für die Abschlüsse der einbezogenen Gesellschaften, die in ausländischer Währung aufgestellt sind, wird das Konzept der funktionalen Währung angewendet. Die Tochtergesellschaften der Merck-Gruppe betreiben ihr Geschäft selbstständig. Bei diesen Gesellschaften ist die funktionale Währung in der Regel die jeweilige Landeswährung. Gemäß IAS 21 werden die Vermögenswerte sowie Schulden zum Stichtagskurs und die Aufwendungen sowie Erträge zu Jahresdurchschnittskursen in die Darstellungswährung Euro umgerechnet. Die sich während der Konzernzugehörigkeit aus der Umrechnung im Eigenkapital ergebenden Unterschiedsbeträge werden erfolgsneutral im Eigenkapital erfasst. Scheiden Konzernunternehmen aus dem Konsolidierungskreis aus, werden bestehende Währungsdifferenzen ergebniswirksam aufgelöst.

Für Geschäftsvorfälle, die in anderen Währungen als der funktionalen Währung abgewickelt werden, erfolgt die Umrechnung mit dem aktuellen Wechselkurs am Tag des Geschäftsvorfalles. Monetäre Positionen (Zahlungsmittel und Zahlungsmitteläquivalente, Forderungen und Verbindlichkeiten) in fremder Währung werden für die Aufstellung der Einzelbilanz mit dem jeweiligen Stichtagskurs angesetzt. Währungsdifferenzen aus der Umrechnung monetärer Positionen werden – außer im Fall einer Nettoinvestition in einem ausländischen Geschäftsbetrieb – erfolgswirksam erfasst. Kursgesicherte Positionen werden ebenfalls nach IAS 21 zum Stichtagskurs angesetzt. Daraus resultierende Gewinne und Verluste werden mit gegenläufigen Werten aus der Marktbewertung der Derivate in der Ergebnisrechnung zusammengefasst. Nichtmonetäre Positionen in fremder Währung sind mit ihren historischen Werten angesetzt.

Im Berichtsjahr wurde die Berichtswährung unseres Tochterunternehmens Merck Serono S.A., Genf, Schweiz, von Schweizer Franken auf Euro umgestellt. Damit tragen wir dem Umstand Rechnung, dass die Aktivitäten der Gesellschaft nun überwiegend in der neuen Berichtswährung abgewickelt werden.

Der Währungsumrechnung liegen die folgenden wesentlichen Wechselkurse zugrunde:

|                             | Jahresdurchschnittskurse |         | Stichtagskurse |            |
|-----------------------------|--------------------------|---------|----------------|------------|
|                             | 2010                     | 2009    | 31.12.2010     | 31.12.2009 |
| 1 EUR =                     |                          |         |                |            |
| Britisches Pfund (GBP)      | 0,858                    | 0,895   | 0,861          | 0,888      |
| Chinesischer Renminbi (CNY) | 8,995                    | 9,545   | 8,818          | 9,807      |
| Japanischer Yen (JPY)       | 116,583                  | 130,329 | 108,670        | 133,283    |
| Schweizer Franken (CHF)     | 1,380                    | 1,506   | 1,253          | 1,485      |
| Taiwanesischer Dollar (TWD) | 41,787                   | 45,926  | 38,938         | 45,951     |
| US-Dollar (USD)             | 1,329                    | 1,396   | 1,336          | 1,436      |

**Realisierung von  
Umsatzerlösen und  
sonstigen Erträgen**

Umsatzerlöse werden nach Abzug von umsatzabhängigen Steuern sowie von Erlösminderungen gebucht. Sie gelten als realisiert, wenn die geschuldeten Lieferungen und Leistungen erbracht wurden und die wesentlichen Risiken und Chancen auf den Erwerber übergegangen sind, die Höhe der Erlöse verlässlich bestimmt werden kann und die Zahlung hinreichend wahrscheinlich ist. Für erwartete Erlösminderungen, wie zum Beispiel Rabatte, Skonti und Rücklieferungen, werden zum Zeitpunkt der Umsatzrealisierung geschätzte Beträge zurückgestellt.

Neben den Erlösen aus Warenverkäufen enthalten die Umsatzerlöse auch Erlöse aus Dienstleistungen, die insgesamt jedoch nur einen geringfügigen Umfang haben.

Provisionserlöse und Lizenzerlöse werden – je nach dem wirtschaftlichen Gehalt der zugrundeliegenden Verträge – entweder sofort realisiert oder, wenn eine vertragliche Verpflichtung zu weiteren Leistungen besteht, abgegrenzt und zeitanteilig erfasst.

Dividendenerträge werden zum Zeitpunkt erfasst, in dem das Recht auf den Empfang der Zahlung entsteht. Dies entspricht dem Zeitpunkt des Ausschüttungsbeschlusses. Zinserträge werden zeitanteilig unter Anwendung der Effektivzinsmethode erfasst.

**Forschungs- und  
Entwicklungskosten**

Die Aufteilung der Forschungs- und Entwicklungskosten nach Sparten und die regionalen Schwerpunkte können dem Segmentbericht entnommen werden. Diese Position enthält neben den Kosten der Forschungsabteilungen und der Verfahrensentwicklung auch Fremdleistungen sowie die Kosten für klinische Prüfungen. Forschungs- und Entwicklungskosten wurden vollständig als Periodenaufwand gebucht. Die Aktivierung von Entwicklungskosten des Unternehmensbereichs Pharma ist nicht möglich, da aufgrund der hohen Risiken bis zur Markteinführung pharmazeutischer Produkte die Voraussetzungen von IAS 38 nicht vollständig erfüllt sind. Die nach der Zulassung durch die zuständigen Behörden anfallenden Kosten sind unwesentlich. Auch im Unternehmensbereich Chemie liegen aktivierungspflichtige Entwicklungskosten aufgrund der bestehenden Risiken bis zur Markteinführung nicht vor. Zusätzlich zur eigenen Forschung und Entwicklung ist Merck auch Partner von Kooperationen mit dem Ziel, vermarktungsfähige Produkte zu entwickeln. Typisch für diese Kooperationen ist die Vereinbarung von Zahlungen bei Erreichen bestimmter Meilensteine. Mit Blick hierauf bedarf es der Beurteilung, ob diese Einstands- oder Meilenstein-Zahlungen eine Vergütung für erbrachte Dienstleistungen (laufender Forschungs- und Entwicklungsaufwand) darstellen oder ob durch die Zahlung ein aktivierungspflichtiges Recht erworben wird. Mit den Forschungs- und Entwicklungskosten sind Erstattungen für Forschung und Entwicklung verrechnet.

**Finanzinstrumente:  
Grundlagen**

Ein Finanzinstrument ist eine vertragliche Regelung, die gleichzeitig bei einem Unternehmen zu einem finanziellen Vermögenswert und bei einem anderen Unternehmen zu einer finanziellen Verbindlichkeit oder einem Eigenkapitalinstrument führt. Unterschieden werden dabei originäre und derivative Finanzinstrumente.

Derivative Finanzinstrumente können in andere Finanzinstrumente oder Nicht-Finanzinstrumente eingebettet sein. Nach den IFRS ist ein eingebettetes Derivat vom Basisvertrag zu lösen und separat zum beizulegenden Zeitwert zu bilanzieren, wenn die wirtschaftlichen Merkmale des eingebetteten Derivats nicht eng mit den wirtschaftlichen Merkmalen des Basisvertrags verbunden sind. Im Geschäftsjahr bestanden bei Merck keine trennungspflichtigen eingebetteten Derivate. Emittierte zusammengesetzte Finanzinstrumente, die sowohl eine Eigen- als auch eine Fremdkapitalkomponente aufweisen, sind entsprechend ihrer Eigenschaften separat in der Bilanz anzusetzen. Im Geschäftsjahr war Merck keine Vertragspartei eines hybriden beziehungsweise zusammengesetzten Finanzinstruments.

In der Regel werden marktübliche Käufe und Verkäufe von Finanzinstrumenten bei Merck zum Erfüllungstag bilanziert, Derivate werden zum Handelstag erfasst.



Grundsätzlich werden finanzielle Vermögenswerte und finanzielle Verbindlichkeiten erstmalig mit dem beizulegenden Zeitwert, falls erforderlich unter Berücksichtigung von Transaktionskosten, bewertet. Der beizulegende Zeitwert eines Finanzinstruments entspricht dem Betrag, den zwei unabhängige, vertragswillige Parteien für dieses Finanzinstrument vereinbaren würden. Liegen Preisnotierungen auf einem aktiven Markt vor, werden diese bei der Bewertung des Finanzinstruments zu Grunde gelegt. In anderen Fällen werden anerkannte finanzmathematische Bewertungsmodelle unter Verwendung am Markt beobachtbarer Preise genutzt oder Bewertungen Dritter herangezogen. Finanzielle Vermögenswerte werden ganz oder teilweise ausgebucht, wenn die vertraglichen Rechte auf Zahlungen aus diesen ausgelaufen sind oder die Verfügungsmacht sowie wesentliche Chancen und Risiken aus dem Vermögenswert auf einen Dritten übertragen wurden. Finanzielle Verbindlichkeiten werden ausgebucht, wenn die vertraglichen Verpflichtungen beglichen, aufgehoben oder ausgelaufen sind.

**Finanzinstrumente:  
Kategorien und Klassen von  
Finanzinstrumenten**

Unterschieden wird bei finanziellen Vermögenswerten und Verbindlichkeiten nach den folgenden Bewertungskategorien des IAS 39 und Klassen des IFRS 7.

„Erfolgswirksam zum beizulegenden Zeitwert bewertete finanzielle Vermögenswerte und Verbindlichkeiten“ (at fair value through profit or loss) können sowohl originäre als auch derivative Finanzinstrumente sein. Die Folgebewertung in dieser Kategorie bestimmt sich nach dem beizulegenden Zeitwert. Gewinne und Verluste von Finanzinstrumenten dieser Bewertungskategorie sind unmittelbar in der Gewinn- und Verlustrechnung zu erfassen. Grundsätzlich besteht in dieser Bewertungskategorie die Möglichkeit, originäre Finanzinstrumente beim erstmaligen Ansatz als „Erfolgswirksam zum beizulegenden Zeitwert bewertete finanzielle Vermögenswerte und Verbindlichkeiten“ einzustufen (fair value option) oder „Finanzinstrumente zu Handelszwecken“ zu halten (held for trading). Von der Fair Value Option wurde im Geschäftsjahr kein Gebrauch gemacht. Der Bewertungskategorie zu Handelszwecken gehalten sind bei Merck nur Derivate zugeordnet. Für Derivate, die als Sicherungsinstrumente in einer Sicherungsbeziehung designiert sind, gelten gesonderte Vorschriften.

„Bis zur Endfälligkeit zu haltende Finanzinvestitionen“ (held to maturity) beinhalten nicht-derivative finanzielle Vermögenswerte mit festen oder bestimmbar Zahlungen und einer festen Laufzeit, die an einem aktiven Markt notiert sind. Um einen finanziellen Vermögenswert dieser Bewertungskategorie zuordnen zu können, muss das Unternehmen die feste Absicht und die Fähigkeit haben, diesen Vermögenswert bis zur Endfälligkeit zu halten.

Die Folgebewertung erfolgt zu fortgeführten Anschaffungskosten. Bestehen objektive substantielle Hinweise auf eine Wertminderung, wird diese unmittelbar erfolgswirksam in der Gewinn- und Verlustrechnung erfasst. Spätere Wertaufholungen sind in gleicher Weise erfolgswirksam in der Gewinn- und Verlustrechnung bis zur Höhe der ursprünglichen Anschaffungskosten zu erfassen. Bei Merck zählen zu dieser Bewertungskategorie kurzfristige Wertpapiere und finanzielle Vermögenswerte sowie langfristige Finanzanlagen.

„Kredite und Forderungen“ (loans and receivables) enthalten nicht-derivative finanzielle Vermögenswerte mit festen oder bestimmbar Zahlungen, die nicht an einem aktiven Markt notiert sind. Die Folgebewertung erfolgt zu fortgeführten Anschaffungskosten. Bestehen objektive substantielle Hinweise auf eine Wertminderung, werden diese unmittelbar erfolgswirksam in der Gewinn- und Verlustrechnung erfasst. Spätere Wertaufholungen sind in gleicher Weise erfolgswirksam in der Gewinn- und Verlustrechnung bis zur Höhe der ursprünglichen Anschaffungskosten zu erfassen. Langfristige unverzinsliche oder niedrig verzinsliche Forderungen werden mit dem Barwert angesetzt. Dieser Bewertungskategorie sind bei Merck im Wesentlichen Forderungen aus Lieferungen

und Leistungen, Ausleihungen sowie kurz- und langfristige übrige Forderungen zugeordnet. Für Wertberichtigungen bei Forderungen aus Lieferungen und Leistungen und sonstigen Forderungen nutzt Merck ein separates Wertberichtigungskonto.

„Zur Veräußerung verfügbare finanzielle Vermögenswerte“ (available for sale financial assets) umfassen nicht-derivative finanzielle Vermögenswerte, die nicht den Kategorien „Erfolgswirksam zum beizulegenden Zeitwert bewertete finanzielle Vermögenswerte und Verbindlichkeiten“, „Kredite und Forderungen“ oder „Bis zur Endfälligkeit zu haltende Finanzinvestitionen“ zugeordnet wurden. Die Folgebewertung finanzieller Vermögenswerte dieser Kategorie erfolgt zum beizulegenden Zeitwert. Änderungen des beizulegenden Zeitwerts werden erfolgsneutral im Eigenkapital und erst bei der Ausbuchung des finanziellen Vermögenswerts erfolgswirksam in der Gewinn- und Verlustrechnung erfasst. Bestehen objektive substantielle Hinweise auf eine Wertminderung, wird diese – unter Berücksichtigung bereits im Eigenkapital erfasster Beträge – unmittelbar erfolgswirksam in der Gewinn- und Verlustrechnung erfasst. Wertaufholungen von zuvor wertgeminderten Eigenkapitalinstrumenten werden erfolgsneutral erfasst. Wertaufholungen von zuvor wertgeminderten Fremdkapitalinstrumenten werden bis zur Höhe der Wertminderung erfolgswirksam erfasst, darüber hinaus erfolgsneutral. Bei Merck zählen zu dieser Bewertungskategorie insbesondere kurzfristige Wertpapiere und finanzielle Vermögenswerte sowie langfristige Finanzbeteiligungen und Wertpapiere. Für finanzielle Vermögenswerte dieser Kategorie, für die kein beizulegender Zeitwert verfügbar beziehungsweise verlässlich bestimmbar ist, sind die Anschaffungskosten abzüglich eventueller Wertminderungen anzusetzen. Eine Wertaufholung von zu Anschaffungskosten bewerteten finanziellen Vermögenswerten ist nicht zulässig.

„Sonstige finanzielle Verbindlichkeiten“ (other liabilities) sind nicht-derivative finanzielle Verbindlichkeiten, deren Folgebewertung zu fortgeführten Anschaffungskosten erfolgt. Unterschiedsbeträge aus dem vereinnahmten Betrag und dem Rückzahlungsbetrag werden über die Laufzeit verteilt in der Gewinn- und Verlustrechnung erfasst. Dieser Kategorie sind bei Merck insbesondere Finanzschulden, Verbindlichkeiten aus Lieferungen und Leistungen sowie nicht-derivative kurz- und langfristige übrige Verbindlichkeiten zugeordnet.

Zwischen den einzelnen Bewertungskategorien haben im Geschäftsjahr keine Umklassifizierungen stattgefunden.

Die nach IFRS 7 zu bildenden Klassen umfassen die hier dargestellten Bewertungskategorien. Darüber hinaus zählen die Zahlungsmittel und Zahlungsmitteläquivalente mit einer Fälligkeit bis zu 90 Tagen ab Erwerbszeitpunkt, die Verbindlichkeiten aus Finanzierungsleasing sowie Sicherungsderivate im Rahmen des Hedge Accountings zu den Klassen nach IFRS 7. Eine ausführliche Übersicht hierzu gibt Anmerkung [42].

#### Finanzinstrumente: Derivate und Hedge Accounting

Merck setzt Derivate ausschließlich zur Sicherung bilanzierter und zukünftiger Transaktionen ein. Für einen Teil dieser Sicherungsgeschäfte wird das „Hedge-Accounting“ nach den IFRS-Vorschriften angewendet. Hierbei ist zwischen Fair Value Hedge Accounting und Cash Flow Hedge Accounting zu unterscheiden. Zur Designation einer Sicherungsbeziehung ist regelmäßig ein gesichertes Grundgeschäft sowie ein genau diesem zugeordnetes Sicherungsinstrument erforderlich. Bei Merck bezieht sich jede Absicherung auf bestehende oder sicher erwartete Grundgeschäfte. Als Sicherungsinstrumente kommen bei Merck nur Derivate zum Einsatz.

Die Veränderung aus Grundgeschäft und Sicherungsinstrument muss jederzeit effektiv sein. Der nicht effektive Teil einer Sicherungsbeziehung ist sowohl beim Cash Flow Hedge als auch beim Fair Value Hedge Accounting unmittelbar in der Gewinn- und Verlustrechnung zu erfassen. Zur Messung der Effektivität wendet Merck die Dollar-Offset-Methode an. Es bestehen hohe Anforderungen an

die Dokumentation zur Bilanzierung von Sicherungsgeschäften. Derivate, die Dokumentations- oder Effektivitätserfordernisse für das Hedge Accounting nicht oder nicht mehr erfüllen oder deren Grundgeschäft nicht mehr besteht, werden in der Kategorie „Erfolgswirksam zum beizulegenden Zeitwert bewertete finanzielle Vermögenswerte und Verbindlichkeiten“ ausgewiesen. Eine Veränderung des beizulegenden Zeitwerts wird dann unmittelbar in der Gewinn- und Verlustrechnung erfasst.

Ein Fair Value Hedge zielt in der Regel darauf ab, Marktwertveränderungen bilanzierter gesicherter Grundgeschäfte (finanzielle Vermögenswerte oder finanzielle Verbindlichkeiten) durch gegenläufige Marktwertveränderungen eines Sicherungsinstruments auszugleichen. Aus den Marktwertveränderungen resultierende gegenläufige Gewinne und Verluste des Sicherungsinstruments sind, unter Berücksichtigung latenter Steuern, unmittelbar in der Gewinn- und Verlustrechnung zu erfassen. Gegenläufige Gewinne und Verluste aus dem gesicherten Grundgeschäft im Bezug auf das gesicherte Risiko sind ebenfalls in der Gewinn- und Verlustrechnung zu erfassen, unabhängig von der Einstufung in eine Bewertungskategorie.

Ein Cash Flow Hedge regelt die Absicherung von Zahlungsstromänderungen, die sich bei Merck üblicherweise aus mit hoher Wahrscheinlichkeit eintretenden geplanten Transaktionen in fremder Währung ergeben. Der effektive Teil der Gewinne und Verluste aus dem Sicherungsinstrument ist beim Cash Flow Hedge Accounting unter Berücksichtigung latenter Steuern so lange erfolgsneutral im Eigenkapital zu erfassen bis das gesicherte Grundgeschäft eingetreten ist. Dies gilt auch, wenn das Sicherungsinstrument zwischenzeitlich ausläuft, verkauft oder beendet wird. Der ineffektive Teil eines Cash Flow Hedge wird immer unmittelbar in der Gewinn- und Verlustrechnung erfasst. Eine ausführliche Übersicht hierzu gibt Anmerkung [40].

#### Sonstige nicht finanzielle Vermögenswerte und Verbindlichkeiten

Sonstige nicht finanzielle Vermögenswerte sind zu fortgeführten Anschaffungskosten bilanziert. Etwaige Ausfallrisiken sind durch Wertberichtigungen berücksichtigt. Unverzinsliche beziehungsweise niedrig verzinsliche langfristige Forderungen werden mit ihrem Barwert bilanziert. Sonstige nicht finanzielle Verbindlichkeiten sind zum Rückzahlungsbetrag angesetzt.

#### Vorräte

Vorräte sind zu Anschaffungs- oder Herstellungskosten bei Anwendung der Durchschnittsmethode angesetzt. Die Herstellungskosten beinhalten gemäß IAS 2 neben den direkt zurechenbaren Einzelkosten auch dem Produktionsprozess zuzurechnende Gemeinkosten einschließlich angemessener Abschreibungen auf Fertigungsanlagen, die auf Basis einer Normalauslastung der Produktionsanlagen ermittelt werden.

Wertberichtigungen auf Vorräte werden vorgenommen, wenn der realisierbare Nettoveräußerungswert unter den bilanzierten Anschaffungs- oder Herstellungskosten liegt.

#### Immaterielle Vermögenswerte

Erworbene immaterielle Vermögenswerte werden zu Anschaffungskosten aktiviert und in Vermögenswerte mit unbestimmter und bestimmter Nutzungsdauer unterteilt. Selbst geschaffene immaterielle Vermögenswerte werden nicht aktiviert. Im Rahmen von Unternehmenszusammenschlüssen erworbene immaterielle Vermögenswerte mit unbestimmter Nutzungsdauer werden mit dem beizulegenden Zeitwert zum Erwerbszeitpunkt aktiviert. Hierzu zählen auch erworbene Geschäfts- oder Firmenwerte und immaterielle Vermögenswerte, denen Produkte zugrunde liegen, die noch keine Marktreife erlangt haben. Immaterielle Vermögenswerte mit unbestimmter Nutzungsdauer werden nicht planmäßig abgeschrieben, jedoch anlassbezogen oder mindestens einmal jährlich auf einen Wertminderungsbedarf überprüft. Geschäfts- oder Firmenwerte werden

jährlich – oder im Falle des Vorliegens von Anzeichen einer Wertminderung – im Rahmen des Werthaltigkeitstests („Impairment-Tests“) auf ihre Werthaltigkeit überprüft und zahlungsmittelgenerierenden Einheiten („cash-generating units“) zugeordnet. Eine zahlungsmittelgenerierende Einheit wird in der Regel durch eine Sparte gemäß der Segmentberichterstattung gebildet. Durch Gegenüberstellung der Buchwerte mit den erzielbaren Beträgen der zahlungsmittelgenerierenden Einheit wird ein notwendiger Wertminderungsbedarf ermittelt, sofern der erzielbare Betrag kleiner als der Buchwert ist. Der erzielbare Betrag einer zahlungsmittelgenerierenden Einheit wird durch den höheren Wert aus beizulegendem Zeitwert abzüglich Veräußerungskosten oder dem mit Hilfe der Discounted-Cash-Flow-Methode ermittelten Nutzungswert bestimmt. Für die Bewertung der Geschäfts- oder Firmenwerte ermittelt Merck den erzielbaren Betrag durch die Diskontierung erwarteter Cash Flows und folgt damit dem Nutzungswertkonzept. Dabei wird in einem ersten Schritt auf die vorliegenden Planungen zurückgegriffen. Diese beziehen sich in der Regel auf einen Zeitraum von vier Jahren. Zahlungsströme darüber hinaus gehender Zeiträume werden unter Nutzung einer für alle zahlungsmittelgenerierenden Einheiten – außer Merck Millipore – einheitlichen, langfristigen Wachstumsrate in Höhe von 1,0% berücksichtigt.

Für die Bewertung des Geschäfts- oder Firmenwerts der Sparte Merck Millipore wurden Businesspläne mit Wachstumsraten von 3,8% verwendet, um dem spezifischen Geschäft und den darin immanenten Wachstumschancen gerecht zu werden.

Die angenommenen zukünftigen Cash Flows werden mit einem Kapitalkostensatz (WACC „Weighted Average Cost of Capital“) von 8,5% (Vorjahr: 7,5%) diskontiert. Bei der Berechnung der Sensitivitäten wurde eine Minderung der zukünftigen Cash Flows um 10% angenommen. Größere Schwankungen halten wir aufgrund unserer Erfahrungen für unwahrscheinlich. Auch bei 10% niedrigeren Cash Flows ergibt sich kein Wertminderungsbedarf bei den Geschäfts- oder Firmenwerten.

Die Ermittlung eines eventuell erforderlichen Wertminderungsbedarfs bei anderen immateriellen Vermögensgegenständen mit unbestimmter Nutzungsdauer erfolgt grundsätzlich analog derjenigen für Geschäfts- oder Firmenwerte.

Bei einem Wegfall der Gründe für eine Wertminderung auf einen immateriellen Vermögenswert mit unbestimmter Nutzungsdauer, mit Ausnahme der Wertminderung auf Geschäfts- oder Firmenwerte, erfolgt eine entsprechende Zuschreibung.

Immaterielle Vermögenswerte mit bestimmter Nutzungsdauer werden um Abschreibungen linear vermindert. Die Nutzungsdauer beträgt für Patente, Lizenzen und ähnliche Rechte, Markennamen, Warenzeichen und Software mit bestimmter Nutzungsdauer zwischen 3 und 15 Jahren. Die Abschreibungen auf immaterielle Vermögenswerte – außer auf Software – werden in einer gesonderten Position ausgewiesen. Diese Position enthält überwiegend die Abschreibungen und Wertminderungen im Zusammenhang mit den Kaufpreisallokationen für Serono und Millipore, in bestimmtem Umfang aber auch die Abschreibung anderer immaterieller Vermögenswerte. Abschreibungen auf Software werden den entsprechenden Funktionskosten in der Gewinn- und Verlustrechnung zugeordnet. Bei Vorliegen von Anhaltspunkten einer Wertminderung wird ein Werthaltigkeitstest durchgeführt. Die Ermittlung eines eventuell erforderlichen Wertminderungsbedarfs erfolgt analog der für immaterielle Vermögensgegenstände mit unbestimmter Nutzungsdauer beschriebenen Vorgehensweise. Bei einem Wegfall der Gründe für eine Wertminderung auf immaterielle Vermögenswerte mit bestimmter Nutzungsdauer erfolgt eine entsprechende Zuschreibung.

**Sachanlagen** Sachanlagen werden mit den Anschaffungs- oder Herstellungskosten abzüglich Abschreibungen bilanziert. Dabei wird der Komponentenansatz gemäß IAS 16 angewendet. Nachträgliche Anschaffungs- und Herstellungskosten werden nur dann aktiviert, wenn es wahrscheinlich ist, dass dem Konzern daraus zukünftig ein wirtschaftlicher Nutzen entstehen wird und die Kosten des Vermögenswerts zuverlässig ermittelt werden können. Bei selbsterstellten Sachanlagen werden die Herstellungskosten anhand der direkt zurechenbaren Einzelkosten sowie angemessener Gemeinkosten einschließlich Abschreibungen ermittelt. Finanzierungskosten werden – sofern wesentlich – aktiviert. Bei öffentlichen Zuschüssen beziehungsweise Subventionen für die Anschaffung oder Herstellung von Vermögenswerten (Investitionszuschüsse) werden gemäß IAS 20 die Anschaffungs- oder Herstellungskosten um den Betrag der Zuschüsse gekürzt. Ertragszuschüsse, denen keine zukünftigen Aufwendungen mehr gegenüberstehen, werden erfolgswirksam erfasst. Die Gegenstände des Sachanlagevermögens werden entsprechend dem Nutzungsverlauf linear abgeschrieben. Den planmäßigen Abschreibungen auf Sachanlagen liegen die folgenden Nutzungsdauern zugrunde:

Tabelle Nutzungsdauern Sachanlagen

|                                    | Nutzungsdauer    |
|------------------------------------|------------------|
| Produktionsgebäude                 | maximal 33 Jahre |
| Verwaltungsgebäude                 | maximal 40 Jahre |
| Technische Anlagen                 | 6 bis 20 Jahre   |
| Andere Anlagen                     | 3 bis 10 Jahre   |
| Betriebs- und Geschäftsausstattung | 3 bis 10 Jahre   |

Die Nutzungsdauer wird regelmäßig geprüft und gegebenenfalls an den erwarteten Verlauf angepasst. Sofern Anhaltspunkte einer Wertminderung vorliegen, wird ein Werthaltigkeitstest durchgeführt. Die Ermittlung eines eventuell erforderlichen Wertminderungsbedarfs erfolgt analog der für immaterielle Vermögensgegenstände beschriebenen Vorgehensweise. Bei einem Wegfall der Gründe für eine Wertminderung auf Sachanlagen erfolgt eine entsprechende Zuschreibung.

#### Als Finanzinvestitionen gehaltene Immobilien

Zu dieser Kategorie zählende Vermögenswerte haben für die Merck-Gruppe nur eine untergeordnete Bedeutung, sie werden zu Anschaffungskosten bilanziert. Zum 31. Dezember 2010 handelte es sich um eine Immobilie, deren Wert sich auf 5,5 Mio EUR (Vorjahr: 5,3 Mio EUR) belief. Sie wurde unter der Position „Grundstücke, grundstücksgleiche Rechte und Bauten einschließlich Bauten auf fremden Grundstücken“ ausgewiesen.

#### Leasing

Sind Anlagegegenstände geleast und liegt das wirtschaftliche Eigentum bei der jeweiligen Konzerngesellschaft (Finanzierungsleasing), werden sie zum Zeitpunkt des Zugangs mit dem Barwert der Leasingraten beziehungsweise einem niedrigeren Zeitwert gemäß IAS 17 aktiviert und entsprechend der Nutzungsdauer abgeschrieben. Die entsprechenden Zahlungsverpflichtungen aus den künftigen Leasingraten werden als Verbindlichkeiten passiviert.

**Latente Steuern** Latente Steuern resultieren aus unterschiedlichen Wertansätzen in den IFRS- und Steuer-Bilanzen der Konzernunternehmen sowie aus Konsolidierungsmaßnahmen, soweit sich diese Unterschiede im Zeitablauf wieder ausgleichen. Darüber hinaus werden für Verlustvorträge latente Steuerabgrenzungen dann und insoweit vorgenommen, als ihre Nutzung in absehbarer Zukunft wahrscheinlich ist. Nach der „Liability“-Methode finden die am Bilanzstichtag geltenden beziehungsweise für die Zukunft bereits beschlossenen und veröffentlichten Steuersätze Anwendung.

**Rückstellungen** Für rechtliche oder faktische Verpflichtungen werden Rückstellungen in der Bilanz angesetzt, wenn der Mittelabfluss zur Begleichung der Verpflichtungen wahrscheinlich und zuverlässig schätzbar ist. Der Wertansatz der Rückstellungen berücksichtigt diejenigen Beträge, die erforderlich sind, um zukünftige Zahlungsverpflichtungen, erkennbare Risiken und ungewisse Verpflichtungen des Konzerns gegenüber Dritten abzudecken. Die Bewertung erfolgt auf Basis des Erfüllungsbetrags mit der höchsten Eintrittswahrscheinlichkeit beziehungsweise – bei Gleichverteilung der Eintrittswahrscheinlichkeiten – mit dem Erwartungswert der Erfüllungsbeträge. Langfristige Rückstellungen werden abgezinst und zum Barwert am Bilanzstichtag bilanziert. Soweit Erstattungsansprüche im Sinne des IAS 37 vorliegen, werden sie getrennt von den Rückstellungen aktivisch in der Bilanz berücksichtigt, falls ihre Realisation nahezu sicher ist.

**Rückstellungen für Pensionen und ähnliche Verpflichtungen** Rückstellungen für Pensionen und ähnliche Verpflichtungen werden nach IAS 19 bilanziert. Für die Mitarbeiter der Merck-Gruppe bestehen je nach rechtlichen, wirtschaftlichen und steuerlichen Gegebenheiten des jeweiligen Landes unterschiedliche Systeme der Altersversorgung, die in der Regel auf Beschäftigungsdauer und Entgelt der Mitarbeiter basieren. Die Pensionsverpflichtungen umfassen in der Merck-Gruppe sowohl leistungs- als auch beitragsorientierte Versorgungssysteme und enthalten sowohl Verpflichtungen aus laufenden Pensionen als auch Anwartschaften auf zukünftig zu zahlende Pensionen. Leistungsorientierte Altersversorgungssysteme sind in der Merck-Gruppe sowohl rückstellungs- als auch fondsfinanziert. Der größte Teil der Verpflichtungen aus laufenden Pensionen sowie Anwartschaften für künftig zu zahlende Pensionen ist durch die in der Bilanz ausgewiesenen Rückstellungen abgedeckt. Der kleinere Teil wird über fondsfinanzierte Versorgungszusagen abgesichert. In den Rückstellungen sind ebenfalls pensionsähnliche Verpflichtungen enthalten, wie die Rückstellungen für künftige Krankheitskosten von Rentnern in den USA. Die Verpflichtungen aus leistungsorientierten Altersversorgungssystemen unserer Gesellschaften werden nach der „Projected Unit Credit“-Methode (Methode der laufenden Einmalprämien) bewertet. Die „Projected Unit Credit“-Methode ermittelt unter Berücksichtigung dynamischer Aspekte die zu erwartenden Versorgungsleistungen nach Eintritt des Versorgungsfalls und verteilt diese über die gesamte Beschäftigungsdauer der begünstigten Mitarbeiter. Dazu werden jährlich versicherungsmathematische Gutachten erstellt. Die Erfassung von versicherungsmathematischen Gewinnen und Verlusten, die sich aus Änderungen versicherungsmathematischer Annahmen beziehungsweise aus Abweichungen zwischen früheren versicherungsmathematischen Annahmen und der tatsächlichen Entwicklung ergeben, erfolgt in Ausübung des Wahlrechts nach IAS 19.93A unter Berücksichtigung latenter Steuern direkt im Eigenkapital in der Periode ihrer Entstehung. Dadurch zeigt die Bilanz den vollen Umfang der Verpflichtungen unter der Vermeidung von Aufwandsschwankungen, die sich insbesondere bei Änderungen der Berechnungsparameter ergeben können. Die in der jeweiligen Berichtsperiode erfassten versicherungsmathematischen Gewinne und Verluste werden in der Gesamtergebnisrechnung gesondert dargestellt.

## ERLÄUTERUNGEN ZUR GEWINN- UND VERLUSTRECHNUNG

- [1] Umsatzerlöse** Umsatzerlöse werden im Wesentlichen aus Warenverkäufen erzielt. Sie enthalten auch in geringem Umfang Erlöse aus erbrachten Dienstleistungen. Die Umsatzerlöse der Merck-Gruppe betrugen im Geschäftsjahr 8.928,9 Mio EUR und stiegen damit um 21,0% gegenüber dem Vorjahr. Bereinigt um Währungs- und Akquisitionseinflüsse, im Wesentlichen aus der Millipore Akquisition, belief sich das organische Wachstum auf 8,5%. Die Aufteilung der Umsatzerlöse nach Unternehmensbereichen und Sparten sowie nach Regionen ist im beigefügten Segmentbericht dargestellt.
- [2] Lizenz- und Provisionserlöse** Im Geschäftsjahr bezifferten sich die Lizenzerlöse auf 339,4 Mio EUR (Vorjahr: 344,9 Mio EUR). Im Wesentlichen waren darin die Lizenzerlöse für die Produkte Avonex® (Biogen Idec), Humira® (Abbott), Enbrel® (Amgen), Puregon® (Merck & Co.) und Vilazodone (Clinical Data) sowie Erträge für die Pharmawirkstoffe Bisoprolol und Metformin enthalten. Die Provisionserlöse erreichten im Geschäftsjahr 22,3 Mio EUR (Vorjahr: 24,4 Mio EUR). Hierbei handelt es sich im Wesentlichen um Kooperations- und Distributionsverträge unter anderem für Ikorel® (Sanofi-Aventis), Euthyrox® (Bracco) und Allergan Produkte. Die Aufteilung der Lizenz- und Provisionserlöse nach Unternehmensbereichen und Sparten ist im beigefügten Segmentbericht dargestellt.
- [3] Herstellungskosten** Die Herstellungskosten umfassen die Kosten der abgesetzten Erzeugnisse sowie die Einstandskosten der verkauften Handelswaren. Sie beinhalten entsprechend IAS 2 neben den direkt zurechenbaren Kosten wie zum Beispiel Material-, Personal- und Energiekosten auch dem Produktionsprozess zuzurechnende Gemeinkosten einschließlich der Abschreibungen auf Produktionsanlagen. Zudem weisen wir Abwertungen auf Vorräte als Teil der Herstellungskosten aus. Die im Rahmen der Akquisition erworbenen Vorräte von Millipore wurden zum Erstkonsolidierungszeitpunkt um 85,8 Mio EUR auf die beizulegenden Zeitwerte aufgewertet. Dieser Betrag wurde im 2. Halbjahr 2010 vollständig in den Herstellungskosten aufwandswirksam berücksichtigt und belastete damit die Bruttomarge einmalig.
- [4] Marketing- und Vertriebskosten** Die Marketing- und Vertriebskosten enthalten neben den Kosten der Vertriebsabteilungen und des Außendienstes auch die Kosten für Werbung und Logistik. Der Anstieg gegenüber dem Vorjahr ist überwiegend auf die erstmalige Einbeziehung von Millipore zurückzuführen. Die Aufteilung der Marketing- und Vertriebskosten nach Unternehmensbereichen und Sparten ist im beigefügten Segmentbericht dargestellt.
- [5] Lizenz- und Provisionsaufwendungen** Die Lizenzaufwendungen beliefen sich im Geschäftsjahr auf 179,5 Mio EUR (Vorjahr: 156,2 Mio EUR) und der Provisionsaufwand auf 297,5 Mio EUR (Vorjahr: 256,8 Mio EUR). Die Aufteilung der Lizenz- und Provisionsaufwendungen nach Unternehmensbereichen und Sparten ist im beigefügten Segmentbericht dargestellt.
- [6] Verwaltungskosten** In den Verwaltungskosten werden die Personal- und Sachkosten der Leitungs- und Verwaltungsstellen ausgewiesen, soweit sie nicht als interne Dienstleistung auf andere Kostenstellen verrechnet worden sind. Der Anstieg der Verwaltungskosten ist unter anderem auf die erstmalige Konsolidierung von Millipore sowie auf Währungseffekte zurückzuführen. Die Aufteilung der Verwaltungskosten nach Unternehmensbereichen und Sparten ist im beigefügten Segmentbericht dargestellt.

[7] Die sonstigen betrieblichen Aufwendungen und Erträge stellten sich wie folgt dar:

Sonstige betriebliche  
Aufwendungen und Erträge

| in Mio EUR                                            | 2010          | 2009          |
|-------------------------------------------------------|---------------|---------------|
| Rechtsstreitigkeiten                                  | -89,2         | -166,9        |
| Projektkosten                                         | -79,2         | -69,3         |
| Wertminderungen                                       | -65,5         | -37,9         |
| Restrukturierungen und Integrationskosten             | -64,4         | -14,5         |
| Prämien, Gebühren und Beiträge                        | -52,8         | -46,7         |
| Nicht einkommensabhängige Steuern                     | -23,7         | -19,5         |
| Wertberichtigungen auf Forderungen                    | -19,7         | -30,8         |
| Spezielle Umweltschutzkosten                          | -10,7         | -4,6          |
| Verluste aus Anlagenabgängen                          | -3,0          | -5,5          |
| Währungsdifferenzen aus operativem Geschäft           | -             | -6,6          |
| Übrige betriebliche Aufwendungen                      | -118,6        | -64,7         |
| <b>Summe sonstige betriebliche Aufwendungen</b>       | <b>-526,8</b> | <b>-467,0</b> |
| Gewinne aus Anlagenabgängen                           | 37,6          | 10,7          |
| Vergütungen für erbrachte Leistungen                  | 26,8          | 17,3          |
| Währungskursdifferenzen aus operativem Geschäft       | 24,7          | -             |
| Auflösung von Wertberichtigungen auf Forderungen      | 10,0          | 2,9           |
| Zuschreibungen                                        | -             | 0,2           |
| Übrige betriebliche Erträge                           | 37,3          | 63,2          |
| <b>Summe sonstige betriebliche Erträge</b>            | <b>136,4</b>  | <b>94,3</b>   |
| <b>Sonstige betriebliche Aufwendungen und Erträge</b> | <b>-390,4</b> | <b>-372,7</b> |

Integrationskosten für Millipore sind insgesamt in Höhe von 87,3 Mio EUR angefallen. Davon sind in der Position „Projektkosten“ 33,9 Mio EUR ausgewiesen. Darin enthalten sind Anschaffungsnebenkosten in Höhe von 31,2 Mio EUR. Weitere 53,4 Mio EUR sind in der Position „Restrukturierungen und Integrationskosten“ ausgewiesen. Dieser Betrag beinhaltet 5,7 Mio EUR Wertminderungen auf Sachanlagen. In den Projektkosten werden neben den im Zusammenhang mit der Millipore Akquisition stehenden Kosten im Wesentlichen die Aufwendungen im Zusammenhang mit unternehmensweiten IT-Projekten ausgewiesen. Hierzu zählen zum Beispiel Projekte zur gruppenweiten Harmonisierung von IT-Anwendungen und Infrastruktur. Die höheren Wertminderungen im Vergleich zum Vorjahr standen überwiegend im Zusammenhang mit der Einstellung von Forschungsprojekten und Forschungskooperationen, aber auch mit der veränderten Einschätzung von Marktbedingungen, welche niedrigere Umsätze als bislang angenommen erwarten lassen und zu entsprechenden Abwertungen geführt haben. 18,0 Mio EUR entfielen auf die Wertminderung von Sachanlagen, 47,5 Mio EUR bezogen sich auf die Wertminderung von immateriellen Vermögenswerten. In den übrigen betrieblichen Aufwendungen werden unter anderem Aufwendungen für an Dritte erbrachte Dienstleistungen sowie Kosten aus Nebengeschäften ausgewiesen. Die übrigen betrieblichen Erträge umfassen unter anderem Erträge aus Nebengeschäften wie Miet- und Pachtverträgen sowie Erlöse aus Wirtschaftsbetrieben. Die Aufteilung der sonstigen betrieblichen Aufwendungen und Erträge nach Unternehmensbereichen und Sparten ist im beigefügten Segmentbericht dargestellt.



**[8] Forschungs- und Entwicklungskosten** Die Aufwendungen für Forschung und Entwicklung stiegen im Geschäftsjahr um 3,9% auf 1.397,1 Mio EUR. Der komplette Anstieg betrifft die Chemiesparten einschließlich Merck Millipore. Mit den Forschungskosten wurden Erstattungen für Forschung und Entwicklung in Höhe von 21,9 Mio EUR (Vorjahr: 13,3 Mio EUR) verrechnet. Die Aufteilung der Forschungs- und Entwicklungskosten nach Unternehmensbereichen und Sparten sowie nach Regionen ist im beigefügten Segmentbericht dargestellt.

**[9] Abschreibungen immaterieller Vermögenswerte** Wegen der besonderen Bedeutung der Abschreibungen auf immaterielle Vermögenswerte weisen wir diese in einer gesonderten Position aus. Diese Position beinhaltet überwiegend die Abschreibungen und Wertminderungen im Zusammenhang mit den Kaufpreisallokationen aus den Akquisitionen von Serono und Millipore. Im Berichtsjahr waren für Merck Serono 579,4 Mio EUR und erstmals für Merck Millipore 95,8 Mio EUR Abschreibungen für immaterielle Vermögenswerte enthalten. Darüber hinaus kam es aufgrund einer Neueinschätzung des Umsatzpotentials für Safinamid zu Wertminderungen in Höhe von 134,0 Mio EUR. Grundlage der Neueinschätzung sind die Ergebnisse einer Phase III Studie, die von unserem Kooperationspartner Newron durchgeführt wurde. Sie führte zu einer Neueinschätzung des Marktpotentials insbesondere im Hinblick auf erreichbare Anwendungsgebiete. Zusätzlich berücksichtigt die Bewertung eine Verzögerung im Projektverlauf und einen Anstieg der Forschungs- und Entwicklungskosten aufgrund von erhöhten Anforderungen der amerikanischen Zulassungsbehörde FDA. In geringerem Umfang umfasst die Position auch Abschreibungen für andere immaterielle Vermögenswerte, wie zum Beispiel aus Meilensteinzahlungen. Die Abschreibungen auf Software werden den Funktionskosten zugerechnet.

**[10] Beteiligungsergebnis**

| in Mio EUR                                                     | 2010       | 2009       |
|----------------------------------------------------------------|------------|------------|
| Beteiligungsergebnis assoziierter Unternehmen (Equity-Methode) | 0,9        | 0,1        |
| Sonstiges Beteiligungsergebnis                                 | 3,2        | 3,4        |
|                                                                | <b>4,1</b> | <b>3,5</b> |

**[11] Sondermaßnahmen**

Die Sondermaßnahmen setzen sich wie folgt zusammen:

| in Mio EUR                                  | 2010        | 2009         |
|---------------------------------------------|-------------|--------------|
| Gewinn aus dem Verkauf von Théramex         | 68,6        | –            |
| Rechtsstreitigkeiten Dey Inc., USA          | –67,2       | –            |
| Verkaufspreisanpassungen Elektrochemikalien | –1,2        | –            |
| Transaktionskosten Verkauf Crop BioScience  | –1,0        | –            |
| Ausstiegskosten Raptiva®                    | –           | –39,7        |
| Veräußerung Naturstoffgeschäft Brasilien    | –           | 10,6         |
| Auflösung Rückstellung                      | –           | 1,1          |
| <b>Sondermaßnahmen</b>                      | <b>–0,8</b> | <b>–28,0</b> |

In den Sondermaßnahmen des abgeschlossenen Geschäftsjahres wurde der Gewinn aus dem Verkauf von Théramex in Höhe von 68,6 Mio EUR ausgewiesen. Weitere Erläuterungen hierzu befinden sich bei den Angaben zum Konsolidierungskreis.

Im Zusammenhang mit Rechtsstreitigkeiten, für unsere frühere Tochtergesellschaft Dey Inc., USA, bestimmte Preisinformationen falsch berichtet zu haben, erfolgte im Geschäftsjahr eine Vergleichszahlung an das US Department of Justice. Die hieraus resultierenden Aufwendungen von 67,2 Mio EUR wurden als Sondermaßnahmen gebucht. Obwohl die Gesellschaft Dey Inc. im Rahmen des Verkaufs des Generika-Geschäfts 2007 an Mylan Inc., USA, übertragen wurde, haftet Merck gegenüber Mylan weiterhin für die Kosten dieses Rechtsstreits (siehe Anmerkung [32]).

In 2010 angefallene Transaktionskosten in Höhe von 1,0 Mio EUR, die im Zusammenhang mit dem angekündigten Verkauf des Crop BioScience Geschäfts stehen, sind ebenfalls in den Sondermaßnahmen enthalten.

Weitere Aufwendungen in Höhe von 1,2 Mio EUR beziehen sich auf den Verkauf des Geschäfts mit Elektrochemikalien im Jahr 2005 und beinhalten eine Kaufpreiserstattung an den damaligen Käufer für nachträglich entrichtete Steuern.

Die Aufteilung der Sondermaßnahmen nach Unternehmensbereichen und Sparten ist im beigefügten Segmentbericht dargestellt.

**[12]** Die Veränderung des Finanzergebnisses war im Wesentlichen auf die Zinsaufwendungen zurückzuführen, die im Zusammenhang mit der Finanzierung der Millipore Akquisition anfielen.

#### Finanzergebnis

| in Mio EUR                                                                                  | 2010          | 2009          |
|---------------------------------------------------------------------------------------------|---------------|---------------|
| Zinserträge und ähnliche Erträge                                                            | 33,0          | 33,6          |
| Zinsaufwendungen und ähnliche Aufwendungen                                                  | -208,9        | -88,7         |
| Zinsanteil aus Währungskurssicherungen                                                      | -11,8         | -3,3          |
|                                                                                             | <b>-187,7</b> | <b>-58,4</b>  |
| Zinsanteil der Zuführung zu Pensionsrückstellungen und anderen langfristigen Rückstellungen | -72,2         | -74,4         |
| Kursdifferenzen aus Finanzierungstätigkeit                                                  | 1,1           | -3,8          |
| Erträge aus Finanzbeteiligungen                                                             | 7,2           | 2,1           |
|                                                                                             | <b>-251,6</b> | <b>-134,5</b> |

#### **[13]** Ertragsteuern

| in Mio EUR                                       | 2010          | 2009          |
|--------------------------------------------------|---------------|---------------|
| Laufende Steuern der Periode                     | -329,8        | -270,8        |
| Laufende Steuern der Periode aus Sondermaßnahmen | -0,1          | 6,1           |
| Periodenfremde Steuern                           | -8,8          | -6,3          |
| Latente Steuern der Periode                      | 120,5         | 166,2         |
| Latente Steuern der Periode aus Sondermaßnahmen  | -1,4          | -4,9          |
|                                                  | <b>-219,6</b> | <b>-109,7</b> |
| Steuerquote                                      | 25,5 %        | 22,6 %        |
| Steuerquote vor Sondermaßnahmen                  | 25,3 %        | 21,6 %        |

Die Steueraufwendungen beinhalten die Körperschaft- und Gewerbesteuern der inländischen Gesellschaften sowie vergleichbare Ertragsteuern der ausländischen Gesellschaften. Durch die Änderung

von Steuersätzen bei den einzelnen Gesellschaften ergab sich insgesamt ein latenter Steueraufwand von –0,1 Mio EUR (Vorjahr: 2,6 Mio EUR Steuerertrag).

Die Überleitung der aktiven und passiven latenten Steuern in der Bilanz einerseits und der latenten Steuern in der Gewinn- und Verlustrechnung andererseits stellt sich wie folgt dar:

| in Mio EUR                                                                      | 2010         | 2009         |
|---------------------------------------------------------------------------------|--------------|--------------|
| Veränderung aktiver latenter Steuern gemäß Bilanz                               | 47,7         | 65,3         |
| Veränderung passiver latenter Steuern gemäß Bilanz                              | –617,0       | 132,7        |
| Veränderung erfolgsneutral gebildeter aktiver/passiver latenter Steuern         | –54,2        | –38,9        |
| Konsolidierungskreisänderungen/Wechselkursänderungen/<br>Sonstige Veränderungen | 742,6        | 2,2          |
| <b>Latente Steuern gemäß Gewinn- und Verlustrechnung</b>                        | <b>119,1</b> | <b>161,3</b> |

Die Konsolidierungskreisänderungen/Wechselkursänderungen/Sonstige Veränderungen resultierten mit 693,9 Mio EUR im Wesentlichen aus der Erstkonsolidierung Millipore. Die weiteren Veränderungen waren vor allem auf Schwankungen in den Wechselkursen des US-Dollar und des Schweizer Franken zurückzuführen.

Die Verlustvorträge gliedern sich wie nachstehend aufgeführt:

| in Mio EUR                            | 31.12.2010  |         |              | 31.12.2009  |         |              |
|---------------------------------------|-------------|---------|--------------|-------------|---------|--------------|
|                                       | Deutschland | Ausland | Gesamt       | Deutschland | Ausland | Gesamt       |
| Verlustvorträge                       | 2,0         | 194,2   | <b>196,2</b> | 164,3       | 121,9   | <b>286,2</b> |
| davon:                                |             |         |              |             |         |              |
| mit latentem Steueranspruch           | –           | 125,7   | <b>125,7</b> | 98,2        | 32,4    | <b>130,6</b> |
| latenter Steueranspruch               | –           | 39,2    | <b>39,2</b>  | 14,5        | 8,3     | <b>22,8</b>  |
| davon:                                |             |         |              |             |         |              |
| ohne latentem Steueranspruch          | 2,0         | 68,5    | <b>70,5</b>  | 66,1        | 89,5    | <b>155,6</b> |
| theoretischer latenter Steueranspruch | 0,5         | 20,5    | <b>21,0</b>  | 10,5        | 17,1    | <b>27,6</b>  |

Die Reduzierung der Verlustvorträge gegenüber dem Vorjahr resultierte im Wesentlichen aus der positiven Geschäftsentwicklung der betroffenen Konzerngesellschaften. Eine Aktivierung von latenten Steuern auf Verlust- und Zinsvorträge erfolgt nur dann, wenn ein Ausgleich in absehbarer Zeit wahrscheinlich ist.

Der überwiegende Teil der Verlustvorträge ist entweder zeitlich unbegrenzt oder bis zu 20 Jahre vortragbar. Zinsvorträge ergeben sich aus den Regelungen zur deutschen Zinsschranke und können Höhe von 7,5 Mio EUR wurden in 2010 vollständig genutzt. Durch die Nutzung von in Vorjahren nicht angesetzten steuerlichen Verlustvorträgen ergab sich im Jahr 2010 eine Verminderung der Ertragsteuerbelastung in Höhe von 20,0 Mio EUR (Vorjahr: 15,6 Mio EUR).

Die in Deutschland aufgelaufenen Verlustvorträge für die Körperschaftsteuer betrugen 1,5 Mio EUR (Vorjahr: 73,8 Mio EUR), für die Gewerbesteuer 0,5 Mio EUR (Vorjahr: 90,5 Mio EUR). Der theoretisch mögliche weitere latente Steueranspruch betrug 21,0 Mio EUR (Vorjahr: 27,6 Mio EUR).

Die aktiven und passiven latenten Steuern lassen sich inhaltlich folgenden Bilanzpositionen zuordnen:

| in Mio EUR                                                     | 31.12.2010   |                | 31.12.2009   |              |
|----------------------------------------------------------------|--------------|----------------|--------------|--------------|
|                                                                | Aktiva       | Passiva        | Aktiva       | Passiva      |
| Immaterielle Vermögenswerte                                    | 33,7         | 1.374,3        | 31,8         | 704,2        |
| Sachanlagen                                                    | 15,6         | 88,1           | 7,3          | 68,2         |
| Kurz- und langfristige Finanzanlagen                           | 5,9          | 19,3           | 2,6          | 15,7         |
| Vorräte                                                        | 305,6        | 3,7            | 242,0        | 5,0          |
| Kurz- und langfristige Forderungen/<br>sonstige Vermögenswerte | 44,6         | 2,8            | 22,4         | 11,9         |
| Rückstellungen für Pensionen und<br>ähnliche Verpflichtungen   | 129,7        | 18,1           | 87,2         | 11,9         |
| Kurz- und langfristige andere Rückstellungen                   | 169,4        | 15,2           | 172,0        | 9,4          |
| Kurz- und langfristige Verbindlichkeiten                       | 27,8         | 5,8            | 17,6         | 6,1          |
| Steuerliche Verlustvorträge                                    | 39,2         | –              | 22,8         | –            |
| Steuererstattungsansprüche/Sonstiges                           | 58,2         | 89,8           | 20,0         | 11,4         |
| Saldierungen aktiver und<br>passiver latenter Steuern          | –236,6       | –236,6         | –80,3        | –80,3        |
| <b>Gesamt latente Steuern</b>                                  | <b>593,1</b> | <b>1.380,5</b> | <b>545,4</b> | <b>763,5</b> |

Für temporäre Unterschiede auf Anteile an Tochterunternehmen wurden latente Steuerschulden in Höhe von 16,7 Mio EUR (Vorjahr: 11,4 Mio EUR) bezogen auf geplante Dividendenausschüttungen und latente Steueransprüche für den angekündigten Verkauf von Crop BioScience von 3,0 Mio EUR gebildet. Für andere temporäre Unterschiede auf Anteile an Tochterunternehmen wurden keine weiteren latenten Steuerschulden berücksichtigt, da eine Umkehrung dieser Unterschiede nicht absehbar ist.

Neben den latenten Steueransprüchen auf Verlustvorträge führten sonstige temporäre Unterschiede zu 553,9 Mio EUR aktivischen Steuerlatenzen (Vorjahr: 522,6 Mio EUR).

In der nachstehend aufgeführten Tabelle wird von dem theoretischen Steueraufwand auf die Steuern vor Sondermaßnahmen und Steuern gemäß Gewinn- und Verlustrechnung übergeleitet. Der theoretische Steueraufwand ergibt sich aus der Anwendung des Steuersatzes einer Kapitalgesellschaft mit Sitz in Darmstadt in Höhe von 30,7 %.

| in Mio EUR                                                                                        | 2010          | 2009          |
|---------------------------------------------------------------------------------------------------|---------------|---------------|
| Konzernergebnis vor Steuern                                                                       | 861,1         | 486,4         |
| Sondermaßnahmen                                                                                   | -0,8          | -28,0         |
| <b>Konzernergebnis vor Steuern und Sondermaßnahmen</b>                                            | <b>861,9</b>  | <b>514,4</b>  |
| Steuersatz Kapitalgesellschaft                                                                    | 30,7 %        | 30,7 %        |
| Theoretischer Steueraufwand vor Sondermaßnahmen                                                   | -264,6        | -157,9        |
| Steuersatzdifferenzen                                                                             | 45,7          | 4,8           |
| Steuereffekt von Gesellschaften mit negativem Konzernbeitrag                                      | -9,0          | -3,5          |
| Periodenfremde Steuern                                                                            | -8,8          | -6,3          |
| Steueranrechnungen                                                                                | 22,9          | 28,1          |
| Steuereffekte auf Verlustvorträge                                                                 | 25,8          | 39,3          |
| Steuereffekt durch nicht abzugsfähige Aufwendungen/<br>steuerfreie Erträge/Sonstige Steuereffekte | -30,1         | -15,4         |
| <b>Steueraufwand vor Sondermaßnahmen</b>                                                          | <b>-218,1</b> | <b>-110,9</b> |
| Steuerquote vor Sondermaßnahmen                                                                   | 25,3 %        | 21,6 %        |
| Steuern aus Sondermaßnahmen                                                                       | -1,5          | 1,2           |
| <b>Steueraufwand gemäß Gewinn- und Verlustrechnung</b>                                            | <b>-219,6</b> | <b>-109,7</b> |
| Steuerquote gemäß Gewinn- und Verlustrechnung                                                     | 25,5 %        | 22,6 %        |

[15]  
Nicht beherrschende  
Anteile

Nicht beherrschende Anteile am Ergebnis enthalten im Wesentlichen die Anteile anderer Gesellschafter an den börsennotierten Gesellschaften Merck Ltd., Indien, und PT Merck Tbk, Indonesien, sowie an den Gesellschaften Merck Ltd., Thailand, Merck (Pvt.) Ltd., Pakistan, und Allergopharma J. Ganzer KG, Deutschland.

[16]  
Ergebnis je Aktie

Das unverwässerte Ergebnis je Aktie ergibt sich aus dem Ergebnis nach Anteilen nicht beherrschender Gesellschafter dividiert durch die gewichtete durchschnittliche Anzahl der theoretisch ausstehenden Aktien. Die theoretische Aktienzahl berücksichtigt, dass das Komplementärkapital nicht in Aktien verbrieft ist. Entsprechend der Unterteilung des Grundkapitals in Höhe von 168,0 Mio EUR in 64.621.126 Aktien errechnet sich eine theoretische Aktienzahl von 152.767.813 Stück für das Komplementärkapital in Höhe von 397,2 Mio EUR. Insgesamt ergeben sich somit 565,2 Mio EUR beziehungsweise 217.388.939 Stück theoretisch ausstehender Aktien.

Zum Stichtag existierten keine potenziell verwässernd wirkenden Aktien.

|                                                                                 | 2010        | 2009        |
|---------------------------------------------------------------------------------|-------------|-------------|
| Ergebnis nach Anteilen nicht beherrschender Gesellschafter (Mio EUR)            | 632,1       | 366,3       |
| Gewichtete durchschnittliche Anzahl theoretisch ausstehender Aktien (Mio Stück) | 217,4       | 217,4       |
| <b>Unverwässertes Ergebnis je Aktie (EUR)</b>                                   | <b>2,91</b> | <b>1,68</b> |

## ERLÄUTERUNGEN ZUR BILANZ

[17]  
Zahlungsmittel und  
Zahlungsmitteläquivalente

Die Zahlungsmittel und Zahlungsmitteläquivalente setzten sich wie folgt zusammen:

| in Mio EUR                                                | 31.12.2010   | 31.12.2009   |
|-----------------------------------------------------------|--------------|--------------|
| Schecks, Kassenbestände und Guthaben bei Kreditinstituten | 233,6        | 282,9        |
| Kurzfristige Geldanlagen                                  | 710,1        | 258,5        |
|                                                           | <b>943,7</b> | <b>541,4</b> |

Die Entwicklung der Zahlungsmittel und Zahlungsmitteläquivalente, die den Finanzmittelfonds gemäß IAS 7 bilden, ist in der Kapitalflussrechnung dargestellt. In der Position waren kurzfristige Forderungen gegenüber nahestehenden und verbundenen Unternehmen in Höhe von 8,6 Mio EUR (Vorjahr: 4,5 Mio EUR) enthalten.

Der Bestand an kurzfristigen Geldanlagen ist im Wesentlichen in Festgeldern bei Banken mit sehr guter Bonität angelegt. Die durchschnittliche Verzinsung aller Anlagen betrug im Geschäftsjahr 1,8%.

[18]  
Wertpapiere und finanzielle  
Vermögenswerte

Die Position gliederte sich in folgende Kategorien:

| in Mio EUR                                            | 31.12.2010  | 31.12.2009     |
|-------------------------------------------------------|-------------|----------------|
| Bis zur Endfälligkeit zu haltende Finanzinvestitionen | 22,7        | 48,4           |
| Zur Veräußerung verfügbare finanzielle Vermögenswerte | 11,3        | 262,5          |
| Kurzfristige Finanzanlagen/Ausleihungen an Dritte     | 0,3         | 1.150,7        |
| Vermögenswerte aus Derivaten (Finanztransaktionen)    | 21,3        | 41,6           |
|                                                       | <b>55,6</b> | <b>1.503,2</b> |

Der deutliche Rückgang der Wertpapiere und finanzielle Vermögenswerte steht im Zusammenhang mit der Finanzierung der Millipore Akquisition.

Bei den Ausleihungen an Dritte lagen keine Wertberichtigungen (Vorjahr: 1,3 Mio EUR) und keine Überfälligkeiten vor. Aufgrund eines Zahlungseinganges in Höhe von 1,1 Mio EUR im Berichtsjahr wurden die im Vorjahr ausgewiesenen Wertberichtigungen in dieser Höhe zurückgenommen. Der verbleibende Betrag in Höhe von 0,2 Mio EUR wurde in Anspruch genommen. Bei den zur Veräußerung verfügbaren finanziellen Vermögenswerten ergaben sich erfolgsneutrale Marktwertanpassungen von -2,0 Mio EUR (Vorjahr: +2,0 Mio EUR).

[19]  
Forderungen aus Lieferungen  
und Leistungen

Die Forderungen aus Lieferungen und Leistungen stellten sich wie folgt dar:

| in Mio EUR                                       | 31.12.2010     | 31.12.2009     |
|--------------------------------------------------|----------------|----------------|
| Forderungen gegenüber Beteiligungsgesellschaften | 0,3            | 0,6            |
| Forderungen gegenüber assoziierten Unternehmen   | 0,8            | –              |
| Forderungen gegenüber Dritten                    | 2.295,2        | 1.788,1        |
|                                                  | <b>2.296,3</b> | <b>1.788,7</b> |

Der Anstieg der Forderungen aus Lieferungen und Leistungen resultierte insbesondere aus der Erstkonsolidierung der Millipore Gesellschaften.

Die Überfälligkeiten der Forderungen aus Lieferungen und Leistungen stellten sich wie folgt dar:

| in Mio EUR                            | 31.12.2010     | 31.12.2009     |
|---------------------------------------|----------------|----------------|
| Weder überfällig noch wertberichtigt  | 1.659,0        | 1.314,9        |
| Überfällig, aber nicht wertberichtigt |                |                |
| bis zu 3 Monate                       | 265,7          | 209,1          |
| bis zu 6 Monate                       | 107,4          | 80,4           |
| bis zu 12 Monate                      | 96,4           | 64,2           |
| über 1 Jahr                           | 109,5          | 56,2           |
| Wertberichtigt                        | 58,3           | 63,9           |
| <b>Buchwert</b>                       | <b>2.296,3</b> | <b>1.788,7</b> |

Die entsprechenden Wertberichtigungen entwickelten sich wie folgt:

| in Mio EUR                                  | 2010         | 2009         |
|---------------------------------------------|--------------|--------------|
| <b>Stand 1.1.</b>                           | <b>-46,0</b> | <b>-16,6</b> |
| Netto-Zuführungen                           | -10,8        | -27,9        |
| Inanspruchnahmen                            | 5,2          | 1,9          |
| Wechselkurseffekte und andere Veränderungen | -7,3         | -3,4         |
| <b>Stand 31.12.</b>                         | <b>-58,9</b> | <b>-46,0</b> |

Hinsichtlich des Bestands der Forderungen aus Lieferungen und Leistungen, der weder wertberichtigt noch in Zahlungsverzug befindlich ist, deuten zum Abschlussstichtag keine Anzeichen daraufhin, dass die Schuldner ihren Zahlungsverpflichtungen nicht nachkommen werden.

[20] Im Einzelnen gliederten sich die Vorräte in:  
Vorräte

| in Mio EUR                                           | 31.12.2010     | 31.12.2009     |
|------------------------------------------------------|----------------|----------------|
| Roh-, Hilfs- und Betriebsstoffe                      | 189,7          | 174,1          |
| Unfertige und fertige Erzeugnisse sowie Handelswaren | 1.483,8        | 1.193,8        |
| Geleistete Anzahlungen                               | -              | -              |
|                                                      | <b>1.673,5</b> | <b>1.367,9</b> |

Die Abwertungen des Vorratsvermögens beliefen sich im Geschäftsjahr auf 138,7 Mio EUR (Vorjahr: 141,7 Mio EUR); zum Bilanzstichtag haben die einer Abwertung unterzogenen Bestände einen Restbuchwert von 757,5 Mio EUR (Vorjahr: 526,3 Mio EUR). Im Geschäftsjahr wurden 27,0 Mio EUR Wertaufholungen auf Vorräte vorgenommen. Vorräte in Höhe von 2.385,4 Mio EUR (Vorjahr: 2.029,3 Mio EUR) sind als Aufwand in der Berichtsperiode erfasst worden. Zum Bilanzstichtag dienten keine Vorräte der Besicherung von Verbindlichkeiten.

[21] **Übrige Vermögenswerte** Die übrigen Forderungen und sonstigen Vermögenswerte enthielten einen Betrag in Höhe von 269,3 Mio EUR aus dem Verkauf Théraxem (siehe Abschnitt „Konsolidierungskreis – Verkauf von Théraxem“) und überwiegend geleistete Vorauszahlungen sowie Zinsabgrenzungen. In 2010 wurde eine eigene Berichtsposition für Forderungen aus nicht einkommensabhängigen Steuern (im Wesentlichen Umsatzsteuer) eingeführt. Die Vorjahreswerte wurden angepasst.

Die übrigen Vermögenswerte setzten sich folgendermaßen zusammen:

| in Mio EUR                                         | kurzfristig  | langfristig | 31.12.2010   | kurzfristig  | langfristig | 31.12.2009   |
|----------------------------------------------------|--------------|-------------|--------------|--------------|-------------|--------------|
| Forderungen gegenüber Dritten                      | 385,6        | 2,1         | 387,7        | 76,5         | 2,1         | 78,6         |
| Forderungen gegenüber nahestehenden Unternehmen    | 17,0         | –           | 17,0         | 14,9         | –           | 14,9         |
| Forderungen gegenüber Beteiligungsgesellschaften   | 2,4          | –           | 2,4          | –            | –           | –            |
| <b>Übrige Forderungen</b>                          | <b>405,0</b> | <b>2,1</b>  | <b>407,1</b> | <b>91,4</b>  | <b>2,1</b>  | <b>93,5</b>  |
| Forderungen aus nicht einkommensabhängigen Steuern | 72,8         | 36,0        | 108,8        | 83,3         | 54,5        | 137,8        |
| Aktive Rechnungsabgrenzungsposten                  | 48,2         | 2,7         | 50,9         | 48,9         | 3,7         | 52,6         |
| Rückerstattungsansprüche aus Planvermögen          | 18,8         | –           | 18,8         | 15,2         | –           | 15,2         |
| Vermögenswerte aus Derivaten (operativ)            | 2,2          | 0,4         | 2,6          | 29,5         | 28,6        | 58,1         |
| Sonstige Vermögenswerte                            | 17,7         | 11,7        | 29,4         | 7,3          | 10,6        | 17,9         |
|                                                    | <b>564,7</b> | <b>52,9</b> | <b>617,6</b> | <b>275,6</b> | <b>99,5</b> | <b>375,1</b> |

Die Überfälligkeiten der übrigen Forderungen gegenüber Dritten stellten sich wie folgt dar:

| in Mio EUR                            | 31.12.2010   | 31.12.2009  |
|---------------------------------------|--------------|-------------|
| Weder überfällig noch wertberichtigt  | 345,0        | 68,7        |
| Überfällig, aber nicht wertberichtigt |              |             |
| bis zu 3 Monate                       | 8,4          | 7,8         |
| bis zu 6 Monate                       | 4,8          | 1,3         |
| bis zu 12 Monate                      | 0,6          | 0,2         |
| über 1 Jahr                           | 2,0          | 0,6         |
| Wertberichtigt                        | 26,9         | –           |
| <b>Buchwert</b>                       | <b>387,7</b> | <b>78,6</b> |

Im Geschäftsjahr erfolgte im Zusammenhang mit dem Rechtsstreitigkeiten unserer früheren inzwischen an Mylan verkauften Tochtergesellschaft Dey Inc., USA, eine Vergleichszahlung an das US Department of Justice (siehe Anmerkung [32]). Soweit diese Zahlung steuerlich abzugsfähig ist, hat Merck einen Rückerstattungsanspruch gegenüber Mylan in Höhe der Steuergutschrift. Wie hoch dieser Betrag sein wird, kann derzeit nicht abschließend beurteilt werden. Merck hat diesen Anspruch um 52,6 Mio EUR auf einen Restbuchwert von 26,9 Mio EUR wertberichtigt. Der Aufwand aus dieser Wertberichtigung ist in den Sondermaßnahmen enthalten.

Wertaufholungen auf übrige Forderungen gegen Dritte fanden sowohl im Geschäftsjahr als auch im Vorjahr nicht statt. Hinsichtlich des Bestands der sonstigen Forderungen, der weder wertberichtigt noch in Zahlungsverzug befindlich ist, deuten zum Abschlussstichtag keine Anzeichen daraufhin, dass die Schuldner ihren Zahlungsverpflichtungen nicht nachkommen werden.



**[22] Steuererstattungsansprüche** Die Steuererstattungsansprüche betrugen 93,7 Mio EUR (Vorjahr: 55,3 Mio EUR) und resultierten aus Steuervorauszahlungen, die über der tatsächlichen Steuerschuld für das abgelaufene Geschäftsjahr und frühere Geschäftsjahre liegen, und aus Erstattungsansprüchen für die Vorjahre sowie anrechenbaren Quellensteuern.

**[23] Zur Veräußerung gehaltene Vermögenswerte und Verbindlichkeiten im Zusammenhang mit zur Veräußerung gehaltener Vermögenswerte** Merck hat am 20. Dezember 2010 bekanntgegeben, das Crop-Bioscience-Geschäft, das Teil der Sparte Performance Materials war, an Novozymes A/S, Dänemark, zu verkaufen. Die Vereinbarung gilt vorbehaltlich der Genehmigung der Behörden. Der Abschluss der Transaktion wird Anfang 2011 erwartet. Das Crop-Bioscience Geschäft erzielte im Jahr 2010 einen Umsatz von rund 46 Mio EUR. In der Konzernbilanz zum 31. Dezember 2010 wurde für diesen Sachverhalt zur Veräußerung gehaltene Vermögenswerte in Höhe von 36,7 Mio EUR und Verbindlichkeiten im Zusammenhang mit zur Veräußerung gehaltener Vermögenswerte in Höhe von 5,9 Mio EUR ausgewiesen.

Die nachfolgende Tabelle zeigt die Zusammensetzung dieser Position:

| in Mio EUR                                                                             | 31.12.2010  |
|----------------------------------------------------------------------------------------|-------------|
| <b>Kurzfristige Vermögenswerte</b>                                                     |             |
| Zahlungsmittel und Zahlungsmitteläquivalente                                           | 1,2         |
| Vorräte                                                                                | 4,6         |
| Forderungen                                                                            | 10,6        |
| Sonstige kurzfristige Vermögenswerte                                                   | 0,6         |
|                                                                                        | <b>17,0</b> |
| <b>Langfristige Vermögenswerte</b>                                                     |             |
| Immaterielle Vermögenswerte                                                            | 13,4        |
| Sachanlagen                                                                            | 4,4         |
| Sonstige langfristige Vermögenswerte                                                   | 1,9         |
|                                                                                        | <b>19,7</b> |
| <b>Zur Veräußerung gehaltene Vermögenswerte</b>                                        | <b>36,7</b> |
| <b>Kurzfristige Verbindlichkeiten</b>                                                  |             |
| Verbindlichkeiten aus Lieferungen und Leistungen                                       | 1,0         |
| Sonstige kurzfristige Verbindlichkeiten                                                | 4,7         |
|                                                                                        | <b>5,7</b>  |
| <b>Langfristige Verbindlichkeiten</b>                                                  | <b>0,2</b>  |
| <b>Verbindlichkeiten im Zusammenhang mit zur Veräußerung gehaltener Vermögenswerte</b> | <b>5,9</b>  |

## [24] Immaterielle Vermögenswerte

|                                                             | Patente, Lizenzen<br>und ähnliche Rechte,<br>Markennamen,<br>Warenzeichen und Sonstiges |                                   | Geschäfts-<br>oder<br>Firmenwerte | Software      | Geleistete<br>Anzahlungen | Gesamt          |
|-------------------------------------------------------------|-----------------------------------------------------------------------------------------|-----------------------------------|-----------------------------------|---------------|---------------------------|-----------------|
|                                                             | bestimmte<br>Nutzungs-<br>dauer                                                         | unbestimmte<br>Nutzungs-<br>dauer |                                   |               |                           |                 |
| in Mio EUR                                                  |                                                                                         |                                   |                                   |               |                           |                 |
| <b>Anschaffungskosten Stand 1.1.2009</b>                    | <b>7.540,6</b>                                                                          | <b>543,0</b>                      | <b>1.971,3</b>                    | <b>177,9</b>  | <b>17,2</b>               | <b>10.250,0</b> |
| Währungsumrechnungsdifferenz                                | -5,9                                                                                    | -0,8                              | -0,7                              | 1,5           | -                         | -5,9            |
| Veränderungen im Konsolidierungskreis                       | 4,7                                                                                     | -                                 | 15,7                              | -             | -                         | 20,4            |
| Zugänge                                                     | 5,7                                                                                     | 31,4                              | -                                 | 30,7          | 28,8                      | 96,6            |
| Abgänge                                                     | -9,3                                                                                    | -11,9                             | -3,6                              | -15,7         | -0,3                      | -40,8           |
| Umbuchungen                                                 | 62,9                                                                                    | -60,4                             | -                                 | 18,4          | -12,8                     | 8,1             |
| <b>Stand 31.12.2009</b>                                     | <b>7.598,7</b>                                                                          | <b>501,3</b>                      | <b>1.982,7</b>                    | <b>212,8</b>  | <b>32,9</b>               | <b>10.328,4</b> |
| <b>Kumulierte Abschreibungen Stand 1.1.2009</b>             | <b>-1.757,8</b>                                                                         | <b>-129,3</b>                     | <b>-42,2</b>                      | <b>-117,3</b> | <b>-</b>                  | <b>-2.046,6</b> |
| Währungsumrechnungsdifferenz                                | -4,5                                                                                    | -0,1                              | -0,2                              | -0,3          | -                         | -5,1            |
| Veränderungen im Konsolidierungskreis                       | -                                                                                       | -                                 | -                                 | -             | -                         | -               |
| Abschreibungen und Wertminderungen                          | -664,4                                                                                  | -21,1                             | -                                 | -30,3         | -                         | -715,8          |
| Abgänge                                                     | 7,6                                                                                     | 11,6                              | 3,6                               | 14,7          | -                         | 37,5            |
| Umbuchungen                                                 | -0,1                                                                                    | -                                 | -                                 | 0,1           | -                         | -               |
| Zuschreibungen                                              | -                                                                                       | -                                 | -                                 | -             | -                         | -               |
| <b>Stand 31.12.2009</b>                                     | <b>-2.419,2</b>                                                                         | <b>-138,9</b>                     | <b>-38,8</b>                      | <b>-133,1</b> | <b>-</b>                  | <b>-2.730,0</b> |
| <b>Restbuchwerte Stand 31.12.2009</b>                       | <b>5.179,5</b>                                                                          | <b>362,4</b>                      | <b>1.943,9</b>                    | <b>79,7</b>   | <b>32,9</b>               | <b>7.598,4</b>  |
| <b>Anschaffungskosten Stand 1.1.2010</b>                    | <b>7.598,7</b>                                                                          | <b>501,3</b>                      | <b>1.982,7</b>                    | <b>212,8</b>  | <b>32,9</b>               | <b>10.328,4</b> |
| Währungsumrechnungsdifferenz                                | 704,5                                                                                   | 37,0                              | 89,4                              | 14,5          | 1,7                       | 847,1           |
| Veränderungen im Konsolidierungskreis                       | 2.534,9                                                                                 | 9,3                               | 2.545,3                           | 11,3          | -                         | 5.100,8         |
| Zugänge                                                     | 23,0                                                                                    | 20,8                              | -                                 | 17,3          | 43,1                      | 104,2           |
| Abgänge                                                     | -10,1                                                                                   | -0,5                              | -                                 | -27,2         | -0,1                      | -37,9           |
| Umbuchungen                                                 | 76,5                                                                                    | -76,3                             | 4,9                               | 48,4          | -35,7                     | 17,8            |
| Umgliederung in zur Veräußerung<br>gehaltene Vermögenswerte | -29,8                                                                                   | -                                 | -                                 | -0,3          | -                         | -30,1           |
| <b>Stand 31.12.2010</b>                                     | <b>10.897,7</b>                                                                         | <b>491,6</b>                      | <b>4.622,3</b>                    | <b>276,8</b>  | <b>41,9</b>               | <b>16.330,3</b> |
| <b>Kumulierte Abschreibungen Stand 1.1.2010</b>             | <b>-2.419,2</b>                                                                         | <b>-138,9</b>                     | <b>-38,8</b>                      | <b>-133,1</b> | <b>-</b>                  | <b>-2.730,0</b> |
| Währungsumrechnungsdifferenz                                | -234,8                                                                                  | -10,3                             | 0,2                               | -11,2         | -                         | -256,1          |
| Veränderungen im Konsolidierungskreis                       | 1,2                                                                                     | -                                 | -                                 | 2,2           | -                         | 3,4             |
| Abschreibungen und Wertminderungen                          | -701,7                                                                                  | -164,4                            | -                                 | -40,1         | -                         | -906,2          |
| Abgänge                                                     | 7,7                                                                                     | -                                 | -                                 | 26,3          | -                         | 34,0            |
| Umbuchungen                                                 | 0,1                                                                                     | -                                 | -3,6                              | -4,5          | -                         | -8,0            |
| Zuschreibungen                                              | -                                                                                       | -                                 | -                                 | -             | -                         | -               |
| Umgliederung in zur Veräußerung<br>gehaltene Vermögenswerte | 16,4                                                                                    | -                                 | -                                 | 0,3           | -                         | 16,7            |
| <b>Stand 31.12.2010</b>                                     | <b>-3.330,3</b>                                                                         | <b>-313,6</b>                     | <b>-42,2</b>                      | <b>-160,1</b> | <b>-</b>                  | <b>-3.846,2</b> |
| <b>Restbuchwerte Stand 31.12.2010</b>                       | <b>7.567,4</b>                                                                          | <b>178,0</b>                      | <b>4.580,1</b>                    | <b>116,7</b>  | <b>41,9</b>               | <b>12.484,1</b> |

Die Veränderungen im Konsolidierungskreis beinhalten Zugänge in Höhe von 5.263,9 Mio EUR (Vorjahr: 20,6 Mio EUR) und Abgänge in Höhe von 159,7 Mio EUR (Vorjahr: 0,2 Mio EUR).

Die Zugänge im Konsolidierungskreis beruhen fast ausschließlich auf der Akquisition von Millipore. Eine detaillierte Darstellung zu diesem Sachverhalt ist in dem Abschnitt „Konsolidierungskreis – Akquisition Millipore“ gegeben. Zum Erwerbszeitpunkt beträgt der Geschäfts- oder Firmenwert von Millipore 2.704,4 Mio EUR und der beizulegende Zeitwert der übrigen immateriellen Vermögenswerte 2.559,5 Mio EUR. Die Abgänge im Konsolidierungskreis sind insbesondere auf den Verkauf von Théramex zurückzuführen.

Die Veränderung der Währungsumrechnungsdifferenzen gegenüber dem Vorjahr beruht überwiegend auf der Umrechnung der in US-Dollar und Schweizer Franken geführten immateriellen Vermögenswerte in die Konzernwährung Euro.

Im Restbuchwert der Position „Patente, Lizenzen und ähnlichen Rechte, Markennamen, Warenzeichen und Sonstiges“ mit bestimmter Nutzungsdauer von 7.567,4 Mio EUR sind vor allem aktivierte Werte aus den Kaufpreisallokationen Millipore aus dem Jahr 2010 und Serono aus dem Jahr 2007 enthalten. Der weitaus größte Teil davon entfällt auf Technologien und Know-how. Die Restnutzungsdauern dieser Vermögenswerte liegen bei 8 bis 15,5 Jahren. Weiter sind aus diesen Akquisitionen Lizenzen mit Restnutzungsdauern zwischen 2 und 7 Jahren enthalten.

Im Geschäftsjahr 2010 wurden für immaterielle Vermögenswerte mit bestimmter Nutzungsdauer Wertminderungen in Höhe von insgesamt 17,1 Mio EUR vorgenommen. Davon entfallen 16,4 Mio EUR auf die Geschäftseinheit Liquid Crystals. Diese Wertminderung wurde aufgrund geänderter Markteinschätzungen und damit verbundener gesunkener Umsatzerwartungen notwendig. Der Sachverhalt ist in der Gewinn- und Verlustrechnung innerhalb der sonstigen betrieblichen Aufwendungen erfasst.

Die währungsbedingten Änderungen der Geschäfts- oder Firmenwerte resultierten nahezu ausschließlich aus der Umrechnung des Geschäfts- oder Firmenwerts für Serono aus dem Schweizer Franken in die Konzernwährung Euro und der Umrechnung des Geschäfts- oder Firmenwerts für Millipore, der zur Hälfte in US-Dollar geführt wird, in Euro.

Da Geschäfts- oder Firmenwerte und immaterielle Vermögenswerte mit unbestimmter Nutzungsdauer nicht planmäßig abgeschrieben werden, erfolgt jährlich ein Wertminderungstest. Dabei wurden den Buchwerten die Nutzungswerte gegenübergestellt. Es resultiert daraus im Geschäftsjahr eine Wertminderung in Höhe von 164,4 Mio EUR. Davon entfallen 134,0 Mio EUR auf Safinamid. Wegen einer Neueinschätzung des Umsatzpotenzials wurde diese Wertminderung auf einen Restbuchwert von 63,4 Mio EUR notwendig. Der Ausweis in der Gewinn- und Verlustrechnung erfolgt in der Position „Abschreibungen auf immaterielle Vermögenswerte“. Grundlage der Neueinschätzung sind die Ergebnisse einer Phase III Studie, die von unserem Kooperationspartner Newron durchgeführt wurde. Sie führte zu einer Neueinschätzung des Marktpotentials insbesondere im Hinblick auf erreichbare Anwendungsgebiete. Zusätzlich berücksichtigt die Bewertung eine Verzögerung im Projektverlauf und einen Anstieg der Forschungs- und Entwicklungskosten aufgrund von erhöhten Anforderungen der amerikanischen Zulassungsbehörde FDA.

Die übrigen Wertminderungen in Höhe von 17,2 Mio EUR beziehen sich auf Vollabschreibungen von Vermögenswerten im Zusammenhang mit der Beendigung von Forschungsprojekten der Sparte Merck Serono und sind innerhalb der sonstigen betrieblichen Aufwendungen ausgewiesen. Durch die Auslizenzierung eines im Zuge einer Akquisition erworbenen Wirkstoffes wurde dessen Nutzungswert neu bestimmt. Daraus resultierte ein Wertminderungsbedarf in der Sparte Merck Serono in Höhe von 13,2 Mio EUR, der in den sonstigen betrieblichen Aufwendungen erfasst wurde.

Die Buchwerte der Position „Patente, Lizenzen und ähnliche Rechte, Markennamen, Warenzeichen und Sonstiges“ sowie des Geschäfts- und Firmenwerts lassen sich wie folgt auf die Sparten zuordnen:

| in Mio EUR                                                                            | Restnut-<br>zungsdauer<br>in Jahren | Merck Serono   | Consumer<br>Health Care | Merck<br>Millipore | Performance<br>Materials | Gesamt<br>31.12.2010 | Gesamt<br>31.12.2009 |
|---------------------------------------------------------------------------------------|-------------------------------------|----------------|-------------------------|--------------------|--------------------------|----------------------|----------------------|
| <b>Patente, Lizenzen und ähnliche Rechte, Markennamen, Warenzeichen und Sonstiges</b> |                                     |                |                         |                    |                          |                      |                      |
| <b>bestimmte Nutzungsdauer</b>                                                        |                                     | <b>5.165,1</b> | <b>20,1</b>             | <b>2.367,0</b>     | <b>15,2</b>              | <b>7.567,4</b>       | <b>5.179,5</b>       |
| Rebif®                                                                                | 11                                  | 3.296,5        | –                       | –                  | –                        | 3.296,5              | 3.221,5              |
| Gonal-f®                                                                              | 8                                   | 759,6          | –                       | –                  | –                        | 759,6                | 765,2                |
| Saizen®                                                                               | 9                                   | 276,6          | –                       | –                  | –                        | 276,6                | 275,3                |
| Humira®                                                                               | 7                                   | 257,3          | –                       | –                  | –                        | 257,3                | 267,9                |
| Avonex®                                                                               | 2,5                                 | 120,3          | –                       | –                  | –                        | 120,3                | 152,7                |
| Enbrel®                                                                               | 2                                   | 74,9           | –                       | –                  | –                        | 74,9                 | 109,1                |
| Cladribin                                                                             | 10                                  | 51,7           | –                       | –                  | –                        | 51,7                 | –                    |
| Puregon®                                                                              | 4                                   | 45,8           | –                       | –                  | –                        | 45,8                 | 51,3                 |
| Technologien                                                                          | 0,5 bis 15,5                        | 280,6          | 3,7                     | 532,0              | 11,7                     | 828,0                | 309,2                |
| Marken                                                                                | 4,75 bis 13,5                       | 1,0            | 16,4                    | 316,9              | 0,3                      | 334,6                | 20,5                 |
| Kundenbeziehungen                                                                     | 0,5 bis 16,5                        | 0,8            | –                       | 1.518,1            | 3,2                      | 1.522,1              | 6,8                  |
| <b>unbestimmte Nutzungsdauer</b>                                                      |                                     | <b>167,8</b>   | <b>–</b>                | <b>8,7</b>         | <b>1,5</b>               | <b>178,0</b>         | <b>362,4</b>         |
| Safinamid                                                                             | –                                   | 63,4           | –                       | –                  | –                        | 63,4                 | 176,8                |
| Cladribin                                                                             | –                                   | –              | –                       | –                  | –                        | –                    | 48,2                 |
| Sonstige                                                                              | –                                   | 104,4          | –                       | 8,7                | 1,5                      | 114,6                | 137,4                |
| <b>Geschäfts- oder Firmenwerte</b>                                                    | <b>–</b>                            | <b>1.681,6</b> | <b>164,7</b>            | <b>2.714,6</b>     | <b>19,2</b>              | <b>4.580,1</b>       | <b>1.943,9</b>       |

Bei den immateriellen Vermögenswerten mit unbestimmter Nutzungsdauer handelt es sich überwiegend um Rechte, die Merck im Zusammenhang mit Produkten oder Technologien erworben hat und die sich noch im Forschungs- und Entwicklungsstadium befinden. Die Abschreibung beginnt erst mit dem Zeitpunkt der Vermarktung der Produkte.

## [25] Sachanlagen

| in Mio EUR                                                  | Grundstücke,<br>grundstücksgleiche<br>Rechte und<br>Bauten einschl.<br>Bauten auf frem-<br>den Grundstücken | Technische<br>Anlagen und<br>Maschinen | Andere Anlagen,<br>Betriebs- und<br>Geschäfts-<br>ausstattung | Geleistete<br>Anzahlungen<br>und Anlagen<br>im Bau | Gesamt          |
|-------------------------------------------------------------|-------------------------------------------------------------------------------------------------------------|----------------------------------------|---------------------------------------------------------------|----------------------------------------------------|-----------------|
| <b>Anschaffungskosten Stand 1.1.2009</b>                    | <b>1.885,8</b>                                                                                              | <b>2.391,6</b>                         | <b>774,7</b>                                                  | <b>315,7</b>                                       | <b>5.367,8</b>  |
| Währungsumrechnungsdifferenz                                | 0,8                                                                                                         | 3,0                                    | 1,5                                                           | 2,6                                                | 7,9             |
| Veränderungen im Konsolidierungskreis                       | 3,5                                                                                                         | 2,9                                    | 2,2                                                           | –                                                  | 8,6             |
| Zugänge                                                     | 26,9                                                                                                        | 48,3                                   | 45,2                                                          | 346,9                                              | 467,3           |
| Abgänge                                                     | –60,5                                                                                                       | –61,3                                  | –52,3                                                         | –5,6                                               | –179,7          |
| Umbuchungen                                                 | 37,7                                                                                                        | 71,0                                   | 33,6                                                          | –150,4                                             | –8,1            |
| <b>Stand 31.12.2009</b>                                     | <b>1.894,2</b>                                                                                              | <b>2.455,5</b>                         | <b>804,9</b>                                                  | <b>509,2</b>                                       | <b>5.663,8</b>  |
| <b>Kumulierte Abschreibungen<br/>Stand 1.1.2009</b>         | <b>–720,4</b>                                                                                               | <b>–1.644,6</b>                        | <b>–547,4</b>                                                 | <b>–15,3</b>                                       | <b>–2.927,7</b> |
| Währungsumrechnungsdifferenz                                | –1,2                                                                                                        | –1,8                                   | –1,3                                                          | –                                                  | –4,3            |
| Veränderungen im Konsolidierungskreis                       | –0,4                                                                                                        | –0,6                                   | –0,3                                                          | –                                                  | –1,3            |
| Abschreibungen und Wertminderungen                          | –73,7                                                                                                       | –145,6                                 | –66,3                                                         | –                                                  | –285,6          |
| Abgänge                                                     | 54,1                                                                                                        | 57,1                                   | 46,5                                                          | 4,8                                                | 162,5           |
| Umbuchungen                                                 | 0,2                                                                                                         | –0,4                                   | 0,2                                                           | –                                                  | –               |
| Zuschreibungen                                              | 0,1                                                                                                         | –                                      | 0,1                                                           | –                                                  | 0,2             |
| <b>Stand 31.12.2009</b>                                     | <b>–741,3</b>                                                                                               | <b>–1.735,9</b>                        | <b>–568,5</b>                                                 | <b>–10,5</b>                                       | <b>–3.056,2</b> |
| <b>Restbuchwerte Stand 31.12.2009</b>                       | <b>1.152,9</b>                                                                                              | <b>719,6</b>                           | <b>236,4</b>                                                  | <b>498,7</b>                                       | <b>2.607,6</b>  |
| <b>Anschaffungskosten Stand 1.1.2010</b>                    | <b>1.894,2</b>                                                                                              | <b>2.455,5</b>                         | <b>804,9</b>                                                  | <b>509,2</b>                                       | <b>5.663,8</b>  |
| Währungsumrechnungsdifferenz                                | 129,1                                                                                                       | 78,1                                   | 21,9                                                          | 41,6                                               | 270,7           |
| Veränderungen im Konsolidierungskreis                       | 240,5                                                                                                       | 109,4                                  | 14,6                                                          | 75,8                                               | 440,3           |
| Zugänge                                                     | 14,1                                                                                                        | 33,2                                   | 37,8                                                          | 311,1                                              | 396,2           |
| Abgänge                                                     | –12,8                                                                                                       | –76,9                                  | –38,8                                                         | –2,3                                               | –130,8          |
| Umbuchungen                                                 | 61,9                                                                                                        | 70,1                                   | 6,6                                                           | –155,6                                             | –17,0           |
| Umgliederung in zur Veräußerung gehaltene<br>Vermögenswerte | –5,1                                                                                                        | –5,5                                   | –1,6                                                          | –0,9                                               | –13,1           |
| <b>Stand 31.12.2010</b>                                     | <b>2.321,9</b>                                                                                              | <b>2.663,9</b>                         | <b>845,4</b>                                                  | <b>778,9</b>                                       | <b>6.610,1</b>  |
| <b>Kumulierte Abschreibungen<br/>Stand 1.1.2010</b>         | <b>–741,3</b>                                                                                               | <b>–1.735,9</b>                        | <b>–568,5</b>                                                 | <b>–10,5</b>                                       | <b>–3.056,2</b> |
| Währungsumrechnungsdifferenz                                | –42,9                                                                                                       | –64,9                                  | –17,0                                                         | –                                                  | –124,8          |
| Veränderungen im Konsolidierungskreis                       | –                                                                                                           | 13,9                                   | 12,7                                                          | –                                                  | 26,6            |
| Abschreibungen und Wertminderungen                          | –97,0                                                                                                       | –177,7                                 | –77,0                                                         | –                                                  | –351,7          |
| Abgänge                                                     | 10,5                                                                                                        | 75,3                                   | 35,4                                                          | 0,4                                                | 121,6           |
| Umbuchungen                                                 | –5,1                                                                                                        | –0,3                                   | 12,6                                                          | –                                                  | 7,2             |
| Zuschreibungen                                              | –                                                                                                           | –                                      | –                                                             | –                                                  | –               |
| Umgliederung in zur Veräußerung gehaltene<br>Vermögenswerte | 3,3                                                                                                         | 4,1                                    | 1,3                                                           | –                                                  | 8,7             |
| <b>Stand 31.12.2010</b>                                     | <b>–872,5</b>                                                                                               | <b>–1.885,5</b>                        | <b>–600,5</b>                                                 | <b>–10,1</b>                                       | <b>–3.368,6</b> |
| <b>Restbuchwerte Stand 31.12.2010</b>                       | <b>1.449,4</b>                                                                                              | <b>778,4</b>                           | <b>244,9</b>                                                  | <b>768,8</b>                                       | <b>3.241,5</b>  |

Die Veränderungen im Konsolidierungskreis beinhalten Zugänge in Höhe von 474,2 Mio EUR (Vorjahr: 25,8 Mio EUR) und Abgänge in Höhe von 7,3 Mio EUR (Vorjahr: 18,5 Mio EUR), die auf die Akquisition von Millipore beziehungsweise auf den Verkauf von Théraxem zurückzuführen sind. Im Geschäftsjahr wurden Wertminderungen in Höhe von 23,7 Mio EUR vorgenommen. Diese entfielen insbesondere auf Abschreibungen von Produktionsanlagen in den Sparten Merck Millipore, Consumer Health Care und Merck Serono und sind unter den sonstigen betrieblichen Aufwendungen ausgewiesen.

Sachanlagen in Höhe von 8,1 Mio EUR dienten als Sicherheit (Vorjahr: 8,1 Mio EUR). Die öffentlichen Zuschüsse und Subventionen betrugen im Geschäftsjahr 11,5 Mio EUR (Vorjahr: 5,4 Mio EUR). Das Sachanlagevermögen beinhaltet auch geleaste Vermögenswerte. Der Gesamtwert der aktivierten Leasinggegenstände lag bei 11,6 Mio EUR (Vorjahr: 13,0 Mio EUR). Die entsprechenden Verpflichtungen beliefen sich auf 7,1 Mio EUR (Vorjahr: 10,4 Mio EUR), siehe auch Anmerkung [28].

Die Buchwerte der aktivierten Leasinggegenstände unterteilten sich wie folgt:

| in Mio EUR                              | 31.12.2010  | 31.12.2009  |
|-----------------------------------------|-------------|-------------|
| Aktiviert geleaste Gebäude              | 9,3         | 11,7        |
| Aktiviert geleaste Fahrzeuge            | 2,3         | 1,1         |
| Aktiviert geleaste sonstige Sachanlagen | –           | 0,2         |
|                                         | <b>11,6</b> | <b>13,0</b> |

[26]  
Nach der Equity-Methode  
bilanzierte Finanzanlagen

| in Mio EUR                            | 2010       | 2009       |
|---------------------------------------|------------|------------|
| Buchwerte Stand 1.1.                  | 1,6        | 1,3        |
| Zugänge                               | –          | –          |
| Anteiliges Ergebnis                   | 0,9        | 0,1        |
| Abgänge                               | –          | –          |
| Währungsumrechnungsdifferenz          | 0,3        | 0,2        |
| Veränderungen im Konsolidierungskreis | 2,2        | –          |
| <b>Buchwerte Stand 31.12.</b>         | <b>5,0</b> | <b>1,6</b> |

Die Konsolidierungskreisveränderungen sind auf die Erstkonsolidierung von Millipore zurückzuführen.

**[27] Langfristige Finanzanlagen**

| in Mio EUR                                   | Anteile an                                         |                                                     | Wertpapiere                                                       |                                                                  | Ausleihungen<br>und andere<br>langfristige<br>Finanzanlagen | Gesamt       |
|----------------------------------------------|----------------------------------------------------|-----------------------------------------------------|-------------------------------------------------------------------|------------------------------------------------------------------|-------------------------------------------------------------|--------------|
|                                              | zur<br>Veräußerung<br>verfügbaren<br>Beteiligungen | zur<br>Veräußerung<br>verfügbaren<br>Gesellschaften | zur<br>Veräußerung<br>verfügbare<br>finanzielle<br>Vermögenswerte | bis zur<br>Endfälligkeit zu<br>haltende Finanz-<br>investitionen |                                                             |              |
| <b>Buchwerte Stand 1.1.2009</b>              | <b>45,6</b>                                        | <b>25,5</b>                                         | <b>0,9</b>                                                        | <b>10,1</b>                                                      | <b>15,3</b>                                                 | <b>97,4</b>  |
| Währungsumrechnungsdifferenz                 | –                                                  | –                                                   | –0,1                                                              | –                                                                | 0,1                                                         | –            |
| Veränderungen im<br>Konsolidierungskreis     | –                                                  | –34,3                                               | –                                                                 | –                                                                | –                                                           | –34,3        |
| Zugänge                                      | 9,6                                                | 35,6                                                | 1,1                                                               | –                                                                | 4,3                                                         | 50,6         |
| Wertminderungen                              | –1,9                                               | –                                                   | –0,7                                                              | –                                                                | –                                                           | –2,6         |
| Abgänge                                      | –                                                  | –4,2                                                | –0,2                                                              | –10,1                                                            | –3,7                                                        | –18,2        |
| Erfolgsneutrale Anpassungen<br>an Marktwerte | 25,5                                               | –                                                   | –                                                                 | –                                                                | –                                                           | 25,5         |
| Umbuchungen                                  | 0,6                                                | –0,6                                                | –                                                                 | –                                                                | –                                                           | –            |
| <b>Buchwerte Stand 31.12.2009</b>            | <b>79,4</b>                                        | <b>22,0</b>                                         | <b>1,0</b>                                                        | <b>–</b>                                                         | <b>16,0</b>                                                 | <b>118,4</b> |
| <b>Buchwerte Stand 1.1.2010</b>              | <b>79,4</b>                                        | <b>22,0</b>                                         | <b>1,0</b>                                                        | <b>–</b>                                                         | <b>16,0</b>                                                 | <b>118,4</b> |
| Währungsumrechnungsdifferenz                 | –                                                  | –                                                   | –                                                                 | –                                                                | 0,2                                                         | 0,2          |
| Veränderungen im<br>Konsolidierungskreis     | –                                                  | –4.419,8                                            | –                                                                 | –                                                                | –                                                           | –4.419,8     |
| Zugänge                                      | 9,2                                                | 4.628,0                                             | 6,8                                                               | –                                                                | 22,4                                                        | 4.666,4      |
| Wertminderungen                              | –                                                  | –                                                   | –                                                                 | –                                                                | –                                                           | –            |
| Abgänge                                      | –15,2                                              | –201,7                                              | –0,3                                                              | –                                                                | –4,1                                                        | –221,3       |
| Erfolgsneutrale Anpassungen<br>an Marktwerte | –13,6                                              | –                                                   | –                                                                 | –                                                                | –                                                           | –13,6        |
| Umbuchungen                                  | 1,1                                                | –1,1                                                | –                                                                 | –                                                                | –                                                           | –            |
| <b>Buchwerte Stand 31.12.2010</b>            | <b>60,9</b>                                        | <b>27,4</b>                                         | <b>7,5</b>                                                        | <b>–</b>                                                         | <b>34,5</b>                                                 | <b>130,3</b> |

Zum Bilanzstichtag waren langfristige zur Veräußerung verfügbare Finanzanlagen (Anteile) mit einem Buchwert von 57,2 Mio EUR (Vorjahr: 48,2 Mio EUR) zu Anschaffungskosten bewertet, da ein Marktpreis nicht zu ermitteln war.

Die Veränderungen im Konsolidierungskreis beinhalten Zugänge in Höhe von 192,8 Mio EUR (Vorjahr: 0,5 Mio EUR) und Abgänge in Höhe von 4.612,6 Mio EUR (Vorjahr: 34,8 Mio EUR). Die Zugänge im Konsolidierungskreis beruhen fast ausschließlich aus dem Verkauf und der damit verbundenen Entkonsolidierung von Thérámex. Die Abgänge im Konsolidierungskreis sind insbesondere auf die Akquisition und die damit einhergehende Erstkonsolidierung von Millipore zurückzuführen. Eine detaillierte Darstellung zu diesem Sachverhalt ist in dem Abschnitt „Konsolidierungskreis – Akquisition Millipore“ gegeben.

Für die langfristigen zur Veräußerung verfügbaren Finanzanlagen ergaben sich zum Stichtag insgesamt folgende erfolgsneutral im Eigenkapital erfassten Beträge:

| in Mio EUR                            | Zur<br>Veräußerung<br>verfügbare<br>Anteile | Zur<br>Veräußerung<br>verfügbare<br>Wertpapiere | Gesamt<br>31.12.2010 | Zur<br>Veräußerung<br>verfügbare<br>Anteile | Zur<br>Veräußerung<br>verfügbare<br>Wertpapiere | Gesamt<br>31.12.2009 |
|---------------------------------------|---------------------------------------------|-------------------------------------------------|----------------------|---------------------------------------------|-------------------------------------------------|----------------------|
| Marktwerte/<br>Buchwerte              | 88,3                                        | 7,5                                             | 95,8                 | 101,4                                       | 1,0                                             | 102,4                |
| fortgeführte<br>Anschaffungskosten    | 90,5                                        | 7,5                                             | 98,0                 | 90,0                                        | 1,0                                             | 91,0                 |
| nicht realisierte<br>Gewinne/Verluste | -2,2                                        | -                                               | -2,2                 | 11,4                                        | -                                               | 11,4                 |

[28]  
Finanzanlagen zur  
Unterlegung von  
Pensionsverpflichtungen

| in Mio EUR                                | Zur<br>Veräußerung<br>verfügbare<br>finanzielle<br>Vermögenswerte | Bis zur<br>Endfälligkeit zu<br>haltende Finanz-<br>investitionen | Gesamt       |
|-------------------------------------------|-------------------------------------------------------------------|------------------------------------------------------------------|--------------|
| <b>Buchwerte Stand 1.1.2009</b>           | <b>-</b>                                                          | <b>-</b>                                                         | <b>-</b>     |
| Währungsumrechnungsdifferenz              | -                                                                 | -                                                                | -            |
| Veränderungen im Konsolidierungskreis     | -                                                                 | -                                                                | -            |
| Zugänge                                   | 187,2                                                             | 61,1                                                             | 248,3        |
| Wertminderungen                           | -                                                                 | -                                                                | -            |
| Abgänge                                   | -47,0                                                             | -                                                                | -47,0        |
| Erfolgsneutrale Anpassungen an Marktwerte | 8,3                                                               | -                                                                | 8,3          |
| Umbuchungen                               | -                                                                 | -                                                                | -            |
| <b>Buchwerte Stand 31.12.2009</b>         | <b>148,5</b>                                                      | <b>61,1</b>                                                      | <b>209,6</b> |
| <b>Buchwerte Stand 1.1.2010</b>           | <b>148,5</b>                                                      | <b>61,1</b>                                                      | <b>209,6</b> |
| Währungsumrechnungsdifferenz              | -                                                                 | -                                                                | -            |
| Veränderungen im Konsolidierungskreis     | -                                                                 | -                                                                | -            |
| Zugänge                                   | 72,1                                                              | 21,0                                                             | 93,1         |
| Wertminderungen                           | -                                                                 | -                                                                | -            |
| Abgänge                                   | -60,2                                                             | -17,5                                                            | -77,7        |
| Erfolgsneutrale Anpassungen an Marktwerte | -8,1                                                              | -                                                                | -8,1         |
| Umbuchungen                               | -                                                                 | -                                                                | -            |
| <b>Buchwerte Stand 31.12.2010</b>         | <b>152,3</b>                                                      | <b>64,6</b>                                                      | <b>216,9</b> |

Merck hat in 2009 damit begonnen, die Pensionsverpflichtungen der Merck KGaA mit dafür vorgesehenen finanziellen Vermögenswerten zu unterlegen. Die Unterlegung der Pensionsrückstellungen mit zugeordneten finanziellen Vermögenswerten ist auf Dauer angelegt und soll kontinuierlich erweitert werden. Das Management dieser Vermögenswerte erfolgt mittels eines Vermögensverwaltungsvertrags mit einem externen Dienstleister. Merck steuert die Anlagen über weitere Restriktionen hinsichtlich Rating und Titelauswahl. Performance- und Risiko-Controlling erfolgen regelmäßig und beinhalten die monatliche Performancemessung, die Überprüfung der Zielkonformität der Anlagestrategie und Anlageorganisation sowie deren Umsetzung. Die strategische Anlagenaufteilung folgt mit einem Anteil von ca. 75 % in festverzinslichen Wertpapieren einem sehr vorsichtigen Ansatz. Alle Anlagen erfolgen ausschließlich in Euro. Die Bewertung dieser finanziellen Vermögens-



werte erfolgt im Wesentlichen in der Bewertungskategorie „Zur Veräußerung verfügbare finanzielle Vermögenswerte“, ansonsten in der Kategorie „Bis zur Endfälligkeit zu haltende Finanzinvestitionen“. Um die Transparenz in der Berichterstattung zu gewährleisten, stellen wir diese Finanzanlagen separat in der Bilanz dar.

Für die zur Veräußerung verfügbaren Finanzanlagen zur Unterlegung von Pensionsverpflichtungen ergaben sich zum Stichtag insgesamt folgende erfolgsneutral im Eigenkapital erfassten Beträge:

| in Mio EUR                         | Gesamt<br>31.12.2010 | Gesamt<br>31.12.2009 |
|------------------------------------|----------------------|----------------------|
| Marktwerte/Buchwerte               | 152,3                | 148,5                |
| fortgeführte Anschaffungskosten    | 152,1                | 140,2                |
| nicht realisierte Gewinne/Verluste | 0,2                  | 8,3                  |

[29] Die Finanzschulden setzten sich wie folgt zusammen:  
Finanzschulden

| in Mio EUR                                                    | kurzfristig  | langfristig    | 31.12.<br>2010 | kurzfristig  | langfristig    | 31.12.<br>2009 |
|---------------------------------------------------------------|--------------|----------------|----------------|--------------|----------------|----------------|
| Anleihen                                                      | 25,3         | 4.948,3        | 4.973,6        | 499,4        | 1.490,9        | 1.990,3        |
| Commercial Paper                                              | 10,0         | –              | 10,0           | –            | –              | –              |
| Verbindlichkeiten gegen-<br>über Kreditinstituten             | 85,7         | 30,0           | 115,7          | 57,3         | 30,1           | 87,4           |
| Verbindlichkeiten gegen-<br>über nahestehenden<br>Unternehmen | 190,3        | –              | 190,3          | 118,8        | –              | 118,8          |
| Darlehen von Dritten<br>und sonstige Finanz-<br>schulden      | 14,3         | 63,8           | 78,1           | 11,9         | 71,0           | 82,9           |
| Verbindlichkeiten<br>aus Derivaten<br>(Finanztransaktionen)   | 28,7         | 80,0           | 108,7          | 16,0         | 1,5            | 17,5           |
| Verbindlichkeiten aus<br>Finanzierungsleasing                 | 1,8          | 5,3            | 7,1            | 1,8          | 8,6            | 10,4           |
|                                                               | <b>356,1</b> | <b>5.127,4</b> | <b>5.483,5</b> | <b>705,2</b> | <b>1.602,1</b> | <b>2.307,3</b> |

Die Finanzierungszusagen von Kreditinstituten gegenüber der Merck-Gruppe setzten sich wie folgt zusammen:

| in Mio EUR                                              | Finanzierungs-<br>zusagen von<br>Kreditinstituten | Ausnutzung*<br>am<br>31.12.2010 | Verzinsung   | Fälligkeit |
|---------------------------------------------------------|---------------------------------------------------|---------------------------------|--------------|------------|
| Syndizierter Kredit 2007                                | 2.000,0                                           | –                               | variabel     | 2014       |
| Bilaterale Kreditvereinbarungen<br>mit Kreditinstituten | 5,9                                               | 5,9                             | fix          | 2012       |
| Bilaterale Kreditvereinbarungen<br>mit Kreditinstituten | 9,1                                               | 9,1                             | fix          | 2017       |
| Bilaterale Kreditvereinbarungen<br>mit Kreditinstituten | 15,0                                              | 15,0                            | fix          | 2018       |
| Diverse Banklinien                                      | 294,8                                             | 85,7                            | fix/variabel | < 1 Jahr   |
|                                                         | <b>2.324,8</b>                                    | <b>115,7</b>                    |              |            |

\*Gebuchte Disagios wurden in der Darstellung nicht berücksichtigt

Die kurz- und langfristigen Verbindlichkeiten der Merck-Gruppe gegenüber Kreditinstituten bestanden in folgenden Währungen:

| in %              | 31.12.2010   | 31.12.2009   |
|-------------------|--------------|--------------|
| Euro              | 30,0         | 56,0         |
| US-Dollar         | 0,1          | 5,6          |
| Pfund Sterling    | 0,2          | 0,4          |
| Schweizer Franken | -            | -            |
| Yen               | 0,3          | -            |
| Übrige Währungen  | 69,4         | 38,0         |
|                   | <b>100,0</b> | <b>100,0</b> |

Im Geschäftsjahr 2007 wurde eine Multi-Währungs-Betriebsmittelkreditlinie über 2 Mrd EUR vereinbart. Der Kreditrahmen hat eine siebenjährige Laufzeit und wurde mit einem international zusammengesetzten Bankenkonsortium vereinbart.

Merck hat 2009 ein Debt Issuance Program aufgelegt, das den vertraglichen Rahmen für die Begebung von Anleihen im Nominalvolumen von bis zu 5 Mrd EUR bildet. In 2010 wurde dieses Volumen auf 10 Mrd EUR erhöht.

Folgende Anleihen sind durch die Merck-Gruppe begeben worden:

| Emittent                                   | Nominal-<br>volumen | Laufzeit                      | Nominalzins | Ausgabepreis |
|--------------------------------------------|---------------------|-------------------------------|-------------|--------------|
| Merck Financial Services GmbH, Deutschland | 500 Mio EUR         | März 2010 – März 2012         | 2,125 %     | 99,775       |
| Merck Finanz AG, Luxemburg                 | 500 Mio EUR         | Dezember 2005 – Dezember 2012 | * 2,2 %     | 99,716       |
| Merck Financial Services GmbH, Deutschland | 750 Mio EUR         | März 2009 – September 2013    | 4,875 %     | 99,697       |
| Merck Financial Services GmbH, Deutschland | 1.350 Mio EUR       | März 2010 – März 2015         | 3,375 %     | 99,769       |
| Merck Financial Services GmbH, Deutschland | 100 Mio EUR         | Dezember 2009 – Dezember 2015 | ** 3.615 %  | 100,000      |
| Millipore Corporation, USA                 | 250 Mio EUR         | Juni 2006 – Juni 2016         | 5,875 %     | 99,611       |
| Merck Financial Services GmbH, Deutschland | 60 Mio EUR          | November 2009 – November 2016 | 4,000 %     | 100,000      |
| Merck Financial Services GmbH, Deutschland | 70 Mio EUR          | Dezember 2009 – Dezember 2019 | 4,250 %     | 97,788       |
| Merck Financial Services GmbH, Deutschland | 1.350 Mio EUR       | März 2010 – März 2020         | 4,500 %     | 99,582       |

\*variabilisiert durch Zinsswaps auf 6 Monat EURIBOR Basis und in 2010 durch Zinstermingeschäfte auf 6 Monat EURIBOR Basis fixiert

\*\* fixiert durch Zinsswaps

Desweiteren bestehen bei der Millipore Corporation, USA, noch Wandelanleihen mit einem Nominalvolumen von 27,2 Mio USD. Eine Möglichkeit, die Anleihen in Aktien zu tauschen, besteht nicht mehr. Die in 2010 aufgelegten Anleihen bei der Merck Financial Services GmbH wurden zur Finanzierung der Akquisition des amerikanischen Unternehmens Millipore Corporation begeben und sind im regulierten Markt an der Luxemburger Wertpapierbörse zugelassen. Im vierten Quartal 2010 lief eine 500 Mio EUR Anleihe der Merck KGaA aus und wurde vollständig zurückgeführt. Zur Deckung des kurzfristigen Kapitalbedarfs steht der Merck KGaA ein Commercial-Paper-Programm mit einem Volumen von 2 Mrd EUR zur Verfügung, welches zum Berichtszeitpunkt in Höhe von nominal 10,0 Mio EUR in Anspruch genommen war.

Die Verbindlichkeiten aus Finanzierungsleasing stellen den diskontierten Wert zukünftiger Zahlungen aus Finanzierungsleasing dar. Es handelt sich dabei zum größten Teil um Verbindlichkeiten aus Finanzierungsleasing von Gebäuden. Informationen zu den Verbindlichkeiten gegenüber nahestehenden Unternehmen und Personen sind der Anmerkung [47] zu entnehmen.

[30] Die Verbindlichkeiten aus Lieferungen und Leistungen untergliederten sich wie folgt:

#### Verbindlichkeiten aus Lieferungen und Leistungen

| in Mio EUR                                             | 31.12.2010     | 31.12.2009   |
|--------------------------------------------------------|----------------|--------------|
| Verbindlichkeiten gegenüber Dritten                    | 1.200,0        | 935,7        |
| Verbindlichkeiten gegenüber Beteiligungsgesellschaften | 0,1            | –            |
|                                                        | <b>1.200,1</b> | <b>935,7</b> |

In den Verbindlichkeiten aus Lieferungen und Leistungen waren auch Abgrenzungen für ausstehende Rechnungen und abgegrenzte Erlösschmälerungen in Höhe von 648,1 Mio EUR (Vorjahr: 614,2 Mio EUR) enthalten.

[31] Die übrigen Verbindlichkeiten setzten sich wie folgt zusammen:

#### Übrige Verbindlichkeiten

| in Mio EUR                                               | kurzfristig    | langfristig | 31.12.<br>2010 | kurzfristig  | langfristig | 31.12.<br>2009 |
|----------------------------------------------------------|----------------|-------------|----------------|--------------|-------------|----------------|
| Verbindlichkeiten gegenüber nahestehenden Unternehmen    | 260,6          | –           | 260,6          | 173,8        | –           | 173,8          |
| Verbindlichkeiten gegenüber Beteiligungsgesellschaften   | 3,2            | –           | 3,2            | 1,8          | –           | 1,8            |
| Zinsabgrenzungen                                         | 103,5          | –           | 103,5          | 14,3         | –           | 14,3           |
| Verbindlichkeiten aus Lohn- und Gehaltsabrechnung        | 65,0           | 0,6         | 65,6           | 50,2         | 0,6         | 50,8           |
| Verbindlichkeiten aus Gewinnausschüttung                 | 0,7            | –           | 0,7            | 1,3          | –           | 1,3            |
| Sonstige finanzielle Verbindlichkeiten gegenüber Dritten | 48,7           | 4,0         | 52,7           | 58,7         | 1,8         | 60,5           |
| <b>Übrige sonstige finanzielle Verbindlichkeiten</b>     | <b>481,7</b>   | <b>4,6</b>  | <b>486,3</b>   | <b>300,1</b> | <b>2,4</b>  | <b>302,5</b>   |
| Abgrenzungen für Personalaufwendungen                    | 443,0          | –           | 443,0          | 293,6        | –           | 293,6          |
| Passive Rechnungsabgrenzungsposten                       | 29,0           | 27,2        | 56,2           | 14,6         | 13,1        | 27,7           |
| Erhaltene Anzahlungen auf Bestellungen                   | 12,6           | –           | 12,6           | 5,1          | 1,4         | 6,5            |
| Verbindlichkeiten aus Derivaten (operativ)               | 26,8           | 11,1        | 37,9           | 1,4          | –           | 1,4            |
| Verbindlichkeiten aus nicht einkommensabhängigen Steuern | 61,5           | –           | 61,5           | 23,4         | –           | 23,4           |
|                                                          | <b>1.054,6</b> | <b>42,9</b> | <b>1.097,5</b> | <b>638,2</b> | <b>16,9</b> | <b>655,1</b>   |

Die Verbindlichkeiten gegenüber nahestehenden Unternehmen bestanden gegenüber dem Gesellschafter E. Merck KG und resultierten aus zum Stichtag bestehenden Gewinnansprüchen. Die sonstigen finanziellen Verbindlichkeiten gegenüber Dritten enthielten unter anderem Verbindlichkeiten gegenüber Versicherungen, Zahlungsverpflichtungen aus vertraglichen Vereinbarungen mit anderen Unternehmen sowie 13,6 Mio EUR für den Kauf der Beijing Skywing Technology Co. Ltd. (siehe Abschnitt „Konsolidierungskreis – weitere Akquisitionen“). In 2010 wurde eine eigene Berichtsposition für Verbindlichkeiten aus nicht einkommensabhängigen Steuern (im Wesentlichen Umsatzsteuer) eingeführt. Die Vorjahreswerte wurden angepasst.

**[32]** Die Steuerverbindlichkeiten beliefen sich auf 57,5 Mio EUR (Vorjahr: 72,8 Mio EUR). Zusammen mit **Steuerschulden** den Rückstellungen für Steuerverpflichtungen in Höhe von 310,9 Mio EUR (Vorjahr: 201,7 Mio EUR) ergaben sich Steuerschulden in Höhe von 368,4 Mio EUR (Vorjahr: 274,5 Mio EUR).

**[33]** Die Rückstellungen haben sich wie folgt entwickelt:  
**Rückstellungen**

| in Mio EUR                                      | Restrukturierung | Rechtsstreitigkeiten | Leistungen an Arbeitnehmer | Umweltschutzmaßnahmen | Übrige       | Gesamt       |
|-------------------------------------------------|------------------|----------------------|----------------------------|-----------------------|--------------|--------------|
| <b>Stand 1.1.2010</b>                           | <b>45,8</b>      | <b>519,2</b>         | <b>140,5</b>               | <b>72,1</b>           | <b>173,8</b> | <b>951,4</b> |
| Zugang                                          | 26,4             | 85,0                 | 49,6                       | 0,2                   | 53,4         | 214,6        |
| Verbrauch                                       | -30,4            | -129,3               | -33,6                      | -9,0                  | -44,7        | -247,0       |
| Auflösung                                       | -5,2             | -8,5                 | -12,6                      | 0,0                   | -57,4        | -83,7        |
| Währungsdifferenzen                             | 0,8              | 16,0                 | 1,2                        | 0,5                   | 4,2          | 22,7         |
| Veränderungen im Konsolidierungskreis/Sonstiges | 2,7              | -0,4                 | 26,6                       | 6,6                   | 5,2          | 40,7         |
| <b>Stand 31.12.2010</b>                         | <b>40,1</b>      | <b>482,0</b>         | <b>171,7</b>               | <b>70,4</b>           | <b>134,5</b> | <b>898,7</b> |
| davon kurzfristig                               | 26,8             | 174,5                | 42,5                       | 7,0                   | 123,7        | 374,5        |
| davon langfristig                               | 13,3             | 307,5                | 129,2                      | 63,4                  | 10,8         | 524,2        |

Rückstellungen für Restrukturierung beinhalten im Wesentlichen Rückstellungen für Abfindungen gegenüber Mitarbeitern im Zusammenhang mit Restrukturierungsprojekten, vertragliche Ausstiegsverpflichtungen und Rückstellungen für belastende Verträge. Der Ansatz erfolgt, wenn detaillierte Restrukturierungspläne aufgestellt und bekannt gegeben sind.

Die Rückstellungen für Rechtsstreitigkeiten belaufen sich zum Bilanzstichtag auf 482,0 Mio EUR. Im Geschäftsjahr wurden weitere Rückstellungen für Rechtsstreitigkeiten über die sonstigen betrieblichen Aufwendungen gebildet. Die Rückstellungen für Rechtsstreitigkeiten berücksichtigen Rechtsrisiken im Zusammenhang mit unserer früheren Generics-Tochtergesellschaft Dey Inc., USA, der vorgeworfen wird, bestimmte Preisinformationen falsch berichtet zu haben. Obwohl die Gesellschaft Dey Inc. im Rahmen des Verkaufs des Generika-Geschäfts im Jahr 2007 an Mylan Inc., USA, übertragen wurde, haftet Merck weiterhin für die Kosten, die aus der oben erwähnten Rechtsstreitigkeit entstehen, da das genannte Risiko nicht auf Mylan übergegangen ist. In diesem Zusammenhang wurden im Geschäftsjahr und in den letzten Jahren in einer Reihe von US-Staaten Vergleiche abgeschlossen. Darüber hinaus kam es diesbezüglich im Geschäftsjahr gegen eine Zahlung von 214,5 Mio EUR zu einem Vergleich mit dem US Department of Justice. Unter Berücksichtigung der bestehenden Rückstellungen führten diese Vergleichszahlungen im Berichtsjahr zu Aufwendungen in Höhe von 67,2 Mio EUR, die – wie der damalige Veräußerungsgewinn für das Generikageschäft – in den Sondermaßnahmen ausgewiesen werden. Ein Rückerstattungsanspruch seitens Merck

gegenüber Mylan ist soweit und in der Höhe gegeben, wie Mylan die Zahlung an das US Department of Justice steuerlich geltend machen kann. Wie hoch dieser Betrag sein wird, kann derzeit nicht abschließend beurteilt werden. Merck hat diesen Rückerstattungsanspruch zum Stichtag in Höhe von 52,6 Mio EUR wertberichtigt.

Zum Stichtag bestanden weiterhin Rückstellungen im Zusammenhang mit einem Rechtsstreit mit der italienischen Gesellschaft Italfarmaco S.p.A., in dem Italfarmaco Schadenersatz wegen einer angeblich fehlerhaften Kündigung eines Lizenz- und Liefervertrags in Bezug auf das Produkt Rebif® fordert. Des Weiteren bestanden Rückstellungen im Zusammenhang mit dem Rechtsstreit mit der Firma Israel Bio-Engineering Project Limited Partnership (IBEP), in dem IBEP Eigentumsrechte und Lizenzgebühren im Zusammenhang mit der Finanzierung und Entwicklung von Rebif® und anderen Produkten für sich geltend macht. Eine unserer Tochtergesellschaften erwägt die Beilegung einer zivilrechtlichen Klage des United States Department of Justice nach dem False Claims Act im Zusammenhang mit der Vermarktung von Rebif®. Für die potentielle Beilegung des Rechtsstreits wurde eine Rückstellung gebildet.

Für verschiedene kleinere anhängige Rechtsstreitigkeiten bei Gesellschaften der Merck-Gruppe bestehen ebenfalls aus heutiger Sicht angemessene Rückstellungen.

In den Rückstellungen für Leistungen an Arbeitnehmer waren Verpflichtungen aus dem Merck Long-Term Incentive Plan (LTIP) in Höhe von 29,8 Mio EUR (Vorjahr: 12,3 Mio EUR) enthalten. Darüber hinaus waren hierin Rückstellungen für Altersteilzeitverpflichtungen, sonstige Abfindungen und Jubiläumsgelder berücksichtigt. Der LTIP bietet berechtigten Führungskräften und Mitarbeitern der Merck-Gruppe eine langfristige erfolgsabhängige Vergütungskomponente. Das Programm wurde im Geschäftsjahr 2008 beschlossen. Die Geschäftsleitung ist ausgenommen. Die Höhe der Auszahlung ist abhängig von dem Erreichen der beiden Verhältniskennzahlen „Auf die Gesamterlöse bezogener Basis Free Cash Flow (FCR)“ und „Umsatzrendite (ROS)“ am Ende eines Zeitraums von drei Jahren. Bei dem Plan sind die potentiellen Auszahlungen in der Zukunft bei hohem Zielerreichungsgrad nach oben begrenzt – bei einem zu geringen Zielerreichungsgrad erfolgt dagegen keine Auszahlung.

Bezüglich der Rückstellungen für leistungsorientierte Pläne nach Beendigung des Arbeitsverhältnisses verweisen wir auf Anmerkung [33].

Die Rückstellungen für Umweltschutzmaßnahmen bestehen in Deutschland und den USA.

Die übrigen Rückstellungen beinhalten darüber hinaus Rückstellungen für ungewisse Verpflichtungen aus Beiträgen, Abgaben und Gebühren.

**[34]**  
Rückstellungen für  
Pensionen und ähnliche  
Verpflichtungen

Die Berechnung der Verpflichtungen sowie des in bestimmten Fällen zugehörigen Planvermögens beruhte auf folgenden versicherungsmathematischen Parametern:

| in %                                            | 2010 | 2009 |
|-------------------------------------------------|------|------|
| Abzinsungssatz                                  | 4,3  | 5,0  |
| Künftige Gehaltssteigerung                      | 2,7  | 2,9  |
| Künftige Rentensteigerung                       | 2,0  | 2,3  |
| Fluktuation                                     | 3,4  | 2,0  |
| Erwartete Rendite des Planvermögens             | 4,9  | 4,9  |
| Künftige Steigerung für medizinische Versorgung | 5,0  | 6,5  |

Es handelt sich dabei um Durchschnittswerte, die mit dem Barwert der jeweiligen Versorgungsverpflichtung gewichtet sind. Der Durchschnitt der erwarteten Rendite des Planvermögens wird mit dem Zeitwert des jeweiligen Planvermögens gewichtet. Das Planvermögen für fondsfinanzierte Versorgungsverpflichtungen setzt sich im Wesentlichen aus festverzinslichen Wertpapieren, Aktien sowie Immobilien zusammen. Darin sind weder Finanzinstrumente, die von Gesellschaften der Merck-Gruppe emittiert wurden, noch von Konzerngesellschaften genutzte Immobilien enthalten.

Der in der Bilanz erfasste Wert für „Rückstellungen für Pensionen und ähnliche Verpflichtungen“ leitete sich wie folgt her:

| in Mio EUR                                                       | 31.12.2010     | 31.12.2009     |
|------------------------------------------------------------------|----------------|----------------|
| Barwert der rückerstattungsfinanzierten Versorgungszusagen       | 1.467,7        | 1.260,2        |
| Barwert der fondsfinanzierten Versorgungszusagen                 | 888,1          | 617,5          |
| <b>Barwert aller Versorgungszusagen</b>                          | <b>2.355,8</b> | <b>1.877,7</b> |
| Zeitwert des Planvermögens aller Fonds                           | -793,3         | -582,6         |
| <b>Finanzierungsstatus</b>                                       | <b>1.562,5</b> | <b>1.295,1</b> |
| Sonstige Veränderungen                                           | 0,3            | 1,2            |
| <b>Nettoschuld der bilanzierten Beträge</b>                      | <b>1.562,8</b> | <b>1.296,3</b> |
| Rückerstattungsansprüche aus Planvermögen                        | 18,8           | 15,2           |
| <b>Rückstellungen für Pensionen und ähnliche Verpflichtungen</b> | <b>1.581,6</b> | <b>1.311,5</b> |

In der Berichtsperiode wurden insgesamt folgende Posten ergebniswirksam erfasst:

| in Mio EUR                                        | 2010         | 2009         |
|---------------------------------------------------|--------------|--------------|
| Laufender Dienstzeitaufwand                       | 69,5         | 58,1         |
| Nachzuverrechnender Dienstzeitaufwand             | -0,1         | -            |
| Zinsaufwand auf die Verpflichtungen               | 99,6         | 93,1         |
| Erwartete Erträge aus Planvermögen                | -34,1        | -25,6        |
| Sonstige ergebniswirksam erfasste Einflüsse       | 0,1          | -10,8        |
| <b>Summe der erfolgswirksam erfassten Beträge</b> | <b>135,0</b> | <b>114,8</b> |

Der Barwert der rückerstattungsfinanzierten Versorgungszusagen entfällt mit 1.316,8 Mio EUR (Vorjahr: 1.136,1 Mio EUR) überwiegend auf Pensionspläne der Konzernobergesellschaft Merck KGaA. Der Barwert der Verpflichtungen für künftige Krankheitskosten von Rentnern in den USA beruht auf einer erwarteten künftigen Kostensteigerung für medizinische Versorgung von 5,0%. Sollte die Steigerungsrate um einen Prozentpunkt höher oder niedriger sein, wäre der Barwert der Verpflichtung um 0,9 Mio EUR höher beziehungsweise 0,8 Mio EUR niedriger anzusetzen. Die im Berichtsjahr erfassten Aufwendungen wären um 0,1 Mio EUR höher beziehungsweise niedriger ausgefallen.

Der tatsächliche Ertrag aus dem Planvermögen betrug im Berichtsjahr 61,0 Mio EUR (Vorjahr: Ertrag 63,8 Mio EUR). Bis auf den Saldo aus dem Zinsaufwand auf die Verpflichtungen und den erwarteten Erträgen aus dem Planvermögen, der im Finanzergebnis ausgewiesen wird, sind die relevanten Aufwendungen für leistungs- und beitragsorientierte Versorgungssysteme auf die einzelnen Funktionsbereiche verteilt.

Während der Berichtsperiode hat sich der Barwert der Versorgungszusagen wie nachfolgend dargestellt verändert:

| in Mio EUR                                                                    | rückstellungs-<br>finanzierte<br>Versorgungs-<br>zusagen | fonds-<br>finanzierte<br>Versorgungs-<br>zusagen | 2010           | rückstellungs-<br>finanzierte<br>Versorgungs-<br>zusagen | fonds-<br>finanzierte<br>Versorgungs-<br>zusagen | 2009           |
|-------------------------------------------------------------------------------|----------------------------------------------------------|--------------------------------------------------|----------------|----------------------------------------------------------|--------------------------------------------------|----------------|
| Barwert aller Versorgungszusagen Stand 1.1.                                   | 1.260,2                                                  | 617,5                                            | 1.877,7        | 1.051,5                                                  | 534,4                                            | 1.585,9        |
| Währungsumrechnungsdifferenzen                                                | 2,8                                                      | 71,2                                             | 74,0           | 2,6                                                      | 11,4                                             | 14,0           |
| Laufender Dienstzeitaufwand                                                   | 35,4                                                     | 34,1                                             | 69,5           | 27,3                                                     | 30,8                                             | 58,1           |
| Zinsaufwand auf die Verpflichtungen                                           | 66,3                                                     | 33,3                                             | 99,6           | 64,6                                                     | 28,5                                             | 93,1           |
| Sonstige ergebniswirksam erfasste Einflüsse                                   | 0,1                                                      | 0,1                                              | 0,2            | 0,7                                                      | -11,5                                            | -10,8          |
| Versicherungsmathematische Gewinne/Verluste                                   | 160,5                                                    | 37,2                                             | 197,7          | 172,2                                                    | 44,2                                             | 216,4          |
| Pensionszahlungen der Berichtsperiode                                         | -56,6                                                    | -37,9                                            | -94,5          | -57,1                                                    | -29,7                                            | -86,8          |
| Übertragungen/Veränderungen im<br>Konsolidierungskreis/Sonstige Veränderungen | -1,0                                                     | 132,6                                            | 131,6          | -1,6                                                     | 9,4                                              | 7,8            |
| <b>Barwert aller Versorgungszusagen Stand 31.12.</b>                          | <b>1.467,7</b>                                           | <b>888,1</b>                                     | <b>2.355,8</b> | <b>1.260,2</b>                                           | <b>617,5</b>                                     | <b>1.877,7</b> |

Der Zeitwert des Planvermögens aller Fonds hat sich im Laufe der Berichtsperiode wie nachfolgend dargestellt verändert:

| in Mio EUR                                                                    | 2010         | 2009         |
|-------------------------------------------------------------------------------|--------------|--------------|
| Zeitwert des Planvermögens aller Fonds Stand 1.1.                             | 582,6        | 462,6        |
| Währungsumrechnungsdifferenzen                                                | 68,1         | 10,4         |
| Erwartete Erträge aus Planvermögen                                            | 34,1         | 25,6         |
| Sonstige ergebniswirksam erfasste Einflüsse                                   | 0,1          | -            |
| Versicherungsmathematische Verluste/Gewinne                                   | 26,9         | 38,2         |
| Eingezahlte Beträge – Arbeitgeber                                             | 36,4         | 64,1         |
| Eingezahlte Beträge – Arbeitnehmer                                            | 12,5         | 10,8         |
| Pensionszahlungen der Berichtsperiode                                         | -37,1        | -27,8        |
| Übertragungen/Veränderungen im<br>Konsolidierungskreis/Sonstige Veränderungen | 69,7         | -1,3         |
| <b>Zeitwert des Planvermögens aller Fonds Stand 31.12.</b>                    | <b>793,3</b> | <b>582,6</b> |

Im Berichtsjahr wurden versicherungsmathematische Gewinne (+) und Verluste (-) sowie Auswirkungen aus der Limitierung von Rückerstattungsansprüchen aus dem Planvermögen gemäß IAS 19.58 in Höhe von -170,7 Mio EUR (Vorjahr: -178,1 Mio EUR) und sonstige Effekte in Höhe von -4,8 Mio EUR (Vorjahr: 14,5 Mio EUR) mit dem Eigenkapital verrechnet. Außerdem erfolgten in 2010 Umgliederungen in die Gewinnrücklagen in Höhe von -0,2 Mio EUR (Vorjahr: -0,5 Mio EUR). Zum Stichtag wurden aus den oben genannten Gründen für die hier dargestellten Versorgungszusagen insgesamt -472,9 Mio EUR (Vorjahr: -297,2 Mio EUR) mit dem Eigenkapital verrechnet.

Der Zeitwert des Planvermögens verteilt sich wie folgt auf die einzelnen Vermögenswertkategorien. Es handelt sich dabei um gewichtete Durchschnittswerte:

| in %                    | 31.12.2010 | 31.12.2009 |
|-------------------------|------------|------------|
| Fremdkapitalinstrumente | 41,6       | 43,3       |
| Eigenkapitalinstrumente | 34,1       | 34,1       |
| Immobilien              | 14,4       | 12,0       |
| Sonstige Vermögenswerte | 9,9        | 10,6       |

Die erwartete Rendite für Fremdkapitalinstrumente beträgt im Durchschnitt 3,4%, für Eigenkapitalinstrumente 7,0% und für Immobilien 5,2%. Die jeweiligen Renditen berücksichtigen landesspezifische Gegebenheiten und basieren unter anderem auf langfristig erwarteten Zins- und Dividendenerträgen sowie Wertsteigerungen des Anlageportfolios, nach Abzug direkt zurechenbarer Steuern und Aufwendungen.

In den zurückliegenden fünf Jahren hat sich der Finanzierungsstatus, bestehend aus dem Barwert der Versorgungsverpflichtungen und dem Zeitwert des Planvermögens, wie folgt geändert:

| in Mio EUR Stand 31.12.                | 2010           | 2009           | 2008           | 2007           | 2006           |
|----------------------------------------|----------------|----------------|----------------|----------------|----------------|
| Barwert aller Versorgungszusagen       | 2.355,8        | 1.877,7        | 1.585,9        | 1.665,9        | 1.607,2        |
| Zeitwert des Planvermögens aller Fonds | -793,3         | -582,6         | -462,6         | -520,5         | -346,2         |
| <b>Finanzierungsstatus</b>             | <b>1.562,5</b> | <b>1.295,1</b> | <b>1.123,3</b> | <b>1.145,4</b> | <b>1.261,0</b> |

Wir erwarten, dass die direkten Zahlungen an Bezugsberechtigte im folgenden Jahr rund 83 Mio EUR (Vorjahr: 72 Mio EUR) betragen werden. Die Einzahlungen des Arbeitgebers in Planvermögen betragen voraussichtlich 41 Mio EUR (Vorjahr: 24 Mio EUR).

Für beitragsorientierte Altersversorgungssysteme, die ausschließlich über externe Fonds finanziert werden und bei denen außer der Zahlung von Beiträgen keine weiteren Verpflichtungen für Gesellschaften der Merck-Gruppe bestehen, betrug der Aufwand aus den laufenden Beitragszahlungen 16,7 Mio EUR (Vorjahr: 8,6 Mio EUR). Ferner wurden an die gesetzliche Rentenversicherung in Deutschland Arbeitgeberbeiträge in Höhe von 49,9 Mio EUR (Vorjahr: 48,3 Mio EUR) und an gesetzliche Rentenversicherungen im Ausland Arbeitgeberbeiträge in Höhe von 19,6 Mio EUR (Vorjahr: 8,2 Mio EUR) abgeführt.



- [35] Eigenkapital** Eine starke Eigenkapitalausstattung ist für Merck eine wichtige Voraussetzung, um den dauerhaften Fortbestand des Unternehmens zu sichern. Auf Basis unseres Finanzkonzepts überprüft die Geschäftsleitung regelmäßig verschiedene Kennzahlen zur Kapitalausstattung des Unternehmens. Das Eigenkapital-Gearing (Verhältnis der Schulden und der Pensionsrückstellungen zum Eigenkapital) und die Eigenkapitalquote sind hierbei wichtige Kennzahlen.
- Zum Bilanzstichtag waren insgesamt 64.621.126 Stückaktien ausgegeben. Der bei der Ausgabe von Aktien durch die Merck KGaA über den Nennbetrag hinaus erzielte Betrag wird in der Kapitalrücklage ausgewiesen. Die Rücklagen enthalten zudem die Gewinnrücklagen und den Bilanzgewinn der in den Konzernabschluss einbezogenen Gesellschaften sowie die versicherungsmathematischen Gewinne und Verluste.
- Grundlage für die Anteile nicht beherrschender Gesellschafter ist das bilanzierte Eigenkapital der betreffenden Tochtergesellschaften, gegebenenfalls nach Anpassung an die Bilanzierungsmethoden der Merck-Gruppe sowie anteilige Konsolidierungsbuchungen.
- Die Anteile nicht beherrschender Gesellschafter am Eigenkapital beinhalten im Wesentlichen die Fremddanteile an der Merck Ltd., Indien, der Merck Ltd., Thailand, der Merck S.A. France, Frankreich, und der PT Merck Tbk, Indonesien.
- Die Ergebnisverwendung umfasst neben den Dividendenzahlungen an die Aktionäre der Merck KGaA und an Minderheitsgesellschaften bei Tochtergesellschaften der Merck-Gruppe auch die gesellschaftsvertraglichen Ergebnisabführungen der Merck & Cie an E. Merck KG sowie die satzungsmäßige gegenseitige Ergebnisabführung zwischen E. Merck KG und der Merck KGaA, die sich wie folgt darstellt:

| in Mio EUR                                                                              | 2010         |              | 2009         |              |
|-----------------------------------------------------------------------------------------|--------------|--------------|--------------|--------------|
|                                                                                         | E. Merck KG  | Merck KGaA   | E. Merck KG  | Merck KGaA   |
| Ergebnis von E. Merck KG                                                                | 12,3         | –            | –2,9         | –            |
| Ergebnis der gewöhnlichen Geschäftstätigkeit der Merck KGaA                             | –            | 709,4        | –            | 309,2        |
| Außerordentliches Ergebnis                                                              | –            | –21,0        | –            | –            |
| Hinzurechnung der Gewerbeertragsteuerbelastung gem. § 27 (1) der Satzung der Merck KGaA | 0,0          | –            | 4,8          | –            |
| Gewerbeertragsteuer gem. § 30 (1) der Satzung der Merck KGaA                            | –            | –71,0        | –            | 0,9          |
| <b>Basis für Ergebnisaufteilung (100%)</b>                                              | <b>12,3</b>  | <b>617,4</b> | <b>1,9</b>   | <b>310,1</b> |
| Ergebnisabführung an E. Merck KG                                                        |              |              |              |              |
| Verhältnis Komplementärkapital zum Gesamtkapital (70,274%)                              | 433,9        | –433,9       | 217,9        | –217,9       |
| Ergebnisabführung von E. Merck KG                                                       |              |              |              |              |
| Verhältnis Grundkapital zum Gesamtkapital (29,726%)                                     | –3,7         | 3,7          | –0,6         | 0,6          |
| Gewerbesteuer                                                                           | 0,0          | –            | –4,8         | –            |
| Körperschaftsteuer                                                                      | –            | –16,7        | –            | –0,1         |
| <b>Jahresüberschuss</b>                                                                 | <b>442,5</b> | <b>170,5</b> | <b>214,4</b> | <b>92,7</b>  |

Entsprechend den Satzungsbestimmungen partizipiert E. Merck KG zu 70,274 % am Ergebnis der Merck KGaA und umgekehrt die Merck KGaA zu 29,726 % am Ergebnis von E. Merck KG. Das der Ergebnisverteilung zugrunde liegende Ergebnis der gewöhnlichen Geschäftstätigkeit angepasst um die Gewerbeertragsteuer und das außerordentliche Ergebnis der Merck KGaA beträgt 617,4 Mio EUR (Vorjahr: 310,1 Mio EUR). Von dem Ergebnis der Merck KGaA wurden 433,9 Mio EUR an die E. Merck KG abgeführt (Vorjahr: 217,9 Mio EUR Gewinnabführung). Das für die Ergebnisverteilung zugrunde liegende Ergebnis der E. Merck KG beläuft sich auf 12,3 Mio EUR (Vorjahr: 1,9 Mio EUR). Hieraus resultiert eine Ergebnisübernahme seitens der Merck KGaA in Höhe von 3,7 Mio EUR (Vorjahr: 0,6 Mio EUR).

Des Weiteren wurden im Jahr 2010 von der Merck & Cie 43,0 Mio EUR (Vorjahr: 26,8 Mio EUR) an die E. Merck KG abgeführt.

Für das Geschäftsjahr 2009 wurde je Aktie eine Dividende in Höhe von 1,00 EUR ausgeschüttet. Der Gewinnverwendungsvorschlag für das Geschäftsjahr 2010 sieht eine Ausschüttung von 1,25 EUR je Aktie vor. Dies entspricht einem Gesamtbetrag von 80,8 Mio EUR bezogen auf die Kommanditaktionäre.

Die kumulierten erfolgsneutral im Eigenkapital der Anteilseigner der Obergesellschaft erfassten Vorgänge entwickelten sich wie folgt:

| in Mio EUR                                          | Zur Veräußerung<br>verfügbare<br>finanzielle<br>Vermögenswerte | Derivative<br>Finanz-<br>instrumente | Unterschieds-<br>betrag aus der<br>Währungs-<br>umrechnung | Gesamt         |
|-----------------------------------------------------|----------------------------------------------------------------|--------------------------------------|------------------------------------------------------------|----------------|
| <b>Stand 1.1.2009</b>                               | <b>-15,0</b>                                                   | <b>64,1</b>                          | <b>525,4</b>                                               | <b>574,5</b>   |
| Direkt im Eigenkapital<br>berücksichtigtes Ergebnis | 33,8                                                           | -16,6                                | -15,5                                                      | 1,7            |
| Veränderung Konsolidierungskreis/Sonstiges          | -                                                              | -                                    | -                                                          | -              |
| <b>Stand 31.12.2009</b>                             | <b>18,8</b>                                                    | <b>47,5</b>                          | <b>509,9</b>                                               | <b>576,2</b>   |
| <b>Stand 1.1.2010</b>                               | <b>18,8</b>                                                    | <b>47,5</b>                          | <b>509,9</b>                                               | <b>576,2</b>   |
| Direkt im Eigenkapital<br>berücksichtigtes Ergebnis | -21,8                                                          | -108,6                               | 834,6                                                      | 704,2          |
| Veränderung Konsolidierungskreis/Sonstiges          | -0,1                                                           | -                                    | 0,1                                                        | -              |
| <b>Stand 31.12.2010</b>                             | <b>-3,1</b>                                                    | <b>-61,1</b>                         | <b>1.344,6</b>                                             | <b>1.280,4</b> |

Der Anstieg des Unterschiedsbetrags aus der Währungsumrechnung resultiert im Wesentlichen aus der Abwertung des Euro gegenüber dem Schweizer Franken und dem US-Dollar.

## ERLÄUTERUNGEN ZUM SEGMENTBERICHT

Die Aufgliederung der Vermögens- und Ertragszahlen sowie weiterer Kenngrößen nach Tätigkeitsgebieten beziehungsweise nach Regionen entsprechend IFRS 8 sind im Segmentbericht dargestellt. Die dargestellten Segmente entsprechen der internen Organisations- und Berichtsstruktur der Merck-Gruppe. In der Sparte Merck Serono konzentrieren wir uns auf Therapiegebiete mit hohem Spezialisierungsgrad und vertreiben innovative, verschreibungspflichtige Medikamente chemischen und biotechnologischen Ursprungs. In der Sparte Consumer Health Care bündelt

Merck das Geschäft mit hochwertigen Selbstmedikationsprodukten für die Gesundheitsvorsorge und die eigenverantwortliche Behandlung von leichten Erkrankungen. Beide Sparten zusammen bilden den Unternehmensbereich Pharma.

Mit der erfolgten Akquisition von Millipore wurde der Unternehmensbereich Chemie neu strukturiert. In der neuen Sparte Merck Millipore sind die erworbenen Aktivitäten der Millipore-Gruppe mit wesentlichen Teilen des ehemaligen Life-Science-Solutions-Geschäft zusammengeführt. Die neue Sparte Performance Materials umfasst die Geschäftseinheiten Liquid Crystals, Pigments und Cosmetics sowie den Bereich Advanced Technologies mit seinen Materialien für LEDs (Leuchtdioden) und Photovoltaik sowie weitere innovative Technologien. Entsprechend werden im Segmentbericht zum 31. Dezember 2010 die Segmente Merck Millipore und Performance Materials innerhalb des Unternehmensbereichs Chemie berichtet. Die Vorjahreszahlen wurden an die neue Spartenstruktur angepasst.

Das Segment Konzernkosten und Sonstiges beinhaltet im Wesentlichen den operativen Segmenten nicht zugeordnete Aufwendungen und Erträge, wie zum Beispiel Aufwendungen für die zentralen Verwaltungseinheiten. Ebenfalls werden ihm das Finanzergebnis und die Ertragsteuern vollständig zugewiesen. Die Tätigkeitsfelder sind detailliert in den Kapiteln zu den Sparten im Lagebericht beschrieben.

Maßstab für den Erfolg eines Segments sind neben den Gesamterlösen vor allem das Spartenergebnis sowie der Free Cash Flow und daraus abgeleitete Kennzahlen wie „Auf die Gesamterlöse bezogener Basis Free Cash Flow (FCR)“ und „Umsatzrendite (ROS)“. Für die Ermittlung dieser Kennzahlen werden die gleichen Rechnungslegungsnormen (IFRS) angewandt, die für die externe Berichterstattung zugrunde gelegt werden.

Die Verrechnungspreise für konzerninterne Umsätze werden marktorientiert festgelegt. Zwischen den Segmenten bestanden keine wesentlichen Innenbeziehungen.

Im Geschäftsjahr 2010 sowie im Vorjahr wurden mit keinem Kunden mehr als 10 % der Umsatzerlöse des Merck-Konzerns getätigt.

Für das Betriebsvermögen im Segmentbericht galt folgende Überleitung:

| in Mio EUR                                                                                                             | 31.12.2010      | 31.12.2009      |
|------------------------------------------------------------------------------------------------------------------------|-----------------|-----------------|
| Vermögenswerte                                                                                                         | 22.388,0        | 16.712,6        |
| Monetäre Aktiva (Zahlungsmittel und Zahlungsmitteläquivalente, Ausleihungen, Wertpapiere)                              | -1.042,4        | -2.119,7        |
| Finanzanlagen zur Unterlegung von Pensionsverpflichtungen                                                              | -216,9          | -209,6          |
| Nicht operative Forderungen, Steuererstattungsansprüche, latente Steuern und Rückerstattungsansprüche aus Planvermögen | -723,1          | -635,6          |
| Zur Veräußerung gehaltene Vermögenswerte                                                                               | -36,7           | -               |
| <b>Betriebsvermögen (brutto)</b>                                                                                       | <b>20.368,9</b> | <b>13.747,7</b> |
| Verbindlichkeiten aus Lieferungen und Leistungen                                                                       | -1.200,1        | -935,7          |
| Sonstige operative Verbindlichkeiten                                                                                   | -698,3          | -465,3          |
| <b>Betriebsvermögen (netto)</b>                                                                                        | <b>18.470,5</b> | <b>12.346,7</b> |

Das in der Gewinn- und Verlustrechnung ausgewiesene Beteiligungsergebnis entfiel mit 0,9 Mio EUR (Vorjahr: 0,1 Mio EUR) auf die Sparte Merck Millipore und mit 3,2 Mio EUR (Vorjahr: 3,4 Mio EUR) auf das Segment Konzernkosten und Sonstiges.

## ERLÄUTERUNGEN ZUR KAPITALFLUSSRECHNUNG

[36] Die Steuerzahlungen im Geschäftsjahr betrugen 336,1 Mio EUR (Vorjahr: 260,1 Mio EUR); Steuererstattungen fielen in Höhe von 18,7 Mio EUR (Vorjahr: 0,0 Mio EUR) an. Die Zinsausgaben beliefen sich im abgeschlossenen Geschäftsjahr auf 134,7 Mio EUR (Vorjahr: 76,9 Mio EUR). Die Zinseinnahmen lagen bei 38,1 Mio EUR (Vorjahr: 26,6 Mio EUR).

[37] Für Akquisitionen und Investitionen in sonstige Finanzanlagen wurden insgesamt 4.859,7 Mio EUR (Vorjahr: 40,0 Mio EUR) ausgegeben. Dabei entfielen auf Akquisitionen 4.843,7 Mio EUR (Vorjahr: 23,5 Mio EUR) und auf Investitionen in sonstige Finanzanlagen 16,0 Mio EUR (Vorjahr: 16,5 Mio EUR). Für die Kaufpreiszahlung Millipore ergab sich – unter Berücksichtigung der erworbenen Zahlungsmittel – ein Mittelabfluss in Höhe von 4.837,1 Mio EUR. Für die im Jahr 2009 erworbene Suzhou Taizhu China Group wurde eine letzte Kaufpreistranche in Höhe von 6,6 Mio EUR beglichen.

| in Mio EUR                                                 | Millipore      | Suzhou<br>Taizhu<br>China Group | Gesamt<br>2010 |
|------------------------------------------------------------|----------------|---------------------------------|----------------|
| Kaufpreis                                                  | 4.611,9        | 6,6                             | 4.618,5        |
| Eigenkapitalähnliche Kaufpreisbestandteile (Wandelanleihe) | 525,2          | –                               | 525,2          |
| <b>Kaufpreis einschließlich Wandelanleihe</b>              | <b>5.137,1</b> | <b>6,6</b>                      | <b>5.143,7</b> |
| Erworbene Zahlungsmittel und Zahlungsmitteläquivalente     | –300,0         | –                               | –300,0         |
| <b>Akquisitionen</b>                                       | <b>4.837,1</b> | <b>6,6</b>                      | <b>4.843,7</b> |

Aus dem Verkauf von Theramex sind in 2010 keine Zahlungsmittel zugeflossen, da die Kaufpreiszahlung im Januar 2011 erfolgte. Vielmehr sind in 2010 im Rahmen dieser Veräußerung liquide Mittel von insgesamt 9,7 Mio EUR abgegangen, die sich aus dem Zahlungsmittelbestand der Théraxem zum Entkonsolidierungszeitpunkt in Höhe von 9,2 Mio EUR sowie den zahlungswirksamen Transaktionskosten in Höhe von 0,5 Mio EUR zusammensetzten. In der Kapitalflussrechnung wurde dieser Sachverhalt in der Position „Erlöse aus Anlageabgängen“ ausgewiesen.

Der Netto-Mittelzufluss aus den Veränderungen der übrigen finanziellen Vermögenswerten in Höhe von 1.431,3 Mio EUR resultiert im Wesentlichen aus dem Verkauf von kurzfristigen Wertpapieren und finanziellen Vermögenswerten und wurde zur Finanzierung der Millipore Akquisition verwendet.

[38] Die ausgewiesenen Dividendenzahlungen und satzungsmäßigen Ergebnisabführungen setzten sich im Geschäftsjahr wie folgt zusammen:

| in Mio EUR                                       | 2010         | 2009          |
|--------------------------------------------------|--------------|---------------|
| Dividenden an Kommanditaktionäre                 | –64,6        | –96,9         |
| Dividenden an nicht beherrschende Gesellschafter | –21,5        | –7,9          |
| <b>Dividendenzahlungen</b>                       | <b>–86,1</b> | <b>–104,8</b> |

| in Mio EUR                                                        | 2010          | 2009          |
|-------------------------------------------------------------------|---------------|---------------|
| Satzungsmäßige Ergebnisabführung E. Merck KG an Merck KGaA        | 3,7           | 0,6           |
| Satzungsmäßige Ergebnisabführung Merck KGaA an E. Merck KG        | -433,9        | -217,9        |
| Rücklagenveränderungen bei der Merck KGaA durch E. Merck KG       | 212,1         | 66,3          |
| <b>Ergebnisabführungen der Merck KGaA an E. Merck KG</b>          | <b>-218,1</b> | <b>-151,0</b> |
| Ergebnisabführung der Merck & Cie an E. Merck KG                  | -43,0         | -26,8         |
| <b>Gesamt Ergebnisabführung an E. Merck KG</b>                    | <b>-261,1</b> | <b>-177,8</b> |
| Veränderung der Finanzschulden gegenüber E. Merck KG              | 71,5          | 20,6          |
| Veränderung der sonstigen Verbindlichkeiten gegenüber E. Merck KG | 79,1          | -53,2         |
| <b>Veränderung der Verbindlichkeiten gegenüber E. Merck KG</b>    | <b>150,6</b>  | <b>-32,6</b>  |
| <b>Gesamt Mitteltransfer mit E. Merck KG</b>                      | <b>-110,5</b> | <b>-210,4</b> |

Der Free Cash Flow nach Dividenden und Ergebnisabführungen betrug -3.869,7 Mio EUR (Vorjahr: 529,8 Mio EUR).

**[39]** Die Zusammensetzung der Zahlungsmittel und Zahlungsmitteläquivalente ist im Abschnitt „Erläuterungen zur Bilanz“ dargestellt.

**Zahlungsmittel und Zahlungsmitteläquivalente**

**[40]** Der Free Cash Flow und der Basis Free Cash Flow sind von uns verwendete Kennzahlen, die als interne Steuerungsgrößen für den Liquiditätsbeitrag unserer Geschäftsbereiche dienen. Zum Free Cash Flow zählen alle Mittelflüsse aus operativer Tätigkeit sowie die mit dem operativen Geschäft in Verbindung stehenden Mittelflüsse der investiven Tätigkeit. Nicht zum Free Cash Flow zählen wir die nach IFRS ebenfalls als Mittelfluss aus investiver Tätigkeit auszuweisenden reinen Finanzinvestitionen und ähnliche Geldanlagen über drei Monate.

Bei der Überleitung vom Free Cash Flow auf den Basis Free Cash Flow werden neben den akquisitionsbedingten Auszahlungen auch Zahlungsströme im Zusammenhang mit Unternehmensveräußerungen berücksichtigt. Die akquisitionsbedingten Auszahlungen von 4.941,9 Mio EUR (Vorjahr: 23,5 Mio EUR) setzen sich aus den Akquisitionen in Höhe von 4.843,7 Mio EUR (Vorjahr: 23,5 Mio EUR) sowie aus weiteren im Zusammenhang mit dem Erwerb von Millipore stehenden Auszahlungen in Höhe von 98,2 Mio EUR zusammen. Hierbei handelt es sich um die Anschaffungsnebenkosten und die Sozialabgaben, die im Zusammenhang mit den Zahlungen für Optionen aus dem Aktienoptionsprogramm stehen. Im Geschäftsjahr wurden insgesamt Zahlungen in Höhe von 240,7 Mio EUR (Vorjahr: 15,7 Mio EUR) geleistet, die im Zusammenhang mit Rechtsrisiken stehen, die Merck aus dem Verkauf der früheren Generics-Tochtergesellschaft Dey Inc., USA, zurück behalten hat. Darin enthalten ist die Zahlung aus dem Vergleich mit dem US Department of Justice in Höhe von 214,5 Mio EUR (siehe auch Anmerkung [32]). Desweiteren wurden 9,7 Mio EUR aus dem Verkauf von Théramex berücksichtigt.

**Free Cash Flow und Basis Free Cash Flow**

## SONSTIGE ERLÄUTERUNGEN

[41]  
Derivative  
Finanzinstrumente

Merck setzt derivative Finanzinstrumente ausschließlich zur Sicherung von Währungs- und Zinspositionen ein, um Währungs- und Zinsrisiken zu reduzieren. Fremdwährungsrisiken aus gebuchten Transaktionen werden weitgehend abgesichert. Als Sicherungsinstrumente nutzt Merck derzeit marktgängige Devisentermingeschäfte, Zinstermingeschäfte und Zinsswaps. Der Ausweis der Derivate in der Gewinn- und Verlustrechnung erfolgt in Abhängigkeit von der Art des Sicherungsgeschäfts entweder im Operativen Ergebnis oder im Fall von Finanztransaktionen im Finanzergebnis.

Die Strategie zur Absicherung von Zins- und Währungsschwankungen aus zukünftigen Transaktionen wird von einem hierfür eingesetzten und in regelmäßigen Abständen tagenden Zins- und Währungsausschuss der Merck-Gruppe festgelegt. Grundlage für den Abschluss von Währungsderivaten ist in der Regel ein Betrachtungszeitraum bis zu 36 Monaten. Der Einsatz von Derivaten ist durch umfangreiche Richtlinien geregelt. Es gilt das Verbot der Spekulation. Die Abschlüsse derivativer Geschäfte unterliegen einer ständigen Risikokontrolle. Eine strikte Funktionstrennung von Handel, Abwicklung und Kontrolle ist sichergestellt. Derivative Finanzkontrakte werden nur mit Banken guter Bonität abgeschlossen.

Zum Bilanzstichtag bestanden folgende derivative Finanzpositionen:

| in Mio EUR                             | Nominalvolumen |                | Marktwert     |             |
|----------------------------------------|----------------|----------------|---------------|-------------|
|                                        | 31.12.2010     | 31.12.2009     | 31.12.2010    | 31.12.2009  |
| Cash flow hedge                        | 3.713,5        | 902,0          | -102,0        | 57,6        |
| Zinsabsicherung                        | 100,0          | 100,0          | -1,1          | -0,3        |
| Währungsabsicherung                    | 3.613,5        | 802,0          | -100,9        | 57,9        |
| Fair value hedge                       | 502,5          | 520,9          | 15,3          | 14,5        |
| Zinsabsicherung                        | 500,0          | 500,0          | 15,4          | 14,6        |
| Währungsabsicherung                    | 2,5            | 20,9           | -0,1          | -0,1        |
| Keine bilanziellen Sicherungsgeschäfte | 5.298,0        | 2.161,1        | -18,1         | 8,8         |
| Zinsabsicherung                        | 1.500,0        | -              | -0,6          | -           |
| Währungsabsicherung                    | 3.798,0        | 2.161,1        | -17,5         | 8,8         |
|                                        | <b>9.514,0</b> | <b>3.584,0</b> | <b>-104,8</b> | <b>80,9</b> |

Das Nominalvolumen ist die Summe aller Kauf- und Verkaufsbeträge derivativer Finanzgeschäfte. Die Marktwerte ergeben sich aus der Bewertung der ausstehenden Positionen zu Marktpreisen ohne Berücksichtigung gegenläufiger Wertentwicklungen aus den Grundgeschäften. Sie entsprechen den Aufwendungen beziehungsweise Erträgen bei einer Glattstellung der Derivatkontrakte zum Bilanzstichtag. Die Bewertung der Geschäfte erfolgt marktgerecht basierend auf quotierten Preisen oder von einem anerkannten Informationsdienst bereitgestellten aktuellen Marktdaten.

Für die Sicherungsgeschäfte (Nominalvolumen) bestanden zum Bilanzstichtag folgende Restlaufzeiten:

| in Mio EUR             | Restlaufzeit<br>bis 1 Jahr | Restlaufzeit<br>über 1 Jahr | Gesamt<br>31.12.2010 | Restlaufzeit<br>bis 1 Jahr | Restlaufzeit<br>über 1 Jahr | Gesamt<br>31.12.2009 |
|------------------------|----------------------------|-----------------------------|----------------------|----------------------------|-----------------------------|----------------------|
| Devisentermingeschäfte | 4.454,0                    | 2.960,0                     | 7.414,0              | 2.598,3                    | 385,7                       | 2.984,0              |
| Zinsswaps              | 500,0                      | 100,0                       | 600,0                | –                          | 600,0                       | 600,0                |
| Zinstermingeschäfte    | 1.500,0                    | –                           | 1.500,0              | –                          | –                           | –                    |
|                        | <b>6.454,0</b>             | <b>3.060,0</b>              | <b>9.514,0</b>       | <b>2.598,3</b>             | <b>985,7</b>                | <b>3.584,0</b>       |

Die zur Reduktion des Währungskursrisikos eingegangenen Devisentermingeschäfte mit einem Nominalvolumen von 7.414,0 Mio EUR dienten im Wesentlichen der Absicherung von konzerninternen Finanzierungen in Fremdwährung. Hier wurden im Wesentlichen Währungskursschwankungen des US-Dollar (4.046,8 Mio EUR), des Schweizer Franken (483,5 Mio EUR), des Japanischen Yen (845,1 Mio EUR), des Taiwanesischen Dollars (533,2 Mio EUR) und des Britischen Pfunds (494,7 Mio EUR) abgesichert.

Zukünftige Transaktionen werden mittels Cash Flow Hedge nur dann gesichert, wenn deren Eintritt mit sehr hoher Wahrscheinlichkeit angenommen werden kann. Das Nominalvolumen gesicherter zukünftiger Transaktionen betrug zum Bilanzstichtag 3.713,5 Mio EUR (Vorjahr: 902,0 Mio EUR) und betrifft im Wesentlichen die Sicherung künftiger Umsätze in US-Dollar, Taiwanesischem Dollar und Japanischem Yen und Ausgaben in Schweizer Franken. Der Eintritt der gesicherten Positionen wird innerhalb der nächsten 36 Monate erwartet. Darüber hinaus werden Finanzanlagen und -aufnahmen in Fremdwährung durch Devisentermingeschäfte gesichert und als Cash Flow Hedge designiert. Es wurden im Geschäftsjahr 125,3 Mio EUR Aufwendungen (Vorjahr: 47,5 Mio EUR Erträge) aus der Marktwertbewertung der Derivate erfolgsneutral im Eigenkapital berücksichtigt, 17,2 Mio EUR (Vorjahr: 64,8 Mio EUR) wurden aus dem Eigenkapital ausgebucht und als Aufwand (Vorjahr: Ertrag) im Periodenergebnis erfasst.

Der Zinsaufwand der im Jahr 2005 aufgelegten Euro-Benchmark-Anleihe im Volumen von 500 Mio EUR wurde durch als Fair Value Hedge bilanzierte Zinsswaps von 3,75% fix auf 6-Monats-Euribor variabilisiert. Die Marktbewertung der Anleihe führte zu einem Ertrag in Höhe von 0,2 Mio EUR (Vorjahr: 15,2 Mio EUR Aufwand), diesem stand ein Aufwand aus dem Zinsswap in gleicher Höhe gegenüber. Die Nettozinszahlungen aus Anleihe und Zinsswaps wurden 2010 durch Zinstermingeschäfte auf Basis der 6-Monats-Euribor Forward-Kurve fixiert. Der Zinsaufwand der im Jahr 2009 im Rahmen des Debt Issuance Program aufgelegten Privatplatzierung in Höhe von 100 Mio EUR wurde durch einen als Cash Flow Hedge bilanzierten Zinsswap von 3-Monats-Euribor plus 0,77% fixiert. Die Marktbewertung des Zinsswaps führte zu einem Aufwand von 1,1 Mio EUR (Vorjahr: 0,3 Mio EUR). Dieser Betrag wurde bei 100%iger Effektivität im Eigenkapital berücksichtigt.

- [42] **Management von Finanzrisiken** Preisschwankungen von Währungen und Zinsen können signifikante Gewinn- und Cash Flow-Risiken für Merck zur Folge haben. Merck zentralisiert daher diese Risiken soweit wie möglich und steuert diese dann vorausschauend, auch unter Nutzung von derivativen Finanzinstrumenten. Weitere Informationen zum Risikomanagement von Finanzrisiken enthält der Risikobericht im Lagebericht.

**Fremdwährungsrisiken**

Transaktionsrisiken: Aufgrund seiner internationalen Geschäftsausrichtung ist Merck sowohl im Rahmen der gewöhnlichen Geschäftstätigkeit als auch im Rahmen von Finanzierungstätigkeiten Währungsrisiken ausgesetzt. Um diese Risiken zu begrenzen oder auszuschalten, werden unterschiedliche Strategien angewendet.

Währungsrisiken aus Finanzierungstätigkeit werden grundsätzlich so weit wie möglich durch den Einsatz von Devisentermingeschäften eliminiert. Währungsrisiken aus operativer Tätigkeit werden regelmäßig analysiert und gegebenenfalls durch Devisentermingeschäfte oder Devisenoptionen unter Anwendung des Hedge-Accountings reduziert.

In der folgenden Tabelle ist das Nettofremdwährungsrisiko aus erwarteten und gebuchten Transaktionen im Jahr 2011 in den wichtigsten Währungen dargestellt:

| in Mio EUR Stand 31.12.2010                                                               | CHF           | GBP          | JPY          | TWD          | USD            |
|-------------------------------------------------------------------------------------------|---------------|--------------|--------------|--------------|----------------|
| Fremdwährungsrisiko aus Bilanzpositionen                                                  | -80,9         | 74,9         | 206,6        | 70,4         | 2.804,9        |
| Fremdwährungsrisiko aus schwebenden<br>Geschäften und antizipierten Transaktionen in 2011 | -467,9        | 114,2        | 291,3        | 421,5        | 1.147,1        |
| <b>Transaktionsbezogene Fremdwährungsposition</b>                                         | <b>-548,8</b> | <b>189,1</b> | <b>497,9</b> | <b>491,9</b> | <b>3.952,0</b> |
| Wirtschaftlich durch Derivate abgesicherte Position                                       | 130,0         | -75,0        | -386,5       | -346,6       | -3.294,2       |
| <b>Offene Fremdwährungsrisikoposition</b>                                                 | <b>-418,8</b> | <b>114,1</b> | <b>111,4</b> | <b>145,3</b> | <b>657,8</b>   |
| Veränderung der Fremdwährungsposition<br>durch eine 10%ige Aufwertung des Euro            | 41,9          | -11,4        | -11,1        | -14,5        | -65,8          |
| davon im Ergebnis                                                                         | -4,9          | -            | 3,5          | 4,5          | 8,4            |
| davon im Eigenkapital                                                                     | -             | -            | 14,5         | 23,1         | 40,5           |

Des Weiteren bestehen Derivate zur Sicherung antizipierter Zahlungsströme über das Jahr 2011 hinaus. Diese würden zu einer Veränderung des Eigenkapitals in Höhe von 20,0 Mio EUR im Japanischen Yen führen. Im Vorjahr hätte dies aufgrund der Sicherung antizipierter Zahlungsströme über das Jahr 2010 hinaus zu einer Veränderung im Eigenkapital in Höhe von 11,5 Mio EUR, im Japanischen Yen, 4,1 Mio EUR im Taiwanesischen Dollar und 18,5 Mio EUR im US Dollar geführt. Die entsprechenden Vorjahreswerte für das Nettofremdwährungsrisiko aus erwarteten und gebuchten Transaktionen stellten sich wie folgt dar:

| in Mio EUR Stand 31.12.2009                                                               | CHF           | GBP          | JPY          | TWD          | USD          |
|-------------------------------------------------------------------------------------------|---------------|--------------|--------------|--------------|--------------|
| Fremdwährungsrisiko aus Bilanzpositionen                                                  | -167,8        | 154,7        | 156,9        | 57,9         | -345,9       |
| Fremdwährungsrisiko aus schwebenden<br>Geschäften und antizipierten Transaktionen in 2010 | -281,3        | 78,2         | 158,0        | 290,1        | 672,9        |
| <b>Transaktionsbezogene Fremdwährungsposition</b>                                         | <b>-449,1</b> | <b>232,9</b> | <b>314,9</b> | <b>348,0</b> | <b>327,0</b> |
| Wirtschaftlich durch Derivate abgesicherte Position                                       | 176,0         | -172,1       | -262,4       | -136,1       | -7,5         |
| <b>Offene Fremdwährungsrisikoposition</b>                                                 | <b>-273,1</b> | <b>60,8</b>  | <b>52,5</b>  | <b>211,9</b> | <b>319,5</b> |
| Veränderung der Fremdwährungsposition<br>durch eine 10%ige Aufwertung des Euro            | 27,3          | -6,1         | -5,2         | -21,2        | -31,9        |
| davon im Ergebnis                                                                         | -0,8          | -0,3         | -0,9         | 2,4          | 12,6         |
| davon im Eigenkapital                                                                     | -             | 2,0          | 11,4         | 5,4          | 22,8         |



Translationsrisiken: Viele Merck-Gesellschaften sind außerhalb des Euro-Währungsraums. Die Abschlüsse dieser Gesellschaften werden in Euro überführt. Durch Währungsschwankungen verursachte Veränderungen aus der Translation der Vermögenswerte dieser Gesellschaften werden im Eigenkapital abgebildet.

**Zinsrisiken** Zinsrisiken stehen im Wesentlichen im Zusammenhang mit Finanzschulden in Höhe von 5.483,5 Mio EUR (Vorjahr: 2.307,3 Mio EUR) und Geldanlagen in Höhe von 1.346,5 Mio EUR (Vorjahr: 2.372,6 Mio EUR). Gegebenenfalls werden durch Einsatz derivativer Instrumente Festzinsszahlungen in variable Zinszahlungen gedreht. Ziel ist, das Zinsergebnis zu optimieren und die Zinsrisiken zu minimieren. Eine parallele Verschiebung der Zinskurve um +100 Basispunkte hätte bezogen auf die Nettozinsschulden zum Stichtag einen Ergebniseffekt von 6,3 Mio EUR (Vorjahr: 10,3 Mio EUR) zur Folge. Dies entspricht einem erhöhten Zinsertrag von 9,1 Mio EUR (Vorjahr: 17,3 Mio EUR) auf finanzielle Vermögenswerte und einem zusätzlichen Zinsaufwand von 2,8 Mio EUR (Vorjahr: 7,0 Mio EUR) auf Finanzschulden. Die resultierende Marktwertveränderung von zum Fair Value bilanzierten Vermögenswerten würde im Eigenkapital zu einem Aufwand von 6,8 Mio EUR (Vorjahr: 5,1 Mio EUR) führen.

**Aktienkursrisiken** Das Aktienportfolio börsennotierter Unternehmen in Höhe von 60,0 Mio EUR unterliegt grundsätzlich einem Marktwertisiko. Eine Veränderung des allgemeinen Aktienmarktniveaus um 10 % hätte damit eine Auswirkung von 6,0 Mio EUR im Eigenkapital zur Folge. Diese Wertveränderungen werden zum Zeitpunkt der Veräußerung ergebniswirksam.

**Liquiditätsrisiken** Das Liquiditätsrisiko, das heißt das Risiko, dass Merck seinen finanziellen Verpflichtungen nicht nachkommen kann, wird sowohl durch Schaffung der notwendigen finanziellen Flexibilität als auch durch ein effektives Cash-Management begrenzt. So steht Merck neben liquiden Mitteln in Höhe von 999,3 Mio EUR (Vorjahr: 2.044,6 Mio EUR) eine Multi-Währungs-Betriebsmittelkreditlinie über 2 Mrd EUR mit einer verbleibenden Laufzeit von vier Jahren zur Verfügung sowie bilaterale Kreditzusagen in Höhe von 324,8 Mio EUR (Vorjahr: 233,1 Mio EUR). Es liegen keine Anzeichen vor, dass eingeräumte Kreditrahmen in ihrer Verfügbarkeit eingeschränkt sind. Des Weiteren bestehen ein Commercial Paper Programm über 2 Mrd EUR und ein 2009 aufgelegtes Debt Issuance Program über 10 Mrd EUR. Liquiditätsrisiken werden regelmäßig überwacht und an das Management berichtet. Wir haben in unseren Kreditverträgen keine Financial Covenants vereinbart. Die Verbindlichkeiten aus Lieferungen und Leistungen in Höhe von 1.200,1 Mio EUR (Vorjahr: 935,7 Mio EUR) sowie die operativen Verbindlichkeiten aus Derivaten in Höhe von 37,9 Mio EUR (Vorjahr: 1,4 Mio EUR) haben eine Laufzeit kleiner einem Jahr. Von den übrigen finanziellen Verbindlichkeiten in Höhe von 486,3 Mio EUR (Vorjahr: 302,5 Mio EUR) sind 481,7 Mio EUR (Vorjahr: 300,1 Mio EUR) innerhalb eines Jahres fällig.

In den nachfolgenden Tabellen sind die vertraglich fixierten Zahlungen wie Tilgungen und Zinsen aus Finanzschulden und derivative Instrumente mit negativem Marktwert dargestellt:

| in Mio EUR<br>Stand 31.12.2010                        | Buchwert       | Cash Flows<br>2011 |              | Cash Flows<br>2012–2016 |                | Cash Flows<br>2017–2023 |                |
|-------------------------------------------------------|----------------|--------------------|--------------|-------------------------|----------------|-------------------------|----------------|
|                                                       |                | Zins               | Tilgung      | Zins                    | Tilgung        | Zins                    | Tilgung        |
| Anleihen und Commercial Paper                         | 4.983,6        | 190,4              | 35,3         | 643,3                   | 3.509,5        | 213,8                   | 1.419,3        |
| Verbindlichkeiten gegenüber Kreditinstituten          | 115,7          | 1,7                | 81,2         | 3,1                     | 29,9           | 0,1                     | 4,6            |
| Verbindlichkeiten gegenüber nahestehenden Unternehmen | 190,3          | –                  | 190,3        | –                       | –              | –                       | –              |
| Darlehen von Dritten und sonstige Finanzschulden      | 78,1           | 4,5                | 11,0         | 8,0                     | 58,7           | –                       | 8,5            |
| Verbindlichkeiten aus Derivaten (Finanztransaktionen) | 108,7          | –                  | 28,7         | –                       | 80,0           | –                       | –              |
| Verbindlichkeiten aus Finanzierungsleasing            | 7,1            | 0,1                | 0,7          | 0,2                     | 4,1            | –                       | 2,3            |
|                                                       | <b>5.483,5</b> | <b>196,7</b>       | <b>347,2</b> | <b>654,6</b>            | <b>3.682,2</b> | <b>213,9</b>            | <b>1.434,7</b> |

| in Mio EUR<br>Stand 31.12.2009                        | Buchwert       | Cash Flows<br>2010 |              | Cash Flows<br>2011–2015 |                | Cash Flows<br>2016–2022 |              |
|-------------------------------------------------------|----------------|--------------------|--------------|-------------------------|----------------|-------------------------|--------------|
|                                                       |                | Zins               | Tilgung      | Zins                    | Tilgung        | Zins                    | Tilgung      |
| Anleihen und Commercial Paper                         | 1.990,3        | 83,6               | 500,0        | 170,9                   | 1.350,0        | 14,1                    | 130,0        |
| Verbindlichkeiten gegenüber Kreditinstituten          | 87,4           | 1,6                | 63,8         | 3,5                     | 14,8           | 0,4                     | 5,2          |
| Verbindlichkeiten gegenüber nahestehenden Unternehmen | 118,8          | –                  | 118,8        | –                       | –              | –                       | –            |
| Darlehen von Dritten und sonstige Finanzschulden      | 82,9           | 4,2                | 11,9         | 8,4                     | 61,2           | 0,1                     | 9,7          |
| Verbindlichkeiten aus Derivaten (Finanztransaktionen) | 17,5           | 2,1                | 16,0         | 10,6                    | 1,2            | –                       | –            |
| Verbindlichkeiten aus Finanzierungsleasing            | 10,4           | 0,7                | 5,9          | 0,3                     | 4,5            | –                       | –            |
|                                                       | <b>2.307,3</b> | <b>92,2</b>        | <b>716,4</b> | <b>193,7</b>            | <b>1.431,7</b> | <b>14,6</b>             | <b>144,9</b> |

#### Kreditrisiken

Merck ist nur einem geringen Kreditrisiko, das heißt dem unerwarteten Verlust von Zahlungsmitteln oder Erträgen ausgesetzt. Zum einen werden Finanzkontrakte nur mit Banken guter Bonität abgeschlossen, zum anderen bestehen für die Merck-Gruppe aufgrund der breit angelegten Geschäftsstruktur weder hinsichtlich der Kunden noch für einzelne Länder besondere Konzentrationen von Kreditrisiken. Das Kreditrisiko gegenüber Kunden wird durch Analysen der Altersstruktur der Forderungen aus Lieferungen und Leistungen kontinuierlich betrachtet. Das theoretisch maximale Ausfallrisiko entspricht den Buchwerten.

### [43] Sonstige Angaben zu Finanzinstrumenten

Die nachfolgende Tabelle zeigt die Überleitung der Bilanzpositionen auf die nach IFRS 7 zu bildenden Klassen von Finanzinstrumenten:

| in Mio EUR                                                   | Buchwerte<br>31.12.2010 | Folgebewertung nach IAS 39              |                              |                           |                           | Nicht<br>finanzielle<br>Posten |
|--------------------------------------------------------------|-------------------------|-----------------------------------------|------------------------------|---------------------------|---------------------------|--------------------------------|
|                                                              |                         | Fortgeführte<br>Anschaffungs-<br>kosten | Anschaf-<br>fungs-<br>kosten | Beizulegender<br>Zeitwert | Wertansatz<br>nach IAS 17 |                                |
| <b>Vermögenswerte</b>                                        |                         |                                         |                              |                           |                           |                                |
| Zahlungsmittel und Zahlungsmitteläquivalente                 | 943,7                   | 943,7                                   | -                            | -                         | -                         | -                              |
| Wertpapiere und finanzielle Vermögenswerte                   | 55,6                    | 23,0                                    | -                            | 32,6                      | -                         | -                              |
| zu Handelszwecken gehalten (nicht derivativ)                 | 0,0                     | -                                       | -                            | 0,0                       | -                         | -                              |
| Derivate nicht in einer Sicherungsbeziehung                  | 0,0                     | -                                       | -                            | 0,0                       | -                         | -                              |
| bis zur Endfälligkeit zu halten                              | 22,7                    | 22,7                                    | -                            | -                         | -                         | -                              |
| Kredite und Forderungen                                      | 0,3                     | 0,3                                     | -                            | -                         | -                         | -                              |
| zur Veräußerung verfügbar                                    | 11,3                    | -                                       | -                            | 11,3                      | -                         | -                              |
| Derivate in einer Sicherungsbeziehung                        | 21,3                    | -                                       | -                            | 21,3                      | -                         | -                              |
| Forderungen aus Lieferungen und Leistungen                   | 2.296,3                 | 2.296,3                                 | -                            | -                         | -                         | -                              |
| Kredite und Forderungen                                      | 2.296,3                 | 2.296,3                                 | -                            | -                         | -                         | -                              |
| Übrige kurz- und langfristige Vermögenswerte                 | 617,6                   | 407,1                                   | -                            | 2,6                       | -                         | 207,9                          |
| Derivate nicht in einer Sicherungsbeziehung                  | 1,3                     | -                                       | -                            | 1,3                       | -                         | -                              |
| Kredite und Forderungen                                      | 407,1                   | 407,1                                   | -                            | -                         | -                         | -                              |
| Derivate in einer Sicherungsbeziehung                        | 1,3                     | -                                       | -                            | 1,3                       | -                         | -                              |
| Nicht finanzielle Posten                                     | 207,9                   | -                                       | -                            | -                         | -                         | 207,9                          |
| Langfristige Finanzanlagen                                   | 130,3                   | 16,6                                    | 57,2                         | 56,5                      | -                         | -                              |
| Derivate nicht in einer Sicherungsbeziehung                  | 0,0                     | -                                       | -                            | 0,0                       | -                         | -                              |
| bis zur Endfälligkeit zu halten                              | 0,0                     | 0,0                                     | -                            | -                         | -                         | -                              |
| Kredite und Forderungen                                      | 16,6                    | 16,6                                    | -                            | -                         | -                         | -                              |
| zur Veräußerung verfügbar                                    | 95,8                    | -                                       | 57,2                         | 38,6                      | -                         | -                              |
| Derivate in einer Sicherungsbeziehung                        | 17,9                    | -                                       | -                            | 17,9                      | -                         | -                              |
| Finanzanlagen zur Unterlegung<br>von Pensionsverpflichtungen | 216,9                   | 64,6                                    | -                            | 152,3                     | -                         | -                              |
| bis zur Endfälligkeit zu halten                              | 64,6                    | 64,6                                    | -                            | -                         | -                         | -                              |
| zur Veräußerung verfügbar                                    | 152,3                   | -                                       | -                            | 152,3                     | -                         | -                              |
| <b>Schulden</b>                                              |                         |                                         |                              |                           |                           |                                |
| Kurz- und langfristige Finanzschulden                        | 5.483,5                 | 5.367,7                                 | -                            | 108,7                     | 7,1                       | -                              |
| Derivate nicht in einer Sicherungsbeziehung                  | 15,8                    | -                                       | -                            | 15,8                      | -                         | -                              |
| Sonstige finanzielle Verbindlichkeiten                       | 5.367,7                 | 5.367,7                                 | -                            | -                         | -                         | -                              |
| Derivate in einer Sicherungsbeziehung                        | 92,9                    | -                                       | -                            | 92,9                      | -                         | -                              |
| Verbindlichkeiten aus Finanzierungsleasing                   | 7,1                     | -                                       | -                            | -                         | 7,1                       | -                              |
| Verbindlichkeiten aus Lieferungen und Leistungen             | 1.200,1                 | 1.200,1                                 | -                            | -                         | -                         | -                              |
| Sonstige finanzielle Verbindlichkeiten                       | 1.200,1                 | 1.200,1                                 | -                            | -                         | -                         | -                              |
| Übrige kurz- und langfristige Verbindlichkeiten              | 1.097,5                 | 486,3                                   | -                            | 37,9                      | -                         | 573,3                          |
| Derivate nicht in einer Sicherungsbeziehung                  | 3,5                     | -                                       | -                            | 3,5                       | -                         | -                              |
| Sonstige finanzielle Verbindlichkeiten                       | 486,3                   | 486,3                                   | -                            | -                         | -                         | -                              |
| Derivate in einer Sicherungsbeziehung                        | 34,4                    | -                                       | -                            | 34,4                      | -                         | -                              |
| Nicht finanzielle Posten                                     | 573,3                   | -                                       | -                            | -                         | -                         | 573,3                          |

| Beizulegender<br>Zeitwert<br>31.12.2010 | Buchwerte<br>31.12.2009 | Folgebewertung nach IAS 39              |                         |                           |                           | Nicht finanzielle<br>Posten | Beizulegender<br>Zeitwert<br>31.12.2009 |
|-----------------------------------------|-------------------------|-----------------------------------------|-------------------------|---------------------------|---------------------------|-----------------------------|-----------------------------------------|
|                                         |                         | Fortgeführte<br>Anschaffungs-<br>kosten | Anschaffungs-<br>kosten | Beizulegender<br>Zeitwert | Wertansatz<br>nach IAS 17 |                             |                                         |
| 943,7                                   | 541,4                   | 541,4                                   | -                       | -                         | -                         | -                           | 541,4                                   |
|                                         | 1.503,2                 | 1.199,1                                 | -                       | 304,1                     | -                         | -                           |                                         |
| 0,0                                     | 0,0                     | -                                       | -                       | -                         | -                         | -                           | 0,0                                     |
| 0,0                                     | 27,0                    | -                                       | -                       | 27,0                      | -                         | -                           | 27,0                                    |
| 22,7                                    | 48,4                    | 48,4                                    | -                       | -                         | -                         | -                           | 48,4                                    |
| 0,3                                     | 1.150,7                 | 1.150,7                                 | -                       | -                         | -                         | -                           | 1.150,7                                 |
| 11,3                                    | 262,5                   | -                                       | -                       | 262,5                     | -                         | -                           | 262,5                                   |
| 21,3                                    | 14,6                    | -                                       | -                       | 14,6                      | -                         | -                           | 14,6                                    |
|                                         | 1.788,7                 | 1.788,7                                 | -                       | -                         | -                         | -                           |                                         |
| 2.296,3                                 | 1.788,7                 | 1.788,7                                 | -                       | -                         | -                         | -                           | 1.788,7                                 |
|                                         | 375,1                   | 93,5                                    | -                       | 58,1                      | -                         | 223,5                       |                                         |
| 1,3                                     | 0,0                     | -                                       | -                       | -                         | -                         | -                           | 0,0                                     |
| 407,1                                   | 93,5                    | 93,5                                    | -                       | -                         | -                         | -                           | 93,5                                    |
| 1,3                                     | 58,1                    | -                                       | -                       | 58,1                      | -                         | -                           | 58,1                                    |
|                                         | 223,5                   | -                                       | -                       | -                         | -                         | 223,5                       |                                         |
|                                         | 118,4                   | 15,9                                    | 48,2                    | 54,3                      | -                         | -                           |                                         |
| 0,0                                     | 0,1                     | -                                       | -                       | 0,1                       | -                         | -                           | 0,1                                     |
| 0,0                                     | 0,0                     | -                                       | -                       | -                         | -                         | -                           | 0,0                                     |
| 16,6                                    | 15,9                    | 15,9                                    | -                       | -                         | -                         | -                           | 15,9                                    |
| 95,8                                    | 102,4                   | -                                       | 48,2                    | 54,2                      | -                         | -                           | 102,4                                   |
| 17,9                                    | 0,0                     | -                                       | -                       | -                         | -                         | -                           | 0,0                                     |
|                                         | 209,6                   | 61,1                                    | -                       | 148,5                     | -                         | -                           |                                         |
| 64,6                                    | 61,1                    | 61,1                                    | -                       | -                         | -                         | -                           | 61,1                                    |
| 152,3                                   | 148,5                   | -                                       | -                       | 148,5                     | -                         | -                           | 148,5                                   |
|                                         | 2.307,3                 | 2.279,4                                 | -                       | 17,5                      | 10,4                      | -                           |                                         |
| 15,8                                    | 17,2                    | -                                       | -                       | 17,2                      | -                         | -                           | 17,2                                    |
| 5.532,1                                 | 2.279,4                 | 2.279,4                                 | -                       | -                         | -                         | -                           | 2.350,7                                 |
| 92,9                                    | 0,3                     | -                                       | -                       | 0,3                       | -                         | -                           | 0,3                                     |
| 7,1                                     | 10,4                    | -                                       | -                       | -                         | 10,4                      | -                           | 10,4                                    |
|                                         | 935,7                   | 935,7                                   | -                       | -                         | -                         | -                           |                                         |
| 1.200,1                                 | 935,7                   | 935,7                                   | -                       | -                         | -                         | -                           | 935,7                                   |
|                                         | 655,1                   | 302,5                                   | -                       | 1,4                       | -                         | 351,2                       | -                                       |
| 3,5                                     | 1,1                     | -                                       | -                       | 1,1                       | -                         | -                           | 1,1                                     |
| 486,3                                   | 302,5                   | 302,5                                   | -                       | -                         | -                         | -                           | 302,5                                   |
| 34,4                                    | 0,3                     | -                                       | -                       | 0,3                       | -                         | -                           | 0,3                                     |
|                                         | 351,2                   | -                                       | -                       | -                         | -                         | 351,2                       | -                                       |

Nettogewinne und -verluste aus Finanzinstrumenten umfassen die Ergebnisauswirkungen aus Finanzinstrumenten. Diese beinhalten im Wesentlichen Bewertungsergebnisse aus der Währungs-umrechnung, die Anpassung an den beizulegenden Zeitwert, Wertminderungen und -aufholungen sowie die Erfassung von Agien und Disagien. Dividenden und Zinsen werden, außer in der Bewertungskategorie „Zu Handelszwecken gehalten“, nicht den Nettogewinnen und -verlusten aus Finanzinstrumenten zugerechnet. Ausschließlich in der Kategorie „Erfolgswirksam zum beizulegenden Zeitwert bewertete finanzielle Vermögenswerte und Verbindlichkeiten“, zählen hierzu auch vereinnahmte und gezahlte Zinsen.

Die Nettogewinne und -verluste der Finanzinstrumente nach Bewertungskategorien stellten sich wie folgt dar:

| 2010 in Mio EUR                           | Nettogewinne und Nettoverluste |                      |                      |                                            |                      |
|-------------------------------------------|--------------------------------|----------------------|----------------------|--------------------------------------------|----------------------|
|                                           | Zins-<br>ergebnis              | Wertmin-<br>derungen | Wertauf-<br>holungen | Änderung<br>beizu-<br>legender<br>Zeitwert | Abgangs-<br>ergebnis |
| Finanzinstrumente der Bewertungskategorie |                                |                      |                      |                                            |                      |
| Zu Handelszwecken gehalten                | -                              | -                    | -                    | 18,3                                       | -                    |
| Bis zur Endfälligkeit zu halten           | 15,2                           | -0,2                 | 0,0                  | -                                          | 1,5                  |
| Kredite und Forderungen                   | 5,2                            | -72,4                | 9,3                  | -                                          | 0,0                  |
| Zur Veräußerung verfügbar                 | 10,8                           | -2,1                 | 0,0                  | -                                          | 0,0                  |
| Sonstige Verbindlichkeiten                | -195,7                         | -                    | -                    | -                                          | -                    |

| 2009 in Mio EUR                           | Nettogewinne und Nettoverluste |                      |                      |                                            |                      |
|-------------------------------------------|--------------------------------|----------------------|----------------------|--------------------------------------------|----------------------|
|                                           | Zins-<br>ergebnis              | Wertmin-<br>derungen | Wertauf-<br>holungen | Änderung<br>beizu-<br>legender<br>Zeitwert | Abgangs-<br>ergebnis |
| Finanzinstrumente der Bewertungskategorie |                                |                      |                      |                                            |                      |
| Zu Handelszwecken gehalten                | -                              | -                    | -                    | 18,6                                       | -                    |
| Bis zur Endfälligkeit zu halten           | 1,1                            | 0,0                  | 0,0                  | -                                          | 0,0                  |
| Kredite und Forderungen                   | 30,6                           | -30,8                | 2,9                  | -                                          | 0,0                  |
| Zur Veräußerung verfügbar                 | 1,9                            | -2,6                 | 0,0                  | -                                          | 1,3                  |
| Sonstige Verbindlichkeiten                | -92,9                          | -                    | -                    | -                                          | -                    |

Im Geschäftsjahr wurden Kursgewinne aus operativen Forderungen und Verbindlichkeiten in Höhe von 22,9 Mio EUR (Vorjahr: Kursverluste in Höhe von -9,7 Mio EUR) verbucht. Aus Sicherungsgeschäften für operative Geschäfte fielen Erträge von insgesamt 1,8 Mio EUR (Vorjahr: 3,1 Mio EUR) an. Für finanzielle Forderungen/Verbindlichkeiten und deren ökonomische Sicherung resultierten Kursgewinne in Höhe von 1,1 Mio EUR (Vorjahr: Kursverluste in Höhe von -3,7 Mio EUR). Aus Kursicherungen für Finanzgeschäfte ergaben sich Kursgewinne in Höhe von 11,8 Mio EUR (Vorjahr: Kursverluste in Höhe von -3,3 Mio EUR).

Der beizulegende Zeitwert von Aktien und Anleihen, die zur Ausfinanzierung der Pensionsverpflichtungen und zum Liquiditätsmanagement eingesetzt werden, basiert überwiegend auf am Markt zum Bilanzstichtag quotierten offiziellen Kursen und Marktwerten. Die Bestimmung des beizulegenden Zeitwerts zinstragender Wertpapiere erfolgt durch die Diskontierung zukünftiger Zahlungsströme mit am Markt beobachtbaren Zinssätzen. Devisentermingeschäfte werden zum beizulegenden Zeitwert bilanziert. Die Bewertung erfolgt mit Hilfe am Markt beobachtbarer Kassamittelkurse und der Laufzeit spezifischen Zinsaufschläge und -abschläge in Relation zum gehandelten Marktkurs. Der beizulegende Zeitwert von zur Zinssicherung gehaltener Zinsswaps wird mit Hilfe von marktüblichen Bewertungsmodellen basierend auf am Markt verfügbaren Zinskurven ermittelt. Gegenüber dem Vorjahr ergeben sich bezüglich der Methodik der Ermittlung der beizulegenden Zeitwerte keine Änderungen.

Die beizulegenden Zeitwerte der bei Merck bilanzierten Finanzinstrumente ermitteln sich folgendermaßen:

| in Mio EUR Stand 31.12.2010                                  | Vermögens-<br>werte | Schulden      |
|--------------------------------------------------------------|---------------------|---------------|
| <b>Quotierte offizielle Kurse und Marktwerte</b>             | <b>202,2</b>        | <b>0,0</b>    |
| davon als zur Veräußerung verfügbar kategorisiert            | 202,2               | –             |
| <b>Modellwerte mit Hilfe am Markt beobachteter Parameter</b> | <b>41,8</b>         | <b>–146,6</b> |
| davon als zur Veräußerung verfügbar kategorisiert            | 0,0                 | –             |
| davon Derivate in einer Sicherungsbeziehung                  | 40,5                | –127,2        |
| davon Derivate nicht in einer Sicherungsbeziehung            | 1,3                 | –19,4         |
| <b>Theoretische Modellwerte</b>                              | <b>0,0</b>          | <b>0,0</b>    |

| in Mio EUR Stand 31.12.2009                                  | Vermögens-<br>werte | Schulden    |
|--------------------------------------------------------------|---------------------|-------------|
| <b>Quotierte offizielle Kurse und Marktwerte</b>             | <b>213,4</b>        | <b>0,0</b>  |
| davon als zur Veräußerung verfügbar kategorisiert            | 213,4               | 0,0         |
| <b>Modellwerte mit Hilfe am Markt beobachteter Parameter</b> | <b>351,7</b>        | <b>18,9</b> |
| davon als zur Veräußerung verfügbar kategorisiert            | 251,8               | 0,0         |
| davon Derivate in einer Sicherungsbeziehung                  | 72,8                | 0,6         |
| davon Derivate nicht in einer Sicherungsbeziehung            | 27,1                | 18,3        |
| <b>Theoretische Modellwerte</b>                              | <b>0,0</b>          | <b>0,0</b>  |

[44]  
Eventual-  
verbindlichkeiten

| in Mio EUR                         | 31.12.2010 | davon<br>verbundene<br>Unternehmen | 31.12.2009 | davon<br>verbundene<br>Unternehmen |
|------------------------------------|------------|------------------------------------|------------|------------------------------------|
| Bürgschaften                       | 105,0      | –                                  | 69,0       | –                                  |
| Gewährleistungsverträge            | 0,5        | –                                  | 1,3        | –                                  |
| Sonstige Eventualverbindlichkeiten | 40,7       | –                                  | 26,2       | –                                  |

Der wesentliche Teil der ausgereichten Bürgschaften ist auf das Pharmageschäft in Italien zurückzuführen. Dort müssen aufgrund steuerlicher Regelungen Bürgschaften für die Rückerstattung von Steuerforderungen gegenüber dem italienischen Fiskus sowie für die Sicherstellung von Produktlieferungen an öffentliche Krankenhäuser hinterlegt werden. Diese belaufen sich zum Stichtag auf 54,0 Mio EUR (Vorjahr: 43,0 Mio EUR). Die sonstigen Eventualverbindlichkeiten umfassen unter anderem vergebene Sicherheiten auf Sachanlagevermögen wie Gebäude und potenzielle Verpflichtungen aus Rechtsstreitigkeiten, bei denen die Wahrscheinlichkeit eines Ressourcenabflusses zum Bilanzstichtag nicht hinreichend für die Bildung einer Rückstellung war.

[45]  
Sonstige finanzielle  
Verpflichtungen

Die sonstigen finanziellen Verpflichtungen gliederten sich wie folgt:

| in Mio EUR                                                   | 31.12.2010     | davon<br>verbundene<br>Unternehmen | 31.12.2009     | davon<br>verbundene<br>Unternehmen |
|--------------------------------------------------------------|----------------|------------------------------------|----------------|------------------------------------|
| Verpflichtungen zum Erwerb von immateriellen Vermögenswerten | 1.003,6        | –                                  | 1.207,5        | –                                  |
| Bestellungen für Investitionen in Sachanlagevermögen         | 179,2          | –                                  | 211,0          | –                                  |
| Künftige Zahlungen aus Operating-Leasing                     | 208,8          | –                                  | 133,3          | –                                  |
| Langfristige Abnahmeverpflichtungen                          | 315,2          | –                                  | 326,6          | –                                  |
| Übrige finanzielle Verpflichtungen                           | 18,2           | –                                  | 18,6           | –                                  |
|                                                              | <b>1.725,0</b> | <b>–</b>                           | <b>1.897,0</b> | <b>–</b>                           |

Verpflichtungen zum Erwerb von immateriellen Vermögenswerten bestehen insbesondere im Rahmen von Kooperationen zur Forschung und Entwicklung. Hier ist Merck Verpflichtungen zur Zahlung von Meilensteinzahlungen bei Erreichen von bestimmten Zielen durch den Partner eingegangen. Für den unwahrscheinlichen Fall, dass alle Vertragspartner sämtliche Meilensteine erreichen, müsste Merck bis zu 1.003,6 Mio EUR (Vorjahr: 1.207,5 Mio EUR) für den Erwerb von immateriellen Vermögenswerten zahlen.

Die mögliche Fristigkeit dieser Verpflichtungen stellt sich wie folgt dar:

| in Mio EUR<br>Stand 31.12.2010                                  | mögliche<br>Fälligkeit<br>in 1 Jahr | mögliche<br>Fälligkeit<br>in 1 – 5 Jahren | mögliche<br>Fälligkeit in<br>über 5 Jahren | Gesamt         |
|-----------------------------------------------------------------|-------------------------------------|-------------------------------------------|--------------------------------------------|----------------|
| Verpflichtungen zum Erwerb von<br>immateriellen Vermögenswerten | 32,9                                | 219,3                                     | 751,4                                      | <b>1.003,6</b> |

| in Mio EUR<br>Stand 31.12.2009                                  | mögliche<br>Fälligkeit<br>in 1 Jahr | mögliche<br>Fälligkeit<br>in 1 – 5 Jahren | mögliche<br>Fälligkeit in<br>über 5 Jahren | Gesamt  |
|-----------------------------------------------------------------|-------------------------------------|-------------------------------------------|--------------------------------------------|---------|
| Verpflichtungen zum Erwerb von<br>immateriellen Vermögenswerten | 60,4                                | 309,1                                     | 838,0                                      | 1.207,5 |

Die sonstigen finanziellen Verpflichtungen sind zum Nominalwert bewertet. Die Verpflichtungen aus Leasing-Vereinbarungen ließen sich wie folgt unterteilen:

| in Mio EUR<br>Stand 31.12.2010                            | Restlaufzeit<br>bis 1 Jahr | Restlaufzeit<br>1 – 5 Jahre | Restlaufzeit<br>über 5 Jahre | Gesamt       |
|-----------------------------------------------------------|----------------------------|-----------------------------|------------------------------|--------------|
| Barwert der künftigen Leasingraten<br>aus Finance-Leasing | 1,8                        | 3,0                         | 2,3                          | 7,1          |
| Zinsanteil Finance-Leasing                                | 0,3                        | 0,3                         | –                            | 0,6          |
| <b>Künftige Zahlungen aus Finance-Leasing</b>             | <b>2,1</b>                 | <b>3,3</b>                  | <b>2,3</b>                   | <b>7,7</b>   |
| <b>Künftige Zahlungen aus Operating-Leasing</b>           | <b>50,3</b>                | <b>130,3</b>                | <b>28,2</b>                  | <b>208,8</b> |

| in Mio EUR<br>Stand 31.12.2009                            | Restlaufzeit<br>bis 1 Jahr | Restlaufzeit<br>1 – 5 Jahre | Restlaufzeit<br>über 5 Jahre | Gesamt       |
|-----------------------------------------------------------|----------------------------|-----------------------------|------------------------------|--------------|
| Barwert der künftigen Leasingraten<br>aus Finance-Leasing | 1,8                        | 8,6                         | –                            | 10,4         |
| Zinsanteil Finance-Leasing                                | 0,1                        | 0,4                         | –                            | 0,5          |
| <b>Künftige Zahlungen aus Finance-Leasing</b>             | <b>1,9</b>                 | <b>9,0</b>                  | <b>–</b>                     | <b>10,9</b>  |
| <b>Künftige Zahlungen aus Operating-Leasing</b>           | <b>25,1</b>                | <b>70,8</b>                 | <b>37,4</b>                  | <b>133,3</b> |

Operating-Lease-Verträge betreffen im Wesentlichen markttypische Leasingverhältnisse zur Miete von Betriebs- und Geschäftsausstattung.

[46] Der Personalaufwand setzte sich wie folgt zusammen:

Personalaufwand/  
Anzahl Mitarbeiter

| in Mio EUR                                         | 2010           | 2009           |
|----------------------------------------------------|----------------|----------------|
| Löhne und Gehälter                                 | 2.145,5        | 1.764,1        |
| Soziale Abgaben und Aufwendungen für Unterstützung | 319,3          | 266,7          |
| Aufwendungen für Altersversorgung                  | 132,1          | 98,1           |
|                                                    | <b>2.596,9</b> | <b>2.128,9</b> |

Zum 31. Dezember 2010 zählten 40.562 Mitarbeiter zur Merck-Gruppe (Vorjahr: 33.062).  
Im Jahresdurchschnitt waren 36.347 Mitarbeiter beschäftigt (Vorjahr: 32.850).



Die Aufteilung auf die verschiedenen Funktionsbereiche ist wie folgt:

| durchschnittliche Anzahl Mitarbeiter | 2010          | 2009          |
|--------------------------------------|---------------|---------------|
| Produktion                           | 8.327         | 6.956         |
| Logistik                             | 1.927         | 1.773         |
| Marketing und Vertrieb               | 11.541        | 10.582        |
| Administration                       | 4.378         | 3.750         |
| Forschung und Entwicklung            | 4.116         | 3.627         |
| Infrastruktur und Sonstige           | 6.058         | 6.162         |
|                                      | <b>36.347</b> | <b>32.850</b> |

**[47]** Der Materialaufwand im Jahr 2010 betrug 1.246 Mio EUR (Vorjahr: 1.052 Mio EUR) und wird als **Materialaufwand** Teil der Herstellungskosten ausgewiesen.

**[48]** Der Aufwand für die Konzernabschlussprüfer der Merck-Gruppe (KPMG) setzte sich wie folgt zusammen:  
**Aufwand für Abschlussprüfer**

| Aufwand in Mio EUR für          | 2010         |                                          | 2009         |                                          |
|---------------------------------|--------------|------------------------------------------|--------------|------------------------------------------|
|                                 | Merck-Gruppe | davon KPMG AG und verbundene Unternehmen | Merck-Gruppe | davon KPMG AG und verbundene Unternehmen |
| Abschlussprüfungen              | 8,1          | 3,4                                      | 5,2          | 2,2                                      |
| Sonstige Bestätigungsleistungen | 0,2          | –                                        | 0,4          | 0,3                                      |
| Steuerberatungsleistungen       | 0,4          | 0,2                                      | 0,3          | 0,1                                      |
| Sonstige Leistungen             | 0,6          | 0,5                                      | 1,0          | 0,9                                      |
|                                 | <b>9,3</b>   | <b>4,1</b>                               | <b>6,9</b>   | <b>3,5</b>                               |

Der Anstieg des Aufwands für die Konzernabschlussprüfer ist im Wesentlichen auf die Erst- und Folgeprüfungen der Millipore-Gesellschaften zurückzuführen.

Zu den mit den Abschlußprüfern der KPMG Aktiengesellschaft Wirtschaftsprüfungsgesellschaft verbundenen Unternehmen zählen die zum 31. Dezember 2010 unter dem Dach der KPMG Europe LLP verbundenen Unternehmen.

**[49]** Die Entsprechenserklärung nach § 161 Aktiengesetz wurde im Februar 2010 auf unserer Website **Corporate Governance** [www.merck.de/investoren](http://www.merck.de/investoren) → Corporate Governance aktualisiert veröffentlicht und damit dauerhaft zugänglich gemacht.

**[50]** Folgende in diesen Konzernabschluss einbezogene Tochterunternehmen haben von der Befreiungsmöglichkeit nach § 264 Abs. 3 HGB Gebrauch gemacht:  
**Unternehmen, die von der Befreiung gemäß § 264 Abs. 3 HGB Gebrauch machen**  
Chemische Fabrik Lehrte Dr. Andreas Kossel GmbH, Lehrte  
Merck Export GmbH, Darmstadt  
Merck Selbstmedikation GmbH, Darmstadt  
Merck Shared Services Europe GmbH, Darmstadt  
Merck Serono GmbH, Darmstadt

**[51]**  
**Angaben über Beziehungen  
zu nahestehenden Personen  
und Unternehmen**

Nahestehend zur Merck-Gruppe sind die E. Merck KG, die Emanuel Merck Vermögens KG und die E. Merck Beteiligungen KG. Grundsätzlich sind auch direkte oder indirekte Tochtergesellschaften der Merck KGaA, assoziierte Gesellschaften und Joint Ventures der Merck-Gruppe sowie Pensionsfonds, die als leistungsorientierte Pläne gemäß IAS 19 zu klassifizieren sind, nahestehende Unternehmen im Sinne von IAS 24. Des Weiteren sind die Mitglieder der Geschäftsleitung und des Aufsichtsrats der Merck KGaA, des Vorstands und des Gesellschafterrats der E. Merck KG sowie deren nahe Familienangehörige nahestehende Personen.

Zum 31. Dezember 2010 bestanden Verbindlichkeiten der Merck KGaA, der Merck Financial Services GmbH und der Merck & Cie, Altdorf, gegenüber der E. Merck KG in Höhe von 450,9 Mio EUR (Vorjahr: 292,6 Mio EUR). Ferner bestanden per 31. Dezember 2010 Forderungen der Merck KGaA gegenüber der E. Merck KG in Höhe von 12,3 Mio EUR (Vorjahr: 10,7 Mio EUR) und gegenüber der E. Merck Beteiligungen KG in Höhe von 4,7 Mio EUR (Vorjahr: 4,2 Mio EUR). Die Salden resultierten im Wesentlichen aus den Ergebnisabführungen der Merck & Cie an die E. Merck KG, den gegenseitigen Ergebnisabführungen zwischen Merck KGaA und E. Merck KG sowie aus der Gewährung von Darlehen der E. Merck KG an die Merck Financial Services GmbH. Diese Finanzverbindlichkeiten in Höhe von 190,3 Mio EUR (Vorjahr: 118,8 Mio EUR) wurden zu marktüblichen Konditionen verzinst. Von Januar bis Dezember 2010 erbrachten die Merck KGaA und die Merck Shared Services Europe GmbH Dienstleistungen für die E. Merck KG im Wert von 1,1 Mio EUR (Vorjahr: 1,2 Mio EUR), für die E. Merck Beteiligungen KG im Wert von 0,4 Mio EUR (Vorjahr: 0,4 Mio EUR) und für die Emanuel Merck Vermögens KG im Wert von 0,2 Mio EUR (Vorjahr: 0,1 Mio EUR). Im gleichen Zeitraum erbrachte die E. Merck KG Dienstleistungen für die Merck KGaA im Wert von 0,5 Mio EUR (Vorjahr: 0,5 Mio EUR).

Geschäftsvorfälle mit wesentlichen Tochtergesellschaften wurden im Zuge der Konsolidierung eliminiert und werden nicht weitergehend erläutert. Angaben zu Pensionsfonds, die als leistungsorientierte Pläne gemäß IAS 19 zu klassifizieren sind, können den Angaben im Kapitel Rückstellungen für Pensionen und ähnliche Verpflichtungen entnommen werden. Weitere wesentliche Geschäftsvorfälle mit diesen Pensionsfonds lagen nicht vor.

Gesellschaften der Merck-Gruppe lieferten von Januar bis Dezember 2010 Waren im Wert von 1,1 Mio EUR (Vorjahr: 0,3 Mio EUR) an assoziierte Gesellschaften. Zum 31. Dezember 2010 bestanden Forderungen von Gesellschaften der Merck-Gruppe an assoziierte Gesellschaften in Höhe von 0,8 Mio EUR (Vorjahr: 0,0 Mio EUR). Weitere wesentliche Geschäftsvorfälle mit assoziierten Unternehmen traten nicht auf.

Weitere wesentliche Geschäfte, wie etwa die Bereitstellung von Dienstleistungen oder die Gewährung von Darlehen, zwischen Gesellschaften der Merck-Gruppe und Mitgliedern der Geschäftsleitung und des Aufsichtsrats der Merck KGaA, des Vorstands und des Gesellschafterrats der E. Merck KG sowie deren nahen Familienangehörigen fanden im Geschäftsjahr nicht statt.

- Bezüge der Geschäftsleitung und des Aufsichtsrats** [52] Die Bezüge der Geschäftsleitung der Merck KGaA werden überwiegend vom Komplementär E. Merck KG getragen und in dessen Gewinn- und Verlustrechnung als Aufwand erfasst. Für Januar bis Dezember 2010 wurden für Mitglieder der Geschäftsleitung der Merck KGaA fixe Bezüge in Höhe von 3,5 Mio EUR (Vorjahr: 3,5 Mio EUR) und variable Bezüge in Höhe von 6,2 Mio EUR (Vorjahr: 3,7 Mio EUR) erfasst. Weiterhin war in den Zuführungen zu den Pensionsrückstellungen der E. Merck KG ein laufender Dienstzeitaufwand in Höhe von 2,1 Mio EUR (Vorjahr: 1,6 Mio EUR) für Mitglieder der Geschäftsleitung der Merck KGaA enthalten.
- Vorbehaltlich der Zustimmung der Hauptversammlung zur vorgeschlagenen Ausschüttung von 1,25 EUR/Aktie setzen sich die Bezüge des Aufsichtsrats in Höhe von 528 TEUR (Vorjahr: 435 TEUR) aus 123 TEUR (Vorjahr: 123 TEUR) fixen und 405 TEUR (Vorjahr: 312 TEUR) variablen Bestandteilen zusammen.
- Weitere Erläuterungen befinden sich im Vergütungsbericht auf den Seiten 111 bis 117.
- Angaben zur Aufstellung und Freigabe** [53] Die Geschäftsleitung der Merck KGaA hat den Konzernabschluss am 8. Februar 2011 aufgestellt und zur Weitergabe an den Aufsichtsrat freigegeben. Der Aufsichtsrat hat die Aufgabe, den Konzernabschluss zu prüfen und zu erklären, ob er ihn billigt.
- Ereignisse nach dem Bilanzstichtag** [54] Im Januar 2011 wurde die bisherige Einschätzung des Committee for Medicinal Products for Human Use (CHMP) der European Medicines Agency (EMA) bestätigt und der Antrag auf Marktzulassung für Cladribin-Tabletten in Europa endgültig negativ beschieden.
- Am 7. Februar 2011 wurde der Verkauf der Crop BioScience Aktivitäten abgeschlossen. Bei einem Verkaufspreis von 208 Mio EUR ergibt sich voraussichtlich ein Veräußerungsgewinn in Höhe von rund 160 Mio EUR vor Steuern. Die Aktivitäten wurden zum Stichtag 31. Dezember 2010 im Konzernabschluss als zur Veräußerung gehaltene Vermögenswerte und Verbindlichkeiten ausgewiesen.

**[55] Aufstellung des Anteilsbesitzes**

Nachfolgend ist die Anteilsbesitzliste der Merck-Gruppe zum 31. Dezember 2010 dargestellt.

| Land                                    | Gesellschaft                                            | Sitz           | Anteil<br>am<br>Kapital<br>(%) | davon<br>Merck<br>KGaA<br>(%) |
|-----------------------------------------|---------------------------------------------------------|----------------|--------------------------------|-------------------------------|
| <b>I. Vollkonsolidierte Unternehmen</b> |                                                         |                |                                |                               |
| <b>Deutschland</b>                      |                                                         |                |                                |                               |
| Deutschland                             | Merck KGaA                                              | Darmstadt      | Obergesell-<br>schaft          |                               |
| Deutschland                             | Allergopharma J. Ganzer KG                              | Reinbek        | 95,00                          |                               |
| Deutschland                             | Cape June Ltd. & Co. KG                                 | Frankfurt      | 100,00                         |                               |
| Deutschland                             | Chemische Fabrik Lehrte<br>Dr. Andreas Kossel GmbH      | Lehrte         | 100,00                         | 100,00                        |
| Deutschland                             | Chemitra GmbH                                           | Darmstadt      | 100,00                         | 100,00                        |
| Deutschland                             | Emedia Export Company mbH                               | Gernsheim      | 100,00                         |                               |
| Deutschland                             | Litec-LLL GmbH                                          | Greifswald     | 100,00                         | 100,00                        |
| Deutschland                             | Merck Biosciences GmbH                                  | Schwalbach/Ts. | 100,00                         |                               |
| Deutschland                             | Merck China Chemicals Holding GmbH                      | Darmstadt      | 100,00                         |                               |
| Deutschland                             | Merck Consumer Health Care Holding GmbH                 | Darmstadt      | 100,00                         | 100,00                        |
| Deutschland                             | Merck Export GmbH                                       | Darmstadt      | 100,00                         | 100,00                        |
| Deutschland                             | Merck Financial Services GmbH                           | Darmstadt      | 100,00                         | 100,00                        |
| Deutschland                             | Merck Holding GmbH                                      | Gernsheim      | 100,00                         | 100,00                        |
| Deutschland                             | Merck Internationale Beteiligungen GmbH                 | Darmstadt      | 100,00                         |                               |
| Deutschland                             | Merck Schuchardt OHG                                    | Hohenbrunn     | 100,00                         | 100,00                        |
| Deutschland                             | Merck Selbstmedikation GmbH                             | Darmstadt      | 100,00                         |                               |
| Deutschland                             | Merck Serono GmbH                                       | Darmstadt      | 100,00                         | 100,00                        |
| Deutschland                             | Merck Shared Services Europe GmbH                       | Darmstadt      | 100,00                         | 100,00                        |
| Deutschland                             | Merck Versicherungsvermittlung GmbH                     | Darmstadt      | 100,00                         | 100,00                        |
| Deutschland                             | Merck Verwaltungsgesellschaft mbH                       | Darmstadt      | 100,00                         | 100,00                        |
| Deutschland                             | Merck Vierte Allgemeine<br>Beteiligungsgesellschaft mbH | Gernsheim      | 100,00                         |                               |
| Deutschland                             | Millipore GmbH                                          | Schwalbach/Ts. | 100,00                         |                               |
| Deutschland                             | Solvent Innovation GmbH                                 | Darmstadt      | 100,00                         | 100,00                        |
| <b>Übriges Europa</b>                   |                                                         |                |                                |                               |
| Schweiz                                 | Allergopharma AG                                        | Therwil        | 100,00                         |                               |
| Schweiz                                 | Ares Trading SA                                         | Aubonne        | 100,00                         |                               |
| Schweiz                                 | Horizon North SA                                        | Genf           | 100,00                         |                               |
| Schweiz                                 | Horizon South SA                                        | Genf           | 100,00                         |                               |
| Schweiz                                 | Merck & Cie                                             | Altdorf        | 98,87                          | 98,87                         |
| Schweiz                                 | Merck (Schweiz) AG                                      | Zug            | 100,00                         |                               |
| Schweiz                                 | Merck AG                                                | Zug            | 100,00                         | 20,87                         |
| Schweiz                                 | Merck Biosciences AG                                    | Läufelfingen   | 100,00                         |                               |
| Schweiz                                 | Merck Eprova AG in Liquidation                          | Schaffhausen   | 100,00                         |                               |
| Schweiz                                 | Merck Serono SA                                         | Coinsins       | 100,00                         |                               |

| Land           | Gesellschaft                             | Sitz            | Anteil<br>am<br>Kapital<br>(%) | davon<br>Merck<br>KGaA<br>(%) |
|----------------|------------------------------------------|-----------------|--------------------------------|-------------------------------|
| Schweiz        | Millipore AG                             | Zug             | 100,00                         |                               |
| Schweiz        | SeroMer Holding SA                       | Chésereux       | 100,00                         |                               |
| Schweiz        | Serono Technologies SA                   | Genf            | 100,00                         |                               |
| Frankreich     | Delahardt S.A.S.                         | Molsheim        | 100,00                         |                               |
| Frankreich     | Laboratoire Médiflor S.A.S.              | Lyon            | 100,00                         |                               |
| Frankreich     | Merck Chimie S.A.S.                      | Fontenay s/Bois | 100,00                         |                               |
| Frankreich     | Merck Médication Familiale S.A.S.        | Lyon            | 100,00                         |                               |
| Frankreich     | Merck S.A.                               | Lyon            | 99,76                          | 88,94                         |
| Frankreich     | Merck Santé S.A.S.                       | Lyon            | 100,00                         |                               |
| Frankreich     | Merck Serono Biodevelopment S.A.S.       | Lyon            | 100,00                         |                               |
| Frankreich     | Merck Serono S.A.S.                      | Lyon            | 100,00                         |                               |
| Frankreich     | Millipore S.A.S.                         | Molsheim        | 100,00                         |                               |
| Großbritannien | Baird & Tatlock Ltd.                     | Hull            | 100,00                         |                               |
| Großbritannien | BioAnaLab Ltd.                           | London          | 100,00                         |                               |
| Großbritannien | Bioprocessing Ltd.                       | London          | 100,00                         |                               |
| Großbritannien | Bioprocessing Corp. Ltd.                 | London          | 100,00                         |                               |
| Großbritannien | British Cod Liver Oils Ltd.              | Hull            | 100,00                         |                               |
| Großbritannien | Celliance Ltd.                           | Edinburgh       | 100,00                         |                               |
| Großbritannien | Chemicon Europe Ltd.                     | London          | 100,00                         |                               |
| Großbritannien | E. Merck Ltd.                            | Hull            | 100,00                         |                               |
| Großbritannien | Hofels Pure Foods Ltd.                   | Hull            | 100,00                         |                               |
| Großbritannien | Lamberts Healthcare Ltd.                 | Tunbridge Wells | 100,00                         |                               |
| Großbritannien | Lipha Pharmaceuticals Ltd.               | Hull            | 100,00                         |                               |
| Großbritannien | Marfleet Refining Company Ltd.           | Hull            | 100,00                         |                               |
| Großbritannien | Merck Biosciences Ltd.                   | Nottingham      | 100,00                         |                               |
| Großbritannien | Merck Chemicals Ltd.                     | Nottingham      | 100,00                         |                               |
| Großbritannien | Merck Consumer Health Care Ltd.          | Hull            | 100,00                         |                               |
| Großbritannien | Merck Cross Border Trustees Ltd.         | Hull            | 100,00                         |                               |
| Großbritannien | Merck Investments Ltd.                   | Hull            | 100,00                         |                               |
| Großbritannien | Merck Ltd.                               | Hull            | 100,00                         |                               |
| Großbritannien | Merck Pension Trustees Ltd.              | Hull            | 100,00                         |                               |
| Großbritannien | Merck Serono Europe Ltd.                 | London          | 100,00                         |                               |
| Großbritannien | Merck Serono Ltd.                        | Feltham         | 100,00                         |                               |
| Großbritannien | Merck Services U.K. Ltd.                 | Hull            | 100,00                         |                               |
| Großbritannien | Millipore (U.K.) Ltd.                    | London          | 100,00                         |                               |
| Großbritannien | Millipore UK Holdings LLP                | London          | 100,00                         |                               |
| Großbritannien | New Era Laboratories Ltd.                | Hull            | 100,00                         |                               |
| Großbritannien | Phillips Yeast Products Ltd.             | Hull            | 100,00                         |                               |
| Großbritannien | Rona Laboratories Ltd.                   | Hull            | 100,00                         |                               |
| Großbritannien | Serologicals European Holding Ltd.       | London          | 100,00                         |                               |
| Großbritannien | Serologicals Global Holding Company Ltd. | London          | 100,00                         |                               |
| Großbritannien | Serologicals UK Holding Company Ltd.     | London          | 100,00                         |                               |

| Land           | Gesellschaft                                                 | Sitz                  | Anteil<br>am<br>Kapital<br>(%) | davon<br>Merck<br>KGaA<br>(%) |
|----------------|--------------------------------------------------------------|-----------------------|--------------------------------|-------------------------------|
| Großbritannien | Serono Contracting Ltd.                                      | Hull                  | 100,00                         |                               |
| Großbritannien | Serono Ltd.                                                  | Feltham               | 100,00                         |                               |
| Großbritannien | Seven Seas Healthcare Ltd.                                   | Hull                  | 100,00                         |                               |
| Großbritannien | Seven Seas Ltd.                                              | Hull                  | 100,00                         |                               |
| Großbritannien | Seven Seas Pension Trustees Ltd.                             | Hull                  | 100,00                         |                               |
| Großbritannien | Upstate Ion Channel Discovery Group Ltd.                     | London                | 100,00                         |                               |
| Großbritannien | Upstate Ltd.                                                 | London                | 100,00                         |                               |
| Italien        | Allergopharma S.p.A.                                         | Mailand               | 100,00                         |                               |
| Italien        | Baker Italia S.p.A.                                          | Rom                   | 100,00                         |                               |
| Italien        | Istituto di Ricerche Biomediche<br>Antoine Marxer RBM S.p.A. | Colleretto<br>Giacosa | 100,00                         |                               |
| Italien        | Merck S.p.A.                                                 | Mailand               | 100,00                         |                               |
| Italien        | Merck Serono S.p.A.                                          | Rom                   | 99,74                          |                               |
| Italien        | Millipore S.p.A.                                             | Mailand               | 100,00                         |                               |
| Spanien        | Merck, S.L.                                                  | Madrid                | 100,00                         |                               |
| Spanien        | Millipore Iberica S.A.                                       | Madrid                | 100,00                         |                               |
| Belgien        | Merck Consumer Healthcare N.V.-S.A.                          | Overijse              | 100,00                         |                               |
| Belgien        | Merck N.V.-S.A.                                              | Overijse              | 100,00                         |                               |
| Belgien        | Millipore S.A./N.V.                                          | Brüssel               | 100,00                         |                               |
| Bulgarien      | Merck Bulgaria EAD                                           | Sofia                 | 100,00                         |                               |
| Dänemark       | Millipore A/S                                                | Kopenhagen            | 100,00                         |                               |
| Dänemark       | Survac ApS                                                   | Frederiksberg         | 100,00                         | 100,00                        |
| Estland        | Merck Serono OÜ                                              | Tallinn               | 100,00                         |                               |
| Finnland       | Merck OY                                                     | Espoo                 | 100,00                         |                               |
| Finnland       | Millipore OY                                                 | Espoo                 | 100,00                         |                               |
| Griechenland   | Merck A.E.                                                   | Marousi               | 100,00                         |                               |
| Irland         | Millipore Cork                                               | Carrigtwohill         | 100,00                         |                               |
| Irland         | Millipore Dublin International Finance Company               | Dublin                | 100,00                         |                               |
| Irland         | Millipore Ireland Ltd.                                       | Carrigtwohill         | 100,00                         |                               |
| Irland         | Seven Seas (Ireland) Ltd.                                    | Dublin                | 100,00                         |                               |
| Irland         | Tullagreen Holdings Ltd.                                     | Dublin                | 100,00                         |                               |
| Kroatien       | Merck d.o.o.                                                 | Zagreb                | 100,00                         |                               |
| Lettland       | Merck Serono SIA                                             | Riga                  | 100,00                         |                               |
| Litauen        | Merck Serono, UAB                                            | Kaunas                | 100,00                         |                               |
| Luxemburg      | Merck Re S.A.                                                | Luxemburg             | 100,00                         |                               |
| Luxemburg      | Merck-Finanz AG                                              | Luxemburg             | 100,00                         | 100,00                        |
| Luxemburg      | Millilux S.a.r.L.                                            | Luxemburg             | 100,00                         |                               |
| Luxemburg      | Millinvest S.a.r.L.                                          | Luxemburg             | 100,00                         |                               |
| Luxemburg      | Millipart S.a.r.L.                                           | Luxemburg             | 100,00                         |                               |
| Luxemburg      | Millipore International Holdings, S.a.r.L.                   | Luxemburg             | 100,00                         |                               |
| Malta          | Merck Capital Asset Management Ltd.                          | St. Julians           | 100,00                         |                               |
| Malta          | Merck Capital Holding Ltd.                                   | St. Julians           | 100,00                         |                               |

| Land        | Gesellschaft                                 | Sitz                  | Anteil<br>am<br>Kapital<br>(%) | davon<br>Merck<br>KGaA<br>(%) |
|-------------|----------------------------------------------|-----------------------|--------------------------------|-------------------------------|
| Malta       | Merck Capital Ltd.                           | St. Julians           | 100,00                         |                               |
| Niederlande | Merck B.V.                                   | Schiphol-Rijk         | 100,00                         |                               |
| Niederlande | Millipore B.V.                               | Amsterdam<br>Zuidoost | 100,00                         |                               |
| Niederlande | Millipore International Holding Company B.V. | Amsterdam<br>Zuidoost | 100,00                         |                               |
| Niederlande | Millipore Ireland B.V.                       | Amsterdam<br>Zuidoost | 100,00                         |                               |
| Niederlande | Serono Tri Holdings B.V.                     | Schiphol-Rijk         | 100,00                         |                               |
| Norwegen    | Millipore AS                                 | Oslo                  | 100,00                         |                               |
| Österreich  | Allergopharma Vertriebsgesellschaft m.b.H.   | Wien                  | 100,00                         |                               |
| Österreich  | Arcana Life-Science-Produkte GmbH            | Wien                  | 100,00                         |                               |
| Österreich  | Merck Gesellschaft mbH                       | Wien                  | 100,00                         |                               |
| Österreich  | Merck KGaA & Co. Werk Spittal                | Spittal               | 100,00                         | 99,00                         |
| Österreich  | Millipore GesmbH                             | Wien                  | 100,00                         |                               |
| Polen       | Merck Sp.z o.o.                              | Warschau              | 100,00                         |                               |
| Polen       | Millipore Sp.z.o.o.                          | Warschau              | 100,00                         |                               |
| Portugal    | Merck, S.A.                                  | Lissabon              | 100,00                         |                               |
| Rumänien    | Merck Romania S.R.L.                         | Bukarest              | 100,00                         |                               |
| Russland    | Merck LLC                                    | Moskau                | 100,00                         |                               |
| Schweden    | Merck AB                                     | Stockholm             | 100,00                         |                               |
| Schweden    | Merck SeQuant AB                             | Umea                  | 100,00                         |                               |
| Schweden    | Millipore AB                                 | Solna                 | 100,00                         |                               |
| Serbien     | Merck d.o.o. Beograd                         | Belgrad               | 100,00                         |                               |
| Slowakei    | Merck Pharma s.r.o.                          | Bratislava            | 100,00                         |                               |
| Slowakei    | Merck spol.s.r.o.                            | Bratislava            | 100,00                         |                               |
| Slowenien   | Merck d.o.o.                                 | Ljubljana             | 100,00                         |                               |
| Tschechien  | Merck spol.s.r.o.                            | Prag                  | 100,00                         |                               |
| Tschechien  | Millipore s.r.o.                             | Prag                  | 100,00                         |                               |
| Tschechien  | Merck Pharma k.s.                            | Prag                  | 100,00                         | 80,00                         |
| Türkei      | Merck Ilac Ecza ve Kimya Ticaret AS          | Istanbul              | 100,00                         |                               |
| Ungarn      | Merck Kft.                                   | Budapest              | 100,00                         |                               |
| Ungarn      | Millipore Kft.                               | Budapest              | 100,00                         |                               |

#### Nordamerika

|     |                                     |            |        |  |
|-----|-------------------------------------|------------|--------|--|
| USA | Celliance Lawrence, Inc.            | Wilmington | 100,00 |  |
| USA | Concord Investments Corp.           | Rockland   | 100,00 |  |
| USA | EMD Chemicals Inc.                  | Gibbstown  | 100,00 |  |
| USA | EMD Crop BioScience Inc.            | Brookfield | 100,00 |  |
| USA | EMD Serono Biotech Center, Inc.     | Billerica  | 100,00 |  |
| USA | EMD Serono Holding Inc.             | Rockland   | 100,00 |  |
| USA | EMD Serono Research Center, Inc.    | Billerica  | 100,00 |  |
| USA | EMD Serono Research Institute, Inc. | Rockland   | 100,00 |  |

| Land        | Gesellschaft                           | Sitz        | Anteil<br>am<br>Kapital<br>(%) | davon<br>Merck<br>KGaA<br>(%) |
|-------------|----------------------------------------|-------------|--------------------------------|-------------------------------|
| USA         | EMD Serono, Inc.                       | Rockland    | 100,00                         |                               |
| USA         | EMD Shared Services America Corp.      | Quincy      | 100,00                         |                               |
| USA         | Millipore Asia Ltd.                    | Wilmington  | 100,00                         |                               |
| USA         | Millipore Corp.                        | Billerica   | 100,00                         |                               |
| USA         | Millipore Pacific Ltd.                 | Wilmington  | 100,00                         |                               |
| USA         | Millipore UK Holdings I, LLC           | Wilmington  | 100,00                         |                               |
| USA         | Millipore UK Holdings II, LLC          | Wilmington  | 100,00                         |                               |
| USA         | Randolph Diagnostics Development, Inc. | Rockland    | 100,00                         |                               |
| USA         | Serono Laboratories Inc.               | Rockland    | 100,00                         |                               |
| USA         | Upstate USA, Inc.                      | New York    | 100,00                         |                               |
| Puerto Rico | Millipore Corp., Puerto Rico Branch    | Cidra       | 100,00                         |                               |
| Kanada      | EMD Chemicals Canada Inc.              | Oakville    | 100,00                         |                               |
| Kanada      | EMD Crop BioScience Canada Inc.        | Oakville    | 100,00                         |                               |
| Kanada      | EMD Inc.                               | Mississauga | 100,00                         |                               |
| Kanada      | Millipore (Canada) Ltd.                | Toronto     | 100,00                         |                               |
| Bermuda     | Millipore Bioscience Caribe Ltd.       | Hamilton    | 100,00                         |                               |
| Bermuda     | Minerva Insurance Co. Ltd.             | Hamilton    | 100,00                         |                               |

**Lateinamerika**

|             |                                      |                   |        |       |
|-------------|--------------------------------------|-------------------|--------|-------|
| Argentinien | Merck Crop BioScience Argentina S.A. | Buenos Aires      | 99,95  | 99,95 |
| Argentinien | Merck Quimica Argentina S.A.I.C.     | Buenos Aires      | 100,00 |       |
| Brasilien   | Merck S.A.                           | Rio de Janeiro    | 100,00 |       |
| Brasilien   | Millipore Industria e Comercio Ltda. | Sao Paulo         | 100,00 |       |
| Chile       | Merck S.A.                           | Santiago de Chile | 100,00 |       |
| Ecuador     | Merck C.A.                           | Quito             | 100,00 |       |
| Guatemala   | Merck, S.A.                          | Guatemala-Stadt   | 100,00 |       |
| Kolumbien   | Merck S.A.                           | Bogota            | 100,00 |       |
| Mexiko      | Merck, S.A. de C.V.                  | Mexiko-Stadt      | 100,00 |       |
| Mexiko      | Millipore S.A. de C.V.               | Mexiko-Stadt      | 100,00 |       |
| Mexiko      | Serono de Mexico S.A. de C.V.        | Mexiko-Stadt      | 100,00 |       |
| Panama      | Mesofarma Corporation                | Panama-Stadt      | 100,00 |       |
| Peru        | Merck Peruana S.A.                   | Lima              | 100,00 |       |
| Uruguay     | ARES Trading Uruguay S.A.            | Montevideo        | 100,00 |       |
| Venezuela   | Merck S.A.                           | Caracas           | 100,00 |       |
| Venezuela   | Representaciones MEPRO S.A.          | Caracas           | 100,00 |       |

**Asien, Afrika, Australien**

|       |                                                          |           |        |  |
|-------|----------------------------------------------------------|-----------|--------|--|
| China | Merck Chemicals (Shanghai) Co., Ltd.                     | Schanghai | 100,00 |  |
| China | Merck Consumer Health Care<br>Shanghai Trading Co., Ltd. | Schanghai | 100,00 |  |
| China | Merck Ltd.                                               | Hong Kong | 100,00 |  |
| China | Merck Pharmaceutical (HK) Ltd.                           | Hong Kong | 100,00 |  |



| Land                              | Gesellschaft                                           | Sitz              | Anteil<br>am<br>Kapital<br>(%) | davon<br>Merck<br>KGaA<br>(%) |
|-----------------------------------|--------------------------------------------------------|-------------------|--------------------------------|-------------------------------|
| China                             | Merck Serono (Beijing)<br>Pharmaceutical R&D Co., Ltd. | Peking            | 100,00                         |                               |
| China                             | Merck Serono Co., Ltd.                                 | Peking            | 100,00                         |                               |
| China                             | Merck Song-Jiang Ltd.                                  | Schanghai         | 100,00                         |                               |
| China                             | Millipore (Shanghai) Trading Co., Ltd.                 | Schanghai         | 100,00                         |                               |
| China                             | Millipore China Ltd.                                   | Hong Kong         | 100,00                         |                               |
| China                             | Shanghai Yayang International Co., Ltd.                | Schanghai         | 100,00                         |                               |
| China                             | Suzhou Taizhu Technology Development Co., Ltd.         | Taicang           | 100,00                         |                               |
| Indien                            | Merck Ltd.                                             | Mumbai            | 51,80                          |                               |
| Indien                            | Merck Specialities Pvt. Ltd.                           | Mumbai            | 100,00                         |                               |
| Indien                            | Millipore India Pvt. Ltd.                              | Bangalore         | 100,00                         |                               |
| Indonesien                        | P.T. Merck Tbk.                                        | Jakarta           | 86,65                          |                               |
| Israel                            | Inter-Lab Ltd.                                         | Yavne             | 100,00                         |                               |
| Israel                            | InterPharm Industries Ltd.                             | Yavne             | 100,00                         |                               |
| Israel                            | InterPharm Laboratories Ltd.                           | Yavne             | 100,00                         |                               |
| Israel                            | Merck Serono Ltd.                                      | Herzlia Pituach   | 100,00                         |                               |
| Japan                             | Merck Ltd.                                             | Tokio             | 100,00                         | 18,00                         |
| Japan                             | Merck Serono Co., Ltd.                                 | Tokio             | 100,00                         |                               |
| Japan                             | Nihon Millipore K.K.                                   | Tokio             | 100,00                         |                               |
| Malaysia                          | Merck Sdn Bhd                                          | Petaling Jaya     | 100,00                         |                               |
| Malaysia                          | Millipore Asia Ltd., Malaysia Branch                   | Kuala Lumpur      | 100,00                         |                               |
| Pakistan                          | Merck (Pvt.) Ltd.                                      | Karatschi         | 75,00                          | 26,00                         |
| Pakistan                          | Merck Pharmaceuticals (Pvt.) Ltd.                      | Karatschi         | 75,00                          |                               |
| Pakistan                          | Merck Specialities (Pvt.) Ltd.                         | Karatschi         | 100,00                         |                               |
| Philippinen                       | Merck Inc.                                             | Makati City       | 100,00                         |                               |
| Singapur                          | Merck Pte. Ltd.                                        | Singapur          | 100,00                         |                               |
| Singapur                          | Millipore Singapore Pte. Ltd.                          | Singapur          | 100,00                         |                               |
| Südkorea                          | Merck Advanced Technologies Ltd.                       | Pyungtaek-shi     | 100,00                         |                               |
| Südkorea                          | Merck Ltd.                                             | Seoul             | 100,00                         |                               |
| Südkorea                          | Millipore Korea Ltd.                                   | Seoul             | 100,00                         |                               |
| Taiwan                            | Merck Display Technologies Ltd.                        | Taipei            | 100,00                         |                               |
| Taiwan                            | Merck Ltd.                                             | Taipei            | 100,00                         |                               |
| Taiwan                            | Millipore Asia Ltd., Taiwan Branch                     | Taipei            | 100,00                         |                               |
| Thailand                          | Merck Ltd.                                             | Bangkok           | 45,11                          |                               |
| Vereinigte Ara-<br>bische Emirate | Merck Serono Middle East FZ-LLC                        | Dubai             | 100,00                         |                               |
| Vietnam                           | Merck Vietnam Ltd.                                     | Ho Chi Minh Stadt | 100,00                         |                               |
| Ägypten                           | Merck Ltd.                                             | Kairo             | 100,00                         |                               |
| Mauritius                         | Millipore Mauritius Ltd.                               | Cyber City        | 100,00                         |                               |
| Südafrika                         | Merck (Pty) Ltd.                                       | Modderfontein     | 100,00                         |                               |
| Südafrika                         | Merck Pharmaceutical Manufacturing (Pty) Ltd.          | Wadeville         | 100,00                         |                               |

| Land       | Gesellschaft                     | Sitz         | Anteil<br>am<br>Kapital<br>(%) | davon<br>Merck<br>KGaA<br>(%) |
|------------|----------------------------------|--------------|--------------------------------|-------------------------------|
| Tunesien   | Merck Promotion SARL             | Tunis        | 100,00                         |                               |
| Tunesien   | Merck SARL                       | Tunis        | 100,00                         |                               |
| Australien | Chemicon Australia Pty. Ltd.     | Sydney       | 100,00                         |                               |
| Australien | Merck Pty. Ltd.                  | Kilsyth      | 100,00                         |                               |
| Australien | Merck Serono Australia Pty. Ltd. | Sydney       | 100,00                         |                               |
| Australien | Millipore Australia Pty. Ltd.    | Sydney       | 100,00                         |                               |
| Neuseeland | Merck Ltd.                       | Manukau City | 100,00                         |                               |

## II. Nach der Equity-Methode bilanzierte assoziierte Unternehmen

### Lateinamerika

|       |               |                   |       |  |
|-------|---------------|-------------------|-------|--|
| Chile | Tecnigen S.A. | Santiago de Chile | 36,00 |  |
|-------|---------------|-------------------|-------|--|

### Asien, Afrika, Australien

|           |                     |         |       |  |
|-----------|---------------------|---------|-------|--|
| Südafrika | Microsep (Pty) Ltd. | Sandton | 24,50 |  |
|-----------|---------------------|---------|-------|--|

## III. Wegen untergeordneter Bedeutung nicht konsolidierte Tochterunternehmen

### Deutschland

|             |                                                                 |           |        |        |
|-------------|-----------------------------------------------------------------|-----------|--------|--------|
| Deutschland | Merck 11. Allgemeine Beteiligungs GmbH                          | Darmstadt | 100,00 | 100,00 |
| Deutschland | Merck Patent GmbH                                               | Darmstadt | 100,00 |        |
| Deutschland | Merck Sechste Allgemeine Beteiligungs-<br>gesellschaft mbH      | Darmstadt | 100,00 |        |
| Deutschland | Merck Wohnungs- und Grundstücks-<br>verwaltungsgesellschaft mbH | Darmstadt | 100,00 | 100,00 |

### Übriges Europa

|                |                                                    |                 |        |  |
|----------------|----------------------------------------------------|-----------------|--------|--|
| Frankreich     | Financière du 8ème S.A.S.                          | Lyon            | 100,00 |  |
| Frankreich     | Gonnon S.A.S.                                      | Lyon            | 100,00 |  |
| Großbritannien | Biovation Ltd.                                     | Aberdeen        | 100,00 |  |
| Großbritannien | Merck UK Limited Partnership                       | Poole           | 100,00 |  |
| Großbritannien | Nature's Best Health Products Ltd.                 | Tunbridge Wells | 100,00 |  |
| Dänemark       | Merck A/S                                          | Hellerup        | 100,00 |  |
| Irland         | Merck Serono (Ireland) Ltd.                        | Dublin          | 100,00 |  |
| Niederlande    | Merck Holding Netherlands B.V.                     | Schiphol-Rijk   | 100,00 |  |
| Norwegen       | Merck AS                                           | Lorenskog       | 100,00 |  |
| Österreich     | Eurodrug Chemisch-pharmazeutische<br>Produkte GmbH | Wien            | 100,00 |  |
| Österreich     | Merck Vermögensverwaltungs-GmbH                    | Wien            | 100,00 |  |
| Portugal       | Laboratorio dos Produtos Sigma S.A.                | Lissabon        | 100,00 |  |
| Portugal       | Laquifa Laboratorios S.A.                          | Lissabon        | 100,00 |  |

| Land                         | Gesellschaft                              | Sitz          | Anteil<br>am<br>Kapital<br>(%) | davon<br>Merck<br>KGaA<br>(%) |
|------------------------------|-------------------------------------------|---------------|--------------------------------|-------------------------------|
| <b>Lateinamerika</b>         |                                           |               |                                |                               |
| Britische<br>Jungfern-Inseln | Axebury Ltd.                              | Tortola       | 100,00                         |                               |
| Dominikanische<br>Republik   | Merck Dominicana S.A.                     | Santo Domingo | 100,00                         |                               |
| Niederländische<br>Antillen  | Applied Research Systems ARS Holding N.V. | Curacao       | 100,00                         |                               |
| Niederländische<br>Antillen  | CMIP (Curacao) B.V.                       | Curacao       | 100,00                         |                               |

**Asien, Afrika, Australien**

|            |                                             |               |        |  |
|------------|---------------------------------------------|---------------|--------|--|
| China      | Beijing Skywing Technology Co., Ltd.        | Peking        | 100,00 |  |
| Indonesien | P.T. Merck Specialities                     | Jakarta       | 100,00 |  |
| Marokko    | Merck Maroc S.A.R.L.                        | Casablanca    | 100,00 |  |
| Südafrika  | Merck Chemicals (Pty) Ltd. (in liquidation) | Modderfontein | 100,00 |  |
| Südafrika  | Serono South Africa Ltd.                    | Johannesburg  | 100,00 |  |
| Australien | E. Merck Pty. Ltd.                          | Kilsyth       | 100,00 |  |

**IV. Wegen untergeordneter Bedeutung nicht nach der Equity-Methode bilanzierte assoziierte Unternehmen****Deutschland**

|             |                                                         |       |       |  |
|-------------|---------------------------------------------------------|-------|-------|--|
| Deutschland | pharma mall Gesellschaft<br>für Electronic Commerce mbH | Böhen | 16,67 |  |
|-------------|---------------------------------------------------------|-------|-------|--|

**Übriges Europa**

|         |                                      |                    |       |  |
|---------|--------------------------------------|--------------------|-------|--|
| Schweiz | Vaximm Holding AG                    | Basel              | 22,76 |  |
| Italien | BioIndustry Park del Canavese S.p.A. | Colleretto Giacosa | 13,30 |  |

**Nordamerika**

|     |                             |           |       |       |
|-----|-----------------------------|-----------|-------|-------|
| USA | Tioga Pharmaceuticals, Inc. | San Diego | 17,22 | 17,22 |
|-----|-----------------------------|-----------|-------|-------|

## VERSICHERUNG DER GESETZLICHEN VERTRETER

Wir versichern nach bestem Wissen, dass gemäß den anzuwendenden Rechnungslegungsgrundsätzen der Konzernabschluss der Merck-Gruppe ein den tatsächlichen Verhältnissen entsprechendes Bild der Vermögens-, Finanz- und Ertragslage des Konzerns vermittelt und im Konzernlagebericht der Geschäftsverlauf einschließlich des Geschäftsergebnisses und die Lage des Konzerns so dargestellt sind, dass ein den tatsächlichen Verhältnissen entsprechendes Bild vermittelt wird, sowie die wesentlichen Chancen und Risiken der voraussichtlichen Entwicklung des Konzerns beschrieben sind.

Darmstadt, den 8. Februar 2011



Karl-Ludwig Kley



Michael Becker



Bernd Reckmann



Stefan Oschmann



Elmar Schnee

## BESTÄTIGUNGSVERMERK DES ABSCHLUSSPRÜFERS

„Wir haben den von der Merck Kommanditgesellschaft auf Aktien, Darmstadt, aufgestellten Konzernabschluss – bestehend aus Bilanz, Gewinn- und Verlustrechnung, Gesamtergebnisrechnung, Kapitalflussrechnung, Eigenkapitalveränderungsrechnung und Anhang – sowie den Konzernlagebericht für das Geschäftsjahr vom 1. Januar bis 31. Dezember 2010 geprüft. Die Aufstellung von Konzernabschluss und Konzernlagebericht nach den IFRS, wie sie in der EU anzuwenden sind, und den ergänzend nach § 315a Abs. 1 HGB anzuwendenden handelsrechtlichen Vorschriften sowie den ergänzenden Bestimmungen der Satzung liegt in der Verantwortung der Geschäftsleitung der Gesellschaft. Unsere Aufgabe ist es, auf der Grundlage der von uns durchgeführten Prüfung eine Beurteilung über den Konzernabschluss und den Konzernlagebericht abzugeben. Wir haben unsere Konzernabschlussprüfung nach § 317 HGB unter Beachtung der vom Institut der Wirtschaftsprüfer (IDW) festgestellten deutschen Grundsätze ordnungsmäßiger Abschlussprüfung vorgenommen. Danach ist die Prüfung so zu planen und durchzuführen, dass Unrichtigkeiten und Verstöße, die sich auf die Darstellung des durch den Konzernabschluss unter Beachtung der anzuwendenden Rechnungslegungsvorschriften und durch den Konzernlagebericht vermittelten Bildes der Vermögens-, Finanz- und Ertragslage wesentlich auswirken, mit hinreichender Sicherheit erkannt werden. Bei der Festlegung der Prüfungshandlungen werden die Kenntnisse über die Geschäftstätigkeit und über das wirtschaftliche und rechtliche Umfeld des Konzerns sowie die Erwartungen über mögliche Fehler berücksichtigt. Im Rahmen der Prüfung werden die Wirksamkeit des rechnungslegungsbezogenen internen Kontrollsystems sowie Nachweise für die Angaben im Konzernabschluss und Konzernlagebericht überwiegend auf der Basis von Stichproben beurteilt. Die Prüfung umfasst die Beurteilung der Jahresabschlüsse der in den Konzernabschluss einbezogenen Unternehmen, der Abgrenzung des Konsolidierungskreises, der angewandten Bilanzierungs- und Konsolidierungsgrundsätze und der wesentlichen Einschätzungen der Geschäftsleitung sowie die Würdigung der Gesamtdarstellung des Konzernabschlusses und des Konzernlageberichts. Wir sind der Auffassung, dass unsere Prüfung eine hinreichend sichere Grundlage für unsere Beurteilung bildet.

Unsere Prüfung hat zu keinen Einwendungen geführt.

Nach unserer Beurteilung auf Grund der bei der Prüfung gewonnenen Erkenntnisse entspricht der Konzernabschluss den IFRS, wie sie in der EU anzuwenden sind, und den ergänzend nach § 315a Abs. 1 HGB anzuwendenden handelsrechtlichen Vorschriften sowie den ergänzenden Bestimmungen der Satzung und vermittelt unter Beachtung dieser Vorschriften ein den tatsächlichen Verhältnissen entsprechendes Bild der Vermögens-, Finanz- und Ertragslage des Konzerns. Der Konzernlagebericht steht in Einklang mit dem Konzernabschluss, vermittelt insgesamt ein zutreffendes Bild von der Lage des Konzerns und stellt die Chancen und Risiken der zukünftigen Entwicklung zutreffend dar."

Frankfurt am Main, den 9. Februar 2011

KPMG AG  
Wirtschaftsprüfungsgesellschaft



Prof. Dr. Nonnenmacher  
Wirtschaftsprüfer



Jenal  
Wirtschaftsprüfer

## GLOSSAR

### A

---

|                                 |                                                                                                                                                            |
|---------------------------------|------------------------------------------------------------------------------------------------------------------------------------------------------------|
| <b>Assoziiertes Unternehmen</b> | Ein Unternehmen, bei welchem der Anteilseigner über einen maßgeblichen Einfluss verfügt, jedoch nicht die Kontrolle oder gemeinschaftliche Führung ausübt. |
|---------------------------------|------------------------------------------------------------------------------------------------------------------------------------------------------------|

### B

---

|                                 |                                                                                                                                                                                                                                                                                                                                                            |
|---------------------------------|------------------------------------------------------------------------------------------------------------------------------------------------------------------------------------------------------------------------------------------------------------------------------------------------------------------------------------------------------------|
| <b>Basis Free Cash Flow</b>     | Free Cash Flow bereinigt um Akquisitionen und Veräußerungen.                                                                                                                                                                                                                                                                                               |
| <b>Betablocker</b>              | Sammelbegriff für ähnlich wirkende Arzneistoffe, die im Körper an $\beta$ -Rezeptoren als inverse Agonisten wirken und so die Wirkung von Stresshormonen (insbesondere Noradrenalin und Adrenalin) hemmen. Sie führen zu einer Senkung von Pulsfrequenz und Blutdruck sowie zu einer geringeren Schlagkraft und Erregbarkeit des Herzens.                  |
| <b>Beteiligungsgesellschaft</b> | Ein Unternehmen, das wegen untergeordneter Bedeutung nicht in den Konsolidierungskreis einbezogen wurde.                                                                                                                                                                                                                                                   |
| <b>BH4</b>                      | Abkürzung für Tetrahydrobiopterin, einem wichtigen Kofaktor im Aminosäurestoffwechsel. BH4 reduziert den Phenylalanin-Spiegel im Blut von Patienten mit Phenylketonurie, die auf die Therapie ansprechen.                                                                                                                                                  |
| <b>Bilharziose</b>              | Schistosomiasis oder Bilharziose ist eine Wurmkrankheit, die in warmen Binnengewässern durch Schnecken als Zwischenwirt verbreitet wird.                                                                                                                                                                                                                   |
| <b>Biomarker</b>                | Bestimmte Substanzen im Körper oder auch Eigenschaften von Zellen. Sie können Ärzten helfen festzustellen, woran ein Patient erkrankt ist. In der Behandlung von Krebserkrankungen spielen häufig bestimmte Gene eine Rolle beziehungsweise die Frage, ob sie „normal“ oder verändert, also „mutiert“, sind. Das nennt man dann auch Wildtyp oder Mutante. |
| <b>BIP</b>                      | Bruttoinlandsprodukt: Gesamtwert aller Güter (Waren und Dienstleistungen), die innerhalb eines Jahres innerhalb der Landesgrenzen einer Volkswirtschaft hergestellt wurden und dem Endverbrauch dienen.                                                                                                                                                    |

### C

---

|                                 |                                                                                                                                                                                                                                                                                                                                                                             |
|---------------------------------|-----------------------------------------------------------------------------------------------------------------------------------------------------------------------------------------------------------------------------------------------------------------------------------------------------------------------------------------------------------------------------|
| <b>CEPIC</b>                    | Europäischer Chemieverband – European Chemical Industry Council.                                                                                                                                                                                                                                                                                                            |
| <b>Cash Flow</b>                | Als Cash Flow werden alle Zahlungsmittelzuflüsse (Einnahmen) und Zahlungsmittelabflüsse (Ausgaben) bezeichnet.                                                                                                                                                                                                                                                              |
| <b>CHMP</b>                     | Ausschuss für Humanarzneimittel (Committee for Medicinal Products for Human Use); wissenschaftlicher Ausschuss der Europäischen Arzneimittelagentur EMA. Er bereitet deren Bewertungen vor und beschäftigt sich mit Zulassung und Risikobewertung von Arzneimitteln.                                                                                                        |
| <b>Credit Facility</b>          | Als „Credit Facility“ oder Kreditlinie wird der finanzielle Rahmen bezeichnet, bis zu dem eine Bank dem Kreditnehmer zugesagt hat, ihm Kredit zu gewähren. Bei einer Kreditlinie handelt es sich um einen revolving Kredit, das heißt er kann nach zwischenzeitlicher Rückführung bis zum Laufzeitende oder bis zur Kündigung immer wieder neu in Anspruch genommen werden. |
| <b>Commercial-Paper Program</b> | Bei einem Commercial Paper Program handelt es sich um eine Rahmendokumentation, die die vertragliche Grundlage für die Emission von sog. Commercial Papers darstellt. Hierbei handelt es sich um Schuldverschreibungen mit kurzer Laufzeit.                                                                                                                                 |
| <b>Compliance</b>               | Unter dem Begriff Compliance wird die Einhaltung von Gesetzen und Regelwerken, sowie unternehmensinternen freiwilligen Kodizes zusammengefasst. Die Compliance ist Bestandteil der ordnungsgemäßen Unternehmensführung.                                                                                                                                                     |
| <b>Corporate Governance</b>     | Der Begriff umfasst das Einhalten von Gesetzen und Regelwerken (Compliance), das Befolgen anerkannter Standards und Empfehlungen, das Entwickeln und Befolgen eigener Unternehmensleitlinien sowie die Ausgestaltung und Implementierung von Leitungs- und Kontrollstrukturen.                                                                                              |

## D

---

|                              |                                                                                                                                                                                                                                                                                  |
|------------------------------|----------------------------------------------------------------------------------------------------------------------------------------------------------------------------------------------------------------------------------------------------------------------------------|
| <b>DAX®</b>                  | Deutscher Aktienindex: Für die Berechnung werden die Kurse der 30 nach Marktkapitalisierung und Orderbuchumsatz größten deutschen Unternehmen zugrunde gelegt.                                                                                                                   |
| <b>Debt Issuance Program</b> | Bei einem Debt Issuance Program handelt es sich um eine Rahmendokumentation, die die vertragliche Grundlage für die Emission von Anleihen darstellt. Aufgrund der jederzeit vorliegenden Dokumentation ermöglicht das Programm dem Unternehmen eine flexible Emissionstätigkeit. |
| <b>Dividendenrendite</b>     | Die Dividendenrendite gibt das Verhältnis der Dividende zum Aktienkurs an.                                                                                                                                                                                                       |

## E

---

|                                                |                                                                                                                                                                                                                                                                                                                                                                                                                 |
|------------------------------------------------|-----------------------------------------------------------------------------------------------------------------------------------------------------------------------------------------------------------------------------------------------------------------------------------------------------------------------------------------------------------------------------------------------------------------|
| <b>EBIT</b>                                    | Earnings before interest and taxes: Das Ergebnis vor Zinsen und Steuern entspricht dem Operativen Ergebnis zuzüglich der Sondermaßnahmen.                                                                                                                                                                                                                                                                       |
| <b>EBITDA</b>                                  | Earnings before interest, taxes, depreciation and amortization: Zum Ergebnis vor Zinsen und Steuern (EBIT) werden Abschreibungen und Wertberichtigungen hinzuaddiert.                                                                                                                                                                                                                                           |
| <b>EGFR</b>                                    | Epidermal-Growth-Factor-Receptor oder epidermaler Wachstumsfaktorrezeptor. Er wird in verschiedenen Tumorarten hochreguliert und/oder in mutierter Form vorgefunden, was dazu führt, dass die Tumorzellen unkontrolliert wachsen und sich vermehren. Neuartige Krebstherapien zielen darauf ab, den EGFR zu blockieren und somit das Tumorwachstum zu unterbinden.                                              |
| <b>Eigenkapitalquote</b>                       | Kennzahl, die das Eigen- zum Gesamtkapital ins Verhältnis setzt. Sie dient zur Beurteilung der finanziellen Stabilität und Unabhängigkeit eines Unternehmens.                                                                                                                                                                                                                                                   |
| <b>EMA (früher: EMEA)</b>                      | Europäische Arzneimittelagentur (European Medicines Agency): Agentur der Europäischen Union mit Sitz in London. Sie ist für die Beurteilung und Überwachung von Arzneimitteln zuständig und spielt eine zentrale Rolle in der Arzneimittelzulassung.                                                                                                                                                            |
| <b>Ergebnis je Aktie</b>                       | Das Ergebnis je Aktie ergibt sich aus der Division des Konzernergebnisses durch die gewichtete durchschnittliche Anzahl der Aktien. Die Berechnung erfolgt nach IAS 33.                                                                                                                                                                                                                                         |
| <b>Erst-, Zweit- und Dritt-Linien-Therapie</b> | Erst- und Zweit-Linien-Therapie tragen kurativen Charakter (kurativ = in der Absicht zu heilen). Deshalb haben sie immer Vorrang. Allerdings profitieren einige Betroffene von beiden nicht oder nur sehr wenig. Für diese Patienten, bei denen die beiden ersten Behandlungsstufen versagt haben, gibt es noch eine dritte. Diese Dritt-Linien-Therapie ist palliativ (palliativ = in der Absicht zu lindern). |
| <b>Euribor</b>                                 | Euro InterBank Offered Rate (EURIBOR) ist der Zinssatz für Termingelder in Euro im Interbankengeschäft. Der Euribor wird für die Laufzeiten 1 Woche, 2 und 3 Wochen und die 12 monatlichen Laufzeiten von 1 Monat bis 12 Monaten ermittelt.                                                                                                                                                                     |
| <b>Equity-Methode</b>                          | Die Grundidee der Equity-Methode ist es, den Beteiligungsbuchwert in der Bilanz des Investors spiegelbildlich zur Entwicklung des anteiligen Eigenkapitals am beteiligten Unternehmen abzubilden.                                                                                                                                                                                                               |

## F

---

|                            |                                                                                                                                                                                                                                                         |
|----------------------------|---------------------------------------------------------------------------------------------------------------------------------------------------------------------------------------------------------------------------------------------------------|
| <b>FDA</b>                 | Food & Drug Administration: US-amerikanische Behörde für Lebensmittel- und Arzneimittelsicherheit.                                                                                                                                                      |
| <b>Financial Covenants</b> | In Kreditverträgen vereinbarte Finanzkennzahlen, die während der Laufzeit des Kredits vom Unternehmen einzuhalten sind.                                                                                                                                 |
| <b>Forschungsquote</b>     | Forschungsausgaben im Verhältnis zu Gesamterlösen des Unternehmens beziehungsweise der Sparte.                                                                                                                                                          |
| <b>FCR</b>                 | Free Cash Flow on Revenues: Der FCR errechnet sich aus dem Basis Free Cash Flow in Relation zu den Gesamterlösen. FCR und ROS sind für Merck entscheidend zur Steuerung des Geschäfts.                                                                  |
| <b>Free Cash Flow</b>      | Summe des Netto-Cash-Flow aus operativer Tätigkeit abzüglich Investitionen in immaterielle Vermögenswerte und Sachanlagen, Akquisitionen und Investitionen in sonstige Finanzanlagen plus Erlöse aus Anlageabgängen und Veränderungen bei Wertpapieren. |



## G

|                                              |                                                                                                                                                                                                                                                                        |
|----------------------------------------------|------------------------------------------------------------------------------------------------------------------------------------------------------------------------------------------------------------------------------------------------------------------------|
| <b>Gearing</b>                               | Verhältnis von Nettofinanzschulden einschließlich Pensionsrückstellungen zu Eigenkapital.                                                                                                                                                                              |
| <b>Gesamterlöse</b>                          | Summe aus Umsätzen, Lizenz- und Provisionserlösen. Die Lizenzerlöse werden vor allem im Unternehmensbereich Pharma mit Patenten für Arzneimittel erzielt.                                                                                                              |
| <b>Geschäfts- oder Firmenwert / Goodwill</b> | Ergibt sich im Zusammenhang mit einem Unternehmenszusammenschluss (erworbener Geschäfts- oder Firmenwert) und stellt im Wesentlichen den Unterschiedsbetrag zwischen dem Marktwert des erworbenen Nettovermögens und dem gezahlten Kaufpreis dar.                      |
| <b>GHS</b>                                   | GHS steht für „Globally Harmonized System of Classification and Labelling of Chemicals“. Es handelt sich um ein weltweit einheitliches System zur Einstufung von Chemikalien sowie deren Kennzeichnung auf Verpackungen und in Sicherheitsdatenblättern.               |
| <b>GPHF</b>                                  | Der Global Pharma Health Fund e.V. ist eine gemeinnützige Initiative von Merck. Zweck des Vereins ist die Förderung des Gesundheitswesens im Rahmen der Entwicklungshilfe – insbesondere der Kampf gegen Arzneimittelfälschungen durch den Einsatz des GPHF-Minilabs®. |
| <b>GPHF-Minilab®</b>                         | Mit dem GPHF-Minilab® bietet der GPHF ein einzigartiges mobiles Kompaktlabor an, das innerhalb kürzester Zeit die Qualität von Arzneimitteln überprüfen kann.                                                                                                          |
| <b>Greenhouse Gas Protocol</b>               | Am weitesten verbreitetes Bilanzierungs- und Berichtssystem für Treibhausgas-Emissionen.                                                                                                                                                                               |

## H

|                |                                                                                                                                                                                                                                                                                                                                                                                                                                                                                                                                                                                                          |
|----------------|----------------------------------------------------------------------------------------------------------------------------------------------------------------------------------------------------------------------------------------------------------------------------------------------------------------------------------------------------------------------------------------------------------------------------------------------------------------------------------------------------------------------------------------------------------------------------------------------------------|
| <b>Hedging</b> | Unter Hedging versteht man die Absicherung beziehungsweise die Begrenzung von bestimmten, klar identifizierten Risiken, die sich zum Beispiel aus Fremdwährungskursänderungen oder Aktienkursänderungen ergeben können. Z. B. Fair Value Hedge: Beim Fair Value Hedge geht es im Wesentlichen um die Absicherung gegen mögliche Marktwertänderungen von bereits in der Bilanz erfassten Vermögenswerten und Verbindlichkeiten. Oder Cash Flow Hedge: Wesentlicher Zweck eines Cash Flow Hedges ist es, unsichere Zahlungsströme abzusichern, die insbesondere aus zukünftigen Transaktionen resultieren. |
|----------------|----------------------------------------------------------------------------------------------------------------------------------------------------------------------------------------------------------------------------------------------------------------------------------------------------------------------------------------------------------------------------------------------------------------------------------------------------------------------------------------------------------------------------------------------------------------------------------------------------------|

## I

|                          |                                                                                                                                                                                                                                                                    |
|--------------------------|--------------------------------------------------------------------------------------------------------------------------------------------------------------------------------------------------------------------------------------------------------------------|
| <b>ICCA</b>              | International Council of Chemical Associations – weltweiter Chemieverband.                                                                                                                                                                                         |
| <b>IFRS</b>              | „International Financial Reporting Standards“ (bis 2001: International Financial Accounting Standards, IAS) sind internationale Rechnungslegungsvorschriften, die für börsennotierte Unternehmen mit Sitz in der Europäischen Union verpflichtend anzuwenden sind. |
| <b>Investitionsquote</b> | Investitionen im Verhältnis zu Gesamterlösen.                                                                                                                                                                                                                      |
| <b>ISO 14001</b>         | Diese internationale Umweltmanagementnorm legt weltweit anerkannte Anforderungen an ein Umweltmanagementsystem fest.                                                                                                                                               |
| <b>IWF</b>               | Der Internationale Währungsfonds (IMF: International Monetary Fund) mit Sitz in Washington ist eine Organisation der Vereinten Nationen.                                                                                                                           |

## J

|                      |                                                                                                                                                            |
|----------------------|------------------------------------------------------------------------------------------------------------------------------------------------------------|
| <b>Joint Venture</b> | Als Joint Venture wird ein Gemeinschaftsunternehmen bezeichnet, an dem mindestens zwei rechtliche und wirtschaftlich getrennte Unternehmen beteiligt sind. |
|----------------------|------------------------------------------------------------------------------------------------------------------------------------------------------------|

## K

|                            |                                                                                                                                                                                                                                                                                                                                                                        |
|----------------------------|------------------------------------------------------------------------------------------------------------------------------------------------------------------------------------------------------------------------------------------------------------------------------------------------------------------------------------------------------------------------|
| <b>Kaufpreisallokation</b> | Durch die Kaufpreisallokation werden die Anschaffungskosten (Kaufpreis) eines Unternehmens auf die damit erworbenen materiellen und immateriellen Vermögenswerte und Schulden verteilt.                                                                                                                                                                                |
| <b>KRAS</b>                | Kürzlich identifizierter Biomarker, der Auskunft darüber geben kann, ob ein Patient auf eine EGFR-Antikörpertherapie beim metastasierten kolorektalen Karzinom anspricht oder nicht. Dazu wird der Status des KRAS-Gens im Tumor getestet, das entweder normal („Wildtyp“) oder abnormal („mutiert“) ist. Die Abkürzung KRAS steht im übrigen für Kirsten Rat Sarcoma. |

## L

|                                 |                                                                                                                                                                                                                                                                                                                                                                        |
|---------------------------------|------------------------------------------------------------------------------------------------------------------------------------------------------------------------------------------------------------------------------------------------------------------------------------------------------------------------------------------------------------------------|
| <b>LED</b>                      | Elektronisches Halbleiter-Bauelement und Abkürzung für „Light Emitting Diode“ beziehungsweise „Lichtemittierende Diode“. Fließt durch die Leuchtdiode Strom in Durchlassrichtung, so strahlt sie sichtbares Licht, Infrarotstrahlung (als Infrarotdiode) oder auch Ultraviolettstrahlung mit einer vom Halbleitermaterial und der Dotierung abhängigen Wellenlänge ab. |
| <b>Liquid Crystals (LC)</b>     | Englischer Begriff für Flüssigkristalle. Diese Spezialchemikalien sind in LC-Displays (LCD) zu finden, beispielsweise in flachen Fernsehern, Notebooks, Mobiltelefonen etc.                                                                                                                                                                                            |
| <b>Lupus Erythematodes (LE)</b> | Autoimmunkrankheit, die zum entzündlichen Rheuma und dort zu den „Kollagenosen“ gehört. Es gibt zwei Hauptformen: Hautlupus und Systemischer Lupus Erythematodes (SLE). Neben der Haut und den Gelenken können weitere Organe betroffen sein, so zum Beispiel die Nieren bei Lupusnephritis (LN).                                                                      |
| <b>LTIR</b>                     | Lost Time Injury Rate: Indikator für Arbeitssicherheit. Zahl der Arbeitsunfälle mit einem oder mehreren Tagen Ausfallzeit pro Million geleisteter Arbeitsstunden.                                                                                                                                                                                                      |

## M

|                                                 |                                                                                                                                                                                                                                                                                                                                                                                                  |
|-------------------------------------------------|--------------------------------------------------------------------------------------------------------------------------------------------------------------------------------------------------------------------------------------------------------------------------------------------------------------------------------------------------------------------------------------------------|
| <b>Marketing- und Vertriebskosten-Quote</b>     | Marketing- und Vertriebskosten im Verhältnis zu den Gesamterlösen.                                                                                                                                                                                                                                                                                                                               |
| <b>Metafolin®</b>                               | Diese im Körper bereits natürlich vorkommende, biologisch aktive Folatform wird vom Körper besser verwertet als Folsäure. Folsäure und Metafolin® sind wichtig für Zellteilung und Blutbildung und daher für Entwicklung und Wachstum neuen Lebens.                                                                                                                                              |
| <b>Monoklonale Antikörper</b>                   | Hochspezialisierte und zielgerichtete Antikörper, die mit Hilfe biotechnologischer Verfahren synthetisch hergestellt werden. Das Besondere an ihnen ist, dass sie in der Lage sind, natürliche Abwehrprozesse des Körpers gegen die Krankheit zu aktivieren. Bisher werden monoklonale Antikörper insbesondere zur Krebstherapie und zur Unterdrückung unerwünschter Immunreaktionen eingesetzt. |
| <b>MUC1</b>                                     | MUC1 oder auch PEM („polymorphic epithelial mucin“) ist ein in Zellmembranen eingebettetes Muzin aus der Gruppe der Glykoproteine, das in allen Organen des Menschen vorkommt. Das Muzin MUC1 ist ein etablierter Tumormarker. In der Krebstherapie ist dieser Tumormarker der Ansatzpunkt für einige neue Therapeutika.                                                                         |
| <b>Multi-Währungs-Betriebsmittelkreditlinie</b> | Hierbei handelt es sich um einen Vertrag zwischen dem Unternehmen und einer Bank (oder mehreren Banken), in dem die Bank dem Unternehmen die Möglichkeit einräumt, auf eine vorher definierte Summe zu bestimmten Konditionen zugreifen zu können. Die Auszahlung kann je nach Vereinbarung in unterschiedlichen Währungen erfolgen.                                                             |

## O

|                             |                                                                                                                                                                                                                                    |
|-----------------------------|------------------------------------------------------------------------------------------------------------------------------------------------------------------------------------------------------------------------------------|
| <b>OECD</b>                 | Die internationale Organisation für wirtschaftliche Zusammenarbeit und Entwicklung mit Sitz in Paris ist ein Zusammenschluss von 34 Ländern, die der Demokratie und der Marktwirtschaft verpflichtet sind.                         |
| <b>OLED</b>                 | Organic Light Emitting Diodes, organische lichtemittierende Dioden. Neue Technologie für Displays und Beleuchtungen. Zu finden beispielsweise in Handys, MP3-Playern, und inzwischen auch in ersten Fernsehgeräten oder in Lampen. |
| <b>Organisches Wachstum</b> | Organisches Wachstum ist der Teil des Wachstums eines Unternehmens, welcher nicht auf Akquisitionen oder auf Währungseffekte zurückzuführen ist.                                                                                   |
| <b>OTC</b>                  | OTC-Arzneimittel (Over-the-counter drugs) ist die Bezeichnung für frei verkäufliche und apothekenpflichtige, also nicht verschreibungspflichtige Medikamente.                                                                      |

## P

|                                     |                                                                                                                                                                                      |
|-------------------------------------|--------------------------------------------------------------------------------------------------------------------------------------------------------------------------------------|
| <b>Praziquantel</b>                 | Ein Wurmmittel, das gegen Plattwürmer wie Bandwürmer und Saugwürmer einschließlich des Pärchenegel, des Erregers der Tropenkrankheit Schistosomiasis, wirkt.                         |
| <b>Progressionsfreies Überleben</b> | In der Onkologie die Zeitspanne zwischen dem Start einer klinischen Studie und dem Fortschreiten der Erkrankung oder dem Todesdatum des Patienten – je nachdem, was zuerst eintritt. |

- PS-VA** Polymer Stabilised Vertical Alignment: polymer-stabilisierte vertikale Orientierung. Durch eine Polymerschicht werden die Moleküle innerhalb des Displays in eine bestimmte Richtung vororientiert. Der Flüssigkristall steht im Schwarz-Zustand nicht genau senkrecht, sondern ist mit einer leichten Schlagseite ausgerichtet („Tilt“). Dies beschleunigt den Schaltvorgang. Die Lichtdurchlässigkeit des Displays ist deutlich höher, die Hintergrundbeleuchtung – eine der teuersten Komponenten in der Herstellung – kann reduziert werden.

## R

- Rating** Rating bezeichnet die Einschätzung der Zahlungsfähigkeit eines Schuldners. Die Einordnung erfolgt nach bankeigenen Kriterien („internes Rating“) oder wird von internationalen Ratingagenturen wie Moody's oder Standard & Poor's („externes Rating“) vorgenommen.
- Randomisierte Studie** In der medizinischen Forschung bedeutet Randomisierung, dass die Zuordnung zu einer Behandlungsgruppe zufällig erfolgt. Zweck ist, eine Einflussnahme des Untersuchers auszuschließen und die gleichmäßige Verteilung von bekannten und nicht bekannten Einflussfaktoren auf alle Gruppen sicherzustellen.
- REACH** REACH steht für „Registration, Evaluation, Authorisation and Restriction of Chemicals“. Es handelt sich um eine EU-Verordnung, die Mitte 2007 in Kraft getreten ist.
- Reaktive Mesogene** Polymerisierbare Flüssigkristalle, die z. B. als Material für optische Filme eingesetzt werden können und die Bildqualität von Displays verbessern.
- Rezidivierend** Wiederauftreten einer Krankheit. Es wird bei der Behandlung von Krebs meist durch eine unvollständige Entfernung des Tumors verursacht, die nach einiger Zeit zu einem erneuten Auftreten der Krankheit führen kann.
- Rückstellungen  
Rücklagen** Rückstellungen werden für Verbindlichkeiten gebildet, die bezüglich ihrer Höhe oder Fälligkeit ungewiss sind. Rücklagen dagegen sind Bestandteil des Eigenkapitals eines Unternehmens.
- ROS.** Umsatzrendite (Return on Sales): Der ROS errechnet sich als Quotient zwischen Operativem Ergebnis und Gesamterlösen. ROS und FCR sind für Merck entscheidend zur Steuerung des Geschäfts.

## S

- Somatotropin** Proteohormon, das als Wachstumshormon im menschlichen und tierischen Organismus vorkommt. Somatotropin ist essenziell für ein normales Längenwachstum.
- Steuersatz** Der Steuersatz gibt an, mit welchem Prozentsatz das Konzernergebnis vor Steuern und Sondermaßnahmen zu multiplizieren ist, um den theoretischen Steueraufwand vor Sondermaßnahmen zu ermitteln.
- Steuerquote** Die Steuerquote gibt das Verhältnis der gesamten Steuern zum Jahresergebnis vor Steuern wieder.
- Steuerquote vor  
Sondermaßnahmen** Die Steuerquote vor Sondermaßnahmen gibt das Verhältnis der um Steuereffekte auf Sondermaßnahmen bereinigten gesamten Steuern zum Jahresergebnis vor Steuern, bereinigt um Sondermaßnahmen, wieder.
- Syndizierter Kredit** Auch: Konsortialkredit; hierbei handelt es sich um einen Kredit, der von mehreren Banken eingeräumt wird. Die Banken bilden hierbei ein sog. Bankenkonsortium.

## T

- Touch-Screen** Berührungsempfindlicher Bildschirm, beispielsweise bei Tablet-PCs.

## V

- VCI** Der Verband der Chemischen Industrie vertritt die wirtschaftspolitischen Interessen von 1.600 deutschen Chemieunternehmen.

## Z

- Zinsswaps** Ein Zinsswap stellt eine Vereinbarung zwischen zwei Vertragspartnern zum Austausch von unterschiedlichen Zinszahlungen dar. Ein Unternehmen kann so eine variabel verzinsliche Position in eine festverzinsliche Position tauschen oder umgekehrt.

# GESCHÄFTSENTWICKLUNG 2001 – 2010

Diese Übersicht kann historisch angepasste Werte enthalten, um eine Vergleichbarkeit mit dem Berichtsjahr herzustellen.

| in MioEUR                                                  | 2001   | 2002   | 2003   | 2004   |
|------------------------------------------------------------|--------|--------|--------|--------|
| Gesamterlöse nach Sparten                                  | 7.721  | 7.521  | 7.364  | 6.017  |
| Pharma                                                     | 3.484  | 3.265  | 3.458  | 3.601  |
| Merck Serono                                               | 2.228  | 1.850  | 1.546  | 1.619  |
| Generics <sup>2</sup>                                      | 936    | 1.096  | 1.585  | 1.625  |
| Consumer Health Care                                       | 320    | 319    | 327    | 357    |
| Chemie                                                     | 1.729  | 1.791  | 1.707  | 1.696  |
| Merck Millipore                                            | –      | –      | –      | –      |
| Performance Materials                                      | –      | –      | –      | –      |
| Liquid Crystals                                            | 297    | 383    | 443    | 589    |
| Performance & Life Science Chemicals                       | 1.216  | 1.216  | 1.083  | 1.107  |
| Electronic Chemicals <sup>2</sup>                          | 216    | 192    | 181    | –      |
| Labordistribution <sup>2</sup>                             | 2.754  | 2.711  | 2.427  | 582    |
| Innenumsätze Labor                                         | –246   | –246   | –228   | –62    |
| Konzernkosten und Sonstiges                                | –      | –      | –      | 200    |
| Operatives Ergebnis nach Unternehmensbereichen             | 877    | 616    | 736    | 776    |
| Pharma                                                     | 581    | 272    | 389    | 391    |
| Chemie                                                     | 204    | 260    | 316    | 420    |
| Labordistribution <sup>2</sup>                             | 92     | 84     | 79     | 21     |
| Konzernkosten und Sonstiges                                | –      | –      | –48    | –56    |
| Ergebnis vor Zinsen und Steuern (EBIT)                     | 1.286  | 559    | 538    | 1.044  |
| EBIT vor Abschreibungen und Wertberichtigungen (EBITDA)    | 1.694  | 985    | 1.008  | 1.419  |
| Ergebnis vor Steuern                                       | 1.078  | 412    | 423    | 961    |
| Ergebnis nach Steuern                                      | 655    | 215    | 218    | 672    |
| Free Cash Flow                                             | 664    | 441    | 442    | 1.889  |
| Investitionen in Sachanlagen                               | 470    | 377    | 281    | 234    |
| Forschung und Entwicklung                                  | 577    | 608    | 605    | 599    |
| Bilanzsumme                                                | 8.255  | 7.511  | 6.982  | 5.754  |
| Eigenkapital                                               | 2.336  | 2.054  | 2.363  | 2.800  |
| Mitarbeiter (Anzahl 31.12.)                                | 34.294 | 34.504 | 34.206 | 28.877 |
| Umsatzrendite in % (ROS: Operatives Ergebnis/Gesamterlöse) | 11,4   | 8,2    | 10,0   | 12,9   |
| Ergebnis je Aktie in EUR                                   | 3,66   | 1,18   | 1,15   | 3,47   |
| Dividende je Aktie in EUR                                  | 0,95   | 1,00   | 0,80   | 0,80   |
| Einmaliger Bonus je Aktie in EUR                           | –      | –      | –      | 0,20   |

<sup>1</sup> Mit der Akquisition von Millipore wurde der Unternehmensbereich Chemie neu strukturiert. Die Vorjahreszahlen wurden entsprechend angepasst.

<sup>2</sup> Geschäft wurde veräußert

<sup>3</sup> Inklusive aufgegebenem Geschäftsbereich Generics (einschließlich Veräußerungsgewinn)

| 2005   | 2006   | 2007                | 2008   | 2009               | 2010   | Veränderung in %<br>zum Vorjahr |
|--------|--------|---------------------|--------|--------------------|--------|---------------------------------|
| 5.887  | 6.310  | 7.081               | 7.590  | 7.747              | 9.291  | 19,9                            |
| 3.905  | 4.163  | 4.900               | 5.456  | 5.812              | 6.226  | 7,1                             |
| 1.817  | 1.938  | 4.480               | 5.014  | 5.345              | 5.754  | 7,6                             |
| 1.712  | 1.825  | -                   | -      | -                  | -      | -                               |
| 376    | 400    | 420                 | 442    | 467                | 472    | 1,1                             |
| 1.906  | 2.113  | 2.152               | 2.127  | 1.935              | 3.065  | 58,4                            |
| -      | -      | -                   | -      | 929 <sup>1</sup>   | 1.681  | 80,9                            |
| -      | -      | -                   | -      | 1.006 <sup>1</sup> | 1.384  | 37,7                            |
| 741    | 895    | 916                 | 878    | -                  | -      | -                               |
| 1.165  | 1.218  | 1.236               | 1.249  | -                  | -      | -                               |
| -      | -      | -                   | -      | -                  | -      | -                               |
| -      | -      | -                   | -      | -                  | -      | -                               |
| -      | -      | -                   | -      | -                  | -      | -                               |
| 76     | 34     | 29                  | 7      | -                  | -      | -                               |
| 883    | 1.105  | 976                 | 1.131  | 649                | 1.113  | 71,6                            |
| 454    | 524    | 417                 | 655    | 403                | 579    | 43,7                            |
| 492    | 641    | 631                 | 558    | 324                | 624    | 92,4                            |
| -      | -      | -                   | -      | -                  | -      | -                               |
| -63    | -60    | -72                 | -81    | -78                | -90    | 14,1                            |
| 956    | 1.325  | 200                 | 731    | 621                | 1.113  | 79,2                            |
| 1.245  | 1.628  | 1.858               | 1.947  | 1.625              | 2.457  | 51,2                            |
| 893    | 1.273  | -111                | 575    | 486                | 861    | 77,0                            |
| 673    | 1.001  | 3.520 <sup>3</sup>  | 379    | 377                | 642    | 70,3                            |
| 657    | -1.073 | -1.473 <sup>3</sup> | 438    | 812                | -3.522 | -                               |
| 268    | 253    | 283 <sup>3</sup>    | 395    | 467                | 396    | -15,2                           |
| 713    | 752    | 1.028               | 1.234  | 1.345              | 1.397  | 3,9                             |
| 7.281  | 8.102  | 14.922              | 15.645 | 16.713             | 22.388 | 34,0                            |
| 3.329  | 3.807  | 8.688               | 9.563  | 9.514              | 10.372 | 9,0                             |
| 29.133 | 29.999 | 30.968              | 32.800 | 33.062             | 40.562 | 22,7                            |
| 15,0   | 17,5   | 13,8                | 14,9   | 8,4                | 12,0   |                                 |
| 3,40   | 5,07   | 16,21 <sup>3</sup>  | 1,69   | 1,68               | 2,91   | 73,2                            |
| 0,85   | 0,90   | 1,20                | 1,50   | 1,00               | 1,25   | 25,0                            |
| -      | 0,15   | 2,00                | -      | -                  | -      | -                               |

## TERMINE 2011

**Bilanzpressekonferenz:** Montag, 21. Februar

**Hauptversammlung:** Freitag, 8. April

**Quartals-Finanzbericht Q1:** Donnerstag, 28. April

**Halbjahres-Finanzbericht:** Mittwoch, 27. Juli

**Herbstpressekonferenz und Quartals-Finanzbericht Q3:** Mittwoch, 26. Oktober

## SERVICE

Der Geschäftsbericht 2010 wurde in Deutsch und Englisch sowie in Kurzfassungen veröffentlicht. Der Bericht ist auch als komplett navigierbare Online-Version im Internet unter [www.merck.de/geschaeftsbericht2010](http://www.merck.de/geschaeftsbericht2010) zu finden.

Weitere Informationen über Merck finden Sie im Internet unter [www.merck.de](http://www.merck.de) und in den folgenden Broschüren, die Sie auch online ([www.merck.de/publikationen](http://www.merck.de/publikationen)) lesen oder bestellen können (in Deutsch und Englisch):

Corporate-Responsibility-Bericht 2009

Merck-Fakten und Zahlen (auch auf Französisch und Spanisch erhältlich)

Diese Publikationen können Sie bei Corporate Communications, Merck KGaA, 64271 Darmstadt oder unter der E-Mail-Adresse [corpcom@merck.de](mailto:corpcom@merck.de) bestellen.

### Impressum

**Herausgegeben am 21. Februar 2011** von Merck KGaA  
Corporate Communications, Frankfurter Straße 250, 64293 Darmstadt  
Telefon: +49 (0) 6151-72 0, Fax: +49 (0) 6151-72 5577  
E-Mail: [corpcom@merck.de](mailto:corpcom@merck.de)  
Internet: [www.merck.de](http://www.merck.de)

**Konzept, Gestaltung und Satz:** XEO GmbH, Düsseldorf  
**Fotos:** Seiten 5, 8, 12, 13 und 76: Catrin Moritz, Essen;  
Seiten 1, 5, 6, 8, 12, 13, 14, 46, 62, 68 und 76: Reinhard Koslowski, Düsseldorf  
**Druck:** Franz Kuthal GmbH & Co. KG, Mainaschaff  
**Papier:** FSC-zertifiziertes LuxoSatin von Papyrus

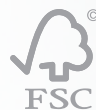

Mix

Produktgruppe aus vorbildlich bewirtschafteten  
Wäldern und anderen kontrollierten Herkünften  
[www.fsc.org](http://www.fsc.org) Zert.-Nr. SGS-COC-2931  
© 1996 Forest Stewardship Council

W 840 550  
350211
