# Supplementary material
Source: publisher site journal article supplement (https://www.degruyterbrill.com/publication/isbn/9783110432879/downloadAsset/9783110432879_Elektronischer_Anhang_2.zip)
Supplement: Supplementary file 76 [file Merck Leitbild.pdf › Korpustexte/Korpustexte pdf/Merck/Merck Leitbild.pdf]

# Leitbild

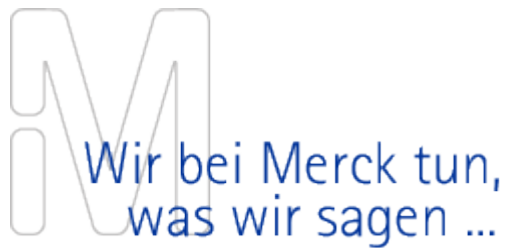

Unser weltweit gültiges, 1991 formuliertes Leitbild definiert unser Selbstverständnis als erfolgreiches und verantwortungsbewusstes Unternehmen. Das Dokument im Wortlaut: Wir, Führung und Mitarbeiter, wollen unternehmerischen Erfolg; unternehmerischer Erfolg beginnt beim Menschen.

Wir wollen ein weltweit tätiges Unternehmen gestalten, das für die Menschen, für seine Marktpartner und seine Mitwelt Nutzen schafft.

Wir wollen durch Forschung und Entwicklung, Produktion und Vertrieb pharmazeutischer und chemischer Spezialitäten unseren Kunden Chancen eröffnen. Dazu konzentrieren wir uns auf Geschäftsfelder, in denen wir durch exzellente Qualität unserer Produkte, Leistungen und Systeme Wettbewerbsvorteile erreichen. Unser Ziel ist die dauerhafte Geschäftsbeziehung, nicht nur der kurzfristige Erfolg.

Auf dieser Grundlage handeln wir als selbstständiges Unternehmen ertragsorientiert. Wir fordern Leistung voneinander und honorieren diese entsprechend. Den Eigentümern sichern wir eine angemessene Verzinsung des Kapitals.

In allen Ländern, in denen wir tätig sind, achten wir auf die kulturellen Besonderheiten und nationalen Interessen. Wir streben nach Anerkennung unseres Unternehmens in der Gesellschaft. Die Verantwortung für Sicherheit hat für Merck einen hohen Stellenwert. Dem schonenden Umgang mit der Umwelt sind wir verpflichtet.

Wir wollen ehrlich und konstruktiv miteinander umgehen. Offene Kommunikation nach innen und nach außen sehen wir als Voraussetzung, um ein gemeinsames Zielverständnis zu erreichen und eine sinnerfüllte Tätigkeit zu ermöglichen. Bereichs- und Ländergrenzen sind keine Hindernisse. Alle Mitarbeiter - Frauen wie Männer - erhalten gleiche Chancen für ihre berufliche Entwicklung.

Wir alle leisten durch unser Mitdenken, Mitgestalten und Mitverantworten einen persönlichen Beitrag zum unternehmerischen Erfolg.

... und daran lassen  
wir uns messen.

[http://www.merck.de/de/unternehmen/leitbild\\_werte\\_strategie/leitbild.html](http://www.merck.de/de/unternehmen/leitbild_werte_strategie/leitbild.html)
