# Supplementary material
Source: publisher site journal article supplement (https://www.degruyterbrill.com/publication/isbn/9783110432879/downloadAsset/9783110432879_Elektronischer_Anhang_2.zip)
Supplement: Supplementary file 77 [file Merck Merck Werte.pdf › Korpustexte/Korpustexte pdf/Merck/Merck Merck Werte.pdf]

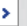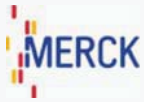[Über Merck](#) [Produkte](#) [Innovation](#) [Verantwortung](#) [Presse](#) [Investoren](#) [Karriere](#)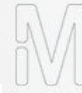

## Unsere Geschäfte

[Mission Statement, Werte,  
Strategie](#)[Mission Statement](#)**Werte**[Strategie](#)[Management](#)[Geschichte](#)[Merck – Das Original](#)[Merck in Deutschland](#)[Merck interaktiv](#)[Publikationen](#)[Home](#) » [Über Merck](#) » [Mission Statement, Werte, Strategie](#) » [Werte](#)

## Merck Werte - die Grundlage unseres Erfolgs

Unsere Unternehmenswerte sind die Messlatte für unser Denken und Handeln. Sie sind die Essenz dessen, was unser Heute und Morgen zusammenhält.

"Merck stützt sich als Unternehmen auf gemeinsame Werte. Unser Erfolg beruht auf Mut, Leistung, Verantwortung, Respekt, Integrität und Transparenz. Diese Werte bestimmen täglich unsere Handlungen oder Interaktionen mit Kunden und Geschäftspartnern sowie unsere Teamarbeit und unsere Zusammenarbeit miteinander."

|            |                          |                               |                         |                            |                             |
|------------|--------------------------|-------------------------------|-------------------------|----------------------------|-----------------------------|
| <b>Mut</b> | <a href="#">Leistung</a> | <a href="#">Verantwortung</a> | <a href="#">Respekt</a> | <a href="#">Integrität</a> | <a href="#">Transparenz</a> |
|------------|--------------------------|-------------------------------|-------------------------|----------------------------|-----------------------------|

**Mut eröffnet Zukunft.**

- Mut setzt das Vertrauen in die eigenen Fähigkeiten voraus.
- Mut führt zu einer gesunden Selbsteinschätzung.
- Mut unterstützt die Handlungskompetenz in Veränderungsprozessen.
- Mut heißt für uns: Wir trauen uns etwas.
- Mut öffnet uns für das Neue.

**SERVICE**[Seite empfehlen](#)[Seite drucken](#)[Informationen anfordern](#)

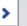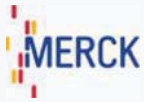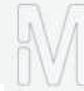[Über Merck](#) [Produkte](#) [Innovation](#) [Verantwortung](#) [Presse](#) [Investoren](#) [Karriere](#)

## Unsere Geschäfte

[Mission Statement, Werte,  
Strategie](#)[Mission Statement](#)**Werte**[Strategie](#)[Management](#)[Geschichte](#)[Merck – Das Original](#)[Merck in Deutschland](#)[Merck interaktiv](#)[Publikationen](#)[Home](#) » [Über Merck](#) » [Mission Statement, Werte, Strategie](#) » [Werte](#)

## Merck Werte - die Grundlage unseres Erfolgs

Unsere Unternehmenswerte sind die Messlatte für unser Denken und Handeln. Sie sind die Essenz dessen, was unser Heute und Morgen zusammenhält.

"Merck stützt sich als Unternehmen auf gemeinsame Werte. Unser Erfolg beruht auf Mut, Leistung, Verantwortung, Respekt, Integrität und Transparenz. Diese Werte bestimmen täglich unsere Handlungen oder Interaktionen mit Kunden und Geschäftspartnern sowie unsere Teamarbeit und unsere Zusammenarbeit miteinander."

[Mut](#)**[Leistung](#)**[Verantwortung](#)[Respekt](#)[Integrität](#)[Transparenz](#)**Leistung ermöglicht unseren unternehmerischen Erfolg.**

- Leistung verleiht dem individuellen und unternehmerischen Können seine Gestalt.
- Leistung fordert und fördert unsere Mitarbeiter.
- Leistung unterstützt die persönliche Entwicklung unserer Mitarbeiter.
- Leistung bemisst sich durch das erzielte Ergebnis.
- Leistung sichert die unternehmerische Unabhängigkeit.

**SERVICE**[Seite empfehlen](#)[Seite drucken](#)[Informationen anfordern](#)

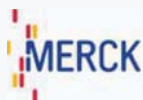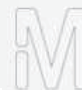

## Unsere Geschäfte

[Mission Statement, Werte, Strategie](#)[Mission Statement](#)**Werte**[Strategie](#)[Management](#)[Geschichte](#)[Merck – Das Original](#)[Merck in Deutschland](#)[Merck interaktiv](#)[Publikationen](#)[Home](#) > [Über Merck](#) > [Mission Statement, Werte, Strategie](#) > [Werte](#)

## Merck Werte - die Grundlage unseres Erfolgs

Unsere Unternehmenswerte sind die Messlatte für unser Denken und Handeln. Sie sind die Essenz dessen, was unser Heute und Morgen zusammenhält.

"Merck stützt sich als Unternehmen auf gemeinsame Werte. Unser Erfolg beruht auf Mut, Leistung, Verantwortung, Respekt, Integrität und Transparenz. Diese Werte bestimmen täglich unsere Handlungen oder Interaktionen mit Kunden und Geschäftspartnern sowie unsere Teamarbeit und unsere Zusammenarbeit miteinander."

|                     |                          |                                      |                         |                            |                             |
|---------------------|--------------------------|--------------------------------------|-------------------------|----------------------------|-----------------------------|
| <a href="#">Mut</a> | <a href="#">Leistung</a> | <b><a href="#">Verantwortung</a></b> | <a href="#">Respekt</a> | <a href="#">Integrität</a> | <a href="#">Transparenz</a> |
|---------------------|--------------------------|--------------------------------------|-------------------------|----------------------------|-----------------------------|

**Verantwortung bestimmt unser unternehmerisches Handeln.**

- Verantwortung kennzeichnet unser Handeln gegenüber unseren Kunden, Mitarbeitern, Kapitalgebern und Partnern.
- Verantwortung bedeutet den schonungsvollen Umgang mit den natürlichen Ressourcen und wachsame Vorsorge für unsere Umwelt.
- Verantwortung bestimmt unsere unternehmerischen Entscheidungen, für die wir gemeinsam eintreten.
- Verantwortung heißt, Vorbild zu sein.
- Verantwortung gibt uns Anerkennung und die Akzeptanz unserer unternehmerischen Tätigkeit.

**SERVICE**[Seite empfehlen](#)[Seite drucken](#)[Informationen anfordern](#)

[Über Merck](#) [Produkte](#) [Innovation](#) [Verantwortung](#) [Presse](#) [Investoren](#) [Karriere](#)

## Unsere Geschäfte

[Mission Statement, Werte,  
Strategie](#)[Mission Statement](#)**Werte**[Strategie](#)[Management](#)[Geschichte](#)[Merck – Das Original](#)[Merck in Deutschland](#)[Merck interaktiv](#)[Publikationen](#)[Home](#) » [Über Merck](#) » [Mission Statement, Werte, Strategie](#) » [Werte](#)

## Merck Werte - die Grundlage unseres Erfolgs

Unsere Unternehmenswerte sind die Messlatte für unser Denken und Handeln. Sie sind die Essenz dessen, was unser Heute und Morgen zusammenhält.

"Merck stützt sich als Unternehmen auf gemeinsame Werte. Unser Erfolg beruht auf Mut, Leistung, Verantwortung, Respekt, Integrität und Transparenz. Diese Werte bestimmen täglich unsere Handlungen oder Interaktionen mit Kunden und Geschäftspartnern sowie unsere Teamarbeit und unsere Zusammenarbeit miteinander."

|                     |                          |                               |                |                            |                             |
|---------------------|--------------------------|-------------------------------|----------------|----------------------------|-----------------------------|
| <a href="#">Mut</a> | <a href="#">Leistung</a> | <a href="#">Verantwortung</a> | <b>Respekt</b> | <a href="#">Integrität</a> | <a href="#">Transparenz</a> |
|---------------------|--------------------------|-------------------------------|----------------|----------------------------|-----------------------------|

**Respekt begründet ein partnerschaftliches Miteinander.**

- Respekt basiert auf dem Bild vom Menschen und seiner Würde.
- Respekt erzeugt ein Klima der Achtung, der Fairness und der Anerkennung.
- Respekt verlangt eine offene und ehrliche Kommunikation.
- Respekt unterstützt das erfolgreiche Arbeiten in verschiedenen Kulturen und mit unterschiedlichen Menschen.
- Respekt heißt, Leistung wertzuschätzen – im Gestern, Heute und auch im Morgen.

**SERVICE**[Seite empfehlen](#)[Seite drucken](#)[Informationen anfordern](#)

[Über Merck](#) [Produkte](#) [Innovation](#) [Verantwortung](#) [Presse](#) [Investoren](#) [Karriere](#)

## Unsere Geschäfte

[Mission Statement, Werte, Strategie](#)[Mission Statement](#)**Werte**[Strategie](#)[Management](#)[Geschichte](#)[Merck – Das Original](#)[Merck in Deutschland](#)[Merck interaktiv](#)[Publikationen](#)[Home](#) » [Über Merck](#) » [Mission Statement, Werte, Strategie](#) » [Werte](#)

## Merck Werte - die Grundlage unseres Erfolgs

Unsere Unternehmenswerte sind die Messlatte für unser Denken und Handeln. Sie sind die Essenz dessen, was unser Heute und Morgen zusammenhält.

"Merck stützt sich als Unternehmen auf gemeinsame Werte. Unser Erfolg beruht auf Mut, Leistung, Verantwortung, Respekt, Integrität und Transparenz. Diese Werte bestimmen täglich unsere Handlungen oder Interaktionen mit Kunden und Geschäftspartnern sowie unsere Teamarbeit und unsere Zusammenarbeit miteinander."

|                     |                          |                               |                         |                                   |                             |
|---------------------|--------------------------|-------------------------------|-------------------------|-----------------------------------|-----------------------------|
| <a href="#">Mut</a> | <a href="#">Leistung</a> | <a href="#">Verantwortung</a> | <a href="#">Respekt</a> | <b><a href="#">Integrität</a></b> | <a href="#">Transparenz</a> |
|---------------------|--------------------------|-------------------------------|-------------------------|-----------------------------------|-----------------------------|

**Integrität sichert unsere Glaubwürdigkeit.**

- Integrität ist der Eckstein unserer Glaubwürdigkeit gegenüber jedermann.
- Integrität lässt uns tun, was wir sagen.
- Integrität verpflichtet uns, zu halten, was wir versprechen.
- Integrität bedeutet auch, Nein sagen zu können.
- Integrität lässt nur Geschäfte und Handlungen zu, die im Einklang mit unseren Werten stehen.

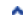**SERVICE**[Seite empfehlen](#)[Seite drucken](#)[Informationen anfordern](#)

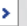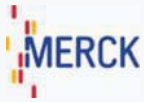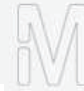[Über Merck](#) [Produkte](#) [Innovation](#) [Verantwortung](#) [Presse](#) [Investoren](#) [Karriere](#)

## Unsere Geschäfte

[Mission Statement, Werte,  
Strategie](#)[Mission Statement](#)**Werte**[Strategie](#)[Management](#)[Geschichte](#)[Merck – Das Original](#)[Merck in Deutschland](#)[Merck interaktiv](#)[Publikationen](#)[Home](#) » [Über Merck](#) » [Mission Statement, Werte, Strategie](#) » [Werte](#)

## Merck Werte - die Grundlage unseres Erfolgs

Unsere Unternehmenswerte sind die Messlatte für unser Denken und Handeln. Sie sind die Essenz dessen, was unser Heute und Morgen zusammenhält.

"Merck stützt sich als Unternehmen auf gemeinsame Werte. Unser Erfolg beruht auf Mut, Leistung, Verantwortung, Respekt, Integrität und Transparenz. Diese Werte bestimmen täglich unsere Handlungen oder Interaktionen mit Kunden und Geschäftspartnern sowie unsere Teamarbeit und unsere Zusammenarbeit miteinander."

|                     |                          |                               |                         |                            |                                    |
|---------------------|--------------------------|-------------------------------|-------------------------|----------------------------|------------------------------------|
| <a href="#">Mut</a> | <a href="#">Leistung</a> | <a href="#">Verantwortung</a> | <a href="#">Respekt</a> | <a href="#">Integrität</a> | <b><a href="#">Transparenz</a></b> |
|---------------------|--------------------------|-------------------------------|-------------------------|----------------------------|------------------------------------|

**Transparenz erlaubt gegenseitiges Vertrauen.**

- Transparenz ist die Beteiligung aller Anspruchsgruppen durch Information.
- Transparenz macht unser Handeln verstehbar.
- Transparenz unterstützt zielorientiertes Handeln im ganzen Unternehmen.
- Transparenz schafft Verlässlichkeit.
- Transparenz fördert die Teilhabe aller im Unternehmen, die bereit sind, Verantwortung zu übernehmen.

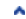**SERVICE**[Seite empfehlen](#)[Seite drucken](#)[Informationen anfordern](#)
