# Supplementary material
Source: publisher site journal article supplement (https://www.degruyterbrill.com/publication/isbn/9783110432879/downloadAsset/9783110432879_Elektronischer_Anhang_2.zip)
Supplement: Supplementary file 78 [file Merck Stabile Einheit Leitbild, Werte, Strategie.pdf › Korpustexte/Korpustexte pdf/Merck/Merck Stabile Einheit Leitbild, Werte, Strategie.pdf]

# Stabile Einheit: Leitbild, Werte, Strategie

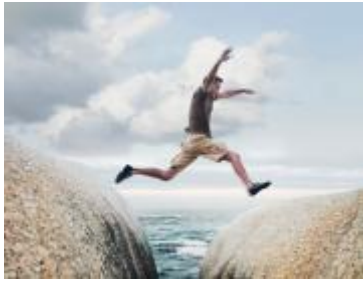

„Wir bei Merck tun, was wir sagen ... und daran lassen wir uns messen“: Das Motto unseres Leitbilds gilt auch für unsere Werte und prägt unsere Unternehmensführung. Damit es zuverlässig umgesetzt wird, haben wir weltweit einheitliche Instrumente und Kontrollsysteme geschaffen. So gestalten wir aktiv unsere Unternehmenskultur und können uns selbst noch besser an den eigenen Grundsätzen messen.

## Leitbild

Das [Leitbild](#) definiert unser Selbstverständnis als erfolgreiches und verantwortungsbewusstes Unternehmen. Es zeigt aber auch unsere Ziele auf, die auf die Interessen von Kunden und Kapitalgebern, Mitarbeitern und Gesellschaft ausgerichtet sind. Einer der zentralen Kernsätze darin: "Unternehmerischer Erfolg beginnt beim Menschen. Wir wollen ein weltweit tätiges Unternehmen gestalten, das für die Menschen, für seine Marktpartner und seine Mitwelt Nutzen schafft."

## Werte

Unsere [Unternehmenswerte](#) sind die Messlatte für unser Denken und Handeln. Sie sind die Essenz dessen, was unser Heute und Morgen zusammenhält.

## Strategie

Auch in Zukunft wird sich Merck auf Spezialitätengeschäfte in den beiden Arbeitsfeldern Pharma und Chemie konzentrieren und damit das unternehmerische Risiko streuen. Innovationskraft und Kundenorientierung sind Kernkompetenzen von Merck. Wir konzentrieren uns auf Märkte, die Innovationen brauchen und honorieren. Die [Strategie](#) ist auf geschäftlichen Erfolg ausgerichtet, achtet aber genauso die Interessen von Mitarbeitern und Kunden, von Kapitalgebern und Gesellschaft.

[http://www.merckgroup.com/de/unternehmen/leitbild\\_werte\\_strategie/leitbild\\_werte\\_strategie.html](http://www.merckgroup.com/de/unternehmen/leitbild_werte_strategie/leitbild_werte_strategie.html)
