# Supplementary material
Source: publisher site journal article supplement (https://www.degruyterbrill.com/publication/isbn/9783110432879/downloadAsset/9783110432879_Elektronischer_Anhang_2.zip)
Supplement: Supplementary file 79 [file Metro Corporate Principles.pdf › Korpustexte/Korpustexte pdf/Metro/Metro Corporate Principles.pdf]

# Unternehmen

## Corporate Principles

### Inhaltsübersicht

- Vorwort
  - Leistungsidentität
  - Wirtschaftliche Stärke
  - Nachhaltige Marktdurchdringung
  - Marktposition
  - Strategische Stärke
  - Innovationsfähigkeit
- Führungsidentität
  - Strategische Steuerung
  - Konzepthoheit der Vertriebslinien
  - Vielfalt, Chancengleichheit und Toleranz
  - Leistungsorientierte Führung nach dem "Best-Practice-Prinzip"
- Gesellschaftspolitische Identität
  - Politische Mitgestaltung
  - Wahrnehmung Öffentlicher Aufgaben
  - Corporate Social Responsibility

## Vorwort

Die METRO GROUP ist ein leistungsstarkes und auf nachhaltiges profitables Wachstum ausgerichtetes, international tätiges Handelsunternehmen. Unser unternehmerisches Denken und Handeln ist von dem Bewusstsein unserer Verantwortung gegenüber unseren Kunden und Kapitalgebern, den Mitarbeitern und der Öffentlichkeit beherrscht. Im Zentrum unserer geschäftlichen Aktivitäten stehen der Kunde und die bestmögliche Erfüllung seiner Ansprüche. Transparenz und Glaubwürdigkeit sind wesentliche Bestandteile unserer Unternehmenskultur. Gelebte kulturelle Offenheit, Toleranz und Respekt nach innen und nach außen prägen unser internationales Profil. Die Unternehmensgruppe will ihren Beitrag zur Weiterentwicklung des Handels auf nationaler und internationaler Ebene leisten und weltweit gestaltenden Einfluss auf die Innovation der Branche nehmen. Die METRO GROUP sieht sich den Belangen des Umweltschutzes und dem verantwortungsvollen Ressourcenverbrauch verpflichtet. Als leistungsstarker Unternehmensverbund von erfolgreichen Vertriebslinien und Gesellschaften bekennen wir uns zu einer gemeinsamen, identitätsstiftenden Wertordnung und stehen in der Verpflichtung, an der Umsetzung unserer gemeinsamen Ziele mitzuwirken.

## Leistungsidentität

### Wirtschaftliche Stärke

Wir wollen unsere Stellung als eines der weltweit führenden internationalen Handelsunternehmen ausbauen und unsere Profitabilität weiter steigern. Mit diesem Ziel

optimieren wir fortlaufend unsere Vertriebskonzepte, unsere Kostenstrukturen sowie unser auf wachstumsrelevante Geschäftsfelder fokussiertes Portfolio und setzen die internationale Expansion konsequent fort.

## **Nachhaltige Marktdurchdringung**

Wir erzielen profitables Wachstum, indem wir Märkte nachhaltig durchdringen. Die Internationalisierung des Unternehmens setzen wir konsequent weiter fort. Im Fokus unserer internationalen Aktivitäten stehen die Wachstumsregionen Osteuropas und Asiens. Wir haben die Kompetenzführerschaft bei der Erschließung von "emerging markets" für moderne Handelsformate. Diese Stellung wissen wir als Wettbewerbsvorsprung für unser Unternehmen zu nutzen.

## **Marktposition**

Basis des wirtschaftlichen Erfolgs der METRO GROUP ist die Leistungsfähigkeit unserer Vertriebslinien. Deren Markenkraft und Konzeptstärke sind wesentlich für den Gesamterfolg. Alle Vertriebslinien beanspruchen eine führende Position in ihrem jeweiligen Marktsegment. Unter dieser Zielsetzung prüfen und verbessern wir fortlaufend unsere Vertriebskonzepte. Diese wollen wir zu unverwechselbaren, vom Wettbewerb differenzierten Marken im Handel (Retail Brands) weiterentwickeln bzw. diesen Status ausbauen.

## **Strategische Stärke**

Wir bündeln die Leistungsstärken unserer Vertriebslinien und Querschnittsgesellschaften und schöpfen Synergien konzernweit aus. Dadurch verfügen wir über die strategischen Fähigkeiten und das wirtschaftliche Potenzial, unsere Wettbewerbsfähigkeit kontinuierlich zu steigern und weltweit unseren Kunden dauerhaft ein vielfältiges und qualitativ anspruchsvolles Angebot zu attraktiven Preisen zu offerieren.

## **Innovationsfähigkeit**

Zu den wesentlichen Erfolgsfaktoren unseres Unternehmens gehört unsere hohe Innovationsfähigkeit. Wir leisten unseren Beitrag zur Weiterentwicklung des Handels sowohl auf nationaler als auch auf internationaler Ebene. Das gilt insbesondere auch im Hinblick auf die Entwicklung und den Einsatz neuer Technologien im Handel. Diese versetzen uns in die Lage, die Wünsche unserer Kunden in Zukunft noch besser zu erfüllen, die Effizienz der Geschäftsprozesse zu steigern und gleichzeitig die Kosten zu senken. Wir wollen zu den Vorreitern dieser Entwicklung gehören und uns einen Wettbewerbsvorsprung sichern.

## **Führungsidentität**

### **Strategische Steuerung**

Die Steuerung des Portfolios, die Entscheidung über die Gesamtstrategie, die Führungskräfteentwicklung, die Erarbeitung personalpolitischer Strategien, die

Konzernkommunikation sowie die Positionierung der METRO GROUP im Kapitalmarkt erfolgen durch die METRO AG in Abstimmung mit den Vertriebslinien.

## **Konzepthoheit der Vertriebslinien**

Die Vertriebslinien der METRO GROUP sind in der operativen Unternehmensführung eigenständig. Sie zeichnen für die Weiterentwicklung ihrer Konzepte und Formate ebenso verantwortlich wie für die Umsetzung unternehmensstrategischer Entscheidungen.

## **Vielfalt, Chancengleichheit und Toleranz**

Die Vielfalt unserer Mitarbeiter ist eine unserer großen Stärken für den nachhaltigen Unternehmenserfolg. Wir fördern unsere Mitarbeiter nach ihren Fähigkeiten und nach ihrer Leistung. Wir begegnen einander mit Offenheit und Toleranz. Als "Equal Opportunity Employer" bieten wir allen Mitarbeitern und Bewerbern volle Chancengleichheit, ungeachtet ihres Geschlechts und Alters, ihrer Rasse, ethnischen Herkunft, sexuellen Identität und möglichen Behinderungen, ihrer Religion oder ihres Glaubens.

## **Leistungsorientierte Führung nach dem "Best-Practice-Prinzip"**

Unser Führungsstil ist geprägt von einem respektvollen und fairen Umgang mit allen Mitarbeitern sowie einer kulturellen und geografische Grenzen überschreitenden Zusammenarbeit unter Anwendung des "Best-Practice-Prinzips". Wir schaffen ein Arbeitsklima, das Menschen motiviert und zu überdurchschnittlichen Leistungen anspornt.

## **Gesellschaftspolitische Identität**

### **Politische Mitgestaltung**

Wir bringen unseren Sachverstand und unsere Erfahrung im Vorfeld gesetzgeberischer Entscheidungen ein, die den Handel betreffen. Dies leisten wir durch Beratung der politisch verantwortlichen Entscheidungsträger sowie durch aktive Mitwirkung in Verbänden und Organisationen des Handels auf nationaler und internationaler Ebene. Wir wollen auf diese Weise erreichen, dass die Bedürfnisse des Handels im Rahmen der politischen und rechtlichen Entscheidungsfindung in angemessener Weise Berücksichtigung finden.

### **Wahrnehmung Öffentlicher Aufgaben**

Wir ermutigen unsere Mitarbeiter, öffentliche Ämter und Aufgaben zu übernehmen. Dies trägt zu einer positiven Wahrnehmung des Unternehmens und seiner Repräsentanten in der Öffentlichkeit bei. Durch ein solches Engagement können die Interessen des Unternehmens auch im außerparlamentarischen Raum in angemessener Weise zur Geltung gebracht werden.

## **Corporate Social Responsibility**

Wir bekennen uns zum Grundsatz der "Corporate Social Responsibility", den wir durch Beteiligung an sozialen Projekten, der Sport- und Kulturförderung und durch unser Engagement für den Umweltschutz mit Leben füllen. Die Sicherung des dauerhaften wirtschaftlichen Erfolgs der METRO GROUP schließt nach unserem unternehmerischen Selbstverständnis die Übernahme von Verantwortung im gesellschaftlichen Raum und die Beachtung von Umweltbelangen ein.

<http://www.metrogroup.de/internet/site/metrogroup/node/11149/Lde/index.html>
