# Supplementary material
Source: publisher site journal article supplement (https://www.degruyterbrill.com/publication/isbn/9783110432879/downloadAsset/9783110432879_Elektronischer_Anhang_2.zip)
Supplement: Supplementary file 80 [file Metro GB 2010.pdf › Korpustexte/Korpustexte pdf/Metro/Metro GB 2010.pdf]

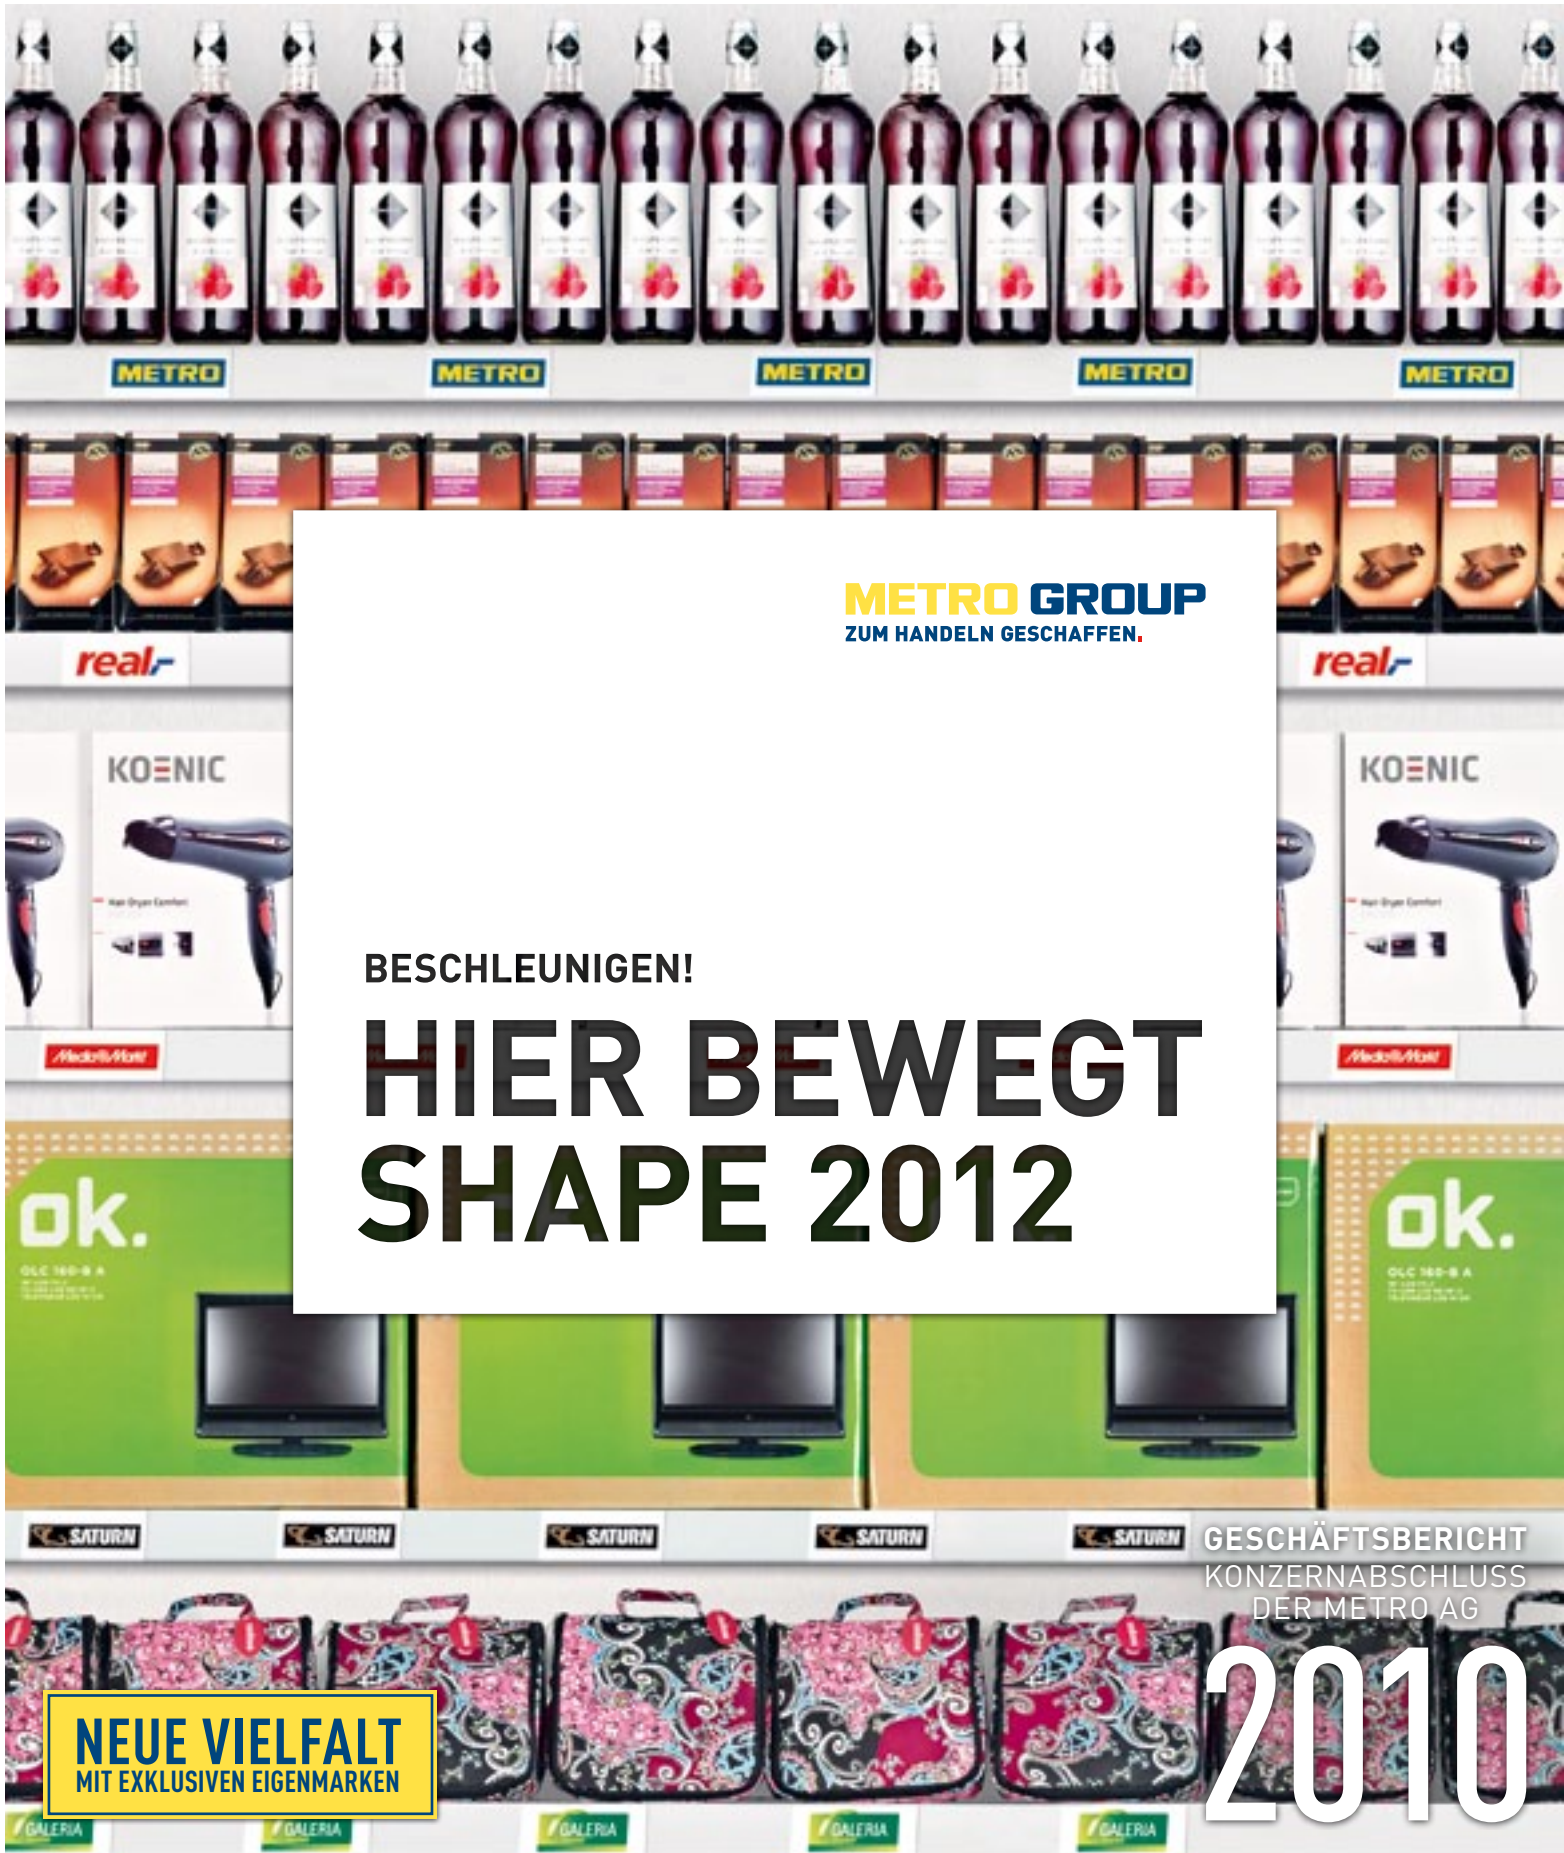

**METRO GROUP**  
ZUM HANDELN GESCHAFFEN.

BESCHLEUNIGEN!

# HIER BEWEGT SHAPE 2012

GESCHÄFTSBERICHT  
KONZERNABSCHLUSS  
DER METRO AG

# 2010

**NEUE VIELFALT**  
MIT EXKLUSIVEN EIGENMARKEN

# INHALT

## Beschleunigen!

Das Magazin

- S. 001 Brief an die Aktionäre
- S. 015 Was bringt Shape 2012?
- S. 016 Der Vorstand
- S. 018 Danksagung

## Die Strategie

- S. 021 Interview mit dem Vorstandsvorsitzenden
- S. 024 Rückblick
- S. 026 Strategische Ausrichtung der METRO GROUP
- S. 036 Shape 2012

## Das Investment

- S. 044
- S. 045 Metro-Aktie

## Das Geschäft

- S. 051 Bericht des Aufsichtsrats
- S. 059 Corporate-Governance-Bericht
- S. 070 Konzernlagebericht mit dem erläuternden Bericht des Vorstands zu den übernahmerelevanten Angaben nach § 315 Abs. 4 HGB
- S. 144 Konzernabschluss
- S. 151 Anhang
- S. 252 Versicherung der gesetzlichen Vertreter
- S. 253 Bestätigungsvermerk des Abschlussprüfers

## Service

- S. 256

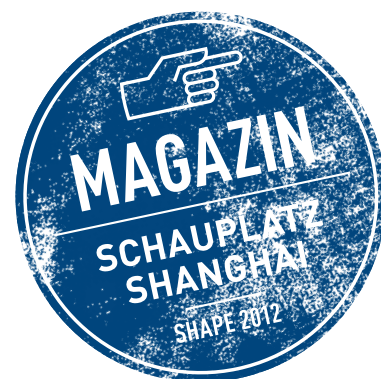

## METRO GROUP in Zahlen<sup>1</sup>

| Mio. €                                                                            | 2010                 | 2009 <sup>2</sup>    | Veränderung<br>in % | 2008 <sup>3</sup>    |
|-----------------------------------------------------------------------------------|----------------------|----------------------|---------------------|----------------------|
| <b>Finanzkennzahlen</b>                                                           |                      |                      |                     |                      |
| Umsatz (netto)                                                                    | 67.258               | 65.529               | 2,6                 | 67.955               |
| Metro Cash & Carry                                                                | 31.095               | 30.613               | 1,6                 | 33.143               |
| Real                                                                              | 11.499               | 11.298               | 1,8                 | 11.635               |
| Media Markt und Saturn                                                            | 20.794               | 19.693               | 5,6                 | 18.993               |
| Galeria Kaufhof                                                                   | 3.584                | 3.539                | 1,3                 | 3.607                |
| Sonstige                                                                          | 286                  | 386                  | -26,0               | 577                  |
| EBITDA                                                                            | 3.591                | 3.068 <sup>4</sup>   | 17,1                | 3.337                |
| EBITDA vor Sonderfaktoren                                                         | 3.726 <sup>5</sup>   | 3.319 <sup>4,5</sup> | 12,3                | 3.540 <sup>7</sup>   |
| EBIT                                                                              | 2.211                | 1.681                | 31,5                | 1.985                |
| EBIT vor Sonderfaktoren                                                           | 2.415 <sup>5</sup>   | 2.024 <sup>5</sup>   | 19,3                | 2.222 <sup>7</sup>   |
| Metro Cash & Carry                                                                | 1.104 <sup>5</sup>   | 936 <sup>5</sup>     | 17,9                | 1.139                |
| Real                                                                              | 132 <sup>5</sup>     | 52 <sup>5</sup>      | -                   | 6 <sup>7</sup>       |
| Media Markt und Saturn                                                            | 625 <sup>5</sup>     | 608 <sup>5</sup>     | 2,8                 | 603                  |
| Galeria Kaufhof                                                                   | 138 <sup>5</sup>     | 119 <sup>5</sup>     | 16,5                | 115                  |
| Immobilien                                                                        | 698 <sup>5</sup>     | 551 <sup>5</sup>     | 26,8                | 538                  |
| Sonstige                                                                          | -282 <sup>5</sup>    | -230 <sup>5</sup>    | -22,7               | -158                 |
| Konsolidierung                                                                    | 0 <sup>5</sup>       | -12                  | -                   | -21 <sup>7</sup>     |
| Finanzergebnis                                                                    | -581                 | -631                 | 7,9                 | -574                 |
| Ergebnis vor Steuern                                                              | 1.630                | 1.050                | 55,2                | 1.411                |
| Ergebnis vor Steuern und vor Sonderfaktoren                                       | 1.834 <sup>5</sup>   | 1.393 <sup>5</sup>   | 31,7                | 1.648 <sup>7</sup>   |
| Periodenergebnis                                                                  | 936                  | 519                  | 80,2                | 558                  |
| davon aus fortgeführten Aktivitäten                                               | 936                  | 519                  | 80,2                | 987                  |
| davon aus nicht fortgeführten Aktivitäten                                         | 0                    | 0                    | -                   | -429                 |
| Periodenergebnis vor Sonderfaktoren <sup>6</sup>                                  | 1.139 <sup>7</sup>   | 824 <sup>7</sup>     | 38,2                | 722 <sup>7</sup>     |
| Ergebnis je Aktie aus fortgeführten Aktivitäten                                   | € 2,60               | 1,17                 | -                   | 2,54                 |
| Ergebnis je Aktie aus fortgeführten Aktivitäten vor Sonderfaktoren <sup>7,8</sup> | € 3,12               | 2,10                 | 48,6                | 3,04                 |
| Dividende je Stammaktie                                                           | € 1,35 <sup>9</sup>  | 1,18                 | -                   | 1,18                 |
| Dividende je Vorzugsaktie                                                         | € 1,485 <sup>9</sup> | 1,298                | -                   | 1,298                |
| Cashflow aus laufender Geschäftstätigkeit                                         | 2.514                | 2.494                | 0,8                 | 2.637                |
| Investitionen                                                                     | 1.683                | 1.517                | 11,0                | 2.423                |
| Abschreibungen                                                                    | 1.427                | 1.396                | 2,3                 | 1.352                |
| Eigenkapital                                                                      | 6.460                | 5.992                | 7,8                 | 6.061                |
| Eigenkapitalquote                                                                 | % 18,4               | 18,0                 | -                   | 18,1                 |
| Nettoverschuldung                                                                 | 3.478                | 3.724                | -6,6                | 4.016                |
| Mitarbeiter (Jahresdurchschnitt nach Köpfen)                                      | 283.280              | 286.329              | -1,1                | 290.940              |
| Standorte                                                                         | 2.131                | 2.127                | 0,2                 | 2.111 <sup>10</sup>  |
| Verkaufsfläche (1.000 m <sup>2</sup> )                                            | 12.771               | 12.629               | 1,1                 | 12.302 <sup>10</sup> |

<sup>1</sup> Nur fortgeführte Aktivitäten (nicht fortgeführte Aktivitäten: 2009 Adler; 2008 Extra und Adler)

<sup>2</sup> Adjustierung aufgrund geänderter Ausweise

<sup>3</sup> Adjustierung aufgrund der Erstanwendung neuer und geänderter IFRS im Geschäftsjahr 2009

<sup>4</sup> Adjustierung aufgrund der saldierten Darstellung von außerplanmäßigen Abschreibungen und Zuschreibungen im EBITDA in Höhe von 9 Mio. € (Real), 6 Mio. € (Immobilien) und -6 Mio. € (Konsolidierung)

<sup>5</sup> 2010 (2009) bereinigt um Sonderfaktoren Shape 2012: Im EBITDA um 135 Mio. € (251 Mio. €), davon entfallen 11 Mio. € (104 Mio. €) auf Metro Cash & Carry, 11 Mio. € (16 Mio. €) auf Real, 58 Mio. € (4 Mio. €) auf Media Markt und Saturn, -1 Mio. € (57 Mio. €) auf Galeria Kaufhof, -14 Mio. € (5 Mio. €) auf Immobilien, 41 Mio. € (65 Mio. €) auf Sonstige sowie 29 Mio. € (0 Mio. €) auf Konsolidierung; im EBIT und im Ergebnis vor Steuern um 204 Mio. € (343 Mio. €), davon entfallen 10 Mio. € (143 Mio. €) auf Metro Cash & Carry, 27 Mio. € (16 Mio. €) auf Real, 133 Mio. € (5 Mio. €) auf Media Markt und Saturn, 0 Mio. € (58 Mio. €) auf Galeria Kaufhof, -20 Mio. € (15 Mio. €) auf Immobilien, 41 Mio. € (106 Mio. €) auf Sonstige sowie 13 Mio. € (0 Mio. €) auf Konsolidierung.

<sup>6</sup> Einschließlich nicht fortgeführter Aktivitäten

<sup>7</sup> 2010, 2009 und 2008 bereinigt um Sonderfaktoren Shape 2012

<sup>8</sup> Nach Anteilen nicht beherrschender Gesellschafter

<sup>9</sup> Vorbehaltlich des Hauptversammlungsbeschlusses

<sup>10</sup> Die 84 Standorte von Dinea wurden aus dem Segment Sonstige in das Segment Galeria Kaufhof umgegliedert. Im Segment Galeria Kaufhof werden diese nicht mehr als eigenständige Standorte gezählt, sondern dem jeweiligen Standort von Galeria Kaufhof zugerechnet. Daher werden die Standorte sowie die Verkaufsflächen nicht mehr gesondert ausgewiesen.

**METRO GROUP**  
ZUM HANDELN GESCHAFFEN.

**BESCHLEUNIGEN!**

# **HIER BEWEGT SHAPE 2012**

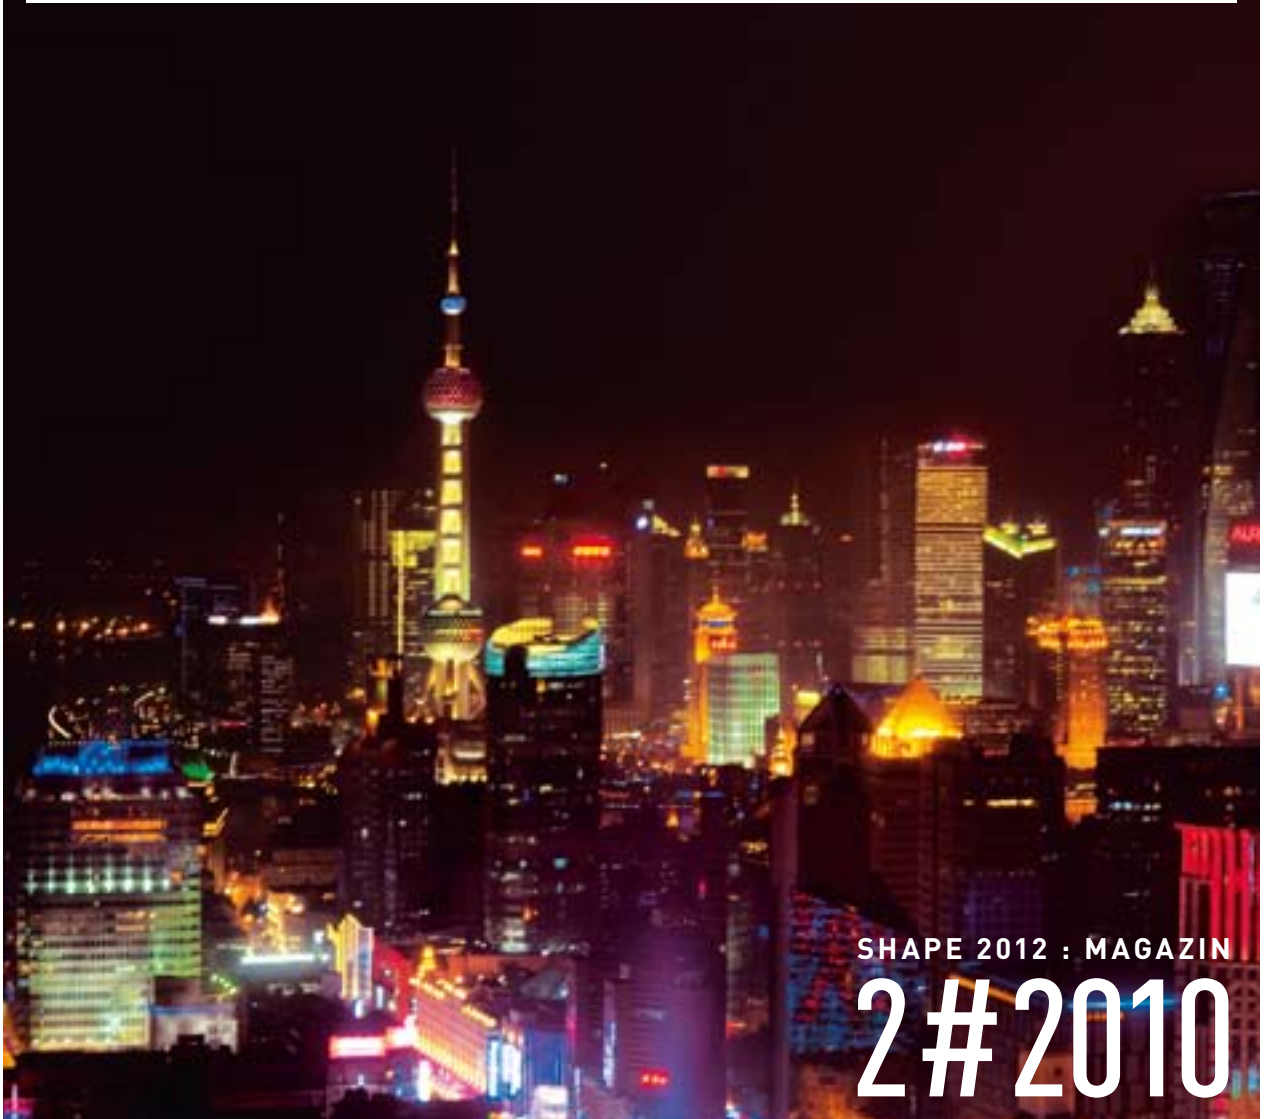

SHAPE 2012 : MAGAZIN

# 2#2010

# EIN BISSCHEN SHAPE 2012 STECKT AUCH IN JULIAS ALLTAG

Shape 2012 ist unser Effizienz- und  
Wertsteigerungsprogramm

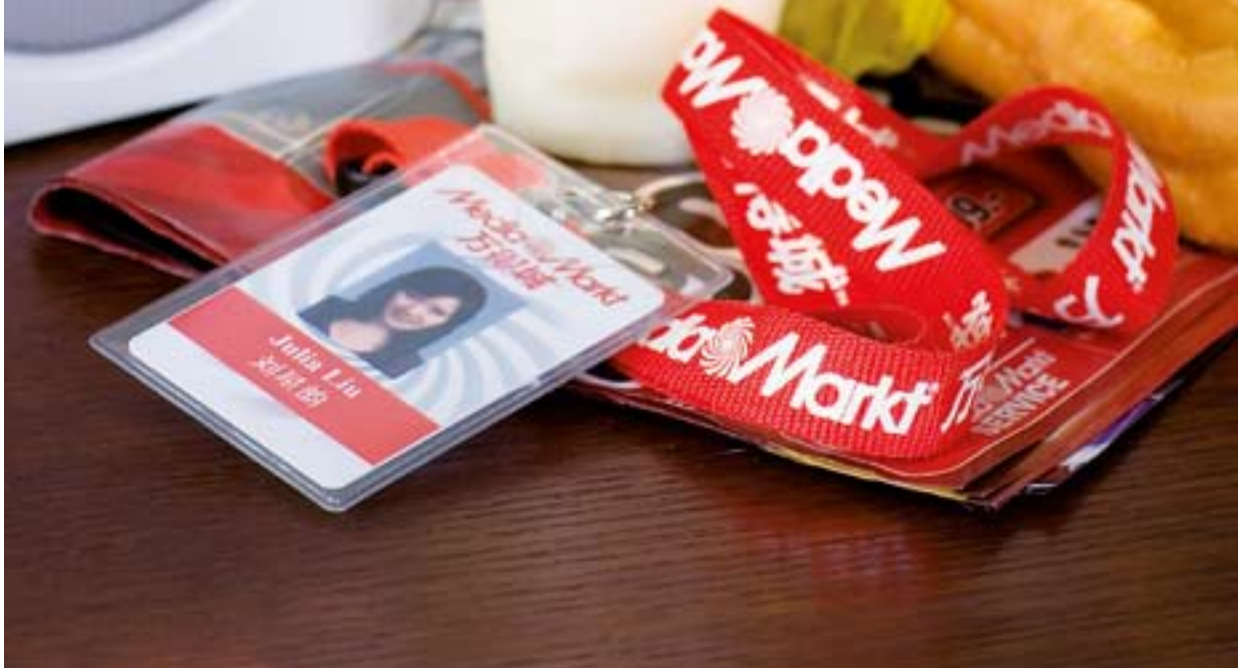

SHAPE 2012 : MAGAZIN

# 2#2010

**Das Herz von Julia Liu schlägt für ihr Unternehmen.** Es schlägt für ihr großartiges Team im Media Markt in der Huai Hai Road in Shanghai. Und: Es schlägt für Karaoke. Doch dazu später mehr.

**Zunächst möchten wir Ihnen ein wenig über uns – die METRO GROUP – und über den ersten Media Markt in China erzählen.** Gemeinsam mit Julia und ihren 274 engagierten Kolleginnen und Kollegen haben wir ihn im November 2010 eröffnet – mit rund 45.000 Produkten auf mehr als 9.500 Quadratmetern Verkaufsfläche. Für uns ist der Markteintritt von Media Markt ein weiterer bedeutender Schritt in unserer Expansion. Die pulsierenden Märkte Osteuropas und Asiens spielen für das nachhaltige Wachstum der METRO GROUP eine entscheidende Rolle. Nicht ohne Grund ist zum Beispiel unser Selbstbedienungsgroßhändler Metro Cash & Carry seit 14 Jahren in China aktiv und betreibt dort mittlerweile 48 Großmärkte. Unser internationaler Erfolg beruht auf einer starken Basis: rund 283.000 Mitarbeiterinnen und Mitarbeiter in 33 Ländern der Erde, die sich jeden Tag aufs Neue für unser Geschäft und unsere Kunden begeistern. In den Elektrofachmärkten von Media Markt oder Saturn ebenso wie in den Großmärkten von Metro Cash & Carry, in den Real SB-Warenhäusern, in den Filialen von Galeria Kaufhof sowie bei unserer Immobiliengesellschaft METRO Group Asset Management.

**So wie Julia und ihre Kolleginnen, die nicht nur beruflich ein starkes Team sind, sondern auch privat vieles teilen:** ihr Interesse an Trends, ihre Begeisterung für alles Elektronische, ihr Faible für Schrilles und Schräges und ihre Leidenschaft für Musik und Karaoke. Wir haben sie einen Tag lang begleitet. Zu Hause, bei der Arbeit, während der Mittagspause in einer der vielen traditionellen Garküchen und abends beim Feiern.

**Gemeinsam mit Julia haben wir das junge China kennengelernt: ein faszinierendes Land voller Kontraste, in dem die Zukunft greifbar wird.** Eine Zukunft, an der wir auf Basis von Shape 2012 mit großem Erfolg teilhaben. Wo wir heute stehen und was wir für morgen planen, das erfahren Sie auf den folgenden Seiten.

DIE VIELFALT DER METRO GROUP

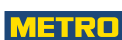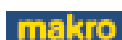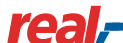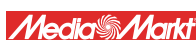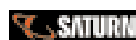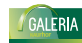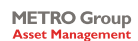

DIE WERTTREIBER  
DER  
**METRO GROUP**

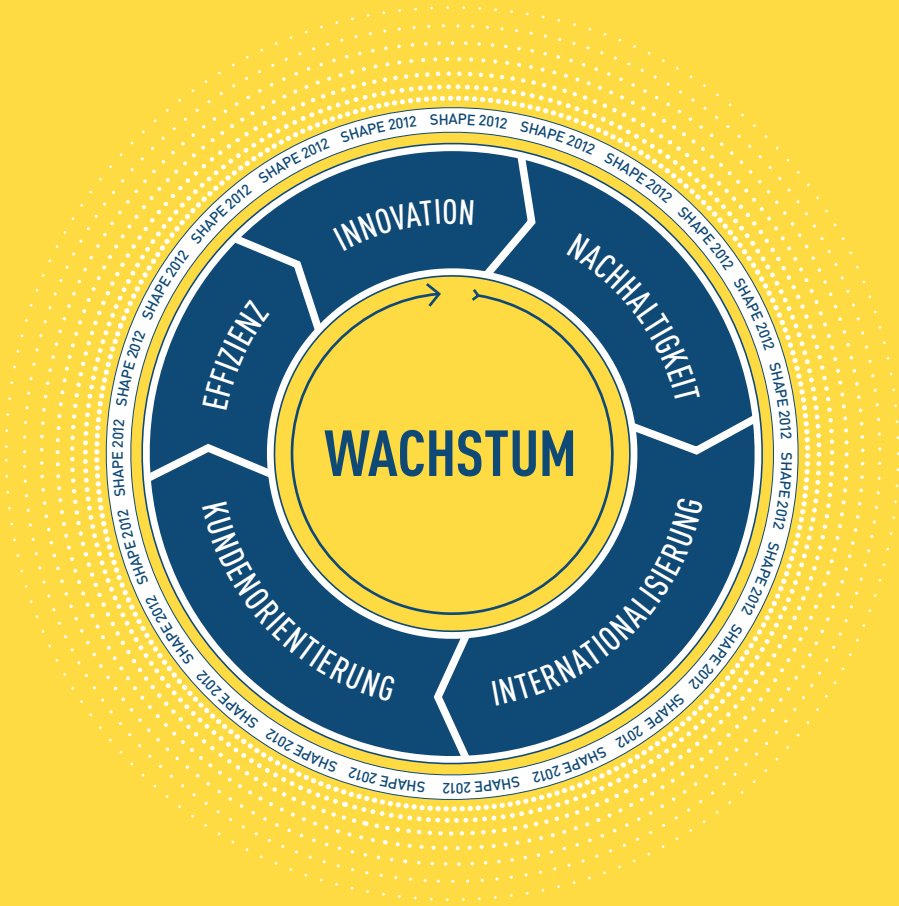

Lesen Sie auch das Kapitel  
**„Strategische Ausrichtung der METRO GROUP“**  
im Geschäftsbericht auf den Seiten 026 bis 035,  
um mehr über die Werttreiber zu erfahren.

# WACHSTUM HAT FÜR UNS VIELE FACETTEN

Unsere Werttreiber

Links sehen Sie die fünf Werttreiber, die für uns besonders wichtig sind.

„Was hat das mit Shape 2012 und einer Mitarbeiterin wie Julia Liu zu tun?“, möchten Sie sicherlich wissen. Unsere Antwort: Mehr, als Sie auf den ersten Blick vermuten würden.

Unser Vorstandsvorsitzender Dr. Eckhard Cordes schildert, wie wir dank unserer Werttreiber noch leistungsstärker werden und für Kunden, Mitarbeiter, Anleger und Gesellschaft gleichermaßen Wachstum ermöglichen.

Blättern Sie um!



# WAS GIBT ES NEUES BEI SHAPE 2012, HERR DR. CORDES?

Interview mit dem Vorstandsvorsitzenden der METRO AG

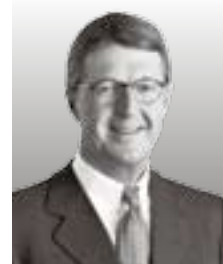

 104

→ **Shape 2012 geht in die zweite Halbzeit. Sind Sie mit den Erfolgen bislang zufrieden?**

Ja, denn wir sind ein anderer, ein leistungsfähigerer Konzern als noch vor zwei Jahren. Die METRO GROUP hat Shape 2012 auf allen Ebenen verinnerlicht. Das Programm ist in unsere DNA übergegangen.

→ **Was bedeutet das im Arbeitsalltag?**

Unsere Strukturen und Prozesse sind effizienter. Die Mitarbeiter können sich auf das eigentliche Geschäft konzentrieren: den Handel und unsere Kunden. Wir erleben einen neuen Unternehmergeist. Er macht sich in den zahlreichen Projekten bemerkbar, die wir angestoßen haben. Dazu gehören zum Beispiel innovative Vertriebsformate und -konzepte, mit denen wir die Erwartungen der Kunden noch besser erfüllen.

→ **Aufbruchstimmung herrscht auch bei Ihrer Expansion in Asien ...**

Genau, wir können uns dank Shape 2012 stärker auf jene Felder konzentrieren, von denen wir uns mehr Wachstum versprechen. Die beschleunigte Expansion gehört dazu. Mit Media Markt in China sind wir genau zur richtigen Zeit am richtigen Ort.

→ **Welche Rolle spielt das Thema Nachhaltigkeit?**

Nachhaltigkeit ist eine absolute Notwendigkeit. Sie muss aber am Kerngeschäft des Unternehmens ansetzen und seine wirtschaftlichen Ziele unterstützen. Bei der METRO GROUP ist dies der Fall. Indem wir nachhaltig handeln, sichern wir unseren langfristigen Erfolg.

# „WIRKUNGSVOLL UND ERFOLGREICH – BEREITS IN DER ERSTEN HALBZEIT“

Dr. Eckhard Cordes zum Fortschritt bei Shape 2012

## NEUES FÜHRUNGSMODELL

für größere Markt- und Kundennähe

### + UNGETEILTE VERANTWORTUNG

der Vertriebslinien für das operative Geschäft

### + STRAFFE ORGANISATIONSSTRUKTUR

für Finanzen, Compliance und Nachhaltigkeit

### + IMMOBILIENPORTFOLIO ALS PROFITCENTER

mit eigenständigem Wertbeitrag

### + ZENTRALE RENDITEVORGABEN

für eine straffe Führung

---

= Ergebnisverbesserungspotenzial ab 2012:

**1.500.000.000 €**

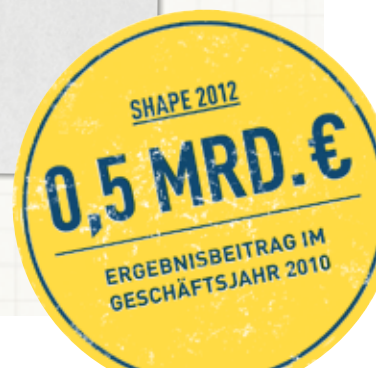

# JULIAS HERZ SCHLÄGT FÜR SHANGHAI – UND FÜR MEDIA MARKT!

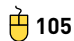

Halb acht in Shanghai – Julia Liu genießt ihren Morgentee. Es ist ihr 27. Geburtstag, aber sie ist bereits früh auf den Beinen. Denn im Media Markt, in dem sie als Fachberaterin arbeitet, gibt es jede Menge zu tun.

Keine Frage, Julias Media Markt ist ein ganz besonderer: Es ist der erste Media Markt Chinas. Gemeinsam mit ihren neuen Kolleginnen und Kollegen hat sie die Eröffnung in den vergangenen Monaten vorbereitet. Mit Leidenschaft. Mit Engagement. Und mit ganzem Herzen, vor allem kurz vor der großen Feier zur Eröffnung am 17. November 2010. Seit dem Start ist im Media Markt jeden Tag volles Haus. Das liegt an Julia und ihren Kolleginnen und Kollegen, die im Elektrofachmarkt alles für ihre Kunden geben.

Wir haben Julia einen Tag lang bei ihrer Arbeit über die Schulter geschaut. Wir haben gesehen, wie Technikbegeisterung Kunden und Mitarbeiter verbindet. Beim Probesitzen im Massagesessel haben wir etwas über asiatische Einkaufsgewohnheiten erfahren. Und mittags gab es leckeren frittierten Tofu in Julias Lieblings-Garküche. Wir sind mit Julia und ihren Freundinnen losgezogen und haben ihren Geburtstag ausgelassen gefeiert – in der Karaoke-Bar um die Ecke.

Kurz: In knapp elf Stunden gab es zahlreiche Einblicke in das chinesische Großstadtleben mit vielen Begegnungen. Begeisterte Kunden und motivierte Mitarbeiter waren ebenso darunter wie ein Garkoch und auch ein deutscher Geschäftsmann. An der U-Bahn-Haltestelle, in der Mittagspause und abends in der Karaoke-Bar haben wir nicht nur viele Menschen getroffen. Wir haben zudem zahlreiche Produkte entdeckt, die aus unseren Märkten und Filialen stammen. Zugegeben: Nicht alle davon gibt es bei Media Markt. Aber die Metro Cash & Carry Märkte in Julias Heimatstadt haben ebenfalls ein reichhaltiges Sortiment. Genau wie Real, Saturn und Galeria Kaufhof in Europa.

Für Julia Liu sind die vier Vertriebslinien der METRO GROUP ein Begriff. Denn sie hat lange in Deutschland gelebt und dort gearbeitet. Aus dieser Zeit rührt auch ihr westlicher Vorname. Julia ist begeistert, wenn sie von ihren Erfahrungen erzählt: Es war Liebe auf den ersten Blick. Mit vielen ihrer damaligen Kolleginnen und Kollegen verbindet sie bis heute eine echte Freundschaft. So verwundert es auch nicht, dass Julia regelmäßig Gäste aus Europa empfängt. Übrigens: Über Mitbringsel aus ihrer alten Heimat freut sie sich immer.

# JULIA WIRD HEUTE 27\*

\*WIR GRATULIEREN!

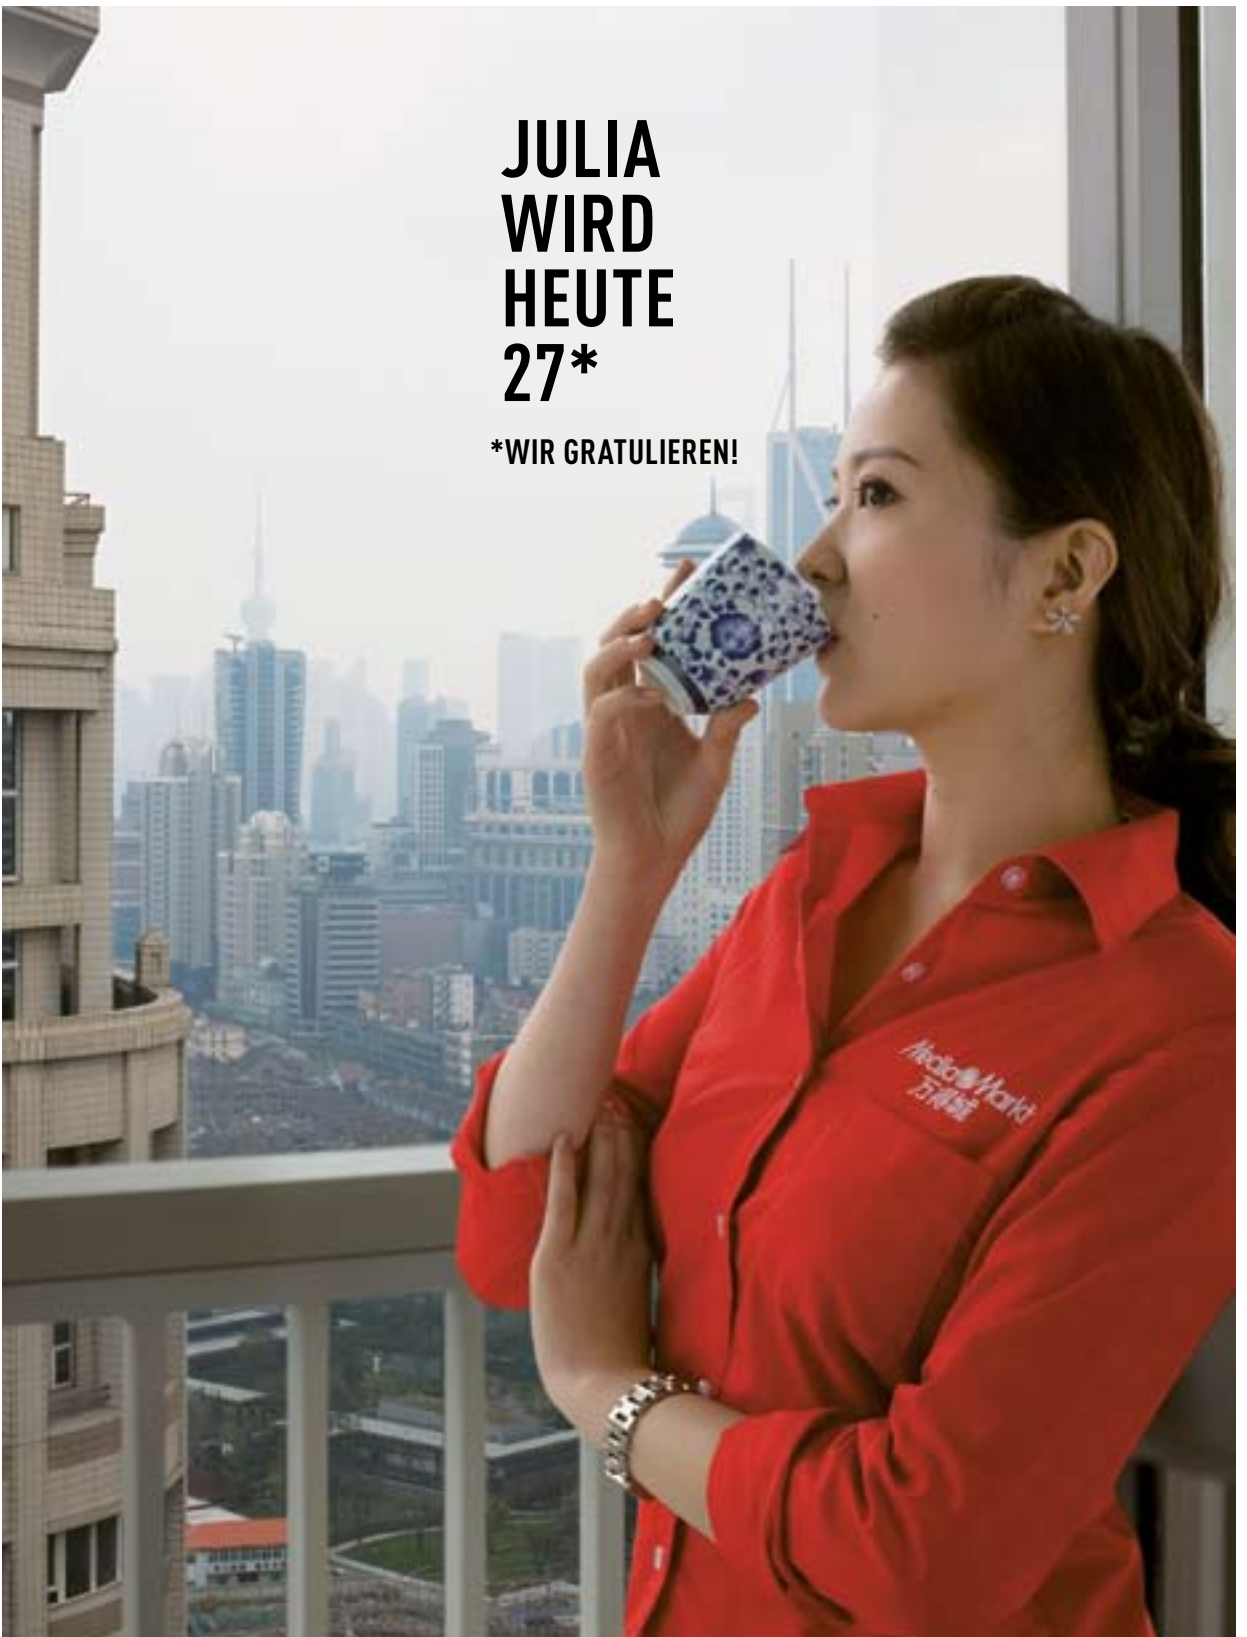

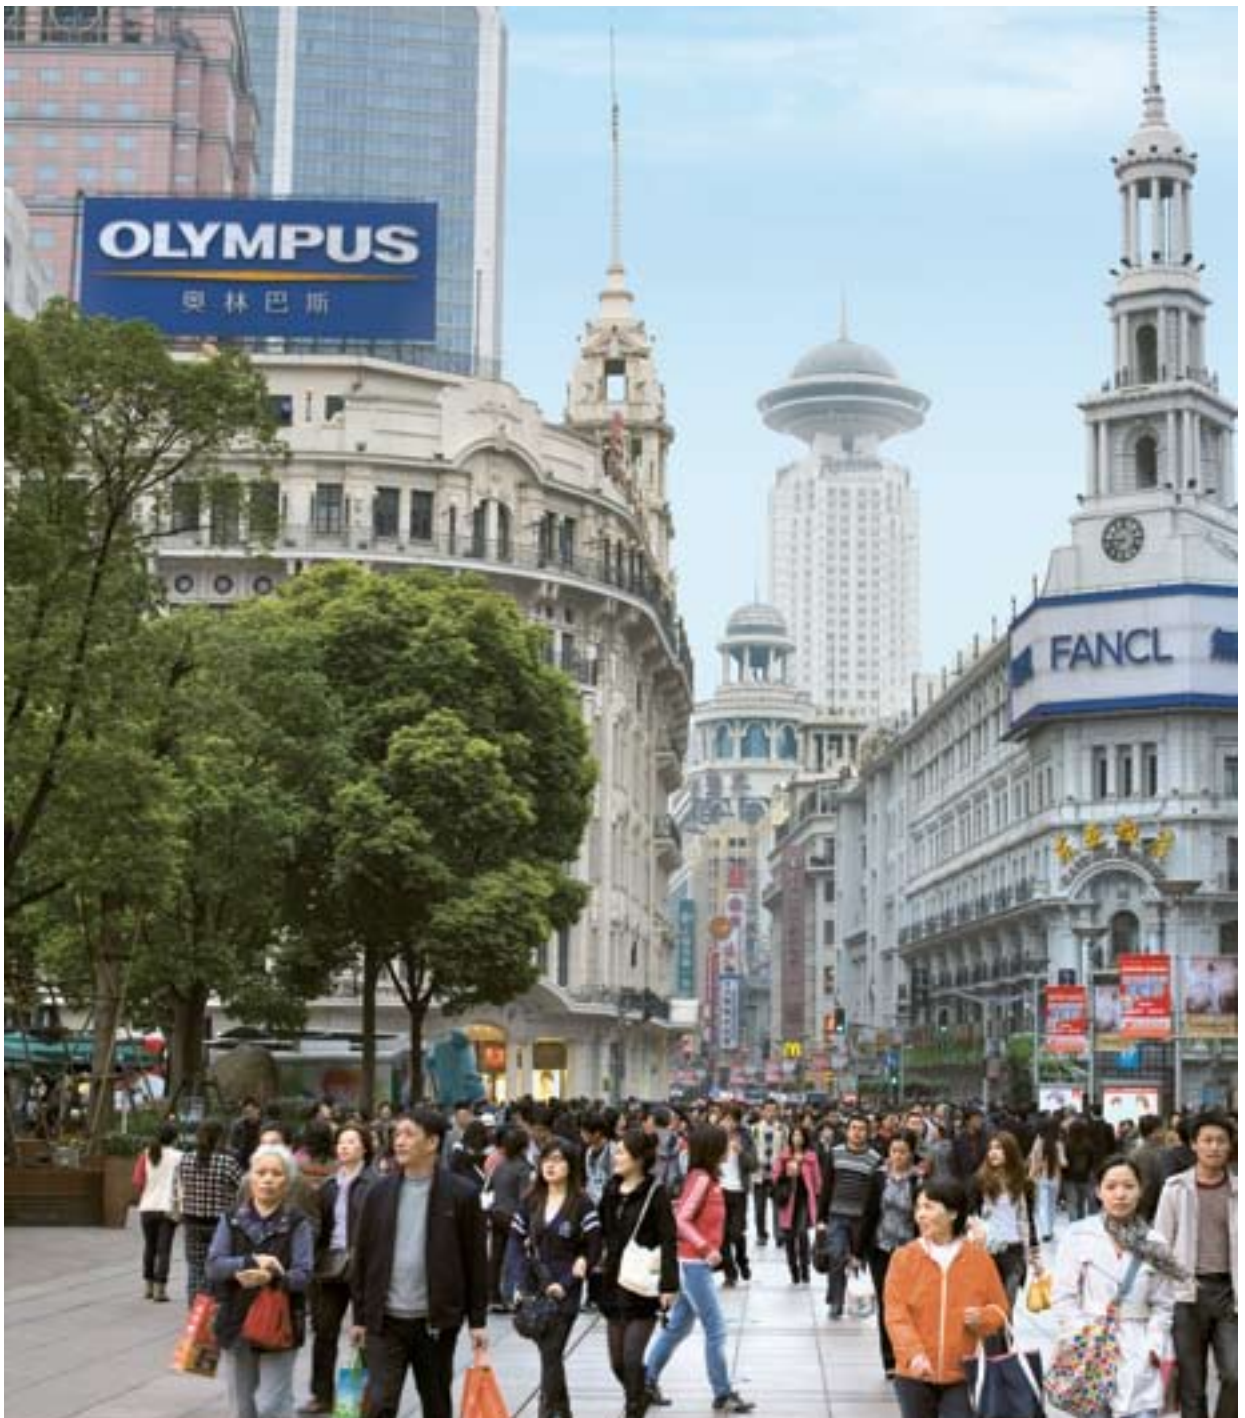

07:45 UHR  
**BOOMTOWN SHANGHAI:  
CHINA IST SCHON FRÜH  
AUF DEN BEINEN**

Chinas Wirtschaft wächst rasant. Die chinesischen Verbraucher entdecken zunehmend den Spaß am Konsum. Beispiel Unterhaltungs- und Haushaltselektronik: Prognosen zufolge liegt das Umsatzpotenzial allein in Julias Heimatstadt Shanghai bei jährlich 5,5 Milliarden Euro. Der Elektrofachhandel verbucht im Schnitt Zuwächse von 8 Prozent. Von diesem Wachstum will Media Markt profitieren.

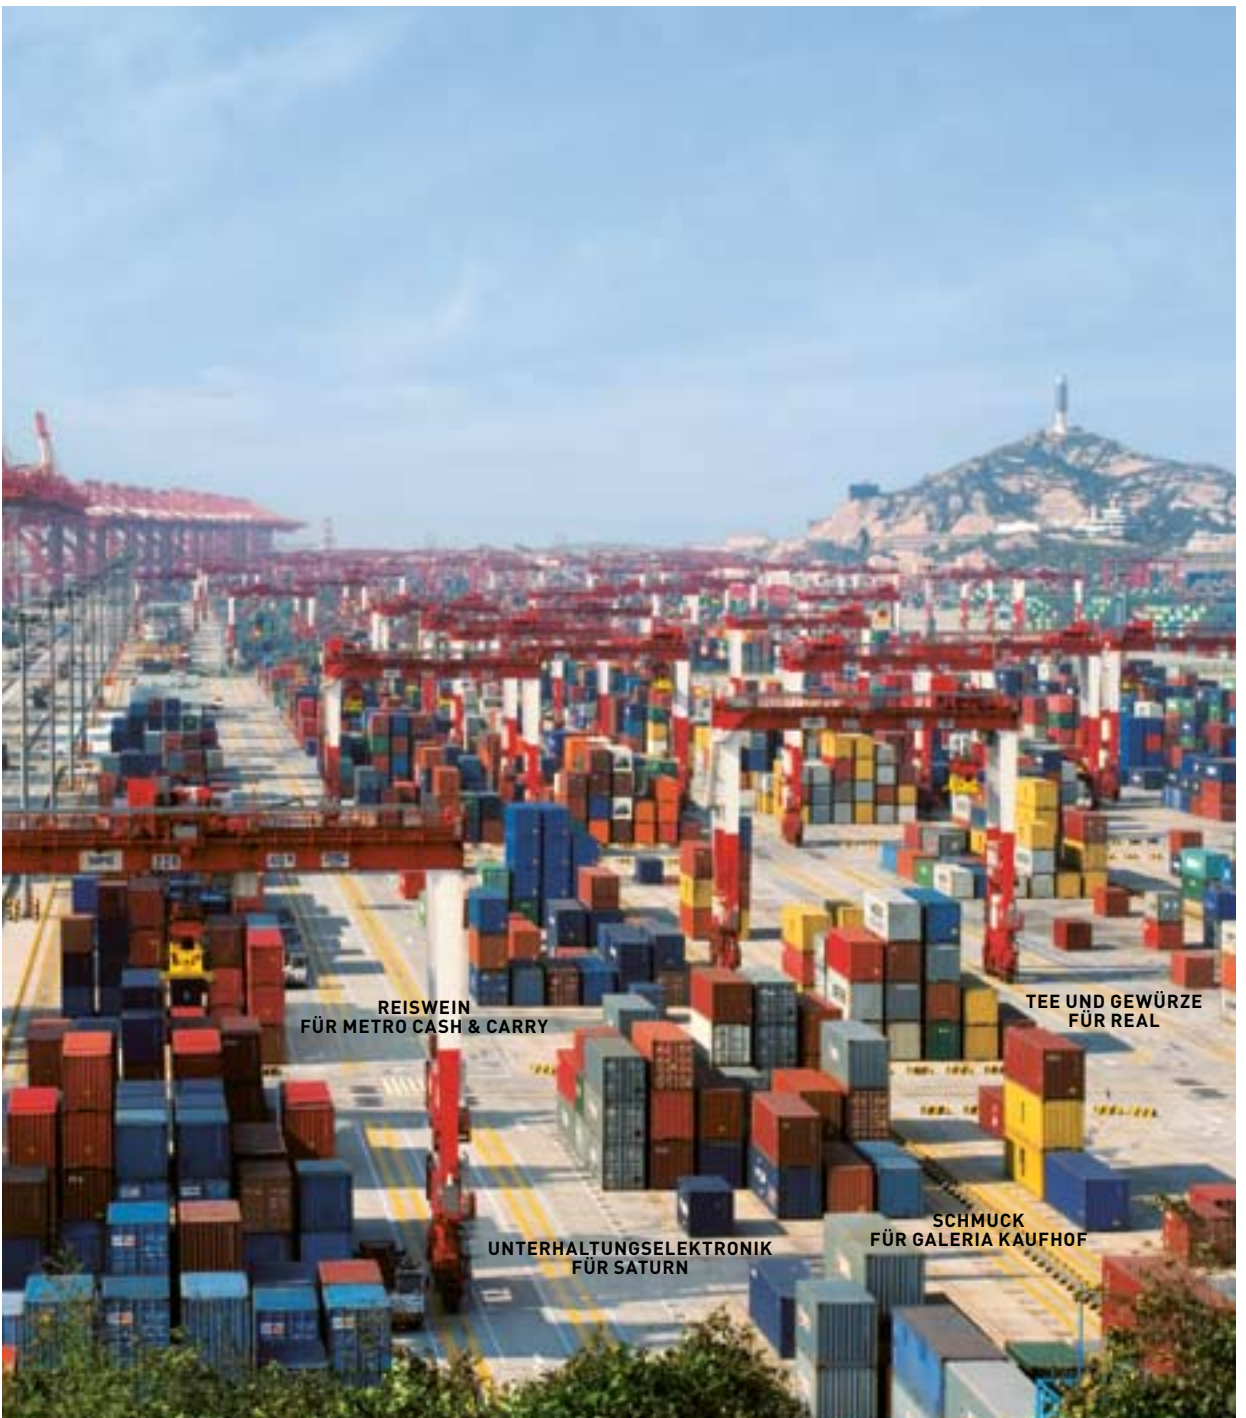

REISWEIN  
FÜR METRO CASH & CARRY

TEE UND GEWÜRZE  
FÜR REAL

UNTERHALTUNGSELEKTRONIK  
FÜR SATURN

SCHMUCK  
FÜR GALERIA KAUFHOF

08:10 UHR  
**HOCHBETRIEB IM HAFEN:  
HEISSBEGEHRTE FRACHT  
FÜR EUROPAS MÄRKTE**

Shanghai hat sich viel vorgenommen. Bis zum Jahr 2020 soll der Hafen der Stadt der weltweit größte sein. Schon heute ist er einer der bedeutendsten Umschlagplätze für Waren, die von hier aus verschifft werden. Der Exportweltmeister China ist auch für die Vertriebslinien der METRO GROUP ein bedeutender Handelspartner. Von den günstigen Einkaufspreisen und der hohen Qualität profitieren Verbraucher in Asien und ganz Europa.

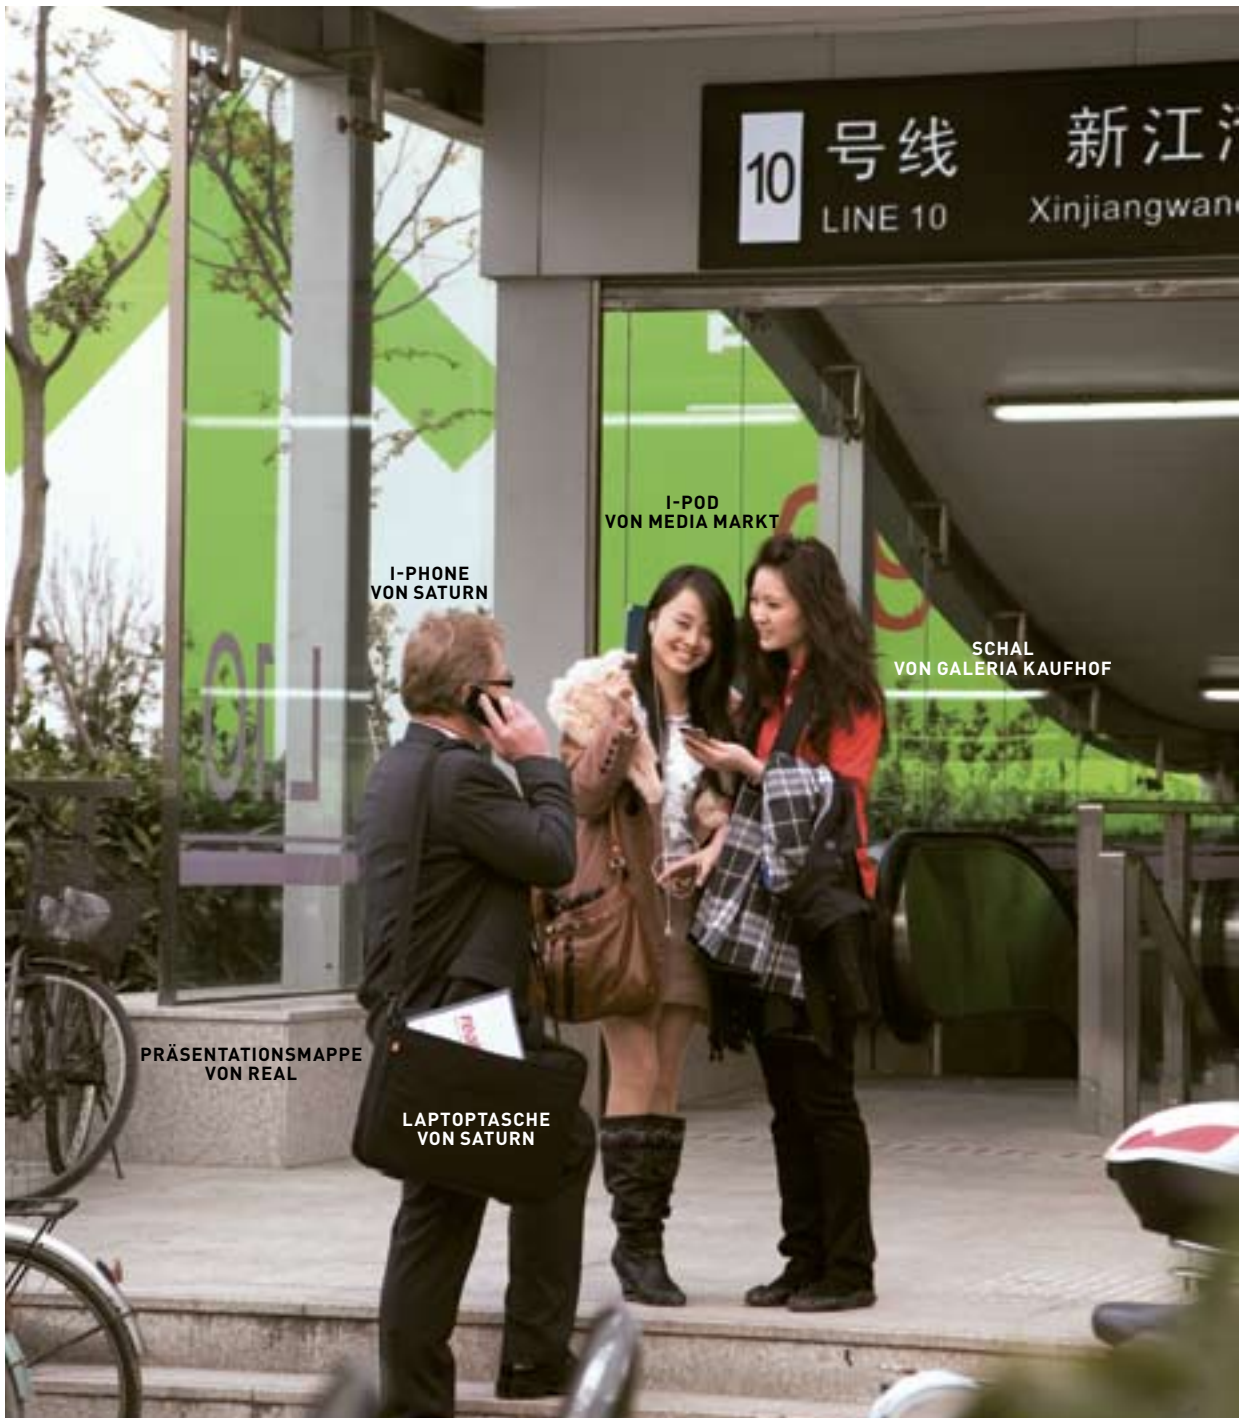

10 号线  
LINE 10

新江湾  
Xinjiangwan

I-POD  
VON MEDIA MARKT

I-PHONE  
VON SATURN

SCHAL  
VON GALERIA KAUFHOF

PRÄSENTATIONSMAPPE  
VON REAL

LAPTOPTASCHE  
VON SATURN

08:20 UHR  
**JULIA TRIFFT  
KOLLEGEN, ERWARTET  
UND UNERWARTET**

Die chinesische Industriemetropole, in der Tradition und Moderne aufeinander treffen, hat sich zu einem Anziehungspunkt für Geschäftsleute aus dem In- und Ausland entwickelt. Auch die europäischen Mitarbeiter der Vertriebslinien der METRO GROUP sind regelmäßig zu Gast in der Stadt und im Umland. Zum Beispiel, um sich vor Ort von der Qualität und Sicherheit der Produkte und den Herstellungsbedingungen zu überzeugen.

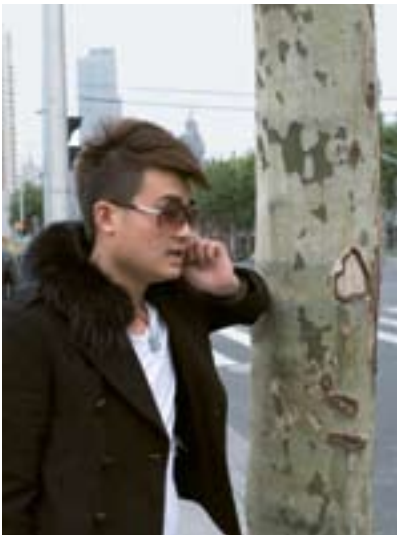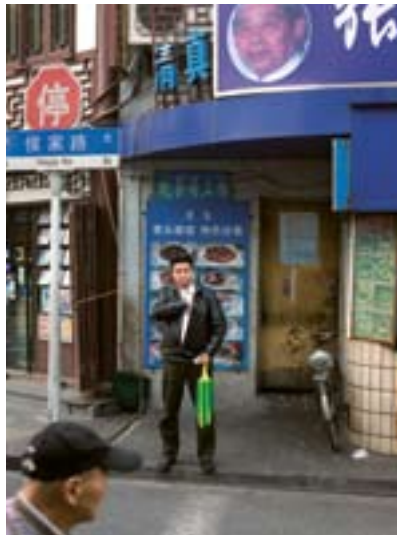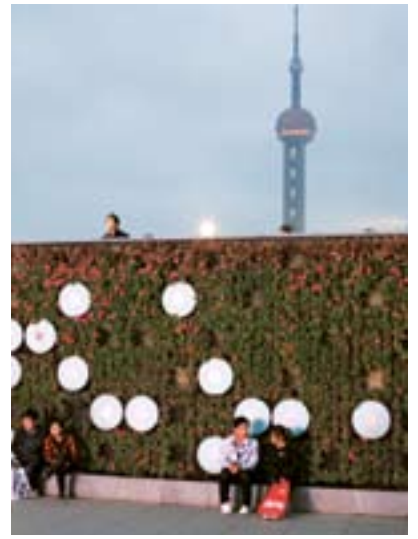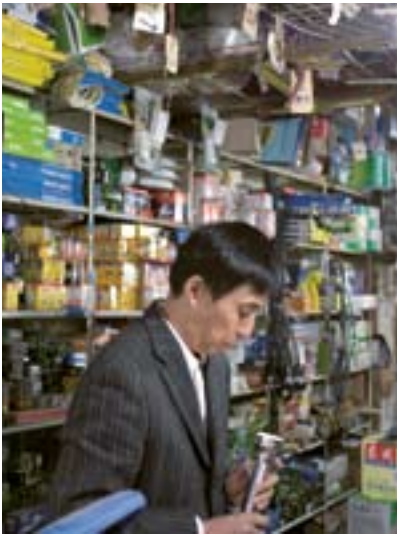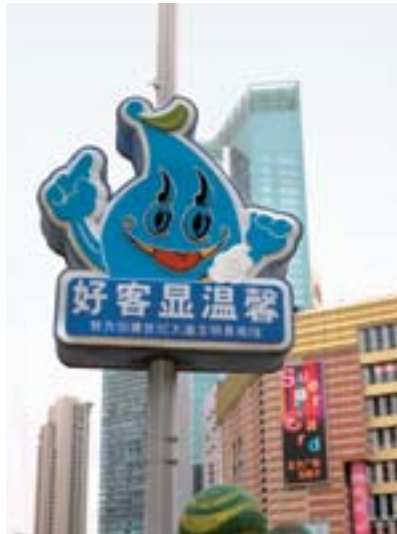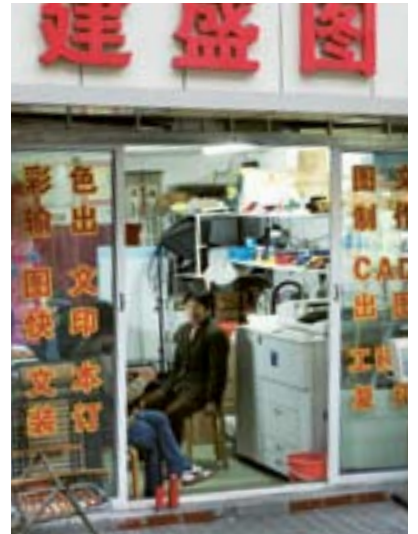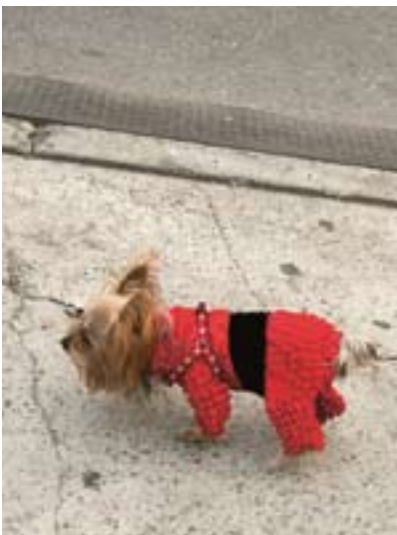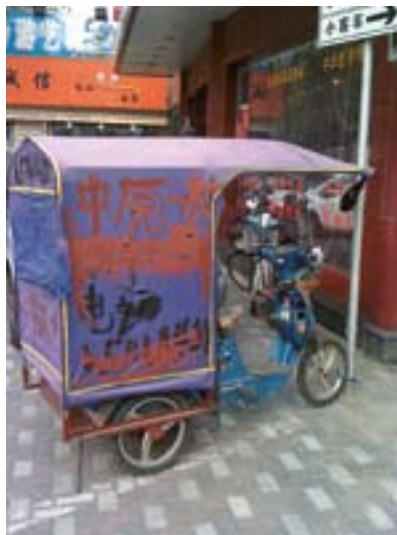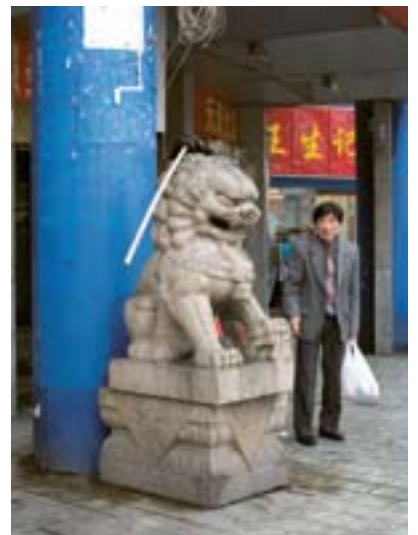



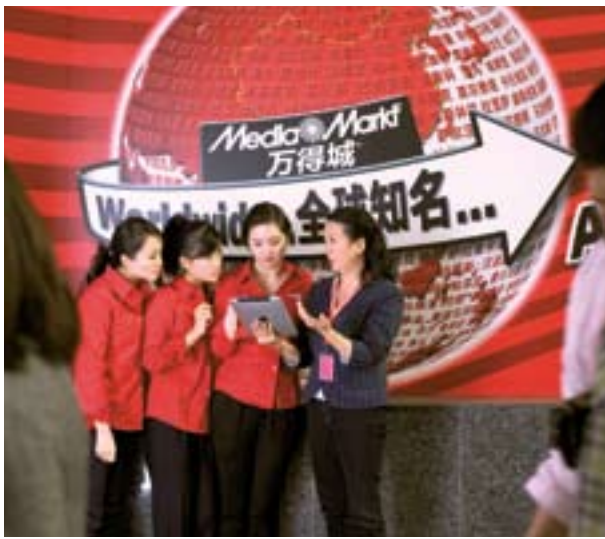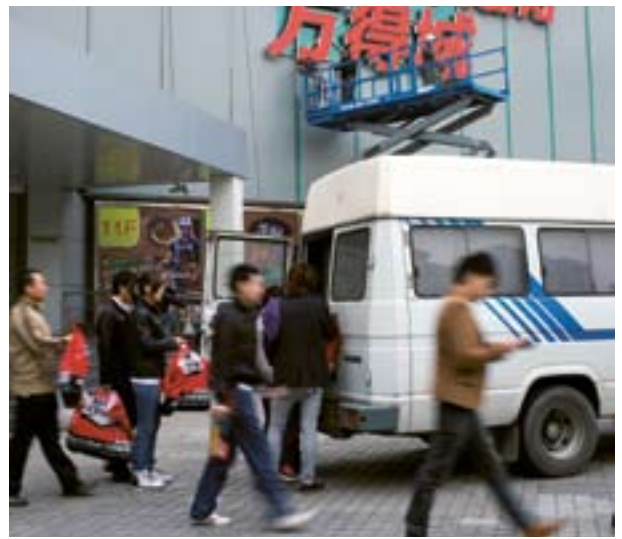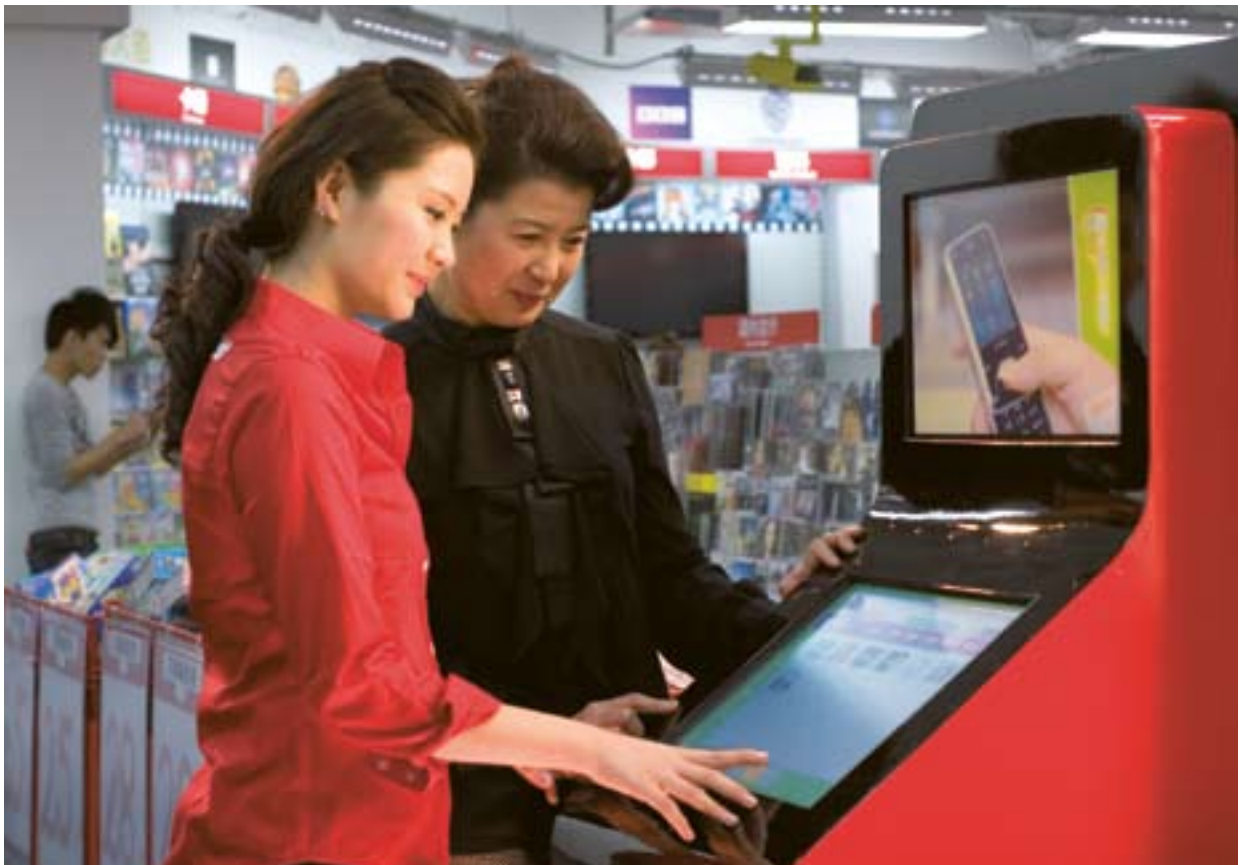

10:40 UHR  
**HOCHBETRIEB IM  
MEDIA MARKT: JULIA  
IST IN IHREM ELEMENT**

Wan De Cheng – so lautet der chinesische Name von Media Markt. Frei übersetzt heißt das so viel wie „Stadt, in der du alles bekommst“. Gemeinsam mit ihren Kolleginnen und Kollegen setzt sich Julia täglich mit Leidenschaft dafür ein, dieses Versprechen einzulösen. Ihr Media Markt bietet nicht nur eine große Auswahl an Markenprodukten zu günstigen Preisen, sondern auch erstklassigen Service und fachkundige Beratung.

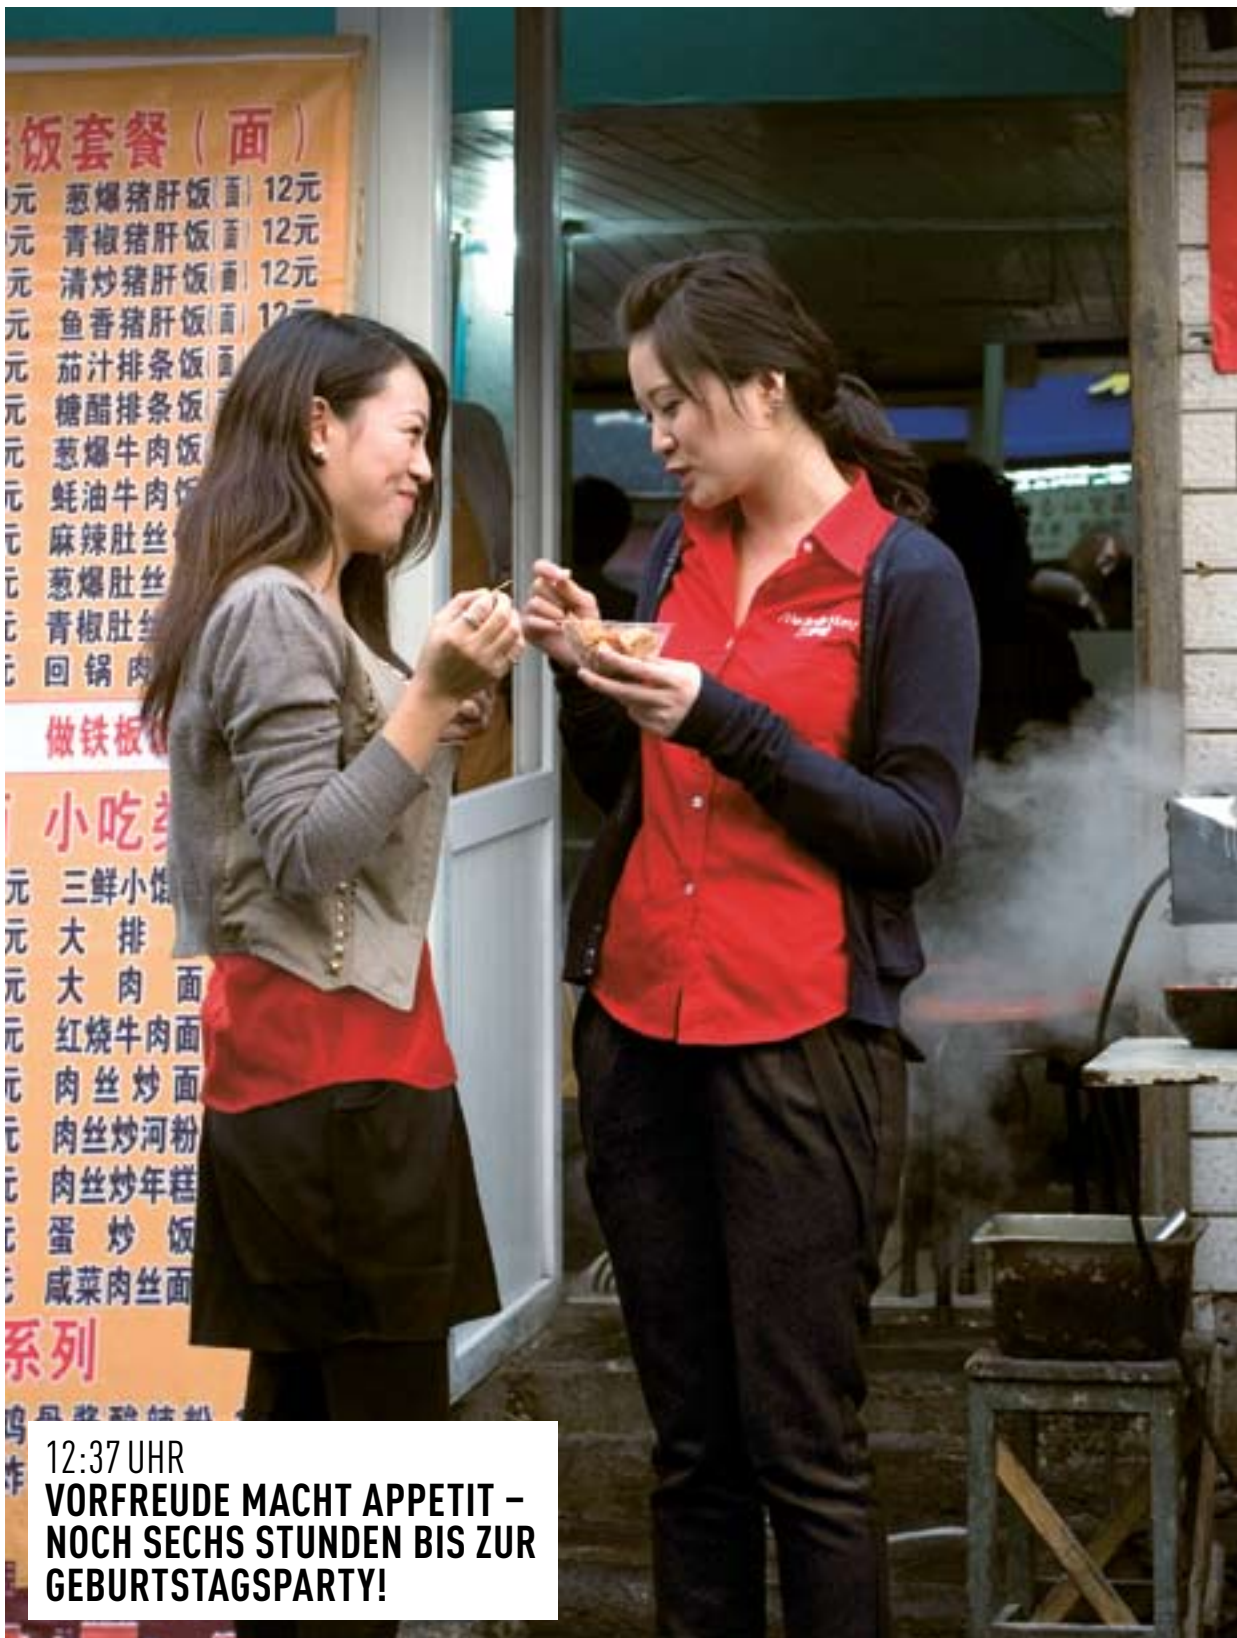

## 饭套餐 (面)

- 元 葱爆猪肝饭 面 | 12元
- 元 青椒猪肝饭 面 | 12元
- 元 清炒猪肝饭 面 | 12元
- 元 鱼香猪肝饭 面 | 12元
- 元 茄汁排条饭 面
- 元 糖醋排条饭 面
- 元 葱爆牛肉饭
- 元 蚝油牛肉饭
- 元 麻辣肚丝
- 元 葱爆肚丝
- 元 青椒肚丝
- 元 回锅肉

## 做铁板

## 小吃

- 元 三鲜小馄饨
- 元 大排
- 元 大肉 面
- 元 红烧牛肉面
- 元 肉丝炒面
- 元 肉丝炒河粉
- 元 肉丝炒年糕
- 元 蛋炒饭
- 元 咸菜肉丝面

## 系列

鸡 鸭 蹄 膀

12:37 UHR  
**VORFREUDE MACHT APPETIT -  
NOCH SECHS STUNDEN BIS ZUR  
GEBURTSTAGSPARTY!**

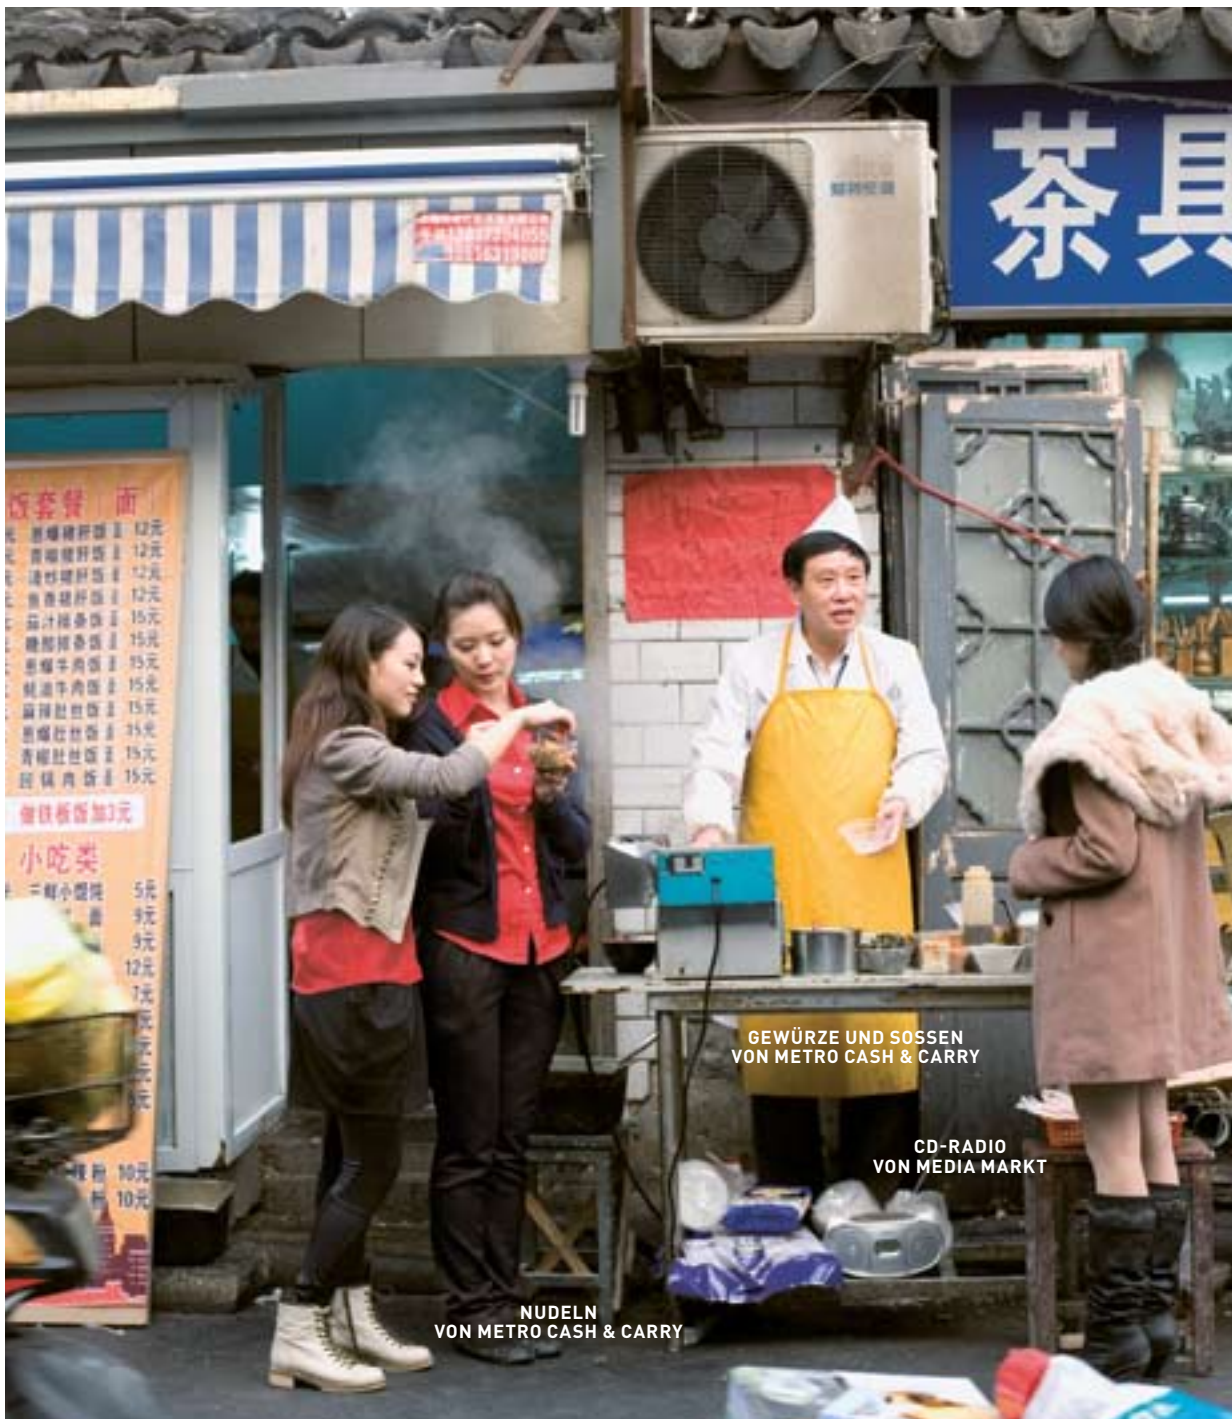

GEWÜRZE UND SOSSEN  
VON METRO CASH & CARRY

CD-RADIO  
VON MEDIA MARKT

NUDELN  
VON METRO CASH & CARRY

12:38 UHR  
**GARKOCH SONG WEISS,  
WAS SCHMECKT – UND  
SCHWÖRT AUF HORECA!**

Gewerbetreibende wie Song, dessen Garküche ein echter Geheimtipp ist, sind die Kunden von Metro Cash & Carry. In China ist die Vertriebslinie seit 1996 aktiv. Wie immer gilt: Angebot und Service sind konsequent an die Bedürfnisse professioneller Kunden angepasst. Ein neues Format ist „METRO for HORECA“. Der 2.100 Quadratmeter große Markt in der Innenstadt richtet sich speziell an Hotels, Restaurants und Caterer.

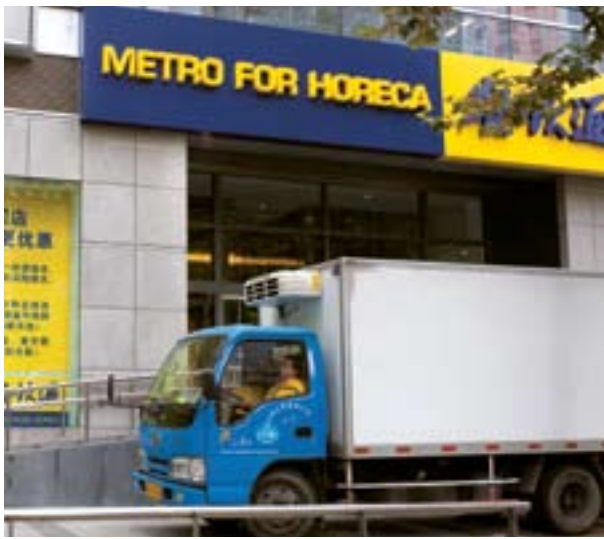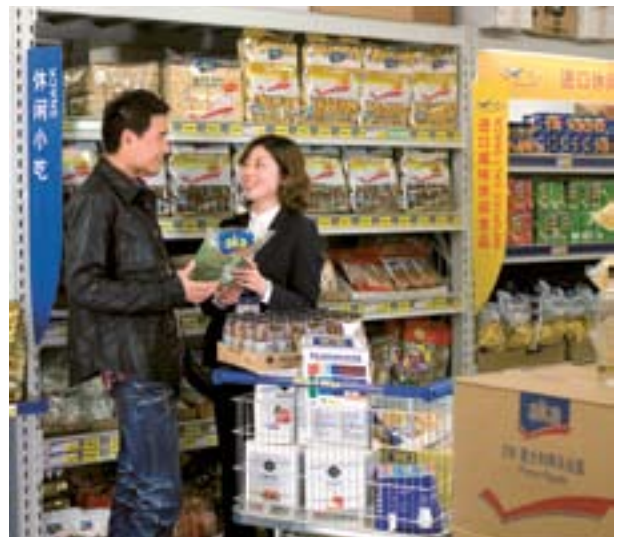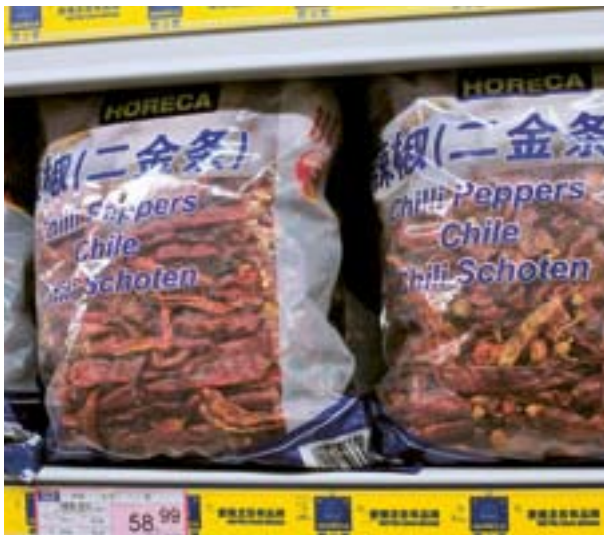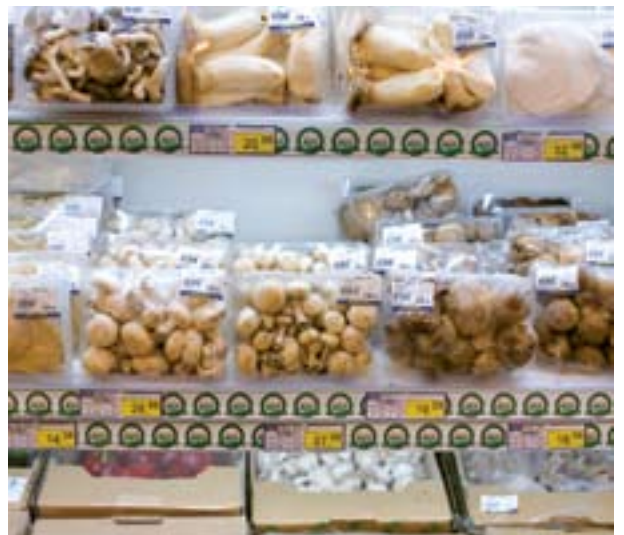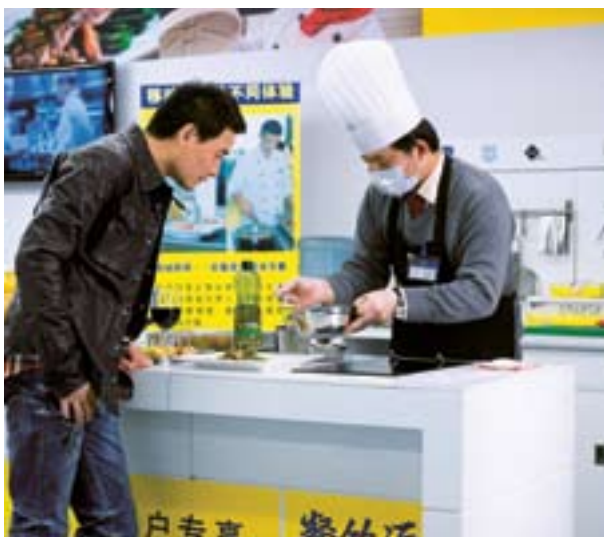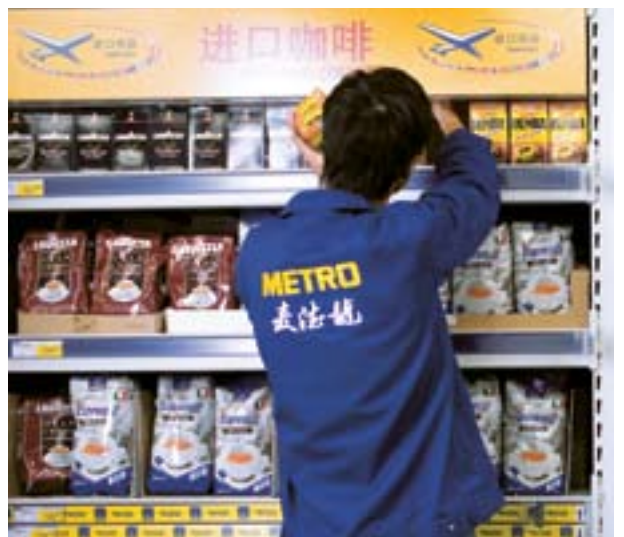

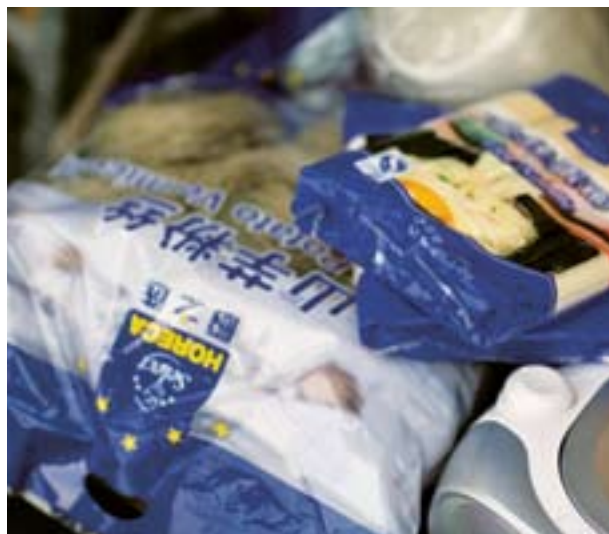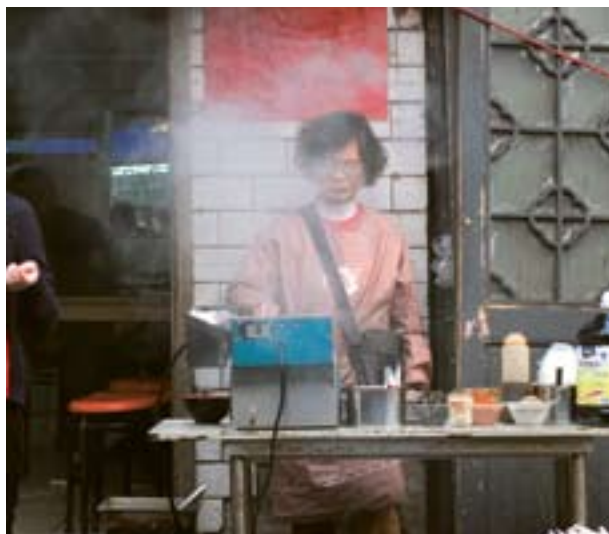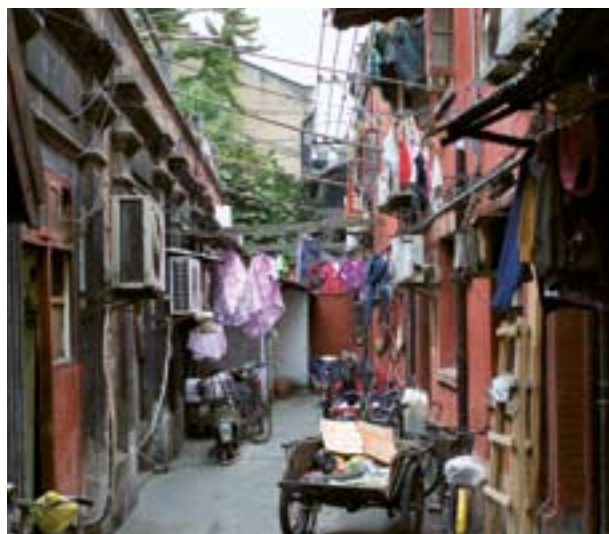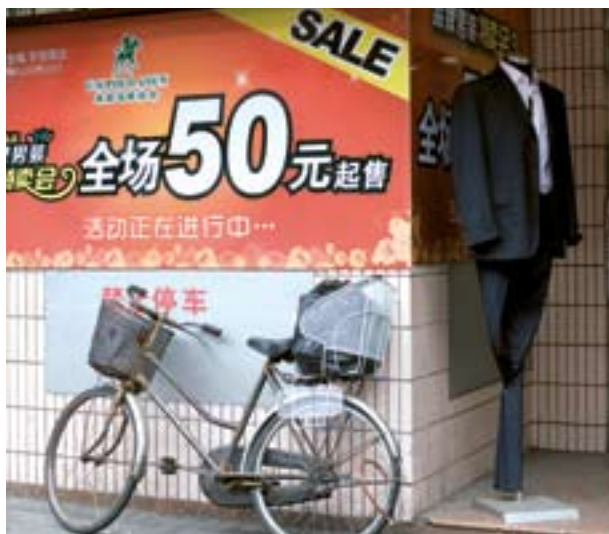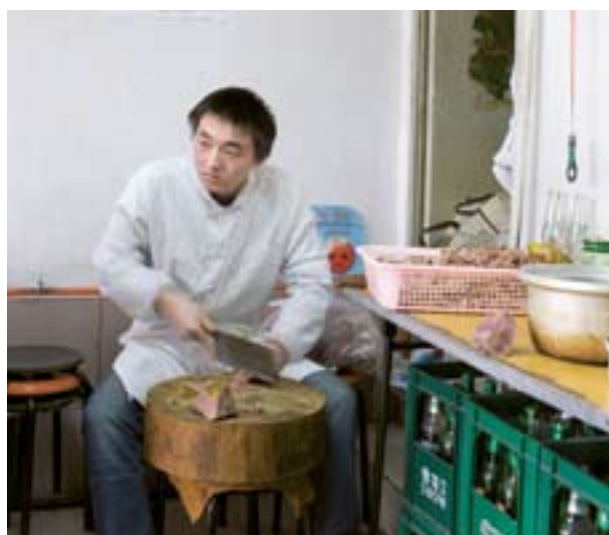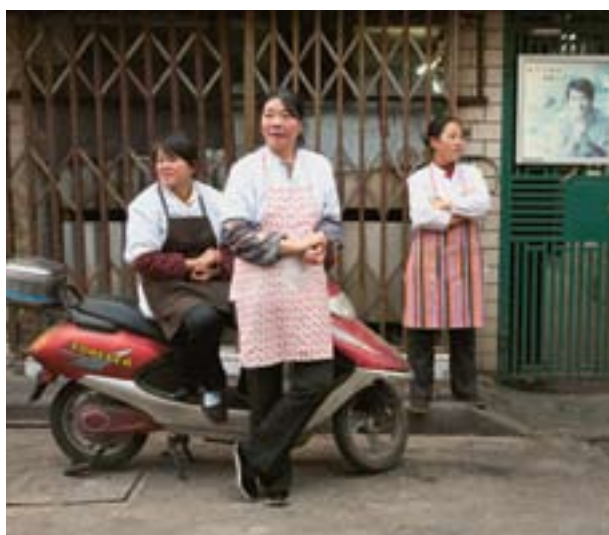

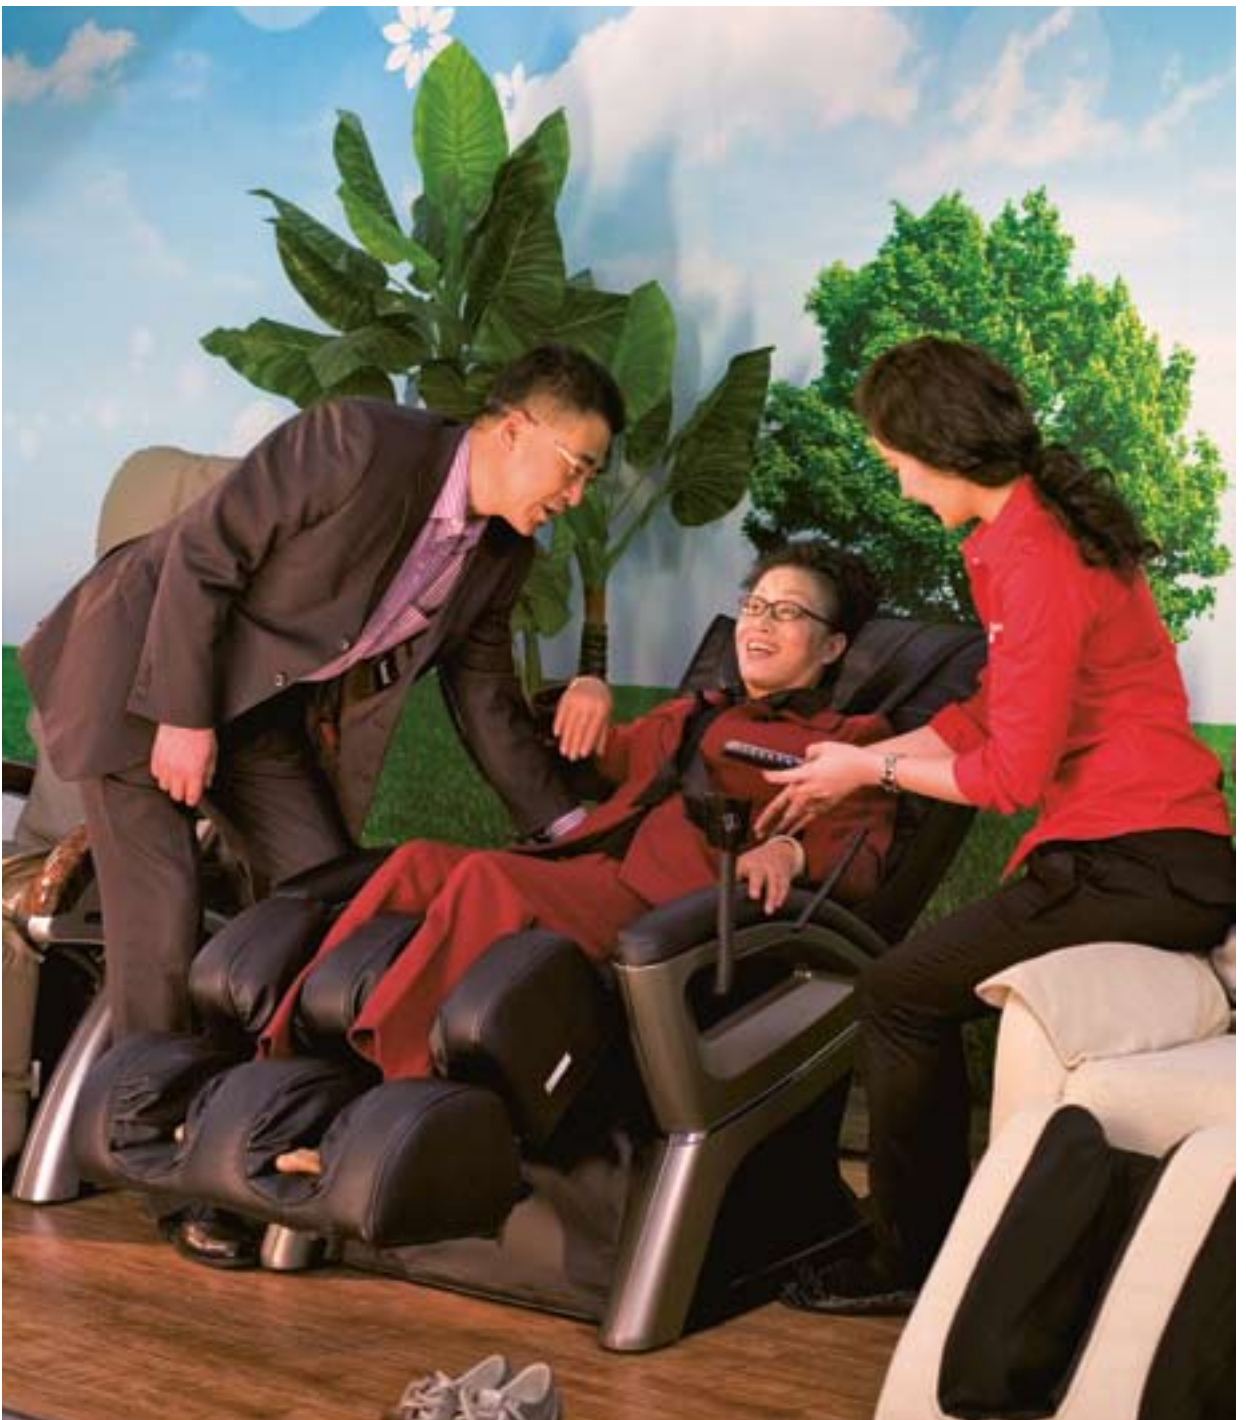

15:34 UHR  
**EHEPAAR WANG  
TIEFENENTSPANNT  
IM MEDIA MARKT**

Internationalen Erfolg hat, wer landestypische Bedürfnisse berücksichtigt. In Julius Media Markt gibt es deshalb einen Entspannungsbereich, in dem Kunden vor dem Kauf Massagesessel und weitere Wellness-Produkte testen können. Diese Artikel sind in China besonders gefragt. Die Vertriebsformate der METRO GROUP sind so flexibel, dass sie auf solche spezifischen Einkaufsgewohnheiten eingehen können.

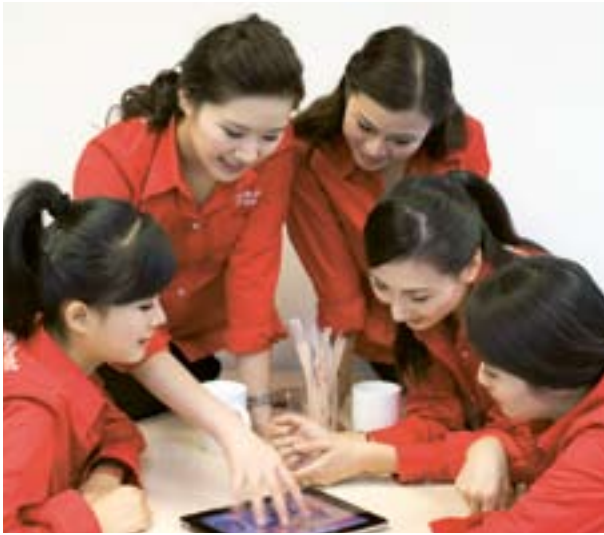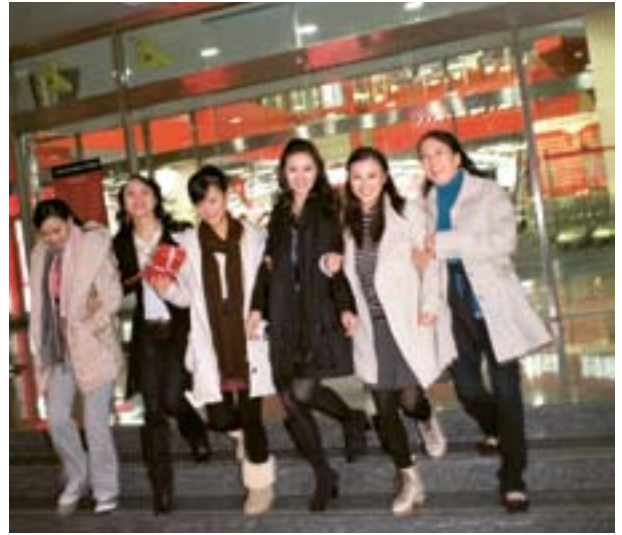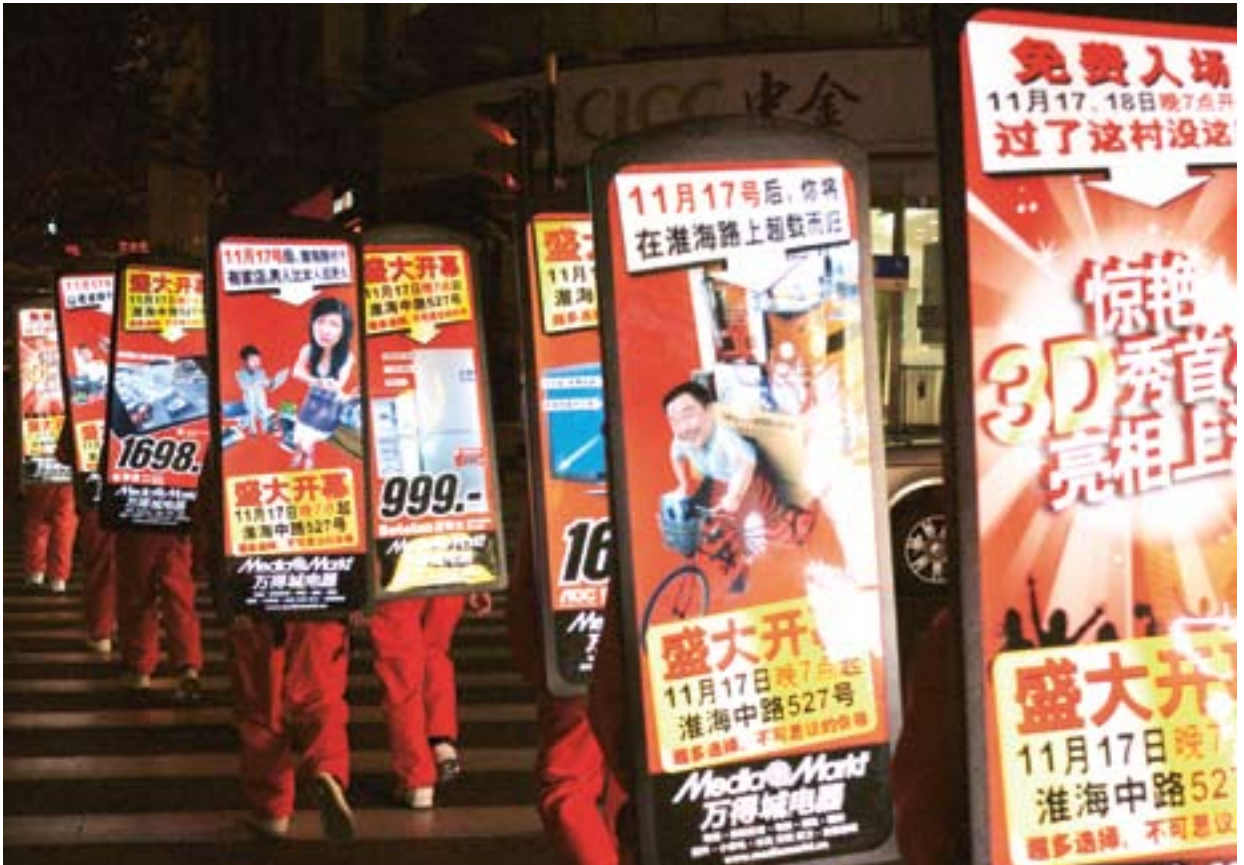

18:27 UHR  
**LETZTE BESPRECHUNG,  
 UND DANN:  
 AUF ZUR KARAOKE-BAR**

Media Markt lebt – wie alle Vertriebslinien der METRO GROUP – vom Engagement seiner Mitarbeiter. Sie geben das Beste für die Kunden. Zu einer starken Marke gehört außerdem ein starker Auftritt. In Europa sorgt Media Markt mit plakativer Werbung für Aufmerksamkeit. In China ist das nicht anders. Das zeigen zum Beispiel die mobilen elektronischen Anzeigetafeln, die Julia und ihre Freundinnen unterwegs entdeckt haben.



DIGITALKAMERA  
VON MEDIA MARKT

19:00 UHR  
**KÜSSCHEN UND GLÜCK-  
WUNSCH ZUM GEBURTSTAG –  
DIE SPANNUNG STEIGT!**



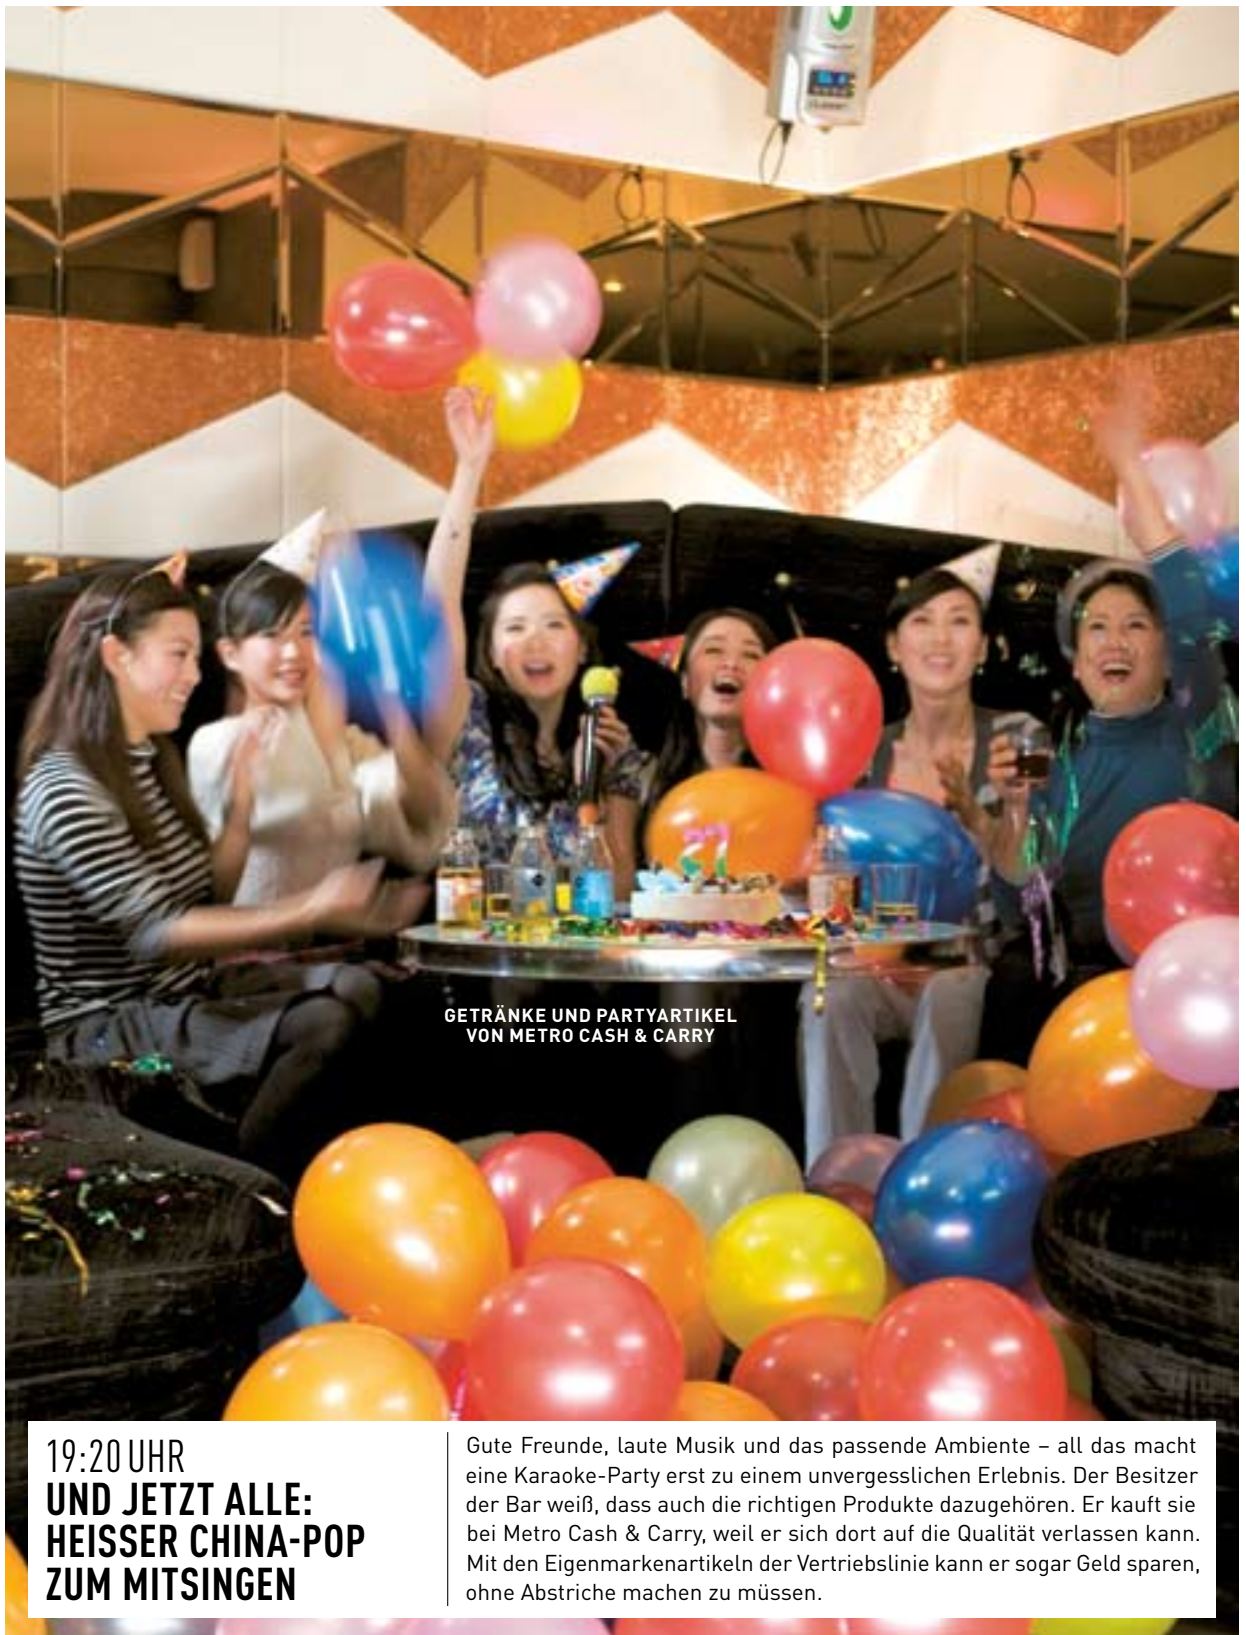

GETRÄNKE UND PARTYARTIKEL  
VON METRO CASH & CARRY

19:20 UHR  
**UND JETZT ALLE:  
HEISSER CHINA-POP  
ZUM MITSINGEN**

Gute Freunde, laute Musik und das passende Ambiente – all das macht eine Karaoke-Party erst zu einem unvergesslichen Erlebnis. Der Besitzer der Bar weiß, dass auch die richtigen Produkte dazugehören. Er kauft sie bei Metro Cash & Carry, weil er sich dort auf die Qualität verlassen kann. Mit den Eigenmarkenartikeln der Vertriebslinie kann er sogar Geld sparen, ohne Abstriche machen zu müssen.

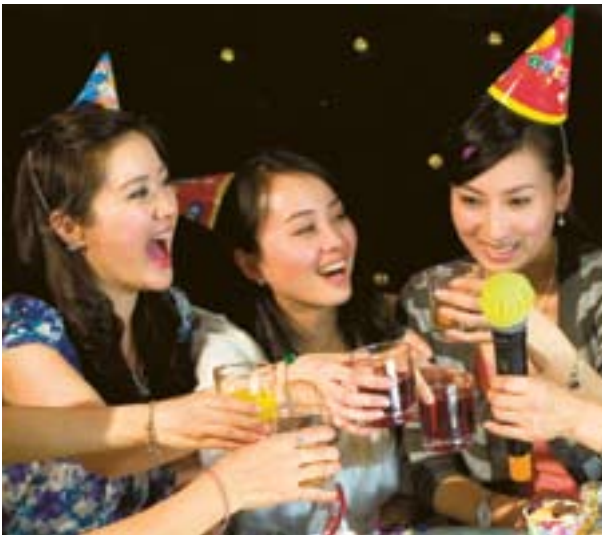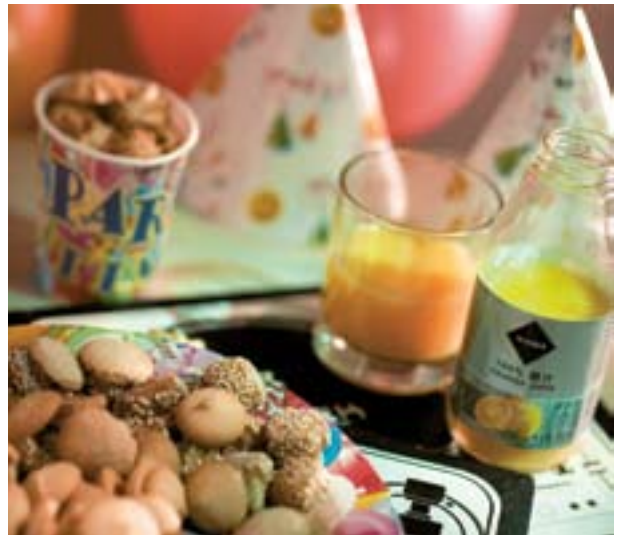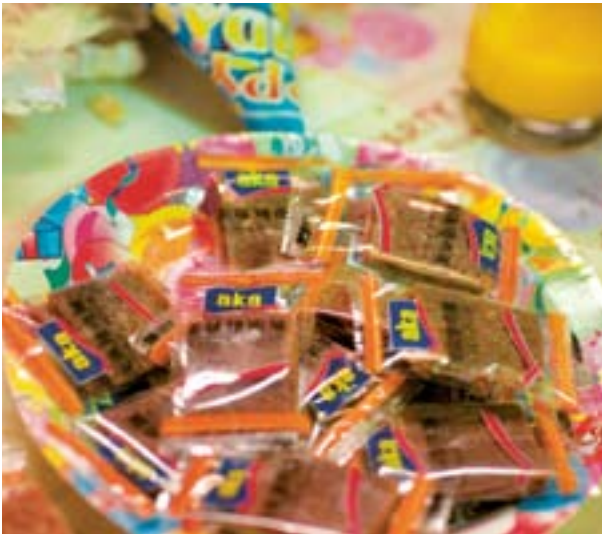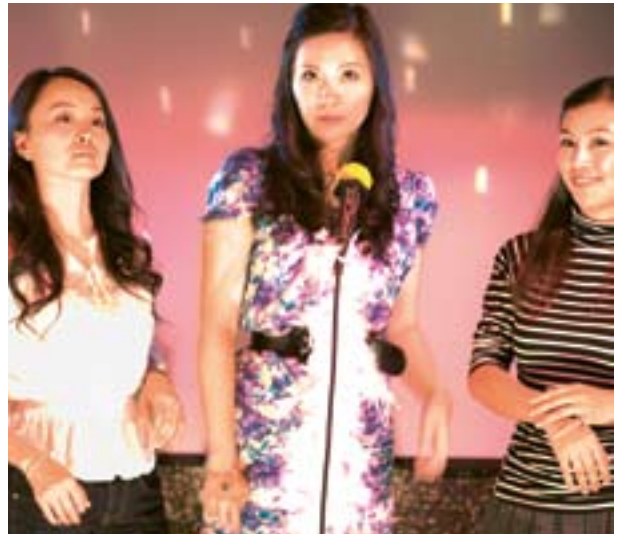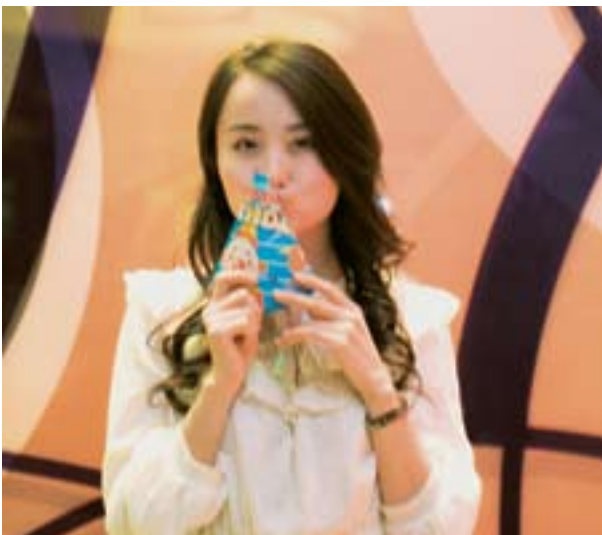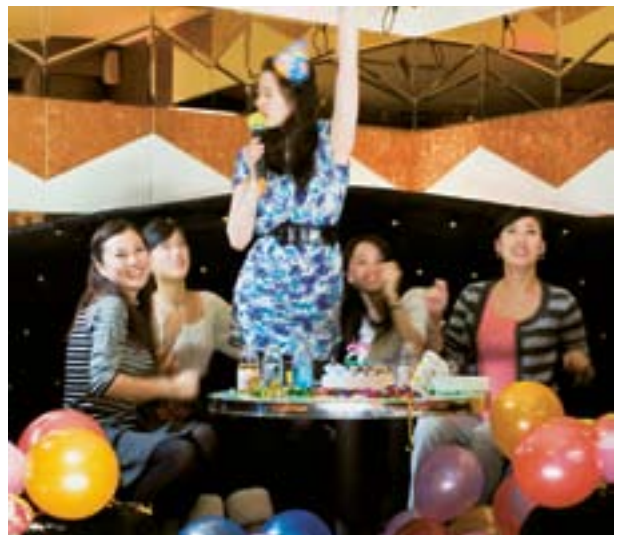

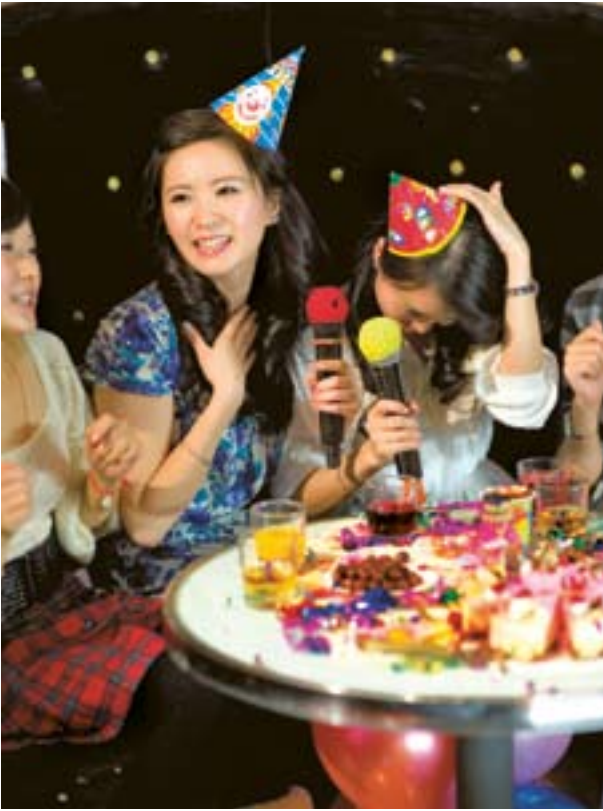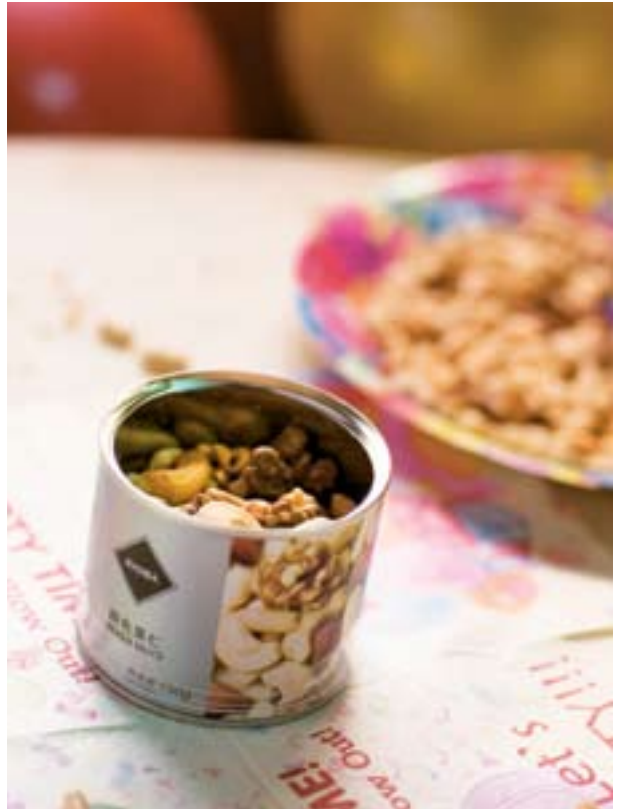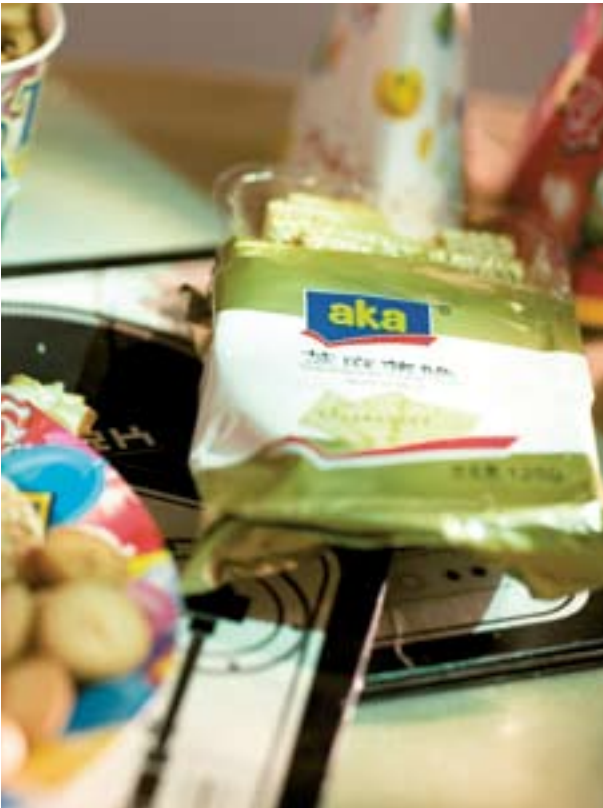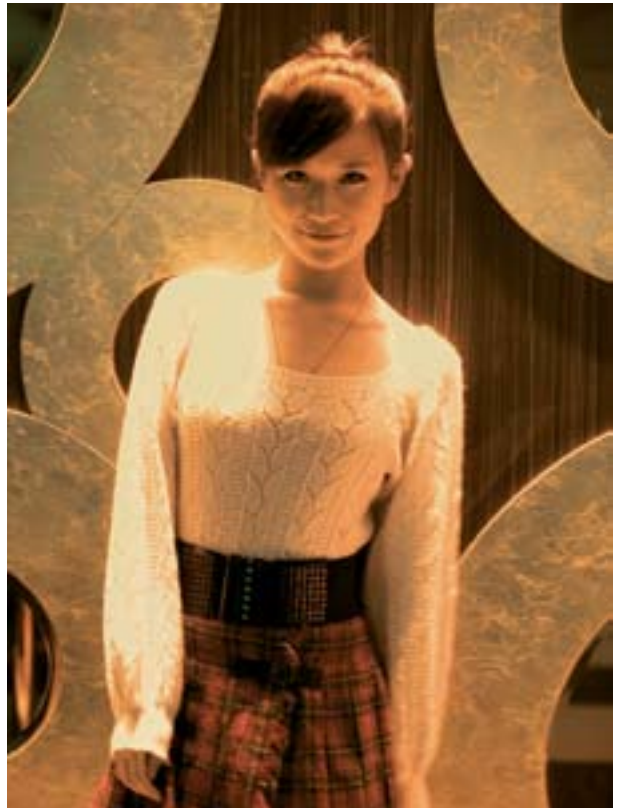

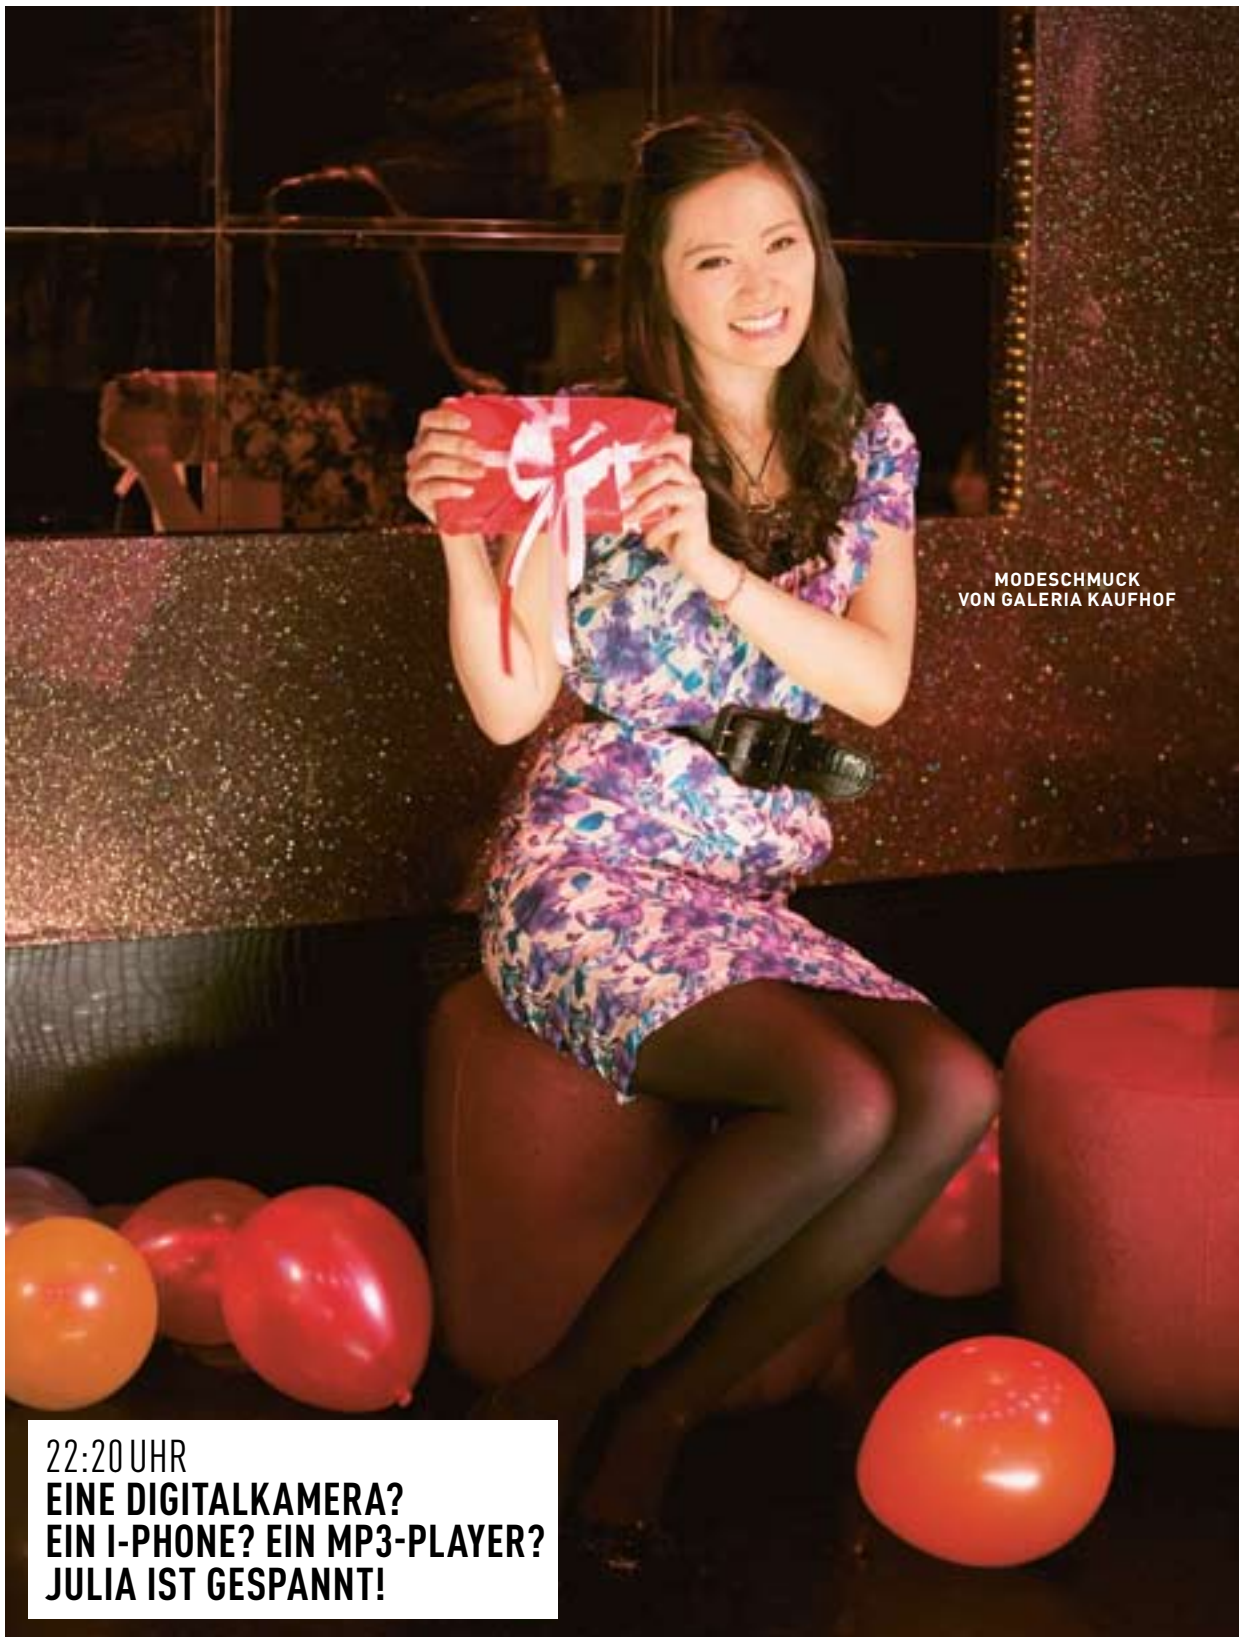

MODESCHMUCK  
VON GALERIA KAUFHOF

22:20 UHR  
EINE DIGITALKAMERA?  
EIN I-PHONE? EIN MP3-PLAYER?  
JULIA IST GESPANNT!

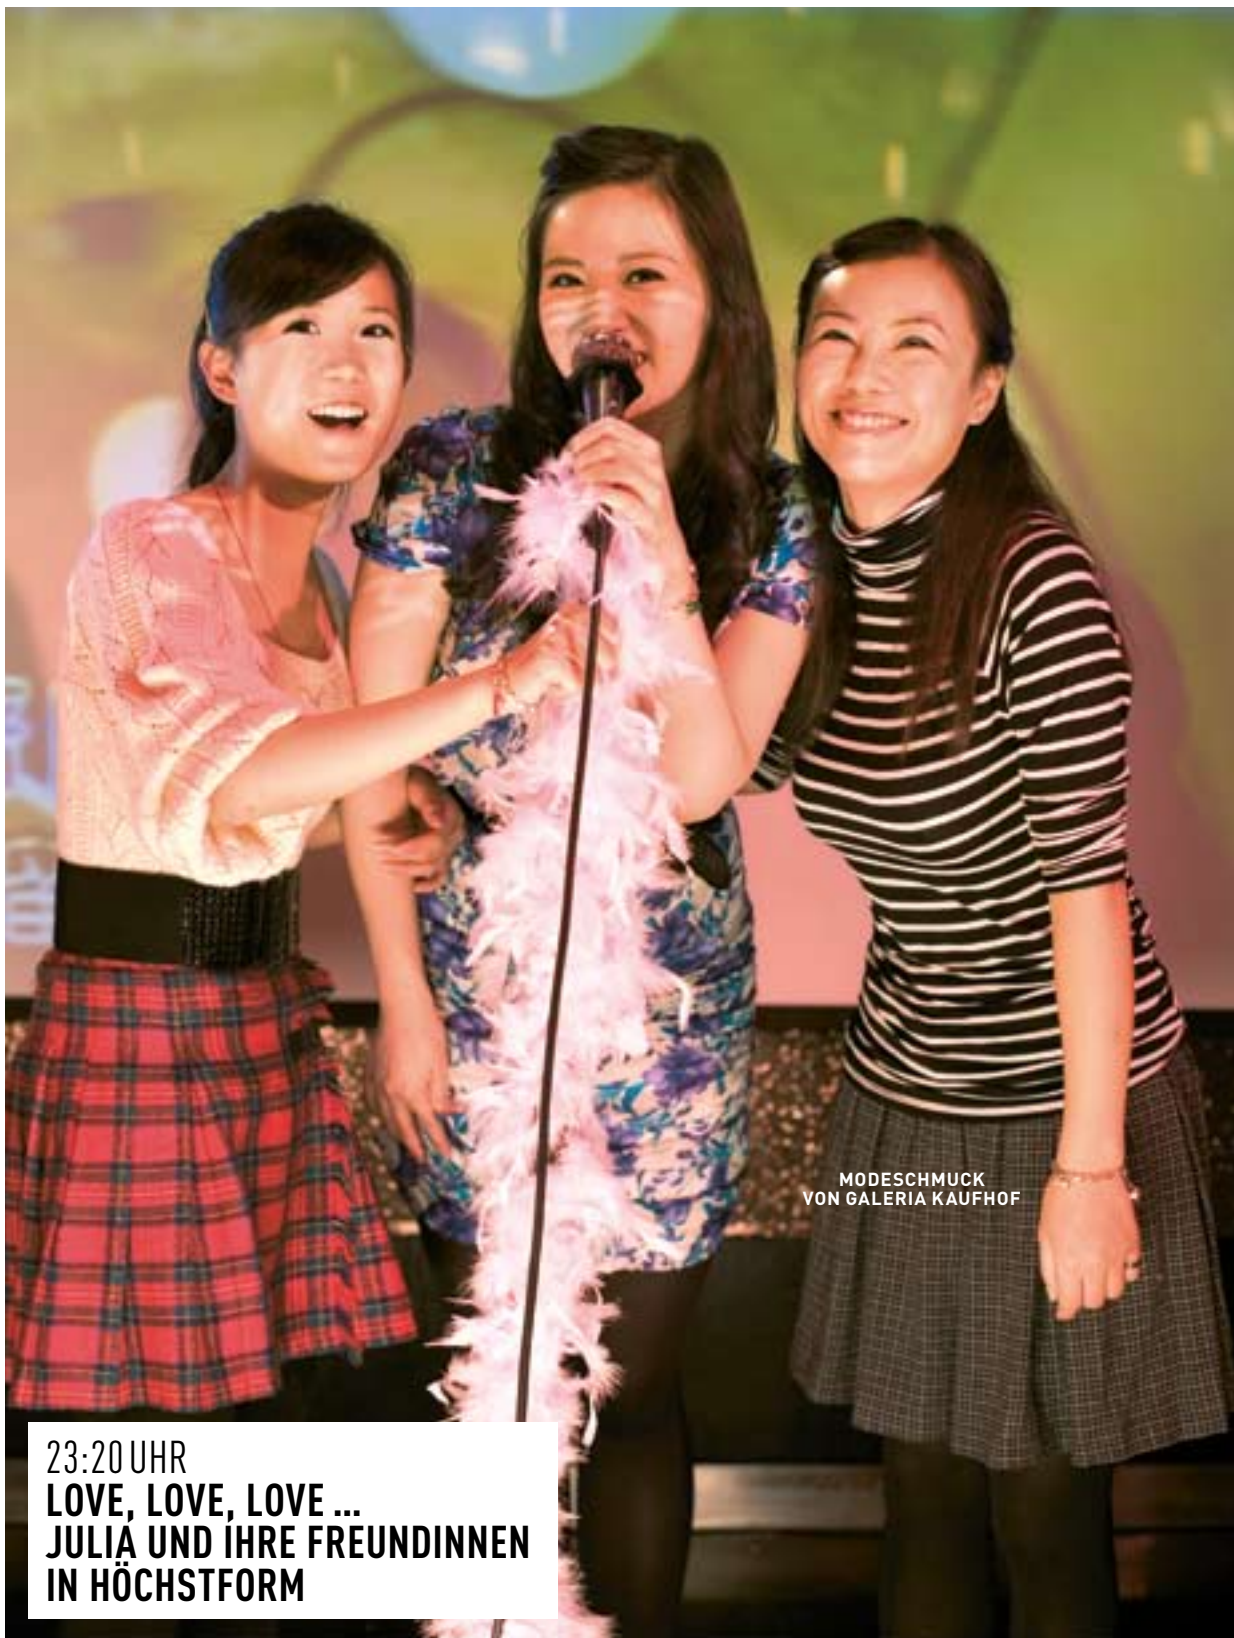

MODESCHMUCK  
VON GALERIA KAUFHOF

23:20 UHR  
**LOVE, LOVE, LOVE ...**  
**JULIA UND IHRE FREUNDINNEN**  
**IN HÖCHSTFORM**

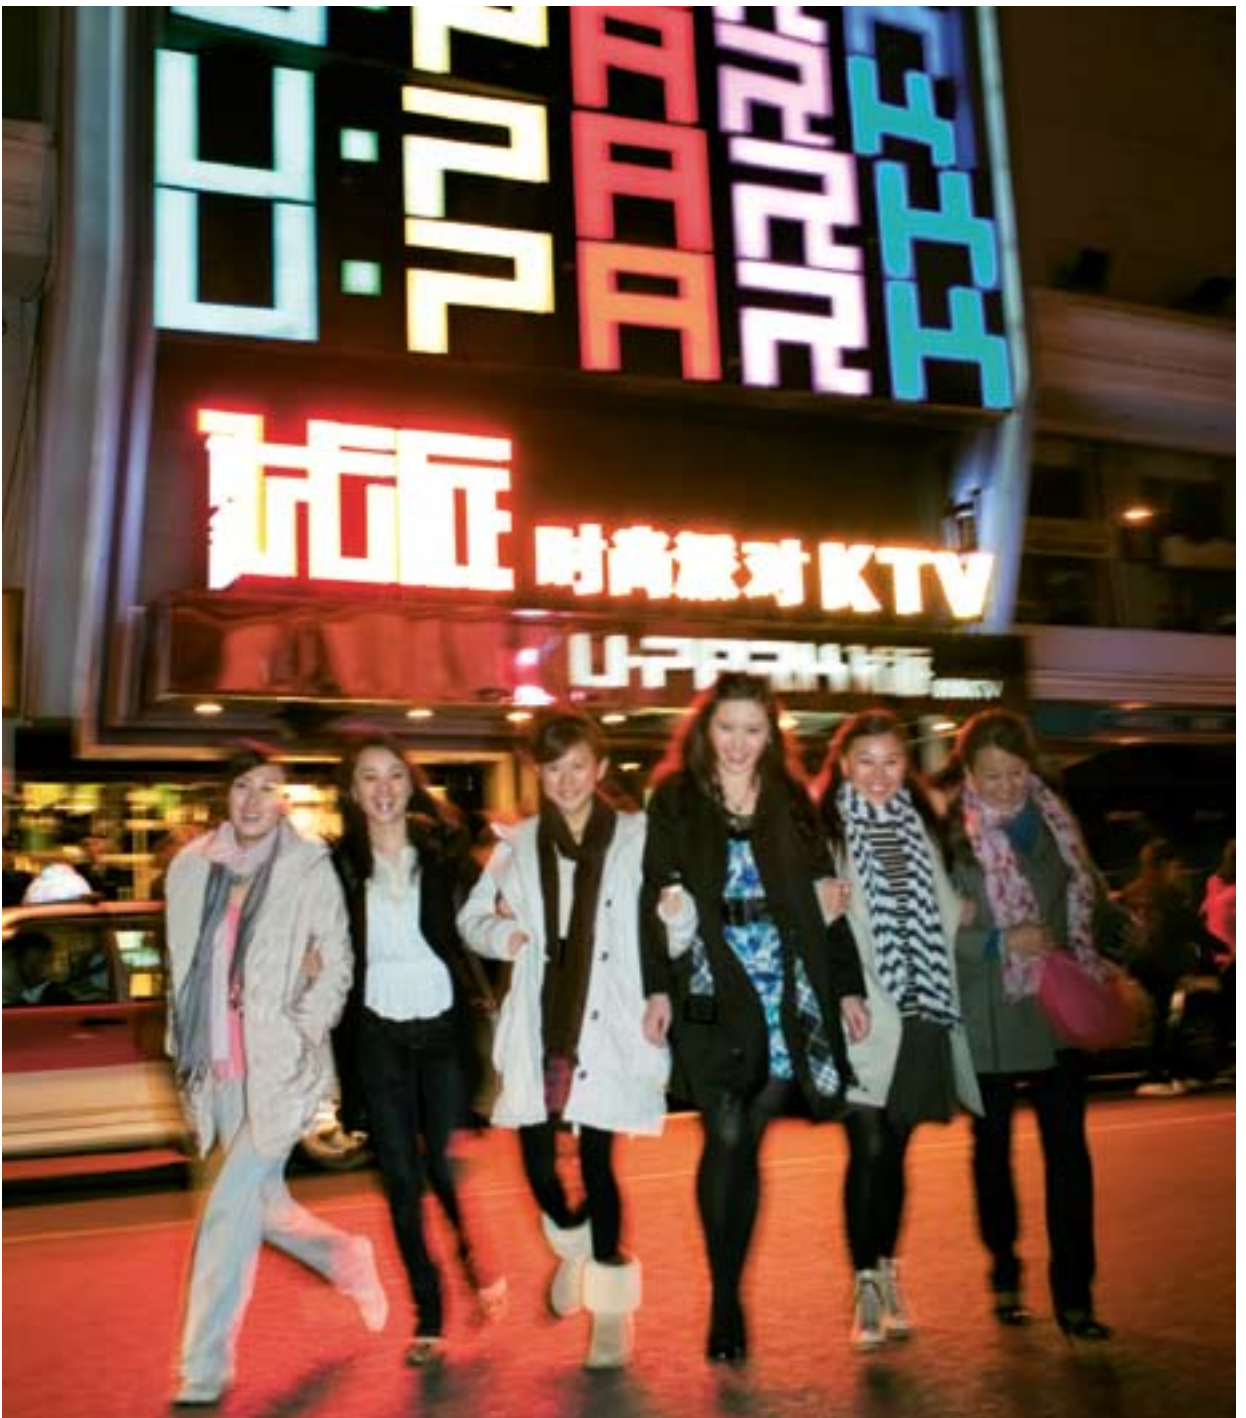

00:20 UHR  
**DIE PARTY IST VORBEI,  
DIE BEGEISTERUNG  
BLEIBT!**

Für Julia und ihre Freundinnen geht ein langer Geburtstag zu Ende. Auch wenn Shanghai niemals zur Ruhe kommt, wollen sie jetzt schnell ins Bett. Denn morgen früh heißt es wieder: voller Einsatz für ihren Media Markt. Das Engagement der Mitarbeiter ist ein wichtiger Erfolgsfaktor für das Wachstum der METRO GROUP.

# UNSERE WELT IST VIELFÄLTIG – GENAU WIE UNSERE MITARBEITER

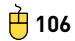

Julia Liu ist einer von rund 283.000 Menschen weltweit, die für die METRO GROUP arbeiten. Wir vertrauen ihr das Wichtigste an, das wir haben: unsere Kunden. Kein Problem, denn wir wissen: Auf Julia und ihre Kolleginnen und Kollegen ist stets Verlass. Sie kennen die Einkaufsgewohnheiten ihrer Kunden und die lokalen Rahmenbedingungen. Sie wissen, was im Marktumfeld geschieht. Und sie können flexibel auf neue Anforderungen reagieren. Mit Shape 2012 haben wir ihnen dafür den benötigten Handlungsspielraum gegeben, denn die Vertriebslinien Metro Cash & Carry, Real, Media Markt und Saturn sowie Galeria Kaufhof agieren operativ jetzt vollständig eigenverantwortlich. Das Resultat ist ein optimales Angebot mit Produkten in bester Qualität zu attraktiven Preisen und ein passgenauer Service.

Die Vielfalt unserer Belegschaft ist ein wichtiger Eckpfeiler für unser nachhaltiges, internationales Wachstum. Denn unsere Kunden sind genauso

vielfältig, in 33 Ländern dieser Welt. Einen Großteil unserer Mitarbeiter rekrutieren wir folgerichtig vor Ort, dort, wo wir handeln. Im neuen Media Markt in Shanghai sind zum Beispiel 99 Prozent der Kolleginnen und Kollegen chinesischer Herkunft. Wir investieren in ihre Aus- und Weiterbildung, weil wir gemeinsam mit ihnen wachsen möchten. So profitieren sie vom globalen Know-how und den starken Vertriebsmarken eines internationalen Handelskonzerns. Die METRO GROUP wiederum profitiert von gut qualifizierten und motivierten Mitarbeitern, die zum Unternehmenserfolg beitragen.

Denn nicht zuletzt sind unsere Mitarbeiter Treiber des Fortschritts. Sie sind es, die Impulse für neue Ideen und Konzepte geben, diese testen und in die Praxis umsetzen. Die unsere fortschreitende Expansion vorantreiben. Die nachhaltiges Handeln in ihrem Arbeitsalltag vorleben. Kurz: die Shape 2012 zum Erfolg führen.

NOVEMBER#2010

# METRO CASH & CARRY

 107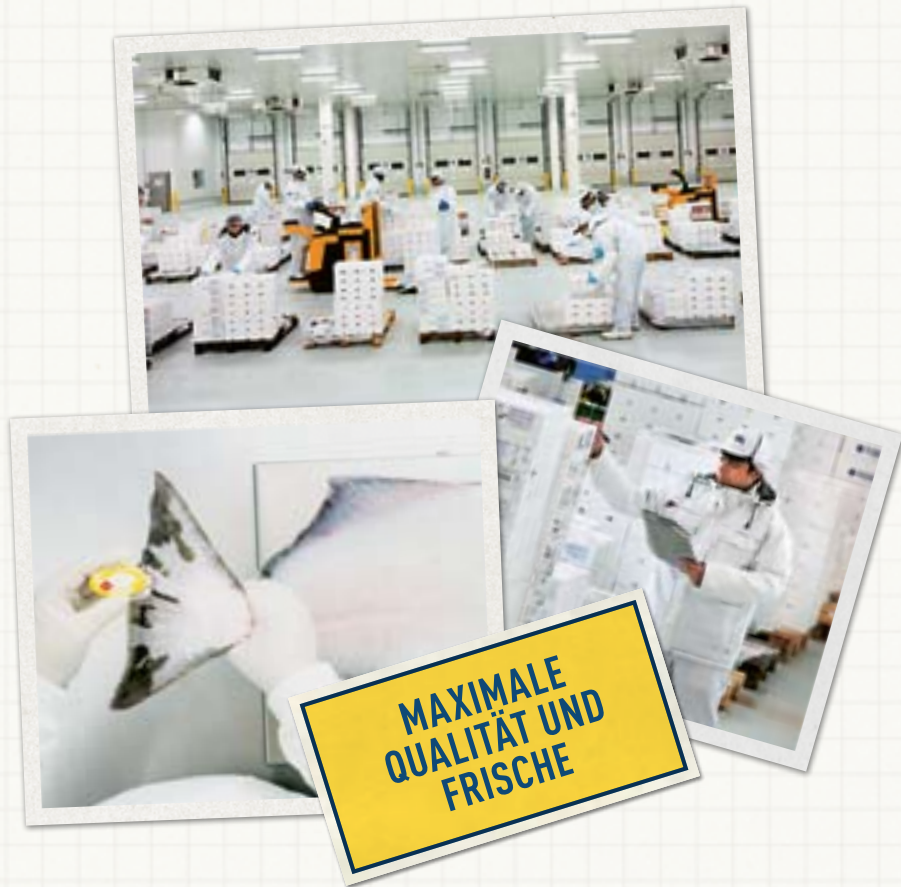

**Metro Cash & Carry ist einer der größten Fischhändler Europas.** Um die Belieferung der Großmärkte in Deutschland und Österreich weiter zu beschleunigen, hat die Vertriebslinie in Groß-Gerau bei Frankfurt am Main im November 2010 ein Fisch-Logistikzentrum eröffnet, in dem alle logistischen Prozesse zentral zusammenlaufen. Vorteil für die gewerbetreibenden Kunden der Vertriebslinie: Beinahe alle Sorten sind innerhalb von 48 Stunden nach dem Fang frisch und in gesicherter Qualität in den Großmärkten verfügbar. Standards setzt das neue Fisch-Logistikzentrum auch in Sachen Nachhaltigkeit. Gebäude und Prozesse wurden mit dem „Deutschen Gütesiegel Nachhaltiges Bauen“ ausgezeichnet.



NOVEMBER#2010

# REAL

 108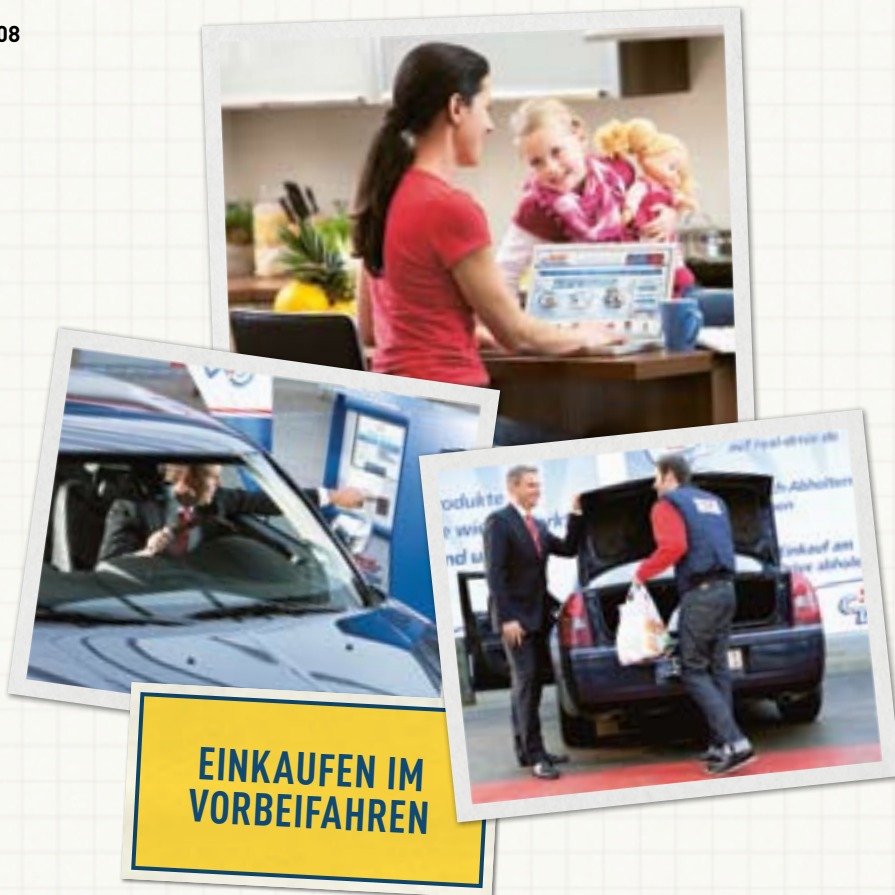

**Für den Lebensmittelkauf bietet Real seit November 2010 eine ganz neue Lösung.** Der „Real Drive“ in der Nähe von Hannover ist Deutschlands erster eigenständiger Drive-in-Lebensmittelmarkt. Das Prinzip: Auf der Internetseite [www.real-drive.de](http://www.real-drive.de) stellen die Kunden ihren Einkauf aus einer Auswahl von rund 5.000 Artikeln zusammen. Im Angebot sind auch Frische- und Tiefkühlprodukte. Die Kunden geben die gewünschte Abholzeit ein und können die fertig gepackte Ware dann im Real-Drive-Shop bezahlen und abholen. Das ganze dauert maximal fünf Minuten – eine deutliche Zeitersparnis für den Verbraucher.

JULI#2010

# MEDIA MARKT

 109

GIGANTISCHE  
FUSSBALLWETTE



**DIE GRÖSSTE WM-WETTE DER WELT**

**FERNSEHER FÜR UMSONST!**

**DEUTSCHLAND WIRD WELTMEISTER WETTE**

**JETZT KAUFEN!**  
Am 1. Juli und 2. Juli 2010 einen Fernseher oder Beamer ab einem Marktwert von 500 Euro kaufen.

**WETTEN!**  
Mit jedem Einkauf setzen Sie automatisch, dass Deutschland Fußballweltmeister 2010 wird.

**GELD ZURÜCK!**  
Hat unsere Mannschaft den Titel, gibt's den vollen Kaufpreis zurück! Gewinnausschüttung nur mit Kassabonus möglich. Gewinnausschüttung bis 31.08.2010.

**Nur Donnerstag 1. Juli und Freitag 2. Juli**

**Media Markt**  
www.mediamarkt.de  
Ich bin doch nicht blöd.

**Die Fußball-Weltmeisterschaft 2010 in Südafrika bewegte Fernsehzuschauer weltweit.** Wer sich zum Viertelfinale noch ein neues TV-Gerät oder einen Projektor besorgen wollte, dem machte Media Markt Deutschland Anfang Juli ein besonderes Angebot: Jeder Käufer bekommt den vollen Kaufpreis zurück-erstattet. Vorausgesetzt, die deutsche Nationalmannschaft wird Weltmeister. Für die Kunden war es eine Wette ohne Risiko. Jeder Käufer nahm automatisch an der Aktion teil. Auch wenn es am Ende nicht für den WM-Titel reichte – die Aufmerksamkeit war Europas Nummer eins unter den Elektrofachmärkten gewiss.

OKTOBER#2010

# SATURN

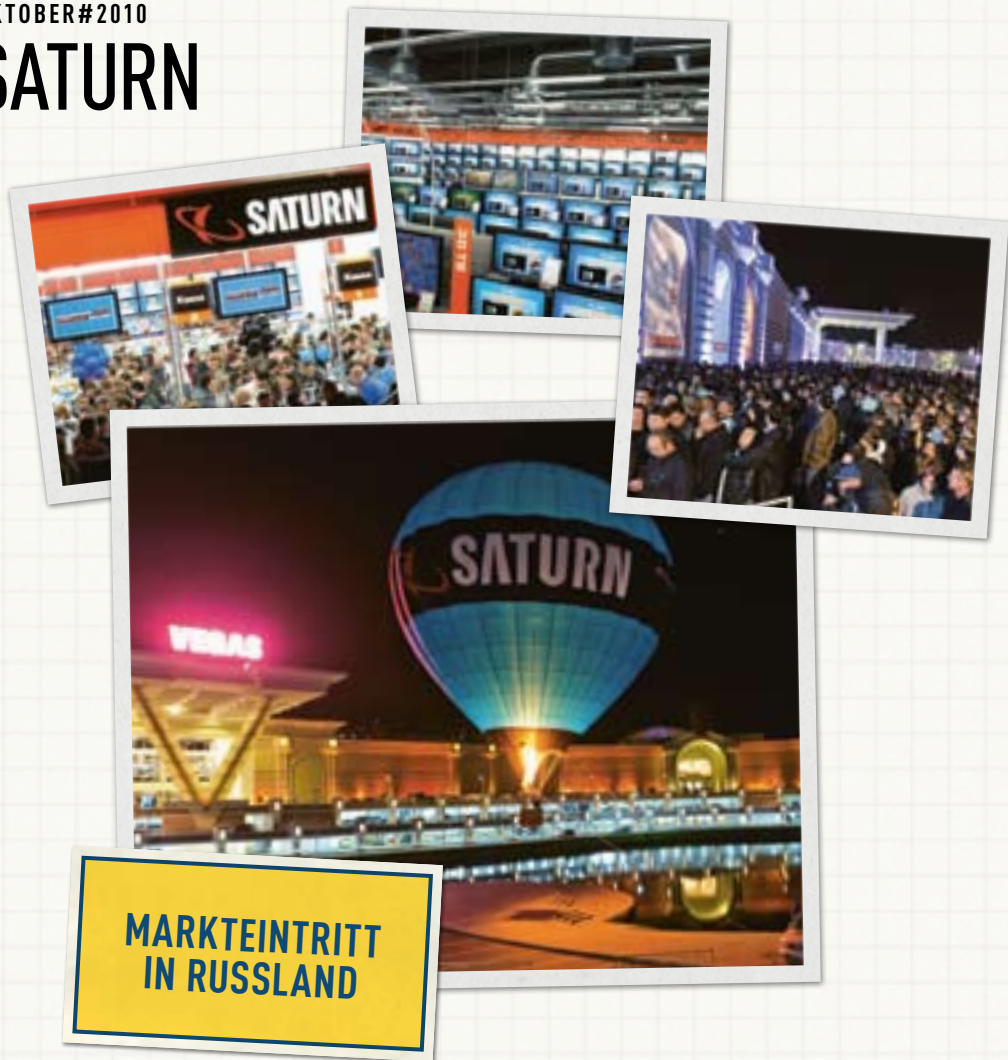

**Russland ist für die METRO GROUP ein bedeutender Wachstumsmarkt.** Die Kaufkraft der Bevölkerung steigt, ebenso die Konsumlust. Dies gilt vor allem für Ballungszentren wie Moskau. Im Einkaufs- und Freizeitzentrum Vegas Mall im Südosten der Stadt hat Saturn im Oktober 2010 seinen ersten Elektrofachmarkt in Russland eröffnet. Auf einer Verkaufsfläche von rund 4.700 Quadratmetern finden Kunden eine große Auswahl an Markenprodukten zu günstigen Preisen. Bereits einen Monat später folgt der zweite Saturn-Markt in Voronezh, im Südwesten des Landes. Die Vertriebslinie setzt ihre Zwei-Marken-Strategie damit konsequent fort. Media Markt ist bereits seit 2006 in Russland vertreten.

SEPTEMBER#2010

# GALERIA KAUFHOF

🏪 110

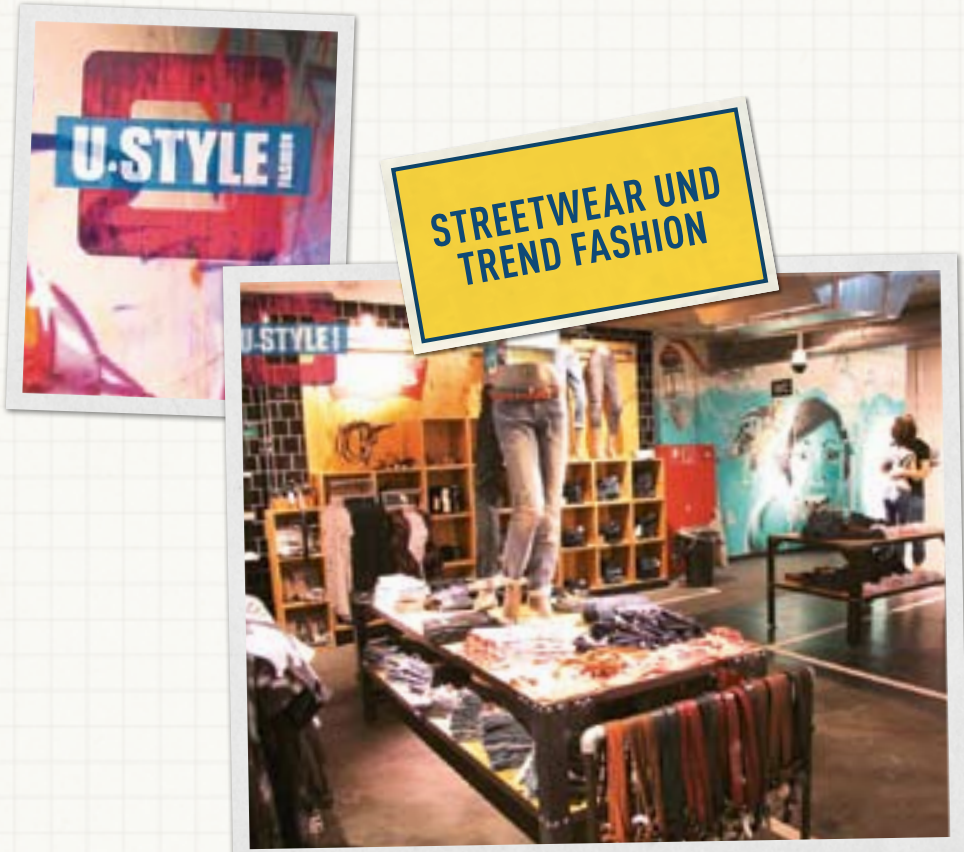

**Der Münchener Marienplatz ist das urbane Zentrum der Stadt.** Für trendbewusste Kunden hat Galeria Kaufhof dort im September 2010 ein innovatives, individuelles Konzept umgesetzt, das genau auf die Anforderungen des Standorts zugeschnitten ist: U.Style Fashion. Der eigenständige Store befindet sich im zweiten Untergeschoss des Warenhauses und bietet Streetwear und Accessoires von mehr als 30 Markenherstellern. Kernzielgruppe sind 15- bis 25-jährige Verbraucher, die sich als individuell, jung und kreativ verstehen.

APRIL#2010

# METRO GROUP ASSET MANAGEMENT

 111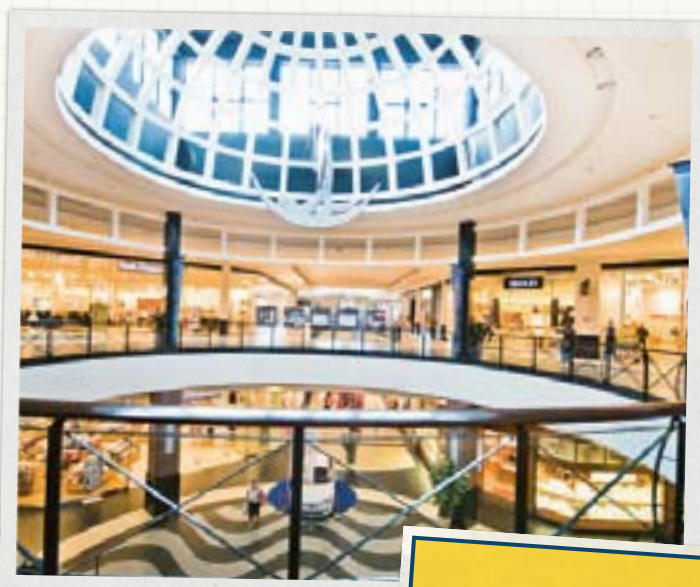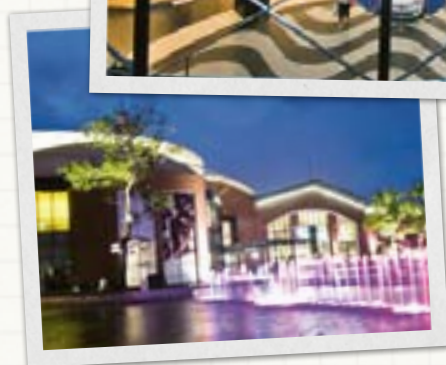

**EINKAUF, SPORT  
UND UNTERHALTUNG**

**Der Magnolia Park im polnischen Wroctaw ist eines der größten Einkaufscenter des Landes.** Auf mehr als 74.000 Quadratmetern bieten sich Besuchern vielfältige Einkaufs-, Sport- und Unterhaltungsmöglichkeiten. Für die Verwaltung und das strategische Management des Magnolia Parks ist seit April 2010 die METRO Group Asset Management zuständig. Damit baut die Immobiliengesellschaft des Konzerns ihr internationales Centergeschäft konsequent aus. Allein in Polen ist die METRO Group Asset Management mittlerweile für insgesamt 10 Einkaufscenter verantwortlich.

DAS INTERNATIONALE GESCHÄFT  
DER  
**METRO GROUP**

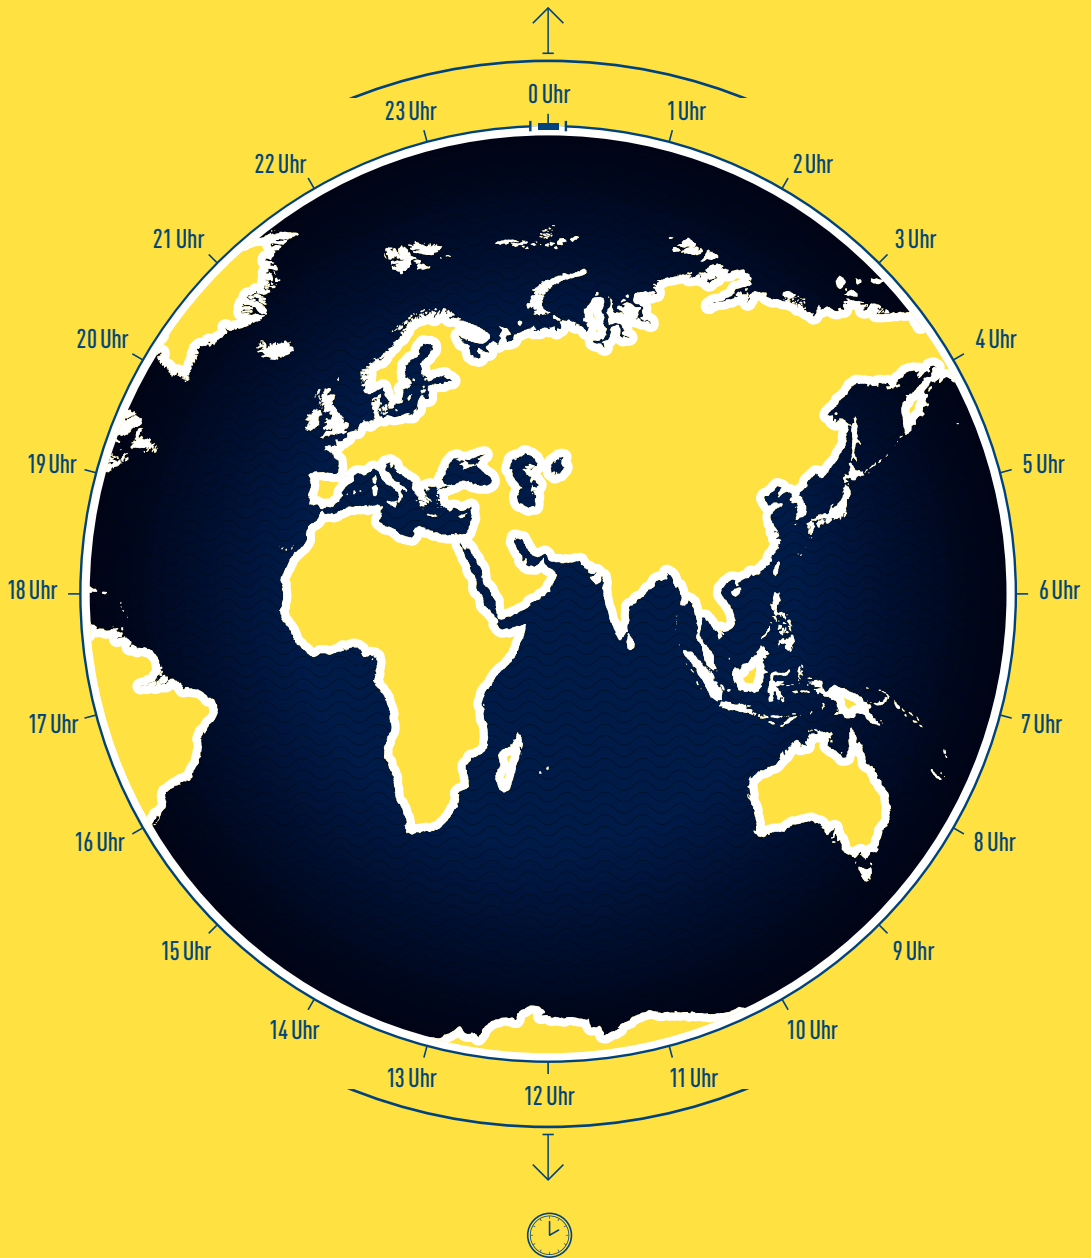

**TÄGLICH 24 STUNDEN GEÖFFNET**

Alles zu Shape 2012, Fotos, Filme und Julias Tipps für Shanghai sowie die kompletten Zahlen, Daten und Fakten zum Geschäftsjahr 2010 finden Sie in unserem Online-Bericht:

[www.metrogroup.de/geschaeftsbericht](http://www.metrogroup.de/geschaeftsbericht)

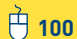

Der „Quicklink“ führt Sie direkt zu den entsprechenden Inhalten und zu weiterführenden Informationen im Internet. Nutzen Sie dazu die Suchmaske auf der Startseite unseres Online-Berichts.

# BRIEF AN DIE AKTIONÄRE

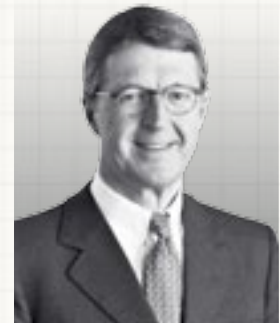

Eckhard Cordes

---

VORSTANDSVORSITZENDER  
DER METRO AG

---

*Sehr geehrte Damen und Herren,*

im Jahr 2010 hat sich die Weltwirtschaft von den Folgen der globalen Krise ein Stück weit erholt. Die meisten Länder, in denen wir vertreten sind, lagen zwar erneut auf Wachstumskurs. An die Wirtschaftsleistung des Vorkrisenjahres 2008 konnten aber viele Volkswirtschaften West- und Osteuropas noch nicht wieder anknüpfen.

Umso erfreulicher sind vor diesem Hintergrund die Geschäftszahlen, die die METRO GROUP Ihnen nun vorlegen kann. Kurz gesagt: 2010 ist für Ihr Unternehmen sehr erfolgreich verlaufen. Der Konzernumsatz lag mit 67,3 Mrd. € deutlich über dem des Vorjahres. Wir haben ein EBIT von 2,4 Mrd. € vor Sonderfaktoren erzielt, mithin das höchste Ergebnis in der Geschichte unseres Unternehmens. Wir haben damit wahr gemacht, was wir versprochen haben.

In der Krise der vergangenen Jahre ist die METRO GROUP kein Getriebener gewesen, sondern hat den Wandel aktiv gestaltet und die Chancen für Wert- und Wachstumssteigerung genutzt.

**Doch Kennzahlen können nur zum Teil ausdrücken, wie viel wir im Geschäftsjahr 2010 bewegt haben – auch dank Shape 2012.** In allen unseren Geschäftsbereichen haben wir mit unserem Effizienz- und Wertsteigerungsprogramm erneut signifikante Veränderungen angestoßen. Das Ziel: mehr Kundenorientierung, mehr Effizienz, eine erhöhte Schlagzahl bei der internationalen Expansion und somit letztlich eine deutlich größere Wachstumsdynamik.

Für unsere größte Vertriebslinie Metro Cash & Carry bedeutet dies, dass wir viel stärker auf die unterschiedlichen regionalen Anforderungen der Kunden reagieren. Deshalb haben wir unser Großhandelsgeschäft neu strukturiert: In den saturierten Märkten Westeuropas und in Deutschland konzentrieren wir uns vor allem darauf, unser erfolgreiches Belieferungsgeschäft weiterzuentwickeln, den Anteil der Eigenmarken auszubauen und unsere Außendienstberatung weiter zu stärken. In den Wachstumsmärkten Asiens und Osteuropas wollen wir hingegen in erster Linie schnell expandieren, um von der wirtschaftlichen Dynamik dieser Regionen zu profitieren. Umgekehrt scheuen wir uns nicht vor einem Rückzug



# „IHRE METRO GROUP IST EFFIZIENTER, KUNDENORIENTIERTER UND INTERNATIONALER ALS JE ZUVOR.“

---

aus Märkten, für die wir keine nachhaltige Wachstumsperspektive mehr erkennen können. Dies war bei unserem Großhandelsgeschäft in Marokko der Fall, von dem wir uns im Berichtsjahr getrennt haben.

Für Real gilt: Die Vertriebslinie hat 2010 ihre Neuausrichtung in Deutschland erfolgreich fortgeführt. Wir haben die Kosten weiter gesenkt und das Vertriebsnetz optimiert. Dazu gehört, die SB-Warenhäuser zu modernisieren und Sortimente anzubieten, die exakt auf die Bedürfnisse der Kunden vor Ort zugeschnitten sind. Real hat 2010 nicht nur den Schritt in den Online-Handel gewagt, sondern erprobt mit dem Abholmarkt für Lebensmittel „Real Drive“ auch ein innovatives Konzept, das stationären und elektronischen Vertrieb eng miteinander verknüpft. Insgesamt hat die Vertriebslinie ihr Profil bei den Kunden 2010 deutlich schärfen können. Das schlägt sich in steigenden flächenbereinigten Umsätzen und einer spürbaren Ergebnisverbesserung nieder. International hat Real 2010 erstmals die Gewinnzone erreicht.

Erfreulich ist einmal mehr die Entwicklung bei Media Markt und Saturn. Der Umsatz der Vertriebslinie legte um 5,6 Prozent gegenüber dem Vorjahr zu. Zu den Meilensteinen des Berichtsjahres gehörte der Start des Online-Geschäfts in Österreich und den Niederlanden, mit dem wir unseren Multi-Channel-Vertrieb für weitere Märkte vorbereiten. Ein weiterer Höhepunkt war die Eröffnung des ersten chinesischen Media Markts in Shanghai. Dieser Markteintritt ist ein wichtiger Schritt, um unsere Präsenz im Reich der Mitte auszubauen. Denn wir wollen am wirtschaftlichen Aufschwung des Landes unmittelbar teilhaben. Hierfür verfügt Media Markt und Saturn über ein passendes Konzept, das in China zudem einmalig ist: mit attraktiven Markenprodukten, günstigen Preisen und einer erstklassigen Beratung. Für die Expansionsstrategie von Media Markt und Saturn haben wir die klare Entscheidung getroffen, uns nur noch auf Länder zu konzentrieren, in denen wir schnell wachsen und die Marktführerschaft erreichen können. Dies war in Frankreich nicht möglich. Im Zuge unserer strategischen Portfolio-Optimierung haben wir deshalb beschlossen, unsere Saturn-Elektrofachmärkte dort zu veräußern.

Der Geschäftsverlauf bei Galeria Kaufhof zeigt, dass das Warenhauskonzept in Deutschland nicht tot ist – wenn es erfolgreich geführt und umgesetzt wird. Das Ergebnis stieg im sechsten Jahr in Folge und es konnte eine EBIT-Marge von rund 4 Prozent erreicht werden. Dies belegt: Unsere Trading-up-Strategie, im Zuge derer wir deutlich attraktivere Sortimente anbieten können, geht auf.

Für unser Immobilienmanagement haben wir 2010 eine neue, klarere Struktur geschaffen. Diese ermöglicht eine engere Ausrichtung am operativen Geschäft – weg von einer funktionalen, zentralen Führung hin

zu einer dezentralen Organisation. Damit legen wir die Basis, auf der wir das Geschäft international weiterentwickeln können.

**Zusammengefasst: Ihre METRO GROUP ist effizienter, kundenorientierter und internationaler als je zuvor** – und schafft damit mehr Wachstum. Wir haben bereits mehr als ein Drittel des mit Shape 2012 geplanten Ergebnisverbesserungspotenzials von 1,5 Mrd. € realisiert. Das ist vor allem das Verdienst unserer rund 283.000 Mitarbeiter in 33 Ländern, die maßgeblich zum Erfolg unseres Unternehmens beigetragen haben. Ihr außerordentliches Engagement macht es möglich, unseren Kunden eine umfassende Palette an Produkten und Serviceleistungen anzubieten. Auch im Namen meiner Vorstandskollegen möchte ich mich bei den Mitarbeiterinnen und Mitarbeitern der METRO GROUP herzlich bedanken.

Der positive Geschäftsverlauf spiegelt sich auch in der Entwicklung der Metro-Aktie wider. Die starke Performance im Berichtszeitraum übertrifft mit einem Plus von 26,6 Prozent deutlich die Wertentwicklung des Deutschen Aktienindex DAX. An der Ergebnisentwicklung sollen Sie als Anteilseigner des Unternehmens selbstverständlich teilhaben. Vorstand und Aufsichtsrat werden Ihnen daher auf der Hauptversammlung am 6. Mai 2011 in Düsseldorf vorschlagen, für das Geschäftsjahr 2010 eine erhöhte Dividende von 1,35 € je Stammaktie auszuschütten.

**Wie geht es 2011 weiter? Wir werden den Erfolg von 2010 verstetigen und ausbauen**, das heißt, dass die erzielten Ertragserfolge zum Standard unseres Unternehmens werden sollen. Wir haben bei Shape 2012 zwar einen großen Teil der Wegstrecke bereits zurückgelegt. Nun wird es aber darauf ankommen, einen langen Atem zu beweisen. Das bedeutet: Wir werden uns 2011 und 2012 vor allem darauf konzentrieren, unsere Produktivität weiter zu steigern. Dabei kommt uns die Tatsache zugute, dass wir Shape 2012 verinnerlicht haben, das Programm also Teil unserer Unternehmens-DNA geworden ist. Der Unternehmergeist, den ich in der gesamten METRO GROUP verspüre, bestärkt mich in der Überzeugung: Wir werden auch 2011 erneut eine Vielzahl von Maßnahmen umsetzen, die unser langfristiges Wachstum fördern.

**Der künftige Erfolg der METRO GROUP ist dabei eng mit dem Erfolg unserer Nachhaltigkeitsstrategie verknüpft.** Damit unser Unternehmen weiterhin profitabel wachsen kann, muss es sein Kerngeschäft nachhaltig betreiben. Dieses Prinzip haben wir fest in unserer Strategie verankert. Alle Vertriebslinien

# „UNSERE INTERNATIONALE EXPANSION SETZEN WIR FORT UND PLANEN, MEHR ALS 110 NEUE STANDORTE ZU ERÖFFNEN.“

---

und Gesellschaften berücksichtigen in ihrer Geschäftstätigkeit neben ökonomischen auch und gerade soziale und ökologische Aspekte. Dass wir mit diesem Ansatz erfolgreich sind, wird auch von unabhängiger Seite bestätigt: Bei der Bewertung für den renommierten Dow Jones Sustainability World Index, der die Performance der auf dem Gebiet der Nachhaltigkeit weltweit führenden Unternehmen bewertet, haben wir in den drei Bereichen Wirtschaft, Umwelt und Soziales besser abgeschnitten als im Vorjahr. Darüber hinaus wurden wir von oekom research erstmals als „Prime“-Investment für nachhaltig orientierte Anleger empfohlen. Den eingeschlagenen Weg setzen wir konsequent fort.

**2011 ist für die METRO GROUP darüber hinaus ein besonderes Jahr, denn wir feiern unser 15-jähriges Bestehen.** Am 25. Juli 1996 wurde die Aktie der METRO AG erstmals an der Frankfurter Börse gelistet. Seit diesem Tag hat unser Unternehmen immer wieder den Mut und die Bereitschaft zur Veränderung gezeigt. Wir sind gestartet als eine auf Deutschland fokussierte Unternehmensgruppe. Heute sind wir einer der bedeutendsten internationalen Handelskonzerne. Und wir setzen uns ehrgeizige Ziele für die Zukunft. Wir wollen Umsatz und Ergebnis des Jahres 2010 übertreffen. Unsere internationale Expansion setzen wir fort und planen, mehr als 110 neue Standorte zu eröffnen. Wir entwickeln unsere erfolgreichen Formate kontinuierlich weiter. Zudem forcieren wir im Rahmen unserer Multi-Channel-Strategie die Verzahnung des stationären Vertriebs mit dem Online-Geschäft.

Liebe Aktionärinnen und Aktionäre, im Namen des Vorstands der METRO AG möchte ich Ihnen herzlich danken. Als Anteilseigner unseres Konzerns bildet Ihr Vertrauen das Fundament für unser unternehmerisches Handeln. Wir werden auch in diesem Jahr gewissenhaft und engagiert Ihre Interessen wahren und bitten erneut um Ihr Vertrauen.

Mit freundlichen Grüßen

**ECKHARD CORDES**  
VORSTANDSVORSITZENDER DER METRO AG

242mm MAXIMUM WEB WIDTH

[9.803]

VISIBLE ARTWORK AREA

CUP CENTRELINE

BLEED FOR SOLIDS

JOIN LINE

DIE CUT

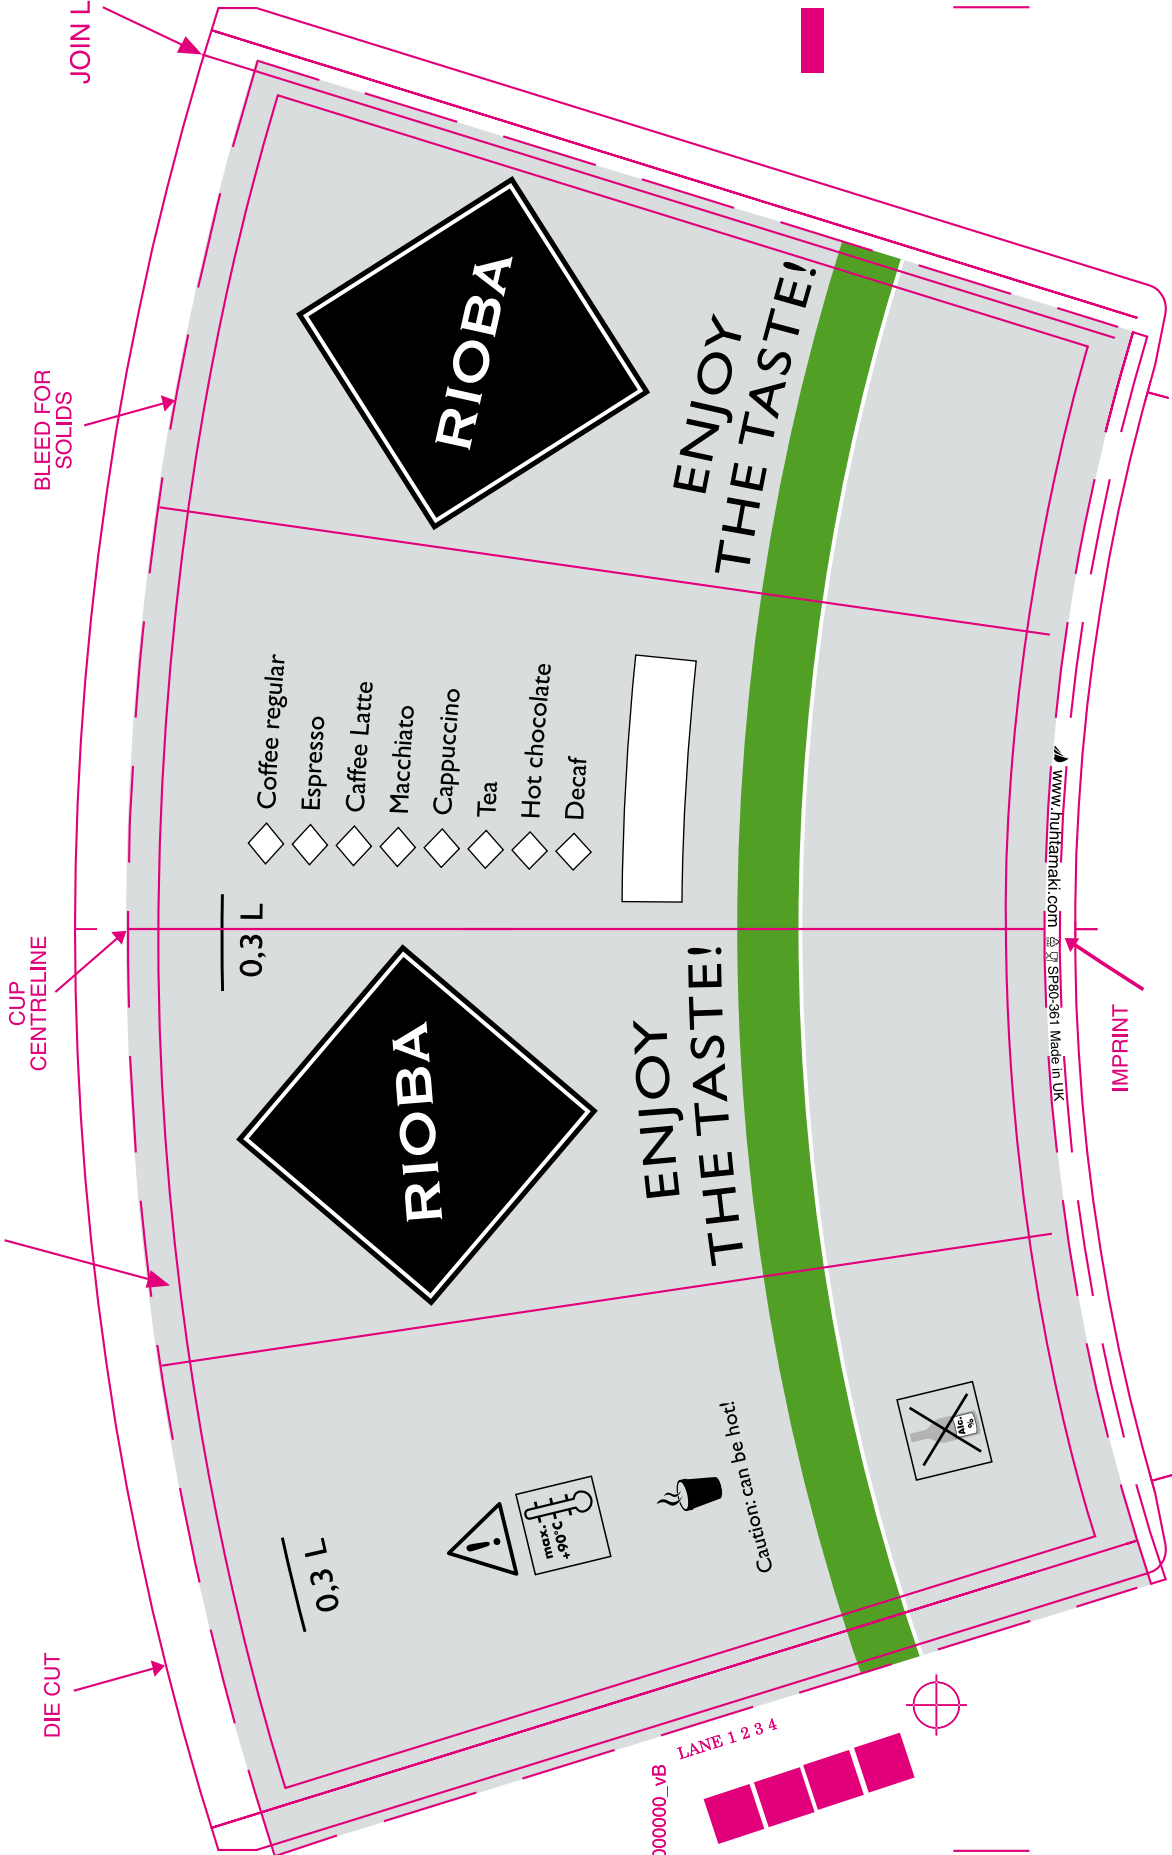

IMPRINT

# 120Z SP80-361

000000\_VB

LANE 1 2 3 4

Construction of data:

Quantity of EAN modified at:  
At disposition of:

Proofread  
Unread

Black  
Diecut  
Barcode

Colours:

Metro Food  
Date: 07-07-2010  
Product: RIOBA

Customer:  
Date:  
Product:

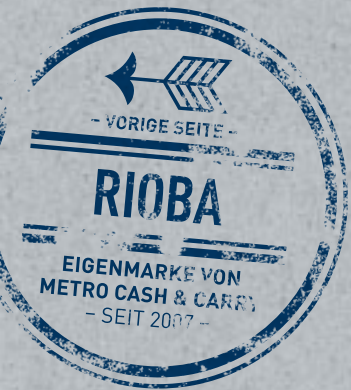

VOLLMILCH

real-  
SELECTION

real-  
SELECTION

real-  
SELECTION

real-  
SELECTION

real-  
SELECTION

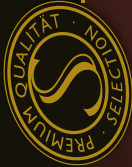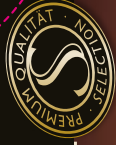

Finest Swiss  
Chocolate

VOLLMILCH

Mit Schweizer Vollmilch-  
schokolade mit erlesener,  
fein schmelzender Alpenmilch

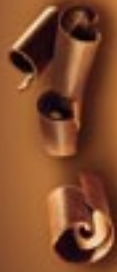

Entdecken Sie mit real- SELECTION  
eine Vielfalt von exquisiten Schokoladen-Variationen  
mit erlesenen, feinsten Zutaten und nach Schweizer Art  
zubereitet. Ein Genuss auf höchstem Niveau –  
für Schokoladen-Liebhaber.

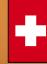

FINEST SWISS CHOCOLATE

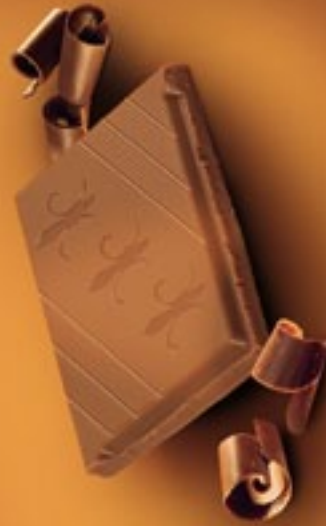

25 g  
kcal  
144  
7%  
GDA

FINEST SWISS CHOCOLATE

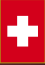

| Durchschnittliche Nährwerte | 100 g               | 1 Portion pro Portion | GDA* |
|-----------------------------|---------------------|-----------------------|------|
| Brennwert                   | 2390 kJ<br>574 kcal | 539 kJ<br>144 kcal    | 7%   |
| Eiweiß                      | 7,4 g               | 1,9 g                 | 4%   |
| Kohlenhydrate               | 49,6 g              | 12,4 g                | 5%   |
| davon Zucker                | 49,9 g              | 12,2 g                | 14%  |
| Fett                        | 39,4 g              | 9,6 g                 | 14%  |
| davon gesättigte Fettsäuren | 24,5 g              | 6,1 g                 | 31%  |
| Ballaststoffe               | 1,0 g               | 0,3 g                 | 1%   |
| Nachkautz                   | 0,25 g              | 0,06 g                | 1%   |
| Protein                     | 0,25 g              | 0,06 g                | 1%   |

GDA (Guideline Daily Amount): Richtwert für eine erwachsene Person mit einer durchschnittlichen Körpergröße von 1,75 m und einem Energiebedarf von 2000 kcal/Tag. Die tatsächliche Bedarf variiert nach Alter, Geschlecht und körperlicher Aktivität.

**Vollmilchschokolade**  
(Kakao: 34% mindestens,  
Milchbestandteile: 22% mindestens)

Zutaten: Zucker, Kakaobutter, Vollmilchpulver, Kakaomasse, Magermilchpulver, Emulgator Sojalecithine, Aroma Vanille.  
Enthält: Spuren von Nüssen, Erdnüssen und Gluten.  
Trocknen lagern und vor Wärme schützen.

Fragen zum Produkt?  
0800 / 503 54 18

Hergestellt in Deutschland mit Schweizer Schokolade für: real.- Handels GmbH, Schlüterstr. 5, D-40235 Düsseldorf, www.real.de, SKA

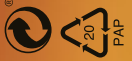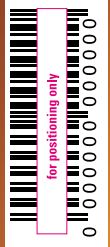

100 g e

Mindestens haltbar bis:

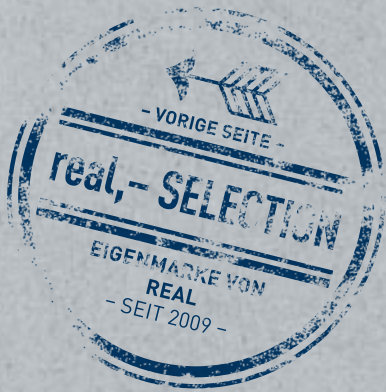

# KOENIC

## Hair dryer Comfort KHD 200

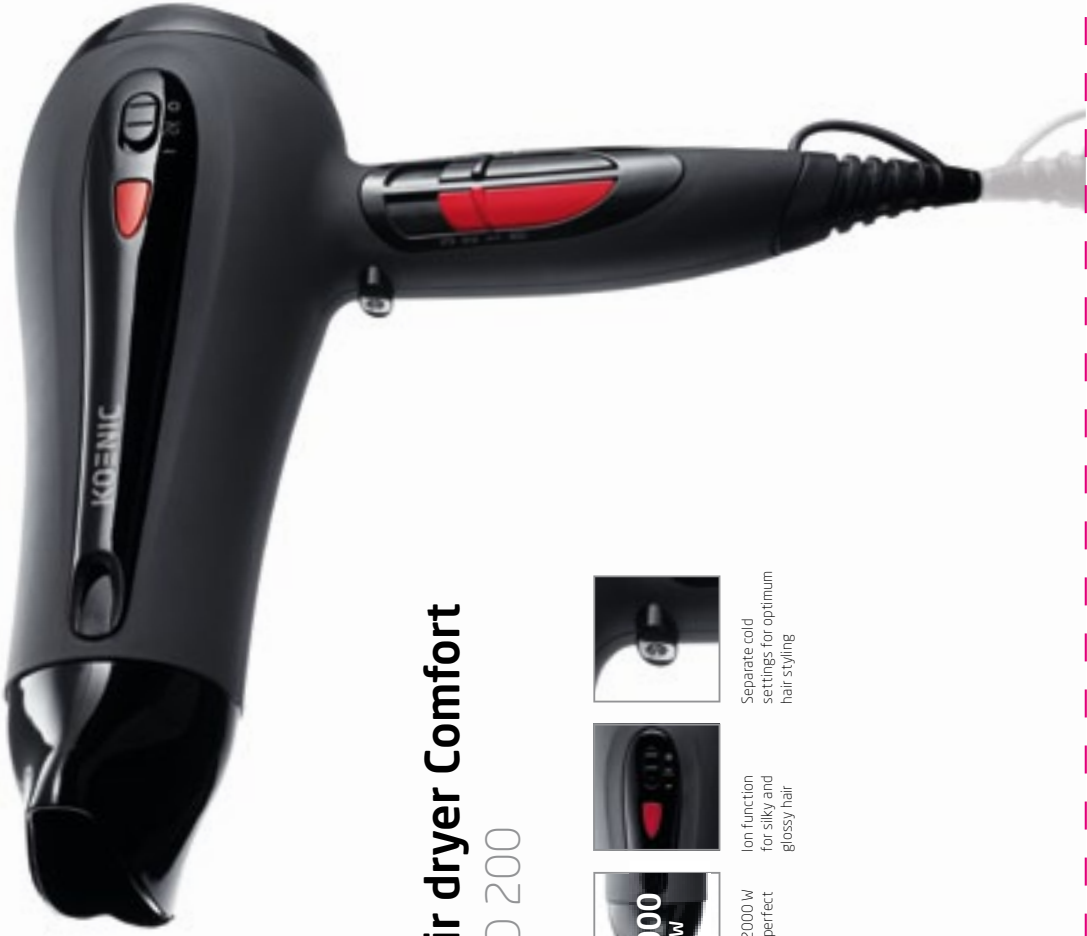

## Hair dryer Comfort

### KHD 200

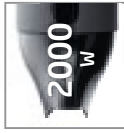

Powerful 2000 W motor for perfect styling

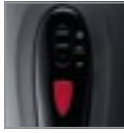

Ion function for silky and glossy hair

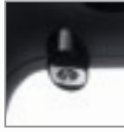

Separate cold settings for optimum hair styling

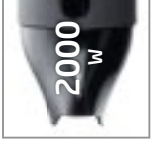

**DE** Leistungsstarker 2000 Watt Motor für perfektes Styling / Zuschaibbare Ionen-Funktion für geschmeidiges und glänzendes Haar / Separate Kaltstufe zur optimalen Fixierung der Frisur

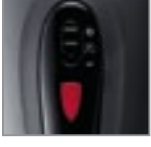

**NL** Krachtige motor 2000 W voor een perfecte styling / Inschakelbare ionenfunctie voor zacht en glanzend haar / Afzonderlijke koudestand voor een optimale fixering van het kapsel

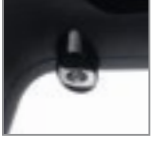

**EL** Αποδοτικό motor 2000 W για τέλειο styling / Ιονιστική λειτουργία για λαμύ και γυαλιστερή μαλλιά / Διακριτική βαθμίδα κρύου αέρα για βέλτιστο styling του χτενίσματος

**EN** Powerful 2000 W motor for perfect styling / Ion function for silky and glossy hair / Separate cold settings for optimum hair styling

**ES** Potente motor de 2000 W para un estilo perfecto / Función de iones conectable para lograr un pelo suave y brillante / Nivel de frío separado para la óptima fijación del peinado

**FR** Moteur puissant de 2000 W pour un styling parfait / Fonction Ionic pour des cheveux plus faciles à coiffer et plus brillants / Touche air froid pour une fixation parfaite de la coiffure

**HU** Nagy teljesítményű 2000 W-os motor a tökéletes stylinghoz / Bekapcsolható ionizáló funkció a selymes és csillogó haj érdekében / Külön hideg fokozat a frizúra optimális rögzítéséhez

**IT** Resistente motore 2000 W per tenuta perfetta / Funzione ioni azionabile per capelli elastici e luminosi / Livello di freddo separato per tenuta ottimale della pettinatura

**PL** Wysokiej mocy silnik 2000 W dla perfekcyjnej stylizacji / Funkcja jonizacyjna dla sprężystych i błyszczących włosów / Dodatkowy stopień chłodzący dla optymalnego utrwalenia fryzury

**PT** Motor potente de 2000 W para um styling perfeito / Função de comutação de íons para um cabelo mais maleável e brilhante / Nivel frio separado para uma melhor fixação do penteado

**RU** Мощный двигатель в 2000 Вт для идеального моделирования / Подключаемая ионная функция для эластичных и блестящих волос / Отдельный уровень охлаждения для оптимальной фиксации прически

**SV** Effektstart 2000 W motor för perfekt styling / Ionkopplingsbar jonifunktion för smidigt och glänsande hår / Separat kylsteg för optimal fixering av frisyren

**TR** Mükemmel şekillendirme için güçlü 2000 W motor / Yumuşak ve parlak saçlar için devreye alınabilen iyon fonksiyonu / Sac şeklini optimum düzeyde sabitlemek için ayrı soğuk kademe

**ZH** 2000 瓦超强动力操作完美造型 / 离子功能塑造丝般柔滑亮泽的长发 / 独立的冷风设置采用最佳造型

# KOENIC

## Haartro KHD 200

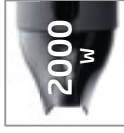

Leistungsstarker 2000 W Motor für perfektes Styling

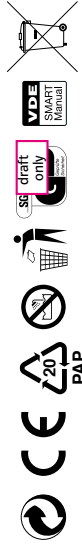



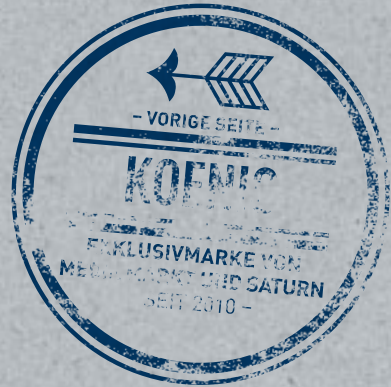



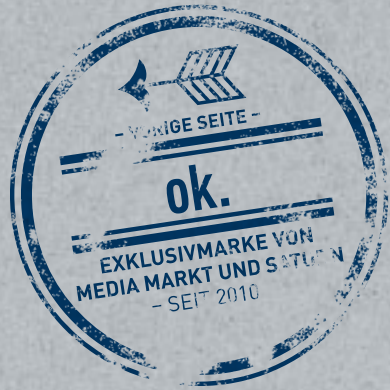

NCS S8010R90B  
10 101810  
matt/ uncoated  
Paper  
300 gr.

19-1629 TC  
195 M  
NCS S 5040-R  
Shiny

14-1112 TC  
7501U  
NCS S2010-Y20R  
embossed Type  
uncoated Paper

Eau de Toilette

INGREDIENTS: ALCOHOL, AQUA, PARFUM, BENZYL  
BENZOATE, BENZYL SALICYLATE, CITRAL,  
CITRONELLOL, COUMARIN, GERANIOL, LIMONENE,  
LINALOOL, CI 28440, CI 15985, CI 47005.

Alc. 80% Vol

Erhältlich nur in autorisierten Fachgeschäften.  
Only authorized retailers are permitted to sell this product.  
Distribution réservée aux dépositaires agréés.

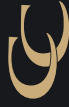

CRÉATEURS COSMÉTIQUES

Ein Unternehmen der:  
MAXIM Markenprodukte  
Donatusstraße 112  
50259 Pulheim/Brauweiler

Made in Germany

Ref. 41671-000

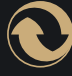

100 ml e 3.4 FL.OZ.

  
**RED WOOD**  
NATURAL SPIRIT

**EDT 100 ml**  
NATURAL SPRAY VAPORISATEUR

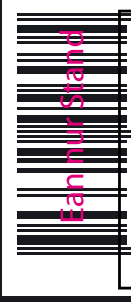

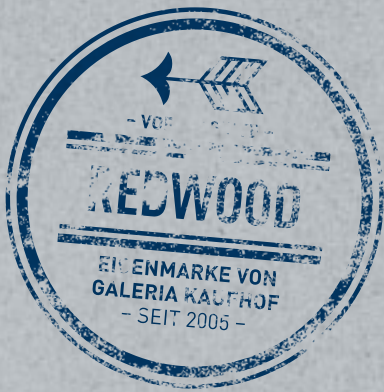

# MEHR WERT

## METRO GROUP

67,3 Mrd. € Umsatz, 2,4 Mrd. € EBIT vor Sonderfaktoren  
mit 2.131 Standorten in 33 Ländern

---

### METRO CASH & CARRY → SELBSTBEDIENUNGSGROSSHANDEL

31,1 Mrd. € Umsatz, 1.104 Mio. € EBIT vor Sonderfaktoren  
mit 687 Standorten in 30 Ländern

### REAL → LEBENSMITTELEINZELHANDEL

11,5 Mrd. € Umsatz, 132 Mio. € EBIT vor Sonderfaktoren  
mit 429 Standorten in 6 Ländern

### MEDIA MARKT UND SATURN → ELEKTROFACHMÄRKTE

20,8 Mrd. € Umsatz, 625 Mio. € EBIT vor Sonderfaktoren  
mit 877 Standorten in 17 Ländern

### GALERIA KAUFHOF → WARENHÄUSER

3,6 Mrd. € Umsatz, 138 Mio. € EBIT vor Sonderfaktoren  
mit 138 Standorten in 2 Ländern

### IMMOBILIEN

698 Mio. € EBIT vor Sonderfaktoren  
mit Immobilienvermögen in 30 Ländern

### SONSTIGE

0,3 Mrd. € Umsatz, -282 Mio. € EBIT vor Sonderfaktoren

# DER VORSTAND



**Dr. Eckhard Cordes**  
 VORSTANDSVORSITZENDER UND ARBEITSDIREKTOR

**Zuständigkeitsbereiche:** Human Resources; Investor Relations; Corporate Legal Affairs & Compliance; Corporate Internal Audit; Corporate Strategy; Corporate Projects and M&A; Corporate Communication, Public Affairs, CSR; Corporate Office; Media Markt und Saturn

**Kurzprofil:** Dr. Eckhard Cordes, Jahrgang 1950, wurde in Neumünster geboren. Er ist verheiratet und hat vier Kinder. Seit dem 1. November 2007 ist er Vorstandsvorsitzender der METRO AG. Am 2. März 2010 wurde er zudem Arbeitsdirektor des Unternehmens. Dr. Eckhard Cordes ist bis zum 31. Oktober 2012 bestellt.




**Olaf Koch**  
 FINANZVORSTAND

**Zuständigkeitsbereiche:** Corporate Finance & Treasury; Corporate Accounting; Corporate Controlling; Corporate Risk Management; Corporate Tax; Information Technology; Insurance; Galeria Kaufhof

**Kurzprofil:** Olaf Koch wurde 1970 in Bad Soden am Taunus geboren. Er ist verheiratet und hat drei Kinder. Im September 2009 trat er in den Vorstand der METRO AG als CFO ein. Seit Oktober 2010 ist er im Vorstand zudem für die Vertriebslinie Galeria Kaufhof zuständig. Olaf Koch ist bis zum 13. September 2012 bestellt.



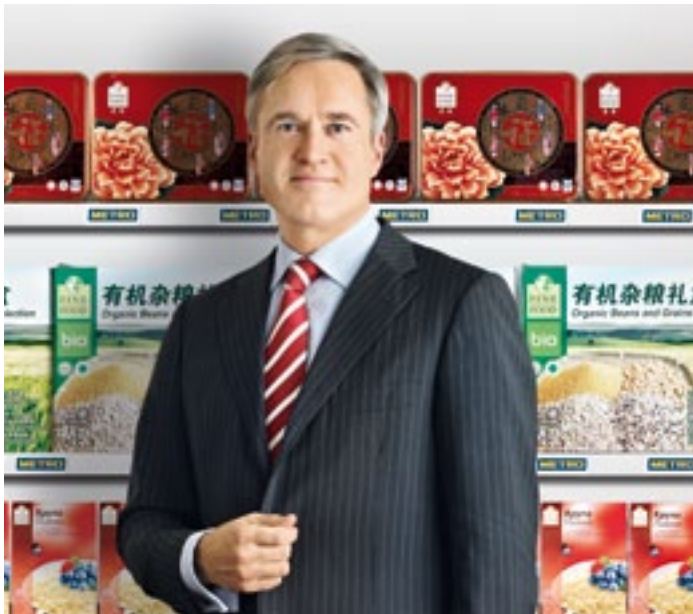

### Frans W. H. Muller

Zuständigkeitsbereiche: Metro Cash & Carry Asien/CIS/ Neue Märkte; METRO Group Asset Management; MGA METRO GROUP Advertising

Kurzprofil: Frans W. H. Muller wurde 1961 in Nieuwer-Amstel, Niederlande, geboren. Er ist seit 1997 in führenden Funktionen für Gesellschaften der METRO GROUP tätig. Zwischen 2005 und 2006 war er Generalbevollmächtigter der METRO AG. Seine Berufung in den Vorstand erfolgte im August 2006. Seit 2008 ist er CEO der Vertriebslinie Metro Cash & Carry, seit April 2010 zuständig für Asien/CIS (Commonwealth of Independent States, Zusammenschluss von Staaten der ehemaligen Sowjetunion)/Neue Märkte. Frans W. H. Muller ist bis zum 31. Juli 2014 bestellt.

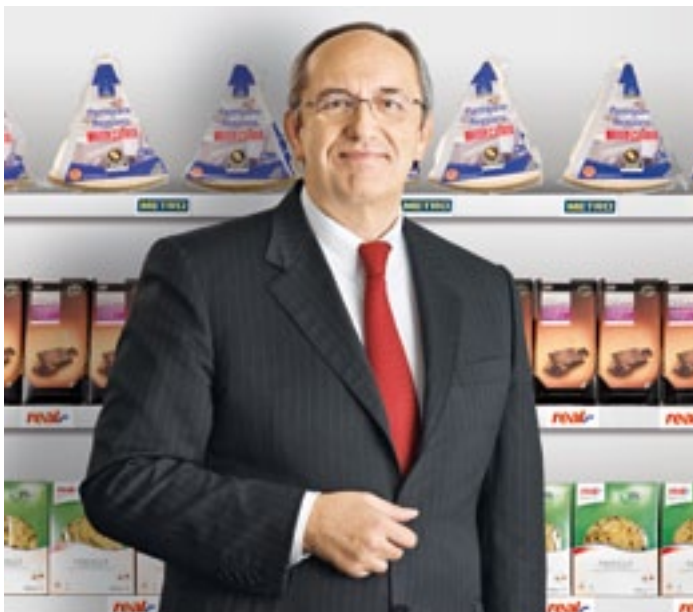

### Joël Saveuse

Zuständigkeitsbereiche: Metro Cash & Carry Europa/MENA; Real; MGB METRO GROUP Buying Hongkong; MGL METRO GROUP Logistics

Kurzprofil: Joël Saveuse, Jahrgang 1953, wurde in Tours-en-Vimeu, Frankreich, geboren. Zwischen 1985 und 1996 war er als Sprecher der Geschäftsführung von Metro Cash & Carry Frankreich sowie Metro Cash & Carry Deutschland tätig. Im April 2008 wurde er in den Vorstand der METRO AG berufen. Seit April 2010 ist er außerdem CEO der Vertriebslinie Metro Cash & Carry und zuständig für Europa/MENA (Mittlerer Osten und nördliches Afrika). Er ist bis zum 30. April 2013 als Vorstand der METRO AG bestellt.



# DIE METRO GROUP SAGT DANKE

Die METRO GROUP befindet sich im Wandel. Mit einer Vielzahl von Maßnahmen ist es uns gelungen, unsere Umsätze zu steigern. Wir haben die Kundenorientierung ausgebaut und effizientere Prozesse etabliert. Veränderungen wie diese setzen Engagement und Ausdauer voraus. Allen, die sich im vergangenen Jahr für unser Unternehmen eingesetzt haben, möchten wir an dieser Stelle ausdrücklich danken.

Den Wandel der METRO GROUP aktiv gestalten – das wird auch in Zukunft unsere vorrangige Aufgabe bleiben. Es gilt, gemeinsam Unternehmergeist und Innovationskraft zu beweisen und neue Ideen in die Praxis umzusetzen.

So wird die neue METRO GROUP lebendig.

---

DER VORSTAND DER METRO AG

# METRO GROUP 2010

## DIE STRATEGIE

DAS INVESTMENT  
DAS GESCHÄFT  
SERVICE

# DIE STRATEGIE

→ S. 021 Interview mit dem Vorstandsvorsitzenden

→ S. 024 Rückblick

→ S. 026 Strategische Ausrichtung der METRO GROUP

→ S. 026 METRO GROUP

→ S. 027 Metro Cash & Carry

→ S. 029 Real

→ S. 031 Media Markt und Saturn

→ S. 033 Galeria Kaufhof

→ S. 034 Immobilien

→ S. 036 Shape 2012

→ S. 037 Basis für nachhaltige Wertsteigerung

→ S. 037 Veränderungsmanagement und Programmstruktur

→ S. 038 Umfassender Wandel

→ S. 038 Fortführung der Reorganisation

→ S. 039 Transformation zeigt Wirkung

→ S. 039 Veränderungen in der Programmsteuerung

→ S. 041 Erfolgsgeschichten

# „PROFITABLES WACHSTUM BRAUCHT WERTE.“

Interview mit Dr. Eckhard Cordes, Vorstandsvorsitzender der METRO AG,  
über nachhaltiges Engagement

→ **Herr Dr. Cordes, die METRO GROUP versteht sich als ein nachhaltig agierendes Unternehmen. Was bedeutet das?** Dass wir profitables Wachstum und die Orientierung an anspruchsvollen ökologischen und sozialen Standards sowie gesellschaftliche Verantwortung in einen strategischen Gesamtansatz bringen. Nachhaltigkeit ergänzt in sinnvoller Weise unser operatives Geschäft und bringt auch für das Verhältnis von Kunden, Aktionären, Mitarbeitern sowie anderen Anspruchsgruppen neue Chancen. Nachhaltigkeit ist fester Bestandteil unserer Unternehmensstrategie.

→ **Das müssen Sie näher erläutern.** Nachhaltigkeit wird noch zu oft ausschließlich als Ressourcenschonung und Kosteneinsparung verstanden. Dabei bieten sich durch eine klare nachhaltige Ausrichtung bei der Produktstrategie und der Prozesssteuerung auch Wachstumschancen. Zugleich muss profitables Wachstum langfristig in verantwortliches Handeln gegenüber der Gesellschaft und der

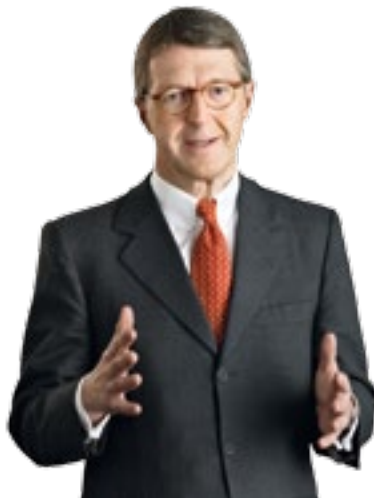

**WIR HABEN IN DIESEM SINNE  
GEHANDELT UND AUCH IN  
DER GLOBALEN FINANZ- UND  
WIRTSCHAFTSKRISE UNSER  
ENGAGEMENT FÜR NACH-  
HALTIGKEIT AUSGEBAUT,  
ANSTATT ES ZU REDUZIEREN.**

Umwelt eingebettet werden. Wir haben in diesem Sinne gehandelt und auch in der globalen Finanz- und Wirtschaftskrise unser Engagement für Nachhaltigkeit ausgebaut, anstatt es zu reduzieren. Denn gerade in wirtschaftlich angespannten Situationen ist es für ein verantwortungsbewusstes Unternehmen wichtig, seine langfristigen Ziele nicht aus den Augen zu verlieren – auch um auf dem Kapitalmarkt zu überzeugen. Professionelle Anleger achten bei ihren Investitionen immer häufiger auf konsequent nachhaltiges Wirtschaften. Und mehr noch: Wenn nachhaltiges Handeln Teil der operativen Geschäftsstrategie ist, dann strahlt das in andere Bereiche aus. Denn zwischen dem Markt der Produkte und dem Markt der Meinungen und Wertschätzungen gibt es einen unmittelbaren Zusammenhang.

→ **Ist denn diese nachhaltige Geschäftsstrategie der METRO GROUP profitabel?** Eindeutig ja. Profitabel heißt für uns, dass wir beim EBIT schneller wachsen als beim Umsatz. Mit einem

Ergebnis vor Sonderfaktoren von 2,4 Mrd. € haben wir 2010 das beste EBIT in unserer Unternehmensgeschichte erzielt. Wir haben 100 neue Standorte eröffnet, sind mit drei unserer Vertriebsmarken in neue Märkte eingetreten und konnten gleichzeitig Kosten reduzieren. Nachhaltigkeit und Profitabilität schließen sich nicht aus. Die Reihenfolge ist aber klar – nur ein profitables Unternehmen kann auch ein soziales und ökologisches Unternehmen sein.

→ **Verbessert dieser Ansatz auch die Position der METRO GROUP im Wettbewerb?** Ja, indem wir ökologische und soziale Erfordernisse bei allen unternehmerischen Entscheidungen und Prozessen berücksichtigen, sichern wir uns Vorteile gegenüber unseren Wettbewerbern. Diese nachhaltige Ausrichtung hilft uns, frühzeitig auf veränderte wirtschaftliche und gesellschaftliche Rahmenbedingungen zu reagieren.

→ **Welche Veränderungen meinen Sie damit?** Wenn sich Produkte und Preise unterschiedlicher Marktteilnehmer angleichen, wird die soziale und ökologische Kompetenz eines Unternehmens immer wichtiger. Das gilt auf drei Ebenen: Die Kunden fordern von uns zunehmend ein nachhaltiges Angebot. Der Kapitalmarkt interessiert sich dafür, ob wir auf globale Herausforderungen wie die demografische Entwicklung oder den Klimawandel vorbereitet sind. Und die Politik wünscht sich von uns, dass wir uns an der Lösung dieser Herausforderungen beteiligen – denn diese Themen sind so bedeutend, dass sie gemeinsame Antworten von Wirtschaft, Politik und Gesellschaft brauchen.

→ **Wie spiegeln sich diese Anforderungen in Ihrer Strategie wider?** Bereits 2009 haben wir einen Nachhaltigkeitsrat eingerichtet, um die zahlreichen

---

**IN UNSEREM EIGENEN  
GESCHÄFT TUN WIR VEREINFACHT  
GESAGT DAS, WAS UNS WIRTSCHAFTLICH NÜTZT  
UND WAS UNSERE NACHHALTIGKEITSZIELE STÜTZT.**

---

bestehenden Aktivitäten im Konzern zu bündeln und zu steuern. Zudem wollen wir über den Rat das nachhaltige Denken und Handeln im gesamten Unternehmen und in seinen Vertriebslinien verankern. Es gibt vier thematische Arbeitsgruppen mit Spezialisten aus den Vertriebslinien und Zentralbereichen der METRO AG. Die erste für Qualität, Gesundheit und Umwelt; die zweite für Energie- und Ressourcenmanagement; die dritte für Mitarbeiter und Soziales; und die vierte für Gesellschaftspolitik und Stakeholder-Dialog. Die Arbeitsgruppen diskutieren aktuelle Fachthemen, entwickeln Konzepte und Maßnahmen und bereiten verbindliche Entscheidungen des Nachhaltigkeitsrats vor.

→ **Das ist die abstrakte Ebene. Wie übertragen Sie das in die Praxis?**

In unserem eigenen Geschäft tun wir vereinfacht gesagt das, was uns wirtschaftlich nützt und was unsere Nachhaltigkeitsziele stützt. Beispiel Klimaschutz: Mit modernen Kühlmöbeln oder energetischer Bauweise senken wir den Energieverbrauch und reduzieren gleichzeitig den CO<sub>2</sub>-Ausstoß. Wenn wir in die Qualifizierung unserer Mitarbeiter investieren, sichern wir uns Fachkräfte und stärken die Bindung an das Unternehmen. Darüber hinaus übernehmen wir Verantwortung entlang der gesamten Wertschöpfungskette.

→ **Das bedeutet?** Wir setzen uns unter anderem für faire Produktions- und Arbeitsbedingungen bei unseren Lieferanten ein. Und wir helfen landwirtschaftlichen Erzeugern in Schwellenländern dabei, Standards für die Qualität und die Sicherheit von Lebensmitteln zu erreichen. Dies geschieht beispielsweise in Form von Trainings, die wir gemeinsam mit der Organisation der Vereinten Nationen für industrielle Entwicklung, UNIDO, durchführen.

→ **Würden Sie sagen, die METRO GROUP ist ein grünes Unternehmen?** Wenn Sie uns unbedingt Farben zuschreiben wollen, dann bitte Gelb und Blau. Denn wir verstehen uns in erster Linie als Handelsunternehmen, das sich konsequent an den Bedürfnissen seiner Kunden ausrichtet. Ich würde aber sagen, dass wir 2010 im Bereich Nachhaltigkeit erneut große Fortschritte gemacht haben. Das honoriert auch der Kapitalmarkt: Wir konnten uns zum Beispiel im Dow Jones Sustainability World Index deutlich verbessern und wurden von oekom research – einer der führenden Rating-Agenturen für Nachhaltigkeit – als „Prime“-Investment bewertet.

→ **Wie geht es 2011 weiter?** Wir setzen den eingeschlagenen Weg entschlossen fort, um unsere Erfolge langfristig zu sichern. Zugleich verfolgen wir konsequent unsere selbstgesteckten Ziele – wie die Reduzierung der CO<sub>2</sub>-Emissionen bis 2015 um 15 Prozent. Und neue Ziele kommen hinzu: Bereits Anfang des Jahres 2010 sind wir dem UN Global Compact beigetreten, dem Netzwerk der Vereinten Nationen für unternehmerische Verantwortung. Damit verpflichten wir uns dazu, uns hinsichtlich der UN-Global-Compact-Prinzipien kontinuierlich zu verbessern. Ein weiteres, klares Signal, dass wir es mit dem Thema Nachhaltigkeit ernst meinen.

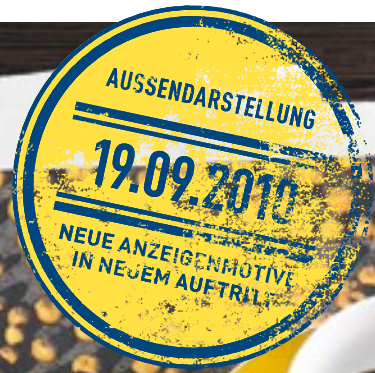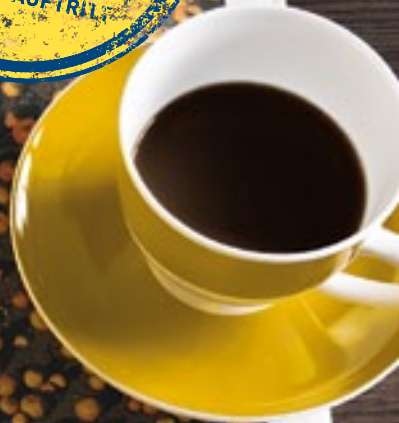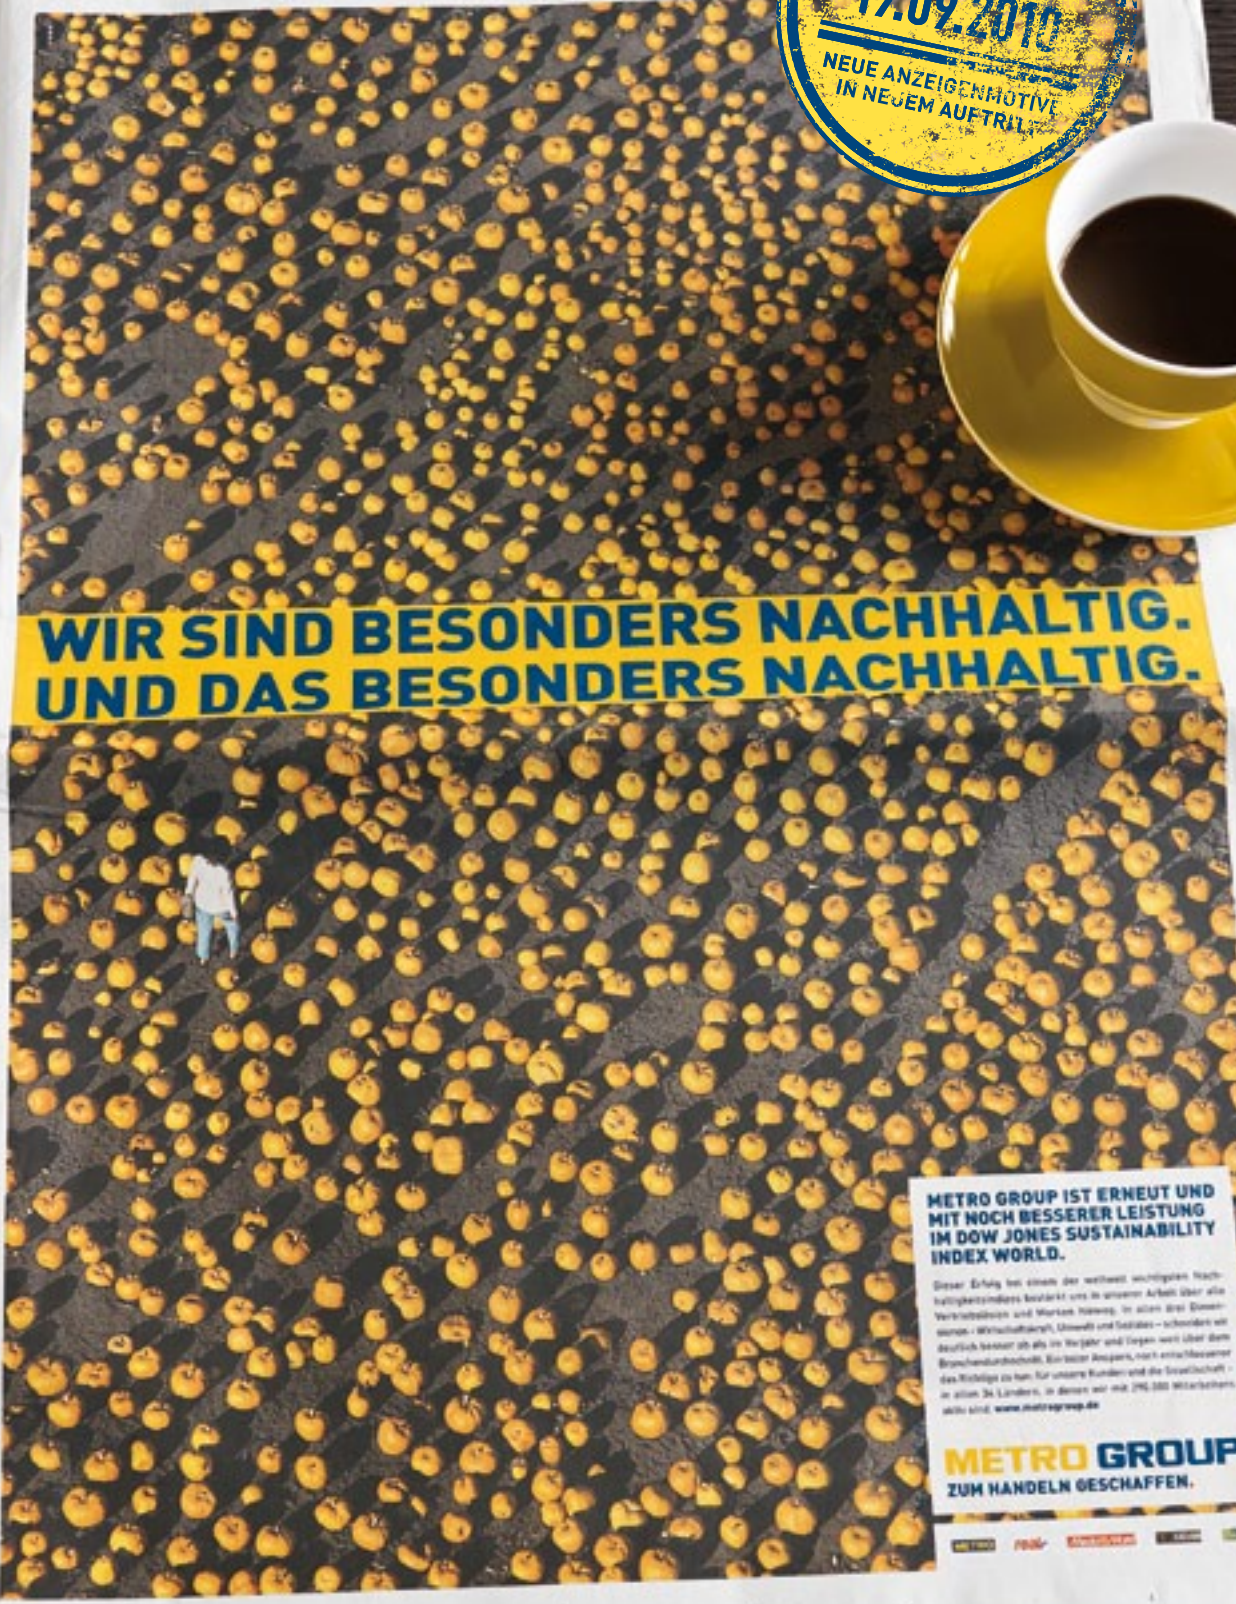

**WIR SIND BESONDERS NACHHALTIG.  
UND DAS BESONDERS NACHHALTIG.**

**METRO GROUP IST ERNEUT UND MIT NOCH BESSERER LEISTUNG IM DOW JONES SUSTAINABILITY INDEX WORLD.**

Dieser Erfolg hat einem der weltweit wichtigsten Nachhaltigkeitsindizes bedankt uns in unserer Arbeit über alle Vertriebsstellen und Märkte hinweg. In allen drei Dimensionen - Wirtschaftlich, Umwelt und Soziales - schneiden wir deutlich besser ab als im Vorjahr und liegen weit über dem Branchendurchschnitt. Ein toller Ansporn, noch entschlossener das Richtige zu tun. Für unsere Kunden und die Gesellschaft - in allen 34 Ländern, in denen wir mit 276.000 Mitarbeitern aktiv sind. [www.metrogroup.de](http://www.metrogroup.de)

**METRO GROUP**  
ZUM HANDELN GESCHAFFEN.

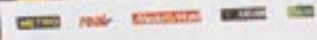

# RÜCKBLICK

Ausgewählte Ereignisse aus dem Geschäftsjahr 2010

## ERÖFFNUNG BERLIN-REPRÄSENTANZ Q1

**25.01.2010 +++** Gemeinsam mit Rainer Brüderle, deutscher Bundesminister für Wirtschaft und Technologie, eröffnet Dr. Eckhard Cordes die Hauptstadt-Repräsentanz der METRO GROUP in Berlin. Ziel des Unternehmens ist, den Dialog mit Regierung, Parlament und relevanten Interessengruppen zu intensivieren.

## KATASTROPHENHILFE FÜR HAITI

**17.02.2010 +++** In Zusammenarbeit mit der Welthungerhilfe unterstützt die METRO GROUP die Bevölkerung in Haiti nach einem schweren Erdbeben mit mehr als 125 Tonnen Hilfsgütern.

## VERÄNDERUNG IM VORSTAND (1)

**02.03.2010 +++** Zygmunt Mierdorf, seit 1999 Mitglied des Vorstands der METRO AG, ist mit Ablauf des 1. März 2010 aus dem Führungsgremium des Unternehmens ausgeschieden.

## NEUE STRUKTUR

**17.03.2010 +++** Mit Wirkung zum 1. April 2010 wird das Geschäft von Metro Cash & Carry in die zwei Einheiten Europa/MENA (Mittlerer Osten und nördliches Afrika) sowie Asien/CIS (Commonwealth of Independent States,

Zusammenschluss von Staaten der ehemaligen Sowjetunion)/Neue Märkte gegliedert. Gleichzeitig vereinfacht die METRO GROUP ihre Managementorganisation: Die Führungs- und Verwaltungsfunktionen von METRO AG und Metro Cash & Carry International werden weitestgehend in die METRO AG integriert. Parallel dazu passt die METRO GROUP ihren Auftritt an und führt unter anderem ein neues Logo ein.

## EXPO-AUFTRITT IN SHANGHAI Q2

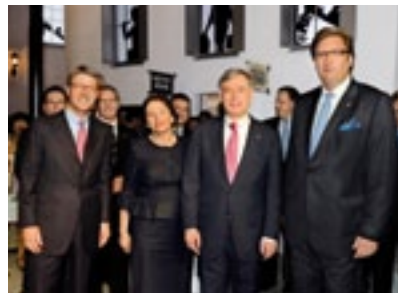

**01.05.2010 +++** Unter dem Motto „Better City, Better Life“ präsentiert sich die METRO GROUP als Exklusivpartner der Stadt Düsseldorf auf der EXPO in Shanghai. Im Mittelpunkt des sechsmonatigen Auftritts stehen Metro Cash & Carry und Media Markt. Bis Oktober besuchen mehr als 70 Millionen Menschen die Weltausstellung.

## WECHSEL IM AUFSICHTSRAT

**05.05.2010 +++** Prof. Dr. Jürgen Kluge wird zum neuen Vorsitzenden des Aufsichtsrats der METRO AG gewählt. Er folgt auf Franz Markus Haniel, der sein Amt niedergelegt hat.

## REAL STARTET ONLINE-SHOP

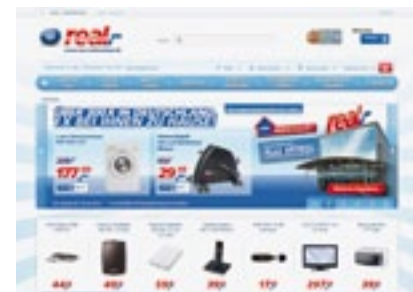

**21.05.2010 +++** Mit ihrem neuen Online-Shop verzahnt die Vertriebslinie Real den stationären und den elektronischen Handel und richtet sich konsequent an den Einkaufsgewohnheiten der Kunden aus. Rund 3.500 Produkte sind über den neuen Vertriebskanal erhältlich.

## MARKTEINTRITT IN ÄGYPTEN

**29.06.2010 +++** Die Vertriebslinie Metro Cash & Carry expandiert nach Ägypten. Unter dem Markennamen Makro eröffnet der Selbstbedienungs-großhändler den ersten Großmarkt nahe Kairo.

## KINDERTAGESSTÄTTE IN BANGLADESCH

Q3

**13.08.2010 +++** Die METRO GROUP eröffnet gemeinsam mit dem Textilerstellerverband von Bangladesch (BKMEA) eine Kindertagesstätte in Narayanganj, Bangladesch, einem der größten Zentren für die Bekleidungsindustrie. Die Einrichtung soll berufstätige Frauen dabei unterstützen, Familienleben und Arbeit zu vereinbaren.

## EFFIZIENTE IT-ORGANISATION

**15.09.2010 +++** In der Gesellschaft METRO SYSTEMS bündelt die METRO GROUP die Aufgaben von Information Management und Information Technology. Ziel ist es, die IT-Prozesse zu vereinheitlichen und marktorientierter zu gestalten.

## NEUE EXKLUSIVMARKEN

**16.09.2010 +++** Media Markt und Saturn führen neue Exklusivmarken ein und bieten damit eine noch größere Auswahl qualitativ hochwertiger Produkte. Die Marken „ok.“ und „KOENIC“ sind bereits im Weihnachtsgeschäft erhältlich; 2011 folgen „PEAQ“ und „ISY“.

## VERÄNDERUNG IM VORSTAND (2)

**30.09.2010 +++** Thomas Unger, stellvertretender Vorstandsvorsitzender der METRO AG, verlässt das Führungsgremium des Unternehmens.

## MARKTEINTRITT SATURN IN RUSSLAND

Q4

**08.10.2010 +++** Die Vertriebsmarke Saturn startet mit ihrem ersten Markt in Russland.

## DIALOG MIT GREENPEACE INTERNATIONAL

**25.10.2010 +++** Der Vorstand der METRO AG und die Geschäftsführung von Greenpeace International verständigen sich in Amsterdam darauf, den Dialog zu intensivieren.

## AUSZEICHNUNG FÜR NACHHALTIGES ENGAGEMENT

**26.10.2010 +++** Galeria Kaufhof erhält die Auszeichnung „Nachhaltiges Einzelhandelsunternehmen 2010“ für die Sortimente Spielwaren und Schreibwaren. Die Verbraucher Initiative e. V. honoriert das Engagement des Unternehmens mit einer Silbermedaille.

## ABHOLMARKT FÜR VERBRAUCHER

**09.11.2010 +++** Real eröffnet den ersten Drive-in-Lebensmittelmarkt in Deutschland. Kunden können ihre im Internet bestellten Einkäufe am gewünschten Termin im Testmarkt bei Hannover abholen.

## MEDIA MARKT STARTET IN CHINA

**17.11.2010 +++** Media Markt eröffnet in Shanghai den ersten Elektrofachmarkt in China. Mehr als 10.000 Kunden kommen am ersten Verkaufstag in den zweitgrößten Media Markt der Welt.

## VERKAUF DES GESCHÄFTS IN MAROKKO

**22.11.2010 +++** Die Vertriebslinie Metro Cash & Carry veräußert ihr Geschäft in Marokko mit Wirkung zum 30. November 2010.

## LOGISTIKDREHSCHIBE FÜR FRISCHFISCH

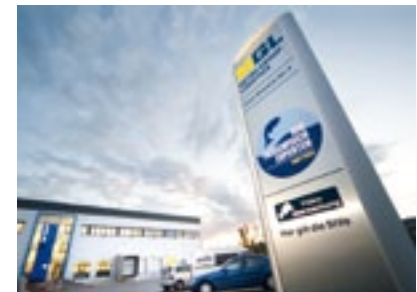

**23.11.2010 +++** Das neue Fisch-Logistikzentrum in der Nähe des Frankfurter Flughafens wird eröffnet. An diesem Standort bündelt Metro Cash & Carry jetzt sämtliche Prozesse der Frischfisch-Logistik in Deutschland.

## DEZENTRALES IMMOBILIENMANAGEMENT

**01.12.2010 +++** Die METRO Group Asset Management erhält eine neue, dezentrale Struktur. Das Immobilienmanagement wird stärker am operativen Geschäft der Vertriebslinien ausgerichtet und dazu in sieben Länder beziehungsweise Regionen gegliedert.

## VERKAUF SATURN-MÄRKTE IN FRANKREICH

**20.12.2010 +++** Die METRO GROUP und die Media-Saturn-Holding geben den Verkauf von 34 Saturn-Märkten in Frankreich an die HTM Group bekannt. Die Abgabe steht unter anderem unter dem Vorbehalt der Kartellbehörde.



# STRATEGISCHE AUSRICHTUNG DER METRO GROUP

## METRO GROUP

Die METRO GROUP zählt zu den bedeutendsten internationalen Handelsunternehmen der Welt. Unser operatives Geschäft verantworten die vier Vertriebslinien Metro Cash & Carry, Real, Media Markt und Saturn sowie Galeria Kaufhof. Sie bieten privaten und gewerblichen Kunden in 33 Ländern ein umfassendes Angebot an Produkten und Dienstleistungen, das auf deren spezifische Einkaufsgewohnheiten zugeschnitten ist. Die Vertriebslinien nehmen in ihren jeweiligen Geschäftsfeldern eine führende Position ein. Zusätzlich steuern und verwalten wir mit unserer Gesellschaft METRO Group Asset Management ein einzigartiges Portfolio an Handelsimmobilien. Unser langfristiges profitables Wachstum basiert auf fünf strategischen Werttreibern: Kundenorientierung, Internationalisierung, Effizienz, Nachhaltigkeit und Innovation. Sie spiegeln sich in unserer Markenbotschaft „Zum Handeln geschaffen.“ wider.

### Kundenorientierung

Unsere Vertriebslinien richten ihr Geschäft konsequent an den individuellen Bedürfnissen ihrer Kunden aus. Das gilt zum Beispiel für die Sortimente in den Märkten und Filialen: Verbraucher und Gewerbetreibende erhalten dort stets eine große Auswahl an qualitativ hochwertigen Produkten zu einem optimalen Preis-Leistungs-Verhältnis. Hinzu kommen persönliche Beratung und attraktive Serviceleistungen. Zunehmend an Bedeutung gewinnt außerdem der Einkaufskomfort. Wir testen und realisieren neue Vertriebskonzepte, die dem hohen Anspruch etwa mit Blick auf die Warenpräsentation gerecht werden. Zusätzlich verzahnen wir verstärkt den stationären Handel mit dem Vertrieb über das Internet, um Kunden zu

gewinnen und langfristig zu binden. Ein wesentlicher Erfolgsfaktor der Kundenorientierung ist die Eigenverantwortung der Vertriebslinien und deren lokale Verankerung. So können die Mitarbeiter vor Ort frühzeitig auf sich ändernde Rahmenbedingungen reagieren.

### Internationalisierung

Im Berichtsjahr haben wir 61 Prozent unseres Umsatzes außerhalb Deutschlands erzielt. Vor allem mit den großflächigen Handelsformaten Metro Cash & Carry, Real sowie Media Markt und Saturn sind wir international erfolgreich. Unsere Vertriebslinien und Gesellschaften agieren in 33 Ländern Europas, Asiens und Afrikas. Sie treiben ihre Expansion aus eigener Kraft voran, indem sie neue Standorte eröffnen und weitere Regionen erschließen. Dabei konzentrieren sie sich vorrangig auf Märkte mit steigender Wirtschaftskraft und positiver Kaufkraftentwicklung. Strategische Zukäufe und Kooperationen können zu einem beschleunigten Wachstum beitragen. Unsere breite internationale Aufstellung stärkt die Unabhängigkeit von konjunkturellen Schwächephase in einzelnen Ländern beziehungsweise Regionen.

Bei unserer fortschreitenden Expansion agieren wir mit unterschiedlichen Geschwindigkeiten. In den Wachstumsmärkten Asiens und Osteuropas legen wir einen Schwerpunkt darauf, das Vertriebsnetz zu erweitern. In den weitgehend saturierten Märkten Westeuropas hingegen können wir Umsatzsteigerungen vor allem durch neu ausgerichtete Vertriebskonzepte erzielen. Mit diesem Ansatz tragen wir der Tatsache Rechnung, dass unser Unternehmen in Märkten mit unterschiedlich stark entwickelten Handelsstrukturen agiert. Die Flexibilität ihrer

Formate erlaubt es unseren Vertriebslinien zudem, sich landestypischen Besonderheiten anzupassen, ohne die grundsätzliche Ausrichtung zu verändern. Der neue Media Markt in China, der im November 2010 in Shanghai eröffnet hat, führt beispielsweise eine große Auswahl an Wellness-Geräten. Diese Produkte werden in China häufig nachgefragt.

## Effizienz

Mit unserem Effizienz- und Wertsteigerungsprogramm Shape 2012 haben wir uns zum Ziel gesetzt, sämtliche Strukturen und Prozesse in der Unternehmensgruppe effizienter zu gestalten und die Komplexität des Konzerns deutlich zu reduzieren. Damit legen wir die Basis für weitere Ergebnisverbesserungen. Das Leitmotiv von Shape 2012 lautet: So dezentral wie möglich, so zentral wie nötig. So haben die Vertriebslinien die ungeteilte Verantwortung für das operative Geschäft übernommen – vom Einkauf über die Logistik bis hin zum Vertrieb. Das gibt ihnen den notwendigen Handlungsspielraum, um ihre strategischen Ziele und Renditevorgaben zu erreichen. Gleichzeitig sind übergreifende Funktionen, die für die Steuerung des Gesamtkonzerns relevant sind, in der METRO AG verankert. Dazu zählen beispielsweise Finanzen, Compliance und Controlling. Die METRO AG steuert die strategischen Entscheidungen der Vertriebslinien und nimmt die Kapital- und Ressourcenallokation vor. Weitere zentrale Funktionen sind unter anderem Investor Relations sowie die Führungskräfteentwicklung des Konzerns.

Das Handels- und das Immobiliengeschäft sind im Konzern finanziell voneinander getrennt, um dem unterschiedlichen Charakter der Vermögensklassen gerecht zu werden. Die METRO Group Asset Management ist als Profitcenter aufgestellt. Im operativen Geschäft ist das aktive Immobiliengeschäft seit Dezember 2010 hingegen enger mit den Vertriebslinien verzahnt. Auf diese Weise soll es international erfolgreich weiterentwickelt werden.

Shape 2012 wird auf den Seiten 36 bis 42 beschrieben.

## Nachhaltigkeit

In unserer Geschäftstätigkeit berücksichtigen wir neben ökonomischen auch und gerade soziale und ökologische Belange. Das Prinzip des nachhaltigen Wirtschaftens ist fest in unserer Unternehmensstrategie verankert und damit ein langfristiges Ziel der METRO GROUP. Denn profitables Wachstum erfordert verantwortliches Handeln gegenüber Gesellschaft und Umwelt. Unser Engagement setzt dabei vor allem am Kerngeschäft

an – genau dort, wo wir unmittelbar in der Verantwortung stehen und unsere Kompetenzen einbringen können. Die Nachhaltigkeitsstrategie umfasst die vier Bestandteile „Qualität, Gesundheit und Umwelt“, „Energie- und Ressourcenmanagement“, „Mitarbeiter und Soziales“ sowie „Gesellschaftspolitik und Stakeholder-Dialog“. Der 2009 gegründete Nachhaltigkeitsrat bündelt und steuert konzernweit die vorhandenen Maßnahmen. Das Gremium, dem Experten und Entscheider unserer Konzerngesellschaften angehören, etabliert außerdem die für Nachhaltigkeit erforderlichen Standards und Strukturen im Unternehmen. Auf dieser Grundlage können wir unser Engagement weiter ausbauen.

Das Nachhaltigkeitsmanagement der METRO GROUP wird auf den Seiten 105 bis 109 beschrieben.

## Innovation

Innovatives Denken und Handeln ist für uns unmittelbar mit unserem wirtschaftlichen Erfolg verknüpft. Neue Ideen für Konzepte und Formate sowie moderne Technologien helfen uns, noch besser auf die Bedürfnisse von Verbrauchern und Gewerbetreibenden eingehen zu können. Gleichzeitig können wir unsere Prozesse optimieren und beispielsweise die Zusammenarbeit mit Lieferanten verbessern. Ein systematisches Innovationsmanagement sorgt dafür, dass wir relevante Trends identifizieren, gemeinsam mit Partnern und Kunden Lösungen entwickeln, testen, bewerten und in die Praxis überführen können. Dabei unterstützt Shape 2012 die Ideengenerierung im gesamten Konzern.

Das Innovationsmanagement der METRO GROUP wird auf den Seiten 103 bis 104 beschrieben.

## Metro Cash & Carry

Metro Cash & Carry ist international führend im Selbstbedienungs-großhandel und einer der Wachstumstreiber der METRO GROUP. Die Vertriebslinie operiert unter den Markennamen Metro und Makro in 30 Ländern Europas, Asiens und Afrikas. In Deutschland wird das Portfolio zudem durch die Marke C+C Schaper ergänzt. Mit seinem vielfältigen Produkt- und Service-Angebot richtet sich Metro Cash & Carry speziell an gewerbliche Kunden: Hotel- und Restaurantbesitzer, Cateringunternehmen, unabhängige Einzelhändler sowie Dienstleister und Behörden. Ihnen bietet Metro Cash & Carry ein umfassendes Sortiment von bis zu 20.000 Lebensmitteln und

bis zu 30.000 Nicht-Lebensmitteln. Großen Wert legt der Selbstbedienungsgroßhändler auf lokale Produkte: In den meisten Ländern, in denen er vertreten ist, werden bis zu 90 Prozent im Land selbst eingekauft. Zudem vertreibt das Unternehmen Markenprodukte renommierter Hersteller sowie sechs exklusive Eigenmarken, die hohe Qualität und attraktive Preise vereinen: Aro, Fine Food, Horeca Select, H-Line, Rioba und Sigma. Die große Auswahl ist nur ein Beispiel dafür, wie Metro Cash & Carry den Anspruch an Kundenorientierung einlöst.

### Nah am Kunden: innovative Marktformate 406

Zu den Stärken von Metro Cash & Carry zählt außer dem vielfältigen Sortiment, der Qualität und der Frische auch ein flexibles Vertriebskonzept, das sich optimal an die spezifischen Bedingungen und Anforderungen in den jeweiligen Ländern anpassen lässt. Den Kern bilden die drei Marktformate Classic, Junior und Eco mit unterschiedlichen Verkaufsflächen und Sortimentstiefen. Das Classic-Format mit einer Verkaufsfläche zwischen 10.000 und 16.000 Quadratmetern ist vor allem in Westeuropa verbreitet. In Osteuropa und Asien setzt Metro Cash & Carry auf das Junior-Format mit einer Verkaufsfläche zwischen 6.500 und 8.500 Quadratmetern. Die Eco-Großmärkte verfügen über Flächen zwischen 2.500 und 6.500 Quadratmetern und sind auf frische Lebensmittel spezialisiert. Dieses Format spielt vor allem in Frankreich, aber auch in Südeuropa und Japan eine wichtige Rolle.

Um die Erwartungen der Kunden noch besser erfüllen zu können, baut Metro Cash & Carry neue Vertriebsformate konsequent aus. Beispielhaft dafür ist das Marktkonzept „MAKRO Punkt“, das der Selbstbedienungsgroßhändler im Oktober 2009 im polnischen Tarnów eingeführt hat. Mit seiner regional ausgerichteten Sortimentsauswahl und einer maßgeschneiderten Kundenbetreuung wendet sich „MAKRO Punkt“ insbesondere an unabhängige Lebensmitteleinzelhändler aus der Region. Auf einer Fläche von etwa 1.500 Quadratmetern bietet ihnen der Markt überwiegend Molkereiprodukte, Obst, Gemüse, Getränke und Konserven an. Etwa 2.000 verschiedene Lebensmittelprodukte sind ständig vorrätig. Rund 50 Nicht-Lebensmittelprodukte sowie bis zu 100 Saisonartikel ergänzen das Sortiment. Eine eigene Laderampe ermöglicht es den Kunden, Einkäufe zügig und bequem in ihre Fahrzeuge zu verladen. Ende 2010 gab es 4 „MAKRO Punkt“-Standorte in Polen.

In der Innenstadt von Shanghai, China, testet Metro Cash & Carry ebenfalls ein neues Format: „METRO for HORECA“. Das Produktangebot des 2.100 Quadratmeter großen

Markts ist ausschließlich auf die Bedürfnisse von Hotels, Restaurants und Caterern zugeschnitten. Die zentrale Innenstadtlage mit ihren kurzen Anfahrtswegen spricht dabei vor allem auch Neukunden an.

Im indischen Hyderabad wiederum hat Metro Cash & Carry im Oktober 2010 den ersten Markt eröffnet, der auf dem sogenannten „Genesis-Konzept“ basiert. Das bedeutet: Der Standort verfügt lediglich über eine Größe von 5.000 Quadratmetern, davon sind mindestens 75 Prozent als Verkaufsfläche ausgewiesen. Das Sortiment ist auf ein Kernangebot reduziert, das Gewerbetreibende in der Region häufig nachfragen. Ein zentrales Element ist der 400 Quadratmeter große „Mandi“ (hindi für „Marktplatz“), auf dem die Kunden Obst und Gemüse erhalten.

Auch in den übrigen Ländern arbeitet Metro Cash & Carry intensiv daran, die Belieferung zu optimieren und die Vertriebskonzepte kundenorientiert zu erweitern. So führte das Unternehmen 2009 in Frankreich das Konzept „Metro Drive“ ein. Ziel ist es, neue Einzugsgebiete zu erschließen, das heißt, Profikunden zu erreichen, die keinen Großmarkt in ihrer näheren Umgebung haben. Die Gewerbetreibenden bestellen ihre Ware wie gewohnt und können sie 48 Stunden später bei einem der lokalen Drive-in-Märkte abholen. In Frankreich hat Metro Cash & Carry im Berichtsjahr 11 neue „Metro Drive“-Abholmärkte eröffnet. Insgesamt sind es mittlerweile 14 Standorte. In Deutschland setzt C+C Schaper dieses Konzept seit 2010 um. Im Juli eröffneten die ersten beiden C+C Schaper Drive-in-Märkte in Singen und Lahr. Im Oktober folgte ein weiterer Standort in Garmisch-Partenkirchen. An den Stationen können Kunden ihre vorab bestellte und fertig kommissionierte Ware abholen. Mit dem Konzept zielt Metro Cash & Carry auf das Geschäft jenseits der Ballungszentren und stärkt seine Vorreiterrolle im Selbstbedienungsgroßhandel.

### Erweitertes Geschäftsmodell: Erfolgskonzept Belieferung

Shape 2012 rückt die Kunden stärker in den Mittelpunkt. Das belegen zahlreiche Maßnahmen, die Metro Cash & Carry bereits entwickelt und umgesetzt hat. Zu den Meilensteinen gehört der Lieferservice, den das Unternehmen 2009 in Deutschland etabliert hat. Im Berichtsjahr hat Metro Cash & Carry das Modell auf 27 Länder ausgedehnt. Weltweit waren mehr als 3.600 Mitarbeiter damit beschäftigt, Bestellungen von Kunden zu bearbeiten, Waren zu kommissionieren und sie auszuliefern. Durch die Erweiterung seines Geschäftsmodells gewinnt der Selbstbedienungsgroßhändler neue Kunden und

verbessert den Service für bestehende Kunden. Dabei hat Metro Cash & Carry vor allem die Kernzielgruppe der Hotel- und Restaurantbesitzer sowie Cateringunternehmen im Blick. Rund 50.000 Gewerbetreibende nutzen das Angebot bereits. Im Berichtsjahr erzielte das Unternehmen mit dem Lieferservice einen flächenbereinigten Umsatz von mehr als 800 Mio. €. Metro Cash & Carry entwickelt das Konzept kontinuierlich weiter: Um den Ablauf effizienter zu gestalten, eröffnete in Deutschland im November 2010 in Weiterstadt bei Frankfurt am Main das erste regionale Zustelldepot. Die Logistikkreisscheibe bündelt die Belieferungsprozesse der Region zentral an einem Standort und übernimmt die Versorgung sämtlicher Kunden im Rhein-Main-Gebiet.

### **Effiziente Frischfisch-Logistik: optimierte Wege und Prozesse** 407

Neue Wege geht Metro Cash & Carry seit 2010 auch in der Frischfisch-Logistik. Mit seinem Fisch-Logistikzentrum, das die MGL METRO GROUP Logistics in Groß-Gerau, in der Nähe des Frankfurter Flughafens, betreibt, bündelt das Unternehmen die logistischen Prozesse an einem Standort. Da somit zeit- und kostenintensive Zwischenstufen im Handel entfallen, verkürzen sich die Lieferzeiten deutlich. Innerhalb von 48 Stunden nach dem Fang sind fast alle Fischarten in den Großmärkten für die Kunden verfügbar. Der Logistikstandort setzt darüber hinaus Maßstäbe in Sachen Nachhaltigkeit: Das Fisch-Logistikzentrum und seine Prozesse wurden mit dem „Deutschen Gütesiegel Nachhaltiges Bauen“ ausgezeichnet.

### **Fortführung der Internationalisierung: Markteintritt in Ägypten**

Metro Cash & Carry agiert in 30 Ländern auf drei Kontinenten. Die Rahmenbedingungen sind dabei sehr unterschiedlich. Während in westeuropäischen Märkten die Handelsstrukturen bereits vollständig ausgebaut sind, befinden sich die osteuropäischen, asiatischen und afrikanischen Länder in unterschiedlichen Entwicklungsstadien. 2010 hat Metro Cash & Carry die ersten 2 Großmärkte in Ägypten eröffnet. Auch wenn die Standorte von den Unruhen im Januar 2011 betroffen waren, steht die Vertriebslinie grundsätzlich zu ihren Investitionen in dem Land. In Kasachstan entstanden 4 neue Märkte; dort ist Metro Cash & Carry nun mit 5 Märkten vertreten. Weltweit belief sich die Zahl der neu eröffneten Großmärkte im Berichtsjahr auf 38, allein 16 davon befinden sich in Asien/Afrika. Im November 2010 hat sich das Unternehmen dafür entschieden, sich von seinen Aktivitäten in Marokko zu trennen. Der Grund: Metro

Cash & Carry hat in dem Land keine nachhaltige Expansions- und Wachstumsperspektive für das spezifische Konzept des Selbstbedienungsgroßhandels gesehen.

### **Neue Struktur: Basis für künftiges Wachstum**

Im Zuge von Shape 2012 hat die METRO GROUP die Entscheidungskompetenzen für das operative Geschäft von Metro Cash & Carry im Berichtsjahr weiter dezentralisiert, um die Voraussetzungen für eine schnellere Expansion zu schaffen. Grundlage ist eine neue Unternehmensstruktur: Metro Cash & Carry wurde in die beiden Geschäftseinheiten Europa/MENA (Mittlerer Osten und nördliches Afrika) sowie Asien/CIS (Commonwealth of Independent States, Zusammenschluss von Staaten der ehemaligen Sowjetunion)/Neue Märkte gegliedert. Diese Struktur geht auf die unterschiedlichen regionalen Marktanforderungen ein und entspricht der hohen Bedeutung der Vertriebslinie für den Gesamtkonzern. Zu den strategischen Schwerpunkten der Geschäftseinheit Europa/MENA gehört vor allem, die Eigenmarken auszubauen, das Belieferungsgeschäft weiterzuentwickeln und den Außendienst zu stärken, also die Vor-Ort-Beratung bei den professionellen Kunden. Der Fokus der Geschäftseinheit Asien/CIS/Neue Märkte richtet sich hingegen auf die internationale Expansion des Großhandelsgeschäfts, um noch stärker von der Wachstumsdynamik dieser Regionen zu profitieren.

## **Real**

Die Vertriebslinie Real betreibt 429 SB-Warenhäuser in Deutschland, Polen, Rumänien, Russland, der Ukraine sowie in der Türkei. In den Märkten mit bis zu 15.000 Quadratmetern Verkaufsfläche finden Kunden alle Produkte des täglichen Bedarfs – an einem Ort und zu attraktiven Preisen. Damit löst die Vertriebslinie das Versprechen ein, das sie mit ihrer Werbung abgibt: „Einmal hin. Alles drin.“ Drei Viertel des Umsatzes erzielt Real mit Lebensmitteln. Ein Schwerpunkt des Angebots liegt auf qualitativ hochwertigen Frischeprodukten, zum Beispiel Obst und Gemüse, Fleisch, Wurst, Fisch und Käse. Zusätzlich bietet Real ein breites Sortiment an Nicht-Lebensmitteln, darunter Elektronikartikel, Haushaltswaren und Textilien. Bis zu 80.000 unterschiedliche Artikel sind in jedem Real SB-Warenhaus erhältlich. Seit 2008 treibt die Vertriebslinie ihre Neuausrichtung voran, um die Profitabilität nachhaltig zu steigern. Dazu wurden auch im Berichtsjahr die Kosten und Strukturen angepasst, das Vertriebsnetz optimiert und die Marke Real geschärft.

## Profiliert gegenüber dem Wettbewerb

Der langfristige Erfolg von Real beruht auf einem Höchstmaß an Kundenorientierung. Das schließt die Auswahl an Produkten ebenso ein wie die Qualität und Frische, die Preisgestaltung, die Warenpräsentation sowie die Serviceleistungen. Real baut seine Kompetenz unter anderem im Frischebereich konsequent aus, da die zugehörigen Warengruppen für die Kunden der Vertriebslinie eine hohe Bedeutung beim Einkauf haben: Fleisch, Wurst und Käse sowie Obst und Gemüse. Real hat den Anspruch, hier deutschlandweit das beste Image aufzubauen. Die aktuellen Ergebnisse des Kundenbarometers – einer jährlichen Telefonbefragung von Verbrauchern – belegen, dass die Vertriebslinie sich in der Wahrnehmung weiter verbessern konnte. Die Indizes für die Globalzufriedenheit der Kunden sowie die Servicemerkmale der Vertriebslinie wiesen gegenüber den Vorjahren erneut Verbesserungen auf.

Im Berichtsjahr hat Real sein Programm für verbesserte Kundenorientierung auf das gesamte Unternehmen ausgeweitet. Die Bereiche in der Zentrale verstehen sich nun noch stärker als Dienstleister für ihre Kunden: die SB-Warenhäuser des Unternehmens.

## Erneute Steigerung des Eigenmarkenanteils

Mit den Eigenmarken „real,- QUALITY“, „real,- BIO“ und „real,- SELECTION“ bietet die Vertriebslinie ihren Kunden eine günstige und qualitativ gleichwertige Alternative zu klassischen Markenprodukten in mittleren und oberen Preislagen. Darüber hinaus führt Real mit „TiP“ eine der bundesweit bekanntesten Eigenmarken im Preiseinstiegssegment. 2010 führte Real rund 3.000 Eigenmarkenprodukte im Sortiment – eine deutliche Steigerung gegenüber dem Vorjahr. Die Artikel, die Real unter eigenem Namen vertreibt, tragen zu einer weiteren Schärfung der Marke bei. Zudem kann die Vertriebslinie ihren Rohertrag weiter steigern, da die Margen bei Eigenmarken besser sind als bei klassischen Markenprodukten. Mittelfristig will Real bis zu 25 Prozent des Lebensmittelumsatzes mit Eigenmarken erzielen.

## Optimierung des Vertriebsnetzes

Ein wichtiger Baustein bei der Neuausrichtung von Real ist die Modernisierung der Standorte. Bis 2011 plant Real, in Deutschland rund 2.000 Konzeptbausteine neu in den SB-Warenhäusern einzubauen. Dabei handelt es sich um Warengruppen, die gebündelt und einheitlich präsentiert werden. Zu

den Konzepten von Real gehört zum Beispiel die Fachmetzgerei „Der Meistermetzger“, die bereits an vielen Standorten eingeführt ist. Wesentliche Elemente sind eine zeitgemäße, appetitliche Präsentation der Wurstwaren, eine freundlichere Farbgebung und Dekoration für die Bedientheke sowie eine Sortimentsoptimierung. „Der Meistermetzger“ bietet zudem überwiegend Artikel aus regionalen Betrieben, um die Transportwege zu reduzieren. Umfragen hatten zuvor gezeigt, dass sich Kunden vor allem lokale und frische Produkte wünschen. Bis Ende 2010 hat Real rund zwei Drittel der geplanten Konzeptbausteine umgesetzt. 2 SB-Warenhäuser wurden in diesem Zusammenhang aufwendig umgebaut: Die Standorte Karlsruhe und Wiesbaden stehen beispielhaft für eine attraktive, emotionale Einkaufsatmosphäre. Das Angebot zeichnet sich vor allem durch handwerklich frisch hergestellte Lebensmittel – etwa Brot und Brötchen oder selbst produzierte Metzgereiprodukte – und die große Auswahl an Nicht-Lebensmitteln aus.

## Pilotprojekt für mehr Unternehmertum

Im Juli 2010 hat Real das Pilotprojekt „Unternehmertum vor Ort“ gestartet. Ziel ist es, den Handlungsspielraum der Marktleiter zu erweitern. Innerhalb eines definierten Rahmens können sie weitgehend eigenständig über Sortimente, Preise, Warenplatzierung, Werbung, Prozesse und Personal entscheiden. Auf diese Weise lassen sich zentrale Vorgaben besser an die Bedürfnisse vor Ort anpassen. An dem Pilotprojekt nehmen die 3 Standorte Rostock, Hameln und Flensburg teil. Die Umsatz- und Ergebnisentwicklung dieser SB-Warenhäuser wird kontinuierlich beobachtet, um den Erfolg zu messen. Sollte sich der Ansatz bewähren, prüft Real eine bundesweite Umsetzung der Maßnahme.

## International Gewinnzone erreicht

Auch 2010 hat Real seine internationale Expansion in Osteuropa fortgeführt. In Russland und Rumänien hat die Vertriebslinie jeweils einen neuen Standort eröffnet. In der Türkei wurde hingegen ein Standort an die Vertriebslinie Metro Cash & Carry abgegeben. Die Entwicklung des internationalen Geschäfts ist von einem deutlichen Umsatzwachstum geprägt. Wie geplant hat Real im Berichtsjahr international erstmals die Gewinnzone erreicht.

## Nachhaltigkeit im Verkaufsraum

Wie alle Vertriebslinien und Gesellschaften der METRO GROUP übernimmt Real Verantwortung für Gesellschaft und Umwelt. Ein wichtiges Element ist das Energie- und Ressourcenmanagement. So hat Real zwischen 2009 und 2010 rund 21,8 Millionen Kilowattstunden Strom eingespart, zum Beispiel durch die energetische Sanierung der Märkte, neue Kühltheken in den Verkaufsräumen, den Einsatz neuer Leuchtmittel und Optimierungen im Entsorgungsbereich. Der Ausstoß von Kohlenstoffdioxid konnte um 16.060 Tonnen jährlich reduziert werden. Das entspricht dem Verbrauch von 18.000 Ein-Personen-Haushalten. Die Gesamthöhe der Investitionen beläuft sich auf 8 Mio. €.

## Starke Mitarbeiterbindung

Um die Zufriedenheit der Mitarbeiter zu ermitteln, führt das renommierte Gallup-Institut für Real regelmäßig Umfragen durch. Dabei lässt sich seit 2007 – dem Jahr vor der Neuausrichtung – eine deutliche Steigerung feststellen. 48 Prozent der befragten Führungskräfte waren 2010 „äußerst zufrieden“, für Real zu arbeiten. Das sind 26 Prozentpunkte mehr als 2007. 56 Prozent gaben an, eine hohe emotionale Bindung an das Unternehmen zu haben. Das entspricht einer Steigerung um 39 Prozentpunkte gegenüber 2007. Mit diesen Ergebnissen liegt Real über dem Durchschnitt der von Gallup betreuten Unternehmen.

## Neue Vertriebskanäle erschlossen

Unter dem Stichwort „Multi-Channel“ hat Real im Berichtsjahr zwei neue Vertriebskanäle erschlossen: In ihrem Internet-Shop [www.real-onlineshop.de](http://www.real-onlineshop.de) bietet die Vertriebslinie seit Mai 2010 mehr als 3.500 Produkte an. Das Sortiment umfasst vor allem Nicht-Lebensmittelprodukte. Real partizipiert mit seinem Angebot an den steigenden Wachstumsraten im Online-Handel. Zwischen Mai und Dezember 2010 hat die Vertriebslinie mehr als 100.000 Bestellungen abgewickelt. Der Online-Shop bietet dem Unternehmen die Chance, neue Kundengruppen zu erschließen und zusätzliche Umsätze zu erzielen.

Als weitere Neuerung hat Real Anfang November 2010 in der Nähe von Hannover seinen ersten eigenständigen Drive-in-Lebensmittelmarkt Deutschlands eröffnet. Die Kunden können im Internet unter [www.real-drive.de](http://www.real-drive.de) Lebensmittel und Drogerieartikel bestellen und bereits nach zwei Stunden am Drive-in-Shop abholen. Der Bezahl- und Abholvorgang dauert maximal fünf Minuten, sodass der Einkauf bei „Real Drive“ für

die Kunden eine hohe Zeitersparnis darstellt. Das Konzept ist zunächst als Pilotprojekt angelegt. Nach einer Testphase, die im ersten Halbjahr 2011 enden wird, soll über eine Ausweitung des Angebots entschieden werden.

## Media Markt und Saturn

Gemessen am Umsatz und an der Zahl der Mitarbeiter ist Media Markt und Saturn die zweitgrößte Vertriebslinie der METRO GROUP. Die Elektrofachmärkte beider Vertriebsmarken zeichnen sich aus durch eine Tiefpreisgarantie, die Kunden stets das beste stationäre Angebot ihrer Region zum günstigsten Preis gewährleistet, eine große Auswahl an innovativen Produkten, ein umfassendes Sortiment an Top-Marken, besten Service sowie auffällige und originelle Werbung. Die Vertriebslinie hat sich auch dank dieser Merkmale zur Nummer eins unter den Elektrofachmärkten in Europa entwickelt. Der Erfolg gründet außerdem auf der konsequenten Zwei-Marken-Strategie. Media Markt und Saturn treten eigenständig am Markt auf und stehen im Wettbewerb zueinander. Eine dezentrale Organisationsstruktur, engagierte Mitarbeiter und unternehmerischer Mut bilden die Eckpfeiler der Unternehmensphilosophie. Sie stützen das internationale Wachstum von Media Markt und Saturn in Europa und darüber hinaus.

## Kultur des Wettbewerbs

Mit der Übernahme der Saturn-Häuser in den Jahren 1990 und 1993 traf die spätere Media-Saturn-Gruppe die bewusste Entscheidung, beide Vertriebsmarken im operativen Geschäft unabhängig voneinander agieren zu lassen. Aus diesem Grund haben Media Markt und Saturn jeweils ein eigenes Management. Die einzelnen Elektrofachmärkte sind außerdem als eigenständige Gesellschaften aufgestellt, an denen die Geschäftsführer vor Ort mit bis zu 10 Prozent beteiligt sind. Damit einher geht eine große Entscheidungsfreiheit. Werbemaßnahmen, Produktauswahl, Preisgestaltung und Personalplanung werden beispielsweise direkt von den Elektrofachmärkten gesteuert. Auch die Mitarbeiter verfügen über ein hohes Maß an Eigenverantwortung im operativen Geschäft. Das stärkt ihre Identifikation mit dem Unternehmen, steigert die Motivation und fördert nicht zuletzt die Kundenorientierung. Denn sie stehen im direkten Kontakt mit den Kunden und kennen deren Bedürfnisse und die Rahmenbedingungen vor Ort aus erster Hand. Die Organisationsstruktur von Media Markt und Saturn stellt sicher, dass die Mitarbeiter flexibel darauf eingehen können.

## „Power Service“ für die Kunden

Media Markt und Saturn verkaufen nicht nur Haushaltsgeräte und Unterhaltungselektronik, sondern bieten zu jedem Produkt auch die passenden Dienstleistungen an: angefangen bei der Tiefpreisgarantie und der Finanzierung des Kaufs über Lieferung, PC-Service und Montage bis hin zur Installation. Mit dem „Power Service“ von Media Markt und Saturn können die Kunden eine Bandbreite an Leistungen zum günstigen Festpreis in Anspruch nehmen. Dazu zählen Dienste zur Datenrettung, die Überprüfung von Einbaugeräten und Satellitenanlagen beim Kunden zu Hause, Wartungspakete sowie die Installation technischer Geräte wie Waschmaschinen und Computer.

## Erste Exklusivmarken zum Weihnachtsgeschäft 408

Im Berichtsjahr hat Media Markt und Saturn die Vorbereitungen für die Exklusivmarkenstrategie abgeschlossen. Danach wird die Vertriebslinie international vier Exklusivmarken einführen: „ok.“ für das Preiseinstiegssegment, „KOENIC“ für hochwertige kleine und große Haushaltsgeräte, „PEAQ“ für Unterhaltungselektronik sowie „ISY“ für Zubehör. Mit diesen Marken deckt Media Markt und Saturn alle Preissegmente und sämtliche Produktkategorien ab. Die Vertriebslinie kooperiert mit namhaften Markenherstellern, um eine hohe Produktqualität sicherzustellen – zunächst in den Segmenten Weiße Ware, beispielsweise Waschmaschinen und Kühlschränke, sowie Unterhaltungselektronik. Seit November 2010, pünktlich zum Weihnachtsgeschäft, sind die ersten Artikel der Exklusivmarken „ok.“ sowie „KOENIC“ in Deutschland, Italien, den Niederlanden und Österreich erhältlich. In den übrigen europäischen Ländern, in denen die Vertriebslinie vertreten ist, wird das Sortiment sukzessive ausgebaut. 2011 sollen die Marken „PEAQ“ und „ISY“ folgen.

## Starke Marketingkampagnen 409

Sowohl Media Markt als auch Saturn sind für ihre außergewöhnlichen Werbekampagnen und die einprägsamen Markenbotschaften bekannt – in Deutschland und in anderen Ländern. Die Werbung von Media Markt und Saturn soll gleichermaßen informieren, polarisieren und anziehen. Im Berichtsjahr haben die Vertriebsmarken erneut Marketingkampagnen umgesetzt, die für Aufmerksamkeit sorgten. Dazu zählt die plakative Werbung von Media Markt mit dem deutschen Komiker Mario Barth und dem Slogan „Billiger geht so“. Saturn hat unter dem Motto „Sternhagelgünstig“ den US-amerikanischen Rocksänger Alice

Cooper als Werbebotschafter eingesetzt. Im Saisongeschäft 2010 von Oktober bis Dezember erhielt er Unterstützung von dem bekannten deutschen Popstar Bill Kaulitz von der Gruppe Tokio Hotel. Zur Fußball-Weltmeisterschaft im Juni 2010 haben Media Markt und Saturn jeweils Sonderaktionen gestartet. Dazu gehörte zum Beispiel eine Fußballwette bei Media Markt: Bei einem deutschen WM-Sieg hätten Käufer von TV-Geräten und Projektoren den vollen Preis zurückerstattet bekommen.

## Aufbruch nach Fernost 410

In Europa haben Media Markt und Saturn ihre Vision, die Nummer eins im Elektrofachhandel zu sein, bereits verwirklicht. Die Vertriebsmarken sind an 877 Standorten in 17 Ländern vertreten. 2010 haben sie ihre dynamische Expansion weiter fortgesetzt. Eine der Kernregionen ist dabei Osteuropa. Saturn eröffnete im Oktober 2010 seinen ersten russischen Elektrofachmarkt in der Hauptstadt Moskau. Ein weiterer folgte bereits im November 2010 in Woronesch, im Südwesten des Landes. Damit begegnet die Vertriebslinie der steigenden Nachfrage nach Elektronikprodukten in Russland. Media Markt ist dort bereits seit 2006 vertreten. Einen Meilenstein der internationalen Expansion bildete der Markteintritt von Media Markt in China. Im November 2010 eröffnete das Unternehmen in Shanghai einen Flagship-Store. Dieser Vorzeigemarkt ist mit einer Verkaufsfläche von 9.500 Quadratmetern auf fünf Stockwerken der zweitgrößte Media Markt der Welt. Bis 2012 will die Vertriebsmarke mit bis zu 10 Elektrofachmärkten in der chinesischen Metropole vertreten sein. Media Markt China wurde unter 25-prozentiger Beteiligung der chinesischen Foxconn Technology Group gegründet. Die METRO GROUP und die Gründerfamilien von Media Markt, Kellerhals und Stiefel, halten die übrigen 75 Prozent.

## Neue Wege eingeschlagen

Im Rahmen der Multi-Channel-Strategie erweitert Media Markt und Saturn das Geschäftsmodell um weitere Vertriebskanäle. Dazu gehören die 2010 eröffneten Online-Shops in den Testmärkten Niederlande und Österreich, die Internetangebot und Elektrofachmärkte eng miteinander verzahnen. Einkauf, Warenabholung und die Inanspruchnahme von Dienstleistungen sind weiterhin vor Ort möglich. Media Markt und Saturn nutzen das Internet außerdem als Vertriebskanal für digitale Produkte. Im August startete Media Markt als erster stationärer Händler in Deutschland eine Video-on-Demand-Plattform. Kunden können darüber Filme und TV-Serien herunterladen und ansehen. Saturn wiederum hat sein bestehendes

Musik-Download-Angebot um eine Applikation für Smartphones erweitert. Die Software „MusicScan“ ermöglicht es Anwendern, unterwegs im Saturn-Angebot zu stöbern und Ausschnitte aus Musiktiteln anzuhören. Eine gänzlich neue Form der Kundenansprache testet die Vertriebslinie seit Dezember 2010 mit dem „Media Markt toGo“. Dabei handelt es sich um Verkaufsautomaten für ausgewählte Produkte wie beispielsweise Kopfhörer und Ladekabel, die an zentralen Standorten wie Bahnhöfen und Flughäfen aufgestellt sind. „Media Markt toGo“ gibt es bereits viermal: an den Flughäfen Düsseldorf, Hamburg und München sowie am Münchener Hauptbahnhof. Bis Mitte 2011 sollen deutschlandweit elf dieser Automaten aufgestellt werden. Auch Saturn startet Anfang 2011 mit vergleichbaren Verkaufsautomaten unter dem Namen „Saturn Xpress“.

## Galeria Kaufhof 411

Mit einer konsequenten Markenstrategie hat sich Galeria Kaufhof zum Multispezialisten mit leistungsstarken, internationalen Sortimenten und hochwertigen Eigenmarken entwickelt. Die Schwerpunkte des Sortiments liegen auf den Bereichen Mode, Parfümerie und Haushalt. Angebot und Service der Vertriebslinie können sich mit dem von Fachgeschäften und vertikalen Anbietern messen – dazu zählen beispielsweise BekleidungsHersteller mit eigenen Ladengeschäften. Galeria Kaufhof positioniert sich im Einzelhandel als unverwechselbare und erfolgreiche Lifestyle-Marke. Ihre Warenhäuser befinden sich überwiegend in besten Innenstadtlagen. In Deutschland tritt die Vertriebslinie unter den Namen Galeria Kaufhof und Kaufhof, in Belgien als Galeria Inno auf. Zum Portfolio gehört außerdem das auf Sportartikel und -bekleidung spezialisierte Vertriebsformat Sportarena. Die Servicegesellschaft Dinea betreibt die Gastronomie in den Warenhäusern.

### Verlässliche und überraschende Sortimente

Im Berichtsjahr hat Galeria Kaufhof ihre Trading-up-Strategie fortgesetzt. Das bedeutet: Die Vertriebslinie hat ihre Sortimente mit internationalen Marken und Eigenmarken in mittleren bis oberen Preislagen weiterentwickelt und zusätzliche attraktive Lifestyle-Marken in das Angebot aufgenommen. Auch neuen, bislang unbekanntem Herstellern bietet Galeria Kaufhof so eine Plattform für den Einstieg in den deutschen Markt. Rund 50 Prozent des Umsatzes erwirtschaftet die Vertriebslinie mit Bekleidungsartikeln. Dieses Segment erfordert leistungskräftige Prozesse und Systeme im Warenhaus. Denn

Modetrends können sich schnell verändern. Zum Teil wechseln die Kollektionen in einem monatlichen Rhythmus. Galeria Kaufhof hat mit ihrer Warenwirtschaft bereits einen hohen Standard erreicht, um diesen Herausforderungen gerecht zu werden. Im Rahmen von Shape 2012 hat die Vertriebslinie ein sogenanntes Product-Lifecycle-Management-System eingeführt. Damit kann Galeria Kaufhof den Lebenszyklus eines Produkts innerhalb eines durchgängigen EDV-Prozesses abbilden – von der Entwicklung und Beschaffung über den Wareneingang und den Verkauf bis hin zur Nachbestellung. Ein wichtiger Bestandteil des Systems ist außerdem das Abschriftenmanagement. Damit lässt sich für jeden Zeitpunkt der optimale Verkaufspreis eines Produkts bestimmen und das Angebot entsprechend anpassen. Dies ist vor allem bei Saisonware wichtig, die zyklischen Veränderungen unterliegt.

### Lokale Ausrichtung der Filialen 412

Kunden kaufen in der Regel lokal. Ihr Einkaufsverhalten wird durch das direkte Marktumfeld stark beeinflusst. Deshalb richtet Galeria Kaufhof ihre Warenhäuser noch stärker an den Gegebenheiten vor Ort aus. Dazu erhalten die Filialteams stärkeren Einfluss auf die Gestaltung der Sortimente. Zudem hat Galeria Kaufhof Marketingkonzepte und Werbung bestmöglich auf die Bedürfnisse der Filialen ausgerichtet. Beispiel Sortimente: An einzelnen Standorten hat Galeria Kaufhof eine Bereinigung des Angebots vorgenommen und im Gegenzug Warenbereiche ausgebaut, die Kunden vor Ort stark nachfragen. Die Vertriebslinie prüft zudem kontinuierlich für jeden Standort das Angebot an Marken und nimmt bei Bedarf Anpassungen vor. Eine weitere beispielhafte Maßnahme für die Orientierung an lokalen Bedürfnissen ist das neue Konzept des U.Style Fashion Stores, den Galeria Kaufhof im Berichtsjahr in München eröffnet hat. Er befindet sich im zweiten Untergeschoss von Galeria Kaufhof am Münchener Marienplatz, auf der gleichen Ebene wie die U-Bahn-Station. Der U.Style Fashion Store vertreibt Streetwear, also jugendliche Freizeitkleidung, sowie Accessoires und richtet sich an 15- bis 25-jährige Verbraucher.

### Emotionalisierung der Marke 413

Ein Warenhaus muss seine Kunden emotional ansprechen. Die Kunden von Galeria Kaufhof erwarten Inspiration für ihren Lebensstil. Filialen, Sortimente und Services sind darauf ausgerichtet, das Markenversprechen „Wir bieten Lifestyle-Welten“ einzulösen. Ein wichtiger Baustein ist dabei die Kooperation mit dem bekannten Designer Wolfgang Joop, die Galeria Kaufhof im



Berichtsjahr eingegangen ist. Ein Kreativteam, bestehend aus Mitarbeitern der Fachbereiche Marketing, Einkauf und Verkauf von Galeria Kaufhof, entwickelt gemeinsam mit Wolfgang Joop neue Konzepte für eine emotionale Kundenansprache. Gefühlsbetont war auch die TV-Werbekampagne, die Galeria Kaufhof zum Weihnachtsgeschäft 2010 präsentierte: Unter dem Motto „Geschenke, die glücklich machen“ konzentrierten sich die Spots vorrangig darauf, was Schenken und Beschenktwerden in Menschen auslöst.

### Zukunftsorientiert positioniert

Um die Warenhäuser langfristig profitabel zu betreiben, analysiert Galeria Kaufhof regelmäßig die Marktbedingungen und das Umfeld der Standorte. Auf dieser Basis hat die Vertriebslinie ihr Standortportfolio auch 2010 optimiert und noch gezielter an die Markt- und Kundenanforderungen vor Ort angepasst. Die Ergebnisentwicklung zeigt, dass Galeria Kaufhof damit positive Effekte erzielen konnte. Im Berichtsjahr wurden aber auch die Filialen in Krefeld am Ostwall, Ludwigshafen und Mülheim an der Ruhr mit dem Auslaufen der Mietverträge aufgegeben. Der Standort Leipzig-Paunsdorf folgt Anfang 2011. Diese Filialen boten auch langfristig zu wenig Potenzial, um profitabel betrieben zu werden.

Bei Galeria Kaufhof entwickeln Mitarbeiter aller Fachbereiche Maßnahmen, um die internen Prozesse und Systeme im Sinne der Kundenorientierung weiter zu verbessern. Die stärkere lokale Ausrichtung der Filialen ist dabei ein wesentlicher Aspekt, der auch in den kommenden Jahren einen hohen Stellenwert einnehmen wird. Das Unternehmen wird seinen Multi-Channel-Ansatz fortführen und sein E-Commerce-Geschäft weiter ausbauen. Außer einem erweiterten Sortiment an Hartwaren, beispielsweise Haushaltswaren, Spielwaren und Schmuck, wird die Vertriebslinie auch textile Sortimente im Internet anbieten – immer eng vernetzt mit dem Geschäft der Warenhäuser.

## Immobilien 414

Mit 688 Handelsstandorten in 30 Ländern stellt das Immobilieneigentum der METRO GROUP weltweit das internationalste Groß- und Einzelhandelsportfolio dar. Für die Führung der Immobilienaktivitäten des Konzerns und seiner Vertriebslinien ist die METRO Group Asset Management zuständig. Sie setzt dabei ein zukunftsweisendes Konzept um: aktives und wertsteigerndes Portfoliomanagement der Immobilien, die

visionäre Entwicklung, den Bau und das Management von Shopping-Centern sowie maßgeschneiderte Facility-Services und ein kompetentes Energiemanagement. Dabei werden wirtschaftliche Effizienz und ökologische Nachhaltigkeit vereint. Ziel ist es, das Portfolio langfristig zu sichern und kontinuierlich im Wert zu steigern. Die Immobilien weist die METRO GROUP als eigenständiges Segment aus, um ihren Wertbeitrag besser herauszustellen. Die METRO Group Asset Management hat im Berichtsjahr ihre – bislang überwiegend innerhalb der Unternehmensgruppe genutzten – Dienstleistungen erweitert und mit Erfolg im Markt platziert.

### Dezentrale Organisationsstruktur

Die METRO Group Asset Management ist als eigenständiges Profitcenter positioniert. Sie erhielt zum 1. Dezember 2010 eine dezentrale Struktur, um eine engere Verzahnung mit dem operativen Geschäft der Vertriebslinien zu ermöglichen. Das Immobilienmanagement wurde dazu in sieben Regionen gegliedert: Deutschland, Polen, Türkei, Osteuropa, Westeuropa, CIS (Commonwealth of Independent States, Zusammenschluss von Staaten der ehemaligen Sowjetunion) und Asien. Die für die Regionen verantwortlichen Geschäftsführer stehen den Vertriebslinien als Ansprechpartner zur Verfügung. Für die bisherigen funktionalen Geschäftsbereiche wie Centermanagement und Projektentwicklung hat die METRO Group Asset Management Verantwortliche benannt, die international einheitliche Prozesse gewährleisten sollen. In Deutschland ist zudem der Energieeinkauf der METRO GROUP in der Gesellschaft gebündelt. Dies führt zu positiven Mengeneffekten.

### Wachsendes Portfolio

Regelmäßig bewerten und analysieren die Mitarbeiter des Geschäftsbereichs alle globalen und lokalen Märkte, Standorte und Objekte als Basis für das wertsteigernde Immobilienmanagement. Auf Grundlage der Beurteilung leiten sie eine Portfoliostrategie ab, entwickeln innovative und lukrative Formate und erarbeiten Leitlinien und Zielvorgaben für die einzelnen Standorte und Objekte. Ziel ist die systematische und nachhaltige Ertrags- und Wertsteigerung. Die METRO Group Asset Management nutzt dafür Investitionszyklen optimal aus. Immobilien werden beispielsweise dann verkauft, wenn ein Markt gesättigt ist. Rentable Zukäufe wiederum erfolgen in solchen Märkten, in denen die Immobilienpreise langfristig Potenzial für Steigerungen bieten. So wurden 2010 bei Metro Cash & Carry Italien erstmals in größerem Stil Immobilien im Zuge eines Fondsgeschäfts erfolgreich am Markt platziert.

Insgesamt beteiligten sich sechs internationale Investoren an 20 Immobilien von Metro Cash & Carry Italien, und damit rund der Hälfte des dortigen Standortportfolios. Die METRO Group Asset Management ist mit eigenen Büros in Düsseldorf, Saarbrücken, Warschau, Istanbul, Moskau, Paris, Singapur und Budapest vertreten.

### **Neue Aufträge im Centermanagement**

Mit 70 Einkaufszentren und Centerstandorten sowie mehr als 3.000 Mietern in Deutschland, Polen und der Türkei gehört die METRO Group Asset Management zu den führenden Centermanagementgesellschaften Europas. Die Kenntnis lokaler Märkte und kosteneffizientes Handeln tragen zum Erfolg bei. Der Geschäftsbereich verstärkte im Berichtsjahr sein Engagement im Segment der internationalen Einkaufszentren. In Polen betreut er seit 2010 fünf weitere Standorte und ist damit dort Marktführer. Zu den neu hinzugewonnen Centerstandorten gehört der Magnolia Park in Wrocław – mit rund 74.400 Quadratmetern eines der größten Einkaufs-, Freizeit- und Unterhaltungszentren in Polen.

### **Experten für Projektentwicklung und Baumanagement**

Ob Neubauten, Modernisierungen, Umbauten oder Erweiterungen – die METRO Group Asset Management bietet schlüsselfertige Lösungen für alle Anforderungen an Handelsimmobilien. Dabei arbeitet ein Team aus Projektentwicklern, Architekten und Ingenieuren eng mit den Vertriebslinien sowie den Investoren und Managern von Einkaufszentren zusammen. Ziel ist es, den individuellen Anforderungen der jeweiligen Standorte und Länder gerecht zu werden.

### **Neue Struktur für Facility-Services**

Die METRO Group Asset Management verantwortet für ihre Centerstandorte und im Auftrag der Vertriebslinien auch infrastrukturelle, kaufmännische und technische Facility-Management-Services. Der zuständige Geschäftsbereich wurde im Berichtsjahr umstrukturiert; dabei wurden in Deutschland Aufgaben an die Vertriebslinien übertragen. Im Ausland, vor allem in Osteuropa, erbringt der Geschäftsbereich Facility-Management-Leistungen auch für externe Auftraggeber.

### **Energieeffizienz als Zukunftsaufgabe**

Für die METRO GROUP ist die energetische Optimierung ihrer 2.131 Standorte ein langfristiges und strategisches Vorhaben. Auf diese Weise kann sie den kontinuierlich steigenden Energiepreisen begegnen und ihre Ziele zur Reduzierung der Klimawirkung erreichen. Die METRO Group Asset Management entwickelt mit ihren Partnern Konzepte, auf deren Basis die METRO GROUP ihren Energieverbrauch sowie den Ausstoß von Kohlenstoffdioxid verringern kann – beispielsweise durch den Einsatz von alternativen Energieträgern und regenerativer Stromerzeugung. Eine Grundlage für diese Konzepte liefert das METRO GROUP Energy Management System (MEMS), in dem der weltweite Energieverbrauch des Konzerns zentral und einheitlich erfasst ist. Der Ausbau des Systems wurde 2010 deutlich vorangetrieben. Die Verbrauchskontrolle der energieintensivsten Gewerbekälte-, Lüftungs- und Beleuchtungsanlagen für mehr als 800 Standorte der METRO GROUP ist bereits im Betrieb, unter anderem in Deutschland, Polen und Österreich. Auf Grundlage der Analysen ist die METRO GROUP in der Lage, erforderliche Sanierungen sowie zukunftsweisende technische Anlagenkonzepte zu planen und so Energieeinsparungen in erheblichem Umfang einzuleiten.

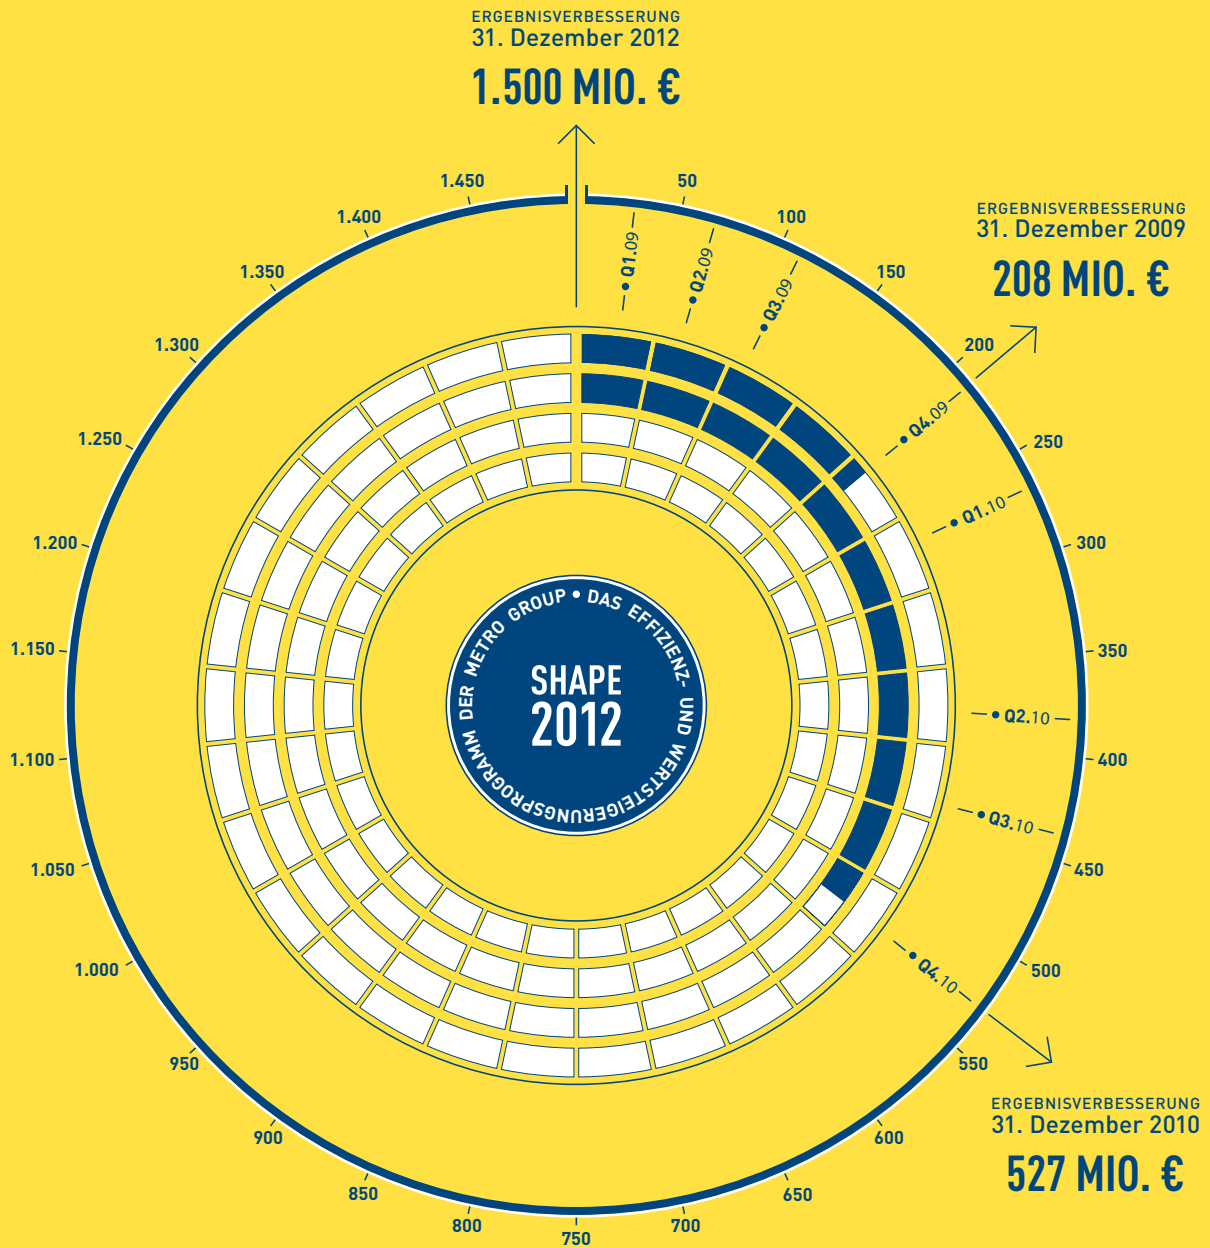

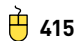

415

# SHAPE 2012

Als international agierendes Handelsunternehmen mit Aktivitäten in 33 Ländern steht die METRO GROUP vor einer Vielzahl an Herausforderungen. Vor allem in den reifen Märkten Westeuropas hat sich das Bruttoinlandsprodukt in den vergangenen Jahren schwach entwickelt – mit der Folge, dass unter anderem die Höhe der verfügbaren Einkommen stagnierte. Um unter diesen Rahmenbedingungen Wachstum zu erzielen, konkurrieren Handelsunternehmen immer stärker um die Gunst der Verbraucher. Für uns gilt es somit, partnerschaftliche Kundenbeziehungen auf- und auszubauen. Auch an den Kapitalmärkten messen wir uns mit leistungsstarken internationalen Wettbewerbern, die sich durch ihre hohe Profitabilität auszeichnen. Nicht zuletzt sind die Anforderungen an die Compliance – also die regelgerechte Unternehmensführung – sowie an die finanzielle Steuerung des Konzerns in den vergangenen Jahren weiter gestiegen.

## Basis für nachhaltige Wertsteigerung

Mit dem Effizienz- und Wertsteigerungsprogramm Shape 2012, das wir im Januar 2009 gestartet haben, stellen wir uns den Herausforderungen und schaffen die Basis für langfristige und nachhaltige Wertsteigerung. So wollen wir mit Shape 2012 vor allem unsere Kundenorientierung weiter ausbauen und die Effizienz für die gesamte Unternehmensgruppe steigern. Das finanzielle Ziel: Ab 2012 und darüber hinaus streben wir eine Ergebnisverbesserung von 1,5 Mrd. € gegenüber 2008 an. Davon entfallen rund 800 Mio. € auf Kosteneinsparungen, die voraussichtlich ab 2011 vollständig ergebniswirksam sein werden. Den Rest erzielen wir mit Produktivitätsmaßnahmen, die den Umsatz fördern und die Margen verbessern. Dazu

gehören beispielsweise neue Geschäftsmodelle, Eigenmarken sowie Angebote, mit denen wir Neukunden ansprechen. Bereits 2009 hatte Shape 2012 mit 208 Mio. € zum Ergebnis der METRO GROUP beigetragen. Diese positive Entwicklung setzte sich im Berichtsjahr fort. Der Ergebnisbeitrag durch Shape 2012 belief sich im Jahr 2010 bereits auf 527 Mio. €.

Shape 2012 betrifft alle Gesellschaften der METRO GROUP – in allen Ländern, in denen wir vertreten sind. Es ist damit das größte Veränderungsprogramm in der Geschichte unseres Unternehmens. In den Vertriebslinien haben wir zum Start eigene Veränderungsprojekte initiiert und diese mit vorhandenen Programmen in Shape 2012 integriert. Die neuen beziehungsweise bereits bestehenden Programme der Vertriebslinien sind MCC 2012 von Metro Cash & Carry, Real 2010 von Real, Vision No. 1 von Media Markt und Saturn sowie GALERIA 2012 von Galeria Kaufhof.

## Veränderungsmanagement und Programmstruktur

Mit Shape 2012 verbinden wir nicht nur ein eindeutiges finanzielles Ziel, sondern streben vor allem eine Veränderung in unserer Unternehmenskultur an: Denn damit wir uns auch künftig konsequent an den Bedürfnissen unserer Kunden ausrichten und effizienter agieren können, müssen wir den Unternehmergeist unserer Mitarbeiter und unsere Innovationskraft stärken. Es gilt, Chancen zu entdecken und zu ergreifen, neue Ideen in der Praxis umzusetzen und die Eigenverantwortung der Mitarbeiter zu stärken. All das setzt eine handlungsfähige Organisation voraus, die schnelle Entscheidungen zulässt und

die sich auf wesentliche Handlungsfelder konzentriert. Wir haben Shape 2012 deshalb mit fünf zentralen Handlungsfeldern aufgesetzt.

1. Neues Führungsmodell für mehr Markt- und Kundennähe
2. Ungeteilte Verantwortung der Vertriebslinien für das operative Geschäft
3. Straffe Organisationsstruktur für Finanzen, Compliance und Nachhaltigkeit
4. Immobilienportfolio als Profitcenter
5. Zentrale Renditevorgaben für eine straffe Führung

Um die Entwicklung hin zu einer neuen, von Unternehmergeist geprägten METRO GROUP zu unterstützen, haben wir zudem eine effiziente, zielgerichtete Umsetzungsmethodik festgelegt. Jede Gesellschaft entwickelt zunächst eigenständig Maßnahmen, die geeignet sind, die zentral vorgegebenen Ziele zu erreichen. Bei der Definition wird darauf geachtet, dass diese Maßnahmen nachhaltig und nicht nur einmalig zur Ergebnisverbesserung beitragen. Jede Maßnahme ist einem Verantwortlichen zugeordnet. Zudem werden jeweils detailliert Ziel, Ergebnisbeitrag, Zeitplan und Arbeitsschritte festgelegt sowie Risiken beschrieben. In allen Ländern, in denen die METRO GROUP vertreten ist, gelten die gleichen Standards für die Steuerung. Der jeweilige Fortschritt wird dabei mithilfe eines einheitlichen IT-Systems dokumentiert und kontrolliert, das allen Unternehmensbereichen zur Verfügung steht. So lassen sich mögliche Abweichungen frühzeitig identifizieren. In unseren Planungen berücksichtigen wir die Möglichkeit, dass einzelne Maßnahmen nicht zum gewünschten Effekt führen oder gar nicht erst umgesetzt werden. Das bedeutet: In der finanziellen Planung ist ein entsprechender Puffer bereits einkalkuliert. So können im Rahmen von Shape 2012 möglichst viele Ideen und Maßnahmen entwickelt, diskutiert und getestet werden. Die besten davon setzen wir um.

## Umfassender Wandel

Das Effizienz- und Wertsteigerungsprogramm Shape 2012 ist in zwei Phasen gegliedert, die zum Teil parallel laufen. Zum einen optimieren wir die Organisationsstrukturen des Konzerns. Ziel dieser Reorganisationsphase ist es, das gesamte Unternehmen handlungsfähiger, effizienter und kundenorientierter zu gestalten. Zum anderen setzen wir im Rahmen einer Transformationsphase Maßnahmen um, mit denen sich Kosten senken sowie Umsatz und Margen steigern lassen.

## Fortführung der Reorganisation

Bereits 2009 haben wir wesentliche Veränderungen in der Organisationsstruktur der METRO GROUP vorgenommen und beispielsweise die Verantwortung für Einkauf und Logistik zurück in die Vertriebslinien übertragen. Im Geschäftsjahr 2010 haben wir weitere Anpassungen umgesetzt:

- Zum 1. April 2010 wurde Metro Cash & Carry in zwei Geschäftseinheiten gegliedert: Europa/MENA (Mittlerer Osten und nördliches Afrika) sowie Asien/CIS (Commonwealth of Independent States, Zusammenschluss von Staaten der ehemaligen Sowjetunion)/Neue Märkte. Mit dieser Aufteilung unterstreicht die Vertriebslinie ihren Anspruch auf größere Markt- und Kundennähe. Zudem wird sie so den unterschiedlichen Entwicklungsgraden der Absatzmärkte besser gerecht. Denn jede Geschäftseinheit kann sich stärker auf ihre strategischen Schwerpunkte konzentrieren. Für Europa/MENA sind dies vor allem die Neuausrichtung des Geschäftsmodells für saturierte Märkte und der Ausbau der Eigenmarken sowie des Belieferungsservice. Die Geschäftseinheit Asien/CIS/Neue Märkte will vor allem mittelfristig ihre Expansion weiter beschleunigen und die Kapitaleffizienz bei Neueröffnungen von Großmärkten verbessern.
- Mit Wirksamkeit zum 1. Juli 2010 haben wir die Führungs- und Verwaltungsfunktionen von Metro Cash & Carry International und unserer Holding-Gesellschaft METRO AG integriert. Bisläng doppelt vorhandene Prozesse und Verantwortlichkeiten können wir so vermeiden. Mit der neuen Struktur ermöglichen wir eine effizientere Führung und senken zugleich die Kosten.
- Zum 15. September 2010 wurden die Funktionen für Informationstechnologie (IT) und Informationsmanagement (IM) von METRO AG, Metro Cash & Carry sowie MGI METRO GROUP Information Technology in der METRO SYSTEMS zusammengeführt. Damit verbunden sind die Ziele, vorhandenes Know-how in den Ländern besser zu nutzen, die zugehörigen Prozesse enger am operativen Geschäft auszurichten und IT- und IM-Konzepte schneller zur Marktreife zu bringen.
- Seit dem 1. Dezember 2010 arbeitet der Geschäftsbereich METRO Group Asset Management mit einer neuen, dezentralisierten Führungsstruktur. Das Immobilienmanagement ist nun in sieben Regionen gegliedert und damit eng am operativen Geschäft der Vertriebslinien vor Ort ausgerichtet.

Sofern durch organisatorische Veränderungen Personalanpassungen erforderlich waren, sind diese in einem geordneten und fairen Verfahren durchgeführt und die Arbeitnehmervertreter entsprechend den gesetzlichen Bestimmungen beteiligt worden. Grundsätzlich gilt: Personalabbau im Rahmen von Shape 2012 erfolgt soweit wie möglich durch natürliche Fluktuation.

### Transformation zeigt Wirkung

Seit dem Start von Shape 2012 im Jahr 2009 haben unsere Mitarbeiter rund 7.500 Maßnahmen entwickelt, mit denen sich Kosten senken oder Umsätze und Margen verbessern lassen – davon allein 1.500 im Jahr 2010. Dies lässt sich unter anderem darauf zurückführen, dass unsere Vertriebslinien die Maßnahmenentwicklung weiter intensiviert haben. Dazu haben sie beispielsweise Innovationsworkshops mit Mitarbeitern umgesetzt, Kundenforen initiiert, Fokusgruppen befragt, interne Ideenwettbewerbe gestartet und den Erfahrungsaustausch innerhalb der Unternehmensgruppe gestärkt.

Im Geschäftsjahr 2010 haben wir einen Schwerpunkt darauf gelegt, Maßnahmen zu testen und flächendeckend umzusetzen. Die Aufteilung des erzielten Ergebnisverbesserungspotenzials entwickelte sich im Berichtsjahr wie erwartet: Der überwiegende Teil der Verbesserungen entfiel auf Kostenreduzierungen. Gleichzeitig wurden zahlreiche Maßnahmen zur Steigerung der Produktivität auf den Weg gebracht beziehungsweise fortgeführt. Dabei ist zu berücksichtigen, dass Maßnahmen zur Kostensenkung in der Regel schneller wirken als Projekte, die Umsätze und Margen verbessern.

Alle Vertriebslinien haben 2010 erneut erfolgreich Maßnahmen umgesetzt, um ihre Kundenorientierung auszubauen. Dazu gehören beispielsweise neue Warenkonzepte, Eigenmarken und Vertriebskanäle. In diesem Zusammenhang ermitteln die Vertriebslinien regelmäßig die Einkaufsgewohnheiten und die Zufriedenheit ihrer Kunden. Messkriterien hierfür sind unter anderem die Zahl der Besuche, der durchschnittliche Einkaufswert sowie die Zahl der Kunden. Vorreiter für den sogenannten kundenzentrischen Ansatz ist die Vertriebslinie Real: Sie hat ihre Kundensegmente auf Basis von vorhandenen Daten aus Kundenbindungsprogrammen neu unterteilt – gestützt durch Marktforschungsergebnisse, Fokusgruppenanalysen und Daten der Gesellschaft für Konsumforschung (GfK). Auf dieser Grundlage kann Real unter anderem Angebot,

Warenpräsentation, Preise und Marketingaktionen exakt an die Bedürfnisse der jeweiligen Kundengruppe anpassen. Umfragen bestätigen, dass die Vertriebslinie die generelle Zufriedenheit ihrer Kunden mit diesem Ansatz deutlich steigern konnte.

### Veränderungen in der Programmsteuerung

Wie geplant haben wir Anfang 2010 inhaltliche Schwerpunkte definiert, an denen sich die Steuerung von Shape 2012 ausrichtet und über die regelmäßig an den Vorstand der METRO AG sowie die zuständigen Programmbüros berichtet wird:

- Kundenorientierung
- Einkauf
- Eigenmarkenmanagement
- Neue Geschäftsmodelle
- Belieferungsservices
- Prozesse in den Märkten, Filialen und Verwaltungen
- Logistik

Diese Fokussierung hat sich für die Steuerung von Shape 2012 bewährt, da sie eine gezielte Bewertung der einzelnen Schwerpunkte ermöglicht. Zudem lässt sich der Fortschritt nun besser dokumentieren und kontrollieren.

Wir haben nicht nur die Inhalte weiter fokussiert, sondern auch die Programmsteuerung durch einzelne Maßnahmen optimiert. So haben wir im Geschäftsjahr 2010 zusätzlich ausgewählte Service- und Funktionsbereiche der METRO GROUP in die regelmäßige Berichterstattung über Shape 2012 eingegliedert, darunter Finanzen, Human Resources und Informationsmanagement.

Darüber hinaus haben wir die Maßnahmensteuerung im Geschäftsjahr 2010 enger mit der Unternehmensstrategie und der Finanzberichterstattung verzahnt. Ferner haben wir konkrete Schritte entwickelt, um Maßnahmen zur Steigerung der Produktivität noch eindeutiger kontrollieren zu können. Ein weiterer Schwerpunkt der Arbeit ist die Risikobewertung für Shape 2012: Sollten Projekte nicht so erfolgreich laufen wie geplant, können wir nun zügig Gegenmaßnahmen einleiten.

Im Geschäftsjahr 2010 haben wir außerdem einen stärkeren Fokus auf unsere Servicegesellschaften, zum Beispiel METRO SYSTEMS und MGL METRO GROUP Logistics, gelegt; ihre geplanten Ergebnisverbesserungsbeiträge in Shape 2012

wurden weiter konkretisiert. Die Optimierungen werden zukünftig nicht allein im Ergebnis der Servicegesellschaften erkennbar sein, sondern sich teilweise als Ergebnisverbesserung unserer Vertriebslinien niederschlagen.

Zudem hat der Vorstand der METRO AG Ende 2010 eine Initiative gestartet, um den Erfahrungsaustausch innerhalb des Unternehmens zu fördern. Ein Kernelement sind die sogenannten

„Success Stories“. Dabei handelt es sich um Erfolgsbeispiele, die vorbildliche Maßnahmen detailliert beschreiben und die der Vorstand regelmäßig an die Führungskräfte des Unternehmens verschickt. Die Erfolgsgeschichten benennen nicht nur die konkreten Schritte von der Ideenentwicklung bis zur Umsetzung. Sie belegen darüber hinaus die Wirkung von Shape 2012 und sollen Mitarbeiter dazu motivieren, eigene Projekte anzustoßen.

# ERFOLGS- GESCHICHTEN

Hier bewegt Shape 2012

## METRO CASH & CARRY – STÄRKUNG DER FACHBERA- TUNG IM AUSSENDIENST

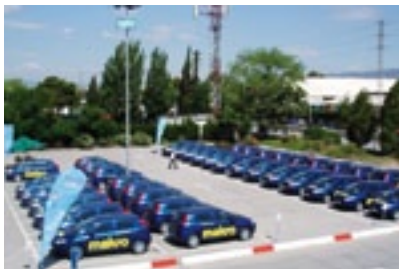

Bereits im Jahr 2008 hat Makro Cash & Carry Spanien damit begonnen, seinen Außendienst weiter zu professionalisieren. Mitarbeiter sollten die gewerbetreibenden Kunden vor Ort in ihren Betrieben besser unterstützen und ihnen maßgeschneiderte Lösungen anbieten. Mit einem Netzwerk von kompetenten Beratern will Makro Cash & Carry sich als Partner unter anderem für Hotels, Restaurants und Caterer positionieren. Ein erster Schritt war, Kunden nicht länger nach ihren tatsächlichen Umsätzen zu bewerten, sondern nach potenziellen. Darauf aufbauend, konnten die Mitarbeiter des Außendienstes auf ihre Aufgabe vorbereitet werden: Sie erhielten umfassende Trainings und wurden mit Verkaufsmaterialien und Instrumenten für die Kundenanalyse ausgestattet. Darüber hinaus hat die Vertriebslinie in Spanien ein erfolgsabhängiges Vergütungssystem eingeführt. Der neue Außendienst nahm 2009 seine Arbeit auf. 2010 waren erste

Erfolge sichtbar: Umsatz und Kundenfrequenz verbesserten sich im Vergleich zu 2009 jeweils um einen deutlich zweistelligen Prozentwert. Das Ziel, das Kundenpotenzial besser auszuschöpfen, konnte damit erreicht werden. Mittlerweile wird das Konzept auch in weiteren Ländern eingesetzt, in denen Metro Cash & Carry vertreten ist, darunter Deutschland, Kroatien, die Türkei und Vietnam.

## REAL – KUNDENZENTRISCHE KONZEPTE

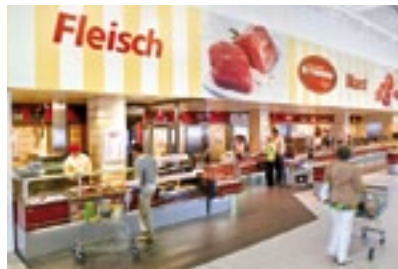

Anfang 2008 startete Real eine umfassende Repositionierung. Die Vision: Die Vertriebslinie wird als der kompetente Anbieter von Lebensmitteln mit Schwerpunkt Frische und attraktivem Angebot an Nicht-Lebensmitteln etabliert. Um dieses Ziel zu erreichen, hat Real alle vorhandenen Warenkonzepte vollständig überarbeitet. Als zentraler Erfolgsfaktor erwies sich dabei ein kundenzentrierter Ansatz: Auf Basis von Befragungen, detaillierten Analysen und Marktforschungsergebnissen hat Real zehn Kernkundengruppen identifiziert, die sich in ihren Einkaufsgewohnheiten unterscheiden. Beispiel „Junge, schnelle Küche“: Verbraucher dieses Typs bevorzugen Convenience- und Tiefkühlwaren und sind bereit, innovative Produkte auszuprobieren. Die Bedürfnisse von vier besonders wichtigen Kundensegmenten waren ausschlaggebend für die Ausarbeitung der Warenkonzepte – angefangen bei

der Produktauswahl über den Eigenmarkenanteil pro Sortimentsbereich, die Preisgestaltung und die Warenpräsentation bis hin zum Marketing. Auf diese Weise konnte Real das gesamte Sortiment noch stärker auf die Bedürfnisse der Kunden ausrichten. Bei der Überarbeitung von Sortimenten hat die Vertriebslinie die Konzeptmodule zudem den unterschiedlichen Anforderungen der Standorte angepasst, die sich aus der Kundenstruktur an den jeweiligen Standorten ergeben. Seit 2008 konnte Real bereits mehr als 2.000 Konzeptmodule in den SB-Warenhäusern einbauen. Sie haben dazu beigetragen, die Marke zu schärfen und die Zufriedenheit der Kunden zu steigern. Damit führen die neuen Konzepte unmittelbar zu Umsatz- und Ergebnisverbesserungen.

## MEDIA MARKT UND SATURN – KUNDENGERECHTE EXKLUSIVMARKEN

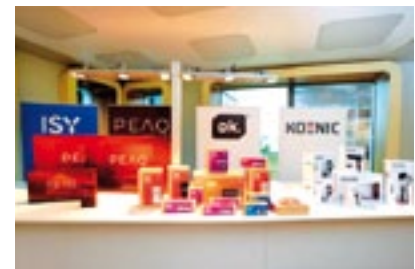

Die Vertriebslinie Media Markt und Saturn hat erstmals ein Exklusivmarkenkonzept entwickelt. Es orientiert sich mit Blick auf Preis und Qualität vollständig an den Kundenbedürfnissen. Darüber hinaus können sich Media Markt und Saturn mit Exklusivmarken von ihren Wettbewerbern differenzieren und höhere Margen erzielen. Vier neue Exklusivmarken bedienen alle Preissegmente. Spezifische Verpackungskonzepte spiegeln die jeweilige Markenpositionierung



wider. „ok.“ bedient das Preiseinstiegssegment über alle Produktkategorien hinweg bei solider Qualität. „KOENIC“ positioniert sich als Exklusivmarke für hochwertige Haushaltsklein- und -großgeräte im mittleren Preissegment für Kunden mit hohem Qualitätsanspruch. Die Exklusivmarke „PEAQ“ umfasst Elektronikartikel wie Laptops, Fernseher und HiFi-Anlagen. Die Geräte sind in Technik, Design und Qualität mit denen der Top-Marken vergleichbar, preislich aber etwas günstiger. „ISY“ ist die Exklusivmarke für Zubehör aus allen Sortimentsbereichen – in Qualität und Design vergleichbar mit klassischen Markenprodukten. Um einen hohen Standard zu gewährleisten, kooperiert Media Markt und Saturn mit namhaften Herstellern von Premium-Marken. Pünktlich zum Weihnachtsgeschäft 2010 hatte die Vertriebslinie rund 50 Produkte von „ok.“ und „KOENIC“ in ihren Märkten in Deutschland, Italien, den Niederlanden und Österreich im Angebot. 2011 sollen die Marken „PEAQ“ und „ISY“ folgen. Die Sortimente werden sukzessive in allen Ländern, in denen Media Markt und Saturn vertreten ist, ausgebaut.

## GALERIA KAUFHOF – NETTOUMLAUFVERMÖGEN

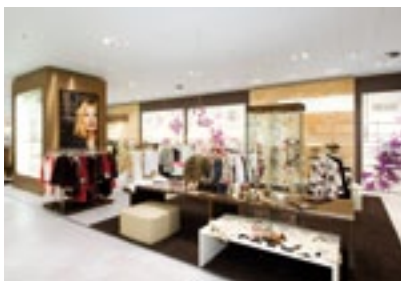

Internationale Vergleichsstudien haben gezeigt, dass das sogenannte Nettoumlaufvermögen im Handel erhebliches Potenzial für Ertragssteigerungen bietet. Galeria Kaufhof

hat sich zum Ziel gesetzt, das Nettoumlaufvermögen deutlich zu verbessern. Altwarenbestände werden über Ausverkäufe konsequent reduziert. Der Anteil der vom Lieferanten finanzierten Neuware auf der Verkaufsfläche kann erhöht werden. Auf diese Weise gestaltet die Vertriebslinie ihr Angebot deutlich attraktiver für die Kunden, vor allem durch regelmäßig wechselnde Textil-Kollektionen. Zudem kann sie die Kapitalbindung reduzieren. In einem ersten Schritt hat Galeria Kaufhof deshalb zunächst den Planungsprozess für den Einkauf optimiert und ein Anforderungsprofil für die Sortimente auf Basis von Verkaufsdaten und der Verfügbarkeit

## IMMOBILIEN – AUFBAU DRITTKUNDENGESCHÄFT

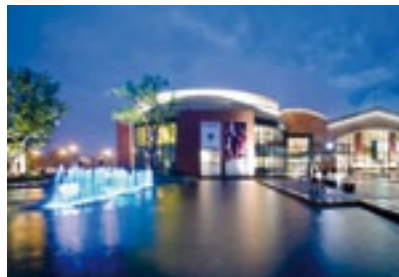

Bereits 2009 hat die METRO Group Asset Management das Projekt „Aufbau Drittkundengeschäft“ gestartet. Ziel war es, das umfassende Dienstleistungsspektrum des Geschäftsbereichs Betreibern von Einkaufszentren anzubieten, die bisher nicht in einer Beziehung zur METRO GROUP stehen. Zunächst hat die METRO Group Asset Management potenzielle Kunden mithilfe einer Umfrage erfasst, ihre Bedürfnisse identifiziert und eine Datenbank aufgebaut. Auf dieser Basis entwickelte der Geschäftsbereich eine

der Verkaufsflächen erstellt. Darauf aufbauend hat die Vertriebslinie eine automatisierte Artikeldisposition eingeführt, die sich am tatsächlichen Bedarf der Filialen orientiert. Die Preisgestaltung ist gekoppelt an vorab definierte Zeiträume, nach deren Ablauf Ware optimalerweise verkauft sein sollte. Verbleibt ein Artikel länger im Sortiment, kann der Preis abhängig von der Kundenstruktur automatisch reduziert werden. Verringerte Lagerkapazitäten tragen zu einer weiteren Optimierung bei. Galeria Kaufhof konnte mit diesem Projekt 2010 seine Altwarenquote gegenüber dem Jahr 2007 um mehr als 50 Prozent senken.

zielgerichtete Marketingkampagne, die die Bekanntheit erhöht und das Leistungsspektrum sowie das Know-how abbildet. Bereits im April 2010 konnte die Landesgesellschaft Polen einen ersten Großkunden gewinnen: ein Einkaufszentrum mit einer Gesamtfläche von rund 70.000 Quadratmetern und 230 Mietern, das einem Investmentfonds gehört. Anfang 2011 folgten zwei weitere Einkaufszentren mit insgesamt 64.000 Quadratmetern Mietfläche und 87 Mietern. Die METRO Group Asset Management übernimmt Aufgaben wie Buchhaltung, Management von Mietverträgen, Leasing und Bauaufsicht. Bis Ende 2010 konnte der Geschäftsbereich in Polen zwei weitere Kunden akquirieren. Für diese übernimmt die METRO Group Asset Management das vollständige Centermanagement. So kann der Geschäftsbereich zum einen seine Profitabilität steigern. Zum anderen kann er belegen, dass sein Angebot und seine Preisgestaltung marktgerecht sind.

# METRO GROUP 2010

DIE STRATEGIE  
DAS INVESTMENT

DAS GESCHÄFT  
SERVICE

# DAS INVESTMENT

- S. 045 **Metro-Aktie**
- S. 045 Aktionärsstruktur der METRO AG
- S. 047 Marktkapitalisierung und Indexzugehörigkeit
- S. 047 Dividende
- S. 047 Erfolgreiche Investor Relations

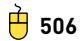

506

# METRO-AKTIE

Die internationalen Aktienmärkte verzeichneten im Berichtsjahr eine uneinheitliche Entwicklung. Zu Beginn des Jahres 2010 fielen die Börsenkurse auf breiter Front. Die Verschuldungsproblematik in Europa rückte in den Fokus des Kapitalmarkts und führte zeitweilig zu Turbulenzen an den internationalen Finanzmärkten. Auch die Metro-Aktie konnte sich dem nicht entziehen.

Der Ausblick auf die konjunkturelle Entwicklung verbesserte sich im März und führte zu einer spürbaren Kurserholung. Allerdings hielt der Aufwärtstrend nur bis Ende April, dann sorgte die Finanzkrise in Griechenland erneut für Verunsicherung bei den Investoren. Die folgenden Monate waren durch eine Seitwärtsbewegung gekennzeichnet. Neuen Aufschwung erfuhr die Börse im Herbst durch die sehr gute Wirtschaftsentwicklung in Deutschland. Von den verbesserten makroökonomischen Aussichten und vor allem der zunehmend positiveren Einschätzung des Konsumverhaltens profitierte vor allem die Aktie der METRO AG. Es folgte eine deutlich positive dynamische Aufwärtsbewegung im vierten Quartal 2010. Die Erhöhung der Ergebnisprognose sowie die in weiten Teilen der Welt anziehende Konjunktur beflügelten die Marktmeinung. Die Mehrzahl der Analysten erhöhte dementsprechend die Kursziele. Die erkennbaren Erfolge und das zukünftige Potenzial des Effizienz- und Wertsteigerungsprogramms Shape 2012 führten darüber hinaus zu einer Anhebung der Ergebnisschätzungen der Analysten für die Jahre 2011 und 2012.

Hinzu kamen positive Nachrichten aus den exportorientierten Branchen wie der Automobilindustrie und dem Maschinenbau.

In der Folge zogen die Aktienkurse auf breiter Front an und die Rallye setzte sich bis in den Dezember fort. Der deutsche Aktienindex DAX verzeichnete kurz vor Weihnachten mit 7.078 Punkten seinen Jahreshöchstwert und den höchsten Stand seit Juni 2008. Zum Jahresende 2010 konnte der DAX einen Zuwachs um 16,1 Prozent verbuchen.

Im Vergleich zum Branchenindex Dow Jones Euro Stoxx Retail, in dem die elf wichtigsten kontinentaleuropäischen Händler gelistet sind, entwickelte sich die Aktie der METRO AG bis Ende Oktober unterdurchschnittlich. Die Trendwende kam im November nach der Veröffentlichung des Finanzberichts für die ersten neun Monate sowie das dritte Quartal 2010: Am Jahresende übertraf der Kurs der Metro-Aktie den Indexverlauf deutlich. Während der Dow Jones Euro Stoxx Retail um 13,7 Prozent zulegen, verzeichnete die Metro-Aktie einen Zuwachs von 26,6 Prozent.

Im Vergleich zu deutschen Staatsanleihen entwickelte sich die Metro-Aktie deutlich besser. Der Deutsche Rentenindex REX, ein repräsentativer Ausschnitt des Markts für deutsche Staatsanleihen mit fester Verzinsung und Restlaufzeiten zwischen 0,5 und 10,5 Jahren, stieg um 4,0 Prozent.

## Aktionärsstruktur der METRO AG 507

Die Hauptanteilseigner der METRO AG sind die Großaktionäre Haniel, Schmidt-Ruthenbeck und Beisheim. Zum Jahresende 2010 hielten sie nach den der METRO AG vorliegenden Informationen 59,98 Prozent der Stimmrechte.

**Kursentwicklung der Metro-Aktie (%)**

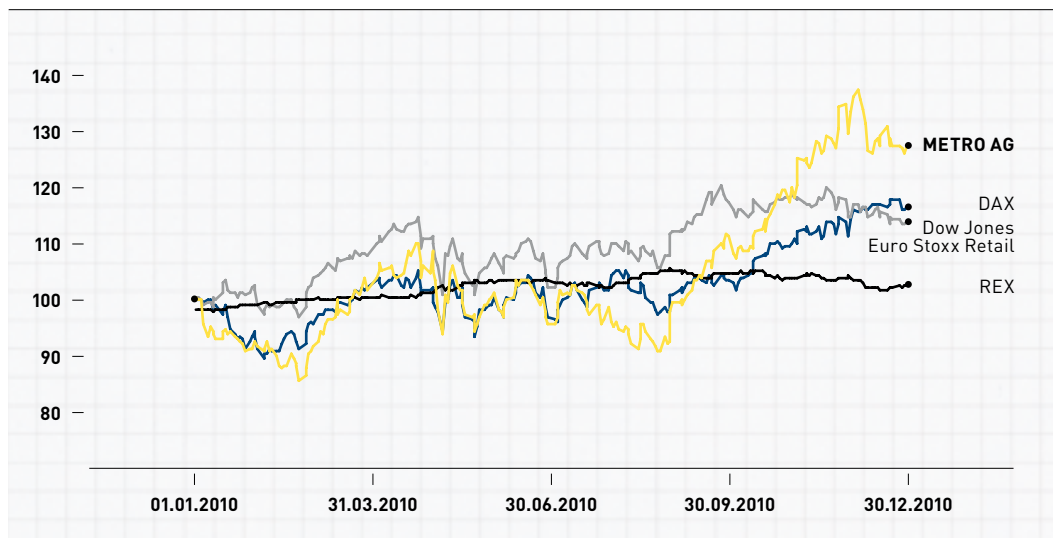

**Performancevergleich der Metro-Stammaktie 2010 vs. DAX vs. Dow Jones Euro Stoxx Retail vs. REX**

| METRO GROUP   | DAX           | Dow Jones Euro Stoxx Retail | REX          |
|---------------|---------------|-----------------------------|--------------|
| <b>26,6 %</b> | <b>16,1 %</b> | <b>13,7 %</b>               | <b>4,0 %</b> |

Quelle: Bloomberg

**Metro-Aktie 2008–2010 (€)**

|                                                     |              | 2010               | 2009  | 2008  |
|-----------------------------------------------------|--------------|--------------------|-------|-------|
| Jahresschlusskurs                                   | Stammaktie   | 53,88              | 42,57 | 28,57 |
|                                                     | Vorzugsaktie | 36,09              | 35,00 | 29,00 |
| Jahreshöchstkurs                                    | Stammaktie   | 58,53              | 43,50 | 57,51 |
|                                                     | Vorzugsaktie | 40,89              | 37,50 | 46,00 |
| Jahrestiefstkurs                                    | Stammaktie   | 37,28              | 20,07 | 17,67 |
|                                                     | Vorzugsaktie | 32,00              | 21,90 | 19,00 |
| Ausschüttung                                        | Stammaktie   | 1,35 <sup>1</sup>  | 1,18  | 1,18  |
|                                                     | Vorzugsaktie | 1,485 <sup>1</sup> | 1,298 | 1,298 |
| Dividendenrendite auf<br>Jahresschlusskursbasis (%) | Stammaktie   | 2,5 <sup>1</sup>   | 2,8   | 4,1   |
|                                                     | Vorzugsaktie | 4,1 <sup>1</sup>   | 3,7   | 4,5   |
| Marktkapitalisierung (Mrd. €)                       |              | 17,6               | 13,9  | 9,3   |

<sup>1</sup> Vorbehaltlich des Hauptversammlungsbeschlusses  
 Daten auf Basis der XETRA-Schlusskurse  
 Quelle: Bloomberg

**Daten zur Metro-Aktie**

|                       | <b>Stammaktie</b> | <b>Vorzugsaktie</b> |
|-----------------------|-------------------|---------------------|
| Wertpapierkenn-Nummer | 725 750           | 725 753             |
| ISIN-Code             | DE 000 725 750 3  | DE 000 725 753 7    |
| Reuters-Kürzel        | MEOG.DE           | MEOG_p.DE           |
| Bloomberg-Kürzel      | MEO GR            | ME03 GR             |
| Anzahl der Aktien     | 324.109.563       | 2.677.966           |

Größte Anteilseigner sind die Gesellschafterstämme Haniel und Schmidt-Ruthenbeck. Sie haben gemäß Stimmrechtsmitteilungen nach dem Wertpapierhandelsgesetz (WpHG) 50,01 Prozent der Stimmrechte gebündelt. Dem Gesellschafterstamm Beisheim sind gemäß Stimmrechtsmitteilungen 9,97 Prozent der Stimmrechte zuzurechnen. Die übrigen Anteile in Höhe von 40,02 Prozent werden im Streubesitz von einer Vielzahl nationaler und internationaler Investoren gehalten.

Aus Mitteilungen von Fondsgesellschaften und anderen Informationsquellen geht hervor, dass deutsche Anleger den größten Anteil stellen, gefolgt von britischen und nordamerikanischen Investoren. Zudem sind schätzungsweise rund 60.000 Privatanleger Anteilseigner der METRO AG.

**Marktkapitalisierung und Indexzugehörigkeit  508 + 509**

Die Marktkapitalisierung der METRO AG hat sich im Vergleich zum Vorjahr weiter erhöht. Ende Dezember 2010 betrug sie 17,6 Mrd. €.

Als eines der größten deutschen Unternehmen ist die METRO AG im Deutschen Aktienindex DAX enthalten. Bei der indexrelevanten Marktkapitalisierung liegt die METRO AG zum Jahresende auf dem 25. Platz und beim Börsenumsatz ebenfalls auf Rang 25. Das Handelsvolumen der Metro-Aktie lag dabei im Jahr 2010 unter dem Niveau des Vorjahres. Durchschnittlich wurden börsentäglich 1,0 Millionen Stammaktien der METRO AG gehandelt; im Vorjahr waren es 1,1 Millionen.

Die Bedeutung der METRO GROUP an den nationalen und internationalen Kapitalmärkten zeigt sich in der Zugehörigkeit der Metro-Aktie zu wichtigen Indizes. Hierzu gehören unter anderem der Dow Jones Euro Stoxx und der dazugehörige Branchenindex Dow Jones Euro Stoxx Retail. Auch der Index Morgan Stanley Capital International (MSCI) Euro führt die Aktie der METRO AG.

Zudem ist die Metro-Aktie Teil des DAXglobal Sarasin Sustainability Germany und gehört dem Nachhaltigkeitsindex Dow Jones Sustainability World an. In diesem konnte sich die METRO GROUP 2010 in den drei Bereichen Wirtschaft, Umwelt und Soziales gegenüber dem Vorjahr verbessern.

**Dividende  510**

Die METRO GROUP möchte ihre Aktionäre an der positiven Ergebnisentwicklung und den Erfolgen des Effizienz- und Wertsteigerungsprogramms Shape 2012 teilhaben lassen. Deshalb werden Vorstand und Aufsichtsrat der Hauptversammlung am 6. Mai 2011 vorschlagen, für das Geschäftsjahr 2010 eine erhöhte Dividende von 1,35 € je Stammaktie und 1,485 € je Vorzugsaktie auszuschütten. Auf Basis des Jahresschlusskurses 2010 in Höhe von 53,88 € ergibt sich daraus eine Dividendenrendite der Stammaktie von 2,5 Prozent. Bezogen auf das Ergebnis je Aktie vor Sonderfaktoren in Höhe von 3,12 € beträgt die Ausschüttungsquote damit 43,3 Prozent.

**Dividendenrendite 2005–2010**

| 2010  | 2009  | 2008  | 2007  | 2006  | 2005  |
|-------|-------|-------|-------|-------|-------|
| 2,5 % | 2,8 % | 4,1 % | 2,1 % | 2,3 % | 2,5 % |

**Ausschüttungsquote 2005–2010**

| 2010   | 2009   | 2008   | 2007   | 2006   | 2005   |
|--------|--------|--------|--------|--------|--------|
| 43,3 % | 56,2 % | 38,7 % | 45,2 % | 42,4 % | 41,3 % |

**Erfolgreiche Investor Relations  511 + 512**

Die METRO GROUP misst dem intensiven Dialog mit Aktionären, potenziellen Investoren sowie Analysten eine hohe Bedeutung bei. In einem von Volatilität geprägten Marktumfeld haben wir die Berichterstattung an die Kapitalmarktteilnehmer weiter intensiv fortgeführt. Die Investor-Relations-Kommunikation ist für uns ein bedeutender und integraler

Bestandteil der Strategie. Transparenz, Zuverlässigkeit und Vertrauen sind dabei die wesentlichen Treiber für das Schaffen von Werten.

Den Jahresauftakt in der Kapitalmarktkommunikation markierte die Veröffentlichung der Umsatzentwicklung 2009 im Januar 2010. Im März 2010 hat der Vorstand der METRO AG die Geschäftsentwicklung 2009 zusammen mit dem Geschäftsbericht auf der in Düsseldorf stattfindenden Analysten- und Investorenkonferenz erläutert. Die unterjährige Geschäftsentwicklung haben wir mit Finanzberichten kommuniziert. Telefonkonferenzen mit Erläuterungen durch den Vorstand rundeten die Berichterstattung ab. Unterlagen zu allen Veranstaltungen stehen auch im Internet zur Verfügung.

Ein Höhepunkt der Investor-Relations-Arbeit war der Analysten- und Investorentag in München. Auf der Agenda standen Führungen bei Metro Cash & Carry und Media Markt sowie umfangreiche Informationen zur Strategie der beiden Vertriebslinien. Für Metro Cash & Carry haben wir Maßnahmen aufgezeigt, die die Entwicklung des deutschen Geschäfts verbessern sollen. Im Fall von Media Markt und Saturn ging es vor allem um die weitere Expansion: Hauptthema waren neue Geschäftsmodelle und der Markteintritt von Media Markt in China.

Für den direkten Dialog mit Aktionären, potenziellen Investoren und Analysten hat sich die METRO GROUP im Berichtszeitraum auf wichtigen Finanzmärkten in Europa, den USA und Asien präsentiert. 14 Konferenzen und 34 Roadshow-Tage in 13 Ländern sowie eine große Zahl von Gesprächen und Marktbesichtigungen am Sitz der METRO AG in Düsseldorf unterstützten die Kapitalmarktkommunikation. Insgesamt hat der Bereich Investor Relations zahlreiche Einzel- und Gruppengespräche im Jahr 2010 geführt.

Auch 2010 erfreute sich die Metro-Aktie eines großen Interesses. Rund 40 Analysten aller namhaften nationalen und internationalen Banken beobachten und analysieren das Unternehmen. Die entsprechenden Empfehlungen und Kursziele veröffentlicht die METRO GROUP regelmäßig auf ihren Investor-Relations-Seiten im Internet. Zum Jahresende 2010 empfahlen 50 Prozent der Analysten den Kauf der Metro-Aktie (Vorjahr 33 Prozent); 38 Prozent (Vorjahr 31 Prozent) stufen sie auf Halten und nur 12 Prozent (Vorjahr 36 Prozent) sprachen eine Verkaufsempfehlung aus. Der Median der Kursziele lag bei 58 € im Vergleich zu 40 € im Jahr 2009.

Neben den institutionellen Anlegern sind die Privatanleger eine sehr wichtige Aktionärsgruppe. Einen umfassenden Einblick in die Geschäftsentwicklung und die langfristigen Perspektiven des Geschäftsmodells eröffnen die Internetseiten der METRO GROUP. Sie bieten allen Interessenten eine Vielzahl von Informationen und Publikationen. Der Bereich Investor Relations steht darüber hinaus im regelmäßigen Austausch mit Privatanlegern und beantwortete im Berichtszeitraum zahlreiche Anfragen. Zum Dialog mit den privaten Aktionären gehören außerdem Präsenzveranstaltungen wie die jährliche Hauptversammlung, Aktienforen und Börsentage. So präsentierte sich die METRO GROUP im November 2010 auf dem Kölner Börsentag vor fast 3.500 Besuchern.

Das Prinzip des nachhaltigen Wirtschaftens ist nicht nur Teil der Unternehmensstrategie der METRO GROUP. Es gewinnt auch bei institutionellen und privaten Anlegern immer mehr an Bedeutung. In Zusammenarbeit mit Experten der Abteilung Nachhaltigkeit und Umwelt erläuterte der Bereich Investor Relations die Strategie der METRO GROUP und beantwortete entsprechende Fragen.

Auch 2010 erhielt die Investor-Relations-Arbeit der METRO GROUP Auszeichnungen vom Kapitalmarkt. So belegte die METRO AG den ersten Platz im Handelssektor des angesehenen „Extel Pan-European Survey“ von Thomson Reuters – und das sowohl in der Einzel- als auch in der Teamwertung.

Zum siebten Mal in Folge ehrte das internationale Wirtschaftsmagazin „Institutional Investor“ die METRO GROUP für die beste Investor-Relations-Arbeit im europäischen Handel. Eine weitere Auszeichnung erhielt die METRO GROUP am 16. Juni 2010 in Frankfurt: Platz eins in der Kategorie DAX beim renommierten Investor-Relations-Preis des Wirtschaftsmagazins „Capital“. Im Rahmen des Wettbewerbs wird die Kommunikation börsennotierter Unternehmen mit dem Kapitalmarkt bewertet. Darüber hinaus erhielt die METRO GROUP weitere Anerkennungen, unter anderem lobten Untersuchungen externer Institute den Internetauftritt für seine umfangreichen und detaillierten Informationen.

Die METRO GROUP sieht die vielfältigen Auszeichnungen als Bestätigung ihrer Investor-Relations-Kommunikation. Eine umfassende und transparente Kommunikation mit dem Kapitalmarkt ist selbstverständlich und unverzichtbar – unabhängig von der aktuellen Börsenstimmung und der Kursentwicklung der Metro-Aktie.

# METRO GROUP 2010

DIE STRATEGIE  
DAS INVESTMENT  
DAS GESCHÄFT  
SERVICE



# DAS GESCHÄFT

- S. 051 **Bericht des Aufsichtsrats**
- S. 059 **Corporate-Governance-Bericht**
- S. 070 **Konzernlagebericht**
  - S. 071 Überblick über das Geschäftsjahr 2010 und Prognose
  - S. 072 1. Konzernstruktur
  - S. 075 2. Wirtschaftliche Rahmenbedingungen
  - S. 080 3. Ertragslage
  - S. 090 4. Finanz- und Vermögenslage
  - S. 096 5. Mitarbeiter
  - S. 103 6. Innovationsmanagement
  - S. 105 7. Nachhaltigkeitsmanagement
  - S. 110 8. Vergütungsbericht
  - S. 118 9. Angaben gemäß § 315 Abs. 4 HGB sowie erläuternder Bericht des Vorstands
  - S. 126 10. Rechnungslegungsbezogenes internes Kontroll- und Risikomanagementsystem
  - S. 129 11. Risikobericht
  - S. 134 12. Nachtrags- und Prognosebericht
- S. 144 **Konzernabschluss**
  - S. 145 Konzernabschluss
  - S. 146 Gewinn- und Verlustrechnung
  - S. 147 Periodenergebnis
  - S. 148 Bilanz
  - S. 148 Eigenkapitalentwicklung
  - S. 150 Kapitalflussrechnung
- S. 151 **Anhang**
  - S. 152 Segmentberichterstattung
  - S. 252 Versicherung der gesetzlichen Vertreter
  - S. 253 Bestätigungsvermerk des Abschlussprüfers

# BERICHT DES AUFSICHTSRATS

Prof. Dr. Jürgen Kluge  
VORSITZENDER DES AUFSICHTSRATS

*Sehr geehrte Aktionärinnen und Aktionäre,*

die METRO GROUP blickt auf ein erfolgreiches Geschäftsjahr 2010 zurück. Der Umsatz des Konzerns ist um 2,6 Prozent auf 67,3 Mrd. € gestiegen. Das EBIT vor Sonderfaktoren stieg um 19,3 Prozent auf 2,4 Mrd. €. Einen der Grundsteine dieses Erfolgs hat der Vorstand bereits Anfang 2009 mit dem Effizienz- und Wertsteigerungsprogramm Shape 2012 gelegt. Mit diesem Programm wurde auch die Basis geschaffen, auf der die METRO GROUP ihre internationale Expansion beschleunigen konnte. Im Geschäftsjahr 2010 hat das Unternehmen 100 Märkte in 25 Ländern eröffnet, 2009 waren es 80 Neueröffnungen.

Der Aufsichtsrat hat die Entwicklung des Effizienz- und Wertsteigerungsprogramms im Geschäftsjahr 2010 konsequent verfolgt. Die Produktivitätsgewinne aus Shape 2012 und die forcierte Expansion sollen das profitable Wachstum des Konzerns weiter beschleunigen. Im Mittelpunkt der Arbeit des Aufsichtsrats stand daher die Frage, welche Weichenstellungen notwendig sind, um die durch den Erfolg von Shape 2012 eröffneten Chancen optimal zu nutzen. Die Strategie und die Innovationen des Konzerns waren zentrale Aspekte vieler Gespräche mit dem Vorstand.

Die Mitarbeiterinnen und Mitarbeiter der METRO GROUP haben 2010 nicht nur strategische Konzepte umgesetzt. Sie haben im Rahmen von Shape 2012 auch mit eigenen Ideen zum Unternehmenserfolg beigetragen. Hierin zeigt sich eine große unternehmerische Kraft, aber auch Begeisterung für den Handel und Verbundenheit mit Kolleginnen und Kollegen in der METRO GROUP. Der Aufsichtsrat dankt allen Mitarbeiterinnen und Mitarbeitern für ihr großes Engagement.

## Überwachung der Geschäftsführung und Zusammenarbeit mit dem Vorstand

Der Aufsichtsrat der METRO AG hat auch im Geschäftsjahr 2010 die ihm nach Gesetz und Satzung obliegenden Beratungs- und Kontrollaufgaben wahrgenommen. Er hat den Vorstand bei der Leitung der METRO AG und des Metro-Konzerns ausführlich beraten und die Geschäftsführung kontinuierlich überwacht. In alle

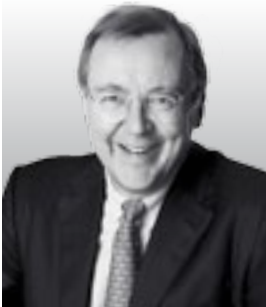

Prof. Dr. Jürgen Kluge

**VORSITZENDER  
DES AUFSICHTSRATS**

Kurzprofil: Prof. Dr. Jürgen Kluge ist seit Mai 2010 Vorsitzender des Aufsichtsrats der METRO AG. Er wurde 1953 in Hagen geboren. Kluge hat an den Universitäten Köln und Essen Physik mit dem Schwerpunkt experimentelle Laserphysik studiert und 1984 an der Universität Essen promoviert. Seit 2004 ist er Honorarprofessor der Technischen Universität Darmstadt im Fach Maschinenbau. Von 1984 bis 2009 arbeitete Kluge bei McKinsey & Company in Düsseldorf. In den Jahren 1999 bis 2006 leitete er die deutsche Organisation der Unternehmensberatung, zuletzt zeichnete er verantwortlich für die Public Sector Practice. Kluge war ein langjähriges Mitglied des Shareholder Council, dem internationalen Führungsgremium von McKinsey. Seit dem 1. Januar 2010 ist Kluge Vorsitzender des Vorstands und Arbeitsdirektor der Franz Haniel & Cie. GmbH. Er trägt dort die Verantwortung für die Gesamtstrategie sowie für die Bereiche Konzernentwicklung/Mergers & Acquisitions, Personal, Kommunikation und Revision.

für die METRO AG und die METRO GROUP bedeutsamen Entscheidungen war der Aufsichtsrat frühzeitig und intensiv eingebunden.

Wesentliche Grundlage der Tätigkeit des Aufsichtsrats bildeten die mündlichen und schriftlichen Berichte im Sinne des § 90 Aktiengesetz (AktG), die der Vorstand innerhalb und außerhalb von Sitzungen des Aufsichtsrats und seiner Ausschüsse erstattet hat. Der Vorstand unterrichtete den Aufsichtsrat umfassend und zeitnah über alle wesentlichen Entwicklungen der METRO GROUP. Die Berichterstattung umfasste insbesondere die beabsichtigte Geschäftspolitik und andere grundsätzliche Fragen der Unternehmensplanung. Weitere Themen waren die Rentabilität des Unternehmens, die laufende Geschäftsentwicklung einschließlich der Lage der METRO GROUP sowie Geschäfte von erheblicher Bedeutung für die Rentabilität und Liquidität des Konzerns. Die Berichte wurden regelmäßig und unter Beachtung der Erfordernisse des § 90 Abs. 2 AktG erstattet. Abweichungen des Geschäftsverlaufs von den aufgestellten Plänen und Zielen erläuterte der Vorstand jeweils unter Angabe von Gründen und Vorstellung zielführender Maßnahmen.

Der Aufsichtsrat hat sämtlichen Angelegenheiten zugestimmt, die ihm vom Vorstand entsprechend den Geschäftsordnungen des Aufsichtsrats und des Vorstands als zustimmungspflichtige Geschäfte vorgelegt wurden. Hierzu gehörten der Verkauf des Großhandelsgeschäfts in Marokko, der Elektrofachmärkte in Frankreich sowie eines italienischen Immobilienportfolios. Ferner stimmte der Aufsichtsrat Investitionen zur Errichtung eines Einkaufszentrums in Moskau und zur langfristigen Sicherung von Standorten für Real und Metro Cash & Carry Deutschland zu. Änderungen des Geschäftsverteilungsplans für den Vorstand sowie die vom Vorstand vorgelegten Budgetplanungen fanden ebenfalls die Zustimmung des Aufsichtsrats. Zur Vorbereitung seiner Beschlussfassungen in diesen und anderen Fällen lagen dem Aufsichtsrat regelmäßig schriftliche Unterlagen vor. Vom Einsichts- und Prüfungsrecht nach § 111 Abs. 2 Satz 1 und 2 AktG hat der Aufsichtsrat nicht Gebrauch gemacht, da es keine klärungsbedürftigen Sachverhalte gab.

Zwischen den Sitzungsterminen standen die Aufsichtsratsvorsitzenden – bis zum 5. Mai 2010 Franz M. Haniel und ihm nachfolgend Prof. Dr. Jürgen Kluge – in kontinuierlichem Austausch mit dem Vorstandsvorsitzenden. Sie wurden über bedeutende Geschäftsvorfälle und anstehende Entscheidungen informiert.

Der Aufsichtsrat hat alle ihm unterbreiteten Berichte und Unterlagen im gebotenen Maß erörtert und geprüft. Weitere Einzelheiten werden nachstehend näher beschrieben. Beanstandungen der Vorstandstätigkeit ergaben sich nicht.

## Interessenkonflikte

Das Vergütungssystem für den Vorstand sieht vor, dass der Aufsichtsrat für die Ermittlung der kennzahlenbasierten erfolgsabhängigen Vergütung die Bereinigung von Sonderfaktoren beschließen kann. Der Aufsichtsrat hat von dieser Möglichkeit im Geschäftsjahr 2010 Gebrauch gemacht. Bei der Abstimmung enthielt sich das Aufsichtsratsmitglied Andreas Herwarth der Stimme. Als Grund hierfür gab er die Ankündigung des Vorstands an, für das Führungsgremium getroffene Regelungen auch für die Mitarbeiter der METRO AG anwenden zu wollen. Herr Herwarth wies das Plenum darauf hin, dass er als Beschäftigter der METRO AG indirekt selbst von der Beschlussfassung betroffen ist.

Der Vorstand hat den Aufsichtsrat im Geschäftsjahr 2010 darum gebeten, der Verlängerung von Mietverträgen für einzelne Standorte von Metro Cash & Carry Deutschland zuzustimmen. Indirekter Gesellschafter des Vermieters sind die drei Großgesellschafter der METRO AG: Haniel, Schmidt-Ruthenbeck und Beisheim. Unabhängig von der Frage, ob in diesem Zusammenhang ein Interessenkonflikt vorlag, wiesen die den Großaktionären verbundenen Aufsichtsratsmitglieder Prof. Dr. Jürgen Kluge, Prof. Dr. Dr. h. c. mult. Erich Greipl und Peter Küpfer das Plenum auf die Hintergründe hin und nahmen an der betreffenden Abstimmung im Aufsichtsrat aus eigenem Entschluss nicht teil.

In gleicher Weise handelte das Aufsichtsratsmitglied Peter Stieger im Fall der zustimmungspflichtigen Verlängerung von Mietverträgen für Standorte von Real Deutschland. Herr Stieger wies den Aufsichtsrat darauf hin, dass er als Konzessionär einen Gewerbebetrieb unter dem Dach eines der beschlussgegenständlichen SB-Warenhäuser betreibt. Er nahm an der betreffenden Abstimmung im Aufsichtsrat aus eigenem Entschluss nicht teil.

## Sitzungen und Beschlussfassungen des Aufsichtsrats

Im Geschäftsjahr 2010 fanden sechs Aufsichtsratssitzungen statt. Davon wurde eine außerordentlich einberufen. Ein Beschluss des Aufsichtsrats wurde im schriftlichen Verfahren gefasst.

Der Deutsche Corporate Governance Kodex empfiehlt einen Vermerk in diesem Bericht, wenn ein Mitglied des Aufsichtsrats in einem Geschäftsjahr an weniger als der Hälfte der Sitzungen des Aufsichtsrats teilgenommen hat. Dies war nicht der Fall. Kein Mitglied des Aufsichtsrats war in weniger als der Hälfte der Sitzungen anwesend.

Der Aufsichtsrat hat sich in jeder ordentlichen Sitzung eingehend mit der Geschäftsentwicklung der METRO GROUP befasst. Darüber hinaus berichteten die Ausschussvorsitzenden regelmäßig über Inhalt und Ergebnisse vorausgegangener Ausschusssitzungen.

### Wesentliche Inhalte der Aufsichtsratssitzungen und -beschlüsse im Jahresüberblick

**Februar 2010** – In einer außerordentlichen Sitzung beschloss der Aufsichtsrat, die Bestellung von Herrn Zygmunt Mierdorf zum Mitglied des Vorstands und Arbeitsdirektor einvernehmlich aufzuheben. Der Geschäftsverteilungsplan für den Vorstand wurde in der Folge angepasst. Zum neuen Arbeitsdirektor bestellte der Aufsichtsrat Herrn Dr. Eckhard Cordes.

**März 2010** – Im Mittelpunkt der Bilanz-Aufsichtsratssitzung standen der Jahres- und Konzernabschluss für das Geschäftsjahr 2009, der Lagebericht der METRO AG 2009, der Konzernlagebericht 2009, der Vorschlag des Vorstands an die Hauptversammlung 2010 für die Verwendung des Bilanzgewinns sowie der Bericht des Vorstands über die Beziehungen zu verbundenen Unternehmen 2009. Der Abschlussprüfer nahm an dieser Sitzung teil und berichtete über die wesentlichen Ergebnisse seiner vorangegangenen Prüfungen. Einen zweiten turnusgemäßen Schwerpunkt der Sitzung bildete die Vorstandsvergütung. Der Aufsichtsrat prüfte das Vergütungssystem für den Vorstand und fasste einen Beschluss hinsichtlich der kennzahlenbasierten erfolgsabhängigen Vergütung 2009. Zugleich wurde die Vorstandsvergütung 2009 einer – im Ergebnis positiven – Angemessenheitsprüfung unterzogen. Weitere Themen der Aufsichtsratssitzung waren die aktuelle Geschäftsentwicklung, eine Änderung des Geschäftsverteilungsplans für den Vorstand im Zusammenhang mit Strukturmaßnahmen sowie die Vorbereitung der Hauptversammlung 2010 einschließlich des Berichts des Aufsichtsrats und des Corporate-Governance-Berichts. Vorbehaltlich der Prüferwahl durch die Hauptversammlung 2010 wurden zudem die Prüfungsaufträge für den Jahres- und Konzernabschluss 2010 und für die prüferische Durchsicht des verkürzten Abschlusses und Zwischenlageberichts des ersten Halbjahres 2010 beschlossen. In der Bilanz-Aufsichtsratssitzung wurde auch über vertragliche Angelegenheiten des Vorstands entschieden, vor allem über den Abschluss einer Aufhebungsvereinbarung mit Herrn Zygmunt Mierdorf. Ferner berichtete der Vorstand über die Vergabe von Spenden im Geschäftsjahr 2009.

**Mai 2010** – In einer Sitzung unmittelbar vor Beginn der Hauptversammlung berichtete der Vorstand über die aktuelle Geschäftsentwicklung. Der Aufsichtsrat fasste Beschlüsse über Personalangelegenheiten des Vorstands, insbesondere über die weitere Bestellung von Herrn Joël Saveuse zum Mitglied des Vorstands sowie seinen Dienstvertrag. Da im Dienstvertrag von Herrn Saveuse auf die Vereinbarung eines sogenannten Abfindungs-Caps verzichtet wurde, beschloss der Aufsichtsrat auch eine aktualisierte Entsprechenserklärung gemäß § 161 AktG. Für den Fall einer Anfechtungsklage gegen Beschlüsse der Hauptversammlung 2010 fasste der Aufsichtsrat ferner einen vorsorglichen Beschluss über die Bevollmächtigung einer Rechtsanwaltssozietät. Vorbehaltlich seiner Wahl durch die Hauptversammlung 2010 zum Mitglied des Aufsichtsrats wurde Herr Prof. Dr. Jürgen Kluge zum neuen Vorsitzenden des Aufsichtsrats der METRO AG gewählt.

**Juni 2010** – In einem schriftlichen Verfahren stimmte der Aufsichtsrat einer Erhöhung des Investitionsbudgets 2010 zu.

**Juli 2010** – Ein Schwerpunkt der Sitzung, die in Istanbul stattfand, war die Beratung mit dem Vorstand über Status quo und Strategie der METRO GROUP in der Türkei. Ferner erörterte der Aufsichtsrat personelle Angelegenheiten des Vorstands und fasste den Beschluss, die Bestellung von Herrn Thomas Unger zum Mitglied des Vorstands und stellvertretenden Vorstandsvorsitzenden einvernehmlich aufzuheben. In diesem Zusammenhang wurde auch über den Abschluss eines Aufhebungsvertrags mit Herrn Unger und eine Anpassung des Geschäftsverteilungsplans für den Vorstand entschieden. Weitere Beschlusspunkte waren die Festlegung eines Zielwerts für eine erfolgsabhängige Vergütung des Vorstandsmitglieds Joël Saveuse, der Verkauf eines italienischen Immobilienportfolios, die Errichtung eines Einkaufszentrums in Moskau und die Ermächtigung des Personalausschusses zur Beauftragung eines Sachverständigen in Vergütungsfragen. Der Vorstand informierte den Aufsichtsrat über die aktuelle Geschäftsentwicklung, das Risikomanagement und die konzernweiten Aktivitäten im Bereich Compliance sowie neue Empfehlungen des Deutschen Corporate Governance Kodex in der Fassung vom 26. Mai 2010.

**Oktober 2010** – Vorstand und Aufsichtsrat erörterten gemeinsam intensiv die Konzernstrategie. Der Aufsichtsrat fasste Beschlüsse zur Weiterentwicklung des Systems der Vorstandsvergütung und prüfte den

Status quo der betrieblichen Altersversorgung für den Vorstand. Herrn Frans W. H. Muller bestellte der Aufsichtsrat für weitere drei Jahre, das heißt bis zum 31. Juli 2014, zum Mitglied des Vorstands und verabschiedete auch einen neuen Dienstvertrag mit Herrn Muller. Darüber hinaus stimmte das Plenum dem Verkauf des Großhandelsgeschäfts in Marokko zu und fasste Beschlüsse zur Benennung von Zielen für seine eigene Besetzung (Ziffer 5.4.1 Deutscher Corporate Governance Kodex) sowie zur Vorbereitung der Effizienzprüfung 2011 des Aufsichtsrats (Ziffer 5.6 des Kodex). Der Vorstand berichtete zudem über die aktuelle Geschäfts- und Führungskräfteentwicklung in der METRO GROUP.

**Dezember 2010** – Der Vorstand berichtete über die aktuelle Geschäftsentwicklung und die Entwicklung der Eigenmarken in der METRO GROUP. Der Aufsichtsrat stimmte dem Verkauf der Elektrofachmärkte in Frankreich, Investitionen zur langfristigen Sicherung von Standorten für Real und Metro Cash & Carry Deutschland sowie der vom Vorstand vorgelegten Budgetplanung zu. Ferner fasste der Aufsichtsrat Beschlüsse zur Abgabe einer Entsprechenserklärung gemäß § 161 AktG sowie zur weiteren Ausgestaltung der betrieblichen Altersversorgung für die Mitglieder des Vorstands.

## Sitzungen und Beschlussfassungen der Ausschüsse des Aufsichtsrats

Der Aufsichtsrat der METRO AG verfügte 2010 über fünf Ausschüsse: Aufsichtsratspräsidium, Personalausschuss, Bilanz- und Prüfungsausschuss, Nominierungsausschuss sowie Vermittlungsausschuss gemäß § 27 Abs. 3 Mitbestimmungsgesetz (MitbestG).

**Bilanz- und Prüfungsausschuss** – Die Aufgaben des Bilanz- und Prüfungsausschusses umfassen vor allem Fragen der Rechnungslegung und Abschlussprüfung sowie die Themen Risikomanagement und Compliance. Im Geschäftsjahr 2010 fanden insgesamt sieben Sitzungen statt: zwei außerordentliche Sitzungen im Januar und Februar (letztere gemeinsam mit dem Aufsichtsratspräsidium) sowie fünf ordentliche Sitzungen in den Monaten März, April, Juli, Oktober und Dezember.

Die Sitzung im März 2010 diente im Wesentlichen der Vorbereitung der Bilanzsitzung des Aufsichtsrats. Der Ausschuss prüfte den Jahres- und Konzernabschluss 2009, die Lageberichte sowie den Bericht des Vorstands über die Beziehungen zu verbundenen Unternehmen. In Anwesenheit des Abschlussprüfers wurden darüber hinaus die Ergebnisse der Abschlussprüfungen erörtert. Zudem sprach der Bilanz- und Prüfungsausschuss konkrete Empfehlungen an den Aufsichtsrat aus. Dazu zählte, sich dem Vorschlag des Vorstands an die Hauptversammlung für die Verwendung des Bilanzgewinns anzuschließen. Ferner gab der Bilanz- und Prüfungsausschuss dem Aufsichtsrat eine Empfehlung für den Vorschlag des Aufsichtsrats an die Hauptversammlung zur Wahl des Abschlussprüfers. Der Ausschuss bereitete auch die Erteilung der Prüfungsaufträge für den Jahres- und Konzernabschluss 2010 und für die prüferische Durchsicht des verkürzten Abschlusses und Zwischenlageberichts des ersten Halbjahres 2010 durch den Aufsichtsrat vor. Der Vorstand berichtete über die Vergabe von Spenden im Geschäftsjahr 2009 sowie den Status steuerlicher Betriebsprüfungen.

Im Übrigen befasste sich der Bilanz- und Prüfungsausschuss 2010 schwerpunktmäßig mit den zur Veröffentlichung anstehenden Quartalsfinanzberichten und dem Halbjahresfinanzbericht der METRO AG. Ferner diskutierte der Vorstand mit dem Bilanz- und Prüfungsausschuss wesentliche Ereignisse und Transaktionen, auch wenn diese nicht der Zustimmung des Aufsichtsrats bedurften. Hierzu zählte auch eine noch laufende Untersuchung des Bundeskartellamts, über die der Vorstand bereits im Konzern-

geschäftsbericht 2009 berichtet hat. Weitere Themen der Ausschussarbeit waren die Berichte des Vorstands zu internen Kontrollsystemen, Risikomanagement, Compliance und interner Revision. Ebenfalls während des Geschäftsjahres 2010 erörtert wurden außerdem die Weiterentwicklung internationaler Rechnungslegungsstandards, die Corporate Governance der METRO GROUP, Abhängigkeitsfragen und die Konzernsteuerplanung. Der Ausschuss bereitete auch die turnusgemäße Beschlussfassung des Plenums über die Budgetplanung des Vorstands vor.

**Personalausschuss** – Der Personalausschuss befasst sich im Wesentlichen mit Personalangelegenheiten des Vorstands.

Im Geschäftsjahr 2010 fanden insgesamt sechs Ausschusssitzungen statt: zwei ordentliche in den Monaten Februar und Oktober (jeweils gemeinsam mit dem Aufsichtsratspräsidium) und vier außerordentliche in den Monaten März, April (letztere gemeinsam mit dem Aufsichtsratspräsidium) und Juli.

Die Arbeit des Personalausschusses war geprägt durch die Vorbereitung der Entscheidungen des Aufsichtsrats über die einvernehmliche Beendigung der Tätigkeit von Herrn Zygmunt Mierdorf und Herrn Thomas Unger im Vorstand. Darüber hinaus wurden insbesondere die Vergütung und das Vergütungssystem für die Mitglieder des Vorstands intensiv erörtert. Der Ausschuss beauftragte einen externen unabhängigen Vergütungsexperten und sprach eine Empfehlung zur Weiterentwicklung des Vergütungssystems aus, der das Plenum folgte. Weitere Schwerpunkte der Ausschussarbeit waren die Themen Corporate Governance und Führungskräfteentwicklung.

**Aufsichtsratspräsidium** – Das Aufsichtsratspräsidium befasst sich mit der Konzern- und Regionalstrategie, der Überwachung der Einhaltung von Rechtsvorschriften und der Anwendung des Deutschen Corporate Governance Kodex. Unter Beachtung von § 107 Abs. 3 Satz 3 AktG beschließt das Präsidium über eilige Angelegenheiten und solche, die ihm der Aufsichtsrat zur Beschlussfassung übertragen hat.

Das Aufsichtsratspräsidium tagte im Geschäftsjahr 2010 viermal, hiervon einmal gemeinsam mit dem Bilanz- und Prüfungsausschuss und dreimal mit dem Personalausschuss. Der Vorstand informierte das Präsidium über aktuelle Entwicklungen und Transaktionen und diskutierte mit den Ausschussmitgliedern die Konzernstrategie. Der Ausschuss befasste sich ferner mit der Corporate Governance der METRO GROUP einschließlich der Vorstandsvergütung, deren Erläuterung Teil des jährlichen Corporate-Governance-Berichts ist.

**Nominierungsausschuss** – Aufgabe des Nominierungsausschusses ist es, dem Aufsichtsrat geeignete Kandidaten für dessen Wahlvorschläge an die Hauptversammlung zu benennen.

Im Geschäftsjahr 2010 tagte der Nominierungsausschuss einmal und sprach die Empfehlung aus, der Hauptversammlung 2010 die Wahl von Herrn Prof. Dr. Jürgen Kluge in den Aufsichtsrat der METRO AG vorzuschlagen.

**Vermittlungsausschuss** – Der Vermittlungsausschuss erarbeitet Vorschläge für die Bestellung oder Abberufung von Mitgliedern des Vorstands in den nach § 31 MitbestG vorgesehenen Fällen. Im Geschäftsjahr 2010 musste der Vermittlungsausschuss nicht einberufen werden.

## Corporate Governance

Über die Corporate Governance der METRO GROUP berichten Vorstand und Aufsichtsrat im Corporate-Governance-Bericht für das Jahr 2010.

Vorstand und Aufsichtsrat der METRO AG haben 2010 zwei Entsprechenserklärungen zu den Empfehlungen der Regierungskommission Deutscher Corporate Governance Kodex gemäß § 161 AktG abgegeben (Mai und Dezember 2010). Beide Erklärungen wurden den Aktionären auf der Internetseite [www.metrogroup.de](http://www.metrogroup.de) dauerhaft zugänglich gemacht und sind im Corporate-Governance-Bericht 2010 vollständig wiedergegeben.

Der Abschlussprüfer hat vor der Sitzung des Aufsichtsrats im März 2010 die von Ziffer 7.2.1 des Deutschen Corporate Governance Kodex geforderte Unabhängigkeitserklärung abgegeben. Die Anforderungen von Ziffer 7.2 des Deutschen Corporate Governance Kodex an das Auftragsverhältnis zwischen Gesellschaft und Abschlussprüfer sind erfüllt. Unter anderem wurde vereinbart, dass der Abschlussprüfer die Vorsitzenden des Aufsichtsrats und des Bilanz- und Prüfungsausschusses über während der Prüfung auftretende mögliche Ausschluss- oder Befangenheitsgründe unverzüglich unterrichtet, sofern diese nicht unverzüglich beseitigt werden können. Der Abschlussprüfer hat bis zum Abschluss der Prüfung am 28. Februar 2011 keine möglichen Ausschluss- oder Befangenheitsgründe mitgeteilt. Der Aufsichtsrat hatte im Übrigen keine Anhaltspunkte dafür, dass Ausschluss- oder Befangenheitsgründe vorlagen.

## Jahres- und Konzernabschluss 2010, Bericht über die Beziehungen zu verbundenen Unternehmen 2010

Der vom Vorstand nach den Regeln des HGB aufgestellte Jahresabschluss der METRO AG für das Geschäftsjahr 2010 unter Einbeziehung der Buchführung, der Lagebericht 2010 der METRO AG sowie der von der METRO AG nach den International Financial Reporting Standards (IFRS) aufgestellte Konzernabschluss 2010 und Konzernlagebericht 2010 wurden von der KPMG AG Wirtschaftsprüfungsgesellschaft geprüft und jeweils mit einem uneingeschränkten Bestätigungsvermerk versehen. Der Abschlussprüfer berichtete schriftlich über das Ergebnis der Prüfung.

Der Aufsichtsrat hat den Jahresabschluss der METRO AG und den Konzernabschluss für das Geschäftsjahr 2010, den Lagebericht der METRO AG und den Lagebericht des Konzerns für das Geschäftsjahr 2010 sowie den Vorschlag des Vorstands an die Hauptversammlung 2011 für die Verwendung des Bilanzgewinns geprüft. Hierfür wurden diese Unterlagen sowie die Prüfungsberichte des Abschlussprüfers dem Aufsichtsrat rechtzeitig vorgelegt und in der Bilanzsitzung des Aufsichtsrats am 15. März 2011 eingehend erörtert und geprüft. Der an der Sitzung teilnehmende Abschlussprüfer berichtete über die wesentlichen Ergebnisse seiner Prüfung und stand dem Aufsichtsrat auch in Abwesenheit des Vorstands für Fragen und ergänzende Auskünfte zur Verfügung. Wesentliche Schwächen des internen Kontroll- und Risikomanagementsystems, bezogen auf den Rechnungslegungsprozess, wurden durch den Abschlussprüfer nicht berichtet. Der Prüfer informierte auch über Leistungen, die er zusätzlich zu den Abschlussprüfungsleistungen erbracht hat. Umstände, die seine Befangenheit besorgen lassen, lagen nach Information des Abschlussprüfers nicht vor. Der Aufsichtsrat hat sich dem Ergebnis der Prüfung des Abschlussprüfers angeschlossen und auf der Grundlage seiner eigenen Prüfung festgestellt, dass Einwendungen nicht zu erheben sind. Der Aufsichtsrat teilt insbesondere die in den Lageberichten der METRO AG und des Konzerns enthaltenen Beurteilungen des Vorstands. Der Aufsichtsrat hat die vom Vorstand aufgestellten Abschlüsse gebilligt, womit der Jahresabschluss der METRO AG 2010 festgestellt ist. Dem



Vorschlag des Vorstands zur Verwendung des Bilanzgewinns schließt sich der Aufsichtsrat nach Abwägung der Interessen der Aktionäre an einer Ausschüttung und der Interessen der Gesellschaft an einem Gewinnvortrag an.

Gemäß § 312 AktG hat der Vorstand der METRO AG einen Bericht über die Beziehungen der Gesellschaft zu verbundenen Unternehmen für das Geschäftsjahr 2010 erstellt. Der Abschlussprüfer hat diesen Bericht geprüft, über das Ergebnis der Prüfung schriftlich berichtet und folgenden Bestätigungsvermerk erteilt:

„Nach unserer pflichtmäßigen Prüfung und Beurteilung bestätigen wir, dass

1. die tatsächlichen Angaben des Berichts richtig sind,
2. bei den im Bericht aufgeführten Rechtsgeschäften die Leistung der Gesellschaft nicht unangemessen hoch war,
3. bei den im Bericht aufgeführten Maßnahmen keine Umstände für eine wesentlich andere Beurteilung als die durch den Vorstand sprechen.“

Dieser Bericht ist dem Aufsichtsrat zusammen mit dem Prüfungsbericht des Abschlussprüfers rechtzeitig vorgelegt und in der Bilanzsitzung des Aufsichtsrats am 15. März 2011 eingehend erörtert sowie insbesondere auf Vollständigkeit und Richtigkeit überprüft worden. Der Abschlussprüfer nahm an dieser Sitzung teil, berichtete über die wesentlichen Ergebnisse seiner Prüfung und stand dem Gremium auch in Abwesenheit des Vorstands für Fragen und ergänzende Auskünfte zur Verfügung. Der Aufsichtsrat hat sich dem Ergebnis der Prüfung des Abschlussprüfers angeschlossen. Als Ergebnis seiner eigenen Prüfung hat der Aufsichtsrat abschließend festgestellt, dass keine Einwendungen gegen die Erklärung des Vorstands am Schluss des Berichts zu erheben sind.

Die vorstehend beschriebenen Prüfungen des Jahres- und Konzernabschlusses 2010, der Lageberichte 2010, des Gewinnverwendungsvorschlags sowie des Berichts des Vorstands über die Beziehungen zu verbundenen Unternehmen 2010 sind durch den Bilanz- und Prüfungsausschuss in einer Sitzung am 14. März 2011 vorbereitet worden. In Anwesenheit des Abschlussprüfers prüfte und erörterte der Ausschuss eingehend den Jahres- und Konzernabschluss, die Lageberichte, die Prüfungsberichte des Abschlussprüfers, den Gewinnverwendungsvorschlag sowie den Bericht des Vorstands über die Beziehungen zu verbundenen Unternehmen und den dazugehörigen Prüfungsbericht des Abschlussprüfers. Der Bilanz- und Prüfungsausschuss empfahl dem Aufsichtsrat, die aufgestellten Abschlüsse zu billigen und sich dem Gewinnverwendungsvorschlag des Vorstands anzuschließen.

## Personalia

Das Mandat von Herrn Franz M. Haniel als Mitglied und Vorsitzender des Aufsichtsrats endete mit Ablauf der Hauptversammlung der METRO AG am 5. Mai 2010. Als sein Nachfolger trat in unmittelbarem Anschluss durch Wahl der Hauptversammlung Herr Prof. Dr. Jürgen Kluge in den Aufsichtsrat ein. Herr Kluge wurde durch den Aufsichtsrat zu seinem Vorsitzenden gewählt.

Düsseldorf, 15. März 2011

Der Aufsichtsrat

**PROF. DR. JÜRGEN KLUGE**  
VORSITZENDER

# CORPORATE- GOVERNANCE- BERICHT

Gemäß der Empfehlung in Ziffer 3.10 des Deutschen Corporate Governance Kodex berichten Vorstand und Aufsichtsrat der METRO AG nachfolgend über die Corporate Governance der METRO GROUP.<sup>1</sup>

Vorstand und Aufsichtsrat der METRO AG sind den Grundsätzen einer transparenten, verantwortungsvollen Unternehmensführung und -kontrolle verpflichtet. Sie messen den Standards guter Corporate Governance einen hohen Stellenwert bei. Die freiwillige Bindung an den Deutschen Corporate Governance Kodex wird durch nachfolgende Festlegung in den Geschäftsordnungen der Organe gestärkt:

„Vorstand und Aufsichtsrat der METRO AG richten ihr Handeln an den jeweils gültigen Empfehlungen des Deutschen Corporate Governance Kodex aus und weichen von den Empfehlungen des Kodex nur in begründeten Ausnahmefällen ab. Besteht im Vorstand oder Aufsichtsrat die Absicht, von einer Empfehlung abzuweichen, unterrichten die Organe sich zuvor über das geplante Vorgehen.“

## Entsprechenserklärung zum Deutschen Corporate Governance Kodex

Die Umsetzung der Empfehlungen des Deutschen Corporate Governance Kodex in der METRO GROUP wird durch Vorstand und Aufsichtsrat regelmäßig erörtert. Im Mai 2010 fassten beide Organe einen Beschluss über die Aktualisierung der im Dezember 2009 abgegebenen Entsprechenserklärung gemäß § 161 Aktiengesetz (AktG). Anlass dieser Aktualisierung war die Beschlussfassung des Aufsichtsrats über die erneute

Bestellung von Herrn Joël Saveuse zum Mitglied des Vorstands der METRO AG. In diesem Zusammenhang wurde mit Herrn Saveuse ein neuer Dienstvertrag vereinbart, der aufgrund der kurzen Laufzeit keine Regelung über sogenannte Abfindungs-Caps im Sinne der Ziffer 4.2.3 des Kodex enthält. Vorstand und Aufsichtsrat haben daher im Mai 2010 nachfolgende Erklärung gemäß § 161 AktG abgegeben:

„Vorstand und Aufsichtsrat der METRO AG erklären, dass den vom Bundesministerium der Justiz im amtlichen Teil des elektronischen Bundesanzeigers bekannt gemachten Empfehlungen der „Regierungskommission Deutscher Corporate Governance Kodex“ in der jeweils geltenden Fassung während der letzten 12 Monate und insbesondere seit Abgabe der letzten Entsprechenserklärung im Dezember 2009 bis zum 4. Mai 2010 ohne Ausnahme entsprochen wurde.

Vorstand und Aufsichtsrat erklären weiter, dass den Empfehlungen der Regierungskommission in der geltenden Fassung mit einer Ausnahme entsprochen wird:

Am 5. Mai 2010 hat der Aufsichtsrat der METRO AG beschlossen, in einem Einzelfall von den Empfehlungen in Ziffer 4.2.3 Abs. 4 des Deutschen Corporate Governance Kodex abzuweichen. Nach diesen Empfehlungen soll bei Abschluss von Vorstandsverträgen darauf geachtet werden, dass Zahlungen an ein Vorstandsmitglied bei vorzeitiger Beendigung der Vorstandstätigkeit ohne wichtigen Grund einschließlich Nebenleistungen den Wert von zwei Jahresvergütungen nicht überschreiten (Abfindungs-Cap)

<sup>1</sup> Der Corporate-Governance-Bericht ist als Erklärung zur Unternehmensführung gemäß § 289a HGB auch Teil des Lageberichts der METRO AG 2010

und nicht mehr als die Restlaufzeit des Anstellungsvertrages vergüten. Auf die Vereinbarung solcher Regelungen wird bei dem Abschluss eines neuen Dienstvertrags mit Herrn Joël Saveuse in 2010 verzichtet. Der Grund hierfür liegt in dem vergleichsweise kurzen Bestellungszeitraum und der entsprechend kurzen Vertragslaufzeit. Herr Saveuse wurde mit Beschluss des Aufsichtsrats vom 5. Mai 2010 nur für rund zwei weitere Jahre zum Mitglied des Vorstands bestellt. Wie die Bestellung, so endet auch der neu zu schließende Dienstvertrag im April 2013. Die kurze Vertragsdauer bietet der Gesellschaft ausreichenden Schutz vor unangemessenen Abfindungszahlungen, so dass der Aufsichtsrat keine Notwendigkeit sieht, auf die Vereinbarung eines Abfindungs-Caps im Sinne des Kodex zu bestehen.“

Die im Mai 2010 abgegebene Erklärung gemäß § 161 AktG erfolgte somit vor dem Hintergrund einer einzelfallbezogenen Entscheidung des Aufsichtsrats. Turnusgemäß, das heißt ohne speziellen Anlass, befassten sich Vorstand und Aufsichtsrat im Dezember 2010 mit der Umsetzung der Empfehlungen des Kodex. Die Organe gaben eine Entsprechenserklärung gemäß § 161 AktG ab, in der sie erneut darauf hinwiesen, dass im Mai 2010 in einem Einzelfall auf die Vereinbarung eines Abfindungs-Caps verzichtet wurde. Ferner legt die Erklärung offen, dass eine neue, im Juli 2010 in Kraft getretene Empfehlung des Deutschen Corporate Governance Kodex durch eine Beschlussfassung des Aufsichtsrats im Oktober umgesetzt wurde und Abweichungen von den Kodex-Empfehlungen in der Zukunft nicht beabsichtigt sind:

„Vorstand und Aufsichtsrat der METRO AG erklären,

dass den vom Bundesministerium der Justiz im amtlichen Teil des elektronischen Bundesanzeigers bekannt gemachten Empfehlungen der „Regierungskommission Deutscher Corporate Governance Kodex“ in der jeweils geltenden Fassung während der letzten 12 Monate und insbesondere seit Abgabe der letzten Entsprechenserklärung am 5. Mai 2010 mit folgenden Ausnahmen entsprochen wurde:

#### 1. Abfindungs-Cap

Am 5. Mai 2010 hat der Aufsichtsrat der METRO AG beschlossen, in einem Einzelfall von den Empfehlungen in

Ziffer 4.2.3 Abs. 4 des Deutschen Corporate Governance Kodex abzuweichen. Nach diesen Empfehlungen soll bei Abschluss von Vorstandsverträgen darauf geachtet werden, dass Zahlungen an ein Vorstandsmitglied bei vorzeitiger Beendigung der Vorstandstätigkeit ohne wichtigen Grund einschließlich Nebenleistungen den Wert von zwei Jahresvergütungen nicht überschreiten (Abfindungs-Cap) und nicht mehr als die Restlaufzeit des Anstellungsvertrags vergüten. Auf die Vereinbarung solcher Regelungen wurde bei dem Abschluss eines neuen Dienstvertrags mit Herrn Joël Saveuse in 2010 verzichtet. Der Grund hierfür lag in dem vergleichsweise kurzen Bestellungszeitraum und der entsprechend kurzen Vertragslaufzeit. Herr Saveuse wurde mit Beschluss des Aufsichtsrats vom 5. Mai 2010 nur für rund zwei weitere Jahre zum Mitglied des Vorstands bestellt. Wie die Bestellung, so endet auch der neu abgeschlossene Dienstvertrag im April 2013. Die kurze Vertragsdauer bietet der Gesellschaft ausreichenden Schutz vor unangemessenen Abfindungszahlungen, so dass der Aufsichtsrat keine Notwendigkeit sah, auf die Vereinbarung eines Abfindungs-Caps im Sinne des Kodex zu bestehen.

#### 2. Ziele für die Besetzung des Aufsichtsrats

Die neue Empfehlung der Regierungskommission Deutscher Corporate Governance Kodex, nach der der Aufsichtsrat konkrete Ziele für seine Zusammensetzung benennen soll (Ziffer 5.4.1 des Kodex), ist am 2. Juli 2010 im elektronischen Bundesanzeiger bekannt gemacht worden. Die Umsetzung der Empfehlung bedurfte zunächst der Beratung durch einen Ausschuss; ein Beschluss des Plenums zur Benennung der Ziele wurde daraufhin im Oktober 2010 gefasst. Bedingt durch diese Zeitfolge wurde der neuen Empfehlung im Zeitraum vom 2. Juli 2010 bis zum 27. Oktober 2010 formal nicht entsprochen.

Vorstand und Aufsichtsrat beabsichtigen, den Empfehlungen der Regierungskommission in ihrer Fassung vom 26. Mai 2010 zukünftig ohne Ausnahme zu entsprechen.“

Beide im Berichtsjahr abgegebenen Entsprechenserklärungen wurden den Aktionären auf der Internetseite [www.metrogroup.de](http://www.metrogroup.de) dauerhaft zugänglich gemacht.

## Anregungen des Deutschen Corporate Governance Kodex

Die Entsprechenserklärungen des Vorstands und des Aufsichtsrats der METRO AG erfassen nach den Vorgaben des Gesetzes nur die Empfehlungen des Deutschen Corporate Governance Kodex. Über die Empfehlungen hinaus enthält der Kodex jedoch auch Anregungen, zu deren Umsetzung Stellung genommen werden kann, aber nicht muss.

Die METRO AG folgt der ganz überwiegenden Anzahl der Anregungen des Deutschen Corporate Governance Kodex. Im Geschäftsjahr 2010 wurden lediglich zwei Punkte nicht vollständig umgesetzt:

1. Ziffer 2.3.4 des Kodex regt an, den Aktionären die Verfolgung der Hauptversammlung über moderne Kommunikationsmedien wie das Internet zu ermöglichen. Die METRO AG hat sich im Geschäftsjahr 2010 – wie in den Vorjahren – auf die Übertragung der Rede des Vorstandsvorsitzenden beschränkt. Der weitere Verlauf der Hauptversammlung wurde nicht im Internet übertragen. Diese Praxis soll 2011 fortgesetzt werden.
2. Der Kodex regt in seiner Ziffer 3.6 an, dass in mitbestimmten Aufsichtsräten die Vertreter der Aktionäre und der Arbeitnehmer die Sitzungen des Aufsichtsrats jeweils gesondert und gegebenenfalls mit Mitgliedern des Vorstands vorbereiten. Die Mitglieder des Aufsichtsrats der METRO AG finden in der Regel zu solchen Vorbereitungs-sitzungen zusammen, jedoch nicht vor jeder Sitzung des Aufsichtsrats.

## Unternehmensführungspraktiken

Der Deutsche Corporate Governance Kodex verdeutlicht die Verpflichtung von Vorstand und Aufsichtsrat, im Einklang mit den Prinzipien der sozialen Marktwirtschaft für den Bestand des Unternehmens und seine nachhaltige Wertschöpfung zu sorgen. In Ausübung dieser Verantwortung und über die gesetzlichen Anforderungen hinaus hat der Vorstand der METRO AG Richtlinien und Standards entwickelt und im Unternehmen verankert. Von besonderer Bedeutung für die nachhaltige Wertschöpfung der METRO GROUP sind die Themen Compliance, Risikomanagement und Nachhaltigkeit.

## Compliance: Organisation und Inhalte weiter etabliert

Im Rahmen des 2009 begonnenen Effizienz- und Wertsteigerungsprogramms Shape 2012 wurden Bereiche des Unternehmens zentralisiert, die für die finanzielle Steuerung und die Kontrolle des Konzerns wichtig sind. Hierzu zählte von Beginn an auch der Bereich Compliance. Eine konzernweite Compliance-Organisation wurde etabliert. Im Zuge dessen wurden die Inhalte des Compliance-Programms der METRO GROUP weiter ausgestaltet und entwickelt. Dies erfolgte nicht nur im Hinblick auf die Internationalität und Komplexität des Unternehmens. Darüber hinaus sollte den steigenden regulatorischen Anforderungen an die METRO AG als börsennotierte Holding-Gesellschaft der METRO GROUP Rechnung getragen werden.

Das Compliance-System der METRO GROUP zielt darauf ab, Regelverstößen im Unternehmen nachhaltig vorzubeugen beziehungsweise diese mindestens zu erschweren. Daraus ergibt sich in organisatorischer Hinsicht eine klare Abgrenzung von der internen Revision. Risiken beugt die METRO GROUP vor allem dadurch vor, dass sie regelmäßig verhaltensbedingte Risiken des Unternehmens identifiziert, die erforderlichen organisatorischen Strukturen etabliert und diese Risiken konsistent durch die jeweils verantwortlichen Fachbereiche steuern und kontrollieren lässt.

In organisatorischer Hinsicht stehen in allen Führungsgesellschaften der Vertriebslinien der METRO GROUP, in allen wesentlichen Servicegesellschaften des Konzerns sowie in den Landesgesellschaften Compliance-Beauftragte als Ansprechpartner und Berater für die verantwortlichen Geschäftsleitungen und Mitarbeiter zur Verfügung. Der Chief Compliance Officer der METRO GROUP berichtet unmittelbar an den Vorstandsvorsitzenden der METRO AG, Herrn Dr. Eckhard Cordes.

Zum Instrumentarium der konsistenten Steuerung verhaltensbedingter Risiken gehören vor allem die Zuweisung klarer Verantwortlichkeiten für Risikobereiche, die Überarbeitung beziehungsweise Einführung eindeutiger Verhaltensrichtlinien sowie die Entwicklung und Bereitstellung geeigneter Risikosteuerungs- und Kontrollprozesse. Hinzu kommen Schulungsangebote, systematische und adressatengerechte Kommunikationsmaßnahmen sowie der transparente Umgang mit Compliance-Risiken und deren Steuerung. Zudem steht den Mitarbeitern der METRO GROUP ein Meldesystem zur Verfügung, das im Berichtsjahr weiter professionalisiert wurde. Darüber können Mitarbeiter beobachtete oder potenzielle

Compliance-Verstöße – im Bedarfsfall auch anonym – dem Unternehmen in allen Konzernsprachen mitteilen. Die Compliance-Funktion gewährleistet, dass allen Hinweisen in angemessener Form nachgegangen wird.

Die bereits seit 2007 bestehenden Geschäftsgrundsätze der METRO GROUP stellen weiterhin das inhaltliche Kernstück des konzernweiten Compliance-Programms dar. Alle Mitarbeiter werden zu den Geschäftsgrundsätzen geschult. Im Berichtsjahr wurden sie im Rahmen einer konzernweit angelegten Kommunikationskampagne weitergehend informiert. Die Geschäftsgrundsätze werden auf Veranlassung der oder durch die Compliance-Organisation inhaltlich konkretisiert und weiter ausgestaltet. Beispiele hierfür sind die Implementierung präziser Verhaltensrichtlinien zur Korruptionsprävention, zum Umgang mit Spenden- und Sponsoringmaßnahmen sowie zur Beauftragung externer Berater. Wesentliche Bausteine des Compliance-Programms sind zudem die Verhaltensrichtlinien und -leitfäden zum Kartellrecht. Unmittelbar verbunden mit den inhaltlichen Compliance-Initiativen sind adressatenorientierte Schulungsprogramme für die betreffenden Führungskräfte und Mitarbeiter, die Gestaltung und Prüfung interner Kontrollen sowie die Integration der Compliance-Anforderungen in die operativen Geschäftsprozesse.

Compliance ist in steigendem Maß Gegenstand strategischer Entscheidungen und leistet so einen wesentlichen Beitrag zu nachhaltigem Wirtschaften. Weitere Informationen zum Thema Compliance sind auf der Internetseite [www.metrogroup.de](http://www.metrogroup.de) unter der Rubrik Unternehmen – Compliance abrufbar. Dort stehen auch die Geschäftsgrundsätze für Mitarbeiter der METRO AG zum Herunterladen bereit.

### **Risikomanagement**

Das Risikomanagement der METRO GROUP ist ein weiterer integraler Bestandteil der wertorientierten Unternehmensführung. Es unterstützt das Management dabei, Chancen zu nutzen und Risiken zu begrenzen und basiert auf einem systematischen und konzernweiten Risikoreporting. So lassen sich frühzeitig ungünstige Entwicklungen erkennen und entsprechende Gegenmaßnahmen einleiten. Darüber hinaus werden vorhandene Chancen zielgerichtet identifiziert, beurteilt und realisiert.

Im Zuge der Weiterentwicklung des Risikomanagements arbeitet die METRO GROUP an der Optimierung und Ergänzung

vorhandener Elemente, insbesondere im Hinblick auf eine aktive Risikosteuerung und eine verbesserte Einbindung in das Performance-Management.

### **Nachhaltigkeit und Verantwortung**

Profitables Wachstum ist langfristig nur durch verantwortliches Handeln gegenüber Gesellschaft und Umwelt möglich. Deshalb hat die METRO GROUP Nachhaltigkeit zum festen Bestandteil ihrer Unternehmensstrategie erklärt. Das bedeutet, bei allen unternehmerischen Entscheidungen und Prozessen auch ökologische und soziale Erfordernisse zu berücksichtigen. Ziel des Nachhaltigkeitsmanagements ist es, künftige Geschäftsgrundlagen für das Unternehmen zu sichern. Gleichzeitig will die METRO GROUP durch verantwortungsvolles Handeln den gestiegenen Erwartungen unterschiedlicher Anspruchsgruppen Rechnung tragen.

Damit Nachhaltigkeit ein zentraler Wachstums- und Wertschöpfungsfaktor wird, bedarf es integrierter Managementsysteme und einer Organisationsstruktur mit klar definierten Verantwortlichkeiten. Deshalb hat die METRO GROUP 2009 einen Nachhaltigkeitsrat gegründet. Das Gremium erarbeitet konzernweite Standards für ein nachhaltiges Wirtschaften und hilft, diese im Unternehmen zu verankern.

Weitere Informationen zum Thema Nachhaltigkeit und Verantwortung sind auf der Internetseite [www.metrogroup.de](http://www.metrogroup.de) unter der Rubrik Nachhaltigkeit und Verantwortung abrufbar. Dort steht auch der Nachhaltigkeitsbericht zum Herunterladen bereit.

### **Unsere Mitarbeiter**

Kundenorientierung ist für die METRO GROUP als Handelsunternehmen ein zentraler Werttreiber. Deshalb benötigt sie motivierte und qualifizierte Mitarbeiter, die die Erwartungen und Einkaufsgewohnheiten der Kunden kennen und entsprechend darauf reagieren können. Das Engagement für die eigenen Mitarbeiter zählt folgerichtig zu den Schwerpunkten des Nachhaltigkeitsmanagements der METRO GROUP. Infolge des demografischen Wandels wird die Zahl erwerbsfähiger Menschen in vielen Ländern weiter sinken. Umso wichtiger ist es für die METRO GROUP, mit vorausschauenden und innovativen Personalkonzepten ihren Bedarf an Mitarbeitern, insbesondere an Fach- und Führungskräften, langfristig zu sichern. Dazu zählt unter anderem ein aktives Diversity-Management. So sind für die METRO GROUP beispielsweise ältere und behinderte

Mitarbeiter ein selbstverständlicher und wichtiger Teil der Belegschaft.

Die METRO GROUP engagiert sich weltweit für faire und gerechte Arbeitsbedingungen. Sie bekennt sich im Geltungsreich der eigenen Märkte und Betriebe uneingeschränkt zu den Grundsätzen der vier Kernarbeitsprinzipien der Internationalen Arbeitsorganisation (ILO).

Umfangreiche Informationen zum Thema Mitarbeiter sind auf der Internetseite [www.metrogroup.de](http://www.metrogroup.de) unter der Rubrik Jobs und Karriere abrufbar. Informationen zu den Themen Arbeitsbedingungen, Ausbildung, Weiterbildung und Mitarbeiterbindung sowie zu den Kernarbeitsprinzipien der ILO sind ebenfalls auf der Internetseite [www.metrogroup.de](http://www.metrogroup.de) unter der Rubrik Nachhaltigkeit und Verantwortung – Mitarbeiter abrufbar.

#### Hohe Standards in der Lieferkette

Auch die Lieferanten der METRO GROUP müssen hohe Standards entlang der gesamten Wertschöpfungskette erfüllen – von der Herstellung bis zum Verkaufsregal. Dazu zählen anspruchsvolle Qualitätsvorgaben ebenso wie die Beachtung von Menschenrechten, Tierschutz- und Umweltaspekten. Das Verbot von Zwangsarbeit, Kinderarbeit oder jeglicher Form von Ausbeutung ist grundlegender Bestandteil von Vereinbarungen mit Lieferanten der METRO GROUP.

Beim Import von Produkten bestimmter Warengruppen in die Europäische Union hat sich die METRO GROUP zudem verpflichtet, ihre Lieferanten zu überprüfen und sie bei der Einführung besserer Arbeitsbedingungen zu unterstützen. Die METRO GROUP gehört zu den Gründungsmitgliedern der Business Social Compliance Initiative, kurz BSCI, deren Ziel die Wahrung der Menschenrechte in der Produktions- und Lieferkette ist. Um die Einhaltung sozialer Mindeststandards bei der Herstellung von Produkten sicherzustellen, sind die Lieferanten verpflichtet, den BSCI-Verhaltenskodex zu beachten.

Der BSCI-Verhaltenskodex sowie Hintergrundinformationen zum BSCI-Managementsystem sind auf der Internetseite [www.metrogroup.de](http://www.metrogroup.de) unter der Rubrik Nachhaltigkeit und Verantwortung – Lieferkette oder unter [www.bsci-intl.org](http://www.bsci-intl.org) abrufbar.

#### Effizientes Energiemanagement und Ressourcenschutz

Die Herstellung, der Handel und die Nutzung von Lebensmitteln und anderen Konsumgütern sind mit unterschiedlichen

Umweltwirkungen verbunden. Die METRO GROUP ist Teil dieser Wertschöpfungskette. An ihren eigenen Standorten hat sie den größten Einfluss auf umweltrelevante Prozesse wie den Energie- und Ressourcenverbrauch oder den Ausstoß klimarelevanter Emissionen. Um Klimawirkungen ebenso wie Betriebskosten zu reduzieren, konzentriert sich das Umweltmanagement der METRO GROUP vor allem auf den sparsamen und effizienten Ressourceneinsatz.

Auf der Internetseite [www.metrogroup.de](http://www.metrogroup.de) unter der Rubrik Nachhaltigkeit und Verantwortung – Umwelt sind Projekte dargestellt, die beispielhaft zeigen, wie die METRO GROUP Geschäftsgrundlagen und Wettbewerbsvorteile durch ökologisch verantwortliches Handeln sichert.

#### Aufgaben- und Verantwortungsteilung zwischen Vorstand und Aufsichtsrat

Ein wesentliches Element der Corporate Governance deutscher Aktiengesellschaften ist die Trennung von Unternehmensführung und Unternehmenskontrolle. Aufgaben und Verantwortung sind zwischen Vorstand und Aufsichtsrat klar verteilt. Diese durch das deutsche Aktienrecht vorgegebene Grundstruktur wird durch die in der METRO GROUP gelebten Standards wirksam ergänzt.

#### Der Vorstand

Der Vorstand der METRO AG hat vier Mitglieder:

- Dr. Eckhard Cordes  
(Vorstandsvorsitzender und Arbeitsdirektor)
- Olaf Koch (Finanzvorstand)
- Frans W. H. Muller
- Joël Saveuse

Stand: 28. Februar 2011

Informationen zu den Mitgliedern des Vorstands sind im Kapitel Vorstand des Geschäftsberichts 2010 der METRO GROUP enthalten sowie auf der Internetseite [www.metrogroup.de](http://www.metrogroup.de) unter der Rubrik Unternehmen – Organe – Vorstand abrufbar.

Der Vorstand leitet die METRO AG und den Konzern in eigener Verantwortung. Wesentliche Führungsaufgabe des Vorstands der METRO AG ist zunächst, die strategische Ausrichtung des Konzerns in Abstimmung mit dem Aufsichtsrat der Gesellschaft zu entwickeln und umzusetzen. Der Vorstand der

METRO AG sichert darüber hinaus die Verfügbarkeit von Investitionsmitteln und entscheidet über ihre Vergabe innerhalb des Konzerns. Die METRO AG übernimmt zudem konzernübergreifend die Aufgabe, hoch qualifizierte Führungskräfte zu gewinnen und zu betreuen. Die weiteren Aufgaben der METRO AG umfassen vor allem die zur Führung des Konzerns erforderlichen Organisationsstrukturen sowie Kontroll- und Steuerungssysteme. Um sicherzustellen, dass sich zentrale Konzernfunktionen effektiv an den notwendigen Anforderungen des operativen Geschäfts ausrichten, sind alle Vertriebslinien der METRO GROUP im Vorstand repräsentiert. Dr. Eckhard Cordes überwacht und berät die Geschäftsleitung von Media Markt und Saturn, Olaf Koch betreut Galeria Kaufhof, Frans W. H. Muller ist für das Immobiliengeschäft zuständig und zugleich CEO von Metro Cash & Carry Asien/CIS (Commonwealth of Independent States, Zusammenschluss von Staaten der ehemaligen Sowjetunion)/Neue Märkte, Joël Saveuse ist CEO von Metro Cash & Carry Europa/MENA (Mittlerer Osten und nördliches Afrika) sowie CEO der Real-Gruppe.

Grundlegende Regelungen für die Zusammenarbeit des Vorstands sind in einer Geschäftsordnung niedergelegt, die sich der Vorstand mit Zustimmung des Aufsichtsrats selbst gegeben hat. Die Mitglieder des Vorstands tragen gemeinsam die Verantwortung für die gesamte Geschäftsführung. Sie arbeiten kollegial zusammen und unterrichten sich gegenseitig laufend über wichtige Maßnahmen und Vorgänge in ihren Geschäftsbereichen. Unbeschadet der Gesamtverantwortung des Vorstands, führt jedes einzelne Vorstandsmitglied die ihm zugewiesenen Geschäftsbereiche in eigener Verantwortung. Angelegenheiten, die einer Beschlussfassung des Gesamtvorstands bedürfen, sind in der Geschäftsordnung des Vorstands festgelegt. Die Koordination aller Geschäftsbereiche und die Repräsentation gegenüber den Aktionären und der Öffentlichkeit obliegen dem Vorstandsvorsitzenden. Er ist auch erster Ansprechpartner des Aufsichtsratsvorsitzenden.

Beschlüsse des Vorstands werden nach der Geschäftsordnung des Vorstands in der Regel in Sitzungen gefasst, die mindestens alle zwei Wochen stattfinden sollen. Die Geschäftsordnung des Vorstands enthält Vorgaben für die Einberufung und den Ablauf der Sitzungen und regelt auch die erforderliche Mehrheit bei Vorstandsbeschlüssen.

### Der Aufsichtsrat

Der Aufsichtsrat der METRO AG setzt sich gemäß den Regelungen des Mitbestimmungsgesetzes aus zehn Vertretern der Anteilseigner und zehn Vertretern der Arbeitnehmer zusammen.

| Vertreter der Anteilseigner            | Vertreter der Arbeitnehmer        |
|----------------------------------------|-----------------------------------|
| Prof. Dr. Jürgen Kluge, Vorsitzender   | Klaus Bruns, stellv. Vorsitzender |
| Dr. Wulf H. Bernotat                   | Ulrich Dalibor                    |
| Jürgen Fitschen                        | Hubert Frieling                   |
| Prof. Dr. Dr. h. c. mult. Erich Greipl | Andreas Herwarth                  |
| Peter Küpfer                           | Uwe Hoepfel                       |
| Marie-Christine Lombard                | Werner Klockhaus                  |
| Prof. Dr. Klaus Mangold                | Rainer Kuschewski                 |
| Dr.-Ing. e. h. Bernd Pischetsrieder    | Xaver Schiller                    |
| M. P. M. (Theo) de Raad                | Peter Stieger                     |
| Dr. jur. Hans-Jürgen Schinzler         | Angelika Will                     |

Stand: 28. Februar 2011

Informationen zur personellen Zusammensetzung des Aufsichtsrats sowie zu den einzelnen Aufsichtsratsmitgliedern sind auch auf der Internetseite [www.metrogroup.de](http://www.metrogroup.de) unter der Rubrik Unternehmen – Organe – Aufsichtsrat abrufbar.

### Ziele des Aufsichtsrats für seine Zusammensetzung und Stand der Umsetzung

Zur ordnungsgemäßen Wahrnehmung seiner Aufgaben muss der Aufsichtsrat über ein breites Spektrum an Kenntnissen, Fähigkeiten und Erfahrungen verfügen. Um dies zu erreichen, hat der Aufsichtsrat bereits in der Vergangenheit spezifische Qualifikations- und Besetzungsanforderungen formuliert, die über die gesetzlichen Anforderungen hinausgehen und bei den Wahlvorschlägen der Anteilseignervertreter an die Hauptversammlung berücksichtigt wurden. Im Oktober 2010 hat der Aufsichtsrat der METRO AG die Anforderungen an seine Zusammensetzung weiterentwickelt. Im Einzelnen wurden folgende konkrete Ziele benannt:

#### Diversity

Vor dem Hintergrund der internationalen Expansion der METRO GROUP soll dem Aufsichtsrat mindestens eine Unternehmerpersönlichkeit mit fundierter Erfahrung in einer der Wachstumsregionen des Unternehmens angehören. Diese Zielsetzung wird durch den Aufsichtsrat in seiner aktuellen Besetzung mehr als erfüllt. Das Gremium verfügt insbesondere über Mitglieder mit fundierter Erfahrung in den Wachstumsregionen Osteuropa und Asien.

Um den Pool qualifizierter Persönlichkeiten für die Besetzung des Aufsichtsrats künftig besser zu nutzen, wurde ein zu erreichender Frauenanteil festgesetzt. Der Aufsichtsrat strebt an, dass nach den Aufsichtsratswahlen im Jahr 2013 mindestens 20 Prozent seiner Sitze mit Frauen besetzt sind. Im Jahr 2018 soll ein Frauenanteil von mindestens 30 Prozent erreicht werden. Derzeit beträgt der Frauenanteil 10 Prozent.

#### **Bilanz- und Prüfungsausschuss, Unabhängigkeit des Ausschussvorsitzenden**

Um eine qualifizierte Besetzung des Bilanz- und Prüfungsausschusses aus der Mitte des Aufsichtsrats sicherzustellen, muss mindestens ein Mitglied des Aufsichtsrats die Voraussetzungen zur Übernahme des Vorsitzes im Bilanz- und Prüfungsausschuss erfüllen. Gemäß der Geschäftsordnung des Bilanz- und Prüfungsausschusses muss der Ausschussvorsitzende unabhängig sein und über Sachverstand auf den Gebieten Rechnungslegung oder Abschlussprüfung sowie interne Kontrollverfahren verfügen („financial expert“). Fünf weitere, aus der Mitte des Aufsichtsrats zu wählende Ausschussmitglieder sollten über ausreichende Kenntnisse und Erfahrungen auf diesen Gebieten verfügen. Möglichst ein potenzielles Mitglied des Bilanz- und Prüfungsausschusses soll zusätzlich über besondere Kenntnisse auf den Gebieten der Corporate Governance und Compliance verfügen.

Diese Zielsetzungen sind mit der gegenwärtigen Besetzung des Aufsichtsrats und seines Bilanz- und Prüfungsausschusses erfüllt. Vorsitzender des Ausschusses ist Herr Dr. jur. Hans-Jürgen Schinzler.

#### **Potenzielle Interessenkonflikte/Altersgrenze**

Um potenziellen Interessenkonflikten vorzubeugen, sind die Wahrnehmung von Organfunktionen und Beratungsaufgaben sowie Mitgliedschaften in Kontrollgremien in- und ausländischer direkter, wesentlicher Konkurrenzunternehmen mit der Mitgliedschaft im Aufsichtsrat der METRO AG unvereinbar. Diese auch in der Geschäftsordnung des Aufsichtsrats niedergelegte Vorgabe ist bei der Ermittlung von Kandidaten für den Aufsichtsrat zu berücksichtigen. Ebenfalls zu beachten ist eine weitere Regelung der Geschäftsordnung, wonach die Mitglieder des Aufsichtsrats, außer in begründeten Ausnahmefällen, nicht länger amtieren als bis zum Ende der Hauptversammlung, die auf die Vollendung ihres 75. Lebensjahres folgt.

Auch diese Zielsetzungen werden durch den Aufsichtsrat der METRO AG erfüllt. Kein Mitglied des Aufsichtsrats wird die Altersgrenze von 75 Jahren kurzfristig erreichen und kein Mitglied übt ein Aufsichtsmandat bei direkten, wesentlichen Konkurrenzunternehmen aus.

Die künftigen Vorschläge des Aufsichtsrats zur Wahl von Aufsichtsratsmitgliedern durch die Hauptversammlung werden sich an den dargestellten Zielen orientieren. Der Aufsichtsrat der METRO AG hat allerdings kein Vorschlagsrecht zur Wahl der Arbeitnehmervertreter in den Aufsichtsrat. Dessen ungeachtet streben die Mitglieder des Aufsichtsrats an, die vorgenannten Ziele für die Seite der Anteilseigner und für die Seite der Arbeitnehmer gemeinsam zu erreichen.

#### **Aufgaben und Arbeit des Aufsichtsrats**

Der Aufsichtsrat der METRO AG berät den Vorstand und überwacht dessen Geschäftsführung, auch im Hinblick auf das Erreichen der langfristigen Unternehmensziele. In die Planungen für die weitere Entwicklung der METRO GROUP wird der Aufsichtsrat durch den Vorstand ebenso einbezogen wie in Entscheidungen über bedeutende Maßnahmen. Neben den gesetzlich vorgesehenen Zustimmungspflichten hat der Aufsichtsrat weitere eigene Zustimmungsvorbehalte für bestimmte Maßnahmen und Geschäfte des Vorstands festgelegt.

Der Aufsichtsrat der METRO AG tritt regelmäßig zu fünf ordentlichen Sitzungen pro Geschäftsjahr zusammen. Regelungen zur Einberufung von Sitzungen sowie zur Beschlussfassung sind in der Geschäftsordnung des Aufsichtsrats festgelegt. Einzelheiten zu den Sitzungen und zur Zusammenarbeit von Vorstand und Aufsichtsrat der METRO AG im Geschäftsjahr 2010 sind im Bericht des Aufsichtsrats enthalten.

Der Vorstand informiert den Aufsichtsrat nach Maßgabe der gesetzlichen Bestimmungen, der Regelungen des Deutschen Corporate Governance Kodex, der Festlegungen in den Geschäftsordnungen des Vorstands, des Aufsichtsrats oder eines Ausschusses des Aufsichtsrats sowie aufgrund sonstiger Informationsanforderungen des Aufsichtsrats im Einzelfall.

#### **Die Ausschüsse des Aufsichtsrats**

Der Aufsichtsrat wird in seiner Tätigkeit durch fünf Ausschüsse unterstützt, die einen ganz wesentlichen Beitrag zur Effizienz des Gesamtremiums leisten.



**Aufsichtsratspräsidium**

Das Aufsichtsratspräsidium befasst sich mit

- den Ergebnissen zur Fortentwicklung der Konzern- und Regionalstrategie der METRO AG und ihrer abhängigen Konzernunternehmen;
- der Überwachung der Einhaltung von Rechtsvorschriften und der Anwendung des Deutschen Corporate Governance Kodex; das Präsidium bereitet die jährliche Entsprechenserklärung vor;
- der Beschlussfassung in solchen Fällen, in denen zur Abwendung wesentlicher Nachteile eine Eilentscheidung erforderlich ist, diese aber durch den Aufsichtsrat nicht herbeigeführt werden kann, und
- sonstigen Angelegenheiten, die der Aufsichtsrat durch Beschluss dem Aufsichtsratspräsidium übertragen hat.

Den Vorsitz im Aufsichtsratspräsidium führt nach der Geschäftsordnung des Aufsichtsrats der METRO AG der Aufsichtsratsvorsitzende. Mitglieder des Aufsichtsratspräsidiums sind die Herren Prof. Dr. Jürgen Kluge (Vorsitzender), Klaus Bruns (stellv. Vorsitzender), Dr. Wulf H. Bernotat sowie Werner Klockhaus.

**Personalausschuss**

Der Personalausschuss wird bei folgenden Themen vorbereitend für den Aufsichtsrat tätig und gibt gegebenenfalls Beschlussempfehlungen ab:

- Bestellung und Abberufung von Vorstandsmitgliedern;
- Festlegung des Vergütungssystems für die Mitglieder des Vorstands sowie Festsetzung und gegebenenfalls Herabsetzung der individuellen Vorstandsvergütung.

Anstelle des Aufsichtsrats beschließt der Personalausschuss insbesondere in folgenden Angelegenheiten:

- nicht vergütungsrelevante Bestandteile der Anstellungsverträge der Vorstandsmitglieder;
- Genehmigung von Nebentätigkeiten der Vorstandsmitglieder, insbesondere im Falle der Übernahme von Aufsichtsratsmandaten außerhalb der METRO GROUP;
- Nachfolgeplanung des Vorstands;
- bestimmte Rechtsgeschäfte mit Vorstandsmitgliedern, zum Beispiel im Sinne des § 112 AktG;

- Gewährung von Darlehen an Vorstands- und Aufsichtsratsmitglieder; sofern die Gewährung eines Darlehens an ein Mitglied des Vorstands als Vergütungsbestandteil aufzufassen ist, bereitet der Personalausschuss allerdings lediglich die Beschlussfassung des Aufsichtsrats vor;
- Zustimmung zu Verträgen mit Aufsichtsratsmitgliedern nach § 114 AktG.

Den Vorsitz im Personalausschuss hat nach der Geschäftsordnung des Aufsichtsrats der METRO AG ebenfalls der Aufsichtsratsvorsitzende inne. Mitglieder des Personalausschusses sind die Herren Prof. Dr. Jürgen Kluge (Vorsitzender), Klaus Bruns (stellv. Vorsitzender), Dr. Wulf H. Bernotat sowie Werner Klockhaus.

**Bilanz- und Prüfungsausschuss**

Der Bilanz- und Prüfungsausschuss unterstützt den Aufsichtsrat vor allem in den Bereichen Rechnungslegung und Finanzberichterstattung, Abhängigkeitskontrolle, Revision, Compliance und Risikomanagement. Anstelle des Aufsichtsrats nimmt der Ausschuss dabei im Wesentlichen folgende Aufgaben wahr:

- Befassung mit Fragen der Rechnungslegung und Monitoring des Rechnungslegungsprozesses;
- Erörterung der Quartalsfinanzberichte und des Halbjahresfinanzberichts;
- Überwachung der Abschlussprüfung, insbesondere der erforderlichen Unabhängigkeit des Abschlussprüfers und der vom Abschlussprüfer zusätzlich erbrachten Leistungen sowie die Bestimmung von Prüfungsschwerpunkten;
- Befassung mit Fragen der Konzernsteuerplanung;
- Befassung mit Fragen der Abhängigkeitskontrolle in Bezug auf die METRO AG.

Daneben bereitet der Bilanz- und Prüfungsausschuss Sitzungen des Aufsichtsrats vor und gibt Beschlussempfehlungen ab. Zu den vorbereitenden Aufgaben des Bilanz- und Prüfungsausschusses gehören im Wesentlichen:

- Überwachung der Wirksamkeit des Risikomanagementsystems, des internen Revisionssystems, der internen Kontrollsysteme sowie sogenannter Anti-Fraud-Maßnahmen;
- Befassung mit Fragen der Compliance und Überwachung des Compliance-Systems in der METRO GROUP;

- Prüfung des Jahres- und Konzernabschlusses einschließlich der jeweiligen Lageberichte;
- Prüfung des Abhängigkeitsberichts;
- Vorschlag des Aufsichtsrats an die Hauptversammlung zur Wahl des Abschlussprüfers sowie Erteilung des Prüfungsauftrags an den Abschlussprüfer und Abschluss der Honorarvereinbarung;
- Mittelfristplanung und Jahresbudget für die METRO GROUP;
- Entsprechungskontrolle und Abgabe der Entsprechenserklärung nach § 161 AktG.

Der Vorsitzende des Bilanz- und Prüfungsausschusses wird durch dessen Mitglieder gewählt. Die mit dem Amt verbundenen persönlichen Voraussetzungen sind in der Geschäftsordnung des Ausschusses formuliert. Wie auch bereits in den Zielen für die Besetzung des Aufsichtsrats niedergelegt, muss der Ausschussvorsitzende unabhängig sein und über Sachverstand auf den Gebieten Rechnungslegung oder Abschlussprüfung sowie interne Kontrollverfahren verfügen („financial expert“). Ferner muss der Vorsitzende Vertreter der Anteilseigner sein. Einem ehemaligen Mitglied des Vorstands, dessen Bestellung vor weniger als zwei Jahren endete, soll weder der Vorsitz noch der stellvertretende Vorsitz im Bilanz- und Prüfungsausschuss übertragen werden. Auch soll im Sinne einer guten Corporate Governance der Vorsitzende des Aufsichtsrats nicht zugleich Vorsitzender oder stellvertretender Vorsitzender des Bilanz- und Prüfungsausschusses sein. Unter Zugrundelegung dieser Anforderungen hat der Bilanz- und Prüfungsausschuss im Geschäftsjahr 2007 Herrn Dr. jur. Hans-Jürgen Schinzler zum Vorsitzenden des Ausschusses gewählt. Damit sind die Voraussetzungen der §§ 107 Abs. 4, 100 Abs. 5 AktG erfüllt.

Die weiteren Mitglieder sollten über ausreichende Kenntnisse und Erfahrungen auf den Gebieten Rechnungslegung oder Abschlussprüfung sowie interne Kontrollverfahren verfügen, möglichst ein Mitglied sollte zusätzlich besondere Kenntnisse auf den Gebieten der Corporate Governance und Compliance besitzen.

Mitglieder des Bilanz- und Prüfungsausschusses sind außer Herrn Dr. jur. Hans-Jürgen Schinzler (Vorsitzender) die Herren Klaus Bruns (stellv. Vorsitzender), Prof. Dr. Dr. h. c. mult. Erich Greipl, Prof. Dr. Jürgen Kluge, Xaver Schiller sowie Peter Stieger.

### **Nominierungsausschuss**

Die Vertreter der Aktionäre im Aufsichtsrat der METRO AG werden durch die Hauptversammlung gewählt. Der Aufsichtsrat unterbreitet hierzu Wahlvorschläge und wird dabei durch den Nominierungsausschuss unterstützt. Dieser sucht planmäßig nach geeigneten Kandidaten und spricht Empfehlungen an den Aufsichtsrat aus. Der Ausschuss berücksichtigt dabei die gesetzlichen Vorgaben, die Empfehlungen des Deutschen Corporate Governance Kodex und die vom Aufsichtsrat selbst benannten Ziele für seine eigene Besetzung. Der Nominierungsausschuss achtet bei seinen Vorschlägen auch darauf, dass eine fachlich qualifizierte Besetzung der Ausschüsse erfolgen kann.

Im Nominierungsausschuss sind ausschließlich Vertreter der Aktionäre tätig. Er besteht gemäß der Geschäftsordnung des Aufsichtsrats aus dem Aufsichtsratsvorsitzenden sowie zwei unabhängigen Aktionärsvertretern. Durch diese Festlegung hat der Aufsichtsrat der METRO AG den Anspruch unterstrichen, bei der Ermittlung geeigneter Kandidaten für den Aufsichtsrat durch ein den Interessen aller Aktionäre verbundenes Gremium beraten zu werden.

Mitglieder des Nominierungsausschusses sind die Herren Prof. Dr. Jürgen Kluge (Vorsitzender), Dr.-Ing. e. h. Bernd Pischetsrieder sowie Dr. jur. Hans-Jürgen Schinzler.

### **Vermittlungsausschuss**

Das Mitbestimmungsgesetz schreibt die Einrichtung eines Vermittlungsausschusses vor. Er unterbreitet dem Aufsichtsrat Personalvorschläge, wenn die für die Bestellung und Abberufung von Vorstandsmitgliedern erforderliche Zweidrittelmehrheit nicht erreicht worden ist.

Mitglieder des Vermittlungsausschusses sind die Herren Prof. Dr. Jürgen Kluge, Klaus Bruns, Prof. Dr. Dr. h. c. mult. Erich Greipl sowie Werner Klockhaus.

### **Information des Aufsichtsrats durch Ausschüsse und Vorstand**

Über Beratungen und Beschlüsse der Ausschüsse berichtet der jeweilige Ausschussvorsitzende dem Aufsichtsrat zeitnah, im Regelfall mündlich, in der jeweils nächsten Sitzung des Aufsichtsrats.

Die Information des Aufsichtsrats beziehungsweise seiner Ausschüsse durch den Vorstand regelt eine Informationsordnung, die Teil der Geschäftsordnung des Vorstands ist. Die dort getroffenen Festlegungen zur Information und Berichterstattung werden durch einen Sitzungs- und Themenplan des Aufsichtsrats und seiner Ausschüsse konkretisiert. Dieser gibt vor, wann welche Regel- und Schwerpunktthemen zwischen Vorstand und Aufsichtsrat beziehungsweise mit den Ausschüssen erörtert werden. Der Sitzungs- und Themenplan ist Teil der Geschäftsordnung des Aufsichtsrats.

#### **Effizienzprüfungen des Aufsichtsrats**

Der Aufsichtsrat der METRO AG überprüft regelmäßig die Effizienz seiner Tätigkeit. Die letzte Effizienzprüfung fand im Geschäftsjahr 2009 statt. Die nächste Prüfung ist für 2011 vorgesehen.

#### **Transparente Unternehmensführung**

Gute Corporate Governance setzt Transparenz gegenüber den Aktionären der METRO AG voraus. Ein wichtiges Medium zur Information der Aktionäre der METRO AG, des Kapitalmarkts und der Öffentlichkeit ist die Internetseite [www.metrogroup.de](http://www.metrogroup.de). Außer vielfältigen Informationen über die Geschäftsfelder und Vertriebslinien der METRO GROUP finden sich dort unter anderem die Finanzberichte der METRO AG sowie Ad-hoc-Mitteilungen, Investor-News und weitere Veröffentlichungen nach dem Wertpapierhandelsgesetz. Die Termine der wesentlichen wiederkehrenden Veröffentlichungen und Veranstaltungen (Trading Statement, Geschäftsberichte sowie Quartals- und Halbjahresfinanzberichte, Bilanzpressekonferenz, Analystentreffen und Hauptversammlung) werden auf der Internetseite in einem Finanzkalender mit angemessenem Zeitvorlauf publiziert. Aktionäre und interessierte Leser haben darüber hinaus Zugriff auf die Unterlagen zur jährlichen Bilanzpressekonferenz sowie zum Analystentreffen und auf Präsentationen, die im Rahmen von Roadshows, Investorenkonferenzen und Informationsveranstaltungen für Privatanleger gezeigt werden. Weiterhin besteht die Möglichkeit, einen elektronischen Investor-Relations-Newsletter zu abonnieren.

#### **Die Hauptversammlung**

Die jährliche Hauptversammlung der METRO AG gibt ihren Aktionären die Möglichkeit, ihre gesetzlichen Rechte wahrzunehmen. Das heißt vor allem, ihr Stimmrecht (soweit vorhanden)

auszuüben und Fragen an den Vorstand der Gesellschaft zu richten.

Um den Aktionären die persönliche Wahrnehmung ihrer Rechte in der Hauptversammlung zu erleichtern, werden Dokumente und Informationen im Vorfeld jeder Hauptversammlung auf der Internetseite der METRO GROUP zur Verfügung gestellt. Hierzu zählt außer den gesetzlich vorgeschriebenen Dokumenten insbesondere der jeweils aktuelle Geschäftsbericht.

Das Anmelde- und Legitimationsverfahren für die Hauptversammlungen der METRO AG entspricht den Vorgaben des deutschen Aktienrechts und den internationalen Standards. Jeder Aktionär, der an einer Hauptversammlung der METRO AG teilnehmen und dort sein Stimmrecht ausüben möchte, muss sich anmelden und einen Nachweis über seine Berechtigung zur Teilnahme und Ausübung des Stimmrechts erbringen. Hierfür ist ein in Textform und in deutscher oder englischer Sprache erstellter Nachweis des Anteilsbesitzes durch das depotführende Institut ausreichend. Eine Hinterlegung von Aktien ist nicht erforderlich. Der Nachweis des Anteilsbesitzes hat sich auf den Beginn des 21. Tages vor jeder Hauptversammlung zu beziehen und muss der METRO AG ebenso wie die Anmeldung zur Hauptversammlung unter der in der Einberufung hierfür mitgeteilten Adresse in der nach Gesetz und Satzung vorgeschriebenen Frist zugehen. Die Einzelheiten der Anmelde- und Teilnahmebedingungen werden in der Einladung zu jeder Hauptversammlung bekannt gemacht.

Aktionäre, die nicht selbst an der Hauptversammlung teilnehmen, können ihr Stimmrecht durch einen Bevollmächtigten ausüben lassen. Die Vollmacht bedarf grundsätzlich der Textform. Zugunsten der Aktionäre gelten in bestimmten, in der Einladung zur Hauptversammlung beschriebenen Fällen erleichterte Formvorschriften, zum Beispiel für Vollmachten an Kreditinstitute und Aktionärsvereinigungen.

Aktionäre können auch von der Gesellschaft benannte Stimmrechtsvertreter mit der Ausübung ihres Stimmrechts bevollmächtigen (sogenanntes Proxy Voting). Dazu gelten folgende Regeln: Außer der Vollmacht müssen die Aktionäre auch Weisungen für die Ausübung des Stimmrechts erteilen. Die von der Gesellschaft benannten Stimmrechtsvertreter sind verpflichtet, gemäß diesen Weisungen abzustimmen. Aktionären, die zunächst an einer Hauptversammlung teilnehmen, diese aber vorzeitig verlassen möchten, ohne auf die Ausübung ihres

Stimmrechts verzichten zu wollen, stehen die Stimmrechtsvertreter der METRO AG auch während der Hauptversammlung zur Bevollmächtigung zur Verfügung. Das Recht, anderen Personen Vollmacht zu erteilen, wird dadurch selbstverständlich nicht berührt. Die Einzelheiten zur Stimmrechtsvertretung werden in der Einladung zu jeder Hauptversammlung bekannt gemacht.

Im Interesse der Aktionäre sorgt der Leiter der Hauptversammlung, im Regelfall der Vorsitzende des Aufsichtsrats, für eine zügige und effiziente Abwicklung der Hauptversammlung. Im Einklang mit dem Deutschen Corporate Governance Kodex wird angestrebt, eine ordentliche Hauptversammlung der METRO AG spätestens nach vier bis sechs Stunden zu beenden.

### **Directors' Dealings, Aktienbesitz von Vorstand und Aufsichtsrat**

Gemäß § 15a des Wertpapierhandelsgesetzes haben Mitglieder des Vorstands und des Aufsichtsrats der METRO AG eigene Geschäfte mit Metro-Aktien oder sich darauf beziehenden Finanzinstrumenten – kurz Directors' Dealings – der METRO AG mitzuteilen. Die Verpflichtung obliegt auch Personen, die mit Organmitgliedern in einer engen Beziehung stehen. Eine Mitteilungspflicht besteht jedoch nicht, solange die Gesamtsumme der Geschäfte eines Organmitglieds und der mit dem Organmitglied in einer engen Beziehung stehenden Personen insgesamt einen Betrag von 5.000 € bis zum Ende des Kalenderjahres nicht erreicht.

Mitteilungen über Directors' Dealings im Berichtsjahr 2010 wurden auf der Internetseite [www.metrogroup.de](http://www.metrogroup.de) unter der Rubrik Investor Relations – Publikationen – Directors' Dealings veröffentlicht.

Die METRO AG beachtet auch die Transparenzempfehlungen gemäß Ziffer 6.6 des Deutschen Corporate Governance Kodex. Ist der Besitz von Aktien der METRO AG oder sich darauf beziehender Finanzinstrumente von Vorstands- und Aufsichtsratsmitgliedern direkt oder indirekt größer als 1 Prozent der von der METRO AG ausgegebenen Aktien, wird dies offengelegt. Übersteigt der Gesamtbesitz aller Vorstands- und Aufsichtsratsmitglieder 1 Prozent der von der Gesellschaft ausgegebenen Aktien, wird der Gesamtbesitz getrennt nach Vorstand und Aufsichtsrat angegeben. Im Geschäftsjahr 2010 wurden die Schwellenwerte von 1 Prozent nicht erreicht.

### **Abschlussprüfung**

Die Hauptversammlung der METRO AG hat 2010 die KPMG AG Wirtschaftsprüfungsgesellschaft (KPMG) zum Abschlussprüfer für das Geschäftsjahr 2010 gewählt. Der Auftrag des Aufsichtsrats zur Durchführung der Abschlussprüfung wurde durch den Bilanz- und Prüfungsausschuss vorbereitet und berücksichtigte die Empfehlungen in Ziffer 7.2 des Deutschen Corporate Governance Kodex.

Die KPMG hat dem Aufsichtsrat bis zum Abschluss der Prüfung keine Ausschluss- oder Befangenheitsgründe mitgeteilt. Auch bestanden keine Anhaltspunkte dafür, dass solche Gründe vorlagen. Ferner gab es keine unerwarteten und für die Aufgaben des Aufsichtsrats wesentlichen Feststellungen und Vorkommnisse während der Durchführung der Prüfung, sodass eine außerordentliche Berichterstattung des Abschlussprüfers an den Aufsichtsrat nicht erforderlich war. Abweichungen der Entsprechenserklärungen des Vorstands und des Aufsichtsrats zum Deutschen Corporate Governance Kodex konnte der Abschlussprüfer nicht feststellen.

### **Vergütungsbericht 2010**

Der Vergütungsbericht für das Jahr 2010 befindet sich im Kapitel 8 des Konzernlageberichts. Der Aufsichtsrat hat den Vergütungsbericht des Vorstands eingehend geprüft und macht sich die Ausführungen im Rahmen des Corporate-Governance-Berichts gemäß Ziffer 3.10 Deutscher Corporate Governance Kodex zu eigen.

Ausführliche Informationen zum Thema Corporate Governance bei der METRO GROUP sind auch auf der Internetseite [www.metrogroup.de](http://www.metrogroup.de) unter der Rubrik Unternehmen abrufbar.

# KONZERNLAGEBERICHT

- S. 071 Überblick über das Geschäftsjahr 2010 und Prognose
- S. 072 1. Konzernstruktur
- S. 075 2. Wirtschaftliche Rahmenbedingungen
- S. 080 3. Ertragslage
- S. 090 4. Finanz- und Vermögenslage
- S. 096 5. Mitarbeiter
- S. 103 6. Innovationsmanagement
- S. 105 7. Nachhaltigkeitsmanagement
- S. 110 8. Vergütungsbericht
- S. 118 9. Angaben gemäß § 315 Abs. 4 HGB sowie erläuternder Bericht des Vorstands
- S. 126 10. Rechnungslegungsbezogenes internes Kontroll- und Risikomanagementsystem
- S. 129 11. Risikobericht
- S. 134 12. Nachtrags- und Prognosebericht

# KONZERNLAGEBERICHT

## Überblick über das Geschäftsjahr 2010 und Prognose

Der Umsatz der METRO GROUP wächst um 2,6 Prozent. Das EBIT vor Sonderfaktoren erreicht mit 2.415 Mio. € den höchsten Wert in der Geschichte des Unternehmens.

### Ertragslage

- Umsatz der METRO GROUP steigt im Jahr 2010 um 2,6 Prozent auf 67,3 Mrd. €
- Konzernumsatz wächst im Ausland unterstützt von positiven Währungseffekten um 5,4 Prozent
- Umsatz in Deutschland liegt bereinigt um Standortabgaben und Desinvestitionen nahezu auf Vorjahresniveau
- Konzern-EBIT vor Sonderfaktoren erreicht 2,4 Mrd. € (Vorjahr 2,0 Mrd. €)
- Periodenergebnis beträgt 936 Mio. € (Vorjahr 519 Mio. €) und enthält Sonderfaktoren aus Shape 2012 in Höhe von 203 Mio. € (Vorjahr 305 Mio. €)
- Ergebnis je Aktie vor Sonderfaktoren bei 3,12 € nach 2,10 € im Vorjahr

### Finanz- und Vermögenslage

- Investitionen steigen um 0,2 Mrd. € auf 1,7 Mrd. €
- Nettoverschuldung sinkt um 0,2 Mrd. € auf 3,5 Mrd. €
- Langfristiges Rating unverändert „BBB“ (Standard & Poor's) sowie „Baa2“ (Moody's)

- Cashflow aus laufender Geschäftstätigkeit der fortgeführten Aktivitäten mit 2,5 Mrd. € auf Vorjahresniveau
- Bilanzsumme mit 35,1 Mrd. € um 1,8 Mrd. € höher als im Vorjahr
- Eigenkapital mit 6,5 Mrd. € deutlich über dem Vorjahreswert; Eigenkapitalquote steigt um 0,4 Prozentpunkte auf 18,4 Prozent

### Prognose der METRO GROUP

#### Umsatz

Die METRO GROUP geht auf mittlere Sicht unverändert von einem Umsatzwachstum von mehr als 6 Prozent pro Jahr aus. Für 2011 wird ein Umsatzplus von 4 bis 6 Prozent erwartet.

#### Ergebnis

Die Strategie der METRO GROUP zielt auf ein langfristiges profitables Wachstum, das heißt ein im Vergleich zum Umsatz überproportional wachsendes Ergebnis. Mittelfristig wird beim Ergebnis, gemessen am EBIT vor Sonderfaktoren, ein Wachstum von mehr als 10 Prozent pro Jahr angestrebt. Dabei wird Shape 2012 seine positive Ergebniswirkung sukzessive entfalten und ab 2012 vollständig wirken.

Unter der Voraussetzung, dass sich die gesamtwirtschaftlichen Rahmenbedingungen weiter verbessern, gehen wir derzeit davon aus, das mittelfristige Ziel beim Ergebniswachstum vor Sonderfaktoren bereits 2011 erreichen zu können. Basis ist das EBIT vor Sonderfaktoren 2010 in Höhe von 2.415 Mio. €.

# 1. Konzernstruktur

Im Rahmen von Shape 2012 hat die METRO GROUP im Berichtsjahr erneut Veränderungen in der Konzernstruktur vorgenommen. An der Spitze des Unternehmens steht weiterhin die METRO AG mit Sitz in Düsseldorf. Als strategische Holding steuert sie unter anderem die Bereiche Finanzen, Controlling und Compliance für den gesamten Konzern. Darüber hinaus übernimmt sie die Führungs- und Verwaltungsfunktionen von Metro Cash & Carry, die mit Wirksamkeit zum 1. Juli 2010 in die METRO AG integriert worden sind.

Für das operative Geschäft sind die vier Vertriebslinien Metro Cash & Carry, Real, Media Markt und Saturn sowie Galeria Kaufhof zuständig, die teilweise mit mehreren Vertriebsmarken im Markt agieren. Sie haben die ungeteilte Verantwortung

für ihre gesamte Prozesskette – vom Einkauf über die Logistik bis hin zum Vertrieb. Wesentlicher Teil der neuen Konzernstruktur ist die Gliederung von Metro Cash & Carry in zwei Geschäftseinheiten: Europa/MENA (Mittlerer Osten und nördliches Afrika) sowie Asien/CIS (Commonwealth of Independent States, Zusammenschluss von Staaten der ehemaligen Sowjetunion)/Neue Märkte.

Das Immobilienportfolio der METRO GROUP wird durch die METRO Group Asset Management betreut, die als eigenständiges Profitcenter agiert und im Berichtsjahr eine neue dezentrale Struktur erhalten hat: Mit Wirksamkeit zum 1. Dezember 2010 wurde das Immobilienmanagement in sieben Regionen gegliedert.

Servicegesellschaften unterstützen die Segmente der METRO GROUP übergreifend mit Dienstleistungen.

## METRO GROUP und ihre Segmente im Überblick

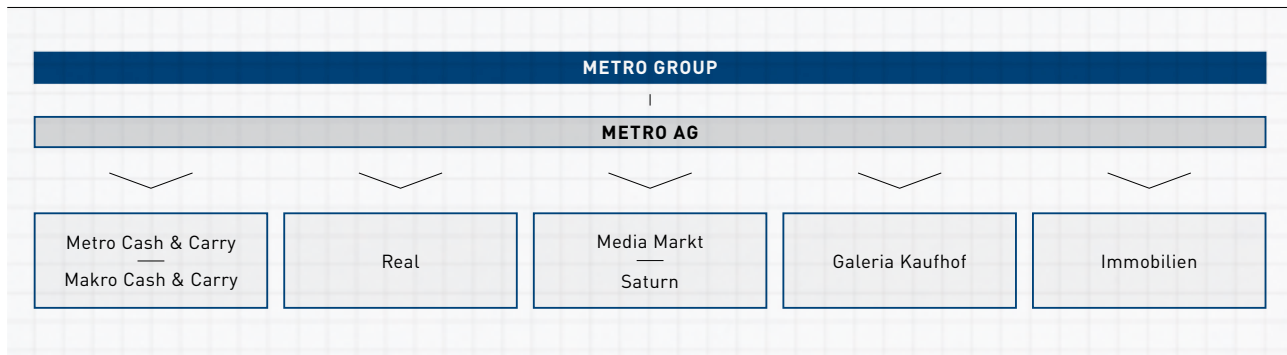

## Die Segmente der METRO GROUP

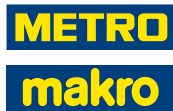

**Metro Cash & Carry** ist international führend im Selbstbedienungsgroßhandel und mit den Marken Metro und Makro in 30 Ländern Europas, Asiens und Afrikas vertreten. Das Produkt- und Service-Angebot der Großmärkte ist speziell auf die Anforderungen gewerblicher Kunden abgestimmt, darunter Hoteliers, Restaurantbesitzer und Cateringunternehmen.

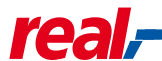

**Real** zählt zu den führenden SB-Warenhausbetreibern in Deutschland. Die Vertriebslinie ist darüber hinaus mit Standorten in Polen, Rumänien, Russland, der Ukraine und der Türkei vertreten. Alle Märkte zeichnen sich durch ihr umfassendes Sortiment mit einem hohen Anteil an Frischeprodukten aus.

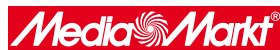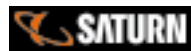

**Media Markt und Saturn** ist die Nummer eins im europäischen Elektrofachhandel. Die Vertriebslinie ist in 17 Ländern vertreten. Eine dezentrale Organisationsstruktur, attraktive Sortimente und innovatives Marketing tragen zum Erfolg beider Vertriebsmarken bei.

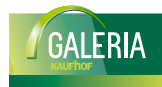

**Galeria Kaufhof** ist Konzept- und Systemführer unter den deutschen Warenhäusern und Marktführer in Belgien. Dort tritt die Vertriebslinie als Galeria Inno auf. Das internationale Sortiment mit hochwertigen Marken, die angenehme Atmosphäre und das umfassende Serviceangebot inspirieren die Kunden und tragen zu einem erlebnisreichen Einkauf bei.

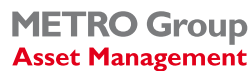

**METRO Group Asset Management** betreut das Immobilienvermögen der METRO GROUP in 30 Ländern. Zu ihren Aufgaben gehört es unter anderem, den Wert des Portfolios aktiv zu steigern, neue Märkte zu planen sowie die bereits bestehenden Standorte zu verwalten.



**Standortportfolio nach Ländern und Segmenten**

|                                    | Metro Cash & Carry |            | Real       | Media Markt und Saturn |            | Galeria Kaufhof |            | Sonstige   |          | METRO GROUP |              |              |
|------------------------------------|--------------------|------------|------------|------------------------|------------|-----------------|------------|------------|----------|-------------|--------------|--------------|
|                                    | 2010               | 2009       |            | 2010                   | 2009       | 2010            | 2009       | 2010       | 2009     | 2010        | 2009         |              |
| <b>Deutschland</b>                 | <b>117</b>         | <b>124</b> | <b>320</b> | <b>333</b>             | <b>382</b> | <b>375</b>      | <b>123</b> | <b>126</b> | <b>0</b> | <b>59</b>   | <b>942</b>   | <b>1.017</b> |
| Belgien                            | 11                 | 11         |            |                        | 20         | 18              | 15         | 15         |          |             | 46           | 44           |
| Dänemark                           | 5                  | 5          |            |                        |            |                 |            |            |          |             | 5            | 5            |
| Frankreich                         | 91                 | 91         |            |                        | 34         | 32              |            |            |          |             | 125          | 123          |
| Italien                            | 48                 | 48         |            |                        | 104        | 99              |            |            |          |             | 152          | 147          |
| Luxemburg                          |                    |            |            |                        | 2          | 1               |            |            |          |             | 2            | 1            |
| Niederlande                        | 17                 | 17         |            |                        | 36         | 32              |            |            |          |             | 53           | 49           |
| Österreich                         | 12                 | 12         |            |                        | 42         | 34              |            |            |          |             | 54           | 46           |
| Portugal                           | 11                 | 11         |            |                        | 9          | 9               |            |            |          |             | 20           | 20           |
| Schweden                           |                    |            |            |                        | 19         | 16              |            |            |          |             | 19           | 16           |
| Schweiz                            |                    |            |            |                        | 23         | 20              |            |            |          |             | 23           | 20           |
| Spanien                            | 34                 | 34         |            |                        | 64         | 61              |            |            |          |             | 98           | 95           |
| Vereinigtes Königreich             | 30                 | 30         |            |                        |            |                 |            |            |          |             | 30           | 30           |
| <b>Westeuropa ohne Deutschland</b> | <b>259</b>         | <b>259</b> |            |                        | <b>353</b> | <b>322</b>      | <b>15</b>  | <b>15</b>  |          |             | <b>627</b>   | <b>596</b>   |
| Bulgarien                          | 11                 | 11         |            |                        |            |                 |            |            |          |             | 11           | 11           |
| Griechenland                       | 9                  | 9          |            |                        | 13         | 10              |            |            |          |             | 22           | 19           |
| Kasachstan                         | 5                  | 1          |            |                        |            |                 |            |            |          |             | 5            | 1            |
| Kroatien                           | 6                  | 6          |            |                        |            |                 |            |            |          |             | 6            | 6            |
| Moldawien                          | 3                  | 3          |            |                        |            |                 |            |            |          |             | 3            | 3            |
| Polen                              | 29                 | 29         | 54         | 54                     | 59         | 53              |            |            |          |             | 142          | 136          |
| Rumänien                           | 26                 | 24         | 25         | 24                     |            |                 |            |            |          |             | 51           | 48           |
| Russland                           | 57                 | 52         | 16         | 15                     | 31         | 20              |            |            |          |             | 104          | 87           |
| Serbien                            | 6                  | 5          |            |                        |            |                 |            |            |          |             | 6            | 5            |
| Slowakei                           | 6                  | 5          |            |                        |            |                 |            |            |          |             | 6            | 5            |
| Tschechien                         | 13                 | 13         |            |                        |            |                 |            |            |          |             | 13           | 13           |
| Türkei                             | 18                 | 14         | 13         | 14                     | 17         | 16              |            |            |          |             | 48           | 44           |
| Ukraine                            | 26                 | 25         | 1          | 1                      |            |                 |            |            |          |             | 27           | 26           |
| Ungarn                             | 13                 | 13         |            |                        | 21         | 22              |            |            |          |             | 34           | 35           |
| <b>Osteuropa</b>                   | <b>228</b>         | <b>210</b> | <b>109</b> | <b>108</b>             | <b>141</b> | <b>121</b>      |            |            |          |             | <b>478</b>   | <b>439</b>   |
| Ägypten                            | 2                  | 0          |            |                        |            |                 |            |            |          |             | 2            | 0            |
| China                              | 48                 | 42         |            |                        | 1          | 0               |            |            |          |             | 49           | 42           |
| Indien                             | 6                  | 5          |            |                        |            |                 |            |            |          |             | 6            | 5            |
| Japan                              | 9                  | 6          |            |                        |            |                 |            |            |          |             | 9            | 6            |
| Marokko                            | 0                  | 8          |            |                        |            |                 |            |            |          |             | 0            | 8            |
| Pakistan                           | 5                  | 5          |            |                        |            |                 |            |            |          |             | 5            | 5            |
| Vietnam                            | 13                 | 9          |            |                        |            |                 |            |            |          |             | 13           | 9            |
| <b>Asien/Afrika</b>                | <b>83</b>          | <b>75</b>  |            |                        | <b>1</b>   | <b>0</b>        |            |            |          |             | <b>84</b>    | <b>75</b>    |
| <b>International</b>               | <b>570</b>         | <b>544</b> | <b>109</b> | <b>108</b>             | <b>495</b> | <b>443</b>      | <b>15</b>  | <b>15</b>  |          |             | <b>1.189</b> | <b>1.110</b> |
| <b>METRO GROUP</b>                 | <b>687</b>         | <b>668</b> | <b>429</b> | <b>441</b>             | <b>877</b> | <b>818</b>      | <b>138</b> | <b>141</b> | <b>0</b> | <b>59</b>   | <b>2.131</b> | <b>2.127</b> |

## 2. Wirtschaftliche Rahmenbedingungen

### Weltwirtschaft im Aufschwung

Die Weltwirtschaft hat sich 2010 insgesamt positiv entwickelt und sich damit ein Stück weit von den Folgen der Wirtschafts- und Finanzkrise erholt. Nahezu alle Länder, in denen die METRO GROUP vertreten ist, lagen wieder auf Wachstumskurs. Der Aufschwung fiel dabei unterschiedlich stark aus: Während die asiatischen Schwellenländer eine hohe Wachstumsdynamik verzeichneten, stellte sich die Lage in Europa uneinheitlich dar. Ländern mit starkem Wachstum standen solche gegenüber, die weiterhin mit Problemen – vor allem mit einer zu hohen Staatsverschuldung – zu kämpfen hatten.

Zur Belebung der Weltwirtschaft trug außer der expansiven Geld- und Finanzpolitik die starke Importnachfrage aus den asiatischen Schwellenländern bei. Die spürbare Erholung im ersten Halbjahr schwächte sich in der zweiten Jahreshälfte allmählich weltweit ab, wobei Asien weiter die wachstumsstärkste Region blieb. Ursachen für diese Entwicklung waren unter anderem das Auslaufen nationaler und internationaler Konjunkturpakete sowie zum Teil massive Sparmaßnahmen zur Haushaltskonsolidierung in zahlreichen Ländern.

Insbesondere die Länder West- und Osteuropas haben 2010 noch nicht wieder die Wirtschaftsleistung aus dem Vorkrisenjahr 2008 erreichen können – trotz einer insgesamt positiven Entwicklung.

#### Deutschland

Deutschland war 2010 die Konjunkturlokomotive in Westeuropa und wies mit 3,6 Prozent ein Rekordwachstum auf. In der ersten Jahreshälfte war der Export stärkster Wachstumstreiber. Gestützt durch die positive Entwicklung am

Arbeitsmarkt und den Anstieg der verfügbaren Einkommen, konnte auch der private Konsum im zweiten Halbjahr vom Aufschwung profitieren, allerdings nur unterdurchschnittlich. Insgesamt schwächte sich das Wirtschaftswachstum in der zweiten Jahreshälfte nach dem Rekordwachstum im zweiten Quartal etwas ab. Die Zuwachsraten blieben aber weiter ansehnlich. Die Inflation bewegte sich mit etwas über 1 Prozent im Jahresdurchschnitt auf niedrigem Niveau, allerdings mit ansteigender Tendenz zum Jahresende.

#### Westeuropa

In den anderen Ländern Westeuropas schritt die wirtschaftliche Erholung deutlich langsamer voran als in Deutschland. Obwohl die Region Westeuropa zwar von der Exportdynamik profitierte, war die Konjunkturerholung insgesamt noch nicht stabil. Das Wirtschaftswachstum ohne Deutschland lag bei 1,3 Prozent, nach einem Rückgang von 4 Prozent im Jahr 2009. Prägend war das unterschiedliche Tempo der wirtschaftlichen Erholung. Vor allem die hohe Staatsverschuldung sowie Sparmaßnahmen zur Haushaltskonsolidierung belasteten einzelne Länder stark. So entwickelte sich beispielsweise Griechenlands Wirtschaft auch 2010 rückläufig. Gleiches gilt für Spanien, das noch immer an den Lasten der heimischen Immobilienkrise trägt. Auch Italien und Portugal wiesen im westeuropäischen Vergleich ein unterdurchschnittliches Wachstum auf. Positiv entwickelten sich hingegen Länder wie Schweden, Dänemark, die Schweiz und Belgien. Die Wachstumszahlen von Frankreich und dem Vereinigten Königreich lagen im westeuropäischen Durchschnitt.

Die Inflation in Westeuropa entwickelte sich im ersten Halbjahr 2010 moderat, zeigte dann aber in der zweiten Jahreshälfte eine ansteigende Tendenz. Erhöhte Kosten für Energie und weitere Rohstoffe auf dem Weltmarkt waren die primäre Ursache für den Auftrieb der Verbraucherpreise; überdurchschnittlich stiegen auch die Nahrungsmittelpreise.

#### Osteuropa

Die Länder Osteuropas unterschieden sich ebenfalls hinsichtlich ihres Erholungstempos. Die Türkei erlebte einen eindrucksvollen Aufschwung, und auch Russland wies nach dem starken Rückgang 2009 wieder ein gutes Wirtschaftswachstum auf. Andere Länder hatten nach wie vor mit den Folgen der Wirtschafts- und Finanzkrise zu kämpfen: Vor allem Rumänien, Bulgarien und Ungarn erholten sich nur sehr langsam, auch aufgrund ihrer belasteten Staatshaushalte. Nach den starken Währungsabwertungen 2009 konnten die meisten osteuropäischen Währungen 2010 gegenüber dem Euro wieder etwas an Wert zulegen.

#### Entwicklung des Bruttoinlandsprodukts wichtiger Weltregionen und Deutschlands

Veränderungen zum Vorjahr in Prozent

|                             | 2010 | 2009 |
|-----------------------------|------|------|
| Asien                       | 6,9  | -0,2 |
| Welt                        | 4,1  | -2,1 |
| Deutschland                 | 3,6  | -4,7 |
| Osteuropa                   | 2,9  | -5,8 |
| Westeuropa ohne Deutschland | 1,3  | -4,0 |

Quelle: FERI

Die Inflation in Osteuropa ging bis zur Jahresmitte zurück, dann erfolgte jedoch die Trendwende hin zu spürbaren Preissteigerungen. In Rumänien verursachte die Anhebung der Umsatzsteuersätze einen zusätzlichen Preisschub.

### Asien

Die Schwellenländer Asiens verzeichneten erneut die weltweit stärkste wirtschaftliche Dynamik und waren damit Motor

### Entwicklung des Bruttoinlandsprodukts der METRO GROUP Länder

Reale Veränderungen zum Vorjahr in Prozent

|                        | 2010 | 2009  |
|------------------------|------|-------|
| China                  | 10,3 | 9,2   |
| Indien                 | 9,9  | 5,7   |
| Türkei                 | 7,8  | -4,7  |
| Vietnam                | 6,6  | 5,3   |
| Kasachstan             | 5,4  | 1,3   |
| Schweden               | 5,2  | -5,3  |
| Ägypten                | 5,0  | 4,7   |
| Pakistan               | 4,4  | 3,6   |
| Ukraine                | 4,2  | -15,1 |
| Marokko                | 4,0  | 5,4   |
| Russland               | 4,0  | -7,8  |
| Japan                  | 3,9  | -6,3  |
| Slowakei               | 3,7  | -4,8  |
| Polen                  | 3,7  | 1,7   |
| Deutschland            | 3,6  | -4,7  |
| Moldawien              | 3,2  | -6,5  |
| Luxemburg              | 3,0  | -3,4  |
| Schweiz                | 2,7  | -1,9  |
| Tschechien             | 2,3  | -4,1  |
| Dänemark               | 2,1  | -5,2  |
| Serbien                | 2,1  | -3,1  |
| Belgien                | 2,0  | -2,7  |
| Österreich             | 1,8  | -3,9  |
| Niederlande            | 1,7  | -3,9  |
| Frankreich             | 1,5  | -2,5  |
| Vereinigtes Königreich | 1,4  | -4,8  |
| Portugal               | 1,3  | -2,5  |
| Italien                | 1,1  | -5,1  |
| Ungarn                 | 1,1  | -6,7  |
| Bulgarien              | -0,1 | -4,9  |
| Spanien                | -0,1 | -3,7  |
| Kroatien               | -1,2 | -5,8  |
| Rumänien               | -1,5 | -7,1  |
| Griechenland           | -4,5 | -2,3  |

und Stütze der Weltwirtschaft. Außenhandel und Industrieproduktion überschritten das Vorkrisenniveau bereits wieder merklich, auch wenn sich die Zuwachsraten zum Jahresende hin leicht abschwächten. Wachstumstreiber war einmal mehr China. Im Jahresverlauf zeigten sich jedoch leichte Überhitzungstendenzen, die mit steigenden Immobilien- und Verbraucherpreisen einhergingen. Auch Japan konnte trotz einer erheblichen Verlangsamung im zweiten Halbjahr ein gutes Wirtschaftswachstum erzielen.

### Der globale Konsumgüterhandel erholt sich

Von der wirtschaftlichen Erholung 2010 konnte auch der Konsumgüterhandel profitieren. Allerdings blieb das Handelswachstum insgesamt hinter der gesamtwirtschaftlichen Entwicklung zurück. Ein Grund dafür war der andauernde Anstieg der Arbeitslosigkeit in vielen Ländern im ersten Halbjahr als Spätfolge der Wirtschaftskrise. Zusätzlich belasteten verschiedene Sparprogramme zur Haushaltskonsolidierung die verfügbaren Einkommen und damit die Konsumausgaben.

Insgesamt entwickelte sich der Handel, ebenso wie die Gesamtwirtschaft in Europa, in unterschiedlicher Geschwindigkeit und Intensität. Asiens Schwellenländer erzielten dagegen auch im Konsumgüterhandel durchweg dynamische Wachstumsraten.

### Deutschland

Nachdem in Deutschland der wirtschaftliche Aufschwung zunächst vor allem exportgetrieben war, konnten im Jahresverlauf auch der private Konsum und der Einzelhandel von der wirtschaftlichen Erholung profitieren – allerdings nur unterdurchschnittlich. Die erfreuliche Entwicklung am Arbeitsmarkt sorgte für einen positiven Einzelhandelstrend im Jahresverlauf. Mit einem nominalen Wachstum von 2 Prozent entwickelte sich der Einzelhandel in Deutschland deutlich besser als in den übrigen Ländern Westeuropas.

### Westeuropa

In Westeuropa wuchs der Handel insgesamt nur schwach. Im ersten Halbjahr bremste die steigende Arbeitslosigkeit in vielen Ländern die Erholung. Erst in der zweiten Jahreshälfte zeigte sich auch im Einzelhandel eine Aufwärtstendenz. Staatliche Sparprogramme trübten in vielen Ländern jedoch die Konsumfreude. Insgesamt erholte sich der Handel in den Ländern Westeuropas analog zur Gesamtwirtschaft uneinheitlich. Griechenland und Spanien waren mit rückläufigen Umsätzen die Schlusslichter, während Schweden, Frankreich und Österreich die stärksten Zuwächse erzielen konnten.

**Osteuropa**

Im Vergleich zur Gesamtwirtschaft entwickelte sich der Einzelhandel in Osteuropa nur unterdurchschnittlich. Wie in Westeuropa zeigte sich auch hier die erkennbare Aufwärtstendenz in den einzelnen Ländern mit unterschiedlicher Intensität. In Einklang mit der gesamtwirtschaftlichen Erholung wiesen vor allem die Türkei, Russland und Polen gute Einzelhandelszuwächse auf. In Bulgarien, Tschechien oder der Slowakei waren die Umsätze hingegen 2010 rückläufig.

**Asien/Afrika**

In Asien und auch in den Ländern Nordafrikas profitierte der Einzelhandel von der hohen Wirtschaftsdynamik. In China und Indien wuchsen die Einzelhandelsumsätze erneut zweistellig; und auch in Japan entwickelte sich der Einzelhandel positiv.

**Metro Cash & Carry: Branchenentwicklung im Selbstbedienungsgroßhandel**

Metro Cash & Carry ist international führend im Selbstbedienungsgroßhandel. Im Juni 2010 erfolgte der Markteintritt in Ägypten. Im Zuge der kontinuierlichen strategischen Portfolio-Optimierung hat die Vertriebslinie mit Wirkung zum 30. November 2010 das Großhandelsgeschäft in Marokko veräußert. Somit war Metro Cash & Carry Ende 2010 in 30 Ländern tätig.

Die Entwicklung im Selbstbedienungsgroßhandel war 2010 in Deutschland und Westeuropa geprägt von der unterschiedlich schnellen Erholung von den Folgen der Wirtschaftskrise. Der Umsatz lag in Deutschland leicht unter dem Vorjahresniveau, wobei sich Metro Cash & Carry auf dem selben Niveau wie der vergleichbare Wettbewerb entwickelte. In den westeuropäischen Ländern, in denen Metro Cash & Carry vertreten ist, entwickelten sich die Erlöse der Branche uneinheitlich. Insgesamt wurde 2010 in Westeuropa der Umsatz des Vorjahres leicht übertroffen.

In Osteuropa sind die Umsätze im Selbstbedienungsgroßhandel gestiegen. Preissteigerungen bei Lebensmitteln, insbesondere in der zweiten Jahreshälfte, wirkten sich ebenso positiv auf die Branchenentwicklung aus wie die Aufwertung einiger osteuropäischer Währungen. Sehr starke Umsatzsteigerungen verzeichnete die Branche in Russland und der Türkei.

Die höchsten Wachstumsraten erzielte das Cash-&-Carry-Format erneut in Asien. Dort entwickelten sich die Umsätze im Selbstbedienungsgroßhandel dynamischer als im modernen Lebensmitteleinzelhandel. Die traditionell geprägten

Handelsstrukturen und die geringe Marktkonzentration bieten auch weiterhin ein hohes Wachstumspotenzial. Die Region war 2010 ein Schwerpunkt der Expansion von Metro Cash & Carry.

**Real: Branchenentwicklung im Lebensmitteleinzelhandel**

Die Vertriebslinie Real ist im großflächigen Lebensmitteleinzelhandel die Nummer zwei in Deutschland und zählt auch in Osteuropa zu den führenden Anbietern dieses Vertriebsformats. Im abgelaufenen Geschäftsjahr startete Real in Deutschland den Verkauf über das Internet. Das Sortiment umfasst vor allem Nicht-Lebensmittelprodukte. Außerdem testet die Vertriebslinie in Deutschland mit „Real Drive“ ein neuartiges Formatkonzept, bei dem Kunden Lebensmittel über das Internet bestellen und anschließend selbst im Drive-in-Shop abholen können.

Der Umsatz im Lebensmitteleinzelhandel in Deutschland hat 2010 das Vorjahresniveau knapp übertroffen. Im ersten Halbjahr setzte sich die deflationäre Tendenz bei den Lebensmittelpreisen fort. Ab der zweiten Jahreshälfte stiegen die Preise bei schnell-drehenden Konsumgütern zwar wieder an; bezogen auf das gesamte Jahr ergaben sich daraus aber keine wesentlichen positiven Umsatzimpulse. Besser als der Gesamtmarkt entwickelten sich die nominalen Erlöse im großflächigen Lebensmitteleinzelhandel mit einer Verkaufsfläche von mehr als 2.500 Quadratmetern. Auf bereinigter Verkaufsfläche gingen die Umsätze der großen Verbrauchermärkte jedoch zurück. Im Vergleich dazu entwickelte sich der Umsatz von Real flächenbereinigt erneut besser als der des vergleichbaren Wettbewerbs.

In den osteuropäischen Ländern, in denen Real vertreten ist, sind die Umsätze im modernen Lebensmitteleinzelhandel 2010 erneut deutlich gestiegen. Allerdings lagen die Wachstumsraten zum Teil deutlich unter dem Niveau der Vorjahre. Die positive Erlösentwicklung ist überwiegend auf Preissteigerungen bei Lebensmitteln sowie eine höhere Nachfrage der Konsumenten zurückzuführen. Dagegen hat die Expansion im modernen Lebensmitteleinzelhandel vor dem Hintergrund der Wirtschaftskrise an Dynamik verloren. Dabei blieb der Marktanteil der modernen Großflächenkonzepte am Gesamtmarkt nahezu unverändert.

**Media Markt und Saturn: Branchenentwicklung im Elektrofachhandel**

Die Unternehmensgruppe Media Markt und Saturn hat im abgelaufenen Geschäftsjahr ihre Marktführerschaft im

europäischen Elektrofachhandel weiter ausgebaut. Mit der Eröffnung des ersten Media Markts in China erfolgte im November 2010 der Eintritt in den dynamisch wachsenden asiatischen Markt.

Der deutsche Elektrofachhandel profitierte von der guten Stimmung der Konsumenten und konnte hohe Umsatzzuwächse verzeichnen. Die Fußball-Weltmeisterschaft belebte das ohnehin hohe Kundeninteresse an Unterhaltungselektronik. Die Nachfrage nach Informationstechnologie war ebenfalls hoch. Flachbildfernseher und Computer erzielten 2010 neue Absatzrekorde. Nachdem sich Media Markt und Saturn 2009 – auch aufgrund der großen Anzahl erfolgreicher Sonderaktionen aus Anlass des 30-jährigen Bestehens von Media Markt – deutlich besser als die Branche entwickelt hatte, blieb die Umsatzentwicklung 2010 hinter dem Branchendurchschnitt zurück.

In Westeuropa entwickelten sich 2010 die Umsätze im Elektrofachhandel positiv. Die Branche zeigte sich nach zwei schwächeren Jahren bereits 2010 in fast allen Ländern gut erholt von der Wirtschaftskrise. Media Markt und Saturn hat in allen westeuropäischen Ländern den Marktanteil gesteigert oder zumindest behauptet.

In Osteuropa entwickelte sich der Elektrofachhandel 2010 uneinheitlich: Hohen Wachstumsraten in Russland und der Türkei standen rückläufige Marktentwicklungen in Griechenland, Ungarn – den Ländern mit einer hohen Staatsverschuldung – sowie Polen gegenüber. Media Markt und Saturn konnte, abgesehen von Polen, in allen osteuropäischen Märkten Marktanteile hinzugewinnen.

Der Online-Absatz wuchs in Deutschland und in Westeuropa überproportional, erreicht in den meisten Ländern aber weiterhin nur geringe Marktanteile. Eine Ausnahme hiervon bilden Deutschland, die Niederlande, Österreich und die Schweiz. Media Markt und Saturn hat 2010 den Online-Verkauf in den Niederlanden und in Österreich gestartet. In Deutschland wurde das Angebot kostenpflichtiger digitaler Download-Inhalte von Musik und Software auf Filme und elektronische Bücher ausgeweitet. In Italien vertreibt Media Markt und Saturn bereits seit mehreren Jahren Produkte über das Internet.

### **Galeria Kaufhof: Branchenentwicklung im Warenhausgeschäft**

Die Vertriebslinie Galeria Kaufhof hat sich 2010 erneut besser entwickelt als das deutsche Warenhaussegment. Mit der posi-

tiven Umsatzentwicklung festigte Galeria Kaufhof ihre Rolle im deutschen Warenhaussegment als Konzept- und Systemführer.

Der Branchenumsatz lag 2010 in Deutschland etwa auf dem Niveau von 2009. Damit entwickelte sich das Warenhausgeschäft besser als in vorangegangenen Jahren, in denen die Umsätze, vor allem durch Geschäftsaufgaben, deutlich rückläufig waren. Die positive Erlösentwicklung bei Textilien leistete hierzu einen wesentlichen Beitrag. Trotz des vergleichsweise guten Abschneidens konnte das Warenhaussegment mit dem Umsatzwachstum im deutschen Einzelhandel nicht ganz Schritt halten und entwickelte sich auch 2010 unterdurchschnittlich.

In Belgien setzte sich die positive Entwicklung von Galeria Inno auch im Geschäftsjahr 2010 fort. Im Vergleich zum Einzelhandel nahmen die Erlöse von Galeria Inno erneut überproportional zu.

### **Immobilien: Branchenentwicklung im Immobiliengeschäft**

Die Erholung der Weltwirtschaft spiegelt sich in dem einsetzenden Aufwärtstrend der Immobilienmärkte wider. Das Volumen der Investitionen in gewerbliche Immobilien nahm weltweit zu, doch die Nachwehen der Finanzkrise waren weiter deutlich zu spüren. Anleger blieben weiterhin risikoscheu und investierten fast ausschließlich in sogenannte Core-Immobilien in etablierten Lagen mit guter Mieterbonität und langfristigen Mietverträgen.

Die Erholung an den Immobilienmärkten ist regional differenziert zu betrachten. In Europa verlief die Gesundung eher schleppend und sehr heterogen. 2010 wurden europaweit 105 Mrd. € umgesetzt, was einem Zuwachs von 44 Prozent gegenüber dem Vorjahr entspricht. Rund ein Drittel der Transaktionen entfiel auf Handelsimmobilien. Die Investmentaktivitäten in diesem Segment waren jedoch zu rund 77 Prozent auf die Märkte Vereinigtes Königreich und Deutschland fokussiert. Europaweit ließen sich stabilisierende bis leicht sinkende Immobilienrenditen beobachten; auch der europäische Mietmarkt erholte sich langsam, sodass insgesamt von einem weiteren positiven Trend ausgegangen werden kann.

In Deutschland beflügelte die aussichtsreiche wirtschaftliche Entwicklung den Markt für gewerbliche Immobilien. Im Berichtsjahr nahm das Transaktionsvolumen im Vergleich zum Vorjahr um 83 Prozent zu. Deutschland stand weiterhin im Anlagefokus nationaler wie internationaler Investoren, doch auch

dort beschränkte sich die Nachfrage weitestgehend auf das Top-Segment.

Die Region Mittel- und Osteuropa zeichnete ein uneinheitliches Bild. Allgemein profitierte sie von der zunehmenden Nachfrage aus dem Euroraum. Dies führte dazu, dass das Transaktionsvolumen in den gewerblichen Immobilienmärkten im Jahr 2010 um 90 Prozent im Vergleich zum Vorjahr wuchs. Der Investorenfokus lag jedoch auf den reiferen Märkten Polen und Russland, während kleinere, aufstrebende Märkte wie Serbien weiterhin kaum Aktivität zeigten. Generell waren in der Region weitestgehend stabile Renditen zu beobachten.

Von dem anhaltenden starken Wirtschaftswachstum in Asien profitierten auch die gewerblichen Immobilienmärkte in der Region: Die Nachfrage nach Mietflächen zog stark an, sodass

ein Mietpreiswachstum beobachtet werden konnte. Auch das Immobilien-Transaktionsvolumen verdoppelte sich 2010 im Vergleich zum Vorjahr. Das Investoreninteresse ist in Asien noch vornehmlich lokal dominiert; lediglich bei 12 Prozent des Transaktionsvolumens handelte es sich um sogenannte Cross-Border-Investitionen. In China waren partiell Anzeichen für eine Überhitzung des Immobilienmarkts gegeben: Ein sprunghafter Anstieg von spekulativen Investitionen und Immobilienpreisen setzte die chinesische Regierung unter Handlungsdruck. Dies galt insbesondere für den Wohnungsmarkt beziehungsweise für Metropolen wie Shanghai. Aufgrund des Überangebots an Gewerbeimmobilien in Indien und Vietnam waren die Mietmärkte unter Druck geraten. Das dynamische Wirtschaftswachstum in beiden Ländern ließ die Nachfrage aber wieder aufleben und stoppte den Abwärtstrend der Mieten, während die Immobilienrenditen weitgehend stabil blieben.

### 3. Ertragslage

#### Geschäftsverlauf des Konzerns im Überblick

Die METRO GROUP blickt auf ein erfolgreiches Geschäftsjahr 2010 zurück. Alle Vertriebslinien konnten den Umsatz gegenüber 2009 steigern. Der Konzernumsatz belief sich auf 67,3 Mrd. €. Dies entspricht einem Umsatzanstieg um 2,6 Prozent (in Landeswährung +0,9 Prozent).

Das EBITDA lag mit 3.591 Mio. € deutlich über dem Vorjahreswert von 3.068 Mio. €. Bereinigt um Sonderfaktoren stieg das EBITDA im Berichtsjahr auf 3.726 Mio. € und verbesserte sich damit um 12,3 Prozent.

Das Konzern-EBIT nahm um 530 Mio. € auf 2.211 Mio. € zu. Vor Sonderfaktoren wuchs das EBIT um 19,3 Prozent auf 2.415 Mio. €. Damit erreichte die METRO GROUP das höchste Ergebnis in ihrer Unternehmensgeschichte.

#### Umsatz- und Ergebnisentwicklung

Im Geschäftsjahr 2010 stieg der Konzernumsatz der METRO GROUP um 2,6 Prozent auf 67,3 Mrd. € (Vorjahr 65,5 Mrd. €).

In Deutschland ging der Umsatz um 1,4 Prozent auf 26,1 Mrd. € zurück; bereinigt um Standortabgaben und Desinvestitionen

#### Umsatzentwicklung im Konzern

nach Vertriebslinien und nach Regionen

|                        | 2010<br>Mio. € | 2009<br>Mio. € | Veränderung in % |                                                   |                      |
|------------------------|----------------|----------------|------------------|---------------------------------------------------|----------------------|
|                        |                |                | in €             | Wechsel-<br>kurseffekte<br>in Prozent-<br>punkten | in Lokal-<br>währung |
| Metro Cash & Carry     | 31.095         | 30.613         | 1,6              | 2,2                                               | -0,6                 |
| Real                   | 11.499         | 11.298         | 1,8              | 1,6                                               | 0,2                  |
| Media Markt und Saturn | 20.794         | 19.693         | 5,6              | 1,3                                               | 4,3                  |
| Galeria Kaufhof        | 3.584          | 3.539          | 1,3              | 0,0                                               | 1,3                  |
| Sonstige               | 286            | 386            | -26,0            | -                                                 | -                    |
| <b>METRO GROUP</b>     | <b>67.258</b>  | <b>65.529</b>  | <b>2,6</b>       | <b>1,7</b>                                        | <b>0,9</b>           |
| davon Deutschland      | 26.130         | 26.511         | -1,4             | 0,0                                               | -1,4                 |
| davon international    | 41.128         | 39.018         | 5,4              | 2,9                                               | 2,5                  |
| Westeuropa             | 21.528         | 20.932         | 2,8              | 0,7                                               | 2,1                  |
| Osteuropa              | 16.880         | 15.766         | 7,1              | 5,6                                               | 1,5                  |
| Asien/Afrika           | 2.720          | 2.320          | 17,3             | 4,4                                               | 12,9                 |

#### Konzernumsatz METRO GROUP 2010

nach Regionen

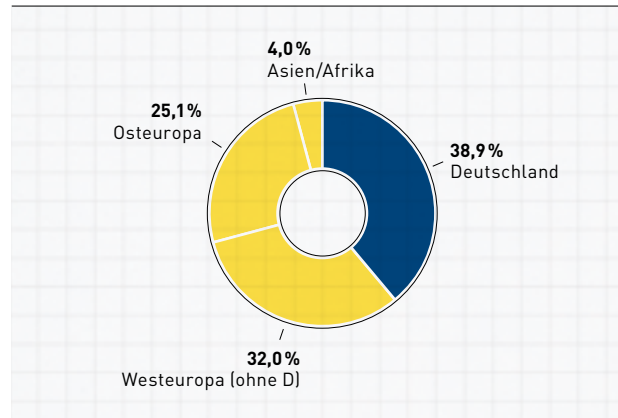

wurde jedoch nahezu das Niveau des Vorjahres erreicht. Im internationalen Geschäft konnte der Umsatz um 5,4 Prozent auf 41,1 Mrd. € zulegen (in Landeswährung +2,5 Prozent). Damit stieg der internationale Umsatzanteil von 59,5 Prozent auf 61,1 Prozent. In Westeuropa legte der Umsatz um 2,8 Prozent auf 21,5 Mrd. € zu (in Landeswährung +2,1 Prozent). In Osteuropa stieg der Umsatz um 7,1 Prozent auf 16,9 Mrd. € (in Landeswährung +1,5 Prozent). In Asien/Afrika wuchs der Umsatz um 17,3 Prozent auf 2,7 Mrd. € (in Landeswährung +12,9 Prozent).

Das EBIT der METRO GROUP konnte im Geschäftsjahr 2010 um 31,5 Prozent auf 2.211 Mio. € gesteigert werden. Als Sonderfaktor sind Einmalaufwendungen aus dem Effizienz- und Wertsteigerungsprogramm Shape 2012 in Höhe von 204 Mio. € enthalten. Vor Sonderfaktoren erreichte das EBIT einen neuen Rekordwert von 2.415 Mio. €. Dies entspricht einer Ergebnissteigerung um 19,3 Prozent und zeigt, dass Shape 2012 greift und die im Rahmen des Programms umgesetzten Maßnahmen spürbar Wirkung entfalten. Im Geschäftsjahr 2010 trug Shape 2012 nach 208 Mio. € im Vorjahr mit 527 Mio. € zum Ergebnis bei.

In Deutschland verbesserte sich das EBIT um 65 Mio. € auf 399 Mio. €. Vor Sonderfaktoren ging das EBIT in Deutschland um 63 Mio. € auf 524 Mio. € zurück. Hier konnte eine Ergebnisverbesserung bei den Vertriebslinien geringere Erträge aus Immobilienveräußerungen und höhere Kosten im Segment Sonstige nicht kompensieren. Die METRO GROUP konnte das internationale EBIT in allen Regionen deutlich steigern. In Westeuropa legte das EBIT um 35,4 Prozent auf 888 Mio. € zu. Vor Sonderfaktoren betrug das Ergebnis 1.026 Mio. €. Dies entspricht einem Ergebnisanstieg um 45,0 Prozent. In Osteuropa

**Entwicklung des Konzern-EBITDA/EBIT und des EBITDA/EBIT der Vertriebslinien**

| Mio. €                 | EBITDA <sup>1</sup> |                          | EBIT <sup>1</sup> |              |
|------------------------|---------------------|--------------------------|-------------------|--------------|
|                        | 2010                | 2009                     | 2010              | 2009         |
| Metro Cash & Carry     | 1.374               | 1.165                    | 1.104             | 936          |
| Real                   | 321                 | 226 <sup>2</sup>         | 132               | 52           |
| Media Markt und Saturn | 876                 | 851                      | 625               | 608          |
| Galeria Kaufhof        | 233                 | 223                      | 138               | 119          |
| Immobilien             | 1.087               | 953 <sup>2</sup>         | 698               | 551          |
| Sonstige               | -166                | -87                      | -282              | -230         |
| Konsolidierung         | 1                   | -12 <sup>2</sup>         | 0                 | -12          |
| <b>METRO GROUP</b>     | <b>3.726</b>        | <b>3.319<sup>2</sup></b> | <b>2.415</b>      | <b>2.024</b> |

<sup>1</sup> 2010 (2009) bereinigt um Sonderfaktoren aus Shape 2012: Im EBITDA um 135 Mio. € (251 Mio. €), davon entfallen 11 Mio. € (104 Mio. €) auf Metro Cash & Carry, 11 Mio. € (16 Mio. €) auf Real, 58 Mio. € (4 Mio. €) auf Media Markt und Saturn, -1 Mio. € (57 Mio. €) auf Galeria Kaufhof, -14 Mio. € (5 Mio. €) auf Immobilien, 41 Mio. € (65 Mio. €) auf Sonstige sowie 29 Mio. € (0 Mio. €) auf Konsolidierung; im EBIT und im Ergebnis vor Steuern um 204 Mio. € (343 Mio. €), davon entfallen 10 Mio. € (143 Mio. €) auf Metro Cash & Carry, 27 Mio. € (16 Mio. €) auf Real, 133 Mio. € (5 Mio. €) auf Media Markt und Saturn, 0 Mio. € (58 Mio. €) auf Galeria Kaufhof, -20 Mio. € (15 Mio. €) auf Immobilien, 41 Mio. € (106 Mio. €) auf Sonstige sowie 13 Mio. € (0 Mio. €) auf Konsolidierung

<sup>2</sup> Adjustierung aufgrund der saldierten Darstellung von außerplanmäßigen Abschreibungen und Zuschreibungen im EBITDA in Höhe von 9 Mio. € (Real), 6 Mio. € (Immobilien) und -6 Mio. € (Konsolidierung)

wuchs das EBIT um 186 Mio. € auf 920 Mio. €. Vor Sonderfaktoren stieg das EBIT um 152 Mio. € auf 917 Mio. €. In der Region Asien/Afrika verbesserte sich das EBIT um 50 Mio. € auf 5 Mio. €. Vor Sonderfaktoren ging das Ergebnis um 16 Mio. € auf -51 Mio. € zurück und beinhaltet Anlaufkosten für den Markteintritt von Media Markt in China.

**Umsatz- und Ergebnisentwicklung der Vertriebslinien**

**Metro Cash & Carry**

Der Umsatz von Metro Cash & Carry stieg 2010 um 1,6 Prozent (in Landeswährung -0,6 Prozent) auf 31,1 Mrd. €. Auf vergleichbarer Fläche sank der Umsatz um 1,7 Prozent. Die Entwicklung war dabei sowohl in West- als auch in Osteuropa von einer starken Kaufzurückhaltung bei Nicht-Lebensmitteln geprägt.

In Deutschland ging der Umsatz im Gesamtjahr 2010 im Wesentlichen aufgrund von Standortabgaben und Desinvestitionen sowie der gezielten Reduzierung des margenschwachen Geschäfts mit Tabakwaren und Telefonkarten um 2,8 Prozent auf 5,3 Mrd. € zurück. Flächenbereinigt verringerte sich der Umsatz um 1,7 Prozent. Ohne Tabakwaren und Telefonkarten entwickelte sich der flächenbereinigte Umsatz jedoch positiv.

Der internationale Anteil am Umsatz von Metro Cash & Carry nahm von 82,2 Prozent auf 82,9 Prozent zu.

**Umsatz Metro Cash & Carry 2010**

nach Regionen

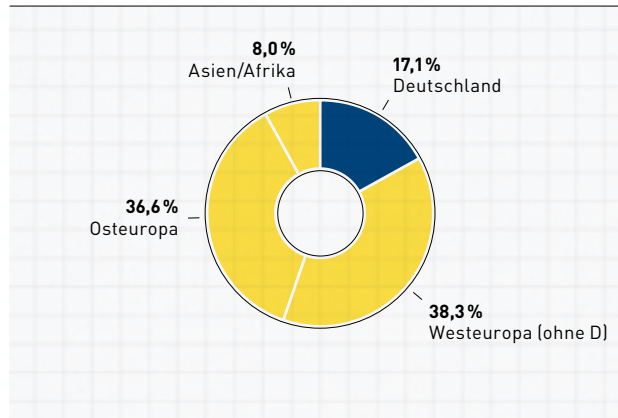

Aufgrund der anhaltend schwierigen wirtschaftlichen Bedingungen blieb der Umsatz in Westeuropa hinter dem Vorjahresniveau zurück und verringerte sich um 1,3 Prozent auf 11,9 Mrd. € (in Landeswährung -1,6 Prozent).

Positiv stellte sich das Geschäft in Osteuropa dar. Der Umsatz in dieser Region betrug 11,4 Mrd. € und stieg damit um 3,5 Prozent (in Landeswährung -1,4 Prozent). Flächenbereinigt ging der Umsatz um 3,6 Prozent zurück. Das Geschäft in Osteuropa war auch im Jahr 2010 von einer starken Kaufzurückhaltung bei Nicht-Lebensmitteln geprägt.

Die Umsatzentwicklung in der Region Asien/Afrika verlief erneut äußerst positiv. Der Umsatz stieg um 19,7 Prozent auf 2,5 Mrd. € (in Landeswährung +14,7 Prozent). Alle asiatischen Länder konnten dabei den Umsatz um einen zweistelligen Prozentwert steigern.

Zum 31. Dezember 2010 war Metro Cash & Carry in 30 Ländern an 687 Standorten vertreten, davon mit 117 Märkten in Deutschland, 259 in Westeuropa, 228 in Osteuropa sowie 83 in Asien/Afrika. Die Gesamtverkaufsfläche umfasste 5,4 Mio. Quadratmeter.

Das EBIT von Metro Cash & Carry nahm um 37,9 Prozent auf 1.094 Mio. € zu. Vor Sonderfaktoren stieg das EBIT um 17,9 Prozent auf 1.104 Mio. €. Dieser Ergebnisanstieg ist auf Margenverbesserungen und Kosteneinsparungen im Rahmen von Shape 2012 zurückzuführen. Mit einer EBIT-Marge von 3,6 Prozent vor Sonderfaktoren hat Metro Cash & Carry seine hohe Ertragsstärke auch in einem wirtschaftlich weiterhin herausfordernden Umfeld unter Beweis gestellt.



### Kennzahlen Metro Cash & Carry 2010

im Vorjahresvergleich

|                              | 2010<br>Mio. €     | 2009<br>Mio. €     | Veränderung in % |                                                   |                      |                                              |
|------------------------------|--------------------|--------------------|------------------|---------------------------------------------------|----------------------|----------------------------------------------|
|                              |                    |                    | in €             | Wechsel-<br>kurseffekte<br>in Prozent-<br>punkten | in Lokal-<br>währung | flächen-<br>bereinigt<br>(Lokal-<br>währung) |
| Umsatz                       | 31.095             | 30.613             | 1,6              | 2,2                                               | -0,6                 | -1,7                                         |
| Deutschland                  | 5.302              | 5.454              | -2,8             | 0,0                                               | -2,8                 | -1,7                                         |
| Westeuropa                   | 11.912             | 12.072             | -1,3             | 0,3                                               | -1,6                 | -1,5                                         |
| Osteuropa                    | 11.407             | 11.020             | 3,5              | 4,9                                               | -1,4                 | -3,6                                         |
| Asien/Afrika                 | 2.474              | 2.067              | 19,7             | 5,0                                               | 14,7                 | 8,1                                          |
| EBITDA                       | 1.374 <sup>1</sup> | 1.165 <sup>1</sup> | 18,0             | -                                                 | -                    | -                                            |
| EBIT                         | 1.104 <sup>1</sup> | 936 <sup>1</sup>   | 17,9             | -                                                 | -                    | -                                            |
| EBIT-Marge (%)               | 3,6 <sup>1</sup>   | 3,1 <sup>1</sup>   | -                | -                                                 | -                    | -                                            |
| Standorte (Anzahl)           | 687                | 668                | -                | -                                                 | -                    | -                                            |
| Verkaufsfläche<br>(1.000 qm) | 5.355              | 5.291              | 1,2              | -                                                 | -                    | -                                            |

<sup>1</sup> Vor Sonderfaktoren Shape 2012

### Real

Der Umsatz von Real legte im Jahr 2010 um 1,8 Prozent auf 11,5 Mrd. € zu (in Landeswährung +0,2 Prozent). Auf vergleichbarer Fläche stieg der Umsatz um 0,1 Prozent.

In Deutschland hat Real in einem schwierigen Umfeld die Re-positionierung weiter vorangetrieben. Zwar verringerte sich der Umsatz um 1,8 Prozent auf 8,4 Mrd. €, jedoch ist dieser Rückgang ausschließlich auf die Verwertung von 13 unprofitablen SB-Warenhäusern zurückzuführen. Der flächenbereinigte Umsatz lag 0,2 Prozent über dem Vorjahr.

### Umsatz Real 2010

nach Regionen

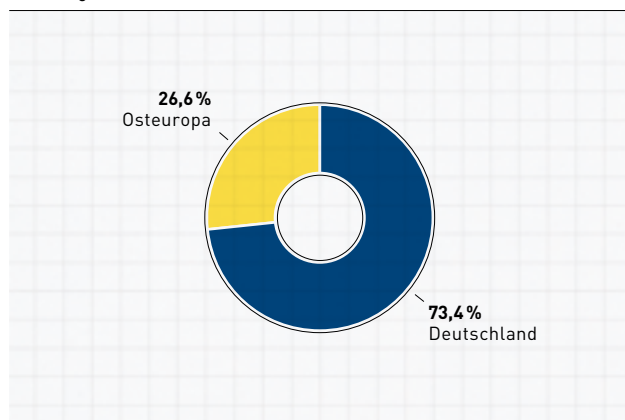

Der internationale Umsatzanteil von Real stieg von 23,9 Prozent auf 26,6 Prozent.

Der Umsatz in Osteuropa erhöhte sich um 13,1 Prozent auf 3,1 Mrd. € (in Landeswährung +6,1 Prozent). Während die Umsätze in Russland und der Türkei dynamisch wuchsen, führten die schwierigen volkswirtschaftlichen Rahmenbedingungen zu einem flächenbereinigten Umsatzrückgang in Rumänien. Der flächenbereinigte Umsatz in Osteuropa sank um 0,5 Prozent. Dabei konnte das starke flächenbereinigte Umsatzwachstum in Russland und der Türkei nahezu den Umsatzrückgang in Rumänien kompensieren.

Ende 2010 umfasste das Standortnetz von Real 429 SB-Warenhäuser in 6 Ländern, davon 320 in Deutschland und 109 in Osteuropa.

Das EBIT verbesserte sich um rund 69 Mio. € auf 105 Mio. €. Auch vor Sonderfaktoren stieg das EBIT deutlich um 80 Mio. € auf 132 Mio. €. Durch Shape 2012 konnte Real in Deutschland die Rohertragsmarge verbessern und die Kosten weiter senken. In Osteuropa konnte erstmals ein positives EBIT erzielt werden. Hier wirkten sich im Rahmen von Shape 2012 insbesondere Produktivitätsgewinne in Russland und der Türkei sowie Kosteneinsparungen in Rumänien positiv aus.

### Kennzahlen Real 2010

im Vorjahresvergleich

|                              | 2010<br>Mio. €   | 2009<br>Mio. €     | Veränderung in % |                                                   |                      |                                              |
|------------------------------|------------------|--------------------|------------------|---------------------------------------------------|----------------------|----------------------------------------------|
|                              |                  |                    | in €             | Wechsel-<br>kurseffekte<br>in Prozent-<br>punkten | in Lokal-<br>währung | flächen-<br>bereinigt<br>(Lokal-<br>währung) |
| Umsatz                       | 11.499           | 11.298             | 1,8              | 1,6                                               | 0,2                  | 0,1                                          |
| Deutschland                  | 8.441            | 8.593              | -1,8             | 0,0                                               | -1,8                 | 0,2                                          |
| Osteuropa                    | 3.058            | 2.705              | 13,1             | 7,0                                               | 6,1                  | -0,5                                         |
| EBITDA                       | 321 <sup>1</sup> | 226 <sup>1,2</sup> | 42,7             | -                                                 | -                    | -                                            |
| EBIT                         | 132 <sup>1</sup> | 52 <sup>1</sup>    | -                | -                                                 | -                    | -                                            |
| EBIT-Marge (%)               | 1,1 <sup>1</sup> | 0,5 <sup>1</sup>   | -                | -                                                 | -                    | -                                            |
| Standorte (Anzahl)           | 429              | 441                | -                | -                                                 | -                    | -                                            |
| Verkaufsfläche<br>(1.000 qm) | 3.107            | 3.184              | -2,4             | -                                                 | -                    | -                                            |

<sup>1</sup> Vor Sonderfaktoren Shape 2012

<sup>2</sup> Adjustierung aufgrund der saldierten Darstellung von außerplanmäßigen Abschreibungen und Zuschreibungen in Höhe von 9 Mio. €

### Media Markt und Saturn

Media Markt und Saturn hat die führende Marktposition in Europa auch im Jahr 2010 bestätigt. Der Umsatz stieg um 5,6 Prozent auf 20,8 Mrd. € (in Landeswährung +4,3 Prozent). Flächenbereinigt sank der Umsatz um 1,2 Prozent.

**Umsatz Media Markt und Saturn 2010**

nach Regionen

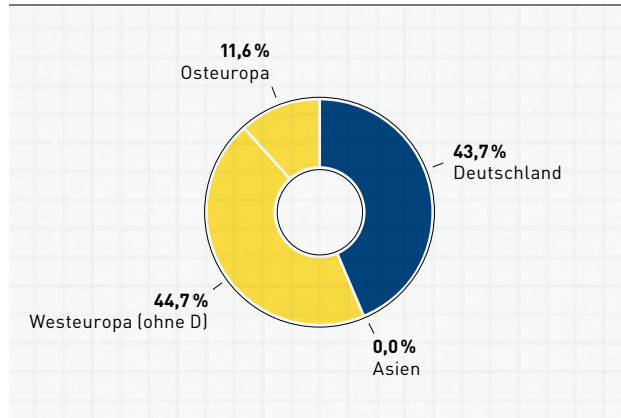

In Deutschland erreichte der Umsatz 2010 nahezu das Vorjahresniveau. Dabei war die Vorjahresbasis von der sehr erfolgreichen Kampagne zum 30. Geburtstag von Media Markt geprägt. Media Markt und Saturn hat pünktlich zum Weihnachtsgeschäft die ersten Produkte der neuen Eigenmarken „ok.“ und „KOENIC“ in das Sortiment aufgenommen. Die Kundenresonanz war äußerst positiv.

Der internationale Umsatzanteil von Media Markt und Saturn stieg von 53,7 Prozent auf 56,3 Prozent.

Der Umsatz in Westeuropa im Gesamtjahr 2010 lag trotz der herausfordernden konjunkturellen Marktbedingungen deutlich über dem Niveau des Vorjahres und stieg um 8,7 Prozent auf 9,3 Mrd. € (in Landeswährung +7,4 Prozent). Flächenbereinigt legte der Umsatz um 0,6 Prozent zu.

In Osteuropa hingegen erzielte Media Markt und Saturn im Geschäftsjahr 2010 einen Umsatzzuwachs um 18,3 Prozent auf 2,4 Mrd. € (in Landeswährung +10,8 Prozent). Der flächenbereinigte Umsatz entwickelte sich in den einzelnen Ländern sehr heterogen und ging in Summe um 7,1 Prozent zurück. Während der flächenbereinigte Umsatz in Russland und der Türkei deutlich anstieg, sank der Umsatz in Polen vor allem aufgrund einer rückläufigen Marktentwicklung im Elektrofachhandel.

In Asien wurde der erste Media Markt in Shanghai eröffnet und erzielte seit Mitte November bereits einen Umsatz von 9 Mio. €.

Ende 2010 umfasste das Standortnetz von Media Markt und Saturn 877 Elektrofachmärkte, davon 382 in Deutschland, 353 in Westeuropa, 141 in Osteuropa sowie 1 Standort in Asien.

Das EBIT von Media Markt und Saturn betrug 492 Mio. € nach 603 Mio. € im Vorjahr. Dieser Rückgang resultiert im Wesentlichen aus den Sonderfaktoren im Zusammenhang mit der – noch unter Vorbehalt der Kartellbehörde stehenden – Veräußerung der französischen Standorte, mit der die METRO GROUP die strategische Portfolio-Optimierung konsequent vorantreibt. Vor Sonderfaktoren stieg das EBIT um 17 Mio. € auf 625 Mio. €. Das EBIT beinhaltet Anlaufkosten für den Markteintritt in China sowie den Aufbau des Online- und Eigenmarkengeschäfts. In Deutschland, West- und Osteuropa ist das EBIT vor Sonderfaktoren gestiegen.

**Kennzahlen Media Markt und Saturn 2010**

im Vorjahresvergleich

|                              | 2010<br>Mio. €   | 2009<br>Mio. €   | Veränderung in % |                                                   |                      |                                              |
|------------------------------|------------------|------------------|------------------|---------------------------------------------------|----------------------|----------------------------------------------|
|                              |                  |                  | in €             | Wechsel-<br>kurseffekte<br>in Prozent-<br>punkten | in Lokal-<br>währung | flächen-<br>bereinigt<br>(Lokal-<br>währung) |
| Umsatz                       | 20.794           | 19.693           | 5,6              | 1,3                                               | 4,3                  | -1,2                                         |
| Deutschland                  | 9.087            | 9.114            | -0,3             | 0,0                                               | -0,3                 | -1,6                                         |
| Westeuropa                   | 9.283            | 8.538            | 8,7              | 1,3                                               | 7,4                  | 0,6                                          |
| Osteuropa                    | 2.415            | 2.041            | 18,3             | 7,5                                               | 10,8                 | -7,1                                         |
| Asien/Afrika                 | 9                | 0                | -                | -                                                 | -                    | -                                            |
| EBITDA                       | 876 <sup>1</sup> | 851 <sup>1</sup> | 2,9              | -                                                 | -                    | -                                            |
| EBIT                         | 625 <sup>1</sup> | 608 <sup>1</sup> | 2,8              | -                                                 | -                    | -                                            |
| EBIT-Marge (%)               | 3,0 <sup>1</sup> | 3,1 <sup>1</sup> | -                | -                                                 | -                    | -                                            |
| Standorte (Anzahl)           | 877              | 818              | -                | -                                                 | -                    | -                                            |
| Verkaufsfläche<br>(1.000 qm) | 2.829            | 2.633            | 7,4              | -                                                 | -                    | -                                            |

<sup>1</sup> Vor Sonderfaktoren Shape 2012

**Galeria Kaufhof**

Der Umsatz von Galeria Kaufhof stieg 2010 gegenüber dem Vorjahr trotz der Schließung von drei unprofitablen Standorten um 1,3 Prozent auf 3,6 Mrd. €. Flächenbereinigt legte der Umsatz um 1,2 Prozent zu.

In Deutschland stieg der Umsatz um 1,0 Prozent auf 3,3 Mrd. €. Flächenbereinigt war ein Umsatzzuwachs um 1,1 Prozent zu verzeichnen. Wertschöpfungsmaßnahmen im Warengeschäft wie zum Beispiel Sortimentsoptimierungen im Zuge der Trading-up-Strategie konnte Galeria Kaufhof weiterhin erfolgreich umsetzen. Damit hat Galeria Kaufhof eine führende Rolle im deutschen Warenhaussegment bestätigt.

In Westeuropa stieg der Umsatz um 3,4 Prozent auf 333 Mio. €. Flächenbereinigt legte der Umsatz um 2,9 Prozent zu.

Ende 2010 betrieb Galeria Kaufhof 138 Warenhäuser, davon 123 Standorte in Deutschland und 15 Standorte in Belgien.

**Umsatz Galeria Kaufhof 2010**

nach Regionen

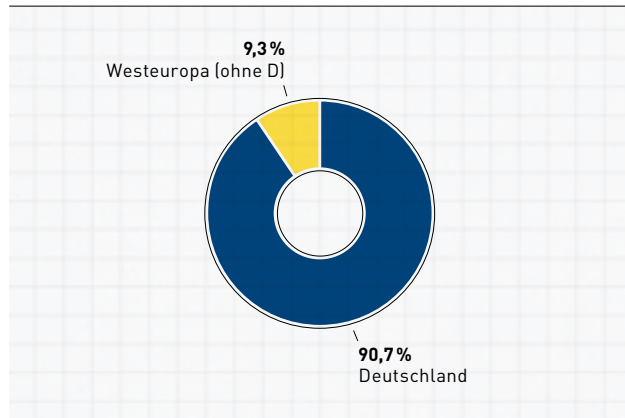

Das EBIT erreichte 138 Mio. € nach 61 Mio. € im Vorjahr. Vor Sonderfaktoren lag das EBIT um 19 Mio. € über dem Vorjahreswert.

Die EBIT-Marge vor Sonderfaktoren konnte um 0,5 Prozentpunkte deutlich gesteigert werden und erreichte einen Wert von 3,9 Prozent.

**Kennzahlen Galeria Kaufhof 2010**

im Vorjahresvergleich

|                              | 2010<br>Mio. €   | 2009<br>Mio. €   | Veränderung in % |                                                   |                      |                                              |
|------------------------------|------------------|------------------|------------------|---------------------------------------------------|----------------------|----------------------------------------------|
|                              |                  |                  | in €             | Wechsel-<br>kurseffekte<br>in Prozent-<br>punkten | in Lokal-<br>währung | flächen-<br>bereinigt<br>(Lokal-<br>währung) |
| Umsatz                       | 3.584            | 3.539            | 1,3              | 0,0                                               | 1,3                  | 1,2                                          |
| Deutschland                  | 3.251            | 3.217            | 1,0              | 0,0                                               | 1,0                  | 1,1                                          |
| Westeuropa                   | 333              | 322              | 3,4              | 0,0                                               | 3,4                  | 2,9                                          |
| EBITDA                       | 233 <sup>1</sup> | 223 <sup>1</sup> | 4,7              | -                                                 | -                    | -                                            |
| EBIT                         | 138 <sup>1</sup> | 119 <sup>1</sup> | 16,5             | -                                                 | -                    | -                                            |
| EBIT-Marge (%)               | 3,9 <sup>1</sup> | 3,4 <sup>1</sup> | -                | -                                                 | -                    | -                                            |
| Standorte (Anzahl)           | 138              | 141              | -                | -                                                 | -                    | -                                            |
| Verkaufsfläche<br>(1.000 qm) | 1.480            | 1.501            | -1,4             | -                                                 | -                    | -                                            |

<sup>1</sup> Vor Sonderfaktoren Shape 2012

**Immobilien**

Das Segment Immobilien umfasst alle Immobilien der METRO GROUP in 30 Ländern sowie immobiliennahe Dienstleistungen.

Das Immobilienmanagement trägt aktiv zur Wertgenerierung der METRO GROUP bei. Durch die internationale Expansion,

das aktive Asset- und Portfoliomanagement sowie einen optimierten Ressourceneinsatz soll das Immobilienvermögen langfristig gesichert und systematisch gesteigert werden.

Als eine der größten Managementgesellschaften für Handelsimmobilien in Europa unterstützt die METRO Group Asset Management die internationale Expansion der Vertriebslinien. Die Verwertung attraktiver Grundstücke und Gebäude aus den saturierten Märkten in Westeuropa dient dem Geschäftsbereich dabei als Finanzierungsgrundlage, um neues Immobilienvermögen in den Wachstumsmärkten Osteuropas und Asiens aufzubauen. Darüber hinaus sichert und steigert die METRO Group Asset Management systematisch und langfristig den Wert des Immobilienvermögens durch aktives Asset- und Portfoliomanagement sowie einen nachhaltigen Ressourceneinsatz.

Das EBIT stieg deutlich von 536 Mio. € auf 718 Mio. €. Vor Sonderfaktoren wurde ein Ergebnis von 698 Mio. € und damit ein Anstieg von 147 Mio. € erzielt. Die Ergebnisverbesserung ist dabei im Wesentlichen auf die Veräußerung von 20 Eigentumsstandorten von Metro Cash & Carry Italien zurückzuführen. Diese erfolgte über eine Platzierung von Fondsanteilen. Mit diesem professionellen Vermarktungsansatz hebt die METRO GROUP systematisch Werte.

**Eigentumsstandorte (688 Standorte)**

nach Regionen

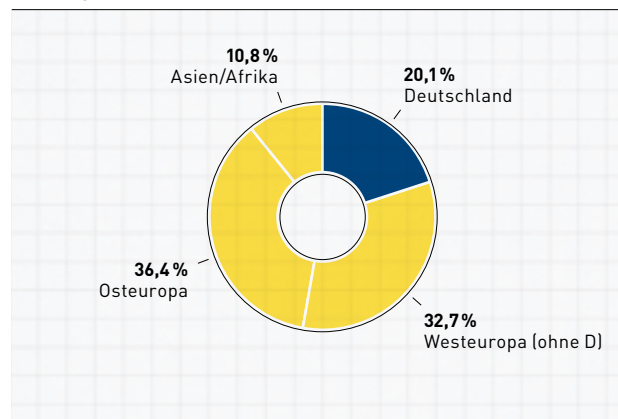

**Sonstige**

Das Segment Sonstige enthält neben der METRO AG als strategische Führungsholding der METRO GROUP unter anderem die Einkaufsorganisation in Hongkong, die auch für fremde Dritte tätig ist, sowie die Logistikdienstleistungen und das Gastronomiegeschäft. 2010 ging der Umsatz des Segments

Sonstige um 26,0 Prozent auf 286 Mio. € zurück. Dieser Rückgang beruht vor allem auf der Trennung vom operativen Geschäft der AXXE Reisegastronomie, der Abgabe von Grillpfanne-Standorten sowie einem Rückgang des Einkaufsvolumens für Dritte.

Das EBIT betrug –323 Mio. € nach –336 Mio. € im Jahr 2009. Vor Sonderfaktoren lag das EBIT mit –282 Mio. € um 52 Mio. € unter dem Vorjahreswert. Der EBIT-Rückgang resultiert im Wesentlichen aus höheren Aufwendungen für Funktionen, die für die Unternehmensführung (Governance) relevant sind, sowie aus Einmalaufwendungen im Zusammenhang mit dem Ausscheiden von Vorstandsmitgliedern der METRO AG.

## Finanzergebnis und Steuern

| Mio. €                                | 2010                     | 2009                     |
|---------------------------------------|--------------------------|--------------------------|
| <b>Betriebliches Ergebnis EBIT</b>    | <b>2.211<sup>1</sup></b> | <b>1.681<sup>1</sup></b> |
| Ergebnis aus assoziierten Unternehmen | 0                        | 0                        |
| Sonstiges Beteiligungsergebnis        | 15                       | 15                       |
| Zinsertrag/-aufwand (Zinsergebnis)    | –606                     | –553                     |
| Übriges Finanzergebnis                | 10                       | –93                      |
| <b>Finanzergebnis</b>                 | <b>–581</b>              | <b>–631</b>              |
| <b>Ergebnis vor Steuern EBT</b>       | <b>1.630<sup>1</sup></b> | <b>1.050<sup>1</sup></b> |
| Steuern vom Einkommen und vom Ertrag  | –694                     | –531                     |
| <b>Periodenergebnis</b>               | <b>936<sup>2</sup></b>   | <b>519<sup>2</sup></b>   |

<sup>1</sup> Enthält Sonderfaktoren Shape 2012 im Jahr 2010 in Höhe von 204 Mio. € (Vorjahr 343 Mio. €)

<sup>2</sup> Enthält Sonderfaktoren Shape 2012 im Jahr 2010 nach Steuern in Höhe von 203 Mio. € (Vorjahr 305 Mio. €)

### Finanzergebnis

Das Finanzergebnis besteht im Wesentlichen aus dem Zinsergebnis von –606 Mio. € (Vorjahr –553 Mio. €). Die Zinsaufwendungen stiegen um 36 Mio. €, wovon 22 Mio. € auf Zinsaufwendungen im Zusammenhang mit betrieblicher Altersvorsorge entfallen. Darüber hinaus enthält das Zinsergebnis um 15 Mio. € geringere Zinserträge aus Krediten und Forderungen inklusive Zahlungsmitteln und Zahlungsmitteläquivalenten. Das übrige Finanzergebnis erhöhte sich um 103 Mio. € auf 10 Mio. €. Dies resultiert vor allem aus dem Anstieg des Gesamtergebnisses aus Wechselkurseffekten sowie Bewertungsergebnissen von Sicherungsgeschäften und Sicherungszusammenhängen um 101 Mio. €.

Weitere Angaben zum Finanzergebnis sind im Konzernanhang unter den Nummern 6 bis 8 „Sonstiges Beteiligungsergebnis“,

„Zinsertrag/Zinsaufwand“ und „Übriges Finanzergebnis“ enthalten.

### Steuern

Die Zunahme an gezahlten beziehungsweise geschuldeten Steuern ist auf die positive Ergebnisentwicklung des Geschäftsjahres zurückzuführen. Dies hat insbesondere in Osteuropa zu einem Anstieg der Steuerzahlungen geführt.

| Mio. €                                            | 2010       | 2009       |
|---------------------------------------------------|------------|------------|
| Gezahlte bzw. geschuldete Steuern                 | 659        | 495        |
| davon Deutschland                                 | (215)      | (158)      |
| davon international                               | (444)      | (337)      |
| davon Steueraufwand/-ertrag der laufenden Periode | (610)      | (507)      |
| davon Steueraufwand/-ertrag aus Vorperioden       | (49)       | (–12)      |
| Latente Steuern                                   | 35         | 36         |
| davon Deutschland                                 | (22)       | (42)       |
| davon international                               | (13)       | (–6)       |
|                                                   | <b>694</b> | <b>531</b> |

Weitere Erläuterungen zu Steuern vom Einkommen und vom Ertrag sind im Konzernanhang unter der Nummer 10 „Steuern vom Einkommen und vom Ertrag“ enthalten.

## Konzerngewinn und Ergebnis je Aktie

Das Periodenergebnis (Konzernjahresüberschuss) 2010 lag mit 936 Mio. € um 80,2 Prozent über dem Wert des Vorjahres. Nach Abzug der Anteile nicht beherrschender Gesellschafter verbleibt ein auf die Aktionäre der METRO AG entfallender Konzerngewinn von 850 Mio. € (Vorjahr 383 Mio. €).

Das Periodenergebnis enthält Sonderfaktoren in Höhe von 203 Mio. € (Vorjahr 305 Mio. €) aus Shape 2012. Das um diese Sonderfaktoren bereinigte Periodenergebnis beträgt somit 1.139 Mio. € (Vorjahr 824 Mio. €).

Die METRO GROUP erzielte im Geschäftsjahr 2010 ein Ergebnis je Aktie von 2,60 € (Vorjahr 1,17 €). Der Berechnung war im Geschäftsjahr 2010 wie im Vorjahr eine gewichtete Anzahl von 326.787.529 Aktien zugrunde zu legen. Auf diese Aktienanzahl wurde der den Aktionären zustehende Konzerngewinn von 850 Mio. € verteilt. Ein Verwässerungseffekt war weder im Berichtsjahr noch im Vorjahr gegeben.

|                                                                        |        | 2010              | Veränderung       |         |       |
|------------------------------------------------------------------------|--------|-------------------|-------------------|---------|-------|
|                                                                        |        |                   | 2009              | Absolut | %     |
| Periodenergebnis                                                       | Mio. € | 936 <sup>1</sup>  | 519 <sup>1</sup>  | 417     | 80,2  |
| Den Anteilen nicht beherrschender Gesellschafter zuzurechnender Gewinn | Mio. € | 86                | 136               | -50     | -36,7 |
| Den Anteilseignern der METRO AG zuzurechnender Gewinn                  | Mio. € | 850 <sup>2</sup>  | 383 <sup>2</sup>  | 467     | -     |
| Ergebnis je Aktie <sup>3</sup>                                         | €      | 2,60 <sup>4</sup> | 1,17 <sup>4</sup> | 1,43    | -     |
| Ergebnis je Aktie vor Sonderfaktoren <sup>3,5</sup>                    | €      | 3,12              | 2,10              | 1,02    | 48,6  |

<sup>1</sup> Enthält Sonderfaktoren aus Shape 2012 nach Steuern in Höhe von 203 Mio. € (Vorjahr 305 Mio. €)

<sup>2</sup> Enthält Sonderfaktoren aus Shape 2012 nach Steuern in Höhe von 169 Mio. € (Vorjahr 303 Mio. €)

<sup>3</sup> Nach Anteilen nicht beherrschender Gesellschafter

<sup>4</sup> Enthält Sonderfaktoren aus Shape 2012 nach Steuern in Höhe von 0,52 € je Aktie (Vorjahr 0,93 €)

<sup>5</sup> Bereinigt um Sonderfaktoren Shape 2012

Das Ergebnis je Aktie vor Sonderfaktoren, das heißt bereinigt um die Sonderfaktoren aus Shape 2012, lag bei 3,12 € (Vorjahr 2,10 €).

### EBIT after Cost of Capital (EBITaC)

Die Leistungsstärke der METRO GROUP zeigt sich in ihrer Fähigkeit, den Unternehmenswert durch Wachstum und operative Effizienz kontinuierlich zu steigern und dabei das Geschäftsvermögen optimal einzusetzen. Um eine nachhaltige Wertsteigerung sicherzustellen, setzt die METRO GROUP seit dem Jahr 2000 wertorientierte Kennzahlen zur Steuerung ein. Seit 2009 ermitteln wir den Wertbeitrag mit der Kennzahl EBITaC (EBIT after Cost of Capital). Ein positiver Wertbeitrag ist erreicht, wenn das Ergebnis vor Zinsen und Steuern über den Kapitalkosten liegt, die für die Finanzierung des durchschnittlich gebundenen Geschäftsvermögens erforderlich sind.

$$\begin{aligned} \text{EBITaC} &= \text{EBIT}^1 - \text{Kapitalkosten} \\ &= \text{EBIT}^1 - (\text{Geschäftsvermögen} \times \text{WACC}) \end{aligned}$$

<sup>1</sup> Sonderfaktoren Shape 2012 über vier Jahre periodisiert

Die Verwendung der Kennzahl EBITaC ermöglicht es der METRO GROUP, sich auf die wesentlichen und vom Management beeinflussbaren Treiber des operativen Geschäfts zu konzentrieren: die Steigerung der operativen Effizienz, wertsteigerndes Wachstum und die Optimierung der Kapitalbindung. Das Effizienz- und Wertsteigerungsprogramm Shape 2012 trägt insbesondere zur Steigerung der operativen Effizienz sowie zur Optimierung des Kapitaleinsatzes bei. Wertsteigerndes Wachstum wird hingegen weiterhin durch die Strategie der

METRO GROUP erreicht, in renditestarke Wachstumsregionen Osteuropas und Asiens zu investieren.

Die Kapitalkosten stellen die erwartete Entlohnung der Investoren für das zur Verfügung gestellte Kapital und das eingegangene Anlagerisiko vor Steuern dar. Sie werden ermittelt, indem das durchschnittlich gebundene Geschäftsvermögen mit dem gewichteten Kapitalkostensatz vor Steuern (WACC, Weighted Average Cost of Capital) multipliziert wird.

Der Kapitalkostensatz vor Steuern entspricht der von den Kapitalgebern geforderten Mindestrendite auf das eingesetzte Kapital. Er spiegelt die gesamten Kosten des eingesetzten Kapitals wider und setzt sich demnach aus dem Eigen- und dem Fremdkapitalkostensatz zusammen. Bisher wurde bei der Kalkulation der Kapitalkosten ein einheitliches Risiko für alle Vertriebslinien verwendet. Aus Gründen der Praktikabilität sah dieses jedoch zum einen keine Differenzierung zwischen Handels- und Immobiliengeschäft vor, zum anderen wurde bei der Bestimmung des WACC für die Segmente keine Gewichtung der Länderrisiken berücksichtigt. Infolge der Einführung des Immobiliensegments als eigenständiges Profitcenter hat die METRO GROUP 2010 die Kapitalkostensystematik angepasst. Dies hat wesentliche Auswirkungen auf die Konzernsteuerung. Durch die Anwendung von risikoadäquaten Kapitalkosten, die nach Ländern und Segmenten differenziert sind, kann die METRO GROUP unter anderem die Allokation der verfügbaren Investitionsmittel optimiert vornehmen. Die Höhe des Kapitalkostensatzes wird bestimmt durch einen risikofreien Zins, einen länderspezifischen Risikozuschlag, das segment-spezifische Geschäftsrisiko sowie das Finanzierungsrisiko. Die Bewertung des jeweiligen Geschäftsrisikos der Segmente, abgebildet im Beta-Faktor, wurde durch eine Analyse von Vergleichsunternehmen für die jeweiligen Vertriebslinien und das Immobiliensegment vorgenommen. Zudem werden in der neuen WACC-Systematik branchenspezifische Finanzierungsstrukturen und individuelle Länderrisiken zur Kalkulation der Segment-WACCs explizit berücksichtigt. Im Jahr 2010 lag der Kapitalkostensatz der METRO GROUP vor Steuern bei 9,8 Prozent. Dieser ergibt sich aus den mit dem Geschäftsvermögen gewichteten segmentspezifischen Kapitalkostensätzen.

Das Geschäftsvermögen stellt das zu verzinsende Vermögen dar. Um die Nachvollziehbarkeit der Berechnung nochmals zu erhöhen, wurde die Definition des Geschäftsvermögens weiter konkretisiert. Das Geschäftsvermögen setzt sich aus dem Segmentvermögen zuzüglich der operativen Kasse und abzüglich der Verbindlichkeiten aus Lieferungen und

| EIGENKAPITALKOSTENSATZ                                  |              | FREMDKAPITALKOSTENSATZ                           |              |
|---------------------------------------------------------|--------------|--------------------------------------------------|--------------|
| Zinssatz für risikofreie Anlagen                        | 4,7 %        | Zinssatz für risikofreie Anlagen                 | 4,7 %        |
| +                                                       |              | +                                                |              |
| Marktrisikoprämie                                       | 5,0 %        | Durchschnittlicher, langfristiger Risikozuschlag | 1,5 %        |
| x Betafaktor (spezifische Risikoprämie für METRO GROUP) | 1,0          | =                                                | 6,2 %        |
|                                                         |              | - Steuereffekt                                   | -1,6 %       |
| =                                                       | <b>9,7 %</b> | =                                                | <b>4,6 %</b> |
| Gewichtung zu Marktwerten 50 %                          |              | Gewichtung zu Marktwerten 50 %                   |              |
| <b>7,2 % Konzern-WACC nach Steuern</b>                  |              |                                                  |              |
| Steuereffekt (1-26,6 %)                                 |              |                                                  |              |
| <b>9,8 % Konzern-WACC vor Steuern</b>                   |              |                                                  |              |

Leistungen sowie passiver Rechnungsabgrenzungsposten zusammen. Es stellt grundsätzlich ein durchschnittliches, aus Quartalsbilanzen berechnetes Geschäftsvermögen dar. Die Verwendung von Durchschnittswerten hat den Vorteil, dass auch unterjährige Entwicklungen des Geschäftsvermögens in die Kalkulation einfließen.

Sonderfaktoren aus dem Projekt Shape 2012 werden im Berichtsjahr bei der Berechnung des EBITaC linear über vier Jahre periodisiert im Ergebnis vor Zinsen und Steuern (EBIT) berücksichtigt. Die im Geschäftsjahr 2010 entstandenen Sonderfaktoren aus Shape 2012 resultieren im Wesentlichen aus der Optimierung des Standortportfolios, der Verkaufsflächen und der Organisationsstruktur. Da die entsprechenden positiven EBIT-Wirkungen zum großen Teil zeitverzögert zu den Aufwendungen entstehen, ergibt sich durch Periodisierung dieser Sonderfaktoren eine zutreffende Darstellung der operativen Performance. Kurzfristige Sondereinflüsse wirken sich dadurch nicht in vollem Umfang auf das Ergebnis der Periode des Auftretens aus. Die Periodisierung trägt außerdem dazu bei, dass langfristig wertsteigernde Entscheidungen nicht aufgrund von kurzfristig negativen Ergebniseffekten unterlassen werden.

Die Ergebnisse der Analyse des EBITaC werden unter anderem zur Steuerung des Portfolios der METRO GROUP sowie zur Allokation der Investitionsmittel eingesetzt. Entscheidend bei der Allokation ist die mittel- und langfristige Auswirkung auf die Wertschaffung. Das entscheidende Kriterium für alle Investitionen innerhalb der METRO GROUP ist daher der Barwert der zukünftigen Wertbeiträge. Um auch steuerliche

Gesichtspunkte bei der Entscheidung über die zukünftige Expansion zu berücksichtigen, werden in diesen Fällen die Wertbeiträge nach Steuern kalkuliert. Zusätzlich zu den Wertbeiträgen von Investitionsprojekten werden der Free Cashflow sowie die Amortisationsdauer als liquiditätsorientierte Kennzahlen unterstützend verwendet, um auch die Liquidität sicherzustellen. Vor allem in Zeiten knappen Kapitals ist ein Ranking alternativer Investitionsprojekte besonders wichtig für eine erfolgreiche Unternehmenssteuerung.

Die METRO GROUP setzte im Jahr 2010 ihr Geschäftsvermögen erfolgreich ein und erzielte ein positives EBITaC in Höhe von 668 Mio. €. Das EBIT 2010 lag nach Periodisierung der 2010 entstandenen Sonderfaktoren aus Shape 2012 in Höhe von 204 Mio. € sowie nach Berücksichtigung der periodisierten Aufwendungen aus 2008 (237 Mio. € zur Straffung des Real-Ladennetzes) und 2009 (343 Mio. € Einmalaufwendungen aus Shape 2012) bei 2.219 Mio. €. Bei einem durchschnittlichen Geschäftsvermögen in Höhe von 15.895 Mio. € betragen die Kapitalkosten 1.551 Mio. €. Der Anstieg des Geschäftsvermögens, unter anderem infolge der verstärkten internationalen Expansion, konnte durch das EBIT-Wachstum kompensiert werden. Die Vertriebslinie Metro Cash & Carry erzielte im Jahr 2010 wieder einen positiven Wertbeitrag und lag über dem Vorjahr. Auch Media Markt und Saturn erzielte 2010 einen positiven Wertbeitrag, der aber unter Vorjahresniveau lag. Der Rückgang gegenüber 2009 ist auf die Shape-2012-Einmalaufwendungen im Zusammenhang mit dem unter Kartellvorbehalt stehenden Verkauf der Saturn-Elektrofachmärkte in Frankreich zurückzuführen. Diese belasten trotz Periodisierung das Ergebnis von

Media Markt und Saturn mit circa 30 Mio. €. Galeria Kaufhof verdiente ebenfalls die Kapitalkosten. Real erzielte 2010 gegenüber dem Vorjahreswert eine deutliche Verbesserung des EBITaC und hat damit die Restrukturierung erfolgreich vorangetrieben.

| Mio. €                                                   | 2010   | 2009 <sup>1</sup> | Delta |
|----------------------------------------------------------|--------|-------------------|-------|
| EBIT vor Sonderfaktoren                                  | 2.415  | 2.024             | 391   |
| EBIT nach Periodisierung von Sonderfaktoren <sup>2</sup> | 2.219  | 1.879             | 340   |
| Ø Geschäftsvermögen                                      | 15.895 | 15.798            | 97    |
| Vorsteuer-WACC                                           | 9,8 %  | 9,8 %             | -     |
| Kapitalkosten                                            | -1.551 | -1.542            | -9    |
| EBITaC                                                   | 668    | 337               | 331   |

<sup>1</sup> Vorjahr vergleichbar gerechnet

<sup>2</sup> Die Wirkung der Sonderfaktoren wird über 4 Jahre verteilt

## Bilanzgewinn und Gewinnverwendung der METRO AG nach handelsrechtlichen Vorschriften

Der Abschluss der METRO AG nach handelsrechtlichen Vorschriften dient als Ausschüttungsbemessungsgrundlage. Im Folgenden sind die Bilanz- sowie die Gewinn- und Verlustrechnung der METRO AG nach HGB dargestellt:

### Gewinn- und Verlustrechnung für das Geschäftsjahr vom 1. Januar bis 31. Dezember 2010 nach HGB

| Mio. €                                                               | 2010         | 2009         |
|----------------------------------------------------------------------|--------------|--------------|
| Beteiligungsergebnis                                                 | 919,9        | 772,2        |
| Finanzergebnis                                                       | -178,9       | -111,2       |
| Sonstige betriebliche Erträge                                        | 304,8        | 139,1        |
| Personalaufwand                                                      | -153,4       | -87,1        |
| Abschreibungen auf immaterielle Vermögensgegenstände und Sachanlagen | -37,8        | -2,1         |
| Sonstige betriebliche Aufwendungen                                   | -291,7       | -151,7       |
| <b>Ergebnis der gewöhnlichen Geschäftstätigkeit</b>                  | <b>562,9</b> | <b>559,2</b> |
| Außerordentliches Ergebnis                                           | -31,5        | 0,0          |
| Steuern vom Einkommen und vom Ertrag                                 | -35,9        | -25,5        |
| Sonstige Steuern                                                     | -3,5         | 6,4          |
| <b>Jahresüberschuss</b>                                              | <b>492,0</b> | <b>540,1</b> |
| Gewinnvortrag aus dem Vorjahr                                        | 23,9         | 9,7          |
| Einstellungen in Gewinnrücklagen                                     | -60,0        | -140,0       |
| <b>Bilanzgewinn</b>                                                  | <b>455,9</b> | <b>409,8</b> |

### Bilanzgewinn der METRO AG und Gewinnverwendung

Die METRO AG weist im Geschäftsjahr ein Beteiligungsergebnis in Höhe von 919,9 Mio. € aus, gegenüber 772,2 Mio. € im Vorjahr.

Unter Einbeziehung von sonstigen Erträgen, Aufwendungen und Steuern sowie nach Einstellung von 60,0 Mio. € in die Gewinnrücklagen weist sie einen Bilanzgewinn von 455,9 Mio. € gegenüber 409,8 Mio. € im Jahr 2009 aus.

Der Vorstand der METRO AG schlägt der Hauptversammlung vor, aus dem ausgewiesenen Bilanzgewinn von 455,9 Mio. € eine Dividende in Höhe von 441,5 Mio. € auszuschütten und den verbleibenden Betrag von 14,4 Mio. € auf neue Rechnung vorzutragen. In dem Bilanzgewinn von 455,9 Mio. € ist ein Gewinnvortrag von 23,9 Mio. € enthalten. Die vom Vorstand vorgeschlagene Dividende beträgt

→ 1,350 € je Stammaktie und

→ 1,485 € je Vorzugsaktie.

### Bilanz zum 31. Dezember 2010

#### Aktiva

| Mio. €                                                   | 31.12.2010      | 31.12.2009      |
|----------------------------------------------------------|-----------------|-----------------|
| <b>Anlagevermögen</b>                                    |                 |                 |
| Immaterielle Vermögensgegenstände                        | 148,4           | 2,4             |
| Sachanlagen                                              | 4,3             | 4,1             |
| Finanzanlagen                                            | 7.921,4         | 8.319,3         |
|                                                          | <b>8.074,1</b>  | <b>8.325,8</b>  |
| <b>Umlaufvermögen</b>                                    |                 |                 |
| Forderungen und sonstige Vermögensgegenstände            | 2.829,3         | 1.638,5         |
| Kassenbestand, Guthaben bei Kreditinstituten und Schecks | 2.199,8         | 1.294,8         |
|                                                          | <b>5.029,1</b>  | <b>2.933,3</b>  |
| <b>Rechnungsabgrenzungsposten</b>                        | <b>19,0</b>     | <b>11,8</b>     |
|                                                          | <b>13.122,2</b> | <b>11.270,9</b> |

#### Passiva

| Mio. €                            | 31.12.2010      | 31.12.2009      |
|-----------------------------------|-----------------|-----------------|
| <b>Eigenkapital</b>               |                 |                 |
| Gezeichnetes Kapital              | 835,4           | 835,4           |
| Stammaktien                       | 828,6           | 828,6           |
| Vorzugsaktien                     | 6,8             | 6,8             |
| (Bedingtes Kapital)               | (127,8)         | (127,8)         |
| Kapitalrücklage                   | 2.558,0         | 2.558,0         |
| Gewinnrücklagen                   | 1.726,3         | 1.664,0         |
| Bilanzgewinn                      | 455,9           | 409,8           |
|                                   | <b>5.575,6</b>  | <b>5.467,2</b>  |
| <b>Rückstellungen</b>             | <b>371,3</b>    | <b>295,9</b>    |
| <b>Verbindlichkeiten</b>          | <b>7.172,9</b>  | <b>5.507,7</b>  |
| <b>Rechnungsabgrenzungsposten</b> | <b>2,4</b>      | <b>0,1</b>      |
|                                   | <b>13.122,2</b> | <b>11.270,9</b> |

**Sonderfaktoren Shape 2012**

nach Vertriebslinien

| Mio. €                          | 2010<br>wie<br>berichtet | 2009 <sup>1</sup><br>wie<br>berichtet | 2010<br>Sonder-<br>faktoren | 2009<br>Sonder-<br>faktoren | 2010<br>vor Sonder-<br>faktoren | 2009 <sup>1</sup><br>vor Sonder-<br>faktoren |
|---------------------------------|--------------------------|---------------------------------------|-----------------------------|-----------------------------|---------------------------------|----------------------------------------------|
| <b>EBITDA</b>                   | 3.591                    | 3.068 <sup>1</sup>                    | 135                         | 251                         | 3.726                           | 3.319 <sup>1</sup>                           |
| davon Metro Cash & Carry        | 1.363                    | 1.061                                 | 11                          | 104                         | 1.374                           | 1.165                                        |
| Real                            | 310                      | 210 <sup>1</sup>                      | 11                          | 16                          | 321                             | 226 <sup>1</sup>                             |
| Media Markt und Saturn          | 818                      | 847                                   | 58                          | 4                           | 876                             | 851                                          |
| Galeria Kaufhof                 | 234                      | 166                                   | -1                          | 57                          | 233                             | 223                                          |
| Immobilien                      | 1.101                    | 948 <sup>1</sup>                      | -14                         | 5                           | 1.087                           | 953 <sup>1</sup>                             |
| Sonstige                        | -207                     | -152                                  | 41                          | 65                          | -166                            | -87                                          |
| Konsolidierung                  | -28                      | -12 <sup>1</sup>                      | 29                          | 0                           | 1                               | -12 <sup>1</sup>                             |
| <b>EBIT</b>                     | 2.211                    | 1.681                                 | 204                         | 343                         | 2.415                           | 2.024                                        |
| davon Metro Cash & Carry        | 1.094                    | 793                                   | 10                          | 143                         | 1.104                           | 936                                          |
| Real                            | 105                      | 36                                    | 27                          | 16                          | 132                             | 52                                           |
| Media Markt und Saturn          | 492                      | 603                                   | 133                         | 5                           | 625                             | 608                                          |
| Galeria Kaufhof                 | 138                      | 61                                    | 0                           | 58                          | 138                             | 119                                          |
| Immobilien                      | 718                      | 536                                   | -20                         | 15                          | 698                             | 551                                          |
| Sonstige                        | -323                     | -336                                  | 41                          | 106                         | -282                            | -230                                         |
| Konsolidierung                  | -13                      | -12                                   | 13                          | 0                           | 0                               | -12                                          |
| <b>Ergebnis vor Steuern EBT</b> | <b>1.630</b>             | <b>1.050</b>                          | <b>204</b>                  | <b>343</b>                  | <b>1.834</b>                    | <b>1.393</b>                                 |
| <b>Ergebnis je Aktie (€)</b>    | <b>2,60</b>              | <b>1,17</b>                           | <b>0,52</b>                 | <b>0,93</b>                 | <b>3,12</b>                     | <b>2,10</b>                                  |

<sup>1</sup> Adjustierung aufgrund der saldierten Darstellung von außerplanmäßigen Abschreibungen und Zuschreibungen im EBITDA in Höhe von 9 Mio. € (Real), 6 Mio. € (Immobilien) und -6 Mio. € (Konsolidierung)

**Sonderfaktoren Shape 2012**

nach Regionen

| Mio. €                                                     | 2010<br>wie<br>berichtet | 2009 <sup>1</sup><br>wie<br>berichtet | 2010<br>Sonder-<br>faktoren | 2009<br>Sonder-<br>faktoren | 2010<br>vor Sonder-<br>faktoren | 2009 <sup>1</sup><br>vor Sonder-<br>faktoren |
|------------------------------------------------------------|--------------------------|---------------------------------------|-----------------------------|-----------------------------|---------------------------------|----------------------------------------------|
| <b>EBITDA</b>                                              | 3.591                    | 3.068 <sup>1</sup>                    | 135                         | 251                         | 3.726                           | 3.319 <sup>1</sup>                           |
| davon Deutschland                                          | 1.057                    | 1.023 <sup>1</sup>                    | 111                         | 193                         | 1.168                           | 1.216 <sup>1</sup>                           |
| Westeuropa ohne Deutschland                                | 1.242                    | 968                                   | 67                          | 42                          | 1.309                           | 1.010                                        |
| Osteuropa                                                  | 1.242                    | 1.072                                 | 9                           | 13                          | 1.251                           | 1.085                                        |
| Asien/Afrika                                               | 51                       | 3                                     | -52                         | 6                           | -1                              | 9                                            |
| International                                              | 2.535                    | 2.043                                 | 24                          | 61                          | 2.559                           | 2.104                                        |
| Konsolidierung                                             | -1                       | 2                                     | 0                           | -3                          | -1                              | -1                                           |
| <b>EBIT</b>                                                | 2.211                    | 1.681                                 | 204                         | 343                         | 2.415                           | 2.024                                        |
| davon Deutschland                                          | 399                      | 334                                   | 125                         | 253                         | 524                             | 587                                          |
| Westeuropa ohne Deutschland                                | 888                      | 656                                   | 138                         | 52                          | 1.026                           | 708                                          |
| Osteuropa                                                  | 920                      | 734                                   | -3                          | 31                          | 917                             | 765                                          |
| Asien/Afrika                                               | 5                        | -45                                   | -56                         | 10                          | -51                             | -35                                          |
| International                                              | 1.813                    | 1.345                                 | 79                          | 93                          | 1.892                           | 1.438                                        |
| Konsolidierung                                             | -1                       | 2                                     | 0                           | -3                          | -1                              | -1                                           |
| <b>Ergebnis vor Steuern EBT</b>                            | <b>1.630</b>             | <b>1.050</b>                          | <b>204</b>                  | <b>343</b>                  | <b>1.834</b>                    | <b>1.393</b>                                 |
| <b>Ergebnis je Aktie aus fortgeführten Aktivitäten (€)</b> | <b>2,60</b>              | <b>1,17</b>                           | <b>0,52</b>                 | <b>0,93</b>                 | <b>3,12</b>                     | <b>2,10</b>                                  |

<sup>1</sup> Adjustierung aufgrund der saldierten Darstellung von außerplanmäßigen Abschreibungen und Zuschreibungen im EBITDA in Höhe von 9 Mio. € (Deutschland)



## 4. Finanz- und Vermögenslage

### Finanzmanagement

#### Grundsätze und Ziele der Finanzaktivitäten

Das Finanzmanagement der METRO GROUP sichert die permanente Liquiditätsversorgung des Unternehmens, reduziert finanzielle Risiken soweit wirtschaftlich sinnvoll, vergibt Kredite an die Gesellschaften und gewährt Finanzierungshilfen in Form von Garantien oder Patronatserklärungen für Konzerneinheiten. Alle Aufgaben werden zentral durch die METRO AG gesteuert und erbracht. Ziel ist es, den Finanzbedarf der Gesellschaften ausreichend und kostengünstig über die internationalen Kapitalmärkte zu decken. Dies gilt sowohl für das operative Geschäft als auch für Investitionen. Die Auswahl der Finanzprodukte orientiert sich grundsätzlich an der Fristigkeit des zugrunde liegenden Geschäfts. Um den Kapitalmarktzugang auch in einem angespannten wirtschaftlichen Umfeld zu sichern, wird ein Rating im Investment-Grade von mindestens langfristig BBB/Baa2 beziehungsweise kurzfristig A-2/P-2 vorausgesetzt. Grundlage für die Finanzaktivitäten der METRO GROUP ist die monatlich aktualisierte Konzernfinanzplanung, die alle wesentlichen Gesellschaften berücksichtigt. Zusätzlich erstellt die METRO AG eine auf 14 Tage ausgerichtete Liquiditätsplanung. Bei sämtlichen Finanzaktivitäten gelten konzernweit die folgenden Grundsätze:

#### Finanzielle Einheit

Der Konzern tritt nach außen als finanzielle Einheit auf und erzielt dadurch bessere Konditionen an den Finanzmärkten.

#### Finanzieller Handlungsspielraum

Bei finanzwirtschaftlichen Entscheidungen wahrt die METRO GROUP im Verhältnis zu Banken oder Geschäftspartnern stets ihren Handlungsspielraum, um unabhängig zu bleiben. Im Rahmen der Bankenpolitik sind Limits so definiert, dass der Konzern einen Finanzpartner jederzeit durch einen anderen ersetzen kann.

#### Zentrales Risikomanagement

Über Finanzgeschäfte deckt die METRO GROUP zum einen ihren Finanzbedarf. Zum anderen sichert das Unternehmen Grundgeschäfte ab, die mit Risiken behaftet sind. Die METRO AG überwacht zentral das Gesamtportfolio aller Finanzgeschäfte der METRO GROUP.

#### Zentrale Risikoüberwachung

Veränderte finanzwirtschaftliche Rahmenbedingungen, darunter beispielsweise Zinssatz- oder Devisenkursänderungen, können sich auf die Finanzierung der METRO GROUP auswirken. Die damit verbundenen Risiken quantifiziert die METRO AG regelmäßig in Szenario-Analysen. Offene Risikopositionen – wie etwa der Abschluss von Finanztransaktionen ohne korrespondierendes Grundgeschäft – dürfen nur nach entsprechender Freigabe durch den Vorstand der METRO AG gehalten werden.

#### Ausschließlich zugelassene Vertragspartner

Für Finanzgeschäfte der METRO GROUP kommen ausschließlich Vertragspartner infrage, die von der METRO AG zugelassen sind. Die Bonität dieser Vertragspartner wird auf der Basis ihres Ratings täglich überprüft. Zudem überwacht das im Bereich Treasury der METRO AG angesiedelte Risikocontrolling fortlaufend die eingerichteten Limits.

#### Freigabepflicht

Finanzgeschäfte der METRO GROUP werden grundsätzlich mit der METRO AG abgeschlossen. Ist dies aus rechtlichen Gründen nicht möglich, werden sie nach Freigabe durch die METRO AG direkt zwischen der Konzerngesellschaft und einem Finanzpartner vereinbart.

#### Revisionsicherheit

In der METRO GROUP gilt generell das Vier-Augen-Prinzip. Abläufe und Verantwortlichkeiten sind in konzernweit geltenden Richtlinien festgelegt. Der Abschluss von Finanzgeschäften ist organisatorisch von Abwicklung und Kontrolle getrennt.

#### Ratings

Ratings bewerten die Fähigkeit eines Unternehmens, seinen finanziellen Verpflichtungen nachzukommen. Sie dienen dem Nachweis der Kreditwürdigkeit eines Unternehmens gegenüber potenziellen Fremdkapitalgebern. Ein Rating erleichtert zudem den Zugang zu den internationalen Kapitalmärkten. Die METRO GROUP wird von zwei führenden internationalen Rating-Agenturen – Moody's und Standard & Poor's – kontinuierlich überwacht.

Die lang- und kurzfristigen Bewertungen der vergangenen fünf Jahre sind in der folgenden Grafik dargestellt:

### Entwicklung von Rating und Ausblick

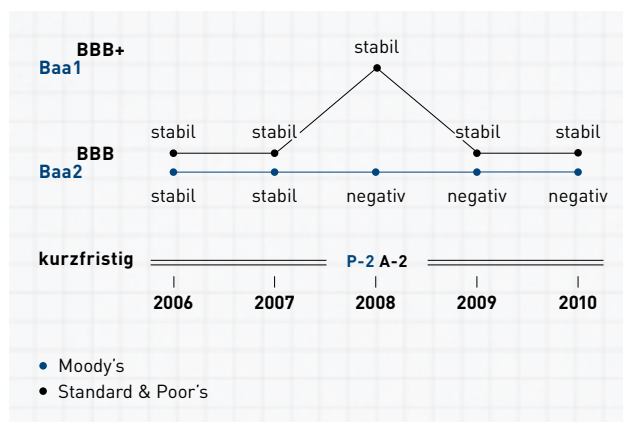

Moody's und Standard & Poor's bewerten die METRO GROUP folgendermaßen:

| Kategorie   | 2010    |                   |
|-------------|---------|-------------------|
|             | Moody's | Standard & Poor's |
| Langfristig | Baa2    | BBB               |
| Kurzfristig | P-2     | A-2               |
| Ausblick    | negativ | stabil            |

Mit diesen Ratings stehen der METRO GROUP alle Finanzmärkte offen.

### Finanzierungsmaßnahmen

Der langfristigen Finanzierung dient ein „Debt Issuance Programme“, in dessen Rahmen 2010 folgende Transaktionen abgewickelt wurden:

| Transaktionsart | Emissionsdatum | Laufzeit | Fälligkeit     | Nominalvolumen | Verzinsung  |
|-----------------|----------------|----------|----------------|----------------|-------------|
| Neu-emission    | Februar 2010   | 7 Jahre  | Februar 2017   | 750 Mio. €     | 4,250 % fix |
| Rückzahlung     | September 2006 | 4 Jahre  | September 2010 | 200 Mio. €     | variabel    |

In der kurz- und mittelfristigen Finanzierung werden unter anderem Daueremissionsprogramme eingesetzt. Dazu zählen ein „Euro Commercial Paper Programme“ sowie ein weiteres, speziell auf französische Investoren ausgerichtetes „Commercial Paper Programme“. Beide Programme sind 2010 im Durchschnitt mit insgesamt 687 Mio. € in Anspruch genommen worden. Darüber hinaus wurden zum Berichtsstichtag Kreditlinien von insgesamt 1.211 Mio. € genutzt.

Weitergehende Informationen zu Finanzierungsprogrammen und Kreditlinien sind im Konzernanhang unter Nummer 36 „Finanzielle Schulden“ enthalten.

Außer den etablierten Emissionsprogrammen stand dem Konzern zu jedem Zeitpunkt ausreichende Liquidität durch umfangreiche, im Wesentlichen mehrjährige Kreditlinien zur Verfügung. Sie sind in der unten stehenden Tabelle dargestellt.

### Kreditlinien der METRO GROUP

| Mio. €                           | 31.12.2010   |            |              | 31.12.2009   |            |              |
|----------------------------------|--------------|------------|--------------|--------------|------------|--------------|
|                                  | Gesamt       | Bis 1 Jahr | Über 1 Jahr  | Gesamt       | Bis 1 Jahr | Über 1 Jahr  |
| Bilaterale Kreditlinien          | 2.204        | 1.006      | 1.198        | 2.467        | 1.246      | 1.221        |
| Inanspruchnahme                  | -1.211       | -375       | -836         | -1.214       | -534       | -680         |
| Freie bilaterale Kreditlinien    | 993          | 631        | 362          | 1.253        | 712        | 541          |
| Syndizierte Kreditlinien         | 2.475        | 0          | 2.475        | 2.975        | 0          | 2.975        |
| Inanspruchnahme                  | 0            | 0          | 0            | 0            | 0          | 0            |
| Freie syndizierte Kreditlinien   | 2.475        | 0          | 2.475        | 2.975        | 0          | 2.975        |
| Kreditlinien gesamt              | 4.679        | 1.006      | 3.673        | 5.442        | 1.246      | 4.196        |
| Inanspruchnahme gesamt           | -1.211       | -375       | -836         | -1.214       | -534       | -680         |
| <b>Freie Kreditlinien gesamt</b> | <b>3.468</b> | <b>631</b> | <b>2.837</b> | <b>4.228</b> | <b>712</b> | <b>3.516</b> |

## Investitionen/Desinvestitionen

Im Geschäftsjahr 2010 hat die METRO GROUP 1,7 Mrd. € investiert. Das sind rund 0,2 Mrd. € beziehungsweise 11,0 Prozent mehr als im Vorjahr. Rund die Hälfte der Investitionen im Berichtsjahr entfiel auf die fortgesetzte internationale Expansion der Vertriebslinien Metro Cash & Carry, Real sowie Media Markt und Saturn. Darüber hinaus wurde in die Modernisierung des bestehenden Standortnetzes investiert.

| Mio. €                 | 2010         | 2009         | Veränderung |             |
|------------------------|--------------|--------------|-------------|-------------|
|                        |              |              | Absolut     | %           |
| Metro Cash & Carry     | 499          | 220          | 279         | -           |
| Real                   | 156          | 193          | -37         | -19,3       |
| Media Markt und Saturn | 362          | 353          | 9           | 2,7         |
| Galeria Kaufhof        | 104          | 57           | 47          | 82,7        |
| Immobilien             | 490          | 580          | -90         | -15,5       |
| Sonstige               | 72           | 114          | -42         | -36,6       |
| <b>METRO GROUP</b>     | <b>1.683</b> | <b>1.517</b> | <b>166</b>  | <b>11,0</b> |

**Metro Cash & Carry** hat im Berichtsjahr 499 Mio. € investiert – das sind 279 Mio. € mehr als im Vorjahr. Weltweit eröffnete die Vertriebslinie 38 neue Standorte, davon 3 in Deutschland. Der Schwerpunkt der Expansion lag in den Wachstumsregionen Osteuropa und Asien/Afrika mit 18 beziehungsweise 16 neuen Standorten. Allein in China erweiterte der Selbstbedienungsgroßhändler das bestehende Standortnetz um 6 und in Russland um 5 neue Märkte. In Kasachstan, der Türkei und Vietnam eröffnete die Vertriebslinie jeweils 4 Standorte. In Indien, Portugal, der Slowakei, Serbien und der Ukraine kam jeweils 1 neuer Markt hinzu; in Rumänien und Ägypten belief sich die Zahl der Neueröffnungen auf jeweils 2 Großmärkte, in Japan auf 3 Standorte. Mit dem Verkauf von 8 Standorten in Marokko hat die Vertriebslinie Metro Cash & Carry ihre strategische Portfolio-Optimierung konsequent fortgesetzt. Darüber hinaus wurden in Deutschland 10 Märkte geschlossen, darunter 3 Märkte der Vertriebsmarke C+C Schaper.

Bei **Real** betragen die Investitionen im Berichtsjahr 156 Mio. €. Das sind 37 Mio. € weniger als im Vorjahr. Real erweiterte das Filialnetz um jeweils 1 SB-Warenhaus in Rumänien und Russland. Im Zuge der Straffung des Standortnetzes wurden 13 Märkte in Deutschland verwertet, 1 Markt in der Türkei wurde an Metro Cash & Carry abgegeben. Außerdem hat Real die konzeptionelle Überarbeitung der bestehenden Standorte vorangetrieben und vor allem in Deutschland in Modernisierung investiert.

Die Investitionen von **Media Markt und Saturn** lagen im Berichtsjahr mit 362 Mio. € leicht über dem Vorjahresniveau. Auch 2010 baute die Vertriebslinie ihr nationales und internationales Standortnetz konsequent aus. Insgesamt hat Media Markt und Saturn 60 Elektrofachmärkte eröffnet, davon 7 in Deutschland. Der Fokus der Expansion lag mit 31 Neueröffnungen in Westeuropa. In Österreich kamen 8, in Italien 5 und in den Niederlanden 4 neue Standorte hinzu. In Schweden, der Schweiz und in Spanien wurden jeweils 3, in Belgien und Frankreich jeweils 2 neue Märkte eröffnet; in Luxemburg kam 1 Markt hinzu. In Osteuropa eröffnete Media Markt und Saturn 21 Märkte, davon 11 in Russland, 6 in Polen sowie 3 in Griechenland und 1 Markt in der Türkei. Im November 2010 hat Media Markt und Saturn den Markteintritt in China vollzogen und 1 Elektrofachmarkt in Shanghai eröffnet. In Ungarn wurde 1 Standort aufgegeben.

Die Investitionen von **Galeria Kaufhof** beliefen sich im Berichtsjahr auf 104 Mio. € und lagen damit deutlich über dem Vorjahresniveau. Im Vordergrund standen zahlreiche Modernisierungen auf Basis des Galeria-Konzepts. Im Geschäftsjahr 2010 wurden 3 Warenhäuser verwertet.

Im **Immobiliensegment** beliefen sich die Investitionen im Berichtsjahr auf 490 Mio. € und lagen damit 90 Mio. € unter dem Vorjahresniveau. Die Investitionen wurden im Wesentlichen für den Erwerb von Immobilien im Zusammenhang mit der Expansion der Vertriebslinien Metro Cash & Carry und Real getätigt.

Das Investitionsvolumen im Segment **Sonstige** lag im Berichtsjahr mit 72 Mio. € um 42 Mio. € unter dem Vorjahreswert. Die Investitionen entfielen im Wesentlichen auf immaterielle Vermögenswerte sowie auf Betriebs- und Geschäftsausstattung.

Die Investitionsverpflichtungen belaufen sich auf 256 Mio. €. Angaben hierzu sind im Konzernanhang unter Nummer 19 „Sonstige immaterielle Vermögenswerte“, Nummer 20 „Sachanlagen“ und Nummer 21 „Als Finanzinvestition gehaltene Immobilien“ enthalten.

Aus Desinvestitionen sind der METRO GROUP Zahlungsmittel in Höhe von 784 Mio. € zugeflossen, die im Wesentlichen durch den Verkauf von Immobilien entstanden sind. Weitere Informationen zu Desinvestitionen sind im Konzernabschluss unter „Kapitalflussrechnung“ sowie im Konzernanhang unter Nummer 40 „Erläuterungen zur Kapitalflussrechnung“ enthalten.

## Konzern-Kapitalflussrechnung<sup>1</sup>

Die Kapitalflussrechnung dient der Ermittlung und Darstellung des Zahlungsmittelflusses, den die METRO GROUP im Geschäftsjahr aus laufender Geschäfts-, Investitions- und Finanztätigkeit erwirtschaftet oder verwendet hat. Außerdem beschreibt sie die Gesamtveränderung der Zahlungsmittel zwischen dem Beginn und dem Ende des Geschäftsjahres.

Aus der laufenden Geschäftstätigkeit der fortgeführten Aktivitäten konnten im Berichtsjahr 2.514 Mio. € (Vorjahr

2.494 Mio. €) generiert werden. Aus dem Bereich der Investitionstätigkeit der fortgeführten Aktivitäten ist ein Mittelabfluss von 961 Mio. € (Vorjahr 1.162 Mio. €) zu verzeichnen. Daraus ergibt sich im Vergleich zu 2009 eine positive Veränderung des Cashflows der fortgeführten Aktivitäten vor Finanztätigkeit von 221 Mio. € auf 1.553 Mio. € 2010. Der Cashflow aus Finanztätigkeit der fortgeführten Aktivitäten weist einen Mittelabfluss von 734 Mio. € (Vorjahr 1.225 Mio. €) aus.

Erläuterungen sind im Konzernanhang unter Nummer 40 „Erläuterungen zur Kapitalflussrechnung“ enthalten.

### Cashflow

| Mio. €                                                                              | 2010         | 2009 <sup>2</sup> |
|-------------------------------------------------------------------------------------|--------------|-------------------|
| Cashflow aus laufender Geschäftstätigkeit der fortgeführten Aktivitäten             | 2.514        | 2.494             |
| Cashflow aus laufender Geschäftstätigkeit der nicht fortgeführten Aktivitäten       | 0            | -18               |
| <b>Cashflow aus laufender Geschäftstätigkeit gesamt</b>                             | <b>2.514</b> | <b>2.476</b>      |
| Cashflow aus Investitionstätigkeit der fortgeführten Aktivitäten                    | -961         | -1.162            |
| Cashflow aus Investitionstätigkeit der nicht fortgeführten Aktivitäten              | 0            | 0                 |
| <b>Cashflow aus Investitionstätigkeit gesamt</b>                                    | <b>-961</b>  | <b>-1.162</b>     |
| <b>Cashflow aus fortgeführten Aktivitäten vor Finanztätigkeit</b>                   | <b>1.553</b> | <b>1.332</b>      |
| Cashflow aus Finanztätigkeit der fortgeführten Aktivitäten                          | -734         | -1.225            |
| Cashflow aus Finanztätigkeit der nicht fortgeführten Aktivitäten                    | 0            | 36                |
| <b>Cashflow aus Finanztätigkeit gesamt</b>                                          | <b>-734</b>  | <b>-1.189</b>     |
| <b>Summe der Cashflows gesamt</b>                                                   | <b>819</b>   | <b>125</b>        |
| Wechselkurseffekte auf die Zahlungsmittel                                           | 13           | -4                |
| Veränderung der Zahlungsmittel aufgrund erstmaliger Einbeziehung von Gesellschaften | 0            | 1                 |
| <b>Gesamtveränderung der Zahlungsmittel</b>                                         | <b>832</b>   | <b>122</b>        |

<sup>1</sup> Verkürzte Fassung. Die vollständige Fassung ist im Konzernabschluss enthalten.

<sup>2</sup> Adjustierung aufgrund eines geänderten Ausweises

## Kapitalstruktur

Die Konzernbilanz der METRO GROUP weist per Ende 2010 ein Eigenkapital von 6.460 Mio. € gegenüber 5.992 Mio. € im Vorjahr aus. Die Gewinnrücklagen haben sich um 554 Mio. € erhöht. Unter Berücksichtigung der Dividendenzahlung 2009 (386 Mio. €) und der Einstellung des den Anteilseignern der METRO AG zustehenden Periodengewinns (850 Mio. €) resultiert dieser Anstieg im Wesentlichen aus Währungsumrechnungsdifferenzen, die die Gewinnrücklagen gestärkt haben. Die Eigenkapitalquote ist um 0,4 Prozentpunkte auf 18,4 Prozent gestiegen. Der Anteil der Gewinnrücklagen am Eigenkapital beträgt 45,3 Prozent gegenüber 39,6 Prozent im Vorjahr.

Die bilanzielle Nettoverschuldung nach Saldierung der Zahlungsmittel gemäß Bilanz und der Geldanlagen mit den finanziellen Schulden inklusive Finanzierungs-Leasingverhältnissen beträgt 3.478 Mio. € nach 3.724 Mio. € im Jahr 2009. Die langfristigen finanziellen Schulden verringerten sich um 210 Mio. € auf 6.533 Mio. €, die kurzfristigen finanziellen Schulden erhöhten sich um 766 Mio. € auf 1.750 Mio. €. Im ersten Halbjahr 2011 fällige Anleihen mit Nominalwerten von 750 Mio. € und 350 Mio. € wurden aufgrund des Näherrückens der Fälligkeitstermine im Gegensatz zum Vorjahr in den kurzfristigen finanziellen Schulden ausgewiesen. Gegenläufig wirkte die Neuemission einer langfristigen Anleihe mit einem Nominalvolumen von 750 Mio. €. Die Zahlungsmittel stiegen im Geschäftsjahr 2010 um 803 Mio. € auf 4.799 Mio. €.

**Kapitalstruktur der METRO GROUP<sup>1</sup>**  
 Mio. €

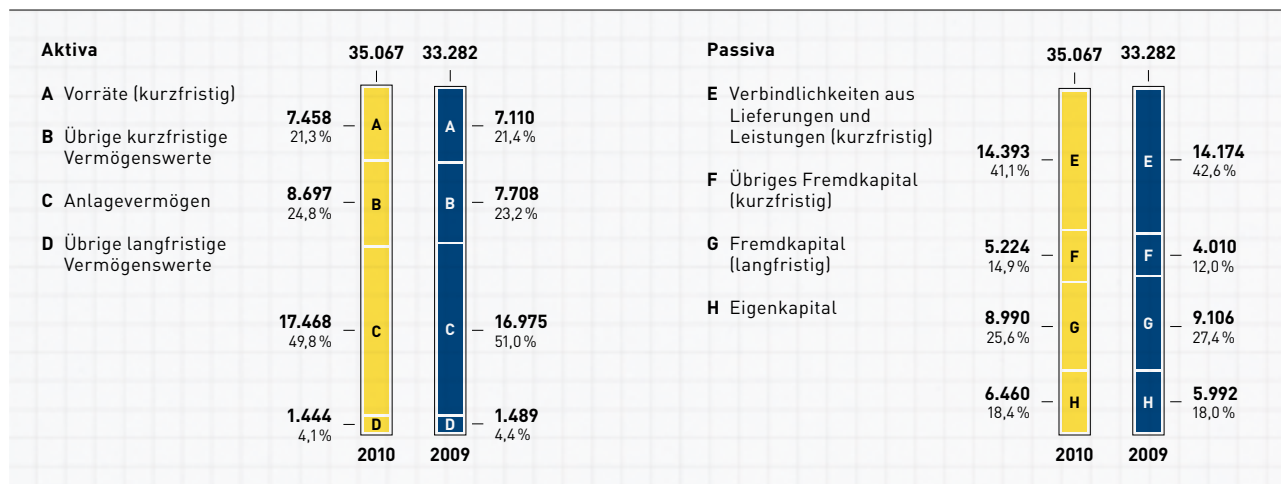

<sup>1</sup> Adjustierung der Vorjahreswerte aufgrund geänderter Ausweise

| Mio. €                                      | Anhang Nr. | 31.12.2010   | 31.12.2009   |
|---------------------------------------------|------------|--------------|--------------|
| <b>Eigenkapital</b>                         | 31         | <b>6.460</b> | <b>5.992</b> |
| Gezeichnetes Kapital                        |            | 835          | 835          |
| Kapitalrücklage                             |            | 2.544        | 2.544        |
| Gewinnrücklagen                             |            | 2.929        | 2.375        |
| Anteile nicht beherrschender Gesellschafter |            | 152          | 238          |

| Mio. €                                                                      | 31.12.2010   | 31.12.2009   |
|-----------------------------------------------------------------------------|--------------|--------------|
| Zahlungsmittel gem. Bilanz                                                  | 4.799        | 3.996        |
| Geldanlagen <sup>1</sup>                                                    | 6            | 7            |
| Finanzielle Schulden (inkl. Finanzierungs-Leasingverhältnisse) <sup>2</sup> | 8.283        | 7.727        |
| <b>Nettoverschuldung<sup>2</sup></b>                                        | <b>3.478</b> | <b>3.724</b> |

<sup>1</sup> In der Bilanz in den sonstigen Forderungen und Vermögenswerten (kurzfristig) enthalten  
<sup>2</sup> Adjustierung der Vorjahreswerte aufgrund eines geänderten Ausweises

Die Fremdkapitalquote hat sich um 0,4 Prozentpunkte auf 81,6 Prozent verringert. Die kurzfristigen Schulden haben einen Anteil von 68,6 Prozent am gesamten Fremdkapital nach 66,6 Prozent im vorangegangenen Geschäftsjahr.

Die Verbindlichkeiten aus Lieferungen und Leistungen erhöhten sich aufgrund von Währungseffekten und der Ausweitung des internationalen Geschäfts bei den Vertriebslinien Metro Cash & Carry sowie Media Markt und Saturn um 219 Mio. € auf

14.393 Mio. €. Zum 31.12.2010 wurden im Zuge der beschlossenen Abgabe von Elektrofachmärkten in Frankreich Schulden im Zusammenhang mit zur Veräußerung vorgesehenen Vermögenswerten in Höhe von 193 Mio. € ausgewiesen.

Angaben zur Fälligkeits-, Währungs- und Zinsstruktur der finanziellen Schulden sowie zu Kreditlinien sind im Konzernanhang unter Nummer 36 „Finanzielle Schulden“ enthalten.

| Mio. €                                                         | Anhang Nr. | 31.12.2010    | 31.12.2009 <sup>1</sup> |
|----------------------------------------------------------------|------------|---------------|-------------------------|
| <b>Langfristige Schulden</b>                                   |            | <b>8.990</b>  | <b>9.106</b>            |
| Rückstellungen für Pensionen und ähnliche Verpflichtungen      | 32         | 1.016         | 978                     |
| Sonstige Rückstellungen                                        | 33         | 472           | 502                     |
| Finanzielle Schulden                                           | 34, 36     | 6.533         | 6.743                   |
| Sonstige Verbindlichkeiten                                     | 34, 37     | 757           | 667                     |
| Latente Steuerschulden                                         | 24         | 212           | 216                     |
| <b>Kurzfristige Schulden</b>                                   |            | <b>19.617</b> | <b>18.184</b>           |
| Verbindlichkeiten aus Lieferungen und Leistungen               | 34, 35     | 14.393        | 14.174                  |
| Rückstellungen                                                 | 33         | 532           | 561                     |
| Finanzielle Schulden                                           | 34, 36     | 1.750         | 984                     |
| Sonstige Verbindlichkeiten                                     | 34, 37     | 2.458         | 2.200                   |
| Ertragsteuerschulden                                           | 34         | 291           | 265                     |
| Schulden i. Z. m. zur Veräußerung vorgesehenen Vermögenswerten | 30         | 193           | 0                       |

<sup>1</sup> Adjustierung aufgrund geänderter Ausweise

Weitere Informationen zur Entwicklung der Schulden sind im Konzernanhang unter den in der Tabelle angegebenen Nummern zu finden.

## Vermögenslage

Im Geschäftsjahr 2010 erhöhte sich die Bilanzsumme um 1.785 Mio. € auf 35.067 Mio €. Bei den langfristigen Vermögenswerten war im Geschäftsjahr 2010 ein Anstieg von 448 Mio. € auf 18.912 Mio. € zu verzeichnen, die kurzfristigen Vermögenswerte nahmen um 1.337 Mio. € auf 16.155 Mio. € zu.

### Langfristige Vermögenswerte

| Mio. €                                     | Anhang Nr. | 31.12.2010    | 31.12.2009    |
|--------------------------------------------|------------|---------------|---------------|
| <b>Langfristige Vermögenswerte</b>         |            | <b>18.912</b> | <b>18.464</b> |
| Geschäfts- oder Firmenwerte                | 17, 18     | 4.064         | 3.992         |
| Sonstige immaterielle Vermögenswerte       | 17, 19     | 436           | 497           |
| Sachanlagen                                | 17, 20     | 12.482        | 12.244        |
| Als Finanzinvestition gehaltene Immobilien | 17, 21     | 238           | 129           |
| Finanzielle Vermögenswerte                 | 17, 22     | 248           | 113           |
| Sonstige Forderungen und Vermögenswerte    | 23         | 444           | 463           |
| Latente Steueransprüche                    | 24         | 1.000         | 1.026         |

Die Zunahme der Geschäfts- oder Firmenwerte in Höhe von 72 Mio. € resultiert im Wesentlichen aus der bilanziellen Behandlung von Andienungsrechten, die nicht beherrschenden Gesellschaftern gewährt wurden. Der Anstieg der Sachanlagen in Höhe von 238 Mio. € ist vor allem mit der Eröffnung neuer Märkte bei Metro Cash & Carry sowie Media Markt und Saturn sowie positiven Währungseffekten in Osteuropa und Asien zu begründen. Als Folge der Aufgabe der beabsichtigten Selbstnutzung wurden Immobilien aus den Sachanlagen in die Bilanzposition „Als Finanzinvestition gehaltene Immobilien“ (109 Mio. €) umgliedert.

Weitere Informationen zur Entwicklung der langfristigen Vermögenswerte sind im Konzernanhang unter den in der Tabelle angegebenen Nummern zu finden.

### Kurzfristige Vermögenswerte

| Mio. €                                     | Anhang Nr. | 31.12.2010    | 31.12.2009 <sup>1</sup> |
|--------------------------------------------|------------|---------------|-------------------------|
| <b>Kurzfristige Vermögenswerte</b>         |            | <b>16.155</b> | <b>14.818</b>           |
| Vorräte                                    | 25         | 7.458         | 7.110                   |
| Forderungen aus Lieferungen und Leistungen | 26         | 526           | 539                     |
| Finanzielle Vermögenswerte                 |            | 3             | 38                      |
| Sonstige Forderungen und Vermögenswerte    | 23         | 2.724         | 2.613                   |
| Ertragsteuererstattungsansprüche           |            | 412           | 405                     |
| Zahlungsmittel                             | 29         | 4.799         | 3.996                   |
| Zur Veräußerung vorgesehene Vermögenswerte | 30         | 233           | 117                     |

<sup>1</sup> Adjustierung aufgrund eines geänderten Ausweises

Das Vorratsvermögen ist um 348 Mio. € auf 7.458 Mio. € gestiegen. Die Erhöhung ist in erster Linie auf die internationale Expansion der Vertriebslinien Metro Cash & Carry sowie Media Markt und Saturn zurückzuführen. Zusätzlichen vorraterhöhenden Währungseffekten wirkte die Umgliederung von Vorräten in die Bilanzposition „Zur Veräußerung vorgesehene Vermögenswerte“ im Zusammenhang mit der beschlossenen Abgabe der Elektrofachmärkte in Frankreich entgegen. Insgesamt wurden im Geschäftsjahr 2010 in Verbindung mit den abzugebenden Elektrofachmärkten in Frankreich zur Veräußerung vorgesehene Vermögenswerte in Höhe von 196 Mio. € ausgewiesen. Verkauft wurden hingegen zur Veräußerung vorgesehene Vermögenswerte in Höhe von 56 Mio. €. Ferner wurden Immobilien mit einem Betrag von 69 Mio. € als langfristige Vermögenswerte aufgrund der nunmehr vorgesehenen konzerninternen Nutzung reklassifiziert.

Weitere Informationen zur Entwicklung der kurzfristigen Vermögenswerte sind im Konzernanhang unter den in der Tabelle angegebenen Nummern zu finden.

## 5. Mitarbeiter

### Starke Basis für den Erfolg

Die METRO GROUP richtet ihr unternehmerisches Handeln konsequent an den Bedürfnissen und Einkaufsgewohnheiten ihrer Kunden aus. Unseren Mitarbeitern kommt deshalb eine hohe Verantwortung zu: Sie kennen die Anforderungen von Verbrauchern und Gewerbetreibenden am besten und können individuell auf deren Erwartungen reagieren. Entsprechend legen wir großen Wert auf eine qualifizierte, motivierte, leistungsbereite und unternehmerisch denkende Belegschaft.

Im Geschäftsjahr 2010 beschäftigte die METRO GROUP durchschnittlich 283.280 Mitarbeiter, 1,1 Prozent weniger als im Vorjahr. In dieser Zahl enthalten sind außer der Stammbesetzung auch befristet Beschäftigte. Die Zahl der Beschäftigten auf Vollzeitbasis belief sich auf 252.258 Mitarbeiter – das entspricht einem Rückgang um 1.534 Mitarbeiter beziehungsweise 0,6 Prozent im Vergleich zum Vorjahr. In Deutschland hat sich die Zahl der Mitarbeiter auf Vollzeitbasis um 2.772 Beschäftigte reduziert und belief sich im Berichtsjahr auf 94.169 Mitarbeiter. Das entspricht einem Rückgang von 2,9 Prozent gegenüber dem Vorjahr. In den übrigen Ländern, in denen die METRO GROUP vertreten ist, war ein Anstieg um 1.238 auf 158.089 Beschäftigte auf Vollzeitbasis zu verzeichnen – das sind 0,8 Prozent mehr Mitarbeiter als im Vorjahr.

#### Mitarbeiterentwicklung der METRO GROUP

Jahresdurchschnitt

| Mitarbeiterzahl nach Köpfen       |             |               |                  |
|-----------------------------------|-------------|---------------|------------------|
|                                   | Deutschland | International | Gesamt           |
| 2010                              | 112.464     | 170.816       | 283.280 (-1,1 %) |
| 2009                              | 116.791     | 169.538       | 286.329          |
| Mitarbeiterzahl auf Vollzeitbasis |             |               |                  |
|                                   | Deutschland | International | Gesamt           |
| 2010                              | 94.169      | 158.089       | 252.258 (-0,6 %) |
| 2009                              | 96.941      | 156.851       | 253.792          |

Ein wesentlicher Grund für den geringen Rückgang der Mitarbeiterzahlen waren die Restrukturierungen im Zuge von Shape 2012. Hierzu zählte auch die Abgabe von Standorten.

Die METRO GROUP hat 2010 in diesem Rahmen weitere 9.005 Stellen abgebaut. Die Reduzierungen erfolgten dabei soweit möglich über natürliche Fluktuation. Die Gesamtzahl der von Shape 2012 betroffenen Stellen seit 2009 beträgt damit 16.864<sup>1</sup>. Diese Anpassungen konnten wir aber zu einem Großteil durch neu geschaffene Arbeitsplätze kompensieren, die unter anderem im Rahmen unserer fortschreitenden Expansion entstanden sind. Neue Konzepte wirkten sich ebenfalls positiv auf die Mitarbeiterzahl aus.

Unser Personalaufwand belief sich im Berichtsjahr auf 7,4 Mrd. €. Das ist ein Anstieg um 2,5 Prozent gegenüber dem Vorjahr. Vom Personalaufwand entfielen 6,1 Mrd. € auf Löhne und Gehälter – inklusive Lohnsteuer und Arbeitnehmeranteile an der Sozialversicherung. 1,3 Mrd. € entfielen im Berichtsjahr auf soziale Abgaben und Aufwendungen für Altersvorsorge und Unterstützung.

In Deutschland belief sich die Fluktuationsrate im Berichtsjahr auf 8,3 Prozent. Konzernweit betrug sie 16,6 Prozent. In den dynamischen Wachstumsmärkten Osteuropas lag sie hingegen bei 23,5 Prozent.

Die Teilzeitquote in unserem Unternehmen war – im Gegensatz zum Branchentrend – weiterhin rückläufig. 2010 arbeiteten 28,6 Prozent (Vorjahr 29,8 Prozent) aller Mitarbeiter in Teilzeit; in Deutschland waren es 44,5 Prozent (Vorjahr 45,4 Prozent). Das Durchschnittsalter der Beschäftigten stieg von 36,2 auf 37,4 Jahre; die Betriebszugehörigkeit stieg im Schnitt von 8,0 auf 8,1 Jahre.

#### Gestalter des demografischen Wandels

Im Zuge des demografischen Wandels wird das Erwerbstätigenpotenzial in Europa nach unserer Einschätzung abnehmen. Zudem wird das Durchschnittsalter der Arbeitnehmer weltweit steigen und die Migration in westeuropäische Länder zunehmen. Die aktive Gestaltung dieser Veränderungen hat für uns hohe Priorität. So setzen wir auf eine bedarfsgerechte Ausbildung qualifizierter Fach- und Führungskräfte, ein aktives Diversity-Management und eine nachhaltige Gesundheits- und Arbeitssicherheitspolitik.

#### Ausbildung fördern – Zukunft sichern

Unseren Bedarf an qualifizierten Fach- und Führungskräften decken wir zu einem Großteil über die eigene Ausbildung. Weltweit belief sich die Zahl der Auszubildenden im Berichtsjahr auf 10.682 Personen. Das ist eine leichte Steigerung um 4,7 Prozent gegenüber dem Vorjahr. In Deutschland gehörte

<sup>1</sup> Vergleich der Mitarbeiterzahl der zum 31. Dezember 2008 bestehenden METRO GROUP Standorte mit der Mitarbeiterzahl der zum 31. Dezember 2010 bestehenden Standorte, bereinigt um Mitarbeiter neu eröffneter Standorte im gleichen Zeitraum

### Mitarbeiter nach Regionen

auf Vollzeitbasis

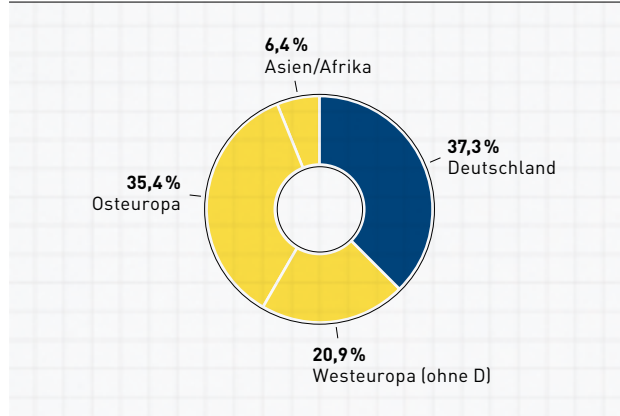

unser Unternehmen mit einer Quote von 8,4 Prozent erneut zu den größten Ausbildern. So haben wir 2010 insgesamt 7.894 Nachwuchskräfte in mehr als 25 Berufen ausgebildet. Das sind 406 weniger als im Vorjahr. Der Grund für den Rückgang: Wir haben uns dazu entschieden, unser Engagement stärker an den eigenen Anforderungen auszurichten. Da die Zahl der Schulabgänger zuletzt deutlich zurückgegangen war, ist der gesellschaftliche Bedarf an zusätzlich zu schaffenden Ausbildungsplätzen gesunken. Bundesweit haben im Berichtsjahr 2.371 Auszubildende ein Ausbildungsverhältnis in unseren Vertriebslinien und Gesellschaften aufgenommen. Diese Zahl bewegt sich leicht über dem Niveau des Vorjahres. Rund 96 Prozent der Jugendlichen schlossen 2010 ihre Ausbildung bei der METRO GROUP erfolgreich ab. Davon wurden etwa zwei Drittel in ein Arbeitsverhältnis übernommen.

Als attraktives Ausbildungsunternehmen präsentieren wir uns auf Messen und kooperieren mit Schulen im direkten Umfeld von Märkten und Filialen. Diese Form der Zusammenarbeit mit Bildungseinrichtungen haben wir in den vergangenen zehn Jahren konsequent ausgebaut, um einen praxisnahen, realistischen und modernen Unterricht anzuregen und zu unterstützen. Während die Zahl der Schulpartnerschaften im Jahr 2005 noch bei 52 lag, stieg sie bis 2008 auf 104; im Jahr 2010 betrug sie 133.

Gemeinsam mit unseren Sozialpartnern in Europa haben wir im Rahmen des von der Europäischen Union geförderten Leonardo-da-Vinci-Programms zudem europaweit anerkannte Qualifizierungsmodule für den Handel entwickelt. Unter dem Namen European Commerce Competence (EuCoCo) bieten wir PC-gestützte Lernprogramme an, die in betriebliche

### Mitarbeiter nach Segmenten

auf Vollzeitbasis

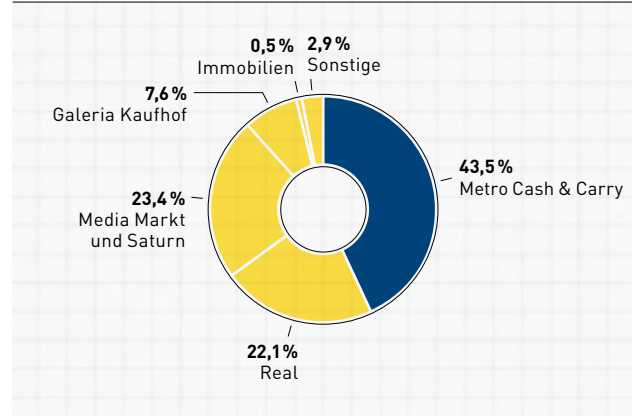

Ausbildungspläne und Online-Lernplattformen integriert wurden. Sie stehen in den Sprachen Deutsch und Englisch sowie seit 2010 auch in einer finalen Version in Polnisch, Rumänisch und Türkisch zur Verfügung.

Um unsere internationale Expansion mit qualifiziertem Personal voranzutreiben, fördern wir mit dem Programm Metro Education seit zehn Jahren Ausbildungs- und Praxisprogramme für Nachwuchskräfte. Ziel ist es, Schulabgänger auf Tätigkeiten im Handel vorzubereiten. Metro Education wird in Polen, Russland, Rumänien, der Slowakei, Tschechien und der Ukraine angeboten. Es umfasst handelsspezifischen Unterricht an insgesamt 76 berufsvorbereitenden Schulen sowie praktische Einsätze bei unseren Vertriebslinien. 2010 beteiligten sich sieben Schulen mehr am Metro-Education-Programm als im Vorjahr. Entsprechend stiegen auch die Schülerzahlen. Im Berichtsjahr nahmen 3.770 Schüler an dem Programm teil. Dies waren 345 Schüler mehr als im Vorjahr.

### Gleiche Chancen für alle Mitarbeiter und Bewerber

Wir sind ein „Equal Opportunity Employer“: Unser Unternehmen bietet allen Mitarbeitern und Bewerbern gleiche Chancen – unabhängig von deren Geschlecht, Alter, Rasse, ethnischer Herkunft, sexueller Orientierung, möglicher Behinderung oder Religionszugehörigkeit.

In der Vielfalt und Internationalität unserer Belegschaft erkennen wir die Basis für den nachhaltigen Geschäftserfolg. Weltweit arbeiten Menschen aus 179 Ländern für unser Unternehmen. Allein in Deutschland waren im Jahr 2010 Mitarbeiter aus mehr als 135 Nationen für die METRO GROUP tätig.



**Mitarbeiterentwicklung nach Ländern und Segmenten**

durchschnittlich auf Vollzeitbasis<sup>1</sup>

|                            | Metro Cash & Carry |                | Real          |               | Media Markt und Saturn |               | Galeria Kaufhof |               | Immobilien   |              | Sonstige     |              | METRO GROUP    |                |
|----------------------------|--------------------|----------------|---------------|---------------|------------------------|---------------|-----------------|---------------|--------------|--------------|--------------|--------------|----------------|----------------|
|                            | 2010               | 2009           | 2010          | 2009          | 2010                   | 2009          | 2010            | 2009          | 2010         | 2009         | 2010         | 2009         | 2010           | 2009           |
| <b>Deutschland</b>         | <b>14.725</b>      | <b>14.995</b>  | <b>30.921</b> | <b>32.119</b> | <b>24.095</b>          | <b>23.578</b> | <b>18.068</b>   | <b>18.221</b> | <b>727</b>   | <b>760</b>   | <b>5.633</b> | <b>7.268</b> | <b>94.169</b>  | <b>96.941</b>  |
| Belgien                    | 2.810              | 2.821          |               |               | 1.381                  | 1.217         | 1.061           | 1.062         |              |              |              |              | 5.251          | 5.100          |
| Dänemark                   | 499                | 515            |               |               | 23                     | 12            |                 |               |              |              |              |              | 522            | 527            |
| Frankreich                 | 8.368              | 8.253          |               |               | 2.023                  | 1.806         |                 |               |              |              |              |              | 10.390         | 10.059         |
| Italien                    | 3.986              | 3.926          |               |               | 6.263                  | 6.042         |                 |               |              |              | 1            | 25           | 10.250         | 9.993          |
| Luxemburg                  |                    |                |               |               | 93                     | 65            |                 |               | 0            | 2            |              |              | 93             | 67             |
| Niederlande                | 3.000              | 2.991          |               |               | 2.218                  | 2.063         |                 |               |              |              | 8            | 8            | 5.226          | 5.062          |
| Österreich                 | 1.870              | 1.868          |               |               | 2.289                  | 2.065         | 0               | 8             |              |              |              |              | 4.159          | 3.942          |
| Portugal                   | 1.429              | 1.506          |               |               | 762                    | 792           |                 |               |              |              |              |              | 2.192          | 2.298          |
| Schweden                   |                    |                |               |               | 1.517                  | 1.257         |                 |               |              |              |              |              | 1.517          | 1.257          |
| Schweiz                    |                    |                |               |               | 1.278                  | 1.122         |                 |               |              |              | 83           | 83           | 1.362          | 1.206          |
| Spanien                    | 3.394              | 3.301          |               |               | 5.367                  | 5.297         |                 |               |              |              | 0            | 8            | 8.761          | 8.606          |
| Vereinigtes Königreich     | 3.020              | 3.696          |               |               | 3                      | 2             |                 |               |              |              |              |              | 3.023          | 3.698          |
| <b>Westeuropa (ohne D)</b> | <b>28.375</b>      | <b>28.877</b>  |               |               | <b>23.218</b>          | <b>21.740</b> | <b>1.061</b>    | <b>1.070</b>  | <b>0</b>     | <b>2</b>     | <b>92</b>    | <b>124</b>   | <b>52.746</b>  | <b>51.813</b>  |
| Bulgarien                  | 2.485              | 2.478          |               |               |                        |               |                 |               |              |              | 0            | 8            | 2.485          | 2.485          |
| Griechenland               | 1.166              | 1.097          |               |               | 1.012                  | 936           |                 |               | 0            | 1            | 0            | 2            | 2.177          | 2.036          |
| Kasachstan                 | 621                | 189            |               |               |                        |               |                 |               |              |              |              |              | 621            | 189            |
| Kroatien                   | 1.212              | 1.307          |               |               |                        |               |                 |               |              |              |              |              | 1.212          | 1.307          |
| Moldawien                  | 676                | 693            |               |               |                        |               |                 |               |              |              |              |              | 676            | 693            |
| Polen                      | 6.838              | 7.026          | 10.481        | 11.092        | 5.001                  | 5.383         |                 |               | 284          | 277          | 196          | 300          | 22.800         | 24.077         |
| Rumänien                   | 5.636              | 5.639          | 7.973         | 8.282         |                        |               |                 |               | 1            | 4            | 369          | 354          | 13.978         | 14.279         |
| Russland                   | 13.689             | 13.291         | 4.118         | 4.036         | 2.798                  | 2.043         |                 |               | 104          | 116          | 452          | 615          | 21.160         | 20.101         |
| Serbien                    | 1.390              | 1.259          |               |               |                        |               |                 |               |              |              |              |              | 1.390          | 1.259          |
| Slowakei                   | 1.343              | 1.257          |               |               |                        |               |                 |               |              |              |              |              | 1.343          | 1.257          |
| Tschechien                 | 3.510              | 3.471          |               |               |                        |               |                 |               |              |              |              |              | 3.510          | 3.471          |
| Türkei                     | 3.167              | 2.800          | 1.889         | 2.141         | 1.218                  | 1.029         |                 |               | 132          | 147          | 38           | 132          | 6.443          | 6.248          |
| Ukraine                    | 6.579              | 7.482          | 422           | 359           |                        |               |                 |               | 2            | 78           | 9            | 24           | 7.011          | 7.942          |
| Ungarn                     | 2.872              | 2.952          |               |               | 1.396                  | 1.490         |                 |               | 72           | 59           | 2            | 17           | 4.342          | 4.518          |
| <b>Osteuropa</b>           | <b>51.182</b>      | <b>50.939</b>  | <b>24.883</b> | <b>25.909</b> | <b>11.424</b>          | <b>10.881</b> |                 |               | <b>595</b>   | <b>682</b>   | <b>1.065</b> | <b>1.452</b> | <b>89.149</b>  | <b>89.863</b>  |
| Ägypten                    | 447                | 83             |               |               |                        |               |                 |               |              |              |              |              | 447            | 83             |
| China                      | 7.734              | 7.104          |               |               | 160                    | 0             |                 |               |              |              | 607          | 656          | 8.501          | 7.760          |
| Indien                     | 1.426              | 1.475          |               |               |                        |               |                 |               |              |              |              |              | 1.426          | 1.475          |
| Japan                      | 687                | 537            |               |               |                        |               |                 |               |              |              |              |              | 687            | 537            |
| Marokko                    | 1.056              | 1.442          |               |               |                        |               |                 |               |              |              |              |              | 1.056          | 1.442          |
| Pakistan                   | 1.286              | 1.402          |               |               |                        |               |                 |               |              |              |              |              | 1.286          | 1.402          |
| Vietnam                    | 2.792              | 2.477          |               |               |                        |               |                 |               |              |              |              |              | 2.792          | 2.477          |
| <b>Asien/Afrika</b>        | <b>15.427</b>      | <b>14.519</b>  |               |               | <b>160</b>             | <b>0</b>      |                 |               |              |              | <b>607</b>   | <b>656</b>   | <b>16.194</b>  | <b>15.175</b>  |
| <b>International</b>       | <b>94.984</b>      | <b>94.335</b>  | <b>24.883</b> | <b>25.909</b> | <b>34.802</b>          | <b>32.621</b> | <b>1.061</b>    | <b>1.070</b>  | <b>595</b>   | <b>684</b>   | <b>1.764</b> | <b>2.232</b> | <b>158.089</b> | <b>156.851</b> |
| <b>METRO GROUP</b>         | <b>109.709</b>     | <b>109.330</b> | <b>55.804</b> | <b>58.028</b> | <b>58.897</b>          | <b>56.199</b> | <b>19.129</b>   | <b>19.291</b> | <b>1.322</b> | <b>1.444</b> | <b>7.397</b> | <b>9.500</b> | <b>252.258</b> | <b>253.792</b> |

<sup>1</sup> Rundungsdifferenzen möglich

**Mitarbeiterentwicklung nach Ländern und Segmenten**

nach Köpfen zum Stichtag 31.12.

|                            | Metro Cash & Carry |                | Real          |               | Media Markt und Saturn |               | Galeria Kaufhof |               | Immobilien   |              | Sonstige     |              | METRO GROUP    |                |
|----------------------------|--------------------|----------------|---------------|---------------|------------------------|---------------|-----------------|---------------|--------------|--------------|--------------|--------------|----------------|----------------|
|                            | 2010               | 2009           | 2010          | 2009          | 2010                   | 2009          | 2010            | 2009          | 2010         | 2009         | 2010         | 2009         | 2010           | 2009           |
| <b>Deutschland</b>         | <b>16.687</b>      | <b>17.347</b>  | <b>40.342</b> | <b>42.082</b> | <b>26.885</b>          | <b>26.725</b> | <b>22.992</b>   | <b>23.334</b> | <b>828</b>   | <b>893</b>   | <b>5.696</b> | <b>6.795</b> | <b>113.430</b> | <b>117.176</b> |
| Belgien                    | 3.667              | 4.042          |               |               | 1.514                  | 1.427         | 1.431           | 1.443         |              |              |              |              | 6.612          | 6.912          |
| Dänemark                   | 715                | 744            |               |               | 23                     | 25            |                 |               |              |              |              |              | 738            | 769            |
| Frankreich                 | 8.696              | 8.683          |               |               | 2.140                  | 2.149         |                 |               |              |              |              |              | 10.836         | 10.832         |
| Italien                    | 4.736              | 4.697          |               |               | 7.115                  | 6.996         |                 |               |              |              | 0            | 19           | 11.851         | 11.712         |
| Luxemburg                  |                    |                |               |               | 130                    | 62            |                 |               | 0            | 2            |              |              | 130            | 64             |
| Niederlande                | 5.006              | 5.232          |               |               | 4.179                  | 3.795         |                 |               |              |              | 9            | 9            | 9.194          | 9.036          |
| Österreich                 | 2.134              | 2.123          |               |               | 2.857                  | 2.428         |                 |               |              |              |              |              | 4.991          | 4.551          |
| Portugal                   | 1.505              | 1.521          |               |               | 807                    | 846           |                 |               |              |              |              |              | 2.312          | 2.367          |
| Schweden                   |                    |                |               |               | 2.035                  | 1.708         |                 |               |              |              |              |              | 2.035          | 1.708          |
| Schweiz                    |                    |                |               |               | 1.456                  | 1.309         |                 |               |              |              | 87           | 87           | 1.543          | 1.396          |
| Spanien                    | 3.816              | 3.780          |               |               | 6.707                  | 6.571         |                 |               |              |              | 0            | 5            | 10.523         | 10.356         |
| Vereinigtes Königreich     | 3.858              | 4.596          |               |               | 3                      | 5             |                 |               |              |              |              |              | 3.861          | 4.601          |
| <b>Westeuropa (ohne D)</b> | <b>34.133</b>      | <b>35.418</b>  |               |               | <b>28.966</b>          | <b>27.321</b> | <b>1.431</b>    | <b>1.443</b>  | <b>0</b>     | <b>2</b>     | <b>96</b>    | <b>120</b>   | <b>64.626</b>  | <b>64.304</b>  |
| Bulgarien                  | 2.600              | 2.540          |               |               |                        |               |                 |               |              |              | 0            | 7            | 2.600          | 2.547          |
| Griechenland               | 1.158              | 1.210          |               |               | 1.047                  | 1.077         |                 |               |              |              |              |              | 2.205          | 2.287          |
| Kasachstan                 | 1.050              | 319            |               |               |                        |               |                 |               | 8            | 0            |              |              | 1.058          | 319            |
| Kroatien                   | 1.206              | 1.264          |               |               |                        |               |                 |               |              |              |              |              | 1.206          | 1.264          |
| Moldawien                  | 766                | 702            |               |               |                        |               |                 |               |              |              |              |              | 766            | 702            |
| Polen                      | 7.252              | 7.442          | 11.185        | 12.035        | 5.057                  | 5.276         |                 |               | 292          | 275          | 190          | 306          | 23.976         | 25.334         |
| Rumänien                   | 5.716              | 5.731          | 7.482         | 8.736         |                        |               |                 |               | 1            | 3            | 359          | 374          | 13.558         | 14.844         |
| Russland                   | 15.582             | 13.600         | 4.471         | 4.309         | 3.253                  | 2.428         |                 |               | 104          | 155          | 504          | 580          | 23.914         | 21.072         |
| Serbien                    | 1.519              | 1.283          |               |               |                        |               |                 |               |              |              |              |              | 1.519          | 1.283          |
| Slowakei                   | 1.550              | 1.206          |               |               |                        |               |                 |               |              |              |              |              | 1.550          | 1.206          |
| Tschechien                 | 3.586              | 3.530          |               |               |                        |               |                 |               |              |              |              |              | 3.586          | 3.530          |
| Türkei                     | 3.437              | 2.882          | 2.012         | 2.550         | 1.261                  | 1.262         |                 |               | 119          | 142          | 37           | 122          | 6.866          | 6.958          |
| Ukraine                    | 6.861              | 7.675          | 422           | 558           |                        |               |                 |               |              | 21           | 8            | 24           | 7.291          | 8.278          |
| Ungarn                     | 3.072              | 2.958          |               |               | 1.443                  | 1.483         |                 |               | 72           | 71           |              | 17           | 4.587          | 4.529          |
| <b>Osteuropa</b>           | <b>55.355</b>      | <b>52.342</b>  | <b>25.572</b> | <b>28.188</b> | <b>12.061</b>          | <b>11.526</b> |                 |               | <b>596</b>   | <b>667</b>   | <b>1.098</b> | <b>1.430</b> | <b>94.682</b>  | <b>94.153</b>  |
| Ägypten                    | 679                | 108            |               |               |                        |               |                 |               |              |              |              |              | 679            | 108            |
| China                      | 8.212              | 6.833          |               |               | 391                    | 0             |                 |               |              |              | 602          | 588          | 9.205          | 7.421          |
| Indien                     | 1.528              | 1.369          |               |               |                        |               |                 |               |              |              |              |              | 1.528          | 1.369          |
| Japan                      | 1.096              | 789            |               |               |                        |               |                 |               |              |              |              |              | 1.096          | 789            |
| Marokko                    | 0                  | 1.457          |               |               |                        |               |                 |               |              |              |              |              | 0              | 1.457          |
| Pakistan                   | 1.304              | 1.355          |               |               |                        |               |                 |               |              |              |              |              | 1.304          | 1.355          |
| Vietnam                    | 3.396              | 2.411          |               |               |                        |               |                 |               |              |              |              |              | 3.396          | 2.411          |
| <b>Asien/Afrika</b>        | <b>16.215</b>      | <b>14.322</b>  |               |               | <b>391</b>             | <b>0</b>      |                 |               |              |              | <b>602</b>   | <b>588</b>   | <b>17.208</b>  | <b>14.910</b>  |
| <b>International</b>       | <b>105.703</b>     | <b>102.082</b> | <b>25.572</b> | <b>28.188</b> | <b>41.418</b>          | <b>38.847</b> | <b>1.431</b>    | <b>1.443</b>  | <b>596</b>   | <b>669</b>   | <b>1.796</b> | <b>2.138</b> | <b>176.516</b> | <b>173.367</b> |
| <b>METRO GROUP</b>         | <b>122.390</b>     | <b>119.429</b> | <b>65.914</b> | <b>70.270</b> | <b>68.303</b>          | <b>65.572</b> | <b>24.423</b>   | <b>24.777</b> | <b>1.424</b> | <b>1.562</b> | <b>7.492</b> | <b>8.933</b> | <b>289.946</b> | <b>290.543</b> |

**Mitarbeiterentwicklung nach Ländern und Segmenten**

auf Vollzeitbasis<sup>1</sup> zum Stichtag 31.12.

|                            | Metro Cash & Carry |                | Real          |               | Media Markt und Saturn |               | Galeria Kaufhof |               | Immobilien   |              | Sonstige     |              | METRO GROUP    |                |
|----------------------------|--------------------|----------------|---------------|---------------|------------------------|---------------|-----------------|---------------|--------------|--------------|--------------|--------------|----------------|----------------|
|                            | 2010               | 2009           | 2010          | 2009          | 2010                   | 2009          | 2010            | 2009          | 2010         | 2009         | 2010         | 2009         | 2010           | 2009           |
| <b>Deutschland</b>         | <b>14.359</b>      | <b>14.842</b>  | <b>30.753</b> | <b>31.796</b> | <b>24.302</b>          | <b>24.002</b> | <b>18.753</b>   | <b>18.924</b> | <b>713</b>   | <b>759</b>   | <b>5.546</b> | <b>6.482</b> | <b>94.426</b>  | <b>96.804</b>  |
| Belgien                    | 3.008              | 3.093          |               |               | 1.419                  | 1.333         | 1.111           | 1.124         |              |              |              |              | 5.538          | 5.551          |
| Dänemark                   | 487                | 509            |               |               | 22                     | 24            |                 |               |              |              |              |              | 509            | 533            |
| Frankreich                 | 8.347              | 8.318          |               |               | 2.053                  | 2.031         |                 |               |              |              |              |              | 10.400         | 10.349         |
| Italien                    | 4.121              | 4.010          |               |               | 6.622                  | 6.497         |                 |               |              |              | 0            | 19           | 10.743         | 10.526         |
| Luxemburg                  |                    |                |               |               | 126                    | 59            |                 |               | 0            | 2            |              |              | 126            | 61             |
| Niederlande                | 3.126              | 3.090          |               |               | 2.358                  | 2.112         |                 |               |              |              | 8            | 8            | 5.492          | 5.210          |
| Österreich                 | 1.909              | 1.901          |               |               | 2.521                  | 2.124         |                 |               |              |              |              |              | 4.430          | 4.025          |
| Portugal                   | 1.421              | 1.437          |               |               | 770                    | 806           |                 |               |              |              |              |              | 2.190          | 2.243          |
| Schweden                   |                    |                |               |               | 1.689                  | 1.391         |                 |               |              |              |              |              | 1.689          | 1.391          |
| Schweiz                    |                    |                |               |               | 1.335                  | 1.157         |                 |               |              |              | 82           | 80           | 1.417          | 1.237          |
| Spanien                    | 3.446              | 3.390          |               |               | 5.846                  | 5.778         |                 |               |              |              | 0            | 5            | 9.292          | 9.173          |
| Vereinigtes Königreich     | 2.999              | 3.417          |               |               | 2                      | 5             |                 |               |              |              |              |              | 3.001          | 3.421          |
| <b>Westeuropa (ohne D)</b> | <b>28.864</b>      | <b>29.166</b>  |               |               | <b>24.762</b>          | <b>23.315</b> | <b>1.111</b>    | <b>1.124</b>  | <b>0</b>     | <b>2</b>     | <b>90</b>    | <b>112</b>   | <b>54.827</b>  | <b>53.720</b>  |
| Bulgarien                  | 2.573              | 2.520          |               |               |                        |               |                 |               |              |              |              | 7            | 2.573          | 2.527          |
| Griechenland               | 1.156              | 1.093          |               |               | 977                    | 999           |                 |               |              |              |              |              | 2.133          | 2.092          |
| Kasachstan                 | 1.049              | 319            |               |               |                        |               |                 |               | 1            | 0            |              |              | 1.050          | 319            |
| Kroatien                   | 1.201              | 1.244          |               |               |                        |               |                 |               |              |              |              |              | 1.201          | 1.244          |
| Moldawien                  | 766                | 702            |               |               |                        |               |                 |               |              |              |              |              | 766            | 702            |
| Polen                      | 6.861              | 7.026          | 10.258        | 11.021        | 4.996                  | 5.225         |                 |               | 291          | 275          | 184          | 303          | 22.589         | 23.849         |
| Rumänien                   | 5.686              | 5.691          | 7.390         | 8.654         |                        |               |                 |               | 1            | 3            | 359          | 371          | 13.436         | 14.719         |
| Russland                   | 15.471             | 13.600         | 4.306         | 4.309         | 3.237                  | 2.418         |                 |               | 102          | 106          | 498          | 580          | 23.613         | 21.012         |
| Serbien                    | 1.519              | 1.283          |               |               |                        |               |                 |               |              |              |              |              | 1.519          | 1.283          |
| Slowakei                   | 1.519              | 1.195          |               |               |                        |               |                 |               |              |              |              |              | 1.519          | 1.195          |
| Tschechien                 | 3.460              | 3.483          |               |               |                        |               |                 |               |              |              |              |              | 3.460          | 3.483          |
| Türkei                     | 3.437              | 2.789          | 1.819         | 2.279         | 1.261                  | 1.262         |                 |               | 119          | 142          | 37           | 122          | 6.673          | 6.594          |
| Ukraine                    | 6.708              | 7.675          | 421           | 558           |                        |               |                 |               |              | 21           | 8            | 24           | 7.137          | 8.278          |
| Ungarn                     | 2.856              | 2.899          |               |               | 1.421                  | 1.473         |                 |               | 72           | 71           |              | 17           | 4.348          | 4.460          |
| <b>Osteuropa</b>           | <b>54.261</b>      | <b>51.516</b>  | <b>24.195</b> | <b>26.821</b> | <b>11.891</b>          | <b>11.377</b> |                 |               | <b>586</b>   | <b>618</b>   | <b>1.086</b> | <b>1.424</b> | <b>92.018</b>  | <b>91.755</b>  |
| Ägypten                    | 656                | 108            |               |               |                        |               |                 |               |              |              |              |              | 656            | 108            |
| China                      | 8.205              | 6.833          |               |               | 391                    | 0             |                 |               |              |              | 595          | 588          | 9.191          | 7.421          |
| Indien                     | 1.520              | 1.344          |               |               |                        |               |                 |               |              |              |              |              | 1.520          | 1.344          |
| Japan                      | 808                | 601            |               |               |                        |               |                 |               |              |              |              |              | 808            | 601            |
| Marokko                    | 0                  | 1.457          |               |               |                        |               |                 |               |              |              |              |              | 0              | 1.457          |
| Pakistan                   | 1.284              | 1.355          |               |               |                        |               |                 |               |              |              |              |              | 1.284          | 1.355          |
| Vietnam                    | 3.298              | 2.411          |               |               |                        |               |                 |               |              |              |              |              | 3.298          | 2.411          |
| <b>Asien/Afrika</b>        | <b>15.772</b>      | <b>14.109</b>  |               |               | <b>391</b>             | <b>0</b>      |                 |               |              |              | <b>595</b>   | <b>588</b>   | <b>16.758</b>  | <b>14.697</b>  |
| <b>International</b>       | <b>98.897</b>      | <b>94.790</b>  | <b>24.195</b> | <b>26.821</b> | <b>37.044</b>          | <b>34.692</b> | <b>1.111</b>    | <b>1.124</b>  | <b>586</b>   | <b>620</b>   | <b>1.770</b> | <b>2.125</b> | <b>163.603</b> | <b>160.171</b> |
| <b>METRO GROUP</b>         | <b>113.256</b>     | <b>109.632</b> | <b>54.948</b> | <b>58.616</b> | <b>61.346</b>          | <b>58.694</b> | <b>19.865</b>   | <b>20.048</b> | <b>1.299</b> | <b>1.378</b> | <b>7.316</b> | <b>8.606</b> | <b>258.029</b> | <b>256.975</b> |

<sup>1</sup> Rundungsdifferenzen möglich

Im Berichtsjahr beschäftigten wir in Deutschland 5.209 Menschen mit anerkannter Schwerbehinderung oder Gleichgestellte.

Der Anteil der Mitarbeiter in der Altersgruppe 50 Jahre und älter belief sich auf 16,8 Prozent der Gesamtbelegschaft. In Deutschland gehörten 28,9 Prozent der Mitarbeiter dieser Altersgruppe an. Bundesweit wurden im Berichtsjahr 846 Mitarbeiter der Altersgruppe 50plus eingestellt; international waren es 1.014 Beschäftigte.

Im Rahmen unseres Diversity-Managements fördern wir die Chancengleichheit von Frauen und Männern im Beruf. Dazu haben wir Maßnahmen zur besseren Vereinbarkeit von Familie und Beruf aufgelegt. Personalinstrumente sollen es Mitarbeitern je nach Lebensphase ermöglichen, berufliche Anforderungen und persönliche Bedürfnisse wie beispielsweise Kindererziehung oder die Pflege von Angehörigen bedarfsgerecht zu gestalten. So wird 2011 eine dritte Kindertagesstätte am Campus Düsseldorf eingerichtet und eine Kinderbetreuung während der Schulferien angeboten. Zudem sollen Mitarbeiter, die nahe Angehörige pflegen, für eine Zeit von bis zu zwei Jahren nach Ablauf der gesetzlichen Pflegezeit unternehmensseitig unterstützt werden.

Darüber hinaus haben wir uns das Ziel gesetzt, den Frauenanteil in Managementpositionen weiter zu steigern. Als Managementpositionen gelten die Ebenen 1 bis 3, also Vorstand/ Geschäftsführung, Bereichsleitung, Hauptabteilungs- beziehungsweise Abteilungsleitung sowie Marktleitung. Der Anteil der Frauen in diesen Ebenen lag im Berichtsjahr bei 18,6 Prozent. Der Vorjahreswert belief sich auf 16,0 Prozent<sup>1</sup>.

### **Nachhaltiges Gesundheits- und Arbeitssicherheitsmanagement**

Unser Unternehmen erleichtert es den Mitarbeitern, fit für den beruflichen Alltag zu bleiben. Wir setzen uns für ein sicheres, gefahrungsfreies Arbeitsumfeld ein. Unter dem Dach der Gesundheitsoffensive GO erhalten Mitarbeiter bereits seit 2004 Angebote zur Stärkung der physischen und mentalen Gesundheit, Tipps zur gesunden Ernährung oder zur ergonomischen Gestaltung von Arbeitsplätzen. Dies schließt zum Beispiel Bewegungsangebote wie Rückenschule, Fitnesskurse und Betriebssport ein. Außerdem gibt es Ergonomieberatungen am Arbeitsplatz und die Möglichkeit, an Workshops beziehungsweise Trainings zum Stressmanagement teilzunehmen. Zudem haben wir im Berichtsjahr einen Fitnessraum eröffnet, den Mitarbeiter am Campus Düsseldorf kostenlos nutzen können.

### **Konzernweites Altersvorsorgemodell**

Unser „Zukunftspaket“ unterstützt die Mitarbeiter beim Aufbau ihrer privaten Altersvorsorge. Das konzernweite Vorsorgemodell bietet freiwillige Leistungen, die über branchenübliche tarifliche Standards hinausgehen. In Deutschland beteiligten sich im Berichtsjahr 58.311 Mitarbeiter an diesem Angebot. Das entspricht einer Quote von 52,9 Prozent.

### **Corporate University: herausragende Führung**

Im Zuge von Shape 2012 haben wir innerhalb unseres Personalressorts eine neue Abteilung, „Leadership & Transformation“, eingerichtet, um die Führungsfähigkeit von leitenden Angestellten zu stärken. Auf diese Weise unterstützen wir den Kulturwandel innerhalb der METRO GROUP. Ein zentrales Element ist dabei die Corporate University, mit der wir unsere heutigen und künftigen Führungskräfte entwickeln und qualifizieren. Dabei kooperieren wir mit renommierten internationalen Partnern wie der Universität St. Gallen, Schweiz, und dem Institut Européen d'Administration des Affaires (INSEAD) in Fontainebleau, Frankreich. 2010 haben mehr als 380 leitende Angestellte und Nachwuchsführungskräfte an den acht angebotenen Entwicklungsprogrammen teilgenommen. Weitere 500 Manager haben spezielle Seminare durchlaufen. Charakteristisch für die Corporate University ist das Mentorenprogramm, bei dem die Mitglieder des Vorstands der METRO AG sowie die Geschäftsführer der Vertriebslinien persönlich zur Entwicklung der Führungskräfte beitragen. Damit der direkte Geschäftsbezug der Führungskräfteentwicklung sichergestellt wird, sind die Initiativen und Programme von Metro Cash & Carry International in der Corporate University der METRO GROUP aufgegangen. Alle Seminare wurden entsprechend neu ausgelegt.

### **Zentrale Führungskräfteentwicklung für hohe Wettbewerbsfähigkeit**

Ein wichtiger Bestandteil von Shape 2012 ist es, die Führungskräfteentwicklung als strategische Funktion der Holding zu etablieren und klar an den Geschäftsbedürfnissen unseres Unternehmens auszurichten. Daher haben wir im Berichtsjahr im Zuge der Integration der Verwaltungsfunktionen von METRO AG und Metro Cash & Carry International die Personalstrategie für die obere Führungsebene des gesamten Konzerns neu ausgerichtet und zusammengeführt.

Basis der Führungskräfteentwicklung und Nachfolgeplanung von oberen Managementpositionen ist ein systematisches Talent-Management. Dabei ist die individuelle Entwicklung der Führungskräfte an den strategischen Zielen

<sup>1</sup> 16,0 Prozent im Vorjahr bezieht sich auf den Frauenanteil in den Ebenen 1 bis 3. Der im letzten Geschäftsbericht genannte Wert von 17,8 Prozent basierte auf einer Berechnung ohne die Ebene 1 (Vorstand/Geschäftsführung).

der METRO GROUP ausgerichtet. Dieses System eröffnet den Führungskräften Karrierewege in allen Ländern, in denen wir vertreten sind. Die Instrumente des Talent-Managements – ein transparentes Leadership-Modell, regelmäßige Leistungs- und Potenzialbeurteilungen, die zentrale Verantwortung für Management-Assessments und Development Center sowie ein aktives Management von Talentpools – schaffen die Grundlage für einen weltweiten Kandidatenpool für unternehmenskritische Funktionen. Die Corporate University mit ihren Management-Development-Programmen fördert darüber hinaus gezielt die individuellen Karrierewege und stärkt unser einheitliches internationales Führungsmodell.

#### **Regelmäßige Beurteilung unterstützt individuelle Entwicklung**

Jährlich nehmen wir für unsere Führungskräfte und Mitarbeiter eine Performance- und Potenzialbeurteilung vor. Ziel ist es, eine Einschätzung über die individuellen Leistungen und Kompetenzen auf Basis der METRO GROUP Kernkompetenzen zu erhalten, die die Verhaltensanforderungen an erfolgreiche Führungskräfte beschreiben. Die anschließenden Feedback-Gespräche bilden die Grundlage für individuelle Entwicklungspläne. Dieses Verfahren stellt sicher, dass wir die besten Talente frühzeitig identifizieren und fördern und unser Unternehmen für sie weiterhin ein attraktiver Arbeitgeber bleibt.

#### **Langfristige Nachfolgeplanung**

Die Nachfolgeplanung der METRO GROUP gewährleistet, dass Schlüsselpositionen auch künftig mit den besten Führungskräften besetzt werden. Innerhalb des Talent-Managements führen wir eine belastbare Analyse potenzieller Nachfolgekandidaten durch. Die interne Nachbesetzungsquote für die Top-Führungsebene lag 2010 bei rund 79 Prozent. Das angestrebte Ziel von mindestens 75 Prozent haben wir damit erreicht.

#### **Führungskräfte von morgen gewinnen**

Eine konsequente Profilierung als attraktiver Arbeitgeber unterstützt uns dabei, talentierten Führungskräftenachwuchs zu gewinnen. Im Berichtsjahr haben wir eine internationale Initiative zum Ausbau der Arbeitgebermarken der METRO GROUP und ihrer Vertriebslinien gestartet. Schwerpunkte bilden die enge Kooperation mit ausgewählten Universitäten und Fachhochschulen, die Zusammenarbeit mit Studentenorganisationen und eine intensive Praktikantenbetreuung. Seit 2002 findet jährlich die Veranstaltung Meeting Metro statt, die Studierenden den Handel auf direkte Weise nahebringt. Sie eröffnet ihnen zugleich die Möglichkeit, unser Unternehmen mit seinen Vertriebslinien und Gesellschaften zu erleben und sich über die vielfältigen Einstiegs- und Aufstiegsmöglichkeiten zu informieren. Im Berichtsjahr haben wir mit Meeting Metro rund 13.500 Interessierte angesprochen. Die positive Resonanz bestärkt uns darin, das Konzept von Meeting Metro weiter auszubauen.

## 6. Innovationsmanagement

Als Handelsunternehmen betreibt die METRO GROUP keine Forschung und Entwicklung im engeren Sinn. Vielmehr entwickeln und nutzen wir im Rahmen unseres Innovationsmanagements neue Konzepte und Technologien, um noch besser auf die Bedürfnisse und Einkaufsgewohnheiten von Kunden eingehen zu können. So stärken wir die Wettbewerbsfähigkeit unserer Vertriebslinien. Ein weiteres zentrales Ziel ist es, interne und externe Prozesse effizienter zu gestalten, zum Beispiel in der Zusammenarbeit mit Lieferanten und Industriepartnern. Auf diese Weise unterstützt unser Innovationsmanagement die Ziele von Shape 2012: eine stärkere Kundenorientierung und mehr Effizienz für die gesamte Unternehmensgruppe. Innovationen sichern damit das langfristige, profitable Wachstum der METRO GROUP.

Unser Innovationsmanagement ist systematisch aufgebaut: Wir identifizieren Kundenbedürfnisse und Marktanforderungen sowie relevante technologische und konzeptionelle Neuerungen, treiben Entwicklungen gemeinsam mit internen und externen Partnern voran und setzen Pilotverfahren inklusive Evaluierung um. Bei erfolgreichen Tests führen wir die Innovationen im operativen Geschäft ein. Die METRO GROUP stellt in diesem Rahmen adäquate Ressourcen bereit, mit denen unsere Gesellschaften bedarfsgerechte Lösungen erarbeiten können. Dazu zählen zum Beispiel Testeinrichtungen.

Im Sinne eines konzernübergreifenden Austauschs kooperieren die für Innovationen zuständigen Mitarbeiter der METRO AG und des internen IT-Dienstleisters METRO SYSTEMS eng mit den Spezialisten der Vertriebslinien. Auf diese Weise lassen sich relevante Kenntnisse und Qualifikationen innerhalb der METRO GROUP aufbauen und austauschen. Darüber hinaus ist sichergestellt, dass die entwickelten Innovationen den Bedürfnissen der Kunden und den spezifischen Anforderungen der Segmente entsprechen. Bei der Einführung neuer Konzepte und technologischer Innovationen setzen wir auf einen offenen, konstruktiven Dialog mit externen Partnern. Dazu zählen zum Beispiel Verbraucherverbände und Gewerkschaften. Wir sind in nationalen und internationalen Gremien vertreten, um die Entwicklung von Standards zu begleiten. Für unsere Mitarbeiter führen wir Schulungen durch, die sie auf die Einführung neuer Prozesse vorbereiten.

Bereits laufende Projekte haben wir 2010 fortgesetzt und durch weitere Maßnahmen der Vertriebslinien ergänzt. Ziel bleibt es

weiterhin, neue Konzepte in der Praxis erfolgreich umzusetzen, innovative Technologien in den Märkten und Lägern zu nutzen sowie deren Einsatz in Zusammenarbeit mit Lieferanten und Geschäftspartnern auszuweiten. Im Mittelpunkt stehen dabei die modernen Informations- und Kommunikationstechnologien (IKT) und die Radiofrequenz-Identifikation (RFID), mit der sich Produkte und Warenbewegungen berührungslos in EDV-Systemen erfassen lassen.

### Zusammenarbeit mit externen Partnern

Bereits 2002 haben wir die METRO GROUP Future Store Initiative gegründet. Dabei handelt es sich um einen Zusammenschluss von derzeit 90 Partnern aus Wissenschaft, Konsumgüterindustrie sowie Dienstleistungs- und IKT-Branche. Um den operativen Herausforderungen der Vertriebslinien zu begegnen, entwickeln und testen wir in diesem Rahmen innovative Lösungen. Dazu gehören beispielsweise neue Vertriebsformen, eine attraktive Kundenansprache, die Markt- und Sortimentsgestaltung, die Bereitstellung von Produktinformationen sowie beschleunigte Prozesse. Im Mittelpunkt der Partnerschaft, die im Berichtsjahr erfolgreich fortgeführt wurde, stehen dabei stets die Kunden und ihre Bedürfnisse.

Eine zentrale Testplattform der Initiative ist der Future Store der METRO GROUP in Tönisvorst, Nordrhein-Westfalen. Dabei handelt es sich um ein Real SB-Warenhaus, in dem die Vertriebslinie seit 2008 gemeinsam mit den Partnern der METRO GROUP Future Store Initiative neue Konzepte und Technologien auf ihre Praxistauglichkeit erprobt. Innovationen, die sich im Future Store bewähren, führt Real sukzessive ein. Mehr als 100 Standorte der Vertriebslinie nutzten 2010 die neuen Technologien und Konzepte aus Tönisvorst, darunter Multimedia-Terminals und Vertriebskonzepte wie „Der Meistermetzger“ und „Frische und Convenience“ sowie den neu konzipierten Drogeriebereich „beauty & more“.

### Digitaler Einkauf

Zu den zentralen Herausforderungen für den Handel gehören sich verändernde Einkaufsgewohnheiten, die beispielsweise auf den Einfluss des Internets zurückzuführen sind. Die METRO GROUP nimmt diese Entwicklung in ihrem Innovationsmanagement auf. Ziel ist es, die Vorteile des Einkaufs im Internet mit denen des stationären Handels zu kombinieren, um durch Service, Authentizität und Qualität ein Alleinstellungsmerkmal im Wettbewerb zu schaffen.

Ein Beispiel ist das Vertriebsformat „Metro Drive“, das Metro Cash & Carry 2009 erstmals in Frankreich erprobt hat. Der Großhändler bietet seinen gewerbetreibenden Kunden damit die Möglichkeit, zu jeder Tageszeit Waren telefonisch, per Fax oder im Internet zu bestellen. Der Kunde kann diese anschließend an der nächstgelegenen Abholstelle entgegennehmen. 2010 hat Metro Cash & Carry das Angebot in Frankreich um weitere 11 auf nun insgesamt 14 „Metro Drive“-Stationen erweitert.

In Deutschland hat die Vertriebslinie Real im November 2010 den ersten Drive-in-Markt für Lebensmittel in Isernhagen-Altwarmbüchen bei Hannover eröffnet. Auf der Internetseite [www.real-drive.de](http://www.real-drive.de) können Kunden aus einem Sortiment von rund 5.000 Artikeln – darunter auch Tiefkühl- und Frischeprodukte – wählen und ihren Einkauf zusammenstellen. Bereits zwei Stunden nach der Bestellung lassen sich die Waren an der Drive-in-Station abholen. Für die Nutzung des Angebots fällt eine Servicegebühr in Höhe von 1 € an. Die Produktpreise entsprechen denen der SB-Warenhäuser von Real. Der „Real Drive“ ist als Testmarkt konzipiert. Bewährt sich der Service, wird Real 2011 über eine Ausweitung des Angebots auf weitere deutsche Städte entscheiden.

An Bedeutung gewinnt im Handel auch der Einsatz von Einkaufsservices, die sich mithilfe von mobilen Endgeräten ortsunabhängig nutzen lassen. Vor allem die zunehmende Verbreitung von Smartphones ermöglicht neue Formen der Kundenansprache und -bindung. Anfang 2010 hat Real zum Beispiel eine Applikation für das iPhone und den iPod touch von Apple veröffentlicht. Mit diesem Angebot können Kunden elektronische Einkaufslisten erstellen, Aktionsangebote abrufen und sich den Weg zum nächstgelegenen Real SB-Warenhaus anzeigen lassen. Zudem bietet die Applikation Zugriff auf eine Kochshow, in der Menüvorschläge per Video präsentiert und die dazugehörigen Rezepte angezeigt werden. Die notwendigen Zutaten lassen sich direkt in die elektronische Einkaufsliste übertragen. Darüber hinaus lassen sich die Angebote und Rezepte in sozialen Netzwerken wie Facebook und Twitter weiterempfehlen und veröffentlichen. Seit dem Start wurde die kostenlose Applikation über 180.000 Mal auf Smartphones installiert.

Auch Metro Cash & Carry bietet Gewerbetreibenden eine eigene Applikation für das iPhone an, das „METROphone“. Ausgewählte Kunden des Belieferungsservice können mit dieser Anwendung Produkte direkt per Smartphone bestellen. Die Produktauswahl erfolgt über eine Suchfunktion; alternativ lassen sich Barcodes mit der Kamera eines Smartphones

erfassen. Es stehen dabei alle Artikel aus dem persönlichen Kundenordersatz sowie das gesamte Liefersortiment des jeweiligen Metro Cash & Carry Großmarkts zur Verfügung. Die ausgewählten Produkte werden einem virtuellen Warenkorb hinzugefügt. Ist die Bestellung abgeschlossen, erhält der Kunde automatisch eine Bestätigung per E-Mail oder Fax. Er kann auf dem Smartphone jederzeit den Status seiner Bestellungen bis zum Zeitpunkt des Versands prüfen.

### **Operativer Einsatz von RFID**

Die METRO GROUP zählt im Handel zu den Vorreitern beim Einsatz der Radiofrequenz-Identifikation (RFID). Diese Technologie ermöglicht es, Warenbewegungen entlang der gesamten Prozesskette automatisch zu erfassen und berührungslos in EDV-Systeme zu übertragen. RFID hilft dem Handel, Prozesse in der Logistik und im Lagermanagement zu optimieren, Warensicherung effizienter zu gestalten und die Kundenzufriedenheit noch weiter zu verbessern. Herzstück ist der RFID-Transponder, ein winziger Computerchip mit Antenne. Auf diesem Chip ist in der Regel ein Elektronischer Produktcode (EPC) gespeichert. Der EPC lässt sich mit einem RFID-Lesegerät berührungslos, ohne Sichtverbindung und auch in großen Stückzahlen extrem schnell erfassen und verweist auf Produktinformationen im Warenwirtschaftssystem – wie etwa Herkunft, Hersteller oder Mindesthaltbarkeitsdatum.

Die METRO GROUP verwendet RFID bereits seit 2007 in der Logistik. An rund 400 Standorten sorgt die Technologie für effizientere Abläufe im Wareneingang. Damit ist die METRO GROUP im europäischen Handel weiterhin führend. Die RFID-Technologie wird bei Metro Cash & Carry in Deutschland und Frankreich sowie bei Real und der MGL METRO GROUP Logistics in Deutschland genutzt. Allein im Zentrallager Unna werden jährlich mehr als 750.000 Paletten mithilfe von RFID erfasst. Im Berichtsjahr haben wir in umfangreichen Tests nachgewiesen, dass RFID Prozesse auf Einzelartikelebene unterstützen kann. Pilottests in den Vertriebslinien, unter anderem bei Metro Cash & Carry Niederlande und bei der Media-Saturn-Gruppe, sind in der Vorbereitung. Hier wird RFID zur Verbesserung der Bestandsübersicht, von Bestellvorgängen und Retouren für ausgewählte Artikel sowie für die Elektronische Artikelsicherung (EAS) verwendet werden.

## 7. Nachhaltigkeitsmanagement

Wirtschaftlicher Erfolg und nachhaltiges Wirtschaften sind für uns zwei Seiten einer Medaille: Profitables Wachstum ist langfristig nur durch verantwortliches Handeln gegenüber Gesellschaft und Umwelt möglich. Deshalb haben wir Nachhaltigkeit zum festen Bestandteil unserer Unternehmensstrategie erklärt. Das bedeutet, bei allen unternehmerischen Entscheidungen und Prozessen auch ökologische und soziale Erfordernisse zu berücksichtigen. Ziel des Nachhaltigkeitsmanagements ist es, unsere künftigen Geschäftsgrundlagen zu sichern. Gleichzeitig wollen wir den gestiegenen Erwartungen unterschiedlicher Anspruchsgruppen Rechnung tragen. Die bessere Bewertung im Dow Jones Sustainability World Index (DJSI World), der die im Bereich Nachhaltigkeit weltweit führenden Unternehmen misst, dokumentiert unsere Fortschritte auf diesem Gebiet: Die METRO GROUP schnitt im September 2010 in den drei Bereichen Wirtschaft, Umwelt und Soziales besser ab als im Vorjahr und liegt deutlich über dem Branchendurchschnitt.

Im Berichtsjahr haben wir die Strategie „Go sustainable 2012“ entwickelt, mit der wir unser konzernweites Nachhaltigkeitsmanagement weiter ausbauen und fokussieren. Sie soll auch über das Jahr 2012 hinaus dazu beitragen, dass wir im Bereich Nachhaltigkeit zu den führenden Handelsunternehmen zählen. Die Strategie unterstützt gleichzeitig die wesentlichen Aspekte unseres Effizienz- und Wertsteigerungsprogramms Shape 2012. Im Zuge dessen identifizieren wir kontinuierlich die relevanten sozialen und ökologischen Herausforderungen des Handels. Die daraus abgeleiteten Maßnahmen helfen uns, Umsatz- und Kostenrisiken für das Unternehmen zu minimieren sowie Chancen für Umsatzsteigerungen und Kostenreduzierungen im operativen Geschäft gewinnbringend zu nutzen. Damit „Go sustainable 2012“ zu einer Wachstumschance für das operative Geschäft wird, haben wir im Geschäftsjahr 2010 für alle Handlungsfelder der Strategie konkrete Ziele formuliert. So werden wir unsere Klima- und Ressourcenschutzaktivitäten ausbauen, die Trainingsprogramme für Lieferanten in Schwellen- und Entwicklungsländern ausweiten und unser Demografiemanagement weiterentwickeln.

### Nachhaltigkeitsorganisation mit klaren Zuordnungen

Mit der Strategie „Go sustainable 2012“ entwickeln wir Nachhaltigkeit zu einem zentralen Wertschöpfungsfaktor für unser

Unternehmen. Das setzt integrierte Managementsysteme und eine Organisationsstruktur mit klar definierten Verantwortlichkeiten voraus. Der 2009 gegründete Nachhaltigkeitsrat erarbeitet deshalb konzernweit verbindliche Standards für ein nachhaltiges Wirtschaften und hilft uns, diese im Unternehmen zu verankern. Dem Nachhaltigkeitsrat gehören Vertreter der Vertriebslinien sowie die Leiter der zentralen Bereiche der Konzernholding an. So ist gewährleistet, dass alle Entscheidungen praktikabel am Unternehmensalltag ausgerichtet sind. Die Mitglieder sind im Folgenden dargestellt:

#### Vorsitz

Dr. Eckhard Cordes, Vorstandsvorsitzender der METRO AG

#### Geschäftsführende Leitung

Dr. Michael J. Inacker, Bereichsleiter Corporate Communications, Public Affairs & CSR

#### Vertreter der Vertriebslinien

Peter Overbosch, Bereichsleiter Quality Management  
Metro Cash & Carry

Dr. Hans-Jörg Gidlewitz, Mitglied der Geschäftsführung Real

Ralph Spangenberg, Mitglied der Geschäftsführung  
Media-Saturn-Unternehmensgruppe

Marion Sollbach, Bereichsleiterin Nachhaltigkeit  
Galeria Kaufhof

Thomas Storck, Mitglied der Geschäftsführung  
Galeria Kaufhof

Thomas Ziegler, Vorsitzender der Geschäftsführung  
METRO Group Asset Management

#### Vertreter der relevanten Bereiche der METRO AG

Dr. Rolf Giebeler, Bereichsleiter Legal Affairs (bis  
31. Dezember 2010)

Hans-Jürgen Matern, Bereichsleiter Regulatory Affairs  
and External Relations QSHE

Bettina Scharff, Bereichsleiterin Organisational & Social  
Development

Oliver Steinert, Bereichsleiter Investor Relations

Michael Wedell, Bereichsleiter nationale Politik

Michael Wiedmann, Bereichsleiter Corporate Relations/  
internationale Politik

#### Beratende Mitglieder

Peter Wübben, Bereichsleiter Unternehmenskommunikation  
METRO AG/METRO Group Asset Management

Albrecht von Truchsess, Bereichsleiter Unternehmens-  
kommunikation Real



Sven Jacobsen, Bereichsleiter Unternehmenskommunikation  
Media-Saturn-Unternehmensgruppe  
Stefanie Grüter, Bereichsleiterin Unternehmenskommunikation  
Galeria Kaufhof

Unsere Nachhaltigkeitsstrategie „Go sustainable 2012“ basiert auf vier Säulen:

- Qualität, Gesundheit und Umwelt
- Energie- und Ressourcenmanagement
- Mitarbeiter und Soziales
- Gesellschaftspolitik und Stakeholder-Dialog

Für jedes dieser strategischen Themenfelder ist eine Arbeitsgruppe zuständig, die Konzepte entwickelt und die Entscheidungen des Nachhaltigkeitsrats vorbereitet. Die Vertreter der Vertriebslinien sorgen dafür, dass die Maßnahmen praxisnah und stringent im Unternehmensalltag verankert werden. Sie nehmen zu den Konzepten der Arbeitsgruppen Stellung und bringen eigene Vorschläge ein. Außerdem berichten sie über Projektfortschritte und stellen die notwendigen Daten für die Erfolgsmessung zur Verfügung.

### Qualität, Gesundheit und Umwelt

Wir bieten unseren Kunden außer Markenprodukten bekannter Hersteller eine Vielzahl hochwertiger Eigenmarkenartikel. Für diese tragen wir unmittelbar Verantwortung. Das bedeutet unter anderem, dass wir für die Qualitätssicherung zuständig sind. Die METRO GROUP legt für die Eigenmarkenartikel Produktmerkmale und Verpackungsgestaltung in enger Abstimmung und im Dialog mit den Herstellern fest. Da die Lieferketten im Handel ebenso wie die Produkte immer komplexer werden, zählen die Rückverfolgung von Rohstoffen und die Dokumentation der Verarbeitungsstufen entlang der Wertschöpfungskette mit zu den größten Herausforderungen eines internationalen Handelsunternehmens wie der METRO GROUP. Bei der Auditierung von Eigenmarken-Verarbeitungsbetrieben im Lebensmittelbereich spielen die internationalen Qualitätsstandards der Global Food Safety Initiative (GFSI), wie GLOBALGAP und IFS, eine zentrale Rolle. Ziel der Standards ist es, das Vertrauen der Verbraucher in die landwirtschaftliche Erzeugung von Nahrungsmitteln zu stärken. Um das zu erreichen, sollen umweltschädliche Einflüsse durch die Landwirtschaft verringert, Medikamente und chemische Pflanzenschutzmittel reduziert eingesetzt sowie Maßnahmen für die Sicherheit und Gesundheit von Mensch und Tier umgesetzt werden. 100 Prozent der Lieferanten von Obst- und

Gemüse-Eigenmarkenprodukten in Deutschland erfüllen den GLOBALGAP-Standard.

### Lieferantenqualifizierung weiter ausgebaut

Lokale Hersteller und Erzeuger sind für uns wichtige Partner. Denn von ihnen beziehen wir bis zu 90 Prozent der Lebensmittelprodukte in unseren Märkten und Filialen. In zahlreichen Ländern unterstützen wir unsere Lieferanten vor Ort dabei, nach international anerkannten Standards der Global Food Safety Initiative (GFSI) zu produzieren. Wesentliche Ziele der Lieferantenqualifizierung sind: die Versorgung der Märkte mit qualitativ hochwertigen Waren langfristig zu sichern, die lokale Wirtschaft zu fördern und verlässliche Geschäftsbeziehungen zu den Herstellern und Erzeugern aufzubauen. Im Rahmen einer strategischen Kooperation mit der Organisation der Vereinten Nationen für industrielle Entwicklung (UNIDO) schulen wir lokale Produzenten in Fragen der Lebensmittelsicherheit und -hygiene. Auf diese Weise wollen wir das Volumen marktfähiger Waren erhöhen und die Einkommenssituation der Erzeuger verbessern. Nach Start des ersten Projekts dieser Art 2009 in Ägypten haben wir mit der UNIDO im Herbst 2010 Gespräche zur Ausweitung des Engagements in Russland und Vietnam geführt. In Ägypten haben wir bis Ende 2010 über 60 Lieferanten im Bereich Lebensmittelsicherheit geschult.

### Detaillierte Fanggebietsinformationen erleichtern nachhaltigen Fischeinkauf

Als einer der größten Fischhändler Europas bietet die METRO GROUP Verbrauchern und gewerblichen Kunden wie Hotel- und Restaurantbesitzern ein umfangreiches Fischsortiment. Damit dies auch in Zukunft so bleibt, engagieren wir uns in besonderem Maß dafür, die Artenvielfalt der Meere zu erhalten. Gleichzeitig sichern wir auf diese Weise künftige Umsätze. Seit Anfang 2010 unterstützen wir das Projekt „Fischbestände online“, um die Datenlage über den Zustand gefährdeter Fischbestände zu verbessern und nachhaltig gefangenen Fisch noch gezielter beziehen zu können. Das umfangreiche Informationssystem gibt erstmals an zentraler Stelle detaillierte Auskünfte zur Bestandssituation kommerziell genutzter Seefischbestände. Über [www.fischinfo.de](http://www.fischinfo.de) und [www.portal-fischerei.de](http://www.portal-fischerei.de) erhalten Handel, Industrie und Verbraucher Entscheidungshilfen, um den Fischeinkauf an Nachhaltigkeitskriterien auszurichten. Die Fischdatenbank soll in den kommenden Jahren kontinuierlich ausgebaut werden. Rund 130 für den deutschen Markt relevante Fischbestände aus weltweit über 30

Fischarten sollen bis Ende 2012 in der Datenbank beschrieben sein. Unser Ziel ist es, die Fischeinkäufer sukzessive in der Nutzung der Fischbestandsdatenbank zu schulen. Unternehmen aus Handel und Fischereiwirtschaft haben das Projekt gemeinsam mit dem deutschen Verbraucherschutzministerium ins Leben gerufen.

### **Metro Cash & Carry eröffnet Fisch-Logistikzentrum**

Um nachhaltige Logistik und den Anspruch an höchste Qualität und Frische zu verknüpfen, hat Metro Cash & Carry im Berichtsjahr ein Fisch-Logistikzentrum in Groß-Gerau bei Frankfurt am Main errichtet. Durch ihre zentrale Lage in Europa und die Nähe zum Flughafen Frankfurt ist diese Plattform ein idealer Konsolidierungs- und Distributionspunkt für Frischfisch. Die Konzentration der Warenströme in Flughafennähe reduziert sowohl die Lieferzeit für die hochsensible Ware als auch die Logistikkosten. Für die Kunden des Selbstbedienungs-großhändlers bedeutet das noch mehr Frische und Produktqualität beim Fischkauf. Denn fast alle Fischarten sind innerhalb von 48 Stunden nach dem Fang im Großmarkt verfügbar. Bei der Konzeption des Fisch-Logistikzentrums haben wir uns konsequent an Nachhaltigkeitskriterien orientiert. Die Logistikkreislaufdecke deckt beispielsweise einen Teil ihres Strombedarfs aus selbst erzeugter Windenergie und setzt bei der Kühlung und Außenbeleuchtung auf klimaschonende Technik. Die Bauweise des Gebäudes und der Plattform sowie sämtliche dort ablaufenden Prozesse wurden mit dem Silber-Status für temperaturgeführte Immobilien des Deutschen Gütesiegels Nachhaltiges Bauen ausgezeichnet. Dieses umfassende Bewertungssystem für nachhaltige Gebäude haben das Bundesministerium für Verkehr, Bau und Stadtentwicklung (BMVBS) und die Deutsche Gesellschaft für nachhaltiges Bauen e. V. (DGNB) entwickelt.

### **Energie- und Ressourcenmanagement**

Die METRO GROUP versorgt täglich viele Millionen Menschen weltweit mit qualitativ hochwertigen Lebensmitteln und Konsumgütern. Weil Energie und andere für die Wertschöpfungskette wichtige Rohstoffe knapp und teuer werden, ist energieeffizientes und ressourcenschonendes Wirtschaften eine zentrale Säule unseres Nachhaltigkeitsmanagements. Mit der Erholung der Weltwirtschaft im Berichtsjahr haben auch die Preise für Energie wieder spürbar angezogen. Um diesen Steigerungen zu begegnen und die Klimawirkung ihrer Standorte und Märkte zu reduzieren, haben die Vertriebslinien das Energiemanagement weiter ausgebaut.

### **Smart Metering: mehr Transparenz dank digitaler Stromzähler**

Damit Einspar- und Effizienzmaßnahmen passgenau geplant und umgesetzt werden können, bedarf es einer soliden Datengrundlage. Um den Energieverbrauch ihrer Standorte präzise zu erfassen und Erfolge besser kontrollieren zu können, nutzen die Vertriebslinien zunehmend digitale Stromzähler, sogenannte Smart-Metering-Systeme. Ende 2010 waren an mehr als 700 Metro-Standorten in Deutschland und Polen Smart-Metering-Systeme vorhanden. Der Vorteil von Smart-Metering-Systemen liegt vor allem in der ständigen und damit verbrauchsgerechten Erfassung des Strom- und Gasverbrauchs. Die Vertriebslinien erhalten standortspezifische Nutzungsprofile, die es ihnen ermöglichen, Energie bewusster und effizienter zu verwenden. So können mithilfe der digitalen Stromzähler beispielsweise ineffiziente Geräte identifiziert und durch sparsamere ersetzt werden. Media Markt und Saturn hat im Jahr 2010 den Einbau von Smart-Metering-Systemen in allen Landesgesellschaften der Vertriebslinie vorangetrieben. Unser Ziel ist es, bis Ende 2011 an allen Standorten digitale Stromzähler zu installieren, um den Stromverbrauch weltweit präzise messen zu können.

### **Effiziente und umweltfreundliche Steuerung der Warenströme**

Energieverbrauch und Klimawirkungen lassen sich auch beim Warentransport reduzieren. Damit die richtige Ware zum richtigen Zeitpunkt den richtigen Ort erreicht, benötigt die METRO GROUP ein ebenso komplexes wie flexibles Logistiknetzwerk. Wir wollen die damit verbundenen Prozesse so kosteneffizient und ressourcenschonend wie möglich gestalten. Seit 2010 sind wir als eines der ersten Handelsunternehmen in der Lage, die Klimawirkungen unserer gesamten Transportprozesse in Deutschland, Österreich und der Schweiz zu berechnen. Dazu hat die MGL METRO GROUP Logistics zusammen mit einer Unternehmensberatung ein CO<sub>2</sub>-Tool entwickelt, mit dem sich die Kohlenstoffdioxid-Emissionen ermitteln lassen. Neu daran ist, dass die MGL METRO GROUP Logistics nicht nur wie bislang üblich den Kohlenstoffdioxid-Ausstoß der eigenen Fahrzeuge erhebt, sondern nun auch sämtliche Fahrten von beauftragten Logistikunternehmen erfasst. Damit die Ergebnisse einem Vergleich mit anderen Unternehmen standhalten, ließ die MGL METRO GROUP Logistics das Messverfahren von ZER-QMS, Zertifizierungsstelle, Qualitäts- und Umweltgutachter GmbH aus Köln zertifizieren.

## Klimaschutz-Aktivitäten überzeugen Investoren

Unserem Ziel, die spezifische Klimawirkung bis 2015 im Vergleich zu 2006 um 15 Prozent je Quadratmeter Verkaufsfläche zu reduzieren, sind wir 2010 dank des erfolgreichen Ausbaus der Aktivitäten im Bereich energie- und ressourcenschonendes Wirtschaften ein gutes Stück näher gekommen. Die detaillierte Entwicklung des Energieverbrauchs, der Treibhausgas-Emissionen und andere relevante Umweltkennzahlen werden wir in unserer jährlichen Fortschrittsmitteilung zur Nachhaltigkeit zur Hauptversammlung der METRO AG am 6. Mai 2011 veröffentlichen. Auch der Kapitalmarkt honoriert unser umfassendes Engagement für den Klimaschutz: Im Oktober 2010 wurde die METRO AG in den CDP Germany 200 Carbon Disclosure Leadership Index aufgenommen. In diesem Index sind ausschließlich Unternehmen mit einem ausgeprägten Verständnis für die Herausforderungen des Klimawandels und seine Implikationen für das Geschäftsmodell vertreten. Das von 534 institutionellen Investoren getragene Carbon Disclosure Project (CDP) ermittelt jährlich Klimadaten der 500 größten Unternehmen der Welt. Der Index umfasst die besten 30 von 200 untersuchten deutschen Unternehmen.

## Mitarbeiter und Soziales

Ein Unternehmen, bei dem der Kunde im Zentrum allen Handelns steht, benötigt motivierte und qualifizierte Menschen, die diesen Anspruch in der Praxis täglich erfüllen. Deshalb zählt auch das Engagement für die eigenen Mitarbeiter zu den Schwerpunkten unseres Nachhaltigkeitsmanagements. Aufgrund des demografischen Wandels wird die Zahl erwerbsfähiger Menschen in vielen Ländern weiter sinken. Umso wichtiger ist es für uns, mit vorausschauenden und innovativen Personalkonzepten den Bedarf an Mitarbeitern, insbesondere an Fach- und Führungskräften, langfristig zu sichern. Dazu zählt unter anderem ein aktives Diversity-Management, also die gezielte Förderung von Vielfalt im Unternehmen. So sind für uns beispielsweise ältere und behinderte Mitarbeiter ein selbstverständlicher und wichtiger Teil der Belegschaft.

## Investitionen in Aus- und Weiterbildung verstärkt

Um unseren künftigen Bedarf an leistungsfähigen und engagierten Mitarbeitern unter den Bedingungen des demografischen Wandels decken zu können, investieren wir gezielt in Aus- und Weiterbildungsmaßnahmen. In Deutschland ermöglichten wir im Berichtsjahr 2.371 Schulabgängern mit

Ausbildungsplätzen einen Einstieg in das Berufsleben. Mit einer Quote von 8,4 Prozent belegte die METRO GROUP erneut eine Spitzenposition unter den Ausbildungsunternehmen in Deutschland.

Eine vorausschauende und nachhaltige Personalpolitik beinhaltet für uns auch, gezielt die hohe berufliche Qualifikation unserer lebens- und berufserfahrenen Mitarbeiter zu nutzen. Im Jahr 2010 haben wir weltweit 1.859 Mitarbeiter der Altersgruppe 50 Jahre und älter eingestellt. Um die Stärken unserer vielfältigen Mitarbeiterschaft zu fördern, planen wir, entsprechende Qualifizierungs- und Förderprogramme deutlich auszuweiten sowie altersgerechte Arbeitsbedingungen einschließlich Präventivmaßnahmen zu schaffen. In der Führungskräfteentwicklung und Nachfolgeplanung sollen Frauen zukünftig erheblich stärker berücksichtigt werden.

## Gesellschaftspolitik und Stakeholder-Dialog

Als Handelsunternehmen ist die METRO GROUP im Alltag vieler Menschen präsent. Täglich hat das Unternehmen unmittelbaren Kontakt zu Kunden, Mitarbeitern, Lieferanten, Investoren, Politik- und Medienvertretern sowie zu Nichtregierungsorganisationen. Um langfristig erfolgreich zu sein, muss die METRO GROUP nicht nur auf dem Markt der Produkte, sondern auch auf dem Markt der Meinungen überzeugen. Das bedeutet, genau zu wissen, was die relevanten Anspruchsgruppen von dem Unternehmen erwarten. Um die vielfältigen Erwartungen der Stakeholder kennenzulernen und besser erfüllen zu können, pflegen wir den regelmäßigen Dialog. Ein Kernelement der neuen Nachhaltigkeitsstrategie „Go sustainable 2012“ ist es, den Austausch mit wesentlichen Anspruchsgruppen zu den verschiedenen Themen der Nachhaltigkeit zu intensivieren und zu professionalisieren. Ziel ist es, auf diese Weise eine stabile Basis für langfristige, vertrauensvolle Beziehungen zu schaffen.

## Dialogplattform in Berlin

Mit der Anfang 2010 eröffneten Konzernrepräsentanz in Berlin haben wir eine Plattform geschaffen, um den kontinuierlichen, offenen und transparenten Dialog mit Regierung, Parlament, Verbänden sowie relevanten Interessengruppen zu pflegen. Die METRO GROUP schafft so die Basis für Verantwortungspartnerschaften mit der Politik – national wie international. Dabei nutzen wir neue Formate der kooperativen Politikgestaltung. Sichtbarstes Beispiel hierfür ist die 2010 ins Leben gerufene „Mittwochsgesellschaft des Handels“. Diese

Veranstaltungsreihe setzen wir gemeinsam mit dem Handelsverband Deutschland um. Ziel ist nicht nur darzustellen, wie facettenreich, innovativ und leistungsstark unsere Branche ist. Wir wollen darüber hinaus vor allem zeigen, dass die Themen, die den Handel bewegen, große Relevanz für viele Bereiche von Politik, Wirtschaft und Gesellschaft haben. So wurde auf der Veranstaltung im Dezember 2010 darüber diskutiert, welche Verantwortung Lebensmittelindustrie und Handel im Bereich der ökologischen, sozialen und wirtschaftlichen Nachhaltigkeit zu tragen haben.

### **Engagement für Klimaschutzdialog der Bundesregierung**

Im Berichtsjahr übernahm die METRO GROUP eine aktive Rolle im „Klimaschutzdialog Wirtschaft und Politik“, der unter der Leitung von Dr. Norbert Röttgen, dem deutschen Bundesminister für Umwelt, Naturschutz und Reaktorsicherheit, steht. Im Rahmen der Initiative wurden Vorschläge erarbeitet, wie die Wirtschaft einen Beitrag zur Reduktion klimarelevanter Emissionen leisten kann. Für den Produktbereich leitete die METRO GROUP hierzu eine Arbeitsgruppe, bestehend aus Handelsunternehmen, Verbänden sowie Herstellern aus den Bereichen Elektrogeräte, IT, Verpackung und Lebensmittel. Im Fokus der Gespräche standen die klimafreundlichere Produktion und Vermarktung von Konsumgütern sowie verbesserte Rahmenbedingungen seitens der Politik.

### **Intensiver Austausch mit Greenpeace International**

Im Oktober 2010 traf der Vorstand der METRO AG die Geschäftsführung von Greenpeace International zu einem Meinungsaustausch. Dabei ging es um einen verstärkten Dialog und mögliche Optionen für gemeinsame Maßnahmen zum Schutz des Klimas, zum Erhalt des Regenwalds und zum Schutz der Meere. Vereinbart wurde, den Dialog zu intensivieren und die beiderseitige Transparenz zu erhöhen, vor allem im Hinblick auf mögliche kontroverse Themen. Wir verstehen die Fachkenntnis und den kritischen Standpunkt internationaler Umweltschutzorganisationen wie Greenpeace als Chance, Themen im Bereich der nachhaltigen Entwicklung zum Vorteil aller Akteure voranzutreiben.

### **Galeria Kaufhof erneut für Nachhaltigkeit ausgezeichnet**

Im Herbst 2010 wurde Galeria Kaufhof bereits zum zweiten Mal mit der Auszeichnung „Nachhaltiges Einzelhandelsunternehmen“ der Berliner Verbraucher Initiative geehrt. Die Vertriebslinie konnte in den Kategorien Schreibwaren und Spielwaren belegen, dass sie sich im Rahmen ihrer Geschäftstätigkeit sehr stark engagiert. Für die Tests wurden rund 500 Handelsunternehmen eingeladen, einen umfangreichen Fragebogen zu ihrem Umwelt- und Sozialengagement zu beantworten. Ziel der Untersuchung ist es, Verbrauchern Orientierung und praktische Informationen für die Beurteilung der gesellschaftlichen Verantwortung des Handels zu geben.

## 8. Vergütungsbericht

Der nachstehende Bericht erläutert die Vergütung des Vorstands und des Aufsichtsrats der METRO AG für das Geschäftsjahr 2010 nach Maßgabe des Handelsgesetzbuchs. Er ist zugleich Vergütungsbericht im Sinne des Deutschen Corporate Governance Kodex und beschreibt das System der Vorstandsvergütung sowie seine Weiterentwicklung. Auch Informationen zur aktienorientierten Vergütung der Führungskräfte der METRO GROUP sind im Vergütungsbericht enthalten.

### Vergütungssystem für die Mitglieder des Vorstands

Das Vergütungssystem für den Vorstand wird durch den Aufsichtsrat der METRO AG beschlossen. Er wird hierbei durch den Personalausschuss des Aufsichtsrats beraten.

Die Vorstandsvergütung besteht aus einer fixen Grundvergütung und zwei variablen Komponenten: der erfolgsabhängigen Vergütung (Short Term Incentive) sowie der Vergütung mit langfristiger Anreizwirkung (Long Term Incentive). Zusätzlich gewährt das Unternehmen eine betriebliche Altersversorgung und Nebenleistungen. Die Gesamtbezüge sowie die einzelnen Vergütungskomponenten stehen in einem angemessenen Verhältnis zu den Aufgaben und Leistungen des jeweiligen Mitglieds des Vorstands sowie zur Lage der Gesellschaft und erfüllen die gesetzlichen Anforderungen an die Üblichkeit von Vergütungen. Die Incentivierung setzt Leistungsanreize für den Vorstand, den Unternehmenswert zu steigern. Sie ist auf eine nachhaltige Unternehmensentwicklung ausgerichtet und entspricht den Empfehlungen des Deutschen Corporate Governance Kodex.

#### Grundvergütung

Die Grundvergütung ist fest vereinbart und wird in zwölf monatlichen Raten ausbezahlt.

#### Erfolgsabhängige Vergütung (Short Term Incentive)

Das Short Term Incentive der Mitglieder des Vorstands wird im Wesentlichen dadurch bestimmt, wie sich der Return on Capital Employed (RoCE) und die Net Earnings entwickeln. Durch die Verwendung der Kennziffer Net Earnings in Kombination mit dem RoCE wird ein profitables Wachstum der METRO GROUP honoriert. Die Net Earnings entsprechen grundsätzlich dem Periodenergebnis. Der Aufsichtsrat kann eine Bereinigung um Sonderfaktoren beschließen.

Die Mitglieder des Vorstands erhalten pro 0,01 Prozentpunkte RoCE oberhalb eines Mindestwerts von 7 Prozent einen Betrag in Höhe von 1.400 € (Vorsitzender des Vorstands 2.100 €). Hinzu kommt pro Million Euro erzielten Net Earnings ein Betrag in Höhe von 850 € (Vorsitzender des Vorstands 1.275 €). Der Aufsichtsrat der METRO AG legt die Höhe der Beträge auf Basis der Unternehmensstrategie und der mittelfristigen Zielsetzung fest, prüft sie regelmäßig und passt sie gegebenenfalls an. Die Auszahlung der erfolgsabhängigen Vergütung gemäß RoCE und Net Earnings ist für den Vorstandsvorsitzenden auf 3,9 Mio. € und für die weiteren Mitglieder des Vorstands auf 2,6 Mio. € jährlich begrenzt.

Das Short Term Incentive von Herrn Saveuse ist auch von Zielen für die Entwicklung der Vertriebslinie Real abhängig. Für die Vergütung für das Jahr 2010 hat der Aufsichtsrat der METRO AG einen Zielwert für das EBITaC (EBIT after Cost of Capital) der Real-Gruppe definiert. Aus dem Grad der Zielerreichung wird ein EBITaC-Faktor ermittelt, der mit der vereinbarten Grundtantieme multipliziert wird. Die EBITaC-basierte Vergütung von Herrn Saveuse ist vertraglich auf maximal 2,7 Mio. € pro Jahr begrenzt; die jährliche Auszahlung der Grundtantieme (900.000 €) ist garantiert. Auszahlungen aus dem Short Term Incentive auf Basis der Net Earnings und des RoCE der METRO GROUP werden auf die erfolgsabhängige Vergütung von Herrn Saveuse gemäß EBITaC der Real-Gruppe angerechnet.

Die erfolgsabhängige Vergütung aller Mitglieder des Vorstands wird im jeweils folgenden Geschäftsjahr nach Feststellung des Jahresabschlusses ausgezahlt.

#### Aktienorientierte Vergütung (Long Term Incentive)

Das Long Term Incentive ist eine Vergütungskomponente mit langfristiger Anreizwirkung. Sie zielt darauf ab, den Unternehmenswert nachhaltig zu steigern.

#### Aktienprämienprogramm 2004–2008

Im Jahr 2004 hat die METRO AG ein Aktienprämienprogramm aufgelegt, dessen letzte Tranche 2008 gewährt wurde. Das Programm basiert auf auszahlbaren Aktienprämien, deren Höhe sich an der Kursentwicklung der Metro-Aktie unter Berücksichtigung von Vergleichsindizes orientiert. Das Programm ist in jährliche Tranchen aufgeteilt, für die unterschiedliche Zielparаметer gelten. Bei Erreichen des jeweiligen Zielaktienkurses und einer sogenannten Gleichperformance der Aktie mit den Vergleichsindizes wird die volle Aktienprämie ausbezahlt. Die Laufzeit jeder Tranche beträgt drei Jahre. Die Auszahlung der

Aktienprämien kann durch Beschluss des Aufsichtsrats der METRO AG auf die Höhe der Bruttojahresgrundvergütung begrenzt werden.

### Performance Share Plan 2009–2013

Durch Beschluss des Personalausschusses des Aufsichtsrats und mit Zustimmung des Aufsichtsrats hat die METRO AG 2009 einen auf fünf Jahre angelegten Performance Share Plan eingeführt. Für jedes Mitglied des Vorstands wurde zunächst ein Zielwert festgesetzt. Dieser beträgt je Tranche für den Vorstandsvorsitzenden 0,6 Mio. € und für die weiteren Mitglieder des Vorstands jeweils 0,5 Mio. €. Um die Zielanzahl der Performance Shares zu ermitteln, wird der Zielwert durch den Aktienkurs bei Zuteilung dividiert. Maßgeblich ist dabei der Drei-Monats-Durchschnittskurs der Metro-Aktie vor dem Zuteilungszeitpunkt. Ein Performance Share berechtigt zu einer Barauszahlung in Höhe des Kurses der Metro-Aktie zum Auszahlungszeitpunkt. Auch hier ist der Drei-Monats-Durchschnittskurs der Metro-Aktie vor dem Auszahlungszeitpunkt maßgeblich.

In Abhängigkeit von der relativen Performance der Metro-Aktie im Vergleich zum Mittelwert aus den Aktienindizes DAX 30 und dem Dow Jones Euro Stoxx Retail – Total Return – wird nach Ablauf eines Performance-Zeitraums von mindestens drei und maximal 4,25 Jahren die endgültige Anzahl der auszuzahlenden Performance Shares bestimmt. Diese entspricht der Zielanzahl, wenn eine Gleichperformance zu den genannten Aktienindizes erreicht wird. Bis zu einer Outperformance von 60 Prozent erhöht sich die Anzahl linear auf den Maximalwert von 200 Prozent der Zielanzahl. Bis zu einer Underperformance von 30 Prozent reduziert sich die Anzahl entsprechend bis auf 50 Prozent. Bei einer höheren Underperformance fällt die Anzahl auf 0.

Die Auszahlung kann zu sechs möglichen Zeitpunkten erfolgen. Der früheste Auszahlungstermin ist drei Jahre nach Zuteilung der Performance Shares. Ab diesem Zeitpunkt ist eine Auszahlung alle drei Monate möglich. Die Mitglieder des Vorstands haben die Wahl, zu welchem Zeitpunkt ihre Performance Shares ausgezahlt werden. Eine Aufteilung auf mehrere Auszahlungszeitpunkte ist nicht möglich. Die Obergrenze der Auszahlung (Cap) liegt beim Fünffachen des Zielwerts und beträgt somit für den Vorstandsvorsitzenden 3 Mio. € und für die weiteren Mitglieder des Vorstands 2,5 Mio. €.

Mit dem Performance Share Plan wurden zugleich sogenannte Share Ownership Guidelines eingeführt: Als Voraus-

setzung für die Auszahlung der Performance Shares sind die Mitglieder des Vorstands verpflichtet, bis zum Ablauf der dreijährigen Sperrfrist ein eigenfinanziertes Investment in Metro-Aktien aufzubauen und zu halten. Dadurch partizipieren sie als Aktionäre unmittelbar an Kursanstiegen, aber gegebenenfalls auch an Kursverlusten der Metro-Aktie. Das Aktieninvestment unterstützt die langfristige und auf eine nachhaltige Unternehmensentwicklung ausgerichtete Ausgestaltung des Vergütungssystems und führt zu einer ausgewogenen Aufteilung zwischen den verschiedenen Vergütungskomponenten. Die Höhe des eigenfinanzierten Investments gilt für die gesamte Laufzeit des Performance Share Plans. Die geforderten Investments betragen für den Vorstandsvorsitzenden 0,5 Mio. € und für die weiteren Mitglieder des Vorstands jeweils 0,4 Mio. €.

### Altersversorgung

Im Jahr 2009 wurde für die Mitglieder des Vorstands eine betriebliche Altersversorgung eingeführt, dies in Form einer Direktzusage mit einer beitragsorientierten und einer leistungsorientierten Komponente.

Die Finanzierung der beitragsorientierten Komponente erfolgt gemeinsam durch den Vorstand und das Unternehmen. Dabei gilt die Aufteilung „7 + 7 + 7“. Sofern das Vorstandsmitglied einen Eigenbeitrag von 7 Prozent seiner definierten Bemessungsgrundlage erbringt, fügt das Unternehmen den gleichen Beitrag hinzu. In Abhängigkeit von der wirtschaftlichen Lage leistet das Unternehmen darüber hinaus einen Zusatzbeitrag in nochmals gleicher Höhe. Aufgrund des gesamtwirtschaftlichen Umfelds wurde dieser Zusatzbeitrag im Berichtsjahr erneut ausgesetzt. Der Beitrag des Unternehmens wurde für jedes Mitglied des Vorstands auf 0,1 Mio. € pro Jahr begrenzt. Die beitragsorientierte Komponente ist über die Hamburger Pensionsrückdeckungskasse VVaG (HPR) kongruent rückgedeckt. Die Verzinsung der Beiträge erfolgt nach Maßgabe der Überschussbeteiligung der HPR mit einer Garantie auf die eingezahlten Beiträge. Bei Ausscheiden eines Vorstandsmitglieds vor Eintritt eines Versorgungsfalls bleiben die Beiträge mit dem erreichten Stand erhalten.

Anspruch auf Versorgungsleistungen besteht,

- wenn das Dienstverhältnis mit oder nach Erreichung der Regelaltersgrenze in der deutschen gesetzlichen Rentenversicherung endet,
- als vorzeitige Altersleistung, wenn das Dienstverhältnis nach Vollendung des 60. Lebensjahres und vor Erreichen der Regelaltersgrenze endet,

- als Invalidenleistung, wenn das Dienstverhältnis vor Erreichen der Regelaltersgrenze endet und die Voraussetzungen vorliegen,
- als Hinterbliebenenleistung, wenn das Dienstverhältnis durch Tod endet.

Die Auszahlung sieht ein Wahlrecht zwischen Kapital, Ratenzahlungen und lebenslanger Rente vor. Bei Invalidität oder Tod wird eine Mindestauszahlung gewährt. Hierbei wird das bestehende Versorgungsguthaben um die Summe der Beiträge aufgestockt, die dem Vorstandsmitglied für jedes Kalenderjahr bis zu einer Beitragszeit von insgesamt zehn Jahren, maximal jedoch bis zur Vollendung des 60. Lebensjahres, künftig noch gutgeschrieben worden wären. Diese leistungsorientierte Komponente ist nicht rückgedeckt, sondern wird im Versorgungsfall unmittelbar vom Unternehmen erbracht.

#### Weitere Leistungen für den Fall der Beendigung der Tätigkeit

Die aktiven Mitglieder des Vorstands erhalten über die beschriebene Altersversorgung hinaus keine Leistungen für den Fall der Beendigung ihrer Tätigkeit. Es werden insbesondere keine Ruhegelder gewährt. Im Falle des Todes eines Vorstandsmitglieds während der aktiven Dienstzeit wird den

Hinterbliebenen die Grundvergütung für den Sterbemonat sowie für weitere sechs Monate gezahlt.

Herr Mierdorf, der im März 2010 aus dem Vorstand ausgeschieden ist, besaß eine besondere Zusage über Leistungen für den Fall der Beendigung seiner Tätigkeit aus der Zeit vor seiner Bestellung zum Vorstand. Im Geschäftsjahr 2010 hat der Aufsichtsrat einem Aufhebungsvertrag mit Herrn Mierdorf zugestimmt, in dem diese Zusage berücksichtigt wurde.

#### Nebenleistungen

Die den Mitgliedern des Vorstands gewährten Nebenleistungen umfassen geldwerte Vorteile aus Sachbezügen und Aufwandsentschädigungen.

#### Sonstiges

Die Mitglieder des Vorstands der METRO AG haben keinen Anspruch auf zusätzliche Vergütungen oder besondere Leistungen aufgrund eines Kontrollwechsels (Change of Control).

#### Long Term Incentive im Geschäftsjahr 2010

Herrn Dr. Cordes wurden nach den Bedingungen des Performance Share Plans 13.983 Performance Shares zugeteilt. Die Herren Koch, Muller und Saveuse erhielten 2010 jeweils 11.652

### Vergütung des Vorstands im Geschäftsjahr 2010<sup>1</sup>

| Tsd. €                        | Geschäftsjahr | Grundvergütung | Short Term Incentive | Long Term Incentive <sup>2</sup> | Nebenleistungen | Gesamt        |
|-------------------------------|---------------|----------------|----------------------|----------------------------------|-----------------|---------------|
| Dr. Eckhard Cordes            | 2010          | 1.000          | 2.830                | 487                              | 72              | 4.389         |
|                               | 2009          | 1.000          | 1.962                | 701                              | 177             | 3.840         |
| Olaf Koch <sup>3</sup>        | 2010          | 800            | 1.887                | 406                              | 219             | 3.312         |
|                               | 2009          | 239            | 389                  | 0                                | 5               | 633           |
| Zygmunt Mierdorf <sup>4</sup> | 2010          | 133            | 314                  | 0                                | 13              | 460           |
|                               | 2009          | 800            | 1.308                | 584                              | 75              | 2.767         |
| Frans W. H. Muller            | 2010          | 800            | 1.887                | 406                              | 133             | 3.226         |
|                               | 2009          | 800            | 1.308                | 584                              | 189             | 2.881         |
| Joël Saveuse <sup>5</sup>     | 2010          | 917            | 1.920                | 406                              | 39              | 3.282         |
|                               | 2009          | 800            | 1.308                | 584                              | 85              | 2.777         |
| Thomas Unger <sup>6</sup>     | 2010          | 600            | 1.415                | 0                                | 144             | 2.159         |
|                               | 2009          | 800            | 1.308                | 584                              | 94              | 2.786         |
| <b>Gesamt</b>                 | <b>2010</b>   | <b>4.250</b>   | <b>10.253</b>        | <b>1.705</b>                     | <b>620</b>      | <b>16.828</b> |
|                               | 2009          | 4.439          | 7.583                | 3.037                            | 625             | 15.684        |

<sup>1</sup> Angaben nach HGB § 285 Satz 1 Nr. 9a bzw. § 314 Abs. 1 Nr. 6a

<sup>2</sup> Dargestellt ist der beizulegende Zeitwert zum Zeitpunkt der Gewährung der Tranche 2010

<sup>3</sup> Mitglied des Vorstands seit 14. September 2009

<sup>4</sup> Mitglied des Vorstands bis 1. März 2010

<sup>5</sup> Neben der Vergütung für die Tätigkeit als Vorstand der METRO AG erhielt Herr Saveuse für die Tätigkeit als Geschäftsführer von Tochterunternehmen eine Grundvergütung in Höhe von 83 Tsd. € sowie eine erfolgsbezogene Vergütung in Höhe von 404 Tsd. €

<sup>6</sup> Mitglied des Vorstands bis 30. September 2010

Performance Shares. Der Wert einer Share Unit betrug im Zeitpunkt der Gewährung 34,86 €. Bei den zugeteilten Performance Shares handelt es sich nicht um eine fixe Stückzahl von Rechten im Sinne der §§ 285 Satz 1 Nr. 9a Satz 4 HGB bzw. § 314 Abs. 1 Nr. 6a Satz 4 HGB, sondern um eine Zielanzahl. Nach den Bedingungen des Performance Share Plans können Ansprüche hieraus im Zeitpunkt ihrer Gewährung nicht mit einer fixen Stückzahl beschrieben werden. Der Wert der im Jahr 2010 zugeteilten Performance Shares wurde durch externe Gutachter nach einem anerkannten finanzmathematischen Verfahren (Monte-Carlo-Simulation) ermittelt.

Den Herren Mierdorf und Unger wurden aus der Tranche 2010 keine Performance Shares mehr zugeteilt; Rechte aus vorherigen Tranchen des Performance Share Plans und des Aktienprämienprogramms bestehen nicht mehr.

Außer der im Geschäftsjahr 2010 ausgegebenen Tranche des Performance Share Plans verfügen die Herren Dr. Cordes, Muller und Saveuse über Rechte aus der Tranche 2009. Herr Koch, Mitglied des Vorstands seit September 2009, wurden im Rahmen der Tranche 2009 des Performance Share Plans noch keine Performance Shares zugeteilt.

#### Performance Share Plan (Tranchen 2009 und 2010)

| Tranche | Ende der Sperrfrist | Drei-Monats-Durchschnittskurs vor Zuteilungszeitpunkt | Anzahl Performance Shares Vorstand |
|---------|---------------------|-------------------------------------------------------|------------------------------------|
| 2010    | August 2013         | 42,91 €                                               | 48.939                             |
| 2009    | August 2012         | 36,67 €                                               | 43.632                             |

Weiterhin haben die Herren Dr. Cordes, Muller und Saveuse Rechte aus der Tranche 2008 des Aktienprämienprogramms:

#### Aktienprämienprogramm (Tranchen 2007 und 2008)

| Tranche | Ende der Laufzeit | Ausgangskurs | Zielaktienkurs | Zielprämien Vorstand gesamt |
|---------|-------------------|--------------|----------------|-----------------------------|
| 2008    | Juli 2011         | 41,92 €      | 48,21 €        | 1.060 Tsd. €                |
| 2007    | Juli 2010         | 61,61 €      | 70,85 €        | Verfallen                   |

Die Wertangabe zu den Zielprämien der Tranche 2008 setzt voraus, dass der Zielaktienkurs erreicht wird. Der Zielwert für die Tranche 2008 des Aktienprämienprogramms beträgt für Herrn Dr. Cordes 0,40 Mio. €, für Herrn Muller und Herrn Saveuse jeweils 0,33 Mio. €. Herr Koch wurde im Geschäftsjahr 2009 zum Mitglied des Vorstands bestellt und verfügt daher über keine Ansprüche aus dem Aktienprämienprogramm 2004–2008.

Der Aufwand aus allen im Geschäftsjahr 2010 laufenden Tranchen aktienorientierter Vergütungsprogramme beträgt für Herrn Dr. Cordes 1,1 Mio. €, für Herrn Koch 0,1 Mio. € und für die Herren Muller und Saveuse jeweils 0,9 Mio. €.

#### Leistungen nach Beendigung der Tätigkeit im Geschäftsjahr 2010 (einschließlich Altersversorgung)

Im Geschäftsjahr 2010 wurden für die aktiven Mitglieder des Vorstands der METRO AG 23,9 Mio. € für Leistungen nach Beendigung der Tätigkeit aufgewendet (Vorjahr 0,5 Mio. €). Davon entfallen auf die Altersversorgung von Herrn Dr. Cordes, Herrn Koch, Herrn Muller und Herrn Saveuse jeweils rund 0,1 Mio. € und von Herrn Unger 0,075 Mio. €. Der nach Saldierung mit der Rückdeckungsversicherung verbleibende Barwert der Zusagen beträgt 1,8 Mio. €, die auf Herrn Mierdorf entfallen.

Mit den Herren Mierdorf und Unger wurden im Geschäftsjahr 2010 Vereinbarungen über die vorzeitige Aufhebung ihrer Dienstverträge getroffen.

Mit Herrn Mierdorf, der mit Wirkung zum Ablauf des 1. März 2010 einvernehmlich aus dem Vorstand ausschied, wurde zur Abgeltung der Restlaufzeit seines Dienstvertrags eine Abfindung vereinbart, die eine fixe und eine variable Komponente umfasst. Die im Geschäftsjahr 2010 ausgezahlte Fixkomponente deckt die Ansprüche von Herrn Mierdorf aus dem Dienstvertrag ab und berücksichtigt die Entwicklung erfolgsabhängiger und aktienorientierter Vergütungskomponenten auf Grundlage einer konservativen Schätzung. Die variable Komponente der Abfindung führt im Jahr 2010 zu einer zusätzlichen Vergütung in Abhängigkeit vom wirtschaftlichen Erfolg der Gesellschaft und kann in den Jahren 2011 bis 2013 ebenfalls in einer zusätzlichen Vergütung resultieren. Als variable Abfindungsleistung kann Herr Mierdorf den etwaigen Differenzbetrag aus der erfolgsabhängigen Vergütung, die er als Mitglied des Vorstands erhalten hätte, und der insoweit gezahlten Abfindung beanspruchen. Zur Wahrnehmung von Mandaten im Interesse der Gesellschaft wurde mit Herrn Mierdorf ein Beratervertrag geschlossen. Das Beraterhonorar wird auf etwaige Ansprüche auf eine variable Abfindungszahlung angerechnet. Eine Herr Mierdorf erteilte Pensionszusage aus der Zeit vor seiner Bestellung zum Vorstand wird mit Wirkung zum Zeitpunkt der Beendigung des Beratervertrags fällig. Eine jährliche Anpassung an die gestiegenen Lebenshaltungskosten wurde letztmalig mit Wirkung zum 1. Januar 2009 durchgeführt. Aufgrund einer weiteren Zusage aus der Zeit vor der Bestellung von Herrn Mierdorf zum Mitglied des Vorstands berücksichtigt



die Aufhebungsvereinbarung auch eine Zahlung in Höhe der Durchschnittsvergütung der letzten zwei Kalenderjahre auf Basis der Grundvergütung und der erfolgsabhängigen Vergütung.

Mit Herrn Unger, der mit Wirkung zum 30. September 2010 einvernehmlich aus dem Vorstand ausschied, wurde ebenfalls eine Aufhebungsvereinbarung geschlossen, die eine fixe und eine variable Komponente umfasst. Die Fixkomponente deckt die Ansprüche von Herrn Unger aus dem Dienstvertrag ab und berücksichtigt die Entwicklung erfolgsabhängiger und aktienorientierter Vergütungskomponenten auf Grundlage einer konservativen Schätzung. Die variable Komponente der Abfindung führt im Jahr 2010 zu einer zusätzlichen Vergütung in Abhängigkeit vom wirtschaftlichen Erfolg der Gesellschaft und kann in den Jahren 2011 bis 2012 ebenfalls in einer zusätzlichen Vergütung resultieren. Als variable Abfindungsleistung kann Herr Unger – analog zu den für Herrn Mierdorf geltenden Regelungen – den etwaigen Differenzbetrag aus der erfolgsabhängigen Vergütung, die er als Mitglied des Vorstands erhalten hätte, und der insoweit gezahlten Abfindung beanspruchen. Darüber hinaus wurde Herrn Unger für eine angemessene Übergangszeit Sekretariatsunterstützung zugesagt.

**2010 geschlossene Aufhebungsverträge mit ausgeschiedenen Mitgliedern des Vorstands**

**Abfindung**

| Tsd. €           | Fixe Komponente | Variable Komponente 2010 | Zuführung zur Rückstellung für variable Komponente Folgejahre <sup>1</sup> |
|------------------|-----------------|--------------------------|----------------------------------------------------------------------------|
| Zygmunt Mierdorf | 13.007          | 329                      | 2.544                                                                      |
| Thomas Unger     | 6.179           | 114                      | 1.269                                                                      |

<sup>1</sup> Abzinsung gemäß den Rechnungslegungsstandards IFRS

**Gesamtbezüge 2010 der früheren Mitglieder des Vorstands**

Für frühere Mitglieder der Vorstände der METRO AG und der auf die METRO AG verschmolzenen Gesellschaften sowie ihre Hinterbliebenen wurden Leistungen in Höhe von 27,4 Mio. € (Vorjahr 4,3 Mio. €) erbracht. Die für die ausgeschiedenen Vorstandsmitglieder Zygmunt Mierdorf und Thomas Unger beschriebenen Leistungen nach Beendigung der Tätigkeit im Geschäftsjahr 2010 sind hierin enthalten.

Der Barwert des Verpflichtungsvolumens für laufende Pensionen und Anwartschaften auf Pensionen betrug 48,3 Mio. € (Vorjahr 47,4 Mio. €).

**Ausblick: Weiterentwicklung des Vergütungssystems für den Vorstand**

Im Geschäftsjahr 2010 hat der Aufsichtsrat der METRO AG auf Vorschlag des Personalausschusses des Aufsichtsrats beschlossen, das System der Vorstandsvergütung weiterzuentwickeln. Wie bisher wird sich die Vorstandsvergütung aus einer fixen Grundvergütung und zwei variablen Komponenten zusammensetzen: der erfolgsabhängigen Vergütung (Short Term Incentive) und der Vergütung mit langfristiger Anreizwirkung (Long Term Incentive). Zusätzlich werden weiterhin eine betriebliche Altersversorgung und Nebenleistungen gewährt.

Verändert wurde die relative Gewichtung der Vergütungskomponenten (Grundvergütung, Short Term Incentive und Long Term Incentive). Künftig sollen diese Komponenten im Verhältnis 30 : 30 : 40 zueinander stehen.

Um diese Relation zu erreichen, wird die Grundvergütung für ein ordentliches Mitglied des Vorstands im Regelfall 900.000 € (bisher 800.000 €) betragen.

Das auf den Kennzahlen RoCE und Net Earnings basierende Short Term Incentive wurde gesenkt. In der Regel erhält ein ordentliches Mitglied des Vorstands pro 0,01 Prozentpunkte RoCE oberhalb von 7 Prozent nun 625 € (bisher 1.400 €) und pro Million Euro Net Earnings jetzt 380 € (bisher 850 €). Um die persönliche Leistungsbezogenheit der Vorstandsvergütung sicherzustellen, behält sich der Aufsichtsrat der METRO AG generell das Recht vor, das individuelle Short Term Incentive gemäß RoCE und Net Earnings jährlich nach seinem Ermessen um bis zu 30 Prozent zu reduzieren oder um bis zu 30 Prozent zu erhöhen. Die Auszahlung des Short Term Incentive gemäß Net Earnings und RoCE ist für ein ordentliches Mitglied des Vorstands weiterhin auf 2,6 Mio. € jährlich begrenzt.

Der Zielwert der jährlich gewährten Long Term Incentives beträgt für ein ordentliches Mitglied des Vorstands regelmäßig 1,2 Mio. € (bisher 0,5 Mio. €). Die Obergrenze der Auszahlung (Cap) beträgt unverändert das Fünffache des Zielwerts.

Entsprechend der veränderten Gewichtung der Komponenten Grundvergütung, Short Term Incentive und Long Term Incentive wurde auch die Bemessungsgrundlage für die betriebliche Altersversorgung neu definiert. Sie beträgt danach 1,8 Mio. € (bisher 1,6 Mio. €) für ein ordentliches Mitglied des Vorstands.

Die vorstehenden Änderungen des Vergütungssystems für den Vorstand greifen in bestehende Dienstverträge mit Mitgliedern des Vorstands der METRO AG nicht ein. Im Oktober 2010 wurde ein neuer Dienstvertrag mit Herrn Müller vereinbart, der am 1. August 2011 in Kraft tritt. Dieser Vertrag folgt bereits dem geänderten Vergütungssystem.

Die Eckwerte des neuen Vergütungssystems basieren auf einer mittelfristigen Unternehmensplanung, die Veränderungen unterliegen kann. Ferner ist der Aufsichtsrat nach dem Gesetz und im Interesse des Unternehmens verpflichtet, die Höhe einer Vorstandsvergütung im Einzelfall zu entscheiden und nicht aufgrund starrer Vorfestlegungen. Die Bedingungen künftiger Dienstverträge mit Mitgliedern des Vorstands der METRO AG können daher von den beschriebenen Regelungen abweichen. In Ergänzung zu den Anpassungen des Vergütungssystems hat der Aufsichtsrat im Oktober 2010 beschlossen, dass die Bestellungsperioden und die Laufzeit der Anstellungsverträge der Mitglieder des Vorstands zukünftig generell drei Jahre betragen sollen.

Das angepasste System zur Vergütung der Vorstandsmitglieder entspricht den Vorgaben des Aktiengesetzes und den Empfehlungen des Deutschen Corporate Governance Kodex. Vorstand und Aufsichtsrat der METRO AG werden das Vergütungssystem der Hauptversammlung 2011 zur Billigung gemäß § 120 Abs. 4 AktG vorlegen.

### Aktienorientierte Vergütung der Führungskräfte

Entsprechend der Empfehlung in Ziffer 7.1.3 Deutscher Corporate Governance Kodex wird im Folgenden auch über die aktienorientierte Vergütung der Führungskräfte der METRO GROUP berichtet.

#### Aktienprämienprogramm 2004–2008

Der bezugsberechtigte Personenkreis umfasst außer den Mitgliedern des Vorstands auch weitere Führungskräfte der METRO AG sowie Geschäftsführungsorgane und Führungskräfte der Unternehmen der METRO GROUP. Für die Tranchen 2007 bis 2008 gelten folgende Bedingungen:

| Tranche | Ende der Laufzeit | Ausgangskurs | Zielaktienkurs | Zielprämien Führungskräfte gesamt |
|---------|-------------------|--------------|----------------|-----------------------------------|
| 2008    | Juli 2011         | 41,92 €      | 48,21 €        | 15.635.000 €                      |
| 2007    | Juli 2010         | 61,61 €      | 70,85 €        | Verfallen                         |

### Performance Share Plan 2009–2013

Auch der Performance Share Plan 2009–2013 gilt nicht nur für die Mitglieder des Vorstands, sondern auch für weitere Führungskräfte der METRO AG sowie Geschäftsführungsorgane und Führungskräfte der Unternehmen der METRO GROUP. Die Bezugsberechtigten erhalten entsprechend der Bedeutung ihrer Funktion einen individuellen Betrag für den Performance Share Plan (Zielwert). Die weitere Systematik entspricht den Festlegungen für den Vorstand.

Mit dem Performance Share Plan wurden auch für diesen bezugsberechtigten Personenkreis Share Ownership Guidelines eingeführt. Das zu haltende Volumen beträgt in der Regel circa 50 Prozent des individuellen Zielwerts.

Der Wert der im Jahr 2010 insgesamt zugeteilten Performance Shares betrug zum Zeitpunkt der Zuteilung 25,0 Mio. € (Vorjahr 31,6 Mio. €) und wurde durch externe Gutachter nach einem anerkannten finanzmathematischen Verfahren (Monte-Carlo-Simulation) ermittelt. Es gelten folgende Bedingungen:

| Tranche | Ende der Sperrfrist | Drei-Monats-Durchschnittskurs vor Zuteilungszeitpunkt | Anzahl Performance Shares Führungskräfte |
|---------|---------------------|-------------------------------------------------------|------------------------------------------|
| 2010    | August 2013         | 42,91 €                                               | 718.015                                  |
| 2009    | August 2012         | 36,67 €                                               | 737.115                                  |

### Die Vergütung der Aufsichtsratsmitglieder

Die Vergütung der Mitglieder des Aufsichtsrats ist in § 13 der Satzung der METRO AG geregelt. Die Mitglieder des Aufsichtsrats erhalten neben dem Ersatz ihrer baren Auslagen eine feste und eine erfolgsabhängige Vergütung. Die feste Vergütung beträgt 35.000 € je ordentliches Mitglied. Die erfolgsabhängige Vergütung knüpft an das Ergebnis vor Steuern und Anteilen anderer Gesellschafter im Konzernabschluss der METRO AG (EBT) als Bemessungsgrundlage an. Je 25 Mio. € EBT, das im Durchschnitt des Geschäftsjahres 2010 und der zwei diesem vorangegangenen Geschäftsjahre ein EBT von 100 Mio. € übersteigt, erhält jedes Mitglied des Aufsichtsrats eine Vergütung von 600 €. Für das Geschäftsjahr 2010 beträgt die erfolgsabhängige Vergütung 30.360 € je ordentliches Mitglied. Die auf die feste und die erfolgsabhängige Vergütung in Rechnung zu stellende Umsatzsteuer wird den Mitgliedern des Aufsichtsrats gemäß § 13 Abs. 5 der Satzung der METRO AG gezahlt.

| Vergütungsmultiplikatoren         |       |
|-----------------------------------|-------|
| Aufsichtsratsvorsitzender         | ● ● ● |
| Stellv. Aufsichtsratsvorsitzender | ● ●   |
| Ausschussvorsitzende <sup>1</sup> | ● ●   |
| Ausschussmitglieder <sup>1</sup>  | ● ●   |
| Aufsichtsratsmitglieder           | ●     |

<sup>1</sup> Bei mindestens zwei Sitzungen/Beschlussfassungen

Die individuelle Höhe der festen und der erfolgsabhängigen Aufsichtsratsvergütung berücksichtigt den Arbeitsaufwand und die Verantwortung der einzelnen Aufsichtsratsmitglieder aufgrund besonderer Aufgaben. Der Vorsitzende des Aufsichtsrats erhält das Dreifache, sein Stellvertreter sowie Ausschussvorsitzende erhalten je das Doppelte und die sonstigen

Mitglieder der Ausschüsse je das Eineinhalbfache der Vergütungen eines ordentlichen Mitglieds des Aufsichtsrats. Durch Beschluss der Hauptversammlung 2010 wurde die Satzung der METRO AG um die Regelung ergänzt, dass die Vergütung für eine Mitgliedschaft oder den Vorsitz in einem Ausschuss nur gezahlt wird, wenn mindestens zwei Sitzungen oder sonstige Beschlussfassungen dieses Ausschusses im jeweiligen Geschäftsjahr stattgefunden haben. Wenn ein Mitglied des Aufsichtsrats zur gleichen Zeit mehrere Ämter innehat, erhält es die Vergütung nur für ein Amt, bei unterschiedlicher Vergütung für das am höchsten vergütete Amt (§ 13 Abs. 3 Satz 3 der Satzung).

Individuell ergeben sich für das Geschäftsjahr 2010 folgende Werte:

**Vergütung der Aufsichtsratsmitglieder für das Geschäftsjahr 2010 gemäß § 13 der Satzung<sup>1</sup>**

| €                                                     | Geschäftsjahr | Multiplikator | Feste Vergütung | Erfolgsabhängige Vergütung <sup>2</sup> | Gesamt  |
|-------------------------------------------------------|---------------|---------------|-----------------|-----------------------------------------|---------|
| Prof. Dr. Jürgen Kluge, Vorsitzender (ab 5. Mai 2010) | 2010          | ● ● ●         | 70.000          | 60.720                                  | 130.720 |
|                                                       | 2009          |               | -               | -                                       | -       |
| Franz M. Haniel, Vorsitzender (bis 5. Mai 2010)       | 2010          | ● ● ●         | 43.750          | 37.950                                  | 81.700  |
|                                                       | 2009          |               | 105.000         | 89.856                                  | 194.856 |
| Klaus Bruns, stellv. Vorsitzender                     | 2010          | ● ●           | 70.000          | 60.720                                  | 130.720 |
|                                                       | 2009          |               | 70.000          | 59.904                                  | 129.904 |
| Dr. Wulf H. Bernotat                                  | 2010          | ● ●           | 52.500          | 45.540                                  | 98.040  |
|                                                       | 2009          |               | 52.500          | 44.928                                  | 97.428  |
| Ulrich Dalibor                                        | 2010          | ●             | 35.000          | 30.360                                  | 65.360  |
|                                                       | 2009          |               | 35.000          | 29.952                                  | 64.952  |
| Jürgen Fitschen                                       | 2010          | ●             | 35.000          | 30.360                                  | 65.360  |
|                                                       | 2009          |               | 35.000          | 29.952                                  | 64.952  |
| Hubert Frieling                                       | 2010          | ●             | 35.000          | 30.360                                  | 65.360  |
|                                                       | 2009          |               | 35.000          | 29.952                                  | 64.952  |
| Prof. Dr. Dr. h. c. mult. Erich Greipl                | 2010          | ● ●           | 52.500          | 45.540                                  | 98.040  |
|                                                       | 2009          |               | 52.500          | 44.928                                  | 97.428  |
| Andreas Herwarth                                      | 2010          | ●             | 35.000          | 30.360                                  | 65.360  |
|                                                       | 2009          |               | 35.000          | 29.952                                  | 64.952  |
| Uwe Hoepfel                                           | 2010          | ●             | 35.000          | 30.360                                  | 65.360  |
|                                                       | 2009          |               | 23.333          | 19.968                                  | 43.301  |
| Werner Klockhaus                                      | 2010          | ● ●           | 52.500          | 45.540                                  | 98.040  |
|                                                       | 2009          |               | 52.500          | 44.928                                  | 97.428  |
| Peter Küpfer                                          | 2010          | ●             | 35.000          | 30.360                                  | 65.360  |
|                                                       | 2009          |               | 35.000          | 29.952                                  | 64.952  |
| Rainer Kuschewski                                     | 2010          | ●             | 35.000          | 30.360                                  | 65.360  |
|                                                       | 2009          |               | 35.000          | 29.952                                  | 64.952  |
| Marie-Christine Lombard                               | 2010          | ●             | 35.000          | 30.360                                  | 65.360  |
|                                                       | 2009          |               | 35.000          | 29.952                                  | 64.952  |

|                                     |             |    |                |                |                  |
|-------------------------------------|-------------|----|----------------|----------------|------------------|
| Dr. Klaus Mangold                   | 2010        | ●  | 35.000         | 30.360         | 65.360           |
|                                     | 2009        |    | 35.000         | 29.952         | 64.952           |
| Dr.-Ing. e. h. Bernd Pischetsrieder | 2010        | ●  | 35.000         | 30.360         | 65.360           |
|                                     | 2009        |    | 35.000         | 29.952         | 64.952           |
| M. P. M. (Theo) de Raad             | 2010        | ●  | 35.000         | 30.360         | 65.360           |
|                                     | 2009        |    | 35.000         | 29.952         | 64.952           |
| Xaver Schiller                      | 2010        | ●  | 52.500         | 45.540         | 98.040           |
|                                     | 2009        |    | 52.500         | 44.928         | 97.428           |
| Dr. jur. Hans-Jürgen Schinzler      | 2010        | ●● | 70.000         | 60.720         | 130.720          |
|                                     | 2009        |    | 70.000         | 59.904         | 129.904          |
| Peter Stieger                       | 2010        | ●  | 52.500         | 45.540         | 98.040           |
|                                     | 2009        |    | 52.500         | 44.928         | 97.428           |
| Angelika Will                       | 2010        | ●  | 35.000         | 30.360         | 65.360           |
|                                     | 2009        |    | 35.000         | 29.952         | 64.952           |
| <b>Gesamt</b>                       | <b>2010</b> |    | <b>936.250</b> | <b>812.130</b> | <b>1.748.380</b> |
|                                     | 2009        |    | 915.833        | 783.744        | 1.699.577        |

<sup>1</sup> Jeweils zuzüglich gegebenenfalls anfallender Umsatzsteuer gemäß § 13 Abs. 5 der Satzung

<sup>2</sup> Die erfolgsabhängige Vergütung 2010 wird nach Ablauf der Hauptversammlung der METRO AG am 6. Mai 2011 fällig

Die Mitgliedschaften im Nominierungsausschuss und im Vermittlungsausschuss des Aufsichtsrats wurden im Geschäftsjahr 2010 nicht vergütet.

Für Aufsichtsratsmandate bei Konzerngesellschaften wurden einzelnen Mitgliedern des Aufsichtsrats der METRO AG durch die Konzerngesellschaften für das Geschäftsjahr 2010 ebenfalls Vergütungen gewährt:

#### Konzerninterne Vergütungen der Mitglieder des Aufsichtsrats für das Geschäftsjahr 2010<sup>1</sup>

| €                                      | Geschäftsjahr |        |
|----------------------------------------|---------------|--------|
| Klaus Bruns                            | 2010          | 49.800 |
|                                        | 2009          | 49.800 |
| Ulrich Dalibor                         | 2010          | 9.000  |
|                                        | 2009          | 8.500  |
| Prof. Dr. Dr. h. c. mult. Erich Greipl | 2010          | 49.800 |
|                                        | 2009          | 49.800 |
| Uwe Hoepfel                            | 2010          | 49.800 |
|                                        | 2009          | 49.800 |

|                   |             |                |
|-------------------|-------------|----------------|
| Rainer Kuschewski | 2010        | 6.136          |
|                   | 2009        | 6.136          |
| Xaver Schiller    | 2010        | 6.000          |
|                   | 2009        | 6.000          |
| Peter Stieger     | 2010        | 9.203          |
|                   | 2009        | 9.203          |
| Angelika Will     | 2010        | 6.000          |
|                   | 2009        | 6.000          |
| <b>Gesamt</b>     | <b>2010</b> | <b>185.739</b> |
|                   | 2009        | 185.239        |

<sup>1</sup> Jeweils zuzüglich Umsatzsteuer

In den Angaben nicht enthalten sind Vergütungsansprüche eines Aufsichtsratsmitglieds aus konzerninternen Aufsichtsratsmandaten, auf deren Auszahlung das Mitglied verzichtet hat.

Darüber hinaus wurden den Mitgliedern des Aufsichtsrats von Gesellschaften der METRO GROUP keine Vergütungen oder Vorteile für persönlich erbrachte Leistungen, insbesondere Beratungs- und Vermittlungsleistungen, im Sinne von Ziffer 5.4.6 Deutscher Corporate Governance Kodex gewährt.

## 9. Angaben gemäß § 315 Abs. 4 HGB sowie erläuternder Bericht des Vorstands

### Zusammensetzung des Kapitals (§ 315 Abs. 4 Nr. 1 HGB)

Das Grundkapital der METRO AG zum 31. Dezember 2010 beträgt 835.419.052,27 €. Es ist in insgesamt 326.787.529 Stück Inhaberstückaktien eingeteilt. Der anteilige Wert je Aktie am Grundkapital beträgt rund 2,56 €.

Das Grundkapital ist in folgende Aktiengattungen eingeteilt:

|                                      |                    |                  |
|--------------------------------------|--------------------|------------------|
| <b>Stammaktien</b>                   |                    |                  |
| Stück                                | 324.109.563        |                  |
| Anteiliger Wert am Grundkapital in € | 828.572.941        | (ergibt 99,18 %) |
| <b>Vorzugsaktien</b>                 |                    |                  |
| Stück                                | 2.677.966          |                  |
| Anteiliger Wert am Grundkapital in € | 6.846.111          | (ergibt 0,82 %)  |
| <b>Grundkapital gesamt</b>           |                    |                  |
| Stück                                | <b>326.787.529</b> |                  |
| €                                    | <b>835.419.052</b> |                  |

Jede Stammaktie der METRO AG gewährt eine Stimme. Stammaktien der METRO AG berechtigen darüber hinaus insbesondere dazu, Dividenden zu erhalten. Im Unterschied zu den Stammaktien gewähren Vorzugsaktien der METRO AG grundsätzlich kein Stimmrecht und sind mit einem Gewinnvorzug gemäß § 21 der Satzung der METRO AG ausgestattet. Hierin heißt es:

„(1) Die Inhaber von Vorzugsaktien ohne Stimmrecht erhalten aus dem jährlichen Bilanzgewinn eine Vorzugsdividende von 0,17 Euro je Vorzugsaktie.

(2) Reicht der verteilbare Bilanzgewinn in einem Geschäftsjahr zur Zahlung der Vorzugsdividende nicht aus, so ist der Rückstand ohne Zinsen aus dem Bilanzgewinn der folgenden Geschäftsjahre in der Weise nachzuzahlen, daß die älteren Rückstände vor den jüngeren zu tilgen und die aus dem Gewinn eines Geschäftsjahres für dieses zu zahlenden Vorzugsbeträge erst nach Tilgung sämtlicher Rückstände zu leisten sind.

(3) Nach Ausschüttung der Vorzugsdividende erhalten die Inhaber von Stammaktien eine Dividende von 0,17 Euro je

Stammaktie. Danach wird an die Inhaber von Vorzugsaktien ohne Stimmrecht eine nicht nachzahlbare Mehrdividende von 0,06 Euro je Vorzugsaktie gezahlt. Die Mehrdividende beträgt zehn vom Hundert der unter Berücksichtigung von Absatz 4 an die Inhaber von Stammaktien gezahlten Dividende, wenn diese 1,02 Euro je Stammaktie erreicht oder übersteigt.

(4) An einer weiteren Gewinnausschüttung nehmen die Inhaber von Vorzugsaktien ohne Stimmrecht und die Inhaber von Stammaktien entsprechend ihren Anteilen am Grundkapital gleichberechtigt teil.“

Weitere mit den Stamm- und Vorzugsaktien verbundene Rechte sind insbesondere das Recht auf Teilnahme an der Hauptversammlung (§ 118 Abs. 1 AktG), das Auskunftsrecht (§ 131 AktG) sowie das Recht auf Erhebung einer Anfechtungs- und Nichtigkeitsklage (§§ 245 Nr. 1–3, 246, 249 AktG). Neben dem angesprochenen Recht auf Erhalt einer Dividende besteht für die Aktionäre grundsätzlich ein Bezugsrecht bei Kapitalerhöhungen (§ 186 Abs. 1 AktG); sie haben zudem Ansprüche auf den Liquidationserlös nach Auflösung der Gesellschaft (§ 271 AktG) sowie auf Abfindung und Ausgleich bei bestimmten Strukturmaßnahmen, insbesondere nach den §§ 304 ff., 320b, 327b AktG.

### Stimmrechtsrelevante Beschränkungen (§ 315 Abs. 4 Nr. 2 HGB)

Zwischen der BVG Beteiligungs- und Vermögensverwaltung GmbH, der Franz Haniel & Cie. GmbH, der Haniel Finance B. V., der Haniel Finance Deutschland GmbH, der Haniel Beteiligungsfinanzierungs GmbH & Co. KG, der Haniel Beteiligungs-GmbH, der METRO Vermögensverwaltung GmbH & Co. KG, der METRO Vermögensverwaltung GmbH, der 1. HSB Beteiligungsverwaltung GmbH & Co. KG sowie der 1. HSB Verwaltung GmbH bestand im Geschäftsjahr eine Vereinbarung zur Koordination der Ausübung der Stimmrechte aus Aktien der METRO AG.

Ferner besteht nach Kenntnis des Vorstands zwischen der BVG Beteiligungs- und Vermögensverwaltungs GmbH, der Franz Haniel & Cie. GmbH, der Haniel Finance Deutschland GmbH und der Haniel Finance B. V. eine Vereinbarung mit dem Zweck der einheitlichen Interessenwahrnehmung aus den Gesellschafterstämmen Haniel und Schmidt-Ruthenbeck wirtschaftlich zuzurechnenden METRO AG Aktien.

Schließlich besteht nach Kenntnis des Vorstands zwischen der Otto Beisheim Betriebs GmbH, der Otto Beisheim Holding

GmbH und der OB Beteiligungsgesellschaft mbH ein Pool-Vertrag, in den die von der Otto Beisheim Holding GmbH und der OB Beteiligungsgesellschaft mbH gehaltenen Aktien der METRO AG einbezogen sind.

Die vorgenannten Vereinbarungen können als Beschränkungen im Sinne des § 315 Abs. 4 Nr. 2 HGB angesehen werden.

Daneben können auch gesetzliche Beschränkungen des Stimmrechts, etwa gemäß § 136 AktG oder, sofern die Gesellschaft eigene Aktien halten sollte, gemäß § 71 b AktG, bestehen.

### Beteiligungen am Kapital (§ 315 Abs. 4 Nr. 3 HGB)

Angaben nach § 315 Abs. 4 Nr. 3 HGB – direkte und indirekte (gemäß § 22 WpHG) Beteiligungen am Kapital, die 10 vom Hundert der Stimmrechte überschreiten:

| Name/Firma                                                                       | Direkte/Indirekte Beteiligung von mehr als 10 vom Hundert der Stimmrechte |
|----------------------------------------------------------------------------------|---------------------------------------------------------------------------|
| METRO Vermögensverwaltung GmbH & Co. KG, Düsseldorf, Deutschland                 | Direkt und indirekt                                                       |
| METRO Vermögensverwaltung GmbH, Düsseldorf, Deutschland                          | Indirekt                                                                  |
| 1. HSB Beteiligungsverwaltung GmbH & Co. KG, Schönefeld-Waltersdorf, Deutschland | Direkt und indirekt                                                       |
| 1. HSB Verwaltung GmbH, Schönefeld-Waltersdorf, Deutschland                      | Indirekt                                                                  |
| Haniel Finance B. V., Venlo, Niederlande                                         | Indirekt                                                                  |
| Haniel Finance Deutschland GmbH, Duisburg, Deutschland                           | Indirekt                                                                  |
| Haniel Beteiligungsfinanzierungs GmbH & Co. KG, Duisburg, Deutschland            | Direkt und indirekt                                                       |
| Haniel Beteiligungs-GmbH, Duisburg, Deutschland                                  | Indirekt                                                                  |
| Franz Haniel & Cie. GmbH, Duisburg, Deutschland                                  | Indirekt                                                                  |
| BVG Beteiligungs- und Vermögensverwaltung GmbH, Essen, Deutschland               | Indirekt                                                                  |
| Gebr. Schmidt GmbH & Co. KG, Essen, Deutschland                                  | Indirekt                                                                  |
| Gebr. Schmidt Verwaltungsgesellschaft mbH, Essen, Deutschland                    | Indirekt                                                                  |
| Dr. Michael Schmidt-Ruthenbeck, Zürich, Schweiz                                  | Indirekt                                                                  |

Die obigen Angaben basieren insbesondere auf den Mitteilungen nach § 21 Wertpapierhandelsgesetz (WpHG), die die METRO AG in den Geschäftsjahren 2006, 2007, 2009 und 2010 erhalten und veröffentlicht hat.

Durch die METRO AG veröffentlichte Stimmrechtsmitteilungen sind auf der Internetseite [www.metrogroup.de](http://www.metrogroup.de) unter der Rubrik Investor Relations abrufbar.

### Inhaber von Aktien mit Sonderrechten sowie Art der Stimmrechtskontrolle, wenn Arbeitnehmer am Kapital beteiligt sind (§ 315 Abs. 4 Nr. 4 und 5 HGB)

Aktien mit Sonderrechten gemäß § 315 Abs. 4 Nr. 4 HGB hat die Gesellschaft nicht ausgegeben. Arbeitnehmer sind nicht im Sinne des § 315 Abs. 4 Nr. 5 HGB am Kapital beteiligt.

### Bestimmungen über die Ernennung und Abberufung des Vorstands und Änderung der Satzung (§ 315 Abs. 4 Nr. 6 HGB)

Für die Ernennung und Abberufung der Mitglieder des Vorstands der METRO AG sind die gesetzlichen Vorschriften der §§ 84, 85 AktG und der §§ 30, 31, 33 MitbestG maßgebend. Eine ergänzende Vorschrift enthält § 5 der Satzung der METRO AG. Hierin heißt es:

- „(1) Der Vorstand besteht aus mindestens zwei Mitgliedern.  
(2) Im übrigen bestimmt der Aufsichtsrat die Zahl der Mitglieder des Vorstands.“

Änderungen der Satzung der METRO AG bestimmen sich grundsätzlich nach den §§ 179, 181, 133 AktG. Daneben gibt es zahlreiche weitere Vorschriften des Aktiengesetzes, die im Fall einer Satzungsregelung zur Anwendung gelangen können und die vorgenannten Vorschriften modifizieren oder verdrängen, zum Beispiel die §§ 182 ff. AktG bei Kapitalerhöhungen, die §§ 222 ff. AktG bei Kapitalherabsetzungen oder aber § 262 AktG für die Auflösung der AG. Änderungen, die nur die Fassung der Satzung betreffen, können gemäß § 14 der Satzung der METRO AG ohne Beschluss der Hauptversammlung durch den Aufsichtsrat beschlossen werden.

### Befugnisse des Vorstands (§ 315 Abs. 4 Nr. 7 HGB)

#### Befugnisse zur Ausgabe neuer Aktien

Die Hauptversammlung kann den Vorstand gemäß § 202 Abs. 1 AktG ermächtigen, das Grundkapital durch Ausgabe neuer Aktien gegen Einlage zu erhöhen. Zurzeit bestehen drei darauf basierende Ermächtigungen. Eine Ermächtigung erlaubt es dem Vorstand, das Grundkapital durch Ausgabe neuer

Stammaktien gegen Geldeinlage zu erhöhen, eine zweite erlaubt die Erhöhung gegen Sacheinlagen, während die dritte beide Varianten zulässt. Mit diesen Ermächtigungen soll die Gesellschaft in die Lage versetzt werden, auf zusätzliches Eigenkapital als langfristiges Finanzierungsmittel zugreifen zu können. Die angemessene Eigenkapitalausstattung ist für die Finanzierung der Gesellschaft und insbesondere für den Fortgang der internationalen Expansion von erheblicher Bedeutung. Es bestehen derzeit keine konkreten Pläne, von den Ermächtigungen Gebrauch zu machen. Im Einzelnen gilt Folgendes:

#### **Genehmigtes Kapital I**

Der Vorstand wurde durch Beschluss der Hauptversammlung vom 23. Mai 2007 ermächtigt, mit Zustimmung des Aufsichtsrats bis zum 23. Mai 2012 das Grundkapital der Gesellschaft durch Ausgabe neuer auf den Inhaber lautender Stammaktien gegen Geldeinlagen einmalig oder mehrmals, höchstens jedoch um bis zu 40.000.000 € zu erhöhen (genehmigtes Kapital I). Dabei ist den Aktionären ein Bezugsrecht einzuräumen. Der Vorstand ist jedoch ermächtigt, mit Zustimmung des Aufsichtsrats das Bezugsrecht insoweit auszuschließen, als es erforderlich ist, um den Inhabern der von der METRO AG und 100-prozentigen mittelbaren oder unmittelbaren Beteiligungsgesellschaften begebenen Optionsanleihen und Wandelschuldverschreibungen ein Bezugsrecht auf neue Stammaktien in dem Umfang zu gewähren, wie es ihnen nach Ausübung des Options- beziehungsweise Wandlungsrechts zustehen würde, sowie das Bezugsrecht weiter auszuschließen für etwa verbleibende Aufrundungsspitzen. Der Vorstand ist ferner ermächtigt, mit Zustimmung des Aufsichtsrats das Bezugsrecht der Aktionäre für eine oder mehrere Kapitalerhöhungen im Rahmen des genehmigten Kapitals auszuschließen, wenn der Nennbetrag dieser Kapitalerhöhungen insgesamt 10 Prozent des bei der erstmaligen Ausnutzung im Handelsregister eingetragenen Grundkapitals nicht übersteigt und jeweils der Ausgabepreis der neuen Stammaktien den Börsenpreis der bereits börsennotierten Stammaktien der Gesellschaft mit gleicher Ausstattung zum Zeitpunkt der endgültigen Festlegung des Ausgabepreises nicht wesentlich unterschreitet. Der Vorstand ist ermächtigt, mit Zustimmung des Aufsichtsrats die weiteren Einzelheiten der Kapitalerhöhungen festzulegen. Das genehmigte Kapital I wurde bisher nicht ausgenutzt.

#### **Genehmigtes Kapital II**

Der Vorstand wurde durch Beschluss der Hauptversammlung vom 23. Mai 2007 ferner ermächtigt, mit Zustimmung des Aufsichtsrats bis zum 23. Mai 2012 das Grundkapital der

Gesellschaft durch Ausgabe neuer auf den Inhaber lautender Stammaktien gegen Sacheinlagen einmalig oder mehrmals, höchstens jedoch um bis zu 60.000.000 € zu erhöhen (genehmigtes Kapital II). Der Vorstand ist ermächtigt, mit Zustimmung des Aufsichtsrats über den Ausschluss des Bezugsrechts zu entscheiden und die weiteren Einzelheiten der Kapitalerhöhungen festzulegen. Das genehmigte Kapital II wurde bisher nicht ausgenutzt.

#### **Genehmigtes Kapital III**

Die Hauptversammlung vom 13. Mai 2009 hat den Vorstand weiter ermächtigt, mit Zustimmung des Aufsichtsrats bis zum 12. Mai 2014 das Grundkapital der Gesellschaft durch Ausgabe neuer auf den Inhaber lautender Stammaktien gegen Geld- oder Sacheinlagen einmalig oder mehrmals, höchstens jedoch um bis zu 225.000.000 €, zu erhöhen (genehmigtes Kapital III). Dabei ist den Aktionären ein Bezugsrecht einzuräumen. Der Vorstand ist jedoch ermächtigt, mit Zustimmung des Aufsichtsrats Spitzenbeträge von dem Bezugsrecht der Aktionäre auszunehmen. Der Vorstand ist ferner ermächtigt, mit Zustimmung des Aufsichtsrats das Bezugsrecht der Aktionäre auszuschließen, sofern die Aktien gegen Sacheinlagen zum Zwecke von Unternehmenszusammenschlüssen oder des Erwerbs von Unternehmen, Unternehmensteilen oder Anteilen an Unternehmen ausgegeben werden. Der Vorstand ist außerdem ermächtigt, mit Zustimmung des Aufsichtsrats das Bezugsrecht im Fall einer Kapitalerhöhung gegen Geldeinlagen insoweit auszuschließen, als es erforderlich ist, um den Inhabern der von der METRO AG und von Konzerngesellschaften, an denen die METRO AG unmittelbar oder mittelbar zu mindestens 90 Prozent beteiligt ist, begebenen Options- oder Wandelschuldverschreibungen ein Bezugsrecht auf neue Aktien in dem Umfang zu gewähren, wie es ihnen nach Ausübung des Options- oder Wandlungsrechts oder der Erfüllung der Options- oder Wandlungspflicht zustehen würde. Der Vorstand ist ferner ermächtigt, mit Zustimmung des Aufsichtsrats das Bezugsrecht der Aktionäre für eine oder mehrere Kapitalerhöhungen auszuschließen, wenn die Kapitalerhöhung gegen Geldeinlagen erfolgt, der Nennbetrag dieser Kapitalerhöhungen insgesamt 10 Prozent des Grundkapitals nicht übersteigt und jeweils der Ausgabepreis der neuen Aktien den Börsenpreis der bereits börsennotierten Aktien gleicher Ausstattung zum Zeitpunkt der endgültigen Festlegung des Ausgabepreises nicht wesentlich unterschreitet. Die Höchstgrenze von 10 Prozent des Grundkapitals vermindert sich um den anteiligen Betrag des Grundkapitals, der auf diejenigen eigenen Aktien der Gesellschaft entfällt, die während der Laufzeit des genehmigten Kapitals III unter Ausschluss

des Bezugsrechts der Aktionäre gemäß §§ 71 Abs. 1 Nr. 8 Satz 5, 186 Abs. 3 Satz 4 AktG veräußert werden. Die Höchstgrenze vermindert sich ferner um den anteiligen Betrag des Grundkapitals, der auf diejenigen Aktien entfällt, die zur Bedienung von Options- oder Wandelschuldverschreibungen mit Options- oder Wandlungsrecht oder mit Options- oder Wandlungspflicht auszugeben sind, sofern die Schuldverschreibungen während der Laufzeit des genehmigten Kapitals III unter Ausschluss des Bezugsrechts in entsprechender Anwendung von § 186 Abs. 3 Satz 4 AktG ausgegeben werden. Der Vorstand ist ermächtigt, mit Zustimmung des Aufsichtsrats die weiteren Einzelheiten der Kapitalerhöhungen festzulegen. Die neuen Aktien können auch von Kreditinstituten mit der Verpflichtung übernommen werden, sie den Aktionären zum Bezug anzubieten. Das genehmigte Kapital III wurde bisher nicht ausgenutzt.

#### **Befugnisse zum Erwerb eigener Aktien**

Die METRO AG ist ermächtigt, im Rahmen des § 71 AktG eigene Aktien zu erwerben.

Aufgrund des § 71 Abs. 1 Nr. 8 AktG hat die Hauptversammlung vom 5. Mai 2010 beschlossen:

- „a) Die Gesellschaft wird bis zum 4. Mai 2015 ermächtigt, Aktien der Gesellschaft, gleich welcher Gattung, zu erwerben. Die Ermächtigung ist auf den Erwerb von Aktien beschränkt, auf die insgesamt ein anteiliger Betrag von höchstens 10 Prozent des Grundkapitals entfällt, das zum Zeitpunkt der Beschlussfassung der Hauptversammlung besteht. Die Ermächtigung kann ganz oder teilweise, in letzterem Fall auch mehrmals, ausgeübt werden. Sie kann auch zum Erwerb lediglich von Stammaktien oder lediglich von Vorzugsaktien ausgeübt werden.
- b) Der Erwerb erfolgt über die Börse oder mittels eines öffentlichen Kaufangebots.
  - aa) Erfolgt der Erwerb über die Börse, darf der von der Gesellschaft gezahlte Erwerbspreis je Aktie (ohne Erwerbsnebenkosten) den arithmetischen Mittelwert der Schlussauktionspreise von Aktien gleicher Gattung der Gesellschaft im XETRA-Handel (oder in einem an die Stelle des XETRA-Systems getretenen funktional vergleichbaren Nachfolgesystem) an der Frankfurter Wertpapierbörse an den letzten drei Börsentagen vor dem Tag des Erwerbs um nicht mehr als 5 Prozent über- oder unterschreiten.

bb) Erfolgt der Erwerb über ein öffentliches Kaufangebot, darf der von der Gesellschaft angebotene und gezahlte Erwerbspreis je Aktie (ohne Erwerbsnebenkosten) den arithmetischen Mittelwert der Schlussauktionspreise von Aktien gleicher Gattung der Gesellschaft im XETRA-Handel (oder in einem an die Stelle des XETRA-Systems getretenen funktional vergleichbaren Nachfolgesystem) an der Frankfurter Wertpapierbörse an den letzten drei Börsentagen vor dem Tag der Veröffentlichung des Angebots um nicht mehr als 10 Prozent über- oder unterschreiten. Sofern das Kaufangebot überzeichnet ist, kann der Erwerb nach dem Verhältnis der Beteiligungen der andienenden Aktionäre zueinander (Beteiligungsquoten) oder nach dem Verhältnis der angedienten Aktien (Andienungsquoten) erfolgen. Darüber hinaus kann zur Vermeidung rechnerischer Bruchteile von Aktien kaufmännisch gerundet werden.

- c) Der Vorstand wird ermächtigt, die aufgrund der Ermächtigung nach lit. a) oder aufgrund einer früher erteilten Ermächtigung erworbenen Aktien der Gesellschaft neben der Veräußerung über die Börse oder durch Angebot an alle Aktionäre mit Zustimmung des Aufsichtsrats zu folgenden Zwecken zu verwenden:
  - aa) Einführung von Aktien der Gesellschaft an ausländischen Börsen, an denen sie bisher nicht zum Handel zugelassen sind. Der Einführungspreis dieser Aktien darf den arithmetischen Mittelwert der Schlussauktionspreise der bereits börsennotierten Aktien der Gesellschaft mit gleicher Ausstattung im XETRA-Handel (oder in einem an die Stelle des XETRA-Systems getretenen funktional vergleichbaren Nachfolgesystem) an der Frankfurter Wertpapierbörse an den letzten fünf Börsentagen vor dem Tag der Börseneinführung um nicht mehr als 5 Prozent unterschreiten;
  - bb) Übertragung von Aktien der Gesellschaft an Dritte im Rahmen von Unternehmenszusammenschlüssen oder beim Erwerb von Unternehmen, Unternehmensteilen oder Beteiligungen an Unternehmen;
  - cc) Einziehung von Aktien der Gesellschaft, ohne dass die Einziehung und die Durchführung der Einziehung eines weiteren Beschlusses der Hauptversammlung bedarf. Die Einziehung kann auch ohne Kapitalherabsetzung durch Anpassung des anteiligen Betrags der übrigen Stückaktien am Grundkapital der Gesellschaft erfolgen.



Der Vorstand wird in diesem Fall zur Anpassung der Zahl der Stückaktien in der Satzung ermächtigt;

dd) Veräußerung von Aktien der Gesellschaft in anderer Weise als über die Börse oder durch ein Angebot an alle Aktionäre, sofern die Veräußerung gegen Barzahlung und zu einem Preis erfolgt, der den Börsenpreis der bereits börsennotierten Aktien der Gesellschaft mit gleicher Ausstattung zum Zeitpunkt der Veräußerung nicht wesentlich unterschreitet. Diese Ermächtigung ist beschränkt auf die Veräußerung von Aktien, auf die insgesamt ein anteiliger Betrag von höchstens 10 Prozent des Grundkapitals entfällt. Die Höchstgrenze von 10 Prozent des Grundkapitals vermindert sich um den anteiligen Betrag des Grundkapitals, der auf Aktien entfällt, die (a) während der Laufzeit dieser Ermächtigung im Rahmen einer Kapitalerhöhung unter Ausschluss des Bezugsrechts gemäß § 186 Abs. 3 Satz 4 AktG ausgegeben wurden oder die (b) zur Bedienung von Options- oder Wandelschuldverschreibungen mit Options- oder Wandlungsrecht oder einer Options- oder Wandlungspflicht auszugeben sind, sofern die Schuldverschreibungen während der Laufzeit dieser Ermächtigung unter Ausschluss des Bezugsrechts in entsprechender Anwendung des § 186 Abs. 3 Satz 4 AktG ausgegeben wurden;

ee) Lieferung von Aktien an die Inhaber von Options- oder Wandelschuldverschreibungen der Gesellschaft oder ihrer Konzerngesellschaften gemäß den Options- oder Wandelanleihebedingungen; dies gilt auch für die Lieferung von Aktien aufgrund der Ausübung von Bezugsrechten, die bei einer Veräußerung eigener Aktien durch Angebot an alle Aktionäre den Inhabern von Options- oder Wandelschuldverschreibungen der Gesellschaft oder ihrer Konzerngesellschaften in dem Umfang gewährt werden dürfen, in dem die Inhaber der Options- oder Wandelschuldverschreibungen nach Ausübung des Options- oder Wandlungsrechts oder der Erfüllung der Options- oder Wandlungspflicht ein Bezugsrecht auf Aktien der Gesellschaft hätten. Insgesamt darf auf die aufgrund dieser Ermächtigung übertragenen Aktien ein anteiliger Betrag von höchstens 10 Prozent des Grundkapitals entfallen. Auf diese Begrenzung sind Aktien anzurechnen, die in direkter oder entsprechender Anwendung des § 186 Abs. 3 Satz 4 AktG während der Laufzeit dieser Ermächtigung zum Zeitpunkt der Verwendung ausgegeben oder veräußert wurden;

d) Die Ermächtigungen unter lit. c) können einmal oder mehrmals, ganz oder in Teilen, einzeln oder gemeinsam ausgenutzt werden. Aufgrund der Ermächtigung unter lit. a) zur Absicherung von Verpflichtungen unter dem Performance Share Plan 2009 erworbene eigene Aktien können ausschließlich über die Börse veräußert werden.

e) Bei Verwendung eigener Aktien gemäß den Ermächtigungen in lit. c) aa), bb), dd) und ee) wird das Bezugsrecht der Aktionäre ausgeschlossen.“

Die Ermächtigung zum Erwerb eigener Aktien dient den unter lit. c) genannten Verwendungsmöglichkeiten;

Die Ermächtigung soll es der Gesellschaft unter anderem ermöglichen, Aktien der Gesellschaft zu erwerben, um diese unter Ausschluss des Bezugsrechts zur Einführung an ausländischen Börsen zu nutzen, an denen die Stammaktien der Gesellschaft bisher nicht notiert sind. Die Gesellschaft soll auch in der Lage sein, eigene Stammaktien zur Verfügung zu haben, um diese unter Ausschluss des Bezugsrechts als Gegenleistung im Rahmen von Unternehmenszusammenschlüssen oder bei Erwerb von Unternehmen, Unternehmensteilen oder Beteiligungen an Unternehmen gewähren zu können. Die Gesellschaft soll eigene Aktien auch ohne erneuten Beschluss der Hauptversammlung einziehen können. Nach der Ermächtigung soll die Gesellschaft ferner in der Lage sein, eigene Stammaktien unter Ausschluss des Bezugsrechts anders als über die Börse oder durch ein Angebot an die Aktionäre gegen Barzahlung zu veräußern. Damit soll es der Gesellschaft insbesondere ermöglicht werden, kurzfristig Stammaktien der Gesellschaft auszugeben. Die Hauptversammlung vom 5. Mai 2010 hat den Vorstand ermächtigt, mit Zustimmung des Aufsichtsrats auf den Inhaber lautende Options- oder Wandelschuldverschreibungen auszugeben. Es kann sinnvoll sein, die sich daraus ergebenden Rechte auf den Bezug von Stammaktien nicht durch eine Kapitalerhöhung, sondern ganz oder teilweise durch eigene Stammaktien zu bedienen. Aufgrund der Ermächtigung unter lit. a) zur Absicherung von Verpflichtungen unter dem Performance Share Plan 2009 erworbene eigene Aktien können ausschließlich über die Börse veräußert werden.

#### **Befugnisse zur Ausgabe von Options- und/oder Wandelschuldverschreibungen**

Die von der Hauptversammlung vom 13. Mai 2009 beschlossene → bedingte Erhöhung des Grundkapitals um bis zu 127.825.000 €, eingeteilt in bis zu 50.000.000 auf den Inhaber lautende Stammaktien, die im Zusammenhang mit

der Ermächtigung des Vorstands, mit Zustimmung des Aufsichtsrats bis zum 12. Mai 2014 einmalig oder mehrmals auf den Inhaber lautende Options- oder Wandelschuldverschreibungen im Gesamtnennbetrag von bis zu 1.500.000.000 € zu begeben (Ermächtigung I), stand, sowie → die zweite bedingte Erhöhung des Grundkapitals um bis zu 127.825.000 €, eingeteilt in bis zu 50.000.000 auf den Inhaber lautende Stammaktien, die im Zusammenhang mit einer zweiten Ermächtigung des Vorstands, mit Zustimmung des Aufsichtsrats bis zum 12. Mai 2014 einmalig oder mehrmals auf den Inhaber lautende Options- oder Wandelschuldverschreibungen im Gesamtnennbetrag von bis zu 1.500.000.000 € zu begeben (Ermächtigung II), stand,

wurden durch Beschluss der Hauptversammlung vom 5. Mai 2010 aufgehoben. Nach der Regelung des Gesetzes zur Umsetzung der Aktionärsrechterichtlinie (ARUG) und den Entscheidungen des Bundesgerichtshofs vom 18. Mai 2009 waren die detaillierten Vorgaben für die Festsetzung des Options- oder Wandlungspreises in den bisherigen Ermächtigungen I und II überflüssig geworden.

Die Hauptversammlung vom 5. Mai 2010 hat ferner den Vorstand ermächtigt, mit Zustimmung des Aufsichtsrats bis zum 4. Mai 2015 einmalig oder mehrmals auf den Inhaber lautende Options- oder Wandelschuldverschreibungen (zusammen „Schuldverschreibungen“) im Gesamtnennbetrag von bis zu 1.500.000.000 € auszugeben und den Inhabern von Optionschuldverschreibungen Optionsrechte oder -pflichten und den Inhabern von Wandelschuldverschreibungen Wandlungsrechte oder -pflichten für auf den Inhaber lautende Stammaktien der Gesellschaft mit einem anteiligen Betrag des Grundkapitals von insgesamt bis zu 127.825.000 € nach näherer Maßgabe der Options- oder Wandelanleihebedingungen zu gewähren oder aufzuerlegen.

Die Schuldverschreibungen können auch durch eine Konzerngesellschaft der METRO AG im Sinne von § 18 AktG ausgegeben werden, an der die METRO AG unmittelbar oder mittelbar zu mindestens 90 Prozent beteiligt ist. Für diesen Fall wird der Vorstand ermächtigt, mit Zustimmung des Aufsichtsrats für die Gesellschaft die Garantie für diese Schuldverschreibungen zu übernehmen und deren Inhabern Options- oder Wandlungsrechte oder -pflichten auf auf den Inhaber lautende Stammaktien der METRO AG zu gewähren oder aufzuerlegen.

Das gesetzliche Bezugsrecht wird den Aktionären in der Weise eingeräumt, dass die Schuldverschreibungen von einem

Kreditinstitut oder einem Konsortium von Kreditinstituten mit der Verpflichtung übernommen werden, sie den Aktionären zum Bezug anzubieten. Werden Schuldverschreibungen von einer Konzerngesellschaft der METRO AG im Sinne von § 18 AktG ausgegeben, an der die METRO AG unmittelbar oder mittelbar zu mindestens 90 Prozent beteiligt ist, hat die Gesellschaft die Gewährung des gesetzlichen Bezugsrechts für die Aktionäre der METRO AG nach Maßgabe des vorstehenden Satzes sicherzustellen.

Der Vorstand ist jedoch ermächtigt, mit Zustimmung des Aufsichtsrats Spitzenbeträge, die sich aufgrund des Bezugsverhältnisses ergeben, von dem Bezugsrecht der Aktionäre auszunehmen und das Bezugsrecht auch insoweit auszuschließen, wie es erforderlich ist, damit denjenigen, denen bereits zuvor ausgegebene Options- oder Wandlungsrechte oder -pflichten zustehen oder auferlegt sind, ein Bezugsrecht in dem Umfang eingeräumt werden kann, wie es ihnen nach Ausübung des Options- oder Wandlungsrechts oder bei Erfüllung der Options- oder Wandlungspflicht als Aktionär zustehen würde.

Der Vorstand ist ferner ermächtigt, mit Zustimmung des Aufsichtsrats das Bezugsrecht der Aktionäre auf gegen Barzahlung ausgegebene Schuldverschreibungen, die mit Options- oder Wandlungsrecht oder Options- oder Wandlungspflicht ausgegeben werden, vollständig auszuschließen, sofern der Vorstand nach pflichtgemäßer Prüfung zu der Auffassung gelangt, dass der Ausgabepreis der Schuldverschreibungen ihren nach anerkannten, insbesondere finanzmathematischen Methoden ermittelten hypothetischen Marktwert nicht wesentlich unterschreitet. Diese Ermächtigung zum Ausschluss des Bezugsrechts gilt für Schuldverschreibungen, die mit Options- oder Wandlungsrecht oder -pflicht ausgegeben werden, mit einem Options- oder Wandlungsrecht oder -pflicht auf Stammaktien mit einem anteiligen Betrag des Grundkapitals, der insgesamt 10 Prozent des Grundkapitals nicht übersteigen darf, und zwar weder im Zeitpunkt des Wirksamwerdens noch – falls dieser Wert geringer ist – im Zeitpunkt der Ausübung der vorliegenden Ermächtigung. Auf die vorgenannte 10-Prozent-Grenze werden

→ sowohl neue Stammaktien angerechnet, die aus einem genehmigten Kapital unter Ausschluss des Bezugsrechts gemäß § 186 Abs. 3 Satz 4 AktG während der Laufzeit dieser Ermächtigung bis zur nach § 186 Abs. 3 Satz 4 AktG bezugsrechtsfreien Ausgabe der Schuldverschreibungen mit Options- oder Wandlungsrecht oder -pflicht ausgegeben werden,

→ als auch solche Stammaktien, die aufgrund einer Ermächtigung der Hauptversammlung gemäß § 71 Abs. 1 Nr. 8 AktG erworben und gemäß §§ 71 Abs. 1 Nr. 8 Satz 5, 186 Abs. 3 Satz 4 AktG während der Laufzeit dieser Ermächtigung bis zur nach § 186 Abs. 3 Satz 4 AktG bezugsrechtsfreien Ausgabe der Schuldverschreibungen mit Options- oder Wandlungsrecht oder -pflicht unter Ausschluss des Bezugsrechts veräußert werden.

Im Fall der Begebung von Schuldverschreibungen, die ein Options- oder Wandlungsrecht gewähren oder eine Options- oder Wandlungspflicht begründen, bestimmt sich der Options- oder Wandlungspreis nach den Regelungen in § 4 Abs. 8 der Satzung der METRO AG, die unter dem Tagesordnungspunkt 8 lit. b) aa) abgedruckt ist.

Bei mit Options- oder Wandlungsrechten oder -pflichten verbundenen Schuldverschreibungen kann der Options- oder Wandlungspreis im Fall der wirtschaftlichen Verwässerung des Werts der Options- oder Wandlungsrechte oder -pflichten nach näherer Bestimmung der Schuldverschreibungen wertwährend angepasst werden, soweit die Anpassung nicht schon durch ein Gesetz geregelt ist. Die Bedingungen der Schuldverschreibungen können darüber hinaus für den Fall der Kapitalherabsetzung oder anderer außerordentlicher Maßnahmen oder Ereignisse (zum Beispiel ungewöhnlich hohe Dividenden, Kontrollenerlangung durch Dritte) eine Anpassung der Options- oder Wandlungsrechte oder -pflichten vorsehen. Bei einer Kontrollenerlangung durch Dritte kann eine marktübliche Anpassung des Options- oder Wandlungspreises vorgesehen werden. Ferner können die Bedingungen der Schuldverschreibungen vorsehen, dass das Umtauschverhältnis und/oder der Options- oder Wandlungspreis variabel sind und der Options- oder Wandlungspreis innerhalb einer festzulegenden Bandbreite in Abhängigkeit von der Entwicklung des Aktienkurses während der Laufzeit festgelegt wird. Der Mindestausgabebetrag nach den Regelungen in § 4 Abs. 8 der Satzung der METRO AG in der Fassung, die unter diesem Tagesordnungspunkt 8 lit. b) aa) abgedruckt ist, darf auch insoweit nicht unterschritten werden.

Die Bedingungen der Schuldverschreibungen können das Recht der METRO AG vorsehen, im Fall der Wandlung oder Optionsausübung statt der Gewährung von Aktien einen Geldbetrag zu zahlen, der für die Anzahl der anderenfalls zu liefernden Aktien dem volumengewichteten Durchschnittskurs der Stammaktien der METRO AG im XETRA-Handel (oder in einem an die Stelle des XETRA-Systems getretenen funktional vergleichbaren Nachfolgesystem) der Frankfurter Wertpapierbörse während

eines vom Vorstand zu bestimmenden angemessenen Zeitraums von Tagen vor oder nach Erklärung der Wandlung oder der Optionsausübung entspricht. Die Bedingungen der Schuldverschreibungen können auch vorsehen, dass nach Wahl der METRO AG statt in neue Aktien aus bedingtem Kapital in bereits existierende Stammaktien der METRO AG oder Aktien einer anderen börsennotierten Gesellschaft gewandelt oder das Optionsrecht oder die Optionspflicht durch Lieferung solcher Aktien erfüllt werden kann.

Die Bedingungen der Schuldverschreibungen können auch eine Options- oder Wandlungspflicht zum Ende der Laufzeit (oder zu einem anderen Zeitpunkt) oder das Recht der METRO AG vorsehen, bei Endfälligkeit der mit einem Options- oder Wandlungsrecht verbundenen Schuldverschreibungen (dies umfasst auch eine Fälligkeit wegen Kündigung) den Gläubigern der Schuldverschreibungen ganz oder teilweise anstelle der Zahlung des fälligen Geldbetrags Aktien der METRO AG oder Aktien einer anderen börsennotierten Gesellschaft zu gewähren. Der anteilige Betrag des Grundkapitals der bei Wandlung oder Optionsausübung auszugebenden Stammaktien der METRO AG darf den Nennbetrag der Schuldverschreibungen nicht übersteigen. §§ 9 Abs. 1, 199 Abs. 2 AktG sind zu beachten.

Der Vorstand wird ermächtigt, mit Zustimmung des Aufsichtsrats die weiteren Einzelheiten der Ausgabe und Ausstattung der Schuldverschreibungen, insbesondere Zinssatz, Ausgabekurs, Laufzeit und Stückelung, Verwässerungsschutzbestimmungen sowie Options- oder Wandlungszeitraum zu bestimmen oder im Einvernehmen mit den Organen der die Schuldverschreibungen begebenden Konzerngesellschaft der METRO AG festzulegen.

Die Ermächtigungen zur Ausgabe von Schuldverschreibungen sollen die Möglichkeiten der METRO AG zur Finanzierung ihrer Aktivitäten erweitern und der Gesellschaft insbesondere bei Eintritt günstiger Kapitalmarktbedingungen den Weg zu einer flexiblen und zeitnahen Finanzierung eröffnen. Die Emission von Anleihen mit Wandel- und/oder Optionsrechten auf Aktien der METRO AG ermöglicht die Aufnahme von Kapital zu attraktiven Konditionen. Die erzielten Wandel- und Optionsprämien kommen der Gesellschaft zugute. Die ferner vorgesehene Möglichkeit, neben der Einräumung von Wandel- und Optionsrechten auch Options- oder Wandlungspflichten zu begründen und der Gesellschaft das Recht zu geben, statt einer Rückzahlung der Anleihe in bar ganz oder teilweise Aktien der Gesellschaft zu liefern, erweitert den Spielraum für die Ausgestaltung dieses Finanzierungsinstruments.

**Wesentliche Vereinbarungen, die unter der Bedingung eines Kontrollwechsels stehen (§ 315 Abs. 4 Nr. 8 HGB)**

Die METRO AG ist zurzeit als Kreditnehmerin an zwei Konsortialkreditverträgen beteiligt, die im Falle eines Kontrollwechsels durch die Kreditgeber kündbar sind, sofern zusätzlich und als Folge des Kontrollwechsels das Kreditrating der METRO AG in einer vertraglich festgelegten Weise fällt. Voraussetzung eines Kontrollwechsels ist erstens, dass die Aktionäre, die die METRO AG zum Zeitpunkt des jeweiligen Vertragsschlusses kontrolliert haben, diese Kontrolle verlieren. Zweite Voraussetzung ist die Erlangung der Kontrolle über die METRO AG durch eine oder mehrere Parteien. Nur

wenn der Kontrollwechsel und als dessen Folge das Fallen des Kreditratings kumulativ eintreten, können die kreditgebenden Banken den Vertrag kündigen und einen herausgelegten Kredit zurückverlangen. Diese Regelungen sind in der beschriebenen Weise marktüblich und dienen dem Schutz der Gläubiger. Im Jahr 2010 wurden diese Kredite nicht in Anspruch genommen.

**Entschädigungsvereinbarungen bei Kontrollwechseln (§ 315 Abs. 4 Nr. 9 HGB)**

Entschädigungsvereinbarungen der Gesellschaft, die für den Fall eines Übernahmeangebots mit den Mitgliedern des Vorstands oder Arbeitnehmern getroffen sind, bestehen nicht.

## 10. Rechnungslegungs- bezogenes internes Kontroll- und Risikomanagementsystem

Das rechnungslegungsbezogene interne Kontroll- und Risikomanagementsystem der METRO GROUP beinhaltet Instrumente und Maßnahmen, mit denen Risiken koordiniert, verhindert beziehungsweise rechtzeitig erkannt, bewertet und gesteuert werden. Der Bereich Corporate Accounting der METRO AG ist für die Umsetzung der Instrumente und Maßnahmen im Konzern verantwortlich.

Die Gesamtverantwortung für alle Prozesse zur Erstellung des Konzern- beziehungsweise Jahresabschlusses der METRO AG liegt im Ressort des Finanzvorstands der METRO AG, Herrn Olaf Koch. Die eigentliche Aufstellung der Abschlüsse im rechtlichen Sinn obliegt jedoch dem Gesamtvorstand der METRO AG. Im Nachgang der Erstellung werden die Abschlüsse vom Abschlussprüfer geprüft und mit einem Bestätigungsvermerk versehen. Anschließend findet eine Erörterung und Prüfung durch den Aufsichtsrat der METRO AG statt. Bei dieser Aufsichtsratssitzung ist der Abschlussprüfer anwesend, berichtet über die wesentlichen Ergebnisse seiner Prüfung und steht für ergänzende Auskünfte zur Verfügung. Sofern danach vonseiten des Aufsichtsrats keine Einwendungen zu erheben sind, billigt der Aufsichtsrat die Abschlüsse. Der Jahresabschluss der METRO AG ist mit dieser Billigung auch festgestellt.

### IFRS-Bilanzierungsrichtlinie

Der Konzern(zwischen)abschluss der METRO AG wird gemäß den International Financial Reporting Standards (IFRS) aufgestellt, wie sie von der Europäischen Kommission genehmigt wurden. Mit einer konzernweit gültigen und von allen in den Konzernabschluss einbezogenen Gesellschaften verpflichtend anzuwendenden IFRS-Bilanzierungsrichtlinie wird die einheitliche Bilanzierung im Einklang mit den IFRS für die gesamte METRO GROUP sichergestellt. Die Richtlinie erläutert den Konzerngesellschaften die Regelungen der IFRS und macht Vorgaben für die Bilanzierung. Zur Kontrolle der Einhaltung der IFRS-Bilanzierungsrichtlinie ist die Geschäftsführung jedes Konzernunternehmens verpflichtet, dies zu jeder Berichterstattung in einer entsprechenden Erklärung (Letter of Representation – LoR) zu bestätigen. Die IFRS-Bilanzierungsrichtlinie deckt alle für die METRO AG relevanten IFRS ab und bezieht sich nicht nur auf bestimmte Bilanzierungssachverhalte. Für den Richtlinieninhalt ist

der Bereich Corporate Accounting der METRO AG zuständig. Die IFRS-Bilanzierungsrichtlinie wird kontinuierlich an Änderungen der IFRS angepasst und allen in den Konzernabschluss einbezogenen Gesellschaften separat mitgeteilt.

### Rechnungslegungsprozesse der in den Konzernabschluss einbezogenen Unternehmen

Die Einzelabschlusserstellung der einbezogenen Unternehmen nach IFRS für Konsolidierungszwecke erfolgt grundsätzlich in SAP-basierten Rechnungslegungssystemen (SAP-FI). Durch die organisatorische Trennung von Haupt- und Nebenbuchhaltungen (zum Beispiel Anlagenbuchhaltung) wird zum einen die klare Zuständigkeit für die einzelnen Abschlusserstellungstätigkeiten sichergestellt, zum anderen ist eine Funktionstrennung gegeben, durch die Kontrollprozesse wie beispielsweise ein Vier-Augen-Prinzip installiert sind. In diesen Systemen werden die Einzelabschlüsse eines Großteils der Konzernunternehmen unter Zugrundelegung eines zentral gepflegten Kontenplans nach einheitlichen Buchungsvorgaben erstellt. Es ist geplant, dass alle IFRS-Einzelabschlüsse von Unternehmen der METRO GROUP nach zentralen Vorgaben und Prozessen in einem zentralen, SAP-basierten Rechnungslegungssystem (SAP-FI) erstellt werden.

Die Zusammenführung der rechnungslegungsbezogenen Geschäftsdaten im Rahmen der Konzernberichterstattung erfolgt durch ein zentrales, SAP-basiertes Konsolidierungssystem (SAP EC-CS), in das ausnahmslos alle konsolidierten Konzernunternehmen der METRO GROUP eingebunden sind. In diesem System ist ein einheitlicher Kontenplan hinterlegt, der von allen einbezogenen Unternehmen unter Berücksichtigung der IFRS-Bilanzierungsrichtlinie anzuwenden ist. Die Kontenpläne für die IFRS-Einzelabschlüsse und den Konzernabschluss sind miteinander verknüpft.

Außer aus der Nichteinhaltung von Bilanzierungsregeln können Risiken auch aus der Missachtung formaler Fristen und Termine entstehen. Zur Vermeidung dieser Risiken wie auch zur Dokumentation der im Rahmen der Einzel- und Konzernabschlusserstellung nach IFRS zwingend durchzuführenden Arbeitsabläufe, deren zeitlicher Abfolge und der hierfür verantwortlichen Personen wurde ein onlinebasiertes Planungswerkzeug eingeführt. Mit diesem werden die Arbeitsabläufe zur Einzel- und Konzernabschlusserstellung nach IFRS inhaltlich und zeitlich überwacht. Somit ist für übergeordnete Konzerneinheiten die Statusverfolgung sichergestellt, um Risiken frühzeitig zu erkennen und zu beseitigen.

Das Planungswerkzeug gliedert den Erstellungsprozess des Einzelabschlusses in wesentliche Meilensteine, die wiederum in einzelne Aktivitäten untergliedert sind. Inhaltlich orientieren sich diese Meilensteine und Aktivitäten an der IFRS-Bilanzierungsrichtlinie der METRO GROUP und spiegeln somit deren Umsetzung wider. Die darüber hinaus für Zwecke der Strukturierung und Koordination der Konzernabschlusserstellung im Planungswerkzeug zentral vorgegebenen Termine und Meilensteine werden vom Bereich Corporate Accounting der METRO AG hinsichtlich ihrer Einhaltung überwacht. Die Terminierung und Kontrolle der zur Erreichung dieser Konzernmeilensteine notwendigen Meilensteine und Aktivitäten im Rahmen der Einzelabschlusserstellung liegt in der Verantwortung der Geschäftsführung der jeweiligen Einzelgesellschaft.

Nach Übertragung der Einzelabschlussdaten nach IFRS in das SAP-basierte Konsolidierungssystem werden die Daten dort einer automatisierten Überprüfung auf ihre Plausibilität vor dem Hintergrund rechnungswesensspezifischer Zusammenhänge und Abhängigkeiten unterzogen. Sollte das System im Rahmen dieser Validierungen Fehler- oder Warnmeldungen erzeugen, sind diese vom Einzelabschlussverantwortlichen vor Weitergabe der Daten an die Konsolidierungsstelle entsprechend zu bearbeiten.

Ein weiteres Kontrollinstrument stellt der von jedem Konzernunternehmen anlässlich der Einzelabschlusserstellung an die METRO AG weiterzuleitende Report dar, in dem die wesentlichen Positionen der Bilanz und der Gewinn- und Verlustrechnung den Werten der Vorperiode gegenübergestellt und kommentiert werden.

Um die IT-Sicherheit zu gewährleisten, sind Zugriffsregelungen in den rechnungslegungsbezogenen EDV-Systemen (SAP-FI) definiert. Jedes in den Konzernabschluss einbezogene Unternehmen unterliegt den Regeln der IT-Sicherheit, die in einer IT-Security-Richtlinie zusammengefasst sind und deren Einhaltung konzernweit durch die interne Revision überwacht wird. Dadurch wird sichergestellt, dass die Nutzer der Systeme nur auf jene Informationen und Systeme Zugriff haben, die sie zur Erfüllung ihrer Aufgaben benötigen.

## Rechnungslegungsprozesse im Rahmen der Konsolidierung

Das Planungswerkzeug gliedert den Prozess der Konzernabschlusserstellung ebenfalls in wesentliche Meilensteine, Aktivitäten und Termine. Hierbei stellt unter anderem auch

die Abarbeitung der typischen Konsolidierungsschritte – darunter zum Beispiel die Umsatzeliminierung, Aufwands- und Ertrags-, Schulden- und Kapitalkonsolidierung – spezifische Meilensteine zur Erstellung des Konzernabschlusses dar. Die personellen Verantwortlichkeiten für die oben genannten Konsolidierungsschritte sind unter Berücksichtigung einer Vertretungsregelung dokumentiert.

Unterstützende Tätigkeiten im Umfeld des Erstellungsprozesses für den Konzernabschluss werden auch von externen Dienstleistern in Anspruch genommen. Diese Dienstleistungen beziehen sich im Wesentlichen auf die Bewertung von Immobilien, Pensionsverpflichtungen sowie aktienorientierten Vergütungen.

Die zur Erstellung des Konzernabschlusses durchzuführenden Konsolidierungsschritte werden diversen systemtechnischen wie auch manuellen Kontrollen unterzogen. Für die Konsolidierungsmaßnahmen gelten die gleichen automatisierten Plausibilitätsprüfungen (Validierungen) wie für die Einzelabschlussdaten. Weitere Kontrollmechanismen auf Konzernebene sind Soll-Ist-Vergleiche sowie Analysen über die inhaltliche Zusammensetzung und Veränderungen der einzelnen Positionen in der Bilanz und in der Gewinn- und Verlustrechnung. Die Einhaltung interner Kontrollen über den Erstellungs- und Buchungsprozess im Rahmen der Konzernabschlusserstellung wird durch die Konzernrevision regelmäßig überprüft.

Zur Gewährleistung der Einhaltung von Regeln der IT-Sicherheit sind Zugriffsregelungen im Konsolidierungssystem SAP EC-CS implementiert (Schreib- und Leseberechtigungen). Die Berechtigungen zur Nutzung des Konsolidierungssystems werden zentral bei der METRO AG verwaltet. Die Freigabe erfolgt nur durch die Bereiche Corporate Accounting und Planning & Controlling und stellt sicher, dass der Nutzer nur Zugriff auf die Daten hat, die er zur Erfüllung seiner Aufgaben benötigt.

## Unabhängige Prüfung/Kontrolle

### Konzernrevision

Die Konzernrevision erbringt unabhängige und objektive Prüfungs- und Beratungsleistungen in der METRO GROUP und unterstützt den Vorstand und die Geschäftsführungen bei der Erreichung ihrer Ziele durch die potenzialorientierte Bewertung der wesentlichen Führungs- und Geschäftsprozesse. In Abstimmung mit dem Vorstand und den Konzerngesellschaften entwickelt die Konzernrevision einen risikoorientierten jährlichen Prüfungs- und Projektplan.

Auf Basis der beschriebenen Grundsätze nimmt die Konzernrevision unabhängige Prüfungen der Kontrollen der Abschlusserstellungsprozesse, der Implementierung der IFRS-Bilanzierungsrichtlinie und der Konzernrechnungslegungsprozesse innerhalb der METRO GROUP vor. Hierbei werden im Rahmen der risikoorientierten Jahresrevisionsplanung Schwerpunktthemen definiert.

#### **Externe Prüfung**

Die IFRS-Bilanzierungsrichtlinie wird vom Wirtschaftsprüfer des Konzernabschlusses geprüft und den Wirtschaftsprüfern der in den Konzernabschluss einbezogenen Gesellschaften zur Verfügung gestellt. Diese wiederum bestätigen die vollständige Anwendung der IFRS-Bilanzierungsrichtlinie durch die in den Konzernabschluss einbezogenen Gesellschaften.

Darüber hinaus werden sowohl die von den wesentlichen Konzerngesellschaften für Konsolidierungszwecke erstellten Einzelabschlüsse nach IFRS als auch der Konzernabschluss der METRO AG von den jeweiligen Wirtschaftsprüfern auf die Einhaltung der anzuwendenden Rechnungslegungsvorschriften hin überprüft und kontrolliert, wobei der Konzernzwischenabschluss zum Halbjahr einer prüferischen Durchsicht unterzogen und der Konzernabschluss zum Jahresende geprüft wird. Die abschließende prüferische Beurteilung des Konzernabschlusses wird in Form eines Bestätigungsvermerks im Geschäftsbericht veröffentlicht.

## 11. Risikobericht

Das Risikomanagement der METRO GROUP ist integraler Bestandteil der wertorientierten Unternehmensführung. Es unterstützt das Management dabei, Risiken zu begrenzen und Chancen zu nutzen, und basiert auf einem systematischen, den Konzern umfassenden Prozess der Risikoerkennung, -bewertung und -steuerung. Risiken sind interne oder externe Ereignisse, die das Erreichen kurzfristiger Ziele oder die Umsetzung langfristiger Strategien negativ beeinflussen können. Sie entstehen auch aus verpassten oder nur schlecht genutzten Chancen. Als Chancen definieren wir mögliche Erfolge, die über die festgelegten Ziele hinausgehen. Ungünstige Entwicklungen erkennen wir im Rahmen des Risikomanagements frühzeitig und leiten entsprechende Gegenmaßnahmen ein. Zielgerecht identifizieren, beurteilen und realisieren wir darüber hinaus unternehmensweit vorhandene positive Entwicklungen.

### Zentrale Steuerung und effiziente Organisation

Der Risikobeauftragte der METRO GROUP informiert den Vorstand der METRO AG zeitnah und kontinuierlich über wesentliche Entwicklungen im Risikomanagement. Jährlich wird konzernweit eine Risikoinventur durchgeführt, auf deren Grundlage der Beauftragte den Risikobericht erstellt. Vorrangige Aufgaben des zentralen Risikomanagements sind es, den Informationsaustausch in der METRO GROUP über risikorelevante Sachverhalte sicherzustellen sowie das Risikomanagement in sämtlichen Vertriebslinien und Konzernbereichen weiterzuentwickeln. Dazu gehört, die konzernweite Erfassung zu koordinieren und alle bedeutsamen Risiken systematisch nach einheitlichen Maßstäben zu bewerten. Der Risikobeauftragte fasst die Ergebnisse in einem Risikoportfolio zusammen, das die Gesamtbetrachtung der Risiko- und Chancensituation in der METRO GROUP ermöglicht.

Zuständigkeiten und Verantwortung für das Risikomanagement sind im Konzern eindeutig geregelt und spiegeln die Unternehmensstruktur der METRO GROUP wider. Wir verbinden die zentrale Konzernsteuerung durch die Management-Holding METRO AG mit der dezentralen Verantwortung der Vertriebslinien für das operative Geschäft. Die Verantwortung für die Risiken, vor allem im operativen Geschäft, liegt bei den Vertriebslinien und Konzerngesellschaften. Sie steuern das Risikomanagement, die METRO AG überwacht dessen Umsetzung. Auch der Aufsichtsrat und sein Bilanz- und Prüfungsausschuss befassen sich regelmäßig mit dem Risikomanagement.

### EBIT after Cost of Capital (EBITaC) als Kriterium der Risikoabwägung

Eine wichtige Messgröße für den Unternehmenserfolg ist der Wertbeitrag, den wir mit der Kennzahl EBITaC (EBIT after Cost of Capital) berechnen. Diese entspricht dem EBIT unter Berücksichtigung der über vier Jahre periodisierten Sonderfaktoren Shape 2012 abzüglich der Kapitalkosten. Der Grad der Risikobereitschaft orientiert sich ebenfalls an dieser Kennziffer und folgt damit dem Grundsatz der nachhaltigen Steigerung des Unternehmenswerts. Unternehmerische Risiken gehen wir grundsätzlich nur dann ein, wenn sie beherrschbar sind und die mit ihnen verbundenen Chancen eine angemessene Wertsteigerung erwarten lassen.

### Strikte Grundsätze für den Umgang mit Risiken

Risiken, die mit den Kernprozessen des Groß- und Einzelhandels einhergehen, tragen wir selbst. Zu den Kernprozessen gehören: die Entwicklung und Umsetzung von Geschäftsmodellen, Standortentscheidungen, der Ein- und Verkauf von Waren und Dienstleistungen, die Entwicklung von Fach- und Führungskräften sowie die Sicherstellung der Liquidität. Risiken, die sich weder auf diese Kernprozesse noch auf unterstützende Prozesse beziehen, gehen wir grundsätzlich nicht ein.

### Details des Risikomanagements klar definiert

Der koordinierte Maßnahmeneinsatz des Risikomanagements ist dadurch gewährleistet, dass alle relevanten Fakten in Regelwerken zusammengestellt sind. Dazu zählen Satzungen und Geschäftsordnungen der Konzerngesellschaften, konzerninterne Richtlinien sowie das Risikohandbuch der METRO AG. Es informiert über die Funktion des Risikomanagementsystems, bietet eine umfassende Übersicht über mögliche Risikofelder, regelt die Verantwortung für deren Überwachung und enthält konkrete Handlungsanleitungen. Das Risikohandbuch wird permanent überprüft und aktualisiert. Risiken werden ebenso wie Chancen konzernweit von unten nach oben über alle Führungsebenen identifiziert. Ein Frühwarnsystem schätzt Geschäftsrisiken hinsichtlich ihrer Tragweite im Planungszeitraum von drei Jahren ein.

### Konzernberichtswesen fördert die interne Risikokommunikation

Zentrales Element der internen Risikokommunikation ist das Konzernberichtswesen. Es wird durch das Berichtswesen zum



Risikomanagement ergänzt. Ziel ist es, die strukturierte und kontinuierliche Auseinandersetzung mit Risiken zu ermöglichen und entsprechend den gesetzlichen Anforderungen zu dokumentieren. Darüber hinaus ist es Aufgabe, mögliche Risiken an die Verantwortlichen zu kommunizieren.

Alle Gesellschaften der METRO GROUP führen grundsätzlich jährlich zum Halbjahresschluss eine Inventur ihrer Risiken durch. Dabei werden die einzelnen Risiken beschrieben und anhand festgelegter Indikatoren bewertet. Die Führungsgesellschaften der Vertriebslinien und die Querschnittsgesellschaften melden dem Risikobeauftragten der METRO AG ihr Risikoinventar. Dieser erhält zudem von den Bereichsleitern der METRO AG eine Auflistung aller Risiken aus ihren Zuständigkeitsbereichen. Abschließend fasst der Risikobeauftragte der METRO AG die Meldungen der Zentralbereiche und Gesellschaften zusammen und präsentiert das gesamte Risikoportfolio der METRO AG im Vorstand.

Bei plötzlich auftretenden, gravierenden Risiken für die Vermögens-, Finanz- und Ertragslage der METRO GROUP tritt ein Eilmeldesystem in Kraft. In diesem Fall erhält der Vorstand der METRO AG direkt und unverzüglich alle notwendigen Informationen.

### Risiken konsequent überwacht

Alle unsere Führungskräfte sind verpflichtet, Umsetzung und Effektivität des Risikomanagements im eigenen Bereich zu überwachen. Risikobeauftragte sichern die Funktionsfähigkeit des gesamten Risikomanagementsystems und sorgen dafür, dass Standards und Vorgaben aktuell sind. Gemäß den Vorschriften des KonTraG (Gesetz zur Kontrolle und Transparenz im Unternehmensbereich) unterziehen die Wirtschaftsprüfer das Risikofrüherkennungssystem einer periodischen Beurteilung. Das Ergebnis dieser Prüfung legen sie Vorstand und Aufsichtsrat vor.

### Identifikation von Chancen

Chancen frühzeitig zu erkennen und zu nutzen, ist eine grundlegende unternehmerische Aufgabe und sichert den langfristigen Erfolg. Wir betrachten Risiken und Chancen grundsätzlich getrennt. Die Erfassung und Kommunikation von Chancen ist integraler Bestandteil des Steuerungs- und Controlling-systems zwischen den Konzerngesellschaften und der Holding. Hierbei obliegt es dem Management der Vertriebslinien, Querschnittsgesellschaften und zentralen Holding-Einheiten

unmittelbar, operative Chancen zu identifizieren, zu analysieren und zu nutzen. Das jeweilige Management befasst sich dazu mit detaillierten Markt- und Konkurrenzanalysen, Marktszenarien, den relevanten Kostentreibern und kritischen Erfolgsfaktoren, auch im politischen Umfeld des Unternehmens. Zusätzlich werden im Rahmen von Shape 2012 mögliche Chancen zur Kostensenkung sowie zur Steigerung der Produktivität identifiziert. Diese erfassen wir mithilfe eines umfassenden Berichtssystems. Details hierzu sind im Kapitel Strategie – Shape 2012 auf den Seiten 36 bis 42 aufgeführt. Welche Chancen wir in den kommenden Jahren erwarten, beschreibt der Nachtrags- und Prognosebericht auf den Seiten 134 bis 142.

### Darstellung der Risikosituation

Für die METRO GROUP ergeben sich in erster Linie die nachfolgend dargestellten internen und externen Risiken.

#### Umfeld und Branchenrisiken

Als international agierendes Unternehmen ist die METRO GROUP von der konjunkturellen Entwicklung der Weltwirtschaft abhängig. Insgesamt hat sich diese 2010 wieder von der Wirtschafts- und Finanzkrise erholen können. Allerdings erfolgt der Aufschwung mit verschiedenen Geschwindigkeiten. Insbesondere in Europa sind einige Länder durch die hohe Staatsverschuldung belastet. Daher entwickelt sich auch der Konsum uneinheitlich. Trotz verbleibender wirtschaftlicher Risiken hat sich die wirtschaftliche Situation in den Regionen, in denen wir vertreten sind, verbessert. Die Risiken für die kurz- und mittelfristige Entwicklung des Handelssektors und damit der METRO GROUP sind im Vergleich zum Vorjahr leicht rückläufig. Insgesamt ist der Handel weniger konjunkturanfällig als andere Branchen. Unsere Position als eines der führenden internationalen Handelsunternehmen wollen wir besonders in den Wachstumsregionen Asien und Osteuropa weiter ausbauen.

#### Handelsgeschäft

Vor allem in Deutschland und Westeuropa ist der Einzelhandel von einem intensiven Wettbewerb geprägt. Dadurch entstehen Faktoren, die den Geschäftsverlauf beeinflussen und natürliche Geschäftsrisiken darstellen können. Ein grundsätzliches Geschäftsrisiko ist die schwankende Konsumbereitschaft der Verbraucher. Diese hängt von den wirtschaftlichen, politischen und gesellschaftlichen Rahmenbedingungen ab. Im Zuge der Erholung von der Weltwirtschaftskrise hat sich die Konsumbereitschaft in vielen Ländern wieder erhöht. Belastungen des Konsums resultieren allerdings aus Maßnahmen zur Rückführung der Staatsverschuldung, insbesondere in Europa.

Insgesamt erwarten wir aber, dass die Ausgaben für Gegenstände des täglichen Bedarfs ebenso ansteigen wie die für größere Anschaffungen, beispielsweise für Haushaltsgeräte oder Unterhaltungselektronik.

Der Wandel des Konsumverhaltens und der Kundenerwartungen birgt Chancen und Risiken – auch vor dem Hintergrund der demografischen Veränderungen. Es gilt, Vertriebskonzepte kontinuierlich anzupassen und zu optimieren. Um Markttrends und sich verändernde Konsumentenansprüche frühzeitig zu erkennen, werten wir regelmäßig interne und externe Informationen aus. Die konzerneigene Marktforschung bedient sich dabei quantitativer Verfahren wie Zeitreihenanalysen oder Prognosen zur Marktentwicklung, die auf Analysen von Verkaufsdaten und auf Marktforschungsergebnissen beruhen. Zu den Zeitreihenanalysen zählt auch die Beobachtung von Produktsegmenten im Markt über einen bestimmten Zeitraum. Unsere Vertriebslinien erproben innovative Konzepte zunächst in Testmärkten auf praktische Umsetzung und Kundenakzeptanz. Erst danach werden sie systematisch und zügig in weiteren Märkten eingeführt. Um Vertriebskonzepte zu optimieren und Märkte zu modernisieren, stellt die METRO GROUP kontinuierlich Investitionsmittel zur Verfügung. Diese Maßnahmen dienen bei allen Vertriebsmarken dazu, die Wettbewerbsstärke zu sichern und auszubauen.

Im Rahmen unserer Nachhaltigkeitsstrategie sichern wir zudem unsere künftigen Geschäftsgrundlagen. Weitere Informationen hierzu sind im Kapitel Nachhaltigkeitsmanagement auf den Seiten 105 bis 109 dargestellt.

### **Unternehmensstrategische Risiken**

#### **Internationale Expansion**

Wir betrachten es als eine entscheidende Investition in die Zukunft unseres Unternehmens, die Präsenz in den großen Wachstumsräumen Osteuropas und Asiens auf- und auszubauen. Damit nutzen wir die Chance, von der steigenden Kaufkraft vieler Millionen Konsumenten zu profitieren.

Unsere internationale Aufstellung macht es erforderlich, mögliche volkswirtschaftliche, rechtliche und politische Risiken zu berücksichtigen. Die Rahmenbedingungen in einzelnen Ländern können sich zum Teil schnell verändern. Unruhen, Wechsel in der politischen Führung, Terroranschläge oder Naturkatastrophen können die Geschäfte der METRO GROUP in einem Land gefährden. Soweit möglich und sinnvoll, versichern wir uns umfassend gegen Betriebsausfälle, die beispielsweise infolge politischer Unruhen entstehen können. Die Internationalisierung

unseres Geschäfts bietet gleichzeitig die Chance, volkswirtschaftliche, rechtliche und politische Risiken sowie Nachfrageschwankungen in einzelnen Ländern auszugleichen.

Um die Risiken der Expansion so weit wie möglich zu begrenzen, planen wir jeden Markteintritt mit größter Sorgfalt. Die Risiken und Chancen identifizieren wir durch Machbarkeitsstudien. Nur bei einer angemessenen Chancen- und Risikosituation erfolgt der Markteintritt.

Die Risiken bei Markteintritten lassen sich auch durch Kooperationen mit lokalen Unternehmen verringern. Diese kennen das rechtliche, politische und wirtschaftliche Umfeld in dem jeweiligen Expansionsland. Ein aktuelles Beispiel ist die Kooperation, die Media Markt und Saturn mit dem Unternehmen Foxconn für den Markteintritt in China eingegangen ist.

Wir gehen davon aus, dass sich die Wirtschaft in allen für die METRO GROUP relevanten Regionen weiter erholen wird. Allerdings sind Prognosen über den Verlauf des Aufschwungs stets mit großer Unsicherheit behaftet. Obwohl wir unsere Expansionsentscheidungen stets auf Grundlage der besten zur Verfügung stehenden Informationen treffen, können wir nicht ausschließen, dass die Wachstumsdynamik in den kommenden Jahren in einzelnen Ländern hinter unseren Erwartungen zurückbleibt.

#### **Standorte**

In allen Ländern treffen wir unsere Standortauswahl erst nach intensiver Prüfung. Trotzdem besteht bei jeder Neueröffnung das Risiko, dass sie nicht so gut wie geplant von den Kunden angenommen wird. Bei bestehenden Standorten kann zudem der Fall eintreten, dass die Umsätze zurückgehen. Gründe hierfür können unter anderen eine im Zeitablauf veränderte Demografie in der Standortumgebung oder eine Veränderung der Konkurrenzsituation sein. Da wir die Profitabilität unserer Märkte kontinuierlich beobachten, können wir negative Entwicklungen bei einzelnen Märkten oder Filialen frühzeitig erkennen und schnell darauf reagieren. Sollten die eingeleiteten Maßnahmen alle nicht zum Erfolg führen und ist eine nachhaltige Verbesserung der Situation des jeweiligen Standorts nicht wahrscheinlich, trennen wir uns von dem Markt oder der Filiale im Rahmen der Optimierung des Standortnetzes.

#### **Portfolio-Änderungen**

Das Portfolio der METRO GROUP wurde in den vergangenen Jahren stetig optimiert. Alle Änderungen und die damit verbundenen strategischen und investiven Entscheidungen

orientieren sich grundsätzlich an der Wertschaffung für den Konzern. Mit Portfolio-Änderungen einhergehende Risiken werden dadurch minimiert.

### Online-Geschäft

Zusätzlich zur internationalen Expansion ist der Vertrieb über das Internet ein wichtiger Faktor und gleichzeitig eine Chance für den künftigen Erfolg unseres Unternehmens. Im Handel nimmt das Online-Geschäft schon heute eine zunehmend bedeutende Rolle ein. Wir gehen davon aus, dass sich diese Entwicklung fortsetzen wird. Daher ist es für die METRO GROUP unerlässlich, den Vertriebskanal Internet weiter zu stärken, um keine Marktanteile an Wettbewerber abgeben zu müssen. Wir arbeiten daher intensiv daran, das Online-Geschäft unserer Vertriebslinien auszubauen und zu verbessern. Wesentlich für den Erfolg ist zum einen, zahlreiche Anforderungen an die Logistik und IT zu erfüllen, um schnelle, zuverlässige Lieferungen sowie sichere und komfortable Bestellungen zu gewährleisten. Zum anderen gilt es, den stationären und den elektronischen Handel sinnvoll miteinander zu verzahnen.

### Leistungswirtschaftliche Risiken

#### Lieferanten

Als Handelsunternehmen ist die METRO GROUP auf externe Anbieter von Waren und Dienstleistungen angewiesen. Dabei haben die Qualität der gelieferten Waren sowie die Verlässlichkeit unserer Lieferanten für uns einen hohen Stellenwert. Fehlerhafte oder unsichere Produkte würden dem Ansehen der METRO GROUP großen Schaden zufügen und den Unternehmenserfolg nachhaltig gefährden. Daher gehen wir bei der Auswahl unserer Lieferanten mit größter Sorgfalt vor. Sie werden kontinuierlich kontrolliert und müssen den hohen einkaufspolitischen Qualitätsstandards der METRO GROUP entsprechen. Dazu zählen besonders die von der Global Food Safety Initiative geprüften Standards, wie zum Beispiel der International Food Safety Standard und die GLOBALGAP-Zertifizierung für landwirtschaftliche Erzeugnisse. Sie helfen, die Sicherheit von Lebensmitteln auf allen Erzeugungs-, Produktions- und Vertriebsstufen zu gewährleisten. Um Störungen beim Bezug von Waren oder gar Warengruppen vorzubeugen, kooperieren wir mit einer Vielzahl von Lieferanten und achten darauf, dass keine Abhängigkeit von einzelnen Unternehmen entsteht. So stellen wir sicher, dass wir die gewünschte Ware fast immer anbieten können und damit eine hohe Kundenzufriedenheit erzielen.

Der Erfolg der METRO GROUP hängt außerdem stark von den Einkaufspreisen der angebotenen Produkte ab. Unsere hohen

Einkaufsvolumina in zahlreichen Ländern wirken sich vielfach positiv auf die Einkaufspreise aus. Allerdings sind wir wie jedes Handelsunternehmen dem ständigen Risiko ausgesetzt, dass sich Ressourcen verknappen können und sich damit einhergehend Rohstoff- und Lebensmittelpreise verteuern. Beispielsweise kann ein Preisanstieg bei Öl dazu führen, dass sich die Einkaufspreise einer Vielzahl von Artikeln erhöhen.

### IT und Logistik

Die große Vielfalt von Waren und Artikeln im stationären Handel sowie der hohe Warenumsatz sind mit organisatorischen, informationstechnischen und logistischen Risiken verbunden. Diese Risiken erhöhen sich durch die internationale Ausrichtung und die Konzentration auf nationale, regionale und lokale Warensortimente. Störungen in der Wertschöpfungskette, etwa bei der Lieferung von Waren, können zu Betriebsunterbrechungen führen. Wir reduzieren die Abhängigkeit von einzelnen Lieferanten und Dienstleistern, indem wir den Geschäftspartnerkreis erweitern und intern dem Prinzip der effizienten Arbeitsteilung folgen. Da wichtige Geschäftsabläufe wie beispielsweise Warenbestellung oder -verkauf auf IT-Systemen basieren, ist zudem die kontinuierliche Verfügbarkeit der Infrastruktur ein wesentliches Kriterium. Für den Geschäftsbetrieb kritische Systeme sind deshalb weitgehend autark und können zum Beispiel auch bei einem Netzwerkausfall weiter genutzt werden. Dies gilt vor allem für die Kassensysteme in den Märkten und Filialen. Effiziente und sichere Netzwerke gewährleisten im Verbund mit Rechenzentren, dass sich auch größere Systemausfälle überbrücken lassen, beispielsweise nach Naturkatastrophen oder kriminellen Handlungen. Im Rahmen der IT-Sicherheit sorgen wir außerdem für eine hohe Qualität der verarbeiteten Daten. Diese dürfen nur von berechtigten Mitarbeitern eingesehen werden. Die erforderlichen Nutzerkonten und Zugriffsrechte werden in einem definierten Planungsprozess verwaltet. Die wesentlichen Prozesse und Systeme der METRO SYSTEMS werden sowohl von externen Prüfern als auch durch eine auf IT-Auditverfahren spezialisierte Abteilung der Internen Revision bewertet.

### Personalrisiken

Kompetenz, Engagement und Motivation der Beschäftigten bestimmen maßgeblich den Erfolg und die Wettbewerbschancen der METRO GROUP. Eine Voraussetzung für die Realisierung der strategischen Ziele sind qualifizierte Fach- und Führungskräfte. Diese Mitarbeiter zu gewinnen und zu binden, ist eine kontinuierliche Herausforderung, vor allem vor dem Hintergrund des demografischen Wandels und des intensiven Wettbewerbs um die besten Kräfte. Unternehmensinterne Qualifizierungsmaßnahmen sind deshalb unverzichtbar. Um

die Fachkompetenz unserer Mitarbeiter sicherzustellen, optimieren wir die Aus- und Weiterbildung auf allen Ebenen. Schulungen und gezielte Personalentwicklungsmaßnahmen fördern die unternehmerische Denk- und Handlungsweise; variable und erfolgsabhängige Gehaltsbestandteile wirken unterstützend. Die direkte Beteiligung am Unternehmenserfolg stärkt die Identifikation der Mitarbeiter mit der METRO GROUP und schärft ihren Blick für Chancen und Risiken bei allen unternehmerischen Entscheidungen.

Weitere Informationen zur Personalpolitik der METRO GROUP sind im Kapitel Mitarbeiter auf den Seiten 96 bis 102 dargestellt.

#### **Rechtliche Risiken, Steuerrisiken**

Rechtliche Risiken resultieren vor allem aus arbeits- und zivilrechtlichen Verfahren. Daneben können sich Risiken für die METRO GROUP auch aus Ermittlungsverfahren, wie beispielsweise im Rahmen etwaiger Verstöße gegen das Kartell- oder Wettbewerbsrecht, ergeben. Steuerrisiken ergeben sich vornehmlich im Rahmen von Außenprüfungen.

#### **Finanzwirtschaftliche Risiken**

Der Finanzbereich der METRO AG steuert die finanzwirtschaftlichen Risiken der METRO GROUP. Dazu zählen Liquiditätsrisiken, Preisänderungsrisiken, Bonitätsrisiken sowie Risiken aus Schwankungen der Zahlungsströme.

Diese Risiken und deren Management sind im Konzernanhang unter Nummer 43 „Management der finanzwirtschaftlichen Risiken“ beschrieben.

#### **Gesamtbewertung der Risikosituation durch die Unternehmensleitung**

Vorstand, Aufsichtsrat und weitere wichtige Gremien der METRO AG werden regelmäßig über die Risikosituation des Unternehmens informiert. Insgesamt hat sich die Risikolage der METRO GROUP vor allem aufgrund der wirtschaftlichen Rahmenbedingungen gegenüber der Berichterstattung aus dem Vorjahr verbessert. Für die Beurteilung der gegenwärtigen Situation wurden die Risiken nicht nur isoliert betrachtet, sondern es wurden auch Interdependenzen analysiert und entsprechend ihrer Wahrscheinlichkeit bewertet. Die Beurteilung hat ergeben, dass die Risiken insgesamt beherrschbar sind. Es bestehen keine den Fortbestand des Unternehmens gefährdenden Risiken. Auch künftige den Bestand gefährdende Risiken sind nicht erkennbar. Grundlegende Änderungen der Risikolage erwartet der Vorstand der METRO AG derzeit nicht. In ihrer Unternehmensstrategie berücksichtigt die METRO GROUP mögliche Chancen. Welche sie in den kommenden Jahren erwartet, beschreibt der Nachtrags- und Prognosebericht auf den Seiten 134 bis 142.

## 12. Nachtrags- und Prognosebericht

### Nachtragsbericht

#### Ereignisse nach dem Bilanzstichtag

Vorgänge, die für die Beurteilung der Ertrags-, Finanz- und Vermögenslage der METRO AG und der METRO GROUP wesentlich wären, sind zwischen dem Bilanzstichtag (31. Dezember 2010) und dem Zeitpunkt der Aufstellung des Konzernabschlusses (28. Februar 2011) nicht eingetreten.

### Prognosebericht

Dieser Prognosebericht berücksichtigt relevante Fakten und Ereignisse, die zum Zeitpunkt der Bilanzaufstellung bekannt waren und die Geschäftsentwicklung der METRO GROUP beeinflussen können.

#### Wirtschaftliche Rahmenbedingungen 2011 und 2012

##### Künftige gesamtwirtschaftliche Situation

Zum Jahresende 2010 verlor der weltweite Aufschwung nach der Finanz- und Wirtschaftskrise etwas an Fahrt. Für 2011 erwarten wir in Einklang mit der Weltbank und den meisten Wirtschaftsforschungsinstituten, dass die Wachstumsraten insgesamt niedriger ausfallen werden als im Geschäftsjahr 2010. Dabei werden vor allem die Schwellenländer durch ihre starke Binnennachfrage bei nur leicht abgeschwächter Dynamik die Wachstumsmotoren bleiben. Dagegen sind, insbesondere in den Industrieländern, die Folgen der Finanz- und Wirtschaftskrise nach wie vor zu spüren.

Folgende Faktoren beeinflussen dabei die wirtschaftliche Entwicklung in den Jahren 2011 und 2012:

Das Wachstum 2010 fand vor dem Hintergrund statt, dass 2009 die Wirtschaftsleistung krisenbedingt stark zurückgegangen war. Der daran anschließende Aufholprozess hat sich

zuletzt wieder verlangsamt. Auch lösen Sparmaßnahmen zum staatlichen Schuldenabbau die Konjunkturprogramme der vergangenen Jahre ab. Die Einsparungen belasten dabei insbesondere auch die private Nachfrage, beispielsweise durch die Erhöhung der Mehrwertsteuer unter anderem in Griechenland, Großbritannien, Rumänien und Spanien. Darüber hinaus sind weiterhin weltwirtschaftliche Risiken gegeben – angefangen bei der noch nicht abgeschlossenen Konsolidierung der Bankenbilanzen über die Auswirkungen der expansiven Geldpolitik bis hin zu Überhitzungstendenzen der chinesischen Wirtschaft.

Wir erwarten aber auch, dass sich die Arbeitsmärkte bei moderatem Wachstum weiter erholen werden. Das setzt einen positiven Impuls für den privaten Konsum und den Handel. Daher rechnen wir damit, dass sich die langsame Aufwärtsbewegung im Handel auch 2011 weiter fortsetzt, zumal die Branche ein konjunktureller Spätzykler ist. Angesichts anziehender Rohstoffpreise, insbesondere auch bei Nahrungsmitteln, wird der Anstieg der Verbraucherpreise, der Ende 2010 begonnen hat, voraussichtlich auch 2011 weiter anhalten.

Im Jahr 2012 werden dann die bremsenden Faktoren auf die Konjunktur allmählich ihre Wirkung verlieren, sodass wir, in Einklang mit dem Institut für Weltwirtschaft und weiteren Instituten, wieder mit einem höheren weltwirtschaftlichen Wachstum rechnen.

##### Deutschland

Deutschland bleibt voraussichtlich auch 2011 die Wachstumslokomotive Westeuropas. Alle Wirtschaftsforschungsinstitute in Deutschland gehen davon aus, dass das Wachstum weit oberhalb von 2 Prozent liegen wird. Dies bedeutet zwar nach dem Rekordwachstum von 3,6 Prozent im Jahr 2010 eine Verlangsamung; die Zuwachsraten sind aber nach wie vor überdurchschnittlich. Dabei erwarten die Institute, dass sich die positive Entwicklung auf dem Arbeitsmarkt weiter fortsetzt. Trotz Mehrbelastungen für die Bevölkerung, die unter anderem durch steigende Krankenkassenbeiträge sowie höhere Stromkosten entstehen, ist daher auch mit einem stärkeren Wachstumsbeitrag des privaten Konsums zu rechnen. Mittlerweile wird mehrheitlich davon ausgegangen, dass der preisbereinigte Anstieg des privaten Konsums oberhalb von 1 Prozent liegen wird, nach 0,5 Prozent Zunahme im vergangenen Jahr. Auch der Handel wird sich vergleichsweise positiv entwickeln. Allerdings wird er, wie auch in früheren Konjunkturzyklen, nur unterdurchschnittlich von der gesamtwirtschaftlichen Entwicklung profitieren.

Insgesamt steht der Aufschwung in Deutschland auf einer soliden Basis und wird voraussichtlich auch über das Jahr 2011 hinaus anhalten. Ein Risiko besteht vor dem Hintergrund hoher Staatsverschuldungsquoten allerdings in der weiteren wirtschaftlichen Entwicklung vor allem in Europa.

### Westeuropa

In vielen Ländern Westeuropas wird das Wachstum voraussichtlich auch 2011 verhalten ausfallen. Staatsverschuldung und Sparprogramme werden auch in diesem Jahr die Dynamik bremsen. Dabei wird die wirtschaftliche Entwicklung nach Einschätzung der meisten Experten weiter uneinheitlich verlaufen: Die Wirtschaft Griechenlands wird sich aufgrund der Verschuldungssituation auch 2011 rückläufig entwickeln. Spanien und Portugal werden kaum wachsen können. Weiterhin nur schwaches Wachstum in der Größenordnung von 1 Prozent wird für Italien erwartet. Dagegen werden sich außer Deutschland auch die skandinavischen Länder Dänemark und Schweden sowie die Schweiz voraussichtlich weiter positiv entwickeln.

Die Arbeitsmärkte erholten sich 2010 in den meisten Ländern Westeuropas ebenfalls wesentlich langsamer als in Deutschland. Die allmähliche Verbesserung auf den Arbeitsmärkten in der zweiten Jahreshälfte 2010 wird sich jedoch voraussichtlich 2011 fortsetzen und auch den Einzelhandel stützen.

### Osteuropa

Die Wirtschaften der Länder Osteuropas werden sich voraussichtlich auch 2011 in unterschiedlichen Geschwindigkeiten erholen. Eine schwächere Entwicklung werden weiter Bulgarien, Rumänien und Ungarn aufweisen. Allerdings zeigen sich diese Länder mit erwarteten Wachstumsraten von rund 2 Prozent in diesem Jahr etwas verbessert gegenüber den Vorjahren. In der Türkei, Russland oder Polen wird das Wachstum aber voraussichtlich mit Raten von rund 4 Prozent doppelt so hoch liegen wie in den anderen Ländern. Im Durchschnitt wird Osteuropa unseren Prognosen zufolge wieder etwas stärker zulegen können als im Jahr 2010. Und auch für 2012 erwarten wir, dass das Wachstum gegenüber 2011 weiter zunehmen wird. Die hohen Steigerungsraten der Vorkrisenjahre werden allerdings noch nicht wieder erreicht werden. Osteuropa weist aber ebenso wie Asien weiterhin hohes wirtschaftliches Potenzial auf. Daher erwarten wir, dass die Wirtschaften der Länder Osteuropas mittelfristig wieder eine hohe Dynamik entfalten werden – auch aufgrund des weiterhin hohen Nachholpotenzials. Daher rechnen wir für den Handel ebenfalls mit steigenden Zuwachsraten.

### Asien/Afrika

Trotz bestehender Risiken werden die Schwellenländer Asiens voraussichtlich auch 2011 und 2012 die am stärksten wachsende Region sein – bei leichtem Rückgang der Wachstumskraft. Auch die Dynamik im Handel bleibt weiterhin hoch. Wir erwarten für China, Indien, Pakistan und Vietnam jeweils nominale Zuwächse im zweistelligen Bereich. Schwieriger stellt sich dagegen die Situation in Japan dar. Dort wird sich 2011 das Wirtschaftswachstum stark abschwächen und damit auch den Handel belasten. Die weitere Entwicklung in Ägypten ist vor dem Hintergrund politischer Umbrüche gegenwärtig schwer abzuschätzen.

Aufbauend auf unserem Ausblick zur Wirtschafts- und Handelsentwicklung gibt der folgende Abschnitt einen Überblick über die daraus resultierenden Folgen für einzelne Branchen sowie die Vertriebslinien der METRO GROUP.

## Künftige Branchensituation und Entwicklung METRO GROUP

### Metro Cash & Carry

Die Entwicklung im Selbstbedienungsgroßhandel wird 2011 und 2012 weiterhin unter dem Eindruck der wirtschaftlichen Erholung stehen, die je nach Region unterschiedlich schnell und stark ausfällt. Entsprechend rechnen wir damit, dass sich die uneinheitliche Entwicklung des Cash-&-Carry-Segments weiter fortsetzen wird.

In Deutschland und in Westeuropa wird sich das Marktvolumen in den kommenden beiden Jahren nur geringfügig ändern. Vom Hotel- und Gaststättengewerbe sowie vom Außer-Haus-Verzehr, die zu den Hauptkundengruppen des Selbstbedienungsgroßhandels zählen, werden voraussichtlich keine wesentlichen Wachstumsimpulse ausgehen. Aufgrund der zu erwartenden Preissteigerungen ist bei Lebensmitteln von einem Zuwachs leicht unterhalb der Inflationsrate auszugehen, während die Umsätze mit Nicht-Lebensmitteln stabil bleiben werden.

In Osteuropa wird das Cash-&-Carry-Segment in den kommenden zwei Jahren insgesamt weiter wachsen, allerdings mit uneinheitlich stark ausgeprägter Dynamik. Während die Umsätze im Selbstbedienungsgroßhandel in den meisten Ländern zunehmen werden, werden sie sich nach unserer Einschätzung in Griechenland und Ungarn aufgrund der weiterhin angespannten wirtschaftlichen Rahmenbedingungen zumindest 2011 voraussichtlich negativ entwickeln. Die insgesamt positive Erlösentwicklung in Osteuropa wird zum einen getragen durch

eine anziehende Nachfrage sowohl bei Lebensmitteln als auch bei Nicht-Lebensmitteln. Zum anderen wird der Umsatz auch aufgrund von Preissteigerungen vor allem bei Lebensmitteln zulegen.

In Asien wird sich das starke Wachstum des Cash-&-Carry-Segments nach unserer Einschätzung in den kommenden beiden Jahren unverändert fortsetzen. Die Wachstumsdynamik im Selbstbedienungsgroßhandel wird höher bleiben als im modernen Lebensmitteleinzelhandel. In einigen Ländern der Region, wie zum Beispiel in Indien, ist für ausländische Unternehmen der Eintritt in die attraktiven Einzelhandelsmärkte weiterhin stark eingeschränkt, um den traditionellen Handel zu schützen. Damit bleiben zum einen die klassischen Händler als Kundenbasis für den Selbstbedienungsgroßhandel erhalten. Zum anderen stehen die Cash-&-Carry-Märkte dort kaum im Wettbewerb mit anderen modernen Formaten im Lebensmitteleinzelhandel.

Metro Cash & Carry wird die internationale Expansion 2011 und 2012 fortsetzen. Der Schwerpunkt liegt dabei weiterhin auf den Wachstumsregionen Asien und Osteuropa.

### Real

Der Umsatz im deutschen Lebensmitteleinzelhandel wird 2011 und 2012 voraussichtlich stärker wachsen als 2010. Diese positive Entwicklung wird im Wesentlichen auf steigenden Lebensmittelpreisen beruhen, die ihrerseits wiederum aus verteuerten Rohstoffen resultieren. Vor dem Hintergrund des anhaltend intensiven Wettbewerbs insbesondere unter den Discountern ist jedoch nicht sicher, dass der Lebensmitteleinzelhandel höhere Einkaufspreise vollständig an die Verbraucher weitergeben kann. Unverändert ist bei einem insgesamt steigenden Preisniveau damit zu rechnen, dass sich die Nachfrage hin zu preisgünstigeren Alternativen aus dem Eigenmarkenangebot verschiebt.

In Osteuropa wird der Lebensmitteleinzelhandel in den kommenden zwei Jahren weiter wachsen. Neben Preissteigerungen bei Lebensmitteln wird sich auch eine weiter steigende Nachfrage der Konsumenten positiv auf die Branchenentwicklung auswirken. Dies ist auf die zunehmende Erholung von der Finanz- und Wirtschaftskrise zurückzuführen. Für zusätzliches Wachstum sorgt außerdem eine wieder verstärkte Expansion im modernen Lebensmitteleinzelhandel. Wir rechnen damit, dass die großflächigen SB-Warenhäuser dabei eine unverändert treibende Funktion einnehmen und ihren Marktanteil weiter ausbauen werden.

Real wird die erfolgreiche Strategie der vergangenen Jahre fortsetzen und kontinuierlich weiterentwickeln. In Deutschland steht 2011 und 2012 die Fortführung der erfolgreichen Repositionierung von Real im Vordergrund. Dazu zählt auch die Entwicklung Erfolg versprechender neuer Formate wie „Real Drive“ oder der Internet-Shop. International wird Real seine fokussierte Expansion fortsetzen und so weiter am Wachstum der SB-Warenhäuser in Osteuropa teilhaben.

### Media Markt und Saturn

Im Elektrofachhandel wird sich die regional unterschiedliche Entwicklung auch 2011 und 2012 weiter fortsetzen. Dies ist darauf zurückzuführen, dass die Branchenentwicklung überdurchschnittlich stark von den gesamtwirtschaftlichen Rahmenbedingungen abhängig ist.

Für Westeuropa erwartet der Bundesverband Informationswirtschaft, Telekommunikation und neue Medien (BITKOM) für 2011 eine rückläufige Marktentwicklung. In Deutschland, dem größten westeuropäischen Markt, wird sich die Branche nach Einschätzung der Experten besser entwickeln als in den meisten anderen Ländern der Region. Die Umsätze auf dem deutschen Markt werden 2011 das Niveau von 2010 daher nur leicht unterschreiten. Weiterhin stark nachgefragt werden Flachbildfernseher im Bereich Unterhaltungselektronik. Insgesamt wird die Nachfrage in Deutschland und Westeuropa 2011 jedoch zurückgehen, bevor der Absatz 2012 unterstützt durch medienwirksame Sportereignisse wieder zunimmt. Unverändert hoch ist das Kundeninteresse auch an Produkten aus dem Bereich Informationstechnologie. Der Branchenverband BITKOM erwartet zum Beispiel für 2011 in Deutschland einen Absatzrekord bei Computern. Der Vertriebskanal Internet wird in Deutschland und in Westeuropa weiter an Bedeutung zunehmen und Marktanteile hinzugewinnen. Von dieser Entwicklung können insbesondere solche Anbieter profitieren, die nicht nur den stationären oder den elektronischen Vertrieb bedienen, sondern als Multi-Channel-Anbieter beide Kanäle miteinander verzahnen. Media Markt und Saturn tritt in Österreich und in den Niederlanden bereits als Multi-Channel-Anbieter auf. 2011 wird die Vertriebslinie dieses Angebot auf Deutschland ausweiten.

Der Elektrofachhandel in Osteuropa wird sich auch in den kommenden beiden Jahren uneinheitlich entwickeln. Unterstützt durch die schnelle Erholung von der Finanz- und Wirtschaftskrise, wird sich die Nachfrage nach Elektro- und Elektronikprodukten in Russland und in der Türkei 2011 und 2012 positiv entwickeln. Für Russland erwarten wir, dass die

Branchenumsätze spätestens 2012 das Vorkrisenniveau über-treffen. Demgegenüber ist für Länder, die weiterhin stark von der Wirtschaftskrise betroffen sind, mit einer fortgesetz-ten Kaufzurückhaltung zu rechnen. Dies gilt zum Beispiel für Griechenland und Ungarn. Aufgrund des unverändert hohen Bedarfs bei der Grundausstattung an Elektro- und Elektronik-geräten birgt die Region Osteuropa auch über das Jahr 2012 hinaus ein hohes Wachstumspotenzial.

Der chinesische Markt für Elektro- und Elektronikprodukte ist nach den USA und Japan der drittgrößte der Welt. Nach Ein-schätzung des Branchenverbands European Information Tech-nology Observatory (EITO) wird der chinesische Markt 2011 und 2012 zweistellige Wachstumsraten aufweisen und bereits 2012 der zweitgrößte Markt sein – nach den USA.

Media Markt und Saturn wird in den kommenden zwei Jahren weiter wachsen und ihren Marktanteil ausbauen. Die unver-minderte hohe Expansionsgeschwindigkeit in allen Wachstums-märkten wird einen wesentlichen Beitrag zum Ausbau der eigenen Marktposition leisten.

#### **Galeria Kaufhof**

Die gute Stimmung der deutschen Verbraucher und die ver-gleichsweise hohe Anschaffungsneigung werden sich 2011 posi-tiv auf die Entwicklung der Warenhaus- und Bekleidungsbranche auswirken. Ob diese Impulse auch 2012 anhalten werden, hängt davon ab, inwieweit die Konsumneigung stabil bleibt.

Obwohl die letzte Stufe der Konsolidierung in der Warenhaus-branche weiterhin aussteht, wird die Branche Überkapazitä-ten weiter sukzessive abbauen. Entsprechend erwarten wir, dass sich das Warenhaussegment auch 2011 und 2012 im Ver-gleich zum Einzelhandel weiterhin schwächer entwickeln wird. Galeria Kaufhof ist als Konzept- und Systemführer stark am Markt positioniert. Darauf aufbauend wird sich die Vertriebs-linie in den kommenden beiden Jahren nach unserer Ein-schätzung weiterhin besser entwickeln als der vergleichbare Wettbewerb und ihren Marktanteil steigern. Der Ausbau von Galeria Kaufhof zu einem Multi-Channel-Anbieter wird hierzu einen zusätzlichen Beitrag leisten.

### **Ausrichtung der METRO GROUP 2011 und 2012**

#### **Schwerpunkte der künftigen Geschäftspolitik**

Das im Jahr 2009 initiierte und auf vier Jahre angelegte Effizi-enz- und Wertsteigerungsprogramm Shape 2012 hat zu einer Neuausrichtung der Geschäftspolitik geführt. Diese werden

wir 2011 und 2012 kontinuierlich fortführen. Eine Maxime von Shape 2012 ist die konsequenterere Kundenorientierung. Dabei spielen sowohl spezifische Anforderungen der Kundengrup-pen als auch regionale Marktbedingungen eine wichtige Rolle. Diese berücksichtigen wir bei der Weiterentwicklung der Ver-triebsformate und Vertriebskanäle.

Bei Metro Cash & Carry liegt der Fokus auf professionellen, gewerblichen Kunden. Der Selbstbedienungsgroßhändler wird das erfolgreiche Belieferungsgeschäft ausweiten und die Kundenbetreuung intensivieren. Real wird die Einführung neuer Konzeptbausteine fortsetzen sowie neue Vertriebswege erschließen und erweitern. Dazu zählen der Vertrieb über das Internet sowie der Drive-in-Lebensmittelmarkt „Real Drive“. Media Markt und Saturn wird die Verzahnung des stationären Geschäfts mit einem Internetangebot weiter ausbauen und die Internationalisierung vorantreiben. Galeria Kaufhof wird in ihren Warenhäusern die konsequente Lifestyleorientierung weiter umsetzen. Gleichzeitig wird das Warenangebot im Inter-net weiter vergrößert und ausgebaut.

#### **Effizienz- und Wertsteigerungsprogramm Shape 2012**

Ziel von Shape 2012 ist es, das profitable Wachstum der METRO GROUP langfristig zu sichern. Hierzu haben wir unse-re Strukturen vereinfacht und Maßnahmen eingeleitet, um unsere Kostenbasis weiter zu verbessern. Das ab 2012 ange-strebte und darüber hinaus wirkende Ergebnisverbesserungs-potenzial beträgt 1,5 Mrd. € gegenüber dem Vergleichsjahr 2008. Die Jahre 2009 und 2010 waren vor allem davon geprägt, die Dezentralisierung und stärkere Kundenorientierung in der Unternehmensstruktur zu verankern. Darüber hinaus wurden durch zahlreiche Maßnahmen Prozesse effizienter gestaltet, Kosten gesenkt sowie Projekte zur Produktivitätsverbesse-rung initiiert. In den verbleibenden zwei Jahren von Shape 2012 wird es nun darum gehen, insbesondere die Maßnahmen zur Produktivitätsverbesserung weiter zu forcieren und um-zusetzen. Bereits zur Halbzeit zeigt sich, dass das Programm zu einem Umdenken in der METRO GROUP geführt hat. Der Leitgedanke, ein kundenorientierteres und effizienteres Un-ternehmen zu schaffen, durchdringt immer stärker unser All-tagsgeschäft. Shape 2012 prägt die METRO GROUP und wirkt sich auf Entscheidungen in allen Geschäftsprozessen aus. Das Programm bereitet unser Unternehmen auf künftige Heraus-forderungen vor.

In den Jahren 2011 und 2012 wird der Ergebnisbeitrag von Shape 2012 über dem Niveau von 2009 und 2010 liegen. Dazu tragen die verbesserte Kostenbasis und die erhöhte



Produktivität bei. Auch 2011 erwarten wir Sonderfaktoren im Zusammenhang mit der Umsetzung von Shape 2012. Diese werden im Vergleich zum Vorjahr allerdings deutlich geringer ausfallen.

### **Nichtfinanzielle Ziele**

Die METRO GROUP verfolgt außer finanziellen Zielen auch zahlreiche nichtfinanzielle Ziele. Diese sind detailliert im Nachhaltigkeitsbericht dargestellt. Sie umfassen die vier Bestandteile „Qualität, Gesundheit und Umwelt“, „Energie- und Ressourcenmanagement“, „Mitarbeiter und Soziales“ sowie „Gesellschaftspolitik und Stakeholder-Dialog“. Als Gründungsmitglied der Business Social Compliance Initiative (BSCI), einem Zusammenschluss europäischer Handelsunternehmen und Markenhersteller, haben wir uns das Ziel gesetzt, entlang der gesamten Lieferkette gute Arbeitsbedingungen sicherzustellen. Bis Ende 2011 müssen daher mindestens 75 Prozent der Lieferanten das sogenannte BSCI-Sozialaudit bestehen. Als Langfristziel wollen wir zudem die spezifischen Treibhausgasemissionen pro Quadratmeter bis zum Jahr 2015 um 15 Prozent gegenüber dem Referenzjahr 2006 reduzieren.

### **Künftige Absatzmärkte**

Zum Bilanzstichtag war die METRO GROUP in 33 Ländern in Europa, Asien und Afrika aktiv. Unser Ziel ist es, in diesen Märkten mit bestehenden und neuen Standorten weiter zu wachsen. Mithilfe von Machbarkeitsstudien prüfen wir die Expansionsmöglichkeiten für unsere Vertriebslinien in weiteren Ländern. In der Regel starten wir den Eintritt in neue Märkte mit Metro Cash & Carry. Abhängig vom Entwicklungsstand des jeweiligen Landes in Bezug auf Reifegrad und Potenzial bieten sich dann gegebenenfalls in der Folge auch Chancen für den Einstieg von Real sowie Media Markt und Saturn. Für Galeria Kaufhof ist keine Expansion in weitere Länder geplant.

Im November 2010 hat Media Markt in Shanghai seinen ersten Elektrofachmarkt in China eröffnet. Experten gehen davon aus, dass der Absatzmarkt für Unterhaltungselektronik in China in den kommenden fünf Jahren von 82 Mrd. € auf 180 Mrd. € wächst. In diesem schnell wachsenden Markt planen wir zunächst die Eröffnung von bis zu 10 Media Märkten in Shanghai bis Ende 2012. Nach einem erfolgreichen Abschluss dieser ersten Phase planen wir in einem weiteren Expansionsschritt ab 2013 mehr als 100 Media Märkte in China.

Neue Absatzpotenziale ergeben sich auch durch neue Vertriebswege. Hier ist besonders das Internet zu nennen. Vor allem durch die zunehmende Verbreitung von Smartphones

und Tablet-Computern werden die Kunden mobil mit dem Internet verbunden sein. Alle Vertriebslinien der METRO GROUP greifen diese Entwicklung mit dem Ausbau des Multi-Channel-Angebots auf. Neben technischen Lösungen wie Applikationen bietet die METRO GROUP ihren Kunden auch online ein umfangreiches Angebot an Waren und Mehrwertdiensten. Das stationäre Geschäft fungiert dabei auf Wunsch als Abholbasis und sichert den persönlichen Kontakt. Diese Möglichkeit fehlt reinen Internetanbietern und wird deshalb von den Kunden honoriert.

### **Künftige Vertriebsformate, Technologien und Prozesse/ künftige Produkte und Dienstleistungen**

Wir arbeiten kontinuierlich daran, unsere Vertriebsformate auf den Gebieten der Kundenansprache, des Angebots und der Prozesse weiterzuentwickeln. Die Basis hierfür bildet die fortlaufende Analyse der sich ständig verändernden Kundenbedürfnisse. Die Erkenntnisse fließen auch in neue Vertriebsformate ein, die wir konzipieren und regelmäßig testen. Hierzu gehören beispielsweise kleinere innerstädtische Metro Cash & Carry Märkte, die darauf spezialisiert sind, umliegende Hotels und Restaurants zu versorgen. Weitere Vertriebsformate sind „Metro Drive“ und „Real Drive“. Gewerbetreibende beziehungsweise Verbraucher können ihre vorab über das Internet bestellten Waren in diesen Märkten fertig kommissioniert abholen.

Eigenmarken sind für alle unsere Vertriebslinien ein Schwerpunkt in der Sortimentsgestaltung. Das bereits bestehende, umfangreiche Angebot wird auch 2011 erweitert. Neu ist, dass auch Media Markt und Saturn seit 2010 erste Exklusivmarkenprodukte führt. Die Vertriebslinie wird dieses Angebot 2011 deutlich ausbauen.

Die von unseren Vertriebslinien angebotenen Produkte und Dienstleistungen orientieren sich an den Bedürfnissen und Einkaufsgewohnheiten der Kunden. Für alle Vertriebsformate bietet die Industrie permanent Produktinnovationen an. Die höchste Aufmerksamkeit generieren dabei vor allem neue Produkte der Unterhaltungselektronik. Hier rechnen wir auch für die Jahre 2011 und 2012 mit zahlreichen Neuheiten.

Auch im Bereich Konsum- und Gebrauchsgüter führt die Industrie kontinuierlich neue Produkte ein. Wir arbeiten auf diesem Gebiet mit den Lieferanten zusammen und fungieren als Schnittstelle zwischen Lieferant und Kunde. Zahlreiche Produktneuheiten sind allerdings auf Dauer nicht erfolgreich und werden in Folge durch andere Innovationen ersetzt. Aufgrund

der hohen Zahl neuer Produkte müssen wir auswählen, welche davon unseren Kunden einen Mehrwert bieten. Für den Markterfolg ist dabei auch eine entsprechende mediale Begleitung durch die Lieferanten notwendig.

Um die Bedürfnisse der Kunden besser analysieren zu können, werten wir Informationen über das Einkaufsverhalten aus. Bei Metro Cash & Carry besitzt jeder Kunde eine Kundenkarte zur Identifikation. Für Real und Galeria Kaufhof wird die Payback-Karte als Kundenbindungsinstrument angeboten. Durch die Auswertung der Daten können wir unsere Kunden noch bedarfsgerechter ansprechen. Darüber hinaus nutzen wir die Einkaufsdaten für die Gestaltung der Verkaufsflächen sowie der Sortimente und gehen so auf die Bedürfnisse unserer Kunden ein.

Bei den Einkaufsprozessen sind wir für die Zukunft gerüstet. Für relevante Warengruppen haben wir begonnen, Einkaufsbüros in wichtigen Erzeugerregionen aufzubauen. Damit sichern wir uns den direkten Zugang zum Lieferanten und können so bereits vor Ort Waren einkaufen und deren Qualität prüfen, ohne Zwischenhändler einzuschalten.

Ein wichtiger Bestandteil unserer Prozesskette ist die Logistik. Sie muss gewährleisten, dass alle benötigten Produkte zum richtigen Zeitpunkt in ausreichender Zahl für die Kunden verfügbar sind. Vor allem bei Lebensmitteln gehen wir neue Wege in der Logistik, um die vielfältigen Anforderungen der Kunden zu erfüllen. Ein Beispiel ist unsere neue Logistik für Frischfisch: Durch die Eröffnung eines Fisch-Logistikzentrums in Groß-Gerau bei Frankfurt am Main stellen wir nunmehr sicher, dass fast alle Fischarten innerhalb von 48 Stunden nach dem Fang im Markt für den Kunden verfügbar sind. Auch in Zukunft werden wir unsere Logistik weiter optimieren, um die Waren auf eine schnelle, effiziente und nachhaltige Art und Weise in unsere Märkte zu transportieren.

## Erwartete Ertragslage: Ausblick für die Segmente der METRO GROUP

### Metro Cash & Carry

Der Selbstbedienungs-großhandel Metro Cash & Carry ist unsere am stärksten international ausgerichtete Vertriebslinie. Erklärtes Ziel ist es, langfristig weiter profitabel zu wachsen. Neues Umsatzpotenzial erschließt sich im Jahr 2011 durch die geplante Eröffnung von mehr als 40 Standorten und den weiteren Ausbau des Belieferungsgeschäfts. Dabei spielt außer der Ausweitung des Geschäfts in Osteuropa die Expansion in Asien eine sehr wichtige Rolle. In den reifen Ländern Westeuropas

entscheiden wir über Neueröffnungen vor dem Hintergrund neuer Konzepte und sinnvoller Standortnetzverdichtungen.

Neue Formate eignen sich dazu, auch in sehr reifen Märkten neue Kunden anzusprechen. Dazu zählen beispielsweise die sogenannten Satellitenkonzepte. Als Außenstellen bestehender Märkte können sie das vorhandene Vertriebsnetz ergänzen. In den Wachstumsmärkten steht dagegen die Etablierung einer modernen Cash-&-Carry-Großhandelsstruktur im Vordergrund. Qualität und Warenverfügbarkeit sind hier Alleinstellungsmerkmale, die von den Kunden honoriert werden.

In Zukunft will Metro Cash & Carry noch besser und schneller auf die Kundenbedürfnisse eingehen und das Angebot an diesen ausrichten. Hierbei spielen auch langfristige Partnerschaften mit Lieferanten eine Rolle, um jederzeit frische und qualitativ hochwertige Waren in ausreichender Menge anbieten zu können.

Da die Verfügbarkeit und der direkte Zugang zu den Erzeugern immer wichtiger werden, intensiviert Metro Cash & Carry die Beziehungen zu den Lieferanten – zum Beispiel in Form von Qualifizierungsmaßnahmen. So entstehen Grundlagen, die das profitable Wachstum nachhaltig sicherstellen. Eigenmarken haben weltweit eine hohe Priorität und eignen sich als wichtiges Differenzierungsmerkmal gegenüber Wettbewerbern. Mittelfristig soll der Umsatzanteil der Eigenmarken bei Metro Cash & Carry auf 20 Prozent ansteigen.

Für 2011 und 2012 rechnet Metro Cash & Carry bei steigenden Umsätzen mit einem deutlich verbesserten Ergebnis. Die Produktivitätsgewinne sowie Maßnahmen zur Kostenoptimierung tragen dazu entscheidend bei.

### Real

Real Deutschland hat auch 2010 Fortschritte im Rahmen der Neupositionierung erzielt. In den kommenden beiden Jahren soll das Profil der Marke Real weiter geschärft werden; zudem wird der Anteil der Eigenmarken in allen relevanten Produktkategorien weiter erhöht. Mittelfristig soll der Umsatzanteil der Eigenmarken rund 25 Prozent betragen. Real wird seinen Marktauftritt dank neuer Konzeptmodule weiter modernisieren. Diese führen bei relativ geringem Kapitaleinsatz zu einem spürbaren Umsatzzuwachs in der jeweiligen Warengruppe.

International plant Real 2011 die Eröffnung von rund 5 neuen Standorten. Aufgrund des Potenzials in Osteuropa wird Real die Expansion im vorhandenen Länderportfolio konsequent

weiterführen. In Deutschland konzentriert sich Real darauf, das bestehende Standortnetz zu optimieren.

Wir erwarten, dass Real in den Jahren 2011 und 2012 Umsatz und Ergebnis durch Kostenmaßnahmen und eine bessere operative Entwicklung weiter steigert.

### **Media Markt und Saturn**

Media Markt und Saturn ist der führende Elektrofachhändler in Europa. In zahlreichen Ländern hat die Vertriebslinie 2010 ihren Marktanteil gesteigert. Im Jahr 2011 streben wir rund 70 Neueröffnungen an. Der Markteintritt in China bietet enormes Wachstumspotenzial. Bis Ende 2012 wollen wir in Shanghai bis zu 10 Standorte eröffnen. Nach dieser Testphase entscheiden wir über eine weitere Expansion von möglicherweise mehr als 100 Media Markt Standorten in China.

Den Ausbau des Multi-Channel-Geschäfts treibt die Vertriebslinie voran. Hierzu plant Media Markt und Saturn, 2011 in Deutschland ein umfangreiches Waren- und Dienstleistungsangebot im Internet zu starten.

Media Markt und Saturn wird im Jahr 2011 verstärkt neue Exklusivmarkenprodukte einführen. Zudem dehnen wir das Angebot auf weitere Länder aus.

Bei Media Markt und Saturn streben wir für 2011 einen spürbaren Zuwachs bei Umsatz und Ergebnis an. Auch wenn sportliche Großereignisse wie Fußball-Weltmeisterschaft oder Olympische Spiele im Jahr 2011 fehlen, können innovative Produkte zusätzliches Wachstum generieren. Für 2012 rechnen wir ebenfalls mit steigendem Umsatz und wachsendem Ergebnis. Die Marktposition wollen wir dabei ausbauen.

### **Galeria Kaufhof**

Das Jahr 2010 ist für Galeria Kaufhof sehr zufriedenstellend verlaufen. Daran wollen wir auch 2011 anknüpfen. Den vorhandenen Internetauftritt werden wir ausbauen und das Sortiment in Breite und Tiefe erweitern, vor allem um Textilien. So kann Galeria Kaufhof unabhängig von den Warenhausstandorten wachsen und flächendeckend neue Kunden gewinnen.

Insgesamt erwartet Galeria Kaufhof 2011 und 2012 eine solide Umsatzentwicklung verbunden mit einer höheren Profitabilität.

### **Immobilien**

Durch die verstärkte Expansion in den Wachstumsregionen Asien und Osteuropa erwarten wir in den nächsten Jahren

steigende Ergebnisse durch höhere Mieteinnahmen. Die Professionalisierung des Immobilienmanagements wie auch ein aktiveres Portfoliomanagement führten bereits 2010 zu einem erhöhten Ergebnisbeitrag des Segments. Wir gehen davon aus, dass diese Entwicklung nachhaltig ist und auch im laufenden Jahr einen Beitrag zum Gesamtergebnis der METRO GROUP leisten wird.

Im Rahmen des Energie- und Ressourcenmanagements verfolgen wir konsequent das Ziel, die CO<sub>2</sub>-Emissionen deutlich zu senken. Wir erwarten, dass neben einem bewussten und sparsamen Umgang mit Ressourcen auch unsere gebündelten Einkaufsaktivitäten im Energiesektor zu sinkenden Kosten für die Vertriebslinien führen werden.

### **METRO GROUP**

Die wirtschaftliche Lage hat sich 2010 verbessert, in einigen Ländern konnte bereits an das Vorkrisenniveau angeknüpft werden. Dies darf aber nicht darüber hinwegtäuschen, dass auch 2011 noch ungelöste strukturelle Probleme bestehen. Insgesamt gehen wir aber von einer Fortsetzung der wirtschaftlichen Erholung aus.

### **Voraussichtliche Umsatzentwicklung**

Die METRO GROUP geht auf mittlere Sicht von einem Umsatzwachstum von mehr als 6 Prozent pro Jahr aus.

Für 2011 erwartet die METRO GROUP unter Annahme einer gesamtwirtschaftlichen Erholung und eines moderaten Preisanstiegs, insbesondere bei Energie und Rohstoffen, ein Umsatzwachstum von über 4 Prozent, bereinigt um Portfolio-Änderungen. Darüber hinaus unterstellen wir, dass die fiskalpolitischen Maßnahmen zur Stabilisierung der öffentlichen Haushalte in unseren umsatzstarken Märkten weitestgehend implementiert wurden.

### **Voraussichtliche Ergebnisentwicklung**

Die Strategie der METRO GROUP zielt auf ein langfristiges profitables Wachstum, das heißt auf ein im Vergleich zum Umsatz überproportional wachsendes Ergebnis. Mittelfristig wird beim Ergebnis, gemessen am EBIT vor Sonderfaktoren, ein Wachstum von mehr als 10 Prozent pro Jahr angestrebt. Dabei wird Shape 2012 seine positive Ergebniswirkung sukzessive entfalten und ab 2012 vollständig wirken.

Unter der Voraussetzung, dass sich die gesamtwirtschaftlichen Rahmenbedingungen weiter verbessern, gehen wir derzeit davon aus, das mittelfristige Ziel beim Ergebniswachstum

vor Sonderfaktoren bereits 2011 erreichen zu können. Basis ist das EBIT vor Sonderfaktoren 2010 in Höhe von 2.415 Mio. €. Das Ausmaß des Ergebnisanstiegs hängt dabei ganz wesentlich von der weiteren Verbesserung der gesamtwirtschaftlichen Rahmenbedingungen und der Möglichkeit ab, Preissteigerungen auf der Beschaffungsseite kompensieren zu können.

#### **Voraussichtliche Entwicklung wesentlicher Positionen der Gewinn- und Verlustrechnung**

Bei den Aufwandsquoten in der Gewinn- und Verlustrechnung rechnen wir – bereinigt um Sonderfaktoren aus Shape 2012 – mit einer unterproportionalen Entwicklung. Durch die Maßnahmen von Shape 2012 werden vor allem Vertriebskosten und allgemeine Verwaltungskosten reduziert. Da die meisten Maßnahmen zur Kostensenkung bereits umgesetzt sind, werden diese 2011 erstmals ganzjährig wirken. Darüber hinaus wird das Programm den Rohertrag positiv beeinflussen und zu einem Anstieg der Bruttomarge beitragen.

Bedingt durch eine Optimierung der Fälligkeitenstruktur gehen wir davon aus, dass der Zinsaufwand 2011 leicht sinken wird.

#### **Voraussichtliche Dividendenentwicklung**

Seit Gründung der METRO AG vor 15 Jahren haben wir jedes Jahr eine Dividende ausgeschüttet. Grundsätzlich orientiert sich deren Höhe im Rahmen einer dynamischen Dividendenpolitik an der Entwicklung des Ergebnisses je Aktie vor Sonderfaktoren. Wir beabsichtigen, auch in Zukunft eine – im Vergleich zu anderen DAX-30-Unternehmen sowie Handelskonzernen – wettbewerbsfähige und attraktive Dividende auszuschütten. Wir gehen davon aus, dass die erwarteten Gewinnsteigerungen sowohl für 2011 als auch für 2012 zu Dividendenerhöhungen führen werden.

#### **Voraussichtliche Mitarbeiterentwicklung**

Bedingt durch die Expansion wird sich die Zahl der Mitarbeiter der METRO GROUP um einen hohen vierstelligen Wert erhöhen.

#### **Erwartete Finanzlage**

##### **Geplante Finanzierungsmaßnahmen**

Die METRO GROUP zählt sowohl bei privaten als auch bei institutionellen Anlegern zu den solide finanzierten Unternehmen. Im ersten Halbjahr 2011 ist die Rückzahlung von zwei Anleihen mit einem Volumen von insgesamt 1,1 Mrd. € fällig. Diese Fälligkeiten werden auch 2011 über die kurz- und/oder langfristig ausgerichteten kapitalmarktüblichen Daueremissionsprogramme refinanziert. Die METRO GROUP profitiert

dabei seit Jahren von einem ausgezeichneten Zugang zu den internationalen Kapitalmärkten.

#### **Geplante Investitionen**

Unsere mittelfristige Planung beinhaltet jährliche Investitionen von mehr als 2,2 Mrd. € für die Modernisierung des Standortnetzes sowie für die internationale Expansion. Im Jahr 2011 planen wir Investitionen in Höhe von 2,2 Mrd. €. Außer für Modernisierungen ist das Budget vor allem für Neueröffnungen vorgesehen. Mittelfristig haben wir für Metro Cash & Carry in den kommenden Jahren eine steigende Zahl von neuen Märkten vorgesehen. Bei Real wollen wir pro Jahr mehr als 10 und bei Media Markt und Saturn jährlich mehr als 70 neue Märkte eröffnen. Im Jahr 2011 plant Metro Cash & Carry mehr als 40 Neueröffnungen, Real rund 5 neue Standorte und Media Markt und Saturn eine Expansion um mindestens rund 70 Elektrofachmärkte.

#### **Voraussichtliche Entwicklung der Liquidität**

Unsere Liquidität und Verschuldung ist vom hohen Anteil des vierten Quartals am Gesamtumsatz geprägt. Zum Jahresende verfügen wir zwar einerseits über einen überdurchschnittlich hohen Bestand an liquiden Mitteln. Dem stehen andererseits aber höhere Verbindlichkeiten aus Lieferungen und Leistungen gegenüber. Im Laufe des ersten Quartals normalisiert sich sowohl die Verschuldung als auch die Liquidität. Die im Rahmen von Shape 2012 bereits eingeleiteten Maßnahmen werden sich positiv auf die relevanten Liquiditätskennzahlen auswirken. Darüber hinaus streben wir an, zusätzliche Liquidität zu generieren, indem wir unser Nettoumlaufvermögen weiter optimieren.

### **Chancen**

#### **Chancen aus der Entwicklung der wirtschaftlichen Rahmenbedingungen**

Nach dem Abflauen der Weltwirtschaftskrise konnten einige Länder und Regionen bereits wieder an das Vorkrisenniveau anknüpfen. Vor allem Asien zeigt eine sehr positive Entwicklung. Wir können bei Umsatz und Ergebnis von der verbesserten Wirtschaftslage profitieren. Zudem wächst die Bevölkerung in vielen Ländern, in denen wir vertreten sind. Dies führt zu einer höheren Nachfrage.

#### **Unternehmensstrategische Chancen**

Unsere Vertriebslinien besitzen einen hohen Bekanntheitsgrad und sind in den jeweiligen Märkten überwiegend führend. Diese Position gilt es zu festigen und auszubauen. Auch in den kommenden Jahren ist damit zu rechnen, dass schwächere

Marktteilnehmer aufgeben oder zum Verkauf stehen werden. Hier prüfen wir, ob es sinnvoll sein kann, diese Wettbewerber oder einzelne Standorte zu übernehmen. Eine Chance ist der standortunabhängige Verkauf über das Internet. Auf diesem Weg können wir neue Kunden erreichen. Alle unsere Vertriebslinien arbeiten an entsprechenden Konzepten, die gegenüber reinen Internetanbietern durch den Multi-Channel-Ansatz einen echten Mehrwert bieten.

**Leistungswirtschaftliche Chancen**

Shape 2012 zielt darauf ab, unser Ergebnis nachhaltig zu steigern. Das für 2012 angestrebte und darüber hinaus wirkende Ergebnisverbesserungspotenzial beläuft sich auf 1,5 Mrd. € gegenüber 2008. Insgesamt umfasst Shape 2012 rund 7.500 Einzelmaßnahmen. Während die Maßnahmen zur Kostensenkung bereits weitgehend umgesetzt sind und wirken, soll nun die Produktivität gesteigert werden. Hierzu gehören zahlreiche Vorhaben, unter anderem die weitere Verbesserung des Lieferservices und die Einführung von Eigenmarken. Der entsprechende Umsatzanteil soll weiter wachsen und wird sich künftig ergebnissteigernd auswirken.

**Chancen durch qualifizierte Fach- und Führungskräfte**

Mitarbeiter sind die Basis unseres Erfolgs. Durch ihre Förderung ergeben sich Chancen. Aufgrund des demografischen Wandels ist davon auszugehen, dass die Rekrutierung qualifizierter Fach- und Führungskräfte in den kommenden Jahren immer schwieriger wird. Daher intensivieren wir den Dialog mit Hochschulen und führen unter anderem Praktikantenprogramme durch, die außer einer Tätigkeit in den Fachabteilungen auch übergreifende Veranstaltungen einschließen. Aufgabe der Metro Academy ist es, Führungskräfte auf internationaler Ebene weiterzubilden. Auf diese Weise wollen wir qualifizierte und motivierte Mitarbeiter langfristig an das Unternehmen binden und das entsprechende Potenzial nutzen.

**Gesamtaussage des Vorstands der METRO AG zur voraussichtlichen Entwicklung der METRO GROUP**

Den profitablen Wachstumskurs werden wir auch in den kommenden Jahren beibehalten und damit die Position der METRO GROUP als eines der führenden internationalen Handelsunternehmen weiter ausbauen. Wir sehen unser Unternehmen gut für die Zukunft gerüstet und verfügen über ein erfolgreiches Vertriebslinien- und Länderportfolio. Zudem setzen wir mit Shape 2012 ein Effizienz- und Wertsteigerungsprogramm um, das unser Unternehmen erfolgreich und ertragreich in die Zukunft begleitet. Shape 2012 ist bereits heute gelebter Bestandteil unserer Unternehmenskultur und wird auch über das Jahr 2012 hinaus wirken.

Düsseldorf, im Februar 2011  
METRO AG

Der Vorstand

|                                           | 2010<br>geplant | 2010<br>Ist | 2011             | Mittel-<br>fristig |
|-------------------------------------------|-----------------|-------------|------------------|--------------------|
| Investitionen (Mrd. €)                    | ~1,9            | 1,7         | 2,2              | >2,2               |
| Neueröffnungen                            |                 |             |                  |                    |
| Metro Cash & Carry                        | ~30             | 38          | >40              | >40                |
| Real                                      | ~5              | 2           | ~5               | >10                |
| Media Markt und Saturn                    | ~60             | 60          | ~70              | >70                |
| Galeria Kaufhof                           | -               | -           | 4 <sup>1</sup>   | -                  |
| Umsatzwachstum (%)                        | 0-6             | 2,6         | >4               | >6                 |
| Ergebnis (vor Sonderfaktoren)<br>(Mio. €) | über<br>Vorjahr | 2.415       | Anstieg<br>~10 % | Anstieg<br>>10 %   |

<sup>1</sup> Sportarena



# KONZERNABSCHLUSS

## → S. 145 Konzernabschluss

- S. 146 Gewinn- und Verlustrechnung
- S. 147 Periodenergebnis
- S. 148 Bilanz
- S. 148 Eigenkapitalentwicklung
- S. 150 Kapitalflussrechnung

## → S. 151 Anhang

- S. 152 Segmentberichterstattung
- S. 154 Erläuterungen zu Grundlagen und Methoden des Konzernabschlusses
- S. 167 Kapitalmanagement
- S. 168 Erläuterungen zur Gewinn- und Verlustrechnung
- S. 173 Erläuterungen zur Bilanz
- S. 200 Sonstige Erläuterungen
- S. 218 Organe der METRO AG und deren Mandate
- S. 252 Versicherung der gesetzlichen Vertreter
- S. 253 Bestätigungsvermerk des Abschlussprüfers

# KONZERNABSCHLUSS



**Gewinn- und Verlustrechnung  
 für das Geschäftsjahr vom 1. Januar bis 31. Dezember 2010**

| Mio. €                                                                 | Anhang Nr. | 2010          | 2009          |
|------------------------------------------------------------------------|------------|---------------|---------------|
| <b>Umsatzerlöse</b>                                                    | 1          | <b>67.258</b> | <b>65.529</b> |
| Einstandskosten der verkauften Waren                                   |            | -52.865       | -51.664       |
| <b>Bruttoergebnis vom Umsatz</b>                                       |            | <b>14.393</b> | <b>13.865</b> |
| Sonstige betriebliche Erträge                                          | 2          | 1.627         | 1.307         |
| Vertriebskosten                                                        | 3          | -12.173       | -11.854       |
| Allgemeine Verwaltungskosten                                           | 4          | -1.585        | -1.589        |
| Sonstige betriebliche Aufwendungen                                     | 5          | -51           | -48           |
| <b>Betriebliches Ergebnis EBIT</b>                                     |            | <b>2.211</b>  | <b>1.681</b>  |
| Ergebnis aus assoziierten Unternehmen                                  |            | 0             | 0             |
| Sonstiges Beteiligungsergebnis                                         | 6          | 15            | 15            |
| Zinsertrag                                                             | 7          | 112           | 129           |
| Zinsaufwand                                                            | 7          | -718          | -682          |
| Übriges Finanzergebnis                                                 | 8          | 10            | -93           |
| <b>Finanzergebnis</b>                                                  |            | <b>-581</b>   | <b>-631</b>   |
| <b>Ergebnis vor Steuern EBT</b>                                        |            | <b>1.630</b>  | <b>1.050</b>  |
| Steuern vom Einkommen und vom Ertrag                                   | 10         | -694          | -531          |
| <b>Periodenergebnis</b>                                                |            | <b>936</b>    | <b>519</b>    |
| Den Anteilen nicht beherrschender Gesellschafter zuzurechnender Gewinn | 11         | 86            | 136           |
| Den Anteilseignern der METRO AG zuzurechnender Gewinn                  |            | 850           | 383           |
| <b>Ergebnis je Aktie in €</b>                                          | 12         | <b>2,60</b>   | <b>1,17</b>   |

**Überleitung vom Periodenergebnis zum Gesamtergebnis**

| Mio. €                                                                                                 | 2010         | 2009       |
|--------------------------------------------------------------------------------------------------------|--------------|------------|
| <b>Periodenergebnis</b>                                                                                | <b>936</b>   | <b>519</b> |
| <b>Sonstiges Ergebnis</b>                                                                              |              |            |
| Veränderung der Neubewertungsrücklage                                                                  | 0            | 0          |
| Versicherungsmathematische Gewinne/Verluste                                                            | 0            | 0          |
| Währungsumrechnungsdifferenzen aus der Umrechnung der Abschlüsse ausländischer Geschäftsbereiche       | 134          | -78        |
| Effektiver Teil der Gewinne/Verluste aus Cashflow Hedges                                               | -4           | 10         |
| Gewinne/Verluste aus der Neubewertung von Finanzinstrumenten der Kategorie „zur Veräußerung verfügbar“ | 0            | 0          |
| Sonstige Veränderungen                                                                                 | 5            | 0          |
| Auf die Komponenten des „Sonstigen Ergebnisses“ entfallende Ertragsteuern                              | 0            | 16         |
| <b>Gesamtergebnis</b>                                                                                  | <b>1.071</b> | <b>467</b> |
| Den Anteilen nicht beherrschender Gesellschafter zuzurechnendes Gesamtergebnis                         | 100          | 133        |
| Den Anteilseignern der METRO AG zuzurechnendes Gesamtergebnis                                          | 971          | 334        |

## Bilanz zum 31. Dezember 2010

### Aktiva

| Mio. €                                     | Anhang Nr. | Stand<br>31.12.2010 | Stand<br>31.12.2009 <sup>1</sup> | Stand<br>1.1.2009 <sup>2</sup> |
|--------------------------------------------|------------|---------------------|----------------------------------|--------------------------------|
| <b>Langfristige Vermögenswerte</b>         |            | <b>18.912</b>       | <b>18.464</b>                    | <b>18.813</b>                  |
| Geschäfts- oder Firmenwerte                | 17, 18     | 4.064               | 3.992                            | 3.960                          |
| Sonstige immaterielle Vermögenswerte       | 17, 19     | 436                 | 497                              | 552                            |
| Sachanlagen                                | 17, 20     | 12.482              | 12.244                           | 12.524                         |
| Als Finanzinvestition gehaltene Immobilien | 17, 21     | 238                 | 129                              | 133                            |
| Finanzielle Vermögenswerte                 | 17, 22     | 248                 | 113                              | 144                            |
| Sonstige Forderungen und Vermögenswerte    | 23         | 444                 | 463                              | 450                            |
| Latente Steueransprüche                    | 24         | 1.000               | 1.026                            | 1.050                          |
| <b>Kurzfristige Vermögenswerte</b>         |            | <b>16.155</b>       | <b>14.818</b>                    | <b>14.703</b>                  |
| Vorräte                                    | 25         | 7.458               | 7.110                            | 7.001                          |
| Forderungen aus Lieferungen und Leistungen | 26         | 526                 | 539                              | 446                            |
| Finanzielle Vermögenswerte                 |            | 3                   | 38                               | 8                              |
| Sonstige Forderungen und Vermögenswerte    | 23         | 2.724               | 2.613                            | 2.818                          |
| Ertragsteuererstattungsansprüche           |            | 412                 | 405                              | 326                            |
| Zahlungsmittel                             | 29         | 4.799               | 3.996                            | 3.874                          |
| Zur Veräußerung vorgesehene Vermögenswerte | 30         | 233                 | 117                              | 230                            |
|                                            |            | <b>35.067</b>       | <b>33.282</b>                    | <b>33.516</b>                  |

<sup>1</sup> Adjustierung aufgrund geänderter Ausweise

<sup>2</sup> Adjustierung aufgrund der Erstanwendung neuer oder geänderter IFRS im Geschäftsjahr 2009 sowie geänderter Ausweise

## Eigenkapitalentwicklung<sup>1</sup>

| Mio. €                               | Gezeichnetes<br>Kapital | Kapital-<br>rücklage | Effektiver Teil<br>der Gewinne/<br>Verluste<br>aus Cashflow<br>Hedges | Währungs-<br>umrechnungs-<br>differenzen aus<br>der Umrechnung<br>der Abschlüsse<br>ausländischer<br>Geschäfts-<br>bereiche |
|--------------------------------------|-------------------------|----------------------|-----------------------------------------------------------------------|-----------------------------------------------------------------------------------------------------------------------------|
| <b>1.1.2009</b>                      | 835                     | 2.544                | 57                                                                    | -365                                                                                                                        |
| Dividenden                           | 0                       | 0                    | 0                                                                     | 0                                                                                                                           |
| Gesamtergebnis                       | 0                       | 0                    | 10                                                                    | -75                                                                                                                         |
| Kapitalsaldo aus Erwerb von Anteilen | 0                       | 0                    | 0                                                                     | 0                                                                                                                           |
| <b>31.12.2009/1.1.2010</b>           | 835                     | 2.544                | 67                                                                    | -440                                                                                                                        |
| Dividenden                           | 0                       | 0                    | 0                                                                     | 0                                                                                                                           |
| Gesamtergebnis                       | 0                       | 0                    | -4                                                                    | 125                                                                                                                         |
| Kapitalsaldo aus Erwerb von Anteilen | 0                       | 0                    | 0                                                                     | 0                                                                                                                           |
| Änderungen IAS 17                    | 0                       | 0                    | 0                                                                     | 0                                                                                                                           |
| Sonstige Veränderungen               | 0                       | 0                    | 0                                                                     | 0                                                                                                                           |
| <b>31.12.2010</b>                    | <b>835</b>              | <b>2.544</b>         | <b>63</b>                                                             | <b>-315</b>                                                                                                                 |

<sup>1</sup> Die Eigenkapitalentwicklung wird im Anhang unter Nummer 31 „Eigenkapital“ erläutert

<sup>2</sup> Adjustierung des Werts zum 1.1.2009 aufgrund der Erstanwendung neuer oder geänderter IFRS im Geschäftsjahr 2009

Passiva

| Mio. €                                                         | Anhang Nr. | Stand<br>31.12.2010 | Stand<br>31.12.2009 <sup>1</sup> | Stand<br>1.1.2009 <sup>2</sup> |
|----------------------------------------------------------------|------------|---------------------|----------------------------------|--------------------------------|
| <b>Eigenkapital</b>                                            | 31         | <b>6.460</b>        | <b>5.992</b>                     | <b>6.061</b>                   |
| Gezeichnetes Kapital                                           |            | 835                 | 835                              | 835                            |
| Kapitalrücklage                                                |            | 2.544               | 2.544                            | 2.544                          |
| Gewinnrücklagen                                                |            | 2.929               | 2.375                            | 2.428                          |
| Anteile nicht beherrschender Gesellschafter                    |            | 152                 | 238                              | 254                            |
| <b>Langfristige Schulden</b>                                   |            | <b>8.990</b>        | <b>9.106</b>                     | <b>7.369</b>                   |
| Rückstellungen für Pensionen und ähnliche Verpflichtungen      | 32         | 1.016               | 978                              | 964                            |
| Sonstige Rückstellungen                                        | 33         | 472                 | 502                              | 533                            |
| Finanzielle Schulden                                           | 34, 36     | 6.533               | 6.743                            | 5.031                          |
| Sonstige Verbindlichkeiten                                     | 34, 37     | 757                 | 667                              | 620                            |
| Latente Steuerschulden                                         | 24         | 212                 | 216                              | 221                            |
| <b>Kurzfristige Schulden</b>                                   |            | <b>19.617</b>       | <b>18.184</b>                    | <b>20.086</b>                  |
| Verbindlichkeiten aus Lieferungen und Leistungen               | 34, 35     | 14.393              | 14.174                           | 14.125                         |
| Rückstellungen                                                 | 33         | 532                 | 561                              | 522                            |
| Finanzielle Schulden                                           | 34, 36     | 1.750               | 984                              | 2.864                          |
| Sonstige Verbindlichkeiten                                     | 34, 37     | 2.458               | 2.200                            | 2.163                          |
| Ertragsteuerschulden                                           | 34         | 291                 | 265                              | 266                            |
| Schulden i. Z. m. zur Veräußerung vorgesehenen Vermögenswerten | 30         | 193                 | 0                                | 146                            |
|                                                                |            | <b>35.067</b>       | <b>33.282</b>                    | <b>33.516</b>                  |

<sup>1</sup> Adjustierung aufgrund geänderter Ausweise

<sup>2</sup> Adjustierung aufgrund der Erstanwendung neuer oder geänderter IFRS im Geschäftsjahr 2009 sowie geänderter Ausweise

| Auf Komponenten<br>des „Sonstigen<br>Ergebnisses“<br>entfallende<br>Ertragsteuer | Übrige<br>Gewinn-<br>rücklagen | Gewinn-<br>rücklagen<br>gesamt <sup>2</sup> | Summe        | davon auf das<br>„Sonstige Ergebnis“<br>entfallend | Anteile nicht<br>beherrschender<br>Gesellschafter | davon auf<br>das „Sonstige<br>Ergebnis“<br>entfallend | Eigenkapital<br>gesamt |
|----------------------------------------------------------------------------------|--------------------------------|---------------------------------------------|--------------|----------------------------------------------------|---------------------------------------------------|-------------------------------------------------------|------------------------|
| 1                                                                                | 2.735                          | 2.428                                       | 5.807        |                                                    | 254                                               |                                                       | 6.061                  |
| 0                                                                                | -386                           | -386                                        | -386         |                                                    | -124                                              |                                                       | -510                   |
| 16                                                                               | 383                            | 334                                         | 334          | [-49]                                              | 133                                               | [-3]                                                  | 467                    |
| 0                                                                                | -1                             | -1                                          | -1           |                                                    | -25                                               |                                                       | -26                    |
| 17                                                                               | 2.731                          | 2.375                                       | 5.754        |                                                    | 238                                               |                                                       | 5.992                  |
| 0                                                                                | -386                           | -386                                        | -386         |                                                    | -143                                              |                                                       | -529                   |
| 0                                                                                | 850                            | 971                                         | 971          | [121]                                              | 100                                               | [14]                                                  | 1.071                  |
| 0                                                                                | 0                              | 0                                           | 0            |                                                    | -46                                               |                                                       | -46                    |
| 0                                                                                | -28                            | -28                                         | -28          |                                                    | 0                                                 |                                                       | -28                    |
| 0                                                                                | -3                             | -3                                          | -3           |                                                    | 3                                                 |                                                       | 0                      |
| <b>17</b>                                                                        | <b>3.164</b>                   | <b>2.929</b>                                | <b>6.308</b> |                                                    | <b>152</b>                                        |                                                       | <b>6.460</b>           |

**Kapitalflussrechnung<sup>1</sup>**

| Mio. €                                                                              | 2010         | 2009 <sup>2</sup> |
|-------------------------------------------------------------------------------------|--------------|-------------------|
| EBIT                                                                                | 2.211        | 1.681             |
| Zu-/Abschreibungen auf Anlagevermögen ohne finanzielle Vermögenswerte               | 1.380        | 1.387             |
| Veränderung von Pensions- und sonstigen Rückstellungen                              | -18          | -9                |
| Veränderung des Netto-Betriebsvermögens                                             | -288         | 62                |
| Zahlungen Ertragsteuern                                                             | -597         | -560              |
| Sonstiges                                                                           | -174         | -67               |
| <b>Cashflow aus laufender Geschäftstätigkeit der fortgeführten Aktivitäten</b>      | <b>2.514</b> | <b>2.494</b>      |
| Cashflow aus laufender Geschäftstätigkeit der nicht fortgeführten Aktivitäten       | 0            | -18               |
| <b>Cashflow aus laufender Geschäftstätigkeit gesamt</b>                             | <b>2.514</b> | <b>2.476</b>      |
| Unternehmensakquisitionen                                                           | 0            | -8                |
| Investitionen in Sachanlagen (ohne Finanzierungs-Leasing)                           | -1.412       | -1.189            |
| Sonstige Investitionen                                                              | -333         | -191              |
| Unternehmensveräußerungen                                                           | 121          | -34               |
| Anlagenabgänge                                                                      | 663          | 260               |
| <b>Cashflow aus Investitionstätigkeit der fortgeführten Aktivitäten</b>             | <b>-961</b>  | <b>-1.162</b>     |
| Cashflow aus Investitionstätigkeit der nicht fortgeführten Aktivitäten              | 0            | 0                 |
| <b>Cashflow aus Investitionstätigkeit gesamt</b>                                    | <b>-961</b>  | <b>-1.162</b>     |
| Gewinnausschüttungen                                                                |              |                   |
| an METRO AG Gesellschafter                                                          | -386         | -386              |
| an andere Gesellschafter                                                            | -143         | -124              |
| Aufnahme von Finanzverbindlichkeiten                                                | 1.302        | 2.662             |
| Tilgung von Finanzverbindlichkeiten                                                 | -898         | -2.787            |
| Gezahlte Zinsen                                                                     | -695         | -676              |
| Erhaltene Zinsen                                                                    | 111          | 123               |
| Ergebnisübernahmen und sonstige Finanztätigkeit                                     | -25          | 1                 |
| Mittelabfluss zur Finanzierung nicht fortgeführter Aktivitäten                      | 0            | -38               |
| <b>Cashflow aus Finanztätigkeit der fortgeführten Aktivitäten</b>                   | <b>-734</b>  | <b>-1.225</b>     |
| Cashflow aus Finanztätigkeit der nicht fortgeführten Aktivitäten                    | 0            | 36                |
| <b>Cashflow aus Finanztätigkeit gesamt</b>                                          | <b>-734</b>  | <b>-1.189</b>     |
| <b>Summe der Cashflows gesamt</b>                                                   | <b>819</b>   | <b>125</b>        |
| Wechselkurseffekte auf die Zahlungsmittel                                           | 13           | -4                |
| Veränderung der Zahlungsmittel aufgrund erstmaliger Einbeziehung von Gesellschaften | 0            | 1                 |
| <b>Gesamtveränderung der Zahlungsmittel</b>                                         | <b>832</b>   | <b>122</b>        |
| Zahlungsmittel 1. Januar gesamt                                                     | 3.996        | 3.874             |
| Zahlungsmittel 31. Dezember gesamt                                                  | 4.828        | 3.996             |
| abzüglich zur Veräußerung stehende Zahlungsmittel zum 31. Dezember                  | -29          | 0                 |
| <b>Zahlungsmittel 31. Dezember aus fortgeführten Aktivitäten</b>                    | <b>4.799</b> | <b>3.996</b>      |

<sup>1</sup> Die Kapitalflussrechnung wird im Anhang unter Nummer 40 „Erläuterungen zur Kapitalflussrechnung“ erläutert<sup>2</sup> Adjustierung aufgrund geänderter Ausweise

# ANHANG

# Segmentberichterstattung<sup>1,2</sup>

## Geschäftssegmente

### Fortgeführte Aktivitäten des Konzerns

| Mio. €                                 | Metro Cash & Carry |         | Real    |                   | Media Markt und Saturn |         | Galeria Kaufhof |       |
|----------------------------------------|--------------------|---------|---------|-------------------|------------------------|---------|-----------------|-------|
|                                        | 2010               | 2009    | 2010    | 2009 <sup>3</sup> | 2010                   | 2009    | 2010            | 2009  |
| Außenumsätze (netto)                   | 31.095             | 30.613  | 11.499  | 11.298            | 20.794                 | 19.693  | 3.584           | 3.539 |
| Innenumsätze (netto)                   | 20                 | 14      | 1       | 1                 | 0                      | 0       | 0               | 3     |
| Umsatzerlöse (netto)                   | 31.115             | 30.627  | 11.500  | 11.299            | 20.794                 | 19.693  | 3.584           | 3.542 |
| EBITDAR                                | 2.042              | 1.740   | 706     | 624 <sup>3</sup>  | 1.406                  | 1.382   | 492             | 437   |
| EBITDA                                 | 1.363              | 1.061   | 310     | 210 <sup>3</sup>  | 818                    | 847     | 234             | 166   |
| Abschreibungen                         | 271                | 268     | 205     | 183               | 326                    | 244     | 96              | 105   |
| Zuschreibungen                         | 2                  | 0       | 0       | 9                 | 0                      | 0       | 0               | 0     |
| EBIT                                   | 1.094              | 793     | 105     | 36                | 492                    | 603     | 138             | 61    |
| Investitionen                          | 499                | 220     | 156     | 193               | 362                    | 353     | 104             | 57    |
| Segmentvermögen                        | 7.496              | 6.829   | 3.815   | 3.708             | 6.521                  | 6.165   | 1.033           | 1.070 |
| davon langfristig                      | (3.932)            | (3.767) | (2.473) | (2.518)           | (1.755)                | (1.726) | (481)           | (478) |
| Segmentsschulden                       | 6.497              | 6.438   | 2.187   | 2.199             | 7.964                  | 7.489   | 986             | 956   |
| Verkaufsfläche (1.000 m <sup>2</sup> ) | 5.355              | 5.291   | 3.107   | 3.184             | 2.829                  | 2.633   | 1.480           | 1.501 |
| Standorte (Anzahl)                     | 687                | 668     | 429     | 441               | 877                    | 818     | 138             | 141   |

## Regionensegmente

### Fortgeführte Aktivitäten des Konzerns

| Mio. €                                 | Deutschland |                    | Westeuropa ohne Deutschland |         | Osteuropa |         | Asien/Afrika |       |
|----------------------------------------|-------------|--------------------|-----------------------------|---------|-----------|---------|--------------|-------|
|                                        | 2010        | 2009 <sup>3</sup>  | 2010                        | 2009    | 2010      | 2009    | 2010         | 2009  |
| Außenumsätze (netto)                   | 26.130      | 26.511             | 21.528                      | 20.932  | 16.880    | 15.766  | 2.720        | 2.320 |
| Innenumsätze (netto)                   | 26          | 18                 | 22                          | 12      | 0         | 0       | 618          | 636   |
| Umsatzerlöse (netto)                   | 26.156      | 26.529             | 21.550                      | 20.944  | 16.880    | 15.766  | 3.338        | 2.956 |
| EBITDAR                                | 1.614       | 1.627 <sup>3</sup> | 1.508                       | 1.210   | 1.401     | 1.221   | 73           | 15    |
| EBITDA                                 | 1.057       | 1.023 <sup>3</sup> | 1.242                       | 968     | 1.242     | 1.072   | 51           | 3     |
| Abschreibungen                         | 665         | 698                | 360                         | 312     | 350       | 338     | 52           | 48    |
| Zuschreibungen                         | 7           | 9                  | 6                           | 0       | 28        | 0       | 6            | 0     |
| EBIT                                   | 399         | 334                | 888                         | 656     | 920       | 734     | 5            | -45   |
| Investitionen                          | 585         | 514                | 272                         | 256     | 668       | 626     | 158          | 121   |
| Segmentvermögen                        | 11.805      | 11.670             | 7.656                       | 7.537   | 7.867     | 7.057   | 1.481        | 1.237 |
| davon langfristig                      | (6.736)     | (6.827)            | (4.185)                     | (4.369) | (5.664)   | (5.151) | (979)        | (845) |
| Segmentsschulden                       | 8.454       | 8.357              | 6.415                       | 6.049   | 3.905     | 3.690   | 727          | 543   |
| Verkaufsfläche (1.000 m <sup>2</sup> ) | 5.798       | 6.000              | 3.077                       | 2.990   | 3.338     | 3.112   | 558          | 527   |
| Standorte (Anzahl)                     | 942         | 1.017              | 627                         | 596     | 478       | 439     | 84           | 75    |

<sup>1</sup> Die Segmentberichterstattung wird unter Nummer 41 „Segmentberichterstattung“ erläutert

<sup>2</sup> Adjustierung der Vorjahreswerte aufgrund geänderter Ausweise

<sup>3</sup> Adjustierung aufgrund der saldierten Darstellung von außerplanmäßigen Abschreibungen und Zuschreibungen im EBITDA und EBITDAR in Höhe von 9 Mio. € (Real beziehungsweise Deutschland), 6 Mio. € (Immobilien) und -6 Mio. € (Konsolidierung)

| Fortgeführte Aktivitäten des Konzerns |                   |          |       |                |                   |             |                    | Nicht fortgeführte Aktivitäten des Konzerns |       |
|---------------------------------------|-------------------|----------|-------|----------------|-------------------|-------------|--------------------|---------------------------------------------|-------|
| Immobilien                            |                   | Sonstige |       | Konsolidierung |                   | METRO GROUP |                    |                                             |       |
| 2010                                  | 2009 <sup>3</sup> | 2010     | 2009  | 2010           | 2009 <sup>3</sup> | 2010        | 2009 <sup>3</sup>  | 2010                                        | 2009  |
| 0                                     | 0                 | 286      | 386   | 0              | 0                 | 67.258      | 65.529             | 0                                           | 50    |
| 0                                     | 0                 | 6.197    | 5.889 | -6.218         | -5.907            | 0           | 0                  | 0                                           | 0     |
| 0                                     | 0                 | 6.483    | 6.275 | -6.218         | -5.907            | 67.258      | 65.529             | 0                                           | 50    |
| 128                                   | -7 <sup>3</sup>   | -159     | -90   | -21            | -11 <sup>3</sup>  | 4.594       | 4.075 <sup>3</sup> | 0                                           | k. A. |
| 1.101                                 | 948 <sup>3</sup>  | -207     | -152  | -28            | -12 <sup>3</sup>  | 3.591       | 3.068 <sup>3</sup> | 0                                           | -1    |
| 421                                   | 418               | 116      | 184   | -8             | -6                | 1.427       | 1.396              | 0                                           | 0     |
| 38                                    | 6                 | 0        | 0     | 7              | -6                | 47          | 9                  | 0                                           | k. A. |
| 718                                   | 536               | -323     | -336  | -13            | -12               | 2.211       | 1.681              | 0                                           | -1    |
| 490                                   | 580               | 72       | 114   | 0              | 0                 | 1.683       | 1.517              | 0                                           | 1     |
| 8.591                                 | 8.645             | 2.121    | 2.082 | -1.513         | -1.411            | 28.064      | 27.088             | 0                                           | 0     |
| (8.496)                               | (8.367)           | (569)    | (512) | (-148)         | (-155)            | (17.558)    | (17.213)           | (0)                                         | (0)   |
| 566                                   | 600               | 2.484    | 2.095 | -1.653         | -1.449            | 19.031      | 18.328             | 0                                           | 0     |
| 0                                     | 0                 | 0        | 20    | 0              | 0                 | 12.771      | 12.629             | 0                                           | 0     |
| 0                                     | 0                 | 0        | 59    | 0              | 0                 | 2.131       | 2.127              | 0                                           | 0     |

| Fortgeführte Aktivitäten des Konzerns |          |                |      |             |                    | Nicht fortgeführte Aktivitäten des Konzerns |       |
|---------------------------------------|----------|----------------|------|-------------|--------------------|---------------------------------------------|-------|
| International                         |          | Konsolidierung |      | METRO GROUP |                    |                                             |       |
| 2010                                  | 2009     | 2010           | 2009 | 2010        | 2009 <sup>3</sup>  | 2010                                        | 2009  |
| 41.128                                | 39.018   | 0              | 0    | 67.258      | 65.529             | 0                                           | 50    |
| 640                                   | 648      | -666           | -666 | 0           | 0                  | 0                                           | 0     |
| 41.768                                | 39.666   | -666           | -666 | 67.258      | 65.529             | 0                                           | 50    |
| 2.982                                 | 2.446    | -2             | 2    | 4.594       | 4.075 <sup>3</sup> | 0                                           | k. A. |
| 2.535                                 | 2.043    | -1             | 2    | 3.591       | 3.068 <sup>3</sup> | 0                                           | -1    |
| 762                                   | 698      | 0              | 0    | 1.427       | 1.396              | 0                                           | 0     |
| 40                                    | 0        | 0              | 0    | 47          | 9                  | 0                                           | k. A. |
| 1.813                                 | 1.345    | -1             | 2    | 2.211       | 1.681              | 0                                           | -1    |
| 1.098                                 | 1.003    | 0              | 0    | 1.683       | 1.517              | 0                                           | 1     |
| 17.004                                | 15.831   | -745           | -413 | 28.064      | 27.088             | 0                                           | 0     |
| (10.828)                              | (10.365) | (-6)           | (21) | (17.558)    | (17.213)           | (0)                                         | (0)   |
| 11.047                                | 10.282   | -470           | -311 | 19.031      | 18.328             | 0                                           | 0     |
| 6.973                                 | 6.629    | 0              | 0    | 12.771      | 12.629             | 0                                           | 0     |
| 1.189                                 | 1.110    | 0              | 0    | 2.131       | 2.127              | 0                                           | 0     |



## Erläuterungen zu Grundlagen und Methoden des Konzernabschlusses

### Grundlagen der Rechnungslegung

Der Konzernabschluss der METRO AG wurde zum 31. Dezember 2010 nach den International Financial Reporting Standards (IFRS) des International Accounting Standards Board (IASB), London, aufgestellt. Er berücksichtigt alle zu diesem Zeitpunkt verabschiedeten und in der Europäischen Union verpflichtend anzuwendenden Bilanzierungsstandards und Interpretationen. Durch Einhaltung der Standards und Interpretationen wird ein den tatsächlichen Verhältnissen entsprechendes Bild der Vermögens-, Finanz- und Ertragslage der METRO AG vermittelt.

Der Konzernabschluss entspricht in der vorliegenden Fassung der Vorschrift des § 315a Handelsgesetzbuch (HGB). Diese bildet die Rechtsgrundlage für die Konzernrechnungslegung nach internationalen Standards in Deutschland zusammen mit der Verordnung (EG) Nr. 1606/2002 des Europäischen Parlaments und des Rats vom 19. Juli 2002, betreffend die Anwendung internationaler Rechnungslegungsstandards.

Der vorliegende Abschluss basiert grundsätzlich auf dem historischen Anschaffungskostenprinzip. Wesentliche Ausnahmen hiervon sind zum Fair Value bilanzierte Finanzinstrumente sowie Vermögenswerte und Schulden, die als Grundgeschäft innerhalb eines Fair-Value-Hedges mit ihren Fair Values bewertet werden. Ferner sind zur Veräußerung vorgesehene langfristige Vermögenswerte und Veräußerungsgruppen mit dem Fair Value abzüglich Veräußerungskosten bilanziert, sofern dieser Wert unter dem Buchwert liegt. Verbindlichkeiten aus anteilsbasierten Vergütungen mit Barausgleich werden ebenfalls zum Fair Value ausgewiesen. Darüber hinaus sind die finanziellen Verpflichtungen aus nicht beherrschenden Gesellschaftern gewährten Andienungsrechten zum Fair Value bewertet.

Die Gewinn- und Verlustrechnung ist nach dem Umsatzkostenverfahren aufgestellt.

Zur Verbesserung der Klarheit und Aussagefähigkeit werden einzelne Posten in der Gewinn- und Verlustrechnung sowie der Bilanz zusammengefasst. Diese Posten sind im Anhang gesondert ausgewiesen und erläutert.

Der Konzernabschluss wurde in Euro erstellt. Alle Beträge sind in Millionen Euro (Mio. €) angegeben, sofern nicht auf Abweichungen besonders hingewiesen wird. Beträge unter 0,5 Mio. € werden abgerundet und als 0 berichtet.

Die im Folgenden dargestellten Bilanzierungsmethoden kamen bei der Erstellung des Konzernabschlusses zur Anwendung.

### Anwendung neuer Bilanzierungsmethoden

#### Überarbeitete und neue Rechnungslegungsvorschriften

Im vorliegenden Konzernabschluss kamen erstmals diejenigen vom IASB überarbeiteten, ergänzten sowie neu herausgegebenen Bilanzierungsstandards und Interpretationen zur Anwendung, die im Geschäftsjahr 2010 für die METRO AG verpflichtend waren:

#### IFRS 1 (First-time Adoption of International Financial Reporting Standards)

Erstmals im Geschäftsjahr 2010 anzuwenden waren zwei Änderungen des IFRS 1. Aus der ersten Überarbeitung resultieren keine bilanziellen Konsequenzen, da sie lediglich strukturelle und redaktionelle Veränderungen des IFRS 1 zur Folge hatte. Die zweite Änderung sieht zusätzliche Erleichterungen für IFRS-Erstanwender vor. Diese betreffen die Bilanzierung von Leasingverhältnissen sowie von Öl- und Gasvermögenswerten. Diese Änderungen betrafen die METRO AG nicht, da der IFRS 1 nur für IFRS-Erstanwender Gültigkeit hat.

#### IFRS 2 (Share-based Payment)

Durch die Änderung des IFRS 2 wird klargestellt, dass Güter und Dienstleistungen, die ein Unternehmen im Rahmen einer anteilsbasierten Vergütungsvereinbarung erhält, ebenfalls dann zu bilanzieren sind, wenn ein Unternehmen eine Leistung empfängt und ein anderes Unternehmen desselben Konsolidierungskreises (oder ein Anteilseigner irgendeines Unternehmens der Gruppe) die Verpflichtung zur Erfüllung der anteilsbasierten Vergütung übernimmt. Darüber hinaus wird klargestellt, dass der im IFRS 2 verwendete Begriff „Konzern“ die gleiche Bedeutung wie im IAS 27 (Consolidated and Separate Financial Statements) hat, wonach ein Konzern aus einem Mutterunternehmen und seinen Tochterunternehmen besteht. Im Rahmen der Änderung wurden die beiden Interpretationen IFRIC 8 (Scope of IFRS 2) und IFRIC 11 (IFRS 2 – Group and Treasury Share Transactions) in den IFRS 2 integriert und die Einzelverlautbarungen aufgehoben.

Die Änderungen des IFRS 2 hatten keine Auswirkungen auf den Konzernabschluss der METRO AG.

#### IFRS 3 (Business Combinations) in Verbindung mit IAS 27 (Consolidated and Separate Financial Statements)

Aus der Überarbeitung des IFRS 3 und des IAS 27 ergaben sich zahlreiche Änderungen für die Bilanzierung von Unternehmenszusammenschlüssen, welche in ab dem 1. Juli 2009

beginnenden Geschäftsjahren stattfinden. Diese Änderungen waren demnach für die METRO GROUP erstmals für Unternehmenszusammenschlüsse im Geschäftsjahr 2010 anzuwenden. Für die Behandlung des aus einem Unternehmenserwerb resultierenden Geschäfts- oder Firmenwerts wurde ein Wahlrecht eingeführt, dass auch der auf Anteile nicht beherrschender Gesellschafter (neue Bezeichnung für Minderheitenanteile) entfallende Geschäfts- oder Firmenwert bilanziert werden darf. Diese als „Full-Goodwill-Methode“ bezeichnete Vorgehensweise führt zudem dazu, dass die „Anteile nicht beherrschender Gesellschafter“ im „Eigenkapital“ steigen. Da in der METRO GROUP von diesem Wahlrecht kein Gebrauch gemacht wird, erfolgt die Bilanzierung von Geschäfts- oder Firmenwerten weiterhin beteiligungsproportional.

Nach dem bisherigen IFRS 3 wurden bei einem Unternehmenserwerb die direkt zurechenbaren Kosten, wie Notargebühren und Beraterhonorare, in die Anschaffungskosten einbezogen. Ab dem Geschäftsjahr 2010 müssen die bei Unternehmenserwerben anfallenden anschaffungsbezogenen Kosten direkt als Aufwand erfasst werden.

Bei einem sukzessiven Unternehmenserwerb muss beginnend mit dem Geschäftsjahr 2010 zum Zeitpunkt der Erlangung der Beherrschung der bisher gehaltene Eigenkapitalanteil erfolgswirksam neu bewertet werden. Bei einer Differenz zwischen dem bisherigen Buchwert der Beteiligung am Tochterunternehmen und dem anteiligen neu bewerteten Nettovermögen des Tochterunternehmens muss diese als Geschäfts- oder Firmenwert ausgewiesen werden. Im Geschäftsjahr 2010 erfolgte kein sukzessiver Unternehmenserwerb.

Falls bei einem Unternehmenserwerb bedingte Kaufpreiszahlungen vereinbart werden, müssen diese zum Erwerbzeitpunkt mit ihrem Fair Value bewertet und gemäß der vertraglichen Bedingungen als Vermögenswert, Verbindlichkeit oder Eigenkapital erfasst werden. Eine spätere Anpassung des Geschäfts- oder Firmenwerts bei Änderungen des Kaufpreises in Folgeperioden aufgrund von zukünftigen Ereignissen (beispielsweise Erreichung eines Umsatzziels) ist entgegen der alten Regelung nicht mehr zulässig.

Der überarbeitete IAS 27 gibt vor, dass eine Veränderung der Beteiligungsquote an einem Tochterunternehmen als erfolgsneutrale Eigenkapitaltransaktion auszuweisen ist, sofern weiterhin eine Beherrschung vorliegt. Falls jedoch die Beherrschung verloren wird, werden die Vermögenswerte und Schulden des ehemaligen Tochterunternehmens vollständig ausgebucht. Verbleibende Anteile werden zu ihrem Fair Value bilanziert und die Differenz zu den bisher bilanzierten Buchwerten wird erfolgswirksam erfasst.

Anteile nicht beherrschender Gesellschafter, die aufgrund entstandener Verluste negativ werden, sind mit ihrem Negativsaldo offen im Eigenkapital auszuweisen. Bisher wurden diese mit dem Mehrheits-Eigenkapital verrechnet.

Aus den Änderungen des IFRS 3 sowie des IAS 27 ergaben sich keine wesentlichen Auswirkungen auf den Konzernabschluss der METRO AG.

#### **IFRS 5 (Non-current Assets Held for Sale and Discontinued Operations) in Verbindung mit IFRS 1 (First-time Adoption of International Financial Reporting Standards)**

Für Tochterunternehmen, die als „zur Veräußerung vorgesehen“ klassifiziert werden und an denen das Unternehmen nach der Veräußerung einen nicht beherrschenden Anteil behält, ließ die bisherige Regelung den Freiraum, die Vermögenswerte und Schulden des Tochterunternehmens nur in Höhe des zu veräußernden Anteils als „zur Veräußerung vorgesehen“ zu klassifizieren. Mit den „Improvements to IFRSs 2008“ wird klargestellt, dass, selbst wenn ein nicht beherrschender Anteil am Tochterunternehmen im Unternehmen verbleibt, stets die vollen Vermögenswerte und Schulden des Tochterunternehmens als „zur Veräußerung vorgesehen“ zu klassifizieren sind. Als Folge dieser Änderung wurde der IFRS 1 dahingehend ergänzt, dass IFRS-Erstanwender die zuvor beschriebene Anforderung ebenfalls erfüllen müssen.

Die Änderung des IFRS 5 hatte keine Auswirkungen auf den Konzernabschluss der METRO AG.

#### **IAS 17 (Leases)**

Im Rahmen der „Improvements to IFRSs 2009“ wurde der IAS 17 überarbeitet. Dabei wurde die bisher geltende Vorschrift aufgehoben, dass Leasingverhältnisse über Grundstücke generell als Operating-Leasing zu behandeln sind, sofern das Eigentum am Leasingobjekt nach Ablauf der Laufzeit nicht auf den Leasingnehmer übergeht. Ab dem Geschäftsjahr 2010 müssen sämtliche Leasingverhältnisse über Grundstücke analog zu anderen Leasingobjekten beurteilt und als Finanzierungs-Leasing oder Operating-Leasing klassifiziert werden. Dies gilt ebenfalls für bestehende Leasingverhältnisse.

Leasingverhältnisse über Grundstücke der METRO GROUP wurden im ersten Quartal 2010 basierend auf den Daten zum 1. Januar 2010 unter Anwendung der Übergangsregelung neu klassifiziert. Bei den Grundstücken, die neu als Finanzierungs-Leasing eingeordnet wurden, handelte es sich ausschließlich um sehr lange laufende Leasingverträge. Aus der Umklassifizierung folgte ein Ansatz von Vermögenswerten in den „Sachanlagen“ in Höhe von 67 Mio. € sowie eine Abnahme der „Sonstigen Forderungen und Vermögenswerte“ um 23 Mio. €

aufgrund der Auflösung von Abgrenzungsposten für im Voraus gezahlte Mieten. In den „Finanziellen Schulden“ wurden zusätzliche Verbindlichkeiten in Höhe von 72 Mio. € ausgewiesen. Die Differenz zwischen den Vermögenswerten und Verbindlichkeiten in Höhe von –28 Mio. € wurde über die „Gewinnrücklagen“ ausgeglichen.

#### **IAS 39 (Financial Instruments: Recognition and Measurement)**

Durch die Änderung des IAS 39 wird klargestellt, dass auch ein einseitiges Risiko in einer Sicherungsbeziehung abgesichert werden kann. In diesem Fall werden ausschließlich die Änderungen der Cashflows oder des beizulegenden Zeitwerts des gesicherten Grundgeschäfts designiert, die über oder unter einer festgelegten Variablen (beispielsweise dem Preis) liegen. Falls eine Option als Sicherungsinstrument erworben wurde, zeigt deren innerer Wert das einseitige Risiko, aber nicht ihr Zeitwert.

Grundsätzlich stellt Inflation kein gesondert identifizierbares Risiko dar und kann daher nicht als abgesichertes Risiko designiert werden. Durch die Änderung des IAS 39 ist es nun zulässig, Inflationsänderungen, die vertraglich festgelegte Teile von Zahlungsströmen eines finanziellen Grundgeschäfts darstellen, durch einen Cashflow Hedge abzusichern.

Die Änderung des IAS 39 hatte keine Auswirkungen auf den Konzernabschluss der METRO AG.

#### **IFRIC 12 (Service Concession Arrangements)**

Die Interpretation regelt die bilanzielle Abbildung sogenannter Dienstleistungsvereinbarungen. Dies sind Aufträge, die die öffentliche Hand an private Unternehmen vergibt, um öffentliche Infrastrukturprojekte wie Straßenbau, Energieversorgung etc. umzusetzen.

Je nach Art der Vereinbarung erfasst das Unternehmen einen finanziellen oder einen immateriellen Vermögenswert. Der finanzielle Vermögenswert bildet das unbedingte vertragliche Recht zum Erhalt von Zahlungsmitteln oder anderen finanziellen Vermögenswerten von der öffentlichen Hand als Gegenleistung für die Erstellung von Vermögenswerten ab. Ein immaterieller Vermögenswert ist für das Recht des Unternehmens zu bilanzieren, Gebühren für die Benutzung von Vermögenswerten der öffentlichen Hand, die es erstellt hat, zu erheben. Die im Zusammenhang mit Dienstleistungsvereinbarungen bilanzierten finanziellen oder immateriellen Vermögenswerte sind zum Fair Value zu bewerten.

Die erstmalige Anwendung des IFRIC 12 hatte keine Auswirkungen auf den Konzernabschluss der METRO AG.

#### **IFRIC 15 (Agreements for the Construction of Real Estate)**

IFRIC 15 regelt die Ertragsrealisierung aus Immobilienbauverträgen. Nach der Interpretation sind nur solche Verträge oder Vertragsbestandteile als Fertigungsaufträge gemäß IAS 11 (Construction Contracts) zu klassifizieren, bei denen der Auftraggeber vor und/oder während der Bauphase Einfluss auf die wesentlichen Strukturelemente der Immobilie nehmen kann, unabhängig davon, ob er dies tatsächlich tut. Hat der Auftraggeber keine oder nur geringe Einflussmöglichkeiten, liegt kein Fertigungsauftrag, sondern ein Anwendungsfall des IAS 18 (Revenue) vor.

Nach IFRIC 15 ist die „Percentage-of-Completion-Methode“ bei einem IAS-18-Fall dennoch anwendbar, wenn das Unternehmen entweder eine Fertigungsdienstleistung erbringt oder eine fertige Immobilie verkauft, bei der die Kontrolle über die mit dem Eigentum verbundenen Risiken und Chancen der im Bau befindlichen Immobilie kontinuierlich auf den Erwerber übergehen. Werden die Kontrolle sowie die Risiken und Chancen hingegen zu einem einzigen Zeitpunkt übertragen, so ist eine Vereinnahmung nach Leistungsfortschritt nicht zulässig. Die Anwendung des IFRIC 15 hatte keine Auswirkungen auf den Konzernabschluss der METRO AG.

#### **IFRIC 16 (Hedges of a Net Investment in a Foreign Operation)**

Gemäß IFRIC 16 können nur Fremdwährungsdifferenzen zwischen der eigenen funktionalen Währung des Mutterunternehmens und der funktionalen Währung des ausländischen Geschäftsbetriebs als abgesichertes Risiko designiert werden. Die Absicherung von Fremdwährungsdifferenzen zwischen einer von der funktionalen Währung abweichenden Darstellungswährung im Konzernabschluss des Mutterunternehmens und der funktionalen Währung des ausländischen Geschäftsbetriebs ist nicht zulässig.

IFRIC 16 kommt ferner zu dem Schluss, dass Sicherungsinstrumente bei Absicherung einer Nettoinvestition in einen ausländischen Geschäftsbetrieb von jedem Unternehmen innerhalb des Konzerns gehalten werden können, sofern die Voraussetzungen der Sicherungsbilanzierung erfüllt sind. Des Weiteren wird klargestellt, dass bei Abgang des ausländischen Geschäftsbetriebs sowohl der effektive Teil der kumulativen Gewinne und Verluste des Sicherungsinstruments als auch die kumulativ erfassten Währungsumrechnungsdifferenzen für die Nettoinvestition in einen ausländischen Geschäftsbetrieb aus dem Eigenkapital in die Gewinn- und Verlustrechnung umzugliedern sind.

Die Anwendung des IFRIC 16 hatte keine Auswirkungen auf den Konzernabschluss der METRO AG.

**IFRIC 17 (Distributions of Non-cash Assets to Owners)**

IFRIC 17 legt fest, dass Sachdividendenverpflichtungen zu passivieren sind, wenn die Dividende sachgerecht genehmigt wurde und nicht mehr im Ermessen des Unternehmens steht. Dies entspricht in der Regel dem Zeitpunkt der Verkündung durch das zuständige Management und der gegebenenfalls rechtlich vorgeschriebenen Zustimmung der zuständigen Instanz (zum Beispiel Anteilseigner). Die Verpflichtung zur Ausschüttung einer Sachdividende ist mit ihrem Fair Value anzusetzen. Eine Differenz zwischen dem Buchwert des auszuschüttenden Vermögenswerts und der Dividendenverpflichtung ist im Zeitpunkt der Ausschüttung erfolgswirksam zu erfassen.

Da innerhalb der METRO GROUP keine Sachdividenden ausgeschüttet werden, hatte die Anwendung des IFRIC 17 keine Auswirkungen auf den Konzernabschluss der METRO AG.

**IFRIC 18 (Transfers of Assets from Customers)**

Die Interpretation regelt die bilanzielle Darstellung von Vereinbarungen, bei denen ein Unternehmen Sachanlagevermögen oder Geldmittel für den Erwerb oder die Herstellung erforderlicher Sachanlagen von einem Kunden erhält, um den Kunden mittels dieser Sachanlagen an ein Netzwerk anzuschließen und ihm so einen dauerhaften Zugang zur Versorgung mit Gütern oder Dienstleistungen zu gewähren. Nach IFRIC 18 kann das bilanzierende Unternehmen nur dann einen Vermögenswert ansetzen, wenn die übertragene Sachanlage beziehungsweise die mit dem Geld des Kunden erworbene oder hergestellte Sachanlage die Definition eines Vermögenswerts gemäß

Rahmenkonzept erfüllt. Hierfür muss das Unternehmen die Verfügungsmacht über die Sachanlage erlangen. Ist dies gegeben, ist der Vermögenswert dem Sachanlagevermögen zuzuordnen und mit dem Fair Value anzusetzen.

Nach der Auslegung des IFRIC 18 stellt der Anschluss an ein Netzwerk beziehungsweise die dauerhafte Versorgung mit Gütern oder Dienstleistungen im Gegenzug für die Übertragung von Sachanlagevermögen eine Tauschtransaktion im Sinne des IAS 18 (Revenue) dar, für die zum Zeitpunkt der Erfüllung dieser Dienstleistung Erlöse zu realisieren sind. Erbringt das Unternehmen als Gegenleistung für den erhaltenen Gegenstand des Sachanlagevermögens mehrere einzeln identifizierbare Dienstleistungen, ist der Fair Value der erhaltenen Gegenleistung auf die einzelnen Dienstleistungen zu verteilen und getrennt zum jeweiligen Erfüllungszeitpunkt zu vereinnahmen. Die Anwendung des IFRIC 18 hatte keine Auswirkungen auf den Konzernabschluss der METRO AG.

Unter der Bezeichnung „Improvements to IFRSs 2009“ wurden an weiteren Standards Änderungen vorgenommen, die für den Konzernabschluss der METRO AG keine Auswirkungen hatten.

Vom IASB wurde eine Reihe weiterer Bilanzierungsstandards und Interpretationen neu verabschiedet beziehungsweise überarbeitet, die von der METRO AG frühestens ab dem 1. Januar 2011 verpflichtend angewendet werden müssen, sofern sie von der Europäischen Kommission zur Anwendung genehmigt wurden und für die METRO AG einschlägig sind:

| Standard/<br>Interpretation | Titel                                                                                                                                                       | Anwendung bei<br>METRO AG ab | Genehmigt durch<br>EU <sup>1</sup> |
|-----------------------------|-------------------------------------------------------------------------------------------------------------------------------------------------------------|------------------------------|------------------------------------|
| IFRS 1                      | First-time Adoption of International Financial Reporting Standards (Amendment: Severe Hyperinflation and Removal of Fixed Dates for First-Time Adopters)    | 1.1.2012                     | Nein                               |
| IFRS 1                      | First-time Adoption of International Financial Reporting Standards (Limited Exemption from Comparative IFRS 7 Disclosures for First-Time Adopters)          | 1.1.2011                     | Ja                                 |
| IFRS 7                      | Financial Instruments: Disclosures (Amendment: Disclosures – Transfers of Financial Assets)                                                                 | 1.1.2012                     | Nein                               |
| IFRS 9                      | Financial Instruments (Phase 1: Classification and Measurement)                                                                                             | 1.1.2013                     | Nein                               |
| IAS 12                      | Income Taxes (Amendment: Deferred Tax – Recovery of Underlying Assets)                                                                                      | 1.1.2012                     | Nein                               |
| IAS 24                      | Related Party Disclosures (Revised)                                                                                                                         | 1.1.2011                     | Ja                                 |
| IAS 32                      | Financial Instruments: Presentation (Amendment: Classification of Rights Issues)                                                                            | 1.1.2011                     | Ja                                 |
| IFRIC 14                    | IAS 19 – The Limit on a Defined Benefit Asset, Minimum Funding Requirements and their Interaction (Amendment: Prepayments of a Minimum Funding Requirement) | 1.1.2011                     | Ja                                 |
| IFRIC 19                    | Extinguishing Financial Liabilities with Equity Instruments                                                                                                 | 1.1.2011                     | Ja                                 |
| Diverse                     | Improvements to IFRSs 2010                                                                                                                                  | 1.1.2011                     | Nein                               |

<sup>1</sup> Stand: 31.12.2010

Die Erstanwendung der genannten Rechnungslegungsvorschriften wird nach derzeitiger Einschätzung zu keinen wesentlichen Auswirkungen auf die Vermögens-, Finanz- und Ertragslage des Konzerns führen.

### **Geänderter Ausweis**

#### **Zusammensetzung des Netto-Betriebsvermögens**

Die Zusammensetzung des Postens „Veränderung des Netto-Betriebsvermögens“ in der Kapitalflussrechnung wurde im Vergleich zum Vorjahr verändert. Bisher umfasste das Netto-Betriebsvermögen nur die „Vorräte“ sowie die „Verbindlichkeiten aus Lieferungen und Leistungen“. Nach der neuen Definition werden von den Aktiva zusätzlich die „Forderungen aus Lieferungen und Leistungen“ sowie die in den „Sonstigen Forderungen und Vermögenswerten“ erfassten Positionen „Forderungen an Lieferanten“, „Forderungen Kreditkarten“ und „Geleistete Anzahlungen auf Vorräte“ hinzugezählt. Von den Passiva werden die zu den „Sonstigen Verbindlichkeiten“ gehörenden Positionen „Verbindlichkeiten gegenüber Kunden“ und „Erhaltene Anzahlungen auf Bestellungen“ neu einbezogen. Alle diese Positionen wurden in der Kapitalflussrechnung vorher im Posten „Sonstiges“ erfasst. Da diese Positionen nur in den Posten „Veränderung des Netto-Betriebsvermögens“ umgegliedert wurden, bleibt die Höhe des „Cashflows aus laufender Geschäftstätigkeit der fortgeführten Aktivitäten“ unverändert. Zur besseren Vergleichbarkeit wurden die Vorjahreszahlen des Jahres 2009 in der Kapitalflussrechnung entsprechend angepasst.

#### **Umgliederung Forderungen an Lieferanten sowie Verbindlichkeiten aus Lieferungen und Leistungen**

In der Bilanz wurden erfolgsneutrale Umgliederungen zwischen den „Sonstigen Forderungen und Vermögenswerten“ (Unterposition „Forderungen an Lieferanten“), den „Forderungen aus Lieferungen und Leistungen“, den „Verbindlichkeiten aus Lieferungen und Leistungen“ und den „Sonstigen Verbindlichkeiten“ (Unterposition „Übrige Verbindlichkeiten“) vorgenommen, um im Wesentlichen der Aufrechenbarkeit Rechnung zu tragen. Die Zahlen der Vergleichsperioden zum 31. Dezember 2009 sowie zum 1. Januar 2009 wurden zur besseren Vergleichbarkeit adjustiert. Die Umgliederungen betrafen zum 31. Dezember 2009 die „Sonstigen Forderungen und Vermögenswerte“ („Forderungen an Lieferanten“) mit –380 Mio. €, die „Forderungen aus Lieferungen und Leistungen“ mit –5 Mio. €, die „Verbindlichkeiten aus Lieferungen und Leistungen“ mit –383 Mio. € sowie die „Sonstigen Verbindlichkeiten“ („Übrige Verbindlichkeiten“) mit –2 Mio. €. Zum 1. Januar 2009 wurden die „Sonstigen Forderungen und

Vermögenswerte“ („Forderungen an Lieferanten“) sowie die „Verbindlichkeiten aus Lieferungen und Leistungen“ jeweils um –298 Mio. € angepasst. Mit den Umgliederungen wird der wirtschaftliche Gehalt besser wiedergespiegelt, sodass relevantere Informationen über die Vermögens- und Finanzlage der METRO GROUP vermittelt werden.

#### **Umgliederung Wechselverbindlichkeiten**

An Lieferanten ausgegebene Wechsel werden nunmehr unter den „Verbindlichkeiten aus Lieferungen und Leistungen“ ausgewiesen. Zuvor wurden diese Wechsel der Bilanzposition „Finanzielle Schulden“ (kurzfristig) zugeordnet. Der geänderte Ausweis trägt der wirtschaftlichen Substanz der Schuld besser Rechnung, da sie eine Finanzierung aus Transaktionen mit Lieferanten darstellt und sich aus der Begebung von Wechseln für die Lieferantenschulden weder etwas an der Höhe der Schulden noch an der Laufzeit ändert. Zur besseren Vergleichbarkeit wurden die Vorjahreswerte in der Bilanz angepasst. Zum 31. Dezember 2009 wurden Wechselverbindlichkeiten in Höhe von 507 Mio. € aus der Bilanzposition „Finanzielle Schulden“ (kurzfristig) in die „Verbindlichkeiten aus Lieferungen und Leistungen“ umgegliedert sowie zum 1. Januar 2009 584 Mio. €. In der Kapitalflussrechnung enthält die „Veränderung des Netto-Betriebsvermögens“ („Cashflow aus laufender Geschäftstätigkeit der fortgeführten Aktivitäten“) konsequenterweise auch die Veränderungen dieser Wechselverbindlichkeiten, die vorher dem „Cashflow aus Finanzstätigkeit der fortgeführten Aktivitäten“ zugeordnet waren. Auch die Vorjahreswerte in der Kapitalflussrechnung wurden zur besseren Vergleichbarkeit angepasst. Die Anpassungen in der Kapitalflussrechnung führten für das Geschäftsjahr 2009 zu einer Abnahme des „Cashflow aus laufender Geschäftstätigkeit“ in Höhe von 77 Mio. €. Als Folge der Aufnahme der genannten Wechselverbindlichkeiten in die „Verbindlichkeiten aus Lieferungen und Leistungen“ erhöhten sich zudem die Segmentschulden der Vertriebslinie Media Markt und Saturn im Geschäftsjahr 2009 um 507 Mio. €. Darüber hinaus ergab sich aus der Umgliederung der Wechselverbindlichkeiten eine Verbesserung der bilanziellen Nettoverschuldung zum 31. Dezember 2009 in Höhe von 507 Mio. €.

#### **Umgliederungen im Sachanlagen Spiegel**

Rückwirkend zum 1. Januar 2009 werden aus Transparenzgründen die in angemieteten Gebäuden vorgenommenen Mietereinbauten nicht mehr unter „Grundstücke und Bauten“, sondern unter „Andere Anlagen, Betriebs- und Geschäftsausstattung“ innerhalb der Sachanlagen ausgewiesen. Diese Ausweisänderung hat zum 1. Januar 2009 zu einer

ergebnisneutralen Umgliederung in Höhe von 656 Mio. € geführt. Der Effekt zum 31. Dezember 2009 betrug 667 Mio. €. Darüber hinaus werden „Technische Anlagen und Maschinen“ ebenfalls rückwirkend zum 1. Januar 2009 unter „Andere Anlagen, Betriebs- und Geschäftsausstattung“ ausgewiesen, sodass sich der Wert dieser Position sowohl zum 1. Januar 2009 als auch zum 31. Dezember 2009 um 4 Mio. € erhöht hat.

### Konsolidierungskreis

In den Konzernabschluss werden neben der METRO AG alle Tochterunternehmen einbezogen, bei denen die METRO AG die Kontrolle über die Finanz- und Geschäftspolitik durch die Mehrheit der Stimmrechte oder gemäß Satzung, Unternehmensvertrag oder vertraglicher Vereinbarung innehat. Es sind 661 deutsche (Vorjahr 669) und 599 internationale (Vorjahr 581) Tochterunternehmen einbezogen, die von der METRO AG gemäß IAS 27 (Consolidated and Separate Financial Statements) in Verbindung mit SIC-12 (Consolidation – Special Purpose Entities) beherrscht werden.

Gegenüber dem Vorjahr hat sich der Konsolidierungskreis wie folgt geändert:

|                                                |              |
|------------------------------------------------|--------------|
| Stand 1. Januar 2010                           | 1.251        |
| Veränderungen im Geschäftsjahr 2010:           |              |
| Verschmelzung auf andere Konzerngesellschaften | -21          |
| Veräußerung von Anteilen                       | -6           |
| Sonstige Abgänge                               | -7           |
| Neugründungen                                  | 44           |
| <b>Stand 31. Dezember 2010</b>                 | <b>1.261</b> |

Die Zugänge aufgrund von Neugründungen (44 Gesellschaften) sind im Wesentlichen auf die Expansion von Media Markt und Saturn zurückzuführen.

In der Veräußerung von Anteilen ist der Abgang von fünf Konzerngesellschaften im Rahmen des Verkaufs von 100 Prozent der Anteile an der Metro Cash & Carry Morocco S.A. sowie deren vier 100-prozentigen Tochterunternehmen durch Metro Cash & Carry International GmbH an die marokkanische Gesellschaft Label Vie S.A. enthalten. Im Rahmen dieser Veräußerung, die mit Wirkung zum 30. November 2010 erfolgte, wurde ein Abgangsertrag von 51 Mio. € erzielt. Da neben dem operativen Geschäft auch die hiermit im Zusammenhang stehenden Immobilien veräußert wurden, entfiel der Abgangsertrag

mit 21 Mio. € auf das Segment Metro Cash & Carry und mit 30 Mio. € auf das Segment Immobilien.

Einflüsse aus der Veränderung des Konsolidierungskreises werden, sofern diese von besonderer Bedeutung sind, unter den entsprechenden Abschlussposten gesondert erläutert.

4 assoziierte Unternehmen (Vorjahr 2) und 5 Joint-Venture-Unternehmen (Vorjahr 6) werden nach der Equity-Methode in den Konzernabschluss einbezogen. Insgesamt 9 Gesellschaften (Vorjahr 9), bei denen die METRO AG einen Stimmrechtsanteil zwischen 20 und 50 Prozent innehat, werden zu Anschaffungskosten bilanziert, da entweder die Assoziierungsvermutung widerlegt wurde oder aus Wesentlichkeitsüberlegungen auf die Anwendung der Equity-Methode verzichtet werden konnte.

Eine Übersicht aller wesentlichen Konzerngesellschaften ist unter Nummer 54 „Übersicht der wesentlichen vollkonsolidierten Konzerngesellschaften“ aufgeführt. Darüber hinaus erfolgt eine vollständige Auflistung aller Konzerngesellschaften sowie der assoziierten Unternehmen unter Nummer 56 „Anteilsbesitz des METRO AG-Konzerns zum 31.12.2010 gemäß § 313 HGB“.

### Konsolidierungsgrundsätze

Die in die Konsolidierung einbezogenen Abschlüsse der in- und ausländischen Tochterunternehmen werden gemäß IAS 27 nach einheitlichen Bilanzierungs- und Bewertungsmethoden aufgestellt.

Soweit die Geschäftsjahre einbezogener Tochterunternehmen nicht am Abschlussstichtag der METRO AG am 31. Dezember enden, wurden für Zwecke der Konsolidierung Zwischenabschlüsse aufgestellt.

Die Kapitalkonsolidierung wird gemäß IFRS 3 (Business Combinations) nach der Erwerbsmethode vorgenommen. Dabei erfolgt bei Unternehmenszusammenschlüssen die Verrechnung der Beteiligungsbuchwerte mit dem anteiligen neu bewerteten Eigenkapital der Tochterunternehmen zum Zeitpunkt des Erwerbs. Nach Aufdeckung der stillen Reserven und Lasten verbleibende positive Unterschiedsbeträge werden als Geschäfts- oder Firmenwerte aktiviert. Geschäfts- oder Firmenwerte werden einmal pro Jahr – bei Vorliegen von Anhaltspunkten auch unterjährig – auf Wertminderungen hin überprüft und gegebenenfalls auf den niedrigeren erzielbaren Betrag abgeschrieben.

Darüber hinaus werden bei Unternehmenserwerben auch die auf Anteile nicht beherrschender Gesellschafter entfallenden stillen Reserven und stillen Lasten aufgedeckt und im Eigenkapital unter der Position „Anteile nicht beherrschender Gesellschafter“ gezeigt. Von dem Wahlrecht, den auf die Anteile nicht beherrschender Gesellschafter entfallenden Geschäfts- oder Firmenwert zu bilanzieren, wird in der METRO GROUP kein Gebrauch gemacht. Negative Unterschiedsbeträge aus einem Unternehmenszusammenschluss werden gemäß IFRS 3 nach Zuordnung stiller Reserven und stiller Lasten sowie nochmaliger Überprüfung in der Periode, in der der Zusammenschluss stattfand, erfolgswirksam vereinnahmt.

Erwerbe von weiteren Anteilen an Gesellschaften, bei denen die Kontrolle bereits erlangt wurde, werden als Eigenkapitaltransaktionen verbucht. Somit erfolgen weder Anpassungen auf den beizulegenden Zeitwert der Vermögenswerte und Schulden noch werden Gewinne oder Verluste vereinnahmt. Ein Unterschiedsbetrag zwischen den Kosten des zusätzlichen Anteils und dem Buchwert des Nettovermögens zum Zugangszeitpunkt wird direkt mit dem auf den Erwerber entfallenden Kapital verrechnet.

Nach der Equity-Methode bilanzierte Beteiligungen werden gemäß den für die Vollkonsolidierung geltenden Grundsätzen behandelt, wobei ein vorhandener Geschäfts- oder Firmenwert im Beteiligungsansatz und eventuell anfallende außerplanmäßige Abschreibungen hierauf entsprechend im Ergebnis aus assoziierten Unternehmen innerhalb des Finanzergebnisses enthalten sind. Gegebenenfalls abweichende Bilanzierungs- und Bewertungsmethoden in den der Equity-Bewertung zugrunde liegenden Abschlüssen werden beibehalten, sofern sie den konzernerneinheitlichen Bilanzierungs- und Bewertungsmethoden der METRO GROUP nicht wesentlich entgegenstehen.

In Einzelabschlüssen konsolidierter Tochterunternehmen getätigte Zu- beziehungsweise Abschreibungen auf Anteile an konsolidierten Tochterunternehmen werden zurückgenommen.

Konzerninterne Gewinne und Verluste werden eliminiert, Umsatzerlöse, Aufwendungen und Erträge sowie zwischen konsolidierten Tochterunternehmen bestehende Forderungen und Verbindlichkeiten beziehungsweise Rückstellungen werden konsolidiert. Zwischenergebnisse im Anlage- oder Vorratsvermögen aus konzerninternen Lieferungen werden eliminiert, wenn sie nicht von untergeordneter Bedeutung sind. Auf Konsolidierungsvorgänge werden latente Steuern gemäß IAS 12 (Income Taxes) abgegrenzt.

### Währungsumrechnung

In den Einzelabschlüssen der Tochterunternehmen werden Geschäftsvorfälle in fremder Währung mit dem Kurs zum Zeitpunkt der Erstverbuchung bewertet. Bis zum Bilanzstichtag eingetretenen Wechselkursschwankungen wird bei der Bewertung von Fremdwährungsforderungen und -verbindlichkeiten Rechnung getragen; Gewinne und Verluste hieraus werden ergebniswirksam berücksichtigt. Währungsumrechnungsdifferenzen aus Fremdwährungsforderungen und -verbindlichkeiten, die als Nettoinvestition in einen ausländischen Geschäftsbetrieb anzusehen sind, werden erfolgsneutral unter den Gewinnrücklagen ausgewiesen.

Die Jahresabschlüsse ausländischer Tochterunternehmen werden gemäß IAS 21 (The Effects of Changes in Foreign Exchange Rates) nach dem Konzept der funktionalen Währung in Euro umgerechnet. Als funktionale Währung gilt hiernach die Währung des primären Wirtschaftsumfelds, in dem das Tochterunternehmen tätig ist. Die einbezogenen Unternehmen betreiben ihre Geschäfte in finanzieller, wirtschaftlicher und organisatorischer Hinsicht grundsätzlich selbstständig, sodass ihre jeweilige Landeswährung in der Regel die funktionale Währung darstellt. Die Umrechnung der Vermögenswerte und Schulden erfolgt daher zum Mittelkurs am Bilanzstichtag; die Posten der Gewinn- und Verlustrechnung werden mit dem Jahresdurchschnittskurs umgerechnet. Differenzen aus der Umrechnung von Abschlüssen ausländischer Tochterunternehmen werden erfolgsneutral behandelt und unter den Gewinnrücklagen gesondert ausgewiesen. Im Jahr der Entkonsolidierung ausländischer Tochterunternehmen werden diese Währungsdifferenzen ergebniswirksam aufgelöst.

Im Geschäftsjahr 2010 war keine funktionale Währung eines einbezogenen Unternehmens als hochinflationär im Sinne des IAS 29 (Financial Reporting in Hyperinflationary Economies) klassifiziert.

Für die Währungsumrechnung wurden hinsichtlich der für die METRO GROUP wichtigsten Währungen der Länder, die nicht an der Europäischen Währungsunion teilnehmen, folgende Wechselkurse zugrunde gelegt:

|                       |     | Durchschnittskurs je € |              | Stichtagskurs je € |              |
|-----------------------|-----|------------------------|--------------|--------------------|--------------|
|                       |     | 2010                   | 2009         | 31.12.2010         | 31.12.2009   |
| Ägyptisches Pfund     | EGP | 7,47542                | 7,74040      | 7,69730            | 7,85800      |
| Bosnische Mark        | BAM | 1,95583                | 1,95583      | 1,95583            | 1,95583      |
| Britisches Pfund      | GBP | 0,85836                | 0,89129      | 0,86075            | 0,88810      |
| Bulgarischer Lew      | BGN | 1,95583                | 1,95583      | 1,95583            | 1,95583      |
| Chinesischer Renminbi | CNY | 8,97949                | 9,52269      | 8,82200            | 9,83500      |
| Dänische Krone        | DKK | 7,44723                | 7,44634      | 7,45350            | 7,44180      |
| Hongkong-Dollar       | HKD | 10,30688               | 10,80623     | 10,38560           | 11,17090     |
| Indische Rupie        | INR | 60,61675               | 67,27274     | 59,75800           | 66,49150     |
| Japanischer Yen       | JPY | 116,46337              | 130,33060    | 108,65000          | 133,16000    |
| Kasachischer Tenge    | KZT | 195,36055              | 206,08600    | 196,88000          | 213,95000    |
| Kroatische Kuna       | HRK | 7,28869                | 7,34100      | 7,38300            | 7,30000      |
| Marokkanischer Dirham | MAD | 11,16107               | 11,25572     | 11,16765           | 11,31905     |
| Moldau-Leu            | MDL | 16,40377               | 15,51803     | 16,10450           | 17,64260     |
| Pakistanische Rupie   | PKR | 113,09190              | 114,09848    | 114,43630          | 121,37110    |
| Polnischer Złoty      | PLN | 3,99543                | 4,32764      | 3,97500            | 4,10450      |
| Neuer Rumänischer Leu | RON | 4,21160                | 4,23794      | 4,26200            | 4,23630      |
| Russischer Rubel      | RUB | 40,27777               | 44,11781     | 40,82000           | 43,15400     |
| Schwedische Krone     | SEK | 9,54630                | 10,62298     | 8,96550            | 10,25200     |
| Schweizer Franken     | CHF | 1,38198                | 1,51010      | 1,25040            | 1,48360      |
| Serbischer Dinar      | RSD | 102,89962              | 93,90046     | 105,49820          | 95,88880     |
| Singapur-Dollar       | SGD | 1,80791                | 2,02369      | 1,71360            | 2,01940      |
| Tschechische Krone    | CZK | 25,29832               | 26,43568     | 25,06100           | 26,47300     |
| Türkische Lira        | TRY | 1,99805                | 2,16211      | 2,06940            | 2,15470      |
| Ukrainische Hrywnja   | UAH | 10,53283               | 10,87168     | 10,57314           | 11,50094     |
| Ungarischer Forint    | HUF | 275,40584              | 280,39477    | 277,95000          | 270,42000    |
| US-Dollar             | USD | 1,32671                | 1,39415      | 1,33620            | 1,44060      |
| Vietnamesischer Dong  | VND | 24.682,19000           | 23.796,97000 | 25.187,13000       | 25.723,81000 |

## Gewinn- und Verlustrechnung

### Ertrags- und Aufwandsrealisierung

Die Erfassung von Umsatzerlösen und sonstigen betrieblichen Erträgen erfolgt gemäß IAS 18 (Revenue), sobald die Leistungen erbracht beziehungsweise die Waren oder Erzeugnisse geliefert worden sind beziehungsweise der Gefahrenübergang auf den Kunden erfolgt ist. Umsatzerlöse werden nach Abzug von Rabatten und Skonti ausgewiesen.

**Betriebliche Aufwendungen** werden mit Inanspruchnahme der Leistung beziehungsweise zum Zeitpunkt ihrer Verursachung als Aufwand erfasst.

**Dividenden** werden grundsätzlich mit der Entstehung des Rechtsanspruchs auf Zahlung vereinnahmt.

**Zinsen** werden periodengerecht, gegebenenfalls unter Anwendung der Effektivzinsmethode, als Aufwand beziehungsweise Ertrag erfasst.

### Steuern vom Einkommen und vom Ertrag

Die **Steuern vom Einkommen und vom Ertrag** betreffen die tatsächlichen und die latenten Steuern vom Einkommen und vom Ertrag.

### Bilanz

#### Immaterielle Vermögenswerte

**Geschäfts- oder Firmenwerte** werden in Übereinstimmung mit IFRS 3 (Business Combinations) aktiviert. Ein aus einem Unternehmenszusammenschluss resultierender Geschäfts- oder Firmenwert wird derjenigen Gruppe sogenannter zahlungs-



mittelgenerierender Einheiten zugeordnet, die aus den Synergien des Zusammenschlusses Nutzen zieht. Die zahlungsmittelgenerierende Einheit ist gemäß IAS 36 (Impairment of Assets) definiert als die kleinste identifizierbare Gruppe von Vermögenswerten, die Mittelzuflüsse erzeugt, die weitestgehend unabhängig von den Mittelzuflüssen anderer Vermögenswerte oder anderer Gruppen von Vermögenswerten sind. Eine zahlungsmittelgenerierende Einheit innerhalb der METRO GROUP ist grundsätzlich ein einzelner Standort. Geschäfts- oder Firmenwerte innerhalb der METRO GROUP werden auf Ebene der Organisationseinheit Vertriebslinie pro Land für interne Managementzwecke überwacht. Die Prüfung der Geschäfts- oder Firmenwerte auf Wertminderung erfolgt daher auf Ebene dieser jeweiligen Gruppe zahlungsmittelgenerierender Einheiten.

Die aktivierten Geschäfts- oder Firmenwerte werden regelmäßig einmal pro Jahr – bei Vorliegen von Anhaltspunkten auch unterjährig – auf Wertminderungen hin überprüft und gegebenenfalls außerplanmäßig abgeschrieben. Eine Zuschreibung erfolgt bei Fortfall der Gründe einer in Vorjahren vorgenommenen außerplanmäßigen Abschreibung nicht.

Zur Ermittlung einer möglichen Wertminderung wird der erzielbare Betrag einer Gruppe von zahlungsmittelgenerierenden Einheiten mit der Summe der Buchwerte verglichen. Der erzielbare Betrag ergibt sich aus dem höheren Wert aus Nutzungswert und Fair Value abzüglich Veräußerungskosten. Eine Wertminderung für den einer Gruppe von zahlungsmittelgenerierenden Einheiten zugeordneten Geschäfts- oder Firmenwert liegt nur dann vor, wenn der erzielbare Betrag kleiner als die Summe der Buchwerte ist.

**Entgeltlich erworbene sonstige immaterielle Vermögenswerte** werden mit ihren Anschaffungskosten angesetzt. **Selbst erstellte immaterielle Vermögenswerte** werden mit den Herstellungskosten für ihre Entwicklung aktiviert, wenn die Aktivierungskriterien gemäß IAS 38 (Intangible Assets) erfüllt sind. Die Herstellungskosten umfassen dabei alle beim Herstellungsprozess anfallenden direkt zurechenbaren Kosten. Hierzu können folgende Kosten zählen:

|                                             |                                            |
|---------------------------------------------|--------------------------------------------|
| <b>Einzelkosten</b>                         | Materialeinzelkosten                       |
|                                             | Fertigungseinzelkosten                     |
|                                             | Sondereinzelkosten der Fertigung           |
| <b>Gemeinkosten</b><br>(direkt zurechenbar) | Materialgemeinkosten                       |
|                                             | Fertigungsgemeinkosten                     |
|                                             | Werteverzehr des Anlagevermögens           |
|                                             | Entwicklungsbezogene Kosten der Verwaltung |

Bei der Ermittlung der Herstellungskosten werden Fremdkapitalkosten nur einbezogen, falls es sich um einen sogenannten qualifizierten Vermögenswert im Sinne des IAS 23 (Borrowing Costs) handelt. Ein qualifizierter Vermögenswert ist ein nicht finanzieller Vermögenswert, bei dem ein beträchtlicher Zeitraum benötigt wird, um diesen in den beabsichtigten gebrauchsfähigen Zustand zu versetzen. Die Kosten der Forschungsphase werden nicht aktiviert, sondern sofort als Aufwand erfasst.

Alle sonstigen immateriellen Vermögenswerte haben eine **begrenzte wirtschaftliche Nutzungsdauer** und werden daher planmäßig linear abgeschrieben. Aktivierte selbst erstellte und erworbene Software sowie vergleichbare immaterielle Vermögenswerte werden über einen Zeitraum von drei bis fünf Jahren, Lizenzen über ihre wirtschaftliche Nutzungsdauer abgeschrieben. Für diese immateriellen Vermögenswerte wird zu jedem Bilanzstichtag geprüft, ob Anzeichen für eine Wertminderung vorliegen. Eine außerplanmäßige Abschreibung wird vorgenommen, falls der erzielbare Betrag unter den fortgeführten Anschaffungs- oder Herstellungskosten liegt. Eine Zuschreibung erfolgt bei Fortfall der Gründe einer in Vorjahren vorgenommenen außerplanmäßigen Abschreibung.

**Sachanlagen**

**Vermögenswerte des Sachanlagevermögens**, die im Geschäftsbetrieb länger als ein Jahr genutzt werden, sind mit ihren Anschaffungs- oder Herstellungskosten abzüglich planmäßiger Abschreibungen bewertet. Die wahlrechtlich mögliche Neubewertungsmethode nach IAS 16 (Property, Plant and Equipment) kommt nicht zur Anwendung. In den Herstellungskosten der selbst erstellten Anlagen sind neben den Einzelkosten angemessene Teile der zurechenbaren Gemeinkosten enthalten. Finanzierungskosten werden ausschließlich bei qualifizierten Vermögenswerten als Bestandteil der Anschaffungs- oder Herstellungskosten aktiviert. Erhaltene **Investitionszuschüsse** werden berücksichtigt, indem die Anschaffungs- oder Herstellungskosten des entsprechenden Vermögenswerts um den Betrag des Zuschusses gekürzt werden. **Rückbauverpflichtungen** werden in Höhe des abgezinsten Erfüllungsbetrags in die Anschaffungs- oder Herstellungskosten einbezogen. Die aktivierten Rückbaukosten werden ratiertlich über die Nutzungsdauer des Vermögenswerts abgeschrieben.

Die Abschreibung der Sachanlagen erfolgt ausschließlich nach der linearen Methode. Den planmäßigen Abschreibungen liegen konzerneinheitlich folgende wirtschaftliche Nutzungsdauern zugrunde:

|                                    |                                               |
|------------------------------------|-----------------------------------------------|
| Gebäude                            | 10 bis 33 Jahre                               |
| Einbauten in gemieteten Gebäuden   | 8 bis 15 Jahre bzw. kürzere Mietvertragsdauer |
| Betriebs- und Geschäftsausstattung | 3 bis 13 Jahre                                |
| Maschinen                          | 3 bis 8 Jahre                                 |

Bestehen Anhaltspunkte für eine Wertminderung und liegt der erzielbare Betrag unter den fortgeführten Anschaffungs- oder Herstellungskosten, werden die Sachanlagen außerplanmäßig abgeschrieben. Bei Fortfall der Gründe für die außerplanmäßigen Abschreibungen werden entsprechende Zuschreibungen vorgenommen.

Das wirtschaftliche Eigentum an **Leasinggegenständen** ist in Übereinstimmung mit IAS 17 (Leases) dem Leasingnehmer zuzurechnen, wenn dieser alle wesentlichen mit dem Leasingobjekt verbundenen Chancen und Risiken trägt (Finanzierungs-Leasing). Sofern das wirtschaftliche Eigentum den Unternehmen der METRO GROUP zuzurechnen ist, erfolgt die Aktivierung des Leasinggegenstands zum Zeitpunkt des Vertragsabschlusses in Höhe des Fair Values beziehungsweise des niedrigeren Barwerts der Mindestleasingzahlungen. Die Abschreibungen erfolgen – entsprechend vergleichbaren erworbenen Gegenständen des Sachanlagevermögens – planmäßig über die Nutzungsdauer beziehungsweise über die Laufzeit des Leasingverhältnisses, sofern diese kürzer ist. Falls es allerdings hinreichend sicher ist, dass das Eigentum am Leasingobjekt zum Ende der Laufzeit auf den Leasingnehmer übertragen wird, erfolgt die Abschreibung über die Nutzungsdauer. Die aus den zukünftigen Leasingraten resultierenden Zahlungsverpflichtungen sind passiviert.

#### Als Finanzinvestition gehaltene Immobilien

**Als Finanzinvestition gehaltene Immobilien** umfassen nach IAS 40 (Investment Property) solche Immobilien, die zur Erzielung von Mieteinnahmen und/oder zum Zwecke der Wertsteigerung gehalten werden. Sie werden analog zu den Sachanlagen gemäß dem Anschaffungskostenmodell mit ihren Anschaffungs- oder Herstellungskosten abzüglich planmäßiger und gegebenenfalls notwendiger außerplanmäßiger Abschreibungen bilanziert. Eine erfolgswirksame Bewertung zum Fair Value erfolgt nicht. Die planmäßige Abschreibung der als Finanzinvestition gehaltenen Immobilien erfolgt über eine Nutzungsdauer von 15 bis 33 Jahren. Zusätzlich wird der Fair Value dieser Immobilien im Anhang angegeben. Dieser wird entweder mithilfe anerkannter Bewertungsmethoden ermittelt oder basiert auf externen Gutachten.

#### Finanzielle Vermögenswerte

Sofern es sich hierbei nicht um **assoziierte Unternehmen** im Sinne des IAS 28 (Investments in Associates) oder Joint Ventures gemäß IAS 31 (Interests in Joint Ventures) handelt, sind die **finanziellen Vermögenswerte** gemäß IAS 39 (Financial Instruments: Recognition and Measurement) bilanziert und in Abhängigkeit von der hiernach vorzunehmenden Klassifizierung entweder zu (fortgeführten) Anschaffungskosten oder zu Fair Values angesetzt. Der Ansatz erfolgt stets zum Handelstag.

**Beteiligungen** gehören der Klasse „zur Veräußerung verfügbar“ an. Sie werden zum Zeitpunkt ihrer erstmaligen Erfassung mit dem Fair Value inklusive Transaktionskosten bewertet. Sofern in den Folgeperioden die Fair Values zuverlässig ermittelt werden können, sind diese angesetzt; in den Fällen, in denen keine aktiven Märkte existieren und sich die Fair Values nicht mit vertretbarem Aufwand ermitteln lassen, sind die Anschaffungskosten ausgewiesen. **Wertpapiere** sind den Kategorien „bis zur Endfälligkeit gehalten“, „zur Veräußerung verfügbar“ oder „erfolgswirksam zum Fair Value“ zugeordnet. Innerhalb der Kategorie „erfolgswirksam zum Fair Value“ sind alle finanziellen Vermögenswerte als „zu Handelszwecken gehalten“ klassifiziert, da von der Fair-Value-Option des IAS 39 innerhalb der METRO GROUP kein Gebrauch gemacht wird. Um dies deutlich zu machen, wird die gesamte Kategorie im Konzernanhang als „zu Handelszwecken gehalten“ bezeichnet. **Ausleihungen** sind als „Kredite und Forderungen“ klassifiziert und werden folglich mit den fortgeführten Anschaffungskosten unter Anwendung der Effektivzinsmethode bilanziert. Finanzielle Vermögenswerte, die als gesichertes Grundgeschäft innerhalb eines Fair-Value-Hedges designiert sind, werden erfolgswirksam mit ihrem Fair Value bilanziert.

Wertschwankungen von finanziellen Vermögenswerten der Klasse „zur Veräußerung verfügbar“ werden – gegebenenfalls unter Berücksichtigung latenter Steuern – erfolgsneutral im Eigenkapital abgebildet. Die Übernahme der erfolgsneutral erfassten Beträge in das Periodenergebnis erfolgt erst zum Zeitpunkt des Abgangs oder im Falle einer nachhaltigen Wertminderung der Vermögenswerte.

Falls Hinweise auf eine Wertminderung bei einem zu fortgeführten Anschaffungskosten angesetzten finanziellen Vermögenswert vorliegen, wird dessen Werthaltigkeit überprüft und sofern notwendig eine entsprechende außerplanmäßige Abschreibung vorgenommen. Wenn zu einem späteren Zeitpunkt die Gründe hierfür nicht mehr vorliegen, erfolgt eine Zuschreibung auf die fortgeführten Anschaffungskosten.

### Latente Steuern

Die Ermittlung **latenter Steuern** erfolgt in Übereinstimmung mit IAS 12. Danach werden für temporäre Unterschiede zwischen den im Konzernabschluss angesetzten Buchwerten und den steuerlichen Wertansätzen von Vermögenswerten und Schulden zukünftig wahrscheinlich eintretende Steuerent- und -belastungen bilanziert. Erwartete Steuerersparnisse aus der Nutzung von als zukünftig realisierbar eingeschätzten Verlustvorträgen werden aktiviert.

Aktive latente Steuern aus abzugsfähigen temporären Unterschieden und steuerlichen Verlustvorträgen, die die passiven latenten Steuern aus zu versteuernden temporären Unterschieden übersteigen, werden nur in dem Umfang angesetzt, in dem mit hinreichender Wahrscheinlichkeit angenommen werden kann, dass ausreichend steuerpflichtiges Einkommen zur Realisierung des entsprechenden Nutzens erzielt wird.

Latente Steueransprüche und latente Steuerschulden werden saldiert, sofern diese ertragsteuerlichen Ansprüche und Schulden gegenüber der gleichen Steuerbehörde bestehen und sich auf dasselbe Steuersubjekt oder eine Gruppe unterschiedlicher Steuersubjekte beziehen, die ertragsteuerlich gemeinsam veranlagt werden.

### Vorräte

Die als **Vorräte** bilanzierten Handelswaren werden gemäß IAS 2 (Inventories) zu Anschaffungskosten angesetzt. Die Anschaffungskosten werden entweder auf Basis einer Einzelbewertung der Zugänge aus Sicht des Beschaffungsmarkts oder unter Verwendung der Durchschnittskostenmethode ermittelt.

Die Bewertung der Handelswaren am Bilanzstichtag erfolgt zum jeweils niedrigeren Betrag aus Anschaffungskosten und Nettoveräußerungswert. Bei den Handelswaren werden individuelle Bewertungsabschlüsse vorgenommen, sofern der Nettoveräußerungswert niedriger ist als der Buchwert. Als Nettoveräußerungswert werden die voraussichtlich erzielbaren Verkaufserlöse abzüglich der bis zum Verkauf noch anfallenden, direkt zurechenbaren Verkaufskosten angesetzt.

Wenn die Gründe, die zu einer Abwertung der Handelswaren geführt haben, nicht länger bestehen, wird eine entsprechende Wertaufholung vorgenommen.

### Forderungen aus Lieferungen und Leistungen

**Forderungen aus Lieferungen und Leistungen** werden gemäß IAS 39 als „Kredite und Forderungen“ klassifiziert und mit den

fortgeführten Anschaffungskosten angesetzt. Bestehen an der Einbringbarkeit Zweifel, werden die Kundenforderungen mit dem niedrigeren Barwert der geschätzten zukünftigen Cashflows angesetzt. Neben den erforderlichen Einzelwertberichtigungen wird den erkennbaren Risiken aus dem allgemeinen Kreditrisiko durch Bildung von pauschalierten Einzelwertberichtigungen Rechnung getragen.

### Sonstige Forderungen und Vermögenswerte

Die in den **sonstigen Forderungen und Vermögenswerten** ausgewiesenen finanziellen Vermögenswerte, die gemäß IAS 39 der Klasse „Kredite und Forderungen“ angehören, sind mit den fortgeführten Anschaffungskosten bewertet.

Im Rahmen der **Rechnungsabgrenzungsposten** werden transitorische Abgrenzungen ausgewiesen.

Unter den **übrigen Vermögenswerten** werden unter anderem Beteiligungen ausgewiesen sowie derivative Finanzinstrumente, die gemäß IAS 39 als „zu Handelszwecken gehalten“ zu klassifizieren sind. Sie werden im Zeitpunkt ihrer erstmaligen Erfassung mit dem Fair Value bewertet, der den Anschaffungskosten ohne Einbeziehung der Transaktionskosten entspricht. Sofern die Fair Values dieser Finanzinstrumente in der Folge zuverlässig ermittelt werden können, werden diese angesetzt. In den Fällen, in denen keine aktiven Märkte existieren und sich die Fair Values nicht mit vertretbarem Aufwand ermitteln lassen, sind die fortgeführten Anschaffungskosten ausgewiesen. Alle anderen Forderungen und Vermögenswerte sind ebenfalls zu fortgeführten Anschaffungskosten angesetzt.

Bei Anzeichen für eine Wertminderung wird die Werthaltigkeit des Vermögenswerts überprüft. Falls diese nicht gegeben ist, erfolgt eine entsprechende außerplanmäßige Abschreibung. Sollten die Gründe hierfür später nicht mehr vorliegen, erfolgt eine Wertaufholung.

### Ertragsteuererstattungsansprüche und -schulden

Die bilanzierten **Ertragsteuererstattungsansprüche und -schulden** betreffen in- und ausländische Ertragsteuern für das laufende Jahr sowie aus Vorjahren. Sie werden in Übereinstimmung mit den steuerlichen Vorschriften des jeweiligen Landes ermittelt.

### Zahlungsmittel

Die **Zahlungsmittel** beinhalten Schecks, Kassenbestände sowie Guthaben bei Kreditinstituten mit einer Laufzeit von bis zu drei Monaten und sind mit den jeweiligen Nennwerten bewertet.

### Rückstellungen

Die versicherungsmathematische Bewertung der **Pensionsrückstellungen** für die betriebliche Altersversorgung erfolgt nach der in IAS 19 (Employee Benefits) vorgeschriebenen Methode der laufenden Einmalprämien (Projected Unit Credit Method). Im Rahmen dieses Anwartschaftsbarwertverfahrens werden unter Berücksichtigung biometrischer Daten sowohl die am Bilanzstichtag bekannten Renten und erworbenen Anwartschaften als auch die künftig zu erwartenden Steigerungen der Gehälter und Renten berücksichtigt. Falls die ermittelte Leistungsverpflichtung oder der Fair Value des Planvermögens zwischen dem Beginn und dem Ende eines Geschäftsjahres aufgrund von erfahrungsbedingten Anpassungen oder Änderungen der zugrunde liegenden versicherungsmathematischen Annahmen (zum Beispiel Diskontierungszinssatz oder erwartete Rendite des Planvermögens) steigen oder sinken, entstehen hieraus sogenannte versicherungsmathematische Gewinne oder Verluste. Bei deren bilanzieller Behandlung findet innerhalb der METRO GROUP unter Ausübung eines Wahlrechts die Korridormethode Anwendung (anstatt der direkten erfolgswirksamen Erfassung in der Gewinn- und Verlustrechnung oder der erfolgsneutralen Erfassung im Eigenkapital). Nach der Korridormethode werden versicherungsmathematische Gewinne und Verluste nur erfasst, falls deren kumulierter, nicht erfasster Betrag den höheren Wert aus 10 Prozent des Barwerts der Leistungsverpflichtung und 10 Prozent des Fair Values des Planvermögens übersteigt. In diesem Fall werden die den Korridor übersteigenden versicherungsmathematischen Gewinne oder Verluste ab dem Folgejahr über die durchschnittliche Restdienstzeit der berechtigten Mitarbeiter verteilt und als Ertrag oder Aufwand erfasst. Die Korridormethode trägt dem Umstand Rechnung, dass sich versicherungsmathematische Gewinne und Verluste langfristig ausgleichen können. Durch diese Methode werden hohe Volatilitäten in der Gewinn- und Verlustrechnung beziehungsweise im Eigenkapital vermieden. Der in den Pensionsaufwendungen enthaltene Zinsanteil der Rückstellungszuführung wird als Zinsaufwand innerhalb des Finanzergebnisses gezeigt. **Rückstellungen für pensionsähnliche Verpflichtungen** (wie zum Beispiel Jubiläums- und Sterbegelder) werden auf Basis von versicherungsmathematischen Gutachten gemäß IAS 19 gebildet.

**(Sonstige) Rückstellungen** werden gemäß IAS 37 (Provisions, Contingent Liabilities and Contingent Assets) gebildet, soweit rechtliche oder faktische Verpflichtungen gegenüber Dritten bestehen, die auf zurückliegenden Geschäftsvorfällen oder Ereignissen beruhen und wahrscheinlich zu Vermögensabflüssen

führen, die zuverlässig ermittelbar sind. Die Rückstellungen werden unter Berücksichtigung aller daraus erkennbaren Risiken zum voraussichtlichen Erfüllungsbetrag angesetzt und nicht mit Rückgriffsansprüchen verrechnet. Dabei wird grundsätzlich von dem Erfüllungsbetrag mit der höchsten Eintrittswahrscheinlichkeit ausgegangen.

Für standortbezogene Risiken angemieteter Objekte erfolgt zur Ermittlung der Rückstellung für Mietunterdeckung eine Betrachtung der einzelnen Standorte. Die gleiche Betrachtung gilt auch für weiterbetriebene Standorte, sofern sich aus der aktuellen Unternehmensplanung über die Grundmietzeit eine Unterdeckung für den jeweiligen Standort ergibt. Die Rückstellung wird maximal in Höhe der Unterdeckung bewertet, die sich bei einer möglichen Untervermietung ergibt.

Rückstellungen für Restrukturierungsmaßnahmen werden angesetzt, soweit zum Bilanzstichtag die faktische Verpflichtung zur Restrukturierung durch Verabschiedung eines detaillierten Restrukturierungsplans und dessen Kommunikation an die Betroffenen formalisiert wurde. Die Restrukturierungsrückstellungen enthalten ausschließlich solche Ausgaben, die zwangsweise im Zuge der Restrukturierung entstehen und nicht mit den laufenden Aktivitäten des Unternehmens im Zusammenhang stehen.

Rückstellungen für Garantieleistungen werden auf Grundlage der tatsächlich eingetretenen Garantieleistungen der Vergangenheit sowie der Umsätze des Geschäftsjahres gebildet.

Langfristige Rückstellungen, zum Beispiel für Mietunterdeckungen oder Rückbauverpflichtungen, sind mit ihrem auf den Bilanzstichtag abgezinsten Erfüllungsbetrag angesetzt.

### Verbindlichkeiten

Die **Verbindlichkeiten aus Lieferungen und Leistungen** sind zu fortgeführten Anschaffungskosten angesetzt.

Grundsätzlich sind alle **finanziellen Schulden** gemäß IAS 39 zu ihren fortgeführten Anschaffungskosten unter Anwendung der Effektivzinsmethode angesetzt, da die Fair-Value-Option in der METRO GROUP nicht angewandt wird. Finanzschulden, die als Grundgeschäft innerhalb eines Fair-Value-Hedges designiert sind, werden mit ihrem Fair Value passiviert. Die angegebenen Fair Values der Finanzschulden sind auf Basis der am Bilanzstichtag für die entsprechenden Restlaufzeiten und Tilgungsstrukturen gültigen Zinssätze ermittelt.

Finanzielle Schulden aus Finanzierungs-Leasingverhältnissen sind grundsätzlich mit dem Barwert der zukünftigen Mindestleasingzahlungen passiviert.

Die **sonstigen Verbindlichkeiten** sind zum Rückzahlungsbetrag angesetzt, sofern es sich nicht um derivative Finanzinstrumente oder um mit Andienungsrechten versehene Gesellschaftsanteile handelt, die gemäß IAS 39 mit dem Fair Value bilanziert sind. Im Rahmen der Rechnungsabgrenzungsposten werden hier transitorische Abgrenzungen gezeigt.

#### Eventualverbindlichkeiten

**Eventualverbindlichkeiten** sind einerseits **mögliche** Verpflichtungen, die aus vergangenen Ereignissen resultieren, deren Existenz jedoch erst durch das Eintreten oder Nichteintreten unsicherer künftiger Ereignisse bestätigt wird, die nicht vollständig unter der Kontrolle des Unternehmens stehen. Andererseits stellen Eventualverbindlichkeiten **gegenwärtige** Verpflichtungen dar, die aus vergangenen Ereignissen resultieren, bei denen ein Ressourcenabfluss jedoch als nicht wahrscheinlich eingeschätzt wird oder deren Höhe nicht ausreichend verlässlich bestimmt werden kann. Solche Verpflichtungen sind nach IAS 37 nicht in der Bilanz zu erfassen, sondern im Anhang anzugeben.

#### Bilanzierung von derivativen Finanzinstrumenten/Hedge Accounting

**Derivative Finanzinstrumente** werden ausschließlich zur Risikoreduzierung eingesetzt. Ihr Einsatz erfolgt im Rahmen der Vorgaben der entsprechenden Konzernrichtlinie.

Alle derivativen Finanzinstrumente sind gemäß IAS 39 zum Fair Value bilanziert und unter den sonstigen Forderungen und Vermögenswerten beziehungsweise unter den sonstigen Verbindlichkeiten ausgewiesen.

Zur Bewertung der derivativen Finanzinstrumente werden die Interbankenkonditionen gegebenenfalls inklusive der für die METRO GROUP gültigen Kreditmargen oder Börsenkurse herangezogen; dabei werden die Geld- und Briefkurse am Bilanzstichtag verwendet. Falls keine Börsenkurse Anwendung finden, wird der Fair Value mittels anerkannter finanzwirtschaftlicher Modelle berechnet. Die angesetzten Fair Values entsprechen jeweils dem Betrag, zu dem zwischen sachverständigen, vertragswilligen und voneinander unabhängigen Geschäftspartnern ein Vermögenswert getauscht oder eine Schuld beglichen werden könnte.

Gewinne und Verluste aus derivativen Finanzinstrumenten, die als qualifizierte Sicherungsinstrumente innerhalb eines Fair-Value-Hedges bestimmt wurden oder für die kein qualifizierter Sicherungszusammenhang nach den Vorschriften des IAS 39 hergestellt werden konnte und daher kein **Hedge Accounting** angewandt werden durfte, sind erfolgswirksam in der Gewinn- und Verlustrechnung erfasst. Die Ergebnisse aus derivativen Finanzinstrumenten, für die ein Cashflow Hedge gebildet und für die die Effektivität nachgewiesen ist, werden bis zum Realisationszeitpunkt des gesicherten Grundgeschäfts erfolgsneutral im Eigenkapital erfasst. Etwaige Ergebnisveränderungen aus der Ineffektivität dieser Finanzinstrumente sind sofort erfolgswirksam in der Gewinn- und Verlustrechnung erfasst.

#### Bilanzierung von anteilsbasierten Vergütungen

Die im Rahmen des **anteilsbasierten Vergütungssystems** gewährten Aktienprämien sind als „anteilsbasierte Vergütungen mit Barausgleich“ klassifiziert. Für diese werden ratierliche, mit dem Fair Value der eingegangenen Verpflichtungen bewertete Rückstellungen gebildet. Der ratierliche Aufbau der Rückstellungen erfolgt dabei erfolgswirksam als Personalaufwand über die jeweils zugrunde liegende Sperrfrist verteilt. Soweit die gewährten anteilsbasierten Vergütungen durch den Abschluss korrespondierender Sicherungsgeschäfte abgesichert wurden, sind die Sicherungsgeschäfte zum Fair Value bewertet und unter den sonstigen Forderungen und Vermögenswerten ausgewiesen. Hierbei wird der Teil der Wertschwankung der Sicherungsgeschäfte in dem Maße, in dem sie der Wertschwankung der anteilsbasierten Vergütungen entsprechen, erfolgswirksam als Personalaufwand erfasst. Der überschüssige Teil der Wertschwankungen wird erfolgsneutral im Eigenkapital gezeigt.

#### Bilanzierung von zur Veräußerung vorgesehenen langfristigen Vermögenswerten und nicht fortgeführten Aktivitäten

Ein **langfristiger Vermögenswert** ist gemäß IFRS 5 (Non-current Assets Held for Sale and Discontinued Operations) als „zur Veräußerung vorgesehen“ klassifiziert, sofern der zugehörige Buchwert vornehmlich durch Veräußerung und nicht durch fortgesetzte Nutzung realisiert werden soll. Ein Verkauf muss grundsätzlich innerhalb der nächsten zwölf Monate geplant und durchführbar sein. Dieser Vermögenswert ist zum niedrigeren Wert aus Buchwert und Fair Value abzüglich Veräußerungskosten angesetzt und in der Bilanz gesondert ausgewiesen.

Ein Unternehmensbestandteil ist nach IFRS 5 als **nicht fortgeführte Aktivität** bilanziert, wenn dieser zur Veräußerung vorgesehen ist oder bereits veräußert wurde. Die nicht fortgeführte

Aktivität ist mit dem niedrigeren Wert aus Buchwert und Fair Value abzüglich Veräußerungskosten angesetzt. In Gewinn- und Verlustrechnung, Bilanz, Kapitalflussrechnung und Segmentberichterstattung sind nicht fortgeführte Aktivitäten jeweils gesondert dargestellt und im Anhang erläutert. Vorjahreszahlen sind hierbei – mit Ausnahme der Bilanz – entsprechend angepasst.

### Verwendung von Annahmen und Schätzungen

Bei der Aufstellung des Konzernabschlusses sind **Annahmen** getroffen und **Schätzungen** verwandt worden, die sich auf Ausweis und Höhe der bilanzierten Vermögenswerte, Schulden,

### Zusammenfassung ausgewählter Bewertungsmethoden

| Position                                                   | Bewertungsmethode                                                                                     |
|------------------------------------------------------------|-------------------------------------------------------------------------------------------------------|
| <b>Aktiva</b>                                              |                                                                                                       |
| Geschäfts- oder Firmenwerte                                | Anschaffungskosten<br>(Folgebewertung: Impairment-Test)                                               |
| Sonstige immaterielle Vermögenswerte                       |                                                                                                       |
| Entgeltlich erworbene sonstige immaterielle Vermögenswerte | (Fortgeführte) Anschaffungskosten                                                                     |
| Selbst erstellte immaterielle Vermögenswerte               | Herstellungskosten der Entwicklung<br>(Einzelkosten und direkt zurechenbare Gemeinkosten)             |
| Sachanlagen                                                | (Fortgeführte) Anschaffungskosten                                                                     |
| Als Finanzinvestition gehaltene Immobilien                 | (Fortgeführte) Anschaffungskosten                                                                     |
| Finanzielle Vermögenswerte                                 |                                                                                                       |
| „Kredite und Forderungen“                                  | (Fortgeführte) Anschaffungskosten                                                                     |
| „bis zur Endfälligkeit gehalten“                           | (Fortgeführte) Anschaffungskosten                                                                     |
| „zu Handelszwecken gehalten“                               | Erfolgswirksam zum Fair Value                                                                         |
| „zur Veräußerung verfügbar“                                | Erfolgsneutral zum Fair Value                                                                         |
| Vorräte                                                    | Niedrigerer Wert aus Anschaffungskosten und Nettoveräußerungswert                                     |
| Forderungen aus Lieferungen und Leistungen                 | (Fortgeführte) Anschaffungskosten                                                                     |
| Zahlungsmittel                                             | Nennwert                                                                                              |
| Zur Veräußerung vorgesehene Vermögenswerte                 | Niedrigerer Wert aus Buchwert und Fair Value abzüglich Veräußerungskosten                             |
| <b>Passiva</b>                                             |                                                                                                       |
| Rückstellungen                                             |                                                                                                       |
| Pensionsrückstellungen                                     | Methode der laufenden Einmalprämien bzw. Projected Unit Credit Method (Anwartschaftsbarwertverfahren) |
| Sonstige Rückstellungen                                    | Erfüllungsbetrag (mit höchster Eintrittswahrscheinlichkeit)                                           |
| Finanzielle Schulden                                       | (Fortgeführte) Anschaffungskosten                                                                     |
| Sonstige Verbindlichkeiten                                 | Erfüllungsbetrag oder Fair Value                                                                      |
| Verbindlichkeiten aus Lieferungen und Leistungen           | (Fortgeführte) Anschaffungskosten                                                                     |

Erträge, Aufwendungen sowie der Eventualverbindlichkeiten ausgewirkt haben. Diese Annahmen und Schätzungen beziehen sich im Wesentlichen auf die Beurteilung der Werthaltigkeit von Vermögenswerten wie beispielsweise Geschäfts- oder Firmenwerten, die konzerneinheitliche Festlegung wirtschaftlicher Nutzungsdauern, die Bewertung von Rückstellungen (zum Beispiel für Restrukturierungen, Pensionen oder standortbezogene Risiken) sowie die Realisierbarkeit zukünftiger Steuerentlastungen, insbesondere aus Verlustvorträgen. Des Weiteren sind Schätzungen und Annahmen vor allem bei der Ermittlung von Fair Values im Rahmen der Erstkonsolidierung von Bedeutung. Die tatsächlichen Werte können in Einzelfällen von den getroffenen Annahmen und Schätzungen abweichen. Änderungen werden zum Zeitpunkt der besseren Kenntnis berücksichtigt.

### Kapitalmanagement

Ziele der Kapitalmanagementstrategie der METRO GROUP sind die Sicherung des Geschäftsbetriebs, die Steigerung des Unternehmenswerts, die Schaffung einer soliden Kapitalbasis zur Finanzierung des profitablen Wachstumskurses sowie die Gewährleistung attraktiver Dividendenzahlungen und des Kapitaldienstes.

Die Kapitalmanagementstrategie der METRO GROUP hat sich im Vergleich zum Vorjahr nicht geändert.

### EBIT after Cost of Capital (EBITaC)

Die Steuerung der METRO GROUP folgt einer wertorientierten Unternehmensführung auf Grundlage des EBIT after Cost of Capital (EBITaC). Im Fokus stehen der erfolgreiche Einsatz des Geschäftsvermögens und das Erreichen eines über den Kapitalkosten liegenden Wertbeitrags für die METRO GROUP.

Weitere Informationen zur Entwicklung des EBIT after Cost of Capital enthält der Konzernlagebericht im Abschnitt „EBIT after Cost of Capital (EBITaC)“.

### Rating

Die Ratings der METRO GROUP durch zwei internationale Agenturen dienen aktuellen/potenziellen Fremdkapitalinvestoren als Bonitätsnachweis. Die aktuellen Ratings der METRO GROUP sichern den umfassenden Zugang zu allen Fremdkapitalmärkten.

Nähere Informationen zum Rating der METRO GROUP sind im Konzernlagebericht im Abschnitt „Finanzmanagement“ zu finden.

### Eigen- und Fremdkapital sowie bilanzielle Nettoverschuldung im Konzernabschluss

Das Eigenkapital hatte eine Höhe von 6.460 Mio. € (Vorjahr 5.992 Mio. €), während das Fremdkapital 28.607 Mio. € (Vorjahr 27.290 Mio. €) betrug. Die bilanzielle Nettoverschuldung belief sich auf 3.478 Mio. € gegenüber 3.724 Mio. € im Vorjahr.

| Mio. €                                                          | 31.12.2010    | 31.12.2009 <sup>1</sup> |
|-----------------------------------------------------------------|---------------|-------------------------|
| <b>Eigenkapital</b>                                             | <b>6.460</b>  | <b>5.992</b>            |
| <b>Fremdkapital</b>                                             | <b>28.607</b> | <b>27.290</b>           |
| <b>Nettoverschuldung</b>                                        | <b>3.478</b>  | <b>3.724</b>            |
| Finanzielle Schulden (inkl. Finanzierungs-Leasingverhältnissen) | 8.283         | 7.727                   |
| Zahlungsmittel                                                  | 4.799         | 3.996                   |
| Geldanlagen > 3 Monate < 1 Jahr <sup>2</sup>                    | 6             | 7                       |

<sup>1</sup> Adjustierung der Vorjahreswerte aufgrund eines geänderten Ausweises

<sup>2</sup> In der Bilanz in den „Sonstigen Forderungen und Vermögenswerten (kurzfristig)“ enthalten

### Lokale Kapitalanforderungen

Die Kapitalmanagementstrategie der METRO GROUP zielt stets darauf ab, dass die Konzerngesellschaften eine den lokalen Anforderungen entsprechende Eigenkapitalausstattung haben. Im Berichtsjahr wurden alle extern auferlegten Kapitalanforderungen erfüllt. Diese beinhalten beispielsweise die Einhaltung eines bestimmten Verschuldungsgrads oder einer festen Eigenkapitalquote.

## Erläuterungen zur Gewinn- und Verlustrechnung

### 1. Umsatzerlöse

Die Umsatzerlöse (netto) setzen sich wie folgt zusammen:

| Mio. €                 | 2010          | 2009          |
|------------------------|---------------|---------------|
| Metro Cash & Carry     | 31.095        | 30.613        |
| Real                   | 11.499        | 11.298        |
| Media Markt und Saturn | 20.794        | 19.693        |
| Galeria Kaufhof        | 3.584         | 3.539         |
| Sonstige               | 286           | 386           |
|                        | <b>67.258</b> | <b>65.529</b> |

Die im Segment Sonstige ausgewiesenen Umsätze betreffen im Wesentlichen die MGB METRO Group Buying mit 238 Mio. € (Vorjahr 253 Mio. €) und Grillpfanne mit 13 Mio. € (Vorjahr 73 Mio. € inklusive AXXE).

Von den Umsatzerlösen entfallen 41,1 Mrd. € (Vorjahr 39,0 Mrd. €) auf Konzernunternehmen mit internationalem Sitz.

Die Entwicklung der Umsätze nach Geschäfts- und Regionen-segmenten ist in der Segmentberichterstattung dargestellt.

### 2. Sonstige betriebliche Erträge

| Mio. €                                                                             | 2010         | 2009         |
|------------------------------------------------------------------------------------|--------------|--------------|
| Mieten einschließlich Erstattungen von Mietnebenkosten                             | 479          | 477          |
| Dienstleistungen/Kostenerstattungen                                                | 306          | 294          |
| Serviceleistungen an Lieferanten                                                   | 298          | 225          |
| Erträge aus dem Abgang von Gegenständen des Anlagevermögens und aus Zuschreibungen | 279          | 95           |
| Erträge aus Entkonsolidierung                                                      | 52           | 0            |
| Übrige                                                                             | 213          | 216          |
|                                                                                    | <b>1.627</b> | <b>1.307</b> |

Die Erträge aus dem Abgang von Gegenständen des Anlagevermögens beinhalten hauptsächlich Erträge aus Sale-and-Leaseback-Transaktionen in Höhe von 198 Mio. € (Vorjahr 85 Mio. €).

In den Erträgen aus Entkonsolidierung sind im Wesentlichen die Erträge aus der Veräußerung von Anteilen an der Metro Cash & Carry Morocco S.A. enthalten.

Die übrigen sonstigen betrieblichen Erträge beinhalten unter anderem Erträge aus Schadenersatz, Erträge aus Bauleistungen, Zuschüsse der öffentlichen Hand, Erträge aus der Ausbuchung von verjährten Verbindlichkeiten, Erträge aus Kantineneinnahmen, sonstige Erstattungen sowie darüber hinaus eine Vielzahl weiterer Positionen.

### 3. Vertriebskosten

| Mio. €         | 2010          | 2009          |
|----------------|---------------|---------------|
| Personalkosten | 5.940         | 5.825         |
| Sachkosten     | 6.233         | 6.029         |
|                | <b>12.173</b> | <b>11.854</b> |

Der Anstieg der Vertriebskosten ist besonders durch Expansion sowie durch Aufwendungen im Rahmen der Abgabe der Elektrofachmärkte in Frankreich begründet.

Im Bereich der Personalkosten wird der Anstieg im Wesentlichen durch die Expansion, insbesondere bei Media Markt und Saturn, verursacht. Dieser Anstieg wird jedoch abgeschwächt durch den Rückgang der Anzahl neu eingeleiteter Shape-Maßnahmen, was zu einer Reduktion der hiermit in Verbindung stehenden Personalkosten führt. Darüber hinaus wirken sich Einspareffekte aus bereits umgesetzten Shape-Maßnahmen mindernd aus.

In den Sachkosten verursachen darüber hinaus noch Wertberichtigungen und Rückstellungsbildungen vor dem Hintergrund der Entscheidung zur Abgabe der französischen Elektrofachmärkte Einmalaufwendungen in Höhe von 119 Mio. €.

#### 4. Allgemeine Verwaltungskosten

| Mio. €         | 2010         | 2009         |
|----------------|--------------|--------------|
| Personalkosten | 889          | 831          |
| Sachkosten     | 696          | 758          |
|                | <b>1.585</b> | <b>1.589</b> |

Im Vorjahresvergleich sind die allgemeinen Verwaltungskosten mit deutlich niedrigeren Shape-Sonderfaktoren belastet. Darüber hinaus führen die Kosteneinsparungseffekte aus bereits wirksam gewordenen Shape-Maßnahmen zu weiteren Kostensenkungen. Diese Einspareffekte werden jedoch durch den hauptsächlich expansionsbedingten Kostenanstieg weitgehend neutralisiert. Im Bereich der Personalkosten führt dies zu einem Anstieg von 58 Mio. €. Die Sachkosten verringerten sich insgesamt hingegen um 62 Mio. €.

#### 5. Sonstige betriebliche Aufwendungen

| Mio. €                                                       | 2010      | 2009      |
|--------------------------------------------------------------|-----------|-----------|
| Verluste aus dem Abgang von Gegenständen des Anlagevermögens | 21        | 23        |
| Übrige                                                       | 30        | 25        |
|                                                              | <b>51</b> | <b>48</b> |

Die übrigen sonstigen betrieblichen Aufwendungen beinhalten neben den Aufwendungen aus Bauleistungen noch eine Vielzahl weiterer Sachverhalte.

#### 6. Sonstiges Beteiligungsergebnis

Das sonstige Beteiligungsergebnis in Höhe von 15 Mio. € (Vorjahr 15 Mio. €) beinhaltet hauptsächlich Gewinnausschüttungen.

#### 7. Zinsertrag/Zinsaufwand

Das Zinsergebnis setzt sich wie folgt zusammen:

| Mio. €                                                                            | 2010        | 2009        |
|-----------------------------------------------------------------------------------|-------------|-------------|
| Zinserträge                                                                       | 112         | 129         |
| davon aus Finanzierungs-Leasingverhältnissen                                      | (1)         | (1)         |
| davon aus betrieblicher Altersvorsorge                                            | (41)        | (42)        |
| davon aus Finanzinstrumenten der Bewertungskategorien gem. IAS 39:                |             |             |
| Kredite und Forderungen inkl. Zahlungsmitteln und Zahlungsmitteläquivalenten      | (46)        | (61)        |
| bis zur Endfälligkeit gehalten                                                    | (0)         | (0)         |
| zu Handelszwecken gehalten inkl. Derivaten mit Sicherungszusammenhang gem. IAS 39 | (5)         | (6)         |
| zur Veräußerung verfügbar                                                         | (0)         | (0)         |
| Zinsaufwendungen                                                                  | -718        | -682        |
| davon aus Finanzierungs-Leasingverhältnissen                                      | (-117)      | (-112)      |
| davon aus betrieblicher Altersvorsorge                                            | (-127)      | (-105)      |
| davon aus Finanzinstrumenten der Bewertungskategorien gem. IAS 39:                |             |             |
| zu Handelszwecken gehalten inkl. Derivaten mit Sicherungszusammenhang gem. IAS 39 | (-10)       | (-25)       |
| übrige finanzielle Verbindlichkeiten                                              | (-388)      | (-380)      |
|                                                                                   | <b>-606</b> | <b>-553</b> |

Die Zinserträge und Zinsaufwendungen aus Finanzinstrumenten sind den Bewertungskategorien gemäß IAS 39 anhand der Grundgeschäfte zugeordnet.



### 8. Übriges Finanzergebnis

| Mio. €                                                                                                      | 2010      | 2009       |
|-------------------------------------------------------------------------------------------------------------|-----------|------------|
| Sonstige finanzielle Erträge                                                                                | 471       | 392        |
| davon aus Wechselkurseffekten                                                                               | [379]     | [342]      |
| davon aus Sicherungsgeschäften                                                                              | [87]      | [46]       |
| Sonstige finanzielle Aufwendungen                                                                           | -461      | -485       |
| davon aus Wechselkurseffekten                                                                               | [-380]    | [-352]     |
| davon aus Sicherungsgeschäften                                                                              | [-58]     | [-109]     |
| <b>Übriges Finanzergebnis</b>                                                                               | <b>10</b> | <b>-93</b> |
| davon aus Finanzinstrumenten der Bewertungskategorien gem. IAS 39:                                          |           |            |
| Kredite und Forderungen inkl. Zahlungsmitteln und Zahlungsmitteläquivalenten bis zur Endfälligkeit gehalten | [4]       | [13]       |
| zu Handelszwecken gehalten                                                                                  | [30]      | [-62]      |
| zur Veräußerung verfügbar                                                                                   | [0]       | [0]        |
| übrige finanzielle Verbindlichkeiten                                                                        | [-15]     | [-35]      |
| davon aus Fair-Value-Hedges:                                                                                |           |            |
| Grundgeschäfte                                                                                              | [0]       | [0]        |
| Sicherungsgeschäfte                                                                                         | [0]       | [0]        |
| davon aus Cashflow Hedges:                                                                                  |           |            |
| Ineffektivitäten                                                                                            | [-1]      | [-2]       |

Die sonstigen finanziellen Erträge und Aufwendungen aus Finanzinstrumenten sind den Bewertungskategorien gemäß IAS 39 anhand der Grundgeschäfte zugeordnet. Dabei sind neben Erträgen und Aufwendungen aus der Bewertung von Finanzinstrumenten gemäß IAS 39 auch Bewertungen von Fremdwährungspositionen gemäß IAS 21 berücksichtigt.

Das Gesamtergebnis aus Wechselkurseffekten sowie aus Bewertungsergebnissen von Sicherungsgeschäften und Sicherungszusammenhängen beträgt 28 Mio. € (Vorjahr -73 Mio. €). Die Erholung insbesondere einzelner osteuropäischer Währungen führte sowohl im Bereich der Wechselkurseffekte als auch der Sicherungsgeschäfte zu einer positiven Entwicklung im Vergleich zum Vorjahr. Bewertungsergebnisse von Rohstoffkontrakten für Energie und Kraftstoffe wirkten sich mit einem Ertrag von 12 Mio. € (Vorjahr -8 Mio. €) aus. Darüber hinaus war das Vorjahr durch Aufwendungen aus Fremdwährungsfinanzierungen in Rumänien, Russland und Moldawien geprägt. Zu möglichen Auswirkungen von Währungsrisiken wird auf Nummer 43 „Management der finanzwirtschaftlichen Risiken“ verwiesen.

### 9. Nettoergebnisse nach Bewertungskategorien

Die wesentlichen Ergebniseinflüsse aus Finanzinstrumenten stellen sich wie folgt dar:

| 2010                                                                              | Beteiligungen | Zinsen      | Fair-Value-Bewertungen | Währungs-umrechnungen | Abgänge  | Wert-berichtigungen | Sonstiges  | Netto-ergebnis 2010 |
|-----------------------------------------------------------------------------------|---------------|-------------|------------------------|-----------------------|----------|---------------------|------------|---------------------|
| Mio. €                                                                            |               |             |                        |                       |          |                     |            |                     |
| Kredite und Forderungen inkl. Zahlungsmitteln und Zahlungsmitteläquivalenten      | 0             | 46          | 0                      | 1                     | 0        | -31                 | 2          | 18                  |
| Bis zur Endfälligkeit gehalten                                                    | 0             | 0           | 0                      | 0                     | 0        | 0                   | 0          | 0                   |
| Zu Handelszwecken gehalten inkl. Derivaten mit Sicherungszusammenhang gem. IAS 39 | 0             | -5          | 29                     | 0                     | 0        | 0                   | 0          | 24                  |
| Zur Veräußerung verfügbar                                                         | 15            | 0           | 0                      | 0                     | 0        | 0                   | 0          | 15                  |
| Übrige finanzielle Verbindlichkeiten                                              | 0             | -388        | 0                      | -2                    | 9        | 0                   | -12        | -393                |
|                                                                                   | <b>15</b>     | <b>-347</b> | <b>29</b>              | <b>-1</b>             | <b>9</b> | <b>-31</b>          | <b>-10</b> | <b>-336</b>         |

| 2009                                                                              | Beteiligungen | Zinsen      | Fair-Value-Bewertungen | Währungs-umrechnungen | Abgänge  | Wert-berichtigungen | Sonstiges  | Netto-ergebnis 2009 |
|-----------------------------------------------------------------------------------|---------------|-------------|------------------------|-----------------------|----------|---------------------|------------|---------------------|
| Mio. €                                                                            |               |             |                        |                       |          |                     |            |                     |
| Kredite und Forderungen inkl. Zahlungsmitteln und Zahlungsmitteläquivalenten      | 0             | 61          | 0                      | 13                    | 0        | -40                 | 0          | 34                  |
| Bis zur Endfälligkeit gehalten                                                    | 0             | 0           | 0                      | 0                     | 0        | 0                   | 0          | 0                   |
| Zu Handelszwecken gehalten inkl. Derivaten mit Sicherungszusammenhang gem. IAS 39 | 0             | -19         | -64                    | 0                     | 0        | 0                   | 0          | -83                 |
| Zur Veräußerung verfügbar                                                         | 15            | 0           | 0                      | 0                     | 0        | 0                   | 0          | 15                  |
| Übrige finanzielle Verbindlichkeiten                                              | 0             | -380        | 0                      | -23                   | 5        | 0                   | -11        | -409                |
|                                                                                   | <b>15</b>     | <b>-338</b> | <b>-64</b>             | <b>-10</b>            | <b>5</b> | <b>-40</b>          | <b>-11</b> | <b>-443</b>         |

Die Erträge und Aufwendungen aus Finanzinstrumenten sind den Bewertungskategorien gemäß IAS 39 anhand der Grundgeschäfte zugeordnet.

Die Erträge aus Beteiligungen sind im sonstigen Beteiligungsergebnis berücksichtigt. Die Erträge und Aufwendungen aus Zinsen sind Bestandteil des Zinsergebnisses. Fair-Value-Bewertungen sowie Effekte aus der Währungsumrechnung werden im übrigen Finanzergebnis erfasst. Ergebniseffekte aus dem Abgang übriger finanzieller Verbindlichkeiten sind Bestandteil des betrieblichen Ergebnisses (EBIT). Ebenso sind die Aufwendungen aus Wertberichtigungen im Wesentlichen Bestandteil des betrieblichen Ergebnisses (EBIT) und sind detailliert unter Nummer 27 „Wertberichtigungen auf aktivierte Finanzinstrumente“ beschrieben. Bei den verbleibenden finanziellen Erträgen und Aufwendungen, die im übrigen Finanzergebnis erfasst werden, handelt es sich überwiegend um Bankprovisionen und ähnliche Aufwendungen, die im Zusammenhang mit finanziellen Vermögenswerten und Schulden stehen.

### 10. Steuern vom Einkommen und vom Ertrag

Als Steuern vom Einkommen und vom Ertrag sind die in den einzelnen Ländern gezahlten beziehungsweise geschuldeten Steuern auf Einkommen und Ertrag sowie die latenten Steuerabgrenzungen ausgewiesen.

| Mio. €                                            | 2010       | 2009       |
|---------------------------------------------------|------------|------------|
| Gezahlte bzw. geschuldete Steuern                 | 659        | 495        |
| davon Deutschland                                 | (215)      | (158)      |
| davon international                               | (444)      | (337)      |
| davon Steueraufwand/-ertrag der laufenden Periode | (610)      | (507)      |
| davon Steueraufwand/-ertrag aus Vorperioden       | (49)       | (-12)      |
| Latente Steuern                                   | 35         | 36         |
| davon Deutschland                                 | (22)       | (42)       |
| davon international                               | (13)       | (-6)       |
|                                                   | <b>694</b> | <b>531</b> |

Der Ertragsteuersatz der deutschen Gesellschaften der METRO GROUP setzt sich zusammen aus dem Körperschaftsteuersatz von 15,00 Prozent zuzüglich Solidaritätszuschlag von 5,50 Prozent sowie dem Gewerbesteuersatz von 14,70 Prozent bei einem durchschnittlichen Hebesatz von 420,00 Prozent. Insgesamt ergibt sich daraus ein Gesamtsteuersatz von 30,53 Prozent. Die Steuersätze stimmen mit den Vorjahreswerten überein. Die angewandten ausländischen Ertragsteuersätze basieren auf den in den einzelnen Ländern gültigen Gesetzen und Verordnungen

und variieren zwischen 0,00 Prozent (Tax Holidays) und 40,69 Prozent. Auch hier gibt es keine Veränderung zum Vorjahr.

Der Ermittlung der latenten Steuern liegen die in den einzelnen Ländern zum Realisierungszeitpunkt erwarteten Steuersätze zugrunde. Diese basieren grundsätzlich auf den am Bilanzstichtag gültigen beziehungsweise verabschiedeten gesetzlichen Regelungen

| Mio. €                                                     | 2010 | 2009  |
|------------------------------------------------------------|------|-------|
| Latente Steuern in der Konzern-Gewinn- und Verlustrechnung | 35   | 36    |
| davon aus temporären Differenzen                           | (44) | (127) |
| davon aus Verlust- und Zinsvorträgen                       | (-9) | (-93) |
| davon aus Steuersatzänderungen                             | (0)  | (2)   |

Der Ertragsteueraufwand von 694 Mio. € (Vorjahr 531 Mio. €), der vollständig auf das Ergebnis der gewöhnlichen Geschäftstätigkeit entfällt, ist um 196 Mio. € höher (Vorjahr 210 Mio. €) als der erwartete Ertragsteueraufwand von 498 Mio. € (Vorjahr 321 Mio. €), der sich bei Anwendung des deutschen Gesamtsteuersatzes auf das Jahresergebnis des Konzerns vor Ertragsteuern ergäbe.

Vom erwarteten zum ausgewiesenen Ertragsteueraufwand ist wie folgt überzuleiten:

| Mio. €                                                                | 2010         | 2009         |
|-----------------------------------------------------------------------|--------------|--------------|
| <b>Ergebnis vor Steuern</b>                                           | <b>1.630</b> | <b>1.050</b> |
| Erwarteter Ertragsteueraufwand (30,53 %)                              | 498          | 321          |
| Auswirkungen abweichender nationaler Steuersätze                      | -137         | -62          |
| Periodenfremde Steueraufwendungen und -erträge                        | 49           | -12          |
| Steuerlich nicht abzugsfähige Betriebsausgaben                        | 90           | 75           |
| Auswirkungen nicht angesetzter bzw. wertberichtigter latenter Steuern | 182          | 180          |
| Hinzurechnungen und Kürzungen für lokale Steuern                      | 38           | 26           |
| Steuerfreie Erträge/Tax Holidays                                      | -33          | -13          |
| Sonstige Abweichungen                                                 | 7            | 16           |
| <b>Ertragsteueraufwand laut Gewinn- und Verlustrechnung</b>           | <b>694</b>   | <b>531</b>   |
| Effektiver Steuersatz (in %)                                          | <b>42,56</b> | <b>50,53</b> |

Bereinigt um Sonderfaktoren aus dem Effizienz- und Wertsteigerungsprogramm Shape 2012 liegt der effektive Steuersatz bei 37,88 Prozent (Vorjahr 40,81 Prozent).

### 11. Den Anteilen nicht beherrschender Gesellschafter zuzurechnender Gewinn

Das den Anteilen nicht beherrschender Gesellschafter zuzurechnende Ergebnis betrifft mit 178 Mio. € (Vorjahr 173 Mio. €) Gewinnanteile und mit 92 Mio. € (Vorjahr 37 Mio. €) Verlustanteile. Im Wesentlichen handelt es sich um Gewinn-/Verlustanteile nicht beherrschender Gesellschafter in der Vertriebslinie Media Markt und Saturn.

### 12. Ergebnis je Aktie

Die METRO AG versteht unter dem Ergebnis je Aktie das Ergebnis je Stammaktie. Den Vorzugsaktionären der METRO AG stand 2009 mit 1,298 € eine Mehrdividende von 0,118 € gegenüber den Stammaktionären zu. Diese Mehrdividende wird bei der Berechnung des Ergebnisses je Aktie vom Gewinn, das den Anteilseignern der METRO AG zuzurechnen ist, abgezogen.

Das Ergebnis je Aktie ergibt sich aus der Division des den Anteilseignern der METRO AG zuzurechnenden Gewinns durch eine gewichtete Zahl ausgegebener Aktien.

Ein Verwässerungseffekt, der sich aus sogenannten potenziellen Aktien ergeben könnte, ist weder im Geschäftsjahr noch im Vorjahr eingetreten.

|                                                                | 2010        | 2009        |
|----------------------------------------------------------------|-------------|-------------|
| Gewichtete Anzahl der ausgegebenen Stückaktien                 | 326.787.529 | 326.787.529 |
| Den Anteilseignern der METRO AG zuzurechnender Gewinn (Mio. €) | 850         | 383         |
| <b>Ergebnis je Aktie (€)</b>                                   | <b>2,60</b> | <b>1,17</b> |

Das Ergebnis je Vorzugsaktie beträgt im Geschäftsjahr 2,74 € (Vorjahr 1,29 €) und liegt somit um den Betrag der Mehrdividende von 0,135 € über dem Ergebnis je Aktie.

### 13. Abschreibungen

| Mio. €                                                                                                                                                             | 2010         | 2009         |
|--------------------------------------------------------------------------------------------------------------------------------------------------------------------|--------------|--------------|
| Planmäßige Abschreibungen auf Sachanlagen, immaterielle Vermögenswerte und als Finanzinvestition gehaltene Immobilien                                              | 1.274        | 1.280        |
| Außerplanmäßige Abschreibungen auf Sachanlagen, immaterielle Vermögenswerte (einschl. Geschäfts- oder Firmenwerten) und als Finanzinvestition gehaltene Immobilien | 153          | 116          |
| Außerplanmäßige Abschreibungen auf langfristige finanzielle Vermögenswerte                                                                                         | 0            | 1            |
|                                                                                                                                                                    | <b>1.427</b> | <b>1.397</b> |

Die außerplanmäßigen Abschreibungen sind in Höhe von 141 Mio. € in den Vertriebskosten (Vorjahr 75 Mio. €) und in Höhe von 12 Mio. € in den Verwaltungskosten (Vorjahr 41 Mio. €) erfasst. Sie betreffen mit 11 Mio. € Wertberichtigungen von immateriellen Vermögenswerten (Vorjahr 43 Mio. €), mit 134 Mio. € Wertberichtigungen von Sachanlagevermögen (Vorjahr 73 Mio. €) und mit 8 Mio. € (Vorjahr 0 Mio. €) Wertberichtigungen auf als Finanzinvestition gehaltene Immobilien.

Von den außerplanmäßigen Abschreibungen entfallen auf Metro Cash & Carry 2 Mio. € (Vorjahr 15 Mio. €), auf Real 17 Mio. € (Vorjahr 0 Mio. €), auf Media Markt und Saturn 73 Mio. € (Vorjahr 0 Mio. €), auf das Immobiliensegment 50 Mio. € (Vorjahr 59 Mio. €) und auf andere Gesellschaften 11 Mio. € (Vorjahr 43 Mio. €).

### 14. Materialaufwand

In den Einstandskosten der verkauften Waren sind folgende Materialaufwendungen enthalten:

| Mio. €                                                                  | 2010          | 2009          |
|-------------------------------------------------------------------------|---------------|---------------|
| Aufwendungen für Roh-, Hilfs- und Betriebsstoffe und für bezogene Waren | 52.491        | 51.422        |
| Aufwendungen für bezogene Leistungen                                    | 96            | 85            |
|                                                                         | <b>52.587</b> | <b>51.507</b> |

### 15. Personalaufwand

Die Personalaufwendungen setzen sich wie folgt zusammen:

| Mio. €                                                                      | 2010         | 2009         |
|-----------------------------------------------------------------------------|--------------|--------------|
| Löhne und Gehälter                                                          | 6.066        | 5.910        |
| Soziale Abgaben und Aufwendungen für Altersversorgung und für Unterstützung | 1.301        | 1.275        |
| davon für Altersversorgung                                                  | (67)         | (73)         |
|                                                                             | <b>7.367</b> | <b>7.185</b> |

Im Geschäftsjahr 2010 sind in der METRO GROUP Aufwendungen für Abfindungen in Höhe von 63 Mio. € (Vorjahr 40 Mio. €) angefallen.

Der Personalaufwand enthält auch zeitanteilige Aufwendungen für aktienbasierte Vergütungen in Höhe von 32 Mio. € (Vorjahr 12 Mio. €).

Im Jahresdurchschnitt waren im Konzern beschäftigt:

| Anzahl der Mitarbeiter | 2010           | 2009           |
|------------------------|----------------|----------------|
| Arbeiter/Angestellte   | 283.280        | 286.329        |
| Auszubildende          | 10.682         | 10.201         |
|                        | <b>293.962</b> | <b>296.530</b> |

Hierin sind auf Personenbasis 80.975 (Vorjahr 85.229) Teilzeitbeschäftigte berücksichtigt. Der Anteil der im Ausland beschäftigten Mitarbeiter betrug auf Vollzeitbasis 62,7 Prozent gegenüber 61,8 Prozent im Vorjahr.

## 16. Sonstige Steuern

Die sonstigen Steuern (zum Beispiel Grundsteuer, Kraftfahrzeugsteuer, Verbrauch- und Verkehrssteuer) in Höhe von 152 Mio. € (Vorjahr 173 Mio. €) sind in den Einstandskosten der verkauften Waren, in den Vertriebskosten sowie in den Verwaltungskosten enthalten.

## Erläuterungen zur Bilanz

### 17. Anlagevermögen

| Mio. €                                       | Geschäfts- oder Firmenwerte | Sonstige immaterielle Vermögenswerte | Sachanlagen   | Als Finanzinvestition gehaltene Immobilien | Finanzielle Vermögenswerte | Summe Anlagevermögen |
|----------------------------------------------|-----------------------------|--------------------------------------|---------------|--------------------------------------------|----------------------------|----------------------|
| <b>Anschaffungs- oder Herstellungskosten</b> |                             |                                      |               |                                            |                            |                      |
| Stand 1.1.2009                               | 3.960                       | 1.329                                | 20.697        | 326                                        | 170                        | 26.482               |
| Währungsumrechnung                           | 1                           | -1                                   | -108          | 0                                          | 1                          | -107                 |
| Zugänge Konsolidierungskreis                 | 0                           | 0                                    | 12            | 0                                          | 0                          | 12                   |
| Zugänge                                      | 49                          | 169                                  | 1.298         | 2                                          | 33                         | 1.551                |
| Abgänge                                      | -18                         | -39                                  | -749          | -60                                        | -47                        | -913                 |
| Umbuchungen                                  | 0                           | 0                                    | -50           | 50                                         | -33                        | -33                  |
| Stand 31.12.2009/1.1.2010                    | 3.992                       | 1.458                                | 21.100        | 318                                        | 124                        | 26.992               |
| Währungsumrechnung                           | 9                           | 4                                    | 310           | 0                                          | 1                          | 324                  |
| Zugänge Konsolidierungskreis                 | 0                           | 0                                    | 0             | 0                                          | 0                          | 0                    |
| Zugänge                                      | 73                          | 138                                  | 1.524         | 19                                         | 196                        | 1.950                |
| Abgänge                                      | -10                         | -64                                  | -944          | -12                                        | -62                        | -1.092               |
| Umbuchungen                                  | 0                           | -1                                   | -108          | 174                                        | 0                          | 65                   |
| Stand 31.12.2010                             | 4.064                       | 1.535                                | 21.882        | 499                                        | 259                        | 28.239               |
| <b>Abschreibungen</b>                        |                             |                                      |               |                                            |                            |                      |
| Stand 1.1.2009                               | 0                           | 777                                  | 8.173         | 193                                        | 26                         | 9.169                |
| Währungsumrechnung                           | 0                           | -1                                   | -3            | 0                                          | 0                          | -4                   |
| Zugänge, planmäßig                           | 0                           | 169                                  | 1.104         | 7                                          | 0                          | 1.280                |
| Zugänge, außerplanmäßig                      | 0                           | 43                                   | 73            | 0                                          | 1                          | 117                  |
| Abgänge                                      | 0                           | -27                                  | -448          | -45                                        | -15                        | -535                 |
| Zuschreibungen                               | 0                           | 0                                    | -9            | 0                                          | 0                          | -9                   |
| Umbuchungen                                  | 0                           | 0                                    | -34           | 34                                         | -1                         | -1                   |
| Stand 31.12.2009/1.1.2010                    | 0                           | 961                                  | 8.856         | 189                                        | 11                         | 10.017               |
| Währungsumrechnung                           | 0                           | 3                                    | 84            | 0                                          | 0                          | 87                   |
| Zugänge, planmäßig                           | 0                           | 167                                  | 1.098         | 9                                          | 0                          | 1.274                |
| Zugänge, außerplanmäßig                      | 0                           | 11                                   | 134           | 8                                          | 0                          | 153                  |
| Abgänge                                      | 0                           | -42                                  | -668          | -8                                         | 0                          | -718                 |
| Zuschreibungen                               | 0                           | 0                                    | -47           | 0                                          | 0                          | -47                  |
| Umbuchungen                                  | 0                           | -1                                   | -57           | 63                                         | 0                          | 5                    |
| Stand 31.12.2010                             | 0                           | 1.099                                | 9.400         | 261                                        | 11                         | 10.771               |
| Buchwert 1.1.2009                            | 3.960                       | 552                                  | 12.524        | 133                                        | 144                        | 17.313               |
| Buchwert 31.12.2009                          | 3.992                       | 497                                  | 12.244        | 129                                        | 113                        | 16.975               |
| <b>Buchwert 31.12.2010</b>                   | <b>4.064</b>                | <b>436</b>                           | <b>12.482</b> | <b>238</b>                                 | <b>248</b>                 | <b>17.468</b>        |

Im laufenden Geschäftsjahr sind Abgänge von Immobilien in Höhe von 197 Mio. € (Vorjahr 235 Mio. €) enthalten.

Die außerplanmäßigen Abschreibungen betreffen im Wesentlichen die Betriebs- und Geschäftsausstattung vor dem Hintergrund der Abgabe der französischen Elektrofachmärkte sowie Wertberichtigungen von Immobilien.

### 18. Geschäfts- oder Firmenwerte

Die Geschäfts- oder Firmenwerte betragen im Geschäftsjahr 2010 4.064 Mio. € (Vorjahr 3.992 Mio. €).

Durch die bilanzielle Abbildung der mit Andienungsrechten versehenen Gesellschaftsanteile erhöhte sich der Geschäfts- oder Firmenwert von Media Markt und Saturn im Jahr 2010 um 26 Mio. € (Vorjahr Reduzierung um 14 Mio. €).

2009 erhielten die nicht beherrschenden Gesellschafter von Metro Cash & Carry Rumänien die Möglichkeit zur Andienung ihrer Gesellschaftsanteile gegenüber der METRO GROUP. Im Rahmen der Folgebewertung dieser Andienungsrechte erhöhte sich der Geschäfts- oder Firmenwert um 47 Mio. € (Vorjahr 27 Mio. €).

Mit der Veräußerung von Metro Cash & Carry Marokko ist ein Geschäfts- oder Firmenwert in Höhe von 10 Mio. € abgegangen.

Wesentliche Anteile der Geschäfts- oder Firmenwerte bestanden zum Berichtsstichtag bei folgenden Gruppen von zahlungsmittelgenerierenden Einheiten:

| Mio. €                              | 31.12.2010 | 31.12.2009 |
|-------------------------------------|------------|------------|
| Real Deutschland                    | 1.083      | 1.083      |
| Metro Cash & Carry Frankreich       | 398        | 398        |
| Metro Cash & Carry Niederlande      | 352        | 352        |
| Metro Cash & Carry Polen            | 260        | 258        |
| Media Markt und Saturn Deutschland  | 245        | 232        |
| Metro Cash & Carry Ungarn           | 239        | 239        |
| Metro Cash & Carry Deutschland      | 223        | 223        |
| Metro Cash & Carry Italien          | 171        | 171        |
| Real Polen                          | 151        | 144        |
| Metro Cash & Carry Belgien          | 145        | 145        |
| Metro Cash & Carry Portugal         | 91         | 91         |
| Metro Cash & Carry Rumänien         | 84         | 37         |
| Media Markt und Saturn Italien      | 79         | 76         |
| Galeria Kaufhof Warenhäuser Belgien | 57         | 57         |

|                                           |              |              |
|-------------------------------------------|--------------|--------------|
| Media Markt und Saturn Spanien            | 54           | 51           |
| Metro Cash & Carry Spanien                | 51           | 51           |
| Metro Cash & Carry Griechenland           | 45           | 45           |
| Metro Cash & Carry Vereinigtes Königreich | 37           | 37           |
| Metro Cash & Carry Österreich             | 27           | 27           |
| Media Markt und Saturn Niederlande        | 24           | 22           |
| Media Markt und Saturn Österreich         | 19           | 17           |
| Media Markt und Saturn Polen              | 19           | 17           |
| Media Markt und Saturn Schweiz            | 18           | 17           |
| Metro Cash & Carry China                  | 17           | 17           |
| Real Russland                             | 17           | 16           |
| Metro Cash & Carry Dänemark               | 16           | 16           |
| Galeria Kaufhof Warenhäuser Deutschland   | 14           | 14           |
| Metro Cash & Carry Marokko                | 0            | 10           |
| Sonstige Gesellschaften                   | 128          | 129          |
|                                           | <b>4.064</b> | <b>3.992</b> |

Aufgrund der Vorschriften des IFRS 3 in Verbindung mit IAS 36 wird eine jährliche Werthaltigkeitsprüfung der Geschäfts- oder Firmenwerte durchgeführt. Diese erfolgt auf Ebene einer Gruppe von sogenannten zahlungsmittelgenerierenden Einheiten. Diese Gruppe ist beim Geschäfts- oder Firmenwert die Organisationseinheit Vertriebslinie pro Land. Bei der Prüfung auf Werthaltigkeit wird die Summe der Buchwerte der Gruppe von zahlungsmittelgenerierenden Einheiten dem erzielbaren Betrag gegenübergestellt. Als erzielbarer Betrag wird der beizulegende Zeitwert abzüglich Verkaufskosten verwendet, der aus diskontierten zukünftigen Cashflows berechnet wird. Die erwarteten Cashflows basieren auf einem qualifizierten Planungsprozess unter Beachtung von unternehmensinternen Erfahrungswerten sowie unternehmensextern erhobenen volkswirtschaftlichen Rahmendaten. Der Detailplanungszeitraum umfasst grundsätzlich drei Jahre. Im Anschluss an den Detailplanungszeitraum wird wie im Vorjahr in der Regel eine Wachstumsrate von 1,0 Prozent unterstellt. Als Kapitalisierungszinssatz wird der durchschnittliche gewichtete Kapitalkostensatz (WACC) unter Anwendung des Capital Asset Pricing Model abgeleitet. Die individuell für jede Gruppe von zahlungsmittelgenerierenden Einheiten ermittelten Kapitalisierungszinssätze nach Steuern liegen zwischen 5,8 und 8,3 Prozent (Vorjahr 6,7 bis 11,7 Prozent).

Die vorgeschriebene jährliche Prüfung bestätigte zum 31. Dezember 2010 die Werthaltigkeit aller aktivierten Geschäfts- oder Firmenwerte. Außerplanmäßige Abschreibungen auf die Geschäfts- oder Firmenwerte waren insofern nicht erforderlich.

Zusätzlich zum Impairment-Test wurden für jede Gruppe von zahlungsmittelgenerierenden Einheiten zwei Sensitivitätsanalysen durchgeführt. Die Annahme einer Wachstumsrate von 0 Prozent führte zu keinem Abschreibungsbedarf. Ebenso würde aus einer Anhebung der Kapitalisierungszinssätze um jeweils 10 Prozent für keine der Gruppen von zahlungsmittelgenerierenden Einheiten eine außerplanmäßige Abschreibung des Geschäfts- oder Firmenwerts resultieren.

### 19. Sonstige immaterielle Vermögenswerte

Die sonstigen immateriellen Vermögenswerte weisen eine begrenzte wirtschaftliche Nutzungsdauer auf und werden daher planmäßig abgeschrieben. Die außerplanmäßigen Abschreibungen betreffen mit 7 Mio. € selbst erstellte Software, mit 1 Mio. € Miet- und Nutzungsrechte sowie mit 3 Mio. € erworbene Konzessionen, Rechte und Lizenzen. Im Vorjahr betrafen die außerplanmäßigen Abschreibungen mit 41 Mio. € selbst

| Mio. €                                       | Immaterielle<br>Vermögenswerte<br>ohne Firmenwerte | (davon selbst<br>erstellte<br>immaterielle<br>Vermögenswerte) |
|----------------------------------------------|----------------------------------------------------|---------------------------------------------------------------|
| <b>Anschaftungs- oder Herstellungskosten</b> |                                                    |                                                               |
| Stand 1.1.2009                               | 1.329                                              | (665)                                                         |
| Währungsumrechnung                           | -1                                                 | (0)                                                           |
| Zugänge Konsolidierungskreis                 | 0                                                  | (0)                                                           |
| Zugänge                                      | 169                                                | (108)                                                         |
| Abgänge                                      | -39                                                | (-3)                                                          |
| Umbuchungen                                  | 0                                                  | (-1)                                                          |
| Stand 31.12.2009/1.1.2010                    | 1.458                                              | (769)                                                         |
| Währungsumrechnung                           | 4                                                  | (1)                                                           |
| Zugänge Konsolidierungskreis                 | 0                                                  | (0)                                                           |
| Zugänge                                      | 138                                                | (87)                                                          |
| Abgänge                                      | -64                                                | (-19)                                                         |
| Umbuchungen                                  | -1                                                 | (-1)                                                          |
| Stand 31.12.2010                             | 1.535                                              | (837)                                                         |
| <b>Abschreibungen</b>                        |                                                    |                                                               |
| Stand 1.1.2009                               | 777                                                | (370)                                                         |
| Währungsumrechnung                           | -1                                                 | (0)                                                           |
| Zugänge, planmäßig                           | 169                                                | (103)                                                         |
| Zugänge, außerplanmäßig                      | 43                                                 | (41)                                                          |
| Abgänge                                      | -27                                                | (-1)                                                          |
| Zuschreibungen                               | 0                                                  | (0)                                                           |
| Umbuchungen                                  | 0                                                  | (-2)                                                          |
| Stand 31.12.2009/1.1.2010                    | 961                                                | (511)                                                         |
| Währungsumrechnung                           | 3                                                  | (1)                                                           |
| Zugänge, planmäßig                           | 167                                                | (105)                                                         |
| Zugänge, außerplanmäßig                      | 11                                                 | (7)                                                           |
| Abgänge                                      | -42                                                | (-14)                                                         |
| Zuschreibungen                               | 0                                                  | (0)                                                           |
| Umbuchungen                                  | -1                                                 | (-1)                                                          |
| Stand 31.12.2010                             | 1.099                                              | (609)                                                         |
| Buchwert 1.1.2009                            | 552                                                | (295)                                                         |
| Buchwert 31.12.2009                          | 497                                                | (258)                                                         |
| <b>Buchwert 31.12.2010</b>                   | <b>436</b>                                         | <b>(228)</b>                                                  |

erstellte Software sowie mit 2 Mio. € erworbene Konzessionen, Rechte und Lizenzen.

Die Zugänge zu den Abschreibungen auf sonstige immaterielle Vermögenswerte werden mit 60 Mio. € (Vorjahr 60 Mio. €) in den Vertriebskosten und mit 118 Mio. € (Vorjahr 152 Mio. €) in den Verwaltungskosten ausgewiesen.

Die als Aufwand erfassten Ausgaben für Forschung und Entwicklung betreffen im Wesentlichen selbst erstellte Software

und betragen im laufenden Geschäftsjahr 29 Mio. € (Vorjahr 79 Mio. €).

Für immaterielle Vermögenswerte bestehen – wie im Vorjahr – keine Eigentums- oder Verfügungsbeschränkungen. Es wurden Erwerbsverpflichtungen für immaterielle Vermögenswerte in Höhe von 1 Mio. € (Vorjahr 2 Mio. €) eingegangen.

## 20. Sachanlagen

| Mio. €                                       | Grundstücke<br>und Bauten <sup>1</sup> | Andere Anlagen,<br>Betriebs- und<br>Geschäfts-<br>ausstattung <sup>1</sup> | Anlagen<br>im Bau | Gesamt        |
|----------------------------------------------|----------------------------------------|----------------------------------------------------------------------------|-------------------|---------------|
| <b>Anschaffungs- oder Herstellungskosten</b> |                                        |                                                                            |                   |               |
| Stand 1.1.2009                               | 12.799                                 | 7.529                                                                      | 369               | 20.697        |
| Währungsumrechnung                           | -81                                    | -17                                                                        | -10               | -108          |
| Zugänge Konsolidierungskreis                 | 11                                     | 1                                                                          | 0                 | 12            |
| Zugänge                                      | 307                                    | 493                                                                        | 498               | 1.298         |
| Abgänge                                      | -399                                   | -320                                                                       | -30               | -749          |
| Umbuchungen                                  | 393                                    | 165                                                                        | -608              | -50           |
| Stand 31.12.2009/1.1.2010                    | 13.030                                 | 7.851                                                                      | 219               | 21.100        |
| Währungsumrechnung                           | 191                                    | 110                                                                        | 9                 | 310           |
| Zugänge Konsolidierungskreis                 | 0                                      | 0                                                                          | 0                 | 0             |
| Zugänge                                      | 275                                    | 576                                                                        | 673               | 1.524         |
| Abgänge                                      | -410                                   | -515                                                                       | -19               | -944          |
| Umbuchungen                                  | 165                                    | 292                                                                        | -565              | -108          |
| Stand 31.12.2010                             | 13.251                                 | 8.314                                                                      | 317               | 21.882        |
| <b>Abschreibungen</b>                        |                                        |                                                                            |                   |               |
| Stand 1.1.2009                               | 3.644                                  | 4.524                                                                      | 5                 | 8.173         |
| Währungsumrechnung                           | -5                                     | 2                                                                          | 0                 | -3            |
| Zugänge, planmäßig                           | 465                                    | 639                                                                        | 0                 | 1.104         |
| Zugänge, außerplanmäßig                      | 61                                     | 12                                                                         | 0                 | 73            |
| Abgänge                                      | -179                                   | -269                                                                       | 0                 | -448          |
| Zuschreibungen                               | -9                                     | 0                                                                          | 0                 | -9            |
| Umbuchungen                                  | -20                                    | -12                                                                        | -2                | -34           |
| Stand 31.12.2009/1.1.2010                    | 3.957                                  | 4.896                                                                      | 3                 | 8.856         |
| Währungsumrechnung                           | 31                                     | 53                                                                         | 0                 | 84            |
| Zugänge, planmäßig                           | 459                                    | 639                                                                        | 0                 | 1.098         |
| Zugänge, außerplanmäßig                      | 44                                     | 80                                                                         | 10                | 134           |
| Abgänge                                      | -217                                   | -450                                                                       | -1                | -668          |
| Zuschreibungen                               | -45                                    | -2                                                                         | 0                 | -47           |
| Umbuchungen                                  | -84                                    | 27                                                                         | 0                 | -57           |
| Stand 31.12.2010                             | 4.145                                  | 5.243                                                                      | 12                | 9.400         |
| Buchwert 1.1.2009                            | 9.155                                  | 3.005                                                                      | 364               | 12.524        |
| Buchwert 31.12.2009                          | 9.073                                  | 2.955                                                                      | 216               | 12.244        |
| <b>Buchwert 31.12.2010</b>                   | <b>9.106</b>                           | <b>3.071</b>                                                               | <b>305</b>        | <b>12.482</b> |

<sup>1</sup>Adjustierung aufgrund geänderter Ausweise

Die Zugänge im Sachanlagevermögen betreffen überwiegend die Eröffnung neuer Märkte bei Metro Cash & Carry sowie Media Markt und Saturn.

Während bei Metro Cash & Carry im Wesentlichen die Expansion in Osteuropa und Asien zum Anstieg des Sachanlagevermögens geführt hat, ist der Anstieg bei Media Markt und Saturn insbesondere auf die Neueröffnungen in West- und Osteuropa zurückzuführen.

Durch Währungsumrechnungseffekte hat sich der Wert des Sachanlagevermögens um 226 Mio. € erhöht (Vorjahr Verminderung um 105 Mio. €). Diese resultieren im Wesentlichen aus den Wechselkursentwicklungen in Russland, der Ukraine, Polen, Tschechien, China sowie Japan und Indien.

Verfügungsbeschränkungen in Form von Grundpfandrechten und Sicherungsübereignungen für Gegenstände des Sachanlagevermögens liegen in Höhe von 346 Mio. € (Vorjahr 384 Mio. €) vor.

Für Gegenstände des Sachanlagevermögens wurden in Höhe von 250 Mio. € (Vorjahr 182 Mio. €) Erwerbsverpflichtungen eingegangen.

Anlagegegenstände, die dem Konzern im Rahmen eines Finanzierungs-Leasingverhältnisses zur Verfügung stehen, sind mit 1.074 Mio. € (Vorjahr 1.113 Mio. €) enthalten; sie betreffen im Wesentlichen angemietete Gebäude.

Finanzierungs-Leasingverhältnisse werden in der Regel über eine Grundmietzeit zwischen 15 und 25 Jahren abgeschlossen und sehen nach Ablauf der Grundmietzeit die Option vor, den Vertrag mindestens einmal für fünf Jahre zu verlängern. Die Zinssätze, die den Verträgen zugrunde liegen, variieren je nach Markt und Zeitpunkt des Vertragsabschlusses zwischen 3,1 und 25,1 Prozent.

Neben den Finanzierungs-Leasingverhältnissen bestehen in der METRO GROUP Miet- beziehungsweise Leasingverhältnisse, die nach ihrem wirtschaftlichen Gehalt als Operating-Leasingverhältnisse zu qualifizieren sind. Operating-Leasingverhältnisse werden in der Regel über eine Grundmietzeit von bis zu 15 Jahren abgeschlossen. Die Leasingverträge beinhalten Leasingraten, die teilweise auf variablen, teilweise auf fixen Mietzinsen basieren.

Die Verpflichtungen aus Finanzierungs- und Operating-Leasingverhältnissen werden in den Folgeperioden wie folgt fällig:

| Mio. €                                              | Bis 1 Jahr | 1 bis 5 Jahre | Über 5 Jahre |
|-----------------------------------------------------|------------|---------------|--------------|
| <b>Finanzierungs-Leasingverhältnisse 31.12.2010</b> |            |               |              |
| Zukünftig zu leistende Leasingzahlungen (nominal)   | 224        | 837           | 1.555        |
| Abzinsungen                                         | -18        | -229          | -780         |
| Barwert                                             | 206        | 608           | 775          |
| <b>Operating-Leasingverhältnisse 31.12.2010</b>     |            |               |              |
| Zukünftig zu leistende Leasingzahlungen (nominal)   | 1.437      | 4.726         | 4.280        |
| <b>Finanzierungs-Leasingverhältnisse 31.12.2009</b> |            |               |              |
| Zukünftig zu leistende Leasingzahlungen (nominal)   | 224        | 824           | 1.501        |
| Abzinsungen                                         | -15        | -247          | -678         |
| Barwert                                             | 209        | 577           | 823          |
| <b>Operating-Leasingverhältnisse 31.12.2009</b>     |            |               |              |
| Zukünftig zu leistende Leasingzahlungen (nominal)   | 1.393      | 4.494         | 4.071        |

Die zukünftig zu leistenden Leasingzahlungen aus Finanzierungs-Leasingverhältnissen enthalten für die Ausübung günstiger Kaufoptionen erforderliche Kaufpreiszahlungen in Höhe von 99 Mio. € (Vorjahr 99 Mio. €).

Leasingzahlungen, die der METRO GROUP zukünftig aus der Untervermietung aus Finanzierungs-Leasingverhältnissen (Sublease) zufließen werden, betragen nominal 182 Mio. € (Vorjahr 222 Mio. €).

Leasingzahlungen, die der METRO GROUP zukünftig aus der Untervermietung aus Operating-Leasingverhältnissen (Sublease) zufließen werden, betragen nominal 993 Mio. € (Vorjahr 1.023 Mio. €).

Im Periodenergebnis sind geleistete Zahlungen aus Leasingverhältnissen in Höhe von 1.497 Mio. € (Vorjahr 1.470 Mio. €) und erhaltene Zahlungen aus Mietverhältnissen in Höhe von 417 Mio. € (Vorjahr 404 Mio. €) enthalten.

Die in der Periode als Aufwand erfassten bedingten Mietzahlungen aus den Finanzierungs-Leasingverhältnissen betragen 8 Mio. € (Vorjahr 8 Mio. €).

Die in der Periode als Aufwand erfassten bedingten Mietzahlungen aus den Operating-Leasingverhältnissen betragen 62 Mio. € (Vorjahr 58 Mio. €).



Es bestehen Ansprüche auf den Erhalt von Leasingzahlungen gegenüber Konzernfremden (METRO GROUP als Leasinggeber), die in den Folgeperioden wie folgt fällig werden:

| Mio. €                                              | Bis 1 Jahr | 1 bis 5 Jahre | Über 5 Jahre |
|-----------------------------------------------------|------------|---------------|--------------|
| <b>Finanzierungs-Leasingverhältnisse 31.12.2010</b> |            |               |              |
| Zukünftig zu erwartende Leasingzahlungen (nominal)  | 4          | 9             | 8            |
| Abzinsungen                                         | 0          | -1            | -6           |
| Barwert                                             | 4          | 8             | 2            |
| <b>Operating-Leasingverhältnisse 31.12.2010</b>     |            |               |              |
| Zukünftig zu erwartende Leasingzahlungen (nominal)  | 48         | 119           | 131          |

| Mio. €                                              | Bis 1 Jahr | 1 bis 5 Jahre | Über 5 Jahre |
|-----------------------------------------------------|------------|---------------|--------------|
| <b>Finanzierungs-Leasingverhältnisse 31.12.2009</b> |            |               |              |
| Zukünftig zu erwartende Leasingzahlungen (nominal)  | 4          | 14            | 10           |
| Abzinsungen                                         | 0          | -2            | -6           |
| Barwert                                             | 4          | 12            | 4            |
| <b>Operating-Leasingverhältnisse 31.12.2009</b>     |            |               |              |
| Zukünftig zu erwartende Leasingzahlungen (nominal)  | 49         | 123           | 125          |

Bei den bestehenden Finanzierungs-Leasingverhältnissen aus Sicht des Leasinggebers ist zu den nominalen Mindestleasingzahlungen in Höhe von 21 Mio. € (Vorjahr 28 Mio. €) der nicht garantierte Restwert hinzuzurechnen. Dieser beträgt im Geschäftsjahr 3 Mio. € (Vorjahr 5 Mio. €). Der sich daraus ergebende Bruttoinvestitionswert beträgt insofern 24 Mio. € (Vorjahr 33 Mio. €). Daneben besteht ein noch nicht realisierter Finanzertrag von 7 Mio. € (Vorjahr 8 Mio. €).

### 21. Als Finanzinvestition gehaltene Immobilien

Als Finanzinvestition gehaltene Immobilien werden mit ihren fortgeführten Anschaffungs- oder Herstellungskosten bewertet. Zum 31. Dezember 2010 waren insgesamt 238 Mio. € (Vorjahr 129 Mio. €) bilanziert. Der Anstieg in Höhe von 109 Mio. € resultiert im Wesentlichen aus der Aufgabe der Selbstnutzung von Immobilien und der damit einhergehenden Umklassifizierung in die als Finanzinvestition gehaltenen Immobilien. Der Fair Value dieser Immobilien wurde nach international anerkannten Bewertungsmethoden, insbesondere mithilfe des Vergleichswertverfahrens und der Discounted-Cashflow-Methode, ermittelt. Er beträgt insgesamt 322 Mio. € (Vorjahr

203 Mio. €). Die Mieterträge aus diesen Immobilien betragen 24 Mio. € (Vorjahr 15 Mio. €) und die damit im Zusammenhang stehenden Aufwendungen belaufen sich auf 13 Mio. € (Vorjahr 10 Mio. €). Für Objekte ohne Mieteinnahmen sind Aufwendungen in Höhe von 0 Mio. € (Vorjahr 1 Mio. €) entstanden.

Verfügungsbeschränkungen in Form von Grundpfandrechten und Sicherungsübereignungen liegen in Höhe von 53 Mio. € (Vorjahr 61 Mio. €) vor. Die als Finanzinvestition gehaltenen Immobilien enthalten Erwerbsverpflichtungen in Höhe von 5 Mio. € (Vorjahr 2 Mio. €).

### 22. Finanzielle Vermögenswerte (langfristig)

| Mio. €                                       | Ausleihungen | Beteiligungen | Wertpapiere | Gesamt     |
|----------------------------------------------|--------------|---------------|-------------|------------|
| <b>Anschaffungs- oder Herstellungskosten</b> |              |               |             |            |
| Stand 1.1.2009                               | 130          | 39            | 1           | 170        |
| Währungsumrechnung                           | 1            | 0             | 0           | 1          |
| Zugänge                                      | 33           | 0             | 0           | 33         |
| Abgänge                                      | -32          | -15           | 0           | -47        |
| Umbuchungen                                  | -32          | -1            | 0           | -33        |
| Stand 31.12.2009/1.1.2010                    | 100          | 23            | 1           | 124        |
| Währungsumrechnung                           | 1            | 0             | 0           | 1          |
| Zugänge                                      | 78           | 3             | 115         | 196        |
| Abgänge                                      | -49          | -13           | 0           | -62        |
| Umbuchungen                                  | 0            | 0             | 0           | 0          |
| Stand 31.12.2010                             | 130          | 13            | 116         | 259        |
| <b>Abschreibungen</b>                        |              |               |             |            |
| Stand 1.1.2009                               | 10           | 16            | 0           | 26         |
| Währungsumrechnung                           | 0            | 0             | 0           | 0          |
| Zugänge, außerplanmäßig                      | 1            | 0             | 0           | 1          |
| Abgänge                                      | 0            | -15           | 0           | -15        |
| Zuschreibungen                               | 0            | 0             | 0           | 0          |
| Umbuchungen                                  | 0            | -1            | 0           | -1         |
| Stand 31.12.2009/1.1.2010                    | 11           | 0             | 0           | 11         |
| Zugänge, außerplanmäßig                      | 0            | 0             | 0           | 0          |
| Abgänge                                      | 0            | 0             | 0           | 0          |
| Zuschreibungen                               | 0            | 0             | 0           | 0          |
| Umbuchungen                                  | 0            | 0             | 0           | 0          |
| Stand 31.12.2010                             | 11           | 0             | 0           | 11         |
| Buchwert 1.1.2009                            | 120          | 23            | 1           | 144        |
| Buchwert 31.12.2009                          | 89           | 23            | 1           | 113        |
| <b>Buchwert 31.12.2010</b>                   | <b>119</b>   | <b>13</b>     | <b>116</b>  | <b>248</b> |

Der starke Anstieg bei den Wertpapieren in den langfristigen finanziellen Vermögenswerten ist auf eine Fondsanlage der Zahlungseingänge aus der Veräußerung der Anteile an der Metro Cash & Carry Morocco S.A. zurückzuführen.

Im Buchwert der Beteiligungen sind 2 Mio. € (Vorjahr 1 Mio. €) Beteiligungen an 4 assoziierten Unternehmen (Vorjahr 2 assoziierte Unternehmen) enthalten, die nach der Equity-Methode bewertet werden.

### 23. Sonstige Forderungen und Vermögenswerte

Die Forderungen an Lieferanten beinhalten die späteren Vergütungen von Lieferanten (zum Beispiel Boni, Werbekostenzuschüsse).

Der aktive Rechnungsabgrenzungsposten enthält abgegrenzte Miet-, Leasing- und Zinsvorauszahlungen sowie übrige Abgrenzungen.

Die übrigen Vermögenswerte bestehen im Wesentlichen aus den Forderungen aus Kreditkartengeschäften in Höhe von 114 Mio. € (Vorjahr 114 Mio. €), den Forderungen aus sonstigen Finanzgeschäften in Höhe von 108 Mio. € (Vorjahr 95 Mio. €), Aktivwerten für mittelbare Zusagen in Höhe von 95 Mio. € (Vorjahr 76 Mio. €) und den Forderungen/sonstigen Vermögenswerten aus dem Immobilienbereich in Höhe von 78 Mio. € (Vorjahr 187 Mio. €).

### 24. Latente Steueransprüche/Latente Steuerschulden

Die aktiven latenten Steuern auf Verlustvorträge und temporäre Differenzen betragen 1.000 Mio. € und haben im Vergleich zum Vorjahr um 26 Mio. € abgenommen. Bei den passiven latenten Steuern hat sich der Bilanzwert auf 212 Mio. € reduziert und liegt damit um 4 Mio. € unter Vorjahresniveau.

| Mio. €                                  | 31.12.2010   |              |                 | 31.12.2009   |              |                 | 1.1.2009     |              |                 |
|-----------------------------------------|--------------|--------------|-----------------|--------------|--------------|-----------------|--------------|--------------|-----------------|
|                                         | Restlaufzeit |              |                 | Restlaufzeit |              |                 | Restlaufzeit |              |                 |
|                                         | Gesamt       | Bis 1 Jahr   | Mehr als 1 Jahr | Gesamt       | Bis 1 Jahr   | Mehr als 1 Jahr | Gesamt       | Bis 1 Jahr   | Mehr als 1 Jahr |
| Forderungen an Lieferanten <sup>1</sup> | 1.560        | 1.558        | 2               | 1.359        | 1.356        | 3               | 1.482        | 1.482        | 0               |
| Sonstige Steuererstattungsansprüche     | 356          | 356          | 0               | 363          | 363          | 0               | 417          | 417          | 0               |
| Aktiver Rechnungsabgrenzungsposten      | 388          | 109          | 279             | 370          | 101          | 269             | 347          | 99           | 248             |
| Übrige Vermögenswerte <sup>2</sup>      | 864          | 701          | 163             | 984          | 793          | 191             | 1.022        | 820          | 202             |
|                                         | <b>3.168</b> | <b>2.724</b> | <b>444</b>      | <b>3.076</b> | <b>2.613</b> | <b>463</b>      | <b>3.268</b> | <b>2.818</b> | <b>450</b>      |

<sup>1</sup> Adjustierung der Vorjahreswerte aufgrund eines geänderten Ausweises

<sup>2</sup> Adjustierung der Werte zum 1.1.2009 aufgrund der Erstanwendung geänderter IFRS im Geschäftsjahr 2009

Die bilanzierten latenten Steuern betreffen folgende Bilanzposten:

| Mio. €                                                                  | 31.12.2010   |            | 31.12.2009   |            | 1.1.2009     |            |
|-------------------------------------------------------------------------|--------------|------------|--------------|------------|--------------|------------|
|                                                                         | Aktiv        | Passiv     | Aktiv        | Passiv     | Aktiv        | Passiv     |
| Geschäfts- oder Firmenwerte                                             | 257          | 144        | 291          | 171        | 328          | 158        |
| Sonstige immaterielle Vermögenswerte                                    | 131          | 25         | 164          | 45         | 179          | 39         |
| Sachanlagen und als Finanzinvestition gehaltene Immobilien <sup>1</sup> | 156          | 671        | 143          | 653        | 133          | 677        |
| Finanzielle Vermögenswerte                                              | 7            | 8          | 6            | 9          | 10           | 4          |
| Vorräte                                                                 | 85           | 25         | 92           | 35         | 91           | 29         |
| Sonstige Forderungen und Vermögenswerte <sup>2</sup>                    | 124          | 85         | 139          | 74         | 120          | 73         |
| Rückstellungen für Pensionen und ähnliche Verpflichtungen               | 126          | 16         | 115          | 11         | 107          | 10         |
| Sonstige Rückstellungen                                                 | 101          | 11         | 104          | 27         | 104          | 36         |
| Finanzielle Schulden <sup>1</sup>                                       | 417          | 5          | 415          | 4          | 510          | 3          |
| Sonstige Verbindlichkeiten <sup>1</sup>                                 | 158          | 65         | 132          | 46         | 128          | 40         |
| Outside Basis Differences                                               | 0            | 6          | 0            | 6          | 0            | 6          |
| Wertberichtigungen <sup>1</sup>                                         | -40          | 0          | -28          | 0          | -22          | 0          |
| Verlustvorträge                                                         | 327          | 0          | 318          | 0          | 216          | 0          |
| Summe                                                                   | 1.849        | 1.061      | 1.891        | 1.081      | 1.904        | 1.075      |
| Saldierung                                                              | -849         | -849       | -865         | -865       | -854         | -854       |
| <b>Bilanzwert der latenten Steuern</b>                                  | <b>1.000</b> | <b>212</b> | <b>1.026</b> | <b>216</b> | <b>1.050</b> | <b>221</b> |

<sup>1</sup> Adjustierung der Vorjahreswerte aufgrund gesonderten Ausweises von Wertberichtigungen

<sup>2</sup> Adjustierung der Werte zum 1.1.2009 aufgrund der Erstanwendung neuer und geänderter IFRS im Geschäftsjahr 2009

Gemäß IAS 12 sind latente Steuern auf den Unterschiedsbeitrag zwischen dem in der Konzernbilanz erfassten anteiligen Eigenkapital einer Tochtergesellschaft und dem Beteiligungsbuchwert für diese Tochtergesellschaft in der Steuerbilanz der Muttergesellschaft zu bilden (sogenannte Outside Basis Differences), wenn mit der Realisierung zu rechnen ist. Auf thesaurierte Gewinne von Tochterunternehmen wurden keine latenten Steuern berechnet, da die Gewinne auf unbestimmte Zeit reinvestiert werden oder keiner entsprechenden Besteuerung unterliegen. Für geplante Dividendenzahlungen wurden wie im Vorjahr unverändert 6 Mio. € passive latente Steuern aus Outside Basis Differences berücksichtigt.

Folgende Verlust- und Zinsvorträge sowie temporäre Differenzen wurden nicht mit latenten Steuern bewertet, da mit einer kurzfristigen Nutzung nicht zu rechnen ist:

| Mio. €                           | 2010  | 2009  |
|----------------------------------|-------|-------|
| Körperschaftsteuerliche Verluste | 6.488 | 5.686 |
| Gewerbesteuerliche Verluste      | 6.839 | 6.523 |
| Zinsvorträge                     | 6     | 6     |
| Temporäre Differenzen            | 121   | 92    |

Die Verluste betreffen im Wesentlichen das Inland. Sie sind unbegrenzt vortragsfähig.

**Steuerliche Auswirkungen auf Komponenten des sonstigen Ergebnisses**

| Mio. €                                                                                                 | 2010        |          |              | 2009        |           |              |
|--------------------------------------------------------------------------------------------------------|-------------|----------|--------------|-------------|-----------|--------------|
|                                                                                                        | Vor Steuern | Steuern  | Nach Steuern | Vor Steuern | Steuern   | Nach Steuern |
| Veränderung der Neubewertungsrücklage                                                                  | 0           | 0        | 0            | 0           | 0         | 0            |
| Währungsumrechnungsdifferenzen aus Nettoinvestitionen in ausländische Geschäftsbetriebe                | 134         | -13      | 121          | -78         | 5         | -73          |
| Effektiver Teil der Gewinne/Verluste aus Cashflow Hedges und Aktienprämienprogramme                    | -4          | 0        | -4           | 10          | -2        | 8            |
| Gewinne/Verluste aus der Neubewertung von Finanzinstrumenten der Kategorie „zur Veräußerung verfügbar“ | 0           | 0        | 0            | 0           | 0         | 0            |
| Sonstige Veränderungen                                                                                 | 5           | 0        | 5            | 0           | 0         | 0            |
| Restliche Ertragsteuer auf das sonstige Ergebnis                                                       | 0           | 13       | 13           | 0           | 13        | 13           |
|                                                                                                        | <b>135</b>  | <b>0</b> | <b>135</b>   | <b>-68</b>  | <b>16</b> | <b>-52</b>   |

**25. Vorräte**

| Mio. €                          | 31.12.2010   | 31.12.2009   |
|---------------------------------|--------------|--------------|
| Handelswaren Lebensmittel       | 2.147        | 2.011        |
| Handelswaren Nicht-Lebensmittel | 5.311        | 5.099        |
|                                 | <b>7.458</b> | <b>7.110</b> |

Die Vorräte verteilen sich auf die Vertriebslinien wie folgt:

| Mio. €                 | 31.12.2010   | 31.12.2009   |
|------------------------|--------------|--------------|
| Metro Cash & Carry     | 2.514        | 2.263        |
| Real                   | 1.030        | 1.027        |
| Media Markt und Saturn | 3.112        | 3.014        |
| Galeria Kaufhof        | 474          | 508          |
| Sonstige               | 328          | 298          |
|                        | <b>7.458</b> | <b>7.110</b> |

Der Anstieg der Vorräte ist im Wesentlichen auf die Ausweitung – insbesondere des internationalen Geschäfts – bei den Vertriebslinien Media Markt und Saturn sowie Metro Cash & Carry zurückzuführen. Zusätzliche vorraterhöhende Einflüsse aus

Währungseffekten werden durch die Umgliederung von Vorräten in die Position „Zur Veräußerung vorgesehene Vermögenswerte“ im Zusammenhang mit der beschlossenen Abgabe der Elektrofachmärkte in Frankreich kompensiert.

Im Vorratsvermögen sind Wertberichtigungen in Höhe von 317 Mio. € (Vorjahr 348 Mio. €) enthalten.

**26. Forderungen aus Lieferungen und Leistungen**

Von den Forderungen aus Lieferungen und Leistungen in Höhe von 526 Mio. € (Vorjahr 539 Mio. €) weisen 1 Mio. € (Vorjahr 2 Mio. €) eine Restlaufzeit von mehr als einem Jahr auf.

Die Verringerung der Forderungen aus Lieferungen und Leistungen resultiert im Wesentlichen aus dem im Vergleich zum Vorjahr rückläufigen Provisionsgeschäft. Darüber hinaus wurde im Rahmen der Abgabe der französischen Elektrofachmärkte eine Umgliederung in die Position „Zur Veräußerung vorgesehene Vermögenswerte“ vorgenommen.

Gegenläufige Effekte entstehen durch die Eröffnung neuer Standorte im Rahmen der Expansion sowie durch Sonderverkaufsaktionen zum Jahresende.

### 27. Wertberichtigungen auf aktivierte Finanzinstrumente

Die Wertberichtigungen auf aktivierte Finanzinstrumente, die zu fortgeführten Anschaffungskosten bewertet werden, lauten wie folgt:

| Mio. €                           | Kategorie „Kredite und Forderungen“ | Kategorie „Bis zur Endfälligkeit gehalten“ |
|----------------------------------|-------------------------------------|--------------------------------------------|
| Stand 1.1.2009                   | 210                                 | 0                                          |
| Währungsumrechnung               | -1                                  | 0                                          |
| Veränderung Konsolidierungskreis | 0                                   | 0                                          |
| Zugänge                          | 105                                 | 0                                          |
| Auflösung                        | -63                                 | 0                                          |
| Inanspruchnahme                  | -55                                 | 0                                          |
| Umbuchungen                      | 0                                   | 0                                          |
| Stand 31.12.2009/1.1.2010        | 196                                 | 0                                          |
| Währungsumrechnung               | 1                                   | 0                                          |
| Veränderung Konsolidierungskreis | -4                                  | 0                                          |
| Zugänge                          | 123                                 | 0                                          |
| Auflösung                        | -90                                 | 0                                          |
| Inanspruchnahme                  | -60                                 | 0                                          |
| Umbuchungen                      | 0                                   | 0                                          |
| <b>Stand 31.12.2010</b>          | <b>166</b>                          | <b>0</b>                                   |

Für die Kategorie „Kredite und Forderungen“ lagen negative Ergebniseinflüsse aus Wertberichtigungen in Höhe von 31 Mio. € (Vorjahr 40 Mio. €) vor. Hierin enthalten sind auch Erträge aus dem Erhalt von Zahlungsmitteln aus bereits wegen erwarteter Uneinbringlichkeit ausgebuchten Forderungen in Höhe von 2 Mio. € (Vorjahr 2 Mio. €). Für die Kategorie „Bis zur Endfälligkeit gehalten“ lagen wie im Vorjahr keine Ergebniseinflüsse vor.

### 28. Buchwerte überfälliger, nicht einzelwertberichtigter aktivierter Finanzinstrumente

Folgende aktivierte Finanzinstrumente waren zum Bilanzstichtag überfällig und nicht einzelwertberichtigt:

davon zum Abschlussstichtag nicht einzelwertberichtigt und überfällig

| Mio. €                                         | Gesamter Buchwert 31.12.2010 | Innerhalb der letzten 90 Tage | Seit 91 bis 180 Tagen | Seit 181 bis 270 Tagen | Seit 271 bis 360 Tagen | Seit mehr als 360 Tagen |
|------------------------------------------------|------------------------------|-------------------------------|-----------------------|------------------------|------------------------|-------------------------|
| <b>Aktiva</b>                                  |                              |                               |                       |                        |                        |                         |
| der Kategorie „Kredite und Forderungen“        | 2.731                        | 154                           | 4                     | 1                      | 1                      | 3                       |
| der Kategorie „Bis zur Endfälligkeit gehalten“ | 0                            | 0                             | 0                     | 0                      | 0                      | 0                       |
| der Kategorie „Zu Handelszwecken gehalten“     | 30                           | 0                             | 0                     | 0                      | 0                      | 0                       |
| der Kategorie „Zur Veräußerung verfügbar“      | 13                           | 0                             | 0                     | 0                      | 0                      | 0                       |
|                                                | <b>2.774</b>                 | <b>154</b>                    | <b>4</b>              | <b>1</b>               | <b>1</b>               | <b>3</b>                |

davon zum Abschlussstichtag nicht einzelwertberichtigt und überfällig

| Mio. €                                               | Gesamter Buchwert 31.12.2009 | Innerhalb der letzten 90 Tage | Seit 91 bis 180 Tagen | Seit 181 bis 270 Tagen | Seit 271 bis 360 Tagen | Seit mehr als 360 Tagen |
|------------------------------------------------------|------------------------------|-------------------------------|-----------------------|------------------------|------------------------|-------------------------|
| <b>Aktiva</b>                                        |                              |                               |                       |                        |                        |                         |
| der Kategorie „Kredite und Forderungen“ <sup>1</sup> | 2.722                        | 141                           | 6                     | 0                      | 2                      | 8                       |
| der Kategorie „Bis zur Endfälligkeit gehalten“       | 9                            | 0                             | 0                     | 0                      | 0                      | 0                       |
| der Kategorie „Zu Handelszwecken gehalten“           | 35                           | 0                             | 0                     | 0                      | 0                      | 0                       |
| der Kategorie „Zur Veräußerung verfügbar“            | 23                           | 0                             | 0                     | 0                      | 0                      | 0                       |
|                                                      | <b>2.789</b>                 | <b>141</b>                    | <b>6</b>              | <b>0</b>               | <b>2</b>               | <b>8</b>                |

<sup>1</sup> Adjustierung der Vorjahreswerte aufgrund eines geänderten Ausweises

Die innerhalb der letzten 90 Tage fälligen Kredite und Forderungen resultieren im Wesentlichen aus dem geschäftsüblichen Zahlungsverkehr ohne Zahlungsziel beziehungsweise mit kurzen Zahlungszielen. Bei den nicht einzelwertberechtigten Krediten und Forderungen, die seit mehr als 90 Tagen überfällig sind, deuten zum Abschlussstichtag keine Anzeichen darauf hin, dass die Schuldner ihren Zahlungsverpflichtungen nicht nachkommen werden. Dies gilt auch für alle nicht überfälligen und nicht einzelwertberechtigten aktivierten Finanzinstrumente.

### 29. Zahlungsmittel

| Mio. €                        | 31.12.2010   | 31.12.2009   |
|-------------------------------|--------------|--------------|
| Schecks und Kassenbestand     | 128          | 149          |
| Guthaben bei Kreditinstituten | 4.671        | 3.847        |
|                               | <b>4.799</b> | <b>3.996</b> |

Im Einzelnen wird auf die Kapitalflussrechnung sowie auf Nummer 40 „Erläuterungen zur Kapitalflussrechnung“ verwiesen.

### 30. Zur Veräußerung vorgesehene Vermögenswerte/ Schulden im Zusammenhang mit zur Veräußerung vorgesehenen Vermögenswerten

Im Dezember 2010 beschloss die METRO GROUP die Abgabe ihrer gesamten Elektrofachmärkte in Frankreich an den französischen Investor High Tech Multicanal Group SA (HTM Group). Vor diesem Hintergrund entstanden im Rahmen der Anwendung der Bewertungsvorschriften des IAS 16, 36 und 37 Aufwendungen in Höhe von 121 Mio. €, die sich mit 71 Mio. € auf außerplanmäßige Abschreibungen und mit 50 Mio. € auf die Bildung von Rückstellungen für belastende Verträge bezogen. Ab dem Zeitpunkt der Genehmigung des Verkaufsprozesses durch die relevanten Gremien der METRO GROUP wurden alle Vermögenswerte (197 Mio. €) und Schulden (386 Mio. €) der französischen Elektrofachmärkte als Veräußerungsgruppe im Sinne des IFRS 5 behandelt. Nach Konsolidierung aller konzerninternen Vermögenswerte und Schulden erfolgt ihr Ausweis demnach in der Bilanz unter der Position „Zur Veräußerung vorgesehene Vermögenswerte“ (196 Mio. €) beziehungsweise unter der Position „Schulden im Zusammenhang mit zur Veräußerung vorgesehenen Vermögenswerten“ (193 Mio. €). Wertberichtigungen im Rahmen der Anpassung der Buchwerte dieser zur Veräußerung vorgesehenen Vermögenswerte und Schulden an den beizulegenden Zeitwert abzüglich Veräußerungskosten waren nicht notwendig. Der Kaufvertrag mit der HTM Group wurde am

18. Dezember 2010 geschlossen und steht noch unter dem Vorbehalt der Zustimmung durch die französische Kartellbehörde. Bis zum Zeitpunkt dieser Zustimmung verbleiben die französischen Elektrofachmärkte Bestandteil der METRO GROUP und tragen bis dahin zum Konzernergebnis bei.

Die im Zusammenhang mit der Veräußerung umgegliederten Vermögenswerte und Schulden setzen sich nach Konsolidierung aller konzerninternen Sachverhalte aus folgenden Positionen zusammen:

| Mio. €                                                    | 2010       |
|-----------------------------------------------------------|------------|
| <b>Vermögenswerte</b>                                     |            |
| Finanzielle Vermögenswerte (langfristig)                  | 1          |
| Sonstige Forderungen und Vermögenswerte (langfristig)     | 1          |
| Vorräte                                                   | 91         |
| Forderungen aus Lieferungen und Leistungen                | 7          |
| Sonstige Forderungen und Vermögenswerte (kurzfristig)     | 67         |
| Zahlungsmittel                                            | 29         |
|                                                           | <b>196</b> |
| <b>Schulden</b>                                           |            |
| Rückstellungen für Pensionen und ähnliche Verpflichtungen | 1          |
| Verbindlichkeiten aus Lieferungen und Leistungen          | 111        |
| Sonstige Rückstellungen (kurzfristig)                     | 53         |
| Sonstige Verbindlichkeiten (kurzfristig)                  | 28         |
|                                                           | <b>193</b> |

Die zur Veräußerung vorgesehenen Vermögenswerte und Schulden der französischen Elektrofachmärkte tragen im Segment Media Markt und Saturn mit 164 Mio. € zum Segmentvermögen und mit 185 Mio. € zu den Segmentschulden bei.

Weiterhin veräußerte die METRO GROUP ihre 9-prozentige Beteiligung an der Loyalty Partner Holdings S.A., Luxemburg, (Loyalty) mit Kaufvertrag vom 16. Dezember 2010 an die Amex Global Holdings CV, Jersey. Dieser Kaufvertrag steht noch unter dem Vorbehalt der Zustimmung durch die deutsche Kartellbehörde. Aus diesem Grund wurde der Buchwert der Anteile an der Loyalty in Höhe von 13 Mio. € aus den langfristigen finanziellen Vermögenswerten umgegliedert in die Position „Zur Veräußerung vorgesehene Vermögenswerte“. Eine außerplanmäßige Abschreibung des Buchwerts auf einen niedrigeren beizulegenden Zeitwert abzüglich Veräußerungskosten war nicht erforderlich. Es wird erwartet, dass die bilanzielle Abbildung der Veräußerung noch im ersten Halbjahr des Geschäftsjahres 2011 nach Vorliegen der notwendigen Zustimmung der deutschen Kartellbehörde vorgenommen werden kann.

Durch Umgliederung mehrerer Immobilien aus dem Bereich der langfristigen Vermögenswerte sowie durch renovierungsbedingte Nachaktivierungen bei bereits in den zur Veräußerung vorgesehenen Vermögenswerten bilanzierten Immobilien erhöhte sich der Wert dieser Bilanzposition um weitere 32 Mio. €. Immobilien mit Buchwerten von insgesamt 69 Mio. € wurden in die langfristigen Vermögenswerte zurückgegliedert, da seitens der METRO GROUP die Entscheidung getroffen wurde, sie konzernintern weiter zu nutzen. Planmäßige Abschreibungen, die im Zeitraum des Ausweises gemäß den Vorschriften des IFRS 5 unterblieben sind, wurden anlässlich der Umgliederung in die langfristigen Vermögenswerte nachgeholt. Immobilien mit einem Buchwert von 56 Mio. € wurden veräußert.

Es wird davon ausgegangen, dass die als „Zur Veräußerung vorgesehenen Vermögenswerte“ bilanzierten Immobilienobjekte im Verlauf des Jahres 2011 veräußert werden. Eine außerplanmäßige Abschreibung auf ihren beizulegenden Zeitwert abzüglich Veräußerungskosten war für diese Objekte nicht erforderlich. Im Rahmen der Segmentberichterstattung werden sie in der Position „Segmentvermögen“ in Höhe von 24 Mio. € im Segment Immobilien erfasst.

### 31. Eigenkapital

Das gezeichnete Kapital hat sich hinsichtlich Höhe und Zusammensetzung nach Stamm- und Vorzugsaktien gegenüber dem Stand am 31. Dezember 2009 nicht verändert und beträgt 835.419.052,27 €. Es ist wie folgt eingeteilt:

| Inhaberstückaktien, anteiliger Wert je Aktie am Grundkapital rd. 2,56 € |              | 31.12.2010         | 31.12.2009         |
|-------------------------------------------------------------------------|--------------|--------------------|--------------------|
| Stammaktien                                                             | Stück        | 324.109.563        | 324.109.563        |
|                                                                         | €            | 828.572.941        | 828.572.941        |
| Vorzugsaktien                                                           | Stück        | 2.677.966          | 2.677.966          |
|                                                                         | €            | 6.846.111          | 6.846.111          |
| <b>Grundkapital gesamt</b>                                              | <b>Stück</b> | <b>326.787.529</b> | <b>326.787.529</b> |
|                                                                         | <b>€</b>     | <b>835.419.052</b> | <b>835.419.052</b> |

Jede Stammaktie der METRO AG gewährt eine Stimme. Stammaktien der METRO AG berechtigen darüber hinaus insbesondere zum Erhalt von Dividenden. Im Unterschied zu den Stammaktien gewähren Vorzugsaktien der METRO AG grundsätzlich kein Stimmrecht und sind mit einem Gewinnvorzug gemäß § 21 der Satzung der METRO AG ausgestattet. Hierin heißt es:

- „(1) Die Inhaber von Vorzugsaktien ohne Stimmrecht erhalten aus dem jährlichen Bilanzgewinn eine Vorzugsdividende von 0,17 Euro je Vorzugsaktie.
- (2) Reicht der verteilbare Bilanzgewinn in einem Geschäftsjahr zur Zahlung der Vorzugsdividende nicht aus, so ist der Rückstand ohne Zinsen aus dem Bilanzgewinn der folgenden Geschäftsjahre in der Weise nachzuzahlen, daß die älteren Rückstände vor den jüngeren zu tilgen und die aus dem Gewinn eines Geschäftsjahres für dieses zu zahlenden Vorzugsbeträge erst nach Tilgung sämtlicher Rückstände zu leisten sind.
- (3) Nach Ausschüttung der Vorzugsdividende erhalten die Inhaber von Stammaktien eine Dividende von 0,17 Euro je Stammaktie. Danach wird an die Inhaber von Vorzugsaktien ohne Stimmrecht eine nicht nachzahlbare Mehrdividende von 0,06 Euro je Vorzugsaktie gezahlt. Die Mehrdividende beträgt 10 vom Hundert der unter Berücksichtigung von Absatz 4 an die Inhaber von Stammaktien gezahlten Dividende, wenn diese 1,02 Euro je Stammaktie erreicht oder übersteigt.
- (4) An einer weiteren Gewinnausschüttung nehmen die Inhaber von Vorzugsaktien ohne Stimmrecht und die Inhaber von Stammaktien entsprechend ihren Anteilen am Grundkapital gleichberechtigt teil.“

### Bedingtes Kapital I

Die von der Hauptversammlung vom 13. Mai 2009 beschlossene  
 → bedingte Erhöhung des Grundkapitals um bis zu 127.825.000 €, eingeteilt in bis zu 50.000.000 auf den Inhaber lautende Stammaktien, die im Zusammenhang mit der Ermächtigung des Vorstands, mit Zustimmung des Aufsichtsrats bis zum 12. Mai 2014 einmalig oder mehrmals auf den Inhaber lautende Options- oder Wandelschuldverschreibungen im Gesamtnennbetrag von bis zu 1.500.000.000 € zu begeben und den Inhabern Optionsbeziehungsweise Wandlungsrechte auf bis zu 50.000.000 Stück neue Stammaktien der Gesellschaft zu gewähren, entsprechende Options- oder Wandelpflichten zu begründen oder das Recht der Gesellschaft vorzusehen, statt einer Rückzahlung der Schuldverschreibungen in bar ganz oder teilweise Stammaktien der Gesellschaft zu liefern (Ermächtigung I), stand, sowie  
 → zweite bedingte Erhöhung des Grundkapitals um bis zu 127.825.000 €, eingeteilt in bis zu 50.000.000 auf den Inhaber lautende Stammaktien, die im Zusammenhang mit

einer zweiten Ermächtigung des Vorstands, mit Zustimmung des Aufsichtsrats bis zum 12. Mai 2014 einmalig oder mehrmals auf den Inhaber lautende Options- oder Wandelschuldverschreibungen im Gesamtnennbetrag von bis zu 1.500.000.000 € zu begeben und den Inhabern Optionsbeziehungsweise Wandlungsrechte auf bis zu 50.000.000 Stück neue Stammaktien der Gesellschaft zu gewähren, entsprechende Options- oder Wandelpflichten zu begründen oder das Recht der Gesellschaft vorzusehen, statt einer Rückzahlung der Schuldverschreibungen in bar ganz oder teilweise Stammaktien der Gesellschaft zu liefern (Ermächtigung II), stand,

wurden durch Beschluss der Hauptversammlung vom 5. Mai 2010 aufgehoben. Nach der Regelung des Gesetzes zur Umsetzung der Aktionärsrechterichtlinie (ARUG) und den Entscheidungen des Bundesgerichtshofs vom 18. Mai 2009 waren die detaillierten Vorgaben für die Festsetzung des Options- oder Wandlungspreises in den bisherigen Ermächtigungen I und II überflüssig geworden.

Die Hauptversammlung vom 5. Mai 2010 hat eine bedingte Erhöhung des Grundkapitals um bis zu 127.825.000 €, eingeteilt in bis zu 50.000.000 auf den Inhaber lautende Stammaktien, neu beschlossen (bedingtes Kapital I). Diese bedingte Kapitalerhöhung steht im Zusammenhang mit der Schaffung einer neuen Ermächtigung des Vorstands, mit Zustimmung des Aufsichtsrats bis zum 4. Mai 2015 einmalig oder mehrmals auf den Inhaber lautende Options- oder Wandelschuldverschreibungen (zusammen „Schuldverschreibungen“) im Gesamtnennbetrag von bis zu 1.500.000.000 € zu begeben und den Inhabern Optionsbeziehungsweise Wandlungsrechte auf bis zu 50.000.000 Stück neue Stammaktien der Gesellschaft nach näherer Maßgabe der Bedingungen der Schuldverschreibungen zu gewähren oder aufzuerlegen, entsprechende Options- oder Wandelpflichten zu begründen oder das Recht der Gesellschaft vorzusehen, statt einer Rückzahlung der Schuldverschreibungen in bar ganz oder teilweise Stammaktien der Gesellschaft zu liefern. Es wurden bisher keine Options- und/oder Wandelschuldverschreibungen aufgrund der vorgenannten Ermächtigung begeben.

#### **Genehmigtes Kapital I**

Der Vorstand wurde durch Beschluss der Hauptversammlung vom 23. Mai 2007 ermächtigt, mit Zustimmung des Aufsichtsrats bis zum 23. Mai 2012 das Grundkapital der Gesellschaft durch Ausgabe neuer auf den Inhaber lautender Stammaktien gegen Geldeinlagen einmalig oder mehrmals, höchstens jedoch um bis zu 40.000.000 € zu erhöhen (genehmigtes Kapital I).

Dabei ist den Aktionären ein Bezugsrecht einzuräumen. Der Vorstand ist jedoch ermächtigt, mit Zustimmung des Aufsichtsrats das Bezugsrecht insoweit auszuschließen, als es erforderlich ist, um den Inhabern der von der METRO AG und 100-prozentigen mittelbaren oder unmittelbaren Beteiligungsgesellschaften begebenen Optionsanleihen und Wandelschuldverschreibungen ein Bezugsrecht auf neue Stammaktien in dem Umfang zu gewähren, wie es ihnen nach Ausübung des Optionsbeziehungsweise Wandlungsrechts zustehen würde, sowie das Bezugsrecht weiter auszuschließen für etwa verbleibende Aufrundungsspitzen.

Der Vorstand ist ferner ermächtigt, mit Zustimmung des Aufsichtsrats das Bezugsrecht der Aktionäre für eine oder mehrere Kapitalerhöhungen im Rahmen des genehmigten Kapitals auszuschließen, wenn der Nennbetrag dieser Kapitalerhöhungen insgesamt 10 Prozent des bei der erstmaligen Ausnutzung im Handelsregister eingetragenen Grundkapitals nicht übersteigt und jeweils der Ausgabepreis der neuen Stammaktien den Börsenpreis der bereits börsennotierten Stammaktien der Gesellschaft mit gleicher Ausstattung zum Zeitpunkt der endgültigen Festlegung des Ausgabepreises nicht wesentlich unterschreitet. Der Vorstand ist ermächtigt, mit Zustimmung des Aufsichtsrats die weiteren Einzelheiten der Kapitalerhöhungen festzulegen. Das genehmigte Kapital I wurde bisher nicht ausgenutzt.

#### **Genehmigtes Kapital II**

Der Vorstand wurde durch Beschluss der Hauptversammlung vom 23. Mai 2007 ermächtigt, mit Zustimmung des Aufsichtsrats bis zum 23. Mai 2012 das Grundkapital der Gesellschaft durch Ausgabe neuer auf den Inhaber lautender Stammaktien gegen Sacheinlagen einmalig oder mehrmals, höchstens jedoch um bis zu 60.000.000 € zu erhöhen (genehmigtes Kapital II). Der Vorstand ist ermächtigt, mit Zustimmung des Aufsichtsrats über den Ausschluss des Bezugsrechts zu entscheiden und die weiteren Einzelheiten der Kapitalerhöhungen festzulegen. Das genehmigte Kapital II wurde bisher nicht ausgenutzt.

#### **Genehmigtes Kapital III**

Die Hauptversammlung vom 13. Mai 2009 hat den Vorstand ermächtigt, mit Zustimmung des Aufsichtsrats bis zum 12. Mai 2014 das Grundkapital der Gesellschaft durch Ausgabe neuer auf den Inhaber lautender Stammaktien gegen Geld- oder Sacheinlagen einmalig oder mehrmals, höchstens jedoch um bis zu 225.000.000 € zu erhöhen (genehmigtes Kapital III). Dabei ist den Aktionären ein Bezugsrecht einzuräumen.



Der Vorstand ist jedoch ermächtigt, mit Zustimmung des Aufsichtsrats Spitzenbeträge von dem Bezugsrecht der Aktionäre auszunehmen. Der Vorstand ist ferner ermächtigt, mit Zustimmung des Aufsichtsrats das Bezugsrecht der Aktionäre auszuschließen, sofern die Aktien gegen Sacheinlagen zum Zwecke von Unternehmenszusammenschlüssen oder des Erwerbs von Unternehmen, Unternehmensteilen oder Anteilen an Unternehmen ausgegeben werden. Der Vorstand ist außerdem ermächtigt, mit Zustimmung des Aufsichtsrats das Bezugsrecht im Fall einer Kapitalerhöhung gegen Geldeinlagen insoweit auszuschließen, als es erforderlich ist, um den Inhabern der von der METRO AG und von Konzerngesellschaften, an denen die METRO AG unmittelbar oder mittelbar zu mindestens 90 Prozent beteiligt ist, begebenen Options- oder Wandelschuldverschreibungen ein Bezugsrecht auf neue Aktien in dem Umfang zu gewähren, wie es ihnen nach Ausübung des Options- oder Wandlungsrechts oder der Erfüllung der Options- oder Wandlungspflicht zustehen würde. Der Vorstand ist ferner ermächtigt, mit Zustimmung des Aufsichtsrats das Bezugsrecht der Aktionäre für eine oder mehrere Kapitalerhöhungen auszuschließen, wenn die Kapitalerhöhung gegen Geldeinlagen erfolgt, der Nennbetrag dieser Kapitalerhöhungen insgesamt 10 Prozent des Grundkapitals nicht übersteigt und jeweils der Ausgabepreis der neuen Aktien den Börsenpreis der bereits börsennotierten Aktien gleicher Ausstattung zum Zeitpunkt der endgültigen Festlegung des Ausgabepreises nicht wesentlich unterschreitet. Die Höchstgrenze von 10 Prozent des Grundkapitals vermindert sich um den anteiligen Betrag des Grundkapitals, der auf diejenigen eigenen Aktien der Gesellschaft entfällt, die während der Laufzeit des genehmigten Kapitals III unter Ausschluss des Bezugsrechts der Aktionäre gemäß §§ 71 Abs. 1 Nr. 8 Satz 5, 186 Abs. 3 Satz 4 AktG veräußert werden. Die Höchstgrenze vermindert sich ferner um den anteiligen Betrag des Grundkapitals, der auf diejenigen Aktien entfällt, die zur Bedienung von Options- oder Wandelschuldverschreibungen mit Options- oder Wandlungsrecht oder mit Options- oder Wandlungspflicht auszugeben sind, sofern die Schuldverschreibungen während der Laufzeit des genehmigten Kapitals III unter Ausschluss des Bezugsrechts in entsprechender Anwendung von § 186 Abs. 3 Satz 4 AktG ausgegeben werden. Der Vorstand ist ermächtigt, mit Zustimmung des Aufsichtsrats die weiteren Einzelheiten der Kapitalerhöhungen festzulegen. Die neuen Aktien können auch von Kreditinstituten mit der Verpflichtung übernommen werden, sie den Aktionären zum Bezug anzubieten. Das genehmigte Kapital III wurde bisher nicht ausgenutzt.

### Erwerb eigener Aktien

Die Hauptversammlung vom 5. Mai 2010 hat die Gesellschaft gemäß § 71 Abs. 1 Nr. 8 AktG ermächtigt, bis zum 4. Mai 2015 eigene Aktien, gleich welcher Gattung, bis zu insgesamt 10 vom Hundert des Grundkapitals zu erwerben. Die durch die Hauptversammlung am 13. Mai 2009 erteilte und bis 12. November 2010 befristete Ermächtigung zum Erwerb eigener Aktien wurde mit Wirksamwerden dieser neuen Ermächtigung aufgehoben.

Von dieser Ermächtigung hat bisher weder die Gesellschaft noch ein abhängiges oder im Mehrheitsbesitz der Gesellschaft stehendes Unternehmen oder ein anderer für Rechnung der Gesellschaft oder eines abhängigen oder eines in Mehrheitsbesitz der Gesellschaft stehenden Unternehmens Gebrauch gemacht.

### Kapitalrücklagen

Die Kapitalrücklage beträgt 2.544 Mio. € (Vorjahr 2.544 Mio. €).

### Gewinnrücklagen

| Mio. €                                                                                 | 31.12.2010   | 31.12.2009   |
|----------------------------------------------------------------------------------------|--------------|--------------|
| Rücklage für Bewertung nach IAS 39 und für latente Steuern auf das „Sonstige Ergebnis“ | 80           | 84           |
| Rücklage für Währungsumrechnungen                                                      | -315         | -440         |
| Übrige Gewinnrücklagen                                                                 | 3.164        | 2.731        |
|                                                                                        | <b>2.929</b> | <b>2.375</b> |

Die Veränderung der Gewinnrücklagen beinhaltet unter anderem die Effekte aus der erfolgsneutralen Bewertung nach IAS 39 sowie latente Steuern hierauf. Im Geschäftsjahr wurden insgesamt -4 Mio. € (Vorjahr +26 Mio. €) erfolgsneutral im Eigenkapital erfasst, die im Wesentlichen aus der Bewertung von Cashflow Hedges und den darauf entfallenden latenten Steuern resultieren. In dieser Veränderung sind -1 Mio. € (Vorjahr -7 Mio. €) aus Ausbuchungen enthalten. Hiervon entfallen 1 Mio. € (Vorjahr -4 Mio. €) auf das Vorratsvermögen und -2 Mio. € (Vorjahr -3 Mio. €) auf das Finanzergebnis. Darüber hinaus beinhaltet die Veränderung noch -8 Mio. € (Vorjahr 1 Mio. €) aus der Erst- beziehungsweise Folgebewertung derivativer Finanzinstrumente sowie 5 Mio. € (Vorjahr 16 Mio. €) aus erfolgsneutral erfassten Fair-Value-Veränderungen der für die aktienorientierten Vergütungen erworbenen Sicherungsgeschäfte. Im Zusammenhang mit der Klasse „Zur Veräußerung verfügbar“ waren im laufenden Jahr, wie im Vorjahr, keine Erträge beziehungsweise Aufwendungen erfolgswirksam zu

erfassen. Diesen gesamten Bewertungseffekten steht eine saldierte latente Steuerauswirkung von 0 Mio. € (Vorjahr 16 Mio. €) gegenüber.

Daneben haben Währungsumrechnungsdifferenzen mit 125 Mio. € das Eigenkapital gestärkt (Vorjahr –75 Mio. €). Die währungsbedingte Eigenkapitalstärkung stammt im Wesentlichen aus den Ländern Russland, Ukraine, Polen, Indien, Tschechische Republik und China, dagegen kommen währungsbedingte Eigenkapitalminderungen hauptsächlich aus den Ländern Serbien und Ungarn.

Die übrigen Gewinnrücklagen erhöhten sich unter Berücksichtigung der Dividendenzahlung 2009 (–386 Mio. €) im Wesentlichen durch das Einstellen des den Anteilseignern der METRO AG zustehenden Periodengewinns 2010 (850 Mio. €) auf 3.164 Mio. €.

#### Anteile nicht beherrschender Gesellschafter

Die Anteile nicht beherrschender Gesellschafter umfassen die Anteile Dritter am Eigenkapital der konsolidierten Tochterunternehmen. Diese betragen zum Jahresende 152 Mio. € (Vorjahr 238 Mio. €). Neben den Veränderungen an den Anteilen nicht beherrschender Gesellschafter zuzurechnenden Gesamtergebnis (100 Mio. €) und den Dividenden (–143 Mio. €) sind im Immobilienbereich Anteile nicht beherrschender Gesellschafter in Höhe von 46 Mio. € abgegangen. Nennenswerte Anteile nicht beherrschender Gesellschafter bestehen seither lediglich bei der Media-Saturn-Holding GmbH.

#### Verwendung des Bilanzgewinns, Dividenden

Die Dividendenausschüttung der METRO AG richtet sich nach dem handelsrechtlichen Jahresabschluss der METRO AG.

Aus dem für das Geschäftsjahr 2009 ausgewiesenen Bilanzgewinn von 409,8 Mio. € wurden im Geschäftsjahr 2010 gemäß Beschluss der Hauptversammlung vom 5. Mai 2010 Dividenden in Höhe von 1,180 € je Stammaktie und 1,298 € je Vorzugsaktie, also insgesamt 385,9 Mio. €, ausgeschüttet. Der Restbetrag von 23,9 Mio. € wurde als Gewinnvortrag auf neue Rechnung vorgetragen.

Zur Verwendung des Bilanzgewinns 2010 schlägt der Vorstand der METRO AG der Hauptversammlung vor, aus dem ausgewiesenen Bilanzgewinn von 455,9 Mio. € eine Dividendenausschüttung in Höhe von 1,350 € je Stammaktie und 1,485 € je Vorzugsaktie, also insgesamt 441,5 Mio. €, zu beschließen und den Restbetrag von 14,4 Mio. € als Gewinnvortrag auf

neue Rechnung vorzutragen. In dem Bilanzgewinn 2010 von 455,9 Mio. € ist ein Gewinnvortrag von 23,9 Mio. € enthalten.

### 32. Rückstellungen für Pensionen und ähnliche Verpflichtungen

| Mio. €                                                       | 31.12.2010   | 31.12.2009 |
|--------------------------------------------------------------|--------------|------------|
| Rückstellungen für Pensionen (Direktzusagen)                 | 573          | 575        |
| Rückstellungen für mittelbare Zusagen                        | 278          | 239        |
| Rückstellungen für Abfertigungsleistungen                    | 81           | 83         |
| Rückstellungen für betriebliche Höherversorgung              | 5            | 5          |
| Rückstellungen für betriebliche Altersversorgung             | 937          | 902        |
| Sonstige Rückstellungen für pensionsähnliche Verpflichtungen | 79           | 76         |
|                                                              | <b>1.016</b> | <b>978</b> |

Die Rückstellungen für betriebliche Altersversorgung beinhalten größtenteils leistungsorientierte Ansprüche aus unmittlaren Zusagen (Direktzusagen) und gegenüber externen Versorgungsträgern (Unterstützungskassen in Deutschland und Pensionsfonds oder Versicherungen im Ausland). Das Vermögen der externen Träger dient ausschließlich der Finanzierung der Pensionsansprüche und ist als Planvermögen unter IAS 19 qualifiziert. Die Versorgungsleistungen sind gemäß den jeweiligen Leistungsplänen einkommens- und dienstzeitbezogen; daneben werden dienstzeitbezogene Versorgungsleistungen auf der Grundlage von Festbeträgen gewährt.

Im Folgenden werden die wichtigsten Altersversorgungspläne beschrieben.

#### Deutschland

Bei den wesentlichen Plänen ist ein monatlich zahlbares Ruhegeld vorgesehen. Dieses ist entweder betragsmäßig festgelegt oder ergibt sich aus der Beschäftigungsdauer. In einzelnen Fällen ist eine Anrechnung beziehungsweise Begrenzung durch Leistungen aus der gesetzlichen Rentenversicherung vorgesehen. Außerdem bestehen Anwartschaften auf Witwen- und Witwerrenten.

#### Vereinigtes Königreich

Es gibt einen leistungsorientierten Plan mit Zusagen auf Altersleistungen, vorgezogene Altersleistungen, Invalidenleistungen und Hinterbliebenenleistungen. Die Höhe der Leistung ist abhängig von der Dienstzeit und vom letzten ruhegeldfähigen Einkommen.

**Italien**

In Italien erhalten Arbeitnehmer Zahlungen bei Beendigung des Arbeitsverhältnisses, unabhängig vom Grund für die Beendigung. Zum 1. Januar 2007 ist ein Rentenreformgesetz in Kraft getreten, mit dem die betriebliche und individuelle Altersvorsorge gefördert werden sollen. Unternehmen mit mehr als 50 Mitarbeitern sind verpflichtet, die ab Inkrafttreten auflaufenden Mitarbeiterguthaben an den neu eingerichteten staatlichen Fonds zu transferieren.

**Belgien**

Es gibt sowohl Altersrenten- als auch Kapitalzusagen, deren Höhe sich nach der Dienstzeit und dem Entgelt bemisst.

Darüber hinaus werden Abfertigungsleistungen im Falle der Arbeitslosigkeit nach Vollendung des 58. Lebensjahres gezahlt.

Die genannten Verpflichtungen werden versicherungsmathematisch nach den einschlägigen Prinzipien des IAS 19 bewertet. Grundlage der Bewertungen sind die rechtlichen, wirtschaftlichen und steuerlichen Gegebenheiten des jeweiligen Landes.

Die folgenden durchschnittlichen Annahmen wurden für die versicherungsmathematische Bewertung herangezogen:

| %                                  | 31.12.2010 |             |             |                        | 31.12.2009 |             |             |                        |
|------------------------------------|------------|-------------|-------------|------------------------|------------|-------------|-------------|------------------------|
|                                    | Euroraum   | Deutschland | Niederlande | Vereinigtes Königreich | Euroraum   | Deutschland | Niederlande | Vereinigtes Königreich |
| Rechnungszins                      | 5,03       | 4,95        | 5,60        | 5,50                   | 5,40       | 5,40        | 5,40        | 5,75                   |
| Inflationsrate                     | 1,81       | 1,75        | 2,00        | 3,75                   | 2,00       | 2,00        | 2,00        | 3,80                   |
| Rententrend                        | 1,71       | 1,76        | 1,60        | 3,55                   | 1,93       | 2,00        | 1,60        | 3,60                   |
| Einkommensrend                     | 2,40       | 2,35        | 2,50        | 4,50                   | 2,12       | 2,00        | 2,50        | 4,55                   |
| Erwartete Rendite aus Planvermögen | 4,59       | 4,08        | 5,50        | 6,10                   | 4,87       | 4,48        | 5,50        | 6,50                   |

Die Mitarbeiterfluktuation ist betriebsspezifisch ermittelt und alters-/dienstzeitabhängig berücksichtigt. In Deutschland beträgt die durchschnittliche Fluktuation 3,90 Prozent (Vorjahr 3,00 Prozent). Den versicherungsmathematischen Bewertungen liegen länderspezifische Sterbetafeln zugrunde. Bei den deutschen Konzernunternehmen basieren die Berechnungen auf den Richttafeln 2005 G von Prof. Dr. Klaus Heubeck, die um aktuelle Erkenntnisse der deutschen Rentenversicherung modifiziert wurden.

Für die Ermittlung des Rechnungszinssatzes zum 31. Dezember 2010 wurde das bis dato verwendete Verfahren weiterentwickelt. Unter Zugrundelegung des bisherigen Verfahrens hätte sich für Deutschland ein Rechnungszinssatz von 5,20 Prozent ergeben. Der Umstellungseffekt von 5,20 Prozent auf 4,95 Prozent hat eine Erhöhung der versicherungsmathematischen Verluste von 39 Mio. € zur Folge. Infolgedessen wird ceteris paribus die Amortisation der versicherungsmathematischen Verluste für 2011 um 4 Mio. € steigen.

Der Zeitwert des Planvermögens verteilt sich prozentual wie folgt auf die einzelnen Vermögenswertkategorien:

| %                            | 31.12.2010 | 31.12.2009 |
|------------------------------|------------|------------|
| Festverzinsliche Wertpapiere | 49         | 61         |
| Aktien, Fonds                | 18         | 18         |
| Immobilien                   | 17         | 13         |
| Sonstige Vermögenswerte      | 16         | 8          |
|                              | <b>100</b> | <b>100</b> |

Die erwartete durchschnittliche Verzinsung beträgt für die festverzinslichen Wertpapiere 3,9 Prozent (Vorjahr 4,2 Prozent), für Aktien und Fonds 7,9 Prozent (Vorjahr 7,8 Prozent) und für Immobilien 5,8 Prozent (Vorjahr 6,2 Prozent). Die jeweiligen Verzinsungen berücksichtigen landesspezifische Gegebenheiten und basieren unter anderem auf langfristig erwarteten Zins- und Dividenderträgen sowie Wertsteigerungen des Anlageportfolios.

Im Planvermögen sind von der METRO GROUP genutzte Immobilien in Höhe von 137 Mio. € (Vorjahr 103 Mio. €) enthalten.

Der tatsächliche Ertrag aus dem Planvermögen beträgt im Berichtsjahr 80 Mio. € (Vorjahr 55 Mio. €).

Der Finanzierungsstatus, der sich aus dem Saldo von Anwartschaftsbarwert und Zeitwert des Planvermögens ergibt, hat sich in den vergangenen fünf Jahren wie folgt entwickelt:

| Mio. €                                                      | 31.12.2010 | 31.12.2009 | 31.12.2008 | 31.12.2007 | 31.12.2006 |
|-------------------------------------------------------------|------------|------------|------------|------------|------------|
| Anwartschaftsbarwert                                        | 2.026      | 1.944      | 1.827      | 1.861      | 2.034      |
| Planvermögen                                                | -936       | -870       | -845       | -936       | -907       |
| Finanzierungsstatus                                         | 1.090      | 1.074      | 982        | 925        | 1.127      |
| Erfahrungsbedingte Anpassungen der Schulden der Pläne       | -13        | 2          | -3         | -1         | -14        |
| Erfahrungsbedingte Anpassungen der Vermögenswerte der Pläne | 38         | 13         | -82        | -10        | 10         |

Für das Geschäftsjahr 2011 werden Zahlungen an externe Versorgungsträger in Höhe von 48 Mio. € erwartet.

Die Veränderungen des Anwartschaftsbarwerts sowie der Planvermögen von externen Versorgungseinrichtungen ergeben sich wie folgt:

| Mio. €                                                                              | 2010         | 2009         |
|-------------------------------------------------------------------------------------|--------------|--------------|
| <b>Anwartschaftsbarwert</b>                                                         |              |              |
| Stand 1.1.                                                                          | 1.944        | 1.827        |
| Zinsaufwand                                                                         | 101          | 102          |
| Dienstzeitaufwand                                                                   | 41           | 31           |
| Nachzuverrechnender Dienstzeitaufwand                                               | -7           | 0            |
| Plankürzungen/Abgeltungen                                                           | -8           | -1           |
| Plankosten                                                                          | 0            | -1           |
| Rentenzahlungen                                                                     | -126         | -128         |
| Versicherungsmathematische Gewinne (-)/Verluste (+)                                 | 66           | 105          |
| Veränderung Konsolidierungskreis                                                    | 0            | 2            |
| Währungseffekte                                                                     | 15           | 7            |
| <b>Stand 31.12.</b>                                                                 | <b>2.026</b> | <b>1.944</b> |
| <b>Veränderungen der Planvermögen</b>                                               |              |              |
| Stand 1.1.                                                                          | 870          | 845          |
| Erwarteter Ertrag aus Planvermögen                                                  | 41           | 42           |
| Plankosten                                                                          | -1           | -1           |
| Rentenzahlungen                                                                     | -74          | -74          |
| Beiträge von Arbeitgebern                                                           | 34           | 31           |
| Beiträge der Teilnehmer des Plans                                                   | 13           | 7            |
| Versicherungsmathematische Gewinne (+)/Verluste (-)                                 | 38           | 13           |
| Währungseffekte                                                                     | 15           | 7            |
| <b>Stand 31.12.</b>                                                                 | <b>936</b>   | <b>870</b>   |
| <b>Finanzierungsstand</b>                                                           |              |              |
| Anwartschaftsbarwert nicht fondsfinanziert                                          | 744          | 721          |
| Anwartschaftsbarwert ganz oder teilweise fondsfinanziert                            | 1.282        | 1.223        |
| Zwischensumme                                                                       | 2.026        | 1.944        |
| Marktwert des Planvermögens                                                         | -936         | -870         |
| Stand 31.12.                                                                        | 1.090        | 1.074        |
| Noch nicht berücksichtigte versicherungsmathematische Gewinne (+)/Verluste (-)      | -244         | -243         |
| Nachzuverrechnender Dienstzeitaufwand                                               | -6           | -7           |
| Aufgrund der Begrenzung nach IAS 19.58 (b) nicht als Vermögenswert erfasster Betrag | 0            | 0            |
| Bilanzierte Erstattungsansprüche nach IAS 19.104A                                   | 0            | 0            |
| Nach lokalen Kriterien bewertete Verpflichtungen                                    | 2            | 2            |
| Bilanzierte Vermögenswerte nach IAS 19.58                                           | 95           | 76           |
| <b>Rückstellung für betriebliche Altersversorgung Stand 31.12.</b>                  | <b>937</b>   | <b>902</b>   |

Den Rückstellungen für betriebliche Altersversorgung in Höhe von 937 Mio. € (Vorjahr 902 Mio. €) stehen Aktivwerte für mittelbare Zusagen im Wesentlichen im Vereinigten Königreich und in den Niederlanden in Höhe von 95 Mio. € (Vorjahr 76 Mio. €) gegenüber.

Die Pensionsaufwendungen aus unmittelbaren und mittelbaren Zusagen der betrieblichen Altersversorgung setzen sich wie folgt zusammen:

| Mio. €                                                       | 2010       | 2009      |
|--------------------------------------------------------------|------------|-----------|
| Zinsaufwand auf Anwartschaftsbarwert                         | 101        | 102       |
| Erwartete Erträge der Planvermögen                           | -41        | -42       |
| Erfasste versicherungsmathematische Gewinne (-)/Verluste (+) | 26         | 6         |
| Dienstzeitaufwand <sup>1</sup>                               | 28         | 24        |
| Plankürzungen                                                | -5         | 0         |
| Asset-Limitierung                                            | 0          | -3        |
| Nachzuverrechnender früherer Dienstzeitaufwand               | -6         | 1         |
|                                                              | <b>103</b> | <b>88</b> |

<sup>1</sup> Darin verrechnet: von Mitarbeitern geleistete Beiträge

Zusätzlich zum Aufwand aus leistungsorientierten Pensionszusagen wurden für beitragsorientierte Versorgungszusagen Aufwendungen für Zahlungen an externe Versorgungsträger im Geschäftsjahr in Höhe von 53 Mio. € (Vorjahr 48 Mio. €) berücksichtigt.

Die sonstigen Rückstellungen für pensionsähnliche Verpflichtungen beinhalten im Wesentlichen Verpflichtungen aus Jubiläums- und Sterbegeldern, Gehaltsfortzahlungen im Todesfall sowie Altersteilzeitvereinbarungen. Für die Verpflichtungen aus Altersteilzeit wurden Rückstellungen in Höhe von 28 Mio. € (Vorjahr 33 Mio. €) gebildet. Die korrespondierenden Aufwendungen belaufen sich auf 5 Mio. € (Vorjahr 9 Mio. €).

Die Verpflichtungen werden auf Basis von versicherungsmathematischen Gutachten bewertet. Die hierfür herangezogenen Bewertungsparameter sind grundsätzlich identisch mit denen der betrieblichen Altersversorgung.

### 33. Sonstige Rückstellungen (langfristig)/ Rückstellungen (kurzfristig)

Die sonstigen Rückstellungen (langfristig)/Rückstellungen (kurzfristig) haben sich im Berichtsjahr wie folgt entwickelt:

| Mio. €                                                 | Verpflichtungen aus dem Immobilienbereich | Verpflichtungen aus dem Warengeschäft | Restrukturierung | Steuern    | Übrige     | Gesamt       |
|--------------------------------------------------------|-------------------------------------------|---------------------------------------|------------------|------------|------------|--------------|
| Stand 1.1.2010                                         | 234                                       | 157                                   | 270              | 189        | 213        | 1.063        |
| Währungsumrechnung                                     | 1                                         | 1                                     | 0                | 1          | 1          | 4            |
| Zuführung                                              | 132                                       | 136                                   | 110              | 92         | 171        | 641          |
| Auflösung                                              | -57                                       | -8                                    | -69              | -18        | -69        | -221         |
| Inanspruchnahme                                        | -59                                       | -142                                  | -120             | -33        | -106       | -460         |
| Zinsanteil in der Zuführung/Veränderung des Zinssatzes | 5                                         | 5                                     | 2                | 0          | 20         | 32           |
| Umbuchung                                              | -40                                       | -2                                    | -14              | -31        | 32         | -55          |
| <b>Stand 31.12.2010</b>                                | <b>216</b>                                | <b>147</b>                            | <b>179</b>       | <b>200</b> | <b>262</b> | <b>1.004</b> |
| Langfristig                                            | 161                                       | 13                                    | 43               | 162        | 93         | 472          |
| Kurzfristig                                            | 55                                        | 134                                   | 136              | 38         | 169        | 532          |
| <b>Stand 31.12.2010</b>                                | <b>216</b>                                | <b>147</b>                            | <b>179</b>       | <b>200</b> | <b>262</b> | <b>1.004</b> |

Die Rückstellungen für Verpflichtungen aus dem Immobilienbereich betreffen Mietunterdeckungen in Höhe von 84 Mio. € (Vorjahr 72 Mio. €), standortbezogene Risiken in Höhe von 72 Mio. € (Vorjahr 92 Mio. €), Rückbauverpflichtungen in Höhe von 20 Mio. € (Vorjahr 20 Mio. €) sowie Mietverpflichtungen in Höhe von 20 Mio. € (Vorjahr 16 Mio. €).

Sonstige Verpflichtungen des Immobilienbereichs in Höhe von 20 Mio. € (Vorjahr 34 Mio. €) entfallen im Wesentlichen auf Instandhaltungsverpflichtungen.

Bedeutende Komponenten der Rückstellungen für Verpflichtungen aus dem Warengeschäft sind Rückstellungen für Rabatte aus dem Payback-Verfahren in Höhe von 78 Mio. € (Vorjahr 85 Mio. €) sowie Rückstellungen für Garantieleistungen in Höhe von 53 Mio. € (Vorjahr 54 Mio. €).

Die übrigen Rückstellungen setzen sich vor allem aus Verpflichtungen für Prozesskosten/-risiken in Höhe von 35 Mio. € (Vorjahr 40 Mio. €), aus Abfindungsverpflichtungen in Höhe von 18 Mio. € (Vorjahr 9 Mio. €) sowie aus Bürgschafts- und Gewährleistungsrisiken in Höhe von 12 Mio. € (Vorjahr 4 Mio. €) zusammen. Die Rückstellungen für aktienbasierte Vergütungen betragen 60 Mio. € (Vorjahr 13 Mio. €). Ergänzende Erläuterungen zu den aktienbasierten Vergütungen sind unter Nummer 49 „Aktienorientierte Vergütung für Führungskräfte“ angegeben.

Vor dem Hintergrund der Entscheidung zum Abgang der französischen Elektrofachmärkte wurden Rückstellungen in Höhe von 53 Mio. € in die Position „Schulden im Zusammenhang mit zur Veräußerung vorgesehenen Vermögenswerten“ umgliedert. Die Umgliederung wird als Umbuchung ausgewiesen.

### 34. Verbindlichkeiten

### 35. Verbindlichkeiten aus Lieferungen und Leistungen

Der Anstieg der Verbindlichkeiten aus Lieferungen und Leistungen wird durch positive Währungseffekte sowie durch die Ausweitung des internationalen Geschäfts bei den Vertriebslinien Media Markt und Saturn sowie Metro Cash & Carry verursacht. Abgeschwächt wird dieser Anstieg durch die Umgliederung von Verbindlichkeiten in die Position „Schulden im Zusammenhang mit zur Veräußerung vorgesehenen Vermögenswerten“ im Zusammenhang mit der beschlossenen Abgabe der Elektrofachmärkte in Frankreich. Ebenfalls abschwächend wirkt der Abgang der Verbindlichkeiten aus der Veräußerung von Metro Cash & Carry in Marokko.

### 36. Finanzielle Schulden

Der langfristigen Finanzierung dient ein „Debt Issuance Programme“, in dessen Rahmen 2010 folgende Transaktionen vorgenommen wurden:

| Transaktionsart | Emissionsdatum | Laufzeit | Fälligkeit     | Nominalvolumen | Verzinsung  |
|-----------------|----------------|----------|----------------|----------------|-------------|
| Neuemission     | Februar 2010   | 7 Jahre  | Februar 2017   | 750 Mio. €     | 4,250 % fix |
| Rückzahlung     | September 2006 | 4 Jahre  | September 2010 | 200 Mio. €     | variabel    |

| Mio. €                                                   | 31.12.2010<br>Gesamt | Restlaufzeit  |               |              | 31.12.2009<br>Gesamt <sup>1</sup> | 1.1.2009<br>Gesamt <sup>2</sup> |
|----------------------------------------------------------|----------------------|---------------|---------------|--------------|-----------------------------------|---------------------------------|
|                                                          |                      | Bis 1 Jahr    | 1 bis 5 Jahre | Über 5 Jahre |                                   |                                 |
| <b>Verbindlichkeiten aus Lieferungen und Leistungen</b>  | <b>14.393</b>        | <b>14.393</b> | <b>0</b>      | <b>0</b>     | <b>14.174</b>                     | <b>14.125</b>                   |
| davon Wechselverbindlichkeiten (unverz.)                 | (617)                | (617)         | (0)           | (0)          | (507)                             | (584)                           |
| Anleihen                                                 | 4.615                | 1.253         | 2.615         | 747          | 4.037                             | 3.836                           |
| Verbindlichkeiten gegenüber Kreditinstituten             | 1.211                | 375           | 621           | 215          | 1.214                             | 1.533                           |
| Schuldscheindarlehen                                     | 868                  | 12            | 856           | 0            | 867                               | 707                             |
| Verbindlichkeiten aus Finanzierungs-Leasingverhältnissen | 1.589                | 110           | 471           | 1.008        | 1.609                             | 1.819                           |
| <b>Finanzielle Schulden</b>                              | <b>8.283</b>         | <b>1.750</b>  | <b>4.563</b>  | <b>1.970</b> | <b>7.727</b>                      | <b>7.895</b>                    |
| Sonstige Steuerverbindlichkeiten                         | 535                  | 535           | 0             | 0            | 522                               | 585                             |
| Erhaltene Anzahlungen auf Bestellungen                   | 40                   | 40            | 0             | 0            | 36                                | 32                              |
| Lohn- und Gehaltsverbindlichkeiten                       | 927                  | 925           | 2             | 0            | 850                               | 862                             |
| Verbindlichkeiten aus sonstigen Finanzgeschäften         | 41                   | 38            | 3             | 0            | 51                                | 38                              |
| Passiver Rechnungsabgrenzungsposten                      | 438                  | 154           | 242           | 42           | 407                               | 313                             |
| Übrige Verbindlichkeiten                                 | 1.234                | 766           | 447           | 21           | 1.001                             | 953                             |
| <b>Sonstige Verbindlichkeiten</b>                        | <b>3.215</b>         | <b>2.458</b>  | <b>694</b>    | <b>63</b>    | <b>2.867</b>                      | <b>2.783</b>                    |
| <b>Ertragsteuerschulden</b>                              | <b>291</b>           | <b>291</b>    | <b>0</b>      | <b>0</b>     | <b>265</b>                        | <b>266</b>                      |
|                                                          | <b>26.182</b>        | <b>18.892</b> | <b>5.257</b>  | <b>2.033</b> | <b>25.033</b>                     | <b>25.069</b>                   |

<sup>1</sup> Adjustierung aufgrund geänderter Ausweise

<sup>2</sup> Adjustierung aufgrund der Erstanwendung neuer IFRS im Geschäftsjahr 2009 sowie geänderter Ausweise

Für die kurz- und mittelfristige Finanzierung nutzt die METRO GROUP kapitalmarktübliche Daueremissionsprogramme, so zum Beispiel ein „Euro Commercial Paper Programme“ mit einem nutzbaren Volumen von bis zu 2,0 Mrd. € sowie ein weiteres „Commercial Paper Programme“, das insbesondere Investorengruppen auf dem französischen Kapitalmarkt ansprechen soll. Das Volumen dieses Programms wurde im ersten Halbjahr von 3,0 Mrd. € auf 2,0 Mrd. € zurückgeführt. Insgesamt wurden beide Programme im Jahr 2010 durchschnittlich in Höhe von rund 687 Mio. € (Vorjahr 1.629 Mio. €) ausgenutzt.

Des Weiteren stehen der METRO GROUP syndizierte Kreditlinien im Gesamtbetrag von 2.475 Mio. € (Vorjahr 2.975 Mio. €) mit Laufzeitenden zwischen März 2013 und Dezember 2015 zur Verfügung. Im Falle der Inanspruchnahme liegen die Zinssätze zwischen EURIBOR +30,0 Basispunkten (BP) und EURIBOR +65,0 BP. Der durchschnittliche im Jahr 2010 in Anspruch genommene Betrag lag bei 0 Mio. € (Vorjahr 125 Mio. €), der zum Stichtag bei 0 Mio. € (Vorjahr 0 Mio. €).

Die Vertragsbedingungen für die Konsortialkreditlinien sehen im Falle einer Ratingaufwertung der METRO GROUP um eine Stufe eine Verringerung der Margen von 5 bis 10 BP vor.

Eine Ratingverschlechterung um eine Stufe würde zu einer Margen-Erhöhung von 7,5 bis 20 BP führen.

Der METRO GROUP standen zum 31. Dezember 2010 zusätzliche bilaterale Bankkreditlinien in Höhe von 2.204 Mio. € (Vorjahr 2.467 Mio. €) zur Verfügung, wovon 1.006 Mio. € (Vorjahr 1.246 Mio. €) eine Restlaufzeit von bis zu einem Jahr aufweisen. Zum Bilanzstichtag wurden von den bilateralen Kreditlinien insgesamt 1.211 Mio. € (Vorjahr 1.214 Mio. €) in Anspruch genommen. Davon valutierten 375 Mio. € (Vorjahr 534 Mio. €) mit einer Restlaufzeit bis zu einem Jahr.

Der Ausfall eines Kreditgebers kann durch die bestehenden unausgenutzten Kreditfazilitäten beziehungsweise die verfügbaren Geld- und Kapitalmarktprogramme jederzeit gedeckt werden. Die METRO GROUP trägt somit kein signifikantes Kreditgeberausfallrisiko.

Sicherheiten für die Finanzschulden werden von der METRO GROUP grundsätzlich nicht gegeben. Eine Ausnahme besteht aufgrund der Erstkonsolidierung der Asset Immobilienbeteiligungen GmbH & Co. KG sowie ihrer Tochtergesellschaften im Jahr 2003. Zum 31. Dezember 2010 wurden hieraus für Finanzschulden in Höhe von 417 Mio. € (Vorjahr 486 Mio. €) dingliche Sicherheiten gestellt.

### Freie Kreditlinien der METRO GROUP

| Mio. €                           | 31.12.2010   |            |              | 31.12.2009   |            |              |
|----------------------------------|--------------|------------|--------------|--------------|------------|--------------|
|                                  | Gesamt       | Bis 1 Jahr | Über 1 Jahr  | Gesamt       | Bis 1 Jahr | Über 1 Jahr  |
| Bilaterale Kreditlinien          | 2.204        | 1.006      | 1.198        | 2.467        | 1.246      | 1.221        |
| Inanspruchnahme                  | -1.211       | -375       | -836         | -1.214       | -534       | -680         |
| Freie bilaterale Kreditlinien    | 993          | 631        | 362          | 1.253        | 712        | 541          |
| Syndizierte Kreditlinien         | 2.475        | 0          | 2.475        | 2.975        | 0          | 2.975        |
| Inanspruchnahme                  | 0            | 0          | 0            | 0            | 0          | 0            |
| Freie syndizierte Kreditlinien   | 2.475        | 0          | 2.475        | 2.975        | 0          | 2.975        |
| Kreditlinien gesamt              | 4.679        | 1.006      | 3.673        | 5.442        | 1.246      | 4.196        |
| Inanspruchnahme gesamt           | -1.211       | -375       | -836         | -1.214       | -534       | -680         |
| <b>Freie Kreditlinien gesamt</b> | <b>3.468</b> | <b>631</b> | <b>2.837</b> | <b>4.228</b> | <b>712</b> | <b>3.516</b> |

Die Fälligkeitsstruktur der finanziellen Schulden ist in der folgenden Tabelle dargestellt. Die angegebenen Buchwerte und Fair Values (Marktwerte) beinhalten die aufgelaufenen Zinsen, deren Restlaufzeit jeweils unter einem Jahr liegt.

Tilgungsdarlehen, die unter den Verbindlichkeiten gegenüber Kreditinstituten ausgewiesen werden, sind in den Rest-

laufzeiten entsprechend ihren Tilgungszeitpunkten dargestellt. Die Angaben zum Fair Value dieser Darlehen enthalten bei den Restlaufzeiten über einem Jahr grundsätzlich den Buchwert. Der Differenzbetrag zwischen Buchwert und Fair Value des gesamten Darlehens ist in der Fälligkeit unter einem Jahr dargestellt.

| Finanzierungsart     | Währung                                                          | Restlaufzeit  | 31.12.2010                       |                     |                  |                    | 31.12.2009                       |                     |                  |                                 |     |
|----------------------|------------------------------------------------------------------|---------------|----------------------------------|---------------------|------------------|--------------------|----------------------------------|---------------------|------------------|---------------------------------|-----|
|                      |                                                                  |               | Emissionsvolumen in Mio. Währung | Nominalwerte Mio. € | Buchwerte Mio. € | Fair Values Mio. € | Emissionsvolumen in Mio. Währung | Nominalwerte Mio. € | Buchwerte Mio. € | Fair Values <sup>1</sup> Mio. € |     |
| Anleihen             | EUR                                                              | bis 1 Jahr    | 1.100                            | 1.100               | 1.252            | 1.266              | 200                              | 200                 | 326              | 325                             |     |
|                      |                                                                  | 1 bis 5 Jahre | 2.600                            | 2.600               | 2.592            | 2.955              | 2.700                            | 2.700               | 2.692            | 2.914                           |     |
|                      |                                                                  | über 5 Jahre  | 750                              | 750                 | 747              | 774                | 1.000                            | 1.000               | 994              | 1.170                           |     |
|                      | RON                                                              | bis 1 Jahr    | 0                                | 0                   | 1                | 1                  | 0                                | 0                   | 1                | 1                               |     |
|                      |                                                                  | 1 bis 5 Jahre | 100                              | 23                  | 23               | 25                 | 100                              | 24                  | 24               | 24                              |     |
|                      |                                                                  | über 5 Jahre  | 0                                | 0                   | 0                | 0                  | 0                                | 0                   | 0                | 0                               |     |
|                      | Verbindlichkeiten gegenüber Kreditinstituten (ohne Kontokorrent) | EUR           | bis 1 Jahr                       | 84                  | 84               | 91                 | 129                              | 309                 | 309              | 310                             | 355 |
|                      |                                                                  |               | 1 bis 5 Jahre                    | 465                 | 465              | 457                | 457                              | 177                 | 177              | 177                             | 176 |
|                      |                                                                  |               | über 5 Jahre                     | 202                 | 202              | 202                | 202                              | 348                 | 348              | 348                             | 350 |
| CNY                  |                                                                  | bis 1 Jahr    | 201                              | 23                  | 23               | 28                 | 464                              | 47                  | 47               | 47                              |     |
|                      |                                                                  | 1 bis 5 Jahre | 417                              | 47                  | 47               | 47                 | 486                              | 49                  | 49               | 49                              |     |
|                      |                                                                  | über 5 Jahre  | 0                                | 0                   | 0                | 0                  | 0                                | 0                   | 0                | 0                               |     |
| JPY                  |                                                                  | bis 1 Jahr    | 2.125                            | 16                  | 20               | 21                 | 669                              | 5                   | 5                | 5                               |     |
|                      |                                                                  | 1 bis 5 Jahre | 6.607                            | 54                  | 61               | 61                 | 8.928                            | 60                  | 69               | 60                              |     |
|                      |                                                                  | über 5 Jahre  | 0                                | 0                   | 0                | 0                  | 0                                | 0                   | 0                | 0                               |     |
| RUB                  |                                                                  | bis 1 Jahr    | 3.367                            | 82                  | 82               | 82                 | 1.558                            | 36                  | 36               | 36                              |     |
|                      |                                                                  | 1 bis 5 Jahre | 0                                | 0                   | 0                | 0                  | 0                                | 0                   | 0                | 0                               |     |
|                      |                                                                  | über 5 Jahre  | 0                                | 0                   | 0                | 0                  | 0                                | 0                   | 0                | 0                               |     |
| Sonstige             |                                                                  | bis 1 Jahr    | k. A.                            | 42                  | 43               | 43                 | k. A.                            | 50                  | 50               | 50                              |     |
|                      |                                                                  | 1 bis 5 Jahre | k. A.                            | 56                  | 56               | 56                 | k. A.                            | 28                  | 29               | 28                              |     |
|                      |                                                                  | über 5 Jahre  | k. A.                            | 13                  | 13               | 13                 | k. A.                            | 8                   | 8                | 8                               |     |
| Schuldscheindarlehen | EUR                                                              | bis 1 Jahr    | 0                                | 0                   | 12               | 12                 | 0                                | 0                   | 12               | 12                              |     |
|                      |                                                                  | 1 bis 5 Jahre | 857                              | 857                 | 856              | 880                | 857                              | 857                 | 855              | 882                             |     |
|                      |                                                                  | über 5 Jahre  | 0                                | 0                   | 0                | 0                  | 0                                | 0                   | 0                | 0                               |     |

<sup>1</sup> Anpassung der Vorjahreswerte aufgrund der Berücksichtigung von Credit Spreads



Die Zinsstruktur der finanziellen Schulden ist folgender Tabelle zu entnehmen:

| Finanzierungsart      | Zinskonditionen                                                  | Währung         | Restlaufzeit  | 31.12.2010                                                       |                         | 31.12.2009                                                       |                         |     |
|-----------------------|------------------------------------------------------------------|-----------------|---------------|------------------------------------------------------------------|-------------------------|------------------------------------------------------------------|-------------------------|-----|
|                       |                                                                  |                 |               | Gewichteter Effektivzinssatz in % der originären Mittelaufnahmen | Emissionsvolumen Mio. € | Gewichteter Effektivzinssatz in % der originären Mittelaufnahmen | Emissionsvolumen Mio. € |     |
| Anleihen              | Festverzinslich                                                  | EUR             | bis 1 Jahr    | 4,31                                                             | 1.100                   | -                                                                | 0                       |     |
|                       |                                                                  |                 | 1 bis 5 Jahre | 6,97                                                             | 2.600                   | 5,65                                                             | 2.700                   |     |
|                       |                                                                  |                 | über 5 Jahre  | 4,25                                                             | 750                     | 7,63                                                             | 1.000                   |     |
|                       |                                                                  | RON             | bis 1 Jahr    | -                                                                | 0                       | -                                                                | 0                       |     |
|                       |                                                                  |                 | 1 bis 5 Jahre | 11,55                                                            | 23                      | 11,55                                                            | 24                      |     |
|                       |                                                                  |                 | über 5 Jahre  | -                                                                | 0                       | -                                                                | 0                       |     |
|                       | Variabel verzinslich                                             | EUR             | bis 1 Jahr    | -                                                                | 0                       | 0,98                                                             | 200                     |     |
|                       |                                                                  |                 | 1 bis 5 Jahre | -                                                                | 0                       | -                                                                | 0                       |     |
|                       |                                                                  |                 | über 5 Jahre  | -                                                                | 0                       | -                                                                | 0                       |     |
|                       | Verbindlichkeiten gegenüber Kreditinstituten (ohne Kontokorrent) | Festverzinslich | EUR           | bis 1 Jahr                                                       | 3,56                    | 84                                                               | 3,54                    | 309 |
|                       |                                                                  |                 |               | 1 bis 5 Jahre                                                    | 4,63                    | 458                                                              | 5,34                    | 170 |
|                       |                                                                  |                 |               | über 5 Jahre                                                     | 4,66                    | 201                                                              | 5,21                    | 346 |
| CNY                   |                                                                  |                 | bis 1 Jahr    | 5,27                                                             | 23                      | 4,67                                                             | 47                      |     |
|                       |                                                                  |                 | 1 bis 5 Jahre | 5,21                                                             | 47                      | 5,16                                                             | 49                      |     |
|                       |                                                                  |                 | über 5 Jahre  | -                                                                | 0                       | -                                                                | 0                       |     |
| RUB                   |                                                                  |                 | bis 1 Jahr    | 6,14                                                             | 82                      | 10,70                                                            | 36                      |     |
|                       |                                                                  |                 | 1 bis 5 Jahre | -                                                                | 0                       | -                                                                | 0                       |     |
|                       |                                                                  |                 | über 5 Jahre  | -                                                                | 0                       | -                                                                | 0                       |     |
| Sonstige              |                                                                  |                 | bis 1 Jahr    | 12,26                                                            | 37                      | 8,42                                                             | 50                      |     |
|                       |                                                                  |                 | 1 bis 5 Jahre | 7,88                                                             | 8                       | -                                                                | 0                       |     |
|                       |                                                                  |                 | über 5 Jahre  | -                                                                | 0                       | -                                                                | 0                       |     |
| Variabel verzinslich  |                                                                  | EUR             | bis 1 Jahr    | -                                                                | 0                       | -                                                                | 0                       |     |
|                       |                                                                  |                 | 1 bis 5 Jahre | 4,39                                                             | 7                       | 4,39                                                             | 7                       |     |
|                       |                                                                  |                 | über 5 Jahre  | 4,39                                                             | 1                       | 4,39                                                             | 2                       |     |
|                       |                                                                  | JPY             | bis 1 Jahr    | 5,01                                                             | 16                      | 1,72                                                             | 5                       |     |
|                       |                                                                  |                 | 1 bis 5 Jahre | 3,62                                                             | 54                      | 4,01                                                             | 60                      |     |
|                       |                                                                  |                 | über 5 Jahre  | -                                                                | 0                       | -                                                                | 0                       |     |
| Sonstige              |                                                                  | bis 1 Jahr      | 1,40          | 5                                                                | -                       | 0                                                                |                         |     |
|                       |                                                                  | 1 bis 5 Jahre   | 4,75          | 48                                                               | 6,06                    | 28                                                               |                         |     |
|                       |                                                                  | über 5 Jahre    | 2,89          | 13                                                               | 3,03                    | 8                                                                |                         |     |
| Schuldschein-darlehen | Festverzinslich                                                  | EUR             | bis 1 Jahr    | -                                                                | 0                       | -                                                                | 0                       |     |
|                       |                                                                  |                 | 1 bis 5 Jahre | 4,50                                                             | 244                     | 4,50                                                             | 244                     |     |
|                       |                                                                  |                 | über 5 Jahre  | -                                                                | 0                       | -                                                                | 0                       |     |
|                       | Variabel verzinslich                                             | EUR             | bis 1 Jahr    | -                                                                | 0                       | -                                                                | 0                       |     |
|                       |                                                                  |                 | 1 bis 5 Jahre | 2,22                                                             | 613                     | 2,06                                                             | 613                     |     |
|                       |                                                                  |                 | über 5 Jahre  | -                                                                | 0                       | -                                                                | 0                       |     |

Die Zinsbindung der kurz- und mittelfristigen finanziellen Schulden und die Zinsanpassungstermine aller festverzinslichen finanziellen Schulden entsprechen im Wesentlichen den dargestellten Restlaufzeiten. Die Zinsanpassungstermine variabler Zinssätze liegen unter einem Jahr.

Die Auswirkungen von Zinsänderungen beim variablen Anteil der finanziellen Schulden auf das Periodenergebnis und das Eigenkapital der METRO GROUP sind unter Nummer 43 „Management der finanzwirtschaftlichen Risiken“ ausführlich beschrieben.

### 37. Sonstige Verbindlichkeiten

Die Veränderung bei Lohn- und Gehaltsverbindlichkeiten ist im Wesentlichen auf erhöhte Bonusverpflichtungen zurückzuführen.

Die wesentlichen Positionen in den übrigen Verbindlichkeiten sind mit Andienungsrechten ausgestattete Gesellschaftsanteile in Höhe von 389 Mio. € (Vorjahr 310 Mio. €), Verbindlichkeiten gegenüber Kunden in Höhe von 297 Mio. € (Vorjahr 216 Mio. €) und Verbindlichkeiten aus dem Immobilienbereich in Höhe von 80 Mio. € (Vorjahr 59 Mio. €). Darüber hinaus beinhalten die übrigen Verbindlichkeiten noch eine Vielzahl weiterer Einzelpositionen.

| Mio. €                                           | 31.12.2010   |              |                 | 31.12.2009   |              |                 | 1.1.2009     |              |                 |
|--------------------------------------------------|--------------|--------------|-----------------|--------------|--------------|-----------------|--------------|--------------|-----------------|
|                                                  | Restlaufzeit |              |                 | Restlaufzeit |              |                 | Restlaufzeit |              |                 |
|                                                  | Gesamt       | Bis 1 Jahr   | Mehr als 1 Jahr | Gesamt       | Bis 1 Jahr   | Mehr als 1 Jahr | Gesamt       | Bis 1 Jahr   | Mehr als 1 Jahr |
| Sonstige Steuerverbindlichkeiten                 | 535          | 535          | 0               | 522          | 522          | 0               | 585          | 585          | 0               |
| Lohn- und Gehaltsverbindlichkeiten               | 927          | 925          | 2               | 850          | 842          | 8               | 862          | 832          | 30              |
| Passiver Rechnungsabgrenzungsposten <sup>1</sup> | 438          | 154          | 284             | 407          | 120          | 287             | 313          | 82           | 231             |
| Übrige Verbindlichkeiten <sup>2</sup>            | 1.315        | 844          | 471             | 1.088        | 716          | 372             | 1.023        | 664          | 359             |
|                                                  | <b>3.215</b> | <b>2.458</b> | <b>757</b>      | <b>2.867</b> | <b>2.200</b> | <b>667</b>      | <b>2.783</b> | <b>2.163</b> | <b>620</b>      |

<sup>1</sup> Adjustierung der Werte zum 1.1.2009 aufgrund der Erstanwendung neuer IFRS

<sup>2</sup> Adjustierung der Vorjahreswerte aufgrund eines geänderten Ausweises

### 38. Undiskontierte Cashflows finanzieller Verbindlichkeiten

Die undiskontierten Cashflows der finanziellen Schulden, der Verbindlichkeiten aus Lieferungen und Leistungen sowie der passivierten Derivate lauten wie folgt:

| Mio. €                                           | Buchwert<br>31.12.2010 | Cashflows 2011 |         | Cashflows 2012–2015 |         | Cashflows nach 2015 |         |
|--------------------------------------------------|------------------------|----------------|---------|---------------------|---------|---------------------|---------|
|                                                  |                        | Zinsen         | Tilgung | Zinsen              | Tilgung | Zinsen              | Tilgung |
| <b>Finanzielle Verbindlichkeiten</b>             |                        |                |         |                     |         |                     |         |
| Anleihen                                         | 4.615                  | 263            | 1.253   | 656                 | 2.615   | 64                  | 747     |
| Verbindlichkeiten gegenüber Kreditinstituten     | 1.211                  | 42             | 375     | 95                  | 621     | 5                   | 215     |
| Schuldscheindarlehen                             | 868                    | 27             | 12      | 39                  | 856     | 0                   | 0       |
| Finanzierungs-Leasingverhältnisse                | 1.589                  | 114            | 110     | 366                 | 471     | 547                 | 1.008   |
| Verbindlichkeiten aus Lieferungen und Leistungen | 14.393                 | 0              | 14.393  | 0                   | 0       | 0                   | 0       |
| Zinsbezogene passivierte Derivate                | 17                     | 9              | 0       | 8                   | 0       | 0                   | 0       |
| Währungsbezogene passivierte Derivate            | 22                     | 0              | 22      | 0                   | 0       | 0                   | 0       |
| Rohstoffbezogene passivierte Derivate            | 0                      | 0              | 0       | 0                   | 0       | 0                   | 0       |

| Mio. €                                                        | Buchwert<br>31.12.2009 | Cashflows 2010 |         | Cashflows 2011–2014 |         | Cashflows nach 2014 |         |
|---------------------------------------------------------------|------------------------|----------------|---------|---------------------|---------|---------------------|---------|
|                                                               |                        | Zinsen         | Tilgung | Zinsen              | Tilgung | Zinsen              | Tilgung |
| <b>Finanzielle Verbindlichkeiten</b>                          |                        |                |         |                     |         |                     |         |
| Anleihen                                                      | 4.037                  | 233            | 327     | 683                 | 2.716   | 76                  | 994     |
| Verbindlichkeiten gegenüber Kreditinstituten                  | 1.214                  | 48             | 534     | 93                  | 324     | 11                  | 356     |
| Schuldscheindarlehen                                          | 867                    | 25             | 12      | 77                  | 855     | 0                   | 0       |
| Finanzierungs-Leasingverhältnisse                             | 1.609                  | 113            | 111     | 362                 | 462     | 465                 | 1.036   |
| Verbindlichkeiten aus Lieferungen und Leistungen <sup>1</sup> | 14.174                 | 0              | 14.174  | 0                   | 0       | 0                   | 0       |
| Zinsbezogene passivierte Derivate                             | 15                     | 0              | 0       | 15                  | 0       | 0                   | 0       |
| Währungsbezogene passivierte Derivate                         | 28                     | 0              | 18      | 0                   | 10      | 0                   | 0       |
| Rohstoffbezogene passivierte Derivate                         | 16                     | 0              | 16      | 0                   | 0       | 0                   | 0       |

| Mio. €                                                        | Buchwert<br>1.1.2009 | Cashflows 2009 |         | Cashflows 2010–2013 |         | Cashflows nach 2013 |         |
|---------------------------------------------------------------|----------------------|----------------|---------|---------------------|---------|---------------------|---------|
|                                                               |                      | Zinsen         | Tilgung | Zinsen              | Tilgung | Zinsen              | Tilgung |
| <b>Finanzielle Verbindlichkeiten</b>                          |                      |                |         |                     |         |                     |         |
| Anleihen                                                      | 3.836                | 143            | 1.892   | 334                 | 1.944   | 0                   | 0       |
| Verbindlichkeiten gegenüber Kreditinstituten                  | 1.533                | 62             | 825     | 111                 | 288     | 19                  | 420     |
| Schuldscheindarlehen                                          | 707                  | 29             | 9       | 75                  | 698     | 0                   | 0       |
| Finanzierungs-Leasingverhältnisse                             | 1.819                | 94             | 138     | 298                 | 526     | 436                 | 1.155   |
| Verbindlichkeiten aus Lieferungen und Leistungen <sup>1</sup> | 14.125               | 0              | 14.125  | 0                   | 0       | 0                   | 0       |
| Zinsbezogene passivierte Derivate                             | 8                    | 8              | 0       | 0                   | 0       | 0                   | 0       |
| Währungsbezogene passivierte Derivate                         | 27                   | 0              | 27      | 0                   | 0       | 0                   | 0       |
| Rohstoffbezogene passivierte Derivate                         | 0                    | 0              | 0       | 0                   | 0       | 0                   | 0       |

<sup>1</sup> Adjustierung aufgrund geänderter Ausweise

**39. Buchwerte und Fair Values nach Bewertungskategorien**

Die Buchwerte und Fair Values der bilanzierten Finanzinstrumente lauten wie folgt:

| 31.12.2010                                                                                                                  |               |                                           |                                   |                                   |               |
|-----------------------------------------------------------------------------------------------------------------------------|---------------|-------------------------------------------|-----------------------------------|-----------------------------------|---------------|
| Wertansatz in Bilanz                                                                                                        |               |                                           |                                   |                                   |               |
| Mio. €                                                                                                                      | Buchwert      | (Fortgeführte)<br>Anschaffungs-<br>kosten | Fair Value<br>erfolgs-<br>wirksam | Fair Value<br>erfolgs-<br>neutral | Fair Value    |
| <b>Aktiva</b>                                                                                                               | <b>35.067</b> | <b>k. A.</b>                              | <b>k. A.</b>                      | <b>k. A.</b>                      | <b>k. A.</b>  |
| <b>Kredite und Forderungen</b>                                                                                              | <b>2.731</b>  | <b>2.731</b>                              | <b>0</b>                          | <b>0</b>                          | <b>2.733</b>  |
| Ausleihungen und gewährte Darlehen                                                                                          | 122           | 122                                       | 0                                 | 0                                 | 122           |
| Forderungen an Lieferanten                                                                                                  | 1.560         | 1.560                                     | 0                                 | 0                                 | 1.560         |
| Forderungen aus Lieferungen und Leistungen                                                                                  | 526           | 526                                       | 0                                 | 0                                 | 526           |
| Sonstige finanzielle Vermögenswerte                                                                                         | 523           | 523                                       | 0                                 | 0                                 | 525           |
| <b>Bis zur Endfälligkeit gehalten</b>                                                                                       | <b>0</b>      | <b>0</b>                                  | <b>0</b>                          | <b>0</b>                          | <b>0</b>      |
| <b>Zu Handelszwecken gehalten</b>                                                                                           | <b>30</b>     | <b>0</b>                                  | <b>30</b>                         | <b>0</b>                          | <b>30</b>     |
| Derivative Finanzinstrumente ohne<br>Sicherungszusammenhang gem. IAS 39                                                     | 30            | 0                                         | 30                                | 0                                 | 30            |
| <b>Zur Veräußerung verfügbar</b>                                                                                            | <b>13</b>     | <b>11</b>                                 | <b>0</b>                          | <b>2</b>                          | <b>k. A.</b>  |
| Beteiligungen                                                                                                               | 11            | 11                                        | 0                                 | 0                                 | k. A.         |
| Wertpapiere                                                                                                                 | 2             | 0                                         | 0                                 | 2                                 | 2             |
| <b>Derivative Finanzinstrumente mit<br/>Sicherungszusammenhang gem. IAS 39</b>                                              | <b>37</b>     | <b>0</b>                                  | <b>0</b>                          | <b>37</b>                         | <b>37</b>     |
| <b>Zahlungsmittel und Zahlungsmitteläquivalente</b>                                                                         | <b>4.799</b>  | <b>4.799</b>                              | <b>0</b>                          | <b>0</b>                          | <b>4.799</b>  |
| <b>Nicht nach IFRS 7 klassifizierte Vermögenswerte</b>                                                                      | <b>27.457</b> | <b>k. A.</b>                              | <b>k. A.</b>                      | <b>k. A.</b>                      | <b>k. A.</b>  |
| <b>Passiva</b>                                                                                                              | <b>35.067</b> | <b>k. A.</b>                              | <b>k. A.</b>                      | <b>k. A.</b>                      | <b>k. A.</b>  |
| <b>Zu Handelszwecken gehalten</b>                                                                                           | <b>20</b>     | <b>0</b>                                  | <b>20</b>                         | <b>0</b>                          | <b>20</b>     |
| Derivative Finanzinstrumente ohne<br>Sicherungszusammenhang gem. IAS 39                                                     | 20            | 0                                         | 20                                | 0                                 | 20            |
| Sonstige finanzielle Verbindlichkeiten                                                                                      | 0             | 0                                         | 0                                 | 0                                 | 0             |
| <b>Übrige finanzielle Verbindlichkeiten</b>                                                                                 | <b>23.208</b> | <b>23.208</b>                             | <b>0</b>                          | <b>0</b>                          | <b>23.683</b> |
| Finanzschulden ohne Finanzierungs-Leasingverhältnisse<br>(inkl. Grundgeschäfte aus Sicherungszusammenhängen<br>gem. IAS 39) | 6.694         | 6.694                                     | 0                                 | 0                                 | 7.169         |
| Verbindlichkeiten aus Lieferungen und Leistungen                                                                            | 14.393        | 14.393                                    | 0                                 | 0                                 | 14.393        |
| Sonstige finanzielle Verbindlichkeiten                                                                                      | 2.121         | 2.121                                     | 0                                 | 0                                 | 2.121         |
| <b>Derivative Finanzinstrumente mit<br/>Sicherungszusammenhang gem. IAS 39</b>                                              | <b>19</b>     | <b>0</b>                                  | <b>0</b>                          | <b>19</b>                         | <b>19</b>     |
| <b>Nicht nach IFRS 7 klassifizierte Vermögenswerte</b>                                                                      | <b>11.820</b> | <b>k. A.</b>                              | <b>k. A.</b>                      | <b>k. A.</b>                      | <b>k. A.</b>  |
| <b>Unrealisierter Gewinn (+)/Verlust (-) aus<br/>Gesamtdifferenz von Fair Value und Buchwert</b>                            |               |                                           |                                   |                                   | <b>-473</b>   |

| 31.12.2009                                                                                                                  |               |                                           |                                   |                                   |               |
|-----------------------------------------------------------------------------------------------------------------------------|---------------|-------------------------------------------|-----------------------------------|-----------------------------------|---------------|
| Mio. €                                                                                                                      | Buchwert      | Wertansatz in Bilanz <sup>1</sup>         |                                   |                                   | Fair Value    |
|                                                                                                                             |               | (Fortgeführte)<br>Anschaffungs-<br>kosten | Fair Value<br>erfolgs-<br>wirksam | Fair Value<br>erfolgs-<br>neutral |               |
| <b>Aktiva</b>                                                                                                               | <b>33.282</b> | <b>k. A.</b>                              | <b>k. A.</b>                      | <b>k. A.</b>                      | <b>k. A.</b>  |
| <b>Kredite und Forderungen</b>                                                                                              | <b>2.722</b>  | <b>2.722</b>                              | <b>0</b>                          | <b>0</b>                          | <b>2.733</b>  |
| Ausleihungen und gewährte Darlehen                                                                                          | 129           | 129                                       | 0                                 | 0                                 | 131           |
| Forderungen an Lieferanten                                                                                                  | 1.359         | 1.359                                     | 0                                 | 0                                 | 1.359         |
| Forderungen aus Lieferungen und Leistungen                                                                                  | 539           | 539                                       | 0                                 | 0                                 | 539           |
| Sonstige finanzielle Vermögenswerte                                                                                         | 695           | 695                                       | 0                                 | 0                                 | 704           |
| <b>Bis zur Endfälligkeit gehalten</b>                                                                                       | <b>9</b>      | <b>9</b>                                  | <b>0</b>                          | <b>0</b>                          | <b>9</b>      |
| <b>Zu Handelszwecken gehalten</b>                                                                                           | <b>35</b>     | <b>0</b>                                  | <b>35</b>                         | <b>0</b>                          | <b>35</b>     |
| Derivative Finanzinstrumente ohne<br>Sicherungszusammenhang gem. IAS 39                                                     | 35            | 0                                         | 35                                | 0                                 | 35            |
| <b>Zur Veräußerung verfügbar</b>                                                                                            | <b>23</b>     | <b>22</b>                                 | <b>0</b>                          | <b>1</b>                          | <b>k. A.</b>  |
| Beteiligungen                                                                                                               | 22            | 22                                        | 0                                 | 0                                 | k. A.         |
| Wertpapiere                                                                                                                 | 1             | 0                                         | 0                                 | 1                                 | 1             |
| <b>Derivative Finanzinstrumente mit<br/>Sicherungszusammenhang gem. IAS 39</b>                                              | <b>17</b>     | <b>0</b>                                  | <b>0</b>                          | <b>17</b>                         | <b>17</b>     |
| <b>Zahlungsmittel und Zahlungsmitteläquivalente</b>                                                                         | <b>3.996</b>  | <b>3.996</b>                              | <b>0</b>                          | <b>0</b>                          | <b>3.996</b>  |
| <b>Nicht nach IFRS 7 klassifizierte Vermögenswerte</b>                                                                      | <b>26.480</b> | <b>k. A.</b>                              | <b>k. A.</b>                      | <b>k. A.</b>                      | <b>k. A.</b>  |
| <b>Passiva</b>                                                                                                              | <b>33.282</b> | <b>k. A.</b>                              | <b>k. A.</b>                      | <b>k. A.</b>                      | <b>k. A.</b>  |
| <b>Zu Handelszwecken gehalten</b>                                                                                           | <b>50</b>     | <b>0</b>                                  | <b>50</b>                         | <b>0</b>                          | <b>50</b>     |
| Derivative Finanzinstrumente ohne<br>Sicherungszusammenhang gem. IAS 39                                                     | 50            | 0                                         | 50                                | 0                                 | 50            |
| Sonstige finanzielle Verbindlichkeiten                                                                                      | 0             | 0                                         | 0                                 | 0                                 | 0             |
| <b>Übrige finanzielle Verbindlichkeiten</b>                                                                                 | <b>22.122</b> | <b>22.122</b>                             | <b>0</b>                          | <b>0</b>                          | <b>22.574</b> |
| Finanzschulden ohne Finanzierungs-Leasingverhältnisse<br>(inkl. Grundgeschäfte aus Sicherungszusammenhängen<br>gem. IAS 39) | 6.118         | 6.118                                     | 0                                 | 0                                 | 6.578         |
| Verbindlichkeiten aus Lieferungen und Leistungen                                                                            | 14.174        | 14.174                                    | 0                                 | 0                                 | 14.174        |
| Sonstige finanzielle Verbindlichkeiten                                                                                      | 1.830         | 1.830                                     | 0                                 | 0                                 | 1.822         |
| <b>Derivative Finanzinstrumente mit<br/>Sicherungszusammenhang gem. IAS 39</b>                                              | <b>9</b>      | <b>0</b>                                  | <b>0</b>                          | <b>9</b>                          | <b>9</b>      |
| <b>Nicht nach IFRS 7 klassifizierte Vermögenswerte</b>                                                                      | <b>11.101</b> | <b>k. A.</b>                              | <b>k. A.</b>                      | <b>k. A.</b>                      | <b>k. A.</b>  |
| <b>Unrealisierter Gewinn (+)/Verlust (-) aus<br/>Gesamtdifferenz von Fair Value und Buchwert</b>                            |               |                                           |                                   |                                   | <b>-441</b>   |

<sup>1</sup> Adjustierung der Vorjahreswerte aufgrund geänderter Ausweise sowie der Berücksichtigung von Credit Spreads

Die Fair Values der Forderungen an Lieferanten, der Forderungen und Verbindlichkeiten aus Lieferungen und Leistungen sowie der Zahlungsmittel und Zahlungsmitteläquivalente entsprechen aufgrund der überwiegend kurzen Laufzeit im Wesentlichen deren Buchwerten.

Die Ermittlung der Fair Values der Anleihen und Schuldscheindarlehen erfolgt auf der Basis der Marktzinskurve nach der Zero-Coupon-Methode unter Berücksichtigung von Credit Spreads. Die auf den Stichtag abgegrenzten Zinsen sind in den Werten enthalten.

Die Fair Values aller übrigen finanziellen Vermögenswerte und finanziellen Verbindlichkeiten, die nicht börsennotiert sind, entsprechen den Barwerten der mit diesen Bilanzpositionen verbundenen Zahlungen. Bei der Berechnung wurden die zum Stichtag gültigen landesspezifischen Zinsstrukturkurven herangezogen.

Die nachstehende Tabelle stellt die Finanzinstrumente dar, die in der Bilanz zum Fair Value bewertet werden. Diese sind in eine dreistufige Fair-Value-Hierarchie eingeordnet, deren Level die Marktnähe der bei der Ermittlung der Fair Values einbezogenen Daten widerspiegeln:

| Mio. €                                                               | 31.12.2010 |          |           |          | 31.12.2009 |          |            |          |
|----------------------------------------------------------------------|------------|----------|-----------|----------|------------|----------|------------|----------|
|                                                                      | Gesamt     | Level 1  | Level 2   | Level 3  | Gesamt     | Level 1  | Level 2    | Level 3  |
| <b>Aktiva</b>                                                        | <b>32</b>  | <b>2</b> | <b>30</b> | <b>0</b> | <b>36</b>  | <b>1</b> | <b>35</b>  | <b>0</b> |
| <b>Zu Handelszwecken gehalten</b>                                    |            |          |           |          |            |          |            |          |
| Derivative Finanzinstrumente ohne Sicherungszusammenhang gem. IAS 39 | 30         | 0        | 30        | 0        | 35         | 0        | 35         | 0        |
| <b>Zur Veräußerung verfügbar</b>                                     |            |          |           |          |            |          |            |          |
| Wertpapiere                                                          | 2          | 2        | 0         | 0        | 1          | 1        | 0          | 0        |
| <b>Passiva</b>                                                       | <b>20</b>  | <b>0</b> | <b>20</b> | <b>0</b> | <b>50</b>  | <b>0</b> | <b>50</b>  | <b>0</b> |
| <b>Zu Handelszwecken gehalten</b>                                    |            |          |           |          |            |          |            |          |
| Derivative Finanzinstrumente ohne Sicherungszusammenhang gem. IAS 39 | 20         | 0        | 20        | 0        | 50         | 0        | 50         | 0        |
| <b>Summe</b>                                                         | <b>12</b>  | <b>2</b> | <b>10</b> | <b>0</b> | <b>-14</b> | <b>1</b> | <b>-15</b> | <b>0</b> |

Die Bewertung der Wertpapiere (Level 1) erfolgt anhand quotierter Marktpreise auf aktiven Märkten.

Bei Zinsswaps und Devisengeschäften (alle Level 2) erfolgt eine Mark-to-Market-Bewertung auf Basis notierter Devisenkurse und am Markt erhältlicher Zinsstrukturkurven.

Der Fair Value der Rohstoffderivate (Level 2) wird als Durchschnitt des an der Börse festgestellten Preises des abgelaufenen Monats berechnet.

Während der Berichtsperiode wurden keine Transfers zwischen den Leveln 1 und 2 vorgenommen.

## Sonstige Erläuterungen

### 40. Erläuterungen zur Kapitalflussrechnung

Die Kapitalflussrechnung zeigt gemäß IAS 7 (Statement of Cash Flows), wie sich Zahlungsmittel im Konzern im Laufe des Berichtsjahres durch Mittelzu- und -abflüsse verändert haben.

Der Bestand an Zahlungsmitteln umfasst Schecks und Kassenbestände sowie die Guthaben bei Kreditinstituten mit einer Restlaufzeit von bis zu drei Monaten.

Die Kapitalflussrechnung unterscheidet zwischen Mittelveränderungen aus laufender Geschäftstätigkeit, Investitions- und Finanztätigkeit. Cashflows von nicht fortgeführten Aktivitäten werden separat ausgewiesen, sofern es sich um aufzugebende Geschäftsbereiche handelt. Infolge der Veräußerung der Adler-Modemärkte werden die Cashflows dieses nicht fortgeführten Geschäftsbereichs im Vorjahr separat ausgewiesen.

Im laufenden Geschäftsjahr wurden die Vermögenswerte und Schulden der französischen Elektrofachmärkte als „zur Veräußerung vorgesehene Vermögenswerte“ beziehungsweise unter der Position „Schulden im Zusammenhang mit zur Veräußerung vorgesehenen Vermögenswerten“ ausgewiesen. In den umgegliederten Vermögenswerten sind Kassenbestände in Höhe von 29 Mio. € enthalten.

Aus der laufenden Geschäftstätigkeit der fortgeführten Aktivitäten konnten im Berichtsjahr 2.514 Mio. € (Vorjahr 2.494 Mio. €) generiert werden. Die Abschreibungen entfallen mit 1.232 Mio. € auf Sachanlagen (Vorjahr 1.177 Mio. €), mit 178 Mio. € (Vorjahr 212 Mio. €) auf immaterielle Vermögenswerte sowie mit 17 Mio. € (Vorjahr 7 Mio. €) auf als Finanzinvestitionen gehaltene Immobilien. Dagegen laufen Zuschreibungen in Höhe von 47 Mio. € (Vorjahr 9 Mio. €). Die Veränderung des Netto-Betriebsvermögens beträgt –288 Mio. € (Vorjahr 62 Mio. €) und enthält die Veränderungen der Vorräte, der Forderungen aus Lieferungen und Leistungen und der in der Position „Sonstige Forderungen und Vermögenswerte“ enthaltenen Forderungen an Lieferanten, Forderungen aus Kreditkarten und geleisteten Anzahlungen auf Vorräte. Darüber hinaus enthält sie die Veränderungen der Verbindlichkeiten aus Lieferungen und Leistungen sowie der in der Position „Sonstige Verbindlichkeiten“ enthaltenen Verbindlichkeiten gegenüber Kunden und erhaltenen Anzahlungen auf Bestellungen. Die Position „Sonstiges“ beinhaltet neben diversen Einzelposten im Wesentlichen Umgliederungen von Erträgen aus Anlagenabgängen in Höhe von –215 Mio. € (Vorjahr –51 Mio. €) sowie

aus Unternehmensveräußerungen in Höhe von –68 Mio. € (Vorjahr 0 Mio. €) in den Cashflow aus Investitionstätigkeit. Darüber hinaus sind Veränderungen der Lohn- und Gehaltsverbindlichkeiten in Höhe von 69 Mio. € (Vorjahr –14 Mio. €) enthalten.

Aus dem Bereich der Investitionstätigkeit der fortgeführten Aktivitäten resultiert im Berichtsjahr ein Mittelabfluss von 961 Mio. € (Vorjahr Mittelabfluss 1.162 Mio. €). Der Betrag der als Mittelabfluss dargestellten Investitionen in Sachanlagen unterscheidet sich von dem im Anlagenspiegel dargestellten Zugang in Höhe der nicht zahlungswirksamen Vorgänge. Diese betreffen im Wesentlichen Wechselkurseffekte sowie Zugänge aus Finanzierungs-Leasing. Die sonstigen Investitionen beinhalten Investitionen in immaterielle Vermögenswerte in Höhe von 137 Mio. € sowie Investitionen in finanzielle Vermögenswerte in Höhe von 196 Mio. €. Aus der Veräußerung der Metro Cash & Carry Märkte in Marokko sowie einer Immobiliengesellschaft ergab sich im laufenden Geschäftsjahr ein Mittelzufluss von 121 Mio. € (Vorjahr Mittelabfluss in Höhe von 34 Mio. € aus der Veräußerung der Adler-Modemärkte). Die übrigen Anlagenabgänge beinhalten im Wesentlichen Einzahlungen aus Immobilienveräußerungen.

Der Cashflow aus Finanztätigkeit der fortgeführten Aktivitäten weist im Berichtsjahr einen Mittelabfluss von 734 Mio. € (Vorjahr Mittelabfluss 1.225 Mio. €) aus.

### 41. Segmentberichterstattung

Die Segmentberichterstattung ist nach IFRS 8 (Operating Segments) aufgestellt. Die Segmentierung folgt der internen Steuerung und Berichterstattung des Konzerns und richtet sich grundsätzlich nach der Einteilung des Geschäfts in einzelne Branchen.

#### Selbstbedienungsgroßhandel

Metro Cash & Carry ist mit den Marken Metro und Makro in 30 Ländern vertreten. Mit seinem vielfältigen Produkt- und Service-Angebot richtet sich Metro Cash & Carry speziell an gewerbliche Kunden: Hotel- und Restaurantbesitzer, Catering-unternehmen, unabhängige Einzelhändler sowie Dienstleister und Behörden.

#### Lebensmitteleinzelhandel

Real betreibt SB-Warenhäuser in Deutschland und Polen. Die Vertriebslinie betreibt darüber hinaus Standorte in Rumänien, Russland, der Ukraine und der Türkei. Alle Märkte bieten ein vielfältiges Lebensmittelangebot mit einem hohen Anteil an Frischeprodukten, ergänzt um ein Sortiment von Nicht-Lebensmitteln.

**Elektrofachhandel**

Media Markt und Saturn bietet ein umfassendes Sortiment mit neuesten Markenprodukten an. Mit zwei starken Marken ist die Vertriebslinie in mittlerweile 17 Ländern vertreten.

**Warenhäuser**

Galeria Kaufhof betreibt Warenhäuser in Deutschland und Belgien. In Belgien tritt die Vertriebslinie als Galeria Inno auf. Die Warenhäuser von Galeria bieten hochwertige Sortimente mit einem Schwerpunkt auf Bekleidungsartikeln.

**Immobilien**

Die METRO Group Asset Management betreut das Immobilienvermögen der METRO GROUP in 30 Ländern. Zu ihren Aufgaben gehören unter anderem die aktive Wertsteigerung des Portfolios, die Projektierung neuer Märkte und Filialen sowie die Verwaltung der bereits bestehenden Standorte.

Weitere Angaben zu den Segmenten enthält der Lagebericht.

Neben den Informationen zu den oben genannten Geschäftssegmenten werden gleichwertige Informationen zu den Metro-Regionen veröffentlicht. Dabei wird nach den Regionen Deutschland, Westeuropa ohne Deutschland, Osteuropa und Asien/Afrika unterschieden.

- Der Außenumsatz repräsentiert den Umsatz der Geschäftssegmente mit Konzern-Externen.
- Der Innenumsatz zeigt die Umsätze mit anderen Geschäftssegmenten.
- Das Segment-EBITDAR repräsentiert das EBITDA vor Mietaufwendungen abzüglich Mieterträgen.
- Das Segment-EBITDA umfasst das EBIT vor Abschreibungen und Zuschreibungen auf Sachanlagevermögen und immaterielle Vermögenswerte.
- Die Segmentsteuerungsgröße EBIT beschreibt das betriebliche Ergebnis der Periode vor Finanzergebnis und Ertragsteuern. Konzerninterne Mietverträge werden in den Segmenten als Operating-Leasingverhältnisse dargestellt. Die Vermietung findet dabei zu marktüblichen Konditionen statt. Standortbezogene Risiken sowie Werthaltigkeitsrisiken von langfristigen Vermögenswerten werden in den Segmenten grundsätzlich nur dann abgebildet, wenn es sich um Konzernrisiken handelt.
- Die Segmentinvestitionen beinhalten die Zugänge zum Anlagevermögen, bereinigt um Zugänge aufgrund der Reklassifikation von „zur Veräußerung vorgesehenen Vermögenswerten“ als Anlagevermögen. Ausgenommen

hiervon sind darüber hinaus Zugänge zu den langfristigen finanziellen Vermögenswerten.

- Das Segmentvermögen enthält das lang- und kurzfristige Vermögen. Nicht enthalten sind hauptsächlich finanzielle Vermögenswerte laut Bilanz, Ertragsteuerpositionen, Zahlungsmittel und Vermögenswerte, die nicht fortgeführten Aktivitäten zuzuordnen sind.
- Die Segmentschulden umfassen lang- und kurzfristige Schulden. Nicht zugeordnet sind insbesondere finanzielle Schulden laut Bilanz, Ertragsteuerpositionen sowie Schulden, die nicht fortgeführten Aktivitäten zuzuordnen sind.
- Transfers zwischen den Segmenten finden grundsätzlich auf Basis der aus Konzernsicht entstehenden Kosten statt.
- Die nicht fortgeführten Aktivitäten beinhalten 2009 die Werte der Adler-Modemärkte.

**Überleitungsrechnung**

| Mio. €                                                                  | 31.12.2010    |
|-------------------------------------------------------------------------|---------------|
| <b>Segmentvermögen</b>                                                  | <b>28.064</b> |
| Finanzielle Vermögenswerte lang- und kurzfristig                        | 251           |
| Zahlungsmittel                                                          | 4.799         |
| Latente Steueransprüche                                                 | 1.000         |
| Ertragsteuererstattungsansprüche                                        | 412           |
| Sonstige Steuererstattungsansprüche <sup>1</sup>                        | 356           |
| Forderungen aus sonstigen Finanzgeschäften <sup>2</sup>                 | 108           |
| Sonstiges                                                               | 77            |
| <b>Vermögenswerte des Konzerns</b>                                      | <b>35.067</b> |
| <b>Segmentschulden</b>                                                  | <b>19.031</b> |
| Finanzielle Schulden lang- und kurzfristig                              | 8.283         |
| Latente Steuerschulden                                                  | 212           |
| Ertragsteuerschulden                                                    | 291           |
| Ertragsteuerrückstellungen <sup>3</sup>                                 | 147           |
| Sonstige Steuerverbindlichkeiten <sup>4</sup>                           | 535           |
| Verbindlichkeiten aus sonstigen Finanzgeschäften <sup>4</sup>           | 41            |
| Verbindlichkeiten gegenüber konzernfremden Gesellschaftern <sup>4</sup> | 30            |
| Sonstiges                                                               | 37            |
| <b>Schulden des Konzerns</b>                                            | <b>28.607</b> |

<sup>1</sup> Enthalten in der Bilanzposition „Sonstige Forderungen und Vermögenswerte“ kurzfristig

<sup>2</sup> Enthalten in den Bilanzpositionen „Sonstige Forderungen und Vermögenswerte“ lang- und kurzfristig

<sup>3</sup> Enthalten in den Bilanzpositionen „Sonstige Rückstellungen“ langfristig sowie „Rückstellungen“ kurzfristig

<sup>4</sup> Enthalten in der Bilanzposition „Sonstige Verbindlichkeiten“ lang- und kurzfristig



#### 42. Nicht fortgeführte Aktivitäten

Im Geschäftsjahr 2010 erfolgte keine Bilanzierung nicht fortgeführter Aktivitäten.

Im Vorjahr wurden mit Wirkung zum 28. Februar 2009 die seit September 2008 nach den Vorschriften des IFRS 5 als aufzugebender Geschäftsbereich behandelten Vermögenswerte und Schulden der Adler-Modemärkte veräußert.

Das Ergebnis aus nicht fortgeführten Aktivitäten des Vorjahres beinhaltet folgende Bestandteile:

| Mio. €                                                                                   | 2010     | 2009       |
|------------------------------------------------------------------------------------------|----------|------------|
| Erlöse                                                                                   | 0        | 51         |
| Aufwendungen                                                                             | 0        | -63        |
| Laufendes Ergebnis aus nicht fortgeführten Aktivitäten vor Steuern                       | 0        | -12        |
| Steuern vom Einkommen und vom Ertrag auf laufendes Ergebnis                              | 0        | 0          |
| <b>Laufendes Ergebnis aus nicht fortgeführten Aktivitäten nach Steuern</b>               | <b>0</b> | <b>-12</b> |
| Bewertungs-/Veräußerungsergebnis aus nicht fortgeführten Aktivitäten vor Steuern         | 0        | 12         |
| Steuern auf Bewertungs-/Veräußerungsergebnis                                             | 0        | 0          |
| <b>Bewertungs-/Veräußerungsergebnis aus nicht fortgeführten Aktivitäten nach Steuern</b> | <b>0</b> | <b>12</b>  |
| <b>Ergebnis aus nicht fortgeführten Aktivitäten</b>                                      | <b>0</b> | <b>0</b>   |

#### 43. Management der finanzwirtschaftlichen Risiken

Der Finanzbereich der METRO AG steuert die finanzwirtschaftlichen Risiken der METRO GROUP. Dies sind speziell

- Preisänderungsrisiken,
- Liquiditätsrisiken,
- Bonitätsrisiken und
- Risiken aus Zahlungsstromschwankungen.

##### Preisänderungsrisiken

Preisänderungsrisiken resultieren für die METRO GROUP daraus, dass der Wert eines Finanzinstruments durch Änderungen der Marktzinssätze, der Wechselkurse, Aktienkurse oder aber der Rohstoffpreise beeinflusst wird.

**Zinsrisiken** entstehen durch verschlechterte Cashflows aus Zinsen und durch mögliche Wertschwankungen eines Finanzinstruments aufgrund von Änderungen der Marktzinssätze. Zur Begrenzung dieser Risiken werden Zinsswaps und Zinsbegrenzungvereinbarungen eingesetzt.

Die Ermittlung des verbleibenden Zinsrisikos der METRO GROUP erfolgt gemäß IFRS 7 mittels einer Sensitivitätsanalyse. Dabei werden folgende Annahmen bei der Betrachtung einer Zinssatzänderung zugrunde gelegt:

Die durch die Sensitivitätsanalyse ermittelte Gesamtauswirkung bezieht sich auf den Bestand zum Bilanzstichtag und drückt den Effekt für ein Jahr aus.

Variabel verzinsliche originäre Finanzinstrumente, deren Zinszahlungen nicht als Grundgeschäft im Rahmen von Cashflow Hedges gegen Zinssatzänderungen designiert sind, wirken sich in der Sensitivitätsanalyse ergebniswirksam im Zinsergebnis aus.

Festverzinsliche originäre Finanzinstrumente haben generell keine ergebniswirksamen Auswirkungen im Zinsergebnis. Sie werden nur dann ergebniswirksam im übrigen Finanzergebnis, wenn sie im Rahmen eines Fair-Value-Hedges als Grundgeschäft designiert sind und mit dem Fair Value bewertet werden. Hierbei gleicht sich aber die zinsbedingte Wertänderung des Grundgeschäfts mit der Wertänderung des Sicherungsgeschäfts bei voller Effektivität des Sicherungsgeschäfts aus. Die im Rahmen eines Fair-Value-Hedges im Konzern entstehenden variablen Zinsströme werden ergebniswirksam im Zinsergebnis berücksichtigt.

Finanzinstrumente, die als Sicherungsgeschäft im Rahmen eines Cashflow Hedges zur Absicherung von variablen Zinsströmen designiert sind, wirken sich nur dann im Zinsergebnis aus, wenn die Zahlungsströme ausgelöst werden. Aus der Bewertung des Sicherungsgeschäfts zum Fair Value entstehen jedoch ergebnisneutrale Effekte in den Gewinnrücklagen.

Zinsderivate, die nicht in einem qualifizierten Sicherungszusammenhang nach IAS 39 stehen, wirken sich durch die Bewertung zum Fair Value ergebniswirksam im übrigen Finanzergebnis und durch eintretende Zinsströme im Zinsergebnis aus.

Das verbleibende Zinsrisiko der METRO GROUP resultiert zum Bilanzstichtag im Wesentlichen aus variabel verzinslichen Forderungen und Verbindlichkeiten gegenüber Kreditinstituten mit einem Gesamtanlagesaldo nach Berücksichtigung von Sicherungsgeschäften in Höhe von 3.924 Mio. € (Vorjahr 2.963 Mio. €).

Eine Zinssatzerhöhung von 100 Basispunkten hat bei diesem Gesamtsaldo einen um 39 Mio. € (Vorjahr 30 Mio. €) höheren Ertrag im Zinsergebnis pro Jahr zur Folge. Bei einer Zinssatzreduzierung von 100 Basispunkten ergibt sich ein gegenläufiger Effekt in Höhe von –39 Mio. € (Vorjahr –30 Mio. €).

Aus der Bewertung von Finanzinstrumenten, die in einem Cashflow Hedge stehen, ergibt sich bei einer Zinssatzerhöhung von 100 Basispunkten eine Erhöhung des Eigenkapitals in Höhe von 4 Mio. € (Vorjahr 0 Mio. €). Bei einer Zinssatzverringerung ergibt sich eine Eigenkapitalverschlechterung in Höhe von 4 Mio. € (Vorjahr 0 Mio. €).

**Währungsrisiken** entstehen der METRO GROUP im internationalen Einkauf von Waren und aufgrund von Kosten sowie Finanzierungen, die in einer anderen Währung als der jeweiligen Landeswährung anfallen oder an die Entwicklung einer anderen Währung gebunden sind. Für daraus resultierende Fremdwährungspositionen besteht eine Sicherungspflicht gemäß der Konzernrichtlinie „Fremdwährungstransaktionen“. Ausnahmen bestehen dort, wo es wirtschaftlich nicht sinnvoll ist, sowie bei gesetzlichen und regulatorischen Beschränkungen in den Ländern. Bei der Absicherung kommen Devisentermingeschäfte/-optionen sowie Zins- und Währungsswaps zum Einsatz.

Die Darstellung des durch die Ausnahmen entstehenden Fremdwährungsrisikos erfolgt gemäß IFRS 7 ebenfalls mittels einer Sensitivitätsanalyse. Dabei werden folgende Annahmen bei der Betrachtung einer Ab- beziehungsweise Aufwertung des Euro gegenüber Fremdwährungen getroffen:

Die durch die Sensitivitätsanalyse dargestellte Gesamtauswirkung bezieht sich in ihrer Höhe und ihren Ergebnischarakteristika auf die Fremdwährungsbestände innerhalb der konsolidierten Tochtergesellschaften der METRO GROUP und drückt den Effekt bei Vorliegen der Ab- beziehungsweise Aufwertung des Euro aus.

Bei einer Abwertung des Euro tritt ein positiver Effekt ein, sofern eine Fremdwährungsforderung in einer Tochtergesellschaft besteht, deren funktionale Währung der Euro ist, sowie bei einer Verbindlichkeit in Euro in einer Tochtergesellschaft, deren funktionale Währung nicht der Euro ist. Ein negativer Effekt tritt bei einer Abwertung des Euro ein, sofern eine Forderung in Euro in einer Tochtergesellschaft besteht, deren funktionale Währung nicht der Euro ist, sowie bei einer

Verbindlichkeit in Euro in einer Tochtergesellschaft, deren funktionale Währung der Euro ist. Eine Aufwertung hingegen bewirkt jeweils einen gegenläufigen Effekt.

Die Effekte aus der Bewertung von Fremdwährungspositionen, die gemäß IAS 21 mit dem Stichtagskurs umgerechnet werden und die keinen Eigenkapitalcharakter haben, werden in der Sensitivitätsanalyse ergebniswirksam in der Gewinn- und Verlustrechnung erfasst. In den Fällen, in denen die Fremdwährungspositionen Eigenkapitalcharakter haben, sogenannten Net Investments, werden die Effekte der Stichtagskursbewertung erfolgsneutral im Eigenkapital berücksichtigt.

Devisentermingeschäfte/-optionen sowie Zins- und Währungsswaps, die nicht in einem qualifizierten Sicherungszusammenhang gemäß IAS 39 stehen, wirken sich durch die Bewertung zum Fair Value ergebniswirksam in der Gewinn- und Verlustrechnung aus. Dem gegenüber stehen die Effekte aus der Bewertung des in Fremdwährung gehaltenen Grundgeschäfts, sodass sich bei voller Effektivität des Sicherungsgeschäfts beide Effekte ausgleichen.

Devisentermingeschäfte/-optionen sowie Zins- und Währungsswaps, die als Sicherungsgeschäft im Rahmen eines Cashflow Hedges zur Absicherung von Fremdwährungszahlungsströmen designiert sind, wirken sich nur dann in der Gewinn- und Verlustrechnung aus, wenn die Zahlungsströme ausgelöst werden. Aus der Bewertung der Sicherungsgeschäfte zum Fair Value entstehen jedoch ergebnisneutrale Effekte in den Gewinnrücklagen.

Effekte aus der Währungsumrechnung von Abschlüssen, deren funktionale Währung nicht die Berichtswährung der METRO GROUP ist, berühren die Cashflows in lokaler Währung nicht und sind deshalb nicht Bestandteil der Sensitivitätsanalyse.

Das verbleibende Währungsrisiko der METRO GROUP zum Bilanzstichtag lautet wie folgt:

| Mio. €<br>Währungspaar  | Volumen | Auswirkung bei Ab-/Aufwertung<br>des Euro um 10 % |               |
|-------------------------|---------|---------------------------------------------------|---------------|
|                         |         | 31.12.2010                                        | 31.12.2009    |
| <b>Periodenergebnis</b> |         |                                                   |               |
| CNY / EUR               | -54     | +/-5                                              | +/-3          |
| CZK / EUR               | -3      | +/-0                                              | +/-1          |
| EGP / EUR               | -18     | +/-2                                              | +/-0          |
| HRK / EUR               | -31     | +/-3                                              | +/-1          |
| HUF / EUR               | -10     | +/-1                                              | +/-1          |
| JPY / EUR               | 58      | +/-6                                              | +/-0          |
| MAD / EUR               | 115     | +/-11                                             | +/-0          |
| MDL / EUR               | -41     | +/-4                                              | +/-5          |
| PLN / EUR               | -100    | +/-10                                             | +/-10         |
| RON / EUR               | -217    | +/-22                                             | +/-17         |
| RSD / EUR               | -13     | +/-1                                              | +/-0          |
| RUB / EUR               | -138    | +/-14                                             | +/-10         |
| TRY / EUR               | 19      | -/+2                                              | -/+1          |
| UAH / EUR               | -22     | +/-2                                              | +/-1          |
| USD / EUR               | 26      | +/-2                                              | +/-3          |
| VND / EUR               | -15     | +/-2                                              | +/-1          |
|                         |         | <b>+/-83</b>                                      | <b>+/-52</b>  |
| <b>Eigenkapital</b>     |         |                                                   |               |
| JPY / EUR               | 0       | +/-0                                              | +/-3          |
| PLN / EUR               | 77      | +/-8                                              | +/-7          |
| RUB / EUR               | -526    | +/-53                                             | +/-50         |
| SEK / EUR               | -51     | +/-5                                              | +/-5          |
| TRY / EUR               | -32     | +/-3                                              | +/-3          |
| UAH / EUR               | -248    | +/-25                                             | +/-25         |
| USD / EUR               | 403     | +/-40                                             | +/-26         |
|                         |         | <b>+/-134</b>                                     | <b>+/-119</b> |
|                         |         | <b>+/-217</b>                                     | <b>+/-171</b> |

Darüber hinaus bestehen Währungsrisiken der Währungspaare USD / CNY, USD / HKD, USD / RUB, USD / TRY, USD / VND mit einer Auswirkung von +/-7 Mio. € (Vorjahr +/-6 Mio. €) bei einer Ab- beziehungsweise Aufwertung des USD um 10 Prozent.

**Aktienkursrisiken** entstehen aus einer aktienorientierten Vergütung der Führungskräfte der METRO GROUP. Dabei orientiert sich die Vergütung (Geldprämie) im Wesentlichen an der Kursentwicklung der Metro-Stammaktie.

Zur Begrenzung dieses Risikos aus dem bis 2008 gültigen Aktienprämienprogramm werden Aktienoptionen auf die Stammaktie der METRO AG eingesetzt. Die Sicherung des Aktienkursrisikos aus diesem Programm erfolgt auf fluktuationsbereinigter Basis zu 100 Prozent. Ab 2009 wurde das Aktienprämienprogramm durch den Performance Share Plan ersetzt. Die Aktienkursrisiken aus diesem Programm wurden bisher nicht begrenzt.

Hinsichtlich der **Stromderivate** beeinflussen die Strompreise den Fair Value dieser Instrumente. Die Wertschwankungen wirken sich im übrigen Finanzergebnis aus.

Zum Stichtag beträgt der Nominalwert des Portfolios mit einer Lieferung im Jahr 2011 23,5 Mio. € und der Nominalwert des Portfolios mit einer Lieferung im Jahr 2012 5,6 Mio. €. Der Nominalwert des Portfolios bezieht sich auf die Kosten der Beschaffung.

Mittels der Bestimmung des Value at Risk, mit einem Konfidenzniveau von 99 Prozent und einer Haltedauer von 20 Tagen, wurde für das Portfolio mit einer Lieferung im Jahr 2011 ein maximaler Gewinn in Höhe von 3,1 Mio. € sowie ein maximaler Verlust in Höhe von 2,3 Mio. € ermittelt, für das Portfolio mit einer Lieferung im Jahr 2012 ein maximaler Gewinn in Höhe von 0,8 Mio. € sowie ein maximaler Verlust in Höhe von 0,3 Mio. €. Das Value-at-Risk-Modell basiert auf einer historischen Simulation der Marktpreise der letzten fünf Jahre.

Zins- und Währungsrisiken sind durch die in den METRO GROUP-internen Treasury-Richtlinien festgeschriebenen Grundsätze deutlich reduziert und limitiert. Darin ist konzernweit verbindlich geregelt, dass jede Absicherungsmaßnahme im Rahmen vorher definierter Limite erfolgen muss und in keinem Fall zu einer Erhöhung der Risikoposition führen darf. Die METRO GROUP nimmt dabei bewusst in Kauf, dass die Möglichkeiten, aktuelle oder erwartete Zins- beziehungsweise Wechselkursentwicklungen zur Ergebnisoptimierung zu nutzen, stark eingeschränkt sind.

Zur Absicherung dürfen außerdem ausschließlich markt-gängige derivative Finanzinstrumente eingesetzt werden, deren korrekte finanzmathematische und buchhalterische Abbildung und Bewertung in den Treasury-Systemen sichergestellt sind.

Am Bilanzstichtag sind folgende derivative Finanzinstrumente zur Risikoreduzierung eingesetzt:

| Mio. €                               | 31.12.2010                |                            |                               | 31.12.2009                |                            |                               |
|--------------------------------------|---------------------------|----------------------------|-------------------------------|---------------------------|----------------------------|-------------------------------|
|                                      | Fair Values               |                            |                               | Fair Values               |                            |                               |
|                                      | Nominalvolumen            | Finanzielle Vermögenswerte | Finanzielle Verbindlichkeiten | Nominalvolumen            | Finanzielle Vermögenswerte | Finanzielle Verbindlichkeiten |
| <b>Zinsbezogene Geschäfte</b>        |                           |                            |                               |                           |                            |                               |
| Zinsswaps                            | 171                       | 0                          | 17                            | 171                       | 0                          | 15                            |
| davon innerhalb Fair-Value-Hedges    | (0)                       | (0)                        | (0)                           | (0)                       | (0)                        | (0)                           |
| davon innerhalb Cashflow Hedges      | (126)                     | (0)                        | (8)                           | (126)                     | (0)                        | (6)                           |
| davon nicht in einer Hedge-Beziehung | (45)                      | (0)                        | (9)                           | (45)                      | (0)                        | (9)                           |
| <b>Währungsbezogene Geschäfte</b>    |                           |                            |                               |                           |                            |                               |
| Devisentermingeschäfte/-optionen     | 451                       | 15                         | 22                            | 230                       | 16                         | 18                            |
| davon innerhalb Fair-Value-Hedges    | (0)                       | (0)                        | (0)                           | (0)                       | (0)                        | (0)                           |
| davon innerhalb Cashflow Hedges      | (399)                     | (4)                        | (11)                          | (212)                     | (3)                        | (3)                           |
| davon nicht in einer Hedge-Beziehung | (52)                      | (11)                       | (11)                          | (18)                      | (13)                       | (15)                          |
| Zins-/Währungsswaps                  | 29                        | 15                         | 0                             | 37                        | 14                         | 10                            |
| davon innerhalb Fair-Value-Hedges    | (0)                       | (0)                        | (0)                           | (0)                       | (0)                        | (0)                           |
| davon innerhalb Cashflow Hedges      | (0)                       | (0)                        | (0)                           | (0)                       | (0)                        | (0)                           |
| davon nicht in einer Hedge-Beziehung | (29)                      | (15)                       | (0)                           | (37)                      | (14)                       | (10)                          |
|                                      | 480                       | 30                         | 22                            | 267                       | 30                         | 28                            |
| <b>Rohstoffbezogene Geschäfte</b>    |                           |                            |                               |                           |                            |                               |
| Terminkontrakte                      | 7 Mio. Liter<br>543 GWh   | 4                          | 0                             | 7 Mio. Liter<br>499 GWh   | 8                          | 16                            |
| davon innerhalb Fair-Value-Hedges    | (0)                       | (0)                        | (0)                           | (0)                       | (0)                        | (0)                           |
| davon innerhalb Cashflow Hedges      | (0)                       | (0)                        | (0)                           | (0)                       | (0)                        | (0)                           |
| davon nicht in einer Hedge-Beziehung | (7 Mio. Liter<br>543 GWh) | (4)                        | (0)                           | (7 Mio. Liter<br>499 GWh) | (8)                        | (16)                          |
| <b>Aktienkursbezogene Geschäfte</b>  |                           |                            |                               |                           |                            |                               |
| Sicherungen auf Aktienoptionen       | 2 Mio. Stück              | 33                         | 0                             | 4 Mio. Stück              | 14                         | 0                             |
| davon innerhalb Fair-Value-Hedges    | (0)                       | (0)                        | (0)                           | (0)                       | (0)                        | (0)                           |
| davon innerhalb Cashflow Hedges      | (2 Mio. Stück)            | 33                         | (0)                           | (4 Mio. Stück)            | (14)                       | (0)                           |
| davon nicht in einer Hedge-Beziehung | (0)                       | 0                          | (0)                           | (0)                       | (0)                        | (0)                           |
|                                      | <b>k. A.</b>              | <b>67</b>                  | <b>39</b>                     | <b>k. A.</b>              | <b>52</b>                  | <b>59</b>                     |

Das Nominalvolumen der Devisentermingeschäfte/-optionen und der Zinsbegrenzungsvereinbarungen bestimmt sich aus der Nettoposition der den einzelnen Geschäften zugrunde liegenden An- und Verkaufsbeträge in Fremdwährung, umgerechnet zum entsprechenden Wechselkurs des Bilanzstichtags. Das Nominalvolumen der Zinsswaps beziehungsweise der Zins-/Währungsswaps und der Zins-sicherungskontrakte ist brutto ausgewiesen. Die Angabe zu den Sicherungen auf Aktienprämienprogramme enthält die

Stückzahl der Aktienoptionen mit einem Bezugsverhältnis von 1 : 1.

Sämtliche Fair Values stellen den theoretischen Wert bei Auflösung der Geschäfte zum Stichtag dar. Unter der Prämisse des Haltens der Geschäfte bis zur Endlaufzeit handelt es sich hierbei um unrealisierte Gewinne und Verluste, die sich bei voller Effektivität des Sicherungsgeschäfts bis zur Fälligkeit mit Gewinnen und Verlusten der Grundgeschäfte ausgleichen werden.

Um diesen Ausgleich periodengerecht darstellen zu können, werden zwischen Sicherungsgeschäften und Grundgeschäften Beziehungen hergestellt, die wie folgt verbucht werden:

Innerhalb eines Fair-Value-Hedges wird sowohl das Sicherungsgeschäft als auch das abzusichernde Risiko des Grundgeschäfts mit dem Fair Value (Marktwert) bilanziert. Die Wertschwankungen beider Geschäfte werden in der Gewinn- und Verlustrechnung erfasst, in der sie sich bei voller Effektivität des Sicherungsgeschäfts ausgleichen.

Innerhalb eines Cashflow Hedges werden die Sicherungsgeschäfte ebenfalls grundsätzlich zum Fair Value (Marktwert) bilanziert. Bei voller Effektivität des Sicherungsgeschäfts werden die Bewertungsveränderungen so lange im Eigenkapital erfasst, bis die abgesicherten Zahlungsströme beziehungsweise erwarteten Transaktionen das Ergebnis beeinflussen. Erst dann erfolgt die Erfassung in der Gewinn- und Verlustrechnung.

Sicherungsgeschäfte, die nach IAS 39 nicht in einer Sicherungsbeziehung stehen, werden mit dem Fair Value (Marktwert) bilanziert. Wertveränderungen werden direkt in der Gewinn- und Verlustrechnung erfasst. Auch wenn hier formal kein Sicherungszusammenhang hergestellt wurde, handelt es sich hierbei um Sicherungsgeschäfte, die in einem engen Zusammenhang mit einem Grundgeschäft stehen und die sich in ihrer Ergebnisauswirkung mit denen des Grundgeschäfts ausgleichen (natürlicher Hedge).

Die eingesetzten Währungsderivate beziehen sich vor allem auf das Britische Pfund, die Dänische und Tschechische Krone, den Polnischen Złoty, den Japanischen Yen, den Schweizer Franken, den Ungarischen Forint, den Russischen Rubel, den Neuen Rumänischen Leu, die Türkische Lira sowie den US-Dollar.

Folgende Fälligkeitstermine liegen bei den derivativen Finanzinstrumenten vor:

| Mio. €                               | 31.12.2010 Fair Values |               |              | 31.12.2009 Fair Values |               |              |
|--------------------------------------|------------------------|---------------|--------------|------------------------|---------------|--------------|
|                                      | Fälligkeitstermine     |               |              | Fälligkeitstermine     |               |              |
|                                      | Bis zu 1 Jahr          | 1 bis 5 Jahre | Über 5 Jahre | Bis zu 1 Jahr          | 1 bis 5 Jahre | Über 5 Jahre |
| <b>Zinsbezogene Geschäfte</b>        |                        |               |              |                        |               |              |
| Zinsswaps                            | -9                     | -8            | 0            | 0                      | -15           | 0            |
| davon innerhalb Fair-Value-Hedges    | (0)                    | (0)           | (0)          | (0)                    | (0)           | (0)          |
| davon innerhalb Cashflow Hedges      | (0)                    | (-8)          | (0)          | (0)                    | (-6)          | (0)          |
| davon nicht in einer Hedge-Beziehung | (-9)                   | (0)           | (0)          | (0)                    | (-9)          | (0)          |
| <b>Währungsbezogene Geschäfte</b>    |                        |               |              |                        |               |              |
| Devisentermingeschäfte/-optionen     | -7                     | 0             | 0            | -2                     | 0             | 0            |
| davon innerhalb Fair-Value-Hedges    | (0)                    | (0)           | (0)          | (0)                    | (0)           | (0)          |
| davon innerhalb Cashflow Hedges      | (-7)                   | (0)           | (0)          | (0)                    | (0)           | (0)          |
| davon nicht in einer Hedge-Beziehung | (0)                    | (0)           | (0)          | (-2)                   | (0)           | (0)          |
| Zins-/Währungsswaps                  | 15                     | 0             | 0            | 0                      | 4             | 0            |
| davon innerhalb Fair-Value-Hedges    | (0)                    | (0)           | (0)          | (0)                    | (0)           | (0)          |
| davon innerhalb Cashflow Hedges      | (0)                    | (0)           | (0)          | (0)                    | (0)           | (0)          |
| davon nicht in einer Hedge-Beziehung | (15)                   | (0)           | (0)          | (0)                    | (4)           | (0)          |
| <b>Rohstoffbezogene Geschäfte</b>    |                        |               |              |                        |               |              |
| Terminkontrakte                      | 0                      | 4             | 0            | -9                     | 1             | 0            |
| davon innerhalb Fair-Value-Hedges    | (0)                    | (0)           | (0)          | (0)                    | (0)           | (0)          |
| davon innerhalb Cashflow Hedges      | (0)                    | (0)           | (0)          | (0)                    | (0)           | (0)          |
| davon nicht in einer Hedge-Beziehung | (0)                    | (4)           | (0)          | (-9)                   | (1)           | (0)          |
| <b>Aktienkursbezogene Geschäfte</b>  |                        |               |              |                        |               |              |
| Sicherungen auf Aktienoptionen       | 33                     | 0             | 0            | 0                      | 14            | 0            |
| davon innerhalb Fair-Value-Hedges    | (0)                    | (0)           | (0)          | (0)                    | (0)           | (0)          |
| davon innerhalb Cashflow Hedges      | (33)                   | (0)           | (0)          | (0)                    | (14)          | (0)          |
| davon nicht in einer Hedge-Beziehung | (0)                    | (0)           | (0)          | (0)                    | (0)           | (0)          |
|                                      | <b>32</b>              | <b>-4</b>     | <b>0</b>     | <b>-11</b>             | <b>4</b>      | <b>0</b>     |

Unter den Fälligkeitsterminen sind die Fair Values der in diesen Zeiträumen fälligen finanziellen Vermögenswerte und Verbindlichkeiten angegeben.

Die Zinsanpassungstermine variabler Zinssätze liegen unter einem Jahr.

### Liquiditätsrisiken

Die METRO AG fungiert für die Gesellschaften der METRO GROUP als finanzwirtschaftlicher Koordinator, um eine möglichst kostengünstige und betragsmäßig stets ausreichende Deckung des Finanzbedarfs für das operative Geschäft und für Investitionen sicherzustellen. Die erforderlichen Informationen werden durch eine monatlich aktualisierte Konzernfinanzplanung bereitgestellt und einer monatlichen Abweichungsanalyse unterzogen. Diese Finanzplanung wird zusätzlich durch eine wöchentlich rollierende 14-Tages-Liquiditätsplanung ergänzt.

Als Finanzinstrumente werden Produkte des Geld- und Kapitalmarkts (Fest- und Tagesgelder, Commercial Papers, Schuldscheindarlehen und Anleihen im Rahmen der Daueremissionsprogramme) sowie bilaterale und syndizierte Kredite eingesetzt. Die METRO GROUP verfügt über eine ausreichende Liquiditätsreserve, sodass Liquiditätsrisiken auch dann nicht entstehen, wenn unerwartet auftretende Ereignisse negative finanzwirtschaftliche Auswirkungen auf die Liquiditätslage haben. Zu den Finanzinstrumenten und Kreditlinien verweisen wir auf die Ausführungen unter den entsprechenden Bilanzpositionen.

Durch den konzerninternen Finanzausgleich (Cash Pooling) werden eine Reduzierung des Fremdfinanzierungsvolumens sowie eine Optimierung der Geld- und Kapitalanlagen der METRO GROUP mit positiven Auswirkungen auf das Zinsergebnis erreicht. Das Cash Pooling ermöglicht die Nutzung der Liquiditätsüberschüsse einzelner Konzerngesellschaften zur internen Finanzierung des Geldbedarfs anderer Konzerngesellschaften.

Des Weiteren wird das im Finanzbereich der METRO AG gebündelte Know-how genutzt, um die Konzerngesellschaften in allen relevanten Finanzfragen zu beraten und zu betreuen. Das reicht von grundsätzlichen Überlegungen zur Finanzierung von Investitionsvorhaben bis hin zur Unterstützung der Finanzverantwortlichen der einzelnen Konzerngesellschaften in Gesprächen mit Banken und Finanzdienstleistern vor Ort. Dadurch wird sichergestellt, dass zum einen die Finanzressourcen der

METRO GROUP in Deutschland und international optimal eingesetzt werden und zum anderen alle Konzerngesellschaften an der Bonität und Stärke der METRO GROUP im Hinblick auf ihre Finanzierungsbedingungen teilhaben.

In einigen osteuropäischen Ländern sind gesetzlich die Zahlungsfristen insbesondere für Lieferungen im Lebensmittelbereich verkürzt worden. Kürzere Zahlungsziele gegenüber Lieferanten führen grundsätzlich zu einem höheren Finanzierungsbedarf. Die solide Liquiditätsausstattung der METRO GROUP wird dadurch aber nicht beeinträchtigt.

### Bonitätsrisiken

Bonitätsrisiken entstehen durch den vollständigen oder teilweisen Ausfall eines Kontrahenten, beispielsweise durch Insolvenz, im Rahmen von Geldanlagen sowie bei derivativen Finanzinstrumenten mit positiven Marktwerten. Das maximale Ausfallrisiko, dem die METRO GROUP zum Bilanzstichtag ausgesetzt ist, wird durch die Buchwerte der finanziellen Vermögenswerte in einer Gesamthöhe von 7.610 Mio. € (Vorjahr 6.802 Mio. €) widergespiegelt. Nähere Angaben über die Höhe der jeweiligen Buchwerte sind im Konzernanhang unter Nummer 39 „Buchwerte und Fair Values nach Bewertungskategorien“ enthalten. Die in den Zahlungsmitteln berücksichtigten Kassenbestände in Höhe von 127 Mio. € (Vorjahr 145 Mio. €) unterliegen dabei keinem Ausfallrisiko.

Im Zuge des Risikomanagements von Geldanlagen in Gesamthöhe von 4.476 Mio. € (Vorjahr 3.636 Mio. €) und derivativen Finanzinstrumenten in Gesamthöhe von 67 Mio. € (Vorjahr 52 Mio. €) sind für alle Geschäftspartner der METRO GROUP Mindestanforderungen an die Bonität und zudem individuelle Höchstgrenzen für das Engagement festgelegt. Bei der Ermittlung der Bonitätsrisiken werden Schecks und unterwegs befindliche Gelder nicht berücksichtigt. Grundlage ist dabei eine in den Treasury-Richtlinien festgeschriebene Limitsystematik, die im Wesentlichen auf den Einstufungen internationaler Rating-Agenturen oder auf internen Bonitätsprüfungen basiert. Jedem Kontrahenten der METRO GROUP wird ein individuelles Limit zugewiesen, dessen Einhaltung fortlaufend in Treasury-Systemen überwacht wird.

In der nachfolgenden Tabelle ist eine Einteilung der Geschäftspartner in Rating-Klassen dargestellt:

| Rating-Klassen       |               |                   | Volumen in % |                    |            |                  |            | Derivate mit positiven Marktwerten | Gesamt |
|----------------------|---------------|-------------------|--------------|--------------------|------------|------------------|------------|------------------------------------|--------|
|                      |               |                   | Geldanlagen  |                    |            |                  |            |                                    |        |
| Einstufung           | Moody's       | Standard & Poor's | Deutschland  | Westeuropa ohne D. | Osteuropa  | Asien und Übrige |            |                                    |        |
| Investment-Grade     | Aaa           | AAA               | 0,0          | 0,0                | 0,0        | 0,0              | 0,0        | 94,3                               |        |
|                      | Aa1 bis Aa3   | AA+ bis AA-       | 10,7         | 3,8                | 1,7        | 0,5              | 0,0        |                                    |        |
|                      | A1 bis A3     | A+ bis A-         | 41,3         | 20,4               | 5,5        | 1,6              | 1,4        |                                    |        |
|                      | Baa1 bis Baa3 | BBB+ bis BBB-     | 3,7          | 3,3                | 0,4        | 0,0              | 0,0        |                                    |        |
| Non-Investment-Grade | Ba1 bis Ba3   | BB+ bis BB-       | 0,0          | 0,0                | 1,4        | 0,1              | 0,0        | 1,7                                |        |
|                      | B1 bis B3     | B+ bis B-         | 0,0          | 0,0                | 0,0        | 0,2              | 0,0        |                                    |        |
|                      | C             | C                 | 0,0          | 0,0                | 0,0        | 0,0              | 0,0        |                                    |        |
| Kein Rating          |               |                   | 2,6          | 1,4                | 0,0        | 0,0              | 0,0        | 4,0                                |        |
| <b>Gesamt</b>        |               |                   | <b>58,3</b>  | <b>28,9</b>        | <b>9,0</b> | <b>2,4</b>       | <b>1,4</b> | <b>100,0</b>                       |        |

Aus der Tabelle ist ersichtlich, dass per Stichtag rund 94,3 Prozent des Anlagevolumens inklusive der positiven Marktwerte von Derivaten bei Kontrahenten mit einer Investment-Grade-Einstufung, die somit eine gute bis sehr gute Bonität aufweisen, platziert wurden. Bei Kontrahenten, die bisher noch kein international anerkanntes Rating aufweisen, handelt es sich größtenteils um renommierte Finanzinstitute, deren Bonität aufgrund eigener Analysen als einwandfrei betrachtet werden kann. Die METRO GROUP ist auch in Ländern vertreten, deren Finanzinstitute aufgrund ihrer eigenen Länder-Ratings keine Investment-Grade-Einstufung erreichen. Eine Zusammenarbeit mit diesen Instituten ist aus länderspezifischen Gründen sowie unter Kosten- und Effizienzgesichtspunkten notwendig. Der Anteil am Gesamtvolumen liegt hier bei rund 1,7 Prozent.

Die METRO GROUP ist Bonitätsrisiken somit nur in sehr geringem Maße ausgesetzt.

#### Risiken aus Zahlungsstromschwankungen

Verursacht durch eine Änderung des zukünftigen Zinsniveaus, können sich bei variabel verzinslichen Vermögens- beziehungsweise Schuldposten Schwankungen der Zahlungsströme einstellen. Ein Teilbetrag der variabel verzinslichen Schuldposten wurde durch den Einsatz von derivativen Finanzinstrumenten gesichert. Anhand sogenannter „stress tests“ wird untersucht, welche Auswirkungen die Veränderungen des Zinsniveaus auf die Zahlungsströme haben könnten. In Abstimmung mit dem Finanzvorstand der METRO AG wird der Umfang der abzusichernden Beträge festgelegt.

#### 44. Eventualverbindlichkeiten

| Mio. €                                         | 2010       | 2009       |
|------------------------------------------------|------------|------------|
| Verbindlichkeiten aus Bürgschaften             | 19         | 16         |
| Verbindlichkeiten aus Gewährleistungsverträgen | 122        | 261        |
|                                                | <b>141</b> | <b>277</b> |

Die Verbindlichkeiten aus Gewährleistungsverträgen sind geprägt durch den Wegfall von Gewährleistungen im Zusammenhang mit den im Jahr 2008 veräußerten Extra-Verbrauchermärkten.

#### 45. Sonstige finanzielle Verpflichtungen

| Mio. €                               | 2010       | 2009       |
|--------------------------------------|------------|------------|
| Abnahmeverpflichtungen/Bestellobligo | 396        | 347        |
| Übrige                               | 19         | 20         |
|                                      | <b>415</b> | <b>367</b> |

Der Anstieg der Abnahmeverpflichtungen beziehungsweise des Bestellobligos betrifft überwiegend Verträge über Dienstleistungen.

Zu den Erwerbsverpflichtungen für sonstige immaterielle Vermögenswerte, Gegenstände des Sachanlagevermögens, Verpflichtungen aus Finanzierungs- und Operating-Leasingverhältnissen sowie für als Finanzinvestitionen gehaltene Immobilien verweisen wir auf Nummer 19 „Sonstige immaterielle

Vermögenswerte“, Nummer 20 „Sachanlagen“ und Nummer 21 „Als Finanzinvestition gehaltene Immobilien“.

**46. Sonstige Rechtsangelegenheiten**

**Status Spruchverfahren**

Die bei den 1996 durchgeführten Verschmelzungen der Asko Deutsche Kaufhaus AG und der Deutschen SB-Kauf AG auf die METRO AG festgesetzten Umtauschverhältnisse werden auf Antrag ehemaliger Aktionäre in Spruchverfahren gerichtlich überprüft. Die Antragsteller behaupten, dass das jeweilige Umtauschverhältnis der Anteile zu ihren Lasten zu niedrig bemessen worden sei.

Diese beiden Spruchverfahren sind bei den Landgerichten Saarbrücken und Frankfurt am Main anhängig.

**Untersuchung des Bundeskartellamts**

Am 14. Januar 2010 durchsuchte das Bundeskartellamt ehemalige Geschäftsräume der MGB METRO Group Buying GmbH. Die Untersuchung des Bundeskartellamts dauert an; die Behörde hat bislang keine konkretisierten und individualisierten Tathandlungsvorwürfe gegen die MGB METRO Group Buying GmbH oder eine andere Gesellschaft der METRO GROUP erhoben. Daher können hinsichtlich möglicher Auswirkungen dieser Untersuchungen in Bezug auf den Konzernabschluss der METRO AG zurzeit keine Angaben gemacht werden.

**47. Ereignisse nach dem Bilanzstichtag**

Vorgänge, die für die Beurteilung der Ertrags-, Finanz- und Vermögenslage der METRO AG und der METRO GROUP wesentlich wären, sind zwischen dem Bilanzstichtag (31. Dezember 2010) und dem Zeitpunkt der Aufstellung des Konzernabschlusses (28. Februar 2011) nicht eingetreten.

**48. Angaben über Beziehungen zu nahestehenden Unternehmen und Personen**

Die METRO GROUP hatte im Jahr 2010 zu nahestehenden Unternehmen folgende Geschäftsbeziehungen:

| Mio. €                                      | 2010 | 2009 |
|---------------------------------------------|------|------|
| Erbrachte Leistungen                        | 3    | 3    |
| Erhaltene Leistungen                        | 108  | 110  |
| Forderungen aus erbrachten Leistungen       | 1    | 16   |
| Verbindlichkeiten aus erhaltenen Leistungen | 0    | 1    |

Unternehmen der METRO GROUP erbrachten im Geschäftsjahr 2010 Leistungen in Höhe von 3 Mio. € an Unternehmen, die dem Kreis der nahestehenden Unternehmen zuzurechnen sind. Hierbei handelte es sich im Wesentlichen um Vermietungsleistungen.

Die Leistungen in Höhe von 108 Mio. €, die Unternehmen der METRO GROUP im Geschäftsjahr 2010 von nahestehenden Unternehmen erhalten haben, bestanden hauptsächlich aus der Vermietung von Immobilien.

Die Grundzüge des Vergütungssystems und die Vergütungshöhe von Vorstand und Aufsichtsrat sind im Vergütungsbericht, der Bestandteil des Lageberichts ist, enthalten.

Die Geschäftsbeziehungen zu nahestehenden Unternehmen sind vertraglich vereinbart und entsprechen Marktkonditionen. Im Geschäftsjahr 2010 bestanden wie im Jahr 2009 keine Geschäftsbeziehungen zu nahestehenden natürlichen Personen.

**49. Aktienorientierte Vergütung für Führungskräfte**

Die METRO AG unterhält seit 1999 Programme für aktienorientierte Vergütungen, um die Führungskräfte an der Wertentwicklung des Unternehmens zu beteiligen und deren Beitrag zum nachhaltigen Erfolg der METRO GROUP im Vergleich zum Wettbewerb zu honorieren. Der bezugsberechtigte Personenkreis umfasst die Mitglieder des Vorstands und weitere Führungskräfte der METRO AG sowie Geschäftsführungsorgane und Führungskräfte der Unternehmen der METRO GROUP.

**Aktienprämienprogramm (2004–2008)**

Im Jahr 2004 hat die METRO AG ein Aktienprämienprogramm aufgelegt, dessen letzte Tranche 2008 gewährt wurde. Das Programm basiert auf auszahlbaren Aktienprämien, deren Höhe sich an der Kursentwicklung der Metro-Aktie unter Berücksichtigung von Vergleichsindizes orientiert. Das Programm ist in jährliche Tranchen aufgeteilt, für die unterschiedliche Zielparameter gelten. Bei Erreichen des Zielaktienkurses und einer sogenannten Gleichperformance der Aktie mit den Vergleichsindizes wird die volle Aktienprämie ausbezahlt. Die Laufzeit jeder Tranche beträgt drei Jahre. Für die Tranchen 2004 bis 2008 gelten folgende Bedingungen:



| Tranche | Ende der Laufzeit | Ausgangskurs | Zielaktienkurs | Zielprämien gesamt |
|---------|-------------------|--------------|----------------|--------------------|
| 2004    | Juli 2007         | 37,14 €      | 42,71 €        | Ausgezahlt         |
| 2005    | Juli 2008         | 41,60 €      | 47,84 €        | Verfallen          |
| 2006    | Juli 2009         | 43,15 €      | 49,62 €        | Verfallen          |
| 2007    | Juli 2010         | 61,61 €      | 70,85 €        | Verfallen          |
| 2008    | Juli 2011         | 41,92 €      | 48,21 €        | 16.695.000 €       |

Die Wertangabe zur Zielprämie der Tranche 2008 setzt voraus, dass der Zielaktienkurs erreicht wird. Die Auszahlung der Aktienprämien kann auf die Höhe der Bruttojahresgrundvergütung begrenzt werden.

#### Performance Share Plan und Share Ownership Guidelines (2009–2013)

Im Jahr 2009 hat die METRO AG das bisherige Aktienprämienprogramm durch einen Performance Share Plan ersetzt.

Die Führungskräfte erhalten entsprechend der Bedeutung ihrer Funktion einen individuellen Betrag für den Performance Share Plan (Zielwert). Um die Zielanzahl der Performance Shares zu ermitteln, wird der Zielwert durch den Aktienkurs bei Zuteilung dividiert. Maßgeblich ist dabei der Drei-Monats-Durchschnittskurs der Metro-Aktie vor dem Zuteilungszeitpunkt. Ein Performance Share berechtigt zu einer Barauszahlung in Höhe des Kurses der Metro-Aktie zum Auszahlungszeitpunkt. Auch hier ist der Drei-Monats-Durchschnittskurs der Metro-Aktie vor dem Auszahlungszeitpunkt maßgeblich.

In Abhängigkeit von der relativen Performance der Metro-Aktie im Vergleich zum Mittelwert aus den Aktienindizes DAX 30 und dem Dow Jones Euro Stoxx Retail – Total Return – wird nach Ablauf eines Performance-Zeitraums von mindestens drei und maximal 4,25 Jahren die endgültige Anzahl der auszuzahlenden Performance Shares bestimmt. Diese entspricht der Zielanzahl, wenn eine Gleichperformance zu den genannten Aktienindizes erreicht wird. Bis zu einer Outperformance von 60 Prozent erhöht sich die Anzahl linear auf den Maximalwert von 200 Prozent der Zielanzahl. Bis zu einer Underperformance von 30 Prozent reduziert sich die Anzahl entsprechend bis auf 50 Prozent. Bei einer höheren Underperformance fällt die Anzahl auf 0.

Die Auszahlung kann zu sechs möglichen Zeitpunkten erfolgen. Der früheste Auszahlungstermin ist drei Jahre nach Zuteilung der Performance Shares. Ab diesem Zeitpunkt ist eine Auszahlung alle drei Monate möglich. Die Führungskräfte haben die

Wahl, zu welchem Zeitpunkt ihre Performance Shares ausgezahlt werden. Eine Aufteilung auf mehrere Auszahlungszeitpunkte ist nicht möglich. Die Obergrenze der Auszahlung (Cap) liegt beim Fünffachen des Zielwerts.

Mit dem Performance Share Plan wurden zugleich sogenannte Share Ownership Guidelines eingeführt: Als Voraussetzung für die Auszahlung der Performance Shares sind die Berechtigten verpflichtet, bis zum Ablauf der dreijährigen Sperrfrist ein eigenfinanziertes Investment in Metro-Aktien aufzubauen und zu halten. Dadurch partizipieren sie als Aktionäre unmittelbar an Kursanstiegen, aber gegebenenfalls auch an Kursverlusten der Metro-Aktie. Das zu haltende Volumen beträgt zwischen circa 50 und 85 Prozent des individuellen Zielwerts.

Der Wert der im Jahr 2010 zugeteilten Performance Shares betrug zum Zeitpunkt der Zuteilung 26,7 Mio. € (Vorjahr 34,6 Mio. €) und wurde durch externe Gutachter nach einem anerkannten finanzmathematischen Verfahren (Monte-Carlo-Simulation) ermittelt. Es gelten folgende Bedingungen:

| Tranche | Ende der Sperrfrist | Drei-Monats-Durchschnittskurs vor Zuteilungszeitpunkt | Anzahl Performance Shares |
|---------|---------------------|-------------------------------------------------------|---------------------------|
| 2010    | August 2013         | 42,91 €                                               | 766.954                   |
| 2009    | August 2012         | 36,67 €                                               | 780.747                   |

Der im Geschäftsjahr 2010 erfasste Gesamtaufwand für aktienorientierte Vergütungsprogramme beträgt nach Aufwendungen aus Sicherungsgeschäften 32 Mio. € (Vorjahr 21 Mio. €).

Die damit im Zusammenhang stehenden Rückstellungen zum 31. Dezember 2010 betragen 60 Mio. € (Vorjahr 13 Mio. €). Davon betreffen 31 Mio. € (Vorjahr 8 Mio. €) die Tranche 2008 mit einer Restlaufzeit von bis zu einem Jahr, 23 Mio. € die Tranche 2009 (Vorjahr 5 Mio. €) sowie 6 Mio. € die Tranche 2010.

#### 50. Vorstand und Aufsichtsrat

##### Vergütung der Mitglieder des Vorstands im Geschäftsjahr 2010

Die Vergütung der aktiven Mitglieder des Vorstands setzt sich im Wesentlichen zusammen aus der Grundvergütung, den erfolgsbezogenen Ansprüchen (Short Term Incentive) sowie den im Geschäftsjahr 2010 gewährten aktienorientierten Vergütungen (Long Term Incentive).

Die erfolgsabhängige Vergütung der Mitglieder des Vorstands wird im Wesentlichen durch die Entwicklung der Net Earnings und des Return on Capital Employed (RoCE) bestimmt und

kann darüber hinaus die Erreichung individuell gesetzter Ziele berücksichtigen. Durch die Verwendung der Kennziffer Net Earnings in Kombination mit dem RoCE wird ein profitables Wachstum der METRO GROUP honoriert.

Die Vergütung der aktiven Mitglieder des Vorstands im Geschäftsjahr 2010 beträgt 17,3 Mio. € (Vorjahr 16,0 Mio. €). Davon entfallen 4,3 Mio. € (Vorjahr 4,7 Mio. €) auf die Grundvergütung, 10,7 Mio. € (Vorjahr 7,7 Mio. €) auf erfolgsbezogene Ansprüche, 1,7 Mio. € (Vorjahr 3,0 Mio. €) auf aktienorientierte Vergütung und 0,6 Mio. € (Vorjahr 0,6 Mio. €) auf sonstige Vergütungen.

Die im Geschäftsjahr 2010 gewährten aktienorientierten Vergütungen (Performance Shares) sind mit dem beizulegenden Zeitwert zum Zeitpunkt ihrer Gewährung angegeben. Aus den aktienbasierten Vergütungen, deren Verfallstermine im Geschäftsjahr 2010 oder später liegen, ergab sich ein Aufwand in Höhe von 3,0 Mio. €.

Die Mitglieder des Vorstands erhielten 48.939 Performance Share Units.

Die sonstigen Vergütungen entfallen auf geldwerte Vorteile aus Sachbezügen und Aufwandsentschädigungen.

#### Gesamtbezüge der früheren Mitglieder des Vorstands

Für frühere Mitglieder der Vorstände der METRO AG und der auf die METRO AG verschmolzenen Gesellschaften sowie ihre Hinterbliebenen wurden Leistungen in Höhe von 27,4 Mio. € (Vorjahr 4,3 Mio. €) erbracht. Der Barwert des Verpflichtungsvolumens für laufende Pensionen und Anwartschaften auf Pensionen für diese Personengruppe betrug 48,3 Mio. € (Vorjahr 47,4 Mio. €).

Die Angaben gemäß § 314 Abs. 1 Nr. 6a Satz 5 bis 9 HGB finden sich im ausführlichen Vergütungsbericht unter Kapitel 8 des Konzernlageberichts.

#### Die Vergütung der Aufsichtsratsmitglieder

Die Gesamtvergütung sämtlicher Mitglieder des Aufsichtsrats für das Geschäftsjahr 2010 beträgt 1,7 Mio. € (Vorjahr 1,7 Mio. €).

Weitere Angaben zur Vergütung der Aufsichtsratsmitglieder finden sich im ausführlichen Vergütungsbericht unter Kapitel 8 des Konzernlageberichts.

#### 51. Honorare des Konzernabschlussprüfers

Für die erbrachten Dienstleistungen des Abschlussprüfers KPMG AG Wirtschaftsprüfungsgesellschaft und mit ihr verbundener Unternehmen ist das unten stehende Gesamthonorar berechnet worden. Seit dem Beitritt von KPMG GUS zum 1. Februar 2010 sind diese KPMG-Landesgesellschaften ebenfalls verbundene Unternehmen der KPMG AG Wirtschaftsprüfungsgesellschaft im Sinne des § 271 Abs. 2 HGB. Die Angabepflicht von KPMG GUS bezieht sich auf Dienstleistungen, die nach dem 31. Januar 2010 erbracht worden sind.

| Mio. €                                           | 31.12.2010 | 31.12.2009 |
|--------------------------------------------------|------------|------------|
| Abschlussprüfung                                 | 13         | 12         |
| Sonstige Bestätigungs- oder Bewertungsleistungen | 3          | 2          |
| Steuerberatungsleistungen                        | 2          | 1          |
| Sonstige Leistungen                              | 3          | 2          |
|                                                  | <b>21</b>  | <b>17</b>  |

Es wurden ausschließlich Leistungen erbracht, die mit der Tätigkeit als Abschlussprüfer des Jahresabschlusses und des Konzernabschlusses der METRO AG vereinbar sind.

#### 52. Entsprechenserklärungen zum Deutschen Corporate Governance Kodex

Vorstand und Aufsichtsrat haben im Mai und im Dezember 2010 Erklärungen gemäß § 161 AktG zu den Empfehlungen der Regierungskommission Deutscher Corporate Governance Kodex abgegeben und auf der Homepage der METRO AG ([www.metrogroup.de](http://www.metrogroup.de)) dauerhaft zugänglich gemacht.

#### 53. Befreiungswahlrechte nach §§ 264 Abs. 3 beziehungsweise 264b HGB

Nachfolgende inländische Tochtergesellschaften in der Rechtsform einer Kapitalgesellschaft beziehungsweise Personenhandelsgesellschaft werden die Befreiungsvorschriften gemäß § 264 Abs. 3 und § 264b HGB nutzen und deshalb auf die Offenlegung ihrer Jahresabschlussunterlagen 2010 verzichten sowie überwiegend auch auf die Erstellung des (HGB-)Anhangs und Lageberichts.

**a) Operative Gesellschaften und Serviceeinheiten**

|                                                                                          |                     |
|------------------------------------------------------------------------------------------|---------------------|
| "Buch und Zeit" Verlagsgesellschaft mit beschränkter Haftung                             | Köln                |
| AXXE Reisegastronomie GmbH¹                                                              | Köln                |
| C + C Schaper GmbH                                                                       | Hannover            |
| Campus Store GmbH                                                                        | Alzey               |
| CH-Vermögensverwaltung GmbH                                                              | Düsseldorf          |
| DAYCONOMY GmbH                                                                           | Düsseldorf          |
| Dinea Gastronomie GmbH                                                                   | Köln                |
| emotions GmbH                                                                            | Köln                |
| Fulltrade International GmbH                                                             | Düsseldorf          |
| Galeria Kaufhof GmbH                                                                     | Köln                |
| GEMINI Personalservice GmbH                                                              | Köln                |
| Goldhand Lebensmittel- u. Verbrauchsgüter-Vertriebsgesellschaft mit beschränkter Haftung | Düsseldorf          |
| Grillpfanne GmbH                                                                         | Köln                |
| Johannes Berg GmbH, Weinkellerei                                                         | Düsseldorf          |
| Liqueur & Wine Trade GmbH                                                                | Düsseldorf          |
| LSZ Service GmbH & Co. KG                                                                | Alzey               |
| Lust for Life Gastronomie GmbH                                                           | Köln                |
| MCC Trading Deutschland GmbH                                                             | Düsseldorf          |
| MCC Trading International GmbH                                                           | Düsseldorf          |
| MDH Secundus Vermögensverwaltung GmbH                                                    | Düsseldorf          |
| Meister feines Fleisch - feine Wurst GmbH                                                | Gäufelden           |
| METRO Beteiligungsmanagement Düsseldorf GmbH & Co. KG                                    | Düsseldorf          |
| Metro Cash & Carry Brunenthal GmbH & Co. KG                                              | Brunenthal          |
| METRO Cash & Carry Deutschland GmbH                                                      | Düsseldorf          |
| METRO Cash & Carry International GmbH                                                    | Düsseldorf          |
| METRO Cash & Carry International Management GmbH                                         | Düsseldorf          |
| METRO Dienstleistungs-Holding GmbH                                                       | Düsseldorf          |
| METRO Groß- und Lebensmitteleinzelhandel Holding GmbH                                    | Düsseldorf          |
| METRO Großhandelsgesellschaft mbH                                                        | Düsseldorf          |
| Metro International Beteiligungs GmbH                                                    | Düsseldorf          |
| METRO Kaufhaus und Fachmarkt Holding GmbH                                                | Düsseldorf          |
| METRO Online GmbH                                                                        | Düsseldorf          |
| Metro SB-Großmärkte GmbH & Co. Kommanditgesellschaft                                     | Esslingen am Neckar |
| Metro SB-Großmärkte GmbH & Co. Kommanditgesellschaft                                     | Linden              |
| Metro SB-Großmärkte Verwaltungsgesellschaft mit beschränkter Haftung                     | Mülheim an der Ruhr |
| METRO Siebte Gesellschaft für Vermögensverwaltung mbH                                    | Düsseldorf          |
| METRO Systems GmbH                                                                       | Düsseldorf          |
| METRO Zehnte Gesellschaft für Vermögensverwaltung mbH                                    | Düsseldorf          |
| METRO Zehnte GmbH & Co. KG                                                               | Düsseldorf          |
| METRO Zwölfte Gesellschaft für Vermögensverwaltung mbH                                   | Düsseldorf          |
| MGA METRO Group Advertising GmbH                                                         | Düsseldorf          |
| MGC METRO Group Clearing GmbH                                                            | Düsseldorf          |
| MGE Warenhandelsgesellschaft mbH                                                         | Düsseldorf          |
| MGL METRO Group Logistics GmbH                                                           | Düsseldorf          |
| MGL METRO Group Logistics Warehousing Beteiligungs GmbH                                  | Sarstedt            |
| MGL METRO Group Logistics Warehousing GmbH                                               | Sarstedt            |

|                                                       |              |
|-------------------------------------------------------|--------------|
| MGP METRO Group Account Processing GmbH               | Kehl         |
| MGT METRO Group Travel Services GmbH                  | Düsseldorf   |
| MIB METRO Group Insurance Broker GmbH                 | Düsseldorf   |
| MIP METRO Group Intellectual Property GmbH & Co. KG   | Düsseldorf   |
| MIP METRO Group Intellectual Property Management GmbH | Düsseldorf   |
| MTT METRO Group Textiles Transport GmbH               | Düsseldorf   |
| Multi-Center Warenvertriebs GmbH                      | Hannover     |
| real,- Group Holding GmbH                             | Düsseldorf   |
| real,- Handels GmbH                                   | Düsseldorf   |
| real,- Holding GmbH                                   | Alzey        |
| real,- SB-Warenhaus GmbH                              | Alzey        |
| SIL Verwaltung GmbH & Co. Objekt Haidach KG           | Schwabhausen |
| SPORTARENA GmbH                                       | Köln         |
| Vierte real,- Holding GmbH                            | Alzey        |
| Vierte real,- SB-Warenhaus GmbH                       | Alzey        |
| Weinkellerei Thomas Rath GmbH                         | Düsseldorf   |
| Zweite real,- Multi-Markt Verwaltungsgesellschaft mbH | Alzey        |
| Zweite real,- SB-Warenhaus GmbH                       | Alzey        |

#### **b) Immobiliengesellschaften**

|                                                                            |             |
|----------------------------------------------------------------------------|-------------|
| 1. Schaper Objekt GmbH & Co. Wächtersbach KG                               | Düsseldorf  |
| 2. Schaper Objekt GmbH & Co. Memmingen KG                                  | Düsseldorf  |
| 3. Schaper Objekt GmbH & Co. Erlangen KG                                   | Düsseldorf  |
| ADAGIO 2. Grundstücksverwaltungsgesellschaft mbH                           | Saarbrücken |
| ADAGIO 3. Grundstücksverwaltungsgesellschaft mbH                           | Saarbrücken |
| ADAGIO Grundstücksverwaltungsgesellschaft mbH                              | Saarbrücken |
| Adolf Schaper GmbH & Co. Grundbesitz-KG                                    | Saarbrücken |
| AIB Verwaltungs GmbH                                                       | Düsseldorf  |
| ARKON Grundbesitzverwaltung GmbH                                           | Saarbrücken |
| ASH Grundstücksverwaltung XXX GmbH                                         | Saarbrücken |
| ASSET Grundbesitz GmbH                                                     | Düsseldorf  |
| ASSET Immobilienbeteiligungen GmbH                                         | Saarbrücken |
| ASSET Verwaltungs-GmbH                                                     | Saarbrücken |
| ASSET Verwaltungs-GmbH & Co. Objekt Aachen II KG                           | Saarbrücken |
| ASSET Verwaltungs-GmbH & Co. Objekt Aachen, Adalbertstraße 20-30 KG        | Saarbrücken |
| ASSET Verwaltungs-GmbH & Co. Objekt Aschaffenburg KG                       | Saarbrücken |
| ASSET Verwaltungs-GmbH & Co. Objekt Bergen-Enkheim KG                      | Saarbrücken |
| ASSET Verwaltungs-GmbH & Co. Objekt Bonn, Acherstraße KG                   | Saarbrücken |
| ASSET Verwaltungs-GmbH & Co. Objekt Darmstadt KG                           | Saarbrücken |
| ASSET Verwaltungs-GmbH & Co. Objekt Dortmund KG                            | Saarbrücken |
| ASSET Verwaltungs-GmbH & Co. Objekt Düsseldorf, Königsallee 1 KG           | Saarbrücken |
| ASSET Verwaltungs-GmbH & Co. Objekt Frankfurt Hauptwache KG                | Saarbrücken |
| ASSET Verwaltungs-GmbH & Co. Objekt Freiburg im Breisgau KG                | Saarbrücken |
| ASSET Verwaltungs-GmbH & Co. Objekt Gelsenkirchen KG                       | Saarbrücken |
| ASSET Verwaltungs-GmbH & Co. Objekt Hamburg-Poppenbüttel, Kritenbarg 10 KG | Saarbrücken |
| ASSET Verwaltungs-GmbH & Co. Objekt Hanau KG                               | Saarbrücken |
| ASSET Verwaltungs-GmbH & Co. Objekt Hannover KG                            | Saarbrücken |
| ASSET Verwaltungs-GmbH & Co. Objekt Kassel KG                              | Saarbrücken |

|                                                                                                      |             |
|------------------------------------------------------------------------------------------------------|-------------|
| ASSET Verwaltungs-GmbH & Co. Objekt Kassel, Obere Königstraße KG                                     | Saarbrücken |
| ASSET Verwaltungs-GmbH & Co. Objekt Köln, Minoritenstraße KG                                         | Saarbrücken |
| ASSET Verwaltungs-GmbH & Co. Objekt Köln-Kalk, Kalker Hauptstraße 118-122 KG                         | Saarbrücken |
| ASSET Verwaltungs-GmbH & Co. Objekt Leipzig KG                                                       | Saarbrücken |
| ASSET Verwaltungs-GmbH & Co. Objekt Mainz KG                                                         | Saarbrücken |
| ASSET Verwaltungs-GmbH & Co. Objekt Mönchengladbach KG                                               | Saarbrücken |
| ASSET Verwaltungs-GmbH & Co. Objekt München Pelkovenstraße 155 KG                                    | Saarbrücken |
| ASSET Verwaltungs-GmbH & Co. Objekt Nürnberg, Königstraße 42-52 KG                                   | Saarbrücken |
| ASSET Verwaltungs-GmbH & Co. Objekt Oberhausen Centroallee KG                                        | Saarbrücken |
| ASSET Verwaltungs-GmbH & Co. Objekt Offenbach KG                                                     | Saarbrücken |
| ASSET Verwaltungs-GmbH & Co. Objekt Saarbrücken, Bahnhofstraße 82-92, 98-100 KG                      | Saarbrücken |
| ASSET Verwaltungs-GmbH & Co. Objekt Siegburg KG                                                      | Saarbrücken |
| ASSET Verwaltungs-GmbH & Co. Objekt Stuttgart, Königstraße 6 KG                                      | Saarbrücken |
| ASSET Verwaltungs-GmbH & Co. Objekt Stuttgart-Bad Cannstatt Badstraße, Marktstraße 3 KG              | Saarbrücken |
| ASSET Verwaltungs-GmbH & Co. Objekt Würzburg KG                                                      | Saarbrücken |
| ASSET Zweite Immobilienbeteiligungen GmbH                                                            | Düsseldorf  |
| Bassa Grundstücksverwaltungsgesellschaft mbH                                                         | Saarbrücken |
| BAUGRU Immobilien - Beteiligungsgesellschaft mit beschränkter Haftung & Co. Grundstücksverwaltung KG | Saarbrücken |
| Blabert Grundstücksverwaltungsgesellschaft mbH                                                       | Saarbrücken |
| BLK Grundstücksverwaltung GmbH                                                                       | Saarbrücken |
| Deutsche SB-Kauf GmbH & Co. KG                                                                       | Saarbrücken |
| DFI Verwaltungs GmbH                                                                                 | Saarbrücken |
| Dorina Immobilien-Vermietungsgesellschaft mbH                                                        | Düsseldorf  |
| FZB Fachmarktzentrum Bous Verwaltungsgesellschaft mbH & Co. KG                                       | Saarbrücken |
| FZG Fachmarktzentrum Guben Verwaltungsgesellschaft mbH                                               | Saarbrücken |
| FZG Fachmarktzentrum Guben Verwaltungsgesellschaft mbH & Co. Vermietungs-KG                          | Saarbrücken |
| GBS Gesellschaft für Unternehmensbeteiligungen mbH                                                   | Saarbrücken |
| GKF Vermögensverwaltungsgesellschaft mbH & Co. 10. Objekt-KG                                         | Saarbrücken |
| GKF Vermögensverwaltungsgesellschaft mbH & Co. 25. Objekt-KG                                         | Saarbrücken |
| GKF Vermögensverwaltungsgesellschaft mbH & Co. 6. Objekt - KG                                        | Saarbrücken |
| GKF Vermögensverwaltungsgesellschaft mbH & Co. 8. Objekt - KG                                        | Saarbrücken |
| GKF Vermögensverwaltungsgesellschaft mbH & Co. Arrondierungsgrundstücke KG                           | Saarbrücken |
| GKF Vermögensverwaltungsgesellschaft mbH & Co. Entwicklungsgrundstücke KG                            | Saarbrücken |
| GKF Vermögensverwaltungsgesellschaft mbH & Co. Gewerbegrundstücke KG                                 | Saarbrücken |
| GKF Vermögensverwaltungsgesellschaft mbH & Co. Grundstücksverwaltung KG                              | Saarbrücken |
| GKF Vermögensverwaltungsgesellschaft mbH & Co. Objekt Bielefeld KG                                   | Saarbrücken |
| GKF Vermögensverwaltungsgesellschaft mbH & Co. Objekt Bochum Otto Straße KG                          | Saarbrücken |
| GKF Vermögensverwaltungsgesellschaft mbH & Co. Objekt Brühl KG                                       | Saarbrücken |
| GKF Vermögensverwaltungsgesellschaft mbH & Co. Objekt Edingen-Neckarhausen KG                        | Saarbrücken |
| GKF Vermögensverwaltungsgesellschaft mbH & Co. Objekt Emden KG                                       | Saarbrücken |
| GKF Vermögensverwaltungsgesellschaft mbH & Co. Objekt Espelkamp KG                                   | Saarbrücken |
| GKF Vermögensverwaltungsgesellschaft mbH & Co. Objekt Finowfurt KG                                   | Saarbrücken |
| GKF Vermögensverwaltungsgesellschaft mbH & Co. Objekt Frankenthal KG                                 | Saarbrücken |
| GKF Vermögensverwaltungsgesellschaft mbH & Co. Objekt Frankenthal-Studernheim KG                     | Saarbrücken |
| GKF Vermögensverwaltungsgesellschaft mbH & Co. Objekt Gäufelden KG                                   | Saarbrücken |
| GKF Vermögensverwaltungsgesellschaft mbH & Co. Objekt Gelsenkirchen KG                               | Saarbrücken |
| GKF Vermögensverwaltungsgesellschaft mbH & Co. Objekt Haibach KG                                     | Saarbrücken |
| GKF Vermögensverwaltungsgesellschaft mbH & Co. Objekt Hamburg-Neuwiedenthal KG                       | Saarbrücken |

|                                                                                         |             |
|-----------------------------------------------------------------------------------------|-------------|
| GKF Vermögensverwaltungsgesellschaft mbH & Co. Objekt Hannover / Davenstedter Straße KG | Saarbrücken |
| GKF Vermögensverwaltungsgesellschaft mbH & Co. Objekt Hannover Fössestraße KG           | Saarbrücken |
| GKF Vermögensverwaltungsgesellschaft mbH & Co. Objekt Hannover-Linden KG                | Saarbrücken |
| GKF Vermögensverwaltungsgesellschaft mbH & Co. Objekt Hannover-Südstadt KG              | Saarbrücken |
| GKF Vermögensverwaltungsgesellschaft mbH & Co. Objekt Herten KG                         | Saarbrücken |
| GKF Vermögensverwaltungsgesellschaft mbH & Co. Objekt Hildesheim-Senking KG             | Saarbrücken |
| GKF Vermögensverwaltungsgesellschaft mbH & Co. Objekt Hillesheim KG                     | Saarbrücken |
| GKF Vermögensverwaltungsgesellschaft mbH & Co. Objekt Hörselgau KG                      | Saarbrücken |
| GKF Vermögensverwaltungsgesellschaft mbH & Co. Objekt Mönchengladbach-Rheydt KG         | Saarbrücken |
| GKF Vermögensverwaltungsgesellschaft mbH & Co. Objekt Oldenburg KG                      | Saarbrücken |
| GKF Vermögensverwaltungsgesellschaft mbH & Co. Objekt Paderborn "Südring Center" KG     | Saarbrücken |
| GKF Vermögensverwaltungsgesellschaft mbH & Co. Objekt Prüm KG                           | Saarbrücken |
| GKF Vermögensverwaltungsgesellschaft mbH & Co. Objekt Rastatt KG                        | Saarbrücken |
| GKF Vermögensverwaltungsgesellschaft mbH & Co. Objekt Ratingen KG                       | Saarbrücken |
| GKF Vermögensverwaltungsgesellschaft mbH & Co. Objekt Rinteln KG                        | Saarbrücken |
| GKF Vermögensverwaltungsgesellschaft mbH & Co. Objekt Rüsselsheim KG                    | Saarbrücken |
| GKF Vermögensverwaltungsgesellschaft mbH & Co. Objekt Saar-Grund KG                     | Saarbrücken |
| GKF Vermögensverwaltungsgesellschaft mbH & Co. Objekt Wiesbaden-Nordenstadt KG          | Saarbrücken |
| GKF Vermögensverwaltungsgesellschaft mbH & Co. Vermietungs- und Handels-KG              | Saarbrücken |
| GKF Vermögensverwaltungsgesellschaft mit beschränkter Haftung                           | Saarbrücken |
| Horten GmbH                                                                             | Düsseldorf  |
| Horten Verwaltungs GmbH                                                                 | Saarbrücken |
| Horten Verwaltungs- GmbH & Co. Objekt Duisburg KG                                       | Saarbrücken |
| Horten Verwaltungs- GmbH & Co. Objekt Düsseldorf Berliner Allee KG                      | Saarbrücken |
| Horten Verwaltungs- GmbH & Co. Objekt Düsseldorf Carschhaus KG                          | Saarbrücken |
| Horten Verwaltungs GmbH & Co. Objekt Erlangen KG                                        | Saarbrücken |
| Horten Verwaltungs GmbH & Co. Objekt Giessen KG                                         | Saarbrücken |
| Horten Verwaltungs- GmbH & Co. Objekt Hannover KG                                       | Saarbrücken |
| Horten Verwaltungs- GmbH & Co. Objekt Heidelberg KG                                     | Saarbrücken |
| Horten Verwaltungs GmbH & Co. Objekt Heilbronn KG                                       | Saarbrücken |
| Horten Verwaltungs- GmbH & Co. Objekt Hildesheim KG                                     | Saarbrücken |
| Horten Verwaltungs GmbH & Co. Objekt Ingolstadt KG                                      | Saarbrücken |
| Horten Verwaltungs GmbH & Co. Objekt Kempten KG                                         | Saarbrücken |
| Horten Verwaltungs- GmbH & Co. Objekt Münster KG                                        | Saarbrücken |
| Horten Verwaltungs GmbH & Co. Objekt Nürnberg KG                                        | Saarbrücken |
| Horten Verwaltungs GmbH & Co. Objekt Oldenburg KG                                       | Saarbrücken |
| Horten Verwaltungs GmbH & Co. Objekt Pforzheim KG                                       | Saarbrücken |
| Horten Verwaltungs GmbH & Co. Objekt Regensburg KG                                      | Saarbrücken |
| Horten Verwaltungs GmbH & Co. Objekt Reutlingen KG                                      | Saarbrücken |
| Horten Verwaltungs GmbH & Co. Objekt Schweinfurt KG                                     | Saarbrücken |
| Horten Verwaltungs- GmbH & Co. Objekt Stuttgart KG                                      | Saarbrücken |
| Horten Verwaltungs- GmbH & Co. Objekt Trier KG                                          | Saarbrücken |
| Horten Verwaltungs- GmbH & Co. Objekt Ulm KG                                            | Saarbrücken |
| Horten Verwaltungs- GmbH & Co. Objekt Wiesbaden KG                                      | Saarbrücken |
| Kaufhalle GmbH                                                                          | Saarbrücken |
| Kaufhalle GmbH & Co. Objekt Hamburg Mönckebergstraße KG                                 | Saarbrücken |
| Kaufhalle GmbH & Co. Objekt Lager Apfelstädt KG                                         | Saarbrücken |
| Kaufhof Warenhaus am Alex GmbH                                                          | Berlin      |

|                                                                                  |             |
|----------------------------------------------------------------------------------|-------------|
| Kaufhof Warenhaus Neubrandenburg GmbH                                            | Saarbrücken |
| Kaufhof Warenhaus Rostock GmbH                                                   | Düsseldorf  |
| MCC Grundstücksverwaltungsgesellschaft mbH & Co. Objekt Berlin-Friedrichshain KG | Saarbrücken |
| MCC Grundstücksverwaltungsgesellschaft mbH & Co. Objekt Hamburg-Altona KG        | Saarbrücken |
| MCC Grundstücksverwaltungsgesellschaft mbH & Co. Objekt München-Pasing KG        | Saarbrücken |
| MCC Grundstücksverwaltungsgesellschaft mbH & Co. Objekt Porta-Westfalica KG      | Saarbrücken |
| MCC Grundstücksverwaltungsgesellschaft mbH & Co. Objekt Schwelm KG               | Saarbrücken |
| MDH Secundus GmbH & Co. KG                                                       | Düsseldorf  |
| MEM METRO Group Energy Production & Management GmbH <sup>2</sup>                 | Düsseldorf  |
| MES METRO Group Energy Solutions GmbH <sup>2</sup>                               | Böblingen   |
| Metro Cash & Carry Grundstücksverwaltungsgesellschaft mbH <sup>3</sup>           | Düsseldorf  |
| METRO Group Asset Management GmbH & Co. KG                                       | Saarbrücken |
| METRO Group Asset Management GmbH <sup>2</sup>                                   | Saarbrücken |
| METRO Group Asset Management Services GmbH                                       | Saarbrücken |
| METRO Group Real Estate Holding GmbH                                             | Düsseldorf  |
| METRO Group Retail Real Estate GmbH                                              | Düsseldorf  |
| METRO Group Wholesale Real Estate GmbH                                           | Düsseldorf  |
| METRO Leasing GmbH                                                               | Saarbrücken |
| MFM METRO Group Facility Management GmbH                                         | Düsseldorf  |
| PIL Grundstücksverwaltung GmbH                                                   | Saarbrücken |
| Pro. FS GmbH                                                                     | Böblingen   |
| Renate Grundstücksverwaltungsgesellschaft mbH                                    | Saarbrücken |
| RUDU Verwaltungsgesellschaft mbH                                                 | Düsseldorf  |
| Saalbau-Verein Ulm GmbH                                                          | Saarbrücken |
| Schaper Grundbesitz-Verwaltungsgesellschaft mbH                                  | Saarbrücken |
| Secundus Grundstücksverwertungs-GmbH & Co. Objekt Stuttgart-Königstraße KG       | Saarbrücken |
| STW Grundstücksverwaltung Gesellschaft mit beschränkter Haftung                  | Saarbrücken |
| TANDOS Grundstücks-Verwaltungsgesellschaft mbH                                   | Saarbrücken |
| TKC Objekt Cottbus GmbH & Co. KG                                                 | Saarbrücken |
| Wirichs Immobilien GmbH                                                          | Saarbrücken |
| Wirichs Verwaltungsgesellschaft mbH & Co. Objekt Schwelm KG                      | Saarbrücken |
| Wirichs Verwaltungsgesellschaft mbH & Co. Objekt Voerde und Kamen KG             | Saarbrücken |
| Wolfgang Wirichs GmbH                                                            | Saarbrücken |
| Zentra Beteiligungsgesellschaft mit beschränkter Haftung                         | Saarbrücken |
| Zentra-Grundstücksgesellschaft mbH                                               | Saarbrücken |

<sup>1</sup> Rumpfgeschäftsjahr vom 1.1. bis 31.3.2010

<sup>2</sup> Die Gesellschaft macht von den Befreiungsmöglichkeiten des § 264 Abs. 3 HGB nur für den Lagebericht Gebrauch

<sup>3</sup> Rumpfgeschäftsjahr 1.1. bis 31.1.2010, erneutes Rumpfgeschäftsjahr 1.2. bis 31.12.2010

## 54. Übersicht der wesentlichen vollkonsolidierten Konzerngesellschaften

| Name                                                                | Sitz                          | Konzernanteile<br>in % | Umsatzerlöse <sup>1</sup><br>Mio. € |
|---------------------------------------------------------------------|-------------------------------|------------------------|-------------------------------------|
| <b>Holding-Gesellschaften</b>                                       |                               |                        |                                     |
| METRO AG                                                            | Düsseldorf, Deutschland       |                        | 0                                   |
| METRO Kaufhaus und Fachmarkt Holding GmbH                           | Düsseldorf, Deutschland       | 100,00                 | 0                                   |
| METRO Groß- und Lebensmitteleinzelhandel Holding GmbH               | Düsseldorf, Deutschland       | 100,00                 | 0                                   |
| <b>Cash &amp; Carry</b>                                             |                               |                        |                                     |
| METRO Cash & Carry International Holding GmbH                       | Vösendorf, Österreich         | 100,00                 | 0                                   |
| METRO Großhandelsgesellschaft mbH                                   | Düsseldorf, Deutschland       | 100,00                 | 4.578                               |
| METRO Cash & Carry France S.A.S.                                    | Nanterre, Frankreich          | 100,00                 | 3.900                               |
| METRO Cash & Carry 000                                              | Moskau, Russland              | 100,00                 | 2.931                               |
| Makro Cash and Carry Polska S.A.                                    | Warschau, Polen               | 100,00                 | 1.970                               |
| METRO Italia Cash and Carry S. p. A.                                | San Donato Milanese, Italien  | 100,00                 | 1.836                               |
| Makro Autoservicio Mayorista S. A. U.                               | Madrid, Spanien               | 100,00                 | 1.317                               |
| METRO Jinjiang Cash & Carry Co., Ltd.                               | Shanghai, China               | 90,00                  | 1.304                               |
| METRO Distributie Nederland B. V.                                   | Diemen, Niederlande           | 100,00                 | 1.259                               |
| MAKRO Cash & Carry Belgium NV                                       | Antwerpen, Belgien            | 100,00                 | 1.247                               |
| MAKRO Cash & Carry CR s.r.o.                                        | Prag, Tschechien              | 100,00                 | 1.166                               |
| METRO CASH & CARRY ROMANIA SRL                                      | Bukarest, Rumänien            | 85,00                  | 1.139                               |
| Metro Grosmarket Bakirköy Alisveris Hizmetleri Ticaret Ltd. Sirketi | Istanbul, Türkei              | 100,00                 | 998                                 |
| <b>SB-Warenhäuser</b>                                               |                               |                        |                                     |
| real,- SB-Warenhaus GmbH                                            | Alzey, Deutschland            | 100,00                 | 6.611                               |
| Zweite real,- SB-Warenhaus GmbH                                     | Alzey, Deutschland            | 100,00                 | 1.606                               |
| real,- Sp. z o.o.i Spółka spółka komandytowa                        | Warschau, Polen               | 100,00                 | 1.404                               |
| <b>Elektrofachmärkte</b>                                            |                               |                        |                                     |
| Media-Saturn-Holding GmbH                                           | Ingolstadt, Deutschland       | 75,41                  | 9.091                               |
| Mediamarket S. p. A.                                                | Curno, Italien                | 75,41                  | 2.524                               |
| MEDIA MARKT SATURN, S.A. UNIPERSONAL                                | El Prat de Llobregat, Spanien | 75,41                  | 1.793                               |
| Media Markt Saturn Holding Nederland B. V.                          | Rotterdam, Niederlande        | 75,41                  | 1.206                               |
| Media-Saturn Beteiligungsges. m.b.H.                                | Vösendorf, Österreich         | 75,41                  | 1.079                               |
| <b>Warenhäuser</b>                                                  |                               |                        |                                     |
| Galeria Kaufhof GmbH                                                | Köln, Deutschland             | 100,00                 | 3.083                               |
| INNOVATION S.A.                                                     | Brüssel, Belgien              | 100,00                 | 333                                 |
| <b>Sonstige Gesellschaften</b>                                      |                               |                        |                                     |
| MGL METRO Group Logistics Warehousing GmbH                          | Sarstedt, Deutschland         | 100,00                 | 5.471                               |
| MGB METRO Group Buying HK Limited                                   | Hongkong, China               | 100,00                 | 893                                 |
| METRO Group Asset Management GmbH & Co. KG                          | Saarbrücken, Deutschland      | 98,04                  | 0                                   |
| MIAG Commanditaire Vennootschap                                     | Diemen, Niederlande           | 100,00                 | 0                                   |
| METRO SYSTEMS GmbH                                                  | Düsseldorf, Deutschland       | 100,00                 | 0                                   |

<sup>1</sup> Inklusive einbezogener nationaler Tochtergesellschaften



## 55. Organe der METRO AG und deren Mandate<sup>1</sup>

### Mitglieder des Aufsichtsrats

#### Prof. Dr. Jürgen Kluge (Vorsitzender)

Seit 5. Mai 2010

Vorsitzender des Vorstands der Franz Haniel & Cie. GmbH

- a) Celesio AG (Vorsitzender seit 3. Januar 2010)  
SMS GmbH, seit 15. Februar 2010  
TAKKT AG (stellv. Vorsitzender), seit 4. Mai 2010
- b) Keine

#### Franz M. Haniel (Vorsitzender)

Bis 5. Mai 2010

Vorsitzender des Aufsichtsrats der Franz Haniel & Cie. GmbH

- a) BMW AG  
Delton AG (stellv. Vorsitzender)  
Franz Haniel & Cie. GmbH (Vorsitzender)  
Heraeus Holding GmbH  
secunet Security Networks AG
- b) TBG Limited, Malta (ehemals TBG Holdings N.V., Curaçao, Niederländische Antillen)

#### Dr. Wulf H. Bernotat

Ehemaliger Vorsitzender des Vorstands der E.ON AG

- a) Allianz SE  
Bertelsmann AG  
Deutsche Telekom AG  
E.ON Energie AG (Vorsitzender), bis 30. April 2010  
E.ON Ruhrgas AG (Vorsitzender), bis 5. Juli 2010
- b) E.ON Nordic AB, Malmö, Schweden – Board of Directors (Chairman), bis 4. Januar 2010  
E.ON Sverige AB, Malmö, Schweden – Board of Directors (Chairman), bis 24. Juni 2010  
E.ON US Investments Corp., Delaware (OH), USA – Board of Directors (Chairman), bis 30. April 2010

#### Klaus Bruns (stellv. Vorsitzender)

Vorsitzender des Konzernbetriebsrats der METRO AG

Vorsitzender des Gesamtbetriebsrats der

Galeria Kaufhof GmbH

- a) Galeria Kaufhof GmbH (stellv. Vorsitzender)
- b) Tourismus & Marketing Oberhausen GmbH – Aufsichtsrat

#### Ulrich Dalibor

Bundesfachgruppenleiter Einzelhandel der

Gewerkschaft ver.di

- a) Zweite real,- SB-Warenhaus GmbH (stellv. Vorsitzender)
- b) Keine

#### Jürgen Fitschen

Mitglied des Vorstands der Deutsche Bank AG

- a) Schott AG  
Deutsche Bank Privat- und Geschäftskunden AG
- b) Deutsche Bank A.Ş., Istanbul, Türkei – Yönetim Kurulu Başkanı (Vorsitzender)  
Deutsche Bank S.A./N.V., Brüssel, Belgien – Conseil d'Administration/Raad van Bestuur (Vorsitzender)  
Deutsche Bank S.p.A., Mailand, Italien – Consiglio di Sorveglianza (Presidente)  
Kühne + Nagel International AG, Schindellegi, Schweiz – Verwaltungsrat  
OOO Deutsche Bank, Moskau, Russland – наблюдательный (nabljudatel'nyj) (Vorsitzender)

#### Hubert Frieling

Bereichsleiter Entgeltabrechnung

der real,- SB-Warenhaus GmbH

- a) Keine
- b) Keine

#### Prof. Dr. Dr. h. c. mult. Erich Greipl

Geschäftsführer der Otto Beisheim Group GmbH & Co. KG

- a) Galeria Kaufhof GmbH  
Metro Großhandelsgesellschaft mbH  
real,- Holding GmbH  
Zweite real,- SB-Warenhaus GmbH
- b) Bürgschaftsbank Bayern GmbH – Verwaltungsrat (erster stellv. Vorsitzender)  
BHS Verwaltungs AG, Baar, Schweiz – Verwaltungsrat (Präsident)

<sup>1</sup> Stand der Mandate: 28. Februar 2011 beziehungsweise jeweils das Datum des Ausscheidens aus dem Organ der METRO AG

a) Mitgliedschaften in anderen gesetzlich zu bildenden Aufsichtsräten i. S. d. § 125 Abs. 1 Satz 5, 1. Alt. AktG

b) Mitgliedschaften in vergleichbaren deutschen und internationalen Kontrollgremien von Wirtschaftsunternehmen i. S. d. § 125 Abs. 1 Satz 5, 2. Alt. AktG

**Andreas Herwarth**

Kfm. Angestellter, METRO AG

Vorsitzender des Betriebsrats der METRO AG

- a) Keine
- b) Grundstücksgesellschaft Willich mbH – Aufsichtsrat  
(Vorsitzender)

**Uwe Hoepfel**

Stellv. Vorsitzender des Gesamtbetriebsrats der

Galeria Kaufhof GmbH

Vorsitzender des Betriebsrats der Galeria Kaufhof GmbH,  
Standort Gießen

- a) Galeria Kaufhof GmbH
- b) Keine

**Werner Klockhaus**

Stellv. Vorsitzender des Konzernbetriebsrats  
der METRO AG

Stellv. Vorsitzender des Gesamtbetriebsrats  
der real,- SB-Warenhaus GmbH

- a) Keine
- b) Keine

**Peter Küpfer**

Selbstständiger Unternehmensberater

- a) Keine
- b) Gebr. Schmidt GmbH & Co. KG – Beirat  
ARH Resort Holding AG, Zürich, Schweiz – Verwaltungsrat  
Bank Julius Bär & Co. AG, Zürich, Schweiz – Verwaltungsrat  
Brändle, Missura & Partner Informatik AG, Zürich,  
Schweiz – Verwaltungsrat  
Breda Consulting AG, Zürich, Schweiz – Verwaltungsrat  
GE Money Bank AG, Zürich, Schweiz – Verwaltungsrat  
(Präsident seit 1. Dezember 2010)  
Holcim Ltd., Jona, Schweiz – Verwaltungsrat  
Julius Bär Gruppe AG, Zürich, Schweiz – Verwaltungsrat  
Karl Steiner AG, Zürich, Schweiz – Verwaltungsrat,  
bis 4. Mai 2010  
Karl Steiner Holding AG, Zürich, Schweiz – Verwaltungsrat  
(Vizepräsident)  
Peter Steiner Holding AG, Zürich, Schweiz – Verwaltungsrat  
Supra Holding AG, Baar, Schweiz – Verwaltungsrat  
Travel Charme Hotels & Resorts Holding AG, Zürich,  
Schweiz – Verwaltungsrat

**Rainer Kuschewski**

Gewerkschaftssekretär ver.di Bundesverwaltung

- a) real,- Holding GmbH
- b) Keine

**Marie-Christine Lombard**

Mitglied des Vorstands der TNT N.V.

Group Managing Director TNT Express

- a) Keine
- b) BPCE S.A., Paris, Frankreich – Conseil de Surveillance,  
seit 16. Dezember 2010

**Prof. Dr. Klaus Mangold**

Vorsitzender des Aufsichtsrats der Rothschild GmbH

- a) Continental AG  
Drees & Sommer AG, bis 6. Dezember 2010  
TUI AG, seit 7. Januar 2010  
Universitätsklinikum Freiburg (Anstalt des öffentlichen Rechts)
- b) Rothschild GmbH – Aufsichtsrat (Vorsitzender)  
Alstom S.A., Paris, Frankreich – Conseil d'Administration  
Chubb Corporation, Warren (NJ), USA – Board of Directors, bis 28. April 2010  
Leipziger Messe GmbH – Aufsichtsrat  
Rothschild Europe B.V., Amsterdam, Niederlande – Raad van Commissarissen (Vice-Chairman)

**Dr.-Ing. e. h. Bernd Pischetsrieder**

Berater des Vorstands der Volkswagen AG

- a) Münchener Rückversicherungs-Gesellschaft Aktiengesellschaft
- b) Fürst Fugger Privatbank KG – Aufsichtsrat  
Tetra Laval International S.A., Pully, Schweiz – Board of Directors

**M. P. M. (Theo) de Raad**

Stellvertretender Aufsichtsratsvorsitzender der CSM N.V.

- a) Keine
- b) CSM N.V., Diemen, Niederlande – Raad van Commissarissen (stellv. Vorsitzender)  
HAL Holding N.V., Willemstad, Curaçao, Niederländische Antillen – Raad van Commissarissen  
Vion N.V., Son en Breugel, Niederlande – Raad van Commissarissen  
Vollenhoven Olie Group B.V., Tilburg, Niederlande – Raad van Commissarissen

**Xaver Schiller**

Vorsitzender des Betriebsrats der Metro Cash & Carry Großmärkte München-Brunnthal und München-Schwabing

- a) Metro Großhandelsgesellschaft mbH
- b) Keine

**Dr. jur. Hans-Jürgen Schinzler**

Vorsitzender des Aufsichtsrats der Münchener Rückversicherungs-Gesellschaft Aktiengesellschaft

- a) Münchener Rückversicherungs-Gesellschaft Aktiengesellschaft (Vorsitzender)
- b) UniCredit S.p.A., Genua, Italien – Consiglio di Amministrazione

**Peter Stieger**

Vorsitzender des Gesamtbetriebsrats der real,- SB-Warenhaus GmbH

- a) real,- Holding GmbH (stellv. Vorsitzender)
- b) Keine

**Angelika Will**

Vorsitzende des Betriebsrats des Metro Cash & Carry Großmarkts Düsseldorf

- a) Metro Großhandelsgesellschaft mbH
- b) Keine

### **Ausschüsse des Aufsichtsrats und deren Besetzung**

#### **Aufsichtsratspräsidium**

Prof. Dr. Jürgen Kluge (Vorsitzender)  
Klaus Bruns (stellv. Vorsitzender)  
Dr. Wulf H. Bernotat  
Werner Klockhaus

#### **Personalausschuss**

Prof. Dr. Jürgen Kluge (Vorsitzender)  
Klaus Bruns (stellv. Vorsitzender)  
Dr. Wulf H. Bernotat  
Werner Klockhaus

#### **Bilanz- und Prüfungsausschuss**

Dr. jur. Hans-Jürgen Schinzler (Vorsitzender)  
Klaus Bruns (stellv. Vorsitzender)  
Prof. Dr. Dr. h. c. mult. Erich Greipl  
Prof. Dr. Jürgen Kluge  
Xaver Schiller  
Peter Stieger

#### **Nominierungsausschuss**

Prof. Dr. Jürgen Kluge (Vorsitzender)  
Dr.-Ing. e. h. Bernd Pischetsrieder  
Dr. jur. Hans-Jürgen Schinzler

#### **Vermittlungsausschuss gem. § 27 Abs. 3 MitbestG**

Prof. Dr. Jürgen Kluge  
Klaus Bruns  
Prof. Dr. Dr. h. c. mult. Erich Greipl  
Werner Klockhaus

### Mitglieder des Vorstands

#### Dr. Eckhard Cordes

(Vorsitzender, Arbeitsdirektor seit 2. März 2010)

- a) Galeria Kaufhof GmbH  
real,- Holding GmbH (Vorsitzender), bis 12. April 2010  
Schaeffler GmbH, seit 28. Juni 2010
- b) MediaMarkt (China) International Retail Holding Limited,  
Hongkong, China – Board of Directors, seit 1. Oktober 2010  
Tertia Handelsbeteiligungsgesellschaft mbH – Aufsichts-  
rat (Vorsitzender)

#### Olaf Koch

- a) Galeria Kaufhof GmbH (Vorsitzender),  
seit 21. September 2010  
Hugo Boss AG, bis 20. Februar 2010
- b) Assevermag AG, Baar, Schweiz – Verwaltungsrat  
(Präsident), bis 22. September 2010  
Metro Euro Finance B.V., Venlo, Niederlande – Raad van  
Commissarissen  
Metro Finance B.V., Venlo, Niederlande – Raad van  
Commissarissen  
Metro International AG, Baar, Schweiz – Verwaltungsrat  
(Präsident), bis 26. Juli 2010  
Metro Reinsurance N.V., Amsterdam, Niederlande – Raad  
van Commissarissen  
MGP METRO Group Account Processing International AG,  
Baar, Schweiz – Verwaltungsrat (Präsident),  
bis 22. September 2010

#### Joël Saveuse

- a) Metro Großhandelsgesellschaft mbH (Vorsitzender), seit  
26. März 2010  
real,- Holding GmbH (Vorsitzender), seit 13. April 2010  
Zweite real,- SB-Warenhaus GmbH (Vorsitzender),  
seit 13. April 2010
- b) HF Company S.A., Tauxigny, Frankreich – Conseil  
d'Administration  
Makro Cash and Carry Polska SA, Warschau, Polen –  
Rada Nadzorcza, seit 23. Juni 2010  
Metro Cash & Carry International Holding GmbH,  
Vösendorf, Österreich – Aufsichtsrat, seit 28. April 2010  
Metro Distributie Nederland B.V., Amsterdam, Nieder-  
lande – Raad van Commissarissen, seit 1. Juni 2010  
Metro Holding France S.A., Vitry-sur-Seine, Frankreich –  
Conseil d'Administration (Präsident), seit 1. Mai 2010  
MGB METRO Group Buying HK Limited, Hongkong, China –  
Board of Directors  
MGL METRO Group Logistics GmbH – Beirat  
(Vorsitzender), bis 31. Dezember 2010

**Frans W. H. Muller**

- a) Metro Großhandelsgesellschaft mbH (Vorsitzender), bis 25. März 2010
- b) Makro Cash and Carry Polska SA, Warschau, Polen – Rada Nadzorcza, bis 23. Juni 2010  
MediaMarkt (China) International Retail Holding Limited, Hongkong, China – Board of Directors, seit 1. Oktober 2010  
Metro Cash & Carry International Holding GmbH, Vösendorf, Österreich – Aufsichtsrat (Vorsitzender)  
Metro Distributie Nederland B.V., Amsterdam, Niederlande – Raad van Commissarissen, bis 1. Juni 2010  
METRO Group Asset Management GmbH & Co. KG – Gesellschafterausschuss (Vorsitzender), seit 1. Oktober 2010  
Metro Holding France S.A., Vitry-sur-Seine, Frankreich – Conseil d'Administration (Präsident), bis 30. April 2010  
Metro International AG, Baar, Schweiz – Verwaltungsrat, bis 26. Juli 2010  
Metro Jinjiang Cash & Carry Co., Ltd., Shanghai, China – Board of Directors  
MGP METRO Group Account Processing International AG, Baar, Schweiz – Verwaltungsrat, bis 22. September 2010

**Zygmunt Mierdorf (Arbeitsdirektor)**

- Bis 1. März 2010
- a) Praktiker Bau- und Heimwerkermärkte Holding AG  
Praktiker Deutschland GmbH  
real,- Holding GmbH, bis 1. März 2010  
TÜV SÜD AG
  - b) Loyalty Partner GmbH – Aufsichtsrat, bis 30. April 2010  
Wagner International AG, Altstätten,  
Schweiz – Verwaltungsrat

**Thomas Unger (stellv. Vorsitzender)**

- Bis 30. September 2010
- a) Galeria Kaufhof GmbH (Vorsitzender), bis 20. September 2010  
real,- Holding GmbH, bis 31. März 2010
  - b) MediaMarkt (China) International Retail Holding Limited, Hongkong, China – Board of Directors, bis 30. September 2010  
METRO Group Asset Management GmbH & Co. KG – Gesellschafterausschuss (Vorsitzender), bis 30. September 2010  
Metro International AG, Baar, Schweiz – Verwaltungsrat, bis 26. Juli 2010

**56. Anteilsbesitz des METRO AG-Konzerns zum 31.12.2010 gemäß § 313 HGB**

| Name                                                                         | Sitz        | Land           | Anteile<br>am Kapital<br>in % |
|------------------------------------------------------------------------------|-------------|----------------|-------------------------------|
| <b>Konsolidierte Tochterunternehmen</b>                                      |             |                |                               |
| "Buch und Zeit" Verlagsgesellschaft mit beschränkter Haftung                 | Köln        | Deutschland    | 100,00                        |
| 1. Schaper Objekt GmbH & Co. Wächtersbach KG                                 | Düsseldorf  | Deutschland    | 100,00                        |
| 2. CR Immobilien-Vermietungsgesellschaft mbH & Co. Objekt Brandenburg KG     | Düsseldorf  | Deutschland    | 1,00 <sup>1</sup>             |
| 2. Schaper Objekt GmbH & Co. Memmingen KG                                    | Düsseldorf  | Deutschland    | 100,00                        |
| 24-7 ENTERTAINMENT ApS                                                       | Kopenhagen  | Dänemark       | 100,00                        |
| 24-7 Entertainment GmbH                                                      | Berlin      | Deutschland    | 71,79                         |
| 24-7 ENTERTAINMENT SERVICES LIMITED                                          | Bournemouth | Großbritannien | 100,00                        |
| 24-7 MusicShop (Schweiz) GmbH                                                | Freienbach  | Schweiz        | 95,00                         |
| 3. Schaper Objekt GmbH & Co. Erlangen KG                                     | Düsseldorf  | Deutschland    | 100,00                        |
| ACTIUM Leasobjekt GmbH & Co. Objekt Altötting KG                             | Düsseldorf  | Deutschland    | 0,00 <sup>1</sup>             |
| ADAGIO 2. Grundstücksverwaltungsgesellschaft mbH                             | Saarbrücken | Deutschland    | 100,00                        |
| ADAGIO 3. Grundstücksverwaltungsgesellschaft mbH                             | Saarbrücken | Deutschland    | 100,00                        |
| ADAGIO Grundstücksverwaltungsgesellschaft mbH                                | Saarbrücken | Deutschland    | 100,00                        |
| Adolf Schaper GmbH & Co. Grundbesitz-KG                                      | Saarbrücken | Deutschland    | 100,00                        |
| AIB Verwaltungs GmbH                                                         | Düsseldorf  | Deutschland    | 100,00                        |
| ARKON Grundbesitzverwaltung GmbH                                             | Saarbrücken | Deutschland    | 100,00                        |
| ASH Grundstücksverwaltung XXX GmbH                                           | Saarbrücken | Deutschland    | 100,00                        |
| ASSET Grundbesitz GmbH                                                       | Düsseldorf  | Deutschland    | 100,00                        |
| ASSET Immobilienbeteiligungen GmbH                                           | Saarbrücken | Deutschland    | 100,00                        |
| ASSET Verwaltungs-GmbH                                                       | Saarbrücken | Deutschland    | 100,00                        |
| ASSET Verwaltungs-GmbH & Co. Objekt Aachen II KG                             | Saarbrücken | Deutschland    | 94,00                         |
| ASSET Verwaltungs-GmbH & Co. Objekt Aachen, Adalbertstraße 20-30 KG          | Saarbrücken | Deutschland    | 100,00                        |
| ASSET Verwaltungs-GmbH & Co. Objekt Aschaffenburg KG                         | Saarbrücken | Deutschland    | 100,00                        |
| ASSET Verwaltungs-GmbH & Co. Objekt Bergen-Enkheim KG                        | Saarbrücken | Deutschland    | 100,00                        |
| ASSET Verwaltungs-GmbH & Co. Objekt Bonn, Acherstraße KG                     | Saarbrücken | Deutschland    | 100,00                        |
| ASSET Verwaltungs-GmbH & Co. Objekt Darmstadt KG                             | Saarbrücken | Deutschland    | 100,00                        |
| ASSET Verwaltungs-GmbH & Co. Objekt Dortmund KG                              | Saarbrücken | Deutschland    | 100,00                        |
| ASSET Verwaltungs-GmbH & Co. Objekt Düsseldorf, Königsallee 1 KG             | Saarbrücken | Deutschland    | 100,00                        |
| ASSET Verwaltungs-GmbH & Co. Objekt Frankfurt Hauptwache KG                  | Saarbrücken | Deutschland    | 94,00                         |
| ASSET Verwaltungs-GmbH & Co. Objekt Freiburg im Breisgau KG                  | Saarbrücken | Deutschland    | 100,00                        |
| ASSET Verwaltungs-GmbH & Co. Objekt Gelsenkirchen KG                         | Saarbrücken | Deutschland    | 100,00                        |
| ASSET Verwaltungs-GmbH & Co. Objekt Hamburg-Poppenbüttel, Kritenbarg 10 KG   | Saarbrücken | Deutschland    | 100,00                        |
| ASSET Verwaltungs-GmbH & Co. Objekt Hanau KG                                 | Saarbrücken | Deutschland    | 100,00                        |
| ASSET Verwaltungs-GmbH & Co. Objekt Hannover KG                              | Saarbrücken | Deutschland    | 100,00                        |
| ASSET Verwaltungs-GmbH & Co. Objekt Kassel KG                                | Saarbrücken | Deutschland    | 100,00                        |
| ASSET Verwaltungs-GmbH & Co. Objekt Kassel, Obere Königstraße KG             | Saarbrücken | Deutschland    | 94,00                         |
| ASSET Verwaltungs-GmbH & Co. Objekt Köln, Minoritenstraße KG                 | Saarbrücken | Deutschland    | 94,00                         |
| ASSET Verwaltungs-GmbH & Co. Objekt Köln-Kalk, Kalker Hauptstraße 118-122 KG | Saarbrücken | Deutschland    | 100,00                        |
| ASSET Verwaltungs-GmbH & Co. Objekt Leipzig KG                               | Saarbrücken | Deutschland    | 100,00                        |
| ASSET Verwaltungs-GmbH & Co. Objekt Mainz KG                                 | Saarbrücken | Deutschland    | 100,00                        |
| ASSET Verwaltungs-GmbH & Co. Objekt Mönchengladbach KG                       | Saarbrücken | Deutschland    | 100,00                        |
| ASSET Verwaltungs-GmbH & Co. Objekt München Pelkovenstraße 155 KG            | Saarbrücken | Deutschland    | 100,00                        |
| ASSET Verwaltungs-GmbH & Co. Objekt Nürnberg, Königstraße 42-52 KG           | Saarbrücken | Deutschland    | 100,00                        |

|                                                                                                      |                   |             |                   |
|------------------------------------------------------------------------------------------------------|-------------------|-------------|-------------------|
| ASSET Verwaltungs-GmbH & Co. Objekt Oberhausen Centroallee KG                                        | Saarbrücken       | Deutschland | 100,00            |
| ASSET Verwaltungs-GmbH & Co. Objekt Offenbach KG                                                     | Saarbrücken       | Deutschland | 100,00            |
| ASSET Verwaltungs-GmbH & Co. Objekt Saarbrücken, Bahnhofstraße 82-92, 98-100 KG                      | Saarbrücken       | Deutschland | 100,00            |
| ASSET Verwaltungs-GmbH & Co. Objekt Siegburg KG                                                      | Saarbrücken       | Deutschland | 100,00            |
| ASSET Verwaltungs-GmbH & Co. Objekt Stuttgart, Königstraße 6 KG                                      | Saarbrücken       | Deutschland | 100,00            |
| ASSET Verwaltungs-GmbH & Co. Objekt Stuttgart-Bad Cannstatt Badstraße, Marktstraße 3 KG              | Saarbrücken       | Deutschland | 100,00            |
| ASSET Verwaltungs-GmbH & Co. Objekt Würzburg KG                                                      | Saarbrücken       | Deutschland | 100,00            |
| ASSET Zweite Immobilienbeteiligungen GmbH                                                            | Düsseldorf        | Deutschland | 100,00            |
| Assevermag AG                                                                                        | Baar              | Schweiz     | 79,20             |
| Avilo Marketing Gesellschaft m. b. H.                                                                | Vösendorf         | Österreich  | 100,00            |
| AXXE Reisegastronomie GmbH                                                                           | Köln              | Deutschland | 100,00            |
| Bassa Grundstücksverwaltungsgesellschaft mbH                                                         | Saarbrücken       | Deutschland | 100,00            |
| BAUGRU Immobilien - Beteiligungsgesellschaft mit beschränkter Haftung & Co. Grundstücksverwaltung KG | Saarbrücken       | Deutschland | 100,00            |
| Blabert Grundstücksverwaltungsgesellschaft mbH                                                       | Saarbrücken       | Deutschland | 94,00             |
| BLK Grundstücksverwaltung GmbH                                                                       | Saarbrücken       | Deutschland | 100,00            |
| C + C Schaper GmbH                                                                                   | Hannover          | Deutschland | 100,00            |
| Campus Store GmbH                                                                                    | Alzey             | Deutschland | 100,00            |
| CH-Vermögensverwaltung GmbH                                                                          | Düsseldorf        | Deutschland | 100,00            |
| CITY CENTER S.P.A.                                                                                   | Cinisello Balsamo | Italien     | 100,00            |
| CJSC METRO Management Ukraine                                                                        | Kiew              | Ukraine     | 100,00            |
| Cofalux Immobilière S. A.                                                                            | Strassen          | Luxemburg   | 100,00            |
| COM.TVmarkt Verwaltungs-GmbH                                                                         | Ingolstadt        | Deutschland | 100,00            |
| Convergenta Werbeagentur GmbH                                                                        | München           | Deutschland | 100,00            |
| Dalian Metro Warehouse Management Co., Ltd.                                                          | Dalian            | China       | 100,00            |
| DAYCONOMY GmbH                                                                                       | Düsseldorf        | Deutschland | 100,00            |
| Deelnemingsmaatschappij Arodema B.V.                                                                 | Diemen            | Niederlande | 100,00            |
| Deutsche SB-Kauf GmbH & Co. KG                                                                       | Saarbrücken       | Deutschland | 100,00            |
| DFI Verwaltungs GmbH                                                                                 | Saarbrücken       | Deutschland | 100,00            |
| DINEA Gastronomie GmbH                                                                               | Köln              | Deutschland | 100,00            |
| DINEA Gastronomie GmbH                                                                               | Linz              | Österreich  | 100,00            |
| Dorina Immobilien-Vermietungsgesellschaft mbH                                                        | Düsseldorf        | Deutschland | 100,00            |
| Doxa Grundstücksverwaltungsgesellschaft mbH & Co. Objekt Mönchengladbach KG                          | Mainz             | Deutschland | 0,00 <sup>1</sup> |
| Duplex Grundstücksverwaltungsgesellschaft mbH & Co. Objekt Schaper Bremen-Habenhausen KG             | Mainz             | Deutschland | 0,00 <sup>1</sup> |
| emotions GmbH                                                                                        | Köln              | Deutschland | 100,00            |
| Fromentus Grundstücksverwaltungsgesellschaft mbH                                                     | Mainz             | Deutschland | 0,00 <sup>1</sup> |
| Fulltrade International GmbH                                                                         | Düsseldorf        | Deutschland | 100,00            |
| FZB Fachmarktzentrum Bous Verwaltungsgesellschaft mbH & Co. KG                                       | Saarbrücken       | Deutschland | 100,00            |
| FZG Fachmarktzentrum Guben Verwaltungsgesellschaft mbH                                               | Saarbrücken       | Deutschland | 50,00             |
| FZG Fachmarktzentrum Guben Verwaltungsgesellschaft mbH & Co. Vermietungs-KG                          | Saarbrücken       | Deutschland | 50,00             |
| Galeria Kaufhof GmbH                                                                                 | Köln              | Deutschland | 100,00            |
| GBS Gesellschaft für Unternehmensbeteiligungen mbH                                                   | Saarbrücken       | Deutschland | 100,00            |
| GBS Immobilier France SAS                                                                            | Sarreguemines     | Frankreich  | 100,00            |
| GBS Objekt 14 Sp. z o.o.                                                                             | Warschau          | Polen       | 100,00            |
| GBS Objekt 41 Sp. z o.o.                                                                             | Warschau          | Polen       | 100,00            |
| GEMINI Personalservice GmbH                                                                          | Köln              | Deutschland | 100,00            |
| GKF Vermögensverwaltungsgesellschaft mbH & Co. 10. Objekt-KG                                         | Saarbrücken       | Deutschland | 100,00            |
| GKF Vermögensverwaltungsgesellschaft mbH & Co. 25. Objekt-KG                                         | Saarbrücken       | Deutschland | 100,00            |
| GKF Vermögensverwaltungsgesellschaft mbH & Co. 6. Objekt - KG                                        | Saarbrücken       | Deutschland | 100,00            |



|                                                                                          |             |             |        |
|------------------------------------------------------------------------------------------|-------------|-------------|--------|
| GKF Vermögensverwaltungsgesellschaft mbH & Co. 8. Objekt - KG                            | Saarbrücken | Deutschland | 100,00 |
| GKF Vermögensverwaltungsgesellschaft mbH & Co. Arrondierungsgrundstücke KG               | Saarbrücken | Deutschland | 100,00 |
| GKF Vermögensverwaltungsgesellschaft mbH & Co. Entwicklungsgrundstücke KG                | Saarbrücken | Deutschland | 100,00 |
| GKF Vermögensverwaltungsgesellschaft mbH & Co. Gewerbegrundstücke KG                     | Saarbrücken | Deutschland | 100,00 |
| GKF Vermögensverwaltungsgesellschaft mbH & Co. Grundstücksverwaltung KG                  | Saarbrücken | Deutschland | 100,00 |
| GKF Vermögensverwaltungsgesellschaft mbH & Co. Objekt Bielefeld KG                       | Saarbrücken | Deutschland | 94,00  |
| GKF Vermögensverwaltungsgesellschaft mbH & Co. Objekt Bochum Otto Straße KG              | Saarbrücken | Deutschland | 100,00 |
| GKF Vermögensverwaltungsgesellschaft mbH & Co. Objekt Brühl KG                           | Saarbrücken | Deutschland | 100,00 |
| GKF Vermögensverwaltungsgesellschaft mbH & Co. Objekt Edingen-Neckarhausen KG            | Saarbrücken | Deutschland | 100,00 |
| GKF Vermögensverwaltungsgesellschaft mbH & Co. Objekt Emden KG                           | Saarbrücken | Deutschland | 100,00 |
| GKF Vermögensverwaltungsgesellschaft mbH & Co. Objekt Espelkamp KG                       | Saarbrücken | Deutschland | 94,00  |
| GKF Vermögensverwaltungsgesellschaft mbH & Co. Objekt Finowfurt KG                       | Saarbrücken | Deutschland | 100,00 |
| GKF Vermögensverwaltungsgesellschaft mbH & Co. Objekt Frankenthal KG                     | Saarbrücken | Deutschland | 100,00 |
| GKF Vermögensverwaltungsgesellschaft mbH & Co. Objekt Frankenthal-Studernheim KG         | Saarbrücken | Deutschland | 100,00 |
| GKF Vermögensverwaltungsgesellschaft mbH & Co. Objekt Gäufelden KG                       | Saarbrücken | Deutschland | 100,00 |
| GKF Vermögensverwaltungsgesellschaft mbH & Co. Objekt Gelsenkirchen KG                   | Saarbrücken | Deutschland | 99,00  |
| GKF Vermögensverwaltungsgesellschaft mbH & Co. Objekt Haibach KG                         | Saarbrücken | Deutschland | 100,00 |
| GKF Vermögensverwaltungsgesellschaft mbH & Co. Objekt Hamburg-Neuwiedenthal KG           | Saarbrücken | Deutschland | 100,00 |
| GKF Vermögensverwaltungsgesellschaft mbH & Co. Objekt Hannover / Davenstedter Straße KG  | Saarbrücken | Deutschland | 100,00 |
| GKF Vermögensverwaltungsgesellschaft mbH & Co. Objekt Hannover Fössestraße KG            | Saarbrücken | Deutschland | 94,00  |
| GKF Vermögensverwaltungsgesellschaft mbH & Co. Objekt Hannover-Linden KG                 | Saarbrücken | Deutschland | 100,00 |
| GKF Vermögensverwaltungsgesellschaft mbH & Co. Objekt Hannover-Südstadt KG               | Saarbrücken | Deutschland | 100,00 |
| GKF Vermögensverwaltungsgesellschaft mbH & Co. Objekt Herten KG                          | Saarbrücken | Deutschland | 100,00 |
| GKF Vermögensverwaltungsgesellschaft mbH & Co. Objekt Hildesheim-Senking KG              | Saarbrücken | Deutschland | 100,00 |
| GKF Vermögensverwaltungsgesellschaft mbH & Co. Objekt Hillesheim KG                      | Saarbrücken | Deutschland | 100,00 |
| GKF Vermögensverwaltungsgesellschaft mbH & Co. Objekt Hörselgau KG                       | Saarbrücken | Deutschland | 100,00 |
| GKF Vermögensverwaltungsgesellschaft mbH & Co. Objekt Mönchengladbach-Rheydt KG          | Saarbrücken | Deutschland | 100,00 |
| GKF Vermögensverwaltungsgesellschaft mbH & Co. Objekt Oldenburg KG                       | Saarbrücken | Deutschland | 100,00 |
| GKF Vermögensverwaltungsgesellschaft mbH & Co. Objekt Paderborn "Südring Center" KG      | Saarbrücken | Deutschland | 100,00 |
| GKF Vermögensverwaltungsgesellschaft mbH & Co. Objekt Prüm KG                            | Saarbrücken | Deutschland | 100,00 |
| GKF Vermögensverwaltungsgesellschaft mbH & Co. Objekt Rastatt KG                         | Saarbrücken | Deutschland | 100,00 |
| GKF Vermögensverwaltungsgesellschaft mbH & Co. Objekt Ratingen KG                        | Saarbrücken | Deutschland | 94,00  |
| GKF Vermögensverwaltungsgesellschaft mbH & Co. Objekt Rinteln KG                         | Saarbrücken | Deutschland | 100,00 |
| GKF Vermögensverwaltungsgesellschaft mbH & Co. Objekt Rüsselsheim KG                     | Saarbrücken | Deutschland | 100,00 |
| GKF Vermögensverwaltungsgesellschaft mbH & Co. Objekt Saar-Grund KG                      | Saarbrücken | Deutschland | 100,00 |
| GKF Vermögensverwaltungsgesellschaft mbH & Co. Objekt Wiesbaden-Nordenstadt KG           | Saarbrücken | Deutschland | 100,00 |
| GKF Vermögensverwaltungsgesellschaft mbH & Co. Vermietungs- und Handels-KG               | Saarbrücken | Deutschland | 100,00 |
| GKF Vermögensverwaltungsgesellschaft mit beschränkter Haftung                            | Saarbrücken | Deutschland | 100,00 |
| Goldhand Lebensmittel- u. Verbrauchsgüter-Vertriebsgesellschaft mit beschränkter Haftung | Düsseldorf  | Deutschland | 100,00 |
| Gourmedis (China) Trading Co., Ltd.                                                      | Guangzhou   | China       | 100,00 |
| Grillpfanne GmbH                                                                         | Köln        | Deutschland | 100,00 |
| Hansa Foto-Handelsgesellschaft mit beschränkter Haftung                                  | Köln        | Deutschland | 100,00 |
| Horten GmbH                                                                              | Düsseldorf  | Deutschland | 100,00 |
| Horten Verwaltungs GmbH                                                                  | Saarbrücken | Deutschland | 100,00 |
| Horten Verwaltungs- GmbH & Co. Objekt Duisburg KG                                        | Saarbrücken | Deutschland | 100,00 |
| Horten Verwaltungs- GmbH & Co. Objekt Düsseldorf Berliner Allee KG                       | Saarbrücken | Deutschland | 100,00 |
| Horten Verwaltungs- GmbH & Co. Objekt Düsseldorf Carschhaus KG                           | Saarbrücken | Deutschland | 100,00 |
| Horten Verwaltungs GmbH & Co. Objekt Erlangen KG                                         | Saarbrücken | Deutschland | 100,00 |

|                                                                                      |               |                |                    |
|--------------------------------------------------------------------------------------|---------------|----------------|--------------------|
| Horten Verwaltungs GmbH & Co. Objekt Giessen KG                                      | Saarbrücken   | Deutschland    | 100,00             |
| Horten Verwaltungs- GmbH & Co. Objekt Hannover KG                                    | Saarbrücken   | Deutschland    | 100,00             |
| Horten Verwaltungs- GmbH & Co. Objekt Heidelberg KG                                  | Saarbrücken   | Deutschland    | 100,00             |
| Horten Verwaltungs GmbH & Co. Objekt Heilbronn KG                                    | Saarbrücken   | Deutschland    | 100,00             |
| Horten Verwaltungs- GmbH & Co. Objekt Hildesheim KG                                  | Saarbrücken   | Deutschland    | 100,00             |
| Horten Verwaltungs GmbH & Co. Objekt Ingolstadt KG                                   | Saarbrücken   | Deutschland    | 100,00             |
| Horten Verwaltungs GmbH & Co. Objekt Kempten KG                                      | Saarbrücken   | Deutschland    | 100,00             |
| Horten Verwaltungs- GmbH & Co. Objekt Münster KG                                     | Saarbrücken   | Deutschland    | 100,00             |
| Horten Verwaltungs GmbH & Co. Objekt Nürnberg KG                                     | Saarbrücken   | Deutschland    | 100,00             |
| Horten Verwaltungs GmbH & Co. Objekt Oldenburg KG                                    | Saarbrücken   | Deutschland    | 100,00             |
| Horten Verwaltungs GmbH & Co. Objekt Pforzheim KG                                    | Saarbrücken   | Deutschland    | 100,00             |
| Horten Verwaltungs GmbH & Co. Objekt Regensburg KG                                   | Saarbrücken   | Deutschland    | 100,00             |
| Horten Verwaltungs GmbH & Co. Objekt Reutlingen KG                                   | Saarbrücken   | Deutschland    | 100,00             |
| Horten Verwaltungs GmbH & Co. Objekt Schweinfurt KG                                  | Saarbrücken   | Deutschland    | 100,00             |
| Horten Verwaltungs- GmbH & Co. Objekt Stuttgart KG                                   | Saarbrücken   | Deutschland    | 100,00             |
| Horten Verwaltungs- GmbH & Co. Objekt Trier KG                                       | Saarbrücken   | Deutschland    | 100,00             |
| Horten Verwaltungs- GmbH & Co. Objekt Ulm KG                                         | Saarbrücken   | Deutschland    | 100,00             |
| Horten Verwaltungs- GmbH & Co. Objekt Wiesbaden KG                                   | Saarbrücken   | Deutschland    | 100,00             |
| ICS METRO Cash & Carry Moldova S.R.L.                                                | Chisinau      | Moldawien      | 100,00             |
| ILV - Sechste Immobilien-Vermietungsgesellschaft mbH & Co. Objekt Köln St. Agatha KG | Düsseldorf    | Deutschland    | 0,00 <sup>1</sup>  |
| Immobilien-Vermietungsgesellschaft von Quistorp GmbH & Co. Objekt Rostock KG         | Düsseldorf    | Deutschland    | 1,02 <sup>1</sup>  |
| INNOVATION S.A.                                                                      | Brüssel       | Belgien        | 100,00             |
| Inpakcentrale ICN B.V.                                                               | Duiven        | Niederlande    | 100,00             |
| Johannes Berg GmbH, Weinkellerei                                                     | Düsseldorf    | Deutschland    | 100,00             |
| Jöst Verwaltungs GmbH                                                                | Bruchsal      | Deutschland    | 100,00             |
| JSC Tsaritsino                                                                       | Moskau        | Russland       | 100,00             |
| Kaufhalle GmbH                                                                       | Saarbrücken   | Deutschland    | 100,00             |
| Kaufhalle GmbH & Co. Objekt Hamburg Mönckebergstraße KG                              | Saarbrücken   | Deutschland    | 100,00             |
| Kaufhalle GmbH & Co. Objekt Lager Apfelstädt KG                                      | Saarbrücken   | Deutschland    | 100,00             |
| Kaufhof plus Grundstücks-Vermietungsges. mbH & Co. Objekt Wuppertal-Elberfeld KG     | Düsseldorf    | Deutschland    | 0,00 <sup>1</sup>  |
| Kaufhof Warenhaus am Alex GmbH                                                       | Berlin        | Deutschland    | 100,00             |
| Kaufhof Warenhaus Neubrandenburg GmbH                                                | Saarbrücken   | Deutschland    | 100,00             |
| Kaufhof Warenhaus Rostock GmbH                                                       | Düsseldorf    | Deutschland    | 100,00             |
| KONDOLA Grundstücksgesellschaft mbH & Co. KG                                         | Grünwald      | Deutschland    | 0,01 <sup>1</sup>  |
| Kreal Limited Liability Company                                                      | Rostov-am-Don | Russland       | 100,00             |
| KUPINA Grundstücks-Verwaltungsgesellschaft mbH & Co. KG                              | Grünwald      | Deutschland    | 94,00 <sup>1</sup> |
| Limited Liability Company real,- Hypermarket Ukraine                                 | Kiew          | Ukraine        | 100,00             |
| Liqueur & Wine Trade GmbH                                                            | Düsseldorf    | Deutschland    | 100,00             |
| LLC Ukrainian Wholesale Trade Company                                                | Kiew          | Ukraine        | 100,00             |
| LSZ Service GmbH & Co. KG                                                            | Alzey         | Deutschland    | 100,00             |
| Lust for Life Gastronomie GmbH                                                       | Köln          | Deutschland    | 100,00             |
| MACAR Grundstücksgesellschaft mbH & Co. KG                                           | Grünwald      | Deutschland    | 0,01 <sup>1</sup>  |
| Makro Autoservicio Mayorista S. A. U.                                                | Madrid        | Spanien        | 100,00             |
| MAKRO Cash & Carry Belgium NV                                                        | Antwerpen     | Belgien        | 100,00             |
| MAKRO Cash & Carry CR s.r.o.                                                         | Prag          | Tschechien     | 100,00             |
| Makro Cash & Carry Egypt LLC                                                         | Kairo         | Ägypten        | 100,00             |
| Makro Cash & Carry Portugal S.A.                                                     | Lissabon      | Portugal       | 100,00             |
| Makro Cash & Carry UK Holding Limited                                                | Manchester    | Großbritannien | 100,00             |

|                                                                                  |                      |                |        |
|----------------------------------------------------------------------------------|----------------------|----------------|--------|
| Makro Cash and Carry Polska S.A.                                                 | Warschau             | Polen          | 100,00 |
| Makro Cash and Carry Wholesale S. A.                                             | Athen                | Griechenland   | 100,00 |
| Makro International AG                                                           | Chur                 | Schweiz        | 100,00 |
| Makro Ltd.                                                                       | Manchester           | Großbritannien | 100,00 |
| Makro Pension Trustees Ltd.                                                      | Manchester           | Großbritannien | 100,00 |
| Makro Properties Ltd.                                                            | Manchester           | Großbritannien | 100,00 |
| Makro Self Service Wholesalers Ltd.                                              | Manchester           | Großbritannien | 100,00 |
| MCC Boston Trading Office Inc.                                                   | Boston               | USA            | 100,00 |
| MCC Grundstücksverwaltungsgesellschaft mbH & Co. Objekt Berlin-Friedrichshain KG | Saarbrücken          | Deutschland    | 100,00 |
| MCC Grundstücksverwaltungsgesellschaft mbH & Co. Objekt Hamburg-Altona KG        | Saarbrücken          | Deutschland    | 100,00 |
| MCC Grundstücksverwaltungsgesellschaft mbH & Co. Objekt München-Pasing KG        | Saarbrücken          | Deutschland    | 100,00 |
| MCC Grundstücksverwaltungsgesellschaft mbH & Co. Objekt Porta-Westfalica KG      | Saarbrücken          | Deutschland    | 100,00 |
| MCC Grundstücksverwaltungsgesellschaft mbH & Co. Objekt Schwelm KG               | Saarbrücken          | Deutschland    | 100,00 |
| MCC Trading Deutschland GmbH                                                     | Düsseldorf           | Deutschland    | 100,00 |
| MCC Trading International GmbH                                                   | Düsseldorf           | Deutschland    | 100,00 |
| MCC Trading Office Gida Ticaret Ltd. Şti                                         | Antalya              | Türkei         | 100,00 |
| MCCI Asia Pte. Ltd.                                                              | Singapur             | Singapur       | 100,00 |
| MDH Secundus GmbH & Co. KG                                                       | Düsseldorf           | Deutschland    | 100,00 |
| MDH Secundus Vermögensverwaltung GmbH                                            | Düsseldorf           | Deutschland    | 100,00 |
| Media - Saturn Beteiligungsges.m.b.H.                                            | Vösendorf            | Österreich     | 100,00 |
| MEDIA CONCORDE S.N.C.                                                            | Ris-Orangis          | Frankreich     | 100,00 |
| MEDIA MARKT - BUDAÖRS Video TV Hifi Elektro Fotó Computer Kereskedelmi Kft.      | Budaörs              | Ungarn         | 90,00  |
| MEDIA MARKT A CORUÑA VIDEO-TV-HIFI-ELEKTRO-COMPUTER-FOTO, S.A.                   | A Coruña             | Spanien        | 99,90  |
| MEDIA MARKT ALACANT VIDEO-TV-HIFI-ELEKTRO-COMPUTER-FOTO, S.A.                    | Alicante             | Spanien        | 99,90  |
| MEDIA MARKT ALBACETE VIDEO-TV-HIFI-ELEKTRO-COMPUTER-FOTO S.A.                    | El Prat de Llobregat | Spanien        | 99,90  |
| MEDIA MARKT ALCALA DE GUADAIIRA VIDEO-TV-HIFI-ELEKTRO-COMPUTER-FOTO S.A.         | El Prat de Llobregat | Spanien        | 99,90  |
| MEDIA MARKT ALCALÁ DE HENARES VIDEO-TV-HIFI-ELEKTRO-COMPUTER-FOTO, S.A.          | Alcalá de Henares    | Spanien        | 99,90  |
| MEDIA MARKT ALCORCON VIDEO-TV-HIFI-ELEKTRO-COMPUTER-FOTO, S.A.                   | Alcorcón             | Spanien        | 99,90  |
| Media Markt Alexandrium B.V.                                                     | Rotterdam            | Niederlande    | 90,10  |
| MEDIA MARKT ALFAFAR VIDEO-TV-HIFI-ELEKTRO-COMPUTER-FOTO, S.A.                    | Alfafar              | Spanien        | 99,90  |
| MEDIA MARKT ALFRAGIDE - PRODUTOS INFORMÁTICOS E ELECTRÓNICOS, LDA                | Lissabon             | Portugal       | 90,00  |
| Media Markt Alkmaar B.V.                                                         | Alkmaar              | Niederlande    | 90,10  |
| Media Markt Almere B.V.                                                          | Almere               | Niederlande    | 100,00 |
| MEDIA MARKT ALMERIA VIDEO-TV-HIFI-ELEKTRO-COMPUTER-FOTO, S.A.U.                  | El Prat de Llobregat | Spanien        | 100,00 |
| Media Markt Alphen aan den Rijn B.V.                                             | Alphen aan den Rijn  | Niederlande    | 90,10  |
| Media Markt Amsterdam Noord B.V.                                                 | Amsterdam            | Niederlande    | 90,10  |
| Media Markt Amstetten TV-Hifi-Elektro GmbH                                       | Amstetten            | Österreich     | 90,00  |
| Media Markt Arena B.V.                                                           | Amsterdam            | Niederlande    | 90,10  |
| MEDIA MARKT ÁRKÁD Video TV Hifi Elektro Foto Computer Kereskedelmi Kft.          | Budapest             | Ungarn         | 90,00  |
| Media Markt Arnhem B.V.                                                          | Arnhem               | Niederlande    | 90,10  |
| MEDIA MARKT AVEIRO - PRODUTOS INFORMÁTICOS E ELECTRÓNICOS, LDA                   | Lissabon             | Portugal       | 90,00  |
| MEDIA MARKT BARAKALDO VIDEO-TV-HIFI-ELEKTRO-COMPUTER-FOTO, S.A.                  | Barakaldo            | Spanien        | 99,90  |
| MEDIA MARKT BARCELONA VIDEO-TV-HIFI-ELEKTRO-COMPUTER-FOTO, S.A.                  | Barcelona            | Spanien        | 99,90  |
| MEDIA MARKT BASILIX N.V.                                                         | Sint-Agatha-Berchem  | Belgien        | 90,00  |
| Media Markt Békéscsaba Video TV Hifi Elektro Photo Computer Kereskedelmi Kft.    | Békéscsaba           | Ungarn         | 90,00  |
| MEDIA MARKT BENFICA - PRODUTOS INFORMÁTICOS E ELECTRÓNICOS, LDA                  | Lissabon             | Portugal       | 90,00  |
| Media Markt Bergen op Zoom B.V.                                                  | Bergen op Zoom       | Niederlande    | 100,00 |
| MEDIA MARKT BILBONDO Video-TV-Hifi-Elektro-Computer-Foto, S.A.U.                 | Bilbao               | Spanien        | 100,00 |

|                                                                             |                       |             |        |
|-----------------------------------------------------------------------------|-----------------------|-------------|--------|
| Media Markt Borås TV-Hifi-Elektro AB                                        | Stockholm             | Schweden    | 90,01  |
| MEDIA MARKT BRAGA - PRODUTOS INFORMÁTICOS E ELECTRÓNICOS, LDA               | Lissabon              | Portugal    | 90,00  |
| MEDIA MARKT Braine-l'Alleud                                                 | Braine-l'Alleud       | Belgien     | 90,00  |
| Media Markt Breda B.V.                                                      | Breda                 | Niederlande | 90,10  |
| Media Markt Bruxelles Rue Neuve [Brüssel Nieuwstraat] SA                    | Brüssel               | Belgien     | 90,00  |
| Media Markt Bürs TV-Hifi-Elektro GmbH                                       | Bürs                  | Österreich  | 90,00  |
| MEDIA MARKT CARTAGENA VIDEO-TV-ELEKTRO-COMPUTER-FOTO, S.A.                  | Cartagena             | Spanien     | 99,90  |
| MEDIA MARKT CASTELLÒ DE LA Plana VIDEO-TV-HIFI-ELEKTRO-COMPUTER-FOTO, S.A.  | Castellòn de la Plana | Spanien     | 99,90  |
| MEDIA MARKT CCI TV-HiFi-Elektro GmbH Ingolstadt                             | Ingolstadt            | Deutschland | 100,00 |
| MEDIA MARKT CCIV TV-HiFi-Elektro GmbH Ingolstadt                            | Ingolstadt            | Deutschland | 100,00 |
| Media Markt CCIX TV-HiFi-Elektro GmbH Ingolstadt                            | Ingolstadt            | Deutschland | 100,00 |
| MEDIA MARKT CCL TV-HiFi-Elektro GmbH Ingolstadt                             | Ingolstadt            | Deutschland | 100,00 |
| MEDIA MARKT CCLIII TV-HiFi-Elektro GmbH Ingolstadt                          | Ingolstadt            | Deutschland | 100,00 |
| MEDIA MARKT CCLIV TV-HiFi-Elektro GmbH Ingolstadt                           | Ingolstadt            | Deutschland | 100,00 |
| MEDIA MARKT CCLIX TV-HiFi-Elektro GmbH Ingolstadt                           | Ingolstadt            | Deutschland | 100,00 |
| MEDIA MARKT CCLX TV-HiFi-Elektro GmbH Ingolstadt                            | Ingolstadt            | Deutschland | 100,00 |
| MEDIA MARKT CCLXII TV-HiFi-Elektro GmbH Ingolstadt                          | Ingolstadt            | Deutschland | 100,00 |
| MEDIA MARKT CCLXIV TV-HiFi-Elektro GmbH Ingolstadt                          | Ingolstadt            | Deutschland | 100,00 |
| Media Markt CCLXIX TV-HiFi-Elektro GmbH Ingolstadt                          | Ingolstadt            | Deutschland | 100,00 |
| Media Markt CCLXV TV-HiFi-Elektro GmbH Ingolstadt                           | Ingolstadt            | Deutschland | 100,00 |
| Media Markt CCLXVI TV-HiFi-Elektro GmbH Ingolstadt                          | Ingolstadt            | Deutschland | 100,00 |
| Media Markt CCLXVII TV-HiFi-Elektro GmbH Ingolstadt                         | Ingolstadt            | Deutschland | 100,00 |
| Media Markt CCLXVIII TV-HiFi-Elektro GmbH Ingolstadt                        | Ingolstadt            | Deutschland | 100,00 |
| Media Markt CCLXX TV-HiFi-Elektro GmbH Ingolstadt                           | Ingolstadt            | Deutschland | 100,00 |
| Media Markt CCLXXI TV-HiFi-Elektro GmbH Ingolstadt                          | Ingolstadt            | Deutschland | 100,00 |
| Media Markt CCLXXII TV-HiFi-Elektro GmbH Ingolstadt                         | Ingolstadt            | Deutschland | 100,00 |
| Media Markt CCLXXIII TV-HiFi-Elektro GmbH Ingolstadt                        | Ingolstadt            | Deutschland | 100,00 |
| MEDIA MARKT CCLXXIV TV-HiFi-Elektro GmbH Ingolstadt                         | Ingolstadt            | Deutschland | 100,00 |
| Media Markt CCVIII TV-HiFi-Elektro GmbH Ingolstadt                          | Ingolstadt            | Deutschland | 100,00 |
| MEDIA MARKT CCXL TV-HiFi-Elektro GmbH Ingolstadt                            | Ingolstadt            | Deutschland | 100,00 |
| MEDIA MARKT CCXLIII TV-HiFi-Elektro GmbH Ingolstadt                         | Ingolstadt            | Deutschland | 100,00 |
| MEDIA MARKT CCXLIV TV-HiFi-Elektro GmbH Ingolstadt                          | Ingolstadt            | Deutschland | 100,00 |
| Media Markt CCXLIX TV-HiFi-Elektro GmbH Ingolstadt                          | Ingolstadt            | Deutschland | 100,00 |
| Media Markt CCXLV TV-HiFi-Elektro GmbH Ingolstadt                           | Ingolstadt            | Deutschland | 100,00 |
| Media Markt CCXLVI TV-HiFi-Elektro GmbH Ingolstadt                          | Ingolstadt            | Deutschland | 100,00 |
| MEDIA MARKT CCXXII TV-HiFi-Elektro GmbH Ingolstadt                          | Ingolstadt            | Deutschland | 100,00 |
| MEDIA MARKT CCXXVI TV-HiFi-Elektro GmbH Ingolstadt                          | Ingolstadt            | Deutschland | 100,00 |
| MEDIA MARKT CCXXXIV TV-HiFi-Elektro GmbH Ingolstadt                         | Ingolstadt            | Deutschland | 100,00 |
| MEDIA MARKT CENTURY CENTER NV                                               | Antwerpen             | Belgien     | 90,00  |
| MEDIA MARKT CLII TV-HiFi-Elektro GmbH Ingolstadt                            | Ingolstadt            | Deutschland | 100,00 |
| MEDIA MARKT CLIV TV-HiFi-Elektro GmbH Ingolstadt                            | Ingolstadt            | Deutschland | 100,00 |
| Media Markt CLXXIX TV-HiFi-Elektro GmbH Ingolstadt                          | Ingolstadt            | Deutschland | 100,00 |
| MEDIA MARKT CORDOBA VIDEO-TV-ELEKTRO-COMPUTER-FOTO, S.A.                    | Cordoba               | Spanien     | 99,90  |
| MEDIA MARKT CORDOVILLA-PAMPLONA VIDEO-TV-HIFI-ELEKTRO-COMPUTER-FOTO S.A.    | Pamplona              | Spanien     | 99,90  |
| Media Markt Cruquius B.V.                                                   | Cruquius              | Niederlande | 90,10  |
| Media Markt CXXIX TV-HiFi-Elektro GmbH Ingolstadt                           | Ingolstadt            | Deutschland | 100,00 |
| MEDIA MARKT Debrecen Video-TV-Hifi-Elektro-Photo-Computer-Kereskedelmi Kft. | Debrecen              | Ungarn      | 90,00  |
| Media Markt Den Haag B.V.                                                   | Den Haag              | Niederlande | 90,10  |

|                                                                                  |                            |             |        |
|----------------------------------------------------------------------------------|----------------------------|-------------|--------|
| Media Markt Deventer B.V.                                                        | Deventer                   | Niederlande | 100,00 |
| MEDIA MARKT DIAGONAL MAR-BARCELONA VIDEO-TV-HIFI-ELEKTRO-COMPUTER-FOTO S.A.      | El Prat de Llobregat       | Spanien     | 99,90  |
| MEDIA MARKT DONOSTI VIDEO-TV-HIFI-ELEKTRO-COMPUTER-FOTO, S.A.                    | Donosti                    | Spanien     | 99,90  |
| MEDIA MARKT E247 VIDEO-TV-HIFI-ELEKTRO-COMPUTER-FOTO S.A.U.                      | El Prat de Llobregat       | Spanien     | 100,00 |
| MEDIA MARKT E256 VIDEO-TV-HIFI-ELEKTRO-COMPUTER-FOTO, S.A.U.                     | El Prat de Llobregat       | Spanien     | 100,00 |
| MEDIA MARKT E263 VIDEO-TV-HIFI-ELEKTRO-COMPUTER-FOTO S.A.U.                      | El Prat de Llobregat       | Spanien     | 100,00 |
| MEDIA MARKT E270 VIDEO-TV-HIFI-ELEKTRO-COMPUTER-FOTO S.A.U.                      | El Prat de Llobregat       | Spanien     | 100,00 |
| MEDIA MARKT E271 VIDEO-TV-HIFI-ELEKTRO-COMPUTER-FOTO S.A.U.                      | El Prat de Llobregat       | Spanien     | 100,00 |
| MEDIA MARKT E278 VIDEO-TV-HIFI-ELEKTRO-COMPUTER-FOTO, S.A.U.                     | El Prat de Llobregat       | Spanien     | 100,00 |
| MEDIA MARKT E-284 Video-TV-Hifi-Elektro-Computer-Foto, S.A.U.                    | El Prat de Llobregat       | Spanien     | 100,00 |
| MEDIA MARKT E-285 Video-TV-Hifi-Elektro-Computer-Foto, S.A.U.                    | Barcelona                  | Spanien     | 100,00 |
| MEDIA MARKT E-286 Video-TV-Hifi-Elektro-Computer-Foto, S.A.U.                    | Barcelona                  | Spanien     | 100,00 |
| Media Markt e-commerce GmbH                                                      | Ingolstadt                 | Deutschland | 100,00 |
| Media Markt Ede B.V.                                                             | Ede                        | Niederlande | 90,10  |
| Media Markt Eindhoven B.V.                                                       | Eindhoven                  | Niederlande | 90,10  |
| MEDIA MARKT EL PRAT VIDEO-TV-HIFI-ELEKTRO-COMPUTER-FOTO S.A.                     | El Prat de Llobregat       | Spanien     | 99,90  |
| MEDIA MARKT ELCHE VIDEO-TV-HIFI-ELEKTRO-COMPUTER-FOTO S.A.                       | El Prat de Llobregat       | Spanien     | 99,90  |
| Media Markt Enschede B.V.                                                        | Enschede                   | Niederlande | 90,10  |
| MEDIA MARKT GAIA - PRODUTOS INFORMÁTICOS E ELECTRÓNICOS, LDA                     | Lissabon                   | Portugal    | 90,00  |
| MEDIA MARKT GAVÁ VIDEO-TV-HIFI-ELEKTRO-COMPUTER-FOTO S.A.                        | El Prat de Llobregat       | Spanien     | 99,90  |
| Media Markt Gävle TV-Hifi-Elektro AB                                             | Stockholm                  | Schweden    | 90,01  |
| MEDIA MARKT GETAFE VIDEO-TV-HIFI-ELEKTRO-COMPUTER-FOTO, S.A.                     | Getafe                     | Spanien     | 99,90  |
| MEDIA MARKT GIRONA VIDEO-TV-HIFI-ELEKTRO-COMPUTER-FOTO, S.A.                     | Girona                     | Spanien     | 99,90  |
| Media Markt GmbH TV-HiFi-Elektro                                                 | München                    | Deutschland | 90,00  |
| MEDIA MARKT Gosselies/Charleroi N.V.                                             | Charleroi                  | Belgien     | 90,00  |
| Media Markt Göteborg-Bäckebol TV-Hifi-Elektro AB                                 | Stockholm                  | Schweden    | 90,01  |
| Media Markt Göteborg-Högsbo TV-HiFi-Elektro AB                                   | Stockholm                  | Schweden    | 90,01  |
| MEDIA MARKT GRANADA VIDEO-TV-HIFI-ELEKTRO-COMPUTER-FOTO, S.A.                    | Pulianas-Granada           | Spanien     | 99,90  |
| Media Markt Graz-Liebenau TV-Hifi-Elektro GmbH                                   | Graz                       | Österreich  | 90,00  |
| Media Markt Groningen B.V.                                                       | Groningen                  | Niederlande | 90,10  |
| Media Markt Heerlen B.V.                                                         | Heerlen                    | Niederlande | 90,10  |
| Media Markt Hengelo B.V.                                                         | Hengelo                    | Niederlande | 90,10  |
| MEDIA MARKT Herstal                                                              | Liège                      | Belgien     | 90,00  |
| MEDIA MARKT HUELVA VIDEO-TV-HIFI-ELEKTRO-COMPUTER-FOTO, S.A.                     | El Prat de Llobregat       | Spanien     | 99,90  |
| Media Markt Imst TV-Hifi-Elektro GmbH                                            | Imst                       | Österreich  | 90,00  |
| Media Markt IP Holding Hong Kong Limited                                         | Hong Kong                  | China       | 100,00 |
| Media Markt Jemappes/Mons S. A.                                                  | Mons                       | Belgien     | 90,00  |
| MEDIA MARKT JEREZ DE LA FRONTERA VIDEO-TV-HIFI-ELEKTRO-COMPUTER-FOTO S.A.        | El Prat de Llobregat       | Spanien     | 99,90  |
| Media Markt Jönköping TV-Hifi- Elektro AB                                        | Stockholm                  | Schweden    | 90,01  |
| Media Markt Kalmar TV-Hifi-Elektro AB                                            | Kalmar                     | Schweden    | 90,01  |
| Media Markt Kristianstad TV-Hifi-Elektro AB                                      | Stockholm                  | Schweden    | 100,00 |
| MEDIA MARKT L´ HOSPITALET VIDEO-TV-HIFI-ELEKTRO-COMPUTER-FOTO S.A.               | El Prat de Llobregat       | Spanien     | 99,90  |
| MEDIA MARKT LAS PALMAS DE GRAN CANARIA VIDEO-TV-HIFI-ELEKTRO-COMPUTER-FOTO, S.A. | Las Palmas de Gran Canaria | Spanien     | 99,90  |
| Media Markt Leeuwarden B.V.                                                      | Leeuwarden                 | Niederlande | 90,10  |
| MEDIA MARKT LEGANES VIDEO-TV- HIFI-ELEKTRO-COMPUTER-FOTO, S.A.                   | El Prat de Llobregat       | Spanien     | 99,90  |
| MEDIA MARKT LEIRIA - PRODUTOS INFORMÁTICOS E ELECTRÓNICOS, LDA                   | Lissabon                   | Portugal    | 90,00  |
| Media Markt Leoben TV-Hifi-Elektro GmbH                                          | Leoben                     | Österreich  | 90,00  |
| MEDIA MARKT LEÓN VIDEO-TV-HIFI-ELEKTRO-COMPUTER-FOTO, S.A.                       | León                       | Spanien     | 99,90  |

|                                                                                |                      |             |        |
|--------------------------------------------------------------------------------|----------------------|-------------|--------|
| Media Markt Liège Place Saint-Lambert SA                                       | Liège                | Belgien     | 90,00  |
| MEDIA MARKT LOGRONO VIDEO-TV-HIFI-ELEKTRO-COMPUTER-FOTO, S.A.U.                | Logrono              | Spanien     | 100,00 |
| MEDIA MARKT LOS BARRIOS VÍDO-TV-HIFI-ELEKTRO-COMPUTER-FOTO, S.A.               | Los Barrios          | Spanien     | 99,90  |
| MEDIA MARKT LUGO VÍDEO-TV-HIFI-ELEKTRO-COMPUTER-FOTO, S.A.U.                   | Lugo                 | Spanien     | 100,00 |
| Media Markt Luleå TV-Hifi-Elektro AB                                           | Luleå                | Schweden    | 100,00 |
| Media Markt Lund TV-Hifi-Elektro AB                                            | Stockholm            | Schweden    | 90,01  |
| Media Markt Maastricht B.V.                                                    | Maastricht           | Niederlande | 90,10  |
| MEDIA MARKT MADRID PLENILUNIO VIDEO-TV-HIFI-ELEKTRO-COMPUTER-FOTO S.A.         | El Prat de Llobregat | Spanien     | 99,90  |
| MEDIA MARKT MADRID-VILLAVERDE VIDEO-TV-HIFI-ELEKTRO-COMPUTER-FOTO, S.A.        | Madrid               | Spanien     | 99,90  |
| MEDIA MARKT Majadahonda Video-TV-Hifi-Elektro-Computer-Foto, S.A.              | Majadahonda          | Spanien     | 99,90  |
| MEDIA MARKT MALAGA OESTE VIDEO-TV-HIFI-ELEKTRO-COMPUTER-FOTO S.A.U.            | El Prat de Llobregat | Spanien     | 100,00 |
| MEDIA MARKT MALAGA-CENTRO VÍDEO-TV-HIFI-ELEKTRO-COMPUTER-FOTO, S.A.            | El Prat de Llobregat | Spanien     | 99,90  |
| Media Markt Malmö-Bernstorp TV-Hifi-Elektro AB                                 | Malmö                | Schweden    | 90,01  |
| Media Markt Malmö-Svågertorp TV-Hifi-Elektro AB                                | Stockholm            | Schweden    | 100,00 |
| Media Markt Management GmbH                                                    | Ingolstadt           | Deutschland | 100,00 |
| MEDIA MARKT MATARO VIDEO-TV-HIFI-ELEKTRO-COMPUTER-FOTO, S.A.                   | El Prat de Llobregat | Spanien     | 99,90  |
| MEDIA MARKT Megapark Video TV Hifi Elektro Photo Computer Kereskedelmi Kft.    | Budapest             | Ungarn      | 90,00  |
| Media Markt Middelburg B.V.                                                    | Middelburg           | Niederlande | 100,00 |
| MEDIA MARKT Miskolc Video TV Hifi Elektro Photo Computer Kereskedelmit Kft     | Miskolc              | Ungarn      | 90,00  |
| MEDIA MARKT MOLLET VÍDEO-TV-HIFI-ELEKTRO-COMPUTER-FOTO, S.A.U.                 | El Prat de Llobregat | Spanien     | 100,00 |
| MEDIA MARKT MURCIA NUEVA CONDOMINA VIDEO-TV-HIFI-ELEKTRO-COMPUTER-FOTO S.A.    | El Prat de Llobregat | Spanien     | 99,90  |
| MEDIA MARKT MURCIA VIDEO-TV-HIFI-ELEKTRO-COMPUTER-FOTO S.A.                    | Murcia               | Spanien     | 99,90  |
| MEDIA MARKT NASCENTE - PRODUTOS INFORMÁTICOS E ELECTRÓNICOS, LDA               | Lissabon             | Portugal    | 90,00  |
| Media Markt Norrköping TV-Hifi-Elektro AB                                      | Stockholm            | Schweden    | 90,01  |
| Media Markt Nyíregyháza Video TV Hifi Elektro Photo Computer Kereskedelmi Kft. | Nyíregyháza          | Ungarn      | 90,00  |
| Media Markt Oberwart TV-Hifi-Elektro GmbH                                      | Eisenstadt           | Österreich  | 90,00  |
| Media Markt Oostakker NV                                                       | Oostakker            | Belgien     | 90,00  |
| Media Markt Oostende NV                                                        | Oostende             | Belgien     | 90,00  |
| Media Markt Örebro TV-Hifi-Elektro AB                                          | Stockholm            | Schweden    | 90,01  |
| MEDIA MARKT Pécs Video TV Hifi Elektro Photo Computer Kereskedelmit Kft.       | Pécs                 | Ungarn      | 90,00  |
| MEDIA MARKT PLAZA - PRODUTOS INFORMÁTICOS E ELECTRÓNICOS, LDA                  | Lissabon             | Portugal    | 90,00  |
| Media Markt Polska Sp. z o.o.                                                  | Warschau             | Polen       | 100,00 |
| Media Markt Polska Sp. z o.o. 13 Spółka Komandytowa                            | Warschau             | Polen       | 100,00 |
| Media Markt Polska Sp. z o.o. 15 Spółka Komandytowa                            | Warschau             | Polen       | 100,00 |
| Media Markt Polska Sp. z o.o. 19 Spółka Komandytowa                            | Warschau             | Polen       | 100,00 |
| Media Markt Polska Sp. z o.o. 21 Spółka Komandytowa                            | Warschau             | Polen       | 100,00 |
| Media Markt Polska Sp. z o.o. 22 Spółka Komandytowa                            | Warschau             | Polen       | 100,00 |
| Media Markt Polska Sp. z o.o. 23 Spółka Komandytowa                            | Warschau             | Polen       | 100,00 |
| Media Markt Polska Sp. z o.o. 25 Spółka Komandytowa                            | Warschau             | Polen       | 100,00 |
| Media Markt Polska Sp. z o.o. 26 Spółka Komandytowa                            | Warschau             | Polen       | 100,00 |
| Media Markt Polska Sp. z o.o. 27 Spółka Komandytowa                            | Warschau             | Polen       | 100,00 |
| Media Markt Polska Sp. z o.o. 9 Sp. z o.o. Spółka Komandytowa                  | Warschau             | Polen       | 100,00 |
| Media Markt Polska Sp. z o.o. Białystok Spółka Komandytowa                     | Warschau             | Polen       | 90,00  |
| Media Markt Polska Sp. z o.o. Bydgoszcz Spółka Komandytowa                     | Warschau             | Polen       | 90,00  |
| Media Markt Polska Sp. z o.o. Chorzów Spółka Komandytowa                       | Warschau             | Polen       | 90,00  |
| Media Markt Polska Sp. z o.o. Gdańsk II Spółka Komandytowa                     | Warschau             | Polen       | 90,00  |
| Media Markt Polska Sp. z o.o. Głogów Spółka Komandytowa                        | Warschau             | Polen       | 90,00  |
| Media Markt Polska Sp. z o.o. Gorzów Wielkopolski Spółka Komandytowa           | Warschau             | Polen       | 90,00  |

|                                                                                |                       |             |        |
|--------------------------------------------------------------------------------|-----------------------|-------------|--------|
| Media Markt Polska Sp. z o.o. Kalisz Spółka Komandytowa                        | Warschau              | Polen       | 90,00  |
| Media Markt Polska Sp. z o.o. Konin Spółka Komandytowa                         | Warschau              | Polen       | 90,00  |
| Media Markt Polska Sp. z o.o. Koszalin Spółka Komandytowa                      | Warschau              | Polen       | 90,00  |
| Media Markt Polska Sp. z o.o. Kraków II Spółka Komandytowa                     | Warschau              | Polen       | 90,00  |
| Media Markt Polska Sp. z o.o. Legnica Spółka Komandytowa                       | Warschau              | Polen       | 90,00  |
| Media Markt Polska Sp. z o.o. Nowy Sącz Spółka Komandytowa                     | Warschau              | Polen       | 90,00  |
| Media Markt Polska Sp. z o.o. Piotrków Trybunalski Spółka Komandytowa          | Warschau              | Polen       | 90,00  |
| Media Markt Polska Sp. z o.o. Płock Spółka Komandytowa                         | Warschau              | Polen       | 90,00  |
| Media Markt Polska Sp. z o.o. Poznań II Spółka Komandytowa                     | Warschau              | Polen       | 90,00  |
| Media Markt Polska Sp. z o.o. Przemyśl Spółka Komandytowa                      | Warschau              | Polen       | 90,00  |
| Media Markt Polska Sp. z o.o. Radom Spółka Komandytowa                         | Warschau              | Polen       | 90,00  |
| Media Markt Polska Sp. z o.o. Rybnik Spółka Komandytowa                        | Warschau              | Polen       | 90,00  |
| Media Markt Polska Sp. z o.o. Tarnów Spółka Komandytowa                        | Warschau              | Polen       | 90,00  |
| Media Markt Polska Sp. z o.o. Toruń Spółka Komandytowa                         | Warschau              | Polen       | 90,00  |
| Media Markt Polska Sp. z o.o. Wałbrzych Spółka Komandytowa                     | Warschau              | Polen       | 90,00  |
| Media Markt Polska Sp. z o.o. Zielona Góra Spółka Komandytowa                  | Warschau              | Polen       | 90,00  |
| Media Markt Polska Sp. z.o.o. Bielsko-Biała Spółka Komandytowa                 | Warschau              | Polen       | 90,00  |
| Media Markt Polska Sp. z.o.o. Czeladź Spółka Komandytowa                       | Warschau              | Polen       | 90,00  |
| Media Markt Polska Sp. z.o.o. Częstochowa Spółka Komandytowa                   | Warschau              | Polen       | 90,00  |
| Media Markt Polska Sp. z.o.o. Gdańsk I Spółka Komandytowa                      | Warschau              | Polen       | 90,00  |
| Media Markt Polska Sp. z.o.o. Katowice I Spółka Komandytowa                    | Warschau              | Polen       | 90,00  |
| Media Markt Polska Sp. z.o.o. Kielce Spółka Komandytowa                        | Warschau              | Polen       | 90,00  |
| Media Markt Polska Sp. z.o.o. Kraków I Spółka Komandytowa                      | Warschau              | Polen       | 90,00  |
| Media Markt Polska Sp. z.o.o. Łódź I Spółka Komandytowa                        | Warschau              | Polen       | 90,00  |
| Media Markt Polska Sp. z.o.o. Łódź II Spółka Komandytowa                       | Warschau              | Polen       | 90,00  |
| Media Markt Polska Sp. z.o.o. Lublin Spółka Komandytowa                        | Warschau              | Polen       | 90,00  |
| Media Markt Polska Sp. z.o.o. Olsztyn Spółka Komandytowa                       | Warschau              | Polen       | 90,00  |
| Media Markt Polska Sp. z.o.o. Opole Spółka Komandytowa                         | Warschau              | Polen       | 100,00 |
| Media Markt Polska Sp. z.o.o. Poznań I Spółka Komandytowa                      | Warschau              | Polen       | 90,00  |
| Media Markt Polska Sp. z.o.o. Rzeszów Spółka Komandytowa                       | Warschau              | Polen       | 90,00  |
| Media Markt Polska Sp. z.o.o. Szczecin Spółka Komandytowa                      | Warschau              | Polen       | 90,00  |
| Media Markt Polska Sp. z.o.o. Warszawa 1 Spółka Komandytowa                    | Warschau              | Polen       | 90,00  |
| Media Markt Polska Sp. z.o.o. Warszawa II Spółka Komandytowa                   | Warschau              | Polen       | 90,00  |
| Media Markt Polska Sp. z.o.o. Warszawa III Spółka Komandytowa                  | Warschau              | Polen       | 90,00  |
| Media Markt Polska Sp. z.o.o. Warszawa IV Spółka Komandytowa                   | Warschau              | Polen       | 90,00  |
| Media Markt Polska Sp. z.o.o. Wrocław I Spółka Komandytowa                     | Warschau              | Polen       | 90,00  |
| Media Markt Polska Sp. z.o.o. Wrocław II Spółka Komandytowa                    | Warschau              | Polen       | 90,00  |
| Media Markt Polska Sp. z.o.o. Zabrze Spółka Komandytowa                        | Warschau              | Polen       | 90,00  |
| MEDIA MARKT Pólus Center Video TV Hifi Photo Computer Kereskedelmi Kft.        | Budapest              | Ungarn      | 90,00  |
| MEDIA MARKT PUERTO REAL VIDEO-TV-HIFI-ELECTRO-COMPUTER-FOTO, S.A.              | El Prat de Llobregat  | Spanien     | 99,90  |
| Media Markt Rijswijk B.V.                                                      | Rijswijk (Den Haag)   | Niederlande | 90,10  |
| MEDIA MARKT RIVAS-VACIAMADRID VIDEO-TV-HIFI-ELEKTRO-COMPUTER-FOTO S.A.         | El Prat de Llobregat  | Spanien     | 99,90  |
| Media Markt Roermond B.V.                                                      | Roermond              | Niederlande | 90,10  |
| Media Markt Roeselare NV                                                       | Roeselare             | Belgien     | 90,00  |
| Media Markt Rotterdam Beijerlandseleaan B.V.                                   | Rotterdam             | Niederlande | 100,00 |
| MEDIA MARKT SALAMANCA VIDEO-TV-HIFI-ELEKTRO-COMPUTER-FOTO, S.A.                | Santa Marta de Tormes | Spanien     | 99,90  |
| MEDIA MARKT San Juan de Aznalfarache VIDEO-TV-HIFI-ELECTRO-COMPUTER-FOTO, S.A. | Sevilla               | Spanien     | 99,90  |

|                                                                                   |                            |              |        |
|-----------------------------------------------------------------------------------|----------------------------|--------------|--------|
| MEDIA MARKT SAN SEBASTIAN DE LOS REYES VIDEO-TV-HIFI-ELEKTRO-COMPUTER-FOTO, S.A.  | San Sebastian de los Reyes | Spanien      | 99,99  |
| MEDIA MARKT SANT CUGAT DEL VALLÈS VIDEO-TV-HIFI-ELEKTRO-COMPUTER-FOTO, S.A.       | Sant Cugat del Vallès      | Spanien      | 99,90  |
| MEDIA MARKT Santander Video-TV-Hifi-Elektro-Computer-Foto, S.A.U.                 | Barcelona                  | Spanien      | 100,00 |
| MEDIA MARKT SATURN ADMINISTRACION ESPAÑA, S.A.U.                                  | El Prat de Llobregat       | Spanien      | 100,00 |
| Media Markt Saturn Holding Magyarország Kft.                                      | Budaörs                    | Ungarn       | 100,00 |
| Media Markt Saturn Holding Nederland B.V.                                         | Rotterdam                  | Niederlande  | 100,00 |
| MEDIA MARKT SATURN, S.A. UNIPERSONAL                                              | El Prat de Llobregat       | Spanien      | 100,00 |
| MEDIA MARKT SEVILLA-SANTA JUSTA VIDEO-TV-HIFI-ELEKTRO-COMPUTER-FOTO, S.A.         | Sevilla                    | Spanien      | 99,90  |
| MEDIA MARKT SIERO VIDEO-TV-HIFI-ELEKTRO-COMPUTER-FOTO, S.A.                       | Lugones-Siero              | Spanien      | 99,90  |
| MEDIA MARKT Sint-Lambrechts-Woluwe                                                | Sint-Lambrechts-Woluwe     | Belgien      | 90,00  |
| MEDIA MARKT Sint-Pieters-Leeuw N.V.                                               | Sint-Pieters-Leeuw         | Belgien      | 90,00  |
| MEDIA MARKT SINTRA - PRODUTOS INFORMÁTICOS E ELECTRÓNICOS, LDA                    | Lissabon                   | Portugal     | 90,00  |
| Media Markt Skövde TV-Hifi-Elektro AB                                             | Skövde                     | Schweden     | 90,02  |
| Media Markt Spittal TV-Hifi-Elektro GmbH                                          | Spittal an der Drau        | Österreich   | 90,00  |
| Media Markt St. Lorenzen TV-Hifi-Elektro GmbH                                     | St. Lorenzen im Mürtal     | Österreich   | 90,00  |
| Media Markt Steyr TV-Hifi-Elektro GmbH                                            | Steyr                      | Österreich   | 90,00  |
| Media Markt Stockholm-Barkarby TV-Hifi-Elektro AB                                 | Stockholm                  | Schweden     | 90,01  |
| Media Markt Stockholm-Heron City TV-Hifi-Elektro AB                               | Stockholm                  | Schweden     | 90,01  |
| Media Markt Stockholm-Nacka TV-Hifi-Elektro AB                                    | Stockholm                  | Schweden     | 90,01  |
| MEDIA MARKT Stop Shop Video TV Hifi Elektro Photo Computer Kereskedelmi Kft.      | Budapest                   | Ungarn       | 90,00  |
| Media Markt Sundsvall TV-Hifi-Elektro AB                                          | Stockholm                  | Schweden     | 90,01  |
| MEDIA MARKT Szeged Video-TV-Hifi-Elektro-Photo-Computer-Kereskedelmi Kft.         | Szeged                     | Ungarn       | 90,00  |
| MEDIA MARKT Székesfehérvár Video TV Hifi Elektro Photo Computer Kereskedelmi Kft. | Székesfehérvár             | Ungarn       | 90,00  |
| Media Markt Szolnok Video Tv Hifi Elektro Photo Computer Kereskedelmi Kft.        | Szolnok                    | Ungarn       | 100,00 |
| MEDIA MARKT Szombathely Video-TV-Hifi-Elektro-Photo-Computer-Kereskedelmi Kft.    | Szombathely                | Ungarn       | 90,00  |
| MEDIA MARKT TARRAGONA VIDEO-TV-HIFI-ELEKTRO-COMPUTER-FOTO S.A.                    | Tarragona                  | Spanien      | 99,90  |
| Media Markt Tatabánya Video TV Hifi Elektro Photo Computer Kereskedelmi Kft.      | Tatabánya                  | Ungarn       | 90,00  |
| MEDIA MARKT TELDE VIDEO-TV- HIFI- ELEKTRO- COMPUTER- FOTO, S.A.                   | El Prat de Llobregat       | Spanien      | 99,90  |
| MEDIA MARKT TENERIFE VIDEO-TV-HIFI-ELEKTRO-COMPUTER-COMPUTER, S.A.                | Santa Cruz de Tenerife     | Spanien      | 99,90  |
| Media Markt The Corner B.V.                                                       | Rotterdam                  | Niederlande  | 90,10  |
| Media Markt TV-HiFi-Elektro Athens I Commercial Anonymi Eteria                    | Athen                      | Griechenland | 100,00 |
| Media Markt TV-HiFi-Elektro Athens II Commercial Anonymi Eteria                   | Athen                      | Griechenland | 100,00 |
| Media Markt TV-HiFi-Elektro Athens III Commercial Anonymi Eteria                  | Athen                      | Griechenland | 100,00 |
| Media Markt TV-Hifi-Elektro ATHENS IV Commercial Anonymi Eteria                   | Athen                      | Griechenland | 90,00  |
| Media Markt TV-HiFi-Elektro Athens V Commercial Anonymi Eteria                    | Athen                      | Griechenland | 100,00 |
| MEDIA MARKT TV-HiFi-Elektro Gesellschaft m.b.H.                                   | Seiersberg                 | Österreich   | 90,00  |
| MEDIA MARKT TV-HiFi-Elektro Gesellschaft m.b.H.                                   | Innsbruck                  | Österreich   | 90,00  |
| MEDIA MARKT TV-Hifi-Elektro Gesellschaft m.b.H.                                   | Klagenfurt                 | Österreich   | 90,00  |
| MEDIA MARKT TV-Hifi-Elektro Gesellschaft m.b.H.                                   | Leonding                   | Österreich   | 90,00  |
| MEDIA Markt TV-Hifi-Elektro Gesellschaft m.b.H.                                   | Salzburg                   | Österreich   | 90,00  |
| MEDIA MARKT TV-Hifi-Elektro Gesellschaft m.b.H.                                   | Villach                    | Österreich   | 90,00  |
| MEDIA MARKT TV-Hifi-Elektro Gesellschaft m.b.H.                                   | Vösendorf                  | Österreich   | 90,00  |
| MEDIA MARKT TV-Hifi-Elektro GmbH                                                  | Wien                       | Österreich   | 90,00  |
| MEDIA MARKT TV-Hifi-Elektro GmbH                                                  | St. Pölten                 | Österreich   | 90,00  |
| MEDIA MARKT TV-HiFi-Elektro GmbH                                                  | Bad Dürkheim               | Deutschland  | 90,00  |
| Media Markt TV-HiFi-Elektro GmbH                                                  | Herzogenrath               | Deutschland  | 90,00  |



|                                                            |                           |             |        |
|------------------------------------------------------------|---------------------------|-------------|--------|
| Media Markt TV-HiFi-Elektro GmbH                           | Schwentinental            | Deutschland | 90,00  |
| Media Markt TV-HiFi-Elektro GmbH                           | Lüneburg                  | Deutschland | 90,00  |
| MEDIA MARKT TV-HiFi-Elektro GmbH                           | Dornbirn                  | Österreich  | 90,00  |
| Media Markt TV-HiFi-Elektro GmbH                           | Krems an der Donau        | Österreich  | 90,00  |
| MEDIA Markt TV-HiFi-Elektro GmbH                           | Hallstadt                 | Deutschland | 90,05  |
| MEDIA Markt TV-HiFi-Elektro GmbH                           | Belm                      | Deutschland | 90,05  |
| Media Markt TV-HiFi-Elektro GmbH                           | Peißen                    | Deutschland | 90,05  |
| Media Markt TV-HiFi-Elektro GmbH                           | Porta Westfalica          | Deutschland | 90,05  |
| Media Markt TV-HiFi-Elektro GmbH                           | Schiffdorf-Spaden         | Deutschland | 90,05  |
| Media Markt TV-HiFi-Elektro GmbH & Co. KG Bruchsal         | Bruchsal                  | Deutschland | 100,00 |
| Media Markt TV-HiFi-Elektro GmbH Alzey                     | Alzey                     | Deutschland | 90,00  |
| MEDIA MARKT TV-HiFi-Elektro GmbH Ansbach                   | Ansbach                   | Deutschland | 90,05  |
| MEDIA Markt TV-HiFi-Elektro GmbH Aschaffenburg             | Aschaffenburg             | Deutschland | 90,05  |
| MEDIA Markt TV-HiFi-Elektro GmbH Augsburg                  | Augsburg                  | Deutschland | 90,00  |
| Media Markt TV-HiFi-Elektro GmbH Augsburg-Göggingen        | Augsburg                  | Deutschland | 90,00  |
| MEDIA MARKT TV-HiFi-Elektro GmbH Bad Kreuznach             | Bad Kreuznach             | Deutschland | 90,00  |
| Media Markt TV-HiFi-Elektro GmbH Bad Neustadt an der Saale | Bad Neustadt an der Saale | Deutschland | 90,00  |
| Media Markt TV-HiFi-Elektro GmbH Baden-Baden               | Baden-Baden               | Deutschland | 90,00  |
| MEDIA Markt TV-HiFi-Elektro GmbH Bayreuth                  | Bayreuth                  | Deutschland | 90,05  |
| MEDIA Markt TV-HiFi-Elektro GmbH Berlin-Biesdorf           | Berlin                    | Deutschland | 90,05  |
| Media Markt TV-HiFi-Elektro GmbH Berlin-Charlottenburg     | Berlin                    | Deutschland | 100,00 |
| MEDIA Markt TV-HiFi-Elektro GmbH Berlin-Gropiusstadt       | Berlin                    | Deutschland | 90,05  |
| MEDIA MARKT TV-HiFi-Elektro GmbH Berlin-Hohenschönhausen   | Berlin                    | Deutschland | 90,00  |
| Media Markt TV-HiFi-Elektro GmbH Berlin-Mitte              | Berlin                    | Deutschland | 90,00  |
| MEDIA Markt TV-HiFi-Elektro GmbH Berlin-Neukölln           | Berlin                    | Deutschland | 90,00  |
| Media Markt TV-HiFi-Elektro GmbH Berlin-Prenzlauer Berg    | Berlin                    | Deutschland | 90,00  |
| Media Markt TV-HiFi-Elektro GmbH Berlin-Schöneeweide       | Berlin                    | Deutschland | 90,00  |
| MEDIA MARKT TV-HiFi-Elektro GmbH Berlin-Spandau            | Berlin                    | Deutschland | 90,05  |
| Media Markt TV-HiFi-Elektro GmbH Berlin-Steglitz           | Berlin                    | Deutschland | 90,00  |
| MEDIA MARKT TV-HiFi-Elektro GmbH Berlin-Tegel              | Berlin                    | Deutschland | 90,05  |
| Media Markt TV-HiFi-Elektro GmbH Berlin-Tempelhof          | Berlin                    | Deutschland | 90,00  |
| MEDIA MARKT TV-HiFi-Elektro GmbH Berlin-Wedding            | Berlin                    | Deutschland | 100,00 |
| Media Markt TV-HiFi-Elektro GmbH Bielefeld                 | Bielefeld                 | Deutschland | 90,05  |
| Media Markt TV-HiFi-Elektro GmbH Bischofsheim              | Bischofsheim              | Deutschland | 90,00  |
| Media Markt TV-HiFi-Elektro GmbH Bochum                    | Bochum                    | Deutschland | 90,00  |
| Media Markt TV-HiFi-Elektro GmbH Bochum-Ruhrpark           | Bochum                    | Deutschland | 90,00  |
| Media Markt TV-HiFi-Elektro GmbH Brandenburg an der Havel  | Brandenburg an der Havel  | Deutschland | 100,00 |
| Media Markt TV-HiFi-Elektro GmbH Braunschweig              | Braunschweig              | Deutschland | 90,05  |
| Media Markt TV-HiFi-Elektro GmbH Bremen                    | Bremen                    | Deutschland | 90,05  |
| Media Markt TV-HiFi-Elektro GmbH Bremen-Oslebshausen       | Bremen                    | Deutschland | 90,00  |
| Media Markt TV-HiFi-Elektro GmbH Buchholz in der Nordheide | Buchholz in der Nordheide | Deutschland | 90,00  |
| Media Markt TV-HiFi-Elektro GmbH Buxtehude                 | Buxtehude                 | Deutschland | 90,00  |
| MEDIA MARKT TV-HiFi-Elektro GmbH Castrop-Rauxel            | Castrop-Rauxel            | Deutschland | 90,00  |
| Media Markt TV-HiFi-Elektro GmbH Chemnitz                  | Chemnitz                  | Deutschland | 90,00  |
| Media Markt TV-HiFi-Elektro GmbH Chemnitz-Röhrsdorf        | Chemnitz                  | Deutschland | 90,00  |
| Media Markt TV-HiFi-Elektro GmbH Cottbus/Groß Gaglow       | Cottbus                   | Deutschland | 90,05  |
| Media Markt TV-HiFi-Elektro GmbH Deggendorf                | Deggendorf                | Deutschland | 95,00  |

|                                                        |                            |             |        |
|--------------------------------------------------------|----------------------------|-------------|--------|
| Media Markt TV-HiFi-Elektro GmbH Dessau                | Dessau-Roßlau              | Deutschland | 90,00  |
| MEDIA MARKT TV-HiFi-Elektro GmbH Dietzenbach           | Dietzenbach                | Deutschland | 90,00  |
| Media Markt TV-HiFi-Elektro GmbH Dresden Centrum       | Dresden                    | Deutschland | 90,00  |
| MEDIA MARKT TV-HiFi-Elektro GmbH Dresden-Mickten       | Dresden                    | Deutschland | 90,00  |
| Media Markt TV-HiFi-Elektro GmbH Duisburg              | Duisburg                   | Deutschland | 90,00  |
| Media Markt TV-HiFi-Elektro GmbH Duisburg-Großenbaum   | Duisburg                   | Deutschland | 90,00  |
| Media Markt TV-HiFi-Elektro GmbH Düsseldorf            | Düsseldorf                 | Deutschland | 90,00  |
| Media Markt TV-HiFi-Elektro GmbH Düsseldorf-Bilk       | Düsseldorf                 | Deutschland | 90,00  |
| Media Markt TV-HiFi-Elektro GmbH Egelsbach             | Egelsbach                  | Deutschland | 90,00  |
| Media Markt TV-HiFi-Elektro GmbH Eiche                 | Ahrensfelde-Eiche          | Deutschland | 90,00  |
| Media Markt TV-HiFi-Elektro GmbH Emden                 | Emden                      | Deutschland | 100,00 |
| Media Markt TV-HiFi-Elektro GmbH Erding                | Erding                     | Deutschland | 90,00  |
| Media Markt TV-HiFi-Elektro GmbH Erfurt Thüringen-Park | Erfurt                     | Deutschland | 90,05  |
| Media Markt TV-HiFi-Elektro GmbH Erfurt-Daberstedt     | Erfurt                     | Deutschland | 90,00  |
| Media Markt TV-HiFi-Elektro GmbH Erlangen              | Erlangen                   | Deutschland | 90,00  |
| Media Markt TV-HiFi-Elektro GmbH Essen                 | Essen                      | Deutschland | 90,05  |
| Media Markt TV-HiFi-Elektro GmbH Esslingen             | Esslingen am Neckar        | Deutschland | 90,00  |
| Media Markt TV-HiFi-Elektro GmbH Flensburg             | Flensburg                  | Deutschland | 90,05  |
| Media Markt TV-HiFi-Elektro GmbH Frankfurt             | Frankfurt am Main          | Deutschland | 90,05  |
| MEDIA MARKT TV-HiFi-Elektro GmbH Frankfurt-Borsigallee | Frankfurt am Main          | Deutschland | 90,00  |
| Media Markt TV-HiFi-Elektro GmbH Freiburg              | Freiburg im Breisgau       | Deutschland | 90,05  |
| MEDIA MARKT TV-HiFi-Elektro GmbH Friedrichshafen       | Friedrichshafen            | Deutschland | 90,00  |
| Media Markt TV-HiFi-Elektro GmbH Fulda                 | Fulda                      | Deutschland | 90,05  |
| Media Markt TV-HiFi-Elektro GmbH Gießen                | Gießen                     | Deutschland | 90,00  |
| Media Markt TV-HiFi-Elektro GmbH Goslar                | Goslar                     | Deutschland | 90,00  |
| Media Markt TV-HiFi-Elektro GmbH Göttingen             | Göttingen                  | Deutschland | 90,05  |
| Media Markt TV-HiFi-Elektro GmbH Greifswald            | Greifswald                 | Deutschland | 90,00  |
| Media Markt TV-HiFi-Elektro GmbH Gründau-Lieblos       | Gründau-Lieblos            | Deutschland | 90,00  |
| Media Markt TV-HiFi-Elektro GmbH Günthersdorf          | Günthersdorf               | Deutschland | 90,00  |
| MEDIA MARKT TV-HiFi-Elektro GmbH Gütersloh             | Gütersloh                  | Deutschland | 90,00  |
| Media Markt TV-HiFi-Elektro GmbH Halberstadt           | Halberstadt                | Deutschland | 90,00  |
| Media Markt TV-HiFi-Elektro GmbH Halstenbek            | Halstenbek                 | Deutschland | 90,00  |
| Media Markt TV-HiFi-Elektro GmbH Hamburg- Wandsbek     | Hamburg                    | Deutschland | 90,00  |
| Media Markt TV-HiFi-Elektro GmbH Hamburg-Altona        | Hamburg                    | Deutschland | 90,00  |
| Media Markt TV-HiFi-Elektro GmbH Hamburg-Billstedt     | Hamburg                    | Deutschland | 90,00  |
| MEDIA MARKT TV-HiFi-Elektro GmbH Hamburg-Harburg       | Hamburg                    | Deutschland | 90,00  |
| Media Markt TV-HiFi-Elektro GmbH Hamburg-Hummelsbüttel | Hamburg                    | Deutschland | 90,00  |
| Media Markt TV-HiFi-Elektro GmbH Hamburg-Nedderfeld    | Hamburg                    | Deutschland | 90,00  |
| Media Markt TV-HiFi-Elektro GmbH Hameln                | Hameln                     | Deutschland | 90,05  |
| Media Markt TV-HiFi-Elektro GmbH Hannover-Vahrenheide  | Hannover                   | Deutschland | 90,00  |
| MEDIA MARKT TV-HiFi-Elektro GmbH Hannover-Wülfel       | Hannover                   | Deutschland | 90,00  |
| Media Markt TV-HiFi-Elektro GmbH Heide                 | Heide                      | Deutschland | 90,00  |
| MEDIA Markt TV-HiFi-Elektro GmbH Heidelberg            | Heidelberg                 | Deutschland | 90,00  |
| MEDIA MARKT TV-HiFi-Elektro GmbH Heidelberg-Rohrbach   | Heidelberg                 | Deutschland | 90,00  |
| Media Markt TV-HiFi-Elektro GmbH Henstedt-Ulzburg      | Henstedt-Ulzburg           | Deutschland | 90,00  |
| Media Markt TV-HiFi-Elektro GmbH Heppenheim            | Heppenheim<br>(Bergstraße) | Deutschland | 90,00  |
| Media Markt TV-HiFi-Elektro GmbH Hildesheim            | Hildesheim                 | Deutschland | 90,05  |
| Media Markt TV-HiFi-Elektro GmbH Hof                   | Hof                        | Deutschland | 90,05  |

|                                                          |                     |             |        |
|----------------------------------------------------------|---------------------|-------------|--------|
| Media Markt TV-HiFi-Elektro GmbH Holzminden              | Holzminden          | Deutschland | 90,00  |
| Media Markt TV-HiFi-Elektro GmbH Homburg/Saar            | Homburg             | Deutschland | 90,00  |
| Media Markt TV-HiFi-Elektro GmbH Hückelhoven             | Hückelhoven         | Deutschland | 90,00  |
| Media Markt TV-HiFi-Elektro GmbH Idar-Oberstein          | Idar-Oberstein      | Deutschland | 90,00  |
| Media Markt TV-HiFi-Elektro GmbH Itzehoe                 | Itzehoe             | Deutschland | 90,00  |
| Media Markt TV-HiFi-Elektro GmbH Jena                    | Jena                | Deutschland | 90,05  |
| Media Markt TV-HiFi-Elektro GmbH Kaiserslautern          | Kaiserslautern      | Deutschland | 90,00  |
| Media Markt TV-HiFi-Elektro GmbH Karlsruhe               | Karlsruhe           | Deutschland | 90,05  |
| Media Markt TV-HiFi-Elektro GmbH Karlsruhe-Ettlinger Tor | Karlsruhe           | Deutschland | 90,05  |
| Media Markt TV-HiFi-Elektro GmbH Kassel                  | Kassel              | Deutschland | 90,05  |
| Media Markt TV-HiFi-Elektro GmbH Kempten                 | Kempten (Allgäu)    | Deutschland | 90,00  |
| Media Markt TV-HiFi-Elektro GmbH Kiel                    | Kiel                | Deutschland | 90,00  |
| Media Markt TV-HiFi-Elektro GmbH Koblenz                 | Koblenz             | Deutschland | 90,05  |
| Media Markt TV-HiFi-Elektro GmbH Köln Hohe Straße        | Köln                | Deutschland | 90,05  |
| Media Markt TV-HiFi-Elektro GmbH Köln-Kalk               | Köln                | Deutschland | 90,00  |
| Media Markt TV-HiFi-Elektro GmbH Köln-Marsdorf           | Köln                | Deutschland | 90,05  |
| Media Markt TV-HiFi-Elektro GmbH Konstanz                | Konstanz            | Deutschland | 100,00 |
| Media Markt TV-HiFi-Elektro GmbH Krefeld                 | Krefeld             | Deutschland | 90,05  |
| MEDIA MARKT TV-HiFi-Elektro GmbH Lahr                    | Lahr                | Deutschland | 90,00  |
| Media Markt TV-HiFi-Elektro GmbH Landau/Pfalz            | Landau in der Pfalz | Deutschland | 90,00  |
| Media Markt TV-HiFi-Elektro GmbH Landsberg/Lech          | Landsberg am Lech   | Deutschland | 90,00  |
| Media Markt TV-HiFi-Elektro GmbH Landshut                | Landshut            | Deutschland | 94,00  |
| Media Markt TV-HiFi-Elektro GmbH Leipzig-Paunsdorf       | Leipzig             | Deutschland | 90,00  |
| MEDIA MARKT TV-HiFi-Elektro GmbH Limburg                 | Limburg             | Deutschland | 90,00  |
| Media Markt TV-HiFi-Elektro GmbH Lingen                  | Lingen              | Deutschland | 90,00  |
| Media Markt TV-HiFi-Elektro GmbH Lübeck                  | Lübeck              | Deutschland | 90,00  |
| Media Markt TV-HiFi-Elektro GmbH Ludwigsburg             | Ludwigsburg         | Deutschland | 90,00  |
| Media Markt TV-HiFi-Elektro GmbH Ludwigshafen            | Ludwigshafen        | Deutschland | 95,00  |
| MEDIA MARKT TV-HiFi-Elektro GmbH Magdeburg               | Magdeburg           | Deutschland | 90,05  |
| MEDIA MARKT TV-HiFi-Elektro GmbH Magdeburg-Bördepark     | Magdeburg           | Deutschland | 90,00  |
| Media Markt TV-HiFi-Elektro GmbH Main-Taunus-Zentrum     | Sulzbach            | Deutschland | 90,00  |
| Media Markt TV-HiFi-Elektro GmbH Mainz                   | Mainz               | Deutschland | 90,00  |
| Media Markt TV-HiFi-Elektro GmbH Mannheim                | Mannheim            | Deutschland | 90,00  |
| Media Markt TV-HiFi-Elektro GmbH Mannheim-Sandhofen      | Mannheim            | Deutschland | 90,00  |
| MEDIA MARKT TV-HiFi-Elektro GmbH Marburg                 | Marburg             | Deutschland | 90,00  |
| MEDIA MARKT TV-HiFi-Elektro GmbH Marktredwitz            | Marktredwitz        | Deutschland | 90,00  |
| Media Markt TV-HiFi-Elektro GmbH Meerane                 | Meerane             | Deutschland | 90,00  |
| Media Markt TV-HiFi-Elektro GmbH Memmingen               | Memmingen           | Deutschland | 90,00  |
| Media Markt TV-HiFi-Elektro GmbH Mönchengladbach         | Mönchengladbach     | Deutschland | 90,00  |
| Media Markt TV-HiFi-Elektro GmbH Mühldorf/Inn            | Mühldorf am Inn     | Deutschland | 90,00  |
| Media Markt TV-HiFi-Elektro GmbH Mülheim                 | Mülheim an der Ruhr | Deutschland | 90,05  |
| Media Markt TV-HiFi-Elektro GmbH München-Aubing          | München             | Deutschland | 90,00  |
| Media Markt TV-HiFi-Elektro GmbH München-Haidhausen      | München             | Deutschland | 90,00  |
| Media Markt TV-HiFi-Elektro GmbH München-Solln           | München             | Deutschland | 90,00  |
| Media Markt TV-HiFi-Elektro GmbH Münster                 | Münster             | Deutschland | 90,05  |
| Media Markt TV-HiFi-Elektro GmbH Neubrandenburg          | Neubrandenburg      | Deutschland | 90,05  |
| Media Markt TV-HiFi-Elektro GmbH Neumünster              | Neumünster          | Deutschland | 90,05  |
| Media Markt TV-HiFi-Elektro GmbH Neunkirchen             | Neunkirchen         | Deutschland | 90,00  |

|                                                             |                            |             |        |
|-------------------------------------------------------------|----------------------------|-------------|--------|
| Media Markt TV-HiFi-Elektro GmbH Neuss                      | Neuss                      | Deutschland | 90,00  |
| Media Markt TV-HiFi-Elektro GmbH Neustadt an der Weinstraße | Neustadt an der Weinstraße | Deutschland | 90,00  |
| Media Markt TV-HiFi-Elektro GmbH Neu-Ulm                    | Neu-Ulm                    | Deutschland | 90,00  |
| Media Markt TV-HiFi-Elektro GmbH Neuwied                    | Neuwied                    | Deutschland | 90,05  |
| MEDIA MARKT TV-HiFi-Elektro GmbH Nienburg                   | Nienburg                   | Deutschland | 90,00  |
| Media Markt TV-HiFi-Elektro GmbH Nordhorn                   | Nordhorn                   | Deutschland | 90,00  |
| MEDIA Markt TV-HiFi-Elektro GmbH Nürnberg-Kleinreuth        | Nürnberg                   | Deutschland | 90,00  |
| MEDIA MARKT TV-HiFi-Elektro GmbH Nürnberg-Langwasser        | Nürnberg                   | Deutschland | 90,00  |
| Media Markt TV-HiFi-Elektro GmbH Nürnberg-Schoppershof      | Nürnberg                   | Deutschland | 90,00  |
| Media Markt TV-HiFi-Elektro GmbH Offenburg                  | Offenburg                  | Deutschland | 90,00  |
| Media Markt TV-HiFi-Elektro GmbH Oldenburg                  | Oldenburg                  | Deutschland | 90,00  |
| Media Markt TV-HiFi-Elektro GmbH Paderborn                  | Paderborn                  | Deutschland | 90,05  |
| Media Markt TV-HiFi-Elektro GmbH Papenburg                  | Papenburg                  | Deutschland | 90,00  |
| Media Markt TV-HiFi-Elektro GmbH Passau                     | Passau                     | Deutschland | 90,05  |
| Media Markt TV-HiFi-Elektro GmbH Peine                      | Peine                      | Deutschland | 90,00  |
| Media Markt TV-HiFi-Elektro GmbH Pforzheim                  | Pforzheim                  | Deutschland | 90,00  |
| Media Markt TV-HiFi-Elektro GmbH Pirmasens                  | Pirmasens                  | Deutschland | 95,00  |
| Media Markt TV-HiFi-Elektro GmbH Plauen                     | Plauen                     | Deutschland | 90,00  |
| Media Markt TV-HiFi-Elektro GmbH Potsdam                    | Potsdam                    | Deutschland | 90,00  |
| Media Markt TV-HiFi-Elektro GmbH Ravensburg                 | Ravensburg                 | Deutschland | 90,05  |
| Media Markt TV-HiFi-Elektro GmbH Recklinghausen             | Recklinghausen             | Deutschland | 90,00  |
| Media Markt TV-HiFi-Elektro GmbH Regensburg                 | Regensburg                 | Deutschland | 90,05  |
| Media Markt TV-HiFi-Elektro GmbH Reutlingen                 | Reutlingen                 | Deutschland | 90,05  |
| MEDIA MARKT TV-HiFi-Elektro GmbH Rheine                     | Rheine                     | Deutschland | 90,00  |
| MEDIA MARKT TV-HiFi-Elektro GmbH Rödental                   | Rödental                   | Deutschland | 90,00  |
| MEDIA MARKT TV-HiFi-Elektro GmbH Rosenheim                  | Rosenheim                  | Deutschland | 100,00 |
| Media Markt TV-HiFi-Elektro GmbH Rostock                    | Sievershagen               | Deutschland | 90,05  |
| Media Markt TV-HiFi-Elektro GmbH Rostock-Brinckmansdorf     | Rostock                    | Deutschland | 90,00  |
| MEDIA MARKT TV-HiFi-Elektro GmbH Saarbrücken                | Saarbrücken                | Deutschland | 90,05  |
| Media Markt TV-HiFi-Elektro GmbH Saarbrücken-Saarterrassen  | Saarbrücken                | Deutschland | 90,00  |
| Media Markt TV-HiFi-Elektro GmbH Saarlouis                  | Saarlouis                  | Deutschland | 90,00  |
| Media Markt TV-HiFi-Elektro GmbH Schwedt                    | Schwedt/Oder               | Deutschland | 100,00 |
| Media Markt TV-HiFi-Elektro GmbH Schweinfurt                | Schweinfurt                | Deutschland | 90,05  |
| Media Markt TV-HiFi-Elektro GmbH Schwerin                   | Schwerin                   | Deutschland | 90,05  |
| Media Markt TV-HiFi-Elektro GmbH Siegen                     | Siegen                     | Deutschland | 90,00  |
| Media Markt TV-HiFi-Elektro GmbH Sindelfingen               | Sindelfingen               | Deutschland | 90,00  |
| MEDIA MARKT TV-HiFi-Elektro GmbH Singen                     | Singen                     | Deutschland | 90,00  |
| Media Markt TV-HiFi-Elektro GmbH Speyer                     | Speyer                     | Deutschland | 90,00  |
| Media Markt TV-HiFi-Elektro GmbH Stade                      | Stade                      | Deutschland | 90,00  |
| Media Markt TV-HiFi-Elektro GmbH Stralsund                  | Stralsund                  | Deutschland | 90,05  |
| Media Markt TV-HiFi-Elektro GmbH Straubing                  | Straubing                  | Deutschland | 90,05  |
| MEDIA MARKT TV-HiFi-Elektro GmbH Stuhr                      | Stuhr                      | Deutschland | 90,05  |
| Media Markt TV-HiFi-Elektro GmbH Stuttgart-Feuerbach        | Stuttgart                  | Deutschland | 90,00  |
| Media Markt TV-HiFi-Elektro GmbH Stuttgart-Vaihingen        | Stuttgart                  | Deutschland | 90,00  |
| Media Markt TV-HiFi-Elektro GmbH Traunreut                  | Traunreut                  | Deutschland | 90,00  |
| Media Markt TV-HiFi-Elektro GmbH Traunstein                 | Traunstein                 | Deutschland | 90,00  |
| MEDIA MARKT TV-HiFi-Elektro GmbH Trier                      | Trier                      | Deutschland | 90,00  |
| MEDIA MARKT TV-HiFi-Elektro GmbH Ulm                        | Ulm                        | Deutschland | 90,00  |

|                                                                         |                         |              |        |
|-------------------------------------------------------------------------|-------------------------|--------------|--------|
| MEDIA MARKT TV-HiFi-Elektro GmbH Velbert                                | Velbert                 | Deutschland  | 90,00  |
| Media Markt TV-HiFi-Elektro GmbH Viernheim                              | Viernheim               | Deutschland  | 90,00  |
| Media Markt TV-HiFi-Elektro GmbH Waltersdorf bei Berlin                 | Schönefeld              | Deutschland  | 90,05  |
| Media Markt TV-HiFi-Elektro GmbH Weiden                                 | Weiden in der Oberpfalz | Deutschland  | 90,00  |
| Media Markt TV-HiFi-Elektro GmbH Weilheim                               | Weilheim                | Deutschland  | 90,00  |
| Media Markt TV-HiFi-Elektro GmbH Weiterstadt                            | Weiterstadt             | Deutschland  | 90,00  |
| Media Markt TV-HiFi-Elektro GmbH Wetzlar                                | Wetzlar                 | Deutschland  | 90,00  |
| Media Markt TV-HiFi-Elektro GmbH Wiesbaden                              | Wiesbaden               | Deutschland  | 100,00 |
| Media Markt TV-HiFi-Elektro GmbH Wiesbaden-Äppelallee                   | Wiesbaden               | Deutschland  | 100,00 |
| Media Markt TV-HiFi-Elektro GmbH Wolfsburg                              | Wolfsburg               | Deutschland  | 90,05  |
| Media Markt TV-HiFi-Elektro GmbH Worms                                  | Worms                   | Deutschland  | 90,00  |
| Media Markt TV-HiFi-Elektro GmbH Wuppertal                              | Wuppertal               | Deutschland  | 90,00  |
| Media Markt TV-HiFi-Elektro GmbH Würzburg                               | Würzburg                | Deutschland  | 90,05  |
| Media Markt TV-HiFi-Elektro GmbH Würzburg - Alfred-Nobel-Straße         | Würzburg                | Deutschland  | 90,00  |
| MEDIA MARKT TV-HiFi-Elektro GmbH Zella-Mehlis                           | Zella-Mehlis            | Deutschland  | 90,00  |
| Media Markt TV-HiFi-Elektro GmbH Zwickau                                | Zwickau                 | Deutschland  | 90,05  |
| Media Markt TV-HiFi-Elektro Larissa Commercial Anonymi Eteria           | Athen                   | Griechenland | 100,00 |
| MEDIA Markt TV-HiFi-Elektro Licht GmbH Ingolstadt                       | Ingolstadt              | Deutschland  | 100,00 |
| Media Markt TV-HiFi-Elektro Thessaloniki I Commercial Anonymi Eteria    | Athen                   | Griechenland | 90,00  |
| Media Markt TV-HiFi-Elektro Thessaloniki II Commercial Anonymi Eteria   | Athen                   | Griechenland | 100,00 |
| MEDIA MARKT TV-Hifi-Elektro Wien XI Gesellschaft m.b.H.                 | Wien                    | Österreich   | 90,00  |
| MEDIA MARKT TV-Hifi-Elektro Wien XIII GmbH                              | Wien                    | Österreich   | 90,00  |
| MEDIA MARKT TV-Hifi-Elektro Wien XXI Gesellschaft m.b.H.                | Wien                    | Österreich   | 90,00  |
| MEDIA MARKT TWEE TORENS HASSELT NV                                      | Hasselt                 | Belgien      | 90,00  |
| Media Markt Umeå TV-Hifi-Elektro AB                                     | Umeå                    | Schweden     | 90,01  |
| Media Markt Uppsala TV-Hifi-Elektro AB                                  | Stockholm               | Schweden     | 90,01  |
| Media Markt Utrecht B.V.                                                | Utrecht                 | Niederlande  | 90,10  |
| MEDIA MARKT VALÈNCIA-CAMPANAR VIDEO-TV-HIFI-ELEKTRO-COMPUTER-FOTO, S.A. | València                | Spanien      | 99,90  |
| MEDIA MARKT VALLADOLID VÍDEO-TV-HIFI-ELEKTRO-COMPUTER-FOTO, S.A.        | Valladolid              | Spanien      | 99,90  |
| Media Markt Västerås TV-Hifi-Elektro AB                                 | Stockholm               | Schweden     | 90,01  |
| Media Markt Växjö TV-Hifi-Elektro AB                                    | Stockholm               | Schweden     | 90,01  |
| Media Markt Verbund Heilbronn-Franken GmbH                              | Heilbronn               | Deutschland  | 90,00  |
| Media Markt Video-TV-Hifi-Elektro-Computer-Foto AG, Basel               | Basel                   | Schweiz      | 90,00  |
| Media Markt Video-TV-Hifi-Elektro-Computer-Foto AG, Biel-Brügg          | Brügg bei Biel          | Schweiz      | 90,00  |
| Media Markt Video-TV-Hifi-Elektro-Computer-Foto AG, Chur                | Chur                    | Schweiz      | 90,00  |
| Media Markt Video-TV-HiFi-Elektro-Computer-Foto AG, Conthey             | Conthey                 | Schweiz      | 90,00  |
| Media Markt Video-TV-Hifi-Elektro-Computer-Foto AG, Crissier            | Crissier                | Schweiz      | 90,00  |
| Media Markt Video-TV-Hifi-Elektro-Computer-Foto AG, Granges-Paccot      | Granges-Paccot          | Schweiz      | 90,00  |
| Media Markt Video-TV-Hifi-Elektro-Computer-Foto AG, Kriens              | Kriens                  | Schweiz      | 90,00  |
| Media Markt Video-TV-Hifi-Elektro-Computer-Foto AG, Lyssach             | Lyssach                 | Schweiz      | 100,00 |
| Media Markt Video-TV-Hifi-Elektro-Computer-Foto AG, Meyrin              | Meyrin                  | Schweiz      | 90,00  |
| Media Markt Video-TV-Hifi-Elektro-Computer-Foto AG, Muri b. Bern        | Muri bei Bern           | Schweiz      | 90,00  |
| Media Markt Video-TV-Hifi-Elektro-Computer-Foto AG, Oftringen           | Oftringen               | Schweiz      | 90,00  |
| Media Markt Video-TV-Hifi-Elektro-Computer-Foto AG, Pratteln            | Pratteln                | Schweiz      | 90,00  |
| Media Markt Video-TV-Hifi-Elektro-Computer-Foto AG, St. Gallen          | St. Gallen              | Schweiz      | 90,00  |
| Media Markt Video-TV-Hifi-Elektro-Computer-Foto AG, Zürich              | Zürich                  | Schweiz      | 91,00  |
| Media Markt Video-TV-Hifi-Elektro-Computer-Foto Grancia AG              | Grancia                 | Schweiz      | 90,00  |

|                                                                                                     |                      |              |        |
|-----------------------------------------------------------------------------------------------------|----------------------|--------------|--------|
| Media Markt Video-TV-Hifi-Elektro-Computer-Foto SA, Genève                                          | Genf                 | Schweiz      | 90,00  |
| MEDIA MARKT VIGO VIDEO-TV-HIFI-ELEKTRO-COMPUTER-FOTO S.A.                                           | Vigo                 | Spanien      | 99,90  |
| MEDIA MARKT VITORIA-GASTEIZ VIDEO-TV-HIFI-ELEKTRO-COMPUTER-FOTO, S.A.                               | Vitoria              | Spanien      | 99,90  |
| Media Markt Vöcklabruck TV-Hifi-Elektro GmbH                                                        | Vöcklabruck          | Österreich   | 90,00  |
| Media Markt Wels TV-Hifi-Elektro GmbH                                                               | Wels                 | Österreich   | 90,00  |
| MEDIA MARKT- West End Video TV Hifi Elektro Photo Computer Kereskedelmi Kft.                        | Budapest             | Ungarn       | 90,00  |
| Media Markt Wien XV TV-Hifi-Elektro GmbH                                                            | Wien                 | Österreich   | 90,00  |
| Media Markt Wien XXII TV-Hifi-Elektro GmbH                                                          | Wien                 | Österreich   | 90,00  |
| MEDIA MARKT Wörgl TV-Hifi-Elektro GmbH                                                              | Wörgl                | Österreich   | 90,00  |
| MEDIA MARKT X - Produtos Informáticos e Electrónicos, LDA.                                          | Lissabon             | Portugal     | 100,00 |
| MEDIA MARKT XCV TV-HiFi-Elektro GmbH Ingolstadt                                                     | Ingolstadt           | Deutschland  | 100,00 |
| MEDIA MARKT XI - Produtos Informáticos e Electrónicos, LDA.                                         | Lissabon             | Portugal     | 100,00 |
| MEDIA MARKT XII - Produtos Informáticos e Electrónicos, LDA.                                        | Lissabon             | Portugal     | 100,00 |
| Media Markt Zalaegerszeg Video TV Hifi Elektro Computer Kereskedelmi Korlátolt Felelősségű Társaság | Zalaegerszeg         | Ungarn       | 100,00 |
| MEDIA MARKT ZARAGOZA PUERTO VENECIA VIDEO-TV-HIFI-ELEKTRO-COMPUTER-FOTO, S.A.                       | Zaragoza             | Spanien      | 99,90  |
| MEDIA MARKT ZARAGOZA VIDEO-TV-HIFI-ELEKTRO-COMPUTER-FOTO, S.A.                                      | Zaragoza             | Spanien      | 99,90  |
| Media Markt Zell am See TV-Hifi-Elektro GmbH                                                        | Zell am See          | Österreich   | 90,00  |
| Media Markt Zoetermeer B.V.                                                                         | Zoetermeer           | Niederlande  | 90,10  |
| Media Markt zwei TV-HiFi-Elektro GmbH Dresden-Prohlis                                               | Dresden              | Deutschland  | 90,00  |
| Media Markt Zwolle B.V.                                                                             | Zwolle               | Niederlande  | 90,10  |
| MEDIA MARKT-SATURN BELGIUM N.V.                                                                     | Asse-Zellik          | Belgien      | 100,00 |
| Media Saturn - Servicos de Apoio Administrativo, Lda.                                               | Lissabon             | Portugal     | 100,00 |
| Media Saturn Electronics Hellas Holding Anonymi Eteria                                              | Athen                | Griechenland | 100,00 |
| MEDIA SATURN FRANCE S.C.S.                                                                          | Ris-Orangis          | Frankreich   | 100,00 |
| Media Saturn Hellas Company Administration Anonymi Eteria                                           | Athen                | Griechenland | 100,00 |
| Media Saturn Holding Polska Sp.z.o.o.                                                               | Warschau             | Polen        | 100,00 |
| Media Saturn Management AG                                                                          | Geroldswil           | Schweiz      | 100,00 |
| MEDIA SATURN MULTICHANNEL S.A.U.                                                                    | El Prat de Llobregat | Spanien      | 100,00 |
| Media Saturn Power Service AG                                                                       | Härkingen            | Schweiz      | 80,00  |
| Mediamarket S.p.A.                                                                                  | Curno                | Italien      | 97,00  |
| MediaMarkt (China) International Retail Holding Limited                                             | Hong Kong            | China        | 75,00  |
| MediaMarkt (Shanghai) Commercial & Trading Company Limited                                          | Shanghai             | China        | 100,00 |
| MediaMarkt (Shanghai) Consulting Service Company Limited                                            | Shanghai             | China        | 100,00 |
| MEDIA-Markt TV-HiFi-Elektro GmbH Aachen                                                             | Aachen               | Deutschland  | 90,00  |
| MediaOnline GmbH                                                                                    | Ingolstadt           | Deutschland  | 100,00 |
| MEDIA-SATURN (PORTUGAL), SGPS, UNIPESSOAL LDA                                                       | Lissabon             | Portugal     | 100,00 |
| Media-Saturn China-Holding GmbH                                                                     | Ingolstadt           | Deutschland  | 75,41  |
| Media-Saturn China-Holding Limited                                                                  | Hong Kong            | China        | 100,00 |
| Media-Saturn Deutschland GmbH                                                                       | Ingolstadt           | Deutschland  | 100,00 |
| Media-Saturn Helvetia Holding GmbH                                                                  | Ingolstadt           | Deutschland  | 100,00 |
| Media-Saturn Holding Sweden AB                                                                      | Stockholm            | Schweden     | 100,00 |
| Media-Saturn Immobilien Deutschland GmbH                                                            | Ingolstadt           | Deutschland  | 100,00 |
| Media-Saturn IT Services GmbH                                                                       | Ingolstadt           | Deutschland  | 100,00 |
| Media-Saturn Shared Services Sweden AB                                                              | Stockholm            | Schweden     | 100,00 |
| Media-Saturn Verwaltung Deutschland GmbH                                                            | Ingolstadt           | Deutschland  | 100,00 |
| media-saturn-e-business GmbH                                                                        | Ingolstadt           | Deutschland  | 100,00 |
| Media-Saturn-Holding GmbH                                                                           | Ingolstadt           | Deutschland  | 75,41  |

|                                                                     |                     |                |        |
|---------------------------------------------------------------------|---------------------|----------------|--------|
| Meister feines Fleisch - feine Wurst GmbH                           | Gäufelden           | Deutschland    | 100,00 |
| MEM METRO Group Energy Production & Management GmbH                 | Düsseldorf          | Deutschland    | 100,00 |
| MES METRO Group Energy Solutions GmbH                               | Böblingen           | Deutschland    | 100,00 |
| METRO Beteiligungsmanagement Düsseldorf GmbH & Co. KG               | Düsseldorf          | Deutschland    | 100,00 |
| Metro Cash & Carry Brunnthäl GmbH & Co. KG                          | Brunnthäl           | Deutschland    | 100,00 |
| METRO Cash & Carry Bulgaria EOOD                                    | Sofia               | Bulgarien      | 100,00 |
| METRO Cash & Carry Central Asia Holding GmbH                        | Vösendorf           | Österreich     | 100,00 |
| METRO Cash & Carry China Holding GmbH                               | Vösendorf           | Österreich     | 100,00 |
| METRO Cash & Carry d.o.o.                                           | Zagreb              | Kroatien       | 100,00 |
| METRO Cash & Carry d.o.o.                                           | Belgrad             | Serbien        | 100,00 |
| Metro Cash & Carry Danmark ApS.                                     | Glostrup            | Dänemark       | 100,00 |
| METRO Cash & Carry Deutschland GmbH                                 | Düsseldorf          | Deutschland    | 100,00 |
| METRO Cash & Carry France S.A.S.                                    | Nanterre            | Frankreich     | 100,00 |
| Metro Cash & Carry Grundstücksverwaltungsgesellschaft mbH           | Düsseldorf          | Deutschland    | 100,00 |
| METRO Cash & Carry Import Limited Liability Company                 | Kaliningrad         | Russland       | 100,00 |
| METRO Cash & Carry India Private Limited                            | Bangalore           | Indien         | 100,00 |
| METRO Cash & Carry International GmbH                               | Düsseldorf          | Deutschland    | 100,00 |
| METRO Cash & Carry International Holding B. V.                      | Amsterdam           | Niederlande    | 100,00 |
| METRO Cash & Carry International Holding GmbH                       | Vösendorf           | Österreich     | 100,00 |
| METRO Cash & Carry International Management GmbH                    | Düsseldorf          | Deutschland    | 100,00 |
| METRO Cash & Carry Japan Holding GmbH                               | Vösendorf           | Österreich     | 100,00 |
| METRO Cash & Carry Japan KK                                         | Tokio               | Japan          | 100,00 |
| METRO Cash & Carry Limited Liability Partnership                    | Almaty              | Kasachstan     | 100,00 |
| Metro Cash & Carry Nederland B.V.                                   | Diemen              | Niederlande    | 100,00 |
| METRO Cash & Carry OOO                                              | Moskau              | Russland       | 100,00 |
| METRO Cash & Carry Österreich GmbH                                  | Vösendorf           | Österreich     | 73,00  |
| METRO Cash & Carry Pakistan (Private) Limited                       | Lahore              | Pakistan       | 100,00 |
| METRO CASH & CARRY ROMANIA SRL                                      | Bukarest            | Rumänien       | 85,00  |
| METRO Cash & Carry Slovakia s.r.o.                                  | Ivanka pri Dunaji   | Slowakei       | 100,00 |
| METRO Cash & Carry SR s.r.o.                                        | Ivanka pri Dunaji   | Slowakei       | 100,00 |
| METRO Cash & Carry Ukraine Ltd.                                     | Kiew                | Ukraine        | 100,00 |
| METRO Cash & Carry Vietnam Ltd.                                     | Ho-Chi-Minh-Stadt   | Vietnam        | 100,00 |
| Metro Cash & Carry Wines                                            | Hyderabad           | Indien         | 99,99  |
| METRO Central East Europe GmbH                                      | Wien                | Österreich     | 100,00 |
| METRO Danmark Holding ApS                                           | Glostrup            | Dänemark       | 100,00 |
| METRO Dienstleistungs-Holding GmbH                                  | Düsseldorf          | Deutschland    | 100,00 |
| METRO Distributie Nederland B. V.                                   | Diemen              | Niederlande    | 100,00 |
| METRO DOLOMITI SpA                                                  | San Donato Milanese | Italien        | 100,00 |
| METRO Euro-Finance B. V.                                            | Venlo               | Niederlande    | 100,00 |
| METRO FIM S.p.A.                                                    | Cinisello Balsamo   | Italien        | 100,00 |
| METRO Finance                                                       | Manchester          | Großbritannien | 100,00 |
| METRO Finance B. V.                                                 | Venlo               | Niederlande    | 100,00 |
| METRO Finance Holding Limited                                       | Manchester          | Großbritannien | 100,00 |
| Metro France Immobiliere S. a. r. l.                                | Nanterre            | Frankreich     | 100,00 |
| Metro Grosmarket Bakirköy Alisveris Hizmetleri Ticaret Ltd. Sirketi | Istanbul            | Türkei         | 100,00 |
| METRO Groß- und Lebensmitteleinzelhandel Holding GmbH               | Düsseldorf          | Deutschland    | 100,00 |
| METRO Großhandelsgesellschaft mbH                                   | Düsseldorf          | Deutschland    | 100,00 |
| METRO Group Asset Management B.V.                                   | Amsterdam           | Niederlande    | 100,00 |

|                                                                 |                     |                |        |
|-----------------------------------------------------------------|---------------------|----------------|--------|
| Metro Group Asset Management Emlak Yonetim A.S                  | Istanbul            | Türkei         | 99,93  |
| METRO Group Asset Management GmbH                               | Saarbrücken         | Deutschland    | 66,67  |
| METRO Group Asset Management GmbH & Co. KG                      | Saarbrücken         | Deutschland    | 98,04  |
| METRO Group Asset Management Ingatlan Kft.                      | Budaörs             | Ungarn         | 100,00 |
| METRO Group Asset Management Limited Liability Company          | Moskau              | Russland       | 100,00 |
| METRO Group Asset Management Property Ukraine LLC               | Kiew                | Ukraine        | 100,00 |
| METRO Group Asset Management Services GmbH                      | Saarbrücken         | Deutschland    | 100,00 |
| METRO Group Asset Management Sp.z o.o.                          | Warschau            | Polen          | 100,00 |
| METRO Group Asset Management Ukraine, Limited Liability Company | Kiew                | Ukraine        | 100,00 |
| METRO Group Buying Ukraine Ltd.                                 | Kiew                | Ukraine        | 100,00 |
| METRO Group Energy Production Sp. z o.o.                        | Warschau            | Polen          | 100,00 |
| METRO Group Logistics Hong Kong Co., Limited                    | Hong Kong           | China          | 100,00 |
| Metro Group Logistics LDA                                       | Lissabon            | Portugal       | 100,00 |
| METRO GROUP LOGISTICS S.L.                                      | Madrid              | Spanien        | 100,00 |
| METRO GROUP REAL ESTATE ESPANA S.L.                             | Madrid              | Spanien        | 100,00 |
| METRO Group Real Estate Holding GmbH                            | Düsseldorf          | Deutschland    | 100,00 |
| METRO Group Retail Real Estate GmbH                             | Düsseldorf          | Deutschland    | 100,00 |
| METRO Group Retail Real Estate Romania S.R.L.                   | Voluntari           | Rumänien       | 100,00 |
| Metro Group Settlement AG                                       | Chur                | Schweiz        | 100,00 |
| METRO Group Wholesale Real Estate Bulgaria EOOD                 | Sofia               | Bulgarien      | 100,00 |
| METRO Group Wholesale Real Estate GmbH                          | Düsseldorf          | Deutschland    | 100,00 |
| Metro Holding France S. A.                                      | Vitry sur Seine     | Frankreich     | 100,00 |
| METRO International AG                                          | Baar                | Schweiz        | 100,00 |
| Metro International Beteiligungs GmbH                           | Düsseldorf          | Deutschland    | 100,00 |
| METRO Italia Cash and Carry S. p. A.                            | San Donato Milanese | Italien        | 100,00 |
| METRO Jinjiang Cash & Carry Co., Ltd.                           | Shanghai            | China          | 90,00  |
| METRO Kaufhaus und Fachmarkt Holding GmbH                       | Düsseldorf          | Deutschland    | 100,00 |
| METRO Kereskedelmi Kft.                                         | Budaörs             | Ungarn         | 100,00 |
| METRO Leasing GmbH                                              | Saarbrücken         | Deutschland    | 100,00 |
| Metro Liquors K.K.                                              | Kawaguchi           | Japan          | 100,00 |
| METRO Management EOOD                                           | Sofia               | Bulgarien      | 100,00 |
| METRO Online GmbH                                               | Düsseldorf          | Deutschland    | 100,00 |
| METRO ONLINE USA, Inc.                                          | Delaware            | USA            | 100,00 |
| Metro Properties B.V.                                           | Diemen              | Niederlande    | 100,00 |
| METRO Properties CR s.r.o.                                      | Prag                | Tschechien     | 100,00 |
| Metro Properties Danmark ApS.                                   | Glostrup            | Dänemark       | 100,00 |
| METRO Properties Holding Ltd.                                   | Manchester          | Großbritannien | 100,00 |
| METRO Property Management (Beijing) Co. Ltd.                    | Peking              | China          | 100,00 |
| Metro Property Management (Changsha) Co., Ltd.                  | Changsha            | China          | 100,00 |
| METRO Property Management (Changshu) Co. Ltd.                   | Changshu            | China          | 100,00 |
| Metro Property Management (Changzhou) Co. Ltd.                  | Changzhou           | China          | 100,00 |
| Metro Property Management (Chengdu Qingyang) Co., Ltd.          | Chengdu             | China          | 100,00 |
| METRO Property Management (Chongqing) Co. Ltd.                  | Chongqing           | China          | 100,00 |
| Metro Property Management (Cixi) Co., Limited                   | Cixi                | China          | 100,00 |
| Metro Property Management (Dongguan) Co. Ltd.                   | Dongguan            | China          | 100,00 |
| Metro Property Management (Hangzhou) Company Limited            | Hangzhou            | China          | 100,00 |
| METRO Property Management (Harbin) Co. Ltd.                     | Harbin              | China          | 100,00 |
| Metro Property Management (Hefei) Co. Ltd.                      | Hefei               | China          | 100,00 |



|                                                                           |                     |                |        |
|---------------------------------------------------------------------------|---------------------|----------------|--------|
| Metro Property Management (Jiangyin) Company Limited                      | Jiangyin            | China          | 100,00 |
| Metro Property Management (Jiaxing) Co. Ltd.                              | Jiaxing             | China          | 100,00 |
| Metro Property Management (Kunshan) Company Limited                       | Suzhou              | China          | 100,00 |
| METRO Property Management (Nanchang Qingshanhu) Co. Ltd.                  | Nanchang            | China          | 100,00 |
| Metro Property Management (Nantong) Co. Ltd.                              | Nantong             | China          | 100,00 |
| METRO Property Management (Shenyang) Co. Ltd.                             | Shenyang            | China          | 100,00 |
| METRO Property Management (Shenzhen) Co. Ltd.                             | Shenzhen            | China          | 100,00 |
| Metro Property Management (Suzhou) Co., Ltd.                              | Suzhou              | China          | 100,00 |
| METRO Property Management (Tianjin Hongqiao) Co., Ltd.                    | Tianjin             | China          | 100,00 |
| Metro Property Management (Wuhan) Co., Ltd.                               | Wuhan               | China          | 100,00 |
| METRO Property Management (Xiamen) Co., Ltd.                              | Xiamen              | China          | 100,00 |
| METRO Property Management (Xian) Co., Ltd.                                | Xian                | China          | 100,00 |
| Metro Property Management (Zhengzhou) Co., Ltd.                           | Zhengzhou           | China          | 100,00 |
| METRO Property Management (Zhongshan) Co. Limited                         | Zhongshan           | China          | 100,00 |
| METRO Property Management Wuxi Co. Ltd.                                   | Wuxi                | China          | 100,00 |
| Metro Real Estate Limited                                                 | Manchester          | Großbritannien | 100,00 |
| METRO Real Estate Ltd.                                                    | Zagreb              | Kroatien       | 100,00 |
| Metro Reinsurance N.V.                                                    | Amsterdam           | Niederlande    | 100,00 |
| Metro SB-Großmärkte GmbH & Co. Kommanditgesellschaft                      | Esslingen am Neckar | Deutschland    | 100,00 |
| Metro SB-Großmärkte GmbH & Co. Kommanditgesellschaft                      | Linden              | Deutschland    | 100,00 |
| Metro SB-Großmärkte Verwaltungsgesellschaft mit beschränkter Haftung      | Mülheim an der Ruhr | Deutschland    | 100,00 |
| METRO Sechste Gesellschaft für Vermögensverwaltung mbH                    | Düsseldorf          | Deutschland    | 100,00 |
| METRO Service GmbH                                                        | Vösendorf           | Österreich     | 100,00 |
| Metro Servizi Logistici S. p. A.                                          | San Donato Milanese | Italien        | 100,00 |
| METRO Siebte Gesellschaft für Vermögensverwaltung mbH                     | Düsseldorf          | Deutschland    | 100,00 |
| METRO South East Asia Holding GmbH                                        | Vösendorf           | Österreich     | 100,00 |
| METRO SYSTEMS GmbH                                                        | Düsseldorf          | Deutschland    | 100,00 |
| METRO Systems Ukraine LLC                                                 | Kiew                | Ukraine        | 100,00 |
| METRO Warehouse Management (Chongqing) Co. Ltd.                           | Chongqing           | China          | 100,00 |
| Metro Warehouse Management (Hangzhou) Co. Ltd.                            | Hangzhou            | China          | 100,00 |
| METRO Warehouse Management (Suzhou) Co. Ltd.                              | Suzhou              | China          | 100,00 |
| Metro Warehouse Management (Wuhan) Co. Ltd.                               | Wuhan               | China          | 100,00 |
| Metro Warehouse Management (Yantai) Co., Limited                          | Yantai              | China          | 100,00 |
| Metro Warehouse Noginsk Limited Liability Company                         | Moskau              | Russland       | 100,00 |
| METRO Zehnte Gesellschaft für Vermögensverwaltung mbH                     | Düsseldorf          | Deutschland    | 100,00 |
| METRO Zehnte GmbH & Co. KG                                                | Düsseldorf          | Deutschland    | 100,00 |
| METRO Zwölfte Gesellschaft für Vermögensverwaltung mbH                    | Düsseldorf          | Deutschland    | 100,00 |
| MFM METRO Group Facility Management GmbH                                  | Düsseldorf          | Deutschland    | 100,00 |
| MGA METRO Group Advertising GmbH                                          | Düsseldorf          | Deutschland    | 100,00 |
| MGA METRO Group Advertising Polska Sp. z o.o. i Spółka Sp.k.              | Warschau            | Polen          | 100,00 |
| MGA METRO Group Advertising Polska Spółka z ograniczona odpowiedzialoscia | Warschau            | Polen          | 100,00 |
| MGA METRO Group Advertising Romania srl                                   | Bukarest            | Rumänien       | 100,00 |
| MGA METRO Group Advertising Rus OOO                                       | Moskau              | Russland       | 100,00 |
| MGB METRO Group Buying HK Limited                                         | Hong Kong           | China          | 100,00 |
| MGB Metro Group Buying Romania SRL                                        | Bukarest            | Rumänien       | 100,00 |
| MGB METRO Group Buying RUS LLC                                            | Moskau              | Russland       | 100,00 |
| MGB Metro Group Buying South s.r.l.                                       | Ciniseo Balsamo     | Italien        | 100,00 |
| MGB METRO Group Buying TR Satinalma Ticaret Limited Sirketi               | Istanbul            | Türkei         | 100,00 |

|                                                                 |                      |                |                    |
|-----------------------------------------------------------------|----------------------|----------------|--------------------|
| MGC METRO Group Clearing GmbH                                   | Düsseldorf           | Deutschland    | 100,00             |
| MGE Warenhandelsgesellschaft mbH                                | Düsseldorf           | Deutschland    | 100,00             |
| MGI Metro Group İletişim ve Enformasyon Ticaret Limited Sirketi | Istanbul             | Türkei         | 100,00             |
| MGI METRO Group Information Technology Polska Sp. z o.o.        | Warschau             | Polen          | 100,00             |
| MGI Metro Group Information Technology Romania S.R.L.           | Bukarest             | Rumänien       | 100,00             |
| MGI Metro Group Information Technology RU LLC                   | Moskau               | Rusland        | 100,00             |
| MGL LOGISTICS SERVICES GREECE Eteria Periorismenis Efthisis     | Agios Ioannis Rentis | Griechenland   | 100,00             |
| MGL METRO Group Logistics Bulgaria LTD                          | Sofia                | Bulgarien      | 100,00             |
| MGL METRO Group Logistics GmbH                                  | Düsseldorf           | Deutschland    | 100,00             |
| MGL Metro Group Logistics Italy S.r.l.                          | Cinisello Balsamo    | Italien        | 100,00             |
| MGL METRO Group Logistics Limited Liability Company             | Moskau               | Rusland        | 100,00             |
| MGL METRO Group Logistics Polska Sp. z o.o.                     | Warschau             | Polen          | 100,00             |
| MGL METRO Group Logistics Polska Sp. z o.o. i Spółka Sp.k.      | Warschau             | Polen          | 99,87              |
| MGL METRO GROUP LOGISTICS UKRAINE LLC                           | Kiew                 | Ukraine        | 100,00             |
| MGL METRO Group Logistics Warehousing Beteiligungs GmbH         | Sarstedt             | Deutschland    | 100,00             |
| MGL METRO Group Logistics Warehousing GmbH                      | Sarstedt             | Deutschland    | 100,00             |
| MGL METRO Group Lojistik Hizmetleri Ticaret Limited sirketi     | Istanbul             | Türkei         | 100,00             |
| MGP METRO Group Account Processing GmbH                         | Kehl                 | Deutschland    | 100,00             |
| MGP METRO Group Account Processing International AG             | Baar                 | Schweiz        | 100,00             |
| MGT METRO Group Travel Services GmbH                            | Düsseldorf           | Deutschland    | 100,00             |
| MIAG Asia Co. Ltd.                                              | Hong Kong            | China          | 100,00             |
| MIAG B.V.                                                       | Venlo                | Niederlande    | 100,00             |
| MIAG Commanditaire Vennootschap                                 | Diemen               | Niederlande    | 100,00             |
| MIAG RUS Limited Liability Company                              | Kotelniki            | Rusland        | 100,00             |
| MIB METRO Group Insurance Broker GmbH                           | Düsseldorf           | Deutschland    | 100,00             |
| MIB Services (UK) Ltd                                           | Manchester           | Großbritannien | 100,00             |
| Miller N. V.                                                    | Wommelgem            | Belgien        | 100,00             |
| MIP METRO Group Intellectual Property GmbH & Co. KG             | Düsseldorf           | Deutschland    | 100,00             |
| MIP METRO Group Intellectual Property Management GmbH           | Düsseldorf           | Deutschland    | 100,00             |
| MMS Online Nederland B.V.                                       | Rotterdam            | Niederlande    | 100,00             |
| Morocco Fish Trading Company SARL AU                            | Casablanca           | Marokko        | 100,00             |
| MS Digital Download S.a.r.l.                                    | Esch-sur-Alzette     | Luxemburg      | 100,00             |
| MS E-Business Concepts & Service GmbH                           | Ingolstadt           | Deutschland    | 100,00             |
| MS E-Commerce GmbH                                              | Wiener Neustadt      | Österreich     | 100,00             |
| MS ISTANBUL IC VE DIS TICARET LIMITED SIRKETI                   | Istanbul             | Türkei         | 100,00             |
| MS Multichannel Retailing Ges.m.b.H.                            | Vösendorf            | Österreich     | 100,00             |
| MS Powerservice GmbH                                            | Vösendorf            | Österreich     | 100,00             |
| MTE Grundstücksverwaltung GmbH & Co. Objekt Duisburg oHG        | Pullach im Isartal   | Deutschland    | 19,00 <sup>1</sup> |
| MTT METRO Group Textiles Transport GmbH                         | Düsseldorf           | Deutschland    | 100,00             |
| multi media Kommunikationstechnik Zwei GmbH                     | Heilbronn            | Deutschland    | 100,00             |
| multi media Service GmbH                                        | Heilbronn            | Deutschland    | 80,00              |
| Multi-Center Warenvertriebs GmbH                                | Hannover             | Deutschland    | 100,00             |
| NIGRA Verwaltung GmbH & Co. Objekt Detmold KG                   | Pullach im Isartal   | Deutschland    | 19,00 <sup>1</sup> |
| NIGRA Verwaltung GmbH & Co. Objekt Eschweiler KG                | Pullach im Isartal   | Deutschland    | 19,00 <sup>1</sup> |
| NIGRA Verwaltung GmbH & Co. Objekt Germersheim KG               | Pullach im Isartal   | Deutschland    | 19,00 <sup>1</sup> |
| NIGRA Verwaltung GmbH & Co. Objekt Langendreer KG               | Pullach im Isartal   | Deutschland    | 19,00 <sup>1</sup> |
| NIGRA Verwaltung GmbH & Co. Objekt Ludwigshafen KG              | Pullach im Isartal   | Deutschland    | 49,00 <sup>1</sup> |
| NIGRA Verwaltung GmbH & Co. Objekt Moers KG                     | Pullach im Isartal   | Deutschland    | 19,00 <sup>1</sup> |

|                                                                           |                      |             |                    |
|---------------------------------------------------------------------------|----------------------|-------------|--------------------|
| NIGRA Verwaltung GmbH & Co. Objekt Neunkirchen KG                         | Pullach im Isartal   | Deutschland | 19,00 <sup>1</sup> |
| NIGRA Verwaltung GmbH & Co. Objekt Oberhausen oHG                         | Pullach im Isartal   | Deutschland | 19,00 <sup>1</sup> |
| NIGRA Verwaltung GmbH & Co. Objekt Rendsburg KG                           | Pullach im Isartal   | Deutschland | 19,00 <sup>1</sup> |
| NIGRA Verwaltung GmbH & Co. Objekt Salzgitter KG                          | Pullach im Isartal   | Deutschland | 19,00 <sup>1</sup> |
| 000 Marktkauf Russland                                                    | Moskau               | Russland    | 100,00             |
| 000 Media-Markt-Saturn                                                    | Moskau               | Russland    | 100,00             |
| 000 Media-Saturn-Russland                                                 | Moskau               | Russland    | 100,00             |
| 000 Saturn                                                                | Moskau               | Russland    | 100,00             |
| OSKUS Verwaltung GmbH & Co. Objekt Aachen SB-Warenhaus KG                 | Pullach im Isartal   | Deutschland | 0,00 <sup>1</sup>  |
| OSKUS Verwaltung GmbH & Co. Objekt Krefeld KG                             | Pullach im Isartal   | Deutschland | 0,00 <sup>1</sup>  |
| PAROS Verwaltung GmbH & Co. Objekt Duisburg KG                            | Pullach im Isartal   | Deutschland | 6,00 <sup>1</sup>  |
| PAROS Verwaltung GmbH & Co. Objekt Heinsberg KG                           | Pullach im Isartal   | Deutschland | 6,00 <sup>1</sup>  |
| PAROS Verwaltung GmbH & Co. Objekt Hürth KG                               | Pullach im Isartal   | Deutschland | 0,00 <sup>1</sup>  |
| PAROS Verwaltung GmbH & Co. Objekt Koblenz KG                             | Pullach im Isartal   | Deutschland | 6,00 <sup>1</sup>  |
| PAROS Verwaltung GmbH & Co. Vermietungs-KG                                | Pullach im Isartal   | Deutschland | 1,00 <sup>1</sup>  |
| PayRed Card Services AG                                                   | Geroldswil           | Schweiz     | 100,00             |
| Peoplefone Beteiligungsgesellschaft mbH                                   | Ingolstadt           | Deutschland | 100,00             |
| PIL Grundstücksverwaltung GmbH                                            | Saarbrücken          | Deutschland | 100,00             |
| PowerService Nederland B.V.                                               | Rotterdam            | Niederlande | 100,00             |
| Pro. FS GmbH                                                              | Böblingen            | Deutschland | 100,00             |
| Qingdao Metro Warehouse Management Co. Ltd.                               | Qingdao              | China       | 100,00             |
| RaW Real Estate Asia Pte.Ltd.                                             | Singapur             | Singapur    | 100,00             |
| real, - Sp. z o.o. i Spółka spółka komandytowa                            | Warschau             | Polen       | 100,00             |
| Real Estate Management Misr LLC                                           | Kairo                | Ägypten     | 100,00             |
| Real Properties Ukraine LLC                                               | Kiew                 | Ukraine     | 100,00             |
| real, - Group Holding GmbH                                                | Düsseldorf           | Deutschland | 100,00             |
| real, - Handels GmbH                                                      | Düsseldorf           | Deutschland | 100,00             |
| real, - Hipermarketler Zinciri Anonim Sirketi                             | Istanbul             | Türkei      | 100,00             |
| real, - Holding GmbH                                                      | Alzey                | Deutschland | 100,00             |
| real, - Hypermarket 000                                                   | Moskau               | Russland    | 100,00             |
| real, - Hypermarket Romania S.R.L.                                        | Bukarest             | Rumänien    | 100,00             |
| real, - SB-Warenhaus GmbH                                                 | Alzey                | Deutschland | 100,00             |
| real, - Spółka z ograniczona odpowiedzialnoscia                           | Warschau             | Polen       | 100,00             |
| red blue Marketing GmbH                                                   | München              | Deutschland | 100,00             |
| Remo Zaandam B.V.                                                         | Zaandam              | Niederlande | 100,00             |
| Renate Grundstücksverwaltungsgesellschaft mbH                             | Saarbrücken          | Deutschland | 100,00             |
| Retail Real Estate Limited Liability Company                              | Moskau               | Russland    | 100,00             |
| ROSARIA Grundstücks-Vermietungsgesellschaft mbH & Co. Objekt Gerlingen KG | Düsseldorf           | Deutschland | 94,00 <sup>1</sup> |
| Rotterdam Trading Office B.V.                                             | Diemen               | Niederlande | 100,00             |
| RUDU Verwaltungsgesellschaft mbH                                          | Düsseldorf           | Deutschland | 100,00             |
| RUTIL Verwaltung GmbH & Co. SB-Warenhaus Bielefeld KG                     | Pullach im Isartal   | Deutschland | 19,00 <sup>1</sup> |
| Saalbau-Verein Ulm GmbH                                                   | Saarbrücken          | Deutschland | 100,00             |
| SATURN 14                                                                 | Ris-Orangis          | Frankreich  | 100,00             |
| SATURN 15                                                                 | Ris-Orangis          | Frankreich  | 100,00             |
| SATURN 16                                                                 | Ris-Orangis          | Frankreich  | 100,00             |
| SATURN 17                                                                 | Ris-Orangis          | Frankreich  | 100,00             |
| SATURN ALICANTE ELECTRO, S.A.U.                                           | El Prat de Llobregat | Spanien     | 100,00             |
| SATURN ANNECY                                                             | Annecy               | Frankreich  | 100,00             |

|                                                                    |                      |              |        |
|--------------------------------------------------------------------|----------------------|--------------|--------|
| Saturn Athens I Commercial Anonymi Eteria                          | Athen                | Griechenland | 100,00 |
| Saturn Athens II Commercial Anonymi Eteria                         | Athen                | Griechenland | 100,00 |
| Saturn Athens III Commercial Anonymi Eteria                        | Athen                | Griechenland | 100,00 |
| SATURN AUBERGENVILLE                                               | Aubergenville        | Frankreich   | 100,00 |
| SATURN AULNAY SOUS BOIS                                            | Bobigny              | Frankreich   | 100,00 |
| SATURN BARAKALDO ELEKTRO, S.A.                                     | Barakaldo            | Spanien      | 99,90  |
| SATURN Basel Stücki AG                                             | Basel                | Schweiz      | 90,00  |
| SATURN Brugge                                                      | Brügge               | Belgien      | 90,00  |
| SATURN BUDA Video TV Hifi Elektro Photo Computer Kereskedelmi Kft. | Budapest             | Ungarn       | 90,00  |
| SATURN DOMUS ROSNY SOUS BOIS                                       | Bobigny              | Frankreich   | 100,00 |
| Saturn Duna Video Tv Hifi Elektro Photo Computer Kereskedelmi Kft. | Budapest             | Ungarn       | 100,00 |
| Saturn Düsseldorf-Am Wehrhahn GmbH                                 | Düsseldorf           | Deutschland  | 90,00  |
| Saturn Düsseldorf-Königsallee GmbH                                 | Düsseldorf           | Deutschland  | 90,00  |
| SATURN E502 ELECTRO, S.A.U.                                        | El Prat de Llobregat | Spanien      | 100,00 |
| SATURN E503 ELECTRO,S.A.U.                                         | El Prat de Llobregat | Spanien      | 100,00 |
| SATURN E508 ELECTRO, S.A.U.                                        | El Prat de Llobregat | Spanien      | 100,00 |
| SATURN E-515 Electro, S.A.U.                                       | Barcelona            | Spanien      | 100,00 |
| SATURN E-516 ELECTRO S.A.U.                                        | El Prat de Llobregat | Spanien      | 100,00 |
| SATURN E-517 ELECTRO S.A.U.                                        | Barcelona            | Spanien      | 100,00 |
| Saturn Electro-Handelsges.m.b.H.                                   | Salzburg             | Österreich   | 90,00  |
| Saturn Electro-Handelsges.m.b.H.                                   | Wien                 | Österreich   | 90,00  |
| Saturn Electro-Handelsges.m.b.H.                                   | Graz                 | Österreich   | 90,00  |
| Saturn Electro-Handelsgesellschaft m.b.H.                          | Vösendorf            | Österreich   | 90,00  |
| Saturn Electro-Handelsgesellschaft m.b.H.                          | Linz                 | Österreich   | 90,00  |
| Saturn Electro-Handelsgesellschaft mbH                             | Karlsruhe            | Deutschland  | 90,00  |
| Saturn Electro-Handelsgesellschaft mbH Ansbach                     | Ansbach              | Deutschland  | 90,00  |
| Saturn Electro-Handelsgesellschaft mbH Augsburg                    | Augsburg             | Deutschland  | 90,00  |
| Saturn Electro-Handelsgesellschaft mbH Bad Oeynhausen              | Bad Oeynhausen       | Deutschland  | 90,00  |
| Saturn Electro-Handelsgesellschaft mbH Berlin I                    | Berlin               | Deutschland  | 94,50  |
| Saturn Electro-Handelsgesellschaft mbH Berlin-Charlottenburg       | Berlin               | Deutschland  | 90,00  |
| Saturn Electro-Handelsgesellschaft mbH Berlin-Gesundbrunnen        | Berlin               | Deutschland  | 90,00  |
| Saturn Electro-Handelsgesellschaft mbH Berlin-Reinickendorf        | Berlin               | Deutschland  | 90,00  |
| Saturn Electro-Handelsgesellschaft mbH Berlin-Spandau              | Berlin               | Deutschland  | 90,00  |
| Saturn Electro-Handelsgesellschaft mbH Berlin-Steglitz             | Berlin               | Deutschland  | 90,05  |
| Saturn Electro-Handelsgesellschaft mbH Berlin-Zehlendorf           | Berlin               | Deutschland  | 90,00  |
| Saturn Electro-Handelsgesellschaft mbH Bielefeld                   | Bielefeld            | Deutschland  | 90,05  |
| Saturn Electro-Handelsgesellschaft mbH Bocholt                     | Bocholt              | Deutschland  | 90,00  |
| Saturn Electro-Handelsgesellschaft mbH Bochum                      | Bochum               | Deutschland  | 90,00  |
| Saturn Electro-Handelsgesellschaft mbH Braunschweig                | Braunschweig         | Deutschland  | 90,00  |
| Saturn Electro-Handelsgesellschaft mbH Bremen                      | Bremen               | Deutschland  | 90,05  |
| Saturn Electro-Handelsgesellschaft mbH Bremen-Habhausen            | Bremen               | Deutschland  | 90,00  |
| Saturn Electro-Handelsgesellschaft mbH Bremerhaven                 | Bremerhaven          | Deutschland  | 90,00  |
| Saturn Electro-Handelsgesellschaft mbH Chemnitz                    | Chemnitz             | Deutschland  | 90,00  |
| Saturn Electro-Handelsgesellschaft mbH Chemnitz-Zentrum            | Chemnitz             | Deutschland  | 90,00  |
| Saturn Electro-Handelsgesellschaft mbH Darmstadt                   | Darmstadt            | Deutschland  | 90,00  |
| Saturn Electro-Handelsgesellschaft mbH Delmenhorst                 | Delmenhorst          | Deutschland  | 90,00  |
| Saturn Electro-Handelsgesellschaft mbH Dessau                      | Dessau-Roßlau        | Deutschland  | 90,00  |
| Saturn Electro-Handelsgesellschaft mbH Dortmund                    | Dortmund             | Deutschland  | 90,01  |

|                                                             |                      |             |        |
|-------------------------------------------------------------|----------------------|-------------|--------|
| Saturn Electro-Handelsgesellschaft mbH Dortmund-Eving       | Dortmund             | Deutschland | 90,00  |
| Saturn Electro-Handelsgesellschaft mbH Dresden-Reick        | Dresden              | Deutschland | 90,00  |
| Saturn Electro-Handelsgesellschaft mbH Duisburg             | Duisburg             | Deutschland | 90,00  |
| Saturn Electro-Handelsgesellschaft mbH Erfurt               | Erfurt               | Deutschland | 90,05  |
| Saturn Electro-Handelsgesellschaft mbH Erlangen             | Erlangen             | Deutschland | 90,00  |
| Saturn Electro-Handelsgesellschaft mbH Essen City           | Essen                | Deutschland | 90,00  |
| Saturn Electro-Handelsgesellschaft mbH Essen-Steele         | Essen                | Deutschland | 90,00  |
| Saturn Electro-Handelsgesellschaft mbH Esslingen            | Esslingen am Neckar  | Deutschland | 90,00  |
| Saturn Electro-Handelsgesellschaft mbH Euskirchen           | Euskirchen           | Deutschland | 90,00  |
| Saturn Electro-Handelsgesellschaft mbH Flensburg            | Flensburg            | Deutschland | 90,00  |
| Saturn Electro-Handelsgesellschaft mbH Frankfurt/Main       | Frankfurt am Main    | Deutschland | 92,00  |
| Saturn Electro-Handelsgesellschaft mbH Freiburg             | Freiburg im Breisgau | Deutschland | 90,00  |
| Saturn Electro-Handelsgesellschaft mbH Freising             | Freising             | Deutschland | 90,00  |
| Saturn Electro-Handelsgesellschaft mbH Fürth                | Fürth                | Deutschland | 100,00 |
| Saturn Electro-Handelsgesellschaft mbH Gelsenkirchen        | Gelsenkirchen        | Deutschland | 90,00  |
| Saturn Electro-Handelsgesellschaft mbH Gelsenkirchen-Buer   | Gelsenkirchen        | Deutschland | 90,00  |
| Saturn Electro-Handelsgesellschaft mbH Gießen               | Gießen               | Deutschland | 90,00  |
| Saturn Electro-Handelsgesellschaft mbH Göttingen            | Göttingen            | Deutschland | 90,00  |
| Saturn Electro-Handelsgesellschaft mbH Gummersbach          | Gummersbach          | Deutschland | 90,00  |
| Saturn Electro-Handelsgesellschaft mbH Hagen                | Hagen                | Deutschland | 90,00  |
| Saturn Electro-Handelsgesellschaft mbH Hamburg-Altstadt     | Hamburg              | Deutschland | 90,00  |
| Saturn Electro-Handelsgesellschaft mbH Hamm                 | Hamm                 | Deutschland | 90,05  |
| Saturn Electro-Handelsgesellschaft mbH Hanau                | Hanau                | Deutschland | 90,00  |
| Saturn Electro-Handelsgesellschaft mbH Hannover             | Hannover             | Deutschland | 90,01  |
| Saturn Electro-Handelsgesellschaft mbH Hattingen            | Hattingen            | Deutschland | 100,00 |
| Saturn Electro-Handelsgesellschaft mbH Herford              | Herford              | Deutschland | 90,05  |
| Saturn Electro-Handelsgesellschaft mbH Ingolstadt           | Ingolstadt           | Deutschland | 90,00  |
| Saturn Electro-Handelsgesellschaft mbH Isernhagen           | Isernhagen           | Deutschland | 90,00  |
| Saturn Electro-Handelsgesellschaft mbH Kaiserslautern       | Kaiserslautern       | Deutschland | 90,00  |
| Saturn Electro-Handelsgesellschaft mbH Karlsruhe-Durlach    | Karlsruhe            | Deutschland | 90,00  |
| Saturn Electro-Handelsgesellschaft mbH Kassel               | Kassel               | Deutschland | 90,00  |
| Saturn Electro-Handelsgesellschaft mbH Kempten              | Kempten (Allgäu)     | Deutschland | 90,00  |
| Saturn Electro-Handelsgesellschaft mbH Kleve                | Kleve                | Deutschland | 90,00  |
| Saturn Electro-Handelsgesellschaft mbH Koblenz              | Koblenz              | Deutschland | 90,00  |
| Saturn Electro-Handelsgesellschaft mbH Krefeld              | Krefeld              | Deutschland | 90,00  |
| Saturn Electro-Handelsgesellschaft mbH Landshut             | Landshut             | Deutschland | 90,00  |
| Saturn Electro-Handelsgesellschaft mbH Leipzig              | Leipzig              | Deutschland | 90,00  |
| Saturn Electro-Handelsgesellschaft mbH Leipzig-Hauptbahnhof | Leipzig              | Deutschland | 90,00  |
| Saturn Electro-Handelsgesellschaft mbH Leonberg             | Leonberg             | Deutschland | 90,00  |
| Saturn Electro-Handelsgesellschaft mbH Lübeck               | Lübeck               | Deutschland | 90,00  |
| Saturn Electro-Handelsgesellschaft mbH Lüdenscheid          | Lüdenscheid          | Deutschland | 90,05  |
| Saturn Electro-Handelsgesellschaft mbH Ludwigsburg          | Ludwigsburg          | Deutschland | 90,00  |
| Saturn Electro-Handelsgesellschaft mbH Ludwigshafen         | Ludwigshafen         | Deutschland | 90,00  |
| Saturn Electro-Handelsgesellschaft mbH Lünen                | Lünen                | Deutschland | 90,00  |
| Saturn Electro-Handelsgesellschaft mbH Magdeburg            | Magdeburg            | Deutschland | 90,05  |
| Saturn Electro-Handelsgesellschaft mbH Mainz                | Mainz                | Deutschland | 90,00  |
| Saturn Electro-Handelsgesellschaft mbH Mannheim             | Mannheim             | Deutschland | 90,00  |
| Saturn Electro-Handelsgesellschaft mbH Marl                 | Marl                 | Deutschland | 90,00  |

|                                                                    |                     |             |        |
|--------------------------------------------------------------------|---------------------|-------------|--------|
| Saturn Electro-Handelsgesellschaft mbH Moers                       | Moers               | Deutschland | 90,00  |
| Saturn Electro-Handelsgesellschaft mbH Mülheim                     | Mülheim an der Ruhr | Deutschland | 90,00  |
| Saturn Electro-Handelsgesellschaft mbH München                     | München             | Deutschland | 90,07  |
| Saturn Electro-Handelsgesellschaft mbH München-Riem                | München             | Deutschland | 90,00  |
| Saturn Electro-Handelsgesellschaft mbH Münster                     | Münster             | Deutschland | 90,00  |
| Saturn Electro-Handelsgesellschaft mbH Neckarsulm                  | Neckarsulm          | Deutschland | 90,00  |
| Saturn Electro-Handelsgesellschaft mbH Neu-Isenburg                | Neu-Isenburg        | Deutschland | 90,00  |
| Saturn Electro-Handelsgesellschaft mbH Nürnberg                    | Nürnberg            | Deutschland | 90,01  |
| Saturn Electro-Handelsgesellschaft mbH Oberhausen                  | Oberhausen          | Deutschland | 90,00  |
| Saturn Electro-Handelsgesellschaft mbH Oldenburg                   | Oldenburg           | Deutschland | 90,00  |
| Saturn Electro-Handelsgesellschaft mbH Osnabrück                   | Osnabrück           | Deutschland | 90,00  |
| Saturn Electro-Handelsgesellschaft mbH Passau                      | Passau              | Deutschland | 90,00  |
| Saturn Electro-Handelsgesellschaft mbH Pforzheim                   | Pforzheim           | Deutschland | 90,00  |
| Saturn Electro-Handelsgesellschaft mbH Regensburg                  | Regensburg          | Deutschland | 90,00  |
| Saturn Electro-Handelsgesellschaft mbH Remscheid                   | Remscheid           | Deutschland | 90,05  |
| Saturn Electro-Handelsgesellschaft mbH Reutlingen                  | Reutlingen          | Deutschland | 90,00  |
| Saturn Electro-Handelsgesellschaft mbH Rostock                     | Rostock             | Deutschland | 90,00  |
| Saturn Electro-Handelsgesellschaft mbH Saarbrücken                 | Saarbrücken         | Deutschland | 90,00  |
| Saturn Electro-Handelsgesellschaft mbH Schweinfurt                 | Schweinfurt         | Deutschland | 90,00  |
| Saturn Electro-Handelsgesellschaft mbH Senden                      | Senden              | Deutschland | 90,00  |
| Saturn Electro-Handelsgesellschaft mbH Soest                       | Soest               | Deutschland | 100,00 |
| Saturn Electro-Handelsgesellschaft mbH Solingen                    | Solingen            | Deutschland | 90,05  |
| Saturn Electro-Handelsgesellschaft mbH Stuttgart                   | Stuttgart           | Deutschland | 90,00  |
| Saturn Electro-Handelsgesellschaft mbH Tübingen                    | Tübingen            | Deutschland | 90,00  |
| Saturn Electro-Handelsgesellschaft mbH Weimar                      | Weimar              | Deutschland | 90,00  |
| Saturn Electro-Handelsgesellschaft mbH Weiterstadt                 | Weiterstadt         | Deutschland | 90,00  |
| Saturn Electro-Handelsgesellschaft mbH Wesel                       | Wesel               | Deutschland | 100,00 |
| Saturn Electro-Handelsgesellschaft mbH Wiesbaden                   | Wiesbaden           | Deutschland | 90,00  |
| Saturn Electro-Handelsgesellschaft mbH Witten                      | Witten              | Deutschland | 100,00 |
| Saturn Electro-Handelsgesellschaft mbH Wolfsburg                   | Wolfsburg           | Deutschland | 90,00  |
| Saturn Electro-Handelsgesellschaft mbH Wuppertal-Barmen            | Wuppertal           | Deutschland | 100,00 |
| Saturn Electro-Handelsgesellschaft mbH Zwickau                     | Zwickau             | Deutschland | 90,00  |
| Saturn Electro-Handelsgesellschaft mit beschränkter Haftung        | Köln                | Deutschland | 100,00 |
| SATURN Electronic-Service GmbH                                     | Köln                | Deutschland | 100,00 |
| Saturn Graz V VertriebsgmbH                                        | Graz                | Österreich  | 90,00  |
| Saturn Groningen B.V.                                              | Groningen           | Niederlande | 90,10  |
| Saturn Győr Video TV Hifi Elektro Photo Computer Kereskedelmi Kft. | Győr                | Ungarn      | 100,00 |
| Saturn Haid Electro-Handelsges.m.b.H.                              | Haid                | Österreich  | 90,00  |
| Saturn Heerhugowaard B.V.                                          | Heerhugowaard       | Niederlande | 100,00 |
| Saturn Hoofddorp B.V.                                              | Hoofddorp           | Niederlande | 100,00 |
| Saturn Innsbruck Electro-Handelsges.m.b.H.                         | Innsbruck           | Österreich  | 90,00  |
| SATURN IVRY SUR SEINE                                              | Ivry-sur-Seine      | Frankreich  | 100,00 |
| Saturn Klagenfurt Electro-Handelsges.m.b.H.                        | Klagenfurt          | Österreich  | 90,00  |
| Saturn Kortrijk N.V.                                               | Kortrijk            | Belgien     | 90,00  |
| SATURN LE HAVRE                                                    | Le Havre            | Frankreich  | 100,00 |
| Saturn Leidsche Rijn B.V.                                          | Utrecht             | Niederlande | 100,00 |
| SATURN Liège Médiacité                                             | Liège               | Belgien     | 100,00 |
| Saturn Luxembourg S.A.                                             | Luxemburg           | Luxemburg   | 100,00 |

|                                                                    |                      |             |        |
|--------------------------------------------------------------------|----------------------|-------------|--------|
| SATURN Lyon Carré de Soie                                          | Vaulx en Velin       | Frankreich  | 100,00 |
| SATURN LYON LA PART DIEU                                           | Lyon                 | Frankreich  | 100,00 |
| SATURN MADRID CARABANCHEL ELECTRO, S.A.                            | Madrid               | Spanien     | 99,90  |
| SATURN MADRID-PLENILUNIO ELEKTRO, S.A.                             | Madrid               | Spanien     | 99,90  |
| Saturn Management GmbH                                             | Ingolstadt           | Deutschland | 100,00 |
| SATURN MASSALFASAR-VALENCIA ELECTRO, S.A.                          | València             | Spanien     | 99,90  |
| Saturn Mega Markt GmbH Wuppertal                                   | Wuppertal            | Deutschland | 90,05  |
| SATURN MEIR ANTWERPEN                                              | Antwerpen            | Belgien     | 100,00 |
| SATURN METZ                                                        | Metz                 | Frankreich  | 100,00 |
| Saturn Mons N.V.                                                   | Mons                 | Belgien     | 100,00 |
| SATURN MULHOUSE                                                    | Mulhouse             | Frankreich  | 100,00 |
| SATURN MURCIA THADER ELECTRO, S.A.U.                               | Murcia               | Spanien     | 100,00 |
| Saturn online GmbH                                                 | Ingolstadt           | Deutschland | 100,00 |
| SATURN OVIEDO ELECTRO, S.A.                                        | El Prat de Llobregat | Spanien     | 99,90  |
| SATURN PEST Video TV HiFi Elektro Photo Computer Kereskedelmi Kft. | Budapest             | Ungarn      | 100,00 |
| SATURN PLANET Sp. z o.o.                                           | Warschau             | Polen       | 100,00 |
| Saturn Planet Sp. z o.o. 11 Spółka Komandytowa                     | Warschau             | Polen       | 100,00 |
| Saturn Planet Sp. z o.o. 13 Spółka Komandytowa                     | Warschau             | Polen       | 100,00 |
| Saturn Planet Sp. z o.o. 15 Spółka Komandytowa                     | Warschau             | Polen       | 100,00 |
| Saturn Planet Sp. z o.o. 16 Spółka Komandytowa                     | Warschau             | Polen       | 100,00 |
| Saturn Planet Sp. z o.o. 17 Spółka Komandytowa                     | Warschau             | Polen       | 100,00 |
| Saturn Planet Sp. z o.o. 18 Spółka Komandytowa                     | Warschau             | Polen       | 100,00 |
| Saturn Planet Sp. z o.o. 19 Spółka Komandytowa                     | Warschau             | Polen       | 100,00 |
| Saturn Planet Sp. z o.o. 4 Spółka Komandytowa                      | Warschau             | Polen       | 100,00 |
| Saturn Planet Sp. z o.o. 9 Spółka Komandytowa                      | Warschau             | Polen       | 100,00 |
| Saturn Planet Sp. z o.o. Bydgoszcz Spółka Komandytowa              | Warschau             | Polen       | 90,00  |
| Saturn Planet Sp. z o.o. Gdańsk I Spółka Komandytowa               | Warschau             | Polen       | 90,00  |
| Saturn Planet Sp. z o.o. Katowice I Spółka Komandytowa             | Warschau             | Polen       | 90,00  |
| Saturn Planet Sp. z o.o. Kraków I Spółka Komandytowa               | Warschau             | Polen       | 90,00  |
| Saturn Planet Sp. z o.o. Łódź I Spółka Komandytowa                 | Warschau             | Polen       | 90,00  |
| Saturn Planet Sp. z o.o. Łódź II Spółka Komandytowa                | Warschau             | Polen       | 100,00 |
| Saturn Planet Sp. z o.o. Lubin Spółka Komandytowa                  | Warschau             | Polen       | 90,00  |
| Saturn Planet Sp. z o.o. Poznań I Spółka Komandytowa               | Warschau             | Polen       | 90,00  |
| Saturn Planet Sp. z o.o. Tychy Spółka Komandytowa                  | Warschau             | Polen       | 90,00  |
| Saturn Planet Sp. z o.o. Warszawa I Spółka Komandytowa             | Warschau             | Polen       | 90,00  |
| Saturn Planet Sp. z o.o. Warszawa II Spółka Komandytowa            | Warschau             | Polen       | 90,00  |
| Saturn Planet Sp. z o.o. Warszawa III Spółka Komandytowa           | Warschau             | Polen       | 90,00  |
| Saturn Planet Sp. z o.o. Warszawa IV Spółka Komandytowa            | Warschau             | Polen       | 90,00  |
| Saturn Planet Sp. z o.o. Warszawa V Spółka Komandytowa             | Warschau             | Polen       | 90,00  |
| Saturn Planet Sp. z o.o. Wrocław I Spółka Komandytowa              | Warschau             | Polen       | 90,00  |
| Saturn Planet Sp. z o.o. Wrocław II Spółka Komandytowa             | Warschau             | Polen       | 90,00  |
| SATURN POITIERS                                                    | Poitiers             | Frankreich  | 100,00 |
| SATURN REIMS                                                       | Cormontreuil         | Frankreich  | 100,00 |
| SATURN RENNES                                                      | Rennes               | Frankreich  | 100,00 |
| SATURN RIVAS VACIAMADRID ELECTRO, S.A.                             | Madrid               | Spanien     | 99,90  |
| Saturn Rotterdam Zuidplein B.V.                                    | Rotterdam            | Niederlande | 100,00 |
| SATURN SAN JUAN DE AZNALFARACHE ELECTRO, S.A.U.                    | El Prat de Llobregat | Spanien     | 100,00 |
| SATURN SAN SEBASTIAN DE LOS REYES ELECTRO, S.A.                    | Madrid               | Spanien     | 99,90  |

|                                                                                              |                      |              |                    |
|----------------------------------------------------------------------------------------------|----------------------|--------------|--------------------|
| SATURN Schönbühl (Moosseedorf) AG                                                            | Moosseedorf          | Schweiz      | 90,00              |
| Saturn Techno-Markt Electro GmbH & Co. oHG                                                   | Düsseldorf           | Deutschland  | 100,00             |
| Saturn Techno-Markt Electro-Handelsgesellschaft mbH                                          | Hürth                | Deutschland  | 90,00              |
| Saturn Techno-Markt Electro-Handelsgesellschaft mbH                                          | Aachen               | Deutschland  | 90,00              |
| Saturn Techno-Markt Electro-Handelsgesellschaft mbH                                          | Mönchengladbach      | Deutschland  | 90,00              |
| Saturn Techno-Markt Electro-Handelsgesellschaft mbH                                          | Düren                | Deutschland  | 90,00              |
| Saturn Techno-Markt Electro-Handelsgesellschaft mbH                                          | Siegen               | Deutschland  | 90,01              |
| Saturn Techno-Markt Electro-Handelsgesellschaft mbH                                          | Neuss                | Deutschland  | 90,09              |
| Saturn Techno-Markt Electro-Handelsgesellschaft mbH                                          | Leverkusen           | Deutschland  | 90,09              |
| Saturn Techno-Markt Electro-Handelsgesellschaft mbH                                          | Sankt Augustin       | Deutschland  | 90,09              |
| Saturn Techno-Markt Electro-Handelsgesellschaft mbH                                          | Bergisch Gladbach    | Deutschland  | 90,20              |
| Saturn Techno-Markt Electro-Handelsgesellschaft mbH                                          | Köln                 | Deutschland  | 100,00             |
| SATURN TENERIFE 3 DE MAYO ELECTRO, S.A.                                                      | El Prat de Llobregat | Spanien      | 99,90              |
| Saturn Thessaloniki I Commercial Anonymi Eteria                                              | Athen                | Griechenland | 100,00             |
| Saturn Thessaloniki II Comercial Anonymi Eteria                                              | Athen                | Griechenland | 100,00             |
| Saturn Tilburg B.V.                                                                          | Tilburg              | Niederlande  | 90,10              |
| Saturn Venlo B.V.                                                                            | Venlo                | Niederlande  | 100,00             |
| SATURN Volketswil AG                                                                         | Volketswil           | Schweiz      | 90,00              |
| Saturn Wien X VertriebsgmbH                                                                  | Wien                 | Österreich   | 90,00              |
| Saturn Wien XX VertriebsgmbH                                                                 | Wien                 | Österreich   | 90,00              |
| Saturn Wien XXII Electro-Handelsges.m.b.H.                                                   | Wien                 | Österreich   | 90,00              |
| Saturn Wien XXIII Electro-Handelsges.m.b.H.                                                  | Wien                 | Österreich   | 90,00              |
| SATURN Wilrijk                                                                               | Wilrijk              | Belgien      | 90,00              |
| SATURN Winterthur AG                                                                         | Winterthur           | Schweiz      | 90,00              |
| SATURN WITTENHEIM                                                                            | Mulhouse             | Frankreich   | 100,00             |
| Saturn Zaandam B.V.                                                                          | Zaandam              | Niederlande  | 100,00             |
| Saturn-Mega Markt GmbH Halle                                                                 | Halle (Saale)        | Deutschland  | 90,05              |
| Saturn-Mega Markt GmbH Trier                                                                 | Trier                | Deutschland  | 90,05              |
| Schaper Grundbesitz-Verwaltungsgesellschaft mbH                                              | Saarbrücken          | Deutschland  | 100,00             |
| Secundus Grundstücksverwertungs-GmbH & Co. Objekt Stuttgart-Königstraße KG                   | Saarbrücken          | Deutschland  | 100,00             |
| SIG Import GmbH                                                                              | Düsseldorf           | Deutschland  | 100,00             |
| SIL Verwaltung GmbH & Co. Objekt Haidach KG                                                  | Schwabhausen         | Deutschland  | 92,00              |
| Sinco Großhandelsgesellschaft m. b. H.                                                       | Vösendorf            | Österreich   | 73,00              |
| Smart Retail Kft.                                                                            | Budaörs              | Ungarn       | 100,00             |
| Sociedad Ibérica Restaurantes de Tecnología Avanzada S. A. U.                                | Madrid               | Spanien      | 100,00             |
| SOLUM Grundstücks-Vermietungsgesellschaft mbH & Co. Objekt Promohypermarkt Donaueschingen KG | Düsseldorf           | Deutschland  | 94,00 <sup>1</sup> |
| SOLUM Grundstücks-Vermietungsgesellschaft mbH & Co. Objekt Promohypermarkt Köln KG           | Düsseldorf           | Deutschland  | 94,00 <sup>1</sup> |
| SPORTARENA GmbH                                                                              | Köln                 | Deutschland  | 100,00             |
| Star Farm (Shanghai) Agriculture Information Consulting Company Limited                      | Shanghai             | China        | 100,00             |
| STW Grundstücksverwaltung Gesellschaft mit beschränkter Haftung                              | Saarbrücken          | Deutschland  | 100,00             |
| TANDOS Grundstücks-Verwaltungsgesellschaft mbH                                               | Saarbrücken          | Deutschland  | 100,00             |
| TECHNO-Service Reparatur und Wartungs GmbH                                                   | Landshut             | Deutschland  | 51,00              |
| Tertia Handelsbeteiligungsgesellschaft mbH                                                   | Köln                 | Deutschland  | 60,00              |
| TIMUG GmbH & Co. Objekt Homburg KG                                                           | München              | Deutschland  | 0,00 <sup>1</sup>  |
| TKC Objekt Cottbus GmbH & Co. KG                                                             | Saarbrücken          | Deutschland  | 100,00             |
| VALENCIA TRADING OFFICE, S.L.                                                                | Madrid               | Spanien      | 100,00             |
| Venalisia Asia Hong Kong Limited                                                             | Hong Kong            | China        | 100,00             |
| Venalisia Import GmbH                                                                        | Ingolstadt           | Deutschland  | 100,00             |



|                                                                              |                    |             |                    |
|------------------------------------------------------------------------------|--------------------|-------------|--------------------|
| Vierte real,- Holding GmbH                                                   | Alzey              | Deutschland | 100,00             |
| Vierte real,- SB-Warenhaus GmbH                                              | Alzey              | Deutschland | 100,00             |
| VR-LEASING METRO GmbH & Co. Objekt Karlsruhe KG                              | Eschborn           | Deutschland | 0,00 <sup>1</sup>  |
| VR-LEASING METRO GmbH & Co. Objekte Rhein-Neckar KG                          | Eschborn           | Deutschland | 0,00 <sup>1</sup>  |
| Weinkellerei Thomas Rath GmbH                                                | Düsseldorf         | Deutschland | 100,00             |
| Wholesale Real Estate Belgium N.V.                                           | Wommelgem          | Belgien     | 100,00             |
| Wholesale Real Estate Poland Sp. z o.o.                                      | Warschau           | Polen       | 100,00             |
| Wirichs Immobilien GmbH                                                      | Saarbrücken        | Deutschland | 100,00             |
| Wirichs Verwaltungsgesellschaft mbH & Co. Objekt Schwelm KG                  | Saarbrücken        | Deutschland | 100,00             |
| Wirichs Verwaltungsgesellschaft mbH & Co. Objekt Voerde und Kamen KG         | Saarbrücken        | Deutschland | 100,00             |
| Wolfgang Wirichs GmbH                                                        | Saarbrücken        | Deutschland | 100,00             |
| World Import N. V.                                                           | Puurs              | Belgien     | 100,00             |
| WRE REAL ESTATE Limited Liability Partnership                                | Almaty             | Kasachstan  | 100,00             |
| Yugengaisha MIAG Japan                                                       | Tokio              | Japan       | 100,00             |
| ZARUS Verwaltung GmbH & Co. Dritte Vermietungs-oHG                           | Pullach im Isartal | Deutschland | 19,00 <sup>1</sup> |
| ZARUS Verwaltung GmbH & Co. Objekt Braunschweig Berliner Straße KG           | Pullach im Isartal | Deutschland | 19,00 <sup>1</sup> |
| ZARUS Verwaltung GmbH & Co. Objekt Mutterstadt KG                            | Pullach im Isartal | Deutschland | 19,00 <sup>1</sup> |
| ZARUS Verwaltung GmbH & Co. Objekt Osnabrück KG                              | Pullach im Isartal | Deutschland | 19,00 <sup>1</sup> |
| ZARUS Verwaltung GmbH & Co. Objekte Niedersachsen KG                         | Pullach im Isartal | Deutschland | 19,00 <sup>1</sup> |
| Zentra Beteiligungsgesellschaft mit beschränkter Haftung                     | Saarbrücken        | Deutschland | 100,00             |
| Zentra-Grundstücksgesellschaft mbH                                           | Saarbrücken        | Deutschland | 100,00             |
| Zweite real,- Multi-Markt Verwaltungsgesellschaft mbH                        | Alzey              | Deutschland | 100,00             |
| Zweite real,- SB-Warenhaus GmbH                                              | Alzey              | Deutschland | 100,00             |
| <b>Gemeinschaftsunternehmen</b>                                              |                    |             |                    |
| Intercompra LDA                                                              | Lissabon           | Portugal    | 50,00              |
| MAXXAM B.V.                                                                  | Ede                | Niederlande | 33,33              |
| MAXXAM C.V.                                                                  | Ede                | Niederlande | 33,33              |
| METSPA Beszerzési és Kereskedelmi Kft.                                       | Budaörs            | Ungarn      | 33,33              |
| METSPA d.o.o. za trgovinu                                                    | Zagreb             | Kroatien    | 50,00              |
| <b>At equity bilanziert</b>                                                  |                    |             |                    |
| European EPC Competence Center GmbH                                          | Köln               | Deutschland | 30,00              |
| Iniziativa Methab s.r.l.                                                     | Bozen              | Italien     | 50,00              |
| Peoplefone Polska Spółka Akcyjna                                             | Warschau           | Polen       | 49,00              |
| xplace GmbH                                                                  | Göttingen          | Deutschland | 25,01              |
| <b>Nicht at equity bilanziert</b>                                            |                    |             |                    |
| EZW Kauf- und Freizeitpark GmbH & Co. Kommanditgesellschaft                  | Bremen             | Deutschland | 49,00 <sup>2</sup> |
| EZW Kauf- und Freizeitpark Verwaltungs-GmbH                                  | Bremen             | Deutschland | 49,04 <sup>2</sup> |
| IfH Gesellschaft für Markt- und Unternehmensanalysen mbH                     | Köln               | Deutschland | 20,00 <sup>2</sup> |
| Metro plus Grundstücks-Vermietungsgesellschaft mbH                           | Düsseldorf         | Deutschland | 20,00 <sup>2</sup> |
| <b>Beteiligungen</b>                                                         |                    |             |                    |
| DEG Eishockey GmbH                                                           | Düsseldorf         | Deutschland | 12,40              |
| EKS Handelsgesellschaft mbH                                                  | Salzburg           | Österreich  | 25,00              |
| EKS Handelsgesellschaft mbH & Co. KG                                         | Salzburg           | Österreich  | 25,00              |
| Elbrus Grundstücksverwaltungsgesellschaft mbH & Co. Objekt Frankfurt-Zeil KG | Mainz              | Deutschland | 94,00              |

|                                                                                 |                  |             |        |
|---------------------------------------------------------------------------------|------------------|-------------|--------|
| Erschließungsgesellschaft Schwerin-Krebsförden mbH & Co. KG                     | Lüneburg         | Deutschland | 18,18  |
| Fiege Mega Center Erfurt GmbH & Co. KG                                          | Nesse-Apfelstädt | Deutschland | 49,00  |
| Fiege Mega Center Erfurt Verwaltungs GmbH                                       | Nesse-Apfelstädt | Deutschland | 49,00  |
| Loyalty Partner Holdings S.A.                                                   | Luxemburg        | Luxemburg   | 9,53   |
| QUANTIS Grundstücks-Vermietungsgesellschaft mbH & Co. Objekt Darmstadt KG       | Schönefeld       | Deutschland | 6,00   |
| QUANTIS Grundstücks-Vermietungsgesellschaft mbH & Co. Objekt Junior Augsburg KG | Schönefeld       | Deutschland | 6,00   |
| Stadtmarketinggesellschaft Hamm mbH                                             | Hamm             | Deutschland | 6,25   |
| Unterstützungskasse für ehemalige Kaufhalle-Mitarbeiter GmbH                    | Düsseldorf       | Deutschland | 100,00 |
| Verwaltungsgesellschaft Lebensmittelgesellschaft "GLAWA" mbH & Co. KG           | Hamburg          | Deutschland | 18,75  |
| VR-LEASING MUSCARI GmbH & Co. Immobilien KG                                     | Eschborn         | Deutschland | 94,00  |
| Wirichs Immobilien GmbH & Co. Objekt Herford KG                                 | Saarbrücken      | Deutschland | 45,45  |

<sup>1</sup> Einzubeziehen nach IFRS, SIC-12

<sup>2</sup> Keine at equity Bewertung wegen untergeordneter Bedeutung für die Vermögens-, Finanz- und Ertragslage

28. Februar 2011

DER VORSTAND



DR. CORDES



KOCH



MULLER



SAVEUSE

## Versicherung der gesetzlichen Vertreter

Wir versichern nach bestem Wissen, dass gemäß den anzuwendenden Rechnungslegungsgrundsätzen der Konzernabschluss ein den tatsächlichen Verhältnissen entsprechendes Bild der Vermögens-, Finanz- und Ertragslage des Konzerns vermittelt

und im Konzernlagebericht der Geschäftsverlauf einschließlich des Geschäftsergebnisses und die Lage des Konzerns so dargestellt sind, dass ein den tatsächlichen Verhältnissen entsprechendes Bild vermittelt wird, sowie die wesentlichen Chancen und Risiken der voraussichtlichen Entwicklung des Konzerns beschrieben sind.

28. Februar 2011

DER VORSTAND

DR. CORDES

KOCH

MULLER

SAVEUSE

## Bestätigungsvermerk des Abschlussprüfers

Wir haben den von der METRO AG aufgestellten Konzernabschluss – bestehend aus Bilanz, Gewinn- und Verlustrechnung, Überleitung vom Perioden- zum Gesamtergebnis, Eigenkapitalentwicklung, Kapitalflussrechnung und Anhang – sowie den Konzernlagebericht für das Geschäftsjahr vom 1. Januar bis 31. Dezember 2010 geprüft. Die Aufstellung von Konzernabschluss und Konzernlagebericht nach den IFRS, wie sie in der EU anzuwenden sind, und den ergänzend nach § 315a Abs. 1 HGB anzuwendenden handelsrechtlichen Vorschriften sowie den ergänzenden Bestimmungen der Satzung liegt in der Verantwortung des Vorstands der Gesellschaft. Unsere Aufgabe ist es, auf der Grundlage der von uns durchgeführten Prüfung eine Beurteilung über den Konzernabschluss und den Konzernlagebericht abzugeben.

Wir haben unsere Konzernabschlussprüfung nach § 317 HGB unter Beachtung der vom Institut der Wirtschaftsprüfer (IDW) festgestellten deutschen Grundsätze ordnungsmäßiger Abschlussprüfung vorgenommen. Danach ist die Prüfung so zu planen und durchzuführen, dass Unrichtigkeiten und Verstöße, die sich auf die Darstellung des durch den Konzernabschluss unter Beachtung der anzuwendenden Rechnungslegungsvorschriften und durch den Konzernlagebericht vermittelten Bildes der Vermögens-, Finanz- und Ertragslage wesentlich auswirken, mit hinreichender Sicherheit erkannt werden. Bei der Festlegung der Prüfungshandlungen werden die Kenntnisse über die Geschäftstätigkeit und über das wirtschaftliche und rechtliche Umfeld des Konzerns sowie die Erwartungen über mögliche Fehler berücksichtigt. Im Rahmen der Prüfung werden die Wirksamkeit des rechnungslegungsbezogenen internen Kontrollsystems sowie Nachweise für die Angaben

im Konzernabschluss und Konzernlagebericht überwiegend auf der Basis von Stichproben beurteilt. Die Prüfung umfasst die Beurteilung der Jahresabschlüsse der in den Konzernabschluss einbezogenen Unternehmen, der Abgrenzung des Konsolidierungskreises, der angewandten Bilanzierungs- und Konsolidierungsgrundsätze und der wesentlichen Einschätzungen des Vorstands sowie die Würdigung der Gesamtdarstellung des Konzernabschlusses und des Konzernlageberichts. Wir sind der Auffassung, dass unsere Prüfung eine hinreichend sichere Grundlage für unsere Beurteilung bildet.

Unsere Prüfung hat zu keinen Einwendungen geführt.

Nach unserer Beurteilung aufgrund der bei der Prüfung gewonnenen Erkenntnisse entspricht der Konzernabschluss den IFRS, wie sie in der EU anzuwenden sind, und den ergänzend nach § 315a Abs. 1 HGB anzuwendenden handelsrechtlichen Vorschriften sowie den ergänzenden Bestimmungen der Satzung und vermittelt unter Beachtung dieser Vorschriften ein den tatsächlichen Verhältnissen entsprechendes Bild der Vermögens-, Finanz- und Ertragslage des Konzerns. Der Konzernlagebericht steht in Einklang mit dem Konzernabschluss, vermittelt insgesamt ein zutreffendes Bild von der Lage des Konzerns und stellt die Chancen und Risiken der zukünftigen Entwicklung zutreffend dar.

Köln, den 28. Februar 2011

**KPMG AG**

WIRTSCHAFTSPRÜFUNGSGESELLSCHAFT

**DR. BÖTTCHER**

WIRTSCHAFTSPRÜFER

**KLAASSEN**

WIRTSCHAFTSPRÜFER



# METRO GROUP 2010

DIE STRATEGIE  
DAS INVESTMENT  
DAS GESCHÄFT  
SERVICE

# SERVICE

- S. 257 Glossar
- S. 260 Mehrjahresübersicht
- S. 261 Die Standorte der METRO GROUP
- S. 262 Finanzkalender
- S. 263 Information

# GLOSSAR

---

## **A** Anti-Fraud-Maßnahmen

Vorbeugung gegen Entdeckung von sowie Reaktion auf interne betrügerische Handlungen.

---

## **Asset-Management**

Erwerb, Entwicklung, Bewirtschaftung und Verkauf von Immobilien. Bei der METRO GROUP ist dafür die METRO Group Asset Management zuständig.

---

## **B** Best Ager

Marketingbegriff für Konsumenten, die 50 Jahre und älter sind.

---

## **C** Compliance

Gesamtheit aller Maßnahmen, die das Verhalten eines Unternehmens und seiner Mitarbeiter im Hinblick auf alle gesetzlichen Vorgaben sowie gesellschaftliche Richtlinien und Wertvorstellungen beinhalten.

---

## **Core-Immobilie**

Hochwertige vermietete Immobilie in attraktiver Lage.

---

## **D** Discounter

Vertriebsformat, das durch ein begrenztes Sortiment und aggressive Niedrigpreispolitik gekennzeichnet ist.

---

## **Diversity-Management**

Zentrales Element der Personalpolitik, das die Vielfalt der Mitarbeiter im Hinblick auf Geschlecht, Alter, ethnische Herkunft, Glaubensrichtung, sexuelle Identität oder mögliche Behinderungen für den Unternehmenserfolg nutzbar macht.

---

## **E** EBIT (Earnings Before Interest and Taxes)

Gewinn vor Abzug von Steuern und Zinsaufwendungen. Dient dem internationalen Vergleich von Unternehmen.

---

## **EBITaC (Earnings Before Interest and Taxes after Cost of Capital)**

EBIT nach Abzug der Kapitalkosten. Diese Kennziffer zeigt, ob ein Unternehmen sein Geschäftsvermögen erfolgreich einsetzt und einen über den Kapitalkosten liegenden Wertbeitrag erreicht.

---

## **EBITDA (Earnings Before Interest, Taxes, Depreciation and Amortization)**

Gewinn vor Abzug von Zinsen, Steuern, Abschreibungen auf Sachanlagen und immateriellen Vermögensgegenständen. Diese Kennzahl dient dem Vergleich von Unternehmen, die unter verschiedenen Standards bilanzieren.

---

## **EBT (Earnings Before Taxes)**

Gewinn vor Steuern. Diese Kennziffer dient dem Vergleich von Unternehmen, obwohl unterschiedliche Besteuerungssysteme vorliegen können.

---

## **Eigenmarken**

Auch als Exklusivmarken bezeichnet. Von einem Handelsunternehmen entwickelte und markenrechtlich geschützte Markenartikel mit attraktivem Preis-Leistungs-Verhältnis.

---

## **Elektrofachmarkt**

Großes Einzelhandelsgeschäft, das auf die Sortimente Unterhaltungselektronik, Haushaltsgeräte, Neue Medien, Telekommunikation, Computer und Foto spezialisiert ist. Media Markt und Saturn sind die Elektrofachmärkte der METRO GROUP.

---

## **F** Facility-Management

Verwaltung und Bewirtschaftung von Gebäuden, Anlagen und gebäudespezifischen Dienstleistungen mit dem

---



---

Ziel, Kosten zu senken, die technische Verfügbarkeit zu sichern und den Wert langfristig zu erhalten.

---

### **Flächenbereinigtes Wachstum**

Umsatzwachstum in Lokalwährung auf vergleichbarer Fläche beziehungsweise bezogen auf ein vergleichbares Panel an Standorten. Es gehen nur Umsätze von Standorten ein, die im Berichts- und im Vorjahr weder eröffnet noch im Berichtsjahr geschlossen oder durch Umbau in der Fläche wesentlich verändert wurden.

---

### **G Governance**

Vorgaben zum Führen und Kontrollieren von Akteuren, die Einfluss auf ein Unternehmen haben.

---

### **Großhandel**

Handelsform, bei der Waren an gewerbliche Wiederverkäufer, weiterverarbeitende Unternehmen oder gewerbliche Verwender veräußert werden. Metro Cash & Carry ist die Großhandelssparte der METRO GROUP.

---

### **H Horizontale Anbieter**

Anbieter mit einem breiten Produktspektrum von unterschiedlichen Herstellern.

---

### **I IASB (International Accounting Standards Board)**

Internationales und unabhängiges Gremium, das die International Financial Reporting Standards (IFRS) entwickelt hat und kontinuierlich weiterentwickelt.

---

### **IFRIC (International Financial Reporting Interpretations Committee)**

Für die Interpretation strittiger Bilanzierungsfragen zuständige Gruppe der Stiftung International Accounting Standards Committee Foundation (IASCF).

---

### **IFRS (International Financial Reporting Standards)**

Internationale Vorschriften für die Rechnungslegung. Im Unterschied zum handelsrechtlichen Jahresabschluss steht bei IFRS die anlegerorientierte Informationsfunktion im Vordergrund.

---

### **K Kommissionierung**

Zusammenstellung von Waren in einer vorgegebenen Menge und ihre Bereitstellung für die Auslieferung.

---

### **M Meeting Metro**

Informationsveranstaltung der METRO GROUP zu Ausbildungsperspektiven im Handel, die sich an den Führungskräftenachwuchs und an Lehrer richtet.

---

### **METRO GROUP Future Store Initiative**

Zusammenschluss von Unternehmen aus Handel, Konsumgüterindustrie, Informationstechnologie, Dienstleistungsbranche sowie Forschung und Wissenschaft. Gemeinsam treiben die Partner den Modernisierungsprozess im Handel voran.

---

### **Multi-Channel-Marketing**

Mehrkanalvertrieb: Strategie des Handels, Kunden über mehrere miteinander verzahnte Vertriebswege gleichzeitig zu erreichen, zum Beispiel über Filialen und Internet-Shops.

---

### **N Net Earnings**

Jahresüberschuss eines Unternehmens. Über die Verwendung beschließt die Hauptversammlung.

---

### **Nettoumlaufvermögen**

Differenz zwischen Umlaufvermögen (Forderungen) und kurzfristigem Fremdkapital (Verbindlichkeiten). Diese Kennziffer ist ein Maßstab für die kurzfristige finanzielle Stärke eines Unternehmens und dient zur Beurteilung der operativen Effizienz.

---

### **Nicht-Lebensmittel**

Andere Bezeichnung für Bedarfsgegenstände im Sortiment des Handels.

---

### **P Performance Share**

Erfolgsabhängige Beteiligung. Ein Performance Share berechtigt den Besitzer zu einer Barauszahlung in Höhe des Aktienkurses.

---

### **Prozesskette**

Unterschiedliche Prozesse, die zur Wertschöpfung eines Unternehmens beitragen. Bei der METRO GROUP sind das beispielsweise Logistik, Marketing und Vertrieb.

---

**R Radiofrequenz-Identifikation (RFID)**

Technologie zur berührungslosen Datenübertragung und zur automatischen Identifikation von Warenbewegungen.

**RoCE (Return on Capital Employed)**

Kapitalrendite. Diese Kennziffer beschreibt, ob ein Unternehmen das ihm zur Verfügung stehende Kapital, abzüglich der liquiden Mittel und des kurzfristigen Fremdkapitals, profitabel einsetzt.

**S Schnelldrehende Konsumgüter**

Auch Fast Moving Consumer Goods (FMCG). Konsumgüter, die besonders häufig gekauft und in der Regel täglich konsumiert werden, zum Beispiel Milch und Brot.

**Selbstbedienungswarenhäuser (SB-Warenhäuser)**

Großes Einzelhandelsgeschäft mit verschiedenen Artikeln, die überwiegend in Selbstbedienung angeboten werden. Das Sortiment umfasst außer Lebensmitteln auch Ge- und Verbrauchsgüter. Real ist der SB-Warenhaus-Betreiber der METRO GROUP.

**Shape 2012**

Das Effizienz- und Wertsteigerungsprogramm der METRO GROUP. Das ab 2012 angestrebte und darüber hinauswirkende Ergebnisverbesserungspotenzial beläuft sich auf 1,5 Mrd. €. Die daraus resultierende Ergebnisverbesserung hängt von der Entwicklung der gesamtwirtschaftlichen Rahmenbedingungen in unseren Absatzmärkten ab.

**Share Unit**

Einheit für Performance Shares.

**Shop-in-Shop-Konzept**

Präsentationsform für Teilsortimente im Handel zur Auflockerung großer Verkaufsflächen in Warenhäusern. In einem optisch abgegrenzten Verkaufsraum werden zusammengehörige Waren, vornehmlich von bekannten Markenherstellern, angeboten.

**Solar Chilling**

Klimatisierungstechnologie, die mit der Kraft der Sonne arbeitet. Sie kühlt und heizt beispielsweise

Märkte mithilfe von Solarkollektoren und einer Absorptionskälteanlage.

**Supply Chain Councils**

Steuerungsgremien für die Aktivitäten der bisherigen Querschnittsgesellschaft MGL METRO GROUP Logistics in den Ländern, in denen mehrere Vertriebslinien der METRO GROUP vertreten sind.

**T Trading-up-Strategie**

Qualitative Anhebung des Leistungsprogramms eines Handelsbetriebs, zum Beispiel durch eine größere Produktauswahl, ein höheres Qualitätsniveau, umfangreichere Dienstleistungen und eine anspruchsvollere Geschäftsausstattung.

**V Vertikale Anbieter**

Anbieter mit einem tiefen Produktspektrum, die in der Regel die gesamte Prozesskette – von der Entwicklung über die Herstellung bis zum Vertrieb – steuern.

**Vertriebslinie**

Gesellschaft eines Handelsunternehmens, die Filialen oder Märkte mit einem bestimmten Vertriebskonzept betreibt.

**Vertriebsmarke**

Unternehmen mit durchgängig eigenständigem Marktauftritt. Innerhalb einer Vertriebslinie lassen sich zwei Vertriebsmarken mit identischem Vertriebskonzept positionieren. Dies ist bei Media Markt und Saturn der Fall.

**W Warenhaus**

Großes Einzelhandelsgeschäft, das sich in der Regel in innerstädtischer Lage befindet und Waren jeglicher Art anbietet, darunter Textilien, Haushaltswaren und Lebensmittel. Der Warenhausbetreiber der METRO GROUP ist Galeria Kaufhof.

# MEHRJAHRESÜBERSICHT<sup>1</sup>

| Mio. €                                                                   | 2010               | 2009 <sup>2</sup>     | 2008 <sup>3</sup>    | 2007    | 2006    | 2005    | 2004    |
|--------------------------------------------------------------------------|--------------------|-----------------------|----------------------|---------|---------|---------|---------|
| <b>Finanzkennzahlen</b>                                                  |                    |                       |                      |         |         |         |         |
| Umsatz (netto)                                                           | 67.258             | 65.529                | 67.955               | 64.210  | 58.279  | 55.722  | 53.475  |
| EBITDA                                                                   | 3.726 <sup>5</sup> | 3.319 <sup>4, 5</sup> | 3.540 <sup>7</sup>   | 3.343   | 3.162   | 2.938   | 2.844   |
| EBIT                                                                     | 2.415 <sup>5</sup> | 2.024 <sup>5</sup>    | 2.222 <sup>7</sup>   | 2.078   | 1.928   | 1.738   | 1.723   |
| EBIT-Marge                                                               | 3,6 <sup>5</sup>   | 3,1 <sup>5</sup>      | 3,3 <sup>7</sup>     | 3,2     | 3,3     | 3,1     | 3,2     |
| Ergebnis vor Steuern                                                     | 1.834 <sup>5</sup> | 1.393 <sup>5</sup>    | 1.648 <sup>7</sup>   | 1.561   | 1.564   | 1.358   | 1.260   |
| Periodenergebnis <sup>4</sup>                                            | 1.139 <sup>7</sup> | 824 <sup>7</sup>      | 722 <sup>7</sup>     | 1.051   | 1.196   | 649     | 927     |
| davon aus fortgeführten Aktivitäten                                      | 1.139 <sup>7</sup> | 824 <sup>7</sup>      | 1.151 <sup>7</sup>   | 1.065   | 1.079   | 618     | 858     |
| davon den Anteilseignern der METRO AG zuzurechnender Gewinn <sup>6</sup> | 850                | 383                   | 401                  | 825     | 1.059   | 531     | 828     |
| Investitionen                                                            | 1.683              | 1.517                 | 2.423                | 2.154   | 3.011   | 2.138   | 1.744   |
| Bilanzsumme <sup>6</sup>                                                 | 35.067             | 33.282                | 33.516               | 33.862  | 32.190  | 28.767  | 28.352  |
| Eigenkapital                                                             | 6.460              | 5.992                 | 6.061                | 6.498   | 6.050   | 5.313   | 4.849   |
| Eigenkapitalquote                                                        | 18,4               | 18,0                  | 18,1                 | 19,2    | 18,8    | 18,5    | 17,1    |
| Eigenkapitalrendite nach Steuern                                         | 17,6 <sup>7</sup>  | 13,8 <sup>7</sup>     | 11,9 <sup>7</sup>    | 16,2    | 19,8    | 12,2    | 19,1    |
| Ergebnis je Aktie <sup>6, 8</sup>                                        | 2,60               | 1,17                  | 1,23                 | 2,52    | 3,24    | 1,63    | 2,53    |
| davon aus fortgeführten Aktivitäten                                      | 2,60               | 1,17                  | 2,54                 | 2,58    | 2,88    | 1,54    | 2,32    |
| davon aus nicht fortgeführten Aktivitäten                                | 0,00               | 0,00                  | -1,31                | -0,06   | 0,36    | 0,09    | 0,21    |
| <b>Ausschüttung</b>                                                      |                    |                       |                      |         |         |         |         |
| Dividende je Stammaktie                                                  | 1,35 <sup>9</sup>  | 1,18                  | 1,18                 | 1,18    | 1,12    | 1,02    | 1,02    |
| Dividende je Vorzugsaktie                                                | 1,485 <sup>9</sup> | 1,298                 | 1,298                | 1,298   | 1,232   | 1,122   | 1,122   |
| <b>Operative Daten</b>                                                   |                    |                       |                      |         |         |         |         |
| Mitarbeiter (Jahresdurchschnitt nach Köpfen)                             | 283.280            | 286.329               | 290.940              | 275.520 | 253.117 | 246.875 | 231.841 |
| Standorte                                                                | 2.131              | 2.127                 | 2.111 <sup>10</sup>  | 2.097   | 2.119   | 2.171   | 2.110   |
| Verkaufsfläche (1.000 m <sup>2</sup> )                                   | 12.771             | 12.629                | 12.302 <sup>10</sup> | 11.779  | 11.481  | 10.518  | 9.941   |

<sup>1</sup> Ab 2004 nur fortgeführte Aktivitäten (nicht fortgeführte Aktivitäten: 2005 Praktiker, 2006 Praktiker und Extra, 2007 und 2008 Extra und Adler, 2009 Adler)

<sup>2</sup> Adjustierung aufgrund geänderter Ausweise

<sup>3</sup> Adjustierung aufgrund der Erstanwendung neuer und geänderter IFRS im Geschäftsjahr 2009

<sup>4</sup> Adjustierung aufgrund der saldierten Darstellung von außerplanmäßigen Abschreibungen und Zuschreibungen im EBITDA in Höhe von 9 Mio. € (Real), 6 Mio. € (Immobilien) und -6 Mio. € (Konsolidierung)

<sup>5</sup> 2010 (2009) bereinigt um Sonderfaktoren Shape 2012: Im EBITDA um 135 Mio. € (251 Mio. €), davon entfallen 11 Mio. € (104 Mio. €) auf Metro Cash & Carry, 11 Mio. € (16 Mio. €) auf Real, 58 Mio. € (4 Mio. €) auf Media Markt und Saturn, -1 Mio. € (57 Mio. €) auf Galeria Kaufhof, -14 Mio. € (5 Mio. €) auf Immobilien, 41 Mio. € (65 Mio. €) auf Sonstige sowie 29 Mio. € (0 Mio. €) auf Konsolidierung; im EBIT und im Ergebnis vor Steuern um 204 Mio. € (343 Mio. €), davon entfallen 10 Mio. € (143 Mio. €) auf Metro Cash & Carry, 27 Mio. € (16 Mio. €) auf Real, 133 Mio. € (5 Mio. €) auf Media Markt und Saturn, 0 Mio. € (58 Mio. €) auf Galeria Kaufhof, -20 Mio. € (15 Mio. €) auf Immobilien, 41 Mio. € (106 Mio. €) auf Sonstige sowie 13 Mio. € (0 Mio. €) auf Konsolidierung.

<sup>6</sup> Einschließlich nicht fortgeführter Aktivitäten

<sup>7</sup> 2010, 2009 und 2008 bereinigt um Sonderfaktoren Shape 2012

<sup>8</sup> Nach Anteilen nicht beherrschender Gesellschafter

<sup>9</sup> Vorbehaltlich des Hauptversammlungsbeschlusses

<sup>10</sup> Die 84 Standorte von Dinea wurden aus dem Segment Sonstige in das Segment Galeria Kaufhof umgliedert. Im Segment Galeria Kaufhof werden sie nicht mehr als eigenständige Standorte gezählt, sondern dem jeweiligen Standort von Galeria Kaufhof zugerechnet. Daher werden die Standorte sowie die Verkaufsflächen nicht mehr gesondert ausgewiesen.

A

B

C

D

1

2

3

4

5

6

7

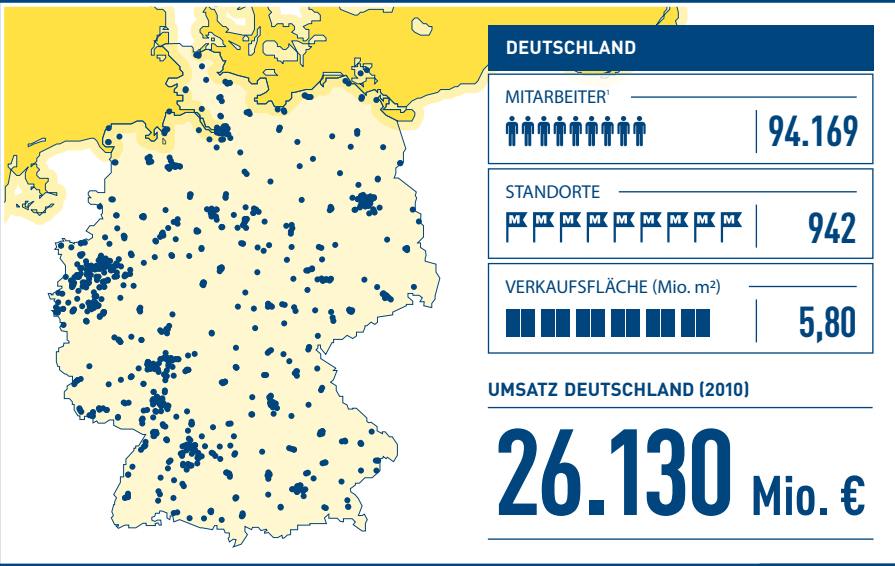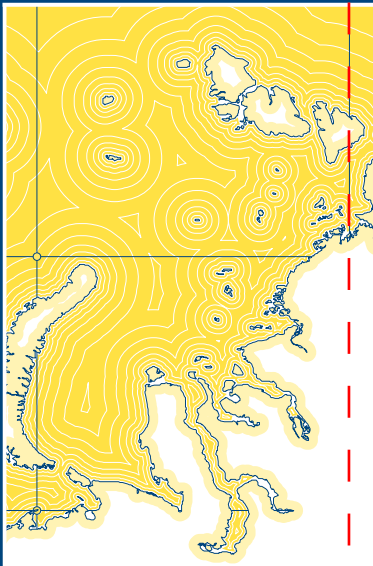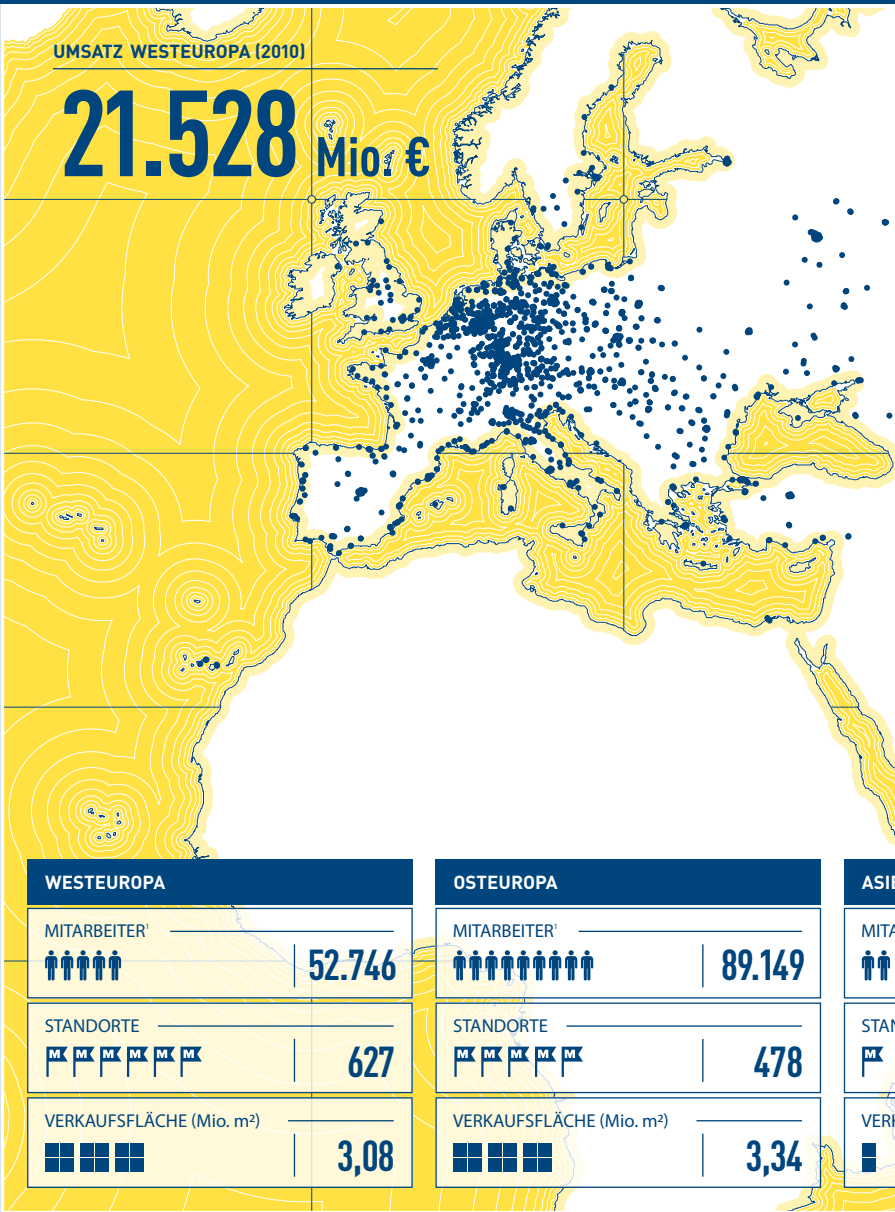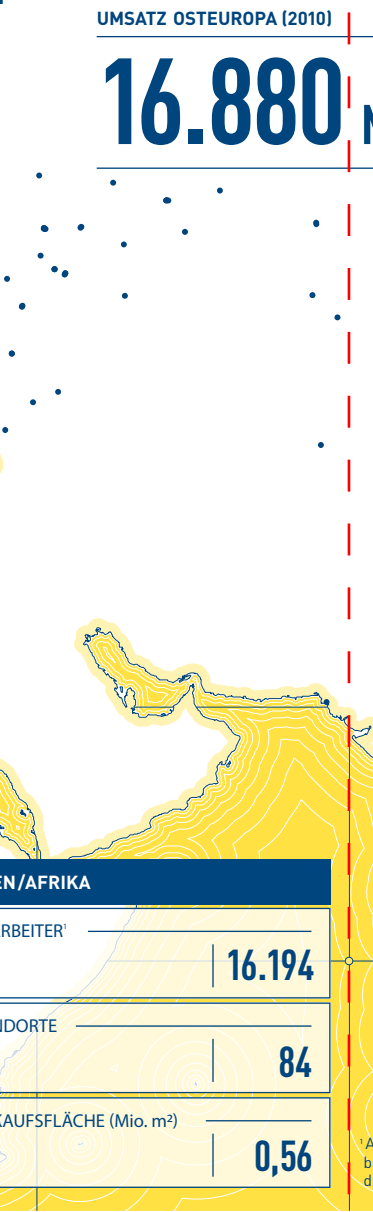

UMSATZ OSTEUROPA (2010)

**16.880** Mio. €

A

B

C

D

A  
b  
d

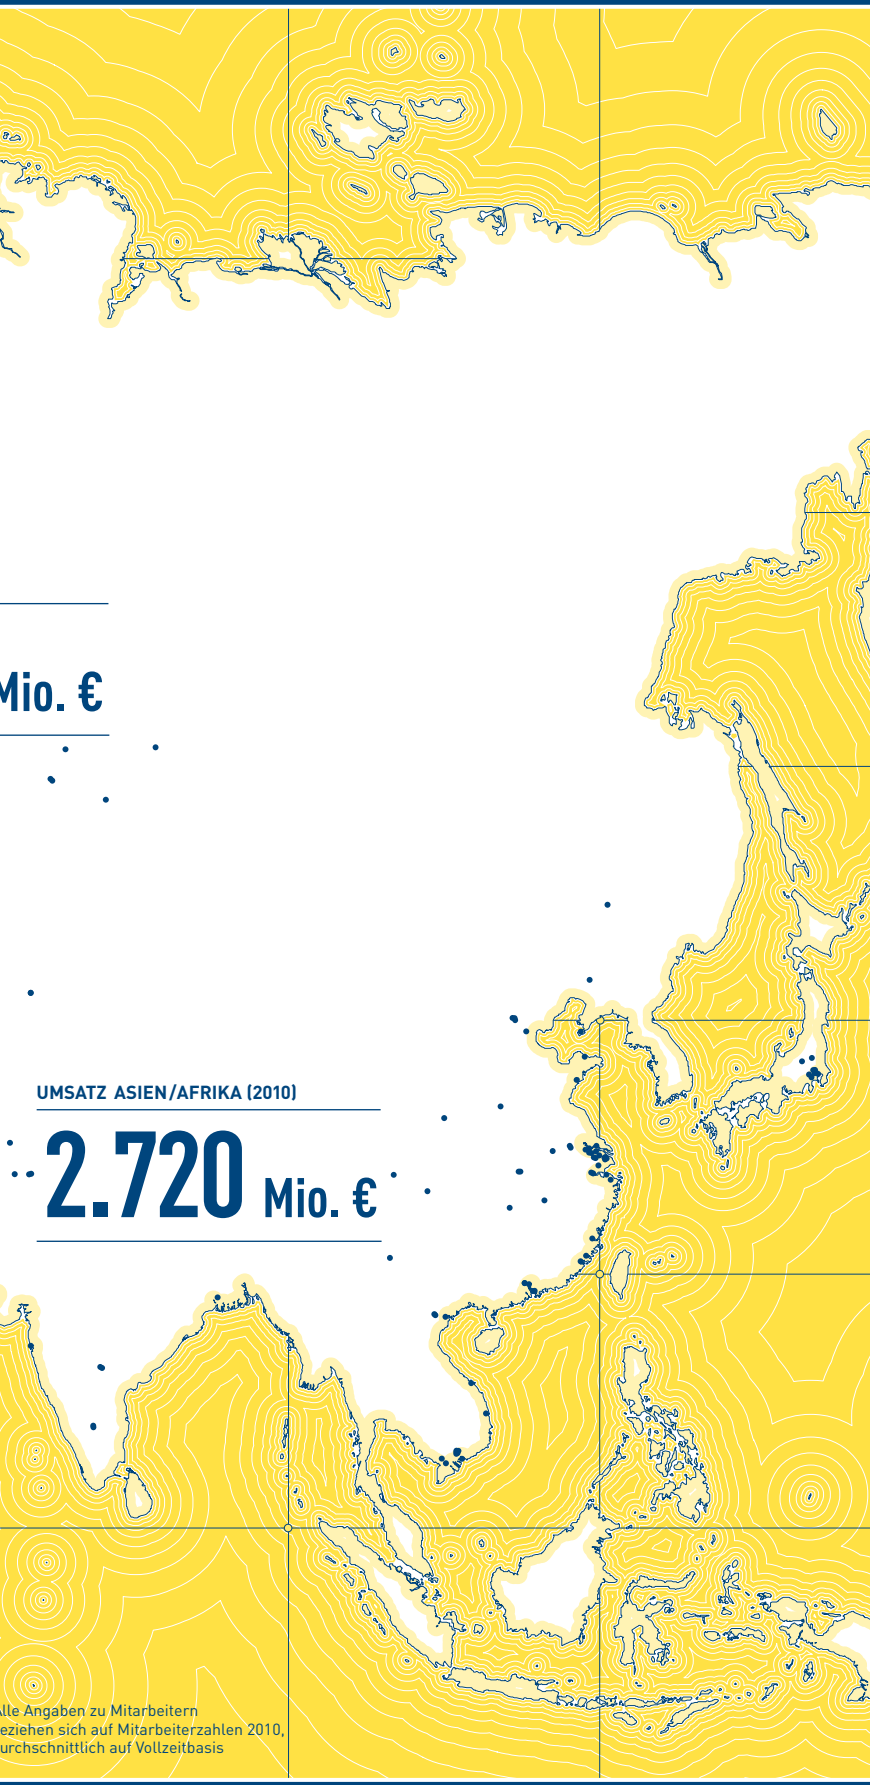

**METRO GROUP**

**2.131**

STANDORTE

**33** LÄNDER

**METRO/MAKRO CASH & CARRY**

**687**

STANDORTE

**30** LÄNDER

**REAL**

**429**

STANDORTE

**6** LÄNDER

**MEDIA MARKT UND SATURN**

**877**

STANDORTE

**17** LÄNDER

**GALERIA KAUFHOF**

**138**

STANDORTE

**2** LÄNDER

Mio. €

UMSATZ ASIEN/AFRIKA (2010)

**2.720** Mio. €

Alle Angaben zu Mitarbeitern beziehen sich auf Mitarbeiterzahlen 2010, durchschnittlich auf Vollzeitbasis

DIE STANDORTE  
DER  
**METRO GROUP**

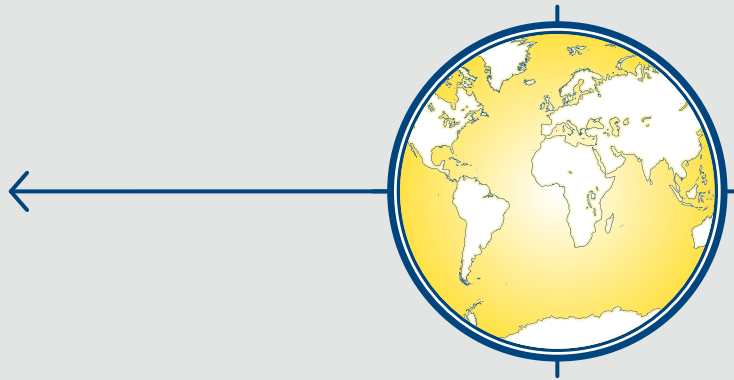

# FINANZKALENDER 2011

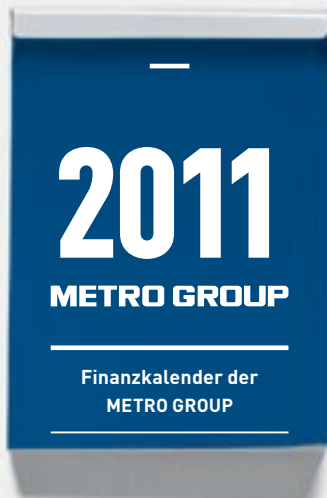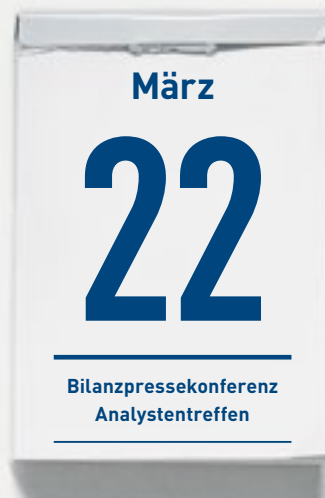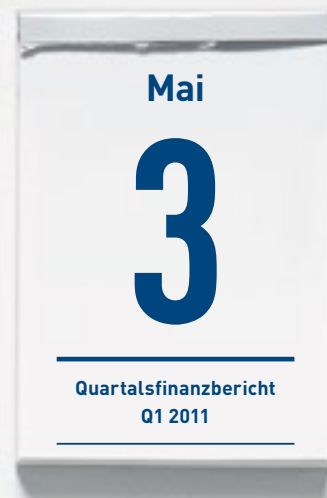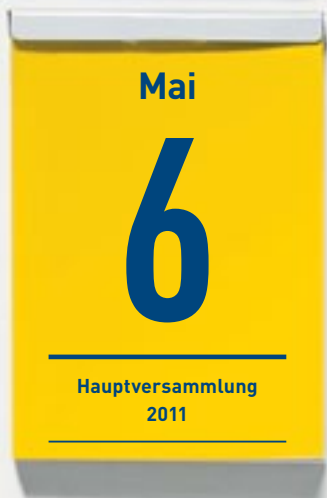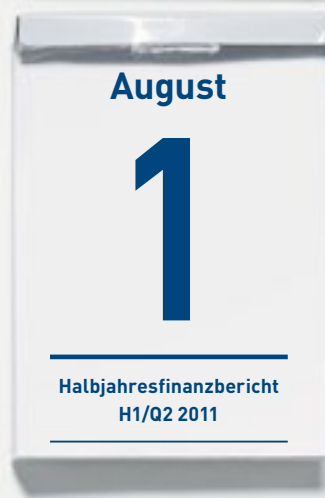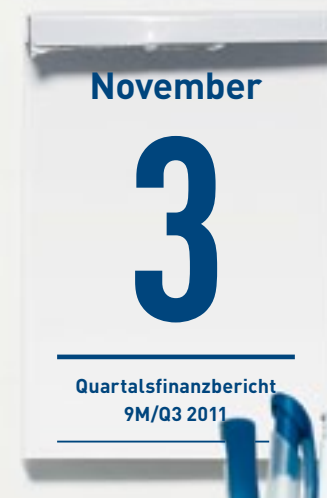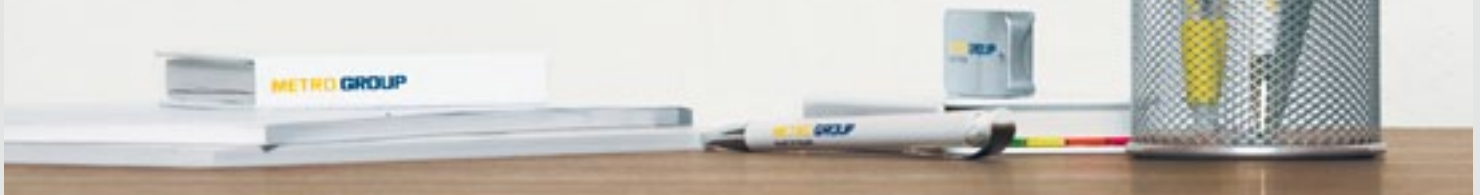

# INFORMATION

## METRO AG

Schlüterstraße 1  
40235 Düsseldorf  
Tel.: +49 (211) 6886-0  
www.metrogroup.de  
www.metro-cc.com

## Real SB-Warenhaus GmbH

Verwaltungssitz:  
Reyerhütte 51  
41065 Mönchengladbach  
Tel.: +49 (2161) 403-0  
www.real.de

## Media-Saturn-Holding GmbH

Wankelstraße 5  
85046 Ingolstadt  
Tel.: +49 (841) 634-0  
www.mediamarkt.de  
www.saturn.de  
www.media-saturn.com

## Galeria Kaufhof GmbH

Leonhard-Tietz-Straße 1  
50676 Köln  
Tel.: +49 (221) 223-0  
www.galeria-kaufhof.de

## METRO Group Asset Management GmbH & Co. KG

Neumannstraße 8  
40235 Düsseldorf  
Tel.: +49 (211) 6886-4250  
www.metro-mam.de

## Herausgeber

METRO AG  
Schlüterstraße 1  
40235 Düsseldorf  
Postfach 23 03 61  
40089 Düsseldorf

## METRO GROUP im Internet

www.metrogroup.de

## Investor Relations

Tel.: +49 (211) 6886-1936  
Fax: +49 (211) 6886-3759  
investorrelations@metro.de

## Konzernkommunikation, Public Affairs & CSR

Tel.: +49 (211) 6886-4252  
Fax: +49 (211) 6886-2001  
presse@metro.de

## Konzept und Redaktion

Dr. Michael J. Inacker  
Katharina Meisel

## Kreative Umsetzung

Strichpunkt GmbH, Stuttgart

## Redaktionelle Unterstützung und Realisation

Ketchum Pleon GmbH, Düsseldorf

## Druck

Druckstudio GmbH, Düsseldorf

## Bildnachweis

METRO AG

## Fotografie

Olaf Unverzart, München (Magazin)  
Boris Zorn, Düsseldorf (S. 016-017  
Vorstandsporträts; S. 023; S. 262)  
Philipp Wente, Witten  
(S. 052 Porträt Prof. Dr. Kluge)

## Zertifizierungen

Dieser Geschäftsbericht besteht aus FSC-zertifiziertem Papier. Mit dem Kauf von FSC-Produkten fördern wir verantwortungsvolle Waldwirtschaft, die nach strengen sozialen, ökologischen und wirtschaftlichen Kriterien des Forest Stewardship Council überprüft wird.

## Global Compact

Die METRO GROUP engagiert sich seit 2011 für den UN Global Compact, den weltweiten Pakt zur Förderung universeller Sozial- und Umweltprinzipien unter dem Dach der Vereinten Nationen. Wir verpflichten uns damit dazu, uns auf den Gebieten Menschenrechte, Arbeitsnormen, Umweltschutz und Korruptionsbekämpfung kontinuierlich zu verbessern.

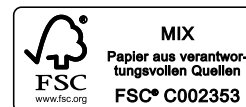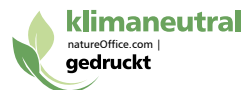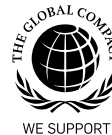

## Disclaimer

Dieser Geschäftsbericht enthält zukunftsgerichtete Aussagen. Solche vorausschauenden Aussagen beruhen auf bestimmten Annahmen und Erwartungen zum Zeitpunkt der Veröffentlichung dieses Geschäftsberichts. Sie sind daher mit Risiken und Ungewissheiten verbunden und die tatsächlichen Ergebnisse werden erheblich von den in den zukunftsgerichteten Aussagen beschriebenen abweichen können. Eine Vielzahl dieser Risiken und Ungewissheiten wird von Faktoren bestimmt, die nicht dem Einfluss der METRO GROUP unterliegen und heute auch nicht sicher abgeschätzt werden können. Dazu zählen zukünftige Marktbedingungen und wirtschaftliche Entwicklungen, das Verhalten anderer Marktteilnehmer, das Erreichen erwarteter Synergieeffekte sowie gesetzliche und politische Entscheidungen. Die METRO GROUP sieht sich auch nicht dazu verpflichtet, Berichtigungen dieser zukunftsgerichteten Aussagen zu veröffentlichen, um Ereignisse oder Umstände widerzuspiegeln, die nach dem Veröffentlichungsdatum dieser Materialien eingetreten sind.
