# Supplementary material
Source: publisher site journal article supplement (https://www.degruyterbrill.com/publication/isbn/9783110432879/downloadAsset/9783110432879_Elektronischer_Anhang_2.zip)
Supplement: Supplementary file 81 [file Munich RE GB 2010.pdf › Korpustexte/Korpustexte pdf/Munich Re/Munich RE GB 2010.pdf]

MUNICH RE  
KONZERNGESCHÄFTSBERICHT  
2010

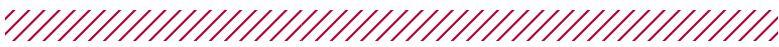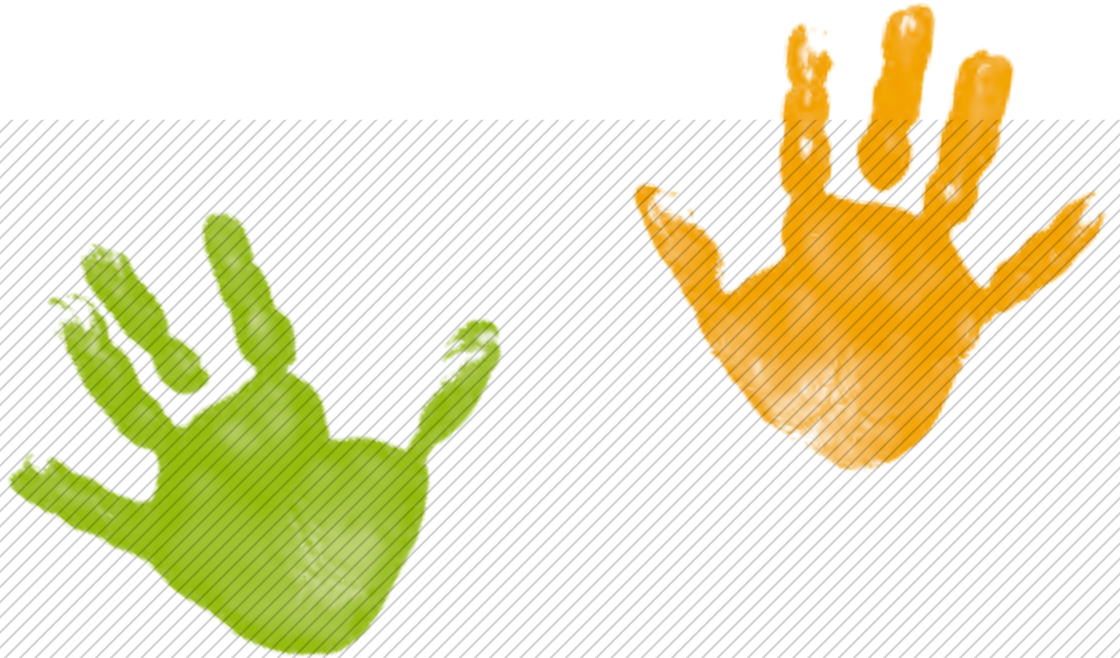

Weiter  
denken

# Wichtige Kennzahlen (IFRS)<sup>1</sup>

## Munich Re

|                                                   |        | 2010   | 2009   | 2008   | 2007   | 2006   |
|---------------------------------------------------|--------|--------|--------|--------|--------|--------|
| Gebuchte Bruttobeiträge                           | Mrd. € | 45,5   | 41,4   | 37,8   | 37,3   | 37,4   |
| Operatives Ergebnis                               | Mio. € | 3.978  | 4.721  | 3.834  | 5.573  | 5.877  |
| Ertragsteuern                                     | Mio. € | 692    | 1.264  | 1.372  | 801    | 1.648  |
| Konzernergebnis                                   | Mio. € | 2.430  | 2.564  | 1.579  | 3.923  | 3.519  |
| auf nicht beherrschende Anteile entfallend        | Mio. € | 8      | 43     | 24     | 83     | 94     |
| Kapitalanlagen                                    | Mrd. € | 193,1  | 182,2  | 174,9  | 176,2  | 176,9  |
| Eigenkapitalrendite                               | %      | 10,4   | 11,8   | 7,0    | 15,3   | 14,1   |
| Eigenkapital                                      | Mrd. € | 23,0   | 22,3   | 21,1   | 25,3   | 26,3   |
| Nicht bilanzierte Bewertungsreserven <sup>2</sup> | Mrd. € | 3,6    | 3,2    | 2,5    | 0,8    | 1,9    |
| Versicherungstechnische Rückstellungen (netto)    | Mrd. € | 171,1  | 163,9  | 157,1  | 152,4  | 153,9  |
| Mitarbeiter zum 31. Dezember                      |        | 46.915 | 47.249 | 44.209 | 38.634 | 37.210 |

## Rückversicherung<sup>3</sup>

|                                                |        | 2010  | 2009  | 2008  | 2007  | 2006 |
|------------------------------------------------|--------|-------|-------|-------|-------|------|
| Gebuchte Bruttobeiträge                        | Mrd. € | 23,6  | 21,8  | 21,9  | 21,5  | 22,2 |
| Kapitalanlagen                                 | Mrd. € | 83,7  | 76,8  | 78,4  | 81,9  | 85,0 |
| Versicherungstechnische Rückstellungen (netto) | Mrd. € | 56,6  | 53,4  | 55,8  | 55,5  | 59,6 |
| Groß- und Größtschäden (netto)                 | Mio. € | 2.228 | 1.157 | 1.507 | 1.126 | 585  |
| Schäden aus Naturkatastrophen                  | Mio. € | 1.564 | 196   | 832   | 634   | 139  |
| Schaden-Kosten-Quote Schaden/Unfall            | %      | 100,5 | 95,3  | 99,4  | 96,4  | 92,6 |

## Erstversicherung<sup>3</sup>

|                                                |        | 2010  | 2009  | 2008  | 2007  | 2006  |
|------------------------------------------------|--------|-------|-------|-------|-------|-------|
| Gebuchte Bruttobeiträge                        | Mrd. € | 17,5  | 16,6  | 17,0  | 17,3  | 16,7  |
| Kapitalanlagen                                 | Mrd. € | 121,8 | 118,4 | 114,0 | 109,3 | 107,4 |
| Versicherungstechnische Rückstellungen (netto) | Mrd. € | 111,2 | 107,7 | 101,4 | 96,9  | 94,3  |
| Schaden-Kosten-Quote Schaden/Unfall            | %      | 96,8  | 93,2  | 90,9  | 93,4  | 90,8  |

## Munich Health<sup>3</sup>

|                                                |        | 2010 | 2009 |  |  |  |
|------------------------------------------------|--------|------|------|--|--|--|
| Gebuchte Bruttobeiträge                        | Mrd. € | 5,1  | 4,0  |  |  |  |
| Kapitalanlagen                                 | Mrd. € | 4,1  | 3,1  |  |  |  |
| Versicherungstechnische Rückstellungen (netto) | Mrd. € | 3,3  | 2,9  |  |  |  |
| Schaden-Kosten-Quote <sup>4</sup>              | %      | 99,7 | 99,4 |  |  |  |

## Unsere Aktie

|                                                                |        | 2010   | 2009   | 2008   | 2007   | 2006   |
|----------------------------------------------------------------|--------|--------|--------|--------|--------|--------|
| Ergebnis je Aktie                                              | €      | 13,06  | 12,95  | 7,74   | 17,83  | 15,05  |
| Dividende je Aktie                                             | €      | 6,25   | 5,75   | 5,50   | 5,50   | 4,50   |
| Ausschüttung                                                   | Mio. € | 1.118  | 1.072  | 1.073  | 1.124  | 988    |
| Kurs der Aktie zum 31. Dezember                                | €      | 113,45 | 108,67 | 111,00 | 132,94 | 130,42 |
| Börsenwert der Münchener Rück AG zum 31. Dezember <sup>5</sup> | Mrd. € | 21,4   | 21,5   | 22,9   | 29,0   | 29,9   |

## Umsatz-/Ergebnisentwicklung

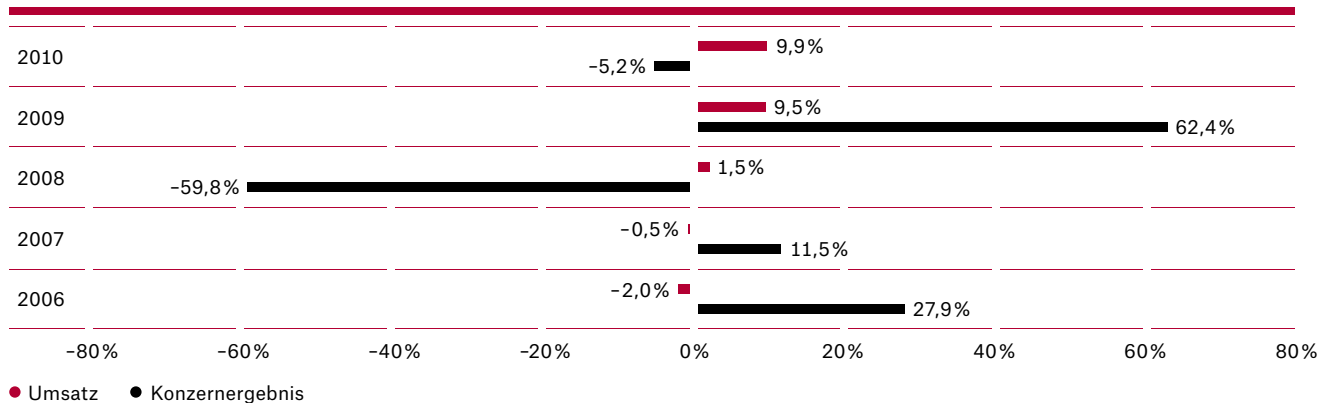

<sup>1</sup> Vorjahreswerte angepasst aufgrund des Ausweises von Munich Health als eigenes Segment, siehe Abschnitt „Bilanzierung und Bewertung“.

<sup>2</sup> Einschließlich der Anteile, die auf andere Gesellschafter und Versicherungsnehmer entfallen.

<sup>3</sup> Vor Eliminierung segmentübergreifender konzerninterner Geschäftsvorfälle.

<sup>4</sup> Ohne nach Art der Lebensversicherung betriebenes Krankenversicherungsgeschäft.

<sup>5</sup> Hierin enthalten sind auch die eigenen Aktien, die zum Einzug vorgesehen sind.

# Diversifizierte Struktur – diversifiziertes Risiko

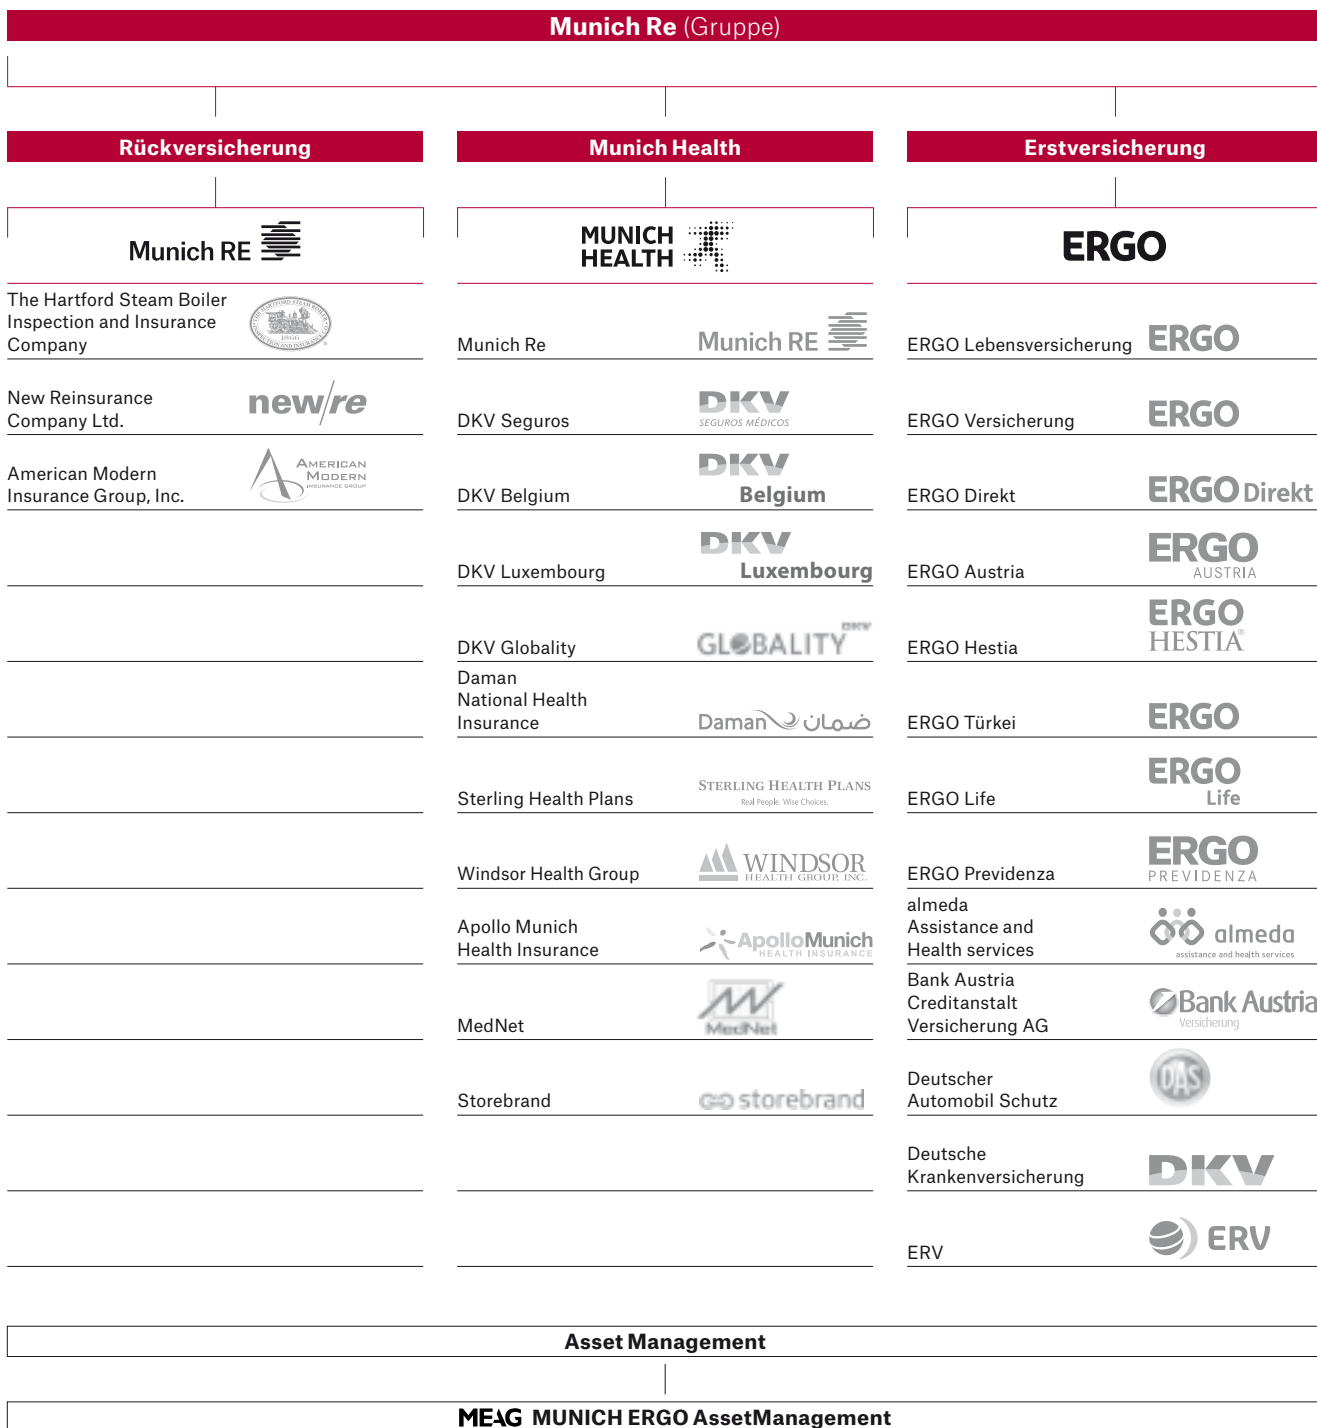

Die Darstellung ist exemplarisch und erhebt keinen Anspruch auf Vollständigkeit. Die genauen Beteiligungsverhältnisse entnehmen Sie bitte der Anteilsbesitzauflistung auf Seite 269.

Unsere Geschäftstätigkeit umfasst alle Aspekte der Übernahme von Risiken im Erst- und Rückversicherungsgeschäft. Weltweit gehören wir zu den führenden Rückversicherern, in Deutschland zu den führenden Erstversicherern.

- // Rückversicherung: Seit 1880 versichern wir Versicherungen.
- // Erstversicherung: Unsere Erstversicherer bieten Sicherheit vorwiegend für Privatkunden und den gewerblichen Mittelstand.
- // Unser Tochterunternehmen MEAG verwaltet unsere Kapitalanlagen und bietet daneben Investmentprodukte für Privatkunden und institutionelle Anleger.

**„Alles in allem wird deutlich, dass die Zukunft große Chancen bereithält – sie enthält aber auch Fallstricke. Der Trick ist, den Fallstricken aus dem Weg zu gehen, die Chancen zu ergreifen und bis sechs Uhr wieder zu Hause zu sein.“**

**Woody Allen** (\*1935)  
Regisseur und Schauspieler

Der nächste Quartalsbericht erscheint am 9. Mai 2011



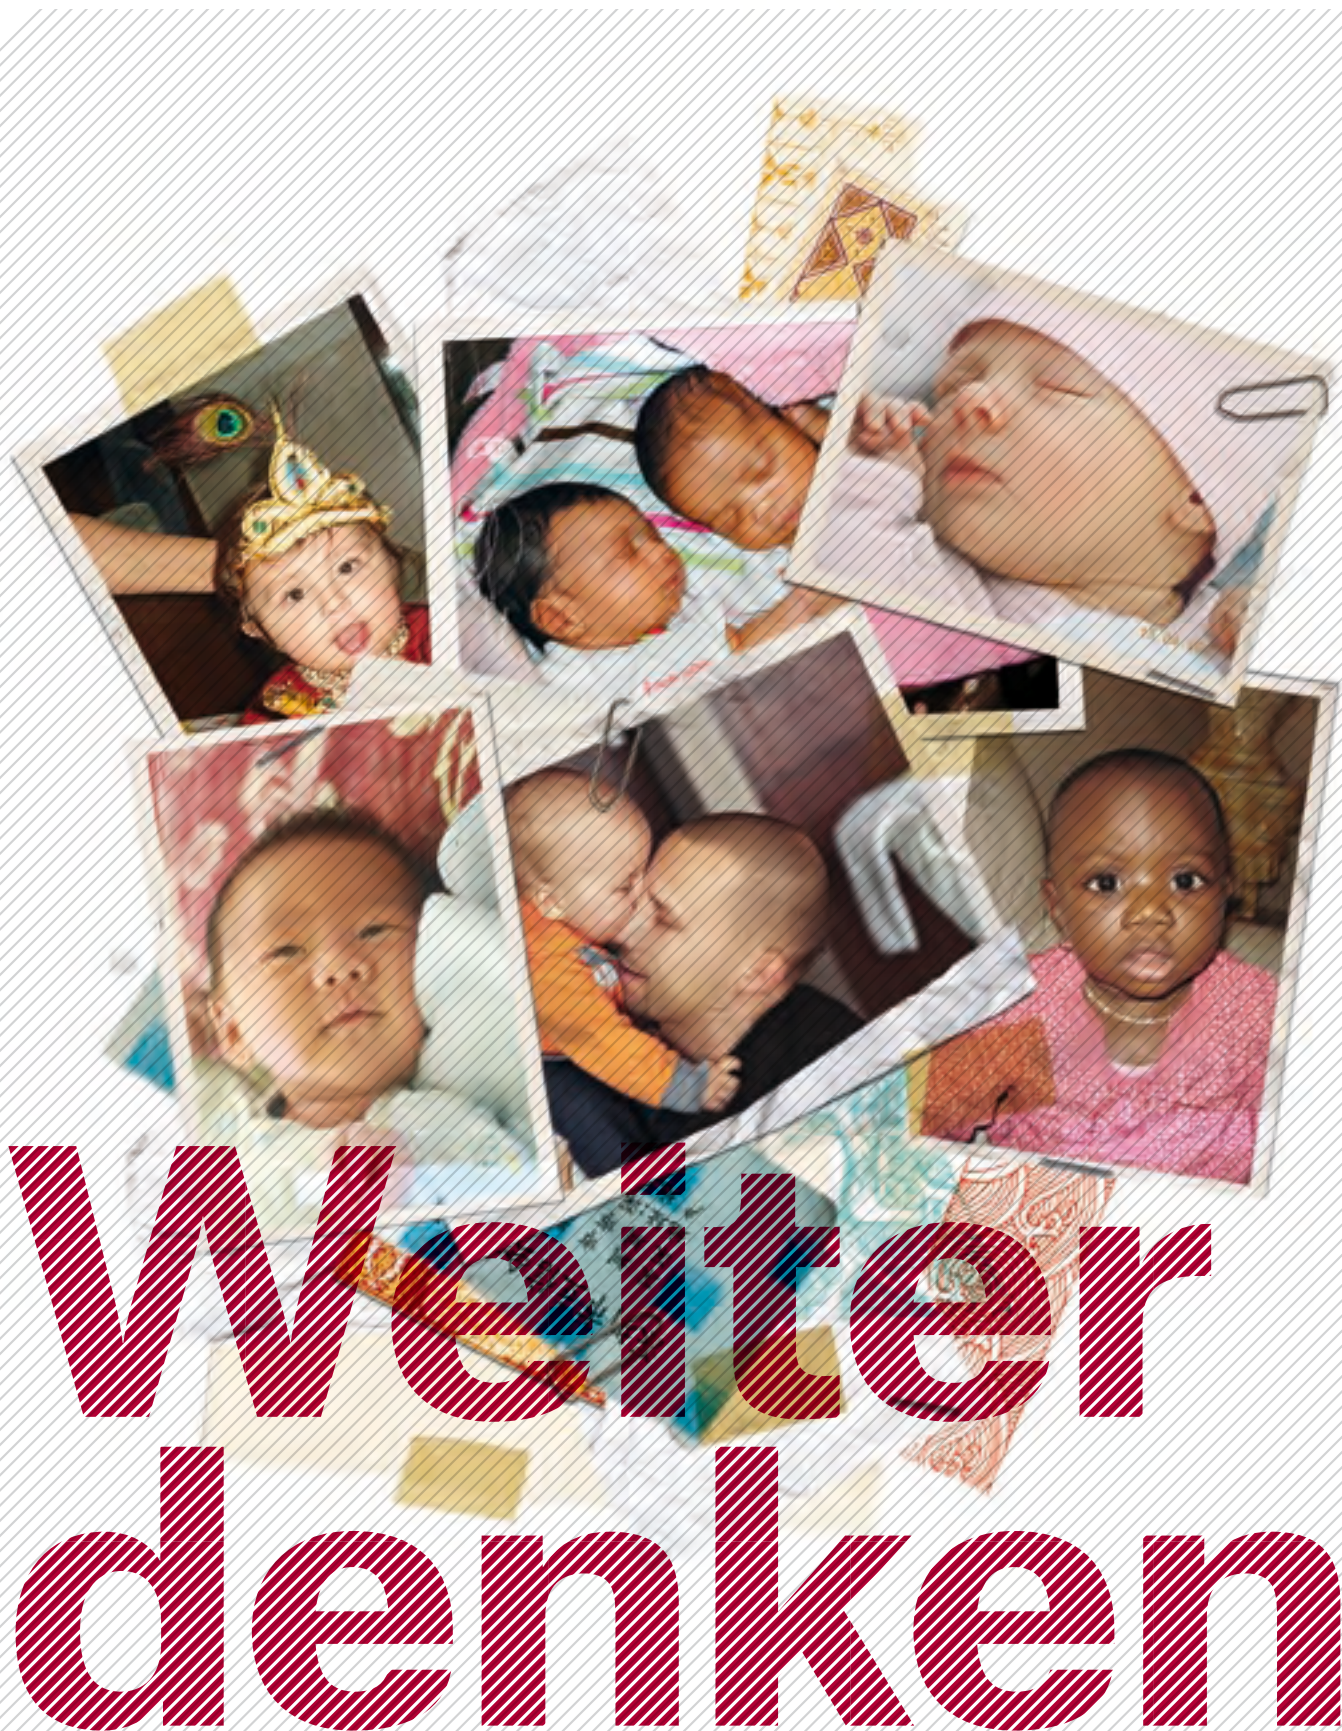

# Weiter denken

## **Eine Versicherung der besonderen Art** 02

*Warum die Zeit reif ist für eine neue Assekuranz*

## **„Wir hören zu“** 07

*Was Kunden tatsächlich wollen // Interview mit **Thomas Bischof***

## **Vom Erwachen eines Elefanten** 08

*Wo Indiens Zukunftspotenziale liegen // von **Antony Jacob***

## **Versicherung – ein Versprechen für die Zukunft** 12

*Was wirklich nachhaltig ist // Kommentar von **Nikolaus von Bomhard***

## **„Wir stehen auf Seiten der Tapferen“** 14

*Warum Polen auch in der Krise boomt // Interview mit **Piotr Sliwicki***

## **„Freuen Sie sich auf ein unglaubliches Erlebnis!“** 18

*Welche Chancen sich im Weltraum bieten //  
**Ernst Steilen** und **Thomas Reiter** diskutieren*

## **Chinas graue Revolution** 22

*Wie sich ein Land dramatisch verändert*

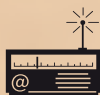

Artikel und Interviews dieses Magazins  
sind im Internet als Audiofiles verfügbar:  
[www.munichre.com/de/audio](http://www.munichre.com/de/audio)

**ZUKUNFT**



**Im vergangenen Jahr wurden weltweit rund 140 Millionen Kinder geboren.**

Wie werden sie morgen leben? Welchen Herausforderungen werden sie sich stellen müssen? Welchen Risiken werden sie ausgesetzt sein? Welche Chancen werden sich ihnen bieten? Und: Wie wird unsere Erde in den kommenden Jahrzehnten aussehen?

**In den Antworten auf diese Fragen liegt für uns der Schlüssel zum Morgen:**

Zu neuen Märkten, neuen Kunden und neuen Produkten. Zu neuem Denken und zu neuen Lösungen. Nicht zuletzt deshalb haben wir 2010 den Großteil unserer Aktivitäten in der Erstversicherung in der Marke ERGO gebündelt. Wir sind sicher, dass wir damit für zukünftige Herausforderungen unserer Branche bestens gewappnet sind.

**Denn: Für uns beginnt die Zukunft bereits heute.**

Und mit unserem integrierten Geschäftsmodell aus Erst- und Rückversicherung sind wir bestens für sie gerüstet. Rund 130 Jahre Erfahrung in Risikobewertung und -management helfen uns, nachhaltige Versicherungslösungen für die großen Herausforderungen von morgen zu entwickeln. Kundenorientiert, innovativ und nachhaltig profitabel. Das macht uns zu einem der weltweit führenden Rück- und Erstversicherer.

**Weiter zu denken – das ist der Anspruch bei allen unseren Aktivitäten.**

Wie wir das tun, das lesen Sie auf den folgenden Seiten.

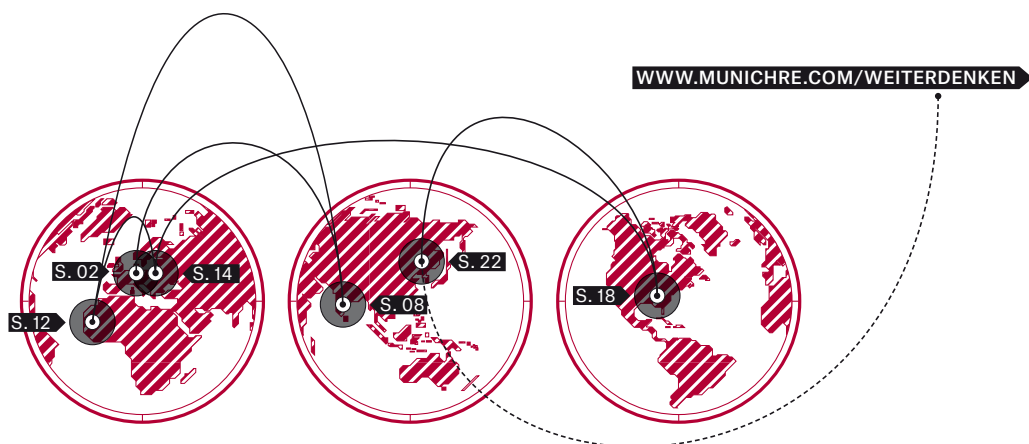

*In diesem Magazin möchten wir Ihnen acht Kinder von Mitarbeiterinnen und Mitarbeitern von Munich Re vorstellen, die 2010 geboren wurden – in Deutschland, Indien, Senegal, Polen, den USA und in China. Wie sie morgen und übermorgen leben werden, erfahren Sie in diesem Heft und im Internet: <http://report2010.munichre.com>*

## Deutschland, 2020

Luisa Antonia

Fleißige Schülerin

Im gleichen Jahr, in dem Luisa Antonia in Köln zur Welt kam, wurde in Deutschland auch eine Versicherung der besonderen Art geboren. ERGO ist die erste Versicherung, die sich konsequent an den Wünschen und Bedürfnissen ihrer Kunden orientiert. Wie viele Verbraucher dieses Ziel begrüßen, zeigen die zahlreichen Reaktionen nach dem Start. Wenn Luisa Antonia ihren zehnten Geburtstag feiert, dürfte sich das Verständnis vom Absichern und Versichert-Werden daher grundlegend gewandelt haben.

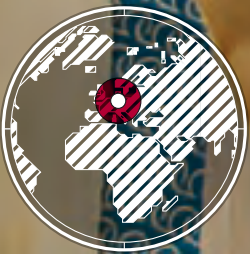



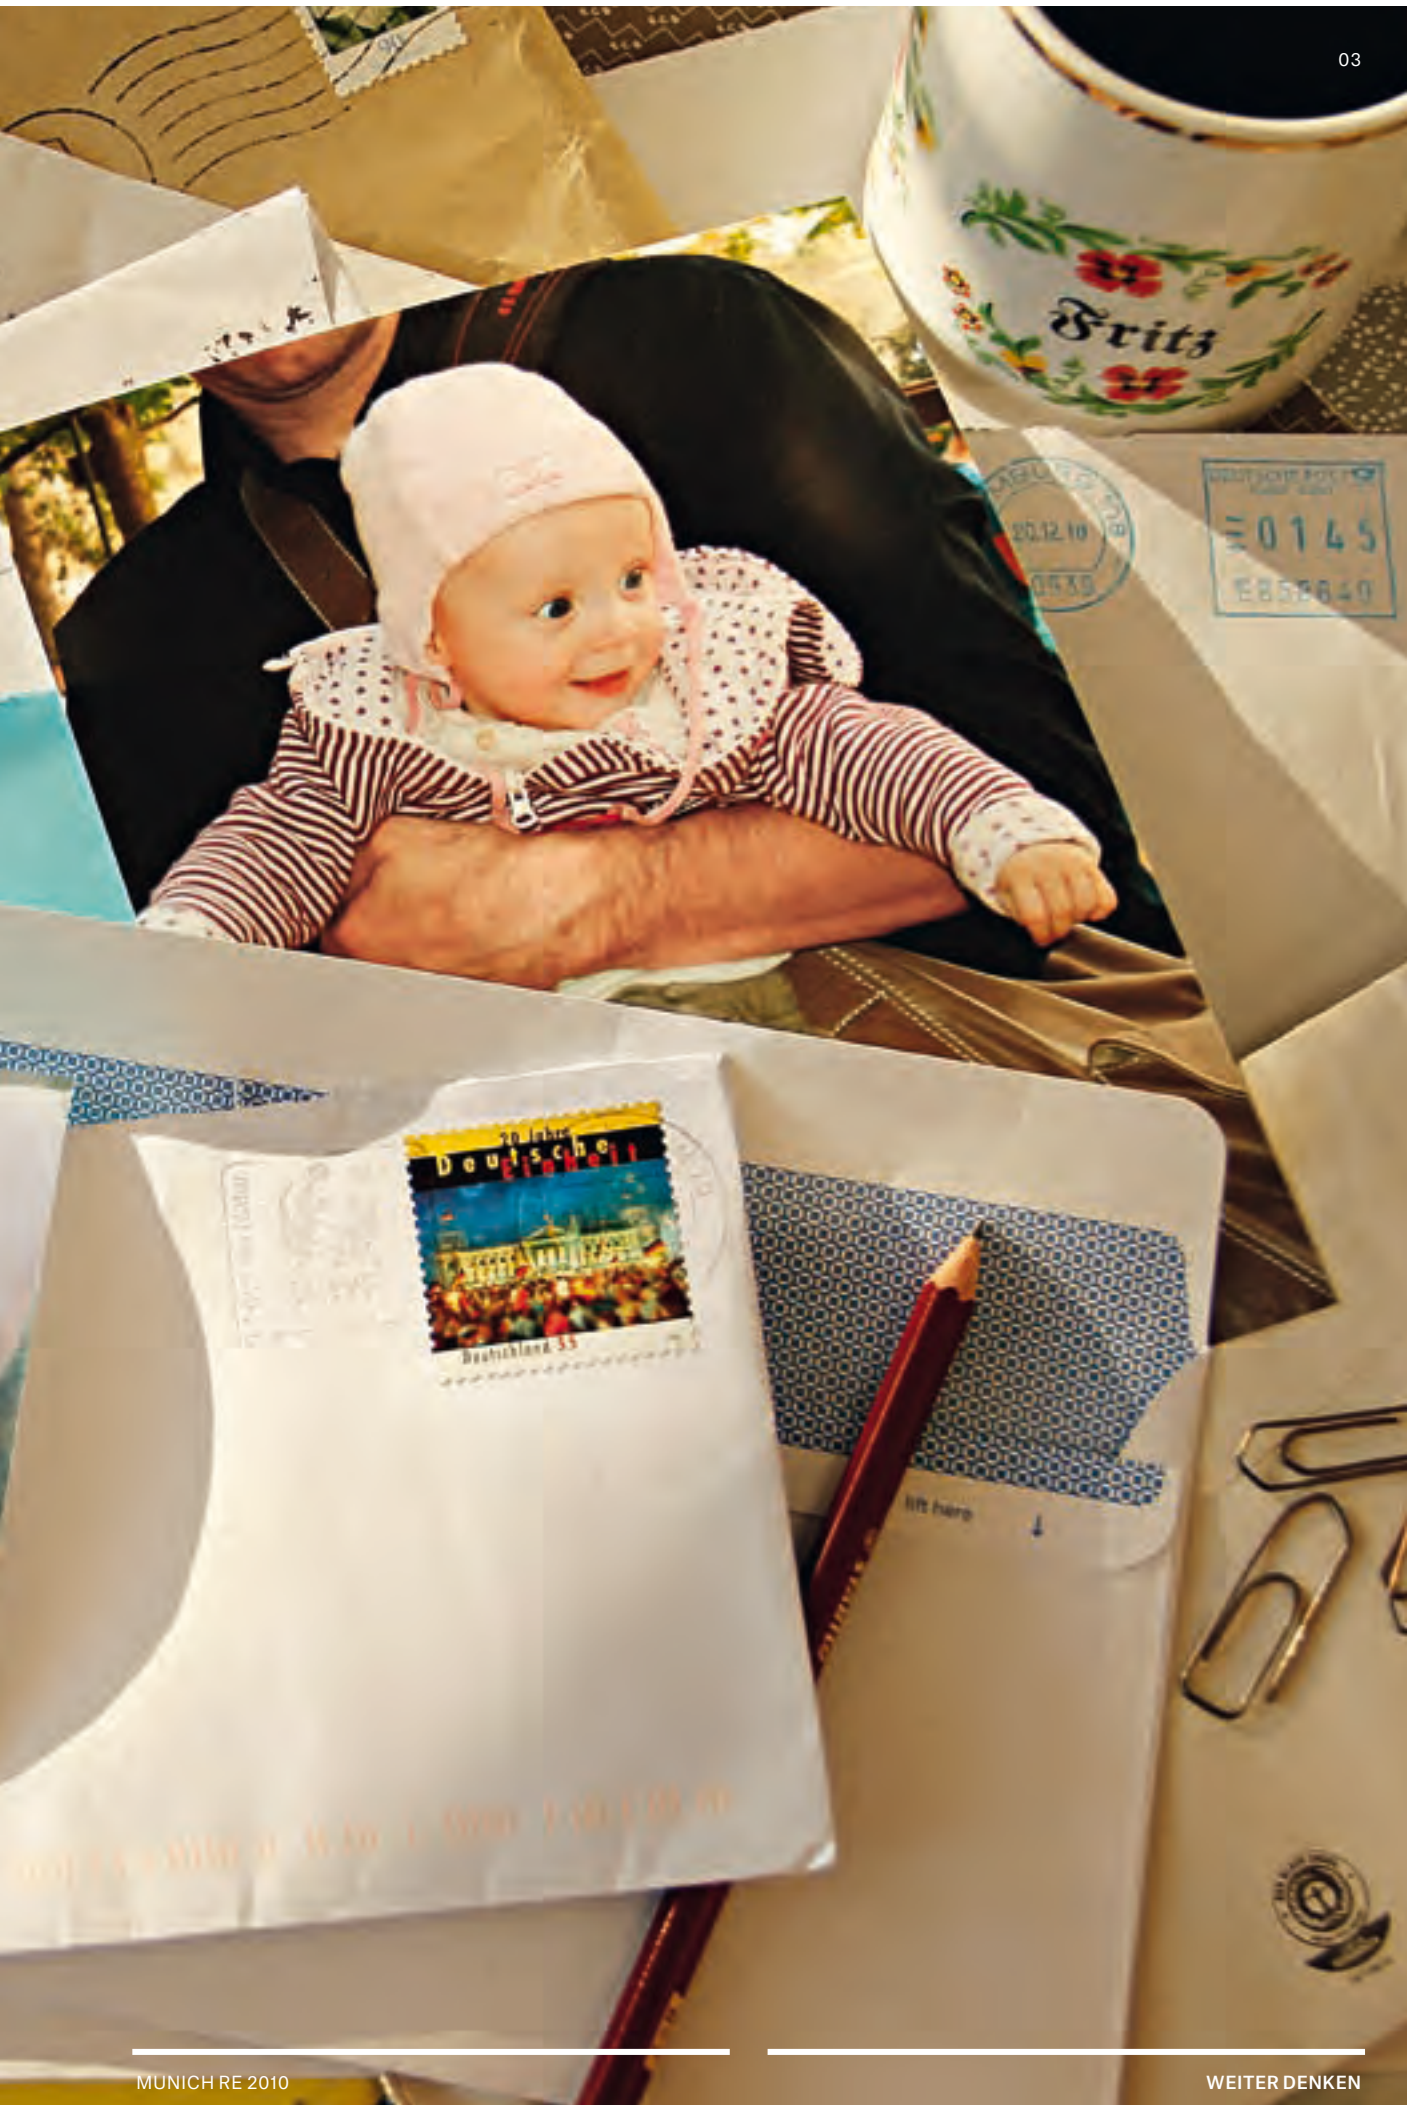



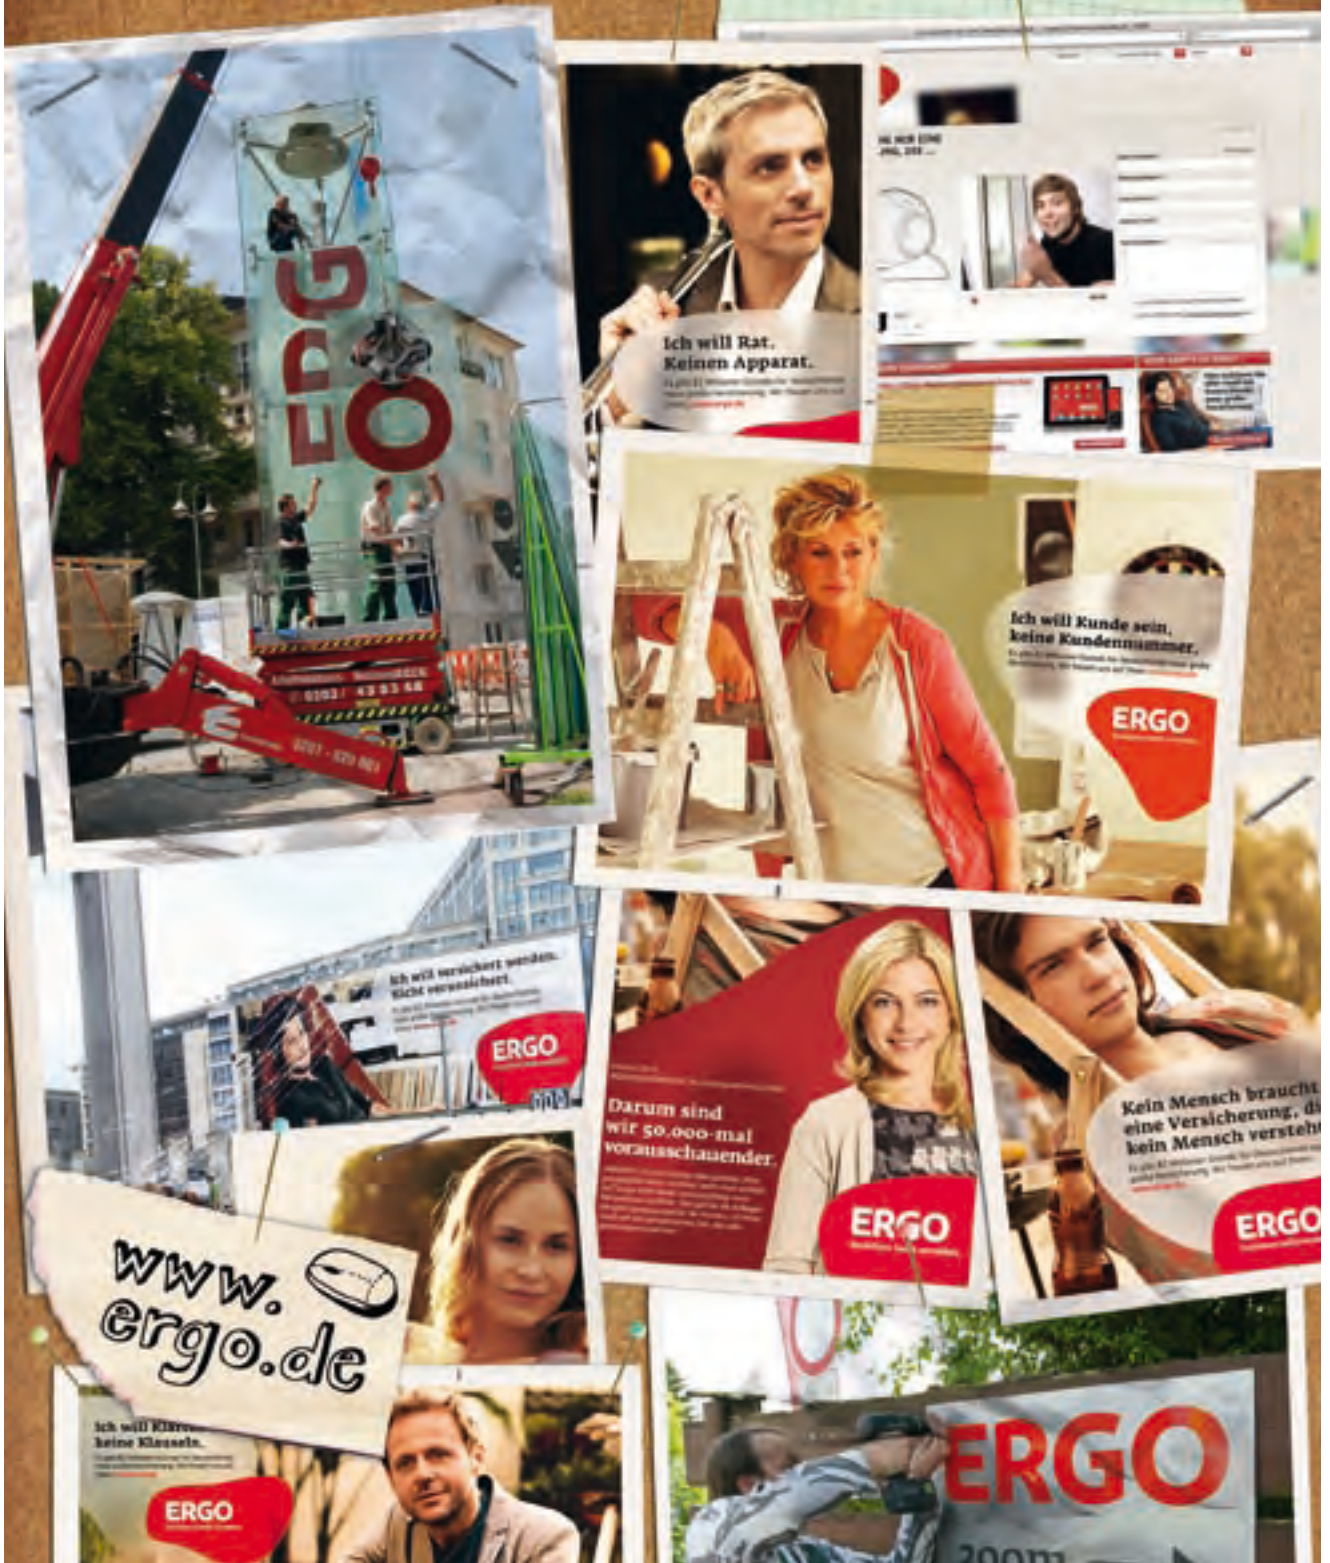

Eine neue Art der Versicherung ist das eine. Eine neuartige Versicherung, welche die Menschen kennen und kennenlernen können, ist etwas ganz anderes. Am 18. Juli 2010 startete die neue ERGO daher eine umfassende, authentische Kampagne in Kino, Zeitungen und Zeitschriften, mit Riesenpostern am Potsdamer Platz und im Hamburger Hafen sowie einem 60-sekündigen Werbespot, der fast zeitgleich auf allen reichweitenstarken Sendern zu sehen war. Ergebnis: Bereits zum Jahresende war ERGO deutlich mehr als der Hälfte der Bundesbürger bekannt.

# Eine Versicherung der besonderen Art

Weitere Informationen: [www.ergo.com/markenlaunch](http://www.ergo.com/markenlaunch)

*Mit ihrem neuen Markenauftritt erfindet sich die Erstversicherungstochter von Munich Re neu – und das Verhältnis von Versicherung und Kunden gleich mit. //*

**Wer mit Verbrauchern** über ihre Meinung zu Versicherungen spricht, erfährt häufig von Enttäuschung, Unzufriedenheit und Misstrauen. Versicherungsvertreter gilt hierzulande als der unbeliebteste Beruf, noch vor dem des Politikers, Lkw-Fahrers oder Straßenkehrers. Und ihren Versicherern geben die Deutschen auf einer Skala von 1 („äußerst vertrauenswürdig“) bis 6 („überhaupt nicht vertrauenswürdig“) lediglich die Note 3,3 – ein enttäuschendes Zeugnis für eine Branche, die wie kaum eine andere vom Vertrauen ihrer Kunden lebt. Was aber stört die Menschen eigentlich genau an Versicherungen? Weshalb fühlen sie sich zwar heftig umworben, aber nur selten gut beraten? Und vor allem: Wie müsste eine Versicherung beschaffen sein, die Kundenwünsche und Ärgernisse ernst nimmt?

**Diese Fragen hat die ERGO Versicherungsgruppe** im vergangenen Jahr intensiv untersucht – und mit einer Konsequenz beantwortet wie kaum ein anderer Versicherer zuvor. Zunächst hatten Interviewer des angesehenen Nürnberger Marktforschungsinstituts Icon im ERGO-Auftrag mehr als 6.000 repräsentativ ausgewählte Deutsche zu ihren Assekuranz-Erfahrungen befragt – und waren mit ziemlich ernüchternden Ergebnissen zurückgekehrt. So glaubt nur gut die Hälfte der Kunden, dass sich ihre Versicherung stark für sie einsetze. Mehr als ein Drittel der Befragten bemängelte, ihr Versicherer halte Zusagen nicht ein und biete kein gutes Preis-Leistungs-Verhältnis. „Versicherungsprodukte sind unübersichtlich“ lautete

ein weiteres typisches Statement. „Die Anbieter informieren nicht über das Kleingedruckte“ ein anderes. Beklagt wurden auch die Unpersönlichkeit des Service, die Intransparenz der Produkte und die mangelnde Nachvollziehbarkeit der Leistungsversprechen.

**„Die Finanzkrise hat dazu geführt**, dass die Menschen heute genauer hinschauen und mehr Fragen stellen“, sagt Dr. Torsten Oletzky, Vorstandsvorsitzender der ERGO Versicherungsgruppe. „Ihnen wird wichtiger, genau zu verstehen, was sie unterschreiben. Und sie haben völlig zu Recht den Anspruch, fair und gut verständlich informiert zu werden.“

**Und weil das so ist**, hat ERGO ihre Strategie im vergangenen Jahr nicht nur neu, sondern durchgehend an den Wünschen und Bedürfnissen von Kunden ausgerichtet. Unter der in Deutschland bis dato weithin unbekannten Marke ERGO hat der Erstversicherer von Munich Re seine Marken Hamburg-Mannheimer und Victoria zusammengeführt und eine Versicherung der neuen Art etabliert. Aus den ehemaligen KarstadtQuelle Versicherungen wurde ERGO Direkt. „Wir haben mit der Positionierung der Marke ERGO die große Chance, das zu ändern, was Menschen an Versicherungen gestört hat“, sagt Thomas Bischof, Leiter Konzernentwicklung bei ERGO.

**So arbeitet ERGO heute** auf eine außergewöhnlich klar verständliche Kommunikation sowie eine konsequente Feedback-Kultur hin und unterstreicht ihre Kundenorientierung durch die neu geschaffene Institution eines ERGO-Kundenanwalts. Auch der Relaunch der Markenstrukturen hat für Kunden vieles vereinfacht. So ist das breite Portfolio an Lebens-, Schaden- und Unfallversicherungen von ERGO heute

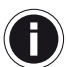

ERGO ist mit über 20 Milliarden Euro Beitragseinnahmen eine der großen europäischen Versicherungsgruppen in Deutschland und Europa. Das Unternehmen ist weltweit in mehr als 30 Ländern vertreten und konzentriert sich auf die Regionen Europa und Asien. Im Heimatmarkt Deutschland gehört ERGO zu den Marktführern. ERGO bietet ein umfassendes Spektrum an Versicherungen, Vorsorge und Dienstleistungen.



unter dem einen starken Markennamen, aber gleichzeitig auf mehreren Vertriebskanälen verfügbar. Egal ob ein Kunde persönlich oder per Telefon beraten wird oder online nach Feierabend oder am Wochenende eine Versicherung abschließen möchte – bei ERGO erhält er auf jedem Weg ein faires, starkes Angebot.

**All das bedeutete für ERGO** einen enormen Aufwand. 28.000 Internet- und Intranetseiten mussten geändert, acht Millionen Kunden angeschrieben und 16,2 Millionen Broschüren gedruckt und verteilt werden. 130 Großwerbeflächen an Dächern und Fassaden wurden frisch bestückt, 1.700 Ladenlokale und 1.000 Agenturen der Victoria und Hamburg-Mannheimer mit Leuchtreklamen und Schildern im neuen ERGO-Look ausgestattet. Zeitweise waren mehr als 1.200 Mitarbeiter plus externe Dienstleister mit der Umsetzung des Projekts „Neue ERGO“ beschäftigt.

**Damit Verbraucher schnell und umfassend** von der Versicherung der neuen Art erfahren, startete ERGO eine 360-Grad-Werbekampagne in nahezu allen wichtigen Medien. Wer immer im Herbst vergangenen Jahres eines der wichtigen deutschen Nachrich-

tenportale anklickte, seinen Fernseher einschaltete, eine große deutsche Tageszeitung aufschlug, zu „Spiegel“, „Zeit“ oder „Stern“ griff oder einfach nur mit offenen Augen durch eine bundesdeutsche Großstadt spazierte, machte unweigerlich Bekanntschaft mit der neuen ERGO. Ihr Versprechen: „ERGO – Versichern heißt verstehen“. Budget: ein mittlerer zweistelliger Millionenbetrag. Resonanz: überwältigend.

**Nach ihrer Freischaltung gingen auf der Online-Plattform** [www.millionen-gruende.de](http://www.millionen-gruende.de) teilweise mehrere Hundert Kundenbeiträge pro Tag ein. Sie war die erste Website, über die Nutzer direkt ihre Erwartungen an Service und Schutz einer Versicherung platzieren können – und das Feedback zeigt, dass eine solche Möglichkeit längst überfällig war.

**Kritik und Anregungen** werden von ERGO sorgfältig geprüft und in verbesserte Produkte und Dienstleistungen übersetzt. „Wir bemühen uns konsequent um ein besseres Verständnis der Kundenbedürfnisse und -wünsche“, sagt Thomas Bischof. „Erst auf dieser Grundlage gestalten wir die entsprechenden Produkte.“ Das klingt eigentlich selbstverständlich, ist aber, wenn man um die Erfahrungen der Verbraucher weiß, kaum weniger als eine Revolution. //

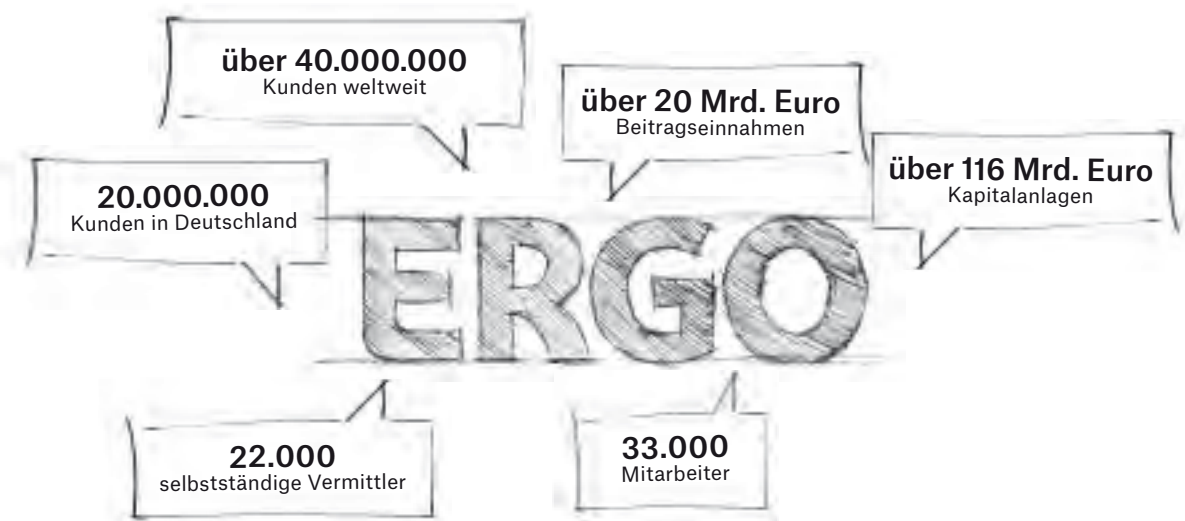

**ERGO im Überblick:** Über 50.000 Menschen arbeiten als angestellte Mitarbeiter oder als hauptberufliche selbstständige Vermittler für die Versicherungsgruppe. Heute vertrauen über 40 Millionen Kunden der Kompetenz, Sicherheit und Hilfe von ERGO und ihren Spezialisten in den verschiedenen Geschäftsfeldern. Die Kapitalanlagen von ERGO in Höhe von über 116 Milliarden Euro werden dabei ganz überwiegend vom Vermögensmanager und Fondsanbieter MEAG betreut, der ebenfalls zu Munich Re – einem der weltweit führenden Rückversicherer und Risikoträger – gehört.



# „Wir hören zu“

*Kunden erwarten einen Versicherer, der mit ihnen auf Augenhöhe kommuniziert, der sie in ihrer Lebenswirklichkeit abholt – und der zuhört.*  
**Thomas Bischof**, Leiter der ERGO Konzernentwicklung, über Anspruch und Strategie der neuen ERGO. //

## Herr Bischof, braucht die Welt wirklich noch eine weitere Versicherungsmarke?

Thomas Bischof: Natürlich nicht. Was Kunden allerdings geradezu sehnlichst erwarten, ist – wie unsere Marktforschungen belegen – ein anderer Versicherer. Einer, der mit ihnen auf Augenhöhe spricht. Einer, der seine Leistungen klar, verständlich und einfach verdeutlicht. Einer, der sie in ihrer Lebenswirklichkeit und bei ihren tatsächlichen Problemen abholt. Genau das ist die neue ERGO.

## Nun lässt sich ein Großunternehmen mit mehr als 30.000 Mitarbeitern aber nicht von heute auf morgen neu ausrichten.

Unser Leitmotiv lautet „Versichern heißt verstehen“, und das nehmen wir absolut ernst. Wir hören zu. Wir überprüfen uns selbstkritisch. Wir werden auch intern transparenter – und das hat im Unternehmen für einen enormen Motivationsschub gesorgt. Unsere Mitarbeiter und Versicherungsvertreter suchen gemeinsam mit unseren Kunden im gesamten Unternehmen nach Punkten, an denen ERGO noch ein bisschen besser werden kann. Fest steht: Das werden wir nicht alles von heute auf morgen schaffen. Aber wir haben uns auf den Weg

gemacht – mit ersten spürbaren Erfolgen.

## Ein Beispiel, bitte.

Wir überprüfen derzeit alles – Policentexte, Kundenanschriften und Leistungsabrechnungen – auf Verständlichkeit, Relevanz und Klarheit. Wir wollen sichergehen, dass wir unseren Kunden künftig alle Informationen verständlich und überzeugend übermitteln. Bis wir unsere zigtausend Kommunikationsmittel überarbeitet haben, wird naturgemäß einige Zeit vergehen. Aber wir lassen uns auch an unseren Fortschritten messen. Wir holen fortlaufend Feedback unserer Kunden ein und werden selbstkritisch prüfen, wie weit wir auf diesem Wege schon vorangekommen sind.

## Nun verfügten Hamburg-Mannheimer und Victoria über viele langjährige Kunden. Setzen Sie mit der Namensänderung nicht deren Vertrauen aufs Spiel?

Nein, denn die meisten von ihnen verfügen über eine starke Bindung zu ihrem Versicherungsvertreter, der ihnen den Übergang zur neuen Marke erleichtern wird. Und an den Verträgen ändert sich ja ohnehin nichts. Bei möglichen Neukunden schafft die Marke ERGO ein überdurchschnittlich hohes Vertrauen, schließlich ist ERGO eines der Schwergewichte der Branche.

## An den Marken Ihrer Spezialversicherer DKV, D.A.S. und ERV halten Sie fest. Warum?

Weil sie Spezialisten sind, die – anders als die breit aufgestellte

Hamburg-Mannheimer oder Victoria – für sehr spezielle Versicherungslösungen und besondere Kompetenzen stehen. Sie sind in ihren Märkten Marktführer und vertreiben ihre Produkte national wie international auch über andere Versicherer und Vertriebspartner, die ansonsten unsere Wettbewerber sind. Wir tun daher gut daran, diese Marken zu bewahren.

## Auf [www.millionen-gruende.de](http://www.millionen-gruende.de) konnten ERGO-Kunden erstmals ihre Erwartungen an eine Versicherung hinterlegen. Haben sie das tatsächlich getan?

Ja, und zwar in weitaus höherem Maße, als wir es erwartet haben. Allein in den ersten drei Monaten haben auf der Website über 1.000 Verbraucher eine Vielzahl von Anregungen und zukunftsfähigen Ideen deponiert, die wir derzeit gerade auswerten. Ein Riesenerfolg war allein schon die hohe Anzahl von Menschen, die sich die Zeit nehmen, um ihre Meinung mit uns zu teilen. Dieses Echo zeigt uns, dass Versicherungskunden wirklich darauf gewartet haben, dass ihnen endlich einmal jemand zuhört. //

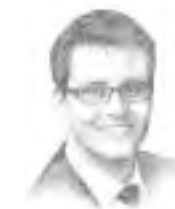

**THOMAS  
BISCHOF**

ERGO

DÜSSELDORF /  
DEUTSCHLAND

## Indien, 2030

Ayaan

Glücklicher Vater

Noch liegt die Sterblichkeit indischer Säuglinge fast neun Mal höher als die von Neugeborenen in Deutschland. In 20 Jahren aber, wenn Ayaan in einem Alter ist, in dem er selbst Kinder hat, dürfte das Sterblichkeitsrisiko für Babys weitaus geringer sein. Besonders in Indiens Großstädten entstehen hochmoderne Kliniken, die medizinische Versorgung nach höchsten Standards gewährleisten. Und Versicherer wie Apollo Munich Health sorgen mit dafür, dass eine gute Gesundheitsversorgung für Inder aus allen Bevölkerungsschichten erreichbar und bezahlbar wird.

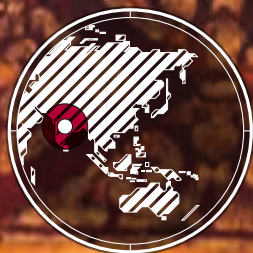

# Vom Erwachen eines Elefanten

Weitere Informationen: [www.apollomunichinsurance.com](http://www.apollomunichinsurance.com)

*Seit Indien sich dem Weltmarkt geöffnet hat, wächst die Wirtschaft des Subkontinents in atemberaubendem Tempo. Allein das Volumen der Krankenversicherungen hat sich binnen acht Jahren verzehnfacht. Warum das so ist und weshalb die Branche dennoch erst ganz am Anfang steht, erklärt **Antony Jacob**, CEO von Apollo Munich Health. //*

**Indien ist das Land der Feste.** Ich wurde in Trichur im indischen Bundesstaat Kerala geboren, einer Stadt, die bekannt ist für ihr jährliches Elefantenfestival. Meine Mutter brachte mich zu Hause und mit Unterstützung einer Hebamme zur Welt. Hätte es bei meiner Geburt Komplikationen gegeben, wäre ein freundlicher Hausarzt in der Nähe gewesen und in einiger Entfernung auch ein einfaches Missionskrankenhaus. Allerdings musste, wer damals ein Hospital aufsuchte, die Behandlungskosten häufig vorab in bar entrichten (eine Bedingung, die in einigen Krankenhäusern bis heute üblich ist). Die Versicherer, die 1972 verstaatlicht wurden, boten zum Teil gar keine Krankenversicherung an. Und wenn doch, erstatteten sie die Kosten mit Verzögerung oder gar nicht. Ohnehin verfügten nur wenige Inder über einen derartigen Schutz.

**Nach meiner Schulzeit** wechselte ich zum Studium an das Loyola College in Chennai. Zunächst arbeitete ich ein paar Jahre in Kolkata, Hyderabad und Neu-Delhi, dann eine Zeitlang in Großbritannien und Neuseeland. Das Indien, in das ich danach zurückkehrte, war ein ganz anderes. In puncto Gesundheitsversorgung ähnelt es heute einer Nation im Highspeed-Modus. Wenn ich in Neu-Delhi oder einer anderen der 65 städtischen Großräume des Landes ein Kranken-

haus aufsuche, weiß ich mich in der Obhut hervorragend ausgebildeter Ärzte und Pfleger, die mit modernsten medizinischen Technologien ausgestattet sind. Um gesundheitlich ausgezeichnet versorgt zu werden, muss heute kein Inder mehr das Land verlassen. Das ist die gute Nachricht.

**Die weniger gute lautet,** dass erst eine relativ kleine Bevölkerungsschicht Zugang zu diesen Dienstleistungen genießt. Dem State-of-the-Art-Angebot in den Großstädten steht eine lückenhafte Versorgung in den Provinzen gegenüber. Mit durchschnittlich einem Krankenhausbett pro 1.000 Einwohnern liegt Indien weit hinter den Werten Chinas (4,3) und Westeuropas, wo für 1.000 Bürger im Schnitt 7,4 Betten bereitstehen. Für die Menschen, die Zugang zu Gesundheitsleistungen haben, stellt sich ein weiteres Problem: Mehr als 40 Prozent aller Inder, die sich im Krankenhaus behandeln lassen, müssen sich Geld leihen oder Besitztümer verkaufen, um ihre Behandlung bezahlen zu können. Gesundheitsausgaben zählen zu den drei wichtigsten Ursachen für Armut im Land. Angesichts der steigenden Kosten für die medizinische Versorgung wird der Bevölkerung zunehmend bewusst, dass sie das Risiko nicht mehr durch Ersparnisse und Darlehen abdecken kann. Daher müssen jetzt neue Wege gefunden werden, wie die Menschen diese Ausgaben finanzieren können.

**Beide Seiten der Medaille** – ein hochwertiges medizinisches Angebot, das aber mit steigenden Kosten einhergeht – belegen, dass wir hier genau zur richtigen Zeit am richtigen Ort agieren. Die weltweiten Erfahrungen zeigen, dass die private Krankenversicherung sich mit am besten dafür eignet, Gesundheitsausgaben zu finanzieren. Mit 320 Millionen Gut-

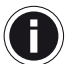

**Apollo Munich Health Insurance** ist ein Joint Venture der indischen Apollo Hospitals Group und Munich Health. Mit über 1.000 Mitarbeitern und rund einer Million Versicherten wird das Unternehmen im Geschäftsjahr 2010/11 voraussichtlich 46,6 Millionen US-Dollar Prämien erlösen und so sein Vorjahresergebnis verdoppeln. Für die kommenden fünf Jahre strebt Apollo Munich Health ein Wachstum des Prämienvolumens von jeweils 25 Prozent pro Jahr an.



oder Hochverdienern gibt es eine gewaltige Anzahl von Indern, die sich dies leisten können und werden. Wer heute von Indien spricht, spricht von einem „erwachenden Elefanten“, dessen Bruttosozialprodukt jährlich um sieben und Durchschnittseinkommen um 14 Prozent zulegen. Indiens Mittelschicht beträgt mittlerweile das Vier- bis Fünffache der Einwohnerzahl Deutschlands, und das zeigt sich auch in den Wachstumsraten der privaten Krankenversicherungen. In den vergangenen acht Jahren hat sich ihr Prämienaufkommen verzehnfacht. Dennoch verfügen weniger als drei Prozent aller Inder über eine private Absicherung gegen gesundheitliche Risiken. Warum ist das so? Ein naheliegender Grund besteht darin, dass die gut verdienenden Inder erst einmal andere Prioritäten haben. Meine Landsleute investieren traditionell vor allem in Grund und Boden, Schmuck oder ein eigenes Haus. Solange Gesundheitsversorgung relativ wenig kostete, stand eine Krankenversicherung überhaupt nicht zur Debatte – man ging davon aus, die Rechnungen aus eigenen Ersparnissen bestreiten oder dafür von Freunden oder Angehörigen Geld leihen zu können. Hinzu kam das mangelnde Vertrauen in Versicherungen – ein Erbe der Prä-Liberalisierungsära, als Versicherungsschutz noch ein rein staatliches Geschäft war, das als kompliziert galt und für Verbraucher wenig nachvollziehbar war.

**Mit Apollo Munich Health** verfügen wir über die besten Voraussetzungen, das Vertrauen des Markts zu gewinnen. Der indische Joint-Venture-Partner, die Apollo Hospitals Group, ist mit 50 Krankenhäusern, einer landesweiten Kette eigener Apotheken, Beratungsdienstleistern und namhaften medizinischen Forschungseinrichtungen Asiens größter integrierter Gesundheitsanbieter. Wir bringen also die Praxiserfahrung des führenden Gesundheitsdienstleisters mit der Versicherungsexpertise des weltweit führenden Rückversicherers zusammen. Für die nächsten fünf bis zehn Jahre erwarten wir ein Umsatzwachstum von 25 Prozent – pro Jahr. Es dürfte nur wenige Branchen auf der Welt geben, die ein derart kontinuierliches und kräftiges Wachstum aufweisen können.

**Auf einem denkbar niedrigen Niveau** sind wir allerdings auch gestartet. Selbst wenn unsere Branche in diesem Tempo weiterwachsen sollte, wird in zehn Jahren erst jeder zehnte Inder krankenversichert sein. Rechnet man staatliche und private Ausgaben zusammen, liegen die Pro-Kopf-Aufwendungen für Gesundheit in den USA bei 7.285 Dollar und immerhin

noch bei 233 Dollar in China. In Indien sind es ganze 109 Dollar pro Einwohner und Jahr.

**Während meiner Reisen durch Indiens Städte** sehe ich aber überall Zeichen des Wandels. Die rasche Urbanisierung lässt städtische Ballungszentren mit der nötigen kritischen Masse entstehen, die es braucht, um erstklassige medizinische Zentren finanzieren und betreiben zu können. Damit werden indische Krankenhäuser zunehmend interessanter für indische Ärzte und Pfleger, von denen immer noch viele das Land verlassen, um besser bezahlte Stellen im Ausland anzutreten. Gut möglich, dass in naher Zukunft indische Ärzte aus dem Ausland zurückkehren, um in den Praxen und Kliniken ihrer Heimat zu arbeiten.

**Diese Entwicklung bezieht sich jedoch nur auf die Städte.** Ein ganz anderes Bild bietet sich auf dem Land und für jene etwa 400 Millionen Inder, die immer noch unterhalb der Armutsgrenze leben. Für sie hat die indische Regierung kürzlich mit einem neuen Programm erstmals einen extrem preiswerten Versicherungsschutz aufgelegt. Für einen Jahresbeitrag von weniger als einem US-Dollar kann sich eine fünfköpfige Familie einen Basis-Krankenversicherungsschutz kaufen. Finanziert wird das Programm im Wesentlichen von Bundes- und Landesregierungen, getragen von privaten Anbietern wie uns – ein Paradebeispiel für eine öffentlich-private Partnerschaft.

**Für uns ist die Versicherung der Ärmsten** ein Geschäft, das sich wie jedes andere selbst tragen muss. Aber es ist eines, auf das wir sehr stolz sind, weil es helfen wird, unser Land zu verändern.

**Angesichts der Chancen,** die sich uns bieten, und des gesellschaftlichen Nutzens, den Versicherungen bringen, habe ich heute, zu dieser Zeit, mit dieser Aufgabe und an diesem Ort zweifellos einen der besten Jobs der Welt. //

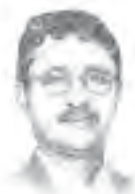

ANTONY  
JACOB

APOLLO MUNICH HEALTH

GURGAON /  
INDIEN

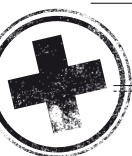

विकास

(Wachstum)

स्वास्थ्य

(Gesundheit)

भविष्य

(Zukunft)

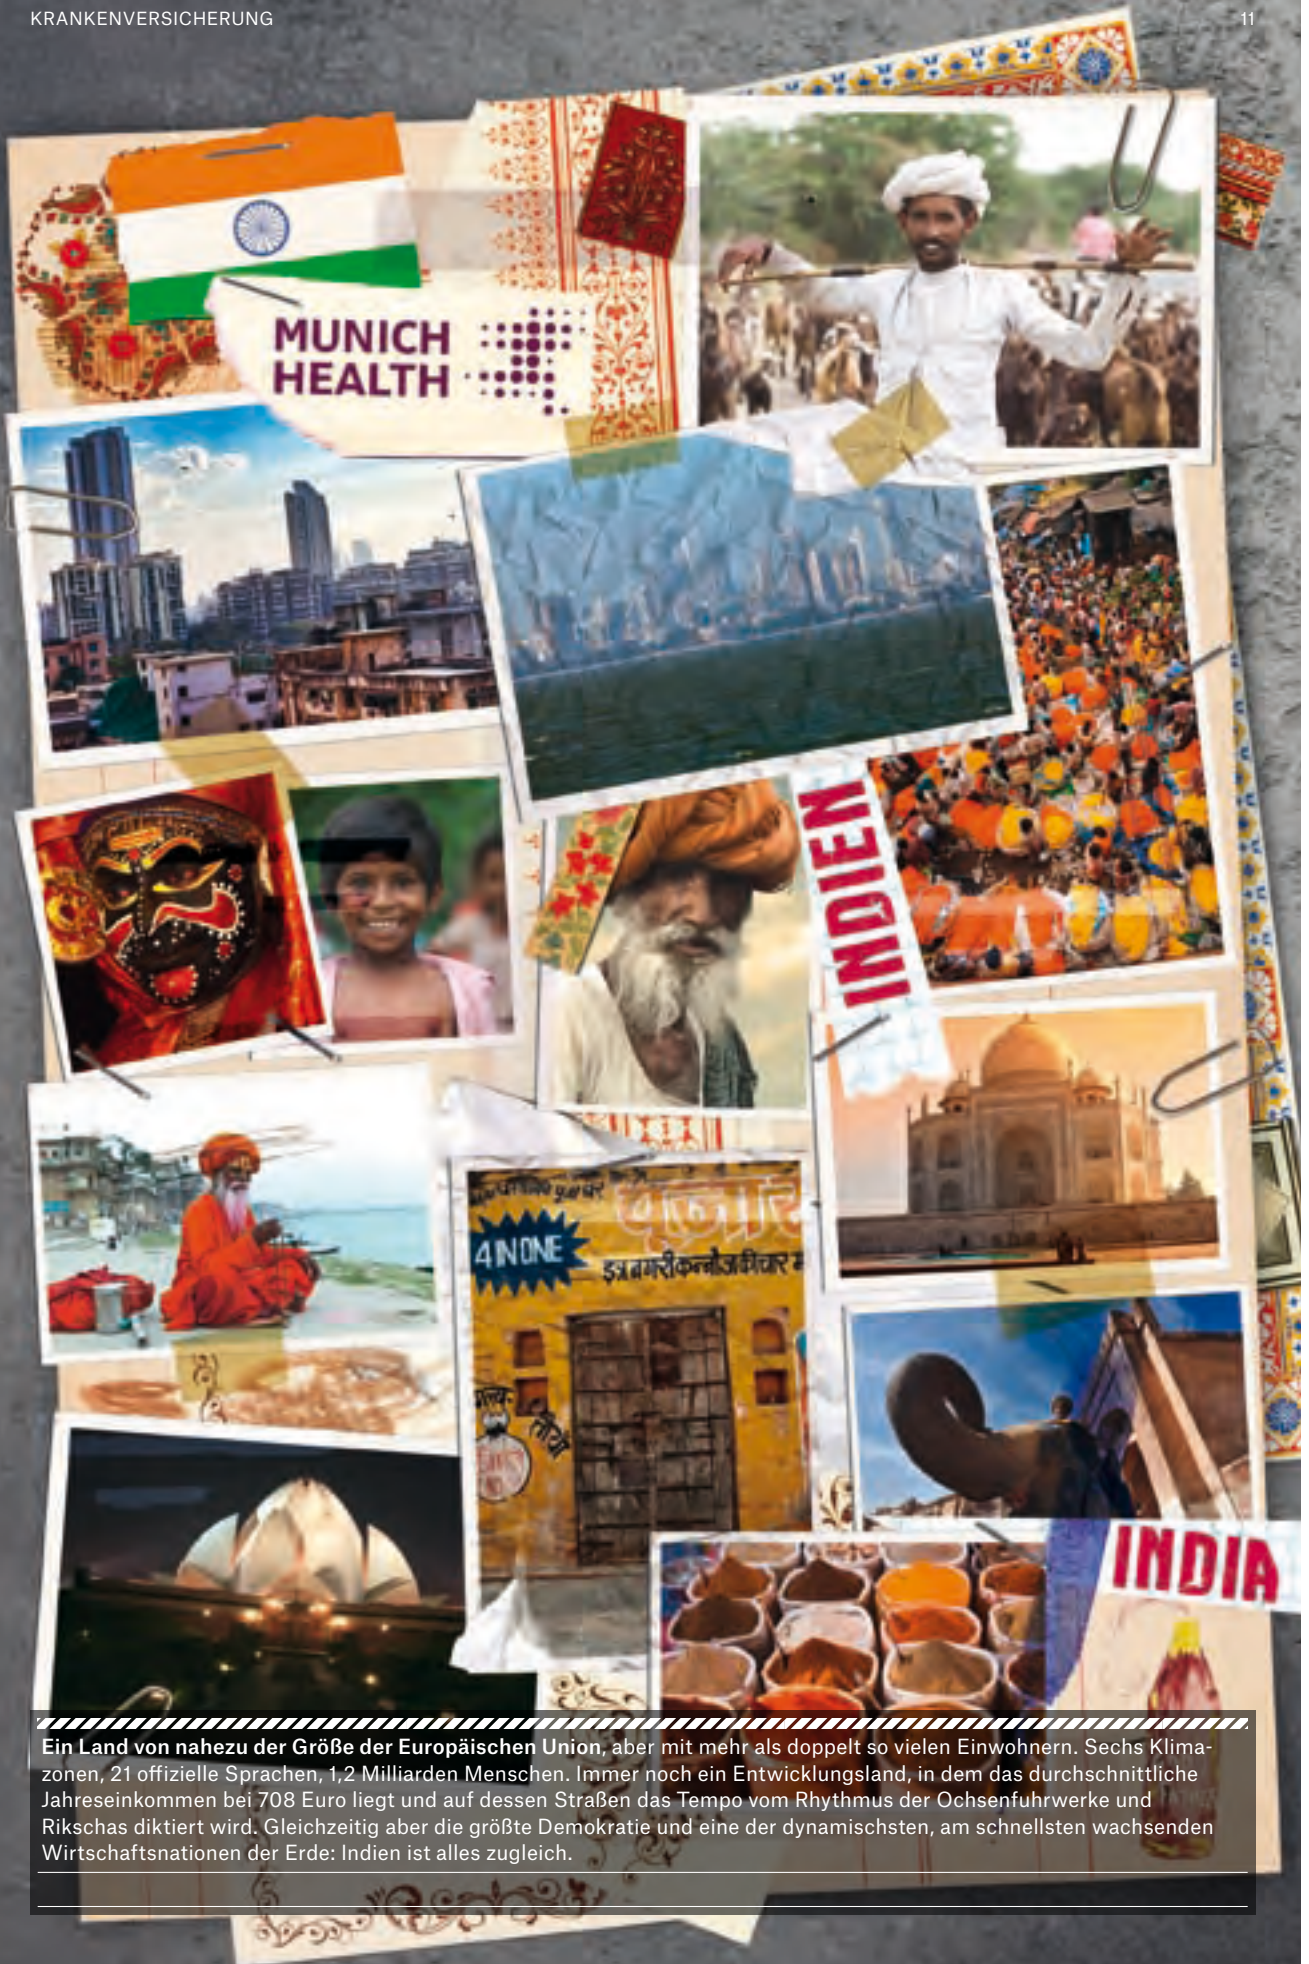

Ein Land von nahezu der Größe der Europäischen Union, aber mit mehr als doppelt so vielen Einwohnern. Sechs Klimazonen, 21 offizielle Sprachen, 1,2 Milliarden Menschen. Immer noch ein Entwicklungsland, in dem das durchschnittliche Jahreseinkommen bei 708 Euro liegt und auf dessen Straßen das Tempo vom Rhythmus der Ochsenfuhrwerke und Rikschas diktiert wird. Gleichzeitig aber die größte Demokratie und eine der dynamischsten, am schnellsten wachsenden Wirtschaftsnationen der Erde: Indien ist alles zugleich.



## Senegal, 2040

### Amina

### Elektroingenieurin

Amina stammt aus einem Kontinent, auf dem ehrgeizige Pläne geschmiedet werden. In den kommenden Jahrzehnten wird die Industrieinitiative Dii die Rahmenbedingungen für ein Netz von Sonnen- und Windkraftwerken in Afrika erarbeiten, das klimaneutralen Strom für die Region und für Europa liefern soll. Weil die Dii-Initiative neben klimaneutraler Energie auch wirtschaftliches Wachstum, Bildungsangebote und Arbeitsplätze erzeugen wird, eröffnet das Projekt eine nachhaltige Chance für den Kontinent. Und vielleicht wird ja auch Amina ihren Beitrag dazu leisten – zum Beispiel als Elektroingenieurin bei einem Solarkraftwerk.

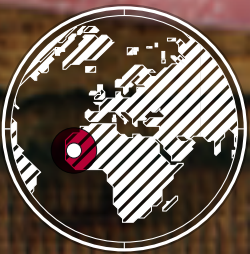

## Versicherung – ein Versprechen für die Zukunft

*Was hat Munich Re mit der Stromerzeugung in Nordafrika zu tun?  
Warum kümmert sie sich um Ölbohrungen in der Tiefsee?  
Berechtigte Fragen, auf die der Vorstandsvorsitzende von Munich Re,  
Nikolaus von Bomhard, Antwort gibt.*

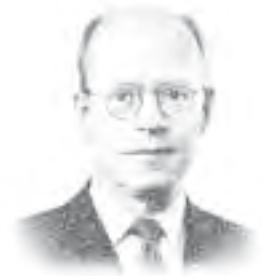

**Gut eineinhalb Jahre ist es her**, dass in München ein Energie- und Infrastrukturprojekt bis dato ungekannter Größenordnung startete. Zusammen mit Großunternehmen aus dem In- und Ausland hat Munich Re im Juli 2009 gemeinsam mit der Desertec Foundation die Industrieinitiative Dii angestoßen. Sie soll die Voraussetzungen dafür schaffen, dass in den kommenden Jahren ein Netz aus vielen Hundert Sonnen- und Windkraftwerken im Norden Afrikas sowie im Nahen und Mittleren Osten aufgespannt werden kann. Ihr Ziel: die Versorgung weiter Teile dieser Region und Europas mit klimaneutral erzeugtem Strom. Ihr Zeithorizont: 40 Jahre. Geschätztes Investitionsvolumen: viele Milliarden Euro. Die enorme Resonanz auf den Start dieses Wüstenstromprojekts hat mich sehr gefreut. Auch wenn darunter viele durchaus kritische Fragen waren: Was hat ein Versicherer eigentlich mit der Erzeugung von Ökostrom zu schaffen? Was verspricht sich Munich Re von ihrem Dii-Engagement? Und warum konzentriert sich einer der weltweit führenden Risikoträger nicht auf sein Kerngeschäft?

**Die grundsätzliche Antwort auf diese Fragen lautet:** Weil es unserem Anspruch als Unternehmen entspricht, gesellschaftliche Verantwortung wahrzunehmen angesichts einer der großen Herausforderungen der Menschheit – des Klimawandels und seiner Folgen. Wir dürfen nicht schweigen und müssen handeln bei diesem Thema, wenn wir aufgrund unseres Wissens oder unserer Einflussmöglichkeiten Lösungen mit entwickeln oder unterstützen können. Auf all diese Fragen gibt es aber auch eine naheliegendere Antwort: Was sich mit dem Klimawandel abzeichnet, berührt direkt unser Kerngeschäft. Wetterbedingte Naturkatastrophen nehmen zu, und daran hat der Klimawandel vermutlich seinen Anteil. Die Folgen einer ungebremsen globalen Erwärmung könnten langfristig so gravierend werden, dass in einigen Jahrzehnten in einzelnen Regionen für Menschen und Unternehmen kein ausreichender Versicherungsschutz mehr darstellbar wäre. Dieses Szenario lässt sich nach heutigem Wissen mit großer Wahrscheinlichkeit nur verhindern, wenn die Erwärmung auf die oft zitierten zwei Grad begrenzt wird.

**Die Explosion der Bohrinself Deepwater Horizon** und die darauf folgende Ölkatastrophe hat im vergangenen Jahr deutlich gemacht, welche schwerwiegenden Risiken mit großen technischen Anlagen verbunden sind. Umweltschäden, wie die im Golf von Mexiko, galten bislang als unsicherbar. Damit auch in Zukunft sichergestellt ist, dass solche Schäden bezahlt werden und nicht der Steuerzahler dafür geradestehen muss, haben wir ein Konzept entwickelt, mit dem große Deckungssummen für eine Ölkatastrophe von der Versicherungswirtschaft bereitgestellt werden können. Diese innovative Idee wurde von der Öffentlichkeit ebenso wie von Versicherern und Maklern sehr gut aufgenommen.

**Beides – der sogenannte Oil Spill Cover und die Wüstenstrominitiative –** sind Beispiele für die Schrittmacherfunktion der Assekuranz. Unsere Produkte ermöglichen es, dass Risiken eingegangen und Innovationen gewagt werden. Diese Innovationen sind nötig, um die großen Herausforderungen unserer Zeit zu meistern. Wir beobachten klimatische, gesellschaftliche und technologische Veränderungen und analysieren den Bedarf an Risikoabsicherung und damit das Geschäftspotenzial; so entwickeln wir beispielsweise auch Versicherungskonzepte für sehr verschiedene Risiken rund um die Gewinnung und den Einsatz von erneuerbaren Energien.

**Zusammenfassen lassen sich alle diese Aktivitäten unter einem Begriff**, der in den vergangenen Jahren leider häufig überstrapaziert worden ist. Und dennoch beschreibt „Nachhaltigkeit“ sehr gut, was uns leitet. Denn Versicherung ist ein Versprechen für die Zukunft; unser Geschäftsmodell baut darauf, die Verpflichtungen aus den Versicherungsverträgen dauerhaft zu erfüllen. Ich bin fest davon überzeugt, dass es in unserem ureigenen Interesse ist, nachhaltig zu wirtschaften. Vorausschauendes und verantwortungsbewusstes Handeln, gelebte Corporate Responsibility, ist bei Munich Re seit vielen Jahren in der Konzernstrategie verankert. Eine in diesem Sinne nachhaltige Geschäftsstrategie ist nicht nur für sich genommen erfolgreicher, sie macht ein Unternehmen auch attraktiver für seine Mitarbeiter, Kunden und Investoren. //



## Polen, 2050 Patryk und Jakub Unternehmer

Als **Patryk und Jakub geboren** wurden, hatte ihr Heimatland gerade ein erstaunliches Jahr hinter sich. Während Polens Nachbarn sich erst nach und nach von der Wirtschafts- und Finanzkrise erholten, wuchs die polnische Wirtschaft, die schon im Krisenjahr 2009 ein Wachstum von 1,7 Prozent zu verzeichnen hatte, weiter. Gleichzeitig ließen sich in Polen 307.000 neue Firmen registrieren und damit mehr als in den zehn Jahren zuvor. Polen wandelt sich zusehends zu einer Nation dynamischer Jungunternehmer – und es ist gut möglich, dass Patryk und Jakub eines Tages dazugehören werden.

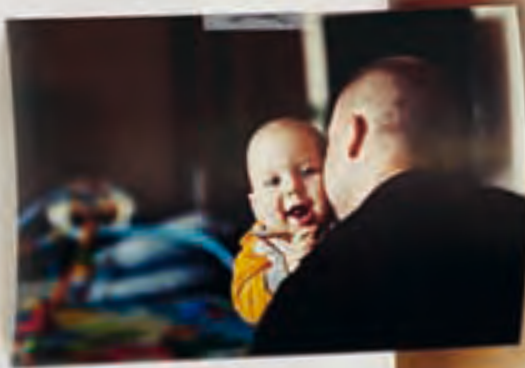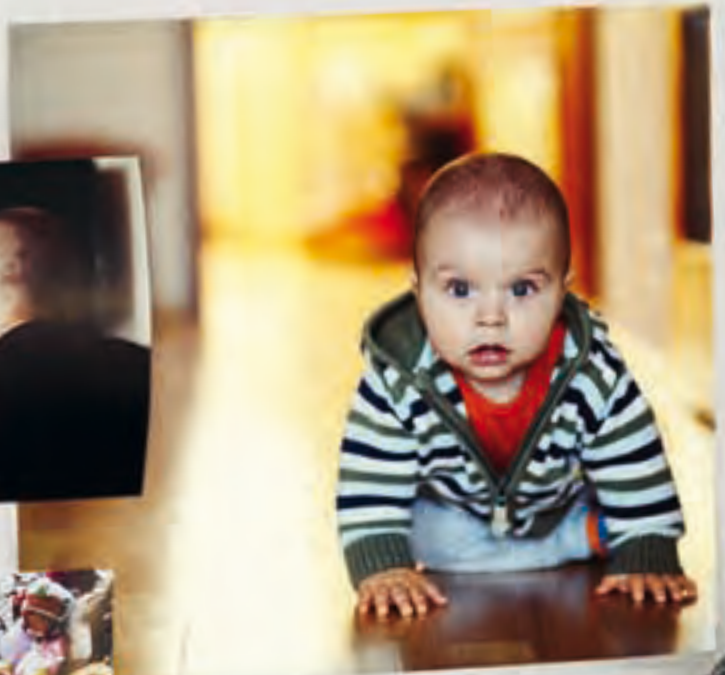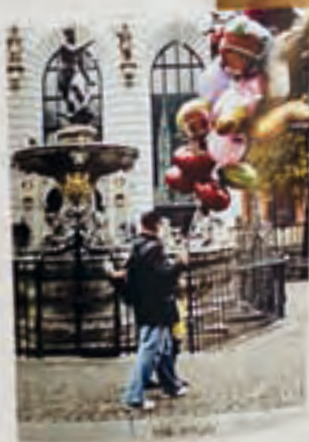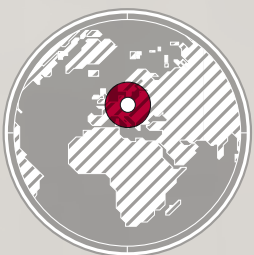



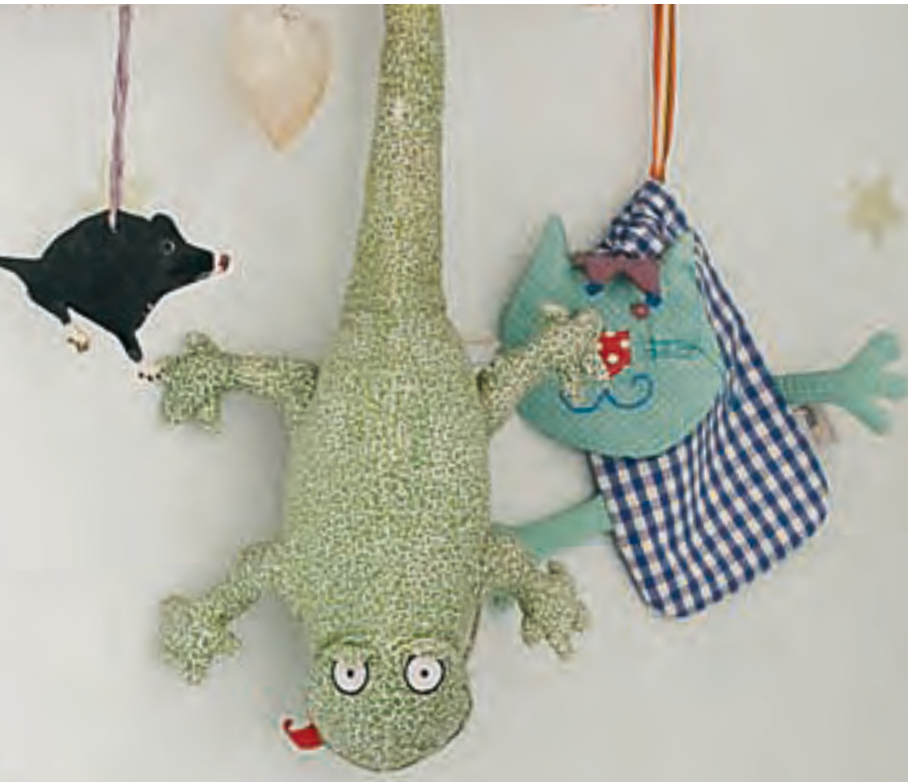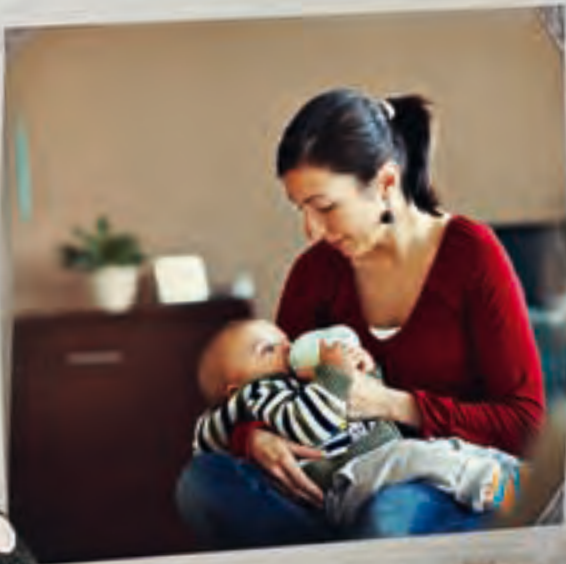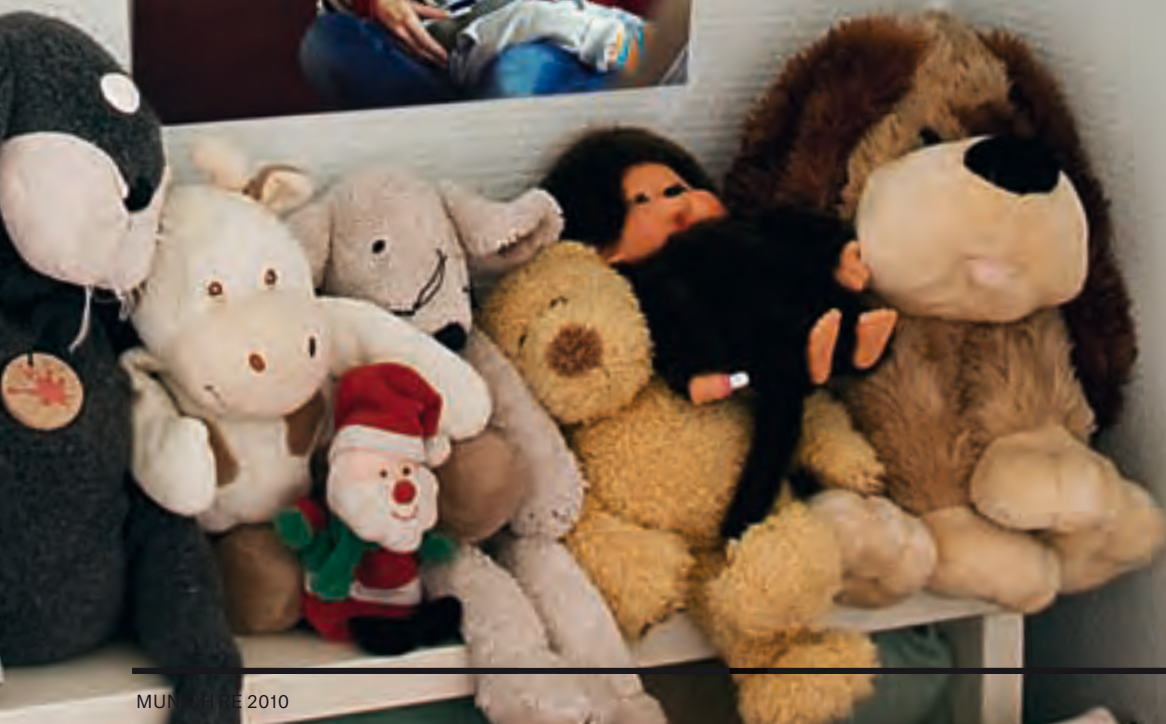

# „Wir stehen auf Seiten der Tapferen!“

Weitere Informationen: [www.ergohestia.pl](http://www.ergohestia.pl)

*Binnen zwanzig Jahren ist die polnische ERGO Hestia vom Start-up zum zweitgrößten Sach- und Unfallversicherer des Landes aufgestiegen. Piotr Sliwicki, Präsident der ERGO-Tochter, erklärt den Boom des europäischen Wirtschaftswunderkinds. //*

**Glückwunsch, Herr Sliwicki: An Polen scheint die Weltwirtschaftskrise der vergangenen Jahre nahezu spurlos vorbeigegangen zu sein. Die polnische Wirtschaft ist als einzige Europas während des Krisenjahres 2009 sogar um 1,7 Prozent gewachsen. Wie lässt sich denn dieser ökonomische Sonderfall erklären?**

Piotr Sliwicki: Verstehen lässt er sich nur durch eine ganze Reihe von Faktoren: Einerseits profitieren wir als Mitglied der Europäischen Union zwar von europäischen Subventionen, verfügen aber nach wie vor über unsere eigene Währung. Anders als die baltischen Staaten, deren Währung an den Euro gekoppelt ist, konnten wir den Zloty in der Krise deutlich abwerten und damit den Preisvorteil unserer Exporte steigern. Andererseits liegt unser Außenhandelsanteil bei nur etwa

40 Prozent des Bruttonettoprodukts und damit deutlich niedriger als jener der Ungarn oder Slowenen, die quasi ausschließlich von ihrer Außenwirtschaft leben. Und letztendlich war unsere Regierung in der Krise besonnen genug, keine übertriebenen Konjunkturprogramme aufzulegen.

**Das allein erklärt aber noch nicht Polens Status als Europas Wirtschaftswunderkind.**

Stimmt, ein weiterer wichtiger Faktor ist das Potenzial an jungen und zunehmend gut ausgebildeten Leuten. In den vergangenen Jahren haben meine Landsleute die Universitäten geradezu gestürmt. Zum Zeitpunkt der politischen Wende gab es in Polen 500.000 Studenten, heute sind allein im ersten Studienjahr mehr als 500.000 an den Universitäten des Landes eingeschrieben. Die jungen Polen investieren in sich, ihre Ausbildung und ihre Zukunft – und das ist natürlich eine gute Sache.

**Sie haben selbst zwei Kinder im Studentenalter. Wie erleben Sie deren Generation?**

Als sehr ehrgeizig und überaus mobil. Die jungen Polen sind hungrig auf Bildung, Veränderung und Fortschritt. Eine weitere

Besonderheit ist ein hohes Verlangen nach übergeordneten gesellschaftlichen Werten.

**Ist das wirklich mehr als eine Worthülse?**

Natürlich, wir als Versicherungsgesellschaft profitieren direkt von Werten wie Integrität, Ehrlichkeit und Gemeinsinn unserer Kunden. Ihren Einfluss hat man beispielsweise bei den drei großen Naturkatastrophen des vorigen Jahres gesehen: Nach zwei verheerenden Fluten und dem härtesten Winter der vergangenen 20 Jahre haben sich viele Polen engagiert für ihre Nachbarn und ihr Land eingesetzt, anstatt tatenlos auf Hilfe des Staates zu warten.

**Sie selbst zählen zu jenen Polen, die ihr Land nach der Wende tatkräftig mit aufgebaut haben. Wie kam es dazu?**

Ich war 29 Jahre alt, als ich 1991 das Angebot bekam, eine Versicherungsgesellschaft aufzubauen. Unsere Lizenz war die allererste Lizenz, die in Polen einer privaten Versicherung erteilt wurde, und unser allererster Kunde war der Premierminister. Bei unseren Besprechungen passten damals alle Mitarbeiter an einen Tisch. Es waren aufregende Zeiten – und

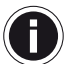

ERGO Hestia ist die zweitgrößte Gesellschaft auf dem polnischen Schaden- und Unfallversicherungsmarkt und bildet gemeinsam mit ihren Tochtergesellschaften die ERGO Hestia Gruppe mit Beitragseinnahmen von knapp 950 Millionen Euro. Mehr als 5,7 Millionen Kunden vertrauen der Leistungsfähigkeit der Gruppe. Sie beschäftigt am Hauptsitz Sopot und in 38 Regionalniederlassungen rund 2.000 Mitarbeiter.

wir tun alles dafür, um uns diesen Unternehmergeist für die Zukunft zu bewahren.

**Wo steht ERGO Hestia heute?**

Wir sind in den vergangenen zehn Jahren um das Vierfache gewachsen und unter den etwa 40 Sach- und Unfallversicherern Polens derzeit die Nummer zwei. Für ERGO Hestia arbeiten heute circa 1.750 Menschen plus 3.500 Versicherungsvermittler. Im vergangenen Jahr haben wir Warta überholt, jene fast 100 Jahre alte staatliche Großversicherung, die zusammen mit der PZU lange einen Duopol in der Versicherungsbranche bildete.

**Wie erklären Sie sich den Erfolg von ERGO Hestia am Markt?**

Wir sind nicht die billigsten und auch nicht die umtriebigsten, was Marketingmaßnahmen betrifft. Aber wir sind definitiv einer Idee verpflichtet: dem schnellen, kompetenten, umfassenden Schadenmanagement. Wir waren Polens erste Versicherungsgesellschaft, die eine mobile Abteilung zur Schadenabwicklung aufgestellt hat. Außerdem haben wir für jeden Kunden einen E-Account eingerichtet, über den er jederzeit nachverfolgen kann, in welchem Stadium der Bearbeitung sich seine Schadenabwicklung gerade befindet. Bis dahin mussten sich Versicherte, die beispielsweise nach Überschwemmungen einen

Schaden reguliert haben wollten, in die langen Warteschlangen vor den Versicherungsbüros einreihen. Mit ERGO Hestia – das zeigen Umfragen – verbinden die Polen das Gefühl, dass sich wirklich jemand um ihre Belange kümmert.

**Daniel Gros, Direktor des Brüsseler Centre for European Policy Studies, hält es für möglich, dass Ihr Land in der kommenden Generation sogar Deutschland überholen könnte. Teilen Sie seine Einschätzung?**

Wir verfügen in der Tat über einen großen Vorteil, nämlich die erwähnte hohe Zahl an jungen, hungrigen Menschen, die etwas erreichen wollen. Das ist vielleicht ein Unterschied zu einem perfekten und eher gesättigten Land wie Deutschland. Investoren gehen in Polen zwar höhere Risiken ein, erhalten aber auch weitaus größere Chancen. Andererseits müssen Sie sich nur unsere Infrastruktur anschauen, um zu erkennen, dass Polen noch einen weiten Weg zu gehen hat, bis es sich mit Deutschland vergleichen kann.

**Was bedeutet das für ERGO Hestia?**

Wir werden auch in den nächsten Jahren von der Steigerung des Lebensstandards und der Wirtschaftskraft profitieren. Erfahrungsgemäß liegt das Wachstum der Versicherungsprämien etwa beim Zweieinhalbfachen des öko-

nomischen Wachstums. Und für 2011 prognostizieren Ökonomen einen Zuwachs des Bruttonettoprodukts von immerhin 3,5 Prozent.

**Was glauben Sie: Wo wird Ihr Unternehmen in 40 Jahren stehen?**

Alles ist möglich. Solange wir weiter die besten Köpfe für uns gewinnen können, sehe ich keinen Grund, warum ERGO Hestia nicht eines Tages die Nummer eins auf dem polnischen Markt sein sollte. „Die Zukunft“, hat Victor Hugo gesagt, „hat viele Namen: Für die Schwachen ist sie das Unerreichbare. Für die Furchtsamen das Unbekannte. Für die Tapferen ist sie die Chance.“ Ich hoffe, ERGO Hestia wird auch in 40 Jahren noch auf Seiten der Tapferen stehen.

**Übrigens, was bedeutet Ihr Unternehmensname eigentlich?**

Hestia ist eine griechische Göttin, die als Hüterin des Familien-Herdfeuers für Sicherheit steht. Ein passender Name für uns, finden Sie nicht? //



**PIOTR SLIWICKI**

ERGO HESTIA

SOPOT / POLEN

Für 2011 prognostizieren Ökonomen einen Zuwachs des Bruttonettoprodukts von immerhin 3,5 Prozent.

Die jungen Polen sind hungrig auf Bildung, Veränderung und Fortschritt.

Wir werden auch in den nächsten Jahren von der Steigerung des Lebensstandards und der Wirtschaftskraft profitieren.

*Alles ist möglich!*



## USA, 2060

### Addison Camille und Alexandra Grace Weltraumtouristinnen

Zum Zeitpunkt der Geburt von Addison Camille und Alexandra Grace (am 3. November 2010 in Houston) sind bereits sieben Touristen in den Weltraum gestartet und zur Erde zurückgekehrt. Geschätzte Kosten pro Reiseticket: zehn bis 20 Millionen Dollar. Derzeit bereiten mehrere Privatunternehmen kommerzielle Flüge ins All sowie die Installation eines Weltraumhotels vor, das 2015 eröffnen soll. Bis zu Addison Camilles und Alexandra Graces 50. Geburtstag werden die Ticketpreise drastisch gefallen und die Reise ins All alltäglich geworden sein. Dennoch dürfte die Raumfahrt ein hochkomplexes und auch riskantes Unterfangen bleiben.

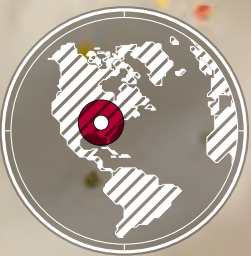

# „Freuen Sie sich auf ein unglaubliches Erlebnis!“

Weitere Informationen: [www.munichre.com/Raumfahrt](http://www.munichre.com/Raumfahrt)

*Weltraumreisen, Solarkraftwerke, seltene Rohstoffe: Die Möglichkeiten, die sich in den kommenden Jahrzehnten im Weltraum eröffnen werden, sind fast so unendlich wie das All selbst. Zuvor gilt es, noch ein paar höchst irdische Herausforderungen zu meistern. **Thomas Reiter**, Europas erfahrester Astronaut, und **Ernst Steilen**, Leiter der Raumfahrtversicherung von Munich Re, diskutieren sie. //*

**Ernst Steilen: Guten Tag, Herr Reiter. Interessantes Gefährt, vor dem Sie da stehen.**

Thomas Reiter: Das ist ein Modell der Rosetta-Landefähre „Philae“, die sich gerade auf einer Kometenmission befindet. Die Daten, die Sie auf den Kontrollschirmen sehen, beschreiben ihre vorausberechnete Reiseroute. Geplant ist die Landung für das Jahr 2014.

**Geht es dabei um die Erkundung von Ressourcen? Einige Ihrer Kollegen vermuten im All wertvolle Rohstoffvorkommen.**

Nein, uns geht es erst einmal um reine Wissenschaft. Bestehen Kometen aus Eis? Oder aus Gestein? Und was sagt uns das über die Vorgeschichte unseres Sonnensystems? Bis zur Gewinnung von Rohstoffen aus dem All ist es noch ein weiter Weg.

**Ich finde es immer wieder höchst erstaunlich, welche Entdeckungen auch mehr als 40 Jahre nach der Mondlandung da draußen auf uns warten. Eine NASA-Mission hat ja kürzlich am Südpol des**

**Monds eine Wassermenge entdeckt, die etwa jener des Bodensees entsprechen soll.**

Das ist in der Tat eine hochinteressante Entdeckung. Denn Wasser lässt sich nicht nur zur Nahrungserzeugung, sondern auch für die Herstellung von Sauerstoff sowie als Treibstoff für den Rückflug nutzen. Und schließlich ist es durchaus vorstellbar, dass in ferner Zukunft auf dem Mond wertvolle Rohstoffe zu holen sind. Sie kennen sicher das populäre Thema Helium-3 ...

**Ach, Sie haben auch den Roman „Limit“ von Frank Schätzing gelesen?**

Sicher, wir haben Frank Schätzing bei der Recherche für den Roman etwas unterstützt. Seine Idee eines Fahrstuhls von der Erde in den Erdborbit ist natürlich Science-Fiction, deutet aber auf die entscheidende Hürde: die Transportkapazitäten und vor allen Dingen die Transportkosten. In der Geschichte der Menschheit hat die Entwicklung der Verkehrs- und Transportmittel immer eine entscheidende Rolle gespielt – und genauso wird es bei diesem Teil unserer Geschichte sein, der ins All führt. Für eine Eroberung des Alls sind die Transportmittel momentan einfach noch zu kostspielig. Der Energieverbrauch ist gewaltig.

**Energie ist das eine, Sicherheit das andere: Eine weitere wichtige Voraussetzung für kommerzielle Flüge wären Raumfahrzeuge, die vergleichbar sicher**

**unterwegs wären wie heutige Flugzeuge. Schließlich gibt es nicht viele Mutige wie Sie, die sich kurz nach der Explosion der Columbia wieder in ein Space-shuttle setzen.**

Na ja, mit der Ariane 5 haben wir immerhin schon ein ziemlich verlässliches Startfahrzeug, das rund 40 Starts erfolgreich absolviert hat. Wenn es uns gelingt, die Kosten des Transports in den Weltraum nur um ein Drittel zu senken, werden plötzlich ganz andere, neue kommerzielle Möglichkeiten für den Transport von Erdbeobachtungs- und Telekommunikationssatelliten denkbar. Möglicherweise schicken wir künftig auch gar keine Satelliten mehr in den Raum, sondern nur noch geostationäre Plattformen, an denen die Provider ihre jeweiligen Transponder montieren können. Wie sehen Sie das?

**Sicher, das wäre ein ganz neues Spiel. Und versicherungstechnisch wäre es kein Problem – genau so haben wir uns vor 40 Jahren an eine damals ganz neue Technologie, die Satelliten, herangetraut. Ohne Versicherungsschutz wäre deren kommerzielle Entwicklung undenkbar gewesen.**

Was kostet die Versicherung eines Satelliten?

**Ein Satellit einschließlich der Startkosten schlägt heute mit etwa 250 Millionen Dollar zu Buche, ein großer Satellit mit komplexen Nutzlasten auch schon mal mit 400 Millionen**

&gt; &gt; &gt; &gt;

**Dollar. Wenn man dazu die Investitionen am Boden rechnet, sprechen wir von rund einer Milliarde Dollar und damit von Risiken, die selbst große Betreiber nicht allein schultern können. Pro Jahr werden etwa 20 bis 30 kommerzielle Satelliten ins All gebracht und als führender Raumfahrtversicherer sind wir quasi an allen beteiligt. Hinzu kommen rund 150 bereits im All stationierte Satelliten, die ebenfalls bei uns versichert sind.**

Wie lassen sich derartige große Risiken überhaupt versichern?

**Wie bei allen großen und komplexen Risiken kommt es auf die Kombination von Wissen, Erfahrung und Wirtschaftskraft an. Wir versichern Weltraumrisiken ja bereits seit den 1970er-Jahren, das heißt: Wir haben alle Höhen und Tiefen der Branche begleitet. Unsere Ingenieure können heute die technischen Risiken und Ausfallwahrscheinlichkeiten von Raumfahrzeugen nicht nur detailliert bewerten, sondern auch in tragfähige Deckungskonzepte übersetzen. Dennoch bleiben natürlich immer noch Risiken – und die sind nirgendwo so vielfältig und so fatal wie im All.**

Stimmt, im Weltraum lässt sich eine Fehlfunktion nicht mal so eben beheben. Häufig führt ein marginales Problem zum Totalverlust.

**Welche Chancen sehen Sie denn, die Transportkosten in absehbarer Zeit zu senken?**

Wenn wir das wirklich wüssten, wären wir schon einen großen Schritt weiter. Bisher basieren sämtliche Triebwerke auf der Ver-

brennung chemischer Treibstoffe, deren Energiegehalt naturgemäß begrenzt ist. Ein Weg wird sein, völlig neue Trägersysteme zu entwickeln. Aber deren Entwicklung ist extrem teuer.

**Einige Ihrer Kollegen plädieren ja dafür, Roboter ins All zu schicken und auf diese Weise Kosten und Risiken in der bemannten Raumfahrt zu minimieren.**

Richtig, die Kosten für die Lebenserhaltungssysteme würden wegfallen. Andererseits verfügt bislang kein Roboter über die spezifischen kognitiven, sensorischen und manipulativen Fähigkeiten wie der Mensch. Auch so etwas wie Intuition kann man kaum in Maschinen nachbilden. Und gerade Intuition kann in der Isolation einer Raumkapsel entscheidend sein. Bei meiner ersten Mission ist beispielsweise ein Gasanalysator ausgefallen. Die Spezialisten im Kontrollzentrum wussten keine Erklärung und auch die Telemetriedaten des Geräts, die zur Erde gefunkt wurden, brachten keinen Aufschluss. Da das Experiment aber ohnehin nicht weitergeführt werden konnte, habe ich es einfach mal auseinandergeschraubt – und tatsächlich den Fehler gefunden.

**Auf welche praktischen Herausforderungen muss man sich als Mensch im All einstellen?**

Bei Montagetätigkeiten fehlt einem eigentlich immer ein dritter Arm oder ein drittes Bein, um sich irgendwo festzustemmen. Und wenn Sie auf die Erde zurückkehren, muss sich – genau wie nach einer langen Seereise – Ihr Gleichgewichtsgefühl erst wieder justieren. Ein längerer Aufenthalt

hinterlässt außerdem Spuren wie Demineralisierung, Muskelatrophie und eine gewisse Trägheit des blutdruckregulierenden Systems. Diese Effekte lassen sich aber dämpfen. Allein durch die besseren Sportgeräte, die wir bei meiner zweiten Mission auf der ISS hatten, hat sich der Kalziumschwund aus meinen Knochen enorm verringert.

**Wie hoch sind denn die Belastungen während der Startphase? Lassen die sich Weltraumtouristen überhaupt zumuten?**

Da habe ich überhaupt keine Bedenken. Die Startbeschleunigung liegt bei etwa 3,5 g, das entspricht weitgehend den Belastungen, die Sie aus einer Achterbahnfahrt kennen. Aber natürlich muss die gesundheitliche Prüfung vor solch einem Flug sehr gewissenhaft sein.

**Ihr praktischer Tipp für Weltraumreisende?**

Freuen Sie sich auf ein wirklich unglaubliches Erlebnis. Einen Raum ohne Flügel oder sonstige Hilfsmittel in seinen drei Dimensionen auskosten zu können ist einfach atemberaubend. Ich habe noch niemanden erlebt, der angesichts dieser Erfahrung nicht in Euphorie verfiel. Zweitens: Gewöhnen Sie sich behutsam an die Schwerelosigkeit. Bewegen Sie sich in den ersten Stunden nur vorsichtig, sonst drohen Ihnen reisekrankheitsähnliche Symptome. Abgesehen davon ist es für mich immer wieder erstaunlich, wie sich der menschliche Körper, der für das Leben unter Schwerkraft geschaffen wurde, geradezu mühelos an die Schwerelosigkeit gewöhnt. //

---

**Thomas Reiter** ist der europäische Raumfahrer mit der meisten Erfahrung im All. Von September 1995 bis Februar 1996 arbeitete er an Bord der russischen Raumstation Mir. 2006 kehrte er für einen fünfmonatigen Arbeitsaufenthalt auf der Internationalen Raumstation (ISS) ins All zurück. Heute ist er als Vorstandsmitglied des Deutschen Zentrums für Luft- und Raumfahrt für die Raumfahrtforschung und -entwicklung zuständig.

---

**Ernst Steilen** ist Head of Space Underwriting bei Munich Re. Der ausgebildete Jurist ist seit 1982 verantwortlich für die Versicherung von Weltraumrisiken und hat in dieser Zeit rund 500 Starts versicherungstechnisch begleitet. Sein prägendstes Erlebnis, was die Raumfahrt betrifft, war die Explosion des Spaceshuttles Challenger, die er live im Fernsehen sah und die ihm nachdrücklich vor Augen führte, dass trotz Anwendung höchster Sicherheitsstandards Menschen und Material fehlbar sind.

---



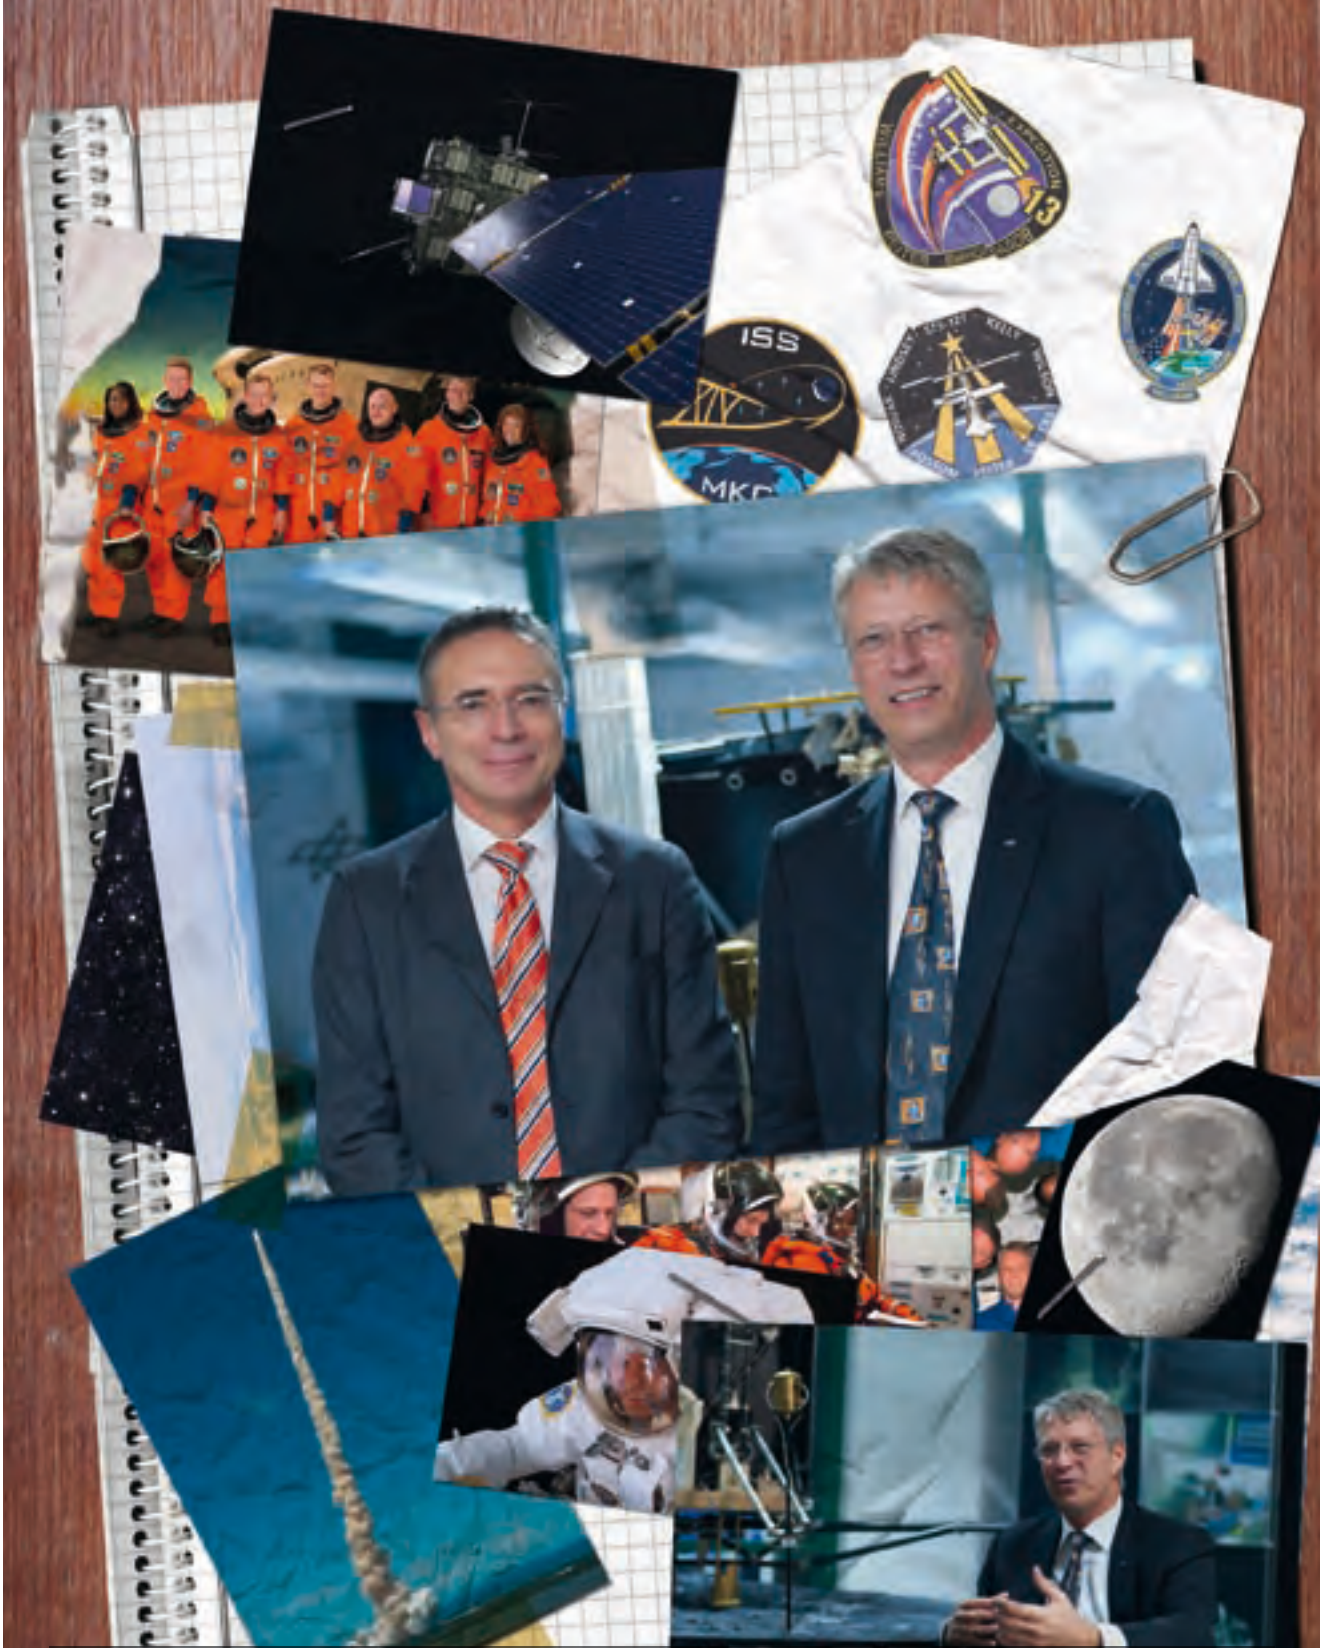

Thomas Reiter und Ernst Steilen (Foto oben, l.) unterhalten sich vor einem Modell der Landefähre Rosetta, deren Original derzeit auf dem Weg zum Kometen Churyumov-Gerasimenko ist. Ziel der Mission, die von der Europäischen Raumfahrtagentur ESA geleitet wird, ist die Entnahme von Proben, die Aufschluss über die Beschaffenheit von Asteroiden geben sollen.



## China, 2110

### Huafei Philip Xu

### Urgroßvater

Vor Kurzem noch galten 100-Jährige als absolute Seltenheit, deren Jahrestage in den Zeitungen gefeiert wurden. Wer aber heute geboren wird, hat dank medizinischen Fortschritts und verbesserter Lebensbedingungen eine gute Chance, seinen 100. Geburtstag zu erreichen. Was für Menschen wie Huafei Philip Xu (geboren 19. Oktober 2010) erfreulich ist, bedeutet für die staatlichen Sicherungssysteme einen extremen Stresstest. In China hilft Munich Re deshalb Erstversicherern beim Design von Versicherungslösungen, mit denen Menschen wie Huafei Xu bis ins hohe Alter gut vorsorgen können.

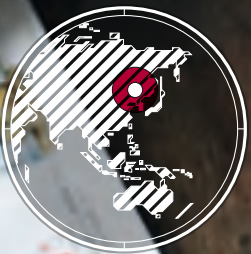



# Chinas graue Revolution

Weitere Informationen: [www.munichre.com/leben](http://www.munichre.com/leben)

*Während sich der Westen mit dem demografischen Wandel zu arrangieren beginnt, kündigt sich in der Volksrepublik China ein weitaus drastischerer Umschwung an. Das Land verändert sich ungewöhnlich rasch von einer jungen zu einer relativ alten, zahlenmäßig rückläufigen Bevölkerung. Diese Entwicklung wird innerhalb nur einer Generation vonstattengehen. In den kommenden Jahrzehnten wird die Zahl der Chinesen im Seniorenalter massiv wachsen – und der Bedarf an Pflege und Absicherung. //*

**40 Jahre ist es her**, dass die chinesische Regierung ihre Modernisierungspolitik in Verbindung mit strengen Maßnahmen zur Geburtenregelung ins Leben rief. Wie grundlegend sie damit den Wandel im Land beschleunigen würden, dürften damals nicht einmal deren Erfinder geahnt haben. Während China vom abgekapselten Dritte-Welt-Land zur Werkbank dieses Planeten aufstieg und sich das Durchschnittseinkommen der Arbeitnehmer versechsfachte, sackte die Geburtenrate von durchschnittlich 5,8 im Jahr 1970 auf rund 1,6 Kinder pro Chinesin ab. Und immer noch ist China ein junges Land: Lediglich 14 Prozent der Volksrepublikaner sind zurzeit älter als 60 Jahre.

**Die Spätfolgen der sinkenden Geburtenraten** kündigen sich mittlerweile jedoch an. Wie eine gewaltige Druckwelle sind die Veränderungen der Familiengröße in den vergangenen Jahrzehnten durch Provinzen und Alterskohorten geschwappt und haben sich zu einem demografischen Donnergrollen ausgewachsen. Denn den Millionen Chinesen, die in den 1960er- und 1970er-Jahren geboren wurden, sind immer weniger gefolgt. „Wenn die gegenwärtigen demografischen Trends anhalten“, heißt es in einer Studie des Center for Strategic & International Studies, „werden im Jahr 2040 in China 397 Millionen Senioren leben – das sind mehr Menschen als gegenwärtig in Frankreich, Deutschland, Italien, Japan und Großbritannien insgesamt.“ Stimmen die Prognosen, dann dürfte Chinas Bevölkerung 2040 älter sein als jene der USA. Und bereits in vier Jahren wird die Anzahl der arbeitenden Chinesen ihren Höhepunkt erreicht haben, um danach ebenso stetig wie unaufhaltsam abzufallen.

**Steve Zhang, Leiter des Bereichs Leben von Munich Re, Peking**, befasst sich bereits heute mit den Folgen dieses Wandels. Gemeinsam mit seinen Kollegen aus den Büros von Munich Re in Peking, Schanghai und Hongkong berät Zhang chinesische Erstversicherer beim Design von Versicherungslösungen, mit denen sich Chinas Bevölkerung gegen die Risiken des Alters absichern kann. „Die weltweite Expertise von Munich Re ist hier von enormem Vorteil“, sagt Zhang. „Wir können das Underwriting-Knowhow aus zig Märkten der Welt nutzen und mit unseren lokalen Marktkennntnissen kombinieren. Das ist in einem jungen Versicherungsmarkt wie dem chinesischen ein gewaltiger Pluspunkt.“

**Wie sich die globale Expertise von Munich Re auszahlt**, zeigte sich anhand der Entwicklung einer umfassenden Pflegeversicherung für chinesische Kunden. Steve Zhang und seine Kollegen konnten hier auf Daten von mehr als 23.000 Leistungsfällen aus einem Portfolio von 767.000 Policen zurückgreifen, die Experten von Munich Re eingehend analysiert und mit Blick auf die Zahl der Pflegefälle für bestimmte Regionen oder Deckungsarten ausgewertet hatten. Praxiswissen steuerten Fachleute von LifePlans bei, einem spezialisierten Dienstleister von Munich Re mit Sitz in Waltham, Massachusetts. „Die globale Expertise von Munich Re in der Pflegeversicherung kann für uns in China beim Umgang mit diesem Thema wichtige Anknüpfungspunkte bieten“, sagt Feng Xiangying, Vice President des chinesischen Erstversicherers PICC Health.

**Begleitet von Steve Zhang** führte Feng vor Kurzem eine Delegation in die USA, um detaillierte Einblicke in die Pflegeversicherung zu bekommen. Dabei besuchte Feng neben LifePlans, US-Regierungsstellen, Versicherungsaufsichtsbehörden und Versicherungsverbänden auch Pflegeheime und US-Pflegeversicherungsanbieter, um Erfahrungen auszutauschen. „Die Unterstützung von Munich Re kann uns dabei helfen, ein Produkt zu entwickeln, das finanziell tragfähig und auf die Bedürfnisse einer alternden Gesellschaft zugeschnitten ist.“

> > > >

**Denn der Bedarf ist gewaltig.** Gesündere Ernährung sowie Verbesserungen bei Hygiene und Gesundheitsversorgung haben die Lebenserwartung seit Gründung der Volksrepublik von 41 auf 71 Jahre ansteigen lassen. Aber nicht nur der Anteil der Senioren, sondern auch jener der sogenannten alten Alten – und damit gleichzeitig Pflegebedürftigeren – wird wachsen. 2050 dürften in China 100 Millionen über 80-Jährige leben. Das sind mehr, als heute auf dem gesamten Erdball zu finden sind.

**Viele Chinesen sorgen deshalb bereits privat für Krankheit und Alter vor.** So sind „Critical Illness“-Policen, die finanzielle Vorsorge im Fall einer schweren Krankheit bieten, heute eine gängige Zusatzversicherung zu Sparprodukten. „Es ist für jeden offensichtlich, dass weder Familien noch der Staat die Herausforderungen einer alternden Gesellschaft allein auffangen werden können“, erklärt Zhang, „und das gilt nicht nur für China, sondern auch für andere Gesellschaften Asiens.“ Für Märkte wie Japan, Südkorea und Singapur hat Munich Re daher ähnliche Pflegeversicherungslösungen entworfen.

**Der gewaltigste Umschwung deutet sich jedoch in China an.** In einem Land, in dem nur ein Bruchteil der Bevölkerung auf eine verlässliche staatliche Rente zählen kann und die Institution des Altersheims quasi unbekannt ist, lebt heute die Mehrheit der Senioren mit und von der Fürsorge ihrer Kinder oder anderer Angehöriger. Dieses informelle Altersversorgungssystem gerät jedoch zusehends ins Wanken, weil die Familien kleiner werden. Zudem leben viele Kinder heute nicht mehr gemeinsam mit ihren Eltern, sondern fernab in den boomenden Millionenstädten. „Wir nennen es das 4-2-1-Problem“, erklärt Zhang. „In vielen Familien müsste heute ein Kind für zwei Eltern und vier Großeltern sorgen. Und natürlich ist den meisten bewusst, dass das nicht funktionieren kann.“

**Fraglich ist nicht mehr, ob der Markt für Pflege- und Rentenversicherungen in China anspringt.** Die Frage ist nur noch, wann, in welcher Geschwindigkeit und mit welcher Wucht er es tut. //

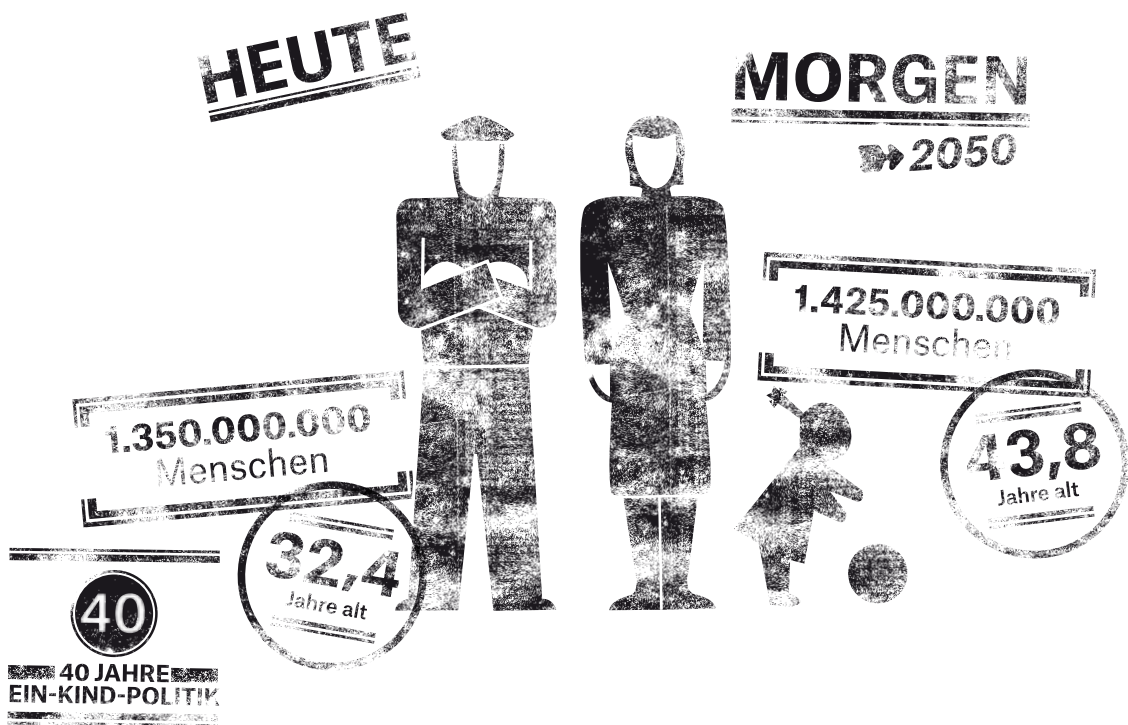

China ist mit rund 1,3 Milliarden Einwohnern das bevölkerungsreichste Land der Erde. In seiner Geschichte waren Überbevölkerung und die damit verbundenen Probleme die Ursachen für tiefe politische und wirtschaftliche Krisen und Hungersnöte. Die Volksrepublik geht deshalb mit der sogenannten Ein-Kind-Politik Wege, die weltweit einzigartig sind. Durch diese Bevölkerungspolitik und die steigende Lebenserwartung wird der Altersdurchschnitt in den kommenden Jahrzehnten allerdings deutlich ansteigen. Zugleich sinkt der Anteil der Erwerbstätigen an der Gesamtbevölkerung.

# Weiterdenken

Wie werden wir morgen leben?  
Ganz ähnlich? Oder ganz anders?  
Weiterführende Links im Internet:  
[www.munichre.com/weiterdenken](http://www.munichre.com/weiterdenken)

ZUKUNFT

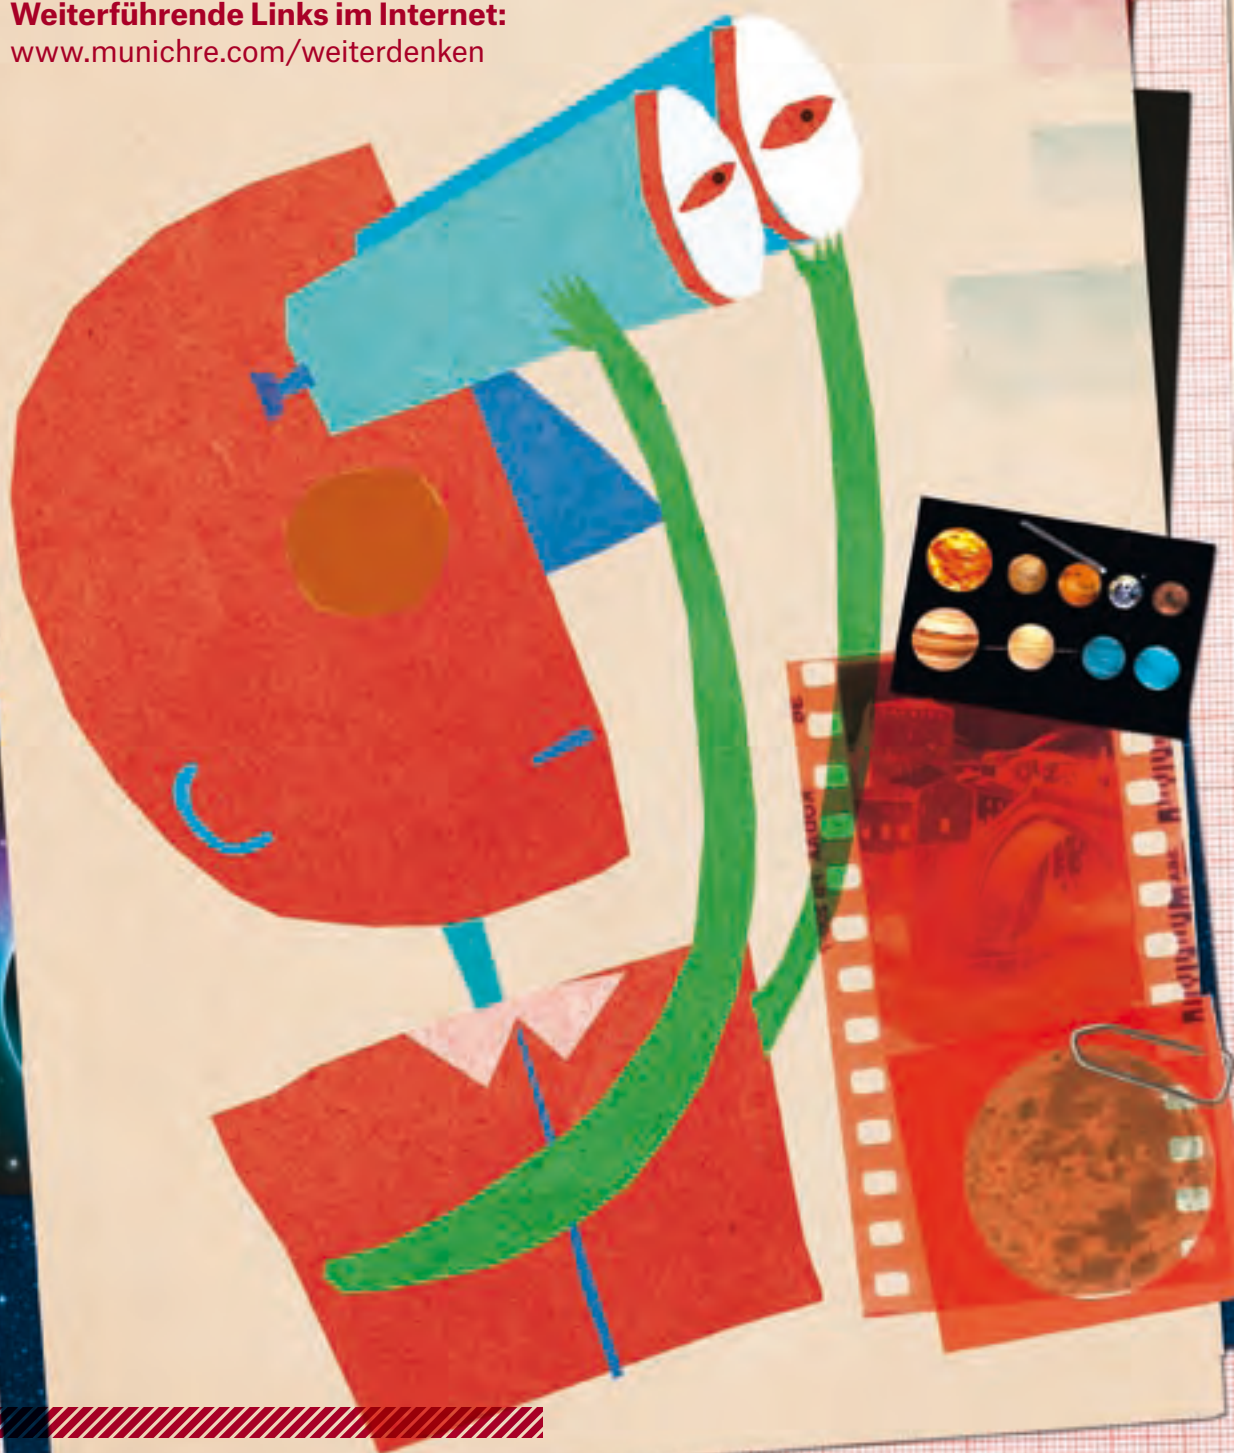

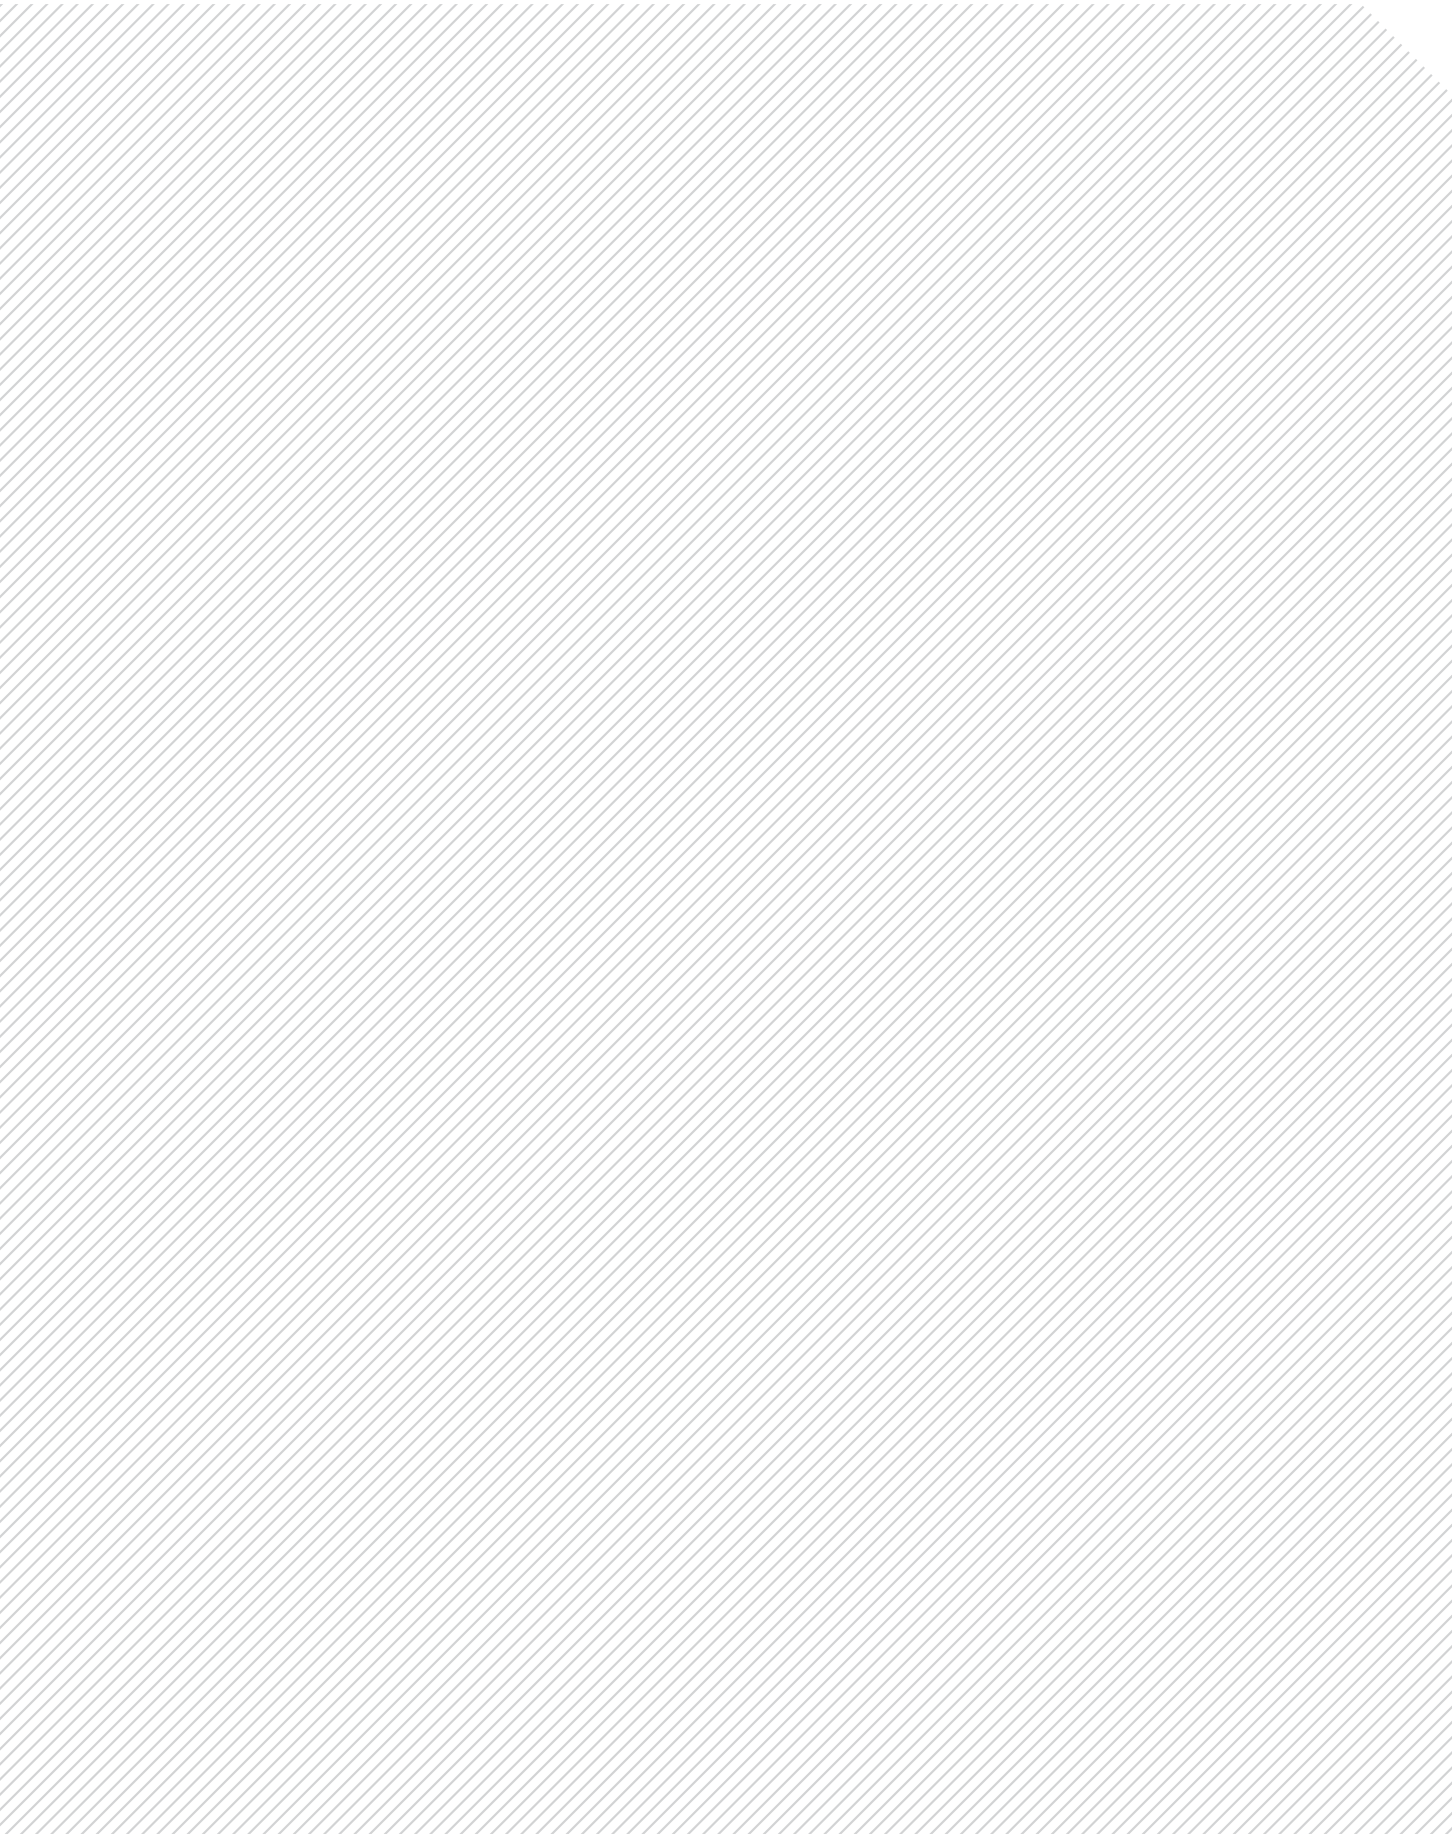

# Weiter denken

**Wir sind der langfristige Partner unserer Investoren.**

Eine starke Kapitalbasis und eine klare Positionierung machen uns schlagkräftig und lassen uns in einem dynamischen Markt profitabel wachsen.

Unser integriertes Geschäftsmodell aus Erst- und Rückversicherung ermöglicht es uns, für unsere Kunden maßgeschneiderte Lösungen zu erarbeiten und erfolgreich im Markt zu platzieren.

Dank ihres Risikowissens und ihrer Innovationskraft schaffen unsere hochqualifizierten und leistungsorientierten Mitarbeiter nachhaltig Wert.

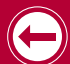

Wie werden wir morgen leben?  
Ganz ähnlich? Oder ganz anders?  
Antworten im beiliegenden Supplement  
und im Internet:  
[www.report2010.munichre.com](http://www.report2010.munichre.com)



# Munich Re 2010

|                                                    |            |
|----------------------------------------------------|------------|
| <b>An die Aktionäre</b>                            | <b>001</b> |
| Jahresrückblick                                    | 003        |
| Aktionärsbrief                                     | 004        |
| Mitglieder des Vorstands                           | 006        |
| Münchener-Rück-Aktie                               | 008        |
| Strategie                                          | 013        |
| <b>Corporate Governance</b>                        | <b>015</b> |
| Bericht des Aufsichtsrats                          | 017        |
| Erklärung zur Unternehmensführung                  | 022        |
| <b>Konzernlagebericht</b>                          | <b>045</b> |
| Munich Re                                          | 048        |
| Rahmenbedingungen                                  | 064        |
| Geschäftsverlauf                                   | 070        |
| Finanzlage                                         | 100        |
| Weitere Erfolgsfaktoren                            | 108        |
| Risikobericht                                      | 116        |
| Ausblick                                           | 138        |
| <b>Konzernabschluss</b>                            | <b>145</b> |
| Konzernbilanz                                      | 150        |
| Konzern-Gewinn- und Verlustrechnung                | 152        |
| Aufstellung der erfassten Erträge und Aufwendungen | 153        |
| Konzern-Eigenkapitalentwicklung                    | 154        |
| Konzern-Kapitalflussrechnung                       | 156        |
| Konzernanhang                                      | 157        |
| <b>Bestätigungsvermerk des Abschlussprüfers</b>    | <b>280</b> |
| <b>Versicherung der gesetzlichen Vertreter</b>     | <b>281</b> |
| <b>Allgemeine Informationen</b>                    | <b>283</b> |
| Glossar                                            | 284        |
| Stichwortverzeichnis                               | 291        |
| Wichtige Anschriften                               | 292        |
| Impressum/Service                                  | 294        |
| Standorte                                          |            |
| Mehrjahres- und Quartalsübersicht                  |            |
| Wichtige Termine                                   |            |

Ein ausführliches Inhaltsverzeichnis finden Sie auf den Kapiteltrennseiten

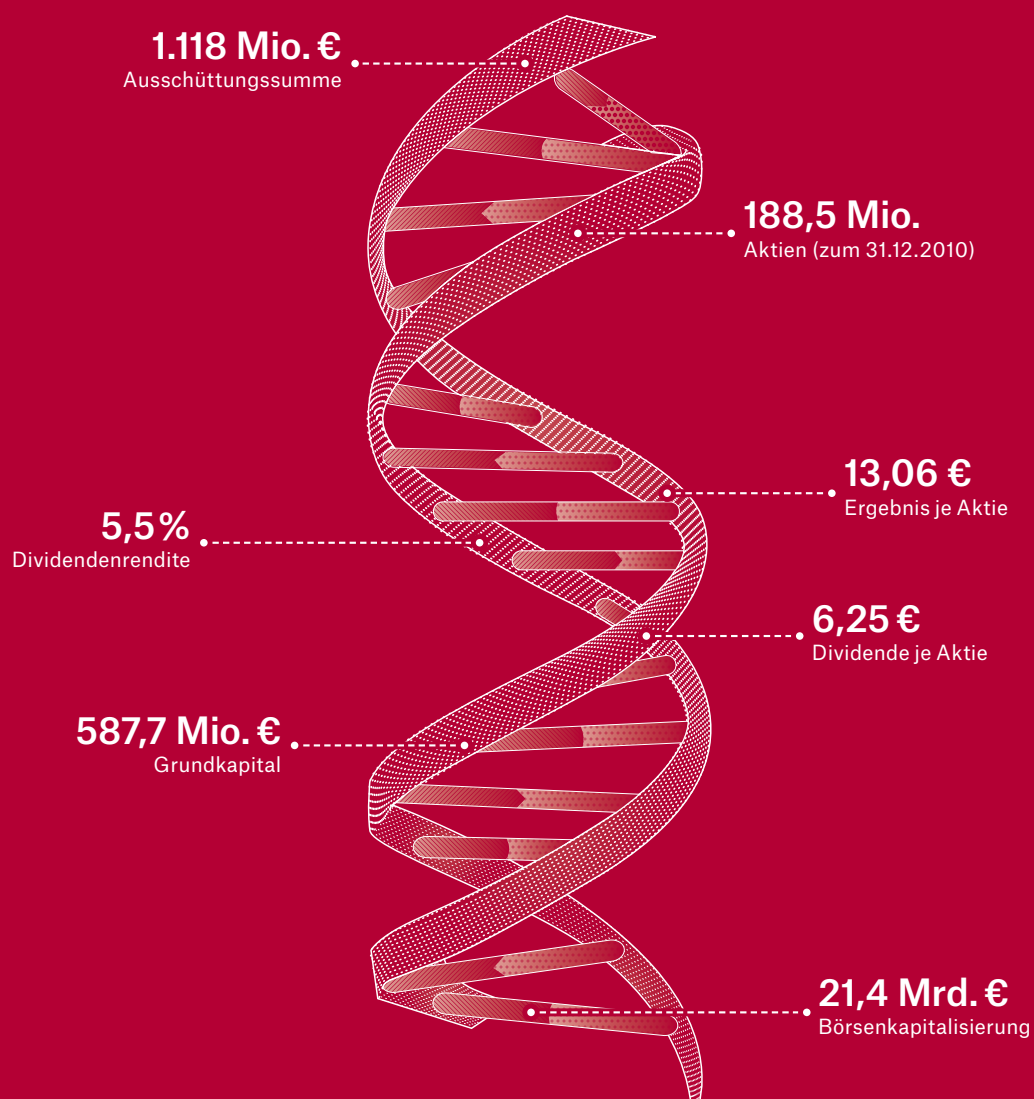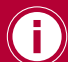

**Desoxyribonukleinsäure** // Desoxyribonukleinsäure wird nach ihrer englischen Bezeichnung meist DNA abgekürzt und ist ein Kettenmolekül, das die Erbinformationen trägt. Die DNA ist in der charakteristischen Form einer Doppelhelix organisiert. Sie enthält all jene Informationen, die für die Bildung von Proteinen und damit die biologische Entwicklung eines Organismus sowie den Stoffwechsel in den Zellen erforderlich sind.

# An die Aktionäre

|                          |     |
|--------------------------|-----|
| Jahresrückblick          | 003 |
| Aktionärsbrief           | 004 |
| Mitglieder des Vorstands | 006 |
| Münchener-Rück-Aktie     | 008 |
| Strategie                | 013 |



# 2010

## Q1/2010

### 1. Januar 2010 //

Im Rahmen der Klimaneutralitätsstrategie für die Rückversicherungsgruppe ist das erste Ziel erreicht: Der Standort in München wurde 2009 klimaneutral gestellt. Ab 2012 folgt die gesamte internationale Rückversicherungsgruppe.

### 5. März 2010 //

Munich Re begrüßt die Berufung von Prof. Klaus Töpfer zum strategischen Berater der Industrieinitiative Dii.

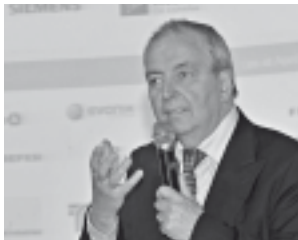

### 15. März 2010 //

Munich Re und LDK Solar Co. Ltd. unterzeichnen Versicherungsvertrag, der das mögliche Risiko einer Leistungsverminderung der Photovoltaik-Module von LDK Solar absichert.

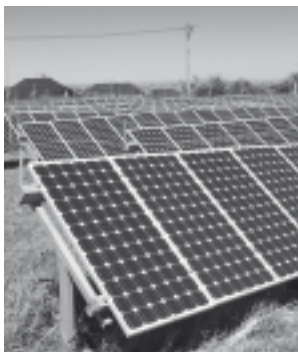

## Q2/2010

### 28. April 2010 //

Munich Re zahlt für das Geschäftsjahr 2009 eine Dividende von 5,75 (Vorjahr: 5,50) Euro pro Aktie und schüttet fast 1,1 Milliarden Euro an ihre Aktionäre aus. Mit einem Aktienrückkaufprogramm hatte Munich Re bis zum 21. April 2010 Aktien im Wert von 1 Milliarde Euro zurückgekauft.

### 22. Juni 2010 //

Der Munich Re Climate Summit zeigt auf der Expo Shanghai innovative Versicherungsprodukte und neue Deckungskonzepte.

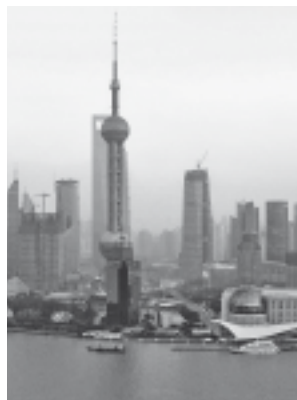

### 30. Juni 2010 //

Die MEAG hat mit 204 Milliarden Euro per 30. Juni 2010 erstmals die Marke von 200 Milliarden Euro Assets unter Management übertroffen. Allein im ersten Halbjahr 2010 legten die Assets unter Management um 11,6 Milliarden Euro zu.

## Q3/2010

### 18. Juli 2010 //

Die ERGO Versicherungsgruppe startet eine Werboffensive für ihre neue Marke. „Versichern heißt verstehen“ – unter diesem Leitgedanken zeigt die Kampagne, dass ERGO Anliegen und Bedürfnisse der Kunden konsequent in den Fokus rückt. Im Zentrum der Kampagne steht der Verbraucher. Die deutschlandweite Werbekampagne formuliert den Anspruch einer neuen Qualität der Kundenansprache und -betreuung. „Wir wollen in einen engen Austausch mit unseren Kunden eintreten. Denn es ist uns wichtig zu verstehen, was sich Kunden von uns als Versicherungsunternehmen wünschen“, betont ERGO-CEO Torsten Oletzky.

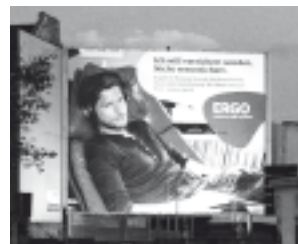

### 12. September 2010 //

Munich Re hat eine Versicherungslösung für Ölfirmen entwickelt, die diese gegen Haftpflichtrisiken aus Ölkatastrophen bei Bohrungen im Meer absichert.

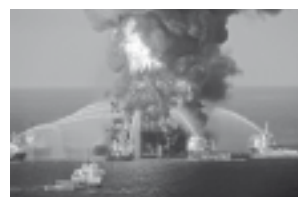

## Q4/2010

### 26. Oktober 2010 //

Munich Re hat eine Vereinbarung zum Kauf der Windsor Health Group, Inc. (Windsor) abgeschlossen. Der geplante Kauf soll die Position von Munich Health auf dem US-Markt stärken. Windsor Health Plan, Inc. bietet staatlich geförderte Krankenversicherungsleistungen und spezielle Versorgungsprogramme für das Seniorensegment an.

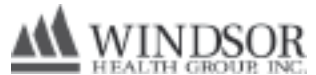

### 3. November 2010 //

Fünf Jahre nach ihrer Gründung begrüßt die DAMAN National Health Insurance in Abu Dhabi ihren zweimillionsten Kunden in den Vereinigten Arabischen Emiraten.

### 23. Dezember 2010 //

Munich Re investiert über ihren Vermögensverwalter MEAG in deutsche Windenergie und übernimmt zum Jahreswechsel 40 Windenergieanlagen in insgesamt elf Windparks mit einer Gesamtleistung von 73 Megawatt. Das Investment in Höhe eines niedrigen dreistelligen Millionenbetrags ist Teil des Programms RENT (Renewable Energy and New Technologies), durch das Munich Re innerhalb der nächsten Jahre bis zu 2,5 Milliarden Euro in erneuerbare Energien und neue Umwelttechnologien investieren will.

**Sehr geehrte Damen und Herren,**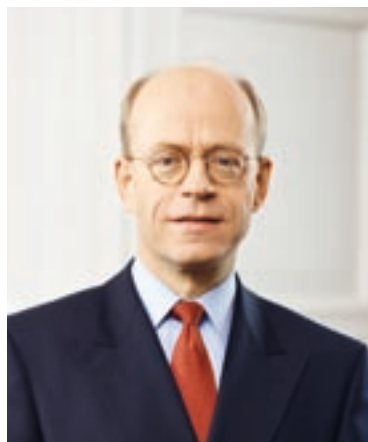

**Dr. Nikolaus von Bomhard**  
Vorsitzender des Vorstands

zahlreiche Naturkatastrophen und Großschäden prägten das Geschäftsjahr 2010. Mit unseren breit gefächerten Produkten in der Erst- und Rückversicherung tragen wir dazu bei, zumindest die finanziellen Folgen dieser Ereignisse für die Betroffenen abzufedern.

Für das Geschäftsjahr 2010 hatten wir uns vorgenommen, unsere bewährte Strategie weiter konsequent umzusetzen und damit Ihre Ergebniserwartungen zu erfüllen. Das ist uns, denke ich, gelungen: Auch im dritten Jahr der Krise haben wir mit einem Gewinn von über 2,4 Milliarden Euro ein gutes Ergebnis erwirtschaftet. Es ist vor allem auch deshalb gut, weil wir mit 13,5 Prozent Rendite auf das risikoadjustierte Eigenkapital unser Ziel von 15 Prozent trotz sehr niedriger Zinsen annähernd erreicht haben. Angesichts des Preisdrucks auf vielen Versicherungsmärkten, der hohen Belastung aus Großschäden sowie der fortbestehenden Unsicherheiten auf den Kapitalmärkten ist dies keineswegs selbstverständlich.

Der Erfolg des Unternehmens erlaubt es, die Dividende gegenüber dem Vorjahr nochmals um 50 Cent zu erhöhen und 6,25 Euro pro Aktie auszuschütten. Vorbehaltlich der Zustimmung der Hauptversammlung zu diesem Gewinnverwendungsvorschlag wird Munich Re für die Krisenjahre 2008 bis 2010 dann mehr als drei Milliarden Euro als Dividende gezahlt haben. Damit nehmen wir unter den DAX-30-Werten einen Spitzenplatz bei der Dividendenrendite ein.

Zusätzlich zu den Dividendenzahlungen haben wir seit 2006 auch umfangreiche Aktienrückkäufe getätigt, bis zur Hauptversammlung 2012 wollen wir nochmals Aktien im Wert von bis zu 500 Millionen Euro zurückkaufen. Rechnet man die Dividenden und Aktienrückkäufe zusammen, so werden wir für den Fünfjahreszeitraum bis 2010 mehr als zehn Milliarden Euro an unsere Aktionäre zurückgegeben haben. Im gleichen Zeitraum haben wir zusätzlich verschiedene Unternehmensbeteiligungen und -übernahmen im Gegenwert von etwas über drei Milliarden Euro vollständig aus Eigenmitteln finanziert. Gleichzeitig blieb unser IFRS-Eigenkapital über die gesamte Zeit stabil, zum 31. Dezember 2010 betrug es 23 Milliarden Euro. Dabei übertreffen wir das Zweieinhalbfache der aufsichtsrechtlich erforderlichen Solvenzmittel.

Diese finanzielle Stärke, ein ausgefeiltes und gelebtes Risikomanagement, unsere risikobewusste Anlagepolitik und das effiziente Kapitalmanagement haben uns in der Krise widerstandsfähig gemacht. Infolgedessen konnten wir uns um die Weiterentwicklung unserer drei Geschäftsfelder Erstversicherung, Rückversicherung und Munich Health kümmern. „Krisenmanagement“ war zu keiner Zeit erforderlich.

In der Erstversicherung haben wir 2010 die Marke ERGO erfolgreich im deutschen Markt eingeführt. ERGO erreicht schon jetzt einen hohen Bekanntheitsgrad in Deutschland, ihr Markenversprechen „Versichern heißt verstehen“ wird von den Kunden gut angenommen. Auf diese Leistung unserer Kollegen bei ERGO bin ich stolz. Ich weiß, sie fühlen sich dem Anspruch dieses Versprechens persönlich verpflichtet. Schwierig bleibt vorerst das Geschäft mit klassischen Lebensversicherungen, dort wirkt sich das niedrige Zinsniveau dämpfend auf Nachfrage und Erträge aus. Diese Herausforderung betrifft freilich nicht nur uns, mit diesem Umfeld müssen alle Marktteilnehmer klarkommen. Es erweist sich dabei als sehr hilfreich, dass wir unsere Kapitalanlagen rechtzeitig ausreichend abgesichert haben, sodass wir auch eine längere Phase niedriger Zinsen verkraften können.

Außerhalb des Heimatmarkts von ERGO wollen wir in den aufstrebenden Märkten Asiens und Osteuropas präsent sein. Dafür hat ERGO Anfang dieses Jahres mit einem lokalen Partner in China ein Joint Venture für Lebensversicherungen vereinbart und ist eine strategische Kooperation mit einem vietnamesischen Schaden/Unfall-Versicherer eingegangen, die durch eine Minderheitsbeteiligung unterlegt ist. Die entscheidende Tugend beim Auf- und Ausbau des internationalen Geschäfts ist Geduld. Nur mit überlegten Schritten zur rechten Zeit lässt sich hier Wert schaffen.

Im Rückversicherungsmarkt ist nach wie vor ausreichend Kapazität vorhanden. Ausnahmen und damit die Möglichkeit zu Preiserhöhungen ergaben sich nur in Segmenten mit überdurchschnittlicher Schadenbelastung. Entscheidend profitieren wir von unserer großen Nähe zu unseren Kunden und unserer Fähigkeit, komplexe Rückversicherungsprogramme bedarfsgerecht zu strukturieren. Damit können wir uns zunehmend vom Wettbewerb differenzieren und auch gewichtige Einzelverträge oder ganze Vertragsprogramme zu unseren individuellen Bedingungen abschließen. Weiterhin erschließen wir uns gezielt attraktive Nischenmärkte, die wir über Spezialversicherer bedienen. Positiv wirkt sich zudem aus, dass derzeit einige Kunden unsere Rückversicherungskapazität zur Kapitalentlastung nutzen, insbesondere in der Lebens- und Krankenversicherung, zuletzt auch in der Schaden/Unfall-Versicherung.

Unser drittes und jüngstes Geschäftsfeld Munich Health wird die 2010 begonnene Konsolidierung im laufenden Jahr abschließen. Mit einem starken Prämienwachstum und einer stetigen Ertragsentwicklung trägt Munich Health zunehmend zum Erfolg der Gruppe bei. Der Abschluss des Erwerbs der Windsor Health Group zum Jahresbeginn 2011 hat unsere Marktposition auf dem US-Medicare-Markt deutlich gestärkt. Dies unterstützt uns auf dem Weg zu einer nachhaltigen Wertschaffung, die auch die Strategie und das Geschäft von Munich Health prägt.

Verehrte Aktionäre, ich danke Ihnen im Namen meiner Vorstandskollegen und aller Mitarbeiter des Konzerns für das Vertrauen, das Sie uns schenken. Die Weichen für eine nachhaltig profitable Zukunft sind gestellt. Wir werden die Gruppe stetig und konsequent weiterentwickeln. Dabei halten wir den eingeschlagenen Kurs und bleiben berechenbar. Sie wollen und sollen wissen, was Sie von Ihrem finanziellen Engagement erwarten können.

Mit besten Grüßen

Ihr



Nikolaus von Bomhard

v.l.n.r. **Wolfgang Strassl**  
**Arbeitsdirektor i. S. von § 33 MitbestG**  
HealthCare/Human Resources

**Jörg Schneider**  
Group Reporting/Group Controlling/Corporate Finance Mergers & Acquisitions/  
Integrated Risk Management/Group Legal, Compliance/Group Taxation/  
Investor and Rating Agency Relations

**Georg Daschner**  
Europe and Latin America

**Peter Röder**  
Global Clients and North America

**Nikolaus von Bomhard**  
**Vorsitzender des Vorstands, Vorsitzender des Konzernausschusses**  
Group Development/Group Investments/Group Communications/Group Audit/  
Group Executive Affairs

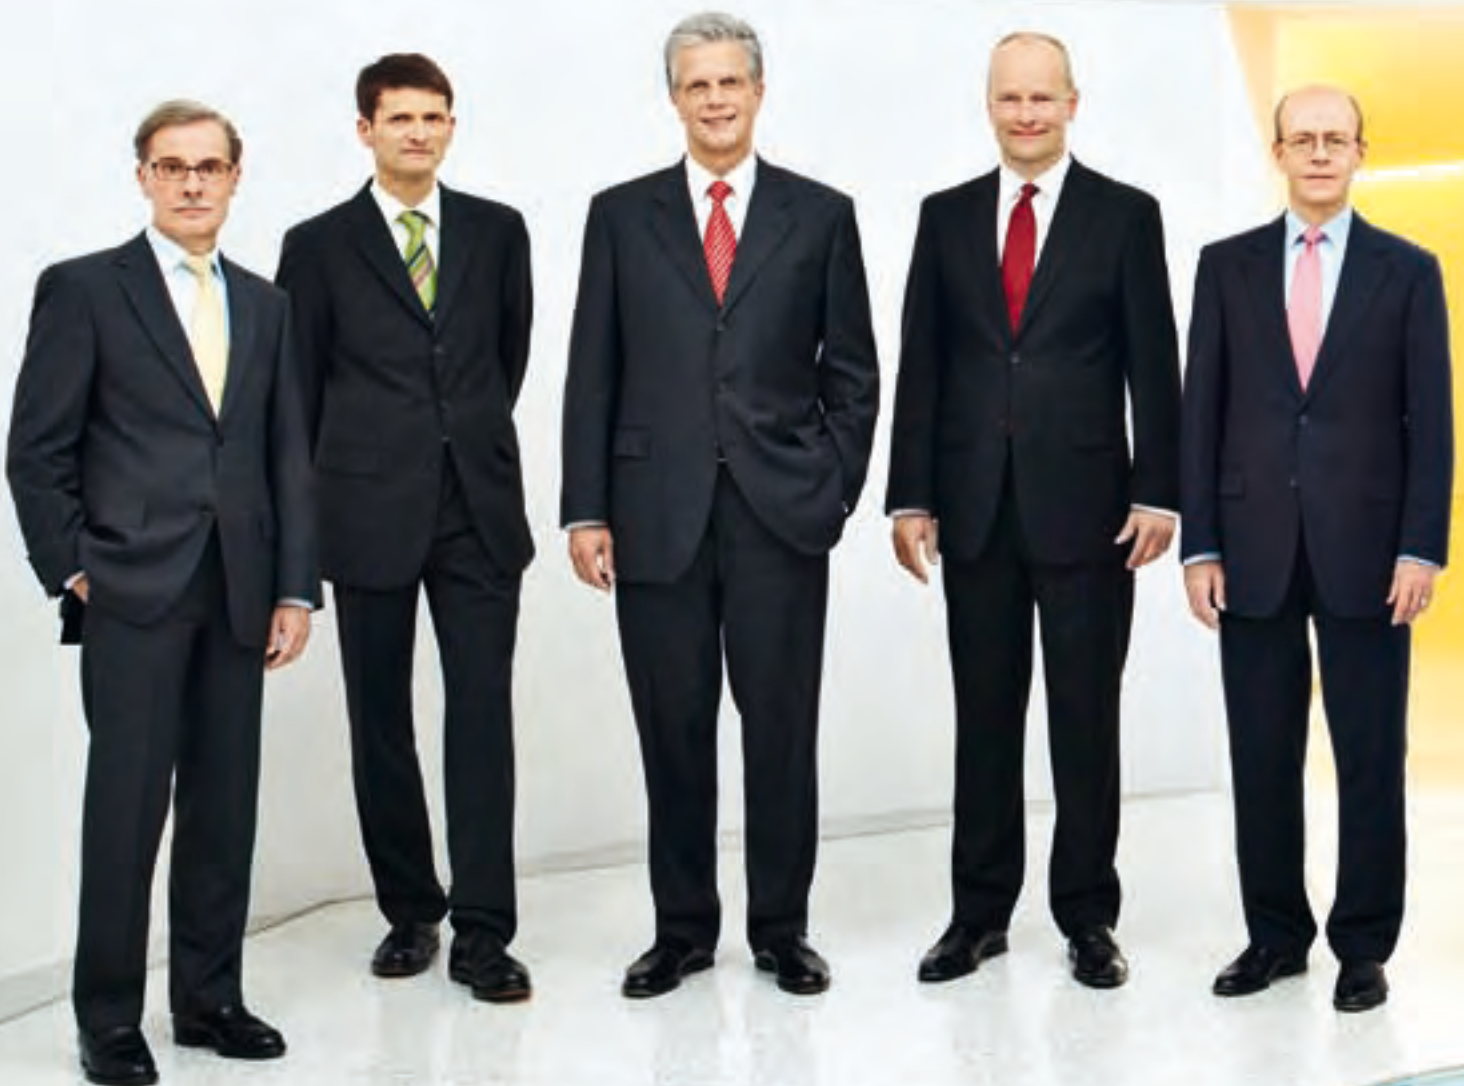



v.l.n.r.

**Torsten Jeworrek**

**Vorsitzender des Rückversicherungsausschusses**

Reinsurance Development/Corporate Underwriting/Accounting, Controlling and  
Central Reserving for Reinsurance/Information Technology/Global Business Architecture/  
Geo Risks Research/Corporate Climate Centre

**Ludger Arnoldussen**

Germany, Asia Pacific and Africa/Services

**Thomas Blunck**

Special and Financial Risks/Reinsurance Investments/Central Procurement

**Joachim Wenning**

Life

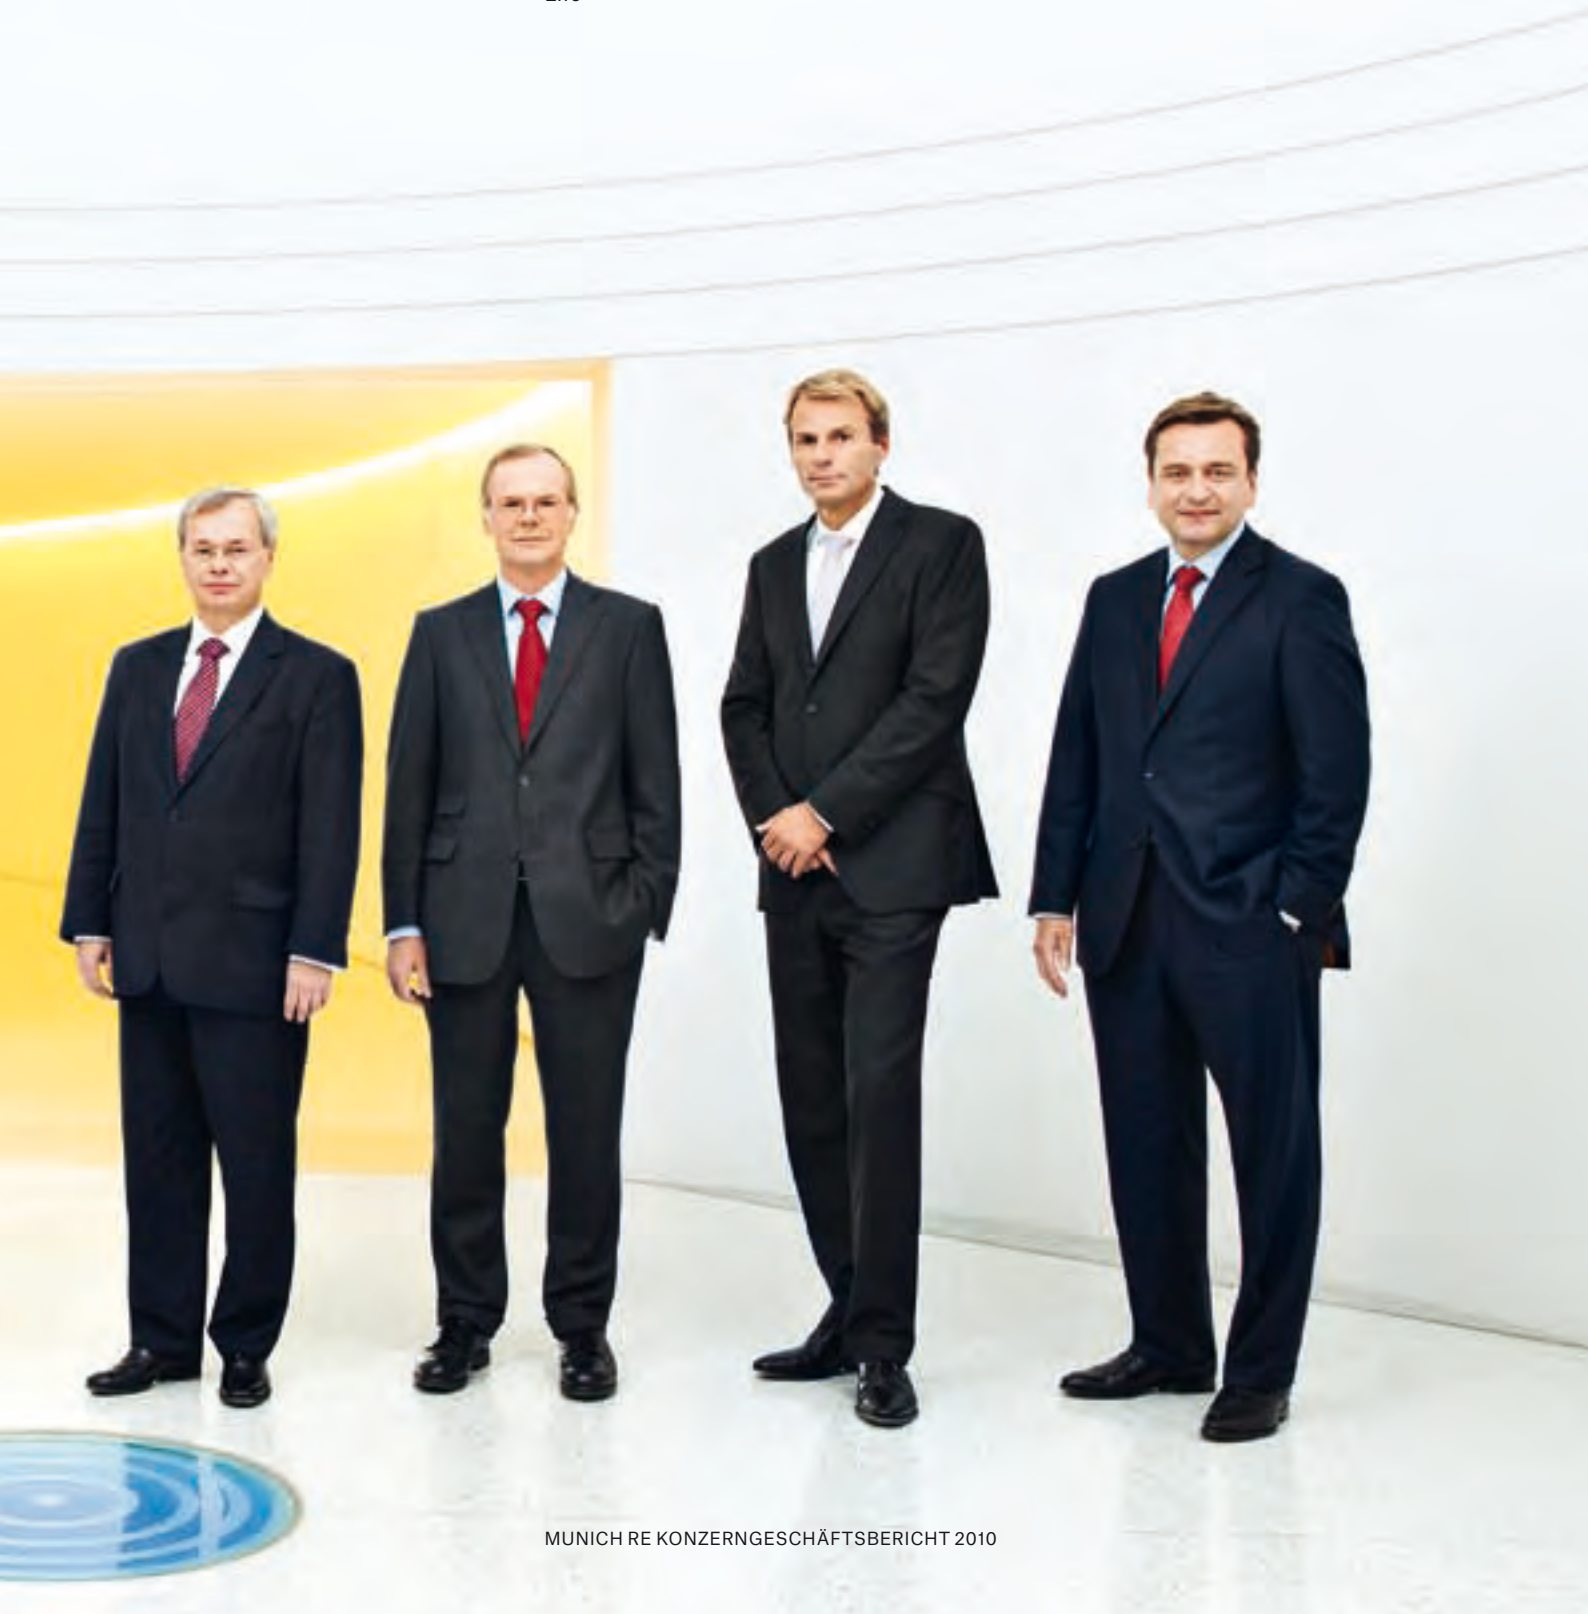

## Die Aktie

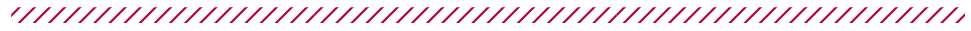

- // Die Weltkonjunktur hat sich nach den gesamtwirtschaftlichen Verwerfungen infolge der Finanzkrise der vorangegangenen Jahre 2010 deutlich erholt.
- // In einem Umfeld anhaltend niedriger Zinsen und herausfordernder Bedingungen in den Versicherungsmärkten hat sich die Münchener-Rück-Aktie als verlässliches Investment erwiesen. Der Kurs stieg im Jahresverlauf um 4,4 Prozent, inklusive der Dividende ergibt sich eine Rendite in Höhe von 10 Prozent.

Die europäischen Kapitalmärkte wurden 2010 über weite Strecken von der Schuldenkrise einiger Staaten der Eurozone und den damit verbundenen Ängsten vor möglichen Zahlungsausfällen geprägt. Die Finanzwerte waren wegen ihrer Investments in Anleihen dieser Länder davon in besonderem Maße betroffen. In den ersten Monaten des Jahres konnte die Münchener-Rück-Aktie – trotz massiver Schäden durch Naturkatastrophen – mit verlässlicher Kapital- und Ertragsstärke punkten.

Ab Mitte April richtete sich die Aufmerksamkeit der Anleger verstärkt auf die Risiken von Versicherungsunternehmen in Anleihen hoch verschuldeter Euroländer. Dies führte bis Ende Mai zu spürbarem Druck auf die Kurse, dem sich auch unsere Aktie nicht entziehen konnte. Von Juni bis Oktober bewegte sich unser Aktienkurs in einem sehr volatilen Umfeld auf dem Niveau des Jahresanfangs: Positiven Impulsen durch einen wieder größeren Risikoappetit der Anleger infolge guter volkswirtschaftlicher Daten gerade in Deutschland standen Rezessionsängste und andere Krisenszenarien gegenüber. Gleichzeitig sorgten die Auswirkungen einer sich manifestierenden Niedrigzinsphase sowie eine anhaltend hohe Wettbewerbsintensität im Versicherungssektor für Verunsicherung bei den Investoren.

Im vierten Quartal profitierte die Münchener-Rück-Aktie neben der allgemein freundlichen Kapitalmarktstimmung zunächst von einem sich abzeichnenden guten versicherungstechnischen Ergebnis aufgrund einer schadenarmen Hurrikansaison. Innerhalb der engen Bandbreiten ihres diversifizierten, konservativen Investmentportfolios konnte Munich Re mit aktiven und strikt an ökonomischen Kriterien ausgerichteten Anlageentscheidungen im gesamten Jahresverlauf von Marktchancen profitieren und substanzielle Kapitalanlageerträge erzielen. Im europäischen Sektorvergleich schneidet die Münchener-Rück-Aktie 2010 damit gut ab und übertrifft zum Beispiel die Performance des europäischen Versicherungsindex DJ EURO STOXX Insurance, kann aber an die starke – insbesondere durch exportorientierte Werte getriebene – Entwicklung des DAX 30 nicht anschließen.

**Kursentwicklung 1.1.2010 = 100**

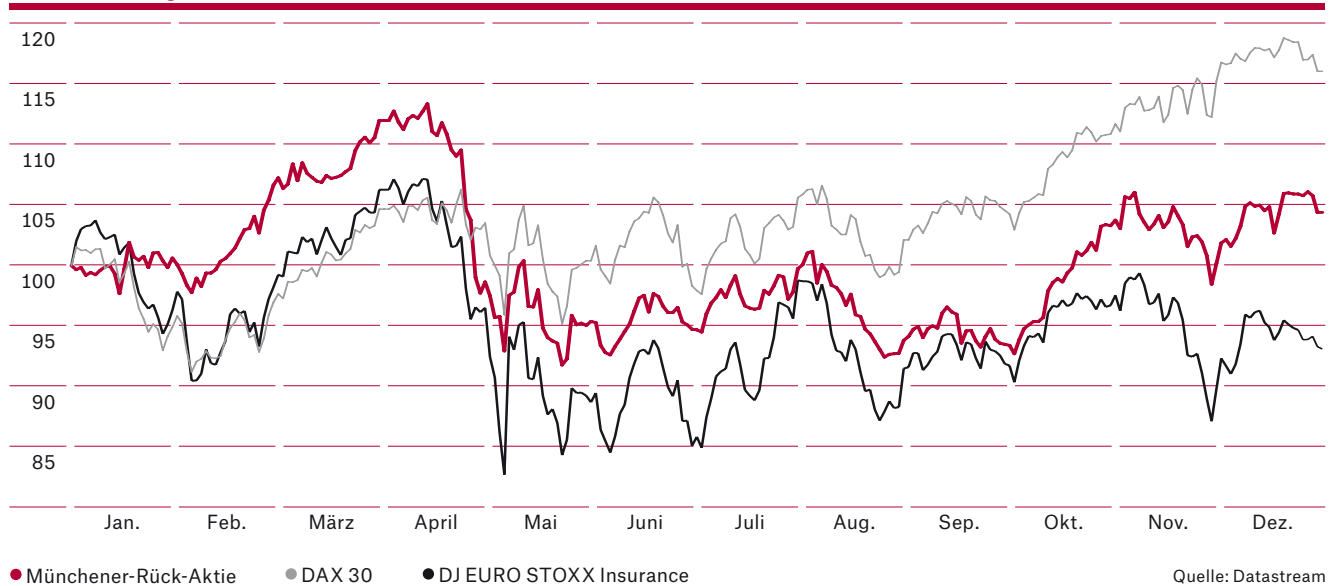

Insgesamt hat die Münchener-Rück-Aktie in einem herausfordernden Umfeld die Attraktivität ihres klaren und berechenbaren Investmentprofils wiederum unter Beweis gestellt. Auch ihre langfristige Performance ist überzeugend: Sowohl über die vergangenen drei Jahre als auch über fünf Jahre hat sich ihr Kurs inklusive der Dividendenzahlungen besser entwickelt als der des Vergleichsindex DJ EURO STOXX Insurance.

Mehr als 40 Banken und Brokerhäuser bewerten regelmäßig die Münchener-Rück-Aktie. Ende Dezember 2010 beurteilten 28 Prozent der Analysten das Papier positiv, 52 Prozent sahen es neutral und 20 Prozent der Analysten bewerteten die Aktie negativ.

**Gewichtung der Münchener-Rück-Aktie<sup>1</sup>**

|                         | %    |
|-------------------------|------|
| DAX 30                  | 3,1  |
| DJ EURO STOXX 50        | 1,2  |
| DJ EURO STOXX Insurance | 11,8 |
| MSCI EURO               | 1,1  |
| FTSE EUROTOP 100        | 0,6  |
| DJ Sustainability World | 0,3  |

<sup>1</sup> Stand: 31.12.2010.

Ein aktives Kapitalmanagement ist für Munich Re wesentlicher Bestandteil ihrer Geschäftspolitik. Wir verfolgen eine flexible Dividendenpolitik, bei der sich die Ausschüttung im Wesentlichen am Jahresergebnis und am Kapitalbedarf orientiert. Unter dieser Maßgabe wollen wir grundsätzlich mindestens 25 Prozent des Jahresergebnisses unseren Aktionären als Dividende zugutekommen lassen. Als eines der wenigen deutschen börsennotierten Unternehmen haben wir für das Geschäftsjahr 2009 im vergangenen Jahr die Dividende sogar um 0,25 Euro auf 5,75 Euro je Aktie angehoben.



Für das Geschäftsjahr 2010 schlugen Vorstand und Aufsichtsrat der Hauptversammlung am 20. April 2011 eine Dividende von 6,25 Euro vor. Insgesamt will Munich Re etwas über 1,1 Milliarden Euro an ihre Aktionäre ausschütten. Im Vorjahr waren es knapp 1,1 Milliarden Euro. Die Dividende werden wir am 21. April 2011 auszahlen, also am Tag nach der Hauptversammlung.

Mit einer Dividendenrendite von rund 5,5 Prozent (bezogen auf den Jahresschlusskurs) bleibt die Münchener-Rück-Aktie ein attraktiver Titel im DivDAX. Dieser Subindex der Deutschen Börse AG bildet die Kursentwicklung der 15 DAX-Unternehmen mit der höchsten Dividendenrendite ab.

Wie angekündigt haben wir im Rahmen des Aktienrückkaufprogramms von Oktober 2009 bis April 2010 eigene Aktien im Wert von 1 Milliarde Euro (knapp 9 Millionen Aktien) aus dem Markt genommen und eingezogen. Im Mai 2010 wurde gemäß der Ermächtigung der Hauptversammlung vom 28. April 2010 ein neuerliches Rückkaufprogramm aufgelegt. Bis zum 25. Februar 2011 haben wir etwa 8 Millionen Aktien für 844 Millionen Euro erworben. Insgesamt sollen bis zur Hauptversammlung am 20. April 2011 bis zu 15 Millionen Aktien im Wert von maximal 1 Milliarde Euro zurückgekauft werden.

Die Münchener-Rück-Aktie ist eine Namensaktie (Stückaktie). Sie wurde am 21. März 1888 erstmals an der Börse München zum Börsenhandel zugelassen und ist heute an allen deutschen Börsen notiert. Der Handel läuft inzwischen fast ausschließlich über die elektronische Handelsplattform Xetra.

#### Wertpapiercodes

|                  |       |             |              |
|------------------|-------|-------------|--------------|
| <b>Reuters</b>   | MUVGn | <b>ISIN</b> | DE0008430026 |
| <b>Bloomberg</b> | MUV2  | <b>WKN</b>  | 843 002      |

An den deutschen Börsen wurden im Xetra- und Parketthandel im Berichtsjahr täglich Münchener-Rück-Aktien im Wert von durchschnittlich 116,2 Millionen Euro gehandelt. Damit rangierte die Aktie am Jahresende 2010 auf Rang 18 unter den DAX-Werten. Mit einem Börsenwert von rund 21,4 Milliarden Euro belegten wir bei der Marktkapitalisierung Platz 13.

#### Kennzahlen unserer Aktie

|                                                |            | <b>2010</b> | <b>2009</b> |
|------------------------------------------------|------------|-------------|-------------|
| Grundkapital                                   | Mio. €     | 587,7       | 587,7       |
| Anzahl der Aktien zum 31.12.                   | Mio. Stück | 188,5       | 197,4       |
| Jahreshöchstkurs                               | €          | 123,55      | 116,80      |
| Datum                                          |            | 15.4.2010   | 9.1.2009    |
| Jahrestiefstkurs                               | €          | 98,38       | 79,01       |
| Datum                                          |            | 8.6.2010    | 9.3.2009    |
| Jahresschlusskurs                              | €          | 113,45      | 108,67      |
| Jahresperformance (ohne Dividende)             | %          | 4,4         | -2,1        |
| Beta relativ zum DAX (täglich, roh)            | %          | 0,7         | 0,8         |
| Börsenkapitalisierung zum 31.12. <sup>1</sup>  | Mrd. €     | 21,4        | 21,5        |
| Marktwert/Eigenkapital zum 31.12. <sup>2</sup> |            | 0,9         | 1,0         |
| Durchschnittliches Handelsvolumen              | Tsd. Stück | 1.069       | 1.191       |
| Ergebnis je Aktie                              | €          | 13,06       | 12,95       |
| Dividende je Aktie                             | €          | 6,25        | 5,75        |
| Dividendenrendite zum 31.12.                   | %          | 5,5         | 5,3         |
| Ausschüttungssumme (Stand 25.2.2011)           | Mio. €     | 1.118       | 1.072       |

<sup>1</sup> Hierin enthalten sind auch eigene Aktien, die zum Einzug vorgesehen sind.

<sup>2</sup> Einschließlich Fremddanteile.

In unserem Aktienregister waren Ende Dezember 2010 rund 140.000 Aktionäre eingetragen. Der weitaus größte Teil der Aktien lag bei institutionellen Anlegern wie Banken, Versicherungen oder Investmentgesellschaften; rund 10,5 Prozent hielten private Investoren. Der Anteil der internationalen Investoren liegt leicht über dem Niveau des Vorjahres (70 Prozent). Zum Jahresende 2010 lagen gut 72 Prozent der Aktien in den Händen ausländischer Aktionäre.

Größter Anteilseigner war zum Jahresende 2010 Warren E. Buffett, der über mehrere Gesellschaften seiner Unternehmensgruppe (Berkshire Hathaway Inc., OBH Inc., National Indemnity Co.) rund 10,2 Prozent an der Münchener Rück AG hält. Der Vermögensverwalter BlackRock belegt mit rund 6,2 Prozent Rang 2. Warren E. Buffett und die von ihm kontrollierten Unternehmen teilten Munich Re im Oktober 2010 mit, dass ihre Investition auf Handelsgewinne ausgerichtet sei und nicht der Umsetzung strategischer Ziele diene. Man beabsichtige, innerhalb der nächsten zwölf Monate weitere Anteile zu erwerben. Eine Einflussnahme auf die Besetzung von Verwaltungs-, Leitungs- oder Aufsichtsorganen oder eine wesentliche Änderung der Kapitalstruktur der Gesellschaft werde nicht angestrebt.

#### Regionale Verteilung<sup>1</sup>

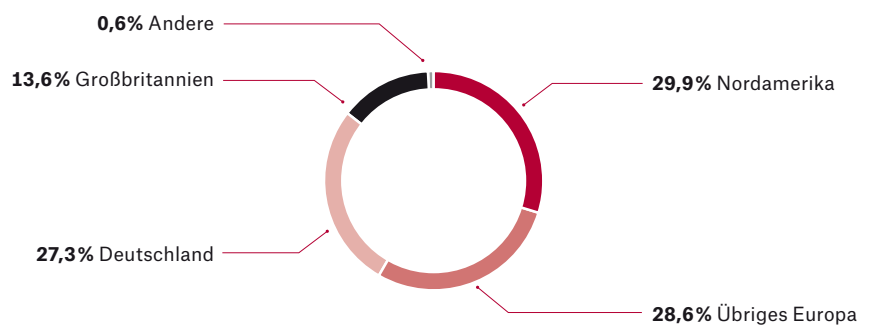

<sup>1</sup> Anteil am Grundkapital; Stand: 31.12.2010.

Quelle: Münchener-Rück-Aktienregister

Unsere auf nachhaltige Wertsteigerung ausgerichtete Unternehmensstrategie begleiten wir durch eine kontinuierliche und offene Kommunikation mit allen Kapitalmarktteilnehmern.

Wesentliche Aufgabe von Investor Relations bei Munich Re ist die gezielte Investorrenansprache, um bestehende Aktionärskontakte zu pflegen und neue Anleger zu gewinnen. Gleichzeitig stellen wir sicher, dass die Meinungen und Präferenzen unserer Investoren im internen Diskussions- und Entscheidungsprozess angemessen berücksichtigt werden. Bei branchenweit durchgeführten Rankings zur Qualität von Investor Relations konnten wir uns erneut gut platzieren und erhielten Anerkennung für die Konsistenz und Transparenz unserer Berichterstattung. Sämtliche Präsentationen, die wir für Analysten- und Investorengespräche, Konferenzen und Roadshows erstellen, veröffentlichen wir zeitgleich im Internet. Auf Wunsch versenden wir sie auch gern an interessierte Aktionäre. Viele Veranstaltungen übertragen wir live über Webstreaming. Anfragen, die uns über die telefonische Aktionärshotline oder per E-Mail erreichen, beantwortet unser Team umgehend. Die Serviceseiten unseres Aktionärsportals im Internet bieten unseren im Aktienregister eingetragenen Aktionären zudem viele weitere Informationen und Kommunikationsmöglichkeiten.

Die 123. ordentliche Hauptversammlung fand am 28. April 2010 im ICM – Internationales Congress Center München – statt. Als erstes DAX-30-Unternehmen bot die Münchener Rück AG die Online-Teilnahme an der Hauptversammlung und die Briefwahl an. Unsere Aktionäre konnten damit auch diese erst kürzlich durch den Gesetzgeber eröffneten Möglichkeiten nutzen, um ihre Stimme zu den Tagesordnungspunkten abzugeben.

Seit vielen Jahren erhält Munich Re konstant ausgezeichnete Ratingeinschätzungen von den führenden Ratingagenturen. Nach den für die Versicherungsbranche herausfordernden Jahren 2008 und 2009 blieb der Ausblick auch im Jahr 2010 für alle Ratings von Munich Re auf unverändert hohem Niveau.

Das hohe Vertrauen in die Finanzstärke unserer Gruppe spiegelt sich auch im Handel mit sogenannten Credit Default Swaps (CDS) wider. Diese Instrumente ermöglichen es, sich am Kapitalmarkt gegen den Zahlungsausfall eines Emittenten abzusichern. Je niedriger der CDS-Satz (Spread), desto sicherer wird der Emittent eingeschätzt. Im nationalen und internationalen Vergleich gehört Munich Re nach wie vor zu den Unternehmen mit sehr geringen CDS-Spreads.

## Die Strategie

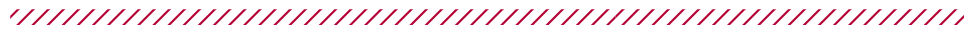

- // Integriertes Geschäftsmodell bewährt sich
- // ERGO mit neuem Markenversprechen
- // Innovative Lösungen in der Rückversicherung
- // Im Wachstumsmarkt Gesundheit gut positioniert

### Profitables Wachstum auf solidem Fundament

Wir verfolgen ein integriertes Geschäftsmodell mit den drei Säulen Erstversicherung, Rückversicherung und Munich Health für den internationalen Gesundheitsmarkt. Diese Aufstellung erlaubt es uns, die gesamte Wertschöpfungskette der Versicherungsbranche abzubilden. Davon profitieren unsere Kunden, denn wir können ihnen Lösungen anbieten, die sich auf die ganze Breite unseres Wissens stützen. Als Gruppe sind wir unabhängiger von Zyklen in einzelnen Branchen und regionalen Märkten. Dies vermindert unseren Risikokapitalbedarf und senkt die Kapitalkosten. Noch weit stärker wirkt insoweit die Unabhängigkeit der sehr unterschiedlichen Risiken, die wir in unsere Bücher nehmen; diese Diversifikation ist wesentlich für unseren Erfolg.

Unser Geschäftsmodell wird getragen von einem konzernweiten Risikomanagement, einer an der Struktur unserer Verbindlichkeiten orientierten Kapitalanlagepolitik sowie einem aktiven Kapitalmanagement. Das Risikomanagement berücksichtigt weit mehr als nur die Risiken aus dem Versicherungsgeschäft: Es bezieht die Kapitalanlagen ein und bildet auch die Wechselwirkungen zwischen den verschiedenen Risiken ab. Es ist gruppenweit tief verankert und wird aktiv gelebt. Die Auswahl der Kapitalanlagen berücksichtigt die Fälligkeiten und Währungen der versicherungstechnischen Verbindlichkeiten. So reduzieren wir Wiederanlage- und Währungsrisiken. Unser aktives Kapitalmanagement stellt sicher, dass die Kapitalausstattung von Munich Re zu jedem Zeitpunkt angemessen ist. Unser aus ökonomischer Sicht, also marktkonsistent, gerechtes Eigenkapital deckt den Bedarf, der sich aus unserem internen Risikomodell ergibt, und berücksichtigt die Anforderungen von Aufsichtsbehörden und Ratingagenturen. Nicht benötigtes Kapital geben wir in Form von Dividenden und über Aktienrückkäufe an unsere Aktionäre zurück. Unsere wichtigste Kennziffer ist die Rendite auf das risiko-adjustierte Kapital (RoRaC). Der RoRaC setzt den Gewinn in Relation zum erforderlichen Risikokapital und erlaubt so eine an der ökonomischen Wertschaffung ausgerichtete Steuerung aller Aktivitäten im Konzern.

In der Erstversicherung streben wir für ERGO einen festen Platz unter den erfolgreichen international tätigen Versicherungsgruppen an. Bei Profitabilität und Kundenzufriedenheit will ERGO Bestnoten erzielen. „Versichern heißt verstehen“ – mit diesem Anspruch ist ERGO im Rahmen der neuen Markenstrategie angetreten, der Versicherer mit einem besonders ausgeprägten Kundenverständnis zu werden. ERGO arbeitet



konsequent an einer klaren Kommunikation mit den Kunden und bittet diese aktiv um Feedback und Anregungen. Ein eigener Kundenanwalt sorgt ab diesem Jahr dafür, dass die Kundenperspektive in allen Unternehmensbereichen fest verankert ist. Damit will sich ERGO positiv von Wettbewerbern abgrenzen und ihre Leistungen gegenüber den Kunden kontinuierlich verbessern. Dies gilt für alle Märkte, in denen ERGO tätig ist – für Deutschland wie auch für zahlreiche Auslandsmärkte. Etwa ein Viertel der Beitragseinnahmen erzielt ERGO außerhalb des Heimatmarkts, der Anteil beim Neugeschäft beträgt bereits die Hälfte. Außerhalb Deutschlands will ERGO vor allem in den aufstrebenden Märkten Asiens und Osteuropas präsent sein.

In der Rückversicherung haben wir im abgelaufenen Jahr unser Leistungsversprechen gegenüber unseren Kunden stärker fokussiert. Angesichts bedeutender Veränderungen im Versicherungsgeschäft steigen auch die Bedürfnisse unserer Kunden nach sachkundigen Antworten auf immer komplexere Fragen. Ganz in diesem Sinne arbeiten wir intensiv an innovativen Lösungen, mit denen oft auch die Grenzen der Versicherbarkeit erweitert werden. Eine immer vernetztere Welt und neu entstehende Risiken führen zu Szenarien, für die traditionelle Rückversicherungsprodukte keine Lösungen bieten. Im Dialog mit Kunden und der Fachwelt erkennen unsere Mitarbeiter diesen neuen Versicherungsbedarf. Indem sie ihr Risikowissen und ihre Marktkennntnisse bündeln, können sie Lösungen erarbeiten. Ein gutes Beispiel ist das Deckungskonzept zur Absicherung von Ölbohrarbeiten auf hoher See, das wir nach der Explosion der Deepwater Horizon vorgestellt haben. Solche Ereignisse, die immense Schäden durch Ölverschmutzung zur Folge haben, konnten bisher nicht ausreichend abgesichert werden. Unser Vorstoß wurde von der breiten Öffentlichkeit ebenso wie von Versicherern und Maklern gut aufgenommen.

Weitere Beispiele für innovative Produktentwicklungen sind Garantiever sicherungen im Bereich der erneuerbaren Energien. Ein von Munich Re entwickeltes Deckungskonzept für Hersteller von Photovoltaikmodulen ist bereits zum Marktstandard geworden. Erst kürzlich haben wir die erste vergleichbare Deckung für Windkraftwerke auf den Markt gebracht. Bei beiden Versicherungen übernimmt Munich Re das finanzielle Risiko, das sich aus den Garantiezusagen der Hersteller solcher Anlagen gegenüber Investoren und Betreibern ergibt. Dies verschafft den Herstellern größeren finanziellen Spielraum und erhöht die Investitionssicherheit für den Käufer. Mit diesen Lösungen erschließt sich Munich Re attraktives Neugeschäft und ermöglicht durch den Risikotransfer die wirtschaftliche Nutzung erneuerbarer Energien.

Der internationale Gesundheitsmarkt wird auch weiterhin überdurchschnittlich stark wachsen. Die zunehmende Alterung ganzer Gesellschaften und der medizinische Fortschritt führen zu steigenden Heil- und Pflegekosten. Dies bringt die sozialen Sicherungssysteme zahlreicher Länder an die Grenzen ihrer Leistungsfähigkeit. In Schwellen- und Entwicklungsländern wiederum fehlen oft noch die Basisversorgung und -finanzierung. Beides schafft eine größere Nachfrage nach privaten Angeboten. Wir erschließen dieses Wachstumspotenzial in unserem Geschäftsfeld Munich Health und positionieren uns auf den Märkten, wo wir den größten Mehrwert schaffen können.

Im Jahr 2011 werden wir unsere Aktivitäten im internationalen Gesundheitsgeschäft weiter konsolidieren und vor allem die Initiativen zügig vorantreiben, die bereits erfolgreich sind. Mit dem Kauf der Windsor Health Group haben wir die Position von Munich Health im Medicare-Geschäft in den USA, dem größten Gesundheitsmarkt weltweit, gestärkt. In den Vereinigten Arabischen Emiraten haben wir erfolgreich einen Krankenversicherer mit aufgebaut, dieses Geschäftsmodell übertragen wir jetzt auf benachbarte Regionen.

2010 war für viele ein sehr turbulentes Jahr. Unsere Gruppe hat es erfolgreich abgeschlossen. Wir befanden uns nicht im Krisenmodus, sondern konnten vielmehr unsere Chancen wahrnehmen und unser Geschäft profitabel ausbauen. Im laufenden Jahr werden wir unsere Strategie konsequent weiter verfolgen.

## DIE BAUSTEINE GUTER CORPORATE GOVERNANCE

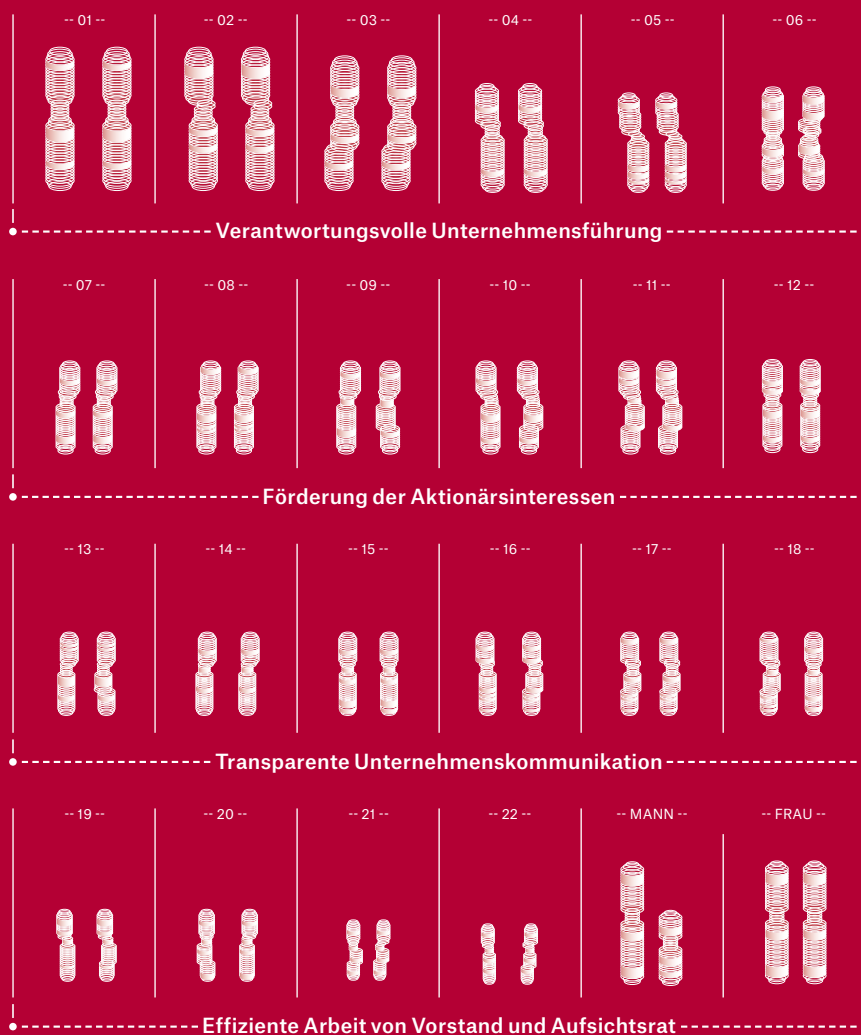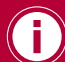

**Chromosomen** // Chromosomen heißen jene Strukturen, die die Erbinformationen und damit den Bauplan des Lebens enthalten. Jeder Mensch verfügt über 23 Chromosomenpaare, von denen eines das jeweilige Geschlecht definiert. Chromosomen finden sich im Zellkern und bestehen aus dem Kettenmolekül DNA. In jener X-ähnlichen Form, in der sie häufig dargestellt werden, befinden sich Chromosomen übrigens nur während der kurzen Phase der Zellteilung.

# Corporate Governance

Bericht des Aufsichtsrats  
Erklärung zur Unternehmensführung

017  
022



## Sehr geehrte Damen und Herren,

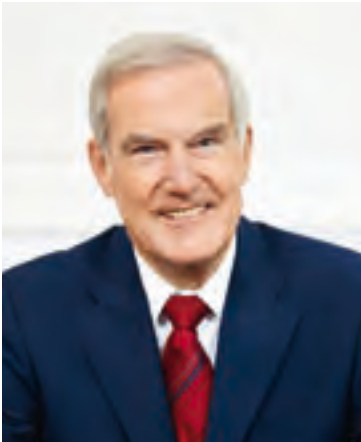

**Dr. Hans-Jürgen Schinzler**  
Vorsitzender des Aufsichtsrats

im Geschäftsjahr 2010 hat der Aufsichtsrat seine Aufgaben und Pflichten nach Gesetz, Satzung und Geschäftsordnung ordnungsgemäß und umfassend wahrgenommen. Wir haben den Vorstand bei der Leitung der Gesellschaft regelmäßig beraten und seine Tätigkeit überwacht. Prüfungsmaßnahmen gemäß § 111 Abs. 2 Satz 1 AktG waren zu keinem Zeitpunkt erforderlich.

Der Vorstand hat seine Berichtspflicht gegenüber dem Aufsichtsrat in jeder Hinsicht erfüllt. Er band uns unmittelbar in alle Entscheidungen von grundsätzlicher Bedeutung ein und informierte uns regelmäßig sowohl mündlich als auch schriftlich über alle wichtigen Geschäftsvorgänge. Turnusmäßig hielt der Vorstand den Aufsichtsrat unter anderem über die Wettbewerbslage, die strategische Entwicklung, die Unternehmensplanung und die aktuelle Situation im Konzern informiert. Abweichungen des Geschäftsverlaufs von der Planung ließ sich der Aufsichtsrat detailliert erläutern. Wir hatten immer ausreichend Gelegenheit, uns mit den Berichten des Vorstands kritisch auseinanderzusetzen sowie Anregungen und Verbesserungsvorschläge einzubringen. Aufsichtsrat und Vorstand arbeiteten im Berichtsjahr vertrauensvoll und konstruktiv zusammen. Die Vertreter der Anteilseigner und der Arbeitnehmer konnten sich mit dem Vorstandsvorsitzenden über wichtige Themen in jeweils separaten Gesprächen vor den Aufsichtsratssitzungen austauschen.

Der Aufsichtsratsvorsitzende und der Vorstandsvorsitzende standen im ständigen Dialog. Wir diskutierten vor allem wichtige Fragen der Strategie, des Risikomanagements des Unternehmens und der aktuellen Geschäftsentwicklung. Sofern erforderlich, unterrichtete mich der Vorstandsvorsitzende zeitnah über wichtige Ereignisse und Entwicklungen im Konzern. Auch der Vorsitzende des Prüfungsausschusses, Professor Dr. Henning Kagermann, hielt außerhalb der Sitzungen engen Kontakt zu dem für die konzernweite Rechnungslegung zuständigen Vorstandsmitglied, Dr. Jörg Schneider.

Um seiner Überwachungs- und Beratungsfunktion noch besser nachkommen zu können, war der Aufsichtsrat übereingekommen, ab 2010 zwei zusätzliche reguläre Sitzungen durchzuführen. Daher fanden im Berichtsjahr erstmals sechs ordentliche Plenums-sitzungen statt. An der Sitzung im Juli nahm ein Vertreter der Bundesanstalt für Finanzdienstleistungsaufsicht (BaFin) als Gast teil.

### Schwerpunkte der Beratungen im Plenum

Die Ergebnisentwicklung von Munich Re stand mit einer Ausnahme in jeder Sitzung auf der Tagesordnung. In diesem Zusammenhang erörterten wir mit dem Vorstand regelmäßig und eingehend Chancen und Risiken des Geschäfts; dazu gehörte auch die Diskussion über die Lage der Lebensversicherung in Deutschland. Der Vorstand erläuterte uns in jedem Quartal, wie sich die Kapitalanlagen der Gesellschaft entwickelten. Wir ließen uns in jeder Sitzung über aktuelle Themen berichten, die wir ausführlich mit dem Vorstand diskutierten, beispielsweise die Einführung der Marke ERGO, die Entwicklung von Solvency II mit seinen Auswirkungen auf das Geschäft sowie den außergewöhnlichen Versicherungsschaden auf der Ölplattform Deepwater Horizon und das daraufhin von Munich Re entwickelte Konzept einer Haftpflichtversicherung für einzelne Tiefsee-Ölbohrungen.

In der ersten Sitzung im Jahr 2010 befassten wir uns mit dem Jahres- und dem Konzernabschluss für das Geschäftsjahr 2009 und den Vorschlägen zur Beschlussfassung durch die Hauptversammlung 2010. Wir entschieden über die Verlängerung einer Vorstandsbestellung und legten – erstmals im Plenum – die individuellen Ziele für die variable Vergütung der Vorstandsmitglieder für 2010 fest. Wir setzten uns mit den Anforderungen der BaFin an Vergütungssysteme im Versicherungsbereich und mit der Etablierung

eines gruppenweiten Vergütungsausschusses auseinander. Ferner ließen wir uns über wichtige Entwicklungen bei ERGO, insbesondere über die Neuausrichtung der Marke und die veränderte Aufstellung des Segments Leben, sowie über Fragen der Compliance und das Anti-Fraud-Management berichten. Schließlich bestellten wir den Abschlussprüfer für das Geschäftsjahr 2010.

Im April fassten wir erstmals im Plenum Beschluss über die Zielerreichungen sowie die Bonuszahlungen aus dem Jahresbonus 2009 für die Vorstandsmitglieder. In einer weiteren Sitzung unmittelbar vor der Hauptversammlung berichtete uns der Vorstand über die bisherige Geschäftsentwicklung im Berichtsjahr.

Im Juli befassten wir uns neben den regelmäßigen Themen der Tagesordnung mit der Strategie für den Ausbau der Agrardeckungen im Segment der Rückversicherung sowie mit Schwerpunkten der Personalarbeit im Konzern.

In der Sitzung im Oktober behandelten wir vor allem Themen der Corporate Governance. Im Rahmen der neuen Empfehlungen des Deutschen Corporate Governance Kodex (DCGK) setzten wir uns intensiv mit dem Thema „Diversity“, und hier insbesondere mit der Frauenförderung im Unternehmen, auseinander. Wir haben Änderungen des Vorstandsvertrags beschlossen, die aufgrund des Versorgungsausgleichsgesetzes sowie der neuen Versicherungs-Vergütungsverordnung erforderlich waren. Außerdem ließen wir uns ausführlich über die Entwicklung von Munich Health sowie über Ertrag und Wachstum in der Gewerbe-/Industrieversicherung von ERGO berichten.

In seiner letzten Sitzung im Dezember befasste sich der Aufsichtsrat mit der Vorstandsvergütung ab 2011 und beschloss die Gewichtungen der einzelnen Zielkategorien sowie die Bemessungsgrundlagen für die finanziellen Ziele im Rahmen der variablen Vergütung 2011. Außerdem passte er die Planbedingungen aller laufenden langfristigen Incentive-Pläne (LIP) des Vorstands an, um ausscheidende Vorstandsmitglieder und Erben hinsichtlich LIP und der seit 2010 neu gestalteten variablen Vergütungskomponente möglichst gleich zu behandeln. Des Weiteren berieten wir über die vom Vorstand vorgetragene Konzernplanung 2011 und 2012. Mit dem Chief Risk Officer erörterten wir die Risikostrategie des Konzerns und setzten uns eingehend mit der Risikolage und Rentabilität des Unternehmens in einem nach wie vor schwierigen Kapitalmarkt auseinander. Wir konnten uns davon überzeugen, dass das Risikomanagement gut aufgestellt ist und gelebt wird, also in allen Teilen des Konzerns seine Wirkung entfaltet.

Außerhalb der Sitzungen unterrichtete uns der Vorstand ad hoc über wichtige Angelegenheiten im Konzern, beispielsweise über das Ausmaß der Schäden des Sturms Xynthia und des Erdbebens in Chile, über das Aktienrückkaufprogramm und über einen Gerichtsentscheid zu einem gewichtigen US-Asbestschaden.

### **Arbeit der Ausschüsse**

Der Aufsichtsrat hat insgesamt fünf Ausschüsse eingerichtet, um seine Aufgaben effizient wahrnehmen zu können. Die Ausschüsse bereiten vor allem Beschlüsse des Aufsichtsratsplenums sowie dort zu behandelnde Themen vor. Einzelheiten zu den Aufgaben der jeweiligen Ausschüsse können Sie dem Corporate Governance Bericht auf Seite 22 entnehmen. Eine Übersicht über deren Besetzung finden Sie auf Seite 24 ff. Die Vorsitzenden der Ausschüsse berichteten dem Plenum in jeder Aufsichtsratsitzung ausführlich über die Arbeit der Ausschüsse.

Der Personalausschuss tagte 2010 sechs Mal. Er bereitete die Vorschläge an das Plenum zur Festlegung der individuellen Ziele für die variable Vergütung der Vorstandsmitglieder im Berichtsjahr vor. Außerdem legte er dem Aufsichtsrat Vorschläge vor zur Vertragsverlängerung eines Vorstandsmitglieds sowie zur Bewertung der Ziele und zur Höhe der Bonuszahlungen an die Vorstandsmitglieder aus dem Jahresbonus

2009. Der Ausschuss ließ sich detailliert über die Gehaltsnebenleistungen und Sachbezüge 2009 für den Vorstand berichten und nahm Anpassungen bei den Richtlinien für Geschenke und für Dienstwagen vor. Er erarbeitete eine Beschlussvorlage für das Plenum zur Anpassung der Vorstandsverträge, die aufgrund des Versorgungsausgleichsgesetzes sowie der neuen Versicherungs-Vergütungsverordnung erforderlich war. In der letzten Sitzung des Jahres bereitete der Personalausschuss Vorschläge an das Plenum zur Vorstandsvergütung ab 2011 sowie zu den Gewichtungen der einzelnen Zielkategorien und den finanziellen Zielen für die variable Vergütung 2011 der Vorstandsmitglieder vor. Daneben machte er dem Plenum den Vorschlag, die Planbedingungen aller laufenden langfristigen Incentive-Pläne (LIP) des Vorstands anzupassen, um ausscheidende Vorstandsmitglieder und Erben hinsichtlich LIP und der seit 2010 neu gestalteten variablen Vergütungskomponente weitgehend einheitlich zu behandeln. In einzelnen Sitzungen genehmigte der Personalausschuss neue Aufsichtsrats-, Beirats- und ähnliche Mandate von Vorstandsmitgliedern. Bevor das BaFin-Rundschreiben zu den Anforderungen an Vergütungssysteme im Versicherungsbereich, die Einrichtung eines Vergütungsausschusses und die Änderungen des DCGK im Plenum behandelt wurden, setzte sich vorab der Personalausschuss intensiv mit diesen Themen auseinander.

Der Ständige Ausschuss kam im Berichtsjahr vier Mal zusammen. Im Wesentlichen bereitete er die Aufsichtsratssitzungen vor und befasste sich mit Themen der Corporate Governance. Darüber hinaus ließ er sich regelmäßig über Entwicklungen im Aktienregister berichten.

Der Prüfungsausschuss hielt fünf Sitzungen ab. In zwei Sitzungen befasste er sich intensiv mit dem Jahres- und Konzernabschluss, dem Lagebericht und dem Konzernlagebericht, den Prüfungsberichten des Abschlussprüfers und dem Gewinnverwendungsvorschlag des Vorstands für das Geschäftsjahr 2009. In einer der beiden Sitzungen bestand auch Gelegenheit, den Jahresabschluss in Gegenwart des Abschlussprüfers zu erörtern. Der Chief Risk Officer erläuterte dem Prüfungsausschuss eingehend die wesentlichen Komponenten des Risikokapitalmodells und berichtete über die Risikolage des Konzerns. Der Leiter der Internen Revision informierte über das Ergebnis der Prüfungen 2009 und über die Prüfungsplanung 2010. Mit Themen der Compliance befasste sich der Prüfungsausschuss in jeder Sitzung. Zusätzlich ließ sich der Ausschuss einmal vom Compliance Officer persönlich über Schwerpunkte seiner Arbeit und die Compliance-Organisation unterrichten. Auch die Entwicklung der Embedded Values im Lebensrückversicherungs- sowie im Lebens- und Krankenerstversicherungsgeschäft war Gegenstand der Beratung.

Der Ausschuss überprüfte und überwachte die Unabhängigkeit des Abschlussprüfers. In diesem Zusammenhang nahm er vom Abschlussprüfer den Bericht über Prüfungsleistungen und prüfungsfremde Tätigkeiten entgegen. Weiterhin bereitete der Prüfungsausschuss für das Aufsichtsratsplenum die Bestellung des Abschlussprüfers für das Geschäftsjahr 2010 vor und legte die Prüfungsschwerpunkte und das Prüfungshonorar fest. Nach Beschluss des Plenums erteilte der Vorsitzende des Ausschusses den Prüfungsauftrag für das Geschäftsjahr 2010. Darüber hinaus beauftragte er den Abschlussprüfer mit der prüferischen Durchsicht des Halbjahresfinanzberichts 2010. Des Weiteren befasste sich der Prüfungsausschuss mit den Quartalsfinanzberichten 2010 sowie dem Halbjahresfinanzbericht 2010, den er in Gegenwart des Prüfers erörterte. Ferner konnte er sich durch eine Präsentation des Abschlussprüfers von dem gut ausgebauten internen Kontrollsystem von Munich Re überzeugen.

Die Auswirkungen der Finanzkrise auf Munich Re beschäftigten den Prüfungsausschuss auch im abgelaufenen Geschäftsjahr. So war das Kapitalanlagenmanagement immer wieder Gegenstand der Beratungen. Die Risikolage der Gesellschaft wurde regelmäßig diskutiert und überwacht. Darüber hinaus erörterte der Prüfungsausschuss



zusammen mit dem Chief Risk Officer die Entwicklungen im Risikomanagement und die Risikostrategie. Gemäß den vereinbarten Richtlinien informierte der Chief Risk Officer den Prüfungsausschuss auch direkt bei einzelnen risikorelevanten Entscheidungen. Darüber hinaus unterrichtete der Vorstand den Ausschuss zeitnah über eine Limitüberschreitung.

Der Nominierungsausschuss beriet sich 2010 in drei Sitzungen über die Nachfolge von Dr. Thomas Wellauer, der sein Mandat zum 30. September 2010 niedergelegt hatte. Gleichzeitig passte er den Kriterienkatalog für die Auswahl geeigneter Aufsichtsratsmitglieder den neuen Empfehlungen des DCGK und den dazu im Plenum beschlossenen Zielen für die künftige Besetzung des Aufsichtsrats an. Der Kriterienkatalog diente als Grundlage für die Auswahl geeigneter Kandidaten. Auf Vorschlag des Ausschusses und mit Zustimmung der Aktionärsvertreter schlägt der Aufsichtsrat Annika Falkengren, President und CEO der Skandinaviska Enskilda Banken (SEB), der Hauptversammlung 2011 für die restliche Amtszeit des Aufsichtsrats zur Wahl vor.

Der Vermittlungsausschuss gemäß Ziffer 7.5 der Geschäftsordnung für den Aufsichtsrat musste auch im abgelaufenen Geschäftsjahr nicht einberufen werden.

### **Corporate Governance und Entsprechenserklärung**

Der Aufsichtsrat befasste sich eingehend mit den Änderungen des DCGK, insbesondere mit dem Thema Diversity. Er legte Ziele für die künftige Zusammensetzung des Aufsichtsrats fest, Einzelheiten hierzu sind im Corporate Governance Bericht auf Seite 26 aufgeführt. Ferner wurde vereinbart, allen Aufsichtsratsmitgliedern einmal jährlich interne Informationsveranstaltungen anzubieten, wie sie für die seit 2009 erstmals gewählten Aufsichtsratsmitglieder bereits durchgeführt worden waren.

Der Ständige Ausschuss überprüfte die Effizienz der Aufsichtsrats Tätigkeit im Berichtsjahr anhand eines umfangreichen Fragebogens und trug das Ergebnis der Befragung sowie Vorschläge zur Umsetzung von Verbesserungsmaßnahmen dem Plenum vor.

Vorstand und Aufsichtsrat gaben im November 2010 die jährliche Erklärung ab, dass sie allen Empfehlungen des DCGK gemäß § 161 AktG entsprochen haben und auch beabsichtigen, ihnen zukünftig zu entsprechen. Weitere Informationen zur Corporate Governance im Allgemeinen entnehmen Sie bitte dem gemeinsamen Bericht von Vorstand und Aufsichtsrat auf Seite 22.

### **Veränderungen im Aufsichtsrat**

Dr. Benita Ferrero-Waldner wurde als Nachfolgerin für den am 23. Juni 2009 verstorbenen Professor Karel Van Miert gerichtlich zum 12. Februar 2010 in den Aufsichtsrat bestellt. Die Hauptversammlung am 28. April 2010 wählte sie für die restliche Amtszeit zum Mitglied des Aufsichtsrats.

Dr. Thomas Wellauer, der dem Aufsichtsrat seit dem 22. April 2009 angehörte, legte aus beruflichen Gründen sein Mandat zum 30. September 2010 nieder. Wir danken ihm für seine wertvolle, leider nur kurze Mitwirkung in unserem Aufsichtsrat.

### **Jahres- und Konzernabschluss**

Die KPMG Bayerische Treuhandgesellschaft Aktiengesellschaft Wirtschaftsprüfungsgesellschaft Steuerberatungsgesellschaft hat den Jahresabschluss und Lagebericht sowie den Konzernabschluss und Konzernlagebericht der Münchener Rück AG zum 31. Dezember 2010 ordnungsgemäß geprüft und mit einem uneingeschränkten Bestätigungsvermerk versehen. Die entsprechenden Berichte und der Vorschlag des Vorstands für die Verwendung des Bilanzgewinns gingen den Aufsichtsratsmitgliedern umgehend zu. Die Mitglieder des Prüfungsausschusses befassten sich bereits am 2. Februar 2011 intensiv mit den vorläufigen Abschlusszahlen zum 31. Dezember 2010.

Am 8. März 2011 bereiteten sie dann den Beschluss des Aufsichtsrats zur Feststellung des Jahresabschlusses und zur Billigung des Konzernabschlusses vor. Hierzu prüfte der Prüfungsausschuss den Jahres- und Konzernabschluss sowie die Lageberichte und den Vorschlag des Vorstands für die Verwendung des Bilanzgewinns. Er besprach diese eingehend mit dem anwesenden Abschlussprüfer und ging dabei auch ausführlich auf die Prüfungsberichte des Abschlussprüfers ein. Der Prüfungsausschussvorsitzende informierte das Aufsichtsratsplenum über das Ergebnis der Beratungen des Prüfungsausschusses in der Bilanzsitzung am 9. März 2011.

Auch der Aufsichtsrat prüfte die Abschlüsse und Lageberichte der Münchener Rück AG und des Konzerns sowie den Vorschlag des Vorstands zur Verwendung des Bilanzgewinns. Nach dem abschließenden Ergebnis seiner eigenen Prüfung und nach Anhörung des Abschlussprüfers stimmte er den Ergebnissen des Abschlussprüfers zu und hatte keine Einwendungen zu erheben. Er billigte am 9. März 2011 den Jahres- und den Konzernabschluss. Der Jahresabschluss war damit festgestellt. Der Aufsichtsrat befürwortete ebenfalls den Vorschlag des Vorstands zur Verwendung des Bilanzgewinns nach Abwägung aller relevanten Aspekte.

#### **Dank an Vorstand und Mitarbeiter**

Der Aufsichtsrat dankt allen Vorstandsmitgliedern und Mitarbeitern für ihren persönlichen Einsatz und für die hervorragende Arbeit, die sich in einem für Munich Re erfreulichen Geschäftsergebnis widerspiegelt.

München, den 9. März 2011

Für den Aufsichtsrat



**Dr. Hans-Jürgen Schinzler**  
Vorsitzender

# Erklärung zur Unternehmensführung<sup>1</sup>

////////////////////////////////////

Die Erklärung zur Unternehmensführung der Münchener Rück AG umfasst unter 1. die Erklärung gemäß § 161 AktG und unter 2. den Bericht von Vorstand und Aufsichtsrat über die Corporate Governance des Unternehmens im Sinne von Ziffer 3.10 des Deutschen Corporate Governance Kodex (DCGK) einschließlich des Vergütungsberichts gemäß Ziffer 4.2.5. DCGK und die Angaben gemäß § 289a Abs. 2 Nr. 2, 3 HGB.

## 1. Erklärung von Vorstand und Aufsichtsrat der Münchener Rück AG gemäß § 161 des Aktiengesetzes vom November 2010

„Die Münchener Rückversicherungs-Gesellschaft Aktiengesellschaft in München entspricht allen Empfehlungen des Deutschen Corporate Governance Kodex in der Fassung vom 26. Mai 2010 (bekannt gemacht am 2. Juli 2010) und beabsichtigt, ihnen auch zukünftig zu entsprechen. Die Münchener Rückversicherungs-Gesellschaft Aktiengesellschaft in München hat seit Abgabe der letzten Entsprechenserklärung im November 2009 allen Empfehlungen des Deutschen Corporate Governance Kodex in der Fassung vom 18. Juni 2009 (bekannt gemacht am 5. August 2009) entsprochen.“

Die Entsprechenserklärung ist auf unserer Internetseite ([www.munichre.com](http://www.munichre.com)) dauerhaft zugänglich.

## 2. Corporate Governance Bericht

Wir sind überzeugt: Gute Corporate Governance schafft nachhaltigen Wert. Daher legen wir an unser Handeln die höchsten Maßstäbe und entsprechen sämtlichen Empfehlungen und Anregungen des DCGK.

### Munich Re Verhaltenskodex

Zusätzlich haben wir uns auf einen eigenen Verhaltenskodex mit hohen ethischen und rechtlichen Anforderungen verpflichtet, den Sie ebenfalls auf unserer Internetseite finden.

Verbindliche Regeln für  
alle Mitarbeiter

In unserem Verhaltenskodex präzisieren wir unsere Vorstellungen von integrem, das heißt rechtlich korrektem und an ethischen Grundsätzen orientiertem Verhalten im Unternehmen. Er ist damit zugleich Ausdruck unseres Verständnisses von Werte-

<sup>1</sup> Abdruck aus dem Lagebericht der Münchener Rück AG; die im Vergütungsbericht enthaltenen Angaben sind aufgrund der Anwendung internationaler Rechnungslegungsstandards zum Teil abweichend.



management. Der Verhaltenskodex enthält verbindliche Regeln für alle Mitarbeiter, einschließlich der Geschäftsleitungsorgane von Munich Re, insbesondere für den Umgang mit Interessenkonflikten, zur Wahrung der Vertraulichkeit, zu Geldwäsche, Wirtschaftskriminalität, zum Wettbewerb, Kartellverbot, zu Spenden und Sponsoring sowie zum Insiderrecht. Ferner sieht der Verhaltenskodex ein Verfahren zur Meldung von Rechtsverstößen vor, um bereits bei einem möglichen Verdacht auf Missstände reagieren und jeder Form von Wirtschaftskriminalität vorbeugen zu können.

Hierfür steht als zusätzlicher Ansprechpartner ein externer und unabhängiger Ombudsmann zur Verfügung. Er berichtet dem Fraud Prevention Committee, das aus dem Fraud Prevention Officer und dem Compliance Officer besteht, über gemeldete Verdachtsfälle und unterstützt damit das Anti-Fraud-Management von Munich Re.

## Global Compact

Um das Werteverständnis und damit auch die Unternehmensverantwortung von Munich Re nach innen wie nach außen sichtbar zu machen, ist Munich Re 2007 dem „Global Compact“ der Vereinten Nationen beigetreten. Die zehn Prinzipien dieser Erklärung sind für uns Maßstab unseres Handelns in allen Unternehmensbereichen und stellen damit den grundlegenden Rahmen für unsere Corporate Responsibility dar. Der jährliche Fortschrittsbericht zum UN Global Compact ist in das Corporate Responsibility-Portal auf unserer Internetseite integriert.

## Unser Verständnis von Corporate Governance

Corporate Governance steht für eine verantwortungsvolle, auf langfristige Wertschöpfung ausgerichtete Unternehmensführung und -kontrolle. Dabei wollen wir das Vertrauen von Anlegern, Kunden, Mitarbeitern und Öffentlichkeit fördern. Daneben sind eine effiziente Arbeit in Vorstand und Aufsichtsrat, eine gute Zusammenarbeit zwischen diesen Organen und mit den Mitarbeitern der Unternehmen sowie eine offene und nachvollziehbare Unternehmenskommunikation für uns von großer Wichtigkeit.

Unsere gute Corporate Governance laufend zu verbessern ist ein Anliegen, das unser unternehmerisches Handeln leitet.

## Welche Regeln gelten für Munich Re?

Aufgrund ihrer internationalen Organisation stellt sich Munich Re den Corporate-Governance-Regeln verschiedener Rechtsordnungen. Neben den nationalen Standards beachten wir selbstverständlich ebenso die international anerkannten Best Practices. In Deutschland, am Sitz der Münchener Rück AG, sind die Corporate-Governance-Regeln vor allem im AktG und im DCGK verankert. Das Versicherungsaufsichtsgesetz (VAG) normiert spezielle Anforderungen an die Qualifikation von Geschäftsleitern und Mitgliedern des Aufsichtsrats von Versicherungsunternehmen. Darüber hinaus hat der Gesetzgeber im VAG für die Vergütungssysteme in Versicherungsunternehmen besondere Regelungen getroffen, auf deren Basis das Bundesministerium der Finanzen im Oktober 2010 die Versicherungs-Vergütungsverordnung (VersVergV) erlassen hat.

Ferner gelten für die Münchener Rück AG das Gesetz über die Mitbestimmung der Arbeitnehmer bei einer grenzüberschreitenden Verschmelzung (MgVG) sowie eine Mitbestimmungsvereinbarung; sie haben das Mitbestimmungsgesetz abgelöst. Die Mitbestimmungsvereinbarung ist auf unserer Internetseite veröffentlicht.

Der DCGK, der 2002 in Kraft trat und seither mehrfach überarbeitet wurde, vereinigt die wesentlichen gesetzlichen Regelungen, die deutsche börsennotierte Gesellschaften zu beachten haben. Außerdem gibt er Empfehlungen und Anregungen, die auf nati-

onal und international anerkannten Standards für gute und verantwortungsbewusste Unternehmensführung beruhen. Vorstand und Aufsichtsrat der Münchener Rück AG veröffentlichen jedes Jahr eine Erklärung, inwieweit den Empfehlungen des DCGK entsprochen wurde und wird. Die aktuelle Entsprechenserklärung finden Sie auf Seite 22.

## Unternehmensverfassung

Die Münchener Rück AG ist eine Aktiengesellschaft gemäß deutschem Aktiengesetz. Sie hat drei Organe: Vorstand, Aufsichtsrat und Hauptversammlung. Ihre Aufgaben und Befugnisse ergeben sich aus dem Gesetz, der Mitbestimmungsvereinbarung und der Satzung, die auf unserer Internetseite einzusehen ist.

Der Grundsatz der paritätischen Mitbestimmung im Aufsichtsrat wurde in der Mitbestimmungsvereinbarung aufrechterhalten und durch Berücksichtigung der im europäischen Ausland beschäftigten Mitarbeiter gestärkt.

## Vorstand

### Aufgaben und Zuständigkeiten

Der Vorstand leitet die Gesellschaft in eigener Verantwortung, legt Ziele und Strategie fest. Er ist dabei an das Unternehmensinteresse gebunden und verpflichtet, den nachhaltigen Unternehmenswert zu steigern. Der Vorstand hat dafür zu sorgen, dass die gesetzlichen Bestimmungen und die unternehmensinternen Richtlinien eingehalten werden. Er ist für ein angemessenes Risikomanagement und -controlling im Unternehmen verantwortlich. Der Vorsitzende des Vorstands sorgt für die Einheitlichkeit der Geschäftsführung der Gesellschaft und vertritt diese gegenüber Behörden, den Medien und Verbänden.

### Innere Ordnung und Arbeitsweise

Gemäß § 16 der Satzung muss der Vorstand aus mindestens zwei Personen bestehen; im Übrigen bestimmt der Aufsichtsrat die Anzahl der Vorstandsmitglieder. Der Vorstand der Münchener Rück AG bestand im Geschäftsjahr 2010 aus neun Mitgliedern. Eine Übersicht, wie er sich zusammensetzt und wie sich die Zuständigkeiten verteilen, findet sich auf Seite 60. Zusätzliche Informationen über die einzelnen Vorstandsmitglieder erhalten Sie auf unserer Internetseite. Der Vorstand hat je einen Ausschuss für Konzernangelegenheiten und für Angelegenheiten aus dem Geschäftsfeld Rückversicherung, um die Effizienz seiner Arbeit zu steigern. Eine Geschäftsordnung, die vom Aufsichtsrat erlassen wurde, regelt die Arbeit des Vorstands, vor allem die Ressortzuständigkeiten einzelner Vorstandsmitglieder, die dem Gesamtvorstand vorbehaltenen Angelegenheiten sowie die erforderliche Mehrheit bei Vorstandsbeschlüssen. Der Gesamtvorstand entscheidet in allen Angelegenheiten, in denen nach Gesetz oder Satzung eine Beschlussfassung durch den Vorstand vorgeschrieben ist. Er ist insbesondere zuständig in Angelegenheiten, in denen die Zustimmung des Aufsichtsrats einzuholen ist, die der Hauptversammlung vorzulegen sind, die grundlegende Leitungsaufgaben darstellen oder eine außergewöhnlich große Bedeutung haben, und schließlich bei wichtigen Personalangelegenheiten der ersten Führungsebene.

Vorstandssitzungen finden nach Bedarf, mindestens einmal im Monat statt. Die Vorstandsmitglieder arbeiten zum Wohl des Unternehmens vertrauensvoll zusammen und streben einstimmige Entscheidungen an.

### Zusammensetzung und Arbeitsweise der Vorstandsausschüsse

Dem **Konzernausschuss** gehören der Vorsitzende des Vorstands sowie mindestens ein weiteres Mitglied des Vorstands an; das sind Nikolaus von Bomhard und Jörg Schneider. Weiteres Mitglied ist der Chief Risk Officer der Münchener Rück AG, Joachim Oechslein. Der Vorsitzende des Vorstands führt auch im Ausschuss den Vorsitz. Der Konzernausschuss entscheidet in allen grundsätzlichen Angelegenheiten der Ressorts seiner stimmberechtigten Mitglieder, soweit nicht zwingend der Gesamtvorstand zuständig ist. Darüber hinaus bereitet er die Entscheidungen vor, die diesem vorbehalten sind.

Dem **Rückversicherungsausschuss** gehören die Mitglieder des Vorstands an, die nicht im Konzernausschuss sitzen. Hierbei handelt es sich um Torsten Jeworrek, Ludger Arnoldussen, Thomas Blunck, Georg Daschner, Peter Röder, Wolfgang Strassl und Joachim Wenning. Weiteres Mitglied ist der Chief Financial Officer für das Geschäftsfeld Rückversicherung, Hermann Pohlchristoph. Der Vorsitzende des Ausschusses wird vom Aufsichtsrat bestimmt; hierbei handelt es sich um Torsten Jeworrek. Der Rückversicherungsausschuss entscheidet in allen grundsätzlichen Angelegenheiten des Geschäftsfelds Rückversicherung, soweit nicht zwingend der Gesamtvorstand zuständig ist.

Sitzungen der Ausschüsse finden nach Bedarf statt, in der Regel in zweiwöchigem Turnus. Stimmberechtigt sind nur die Mitglieder des Vorstands.

#### Unterausschüsse der Vorstandsausschüsse

Sowohl der Konzernausschuss als auch der Rückversicherungsausschuss haben Unterausschüsse gebildet. Diesen Gremien gehören auch sonstige Führungskräfte der Münchener Rück AG und des Konzerns an. Hierbei handelt es sich um das Group Investment Committee, das Group Risk Committee und das Global Underwriting and Risk Committee. In diesen Gremien sind nur die Vorstandsmitglieder der Münchener Rück AG stimmberechtigt. Die Arbeitsweise dieser Gremien ist in eigenen Geschäftsordnungen festgelegt. Das Group Investment Committee befasst sich mit allen wesentlichen Themen, welche die Kapitalanlagen des Konzerns sowie der Geschäftsfelder betreffen. Sowohl das Group Risk Committee als auch das Global Underwriting and Risk Committee behandeln – in unterschiedlichem Rahmen – das Thema Risikomanagementprozess.

#### Zusammenwirken von Vorstand und Aufsichtsrat

Vorstand und Aufsichtsrat arbeiten zum Wohl des Unternehmens eng zusammen. Der Vorstand stimmt die strategische Ausrichtung des Unternehmens mit dem Aufsichtsrat ab und erörtert mit ihm in regelmäßigen Abständen den Stand der Strategieumsetzung. Er berichtet regelmäßig an den Aufsichtsrat über alle für das Unternehmen relevanten Fragen. Der Aufsichtsrat hat die Informations- und Berichtspflichten des Vorstands näher festgelegt. Bestimmte Arten von Geschäften (zum Beispiel Investitionen und Devestitionen von erheblichem Umfang sowie einzelne Kapitalmaßnahmen, zum Beispiel gemäß § 4 der Satzung) darf der Vorstand grundsätzlich nur vornehmen, wenn der Aufsichtsrat zustimmt. Des Weiteren berichtet der Vorstand dem Prüfungsausschuss über spezielle Themen im Rahmen von dessen Zuständigkeit.

### Aufsichtsrat

#### Aufgaben und Zuständigkeiten

Der Aufsichtsrat überwacht die Geschäftsführung des Vorstands und berät ihn dabei. Bestimmten Geschäften muss er zustimmen. Er ist jedoch nicht befugt, Maßnahmen der Geschäftsführung zu ergreifen. Der Aufsichtsrat bestellt zudem den Abschlussprüfer für den Jahres- und Konzernabschluss sowie für den Halbjahresfinanzbericht.

Der Aufsichtsrat hat gemäß der Satzung 20 Mitglieder. Die eine Hälfte setzt sich aus Vertretern der Eigentümer zusammen, welche die Hauptversammlung in einer Wahl bestimmt, die andere besteht aus gewählten Vertretern der Mitarbeiter. Nach der Mitbestimmungsvereinbarung können auch die Mitarbeiter der Gruppengesellschaften in der Europäischen Union (EU) und im Europäischen Wirtschaftsraum (EWR) an der Wahl der Arbeitnehmervertreter teilnehmen.

Eine Übersicht, wie sich der Aufsichtsrat zusammensetzt, findet sich auf Seite 60 f. Zusätzliche Informationen über die derzeitigen Aufsichtsratsmitglieder erhalten Sie auf unserer Internetseite.

Der Aufsichtsrat hat sich eine Geschäftsordnung gegeben, in der die Zuständigkeiten, Arbeitsabläufe und Beschlussmehrheiten geregelt sind. Daneben beschloss er eine eigene Geschäftsordnung für den Prüfungsausschuss. Analog zu den im Mitbestimmungsgesetz vorgesehenen und in § 12 der Satzung übernommenen Regelungen wer-



den der Aufsichtsratsvorsitzende und sein erster Stellvertreter mit einer Mehrheit von zwei Dritteln der Mitglieder gewählt, aus denen der Aufsichtsrat insgesamt zu bestehen hat. Ist ein zweiter Wahlgang erforderlich, so wählen die Anteilseignervertreter den Aufsichtsratsvorsitzenden und die Arbeitnehmervertreter den ersten Stellvertreter. Hier genügt die einfache Stimmenmehrheit.

Der Aufsichtsrat ist beschlussfähig, wenn sämtliche Mitglieder eingeladen oder zur Abstimmung aufgefordert worden sind und entweder zehn Mitglieder, darunter der Vorsitzende, oder 15 Mitglieder an der Beschlussfassung teilnehmen. Der Vorsitzende des Aufsichtsrats ist befugt, Erklärungen für den Aufsichtsrat abzugeben.

Der Aufsichtsrat hat sich gemäß Ziffer 5.4.1 Abs. 2 DCGK die folgenden Ziele für seine künftige Zusammensetzung gesetzt:

- // Weiterhin maßgeblich sind die Ausrichtung auf die nachhaltige Gewinnerzielung des Unternehmens, die Fähigkeiten, Talente, Erfahrungen, insbesondere auch mit internationaler Ausrichtung, Unabhängigkeit, Sachkenntnis und der unternehmerische Geist.
- // Alle Aufsichtsratsmitglieder sollen frei sein von relevanten Interessenkonflikten.
- // Der Aufsichtsrat soll bei der Auswahl der Kandidaten für die Mitgliedschaft auf Vielfalt (Diversity) achten, insbesondere auch hinsichtlich des Alters, der Internationalität und des Geschlechts seiner Mitglieder. Dabei sollen zum Beginn der nächsten Amtszeit (voraussichtlich 2014) mindestens 20 % der Mitglieder und zum Beginn der darauf folgenden Amtszeit (voraussichtlich 2019) mindestens 30 % der Mitglieder weiblich sein. Derzeit gehören dem Aufsichtsrat drei Frauen an; die beiden Vertreterinnen der Arbeitnehmer seit der Aufsichtsratswahl 2009 und die Vertreterin der Anteilseigner seit Februar 2010.

Die oben angeführten Ziele gelten für den gesamten Aufsichtsrat. Anteilseigner- und Arbeitnehmervertreter werden ihren Teil zu deren Erfüllung beitragen. Die nach der Mitbestimmungsvereinbarung für die Wahlvorschläge an das „Europäische Wahlgremium“ zuständigen Gremien werden gebeten, diese Ziele im Rahmen der geltenden Regelungen zu berücksichtigen. Der Nominierungsausschuss hat seinen Kriterienkatalog für Kandidatenvorschläge zur Wahl von Vertretern der Anteilseigner in den Aufsichtsrat entsprechend aktualisiert.

Darüber hinaus sieht die Geschäftsordnung des Aufsichtsrats für Wahlvorschläge eine Soll-Altersgrenze von 70 Jahren vor.

#### Zusammensetzung und Arbeitsweise der Aufsichtsratsausschüsse

Der Aufsichtsrat der Münchener Rück AG hat fünf Ausschüsse gebildet: den Ständigen Ausschuss, den Personalausschuss, den Prüfungsausschuss, den Nominierungsausschuss und den Vermittlungsausschuss. Das Aufsichtsratsplenum wird von dem jeweiligen Ausschussvorsitzenden regelmäßig über die Arbeit der Ausschüsse unterrichtet. Die wesentlichen Ausschusszuständigkeiten sind:

Der **Ständige Ausschuss** bereitet die Sitzungen des Aufsichtsrats vor, soweit dafür kein anderer Ausschuss zuständig ist, und entscheidet über die Zustimmung zu Geschäften der Gesellschaft, die der Aufsichtsrat genehmigen muss, soweit hierfür nicht das Aufsichtsratsplenum oder ein anderer Ausschuss zuständig ist. Er nimmt Satzungsänderungen vor, die nur die Fassung betreffen, und entscheidet über die Beiziehung von Gästen zu Aufsichtsratssitzungen. Darüber hinaus bereitet er die jährliche Entsprechenserklärung des Aufsichtsrats zum DCGK gemäß § 161 AktG und die Berichterstattung des Aufsichtsrats im Geschäftsbericht über die Corporate Governance des Unternehmens vor. Er überprüft jährlich die Effizienz der Aufsichtsrats-tätigkeit und unterbreitet dem Aufsichtsratsplenum gegebenenfalls Vorschläge. Des Weiteren muss er Kreditgeschäfte der Gesellschaft mit Prokuristen und Aufsichtsratsmitgliedern sowie diesen nahestehenden Personen, außerdem sonstige Verträge der Gesellschaft mit Mitgliedern des Aufsichtsrats genehmigen. Im Fall der Verhinderung des Aufsichtsratsvorsitzenden bestimmt er den Leiter der Hauptversammlung.

Mitglieder des Ständigen Ausschusses sind Dr. Hans-Jürgen Schinzler (Vorsitzender), Herbert Bach, Hans Peter Claußen, Wolfgang Mayrhuber und Dr. Bernd Pischetsrieder.

Der **Personalausschuss** bereitet die Bestellung von Vorstandsmitgliedern vor und sorgt zusammen mit dem Vorstand für eine langfristige Nachfolgeplanung. Er bereitet auch die Beschlussfassung des Aufsichtsrats über das Vergütungssystem für den Vorstand einschließlich der Gesamtvergütung der einzelnen Vorstandsmitglieder vor. Ferner vertritt der Personalausschuss die Gesellschaft gegenüber den Vorstandsmitgliedern und ist für die übrigen Personalangelegenheiten der Vorstandsmitglieder zuständig, soweit sie nicht dem Aufsichtsratsplenum zugewiesen sind. Er muss Kreditgeschäfte zwischen der Gesellschaft und Vorstandsmitgliedern sowie diesen nahestehenden Personen genehmigen, desgleichen wesentliche Geschäfte zwischen der Gesellschaft oder der mit ihr verbundenen Unternehmen und Mitgliedern des Vorstands sowie diesen nahestehenden Personen. Er entscheidet auch über Nebentätigkeiten und Mandate der Vorstände bei anderen Gesellschaften.

Mitglieder des Personalausschusses sind Dr. Hans-Jürgen Schinzler (Vorsitzender), Herbert Bach und Dr. Bernd Pischetsrieder.

Der **Prüfungsausschuss** bereitet die Beschlüsse des Aufsichtsrats über die Feststellung des Jahresabschlusses und die Billigung des Konzernabschlusses vor; er prüft die Finanzberichterstattung, erörtert die Quartalsberichte und nimmt die Prüfungsberichte sowie andere Berichte und Erklärungen des Abschlussprüfers entgegen. Der Ausschuss überwacht den Rechnungslegungsprozess einschließlich der Wirksamkeit des internen Kontrollsystems, die Wirksamkeit des Risikomanagement-Systems, die Wirksamkeit des Compliance-Systems sowie des Systems der Internen Revision der Gesellschaft. Darüber hinaus bereitet er die Entscheidung über die Bestellung des Abschlussprüfers vor und kontrolliert dessen Unabhängigkeit und Qualität. Er beauftragt den Abschlussprüfer für den Jahres- und Konzernabschluss, legt Prüfungsschwerpunkte fest und vereinbart die Vergütung; dasselbe gilt für die prüferische Durchsicht des Halbjahresfinanzberichts. Zudem bereitet der Prüfungsausschuss mit dem Vorstand die jährliche Erörterung der Risikostrategie vor dem Aufsichtsrat vor und diskutiert mit dem Vorstand unterjährige Änderungen der Risikostrategie und Abweichungen.

Mitglieder des Prüfungsausschusses sind Prof. Dr. Henning Kagermann (Vorsitzender), Christian Fuhrmann, Marco Nörenberg, Anton van Rossum und Dr. Hans-Jürgen Schinzler.

Der **Nominierungsausschuss** ist ausschließlich mit Vertretern der Anteilseigner besetzt. Er benennt dem Aufsichtsrat geeignete Kandidaten für dessen Wahlvorschläge an die Hauptversammlung. Als Grundlage hat er einen Kriterienkatalog erarbeitet und beschlossen.

Mitglieder des Nominierungsausschusses sind Dr. Hans-Jürgen Schinzler (Vorsitzender), Prof. Dr. Henning Kagermann und Dr. Bernd Pischetsrieder.

Der **Vermittlungsausschuss** unterbreitet dem Aufsichtsratsplenum Personalvorschläge, wenn im ersten Wahlgang nicht die erforderliche Zweidrittelmehrheit zustande kommt, um Vorstandsmitglieder zu bestellen oder abzuwählen. Seine Zuständigkeit blieb auch unter der Mitbestimmungsvereinbarung unverändert und ist nunmehr in Satzung und Geschäftsordnung für den Aufsichtsrat niedergelegt.

Mitglieder des Vermittlungsausschusses sind Dr. Hans-Jürgen Schinzler (Vorsitzender), Herbert Bach, Hans Peter Claußen und Dr. Bernd Pischetsrieder.

Nähere Ausführungen zur Arbeit der Aufsichtsratsausschüsse im abgelaufenen Geschäftsjahr finden Sie auch im Bericht des Aufsichtsrats an die Hauptversammlung auf Seite 17 ff.

## Hauptversammlung

Zu den regelmäßigen Zuständigkeiten der Hauptversammlung gehören die Entscheidung über die Gewinnverwendung sowie die Entlastung von Vorstand und Aufsichtsrat.

Bei der Münchener Rück AG gilt das Prinzip „one share, one vote“, also eine Stimme je Aktie. Solange und soweit die Eintragung eines Aktionärs im eigenen Namen für Aktien, die einem anderen gehören, die Höchstgrenze von 2 % des satzungsmäßigen Grundkapitals überschreitet, bestehen aus der Eintragung keine Stimmrechte. Ziel dieser Regelung ist eine höhere Transparenz des Aktienregisters. Außerdem soll sie den direkten Kontakt mit den Aktionären in Zusammenhang mit der Einberufung der Hauptversammlung und der Ausübung der Stimmrechte erleichtern.

## Vergütungsbericht<sup>1</sup>

### Struktur des Vergütungssystems für den Vorstand

In Übereinstimmung mit dem DCGK erläutern wir im Folgenden die Grundzüge des Vergütungssystems für den Vorstand der Münchener Rück AG und die konkrete Ausgestaltung der einzelnen Komponenten.

Entsprechend Ziffer 4 des DCGK wurde das Vergütungssystem für den Vorstand vom Aufsichtsratsplenum beschlossen. Der Personalausschuss des Aufsichtsrats, dem der Vorsitzende des Aufsichtsrats sowie ein Vertreter der Anteilseigner und ein Vertreter der Arbeitnehmer angehören, hatte den Beschluss für das Plenum vorbereitet.

Ausgehend von den vergütungsrelevanten Neuregelungen des Gesetzes zur Angemessenheit der Vorstandsvergütung (VorstAG) und des DCGK wurde das Vergütungssystem für den Vorstand zum 1. Januar 2010 neu gestaltet. Besonderes Augenmerk wurde dabei auch auf Verständlichkeit und Transparenz gelegt.

Die neue Struktur stellt lediglich auf zwei Vergütungsbestandteile ab, Grundvergütung und variable Vergütung. Die variable Komponente enthält sowohl Jahres- als auch Dreijahresziele und ersetzt damit den bisherigen Jahresbonus sowie den Mid-Term Incentive Plan. Der bisherige langfristige Incentive-Plan ist entfallen. Durch das verpflichtende Eigeninvestment in Aktien mit zwei- und vierjähriger Sperrfrist verbleibt eine Komponente, die an der Entwicklung des Aktienkurses der Münchener Rück AG ausgerichtet ist. Das neue Vergütungssystem orientiert sich insgesamt stärker als bisher an langfristigen Zielen und schafft somit einen noch ausgeprägteren Anreiz für eine nachhaltige Unternehmensentwicklung.

<sup>1</sup> Dieser Vergütungsbericht ist Teil des Konzernlageberichts.

## Struktur und Systematik der Vorstandsvergütung

| Bestandteil                                                                                                                                                                                                                 | Anteil <sup>1</sup> | Bemessungsgrundlage/<br>Parameter                                                                                      | Korridor                                    | Voraussetzung<br>für Zahlung                                                                                                                                    | Auszahlung                                                                                                                                                  |
|-----------------------------------------------------------------------------------------------------------------------------------------------------------------------------------------------------------------------------|---------------------|------------------------------------------------------------------------------------------------------------------------|---------------------------------------------|-----------------------------------------------------------------------------------------------------------------------------------------------------------------|-------------------------------------------------------------------------------------------------------------------------------------------------------------|
| <b>Grundvergütung</b><br><b>zzgl. Sachbezüge/<br/>Nebenleistungen</b><br>(Dienstwagen, Gesundheits-<br>vorsorge, Sicherheitsmaßnahmen,<br>Versicherungen)                                                                   | <b>30%</b>          | Funktion,<br>Verantwortung,<br>Dauer der<br>Vorstandszugehörigkeit                                                     | fix                                         | vertragliche<br>Regelungen                                                                                                                                      | monatlich                                                                                                                                                   |
| <b>Variable Vergütung</b>                                                                                                                                                                                                   | <b>70%</b>          | Gesamterfolg des<br>Unternehmens,<br>Erfolgsbeitrag der<br>Organisationseinheit,<br>Individueller Erfolgsbeitrag       |                                             |                                                                                                                                                                 |                                                                                                                                                             |
| <b>30% Jahres-Performance</b><br>(bei 100 % Zielerreichung)                                                                                                                                                                 |                     | Konzernziel,<br>Gesellschaftsziel,<br>Ressortziele,<br>Individuelle Ziele                                              | <b>0-200%</b><br>(voll erreicht<br>= 100 %) | Erreichen der<br>Jahresziele                                                                                                                                    | im <b>2. Jahr</b> , <b>davon für 50 %<br/>des Nettoauszahlungs-<br/>betrags verpflichtendes<br/>Eigeninvestment in Aktien<br/>mit 4-jähriger Sperrfrist</b> |
| <b>70% Mehrjahres-Performance</b><br>(bei 100 % Zielerreichung)                                                                                                                                                             |                     | Ziele für die<br>Geschäftsfelder<br>- Rückversicherung<br>- Erstversicherung<br>- Munich Health,<br>Individuelle Ziele | <b>0-200%</b><br>(voll erreicht<br>= 100 %) | Erreichen der<br>Dreijahresziele                                                                                                                                | im <b>4. Jahr</b> , <b>davon für 25 %<br/>des Nettoauszahlungs-<br/>betrags verpflichtendes<br/>Eigeninvestment in Aktien<br/>mit 2-jähriger Sperrfrist</b> |
| <b>Altersversorgung</b>                                                                                                                                                                                                     |                     |                                                                                                                        |                                             | > Pensionierung<br>> Versorgungsfall<br>> Vorzeitige Beendigung<br>oder Nichtverlänge-<br>rung des Dienst-<br>vertrags unter<br>bestimmten Voraus-<br>setzungen | -                                                                                                                                                           |
| <b>a) leistungsorientierte<br/>Pensionszusagen</b><br>(vor 2009 bestellte Vorstands-<br>mitglieder, die im Jahr 2008 das<br>55. Lebensjahr bereits vollendet<br>hatten)                                                     | -                   | Pensionsfähige<br>Grundvergütung<br>(= 25 % der Ziel-Gesamt-<br>direktvergütung),<br>Dienstjahre im Vorstand           | Festbetrag                                  |                                                                                                                                                                 |                                                                                                                                                             |
| <b>b) beitragsorientierte<br/>Pensionszusagen</b><br>(vor 2009 bestellte Vorstands-<br>mitglieder, die im Jahr 2008 das<br>55. Lebensjahr noch nicht vollendet<br>hatten, und ab 2009 neu bestellte<br>Vorstandsmitglieder) | -                   | Ziel-Gesamtdirekt-<br>vergütung                                                                                        | Versor-<br>gungs-<br>beitrag                |                                                                                                                                                                 | -                                                                                                                                                           |

<sup>1</sup> Die Anteile ergeben sich bei 100 % Zielerreichung bei der variablen Vergütung.

### Fixe Bestandteile Grundvergütung

Die feste jährliche Grundvergütung wird als monatliches Gehalt ausbezahlt.

### Sachbezüge/Nebenleistungen

Sachbezüge und Nebenleistungen richten sich nach der Funktion und sind im Vergleich zum Markt (DAX-30-Gesellschaften) angemessen. Die damit verbundenen geldwerten Vorteile werden individuell pro Vorstandsmitglied versteuert, die anfallende Lohnsteuer trägt die Gesellschaft. Sachbezüge und Nebenleistungen werden für den Ausweis im Geschäftsbericht nach Aufwand bewertet.



**Variable Vergütung**

Die variable Vergütungskomponente stellt auf den geschäftlichen Gesamterfolg des Konzerns, den Erfolg definierter Organisationseinheiten sowie auf die persönliche Leistung der einzelnen Mitglieder des Vorstands ab. Ausschlaggebend für ihre Höhe ist damit, inwieweit die jeweils jährlich neu festgelegten Ziele für den Jahres- und Mehrjahreszeitraum erreicht werden. Die Zielerreichung wird jeweils nach Ende der Betrachtungszeiträume gemessen; während dieser Zeiträume findet keine Adjustierung der Ziele statt. Auszahlungen erfolgen jeweils nach Ablauf des einjährigen und des dreijährigen Betrachtungszeitraums. Zur Unterstützung einer nachhaltigen Ausrichtung des Handelns werden die Mitglieder des Vorstands verpflichtet, 50 % bzw. 25 % der ausbezahlten variablen Vergütung in Aktien der Münchener Rück AG zu investieren.

**Variable Vergütung basierend auf der Jahres-Performance**

Für die an der Jahres-Performance ausgerichtete variable Vergütung werden Jahresziele festgelegt, die auf die Bemessungsgrundlagen Konzernergebnis (Munich Re Gruppe), Gesellschaftsergebnis (Schaden- und Unfallrückversicherung), Ressortergebnis sowie individuelle Ziele abstellen. Hierfür stehen bei voller Zielerreichung (= 100 %) 30 % des Gesamtzielbetrags der variablen Vergütung zur Verfügung. Die Vorgaben und Skalierungen für Konzernziel, Gesellschaftsziel und Ressortziele sind kennzahlenorientiert, für die individuellen Ziele bilden persönliche Zielvorgaben die Basis. Für das Konzernergebnis wird mit dem „Return on Risk adjusted Capital – RoRaC“ eine Größe verwendet, die aus Kennzahlen der externen Rechnungslegung sowie weiteren wichtigen Bestands- und Erfolgsgrößen abgeleitet wird. Informationen zur Definition des RoRaC finden Sie auf Seite 58. Beim Gesellschaftsergebnis und bei den Ressortergebnissen kommen wertorientierte Steuerungsgrößen zum Einsatz. Die Ziele werden je nach Zuständigkeit der einzelnen Vorstandsmitglieder individuell gewichtet.

Die Auszahlung der variablen Vergütung für die Jahres-Performance erfolgt nach Bewertung und Beschluss durch das Aufsichtsratsplenum jeweils im Jahr nach Ablauf des einjährigen Betrachtungszeitraums. Die Auszahlung erfolgt mit der Maßgabe, dass 50 % des Nettoauszahlungsbetrags in Aktien der Gesellschaft mit vierjähriger Veräußerungssperre investiert werden müssen.

**Variable Vergütung basierend auf der Mehrjahres-Performance**

Für die an der Mehrjahres-Performance ausgerichtete variable Vergütung werden jährlich Dreijahresziele festgelegt, die auf den Erfolg der Geschäftsfelder Rückversicherung, Erstversicherung und Munich Health sowie auf individuelle Ziele abstellen. Hierfür stehen bei voller Zielerreichung (= 100 %) 70 % des Gesamtzielbetrags der variablen Vergütung zur Verfügung. Die Vorgaben und Skalierungen für die Geschäftsfeldziele basieren auf wertorientierten Steuerungsgrößen, die individuellen Ziele auf persönlichen Zielvorgaben. Die Ziele werden je nach Zuständigkeit der einzelnen Vorstandsmitglieder individuell gewichtet.

Die Auszahlung der variablen Vergütung für die Mehrjahres-Performance erfolgt nach Bewertung und Beschluss durch das Aufsichtsratsplenum im Jahr nach Ablauf des dreijährigen Betrachtungszeitraums. Die Auszahlung erfolgt mit der Maßgabe, dass 25 % des Nettoauszahlungsbetrags in Aktien der Gesellschaft mit zweijähriger Veräußerungssperre investiert werden müssen.

**Volle und anteilige Auslobung der variablen Vergütung für die Jahres- und Mehrjahres-Performance**

Basis für die volle und zeitanteilige Auslobung der variablen Vergütung ist das erste Jahr. Es werden nur die vollen „berechtigten“ Monate in diesem Jahr berücksichtigt (pro rata temporis). Bei Übertritt in den Ruhestand, eintretender Berufs- oder Erwerbsunfähigkeit, Tod sowie vorzeitigem Ausscheiden aus der Gesellschaft aus sonstigen Gründen finden die Regelungen für volle und anteilige Auslobung Anwendung.

### Aktienbasierte Vergütungsvereinbarungen, die während der Berichtsperiode in Kraft waren

#### Mid-Term Incentive Plan 2009-2011

Dieser Plan stellt auf das Ergebnis eines Dreijahreszeitraums ab. Er fördert die mittel- und langfristige Unternehmenswertsteigerung von Munich Re, gemessen an der internen Wertschaffung (wertorientierte Erfolgsgrößen) sowie der Steigerung des Total Shareholder Return (TSR) der Münchener-Rück-Aktie. Der Plan umfasst die kostenfreie Vergabe von Performance Share Units, an die Mitglieder des Vorstands erst- und letztmalig für 2009. Die Planteilnehmer haben die Möglichkeit, an der Wertentwicklung von Munich Re teilzuhaben, sofern die Erfolgsziele erreicht werden bzw. der TSR steigt.

Als wertorientierte Erfolgsziele sind Dreijahres-Durchschnittsziele für die Geschäftsfelder Rückversicherung, Erstversicherung und Munich Health festgelegt. Die Zielerreichung wird nach der Planlaufzeit gemessen; während der Planlaufzeit findet keine Adjustierung der Ziele statt.

Der TSR umfasst die gesamte Rendite der Aktie und damit die Aktienkursentwicklung sowie die reinvestierten Dividenden über einen Zeitraum von drei Jahren. Weitere Informationen zum Mid-Term Incentive Plan finden Sie im Anhang unter (45) Mid-Term Incentive Plan.

#### Langfristiger Incentive-Plan

Diese Komponente mit langfristiger Anreizwirkung zielt auf die nachhaltige Steigerung des Aktienkurses ab. Der langfristige Incentive-Plan wird seit 1999 jährlich neu aufgelegt, für die Mitglieder des Vorstands letztmalig im Jahr 2009. Die Berechtigten erhalten eine bestimmte Anzahl von Wertsteigerungsrechten. Sie können nur ausgeübt werden, wenn eine zweijährige Sperrfrist eingehalten wird, die Münchener-Rück-Aktie seit Planbeginn um mindestens 20 % stieg und die Entwicklung des EURO STOXX 50-Index wenigstens zweimal über einen Zeitraum von drei Monaten während der Planlaufzeit geschlagen wurde.

Ob und wann die Wertsteigerungsrechte tatsächlich ausgeübt werden können, steht nicht fest. Ausübung und Erlös hängen ab von der Aktienkursentwicklung und der Erfüllung der Ausübungsbedingungen. Die Höhe des Ertrags ist begrenzt. Bisher konnten aus den Plänen, die 1999 und 2003 bis 2005 aufgelegt wurden, Wertsteigerungsrechte ausgeübt werden. Weitere Informationen zum langfristigen Incentive-Plan finden Sie im Anhang unter (44) Langfristiger Incentive-Plan.

### Gewichtung der Vergütungsbestandteile

Bei hundertprozentiger Zielerreichung (Jahres-Performance und Mehrjahres-Performance) stellen sich die Anteile der einzelnen Komponenten an der Gesamtvergütung 2010 wie folgt dar: Grundvergütung etwa 30 %, variable Vergütung rund 70 %, davon 30 % basierend auf der Jahres-Performance und 70 % basierend auf der Mehrjahres-Performance. Jahres-, Mehrjahresziele und Aktieninvestment bilden zusammen ein ausgewogenes und ökonomisches, das heißt stark risikobasiert ausgerichtetes, Anreizsystem. Des Weiteren soll erreicht werden, dass die Verzielung der Vorstandsmitglieder nicht zu einer Fehlsteuerung führt. Es werden keine garantierten variablen Vergütungsbestandteile gewährt.

Insgesamt hat das Vergütungssystem der Vorstandsmitglieder den für 2010 geltenden Empfehlungen des DCGK entsprochen. Es wird insbesondere auch der Verordnung über die aufsichtsrechtlichen Anforderungen an Vergütungssysteme im Versicherungsbereich (Versicherungs-Vergütungsverordnung – VersVergV) vom 6. Oktober 2010 gerecht, die materiell weitgehend dem Rundschreiben 23/2009 vom 21. Dezember 2009 der Bundesanstalt für Finanzdienstleistungsaufsicht (BaFin) entspricht. Mit diesem Rundschreiben hatte die BaFin für die deutsche Versicherungswirtschaft die „Principles“ des Financial Stability Board konkretisiert, auf deren Umsetzung sich die G-20-Staaten bei ihrem Gipfeltreffen im September 2009 in Pittsburgh verständigt hatten; das Rundschreiben wurde mit Inkrafttreten der VersVergV aufgehoben.

Über das Vergütungssystem hinaus wird seit 2010 vom Aufsichtsratsplenum auf Vorschlag des Personalausschusses des Aufsichtsrats auch die Höhe der Gesamtvergütung festgesetzt und regelmäßig überprüft. Zur Prüfung der Angemessenheit der Vergütung werden auch die Daten von Gesellschaften im Vergleichsumfeld erhoben und die Relationen zu den übrigen Beschäftigten von Munich Re geprüft. Kriterien für die Angemessenheit der Vergütung bilden zudem die Aufgaben des jeweiligen Vorstandsmitglieds, seine persönliche Leistung, die Leistung des Vorstands als Ganzes sowie die wirtschaftliche Lage, der Erfolg und die Zukunftsaussichten des Unternehmens. Neue Vorstandsmitglieder werden in der Regel so eingestuft, dass in den ersten drei Jahren ausreichend Entwicklungspotenzial zur Verfügung steht.

#### Fortzahlung der Bezüge bei Arbeitsunfähigkeit

Bei vorübergehender Arbeitsunfähigkeit durch Krankheit oder infolge anderer Gründe, die das Vorstandsmitglied nicht zu vertreten hat, werden die Bezüge bis zur Beendigung des Anstellungsvertrags weitergezahlt. Die Gesellschaft kann den Anstellungsvertrag vorzeitig beenden, wenn das Vorstandsmitglied länger als zwölf Monate arbeitsunfähig und voraussichtlich auf Dauer nicht mehr in der Lage ist, die ihm übertragenen Aufgaben uneingeschränkt zu erfüllen (dauernde Arbeitsunfähigkeit). In diesem Fall erhält das Vorstandsmitglied eine Arbeitsunfähigkeitsrente.

#### Sonstiges

Vergütungen aus Mandaten sind an die Gesellschaft abzuführen oder werden bei der Verdienstabrechnung abgezogen. Ausgenommen sind lediglich Vergütungen aus Mandaten, die von der Gesellschaft ausdrücklich als persönlich anerkannt werden.

Die Mitglieder des Vorstands haben keinen dienstvertraglichen Anspruch auf Abfindungszahlungen. Im Falle der vorzeitigen Beendigung der Vorstandstätigkeit ohne wichtigen Grund im Sinne von § 626 BGB gilt für gegebenenfalls zu leistende Zahlungen, dass diese insgesamt den Wert von zwei Jahresgesamtvergütungen (bei Kontrollserwerb oder Kontrollwechsel im Sinne von § 29 Abs. 2 des Wertpapiererwerbs- und Übernahmegesetzes – WpÜG: drei Jahresgesamtvergütungen) nicht übersteigen und nicht mehr als die Restlaufzeit des Anstellungsvertrags vergüten dürfen. Für die Berechnung ist auf die Gesamtvergütung des abgelaufenen Geschäftsjahres und gegebenenfalls auch auf die voraussichtliche Gesamtvergütung für das laufende Geschäftsjahr abzustellen.

Bei einem „Change of Control“ sehen lediglich die Bedingungen des langfristigen Incentive-Plans (die letztmalige Zuteilung von Wertsteigerungsrechten an Vorstandsmitglieder erfolgte 2009) besondere Ausübungsmöglichkeiten vor. Einzelheiten hierzu finden Sie im Anhang unter (44) Langfristiger Incentive-Plan.

#### Altersversorgung

Die Mitglieder des Vorstands erhielten bis einschließlich 2008 eine leistungsorientierte Pensionszusage, also die Zusage eines festen Pensionsbetrags, dessen Höhe sich nach ihrer Grundvergütung und ihren Dienstjahren im Vorstand richtete. Der Versorgungsgrad begann bei 30 % und konnte maximal 60 % der jährlichen Grundvergütung erreichen.

Mit Beginn des Jahres 2009 wurde die Altersversorgung der Vorstandsmitglieder auf ein beitragsorientiertes System umgestellt. Wesentliches Ziel dieser Umstellung war, alle versorgungsspezifischen Risiken möglichst komplett aus der Bilanz der Gesellschaft auszulagern. Diese sehr weitgehende Risikoauslagerung wurde dadurch erreicht, dass Anwartschaftszuwächse ausschließlich durch die Einzahlung von Beiträgen in eine Rückdeckungsversicherung finanziert werden. Die Leistungen aus der Altersversorgung sind insoweit nicht mehr von der Gesellschaft zu tragen, sondern ergeben sich aus der Rückdeckungsversicherung. Das Langlebkeitsrisiko, die biometrischen Risiken vorzeitiger Versorgungsfälle wie Invalidität und Tod des aktiven Vorstandsmitglieds sowie das Kapitalmarktrisiko wurden damit auf den Rückdeckungsversicherer und das einzelne Vorstandsmitglied übertragen.

Seit 2009 erhalten somit neu bestellte Vorstandsmitglieder eine beitragsorientierte Pensionszusage. Hierfür stellt die Gesellschaft während der Laufzeit des Anstellungsvertrags des Vorstandsmitglieds für jedes Kalenderjahr (Beitragsjahr) einen Versorgungsbeitrag zur Verfügung, der sich 2009 an der Grundvergütung orientierte. Der Versorgungsbeitrag wird an den Rückdeckungsversicherer abgeführt. Die garantierte Verzinsung des Rückdeckungsversicherers beträgt 2,25 %. Die Versicherungsleistung, die aus den Beitragszahlungen an den Rückdeckungsversicherer resultiert, sagt die Gesellschaft dem Vorstandsmitglied als Leistung zu. Für ab 1. Januar 2009 neu bestellte Vorstandsmitglieder wurde ein einheitlicher Versorgungsbeitragssatz festgelegt, der 2009 mit der jährlichen Grundvergütung multipliziert den Versorgungsbeitrag ergab.

Vorstandsmitglieder, die zum Ende des Jahres 2008 das 55. Lebensjahr noch nicht vollendet hatten, behielten die zum Überleitungszeitpunkt 31. Dezember 2008 bestehende Anwartschaft aus der bisherigen leistungsorientierten Pensionszusage (Festbetrag in Euro), die als Besitzstandsrente festgeschrieben wurde. Seit 1. Januar 2009 erhalten diese Vorstandsmitglieder für die künftigen Dienstjahre eine beitragsorientierte Pensionszusage (Zuwachsrente), die sich grundsätzlich am beitragsorientierten System für neue Vorstandsmitglieder orientiert. Da die Umstellung des Versorgungssystems im Rahmen laufender Vorstandsverträge erfolgte, wurden die Versorgungsbeiträge so berechnet, dass die Summe aus Besitzstands-, Versorgungskassen- und Zuwachsrente bei realistischer Einschätzung die erwartete Rente im Alter 60 nach bisheriger Pensionsregelung ergibt.

Vorstandsmitglieder, die zum Umstellungszeitpunkt das 55. Lebensjahr bereits vollendet hatten, wurden nicht auf das beitragsorientierte System umgestellt und erhalten weiterhin eine leistungsorientierte Pensionszusage nach dem bisherigen System.

Aufgrund der zum 1. Januar 2010 erfolgten Erhöhung des Anteils der Grundvergütung an der Gesamtvergütung von 25 % auf 30 % wurde die Bemessungsgrundlage für die Altersversorgung geändert. Andernfalls hätte dies zu einer nicht beabsichtigten Erhöhung der Versorgung geführt. Bei der Festsetzung der leistungsorientierten Pensionszusage wird daher seit 1. Januar 2010 auf die sogenannte „pensionsfähige Grundvergütung“ abgestellt, die 25 % der Ziel-Gesamtdirektvergütung (= Grundvergütung + variable Vergütung auf Basis 100 % Zielerreichung) entspricht. Bei beitragsorientierten Leistungszusagen wird der Beitragssatz auf Basis der Ziel-Gesamtdirektvergütung festgelegt.

#### **Leistungen für den Fall der Beendigung der Tätigkeit**

**Altersruhegeld** // Ein Vorstandsmitglied hat Anspruch auf Ruhegeld, wenn es nach Vollendung des 60. Lebensjahres, spätestens jedoch nach Vollendung des 65. Lebensjahres aus dem aktiven Dienst der Gesellschaft ausscheidet.

Höhe der Leistung:

- // Für sechs Monate bisherige monatliche Grundvergütung (nur für Vorstandsmitglieder, die vor 2006 bestellt wurden).
- // Bei beitragsorientierten Zusagen für Neueintritte ab 2009: Verrentung des Deckungskapitals, das sich aus der Rückdeckungsversicherung ergibt, oder Auszahlung des Deckungskapitals als Einmalbetrag.
- // Für übergeleitete Vorstandsmitglieder: Besitzstandsrente aus leistungsorientierter Pensionszusage bis 2008 sowie Verrentung oder Auszahlung des Deckungskapitals aus beitragsorientiertem System.
- // Bei leistungsorientierten Zusagen: Pensionszusage zwischen 30 % und 60 % der pensionsfähigen Grundvergütung.



**Ruhegeld aufgrund Arbeitsunfähigkeit** // Das Vorstandsmitglied hat Anspruch auf Ruhegeld, wenn der Vertrag wegen dauernder Arbeitsunfähigkeit einvernehmlich aufgehoben, von der Gesellschaft gekündigt oder infolge Nichtverlängerung oder Widerrufs der Vorstandsbestellung beendet wird. Dauernde Arbeitsunfähigkeit liegt vor, wenn das Vorstandsmitglied länger als zwölf Monate arbeitsunfähig und voraussichtlich auf Dauer nicht mehr in der Lage ist, die ihm übertragenen Aufgaben uneingeschränkt zu erfüllen.

Höhe der Leistung:

- // Für sechs Monate bisherige monatliche Grundvergütung (nur für Vorstandsmitglieder, die vor 2006 bestellt wurden).
- // Bei beitragsorientierten Zusagen für Neueintritte ab 2009: 80 % des versicherten Altersruhegelds bis Alter 59 mit anschließendem Altersruhegeld.
- // Für übergeleitete Vorstandsmitglieder: Besitzstandsrente aus leistungsorientierter Pensionszusage bis 2008 sowie 80 % des versicherten Altersruhegelds bis Alter 59 mit anschließendem Altersruhegeld nach beitragsorientiertem System.
- // Bei leistungsorientierten Zusagen: Pensionszusage zwischen 30 % und 60 % der pensionsfähigen Grundvergütung.

**Vorgezogenes gekürztes Ruhegeld** // Das Vorstandsmitglied hat Anspruch auf Ruhegeld, wenn der Vertrag infolge Nichtverlängerung oder Widerrufs der Vorstandsbestellung beendet wird, ohne dass das Vorstandsmitglied durch eine grobe Verletzung seiner Pflichten oder seinen eigenen Wunsch dazu Veranlassung gegeben hat. Voraussetzung hierfür ist, dass das Vorstandsmitglied das 50. Lebensjahr bereits überschritten hat, bei Vertragsende seit mehr als zehn Jahren in einem Dienst- oder Arbeitsverhältnis mit der Gesellschaft stand und die Vorstandsbestellung schon mindestens einmal verlängert worden war.

Höhe der Leistung:

- // Für sechs Monate bisherige monatliche Grundvergütung (nur für Vorstandsmitglieder, die vor 2006 bestellt wurden).
- // Bei beitragsorientierten Zusagen für Neueintritte ab 2009: Verrentung des Deckungskapitals, das sich aus der Rückdeckungsversicherung ergibt, oder Auszahlung des Deckungskapitals als Einmalbetrag zum Zeitpunkt der Inanspruchnahme.
- // Für übergeleitete Vorstandsmitglieder: Anwartschaft zwischen 30 % und 60 % der pensionsfähigen Grundvergütung, die um 2 % für jedes angefangene Jahr vor Vollendung des 65. Lebensjahres gekürzt wird; die Differenz zwischen monatlichem Ruhegeld und monatlicher Zuwachsrente aus der Rückdeckungsversicherung übernimmt die Gesellschaft. Das zum Zeitpunkt der Inanspruchnahme vorhandene Deckungskapital kann verrentet oder als Einmalbetrag ausbezahlt werden.
- // Bei leistungsorientierten Zusagen: Pensionszusage zwischen 30 % und 60 % der pensionsfähigen Grundvergütung, die um je 2 % für jedes angefangene Jahr vor Vollendung des 65. Lebensjahres gekürzt wird.

**Unverfallbare Anwartschaft auf Alters-, Arbeitsunfähigkeits- und Hinterbliebenenversorgung** // Leistungen aus unverfallbaren Anwartschaften werden bei Vollendung des 60. Lebensjahres, bei Arbeitsunfähigkeit oder bei Tod des Vorstandsmitglieds gezahlt.

**Unverfallbare Anwartschaft nach dem Betriebsrentengesetz** // Das Vorstandsmitglied hat Anspruch auf eine unverfallbare Anwartschaft nach dem Betriebsrentengesetz, wenn es vor Vollendung des 60. Lebensjahres aus den Diensten der Gesellschaft ausscheidet und die Versorgungszusage zum Zeitpunkt des Ausscheidens mindestens fünf Jahre bestanden hat.

Höhe der Leistung:

- // Bei beitragsorientierten Zusagen für Neueintritte ab 2009: Verrentung des Deckungskapitals, das sich aus der Rückdeckungsversicherung ergibt, oder Auszahlung des Deckungskapitals als Einmalbetrag zum Zeitpunkt des Eintritts des Versorgungsfalls.
- // Bei übergeleiteten Vorstandsmitgliedern: Die Anwartschaft aus der Besitzstandsrente entspricht demjenigen Teil der Besitzstandsrente, der dem Verhältnis der Dauer der Betriebszugehörigkeit zu der Zeit vom Beginn der Betriebszugehörigkeit bis zum Erreichen der festen Altersgrenze entspricht (m/n-tel-Verfahren, § 2 Abs. 1 BetrAVG). Die Anwartschaft aus der Zuwachsrente entspricht den nach dem Versicherungsvertrag zum Zeitpunkt des Eintritts des Versorgungsfalls ausfinanzierten Versorgungsleistungen auf der Grundlage der bis zum Ausscheiden erbrachten Versorgungsbeiträge (§ 2 Abs. 5a BetrAVG). Diese Anwartschaft wird verrentet oder als Einmalbetrag ausbezahlt.
- // Bei leistungsorientierten Zusagen: Die Pensionszusage liegt zwischen 30 % und 60 % der pensionsfähigen Grundvergütung. Unverfallbar ist der Teil des Ruhegelds, der dem Verhältnis der tatsächlichen gegenüber der möglichen Betriebszugehörigkeit bis zur Vollendung des 65. Lebensjahres entspricht (m/n-tel-Verfahren, § 2 Abs. 1 BetrAVG).

Verbesserte unverfallbare Anwartschaft // Die verbesserte unverfallbare Anwartschaft wird gewährt, wenn der Anstellungsvertrag aufgrund Nichtverlängerung (durch die Gesellschaft) endet und weder grobe Pflichtverletzung noch eine Eigenkündigung vorliegen. Weiterhin wird vorausgesetzt, dass das Vorstandsmitglied vor Vollendung des 60. Lebensjahres aus den Diensten der Gesellschaft ausscheidet und der Beginn der Betriebszugehörigkeit zum Zeitpunkt des Ausscheidens mindestens zehn Jahre zurückliegt.

Die verbesserte unverfallbare Anwartschaft besteht nicht für Vorstandsmitglieder, die seit 2009 bestellt werden. Bei übergeleiteten Vorstandsmitgliedern gilt die verbesserte unverfallbare Anwartschaft nur für den Teil der Altersversorgung, der sich aus der leistungsorientierten Pensionszusage ergibt.

Höhe der Leistung:

- // Im Anschluss an das Ausscheiden für sechs Monate bisherige monatliche Grundvergütung (nur für Vorstandsmitglieder, die vor 2006 bestellt wurden).
- // Für den Anteil aus der leistungsorientierten Zusage: Pensionszusage zwischen 30 % und 60 % der pensionsfähigen Grundvergütung, die um je 2 % für jedes angefangene Jahr vor Vollendung des 60. Lebensjahres gekürzt wird.

**Hinterbliebenenversorgung**

Bei Tod eines Vorstandsmitglieds während der aktiven Dienstzeit erhalten die Hinterbliebenen für die Dauer von sechs Monaten die bisherige monatliche Grundvergütung, wenn der Verstorbene vor 2006 in den Vorstand berufen wurde. Bei Vorstandsmitgliedern, die ab 2006 bestellt wurden, wird für drei Monate die bisherige monatliche Grundvergütung an die Berechtigten gezahlt. Bei Tod eines Vorstandsmitglieds nach der Pensionierung erhalten die Hinterbliebenen für die Dauer von drei Monaten das bisherige monatliche Ruhegeld, wenn die Eheschließung/Eintragung der Lebenspartnerschaft oder die Geburt des Kindes vor Beginn des Ruhegeldbezugs erfolgte. Wurde das Ruhegeld des Vorstandsmitglieds wegen vorzeitiger Pensionierung gekürzt, errechnen sich die Hinterbliebenenleistungen aus dem gekürzten Ruhegeld.

Die Hinterbliebenen eines Vorstandsmitglieds, das während der aktiven Dienstzeit oder nach der Pensionierung verstorben ist, erhalten anschließend diese Leistungen:

- // Witwen-/Witwerrente oder Rente der eingetragenen Lebenspartnerin/des eingetragenen Lebenspartners in Höhe von 60 % der leistungsorientierten Pensionszusage oder des versicherten Ruhegelds. Ist die Ehefrau/der Ehemann oder die einge-

- tragene Lebenspartnerin/der eingetragene Lebenspartner mehr als zehn Jahre jünger als das Vorstandsmitglied, so wird die Hinterbliebenenversorgung aus der Besitzstandsrente für jedes Jahr des Altersunterschieds um 2 % gekürzt, jedoch höchstens um 50 %.
- // Waisenrente in Höhe von 20 % der leistungsorientierten Pensionszusage oder des versicherten Ruhegelds pro Waise.
  - // Verdoppelung der Waisenrente, wenn keine Witwen-/Witwerrente oder Rente der eingetragenen Lebenspartnerin/des eingetragenen Lebenspartners zu bezahlen ist.
  - // Die Hinterbliebenenleistungen dürfen zusammen das Ruhegeld des Vorstandsmitglieds nicht übersteigen. Gegebenenfalls werden die Waisenrenten anteilig gekürzt.

Die Hinterbliebenenversorgung entfällt für die Witwe/den Witwer oder die eingetragene Lebenspartnerin/den eingetragenen Lebenspartner, wenn die Ehe/eingetragene Lebenspartnerschaft erst zu einem Zeitpunkt geschlossen wurde, zu dem das Vorstandsmitglied bereits Ruhegeld bezog, und für Waisen, wenn sie erst nach diesem Zeitpunkt geboren wurden. Der Anspruch für Waisen entfällt mit der Vollendung des 18. Lebensjahres (20. Lebensjahres für Waisen von übergeleiteten Vorstandsmitgliedern). Für Waisen, die in Schul- oder Berufsausbildung, Wehr- oder Zivildienst sind oder bei denen eine körperliche oder geistige Behinderung vorliegt, verlängert sich der Anspruch bis zur Vollendung des 25. Lebensjahres (27. Lebensjahres für Waisen von übergeleiteten Vorstandsmitgliedern). Die Hinterbliebenenversorgung aus der beitragsorientierten Zusage entfällt, wenn dem Vorstandsmitglied die Rente daraus in Form eines Einmalbetrags ausbezahlt wurde. Die Hinterbliebenenversorgung entfällt für die Hinterbliebenen mit ihrem Tod.

#### Anpassung Altersversorgung

Ruhegeld und Hinterbliebenenversorgung für vor 2009 bestellte Vorstandsmitglieder und ihre Hinterbliebenen werden überprüft, wenn die Tarifgehälter der Versicherungswirtschaft nach dem Durchschnitt der Endgehälter aller Tarifklassen seit der letzten Festsetzung um mehr als 12 % gestiegen sind oder wenn seit der letzten Festsetzung drei Jahre vergangen sind. Dabei ist eine Anpassung mindestens in Höhe der Steigerung der Lebenshaltungskosten nach dem Verbraucherpreisindex vorzusehen. Diese Regelung gilt auch für Vorstandsmitglieder, die seit 2009 neu bestellt werden und die erstmalig vor dem 1. Januar 1999 eine Pensionszusage von der Gesellschaft erhalten haben. Ruhegeld und Hinterbliebenenversorgung für ab 2009 bestellte Vorstandsmitglieder, die vor dem 1. Januar 1999 keine Pensionszusage von der Gesellschaft erhielten, werden ab Bezug des Ruhegelds oder der Hinterbliebenenversorgung gemäß § 16 Abs. 3 Nr. 1 BetrAVG um jährlich 1 % angepasst. Unverfallbare Anwartschaften werden nicht angepasst.

#### Gesamtbezüge des Vorstands

Die Basis für die Berichterstattung über die Vergütung der Organmitglieder bildet der Deutsche Rechnungslegungs Standard Nr. 17 – DRS 17 (geändert 2010). Demnach wird die Vergütung für die Jahres-Performance mit den dafür gebildeten Rückstellungen ausgewiesen, da die zugrunde liegende Tätigkeit bis zum Bilanzstichtag vollständig erbracht wurde und der erforderliche Organbeschluss bereits absehbar ist. Die Vergütung für die Mehrjahres-Performance ist nach dem vorgegebenen Standard erst im Jahr der Auszahlung einzubeziehen. Die Gesamtbezüge des Vorstands der Münchener Rück AG für die Wahrnehmung seiner Aufgaben im Mutterunternehmen und in den Tochterunternehmen betrugen im Geschäftsjahr 11,7 (17,8) Millionen €. Die Gesamtbezüge ermäßigten sich somit gegenüber dem Vorjahr um 6,1 Millionen €. Ausschlaggebend hierfür ist zum einen, dass 2010 keine Performance Share Units und keine Wertsteigerungsrechte gewährt wurden, zum anderen, dass die Rückstellungen für die Mehrjahres-Performance 2010–2012 im Berichtsjahr nicht unter den Bezügen ausgewiesen werden dürfen, da die zugrunde liegende Tätigkeit noch nicht vollständig erbracht wurde.

**Bezüge der einzelnen Vorstandsmitglieder gemäß DRS 17 (geändert 2010)  
(nach § 285 Satz 1 Nr. 9a Satz 5-8 HGB bzw. § 314 Abs. 1 Nr. 6a Satz 5-8 HGB)**

| Name                                        | Ge-<br>schäfts-<br>jahr | Grund-<br>vergütung | Sach-<br>bezüge/<br>Neben-<br>leistungen | Jahres-<br>Perfor-<br>mance<br>(2010)<br>Jahres-<br>bonus<br>(2009) <sup>1</sup> | Wert der<br>gewährten<br>Perfor-<br>mance<br>Share<br>Units <sup>2, 3</sup> | Wert der<br>gewährten<br>Wertstei-<br>gerungs-<br>rechte <sup>4</sup> | Gesamt            | Anzahl<br>Perfor-<br>mance<br>Share<br>Units | Anzahl<br>Wert-<br>steige-<br>rungs-<br>rechte |
|---------------------------------------------|-------------------------|---------------------|------------------------------------------|----------------------------------------------------------------------------------|-----------------------------------------------------------------------------|-----------------------------------------------------------------------|-------------------|----------------------------------------------|------------------------------------------------|
|                                             |                         | €                   | €                                        | €                                                                                | €                                                                           | €                                                                     | €                 | Stück                                        | Stück                                          |
| <b>Dr. Nikolaus von Bomhard<sup>5</sup></b> | <b>2010</b>             | <b>1.092.000</b>    | <b>214.809</b>                           | <b>1.030.666</b>                                                                 | -                                                                           | -                                                                     | <b>2.337.475</b>  | -                                            | -                                              |
|                                             | 2009                    | 910.000             | 35.490                                   | 1.240.750                                                                        | 728.000                                                                     | 505.651                                                               | 3.419.891         | 4.306                                        | 30.333                                         |
| <b>Dr. Ludger Arnoldussen</b>               | <b>2010</b>             | <b>519.000</b>      | <b>37.136</b>                            | <b>685.040</b>                                                                   | -                                                                           | -                                                                     | <b>1.241.176</b>  | -                                            | -                                              |
|                                             | 2009                    | 400.000             | 37.358                                   | 482.825                                                                          | 320.000                                                                     | 222.261                                                               | 1.462.444         | 1.893                                        | 13.333                                         |
| <b>Dr. Thomas Blunck</b>                    | <b>2010</b>             | <b>519.000</b>      | <b>27.829</b>                            | <b>640.923</b>                                                                   | -                                                                           | -                                                                     | <b>1.187.752</b>  | -                                            | -                                              |
|                                             | 2009                    | 432.500             | 64.371                                   | 569.301                                                                          | 346.000                                                                     | 240.331                                                               | 1.652.503         | 2.046                                        | 14.417                                         |
| <b>Georg Daschner</b>                       | <b>2010</b>             | <b>570.000</b>      | <b>31.536</b>                            | <b>582.541</b>                                                                   | -                                                                           | -                                                                     | <b>1.184.077</b>  | -                                            | -                                              |
|                                             | 2009                    | 475.000             | 33.604                                   | 911.418                                                                          | 380.000                                                                     | 263.936                                                               | 2.063.958         | 2.247                                        | 15.833                                         |
| <b>Dr. Torsten Jeworrek</b>                 | <b>2010</b>             | <b>750.000</b>      | <b>31.744</b>                            | <b>754.583</b>                                                                   | -                                                                           | -                                                                     | <b>1.536.327</b>  | -                                            | -                                              |
|                                             | 2009                    | 600.000             | 32.948                                   | 986.202                                                                          | 480.000                                                                     | 333.400                                                               | 2.432.550         | 2.839                                        | 20.000                                         |
| <b>Dr. Peter Röder</b>                      | <b>2010</b>             | <b>480.000</b>      | <b>31.983</b>                            | <b>524.160</b>                                                                   | -                                                                           | -                                                                     | <b>1.036.143</b>  | -                                            | -                                              |
|                                             | 2009                    | 350.000             | 28.488                                   | 612.815                                                                          | 280.000                                                                     | 194.489                                                               | 1.465.792         | 1.656                                        | 11.667                                         |
| <b>Dr. Jörg Schneider</b>                   | <b>2010</b>             | <b>780.000</b>      | <b>35.730</b>                            | <b>685.230</b>                                                                   | -                                                                           | -                                                                     | <b>1.500.960</b>  | -                                            | -                                              |
|                                             | 2009                    | 650.000             | 39.458                                   | 873.950                                                                          | 520.000                                                                     | 361.189                                                               | 2.444.597         | 3.075                                        | 21.667                                         |
| <b>Dr. Wolfgang Strassl</b>                 | <b>2010</b>             | <b>519.000</b>      | <b>28.747</b>                            | <b>258.383</b>                                                                   | -                                                                           | -                                                                     | <b>806.130</b>    | -                                            | -                                              |
|                                             | 2009                    | 432.500             | 26.600                                   | 516.652                                                                          | 346.000                                                                     | 240.331                                                               | 1.562.083         | 2.046                                        | 14.417                                         |
| <b>Dr. Joachim Wenning</b>                  | <b>2010</b>             | <b>420.000</b>      | <b>23.517</b>                            | <b>389.004</b>                                                                   | -                                                                           | -                                                                     | <b>832.521</b>    | -                                            | -                                              |
|                                             | 2009                    | 300.000             | 92.732                                   | 471.240                                                                          | 240.000                                                                     | 166.700                                                               | 1.270.672         | 1.419                                        | 10.000                                         |
| <b>Gesamt</b>                               | <b>2010</b>             | <b>5.649.000</b>    | <b>463.031</b>                           | <b>5.550.530</b>                                                                 | -                                                                           | -                                                                     | <b>11.662.561</b> | -                                            | -                                              |
|                                             | 2009                    | 4.550.000           | 391.049                                  | 6.665.153                                                                        | 3.640.000                                                                   | 2.528.288                                                             | 17.774.490        | 21.527                                       | 151.667                                        |

<sup>1</sup> Zum Aufstellungszeitpunkt lag noch kein Organbeschluss über die Auszahlungsbeträge für 2010 vor. Der Ausweis der Vergütung für die Jahres-Performance erfolgt auf Basis von Schätzungen und der entsprechend gebildeten Rückstellungen. Für den Jahresbonus 2009 wurden insgesamt 271.830 € mehr ausbezahlt als zurückgestellt. Die Beträge für die Jahres-Performance 2010 wurden entsprechend erhöht.

<sup>2</sup> Performance Share Units wurden erst- und letztmals für 2009 unter dem Mid-Term Incentive Plan 2009-2011 gewährt.

<sup>3</sup> Der 2010 erfasste Gesamtaufwand (Rückstellungsaufwand aufgrund der Wertentwicklung der Performance Share Units aus dem Plan 2009-2011) für den Mid-Term Incentive Plan 2009-2011 betrug für: von Bomhard 116.266 €, Arnoldussen 130.399 €, Blunck 140.856 €, Daschner 154.685 €, Jeworrek 195.400 €, Röder 114.001 €, Schneider 83.182 €, Strassl -8.495 €, Wenning 97.589 €.

<sup>4</sup> Der 2010 erfasste Gesamtaufwand (Rückstellungsaufwand/-auflösung aufgrund der Wertentwicklung der Wertsteigerungsrechte aus den Plänen 2003-2009) für die langfristigen Incentive-Pläne betrug für: von Bomhard 133.025,60 €, Arnoldussen 15.205,80 €, Blunck -10.595,78 €, Daschner 48.892,63 €, Jeworrek 86.380,56 €, Röder 19.092,36 €, Schneider 77.035,80 €, Strassl -37.320,55 €, Wenning -3.799,37 €.

<sup>5</sup> Sachbezüge/Nebenleistungen einschließlich Jubiläumsgeldzahlung.

Der Mid-Term Incentive Plan 2009-2011 und der langfristige Incentive-Plan 2009 sind mit den beizulegenden Zeitwerten zum Zeitpunkt der Gewährung berücksichtigt. Informationen zu den beizulegenden Zeitwerten finden Sie im Anhang unter (45) Mid-Term Incentive Plan und (44) Langfristiger Incentive-Plan. Ob und in welcher Höhe diese variablen Bestandteile tatsächlich an die Vorstandsmitglieder ausbezahlt werden, ist noch nicht sicher und hängt von den jeweiligen Zielerreichungen, der Aktienkursentwicklung und der Erfüllung der Ausübungsbedingungen der langfristigen Incentive-Pläne ab. Die zukünftigen Verpflichtungen aus den langfristigen Incentive-Plänen sichern wir ab. Ziel ist dabei, den Aufwand, der aus einem Wertzuwachs der Wertsteigerungsrechte resultiert, durch einen Wertanstieg des Aktienbestands ökonomisch möglichst zu neutralisieren.



Die Zusagebeträge für die variable Vergütung nach dem zum 1. Januar 2010 neu gestalteten Vergütungssystem können Sie der folgenden Tabelle entnehmen.

**Zusagebeträge für die variable Vergütung der einzelnen Vorstandsmitglieder bei voller Zielerreichung (= 100%) gemäß DRS 17 (geändert 2010) Korridor 0-200%**

| Name                     | Jahres-Performance <sup>1, 3</sup> |      |           | Mehrjahres-Performance <sup>2, 3</sup> |      |           | Summe      |
|--------------------------|------------------------------------|------|-----------|----------------------------------------|------|-----------|------------|
|                          | Zusage                             | für  | €         | Zusage                                 | für  | €         | Zusagen    |
| Dr. Nikolaus von Bomhard | 2010                               | 2011 | 798.000   | 2010                                   | 2011 | 1.862.000 | 2.660.000  |
|                          | 2009                               | 2010 | 764.400   | 2009                                   | 2010 | 1.783.600 | 2.548.000  |
| Dr. Ludger Arnoldussen   | 2010                               | 2011 | 363.300   | 2010                                   | 2011 | 847.700   | 1.211.000  |
|                          | 2009                               | 2010 | 363.300   | 2009                                   | 2010 | 847.700   | 1.211.000  |
| Dr. Thomas Blunck        | 2010                               | 2011 | 378.000   | 2010                                   | 2011 | 882.000   | 1.260.000  |
|                          | 2009                               | 2010 | 363.300   | 2009                                   | 2010 | 847.700   | 1.211.000  |
| Georg Daschner           | 2010                               | 2011 | 409.500   | 2010                                   | 2011 | 955.500   | 1.365.000  |
|                          | 2009                               | 2010 | 399.000   | 2009                                   | 2010 | 931.000   | 1.330.000  |
| Dr. Torsten Jeworrek     | 2010                               | 2011 | 546.000   | 2010                                   | 2011 | 1.274.000 | 1.820.000  |
|                          | 2009                               | 2010 | 525.000   | 2009                                   | 2010 | 1.225.000 | 1.750.000  |
| Dr. Peter Röder          | 2010                               | 2011 | 363.300   | 2010                                   | 2011 | 847.700   | 1.211.000  |
|                          | 2009                               | 2010 | 336.000   | 2009                                   | 2010 | 784.000   | 1.120.000  |
| Dr. Jörg Schneider       | 2010                               | 2011 | 567.000   | 2010                                   | 2011 | 1.323.000 | 1.890.000  |
|                          | 2009                               | 2010 | 546.000   | 2009                                   | 2010 | 1.274.000 | 1.820.000  |
| Dr. Wolfgang Strassl     | 2010                               | 2011 | 378.000   | 2010                                   | 2011 | 882.000   | 1.260.000  |
|                          | 2009                               | 2010 | 363.300   | 2009                                   | 2010 | 847.700   | 1.211.000  |
| Dr. Joachim Wenning      | 2010                               | 2011 | 336.000   | 2010                                   | 2011 | 784.000   | 1.120.000  |
|                          | 2009                               | 2010 | 294.000   | 2009                                   | 2010 | 686.000   | 980.000    |
| <b>Gesamt</b>            | 2010                               | 2011 | 4.139.100 | 2010                                   | 2011 | 9.657.900 | 13.797.000 |
|                          | 2009                               | 2010 | 3.954.300 | 2009                                   | 2010 | 9.226.700 | 13.181.000 |

<sup>1</sup> Zum Aufstellungszeitpunkt lag noch kein Organbeschluss über die Auszahlungsbeträge für 2010 vor. Der Ausweis der Vergütung für die Jahres-Performance erfolgt auf Basis von Schätzungen und der entsprechend gebildeten Rückstellungen in der Tabelle auf Seite 37.

<sup>2</sup> Die für 2010 zugesagte Vergütung für die Mehrjahres-Performance ist zahlbar 2013, die für 2011 zugesagte Vergütung 2014.

<sup>3</sup> Die Angaben zu den Bemessungsgrundlagen und Parametern auf Seite 30 für die Zusagen für 2010 gelten auch für die Zusagen für 2011.

### Pensionsanwartschaften

Um die Pensionsanwartschaften für aktive Vorstandsmitglieder zu finanzieren, entstanden im Geschäftsjahr Personalaufwendungen von 4,1 (4,0) Millionen €, wovon 1,0 Millionen € auf die leistungsorientierten Pensionszusagen und 3,1 Millionen € auf die beitragsorientierten Pensionszusagen entfallen. Durch die Risikoauslagerung an einen externen Rückdeckungsversicherer im Rahmen des beitragsorientierten Systems sind die sichtbaren Kosten der Altersversorgung seit 2009 markant höher. Die Gesellschaft nimmt diese Kostensteigerung in Kauf, um spätere Aufwandserhöhungen zu vermeiden und langfristige versorgungsspezifische Risiken auszuschließen. Für die einzelnen Mitglieder des Vorstands ergeben sich folgende Zusagen, Barwerte, Beitragssätze und Personalaufwendungen:

#### Pensionsanwartschaften

| Name                                     | Geschäfts-<br>jahr | Leistungsorientierte Pensionszusagen |                                     |                                                       |
|------------------------------------------|--------------------|--------------------------------------|-------------------------------------|-------------------------------------------------------|
|                                          |                    | Pensions-<br>zusage <sup>1</sup>     | Barwert<br>per 31.12.<br>des Jahres | Personalauf-<br>wand Rück-<br>stellungen <sup>2</sup> |
|                                          |                    | €/Jahr                               | €                                   | €                                                     |
| Dr. Nikolaus von Bomhard <sup>3, 8</sup> | 2010               | 407.100                              | 7.983.206                           | 274.756                                               |
|                                          | 2009               | 407.100                              | 6.549.884                           | 265.663                                               |
| Dr. Ludger Arnoldussen <sup>4, 8</sup>   | 2010               | 157.500                              | 961.497                             | 194.733                                               |
|                                          | 2009               | 157.500                              | 796.419                             | 192.923                                               |
| Dr. Thomas Blunck <sup>5, 8</sup>        | 2010               | 120.000                              | 1.172.379                           | 82.711                                                |
|                                          | 2009               | 120.000                              | 883.757                             | 79.922                                                |
| Georg Daschner <sup>6, 8</sup>           | 2010               | 199.500                              | 5.544.535                           | 0                                                     |
|                                          | 2009               | 190.000                              | 4.565.015                           | 65.676                                                |
| Dr. Torsten Jeworrek <sup>7, 8</sup>     | 2010               | 171.000                              | 2.518.857                           | 102.438                                               |
|                                          | 2009               | 171.000                              | 1.987.220                           | 98.898                                                |
| Dr. Peter Röder <sup>3, 8</sup>          | 2010               | 90.000                               | 1.370.292                           | 55.272                                                |
|                                          | 2009               | 90.000                               | 1.107.930                           | 53.513                                                |
| Dr. Jörg Schneider <sup>3, 8</sup>       | 2010               | 275.000                              | 4.712.708                           | 179.163                                               |
|                                          | 2009               | 275.000                              | 3.811.266                           | 173.179                                               |
| Dr. Wolfgang Strassl <sup>3, 8</sup>     | 2010               | 120.000                              | 2.390.968                           | 93.559                                                |
|                                          | 2009               | 120.000                              | 1.948.445                           | 90.145                                                |
| Dr. Joachim Wenning <sup>4, 8</sup>      | 2010               | -                                    | -                                   | 11.411                                                |
|                                          | 2009               | -                                    | -                                   | -                                                     |
| <b>Gesamt</b>                            | 2010               | 1.540.100                            | 26.654.442                          | 994.043                                               |
|                                          | 2009               | 1.530.600                            | 21.649.936                          | 1.019.919                                             |

Fußnoten siehe Tabelle auf nächster Seite.

## Pensionsanwartschaften

| Name                                     | Geschäfts-<br>jahr | Beitragsorientierte Pensionszusagen                                     |                                                 |                                     |                                          |
|------------------------------------------|--------------------|-------------------------------------------------------------------------|-------------------------------------------------|-------------------------------------|------------------------------------------|
|                                          |                    | Versorgungs-<br>beitragssatz<br>der Ziel-<br>Gesamtdirekt-<br>vergütung | Pensions-<br>zusage<br>per 31.12.<br>des Jahres | Barwert<br>per 31.12.<br>des Jahres | Personalauf-<br>wand Rück-<br>stellungen |
|                                          |                    | %                                                                       | €/Jahr                                          | €                                   | €                                        |
| Dr. Nikolaus von Bomhard <sup>3, 8</sup> | 2010               | 17,00                                                                   | 51.480                                          | 1.014.781                           | 618.800                                  |
|                                          | 2009               | 17,00                                                                   | 25.978                                          | 476.301                             | 618.800                                  |
| Dr. Ludger Arnoldussen <sup>4, 8</sup>   | 2010               | 14,75                                                                   | 22.144                                          | 403.689                             | 255.175                                  |
|                                          | 2009               | 14,75                                                                   | 10.742                                          | 181.900                             | 236.000                                  |
| Dr. Thomas Blunck <sup>5, 8</sup>        | 2010               | 16,25                                                                   | 26.504                                          | 449.741                             | 281.125                                  |
|                                          | 2009               | 16,25                                                                   | 13.375                                          | 209.640                             | 281.125                                  |
| Georg Daschner <sup>6, 8</sup>           | 2010               | -                                                                       | -                                               | -                                   | -                                        |
|                                          | 2009               | -                                                                       | -                                               | -                                   | -                                        |
| Dr. Torsten Jeworrek <sup>7, 8</sup>     | 2010               | 19,50                                                                   | 42.890                                          | 774.611                             | 487.500                                  |
|                                          | 2009               | 19,50                                                                   | 21.215                                          | 354.248                             | 468.000                                  |
| Dr. Peter Röder <sup>3, 8</sup>          | 2010               | 20,25                                                                   | 26.606                                          | 511.122                             | 324.000                                  |
|                                          | 2009               | 20,25                                                                   | 12.547                                          | 224.214                             | 283.500                                  |
| Dr. Jörg Schneider <sup>3, 8</sup>       | 2010               | 16,50                                                                   | 36.759                                          | 695.493                             | 429.000                                  |
|                                          | 2009               | 16,50                                                                   | 18.566                                          | 324.891                             | 429.000                                  |
| Dr. Wolfgang Strassl <sup>3, 8</sup>     | 2010               | 21,00                                                                   | 30.221                                          | 595.730                             | 363.300                                  |
|                                          | 2009               | 21,00                                                                   | 15.249                                          | 279.590                             | 363.300                                  |
| Dr. Joachim Wenning <sup>4, 8</sup>      | 2010               | 25,50                                                                   | 26.089                                          | - <sup>9</sup>                      | 357.000                                  |
|                                          | 2009               | 25,50                                                                   | 12.159                                          | -                                   | 306.000                                  |
| <b>Gesamt</b>                            | 2010               |                                                                         | 262.693                                         | 4.445.167                           | 3.115.900                                |
|                                          | 2009               |                                                                         | 129.831                                         | 2.050.784                           | 2.985.725                                |

<sup>1</sup> Wert entspricht bei übergeleiteten Vorstandsmitgliedern festgeschriebener jährlicher Besitzstandsrente zum 31.12.2008, bei Daschner leistungsorientierter Pensionszusage per 31.12. des Jahres.

<sup>2</sup> Aufwand für leistungsorientiertes System inkl. Rückstellung für Lohnfortzahlung für Hinterbliebene.

<sup>3</sup> Hat bei vorzeitiger oder regulärer Beendigung seiner Tätigkeit Anspruch auf vorgezogenes gekürztes Ruhegeld.

<sup>4</sup> Hat bei vorzeitiger oder regulärer Beendigung seiner Tätigkeit Anspruch auf unverfallbare Anwartschaft nach dem Betriebsrentengesetz.

<sup>5</sup> Hat bei vorzeitiger Beendigung seiner Tätigkeit Anspruch auf unverfallbare Anwartschaft nach dem Betriebsrentengesetz, bei regulärer Beendigung seiner Tätigkeit Anspruch auf verbesserte unverfallbare Anwartschaft.

<sup>6</sup> Keine Umstellung auf beitragsorientiertes System, da zum Umstellungszeitpunkt bereits das 55. Lebensjahr vollendet war. Hat bei vorzeitiger oder regulärer Beendigung seiner Tätigkeit Anspruch auf Altersruhegeld.

<sup>7</sup> Hat bei vorzeitiger Beendigung seiner Tätigkeit Anspruch auf unverfallbare Anwartschaft nach dem Betriebsrentengesetz, bei regulärer Beendigung seiner Tätigkeit Anspruch auf vorgezogenes gekürztes Ruhegeld.

<sup>8</sup> Hat bei Beendigung seiner Tätigkeit aufgrund Arbeitsunfähigkeit Anspruch auf Ruhegeld.

<sup>9</sup> Defined Contribution Plan im Sinne des IAS 19, Leistungen an Arbeitnehmer, daher kein Barwert angegeben.

### **Vergütungsstruktur der leitenden Angestellten**

Entsprechend der VersVergV überprüft Munich Re derzeit die Vergütungssystematik der leitenden Angestellten und nimmt erforderliche Anpassungen vor.

Die leitenden Angestellten der Münchener Rück AG erhalten als fixe Bestandteile eine feste jährliche Grundvergütung, die als monatliches Gehalt ausbezahlt wird, sowie marktübliche Sachbezüge und Nebenleistungen (zum Beispiel Dienstwagen, Versicherungen). Die variablen Bestandteile setzen sich aus den kurzfristigen Komponenten Leistungsvariable und Company-Result-Bonus sowie den aktienkursbasierten Komponenten Mid-Term Incentive Plan und langfristiger Incentive-Plan zusammen.

Für die Leistungsvariable bilden quantitative und qualitative Zielvorgaben die Basis. Bei den quantitativen Zielen kommen Größen aus der operativen Planung zum Einsatz, für den qualitativen Anteil werden persönliche Ziele vereinbart.

Für den Company-Result-Bonus wird der RoRaC als Größe verwendet. Die Vorgaben entsprechen dem Konzernziel bei der variablen Vergütung der Vorstandsmitglieder. Beim Company-Result-Bonus handelt es sich im Grundsatz um ein Bonustopfmodell. Hier wird in Abhängigkeit vom Unternehmenserfolg eine Gesamtsumme ermittelt, die als Bonus an die Mitarbeiter ausgeschüttet werden kann. Mit steigender Managementebene nehmen die Zielwerte des Company-Result-Bonus zu. Durch die Funktionsweise ist sichergestellt, dass der Konzernerfolg systematisch in die Vergütung der Mitarbeiter einfließt und die Bonussumme in einem angemessenen Verhältnis zum Erfolg des Gesamtunternehmens steht.

Der Mid-Term Incentive Plan mit einer Laufzeit von drei Jahren und der langfristige Incentive-Plan mit einer Laufzeit von sieben Jahren orientieren sich an den Plänen der Vorstandsmitglieder der Münchener Rück AG, wie sie auf der Seite 31 erläutert sind. Neben den leitenden Angestellten in München nehmen auch die wichtigsten Führungskräfte der Auslandsorganisation der Münchener Rück AG am langfristigen Incentive-Plan teil.

Die einzelnen variablen Komponenten werden auf allen Managementebenen gewährt, jedoch in unterschiedlicher Gewichtung. Der Anteil aller variablen Vergütungsbestandteile beträgt für die erste Führungsebene unter dem Vorstand mehr als 50 % der Gesamtvergütung. Dieser Anteil nimmt auf den nachfolgenden Managementebenen sukzessive ab und macht für die unterste Managementebene noch etwa ein Drittel aus. Die kurz-, mittel- und langfristigen Komponenten stehen in einem ausgewogenen Verhältnis zueinander. Der Anteil der mittel- und langfristigen Vergütungen an der variablen Vergütung liegt für die erste Führungsebene bei über 50 %, sodass ein nachhaltiges Anreizsystem sichergestellt ist. Garantierte variable Vergütungsbestandteile werden nicht gewährt.



**Gesamtbezüge des Aufsichtsrats**

Die seit dem Geschäftsjahr 2009 geltende Regelung sieht für jedes Aufsichtsratsmitglied jährlich eine feste Vergütungskomponente von 50.000 € vor; hinzu kommen eine variable ergebnisabhängige und eine auf den langfristigen Unternehmenserfolg bezogene Vergütungskomponente. Der Aufsichtsratsvorsitzende erhält jeweils das Zweieinhalbfache, sein Stellvertreter das Eineinhalbfache der festen und der variablen Vergütungen.

Die variablen ergebnisabhängigen Vergütungen berechnen sich nach dem unverwässerten Ergebnis pro Aktie aus den fortzuführenden Geschäftsbereichen, das wir im Konzernabschluss nach den International Financial Reporting Standards (IFRS) ausweisen. Jedes Aufsichtsratsmitglied erhält 4.000 € für jeden vollen Euro, den das Ergebnis pro Aktie den Betrag von 12 € übersteigt, höchstens jedoch 40.000 €. Bei einem Ergebnis pro Aktie von 13,06 € wird für das Geschäftsjahr 2010 eine variable erfolgsabhängige Vergütung ausbezahlt. Die erfolgsorientierte Vergütungskomponente mit langfristiger Anreizwirkung wurde in Übereinstimmung mit dem DCGK eingeführt. Sie beträgt 10.000 € und wird gezahlt, wenn das Ergebnis pro Aktie des Vergütungsjahres das Ergebnis pro Aktie des dem Vergütungsjahr vorgehenden dritten Geschäftsjahres um mindestens 30 % übertrifft. Für das Vergütungsjahr 2010 fällt keine langfristige Vergütungskomponente an.

Mitglieder von Ausschüssen erhalten für ihre Tätigkeit einen Zuschlag von 50 % der Festvergütung, Vorsitzende eines Ausschusses erhalten 100 % der Festvergütung. Auf diese Weise wird dem erheblichen Arbeitsaufwand Rechnung getragen.

Die jährliche Gesamtvergütung für jedes Aufsichtsratsmitglied ist auf das Dreifache der festen Vergütung begrenzt. Dies stellt sicher, dass die Gesamtvergütung der einzelnen Aufsichtsratsmitglieder der Höhe nach angemessen ist, auch für den Fall, dass weitere Ausschüsse gebildet werden.

Vergütung der Aufsichtsratsmitglieder gemäß § 15 der Satzung<sup>1</sup>

| Name                                             | Geschäftsjahr | Feste Vergütung     |                                        | Erfolgs-orientierte Vergütung | Gesamt              |
|--------------------------------------------------|---------------|---------------------|----------------------------------------|-------------------------------|---------------------|
|                                                  |               | Jährlich            | Für Ausschuss-tätigkeiten <sup>2</sup> | Jährlich                      |                     |
|                                                  |               | €                   | €                                      | €                             | €                   |
| <b>Dr. Hans-Jürgen Schinzler</b>                 | <b>2010</b>   | <b>125.000,00</b>   | <b>139.000,00</b>                      | <b>10.000,00</b>              | <b>274.000,00</b>   |
| Vorsitzender                                     | 2009          | 125.000,00          | 143.000,00                             | 0,00                          | 268.000,00          |
| <b>Hans Peter Claußen</b>                        | <b>2010</b>   | <b>75.000,00</b>    | <b>25.000,00</b>                       | <b>6.000,00</b>               | <b>106.000,00</b>   |
| stellvertr. Vorsitzender                         | 2009          | 52.191,78           | 17.397,26                              | 0,00                          | 69.589,04           |
| <b>Herbert Bach</b>                              | <b>2010</b>   | <b>50.000,00</b>    | <b>50.000,00</b>                       | <b>4.000,00</b>               | <b>104.000,00</b>   |
|                                                  | 2009          | 57.808,22           | 50.000,00                              | 0,00                          | 107.808,22          |
| <b>Dina Bösch</b>                                | <b>2010</b>   | <b>50.000,00</b>    | -                                      | <b>4.000,00</b>               | <b>54.000,00</b>    |
|                                                  | 2009          | 34.794,52           | -                                      | 0,00                          | 34.794,52           |
| <b>Frank Fassin</b>                              | <b>2010</b>   | <b>50.000,00</b>    | -                                      | <b>4.000,00</b>               | <b>54.000,00</b>    |
|                                                  | 2009          | 34.794,52           | -                                      | 0,00                          | 34.794,52           |
| <b>Dr. Benita Ferrero-Waldner (ab 12.2.2010)</b> | <b>2010</b>   | <b>44.246,57</b>    | -                                      | <b>3.539,73</b>               | <b>47.786,30</b>    |
|                                                  | 2009          | -                   | -                                      | -                             | -                   |
| <b>Christian Fuhrmann</b>                        | <b>2010</b>   | <b>50.000,00</b>    | <b>35.000,00</b>                       | <b>4.000,00</b>               | <b>89.000,00</b>    |
|                                                  | 2009          | 34.794,52           | 21.397,26                              | 0,00                          | 56.191,78           |
| <b>Prof. Dr. Peter Gruss</b>                     | <b>2010</b>   | <b>50.000,00</b>    | -                                      | <b>4.000,00</b>               | <b>54.000,00</b>    |
|                                                  | 2009          | 34.794,52           | -                                      | 0,00                          | 34.794,52           |
| <b>Prof. Dr. Henning Kagermann</b>               | <b>2010</b>   | <b>50.000,00</b>    | <b>64.000,00</b>                       | <b>4.000,00</b>               | <b>118.000,00</b>   |
|                                                  | 2009          | 50.000,00           | 58.465,75                              | 0,00                          | 108.465,75          |
| <b>Peter Löscher</b>                             | <b>2010</b>   | <b>50.000,00</b>    | -                                      | <b>4.000,00</b>               | <b>54.000,00</b>    |
|                                                  | 2009          | 34.794,52           | -                                      | 0,00                          | 34.794,52           |
| <b>Wolfgang Mayrhuber</b>                        | <b>2010</b>   | <b>50.000,00</b>    | <b>25.000,00</b>                       | <b>4.000,00</b>               | <b>79.000,00</b>    |
|                                                  | 2009          | 50.000,00           | 17.397,26                              | 0,00                          | 67.397,26           |
| <b>Silvia Müller</b>                             | <b>2010</b>   | <b>50.000,00</b>    | -                                      | <b>4.000,00</b>               | <b>54.000,00</b>    |
|                                                  | 2009          | 34.794,52           | -                                      | 0,00                          | 34.794,52           |
| <b>Marco Nörenberg</b>                           | <b>2010</b>   | <b>50.000,00</b>    | <b>35.000,00</b>                       | <b>4.000,00</b>               | <b>89.000,00</b>    |
|                                                  | 2009          | 34.794,52           | 21.397,26                              | 0,00                          | 56.191,78           |
| <b>Reinhard Pasch</b>                            | <b>2010</b>   | <b>50.000,00</b>    | -                                      | <b>4.000,00</b>               | <b>54.000,00</b>    |
|                                                  | 2009          | 34.794,52           | -                                      | 0,00                          | 34.794,52           |
| <b>Dr. Bernd Pischetsrieder</b>                  | <b>2010</b>   | <b>50.000,00</b>    | <b>56.000,00</b>                       | <b>4.000,00</b>               | <b>110.000,00</b>   |
|                                                  | 2009          | 50.000,00           | 58.000,00                              | 0,00                          | 108.000,00          |
| <b>Anton van Rossum</b>                          | <b>2010</b>   | <b>50.000,00</b>    | <b>35.000,00</b>                       | <b>4.000,00</b>               | <b>89.000,00</b>    |
|                                                  | 2009          | 34.794,52           | 21.397,26                              | 0,00                          | 56.191,78           |
| <b>Andrés Ruiz Feger</b>                         | <b>2010</b>   | <b>50.000,00</b>    | -                                      | <b>4.000,00</b>               | <b>54.000,00</b>    |
|                                                  | 2009          | 34.794,52           | -                                      | 0,00                          | 34.794,52           |
| <b>Richard Sommer</b>                            | <b>2010</b>   | <b>50.000,00</b>    | -                                      | <b>4.000,00</b>               | <b>54.000,00</b>    |
|                                                  | 2009          | 34.794,52           | -                                      | 0,00                          | 34.794,52           |
| <b>Dr. Ron Sommer</b>                            | <b>2010</b>   | <b>50.000,00</b>    | -                                      | <b>4.000,00</b>               | <b>54.000,00</b>    |
|                                                  | 2009          | 50.000,00           | -                                      | 0,00                          | 50.000,00           |
| <b>Dr. Thomas Wellauer (bis 30.9.2010)</b>       | <b>2010</b>   | <b>37.397,26</b>    | -                                      | <b>2.991,78</b>               | <b>40.389,04</b>    |
|                                                  | 2009          | 34.794,52           | -                                      | 0,00                          | 34.794,52           |
| <b>Gesamt</b>                                    | <b>2010</b>   | <b>1.081.643,83</b> | <b>464.000,00</b>                      | <b>86.531,51</b>              | <b>1.632.175,34</b> |
|                                                  | 2009          | 852.534,24          | 408.452,05                             | 0,00                          | 1.260.986,29        |

<sup>1</sup> Jeweils zuzüglich Umsatzsteuer gemäß § 15 Abs. 6 der Satzung.

<sup>2</sup> Bei Mitgliedern des Prüfungsausschusses und/oder Nominierungsausschusses jeweils einschließlich Sitzungsgeld gemäß § 15 Abs. 4 der Satzung.

**Vergütung der Aufsichtsratsmitglieder für Aufsichtsrats Tätigkeiten bei Tochterunternehmen der Münchener Rück AG gemäß deren jeweiligen Satzungsbestimmungen<sup>1</sup>**

| Name                      | Geschäftsjahr | Feste Vergütung       |                                       | Erfolgsorientierte Vergütung | Gesamt            |
|---------------------------|---------------|-----------------------|---------------------------------------|------------------------------|-------------------|
|                           |               | Jährlich <sup>2</sup> | Für Ausschusstätigkeiten <sup>2</sup> | Jährlich                     |                   |
|                           |               | €                     | €                                     | €                            | €                 |
| <b>Hans Peter Claußen</b> | <b>2010</b>   | <b>57.500,00</b>      | <b>6.750,00</b>                       | <b>0,00</b>                  | <b>64.250,00</b>  |
| stellvertr. Vorsitzender  | 2009          | 39.915,75             | 4.697,26                              | 0,00                         | 44.613,01         |
| <b>Frank Fassin</b>       | <b>2010</b>   | <b>31.441,78</b>      | -                                     | <b>0,00</b>                  | <b>31.441,78</b>  |
|                           | 2009          | 31.565,07             | -                                     | 0,00                         | 31.565,07         |
| <b>Silvia Müller</b>      | <b>2010</b>   | <b>33.019,86</b>      | -                                     | <b>0,00</b>                  | <b>33.019,86</b>  |
|                           | 2009          | 36.866,44             | -                                     | 0,00                         | 36.866,44         |
| <b>Marco Nörenberg</b>    | <b>2010</b>   | <b>33.389,73</b>      | <b>13.691,10</b>                      | <b>0,00</b>                  | <b>47.080,83</b>  |
|                           | 2009          | 37.828,08             | 15.394,52                             | 0,00                         | 53.222,60         |
| <b>Reinhard Pasch</b>     | <b>2010</b>   | -                     | -                                     | -                            | -                 |
|                           | 2009          | 1.035,62              | 258,91                                | 0,00                         | 1.294,53          |
| <b>Richard Sommer</b>     | <b>2010</b>   | <b>31.343,15</b>      | -                                     | <b>0,00</b>                  | <b>31.343,15</b>  |
|                           | 2009          | 31.565,07             | -                                     | 0,00                         | 31.565,07         |
| <b>Gesamt</b>             | <b>2010</b>   | <b>186.694,52</b>     | <b>20.441,10</b>                      | <b>0,00</b>                  | <b>207.135,62</b> |
|                           | 2009          | 178.776,03            | 20.350,69                             | 0,00                         | 199.126,72        |

<sup>1</sup> Jeweils zuzüglich Umsatzsteuer gemäß den entsprechenden Satzungsbestimmungen der jeweiligen Konzerngesellschaften.

<sup>2</sup> Jeweils einschließlich Sitzungsgeld, soweit dies gemäß den entsprechenden Satzungsbedingungen für die Teilnahme an Sitzungen vorgesehen ist.

**Aktiengeschäfte und Aktienbesitz von Mitgliedern des Vorstands und des Aufsichtsrats**

Erwerben oder veräußern Vorstands- und Aufsichtsratsmitglieder der Gesellschaft sowie bestimmte mit ihnen in enger Beziehung stehende Personen Aktien der Gesellschaft oder sich darauf beziehende Finanzinstrumente, müssen sie dies der Gesellschaft unverzüglich mitteilen. Mitteilungspflichtig sind Erwerbs- und Veräußerungsgeschäfte, die 5.000 € im Kalenderjahr erreichen oder übersteigen.

Die Münchener Rück AG muss entsprechende Mitteilungen unverzüglich auf ihrer Internetseite und im jährlichen Dokument nach § 10 Abs. 1 Wertpapierprospektgesetz veröffentlichen.

Der Gesamtbesitz aller Vorstands- und Aufsichtsratsmitglieder an Aktien und der darauf bezogenen Finanzinstrumente der Münchener Rück AG beträgt weniger als 1% der von der Gesellschaft ausgegebenen Aktien.

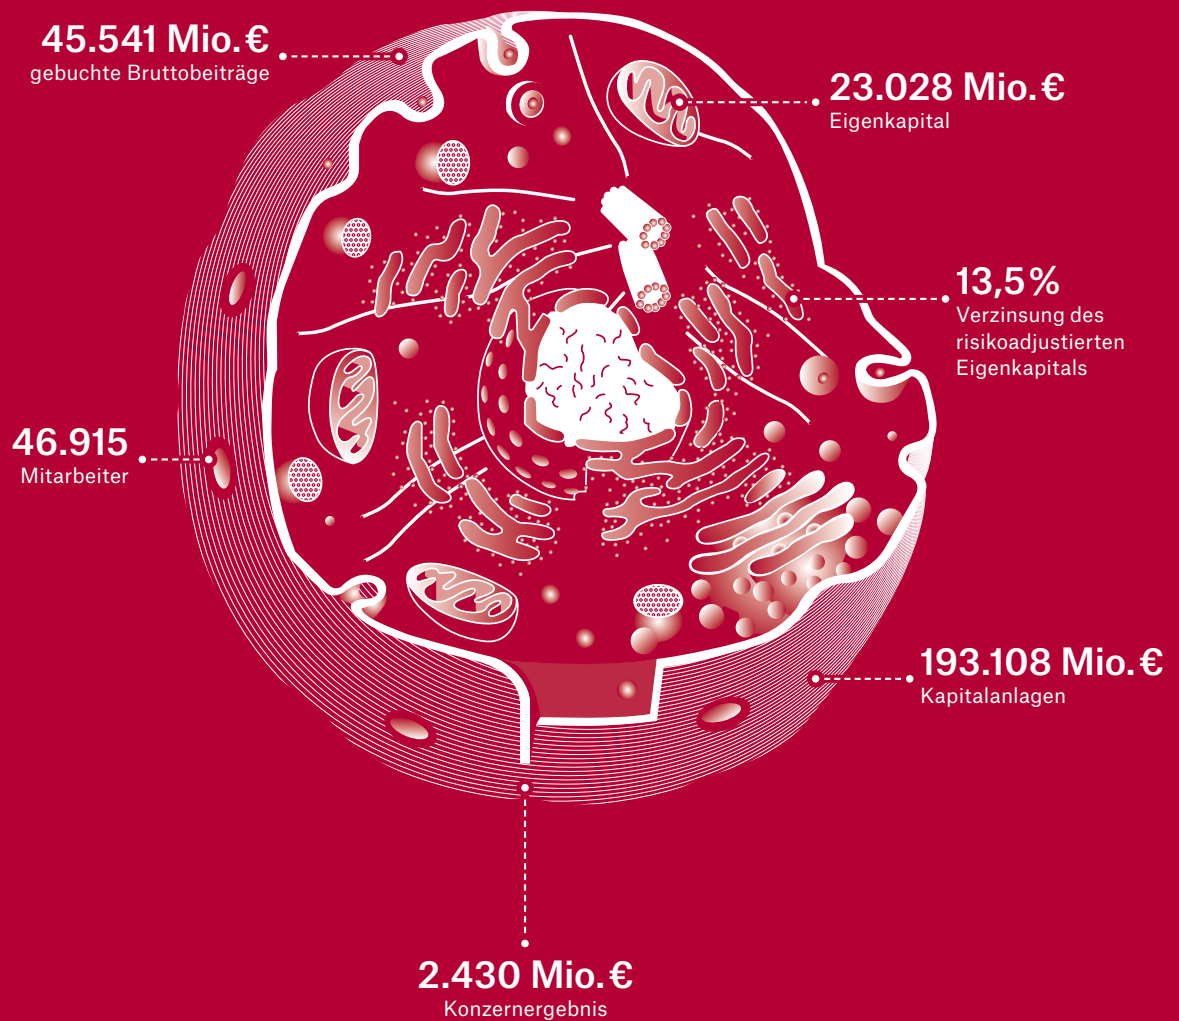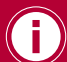

**Die menschliche Zelle** // Rund 220 verschiedene Zell- und Gewebetypen formen den menschlichen Körper, wobei jede einzelne Zelle ein eigenständiges und selbsterhaltendes System bildet. Jede von ihnen kann Nährstoffe aufnehmen und deren Energie für sich nutzbar machen. Die wichtigste Eigenschaft menschlicher Zellen besteht jedoch in ihrer Fähigkeit zur Zellteilung, wodurch jeweils zwei nahezu identische neue Zellen entstehen.



# Konzern- lagebericht

|                         |     |
|-------------------------|-----|
| Munich Re               | 048 |
| Rahmenbedingungen       | 064 |
| Geschäftsverlauf        | 070 |
| Finanzlage              | 100 |
| Weitere Erfolgsfaktoren | 108 |
| Risikobericht           | 116 |
| Ausblick                | 138 |

# Konzernlagebericht

|                                                                      |            |
|----------------------------------------------------------------------|------------|
| <b>Munich Re</b>                                                     | <b>48</b>  |
| Struktur                                                             | 48         |
| Wichtige Instrumente der Unternehmenssteuerung                       | 54         |
| Unternehmensleitung                                                  | 60         |
| <b>Rahmenbedingungen</b>                                             | <b>64</b>  |
| Allgemeine Rahmenbedingungen                                         | 64         |
| Wirtschaftliche Rahmenbedingungen und Konjunktur                     | 64         |
| <b>Geschäftsverlauf</b>                                              | <b>70</b>  |
| Überblick und wichtige Kennzahlen                                    | 70         |
| Rückversicherung                                                     | 75         |
| Erstversicherung                                                     | 87         |
| Munich Health                                                        | 92         |
| Entwicklung der Kapitalanlagen                                       | 94         |
| <b>Finanzlage</b>                                                    | <b>100</b> |
| Analyse der Kapitalstruktur                                          | 100        |
| Asset-Liability-Management                                           | 102        |
| Kapitalmanagement                                                    | 102        |
| Angaben nach § 315 Abs. 4 HGB und erläuternder Bericht des Vorstands | 103        |
| Gruppensolvabilität                                                  | 106        |
| Analyse der Konzern-Kapitalflussrechnung                             | 107        |
| <b>Weitere Erfolgsfaktoren</b>                                       | <b>108</b> |
| Kunden und Kundenbeziehungen                                         | 108        |
| Forschung und Entwicklung                                            | 109        |
| Mitarbeiter                                                          | 110        |
| Corporate Responsibility                                             | 114        |
| <b>Risikobericht</b>                                                 | <b>116</b> |
| Risk Governance und Risikomanagement-System                          | 116        |
| Ökonomisches Risikokapital                                           | 126        |
| Verfügbare Eigenmittel                                               | 132        |
| Ausgewählte Risikokomplexe                                           | 134        |
| Weitere Entwicklungen                                                | 137        |
| Zusammenfassung                                                      | 137        |
| <b>Ausblick</b>                                                      | <b>138</b> |
| Überblick                                                            | 138        |
| Wirtschaftliche Rahmenbedingungen und Konjunktur                     | 138        |
| Entwicklung von Munich Re                                            | 140        |

## Munich Re

////////////////////////////////////

- // Aufstellung des Konzerns in verbesserter Segmentdarstellung;  
neues Segment Munich Health
- // Neue Marke ERGO: Kundenversprechen hebt ERGO vom Wettbewerb ab

Um das global ausgerichtete Spektrum ihres Geschäftsmodells zu verdeutlichen, treten alle Rückversicherungseinheiten weltweit grundsätzlich unter der einheitlichen Marke Munich Re auf. Die Erstversicherungsaktivitäten sind vor allem bei der ERGO Versicherungsgruppe (ERGO) gebündelt. Unter dem Dach der Marke Munich Health sind die Krankenrückversicherung weltweit und die Krankenerstversicherung außerhalb Deutschlands in einer eigenen Organisation zusammengeführt.

### Struktur

Munich Re ist einer der international führenden Risikoträger. Mit ihrem integrierten Geschäftsmodell von Erst- und Rückversicherung kann Munich Re auf dem Markt der Risiken weite Teile der Wertschöpfungskette abdecken. Dabei strebt die Gruppe an, Synergien bei Erträgen und Kosten zu heben, und mindert durch die bessere Diversifikation gleichzeitig das notwendige Risikokapital. Zudem ist Munich Re im Assetmanagement aktiv.

#### Munich Re bietet weltweit Rückversicherungslösungen

Die Rückversicherungsunternehmen der Gruppe sind weltweit tätig. Erstversicherungsunternehmen von ERGO konzentrieren sich traditionell auf Deutschland und wachstumsstarke Märkte in Europa. Mittlerweile engagieren sie sich jedoch auch verstärkt auf asiatischen Märkten wie Indien, Südkorea oder China, die großes Potenzial besitzen. Die Unternehmen agieren direkt von ihren jeweiligen Stammsitzen aus sowie über zahlreiche Zweigniederlassungen, Tochter- und Beteiligungsgesellschaften. Spezialerstversicherer in Nischensegmenten, deren Geschäft besondere Lösungskompetenz benötigt, sind teilweise an die Rückversicherung als Risikoträger gekoppelt. Deshalb betreiben wir dieses Geschäft aus der Rückversicherung heraus. Mit vielen Konzernunternehmen bestehen Beherrschungs- und Gewinnabführungsverträge, insbesondere zwischen der ERGO Versicherungsgruppe AG und ihren Töchtern. Auch Munich Health ist in der Rückversicherung weltweit aktiv und nimmt in der Krankenerstversicherung außerhalb Deutschlands in ausgewählten Wachstumsmärkten wie der Golfregion, Indien und in den USA Geschäftschancen wahr.

Die Münchener Rück AG und die ERGO Versicherungsgruppe AG stehen seit 2005 unter einheitlicher Leitung im Sinne des Aktiengesetzes. Die Verantwortlichkeiten und Kompetenzen von Konzernführung und ERGO bei maßgeblichen Entscheidungen sind in den einschlägigen gesetzlichen Regelungen und einer Konzernrichtlinie geregelt.

## Änderungen der Segmentierung (ab 2010)

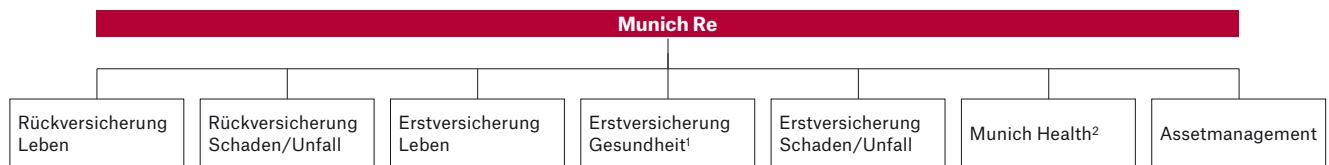

<sup>1</sup> Krankenversicherungsgeschäft in Deutschland sowie Reiseversicherungsgeschäft.

<sup>2</sup> Weltweites Krankenrückversicherungsgeschäft sowie Krankenerstversicherungsgeschäft außerhalb Deutschlands.

Dieser Lagebericht fasst die Geschäftstätigkeit der Gruppe zusammen, und zwar anhand ihrer Segmente Rückversicherung, Erstversicherung, Munich Health und Assetmanagement, nicht nach ihrer gesellschaftsrechtlichen Struktur oder ihren Beteiligungsverhältnissen.

## Rückversicherung

Die Rückversicherung betreibt die Lebens- sowie die Schaden- und Unfallrückversicherung, wobei Letztere weiter in die Zweige Haftpflicht, Unfall, Kraftfahrt, Transport, Luftfahrt, Raumfahrt, Feuer, Technische Versicherung, Kreditversicherung und Sonstige unterteilt werden kann. Unter Sonstige sind die übrigen Versicherungszweige der Schadenversicherung subsumiert, nämlich Einbruchdiebstahl-, Glas-, Hagel- inklusive Agro-, Leitungswasser-, Sonderrisiken-, Sturm-, Tier-, Verbundene Hausrat- und Verbundene Gebäudeversicherung sowie Vertrauensschadenversicherung. Ferner erfassen wir in der Rückversicherung unsere spezialisierten Erstversicherungsaktivitäten, soweit sie von der Rückversicherungsorganisation gesteuert werden, sowie sogenannte Managing General Agencies (MGA). Zum überwiegenden Teil werden sie derzeit als Risk Solutions unter die Marke Munich Re transferiert.

Sechs Ressorts befassen sich mit dem Geschäft in der Rückversicherung

Die Rückversicherung ist in sechs Ressorts unterteilt.

Unser weltweites Geschäft in der Lebensrückversicherung wird im Ressort Life gezeichnet.

Das Ressort Europe and Latin America ist für das Schaden- und Unfallgeschäft unserer Kunden aus Europa (außer Deutschland) sowie aus Lateinamerika und der Karibik zuständig.

Das Ressort Germany, Asia Pacific and Africa betreibt das Schaden- und Unfallgeschäft mit unseren Kunden in Deutschland sowie in Afrika, Asien, Australien und der pazifischen Inselwelt.

Das Ressort Special and Financial Risks betreut die Sparten Kreditrisiken, Luft- und Raumfahrt, Agro-, Unternehmer- und Sonderrisiken sowie das Alternative-Markets-Geschäft. Die Verbriefung von Versicherungsrisiken und den Risikotransfer auf den Kapitalmarkt übernimmt der Bereich Risk Trading. Zudem sorgt das Ressort für unsere eigene Rückversicherung (Retrozession).

Das Ressort Global Clients and North America pflegt unsere Geschäftsverbindungen zu großen international tätigen Versicherungsgruppen, den Global Clients, und zu global agierenden Lloyd's-Syndikaten sowie Bermuda-Gesellschaften. Ferner bündelt es unser Knowhow auf dem nordamerikanischen Markt. Es ist zuständig für die dort angesiedelten Tochtergesellschaften, unter anderem Munich Reinsurance America, Munich Reinsurance Company of Canada, American Modern Insurance Group (AMIG) und Hartford Steam Boiler Group (HSB Group). Hinzu kommt weltweites Geschäft in Spezialsparten wie der Arbeiterunfall- und der Transportversicherung. Auch die Steuerung des Watkins-Syndikats ist in diesem Ressort angesiedelt.



## Die Rückversicherung im Überblick<sup>1</sup>

| Ressort                          | Ausgewählte Tochtergesellschaften und Branches außerhalb Deutschlands <sup>2</sup>                                                                                                                                                                                                                                                                                                                                                                                                                                                                                                                                                                                                                                                                                                                                                                                                                                                                                                                                                                                                                                                                                                                                                                                           |
|----------------------------------|------------------------------------------------------------------------------------------------------------------------------------------------------------------------------------------------------------------------------------------------------------------------------------------------------------------------------------------------------------------------------------------------------------------------------------------------------------------------------------------------------------------------------------------------------------------------------------------------------------------------------------------------------------------------------------------------------------------------------------------------------------------------------------------------------------------------------------------------------------------------------------------------------------------------------------------------------------------------------------------------------------------------------------------------------------------------------------------------------------------------------------------------------------------------------------------------------------------------------------------------------------------------------|
| Life                             | American Modern Life Insurance Company, Amelia, Ohio<br>Munich American Reassurance Company, Atlanta, Georgia<br>Munich Re Japan Services K.K., Tokyo<br>Munich Reinsurance Company Canadian Life Branch, Toronto<br>Munich Reinsurance Company Life Reinsurance Eastern Europe/Central Asia, Moskau<br>Munich Reinsurance Company of Australasia Limited - New Zealand Branch, Auckland<br>Munich Reinsurance Company of Australasia Ltd, Sydney<br>Munich Reinsurance Company UK Life Branch, London<br>Southern Pioneer Life Insurance Company, Jonesboro, Arkansas                                                                                                                                                                                                                                                                                                                                                                                                                                                                                                                                                                                                                                                                                                       |
| Europe and Latin America         | Bell & Clements (London) Ltd, London<br>Münchener Rück do Brasil Resseguradora S.A., São Paulo <sup>3</sup><br>Münchener Rückversicherungs-Gesellschaft A.G. Sucursal España y Portugal, Madrid <sup>3</sup><br>Münchener Rückversicherungs-Gesellschaft AG in München Rappresentanza Generale per l'Italia, Mailand <sup>3</sup><br>Munich Re France Branch, Paris<br>Munich Reinsurance Company UK General Branch, London                                                                                                                                                                                                                                                                                                                                                                                                                                                                                                                                                                                                                                                                                                                                                                                                                                                  |
| Germany, Asia Pacific and Africa | Great Lakes Australia Branch, Sydney<br>Great Lakes Reinsurance (UK) PLC New Zealand Branch, Auckland<br>Münchener Rückversicherungs-Gesellschaft Australian Branch, Sydney<br>Munich Holdings of Australasia Pty. Ltd., Sydney<br>Munich Mauritius Reinsurance Co. Ltd., Port Louis<br>Munich Re Retakaful Malaysia Branch, Kuala Lumpur<br>Munich Reinsurance Company Beijing Branch, Beijing <sup>3</sup><br>Munich Reinsurance Company Hong Kong Branch, Hong Kong <sup>3</sup><br>Munich Reinsurance Company Korea Branch, Seoul <sup>3</sup><br>Munich Reinsurance Company Malaysia Branch, Kuala Lumpur<br>Munich Reinsurance Company New Zealand Branch, Auckland<br>Munich Reinsurance Company of Africa Ltd., Johannesburg<br>Munich Reinsurance Company Singapore Branch, Singapore <sup>3</sup>                                                                                                                                                                                                                                                                                                                                                                                                                                                                  |
| Special and Financial Risks      | Great Lakes Reinsurance (UK) Plc., London <sup>3</sup><br>Great Lakes Switzerland Branch, Zürich<br>Munich Re of Malta p.l.c., Floriana <sup>3</sup><br>New Reinsurance Company Ltd., Zürich <sup>3</sup>                                                                                                                                                                                                                                                                                                                                                                                                                                                                                                                                                                                                                                                                                                                                                                                                                                                                                                                                                                                                                                                                    |
| Global Clients and North America | American Alternative Insurance Corporation, Wilmington, Delaware <sup>3</sup><br>American Family Home Insurance Company, Jacksonville, Florida<br>American Modern Home Insurance Company, Amelia, Ohio<br>American Modern Insurance Company of Florida, Inc., Jacksonville, Florida<br>American Modern Insurance Group, Inc., Amelia, Ohio<br>American Modern Select Insurance Company, Amelia, Ohio<br>American Modern Surplus Lines Insurance Company, Amelia, Ohio<br>American Southern Home Insurance Company, Jacksonville, Florida<br>American Western Home Insurance Company, Oklahoma City, Oklahoma<br>Beaufort Underwriting Agency Ltd., London<br>First Marine Insurance Company, Amelia, Ohio<br>Global Standards, LLC, Wilmington, Delaware<br>Groves, John & Westrup Limited, London<br>HSB Engineering Insurance Limited, London<br>HSB Group, Inc., Hartford, Connecticut<br>HSB Solomon Associates LLC, Wilmington, Delaware<br>HSB Professional Loss Control, Inc., Tennessee<br>MSP Underwriting Ltd., London<br>Munich Re Capital Limited, London<br>Munich Re Holding Company (UK) Ltd., London<br>Munich Reinsurance America, Inc., Wilmington, Delaware <sup>3</sup><br>Munich Reinsurance Company of Canada, Toronto<br>N.M.U. Group Limited, London |

Roanoke Companies Inc., Schaumburg, Illinois  
Temple Insurance Company, Toronto  
The Boiler Inspection and Insurance Company of Canada, Toronto  
The Hartford Steam Boiler Inspection and Insurance Company of Connecticut,  
Hartford, Connecticut  
The Hartford Steam Boiler Inspection and Insurance Company,  
Hartford, Connecticut  
The Princeton Excess and Surplus Lines Insurance Company, Wilmington, Delaware  
The Midland Company, Cincinnati, Ohio  
Watkins Syndicate Hong Kong Limited, Hongkong  
Watkins Syndicate Middle East Limited, Dubai  
Watkins Syndicate Singapore Pte. Limited, Singapur

<sup>1</sup> Die vollständige Liste zum Anteilsbesitz finden Sie im Konzernanhang auf Seite 269 ff.

<sup>2</sup> Nur Tochtergesellschaften außerhalb Deutschlands mit einem Eigenkapital von in der Regel mehr als 5 Millionen € sind aufgeführt.

<sup>3</sup> Einheiten, die auch Geschäfte in Munich Health betreiben und der Rückversicherung daher anteilig zugeordnet werden.

Das Ressort Corporate Underwriting nimmt – ohne direkte operative Geschäftsverantwortung – eine wichtige Funktion für unser Geschäft in der Schaden- und Unfallrückversicherung wahr: Seine Mitarbeiter klären Grundsatzfragen der Zeichnungspolitik, sind verantwortlich für die Qualitätssicherung und integrieren mathematische Verfahren in die Geschäftsprozesse. Auf der Schadenseite wird diese Funktion komplementär von Corporate Claims wahrgenommen

## Erstversicherung

Der zweite Pfeiler von Munich Re ist die Erstversicherung, die bei ERGO gebündelt ist. Mit Ausnahme der Kreditversicherung bieten wir in der Erstversicherung Produkte aus allen wesentlichen Versicherungssparten an. 2009 erhöhte Munich Re ihren Anteil an ERGO von zuvor knapp unter 95 % um weitere fast 5 % und bot den übrigen Aktionären 2010 im Rahmen eines sogenannten Squeeze-out-Verfahrens eine Barabfindung an. Dieses Angebot in Höhe von 97,72 € je Aktie wurde auf der ERGO Hauptversammlung vom 12. Mai 2010 angenommen. Dies ermöglicht eine deutliche Vereinfachung der Beteiligungsstrukturen, spart Kosten und stellt einen konsequenten Schritt im Rahmen unserer Strategie eines integrierten Versicherungskonzerns dar.

### Kundenversprechen hebt ERGO von Wettbewerbern ab

ERGO setzte im Berichtsjahr ihre neue Markenstrategie um und bietet seit dem Sommer 2010 Lebens- sowie Schaden- und Unfallversicherungen in Deutschland unter eigenem Namen an. Die Marken Hamburg-Mannheimer und Victoria wurden vom Markt genommen. Bereits im Februar 2010 wurde der Direktversicherer der Gruppe, die Karstadt-Quelle Versicherungen, in ERGO Direkt Versicherungen umbenannt. Dieser klare Fokus auf die Marke ERGO macht das Rundumangebot der Erstversicherung besser sichtbar. Mit ihrem Kundenversprechen „Versichern heißt verstehen“ hebt ERGO sich von den Wettbewerbern ab; es steht für das Selbstverständnis und das Ziel, sich konsequent an den Bedürfnissen der Menschen auszurichten. Gleichzeitig hat ERGO das Profil ihrer Spezialistenmarken geschärft. Im Oktober 2010 wurde die Krankenversicherung unter der Marke DKV, die Rechtsschutzversicherung unter der Marke D.A.S. zusammengeführt. Die Marke ERV, die europaweit zu den führenden Anbietern zählt, steht weiter für die Reiseversicherung.

Im internationalen Geschäft ist die Gruppe bereits auf vielen Märkten mit der Marke ERGO aktiv und wird sie in Zukunft dort noch konsequenter positionieren. Die türkische ERGOİSVİÇRE Sigorta, eine der großen Auslandsgesellschaften, heißt seit dem Frühjahr 2010 nur noch ERGO Sigorta. Weitere große Auslandsgesellschaften sind der polnische Schaden- und Unfallversicherer ERGO Hestia sowie ERGO Austria. Zusätzlich zu vielen europäischen Märkten ist ERGO in Indien, Südkorea und China präsent und will weitere ausgewählte Märkte in Asien erschließen. Seit Kurzem ist ERGO mit der D.A.S. Kanada auch auf dem amerikanischen Markt vertreten.

**Die Erstversicherung im Überblick<sup>1</sup>**

| Segment               | Ausgewählte Tochtergesellschaften <sup>2</sup>                                                                                                                                                                                                                                                                                                                                                                                                                                                                                                                                                                                                                                                                                                                                                                                                                                  |
|-----------------------|---------------------------------------------------------------------------------------------------------------------------------------------------------------------------------------------------------------------------------------------------------------------------------------------------------------------------------------------------------------------------------------------------------------------------------------------------------------------------------------------------------------------------------------------------------------------------------------------------------------------------------------------------------------------------------------------------------------------------------------------------------------------------------------------------------------------------------------------------------------------------------|
| <b>Leben</b>          | Bank Austria Creditanstalt Versicherung AG, Wien<br>ERGO Direkt Lebensversicherung AG, Fürth<br>ERGO Lebensversicherung AG, Hamburg<br>ERGO Life N.V., Brüssel<br>ERGO Previdenza S.p.A., Mailand<br>Hamburg-Mannheimer Pensionskasse AG, Hamburg<br>San Marino Life Impresa sammarinese di assicurazione sulla vita S.p.A., San Marino<br>Sopockie Towarzystwo Ubezpieczen na Zycie Ergo Hestia Spolka Akcyjna, Sopot<br>VICTORIA Lebensversicherung Aktiengesellschaft, Düsseldorf<br>VICTORIA Pensionskasse AG, Düsseldorf<br>VICTORIA-VOLKSBANKEN Versicherungsaktiengesellschaft, Wien<br>Vorsorge Lebensversicherung AG, Düsseldorf<br>Vorsorge Luxemburg Lebensversicherung S.A., Munsbach                                                                                                                                                                               |
| <b>Gesundheit</b>     | DKV Deutsche Krankenversicherung AG, Köln<br>ERGO Direkt Krankenversicherung AG, Fürth<br>EUROPÄISCHE Reiseversicherung AG, München<br>Europaeiske Rejseforsikring A/S, Kopenhagen                                                                                                                                                                                                                                                                                                                                                                                                                                                                                                                                                                                                                                                                                              |
| <b>Schaden/Unfall</b> | D.A.S. Deutscher Automobil Schutz Allgemeine Rechtsschutz-Versicherungs-Aktiengesellschaft, München<br>D.A.S. Österreichische Allgemeine Rechtsschutz-Versicherungs-Aktiengesellschaft, Wien<br>D.A.S. Société anonyme belge d'assurances de Protection Juridique, Brüssel<br>DAS Legal Expenses Insurance Company Limited, Bristol<br>DAS Nederlandse Rechtsbijstand Verzekeringmaatschappij N.V., Amsterdam<br>ERGO Assicurazioni S.p.A., Mailand<br>ERGO Daum Direct General Insurance Co. Ltd., Seoul<br>ERGO Direkt Versicherung AG, Fürth<br>ERGO RUSS Versicherung AG, St. Petersburg<br>ERGO SIGORTA A.S., Istanbul<br>ERGO Versicherung AG, Düsseldorf<br>MTU Moje Towarzystwo Ubezpieczeniowe S. A., Sopot<br>Sopockie Towarzystwo Ubezpieczen Ergo Hestia Spolka Akcyjna, Sopot<br>VICTORIA General Insurance Company S.A., Athen<br>VICTORIA-Seguros S.A., Lissabon |

<sup>1</sup> Die vollständige Liste zum Anteilsbesitz finden Sie im Konzernanhang auf Seite 269 ff.

<sup>2</sup> Nur Tochtergesellschaften mit einem Prämienvolumen von mehr als 50 Millionen € sind aufgeführt.

Zu den vielfältigen Vertriebskanälen von ERGO gehören neben den schlagkräftigen eigenen Vertriebsorganisationen und dem Direktvertrieb auch der Maklervertrieb und Vertriebskooperationen wie die umfassende Kooperation mit der UniCredit Group.

**Munich Health**

**Munich Health**  
bündelt internationales  
Gesundheitsgeschäft

Der weltweite Gesundheitsmarkt ist einer der wachstumsstärksten Wirtschaftszweige. Dies gilt gleichermaßen für den Versorgungs- und den Versicherungsbereich. Um die damit verbundenen Chancen zu nutzen, hat Munich Re 2008 die Krankerückversicherung weltweit und die Krankenerstversicherung außerhalb Deutschlands zusammengeführt und 2009 unter der Marke Munich Health gebündelt. Munich Health deckt weite Teile der Wertschöpfungskette im Gesundheitsbereich ab und wird seit 2010 als eigenständiges Segment ausgewiesen.

## Munich Health im Überblick<sup>1</sup>

### Gesellschaften, die Munich Health vollständig zugeordnet werden

Apollo Munich Health Insurance Co. Ltd., Hyderabad  
 DAMAN – National Health Insurance Company, Abu Dhabi  
 DKV Belgium S.A., Brüssel  
 DKV Globality S.A, Luxemburg  
 DKV Luxembourg S.A, Luxemburg  
 DKV Seguros y Reaseguros, Sociedad Anónima Española, Saragossa  
 ERGO Generales Seguros y reaseguros, S.A., Madrid  
 ERGO Vida Seguros y Reaseguros, Sociedad Anónima Española, Saragossa  
 Marina Salud S.A., Alicante  
 MedNet Holding GmbH, München  
 Munich Health Holding AG, München  
 Munich Health North America, Inc., Wilmington, Delaware  
 Munich Re Stop Loss, Inc., Wilmington, Delaware  
 Sterling Life Insurance Company, Bellingham, Washington  
 Unión Médica la Fuencisla, S.A., Compañía de Seguros, Saragossa

### Gesellschaften, die Geschäfte in mehreren Segmenten betreiben und Munich Health anteilig zugeordnet werden

American Alternative Insurance Corporation, Wilmington, Delaware  
 Great Lakes Reinsurance (UK) Plc., London  
 Münchener Rück do Brasil Resseguradora S.A., São Paulo  
 Münchener Rückversicherungs-Gesellschaft AG, München  
 Munich Re of Malta p.l.c., Floriana  
 Munich Reinsurance America, Inc., Wilmington, Delaware  
 New Reinsurance Company Ltd., Zürich

<sup>1</sup> Nur Konzerngesellschaften mit einem Eigenkapital von in der Regel mehr als 5 Millionen € sind aufgeführt; die vollständige Liste zum Anteilsbesitz finden Sie im Konzernanhang auf Seite 269 ff.

## Assetmanagement

MEAG bündelt die Kapitalanlageaktivitäten von Munich Re. Darüber hinaus bietet sie ihr umfassendes Knowhow externen institutionellen Anlegern und Privatkunden an.

### Assetmanagement im Überblick

MEAG Cash Management GmbH, München  
 MEAG Hong Kong Ltd., Hongkong  
 MEAG Luxemburg S.á r.l., Luxemburg  
 MEAG MUNICH ERGO AssetManagement GmbH, München  
 MEAG MUNICH ERGO Kapitalanlagegesellschaft mbH, München  
 MEAG New York Corporation, New York  
 MEAG Property Management GmbH, München

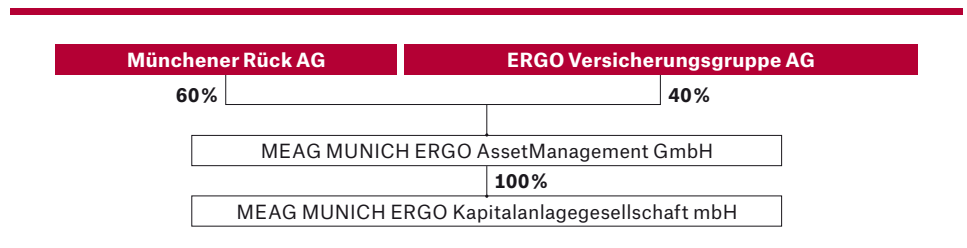



## Wichtige Instrumente der Unternehmenssteuerung

### Wertorientierte Unternehmensführung – die Steuerungsphilosophie von Munich Re

Ziel von Munich Re ist es, Risiken in all ihren Facetten zu erfassen, zu bewerten, zu diversifizieren und so nachhaltig Wert für ihre Aktionäre, Kunden und Mitarbeiter zu schaffen. Den Börsenkurs der Münchener-Rück-Aktie nachhaltig zu steigern ist maßgebliche Richtschnur unseres unternehmerischen Denkens und Handelns. Diesem Ziel dient auch unser aktives Kapitalmanagement, über das wir auf Seite 102 f. berichten. Den Shareholder-Value-Gedanken leben wir vor allem dadurch, dass wir durchgehend wertorientierte Steuerungssysteme in der Unternehmensgruppe einsetzen und diese laufend weiterentwickeln.

Den Rahmen für jegliche Geschäftstätigkeit bildet unsere Risikostrategie (siehe Seite 117 ff.), aus der wir ein dichtes Netz von Limitierungen ableiten. Neben wertbasierten Größen beachten wir bei der Steuerung unseres Geschäfts eine Vielzahl wichtiger Nebenbedingungen. Diese verfolgen wir entweder als Nebenziele oder bestimmen im Einzelfall situationsbedingt die kurzfristige Ausrichtung einer Einheit. Dazu gehören Regelungen örtlicher Rechnungslegungssysteme, steuerliche Aspekte, Liquiditätsanforderungen sowie aufsichtsrechtliche Rahmenbedingungen und Anforderungen von Ratingagenturen.

Folgende Aspekte prägen unsere wertorientierte Unternehmensführung:

- // Geschäftliche Aktivitäten werden nicht einseitig nach ihrem Ertragspotenzial beurteilt, sondern auch nach dem Ausmaß der eingegangenen Risiken, das für die Höhe der Wertschaffung ebenfalls maßgeblich ist. Daher haben wir hohe Qualitätsstandards für Underwriting, Pricing, Kumulkontrolle und Schadenmanagement implementiert. Erst die Rendite-Risiko-Beziehung gibt Aufschluss darüber, ob eine Aktivität aus Aktionärssicht vorteilhaft ist.
- // Mit wertorientierten Steuerungsgrößen sichern wir die ökonomische Betrachtungsweise sowie die notwendige Vergleichbarkeit alternativer Initiativen und priorisieren diese.
- // Verantwortlichkeiten weisen wir klar zu und verdeutlichen Management und Mitarbeitern die Stellgrößen für die Wertsteigerung.
- // Strategie und operative Planung werden eng miteinander verknüpft.

Alle Initiativen sind letztlich auf das oberste finanzielle Ziel ausgerichtet: den Unternehmenswert nachhaltig zu steigern.

### Steuerungssystematik berücksichtigt individuelle Charakteristika der Segmente

#### Ermittlung des Wertbeitrags

Die Schaden- und Unfallversicherung sowie die Krankenrückversicherung sind Sparten, die überwiegend durch eine kurzfristige Geschäftsabwicklung gekennzeichnet sind. Für diese Sparten verwenden wir eine einfache Formel, um die jährliche Wertschaffung durch unser Versicherungsgeschäft zu messen und auf dieser Basis unsere Geschäftsaktivitäten zu steuern und zu überwachen:

---

|                      |   |                    |   |             |
|----------------------|---|--------------------|---|-------------|
| Angepasstes Ergebnis | - | Eigenkapitalkosten | = | Wertbeitrag |
|----------------------|---|--------------------|---|-------------|

---

Das angepasste Ergebnis setzt sich zusammen aus dem versicherungstechnischen Ergebnis, das aus der Gewinn- und Verlustrechnung abgeleitet wird, dem Kapitalanlageergebnis sowie dem übrigen nicht versicherungstechnischen Ergebnis. Diese drei Positionen werden jeweils wertorientiert angepasst: etwa um die Belastung aus Großschäden zu glätten, die Kapitalerträge zu normalisieren und die Schadenaufwendungen bei späterer Zahlung in Höhe des Barwerts zu berücksichtigen.

Dem so angepassten Ergebnis stellen wir die Eigenkapitalkosten als Sollgröße gegenüber. Bei deren Berechnung hat das Risikokapital, das wir mit unserem internen Kapitalmodell bestimmen, einen wesentlichen Einfluss. Für das Schaden- und Unfallversicherungsgeschäft sowie das Krankerückversicherungsgeschäft wird ein positiver Wertbeitrag erzielt, sofern das jeweils für ein Kalenderjahr gemessene angepasste Ergebnis die Eigenkapitalkosten übersteigt.

Embedded Value als  
Steuerungsgröße

Die Produkte der Lebensversicherung sowie der Großteil unseres Krankenerstversicherungsgeschäfts sind geprägt durch ihre Langfristigkeit und den über die Gesamtlaufzeit der Verträge verteilten Ergebnisausweis. Derartige langlaufende Geschäftsportfolios, deren Erfolg sich nicht sinnvoll in einer Einjahressicht messen lässt, bewerten wir auf der Grundlage der European Insurance CFO Forum Market Consistent Embedded Value (MCEV) Principles ©<sup>1</sup>, die vom CFO-Forum in ihrer aktuellen Fassung im Oktober 2009 veröffentlicht wurden.

Der MCEV setzt sich zusammen aus dem im Unternehmen vorhandenen Eigenkapital und dem sogenannten Bestandswert. Letzterer ist der Barwert der nach finanz- und versicherungsmathematischen Grundsätzen berechneten zukünftigen Nettoerträge aus dem Versicherungsbestand und den damit verbundenen Kapitalanlagen unter Berücksichtigung des Zeitwerts der finanziellen Optionen und Garantien sowie der explizit berechneten Kapitalkosten.

Der MCEV bezieht sich dabei auf das zum Bewertungsstichtag vorhandene Portfolio. Von unserem Lebensrückversicherungsgeschäft werden 100 % und von unserem Lebenserst- und langfristigen Krankerestversicherungsgeschäft mehr als 94 % abgebildet. Der Wert des zukünftigen Neugeschäfts wird hingegen nicht berücksichtigt. Allerdings erfolgt die Bewertung unter der Annahme der Fortführung der Geschäftstätigkeit, das heißt insbesondere unter Berücksichtigung der damit verbundenen Kosten. Optionen und Garantien – vor allem die der Versicherungsnehmer in der Erstversicherung – bewerten wir explizit über stochastische Simulationen. Im MCEV wird der Barwert aller Zahlungsströme für alle maßgeblichen Währungsräume auf der Basis der Swap Rates und der impliziten Volatilitäten zum Bewertungsstichtag 31. Dezember 2010 bestimmt. Die Bewertung von Vermögensgegenständen, die auf dem Kapitalmarkt gehandelt werden, fußt auf den zum Bewertungsstichtag beobachteten Marktwerten.

Die Entwicklung des Versicherungsbestands modellieren wir unter Berücksichtigung der aktuellen Erwartungen für Biometrie, Storno und Kosten. In der Erstversicherung modellieren wir die Beteiligung der Versicherungsnehmer an den Überschüssen gemäß der aktuellen Planung und im Rahmen der gesetzlichen Vorschriften. Für die jeweiligen Einzelgesellschaften verwenden wir Steuersätze und Bemessungsgrundlagen gemäß den nationalen Vorschriften; ebenso berücksichtigen wir steuerliche Verlustvorträge bei der Kalkulation. Quellensteuern auf Dividenden von Konzerngesellschaften werden nicht erfasst. Die Kapitalkosten umfassen neben den Steuern und Kosten der Kapitalanlageverwaltung auch die nicht explizit modellierten Risiken des Geschäfts und für die Krankerestversicherung die Beteiligung der Versicherungsnehmer an den Erträgen des Eigenkapitals.

<sup>1</sup> © Stichting CFO Forum Foundation 2008.

Die Änderung des MCEV innerhalb eines Jahres – ohne die Effekte aus Währungskurschwankungen, Unternehmenskäufen oder -verkäufen sowie Ausschüttungen bzw. Kapitaleinschüssen – weisen wir als Embedded-Value-Gesamtergebnis aus. Bereinigt man dieses zusätzlich um Einflüsse aus Änderungen der steuerlichen und kapitalmarktbezogenen Rahmenbedingungen, spricht man vom operativen Embedded-Value-Ergebnis: Es ist das Maß für den Erfolg der operativen Geschäftstätigkeit eines Jahres.

#### Aktiva spiegeln Passiva wider

Die Kapitalanlagen von Munich Re steuern wir, indem wir uns stark an der Struktur der Passivseite der Bilanz orientieren. Als Teil unseres sogenannten „Asset-Liability-Managements“ ermitteln wir die ökonomisch neutrale Position. Dieses synthetische Kapitalanlageportfolio bildet – unter Einbeziehung wesentlicher Nebenbedingungen bei der Anlage – die Charakteristika der Verbindlichkeiten gegenüber den Versicherungsnehmern bestmöglich ab.

Unter Beachtung unserer eigenen Risikotragfähigkeit sowie weiterer Investorenpräferenzen ermitteln wir auf der Grundlage nachhaltig erwarteter Kapitalmarktrenditen in einem Optimierungsprozess ein Benchmarkportfolio. Unser Assetmanager MEAG ist dafür verantwortlich, dieses strategische Benchmarkportfolio in konkrete Vermögensanlagen umzusetzen; er weicht nur in einem sorgfältig definierten Rahmen ab und berücksichtigt dabei die Marktmeinung für das jeweilige Geschäftsjahr. Der Soll-Rendite als erwartetem Ertrag aus dem Benchmarkportfolio wird die Rendite des Ist-Portfolios gegenübergestellt. Den Erfolg unseres Assetmanagers MEAG messen wir an der Höhe der Überrendite, die er im Vergleich zum Benchmarkportfolio unter Berücksichtigung des eingegangenen Risikos erzielt hat.

Neben diesen rein finanziellen Steuerungsgrößen spielen auch nicht finanzielle Faktoren eine Rolle, etwa Innovationen, Prozessgeschwindigkeit, Ausbildungsstand der Mitarbeiter sowie Kundenzufriedenheit. Langfristig kann ein Unternehmen nur erfolgreich sein, wenn es nachhaltig wirtschaftet und zukunftsgerichteten qualitativen Faktoren ebenfalls Rechnung trägt.

Wir verknüpfen Strategie und operative Planung eng miteinander, indem wir unsere Strategien in strukturierten Übersichten darstellen (den sogenannten Scorecards) und aus diesen Initiativen, Messgrößen und Verantwortlichkeiten ableiten. Die Scorecards umfassen vier Dimensionen: Finanzen, Märkte und Kunden, Prozesse sowie Mitarbeiter. Das unternehmerische Denken und Handeln unserer Mitarbeiter fördern wir, indem wir Verantwortlichkeiten eindeutig zuweisen und dadurch deutlich machen, wie viel der Einzelne, eine Einheit oder ein Geschäftsfeld zur Wertsteigerung beiträgt. Daher unterstützen auch unsere Anreizsysteme für Mitarbeiter, Führungskräfte und Vorstand die klare Ausrichtung auf die Wertschaffung: Je höher ein Mitarbeiter oder Geschäftsleitungsmitglied in der Managementhierarchie angesiedelt ist, desto stärker hängt seine Vergütung vom Erfolg ab.

Um die Wertorientierung von Munich Re, die in den internen Steuerungsinstrumenten umgesetzt ist, bei der externen Kommunikation ebenfalls zu betonen, verwenden wir als Konzernziel eine risikoadjustierte Größe; Näheres dazu im Folgenden.

### Was wir erreichen wollen – Ausgangspunkt 2010

Trotz erheblicher Großschäden konnten wir mit einem Konzernergebnis von 2,4 (2,6) Milliarden € 2010 erneut ein erfreuliches Ergebnis erzielen. Dieser Gewinn entspricht einer Verzinsung des IFRS-Eigenkapitals (Return on Equity, RoE) von 10,4 (11,8) % bezogen auf den Mittelwert der zu den Bilanz- und Quartalsstichtagen ausgewiesenen IFRS-Eigenkapitalbestände. Darüber hinaus konnten wir die Kapitalanlagerendite trotz des niedrigen Zinsumfelds auf 4,5 (4,3) % leicht verbessern. Diese Kapitalanlagerendite wird ermittelt aus dem Verhältnis zwischen dem Kapitalanlage-

ergebnis von 8,6 (7,9) Milliarden € und dem Mittelwert der an den Bilanz- und Quartalsstichtagen zu Marktwerten bewerteten Kapitalanlagebestände von 194 (181) Milliarden €. Unser langfristiges Renditeziel, eine risikoadjustierte Eigenkapitalrendite nach Steuern (Return on Risk adjusted Capital, RoRaC) von 15 % über den gesamten Zyklus hinweg, haben wir trotz Erreichung unseres für 2010 gesteckten Ergebnisziels von über 2 Milliarden € unterschritten. Mit einem RoRaC von 13,5 (15,1) % erzielten wir in Anbetracht der Großschadenereignisse und des niedrigen Zinsniveaus dennoch ein beachtliches Ergebnis.

Die Schaden-Kosten-Quote, die man auch als Combined Ratio bezeichnet, beschreibt das prozentuale Verhältnis der Summe aus Leistungen an Kunden (netto) und Aufwendungen für den Versicherungsbetrieb (netto) zu den verdienten Beiträgen (netto). Dies entspricht der Summe aus der Schadenquote und der Kostenquote. Vereinfacht ausgedrückt: Eine Schaden-Kosten-Quote von 100 % besagt, dass Schäden und Kosten genau den Prämieinnahmen entsprechen. Die Leistungen an Kunden (netto) schließen die bezahlten Schäden, die Veränderung der Schadenrückstellung sowie einen Großteil der sonstigen versicherungstechnischen Aufwendungen ein. Bei den Aufwendungen nicht berücksichtigt werden geringfügige Teile der sonstigen versicherungstechnischen Aufwendungen, beispielsweise die deutsche Feuerschutzsteuer. Die Aufwendungen für den Versicherungsbetrieb (netto) umfassen im Wesentlichen die Kosten, die beim Abschluss neuer Versicherungsverträge (zum Beispiel Provisionen) und für die laufende Verwaltung von Verträgen anfallen.

Im Rückversicherungssegment Schaden/Unfall standen 2010 den Nettoaufwendungen für Versicherungsfälle von 9.904 (9.243) Millionen € sowie den Nettoaufwendungen für den Versicherungsbetrieb von 4.437 (4.125) Millionen € verdiente Nettobeiträge von 14.193 (13.968) Millionen € gegenüber. Die Schaden-Kosten-Quote beträgt somit 100,5 (95,3) % – dies ist ein zufriedenstellender Wert, wenn man bedenkt, dass uns 2010 Großschäden aus Naturkatastrophen in Höhe von 1.564 Millionen € bzw. 11,0 % der verdienten Nettobeiträge stärker belasteten als im Vorjahr.

Im Erstversicherungssegment Schaden/Unfall standen 2010 den bezahlten Schäden und der Veränderung der Schadenrückstellung von zusammen 3.130 (2.856) Millionen € sowie den Nettoaufwendungen für den Versicherungsbetrieb von 1.621 (1.502) Millionen € verdiente Nettobeiträge von 4.813 (4.568) Millionen € gegenüber. Die Schaden-Kosten-Quote in der Erstversicherung liegt mit 96,8 (93,2) % zwar über dem Vorjahr, doch nach wie vor auf einem guten Niveau.

Bei der Interpretation der Schaden-Kosten-Quote sind die besonderen Umstände des einzelnen Versicherungszweigs zu berücksichtigen. Von erheblicher Bedeutung ist unter anderem, wie sich das Portfolio zusammensetzt. So sind beispielsweise folgende Zusammenhänge wichtig:

- // Je stärker die Schadenbelastung im Zeitablauf schwankt, desto größer ist das Risiko und desto höher müssen die Beiträge sein, die erforderlich sind, um das Risiko zu decken. Dies bedeutet, dass die Schadenquoten in guten Jahren niedrig sind und ebenso die durchschnittlichen Schadenquoten, die dem Rückversicherer eine angemessene Vergütung für die Übernahme des Risikos gewähren. Das gilt besonders für die Exponierung gegenüber seltenen, aber sehr schweren Naturkatastrophen.
- // Bedeutsam ist die Zeitspanne zwischen dem Eingang der Beiträge und der Schadenzahlung. Je länger diese Zeiträume sind, desto länger können die eingenommenen Prämien auf dem Kapitalmarkt angelegt werden. So stehen hohen Schaden-Kosten-Quoten in Sparten mit einer langen Schadenabwicklung (zum Beispiel Haftpflicht) regelmäßig höhere Ergebnisse aus Kapitalanlagen gegenüber, mit denen die Schadenrückstellungen bedeckt sind. Diese Erträge spiegeln sich in der Schaden-Kosten-Quote nicht wider.

Deshalb möchten wir die Schaden-Kosten-Quote zwar so niedrig wie möglich halten; isoliert betrachtet ist sie für uns jedoch keine hinreichend aussagefähige Zielgröße.

Maßgeblich ist stattdessen die ökonomische Wertschaffung, die sich mit der Schaden-Kosten-Quote nicht sinnvoll abbilden lässt. Diese verfolgen wir intern durch die deutlich aussagekräftigere Steuerungsgröße Wertbeitrag. Ihr Merkmal ist, dass die Wertschaffung nicht nur auf der Basis aktueller und prognostizierter Gewinne, sondern auch unter Berücksichtigung der Höhe der dabei eingegangenen Risiken zu messen ist. Für die Betrachtung der Gesamtgruppe orientieren wir deshalb unsere Ziele – gewissermaßen als verbindendes Element – an der risikoadjustierten Rendite. Sie ist zwar keine direkte und unmittelbare Messgröße, aber dennoch ein aussagekräftiger Indikator für die Wertschaffung von Munich Re.

### Risikoorientiertes Konzern-Renditeziel für 2011

Die nach wie vor bestehenden Unsicherheiten, mögliche Nach- und Folgewirkungen der Finanz- und Wirtschaftskrise abzuschätzen, erschweren es weiterhin, Leitlinien für den künftigen unternehmerischen Erfolg festzulegen. So sind die von uns für das Jahr 2011 gesetzten Ziele vor dem Hintergrund der anhaltenden Unsicherheiten als ehrgeizig zu betrachten. Dabei bauen wir erneut mit dem RoRaC auf einer risikoorientierten Zielgröße auf, mit der wir seit 2006 in der externen Kommunikation arbeiten. Um sie zu bestimmen, setzen wir den erzielten oder angestrebten und in Euro ausgedrückten Gewinn in Relation zum erforderlichen Risikokapital. Dessen Höhe ermitteln wir mit unserem internen Risikomodell und veröffentlichen das Ergebnis einmal jährlich. Erläuterungen zum internen Risikomodell finden Sie auf Seite 126 ff. Damit orientieren wir uns an den ökonomischen Standards, die teilweise schon die aktuellen, jedenfalls aber die künftigen Anforderungen von Aufsichtsbehörden und Ratingagenturen stark prägen.

Der RoRaC ist wie folgt definiert:

|                                                                                                                                                                                      |
|--------------------------------------------------------------------------------------------------------------------------------------------------------------------------------------|
| <b>RoRaC</b> = $\frac{\text{Konzernergebnis} - \text{Zinssatz} \times (1 - \text{Steuersatz}) \times \text{zusätzlich vorhandenes ökonomisches Eigenkapital}}{\text{Risikokapital}}$ |
|--------------------------------------------------------------------------------------------------------------------------------------------------------------------------------------|

Der Zähler der Formel besteht aus dem veröffentlichten IFRS-Konzernergebnis, bereinigt um Nachsteuererträge (Zinssatz  $\times$  [1 – Steuersatz]), die – bei gegebener Risikotoleranz – auf Kapital generiert werden, das nicht unter Risiko steht. Als Bezugsgröße für die Bereinigung dient das Kapital, das über das notwendige Risikokapital hinausgeht, das sogenannte „zusätzlich vorhandene ökonomische Eigenkapital“. Wie man es bestimmt, erläutern wir auf Seite 133. Es ist teilweise für Rating- und Solvenzzwecke sowie für profitables Wachstum erforderlich, soll jedoch durch unser aktives Kapitalmanagement knapp gehalten werden. Denn das zusätzlich vorhandene ökonomische Eigenkapital wird in der hier vorgestellten Systematik nur risikolos verzinst. Der Grund: Sämtliche Risikokomponenten der Kapitalanlagen und der Versicherungstechnik werden durch das interne Risikomodell mit Risikokapital hinterlegt und sind deshalb mit Renditeanforderungen verbunden. Zwar orientieren wir uns an der risikoadjustierten Rendite als Zielgröße. Dennoch streben wir darüber hinaus an, dass die Verzinsung auf das uns überlassene gesamte Kapital den berechtigten hohen Erwartungen unserer Investoren entspricht.



## Wie hoch soll das RoRaC-Ziel gesteckt werden?

An unserem langfristigen Ziel von 15 % RoRaC nach Steuern über den Zyklus der Versicherungs- und Zinsmärkte hinweg halten wir zunächst fest. Es ist jedoch angesichts der gegenwärtig noch immer niedrigen Zinsen nur schwer zu erreichen. Sobald die Anforderungen von Solvency II und den neuen IFRS-Rechnungslegungsstandards für Versicherungsverträge und Finanzinstrumente feststehen, wollen wir unsere Zielmessgrößen an den neuen Kennzahlen dieser dann stark ökonomisch geprägten Welt orientieren. Für 2011 streben wir ein Konzernergebnis von etwa 2,4 Milliarden € an. Dieses Ziel ist allerdings im Hinblick auf die Großschadenbelastung in den ersten zwei Monaten nur erreichbar, wenn die zufallsbedingten Großschäden im weiteren Jahresverlauf unter unseren Erwartungen bleiben.

## Welche Annahmen legen wir zugrunde?

Wir gehen in der Erst- wie in der Rückversicherung von einem statistisch erwartbaren Schadenverlauf aus. Solange sich die Zusammensetzung unserer Geschäftsportfolios nicht signifikant verschiebt, gehen wir in der Schaden- und Unfallrückversicherung über den Marktzyklus hinweg von einer Schaden-Kosten-Quote von ca. 97 % der verdienten Nettobeiträge aus, bei einer durchschnittlichen Großschadenbelastung aus Naturkatastrophen von 6,5 %. Da uns schon bis Ende Februar 2011 Großschäden wie die Überschwemmungen bei Brisbane und – ebenfalls in Australien – der Sturm Yasi sowie das Erdbeben in Neuseeland getroffen haben, werden wir unsere Zielmarke nur erreichen, wenn die zufallsbedingten Großschäden im weiteren Jahresverlauf unter unseren Erwartungen bleiben. In der Schaden- und Unfallerstversicherung sollte die Schaden-Kosten-Quote auf einem guten Niveau von unter 95 % liegen.

## Embedded Value als zusätzliche Steuerungsgröße

Im Lebensversicherungs- sowie im deutschen Krankenerstversicherungsgeschäft bildet der MCEV eines der Fundamente unserer wertorientierten Steuerung.

## Unsere Ziele ambitioniert, aber erreichbar

Bei der Auswahl geeigneter Zielgrößen sind gegenläufige Aspekte zu berücksichtigen und abzuwägen: Einerseits sollten sie nicht zu komplex sein, damit die Ziele für Anleger, Mitarbeiter und Öffentlichkeit noch verständlich sind. Andererseits liegt die Herausforderung darin, nicht zu sehr zu vereinfachen, die ökonomischen Realitäten so gut wie möglich abzubilden und das gesamte Unternehmen dadurch auf nachhaltige Wertschaffung auszurichten. Wie die Beschreibung bereits verdeutlicht hat, sind die Zusammenhänge vielschichtig, da ein Nebeneinander verschiedener Messgrößen unvermeidbar ist.

## Unternehmensleitung

### Vorstand

**Dr. jur. Nikolaus von Bomhard**  
(Vorsitzender des Vorstands)  
(Vorsitzender des Konzernausschusses)  
Group Development  
Group Investments  
Group Communications  
Group Audit  
Group Executive Affairs

**Dr. rer. pol. Ludger Arnoldussen**  
Germany, Asia Pacific and Africa  
Services

**Dr. rer. pol. Thomas Blunck**  
Special and Financial Risks  
Reinsurance Investments  
Central Procurement

**Georg Daschner**  
Europe and Latin America

**Dr. rer. nat. Torsten Jeworrek**  
(Vorsitzender des Rückversicherungs-  
ausschusses)  
Reinsurance Development  
Corporate Underwriting  
Accounting, Controlling and Central  
Reserving for Reinsurance  
Information Technology  
Global Business Architecture  
Geo Risks Research/Corporate Climate  
Centre

**Dr. rer. pol. Peter Röder**  
Global Clients and North America

**Dr. jur. Jörg Schneider**  
Group Reporting  
Group Controlling  
Corporate Finance M&A  
Integrated Risk Management  
Group Legal, Compliance  
Group Taxation  
Investor and Rating Agency Relations

**Dr. oec. publ. Wolfgang Strassl**  
(Arbeitsdirektor i. S. von § 33 MitbestG)  
HealthCare  
Human Resources

**Dr. oec. publ. Joachim Wenning**  
Life

### Aufsichtsrat

**Dr. jur. Hans-Jürgen Schinzler**  
(Vorsitzender)  
Mitglied seit 2.1.2004,  
letzte Wiederwahl 22.4.2009  
Ehemaliger Vorsitzender des Vorstands  
der Münchener Rück AG

**Hans Peter Claußen**  
(Stellvertretender Vorsitzender)  
Mitglied seit 22.4.2009  
Mitarbeiter der D.A.S. Allgemeine Rechts-  
schutz-Versicherungs-AG

**Herbert Bach**  
Mitglied seit 9.12.1994,  
letzte Wiederwahl 22.4.2009  
Mitarbeiter der Münchener Rück AG

**Dina Bösch**  
Mitglied seit 22.4.2009  
Mitglied des ver.di-Bundesvorstands

**Frank Fassin**  
Mitglied seit 22.4.2009  
Landesfachbereichsleiter Finanzdienst-  
leistungen der ver.di Nordrhein-Westfalen

**Dr. jur. Benita Ferrero-Waldner**  
Mitglied seit 12.2.2010  
Ehemaliges Mitglied der Europäischen  
Kommission

**Christian Fuhrmann**  
Mitglied seit 22.4.2009  
Geschäftsbereichsleiter der  
Münchener Rück AG

**Prof. Dr. rer. nat. Peter Gruss**  
Mitglied seit 22.4.2009  
Präsident der Max-Planck-Gesellschaft  
zur Förderung der Wissenschaften e. V.

**Prof. Dr. rer. nat. Dr.-Ing. e.h.  
Henning Kagermann**  
Mitglied seit 22.7.1999,  
letzte Wiederwahl 22.4.2009  
Präsident der acatech – Deutsche Aka-  
demie der Technikwissenschaften

**Peter Löscher**  
Mitglied seit 22.4.2009  
Vorsitzender des Vorstands  
der Siemens AG

**Wolfgang Mayrhuber**

Mitglied seit 13.12.2002,  
letzte Wiederwahl 22.4.2009  
Ehemaliger Vorsitzender des Vorstands  
der Deutschen Lufthansa AG

**Silvia Müller**

Mitglied seit 22.4.2009  
Mitarbeiterin der ERGO Versicherungs-  
gruppe AG

**Marco Nörenberg**

Mitglied seit 22.4.2009  
Mitarbeiter der ERGO Versicherungs-  
gruppe AG

**Reinhard Pasch**

Mitglied seit 22.4.2009  
Mitarbeiter der ERGO Versicherungs-  
gruppe AG

**Dr. e.h. Dipl.-Ing. Bernd Pischetsrieder**

Mitglied seit 17.4.2002,  
letzte Wiederwahl 22.4.2009  
Berater des Vorstands der Volkswagen AG

**Anton van Rossum**

Mitglied seit 22.4.2009  
Ehemaliger Chief Executive Officer und  
ehemaliges Mitglied des Verwaltungsrats  
von Fortis

**Andrés Ruiz Feger**

Mitglied seit 22.4.2009  
Mitarbeiter der Münchener Rückversiche-  
rungs-Gesellschaft Sucursal de España y  
Portugal

**Richard Sommer**

Mitglied seit 22.4.2009  
Gewerkschaftssekretär der ver.di,  
Leiter der Bundesfachgruppe  
Versicherungen

**Dr. phil. Ron Sommer**

Mitglied seit 5.11.1998,  
letzte Wiederwahl 22.4.2009  
Mitglied des Vorstands der  
JFSC Sistema, Moskau

**Dr. Ing. Thomas Wellauer**

Mitglied bis 30.9.2010  
Ehemaliges Mitglied der Geschäfts-  
leitung der Novartis International AG

**Besetzung der Ausschüsse**

Ständiger Ausschuss

**Dr. jur. Hans-Jürgen Schinzler**  
(Vorsitzender)

**Herbert Bach**

**Hans Peter Claußen**

**Wolfgang Mayrhuber**

**Dr. e.h. Dipl.-Ing. Bernd Pischetsrieder**

Personalausschuss

**Dr. jur. Hans-Jürgen Schinzler**  
(Vorsitzender)

**Herbert Bach**

**Dr. e.h. Dipl.-Ing. Bernd Pischetsrieder**

Prüfungsausschuss

**Prof. Dr. rer. nat. Dr.-Ing. e.h.**

**Henning Kagermann**

(Vorsitzender)

**Christian Fuhrmann**

**Marco Nörenberg**

**Anton van Rossum**

**Dr. jur. Hans-Jürgen Schinzler**

Nominierungsausschuss

**Dr. jur. Hans-Jürgen Schinzler**  
(Vorsitzender)

**Prof. Dr. rer. nat. Dr.-Ing. e.h.**

**Henning Kagermann**

**Dr. e.h. Dipl.-Ing. Bernd Pischetsrieder**

Vermittlungsausschuss

**Dr. jur. Hans-Jürgen Schinzler**  
(Vorsitzender)

**Herbert Bach**

**Hans Peter Claußen**

**Dr. e.h. Dipl.-Ing. Bernd Pischetsrieder**

Über die Vergütung der Unternehmens-  
leitung berichten wir im Vergütungsbe-  
richt auf Seite 28 ff.

## Von Mitgliedern des Vorstands und des Aufsichtsrats gehaltene Mandate

| Vorstand <sup>1</sup>                           | Mandate in gesetzlich zu bildenden Aufsichtsräten bei inländischen Gesellschaften                                             | Mitgliedschaften in vergleichbaren in- und ausländischen Kontrollgremien von Wirtschaftsunternehmen                |
|-------------------------------------------------|-------------------------------------------------------------------------------------------------------------------------------|--------------------------------------------------------------------------------------------------------------------|
| Dr. jur. Nikolaus von Bomhard<br>(Vorsitzender) | COMMERZBANK AG<br>ERGO Versicherungsgruppe AG <sup>2</sup><br>(Vorsitz)<br>Munich Health Holding AG <sup>2</sup><br>(Vorsitz) | –                                                                                                                  |
| Dr. rer. pol. Ludger Arnoldussen                | –                                                                                                                             | –                                                                                                                  |
| Dr. rer. pol. Thomas Blunck                     | Münchener & Magdeburger<br>Agrarversicherung AG                                                                               | Global Aerospace Underwriting<br>Managers Ltd. (GAUM), London<br>New Reinsurance Company Ltd.,<br>Zürich (Vorsitz) |
| Georg Daschner                                  | –                                                                                                                             | –                                                                                                                  |
| Dr. rer. nat. Torsten Jeworrek                  | –                                                                                                                             | –                                                                                                                  |
| Dr. rer. pol. Peter Röder                       | EXTREMUS Versicherungs-AG                                                                                                     | Munich Re America Corp.,<br>Wilmington <sup>2</sup><br>Munich Re America, Inc.,<br>Princeton <sup>2</sup>          |
| Dr. jur. Jörg Schneider                         | MEAG MUNICH ERGO<br>Kapitalanlagegesellschaft mbH <sup>2</sup><br>(Vorsitz)                                                   | –                                                                                                                  |
| Dr. oec. publ. Wolfgang Strassl                 | –                                                                                                                             | Apollo Munich Health Insurance<br>Company Ltd., Hyderabad, India<br>Storebrand Helseforsikring AS,<br>Oslo         |
| Dr. oec. publ. Joachim Wenning                  | –                                                                                                                             | –                                                                                                                  |

<sup>1</sup> Stand: 31.12.2010.<sup>2</sup> Konzernmandat im Sinne des § 18 AktG.

| Aufsichtsrat <sup>1</sup>                           | Mandate in anderen gesetzlich zu bildenden Aufsichtsräten bei inländischen Gesellschaften                | Mitgliedschaften in vergleichbaren in- und ausländischen Kontrollgremien von Wirtschaftsunternehmen                               |
|-----------------------------------------------------|----------------------------------------------------------------------------------------------------------|-----------------------------------------------------------------------------------------------------------------------------------|
| Dr. jur. Hans-Jürgen Schinzler (Vorsitzender)       | METRO AG                                                                                                 | UniCredit S.p.A., Genua                                                                                                           |
| Hans Peter Claußen (Stellvertretender Vorsitzender) | D.A.S. Allgemeine Rechtsschutz-Versicherungs-AG <sup>2</sup><br>ERGO Versicherungsgruppe AG <sup>2</sup> | -                                                                                                                                 |
| Herbert Bach                                        | -                                                                                                        | -                                                                                                                                 |
| Dina Bösch                                          | -                                                                                                        | -                                                                                                                                 |
| Frank Fassin                                        | ERGO Versicherungsgruppe AG <sup>2</sup><br>Provinzial NordWest Holding AG                               | -                                                                                                                                 |
| Dr. jur. Benita Ferrero-Waldner                     | Gamesa Corporación Tecnológica. S.A.                                                                     | -                                                                                                                                 |
| Christian Fuhrmann                                  | -                                                                                                        | Munich Re Holding Company (UK) Ltd., London <sup>2</sup>                                                                          |
| Prof. Dr. rer. nat. Peter Gruss                     | Siemens AG                                                                                               | -                                                                                                                                 |
| Prof. Dr. rer. nat. Dr.-Ing. e.h. Henning Kagermann | Bayerische Motoren-Werke AG<br>Deutsche Bank AG<br>Deutsche Post AG                                      | Nokia Corporation, Finnland<br>Wipro Ltd., Indien                                                                                 |
| Peter Löscher                                       | -                                                                                                        | -                                                                                                                                 |
| Wolfgang Mayrhuber                                  | Bayerische Motoren-Werke AG<br>Lufthansa-Technik AG <sup>2</sup><br>UBS Deutschland AG                   | AUA Austrian Airlines, Österreich <sup>2</sup><br>Brussels Airlines, Belgien <sup>2</sup><br>Heico Corporation, Miami             |
| Silvia Müller                                       | ERGO Versicherungsgruppe AG <sup>2</sup>                                                                 | -                                                                                                                                 |
| Marco Nörenberg                                     | ERGO Versicherungsgruppe AG <sup>2</sup>                                                                 | -                                                                                                                                 |
| Reinhard Pasch                                      | -                                                                                                        | -                                                                                                                                 |
| Dr. e.h. Dipl.-Ing. Bernd Pischetsrieder            | METRO AG                                                                                                 | Tetra-Laval International S. A. Group, Pully                                                                                      |
| Anton van Rossum                                    | -                                                                                                        | Credit Suisse Groupe AG, Zürich<br>Rodamco Europe NV, Amsterdam<br>Royal Vopak NV, Rotterdam (Vorsitz)<br>Solvay S.A., Brüssel    |
| Andrés Ruiz Feger                                   | -                                                                                                        | -                                                                                                                                 |
| Richard Sommer                                      | ERGO Versicherungsgruppe AG <sup>2</sup>                                                                 | -                                                                                                                                 |
| Dr. phil. Ron Sommer                                | -                                                                                                        | JSFC Sistema, Russland<br>MTS OJSC, Russland<br>Sistema Shyam Teleservices Ltd., Indien<br>Tata Consultancy Services Ltd., Indien |
| Dr. Ing. Thomas Wellauer (bis 30.9.2010)            | -                                                                                                        | -                                                                                                                                 |

<sup>1</sup> Stand: 31.12.2010 (bei ausgeschiedenen Mitgliedern des Aufsichtsrats ist der Zeitpunkt des Ausscheidens maßgeblich).

<sup>2</sup> Konzernmandat im Sinne des § 18 AktG.



# Rahmenbedingungen

////////////////////////////////////

// Weltwirtschaft setzt konjunkturelle Erholung fort  
// Marktbedingungen für Erst- und Rückversicherung weiterhin herausfordernd  
// Neues Versicherungsaufsichtsrecht „Solvency II“ vor entscheidender Umsetzungsphase

## Allgemeine Rahmenbedingungen

Immer komplexeres Umfeld ist  
Herausforderung für  
Versicherungstechnik

Unsere Geschäftstätigkeit bewegt sich in einem Umfeld, das immer komplexer wird und zudem eine steigende Anzahl von versicherungsrelevanten Großereignissen aufweist. Die versicherten Schäden steigen im Verhältnis zur wirtschaftlichen Aktivität überproportional. Wir glauben, dass neben der Zunahme von Werten in exponierten Regionen auch der Klimawandel daran einen Anteil hat. So entstehen neue Risikopotenziale und Kumulgefahren. Auch der demografische Wandel sorgt für grundlegende Veränderungen in weiten Teilen der Erde und stellt die Sozialversicherungssysteme vor enorme Herausforderungen. Deshalb ist es unerlässlich, Risikomodelle ständig weiterzuentwickeln und neue Erkenntnisse für die Versicherungstechnik nutzbar zu machen. Unternehmen wie Munich Re, die im integrierten Risikomanagement führend sind, können in der Erst- wie in der Rückversicherung nachhaltig die Chancen nutzen, die sich daraus ergeben. Umgekehrt werden unsere kurzfristigen Profitaussichten in Boomzeiten dadurch beeinträchtigt, dass wir vor dem Hintergrund unseres ausgeprägten Risikobewusstseins in Teilbereichen eine eher vorsichtige Unternehmenspolitik verfolgen.

## Wirtschaftliche Rahmenbedingungen und Konjunktur

Das Jahr 2010 war geprägt von der weltweiten konjunkturellen Erholung. Allerdings herrschte weiterhin große Unsicherheit an den Kapitalmärkten: Die Angst vor einem Ausfall der Staatsanleihen aus der Peripherie der Eurozone führte zu einem enormen Wechselkursschwankungen, zum anderen zu einer Flucht in als sicher wahrgenommene deutsche und US-amerikanische Staatsanleihen. Die Zinsen blieben niedrig.

### Reales Bruttoinlandsprodukt (BIP)

| Wachstum in %                                  | 2010<br>(Schätzung) | 2009 | 2008 | 2007 | 2006 |
|------------------------------------------------|---------------------|------|------|------|------|
| Welt <sup>1</sup>                              | 5,0                 | -0,6 | 2,8  | 5,3  | 5,2  |
| Industrieländer <sup>1</sup>                   | 3,0                 | -3,4 | 0,2  | 2,7  | 3,0  |
| Schwellen- und Entwicklungsländer <sup>1</sup> | 7,1                 | 2,6  | 6,0  | 8,7  | 8,2  |
| USA                                            | 2,8                 | -2,6 | 0,0  | 1,9  | 2,7  |
| Eurozone                                       | 1,8                 | -4,1 | 0,5  | 2,9  | 3,0  |
| Deutschland                                    | 3,6                 | -4,7 | 1,0  | 2,7  | 3,4  |
| Großbritannien                                 | 1,7                 | -4,9 | -0,1 | 2,7  | 2,8  |
| Japan                                          | 4,3                 | -6,3 | -1,2 | 2,4  | 2,0  |
| China                                          | 10,3                | 9,2  | 9,6  | 14,2 | 12,7 |

<sup>1</sup> Nationale Wirtschaftsleistungen zur Aggregation gewichtet mit Kaufkraftparitäten.  
Quelle: Internationaler Währungsfonds.

Die Erholung der **Weltwirtschaft**, die bereits Mitte 2009 eingesetzt hatte, setzte sich 2010 wie erwartet fort; ihre Dynamik übertraf in einigen Industrieländern unsere Erwartungen. Dabei blieben die globalen Unterschiede bestehen: Während die Volkswirtschaften einiger Industrieländer nur schwach wuchsen, wiesen die meisten Schwellen- und Entwicklungsländer hohe Wachstumsraten auf. Unter den Schwellenländern legte Chinas Volkswirtschaft besonders stark zu.

#### Eurozone entwickelte sich unterschiedlich

Auch innerhalb der **Eurozone** verlief die wirtschaftliche Entwicklung regional unterschiedlich. Während Spanien, Griechenland und Irland in der Rezession blieben und die Volkswirtschaften Frankreichs und Italiens nur schwach wuchsen, profitierte Deutschland von der schwungvollen Erholung der Weltwirtschaft. In **Deutschland** ging die Arbeitslosenquote im Jahresdurchschnitt auf 7,7% zurück, die Anzahl der Arbeitslosen war mit 3,2 Millionen so niedrig wie seit 1992 nicht mehr.

Der konjunkturelle Aufschwung der **USA** verlor im Lauf des Jahres an Kraft. Die Arbeitslosenquote ging hier zwar im Vergleich zum Jahresende 2009 zurück, lag aber mit einem saisonbereinigten Wert von 9,6% im vierten Quartal immer noch hoch.

Mit der Erholung der globalen Nachfrage stieg wie erwartet der Inflationsdruck wieder an, blieb in den Industrieländern jedoch wegen niedriger Kapazitätsauslastung und hoher Arbeitslosigkeit gering. In **Japan** herrschte trotz einer von Exporten getragenen kräftigen Erholung ein weiteres Jahr Deflation.

### Inflation: Veränderung des Konsumentenpreisindex

| %                                 | 2010<br>(Schätzung) | 2009 | 2008 | 2007 | 2006 |
|-----------------------------------|---------------------|------|------|------|------|
| Industrieländer                   | 1,5                 | 0,1  | 3,4  | 2,2  | 2,4  |
| Schwellen- und Entwicklungsländer | 6,3                 | 5,2  | 9,2  | 6,5  | 5,6  |
| USA                               | 1,6                 | -0,4 | 3,8  | 2,8  | 3,2  |
| Eurozone                          | 1,6                 | 0,3  | 3,3  | 2,1  | 2,2  |
| Deutschland                       | 1,1                 | 0,4  | 2,6  | 2,3  | 1,6  |
| Großbritannien                    | 3,3                 | 2,2  | 3,6  | 2,3  | 2,3  |
| Japan                             | -0,7                | -1,4 | 1,4  | 0,0  | 0,3  |
| China                             | 3,3                 | -0,7 | 5,9  | 4,8  | 1,5  |

Quelle: Internationaler Währungsfonds, nationale Statistikämter und statistisches Amt der Europäischen Union.

## Kapitalmärkte

Im Ausblick des Lageberichts 2009 hatten wir die mittel- bis langfristigen negativen Auswirkungen der zunehmenden Staatsverschuldung auf die wirtschaftliche Entwicklung angesprochen. Die gestiegene Sensibilität der Investoren für Ausfallrisiken von Staatsanleihen zeigte sich 2010 deutlich und führte zu Schwankungen am Kapitalmarkt. Nachdem zu Beginn des Jahres vor allem Griechenland mit steigenden Risikoprämien zu kämpfen hatte und Finanzhilfe der EU-Partnerländer und des Internationalen Währungsfonds (IWF) in Anspruch nehmen musste, weitete sich das Misstrauen der Kapitalmarktteilnehmer auf andere Länder in der Peripherie der Eurozone aus. Der Euro verlor daher zunächst nicht nur gegenüber dem US-Dollar stark an Wert, sondern auch im Vergleich zu anderen führenden Währungen. Um den Kapitalmarkt zu beruhigen und die Stabilität der Einheitswährung zu sichern, spannten die Mitgliedsländer der Eurozone, die EU-Kommission und der IWF im Mai einen Rettungsschirm aus Krediten und Garantien im Umfang von 750 Milliarden € auf. Dieser wurde im November von Irland in Höhe von 85 Milliarden € in Anspruch genommen. In der zweiten Jahreshälfte ließen gedämpfte Wachstumsaussichten für die US-Wirtschaft den Wert des US-Dollars gegenüber Euro und Yen sinken. Spekulationen über einen bevorstehenden Abwertungswettlauf der Währungen sorgten für eine hohe Volatilität der Wechselkurse.

750-Milliarden-€-  
Rettungsschirm aufgespannt

### Kursentwicklung des US\$/€-Kurses

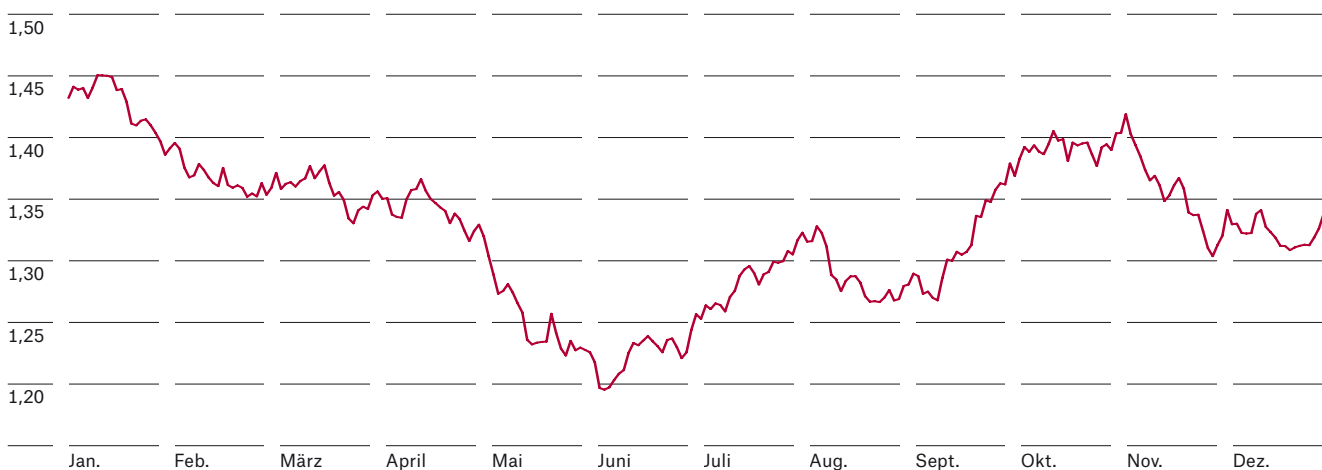

### Kursentwicklung des £/€-Kurses

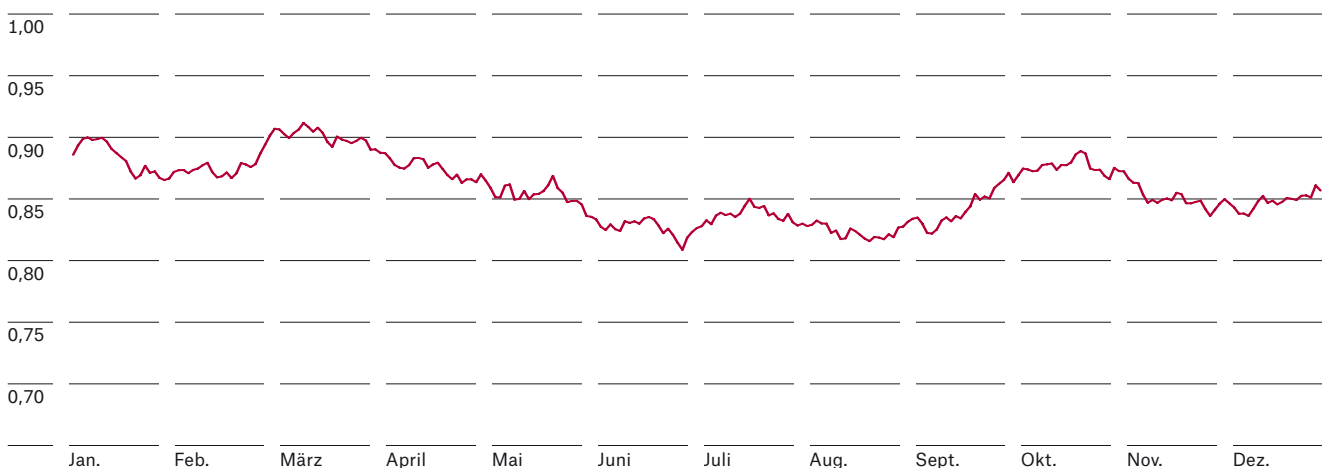

### Kursentwicklung des Yen/€-Kurses

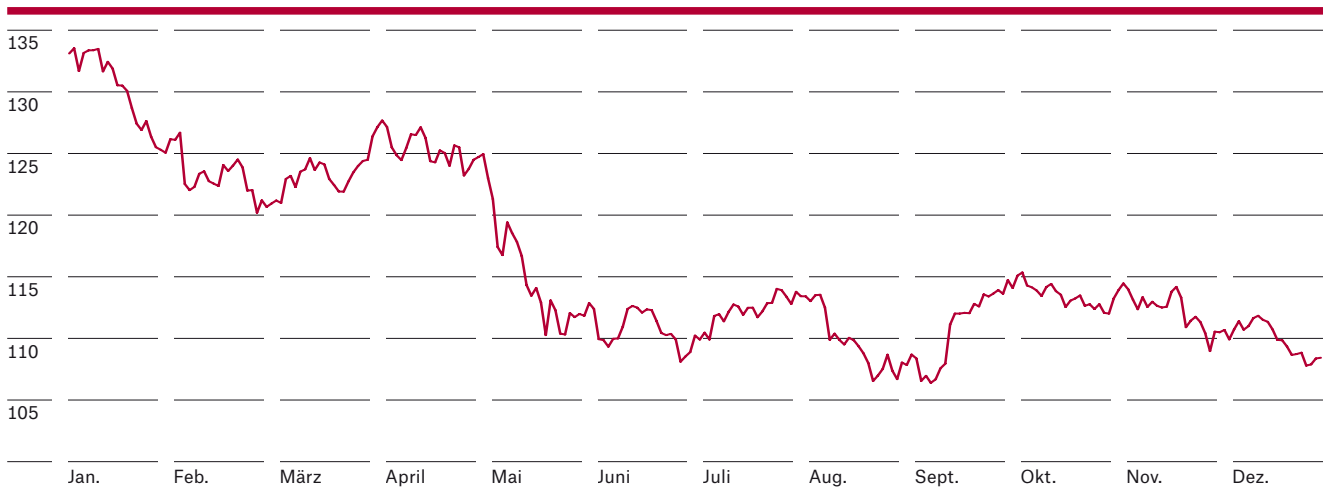

Die hohe Unsicherheit an den Finanzmärkten, der niedrige Inflationsdruck und die hohe Arbeitslosigkeit in vielen Industrieländern veranlassten die dortigen Zentralbanken, ihre Niedrigzinspolitik fortzusetzen. So blieb der Leitzins der Europäischen Zentralbank (EZB) und der Bank von England bei 1% bzw. 0,5%, die japanische Notenbank senkte ihren Leitzins von 0,1% auf 0-0,1%. Die US-Notenbank ließ ihren Leitzins bei 0-0,25% und entschloss sich im Herbst 2010 außerdem zu einer weiteren Runde unkonventioneller geldpolitischer Maßnahmen, um die langfristigen Zinsen niedrig zu halten. Entsprechend hat sich unsere Erwartung eines moderaten Anstiegs des Renditeniveaus langlaufender Staatsanleihen nicht erfüllt. Die Renditen lagen zum Jahresende knapp unter ihrem Jahresanfangsniveau, wobei im letzten Quartal ein deutlicher Anstieg zu beobachten war.

### Renditeentwicklung zehnjähriger Staatsanleihen

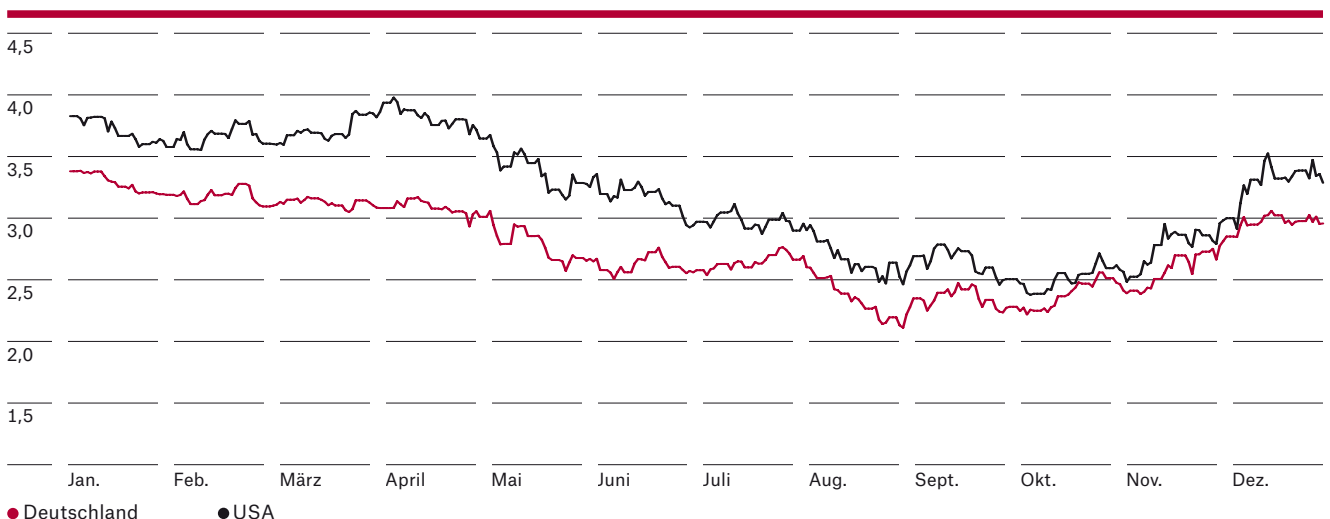

Die Schwankungsbreite der Aktienmärkte hielt sich zwar 2010 im Vergleich zu den beiden Vorjahren im Rahmen, spiegelte aber phasenweise die verbleibende Unsicherheit über die konjunkturelle Entwicklung und die Stabilität des Finanzsystems wider. Über das Jahr betrachtet bewegten sich die Märkte unterschiedlich, wobei insbesondere der DAX sich besser entwickelte als wichtige Vergleichsindizes. Der Ölpreis schloss Ende Dezember rund 10% über dem Wert des Jahresbeginns.

Entwicklung wichtiger Aktienindizes 1.1.2010 = 100

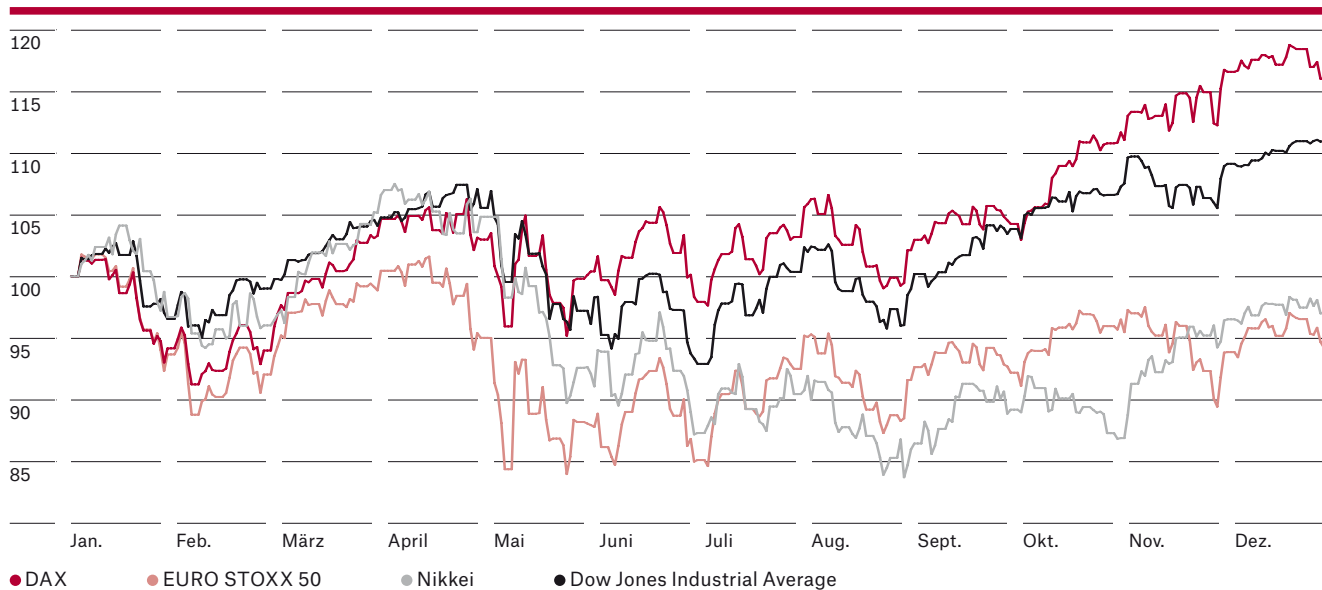

## Versicherungswirtschaft

Während die dynamische wirtschaftliche Entwicklung in vielen Ländern auch die Nachfrage nach Versicherung positiv beeinflusste, dämpfte die Stagnation der Preise die Prämienentwicklung in vielen Segmenten der Schaden- und Unfallversicherung. Die Lebens- und Krankenversicherung erholte sich dahingegen zunehmend. Insgesamt wuchs das **globale Prämienvolumen** im Berichtsjahr moderat, wobei die Nachfrage nach Versicherungsschutz in vielen Schwellenländern erneut sehr dynamisch anstieg.

Die Kapitalbasis der Erst- und Rückversicherer hatte sich bereits im Lauf des Jahres 2009 von den Folgen der internationalen Finanzkrise erholt und lag 2010 sogar über dem Niveau vor der Krise.

2010 standen vor allem im ersten Halbjahr großen Schäden aus Naturkatastrophen hohe Kapitalanlagegewinne der **Rückversicherer** gegenüber. Die Marktbedingungen für Rückversicherer verbesserten sich nicht, und bei den Erneuerungen zum Jahresbeginn sowie zum 1. April und 1. Juli bewegten sich die Preise seitwärts mit einer leichten Abwärtstendenz. Bei den Erneuerungen zum 1. Januar 2011 war im Durchschnitt ein weiterer Preisrückgang zu beobachten.

Die **Erstversicherungsbranche** in Deutschland konnte ihre Beitragseinnahmen nach vorläufigen Berechnungen 2010 um 4,7 % steigern – verglichen mit dem Wachstum von 4,2 % im Vorjahr. Die Lebensversicherung profitierte stark vom Einmalbeitragsgeschäft und konnte das Prämienvolumen deutlich um 6,8 % erhöhen. In der Schaden- und Unfallversicherung waren nur geringe Zuwächse zu verzeichnen; hier lag das Prämienplus bei 0,7 %. Die Prämieinnahmen der privaten Krankenversicherung wuchsen um 6,0 %.



## Regulatorische Änderungen

Um eine neue Finanzkrise zu vermeiden, wurden die regulatorischen Anforderungen für Finanzmärkte und Finanzinstitutionen weiter verändert.

Auf europäischer Ebene wurde ein System von Behörden zur Finanzmarktaufsicht (European System of Financial Supervision, ESFS) geschaffen. Neu ist der sogenannte **„Rat für Systemrisiken“** (European Systemic Risk Board, ESRB). Dieses Gremium soll Makrorisiken identifizieren, als Frühwarnsystem für die Finanzmärkte dienen, vor systemischen Risiken innerhalb des EU-Finanzmarkts warnen und entsprechende Empfehlungen abgeben. Als Teil des ESFS wurde darüber hinaus eine starke europäische Finanzaufsichtsbehörde für das Versicherungswesen und die betriebliche Altersversorgung geschaffen, die seit Anfang 2011 tätig ist. Dazu wurde der bisherige europäische Ausschuss (CEIOPS) in eine Behörde (EIOPA) mit bestimmten Durchgriffsrechten gegenüber Märkten, Versicherungsinstituten und nationalen Aufsehern umgewandelt. Parallel dazu werden die EU-Ausschüsse für Bankenaufsicht und Wertpapiermarktaufsicht in Behörden mit Durchgriffsrechten umgewandelt. Daneben behalten die nationalen Aufseher im Wesentlichen ihre bisherigen Befugnisse.

In den USA wurde mit dem **Dodd-Frank Wall Street Reform and Consumer Protection Act** die Regulierung der gesamten Finanzbranche verstärkt. Die Federal Reserve, die Zentralbank der USA, kann in Zukunft auch Versicherer beaufsichtigen. Zudem wird das Federal Insurance Office errichtet, das die USA international vertreten soll und zuständig ist für den Abschluss von Verträgen mit anderen Staaten über die Beaufsichtigung von Versicherungsunternehmen.

Mit Blick auf das neue europäische Versicherungsaufsichtsrecht **Solvency II** konzentrierten sich im Jahr 2010 die Arbeiten auf die zu erlassenden Durchführungsbestimmungen, in denen zahlreiche wichtige Details festzulegen sein werden. Mit der Verabschiedung dieser Bestimmungen ist nicht vor Sommer 2011 zu rechnen.

In Deutschland wurde, internationalen Vereinbarungen folgend, ein **Gesetz über die aufsichtsrechtlichen Anforderungen an die Vergütungssysteme** von Finanzinstituten und Versicherungsunternehmen verabschiedet. Danach müssen die Vergütungen stets angemessen, nachvollziehbar und auf eine nachhaltige Entwicklung des Unternehmens ausgerichtet sein. Zudem kann die Bundesanstalt für Finanzdienstleistungsaufsicht (BaFin) die Auszahlung variabler Vergütungsbestandteile untersagen oder beschränken, wenn das Unternehmen die Anforderungen an die Eigenkapitalausstattung nicht erfüllt.

## Geschäftsverlauf

////////////////////////////////////

### Überblick und wichtige Kennzahlen

- // Hohe Großschadenbelastung
- // Sehr gutes Ergebnis aus Kapitalanlagen trotz schwierigen Umfelds
- // Verzinsung des risikoadjustierten Eigenkapitals (RoRaC) von 13,5% nach Steuern

#### Verzinsung des risikoadjustierten Eigenkapitals (RoRaC)

| %                  | 2010 | 2009 | 2008 |
|--------------------|------|------|------|
| RoRaC              | 13,5 | 15,1 | 7,2  |
| langfristiges Ziel | 15,0 | 15,0 | 15,0 |

#### Dividende

|                                |        | 2010 | 2009 | 2008 |
|--------------------------------|--------|------|------|------|
| gesamte Dividendenausschüttung | Mrd. € | 1,1  | 1,1  | 1,1  |
| Höhe der Dividende             | €      | 6,25 | 5,75 | 5,50 |

Das abgelaufene Jahr war einerseits geprägt von hohen Schadenbelastungen. Andererseits erzielten wir – bei ausgeprägten Volatilitäten auf den Kapital- und Währungsmärkten – ein sehr gutes Ergebnis aus Kapitalanlagen. Über die Entwicklung der Kapitalanlagen berichten wir auf Seite 94 ff.

Die **risikoadjustierte Eigenkapitalrendite** (Return on Risk adjusted Capital, RoRaC) lag zwar unter unserem langfristigen Ziel, ist aber angesichts des schwierigen Umfelds dennoch ein deutliches Zeichen unserer Ertragsstärke. An unserem erfreulichen Unternehmenserfolg sollen unsere Aktionäre in nochmals größerem Umfang teilhaben: Daher schlagen wir der Hauptversammlung vor, eine Dividende in Höhe von 6,25 (5,75) € je gewinnberechtigter Aktie zu zahlen. Somit halten wir unsere Gewinnausschüttung auf weiterhin hohem Niveau. Darüber hinaus haben wir unser Aktienrückkaufprogramm fortgesetzt, über das wir auf Seite 102 f. berichten.

### Wichtige Kennzahlen<sup>1</sup>

|                                                |        | 2010  | 2009  | 2008  | 2007  | 2006  |
|------------------------------------------------|--------|-------|-------|-------|-------|-------|
| Gebuchte Bruttobeiträge                        | Mrd. € | 45,5  | 41,4  | 37,8  | 37,3  | 37,4  |
| Schaden-Kosten-Quote                           |        |       |       |       |       |       |
| Rückversicherung Schaden/Unfall                | %      | 100,5 | 95,3  | 99,4  | 96,4  | 92,6  |
| Erstversicherung Schaden/Unfall                | %      | 96,8  | 93,2  | 90,9  | 93,4  | 90,8  |
| Munich Health <sup>2</sup>                     | %      | 99,7  | 99,4  |       |       |       |
| Versicherungstechnisches Ergebnis              | Mio. € | 1.965 | 2.747 | 2.756 |       |       |
| Ergebnis aus Kapitalanlagen                    | Mio. € | 8.642 | 7.883 | 5.916 | 9.253 | 8.972 |
| Nicht versicherungstechnisches Ergebnis        | Mio. € | 2.013 | 1.974 | 1.078 |       |       |
| Operatives Ergebnis                            | Mio. € | 3.978 | 4.721 | 3.834 | 5.573 | 5.877 |
| Konzernergebnis                                | Mio. € | 2.430 | 2.564 | 1.579 | 3.923 | 3.519 |
| Kapitalanlagen                                 | Mrd. € | 193,1 | 182,2 | 174,9 | 176,2 | 176,9 |
| Versicherungstechnische Rückstellungen (netto) | Mrd. € | 171,1 | 163,9 | 157,1 | 152,4 | 153,9 |
| Eigenkapital                                   | Mrd. € | 23,0  | 22,3  | 21,1  | 25,3  | 26,3  |

<sup>1</sup> Vorjahreswerte angepasst aufgrund des Ausweises von Munich Health als eigenes Segment, siehe Abschnitt „Bilanzierung und Bewertung“.

<sup>2</sup> Ohne nach Art der Lebensversicherung betriebenes Krankenversicherungsgeschäft.

Am Anstieg der **Bruttobeiträge** waren Währungskurseffekte sowie organisches Wachstum gleichermaßen beteiligt. Wegen der hohen Schadenbelastung lag die Schaden-Kosten-Quote in der Rück- wie in der Erstversicherung deutlich über dem Vorjahresniveau. Dass wir dennoch ein ähnlich gutes Konzernergebnis wie im Vorjahr erreichten, ist dem sehr erfreulichen Kapitalanlageergebnis und einer niedrigeren Steuerquote zu verdanken.

### Konzernumsatz<sup>1</sup>

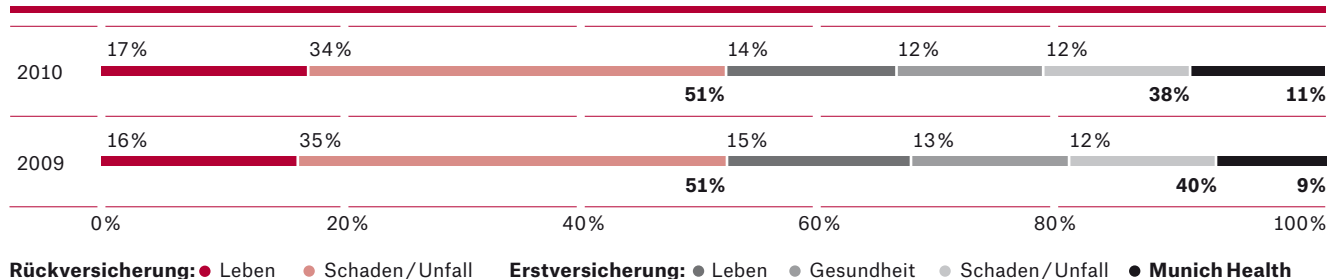

<sup>1</sup> Nach Eliminierung segmentübergreifender konzerninterner Geschäftsvorfälle.

Bei der Berichterstattung über die einzelnen **Geschäftsbereiche** gilt: Volumina und Erfolge aus Geschäften innerhalb eines Segments werden eliminiert; Zahlen, die sich aus Geschäften mit Unternehmen anderer Segmente herleiten (zum Beispiel aus konzerninternen Rückversicherungsabgaben von Erstversicherern an Rückversicherer), sind in den Daten enthalten.

Unsere **Kapitalanlagen**, die zur Bedeckung unserer versicherungstechnischen Rückstellungen und anderer Verbindlichkeiten dienen, werden nicht durchgehend getrennt nach Geschäftsfeldern verwaltet. Somit ist eine Aufteilung der Kapitalanlageergebnisse und Kapitalanlagebestände von Rückversicherungsgesellschaften, die Leben-, Kranken- sowie Schaden- und Unfallrückversicherung betreiben und damit nicht eindeutig einem Segment direkt zugeordnet werden können, erforderlich. Wo wir als Rückversicherer die versicherungstechnischen Rückstellungen bei unseren Kunden besichern, weisen wir die daraus resultierenden Depotforderungen mit den zugehörigen Zinsen selbstverständlich präzise mit den Originalbeträgen dem jeweiligen Segment zu. Dasselbe gilt

für Bestände und Erträge aus Rückversicherungsdeckungen für fondsgebundene Rentenversicherungen mit variablen Garantien (sogenannte GMxB). Für alle übrigen Bestände und Erträge nehmen wir eine zwangsläufig unvollkommene geschlüsselte Verteilung vor. Hier haben wir unsere Methode weiterentwickelt: Bis 2009 haben wir Kapitalanlagebestände und Kapitalanlageergebnisse der Rückversicherungsgesellschaften mit Ausnahme der Münchener Rück AG nach Höhe der Rückstellungen sortiert. Bei der Aufteilung des Kapitalanlageergebnisses der Münchener Rück AG wurde der nach direkter Zuordnung verbleibende Rest nach Höhe der Beiträge verteilt. Ab 2010 teilen wir Kapitalanlageergebnis und Kapitalanlagebestand anhand eines Schlüssels, der auf den versicherungstechnischen Rückstellungen basiert, auf. Die Werte des Vorjahres wurden entsprechend angepasst.

#### Konzernergebnis

|                  | 2010         | Vorjahr      | Veränderung |
|------------------|--------------|--------------|-------------|
|                  | Mio. €       | Mio. €       | %           |
| Rückversicherung | 2.099        | 2.576        | -18,5       |
| Erstversicherung | 656          | 367          | 78,7        |
| Munich Health    | 63           | 27           | 133,3       |
| Assetmanagement  | 37           | 19           | 94,7        |
| Konsolidierung   | -425         | -425         | -           |
| <b>Gesamt</b>    | <b>2.430</b> | <b>2.564</b> | <b>-5,2</b> |

Die **Rückversicherung** war im Berichtszeitraum geprägt von hohen Belastungen aus Großschäden, was zu einem Rückgang des Ergebnisses führte. Nähere Erläuterungen zum Geschäftsverlauf der Rückversicherung finden Sie auf Seite 75 ff.

Trotz Abschreibungen auf Geschäfts- oder Firmenwerte in Höhe von 109 Millionen € erzielte die **Erstversicherung** ein höheres Konzernergebnis, was dem besseren Kapitalanlageergebnis zu verdanken ist. Über die Erstversicherung berichten wir auf Seite 87 ff.

Das Segment **Munich Health** konnte im Berichtsjahr ein höheres Konzernergebnis beisteuern. Das Segment umfasst die weltweite Krankenrückversicherung sowie die Krankenerstversicherung außerhalb Deutschlands und wird 2010 erstmalig als eigenständiges Segment nach IFRS 8 ausgewiesen. Sein Geschäft wurde bisher überwiegend in den Segmenten Rückversicherung Leben/Gesundheit und Erstversicherung Gesundheit ausgewiesen. Das Geschäft des Segments Rückversicherung Leben/Gesundheit ohne Munich Health wird nunmehr in dem neu hinzugekommenen Segment Rückversicherung Leben abgebildet. Im Erstversicherungssegment Gesundheit verbleiben das Krankenerstversicherungsgeschäft in Deutschland sowie das Reiseversicherungsgeschäft. Die Werte des Vorjahres wurden entsprechend angepasst. Erläuterungen zum Geschäftsverlauf von Munich Health finden Sie auf Seite 92 f.

#### Anteil des Auslandsgeschäfts am Umsatz<sup>1</sup>

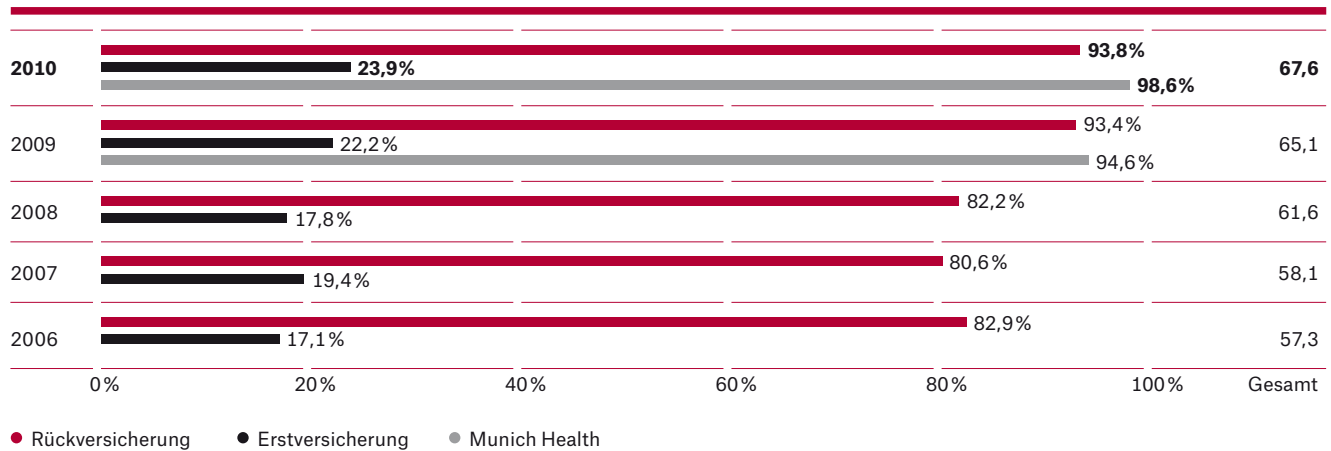

<sup>1</sup> Nach Eliminierung segmentübergreifender konzerninterner Geschäftsvorfälle.

Während wir in der Rückversicherung und bei Munich Health weltweit tätig sind, erwirtschaften wir in der Erstversicherung den Großteil des Umsatzes im Inland. Der Auslandsanteil in der Erstversicherung stieg dank des organischen Wachstums sowie positiver Wechselkurseffekte weiter an.

Der **Steueraufwand** war mit 692 (1.264) Millionen € niedriger als im Vorjahr. Die Steuerquote liegt mit 22,2 (33,0) % erheblich unterhalb der in Deutschland üblicherweise anzutreffenden Steuerbelastung. Verantwortlich für die niedrige Konzernsteuerbelastung sind neben Konzernteilen, die einer vergleichsweise geringeren nominellen Belastung unterliegen, die in den USA erzielten Konzernergebnisse. Ein Großteil der dortigen positiven Ergebnisse konnte mit vorhandenen steuerlichen Verlustvorträgen verrechnet werden, auf welche bisher noch keine aktiven latenten Steuern gebildet wurden. Die Ergebnisse sind daher weder mit laufenden noch mit latenten Steuern belastet.

Der **Rückgang der Steuerquote** gegenüber dem Vorjahr ist im Wesentlichen auf einen höheren Anteil der Gewinne aus den USA am Konzernergebnis zurückzuführen. Darüber hinaus war die Steuerquote des vergangenen Jahres durch Steuernachzahlungen für das Vorjahr erhöht.

#### Währungseinflüsse

Währungskursschwankungen wirken sich auf unseren Konzernabschluss aus. Die erfolgsneutrale Umrechnung der Abschlüsse unserer ausländischen Tochterunternehmen in die Konzernberichtswährung Euro schlägt sich in der „Rücklage aus der Währungsumrechnung“ nieder und beeinflusst somit die Höhe des Konzerneigenkapitals. Grundsätzlich erhöhen steigende Fremdwährungskurse das Konzerneigenkapital, fallende Fremdwährungskurse verringern es.

Dagegen werden Umrechnungsdifferenzen in den Einzelabschlüssen unserer Tochterunternehmen überwiegend erfolgswirksam ausgewiesen. Hierbei handelt es sich um die Umrechnung von Fremdwährungspositionen in die jeweilige funktionale Währung, das heißt die Währung, in welcher der Einzelabschluss erstellt wird. Eine Überdeckung<sup>1</sup> in einer bestimmten Fremdwährung führt bei steigenden Fremdwährungskursen im

<sup>1</sup> Bilanzielle Überdeckung liegt vor, wenn mehr Aktiva als Passiva in einer bestimmten Fremdwährung gehalten werden.



Saldo zu einem positiven Ergebnisbeitrag, eine fallende Fremdwährung verursacht im Saldo einen negativen Ergebnisbeitrag. Bei einer Unterdeckung ergeben sich gegenläufige Effekte. Im Rahmen des Konzernabschlusses erfassen wir diese Umrechnungsdifferenzen im sonstigen nicht operativen Ergebnis.

Darüber hinaus spiegeln sich Effekte aus Währungsschwankungen bei Periodenvergleichen in allen anderen Positionen der Gewinn- und Verlustrechnung wider. So steigen beispielsweise die in die Konzernberichtswährung Euro umgerechneten gebuchten Bruttobeiträge, sofern deren Originalwährung gegenüber dem Euro und der Vorperiode aufgewertet hat. Fallende Fremdwährungskurse wirken sich umgekehrt aus.

### Ereignisse nach dem Bilanzstichtag

Zum 1. Januar 2011 erwarben wir 100 % der Anteile des US-Medicare-Anbieters Windsor Health Group (Windsor). Der Kaufpreis betrug 131 Millionen US\$ (98 Millionen €); nähere Informationen finden Sie im Konzernanhang unter (53) Ereignisse nach dem Bilanzstichtag.

Ebenfalls zum 1. Januar 2011 erwarben wir 100 % der stimmberechtigten Anteile an elf Windpark-Gesellschaften. Der vorläufige Kaufpreis beträgt 40,5 Millionen €; nähere Informationen finden Sie im Konzernanhang unter (53) Ereignisse nach dem Bilanzstichtag.

In China wird ERGO mit der Shandong State-owned Assets Investment Holding Company (SSAIH) ein Joint Venture gründen, das in der Provinz Shandong vor allem Lebensversicherungen für Privatkunden anbieten soll. Wir und SSAIH werden jeweils die Hälfte der Anteile am geplanten Joint Venture halten. Laut Gesellschaftsvertrag zahlen wir für unseren Anteil am Grundkapital der Gesellschaft 300 Millionen RMB (34 Millionen €). Der Aufbau des Unternehmens wird beginnen, sobald die Aufsichtsbehörde ihre Genehmigung erteilt hat. Der Gesellschaftsname soll „ERGO China Life Insurance Co., Ltd.“ lauten.

Die Überschwemmungen als Folge extremer Niederschläge in Australien hielten über den Jahreswechsel hinaus an. Ferner wurde Australien im Februar 2011 von dem Zyklon Yasi getroffen. Für 2011 rechnen wir derzeit für Munich Re mit einer Schadenbelastung nach Retrozession in Höhe eines niedrigen bis mittleren dreistelligen Millionen-Euro-Betrags aus diesen Ereignissen. Zudem ereignete sich am 22. Februar 2011 ein schweres Erdbeben der Magnitude 6,3 nahe der Stadt Christchurch in Neuseeland; Munich Re ist exponiert.

Aus dem Aktienrückkaufprogramm, das der Vorstand der Münchener Rück AG am 7. Mai 2010 beschlossen hat, haben wir nach dem Bilanzstichtag bis 25. Februar 2011 weitere 1,7 Millionen Aktien der Münchener Rück AG im Wert von 195 Millionen € zurückgekauft.

## Rückversicherung

- // Anstieg der Beitragseinnahmen um 8,4 % auf 23,6 Milliarden €, vor allem durch großvolumige Transaktionen
- // Schaden-Kosten-Quote bei 100,5 %, zufriedenstellender Wert in Anbetracht deutlich höherer Großschadenbelastung
- // Kapitalanlageergebnis von 3,4 Milliarden €
- // Zufriedenstellendes Konzernergebnis bei 2,1 Milliarden €

### Wichtige Kennzahlen

|                                        |          | 2010   | 2009   | 2008   | 2007   | 2006   |
|----------------------------------------|----------|--------|--------|--------|--------|--------|
| <b>Gebuchte Bruttobeiträge</b>         |          |        |        |        |        |        |
| Leben                                  | Mio. €   | 7.901  | 6.796  |        |        |        |
| Leben/Gesundheit                       | Mio. €   |        |        | 7.130  | 7.293  | 7.665  |
| Schaden/Unfall                         | Mio. €   | 15.701 | 14.987 | 14.739 | 14.224 | 14.551 |
| <b>Schadenquote</b>                    |          |        |        |        |        |        |
| Gesundheit <sup>1</sup>                | %        |        |        | 76,0   | 72,0   | 68,5   |
| Schaden/Unfall                         | %        | 69,3   | 65,8   | 69,6   | 67,9   | 64,7   |
| davon: Naturkatastrophen <sup>2</sup>  | %-Punkte | 11,0   | 1,4    | 6,2    | 4,7    | 1,0    |
| <b>Kostenquote</b>                     |          |        |        |        |        |        |
| Gesundheit <sup>1</sup>                | %        |        |        | 23,1   | 26,4   | 27,8   |
| Schaden/Unfall                         | %        | 31,2   | 29,5   | 29,8   | 28,5   | 27,9   |
| <b>Schaden-Kosten-Quote</b>            |          |        |        |        |        |        |
| Gesundheit <sup>1</sup>                | %        |        |        | 99,1   | 98,4   | 96,3   |
| Schaden/Unfall                         | %        | 100,5  | 95,3   | 99,4   | 96,4   | 92,6   |
| <b>Operatives Ergebnis<sup>3</sup></b> |          |        |        |        |        |        |
| Leben                                  | Mio. €   | 434    | 718    |        |        |        |
| Leben/Gesundheit                       | Mio. €   |        |        | 930    |        |        |
| Schaden/Unfall                         | Mio. €   | 2.509  | 3.381  | 2.892  |        |        |
| <b>Konzernergebnis</b>                 |          |        |        |        |        |        |
| Leben                                  | Mio. €   | 293    | 465    |        |        |        |
| Leben/Gesundheit                       | Mio. €   |        |        | 705    | 714    | 561    |
| Schaden/Unfall                         | Mio. €   | 1.806  | 2.111  | 1.695  | 2.586  | 2.134  |

<sup>1</sup> Ohne nach Art der Lebensversicherung betriebenes Krankenversicherungsgeschäft.

<sup>2</sup> 2006 bis 2007 angepasst aufgrund von Methodenänderung.

<sup>3</sup> Nicht verfügbar für die Geschäftsjahre 2006 bis 2007 aufgrund Erstanwendung IFRS 8 im Geschäftsjahr 2009.

Munich Re ist in nahezu allen Zweigen der Rückversicherung tätig. Wir bieten die gesamte Produktpalette an, von der traditionellen Rückversicherung bis zu innovativen Lösungen für die Risikoübernahme. Dabei setzen wir unser umfassendes Risikowissen verstärkt ein, um für unsere Kunden individuelle Lösungen bei vielschichtigen Fragestellungen zu entwickeln.

## Vertrieb

Als Rückversicherer zeichnen wir unser Geschäft sowohl im direkten Kontakt mit den Erstversicherern als auch über Makler. Neben dem traditionellen Rückversicherungsgeschäft beteiligen wir uns auch als Risk Solutions am Erstversicherungsgeschäft von Industriekunden, an Versicherungspools, Public Private Partnerships sowie Geschäft in spezialisierten Nischensegmenten. Entscheidender Erfolgsfaktor ist immer unsere Risikoexpertise.

## Ergebnis

Das Rückversicherungsgeschäft von Munich Re war 2010 geprägt von hohen Belastungen aus Großschäden. Die Gesamtbelastung durch Großschäden lag über den Erwartungen und den mehrjährigen Durchschnittswerten – sie betrug 2.228 (1.157) Millionen €; 11,0 (1,4) Prozentpunkte der Schaden-Kosten-Quote stammen aus Naturkatastrophen. Das Konzernergebnis sank um 18,5 % auf 2,1 (2,6) Milliarden €. Bei der Kapitalanlage erzielten wir ein gutes Resultat von 3.436 (3.796) Millionen €. Ausschlaggebend war, dass wir Gewinne aus der Veräußerung von Kapitalanlagen realisierten. Das operative Ergebnis für die Rückversicherung, in das auch das Kapitalanlageergebnis einfließt, ging um 28,2 % auf 2,9 (4,1) Milliarden € zurück. Das versicherungstechnische Ergebnis belief sich auf 1,3 (1,9) Milliarden €.

## Umsatz

### Umsatzplus von 8,4 %

Mit 23,6 (21,8) Milliarden € verzeichneten wir 2010 gestiegene Beitragseinnahmen (8,4 %), bei unveränderten Wechselkursen wären sie um 1,5 % geklettert. Rund 19 Milliarden € oder 81 % der Beiträge wurden in Fremdwährung gezeichnet, davon 37 % in US-Dollar und 12 % in Kanadischen Dollar. 19 % unseres Umsatzes generierten wir in Euro.

Nach wie vor verfolgten wir konsequent unsere Zeichnungspolitik, die von risikoadäquaten Preisen und Bedingungen bestimmt ist. Aufgrund der hohen Marktkapazität, der wirtschaftsbedingt keine ausreichend steigende Nachfrage gegenüberstand, waren die Preise auf den Rückversicherungsmärkten, soweit keine Schadenbelastungen vorlagen, generell unter moderatem Druck. Die Preise in unseren Portfolios konnten aufgrund unseres aktiven Zyklusmanagements hingegen 2010 stabil gehalten werden. Zudem legten wir bei den Beiträgen durch großvolumige Transaktionen in der Lebensrückversicherung zu.

### Bruttobeiträge nach Ressorts

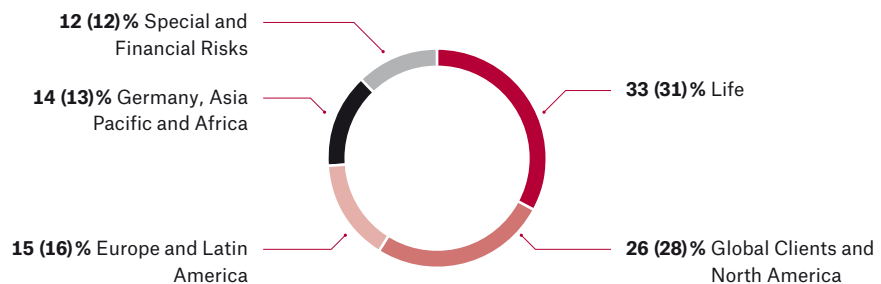

## Leben

// Umsatzsteigerung um 16,3 %

// Market Consistent Embedded Value (MCEV) bei 8.284 Millionen €

Die Bewertung der Lebensrückversicherungsverträge erfolgt auf Basis der MCEV Principles. Der MCEV setzt sich zusammen aus dem im Unternehmen vorhandenen Eigenkapital und dem sogenannten Bestandswert. Dieser ist der Barwert der nach finanz- und versicherungsmathematischen Grundsätzen berechneten zukünftigen Nettoerträge aus dem Versicherungsbestand und den damit verbundenen Kapitalanlagen unter Berücksichtigung des Zeitwerts der finanziellen Optionen und Garantien sowie der explizit berechneten Kapitalkosten (siehe auch Seite 55 f.).

Der MCEV des gesamten Lebensrückversicherungsgeschäfts erhöhte sich im abgelaufenen Geschäftsjahr auf 8.284 (6.773) Millionen €. Zu den Gesamterträgen von 1.018 (1.616) Millionen € trugen das Bestandsgeschäft sowie 2010 gezeichnetes Neugeschäft je etwa hälftig bei. Der Neugeschäftswert von 475 (562) Millionen € setzt sich zusammen sowohl aus nachhaltigem Neugeschäft in verschiedenen Märkten als auch aus einigen großen Geschäftsblöcken. Eine Darstellung des MCEV ist auf der Internetseite von Munich Re verfügbar.

### 16,3 % Plus beim Umsatz

Mit einem Bruttobeitragsvolumen von 7.901 Millionen € stieg der Umsatz in der Lebensrückversicherung im Vergleich zum Vorjahr um 16,3 %. Der wesentliche Motor für dieses Plus: eine Reihe großvolumiger Verträge, bei denen Lebensrückversicherung primär als Kapitalersatz fungiert. Diese vorwiegend im Jahr 2009 mit Kunden in Nordamerika, Asien und Kontinentaleuropa getätigten Abschlüsse führten 2010 zu einer weiteren Umsatzsteigerung. Gegenläufig wirkten die Folgen der weltweiten Rezession, die teilweise die Geschäftsentwicklung bei unseren Kunden belasteten und damit auch die zur Verfügung stehenden Geschäftsvolumina in der Rückversicherung reduzierten.

Grundlegende Wachstumsimpulse für unser zukünftiges Neugeschäft erwarten wir aus den anhaltenden Privatisierungstendenzen bei der Alters-, Pflege- und Berufsunfähigkeitsvorsorge sowie der dynamischen Entwicklung der Versicherungsmärkte in Asien. Weiter steigenden Bedarf sehen wir auch beim Management von Kapitalanlage Risiken in Lebensversicherungsprodukten. So haben wir die Infrastruktur geschaffen, um unseren Kunden umfassende Lösungskonzepte bei der Absicherung von kapitalmarktabhängigen Optionen und Garantien anbieten zu können. Schließlich bauen wir sukzessive die Dienstleistungspalette für unsere Kunden aus, um darüber Zugang zu profitabler Rückversicherung zu erhalten. Besondere Bedeutung haben Beratungsleistungen und Produkte zur Effizienzsteigerung bei den Kernprozessen unserer Kunden. In diesem Bereich bieten wir über unsere Tochtergesellschaft **Allfinanz** modernste internetbasierte Software-Lösungen zur Automatisierung der Risikoprüfung und der Policierung in der Lebensversicherung an.

In einzelnen wichtigen Märkten stellt sich die Situation wie folgt dar:

Ein wichtiger Bestandteil unseres Lebensrückversicherungsgeschäfts in **Deutschland** ist die Deckung des Berufsunfähigkeitsrisikos. In diesem Segment galt es, die Auswirkungen der Finanzkrise besonders genau zu beobachten. Aufgrund unseres Markt- und Produktwissens waren wir in der Lage, unsere Kunden insbesondere bei der Entwicklung zukunftsfähiger Produktkonzepte zu unterstützen. Durch Beratung der Kunden beim Schadenmanagement sowie dank der zwischenzeitlich spürbaren konjunkturellen Erholung war der Schadenverlauf nicht außerordentlich belastet. Im Übrigen führte die bereits im Jahr 2009 durchgeführte Bereinigung der konzerninternen Rückversicherung 2010 zu einem Rückgang der Beitragseinnahmen im Rückversicherungssegment um ca. 0,3 Milliarden €.

In den **USA** steigerte unsere Tochtergesellschaft Munich American Reassurance Company ihre Bruttoprämie auf 1,7 (1,5) Milliarden €. Damit konnte sie ihre Position unter den führenden Lebensrückversicherungsunternehmen behaupten. Trotz des intensiven Wettbewerbs sehen wir gute Chancen, im Bereich der Todesfalldeckungen profitabel zu wachsen, indem wir unseren Kunden auf deren Bedürfnisse zugeschnittene Rückversicherungskapazität anbieten. Das versicherungstechnische Ergebnis blieb hinter den Erwartungen zurück. Während wir in unserem Kerngeschäft, der Deckung von Sterblichkeitsrisiken, einen günstigen Schadenverlauf verzeichneten, erwarten wir in der Zukunft einen Anstieg bei den Leistungen bei Pflegeversicherungen. Für eine Erhöhung der Reserven einschließlich Wertberichtigungen auf für dieses Geschäft aktivierte Abschlusskosten waren deshalb ca. 315 Millionen € aufzuwenden.

In **Kanada** konnte Munich Re, Toronto (Life) auch 2010 Prämien und Ergebnis ausbauen. Sie hat in allen Sparten ihrer Geschäftstätigkeit (Leben, Invalidität, Gesundheit, Critical Illness und Pflegeversicherung) eine führende Marktposition. Die Beitragseinnahmen stiegen auf 2,2 (1,6) Milliarden €, dies vor allem aufgrund großvolumiger Geschäftsabschlüsse aus dem Vorjahr, für die erstmals im Jahr 2010 der volle Jahresumsatz ausgewiesen wird. Zum herausragenden Ergebnis trug besonders der positive Schadenverlauf im Einzelebensgeschäft bei. Aufgrund der Marktstellung befindet sich unsere kanadische Niederlassung in einer ausgezeichneten Position, die Dynamik in der Geschäfts- und Ergebnisentwicklung auch für 2011 aufrechtzuerhalten.

Mit knapp 1,0 (0,6) Milliarden € Beitragseinnahmen entwickelten sich die **asiatischen Lebensversicherungsmärkte** 2010 zu einem Haupttreiber bei Umsatz und Ergebnis unseres Lebensrückversicherungsgeschäfts. Wir führten zukunftsweisende Produktkonzepte im Segment Living Benefits sowie andere auf die Kundenbedürfnisse zugeschnittene Beratungsleistungen ein. Dadurch konnten wir die Geschäftsentwicklung bei unseren Kunden spürbar fördern und über Rückversicherung daran partizipieren. Zudem haben wir gerade in Asien Erfolg mit Transaktionen, die primär auf eine Stärkung der Solvenz unserer Kunden abzielen. Durch globalen Knowhow-Transfer können wir in den sich entwickelnden Märkten einen Wettbewerbsvorteil erzielen. Auch 2010 erhöhten wir unser Engagement in der Region weiter. Im Juli wandelten wir unsere Repräsentanz in Tokio in eine Niederlassung um. Damit können wir an den besonderen Geschäftsmöglichkeiten, die sich aus dem Strukturwandel der japanischen Lebensversicherung ergeben, als Rückversicherer noch erfolgreicher teilhaben.

Der Wettbewerb auf dem **britischen Lebensversicherungsmarkt** ist weiterhin sehr intensiv. Ein Überangebot an Rückversicherungskapazität führt zu einem anhaltenden Preisdruck bei reinen Todesfalldeckungen. Dabei sind wir bereit, Marktanteile aufzugeben, sofern sich unsere Erwartung an einen risikoadäquaten Preis nicht durchsetzen lässt. Im Gruppenrückversicherungsgeschäft erweiterten wir unsere Produktpalette vor allem im Bereich der Automatisierung der Geschäftsprozesse bei unseren Kunden. Die Geschäftsaussichten in diesem Bereich bleiben auch für 2011 gut. Zur verbesserten Diversifizierung unseres Portfolios prüfen wir insbesondere für den britischen Markt preislich attraktive Möglichkeiten zur Übernahme von Langlebighkeitsrisiken. In Großbritannien verzeichnete Munich Re, London (Life) insgesamt Bruttobeitragseinnahmen von 0,8 (0,8) Milliarden €.

In **Spanien und Portugal** ist unser Lebensgeschäft in den vergangenen Jahren stark gewachsen. Zum weiteren Ausbau unserer führenden Position und um die Potenziale in Lateinamerika noch besser zu heben, verstärken wir 2011 das Team von Munich Re, Madrid deutlich und übertragen ihm die operative Managementverantwortung für Spanien, Portugal und Lateinamerika. Dies wird unserem Geschäft gerade in Ländern mit hohen wirtschaftlichen Zuwächsen wie Brasilien zugutekommen.



Unsere Tochtergesellschaft Munich Reinsurance Company of Australasia Ltd., über die wir unser Lebensrückversicherungsgeschäft in **Australien und Neuseeland** zeichnen, wies in den vergangenen Jahren starkes Wachstum auf. 2010 gelang es, die Prämieinnahmen bei attraktiven Gewinnmargen um weitere 45,5 % zu steigern.

Profitables Wachstum verzeichneten wir auch auf dem **afrikanischen Kontinent**. Unsere Tochtergesellschaft Munich Reinsurance Company of Africa Ltd. erhöhte ihre Beitragseinnahmen um 45,7 % auf 153 Millionen €. Die afrikanischen Märkte und besonders Südafrika bieten weiterhin gute Chancen für überdurchschnittliches und profitables Wachstum.

## Schaden und Unfall

// Zufriedenstellendes Ergebnis von 1.806 Millionen €  
// Schaden-Kosten-Quote bei 100,5 %

In der Schaden- und Unfallrückversicherung erwirtschafteten wir insgesamt ein in Anbetracht der hohen zufallsbedingten Großschadenbelastung zufriedenstellendes Ergebnis. In einem weiterhin wettbewerbsintensiven Marktumfeld konnten wir dank unserer Kapitalstärke und unseres Risiko-Knowhows in den Vertragserneuerungen 2010 gute Konditionen erzielen und die Profitabilität des Portfolios nahezu konstant halten.

Für die kommenden Jahre sehen wir – besonders auf den europäischen und einzelnen asiatischen Märkten – Wachstumspotenziale durch die Einführung von Solvency II: Da die Solvenzanforderungen steigen, dürfte ebenso die Nachfrage nach Rückversicherungslösungen zunehmen. Um uns auf diese Entwicklung vorzubereiten, stehen wir bereits in einem intensiven Dialog mit unseren Kunden und haben dafür entsprechende Maßnahmen angestoßen.

## Ergebnis

Schaden-Kosten-Quote  
bei 100,5 %

Wir erreichten 2010 ein operatives Ergebnis von 2.509 (3.381) Millionen € und ein zufriedenstellendes Konzernergebnis von 1.806 (2.111) Millionen €. Über den Marktzyklus hinweg rechnet Munich Re mit einer Schadenquote von etwa 97 % der verdienten Nettobeiträge, die 2010 aufgrund der hohen Großschadenbelastung mit 100,5 (95,3) % jedoch deutlich überschritten wurde.

Die Summe der Schäden aus Naturkatastrophen lag bei 1.564 (196) Millionen €. Das entspricht 11,0 (1,4) Prozentpunkten der verdienten Nettobeiträge und übertrifft deutlich die ursprünglich erwarteten 6,5 %. Das Erdbeben in Chile war der größte Einzelschaden des Jahres 2010 (748 Millionen €); gemessen an der Belastung von Munich Re handelte es sich um den drittgrößten Schaden in der Firmengeschichte nach dem Anschlag auf das World Trade Center (2001) und dem Wirbelsturm Katrina (2005). Daneben ereigneten sich weitere große Naturkatastrophen: Hervorzuheben sind vor allem das Erdbeben in Neuseeland im September (339 Millionen €), die Überschwemmungen in Australien im Dezember (267 Millionen €), zwei Hagelunwetter in Australien im März (171 Millionen €), Wintersturm Xynthia in Europa Ende Februar (47 Millionen €) sowie die Schäden durch starke Schneefälle an der amerikanischen Ostküste im Februar (30 Millionen €). Die Hurrikan-Saison im Nordatlantik verlief dagegen eher mild. Es bildeten sich zwar große Wirbelstürme; sie erreichten glücklicherweise jedoch nur selten dicht besiedelte Küstenregionen.

Die von Menschen verursachten Großschäden lagen 2010 mit 664 (962) Millionen € unterhalb des Vorjahreswerts, der wegen der Finanzkrise von Ausfällen in der Kredit- und Kautionsversicherung geprägt war. Herausragend war die Explosion der Ölbohrplattform Deepwater Horizon im April, für die Munich Re einen niedrigen dreistelligen Millionen-Euro-Betrag reserviert hat. Schäden größeren Ausmaßes richteten darüber

hinaus unter anderem verschiedene Medikamentenhaftpflichtfälle (121 Millionen €), Rohrundichtigkeiten nach der Modernisierung eines Kraftwerks (51 Millionen €), die Explosion in einem Kraftwerk in den USA (51 Millionen €) und das Erstarren von Aluminium in Leitungen einer Fabrik in Katar (47 Millionen €) an.

#### Schaden-Kosten-Quote nach Schaden/Unfall-Ressorts

| %                                | 2010  | 2009  | 2008  | 2007  | 2006 |
|----------------------------------|-------|-------|-------|-------|------|
| Germany, Asia Pacific and Africa | 102,5 | 100,1 | 106,5 | 106,0 | 94,2 |
| Europe and Latin America         | 110,8 | 87,2  | 91,7  | 95,0  | 97,8 |
| Global Clients and North America | 99,6  | 88,8  | 101,4 | 95,8  | 91,9 |
| Special and Financial Risks      | 89,2  | 112,6 | 99,0  | 83,8  | 81,1 |

Die Schaden-Kosten-Quoten der einzelnen Ressorts entwickelten sich unterschiedlich: Das Ressort Special and Financial Risks verbesserte seine Schaden-Kosten-Quote, die 2009 durch die Finanzkrise und Ausfälle in der Warenkredit-, Kautions- und Organhaftpflichtversicherung stark belastet war, auf 89,2 %. 0,2 (0,4) Prozentpunkte davon entfallen auf den Retrozessionsschutz der gesamten Rückversicherung, der vollständig im Ressort Special and Financial Risks verbucht wird. Für die übrigen Ressorts lag die Schaden-Kosten-Quote aufgrund der hohen Großschadenbelastung über dem Vorjahresniveau. Im Ressort Germany, Asia Pacific and Africa stieg die Schaden-Kosten-Quote aufgrund der Großschäden in Australien leicht an. Das Ressort Europe and Latin America verzeichnete vor allem wegen des Erdbebens in Chile einen Anstieg um 23,6 Prozentpunkte. Die Schaden-Kosten-Quote im Ressort Global Clients and North America kletterte auf 99,6 (88,8) %. Dies ist in Anbetracht der Großschäden Erdbeben Chile und Deepwater Horizon ein erfreuliches Ergebnis.

#### Umsatz

Die Verhandlungen zur Erneuerung der Rückversicherungsverträge verliefen 2010 zufriedenstellend. Erwartungsgemäß war das Marktumfeld schwieriger als im Vorjahr. Die Kapitalmärkte haben sich schneller erholt als erwartet und damit auch die Bilanzen vieler Erst- und Rückversicherer. Kapazität stand in den meisten Sparten ausreichend zur Verfügung. Generell zeigten die Preise einen leichten Abwärtstrend; Ausnahmen waren unter anderem der Autoversicherungsmarkt in Großbritannien sowie Märkte und Sparten mit aktueller Großschadenbelastung. So konnten aufgrund des Erdbebens in Chile die Preise von Naturgefahrendeckungen dort signifikant erhöht werden; die wetterbedingten Schäden in Australien führten dort zu einer Stabilisierung des Preisniveaus. Auch in Sparten, die 2009 von Schäden betroffen waren (zum Beispiel Kredit, einige Naturgefahrendeckungen und Offshore-Energy-Deckungen im Golf von Mexiko), konnten Ratenerhöhungen durchgesetzt werden. Dagegen litten die Transportversicherung und die technischen Versicherungszweige unter rezessionsbedingten Raten- und Volumenrückgängen. Dank unserer konsequenten Zeichnungspolitik gelang es uns, die Qualität des Portfolios konstant zu halten. In Bereichen, die derzeit wenig Aussicht auf einen profitablen Verlauf haben, wie zum Teil das Autoversicherungsgeschäft in Osteuropa und Deutschland, aber auch das Kreditgeschäft und ausgewählte Haftpflichtsegmente in den USA, reduzierten wir folglich die Kapazität. Gleichwohl konnten wir unser Beitragsvolumen um 4,8 % auf 15,7 (15,0) Milliarden € steigern. Im Segment der komplexen Haftpflichtrisiken legten wir zu, stellten kurzfristig Kapazität bei bester Bonität zur Verfügung und zeichneten profitables Neugeschäft. Des Weiteren erhöhte unser stärkeres Engagement in Nischensegmenten die Beiträge.

Wie im Vorjahr zeichneten wir rund ein Drittel unseres Vertragsgeschäfts entweder zu individuellen Konditionen, die sich von denen anderer Rückversicherer abheben, oder als exklusive Verträge, bei denen wir als alleiniger Rückversicherer auftreten.

Die Wechselkursentwicklung des Euro gegenüber anderen Währungen beeinflusste unseren Umsatz im Vergleich zum Vorjahr mit 798 Millionen € positiv.

**Gebuchte Bruttobeiträge nach Schaden/Unfall-Ressorts**

| Mio. €                           | 2010  | 2009  | 2008  | 2007  | 2006  |
|----------------------------------|-------|-------|-------|-------|-------|
| Germany, Asia Pacific and Africa | 3.268 | 2.836 | 3.152 | 2.917 | 2.881 |
| Europe and Latin America         | 3.472 | 3.378 | 3.868 | 3.861 | 3.526 |
| Global Clients and North America | 6.140 | 6.058 | 5.086 | 5.751 | 6.097 |
| Special and Financial Risks      | 2.812 | 2.713 | 2.573 | 1.608 | 1.945 |

**Bruttobeiträge nach Versicherungszweigen**

| Mio. €                          | 2010          | 2009          | 2008          | 2007          | 2006          |
|---------------------------------|---------------|---------------|---------------|---------------|---------------|
| Haftpflicht                     | 2.112         | 2.162         | 2.118         | 2.227         | 2.394         |
| Unfall                          | 278           | 353           | 503           | 547           | 713           |
| Kraftfahrt                      | 2.793         | 2.218         | 2.441         | 2.643         | 2.913         |
| Transport, Luftfahrt, Raumfahrt | 1.838         | 1.900         | 1.836         | 1.730         | 1.751         |
| Feuer                           | 4.350         | 4.339         | 3.998         | 3.932         | 3.763         |
| Technische Versicherungen       | 1.658         | 1.536         | 1.457         | 1.286         | 1.239         |
| Kreditversicherung              | 744           | 632           | 825           | 710           | 688           |
| Sonstige Versicherungszweige    | 1.928         | 1.847         | 1.561         | 1.149         | 1.090         |
| <b>Gesamt</b>                   | <b>15.701</b> | <b>14.987</b> | <b>14.739</b> | <b>14.224</b> | <b>14.551</b> |

## Entwicklung und Ausbau auf ausgewählten Märkten und bei Tochtergesellschaften

In **Deutschland** fielen die Beitragseinnahmen auf 1.303 (1.416) Millionen €, zum einen aufgrund weiter anhaltender Rückgänge der Originalraten bei Erstversicherern sowie höherer Selbstbehalte unserer Zedenten; zum anderen gaben wir Geschäft auf, bei dem risikogerechte Preise und Bedingungen nicht durchsetzbar waren.

In der Kraftfahrtversicherung, der umsatzstärksten Branche, hielt der Druck auf das Ratenniveau der Erstversicherer unvermindert an. Das Beitragsvolumen in der Rückversicherung ging über den Gesamtmarkt betrachtet ebenfalls zurück und die Margen sanken. Deshalb reduzierten wir auch 2010 unser Autoversicherungsgeschäft weiter.

In **Greater China** stieg das Beitragsvolumen auf 735 (423) Millionen €. Wir diversifizierten und optimierten unser Portfolio, indem wir bewusst auf Geschäft verzichteten, das unserem Profitabilitätsanspruch nicht genügte, neue großvolumige und gewinnbringende Neuverträge in China zeichneten und unsere Kundenbasis ausdehnten. Zudem partizipierten wir am starken Originalwachstum.

Trotz des kompetitiven Erst- und Rückversicherungsumfelds in **Japan und Korea** sowie der Auswirkungen der weltweiten Finanzkrise stieg unser Prämienvolumen auf 578 (554) Millionen €. Ungeachtet der schwierigen ökonomischen Lage und des starken Yen konnten wir in Japan eine konstante Kapazität bereitstellen, insbesondere für die Naturgefahrendeckungen von Erdbeben und Taifunen. Zudem unterstützen wir die japanischen Gesellschaften bei ihrer internationalen Expansion, bei der Produktentwicklung und beim Ausbau ihres Risikomanagements im Hinblick auf die Einführung von neuen Solvenz- und Rechnungslegungsvorschriften (IFRS).

Die aufsichtsrechtlichen Entwicklungen in **Indien** lassen weiterhin eine Öffnung des Markts für internationale Rückversicherer erwarten. Aufgrund des mittel- und langfristigen Wachstumspotenzials – auch im Bereich Rückversicherung – verfolgt Munich Re unter Berücksichtigung des Marktumfelds nach wie vor den Ansatz, alle strategischen Optionen aufrechtzuerhalten.

In **Australien und Neuseeland** blieben wir Marktführer und erzielten im Vergleich zum Vorjahr ein weiteres Prämienwachstum auf 788 (555) Millionen €. Das Ergebnis wird allerdings belastet durch die Hagelstürme und die Überschwemmung in Australien sowie das Erdbeben in Neuseeland. Trotz der Turbulenzen auf den Finanzmärkten ist die Kapitalisierung australischer Versicherungsgesellschaften weiterhin sehr solide, sodass das Wachstumspotenzial im traditionellen Rückversicherungsgeschäft aufgrund unseres hohen Marktanteils mittelfristig begrenzt ist.

Trotz des starken Wettbewerbs auf dem Rückversicherungsmarkt in **Großbritannien** konnten wir unser Beitragsniveau dort um 1,6 % auf 2.985 (2.937) Millionen € steigern. Wir gaben weiterhin strikt Geschäft zu nicht risikogerechten Preisen und Bedingungen auf. Dennoch konnten wir dies unter anderem durch den Zuwachs im profitablen Autoversicherungsgeschäft über unsere Beteiligung an einem strategischen Partner mehr als kompensieren. Auch das Beitragsniveau unseres Erstversicherungsgeschäfts über unsere Managing General Agency (MGA) Bell & Clements verbesserten wir erneut dank organischem Wachstum bei bestehenden Kunden, neuen Produkten sowie ausgewählten Beteiligungen an Nischengeschäften.

In **Spanien** gingen unsere Beitragseinnahmen auf 403 (448) Millionen € zurück. Dies beruhte einerseits auf der anhaltenden Wirtschaftskrise sowie auf der konsequenten Aufgabe von nicht ertragreichem Geschäft. Dennoch konnten wir unsere führende Marktstellung behaupten.

In **Lateinamerika** bauten wir unsere Marktführerschaft aus. Die Beitragseinnahmen kletterten auf 691 (606) Millionen €. Bei sonst eher konstantem Niveau konnten die Raten für Naturkatastrophendeckungen zum Teil deutlich gesteigert werden. Positiv wirkten unsere renditeorientierte Zeichnungspolitik sowie eine geringe Schadenbelastung in der Karibik. Von dem Erdbeben in Haiti waren wir aufgrund der geringen Versicherungsdichte nur geringfügig betroffen.

Der Großteil der Schäden des Erdbebens in Chile betrifft den Markt Lateinamerika sowie unsere Niederlassungen in Madrid und London. Da wir sofort eine Schadenmanagement-Task-Force vor Ort einsetzten, konnten wir unsere Kunden bei einer effizienten Schadenregulierung unmittelbar unterstützen und schnell Schadenvorauszahlungen leisten. Dank dieser hohen Flexibilität und Servicebereitschaft konnten wir unseren Marktanteil zu deutlich höheren Preisen ausbauen.

Unsere Tochtergesellschaft **Münchener Rück do Brasil Resseguradora S.A.** konnte ihr Beitragsvolumen auf 163 (126) Millionen € steigern und nimmt somit auch weiterhin eine führende Stellung am Markt ein. Aufgrund geringer Schäden hat sich die Schaden-Kosten-Quote mit 83,2 % gegenüber dem Vorjahr deutlich verbessert (120,1%).

**Münchener Rück do Brasil Resseguradora S.A.**

|                                     |          | 2010 | Vorjahr | Veränderung |
|-------------------------------------|----------|------|---------|-------------|
|                                     |          |      |         | %           |
| Gebuchte Bruttobeiträge             | Mio. R\$ | 378  | 347     | 8,9         |
| davon: Schaden/Unfall               | Mio. R\$ | 335  | 322     | 4,0         |
| Verdiente Nettobeiträge             | Mio. R\$ | 169  | 147     | 15,0        |
| davon: Schaden/Unfall               | Mio. R\$ | 146  | 131     | 11,5        |
| Schadenquote Schaden/Unfall         | %        | 49,7 | 83,0    |             |
| Kostenquote Schaden/Unfall          | %        | 33,5 | 37,1    |             |
| Schaden-Kosten-Quote Schaden/Unfall | %        | 83,2 | 120,1   |             |
| Jahresergebnis                      | Mio. R\$ | 25,0 | -22,5   | -           |
| Kapitalanlagen                      | Mio. R\$ | 363  | 202     | 79,7        |

Im **Ressort Global Clients and North America** verzeichneten wir insgesamt einen leichten Anstieg der Prämien aufgrund der Vollkonsolidierung der HSB Group. Wir nutzten bei ausgewählten Produkten und bestehenden Kundenverbindungen attraktive Wachstumschancen, trennten uns aber wegen des Drucks auf die Rückversicherungs-raten konsequent von nicht profitablen Geschäft – darunter waren auch großvolumige Verträge. Unsere Beteiligung am Lloyd's-Syndikat MSP stockten wir von 73,2% auf 84,7% auf.

Im **US-Geschäft** konnten wir sowohl in der Rückversicherung bei Munich Reinsurance America, Inc. als auch bei den Erstversicherungsgesellschaften AMIG und HSB Group erfreuliche Ergebnisse verbuchen. Nordamerika blieb 2010 weitgehend von Naturkatastrophen verschont. Die Integration der HSB Group schlossen wir Anfang 2010 erfolgreich ab; die Beitragseinnahmen von 643 Millionen € wurden erstmals für ein ganzes Jahr vollkonsolidiert (Vorjahr: 9 Monate). Das Ergebnis war mit 122 Millionen € wieder sehr erfreulich. Die HSB Group baut dank der Synergien mit Munich Re ihre internationalen Aktivitäten selektiv in aussichtsreichen Märkten weiter aus. Seit Mitte 2010 sind die Erstversicherungsaktivitäten in den USA noch stärker gebündelt, da sie nun einer einheitlichen Leitung unterstehen. Mit stärkerem Cross-Selling werden wir in Zukunft weitere Geschäftspotenziale heben.

**Munich Reinsurance America**

|                                     |           | 2010   | Vorjahr | Veränderung |
|-------------------------------------|-----------|--------|---------|-------------|
|                                     |           |        |         | %           |
| Gebuchte Bruttobeiträge             | Mio. US\$ | 3.621  | 3.360   | 7,8         |
| davon: Schaden/Unfall               | Mio. US\$ | 3.111  | 3.042   | 2,3         |
| Verdiente Nettobeiträge             | Mio. US\$ | 2.881  | 2.677   | 7,6         |
| davon: Schaden/Unfall               | Mio. US\$ | 2.364  | 2.366   | -0,1        |
| Schadenquote Schaden/Unfall         | %         | 71,0   | 63,4    |             |
| Kostenquote Schaden/Unfall          | %         | 33,2   | 30,3    |             |
| Schaden-Kosten-Quote Schaden/Unfall | %         | 104,2  | 93,7    |             |
| Jahresergebnis                      | Mio. US\$ | 276,5  | 314,5   | -12,1       |
| Kapitalanlagen                      | Mio. US\$ | 15.611 | 13.474  | 15,9        |



Die **Munich Reinsurance Canada Non-Life Group**, die aus Munich Reinsurance Company of Canada und Temple Insurance Company besteht, trug trotz einiger Wetterereignisse erneut sehr positiv zum Ergebnis bei. Erfreulich ist auch, dass sich der Ausbau unserer Spezialversicherungsaktivitäten über die Temple Insurance Company gut entwickelt.

#### Munich Reinsurance Canada Non-Life Group

|                                     |            | 2010  | Vorjahr | Veränderung<br>% |
|-------------------------------------|------------|-------|---------|------------------|
| Gebuchte Bruttobeiträge             | Mio. Kan\$ | 399   | 414     | -3,6             |
| Schaden/Unfall                      | Mio. Kan\$ | 399   | 414     | -3,6             |
| Verdiente Nettobeiträge             | Mio. Kan\$ | 298   | 295     | 1,0              |
| Schaden/Unfall                      | Mio. Kan\$ | 298   | 295     | 1,0              |
| Schadenquote Schaden/Unfall         | %          | 60,7  | 57,2    |                  |
| Kostenquote Schaden/Unfall          | %          | 34,6  | 32,9    |                  |
| Schaden-Kosten-Quote Schaden/Unfall | %          | 95,3  | 90,1    |                  |
| Jahresergebnis                      | Mio. Kan\$ | 59,6  | 76,0    | -21,6            |
| Kapitalanlagen                      | Mio. Kan\$ | 1.550 | 1.510   | 2,6              |

Ein sehr erfreuliches Ergebnis erwirtschaftete erneut unsere Schweizer Tochtergesellschaft **New Reinsurance Company Ltd. (NewRe)**. Sie zeichnet im traditionellen Geschäft inzwischen ausschließlich nicht proportionale Deckungen, dabei in größerem Umfang Naturkatastrophengeschäft. Darüber hinaus fasst sie erfolgreich Fuß auf dem Markt für strukturierte, maßgeschneiderte Rückversicherungslösungen. NewRe setzte ihr konsequentes Zyklusmanagement fort, wobei sie das aktiv reduzierte traditionelle Geschäft durch neu akquirierte, strukturierte Verträge ausgleichen konnte. Das Geschäftsvolumen war mit 1.289 (1.518) Millionen sfr im Geschäftsjahr 2010 deutlich rückläufig, da eine großvolumige Quotenverbindung, die aufgrund des Kapitalbedarfs des Kunden während der Kapitalmarktkrise entstanden war, planmäßig beendet wurde.

#### New Reinsurance Company Ltd.<sup>1</sup>

|                                     |          | 2010  | Vorjahr | Veränderung<br>% |
|-------------------------------------|----------|-------|---------|------------------|
| Gebuchte Bruttobeiträge             | Mio. sfr | 1.289 | 1.518   | -15,1            |
| davon: Schaden/Unfall               | Mio. sfr | 702   | 941     | -25,4            |
| Verdiente Nettobeiträge             | Mio. sfr | 1.162 | 1.465   | -20,7            |
| davon: Schaden/Unfall               | Mio. sfr | 590   | 887     | -33,5            |
| Schadenquote Schaden/Unfall         | %        | 57,2  | 67,8    |                  |
| Kostenquote Schaden/Unfall          | %        | 26,9  | 21,6    |                  |
| Schaden-Kosten-Quote Schaden/Unfall | %        | 84,1  | 89,4    |                  |
| Jahresergebnis                      | Mio. sfr | 136,3 | 205,8   | -33,8            |
| Kapitalanlagen                      | Mio. sfr | 3.858 | 4.387   | -12,1            |

<sup>1</sup> Abschluss nach nationalem Bilanzrecht.

In der **Transportversicherung** entwickelten sich die Beitragseinnahmen im Vergleich zu 2009 rückläufig: Von den insgesamt 1,2 Milliarden € erwirtschaftete unser Londoner Lloyd's-Syndikat Watkins 392 (361) Millionen €. Die Ursache für den Beitragsrückgang war das weltweit geschrumpfte Handelsvolumen infolge der Rezession. Zudem befanden sich die Raten in den klassischen Transportparten, insbesondere in der Warenversicherung, auch 2010 unter Druck. Ebenso trennten wir uns konsequent von nicht

profitablem Geschäft. Im naturgefahren- und großschadenexponierten Rückversicherungsgeschäft konnten wir 2010 Verbesserungen bei Preisen und Bedingungen erzielen. Für 2011 ist aufgrund unserer unbeirrten ertragsorientierten Zeichnungspolitik in einem schwierigen Marktumfeld damit zu rechnen, dass die Beiträge sinken. Allerdings gehen wir davon aus, dass im Offshore-Energy-Bereich infolge der bekannten Exponierung von Naturkatastrophen und des Deepwater-Horizon-Großschadens die Raten im Original- und Rückversicherungsmarkt anziehen werden. Wir werden unsere Marktposition nutzen, um aus dieser Entwicklung werthaltiges Geschäft zu generieren. Unsere Initiative zur Versicherung von Ölbohrungen im Meer zielt in dieselbe Richtung.

## Spezialsparten

In der **Aggroversicherung** bauten wir unsere führende Position weiter aus. Wir zeichneten überwiegend staatlich gestützte Ernteversicherungsprogramme, einen Großteil davon in den USA. In enger Abstimmung mit ausgewählten Zedenten übertragen wir unsere große Erfahrung und Kompetenz in diesem Geschäft auf andere Regionen mit hohem Ertrags- und Wachstumspotenzial.

Auf dem Markt für **Luft- und Raumfahrtisiken** erhöhte sich der Druck auf die Marktraten. Das Prämienvolumen stieg um 4,6 % auf 635 (607) Millionen €. Im Raumfahrtgeschäft konnten wir uns dank unserer Position als Marktführer und aufgrund des Abschlusses langfristiger Verträge dem Druck auf die Raten weitgehend entziehen. Zudem begünstigte eine moderate Schadenbelastung das Ergebnis. Im Luftfahrtgeschäft setzte sich der Ratenanstieg, der 2009 in einigen Teilsegmenten sichtbar war, trotz einer hohen Folge von Großschäden im Jahr 2010 nicht fort. In Folge stieg die Schaden-Kosten-Quote auf 87,7 (83,4) %.

In unserem Geschäftsfeld **Financial Risks** ist die Kredit- und Kautionsrückversicherung die wichtigste Sparte. Hier sichern wir finanzielle Risiken ab, die primär mit dem weltweiten Waren- und Dienstleistungsverkehr verbunden sind oder durch Bürgschaften und Garantien entstehen. Dieses Geschäftsfeld ist eng an die weltweite wirtschaftliche Entwicklung, aber auch an regionale ökonomische Tendenzen gekoppelt. In den Krisen Jahren 2008 und 2009 haben wir gemeinsam mit unseren Kunden gezielte Maßnahmen zur Risikosteuerung in den rückversicherten Portfolios sowie Prämienraten- und Bedingungsverbesserungen auf der Erstversicherungsseite umgesetzt. Diese Aktivitäten, gekoppelt mit der zügigen wirtschaftlichen Erholung, zeigten unmittelbar im Geschäftsjahr 2010 ihre positive Wirkung, sodass wir in Kredit und Kautions die Schaden-Kosten-Quote auf 82,4 (173,4) % senken konnten. Die Beitragseinnahmen entwickelten sich mit 744 (632) Millionen € erwartungsgemäß. Für 2011 rechnen wir, bei einer anhaltenden Verbesserung der gesamtwirtschaftlichen Lage, mit einer Stabilisierung der Kredit- und Kautionsergebnisse in der Erstversicherung auf gutem Niveau; Gleiches gilt für unsere Ergebnisse in der Rückversicherung.

Die **Risk Trading Unit** platziert Versicherungsrisiken auf dem Kapital- sowie dem Retrozessionsmarkt. Die Services dieser Einheit bieten wir primär unseren Kunden an, nutzen sie jedoch ebenso für eigene Zwecke, sofern die Abgabe von Versicherungsrisiken aus der Sicht des Risikomanagements nützlich erscheint. 2010 wurde zum Beispiel in zwei Kundentransaktionen Hurrikan-USA-Kapazität bei Investoren platziert (305 Millionen US\$ und 96 Millionen US\$), zusätzlich führte Munich Re Beratungsleistungen im Rahmen einer weiteren Kapitalmarkttransaktion (150 Millionen US\$) durch. Daneben sicherte Munich Re im ersten Halbjahr in einer eigenen Transaktion die Szenarien Windsturm Europa und Hurrikan USA ab („EOS Wind“, 80 Millionen US\$). Somit war Munich Re 2010 aufgrund der Anzahl der Transaktionen einer der bedeutendsten Akteure auf dem Kapitalmarkt. Mittlerweile sind wir zudem einer der größten europäischen Investoren in sogenannte Insurance-linked Securities (ILS), also in Verbriefungen von Versicherungsrisiken am Kapitalmarkt, und schafften es so, weitere Marktopportunitäten konsequent zu nutzen.

Wir bieten maßgeschneiderte  
Lösungen für Industrie und  
Großkunden

Unseren Kunden im **Industrie- und Großprojektgeschäft** bieten wir über gruppen-eigene Erstversicherungsgesellschaften ein breites Spektrum an Produkten, maßgeschneiderten Lösungen und Services an, die auf unserem ausgewiesenen industrie- und risikospezifischen Wissen fußen. Das Geschäft bearbeiten wir innerhalb der Einheit Corporate Insurance Partner mit Experten in München, London, Paris, New York, Princeton und Singapur. Unser spezialisiertes Wissen bei Identifikation und Einschätzung von Risiken sowie Strukturierung von Versicherungslösungen erlaubt uns, in einem hoch dynamischen und globalisierten Umfeld Wert zu schaffen und uns im Wettbewerb zu differenzieren. Unser Beitragsvolumen in diesem Segment konnten wir leicht steigern. Die Investitionen in den weltweiten Ausbau dieser Aktivitäten sowie Großschäden wie das Erdbeben in Chile belasteten die Schaden-Kosten-Quote im Geschäftsjahr 2010.

## Erstversicherung

- // Gesamte Beitragseinnahmen um 5,4 % im Vergleich zum Vorjahr auf 19,2 Milliarden € gestiegen; deutsches und internationales Geschäft mit Beitragsplus
- // Schaden-Kosten-Quote mit 96,8 % trotz zahlreicher Naturereignisse auf gutem Niveau
- // Kapitalanlageergebnis von 5,6 Milliarden €
- // Konzernergebnis von 656 Millionen € deutlich über Vorjahr
- // Umsetzung neuer Markenstrategie erfolgreich abgeschlossen

### Wichtige Kennzahlen

|                                        |        | 2010  | 2009  | 2008  | 2007   | 2006   |
|----------------------------------------|--------|-------|-------|-------|--------|--------|
| Gesamte Beitragseinnahmen <sup>1</sup> | Mrd. € | 19,2  | 18,2  | 18,1  | 18,3   | 17,7   |
| Gebuchte Bruttobeiträge                |        |       |       |       |        |        |
| Leben                                  | Mio. € | 6.484 | 6.294 | 6.053 |        |        |
| Gesundheit                             | Mio. € | 5.499 | 5.171 | 5.840 |        |        |
| Leben/Gesundheit                       | Mio. € |       |       |       | 11.647 | 11.606 |
| Schaden/Unfall                         | Mio. € | 5.498 | 5.131 | 5.105 | 5.639  | 5.147  |
| Schadenquote Schaden/Unfall            | %      | 63,1  | 60,3  | 58,4  | 58,6   | 55,8   |
| Kostenquote Schaden/Unfall             | %      | 33,7  | 32,9  | 32,5  | 34,8   | 35,0   |
| Schaden-Kosten-Quote Schaden/Unfall    | %      | 96,8  | 93,2  | 90,9  | 93,4   | 90,8   |
| Operatives Ergebnis <sup>2</sup>       |        |       |       |       |        |        |
| Leben                                  | Mio. € | 355   | 218   | 350   |        |        |
| Gesundheit                             | Mio. € | 236   | 216   | 153   |        |        |
| Schaden/Unfall                         | Mio. € | 678   | 474   | 488   |        |        |
| Konzernergebnis                        |        |       |       |       |        |        |
| Leben                                  | Mio. € | 172   | 27    | -12   |        |        |
| Gesundheit                             | Mio. € | 165   | 83    | 16    |        |        |
| Leben/Gesundheit                       | Mio. € |       |       |       | 358    | 319    |
| Schaden/Unfall                         | Mio. € | 319   | 257   | 152   | 626    | 726    |

<sup>1</sup> Die gesamten Beitragseinnahmen der Erstversicherung setzen sich wie folgt zusammen: Im Segment Lebenserstversicherung enthalten diese über die gebuchten Bruttobeiträge hinaus auch die Sparbeiträge aus fondsgebundenen Lebensversicherungen und Kapitalisierungsprodukten in Übereinstimmung mit den statutorischen Bilanzierungsrichtlinien des Heimatlandes des Versicherers. Für die Erstversicherungssegmente Gesundheit und Schaden/Unfall enthalten sie die gebuchten Bruttobeiträge.

<sup>2</sup> Nicht verfügbar für die Geschäftsjahre 2006 bis 2007 aufgrund Erstanwendung IFRS 8 im Geschäftsjahr 2009.

In der Erstversicherung von Munich Re erfassen wir alle Aktivitäten der ERGO Versicherungsgruppe (ERGO) mit Ausnahme der Krankenerstversicherung außerhalb Deutschlands, die Munich Health verantwortet. ERGO bearbeitet nahezu alle Zweige der Lebens-, Kranken- sowie der Schaden- und Unfallversicherung. Ungefähr 75 % der gebuchten Bruttobeiträge erwirtschaftet sie in Deutschland. Die restlichen 25 % stammen aus dem internationalen, hauptsächlich europäischen Geschäft. Insgesamt werden rund 90 % in Euro abgewickelt.

## Vertrieb

ERGO hat für jeden Kunden den richtigen Vertriebsweg: Über 20.000 hauptberufliche selbstständige Vermittler, Mitarbeiter im Direktvertrieb, Makler und starke Kooperationspartner im In- und Ausland sprechen die Kunden an. Mit der europäischen Großbank UniCredit Group verbindet ERGO eine weitreichende Vertriebspartnerschaft in Deutschland sowie in Mittel- und Osteuropa. Mit der ERV verfügt ERGO über mehr als 17.000 Partner aus der Touristikbranche in Deutschland, wobei Reisebüros und Reiseveranstalter zu den wichtigsten zählen.

**2010 im Zeichen der  
neuen Markenstrategie**

In der Erstversicherung stand das Berichtsjahr klar im Zeichen der neuen Markenstrategie, die ERGO im November 2009 beschlossen hatte. Ihre Umsetzung wurde im Berichtsjahr erfolgreich beendet. Kern ist, den Schwerpunkt in der Lebens-, Schaden-/Unfall- und Direktversicherung auf die Marke ERGO zu legen und das Profil der Spezialisten in Gesundheit (DKV), Rechtsschutz- (D.A.S.) und Reiseversicherung (ERV) zu schärfen. Dies kommt sich wandelnden Kundenbedürfnissen entgegen und wird langfristig zu mehr Wachstum führen, weil das Rundumangebot so besser sichtbar wird.

Im ersten Quartal 2010 fiel der Startschuss mit der Umbenennung der KarstadtQuelle Versicherungen in ERGO Direkt Versicherungen. Im Sommer waren dann der Auftritt von ERGO als operative Marke mit den Eintragungen der neuen ERGO Gesellschaften in die Handelsregister sowie der Start der großen Werbekampagne am 18. Juli wichtige Meilensteine. Der Lebensversicherer Hamburg-Mannheimer Versicherungs-AG wurde in ERGO Lebensversicherung AG umbenannt. Der Schaden- und Unfallversicherer Victoria Versicherung AG heißt jetzt ERGO Versicherung AG. Die Schaden- und Unfallversicherer von D.A.S. und Hamburg-Mannheimer wurden auf die ERGO Versicherung AG verschmolzen. Anfang Oktober fand die Umsetzung mit der Neusortierung des Markenauftritts in den Geschäftsfeldern Gesundheit und Rechtsschutz ihren formalen Abschluss: Die Victoria Krankenversicherung wurde mit der DKV und die Hamburg-Mannheimer Rechtsschutz-Versicherungs-AG mit der D.A.S. verschmolzen. Auch im internationalen Geschäft gewann die Marke ERGO an Bedeutung: So wurde die ERGOİSVİÇRE Sigorta umbenannt und heißt nunmehr ERGO Sigorta; bei der ERGO Hestia wurde ERGO im neuen Markenauftritt und im Logo deutlich in den Vordergrund gerückt.

**Ergebnis****Konzernergebnis bei  
656 Millionen €**

ERGO konnte den im zweiten Quartal 2009 eingeleiteten Aufwärtstrend im abgelaufenen Geschäftsjahr bestätigen. Das Konzernergebnis des Erstversicherungssegments lag mit 656 (367) Millionen € um 78,7% über dem Vorjahr, das aufgrund der Folgen der Finanzkrise schwach verlaufen war; für den ERGO Teilkonzern machte es 355 (173) Millionen € aus. Ein wesentlicher Grund für das Plus war das Kapitalanlageergebnis, das wir um 20,8% gegenüber dem Vorjahr steigerten: Vor allem fielen die Abschreibungen und Abgangsverluste im Vergleich zum Vorjahreszeitraum um 740 Millionen € niedriger aus. Ein weiterer positiver Ergebniseffekt in Höhe von 46 Millionen € vor Steuern und Beteiligung der Versicherungsnehmer ergab sich aus den Derivaten, die wir halten, um uns gegen ein andauerndes Niedrigzinsszenario abzusichern. Ergebnismindernd wirkte indessen die Abschreibung des Geschäfts- oder Firmenwerts der ERGO SIGORTA A.S., Istanbul, im zweiten Quartal von 109 Millionen €. Mit dieser Wertberichtigung trugen wir der schwierigen Ertragssituation des türkischen Kraftfahrtversicherungsmarkts Rechnung.

Auch die operative Entwicklung war zufriedenstellend: 2010 verzeichneten wir mit 1.269 (908) Millionen € ein um 39,8% höheres Ergebnis. Das versicherungstechnische Ergebnis betrug 648 (814) Millionen €. Hier machten sich schwierige Verhältnisse auf wichtigen Märkten wie der Türkei, Polen oder Südkorea bemerkbar, doch auch Naturereignisse wie der lange und strenge Winter sowie die Überschwemmungen an Oder und Weichsel. Diese beeinflussten vor allem im internationalen Geschäft das Schadenaufkommen in der Schaden- und Unfallversicherung im Vergleich zum Vorjahr maßgeblich.



## Umsatz

Gesamte Beitragseinnahmen  
stiegen um 5,4 %

Im Geschäftsjahr 2010 betrugen die gesamten Beitragseinnahmen über alle Sparten 19,2 (18,2) Milliarden € – ein Anstieg um 5,4 %. Wachstum erzielten wir vor allem im internationalen Geschäft: Hier machten sich zusätzlich zum organischen Wachstum positive Wechselkursentwicklungen auf für uns wichtigen Märkten bemerkbar. Zwar kommen unsere Beitragseinnahmen in der Erstversicherung größtenteils aus dem Euroraum, gleichwohl beeinflussten die Wechselkursveränderungen besonders des polnischen Zloty unseren Umsatz positiv. In Deutschland lagen die gesamten Beitrags-einnahmen mit 14,5 (14,0) Milliarden € um 3,6 % über dem Vorjahresniveau. Die ge-buchten Bruttobeiträge beliefen sich 2010 auf insgesamt 17,5 (16,6) Milliarden €. Im Unterschied zu den gesamten Beitragseinnahmen sind in den gebuchten Bruttobeiträ-gen die Sparbeiträge in Höhe von 1,7 (1,6) Milliarden € aus fondsgebundenen Lebens-versicherungen oder Kapitalisierungsprodukten nicht enthalten. Mit Blick auf die Markenumstellung in Deutschland ist das Beitragswachstum von ERGO erfreulich; unsere Vertriebe haben hier gute Arbeit geleistet.

### Bruttobeiträge nach Segmenten

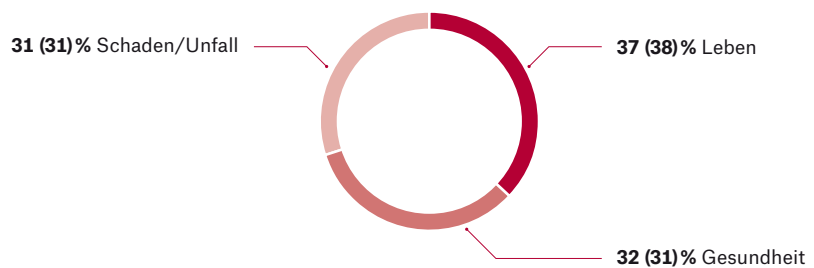

## Leben

Das Konzernergebnis in der Lebenserstversicherung machte im abgelaufenen Geschäftsjahr, auch begünstigt durch die Wertaufholung von Zinssicherungs-instrumenten, 172 (27) Millionen € aus.

Die Unternehmen der Personenerstversicherung bewerten wir aufgrund der langlau-fenden Verbindlichkeiten gemäß den MCEV Principles. Der MCEV setzt sich zusam-men aus dem im Unternehmen vorhandenen Eigenkapital und dem sogenannten Bestandswert. Dieser ist der Barwert der nach finanz- und versicherungsmathema-tischen Grundsätzen berechneten zukünftigen Nettoerträge aus dem Versicherungs-bestand und den damit verbundenen Kapitalanlagen unter Berücksichtigung des Zeitwerts der finanziellen Optionen und Garantien sowie der explizit berechneten Kapitalkosten (siehe auch Seite 55 f.).

MCEV bei 2.375 Millionen €

Der MCEV des Lebenserstversicherungsgeschäfts ging im Geschäftsjahr 2010 auf 2.375 (3.155) Millionen € zurück. Verantwortlich ist vor allem der starke Zinsrückgang verbunden mit einer hohen Zinsvolatilität. Dies stellt eine Herausforderung für die gesamte Branche dar. Aufgrund langlaufender Verträge mit Garantien für die Versicherten führen die strik-ten Vorschriften einer marktkonsistenten Bewertung zum Stichtag 31. Dezember 2010 trotz unserer Absicherungen gegen lang anhaltende Niedrigzinsphasen zu rückläufigen Ergebnissen. Die Gesamterträge des MCEV lagen bei -602 (1.329) Millionen €, der Neu-geschäftswert stieg auf 114 (96) Millionen €. Eine ausführliche Darstellung des MCEV ist auf der Internetseite von Munich Re verfügbar.

Beitragswachstum von 3,6%,  
deutsches und internationales  
Geschäft mit Beitragsplus

Die gesamten Beitragseinnahmen in der Lebenserstversicherung erhöhten sich 2010 um 3,6%. Im internationalen Geschäft legten die Beiträge um 5,3% merklich zu und erreichten 2,1 Milliarden €. Der Anstieg ist nicht zuletzt auf die erfreuliche Entwicklung in Polen und Belgien zurückzuführen, wo wir Zuwächse von 131,7% bzw. 30,3% erzielten. In Polen verdanken wir das hohe Plus vor allem unseren Bankkooperationen. Im Inland verzeichneten wir seit Jahresbeginn ein Beitragsaufkommen von 6,0 (5,9) Milliarden €, das ist ein Anstieg von 3,0%. Die gebuchten Bruttobeiträge im In- und Ausland kletterten um 3,0%.

#### Neugeschäft Lebensversicherung

|                                       | 2010         | Vorjahr      | Veränderung |
|---------------------------------------|--------------|--------------|-------------|
|                                       | Mio. €       | Mio. €       | %           |
| <b>Deutschland</b>                    |              |              |             |
| Laufende Beiträge                     | 331          | 340          | -2,6        |
| Einmalbeiträge                        | 1.609        | 1.260        | 27,7        |
| <b>Gesamt</b>                         | <b>1.940</b> | <b>1.600</b> | <b>21,3</b> |
| Jahresbeitragsäquivalent <sup>1</sup> | 492          | 466          | 5,6         |
| <b>International</b>                  |              |              |             |
| Laufende Beiträge                     | 180          | 165          | 9,1         |
| Einmalbeiträge                        | 800          | 738          | 8,4         |
| <b>Gesamt</b>                         | <b>980</b>   | <b>903</b>   | <b>8,5</b>  |
| Jahresbeitragsäquivalent <sup>1</sup> | 260          | 239          | 8,8         |

<sup>1</sup> Das Jahresbeitragsäquivalent entspricht dem laufenden Beitrag zuzüglich 10% der Einmalbeiträge.

Das deutsche Neugeschäft verbesserte sich im Vergleich zum Vorjahr – der Neuzugang bezifferte sich auf 1,9 Milliarden € – und war damit um 21,3% höher als im Vorjahreszeitraum. Dies ist vor allem auf das Einmalbeitragsgeschäft zurückzuführen; hier konnten wir gerade bei klassischen Rentenversicherungen zweistellige Zuwachsraten verbuchen. Dennoch haben wir beim Vertrieb dieser Produkte zurückhaltend agiert und Geschäft unter strikten Risiko- und Ertragsgesichtspunkten gezeichnet. Angesichts des wirtschaftlichen Umfelds scheuen sich die Kunden jedoch nach wie vor, langfristige Vertragsbindungen mit laufenden Beitragszahlungen für die Altersvorsorge einzugehen. Gemessen in der international gebräuchlicheren Größe Jahresbeitragsäquivalent (Annual Premium Equivalent – APE) lag unser inländisches Neugeschäft um 5,6% über dem Vorjahr. Das internationale Neugeschäft stieg um 8,5% auf 980 Millionen €. In APE gemessen erreichte es ein Plus von 8,8%.

#### Gesundheit

MCEV bei 1.733 Millionen €

Im Erstversicherungssegment Gesundheit stieg das Konzernergebnis 2010 auf 165 (83) Millionen €. Der MCEV betrug zum Ende des Geschäftsjahres 1.733 (1.971) Millionen €. Da in diesem Geschäft nur kurzfristige Zinsgarantien gegeben werden, machte sich das Zinsumfeld nicht so stark bemerkbar wie in der Lebensversicherung. Die Gesamterträge des MCEV sanken gleichwohl auf -122 (168) Millionen €. Der Neugeschäftswert verminderte sich auf 28 (36) Millionen €.

Durch die jüngste Gesundheitsreform haben sich die Bedingungen in der deutschen Krankenvollversicherung seit dem 1. Januar 2009 geändert. Insbesondere hat sich der Einfluss des Versicherungsnehmerverhaltens erhöht, weil den Versicherungsnehmern das Recht zum Wechsel des Anbieters unter teilweiser Mitnahme der Alterungsrückstellungen eingeräumt und eine Leistungspflicht gegenüber Nichtzahlern ohne Kündigungsmöglichkeit eingeführt wurde. Dies wird im MCEV-Modell auf Basis derzeitiger Erfahrungen berücksichtigt, das künftige Kundenverhalten ist jedoch noch schwer ein-

zuschätzen. Geänderte Annahmen aufgrund zukünftiger Erfahrungen könnten unsere MCEV-Zahlen erheblich beeinflussen. Die Diskussionen zum deutschen Gesundheitssystem halten an, auch eventuell bevorstehende gesetzliche Änderungen könnten zu erheblichen Veränderungen in unseren MCEV-Zahlen führen.

Beitragseinnahmen legten  
um 6,3 % zu

Die Beiträge im Segment Gesundheit kletterten seit Jahresbeginn um 6,3 % auf 5,5 (5,2) Milliarden €. Das Geschäft mit Ergänzungsversicherungen wuchs um 6,0 %, die Beitragseinnahmen in der Krankheitskostenvollversicherung erhöhten sich um 6,9 %: Hier machte sich bemerkbar, dass wir die Tarifbeiträge zum Jahresbeginn 2010 spürbar anheben mussten, weil die Leistungen im Gesundheitswesen allgemein immer teurer werden. Auch der Abschluss eines Großvertrags im Vorjahr wirkte sich im Berichtsjahr beitragssteigernd aus. Beim Neugeschäft konnten wir ein deutliches Wachstum von 21,1 % auf 299 (247) Millionen € erzielen, das einerseits auf den Abschluss des erwähnten Großvertrags in der Vollversicherung zurückzuführen ist, andererseits auf eine Steigerung in der Ergänzungsversicherung. Hier konnten wir Wachstum erzielen, indem wir neue Produkte einführten. In unserem Geschäftsfeld Reiseversicherung, das im Segment Gesundheit ausgewiesen wird, verzeichneten wir 2010 um 10,3 % gestiegene Beitragseinnahmen. Nach dem schwierigen Jahr 2009 deuten wir das als Zeichen, dass sich der Reisebereich erholt.

## Schaden und Unfall

Schaden-Kosten-Quote  
bei guten 96,8 %

Das Konzernergebnis in der Schaden- und Unfallversicherung belief sich auf 319 (257) Millionen €; die Schaden-Kosten-Quote lag 2010 mit 96,8 (93,2) % zwar über dem Vorjahr, doch nach wie vor auf einem guten Niveau. Marktweite Probleme in wichtigen Ländern wie der Türkei, Polen oder Südkorea sowie Naturereignisse wie der lange, strenge Winter und Überschwemmungsschäden erhöhten im internationalen Geschäft das Schadenaufkommen deutlich. Die Schaden-Kosten-Quote kletterte im internationalen Geschäft auf 107,8 (102,5) %, in unserem Kernmarkt Deutschland lag sie 2010 mit 89,8 (87,9) % wiederum auf einem sehr guten Niveau.

Im abgelaufenen Geschäftsjahr stieg das Beitragsvolumen; der Zuwachs von 7,2 % basiert größtenteils auf dem internationalen Geschäft: In Griechenland konnten wir im Zuge der exklusiven Kooperation mit der Piraeus-Bank die Beitragseinnahmen um 46,0 % erhöhen. Auch in Polen (+19,6 %) und Südkorea (+36,8 %) wuchsen die Beiträge stark; hier machten sich zusätzlich positive Wechselkursentwicklungen bemerkbar. Insgesamt erreichten wir 2010 in unserem internationalen Geschäft ein Beitragsaufkommen von 2,3 (2,0) Milliarden €, es liegt damit um 18,0 % über dem des Vorjahres. Im deutschen Geschäft erzielten wir im selben Zeitraum Beiträge von 3,17 (3,16) Milliarden €, ein Plus von 0,4 %. Getragen wurde diese Entwicklung vor allem vom Gewerbe- und Industriegeschäft, in dem wir die Beiträge um 2,8 % auf 773 (752) Millionen € steigern konnten. Im wettbewerbsintensiven Kraftfahrtgeschäft erreichten wir 2010 ein leicht über dem Vorjahr liegendes Beitragsvolumen von 601 (593) Millionen €. Im weiterhin schwierigen Rechtsschutzmarkt sind die Beiträge im selbst abgeschlossenen Geschäft um 2,0 % gesunken. Das Geschäft mit Unfallpolicen ging um 1,5 % leicht zurück, das sonstige Privatkundengeschäft blieb im Wesentlichen stabil.

## Munich Health

// Im Berichtsjahr deutlicher Anstieg der Beiträge um 29,3% auf 5,1 Milliarden €  
 // Schaden-Kosten-Quote von Januar bis Dezember von 99,7%  
 // Kapitalanlageergebnis von 142 Millionen €  
 // Konzernergebnis im Berichtsjahr von 63 Millionen €

### Wichtige Kennzahlen

|                                   |        | 2010 | Vorjahr | Veränderung |
|-----------------------------------|--------|------|---------|-------------|
|                                   |        |      |         | %           |
| Gebuchte Bruttobeiträge           | Mrd. € | 5,1  | 4,0     | 29,3        |
| Schadenquote <sup>1</sup>         | %      | 78,5 | 80,0    |             |
| Kostenquote <sup>1</sup>          | %      | 21,2 | 19,4    |             |
| Schaden-Kosten-Quote <sup>1</sup> | %      | 99,7 | 99,4    |             |
| Operatives Ergebnis               | Mio. € | 131  | 133     | -1,5        |
| Konzernergebnis                   | Mio. € | 63   | 27      | 133,3       |

<sup>1</sup> Ohne nach Art der Lebensversicherung betriebenes Krankenversicherungsgeschäft.

In den vergangenen Jahren hat sich der weltweite Gesundheitsmarkt sowohl im Versorgungs- als auch im Versicherungsbereich zu einem der wachstumsstärksten Wirtschaftszweige entwickelt. Ein Trend, der sich als Folge des medizinischen Fortschritts, steigender Lebenserwartung und entstehender Gesundheitsmärkte in den Schwellenländern künftig noch verstärken wird. Um die damit verbundenen Chancen konsequent zu nutzen, hat Munich Re ihre HealthCare-Spezialisten für das internationale Gesundheitsgeschäft aus der Erst- und Rückversicherung – ohne die Erstversicherung in Deutschland – in einer eigenen Organisation unter dem Dach der neuen Marke Munich Health zusammengeführt.

Munich Health umfasst somit unser weltweites Krankenrückversicherungsgeschäft sowie die Krankenerstversicherung außerhalb Deutschlands. Zu ihren Eckpfeilern gehören zum einen die internationalen Tochtergesellschaften unseres Krankenerstversicherers DKV und der Spezialkrankenerstversicherer Sterling Life Insurance Company (Sterling) in den USA, zum anderen das weltweite Krankenrückversicherungsgeschäft von Munich Re sowie die Servicegesellschaften der MedNet-Gruppe.

2010 lag das **Konzernergebnis** bei 63 (27) Millionen €. Beim Kapitalanlageergebnis verzeichneten wir gegenüber dem Vorjahr einen leichten Rückgang um 6,0 % auf 142 (151) Millionen €. Auch beim operativen Ergebnis verzeichneten wir einen leichten Rückgang um 1,5 % auf 131 (133) Millionen €.

Die **gebuchten Bruttobeiträge** kletterten gegenüber dem Vorjahr deutlich um 29,3 % auf 5,1 (4,0) Milliarden €. Bei unveränderten Wechselkursen wäre das Beitragsvolumen im Vergleich zum Vorjahr um 20,2 % höher ausgefallen.

### Bruttobeiträge nach Geschäftsverantwortung

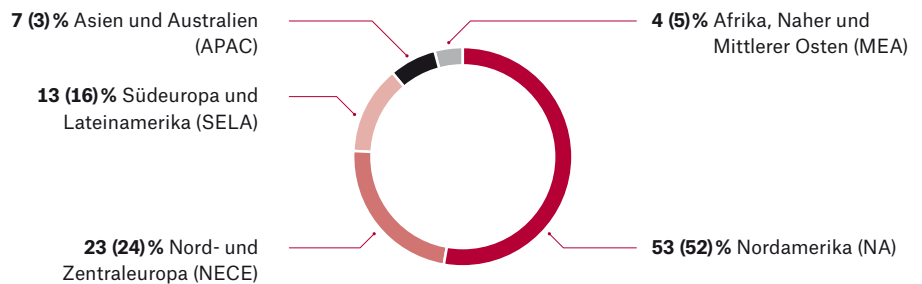

### Akquisition in den USA baut Managed-Care-Kompe- tenzen aus

Im internationalen Krankenerstversicherungsgeschäft verzeichneten wir 2010 einen Zuwachs um 9,1% auf 1.925 (1.764) Millionen €, wobei besonders in Großbritannien, Spanien und Belgien die Beiträge zulegten. Bei Sterling sanken im Gesamtjahr die Beiträge, da die regulatorischen Rahmenbedingungen in den USA im für uns wichtigen Seniorenssegment verschärft wurden: Vertriebsbeschränkungen setzten die Prämien-einnahmen unter Druck. Im vierten Quartal hatte Munich Re den Erwerb von Windsor angekündigt. Die Transaktion wurde zum 1. Januar 2011 vollzogen. Die Zusammenar-beit zwischen Sterling und Windsor ermöglicht es uns – dank des Netzwerks an Ärzten und Krankenhäusern (Providernetzwerk) von Windsor –, in Zukunft übergreifend in Übereinstimmung mit den neuen gesetzlichen Anforderungen Managed-Care-Kompe-tenzen zu nutzen und auszubauen. Damit haben wir die Grundlagen für profitables Wachstum in den USA, dem größten Gesundheitsversicherungsmarkt weltweit, gelegt.

In der Rückversicherung ist das Beitragsplus von 45,5% auf 3.215 (2.210) Millionen € im Wesentlichen neuen großvolumigen Verträgen zur Kapitalentlastung unserer Kunden in Nordamerika und Asien zu verdanken.

Die **Schaden-Kosten-Quote** des Segments Munich Health lag 2010 bei 99,7 (99,4)%. Diese Kennzahl bezieht sich naturgemäß nur auf das kurzfristige Krankenversiche-rungsgeschäft und nicht auf das nach Art der Lebensversicherung betriebene Geschäft etwa in Belgien und Luxemburg. Letzteres machte im Berichtsjahr 12,5 (15,4) % der gebuchten Bruttobeiträge aus. Die relativ hohe Schaden-Kosten-Quote ist zurückzu-führen auf eine hohe Schadenbelastung bei einzelnen Rückversicherungsbeziehungen in Asien, im Mittleren Osten und in Italien. Bei Sterling hingegen konnten wir die Scha-den-Kosten-Quote unter anderem durch Kosteneinsparungsmaßnahmen verbessern, die aufgrund des rückläufigen Medicare-Advantage-Geschäfts eingeleitet wurden.



## Entwicklung der Kapitalanlagen

- // Anteil festverzinslicher Wertpapiere und Darlehen mit 84 % weiterhin bestimmend
- // Erneut gutes Abgangsergebnis von 1,6 Milliarden €
- // Erfreuliche Kapitalanlagerendite von 4,5 %

Dieses Kapitel berichtet einerseits über die Entwicklung der konzerneigenen Kapitalanlagen, die nahezu vollständig den Kerngeschäftsfeldern Rückversicherung, Erstversicherung und Munich Health zuzurechnen sind. Andererseits informieren wir über das Drittgeschäft, in dem wir Vermögen für konzernfremde institutionelle und private Anleger verwalten.

### Kapitalanlagen nach Anlagearten<sup>1</sup>

| Mio. €                                                                            | Rückversicherung |               |                |               |               |               |
|-----------------------------------------------------------------------------------|------------------|---------------|----------------|---------------|---------------|---------------|
|                                                                                   | Leben            |               | Schaden/Unfall |               | Leben         |               |
|                                                                                   | 31.12.2010       | Vorjahr       | 31.12.2010     | Vorjahr       | 31.12.2010    | Vorjahr       |
| Grundstücke und Bauten einschließlich der Bauten auf fremden Grundstücken         | 267              | 211           | 1.178          | 1.095         | 1.760         | 1.775         |
| Anteile an verbundenen Unternehmen                                                | 16               | 12            | 67             | 61            | 20            | 7             |
| Anteile an assoziierten Unternehmen                                               | 54               | 43            | 282            | 256           | 192           | 190           |
| Darlehen                                                                          | 47               | 61            | 188            | 283           | 31.045        | 29.852        |
| Sonstige Wertpapiere, gehalten bis zur Endfälligkeit                              | -                | -             | -              | -             | 42            | 83            |
| Sonstige Wertpapiere, jederzeit veräußerbar                                       |                  |               |                |               |               |               |
| Festverzinslich                                                                   | 11.905           | 10.461        | 45.110         | 44.711        | 35.803        | 36.456        |
| Nicht festverzinslich                                                             | 974              | 359           | 5.419          | 1.832         | 1.892         | 1.913         |
| Sonstige Wertpapiere, erfolgswirksam zum Zeitwert bewertet                        |                  |               |                |               |               |               |
| Handelsbestände                                                                   |                  |               |                |               |               |               |
| Festverzinslich                                                                   | -                | -             | 424            | 546           | 50            | 50            |
| Nicht festverzinslich                                                             | -                | -             | 25             | 20            | 3             | 4             |
| Derivate                                                                          | 331              | 87            | 154            | 185           | 323           | 284           |
| Bestände, als erfolgswirksam zum Zeitwert bewertet klassifiziert                  |                  |               |                |               |               |               |
| Festverzinslich                                                                   | -                | -             | -              | -             | 233           | 372           |
| Nicht festverzinslich                                                             | -                | -             | -              | -             | 8             | 20            |
| Depotforderungen                                                                  | 5.069            | 5.171         | 1.499          | 1.347         | 136           | 118           |
| Sonstige Kapitalanlagen                                                           | 330              | 141           | 787            | 882           | 623           | 633           |
| Kapitalanlagen für Rechnung und Risiko von Inhabern von Lebensversicherungspolice | -                | -             | -              | -             | 4.953         | 4.024         |
| <b>Gesamt</b>                                                                     | <b>18.993</b>    | <b>16.546</b> | <b>55.133</b>  | <b>51.218</b> | <b>77.083</b> | <b>75.781</b> |

<sup>1</sup> Nach Eliminierung segmentübergreifender konzerninterner Geschäftsvorfälle.

|  | Erstversicherung |               |                |              | Munich Health |              | Assetmanagement |            | Gesamt         |                |
|--|------------------|---------------|----------------|--------------|---------------|--------------|-----------------|------------|----------------|----------------|
|  | Gesundheit       |               | Schaden/Unfall |              |               |              |                 |            |                |                |
|  | 31.12.2010       | Vorjahr       | 31.12.2010     | Vorjahr      | 31.12.2010    | Vorjahr      | 31.12.2010      | Vorjahr    | 31.12.2010     | Vorjahr        |
|  | 623              | 635           | 340            | 309          | 16            | 15           | 63              | 46         | 4.247          | 4.086          |
|  | 20               | 19            | 71             | 67           | 1             | 2            | 8               | 10         | 203            | 178            |
|  | 107              | 106           | 150            | 141          | 52            | 32           | 51              | 55         | 888            | 823            |
|  | 15.319           | 14.225        | 2.312          | 2.184        | 24            | 17           | -               | -          | 48.935         | 46.622         |
|  | -                | -             | -              | 1            | -             | -            | -               | -          | 42             | 84             |
|  | 11.794           | 11.099        | 5.202          | 5.063        | 2.447         | 1.692        | 93              | 84         | 112.354        | 109.566        |
|  | 634              | 978           | 655            | 807          | 174           | 129          | 21              | 21         | 9.769          | 6.039          |
|  | -                | -             | -              | -            | -             | -            | -               | -          | -              | -              |
|  | -                | -             | -              | -            | 1             | 4            | -               | -          | 475            | 600            |
|  | -                | 1             | -              | -            | 1             | -            | -               | -          | 29             | 25             |
|  | 37               | 32            | 12             | 5            | 10            | 3            | -               | -          | 867            | 596            |
|  | -                | -             | -              | -            | -             | -            | -               | -          | 233            | 372            |
|  | -                | -             | -              | -            | -             | -            | -               | -          | 8              | 20             |
|  | 1                | 1             | 3              | 3            | 194           | 158          | -               | -          | 6.902          | 6.798          |
|  | 87               | 68            | 463            | 341          | 129           | 10           | 780             | 265        | 3.199          | 2.340          |
|  | 3                | 1             | -              | -            | 1             | 1            | -               | -          | 4.957          | 4.026          |
|  | <b>28.625</b>    | <b>27.165</b> | <b>9.208</b>   | <b>8.921</b> | <b>3.050</b>  | <b>2.063</b> | <b>1.016</b>    | <b>481</b> | <b>193.108</b> | <b>182.175</b> |

## Anlagegrundsätze

Bei unserer **Anlagestrategie** beachten wir selbstverständlich aufsichtsrechtliche Vorschriften, um möglichst große Sicherheit und Rentabilität bei jederzeitiger Liquidität unter Wahrung angemessener Mischung und Streuung zu gewährleisten. Darüber hinaus beachten wir alle weiteren gesetzlichen Anforderungen. Wir investieren nur in Vermögenswerte, von denen wir eine angemessene Rendite erwarten; dabei verfolgt unser Anlagemanagement neben der strengen Beachtung der Risikotragfähigkeit der jeweiligen Gesellschaft auch das Prinzip der Nachhaltigkeit. Währungsrisiken begrenzen wir, indem wir die erwarteten Verpflichtungen nach Möglichkeit mit Kapitalanlagen in den entsprechenden Währungen abdecken. Außerdem achten wir bei unseren festverzinslichen Wertpapieren darauf, die Laufzeiten an der Fälligkeitenstruktur der Verbindlichkeiten auszurichten. Wie wir die Risiken aus Kapitalanlagen steuern, beschreibt ausführlich der Risikobericht auf Seite 116 ff.; unseren Ansatz zum Asset-Liability-Management erläutern wir auf Seite 102.

## Wesentliche Entwicklungen im Geschäftsjahr 2010

Die wichtigsten Aktienindizes entwickelten sich im Jahresverlauf unterschiedlich: So verzeichnete der DAX seit Januar einen Anstieg von rund 16 %, während der EURO STOXX 50 im selben Zeitraum etwa 6 % verlor. Ähnliche Diskrepanzen gab es an den Rentenmärkten; während die Zinsen für deutsche Staatsanleihen fielen, kletterten die Risikozuschläge auf Staatsanleihen der Euro-Peripherieländer stark. Bei Umschichtungen in unserem Portfolio profitierten wir von dem fallenden Zinsniveau und realisierten Abgangsgewinne, die maßgeblich zu unserem Ergebnisanstieg von 7,9 auf 8,6 Milliarden € beitrugen. Entsprechend erwirtschafteten wir eine erfreuliche Kapitalanlagerendite von 4,5 (4,3) %, die unsere Prognose aus dem Vorjahr deutlich übertraf.

### Verteilung der Kapitalanlagen nach Anlagearten

Gesamt: 193,1 (182,2) Mrd. €

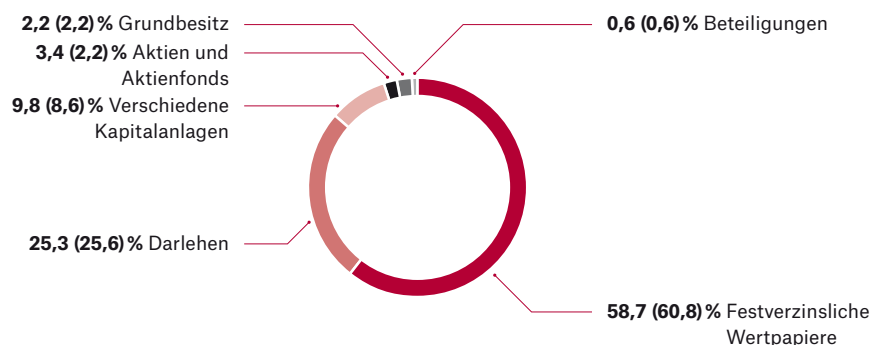

Unser Bestand an **Kapitalanlagen zu Bilanzwerten** stieg 2010 neben den Neuinvestitionen insbesondere auch aufgrund der Währungskursverluste des Euro, die sich auf Jahressicht trotz der deutlichen Erholung gegenüber dem US-Dollar in der zweiten Jahreshälfte ergaben. Diese erhöhten wesentlich die in Euro umgerechneten Marktwerte unserer in Fremdwährung gehaltenen Kapitalanlagen.

**Nicht bilanzierte Bewertungsreserven**

| Mio. €                              | 31.12.2010              |                                |               | Vorjahr                 |                                |               |
|-------------------------------------|-------------------------|--------------------------------|---------------|-------------------------|--------------------------------|---------------|
|                                     | Bewertungs-<br>reserven | Beizu-<br>legender<br>Zeitwert | Buchwert      | Bewertungs-<br>reserven | Beizu-<br>legender<br>Zeitwert | Buchwert      |
| Grundstücke und Bauten <sup>1</sup> | 1.695                   | 8.353                          | 6.658         | 1.722                   | 8.280                          | 6.558         |
| Assoziierte Unternehmen             | 311                     | 1.181                          | 870           | 186                     | 982                            | 796           |
| Darlehen                            | 1.553                   | 50.488                         | 48.935        | 1.287                   | 47.909                         | 46.622        |
| Sonstige Wertpapiere                | 1                       | 43                             | 42            | 2                       | 86                             | 84            |
| Anlagen in regenerative Energien    | -                       | 46                             | 46            | -                       | -                              | -             |
| <b>Gesamt</b>                       | <b>3.560</b>            | <b>60.111</b>                  | <b>56.551</b> | <b>3.197</b>            | <b>57.257</b>                  | <b>54.060</b> |

<sup>1</sup> Inklusive eigengenutzten Grundbesitzes.

Bei einem rückläufigen risikolosen Zinsniveau profitierten wir von einer längeren Duration unserer Kapitalanlagen, die wir gezielt aufrechterhielten; sie betrug am Stichtag 6,3 (5,9) Jahre. Steigende Risikozuschläge führten jedoch dazu, dass unsere gesamten Bewertungsreserven ohne eigengenutzten Grundbesitz, die sich bilanziell und außerbilanziell niederschlagen, von 7,9 Milliarden € auf 7,4 Milliarden € fielen.

**Festverzinsliche Wertpapiere und Darlehen einschließlich der kurzfristigen Anlagemittel auf Marktwertbasis<sup>1</sup>**

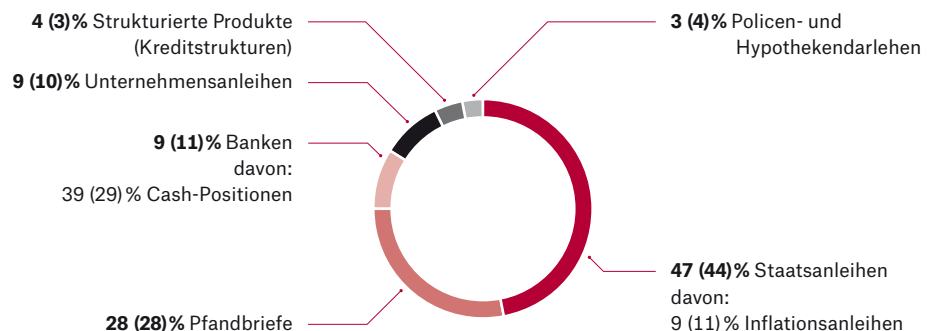

<sup>1</sup> Darstellung beruht auf ökonomischer Sichtweise und ist nicht vollständig mit IFRS-Zahlen vergleichbar. Die ökonomische Sicht enthält unter anderem Cash-Positionen.

2010 wurde unser Bestand an Kapitalanlagen weiterhin maßgeblich von festverzinslichen Wertpapieren, Darlehen und kurzfristigen festverzinslichen Anlagemitteln bestimmt. Von diesen sind über 47 % Staatsanleihen oder Instrumente mit Haftung öffentlicher Institutionen; 14 % davon sind Anleihen von portugiesischen, italienischen, irischen, griechischen und spanischen Emittenten. Darüber hinaus sind etwa 28 % unseres Zinsträgerportfolios erstklassig besicherte Wertpapiere und Forderungen; davon sind rund 43 % deutsche Pfandbriefe.

Im Berichtszeitraum schichteten wir Unternehmensanleihen in Aktien um, wobei wir gleichzeitig die Absicherung gegen fallende Aktienkurse weiter ausbauen. Zum Stichtag machten Unternehmensanleihen 9 % unseres Zinsträgerportfolios aus. Unser Bestand an strukturierten Zinsträgerprodukten, den hauptsächlich unsere Rückversicherungsgesellschaften halten, erhöhte sich vor allem aufgrund der Währungsentwicklung und geringer Zukäufe um 0,8 Milliarden € auf 6,1 (5,3) Milliarden €; rund 79 % der Kreditstrukturen haben ein Rating von AAA.

Wir hielten zum Stichtag 7,2 (7,8) Milliarden € an Inflationsanleihen. Diese bieten uns einen gewissen Schutz gegen die Risiken einer künftigen Inflation und eines Zinsanstiegs.

Auch die Anlage in Sachwerte wie Aktien und Immobilien verbessert den Schutz gegen das Inflationsrisiko und diversifiziert unseren Kapitalanlagebestand. Im Berichtszeitraum erhöhten wir behutsam unser Aktienportfolio inklusive der Anteile an verbundenen und assoziierten Unternehmen zu Marktwerten auf 7,9 (5,2) Milliarden €. Zum Stichtag betrug unser wirtschaftliches Aktienexposure nach Berücksichtigung derivativer Finanzinstrumente 4,4 (2,8) %.

## Ergebnis aus Kapitalanlagen

### Ergebnis aus Kapitalanlagen

| Mio. €                                             | 2010         | 2009         | 2008         | 2007         | 2006         |
|----------------------------------------------------|--------------|--------------|--------------|--------------|--------------|
| Laufende Erträge                                   | 7.749        | 7.629        | 7.859        | 8.110        | 7.834        |
| Zu-/Abschreibungen                                 | -403         | -1.122       | -2.847       | -1.032       | -865         |
| Gewinne/Verluste aus dem Abgang von Kapitalanlagen | 1.649        | 1.612        | 2.208        | 2.803        | 2.559        |
| Sonstige Erträge/Aufwendungen                      | -353         | -236         | -1.304       | -628         | -556         |
| <b>Gesamt</b>                                      | <b>8.642</b> | <b>7.883</b> | <b>5.916</b> | <b>9.253</b> | <b>8.972</b> |

### Ergebnis aus Kapitalanlagen nach Anlagearten

|                                                                                   | 2010         | Vorjahr      | Veränderung |
|-----------------------------------------------------------------------------------|--------------|--------------|-------------|
|                                                                                   | Mio. €       | Mio. €       | %           |
| Grundvermögen                                                                     | 339          | 253          | 34,0        |
| Anteile an verbundenen Unternehmen                                                | 9            | -18          | -           |
| Anteile an assoziierten Unternehmen                                               | 50           | -123         | -           |
| Hypothekendarlehen und übrige Darlehen                                            | 2.150        | 1.984        | 8,4         |
| Sonstige Wertpapiere                                                              | 6.173        | 5.663        | 9,0         |
| Depotforderungen und sonstige Kapitalanlagen                                      | 114          | 150          | -24,0       |
| Kapitalanlagen für Rechnung und Risiko von Inhabern von Lebensversicherungspolice | 271          | 441          | -38,5       |
| Aufwendungen für die Verwaltung von Kapitalanlagen, sonstige Aufwendungen         | 464          | 467          | -0,6        |
| <b>Gesamt</b>                                                                     | <b>8.642</b> | <b>7.883</b> | <b>9,6</b>  |

Wir erzielten höhere **laufende Kapitalanlageerträge**, da wir unseren Bestand an festverzinslichen Wertpapieren und Darlehen ausbauten und vorsichtig wieder in kreditexponierte Papiere investierten. Zudem kletterten die Erträge aus assoziierten Unternehmen.

Unser Ergebnis aus **Zu- und Abschreibungen** belief sich auf -403 (-1.122) Millionen €. Wir verzeichneten per saldo leichte Zuschreibungen auf unsere Swaptions von 80 (-366) Millionen €, was insbesondere auf das fallende Zinsniveau zurückzuführen ist. Mit Swaptions schützen sich unsere Lebenserstversicherer vor Wiederanlagerisiken in Niedrigzinsphasen. Hauptsächlich wegen der volatilen Aktienmärkte verbuchten wir Abschreibungen von 277 (385) Millionen € auf unsere nicht festverzinslichen Wertpapiere.

Bezogen auf unsere gesamten Kapitalanlagen erzielten wir 2010 ein erneut gutes Ergebnis aus **Abgangsgewinnen und -verlusten**. Hierbei entfielen 634 (943) Millionen € auf das Abgangsergebnis nicht festverzinslicher Wertpapiere der Kategorie „jederzeit veräußerbar“, wobei rund 90 Millionen € Gewinn aus dem Abbau unseres Anteils an der Helvetia Holding AG, St. Gallen, von ca. 8,2% auf unter 3% im zweiten Quartal resultierten. Darüber hinaus beinhaltet das gesamte Abgangsergebnis 1.067 (782) Millionen €



aus festverzinslichen Wertpapieren der Kategorie „jederzeit veräußerbar“: Letzteres erwirtschafteten wir auch durch den Verkauf von Unternehmensanleihen, die wir im Vorjahr erworben hatten und die nun infolge der fallenden Risikozuschläge Marktwertgewinne verzeichneten. Zudem kam uns bei der Umschichtung von Staatsanleihen das weiterhin niedrige Zinsniveau zugute. Insgesamt profitierte Munich Re also von ihrem konservativen, aber dennoch aktiven Kapitalanlagemanagement.

Aus den Kapitalanlagen, die wir für Rechnung und Risiko von Inhabern von Lebensversicherungspolice halten, erwirtschafteten wir 271 (441) Millionen €. Dieses Ergebnis findet sich im Kapitalanlageergebnis unter Sonstige Erträge und Sonstige Aufwendungen.

**Im Assetmanagement verwaltetes Drittvermögen**

|                                      |        | <b>31.12.2010</b> | <b>Vorjahr</b> | <b>Veränderung</b> |
|--------------------------------------|--------|-------------------|----------------|--------------------|
|                                      |        |                   |                | <b>%</b>           |
| Kapitalanlagen aus dem Drittgeschäft | Mrd. € | 10,2              | 7,9            | 29,1               |
|                                      |        | <b>2010</b>       | <b>Vorjahr</b> | <b>Veränderung</b> |
|                                      |        |                   |                | <b>%</b>           |
| Konzernergebnis Assetmanagement      | Mio. € | 37                | 19             | 94,7               |

Die MEAG MUNICH ERGO AssetManagement GmbH ist der Vermögensverwalter von Munich Re. Neben ihrer Funktion als Assetmanager des Konzerns bietet die MEAG privaten und institutionellen Kunden ihre Kompetenz an. Die Gelder, die im Privatkundengeschäft über Investmentfonds betreut werden, beliefen sich auf 2,1 (2,0) Milliarden €. Das Vermögen, das sie für gruppenexterne institutionelle Anleger verwaltet, erhöhte sich 2010 um 37% auf 8,1 (5,9) Milliarden €, weil die MEAG neue Kunden gewinnen konnte. Das verwaltete Vermögen der PICC Asset Management Company Ltd. (PAMC), Schanghai, die zu 81% der PICC People's Insurance Company of China und zu 19% der MEAG gehört, kletterte auf 30,0 (18,8) Milliarden €.

## Finanzlage

// Verschuldungsgrad um 0,2 Prozentpunkte gesunken  
 // Asset-Liability-Management Grundlage unserer Kapitalanlagestrategie  
 // Aktienrückkaufprogramm fortgesetzt

Die Finanzstärke von Munich Re bewerten die führenden Agenturen weiterhin einmütig mit ihrer jeweils zweithöchsten **Ratingkategorie**.

### Finanzstärkeratings von Munich Re

| Ratingagentur     | Bewertung         | Ausblick |
|-------------------|-------------------|----------|
| A. M. Best        | A+ (Superior)     | stabil   |
| Fitch             | AA- (Very strong) | stabil   |
| Moody's           | Aa3 (Excellent)   | stabil   |
| Standard & Poor's | AA- (Very strong) | stabil   |

## Analyse der Kapitalstruktur

Unsere Tätigkeit als Erst- und Rückversicherer prägt die Kapitalstruktur von Munich Re wesentlich: Die Kapitalanlagen auf der Aktivseite der Bilanz bedecken in erster Linie versicherungstechnische Rückstellungen (74,7% der Bilanzsumme). Das Eigenkapital (9,7% der Bilanzsumme) sowie die Anleihen, die als strategisches Fremdkapital einzuordnen sind (2,2% der Bilanzsumme), machen die wichtigsten Finanzmittel aus.

## Konzerneigenkapital

### Entwicklung des Konzerneigenkapitals

| Mio. €                                                             | 31.12.2010    | 31.12.2009    | 31.12.2008    |
|--------------------------------------------------------------------|---------------|---------------|---------------|
| Gezeichnetes Kapital und Kapitalrücklage                           | 7.388         | 7.388         | 7.388         |
| Gewinnrücklagen                                                    | 10.735        | 10.667        | 10.843        |
| Übrige Rücklagen                                                   | 2.238         | 1.473         | 1.036         |
| Konzernergebnis auf Anteilseigner der Münchener Rück AG entfallend | 2.422         | 2.521         | 1.555         |
| Nicht beherrschende Anteile am Eigenkapital                        | 245           | 229           | 285           |
| <b>Gesamt</b>                                                      | <b>23.028</b> | <b>22.278</b> | <b>21.107</b> |

Neben dem Konzernergebnis war für die Erhöhung des Eigenkapitals ein Anstieg der Rücklage aus der Währungsumrechnung und ein geringfügig angestiegener positiver Saldo aus unrealisierten Gewinnen und Verlusten verantwortlich. Dieser resultierte im Wesentlichen aus unseren nicht festverzinslichen Wertpapieren der Kategorie „jederzeit veräußerbar“. Eigenkapitalmindernd wirkten vor allem die Dividendenausschüttung sowie das Aktienrückkaufprogramm, über das wir auf Seite 102 f. berichten. Auf unsere nicht bilanzierten Bewertungsreserven in Höhe von 3,6 (3,2) Milliarden € gehen wir auf Seite 97 ein.

## Strategisches Fremdkapital

Als strategisches Fremdkapital bezeichnen wir alle Finanzierungsinstrumente mit Fremdkapitalcharakter, die nicht direkt mit dem operativen Versicherungsgeschäft zusammenhängen. Sie ergänzen unsere Finanzierungsmittel, sollen im Wesentlichen die Kapitalkosten optimieren und sicherstellen, dass jederzeit ausreichend Liquidität vorhanden ist. Um unsere Kapitalstruktur zu verdeutlichen, quantifizieren wir unseren Verschuldungsgrad: Er definiert sich als prozentuales Verhältnis des strategischen Fremdkapitals zur Summe aus Konzerneigenkapital und strategischem Fremdkapital. Dabei bleiben die versicherungstechnischen Rückstellungen unberücksichtigt, obwohl sie uns zu einem großen Teil langfristig als Finanzierungsquelle für die Vermögensanlage zur Verfügung stehen.

### Verschuldungsgrad

|                            | 2010          | Vorjahr       | Veränderung |
|----------------------------|---------------|---------------|-------------|
|                            | Mio. €        | Mio. €        | %           |
| Strategisches Fremdkapital | 5.405         | 5.302         | 1,9         |
| Konzerneigenkapital        | 23.028        | 22.278        | 3,4         |
| <b>Gesamt</b>              | <b>28.433</b> | <b>27.580</b> | <b>3,1</b>  |
| Verschuldungsgrad          | %             | 19,0          | 19,2        |

Im strategischen Fremdkapital sind 4.847 Millionen € nachrangige Verbindlichkeiten enthalten, die im Konzernanhang unter (19) Nachrangige Verbindlichkeiten erläutert werden.

Teile unserer Nachranganleihen erkennt die BaFin als Eigenmittel an. Berücksichtigt man dies bei der Berechnung des strategischen Fremdkapitals, so reduziert sich Letzteres auf 1.738 Millionen € und es ergibt sich lediglich ein Verschuldungsgrad von 7,0 %.

## Versicherungstechnische Rückstellungen

Zu den versicherungstechnischen Rückstellungen tragen die Rückversicherung etwa 32 % bei, das Erstversicherungsgeschäft rund 67 % und Munich Health etwa 1 %. Im Gegensatz zu Verbindlichkeiten aus Krediten und emittierten Wertpapieren können wir bei Verpflichtungen aus dem Versicherungsgeschäft Zahlungszeitpunkt und -höhe nicht sicher vorhersehen. Das gilt vor allem für die Rückversicherung. Während in der Sachversicherung ein Großteil der Rückstellungen bereits innerhalb von zwei bis drei Jahren ausbezahlt ist, fallen in der Lebensversicherung oder in der Haftpflichtversicherung auch Jahrzehnte nach Abschluss der Verträge unter Umständen noch erhebliche Beträge an. Die Währungsverteilung unserer Rückstellungen spiegelt die globale Ausrichtung unserer Gruppe wider. Neben dem Euro sind der US-Dollar und das Pfund Sterling die wichtigsten Valuten. Dass unser Geschäft mit ausreichenden Eigenmitteln hinterlegt ist, stellen wir jederzeit sicher, indem wir dies laufend überwachen und geeignete Maßnahmen ergreifen; auf diese gehen wir im Abschnitt „Kapitalmanagement“ ein.

## Verfügungsbeschränkungen

Da wir ein weltweit tätiges Versicherungsunternehmen sind, unterliegen einige unserer Finanzmittel Verfügungsbeschränkungen. So verpflichten etwa die Aufsichtsbehörden einiger Länder ausländische Rückversicherer, Prämien- und Reservedepots beim Erstversicherer zu stellen oder Treuhandkonten bei bestimmten Finanzinstituten einzurichten. Zum Stichtag betraf das Kapitalanlagen von insgesamt 10,4 (12,7) Milliarden €.

Zudem bestanden Eventualverbindlichkeiten, die wir im Konzernanhang unter (50) Eventualverbindlichkeiten, sonstige finanzielle Verpflichtungen erläutern.

## Asset-Liability-Management

Die Struktur unserer versicherungstechnischen Rückstellungen und anderer Verbindlichkeiten ist die Grundlage für die Kapitalanlagestrategie von Munich Re. In ihrem Mittelpunkt steht das Asset-Liability-Management: Mit ihm streben wir an, dass volkswirtschaftliche Faktoren den Wert unserer Kapitalanlagen ähnlich beeinflussen wie den Wert der versicherungstechnischen Rückstellungen und Verbindlichkeiten. Dies stabilisiert unsere Position gegen Schwankungen auf den Kapitalmärkten. Hierzu spiegeln wir wichtige Eigenschaften der Verpflichtungen wie Laufzeit- und Währungsstrukturen, aber auch Inflationssensitivitäten auf die Kapitalanlageseite, indem wir nach Möglichkeit Investments erwerben, die ähnlich reagieren. Abweichungen gegenüber der Struktur unserer Verbindlichkeiten gehen wir in diesem Ansatz immer bewusst und unter Beachtung der Risikotragfähigkeit und Risikoprämie ein. So haben wir die Laufzeit unserer Kapitalanlagen 2010 relativ zu den Verbindlichkeiten verlängert und konnten von den fallenden Zinsen profitieren. Darüber hinaus versuchen wir beim Asset-Liability-Management, unser Kapitalanlageportfolio teilweise so auszurichten, dass auch die Kapitalanlagen bei steigenden Inflationsraten wachsen.

Um das Assetmanagement so wirkungsvoll wie möglich zu gestalten, setzen wir auch derivative Finanzinstrumente ein, die wir im Konzernanhang unter (9) Sonstige Wertpapiere, erfolgswirksam zum Zeitwert bewertet erläutern.

## Kapitalmanagement

Mit unserem aktiven Kapitalmanagement stellen wir sicher, dass die Kapitalausstattung von Munich Re stets angemessen ist. So müssen die vorhandenen Eigenmittel den Kapitalbedarf decken, den wir anhand unseres internen Risikomodells sowie anhand der Anforderungen der Aufsichtsbehörden und Ratingagenturen bestimmen. Unsere Finanzkraft soll dabei maßvolle Wachstumsmöglichkeiten eröffnen, von normalen Schwankungen der Kapitalmarktbedingungen nicht wesentlich beeinträchtigt werden und auch nach großen Schadenereignissen oder substantiellen Börsenkursrückgängen grundsätzlich gewahrt bleiben. Angemessene Kapitalausstattung bedeutet für uns aber ebenso, dass das ökonomische Eigenkapital unserer Gruppe das so bestimmte betriebsnotwendige Maß nicht übersteigt. Eine derart definierte bedarfs- und risikogerechte Kapitalisierung trägt entscheidend dazu bei, unsere Disziplin in allen Geschäftsprozessen zu gewährleisten.

Unser ökonomisches Eigenkapital leiten wir über verschiedene Anpassungen aus dem IFRS-Eigenkapital ab. Sie werden auf Seite 132 f. dargestellt.

Nicht benötigtes Kapital geben wir unseren Aktionären vorrangig über attraktive Dividenden zurück; vorausgesetzt die Höhe der nach deutschem Handelsrecht ermittelten Gewinnrücklagen der obersten Konzernmuttergesellschaft Münchener Rück AG lässt das zu und unsere strategische Flexibilität sowie Kapitalstärke wird insgesamt nicht beeinträchtigt. Neben Dividendenzahlungen kommen als Instrument der Kapitalrückgabe auch Aktienrückkäufe in Betracht.

Zum Bilanzstichtag am 31. Dezember 2010 betrugen die nach lokaler HGB-Rechnungslegung ermittelten Gewinnrücklagen 1.667 Millionen €. 2010 erwarben wir

11,8 Millionen eigene Aktien im Wert von 1.300 Millionen €; 5,7 Millionen Stück bzw. 650 Millionen € im Rahmen des Aktienrückkaufprogramms 2009/2010, das bis zur Hauptversammlung am 28. April 2010 lief, sowie 6,1 Millionen Stück bzw. 650 Millionen € im Rahmen des Programms 2010/2011, das Aktienrückkäufe in Höhe von bis zu 1 Milliarde € umfasst. Nach dem Bilanzstichtag haben wir bis zum 25. Februar 2011 weitere 1,7 Millionen Aktien im Wert von 195 Millionen € zurückgekauft. Seit Beginn der Aktienrückkäufe im November 2006 gaben wir somit einschließlich Dividenden über 10 Milliarden € an unsere Aktionäre zurück. Unter Berücksichtigung der Aktienrückkäufe 2010/2011 werden die nach HGB ermittelten und zum 31. Dezember 2010 ausgewiesenen Gewinnrücklagen auf 1.473 Millionen € sinken. Auch 2011 werden wir unsere attraktive Ausschüttungspolitik mit einem weiteren Aktienrückkaufprogramm fortsetzen. Bis zur Hauptversammlung 2012 sollen hierzu Aktien im Wert von bis zu 500 Millionen € zurückgekauft werden. Im Interesse unserer Aktionäre werden wir den Nutzen weiterer Aktienrückkäufe sorgfältig den Vorteilen der komfortablen Kapitalausstattung gegenüberstellen und abwägen, auch mit Blick auf organische und etwaige externe Wachstumsmöglichkeiten.

Darüber hinaus beabsichtigen wir für das Geschäftsjahr 2010, vorbehaltlich der Zustimmung der Hauptversammlung, unseren Aktionären aus dem Bilanzgewinn der Münchener Rück AG eine Dividende in Höhe von 6,25 € je Aktie auszuschütten.

## **Angaben nach § 315 Abs. 4 HGB und erläuternder Bericht des Vorstands**

### **Zusammensetzung des gezeichneten Kapitals**

Das Grundkapital der Münchener Rück AG von 587.725.396,48 € war am 31. Dezember 2010 in insgesamt 188.468.471 auf den Namen lautende, voll eingezahlte Stückaktien eingeteilt. Diese Aktien bilden eine Aktiengattung. Die Rechte und Pflichten aus den Aktien ergeben sich aus den gesetzlichen Vorschriften in Verbindung mit der Satzung der Gesellschaft. Die Aktien sind – mit Ausnahme von 8.089.888 eigenen Aktien, die sich zum 31. Dezember 2010 im Bestand von Munich Re befanden (§ 71b AktG) – vollstimm- und gewinnberechtigt. Jede stimmberechtigte Aktie gewährt in der Hauptversammlung eine Stimme. Im Verhältnis zur Gesellschaft gilt nach den Bestimmungen des deutschen Aktienrechts (§ 67 AktG) als Aktionär nur, wer als solcher im Aktienregister eingetragen ist.

### **Beschränkungen, die Stimmrechte oder die Übertragung von Aktien betreffen**

Die börsennotierten Namensaktien sind vinkuliert. Die Ausgabe vinkulierter Namensaktien geht bei der Münchener Rück AG auf ihre Gründung im Jahr 1880 zurück und ist in der Versicherungsbranche weit verbreitet. Die Vinkulierung bedeutet, dass diese Aktien nur mit Zustimmung der Münchener Rück AG auf einen neuen Erwerber übertragen werden können. Gemäß § 3 Abs. 2 der Satzung der Münchener Rück AG steht es im freien Ermessen der Gesellschaft, die Zustimmung zu erteilen. Da die Abläufe für Aktiengeschäfte sehr effizient gestaltet sind, führt diese Zustimmung zu keinerlei Verzögerungen bei der Eintragung ins Aktienregister. Sie wurde in den vergangenen Jahrzehnten ausnahmslos erteilt.

### **Beteiligungen am Kapital, die 10 % der Stimmrechte überschreiten**

Warren E. Buffett und Gesellschaften seiner Unternehmensgruppe teilten uns gemäß § 21 WpHG mit, dass von ihnen insgesamt ein Anteil von 10,244 % an den Stimmrechten der Münchener Rück AG gehalten wird. Im Einzelnen haben sie uns mit Stand 12. Oktober 2010 folgende direkte oder indirekte Beteiligungen am Kapital angezeigt, die 10 % der Stimmrechte überschreiten:



**Beteiligungen am Kapital, die 10% der Stimmrechte überschreiten**

| %                                      | Direkte Beteiligung | Indirekte Beteiligung |
|----------------------------------------|---------------------|-----------------------|
| Warren E. Buffett, USA                 | 0,053               | 10,191                |
| Berkshire Hathaway Inc., Omaha, USA    |                     | 10,191                |
| OBH LLC, Omaha, USA                    |                     | 10,191                |
| National Indemnity Company, Omaha, USA | 10,191              |                       |

Warren E. Buffett und die genannten Gesellschaften seiner Unternehmensgruppe haben uns mit Schreiben vom 15. Oktober 2010 ferner mitgeteilt, dass die Investition der Erzielung von Handelsgewinnen und nicht der Umsetzung strategischer Ziele dient.

**Aktien mit Sonderrechten, die Kontrollbefugnisse verleihen**

Aktien mit Sonderrechten, die Kontrollbefugnisse verleihen, bestehen nicht.

**Gesetzliche Vorschriften und Bestimmungen der Satzung über die Ernennung und Abberufung der Mitglieder des Vorstands und über die Änderung der Satzung**

Der rechtliche Rahmen für Bestellung und Widerruf der Bestellung von Vorstandsmitgliedern ist vorgegeben durch die Mitbestimmungsvereinbarung, §§ 13 und 16 der Satzung und §§ 84, 85 AktG sowie §§ 121a Abs. 1, 7a VAG. Die Mitbestimmungsvereinbarung und die Satzung der Münchener Rück AG haben die Rechtsgedanken des Mitbestimmungsgesetzes übernommen. Der Aufsichtsrat bestellt die Mitglieder des Vorstands und kann sie – falls ein wichtiger Grund vorliegt – jederzeit abberufen. Wird ein Vorstandsmitglied erstmals bestellt, beträgt die Laufzeit seines Dienstvertrags üblicherweise zwischen drei und maximal fünf Jahren. Verlängerungen um bis zu fünf Jahre sind möglich. In besonderen Ausnahmefällen können Vorstandsmitglieder auch gerichtlich bestellt werden.

Das Aktiengesetz enthält allgemeine Bestimmungen über Satzungsänderungen (§§ 124 Abs. 2 Satz 2, 179–181 AktG). Danach kann nur die Hauptversammlung eine Änderung der Satzung beschließen. Dem Beschluss müssen mindestens drei Viertel des Grundkapitals zustimmen, das bei der Beschlussfassung vertreten ist. Die Satzung kann eine andere Kapitalmehrheit (höher und niedriger) bestimmen und weitere Erfordernisse aufstellen. Die Satzung der Münchener Rück AG sieht solche Besonderheiten jedoch nicht vor.

Für Änderungen der Satzung bei einer Erhöhung oder Herabsetzung des Grundkapitals enthält das Aktiengesetz besondere Vorschriften (§§ 182–240 AktG). Danach bestimmt grundsätzlich die Hauptversammlung über Kapitalmaßnahmen. In einem von ihr festgelegten Rahmen kann sie den Vorstand zu bestimmten (Kapital-)Maßnahmen ermächtigen. Welche Ermächtigungen bei der Münchener Rück AG bestehen, ist nachfolgend aufgeführt. In allen Fällen ist ein Beschluss der Hauptversammlung erforderlich, der mit einer Mehrheit von mindestens drei Vierteln des Grundkapitals gefasst werden muss, das bei der Beschlussfassung vertreten ist. Die Satzung der Münchener Rück AG sieht auch für diese Beschlüsse keine anderen (insbesondere höheren) Mehrheiten oder weiteren Erfordernisse vor.

Die Hauptversammlung kann dem Aufsichtsrat die Befugnis übertragen, Satzungsänderungen vorzunehmen, die nur ihre Fassung betreffen (§ 179 Abs. 1 Satz 2 AktG). Bei der Münchener Rück AG ist dies der Fall und in § 14 der Satzung festgelegt.

## Befugnisse des Vorstands, insbesondere hinsichtlich der Möglichkeit, Aktien auszugeben oder zurückzukaufen

Die Befugnisse der Mitglieder des Vorstands ergeben sich aus §§ 71, 76–94 AktG. Zur Ausgabe von Aktien oder zum Aktienrückkauf stehen dem Vorstand folgende Befugnisse zu (der vollständige Wortlaut der Ermächtigungsbeschlüsse und der genannten Satzungsregelungen ist auf unserer Internetseite abrufbar):

- // Die Hauptversammlung am 28. April 2010 hat unter Tagesordnungspunkt 7 und 8 die Gesellschaft nach § 71 Abs. 1 Nr. 8 AktG bis zum 27. April 2015 ermächtigt, eigene Aktien zu erwerben, auf die ein Anteil von bis zu insgesamt 10 % des Grundkapitals zur Zeit des Hauptversammlungsbeschlusses (587.725.396,48 €) entfällt. Auf die erworbenen Aktien dürfen zusammen mit anderen eigenen Aktien, die sich im Besitz der Gesellschaft befinden oder ihr nach den §§ 71a ff. AktG zuzurechnen sind, zu keinem Zeitpunkt mehr als 10 % des Grundkapitals entfallen. Der Erwerb kann nach näherer Maßgabe durch die Ermächtigung auf verschiedene Weise erfolgen. Eigene Aktien bis maximal 5 % des Grundkapitals können dabei auch durch den Einsatz von Derivaten erworben werden. Der Vorstand ist ermächtigt, die so erworbenen Aktien auch unter Ausschluss des Bezugsrechts zu allen gesetzlich zulässigen, insbesondere zu den in der Ermächtigung im Einzelnen genannten Zwecken zu verwenden; unter anderem ist der Vorstand gemäß § 71 Abs. 1 Nr. 8 S. 6 AktG befugt, die Aktien ohne weiteren Beschluss der Hauptversammlung einzuziehen. Der Vorstand hat von dieser Ermächtigung zum Erwerb eigener Aktien mit Beschluss vom 7. Mai 2010 Gebrauch gemacht. Bis zum 31. Dezember 2010 wurden 6,1 Millionen Aktien zu einem Kaufpreis von 650 Millionen € erworben. Im Rahmen des Aktienrückkaufprogramms 2009/2010 wurden zwischen Januar und April 2010 5,7 Millionen eigene Aktien zu einem Kaufpreis von 650 Millionen € erworben. Diese Aktien wurden wie angekündigt im April 2010 zusammen mit weiteren 3,2 Millionen eigenen bereits im Jahr 2009 zurückgekauften Aktien im vereinfachten Verfahren eingezogen.
- // Die Hauptversammlung hat am 28. April 2010 die Aufhebung des Bedingten Kapitals 2005 von 100 Millionen € beschlossen und den Vorstand ermächtigt, mit Zustimmung des Aufsichtsrats bis zum 27. April 2015 einmalig oder mehrmals Wandel- und/oder Optionsschuldverschreibungen im Nennbetrag von bis zu 3 Milliarden € mit oder ohne Laufzeitbegrenzung zu begeben. Den Aktionären steht grundsätzlich ein Bezugsrecht auf die Schuldverschreibungen zu; der Vorstand ist jedoch ermächtigt, mit Zustimmung des Aufsichtsrats dieses Bezugsrecht in bestimmten Fällen auszuschließen, die in der Ermächtigung näher bezeichnet werden. Den Gläubigern dieser Schuldverschreibungen können Wandlungs- bzw. Optionsrechte auf Aktien der Gesellschaft mit einem anteiligen Betrag des Grundkapitals von bis zu 117 Millionen € nach näherer Maßgabe der Wandel- bzw. Optionsanleihebedingungen gewährt werden; zur Absicherung besteht in § 4 Abs. 3 der Satzung ein bedingtes Kapital von 117 Millionen € (Bedingtes Kapital 2010).
- // Nach § 4 Abs. 1 der Satzung ist der Vorstand mit Zustimmung des Aufsichtsrats befugt, das Grundkapital bis zum 21. April 2014 um bis zu 280 Millionen € durch Ausgabe neuer Aktien gegen Geld- oder Sacheinlagen (Genehmigtes Kapital 2009) zu erhöhen. Er kann dabei das Bezugsrecht nach näherer Maßgabe durch die genannte Satzungsregelung ausschließen.
- // Nach § 4 Abs. 2 der Satzung ist der Vorstand ermächtigt, das Grundkapital bis zum 18. April 2011 um insgesamt bis zu 5 Millionen € durch Ausgabe neuer Aktien gegen Geldeinlagen (Genehmigtes Kapital 2006) zu erhöhen. Das Bezugsrecht der Aktionäre ist insoweit ausgeschlossen, um die neuen Aktien an die Mitarbeiter der Münchener Rück AG und ihrer verbundenen Unternehmen auszugeben.

Die genannten Ermächtigungen zur Ausgabe oder zum Rückkauf von Aktien bewegen sich im marktüblichen Rahmen und ermöglichen der Gesellschaft ein aktives Kapitalmanagement: So kann sie einerseits einen möglichen Kapitalbedarf auch kurzfristig decken, um Marktchancen in verschiedenen Geschäftsfeldern schnell und flexibel zu nutzen. Wie die Aktienrückkäufe der Gesellschaft zeigen, bieten die Ermächtigungen andererseits die Chance, auf diese Weise Kapital, das nicht benötigt wird, wieder an die Eigentümer zurückzugeben.

### Wesentliche Vereinbarungen, die unter der Bedingung eines Kontrollwechsels infolge eines Übernahmeangebots stehen, und die hieraus folgenden Wirkungen

Aufgrund unserer Zeichnungsrichtlinien enthalten unsere Rückversicherungsverträge in der Regel eine Klausel, die beiden Vertragsteilen ein außerordentliches Kündigungsrecht einräumt, falls „die andere Partei fusioniert oder sich ihre Eigentums- und Beherrschungsverhältnisse wesentlich ändern“. Solche oder ähnliche Klauseln sind branchentypisch. Auch der langfristige Incentive-Plan der Münchener Rück AG sieht im Fall eines Kontrollwechsels besondere Ausübungsmöglichkeiten vor. Er betrifft Vorstandsmitglieder sowie das obere Management einschließlich der wichtigsten Führungskräfte der Außenorganisation und ist im Vergütungsbericht näher erläutert.

### Entschädigungsvereinbarungen, die für den Fall eines Übernahmeangebots mit den Mitgliedern des Vorstands oder Arbeitnehmern getroffen sind

Entschädigungsvereinbarungen für den Fall eines Übernahmeangebots bestehen weder mit den Mitgliedern des Vorstands noch mit Arbeitnehmern.

### Gruppensolvabilität

Munich Re unterliegt neben den aufsichtsrechtlichen Anforderungen, die für einzelne Versicherungsunternehmen gelten, auch einer Beaufsichtigung auf Gruppenebene. Ferner hat die Münchener Rück AG als Konzernmutter angemessene Kontrollverfahren eingeführt und meldet ergänzende Aspekte aus Gruppensicht (zum Beispiel Beteiligungsverhältnisse, konsolidierte Finanzdaten oder gruppeninterne Geschäfte) an die BaFin, die für die Gruppe zuständig ist.

Solvabilität ist die Fähigkeit eines Versicherers, Verpflichtungen dauerhaft zu erfüllen, die er in seinen Verträgen eingegangen ist. Dabei geht es vor allem um eine definierte Mindestausstattung mit Eigenmitteln. Die Vorschriften zur bereinigten Solvabilität zielen darauf, eine Mehrfachbelegung von Eigenmitteln mit Risiken aus dem Versicherungsgeschäft auf verschiedenen Stufen der Konzernhierarchie zu vermeiden. Um die bereinigte Solvabilität zu berechnen, werden auf der Grundlage des IFRS-Konzernabschlusses die Eigenmittel, die je nach Geschäftsumfang mindestens vorzuhalten sind (Solvabilitäts-Soll), den tatsächlich vorhandenen Eigenmitteln (Solvabilitäts-Ist) gegenübergestellt. Die berücksichtigungsfähigen Eigenmittel bestimmt man, indem man das Eigenkapital nach IFRS anpasst und insbesondere um Teile der nachrangigen Verbindlichkeiten erhöht bzw. um die immateriellen Vermögenswerte verringert. Die anrechenbaren Eigenmittel von Munich Re sind mehr als 2,5-mal so hoch wie gesetzlich gefordert.

#### Bereinigte Solvabilität

|                                            |        | 31.12.2010 | Vorjahr | Veränderung |
|--------------------------------------------|--------|------------|---------|-------------|
|                                            |        |            |         | %           |
| Berücksichtigungsfähige Konzerneigenmittel | Mrd. € | 22,2       | 21,2    | 4,7         |
| Bedeckungssatz                             | %      | 260,5      | 268,5   |             |

Der Bedeckungssatz hat sich von 268,5 % im Vorjahr auf 260,5 % im Jahr 2010 vermindert. Das ist im Wesentlichen auf den Anstieg der Solvabilitätsanforderung zurückzuführen.

## Analyse der Konzern-Kapitalflussrechnung

Der **Zahlungsmittelfluss** von Munich Re ist stark geprägt von unserem Geschäft als Erst- und Rückversicherer: Wir erhalten in der Regel zuerst die Beiträge für die Risikoübernahme und leisten erst später Zahlungen im Schadenfall. Die Kapitalflussrechnung von Versicherungsunternehmen ist daher begrenzt aussagekräftig. In der Kapitalflussrechnung werden Wechselkurseffekte sowie Einflüsse aus Veränderungen des Konsolidierungskreises eliminiert.

### Konzern-Kapitalflussrechnung

|                                               | 2010        | Vorjahr <sup>1</sup> | Veränderung |
|-----------------------------------------------|-------------|----------------------|-------------|
|                                               | Mio. €      | Mio. €               | %           |
| Mittelfluss aus laufender Geschäftstätigkeit  | 8.836       | 8.654                | 2,1         |
| Mittelfluss aus Investitionstätigkeit         | -7.696      | -5.263               | -46,2       |
| Mittelfluss aus Finanzierungstätigkeit        | -1.384      | -2.680               | 48,4        |
| <b>Veränderung des Zahlungsmittelbestands</b> | <b>-244</b> | <b>711</b>           | <b>-</b>    |

<sup>1</sup> Vorjahreswerte angepasst aufgrund IAS 7, siehe Abschnitt „Änderung der Bilanzierungs- und Bewertungsmethoden“.

In der Konzern-Kapitalflussrechnung wird das Konzernergebnis von 2.430 Millionen € auf den **Mittelzufluss aus laufender Geschäftstätigkeit** übergeleitet. Das Konzernergebnis wird um den Anstieg der versicherungstechnischen Rückstellungen in Höhe von 7.141 Millionen € korrigiert. In der Rückversicherung nahmen die Deckungsrückstellungen, unter anderem durch Neugeschäft, zu. Die Deckungsrückstellungen in der Erstversicherung erhöhten sich ebenfalls, da bei den ausländischen Gesellschaften der Bestand aufgebaut und Neugeschäft gezeichnet wurde. Die versicherungstechnischen Rückstellungen im Bereich der Lebensversicherung, soweit das Anlagerisiko von den Versicherungsnehmern getragen wird (fondsgebundene Lebensversicherung), stiegen aufgrund der erfreulichen Bestandsentwicklung. Der – zur Bereinigung des Konzerngewinns vom Mittelfluss abzuziehende – positive Saldo aus den Gewinnen und Verlusten durch den Abgang von Kapitalanlagen stammt im Wesentlichen aus dem Verkauf jederzeit veräußerbarer Wertpapiere.

Die Auszahlungen für den Erwerb von Kapitalanlagen bestimmten den **Mittelabfluss aus Investitionstätigkeit**. Sie überstiegen die Einzahlungen aus dem Verkauf oder der Endfälligkeit von Kapitalanlagen um 7.042 Millionen €. Im November 2010 erwarb Munich Re über ihr Tochterunternehmen EUROPÄISCHE Reiseversicherung AG (ERV), München, weitere Anteile von 75,0 % bzw. 70,1 % an den bisher nach der Equity-Methode bilanzierten Tochterunternehmen CJSIC „European Travel Insurance“, Moskau, sowie Geschlossene Aktiengesellschaft Europäische Reiseversicherung, Kiew, zum Kaufpreis von 3,4 Millionen €. Den Kaufpreis verrechneten wir in der Kapitalflussrechnung mit dem Zahlungsmittelbestand von 1,1 Millionen €.

Der **Mittelabfluss aus Finanzierungstätigkeit** stammt im Wesentlichen aus dem Erwerb eigener Anteile in Höhe von 1.268 Millionen € sowie der Dividendenzahlung 2010 von 1.076 Millionen €.

Insgesamt verringerte sich im Berichtsjahr der Zahlungsmittelbestand, der die laufenden Guthaben bei Kreditinstituten, Schecks und den Kassenbestand umfasst, um 182 Millionen € (inklusive Währungseinflüssen) auf 2.900 Millionen €.

## Weitere Erfolgsfaktoren

////////////////////////////////////

- // Munich Re erste Adresse für alle Risikofragen unserer Kunden
- // Kontinuierliche Entwicklung innovativer Deckungskonzepte für neue und komplexe Risiken
- // Unternehmerische Verantwortung für unsere Mitarbeiter, die Gesellschaft und die Umwelt

### Kunden und Kundenbeziehungen

Munich Re hat in der Erst- und Rückversicherung unterschiedlich strukturierte Kundentämme: So arbeitet die Rückversicherung weltweit mit mehr als 4.000 Firmenkunden aus über 160 Ländern zusammen. Unsere Erstversicherer im ERGO Teilkonzern betreuen rund 40 Millionen überwiegend private Kunden in mehr als 30 Ländern Europas und Asiens. Das Geschäftsfeld Munich Health hat mehr als sechs Millionen Erstversicherungskunden und 400 Kunden in der Rückversicherung.

#### Rückversicherung

Finanzkraft und Risikowissen  
kommen Kunden zugute

Als Rückversicherer setzen wir unser umfassendes Risikowissen ein, um für unsere Kunden individuelle Lösungen bei vielschichtigen Fragestellungen zu entwickeln. Daher bieten wir unseren Zedenten die gesamte Bandbreite versicherungstechnischer Produkte an. Wir nehmen immer wieder eine Vorreiterrolle bei der Entwicklung von Deckungskonzepten ein, etwa beim neuen Konzept für Ölbohrungen auf hoher See. Auch bieten wir unseren Kunden Beratungs- und Service-Dienstleistungen rund um das Thema „Risiko“ an. Unser Clientmanagement stellt sicher, dass wir unseren Kunden optimale Lösungen anbieten und die Zusammenarbeit ausbauen.

Mit Niederlassungen und Tochtergesellschaften in aller Welt finden unsere Kunden uns dort, wo sie uns brauchen.

#### Erstversicherung

ERGO richtet sich konsequent  
an den Bedürfnissen der  
Kunden aus

In der Erstversicherung betreuen wir Privatkunden wie gewerbliche und industrielle Kunden; die privaten Kunden stellen das Gros. Ihnen bietet ERGO Produkte und Dienstleistungen für Altersvorsorge und Vermögensbildung, Gesundheits-, Rechts- und Reiseschutz an. Dank der Vielfalt unserer Vertriebswege können alle Kunden wählen, wie sie uns ansprechen wollen: über einen der rund 20.000 selbstständigen hauptberuflichen Vermittler, über Makler, im Internet, am Telefon im Direktvertrieb und über verschiedene Vertriebspartner.

Seit Sommer 2010 vertreibt die ERGO Versicherungsgruppe Lebens- sowie Schaden- und Unfallversicherungen in ihrem Heimatmarkt Deutschland unter dem eigenen Namen. ERGO hat ein klares Versprechen an ihre Kunden: „Versichern heißt verstehen“ steht für das Ziel, sich direkt an den Bedürfnissen der Kunden auszurichten. Dies



umfasst eine bedarfsgerechte Beratung genauso wie eine klare und verständliche Kommunikation, innovative Serviceleistungen und die schnelle Unterstützung im Schadenfall.

## Munich Health

Munich Re bündelt ihre globale Gesundheitsexpertise in der Erst- und Rückversicherung und im Gesundheitsmanagement unter der Marke Munich Health. Unter diesem Dach entwickeln wir integrierte, intelligente Lösungen, die individuell auf die Bedürfnisse der Kunden in den jeweiligen Märkten zugeschnitten sind, und heben so Geschäftspotenzial.

Mit dem integrierten Fokus auf Risikotragung und Risikomanagement liefert Munich Health individuelle, nachhaltige Lösungen für den Gesundheitsmarkt. Durch eine einzigartige Kombination von Ressourcen schaffen wir die Grundlage für den Erfolg und die Sicherheit unserer Kunden im jeweiligen Markt.

## Assetmanagement

Die MEAG ist in Europa, Asien und Nordamerika präsent und managt zentral alle wichtigen Assetklassen wie Renten, Aktien und Immobilien. Ihre Anlageexperten verfolgen einen stringenten und risikokontrollierten Investmentansatz mit dem Ziel, eine langfristig überdurchschnittliche Performance zu erwirtschaften. Grundlagen sind die enge und vertrauensvolle Zusammenarbeit mit den Mandanten in der Gruppe und anderen institutionellen Anlegern, guter Service für Privatanleger sowie die langjährige Erfahrung von MEAG im Umgang mit Kapitalanlagerisiken. Die Finanzkrise hat gezeigt, dass nach der schwierigen Marktphase 2002/2003 die Weichen für nachhaltig positive Anlageergebnisse richtig gestellt worden sind.

## Forschung und Entwicklung

Umfassendes Risikoverständnis ist die Grundlage unseres Geschäfts. Daher untersuchen wir bekannte Risiken fortlaufend auf Veränderungen bei Struktur und Eintrittswahrscheinlichkeit. Wir konzentrieren uns darauf, neue Risiken frühzeitig zu erkennen und Lösungen für bekannte, aber bisher nicht versicherbare Risiken anzubieten.

## Rückversicherung

Auch die klassische Deckung von Sach- und Haftpflichtrisiken bietet immer wieder Innovationsmöglichkeiten. Munich Re hat eine Versicherungslösung für Ölfirmen entwickelt, die diese gegen Haftpflichtrisiken aus Ölkatastrophen bei Bohrungen im Meer absichert. Weiterhin bieten Klimawandel und der erforderliche Ausbau der erneuerbaren Energien Innovationsmöglichkeiten. Beispielsweise haben wir eine Versicherungslösung entwickelt, welche die Leistungsgarantie der Hersteller von Solarmodulen versichert und damit ein wichtiger Meilenstein für die Finanzierung von Photovoltaik-Projekten ist.

Außerdem arbeiten wir in den unterschiedlichsten Ländern eng mit Regierungen und spezialisierten Erstversicherern zusammen, um beispielsweise Katastrophenfonds für den Agrarsektor zu realisieren. Die Landwirtschaft wird gegen extreme Wetterereignisse – Stürme, Trockenheit, Überflutung, Spätfröste etc. – abgesichert.

## Erstversicherung

In der Erstversicherung liegt unser Schwerpunkt darauf, die demografische Entwicklung zu analysieren und zu prognostizieren. Danach richten sich wichtige Parameter, mit denen wir die Vertragslaufzeiten berechnen und unsere Produkte gestalten. Ferner wirkt sich der demografische Wandel auf die sozialen Sicherungssysteme aus und beeinflusst den Bedarf unserer Kunden an eigenverantwortlicher Vorsorge.

Der Gesundheitsversicherer von ERGO, die DKKV, untersucht in Kooperation mit Hochschulen den Zusammenhang zwischen Gesundheitsverhalten und -risiken. Der repräsentative DKKV-Report „Wie gesund lebt Deutschland?“, der in Zusammenarbeit mit der Deutschen Sporthochschule Köln erstellt wurde, lieferte 2010 erstmals eine umfassende Analyse des Gesundheitsverhaltens in Deutschland.

## Munich Health

In diesem Geschäftsfeld sind die langjährige Erfahrung und Expertise für Krankenrückversicherung, Krankenerstversicherung und Risikomanagement Services gebündelt. Für die Analyse von Gesundheitsrisiken bietet Munich Health heute ihren Kunden Tools zur standardisierten medizinischen Risikobewertung an. Die Experten von Munich Health arbeiten kontinuierlich an dem weiteren Ausbau der Analysefähigkeit mithilfe von Prognoseverfahren. Ein wesentlicher Erfolgsfaktor für Munich Health und ihre Kunden ist die Erhöhung der Prozesseffizienz interner Abläufe. Neue Automatisierungsmöglichkeiten und Prüfalgorithmen, zum Beispiel in der Datenübermittlung von Schadenmeldungen sowie in der Schadenbearbeitung, können Abrechnungsfehler und Missbrauchsfälle frühzeitig aufdecken und tragen zur Reduzierung von medizinischen und operativen Kosten bei.

## Mitarbeiter

Das Geschäftsjahr war im Konzern mehr denn je von unternehmensübergreifenden Initiativen geprägt. Bei dem Markenumbau in der Erstversicherung ist es gelungen, bei den Mitarbeitern die notwendige Aufbruchsstimmung für einen erfolgreichen Start der neuen Marke zu erzeugen. In der Rückversicherung führten wir unseren Performance- und Talent-Management-Prozess erstmals global nach einheitlichen Kriterien durch. Damit schufen wir einen Handlungsrahmen, der es uns ermöglicht, unsere Leistungsträger und Talente weltweit in einheitlichen und nachvollziehbaren Verfahren zu beurteilen, zu fördern und flexibel in der Gruppe einzusetzen.

Die Verfügbarkeit von kompetenten, leistungsbereiten Mitarbeitern und hochkarätigen Talenten bleibt ein entscheidendes Merkmal für erfolgreiche Personalarbeit. Die optimale Nutzung der vielfältigen Qualifikationen, der unterschiedlichen Denkweisen, kulturellen und gesellschaftlichen Hintergründe sowie der individuellen Qualitäten unserer Mitarbeiter ist für uns ein ökonomischer Erfolgsfaktor. Einheit durch Vielfalt ist unsere Philosophie – die Wertschätzung und Förderung von Unterschiedlichkeit und Individualität der Mitarbeiter stellen dabei einen zentralen Wert in unserer Unternehmenskultur dar. Ein konzernweites Projekt zum Thema Diversity Management wird uns hier neue Wege aufzeigen.

## Mitarbeiter nach Regionen

### Rückversicherung

Gesamt: 11.370 (11.309)

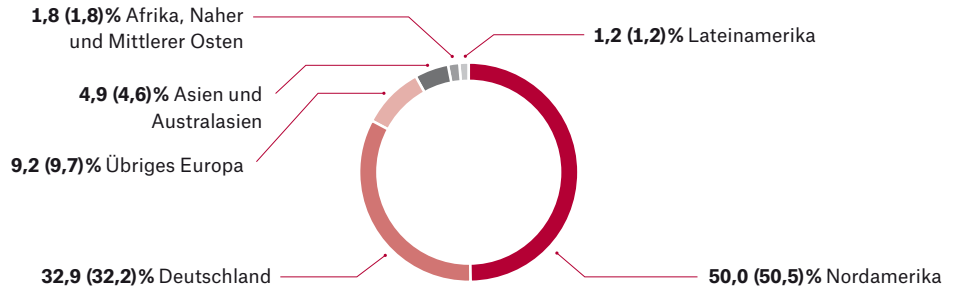

### Erstversicherung

Gesamt: 30.887 (31.145)

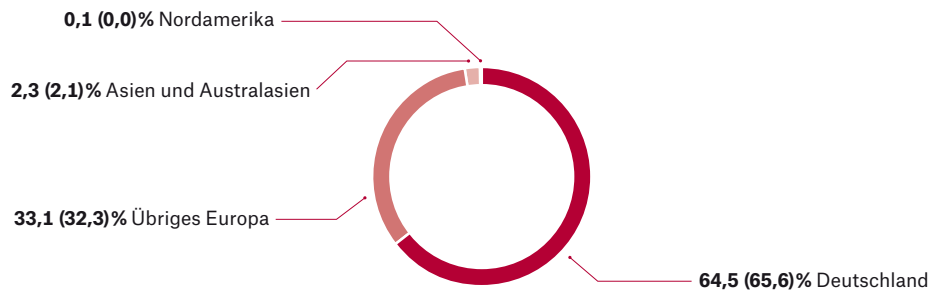

### Munich Health

Gesamt: 3.899 (4.007)

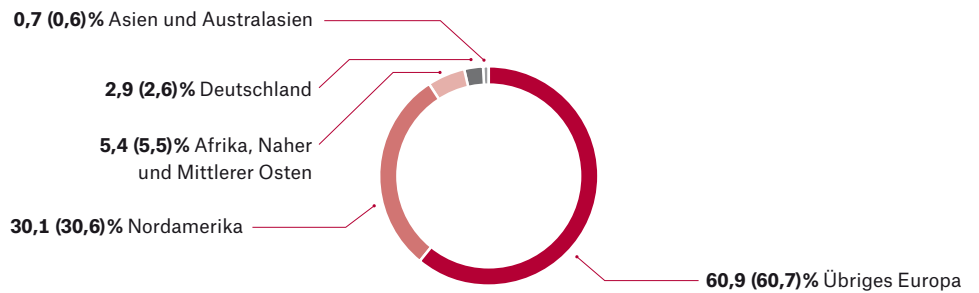

Über 90 % der 759 (788) Mitarbeiter im Assetmanagement sind in Deutschland tätig.

**Unternehmenszugehörigkeit bei wesentlichen Gruppenunternehmen in Deutschland**

| %                                    | Münchener Rück AG |         | ERGO |         | MEAG |         |
|--------------------------------------|-------------------|---------|------|---------|------|---------|
|                                      | 2010              | Vorjahr | 2010 | Vorjahr | 2010 | Vorjahr |
| Bis zu einem Jahr                    | 4,2               | 7,8     | 3,2  | 1,6     | 5,1  | 4,8     |
| Mehr als ein und bis zu fünf Jahren  | 20,6              | 17,2    | 9,7  | 9,6     | 36,5 | 38,1    |
| Mehr als fünf und bis zu zehn Jahren | 28,7              | 29,5    | 17,0 | 20,3    | 30,8 | 38,2    |
| Mehr als zehn und bis zu 20 Jahren   | 29,1              | 27,1    | 41,3 | 41,0    | 23,3 | 15,0    |
| Mehr als 20 Jahre                    | 17,4              | 18,4    | 28,8 | 27,5    | 4,3  | 3,9     |

**Frauenquote bei wesentlichen Gruppenunternehmen in Deutschland**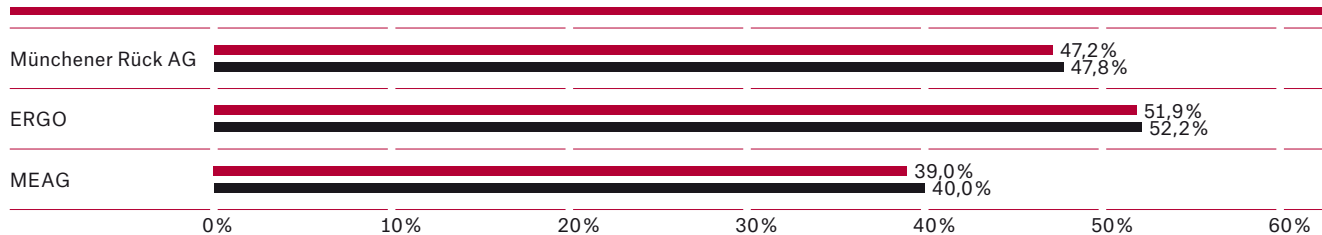

● 2010 ● 2009

**Frauenanteil in Führungspositionen bei wesentlichen Gruppenunternehmen in Deutschland**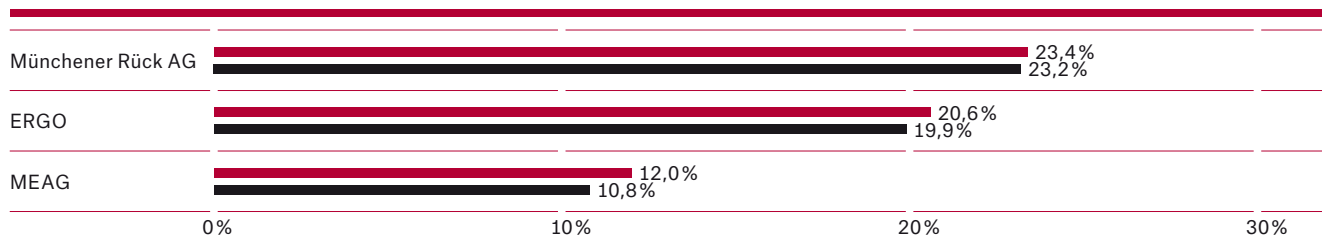

● 2010 ● 2009

**Fluktuationsquote bei wesentlichen Gruppenunternehmen in Deutschland**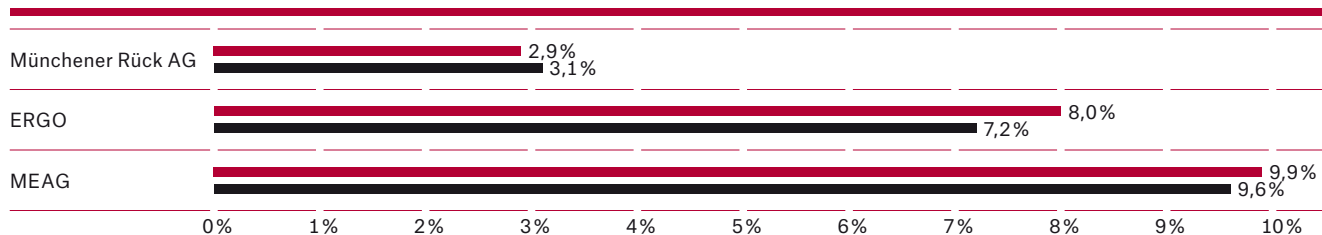

● 2010 ● 2009

**Ausbildungsquote (Deutschland)**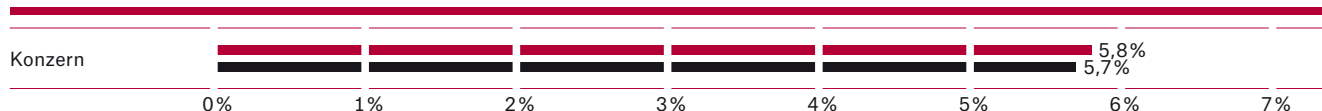

● 2010 ● 2009

#### Weiterbildungsinvestitionen bei wesentlichen Gruppenunternehmen in Deutschland

|                              |        | Münchener Rück AG |         | ERGO   |         | MEAG  |         |
|------------------------------|--------|-------------------|---------|--------|---------|-------|---------|
|                              |        | 2010              | Vorjahr | 2010   | Vorjahr | 2010  | Vorjahr |
| Gesamt                       | Tsd. € | 10.226            | 8.939   | 16.588 | 21.985  | 824   | 936     |
| Aufwendungen pro Mitarbeiter | €      | 2.694             | 2.462   | 833    | 1.396   | 1.075 | 1.180   |

Der Rückgang der Weiterbildungsinvestitionen bei ERGO liegt darin begründet, dass im Rahmen des Projekts „Neue ERGO“ sowohl Veranstaltungen mit großer Teilnehmerzahl als auch Maßnahmen ohne externe Unterstützung, also kostengünstig, durchgeführt werden konnten.

#### Rückversicherung

In unserer Vergütungsstruktur ergänzen sich aufeinander abgestimmte Komponenten zu einem Gesamtpaket, das unseren Anspruch an eine leistungsorientierte und wertschätzende Unternehmenskultur unterstreicht. So wurde zum Beispiel bei der Münchener Rück AG in München 2010 aufgrund des erfolgreichen Geschäftsjahres 2009 erstmals der Company-Result-Bonus ausgezahlt. Mit diesem neuen Vergütungsbaustein beteiligen wir alle Mitarbeiter am Unternehmenserfolg. Bei der Verteilung der Bonuszahlung berücksichtigen wir die individuelle Leistung und zeigen den Mitarbeitern damit, dass sich Leistung lohnt.

Unser Geschäftserfolg basiert auf exzellentem Wissen und der marktorientierten Umsetzung. Initiativen, die Qualifizierung und fachliche Entwicklung fördern, standen daher auch 2010 im Mittelpunkt. Unser internationales Traineeprogramm stockten wir im Jahr 2010 um zehn auf insgesamt 30 Stellen auf – eine Investition in unseren Nachwuchs. Die Fachlaufbahn bei Munich Re wurde weiter gestärkt: Herausragende Experten in geschäftsrelevanten Fachgebieten können sich jetzt bis in den Managementbereich entwickeln. Passende Talent-Management-Maßnahmen begleiten sie. Damit haben wir einen zusätzlichen Baustein zur Gleichwertigkeit von Fach- und Führungslaufbahn realisiert.

Gemäß unserer global ausgerichteten Personalstrategie führen wir gezielt Maßnahmen durch, welche die Bereitschaft zur internationalen beruflichen Beweglichkeit und Entwicklung fördern. Ein neues Programm bereitet Mitarbeiter aus der Internationalen Organisation auf die Übernahme von ersten Führungspositionen außerhalb ihres Heimatlands vor. Eine hohe Qualität der Mitarbeiterführung ist uns ein zentrales Anliegen. Die erneute internationale Befragung zum Führungsverhalten bestätigte das positive Ergebnis des Vorjahres. Gleichzeitig führten wir die Befragung zur Mitarbeiterzufriedenheit erstmals weltweit durch und erhoben den Engagement-Index – auch im Gesamtwert (national und international) mit gutem Resultat.

#### Erstversicherung

Das Projekt „Neue ERGO“ setzte unsere Markenstrategie um. Diesen Prozess unterstützten wir mit einem umfassenden Change-Management-Programm, in das wir die Mitarbeiter aktiv einbezogen. Auf diese Weise erreichten wir eine hohe Akzeptanz der Veränderungen in der Belegschaft. Aus dem Unternehmensleitbild, das im Projekt entwickelt wurde, leiteten wir ein „Mitarbeiterversprechen“ ab, das eine wichtige Plattform für unsere Personalarbeit in den nächsten Jahren bildet.

Der 2009 eingeleitete Personalabbau, den das Projekt „Kontinuierliche Verbesserung der Wettbewerbsposition“ erforderte, konnten wir planmäßig und ohne betriebsbedingte Kündigungen abschließen.



## Munich Health

Die qualitativen Maßnahmen unseres Personalmanagements gelten auch für die Mitarbeiter von Munich Health. Gleichzeitig arbeitet das Management weiter daran, alle Experten und Geschäftsmodelle unter der Dachmarke von Munich Health zu integrieren und unsere Fachkompetenz auf dem internationalen Gesundheitsmarkt weiter auszubauen.

## Assetmanagement

Die MEAG setzt in der Personalarbeit unverändert auf fachliche und persönliche Weiterentwicklung ihrer Mitarbeiter. Für Führungskräfte, die erstmals Führungsverantwortung übernehmen, wurde ein Förderprogramm etabliert, das ihnen Schlüsselkompetenzen für eine erfolgreiche Führungsarbeit vermittelt.

## Corporate Responsibility

Das Geschäftsumfeld von Munich Re wandelt sich ständig und bietet laufend neue Chancen und Risiken. Prägende Rahmenbedingungen wie der Klimawandel, der technologische Fortschritt, die globalisierten Finanzmärkte sowie der demografische Wandel stellen wesentliche Herausforderungen dar. Vorausschauendes und verantwortungsbewusstes Handeln in allen Unternehmensbereichen ist daher fester Bestandteil unseres Geschäftsmodells. Dieses Selbstverständnis haben wir in unserer Corporate-Responsibility-Strategie beschrieben. Sie wurde mit dem Beitritt von Munich Re zum Global Compact der Vereinten Nationen im Jahr 2007 untermauert.

In Erst- und Rückversicherung entwickeln wir neuartige Lösungen wie besondere Deckungskonzepte für erneuerbare Energien, Tarife für klimafreundliche Fahrzeuge oder die Beratung für ganzheitliche Gesundheitsprogramme. Als global handelnder Risikoträger bieten wir auch Mikroversicherungen an, die auf die finanzielle Situation und die Lebensumstände benachteiligter Bevölkerungsteile zugeschnitten sind. International engagieren wir uns unter dem Dach des Umweltprogramms der Vereinten Nationen (UNEP FI) und arbeiten zusammen mit einer Gruppe großer internationaler Finanzunternehmen an den „Principles for Sustainable Insurance“ (PSI). Ein weiteres Beispiel ist die Industrieinitiative der Dii GmbH, die Munich Re 2009 gemeinsam mit der Desertec Foundation und anderen internationalen Unternehmen ins Leben rief. Erklärtes Ziel ist, die technischen, ökonomischen und politischen Voraussetzungen zur kohlendioxidfreien Energieerzeugung in den Wüsten Nordafrikas sowie des Nahen und Mittleren Ostens zu entwickeln.

Die gleichen Prämissen zur Unternehmensverantwortung gelten für die Kapitalanlage, in der unsere Assetmanagementgesellschaft MEAG weltweit bedeutende Anlage-summen verwaltet. Als erstes deutsches Unternehmen unterzeichneten wir deshalb im Jahr 2006 die „Principles for Responsible Investment“ (PRI) der Vereinten Nationen. Zudem ist in den seit 2005 konzernweit geltenden verbindlichen General Investment Guidelines (GIG) festgelegt, dass mindestens 80 % der konzernweiten Investitionen in Aktien, Staats- und Unternehmensanleihen nachhaltigen Kriterien entsprechen sollen. Des Weiteren investiert Munich Re gezielt in erneuerbare Energien und neue Technologien. Mitte 2010 fiel der Startschuss für das Investmentprogramm RENT (Renewable Energy and New Technologies). Auch bei Neubauprojekten und Immobilien-Akquisitionen legen wir großen Wert auf hohe nachhaltige Standards.

In den eigenen Betriebsstätten konzentrieren wir unsere Aktivitäten auf die Reduktion unserer Treibhausgasemissionen:

- // Wir verringern Reisen, Strom- und Wärmeverbrauch sowie Abfall.
- // Wir gehen schonend mit den Ressourcen Wasser und Papier um.
- // Wir ersetzen zunehmend herkömmliche Energien durch erneuerbare Energien.

Ein Fünftel unserer Mitarbeiter im Konzern arbeitet an Betriebsstätten, die nach dem internationalen Umweltmanagement-Standard ISO 14001 zertifiziert sind. 2009 haben wir den Standort München klimaneutral gestellt. Erklärtes Ziel ist, bis 2012 die gesamte Rückversicherung klimaneutral zu stellen.

Corporate Responsibility bedeutet für uns auch, Verantwortung für die Gemeinschaft zu übernehmen, in der wir leben und arbeiten. Neben der gezielten Förderung von Bildung und Wissenschaft unterstützt Munich Re ausgewählte kulturelle und soziale Projekte. Ein weiterer Schwerpunkt unserer Aktivitäten ist der Bereich Gesundheit, zum Beispiel im Rahmen von verschiedenen Präventionsprojekten von ERGO. Ergänzt wird das Engagement von Munich Re durch Stiftungen, die einen maßgeblichen Beitrag zur nachhaltigen Entwicklung leisten.

Unsere Aktie ist in den angesehensten Nachhaltigkeitsindizes wie dem Dow Jones Sustainability Index (DJSI) und dem FTSE4Good Index gelistet. Beide Notierungen wurden im Herbst 2010 erfolgreich bestätigt. Fragestellungen rund um Corporate Responsibility spielen in der Kommunikation mit unseren Aktionären eine zunehmend wichtige Rolle.

# Risikobericht

////////////////////  
 // Risikolage von Munich Re 2010 tragfähig und kontrolliert  
 // Solvabilitätskoeffizient weiterhin komfortabel  
 // Weltweit einheitliches integriertes System zum Management von Risiken

## Risk Governance und Risikomanagement-System

### Risikomanagement-Organisation, Rollen und Verantwortlichkeiten

#### Auftrag und Ziel

Risikomanagement ist ein wichtiger Bestandteil der Unternehmenssteuerung. Neben der Funktion, die Finanzstärke zu erhalten, um die Ansprüche unserer Kunden zu sichern und für unsere Aktionäre nachhaltig Wert zu schaffen, ist es ebenfalls Aufgabe des Risikomanagements, die Reputation von Munich Re zu schützen. Dies erreichen wir durch ein weltweites, alle Bereiche umfassendes Risikomanagement.

#### Organisatorischer Aufbau

Um ein effizientes Risikomanagement zu gewährleisten, hat Munich Re besondere Risikomanagement-Funktionen und -Gremien eingerichtet. Die Funktion Integrated Risk Management (IRM) verantwortet das gruppenweite Risikomanagement und baut dabei auf dezentrale Strukturen in allen Bereichen der Gruppe. IRM steht der Chief Risk Officer (CRO) vor, einzelnen Gesellschaften dezentrale CROs. Unterstützt wird der CRO – ebenso wie die dezentralen CROs – von interdisziplinären Teams hoch qualifizierter Mitarbeiter. Unsere umfassenden Dokumentationen, Richtlinien und Anweisungen bewirken, dass die Mitarbeiter der Risikomanagement-Organisation sowie der gesamten Gruppe über unsere Risikostrategie, Aufbau- und Ablauforganisation informiert sind.

So ist gewährleistet, dass unser Risikomanagement die gesamte Gruppe umfasst. Dies schafft Klarheit und ermöglicht eine aktive Steuerung der eingegangenen Risiken.

#### Risk Governance

Die Risk Governance von Munich Re fördert Entwicklung und Erhalt einer adäquaten Risiko- und Kontrollkultur, die alle materiellen Risikokategorien umfasst. Gremien auf Gruppen- und Segmentebene unterstützen sie:

### Gruppenebene

Der CRO ist ständiges Mitglied im **Konzernausschuss**, dem zentralen Gremium für konzernübergreifende Angelegenheiten, für Strategieentwicklung und Steuerung, finanzielle Steuerung sowie Risikomanagement und Investmentfragen.

Der Konzernausschuss tagt – zusammen mit weiteren fachkundigen Mitgliedern aus Erst- und Rückversicherung – vierteljährlich als **Group Risk Committee** und behandelt dabei die Risikothemen der Gesamtgruppe.

Ebenfalls vierteljährlich tagt der Konzernausschuss – zusammen mit weiteren fachkundigen Mitgliedern aus Erst- und Rückversicherung sowie der MEAG – als **Group Investment Committee**. Es ist das zentrale Steuerungsgremium für wesentliche konzernübergreifende Themen, welche die Kapitalanlagen der Gruppe betreffen. Auch Risikothemen werden hier bearbeitet.

Daneben gibt es das **Reputational Risk Committee** (nähere Erläuterungen finden Sie auf Seite 125).

### Segmentebene

Für die Rückversicherung wurde aus der Mitte des Rückversicherungsausschusses als spezielles Risikogremium das **Global Underwriting and Risk Committee (GURC)** gebildet.

Das Risikomanagement für die Erstversicherung erfolgt primär dezentral bei ERGO IRM; es wird von Risikomanagement-Strukturen in allen Bereichen von ERGO unterstützt. Als Entscheidungsgremium hat der ERGO Vorstand das **ERGO Risk Committee** etabliert.

Munich Re weist seit dem Geschäftsjahr 2010 Munich Health als separates Segment aus, das vom Munich Health Board gesteuert wird. Im April 2010 wurde zudem für Risikothemen das **Munich Health Risk Committee** eingerichtet.

### Festlegung der Risikostrategie

Munich Re ist weltweit tätig, um aus Risiken Wert zu schaffen. Daher ist die Übernahme von Risiken ein ganz wesentlicher Teil unserer Geschäftsstrategie. Die Risikostrategie legt fest, in welchem Ausmaß wir Risiken für unsere Kunden und Aktionäre eingehen. Die Entwicklung der Risikostrategie ist in den Jahresplanungszyklus und damit in die Geschäftsstrategie eingebettet. Sie wird vom Vorstand verabschiedet und regelmäßig mit dem Aufsichtsrat erörtert.

Die Risikostrategie von Munich Re berücksichtigt gleichermaßen die Interessen unserer Kunden und Aktionäre und hat folgende Ziele:

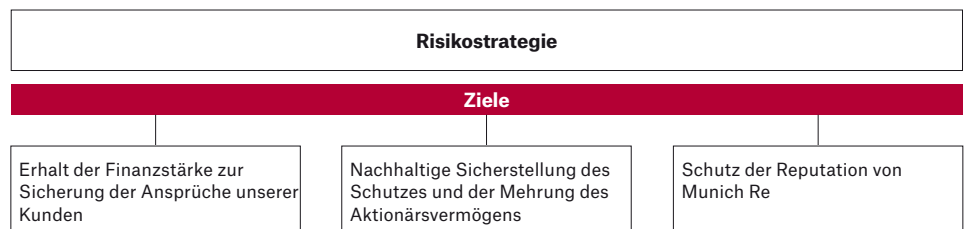

Die Risikostrategie wird bestimmt durch definierte Risikotoleranzen für eine Reihe von Risikokriterien. Diese Toleranzen orientieren sich an der Kapital- und Liquiditätsausstattung sowie an unserem angestrebten Ertrag innerhalb bestimmter Volatilitätsgrenzen und sind eine Vorgabe für die Geschäftsbereiche der Gruppe.

Die Risikokriterien:

- // Gesamtportfolio-Kriterien: Sie beziehen sich auf das gesamte Portfolio von Munich Re und zielen darauf ab, unsere Kapitalstärke sicherzustellen und die Wahrscheinlichkeit eines ökonomischen Jahresverlusts zu begrenzen.
- // Ergänzende Kriterien: Sie begrenzen die Schäden aufgrund einzelner Risikoarten oder Kumule, zum Beispiel für Naturgefahren, Terrorismus- oder Pandemie-Risiken, aber auch für Markt- und Kreditrisiken, welche die Überlebensfähigkeit von Munich Re gefährden könnten, falls sie eintreten.
- // Weitere Kriterien: Sie haben das Ziel, die Reputation von Munich Re zu bewahren und damit ihr künftiges Geschäftspotenzial zu schützen. Sie umfassen die Limitierung von Einzelrisiken, die, falls sie eintreten, nicht notwendigerweise die Existenz des Unternehmens gefährden, aber das Vertrauen von Kunden, Aktionären und Mitarbeitern in das Unternehmen nachhaltig beschädigen könnten.

Die jeweils gewählte Risikotoleranz sorgt für ein ausgewogenes Verhältnis zwischen Geschäftschancen und eingegangenen Risiken. Die Vorgaben der Risikostrategie haben sich bereits in der Finanzkrise und auch in der darauf folgenden Staatsschuldenkrise bewährt.

### Umsetzung der Strategie und Risikomanagement-Kreislauf

Der vom Vorstand festgelegte Risikoappetit wird in der Geschäftsplanung berücksichtigt und ist in der operativen Geschäftsführung verankert. Bei Kapazitätsengpässen oder Konflikten mit dem Limit- und Regelsystem ist nach festgelegten Eskalations- und Entscheidungsprozessen zu verfahren; diese stellen sicher, dass Geschäftsinteressen und Risikomanagement-Aspekte in Einklang gebracht werden. Gegebenenfalls werden Risiken durch Rückversicherung, Derivate oder sonstige Formen der Risikoentlastung abgegeben oder gesichert.

Die **operative Umsetzung des Risikomanagements** umfasst die Identifikation, Messung, Analyse und Bewertung von Risiken und daraus abgeleitet die Risikoberichterstattung, -limitierung (Verringerung auf ein bewusst gewolltes Maß) und -überwachung. Dabei haben wir alle wesentlichen Risiken im Blick.

Die **Risikoidentifikation** erfolgt über geeignete Systeme und Kennzahlen (quantitativer Teil) sowie über verschiedene Risikoerhebungen, die ergänzt werden durch Expertenmeinungen und die Einschätzung ausgewählter besonders erfahrener Führungskräfte (qualitativer Teil). Mithilfe unseres Ad-hoc-Meldeprozesses können unsere Mitarbeiter Risiken jederzeit an das zentrale Risikomanagement (IRM) melden.

### Ständige Weiterentwicklung unserer Instrumente zur Risikomessung

Die Instrumente der **Risikomessung**, die auf das jeweilige Segment zugeschnitten sind, werden ständig weiterentwickelt. Unser primäres Risikomaß basiert auf ökonomischen Grundsätzen. Regelmäßig vergleichen wir unsere Risikomodellergebnisse mit denen von Aufsichtsbehörden und Ratingagenturen. Dies geschieht auf verschiedenen Ebenen, etwa nach Gruppe, Segment, Unternehmen und Risikoart. Regelmäßig führen wir Benchmarkings unserer Risikomodellergebnisse durch und nehmen an Branchenumfragen teil, um unsere Instrumente zu prüfen und zu verfeinern. Darüber hinaus vergleichen wir unser Modell mit dem jeweils aktuellen Stand von Solvency II und nehmen an den sogenannten quantitativen Auswirkungsstudien (Quantitative Impact Studies) teil. Die Resultate des internen Risikomodells erläutern wir auf Seite 126 ff.

**Risikoanalyse und -bewertung** werden auf oberster Ebene in IRM in Form einer konsolidierten Gruppensicht unter Berücksichtigung von Beschränkungen der Kapitalfungibilität vorgenommen. Sie beruhen auf den Analysen, die in den Risikomanagement-Einheiten der Rückversicherung, von ERGO, von Munich Health und des Assetmanagements erstellt wurden. Daneben ist IRM verantwortlich, die Analysen vorgelagerter Instanzen zu plausibilisieren und zu validieren. Zu diesem Zweck arbeitet

IRM eng mit einer Vielzahl von Bereichen und Experten zum Teil aus dem Haus, zum Teil von außerhalb zusammen. So erhalten wir eine quantitative und qualitative Bewertung, die mögliche Wechselwirkungen zwischen den Risiken berücksichtigt.

Die **Risikolimitierung** ergibt sich aus der Risikostrategie. Ausgehend von den definierten Risikotoleranzen werden Limite und Budgets und – sofern notwendig – risikoverringende Maßnahmen beschlossen und umgesetzt. Diverse Einheiten der Gruppe arbeiten Hand in Hand, um die festgelegten Risikokriterien einzuhalten und gleichzeitig den Geschäftsinteressen gerecht zu werden. Identifiziert ein Geschäftsbereich ein attraktives Geschäft, das seine Risikovorgaben überschreiten würde, analysieren die zuständigen Risikomanagement-Abteilungen und IRM die möglichen Auswirkungen auf das Gruppenportfolio und die Risikotoleranz der Gesamtgruppe. Unter Berücksichtigung dieser Ergebnisse und der Ertragserwartungen aus dem Geschäft entwickeln wir ein Konzept, mit dem wir es gegebenenfalls in unsere Bücher nehmen können.

Die quantitative **Risikoüberwachung** wird kennzahlenbasiert sowohl zentral als auch an dezentralen Stellen durchgeführt, etwa bei der MEAG für die Kapitalanlagen oder bei ERGO IRM, und dann zentral zusammengeführt. Was die qualitativ erfassten Risiken betrifft, überwachen wir diese dezentral oder zentral je nach ihrer Wesentlichkeit und Zuordnung.

## Kontroll- und Überwachungssysteme

Weltweit einheitliches  
integriertes System zum  
Management von Risiken

Die Weiterentwicklung unseres internen Risikokontrollsystems (IKS) haben wir im Jahr 2010 weitestgehend abgeschlossen. Das IKS ist ein weltweit einheitliches, über alle Risikodimensionen und Unternehmensbereiche hinweg integriertes System zum Management von operationellen Risiken. Es entspricht neben den für die Konzernleitung geltenden Anforderungen auch den lokalen gesetzlichen und regulatorischen Vorschriften.

Die gruppenweite Verantwortung für das IKS obliegt dem Vorstand und ist organisatorisch dem CRO zugewiesen. Die inhaltliche Verantwortung tragen die Experten und Mitarbeiter der Fachbereiche, die auch die Risiko- und Kontrollbeurteilungen vorgenommen haben. Durch deren Einbindung haben wir innerhalb der Gruppe das einheitliche Risikoverständnis gestärkt sowie unser Risiko- und Kontrollbewusstsein in den operativen Abläufen deutlich geschärft.

Mit dem ganzheitlichen Risikomanagement-Ansatz erreichen wir eine Steigerung der Effektivität und Effizienz bei der Identifikation, Analyse, Bewertung und Dokumentation der wesentlichen operationellen Risiken und Schlüsselkontrollen. Die Optimierung von Risiko- und Kontroll-Verantwortlichkeiten durch klare Zuordnung von Zuständigkeiten sowie die Festlegung von Risikosteuerungsmaßnahmen schaffen zudem Transparenz.

Das IKS liefert für jedes Geschäftsfeld von Munich Re eine Risikolandkarte, das heißt eine systematische Verknüpfung der wesentlichen Risiken und Prozesse. In ihr sind alle relevanten Risikokontrollpunkte markiert. Auch bereichsübergreifende Risiken und Kontrollen lassen sich daraus erkennen. Die Transparenz über unsere Risikosituation ermöglicht es, auf geänderte interne und externe Anforderungen kurzfristig und mit begrenztem Aufwand zu reagieren. Konkret bedeutet dies, Risiken frühzeitig zu erkennen, Kontrolldefizite umgehend zu adressieren und wirksam gegenzusteuern.

Das IKS ist ein „lernendes“ System, das mindestens einmal jährlich die Risiken, Risikoeinschätzungen und Kontrollen überprüft und gegebenenfalls anpasst. Zudem werden die Wirksamkeit des IKS und notwendige Anpassungen an geänderte Rahmenbedingungen mindestens jährlich von der Revision im Rahmen des Revisionsprüfungsplans überprüft.



**Angemessene interne  
Kontrollen für Risiken aus der  
Rechnungslegung**

Im Rahmen des IKS begegnen wir auch Risiken aus der Rechnungslegung mit umfassenden internen Kontrollen, um die Verlässlichkeit der Finanzberichterstattung und die korrekte Erstellung der zu veröffentlichenden Jahresabschlüsse sicherzustellen.

Der Konzernabschluss wird nach Zulieferung der IFRS-Einzelabschlüsse oder der integrierten Teilkonzernabschlüsse zentral in München erstellt. Versicherungstechnische Geschäftsvorfälle sowie die Vorfälle des allgemeinen Geschäfts sind grundsätzlich bei den in den Konzernabschluss einbezogenen Gesellschaften zu erfassen; die Kapitalanlagenbuchhaltung erfolgt überwiegend zentral durch die MEAG, für einige Einheiten jedoch durch externe Dienstleister.

Für Munich Re bestehen differenzierte Wesentlichkeitsgrenzen, um die Angemessenheit der internen Kontrollen sicherzustellen. Diese Grenzen werden anhand der Kriterien Größe, Risikoerfahrung und Compliance ermittelt. Alle aus Gruppensicht wesentlichen Risiken für die Finanzberichterstattung werden nach einheitlichen Kriterien in das IKS aufgenommen.

Munich Re gibt durch ein Bilanzierungshandbuch und regelmäßige Informationen über Änderungsanforderungen gruppenweit einheitliche Regeln für Ansatz, Bewertung und Ausweis aller Positionen der Bilanz und Gewinn- und Verlustrechnung vor. Änderungen unterliegen dabei einem stringenten Prozess in Bezug auf zeitliche Regelungen, Verantwortlichkeiten und Informationswege. Ein standardisiertes Vorgehen sichert Umsetzung und Einhaltung der Rechnungslegungsvorschriften bei den einbezogenen Gesellschaften.

Die Konzernabschlusserstellung unter Fast-Close-Bedingungen beruht auf einer zentralen Systemlösung. Teilkonzernabschlüsse werden als Bestandteil des Gesamtkonzernabschlusses im zentralen System erstellt. Für den Abschlusserstellungsprozess (Konsolidierung und Berichterstattung) bestehen klare, eindeutig dokumentierte Vorgaben und Kontrollen.

Die Geschäftsvorfälle werden bei den einbezogenen Gesellschaften erfasst; dabei verwenden diese ein konzernweit weitgehend einheitliches Hauptbuch mit harmonisierten Stammdaten, einheitlichen Prozessen und Buchungsregeln sowie einer standardisierten Schnittstelle für die Datenlieferung der Gesellschaften an den Konzern bzw. Teilkonzern. Klare Berechtigungskonzepte regeln die Zugriffsbestimmungen in den Rechnungslegungssystemen.

Einzel- und Konzernabschlusserstellung nehmen wir unter Beachtung des Vier-Augen-Prinzips vor. Jeder Schritt der Abschlusserstellung sieht systemtechnische und inhaltliche Überprüfungen vor. Fehler werden analysiert, nachverfolgt und zügig beseitigt.

**Risikoberichterstattung**

Die interne Risikoberichterstattung informiert den Gesamtvorstand regelmäßig über die Risikolage, und zwar in Bezug auf die einzelnen Risikokategorien (fortlaufend) und die der gesamten Gruppe (vierteljährlich). Auch der Prüfungsausschuss des Aufsichtsrats und die BaFin erhalten den vierteljährlichen internen Risikobericht.

So ist über Frühwarnmechanismen sichergestellt, dass negative Trends rechtzeitig erkannt und Gegenmaßnahmen ergriffen werden können.

Ziel unserer externen Risikoberichterstattung ist es, einen verständlichen Überblick über die Risikolage der Gruppe zu geben. Hierzu gehören die Informationen über unsere Risikomanagement-Methoden und -Prozesse, die Risk Governance und die einzelnen Risiken, denen Munich Re ausgesetzt ist.

Mit der Risikoberichterstattung erfüllen wir rechtliche Anforderungen und schaffen darüber hinaus Transparenz für das Management sowie unsere Kunden und Aktionäre.

## Wesentliche Risiken

Als wesentliche Risiken bezeichnen wir Risiken, die sich nachhaltig negativ auf die Vermögens-, Finanz- und Ertragslage von Munich Re auswirken können. Diese Definition haben wir – unter Berücksichtigung der individuellen Risikotragfähigkeit – in gleicher Weise auf die einzelnen Geschäftsbereiche und Gesellschaften übertragen. Die Einschätzung, ob ein Risiko in diesem Sinne wesentlich für eine Einheit ist, obliegt den zuständigen Risikomanagement-Einheiten. Konkret unterscheiden wir zwischen mehreren Risikokategorien, aus denen wesentliche Risiken entstehen können:

### Versicherungstechnisches Risiko: Schaden- und Unfallversicherung

Unter versicherungstechnischem Risiko verstehen wir hier das Risiko, dass die versicherten Schäden im Schaden- und Unfallgeschäft über unseren Erwartungen liegen.

Wesentliche Risiken in der Schaden- und Unfallversicherung sind dabei das Beitrags- und Reserverisiko. Das Beitragsrisiko umfasst das Risiko, dass künftige Entschädigungen aus versicherten, aber noch nicht eingetretenen Schäden höher als erwartet ausfallen. Das Reserverisiko betrifft das Risiko, dass die Schadenrückstellungen, die für bereits eingetretene Schäden ausgewiesen wurden, nicht ausreichend bemessen sind.

#### Beitragsrisiko

Die primäre Verantwortung für die Kontrolle des Beitragsrisikos liegt beim operativen Management: Die operativen Führungskräfte vergeben Zeichnungsvollmachten und definieren interne Prozesse so, wie es zur Qualitätssicherung geboten ist; dabei berücksichtigen sie einerseits die spezifischen Exponierungen ihres Geschäfts, andererseits das Wissen und die Erfahrungen ihrer Mitarbeiter.

Diese operative Verantwortung wird ergänzt oder eingeschränkt durch Vorgaben und Maßnahmen, die den Handlungsrahmen für die operativen Einheiten definieren und dabei die Charakteristika des jeweiligen Versicherungsgeschäfts berücksichtigen.

Für besonders kritische Sachverhalte werden die Zeichnungsvollmachten der operativen Einheiten beschränkt und Mindeststandards zur Schaffung von Transparenz oder Prozesse zur Qualitätssicherung und zum Risikomanagement vorgeschrieben.

Ausgewählte Exponierungen dürfen erst gezeichnet werden, nachdem sie den zuständigen Gremien vorgelegt wurden.

Für die Naturgefahren- und Terrorismusszenarien werden den einzelnen operativen Einheiten Budgetkapazitäten zugeteilt, die mit der Risikostrategie kompatibel sind. Vor der Annahme eines Geschäfts müssen verbindliche Regeln für die Erfassung von Haftungsdaten und die Quantifizierung eines potenziellen Schadens angewandt werden; das Geschäft darf nur gezeichnet werden, wenn genügend Budgetkapazität verfügbar ist.

Um sicherzustellen, dass der Risikoappetit von Munich Re bei der Beteiligung an einem großen Einzelrisiko nicht überschritten wird, gibt es verbindliche Prozesse, in denen vor der Zeichnung geprüft wird, inwieweit wir daran beteiligt sind und wie groß unsere Gesamtbeteiligung ist.

Wegen der Vielfalt und starken Verzweigung des Geschäfts von Munich Re kann es kein Regelwerk geben, das für Akzeptentscheidungen relevante Risiken vollständig abdeckt. Deshalb ist das Knowhow der operativen Underwriter von hoher Bedeutung. Dem tragen wir Rechnung, indem wir Ausbildungsmaßnahmen organisieren, IT-Systeme für Risikoeinschätzung und Tarifierung bereitstellen, Informationspapiere und Underwriting-Empfehlungen intern veröffentlichen sowie Arbeitsgruppen einsetzen, die Underwriting-Wissen erarbeiten und vermitteln.

**Reserverisiko**

Die Schätzung der Rückstellungen ist mit Unsicherheiten behaftet. Das ist darauf zurückzuführen, dass die Regulierung von Schäden, die vor dem Bilanzstichtag eingetreten sind, von künftigen Ereignissen und Entwicklungen abhängt. Nicht vorhersehbare Schadentrends, die sich aufgrund von Gerichtsentscheidungen, veränderten gesetzlichen Rahmenbedingungen, Unterschieden in der Schadenregulierungspraxis, der medizinischen und pflegerischen Versorgung sowie infolge von gesamtwirtschaftlichen Faktoren, beispielsweise der Inflation, ergeben, können sich erheblich auf das Abwicklungsergebnis auswirken.

Wir bestimmen die Reserven für Schäden und Schadenregulierungskosten nach den Grundsätzen versicherungsmathematischer Praxis auf der Grundlage fundierter Annahmen, Methoden und Bewertungen. Diese Annahmen werden regelmäßig überprüft und aktualisiert.

Konsistenz durch gruppenweit geltende Reservierungsregelungen

Über gruppenweit geltende Reservierungsregelungen wird die Konsistenz dieses Vorgehens sichergestellt. Ergänzend führen wir gruppenweit interne Prüfungen durch, um die Einhaltung dieser Regelungen und die Angemessenheit der Rückstellungen fortlaufend zu überprüfen.

Weitere risikorelevante Informationen zur Versicherungstechnik finden Sie im Konzernanhang unter (38) Risiken aus dem Schaden- und Unfallversicherungsgeschäft.

**Versicherungstechnisches Risiko: Lebens- und Krankenversicherung**

Unter versicherungstechnischem Risiko verstehen wir hier das Risiko, dass versicherte Leistungen im Lebens- und Krankenversicherungsgeschäft über unseren Erwartungen liegen. Dabei sind insbesondere das biometrische und das Stornorisiko von Belang. Wir unterscheiden hier zwischen kurz- und langfristig auf das Portfolio einwirkenden Risiken.

Steuerung der Pandemie-szenarien über Budgets

Zufällige jährliche Schwankungen der Versicherungsleistungen oder des Stornoverhaltens können kurzfristig zu einer Wertsenkung des Portfolios führen. Dies gilt jedoch insbesondere für höhere Aufwendungen durch einmalige außergewöhnliche Ereignisse, zum Beispiel Pandemien. Für Pandemie-Szenarien werden den operativen Einheiten daher Budgets zugeteilt, die sich aus der Risikostrategie ergeben.

Darüber hinaus könnten sich Notwendigkeiten zu Anpassungen in den von uns verwendeten Rechnungsgrundlagen für Biometrie und Stornoverhalten ergeben. Diese stellen langfristig auf den Wert des Portfolios einwirkende Risiken dar. In der Lebensversicherung sind hierbei vor allem die Sterblichkeits-, Langlebigkeits- und Invalidisierungsrisiken von Belang, in der Krankenversicherung die Morbiditätsrisiken. Verändern sich in der Erstversicherung die Rechnungsgrundlagen nachhaltig, besteht bei den langfristigen Verträgen in der Regel allerdings auch die Möglichkeit einer Beitragsanpassung.

Die Bewertung unseres Geschäfts im Rahmen des Embedded-Value-Konzepts beruht auf diesen biometrischen und Storno-Rechnungsgrundlagen. Diese werden regelmäßig überprüft und auf Basis neuer Erkenntnisse angepasst, insbesondere aufgrund der unternehmenseigenen Erfahrungen und der Erwartung zukünftiger Entwicklungen.

Die Erläuterungen zu den Zeichnungsrichtlinien und -limiten (siehe Abschnitt „Schaden- und Unfallversicherung“) treffen auch auf die Lebens- und Krankenrückversicherung zu. In der Erstversicherung sind die regelmäßige Überprüfung der Rechnungsgrundlagen durch Aktuarien und gegebenenfalls Anpassungen der Tarifierungsregeln geeignete Maßnahmen, um Risiken und Prozesse adäquat zu steuern.

Weitere risikorelevante Informationen zur Versicherungstechnik finden Sie im Konzernanhang unter (37) Risiken aus dem Lebens- und Krankenversicherungsgeschäft.

### Marktrisiko

Wir definieren Marktrisiko als einen ökonomischen Verlust, der infolge von Wertveränderungen auf den Kapitalmärkten auftritt. Hierzu gehören unter anderem das Aktienkursrisiko, das Allgemeine Zinsrisiko, das Spezifische Zinsrisiko, das Immobilienrisiko und das Währungsrisiko. Das Allgemeine Zinsrisiko beschreibt dabei Änderungen der risikolosen Zinskurven, wohingegen das spezifische Zinsrisiko Änderungen in den Kreditrisikoaufschlägen berücksichtigt. Darüber hinaus zählen wir das Risiko, dass sich Inflationsraten verändern, ebenso zum Marktrisiko wie die Änderung der impliziten Volatilitäten (Kosten von Optionen). Marktpreisschwankungen beeinflussen nicht nur unsere Kapitalanlagen, sondern auch unsere versicherungstechnischen Verpflichtungen. Dies ist insbesondere in der Lebenserstversicherung der Fall. Aufgrund der teilweise langfristigen Zinsgarantien und der vielfältigen Optionen der Versicherten in der traditionellen Lebensversicherung hängt der Wert der Verpflichtungen sehr stark von den Kapitalmärkten ab.

Steuerung der Marktrisiken durch Limit- und Frühwarnsysteme sowie unser Asset-Liability-Management

Die Marktrisiken handhaben wir durch geeignete Limit- und Frühwarnsysteme sowie unser Asset-Liability-Management, das wir auf Seite 102 darstellen. Dabei begrenzen wir die Abweichungen der gesamten Kapitalanlagen von denjenigen Kapitalanlagen, die ökonomisch zur Bedeckung der versicherungstechnischen Verpflichtungen sowie für die Durchführung der Geschäftstätigkeit mit minimalem Marktrisiko notwendig sind. Eine Aufteilung der Kapitalanlagen nach Anlagearten finden Sie auf Seite 94 f. Zur Absicherung von Marktpreisrisiken setzen wir auch derivative Finanzinstrumente ein, die wir im Konzernanhang unter (9) Sonstige Wertpapiere, erfolgswirksam zum Zeitwert bewertet erläutern.

Mit Stresstests sowie Sensitivitäts- und Durationsanalysen simulieren wir gezielt Marktschwankungen und entwickeln Strategien, um bei Bedarf gegensteuern zu können.

Unsere operativen Kapitalanlagen müssen gruppenweiten Mindeststandards genügen. Diese Anforderungen haben wir in unseren General Investment Guidelines (GIG) definiert. Darüber hinaus sind die risikorelevanten Restriktionen für die Kapitalanlagen zu berücksichtigen, die sich aus der Risikostrategie ergeben.

Eine ausführliche Darstellung des ökonomischen Risikokapitals, das für Marktrisiken vorgehalten wird, finden Sie auf Seite 130 f., Sensitivitätsanalysen zu Marktpreisrisiken aus Finanzinstrumenten im Konzernanhang unter (40).

### Kreditrisiko

Wir definieren Kreditrisiko als einen ökonomischen Verlust, der entstehen kann, wenn sich die finanzielle Lage eines Kontrahenten verändert, zum Beispiel eines Emittenten von Wertpapieren oder eines anderen Schuldners mit Verpflichtungen gegenüber unserer Gruppe.

Neben Kreditrisiken, die sich durch die Anlage von Vermögenswerten oder im Zahlungsverkehr mit Kunden ergeben, gehen wir das Kreditrisiko auch aktiv durch die Zeichnung von Erst- und Rückversicherungsgeschäft ein: unter anderem beim Warenkredit- und Bürgschaftsgeschäft, bei der Finanzrückversicherung sowie der Vergabe und Versicherung von Darlehen. Zusätzlich können Kreditrisiken in Zusammenhang mit Risikotransfers in den Kapitalmarkt und anderen Finanztransaktionen entstehen.

Überwachung und Steuerung der Kreditrisiken durch konzernweites Kontrahentenlimit-system

Um unsere gruppenweiten Kreditrisiken zu überwachen und zu steuern, verfügen wir über ein konzernweit gültiges, bilanzübergreifendes Kontrahentenlimitsystem: Die Limite pro einzelnen Kontrahenten (Firmengruppe oder Land) orientieren sich an dessen finanzieller Lage entsprechend den Ergebnissen unserer Fundamentalanalysen, Ratings und Marktdaten sowie an der vom Vorstand definierten Risikotoleranz. Das konzernweit gültige Limit pro Kontrahent wird auf die Rück- und Erstversicherungsegmente sowie auf die Versicherungs- und Anlageseite verteilt. Die Erfassung der Exponierung stützt sich auf die Verlusthöhe beim potenziellen Ausfall unseres Kontra-

henten nach Verwertung der Sicherheiten (Credit Equivalent Exposure – CEE). Die CEE-Faktoren werden auf der Grundlage von historischen Analysen und Expertenmeinungen geschätzt.

Um neben dem Kreditrisiko von Staatsanleihen weitere Länderrisiken zu berücksichtigen, erstellt unsere Einheit Group Development zusätzlich zum reinen Ausfallrating ein spezielles Länderscoring. Dieses Scoring bildet die wesentlichen politischen, ökonomischen und sicherheitsrelevanten Risiken in einem Land ab. Es erlaubt uns damit, Länderrisiken – die für einzelne Geschäftsfelder von unterschiedlicher Bedeutung sind – zusätzlich umfassend einzuschätzen. Es fließt in das Underwriting und die Anlageentscheidungen mit ein und dient als Indikator für individuelle Limitentscheidungen. Darüber hinaus überwachen und gegebenenfalls limitieren wir unsere Kumule in bestimmten Sektoren und Regionen.

Im Bereich Retrozessionen steuern wir das Ausfallrisiko mithilfe des Retro Security Committees. Seine Experten überprüfen unabhängig und anhand verschiedener Kriterien (zum Beispiel Mindestratings, Marktdaten oder Eigenkapitalanforderungen) die Qualität unserer potenziellen Retrozessionäre. So vergeben sie auf Basis einer von IRM erstellten Guideline angemessene Limite. Mit diesem System ermöglichen wir eine breite und qualitativ hochwertige Streuung unserer Retrozessionen auf dem Rückversicherungsmarkt.

Die Kreditexponierung der Kapitalmarktplatzierungen, etwa unserer Katastrophenbonds, verringern wir, indem wir die Hinterlegung erstklassiger Sicherheiten fordern oder andere angemessene Absicherungsmechanismen in die Struktur einbauen.

An die Emittenten unserer Festzinsanlagen stellen wir sehr hohe Anforderungen, die sich in den konzernweiten Anlagegrundsätzen widerspiegeln. Anlagen in strukturierten Produkten werden je nach ihrem Risikoprofil zusätzlich begrenzt.

### **Operationelles Risiko**

Munich Re versteht unter operationellen Risiken Verluste, die aus unangemessenen Prozessen, Technologieversagen, menschlichen Fehlern oder externen Ereignissen resultieren. Darunter fallen zum Beispiel kriminelle Handlungen von Mitarbeitern oder Dritten, Insidergeschäfte, Verstöße gegen das Kartellrecht, Geschäftsunterbrechungen, Fehler in der Geschäftsabwicklung, Nichteinhaltung von Meldepflichten sowie Unstimmigkeiten mit Geschäftspartnern.

Diese Risiken identifizieren und verringern wir im Rahmen des IKS (siehe Seite 119 f.). Unser erklärtes und konsequent verfolgtes Unternehmensziel ist, die Mitarbeiter für mögliche Gefahren zu sensibilisieren und eine angemessene Risikokultur zu verfestigen. Dazu zählt die Bereitschaft, aus Fehlern zu lernen und diese als Chance zur Verbesserung zu erkennen.

### **Liquiditätsrisiko**

Ziel des Managements von Liquiditätsrisiken ist es sicherzustellen, dass wir unseren Zahlungsverpflichtungen jederzeit nachkommen können.

Generell fließen im Versicherungsgeschäft Beitragseinnahmen zu, lange bevor Schadenzahlungen oder sonstige Leistungen an unsere Kunden fällig werden. Dadurch entstehen bedeutsame Liquiditätspositionen.

Außerdem legen wir bei Munich Re ein besonderes Augenmerk auf  
 // ein zeitnahes, angepasstes Cashflow-Management,  
 // eine ausgewogene, unseren finanziellen Verpflichtungen angemessene Kapitalanlagestruktur mit ganz überwiegender Investition in Anlageklassen, die den Kriterien Sicherheit, Liquidität und Veräußerbarkeit zu marktgängigen Preisen Rechnung tragen,

// die regelmäßige Simulation der Auswirkungen von besonderen Belastungen auf unsere Liquiditätssituation.

Die Verfügbarkeit von liquiden Mitteln im Konzern optimieren wir auch mithilfe interner Finanzierungen und einem Cash-Pool, der von den Gruppenunternehmen gespeist wird. Dabei stellen wir unter Beachtung aufsichtsrechtlicher Regelungen durch strenge Verfügbarkeitsanforderungen sicher, dass jede Einheit ihre Zahlungsverpflichtungen erfüllen kann.

**Steuerung des Liquiditäts-  
risikos über gesamtheitliche  
Risikostrategie**

Auch das Liquiditätsrisiko steuern wir über unsere gesamtheitliche Risikostrategie. Dabei legt der Vorstand für das Liquiditätsrisiko Toleranzen fest, aus denen Mindest-Liquiditätsanforderungen für den Geschäftsbetrieb abgeleitet werden. Diese Risikotoleranzen werden jährlich überprüft, die Einhaltung der Mindestanforderungen wird fortlaufend überwacht. Das Liquiditätsrisiko-Management berücksichtigt unter anderem

- // bekannte und erwartete Auszahlungsverpflichtungen durch eine regelmäßige, detaillierte Liquiditätsplanung auf Ebene der Einzelunternehmen und ein zentrales Cashflow-Reporting,
- // kurzfristige Margin- und Besicherungspflichten aus Derivatepositionen, soweit Einzelunternehmen solche Instrumente einsetzen,
- // unerwartet hohe Belastungen, etwa infolge von Kumulschäden, die weit über das normale Maß der Schadenerwartung hinausgehen.

**Strategisches Risiko**

Munich Re definiert strategisches Risiko als das Risiko, das von falschen Geschäftsentscheidungen, schlechter Implementierung von Entscheidungen oder mangelnder Anpassungsfähigkeit an Veränderungen in der Unternehmensumwelt ausgeht. Strategische Risiken existieren in Bezug auf die vorhandenen und neuen Erfolgspotenziale des Konzerns und seiner Geschäftsfelder. Sie treten meist mit zeitlichem Vorlauf auf und bergen die Gefahr einer nachhaltigen und deutlichen Abnahme des Unternehmenswerts.

Diesem Risiko begegnen wir, indem wir wesentliche strategische Themen und Entscheidungen im Strategieausschuss diskutieren und ihre Implementierung regelmäßig nachhalten. Dem Strategieausschuss gehören die Mitglieder des Konzernausschusses und damit auch der CRO sowie die Chief Executive Officer (CEO) der Geschäftsfelder und der Leiter der Einheit Group Development an. Dadurch verzahnen wir strategische Entscheidungsprozesse und Risikomanagement eng. IRM ist zusätzlich in die operative Geschäftsplanung ebenso wie in die Prozesse bei Unternehmenskäufen und -zusammenschlüssen eingebunden.

**Reputationsrisiko**

Wir definieren das Reputationsrisiko als das Risiko eines Schadens, der eintritt, wenn sich das Ansehen des Unternehmens in der Öffentlichkeit (zum Beispiel bei Kunden, Aktionären oder anderen Beteiligten) verschlechtert.

Wir überwachen das Reputationsrisiko, indem wir an verschiedenen Stellen im Haus Identifikationsprozesse etabliert haben. Sobald wir einen Hinweis erhalten, dass ein derartiges Risiko besteht oder im Lauf eines Geschäftsprozesses eintreten könnte, wird dieser Hinweis an ein eigens dafür eingerichtetes Reputational Risk Committee weitergeleitet. Dieses entscheidet, wie im Einzelfall zu reagieren ist. So soll beispielsweise verhindert werden, dass operative Risiken zusätzlich mit Reputationsrisiken verbunden sind. Das Committee setzt sich aus Experten verschiedener Bereiche zusammen und wird vom Compliance Officer geleitet. Eine Geschäftsordnung regelt Funktion und Verfahrensweise des Ausschusses. Die inhaltlichen Vorgaben stammen im Wesentlichen aus dem Verhaltenskodex, der die elementaren Regeln und Grundsätze für ein rechtlich korrektes und verantwortungsbewusstes Verhalten der Mitarbeiter formuliert.



## Ökonomisches Risikokapital

### Übersicht Risikolage

Risikolage von Munich Re  
2010 tragfähig und kontrolliert

Im zentralen Risikomanagement schätzen wir unsere Risikolage anhand qualitativer und quantitativer Faktoren ein. Die Risikolage von Munich Re war während des gesamten Berichtszeitraums tragfähig und kontrolliert. Unsere gut eingeführten modernen Risikomanagement-Prozesse, verbunden mit unserer soliden Kapitalausstattung, haben die Leistungs- und Überlebensfähigkeit des Unternehmens im Sinne unserer Kunden und Aktionäre jederzeit gewährleistet. Neben den versicherungstechnischen und Kapitalmarktrisiken, die zu unserem Geschäftsmodell gehören, die wir gut einschätzen können und daher bewusst eingehen, gibt es eine Vielzahl anderer Risiken, denen Munich Re – wie andere Unternehmen auch – ausgesetzt ist. Ihr Auftreten ist nicht geplant und ihre Eintrittswahrscheinlichkeit und Auswirkungen sind zumeist schlecht einzuschätzen. Wir beobachten daher unsere Umwelt und unser Unternehmen sehr genau, um auch diese Risiken rechtzeitig identifizieren und geeignete Maßnahmen zur Schadenabwehr treffen zu können.

Auf den Seiten 121 ff. finden Sie einige Beispiele für die genannten Risiken und unseren Umgang mit diesen.

### Internes Risikomodell

Steuerung des Geschäfts über  
integriertes Risikomodell

Munich Re steuert ihr Geschäft auf Basis der konsolidierten Gruppensicht. Dazu verfügen wir über ein eigenes integriertes Risikomodell, das den erforderlichen Kapitalbedarf ermittelt, um die Verpflichtungen der Gruppe auch nach extremen Schadenereignissen erfüllen zu können.

Das Risikomodell von Munich Re gibt die stochastische Gewinn- und Verlustverteilung der verfügbaren Eigenmittel über einen Einjahreshorizont an. Es basiert auf separat modellierten Verteilungen für die Risikokategorien Schaden/Unfall, Leben/Gesundheit, Markt, Kredit und operationelle Risiken. Diese Verteilungsannahmen überprüfen wir regelmäßig, etwa mit real eingetretenen Schadenereignissen, und passen sie bei Bedarf entsprechend an.

In den Rück- wie den Erstversicherungssegmenten wird jede Risikokategorie dargestellt. Im Segment Munich Health werden die Risikokategorien Leben/Gesundheit sowie operationelle Risiken gezeigt, nicht jedoch das Markt- und Kreditrisiko. Diese Risiken werden entsprechend unserer internen Risikosteuerung in den Rück- und Erstversicherungssegmenten ausgewiesen.

Ebenfalls zeigen wir **Diversifikationseffekte**, die einerseits durch unsere breite Aufstellung über die verschiedenen Risikokategorien (Versicherungstechnik, Markt, Kredit) und andererseits durch die Kombination von Erst- und Rückversicherungsgeschäft erzielt werden. So verringern wir unseren Kapitalbedarf. Zudem berücksichtigen wir durch Darstellung von (Tail-)Abhängigkeiten, dass die verschiedenen Risiken nicht vollständig unabhängig voneinander sind. Daraus ergibt sich im Vergleich zur Annahme der Unabhängigkeit ein geringerer Diversifikationseffekt, der sich in einem höheren Kapitalbedarf niederschlägt.

Eine zentrale Größe, die im Rahmen des internen Modells berechnet wird, ist das **ökonomische Risikokapital (Economic Risk Capital, ERC)**. Unter dem ökonomischen Risikokapital von Munich Re verstehen wir den Betrag an verfügbaren Eigenmitteln, den Munich Re benötigt, um mit einer vorgegebenen Risikotoleranz unerwartete Verluste des Folgejahres ausgleichen zu können.

Um das ökonomische Risikokapital von Munich Re zu bestimmen, verwenden wir die ökonomische Gewinn-Verlust-Verteilung über alle Risikosegmente. Das ökonomische Risikokapital entspricht dem 1,75-Fachen des Value-at-Risk dieser Verteilung über einen einjährigen Zeithorizont zu einem Sicherheitsniveau von 99,5 %. Der Value-at-Risk zum Sicherheitsniveau von 99,5 % gibt den ökonomischen Verlust von Munich Re an, der bei gleichbleibenden Exponierungen statistisch in höchstens einem von 200 Jahren überschritten wird. Er stellt die zukünftige Risikotoleranz unter Solvency II dar. Indem unsere Gruppe für sich den 1,75-fachen Kapitalbedarf gegenüber dieser Risikotoleranz errechnet, folgt sie einem konservativen Ansatz, mit dem sie ihren Kunden ein hohes Sicherheitsniveau bietet.

Ökonomische Verluste können sich unterschiedlich auf die einzelnen rechtlichen Einheiten von Munich Re verteilen. Die Möglichkeiten einer Einheit, eine andere im Schadenfall finanziell zu unterstützen, sind jedoch rechtlich teilweise eingeschränkt. Bei der Bestimmung des Kapitalbedarfs von Munich Re werden daher ausdrücklich rechtliche oder regulatorische Beschränkungen der Kapitalfungibilität berücksichtigt.

#### Ökonomisches Risikokapital (ERC)

|                        | 31.12.2010  |                            |                            |                  |                                  | Vorjahr <sup>1</sup> |                            |                            |                                  | Änderung   |
|------------------------|-------------|----------------------------|----------------------------|------------------|----------------------------------|----------------------|----------------------------|----------------------------|----------------------------------|------------|
|                        | Gruppe      | Rück-<br>versiche-<br>rung | Erst-<br>versiche-<br>rung | Munich<br>Health | Segment-<br>Diversifi-<br>kation | Gruppe               | Rück-<br>versiche-<br>rung | Erst-<br>versiche-<br>rung | Segment-<br>Diversifi-<br>kation | Gruppe     |
| Mrd. €                 |             |                            |                            |                  |                                  |                      |                            |                            |                                  |            |
| Schaden/Unfall         | 8,9         | 8,8                        | 0,6                        | -                | -0,5                             | 7,6                  | 7,5                        | 0,5                        | -0,4                             | 1,3        |
| Leben/Gesundheit       | 5,1         | 3,9                        | 1,3                        | 0,7              | -0,8                             | 3,7                  | 3,2                        | 0,9                        | -0,4                             | 1,4        |
| Markt                  | 9,9         | 5,5                        | 7,9                        | -                | -3,5                             | 6,8                  | 4,0                        | 5,3                        | -2,5                             | 3,1        |
| Kredit                 | 4,5         | 3,4                        | 1,2                        | -                | -0,1                             | 3,1                  | 2,4                        | 0,7                        | -                                | 1,4        |
| Operationelle Risiken  | 1,6         | 1,3                        | 0,5                        | 0,1              | -0,3                             | 1,5                  | 1,3                        | 0,5                        | -0,3                             | 0,1        |
| <b>Summe</b>           | <b>30,0</b> | <b>22,9</b>                | <b>11,5</b>                | <b>0,8</b>       | <b>-5,2</b>                      | <b>22,7</b>          | <b>18,4</b>                | <b>7,9</b>                 | <b>-3,6</b>                      | <b>7,3</b> |
| Diversifikationseffekt | -9,3        | -8,1                       | -2,0                       | -                | -                                | -5,3                 | -4,9                       | -1,2                       | -                                | -4,0       |
| <b>Gesamt</b>          | <b>20,7</b> | <b>14,8</b>                | <b>9,5</b>                 | <b>0,8</b>       | <b>-4,4</b>                      | <b>17,4</b>          | <b>13,5</b>                | <b>6,7</b>                 | <b>-2,8</b>                      | <b>3,3</b> |

<sup>1</sup> Munich Health wird ab 2010 separat ausgewiesen. Die Vorjahreswerte wurden nicht angepasst.

Erhöhung des  
ökonomischen Risikokapitals um  
3,3 Milliarden €

Die Tabelle zeigt das ökonomische Risikokapital von Munich Re und ihrer Risikokategorien zum 31. Dezember 2010. Im Lauf des vergangenen Jahres erhöhte sich das ökonomische Risikokapital um 3,3 Milliarden €. Folgende Effekte trugen dazu bei:

- // Das ökonomische Risikokapital für die Risikokategorie **Schaden/Unfall**, das auch die Kreditrückversicherung sowie das Kautionsgeschäft enthält, stieg um 1,3 Milliarden €. Wesentliche Einflüsse sind das gegenüber dem Vorjahr erhöhte Exposure in fast allen Naturkatastrophen-Szenarien, auch aufgrund des schwächer gewordenen Euro, sowie einer Veränderung der Platzierung der externen Retrozessionen.
- // Das ökonomische Risikokapital für das **Lebens- und Gesundheitsgeschäft** stieg um 1,4 Milliarden €. Ursächlich für den Anstieg sind insbesondere das Portfoliowachstum im Lebensrückversicherungsgeschäft, Währungseffekte und das gesunkene Zinsniveau in den USA, Kanada und Europa.
- // Das ökonomische Risikokapital für **Markttrisiken** stieg um 3,1 Milliarden €. Gründe hierfür sind die erhöhte Aktienquote nach Berücksichtigung von Derivaten und das höhere Zinsrisiko in der Erstversicherung, hauptsächlich verursacht durch die niedrigen Zinsen.
- // Das ökonomische Risikokapital für die **Kreditrisiken** stieg um 1,4 Milliarden €. Ausschlaggebend für diesen Anstieg ist die erhöhte, marktinduzierte Einschätzung von Kreditrisiken, die sich beispielsweise in niedrigeren Ratings niederschlägt. In der Lebenserstversicherung führen geringere Risikopuffer (zukünftige Überschussbeteiligungen) zu einer verstärkten Risikoübernahme des Versicherers und damit zu einem Anstieg des ausgewiesenen Kreditrisikos.

- // Bei der Ermittlung des ökonomischen Risikokapitalbedarfs für das **operationelle Risiko** verwendeten wir – wie im vergangenen Jahr – Szenarien. Diese Szenarien erarbeiteten verschiedene Expertenteams der Gruppe; sie werden jährlich im Rahmen des IKS Review (siehe Seite 119 f.) überarbeitet und verfeinert.
- // Der **Diversifikationseffekt** zwischen den Risikokategorien Schaden/Unfall, Leben/Gesundheit, Markt, Kredit und Operationelles Risiko stieg um 4,0 Milliarden €. Grund hierfür ist vor allem die um 7,3 Milliarden € auf 30,0 Milliarden € gestiegene einfache Summe der einzelnen Risikokategorien sowie reduzierte (Tail-)Abhängigkeiten zwischen den Risikokategorien. (Tail-)Abhängigkeiten werden durch bilanzübergreifende Szenarien geschätzt, die jährlich auf Basis des aktuellen Risikoprofils evaluiert werden. Die Segmentdiversifikation stieg in den Risikokategorien Markt und Leben/Gesundheit deutlich an. Die Erhöhung im Marktrisiko resultiert im Wesentlichen aus dem gestiegenen Zinsrisikoanteil in den Segmenten Rück- und Erstversicherung. Im Leben/Gesundheit-Risiko sind vor allem die Abbildung des Segments Munich Health sowie das erhöhte Risikokapital in den Segmenten Rück- und Erstversicherung für die Steigerung des Diversifikationseffekts verantwortlich.

### Schaden/Unfall

Wie dargestellt steuert Munich Re ihre Risikoexponierung aktiv. Hierzu gehört, dass wir unsere Exponierung begrenzen, zum Beispiel indem wir Naturkatastrophenrisiken limitieren und budgetieren. Dafür entwickeln unsere Experten Szenarien für mögliche Naturereignisse, die naturwissenschaftliche Faktoren, Eintrittswahrscheinlichkeit und potenzielle Schadenhöhe berücksichtigen. Ausgehend von diesen Modellen werden die Auswirkungen verschiedener Ereignisse auf das Portfolio von Munich Re ermittelt und letztlich in Form eines stochastischen Modells mathematisch erfasst. Diese Modelle dienen als Grundlage der ERC-Berechnung für die Kategorie Groß- und Kumulschäden, die neben Naturgefahrenszenarien auch mögliche von Menschen verursachte Schäden enthält, sowie der Limitierung und Budgetierung von Kumulschäden.

Im Rahmen der quartärlchen ERC-Berechnungen werden die Exponierungen des Rückversicherungssegments aktualisiert; diese Daten nutzen wir dann für die Anpassung der stochastischen Modelle der Naturgefahren. Dabei wird die aktuelle Limitauslastung (auch Budgetverbrauch) durch einen Bottom-up-Prozess bestimmt. Da ihr Portfolio stabiler ist, wird die Exponierung von ERGO nur einmal jährlich aktualisiert.

#### Größte Naturgefahren- exponierung im Szenario „Atlantic Hurricane“

Die größte Naturgefahrenexponierung besteht für Munich Re mit 3,3 Milliarden € (Value-at-Risk zur Wiederkehrperiode von 200 Jahren) im Selbstbehalt derzeit im Szenario „Atlantic Hurricane“. Unsere Exponierung gegenüber europäischen Stürmen haben wir anhand der von uns aufgesetzten Szenarien mit 2,9 Milliarden € im Selbstbehalt quantifiziert.

Folgende Grafiken zeigen, wie wir unsere Exponierung gegenüber den beiden Spitzenszenarien bei einer Wiederkehrperiode von 200 Jahren einschätzen:

#### Atlantic Hurricane

aggregierter VaR (Wiederkehrperiode 200 Jahre)  
Mrd. € (vor Steuern)

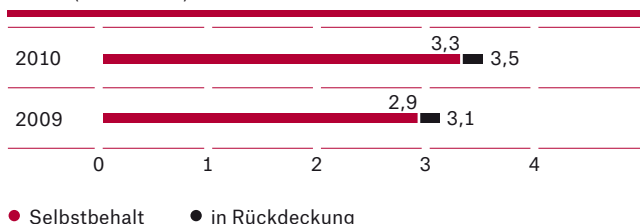

#### Sturm Europa

aggregierter VaR (Wiederkehrperiode 200 Jahre)  
Mrd. € (vor Steuern)

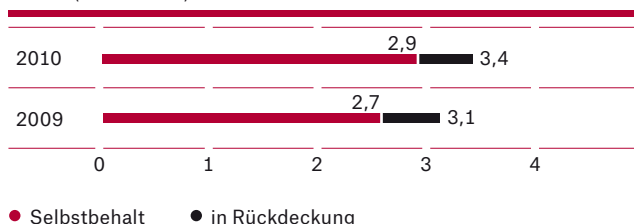

Das Exposure steigt bei beiden Szenarien auch aufgrund der Veränderung der Platzierung der externen Retrozession, beim Szenario „Atlantic Hurricane“ kommt der gegenüber dem US-Dollar schwächer gewordenen Euro hinzu.

Das versicherungstechnische Risikokapital für Schaden/Unfall setzt sich folgendermaßen aus den zwei Komponenten Basisschäden sowie Groß- und Kumulschäden zusammen:

**Ökonomisches Risikokapital (ERC) Schaden/Unfall**

| Mrd. €                    | 31.12.2010  |                            |                            |                                  | Vorjahr     |                            |                            |                                  | Änderung   |
|---------------------------|-------------|----------------------------|----------------------------|----------------------------------|-------------|----------------------------|----------------------------|----------------------------------|------------|
|                           | Gruppe      | Rück-<br>versiche-<br>rung | Erst-<br>versiche-<br>rung | Segment-<br>Diversifi-<br>kation | Gruppe      | Rück-<br>versiche-<br>rung | Erst-<br>versiche-<br>rung | Segment-<br>Diversifi-<br>kation | Gruppe     |
| Basisschäden              | 4,1         | 4,0                        | 0,5                        | -0,4                             | 4,2         | 4,1                        | 0,5                        | -0,4                             | -0,1       |
| Groß- und<br>Kumulschäden | 8,4         | 8,2                        | 0,3                        | -0,1                             | 6,9         | 6,8                        | 0,2                        | -0,1                             | 1,5        |
| <b>Summe</b>              | <b>12,5</b> | <b>12,2</b>                | <b>0,8</b>                 | <b>-0,5</b>                      | <b>11,1</b> | <b>10,9</b>                | <b>0,7</b>                 | <b>-0,5</b>                      | <b>1,4</b> |
| Diversifikationseffekt    | -3,6        | -3,4                       | -0,2                       | -                                | -3,5        | -3,4                       | -0,2                       | -                                | -0,1       |
| <b>Gesamt</b>             | <b>8,9</b>  | <b>8,8</b>                 | <b>0,6</b>                 | <b>-0,5</b>                      | <b>7,6</b>  | <b>7,5</b>                 | <b>0,5</b>                 | <b>-0,4</b>                      | <b>1,3</b> |

Schäden, deren Aufwand auf Gruppenebene 10 Millionen € übersteigt, werden als Großschäden bezeichnet. Kumulschäden sind Schäden, die mehr als ein Risiko (auch mehrere Sparten) betreffen. Alle anderen Schäden bezeichnen wir als Basisschäden.

Der signifikante Anstieg des ökonomischen Risikokapitals für **Groß- und Kumulschäden** ist vor allem auf den bereits beschriebenen Zuwachs bei den Spitzenszenarien „Sturm Europa“ und „Atlantic Hurricane“ zurückzuführen. Zudem haben wir die Platzierung unserer externen Retrozessionen verändert. Bei den Basisschäden hat die jährliche Neuanpassung der Modelle zu einem nahezu unveränderten Bedarf an ökonomischem Risikokapital geführt.

Für **Basisschäden** ermitteln wir das Risiko einer Nachreservierung für Bestandsrisiken innerhalb eines Jahres (Reserverisiko) sowie das Risiko einer Untertarifierung (Beitragsrisiko). Dazu nutzen wir analytische Methoden, die auf Standard-Reservierungsverfahren aufsetzen, aber den Einjahreshorizont berücksichtigen. Das Risiko aus Groß- und Kumulschäden bilden die bereits beschriebenen Modelle ab, wobei die Modelle für Großschäden anhand historischer Schadenerfahrungen kalibriert werden.

Als weltweit agierender Risikoträger können wir die Einzelrisiken breit mischen und streuen; so reduzieren wir die Volatilität der Summe aller versicherungstechnischen Zahlungen erheblich und steigern die Wertschöpfung aller Geschäftsbereiche deutlich.

**Leben/Gesundheit**

Im Lebens- und Krankenversicherungsgeschäft berücksichtigt die Risikomodellierung sowohl kurz- als auch langfristig wirksame adverse Entwicklungen bei den Risikotreibern, die den Wert des Geschäfts beeinflussen.

Als kurzfristig wirksame adverse Entwicklungen modellieren wir neben dem einfachen Zufallsrisiko höherer Schadenbelastungen im Einzeljahr vor allem die Überschäden, die sich durch seltene, aber kostenintensive Ereignisse wie Pandemien ergeben könnten.

Speziell die Produkte der Lebensversicherung sowie ein Großteil unseres Krankenerstversicherungsgeschäfts zeichnen sich jedoch durch ihre Langfristigkeit und den über die Gesamtlaufzeit der Verträge verteilten Ergebnisausweis aus. Für derart langlaufende Geschäftsportfolios weisen wir einen Bestandswert und Wertsensitivitäten im Konzernanhang unter (37) Risiken aus dem Lebens- und Krankenversicherungsgeschäft aus. Dabei können langfristig wirksame adverse Entwicklungen von Risikotreibern, etwa mögliche Änderungen der prognostizierten Sterblichkeits- und Invalidisierungstrends im versicherten Portfolio, zu einer Wertsenkung führen (Trendrisiken). Im Konzernanhang (37) wird dargelegt, wie die Werte reagieren, wenn sie für einzelne Risikotreiber unter speziell veränderten Annahmen berechnet werden. Die Risikomodellierung hinterlegt dann die einzelnen Annahmeänderungen mit Wahrscheinlichkeiten und erzeugt somit eine vollständige stochastische Gewinn- und Verlustverteilung.

### Marktrisiken

Marktrisiken werden durch eine szenariobasierte Simulationsrechnung bestimmt. Die Szenarien werden mit langjährigen Datenreihen kalibriert. Die Risikokategorie Marktrisiko lässt sich dabei in die Unterkategorien Aktienrisiko, Allgemeines Zinsrisiko, Spezifisches Zinsrisiko, Immobilienrisiko und Währungsrisiko unterteilen. Das Allgemeine Zinsrisiko beinhaltet dabei implizite Volatilitätsrisiken sowie Inflationsrisiken.

### Ökonomisches Risikokapital (ERC) Markt

|                         | 31.12.2010  |                            |                            |                                  | Vorjahr     |                            |                            |                                  | Änderung   |
|-------------------------|-------------|----------------------------|----------------------------|----------------------------------|-------------|----------------------------|----------------------------|----------------------------------|------------|
|                         | Gruppe      | Rück-<br>versiche-<br>rung | Erst-<br>versiche-<br>rung | Segment-<br>Diversifi-<br>kation | Gruppe      | Rück-<br>versiche-<br>rung | Erst-<br>versiche-<br>rung | Segment-<br>Diversifi-<br>kation | Gruppe     |
| Mrd. €                  |             |                            |                            |                                  |             |                            |                            |                                  |            |
| Aktienrisiko            | 5,5         | 3,8                        | 1,8                        | -0,1                             | 3,8         | 2,1                        | 1,7                        | -                                | 1,7        |
| Allgemeines Zinsrisiko  | 5,6         | 4,0                        | 6,3                        | -4,7                             | 4,0         | 3,1                        | 4,5                        | -3,6                             | 1,6        |
| Spezifisches Zinsrisiko | 3,6         | 1,8                        | 2,6                        | -0,8                             | 2,2         | 1,5                        | 1,3                        | -0,6                             | 1,4        |
| Immobilienrisiko        | 2,0         | 1,1                        | 1,0                        | -0,1                             | 1,8         | 1,0                        | 0,8                        | -                                | 0,2        |
| Währungsrisiko          | 0,6         | 0,6                        | 0,2                        | -0,2                             | 2,3         | 2,2                        | 0,1                        | -                                | -1,7       |
| <b>Summe</b>            | <b>17,3</b> | <b>11,3</b>                | <b>11,9</b>                | <b>-5,9</b>                      | <b>14,1</b> | <b>9,9</b>                 | <b>8,4</b>                 | <b>-4,2</b>                      | <b>3,2</b> |
| Diversifikationseffekt  | -7,4        | -5,8                       | -4,0                       | -                                | -7,3        | -5,9                       | -3,1                       | -                                | -0,1       |
| <b>Gesamt</b>           | <b>9,9</b>  | <b>5,5</b>                 | <b>7,9</b>                 | <b>-3,5</b>                      | <b>6,8</b>  | <b>4,0</b>                 | <b>5,3</b>                 | <b>-2,5</b>                      | <b>3,1</b> |

### Aktienrisiko

Der Marktwert der Aktien einschließlich der Beteiligungen belief sich am 31. Dezember 2010 auf 7,9 (5,2) Milliarden €. Zu diesem Zeitpunkt lag die Aktienquote auf Marktwertbasis vor Berücksichtigung von Derivaten bei 4,0 (2,8) %, nach Berücksichtigung von Derivaten bei 4,4 (2,8) %. Dieser Anstieg im Vergleich zum Vorjahr ist der Grund für das höhere Risikokapital für Aktien.

### Zinsrisiken

In der Erstversicherung ist der Anstieg der Zinsrisiken überwiegend auf den Rückgang der langfristigen Zinsen und den gleichzeitigen Anstieg der impliziten Zinsvolatilitäten zurückzuführen.

In der Rückversicherung beträgt das Zinsänderungsrisiko der festverzinslichen Kapitalanlagen in Einheiten von **modifizierter Duration** (Zinssatzsensitivität) 5,9, während die modifizierter Duration der Verbindlichkeiten 3,4 ausmacht. Die Sensitivität der verfügbaren Eigenmittel (siehe nächster Abschnitt) zu einem parallelen Anstieg aller Zinskurven um einen Basispunkt (sogenannter DV01) beträgt -15 Millionen €. Dies bedeutet, dass sich die verfügbaren Eigenmittel bei der angegebenen Parallelverschiebung der Zinskurve um den angegebenen Betrag verändern. Der Anstieg des Zinsrisikos in der Rückversicherung ist im Wesentlichen auf den größeren Abstand der Duration von Kapitalanlagen und Verbindlichkeiten zurückzuführen.

In der Erstversicherung weisen die festverzinslichen Kapitalanlagen eine modifizierte Duration von 6,6 und die Verpflichtungen eine von 8,3 auf. Diese Exponierung zu fallenden Zinsen stammt weitgehend aus den langfristigen Optionen und Garantien des Lebensversicherungsgeschäfts. Das umfassende Zinsrisiko-Absicherungsprogramm, das erstmals 2005 umgesetzt wurde, verringerte diese Zinsrisiken maßgeblich. Die Sensitivität der verfügbaren Eigenmittel (siehe nächster Abschnitt) zu einem parallelen Anstieg aller Zinskurven um einen Basispunkt (DV01) beträgt 19 Millionen €. Die unterschiedliche Exponierung in Rück- und Erstversicherung neutralisiert sich somit teilweise auf Gruppenebene.

### Währungsrisiko

Unsere ausländischen Tochterunternehmen sind aus regulatorischen Gründen verpflichtet, Eigenkapital in lokaler Währung vorzuhalten. Für den nicht fungiblen Teil dieser Eigenkapitalia wird auf Gruppenebene kein Währungsrisiko mehr gegenüber dem Euro angesetzt, wodurch das Währungsrisiko sinkt.

### Kreditrisiken

Kreditrisiken ermittelt Munich Re mit einem Portfoliomodell. Es berücksichtigt sowohl Marktwertänderungen aufgrund von Bonitätsänderungen als auch Ausfälle von Schuldnern. Die Kalibrierung des Modells erfolgt hierbei über einen Kreditzyklus.

Der Marktwert der festverzinslichen Wertpapiere und Darlehen betrug zum 31. Dezember 2010 163,9 Milliarden € und entsprach 83,4 % des Marktwerts der Kapitalanlagen von Munich Re. Diese Papiere machten damit den größten Teil der Bestände aus. Eine detaillierte Darstellung der festverzinslichen Wertpapiere und Darlehen einschließlich der kurzfristigen Anlagemittel auf Marktwertbasis finden Sie auf Seite 97. Die Ratingangaben zu diesen Kapitalanlagen können Sie im Konzernanhang unter (5) Darlehen, (6) Sonstige Wertpapiere, gehalten bis zur Endfälligkeit, (8) Sonstige Wertpapiere, jederzeit veräußerbar sowie (9) Sonstige Wertpapiere, erfolgswirksam zum Zeitwert bewertet nachlesen.



Das ausgefeilte Limitsystem und unsere gut eingeführten Administrationssysteme haben sich auch während der Turbulenzen auf den Finanzmärkten bewährt und gewährleisten ein leistungsfähiges und erfolgreiches Management der Kapitalanlagen.

Zum 31. Dezember 2010 waren unsere in Rückdeckung gegebenen Rückstellungen gegenüber Rückversicherern bzw. Retrozessionären folgenden Ratingklassen zugeordnet:

#### In Rückdeckung gegebene versicherungstechnische Rückstellungen nach Rating

| %                     | 31.12.2010 | Vorjahr |
|-----------------------|------------|---------|
| AAA                   | 3,4        | 11,0    |
| AA                    | 35,5       | 29,8    |
| A                     | 54,1       | 53,1    |
| BBB und niedriger     | 1,5        | 1,2     |
| Kein Rating verfügbar | 5,5        | 4,9     |

Die Verschiebungen beruhen hauptsächlich auf der Veränderung des Ratings weniger Rückversicherer bzw. Retrozessionäre.

## Verfügbare Eigenmittel

### Verfügbare Eigenmittel

Anstieg der verfügbaren Eigenmittel um 1,2 Milliarden €

Dem ökonomischen Risikokapital als Anforderung an den Kapitalbedarf von Munich Re stellen wir die verfügbaren Eigenmittel gegenüber, mit denen Schadenereignisse bedeckt werden können, die höher ausfallen als erwartet. Diese verfügbaren Eigenmittel errechnen wir als Summe des sogenannten ökonomischen Eigenkapitals und des verfügbaren Hybridkapitals. Das ökonomische Eigenkapital wiederum basiert im Wesentlichen auf dem IFRS-Eigenkapital von Munich Re, wird jedoch um verschiedene ökonomisch angemessene Berichtigungen adjustiert.

Die Bewertungsreserven enthalten Anpassungen nach Steuer zu Positionen im Schaden/Unfall-Bereich, die gemäß IFRS nicht zum „Fair Value“ bewertet werden, insbesondere zu Grundstücken und Bauten sowie zu Darlehen. Bei den Bewertungsanpassungen Schaden/Unfall und Leben/Gesundheit nehmen wir unterschiedliche Adjustierungen vor: Im Schaden/Unfall-Bereich zinsen wir die unter IFRS nicht oder nicht nach streng ökonomischen Gesichtspunkten diskontierten Rückstellungen ökonomisch ab, berichtigt um sich daraus ergebende Steuereffekte. Diesen Rückstellungen fügen wir eine nach ökonomischen Grundsätzen hergeleitete Risikomarge hinzu. Für Geschäft, für das wir einen marktkonsistenten Embedded Value (MCEV) ausweisen, betrachten wir diesen als werthaltiges, zur Abfederung von Risiken bereitstehendes Kapital. Er ist nur teilweise im IFRS-Eigenkapital enthalten, deshalb wird eine Korrektur vorgenommen. Demgegenüber sind aktivierte Geschäfts- oder Firmenwerte und sonstige immaterielle Vermögenswerte zwar Teil des IFRS-Eigenkapitals der Gruppe. Da angenommen werden muss, dass diese nach einem schweren Schadenergebnis unter Umständen nicht mehr werthaltig sind, ziehen wir sie bei der Bestimmung der verfügbaren Eigenmittel, unter Berücksichtigung von Steuereffekten, ab. Gleichermaßen verfahren wir mit aktiven latenten Steuern auf Verlustvorträge nach IFRS, sofern sie nicht durch einen Überhang an passiven latenten Steuern bei der jeweiligen Gesellschaft gedeckt sind.

### Verfügbare Eigenmittel

| Mrd. €                                                                           | 31.12.2010  | Vorjahr     | Änderung   |
|----------------------------------------------------------------------------------|-------------|-------------|------------|
| IFRS-Eigenkapital                                                                | 23,0        | 22,3        | 0,7        |
| Bewertungsreserven                                                               | 0,9         | 0,9         | -          |
| Bewertungsanpassungen Schaden/Unfall und Leben/Gesundheit                        | 5,1         | 5,2         | -0,1       |
| Geschäfts- oder Firmenwert und sonstige immaterielle Vermögenswerte <sup>1</sup> | -4,1        | -4,6        | 0,5        |
| Steuern und Sonstiges <sup>2</sup>                                               | -0,1        | -0,2        | 0,1        |
| <b>Ökonomisches Eigenkapital</b>                                                 | <b>24,8</b> | <b>23,6</b> | <b>1,2</b> |
| Hybridkapital                                                                    | 4,8         | 4,8         | -          |
| <b>Verfügbare Eigenmittel</b>                                                    | <b>29,6</b> | <b>28,4</b> | <b>1,2</b> |

<sup>1</sup> Methodenänderung: Der Wert zum 31.12.2010 ist unter Berücksichtigung von Steuereffekten dargestellt; die Vorjahreswerte wurden nicht angepasst.

<sup>2</sup> Methodenänderung: Im Wert zum 31.12.2010 sind nur aktive latente Steuern auf Verlustvorträge nach IFRS, die nicht durch einen Überhang an passiven latenten Steuern bei der jeweiligen Gesellschaft gedeckt sind, abgezogen; die Vorjahreswerte wurden nicht angepasst.

Der **ökonomische Kapitalpuffer** zeigt, um welchen Betrag die verfügbaren Eigenmittel das ökonomische Risikokapital übersteigen. Der ökonomische Solvabilitätskoeffizient ergibt sich als Quotient der verfügbaren Eigenmittel (abzüglich angekündigter, aber noch nicht vollzogener Kapitalmaßnahmen wie des Aktienrückkaufs 2010/2011 und der Dividendenausschüttung für das Geschäftsjahr 2010) und des ökonomischen Risikokapitals. Im Zeitverlauf stellt sich die Situation so dar:

### Ökonomische Solvabilitätskoeffizient-Komponenten

|                                                                |        | 31.12.2010 | Vorjahr | Änderung |
|----------------------------------------------------------------|--------|------------|---------|----------|
| (A) Ökonomisches Eigenkapital                                  | Mrd. € | 24,8       | 23,6    | 1,2      |
| (B) Verfügbare Eigenmittel                                     | Mrd. € | 29,6       | 28,4    | 1,2      |
| (C) Verfügbare Eigenmittel (nach Dividende und Aktienrückkauf) | Mrd. € | 28,1       | 26,7    | 1,4      |
| (D) Ökonomisches Risikokapital                                 | Mrd. € | 20,7       | 17,4    | 3,3      |
| (B) minus (D): Ökonomischer Kapitalpuffer                      | Mrd. € | 8,9        | 11,0    | -2,1     |
| (C) dividiert durch (D): Ökonomischer Solvabilitätskoeffizient | %      | 136        | 153     |          |

Der **ökonomische Solvabilitätskoeffizient** von 136 (153) % bringt die Kapitalstärke von Munich Re zum Ausdruck. Das ökonomische Risikokapital von Munich Re, das zum obigen Solvabilitätskoeffizienten führt, entspricht dem 1,75-Fachen des unter Solvency II auf Basis des internen Risikomodells voraussichtlich notwendigen Kapitals.

Für die Berechnung des RoRaC (siehe Definition Seite 58) ist ferner das „zusätzlich vorhandene ökonomische Eigenkapital“ relevant. Es bestimmt sich als Differenz des ökonomischen Eigenkapitals und des ökonomischen Risikokapitals und beträgt zum 31. Dezember 2010 4,1 (6,2) Milliarden €.

### Regulatorische Solvenzanforderungen

Über die regulatorischen Solvenzanforderungen berichten wir auf Seite 106 f.

## Ausgewählte Risikokomplexe

### Übergreifende Kumulrisiken

#### Auswirkungen der Finanzkrise

Ein Beispiel für übergreifende Kumule sind die Folgen der weltweiten Finanzkrise.

Das Versicherungsgeschäft von Munich Re ist nach derzeitigem Kenntnisstand potenziell vor allem über die Haftpflichtbranchen der sogenannten Managerhaftung (D&O) und der Berufshaftpflicht (Professional Indemnity/PI) exponiert. Im Einzelnen kommen Haftungen aus behauptetem Fehlverhalten in Form von unzureichender Beratung, Missmanagement oder Organisationsverschulden bei Vertriebsorganisationen, Banken oder sonstigen Finanzintermediären in Betracht. Selbst wenn die Gerichte Ansprüche letztlich nicht zuerkennen würden, können bereits die unter Umständen mitversicherten Abwehrkosten beträchtlich sein. Da die Verfahren typischerweise sehr langwierig sind, wird es erst in mehreren Jahren letzte Klarheit über das Ausmaß der Schäden geben. Zur Jahreswende 2010/2011 lagen uns (Stand 31. Dezember 2010) vereinzelte, rein vorsorgliche Meldungen unserer Haftpflicht-Rückversicherungskunden vor. Diesen trugen wir ebenfalls vorbeugend Rechnung, indem wir angemessene Spätschadenrückstellungen bildeten.

Bei Versicherern entstehen Risiken aus der finanziellen Exponierung gegenüber einer anderen Partei, einerseits natürlich auf der Passivseite der Bilanz bei unseren klassischen Rückversicherungsaktivitäten, also dem Warenkredit- und Kautionsversicherungsgeschäft. Andererseits müssen wir, gerade als Versicherer und damit große Kapitalsammelstelle, bei der Kapitalanlage bestimmte Kreditrisiken in Kauf nehmen. Offensichtlich ist das bei Unternehmensanleihen. Doch auch die in der Vergangenheit scheinbar sicheren Staatsanleihen beinhalten Risiken. Vor allem in der Personenerstversicherung nutzen wir Staatsanleihen zur laufzeit- und währungskongruenten Besicherung unserer versicherungstechnischen Verbindlichkeiten.

Um auf das gestiegene Risiko bei bestimmten staatlichen Papieren zu reagieren, haben wir unsere internen Steuerungssysteme für Länderrisiken verändert: So wurden zum Beispiel im Kontrahentenlimitsystem Limite für einzelne Staaten nach unten gesetzt und vermehrt Marktindikatoren im Risikomanagement-Prozess verankert. In unserem internen Risikomodell berechnen und allozieren wir auch für sehr gut geratete Staatsanleihen Risikokapital. Von unserem Bestand an Staatsanleihen oder Instrumenten mit Haftung öffentlicher Institutionen entfallen rund 7 (6) % auf italienische, 3 (3) % auf spanische, 2 (3) % auf irische, 1 (3) % auf griechische sowie 1 (1) % auf portugiesische Emittenten.

#### Pandemie

Ein weiteres Beispiel für übergreifende Kumule ist der Fall einer großen Pandemie. Hier ist Munich Re (wie andere Unternehmen der Versicherungswirtschaft) Risiken aus deutlich erhöhter Mortalität und Morbidität sowie Verwerfungen auf den Kapitalmärkten ausgesetzt. Wir begegnen diesem Risiko, indem wir unsere gesamte Exponierung eingehend analysieren (Szenarioanalyse), geeignete Limite definieren und unsere Risikostruktur durch Überwälzung des Risikos optimieren – beispielsweise dadurch, dass wir das Pandemieanleiheprogramm „Nathan“ aufgelegt haben.

### Klimawandel

Wir können die bekannten Risiken unseres Bestands nach derzeitigem Kenntnisstand angemessen beurteilen. Allerdings sind die wissenschaftlichen Forschungsgebiete zu Klimawandelfragen komplex und das politisch-regulatorische Umfeld entwickelt sich dynamisch; daher sind wir zur Vorsicht gezwungen, wenn wir neue oder neu aufkommende Risiken identifizieren und darstellen. Für sie verwenden wir einen fachübergrei-

Klimawandel –  
Risiko und Gelegenheit

fenden Ansatz, der – je nach Risikosituation – das relevante Wissen und die Erfahrung unserer Naturwissenschaftler, Underwriting-Experten, Juristen, Ökonomen, Soziologen und Aktuare nutzt und bündelt.

Der Klimawandel ist eines der größten Änderungsrisiken für die Versicherungswirtschaft. Im Corporate Climate Centre von Munich Re entwickeln wir hierzu einen ganzheitlichen strategischen Ansatz und analysieren und bewerten dieses Risiko. Die Ergebnisse stehen allen Geschäftsbereichen und dem Asset-Liability-Management zur Verfügung. Veränderte physische Umweltbedingungen und neue regulatorische Rahmenbedingungen, die sich aus dem Klimawandel ergeben, öffnen uns jedoch auch viele Geschäftschancen. Auf der Grundlage unseres Wissens, das wir uns über Jahrzehnte erarbeitet haben, nutzen wir diese Chancen: zum Beispiel mit neuen Versicherungsprodukten für Technologien im Bereich erneuerbarer Energien.

## Neue und komplexe Risiken

Unser **Risikofrüherkennungssystem** erfasst unter anderem sogenannte Emerging Risks – also Risiken, die entstehen, weil sich Rahmenbedingungen (etwa rechtliche, soziopolitische oder naturwissenschaftlich-technische) ändern, und die deshalb noch nicht erfasste oder nicht erkannte Auswirkungen auf unser Portfolio haben können. Bei ihnen ist die Unsicherheit in Bezug auf Schadenausmaß und Eintrittswahrscheinlichkeit naturgemäß sehr hoch.

Trends und schwache Signale identifizieren wir auf vielfältige Weise, zum Beispiel mithilfe einer systematischen Trendforschung, unseres Knowledge-Managements oder regelmäßiger strukturierter Diskussionen im „Emerging Risks Think Tank“. Um Emerging Risks zu verstehen, betrachtet eine Gruppe von Experten die Themen aus verschiedenen Blickwinkeln. Sie leiten denkbare Szenarien ab und analysieren deren mögliche Auswirkungen auf Munich Re. Dabei geht es um Interdependenzen zwischen unterschiedlichen Risiken sowie um weitergehende Aspekte, die – auch indirekt – mit den Emerging Risks zusammenhängen. Kooperationen mit externen Partnern ergänzen das interne Frühwarnsystem. Ein Beispiel dafür ist unsere Zusammenarbeit mit dem US RAND Institute for Civil Justice bei Sammelklagen.

Durch die Zunahme globaler Abhängigkeiten und durch die rasche Verbreitung technologischer Innovationen treten vermehrt Ereignisse auf, deren Auswirkungen sich mit klassischen Verfahren der Szenariobildung nur bedingt erkennen lassen. Ein Beispiel war 2010 der Ausbruch des Vulkans Eyjafjallajökull. Die Unterbrechung des Flugverkehrs über großen Teilen Europas führte neben Einschränkungen im Personenverkehr auch zu Ausfällen in der Luftfracht und damit mittelbar zu Betriebsunterbrechungen im verarbeitenden Gewerbe. Derartige Ereignisketten werden in der Zukunft wichtiger werden. Mittels eines systembasierten Ansatzes analysieren wir auch Abhängigkeiten in komplexen Risiken. Ziel ist es, mögliche Schadenkaskaden transparent zu machen und die Gefahr von unangemessenen Vereinfachungen in der Szenariobildung zu reduzieren.

## Rechtliche und aufsichtsrechtliche Risiken

Aufgrund unserer globalen Tätigkeit unterliegen wir aufsichtsrechtlichen Regelungen verschiedenster Länder. Hieraus können aufsichtsrechtliche Risiken entstehen. 2004 leitete Eliot Spitzer, Generalstaatsanwalt von New York, eine Untersuchung sogenannter Placement- bzw. Market-Service-Agreements (PSA) ein, welche die Versicherungswirtschaft einsetzt. Daraufhin befassten sich auch andere bundesstaatliche US-Aufsichtsbehörden und Aufsichtsbehörden anderer Länder damit. Munich Re wurde in Zusammenhang mit diesen Untersuchungen um Auskunft gebeten und arbeitete uneingeschränkt mit den Behörden zusammen. In verschiedenen PSA-Sammelklagen US-amerikanischer Versicherungsnehmer wurden zudem Unternehmen von Munich Re zusammen mit anderen Versicherern und Maklern als Beklagte benannt. Munich Re verteidigt sich weiter in der gebotenen Weise gegen die Vorwürfe.

2004 stellten die US-Finanzaufsichtsbehörde Securities and Exchange Commission (SEC) und die Generalstaatsanwaltschaft New York Nachforschungen zu bestimmten Loss-Mitigation-Versicherungsprodukten an. Anschließend richteten mehrere Behörden in den USA sowie in anderen Ländern formelle und informelle Anfragen an Munich Re und einige ihrer Tochtergesellschaften. Munich Re unterstützte die Untersuchungen durch uneingeschränkte Zusammenarbeit.

Die spanische Kartellbehörde (CNC-Comisión Nacional de la Competencia) hat im November 2009 gegen mehrere Erst- und Rückversicherer, darunter die Münchener Rück Surcursal España y Portugal, Bußgeldbescheide erlassen wegen des Vorwurfs wettbewerbsbeschränkender Absprachen im spanischen Decenale-Geschäft (Pflichtversicherung für Gewährleistungsansprüche bei Bauleistungen). Die Münchener Rück Surcursal España y Portugal legte gegen die Entscheidung der CNC im Dezember 2009 Berufung ein in der Erwartung, dass die nächsthöhere Instanz zu einer anderen Bewertung der Sachlage kommen wird.

Nach dem Scheitern des bundesstaatlichen Gesetzgebungsverfahrens zum Fairness in Asbestos Injury Resolution Act im Februar 2006 wurden in mehreren US-Bundesstaaten Gesetzesinitiativen (Tort Reform) verabschiedet, die sich positiv auf die Regulierung von Asbestschäden auswirken können. Aufgrund von Enthüllungen über häufig fragwürdige Asbesterkrankungsdiagnosen und daraus folgenden Klagen befassen sich einige Untersuchungsausschüsse mit der Aufklärung der Umstände. Ähnlich fragwürdige Praktiken wurden bei Silikoseklagen aufgedeckt, die auch für die US-Asbestproblematik wichtig sind. Diese Entwicklungen deuten darauf hin, dass sich die Rechtslage dazu in den USA positiv entwickelt. Ob und inwieweit dies die Schadenentwicklungen in der Assekuranz künftig vorteilhaft beeinflusst, lässt sich derzeit nicht sagen, zumal die Klägeranwaltschaft große Anstrengungen unternimmt, die Initiativen der Tort Reform zurückzudrängen. Zurzeit belasten uns noch immer zum Teil hohe Nachmeldungen für Schäden aus Asbesterkrankungen und ähnlichen Haftungskomplexen. Wir können zwar einerseits beobachten, dass die Zahl der Asbestklagen insgesamt rückläufig ist, die Anzahl schwerer Mesothelioma- und anderer Krebsfälle blieb in den vergangenen Jahren jedoch relativ konstant.

Die anhaltenden Diskussionen zum deutschen Gesundheitssystem könnten zu weiteren Veränderungen der gesetzlichen Rahmenbedingungen führen. Bei den rechtlichen Risiken ist insbesondere die sogenannte „Bürgerversicherung“ eine Bedrohung für die private Krankenversicherung. Durch den Einbezug aller Personen in die Versicherungspflicht der gesetzlichen Krankenversicherung würde die Bürgerversicherung zumindest das Neugeschäft der privaten Krankenversicherer in der Vollversicherung beenden. Verfassungsrechtliche Hürden sprechen gegen einen Einbezug der bereits privat Krankenversicherten. Wir beobachten dieses Risiko schon seit vielen Jahren und beziehen öffentlich zu den Nachteilen eines solchen Krankenversicherungssystems Stellung. Für die gesetzliche Pflegeversicherung gibt es mit der „Pflegebürgerversicherung“ analoge Vorschläge.

## Weitere Entwicklungen

Die künftigen regulatorischen Anforderungen an das Risikomanagement sind deutlicher geworden, da das Solvency-II-Projekt der Europäischen Union vorankam. Namentlich der Entwurf der Durchführungsbestimmungen der Solvency II Expert Group (SEG) schaffte mehr Klarheit. Nichtsdestotrotz bestehen weiterhin große Unsicherheiten hinsichtlich der zukünftigen Kalibrierung der Standard-Formel und der Anforderungen aus der zweiten und dritten Säule von Solvency II.

## Zusammenfassung

Die Leitungsgremien von Munich Re haben im Berichtsjahr in den definierten Prozessen die Risikotoleranz für die wesentlichen Risikokategorien explizit festgelegt und anhand von Kennzahlen beziffert. Die Risikotoleranz haben wir entlang der Gruppenhierarchie festgesetzt, dokumentiert und im Unternehmen kommuniziert. Die Risikoexponierungen wurden 2010 regelmäßig quantifiziert und mit der Risikotoleranz abgeglichen. Die Risikosituation von Munich Re halten wir daher für beherrschbar und kontrolliert.



## Ausblick

- ////////////////////
- // Trotz unsicherer wirtschaftlicher Rahmenbedingungen Chancen dank Finanzstärke und Lösungskompetenz
  - // Rückversicherung bleibt nach wie vor ein zukunftssträchtiges Geschäftsfeld
  - // ERGO forciert Vertriebskraft mit neuer Markenstrategie
  - // Erwartete Kapitalanlagerendite unter 4 %
  - // Langfristig ausgerichtetes Ergebnisziel einer risikoadjustierten Rendite (RoRaC) von 15 % nach Steuern über den Zyklus gilt unverändert
  - // Angestrebtes Konzernergebnis von etwa 2,4 Milliarden € für 2011
  - // Fortsetzung des Aktienrückkaufs mit halbiertem Volumen
  - // Dividendenvorschlag für 2010: 6,25 € je Aktie

Einschätzungen der kommenden Entwicklung unseres Unternehmens beruhen in erster Linie auf Planungen, Prognosen und Erwartungen. Somit spiegeln sich in der folgenden Einschätzung der Entwicklung von Munich Re allein unsere unvollkommenen Annahmen und subjektiven Ansichten wider. Falls sie nicht oder nicht vollständig eintreten, können wir selbstverständlich keine Haftung übernehmen.

### Überblick

Trotz einer weiterhin schwierigen Wirtschaftslage bieten sich uns vielfältige Chancen. Wachsende Kumulgefahren und tendenziell erhöhte regulatorische Anforderungen werden den Bedarf nach wirkungsvoller Risikoentlastung über Rückversicherung steigern. Wir sind aufgrund unseres Knowhows, unserer Lösungskompetenz und unserer Finanzkraft gut positioniert. Auch in der Erstversicherung erwarten wir eine stabile Entwicklung, allen voran in Leben. Der Vorsorgebedarf der Bevölkerung nimmt zu und muss verstärkt privat finanziert werden. In der Schaden- und Unfallerstversicherung erwarten wir vor allem Wachstum im internationalen Geschäft. Für Munich Health ergeben sich Chancen und Risiken aus der Gesundheitsreform in den USA und vielen vergleichbaren Initiativen in anderen Weltregionen.

### Wirtschaftliche Rahmenbedingungen und Konjunktur

Die wirtschaftlichen Rahmenbedingungen dürften 2011 von etwas geringerer konjunktureller Dynamik geprägt sein. Ob die zuletzt gestiegenen privaten Konsum- und Investitionsausgaben die auslaufenden staatlichen Konjunkturprogramme vollständig ersetzen können, bleibt ungewiss. Wir erwarten daher für die Weltwirtschaft ein leicht schwächeres Wachstum als im Vorjahr, was sich voraussichtlich dämpfend auf die Versicherungsnachfrage auswirken wird. Zudem ist davon auszugehen, dass die weiterhin bestehenden Unsicherheiten in Bezug auf die Stabilität des Finanzsystems und der Staatsfinanzen das Umfeld der Kapitalanlagen bestimmen werden.

In den Schwellenländern, vor allem in China und Indien, dürfte das Wachstum erneut deutlich stärker ausfallen als in den Industrieländern. In einigen Industrieländern dämpfen voraussichtlich hohe Arbeitslosigkeit und ein hoher Grad privater Verschuldung den privaten Konsum. Zudem sind in vielen Staaten im Rahmen der Haushaltskonsolidierung staatliche Ausgabenkürzungen geplant. Wir gehen davon aus, dass die Inflation in den meisten Industrieländern weiterhin niedrig bleiben und nur in einigen Schwellenländern ein höheres Niveau erreichen wird.

## Kapitalmärkte

Das anhaltende Wachstum sollte 2011 zu einem leichten Zinsanstieg bei deutschen und amerikanischen Staatsanleihen führen. Da wir nur geringfügige Leitzinserhöhungen erwarten, dürften die Zinsstrukturkurven relativ steil bleiben. Währungsentwicklungen werden angesichts der Staatsverschuldungsdebatte volatil bleiben. Die lockere Geldpolitik etlicher Industrieländer, das moderat positive Wachstum und die begrenzte Inflation bilden grundsätzlich ein positives Umfeld für Aktien.

## Versicherungswirtschaft

In der Europäischen Union steht die staatliche Aufsicht über Erst- und Rückversicherer aufgrund der geplanten Regelungen durch Solvency II vor tief greifenden Veränderungen. Voraussichtlich Anfang 2013 sollen die neuen Aufsichtsregeln in Kraft treten, die die Versicherungsunternehmen vor erhöhte Kapital-, Risikomanagement- und Berichtsanforderungen stellen werden. In Vorstudien untersucht die EU-Kommission, wie sich die quantitativen Risikokapitalvorschriften von Solvency II auf die betroffenen Unternehmen auswirken. Ungeachtet der noch ausstehenden Feinabstimmung wird Solvency II das Angebot von Versicherungsschutz sowie die Nachfrage beeinflussen. Dies eröffnet Munich Re neue Chancen in der Erst- wie in der Rückversicherung.

Auch bei der Bilanzierung von Versicherungsverträgen und Finanzinstrumenten in unserem Konzernabschluss sind umfassende Änderungen absehbar. So veröffentlichte im Juli 2010 das International Accounting Standards Board (IASB), das zuständige Londoner Gremium, den Entwurf für einen Standard, der erstmals eine konsequente internationale Vereinheitlichung bringen soll. Auch wenn die geplanten Änderungen in manchen Details zu kritisieren sind, wären sie ein großer Schritt in die richtige Richtung. Der vom IASB geschaffene neue Standard für Finanzinstrumente (IFRS 9) bedarf noch der Annahme – in womöglich veränderter Form – durch die EU-Kommission, bevor wir ihn anwenden können.

Während in vielen Schwellenländern auch im Versicherungssektor eine nach wie vor hohe Wachstumsdynamik zu beobachten sein dürfte, ist auf den meisten entwickelten Märkten mit einem eher moderaten Plus bei den Prämieinnahmen zu rechnen. In der Schaden- und Unfallerstversicherung erwarten wir eine gedämpfte Entwicklung der Prämien. Die Nachfrage nach Lebensversicherungsschutz sollte stabil bleiben; der Vorsorgebedarf ist riesig, die dafür verfügbaren Einkommen und die Vorsorgebereitschaft wachsen allenfalls langsam. Andere Sparten wie das Kredit- und Kautionsgeschäft werden vermutlich von der stabilen Konjunktur profitieren und geringere Schäden aufweisen.

Die Preise und Bedingungen auf den internationalen Rückversicherungsmärkten werden im Wesentlichen durch die solide Kapitalausstattung der Anbieter und Nachfrager beeinflusst. Deshalb war in der Schaden- und Unfallrückversicherung bei den Erneuerungen zum Jahresanfang ein weiterer Rückgang der Preise zu beobachten. Davon ausgenommen waren Sparten und Regionen, in denen die Unternehmen hohe Verluste erlitten hatten. Für den weiteren Verlauf des Jahres 2011 erwarten wir eine seitwärts gerichtete Entwicklung, nicht zuletzt unter dem Eindruck der anhaltenden Serie von Naturkatastrophen.

## Risiken

Auch zwei Jahre nach dem Höhepunkt der Krise bleibt der wirtschaftliche Ausblick von Unsicherheiten überschattet. Ein wiederholter Einbruch der Konjunktur bis hin zu einer länger anhaltenden Stagnation mit deflationären Folgen ist in einigen Ländern nicht völlig auszuschließen. Ein lang anhaltendes Niedrigzinsumfeld würde die Lage der Lebensversicherungsunternehmen erheblich beeinträchtigen. Der hohe Verschuldungsgrad vieler Staaten hat die Investoren bereits 2010 stark verunsichert und könnte das Finanzsystem erneut zum Nachteil der Versicherungswirtschaft destabilisieren. Die erheblichen Interventionen der Zentralbanken und die damit verbundene Ausweitung der Geldmenge könnten bei fortgesetzter konjunktureller Erholung eine höhere Inflation mit einer entsprechenden Verteuerung der Schadenkosten für die Versicherer nach sich ziehen. Außerdem könnte die Branche von den Effekten protektionistischer Beschränkungen und Wechselkursinterventionen betroffen werden. Mögliche geopolitische Verwerfungen, etwa im Nahen und Mittleren Osten oder in Ostasien, sind ebenso unverändert ein nennenswertes Risiko für die Weltwirtschaft und damit für die Versicherungsindustrie, das sich in der arabischen Welt zurzeit bereits verwirklicht.

Die Assekuranz ist naturgemäß auch besonders betroffen von wirtschafts- und sozialpolitischen Entscheidungen, etwa bei der Gesundheitspolitik mit ihren erheblichen Auswirkungen auf die private Krankenversicherung. Signifikante Risiken für die Versicherungswirtschaft bringt auch die geplante Verschärfung aufsichtsrechtlicher Regelungen in der Finanzdienstleistungsbranche: So ist nach der Finanzkrise besonders zu befürchten, dass die vorrangig auf das Bankwesen ausgerichteten Veränderungen undifferenziert auf die Assekuranz übertragen werden. Denkbar sind unter anderem überzogene Kapitalanforderungen, unverhältnismäßige Vorschriften für das Berichtswesen oder sogar Restriktionen für einzelne Geschäftsarten.

Auch ruinöser Wettbewerb mit einem über mehrere Jahre anhaltenden Abwärtstrend der Preise für Versicherungsschutz bleibt ein zwar unwahrscheinliches, aber nicht auszuschließendes Risikoszenario. Nach wie vor ist für die Versicherungswirtschaft erfolgsentscheidend, das Augenmerk auf Profitabilität vor Größe und auf die Wirksamkeit der Steuerungssysteme zu richten.

## Entwicklung von Munich Re

### Grenzen der Prognostizierbarkeit von Ergebnissen

Eine verlässliche Vorhersage von IFRS-Ergebnissen ist nicht nur wegen der offenkundigen Schwankungen im Anfall von Großschäden nicht möglich. Auch das Kapitalanlageergebnis ist schwer prognostizierbar. Wir richten die Wahl unserer Kapitalanlagen nach ökonomischen Kriterien an den Charakteristika unserer versicherungstechnischen Rückstellungen und Verbindlichkeiten aus und setzen zur Absicherung von Schwankungen an den Zins-, Aktien- und Währungsmärkten und Feinsteuerung der Exponierungen zusätzlich derivative Finanzinstrumente ein. Die hohen Volatilitäten an diesen Märkten führen zu starken Wertänderungen bei den Derivaten, die wir in der IFRS-Rechnungslegung in der Regel ergebniswirksam, also als Aufwand oder Ertrag in unserer Gewinn- und Verlustrechnung, erfassen. Eine solche ergebniswirksame Erfassung ist bei den zugehörigen Grundgeschäften per se jedoch nicht immer gegeben. Diese Inkonsistenz führt trotz unseres ökonomisch gut ausbalancierten Versicherungs- und Kapitalanlageportfolios zu Ausschlägen im Kapitalanlage- und Konzernergebnis, die eine verlässliche Vorhersage erschweren und für die wir hier nur grobe Richtungen angeben können: So wird zunächst insbesondere ein steigendes Zinsniveau zu tendenziell niedrigeren, ein sinkendes Zinsniveau zu tendenziell höheren Ergebnissen führen als in diesem Ausblick prognostiziert. Auch Währungskursschwankungen können unser Ergebnis beeinflussen. So führt ein stärkerer Euro zu Gewinnen, ein schwächerer Euro zu Belastungen. Zudem könnten starke Aktienkursverluste Abschreibungen auf unser inzwischen wieder gewachsenen Aktienportfolio nach sich ziehen.

## Rückversicherung

Die Rückversicherung bleibt nach wie vor ein zukunftssträchtiges Geschäftsfeld, das uns langfristig vielfältige Ertragsmöglichkeiten öffnet. Auf veränderte Bedarfstrends haben wir 2009 mit unserer Neupositionierung reagiert: Munich Re wird ihren Zedenten noch mehr als bisher spezialisierte Beratung und umfassende Lösungsansätze anbieten – auch für Aufgaben wie Bilanzsteuerung, Risikomodellierung oder Asset-Liability-Management. Rückversicherung bietet eine flexible und effiziente Möglichkeit, die Kapitalbasis zu stärken. Zusätzlich entwickeln wir innovative Deckungskonzepte, die über die traditionelle Rückversicherung hinausgehen.

In der **Lebensrückversicherung** ergeben sich gute Wachstumschancen. Wir verzeichnen eine anhaltende Nachfrage nach großvolumigen Kapitalersatzlösungen. Impulse werden auch von den Privatisierungstendenzen bei der Alters-, Pflege- und Berufsunfähigkeitsvorsorge, dem Absicherungsbedarf für Kapitalanlagerisiken sowie dem dynamischen Wachstum der Lebensversicherungsmärkte in Asien ausgehen. Für 2011 rechnen wir mit gebuchten Bruttobeiträgen in einer Größenordnung von 9 Milliarden €. Beim versicherungstechnischen Ergebnis gehen wir ab 2011 von einem Ergebnis in Höhe von rund 0,4 Milliarden € aus.

Wir hatten uns das Ziel einer Verdoppelung des Neugeschäftswerts in der Lebensrückversicherung zwischen 2006 und 2011 gesetzt. Legt man die Prinzipien marktkonsistenter Bestandsbewertung (sogenannte MCEV Principles) zugrunde, korrespondiert dieses Ziel mit einem Neugeschäftswert von 330 Millionen € für das Jahr 2011. In Anbetracht der hervorragenden Ergebnisse der vergangenen Jahre sind wir sehr zuversichtlich, dieses Ziel zu übertreffen. Bis 2015 wollen wir einen Neugeschäftswert in der Lebensrückversicherung von nachhaltig 450 Millionen € im Jahr erzielen.

In der **Schaden- und Unfallrückversicherung**, die erfahrungsgemäß zyklusabhängiger verläuft, bleibt Munich Re bei ihrer klaren, auf Profitabilität ausgerichteten Zeichnungspolitik und übernimmt Risiken nur zu angemessenen Preisen und Bedingungen.

Bei der Erneuerungsrunde zum 1. Januar 2011 standen etwa 7,9 Milliarden € Prämienvolumen im Vertragsgeschäft zur Erneuerung an. Die Erneuerungsverhandlungen fanden wieder in einem kompetitiven Umfeld statt. Bedingt durch die gute Eigenkapitalausstattung der Erstversicherer blieb deren Nachfrage nach Rückversicherungsschutz zumeist unverändert. Dem gegenüber wurde vonseiten der Rückversicherer mehr als ausreichend Kapazität zur Verfügung gestellt, sodass die Preise im Allgemeinen weiter nachgaben. Lediglich im britischen Autoversicherungsgeschäft sowie in einigen schadenbetroffenen Branchen und Regionen wie bei der Versicherung von Ölbohrplattformen und in Australien ließen sich Preiserhöhungen durchsetzen. Das US-Naturkatastrophengeschäft hat aufgrund von ausreichender Kapazität und nach einer eher milden Hurrikan-Saison mit Blick auf die Schäden Preisrückgänge erfahren, ist aber weiterhin profitabel. In Europa haben die Raten trotz hoher Schadenbelastungen nachgegeben.

Aufgrund anhaltenden Preisdrucks haben wir im Rahmen unseres strikten Zyklusmanagements auf verschiedene Geschäftsmöglichkeiten verzichtet. Von dem Geschäft, das zur Erneuerung anstand, wurden rund 16 % (1,3 Milliarden €) nicht erneuert, weil es unsere Renditeanforderungen nicht mehr erfüllte, davon ein erheblicher Teil in Europa. Einen Teil des Prämienrückgangs konnten wir durch den Ausbau profitabler Kundenbeziehungen kompensieren. Zusätzlich konnte erhebliches Neugeschäftsvolumen in Höhe von etwa 1,2 Milliarden €, insbesondere in stark wachsenden Märkten, erzielt werden. Per saldo ergab sich in der Erneuerung ein leichter Prämienanstieg von etwa 330 Millionen € (+4,1%), wobei das Rateniveau für unser Portfolio mit +0,1% in etwa auf dem Niveau des Vorjahrs lag. Vor allem dank unserer starken globalen Präsenz und unserer Fähigkeit, komplexe Rückversicherungslösungen maßgeschneidert und schnell anzubieten, konnten wir uns dem Trend fallender Preise entziehen. In diesem Marktumfeld zahlt sich die Stabilität und Finanzkraft von Munich Re aus. Wir sind daher mit dem Ergebnis der Erneuerung sehr zufrieden.

Für die anstehenden Erneuerungsrounds zum 1. April 2011 (Japan und Korea) sowie zum 1. Juli 2011 (Teile des US-Markts, Australiens und Lateinamerikas) stehen zusammen etwa 2,8 Milliarden € Prämienvolumen zur Erneuerung an. Hier erwarten wir, auch vor dem Hintergrund der Serie von Naturkatastrophen, eine Stabilisierung des Preisniveaus.

Für 2011 rechnen wir mit gebuchten Bruttobeiträgen in der Schaden- und Unfallrückversicherung von etwas über 15 Milliarden €. Über den Marktzyklus hinweg gehen wir von einer Schaden-Kosten-Quote von ca. 97 % der verdienten Nettobeiträge aus. Dieser Schätzung liegt eine erwartete durchschnittliche Großschadenbelastung aus Naturkatastrophen von 6,5 % zugrunde. Da uns schon bis Ende Februar 2011 Großschäden wie die Überschwemmungen bei Brisbane und – ebenfalls in Australien – der Sturm Yasi sowie das Erdbeben in Neuseeland getroffen haben, werden wir unsere Zielmarke nur erreichen, wenn die zufallsbedingten Großschäden im weiteren Jahresverlauf unter unseren Erwartungen bleiben.

Versicherungen von Anlagen zur Erzeugung von erneuerbaren Energien bieten uns in der Schaden- und Unfallrückversicherung vermehrt Geschäftspotenzial. Für 2020 erwarten wir zum Beispiel für den deutschen Versicherungsmarkt ein Prämienvolumen im mittleren dreistelligen Millionen-Euro-Bereich – das wäre mehr als eine Verdoppelung. Munich Re bietet ihren Kunden die jeweils passenden Produkte: von der klassischen Versicherung der Industrieanlagen bis zu komplexen Lösungen wie Leistungsgarantie-Deckungen für technische Neuerungen, mit denen Kapitalgeber ihre Investitionsrisiken verringern können.

Die Rückversicherung (ohne Munich Health) sollte 2011 **Bruttobeiträge** zwischen 24 und 25 Milliarden € erwirtschaften – vorausgesetzt die Wechselkurse entwickeln sich konstant.

## Erstversicherung

In der Erstversicherung rechnen wir für 2011 damit, dass sich die Beiträge in den einzelnen Segmenten unterschiedlich entwickeln. Der Trend sollte im Großen und Ganzen positiv sein.

In der **Lebenserstversicherung** dürften unsere gesamten Beitragseinnahmen etwas unter dem Niveau des Vorjahres bei knapp 8 Milliarden € liegen, die gebuchten Bruttobeiträge bei etwa 6 Milliarden €. Dabei ist zu berücksichtigen, dass die Entwicklungen im deutschen und im internationalen Geschäft stark davon abhängen werden, ob Einmalbeitragsgeschäft weiterhin so stark nachgefragt wird wie 2010 und ob wir dieses Geschäft im jeweiligen Marktumfeld profitabel zeichnen können.

Im Erstversicherungssegment **Gesundheit** streben wir einen Anstieg der gebuchten Bruttobeiträge auf etwas unter 6 Milliarden € an. Sowohl in der Krankheitskostenvollversicherung als auch in der Ergänzungsversicherung dürften wir Beitragswachstum erzielen. Das Krankenerstversicherungsgeschäft außerhalb Deutschlands wird im Segment Munich Health ausgewiesen.

In der **Schaden- und Unfallerstversicherung** gehen wir von einem Beitragsanstieg auf etwas unter 6 Milliarden € aus. In Deutschland rechnen wir mit einem marktüberdurchschnittlichen Wachstum von ca. 1 %. International dürfte der Anstieg kräftiger ausfallen. Die Schaden-Kosten-Quote in der Kompositversicherung sollte auf einem guten Niveau von unter 95 % liegen.

Die **gesamten Beitragseinnahmen** der Erstversicherung ohne das Krankenerstversicherungsgeschäft außerhalb Deutschlands, das Teil von Munich Health ist, sollten 2011 zwischen 19 und 20 Milliarden € liegen. Bei den gebuchten Bruttobeiträgen rechnen wir mit 17 bis 18 Milliarden €.

Das **Konzernergebnis** für das Erstversicherungssegment sollte sich 2011 abermals positiv entwickeln und gegenüber dem Vorjahr zulegen können. Für den ERGO Konzern erwarten wir 450 bis 550 Millionen €.

## Munich Health

Die internationalen Gesundheitsmärkte bieten vielfältige Wachstumsmöglichkeiten, insbesondere angesichts des medizinischen Fortschritts und steigender Lebenserwartung. Diese Chancen wollen wir nutzen.

Dabei legen wir in allen Märkten, in denen wir präsent sind, den Schwerpunkt auf nachhaltige Profitabilität des Segments und auf langfristig attraktive Geschäftsmodelle. Wenn die politischen Verhältnisse das zulassen, wollen wir beispielsweise das erfolgreiche Geschäftsmodell der Partnerschaft mit der Regierung von Abu Dhabi bei unserem Gemeinschaftsunternehmen DAMAN auf benachbarte Regionen übertragen. In den vergangenen Jahren konnten wir ein sehr erfreuliches Wachstum in der Krankerückversicherung auch aus großvolumigen Kapitalersatzlösungen mit mehrjähriger Laufzeit erzielen. Unser Portfolio überprüfen wir immer wieder kritisch, um seine Ertragskraft zu sichern und, wo nötig, zu verbessern.

Die **gebuchten Bruttobeiträge** für Munich Health dürften 2011 bei rund 6 Milliarden € liegen.

Dabei erwarten wir für dieses junge Geschäftsfeld infolge der laufenden Aufbauinvestitionen bei mehreren Einheiten und durch rezessionsbedingte Belastungen derzeit für 2011 und 2012 nur einen kleineren positiven Ergebnisbeitrag.

## Kapitalanlagen

Wir begegnen den konjunkturellen Unsicherheiten, indem wir unser Portfolio weiterhin stark diversifizieren. Damit bewahren wir in unterschiedlichen Szenarien unsere Handlungsfähigkeit und partizipieren an den Entwicklungen der Kapitalmärkte. Hierzu beabsichtigen wir, unseren Aktien- und Rohstoffbestand moderat aufzustocken. Auch unser bereits bestehendes Kreditexposure werden wir weiterhin vorsichtig ausbauen. Unseren großen Bestand an Staatsanleihen wollen wir im Gegenzug leicht verringern.

Auch im Jahr 2011 richtet sich die Struktur unseres Rentenportfolios grundsätzlich an der Laufzeit unserer Verbindlichkeiten aus, um ein optimales Management des Zinsänderungsrisikos zu gewährleisten. 2010 profitierten wir von einer verlängerten Durationposition, die wir als Schutz gegen ein mögliches Krisenszenario eingegangen waren. Aufgrund des aktuellen Zinsniveaus sowie unserer Erwartung, dass die Zinsen leicht steigen, haben wir die Duration im ersten Quartal 2011 leicht reduziert. Unseren Bestand an inflationsgeschützten Anleihen werden wir 2011 voraussichtlich konstant halten. Unabhängig davon prüfen wir das Investment in Rohstoffe als Absicherungsinstrument gegen Inflation.

Im Bereich der alternativen Kapitalanlagen wollen wir – angemessene Rentabilitätsaussichten vorausgesetzt – verstärkt in erneuerbare Energien sowie neue Technologien investieren. Bereits zum 1. Januar 2011 erwarben wir für einen vorläufigen Kaufpreis von rund 40 Millionen € 100 % der stimmberechtigten Anteile an elf Windparkgesellschaften.

Wir möchten unseren Immobilienbestand 2011 weiter konstant halten. Unser gegenwärtiges Immobilienexposure dient als stabilisierendes Element im Portfolio. Um es noch mehr zu diversifizieren, denken wir darüber nach, in Immobilien aufstrebender Märkte sowie Projekte mit hoher laufender Verzinsung zu investieren.



Wir erwarten keine rasche und deutliche Steigerung der Kapitalmarktzinsen und somit für die Geschäftsjahre 2011 und 2012 vergleichsweise niedrige laufende Erträge aus unseren Kapitalanlagen von insgesamt knapp unter 4%.

### Munich Re (Gruppe)

Für den Konzern als Ganzes rechnen wir für 2011 mit **gebuchten Bruttobeiträgen** zwischen 46 und 48 Milliarden € (konsolidierter Gesamtumsatz), vorausgesetzt die Wechselkurse bleiben im Vergleich zum Jahresende 2010 stabil.

An unserem langfristigen Ziel einer Rendite von 15 % auf unser Risikokapital (RoRaC) nach Steuern über den Zyklus der Versicherungs- und Zinsmärkte hinweg halten wir zunächst fest. Es ist jedoch angesichts der gegenwärtig noch immer niedrigen Zinsen nur schwer zu erreichen. Sobald die Anforderungen von Solvency II und den neuen IFRS-Rechnungslegungsstandards für Versicherungsverträge und Finanzinstrumente feststehen, wollen wir unsere Zielmessgrößen an den neuen Kennzahlen dieser dann stark ökonomisch geprägten Welt orientieren.

Für das Jahr 2011 rechnen wir bei im Wesentlichen stabilen Preisen in der Rückversicherung und einem durchschnittlichen Schadenverlauf mit einem leicht besseren versicherungstechnischen Ergebnis. Allerdings erwarten wir nicht, dass die Kapitalmarktzinsen deutlich steigen, und somit dürften die laufenden Erträge aus festverzinslichen Wertpapieren und Darlehen etwas geringer ausfallen. Wegen der zwar deutlich gestiegenen, im historischen Vergleich aber weiterhin niedrigen Aktienquote ergeben sich nur entsprechend moderate Abschreibungsrisiken und nur moderate Chancen auf Veräußerungsgewinne. Deshalb gehen wir aus heutiger Sicht davon aus, spürbar niedrigere Kapitalanlageergebnisse zu erzielen als 2010, wobei die gesamte Verzinsung auf den Bestand unter 4% liegen sollte. Insgesamt wollen wir deshalb bei ansonsten unveränderten Rahmenbedingungen 2011 ein **Konzernergebnis** von etwa 2,4 Milliarden € und damit in etwa auf dem Niveau von 2010 erwirtschaften. Dieses Ziel ist allerdings im Hinblick auf die Großschadenbelastung in den ersten zwei Monaten nur erreichbar, wenn die zufallsbedingten Großschäden im weiteren Jahresverlauf unter unseren Erwartungen bleiben. Für 2012 streben wir ein Konzernergebnis in ähnlicher Größenordnung an.

Nach dem planmäßigen Abschluss des Aktienrückkaufprogramms 2009/2010 brachten wir im Mai 2010 das Aktienrückkaufprogramm 2010/2011 auf den Weg. Bis zur nächsten Hauptversammlung am 20. April 2011 wollen wir wiederum eigene Aktien bis zu einem Kaufpreis von 1 Milliarde € erwerben. Bis zum 25. Februar 2011 wurden insgesamt bereits 7,7 Millionen Münchener-Rück-Aktien im Wert von 844 Millionen € zurückgekauft. Im folgenden Zwölfmonatszeitraum bis zur Hauptversammlung 2012 sollen weitere Aktien im Wert von bis zu 500 Millionen € zurückgekauft werden. Die vollständige Durchführung der Aktienrückkaufprogramme steht auch weiterhin unter dem Vorbehalt der Entwicklungen an den Kapitalmärkten und der gesamtwirtschaftlichen Rahmenbedingungen.

Unsere Aktionäre können sich über die Dividende für 2010 freuen. Vorbehaltlich der Zustimmung der Hauptversammlung soll die Dividende um 50 Cent auf 6,25 € je Aktie steigen.

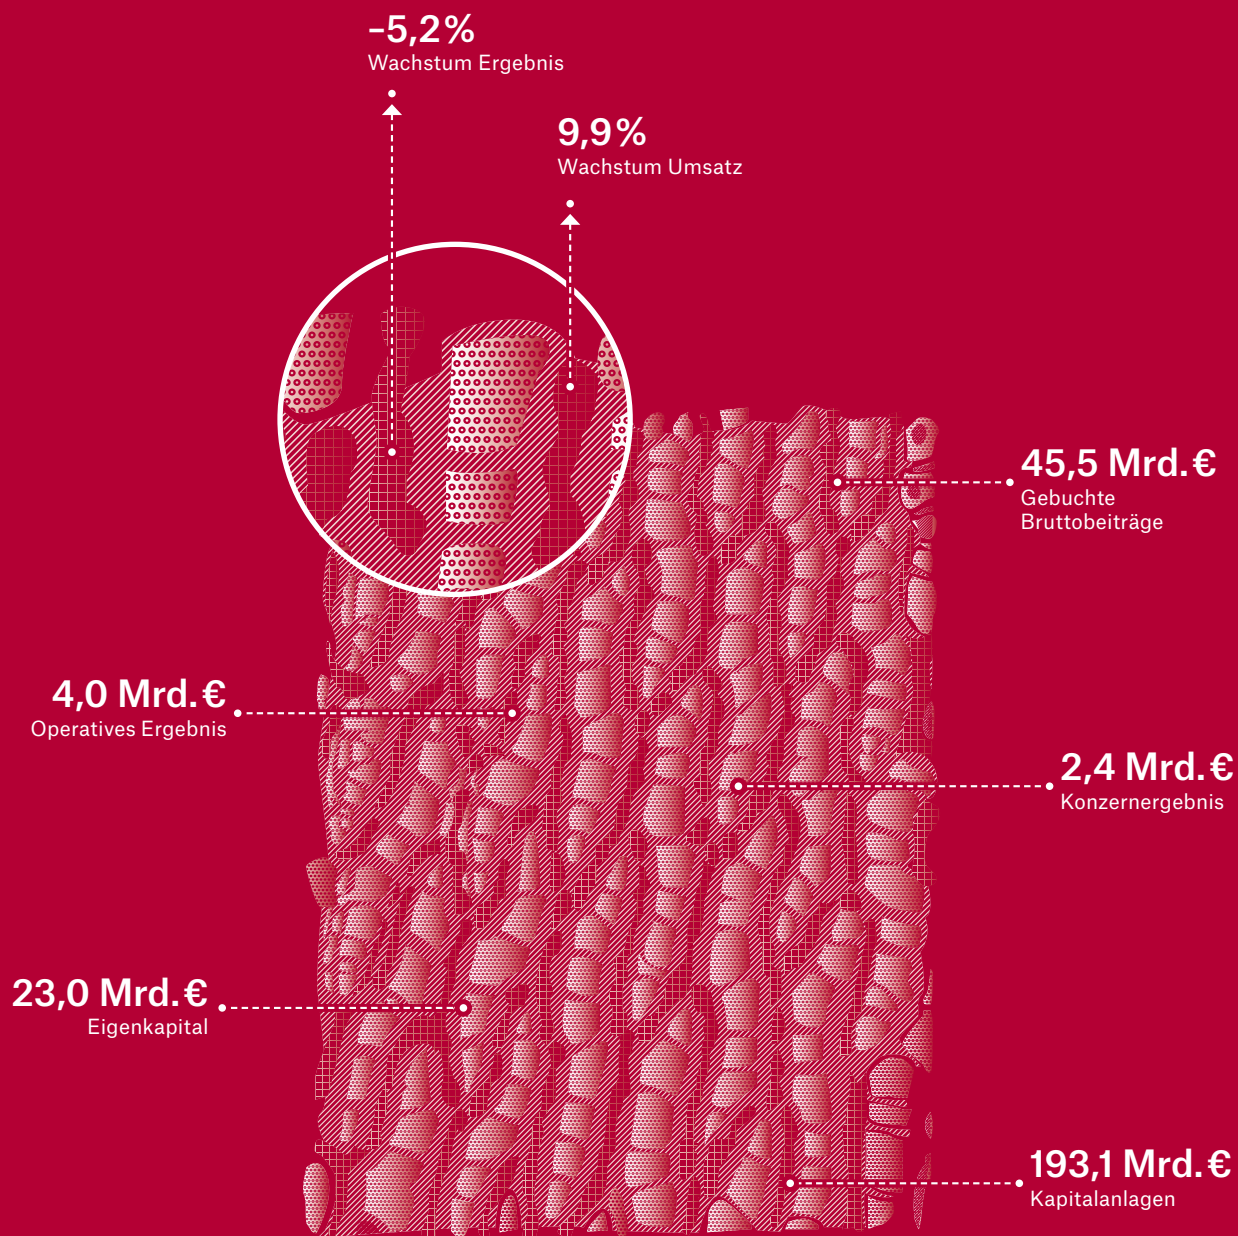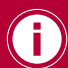

**Zellstruktur** // Während die Zellmembran schützend die Zelle umschließt und den Durchlass von Stoffen steuert, stabilisiert das Zellskelett ihre äußere und innere Struktur. Anders als es der Name vermuten lässt, ist das Zellskelett eine sehr dynamische Proteinstruktur, die unter anderem für Bewegungen und Transporte innerhalb der Zelle verantwortlich ist. In deren Inneren befindet sich der Zellkern, der auch die chromosomale DNA und damit die Gene enthält.

# Konzern- abschluss

|                                                    |     |
|----------------------------------------------------|-----|
| Konzernbilanz                                      | 150 |
| Konzern-Gewinn- und Verlustrechnung                | 152 |
| Aufstellung der erfassten Erträge und Aufwendungen | 153 |
| Konzern-Eigenkapitalentwicklung                    | 154 |
| Konzern-Kapitalflussrechnung                       | 156 |
| Konzernanhang                                      | 157 |

## Konzernanhang

|                                                                                         |     |
|-----------------------------------------------------------------------------------------|-----|
| Anwendung der International Financial Reporting Standards (IFRS)                        | 157 |
| Entsprechenserklärung zum Deutschen Corporate Governance Kodex gemäß § 161 Aktiengesetz | 157 |
| Vorjahreszahlen                                                                         | 157 |
| Konsolidierung                                                                          | 158 |
| Bilanzierung und Bewertung                                                              | 160 |

### Aktivseite

|                                                                                        |     |
|----------------------------------------------------------------------------------------|-----|
| A // Immaterielle Vermögenswerte                                                       | 164 |
| B // Kapitalanlagen                                                                    | 164 |
| C // Kapitalanlagen für Rechnung und Risiko von Inhabern von Lebensversicherungspolice | 169 |
| D // Anteil der Rückversicherer an den versicherungstechnischen Rückstellungen         | 169 |
| E // Forderungen                                                                       | 169 |
| F // Laufende Guthaben bei Kreditinstituten, Schecks und Kassenbestand                 | 170 |
| G // Aktivierte Abschlusskosten                                                        | 170 |
| H // Aktive Steuerabgrenzung                                                           | 170 |
| I // Übrige Aktiva                                                                     | 170 |

### Passivseite

|                                                                                                                                                            |     |
|------------------------------------------------------------------------------------------------------------------------------------------------------------|-----|
| A // Eigenkapital                                                                                                                                          | 171 |
| B // Nachrangige Verbindlichkeiten                                                                                                                         | 171 |
| C // Versicherungstechnische Rückstellungen (brutto)                                                                                                       | 171 |
| D // Versicherungstechnische Rückstellungen im Bereich der Lebensversicherung, soweit das Anlagerisiko von den Versicherungsnehmern getragen wird (brutto) | 174 |
| E // Andere Rückstellungen                                                                                                                                 | 175 |
| F // Verbindlichkeiten                                                                                                                                     | 176 |
| G // Passive Steuerabgrenzung                                                                                                                              | 176 |

### Währungsumrechnung 177

### Segmentberichterstattung

|                                          |     |
|------------------------------------------|-----|
| Segmentaktiva                            | 178 |
| Segmentpassiva                           | 180 |
| Segment-Gewinn- und Verlustrechnung      | 182 |
| Langfristige Vermögenswerte nach Ländern | 184 |
| Gebuchte Bruttobeiträge                  | 184 |

### Erläuterungen zur Konzernbilanz – Aktiva

|                                                                                 |     |
|---------------------------------------------------------------------------------|-----|
| 01 // Geschäfts- oder Firmenwert                                                | 185 |
| 02 // Sonstige immaterielle Vermögenswerte                                      | 187 |
| 03 // Grundstücke und Bauten einschließlich der Bauten auf fremden Grundstücken | 188 |
| 04 // Anteile an verbundenen Unternehmen und assoziierten Unternehmen           | 189 |
| 05 // Darlehen                                                                  | 190 |

|                                                                                        |     |
|----------------------------------------------------------------------------------------|-----|
| 06 // Sonstige Wertpapiere, gehalten bis zur Endfälligkeit                             | 190 |
| 07 // Bewertungshierarchie der Zeitwertbewertung von Kapitalanlagen                    | 191 |
| 08 // Sonstige Wertpapiere, jederzeit veräußerbar                                      | 194 |
| 09 // Sonstige Wertpapiere, erfolgswirksam zum Zeitwert bewertet                       | 196 |
| 10 // Depotforderungen                                                                 | 199 |
| 11 // Sonstige Kapitalanlagen                                                          | 199 |
| 12 // Anteil der Rückversicherer an den<br>versicherungstechnischen Rückstellungen     | 200 |
| 13 // Sonstige Forderungen                                                             | 201 |
| 14 // Aktivierte Abschlusskosten                                                       | 202 |
| 15 // Steuerabgrenzung                                                                 | 204 |
| 16 // Übrige Aktiva                                                                    | 206 |
| 17 // Zur Veräußerung gehaltene langfristige Vermögenswerte und<br>Veräußerungsgruppen | 207 |

#### **Erläuterungen zur Konzernbilanz – Passiva**

|                                                                                                                                                                   |     |
|-------------------------------------------------------------------------------------------------------------------------------------------------------------------|-----|
| 18 // Eigenkapital                                                                                                                                                | 208 |
| 19 // Nachrangige Verbindlichkeiten                                                                                                                               | 211 |
| 20 // Beitragsüberträge                                                                                                                                           | 212 |
| 21 // Deckungsrückstellung                                                                                                                                        | 213 |
| 22 // Rückstellung für noch nicht abgewickelte Versicherungsfälle                                                                                                 | 214 |
| 23 // Übrige versicherungstechnische Rückstellungen                                                                                                               | 218 |
| 24 // Versicherungstechnische Rückstellungen im Bereich der<br>Lebensversicherung, soweit das Anlagerisiko von den<br>Versicherungsnehmern getragen wird (brutto) | 219 |
| 25 // Andere Rückstellungen                                                                                                                                       | 220 |
| 26 // Anleihen                                                                                                                                                    | 224 |
| 27 // Depotverbindlichkeiten                                                                                                                                      | 224 |
| 28 // Sonstige Verbindlichkeiten                                                                                                                                  | 224 |

#### **Erläuterungen zur Konzern-Gewinn- und Verlustrechnung**

|                                                                                                                      |     |
|----------------------------------------------------------------------------------------------------------------------|-----|
| 29 // Beiträge                                                                                                       | 227 |
| 30 // Technischer Zinsertrag                                                                                         | 228 |
| 31 // Leistungen an Kunden                                                                                           | 229 |
| 32 // Aufwendungen für den Versicherungsbetrieb                                                                      | 231 |
| 33 // Ergebnis aus Kapitalanlagen                                                                                    | 232 |
| 34 // Sonstiges operatives Ergebnis                                                                                  | 236 |
| 35 // Sonstiges nicht operatives Ergebnis, Abschreibungen auf<br>Geschäfts- oder Firmenwerte und Finanzierungskosten | 237 |
| 36 // Ertragsteuern                                                                                                  | 238 |

#### **Erläuterungen zu Risiken aus Versicherungsverträgen und Finanzinstrumenten**

|                                                                      |     |
|----------------------------------------------------------------------|-----|
| 37 // Risiken aus dem Lebens- und Krankenversicherungsgeschäft       | 241 |
| 38 // Risiken aus dem Schaden- und Unfallversicherungsgeschäft       | 248 |
| 39 // Bonitätsrisiken aus passivem Rückversicherungsgeschäft         | 254 |
| 40 // Marktpreisrisiko aus Finanzinstrumenten – Sensitivitätsanalyse | 254 |

**Sonstige Angaben**

|                                                                       |     |
|-----------------------------------------------------------------------|-----|
| 41 // Mutterunternehmen                                               | 257 |
| 42 // Beziehungen zu nahestehenden Unternehmen und Personen           | 257 |
| 43 // Personalaufwendungen                                            | 257 |
| 44 // Langfristiger Incentive-Plan                                    | 257 |
| 45 // Mid-Term Incentive Plan                                         | 261 |
| 46 // Vergütungsbericht                                               | 262 |
| 47 // Beteiligungsprogramme                                           | 263 |
| 48 // Mitarbeiterzahl                                                 | 263 |
| 49 // Abschlussprüferhonorare                                         | 263 |
| 50 // Eventualverbindlichkeiten, sonstige finanzielle Verpflichtungen | 264 |
| 51 // Beschränkungen des Finanzmitteltransfers                        | 264 |
| 52 // Leasing                                                         | 265 |
| 53 // Ereignisse nach dem Bilanzstichtag                              | 266 |
| 54 // Ergebnis je Aktie                                               | 268 |
| 55 // Gewinnverwendungsvorschlag                                      | 268 |

**Aufstellung des Anteilsbesitzes zum 31. Dezember 2010  
gemäß § 313 Abs. 2 HGB**

269



Konzernbilanz zum 31. Dezember 2010<sup>1</sup>

## Aktiva

| Anhang                                                                               |      | 31.12.2010 |         |         | Vorjahr | Veränderung |        |
|--------------------------------------------------------------------------------------|------|------------|---------|---------|---------|-------------|--------|
|                                                                                      |      | Mio. €     | Mio. €  | Mio. €  | Mio. €  | Mio. €      | %      |
| A. Immaterielle Vermögenswerte                                                       |      |            |         |         |         |             |        |
| I. Geschäfts- oder Firmenwert                                                        | (1)  |            | 3.453   |         | 3.477   | -24         | -0,7   |
| II. Sonstige immaterielle Vermögenswerte                                             | (2)  |            | 1.633   |         | 1.718   | -85         | -4,9   |
|                                                                                      |      |            |         | 5.086   | 5.195   | -109        | -2,1   |
| B. Kapitalanlagen                                                                    |      |            |         |         |         |             |        |
| I. Grundstücke und Bauten einschließlich der Bauten auf fremden Grundstücken         | (3)  |            | 4.247   |         | 4.086   | 161         | 3,9    |
| davon:<br>Zur Veräußerung gehaltene, fremdgenutzte Grundstücke und Bauten            | (17) |            | -       |         | 90      | -90         | -100,0 |
| II. Anteile an verbundenen Unternehmen und assoziierten Unternehmen                  | (4)  |            | 1.091   |         | 1.001   | 90          | 9,0    |
| davon:<br>Assoziierte Unternehmen nach der Equity-Methode bewertet                   |      |            | 870     |         | 796     | 74          | 9,3    |
| III. Darlehen                                                                        | (5)  |            | 48.935  |         | 46.622  | 2.313       | 5,0    |
| IV. Sonstige Wertpapiere                                                             |      |            |         |         |         |             |        |
| 1. Gehalten bis zur Endfälligkeit                                                    | (6)  | 42         |         |         | 84      | -42         | -50,0  |
| 2. Jederzeit veräußerbar                                                             | (8)  | 122.123    |         |         | 115.605 | 6.518       | 5,6    |
| 3. Erfolgswirksam zum Zeitwert bewertet                                              | (9)  | 1.612      |         |         | 1.613   | -1          | -0,1   |
|                                                                                      |      |            | 123.777 |         | 117.302 | 6.475       | 5,5    |
| V. Depotforderungen                                                                  | (10) |            | 6.902   |         | 6.798   | 104         | 1,5    |
| VI. Sonstige Kapitalanlagen                                                          | (11) |            | 3.199   |         | 2.340   | 859         | 36,7   |
|                                                                                      |      |            |         | 188.151 | 178.149 | 10.002      | 5,6    |
| C. Kapitalanlagen für Rechnung und Risiko von Inhabern von Lebensversicherungspolice |      |            |         | 4.957   | 4.026   | 931         | 23,1   |
| D. Anteil der Rückversicherer an den versicherungstechnischen Rückstellungen         |      | (12)       |         | 5.490   | 4.983   | 507         | 10,2   |
| E. Forderungen                                                                       |      |            |         |         |         |             |        |
| I. Laufende Steuerforderungen                                                        |      |            | 492     |         | 700     | -208        | -29,7  |
| II. Sonstige Forderungen                                                             | (13) |            | 10.576  |         | 10.070  | 506         | 5,0    |
|                                                                                      |      |            |         | 11.068  | 10.770  | 298         | 2,8    |
| F. Laufende Guthaben bei Kreditinstituten, Schecks und Kassenbestand                 |      |            |         | 2.900   | 3.082   | -182        | -5,9   |
| G. Aktivierte Abschlusskosten                                                        |      | (14)       |         |         |         |             |        |
| Brutto                                                                               |      |            | 9.165   |         | 8.604   | 561         | 6,5    |
| Anteil der Rückversicherer                                                           |      |            | 72      |         | 76      | -4          | -5,3   |
| Netto                                                                                |      |            |         | 9.093   | 8.528   | 565         | 6,6    |
| H. Aktive Steuerabgrenzung                                                           | (15) |            |         | 5.959   | 5.025   | 934         | 18,6   |
| I. Übrige Aktiva                                                                     | (16) |            |         | 3.654   | 3.654   | -           | -      |
| davon:<br>Zur Veräußerung gehaltene, eigen- genutzte Grundstücke und Bauten          |      |            |         | -       | 13      | -13         | -100,0 |
| Summe der Aktiva                                                                     |      |            |         | 236.358 | 223.412 | 12.946      | 5,8    |

**Passiva**

|                                                                                                                                                                 | Anhang      | 31.12.2010     | Vorjahr        | Veränderung   |
|-----------------------------------------------------------------------------------------------------------------------------------------------------------------|-------------|----------------|----------------|---------------|
|                                                                                                                                                                 |             | Mio. €         | Mio. €         | Mio. €        |
|                                                                                                                                                                 |             |                |                | %             |
| <b>A. Eigenkapital</b>                                                                                                                                          | <b>(18)</b> |                |                |               |
| I. Gezeichnetes Kapital und Kapitalrücklage                                                                                                                     |             | 7.388          | 7.388          | -             |
| II. Gewinnrücklagen                                                                                                                                             |             | 10.735         | 10.667         | 68            |
| III. Übrige Rücklagen                                                                                                                                           |             | 2.238          | 1.473          | 765           |
| IV. Konzernergebnis auf Anteilseigner der Münchener Rück AG entfallend                                                                                          |             | 2.422          | 2.521          | -99           |
| V. Nicht beherrschende Anteile am Eigenkapital                                                                                                                  |             | 245            | 229            | 16            |
|                                                                                                                                                                 |             | <b>23.028</b>  | <b>22.278</b>  | <b>750</b>    |
| <b>B. Nachrangige Verbindlichkeiten</b>                                                                                                                         | <b>(19)</b> | <b>4.847</b>   | <b>4.790</b>   | <b>57</b>     |
| <b>C. Versicherungstechnische Rückstellungen (brutto)</b>                                                                                                       |             |                |                |               |
| I. Beitragsüberträge                                                                                                                                            | (20)        | 7.879          | 6.946          | 933           |
| II. Deckungsrückstellung                                                                                                                                        | (21)        | 104.413        | 100.862        | 3.551         |
| III. Rückstellung für noch nicht abgewickelte Versicherungsfälle                                                                                                | (22)        | 49.501         | 46.846         | 2.655         |
| IV. Übrige versicherungstechnische Rückstellungen                                                                                                               | (23)        | 9.555          | 10.146         | -591          |
|                                                                                                                                                                 |             | <b>171.348</b> | <b>164.800</b> | <b>6.548</b>  |
| <b>D. Versicherungstechnische Rückstellungen im Bereich der Lebensversicherung, soweit das Anlagerisiko von den Versicherungsnehmern getragen wird (brutto)</b> | <b>(24)</b> | <b>5.210</b>   | <b>4.117</b>   | <b>1.093</b>  |
| <b>E. Andere Rückstellungen</b>                                                                                                                                 | <b>(25)</b> | <b>3.458</b>   | <b>3.206</b>   | <b>252</b>    |
| <b>F. Verbindlichkeiten</b>                                                                                                                                     |             |                |                |               |
| I. Anleihen                                                                                                                                                     | (26)        | 290            | 276            | 14            |
| II. Depotverbindlichkeiten                                                                                                                                      | (27)        | 2.762          | 2.176          | 586           |
| III. Laufende Steuerverbindlichkeiten                                                                                                                           |             | 3.253          | 3.134          | 119           |
| IV. Sonstige Verbindlichkeiten                                                                                                                                  | (28)        | 13.103         | 10.114         | 2.989         |
|                                                                                                                                                                 |             | <b>19.408</b>  | <b>15.700</b>  | <b>3.708</b>  |
| <b>G. Passive Steuerabgrenzung</b>                                                                                                                              | <b>(15)</b> | <b>9.059</b>   | <b>8.521</b>   | <b>538</b>    |
| <b>Summe der Passiva</b>                                                                                                                                        |             | <b>236.358</b> | <b>223.412</b> | <b>12.946</b> |

<sup>1</sup> Vorjahreswerte angepasst aufgrund des Ausweises von Munich Health als eigenes Segment, siehe Abschnitt „Bilanzierung und Bewertung“.

Konzern-Gewinn- und Verlustrechnung für das Geschäftsjahr 2010<sup>1</sup>

## Posten

| Posten                                                                 | Anhang      | 2010          |               |              | Vorjahr       | Veränderung  |              |
|------------------------------------------------------------------------|-------------|---------------|---------------|--------------|---------------|--------------|--------------|
|                                                                        |             | Mio. €        | Mio. €        | Mio. €       | Mio. €        | Mio. €       | %            |
| <b>Gebuchte Bruttobeiträge</b>                                         |             | <b>45.541</b> |               |              | <b>41.423</b> | <b>4.118</b> | <b>9,9</b>   |
| <b>1. Verdiente Beiträge</b>                                           | <b>(29)</b> |               |               |              |               |              |              |
| Brutto                                                                 |             | 44.955        |               |              | 41.227        | 3.728        | 9,0          |
| Abgegeben an Rückversicherer                                           |             | 1.880         |               |              | 1.701         | 179          | 10,5         |
| Netto                                                                  |             |               | 43.075        |              | 39.526        | 3.549        | 9,0          |
| <b>2. Technischer Zinsertrag</b>                                       | <b>(30)</b> |               | <b>6.587</b>  |              | <b>5.794</b>  | <b>793</b>   | <b>13,7</b>  |
| <b>3. Leistungen an Kunden</b>                                         | <b>(31)</b> |               |               |              |               |              |              |
| Brutto                                                                 |             | 37.747        |               |              | 33.163        | 4.584        | 13,8         |
| Anteil der Rückversicherer                                             |             | 1.164         |               |              | 771           | 393          | 51,0         |
| Netto                                                                  |             |               | 36.583        |              | 32.392        | 4.191        | 12,9         |
| <b>4. Aufwendungen für den Versicherungsbetrieb</b>                    | <b>(32)</b> |               |               |              |               |              |              |
| Brutto                                                                 |             | 11.545        |               |              | 10.586        | 959          | 9,1          |
| Anteil der Rückversicherer                                             |             | 431           |               |              | 405           | 26           | 6,4          |
| Netto                                                                  |             |               | 11.114        |              | 10.181        | 933          | 9,2          |
| <b>5. Versicherungstechnisches Ergebnis (1.-4.)</b>                    |             |               |               | <b>1.965</b> | <b>2.747</b>  | <b>-782</b>  | <b>-28,5</b> |
| <b>6. Ergebnis aus Kapitalanlagen</b>                                  | <b>(33)</b> |               |               |              |               |              |              |
| Erträge aus Kapitalanlagen                                             |             | 13.666        |               |              | 13.575        | 91           | 0,7          |
| Aufwendungen für Kapitalanlagen                                        |             | 5.024         |               |              | 5.692         | -668         | -11,7        |
| Gesamt                                                                 |             |               | <b>8.642</b>  |              | <b>7.883</b>  | <b>759</b>   | <b>9,6</b>   |
| davon:                                                                 |             |               |               |              |               |              |              |
| Ergebnis aus assoziierten Unternehmen nach der Equity-Methode bewertet |             |               | 51            |              | -126          | 177          | -            |
| <b>7. Sonstige operative Erträge</b>                                   | <b>(34)</b> |               | <b>807</b>    |              | <b>688</b>    | <b>119</b>   | <b>17,3</b>  |
| <b>8. Sonstige operative Aufwendungen</b>                              | <b>(34)</b> |               | <b>849</b>    |              | <b>803</b>    | <b>46</b>    | <b>5,7</b>   |
| <b>9. Umgliederung technischer Zinsertrag</b>                          |             |               | <b>-6.587</b> |              | <b>-5.794</b> | <b>-793</b>  | <b>-13,7</b> |
| <b>10. Nicht versicherungstechnisches Ergebnis (6.-9.)</b>             |             |               |               | <b>2.013</b> | <b>1.974</b>  | <b>39</b>    | <b>2,0</b>   |
| <b>11. Operatives Ergebnis</b>                                         |             |               |               | <b>3.978</b> | <b>4.721</b>  | <b>-743</b>  | <b>-15,7</b> |
| <b>12. Sonstiges nicht operatives Ergebnis</b>                         | <b>(35)</b> |               |               | <b>-454</b>  | <b>-472</b>   | <b>18</b>    | <b>3,8</b>   |
| <b>13. Abschreibungen auf Geschäfts- oder Firmenwerte</b>              | <b>(35)</b> |               |               | <b>109</b>   | <b>117</b>    | <b>-8</b>    | <b>-6,8</b>  |
| <b>14. Finanzierungskosten</b>                                         | <b>(35)</b> |               |               | <b>293</b>   | <b>304</b>    | <b>-11</b>   | <b>-3,6</b>  |
| <b>15. Ertragsteuern</b>                                               | <b>(36)</b> |               |               | <b>692</b>   | <b>1.264</b>  | <b>-572</b>  | <b>-45,3</b> |
| <b>16. Konzernergebnis</b>                                             |             |               |               | <b>2.430</b> | <b>2.564</b>  | <b>-134</b>  | <b>-5,2</b>  |
| davon:                                                                 |             |               |               |              |               |              |              |
| Auf Anteilseigner der Münchener Rück AG entfallend                     |             |               |               | 2.422        | 2.521         | -99          | -3,9         |
| Auf nicht beherrschende Anteile entfallend                             | (18)        |               |               | 8            | 43            | -35          | -81,4        |
| Anhang                                                                 |             |               |               | €            | €             | €            | %            |
| <b>Ergebnis je Aktie</b>                                               | <b>(54)</b> |               |               | <b>13,06</b> | <b>12,95</b>  | <b>0,11</b>  | <b>0,8</b>   |

<sup>1</sup> Vorjahreswerte angepasst aufgrund des Ausweises von Munich Health als eigenes Segment, siehe Abschnitt „Bilanzierung und Bewertung“.

## Aufstellung der erfassten Erträge und Aufwendungen

| Mio. €                                                                                       | 2010         | Vorjahr      |
|----------------------------------------------------------------------------------------------|--------------|--------------|
| <b>Konzernergebnis</b>                                                                       | <b>2.430</b> | <b>2.564</b> |
| Währungsumrechnung                                                                           |              |              |
| Im Eigenkapital erfasste Gewinne (Verluste)                                                  | 645          | -51          |
| In die Konzern-Gewinn- und Verlustrechnung übernommen                                        | -            | -            |
| Unrealisierte Gewinne und Verluste aus Kapitalanlagen                                        |              |              |
| Im Eigenkapital erfasste Gewinne (Verluste)                                                  | 1.370        | 2.205        |
| In die Konzern-Gewinn- und Verlustrechnung übernommen                                        | -1.240       | -1.690       |
| Veränderung aus der Equity-Bewertung                                                         |              |              |
| Im Eigenkapital erfasste Gewinne (Verluste)                                                  | -8           | 15           |
| In die Konzern-Gewinn- und Verlustrechnung übernommen                                        | -            | -            |
| Veränderung aus Cashflow Hedges                                                              |              |              |
| Im Eigenkapital erfasste Gewinne (Verluste)                                                  | -3           | -2           |
| In die Konzern-Gewinn- und Verlustrechnung übernommen                                        | -            | -            |
| Versicherungsmathematische Gewinne und Verluste aus leistungsorientierten Versorgungszusagen | -50          | -78          |
| Sonstige Veränderungen                                                                       | -20          | -28          |
| <b>Direkt im Eigenkapital erfasste Erträge und Aufwendungen</b>                              | <b>694</b>   | <b>371</b>   |
| <b>Gesamte erfasste Erträge und Aufwendungen</b>                                             | <b>3.124</b> | <b>2.935</b> |
| davon:                                                                                       |              |              |
| Auf Anteilseigner der Münchener Rück AG entfallend                                           | 3.094        | 2.885        |
| Auf nicht beherrschende Anteile entfallend                                                   | 30           | 50           |

## Konzern-Eigenkapitalentwicklung

|                                                                                              | Gezeichnetes<br>Kapital | Kapitalrücklage |  |
|----------------------------------------------------------------------------------------------|-------------------------|-----------------|--|
| Mio. €                                                                                       |                         |                 |  |
| <b>Stand 31.12.2008</b>                                                                      | <b>588</b>              | <b>6.800</b>    |  |
| Einstellung in die Gewinnrücklagen                                                           | -                       | -               |  |
| Konzernergebnis                                                                              | -                       | -               |  |
| Direkt im Eigenkapital erfasste Erträge und Aufwendungen                                     | -                       | -               |  |
| Währungsumrechnung                                                                           | -                       | -               |  |
| Unrealisierte Gewinne und Verluste aus Kapitalanlagen                                        | -                       | -               |  |
| Veränderung aus der Equity-Bewertung                                                         | -                       | -               |  |
| Veränderung aus Cashflow Hedges                                                              | -                       | -               |  |
| Versicherungsmathematische Gewinne und Verluste aus leistungsorientierten Versorgungszusagen | -                       | -               |  |
| Sonstige Veränderungen                                                                       | -                       | -               |  |
| Gesamte erfasste Erträge und Aufwendungen                                                    | -                       | -               |  |
| Veränderung der Eigentumsanteile an Tochterunternehmen                                       | -                       | -               |  |
| Veränderung Konsolidierungskreis                                                             | -                       | -               |  |
| Ausschüttung                                                                                 | -                       | -               |  |
| Erwerb eigener Aktien                                                                        | -                       | -               |  |
| Einzug eigener Aktien                                                                        | -                       | -               |  |
| <b>Stand 31.12.2009</b>                                                                      | <b>588</b>              | <b>6.800</b>    |  |
| Einstellung in die Gewinnrücklagen                                                           | -                       | -               |  |
| Konzernergebnis                                                                              | -                       | -               |  |
| Direkt im Eigenkapital erfasste Erträge und Aufwendungen                                     | -                       | -               |  |
| Währungsumrechnung                                                                           | -                       | -               |  |
| Unrealisierte Gewinne und Verluste aus Kapitalanlagen                                        | -                       | -               |  |
| Veränderung aus der Equity-Bewertung                                                         | -                       | -               |  |
| Veränderung aus Cashflow Hedges                                                              | -                       | -               |  |
| Versicherungsmathematische Gewinne und Verluste aus leistungsorientierten Versorgungszusagen | -                       | -               |  |
| Sonstige Veränderungen                                                                       | -                       | -               |  |
| Gesamte erfasste Erträge und Aufwendungen                                                    | -                       | -               |  |
| Veränderung der Eigentumsanteile an Tochterunternehmen                                       | -                       | -               |  |
| Veränderung Konsolidierungskreis                                                             | -                       | -               |  |
| Ausschüttung                                                                                 | -                       | -               |  |
| Erwerb eigener Aktien                                                                        | -                       | -               |  |
| Einzug eigener Aktien                                                                        | -                       | -               |  |
| <b>Stand 31.12.2010</b>                                                                      | <b>588</b>              | <b>6.800</b>    |  |

| Auf Anteilseigner der Münchener Rück AG entfallende Eigenkapitalanteile |                                 |                                          |                                             |                                                   |                     | Nicht beherrschende Anteile | Eigenkapital Gesamt |
|-------------------------------------------------------------------------|---------------------------------|------------------------------------------|---------------------------------------------|---------------------------------------------------|---------------------|-----------------------------|---------------------|
| Gewinnrücklagen                                                         |                                 | Übrige Rücklagen                         |                                             |                                                   | Konzern<br>ergebnis |                             |                     |
| Gewinnrück-<br>lagen vor<br>Kürzung<br>eigener Aktien                   | Bestand<br>an eigenen<br>Aktien | Unrealisierte<br>Gewinne<br>und Verluste | Rücklage aus<br>der Währungs-<br>umrechnung | Bewertungs-<br>ergebnis aus<br>Cashflow<br>Hedges |                     |                             |                     |
| <b>12.024</b>                                                           | <b>-1.181</b>                   | <b>2.227</b>                             | <b>-1.194</b>                               | <b>3</b>                                          | <b>1.555</b>        | <b>285</b>                  | <b>21.107</b>       |
| 482                                                                     | -                               | -                                        | -                                           | -                                                 | -482                | -                           | -                   |
| -                                                                       | -                               | -                                        | -                                           | -                                                 | 2.521               | 43                          | 2.564               |
| -73                                                                     | -                               | 490                                      | -51                                         | -2                                                | -                   | 7                           | 371                 |
| -                                                                       | -                               | -                                        | -51                                         | -                                                 | -                   | -                           | -51                 |
| -                                                                       | -                               | 477                                      | -                                           | -                                                 | -                   | 38                          | 515                 |
| 2                                                                       | -                               | 13                                       | -                                           | -                                                 | -                   | -                           | 15                  |
| -                                                                       | -                               | -                                        | -                                           | -2                                                | -                   | -                           | -2                  |
| -72                                                                     | -                               | -                                        | -                                           | -                                                 | -                   | -6                          | -78                 |
| -3                                                                      | -                               | -                                        | -                                           | -                                                 | -                   | -25                         | -28                 |
| -73                                                                     | -                               | 490                                      | -51                                         | -2                                                | 2.521               | 50                          | 2.935               |
| -198                                                                    | -                               | -                                        | -                                           | -                                                 | -                   | -164                        | -362                |
| 12                                                                      | -                               | -                                        | -                                           | -                                                 | -                   | 61                          | 73                  |
| -                                                                       | -                               | -                                        | -                                           | -                                                 | -1.073              | -3                          | -1.076              |
| -                                                                       | -399                            | -                                        | -                                           | -                                                 | -                   | -                           | -399                |
| -1.000                                                                  | 1.000                           | -                                        | -                                           | -                                                 | -                   | -                           | -                   |
| <b>11.247</b>                                                           | <b>-580</b>                     | <b>2.717</b>                             | <b>-1.245</b>                               | <b>1</b>                                          | <b>2.521</b>        | <b>229</b>                  | <b>22.278</b>       |
| 1.449                                                                   | -                               | -                                        | -                                           | -                                                 | -1.449              | -                           | -                   |
| -                                                                       | -                               | -                                        | -                                           | -                                                 | 2.422               | 8                           | 2.430               |
| -93                                                                     | -                               | 133                                      | 635                                         | -3                                                | -                   | 22                          | 694                 |
| -                                                                       | -                               | -                                        | 635                                         | -                                                 | -                   | 10                          | 645                 |
| -                                                                       | -                               | 131                                      | -                                           | -                                                 | -                   | -1                          | 130                 |
| -10                                                                     | -                               | 2                                        | -                                           | -                                                 | -                   | -                           | -8                  |
| -                                                                       | -                               | -                                        | -                                           | -3                                                | -                   | -                           | -3                  |
| -52                                                                     | -                               | -                                        | -                                           | -                                                 | -                   | 2                           | -50                 |
| -31                                                                     | -                               | -                                        | -                                           | -                                                 | -                   | 11                          | -20                 |
| -93                                                                     | -                               | 133                                      | 635                                         | -3                                                | 2.422               | 30                          | 3.124               |
| -20                                                                     | -                               | -                                        | -                                           | -                                                 | -                   | -10                         | -30                 |
| -                                                                       | -                               | -                                        | -                                           | -                                                 | -                   | -                           | -                   |
| -                                                                       | -                               | -                                        | -                                           | -                                                 | -1.072              | -4                          | -1.076              |
| -                                                                       | -1.268                          | -                                        | -                                           | -                                                 | -                   | -                           | -1.268              |
| -1.002                                                                  | 1.002                           | -                                        | -                                           | -                                                 | -                   | -                           | -                   |
| <b>11.581</b>                                                           | <b>-846</b>                     | <b>2.850</b>                             | <b>-610</b>                                 | <b>-2</b>                                         | <b>2.422</b>        | <b>245</b>                  | <b>23.028</b>       |



## Konzern-Kapitalflussrechnung für das Geschäftsjahr 2010

| Mio. €                                                                                                          | 2010          | Vorjahr <sup>1</sup> |
|-----------------------------------------------------------------------------------------------------------------|---------------|----------------------|
| <b>Konzernergebnis</b>                                                                                          | <b>2.430</b>  | <b>2.564</b>         |
| Veränderung der versicherungstechnischen Rückstellungen (netto)                                                 | 7.141         | 5.335                |
| Veränderung der aktivierten Abschlusskosten                                                                     | -564          | -70                  |
| Veränderung der Depotforderungen und -verbindlichkeiten sowie der Abrechnungsforderungen und -verbindlichkeiten | 1.152         | -69                  |
| Veränderung der sonstigen Forderungen und Verbindlichkeiten                                                     | 505           | -94                  |
| Gewinne/Verluste aus dem Abgang von Kapitalanlagen                                                              | -1.649        | -1.612               |
| Veränderung bei Wertpapieren im Handelsbestand                                                                  | -165          | 866                  |
| Veränderung sonstiger Bilanzposten                                                                              | 79            | 620                  |
| Sonstige zahlungsunwirksame Aufwendungen und Erträge                                                            | -93           | 1.114                |
| <b>I. Mittelfluss aus laufender Geschäftstätigkeit</b>                                                          | <b>8.836</b>  | <b>8.654</b>         |
| Veränderung aus dem Verlust der Beherrschung über konsolidierte Tochterunternehmen                              | -8            | 1                    |
| Veränderung aus der Übernahme der Beherrschung über konsolidierte Tochterunternehmen                            | -3            | -562                 |
| Veränderung aus dem Erwerb bzw. dem Verkauf und der Endfälligkeit von Kapitalanlagen                            | -7.042        | -3.806               |
| Veränderung aus dem Erwerb sowie dem Verkauf von Kapitalanlagen der fondsgebundenen Lebensversicherung          | -657          | -711                 |
| Sonstige                                                                                                        | 14            | -185                 |
| <b>II. Mittelfluss aus Investitionstätigkeit</b>                                                                | <b>-7.696</b> | <b>-5.263</b>        |
| Einzahlungen aus Eigenkapitalzuführungen und von nicht beherrschenden Anteilseignern                            | -             | -                    |
| Auszahlungen an Unternehmenseigner und nicht beherrschende Anteilseigner                                        | 1.301         | 752                  |
| Dividendenzahlungen                                                                                             | 1.076         | 1.076                |
| Veränderung aus sonstiger Finanzierungstätigkeit                                                                | 993           | -852                 |
| <b>III. Mittelfluss aus Finanzierungstätigkeit</b>                                                              | <b>-1.384</b> | <b>-2.680</b>        |
| <b>Veränderung des Zahlungsmittelbestands (I. + II. + III.)</b>                                                 | <b>-244</b>   | <b>711</b>           |
| Währungseinfluss auf den Zahlungsmittelbestand                                                                  | 62            | 6                    |
| Zahlungsmittelbestand zu Beginn des Geschäftsjahres                                                             | 3.082         | 2.365                |
| Zahlungsmittelbestand am Ende des Geschäftsjahres                                                               | 2.900         | 3.082                |
| Zusatzinformationen                                                                                             |               |                      |
| Ertragsteuerzahlungen (per saldo)                                                                               | 574           | 239                  |
| Erhaltene Dividenden                                                                                            | 308           | 303                  |
| Erhaltene Zinsen                                                                                                | 7.083         | 6.954                |
| Gezahlte Zinsen                                                                                                 | 672           | 735                  |

<sup>1</sup> Vorjahreswerte angepasst aufgrund IAS 7, siehe Abschnitt „Änderung der Bilanzierungs- und Bewertungsmethoden“.

## Konzernanhang

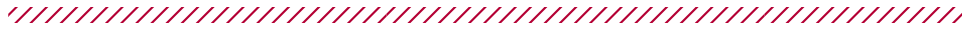

### Anwendung der International Financial Reporting Standards (IFRS)

Der Konzernabschluss von Munich Re wurde auf der Grundlage von § 315 a Abs. 1 HGB in Verbindung mit Artikel 4 der Verordnung (EG) Nr. 1606/2002 des Europäischen Parlaments und des Rates vom 19. Juli 2002 betreffend die Anwendung internationaler Rechnungslegungsstandards erstellt. Beachtet wurden die nach den Artikeln 2, 3 und 6 der genannten Verordnung übernommenen internationalen Rechnungslegungsstandards sowie die in § 315 a Abs. 1 HGB bezeichneten Regelungen des Handelsgesetzbuchs. Der Konzernabschluss erfüllt zugleich sämtliche Anforderungen der IFRS. Berichtswährung ist der Euro (€). Betragsangaben werden auf Millionen € gerundet dargestellt. Betragsangaben in Klammern beziehen sich auf das Vorjahr.

Seit 2002 werden die vom International Accounting Standards Board (IASB) erlassenen Rechnungslegungsstandards als „International Financial Reporting Standards (IFRS)“ bezeichnet; die Vorschriften aus früheren Jahren tragen weiterhin den Namen „International Accounting Standards (IAS)“. Soweit wir uns in unseren Erläuterungen nicht explizit auf einen ganz bestimmten Standard beziehen, gebrauchen wir beide Begriffe synonym. Die versicherungstechnischen Posten werden im Einklang mit den Vorschriften des IFRS 4 auf der Basis der US GAAP (United States Generally Accepted Accounting Principles) bilanziert und bewertet.

### Entsprechenserklärung zum Deutschen Corporate Governance Kodex gemäß § 161 Aktiengesetz

Vorstand und Aufsichtsrat der Münchener Rückversicherungs-Gesellschaft AG haben im November 2010 eine aktualisierte Entsprechenserklärung zum Deutschen Corporate Governance Kodex (§ 161 AktG) abgegeben und ihren Aktionären über das Internet dauerhaft zugänglich gemacht.

### Vorjahreszahlen

Die Vorjahreswerte wurden auf derselben Grundlage ermittelt wie die Zahlen für das Geschäftsjahr 2010.

## Konsolidierung

### Konsolidierungskreis

In den Konzernabschluss beziehen wir gemäß IAS 27 die Münchener Rück AG (Mutterunternehmen) und alle Unternehmen ein, an denen die Münchener Rück AG direkt oder indirekt die Mehrheit der Stimmrechte hält oder bei denen sie über die faktische Kontrollmöglichkeit verfügt (Tochterunternehmen). Zweckgesellschaften, zum Beispiel Spezialfonds, werden gemäß SIC 12 in den Konzernabschluss einbezogen, wenn die wirtschaftliche Betrachtung zeigt, dass seitens Munich Re Beherrschung vorliegt.

#### Anzahl konsolidierter Tochterunternehmen<sup>1</sup>

|                      | Inland | Ausland | Gesamt |
|----------------------|--------|---------|--------|
| 31.12. Vorjahr       | 77     | 233     | 310    |
| Zugänge              | 7      | 8       | 15     |
| Abgänge              | 4      | 13      | 17     |
| 31.12. Geschäftsjahr | 80     | 228     | 308    |

<sup>1</sup> Zudem wurden 64 inländische und 2 ausländische Spezialfonds in den Konsolidierungskreis einbezogen.

### Unternehmenszusammenschlüsse des Geschäftsjahres

Die folgenden Angaben zur erstmaligen Bilanzierung werden auf vorläufiger Basis gemacht, da sich unter anderem noch Änderungen des Kaufpreises und der Steuerpositionen der Bilanz ergeben können.

Am 1. November 2010 hat Munich Re über ihre Tochtergesellschaft Sterling Life Insurance Company, Bellingham, Washington, Teile des Geschäftsbetriebs der Guardian Healthcare Inc. (Guardian), Greenville, South Carolina, übernommen. Guardian bietet spezielle, staatlich geförderte Krankenversicherungsleistungen im Staat South Carolina an. Der Kaufpreis betrug 4 Millionen US\$ (2,9 Millionen €) in bar und wurde vollständig aus eigenen Mitteln finanziert. Durch diese Transaktion verfügt Sterling Life Insurance Company, Bellingham, Washington, über ein etabliertes Netzwerk an medizinischen Dienstleistern und einen erweiterten Kundenstamm.

Am 24. November 2010 hat Munich Re über ihr Tochterunternehmen EUROPÄISCHE Reiseversicherung AG (ERV), München, weitere Anteile von 75,0 % an dem bisher nach der Equity-Methode bilanzierten Tochterunternehmen CJSIC „European Travel Insurance“, Moskau, zu einem Kaufpreis von 2,5 Millionen € erworben. Munich Re hält nun 99,95 % der Anteile.

Des Weiteren hat die EUROPÄISCHE Reiseversicherung AG, München, am 25. November 2010 ihre Anteile an dem bisher nach der Equity-Methode bilanzierten Tochterunternehmen Geschlossene Aktiengesellschaft Europäische Reiseversicherung, Kiew, um 70,1 % zum Kaufpreis von 0,9 Millionen € erhöht. Munich Re hält nun 95,22 % der Anteile.

Ziel der Anteilskäufe ist der Ausbau des Reiseversicherungsgeschäfts der ERV in Russland und in der Ukraine.

Die Aufstellung des gesamten Anteilsbesitzes finden Sie im Abschnitt „Aufstellung des Anteilsbesitzes zum 31. Dezember 2010 gemäß § 313 Abs. 2 HGB“.

### Konsolidierungsgrundsätze

Die Jahresabschlüsse der in den Konzern einbezogenen Tochterunternehmen und Zweckgesellschaften unterliegen einheitlichen Bilanzierungs- und Bewertungsmethoden. Der Bilanzstichtag der einbezogenen Unternehmen ist grundsätzlich der 31. Dezember. Spezialfonds haben zum Teil andere Bilanzstichtage; diese Fonds werden auf der Basis von Zwischenabschlüssen zum 31. Dezember konsolidiert.

Die Kapitalkonsolidierung erfolgt nach der Erwerbsmethode. Um das Eigenkapital zum Zeitpunkt des Erwerbs zu ermitteln, setzen wir die erworbenen identifizierbaren Vermögenswerte und Schulden des Tochterunternehmens beziehungsweise der Zweckgesellschaft mit ihren beizulegenden Zeitwerten an. Die im Austausch für die erworbenen Anteile übertragene Gegenleistung wird mit dem auf den Konzern entfallenden anteiligen Eigenkapital zum Erwerbszeitpunkt verrechnet; ein verbleibender positiver Unterschiedsbetrag wird als Geschäfts- oder Firmenwert aktiviert. Jahresergebnisse, welche die Tochterunternehmen beziehungsweise Zweckgesellschaften nach der Erstkonsolidierung erwirtschaftet haben, sind im Eigenkapital des Konzerns enthalten. Forderungen und Verbindlichkeiten sowie Aufwendungen und Erträge, die aus konzerninternen Geschäften resultieren, werden eliminiert, sofern sie nicht von untergeordneter Bedeutung sind.

### Assoziierte Unternehmen

Als assoziiert gelten nach IAS 28 alle Unternehmen, die nicht Tochter- oder Gemeinschaftsunternehmen sind und bei denen die Möglichkeit besteht, einen maßgeblichen Einfluss auf die Geschäfts- oder Finanzpolitik auszuüben. Bei Anteilen an Unternehmen zwischen 20 % und 50 % der Stimmrechte wird davon ausgegangen, dass es sich um assoziierte Unternehmen handelt, es sei denn, die Vermutung des maßgeblichen Einflusses ist widerlegt.

#### Anzahl der nach der Equity-Methode bewerteten Unternehmen

|                      | Inland | Ausland | Gesamt |
|----------------------|--------|---------|--------|
| 31.12. Vorjahr       | 20     | 32      | 52     |
| Zugänge              | 2      | -       | 2      |
| Abgänge              | -      | 5       | 5      |
| 31.12. Geschäftsjahr | 22     | 27      | 49     |

#### Anzahl der übrigen assoziierten Unternehmen (nicht nach der Equity-Methode bewertet)

|                      | Inland | Ausland | Gesamt |
|----------------------|--------|---------|--------|
| 31.12. Vorjahr       | 45     | 17      | 62     |
| Zugänge              | 2      | 3       | 5      |
| Abgänge              | 2      | 4       | 6      |
| 31.12. Geschäftsjahr | 45     | 16      | 61     |

Erläuterungen zu den Bewertungsmethoden der Anteile an assoziierten Unternehmen finden Sie unter Aktivposten B – Kapitalanlagen.

## Bilanzierung und Bewertung

### Ausübung von Ermessen und Schätzungen bei der Bilanzierung und Bewertung

Bei der Erstellung des Konzernabschlusses ist es erforderlich, bei der Anwendung der Bilanzierungs- und Bewertungsmethoden Ermessen auszuüben sowie Schätzungen und Annahmen zu treffen, die sich auf ausgewiesene Jahresabschlussposten in der Konzernbilanz, der Konzern-Gewinn- und Verlustrechnung sowie auf Angaben zu Eventualforderungen und -verbindlichkeiten auswirken.

Gerade in der Erst- und Rückversicherung ist für die Bewertung der versicherungstechnischen Rückstellungen der Einsatz von Schätzverfahren von erheblicher Bedeutung, zumal im Regelfall keine Marktpreise verfügbar sind und die Entwicklung der künftigen Zahlungsströme von Versicherungsverträgen nicht ex ante abschließend vorhersehbar ist. Jedoch spielen Ermessensentscheidungen und Schätzwerte auch bei einer ganzen Reihe weiterer Positionen eine erhebliche Rolle.

Unsere internen Prozesse sind darauf ausgerichtet, die Wertansätze unter Berücksichtigung aller relevanten Informationen möglichst zuverlässig zu ermitteln. Basis für die Wertermittlung sind die besten Erkenntnisse des Managements zu den jeweiligen Sachverhalten zum Abschlussstichtag. Dennoch liegt es in der Charakteristik dieser Positionen, dass Schätzwerte gegebenenfalls im Zeitverlauf angepasst werden müssen, da neuere Erkenntnisse bei der Bewertung zu berücksichtigen sind.

Wegen der bestehenden Unsicherheiten bei der Schätzung enthalten die zu treffenden Ermessensentscheidungen stets eine subjektive Komponente. Dies kann dazu führen, dass vergleichbare Sachverhalte bei Munich Re mit einem von anderen Unternehmen abweichenden Wert angesetzt werden, zumal die Bandbreite realistischer Annahmen im Einzelfall relativ groß sein kann. Das bedeutet jedoch nicht, dass die Bewertung nicht sachgerecht erfolgt, sondern spiegelt neben ungleichen Erkenntnissen auch die unterschiedliche Einschätzung künftiger Entwicklungen wider.

Ermessensentscheidungen sowie Schätzwerte sind insbesondere bei den folgenden Positionen von Bedeutung und werden in den Erläuterungen dieser Positionen näher beschrieben:

- // Geschäfts- oder Firmenwert und sonstige immaterielle Vermögenswerte
- // Zeitwerte und Wertminderungen von Finanzinstrumenten
- // Aktivierte Abschlusskosten
- // Versicherungstechnische Rückstellungen
- // Pensionsrückstellungen
- // Steuerabgrenzung
- // Eventualverbindlichkeiten

### Änderung der Bilanzierungs- und Bewertungsmethoden

Die Anwendung der Bilanzierungs-, Bewertungs- und Ausweismethoden folgt dem Prinzip der Stetigkeit.

Im Geschäftsjahr 2010 waren folgende neuen bzw. geänderten IFRS erstmalig verpflichtend anzuwenden:

Mit der Änderung des **IFRS 2 (rev. 06/2009), Anteilsbasierte Vergütung**, wird die Bilanzierung von anteilsbasierten Vergütungen mit Barausgleich klargestellt. Neu geregelt wurde im Wesentlichen die Frage, wie einzelne Tochtergesellschaften in einem Konzern bestimmte anteilsbasierte Vergütungsvereinbarungen (mit Barausgleich) in ihrem eigenen Abschluss bilanzieren. Im Rahmen dieser Vereinbarungen erhält das Tochterunternehmen Güter oder Dienstleistungen von Arbeitnehmern oder Lieferanten, die jedoch das Mutterunternehmen oder ein anderes Konzernunternehmen bezahlt. Die Neuregelung hat auf Munich Re keine Auswirkungen.

Die Überarbeitung von **IFRS 3 (rev. 01/2008), Unternehmenszusammenschlüsse, sowie IAS 27 (rev. 01/2008), Konzern- und Einzelabschlüsse**, betrifft insbesondere Änderungen bei der bilanziellen Abbildung von nicht beherrschenden Anteilen, sukzessiven Anteilserwerben, akquisitionsbezogenen Kosten und bedingten Kaufpreisbestandteilen. Auswirkungen der Neuregelungen auf Munich Re ergeben sich im Geschäftsjahr 2010 hauptsächlich durch die akquisitionsbezogenen Kosten, die nicht mehr aktiviert werden dürfen, die erfolgswirksame Neubewertung von Altanteilen bei sukzessiven Anteilserwerben und durch die Folgeänderung von IAS 7, Kapitalflussrechnungen, der verlangt, Änderungen der Eigentumsanteile an Tochterunternehmen ohne Kontrollverlust als Zahlungsmittelflüsse aus Finanzierungstätigkeit einzustufen. Die Konzern-Kapitalflussrechnung wurde für das Vorjahr angepasst.

Mit der Änderung von **IAS 39 (rev. 07/2008), Finanzinstrumente: Ansatz und Bewertung – Geeignete Grundgeschäfte**, erfolgt eine Klarstellung, wie sich die Designation von Teilen der Zahlungsströme oder des Risikos als Grundgeschäft auswirkt und inwieweit Inflationsrisiken als Grundgeschäft designiert werden können. Die Neuregelung wirkt sich auf Munich Re nicht aus.

Die Änderungen, die im Projekt „Jährliche Verbesserungen an den IFRS“ im April 2009 veröffentlicht wurden, sind ebenfalls erstmals anzuwenden für Geschäftsjahre, die am oder nach dem 1. Januar 2010 beginnen. Sie betreffen insgesamt zehn Standards sowie zwei Interpretationen und sind für Munich Re von untergeordneter Bedeutung. Aus dem Prozess der jährlichen Verbesserungen, veröffentlicht im Mai 2008, sind die Änderungen des IFRS 5, Zur Veräußerung gehaltene langfristige Vermögenswerte und aufgegebene Geschäftsbereiche, erstmals für Geschäftsjahre, die am oder nach dem 1. Juli 2009 beginnen, anzuwenden. Diese Änderung ist für Munich Re ebenfalls unwesentlich.

Die erstmalig auf Basis der Verordnung (EG) Nr. 1606/2002 der Europäischen Kommission verpflichtend anzuwendenden Interpretationen IFRIC 12, Dienstleistungskonzessionsvereinbarungen, IFRIC 15, Verträge über die Errichtung von Immobilien, IFRIC 16, Absicherung einer Nettoinvestition in einen ausländischen Geschäftsbetrieb, sowie IFRIC 18, Übertragung von Vermögenswerten durch einen Kunden, haben keine wesentlichen Auswirkungen auf den Abschluss von Munich Re. Dies gilt auch für die erstmalig nach den Vorgaben des IASB verpflichtend anzuwendende Interpretation IFRIC 17, Sachdividenden an Eigentümer.

Im Dezember 2010 hat das IASB ein Leitliniendokument zur Lageberichterstattung (Management Commentary) veröffentlicht. Diese Veröffentlichung ist kein IFRS, sondern ein nicht verpflichtendes Rahmenkonzept für die Erstellung eines den IFRS-Abschluss ergänzenden und erläuternden Berichts. Diese Leitlinien können ab Dezember 2010 freiwillig angewandt werden. Die Vorschriften für die Erstellung eines Lageberichts nach HGB sind mit denen dieses Dokuments vergleichbar. Munich Re ist auf Basis von § 315a Abs. 1 HGB zur Erstellung eines Lageberichts verpflichtet, sodass eine entsprechende Berichterstattung bereits erfolgt.

Außerdem hat das IASB im September 2010 die erste Phase seines Projekts zur Überarbeitung des Rahmenkonzepts für die Aufstellung und Darstellung von Abschlüssen abgeschlossen und die neuen Kapitel 1 „Zielsetzung der Finanzberichterstattung“ und Kapitel 3 „Qualitative Merkmale entscheidungsnützlicher Finanzinformationen“ innerhalb des bestehenden Rahmenkonzepts veröffentlicht. Ziel des Gesamtprojekts ist es, eine Grundlage für die Ableitung künftiger prinzipienbasierter und miteinander konsistenter IFRS zu erarbeiten. Die überarbeiteten Kapitel stellen damit mit ihrer Veröffentlichung die gültige Basis für die Bilanzierung nach IFRS dar.



Ab dem Geschäftsjahr 2010 weisen wir das Geschäftsfeld Munich Health, das die weltweite Krankenrückversicherung sowie die Krankenerstversicherung außerhalb Deutschlands umfasst, erstmals als eigenständiges Segment nach IFRS 8, Geschäftssegmente, aus. Das Geschäft von Munich Health wurde bisher überwiegend in den Segmenten Rückversicherung Leben/Gesundheit und Erstversicherung Gesundheit ausgewiesen. Das Geschäft des Segments Rückversicherung Leben/Gesundheit ohne Munich Health wird nunmehr im Segment Rückversicherung Leben abgebildet. Im Erstversicherungssegment Gesundheit verbleiben das Krankenerstversicherungsgeschäft in Deutschland sowie das Reiseversicherungsgeschäft. Darüber hinaus haben wir die Methode der Verteilung der Kapitalanlagen auf unsere Segmente weiter verfeinert. Die Werte des Vorjahres wurden entsprechend angepasst.

Ab dem Geschäftsjahr 2010 weisen wir Veräußerungsgruppen ausschließlich aus, wenn neben dem zur Veräußerung gehaltenen langfristigen Vermögenswert weitere Vermögenswerte und Schulden tatsächlich auf den jeweiligen Erwerber übergehen. Vermögenswerte und Schulden, die im Rahmen der Transaktion entfallen, aber nicht transferiert werden, ordnen wir der jeweiligen Veräußerungsgruppe daher nicht zu. Dies betrifft beispielsweise bestimmte latente Steuerpositionen und Rückstellungen für latente Beitragsrückerstattung.

#### **Noch nicht in Kraft getretene Standards und Änderungen von Standards**

Die Änderungen von **IAS 32 (rev. 10/2009), Finanzinstrumente: Ausweis**, sind erstmals für Geschäftsjahre anzuwenden, die am oder nach dem 1. Februar 2010 beginnen. Durch die Änderung wird neu geregelt, dass bestimmte Bezugsrechte sowie Optionen und Optionsscheine in Fremdwährung (also einer anderen Währung als der funktionalen Währung) beim Emittenten, auf dessen Eigenkapitalinstrumente sich diese Rechte beziehen, bilanziell nunmehr als Eigenkapital und nicht mehr als Verbindlichkeiten auszuweisen sind.

Die Interpretation **IFRIC 19, Tilgung finanzieller Verbindlichkeiten durch Eigenkapitalinstrumente**, ist erstmals anzuwenden für Geschäftsjahre, die am oder nach dem 1. Juli 2010 beginnen. Die Interpretation enthält Leitlinien, wie finanzielle Verbindlichkeiten in Einklang mit IAS 39 zu bilanzieren sind, wenn der Gläubiger dabei Aktien oder andere Eigenkapitalinstrumente des Unternehmens zur vollen oder teilweisen Tilgung dieser Verbindlichkeiten akzeptiert.

Die folgenden geänderten Standards sind erstmals verpflichtend für Geschäftsjahre anzuwenden, die am oder nach dem 1. Januar 2011 beginnen:

Mit der Überarbeitung von **IAS 24 (rev. 11/2009), Angaben über Beziehungen zu nahestehenden Unternehmen und Personen**, werden die Berichtspflichten von Unternehmen, an denen der Staat beteiligt ist (sogenannte state-controlled entities), vereinfacht. Bestimmte Beziehungen zu nahestehenden Unternehmen, die sich aus einer Beteiligung des Staates an Privatunternehmen ergeben, sind von einigen im geänderten Standard genannten Angabepflichten nach IAS 24 ausgenommen. Darüber hinaus wurde die Definition der nahestehenden Unternehmen und Personen grundlegend überarbeitet. Die Änderungen sind für Munich Re von untergeordneter Bedeutung.

Die Änderungen, die im Projekt „Jährliche Verbesserungen an den IFRS“ im Mai 2010 veröffentlicht wurden, betreffen elf IFRS sowie die Interpretation IFRIC 13. Mit Ausnahme der Änderung von IAS 34, Zwischenberichterstattung, sind diese für Munich Re von untergeordneter Bedeutung. Teilweise sind die Änderungen bereits für Geschäftsjahre anzuwenden, die am oder nach dem 1. Juli 2010 beginnen.

Durch die Änderung des IAS 34 werden die Angabepflichten im Anhang erweitert. Von Bedeutung ist insbesondere, dass künftig auch in Zwischenabschlüssen signifikante Transfers zwischen den Levels der Bewertungshierarchie der Zeitwertbewertung von Finanzinstrumenten veröffentlicht werden müssen. Munich Re hat einen Prozess aufgesetzt, der gewährleistet, dass derartige Transfers transparent gemacht und gegebenenfalls in den Zwischenberichten veröffentlicht werden.

Die geänderte Interpretation IFRIC 14 (rev. 11/2009), IAS 19 – Die Begrenzung eines leistungsorientierten Vermögenswertes, Mindestfinanzierungsvorschriften und ihre Wechselwirkung, erlaubt es Unternehmen unter den Umständen, unter denen diese den Mindestfinanzierungsvorschriften unterliegen und eine Vorauszahlung der Beiträge leisten, die diesen Anforderungen genügen, den Nutzen aus einer solchen Vorauszahlung als Vermögenswert darzustellen. Die Änderung hat für Munich Re keine praktische Bedeutung.

Nach dem 1. Januar 2011 erstmals verpflichtend anzuwenden sind die folgenden Standards. Diese sind in der EU noch nicht übernommen worden.

Mit IFRS 9 (11/2009 sowie rev. 10/2010), Finanzinstrumente, sollen die bisherigen Regelungen des IAS 39 zur Bilanzierung und Bewertung von Finanzinstrumenten abgelöst werden. Wegen seiner Komplexität ist das gesamte Projekt in drei Phasen unterteilt. Die bislang in IFRS 9 verabschiedeten Neuregelungen aus der ersten Phase des Projekts betreffen insbesondere die Bewertung von Finanzinstrumenten. Demnach soll für finanzielle Vermögenswerte künftig grundsätzlich nur noch zwischen einer Bewertung zu fortgeführten Anschaffungskosten oder zu beizulegenden Zeitwerten mit erfolgswirksamer Erfassung der Wertänderungen unterschieden werden. Die Unterscheidung ist auf Basis des Geschäftsmodells des Unternehmens sowie der vertraglichen Zahlungsströme der Vermögenswerte zu treffen. Zusätzlich ist für Eigenkapitalinstrumente auch eine Bewertung zu beizulegenden Zeitwerten ohne Buchung über die Gewinn- und Verlustrechnung möglich. Allerdings ist es dann nicht zulässig, einmal erfolgsneutral erfasste Wertänderungen erfolgswirksam umzubuchen. Die Möglichkeit einer freiwilligen Bewertung zu beizulegenden Zeitwerten (Fair Value Option) bleibt ebenfalls erhalten. Für finanzielle Verbindlichkeiten ändern sich die Bewertungsvorschriften nicht mit der Ausnahme, dass bei Nutzung der Fair Value Option Wertänderungen aufgrund der Änderung der Bonität des Unternehmens künftig erfolgsneutral zu erfassen sind. Die beiden anderen Phasen befassen sich mit den Vorschriften zur Erfassung von Wertminderungen und zur Bilanzierung von Sicherungsbeziehungen. Diese Regelungen stehen derzeit noch in der Diskussion und sollen nach Abschluss des gesamten Projekts in den IFRS 9 integriert werden.

Die Änderungen zu IFRS 7 (rev. 10/2010), Finanzinstrumente: Angaben, Verbesserte Angaben zu Finanzinstrumenten, enthalten erweiterte Angabepflichten zur Übertragung finanzieller Vermögenswerte, um dadurch mehr Transparenz darüber zu schaffen, welchen Einfluss derartige Transaktionen auf die Risikoexponierung und damit auf die finanzielle Lage von Unternehmen haben.

Die Änderungen zu IAS 12 (rev. 12/2010), Ertragsteuern, Deferred Tax: Recovery of Underlying Assets, greifen die Thematik auf, dass die Bewertung latenter Steuern davon abhängt, ob der Buchwert eines Vermögenswerts durch Nutzung oder durch Veräußerung realisiert wird. Dabei ist die Abgrenzung in der Praxis häufig nicht eindeutig. Dies wird nun durch die Einführung einer widerlegbaren Vermutung klargestellt, dass die Realisierung des Buchwerts im Normalfall durch Veräußerung erfolgt.

## Aktivseite

### A // Immaterielle Vermögenswerte

**Geschäfts- oder Firmenwerte** aus der Erstkonsolidierung von Tochterunternehmen werden planmäßig mindestens einmal jährlich sogenannten Werthaltigkeitsprüfungen (Impairmenttests) gemäß IAS 36 unterzogen. Bei Vorliegen von Wertminderungsindikatoren führen wir zusätzlich außerplanmäßige Werthaltigkeitstests durch. Zur Werthaltigkeitsprüfung sind die Geschäfts- oder Firmenwerte den zahlungsmittelgenerierenden Einheiten bzw. Gruppen von zahlungsmittelgenerierenden Einheiten zuzuordnen, die aus den Synergien des Unternehmenszusammenschlusses Nutzen ziehen sollen. Ein etwaiger Wertminderungsbedarf ergibt sich aus dem Vergleich des Buchwerts (inklusive des zugeordneten Geschäfts- oder Firmenwerts) einer zahlungsmittelgenerierenden Einheit bzw. einer Gruppe von zahlungsmittelgenerierenden Einheiten mit dem erzielbaren Betrag. Der erzielbare Betrag ist das Maximum aus dem beizulegenden Zeitwert abzüglich Verkaufskosten und dem Nutzungswert (Barwert der künftigen Zahlungsströme, die voraussichtlich aus einer zahlungsmittelgenerierenden Einheit bzw. einer Gruppe von zahlungsmittelgenerierenden Einheiten abgeleitet werden können). Soweit der erzielbare Betrag niedriger ist als der Buchwert, wird in Höhe der Differenz eine außerplanmäßige Abschreibung des Geschäfts- oder Firmenwerts erfasst.

Die **sonstigen immateriellen Vermögenswerte** enthalten überwiegend erworbene Versicherungsbestände sowie entgeltlich erworbene und selbst erstellte Software. Die erworbenen Versicherungsbestände setzen wir bei Erwerb mit dem Bestandsbarwert (PVFP – Present Value of Future Profits) an. Dieser bestimmt sich als der Barwert der erwarteten Erträge aus dem übernommenen Portfolio ohne Berücksichtigung von Neugeschäft und Steuereffekten. Die planmäßige Abschreibung erfolgt entsprechend der Realisierung der Überschüsse aus den Versicherungsbeständen, die der PVFP-Berechnung zugrunde liegen. Die Software wird zu Anschaffungs- oder Herstellungskosten angesetzt abzüglich linearer Abschreibungen. Als Nutzungsdauer liegen in der Regel drei bis fünf Jahre zugrunde, im Ausnahmefall bis zu zehn Jahre. Die sonstigen immateriellen Vermögenswerte werden zum Stichtag auf ihre Werthaltigkeit überprüft und sofern erforderlich außerplanmäßig abgeschrieben. Die Abschreibungen auf erworbene Versicherungsbestände weisen wir unter den Aufwendungen für den Versicherungsbetrieb aus. Die Abschreibungen auf Software und die übrigen immateriellen Vermögenswerte werden in der Konzern-Gewinn- und Verlustrechnung auf die Aufwendungen für Kapitalanlagen, auf die Leistungen an Kunden und auf die Aufwendungen für den Versicherungsbetrieb verteilt. Sofern keine Zuordnung der Kosten auf die Funktionsbereiche möglich ist, werden sie unter den sonstigen nicht operativen Aufwendungen ausgewiesen. Die Zuschreibungen auf Software und die übrigen immateriellen Vermögenswerte fließen in die sonstigen nicht operativen Erträge ein.

### B // Kapitalanlagen

**Grundstücke und Bauten** in den Kapitalanlagen betreffen fremdgenutzte Objekte. Sie werden mit den Anschaffungs- bzw. Herstellungskosten angesetzt. Unterhaltskosten erfassen wir als Aufwand. Bauliche Maßnahmen werden grundsätzlich ab 5 % der bisherigen historischen Gebäudeanschaffungs-/herstellungskosten auf Aktivierbarkeit analysiert. Gebäude schreiben wir nach dem Komponentenansatz entsprechend ihrer gebäudeklassenspezifischen gewichteten Nutzungsdauer planmäßig linear über 40 bis 55 Jahre ab. Sowohl bei Grundstücken als auch bei Gebäuden nehmen wir außerplanmäßige Abschreibungen vor, wenn ihr erzielbarer Betrag unter den Buchwert sinkt. Außerplanmäßige Abschreibungen erfassen wir in der Konzern-Gewinn- und Verlustrechnung als Aufwendungen für Kapitalanlagen, Zuschreibungen als Erträge aus Kapitalanlagen. Die als „zur Veräußerung gehalten“ klassifizierten Grundstücke und Bauten werden mit dem niedrigeren Wert aus Buchwert und beizulegendem Zeitwert abzüglich Veräußerungskosten bewertet.

**Anteile an verbundenen Unternehmen**, die wir wegen ihrer untergeordneten Bedeutung nicht konsolidieren, setzen wir mit ihrem beizulegenden Zeitwert an, sofern dieser verlässlich bestimmbar ist. Soweit die Anteile an einer Börse notiert sind, verwenden wir die Börsenwerte zum Bilanzstichtag (Marktwerte); bei anderen Anteilen wird der beizulegende Zeitwert nach dem Ertragswert- bzw. dem Net-Asset-Value-Verfahren bestimmt. Die Änderungen des beizulegenden Zeitwerts verbuchen wir in den übrigen Rücklagen unter den unrealisierten Gewinnen und Verlusten.

**Anteile an assoziierten Unternehmen** bewerten wir nach der Equity-Methode mit dem anteiligen Eigenkapital, das auf den Konzern entfällt. Der Anteil am Jahresergebnis eines assoziierten Unternehmens, der den Konzern betrifft, ist im Ergebnis aus Kapitalanlagen enthalten. In der Regel werden Eigenkapital und Jahresergebnis dem letzten verfügbaren Jahres- oder Konzernabschluss des assoziierten Unternehmens entnommen; bei Jahresabschlüssen wesentlicher assoziierter Unternehmen werden gemäß IAS 28.27 für den Konzernabschluss angemessene Anpassungen an die Bilanzierungs- und Bewertungsmethoden von Munich Re vorgenommen; außerordentliche Sachverhalte werden phasengleich berücksichtigt, wenn sie für die zutreffende Darstellung der Vermögens-, Finanz- und Ertragslage des assoziierten Unternehmens wesentlich sind. Anteile an assoziierten Unternehmen, die für die Vermögens-, Finanz- und Ertragslage des Konzerns von untergeordneter Bedeutung sind, setzen wir mit ihrem beizulegenden Zeitwert an, sofern dieser verlässlich bestimmbar ist. Um den beizulegenden Zeitwert zu bestimmen, verwenden wir die Börsenwerte zum Bilanzstichtag, falls die Anteile an einer Börse notiert sind; bei anderen Anteilen wird der beizulegende Zeitwert nach dem Ertragswert- bzw. dem Net-Asset-Value-Verfahren ermittelt.

**Darlehen** sind nicht derivative finanzielle Vermögenswerte mit festen oder bestimmbaren Zahlungen, die nicht auf einem aktiven Markt notiert sind. Sie werden mit fortgeführten Anschaffungskosten nach der Effektivzinsmethode bewertet. Abschreibungen nehmen wir insoweit vor, als mit der Rückzahlung eines Darlehens nicht mehr zu rechnen ist.

**Festverzinsliche Wertpapiere**, die wir mit der Absicht erwerben, sie bis zur Endfälligkeit zu halten, werden mit fortgeführten Anschaffungskosten nach der Effektivzinsmethode bewertet.

**Festverzinsliche oder nicht festverzinsliche Wertpapiere, die jederzeit veräußerbar sind** und nicht zu Handelszwecken gehalten oder unter den Darlehen ausgewiesen werden, bilanzieren wir mit dem beizulegenden Zeitwert. Liegen als Zeitwerte keine Preisnotierungen auf aktiven Märkten vor, bestimmen sich die Wertansätze nach anerkannten Bewertungsmethoden im Einklang mit dem Barwertprinzip. Unrealisierte Gewinne oder Verluste werden unter Berücksichtigung von Zinsabgrenzungen bestimmt und nach Abzug latenter Steuern und der Beträge, die bei Lebens- und Krankenversicherern bei Realisierung den Versicherungsnehmern zustehen (Rückstellung für latente Beitragsrückerstattung), direkt in die übrigen Rücklagen eingestellt.

**Erfolgswirksam zum Zeitwert bewertete Wertpapiere** enthalten Handelsbestände und Wertpapiere, die als erfolgswirksam zum Zeitwert bewertet klassifiziert werden. Handelsbestände umfassen alle festverzinslichen und nicht festverzinslichen Wertpapiere, die wir erworben haben, um damit zu handeln und kurzfristig Gewinne aus Kursveränderungen und Kursdifferenzen zu erzielen; zudem gehören alle derivativen Finanzinstrumente mit positiven Zeitwerten, die wir zu Sicherungszwecken erworben haben, die jedoch nicht den Vorgaben des IAS 39 für eine Bilanzierung als Sicherungsbeziehung genügen, sowie positive Zeitwerte der derivativen Bestandteile von Variable Annuities zu den Handelsbeständen. Bei den Wertpapieren, die als erfolgswirksam zum Zeitwert bewertet klassifiziert werden, handelt es sich um strukturierte Wertpapiere. Diese Klassifizierung kann nur zum Zugangszeitpunkt vorgenommen werden; eine Umgliederung in diese Kategorie in späteren Perioden ist nicht möglich.

Erfolgswirksam zum Zeitwert bewertete Wertpapiere werden mit dem beizulegenden Zeitwert am Bilanzstichtag angesetzt. Liegen als Zeitwerte keine Preisnotierungen auf aktiven Märkten vor, bestimmen sich die Wertansätze insbesondere bei Derivaten nach anerkannten Bewertungsmethoden. Dabei verwendet Munich Re eine Vielzahl von Bewertungsmodellen; Einzelheiten sind der folgenden Tabelle zu entnehmen:

### Bewertungsmodelle

| Derivate                                           | Preismethode       | Parameter                                                                                     | Preismodell                                                                                |
|----------------------------------------------------|--------------------|-----------------------------------------------------------------------------------------------|--------------------------------------------------------------------------------------------|
| <b>Aktien- und Indexrisiken</b>                    |                    |                                                                                               |                                                                                            |
| Börsennotierte Aktienoptionen                      | Notierter Kurs     | -                                                                                             | -                                                                                          |
| OTC Aktienoptionen                                 | Theoretischer Kurs | Notierung Underlying<br>Effektive Volatilitäten<br>Geldmarktzinssatz<br>Dividendenrendite     | Black-Scholes (europ.),<br>Cox, Ross und<br>Rubinstein (amerik.)<br>Monte-Carlo-Simulation |
| Aktien-Forwards                                    | Theoretischer Kurs | Geldmarktzinssatz<br>Aktienkurs<br>Dividendenrendite                                          | Barwert-Methode                                                                            |
| Aktien-/Index-Futures                              | Notierter Kurs     | -                                                                                             | -                                                                                          |
| Total-Return-Swaps<br>(Hedgefonds-Zertifikate)     | Theoretischer Kurs | Marktwerte der Fonds<br>Zinsstrukturkurve                                                     | Barwert-Methode                                                                            |
| <b>Zinsrisiken</b>                                 |                    |                                                                                               |                                                                                            |
| Zins-Swaps                                         | Theoretischer Kurs | Swap-Kurve<br>Geldmarkt-Zinsstrukturkurve                                                     | Barwert-Methode                                                                            |
| Swaptions/Zinsgarantie                             | Theoretischer Kurs | At the money-Volatilitätsmatrix und Skew<br>Swap-Kurve<br>Geldmarkt-Zinsstrukturkurve         | Black-76                                                                                   |
| Zins-Währungs-Swaps                                | Theoretischer Kurs | Swap-Kurve<br>Geldmarkt-Zinsstrukturkurve<br>Devisenkassakurse                                | Barwert-Methode                                                                            |
| Zins-Futures                                       | Notierter Kurs     | -                                                                                             | -                                                                                          |
| Inflations-Swaps                                   | Theoretischer Kurs | Zero-Coupon-Inflation-Swap Sätze<br>Zinsstrukturkurve                                         | Barwert-Methode                                                                            |
| Renten-Futures                                     | Notierter Kurs     | -                                                                                             | -                                                                                          |
| Börsennotierte Optionen<br>auf Renten-Futures      | Notierter Kurs     | -                                                                                             | -                                                                                          |
| <b>Währungsrisiken</b>                             |                    |                                                                                               |                                                                                            |
| Devisenoptionen                                    | Theoretischer Kurs | Volatilität<br>Devisenkassakurse<br>Geldmarkt-Zinsstrukturkurve                               | Garman-Kohlhagen                                                                           |
| Devisentermingeschäfte                             | Theoretischer Kurs | Devisenkassakurse<br>Geldmarkt-Zinsstrukturkurve                                              | Barwert-Methode                                                                            |
| <b>Sonstige Geschäfte</b>                          |                    |                                                                                               |                                                                                            |
| Versicherungsderivate<br>(ohne Variable Annuities) | Theoretischer Kurs | Marktwerte der Katastrophenanleihen<br>Zinsstrukturkurve                                      | Barwert-Methode                                                                            |
| Versicherungsderivate<br>(Variable Annuities)      | Theoretischer Kurs | Biometrische Raten und Stornoraten<br>Volatilitäten<br>Zinsstrukturkurve<br>Devisenkassakurse | Barwert-Methode                                                                            |
| Credit-Default-Swaps                               | Theoretischer Kurs | Credit Spreads<br>Recovery-Rates<br>Zinsstrukturkurve                                         | Barwert-Methode<br>ISDA CDS Standard Model                                                 |
| Commodity-Swaps                                    | Notierter Kurs     | -                                                                                             | -                                                                                          |
| Commodity-Optionen                                 | Theoretischer Kurs | Notierung Underlying<br>Effektive Volatilitäten<br>Geldmarktzinssatz                          | Black-Scholes (europ.),<br>Cox, Ross und Rubinstein<br>(amerik.)                           |

Alle unrealisierten Gewinne oder Verluste aus dieser Bewertung erfassen wir im Ergebnis aus Kapitalanlagen.

**Depotforderungen** sind Forderungen aus dem Rückversicherungsgeschäft an unsere Kunden in Höhe der von diesen vertragsgemäß einbehaltenen Bardepots; wir bilanzieren sie mit dem Nominalbetrag.

Die **sonstigen Kapitalanlagen** setzen sich zusammen aus Einlagen bei Kreditinstituten sowie Anlagen in regenerative Energien. Die Einlagen bei Kreditinstituten werden mit fortgeführten Anschaffungskosten nach der Effektivzinsmethode bewertet. Anlagen in regenerative Energien bilanzieren wir grundsätzlich mit fortgeführten Anschaffungskosten.

#### **Pensionsgeschäfte und Wertpapierleihe**

Im Rahmen von Pensionsgeschäften erwerben wir als Pensionsnehmer Wertpapiere mit der gleichzeitigen Verpflichtung, diese zu einem späteren Zeitpunkt an den Pensionsgeber zurückzuverkaufen. Da die Chancen und Risiken aus den Wertpapieren beim Pensionsgeber verbleiben, werden diese bei uns nicht eingebucht, sondern es wird eine Forderung gegenüber dem Pensionsgeber unter den Sonstigen Kapitalanlagen, Einlagen bei Kreditinstituten, ausgewiesen. Zinserträge aus diesen Geschäften zeigen wir im Ergebnis aus Kapitalanlagen.

Wertpapiere, die wir im Rahmen der Wertpapierleihe verleihen, weisen wir weiterhin in der Bilanz aus, da die wesentlichen Chancen und Risiken, die aus ihnen resultieren, bei Munich Re verbleiben; von uns entlehene Wertpapiere werden beim Verleiher bilanziert. Gebühren aus der Wertpapierleihe zeigen wir im Ergebnis aus Kapitalanlagen.

#### **Ansatz von Finanzinstrumenten**

Grundsätzlich erfassen wir unsere finanziellen Vermögenswerte im Direktbestand zum Erfüllungstag. In Spezialfonds gehaltene Kapitalanlagen werden zum Handelstag erfasst.

#### **Ermittlung der beizulegenden Zeitwerte**

IAS 39 definiert als Zeitwert eines Finanzinstruments den Betrag, zu dem finanzielle Vermögenswerte oder finanzielle Verbindlichkeiten zwischen sachverständigen, vertragswilligen und voneinander unabhängigen Geschäftspartnern getauscht oder beglichen werden können.

Alle Finanzinstrumente, die zum beizulegenden Zeitwert bewertet werden, ordnen wir einem Level der Bewertungshierarchie des IFRS 7 zu. Diese Bewertungshierarchie sieht drei Level für die Bewertung vor. Basis der Zuordnung ist zunächst die ökonomische Anlageklasse. Nur wenn diese nicht zu einer sachgerechten Zuordnung führt, weichen wir im Einzelfall von dieser Vorgehensweise ab.

Die Zuordnung gibt Auskunft darüber, welche der ausgewiesenen Zeitwerte über Transaktionen am Markt zustande gekommen sind bzw. in welchem Umfang die Bewertung wegen fehlender Markttransaktionen anhand von Modellen erfolgt.

Bei Level 1 handelt es sich um unbereinigte notierte Marktpreise auf aktiven Märkten für identische finanzielle Vermögenswerte, auf die Munich Re zum Bewertungsstichtag zugreifen kann. Ein Markt gilt als aktiv, sofern Transaktionen in ausreichender Häufigkeit und ausreichendem Umfang stattfinden und somit laufend Kursinformationen zur Verfügung stehen. Da ein notierter Preis auf einem aktiven Markt die zuverlässigste Indikation des beizulegenden Zeitwerts bestimmt, ist dieser bei Verfügbarkeit stets zu berücksichtigen. Wir haben dieser Hierarchiestufe überwiegend Aktien, Investmentfonds und festverzinsliche Wertpapiere (Inhaberschuldverschreibungen) zugeordnet, für die entweder ein Börsenkurs verfügbar ist oder für die Preise von einem Preisanbieter zur Verfügung gestellt werden, die auf Basis tatsächlicher Markttransaktionen zustande gekommen sind. Ebenso ordnen wir börsengehandelte Derivate dem Level 1 zu.



Bei den Kapitalanlagen, die dem Level 2 zugeordnet werden, erfolgt die Bewertung auf Basis von Modellen, die auf beobachtbaren Marktdaten basieren. Hierzu verwenden wir für das zu bewertende Finanzinstrument Parameter, die am Markt – direkt oder indirekt – zu beobachten sind, bei denen es sich jedoch nicht um notierte Marktpreise handelt. Sofern das Instrument eine festgelegte Vertragslaufzeit besitzt, müssen die für die Bewertung verwendeten Parameter über die gesamte Vertragslaufzeit des Instruments beobachtbar sein. Dieser Hierarchiestufe haben wir überwiegend Schuld-scheindarlehen, Pfandbriefe, nachrangige Wertpapiere sowie nicht börsengehandelte Derivate zugeordnet.

Bei Kapitalanlagen, die dem Level 3 zugeordnet werden, verwenden wir Bewertungsmethoden, die auf nicht am Markt beobachtbaren Parametern basieren. Dies ist nur zulässig, sofern keine beobachtbaren Marktdaten verfügbar sind. Die verwendeten Parameter spiegeln die Annahmen von Munich Re darüber wider, welche Annahmen die Marktteilnehmer bei der Preissetzung berücksichtigen würden. Wir verwenden dazu die besten verfügbaren Informationen, einschließlich unternehmensinterner Daten. Bei den dieser Bewertungsstufe zugeordneten Beständen handelt es sich überwiegend um Investitionen in Private Equity, um bestimmte Kreditstrukturen und um Anteile an verbundenen und assoziierten Unternehmen, die zum beizulegenden Zeitwert bewertet werden.

Veränderungen einzelner Parameter können aufgrund ihrer Hebelwirkung den ausgewiesenen Zeitwert der nach Level 3 bewerteten Instrumente erheblich beeinflussen. Wenn wir im Einzelfall derartige Anpassungen bei der Bewertung vornehmen, erläutern wir die daraus resultierenden Auswirkungen.

#### **Nettoergebnis aus Kapitalanlagen**

Das Nettoergebnis aus Kapitalanlagen setzt sich zusammen aus den laufenden Erträgen, Erträgen aus Zuschreibungen, Gewinnen bzw. Verlusten aus dem Abgang von Kapitalanlagen, sonstigen Erträgen, Abschreibungen auf Kapitalanlagen sowie Verwaltungs-, Zins- und sonstigen Aufwendungen. Die laufenden Erträge und Aufwendungen aus den nicht ergebniswirksam zum beizulegenden Zeitwert bewerteten Kapitalanlagen berechnen sich nach der Effektivzinsmethode, das heißt, eventuell vorhandene Auf- oder Abgelder werden den Anschaffungskosten bis zur Fälligkeit ergebniswirksam ab- oder hinzugerechnet.

#### **Wertminderungen (Impairment)**

Wir prüfen regelmäßig zu jedem Bilanzstichtag, ob es bei unseren finanziellen Vermögenswerten bzw. Gruppen finanzieller Vermögenswerte objektive substanzielle Hinweise gibt, die auf eine Wertminderung hindeuten. Dauerhafte Wertminderungen werden bei allen festverzinslichen Wertpapieren, die bis zur Endfälligkeit gehalten werden bzw. jederzeit veräußerbar sind, sowie bei nicht festverzinslichen Wertpapieren – anders als vorübergehende Wertminderungen – erfolgswirksam in der Konzern-Gewinn- und Verlustrechnung erfasst. IAS 39.59 enthält eine Liste objektiver substanzieller Hinweise auf Wertminderungen finanzieller Vermögenswerte. Zusätzlich bestimmt IAS 39.61, dass das wesentliche oder nachhaltige Absinken des beizulegenden Zeitwerts unter die Anschaffungskosten bei Wertpapieren mit Eigenkapitalcharakter als objektiver Hinweis auf eine Wertminderung gilt. Diese Regelungen werden durch interne Richtlinien konkretisiert. Wir gehen davon aus, dass bei börsennotierten Aktien ein signifikantes Absinken des beizulegenden Zeitwerts vorliegt, wenn der Marktwert im Betrachtungszeitpunkt mindestens 20 % oder mindestens 6 Monate unter den durchschnittlichen historischen Gesellschaftseinstandskursen liegt. Bei festverzinslichen Wertpapieren sowie bei Darlehen werden zur Beurteilung, ob eine Wertminderung vorliegt, insbesondere Hinweise auf erhebliche finanzielle Schwierigkeiten des Emittenten sowie die aktuelle Marktsituation und Nachrichtenlage über einen Emittenten herangezogen.

Wir ermitteln die Anschaffungskosten auf der Basis der durchschnittlichen Gesellschaftseinstandskurse. Die Abschreibung erfolgt bei dauerhafter Wertminderung auf den beizulegenden Zeitwert zum Abschlussstichtag, das heißt grundsätzlich auf den öffentlich notierten Börsenkurs. Bereits einmal wertberichtigte Wertpapiere mit Eigenkapitalcharakter werden bei einem weiteren Absinken des beizulegenden Zeitwerts – auch wenn die Wertminderung nur vorübergehend ist – sofort erfolgswirksam abgeschrieben. Diese erfolgswirksam erfassten Wertminderungen dürfen nicht ergebniswirksam rückgängig gemacht werden.

Bei der Werthaltigkeitsprüfung unserer finanziellen Vermögenswerte (mit Ausnahme der Wertpapiere mit Eigenkapitalcharakter) prüfen wir grundsätzlich zunächst, ob einzelne Posten für sich betrachtet im Wert gemindert sind. Ist dies nicht der Fall sowie bei unwesentlichen Posten führen wir die Werthaltigkeitsprüfung auf der Grundlage von Gruppen finanzieller Vermögenswerte durch. Dabei werden solche Vermögenswerte nicht berücksichtigt, für die bereits eine Einzelwertberichtigung gebildet wurde. Die Höhe des voraussichtlichen Verlusts ergibt sich aus der Differenz der fortgeführten Anschaffungskosten des Vermögenswerts bzw. der Gruppe von Vermögenswerten und dem Barwert der erwarteten künftigen Zahlungsströme aus diesen. Die so ermittelte Wertminderung wird aufwandswirksam erfasst. Wertminderungen setzen wir grundsätzlich direkt aktivisch – ohne ein Wertberichtigungskonto einzuschalten – von den betroffenen Positionen ab. Fallen die Gründe für die Abschreibung weg, nehmen wir eine erfolgswirksame Zuschreibung maximal auf die ursprünglichen fortgeführten Anschaffungskosten vor.

## C // Kapitalanlagen für Rechnung und Risiko von Inhabern von Lebensversicherungspolice

Hierbei handelt es sich um Kapitalanlagen der Versicherungsnehmer aus fondsgebundenen Lebensversicherungen. Wir bilanzieren sie zum Marktwert. Die unrealisierten Gewinne oder Verluste aus Marktwertveränderungen werden im Ergebnis aus Kapitalanlagen berücksichtigt. Ihnen stehen Veränderungen der entsprechenden versicherungstechnischen Rückstellungen (Passivposten D) in gleicher Höhe gegenüber, die in das versicherungstechnische Ergebnis einbezogen werden. In die Veränderung der versicherungstechnischen Rückstellungen gehen zudem noch Veränderungen aus zusätzlichen Beitragsbestandteilen ein, die zu passivieren sind. Indem wir diese Kapitalanlagen erfolgswirksam zu Marktwerten bewerten, vermeiden wir Bewertungsinkongruenzen, die sich ansonsten durch die abweichende Bewertung der korrespondierenden Rückstellungen ergeben würden.

## D // Anteil der Rückversicherer an den versicherungstechnischen Rückstellungen

Die Anteile unserer Rückversicherer an den versicherungstechnischen Rückstellungen ermitteln wir gemäß den vertraglichen Bedingungen aus den jeweiligen versicherungstechnischen Rückstellungen; siehe die Erläuterungen zu Passivposten C. Bonitätsrisiken werden berücksichtigt.

## E // Forderungen

Die laufenden Steuerforderungen und die sonstigen Forderungen setzen wir mit ihrem Nennwert an. Wertberichtigungen nehmen wir vor, sofern Hinweise auf substantielle Wertminderungen vorliegen, siehe Aktivposten B – Wertminderungen.

Die laufenden Steuerforderungen umfassen tatsächliche Ertragsteuern der einzelnen Gesellschaften, die sich auf der Grundlage der jeweiligen nationalen Besteuerung ergeben. Sonstige Steuerforderungen werden unter den sonstigen Forderungen ausgewiesen.

## F // Laufende Guthaben bei Kreditinstituten, Schecks und Kassenbestand

Die Zahlungsmittelbestände weisen wir mit ihrem Nennwert aus.

## G // Aktivierte Abschlusskosten

In den aktivierten Abschlusskosten werden Provisionen und andere variable Kosten abgegrenzt, die unmittelbar bei Abschluss oder Verlängerung von Versicherungsverträgen anfallen. In der Lebensversicherung sowie der langfristigen Krankenerstversicherung werden die aktivierten Abschlusskosten über die planmäßige Laufzeit der Verträge abgeschrieben. Dies geschieht nach FASB Accounting Standards Codification Subtopic 944-30 entweder proportional zu den Beitragseinnahmen (vormals FAS 60) oder proportional zu den erwarteten Bruttomargen (vormals FAS 97 bzw. FAS 120) der jeweiligen Verträge, die für das entsprechende Jahr der Vertragslaufzeit errechnet wurden. Die Zuordnung der einzelnen Verträge zu den relevanten US GAAP-Vorschriften ist in den Erläuterungen zu Passivposten C dargestellt. Bei der Bestimmung des Abschreibungsbetrags berücksichtigen wir eine rechnungsmäßige Verzinsung sowie eine Bestandsveränderung durch den Abgang von Verträgen. In der Schaden- und Unfallversicherung, der kurzfristigen Krankenerstversicherung sowie der Krankenrückversicherung schreiben wir die aktivierten Abschlusskosten linear über die durchschnittliche Vertragslaufzeit von bis zu fünf Jahren ab. Die aktivierten Abschlusskosten werden regelmäßig in einem Angemessenheitstest nach IFRS 4 (Liability-Adequacy-Test) auf ihre Werthaltigkeit überprüft; siehe hierzu die Erläuterungen zu Passivposten C.

## H // Aktive Steuerabgrenzung

Aktive latente Steuern müssen nach IAS 12 dann bilanziert werden, wenn Aktivposten in der Konzernbilanz niedriger oder Passivposten höher anzusetzen sind als in der Steuerbilanz des betreffenden Konzernunternehmens und sich diese Differenzen in der Zukunft mit steuerlicher Wirkung wieder ausgleichen (temporäre Differenzen). Ebenso werden aktive latente Steuern auf steuerliche Verlustvorträge angesetzt. Wir berücksichtigen die landesspezifischen Steuersätze und die jeweilige steuerliche Situation der Konzerngesellschaft; teilweise verwenden wir zur Vereinfachung einheitliche Steuersätze für einzelne Sachverhalte oder Tochterunternehmen. Steuersatz- und Steuer-gesetzänderungen, die am Bilanzstichtag bereits beschlossen sind, beachten wir. Aktive latente Steuern werden angesetzt, soweit eine Realisierung wahrscheinlich ist.

## I // Übrige Aktiva

Übrige Aktiva bilanzieren wir grundsätzlich mit den fortgeführten Anschaffungskosten. Die hier ausgewiesenen eigengenutzten Grundstücke und Bauten werden bewertet wie unter Aktivposten B – Grundstücke und Bauten – dargestellt. Außerplanmäßige Abschreibungen sowie die Zuschreibungen der im Konzern eigengenutzten Grundstücke und Bauten werden auf die versicherungstechnischen Funktionsbereiche verteilt.

## Passivseite

### A // Eigenkapital

Der Posten **Gezeichnetes Kapital und Kapitalrücklage** enthält die von den Aktionären der Münchener Rück AG auf die Aktien eingezahlten Beträge. Die Kapitalrücklage wird durch die extern verursachten Kosten, die unmittelbar mit Eigenkapitalmaßnahmen zusammenhängen, nach Berücksichtigung der Steuereffekte gemindert.

Als **Gewinnrücklagen** weisen wir die Gewinne aus, die Konzernunternehmen seit ihrer Zugehörigkeit zu Munich Re erzielt und nicht ausgeschüttet haben, sowie Erträge und Aufwendungen aus Veränderungen des Konsolidierungskreises. Darüber hinaus wird bei einer Änderung von Bilanzierungs- und Bewertungsmethoden der Anpassungsbetrag für frühere Perioden, die nicht in den Abschluss einbezogen werden, im Eröffnungsbilanzwert der Gewinnrücklagen der frühesten dargestellten Periode erfasst.

Die eigenen Aktien, die Munich Re zum Bilanzstichtag im Bestand hat, werden direkt von den Gewinnrücklagen abgesetzt.

Unrealisierte Gewinne und Verluste aus der Bewertung von jederzeit veräußerbaren sonstigen Wertpapieren zu beizulegenden Zeitwerten, aus Anteilen an nicht konsolidierten verbundenen Unternehmen sowie an assoziierten Unternehmen, die wir nicht nach der Equity-Methode bewerten, werden in den **übrigen Rücklagen** berücksichtigt. Die unrealisierten Gewinne und Verluste aus der Equity-Bewertung assoziierter Unternehmen, die aus der Währungsumrechnung ausländischer Tochterunternehmen resultierenden Umrechnungsdifferenzen sowie das Bewertungsergebnis aus der Absicherung von Zahlungsströmen (Cashflow Hedges) werden ebenfalls in den übrigen Rücklagen ausgewiesen. Zudem werden Zuschreibungen auf jederzeit veräußerbare sonstige Wertpapiere mit Eigenkapitalcharakter in diesem Eigenkapitalposten erfasst.

Die **nicht beherrschenden Anteile** bilanzieren wir als Teil des Eigenkapitals. Diese umfassen die Anteile Dritter am Eigenkapital konsolidierter Tochterunternehmen, die nicht zu 100 % direkt oder indirekt der Münchener Rück AG gehören. Die direkten Fremddanteile an Spezialfonds werden unter den sonstigen Verbindlichkeiten ausgewiesen. Den Anteil am Ergebnis, der auf die nicht beherrschenden Anteile entfällt, weisen wir im Konzernergebnis aus.

### B // Nachrangige Verbindlichkeiten

Nachrangige Verbindlichkeiten umfassen Verbindlichkeiten, die im Liquidations- oder Konkursfall erst nach den Forderungen anderer Gläubiger erfüllt werden dürfen. Sie werden mit fortgeführten Anschaffungskosten nach der Effektivzinsmethode bewertet.

### C // Versicherungstechnische Rückstellungen (brutto)

Die versicherungstechnischen Rückstellungen werden in der Bilanz brutto ausgewiesen, das heißt vor Abzug des Anteils, der auf unsere Rückversicherer entfällt; siehe Erläuterungen zu Aktivposten D. Der Rückversicherungsanteil wird anhand der einzelnen Rückversicherungsverträge ermittelt und bilanziert. Die Abschlusskosten aus Versicherungsverträgen aktivieren wir und verteilen sie über die Laufzeit der Verträge; siehe Erläuterungen zu Aktivposten G. Grundlage für die Bewertung der versicherungstechnischen Rückstellungen ist FASB Accounting Standards Codification Subtopic 944-40 (vormals Standards FAS 60, FAS 97 und FAS 120). Kreditversicherungen werden nach den Vorschriften des IFRS 4 bilanziert.

Die **Beitragsüberträge** entsprechen den bereits vereinnahmten Beiträgen, die auf künftige Risikoperioden entfallen. Diese Beiträge werden in der Erstversicherung für jeden Versicherungsvertrag taggenau abgegrenzt; in der Rückversicherung verwenden wir zum Teil Pauschalsätze, soweit die Daten nicht vorliegen, die für eine zeitanteilige Berechnung erforderlich sind. Die Bildung von Beitragsüberträgen ist auf kurzfristiges Versicherungsgeschäft beschränkt. Dies betrifft jeweils die Schadenversicherung sowie Teile der Unfall- und Krankenversicherung.

Die **Deckungsrückstellung** wird bei langfristigem Versicherungsgeschäft für die Verpflichtungen aus garantierten Ansprüchen der Versicherungsnehmer in Höhe des versicherungsmathematisch errechneten Werts gebildet. Dies betrifft die Lebensversicherung sowie Teile der Kranken- und der Unfallversicherung, soweit das Geschäft nach Art des Lebensversicherungsgeschäfts betrieben wird. Bewertet wird in der Regel nach der prospektiven Methode, indem die Differenz der Barwerte der zukünftigen Leistungen und der zukünftigen Beiträge gebildet wird. In die Berechnung gehen biometrische Rechnungsgrundlagen ein, insbesondere Annahmen in Bezug auf Sterblichkeit, Invalidisierung und Morbidität, sowie Annahmen zur Kapitalanlageverzinsung, zum Storno und zu Kosten. Diese werden zum Zeitpunkt des Vertragsabschlusses auf realistischer Basis geschätzt und umfassen adäquate Sicherheitsmargen, die das Änderungs-, Irrtums- und Zufallsrisiko berücksichtigen.

In der Rückversicherung erfolgt die Bewertung teilweise individuell für jedes Einzelrisiko und teilweise kollektiv für rückgedeckte Bestände. Dafür werden biometrische Rechnungsgrundlagen verwendet, die auf Tafeln der nationalen Aktuarvereinigungen basieren. Sie werden für den jeweiligen rückversicherten Bestand an die beobachteten Wahrscheinlichkeiten für den Eintritt eines Versicherungsfalls angepasst. Zinssätze werden so gewählt, dass sie die bestmögliche Schätzung der erwarteten Kapitalerträge widerspiegeln, abzüglich eines Sicherheitsabschlags. Für den Großteil des Bestands werden diese Annahmen zu Beginn des Vertrags festgelegt und über die Laufzeit nicht verändert.

In der Erstversicherung wird in der Regel jedes Risiko individuell bewertet. In der deutschen Erstversicherung werden biometrische Rechnungsgrundlagen auf der Basis der Tafeln der Deutschen Aktuarvereinigung e. V. verwendet. Im übrigen Erstversicherungsgeschäft kommen hauptsächlich die Tafeln der nationalen Aktuarvereinigungen zum Einsatz. Diskontiert wird mit einem Rechnungszins, der durch den jeweiligen aufsichtsrechtlichen Höchstrechnungszins begrenzt ist.

Die Rechnungsgrundlagen werden angepasst, wenn dies aufgrund eines Angemessenheitstests nach IFRS 4 angezeigt ist.

Die Bewertung der Deckungsrückstellung nach FASB Accounting Standards Codification Subtopic 944-40 hängt ab von der Art des Vertrags:

Für Verträge der Lebenserstversicherung ohne erfolgsabhängige Überschussbeteiligung, der Krankenerstversicherung sowie für den überwiegenden Teil der Rückversicherungsverträge (vormals FAS 60) ergibt sich die Deckungsrückstellung aus dem Barwert der geschätzten künftigen Versicherungsleistungen (einschließlich Schadenregulierungskosten) abzüglich des Barwerts der zukünftigen Reserveprämie. Die Reserveprämie (Net Level Premium) entspricht dem Anteil des Bruttobeitrags, der zur Finanzierung zukünftiger Versicherungsleistungen benötigt wird. Die Bewertung von Lebenserstversicherungsverträgen mit abgekürzter Beitragszahlung geschieht grundsätzlich analog.

Bei Verträgen der Lebenserstversicherung nach dem Universal-Life-Modell, fondsgebundenen Lebensversicherungen sowie der Lebensrückversicherung für übernommene Verträge dieser Art (vormals FAS 97) wird ein Konto geführt, auf dem Reserveprämien und Zinsgewinne gutgeschrieben sowie Risikobeiträge und Verwaltungskosten belastet werden; dabei sind nicht alle Gutschriften und Belastungen bei Vertragsabschluss vertraglich festgelegt. Die Deckungsrückstellung für Lebenserstversicherungen, bei denen die Versicherungsnehmer das Anlagerisiko selbst tragen (fondsgebundene Lebensversicherung), wird unter Passivposten D gesondert ausgewiesen.

Bei Verträgen der Lebenserstversicherung mit erfolgsabhängiger Überschussbeteiligung (vormals FAS 120) setzt sich die Deckungsrückstellung aus einer Rückstellung für Garantieleistungen (Net Level Premium Reserve) und einer Rückstellung für Schlussüberschussanteile zusammen. Die Net Level Premium Reserve ergibt sich aus dem Barwert der garantierten Versicherungsleistungen (inklusive erworbener Boni, aber ohne Schadenregulierungskosten) abzüglich des Barwerts der zukünftigen Reserveprämien. Die Reserveprämie berechnet sich als Nettoprämie abzüglich des für die Deckung des Regulierungsaufwands vorgesehenen Beitragsanteils. Die Rechnungsgrundlagen stimmen im Regelfall mit denen der Beitragskalkulation überein. Die Rückstellung für Schlussüberschüsse wird anteilig mit einer festen Quote der erwarteten Bruttomargen aufgebaut. Dafür wird das gleiche Verfahren angewendet, nach dem die Tilgungsbeträge der aktivierten Abschlusskosten bestimmt werden.

Die **Rückstellung für noch nicht abgewickelte Versicherungsfälle** wird zum Bilanzstichtag gebildet für Zahlungsverpflichtungen aus Versicherungsverträgen, bei denen die Höhe der Versicherungsleistung oder die Fälligkeit noch unsicher ist. Ein Teil der Rückstellung betrifft bekannte Versicherungsfälle, für die wir individuell bestimmte Rückstellungen bilden. Zusätzlich sind Aufwendungen für Versicherungsfälle berücksichtigt, deren Eintritt noch nicht bekannt ist (zum Beispiel weil sie noch nicht gemeldet wurden oder weil sie sich noch nicht manifestiert haben). Eine dritte Klasse von Rückstellungen deckt die Fälle ab, in denen Versicherungsfälle zwar bekannt sind, aber deren Ausmaß später umfangreicher ist, als zunächst abzusehen war. In all diesen Rückstellungen sind jeweils Aufwände für interne und externe Schadenregulierungskosten enthalten. Die Rückstellung für noch nicht abgewickelte Versicherungsfälle beruht auf Schätzungen; die tatsächlichen Zahlungen können daher höher oder niedriger ausfallen. Angesetzt wird der realistisch geschätzte künftige Erfüllungsbetrag; dabei werden Erfahrungen der Vergangenheit und Annahmen in Bezug auf die weitere Entwicklung (zum Beispiel soziale, wirtschaftliche oder technische Einflussfaktoren) berücksichtigt. Die künftigen Zahlungsverpflichtungen werden überwiegend nicht abgezinst; Ausnahmen gelten bei einigen Rückstellungen für Berufsunfähigkeitsrenten, Renten in der Arbeiterunfallversicherung und anderen Sparten der Schaden- und Unfallversicherung, die wir diskontieren. Munich Re verwendet bei der Bestimmung der Rückstellung für noch nicht abgewickelte Versicherungsfälle eine Reihe aktuarieller Projektionsmethoden. Sie umfassen das Chain-Ladder- und das Bornhuetter-Ferguson-Verfahren. Bei der Anwendung der statistischen Verfahren betrachten wir Großschäden gesondert. Die von uns genutzten aktuariellen Standardverfahren werden sowohl auf die Abwicklungsdreiecke der Zahlungen als auch auf die Abwicklungsdreiecke der berichteten Schäden angewandt, sodass wir eine Bandbreite von Schätzungen für den Endschaten erhalten. Innerhalb dieser Bandbreite wird ein realistischer Schätzwert für den Endschaten festgelegt.

Die **übrigen versicherungstechnischen Rückstellungen** enthalten überwiegend die Rückstellung für Beitragsrückerstattung in der Erstversicherung und die Rückstellung für Gewinnanteile in der Rückversicherung. Rückstellungen für Beitragsrückerstattung werden in der Lebens- und Krankenerstversicherung für Verpflichtungen zur Überschussbeteiligung der Versicherungsnehmer gebildet, die am Bilanzstichtag noch nicht unwiderruflich den einzelnen Verträgen zugeordnet sind. Soweit diese Rückstellungen



nach nationalen Vorschriften gebildet werden, verwendet man in der Regel einen retrospektiven Ansatz auf der Grundlage aufsichtsrechtlicher oder einzelvertraglicher Regelungen. Nach nationalen Vorschriften ist die Rückstellung für Beitragsrückerstattung ausschließlich für das deutsche Erstversicherungsgeschäft zu bilden. In der deutschen Krankenerstversicherung werden darüber hinaus die Beitragszuschlagsrückstellung und die Rückstellung für Beitragsermäßigung im Alter in der Rückstellung für Beitragsrückerstattung ausgewiesen. Für die Lebensversicherungsunternehmen und Pensionsfonds, die der Bundesanstalt für Finanzdienstleistungsaufsicht unterstehen, sind dabei die aufsichtsrechtlichen Vorschriften gemäß Versicherungsaufsichtsgesetz und der Verordnung über die Mindestzuführung zu beachten.

Daneben werden Rückstellungen gebildet für latente Beitragsrückerstattung für die auf Versicherungsnehmer entfallenden Anteile an den Bewertungsunterschieden zwischen IFRS und lokaler Rechnungslegung. Dabei werden die erwarteten zukünftigen Quoten zur Überschussbeteiligung zugrunde gelegt. Für unrealisierte Gewinne und Verluste aus jederzeit veräußerbaren Kapitalanlagen, die direkt im Eigenkapital erfasst werden (siehe Aktivposten B), bilden wir die resultierende Rückstellung für latente Beitragsrückerstattung erfolgsneutral; ansonsten berücksichtigen wir Veränderungen der Rückstellung für latente Beitragsrückerstattung erfolgswirksam.

Alle versicherungstechnischen Rückstellungen werden in einem **Angemessenheitstest nach IFRS 4** regelmäßig überprüft. Wenn aktuelle Erfahrungen zeigen, dass die auf der Grundlage der ursprünglichen Annahmen gebildeten Rückstellungen abzüglich der aktivierten Abschlusskosten und der Barwert der zugehörigen Beiträge nicht ausreichen, um die erwarteten zukünftigen Leistungen zu decken, passen wir die betroffenen versicherungstechnischen Rückstellungen erfolgswirksam an und weisen dies in den Erläuterungen zur Konzernbilanz als außerplanmäßige Veränderungen aus; siehe (14) Aktivierte Abschlusskosten und (21) Deckungsrückstellung. Die Angemessenheit der Beitragsüberträge sowie der Rückstellung für noch nicht abgewickelte Versicherungsfälle überprüfen wir in Bezug auf den aktuell realistisch geschätzten künftigen Erfüllungsbetrag. Ob die Deckungsrückstellung angemessen ist, prüfen wir auf der Basis aktueller realistischer Schätzungen der Rechnungsgrundlagen, des anteiligen Ergebnisses aus Kapitalanlagen sowie (für überschussbeteiligte Verträge) der künftigen Überschussbeteiligung.

## **D // Versicherungstechnische Rückstellungen im Bereich der Lebensversicherung, soweit das Anlagerisiko von den Versicherungsnehmern getragen wird (brutto)**

Dieser Posten umfasst die Deckungsrückstellung zu Lebenserstversicherungen, bei denen die Versicherungsnehmer das Anlagerisiko selbst tragen (fondsgebundene Lebensversicherung). Der Wert der Deckungsrückstellung entspricht im Wesentlichen dem Marktwert der jeweiligen Kapitalanlagen, die unter Aktivposten C ausgewiesen werden. Zudem sind, nach FASB Accounting Standards Codification Subtopic 944-40 (vormals FAS 97), unter Umständen zusätzliche Beitragsbestandteile zu passivieren; siehe Erläuterungen zu Passivposten C. Die Veränderungen dieser Rückstellung werden vollständig im versicherungstechnischen Ergebnis berücksichtigt. Soweit sie auf unrealisierten Gewinnen und Verlusten aus Marktwertveränderungen der zugehörigen Kapitalanlagen beruhen, stehen diesen gegenläufige Veränderungen im Ergebnis aus Kapitalanlagen gegenüber. Indem wir diese Rückstellungen erfolgswirksam zu Marktwerten bewerten, vermeiden wir Bewertungsinkongruenzen, die sich sonst durch die abweichende Bewertung der korrespondierenden Kapitalanlagen ergeben würden.

## E // Andere Rückstellungen

Der Posten umfasst unter anderem die **Rückstellungen für Pensionen und ähnliche Verpflichtungen**. Die Unternehmen von Munich Re geben ihren Mitarbeitern in der Regel beitrags- oder leistungsorientierte Pensionszusagen. Art und Höhe der Pensionszusagen richten sich nach den jeweiligen Versorgungsordnungen. Sie basieren zumeist auf Dienstzeit und Entgelt der Mitarbeiter. Bei beitragsorientierten Pensionszusagen leisten die Unternehmen einen festen Beitrag an einen Versicherer oder einen Pensionsfonds. Die Verpflichtung des Unternehmens ist mit der Zahlung des Beitrags endgültig abgegolten. Bei leistungsorientierten Pensionszusagen erteilen Unternehmen oder Pensionsfonds dem Mitarbeiter eine bestimmte Pensionszusage. Die zur Finanzierung zu zahlenden Beiträge des Unternehmens sind nicht im Vorhinein festgelegt. Stehen den Pensionsverpflichtungen Vermögenswerte einer rechtlich eigenständigen Einheit gegenüber (zum Beispiel eines Fonds oder eines Contractual-Trust-Agreements in Form einer doppelseitigen Treuhand), die ausschließlich zur Bedeckung der erteilten Pensionsversprechen verwendet werden dürfen und dem Zugriff etwaiger Gläubiger entzogen sind (Planvermögen), so sind die Pensionsverpflichtungen unter Abzug dieser Vermögenswerte auszuweisen. Übersteigt der beizulegende Zeitwert der Vermögenswerte die zugehörigen ausgelagerten Pensionsverpflichtungen, ist dieser Rückzahlungsanspruch unter den sonstigen Forderungen auszuweisen.

Die Bewertung der Pensionsverpflichtungen erfolgt gemäß IAS 19 nach dem Anwartschaftsbarwertverfahren (Projected Unit Credit Method) und fußt auf versicherungsmathematischen Gutachten. Es werden nicht nur die am Bilanzstichtag bekannten Anwartschaften und laufenden Renten bewertet, sondern man berücksichtigt auch ihre zukünftige Entwicklung.

Der Zinssatz, mit dem die Pensionsverpflichtungen abgezinst werden, orientiert sich an den Zinssätzen, die für langfristige Anleihen von Emittenten bester Bonität gelten (zum Beispiel Industrie- oder Staatsanleihen). Versicherungsmathematische Gewinne oder Verluste aus den Pensionsverpflichtungen und dem Planvermögen ergeben sich durch Abweichungen des geschätzten Risikoverlaufs vom tatsächlichen Risikoverlauf. Sie werden sofort erfolgsneutral mit dem Eigenkapital verrechnet.

Daneben umfasst der Posten die **übrigen Rückstellungen**. Wir bilden sie in Höhe des voraussichtlichen Bedarfs; sofern der Zinseffekt unwesentlich ist, werden sie nicht abgezinst.

## F // Verbindlichkeiten

Die Verbindlichkeiten umfassen Anleihen, Depotverbindlichkeiten, laufende Steuer- und sonstige Verbindlichkeiten. Die finanziellen Verbindlichkeiten bilanzieren wir grundsätzlich zu fortgeführten Anschaffungskosten. Derivate (derivative Finanzinstrumente sowie die derivativen Bestandteile von Variable Annuities) werden zu ihrem beizulegenden Zeitwert angesetzt. Details zur Ermittlung des beizulegenden Zeitwerts sind unter dem Aktivposten B dargestellt.

Die laufenden Steuerverbindlichkeiten umfassen tatsächliche Ertragsteuern der einzelnen Gesellschaften, die sich auf der Grundlage der jeweiligen nationalen Besteuerung ergeben. Sonstige Steuerverbindlichkeiten werden unter den sonstigen Verbindlichkeiten ausgewiesen.

Steuerverbindlichkeiten für tatsächliche Steuern werden ohne Abzinsung entsprechend den voraussichtlichen Steuernachzahlungen für das Berichtsjahr und für Vorjahre angesetzt.

Latente Steuerverpflichtungen werden unter dem Passivposten G ausgewiesen.

Die direkten Fremddanteile an Spezialfonds und an Personengesellschaften werden zum beizulegenden Zeitwert bewertet.

## G // Passive Steuerabgrenzung

Passive latente Steuern müssen nach IAS 12 dann bilanziert werden, wenn Aktivposten in der Konzernbilanz höher oder Passivposten niedriger anzusetzen sind als in der Steuerbilanz des betreffenden Konzernunternehmens und sich diese Differenzen in der Zukunft mit steuerlicher Wirkung wieder ausgleichen (temporäre Differenzen); siehe Erläuterungen zu Aktivposten H.

## Währungsumrechnung

Die Berichtswährung von Munich Re ist der Euro (€). Die Bilanzen ausländischer Tochterunternehmen, deren Landeswährung nicht der Euro ist, rechnen wir gemäß dem Konzept der funktionalen Währung mit den Stichtagskursen vom Jahresende in Euro um, die Gewinn- und Verlustrechnungen mit Quartalsdurchschnittskursen. Umrechnungsdifferenzen, die hieraus resultieren, werden im Eigenkapital (übrige Rücklagen) ausgewiesen. Fremdwährungsgeschäfte werden grundsätzlich gemäß IAS 21 in die jeweilige Landeswährung der Konzernunternehmen umgerechnet. Ergänzend wenden wir das Prinzip der kongruenten Deckung an. Dies bedeutet, dass sich Konzernunternehmen, die einen wesentlichen Teil ihres Geschäfts in Fremdwährung zeichnen, gegen Verluste aus Wechselkursänderungen in der Regel dadurch absichern, dass sie versuchen, Aktiva und Passiva in den einzelnen Fremdwährungen in der gleichen Höhe zu halten. Soweit es bei der Umrechnung von Fremdwährungsgeschäften in die jeweilige Landeswährung der Konzernunternehmen dennoch zu Währungsgewinnen oder -verlusten kommt, werden diese in den sonstigen nicht operativen Erträgen oder Aufwendungen ausgewiesen. Die Umrechnungskurse der für uns wichtigsten Währungen lauten folgendermaßen:

### Umrechnungskurse

| 1 € entspricht:      | Bilanz     |          |          | Erfolgsrechnung |          |          | Erfolgsrechnung |          |          |          |
|----------------------|------------|----------|----------|-----------------|----------|----------|-----------------|----------|----------|----------|
|                      | 31.12.2010 | Vorjahr  | Q4 2010  | Q3 2010         | Q2 2010  | Q1 2010  | Q4 2009         | Q3 2009  | Q2 2009  | Q1 2009  |
| Australischer Dollar | 1,30875    | 1,59530  | 1,37376  | 1,42952         | 1,44180  | 1,53014  | 1,62479         | 1,71675  | 1,79266  | 1,96394  |
| Kanadischer Dollar   | 1,33300    | 1,50410  | 1,37457  | 1,34359         | 1,30782  | 1,43929  | 1,55808         | 1,56978  | 1,58953  | 1,62405  |
| Pfund Sterling       | 0,85685    | 0,88845  | 0,85925  | 0,83357         | 0,85292  | 0,88760  | 0,90434         | 0,87197  | 0,87939  | 0,90966  |
| Rand                 | 8,87535    | 10,56510 | 9,36757  | 9,45681         | 9,60159  | 10,38680 | 11,06000        | 11,15800 | 11,52100 | 12,96380 |
| Schweizer Franken    | 1,25045    | 1,48315  | 1,32172  | 1,33251         | 1,40842  | 1,46288  | 1,50833         | 1,51947  | 1,51389  | 1,49659  |
| US-Dollar            | 1,34155    | 1,43475  | 1,35754  | 1,29286         | 1,27292  | 1,38356  | 1,47672         | 1,43018  | 1,36218  | 1,30438  |
| Yen                  | 108,8060   | 133,5680 | 112,0370 | 110,8440        | 117,2940 | 125,5380 | 132,6730        | 133,7980 | 132,6520 | 122,1650 |

## Segmentberichterstattung

Die Basis für die Segmentierung unserer Geschäftstätigkeit bildet entsprechend dem „Management-Approach“ die interne Steuerung von Munich Re.

Danach haben wir sieben berichtspflichtige Segmente identifiziert:

- // Rückversicherung Leben (weltweites Lebensrückversicherungsgeschäft)
- // Rückversicherung Schaden/Unfall (weltweites Schaden- und Unfallrückversicherungsgeschäft)
- // Erstversicherung Leben (weltweites Lebenserstversicherungsgeschäft)
- // Erstversicherung Gesundheit (deutsches Krankenerstversicherungsgeschäft und weltweites Reiseversicherungsgeschäft)
- // Erstversicherung Schaden/Unfall (weltweites Schaden- und Unfallerstversicherungsgeschäft)
- // Munich Health (weltweites Krankenrückversicherungsgeschäft sowie Kranken-erstversicherungsgeschäft außerhalb Deutschlands)
- // Assetmanagement (Vermögensverwaltung für die Gruppe und für externe Anleger)

### Segmentaktiva

| Mio. €                                                                                      | Rückversicherung |               |                |               |               |               |
|---------------------------------------------------------------------------------------------|------------------|---------------|----------------|---------------|---------------|---------------|
|                                                                                             | Leben            |               | Schaden/Unfall |               | Leben         |               |
|                                                                                             | 31.12. 2010      | Vorjahr       | 31.12. 2010    | Vorjahr       | 31.12. 2010   | Vorjahr       |
| <b>A. Immaterielle Vermögenswerte</b>                                                       | <b>168</b>       | <b>182</b>    | <b>1.969</b>   | <b>1.955</b>  | <b>1.162</b>  | <b>1.206</b>  |
| <b>B. Kapitalanlagen</b>                                                                    |                  |               |                |               |               |               |
| I. Grundstücke und Bauten einschließlich der Bauten auf fremden Grundstücken                | 267              | 211           | 1.178          | 1.095         | 1.760         | 1.776         |
| davon:                                                                                      |                  |               |                |               |               |               |
| Zur Veräußerung gehaltene, fremdgenutzte Grundstücke und Bauten                             | -                | 8             | -              | 39            | -             | 43            |
| II. Anteile an verbundenen Unternehmen und assoziierten Unternehmen                         | 1.274            | 1.086         | 5.418          | 5.442         | 406           | 356           |
| davon:                                                                                      |                  |               |                |               |               |               |
| Assoziierte Unternehmen nach der Equity-Methode bewertet                                    | 58               | 46            | 295            | 270           | 179           | 176           |
| III. Darlehen                                                                               | 339              | 357           | 1.436          | 1.760         | 32.708        | 31.334        |
| IV. Sonstige Wertpapiere                                                                    |                  |               |                |               |               |               |
| 1. Gehalten bis zur Endfälligkeit                                                           | -                | -             | -              | -             | 42            | 83            |
| 2. Jederzeit veräußerbar                                                                    | 12.879           | 10.820        | 50.529         | 46.543        | 37.695        | 38.370        |
| 3. Erfolgswirksam zum Zeitwert bewertet                                                     | 331              | 87            | 603            | 751           | 617           | 730           |
|                                                                                             | 13.210           | 10.907        | 51.132         | 47.294        | 38.354        | 39.183        |
| V. Depotforderungen                                                                         | 6.121            | 6.201         | 1.500          | 1.351         | 137           | 119           |
| VI. Sonstige Kapitalanlagen                                                                 | 457              | 160           | 1.333          | 977           | 624           | 633           |
|                                                                                             | <b>21.668</b>    | <b>18.922</b> | <b>61.997</b>  | <b>57.919</b> | <b>73.989</b> | <b>73.401</b> |
| <b>C. Kapitalanlagen für Rechnung und Risiko von Inhabern von Lebensversicherungspolice</b> | <b>-</b>         | <b>-</b>      | <b>-</b>       | <b>-</b>      | <b>4.953</b>  | <b>4.024</b>  |
| <b>D. Anteil der Rückversicherer an den versicherungstechnischen Rückstellungen</b>         | <b>987</b>       | <b>397</b>    | <b>2.396</b>   | <b>2.603</b>  | <b>2.936</b>  | <b>2.833</b>  |
| <b>E. Übrige Segmentaktiva</b>                                                              | <b>5.631</b>     | <b>4.788</b>  | <b>10.183</b>  | <b>10.033</b> | <b>9.085</b>  | <b>9.123</b>  |
| davon:                                                                                      |                  |               |                |               |               |               |
| Zur Veräußerung gehaltene, eigengenutzte Grundstücke und Bauten                             | -                | 3             | -              | 9             | -             | -             |
| <b>Summe der Segmentaktiva</b>                                                              | <b>28.454</b>    | <b>24.289</b> | <b>76.545</b>  | <b>72.510</b> | <b>92.125</b> | <b>90.587</b> |

Bestimmte Erstversicherer, deren Geschäft spezialisierte Lösungskompetenz benötigt, sind an die Rückversicherung als Risikoträger gekoppelt. Deshalb betreiben wir deren Geschäft aus der Rückversicherung heraus; entsprechend sind sie den Rückversicherungssegmenten zugeordnet.

Munich Re zieht je nach Art und Fristigkeit des Geschäfts unterschiedliche Steuerungsgrößen bzw. Performancemaße heran. Zusätzlich stehen die IFRS-Ergebnisbeiträge im Mittelpunkt der Planung und Strategie aller Segmente. Daher dient als einheitliche Bemessungsgrundlage für die Segmentergebnisgröße ein operatives Ergebnis, das um nicht operative Bestandteile (unter anderem Währungskursgewinne und -verluste, Erträge bzw. Aufwendungen aus dem Verkauf von immateriellen Vermögenswerten) bereinigt wird. Das operative Ergebnis spalten wir in Analogie zur internen Steuerung in die Teilergebnisgrößen versicherungstechnisches und nicht versicherungstechnisches Ergebnis auf. Hierbei wird der Versicherungstechnik eine Zinskomponente in Form des technischen Zinsertrags zugewiesen. Dieser Zinsertrag resultiert aus der Anlage der Beitragseinnahmen sowie dem Anspruch der Versicherungsnehmer an Teilen des nicht versicherungstechnischen Ergebnisses (vgl. Erläuterungen zum technischen Zinsertrag auf Seite 228 f.).

|             |         | Erstversicherung |         | Munich Health |         | Assetmanagement |         | Konsolidierung |         | Gesamt      |         |
|-------------|---------|------------------|---------|---------------|---------|-----------------|---------|----------------|---------|-------------|---------|
| Gesundheit  |         | Schaden/Unfall   |         |               |         |                 |         |                |         |             |         |
| 31.12. 2010 | Vorjahr | 31.12. 2010      | Vorjahr | 31.12. 2010   | Vorjahr | 31.12. 2010     | Vorjahr | 31.12. 2010    | Vorjahr | 31.12. 2010 | Vorjahr |
| 691         | 696     | 955              | 1.008   | 124           | 138     | 21              | 13      | -4             | -3      | 5.086       | 5.195   |
| 623         | 635     | 340              | 309     | 16            | 15      | 63              | 46      | -              | -1      | 4.247       | 4.086   |
| -           | -       | -                | -       | -             | -       | -               | -       | -              | -       | -           | 90      |
| 317         | 321     | 4.280            | 4.025   | 53            | 34      | 59              | 66      | -10.716        | -10.329 | 1.091       | 1.001   |
| 107         | 106     | 153              | 130     | 51            | 32      | 42              | 51      | -15            | -15     | 870         | 796     |
| 15.856      | 14.765  | 2.482            | 2.347   | 25            | 25      | -               | -       | -3.911         | -3.966  | 48.935      | 46.622  |
| -           | -       | -                | 1       | -             | -       | -               | -       | -              | -       | 42          | 84      |
| 12.428      | 12.077  | 5.857            | 5.870   | 2.621         | 1.821   | 114             | 105     | -              | -1      | 122.123     | 115.605 |
| 37          | 33      | 12               | 5       | 12            | 7       | -               | -       | -              | -       | 1.612       | 1.613   |
| 12.465      | 12.110  | 5.869            | 5.876   | 2.633         | 1.828   | 114             | 105     | -              | -1      | 123.777     | 117.302 |
| 1           | 5       | 20               | 20      | 1.251         | 1.232   | -               | -       | -2.128         | -2.130  | 6.902       | 6.798   |
| 87          | 69      | 552              | 509     | 129           | 14      | 780             | 265     | -763           | -287    | 3.199       | 2.340   |
| 29.349      | 27.905  | 13.543           | 13.086  | 4.107         | 3.148   | 1.016           | 482     | -17.518        | -16.714 | 188.151     | 178.149 |
| 3           | 1       | -                | -       | 1             | 1       | -               | -       | -              | -       | 4.957       | 4.026   |
| 1.062       | 1.076   | 894              | 853     | 30            | 31      | -               | -       | -2.815         | -2.810  | 5.490       | 4.983   |
| 3.464       | 3.277   | 4.445            | 4.056   | 1.919         | 1.522   | 58              | 89      | -2.111         | -1.829  | 32.674      | 31.059  |
| -           | -       | -                | -       | -             | 1       | -               | -       | -              | -       | -           | 13      |
| 34.569      | 32.955  | 19.837           | 19.003  | 6.181         | 4.840   | 1.095           | 584     | -22.448        | -21.356 | 236.358     | 223.412 |



## Segmentpassiva

| Mio. €                                                                                                                                                          | Rückversicherung |               |                |               |                |               |
|-----------------------------------------------------------------------------------------------------------------------------------------------------------------|------------------|---------------|----------------|---------------|----------------|---------------|
|                                                                                                                                                                 | Leben            |               | Schaden/Unfall |               | Leben          |               |
|                                                                                                                                                                 | 31.12.<br>2010   | Vorjahr       | 31.12.<br>2010 | Vorjahr       | 31.12.<br>2010 | Vorjahr       |
| <b>A. Nachrangige Verbindlichkeiten</b>                                                                                                                         | <b>1.344</b>     | <b>1.421</b>  | <b>2.885</b>   | <b>2.782</b>  | <b>105</b>     | <b>104</b>    |
| <b>B. Versicherungstechnische Rückstellungen (brutto)</b>                                                                                                       |                  |               |                |               |                |               |
| I. Beitragsüberträge                                                                                                                                            | 52               | 113           | 5.669          | 4.955         | 1              | 1             |
| II. Deckungsrückstellung                                                                                                                                        | 11.605           | 10.636        | 317            | 300           | 69.606         | 68.629        |
| III. Rückstellung für noch nicht abgewickelte Versicherungsfälle                                                                                                | 4.509            | 3.830         | 37.161         | 35.756        | 1.510          | 1.475         |
| IV. Übrige versicherungstechnische Rückstellungen                                                                                                               | 498              | 678           | 138            | 135           | 2.167          | 2.802         |
|                                                                                                                                                                 | <b>16.664</b>    | <b>15.257</b> | <b>43.285</b>  | <b>41.146</b> | <b>73.284</b>  | <b>72.907</b> |
| <b>C. Versicherungstechnische Rückstellungen im Bereich der Lebensversicherung, soweit das Anlagerisiko von den Versicherungsnehmern getragen wird (brutto)</b> | -                | -             | -              | -             | 5.206          | 4.115         |
| <b>D. Andere Rückstellungen</b>                                                                                                                                 | <b>174</b>       | <b>136</b>    | <b>623</b>     | <b>630</b>    | <b>565</b>     | <b>486</b>    |
| <b>E. Übrige Segmentpassiva</b>                                                                                                                                 | <b>5.904</b>     | <b>4.118</b>  | <b>11.296</b>  | <b>8.909</b>  | <b>9.300</b>   | <b>9.381</b>  |
| <b>Summe der Segmentpassiva</b>                                                                                                                                 | <b>24.086</b>    | <b>20.932</b> | <b>58.089</b>  | <b>53.467</b> | <b>88.460</b>  | <b>86.993</b> |

| Gesundheit        |         | Erstversicherung<br>Schaden/Unfall |         | Munich Health  |         | Assetmanagement |         | Konsolidierung |         | Gesamt         |         |
|-------------------|---------|------------------------------------|---------|----------------|---------|-----------------|---------|----------------|---------|----------------|---------|
| 31.12.<br>2010    | Vorjahr | 31.12.<br>2010                     | Vorjahr | 31.12.<br>2010 | Vorjahr | 31.12.<br>2010  | Vorjahr | 31.12.<br>2010 | Vorjahr | 31.12.<br>2010 | Vorjahr |
| 23                | 24      | 366                                | 371     | 185            | 147     | -               | -       | -61            | -59     | 4.847          | 4.790   |
| 97                | 89      | 1.691                              | 1.494   | 444            | 370     | -               | -       | -75            | -76     | 7.879          | 6.946   |
| 22.855            | 21.365  | 443                                | 394     | 1.591          | 1.500   | -               | -       | -2.004         | -1.962  | 104.413        | 100.862 |
| 939               | 943     | 4.915                              | 4.657   | 1.075          | 798     | -               | -       | -608           | -613    | 49.501         | 46.846  |
| 6.508             | 6.307   | 182                                | 151     | 215            | 234     | -               | -       | -153           | -161    | 9.555          | 10.146  |
| 30.399            | 28.704  | 7.231                              | 6.696   | 3.325          | 2.902   | -               | -       | -2.840         | -2.812  | 171.348        | 164.800 |
| 3                 | 1       | -                                  | -       | 1              | 1       | -               | -       | -              | -       | 5.210          | 4.117   |
| 316               | 283     | 1.776                              | 1.610   | 102            | 87      | 47              | 49      | -145           | -75     | 3.458          | 3.206   |
| 2.080             | 2.227   | 6.037                              | 5.992   | 1.559          | 1.190   | 909             | 399     | -8.618         | -7.995  | 28.467         | 24.221  |
| 32.821            | 31.239  | 15.410                             | 14.669  | 5.172          | 4.327   | 956             | 448     | -11.664        | -10.941 | 213.330        | 201.134 |
| Eigenkapital      |         |                                    |         |                |         |                 |         |                |         | 23.028         | 22.278  |
| Summe der Passiva |         |                                    |         |                |         |                 |         |                |         | 236.358        | 223.412 |

## Segment-Gewinn- und Verlustrechnung

| Mio. €                                                                                                          | Rückversicherung |              |                |               |               |               |
|-----------------------------------------------------------------------------------------------------------------|------------------|--------------|----------------|---------------|---------------|---------------|
|                                                                                                                 | Leben            |              | Schaden/Unfall |               | Leben         |               |
|                                                                                                                 | 2010             | Vorjahr      | 2010           | Vorjahr       | 2010          | Vorjahr       |
| <b>Gebuchte Bruttobeiträge</b>                                                                                  | <b>7.901</b>     | <b>6.796</b> | <b>15.701</b>  | <b>14.987</b> | <b>6.484</b>  | <b>6.294</b>  |
| davon:                                                                                                          |                  |              |                |               |               |               |
| Aus Versicherungsgeschäften mit anderen Segmenten                                                               | 135              | 365          | 324            | 312           | -             | -             |
| Aus Versicherungsgeschäften mit externen Dritten                                                                | 7.766            | 6.431        | 15.377         | 14.675        | 6.484         | 6.294         |
| <b>1. Verdiente Beiträge</b>                                                                                    |                  |              |                |               |               |               |
| Brutto                                                                                                          | 7.975            | 6.813        | 15.286         | 14.947        | 6.484         | 6.294         |
| Abgegeben an Rückversicherer                                                                                    | 416              | 322          | 1.093          | 979           | 282           | 549           |
| Netto                                                                                                           | 7.559            | 6.491        | 14.193         | 13.968        | 6.202         | 5.745         |
| <b>2. Technischer Zinsertrag</b>                                                                                | <b>556</b>       | <b>656</b>   | <b>1.371</b>   | <b>1.058</b>  | <b>3.052</b>  | <b>2.874</b>  |
| <b>3. Leistungen an Kunden</b>                                                                                  |                  |              |                |               |               |               |
| Brutto                                                                                                          | 5.977            | 4.934        | 10.669         | 9.677         | 8.333         | 7.631         |
| Anteil der Rückversicherer                                                                                      | 174              | 117          | 765            | 434           | 163           | 170           |
| Netto                                                                                                           | 5.803            | 4.817        | 9.904          | 9.243         | 8.170         | 7.461         |
| <b>4. Aufwendungen für den Versicherungsbetrieb</b>                                                             |                  |              |                |               |               |               |
| Brutto                                                                                                          | 2.391            | 2.168        | 4.652          | 4.348         | 1.148         | 1.363         |
| Anteil der Rückversicherer                                                                                      | 158              | 120          | 215            | 223           | 58            | 298           |
| Netto                                                                                                           | 2.233            | 2.048        | 4.437          | 4.125         | 1.090         | 1.065         |
| davon:                                                                                                          |                  |              |                |               |               |               |
| Abschreibungen auf erworbene Versicherungsbestände                                                              | 13               | 12           | -              | -             | 28            | 57            |
| <b>5. Versicherungstechnisches Ergebnis (1.-4.)</b>                                                             | <b>79</b>        | <b>282</b>   | <b>1.223</b>   | <b>1.658</b>  | <b>-6</b>     | <b>93</b>     |
| <b>6. Ergebnis aus Kapitalanlagen</b>                                                                           |                  |              |                |               |               |               |
| Erträge aus Kapitalanlagen                                                                                      | 1.799            | 1.695        | 4.696          | 5.163         | 4.712         | 5.023         |
| Aufwendungen für Kapitalanlagen                                                                                 | 926              | 613          | 2.133          | 2.449         | 1.227         | 1.937         |
| Gesamt                                                                                                          | 873              | 1.082        | 2.563          | 2.714         | 3.485         | 3.086         |
| davon:                                                                                                          |                  |              |                |               |               |               |
| Zinsen und ähnliche Erträge                                                                                     | 727              | 837          | 1.724          | 1.777         | 3.019         | 2.992         |
| Zinsen und ähnliche Aufwendungen                                                                                | 41               | 20           | 69             | 116           | 26            | 46            |
| Abschreibungen auf Kapitalanlagen                                                                               | 539              | 294          | 755            | 809           | 658           | 1.052         |
| Zuschreibungen auf Kapitalanlagen                                                                               | 470              | 269          | 558            | 682           | 660           | 332           |
| Ergebnis aus assoziierten Unternehmen nach der Equity-Methode bewertet                                          | 7                | -3           | 35             | -12           | 7             | -40           |
| <b>7. Sonstige operative Erträge</b>                                                                            | <b>84</b>        | <b>58</b>    | <b>321</b>     | <b>280</b>    | <b>462</b>    | <b>532</b>    |
| davon:                                                                                                          |                  |              |                |               |               |               |
| Zinsen und ähnliche Erträge                                                                                     | 27               | 8            | 66             | 36            | 7             | 10            |
| Zuschreibungen auf sonstige operative Vermögenswerte                                                            | 1                | -            | 3              | 1             | 1             | 4             |
| <b>8. Sonstige operative Aufwendungen</b>                                                                       | <b>46</b>        | <b>48</b>    | <b>227</b>     | <b>213</b>    | <b>534</b>    | <b>619</b>    |
| davon:                                                                                                          |                  |              |                |               |               |               |
| Zinsen und ähnliche Aufwendungen                                                                                | 6                | 10           | 9              | 20            | 19            | 20            |
| Abschreibungen auf sonstige operative Vermögenswerte                                                            | 3                | 3            | 28             | 11            | 30            | 38            |
| <b>9. Umgliederung technischer Zinsertrag</b>                                                                   | <b>-556</b>      | <b>-656</b>  | <b>-1.371</b>  | <b>-1.058</b> | <b>-3.052</b> | <b>-2.874</b> |
| <b>10. Nicht versicherungstechnisches Ergebnis (6.-9.)</b>                                                      | <b>355</b>       | <b>436</b>   | <b>1.286</b>   | <b>1.723</b>  | <b>361</b>    | <b>125</b>    |
| <b>11. Operatives Ergebnis</b>                                                                                  | <b>434</b>       | <b>718</b>   | <b>2.509</b>   | <b>3.381</b>  | <b>355</b>    | <b>218</b>    |
| 12. Sonstiges nicht operatives Ergebnis, Abschreibungen auf Geschäfts- oder Firmenwerte und Finanzierungskosten | -86              | -79          | -269           | -311          | -102          | -164          |
| 13. Ertragsteuern                                                                                               | 55               | 174          | 434            | 959           | 81            | 27            |
| <b>14. Konzernergebnis</b>                                                                                      | <b>293</b>       | <b>465</b>   | <b>1.806</b>   | <b>2.111</b>  | <b>172</b>    | <b>27</b>     |
| davon:                                                                                                          |                  |              |                |               |               |               |
| Auf Anteilseigner der Münchener Rück AG entfallend                                                              | 294              | 465          | 1.809          | 2.111         | 172           | 14            |
| Auf nicht beherrschende Anteile entfallend                                                                      | -1               | -            | -3             | -             | -             | 13            |

|            |         | Erstversicherung |         | Munich Health |         | Assetmanagement |         | Konsolidierung |         | Gesamt |         |
|------------|---------|------------------|---------|---------------|---------|-----------------|---------|----------------|---------|--------|---------|
| Gesundheit |         | Schaden/Unfall   |         |               |         |                 |         |                |         |        |         |
| 2010       | Vorjahr | 2010             | Vorjahr | 2010          | Vorjahr | 2010            | Vorjahr | 2010           | Vorjahr | 2010   | Vorjahr |
| 5.499      | 5.171   | 5.498            | 5.131   | 5.140         | 3.974   | -               | -       | -682           | -930    | 45.541 | 41.423  |
| 6          | 9       | 39               | 47      | 178           | 197     | -               | -       | -682           | -930    | -      | -       |
| 5.493      | 5.162   | 5.459            | 5.084   | 4.962         | 3.777   | -               | -       | -              | -       | 45.541 | 41.423  |
| 5.492      | 5.172   | 5.329            | 5.054   | 5.075         | 3.881   | -               | -       | -686           | -934    | 44.955 | 41.227  |
| 231        | 244     | 516              | 486     | 28            | 55      | -               | -       | -686           | -934    | 1.880  | 1.701   |
| 5.261      | 4.928   | 4.813            | 4.568   | 5.047         | 3.826   | -               | -       | -              | -       | 43.075 | 39.526  |
| 1.431      | 1.172   | 174              | 150     | 88            | 83      | -               | -       | -85            | -199    | 6.587  | 5.794   |
| 5.805      | 5.256   | 3.485            | 3.141   | 4.020         | 3.166   | -               | -       | -542           | -642    | 37.747 | 33.163  |
| 131        | 171     | 355              | 285     | 22            | 37      | -               | -       | -446           | -443    | 1.164  | 771     |
| 5.674      | 5.085   | 3.130            | 2.856   | 3.998         | 3.129   | -               | -       | -96            | -199    | 36.583 | 32.392  |
| 680        | 711     | 1.726            | 1.613   | 1.074         | 736     | -               | -       | -126           | -353    | 11.545 | 10.586  |
| 80         | 57      | 105              | 111     | 6             | 10      | -               | -       | -191           | -414    | 431    | 405     |
| 600        | 654     | 1.621            | 1.502   | 1.068         | 726     | -               | -       | 65             | 61      | 11.114 | 10.181  |
| 5          | 5       | 2                | -       | -             | -       | -               | -       | -              | -       | 48     | 74      |
| 418        | 361     | 236              | 360     | 69            | 54      | -               | -       | -54            | -61     | 1.965  | 2.747   |
| 1.702      | 1.456   | 1.159            | 802     | 202           | 180     | 12              | 24      | -616           | -768    | 13.666 | 13.575  |
| 385        | 398     | 386              | 331     | 60            | 29      | 10              | 15      | -103           | -80     | 5.024  | 5.692   |
| 1.317      | 1.058   | 773              | 471     | 142           | 151     | 2               | 9       | -513           | -688    | 8.642  | 7.883   |
| 1.194      | 1.106   | 353              | 354     | 127           | 153     | 5               | 7       | -158           | -320    | 6.991  | 6.906   |
| 9          | 15      | 13               | 9       | 2             | 2       | -               | -       | -5             | -4      | 155    | 204     |
| 85         | 125     | 153              | 169     | 20            | 9       | 10              | 13      | -              | -       | 2.220  | 2.471   |
| 71         | 31      | 38               | 28      | 20            | 7       | -               | -       | -              | -       | 1.817  | 1.349   |
| 6          | -       | -3               | -58     | 9             | -3      | -10             | -10     | -              | -       | 51     | -126    |
| 154        | 97      | 1.070            | 550     | 102           | 88      | 265             | 251     | -1.651         | -1.168  | 807    | 688     |
| 8          | 5       | 6                | 5       | 15            | 6       | 5               | 4       | -9             | -11     | 125    | 63      |
| 2          | -       | -                | -       | -             | -       | -               | -       | -              | -       | 7      | 5       |
| 222        | 128     | 1.227            | 757     | 94            | 77      | 192             | 208     | -1.693         | -1.247  | 849    | 803     |
| 34         | 18      | 108              | 109     | 6             | 9       | 10              | 13      | -56            | -77     | 136    | 122     |
| 9          | 7       | 25               | 49      | 9             | 9       | 1               | -       | -              | -       | 105    | 117     |
| -1.431     | -1.172  | -174             | -150    | -88           | -83     | -               | -       | 85             | 199     | -6.587 | -5.794  |
| -182       | -145    | 442              | 114     | 62            | 79      | 75              | 52      | -386           | -410    | 2.013  | 1.974   |
| 236        | 216     | 678              | 474     | 131           | 133     | 75              | 52      | -440           | -471    | 3.978  | 4.721   |
| -62        | -81     | -310             | -188    | -29           | -102    | -10             | -14     | 12             | 46      | -856   | -893    |
| 9          | 52      | 49               | 29      | 39            | 4       | 28              | 19      | -3             | -       | 692    | 1.264   |
| 165        | 83      | 319              | 257     | 63            | 27      | 37              | 19      | -425           | -425    | 2.430  | 2.564   |
| 165        | 78      | 312              | 243     | 60            | 28      | 37              | 13      | -427           | -431    | 2.422  | 2.521   |
| -          | 5       | 7                | 14      | 3             | -1      | -               | 6       | 2              | 6       | 8      | 43      |

Langfristige Vermögenswerte nach Ländern<sup>1</sup>

| Mio. €         | 31.12.2010    | Vorjahr       |
|----------------|---------------|---------------|
| Deutschland    | 7.651         | 7.759         |
| USA            | 2.024         | 1.987         |
| Österreich     | 472           | 471           |
| Großbritannien | 296           | 185           |
| Singapur       | 251           | 219           |
| Schweden       | 247           | 195           |
| Niederlande    | 177           | 182           |
| Frankreich     | 161           | 162           |
| Spanien        | 136           | 235           |
| Polen          | 126           | 102           |
| Portugal       | 110           | 118           |
| Schweiz        | 96            | 71            |
| Italien        | 63            | 80            |
| Griechenland   | 58            | 56            |
| Übrige         | 299           | 400           |
| <b>Gesamt</b>  | <b>12.167</b> | <b>12.222</b> |

<sup>1</sup> Die langfristigen Vermögenswerte beinhalten im Wesentlichen die immateriellen Vermögenswerte (insbesondere Geschäfts- oder Firmenwerte) und den eigen- und fremdgenutzten Grundbesitz.

Gebuchte Bruttobeiträge<sup>1</sup>

| Mio. €                            | Rückversicherer |               | Erstversicherer |               | Munich Health |              | Gesamt        |               |
|-----------------------------------|-----------------|---------------|-----------------|---------------|---------------|--------------|---------------|---------------|
|                                   | 2010            | Vorjahr       | 2010            | Vorjahr       | 2010          | Vorjahr      | 2010          | Vorjahr       |
| Europa                            |                 |               |                 |               |               |              |               |               |
| Deutschland                       | 1.431           | 1.397         | 13.266          | 12.876        | 67            | 203          | 14.764        | 14.476        |
| Großbritannien                    | 3.843           | 3.710         | 151             | 129           | 465           | 322          | 4.459         | 4.161         |
| Italien                           | 377             | 406           | 509             | 481           | 54            | 57           | 940           | 944           |
| Spanien                           | 504             | 581           | 66              | 68            | 601           | 511          | 1.171         | 1.160         |
| Polen                             | 12              | 12            | 923             | 684           | -             | -            | 935           | 696           |
| Übrige                            | 2.109           | 2.444         | 2.349           | 2.176         | 470           | 417          | 4.928         | 5.037         |
|                                   | 8.276           | 8.550         | 17.264          | 16.414        | 1.657         | 1.510        | 27.197        | 26.474        |
| Nordamerika                       |                 |               |                 |               |               |              |               |               |
| USA                               | 6.757           | 6.363         | -               | -             | 1.011         | 861          | 7.768         | 7.224         |
| Kanada                            | 2.598           | 2.017         | -               | -             | 1.695         | 1.071        | 4.293         | 3.088         |
|                                   | 9.355           | 8.380         | -               | -             | 2.706         | 1.932        | 12.061        | 10.312        |
| Asien und Australasien            |                 |               |                 |               |               |              |               |               |
| Australien                        | 1.088           | 764           | -               | -             | -             | -            | 1.088         | 764           |
| China                             | 885             | 491           | -               | -             | 49            | 29           | 934           | 520           |
| Japan                             | 664             | 485           | -               | -             | 2             | 1            | 666           | 486           |
| Taiwan                            | 398             | 234           | -               | -             | 136           | -            | 534           | 234           |
| Übrige                            | 633             | 543           | 172             | 126           | 183           | 77           | 988           | 746           |
|                                   | 3.668           | 2.517         | 172             | 126           | 370           | 107          | 4.210         | 2.750         |
| Afrika, Naher und Mittlerer Osten |                 |               |                 |               |               |              |               |               |
| Südafrika                         | 371             | 331           | -               | -             | -             | -            | 371           | 331           |
| Vereinigte arabische Emirate      | 29              | 35            | -               | -             | 147           | 143          | 176           | 178           |
| Übrige                            | 297             | 321           | -               | -             | 72            | 67           | 369           | 388           |
|                                   | 697             | 687           | -               | -             | 219           | 210          | 916           | 897           |
| Lateinamerika                     | 1.147           | 972           | -               | -             | 10            | 18           | 1.157         | 990           |
| <b>Gesamt</b>                     | <b>23.143</b>   | <b>21.106</b> | <b>17.436</b>   | <b>16.540</b> | <b>4.962</b>  | <b>3.777</b> | <b>45.541</b> | <b>41.423</b> |

<sup>1</sup> Nach Eliminierung segmentübergreifender konzerninterner Rückversicherung. Die Zuordnung der Beiträge erfolgt nach dem Ort des versicherten Risikos. Die Darstellung im Lagebericht weicht hiervon ab. Vergleiche dazu den Hinweis auf Seite 71.

## Erläuterungen zur Konzernbilanz – Aktiva

### 1 // Geschäfts- oder Firmenwert

#### Entwicklung des Geschäfts- oder Firmenwerts

| Mio. €                                         | Rückversicherung  |        | Erstversicherung         |        | Munich Health | Gesamt 2010 | Gesamt Vorjahr |
|------------------------------------------------|-------------------|--------|--------------------------|--------|---------------|-------------|----------------|
|                                                | Munich Re America | Übrige | ERGO Versicherungsgruppe | Übrige | Übrige        |             |                |
| Geschäfts- oder Firmenwert aus dem Erwerb von  |                   |        |                          |        |               |             |                |
| Bruttobuchwert 31.12. Vorjahr                  | 962               | 417    | 1.754                    | 546    | 112           | 3.791       | 3.744          |
| Kumulierte Abschreibungen 31.12. Vorjahr       | -                 | 22     | -                        | 252    | 40            | 314         | 197            |
| Bilanzwert 31.12. Vorjahr                      | 962               | 395    | 1.754                    | 294    | 72            | 3.477       | 3.547          |
| Währungsänderungen                             | 66                | 26     | -                        | 6      | 1             | 99          | -40            |
| Zugänge                                        | -                 | -      | -                        | 2      | -             | 2           | 87             |
| Umgliederungen                                 | -                 | -16    | -                        | -      | -             | -16         | -              |
| Abschreibungen außerplanmäßig                  | -                 | -      | -                        | 109    | -             | 109         | 117            |
| Bilanzwert 31.12. Geschäftsjahr                | 1.028             | 405    | 1.754                    | 193    | 73            | 3.453       | 3.477          |
| Kumulierte Abschreibungen 31.12. Geschäftsjahr | -                 | 22     | -                        | 361    | 40            | 423         | 314            |
| Bruttobuchwert 31.12. Geschäftsjahr            | 1.028             | 427    | 1.754                    | 554    | 113           | 3.876       | 3.791          |

Die Zugänge resultieren aus dem Erwerb zusätzlicher Anteile an den bisher nach der Equity-Methode bilanzierten Tochterunternehmen CJSIC „European Travel Insurance“, Moskau, und Geschlossene Aktiengesellschaft Europäische Reiseversicherung, Kiew. Diese Anteilskäufe haben wir ausführlich in unseren Angaben zum Konsolidierungskreis dargestellt.

#### Zuordnung der Geschäfts- oder Firmenwerte zu zahlungsmittelgenerierenden Einheiten

Für die Werthaltigkeitsprüfung werden die Geschäfts- oder Firmenwerte den zahlungsmittelgenerierenden Einheiten bzw. Gruppen von zahlungsmittelgenerierenden Einheiten zugeordnet, die aus den Synergien des Unternehmenszusammenschlusses Nutzen ziehen. Gleichzeitig stellt die Einheit bzw. die Gruppe von Einheiten, welcher der Geschäfts- oder Firmenwert zugeordnet wurde, die niedrigste Ebene dar, auf welcher der Geschäfts- oder Firmenwert für interne Managementzwecke überwacht wird. In der Rückversicherung haben wir die Geschäfts- oder Firmenwerte den Ressorts bzw. Gruppen von Ressorts zugeordnet, in der Erstversicherung den legalen Einheiten bzw. Gruppen von legalen Einheiten. Für Munich Health sind die Geschäfts- oder Firmenwerte dem gleichlautenden Segment zugeordnet. Die Ressorts sind im Lagebericht auf Seite 49 erläutert.

Unsere Geschäfts- oder Firmenwerte wurden vollständig den folgenden zahlungsmittelgenerierenden Einheiten bzw. Gruppen von zahlungsmittelgenerierenden Einheiten zugeordnet:

#### Zuordnung der Geschäfts- oder Firmenwerte zu zahlungsmittelgenerierenden Einheiten

| Mio. €                                           | Segment Rückversicherung Schaden/Unfall | ERGO         | Diverse zahlungsmittelgenerierende Einheiten |
|--------------------------------------------------|-----------------------------------------|--------------|----------------------------------------------|
| <b>Geschäfts- oder Firmenwert zum 31.12.2010</b> | <b>1.417</b>                            | <b>1.754</b> | <b>282</b>                                   |



Der Geschäfts- oder Firmenwert aus dem Erwerb der Munich Re America wurde der zahlungsmittelgenerierenden Einheit „Segment Rückversicherung Schaden/Unfall“ zugeordnet. Der ausgewiesene Buchwert beinhaltet außerdem weitere Geschäfts- oder Firmenwerte, deren Werthaltigkeitsprüfung auf Basis von zahlungsmittelgenerierenden Einheiten auf Ebene der Ressorts bzw. Gruppen von Ressorts innerhalb des Segments erfolgt, wobei die jeweils zugeordneten Geschäfts- oder Firmenwerte nicht signifikant im Vergleich zum Gesamtbestand sind. Die erzielbaren Beträge dieser zahlungsmittelgenerierenden Einheiten basieren in der Regel auf denselben wesentlichen Annahmen, die in der nachfolgenden Tabelle für das Segment Rückversicherung Schaden/Unfall angegeben sind. Der Geschäfts- oder Firmenwert aus dem Erwerb von Anteilen an der ERGO Versicherungsgruppe wurde der zahlungsmittelgenerierenden Einheit „ERGO“ zugeordnet.

Die Geschäfts- oder Firmenwerte, die diversen zahlungsmittelgenerierenden Einheiten bzw. Gruppen von zahlungsmittelgenerierenden Einheiten zugeordnet wurden, sind jeweils nicht signifikant im Vergleich zum Gesamtbuchwert des Geschäfts- oder Firmenwerts. Sofern die erzielbaren Beträge dieser zahlungsmittelgenerierenden Einheiten bzw. Gruppen von Einheiten auf denselben wesentlichen Annahmen basieren, ist die Summe der zugeordneten Geschäfts- oder Firmenwerte nicht signifikant. Als signifikant im Sinne von IAS 36.134 und IAS 36.135 betrachten wir Beträge, die 10 % oder mehr des gesamten Geschäfts- oder Firmenwerts ausmachen.

#### Annahmen zur Ermittlung des erzielbaren Betrags im Rahmen der Werthaltigkeitsprüfungen

Die Werthaltigkeitsprüfungen der zahlungsmittelgenerierenden Einheiten, denen ein wesentlicher Teil des Geschäfts- oder Firmenwerts zugeordnet wurde, wurden auf Basis folgender Annahmen durchgeführt:

| Zahlungsmittelgenerierende Einheit bzw. Gruppe von zahlungsmittelgenerierenden Einheiten                                            | Segment Rückversicherung Schaden/Unfall                                                                                                                                                                                 | ERGO                                                                                                                                                                                    |
|-------------------------------------------------------------------------------------------------------------------------------------|-------------------------------------------------------------------------------------------------------------------------------------------------------------------------------------------------------------------------|-----------------------------------------------------------------------------------------------------------------------------------------------------------------------------------------|
| Methode für die Berechnung des erzielbaren Betrags                                                                                  | Nutzungswert                                                                                                                                                                                                            | Nutzungswert                                                                                                                                                                            |
| Wesentliche Annahmen in Bezug auf die Zahlungsstromplanung (zum Zeitpunkt der Planung)                                              | In der Detailplanungsphase rechneten wir mit etwa stabilen Beitragseinnahmen bei einem Rückgang der Schadenquoten. Grundsätzlich gingen wir von moderat steigenden Aktienmärkten und von einem stabilen Zinsniveau aus. | Für die Detailplanung erwarteten wir im Durchschnitt einen Anstieg der Ergebnisse. Grundsätzlich gingen wir von moderat steigenden Aktienmärkten und von einem stabilen Zinsniveau aus. |
| Wachstumsraten, die zur Extrapolation jenseits der Zahlungsstromplanung auf der Basis von Finanzplänen/Vorhersagen verwendet werden | 0–1,5%                                                                                                                                                                                                                  |                                                                                                                                                                                         |
|                                                                                                                                     | 1,5% als maximale Wachstumsrate gemäß Rundschreiben 2108/2003 des Gesamtverbands der Deutschen Versicherungswirtschaft e.V.                                                                                             |                                                                                                                                                                                         |
| Diskontzinssätze                                                                                                                    | 8,6%                                                                                                                                                                                                                    | 8,3%                                                                                                                                                                                    |

Die Berechnung des Nutzungswerts erfolgt auf Grundlage von Zahlungsstromprognosen basierend auf der aktuellsten vom Management genehmigten Unternehmensplanung. Die Unternehmenspläne werden im Dialog zwischen den operativen Bereichen, den zuständigen Controlling-Einheiten und dem Vorstand erstellt, mindestens quartalsweise überprüft und fortgeschrieben. Der Planungszeitraum beträgt im Allgemeinen drei Jahre und berücksichtigt das gegenwärtige Marktumfeld. Nach der Detailplanungsphase schätzen wir das langfristige erzielbare Wachstum durch eine Extrapolation der angepassten Zahlungsströme des letzten Planjahres.

Die Diskontzinssätze wurden in Form der gewichteten durchschnittlichen Kapitalkosten ermittelt, wobei die anteiligen Eigenkapitalkosten mithilfe des Capital Asset Pricing Model (CAPM) periodenspezifisch abgeleitet wurden. Die Berechnungen erfolgten auf Basis von Zahlungsströmen nach Berücksichtigung von normalisierten Steuern. In obiger Tabelle wurde für Ausweiszwecke jeweils ein korrespondierender Zinssatz vor Steuern angegeben, eine Überleitung zu den Kapitalkosten von Munich Re ist nicht möglich. Für die Diskontzinssätze und die Wachstumsraten wurden Sensitivitätsanalysen durchgeführt. Dabei wurden keine Wertminderungen identifiziert.

#### Wertminderungsaufwand der Periode

Bei der Werthaltigkeitsprüfung von Geschäfts- oder Firmenwerten wurde im Geschäftsjahr 2010 eine Wertminderung von 109 Millionen € ermittelt. Diese wurde erfolgswirksam in der Position Abschreibungen auf Geschäfts- oder Firmenwerte erfasst und ist auf folgenden Sachverhalt zurückzuführen:

Aufgrund der wirtschaftlichen Entwicklung des lokalen Schaden-/Unfallversicherungsgeschäfts in der Türkei, das aktuell durch eine schwierige Wettbewerbssituation, fallende Kapitalanlageerträge und eine verschärfte Regulierung durch die Aufsicht gekennzeichnet ist, erfolgte im zweiten Quartal eine Werthaltigkeitsprüfung des Geschäfts- oder Firmenwerts aus der Akquisition der Beteiligung an der ERGO Sigorta A.S., Istanbul. Diese Prüfung führte zu einer vollständigen Abschreibung des Geschäfts- oder Firmenwerts in Höhe von 109 Millionen €, die im Segment Erstversicherung Schaden/Unfall erfasst wurde. Die Werthaltigkeitsprüfung fand auf der Ebene der Gruppe aller zahlungsmittelgenerierenden Einheiten unserer Erstversicherungsaktivitäten in der Türkei statt. Der erzielbare Betrag dieser Gruppe von zahlungsmittelgenerierenden Einheiten wurde mit dem Ertragswertverfahren ermittelt. Die Diskontierungszinssätze wurden auf Basis lokaler Kapitalmarktdaten abgeleitet.

## 2 // Sonstige immaterielle Vermögenswerte

#### Entwicklung der sonstigen immateriellen Vermögenswerte

| Mio. €                                         | Software | Erworbene<br>Versicherungs-<br>bestände | Übrige | 2010  | Vorjahr |
|------------------------------------------------|----------|-----------------------------------------|--------|-------|---------|
| Bruttobuchwert 31.12. Vorjahr                  | 969      | 1.340                                   | 1.387  | 3.696 | 3.367   |
| Kumulierte Abschreibungen 31.12. Vorjahr       | 620      | 690                                     | 668    | 1.978 | 1.566   |
| Bilanzwert 31.12. Vorjahr                      | 349      | 650                                     | 719    | 1.718 | 1.801   |
| Währungsänderungen                             | 4        | 11                                      | 32     | 47    | -10     |
| Veränderung Konsolidierungskreis               | -        | -                                       | 3      | 3     | 118     |
| Zugänge                                        | 127      | 10                                      | 21     | 158   | 183     |
| Abgänge                                        | 6        | -                                       | 1      | 7     | 13      |
| Umgliederungen                                 | -        | -                                       | 16     | 16    | -       |
| Zuschreibungen                                 | -        | -                                       | -      | -     | -       |
| Abschreibungen                                 |          |                                         |        |       |         |
| Planmäßig                                      | 83       | 56                                      | 103    | 242   | 296     |
| Außerplanmäßig                                 | 7        | 11                                      | 42     | 60    | 65      |
| Bilanzwert 31.12. Geschäftsjahr                | 384      | 604                                     | 645    | 1.633 | 1.718   |
| Kumulierte Abschreibungen 31.12. Geschäftsjahr | 719      | 774                                     | 740    | 2.233 | 1.978   |
| Bruttobuchwert 31.12. Geschäftsjahr            | 1.103    | 1.378                                   | 1.385  | 3.866 | 3.696   |

Die Software umfasst 177 Millionen € selbst erstellte und 207 Millionen € entgeltlich erworbene Software. Die Zugänge und die planmäßigen Abschreibungen entfallen mit 57 Millionen € und 29 Millionen € auf selbst erstellte sowie mit 70 Millionen € und 54 Millionen € auf entgeltlich erworbene Software. Die Abgänge und die außerplanmäßigen Abschreibungen betreffen entgeltlich erworbene Software.

In den erworbenen Versicherungsbeständen sind mit 502 Millionen € fortgeführte Buchwerte enthalten, die aus der Übernahme des Lebensrückversicherungsgeschäfts der CNA Financial Corporation, der Bank Austria Creditanstalt Versicherung AG sowie aus dem Erwerb zusätzlicher Anteile an der ERGO Versicherungsgruppe AG in den Jahren 2001 und 2002 resultieren. Die übrigen immateriellen Vermögenswerte enthalten grundstücksgleiche Rechte von 6 Millionen € und im Rahmen von Unternehmenszusammenschlüssen erworbene Vertriebsnetze bzw. Kundenstämme der American Modern Insurance Group, der Bank Austria Creditanstalt Versicherung AG, der HSB Group und der MSP Underwriting Ltd. von insgesamt 380 Millionen €.

Die Zugänge aus der Veränderung des Konsolidierungskreises resultieren aus dem Erwerb von Teilen des Geschäftsbetriebs der Guardian Healthcare Inc.

Die außerplanmäßigen Abschreibungen verteilen sich wie folgt auf die Segmente: In der Rückversicherung entfallen auf Leben 19 (27) Millionen € und auf Schaden/Unfall 28 (12) Millionen €, in der Erstversicherung 5 (2) Millionen € auf Schaden/Unfall sowie 8 (24) Millionen € auf Munich Health.

Die außerplanmäßigen Abschreibungen ergeben sich insbesondere aus Wertminderungs-tests, die aufgrund von Verkaufsüberlegungen durchgeführt wurden.

Verfügungsbeschränkungen bzw. Verpfändungen als Sicherheit bestehen in Höhe von 5 (1) Millionen €. Verpflichtungen zum Erwerb sonstiger immaterieller Vermögenswerte belaufen sich auf 3 (4) Millionen €. Bei Softwareprojekten wurden Aufwendungen für Forschung und Entwicklung von 21 (32) Millionen € nicht aktiviert, sondern als Aufwand erfasst.

### 3 // Grundstücke und Bauten einschließlich der Bauten auf fremden Grundstücken

#### Entwicklung der Grundstücke und Bauten einschließlich der Bauten auf fremden Grundstücken

| Mio. €                                         | 2010  | Vorjahr |
|------------------------------------------------|-------|---------|
| Bruttobuchwert 31.12. Vorjahr                  | 4.949 | 4.735   |
| Kumulierte Abschreibungen 31.12. Vorjahr       | 863   | 778     |
| Bilanzwert 31.12. Vorjahr                      | 4.086 | 3.957   |
| Währungsänderungen                             | 78    | 8       |
| Veränderung Konsolidierungskreis               | 7     | 175     |
| Zugänge                                        | 258   | 149     |
| Abgänge                                        | 131   | 24      |
| Zuschreibungen                                 | 19    | 3       |
| Abschreibungen                                 |       |         |
| Planmäßig                                      | 83    | 79      |
| Außerplanmäßig                                 | 37    | 48      |
| Umgliederung                                   | 50    | -55     |
| Bilanzwert 31.12. Geschäftsjahr                | 4.247 | 4.086   |
| Kumulierte Abschreibungen 31.12. Geschäftsjahr | 895   | 863     |
| Bruttobuchwert 31.12. Geschäftsjahr            | 5.142 | 4.949   |

Die außerplanmäßigen Abschreibungen und die Zuschreibungen sind im Wesentlichen durch Marktwertanpassungen begründet. Die außerplanmäßigen Abschreibungen verteilen sich wie folgt auf die Segmente: In der Rückversicherung entfallen auf Leben 2 (5) Millionen € und auf Schaden/Unfall 4 (9) Millionen €, in der Erstversicherung auf Leben 23 (31) Millionen € und auf Gesundheit 8 (3) Millionen €.

Für den Grundbesitz bestehen Verfügungsbeschränkungen bzw. Verpfändungen als Sicherheit in Höhe von 996 (711) Millionen €. Die aktivierten Ausgaben für Gebäude im Bau betragen zum Bilanzstichtag 113 (250) Millionen €; die Verpflichtungen zum Erwerb von Grundbesitz belaufen sich auf 29 (60) Millionen €. Der beizulegende Zeitwert der fremdgenutzten Grundstücke und Bauten beträgt zum Bilanzstichtag 5.672 (5.533) Millionen €. Jedes Grundstück wurde zum 31. Dezember 2010 bewertet; Bewertungen führen im Wesentlichen konzerninterne sowie in Einzelfällen externe Gutachter durch. Maßgeblich für die Bewertung ist die Ermittlung der Nachhaltigkeit von Einnahmen- und Ausgabenströmen unter Berücksichtigung der Entwicklung der Marktgegebenheiten am jeweiligen Standort der Immobilie. Der beizulegende Zeitwert wird objektindividuell bestimmt, indem die zukünftigen Einzahlungsüberschüsse auf den Bewertungszeitpunkt diskontiert werden. Je nach Art der Immobilie werden dabei Zinssätze für Wohngebäude von 3,50 % bis 5,50 %, für Bürogebäude von 4,25 % bis 8,00 % sowie für Einzelhandel von 4,00 % bis 8,25 % verwendet.

#### 4 // Anteile an verbundenen Unternehmen und assoziierten Unternehmen

##### Zusammensetzung der Anteile an verbundenen Unternehmen und assoziierten Unternehmen

| Mio. €                              | 31.12.2010   | Vorjahr      |
|-------------------------------------|--------------|--------------|
| Verbundene Unternehmen              |              |              |
| zum beizulegenden Zeitwert bewertet | 203          | 178          |
| Assoziierte Unternehmen             |              |              |
| nach der Equity-Methode bewertet    | 870          | 796          |
| zum beizulegenden Zeitwert bewertet | 18           | 27           |
| <b>Gesamt</b>                       | <b>1.091</b> | <b>1.001</b> |

Der beizulegende Zeitwert der Anteile an assoziierten Unternehmen, bewertet nach der Equity-Methode, beträgt zum Stichtag 1.181 (982) Millionen €. Im Geschäftsjahr wurden Anteile an den Verlusten assoziierter Unternehmen von 15 (14) Millionen € bilanziell nicht erfasst. Insgesamt betragen die bilanziell nicht erfassten Verluste 16 (17) Millionen €.

Die Vermögenswerte aller assoziierten Unternehmen betragen aggregiert 9.519 (8.702) Millionen €, die Schulden 6.444 (6.236) Millionen €, die Jahresergebnisse 47 (-201) Millionen € sowie die Umsätze 1.520 (2.638) Millionen €. Für die nicht nach der Equity-Methode bewerteten assoziierten Unternehmen ergeben sich Vermögenswerte von 411 (282) Millionen €, Schulden von 355 (241) Millionen €, Jahresergebnisse von -6 (1) Millionen € und Umsätze von 177 (150) Millionen €.

Die Aufstellung des gesamten Anteilsbesitzes finden Sie im Abschnitt „Aufstellung des Anteilsbesitzes zum 31. Dezember 2010 gemäß § 313 Abs. 2 HGB“.

## 5 // Darlehen

## Zusammensetzung der Darlehen

| Mio. €                                                | 31.12.2010    | Vorjahr       |
|-------------------------------------------------------|---------------|---------------|
| Hypothekendarlehen                                    | 4.496         | 4.598         |
| Darlehen und Vorauszahlungen auf Versicherungsscheine | 612           | 613           |
| Übrige Darlehen                                       | 43.827        | 41.411        |
| <b>Gesamt</b>                                         | <b>48.935</b> | <b>46.622</b> |

Bei den übrigen Darlehen handelt es sich überwiegend um Staatsanleihen, Pfandbriefe sowie Schuldscheindarlehen von Banken.

Der beizulegende Zeitwert der Darlehen bestimmt sich nach anerkannten Bewertungsmethoden in Einklang mit dem Barwertprinzip unter Berücksichtigung beobachtbarer Marktparameter. Er beträgt zum Stichtag 50.488 (47.909) Millionen €.

## Vertragliche Restlaufzeit

| Mio. €                                     | Bilanzwerte   |               |
|--------------------------------------------|---------------|---------------|
|                                            | 31.12.2010    | Vorjahr       |
| Bis zu einem Jahr                          | 1.881         | 1.201         |
| Mehr als ein Jahr und bis zu zwei Jahren   | 1.536         | 1.849         |
| Mehr als zwei Jahre und bis zu drei Jahren | 1.455         | 1.696         |
| Mehr als drei Jahre und bis zu vier Jahren | 2.146         | 1.723         |
| Mehr als vier Jahre und bis zu fünf Jahren | 3.257         | 2.276         |
| Mehr als fünf Jahre und bis zu zehn Jahren | 13.228        | 14.529        |
| Mehr als zehn Jahre                        | 25.432        | 23.348        |
| <b>Gesamt</b>                              | <b>48.935</b> | <b>46.622</b> |

## Rating der übrigen Darlehen auf der Basis der Bilanzwerte

| Mio. €            | 31.12.2010    | Vorjahr       |
|-------------------|---------------|---------------|
| AAA               | 22.211        | 20.390        |
| AA                | 16.280        | 15.401        |
| A                 | 4.441         | 4.452         |
| BBB und niedriger | 503           | 711           |
| Kein Rating       | 392           | 457           |
| <b>Gesamt</b>     | <b>43.827</b> | <b>41.411</b> |

Die Ratingkategorien orientieren sich an der Einteilung der führenden internationalen Ratingagenturen. Abweichend von der rein ökonomischen Sichtweise repräsentiert gemäß IFRS 7 der Buchwert der Darlehen die maximale Kreditexponierung zum Bilanzstichtag. Bei den Hypothekendarlehen sowie den Darlehen und Vorauszahlungen auf Versicherungsscheine besteht praktisch kein Kreditrisiko.

## 6 // Sonstige Wertpapiere, gehalten bis zur Endfälligkeit

## Zusammensetzung der sonstigen Wertpapiere, gehalten bis zur Endfälligkeit

| Mio. €                           | Bilanzwerte |           | Beizulegende Zeitwerte |           |
|----------------------------------|-------------|-----------|------------------------|-----------|
|                                  | 31.12.2010  | Vorjahr   | 31.12.2010             | Vorjahr   |
| Staatsanleihen                   | -           | 1         | -                      | 1         |
| Schuldtitel von Kreditinstituten | 42          | 83        | 43                     | 85        |
| <b>Gesamt</b>                    | <b>42</b>   | <b>84</b> | <b>43</b>              | <b>86</b> |

Die beizulegenden Zeitwerte bestimmen sich nach anerkannten Bewertungsmethoden in Einklang mit dem Barwertprinzip unter Berücksichtigung beobachtbarer Marktparameter.

#### Vertragliche Restlaufzeit

| Mio. €                                     | Bilanzwerte |           | Beizulegende Zeitwerte |           |
|--------------------------------------------|-------------|-----------|------------------------|-----------|
|                                            | 31.12.2010  | Vorjahr   | 31.12.2010             | Vorjahr   |
| Bis zu einem Jahr                          | 29          | 38        | 29                     | 38        |
| Mehr als ein Jahr und bis zu zwei Jahren   | 6           | 30        | 7                      | 31        |
| Mehr als zwei Jahre und bis zu drei Jahren | 3           | 7         | 3                      | 7         |
| Mehr als drei Jahre und bis zu vier Jahren | 4           | 3         | 4                      | 4         |
| Mehr als vier Jahre und bis zu fünf Jahren | -           | 6         | -                      | 6         |
| Mehr als fünf Jahre und bis zu zehn Jahren | -           | -         | -                      | -         |
| <b>Gesamt</b>                              | <b>42</b>   | <b>84</b> | <b>43</b>              | <b>86</b> |

#### Rating auf der Basis der Bilanzwerte

| Mio. €            | 31.12.2010 | Vorjahr   |
|-------------------|------------|-----------|
| AAA               | -          | 10        |
| AA                | 2          | -         |
| A                 | 39         | 69        |
| BBB und niedriger | -          | 1         |
| Kein Rating       | 1          | 4         |
| <b>Gesamt</b>     | <b>42</b>  | <b>84</b> |

Die Ratingkategorien orientieren sich an der Einteilung der führenden internationalen Ratingagenturen. Abweichend von der rein ökonomischen Sichtweise repräsentiert gemäß IFRS 7 der Buchwert der Wertpapiere die maximale Kreditexponierung zum Bilanzstichtag.

## 7 // Bewertungshierarchie der Zeitwertbewertung von Kapitalanlagen

Zum 31. Dezember 2010 werden rund 77% der zum beizulegenden Zeitwert bewerteten Kapitalanlagen dem Level 1 der Bewertungshierarchie zugeordnet, 21% dem Level 2 und 2% dem Level 3.

#### Zuordnung der zum beizulegenden Zeitwert bewerteten Kapitalanlagen<sup>1</sup> zu einem Level der Bewertungshierarchie

| Mio. €                                                                             | 31.12.2010    |               |              |
|------------------------------------------------------------------------------------|---------------|---------------|--------------|
|                                                                                    | Level 1       | Level 2       | Level 3      |
| Sonstige Wertpapiere, jederzeit veräußerbar                                        |               |               |              |
| Festverzinslich                                                                    | 86.082        | 25.194        | 1.078        |
| Nicht festverzinslich                                                              | 8.351         | 869           | 549          |
| Anteile an verbundenen Unternehmen, zum Zeitwert bewertet                          | -             | 9             | 194          |
| Anteile an assoziierten Unternehmen, zum Zeitwert bewertet                         | -             | -             | 18           |
| Sonstige Wertpapiere, erfolgswirksam zum Zeitwert bewertet                         |               |               |              |
| Handelsbestände                                                                    | 489           | 1.062         | 17           |
| Bestände, als erfolgswirksam zum Zeitwert bewertet klassifiziert                   | -             | 242           | -            |
| Kapitalanlagen für Rechnung und Risiko von Inhabern von Lebensversicherungspolicen | 4.957         | -             | -            |
| <b>Gesamt</b>                                                                      | <b>99.879</b> | <b>27.376</b> | <b>1.856</b> |

<sup>1</sup> Einschließlich der Derivate mit bilanzielltem Sicherungscharakter.



**Zuordnung der zum beizulegenden Zeitwert bewerteten Kapitalanlagen<sup>1</sup> zu einem Level der Bewertungshierarchie**

|                                                                                   |               |               |              | 31.12.2009     |
|-----------------------------------------------------------------------------------|---------------|---------------|--------------|----------------|
| Mio. €                                                                            | Level 1       | Level 2       | Level 3      | Gesamt         |
| Sonstige Wertpapiere, jederzeit veräußerbar                                       |               |               |              |                |
| Festverzinslich                                                                   | 83.148        | 23.940        | 2.478        | 109.566        |
| Nicht festverzinslich                                                             | 4.816         | 1.097         | 331          | 6.244          |
| Sonstige Wertpapiere, erfolgswirksam zum Zeitwert bewertet                        |               |               |              |                |
| Handelsbestände                                                                   | 644           | 722           | 12           | 1.378          |
| Bestände, als erfolgswirksam zum Zeitwert bewertet klassifiziert                  | -             | 392           | -            | 392            |
| Kapitalanlagen für Rechnung und Risiko von Inhabern von Lebensversicherungspolice | 4.026         | -             | -            | 4.026          |
| <b>Gesamt</b>                                                                     | <b>92.634</b> | <b>26.151</b> | <b>2.821</b> | <b>121.606</b> |

<sup>1</sup> Einschließlich der verbundenen und assoziierten Unternehmen zum Zeitwert bewertet sowie der Derivate mit bilanziellem Sicherungscharakter.

Ausführungen zu den Kriterien für die Zuordnung zu den einzelnen Leveln der Bewertungshierarchie finden Sie in den Erläuterungen zu Aktivposten unter B – Kapitalanlagen, Ermittlung der beizulegenden Zeitwerte.

Im Geschäftsjahr 2010 haben wir einen Teil der Asset-backed Securities/Mortgage-backed Securities in unserem Bestand von Level 3 in Level 2 umgegliedert. Aufgrund der Erholung der Märkte konnten bei der Bewertung der betreffenden Produkte nun wieder beobachtbare Marktdaten verwendet werden. Gleichzeitig erfolgte eine Umgliederung einiger Beteiligungen, des derivativen Anteils bestimmter Katastrophenanleihen sowie von Wetterderivaten von Level 2 in Level 3, da bei deren Bewertung im Geschäftsjahr auch nicht am Markt beobachtbare Parameter zu berücksichtigen waren.

Bei den Handelsbeständen, die dem Level 3 zugeordnet werden, handelt es sich ausschließlich um Hedgefonds bzw. Hedgefonds-Zertifikate sowie die derivativen Bestandteile von Katastrophenanleihen.

Die Überleitungsrechnung vom Anfangs- auf den Endbestand für die Kapitalanlagen, die Level 3 der Bewertungshierarchie zugeordnet werden, ist den folgenden Tabellen zu entnehmen.

**Überleitungsrechnung der dem Level 3 zugeordneten Kapitalanlagen zum 31.12.2010**

| Mio. €                                                                                                                                                  | Sonstige Wertpapiere, jederzeit veräußerbar |                       | Anteile an verbundenen Unternehmen, zum Zeitwert bewertet |
|---------------------------------------------------------------------------------------------------------------------------------------------------------|---------------------------------------------|-----------------------|-----------------------------------------------------------|
|                                                                                                                                                         | Festverzinslich                             | Nicht festverzinslich |                                                           |
| Bilanzwert 31.12. Vorjahr                                                                                                                               | 2.478                                       | 331                   | -                                                         |
| Gewinne und Verluste                                                                                                                                    | 225                                         | -65                   | 3                                                         |
| In der Konzern-Gewinn- und Verlustrechnung erfasste Gewinne (Verluste)                                                                                  | 35                                          | -72                   | -4                                                        |
| Im Eigenkapital erfasste Gewinne (Verluste)                                                                                                             | 190                                         | 7                     | 7                                                         |
| Erwerb                                                                                                                                                  | 2.909                                       | 201                   | 2                                                         |
| Verkäufe                                                                                                                                                | 2.237                                       | 80                    | -                                                         |
| Übertragung in/aus Level 3                                                                                                                              | -2.297                                      | 162                   | 189                                                       |
| Marktwertveränderung Derivate                                                                                                                           | -                                           | -                     | -                                                         |
| <b>Bilanzwert 31.12. Geschäftsjahr</b>                                                                                                                  | <b>1.078</b>                                | <b>549</b>            | <b>194</b>                                                |
| In der Konzern-Gewinn- und Verlustrechnung erfasste Gewinne (Verluste), die auf die zum Ende des Geschäftsjahres ausgewiesenen Kapitalanlagen entfallen |                                             | -57                   | -3                                                        |

| →                                                                                                                                                                | Anteile an<br>assozierten<br>Unternehmen,<br>zum Zeitwert<br>bewertet | Sonstige Wertpapiere,<br>erfolgswirksam zum<br>Zeitwert bewertet |                                                                              | Gesamt       |
|------------------------------------------------------------------------------------------------------------------------------------------------------------------|-----------------------------------------------------------------------|------------------------------------------------------------------|------------------------------------------------------------------------------|--------------|
|                                                                                                                                                                  |                                                                       | Handels-<br>bestände                                             | Bestände, als<br>erfolgswirksam<br>zum Zeitwert<br>bewertet<br>klassifiziert |              |
| Mio. €                                                                                                                                                           |                                                                       |                                                                  |                                                                              |              |
| Bilanzwert 31.12. Vorjahr                                                                                                                                        | -                                                                     | 12                                                               | -                                                                            | 2.821        |
| Gewinne und Verluste                                                                                                                                             | -                                                                     | 2                                                                | -                                                                            | 165          |
| In der Konzern-Gewinn- und Verlustrechnung<br>erfasste Gewinne (Verluste)                                                                                        | -                                                                     | 2                                                                | -                                                                            | -39          |
| Im Eigenkapital erfasste Gewinne (Verluste)                                                                                                                      | -                                                                     | -                                                                | -                                                                            | 204          |
| Erwerb                                                                                                                                                           | -                                                                     | 1                                                                | -                                                                            | 3.113        |
| Verkäufe                                                                                                                                                         | -                                                                     | 8                                                                | -                                                                            | 2.325        |
| Übertragung in/aus Level 3                                                                                                                                       | 18                                                                    | 12                                                               | -                                                                            | -1.916       |
| Marktwertveränderung Derivate                                                                                                                                    | -                                                                     | -2                                                               | -                                                                            | -2           |
| <b>Bilanzwert 31.12. Geschäftsjahr</b>                                                                                                                           | <b>18</b>                                                             | <b>17</b>                                                        | <b>-</b>                                                                     | <b>1.856</b> |
| In der Konzern-Gewinn- und Verlustrechnung erfasste<br>Gewinne (Verluste), die auf die zum Ende des<br>Geschäftsjahres ausgewiesenen Kapitalanlagen<br>entfallen | -                                                                     |                                                                  | 2                                                                            | -58          |

Da die zum Zeitwert bewerteten Anteile an verbundenen bzw. assoziierten Unternehmen im Vorjahr noch dem Level 2 zugeordnet waren, weisen diese zum 31. Dezember des Vorjahres keinen Bestand aus. Die Umgliederung in Level 3 spiegelt sich in den Übertragungen bei diesen Beständen wider. Die umfangreichen Übertragungen aus den zur Veräußerung verfügbaren festverzinslichen Wertpapieren und der insbesondere daraus resultierende erhebliche Rückgang der insgesamt dem Level 3 zugeordneten Kapitalanlagen resultieren aus den Umgliederungen bestimmter Asset-backed Securities/Mortgage-backed Securities in den Level 2.

**Überleitungsrechnung der dem Level 3 zugeordneten Kapitalanlagen zum 31.12.2009**

|                                                                                                                                                               | Sonstige Wertpapiere,<br>jederzeit veräußerbar | Sonstige Wertpapiere,<br>erfolgswirksam zum<br>Zeitwert bewertet |                      | Gesamt                                                                       |
|---------------------------------------------------------------------------------------------------------------------------------------------------------------|------------------------------------------------|------------------------------------------------------------------|----------------------|------------------------------------------------------------------------------|
|                                                                                                                                                               | Fest-<br>verzinslich                           | Nicht fest-<br>verzinslich                                       | Handels-<br>bestände | Bestände, als<br>erfolgswirksam<br>zum Zeitwert<br>bewertet<br>klassifiziert |
| Mio. €                                                                                                                                                        |                                                |                                                                  |                      |                                                                              |
| Bilanzwert 31.12.2008                                                                                                                                         | 2.575                                          | 358                                                              | -                    | -                                                                            |
| Gewinne und Verluste                                                                                                                                          | 128                                            | -31                                                              | 16                   | -                                                                            |
| In der Konzern-Gewinn- und Verlustrechnung<br>erfasste Gewinne (Verluste)                                                                                     | -261                                           | -32                                                              | 16                   | -                                                                            |
| Im Eigenkapital erfasste Gewinne (Verluste)                                                                                                                   | 389                                            | 1                                                                | -                    | -                                                                            |
| Erwerb                                                                                                                                                        | 2.141                                          | 166                                                              | -                    | -                                                                            |
| Verkäufe                                                                                                                                                      | 2.366                                          | 165                                                              | -                    | -                                                                            |
| Übertragung in/aus Level 3                                                                                                                                    | -                                              | 3                                                                | -4                   | -                                                                            |
| <b>Bilanzwert 31.12.2009</b>                                                                                                                                  | <b>2.478</b>                                   | <b>331</b>                                                       | <b>12</b>            | <b>-</b>                                                                     |
| In der Konzern-Gewinn- und Verlustrechnung erfasste<br>Gewinne (Verluste), die auf die zum Ende des Geschäftsjahres<br>ausgewiesenen Kapitalanlagen entfallen |                                                | -9                                                               |                      | 16                                                                           |
|                                                                                                                                                               |                                                |                                                                  |                      | 7                                                                            |

## 8 // Sonstige Wertpapiere, jederzeit veräußerbar

## Zusammensetzung der sonstigen Wertpapiere, jederzeit veräußerbar

| Mio. €                                    | Bilanzwerte    |                | Unrealisierte Gewinne/Verluste |              | Fortgeführte Anschaffungskosten |                |
|-------------------------------------------|----------------|----------------|--------------------------------|--------------|---------------------------------|----------------|
|                                           | 31.12.2010     | Vorjahr        | 31.12.2010                     | Vorjahr      | 31.12.2010                      | Vorjahr        |
| <b>Festverzinsliche Wertpapiere</b>       |                |                |                                |              |                                 |                |
| Staatsanleihen                            |                |                |                                |              |                                 |                |
| Deutschland                               | 7.590          | 7.501          | 288                            | 224          | 7.302                           | 7.277          |
| Übrige EU                                 | 26.605         | 23.782         | -826                           | 469          | 27.431                          | 23.313         |
| USA                                       | 11.190         | 9.481          | 339                            | 50           | 10.851                          | 9.431          |
| Sonstige                                  | 9.245          | 7.862          | 553                            | 295          | 8.692                           | 7.567          |
| Schuldtitel von Kapitalgesellschaften     | 47.142         | 50.018         | 1.410                          | 1.876        | 45.732                          | 48.142         |
| Sonstige                                  | 10.582         | 10.922         | 437                            | 428          | 10.145                          | 10.494         |
|                                           | <b>112.354</b> | <b>109.566</b> | <b>2.201</b>                   | <b>3.342</b> | <b>110.153</b>                  | <b>106.224</b> |
| <b>Nicht festverzinsliche Wertpapiere</b> |                |                |                                |              |                                 |                |
| Aktien                                    | 6.027          | 3.471          | 1.488                          | 1.253        | 4.539                           | 2.218          |
| Investmentfonds                           |                |                |                                |              |                                 |                |
| Aktienfonds                               | 505            | 557            | 85                             | 82           | 420                             | 475            |
| Rentenfonds                               | 1.959          | 731            | 18                             | 41           | 1.941                           | 690            |
| Immobilienfonds                           | 545            | 547            | 10                             | 7            | 535                             | 540            |
| Sonstige                                  | 733            | 733            | 33                             | 25           | 700                             | 708            |
|                                           | <b>9.769</b>   | <b>6.039</b>   | <b>1.634</b>                   | <b>1.408</b> | <b>8.135</b>                    | <b>4.631</b>   |
| <b>Gesamt</b>                             | <b>122.123</b> | <b>115.605</b> | <b>3.835</b>                   | <b>4.750</b> | <b>118.288</b>                  | <b>110.855</b> |

Bei über der Hälfte der Schuldtitel von Kapitalgesellschaften handelt es sich um Pfandbriefe sowie Emissionen von Förderbanken und vergleichbaren Instituten; der übrige Bestand setzt sich zusammen aus Emissionen von Unternehmen außerhalb des Bankensektors, wobei jedes Einzelrisiko weniger als 1% ausmacht, Anleihen von Banken sowie von Landesbanken (mit Gewährträgerhaftung) und Asset-backed Securities/Mortgage-backed Securities, die weitgehend implizite Staatsgarantien oder ein überdurchschnittliches Rating aufweisen.

Verfügungsbeschränkungen bzw. Verpfändungen als Sicherheit bestehen in Höhe von 9.422 (12.037) Millionen €. 1.936 (923) Millionen € der ausgewiesenen Wertpapiere sind an Dritte verliehen. Diese Papiere werden nicht ausgebucht, da die wesentlichen Chancen und Risiken, die aus ihnen resultieren, weiterhin bei Munich Re bleiben. Im Rahmen dieses Wertpapierleihgeschäfts haben wir Barsicherheiten von 764 Millionen € erhalten, die wir in einem Geldmarktfonds angelegt haben. Von den unrealisierten Gewinnen und Verlusten von 3.835 (4.750) Millionen € sind 2.636 (2.516) Millionen € – nach Abzug der Rückstellung für latente Beitragsrückerstattung, latenter Steuern, von nicht beherrschenden Anteilen am Eigenkapital und der Konsolidierungseffekte – im Eigenkapital (übrige Rücklagen) enthalten.

Zur Stützung der Hypo Real Estate (HRE) hatte die Bundesregierung im Oktober 2008 ein Rettungspaket beschlossen, an dem sich neben der Bundesbank auch die deutsche Finanzwirtschaft beteiligt. Munich Re hatte sich an diesem Rettungspaket und auch an dessen Anschlussfinanzierung Ende 2009 beteiligt. Zur weiteren Sanierung der HRE hat diese im Oktober 2010 nicht strategienotwendige Geschäftsbereiche und Risikopositionen auf die Abwicklungsanstalt FMS Wertmanagement übertragen. Die ausgelaufene Anschlussfinanzierung von 2009 wurde im Dezember durch eine neue Anleihe, die von der FMS Wertmanagement emittiert wurde und ein Gesamtvolumen von 16 Milliarden € hat, ersetzt. Die Laufzeit beträgt wiederum ein Jahr. Es besteht keine schuldrechtliche Garantie des Bundes für diese Anleihe, jedoch ist der Sonderfonds Finanzmarktstabilisierung (SoFFin) per Gesetz und Statut der FMS Wertmanagement zum Verlustausgleich verpflichtet. Die Münchener Rück AG zeichnete von dieser Anleihe 49,4 Millionen €, ERGO weitere 26 Millionen €. Die Anleihe wird unter den Schuldtiteln von Kapitalgesellschaften ausgewiesen.

**Erlöse aus Veräußerungen im Geschäftsjahr**

| Mio. €                             | 2010          | Vorjahr       |
|------------------------------------|---------------|---------------|
| Festverzinsliche Wertpapiere       | 53.063        | 70.920        |
| Nicht festverzinsliche Wertpapiere |               |               |
| Börsennotiert                      | 10.036        | 5.942         |
| Nicht börsennotiert                | 2.192         | 824           |
| <b>Gesamt</b>                      | <b>65.291</b> | <b>77.686</b> |

**Realisierte Gewinne und Verluste**

| Mio. €                             | 2010         | Vorjahr      |
|------------------------------------|--------------|--------------|
| Gewinne aus dem Abgang             | 2.253        | 2.878        |
| Festverzinsliche Wertpapiere       | 1.434        | 1.391        |
| Nicht festverzinsliche Wertpapiere | 819          | 1.487        |
| Verluste aus dem Abgang            | 552          | 1.156        |
| Festverzinsliche Wertpapiere       | 367          | 612          |
| Nicht festverzinsliche Wertpapiere | 185          | 544          |
| <b>Gesamt</b>                      | <b>1.701</b> | <b>1.722</b> |

**Vertragliche Restlaufzeit der festverzinslichen Wertpapiere**

| Mio. €                                     | Bilanzwerte    |                | Fortgeführte Anschaffungskosten |                |
|--------------------------------------------|----------------|----------------|---------------------------------|----------------|
|                                            | 31.12.2010     | Vorjahr        | 31.12.2010                      | Vorjahr        |
| Bis zu einem Jahr                          | 9.297          | 9.026          | 9.221                           | 8.919          |
| Mehr als ein Jahr und bis zu zwei Jahren   | 8.510          | 9.576          | 8.306                           | 9.344          |
| Mehr als zwei Jahre und bis zu drei Jahren | 9.690          | 10.056         | 9.398                           | 9.708          |
| Mehr als drei Jahre und bis zu vier Jahren | 10.007         | 9.554          | 9.693                           | 9.162          |
| Mehr als vier Jahre und bis zu fünf Jahren | 9.670          | 10.772         | 9.509                           | 10.394         |
| Mehr als fünf Jahre und bis zu zehn Jahren | 35.809         | 34.847         | 35.377                          | 33.546         |
| Mehr als zehn Jahre                        | 29.371         | 25.735         | 28.649                          | 25.151         |
| <b>Gesamt</b>                              | <b>112.354</b> | <b>109.566</b> | <b>110.153</b>                  | <b>106.224</b> |

**Rating der festverzinslichen Wertpapiere auf der Basis beizulegender Zeitwerte**

| Mio. €        | 31.12.2010     | Vorjahr        |
|---------------|----------------|----------------|
| AAA           | 65.705         | 66.086         |
| AA            | 20.497         | 17.987         |
| A             | 13.752         | 14.381         |
| BBB           | 9.830          | 9.596          |
| Niedriger     | 2.290          | 1.089          |
| Kein Rating   | 280            | 427            |
| <b>Gesamt</b> | <b>112.354</b> | <b>109.566</b> |

Die Ratingkategorien orientieren sich an der Einteilung der führenden internationalen Ratingagenturen. Abweichend von der rein ökonomischen Sichtweise repräsentiert gemäß IFRS 7 der Buchwert der Wertpapiere die maximale Kreditexponierung zum Bilanzstichtag.

## 9 // Sonstige Wertpapiere, erfolgswirksam zum Zeitwert bewertet

Die als erfolgswirksam zum Zeitwert bewerteten Wertpapiere umfassen Handelsbestände von 1.371 (1.221) Millionen € und Wertpapiere, die als erfolgswirksam zum Zeitwert bewertet klassifiziert werden, von 241 (392) Millionen €.

Die Handelsbestände enthalten festverzinsliche Wertpapiere von 475 (600) Millionen €, nicht festverzinsliche Wertpapiere von 29 (25) Millionen € sowie Derivate von 867 (596) Millionen €. Von den Wertpapieren, die als erfolgswirksam zum Zeitwert bewertet klassifiziert werden, entfallen 233 (372) Millionen € auf festverzinsliche Wertpapiere und 8 (20) Millionen € auf nicht festverzinsliche Wertpapiere.

### Rating der festverzinslichen Wertpapiere auf der Basis beizulegender Zeitwerte

| Mio. €        | 31.12.2010 | Vorjahr    |
|---------------|------------|------------|
| AAA           | 326        | 417        |
| AA            | 212        | 307        |
| A             | 137        | 196        |
| BBB           | 15         | 34         |
| Niedriger     | 4          | 4          |
| Kein Rating   | 14         | 14         |
| <b>Gesamt</b> | <b>708</b> | <b>972</b> |

Die Ratingkategorien orientieren sich an der Einteilung der führenden internationalen Ratingagenturen. Abweichend von der rein ökonomischen Sichtweise repräsentiert gemäß IFRS 7 der Buchwert der Wertpapiere die maximale Kreditexponierung zum Bilanzstichtag.

Derivative Finanzinstrumente werden bei Munich Re eingesetzt, um Zinsänderungs-, Währungs- und sonstige Marktpreisrisiken abzusichern. Dies geschieht innerhalb der einzelnen Konzernunternehmen im Rahmen der jeweiligen aufsichtsrechtlichen Vorschriften sowie zusätzlicher innerbetrieblicher Richtlinien. Ein Ausfallrisiko ist bei börsengehandelten Produkten praktisch nicht gegeben. Die außerbörslich abgeschlossenen Over-the-Counter-Derivate enthalten hingegen ein theoretisches Risiko in Höhe der Wiederbeschaffungskosten. Daher wählt Munich Re für diese Geschäfte nur solche Kontrahenten aus, die eine sehr hohe Bonität aufweisen.

### Ausweis der Derivate nach Bilanzposten

| Mio. €                 |                     |                                                       | 31.12.2010 | Vorjahr    |
|------------------------|---------------------|-------------------------------------------------------|------------|------------|
|                        | Bilanzierung als    |                                                       |            |            |
| Beizulegender Zeitwert | Sicherungsbeziehung | Bilanzausweis                                         |            |            |
| Positiv                | Nein                | Kapitalanlagen, sonstige Wertpapiere, Handelsbestände | 867        | 596        |
|                        | Ja                  | Übrige Aktiva                                         | 197        | 157        |
| Negativ                | Nein                |                                                       |            |            |
|                        | Ja                  | Verbindlichkeiten, sonstige Verbindlichkeiten         | -627       | -593       |
| <b>Gesamt</b>          |                     |                                                       | <b>437</b> | <b>160</b> |

In der folgenden Tabelle zeigen wir die beizulegenden Zeitwerte sowie die zugehörigen Nominalwerte unserer gesamten offenen Positionen, gegliedert nach Risikoarten. Positive und negative Zeitwerte haben wir saldiert. Mit 437 (160) Millionen € betrugen die offenen Positionen am 31. Dezember 2010 0,2 (0,1) % der Bilanzsumme.

**Offene Positionen**

| <b>Fälligkeit in Jahren</b>     | <b>&lt; 1</b> | <b>1-2</b> | <b>2-3</b> | <b>3-4</b> | <b>4-5</b> | <b>&gt; 5</b> | <b>31.12.<br/>2010</b> | <b>Vorjahr</b> |
|---------------------------------|---------------|------------|------------|------------|------------|---------------|------------------------|----------------|
| Mio. €                          |               |            |            |            |            |               |                        |                |
| <b>Zinsrisiken</b>              |               |            |            |            |            |               |                        |                |
| Börsengehandelt                 |               |            |            |            |            |               |                        |                |
| Zeitwerte                       | -52           | -          | -          | -          | -          | -             | -52                    | 31             |
| Nominalwerte                    | 9.026         | -          | -          | -          | -          | -             | 9.026                  | 13.693         |
| Over-the-Counter                |               |            |            |            |            |               |                        |                |
| Zeitwerte                       | 36            | 53         | 15         | 131        | 15         | 313           | 563                    | 433            |
| Nominalwerte                    | 1.620         | 2.049      | 1.233      | 2.585      | 1.031      | 9.356         | 17.874                 | 18.667         |
| Summe Zinsrisiken               |               |            |            |            |            |               |                        |                |
| Zeitwerte                       | -16           | 53         | 15         | 131        | 15         | 313           | 511                    | 464            |
| Nominalwerte                    | 10.646        | 2.049      | 1.233      | 2.585      | 1.031      | 9.356         | 26.900                 | 32.360         |
| <b>Währungsrisiken</b>          |               |            |            |            |            |               |                        |                |
| Börsengehandelt                 |               |            |            |            |            |               |                        |                |
| Zeitwerte                       | 3             | -          | -          | -          | -          | -             | 3                      | 1              |
| Nominalwerte                    | 151           | -          | -          | -          | -          | -             | 151                    | 71             |
| Over-the-Counter                |               |            |            |            |            |               |                        |                |
| Zeitwerte                       | -11           | -4         | 1          | 25         | 27         | -             | 38                     | -159           |
| Nominalwerte                    | 15.228        | 388        | 5          | 162        | 172        | 244           | 16.199                 | 11.296         |
| Summe Währungsrisiken           |               |            |            |            |            |               |                        |                |
| Zeitwerte                       | -8            | -4         | 1          | 25         | 27         | -             | 41                     | -158           |
| Nominalwerte                    | 15.379        | 388        | 5          | 162        | 172        | 244           | 16.350                 | 11.367         |
| <b>Aktien- und Indexrisiken</b> |               |            |            |            |            |               |                        |                |
| Börsengehandelt                 |               |            |            |            |            |               |                        |                |
| Zeitwerte                       | 34            | -          | -          | -          | -          | -             | 34                     | -19            |
| Nominalwerte                    | 4.255         | -          | -          | -          | -          | -             | 4.255                  | 1.358          |
| Over-the-Counter                |               |            |            |            |            |               |                        |                |
| Zeitwerte                       | -37           | 2          | -          | -7         | 52         | 3             | 13                     | 10             |
| Nominalwerte                    | 297           | 50         | 11         | 349        | 385        | 81            | 1.173                  | 1.683          |
| Summe Aktien- und Indexrisiken  |               |            |            |            |            |               |                        |                |
| Zeitwerte                       | -3            | 2          | -          | -7         | 52         | 3             | 47                     | -9             |
| Nominalwerte                    | 4.552         | 50         | 11         | 349        | 385        | 81            | 5.428                  | 3.041          |
| <b>Kreditrisiken</b>            |               |            |            |            |            |               |                        |                |
| Over-the-Counter                |               |            |            |            |            |               |                        |                |
| Zeitwerte                       | -             | -1         | -6         | -1         | -11        | -5            | -24                    | -47            |
| Nominalwerte                    | 276           | 37         | 89         | 160        | 1.840      | 20            | 2.422                  | 2.745          |
| <b>Wetterrisiken</b>            |               |            |            |            |            |               |                        |                |
| Over-the-Counter                |               |            |            |            |            |               |                        |                |
| Zeitwerte                       | -16           | 4          | 2          | -          | -          | -             | -10                    | 13             |
| Nominalwerte                    | 732           | 527        | 49         | 103        | -          | -             | 1.411                  | 1.277          |
| <b>Rohstoffrisiken</b>          |               |            |            |            |            |               |                        |                |
| Over-the-Counter                |               |            |            |            |            |               |                        |                |
| Zeitwerte                       | 17            | -          | -          | -          | -          | -             | 17                     | 12             |
| Nominalwerte                    | 764           | -          | -          | -          | -          | -             | 764                    | 244            |
| <b>Sonstige Risiken</b>         |               |            |            |            |            |               |                        |                |
| Over-the-Counter                |               |            |            |            |            |               |                        |                |
| Zeitwerte                       | -             | -1         | 2          | -          | -          | -146          | -145                   | -115           |
| Nominalwerte                    | -             | 22         | 84         | -          | -          | 10.886        | 10.992                 | 6.128          |
| <b>Summe aller Risiken</b>      |               |            |            |            |            |               |                        |                |
| Zeitwerte                       | -26           | 53         | 14         | 148        | 83         | 165           | 437                    | 160            |
| Nominalwerte                    | 32.349        | 3.073      | 1.471      | 3.359      | 3.428      | 20.587        | 64.267                 | 57.162         |



Die derivativen Bestandteile aus Verbriefungen von Mortalitäts- und Morbiditätsrisiken und von Variable Annuities werden unter Sonstige Risiken ausgewiesen.

Zinsrisiken in der Lebensversicherung werden durch Swaptions abgesichert. Diese Optionen auf Erhalt eines festen Zinssatzes werden in der Kategorie Zinsrisiken/Over-the-Counter ausgewiesen. Zum Stichtag betragen die beizulegenden Zeitwerte der genannten Swaptions 185 (175) Millionen €, die zugrunde liegenden Nominalwerte 7.467 (10.867) Millionen €. Das Kapitalanlageergebnis aus Derivaten enthält einen Ertrag aus Wertschwankungen dieser Optionen in Höhe von 76 (-374) Millionen €.

Obwohl bei Munich Re Derivate grundsätzlich dazu dienen, Risiken ökonomisch zu sichern, erfüllt nur ein Anteil von 197 (152) Millionen € die Vorgaben des IAS 39 für eine Bilanzierung als Sicherungsbeziehung.

Der IAS 39 unterscheidet zwischen der Absicherung beizulegender Zeitwerte (Fair-Value-Hedge) und der Absicherung von Zahlungsströmen (Cashflow Hedge).

**Fair-Value-Hedge** Bei der Absicherung beizulegender Zeitwerte wird die Änderung des Zeitwerts des Sicherungsinstruments zusammen mit der Änderung des Zeitwerts des abgesicherten Instruments erfolgswirksam in der Konzern-Gewinn- und Verlustrechnung grundsätzlich unter den Posten Erträge bzw. Aufwendungen für Kapitalanlagen ausgewiesen. Im Fall der gesicherten Nachranganleihe der Münchener Rück AG erfolgt der Ausweis unter den Finanzierungskosten. Bei Munich Re werden Sicherungsbeziehungen in Form einer Absicherung beizulegender Zeitwerte eingesetzt, um gezielt und effizient Risiken aus Zins- und sonstigen Marktpreisänderungen zu mindern. Für die Absicherungen werden im Wesentlichen Swaps und Forwards verwendet. Der beizulegende Zeitwert der hierfür eingesetzten Derivate beträgt zum Stichtag 168 (130) Millionen €. 2010 erfassten wir Wertänderungen für die Sicherungsinstrumente von 37 Millionen € sowie für die zugehörigen Grundgeschäfte von -36 Millionen € erfolgswirksam in der Konzern-Gewinn- und Verlustrechnung.

**Cashflow Hedge** Die Absicherung von Zahlungsströmen spielt bei Schwankungen eine Rolle, die beispielsweise durch variable Zinszahlungen verursacht werden. Bei Munich Re werden mit Cashflow Hedges überwiegend Zinsrisiken abgesichert. Hierfür setzen wir hauptsächlich Zinsswaps ein. Änderungen des beizulegenden Zeitwerts des Sicherungsinstruments verbuchen wir zu diesem Zweck erfolgsneutral im Eigenkapital. Erst mit dem tatsächlichen Kapitalab- oder -zufluss, den der abgesicherte Sachverhalt verursacht, wird die so gebildete Eigenkapitalposition erfolgswirksam aufgelöst.

Die dem ineffektiven Teil der Absicherung zuzuschreibende Wertänderung des Zeitwerts des Sicherungsinstruments ist zum Stichtag zu vernachlässigen.

Zum Stichtag ergibt sich eine Eigenkapitalposition aus der Absicherung von Zahlungsströmen von -2 (1) Millionen €. Der saldierte beizulegende Zeitwert der Derivate, die in diese Kategorie fallen, beläuft sich zum Stichtag auf 29 (22) Millionen €.

#### Restlaufzeit und Höhe der am Bilanzstichtag abgesicherten Zahlungsströme

| Mio. €                                     | < 1 Jahr | 1-2 Jahre | 2-3 Jahre | 3-4 Jahre | 4-5 Jahre | > 5 Jahre | 31.12.2010 | Vorjahr |
|--------------------------------------------|----------|-----------|-----------|-----------|-----------|-----------|------------|---------|
| Nominalbeträge abgesicherter Transaktionen | 45       | -         | -         | 25        | -         | 225       | 295        | 288     |

## 10 // Depotforderungen

Die Depotforderungen dienen unmittelbar als Sicherheit für die vom Zedenten in Rückdeckung übernommenen versicherungstechnischen Rückstellungen. Sie lösen keine Zahlungsströme aus und können von den Zedenten nicht unabhängig verwertet werden. Daher ist das Kreditrisiko begrenzt. Höhe und Veränderungen der Depotforderungen im Bilanzjahr leiten sich im Regelfall aus dem Wert der Veränderungen der zugehörigen versicherungstechnischen Rückstellungen für das in Rückdeckung genommene Versicherungsgeschäft ab. Insofern haben Depotforderungen keine vertraglich fixierte Fälligkeit, ihre Abwicklung erfolgt grundsätzlich in Abhängigkeit von der Abwicklung der korrespondierenden Rückstellungen.

## 11 // Sonstige Kapitalanlagen

Die sonstigen Kapitalanlagen enthalten Einlagen bei Kreditinstituten von 3.153 (2.340) Millionen € sowie unseren Bestand an Anlagen in regenerative Energien in Höhe von 46 Millionen €.

Unter den Einlagen bei Kreditinstituten weisen wir 64 (-) Millionen € Forderungen aus Pensionsgeschäften aus, die wir als Pensionsnehmer im Rahmen von echten Pensionsgeschäften den Pensionsgebern für die Überlassung von Wertpapieren eingebucht haben.

Da die Einlagen bei Kreditinstituten überwiegend eine Laufzeit von weniger als einem Jahr haben, entsprechen die beizulegenden Zeitwerte weitgehend den Buchwerten. Abweichend von der rein ökonomischen Sichtweise repräsentiert gemäß IFRS 7 der Buchwert dieser sonstigen Kapitalanlagen die maximale Kreditexponierung zum Bilanzstichtag.

### Entwicklung der Anlagen in regenerativen Energien

| Mio. €                                         | 2010 | Vorjahr |
|------------------------------------------------|------|---------|
| Bruttobuchwert 31.12. Vorjahr                  | -    | -       |
| Kumulierte Abschreibungen 31.12. Vorjahr       | -    | -       |
| Bilanzwert 31.12. Vorjahr                      | -    | -       |
| Zugänge                                        | 20   | -       |
| Abgänge                                        | 1    | -       |
| Zuschreibungen                                 | -    | -       |
| Abschreibungen                                 |      |         |
| Planmäßig                                      | 3    | -       |
| Außerplanmäßig                                 | -    | -       |
| Umgliederung                                   | 30   | -       |
| Bilanzwert 31.12. Geschäftsjahr                | 46   | -       |
| Kumulierte Abschreibungen 31.12. Geschäftsjahr | 9    | -       |
| Bruttobuchwert 31.12. Geschäftsjahr            | 55   | -       |

Der beizulegende Zeitwert der Anlagen in regenerative Energien beträgt zum Bilanzstichtag 46 Millionen €.

## 12 // Anteil der Rückversicherer an den versicherungstechnischen Rückstellungen

## Anteil der Rückversicherer an den versicherungstechnischen Rückstellungen

| Mio. € <sup>1</sup>                                         | Rückversicherung |            |                |              |
|-------------------------------------------------------------|------------------|------------|----------------|--------------|
|                                                             | Leben            |            | Schaden/Unfall |              |
|                                                             | 31.12.2010       | Vorjahr    | 31.12.2010     | Vorjahr      |
| Beitragsüberträge                                           | -                | 1          | 309            | 272          |
| Deckungsrückstellung                                        | 684              | 147        | -              | -            |
| Rückstellung für noch nicht abgewickelte Versicherungsfälle | 288              | 200        | 2.080          | 2.326        |
| Übrige versicherungstechnische Rückstellungen               | 15               | 50         | 4              | 5            |
| <b>Gesamt</b>                                               | <b>987</b>       | <b>398</b> | <b>2.393</b>   | <b>2.603</b> |

| Mio. € <sup>1</sup>                                         | Erstversicherung |              |            |          |                |            |
|-------------------------------------------------------------|------------------|--------------|------------|----------|----------------|------------|
|                                                             | Leben            |              | Gesundheit |          | Schaden/Unfall |            |
|                                                             | 31.12.2010       | Vorjahr      | 31.12.2010 | Vorjahr  | 31.12.2010     | Vorjahr    |
| Beitragsüberträge                                           | -                | -            | 2          | 1        | 68             | 61         |
| Deckungsrückstellung                                        | 1.742            | 1.682        | 2          | 2        | -              | -          |
| Rückstellung für noch nicht abgewickelte Versicherungsfälle | 19               | 15           | 4          | 4        | 230            | 191        |
| Übrige versicherungstechnische Rückstellungen               | -                | -            | -          | -        | 20             | 8          |
| <b>Gesamt</b>                                               | <b>1.761</b>     | <b>1.697</b> | <b>8</b>   | <b>7</b> | <b>318</b>     | <b>260</b> |

| Mio. € <sup>1</sup>                                         | Munich Health |           | Gesamt       |              |
|-------------------------------------------------------------|---------------|-----------|--------------|--------------|
|                                                             | 31.12.2010    | Vorjahr   | 31.12.2010   | Vorjahr      |
| Beitragsüberträge                                           | 7             | -         | 386          | 335          |
| Deckungsrückstellung                                        | 7             | 7         | 2.435        | 1.838        |
| Rückstellung für noch nicht abgewickelte Versicherungsfälle | 9             | 11        | 2.630        | 2.747        |
| Übrige versicherungstechnische Rückstellungen               | -             | -         | 39           | 63           |
| <b>Gesamt</b>                                               | <b>23</b>     | <b>18</b> | <b>5.490</b> | <b>4.983</b> |

<sup>1</sup> Nach Eliminierung segmentübergreifender konzerninterner Geschäftsvorfälle.

Details zu den Anteilen der Rückversicherer an den versicherungstechnischen Rückstellungen sind dargestellt unter den Erläuterungen zu den Posten (20) Beitragsüberträge, (21) Deckungsrückstellung, (22) Rückstellung für noch nicht abgewickelte Versicherungsfälle, (23) Übrige versicherungstechnische Rückstellungen sowie (39) Bonitätsrisiken aus passivem Rückversicherungsgeschäft.

## 13 // Sonstige Forderungen

### Zusammensetzung der sonstigen Forderungen

| Mio. €                                                           | 31.12.2010    | Vorjahr       |
|------------------------------------------------------------------|---------------|---------------|
| Forderungen aus dem selbst abgeschlossenen Versicherungsgeschäft | 1.411         | 1.425         |
| Abrechnungsforderungen aus dem Rückversicherungsgeschäft         | 4.514         | 4.310         |
| Zinsen und Mieten                                                | 2.852         | 2.913         |
| Übrige Forderungen                                               | 1.799         | 1.422         |
| <b>Gesamt</b>                                                    | <b>10.576</b> | <b>10.070</b> |

Von den Forderungen aus dem selbst abgeschlossenen Versicherungsgeschäft entfallen 632 (622) Millionen € auf Forderungen gegenüber Versicherungsvermittlern. In den übrigen Forderungen enthalten sind Forderungen von 305 (400) Millionen €, die aus Verträgen ohne signifikanten Risikotransfer resultieren. Diese Verträge fallen nicht in den Anwendungsbereich des IFRS 4. Abweichend von der rein ökonomischen Sichtweise repräsentiert gemäß IFRS 7 der Buchwert der Forderungen die maximale Kreditexponierung zum Bilanzstichtag.

### Vertragliche Restlaufzeit der Forderungen

| Mio. €                                     | 31.12.2010    | Bilanzwerte<br>Vorjahr |
|--------------------------------------------|---------------|------------------------|
| Bis zu einem Jahr                          | 10.112        | 9.629                  |
| Mehr als ein Jahr und bis zu zwei Jahren   | 29            | 191                    |
| Mehr als zwei Jahre und bis zu drei Jahren | 33            | 13                     |
| Mehr als drei Jahre und bis zu vier Jahren | 26            | 142                    |
| Mehr als vier Jahre und bis zu fünf Jahren | 211           | 25                     |
| Mehr als fünf Jahre und bis zu zehn Jahren | 116           | 43                     |
| Mehr als zehn Jahre                        | 49            | 27                     |
| <b>Gesamt</b>                              | <b>10.576</b> | <b>10.070</b>          |

Da der weitaus größte Teil der sonstigen Forderungen eine Laufzeit von weniger als einem Jahr aufweist, entsprechen die beizulegenden Zeitwerte dieser Forderungen weitgehend den Buchwerten.

Zum 31. Dezember 2010 verteilten sich unsere Abrechnungsforderungen aus dem abgegebenen Geschäft in Anlehnung an die Ratingklassifikation von Standard & Poor's folgendermaßen:

### Rating der Abrechnungsforderungen

| Mio. €               | 31.12.2010 | Vorjahr |
|----------------------|------------|---------|
| AAA                  | 59         | 35      |
| AA                   | 181        | 142     |
| A                    | 200        | 254     |
| BBB und geringer     | 13         | 16      |
| ohne externes Rating | 174        | 186     |

Von allen unseren Forderungen aus dem Versicherungsgeschäft waren am Bilanzstichtag 379 (224) Millionen € länger als 90 Tage fällig. Die durchschnittlichen Forderungsausfälle der vergangenen drei Jahre belaufen sich auf 141 (198) Millionen €.

## 14 // Aktivierete Abschlusskosten

## Aktivierete Abschlusskosten

| Mio. € <sup>1</sup>        | Rückversicherung |              |                |              |
|----------------------------|------------------|--------------|----------------|--------------|
|                            | Leben            |              | Schaden/Unfall |              |
|                            | 31.12.2010       | Vorjahr      | 31.12.2010     | Vorjahr      |
| Brutto                     | 1.848            | 1.659        | 1.322          | 1.166        |
| Anteil der Rückversicherer | -13              | -14          | 51             | 69           |
| <b>Netto</b>               | <b>1.861</b>     | <b>1.673</b> | <b>1.271</b>   | <b>1.097</b> |

| Mio. € <sup>1</sup>        | Erstversicherung |              |              |              |                |            |
|----------------------------|------------------|--------------|--------------|--------------|----------------|------------|
|                            | Leben            |              | Gesundheit   |              | Schaden/Unfall |            |
|                            | 31.12.2010       | Vorjahr      | 31.12.2010   | Vorjahr      | 31.12.2010     | Vorjahr    |
| Brutto                     | 3.623            | 3.642        | 1.583        | 1.513        | 663            | 553        |
| Anteil der Rückversicherer | 11               | 12           | -            | -            | 5              | 7          |
| <b>Netto</b>               | <b>3.612</b>     | <b>3.630</b> | <b>1.583</b> | <b>1.513</b> | <b>658</b>     | <b>546</b> |

| Mio. € <sup>1</sup>        | Munich Health |           | Gesamt       |              |
|----------------------------|---------------|-----------|--------------|--------------|
|                            | 31.12.2010    | Vorjahr   | 31.12.2010   | Vorjahr      |
|                            | 31.12.2010    | Vorjahr   | 31.12.2010   | Vorjahr      |
| Brutto                     | 126           | 71        | 9.165        | 8.604        |
| Anteil der Rückversicherer | 18            | 2         | 72           | 76           |
| <b>Netto</b>               | <b>108</b>    | <b>69</b> | <b>9.093</b> | <b>8.528</b> |

<sup>1</sup> Nach Eliminierung segmentübergreifender konzerninterner Geschäftsvorfälle.

Entwicklung der aktivierten Abschlusskosten (brutto)

|                                              | Rückversicherung |              |                |              |
|----------------------------------------------|------------------|--------------|----------------|--------------|
|                                              | Leben            |              | Schaden/Unfall |              |
| Mio. € <sup>1</sup>                          | 31.12.2010       | Vorjahr      | 31.12.2010     | Vorjahr      |
| Stand 31.12. Vorjahr                         | 1.659            | 1.531        | 1.166          | 1.044        |
| Währungsänderungen                           | 116              | 76           | 72             | 7            |
| Veränderungen Konsolidierungskreis/Sonstiges | -                | -            | -              | 63           |
| Neu aktivierte Abschlusskosten               | 442              | 309          | 1.431          | 1.065        |
| Veränderungen                                |                  |              |                |              |
| Planmäßig                                    | -312             | -242         | -1.364         | -996         |
| Außerplanmäßig                               | -57              | -15          | 17             | -17          |
| <b>Stand 31.12. Geschäftsjahr</b>            | <b>1.848</b>     | <b>1.659</b> | <b>1.322</b>   | <b>1.166</b> |

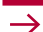

|                                              | Erstversicherung |              |              |              |                |            |
|----------------------------------------------|------------------|--------------|--------------|--------------|----------------|------------|
|                                              | Leben            |              | Gesundheit   |              | Schaden/Unfall |            |
| Mio. € <sup>1</sup>                          | 31.12.2010       | Vorjahr      | 31.12.2010   | Vorjahr      | 31.12.2010     | Vorjahr    |
| Stand 31.12. Vorjahr                         | 3.642            | 3.886        | 1.513        | 1.478        | 553            | 501        |
| Währungsänderungen                           | 1                | 1            | -            | -            | 6              | 2          |
| Veränderungen Konsolidierungskreis/Sonstiges | -                | -            | -            | -            | -              | -          |
| Neu aktivierte Abschlusskosten               | 300              | 386          | 190          | 183          | 354            | 287        |
| Veränderungen                                |                  |              |              |              |                |            |
| Planmäßig                                    | -219             | -360         | -120         | -146         | -250           | -237       |
| Außerplanmäßig                               | -101             | -271         | -            | -2           | -              | -          |
| <b>Stand 31.12. Geschäftsjahr</b>            | <b>3.623</b>     | <b>3.642</b> | <b>1.583</b> | <b>1.513</b> | <b>663</b>     | <b>553</b> |

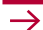

|                                              | Munich Health |           | Gesamt       |              |
|----------------------------------------------|---------------|-----------|--------------|--------------|
|                                              | 31.12.2010    | Vorjahr   | 31.12.2010   | Vorjahr      |
| Mio. € <sup>1</sup>                          |               |           |              |              |
| Stand 31.12. Vorjahr                         | 71            | 66        | 8.604        | 8.506        |
| Währungsänderungen                           | 3             | 2         | 198          | 88           |
| Veränderungen Konsolidierungskreis/Sonstiges | -2            | -         | -2           | 63           |
| Neu aktivierte Abschlusskosten               | 89            | 48        | 2.806        | 2.278        |
| Veränderungen                                |               |           |              |              |
| Planmäßig                                    | -35           | -45       | -2.300       | -2.026       |
| Außerplanmäßig                               | -             | -         | -141         | -305         |
| <b>Stand 31.12. Geschäftsjahr</b>            | <b>126</b>    | <b>71</b> | <b>9.165</b> | <b>8.604</b> |

<sup>1</sup> Nach Eliminierung segmentübergreifender konzerninterner Geschäftsvorfälle.

In den planmäßigen Veränderungen ist neben Abschreibungen auch eine planmäßige Verzinsung enthalten. Unter die außerplanmäßigen Veränderungen fallen Zu- und Abschreibungen aufgrund von Änderungen der den Berechnungen zugrunde liegenden Annahmen, die eine Anpassung der Bewertung erforderlich machen.



## 15 // Steuerabgrenzung

Die in der Konzernbilanz ausgewiesenen aktiven und passiven latenten Steuern betreffen die nachfolgenden Bilanzpositionen:

## Steuerabgrenzung

| Mio. €                                                                                | 31.12.2010   |              | Vorjahr      |              |
|---------------------------------------------------------------------------------------|--------------|--------------|--------------|--------------|
|                                                                                       | Aktiv        | Passiv       | Aktiv        | Passiv       |
| <b>Aktiva</b>                                                                         |              |              |              |              |
| A. Immaterielle Vermögenswerte                                                        | 177          | 345          | 125          | 339          |
| B. Kapitalanlagen                                                                     | 2.381        | 3.603        | 2.006        | 3.228        |
| C. Kapitalanlagen für Rechnung und Risiko von Inhabern von Lebensversicherungspolicen | -            | 2            | -            | 1            |
| E. Forderungen                                                                        | 173          | 46           | 71           | 107          |
| I. Übrige Aktiva                                                                      | 605          | 757          | 489          | 636          |
| <b>Gesamt Aktiva</b>                                                                  | <b>3.336</b> | <b>4.753</b> | <b>2.691</b> | <b>4.311</b> |
| <b>Passiva</b>                                                                        |              |              |              |              |
| C. Versicherungstechnische Rückstellungen (netto)                                     | 1.694        | 3.821        | 1.454        | 3.891        |
| E. Andere Rückstellungen                                                              | 468          | 434          | 441          | 214          |
| F. Verbindlichkeiten                                                                  | 328          | 51           | 229          | 105          |
| <b>Gesamt Passiva</b>                                                                 | <b>2.490</b> | <b>4.306</b> | <b>2.124</b> | <b>4.210</b> |
| <b>Außerbilanziell</b>                                                                |              |              |              |              |
| Verlustvorräte und Steuergutschriften                                                 | 133          | -            | 210          | -            |
| <b>Gesamt</b>                                                                         | <b>5.959</b> | <b>9.059</b> | <b>5.025</b> | <b>8.521</b> |

In den Steuerabgrenzungen für versicherungstechnische Rückstellungen sind die Steuerabgrenzungen für aktivierte Abschlusskosten sowie 2.437 (2.531) Millionen € für Schwankungsrückstellungen, die nach IFRS nicht gebildet werden, enthalten.

Die Verringerung der passivischen Nettoposition der latenten Steuern von 396 (-372) Millionen € wurde in Höhe von 373 (-87) Millionen € erfolgswirksam und in Höhe von 23 (-285) Millionen € erfolgsneutral, davon -20 (7) Millionen € aufgrund von Währungsumrechnungen, abgebildet.

Auf temporäre Differenzen von 41 (44) Millionen € in Verbindung mit Anteilen an Tochterunternehmen und assoziierten Unternehmen, sogenannte Outside Basis Differences, wurden keine latenten Steuern gebildet.

Latente Steuern auf Verlustvorräte werden aktiviert, soweit aufgrund der steuerlichen Ergebnisplanung eine Verwertung mit ausreichender Sicherheit zu erwarten ist. Nachfolgend haben wir die vorhandenen aktiven latenten Steuern auf Verlustvorräte sowie die Verlustvorräte selbst aufgliedert:

Entwicklung der aktiven latenten Steuern auf Verlustvorträge und Steuergutschriften

| Mio. €                            | Vorjahr    | Änderungen<br>aufgrund<br>nachträg-<br>licher<br>steuerlicher<br>Korrekturen | Nachträg-<br>liche Zu- und<br>Abgänge<br>aufgrund<br>geänderter<br>Wertbe-<br>richtigungen | Zugänge<br>aufgrund<br>neuer<br>Verluste | Verbrauch   | Übrige<br>Verände-<br>rungen | 31.12.2010 |
|-----------------------------------|------------|------------------------------------------------------------------------------|--------------------------------------------------------------------------------------------|------------------------------------------|-------------|------------------------------|------------|
| Aktive latente Steuer auf         |            |                                                                              |                                                                                            |                                          |             |                              |            |
| Körperschaftsteuerliche           |            |                                                                              |                                                                                            |                                          |             |                              |            |
| Verlustvorträge                   | 157        | -3                                                                           | 221                                                                                        | 38                                       | -322        | 3                            | 94         |
| Gewerbsteuerliche Verlustvorträge | 35         | 15                                                                           | -                                                                                          | 3                                        | -40         | -3                           | 10         |
| Steuerliche Verlustvorträge aus   |            |                                                                              |                                                                                            |                                          |             |                              |            |
| Veräußerungsverlusten             | -          | -                                                                            | 25                                                                                         | -                                        | -25         | -                            | -          |
| Steuergutschriften                | 18         | -                                                                            | -                                                                                          | 9                                        | -           | 2                            | 29         |
| <b>Gesamt</b>                     | <b>210</b> | <b>12</b>                                                                    | <b>246</b>                                                                                 | <b>50</b>                                | <b>-387</b> | <b>2</b>                     | <b>133</b> |

Steuerliche Verlustvorträge und Steuergutschriften

|                                                       | 31.12.2010                                                   |                                                             |              | Vorjahr                                                      |                                                             |              |
|-------------------------------------------------------|--------------------------------------------------------------|-------------------------------------------------------------|--------------|--------------------------------------------------------------|-------------------------------------------------------------|--------------|
|                                                       | Mit darauf<br>gebildeter<br>aktiver<br>Steuer-<br>abgrenzung | Ohne darauf<br>gebildete<br>aktive<br>Steuer-<br>abgrenzung | Gesamt       | Mit darauf<br>gebildeter<br>aktiver<br>Steuer-<br>abgrenzung | Ohne darauf<br>gebildete<br>aktive<br>Steuer-<br>abgrenzung | Gesamt       |
| Mio. €                                                |                                                              |                                                             |              |                                                              |                                                             |              |
| Körperschaftsteuerliche Verlustvorträge               |                                                              |                                                             |              |                                                              |                                                             |              |
| Bis zu drei Jahre vortragsfähig                       | 11                                                           | 37                                                          | 48           | 15                                                           | 3                                                           | 18           |
| Mehr als drei und bis zu zehn Jahre vortragsfähig     | 160                                                          | 102                                                         | 262          | 13                                                           | 115                                                         | 128          |
| Mehr als zehn Jahre vortragsfähig                     | 16                                                           | 2.305                                                       | 2.321        | 18                                                           | 2.987                                                       | 3.005        |
| Zeitlich unbeschränkt vortragsfähig                   | 208                                                          | 323                                                         | 531          | 794                                                          | 493                                                         | 1.287        |
|                                                       | <b>395</b>                                                   | <b>2.767</b>                                                | <b>3.162</b> | <b>840</b>                                                   | <b>3.598</b>                                                | <b>4.438</b> |
| Gewerbsteuerliche Verlustvorträge                     |                                                              |                                                             |              |                                                              |                                                             |              |
| Zeitlich unbeschränkt vortragsfähig                   | 61                                                           | 202                                                         | 263          | 208                                                          | 200                                                         | 408          |
|                                                       | <b>61</b>                                                    | <b>202</b>                                                  | <b>263</b>   | <b>208</b>                                                   | <b>200</b>                                                  | <b>408</b>   |
| Steuerliche Verlustvorträge aus Veräußerungsverlusten |                                                              |                                                             |              |                                                              |                                                             |              |
| Bis zu drei Jahre vortragsfähig                       | -                                                            | -                                                           | -            | -                                                            | -                                                           | -            |
| Mehr als drei und bis zu zehn Jahre vortragsfähig     | -                                                            | 183                                                         | 183          | -                                                            | 358                                                         | 358          |
| Mehr als zehn Jahre vortragsfähig                     | -                                                            | -                                                           | -            | -                                                            | -                                                           | -            |
| Zeitlich unbeschränkt vortragsfähig                   | -                                                            | -                                                           | -            | -                                                            | -                                                           | -            |
|                                                       | <b>-</b>                                                     | <b>183</b>                                                  | <b>183</b>   | <b>-</b>                                                     | <b>358</b>                                                  | <b>358</b>   |
| Steuergutschriften                                    |                                                              |                                                             |              |                                                              |                                                             |              |
| Bis zu drei Jahre vortragsfähig                       | -                                                            | -                                                           | -            | -                                                            | -                                                           | -            |
| Mehr als drei und bis zu zehn Jahre vortragsfähig     | -                                                            | -                                                           | -            | -                                                            | -                                                           | -            |
| Mehr als zehn Jahre vortragsfähig                     | -                                                            | -                                                           | -            | -                                                            | -                                                           | -            |
| Zeitlich unbeschränkt vortragsfähig                   | 29                                                           | -                                                           | 29           | 18                                                           | -                                                           | 18           |
|                                                       | <b>29</b>                                                    | <b>-</b>                                                    | <b>29</b>    | <b>18</b>                                                    | <b>-</b>                                                    | <b>18</b>    |

## 16 // Übrige Aktiva

Die übrigen Aktiva enthalten im Wesentlichen eigengenutzte Grundstücke und Bauten mit 2.411 (2.472) Millionen €, davon 20 (21) Millionen € aus Finanzierungs-Leasing-verhältnissen, Sachanlagen und Vorräte von 332 (371) Millionen € sowie sonstige Rechnungsabgrenzungsposten von 137 (107) Millionen €.

**Entwicklung der eigengenutzten Grundstücke und Bauten**

| Mio. €                                         | 2010  | Vorjahr |
|------------------------------------------------|-------|---------|
| Bruttobuchwert 31.12. Vorjahr                  | 3.364 | 3.107   |
| Kumulierte Abschreibungen 31.12. Vorjahr       | 892   | 794     |
| Bilanzwert 31.12. Vorjahr                      | 2.472 | 2.313   |
| Währungsänderungen                             | 26    | -1      |
| Veränderung Konsolidierungskreis               | -12   | 3       |
| Zugänge                                        | 156   | 162     |
| Abgänge                                        | 25    | 15      |
| Zuschreibungen                                 | 2     | 15      |
| Abschreibungen                                 |       |         |
| Planmäßig                                      | 55    | 62      |
| Außerplanmäßig                                 | 27    | 3       |
| Umgliederung                                   | -126  | 60      |
| Bilanzwert 31.12. Geschäftsjahr                | 2.411 | 2.472   |
| Kumulierte Abschreibungen 31.12. Geschäftsjahr | 942   | 892     |
| Bruttobuchwert 31.12. Geschäftsjahr            | 3.353 | 3.364   |

Die außerplanmäßigen Abschreibungen und die Zuschreibungen sind im Wesentlichen durch Marktwertanpassungen begründet. Die außerplanmäßigen Abschreibungen verteilen sich wie folgt auf die Segmente: In der Rückversicherung entfallen auf Leben 3 (-) Millionen € und auf Schaden/Unfall 6 (1) Millionen €, in der Erstversicherung betragen die außerplanmäßigen Abschreibungen in Leben 14 (1) Millionen €, in Gesundheit 2 (1) Millionen € und in Schaden/Unfall 1 (-) Million €, und bei Munich Health 1 (-) Million €.

Der beizulegende Zeitwert der Grundstücke und Bauten beläuft sich auf 2.681 (2.746) Millionen €. Die aktivierten Ausgaben für Anlagen im Bau betragen 144 (95) Millionen € für Grundbesitz und 14 (28) Millionen € für Betriebs- und Geschäftsausstattung. Verpflichtungen zum Erwerb von Grundbesitz machen 28 (14) Millionen € und zum Erwerb von Betriebs- und Geschäftsausstattung 24 (18) Millionen € aus.

## 17 // Zur Veräußerung gehaltene langfristige Vermögenswerte und Veräußerungsgruppen

Im vierten Quartal 2009 veräußerten wir mit wirtschaftlicher Wirkung zum 1. Januar 2010 eine eigengenutzte Büroimmobilie mit einem Buchwert von 13 Millionen €. Im Gegenzug erwarben wir eine eigengenutzte Büroimmobilie; der Erwerbspreis betrug 41 Millionen €.

Ebenfalls im vierten Quartal 2009 veräußerten wir mit wirtschaftlicher Wirkung zum 1. April 2010 sieben fremdgenutzte Wohnimmobilien mit einem Buchwert von insgesamt 68 Millionen €.

Darüber hinaus beschlossen wir im vierten Quartal 2009 die Veräußerung einer fremdgenutzten Büroimmobilie mit einem Buchwert von 22 Millionen €. Ein Vertrag über den Verkauf dieser Immobilie mit wirtschaftlicher Wirkung zum 1. Juli 2010 wurde im April 2010 unterzeichnet.

Am 12. April 2010 verkauften wir einen Teil unserer Beteiligung an der Helvetia Holding AG, St. Gallen. Der Marktwert der veräußerten Anteile betrug 119 Millionen €, das Abgangsergebnis 90 Millionen €. Durch den Verkauf reduzierte sich unsere Beteiligung an dieser Gesellschaft von rund 8,2 % auf unter 3 %.

Im dritten Quartal 2010 veräußerten wir vier fremdgenutzte Wohnimmobilien mit einem Buchwert von insgesamt 12 Millionen €.

Die Zuordnung der zur Veräußerung gehaltenen langfristigen Vermögenswerte auf die Segmente ist in der Segmentberichterstattung dargestellt.

## Erläuterungen zur Konzernbilanz – Passiva

### 18 // Eigenkapital

Das Grundkapital von 587.725.396,48 € gliedert sich zum 31. Dezember 2010 in insgesamt 188.468.471 volleingezahlte und stimmberechtigte nennwertlose Namensaktien. Gemäß Beschluss der Hauptversammlung vom 22. April 2009 war die Münchener Rückversicherungs-Gesellschaft bis zum 21. Oktober 2010 ermächtigt, eigene Aktien bis zu 10 % des Grundkapitals zu erwerben. Die Hauptversammlung am 28. April 2010 hat diesen Beschluss erneuert und damit den Vorstand ermächtigt, bis zum 27. April 2015 eigene Aktien bis zu 10 % des Grundkapitals zu erwerben. Seit Inkrafttreten des Gesetzes zur Umsetzung der Aktionärsrechterichtlinie (ARUG) am 1. September 2009 kann die Ermächtigung nunmehr wie bei Kapitalermächtigungen für eine Dauer von bis zu fünf Jahren erteilt werden. Die Anzahl der Aktien im Umlauf hat sich wie folgt entwickelt:

#### Entwicklung der Aktien im Umlauf

| Stückzahl                                                                               | 2010               | Vorjahr            |
|-----------------------------------------------------------------------------------------|--------------------|--------------------|
| Stand 31.12. Vorjahr                                                                    | 191.910.177        | 195.655.351        |
| Zugänge                                                                                 |                    |                    |
| Ausgabe von Mitarbeiteraktien                                                           | -                  | -                  |
| Veräußerung Restbestand Mitarbeiteraktien                                               | 255                | -                  |
| Veräußerung aus Absicherung der Wertsteigerungsrechte der langfristigen Incentive-Pläne | 299.485            | 80.542             |
| Abgänge                                                                                 |                    |                    |
| Erwerb zur Einziehung (Aktienrückkaufprogramm) inkl. Ausübung von Put-Optionen          | 11.797.271         | 3.793.050          |
| Erwerb zur Ausgabe von Mitarbeiteraktien                                                | -                  | -                  |
| Erwerb zur Absicherung der Wertsteigerungsrechte der langfristigen Incentive-Pläne      | 34.063             | 32.666             |
| <b>Stand 31.12. Geschäftsjahr</b>                                                       | <b>180.378.583</b> | <b>191.910.177</b> |

Am 31. Dezember 2010 waren 8.089.888 Aktien der Münchener Rück AG mit einem rechnerischen Nennwert von rund 25,2 Millionen € im Bestand von Konzerngesellschaften. Das entspricht einem Anteil am Grundkapital von 4,3 %.

Am 1. Oktober 2009 hat der Vorstand der Münchener Rück AG ein Aktienrückkaufprogramm beschlossen und damit von der am 22. April 2009 durch die Hauptversammlung gemäß § 71 Abs. 1 Nr. 8 AktG beschlossenen Ermächtigung Gebrauch gemacht. Vom 2. Oktober 2009 bis zum 21. April 2010 wurden 8.933.153 Aktien der Münchener Rück AG über die Börse erworben. Diese eigenen Aktien wurden am 28. April 2010 im vereinfachten Verfahren ohne Herabsetzung des Grundkapitals durch Anpassung des rechnerischen Betrags der übrigen Stückaktien eingezogen.

Am 7. Mai 2010 hat der Vorstand der Münchener Rück AG ein weiteres Aktienrückkaufprogramm beschlossen und damit von der am 28. April 2010 durch die Hauptversammlung gemäß § 71 Abs. 1 Nr. 8 AktG beschlossenen Ermächtigung Gebrauch gemacht. Der Aktienrückkauf ist auf einen für den Erwerb der Aktien insgesamt aufzuwendenden Kaufpreis (ohne Nebenkosten) von maximal 1 Milliarde € bis zur Hauptversammlung 2011 beschränkt. Von 25. Mai 2010 bis zum 31. Dezember 2010 wurden 6.089.668 Aktien zu einem Durchschnittskurs von 106,68 € erworben. Im Jahr 2010 wurden insgesamt 11.797.271 Aktien zu einem durchschnittlichen Kurs von 110,16 € erworben.

Im Jahr 2010 wurden keine Mitarbeiteraktienprogramme aufgelegt, weder für Mitarbeiter der Münchener Rück AG noch für Mitarbeiter von abhängigen oder in Mehrheitsbesitz der Gesellschaft stehenden Unternehmen. Der Restbestand aus dem Mitarbeiteraktienprogramm 2008 der Münchener Rück AG von 255 Aktien wurde im Geschäftsjahr 2010 zu einem Durchschnittskurs von 112,63 € verkauft, sodass nun auch bei der Münchener Rück AG kein Restbestand mehr vorhanden ist.

Ein Tochterunternehmen hält 1.609.067 Aktien, um Wertsteigerungsrechte abzusichern, die seit 1999 an Vorstand und oberes Management der Münchener Rückversicherungs-Gesellschaft ausgegeben wurden. 2010 wurden zur Absicherung dieser Programme keine Aktien erworben, aber insgesamt 222.728 Stück zu einem Durchschnittskurs von 116,15 € veräußert.

Im Geschäftsjahr 2010 haben die Gesellschaften der ERGO Versicherungsgruppe 63 Aktien zu einem Durchschnittskurs von 116,71 € erworben und 70.099 Aktien zu je 120,07 € veräußert, um zukünftige Verpflichtungen aus den langfristigen Incentive-Plänen, die seit 2002 aufgelegt werden, abzusichern. Zusammen mit den Münchener-Rück-Aktien, die in den Vorjahren zur Absicherung ausgegebener Wertsteigerungsrechte erworben wurden und im Bestand verblieben sind, ergibt sich bei der ERGO Versicherungsgruppe zum 31. Dezember 2010 ein Gesamtbestand von 224.057 Stück.

Die MEAG MUNICH ERGO AssetManagement GmbH hat im Geschäftsjahr 2010 zur Absicherung der Verpflichtungen aus dem langfristigen Incentive-Plan 34.000 Aktien zu je 104,13 € erworben sowie 6.658 Stück zu einem Durchschnittskurs von 112,04 € veräußert und hält damit 167.096 Münchener-Rück-Aktien.

Die Anschaffungskosten der Aktien, die zum Geschäftsjahresende im Besitz von Konzerngesellschaften waren, betrugen insgesamt 845.729.551,24 €.

Im Berichtsjahr wurden für das Geschäftsjahr 2009 1.076 Millionen € an die Anteilseigner der Münchener Rück AG ausgeschüttet. Dies entsprach einer Dividende von 5,75 € je gewinnberechtigter Aktie.

#### Zusammensetzung des genehmigten Kapitals

| Mio. €                                            | 31.12.2010 |
|---------------------------------------------------|------------|
| Genehmigtes Kapital 2006 (bis zum 18. April 2011) | 5          |
| Genehmigtes Kapital 2009 (bis zum 21. April 2014) | 280        |
| <b>Gesamt</b>                                     | <b>285</b> |

#### Zusammensetzung des bedingten Kapitals

| Mio. €                                          | 31.12.2010 |
|-------------------------------------------------|------------|
| Bedingtes Kapital 2010 (bis zum 27. April 2015) | 117        |
| <b>Gesamt</b>                                   | <b>117</b> |

#### Eigenkapitalzusammensetzung

| Mio. €                                                             | 31.12.2010    | Vorjahr       |
|--------------------------------------------------------------------|---------------|---------------|
| Gezeichnetes Kapital                                               | 588           | 588           |
| Kapitalrücklage                                                    | 6.800         | 6.800         |
| Gewinnrücklagen                                                    | 10.735        | 10.667        |
| Übrige Rücklagen                                                   | 2.238         | 1.473         |
| Konzernergebnis auf Anteilseigner der Münchener Rück AG entfallend | 2.422         | 2.521         |
| Nicht beherrschende Anteile am Eigenkapital                        | 245           | 229           |
| <b>Eigenkapital gesamt</b>                                         | <b>23.028</b> | <b>22.278</b> |



Die Gewinnrücklagen enthalten 5.795 (5.866) Millionen € Schwankungsrückstellungen.

Die übrigen Rücklagen enthalten –610 (–1.245) Millionen € aus der Währungsumrechnung und –2 (1) Millionen € aufgrund des Bewertungsergebnisses aus Cashflow Hedges. Außerdem sind in den übrigen Rücklagen unrealisierte Gewinne und Verluste enthalten, die sich wie folgt auf die verschiedenen Posten verteilen:

#### Unrealisierte Gewinne und Verluste

| Mio. €                                                                                             | 31.12.2010   | Vorjahr      |
|----------------------------------------------------------------------------------------------------|--------------|--------------|
| Nicht konsolidierte verbundene und nicht nach der Equity-Methode bewertete assoziierte Unternehmen | 161          | 147          |
| Nach der Equity-Methode bewertete assoziierte Unternehmen                                          | 68           | 66           |
| Sonstige Wertpapiere, jederzeit veräußerbar                                                        |              |              |
| Festverzinslich                                                                                    | 2.201        | 3.342        |
| Nicht festverzinslich                                                                              | 1.634        | 1.408        |
| Abzüglich                                                                                          |              |              |
| Erfolgsneutral gebildete Rückstellung für latente Beitragsrückerstattung                           | 598          | 1.632        |
| Erfolgsneutral gebildete latente Steuern                                                           | 605          | 623          |
| Nicht beherrschende Anteile am Eigenkapital                                                        | 11           | 12           |
| Konsolidierungs- und Währungseffekte                                                               | -            | -21          |
| <b>Gesamt</b>                                                                                      | <b>2.850</b> | <b>2.717</b> |

#### Steuereffekte, die in den direkt im Eigenkapital erfassten Erträgen und Aufwendungen enthalten sind

| Mio. €                                                                                       | 2010        |            |              | Vorjahr     |            |              |
|----------------------------------------------------------------------------------------------|-------------|------------|--------------|-------------|------------|--------------|
|                                                                                              | Vor Steuern | Steuer     | Nach Steuern | Vor Steuern | Steuer     | Nach Steuern |
| Währungsumrechnung                                                                           | 645         | -          | 645          | -51         | -          | -51          |
| Unrealisierte Gewinne und Verluste aus Kapitalanlagen                                        | 112         | -18        | 130          | 824         | 309        | 515          |
| Veränderung aus der Equity-Bewertung                                                         | -8          | -          | -8           | 15          | -          | 15           |
| Veränderung aus Cashflow Hedges                                                              | -5          | -2         | -3           | -2          | -          | -2           |
| Versicherungsmathematische Gewinne und Verluste aus leistungsorientierten Versorgungszusagen | -73         | -23        | -50          | -86         | -8         | -78          |
| Sonstige Veränderungen                                                                       | -20         | -          | -20          | -37         | -9         | -28          |
| <b>Direkt im Eigenkapital erfasste Erträge und Aufwendungen</b>                              | <b>651</b>  | <b>-43</b> | <b>694</b>   | <b>663</b>  | <b>292</b> | <b>371</b>   |

#### Nicht beherrschende Anteile am Eigenkapital

| Mio. €                             | 31.12.2010 | Vorjahr    |
|------------------------------------|------------|------------|
| Unrealisierte Gewinne und Verluste | 11         | 12         |
| Konzernergebnis                    | 9          | 8          |
| Übriges Eigenkapital               | 225        | 209        |
| <b>Gesamt</b>                      | <b>245</b> | <b>229</b> |

Im Wesentlichen handelt es sich bei den nicht beherrschenden Anteilen um Anteile konzernfremder Gesellschafter am Eigenkapital einzelner Gesellschaften der Erstversicherungsgruppe. Die direkten Fremdanteile an Spezialfonds weisen wir unter den sonstigen Verbindlichkeiten aus. Im Geschäftsjahr 2010 erwarben wir weitere 0,3% der Anteile an der ERGO Versicherungsgruppe AG, Düsseldorf, für 27 Millionen €. Hierdurch verringerten sich die nicht beherrschenden Anteile und die Gewinnrücklagen um 10 Millionen € bzw. um 17 Millionen €.

Angaben zum Kapitalmanagement und zu den Mindestkapitalanforderungen finden Sie im Lagebericht unter Finanzlage – Kapitalmanagement und Finanzlage – Gruppensolvabilität.

## 19 // Nachrangige Verbindlichkeiten

### Zusammensetzung der nachrangigen Verbindlichkeiten

| Mio. €                                                                                                                                                                          | Kenn-<br>nummer                                                                | A.M.<br>Best | Fitch | Moody's  | S&P | 31.12.2010   | Vorjahr      |
|---------------------------------------------------------------------------------------------------------------------------------------------------------------------------------|--------------------------------------------------------------------------------|--------------|-------|----------|-----|--------------|--------------|
| Münchener Rück AG, München,<br>bis 2013 6,75%, anschließend<br>variabel, 2.900 Millionen €,<br>Anleihe 2003/2023                                                                | WKN: 843278<br>ISIN: XS0166965797<br>Reuters: DE016696579=<br>Bloomberg: MUNRE | a+           | A     | A2 (hyb) | A   | 2.884        | 2.883        |
| Münchener Rück AG, München,<br>bis 2018 7,625%, anschließend<br>variabel, 300 Millionen €,<br>Anleihe 2003/2028                                                                 | WKN: 843449<br>ISIN: XS0167260529<br>Reuters: DE016726052=<br>Bloomberg: MUNRE | a+           | A     | A2 (hyb) | A   | 348          | 335          |
| Münchener Rück AG, München,<br>bis 2017 5,767%, anschließend variabel,<br>1.349 Millionen €, Anleihe 2007/<br>unbegrenzte Laufzeit                                              | WKN: A0N4EX<br>ISIN: XS0304987042<br>Reuters: DE030498704=<br>Bloomberg: MUNRE | a            | A     | A3 (hyb) | A   | 1.513        | 1.475        |
| Bank Austria Creditanstalt Versicherung AG,<br>Wien, 4,95%, 50 Millionen €,<br>Namensschuldverschreibungen 2004/2014                                                            |                                                                                | -            | -     | -        | -   | 49           | 49           |
| Bank Austria Creditanstalt Versicherung AG,<br>Wien, bis 2010 6%, anschließend variabel,<br>12 Millionen €, Namensschuldverschreibung<br>2001/unbegrenzte Laufzeit              |                                                                                | -            | -     | -        | -   | 9            | 9            |
| Bank Austria Creditanstalt Versicherung AG,<br>Wien, Sekundärmarktrendite Bund (Österreich)<br>+70 BP, 13 Millionen €, Namensschuld-<br>verschreibung 1998/unbegrenzte Laufzeit |                                                                                | -            | -     | -        | -   | 10           | 9            |
| HSB Group Inc., Delaware,<br>LIBOR +91 BP, 76 Millionen US\$,<br>Anleihe 1997/2027                                                                                              |                                                                                | -            | -     | -        | -   | 34           | 30           |
| <b>Gesamt</b>                                                                                                                                                                   |                                                                                |              |       |          |     | <b>4.847</b> | <b>4.790</b> |

<sup>1</sup> Die ERGO International AG hält Anleihen mit einem Nominalwert von 3 Millionen € im Bestand; das ausstehende Volumen ist entsprechend reduziert.

<sup>2</sup> Die ERGO AG hält Anleihen mit einem Nominalwert von 3 Millionen € im Bestand; das ausstehende Volumen ist entsprechend reduziert.

Bis zum Zeitpunkt der frühesten Kündigungsmöglichkeit in den Jahren 2013, 2018 und 2017 erfolgen bei den Anleihen der Münchener Rück AG Liquiditätsabflüsse in Höhe der jeweiligen Zinszahlungen von 196 Millionen €, 23 Millionen £ bzw. 78 Millionen €. Danach sind die Liquiditätsabflüsse variabel und hängen vom jeweiligen Zinsniveau ab. Bei der Namensschuldverschreibung der Bank Austria Creditanstalt Versicherung AG von 2004 beträgt der jährliche Liquiditätsabfluss 2 Millionen €. Für deren Namensschuldverschreibung von 2001 beträgt der Mittelabfluss für die ersten zehn Jahre jährlich 1 Million €, danach ist dieser ebenso wie der der Namensschuldverschreibung von 1998 sowie der Anleihe der HSB Group variabel in Abhängigkeit vom jeweiligen Zinsniveau.

Der beizulegende Zeitwert der Nachranganleihe der Münchener Rück AG vom Juni 2007 wird in Bezug auf den risikolosen Zins über einen Zinsswap abgesichert. Die abgesicherten Wertveränderungen der nachrangigen Anleihe sowie des Zinsswaps werden jeweils erfolgswirksam in den Finanzierungskosten ausgewiesen.

Der beizulegende Zeitwert der nachrangigen Verbindlichkeiten beträgt zum Bilanzstichtag 4.777 (4.781) Millionen €. Für die Anleihen der Münchener Rück AG liegen als beizulegende Zeitwerte die Börsenwerte vor. Für die übrigen nachrangigen Verbindlichkeiten ziehen wir Barwertverfahren unter Verwendung beobachtbarer Marktdaten heran, um die beizulegenden Zeitwerte zu ermitteln.

## 20 // Beitragsüberträge

## Beitragsüberträge

| Mio. € <sup>1</sup>        | Rückversicherung |            |                |              |
|----------------------------|------------------|------------|----------------|--------------|
|                            | Leben            |            | Schaden/Unfall |              |
|                            | 31.12.2010       | Vorjahr    | 31.12.2010     | Vorjahr      |
| Brutto                     | 52               | 113        | 5.600          | 4.883        |
| Anteil der Rückversicherer | -                | 1          | 309            | 272          |
| <b>Netto</b>               | <b>52</b>        | <b>112</b> | <b>5.291</b>   | <b>4.611</b> |

| Mio. € <sup>1</sup>        | Erstversicherung |          |            |           |                |              |
|----------------------------|------------------|----------|------------|-----------|----------------|--------------|
|                            | Leben            |          | Gesundheit |           | Schaden/Unfall |              |
|                            | 31.12.2010       | Vorjahr  | 31.12.2010 | Vorjahr   | 31.12.2010     | Vorjahr      |
| Brutto                     | 1                | 1        | 96         | 88        | 1.687          | 1.491        |
| Anteil der Rückversicherer | -                | -        | 2          | 1         | 68             | 61           |
| <b>Netto</b>               | <b>1</b>         | <b>1</b> | <b>94</b>  | <b>87</b> | <b>1.619</b>   | <b>1.430</b> |

| Mio. € <sup>1</sup>        | Munich Health |            |              |              | Gesamt     |         |
|----------------------------|---------------|------------|--------------|--------------|------------|---------|
|                            | 31.12.2010    | Vorjahr    | 31.12.2010   | Vorjahr      | 31.12.2010 | Vorjahr |
|                            | 31.12.2010    | Vorjahr    | 31.12.2010   | Vorjahr      | 31.12.2010 | Vorjahr |
| Brutto                     | 443           | 370        | 7.879        | 6.946        |            |         |
| Anteil der Rückversicherer | 7             | -          | 386          | 335          |            |         |
| <b>Netto</b>               | <b>436</b>    | <b>370</b> | <b>7.493</b> | <b>6.611</b> |            |         |

<sup>1</sup> Nach Eliminierung segmentübergreifender konzerninterner Geschäftsvorfälle.

## Entwicklung der Beitragsüberträge (brutto)

| Mio. € <sup>1</sup>               | Rückversicherung |            |                |              |
|-----------------------------------|------------------|------------|----------------|--------------|
|                                   | Leben            |            | Schaden/Unfall |              |
|                                   | 31.12.2010       | Vorjahr    | 31.12.2010     | Vorjahr      |
| Stand 31.12. Vorjahr              | 113              | 139        | 4.883          | 4.517        |
| Währungsänderungen                | 12               | -8         | 299            | 12           |
| Veränderung Konsolidierungskreis  | -                | -          | -              | 310          |
| Gebuchte Beiträge                 | 7.766            | 6.431      | 15.377         | 14.675       |
| Verdiente Beiträge                | 7.839            | 6.449      | 14.959         | 14.631       |
| <b>Stand 31.12. Geschäftsjahr</b> | <b>52</b>        | <b>113</b> | <b>5.600</b>   | <b>4.883</b> |

| Mio. € <sup>1</sup>               | Erstversicherung |          |            |           |                |              |
|-----------------------------------|------------------|----------|------------|-----------|----------------|--------------|
|                                   | Leben            |          | Gesundheit |           | Schaden/Unfall |              |
|                                   | 31.12.2010       | Vorjahr  | 31.12.2010 | Vorjahr   | 31.12.2010     | Vorjahr      |
| Stand 31.12. Vorjahr              | 1                | -        | 88         | 90        | 1.491          | 1.407        |
| Währungsänderungen                | -                | -        | 1          | -1        | 28             | 9            |
| Veränderung Konsolidierungskreis  | -                | -        | -          | -         | -              | -            |
| Gebuchte Beiträge                 | 6.484            | 6.294    | 5.493      | 5.162     | 5.459          | 5.084        |
| Verdiente Beiträge                | 6.484            | 6.293    | 5.486      | 5.163     | 5.291          | 5.009        |
| <b>Stand 31.12. Geschäftsjahr</b> | <b>1</b>         | <b>1</b> | <b>96</b>  | <b>88</b> | <b>1.687</b>   | <b>1.491</b> |

| Mio. € <sup>1</sup>               | Munich Health |            |              |              | Gesamt     |         |
|-----------------------------------|---------------|------------|--------------|--------------|------------|---------|
|                                   | 31.12.2010    | Vorjahr    | 31.12.2010   | Vorjahr      | 31.12.2010 | Vorjahr |
|                                   | 31.12.2010    | Vorjahr    | 31.12.2010   | Vorjahr      | 31.12.2010 | Vorjahr |
| Stand 31.12. Vorjahr              | 370           | 268        | 6.946        | 6.421        |            |         |
| Währungsänderungen                | 23            | 7          | 363          | 19           |            |         |
| Veränderung Konsolidierungskreis  | -16           | -          | -16          | 310          |            |         |
| Gebuchte Beiträge                 | 4.962         | 3.777      | 45.541       | 41.423       |            |         |
| Verdiente Beiträge                | 4.896         | 3.682      | 44.955       | 41.227       |            |         |
| <b>Stand 31.12. Geschäftsjahr</b> | <b>443</b>    | <b>370</b> | <b>7.879</b> | <b>6.946</b> |            |         |

<sup>1</sup> Nach Eliminierung segmentübergreifender konzerninterner Geschäftsvorfälle.

## 21 // Deckungsrückstellung

### Deckungsrückstellung

|                            | Rückversicherung |              |                |            |
|----------------------------|------------------|--------------|----------------|------------|
|                            | Leben            |              | Schaden/Unfall |            |
| Mio. € <sup>1</sup>        | 31.12.2010       | Vorjahr      | 31.12.2010     | Vorjahr    |
| Brutto                     | 10.521           | 9.590        | 317            | 300        |
| Anteil der Rückversicherer | 684              | 147          | -              | -          |
| <b>Netto</b>               | <b>9.837</b>     | <b>9.443</b> | <b>317</b>     | <b>300</b> |

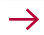

|                            | Erstversicherung |               |               |               |                |            |
|----------------------------|------------------|---------------|---------------|---------------|----------------|------------|
|                            | Leben            |               | Gesundheit    |               | Schaden/Unfall |            |
| Mio. € <sup>1</sup>        | 31.12.2010       | Vorjahr       | 31.12.2010    | Vorjahr       | 31.12.2010     | Vorjahr    |
| Brutto                     | 69.555           | 68.583        | 22.855        | 21.362        | 407            | 358        |
| Anteil der Rückversicherer | 1.742            | 1.682         | 2             | 2             | -              | -          |
| <b>Netto</b>               | <b>67.813</b>    | <b>66.901</b> | <b>22.853</b> | <b>21.360</b> | <b>407</b>     | <b>358</b> |

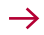

|                            | Munich Health |            | Gesamt         |               |
|----------------------------|---------------|------------|----------------|---------------|
|                            | 31.12.2010    | Vorjahr    | 31.12.2010     | Vorjahr       |
| Mio. € <sup>1</sup>        |               |            |                |               |
| Brutto                     | 758           | 669        | 104.413        | 100.862       |
| Anteil der Rückversicherer | 7             | 7          | 2.435          | 1.838         |
| <b>Netto</b>               | <b>751</b>    | <b>662</b> | <b>101.978</b> | <b>99.024</b> |

<sup>1</sup> Nach Eliminierung segmentübergreifender konzerninterner Geschäftsvorfälle.

### Deckungsrückstellung nach Art des Versicherungsschutzes (brutto)

| Mio. €                                    | 31.12.2010     | Vorjahr        |
|-------------------------------------------|----------------|----------------|
| <b>Leben</b>                              | <b>80.076</b>  | <b>78.173</b>  |
| Rückversicherung                          | 10.521         | 9.590          |
| Erstversicherung                          | 69.555         | 68.583         |
| Risiko-Lebensversicherung                 | 2.654          | 2.589          |
| Sonstige Lebensversicherung               | 39.118         | 39.795         |
| Rentenversicherung                        | 26.697         | 25.133         |
| Berufsunfähigkeitsversicherung            | 1.073          | 1.057          |
| Verträge mit Kombination mehrerer Risiken | 13             | 9              |
| <b>Gesundheit</b>                         | <b>23.613</b>  | <b>22.031</b>  |
| Munich Health                             | 758            | 669            |
| Erstversicherung                          | 22.855         | 21.362         |
| <b>Schaden/Unfall</b>                     | <b>724</b>     | <b>658</b>     |
| Rückversicherung                          | 317            | 300            |
| Erstversicherung                          | 407            | 358            |
| <b>Gesamt</b>                             | <b>104.413</b> | <b>100.862</b> |

Die Deckungsrückstellung in der Lebensrückversicherung bezieht sich zum größten Teil auf Verträge mit dominierendem Todesfall- oder Invaliditätsrisiko. In der Rückversicherung haben Rentenversicherungen ein deutlich geringeres Gewicht als in der Erstversicherung.

Um die Deckungsrückstellung im Bestandsgeschäft zu bewerten, werden im Wesentlichen die gleichen Rechnungsgrundlagen verwendet wie im Vorjahr. Für US-amerikanisches Pflegeversicherungsgeschäft wurden aufgrund der Erkenntnisse aus aktuellen biometrischen Analysen die Annahmen zu Schadeneintritten, Leistungsdauern und Lebenserwartung nach oben angepasst. In der deutschen Erstversicherung, auf die

ca. 88% der Deckungsrückstellung für die Erstversicherung entfallen, werden biometrische Rechnungsgrundlagen auf der Basis der Tafeln der Deutschen Aktuarvereinigung e.V. verwendet.

Weitere Angaben zu den versicherungstechnischen Risiken und Diskontzinsen finden Sie unter (37) Risiken aus dem Lebens- und Krankenversicherungsgeschäft und (38) Risiken aus dem Schaden- und Unfallversicherungsgeschäft.

#### Entwicklung der Deckungsrückstellung (brutto)

| Mio. €                                     | 2010           | Vorjahr        |
|--------------------------------------------|----------------|----------------|
| Stand 31.12. Vorjahr                       | 100.862        | 98.205         |
| Währungsänderungen                         | 144            | 117            |
| Veränderung Konsolidierungskreis/Sonstiges | 955            | 576            |
| Veränderungen                              |                |                |
| Planmäßig                                  | 2.169          | 1.959          |
| Außerplanmäßig                             | 283            | 5              |
| <b>Stand 31.12. Geschäftsjahr</b>          | <b>104.413</b> | <b>100.862</b> |

Die unter Sonstiges ausgewiesene Veränderung betrifft mit 334 Millionen € Sparbeiträge für Kapitalisierungsprodukte und mit 150 Millionen € Portfolioein- bzw. -austritte. In den planmäßigen Veränderungen der Deckungsrückstellung sind die aus der prospektiven Kalkulation resultierenden Veränderungen aufgrund von Beitragszahlungen, Leistungsfällen und der Abwicklung der Diskontierung im Berichtsjahr enthalten. Außerplanmäßige Veränderungen ergeben sich aus Änderungen der den Berechnungen zugrunde liegenden Annahmen, die es erforderlich machten, die Bewertung anzupassen. Sie betreffen im Wesentlichen die Reserveerhöhung für das US-amerikanische Pflegeversicherungsgeschäft.

## 22 // Rückstellung für noch nicht abgewickelte Versicherungsfälle

#### Rückstellung für noch nicht abgewickelte Versicherungsfälle

| Mio. € <sup>1</sup>        | Rückversicherung |              |                |               |
|----------------------------|------------------|--------------|----------------|---------------|
|                            | Leben            |              | Schaden/Unfall |               |
|                            | 31.12.2010       | Vorjahr      | 31.12.2010     | Vorjahr       |
| Brutto                     | 4.477            | 3.797        | 36.632         | 35.182        |
| Anteil der Rückversicherer | 288              | 200          | 2.080          | 2.326         |
| <b>Netto</b>               | <b>4.189</b>     | <b>3.597</b> | <b>34.552</b>  | <b>32.856</b> |

| Mio. € <sup>1</sup>        | Erstversicherung |              |            |            |                |              |
|----------------------------|------------------|--------------|------------|------------|----------------|--------------|
|                            | Leben            |              | Gesundheit |            | Schaden/Unfall |              |
|                            | 31.12.2010       | Vorjahr      | 31.12.2010 | Vorjahr    | 31.12.2010     | Vorjahr      |
| Brutto                     | 1.509            | 1.475        | 938        | 943        | 4.908          | 4.651        |
| Anteil der Rückversicherer | 19               | 15           | 4          | 4          | 230            | 191          |
| <b>Netto</b>               | <b>1.490</b>     | <b>1.460</b> | <b>934</b> | <b>939</b> | <b>4.678</b>   | <b>4.460</b> |

| Mio. € <sup>1</sup>        | Munich Health |            |               |               | Gesamt     |         |
|----------------------------|---------------|------------|---------------|---------------|------------|---------|
|                            | 31.12.2010    | Vorjahr    | 31.12.2010    | Vorjahr       | 31.12.2010 | Vorjahr |
|                            | 31.12.2010    | Vorjahr    | 31.12.2010    | Vorjahr       | 31.12.2010 | Vorjahr |
| Brutto                     | 1.037         | 798        | 49.501        | 46.846        |            |         |
| Anteil der Rückversicherer | 9             | 11         | 2.630         | 2.747         |            |         |
| <b>Netto</b>               | <b>1.028</b>  | <b>787</b> | <b>46.871</b> | <b>44.099</b> |            |         |

<sup>1</sup> Nach Eliminierung segmentübergreifender konzerninterner Geschäftsvorfälle.

**Art der Rückstellung (brutto)**

| Mio. € <sup>1</sup>                         | Rückversicherung |              |                |               |
|---------------------------------------------|------------------|--------------|----------------|---------------|
|                                             | Leben            |              | Schaden/Unfall |               |
|                                             | 31.12.2010       | Vorjahr      | 31.12.2010     | Vorjahr       |
| Rentendeckungsrückstellung                  | 2.568            | 2.232        | 242            | 236           |
| Einzelschadenrückstellung (Case-Reserve)    | 819              | 656          | 17.647         | 17.348        |
| Rückstellung für Spätschäden (IBNR-Reserve) | 1.090            | 909          | 18.743         | 17.598        |
| <b>Gesamt</b>                               | <b>4.477</b>     | <b>3.797</b> | <b>36.632</b>  | <b>35.182</b> |

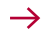

| Mio. € <sup>1</sup>                         | Erstversicherung |              |            |            |                |              |
|---------------------------------------------|------------------|--------------|------------|------------|----------------|--------------|
|                                             | Leben            |              | Gesundheit |            | Schaden/Unfall |              |
|                                             | 31.12.2010       | Vorjahr      | 31.12.2010 | Vorjahr    | 31.12.2010     | Vorjahr      |
| Rentendeckungsrückstellung                  | 1.045            | 994          | 1          | 2          | 346            | 325          |
| Einzelschadenrückstellung (Case-Reserve)    | 290              | 316          | 893        | 904        | 3.526          | 3.400        |
| Rückstellung für Spätschäden (IBNR-Reserve) | 174              | 165          | 44         | 37         | 1.036          | 926          |
| <b>Gesamt</b>                               | <b>1.509</b>     | <b>1.475</b> | <b>938</b> | <b>943</b> | <b>4.908</b>   | <b>4.651</b> |

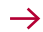

| Mio. € <sup>1</sup>                         | Munich Health |            | Gesamt        |               |
|---------------------------------------------|---------------|------------|---------------|---------------|
|                                             | 31.12.2010    | Vorjahr    | 31.12.2010    | Vorjahr       |
|                                             | 31.12.2010    | Vorjahr    | 31.12.2010    | Vorjahr       |
| Rentendeckungsrückstellung                  | 28            | 28         | 4.230         | 3.817         |
| Einzelschadenrückstellung (Case-Reserve)    | 501           | 386        | 23.676        | 23.010        |
| Rückstellung für Spätschäden (IBNR-Reserve) | 508           | 384        | 21.595        | 20.019        |
| <b>Gesamt</b>                               | <b>1.037</b>  | <b>798</b> | <b>49.501</b> | <b>46.846</b> |

<sup>1</sup> Nach Eliminierung segmentübergreifender konzerninterner Geschäftsvorfälle.

Die Rentendeckungsrückstellung bezieht sich auf regelmäßige Zahlungen für Berufsunfähigkeits- und Invaliditätsfälle und wickelt sich für gewöhnlich langfristig ab. Ein Großteil dieser Rückstellung wird in den Segmenten Rückversicherung Leben und Erstversicherung Leben für zukünftige Rentenzahlungen gebildet, ein kleiner Teil bezieht sich auf Rentenzahlungen für Unfall-, Haftpflicht- und Arbeiterunfallversicherung. Die biometrischen Rechnungsgrundlagen sind aktuariell angemessen gewählt. Rentendeckungsrückstellungen werden als Barwert der erwarteten zukünftigen Zahlungen berechnet. Die verwendeten Diskontzinsen werden unter (37) Risiken aus dem Lebens- und Krankenversicherungsgeschäft und unter (38) Risiken aus dem Schaden- und Unfallversicherungsgeschäft ausgewiesen.

Die Einzelschadenrückstellung ist der Betrag, der erwartungsgemäß benötigt wird, um die Schäden zu regulieren, die am Bilanzstichtag bekannt sind und bereits gemeldet wurden. Der größte Teil dieser Rückstellung wird zum Nominalwert bewertet. Die Rückstellung für Spätschäden wird mithilfe aktueller Methoden auf der Basis historischer Schadenentwicklungsdaten und unter Berücksichtigung absehbarer zukünftiger Trends berechnet.

**Erwartete Auszahlungen aus den Rückstellungen für noch nicht abgewickelte Versicherungsfälle (nur Schaden/Unfall)**

| % <sup>1</sup>                                 | Rückversicherung |         | Erstversicherung |         |
|------------------------------------------------|------------------|---------|------------------|---------|
|                                                | 31.12.2010       | Vorjahr | 31.12.2010       | Vorjahr |
|                                                | 31.12.2010       | Vorjahr | 31.12.2010       | Vorjahr |
| Bis zu einem Jahr                              | 30,2             | 30,1    | 40,4             | 40,4    |
| Mehr als ein Jahr und bis zu fünf Jahren       | 46,5             | 46,6    | 37,3             | 36,7    |
| Mehr als fünf Jahre und bis zu zehn Jahren     | 14,3             | 14,3    | 13,0             | 14,3    |
| Mehr als zehn Jahre und bis zu fünfzehn Jahren | 4,2              | 4,4     | 5,2              | 4,5     |
| Mehr als fünfzehn Jahre                        | 4,8              | 4,6     | 4,1              | 4,1     |

<sup>1</sup> Nach Eliminierung segmentübergreifender konzerninterner Geschäftsvorfälle.



Bei der Ermittlung der erwarteten Auszahlungstermine aus den Rückstellungen für noch nicht abgewinkelte Versicherungsfälle ist zu beachten, dass diese mit einer beträchtlichen Unsicherheit verbunden sein können.

#### Entwicklung der Schadenrückstellung im Segment Schaden/Unfall

|                                             | 2010          |                            |               | Vorjahr       |                            |               |
|---------------------------------------------|---------------|----------------------------|---------------|---------------|----------------------------|---------------|
|                                             | Brutto        | Anteil der Rückversicherer | Netto         | Brutto        | Anteil der Rückversicherer | Netto         |
| Mio. € <sup>1</sup>                         |               |                            |               |               |                            |               |
| Stand 31.12. Vorjahr                        | 39.833        | 2.517                      | 37.316        | 39.188        | 2.838                      | 36.350        |
| Währungsänderungen                          | 1.802         | 53                         | 1.749         | 237           | -87                        | 324           |
| Veränderung Konsolidierungskreis            | -             | -                          | -             | 359           | 137                        | 222           |
| Schadenaufwendungen                         |               |                            |               |               |                            |               |
| Für das Berichtsjahr                        | 14.242        | 782                        | 13.460        | 12.467        | 571                        | 11.896        |
| Für Vorjahre                                | -597          | 94                         | -691          | -538          | -60                        | -478          |
| <b>Gesamt</b>                               | <b>13.645</b> | <b>876</b>                 | <b>12.769</b> | <b>11.929</b> | <b>511</b>                 | <b>11.418</b> |
| Aufzinsung der diskontierten Rückstellungen | 86            | 5                          | 81            | 87            | 7                          | 80            |
| Abzüglich Zahlungen                         |               |                            |               |               |                            |               |
| Für das Berichtsjahr                        | 5.213         | 262                        | 4.951         | 4.378         | 267                        | 4.111         |
| Für Vorjahre                                | 8.613         | 879                        | 7.734         | 7.589         | 622                        | 6.967         |
| <b>Gesamt</b>                               | <b>13.826</b> | <b>1.141</b>               | <b>12.685</b> | <b>11.967</b> | <b>889</b>                 | <b>11.078</b> |
| <b>Stand 31.12. Geschäftsjahr</b>           | <b>41.540</b> | <b>2.310</b>               | <b>39.230</b> | <b>39.833</b> | <b>2.517</b>               | <b>37.316</b> |

<sup>1</sup> Nach Eliminierung segmentübergreifender konzerninterner Geschäftsvorfälle.

Die dargestellten Schadenaufwendungen für das Berichtsjahr umfassen sowohl die für das Berichtsjahr geleisteten Zahlungen als auch Aufwendungen zur Bildung der Rückstellung für die Schadenfälle des Berichtsjahrs. Die Rückstellungen für Schäden aus Vorjahren werden regelmäßig unter Berücksichtigung der Exposure- und Schadeninformationen sowie der Schadenerfahrungen der Vergangenheit als bestmögliche Schätzungen aktualisiert. Die zugehörige Veränderung gegenüber dem Vorjahresstand zeigen wir unter „Schadenaufwendungen für Vorjahre“.

Die meisten Branchen verzeichneten im Berichtsjahr eine vergleichsweise geringe Schadenmeldeaktivität. Davon ausgenommen waren die Latenzschadenkomplexe Asbest und Umwelthaftungen, für die eine Stärkung der Reserven vorgenommen wurde.

**Nettoabwicklungsergebnis im Segment Schaden/Unfall:** Die Werte in den folgenden Abwicklungsdreiecken beziehen sich auf mehr als 99 % des Segments Schaden/Unfall unseres Konzerns.

**Schadenzahlungen für die einzelnen Anfalljahre (pro Kalenderjahr, netto)**

| Mio. €       |        |       |       |       |       |       |       |       |       |       |       | Anfalljahr |
|--------------|--------|-------|-------|-------|-------|-------|-------|-------|-------|-------|-------|------------|
| Kalenderjahr | ≤ 2000 | 2001  | 2002  | 2003  | 2004  | 2005  | 2006  | 2007  | 2008  | 2009  | 2010  | Gesamt     |
| 2000         | 9.380  |       |       |       |       |       |       |       |       |       |       |            |
| 2001         | 5.891  | 3.426 |       |       |       |       |       |       |       |       |       |            |
| 2002         | 3.755  | 3.102 | 3.893 |       |       |       |       |       |       |       |       |            |
| 2003         | 2.242  | 1.586 | 2.906 | 4.066 |       |       |       |       |       |       |       |            |
| 2004         | 2.300  | 873   | 1.245 | 2.173 | 3.848 |       |       |       |       |       |       |            |
| 2005         | 1.427  | 612   | 671   | 906   | 2.890 | 3.503 |       |       |       |       |       |            |
| 2006         | 1.126  | 464   | 372   | 416   | 916   | 3.579 | 3.389 |       |       |       |       |            |
| 2007         | 1.030  | 453   | 258   | 404   | 406   | 1.615 | 2.468 | 4.199 |       |       |       |            |
| 2008         | 1.154  | 364   | 308   | 312   | 414   | 523   | 1.336 | 2.808 | 4.252 |       |       |            |
| 2009         | 933    | 171   | 329   | 231   | 238   | 479   | 542   | 1.224 | 3.185 | 4.406 |       |            |
| 2010         | 608    | 225   | 160   | 248   | 243   | 250   | 423   | 824   | 1.599 | 3.148 | 4.921 | 12.649     |

**Schadenrückstellungen für die einzelnen Anfalljahre zum jeweiligen Stichtag (netto)**

| Mio. €     |        |       |       |       |       |       |       |       |       |       |       | Anfalljahr |
|------------|--------|-------|-------|-------|-------|-------|-------|-------|-------|-------|-------|------------|
| Datum      | ≤ 2000 | 2001  | 2002  | 2003  | 2004  | 2005  | 2006  | 2007  | 2008  | 2009  | 2010  | Gesamt     |
| 31.12.2000 | 19.787 |       |       |       |       |       |       |       |       |       |       |            |
| 31.12.2001 | 15.115 | 7.951 |       |       |       |       |       |       |       |       |       |            |
| 31.12.2002 | 13.275 | 6.028 | 9.447 |       |       |       |       |       |       |       |       |            |
| 31.12.2003 | 11.766 | 5.006 | 5.947 | 8.227 |       |       |       |       |       |       |       |            |
| 31.12.2004 | 10.077 | 4.053 | 4.962 | 5.652 | 7.666 |       |       |       |       |       |       |            |
| 31.12.2005 | 10.758 | 3.654 | 3.057 | 3.995 | 4.823 | 9.001 |       |       |       |       |       |            |
| 31.12.2006 | 10.040 | 3.266 | 2.601 | 3.463 | 3.894 | 5.409 | 7.422 |       |       |       |       |            |
| 31.12.2007 | 9.835  | 2.730 | 2.333 | 2.738 | 3.342 | 3.836 | 4.806 | 7.702 |       |       |       |            |
| 31.12.2008 | 9.011  | 2.427 | 2.027 | 2.267 | 2.538 | 3.030 | 3.349 | 5.155 | 8.652 |       |       |            |
| 31.12.2009 | 8.240  | 2.073 | 1.700 | 1.968 | 1.988 | 2.531 | 2.669 | 3.807 | 5.735 | 8.468 |       |            |
| 31.12.2010 | 8.121  | 1.822 | 1.518 | 1.706 | 1.477 | 1.851 | 1.989 | 2.963 | 4.112 | 5.282 | 8.454 | 39.295     |

**Endschadenstand für die einzelnen Anfalljahre zum jeweiligen Stichtag (netto)**

| Mio. €                        |        |        |        |        |        |        |        |        |        |        |        | Anfalljahr |
|-------------------------------|--------|--------|--------|--------|--------|--------|--------|--------|--------|--------|--------|------------|
| Datum                         | ≤ 2000 | 2001   | 2002   | 2003   | 2004   | 2005   | 2006   | 2007   | 2008   | 2009   | 2010   | Gesamt     |
| 31.12.2000                    | 29.167 |        |        |        |        |        |        |        |        |        |        |            |
| 31.12.2001                    | 30.386 | 11.377 |        |        |        |        |        |        |        |        |        |            |
| 31.12.2002                    | 32.301 | 12.556 | 13.340 |        |        |        |        |        |        |        |        |            |
| 31.12.2003                    | 33.034 | 13.120 | 12.746 | 12.293 |        |        |        |        |        |        |        |            |
| 31.12.2004                    | 33.645 | 13.040 | 13.006 | 11.891 | 11.514 |        |        |        |        |        |        |            |
| 31.12.2005                    | 35.753 | 13.253 | 11.772 | 11.140 | 11.561 | 12.504 |        |        |        |        |        |            |
| 31.12.2006                    | 36.161 | 13.329 | 11.688 | 11.024 | 11.548 | 12.491 | 10.811 |        |        |        |        |            |
| 31.12.2007                    | 36.986 | 13.246 | 11.678 | 10.703 | 11.402 | 12.533 | 10.663 | 11.901 |        |        |        |            |
| 31.12.2008                    | 37.316 | 13.307 | 11.680 | 10.544 | 11.012 | 12.250 | 10.542 | 12.162 | 12.904 |        |        |            |
| 31.12.2009                    | 37.478 | 13.124 | 11.682 | 10.476 | 10.700 | 12.230 | 10.404 | 12.038 | 13.172 | 12.874 |        |            |
| 31.12.2010                    | 37.967 | 13.098 | 11.660 | 10.462 | 10.432 | 11.800 | 10.147 | 12.018 | 13.148 | 12.836 | 13.375 | 156.943    |
| Nettoabwicklungs-<br>ergebnis | -8.800 | -1.721 | 1.680  | 1.831  | 1.082  | 704    | 664    | -117   | -244   | 38     | n/a    | -4.883     |
| Veränderung<br>2009 auf 2010  | -489   | 26     | 22     | 14     | 268    | 430    | 257    | 20     | 24     | 38     | n/a    | 610        |

Der Endschaten eines Anfalljahres enthält alle Zahlungen, die bis zum Bilanzstichtag für dieses Anfalljahr geleistet wurden, sowie die zu diesem Zeitpunkt verbleibende Schadenrückstellung. Bei vollständiger Kenntnis aller bis zum Bilanzstichtag verursachten Schäden würde der Endschatenstand für jedes Anfalljahr unverändert bleiben. In der Praxis zeigt sich aber, dass der auf Schätzung beruhende Endschatenstand Schwankungen ausgesetzt ist, die den wachsenden Kenntnisstand über die Schadenfälle reflektieren. Jedoch können auch Änderungen im Konsolidierungskreis, insbesondere Zugänge, oder die Zusammensetzung der berichtspflichtigen Segmente den Endschatenstand beeinflussen.

Die Abwicklungsdreiecke beruhen auf währungsbereinigten Größen. Zu diesem Zweck wurden alle Werte von der jeweiligen Landeswährung in die Konzernwährung (Euro) umgerechnet, wobei durchgehend die Währungskurse zum Ende des Berichtsjahrs (Kurse vom 31. Dezember 2010) verwendet wurden. Dadurch wird sichergestellt, dass neutrale Nettoabwicklungsergebnisse, das heißt solche, bei denen der erstmals für ein Anfalljahr geschätzte Endschaten mit dem aktuell geschätzten Endschaten übereinstimmt, auch in der Konzernwährung zu keinen währungsbedingten Abwicklungseffekten führen.

## 23 // Übrige versicherungstechnische Rückstellungen

### Zusammensetzung der übrigen versicherungstechnischen Rückstellungen

| Mio. € <sup>1</sup>                                                                     | Rückversicherung |            | Erstversicherung |              | Munich Health |            | Gesamt       |               |
|-----------------------------------------------------------------------------------------|------------------|------------|------------------|--------------|---------------|------------|--------------|---------------|
|                                                                                         | 31.12.2010       | Vorjahr    | 31.12.2010       | Vorjahr      | 31.12.2010    | Vorjahr    | 31.12.2010   | Vorjahr       |
| Rückstellung für Beitragsrückerstattung nach nationalen Vorschriften                    | -                | -          | 5.213            | 4.803        | -             | 77         | 5.213        | 4.880         |
| Rückstellung für latente Beitragsrückerstattung                                         | -                | -          | 3.556            | 4.341        | 1             | 2          | 3.557        | 4.343         |
| davon: aufgrund unrealisierter Gewinne und Verluste aus Kapitalanlagen (erfolgsneutral) | -                | -          | 617              | 1.646        | 1             | 4          | 618          | 1.650         |
| davon: aufgrund sonstiger Umbewertungen (erfolgswirksam)                                | -                | -          | 2.939            | 2.695        | -             | -2         | 2.939        | 2.693         |
| Rückstellung für Gewinnanteile                                                          | 604              | 766        | -                | -            | 36            | 31         | 640          | 797           |
| Sonstige                                                                                | 4                | 13         | 132              | 104          | 9             | 9          | 145          | 126           |
| <b>Gesamt (brutto)</b>                                                                  | <b>608</b>       | <b>779</b> | <b>8.901</b>     | <b>9.248</b> | <b>46</b>     | <b>119</b> | <b>9.555</b> | <b>10.146</b> |

<sup>1</sup> Nach Eliminierung segmentübergreifender konzerninterner Geschäftsvorfälle.

Von der Rückstellung für Beitragsrückerstattung nach nationalen Vorschriften entfallen 63 (61) Millionen € auf die Schaden- und Unfallversicherung. Die Rückstellung für latente Beitragsrückerstattung wird ausschließlich in der Lebens- und Krankenversicherung gebildet.

Der Anteil der Rückversicherer an den übrigen versicherungstechnischen Rückstellungen beträgt 39 (63) Millionen €, davon entfallen – (1) Millionen € auf die in Rückdeckung gegebene Rückstellung für Beitragsrückerstattung nach nationalen Vorschriften.

### Entwicklung der Rückstellung für Beitragsrückerstattung nach nationalen Vorschriften

| Mio. €                            | 2010         | Vorjahr      |
|-----------------------------------|--------------|--------------|
| Stand 31.12. Vorjahr              | 4.880        | 4.442        |
| Veränderung Konsolidierungskreis  | -            | -            |
| Zuführung/Entnahme                | 333          | 438          |
| <b>Stand 31.12. Geschäftsjahr</b> | <b>5.213</b> | <b>4.880</b> |

**Entwicklung der Rückstellung für latente Beitragsrückerstattung**

| Mio. €                                                                                       | 2010         | Vorjahr      |
|----------------------------------------------------------------------------------------------|--------------|--------------|
| Stand 31.12. Vorjahr                                                                         | 4.343        | 4.029        |
| Veränderung Konsolidierungskreis                                                             | -            | -            |
| Veränderung aufgrund unrealisierter Gewinne und Verluste aus Kapitalanlagen (erfolgsneutral) | -1.032       | 903          |
| Veränderung aufgrund sonstiger Umbewertungen (erfolgswirksam)                                | 246          | -589         |
| <b>Stand 31.12. Geschäftsjahr</b>                                                            | <b>3.557</b> | <b>4.343</b> |

Die Veränderung der Rückstellung für latente Beitragsrückerstattung aufgrund unrealisierter Gewinne und Verluste aus Kapitalanlagen reflektiert den auf die erwartete zukünftige Überschussbeteiligung der Versicherungsnehmer entfallenden Anteil an der im vergangenen Jahr eingetretenen Veränderung der Marktwerte. Veränderungen der Rückstellung für latente Beitragsrückerstattung sind nur insoweit in der Konzern-Gewinn- und Verlustrechnung berücksichtigt, als sie aus erfolgswirksam erfassten Bewertungsdifferenzen resultieren. Um den auf die Rückstellung für latente Beitragsrückerstattung entfallenden Anteil der Bewertungsdifferenzen zu bestimmen, werden Quoten zwischen 50 % und 92,5 % nach Steuern verwendet.

**24 // Versicherungstechnische Rückstellungen im Bereich der Lebensversicherung, soweit das Anlagerisiko von den Versicherungsnehmern getragen wird (brutto)**

**Entwicklung der Rückstellung (brutto)**

| Mio. €                                                  | 2010         | Vorjahr      |
|---------------------------------------------------------|--------------|--------------|
| Stand 31.12. Vorjahr                                    | 4.117        | 2.970        |
| Veränderung Konsolidierungskreis und sonstige Einflüsse | 294          | 46           |
| Sparbeiträge                                            | 883          | 945          |
| Unrealisierte Gewinne/Verluste aus Fondsvermögen        | 275          | 461          |
| Entnahme für Kosten und Risiko                          | -44          | -50          |
| Entnahme für Leistungen                                 | -315         | -255         |
| <b>Stand 31.12. Geschäftsjahr</b>                       | <b>5.210</b> | <b>4.117</b> |

Diese Rückstellungen werden retrospektiv bewertet. Die Entnahme für versicherungstechnische Risiken aus den Beiträgen und der Deckungsrückstellung erfolgt auf der Grundlage vorsichtiger Annahmen in Bezug auf die erwartete Sterblichkeit und Invalidisierung. Dabei verwenden wir analog zur Deckungsrückstellung für die nicht fondsgebundene Lebensversicherung Rechnungsgrundlagen auf der Basis bester Schätzwerte mit angemessenen Sicherheitszuschlägen.

Die Rückstellungen werden unmittelbar bedeckt durch die Kapitalanlagen für Rechnung und Risiko von Inhabern von Lebensversicherungspolice. Geringe Differenzbeträge zu diesen Kapitalanlagen ergeben sich aus passivierten, noch nicht verdienten Beitragsanteilen in den Rückstellungen.

## 25 // Andere Rückstellungen

**Zusammensetzung der anderen Rückstellungen**

| Mio. €                                                    | 31.12.2010   | Vorjahr      |
|-----------------------------------------------------------|--------------|--------------|
| Rückstellungen für Pensionen und ähnliche Verpflichtungen | 1.562        | 1.424        |
| Übrige Rückstellungen                                     | 1.896        | 1.782        |
| <b>Gesamt</b>                                             | <b>3.458</b> | <b>3.206</b> |

**Rückstellungen für Pensionen und ähnliche Verpflichtungen** Für die Mitarbeiter von Munich Re wird in der Regel über beitrags- oder leistungsorientierte Pensionszusagen für die Zeit nach der Pensionierung vorgesorgt. Die Art der Pensionszusage richtet sich nach der jeweiligen Versorgungsordnung.

Der Aufwand für beitragsorientierte Pensionszusagen betrug im Berichtsjahr 59 (57) Millionen €.

Bei leistungsorientierten Pensionszusagen hängt die Höhe der zugesagten Leistungen überwiegend von Gehalt und erbrachter Dienstzeit ab. Diese Leistungen können teilweise oder vollständig durch Planvermögen finanziert werden.

**Entwicklung des Barwerts der erdienten Ansprüche aus leistungsorientierten Pensionszusagen**

| Mio. €                                      | 2010         | Vorjahr      |
|---------------------------------------------|--------------|--------------|
| Stand 31.12. Vorjahr                        | 2.618        | 2.319        |
| Währungsänderungen                          | 59           | 6            |
| Veränderung Konsolidierungskreis            | -            | 90           |
| Dienstzeitaufwand                           | 101          | 90           |
| Zinsaufwand                                 | 131          | 123          |
| Versicherungsmathematische Gewinne/Verluste | 131          | 150          |
| Gezahlte Versorgungsleistungen              | -94          | -92          |
| Plankürzungen                               | -2           | -45          |
| Nachzuverrechnender Dienstzeitaufwand       | 5            | -25          |
| Übrige                                      | 3            | 2            |
| <b>Stand 31.12. Geschäftsjahr</b>           | <b>2.952</b> | <b>2.618</b> |

Die leistungsorientierten Pensionszusagen umfassen auch Leistungen für medizinische Versorgung. Der Barwert der erdienten Ansprüche für diese Leistungen beträgt zum Bilanzstichtag 145 (129) Millionen €.

Die Münchener Rück AG etablierte 2003 für die Direktzusagen auf betriebliche Altersversorgung, die sie erteilt hat, ein Contractual Trust Agreement in Form einer doppelseitigen Treuhand. Um die Zusagen auszufinanzieren, ist es notwendig, dass das Treuhandvermögen dem Barwert der Pensionsverpflichtungen entspricht. Dabei ist jedoch dem Unterschied Rechnung zu tragen zwischen dem für die Bewertung der Verpflichtungen relevanten Rechnungszins und den mit den Kapitalanlagen erzielbaren Renditen. Deshalb wurde der Barwert der Pensionsverpflichtungen mit einem Rechnungszins in Höhe der erwarteten Rendite der Kapitalanlagen berechnet. Dadurch erhöhte sich der Barwert der erdienten Pensionsansprüche zum 31. Dezember 2010 um 112 (81) Millionen €.

**Entwicklung des Planvermögens für leistungsorientierte Pensionszusagen**

| Mio. €                                      | 2010         | Vorjahr      |
|---------------------------------------------|--------------|--------------|
| Stand 31.12. Vorjahr                        | 1.229        | 989          |
| Währungsänderungen                          | 43           | 17           |
| Veränderung Konsolidierungskreis            | -            | 41           |
| Erwartete Erträge                           | 66           | 55           |
| Versicherungsmathematische Gewinne/Verluste | 49           | 22           |
| Kapitalübertrag auf Planvermögen            | 85           | 133          |
| Gezahlte Versorgungsleistungen              | -26          | -31          |
| Übrige                                      | 3            | 3            |
| <b>Stand 31.12. Geschäftsjahr</b>           | <b>1.449</b> | <b>1.229</b> |

**Entwicklung der Erstattungsansprüche für leistungsorientierte Pensionszusagen**

| Mio. €                                      | 2010       | Vorjahr    |
|---------------------------------------------|------------|------------|
| Stand 31.12. Vorjahr                        | 117        | 103        |
| Erwartete Erträge                           | 5          | 4          |
| Versicherungsmathematische Gewinne/Verluste | 1          | 3          |
| Kapitalübertrag                             | 8          | 8          |
| Gezahlte Versorgungsleistungen              | -2         | -1         |
| Übrige                                      | -3         | -          |
| <b>Stand 31.12. Geschäftsjahr</b>           | <b>126</b> | <b>117</b> |

Die Erstattungsansprüche ergeben sich aus Rückdeckungsversicherungen, die abgeschlossen wurden, um die Versorgungsverpflichtungen abzusichern.

**Finanzierungsstatus der leistungsorientierten Pensionszusagen**

| Mio. €                                                            | 31.12.2010   | Vorjahr      |
|-------------------------------------------------------------------|--------------|--------------|
| Nicht über Planvermögen finanzierte Pensionszusagen               |              |              |
| Barwert der erdienten Pensionsansprüche                           | 1.432        | 1.307        |
| Nicht berücksichtigter nachzuverrechnender Dienstzeitaufwand      | 13           | 13           |
| Bilanzierte Nettoverbindlichkeit                                  | 1.445        | 1.320        |
| Ganz oder teilweise über Planvermögen finanzierte Pensionszusagen |              |              |
| Barwert der erdienten Pensionsansprüche                           | 1.520        | 1.311        |
| Planvermögen                                                      | -1.449       | -1.229       |
| Sonstige Forderungen                                              | 43           | 19           |
| Übrige                                                            | 3            | 3            |
| Bilanzierte Nettoverbindlichkeit                                  | 117          | 104          |
| <b>Gesamte bilanzierte Nettoverbindlichkeit</b>                   | <b>1.562</b> | <b>1.424</b> |

**Entwicklung der Rückstellung für leistungsorientierte Pensionszusagen**

| Mio. €                                                                  | 2010         | Vorjahr      |
|-------------------------------------------------------------------------|--------------|--------------|
| Stand 31.12. Vorjahr                                                    | 1.424        | 1.335        |
| Währungsänderungen                                                      | 19           | -9           |
| Veränderung Konsolidierungskreis                                        | -            | 56           |
| Aufwand                                                                 | 167          | 98           |
| Gezahlte Versorgungsleistungen                                          | -66          | -60          |
| Kapitalübertrag auf Planvermögen                                        | -85          | -133         |
| Übertrag auf sonstige Forderungen                                       | 22           | 6            |
| Im Eigenkapital verrechnete versicherungsmathematische Gewinne/Verluste | 78           | 125          |
| Übrige                                                                  | 3            | 6            |
| <b>Stand 31.12. Geschäftsjahr</b>                                       | <b>1.562</b> | <b>1.424</b> |



**Zusammensetzung des im Geschäftsjahr gebuchten Aufwands**

| Mio. €                                            | 2010       | Vorjahr   |
|---------------------------------------------------|------------|-----------|
| Dienstzeitaufwand                                 | 101        | 90        |
| Zinsaufwand                                       | 131        | 123       |
| Abzüglich                                         |            |           |
| Erwartete Erträge aus Planvermögen                | -66        | -55       |
| Erwartete Erträge aus Erstattungsansprüchen       | -5         | -4        |
| Tilgung von nachzuverrechnendem Dienstzeitaufwand | 4          | -11       |
| Auswirkungen von Plankürzungen                    | -          | -45       |
| Übrige                                            | 2          | -         |
| <b>Gesamt</b>                                     | <b>167</b> | <b>98</b> |

Die tatsächlichen Erträge aus dem Planvermögen betragen 115 (77) Millionen €, die tatsächlichen Erträge aus Erstattungsansprüchen 6 (7) Millionen €.

Die Aufwendungen sind in der Konzern-Gewinn- und Verlustrechnung im Wesentlichen unter den Aufwendungen für den Versicherungsbetrieb und für Leistungen an Kunden ausgewiesen.

In der Aufstellung der erfassten Erträge und Aufwendungen wurden im Geschäftsjahr unter Berücksichtigung von Währungsschwankungen versicherungsmathematische Verluste von 93 (121) Millionen € ausgewiesen, kumuliert 601 (508) Millionen € versicherungsmathematische Verluste.

**Zusammensetzung des Planvermögens zur Bedeckung der Pensionsverpflichtungen**

| %                                         | 31.12.2010   | Vorjahr      |
|-------------------------------------------|--------------|--------------|
| Nicht festverzinsliche Wertpapiere        | 23,9         | 23,6         |
| Festverzinsliche Wertpapiere und Darlehen | 73,6         | 73,7         |
| Immobilien                                | 0,2          | 0,1          |
| Übrige                                    | 2,3          | 2,6          |
| <b>Gesamt</b>                             | <b>100,0</b> | <b>100,0</b> |

Im beizulegenden Zeitwert des Planvermögens sind keine eigenen Aktien enthalten.

Die Konzernunternehmen legen bei der Bewertung ihrer Pensionsverpflichtungen folgende Annahmen (gewichtete Durchschnittswerte) zugrunde:

**Versicherungsmathematische Annahmen**

| %                                          | 2010 | Vorjahr |
|--------------------------------------------|------|---------|
| Rechnungszins                              | 4,6  | 5,0     |
| Erwartete Rendite des Planvermögens        | 5,2  | 5,5     |
| Erwartete Rendite der Erstattungsansprüche | 4,6  | 4,4     |
| Anwartschafts-/Gehaltstrend                | 3,2  | 3,2     |
| Rententrend                                | 1,6  | 1,6     |
| Kostentrend für medizinische Versorgung    | 4,4  | 5,0     |

Die erwartete Rendite des Planvermögens wird bestimmt auf der Grundlage langfristig erwarteter Kapitalrenditen.

Für das Geschäftsjahr 2011 werden Kapitalüberträge auf das Planvermögen in Höhe von 49 (59) Millionen € erwartet.

Eine Änderung des Kostentrends für medizinische Versorgung um einen Prozentpunkt würde sich folgendermaßen auf den Barwert der erdienten Pensionsansprüche und den Pensionsaufwand auswirken:

**Auswirkung der Änderung des Kostentrends für medizinische Versorgung**

|                                         | Erhöhung<br>um einen<br>Prozent-<br>punkt | Senkung<br>um einen<br>Prozent-<br>punkt |
|-----------------------------------------|-------------------------------------------|------------------------------------------|
| Mio. €                                  |                                           |                                          |
| Barwert der erdienten Pensionsansprüche | 19                                        | -15                                      |
| Pensionsaufwand                         | 2                                         | -1                                       |

**Sonstige Angaben für das laufende Geschäftsjahr und die Vorjahre**

| Mio. €                                                                                   | 2010   | 2009   | 2008  | 2007  | 2006  |
|------------------------------------------------------------------------------------------|--------|--------|-------|-------|-------|
| Barwert der erdienten Pensionsansprüche<br>(ohne Leistungen für medizinische Versorgung) | 2.807  | 2.489  | 2.178 | 2.053 | 2.123 |
| Planvermögen                                                                             | -1.449 | -1.229 | -989  | -965  | -971  |
| Nicht durch Planvermögen gedeckt                                                         | 1.358  | 1.260  | 1.189 | 1.088 | 1.152 |
| Erfahrungsbedingte Anpassungen der Verpflichtung                                         | -3     | -44    | 7     | -24   | 101   |
| Erfahrungsbedingte Anpassungen des Planvermögens                                         | 52     | 20     | -100  | -7    | -     |

**Übrige Rückstellungen**

| Mio. €                                 | Vorjahr      | Zugänge      | Inanspruch-<br>nahme | Auflösung  | Übrige Ver-<br>änderungen | 31.12.2010   |
|----------------------------------------|--------------|--------------|----------------------|------------|---------------------------|--------------|
| Provisionen                            | 182          | 247          | 252                  | 2          | -                         | 175          |
| Vorruhestandsleistungen/Altersteilzeit | 198          | 10           | 25                   | 3          | -15                       | 165          |
| Ausstehende Rechnungen                 | 149          | 146          | 138                  | 19         | -                         | 138          |
| Gratifikationen                        | 115          | 73           | 51                   | 6          | 3                         | 134          |
| Jubiläumsleistungen                    | 67           | 4            | 1                    | 3          | 1                         | 68           |
| Urlaubs- und Zeitguthaben              | 54           | 47           | 40                   | 3          | -                         | 58           |
| Sonstige                               | 1.017        | 795          | 577                  | 108        | 31                        | 1.158        |
| <b>Gesamt</b>                          | <b>1.782</b> | <b>1.322</b> | <b>1.084</b>         | <b>144</b> | <b>20</b>                 | <b>1.896</b> |

Die sonstigen Rückstellungen betreffen eine Vielzahl unterschiedlicher Sachverhalte, darunter 73 (55) Millionen € für mittel- und langfristige Incentive-Pläne, Gehaltsverpflichtungen mit 89 (82) Millionen €, sonstige Innen- und Außendienstvergütung mit 43 (46) Millionen €, Restrukturierung mit 258 (273) Millionen €, Spartenwettbewerbe mit 28 (27) Millionen €, Prozessrisiken mit 29 (27) Millionen € sowie Versicherungssteuer auf Beitragsaußenstände mit 5 (5) Millionen €. Die Rückstellungen für Restrukturierung betreffen im Wesentlichen das Projekt „Kontinuierliche Verbesserung der Wettbewerbsposition“ der ERGO-Gruppe.

Die Rückstellungen für Vorruhestandsleistungen/Altersteilzeit, Jubiläumsleistungen und mittel- sowie langfristige Incentive-Pläne sind überwiegend langfristig, während die Rückstellungen für Provisionen, ausstehende Rechnungen, Gratifikationen, Urlaubs- und Zeitguthaben sowie Sonstiges im Wesentlichen kurzfristig sind.

## 26 // Anleihen

## Zusammensetzung der Anleihen

| Mio. €                                                                                                                     | Kennnummer                                                                   | A.M.<br>Best | Fitch | Moody's | S&P | 31.12.2010 | Vorjahr    |
|----------------------------------------------------------------------------------------------------------------------------|------------------------------------------------------------------------------|--------------|-------|---------|-----|------------|------------|
| Munich Re America Corporation,<br>Princeton, 7,45%,<br>390 Millionen US\$ <sup>1</sup> ,<br>Anleihe 1996/2026 <sup>2</sup> | CUSIP-Nr.: 029163AD4<br>ISIN, Reuters: –<br>Bloomberg:<br>AMER RE CORP MUNRE | bbb+         | A+    | A2      | A–  | 290        | 276        |
| <b>Gesamt</b>                                                                                                              |                                                                              |              |       |         |     | <b>290</b> | <b>276</b> |

<sup>1</sup> Im 1. Quartal 2010 hat die Emittentin Anleihen im Nominalwert von 5 Millionen US\$ und im 3. Quartal 2010 Anleihen im Nominalwert von 2 Millionen US\$ zurückgekauft.

<sup>2</sup> Liquiditätsabflüsse erfolgen bis zur Endfälligkeit jährlich in Höhe der Zinszahlungen von 30 Millionen US\$.

Den beizulegenden Zeitwert der Anleihe der Munich Re America Corporation ermitteln wir anhand anerkannter Bewertungsverfahren unter Verwendung verfügbarer beobachtbarer Marktdaten. Der beizulegende Zeitwert beträgt zum Bilanzstichtag 317 (285) Millionen €.

## 27 // Depotverbindlichkeiten

Die Depotverbindlichkeiten sind einbehaltene Sicherheiten für die an Rückversicherer und Retrozessionäre in Rückdeckung abgegebenen versicherungstechnischen Rückstellungen und lösen keine Zahlungsströme aus. Die Veränderungen der Depotverbindlichkeiten leiten sich im Regelfall aus den Veränderungen der zugehörigen in Rückdeckung gegebenen versicherungstechnischen Rückstellungen ab. Daher haben Depotverbindlichkeiten keine vertraglich fixierte Fälligkeit, ihre Abwicklung erfolgt grundsätzlich in Abhängigkeit von der Abwicklung der korrespondierenden Rückstellungen.

## 28 // Sonstige Verbindlichkeiten

## Zusammensetzung der sonstigen Verbindlichkeiten

| Mio. €                                                                 | 31.12.2010    | Vorjahr       |
|------------------------------------------------------------------------|---------------|---------------|
| Verbindlichkeiten aus dem selbst abgeschlossenen Versicherungsgeschäft | 3.848         | 3.763         |
| Abrechnungsverbindlichkeiten aus dem Rückversicherungsgeschäft         | 3.634         | 2.532         |
| Verbindlichkeiten gegenüber Kreditinstituten                           | 1.843         | 873           |
| Übrige Verbindlichkeiten                                               | 3.778         | 2.946         |
| <b>Gesamt</b>                                                          | <b>13.103</b> | <b>10.114</b> |

Die Verbindlichkeiten aus dem selbst abgeschlossenen Versicherungsgeschäft umfassen überwiegend Verbindlichkeiten gegenüber Versicherungsnehmern, die aus angesammelten Überschussanteilen, Beitragsdepots und Verträgen der Erstversicherer ohne signifikanten Risikotransfer resultieren.

Die übrigen Verbindlichkeiten enthalten Verbindlichkeiten von 150 (157) Millionen €, die sich aus Verträgen der Rückversicherer ohne signifikanten Risikotransfer ergeben, sowie aus derivativen Finanzinstrumenten und derivativen Bestandteilen von Variable Annuities mit einem negativen beizulegenden Zeitwert von 627 (593) Millionen €. In den übrigen Verbindlichkeiten sind zudem Verbindlichkeiten im Rahmen der sozialen Sicherheit in Höhe von 17 (12) Millionen € und Zins- und Mietverbindlichkeiten von 200 (202) Millionen € eingeschlossen.

Die folgende Tabelle gibt Auskunft über die vertraglichen Fälligkeiten unserer sonstigen Verbindlichkeiten. Da Verbindlichkeiten aus dem selbst abgeschlossenen Versicherungsgeschäft untrennbar mit dem zugrunde liegenden Versicherungsgeschäft verbunden sind, analysieren wir das daraus resultierende Liquiditätsrisiko gemeinsam mit den korrespondierenden Versicherungsverträgen. Dies gilt derzeit auch für die im Variable-Annuity-Geschäft enthaltenen Derivate. Vergleiche hierzu (37) Risiken aus dem Lebens- und Krankenversicherungsgeschäft und (38) Risiken aus dem Schaden- und Unfallversicherungsgeschäft. Die hier aufgeführten Derivate sind mit ihren Marktwerten berücksichtigt.

**Restlaufzeiten der sonstigen Verbindlichkeiten auf der Basis von Bilanzwerten**

(ohne Verbindlichkeiten aus dem selbst abgeschlossenen Versicherungsgeschäft und ohne Verbindlichkeiten aus derivativen Bestandteilen von Variable Annuities)

| Mio. €                                     | Bilanzwerte  |              |
|--------------------------------------------|--------------|--------------|
|                                            | 31.12.2010   | Vorjahr      |
| Bis zu einem Jahr                          | 8.120        | 5.132        |
| Mehr als ein Jahr und bis zu zwei Jahren   | 418          | 73           |
| Mehr als zwei Jahre und bis zu drei Jahren | 61           | 237          |
| Mehr als drei Jahre und bis zu vier Jahren | 63           | 40           |
| Mehr als vier Jahre und bis zu fünf Jahren | 51           | 79           |
| Mehr als fünf Jahre und bis zu zehn Jahren | 306          | 297          |
| Mehr als zehn Jahre                        | 236          | 314          |
| <b>Gesamt</b>                              | <b>9.255</b> | <b>6.172</b> |

Der überwiegende Teil der Verbindlichkeiten bis zu einem Jahr betrifft unverzinsliche Verbindlichkeiten, bei denen Bilanzwerte und undiskontierte Zahlungsströme identisch sind. Von den Verbindlichkeiten gegenüber Kreditinstituten sind 1.341 (378) Millionen €, von denen aus Derivaten 250 (273) Millionen € innerhalb eines Jahres fällig. Gegebenenfalls bestehende Abweichungen bei den Verbindlichkeiten mit Restlaufzeiten von mehr als einem Jahr zu den undiskontierten Zahlungsströmen sind für die Darstellung der Bedeutung der finanziellen Verbindlichkeiten für unsere Finanzlage und unseren Unternehmenserfolg unwesentlich.

Die folgende Tabelle zeigt die Zuordnung der zum beizulegenden Zeitwert bewerteten sonstigen Verbindlichkeiten zu einem Level der Bewertungshierarchie.

**Zuordnung der zum beizulegenden Zeitwert bewerteten sonstigen Verbindlichkeiten zu einem Level der Bewertungshierarchie**

|                            |         |         |         | 31.12.2010 |
|----------------------------|---------|---------|---------|------------|
| Mio. €                     | Level 1 | Level 2 | Level 3 | Gesamt     |
| Sonstige Verbindlichkeiten |         |         |         |            |
| Derivate                   | 71      | 537     | 19      | 627        |

**Zuordnung der zum beizulegenden Zeitwert bewerteten sonstigen Verbindlichkeiten zu einem Level der Bewertungshierarchie**

|                            |         |         |         | 31.12.2009 |
|----------------------------|---------|---------|---------|------------|
| Mio. €                     | Level 1 | Level 2 | Level 3 | Gesamt     |
| Sonstige Verbindlichkeiten |         |         |         |            |
| Derivate                   | 52      | 541     | -       | 593        |

Bei den sonstigen Verbindlichkeiten bewerten wir derzeit nur Derivate mit negativem Marktwert zum beizulegenden Zeitwert. Von diesen wurden im Vorjahr lediglich Hedgefonds-Zertifikate dem Level 3 der Bewertungshierarchie zugeordnet. Aufgrund unserer aktuellen Überprüfung der Levelzuordnung werden nun zusätzlich die derivativen Bestandteile von Katastrophenanleihen sowie Wetterderivate dem Level 3 zugeordnet.

Zu Jahresbeginn 2010 hatten wir keine dem Level 3 zugeordneten Kapitalanlagen im Bestand. Die Umgliederungen in den Level 3 betrafen ein Volumen von 9 Millionen €. Durch negative Kursentwicklungen seit der Umgliederung erhöhte sich der Bestand an Derivaten, die dem Level 3 zugeordnet werden, um weitere 12 Millionen €. Gegenläufig wirkten Kurserhöhungen bei den Hedgefonds-Zertifikaten in Höhe von 2 Millionen €. Zum Jahresende 2010 haben wir somit Derivate in Höhe von 19 Millionen € dem Level 3 zugeordnet.

## Erläuterungen zur Konzern-Gewinn- und Verlustrechnung

### 29 // Beiträge

#### Beiträge<sup>1</sup>

| Mio. €                                                     | Rückversicherung |              |                |               |
|------------------------------------------------------------|------------------|--------------|----------------|---------------|
|                                                            | Leben            |              | Schaden/Unfall |               |
|                                                            | 2010             | Vorjahr      | 2010           | Vorjahr       |
| Gesamte Bruttobeiträge                                     | 7.766            | 6.431        | 15.377         | 14.675        |
| Gebuchte Bruttobeiträge                                    | 7.766            | 6.431        | 15.377         | 14.675        |
| Veränderung Beitragsüberträge Brutto                       | -73              | -18          | 418            | 44            |
| <b>Verdiente Beiträge (brutto)</b>                         | <b>7.839</b>     | <b>6.449</b> | <b>14.959</b>  | <b>14.631</b> |
| Gebuchte abgegebene Rückversicherungsbeiträge              | 416              | 321          | 1.100          | 958           |
| Veränderung Beitragsüberträge - Anteil der Rückversicherer | -                | -            | 9              | -22           |
| <b>Verdiente Beiträge - Abgegeben an Rückversicherer</b>   | <b>416</b>       | <b>321</b>   | <b>1.091</b>   | <b>980</b>    |
| <b>Verdiente Beiträge (netto)</b>                          | <b>7.423</b>     | <b>6.128</b> | <b>13.868</b>  | <b>13.651</b> |

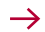

| Mio. €                                                     | Leben        |              | Gesundheit   |              | Erstversicherung Schaden/Unfall |              |
|------------------------------------------------------------|--------------|--------------|--------------|--------------|---------------------------------|--------------|
|                                                            | 2010         | Vorjahr      | 2010         | Vorjahr      | 2010                            | Vorjahr      |
| Gesamte Bruttobeiträge                                     | 8.158        | 7.874        | 5.493        | 5.162        | 5.459                           | 5.084        |
| Gebuchte Bruttobeiträge                                    | 6.484        | 6.294        | 5.493        | 5.162        | 5.459                           | 5.084        |
| Veränderung Beitragsüberträge Brutto                       | -            | 1            | 7            | -1           | 168                             | 75           |
| <b>Verdiente Beiträge (brutto)</b>                         | <b>6.484</b> | <b>6.293</b> | <b>5.486</b> | <b>5.163</b> | <b>5.291</b>                    | <b>5.009</b> |
| Gebuchte abgegebene Rückversicherungsbeiträge              | 139          | 176          | 19           | 13           | 197                             | 170          |
| Veränderung Beitragsüberträge - Anteil der Rückversicherer | -            | -            | -            | -            | 5                               | -13          |
| <b>Verdiente Beiträge - Abgegeben an Rückversicherer</b>   | <b>139</b>   | <b>176</b>   | <b>19</b>    | <b>13</b>    | <b>192</b>                      | <b>183</b>   |
| <b>Verdiente Beiträge (netto)</b>                          | <b>6.345</b> | <b>6.117</b> | <b>5.467</b> | <b>5.150</b> | <b>5.099</b>                    | <b>4.826</b> |

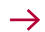

| Mio. €                                                     | Munich Health |              | Gesamt        |               |
|------------------------------------------------------------|---------------|--------------|---------------|---------------|
|                                                            | 2010          | Vorjahr      | 2010          | Vorjahr       |
| Gesamte Bruttobeiträge                                     | 4.962         | 3.777        | 47.215        | 43.003        |
| Gebuchte Bruttobeiträge                                    | 4.962         | 3.777        | 45.541        | 41.423        |
| Veränderung Beitragsüberträge Brutto                       | 66            | 95           | 586           | 196           |
| <b>Verdiente Beiträge (brutto)</b>                         | <b>4.896</b>  | <b>3.682</b> | <b>44.955</b> | <b>41.227</b> |
| Gebuchte abgegebene Rückversicherungsbeiträge              | 26            | 28           | 1.897         | 1.666         |
| Veränderung Beitragsüberträge - Anteil der Rückversicherer | 3             | -            | 17            | -35           |
| <b>Verdiente Beiträge - Abgegeben an Rückversicherer</b>   | <b>23</b>     | <b>28</b>    | <b>1.880</b>  | <b>1.701</b>  |
| <b>Verdiente Beiträge (netto)</b>                          | <b>4.873</b>  | <b>3.654</b> | <b>43.075</b> | <b>39.526</b> |

<sup>1</sup> Nach Eliminierung segmentübergreifender konzerninterner Geschäftsvorfälle.



Die gesamten Bruttobeiträge enthalten neben den gebuchten Bruttobeiträgen insbesondere auch Sparbeiträge aus fondsgebundenen Lebensversicherungen und Kapitalisierungsprodukten. Beiträge aus dem langfristigen Versicherungsgeschäft, insbesondere im Segment Erstversicherung Leben, werden bei Fälligkeit in voller Höhe als verdiente Beiträge berücksichtigt und als Ertrag erfasst. Aus dem fondsgebundenen Geschäft sind unter den gebuchten Bruttobeiträgen nur die Risiko- und Kostenbeiträge erfasst.

Von den gebuchten Beiträgen aus dem kurzfristigen Versicherungsgeschäft werden anteilig Beitragsüberträge abgegrenzt, vergleiche (20) Beitragsüberträge. Die Beitragsüberträge werden entsprechend der Risikoentlastung über die Dauer der Verträge aufgelöst.

### 30 // Technischer Zinsertrag

#### Technischer Zinsertrag<sup>1</sup>

|                               |  | Rückversicherung |            |                |              |
|-------------------------------|--|------------------|------------|----------------|--------------|
|                               |  | Leben            |            | Schaden/Unfall |              |
| Mio. €                        |  | 2010             | Vorjahr    | 2010           | Vorjahr      |
| <b>Technischer Zinsertrag</b> |  | <b>513</b>       | <b>501</b> | <b>1.371</b>   | <b>1.058</b> |

  

| →                             |  | Erstversicherung |              |              |                |
|-------------------------------|--|------------------|--------------|--------------|----------------|
|                               |  | Leben            |              | Gesundheit   | Schaden/Unfall |
| Mio. €                        |  | 2010             | Vorjahr      | 2010         | Vorjahr        |
| <b>Technischer Zinsertrag</b> |  | <b>3.052</b>     | <b>2.874</b> | <b>1.431</b> | <b>150</b>     |

  

| →                             |  | Munich Health |           | Gesamt       |              |
|-------------------------------|--|---------------|-----------|--------------|--------------|
| Mio. €                        |  | 2010          | Vorjahr   | 2010         | Vorjahr      |
| <b>Technischer Zinsertrag</b> |  | <b>46</b>     | <b>39</b> | <b>6.587</b> | <b>5.794</b> |

<sup>1</sup> Nach Eliminierung segmentübergreifender konzerninterner Geschäftsvorfälle.

Der technische Zinsertrag entspricht dem Betrag, den das Versicherungsgeschäft aus der überwiegend risikolosen Anlage der Kapitalanlagen, welche die versicherungstechnischen Rückstellungen bedecken, erwirtschaftet. Je nach Art des betriebenen Versicherungsgeschäfts und den damit verbundenen gesetzlichen Regelungen ist der technische Zinsertrag segmentspezifisch unterschiedlich zu interpretieren:

In den Segmenten Erst- und Rückversicherung Schaden/Unfall tragen wir der Tatsache Rechnung, dass in früheren Jahren gebildete Rückstellungen durch Kapitalanlagen mit höheren Zinsen bedeckt werden, als es dem heutigen Marktzinsniveau entspricht. Daher entspricht der technische Zinsertrag der risikolosen Verzinsung unserer ökonomischen, das heißt für diese Zwecke diskontierten versicherungstechnischen Rückstellungen zum jeweils historischen Zins, unter Berücksichtigung der entsprechenden Laufzeit und Währung. Bilanzielle Rückstellungen oberhalb der ökonomisch benötigten Rückstellungen werden kurzfristig verzinst.

Für das Segment Rückversicherung Leben basiert die Verzinsung der Rückstellungen im Wesentlichen auf vertraglich vereinbarten Zinszuführungen (das entspricht zum Beispiel für Deutschland mindestens der Garantieverzinsung).

Für das Segment Erstversicherung Leben setzt sich der technische Zinsertrag für Leben Deutschland aus den Gewinnen und Verlusten aus der fondsgebundenen Lebensversicherung, der Garantieverzinsung und der anhand des IFRS-Kapitalanlageergebnisses ermittelten Überschussbeteiligung zusammen. Für die Auslandsgesellschaften ent-

spricht der technische Zinsertrag den Gewinnen und Verlusten aus der fondsgebundenen Lebensversicherung und der risikolosen Verzinsung der Deckungsrückstellung mit dem jeweils länderspezifischen Zins.

Im Segment Erstversicherung Gesundheit entspricht der technische Zinsertrag für inländisches Erstversicherungsgeschäft der Zinszuführung zur Alterungsrückstellung (Rechnungszins) sowie der Zuführung zur Rückstellung für Beitragsrückerstattung. Diese beruht auf dem den Rechnungszins überschreitenden Ergebnis aus Kapitalanlagen sowie der Beteiligung der Versicherungsnehmer an den sonstigen nicht versicherungstechnischen Ergebnisbestandteilen.

Im Segment Munich Health beruht der technische Zinsertrag für ausländisches Erstversicherungsgeschäft auf der Verzinsung der sonstigen versicherungstechnischen Rückstellungen mit dem jeweiligen länderspezifischen risikolosen Zinssatz und, soweit vorhanden, auf der Zinszuführung zur Deckungsrückstellung. Bei langfristigen Rückversicherungsverträgen entspricht die Verzinsung den vertraglich vereinbarten Zinszuführungen. Bei kurzfristigem Rückversicherungsgeschäft wird der technische Zinsertrag anhand der risikolosen Verzinsung der versicherungstechnischen Rückstellungen mit dem jeweiligen länderspezifischen Zinssatz berechnet.

### 31 // Leistungen an Kunden

#### Leistungen an Kunden<sup>1</sup>

| Mio. €                                                      | Rückversicherung |              |                |              |
|-------------------------------------------------------------|------------------|--------------|----------------|--------------|
|                                                             | Leben            |              | Schaden/Unfall |              |
|                                                             | 2010             | Vorjahr      | 2010           | Vorjahr      |
| <b>Brutto</b>                                               |                  |              |                |              |
| Zahlungen für Schäden und Versicherungsfälle                | 4.716            | 3.936        | 10.688         | 9.145        |
| Veränderungen der versicherungstechnischen Rückstellungen   |                  |              |                |              |
| Deckungsrückstellung                                        | 724              | 480          | 17             | -23          |
| Rückstellung für noch nicht abgewickelte Versicherungsfälle | 381              | 250          | -328           | 103          |
| Rückstellung für Beitragsrückerstattung                     | -                | -            | 6              | 8            |
| Sonstiges versicherungstechnisches Ergebnis                 | 37               | 40           | 55             | 33           |
| <b>Leistungen an Kunden (brutto)</b>                        | <b>5.858</b>     | <b>4.706</b> | <b>10.438</b>  | <b>9.266</b> |
| <b>Anteil der Rückversicherer</b>                           |                  |              |                |              |
| Zahlungen für Schäden und Versicherungsfälle                | 188              | 119          | 1.056          | 807          |
| Veränderungen der versicherungstechnischen Rückstellungen   |                  |              |                |              |
| Deckungsrückstellung                                        | -69              | -9           | -              | -            |
| Rückstellung für noch nicht abgewickelte Versicherungsfälle | 81               | 13           | -299           | -359         |
| Rückstellung für Beitragsrückerstattung                     | -                | -            | -              | -            |
| Sonstiges versicherungstechnisches Ergebnis                 | -26              | -6           | -7             | -13          |
| <b>Leistungen an Kunden - Anteil der Rückversicherer</b>    | <b>174</b>       | <b>117</b>   | <b>750</b>     | <b>435</b>   |
| <b>Netto</b>                                                |                  |              |                |              |
| Zahlungen für Schäden und Versicherungsfälle                | 4.528            | 3.817        | 9.632          | 8.338        |
| Veränderungen der versicherungstechnischen Rückstellungen   |                  |              |                |              |
| Deckungsrückstellung                                        | 793              | 489          | 17             | -23          |
| Rückstellung für noch nicht abgewickelte Versicherungsfälle | 300              | 237          | -29            | 462          |
| Rückstellung für Beitragsrückerstattung                     | -                | -            | 6              | 8            |
| Sonstiges versicherungstechnisches Ergebnis                 | 63               | 46           | 62             | 46           |
| <b>Leistungen an Kunden (netto)</b>                         | <b>5.684</b>     | <b>4.589</b> | <b>9.688</b>   | <b>8.831</b> |

Fortsetzung auf der nächsten Seite

| →                                                           | Erstversicherung |              |              |              |                |              |
|-------------------------------------------------------------|------------------|--------------|--------------|--------------|----------------|--------------|
|                                                             | Leben            |              | Gesundheit   |              | Schaden/Unfall |              |
| Mio. €                                                      | 2010             | Vorjahr      | 2010         | Vorjahr      | 2010           | Vorjahr      |
| <b>Brutto</b>                                               |                  |              |              |              |                |              |
| Zahlungen für Schäden und Versicherungsfälle                | 6.278            | 6.595        | 3.720        | 3.585        | 3.138          | 2.822        |
| Veränderungen der versicherungstechnischen Rückstellungen   |                  |              |              |              |                |              |
| Deckungsrückstellung                                        | 1.126            | 588          | 1.026        | 1.015        | 47             | 60           |
| Rückstellung für noch nicht abgewickelte Versicherungsfälle | 35               | 166          | -6           | 54           | 233            | 195          |
| Rückstellung für Beitragsrückerstattung                     | 706              | 97           | 1.067        | 612          | 19             | 17           |
| Sonstiges versicherungstechnisches Ergebnis                 | 182              | 184          | -5           | -5           | 30             | 39           |
| <b>Leistungen an Kunden (brutto)</b>                        | <b>8.327</b>     | <b>7.630</b> | <b>5.802</b> | <b>5.261</b> | <b>3.467</b>   | <b>3.133</b> |
| <b>Anteil der Rückversicherer</b>                           |                  |              |              |              |                |              |
| Zahlungen für Schäden und Versicherungsfälle                | 92               | 94           | 7            | 7            | 85             | 82           |
| Veränderungen der versicherungstechnischen Rückstellungen   |                  |              |              |              |                |              |
| Deckungsrückstellung                                        | 65               | 92           | -            | -1           | -              | -            |
| Rückstellung für noch nicht abgewickelte Versicherungsfälle | 3                | 2            | -            | -2           | 39             | -2           |
| Rückstellung für Beitragsrückerstattung                     | 1                | 1            | -            | -            | -              | -2           |
| Sonstiges versicherungstechnisches Ergebnis                 | -73              | -73          | -            | -            | -              | -            |
| <b>Leistungen an Kunden - Anteil der Rückversicherer</b>    | <b>88</b>        | <b>116</b>   | <b>7</b>     | <b>4</b>     | <b>124</b>     | <b>78</b>    |
| <b>Netto</b>                                                |                  |              |              |              |                |              |
| Zahlungen für Schäden und Versicherungsfälle                | 6.186            | 6.501        | 3.713        | 3.578        | 3.053          | 2.740        |
| Veränderungen der versicherungstechnischen Rückstellungen   |                  |              |              |              |                |              |
| Deckungsrückstellung                                        | 1.061            | 496          | 1.026        | 1.016        | 47             | 60           |
| Rückstellung für noch nicht abgewickelte Versicherungsfälle | 32               | 164          | -6           | 56           | 194            | 197          |
| Rückstellung für Beitragsrückerstattung                     | 705              | 96           | 1.067        | 612          | 19             | 19           |
| Sonstiges versicherungstechnisches Ergebnis                 | 255              | 257          | -5           | -5           | 30             | 39           |
| <b>Leistungen an Kunden (netto)</b>                         | <b>8.239</b>     | <b>7.514</b> | <b>5.795</b> | <b>5.257</b> | <b>3.343</b>   | <b>3.055</b> |

| →                                                           | Munich Health |              | Gesamt        |               |
|-------------------------------------------------------------|---------------|--------------|---------------|---------------|
| Mio. €                                                      | 2010          | Vorjahr      | 2010          | Vorjahr       |
| <b>Brutto</b>                                               |               |              |               |               |
| Zahlungen für Schäden und Versicherungsfälle                | 3.512         | 3.015        | 32.052        | 29.098        |
| Veränderungen der versicherungstechnischen Rückstellungen   |               |              |               |               |
| Deckungsrückstellung                                        | 88            | 99           | 3.028         | 2.219         |
| Rückstellung für noch nicht abgewickelte Versicherungsfälle | 258           | 46           | 573           | 814           |
| Rückstellung für Beitragsrückerstattung                     | -6            | 7            | 1.792         | 741           |
| Sonstiges versicherungstechnisches Ergebnis                 | 3             | -            | 302           | 291           |
| <b>Leistungen an Kunden (brutto)</b>                        | <b>3.855</b>  | <b>3.167</b> | <b>37.747</b> | <b>33.163</b> |
| <b>Anteil der Rückversicherer</b>                           |               |              |               |               |
| Zahlungen für Schäden und Versicherungsfälle                | 24            | 23           | 1.452         | 1.132         |
| Veränderungen der versicherungstechnischen Rückstellungen   |               |              |               |               |
| Deckungsrückstellung                                        | -             | -            | -4            | 82            |
| Rückstellung für noch nicht abgewickelte Versicherungsfälle | -3            | -2           | -179          | -350          |
| Rückstellung für Beitragsrückerstattung                     | -             | -            | 1             | -1            |
| Sonstiges versicherungstechnisches Ergebnis                 | -             | -            | -106          | -92           |
| <b>Leistungen an Kunden - Anteil der Rückversicherer</b>    | <b>21</b>     | <b>21</b>    | <b>1.164</b>  | <b>771</b>    |
| <b>Netto</b>                                                |               |              |               |               |
| Zahlungen für Schäden und Versicherungsfälle                | 3.488         | 2.992        | 30.600        | 27.966        |
| Veränderungen der versicherungstechnischen Rückstellungen   |               |              |               |               |
| Deckungsrückstellung                                        | 88            | 99           | 3.032         | 2.137         |
| Rückstellung für noch nicht abgewickelte Versicherungsfälle | 261           | 48           | 752           | 1.164         |
| Rückstellung für Beitragsrückerstattung                     | -6            | 7            | 1.791         | 742           |
| Sonstiges versicherungstechnisches Ergebnis                 | 3             | -            | 408           | 383           |
| <b>Leistungen an Kunden (netto)</b>                         | <b>3.834</b>  | <b>3.146</b> | <b>36.583</b> | <b>32.392</b> |

<sup>1</sup> Nach Eliminierung segmentübergreifender konzerninterner Geschäftsvorfälle.

Die Veränderung der Deckungsrückstellung (netto) enthält 275 (461) Millionen € unrealisierte Gewinne/Verluste aus fondsgebundenen Lebensversicherungen. Die Leistungen an Kunden schließen Aufwendungen für die Überschussbeteiligung an Versicherungsnehmer ein. Davon entfallen 1.308 (1.000) Millionen € auf die Zuführung zur Rückstellung für Beitragsrückerstattung nach nationalen Vorschriften, 240 (-593) Millionen € auf die erfolgswirksame Veränderung der Rückstellung für latente Beitragsrückerstattung sowie 329 (382) Millionen € auf die Direktgutschrift. Das sonstige versicherungstechnische Ergebnis ergibt sich in der Lebenserstversicherung überwiegend aus der Verzinsung des Ansammlungsguthabens von Versicherungsnehmern.

Aufwendungen für eine Gewinnbeteiligung in der Rückversicherung werden nicht unter den Leistungen an Kunden ausgewiesen, sondern unter den Aufwendungen für den Versicherungsbetrieb.

## 32 // Aufwendungen für den Versicherungsbetrieb

### Aufwendungen für den Versicherungsbetrieb<sup>1</sup>

| Mio. €                                                                                                                                       | Rückversicherung |              |                |              |
|----------------------------------------------------------------------------------------------------------------------------------------------|------------------|--------------|----------------|--------------|
|                                                                                                                                              | Leben            |              | Schaden/Unfall |              |
|                                                                                                                                              | 2010             | Vorjahr      | 2010           | Vorjahr      |
| Gezahlte Abschlusskosten, Gewinnanteile und Rückversicherungsprovisionen                                                                     | 2.306            | 1.526        | 3.588          | 3.261        |
| Verwaltungsaufwendungen                                                                                                                      | 297              | 256          | 1.104          | 1.055        |
| Veränderung der aktivierten Abschlusskosten, Veränderung der Provisionsrückstellungen und Abschreibungen auf erworbene Versicherungsbestände | -245             | 126          | -114           | -88          |
| <b>Aufwendungen für den Versicherungsbetrieb (brutto)</b>                                                                                    | <b>2.358</b>     | <b>1.908</b> | <b>4.578</b>   | <b>4.228</b> |
| Anteil der Rückversicherer an gezahlten Abschlusskosten, Gewinnanteilen und Rückversicherungsprovisionen                                     | 193              | 91           | 209            | 220          |
| Anteil der Rückversicherer an der Veränderung der aktivierten Abschlusskosten und der Veränderung der Provisionsrückstellung                 | -35              | 29           | 7              | 3            |
| <b>Aufwendungen für den Versicherungsbetrieb - Anteil der Rückversicherer</b>                                                                | <b>158</b>       | <b>120</b>   | <b>216</b>     | <b>223</b>   |
| <b>Aufwendungen für den Versicherungsbetrieb (netto)</b>                                                                                     | <b>2.200</b>     | <b>1.788</b> | <b>4.362</b>   | <b>4.005</b> |

| Mio. €                                                                                                                                       | Leben        |              | Gesundheit |            | Erstversicherung Schaden/Unfall |              |
|----------------------------------------------------------------------------------------------------------------------------------------------|--------------|--------------|------------|------------|---------------------------------|--------------|
|                                                                                                                                              | 2010         | Vorjahr      | 2010       | Vorjahr    | 2010                            | Vorjahr      |
| Gezahlte Abschlusskosten, Gewinnanteile und Rückversicherungsprovisionen                                                                     | 861          | 822          | 614        | 586        | 1.155                           | 1.041        |
| Verwaltungsaufwendungen                                                                                                                      | 252          | 254          | 159        | 171        | 671                             | 599          |
| Veränderung der aktivierten Abschlusskosten, Veränderung der Provisionsrückstellungen und Abschreibungen auf erworbene Versicherungsbestände | 53           | 309          | -62        | -19        | -102                            | -51          |
| <b>Aufwendungen für den Versicherungsbetrieb (brutto)</b>                                                                                    | <b>1.166</b> | <b>1.385</b> | <b>711</b> | <b>738</b> | <b>1.724</b>                    | <b>1.589</b> |
| Anteil der Rückversicherer an gezahlten Abschlusskosten, Gewinnanteilen und Rückversicherungsprovisionen                                     | 16           | 18           | 4          | 4          | 21                              | 39           |
| Anteil der Rückversicherer an der Veränderung der aktivierten Abschlusskosten und der Veränderung der Provisionsrückstellung                 | 1            | 2            | -          | -          | 11                              | -5           |
| <b>Aufwendungen für den Versicherungsbetrieb - Anteil der Rückversicherer</b>                                                                | <b>17</b>    | <b>20</b>    | <b>4</b>   | <b>4</b>   | <b>32</b>                       | <b>34</b>    |
| <b>Aufwendungen für den Versicherungsbetrieb (netto)</b>                                                                                     | <b>1.149</b> | <b>1.365</b> | <b>707</b> | <b>734</b> | <b>1.692</b>                    | <b>1.555</b> |

Fortsetzung auf der nächsten Seite

| →                                                                                                                                            | Munich Health |            | Gesamt        |               |
|----------------------------------------------------------------------------------------------------------------------------------------------|---------------|------------|---------------|---------------|
| Mio. €                                                                                                                                       | 2010          | Vorjahr    | 2010          | Vorjahr       |
| Gezahlte Abschlusskosten, Gewinnanteile und Rückversicherungsprovisionen                                                                     | 892           | 629        | 9.416         | 7.865         |
| Verwaltungsaufwendungen                                                                                                                      | 139           | 138        | 2.622         | 2.473         |
| Veränderung der aktivierten Abschlusskosten, Veränderung der Provisionsrückstellungen und Abschreibungen auf erworbene Versicherungsbestände | -23           | -29        | -493          | 248           |
| <b>Aufwendungen für den Versicherungsbetrieb (brutto)</b>                                                                                    | <b>1.008</b>  | <b>738</b> | <b>11.545</b> | <b>10.586</b> |
| Anteil der Rückversicherer an gezahlten Abschlusskosten, Gewinnanteilen und Rückversicherungsprovisionen                                     | 4             | 4          | 447           | 376           |
| Anteil der Rückversicherer an der Veränderung der aktivierten Abschlusskosten und der Veränderung der Provisionsrückstellung                 | -             | -          | -16           | 29            |
| <b>Aufwendungen für den Versicherungsbetrieb - Anteil der Rückversicherer</b>                                                                | <b>4</b>      | <b>4</b>   | <b>431</b>    | <b>405</b>    |
| <b>Aufwendungen für den Versicherungsbetrieb (netto)</b>                                                                                     | <b>1.004</b>  | <b>734</b> | <b>11.114</b> | <b>10.181</b> |

<sup>1</sup> Nach Eliminierung segmentübergreifender konzerninterner Geschäftsvorfälle.

### 33 // Ergebnis aus Kapitalanlagen

#### Ergebnis aus Kapitalanlagen nach Anlagearten und Segmenten (vor Umgliederung technischer Zins)<sup>1</sup>

| Mio. €                                                                                    | Leben      |            | Rückversicherung Schaden/Unfall |              |
|-------------------------------------------------------------------------------------------|------------|------------|---------------------------------|--------------|
|                                                                                           | 2010       | Vorjahr    | 2010                            | Vorjahr      |
| <b>Grundstücke und Bauten einschließlich der Bauten auf fremden Grundstücken</b>          | <b>25</b>  | <b>13</b>  | <b>140</b>                      | <b>74</b>    |
| <b>Anteile an verbundenen Unternehmen</b>                                                 | <b>-1</b>  | <b>-1</b>  | <b>-10</b>                      | <b>1</b>     |
| <b>Anteile an assoziierten Unternehmen</b>                                                | <b>7</b>   | <b>-3</b>  | <b>35</b>                       | <b>-11</b>   |
| <b>Darlehen</b>                                                                           | <b>4</b>   | <b>5</b>   | <b>10</b>                       | <b>21</b>    |
| <b>Sonstige Wertpapiere, gehalten bis zur Endfälligkeit</b>                               | <b>-</b>   | <b>-</b>   | <b>-</b>                        | <b>-</b>     |
| <b>Sonstige Wertpapiere, jederzeit veräußerbar</b>                                        |            |            |                                 |              |
| Festverzinslich                                                                           | 599        | 462        | 2.286                           | 2.081        |
| Nicht festverzinslich                                                                     | 51         | 166        | 265                             | 808          |
| <b>Sonstige Wertpapiere, erfolgswirksam zum Zeitwert bewertet</b>                         |            |            |                                 |              |
| Handelsbestände                                                                           |            |            |                                 |              |
| Festverzinslich                                                                           | -          | -          | 16                              | 17           |
| Nicht festverzinslich                                                                     | -          | -          | 1                               | 2            |
| Derivate                                                                                  | 23         | 54         | -44                             | -180         |
| Bestände, als erfolgswirksam zum Zeitwert bewertet klassifiziert                          |            |            |                                 |              |
| Festverzinslich                                                                           | -          | -          | -                               | -            |
| Nicht festverzinslich                                                                     | -          | -          | -                               | -            |
| <b>Depotforderungen und sonstige Kapitalanlagen</b>                                       | <b>146</b> | <b>213</b> | <b>-20</b>                      | <b>-73</b>   |
| <b>Kapitalanlagen für Rechnung und Risiko von Inhabern von Lebensversicherungspolicen</b> | <b>-</b>   | <b>-</b>   | <b>-</b>                        | <b>-</b>     |
| <b>Aufwendungen für die Verwaltung von Kapitalanlagen, sonstige Aufwendungen</b>          | <b>35</b>  | <b>36</b>  | <b>167</b>                      | <b>184</b>   |
| <b>Gesamt</b>                                                                             | <b>819</b> | <b>873</b> | <b>2.512</b>                    | <b>2.556</b> |

| →                                                                                        | Erstversicherung |              |              |              |                |            |
|------------------------------------------------------------------------------------------|------------------|--------------|--------------|--------------|----------------|------------|
|                                                                                          | Leben            |              | Gesundheit   |              | Schaden/Unfall |            |
| Mio. €                                                                                   | 2010             | Vorjahr      | 2010         | Vorjahr      | 2010           | Vorjahr    |
| <b>Grundstücke und Bauten einschließlich der Bauten auf fremden Grundstücken</b>         | <b>98</b>        | <b>99</b>    | <b>39</b>    | <b>36</b>    | <b>30</b>      | <b>26</b>  |
| <b>Anteile an verbundenen Unternehmen</b>                                                | <b>-9</b>        | <b>-12</b>   | <b>-9</b>    | <b>-8</b>    | <b>35</b>      | <b>-7</b>  |
| <b>Anteile an assoziierten Unternehmen</b>                                               | <b>7</b>         | <b>-40</b>   | <b>6</b>     | <b>1</b>     | <b>-4</b>      | <b>-58</b> |
| <b>Darlehen</b>                                                                          | <b>1.381</b>     | <b>1.311</b> | <b>650</b>   | <b>580</b>   | <b>105</b>     | <b>67</b>  |
| <b>Sonstige Wertpapiere, gehalten bis zur Endfälligkeit</b>                              | <b>3</b>         | <b>6</b>     | <b>-</b>     | <b>-</b>     | <b>-</b>       | <b>-</b>   |
| <b>Sonstige Wertpapiere, jederzeit veräußerbar</b>                                       |                  |              |              |              |                |            |
| Festverzinslich                                                                          | 1.681            | 1.788        | 565          | 479          | 275            | 241        |
| Nicht festverzinslich                                                                    | 141              | -110         | 108          | -            | 69             | 2          |
| <b>Sonstige Wertpapiere, erfolgswirksam zum Zeitwert bewertet</b>                        |                  |              |              |              |                |            |
| Handelsbestände                                                                          |                  |              |              |              |                |            |
| Festverzinslich                                                                          | 6                | 26           | -            | -            | -              | -          |
| Nicht festverzinslich                                                                    | -                | -            | -            | -            | -              | -          |
| Derivate                                                                                 | 76               | -271         | -46          | -31          | -3             | 2          |
| Bestände, als erfolgswirksam zum Zeitwert bewertet klassifiziert                         |                  |              |              |              |                |            |
| Festverzinslich                                                                          | 10               | 13           | -            | -            | -              | -          |
| Nicht festverzinslich                                                                    | -4               | -            | -            | -            | -              | -          |
| <b>Depotforderungen und sonstige Kapitalanlagen</b>                                      | <b>-8</b>        | <b>-5</b>    | <b>-7</b>    | <b>7</b>     | <b>-</b>       | <b>5</b>   |
| <b>Kapitalanlagen für Rechnung und Risiko von Inhabern von Lebensversicherungspolice</b> | <b>271</b>       | <b>441</b>   | <b>-</b>     | <b>-</b>     | <b>-</b>       | <b>-</b>   |
| <b>Aufwendungen für die Verwaltung von Kapitalanlagen, sonstige Aufwendungen</b>         | <b>172</b>       | <b>171</b>   | <b>49</b>    | <b>45</b>    | <b>36</b>      | <b>27</b>  |
| <b>Gesamt</b>                                                                            | <b>3.481</b>     | <b>3.075</b> | <b>1.257</b> | <b>1.019</b> | <b>471</b>     | <b>251</b> |

| →                                                                                        | Munich Health |            | Assetmanagement |            | Gesamt       |              |
|------------------------------------------------------------------------------------------|---------------|------------|-----------------|------------|--------------|--------------|
|                                                                                          | 2010          | Vorjahr    | 2010            | Vorjahr    | 2010         | Vorjahr      |
| Mio. €                                                                                   |               |            |                 |            |              |              |
| <b>Grundstücke und Bauten einschließlich der Bauten auf fremden Grundstücken</b>         | <b>3</b>      | <b>1</b>   | <b>4</b>        | <b>4</b>   | <b>339</b>   | <b>253</b>   |
| <b>Anteile an verbundenen Unternehmen</b>                                                | <b>-5</b>     | <b>-</b>   | <b>8</b>        | <b>9</b>   | <b>9</b>     | <b>-18</b>   |
| <b>Anteile an assoziierten Unternehmen</b>                                               | <b>9</b>      | <b>-2</b>  | <b>-10</b>      | <b>-10</b> | <b>50</b>    | <b>-123</b>  |
| <b>Darlehen</b>                                                                          | <b>-</b>      | <b>-</b>   | <b>-</b>        | <b>-</b>   | <b>2.150</b> | <b>1.984</b> |
| <b>Sonstige Wertpapiere, gehalten bis zur Endfälligkeit</b>                              | <b>-</b>      | <b>-</b>   | <b>-</b>        | <b>-</b>   | <b>3</b>     | <b>6</b>     |
| <b>Sonstige Wertpapiere, jederzeit veräußerbar</b>                                       |               |            |                 |            |              |              |
| Festverzinslich                                                                          | 91            | 63         | 2               | 4          | 5.499        | 5.118        |
| Nicht festverzinslich                                                                    | 7             | 41         | -6              | -          | 635          | 907          |
| <b>Sonstige Wertpapiere, erfolgswirksam zum Zeitwert bewertet</b>                        |               |            |                 |            |              |              |
| Handelsbestände                                                                          |               |            |                 |            |              |              |
| Festverzinslich                                                                          | -             | -          | -               | -          | 22           | 43           |
| Nicht festverzinslich                                                                    | -             | -          | -               | -          | 1            | 2            |
| Derivate                                                                                 | 1             | -          | -               | -          | 7            | -426         |
| Bestände, als erfolgswirksam zum Zeitwert bewertet klassifiziert                         |               |            |                 |            |              |              |
| Festverzinslich                                                                          | -             | -          | -               | -          | 10           | 13           |
| Nicht festverzinslich                                                                    | -             | -          | -               | -          | -4           | -            |
| <b>Depotforderungen und sonstige Kapitalanlagen</b>                                      | <b>-</b>      | <b>-</b>   | <b>3</b>        | <b>3</b>   | <b>114</b>   | <b>150</b>   |
| <b>Kapitalanlagen für Rechnung und Risiko von Inhabern von Lebensversicherungspolice</b> | <b>-</b>      | <b>-</b>   | <b>-</b>        | <b>-</b>   | <b>271</b>   | <b>441</b>   |
| <b>Aufwendungen für die Verwaltung von Kapitalanlagen, sonstige Aufwendungen</b>         | <b>5</b>      | <b>3</b>   | <b>-</b>        | <b>1</b>   | <b>464</b>   | <b>467</b>   |
| <b>Gesamt</b>                                                                            | <b>101</b>    | <b>100</b> | <b>1</b>        | <b>9</b>   | <b>8.642</b> | <b>7.883</b> |

<sup>1</sup> Nach Eliminierung segmentübergreifender konzerninterner Geschäftsvorfälle.



Das Ergebnis aus Grundstücken und Bauten enthält Mieterträge von 340 (340) Millionen €. Das Ergebnis aus Anteilen an verbundenen Unternehmen umfasst einen Zahlungseingang von 39 Millionen € aus einer nachgelagerten Kaufpreiskomponente, die im Rahmen des Verkaufs der Nieuwe Hollandse Verzekeringsgroep N.V., Woerden, im Geschäftsjahr 2005 vereinbart wurde und Ende 2009 fällig war. Der Gewinn ist in der Position Erträge aus Kapitalanlagen erfasst. In den Aufwendungen für die Verwaltung von Kapitalanlagen sind Betriebskosten und Aufwendungen für Reparaturen und Instandhaltung von Grundstücken und Bauten von 53 (79) Millionen € enthalten. Zinserträge wurden erzielt aus Darlehen von 2.123 (1.951) Millionen € sowie aus sonstigen Wertpapieren, die bis zur Endfälligkeit gehalten werden, von 3 (6) Millionen €. Sonstige Wertpapiere, die jederzeit veräußerbar sind, erzielten laufende Erträge von 4.686 (4.729) Millionen €.

#### Erträge aus Kapitalanlagen nach Segmenten (vor Umgliederung technischer Zins)<sup>1</sup>

| Mio. €                                    | Rückversicherung |              |                |              |
|-------------------------------------------|------------------|--------------|----------------|--------------|
|                                           | Leben            |              | Schaden/Unfall |              |
|                                           | 2010             | Vorjahr      | 2010           | Vorjahr      |
| Laufende Erträge                          | 788              | 777          | 1.957          | 1.956        |
| davon:                                    |                  |              |                |              |
| Zinserträge                               | 680              | 683          | 1.703          | 1.760        |
| Erträge aus Zuschreibungen                | 470              | 269          | 558            | 682          |
| Gewinne aus dem Abgang von Kapitalanlagen | 481              | 436          | 2.108          | 2.342        |
| Sonstige Erträge                          | -                | -            | -              | -            |
| <b>Gesamt</b>                             | <b>1.739</b>     | <b>1.482</b> | <b>4.623</b>   | <b>4.980</b> |

| →<br>Mio. €                               | Erstversicherung |              |              |              |                |            |
|-------------------------------------------|------------------|--------------|--------------|--------------|----------------|------------|
|                                           | Leben            |              | Gesundheit   |              | Schaden/Unfall |            |
|                                           | 2010             | Vorjahr      | 2010         | Vorjahr      | 2010           | Vorjahr    |
| Laufende Erträge                          | 3.205            | 3.247        | 1.297        | 1.214        | 396            | 350        |
| davon:                                    |                  |              |              |              |                |            |
| Zinserträge                               | 2.999            | 2.970        | 1.185        | 1.085        | 334            | 335        |
| Erträge aus Zuschreibungen                | 660              | 332          | 71           | 31           | 38             | 28         |
| Gewinne aus dem Abgang von Kapitalanlagen | 466              | 933          | 265          | 165          | 382            | 184        |
| Sonstige Erträge                          | 353              | 475          | -1           | -            | 1              | 1          |
| <b>Gesamt</b>                             | <b>4.684</b>     | <b>4.987</b> | <b>1.632</b> | <b>1.410</b> | <b>817</b>     | <b>563</b> |

| →<br>Mio. €                               | Munich Health |            | Assetmanagement |           | Gesamt        |               |
|-------------------------------------------|---------------|------------|-----------------|-----------|---------------|---------------|
|                                           | 2010          | Vorjahr    | 2010            | Vorjahr   | 2010          | Vorjahr       |
|                                           | 2010          | Vorjahr    | 2010            | Vorjahr   | 2010          | Vorjahr       |
| Laufende Erträge                          | 99            | 71         | 7               | 14        | 7.749         | 7.629         |
| davon:                                    |               |            |                 |           |               |               |
| Zinserträge                               | 85            | 68         | 5               | 5         | 6.991         | 6.906         |
| Erträge aus Zuschreibungen                | 20            | 7          | -               | -         | 1.817         | 1.349         |
| Gewinne aus dem Abgang von Kapitalanlagen | 41            | 51         | -               | 6         | 3.743         | 4.117         |
| Sonstige Erträge                          | -             | -          | 4               | 4         | 357           | 480           |
| <b>Gesamt</b>                             | <b>160</b>    | <b>129</b> | <b>11</b>       | <b>24</b> | <b>13.666</b> | <b>13.575</b> |

<sup>1</sup> Nach Eliminierung segmentübergreifender konzerninterner Geschäftsvorfälle.

**Aufwendungen für Kapitalanlagen nach Segmenten (vor Umgliederung technischer Zins)<sup>1</sup>**

| Mio. €                                                              | Rückversicherung |            |                |              |
|---------------------------------------------------------------------|------------------|------------|----------------|--------------|
|                                                                     | Leben            |            | Schaden/Unfall |              |
|                                                                     | 2010             | Vorjahr    | 2010           | Vorjahr      |
| Abschreibungen auf Kapitalanlagen                                   | 539              | 294        | 755            | 809          |
| Verluste aus dem Abgang von Kapitalanlagen                          | 304              | 259        | 1.119          | 1.314        |
| Verwaltungsaufwendungen, Zinsaufwendungen und sonstige Aufwendungen | 77               | 56         | 237            | 301          |
| davon:                                                              |                  |            |                |              |
| Zinsaufwendungen                                                    | 41               | 19         | 69             | 116          |
| <b>Gesamt</b>                                                       | <b>920</b>       | <b>609</b> | <b>2.111</b>   | <b>2.424</b> |

| Mio. €                                                              | Erstversicherung |              |            |            |                |            |
|---------------------------------------------------------------------|------------------|--------------|------------|------------|----------------|------------|
|                                                                     | Leben            |              | Gesundheit |            | Schaden/Unfall |            |
|                                                                     | 2010             | Vorjahr      | 2010       | Vorjahr    | 2010           | Vorjahr    |
| Abschreibungen auf Kapitalanlagen                                   | 658              | 1.052        | 85         | 125        | 153            | 169        |
| Verluste aus dem Abgang von Kapitalanlagen                          | 263              | 606          | 228        | 201        | 147            | 108        |
| Verwaltungsaufwendungen, Zinsaufwendungen und sonstige Aufwendungen | 282              | 254          | 62         | 65         | 46             | 35         |
| davon:                                                              |                  |              |            |            |                |            |
| Zinsaufwendungen                                                    | 24               | 45           | 9          | 15         | 10             | 7          |
| <b>Gesamt</b>                                                       | <b>1.203</b>     | <b>1.912</b> | <b>375</b> | <b>391</b> | <b>346</b>     | <b>312</b> |

| Mio. €                                                              | Munich Health |           | Assetmanagement |           | Gesamt       |              |
|---------------------------------------------------------------------|---------------|-----------|-----------------|-----------|--------------|--------------|
|                                                                     | 2010          | Vorjahr   | 2010            | Vorjahr   | 2010         | Vorjahr      |
|                                                                     | 2010          | Vorjahr   | 2010            | Vorjahr   | 2010         | Vorjahr      |
| Abschreibungen auf Kapitalanlagen                                   | 20            | 9         | 10              | 13        | 2.220        | 2.471        |
| Verluste aus dem Abgang von Kapitalanlagen                          | 33            | 16        | -               | 1         | 2.094        | 2.505        |
| Verwaltungsaufwendungen, Zinsaufwendungen und sonstige Aufwendungen | 6             | 4         | -               | 1         | 710          | 716          |
| davon:                                                              |               |           |                 |           |              |              |
| Zinsaufwendungen                                                    | 2             | 2         | -               | -         | 155          | 204          |
| <b>Gesamt</b>                                                       | <b>59</b>     | <b>29</b> | <b>10</b>       | <b>15</b> | <b>5.024</b> | <b>5.692</b> |

<sup>1</sup> Nach Eliminierung segmentübergreifender konzerninterner Geschäftsvorfälle.

**Abschreibungen auf Kapitalanlagen**

| Mio. €                                                                    | 2010         | Vorjahr      |
|---------------------------------------------------------------------------|--------------|--------------|
| Grundstücke und Bauten einschließlich der Bauten auf fremden Grundstücken | 120          | 127          |
| Anteile an verbundenen Unternehmen                                        | 13           | 16           |
| Anteile an assoziierten Unternehmen                                       | 6            | 87           |
| Darlehen                                                                  | 19           | 74           |
| Sonstige Wertpapiere, jederzeit veräußerbar                               | 283          | 522          |
| Sonstige Wertpapiere, erfolgswirksam zum Zeitwert bewertet                | 1.776        | 1.645        |
| Sonstige Kapitalanlagen                                                   | 3            | -            |
| <b>Gesamt</b>                                                             | <b>2.220</b> | <b>2.471</b> |

## 34 // Sonstiges operatives Ergebnis

Sonstiges operatives Ergebnis<sup>1</sup>

| Mio. €                          | Rückversicherung |         |                |         |
|---------------------------------|------------------|---------|----------------|---------|
|                                 | Leben            |         | Schaden/Unfall |         |
|                                 | 2010             | Vorjahr | 2010           | Vorjahr |
| Sonstige operative Erträge      | 74               | 48      | 295            | 260     |
| Sonstige operative Aufwendungen | 41               | 39      | 201            | 192     |

| Mio. €                          | Erstversicherung |         |            |         |                |         |
|---------------------------------|------------------|---------|------------|---------|----------------|---------|
|                                 | Leben            |         | Gesundheit |         | Schaden/Unfall |         |
|                                 | 2010             | Vorjahr | 2010       | Vorjahr | 2010           | Vorjahr |
| Sonstige operative Erträge      | 107              | 117     | 50         | 55      | 127            | 69      |
| Sonstige operative Aufwendungen | 144              | 200     | 97         | 64      | 236            | 190     |

| Mio. €                          | Munich Health |         | Assetmanagement |         | Gesamt |         |
|---------------------------------|---------------|---------|-----------------|---------|--------|---------|
|                                 | 2010          | Vorjahr | 2010            | Vorjahr | 2010   | Vorjahr |
|                                 | 2010          | Vorjahr | 2010            | Vorjahr | 2010   | Vorjahr |
| Sonstige operative Erträge      | 95            | 80      | 59              | 59      | 807    | 688     |
| Sonstige operative Aufwendungen | 86            | 67      | 44              | 51      | 849    | 803     |

<sup>1</sup> Nach Eliminierung segmentübergreifender konzerninterner Geschäftsvorfälle.

Die sonstigen operativen Erträge enthalten überwiegend Erträge aus erbrachten Dienstleistungen von 470 (361) Millionen €, Zinsen und ähnliche Erträge von 125 (64) Millionen €, Erträge aus der Auflösung/Verminderung von sonstigen Rückstellungen bzw. Wertberichtigungen auf Forderungen von 125 (208) Millionen € sowie Erträge aus eigengenutzten Grundstücken und Bauten, die teilweise auch vermietet sind, von 64 (37) Millionen €.

Die sonstigen operativen Aufwendungen enthalten neben Aufwendungen für erbrachte Dienstleistungen von 323 (292) Millionen € im Wesentlichen Aufwendungen für Zinsen und ähnliche Aufwendungen von 136 (132) Millionen €, sonstige Abschreibungen von 68 (85) Millionen € sowie sonstige Steuern von 34 (36) Millionen €.

Zudem sind Aufwendungen für eigengenutzte Grundstücke und Bauten, die teilweise auch vermietet sind, von 45 (44) Millionen € enthalten.

## 35 // Sonstiges nicht operatives Ergebnis, Abschreibungen auf Geschäfts- oder Firmenwerte und Finanzierungskosten

### Sonstiges nicht operatives Ergebnis, Abschreibungen auf Geschäfts- oder Firmenwerte und Finanzierungskosten<sup>1)</sup>

| Mio. €                                         | Rückversicherung |         |                |         |
|------------------------------------------------|------------------|---------|----------------|---------|
|                                                | Leben            |         | Schaden/Unfall |         |
|                                                | 2010             | Vorjahr | 2010           | Vorjahr |
| Sonstige nicht operative Erträge               | 730              | 377     | 1.519          | 1.251   |
| Sonstige nicht operative Aufwendungen          | 744              | 368     | 1.609          | 1.364   |
| Abschreibungen auf Geschäfts- oder Firmenwerte | -                | -       | -              | 18      |
| Finanzierungskosten                            | 73               | 86      | 179            | 190     |

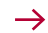

| Mio. €                                         | Erstversicherung |         |            |         |                |         |
|------------------------------------------------|------------------|---------|------------|---------|----------------|---------|
|                                                | Leben            |         | Gesundheit |         | Schaden/Unfall |         |
|                                                | 2010             | Vorjahr | 2010       | Vorjahr | 2010           | Vorjahr |
| Sonstige nicht operative Erträge               | 263              | 746     | 703        | 572     | 268            | 229     |
| Sonstige nicht operative Aufwendungen          | 347              | 836     | 756        | 644     | 455            | 376     |
| Abschreibungen auf Geschäfts- oder Firmenwerte | -                | 47      | -          | -       | 109            | 12      |
| Finanzierungskosten                            | 5                | 5       | -          | -       | 24             | 12      |

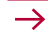

| Mio. €                                         | Munich Health |         | Assetmanagement |         | Gesamt |         |
|------------------------------------------------|---------------|---------|-----------------|---------|--------|---------|
|                                                | 2010          | Vorjahr | 2010            | Vorjahr | 2010   | Vorjahr |
|                                                | 2010          | Vorjahr | 2010            | Vorjahr | 2010   | Vorjahr |
| Sonstige nicht operative Erträge               | 351           | 100     | 5               | 8       | 3.839  | 3.283   |
| Sonstige nicht operative Aufwendungen          | 370           | 147     | 12              | 20      | 4.293  | 3.755   |
| Abschreibungen auf Geschäfts- oder Firmenwerte | -             | 40      | -               | -       | 109    | 117     |
| Finanzierungskosten                            | 10            | 9       | 2               | 2       | 293    | 304     |

<sup>1)</sup> Nach Eliminierung segmentübergreifender konzerninterner Geschäftsvorfälle.

Die sonstigen nicht operativen Erträge und Aufwendungen stehen nicht in Zusammenhang mit dem Abschluss, der Verwaltung oder der Regulierung von Versicherungsverträgen oder der Verwaltung von Kapitalanlagen.

Die sonstigen nicht operativen Erträge enthalten neben Währungskursgewinnen von 3.683 (2.996) Millionen € sonstige nicht versicherungstechnische Erträge von 156 (287) Millionen €.

Die sonstigen nicht operativen Aufwendungen enthalten neben Währungskursverlusten von 3.736 (3.133) Millionen € Abschreibungen auf sonstige immaterielle Vermögenswerte von 135 (142) Millionen € sowie sonstige nicht versicherungstechnische Aufwendungen, zum Beispiel periodenfremde Aufwendungen, Projektkosten und sonstige nicht anders zuordenbare Beträge und Restrukturierungsaufwendungen von 422 (480) Millionen €. Die Restrukturierungsaufwendungen betreffen mit 24 (138) Millionen € das Projekt „Kontinuierliche Verbesserung der Wettbewerbsposition“ der ERGO-Gruppe.

Unter Finanzierungskosten verstehen wir sämtliche Zinsaufwendungen und sonstige Aufwendungen, die unmittelbar mit strategischem Fremdkapital zusammenhängen. Strategischen Charakter haben für uns die Fremdkapitalien, die nicht in einem originären und direkten Zusammenhang mit dem operativen Versicherungsgeschäft stehen.

**Finanzierungskosten nach Finanzierungsinstrumenten**

| Mio. €                                                       | 2010       | Vorjahr    |
|--------------------------------------------------------------|------------|------------|
| Nachrangige Verbindlichkeiten der Münchener Rück AG, München | 249        | 262        |
| Anleihe der Munich Re America Corporation, Princeton         | 23         | 22         |
| Bankverbindlichkeit der Münchener Rück AG, München           | 12         | 11         |
| Nachrangige Verbindlichkeiten der BACAV AG, Wien             | 4          | 4          |
| Übrige                                                       | 5          | 5          |
| <b>Gesamt</b>                                                | <b>293</b> | <b>304</b> |

Informationen zum strategischen Fremdkapital finden Sie im Lagebericht auf Seite 101 sowie unter (19) Nachrangige Verbindlichkeiten und (26) Anleihen.

**36 // Ertragsteuern**

In dieser Position werden die Körperschaft- und Gewerbeertragsteuern der inländischen Konzerngesellschaften (einschließlich Solidaritätszuschlag) sowie die vergleichbaren Ertragsteuern der ausländischen Konzerngesellschaften ausgewiesen. Die Ermittlung der Ertragsteuern nach IAS 12 schließt die Berechnung von Steuerabgrenzungen (latenten Steuern) ein.

**Aufteilung des ausgewiesenen Steueraufwands/-ertrags nach Inland/Ausland**

| Mio. €               | 2010       | Vorjahr      |
|----------------------|------------|--------------|
| Tatsächliche Steuern | 1.065      | 1.177        |
| Deutschland          | 673        | 683          |
| Ausland              | 392        | 494          |
| Latente Steuern      | -373       | 87           |
| Deutschland          | -183       | 169          |
| Ausland              | -190       | -82          |
| <b>Ertragsteuern</b> | <b>692</b> | <b>1.264</b> |

**Aufteilung des ausgewiesenen Steueraufwands/-ertrags nach Hauptbestandteilen**

| Mio. €                                                                           | 2010       | Vorjahr      |
|----------------------------------------------------------------------------------|------------|--------------|
| Tatsächliche Steuern für das Berichtsjahr                                        | 1.138      | 1.093        |
| Periodenfremde tatsächliche Steuern                                              | -73        | 84           |
| Latente Steuern aufgrund der Entstehung bzw. Umkehrung temporärer Unterschiede   | -441       | -195         |
| Latente Steuern aufgrund der Entstehung bzw. des Verbrauchs von Verlustvorträgen | 325        | 382          |
| Wertberichtigungen auf latente Steuern/Verlustvorträge                           | -244       | -86          |
| Auswirkungen von Steuersatzänderungen auf latente Steuern                        | -13        | -14          |
| <b>Ertragsteuern</b>                                                             | <b>692</b> | <b>1.264</b> |

Die tatsächlichen Steuern resultieren aus den steuerlichen Ergebnissen des Geschäftsjahres, auf welche die lokalen Steuersätze der jeweiligen Konzerngesellschaft angewendet werden.

Die folgende Tabelle zeigt die Überleitung der erwarteten zu den tatsächlich ausgewiesenen Ertragsteuern. Der erwartete Steueraufwand errechnet sich aus dem Konzernergebnis vor Ertragsteuern (nach sonstigen Steuern) multipliziert mit dem Konzernsteuersatz. Der anzuwendende Konzernsteuersatz beläuft sich auf 33 %. Darin sind die Körperschaftsteuer inklusive Solidaritätszuschlag sowie die Gewerbesteuer berücksichtigt. Die Bandbreite der Gewerbesteuerhebesätze reicht von 240 % bis 490 %.

**Überleitungsrechnung zum effektiven Steueraufwand**

| Mio. €                                                 | 2010       | Vorjahr      |
|--------------------------------------------------------|------------|--------------|
| Ergebnis vor Ertragsteuern (nach sonstigen Steuern)    | 3.122      | 3.828        |
| Konzernsteuersatz in %                                 | 33,0       | 33,0         |
| Erwartete Ertragsteuern                                | 1.030      | 1.263        |
| Steuerauswirkung von                                   |            |              |
| Steuersatzdifferenzen                                  | -155       | -106         |
| Steuerfreien Erträgen                                  | -84        | -326         |
| Nicht abzugsfähigen Aufwendungen                       | 205        | 251          |
| Wertberichtigungen auf latente Steuern/Verlustvorträge | -244       | -86          |
| Änderungen der Steuersätze und Steuergesetzgebung      | -13        | -14          |
| Steuern Vorjahre                                       | -92        | 249          |
| Gewerbesteuerliche Korrekturen                         | 7          | -2           |
| Sonstigem                                              | 38         | 35           |
| <b>Ausgewiesene Ertragsteuern</b>                      | <b>692</b> | <b>1.264</b> |

Die effektive Steuerbelastung ermittelt sich aus den ausgewiesenen Ertragsteuern im Verhältnis zum Ergebnis vor Ertragsteuern (nach sonstigen Steuern). Im Berichtsjahr ergibt sich eine Steuerbelastung von 22 %, im Vorjahr von 33 %. Die steuerfreien Erträge beziehen sich auf steuerfreie Gewinne aus der Veräußerung von Beteiligungen an Kapitalgesellschaften, auf steuerfreie Dividendenerträge sowie sonstige steuerfreie Einkünfte.

In den nicht abzugsfähigen Aufwendungen sind vor allem Veräußerungsverluste aus Aktien, Abschreibungen auf Geschäfts- oder Firmenwerte sowie Zinsen auf Steuernachzahlungen enthalten.

Der Überleitungseffekt aus Änderungen der Wertberichtigungen auf latente Steuern/Verlustvorträge in Höhe von 244 (86) Millionen € betrifft in Höhe von 246 (100) Millionen € Steuereinsparungen aus der Verrechnung positiven zu versteuernden Einkommens mit steuerlichen Verlustvorträgen, auf die bisher keine aktiven latenten Steuern abgegrenzt wurden. Der Restbetrag betrifft gegenläufige Effekte aus der Änderung von Wertberichtigungen auf aktive latente Steuern.

Die Erträge aus geänderten Steuersätzen und geänderter Steuergesetzgebung betreffen die Länder Kanada, Großbritannien und die Schweiz.

Die Steuern für Vorjahre umfassen im Wesentlichen nachträgliche Steuererstattungen aus dem Übergang zum körperschaftlichen Halbeinkünfteverfahren sowie Erstattungen aufgrund abgeschlossener Rechtsbehelfsverfahren.

## Erläuterungen zu Risiken aus Versicherungsverträgen und Finanzinstrumenten

Munich Re berichtet auf der Grundlage unterschiedlicher Rechtsvorschriften über Risiken, denen sie im Rahmen ihrer Geschäftstätigkeit ausgesetzt ist:

IFRS 4 erfordert Angaben zu Art und Ausmaß von Risiken, die aus Versicherungsverträgen resultieren. Nach IFRS 7 sind analoge Ausführungen zu Risiken erforderlich, die aus Finanzinstrumenten resultieren. Daneben fordert § 315 Abs. 2 Nr. 2 HGB für den Lagebericht ebenfalls Angaben zu den Risikomanagementzielen und -methoden, zu Methoden für Sicherungsgeschäfte sowie zu Risiken in Zusammenhang mit Finanzinstrumenten. Diese Anforderungen werden über den Deutschen Rechnungslegungs Standard (DRS) 15 zur Lageberichterstattung sowie DRS 5 und DRS 5-20 zur Risikoberichterstattung und zur Risikoberichterstattung bei Versicherungsunternehmen noch weiter präzisiert.

Die Berichterstattung über Risiken betrifft nicht nur die Rechnungslegung, sondern auch die Tätigkeit des Integrierten Risikomanagements (IRM) von Munich Re. Um beiden Perspektiven gerecht zu werden, werden Angaben über Risiken sowohl im Risikobericht innerhalb des Lageberichts als auch in den Erläuterungen zu Risiken aus Versicherungsverträgen und Finanzinstrumenten sowie in den jeweiligen Erläuterungen zu Finanzinstrumenten im Anhang gemacht. Dabei fokussieren die Angaben im Risikobericht weitgehend auf eine rein ökonomische Sichtweise. Dieser Bericht erläutert ausführlich die Organisation des Risikomanagements sowie die Risikostrategie von Munich Re, beschreibt kurz die wesentlichen Risiken, denen wir ausgesetzt sind, und beschreibt detailliert das über unser internes Risikomodell berechnete ökonomische Risikokapital sowie die verfügbaren Eigenmittel. Ausführungen zu spezifischen Risikokomplexen runden den Bericht ab.

Der Anhang geht im Detail auf die unterschiedlichen Risiken aus Versicherungsverträgen ein und beschreibt die Unsicherheiten bei deren Bewertung. Gemäß den Vorgaben von IFRS 4 werden außerdem die Auswirkungen bei Änderung von Annahmen bei der Bewertung von Versicherungsverträgen und im Marktumfeld quantifiziert. Für Risiken aus Finanzinstrumenten enthalten die Erläuterungen im Anhang darüber hinaus entsprechend den Vorschriften des IFRS 7 Angaben zur maximalen Kreditrisikoexposition, zu den Restlaufzeiten und zum Rating sowie eine Sensitivitätsanalyse zum Marktpreisrisiko. Diese Angaben sind für die Einschätzung des Risikos ebenfalls von Bedeutung.

Um einen vollständigen Überblick über die Risiken zu erhalten, denen Munich Re ausgesetzt ist, sind sowohl der Risikobericht als auch die Erläuterungen zu Risiken aus Versicherungsverträgen und Finanzinstrumenten im Anhang zu berücksichtigen, ergänzt um weitere Ausführungen in den Erläuterungen zu den Einzelpositionen. Soweit erforderlich, verweisen wir dementsprechend im Risikobericht bzw. in den Erläuterungen zu den jeweiligen Positionen auf die korrespondierenden Ausführungen.



### 37 // Risiken aus dem Lebens- und Krankenversicherungsgeschäft

Die in diesem Abschnitt dargestellten Risiken betreffen Geschäft aus den Segmenten Erstversicherung Leben und Gesundheit, Rückversicherung Leben sowie Munich Health. Im Segment Munich Health sind Erst- und Rückversicherungsverträge enthalten. Da die Erläuterungen auf die Darstellung der jeweiligen Risiken abstellen, wird Munich Health nicht separat aufgeführt, sondern findet sich nach Art des Geschäfts in der Erst- oder Rückversicherung wieder.

Für diese Versicherungsverträge sind primär biometrische Risiken, Zinsrisiken sowie Stornorisiken von Bedeutung. Die Bewertung der versicherungstechnischen Rückstellungen und der aktivierten Abschlusskosten basiert auf biometrischen Rechnungsgrundlagen, das heißt auf Annahmen zur Entwicklung der Sterblichkeit, Invalidisierung und Morbidität sowie auf vertrags- oder tarifspezifischen Diskont- bzw. Rechnungszinsen. Darüber hinaus gehen in die Bewertung Annahmen über die Stornowahrscheinlichkeit und die Überschussbeteiligung ein. Daneben sind sonstige Marktrisiken aus fondsgebundenen Verträgen und Risiken aus eingebetteten Derivaten sowie das Liquiditätsrisiko zu berücksichtigen.

**Biometrische Risiken** Je nach Art der Versicherungsverträge sind unsere Bestände biometrischen Risiken in unterschiedlichem Maß ausgesetzt:

**Biometrische Risiken**

| Produktkategorie                                 | Charakteristika                                                                                                                                                                                                                                                                                                                                          | Wichtige Risiken                                                                                                                                                                                                                                                                                                                                                                                                                                                                                                                                                        |
|--------------------------------------------------|----------------------------------------------------------------------------------------------------------------------------------------------------------------------------------------------------------------------------------------------------------------------------------------------------------------------------------------------------------|-------------------------------------------------------------------------------------------------------------------------------------------------------------------------------------------------------------------------------------------------------------------------------------------------------------------------------------------------------------------------------------------------------------------------------------------------------------------------------------------------------------------------------------------------------------------------|
| <b>Lebenserstversicherung</b>                    |                                                                                                                                                                                                                                                                                                                                                          |                                                                                                                                                                                                                                                                                                                                                                                                                                                                                                                                                                         |
| Lebensversicherung<br>(Todesfallschutz)          | <ul style="list-style-type: none"> <li>- Langfristige Verträge mit einer Todesfallleistung</li> <li>- Überwiegend mit einer Kapitalauszahlung bei Ablauf</li> <li>- Bei Vertragsabschluss fixierte Rechnungsgrundlagen, Beitragsanpassungen nicht möglich</li> </ul>                                                                                     | <p>Sterblichkeit (kurzfristig):</p> <ul style="list-style-type: none"> <li>- Zunahme des Aufwands für Versicherungsfälle durch einmalige außergewöhnliche Umstände (z.B. Pandemien)</li> </ul> <p>Sterblichkeit (langfristig):</p> <ul style="list-style-type: none"> <li>- Zunahme des Aufwands für Versicherungsfälle durch eine nachhaltige Zunahme der Sterblichkeit im Bestand</li> </ul>                                                                                                                                                                          |
| Rentenversicherung                               | <ul style="list-style-type: none"> <li>- Überwiegend lebenslange garantierte Rentenzahlung</li> <li>- Überwiegend bei Vertragsabschluss fixierte Rechnungsgrundlagen</li> </ul>                                                                                                                                                                          | <p>Langlebigkeit:</p> <ul style="list-style-type: none"> <li>- Zunahme des für die Zukunft erwarteten Aufwands für Altersrenten durch eine nachhaltige Zunahme der Lebenserwartung im Bestand</li> </ul>                                                                                                                                                                                                                                                                                                                                                                |
| Berufsunfähigkeits- und Invaliditätsversicherung | <ul style="list-style-type: none"> <li>- Langfristige Verträge mit einer garantierten zeitlich befristeten Rente im Invaliditätsfall</li> <li>- Bei Vertragsabschluss fixierte Rechnungsgrundlagen</li> </ul>                                                                                                                                            | <p>Invalidisierung:</p> <ul style="list-style-type: none"> <li>- Erhöhter Aufwand durch Zunahme der Fälle von Invalidität im Bestand sowie eine Verringerung des durchschnittlichen Alters, in dem ein Versicherungsfall eintritt</li> </ul> <p>Langlebigkeit:</p> <ul style="list-style-type: none"> <li>- Erhöhter Aufwand durch Anstieg der durchschnittlichen Dauer des Rentenempfangs</li> </ul>                                                                                                                                                                   |
| <b>Lebensrückversicherung</b>                    |                                                                                                                                                                                                                                                                                                                                                          |                                                                                                                                                                                                                                                                                                                                                                                                                                                                                                                                                                         |
|                                                  | <ul style="list-style-type: none"> <li>- Großteils langfristige Verträge, durch die überwiegend Todesfall- und Invaliditätsrisiken von Zedenten übernommen werden</li> </ul>                                                                                                                                                                             | <p>Sterblichkeit (kurzfristig):</p> <ul style="list-style-type: none"> <li>- Zunahme des Aufwands für Versicherungsfälle durch einmalige außergewöhnliche Umstände (z.B. Pandemien)</li> </ul> <p>Sterblichkeit (langfristig):</p> <ul style="list-style-type: none"> <li>- Erhöhter Aufwand für Versicherungsfälle durch eine nachhaltige Zunahme der Sterblichkeit in den Beständen der Zedenten</li> </ul> <p>Invalidisierung:</p> <ul style="list-style-type: none"> <li>- Erhöhter Aufwand für Invaliditätsversicherungen in den Beständen der Zedenten</li> </ul> |
| <b>Krankenerstversicherung</b>                   |                                                                                                                                                                                                                                                                                                                                                          |                                                                                                                                                                                                                                                                                                                                                                                                                                                                                                                                                                         |
|                                                  | <ul style="list-style-type: none"> <li>- Überwiegend langfristige Verträge, welche die Übernahme von Kosten für medizinische Behandlung garantieren; zur Deckung erhöhter Kosten im Alter werden Rückstellungen gebildet</li> <li>- Variable Rechnungsgrundlagen, Beitragsanpassung bei nachhaltigen Veränderungen der Kostenstruktur möglich</li> </ul> | <p>Morbidität:</p> <ul style="list-style-type: none"> <li>- Zunahme der Kosten für medizinische Behandlung, die nicht durch Beitragsanpassungen aufgefangen werden können</li> <li>- Zunahme des Aufwands für Versicherungsfälle durch einmalige außergewöhnliche Ereignisse (z.B. Pandemien)</li> </ul>                                                                                                                                                                                                                                                                |
| <b>Krankenrückversicherung</b>                   |                                                                                                                                                                                                                                                                                                                                                          |                                                                                                                                                                                                                                                                                                                                                                                                                                                                                                                                                                         |
|                                                  | <ul style="list-style-type: none"> <li>- Überwiegend kurzfristige Verträge, durch die Morbiditätsrisiken von Zedenten übernommen werden</li> </ul>                                                                                                                                                                                                       | <p>Morbidität (kurzfristig):</p> <ul style="list-style-type: none"> <li>- Zunahme der Kosten für medizinische Behandlung innerhalb der Risikoperiode</li> <li>- Zunahme des Aufwands für Versicherungsfälle durch einmalige außergewöhnliche Ereignisse (z.B. Pandemien)</li> </ul>                                                                                                                                                                                                                                                                                     |

Die Struktur unseres Geschäfts ist in den Erläuterungen unter (21) Deckungsrückstellung quantitativ dargestellt.

Die biometrischen Annahmen, die wir für die Bewertung der Versicherungsverträge in unseren Beständen verwenden, werden auf der Grundlage aktualisierter Bestandsinformationen regelmäßig überprüft. Speziell in der Erstversicherung werden dabei auch die länderspezifischen Überprüfungen durch die Aufsichtsbehörden berücksichtigt.

Zudem ziehen wir Marktstandards heran, um die Angemessenheit der biometrischen Rechnungsgrundlagen sowie der darin enthaltenen Trendannahmen zu überprüfen. Dies kann dazu führen, dass sich die in den Rechnungsgrundlagen jeweils berücksichtigte Sicherheitsmarge verändert. Die Höhe der versicherungstechnischen Rückstellungen und der aktivierten Abschlusskosten beeinflusst dies nicht unmittelbar, solange Sicherheitsmargen vorhanden sind. Die biometrischen Rechnungsgrundlagen, die wir verwenden, sind nach Einschätzung der Verantwortlichen Aktuarien ausreichend. Jedoch gehen wir bei der langfristigen Krankenversicherung auch künftig davon aus, dass sich die medizinischen Behandlungsmöglichkeiten verbessern werden, was höhere Kosten nach sich ziehen kann. Für dieses Geschäft besteht dann in der Regel die Möglichkeit, veränderte Rechnungsgrundlagen durch eine Beitragsanpassung auszugleichen.

Für das kurzfristige Krankenversicherungsgeschäft besteht dagegen vor allem das Risiko, dass einmalige außergewöhnliche Ereignisse kurzfristig zu höheren Aufwendungen führen.

Gesetzgeberische und gerichtliche Eingriffe in die den Vertragsabschlüssen zugrunde liegenden Chancen- und Risikoverteilungen zwischen den Partnern von Versicherungsverträgen können die dargestellten biometrischen Risiken überlagern und gegebenenfalls erhöhen. Dadurch kann eine Anpassung der Rückstellung erforderlich werden.

Die Sensitivität gegenüber Veränderungen der biometrischen Annahmen in der Lebensversicherung sowie bei langfristigen Verträgen in der Krankenversicherung messen wir im Rahmen einer Embedded-Value-Analyse, siehe Seite 247 f.

**Zinsrisiken** Zu unterscheiden sind Zinsänderungs- und Zinsgarantierisiken. Zinsänderungsrisiken resultieren aus der Diskontierung der Deckungsrückstellung sowie von Teilen der Rückstellung für noch nicht abgewinkelte Versicherungsfälle. Entsprechend den bilanziellen Bewertungsvorschriften wird der Diskontzins zu Vertragsbeginn fixiert und in der Regel im Vertragsverlauf nicht mehr angepasst. Insofern hängt die bilanzielle Bewertung dieser versicherungstechnischen Rückstellungen zunächst nicht unmittelbar von der Höhe der Marktzinsen ab.

Ökonomisch resultiert jedoch prinzipiell ein Zinsrisiko aus der Notwendigkeit, mit den Erträgen der Kapitalanlagen, welche die Rückstellungen bedecken, den kalkulatorisch zur Bewertung der Rückstellung verwendeten Diskontzins zu erwirtschaften.

In der Rückversicherung verwenden wir für die Deckungsrückstellung und die Rückstellung für noch nicht abgewinkelte Versicherungsfälle folgende Zinssätze:

**Rückstellungen nach Diskontzinssätzen - Rückversicherung (brutto)**

| Mio. € <sup>1</sup>          | 31.12.2010    | Vorjahr       |
|------------------------------|---------------|---------------|
| Ohne Verzinsung              | 2.519         | 2.297         |
| Zins ≤ 2,5%                  | 180           | -             |
| 2,5% < Zins ≤ 3,5%           | 573           | 645           |
| 3,5% < Zins ≤ 4,5%           | 2.032         | 1.469         |
| 4,5% < Zins ≤ 5,5%           | 3.151         | 2.416         |
| 5,5% < Zins ≤ 6,5%           | 1.458         | 1.370         |
| 6,5% < Zins ≤ 7,5%           | 426           | 352           |
| Zins > 7,5%                  | 120           | 108           |
| Mit Depotforderungen bedeckt | 5.121         | 5.216         |
| <b>Gesamt</b>                | <b>15.580</b> | <b>13.873</b> |

<sup>1</sup> Nach Eliminierung segmentübergreifender konzerninterner Geschäftsvorfälle.

Bedecken Depotforderungen die Rückstellungen, ist die Verzinsung unmittelbar durch einen Zufluss von Kapitalerträgen sichergestellt, den der Zedent in der Regel garantiert. Folglich besteht für die Rückstellungen, für die vom Zedenten mindestens der Diskontzinssatz garantiert wird, kein Zinsrisiko. Für Depotforderungen in Höhe von 1.146 Millionen € gibt der Zedent keine Zinsgarantie. Deshalb wird für den verbleibenden Bestand aller Rückstellungen, deren Verzinsung nicht durch den Zedenten garantiert ist, mit dem Angemessenheitstest nach IFRS 4 unter anderem sichergestellt, dass die erwarteten Kapitalerträge aus den Kapitalanlagen, die den versicherungstechnischen Rückstellungen gegenüberstehen, ausreichen, um insgesamt die zukünftigen Verpflichtungen erfüllen zu können.

In der Lebenserstversicherung wird in der Regel über die gesamte Laufzeit eine implizite oder explizite Zinsgarantie auf der Basis eines zum Zeitpunkt des Vertragsabschlusses fixierten Zinssatzes gewährt. Der zur Berechnung der Deckungsrückstellung verwendete Diskontzins ist für den überwiegenden Teil der Verträge in unseren Beständen identisch mit diesem Zinssatz. Aus dem Kapitalanlageergebnis ist – eventuell mithilfe des versicherungstechnischen Ergebnisses – eine entsprechende Mindestverzinsung für die vertraglich garantierten Leistungen langfristig zu erwirtschaften. In der Krankenerstversicherung wird ebenfalls ein kalkulatorischer Diskontzins verwendet, um die Deckungsrückstellung zu bestimmen; dieser kann aber für langfristiges Geschäft grundsätzlich bei einer Beitragsanpassung verändert werden. Für das kurzfristige Geschäft besteht kein unmittelbares Zinsrisiko.

Die für den Bestand relevanten Diskontzinssätze für die Deckungsrückstellung und die Rückstellung für noch nicht abgewinkelte Versicherungsfälle stellen sich wie folgt dar:

#### Rückstellungen nach Diskontzinssätzen - Erstversicherung (brutto)

| Mio. € <sup>1</sup> | Leben<br>31.12.2010 | Gesundheit<br>31.12.2010 | Gesamt<br>31.12.2010 | Gesamt<br>Vorjahr |
|---------------------|---------------------|--------------------------|----------------------|-------------------|
| Ohne Verzinsung     | 4.633               | 1.513                    | 6.146                | 6.013             |
| Zins ≤ 2,5%         | 6.122               | 50                       | 6.172                | 4.713             |
| 2,5% < Zins ≤ 3,0%  | 18.713              | 23                       | 18.736               | 18.938            |
| 3,0% < Zins ≤ 3,5%  | 26.560              | 1.160                    | 27.720               | 27.760            |
| 3,5% < Zins ≤ 4,0%  | 14.982              | 1.082                    | 16.064               | 15.738            |
| 4,0% < Zins ≤ 4,5%  | 32                  | 2.756                    | 2.788                | 2.503             |
| 4,5% < Zins ≤ 5,0%  | 2                   | 18.306                   | 18.308               | 17.435            |
| Zins > 5,0%         | 20                  | 116                      | 136                  | 244               |
| <b>Gesamt</b>       | <b>71.064</b>       | <b>25.006</b>            | <b>96.070</b>        | <b>93.344</b>     |

<sup>1</sup> Nach Eliminierung segmentübergreifender konzerninterner Geschäftsvorfälle.

In der deutschen Krankenerstversicherung wird darüber hinaus für die Beitragszuschlagsrückstellung und für die Rückstellung für Beitragsermäßigung im Alter in Höhe von insgesamt 3.086 (2.830) Millionen €, die Teil der Rückstellung für Beitragsrückerstattung sind, ein kalkulatorischer Diskontzins von 3,5 (3,5)% angewendet, der jedoch prinzipiell bei einer Beitragsanpassung verändert werden kann.

Den Rückstellungen, die nicht durch Depotforderungen bedeckt sind, stehen in der Rück- und Erstversicherung bedeckende Kapitalanlagen gegenüber. Das Hauptrisiko ergibt sich beim Auseinanderfallen der Laufzeiten dieser Kapitalanlagen und denen der Verpflichtungen („Durations-Mismatch“) daraus, dass bei deutlich sinkenden Zinsen über die verbleibende Abwicklungsdauer der Verpflichtungen die Wiederanlageerträge hinter den Diskontzinssätzen zurückbleiben und sich daraus weitere Aufwendungen ergeben. Ein vollkommenes Laufzeiten-Matching der Verpflichtungen

durch festverzinsliche Kapitalanlagen gleicher Laufzeiten wäre indes nicht sinnvoll, weil bei deutlich steigenden Zinsen die Versicherungsnehmer verstärkt ihre Storno-rechte ausüben könnten und sich ein Liquiditätsbedarf für vorzeitige Auszahlungen ergeben würde.

Die Sensitivität gegenüber dem Zinsrisiko messen wir im Rahmen einer Embedded-Value-Analyse, siehe Seite 247 f.

**Sonstige Marktrisiken und eingebettete Derivate** In der Rückversicherung sind sonstige Marktrisiken durch eine geeignete Vertragsgestaltung im Allgemeinen ausgeschlossen. In einigen Rückversicherungsverträgen sind derivative Bestandteile von Variable Annuities enthalten, die getrennt bewertet und deren Wertveränderungen im Kapitalanlageergebnis erfasst werden. Die Bewertung dieser eingebetteten Derivate ist aktienkurs- und zinssensitiv, wobei diese Sensitivitäten dadurch nahezu vollständig kompensiert werden, dass diesen Derivaten zum Großteil direkt Finanzderivate zu Sicherungszwecken gegenüberstehen.

In der Erstversicherung sind neben der Zinsgarantie, die wir bei der Darstellung des Zinsrisikos analysieren, insbesondere Risiken aus der fondsgebundenen Lebensversicherung sowie das Kapitalwahlrecht bei der aufgeschobenen Rentenversicherung zu berücksichtigen. Andere eingebettete Derivate sind wirtschaftlich unwesentlich.

Für die fondsgebundenen Versicherungsverträge in unseren Beständen werden die Kapitalanlagen für Rechnung und Risiko der Versicherungsnehmer gehalten. Somit ergibt sich hieraus kein unmittelbares Marktrisiko. Eine entsprechende Tarifgestaltung stellt sicher, dass die für eine garantierte Mindestleistung im Todesfall erforderlichen Beitragsanteile jeweils bedarfsgerecht entnommen werden, orientiert am aktuellen Fondsvermögen.

Das Kapitalwahlrecht bei der aufgeschobenen Rentenversicherung verschafft dem Versicherungsnehmer die Option, sich die Rente zu einem festgelegten Zeitpunkt durch eine Einmalzahlung abfinden zu lassen. Hierbei ergibt sich ein potenzielles Risiko, wenn bei einem Zinsniveau deutlich oberhalb des für die Rentenkalkulation verwendeten Diskontzinssatzes unerwartet viele Versicherungsnehmer ihr Wahlrecht ausüben. Es besteht jedoch keine unmittelbare Zins- oder Marktsensitivität, da die Ausübung des Wahlrechts aufgrund der vorhandenen Versicherungskomponente durch individuelle Faktoren beim Versicherungsnehmer entscheidend beeinflusst wird. Beim Angemessenheitstest der versicherungstechnischen Rückstellungen, der nach IFRS 4 vorgeschrieben ist, wird diese Option ausdrücklich berücksichtigt.

**Stornorisiken** In der Rückversicherung ergibt sich ein Stornorisiko primär aus der mittelbaren Übernahme von Stornorisiken von den Zedenten. Durch eine geeignete Vertragsgestaltung werden in der Regel sowohl dieses Risiko als auch das wirtschaftliche Risiko einer außerplanmäßigen Kündigung von Rückversicherungsverträgen weitgehend ausgeschlossen.

In der Lebenserstversicherung ist bei Verträgen mit Rückkaufrecht die bilanzierte versicherungstechnische Rückstellung grundsätzlich mindestens so hoch wie die zugehörigen Rückkaufswerte. Die Fortschreibung der aktivierten Abschlusskosten in der Lebenserst- und -rückversicherung erfolgt unter Beachtung erwarteter Rückkäufe. Das Recht des Versicherungsnehmers auf eine beitragsfreie Fortführung des Vertrags bei angepassten garantierten Leistungen, das bei einigen Verträgen besteht, entspricht einem partiellen Storno und wird kalkulatorisch analog behandelt. In Abhängigkeit von den rechtlichen Rahmenbedingungen werden erwartete Übertragungswerte bei der Kalkulation der Rückstellungen in der Krankenerstversicherung berücksichtigt. Die hier jeweils zugrunde gelegten Annahmen werden regelmäßig überprüft.

Die Sensitivität gegenüber einer Veränderung der Stornowahrscheinlichkeit in der Lebensversicherung sowie bei langfristigen Verträgen in der Krankenversicherung messen wir im Rahmen einer Embedded-Value-Analyse, siehe Seite 247 f.

**Liquiditätsrisiken** Für Munich Re könnte ein Liquiditätsrisiko bestehen, wenn der Zahlungsmittelabfluss durch Zahlungen für Versicherungsfälle und die mit dem Geschäft in Zusammenhang stehenden Kosten den Zahlungsmittelzufluss aus Beiträgen sowie aus Kapitalanlagen übersteigen würde. Für unser größtenteils langfristiges Geschäft analysieren wir daher den zukünftig erwarteten Saldo aus Zahlungszuflüssen durch Beitragszahlungen und Zahlungsabflüssen durch die Auszahlung von Versicherungsleistungen und Kosten.

Für das Geschäft am Bilanzstichtag ergeben sich dabei die in der Tabelle dargestellten zukünftig erwarteten versicherungstechnischen Zahlungssalden (einschließlich Variable Annuities) nach Laufzeitbändern. Da nur versicherungstechnische Zahlungsströme betrachtet werden, gehen Rückflüsse aus Kapitalanlagen, das heißt Kapitalerträge und frei werdende Investments, nicht in die Quantifizierungen ein. Unter Berücksichtigung der Rückflüsse aus Kapitalanlagen, deren Zahlungsströme durch unser Asset-Liability-Management weitgehend mit denjenigen der Verpflichtungen abgestimmt sind, entstehen in den zukünftigen Erwartungen durchweg positive Positionen, sodass das Liquiditätsrisiko dieser Versicherungsverträge entsprechend minimiert ist.

**Erwarteter zukünftiger versicherungstechnischer Zahlungsstrom (brutto)<sup>1,2</sup>**

| Mio. €                                        | 31.12.2010 | Vorjahr  |
|-----------------------------------------------|------------|----------|
| Bis zu einem Jahr                             | -2.342     | -2.178   |
| Mehr als ein Jahr und bis zu fünf Jahren      | -9.061     | -10.715  |
| Mehr als fünf Jahre und bis zu zehn Jahren    | -17.222    | -20.202  |
| Mehr als zehn Jahre und bis zu zwanzig Jahren | -36.543    | -39.175  |
| Mehr als zwanzig Jahre                        | -141.399   | -127.571 |

<sup>1</sup> Beiträge abzüglich zum Bilanzstichtag garantierter Leistungen und Kosten (ohne Berücksichtigung fondsgebundener Produkte).

<sup>2</sup> Nach Eliminierung segmentübergreifender konzerninterner Geschäftsvorfälle.

Bei diesen Schätzwerten ist zu beachten, dass diese in die Zukunft gerichteten Angaben mit einer beträchtlichen Unsicherheit verbunden sein können.

Weitere Angaben zum Liquiditätsrisiko siehe Risikobericht, Seite 124 f.

**Maßnahmen zur Risikominderung** In der Rückversicherung steuert eine risikoadäquate Zeichnungspolitik die Übernahme biometrischer Risiken. Dabei erfolgt eine Risikobegrenzung durch geeignete Vertragsgestaltungen, speziell durch eine Limitierung der Deckung bei nicht proportionalem Geschäft. Insbesondere ist die Übernahme von Langlebigkeitsrisiken aus in Rückdeckung genommenen Beständen strikt begrenzt. Die Übernahme von Zins- und sonstigen Marktrisiken wird häufig durch eine Deponierung der Rückstellungen beim Zedenten mit garantierter Verzinsung des Depots ausgeschlossen. Darüber hinaus werden diese Risiken in Einzelfällen durch geeignete Kapitalmarktinstrumente abgesichert.

In der Erstversicherung sorgt die Produktgestaltung für eine substanzielle Risikominderung. Überwiegend werden vorsichtige Rechnungsgrundlagen zur Festlegung der garantierten Leistungen verwendet; die Versicherungsnehmer erhalten über die garantierten Leistungen hinaus eine erfolgsabhängige Überschussbeteiligung. Mehr als 99 (99) % der unter (21) Deckungsrückstellung ausgewiesenen Beträge entfallen auf derartige Verträge. Aufgrund der entsprechenden Margen in den Rechnungsgrundlagen ist es auch

unter moderat veränderten Annahmen möglich, die ausgesprochenen Garantien zu erbringen, ohne die Rückstellungen anpassen zu müssen. Bei adversen Entwicklungen tragen Teile der Rückstellung für Beitragsrückerstattung nach nationalen Vorschriften, Teile der Rückstellung für latente Beitragsrückerstattung aufgrund sonstiger Umbewertungen sowie unrealisierte Gewinne und Verluste aus Kapitalanlagen, aufgrund derer wir Rückstellungen für latente Beitragsrückerstattung gebildet haben, erheblich zum Risikoausgleich bei. Siehe (23) Übrige versicherungstechnische Rückstellungen.

In der Krankenerstversicherung besteht zusätzlich bei den meisten langfristigen Verträgen die Möglichkeit, die Beiträge anzupassen. Sofern abzusehen ist, dass die Annahmen der Kalkulation nachhaltig nicht ausreichen, den Aufwand für Versicherungsfälle zu decken oder die tatsächlichen Sterblichkeiten wesentlich von den kalkulierten abweichen, können die Beiträge entsprechend angehoben werden. Dadurch sind die wirtschaftlichen und bilanziellen Auswirkungen sowohl von Kostensteigerungen im Gesundheitswesen als auch von nachhaltigen Veränderungen der Morbidität eng begrenzt.

Zu unseren Risikomanagementprozessen siehe auch Risikobericht, Seite 116–120 sowie Seite 122.

**Auswirkungen auf das Eigenkapital sowie die Konzern-Gewinn- und Verlustrechnung** Mit einem Angemessenheitstest nach IFRS 4 werden die versicherungstechnischen Rückstellungen und die aktivierten Abschlusskosten regelmäßig auf ihre Angemessenheit überprüft. Wenn sich dabei herausstellt, dass die mit den bisherigen Annahmen über die biometrischen Rechnungsgrundlagen, über die Diskontierung der Rückstellungen und über das Storno kalkulierten Beträge insgesamt nicht mehr ausreichend sind, erfolgt eine Anpassung. Dabei sind insbesondere in der Erstversicherung die Möglichkeiten zur Überschussanpassung zu berücksichtigen.

Sofern eine Anpassung erforderlich ist, erfassen wir einen Fehlbetrag erfolgswirksam in der Konzern-Gewinn- und Verlustrechnung.

**Quantitative Auswirkungen von Veränderungen der Annahmen auf das langfristige Versicherungsgeschäft** Munich Re misst die Sensitivität ihres langfristigen Lebens- und Krankenversicherungsgeschäfts mithilfe einer ökonomischen Bewertung, basierend auf den Market Consistent Embedded Value Principles and Guidance des CFO-Forums, siehe Seite 55 f. Dabei werden in der Rückversicherung 100 (100) % und in der Erstversicherung mehr als 94 (94) % des langfristigen Versicherungsgeschäfts abgedeckt.

Die hier angegebenen Sensitivitäten messen die Auswirkung von Veränderungen der Kalkulationsgrundlagen und der Kapitalmarktparameter auf den berechneten ökonomischen Wert unseres Geschäfts. Dabei sind Maßnahmen zur Risikominderung sowie steuerliche Effekte berücksichtigt.

Munich Re hält unverändert an den strengen Vorschriften einer marktkonsistenten Bewertung zum Jahresende fest. Das niedrige Zinsniveau und die hohe Volatilität zum Stichtag 31. Dezember 2010 führen vor allem in der Lebenserstversicherung aufgrund der langlaufenden Zinsgarantien zu Verwerfungen.



## Embedded-Value-Sensitivitäten

| Mio. €                                                                                                        | Rückversicherung |              | Erstversicherung |              |
|---------------------------------------------------------------------------------------------------------------|------------------|--------------|------------------|--------------|
|                                                                                                               | 2010             | Vorjahr      | 2010             | Vorjahr      |
| <b>Embedded Value am Bilanzstichtag</b>                                                                       | <b>8.284</b>     | <b>6.773</b> | <b>4.108</b>     | <b>5.126</b> |
| Veränderung bei einem nachhaltigen Zinsanstieg um 100 BP                                                      | -294             | -267         | 1.099            | 585          |
| Veränderung bei einem nachhaltigen Zinsrückgang um 100 BP                                                     | 260              | 265          | -1.632           | -1.173       |
| Veränderung bei einem Rückgang des Werts von Aktien und Grundbesitz um 10%                                    | -                | -3           | -143             | -94          |
| Veränderung bei einem Anstieg der Sterblichkeit um 5% bei Verträgen mit überwiegendem Sterblichkeitsrisiko    | -1.479           | -1.137       | -29              | -23          |
| Veränderung bei einem Rückgang der Sterblichkeit um 5% bei Verträgen mit überwiegendem Langleblichkeitsrisiko | -34              | -10          | -58              | -45          |
| Veränderung bei einem Anstieg der Morbidität um 5%                                                            | -281             | -183         | -28              | -25          |
| Veränderung bei einem Anstieg der Stornowahrscheinlichkeit um 10%                                             | -10              | 25           | 14               | -27          |

## 38 // Risiken aus dem Schaden- und Unfallversicherungsgeschäft

Die in diesem Abschnitt dargestellten Risiken betreffen Geschäft aus den Segmenten Erst- und Rückversicherung Schaden/Unfall.

Für diese Versicherungsverträge sind insbesondere das Schätzrisiko in Bezug auf die Höhe des erwarteten Schadenbedarfs für zukünftige Schäden aus laufenden Versicherungsverträgen (Beitragsrisiko) sowie für bereits eingetretene Versicherungsfälle (Reserverisiko) von Bedeutung. Um den Schadenbedarf zu schätzen, werden auch Kostensteigerungen berücksichtigt. Für Teile des Bestands besteht ein Zinsrisiko. Darüber hinaus ist das Liquiditätsrisiko zu berücksichtigen.

Grundlage für die Bewertung des übernommenen Risikos ist eine Einschätzung der Schadenhäufigkeit, die für einen Vertrag oder ein Portfolio von Verträgen erwartet wird. Daneben ist die Schätzung der Schadenhöhe erforderlich, aus der sich eine mathematische Verteilung der erwarteten Schäden ergibt. Als Ergebnis liefern diese beiden Schritte eine Schätzung für den erwarteten Gesamtschaden in einem Portfolio. Als drittes Element sind die erwarteten Zahlungsströme für die Abwicklung eingetretener Schäden zu schätzen, die sich häufig über mehrere Jahre erstreckt.

Da der Anteil des in Rückdeckung gegebenen Geschäfts sehr gering ist, folgt die nachfolgende Analyse der versicherungstechnischen Risiken überwiegend einer Bruttobetrachtung.

**Beitragsrisiken** Je nach Versicherungszweig sind unsere Bestände in der Rück- und Erstversicherung in unterschiedlichem Maß Schätzrisiken ausgesetzt. Aus den Schadenquoten bzw. den Schaden-Kosten-Quoten der vergangenen Jahre lassen sich Rückschlüsse auf die historischen Schwankungsanfälligkeiten in den Versicherungszweigen sowie mögliche wechselseitige Abhängigkeiten ziehen. Die Volatilitäten sind sowohl auf Schwankungen der Schadenbelastungen als auch der Marktpreisniveaus für die gewährten Deckungen zurückzuführen.

**Beiträge sowie Schaden- und Kostenbelastung nach Versicherungszweigen**

|                                  | 2010  | 2009  | 2008  | 2007  | 2006  |
|----------------------------------|-------|-------|-------|-------|-------|
| <b>Bruttobeiträge in Mio. €</b>  |       |       |       |       |       |
| Rückversicherung                 |       |       |       |       |       |
| Haftpflicht                      | 2.112 | 2.162 | 2.118 | 2.227 | 2.394 |
| Unfall                           | 278   | 353   | 503   | 547   | 713   |
| Kraftfahrt                       | 2.793 | 2.218 | 2.441 | 2.643 | 2.913 |
| Transport, Luftfahrt, Raumfahrt  | 1.838 | 1.900 | 1.836 | 1.730 | 1.751 |
| Feuer                            | 4.350 | 4.339 | 3.998 | 3.932 | 3.763 |
| Technische Versicherung          | 1.658 | 1.536 | 1.457 | 1.286 | 1.239 |
| Kreditversicherung               | 744   | 632   | 825   | 710   | 688   |
| Sonstige Versicherungszweige     | 1.928 | 1.847 | 1.561 | 1.149 | 1.090 |
| Erstversicherung                 | 5.498 | 5.131 | 5.105 | 5.639 | 5.147 |
| <b>Schadenquote in %</b>         |       |       |       |       |       |
| Rückversicherung                 |       |       |       |       |       |
| Haftpflicht                      | 101,1 | 108,7 | 80,0  | 80,4  | 81,7  |
| Unfall                           | 114,4 | 102,7 | 108,6 | 118,6 | 134,0 |
| Kraftfahrt                       | 74,6  | 66,7  | 86,6  | 80,9  | 84,9  |
| Transport, Luftfahrt, Raumfahrt  | 65,2  | 64,6  | 69,9  | 63,5  | 67,7  |
| Feuer                            | 62,8  | 35,4  | 57,1  | 52,6  | 32,2  |
| Technische Versicherung          | 63,2  | 46,6  | 58,5  | 53,9  | 56,4  |
| Kreditversicherung               | 48,1  | 131,1 | 59,4  | 43,3  | 42,4  |
| Sonstige Versicherungszweige     | 50,7  | 70,3  | 63,3  | 76,8  | 56,8  |
| Erstversicherung                 | 63,1  | 60,3  | 58,4  | 58,6  | 55,8  |
| <b>Schaden-Kosten-Quote in %</b> |       |       |       |       |       |
| Rückversicherung                 |       |       |       |       |       |
| Haftpflicht                      | 133,1 | 139,3 | 114,2 | 111,0 | 110,7 |
| Unfall                           | 144,3 | 144,7 | 148,8 | 160,2 | 167,7 |
| Kraftfahrt                       | 102,0 | 92,2  | 111,6 | 104,6 | 109,7 |
| Transport, Luftfahrt, Raumfahrt  | 94,1  | 90,8  | 96,1  | 93,3  | 91,5  |
| Feuer                            | 89,8  | 61,0  | 84,6  | 78,0  | 58,8  |
| Technische Versicherung          | 104,0 | 83,2  | 89,7  | 87,3  | 87,8  |
| Kreditversicherung               | 82,4  | 173,4 | 98,3  | 85,6  | 78,6  |
| Sonstige Versicherungszweige     | 89,8  | 102,3 | 94,3  | 100,4 | 86,7  |
| Erstversicherung                 | 96,8  | 93,2  | 90,9  | 93,4  | 90,8  |

Bei der Abschätzung und Preiskalkulation übernommener Risiken spielt in allen Versicherungszweigen die Einschätzung der technischen, sozialen und demografischen Rahmenbedingungen eine wichtige Rolle. In der Haftpflichtversicherung, der Arbeiterunfallversicherung, der Kreditversicherung und in Teilen der Kraftfahrtversicherung kann darüber hinaus die Entwicklung der ökonomischen und rechtlichen Rahmenbedingungen von Bedeutung sein; in erster Linie in den Versicherungszweigen Feuer und Transport sowie in Teilen der technischen Rückversicherung und der Erstversicherung besteht eine hohe Sensitivität bei den zugrunde liegenden Annahmen über Naturkatastrophen. Wir beziehen bei der Abschätzung dieser Risiken erwartete Trends in unsere Überlegungen mit ein. Dabei spielt die genaue Analyse klimabedingter Veränderungen des Risikoprofils eine herausragende Rolle. Nachfolgend dargestellt sind die Schaden-Kosten-Quoten von Munich Re mit und ohne Berücksichtigung von Naturkatastrophen.

**Schaden-Kosten-Quoten der vergangenen 10 Jahre**

| %                      | 2010  | 2009 | 2008 | 2007 | 2006 | 2005  | 2004 | 2003 | 2002 <sup>1</sup> | 2001 <sup>2</sup> |
|------------------------|-------|------|------|------|------|-------|------|------|-------------------|-------------------|
| Mit Naturkatastrophen  | 100,5 | 95,3 | 99,4 | 96,4 | 92,6 | 111,7 | 98,9 | 96,5 | 123,7             | 136,9             |
| Ohne Naturkatastrophen | 89,5  | 93,9 | 93,2 | 91,7 | 91,6 | 92,5  | 93,9 | 94,8 | 120,3             | 135,4             |

<sup>1</sup> Davon World Trade Center und Reserveaufstockung bei Munich Re America 17,1%.

<sup>2</sup> Davon World Trade Center und Reserveaufstockung bei Munich Re America 24,3%.

Insbesondere Groß- und Größtschäden haben für das Schaden- und Unfallversicherungsgeschäft im Rückversicherungsbereich Relevanz. Die unten stehende Analyse zeigt, dass die Schwankungsanfälligkeit der einzelnen Jahre in dieser Schadenkategorie überwiegend auf die jeweilige Intensität der Naturkatastrophenbelastung zurückzuführen ist; die sonstigen Kumulrisiken weisen einen deutlich weniger volatilen Verlauf auf.

**Groß- und Größtschäden in der Rückversicherung nach einzelnen Kalenderjahren (netto)**

| Mio. €                                    | 2010  | 2009  | 2008  | 2007  | 2006 |
|-------------------------------------------|-------|-------|-------|-------|------|
| Groß- und Größtschäden                    | 2.228 | 1.158 | 1.509 | 1.103 | 585  |
| davon: Schäden aus Naturkatastrophen      | 1.564 | 196   | 832   | 634   | 139  |
| davon: Sonstige Kumulschäden <sup>1</sup> | 664   | 962   | 677   | 469   | 446  |

<sup>1</sup> Sondereffekt für das Jahr 2009: Ausfälle in der Kredit- und Kautionsversicherung, die durch die Finanzkrise bedingt waren, haben hier zu einer Schadenbelastung von 510 Millionen € geführt.

Weitere Angaben zu Risiken aus Groß- und Kumulschäden finden sich im Risikobericht auf Seite 128 f.

**Reserverisiken** Bei der Rückstellung für noch nicht abgewinkelte Versicherungsfälle besteht die Unsicherheit einer Besser- oder Schlechterabwicklung (Reserverisiko). Dabei wird insbesondere auf Situationen geachtet, in denen die Mittel, die für künftige Schadenzahlungen zurückgestellt wurden, möglicherweise unzureichend sind.

Grundlage für die Bewertung der Rückstellung für noch nicht abgewinkelte Versicherungsfälle sind Annahmen, die auf einer Analyse der historischen Schadenentwicklungsdaten von verschiedenen Versicherungszweigen beruhen. Um diese Daten zu analysieren und zu bewerten, setzen wir verschiedene etablierte aktuarielle Methoden ein. Diese berücksichtigen die unterschiedlichen Preis-, Deckungs-, Leistungs- und Inflationsniveaus. Dabei nutzen wir das in unseren Schaden- und Underwriting-Abteilungen vorhandene Spezialwissen und berücksichtigen alle bereits absehbaren zukünftigen Trends. Wir beobachten unsere Abwicklungsergebnisse kontinuierlich und gewährleisten dadurch, dass die Annahmen, die der Bewertung der Rückstellungen zugrunde liegen, immer den aktuellen Kenntnisstand widerspiegeln. Folglich kann sich bei der Abwicklung der Rückstellungen die Notwendigkeit ergeben, die ursprünglichen Einschätzungen des Schadenbedarfs zu revidieren und die Rückstellungen anzupassen.

Die Entwicklung unserer Schadenrückstellungen sowie die entsprechenden Abwicklungsergebnisse sind unter (22) Rückstellung für noch nicht abgewinkelte Versicherungsfälle dargestellt.

Eine besondere Sensitivität besteht bei Verträgen mit langen Abwicklungsdauern. Dies trifft insbesondere auf die Haftpflichtversicherung zu, bei der sich Haftungen mit erheblicher zeitlicher Verzögerung manifestieren können. Darüber hinaus können Änderungen in der Rechtsprechung, Sammelklagen, Preissteigerungen für medizinische Leistungen sowie Veränderungen der allgemeinen Lebenserwartung die Bewertung der Rückstellungen beeinflussen. Nachfolgend beschreiben wir Bereiche des aktuellen Rückstellungsbestands, die im Rahmen einer angemessenen Reserveeinschätzung die größten Unsicherheitsfaktoren darstellen.

Asbesthaftungen, die vorwiegend aus den USA und einigen europäischen Ländern herrühren, bereiten der gesamten Versicherungswirtschaft Sorge. Weltweit tätige Industrieversicherer wurden seit Mitte der 1980er-Jahre mit Asbestschäden aus Versicherungsverträgen konfrontiert, die zum Teil vor mehreren Jahrzehnten gezeichnet worden waren. Dies trifft auch auf Munich Re zu. Unsere Policen decken vor allem Schäden, die mit einer zeitlichen Verzögerung von 30 bis 50 Jahren auftreten. Demzufolge haben wir auch Rückstellungen gebildet für Schadenbelastungen aus längst gekündigten Haftpflichtpolicen, die vor dem Hintergrund der damaligen rechtlichen Rahmenbedingungen einen entsprechenden Versicherungsschutz boten.

Zeitliche Verzögerungen bei der Schadenabwicklung können insbesondere in der Rückversicherung signifikante Ausmaße annehmen. Die Meldung eines Schadens steht oft erst am Ende einer langen Kette von Ereignissen: die Exponierung des versicherten Risikos, der Schadeneintritt, eine mögliche Klageerhebung und Urteilsfindung, die Schadenmeldung und -zahlung durch den Erstversicherer und schließlich die Abwicklung durch den Rückversicherer. Daher beobachten wir nicht nur, wie sich einzelne Schäden entwickeln, sondern verfolgen auch den branchenweiten Trend, der ein wichtiger Frühindikator sein kann.

#### Rückstellungen für Asbest- und Umwelthaftpflichtschäden

| Mio. € <sup>1</sup> | 31.12.2010 |       | Vorjahr |       |
|---------------------|------------|-------|---------|-------|
|                     | Brutto     | Netto | Brutto  | Netto |
| Asbest              | 1.935      | 1.549 | 1.762   | 1.422 |
| Umwelt              | 460        | 368   | 354     | 302   |

<sup>1</sup> Die Vorjahreszahlen wurden um die Wechselkurseinflüsse angepasst.

Daneben gibt es Schadensszenarien, die sehr stark beeinflusst werden von der sich stetig wandelnden Rechtsprechung zum Haftungsrecht, aber auch durch eine steigende Anzahl von Gruppenklagen. Betroffen sind in erster Linie die Branchen Produkthaftpflicht und Berufshaftpflicht in den USA. Darüber hinaus sehen wir durch die massiven Änderungen in den wirtschaftlichen Rahmenbedingungen gestiegene Unsicherheiten in der Einschätzung der Haftungsszenarien für reine Vermögensschäden. Die Subprime-Loan-Krise sowie die nachfolgende umfassende Finanzkrise führten bereits zu einer Welle von Klagen geschädigter Investoren und Aktionäre, insbesondere gegen das Management von Finanzinstituten. Wir beobachten diese Entwicklungen weiterhin aufmerksam und werden bei neueren Erkenntnissen geeignete Maßnahmen ergreifen.

Bei Personenschäden hält Munich Re beträchtliche Rückstellungen für Anspruchsteller vor, die schwere Verletzungen erlitten haben und umfangreiche individuelle medizinische Spezialversorgung und -pflege benötigen. Solche Schäden betreffen insbesondere das US-amerikanische Arbeiterunfallgeschäft sowie in einigen Ländern Europas das Kfz-Haftpflichtgeschäft. In beiden Fällen wird Deckungsschutz für Geschädigte gewährt, bei denen von einer längeren Lebenserwartung und umfassender medizinischer Betreuung auszugehen ist. Die Schadenrückstellungen sind daher stark abhängig von Preissteigerungen bei medizinischen Leistungen, speziell bei den Pflegekosten, und von der Entwicklung der allgemeinen Lebenserwartung. Wegen unerwartet hoher Preissteigerungen mussten wir in der Vergangenheit diese Rückstellungen wiederholt anheben. Den tatsächlich erhaltenen Schadenmeldungen stellen wir die prognostizierten Schadensummen gegenüber und prüfen so, ob die angewendeten Schadenentwicklungsmuster auch weiterhin geeignet sind, künftige Schadenzahlungen zu projizieren.

**Maßnahmen zur Risikominderung** Durch eine Zeichnungspolitik, die auf eine systematische Diversifikation abzielt, also die möglichst breite Mischung und Streuung von Einzelrisiken, reduzieren wir die Volatilität für unser Versicherungsportfolio insgesamt erheblich.

Eine weitere wichtige Maßnahme zur Steuerung versicherungstechnischer Risiken ist, einen Teil unseres Risikos über Rückversicherung bzw. Retrozession an andere Risikoträger abzugeben. Siehe hierzu auch (12) Anteil der Rückversicherer an den versicherungstechnischen Rückstellungen und (29) Beiträge. Für alle unsere Unternehmen besteht gruppeninterner und externer Rückversicherungs- und Retrozessionsschutz. Von besonderer Bedeutung ist dabei eine Kumulschadendeckung, die Sachschäden aus Naturkatastrophen abdeckt. Ihre Dimensionierung fußt auf den Analysen unserer Kumulbudgets in den Regionen der Erde, die im Hinblick auf Naturkatastrophen exponiert sind. Der Retrozessionsschutz kommt zum Zug, wenn uns ein extrem hoher Schaden trifft.

Durch die Begebung von Katastrophenanleihen diversifizieren wir unsere Risikomanagement-Instrumente weiter.

Zu unseren Risikomanagement-Prozessen siehe auch Risikobericht, Seite 116–122.

**Zinsrisiken** Ökonomisch resultiert prinzipiell ein Zinsrisiko aus der Notwendigkeit, mit den Erträgen der Kapitalanlagen, welche die Rückstellungen bedecken, den kalkulatorisch zur Bewertung der Rückstellung verwendeten Diskontzins zu erwirtschaften. Bilanzell betrifft das Zinsrisiko nur die Teile der versicherungstechnischen Rückstellungen, die diskontiert werden und für die nicht vom Zedenten mindestens in gleicher Höhe ein garantierter Zufluss von Kapitalerträgen aus Depotforderungen sichergestellt ist.

#### Diskontierte versicherungstechnische Rückstellungen nach Zinssätzen (brutto)

| Mio. € <sup>1</sup> | Rückversicherung |              | Erstversicherung |            | Gesamt       |              |
|---------------------|------------------|--------------|------------------|------------|--------------|--------------|
|                     | 31.12.2010       | Vorjahr      | 31.12.2010       | Vorjahr    | 31.12.2010   | Vorjahr      |
| Zins ≤ 2,5%         | 15               | 7            | 169              | 126        | 184          | 133          |
| 2,5% < Zins ≤ 3,5%  | 223              | 138          | 511              | 479        | 734          | 617          |
| 3,5% < Zins ≤ 4,5%  | 1.863            | 1.740        | 68               | 74         | 1.931        | 1.814        |
| Zins > 4,5%         | -                | -            | -                | -          | -            | -            |
| <b>Gesamt</b>       | <b>2.101</b>     | <b>1.885</b> | <b>748</b>       | <b>679</b> | <b>2.849</b> | <b>2.564</b> |

<sup>1</sup> Nach Eliminierung segmentübergreifender konzerninterner Geschäftsvorfälle.

Der überwiegende Teil der diskontierten Rückstellungen in der Rückversicherung wird für das US-amerikanische Arbeiterunfallgeschäft gebildet. Die Diskontzinssätze für dieses Geschäft sind aufsichtsrechtlich reguliert und werden pro Anfalljahr prospektiv festgelegt. Derzeit rechnen wir nicht damit, dass sich an diesem Genehmigungsverfahren durch die amerikanische Aufsicht etwas ändert. Auf einen nachhaltigen Rückgang des Marktzins reagieren wir mit konservativen Diskontzinsannahmen für zukünftige Rückstellungen für noch nicht abgewinkelte Versicherungsfälle. Würde der Diskontzins nachträglich um 100 BP gesenkt, ergäbe sich ein zusätzlicher Rückstellungsbedarf von 222 (227) Millionen €, der erfolgswirksam als Aufwand zu erfassen wäre.

Die Diskontierung der Rückstellungen in der Erstversicherung ist ebenfalls überwiegend aufsichtsrechtlich geregelt. Ein Zinsrisiko ergibt sich für uns dabei vornehmlich für Rentenversicherungsfälle. Da jedoch lediglich ca. 14,1 (13,6) % der in diesem Zusammenhang zu betrachtenden Deckungs- und Schadenrückstellungen der Erstversicherung Schaden/Unfall diskontiert sind, ist dieses Risiko als gering einzuschätzen. Falls die Kapitalerträge die Aufwände, die durch die Diskontierung entstehen, nicht decken würden, entstünden nicht einkalkulierte Verluste. In diesem Fall könnte eine Reserveanpassung erforderlich sein. Umgekehrt würden bei höheren Kapitalerträgen unvorhergesehene Gewinne entstehen.

**Liquiditätsrisiken** Liquiditätsrisiken könnten sich für Munich Re ergeben, wenn der Zahlungsmittelabfluss durch Zahlungen für Versicherungsfälle und die mit dem Geschäft in Zusammenhang stehenden Kosten den Zahlungsmittelzufluss aus Beiträgen sowie aus Kapitalanlagen übersteigen würde. In der Schaden- und Unfallversicherung ist zu differenzieren zwischen Zahlungen für Versicherungsfälle, für die bereits in den Vorjahren Schadenrückstellungen gebildet wurden, und unmittelbaren Zahlungen, das heißt Zahlungen für Schäden, die im laufenden Geschäftsjahr angefallen sind. Soweit für Versicherungsfälle Schadenrückstellungen gebildet werden, lässt sich das Liquiditätsrisiko durch unser Asset-Liability-Management, bei dem sich die Kapitalanlage am Charakter der Verpflichtungen orientiert, minimieren. Die unmittelbaren Zahlungen stellen nur einen Teil der insgesamt zu leistenden Zahlungen dar, deren Anteil nach unseren Erfahrungen im Zeitablauf stabil ist, sodass sich auch diesbezüglich die Liquiditätsrisiken durch das Asset-Liability-Management entsprechend reduzieren lassen.

Die nachfolgende Tabelle zeigt, dass in den zurückliegenden Kalenderjahren durchweg eine positive Liquiditätssituation vorlag. Nicht explizit in der Quantifizierung berücksichtigt ist, dass aufgrund unseres weitgehenden Asset-Liability-Managements für Zahlungen für Versicherungsfälle der Vorjahre auch extremste Größtschäden (aus Naturkatastrophen- und Nicht-Naturkatastrophenszenarien) durch unsere Liquiditätsposition gedeckt sind. Zudem simulieren wir regelmäßig die Auswirkungen von großen Schockszenarien auf unsere Liquiditätssituation und berücksichtigen diese in angemessener Weise in der Struktur unserer Kapitalanlagen. Die in den Szenarien simulierten Schäden übersteigen sowohl in absoluter Höhe als auch in der Abwicklungsgeschwindigkeit deutlich die Anforderungen sehr großer Schadenbelastungen der Vergangenheit (zum Beispiel World Trade Center oder Hurrikane wie Katrina).

**Zahlungsflüsse und liquide Mittel der einzelnen Kalenderjahre (brutto)**

| Mio. €                         | 2010   | 2009   | 2008   | 2007   | 2006   |
|--------------------------------|--------|--------|--------|--------|--------|
| Prämieingang                   | 20.834 | 19.759 | 19.491 | 19.021 | 18.917 |
| Schadenzahlungen Geschäftsjahr | 5.213  | 4.378  | 4.393  | 4.264  | 3.493  |
| Schadenzahlungen Vorjahre      | 8.613  | 7.589  | 7.675  | 7.597  | 7.722  |
| Kosten                         | 6.517  | 5.956  | 5.728  | 5.717  | 5.455  |
| Liquide Mittel                 | 491    | 1.836  | 1.695  | 1.443  | 2.247  |

Weitere Angaben zum Liquiditätsrisiko siehe Risikobericht, Seite 124 f.

**Auswirkungen von Veränderungen der versicherungstechnischen Annahmen auf das Eigenkapital sowie die Konzern-Gewinn- und Verlustrechnung** Bei der Überwachung unseres Bestands überprüfen wir, ob die ursprünglichen Annahmen anzupassen sind. Mit dem Angemessenheitstest nach IFRS 4 überprüfen wir den unter aktualisierten Annahmen erwarteten Schadenbedarf. Dabei werden unsere Maßnahmen zur Risikominderung berücksichtigt. Ist es erforderlich, die versicherungstechnischen Rückstellungen anzupassen, erfassen wir dies in der Konzern-Gewinn- und Verlustrechnung.

### 39 // Bonitätsrisiken aus passivem Rückversicherungsgeschäft

Für das in Rückdeckung gegebene Versicherungsgeschäft ist darüber hinaus das Ausfallrisiko relevant. Für unsere extern zu platzierenden Rückversicherungen und Retrozessionen kommen als Geschäftspartner nur Gesellschaften infrage, die den Anforderungen unserer Retro Security Guideline genügen.

Die Bonitäten unserer Retrozessionäre bzw. Rückversicherer, die sich für die in Rückdeckung gegebenen Rückstellungen ergeben, sind im Risikobericht auf Seite 132 dargestellt; auf Seite 123 f finden sich weitere Angaben zu den Bonitätsrisiken.

Von den in Rückdeckung gegebenen Rückstellungen sind 50 (44) % unmittelbar durch Depots besichert. Ein Bonitätsrisiko für diesen Anteil entfällt.

Darüber hinaus bestehen Bonitätsrisiken aus der Zeichnung von Kreditrückversicherungsverträgen. Angaben hierzu finden sich unter (38) Risiken aus dem Schaden- und Unfallversicherungsgeschäft. In der Erstversicherung wird kein aktives Kreditversicherungsgeschäft betrieben.

### 40 // Marktpreisrisiko aus Finanzinstrumenten – Sensitivitätsanalyse

Die Sensitivitätsanalyse zeigt den Effekt von Kapitalmarktereignissen auf den Wert der Kapitalanlagen sowie die entsprechenden Auswirkungen auf die Gewinn- und Verlustrechnung. Aktien-, Zins- und Währungssensitivitäten werden unabhängig voneinander, das heißt *ceteris paribus*, durchgeführt. Die Basis dafür ist die Bestimmung der Marktwertänderung unter ausgewählten Kapitalmarktszenarien, die wie folgt durchgeführt wird:

Der Analyse der Aktien und Aktienderivate liegt eine Marktwertänderung von  $\pm 10\%$  und  $\pm 30\%$  des deltagewichteten Exposure zugrunde. Für zinssensitive Instrumente hingegen wird die Marktwertänderung einer globalen Zinsänderung in Höhe von +200 BP,  $\pm 100$  BP und -50 BP über Duration und Konvexität bestimmt. Aufgrund des niedrigen Marktzinsniveaus würden bei einem angenommenen Rückgang der Zinsen um 200 BP die Zinssätze teilweise negativ. Demgegenüber ist ein Zinsanstieg um 200 BP nicht unrealistisch, was zu der asymmetrischen Darstellung des Marktzinsrisikos zinssensitiver Kapitalanlagen führt. Die Reaktion von Zinsderivaten auf die Marktwertänderung des Underlyings wird über das Delta des Derivats berücksichtigt. Im Gegensatz hierzu betrifft die Währungsveränderung sowohl zins- als auch aktiensensitive Instrumente. Die Bestimmung der Sensitivität von Instrumenten in Fremdwährung erfolgt durch Multiplikation des Euro-Marktwerts mit der angenommenen Wechselkursänderung von  $\pm 10\%$ . Alternative Anlagen (Private Equity, Hedgefonds und Commodities) werden zusammen mit den Aktien analysiert.

Die im Folgenden aufgeführten Effekte der Kapitalmarktereignisse berücksichtigen nicht die Steuer sowie die Rückstellung für Beitragsrückerstattung (Bruttodarstellung). Das heißt, die Analyse berücksichtigt nicht die Effekte, die sich aufgrund der Überschussbeteiligung der Versicherungsnehmer in der Personenerstversicherung ergeben. Die nachfolgend dargestellten Auswirkungen auf die Ergebnisse und das Eigenkapital würden sich bei Berücksichtigung dieser Effekte erheblich reduzieren. Es wird auch davon ausgegangen, dass die Änderungen am Kapitalmarkt instantan eintreten und damit Limitsysteme und aktives Gegensteuern nicht greifen. Bei der Analyse wurden ca. 98 % der Kapitalanlagen von Munich Re berücksichtigt.

**Marktpreisrisiko Aktien** Die Auswirkung einer Veränderung der Aktienmärkte in absoluten Beträgen hat sich im Berichtsjahr erhöht. Der Grund dafür ist ein aktiver Aufbau der Aktienpositionen, vor allem im zweiten Halbjahr 2010. Eine Änderung des Aktienmarkts um 10 % zieht einen Effekt von 11,2 (10,5) % auf den Marktwert des Aktienportfolios nach sich.



Die nicht linearen Effekte von Aktienoptionen oder anderen asymmetrischen Strategien sind wegen des gewählten deltagewichteten Ansatzes in dieser Darstellung nicht berücksichtigt.

**Marktwertveränderung aktienkurssensitiver Kapitalanlagen**

| Aktienkursveränderung | 31.12.2010                                     |                                              |                                | Vorjahr                                        |                                              |                                |
|-----------------------|------------------------------------------------|----------------------------------------------|--------------------------------|------------------------------------------------|----------------------------------------------|--------------------------------|
|                       | Auswirkung auf den Gewinn/Verlust <sup>1</sup> | Auswirkung auf das Eigenkapital <sup>1</sup> | Marktwertveränderung insgesamt | Auswirkung auf den Gewinn/Verlust <sup>1</sup> | Auswirkung auf das Eigenkapital <sup>1</sup> | Marktwertveränderung insgesamt |
| Mrd. €                |                                                |                                              |                                |                                                |                                              |                                |
| Anstieg um 30 %       | 0,401                                          | 2,290                                        | 3,087                          | 0,120                                          | 1,323                                        | 1,763                          |
| Anstieg um 10 %       | 0,120                                          | 0,763                                        | 1,015                          | 0,040                                          | 0,441                                        | 0,588                          |
| Rückgang um 10 %      | -0,393                                         | -0,489                                       | -1,014                         | -0,150                                         | -0,331                                       | -0,587                         |
| Rückgang um 30 %      | -1,560                                         | -1,085                                       | -3,040                         | -0,583                                         | -0,856                                       | -1,760                         |
| Marktwerte            |                                                |                                              | 9,057                          |                                                |                                              | 5,605                          |

<sup>1</sup> Brutto vor Steuer und Überschussbeteiligung.

**Marktpreisrisiko Zinsen** Die Berechnung der Marktpreisveränderung der zinssensitiven Kapitalanlagen erfolgt durch eine Parallelverschiebung der Zinskurve und eine Neubewertung der festverzinslichen Wertpapiere und Zinsderivate aufgrund ihrer Duration und Konvexität. Cash-Bestände und andere Derivate gehen in die Berechnung nicht ein. Die wesentlichen strategischen Zinsderivate sind Receiver-Swaps und Swaptions. Zur taktischen Steuerung werden Renten-Futures eingesetzt.

Die Auswirkungen auf die Gewinn- und Verlustrechnung sind im Vergleich zu den Auswirkungen auf das Eigenkapital bei Zinsänderungen gering, da der größte Teil der Wertänderungen der festverzinslichen Anlagen erfolgsneutral über das Eigenkapital gebucht wird. Auch wird knapp ein Drittel der bei dieser Analyse berücksichtigten Kapitalanlagen zu fortgeführten Anschaffungskosten bewertet, sodass Veränderungen der Marktwerte im Abschluss keine Auswirkungen haben.

Ökonomisch steht dem Eigenkapitaleffekt der festverzinslichen Kapitalanlagen die Änderung des ökonomischen Werts der Verbindlichkeiten gegenüber. Deshalb steuert unser Asset-Liability-Management die Kapitalanlagen so, dass sich die Wirkung von Zinsänderungen auf den Wert der Kapitalanlagen und auf den ökonomischen Wert der Verbindlichkeiten weitgehend aufheben. Diese Gegenposition ist jedoch bilanziell nicht wirksam, da bilanziell wesentliche Teile der Verbindlichkeiten nicht auf der Basis der aktuellen Zinskurven bewertet werden.

**Marktwertveränderung zinssensitiver Kapitalanlagen**

| Zinsveränderung    | 31.12.2010                                     |                                              |                                | Vorjahr                                        |                                              |                                |
|--------------------|------------------------------------------------|----------------------------------------------|--------------------------------|------------------------------------------------|----------------------------------------------|--------------------------------|
|                    | Auswirkung auf den Gewinn/Verlust <sup>1</sup> | Auswirkung auf das Eigenkapital <sup>1</sup> | Marktwertveränderung insgesamt | Auswirkung auf den Gewinn/Verlust <sup>1</sup> | Auswirkung auf das Eigenkapital <sup>1</sup> | Marktwertveränderung insgesamt |
| Mrd. €             |                                                |                                              |                                |                                                |                                              |                                |
| Anstieg um 200 BP  | -0,930                                         | -11,342                                      | -18,909                        | 0,097                                          | -10,426                                      | -16,323                        |
| Anstieg um 100 BP  | -0,596                                         | -5,957                                       | -10,147                        | -0,054                                         | -5,442                                       | -8,750                         |
| Rückgang um 50 BP  | 0,396                                          | 3,193                                        | 5,593                          | 0,104                                          | 2,893                                        | 4,816                          |
| Rückgang um 100 BP | 0,858                                          | 6,528                                        | 11,531                         | 0,259                                          | 5,901                                        | 9,927                          |
| Marktwerte         |                                                |                                              | 162,777                        |                                                |                                              | 157,391                        |

<sup>1</sup> Brutto vor Steuer und Überschussbeteiligung.

**Marktpreisrisiko Wechselkurse** Das Asset-Liability-Management richtet die Währungsstruktur der Kapitalanlagen an den Verbindlichkeiten aus. Da ein substanzieller Teil der Nicht-Euro-Verbindlichkeiten in US-Dollar besteht, kommen somit rund 60 % der ausgewiesenen Währungssensitivität der Kapitalanlagen aus dem US-Dollar. Britisches Pfund und Kanadischer Dollar tragen zu weiteren 28 % des Effekts bei. Bei dieser Analyse ist ein Anstieg um 10 % im Wechselkurs als eine Aufwertung der ausländischen Währungen um 10 % gegenüber dem Euro zu verstehen.

#### Marktwertveränderung währungssensitiver Kapitalanlagen

| Veränderung der Wechselkurse | 31.12.2010                                     |                                              |                                | Vorjahr                                        |                                              |                                |
|------------------------------|------------------------------------------------|----------------------------------------------|--------------------------------|------------------------------------------------|----------------------------------------------|--------------------------------|
|                              | Auswirkung auf den Gewinn/Verlust <sup>1</sup> | Auswirkung auf das Eigenkapital <sup>1</sup> | Marktwertveränderung insgesamt | Auswirkung auf den Gewinn/Verlust <sup>1</sup> | Auswirkung auf das Eigenkapital <sup>1</sup> | Marktwertveränderung insgesamt |
| Mrd. €                       |                                                |                                              |                                |                                                |                                              |                                |
| Anstieg um 10 %              | 4,006                                          | 0,463                                        | 4,469                          | 3,463                                          | 0,140                                        | 3,603                          |
| Rückgang um 10 %             | -4,006                                         | -0,463                                       | -4,469                         | -3,463                                         | -0,140                                       | -3,603                         |
| Marktwerte                   |                                                |                                              | 52,053                         |                                                |                                              | 43,389                         |

<sup>1</sup> Brutto vor Steuer und Überschussbeteiligung.

## Sonstige Angaben

### 41 // Mutterunternehmen

Oberstes Mutterunternehmen des Konzerns ist die Münchener Rückversicherungs-Gesellschaft Aktiengesellschaft in München, Königinstraße 107, 80802 München. Der Sitz der Gesellschaft ist München, Deutschland.

Die Gesellschaft erfüllt neben ihrer Aufgabe als Rückversicherer auch die Aufgaben einer Holding des Konzerns.

### 42 // Beziehungen zu nahestehenden Unternehmen und Personen

Angaben über die Bezüge der Organmitglieder sowie über Geschäftsvorfälle mit diesen finden Sie im Vergütungsbericht ab Seite 28 sowie unter (46) Vergütungsbericht. Geschäftsvorfälle zwischen der Münchener Rück AG und den Tochterunternehmen, die als nahestehende Unternehmen anzusehen sind, wurden durch die Konsolidierung eliminiert und werden im Anhang nicht erläutert. Geschäftsbeziehungen, die mit nicht konsolidierten Tochterunternehmen bestehen, sind insgesamt von untergeordneter Bedeutung; dies gilt ebenso für die Geschäftsbeziehungen zu assoziierten Unternehmen.

Für die Direktzusagen auf betriebliche Altersversorgung hat die Münchener Rück AG ein Contractual Trust Agreement in Form einer doppelseitigen Treuhand eingerichtet. Die Münchener Rück Versorgungskasse gilt als nahestehendes Unternehmen gemäß IAS 24. Die Beiträge an die Versorgungskasse werden als Aufwand für beitragsorientierte Pensionszusagen ausgewiesen, siehe die Ausführungen zu (25) Andere Rückstellungen.

### 43 // Personalaufwendungen

Die Aufwendungen für den Versicherungsbetrieb, die Leistungen an Kunden (für Schadenregulierung) und das Ergebnis aus Kapitalanlagen umfassen folgende Personalaufwendungen:

#### Zusammensetzung der Personalaufwendungen

| Mio. €                                             | 2010         | Vorjahr      |
|----------------------------------------------------|--------------|--------------|
| Löhne und Gehälter                                 | 2.534        | 2.280        |
| Soziale Abgaben und Aufwendungen für Unterstützung | 472          | 402          |
| Aufwendungen für Altersversorgung                  | 208          | 199          |
| <b>Gesamt</b>                                      | <b>3.214</b> | <b>2.881</b> |

### 44 // Langfristiger Incentive-Plan

Die Münchener Rück AG legt seit 1. Juli 1999 jährlich langfristige Incentive-Pläne mit einer Laufzeit von jeweils sieben Jahren auf. Von 1999 bis 2009 setzte sich der Teilnehmerkreis aus den Mitgliedern des Vorstands, dem oberen Management in München sowie den wichtigsten Führungskräften der Auslandsorganisation zusammen. Seit 2010 werden diese aktienkursbezogenen Vergütungspläne nur noch für Mitglieder des oberen Managements in München sowie ausgewählte Führungskräfte der Auslandsorganisation aufgelegt.

Die Teilnehmer erhalten eine bestimmte Anzahl von Wertsteigerungsrechten (Stock Appreciation Rights).

Der maßgebliche Basiskurs der Wertsteigerungsrechte ermittelt sich aus dem Durchschnitt der Schlusskurse der Münchener-Rück-Aktie aus dem Frankfurter Xetra-Handel der letzten drei Monate vor Planbeginn. Der Basiskurs für den langfristigen Incentive-Plan 2010 beträgt 109,11 (97,57) €. Aufgrund einer Kapitalerhöhung der Münchener Rück AG im Geschäftsjahr 2003 wurden der Basiskurs der bis dahin ausgegebenen Wertsteigerungsrechte sowie die Anzahl der bis dahin bereits gewährten Wertsteigerungsrechte bedingungsgemäß angepasst. Im Berichtsjahr wurden insgesamt 675.029 (459.734) Wertsteigerungsrechte gewährt, davon – (151.667) an Mitglieder des Vorstands. Die zukünftigen Verpflichtungen aus dem langfristigen Incentive-Plan werden mit Aktien der Münchener Rück AG abgesichert.

Der aus den Wertsteigerungsrechten resultierende Personalaufwand bzw. Ertrag wird auf der Grundlage der Veränderung des beizulegenden Zeitwerts der zugrunde liegenden Optionsrechte berechnet. Der beizulegende Zeitwert berücksichtigt neben dem inneren Wert (Differenz zwischen Aktien- und Basiskurs der Wertsteigerungsrechte) zusätzlich die Möglichkeit des Wertzuwachses bis zum Zeitpunkt des Verfalls der Rechte und wird unter Berücksichtigung der Ausübungsbedingungen anhand anerkannter Bewertungsmodelle ermittelt. Zu jedem Bilanzstichtag wird der beizulegende Zeitwert der Wertsteigerungsrechte berechnet und zurückgestellt; dieser Betrag wird in voller Höhe erfasst. Im Berichtsjahr ergab sich ein Rückstellungsbedarf für die Münchener Rück AG von 36,7 (29,5) Millionen €. Der erfolgswirksam ausgewiesene Personalaufwand bzw. Ertrag entspricht – unter Berücksichtigung gegebenenfalls ausgeübter Rechte – der Veränderung der Rückstellung im Berichtsjahr. Dadurch ergab sich 2010 ein Aufwand von 15,1 (–33,3) Millionen €. Der gewichtete Durchschnittskurs der 2010 ausgeübten Wertsteigerungsrechte betrug 111,26 € für das Planjahr 2003, 117,66 € für das Planjahr 2004 und 116,69 € für das Planjahr 2005. Der innere Wert der ausübenden Wertsteigerungsrechte belief sich zum Bilanzstichtag auf 10,9 Millionen €.

**Langfristige Incentive-Pläne 2003-2010 der Münchener Rück AG**

|                                                 | Incentive-<br>Plan 2003 | Incentive-<br>Plan 2004 | Incentive-<br>Plan 2005 | Incentive-<br>Plan 2006 | Incentive-<br>Plan 2007 | Incentive-<br>Plan 2008 | Incentive-<br>Plan 2009 | Incentive-<br>Plan 2010 |
|-------------------------------------------------|-------------------------|-------------------------|-------------------------|-------------------------|-------------------------|-------------------------|-------------------------|-------------------------|
| Planbeginn                                      | 1.7.2003                | 1.7.2004                | 1.7.2005                | 1.7.2006                | 1.7.2007                | 1.7.2008                | 1.7.2009                | 1.7.2010                |
| Planende                                        | 30.6.2010               | 30.6.2011               | 30.6.2012               | 30.6.2013               | 30.6.2014               | 30.6.2015               | 30.6.2016               | 30.6.2017               |
| Basiskurs alt                                   | 86,24 €                 | -                       | -                       | -                       | -                       | -                       | -                       | -                       |
| Basiskurs neu nach<br>Kapitalerhöhung 2003      | 82,02 €                 | 88,65 €                 | 88,10 €                 | 108,87 €                | 134,07 €                | 121,84 €                | 97,57 €                 | 109,11 €                |
| Innerer Wert 2010 für ein Recht                 | 31,28 €                 | 24,65 €                 | 25,20 €                 | 4,43 €                  | -                       | -                       | 15,73 €                 | 4,19 €                  |
| Beizulegender Zeitwert 2010<br>für ein Recht    | -                       | 24,75 €                 | 25,30 €                 | 10,25 €                 | 5,65 €                  | 9,15 €                  | 17,10 €                 | 14,22 €                 |
| Zahl der Rechte am 31. Dezember 2003            | 439.581                 | -                       | -                       | -                       | -                       | -                       | -                       | -                       |
| Zugang                                          | -                       | 456.336                 | -                       | -                       | -                       | -                       | -                       | -                       |
| Verfallen                                       | 2.354                   | -                       | -                       | -                       | -                       | -                       | -                       | -                       |
| Zahl der Rechte am 31. Dezember 2004            | 437.227                 | 456.336                 | -                       | -                       | -                       | -                       | -                       | -                       |
| Zugang                                          | 320                     | 1.697                   | 485.527                 | -                       | -                       | -                       | -                       | -                       |
| Ausgeübt                                        | 177.748                 | -                       | -                       | -                       | -                       | -                       | -                       | -                       |
| Verfallen                                       | 121                     | 2.005                   | -                       | -                       | -                       | -                       | -                       | -                       |
| Zahl der Rechte am 31. Dezember 2005            | 259.678                 | 456.028                 | 485.527                 | -                       | -                       | -                       | -                       | -                       |
| Zugang                                          | -                       | -                       | -                       | 443.609                 | -                       | -                       | -                       | -                       |
| Ausgeübt                                        | 63.942                  | 119.363                 | -                       | -                       | -                       | -                       | -                       | -                       |
| Verfallen                                       | -                       | -                       | -                       | 1.019                   | -                       | -                       | -                       | -                       |
| Zahl der Rechte am 31. Dezember 2006            | 195.736                 | 336.665                 | 485.527                 | 442.590                 | -                       | -                       | -                       | -                       |
| Zugang                                          | -                       | -                       | -                       | 6.123                   | 341.737                 | -                       | -                       | -                       |
| Ausgeübt                                        | 70.690                  | 85.652                  | 84.329                  | -                       | -                       | -                       | -                       | -                       |
| Verfallen                                       | -                       | -                       | 3.892                   | 8.514                   | 503                     | -                       | -                       | -                       |
| Zahl der Rechte am 31. Dezember 2007            | 125.046                 | 251.013                 | 397.306                 | 440.199                 | 341.234                 | -                       | -                       | -                       |
| Zugang                                          | -                       | -                       | -                       | -                       | 4.013                   | 444.104                 | -                       | -                       |
| Ausgeübt                                        | 40.045                  | 31.582                  | 31.716                  | -                       | -                       | -                       | -                       | -                       |
| Verfallen                                       | -                       | 1.069                   | -                       | 5.388                   | 5.848                   | 3.063                   | -                       | -                       |
| Zahl der Rechte am 31. Dezember 2008            | 85.001                  | 218.362                 | 365.590                 | 434.811                 | 339.399                 | 441.041                 | -                       | -                       |
| Zugang                                          | -                       | -                       | -                       | -                       | -                       | 463                     | 459.271                 | -                       |
| Ausgeübt                                        | 24.085                  | 8.906                   | 19.213                  | -                       | -                       | -                       | -                       | -                       |
| Verfallen                                       | -                       | -                       | 715                     | 2.904                   | 2.804                   | 4.194                   | -                       | -                       |
| Zahl der Rechte am 31. Dezember 2009            | 60.916                  | 209.456                 | 345.662                 | 431.907                 | 336.595                 | 437.310                 | 459.271                 | -                       |
| Zugang                                          | -                       | -                       | -                       | -                       | -                       | -                       | -                       | 675.029                 |
| Ausgeübt                                        | 60.916                  | 120.331                 | 72.662                  | -                       | -                       | -                       | -                       | -                       |
| Verfallen                                       | -                       | 1.833                   | 1.936                   | 1.653                   | 1.379                   | 1.462                   | 1.287                   | -                       |
| <b>Zahl der Rechte am<br/>31. Dezember 2010</b> | -                       | <b>87.292</b>           | <b>271.064</b>          | <b>430.254</b>          | <b>335.216</b>          | <b>435.848</b>          | <b>457.984</b>          | <b>675.029</b>          |
| <b>Ausübbar am Jahresende</b>                   | -                       | <b>87.292</b>           | <b>271.064</b>          | <b>430.254</b>          | <b>335.216</b>          | <b>435.848</b>          | -                       | -                       |

Die ERGO Versicherungsgruppe AG und einzelne ihrer Tochterunternehmen sowie die MEAG-Gesellschaften haben 2002 bis 2009 ebenfalls im jährlichen Abstand langfristige Incentive-Pläne aufgelegt, deren Laufzeit jeweils auf sieben Jahre ausgerichtet ist. Die zur Teilnahme berechtigten Mitglieder des Vorstands, Geschäftsführer und im Einzelfall auch Führungskräfte der obersten Ebene erhielten eine bestimmte Anzahl von Wertsteigerungsrechten auf die Münchener-Rück-Aktie. Seit 2010 werden diese aktienkursbasierten Vergütungspläne nur noch für die Mitglieder des oberen Managements der MEAG-Gesellschaften sowie für die Geschäftsführer der MEAG MUNICH ERGO Kapitalanlagegesellschaft mbH aufgelegt. Die Pläne sind genauso ausgestaltet wie die Münchener-Rück-Pläne und werden analog bilanziert. Im Berichtsjahr wurden insgesamt 39.046 (148.834) Wertsteigerungsrechte gewährt, davon - (112.764) an Mitglieder des Vorstands. Die zukünftigen Verpflichtungen aus dem langfristigen Incentive-Plan

werden mit Aktien der Münchener Rück AG oder Optionen auf Münchener-Rück-Aktien abgesichert. Im Berichtsjahr ergab sich ein Rückstellungsbedarf für die ERGO- und MEAG-Gesellschaften in Höhe von 8,9 (9,4) Millionen €. Der erfolgswirksam ausgewiesene Personalaufwand bzw. Ertrag entspricht – unter Berücksichtigung gegebenenfalls ausgeübter Rechte – der Veränderung der Rückstellung im Berichtsjahr. Dadurch ergab sich 2010 ein Aufwand von 0,8 (–7,6) Millionen €. Der gewichtete Durchschnittskurs der 2010 ausgeübten Wertsteigerungsrechte betrug für das Planjahr 2003 111,13 €, für das Planjahr 2004 116,93 € und für das Planjahr 2005 118,09 €. Der innere Wert der ausübaren Wertsteigerungsrechte belief sich zum Bilanzstichtag auf 2,7 Millionen €.

#### Langfristige Incentive-Pläne 2003–2010 der ERGO- und MEAG-Gesellschaften

|                                                 | Incentive-<br>Plan 2003 | Incentive-<br>Plan 2004 | Incentive-<br>Plan 2005 | Incentive-<br>Plan 2006 | Incentive-<br>Plan 2007 | Incentive-<br>Plan 2008 | Incentive-<br>Plan 2009 | Incentive-<br>Plan 2010 |
|-------------------------------------------------|-------------------------|-------------------------|-------------------------|-------------------------|-------------------------|-------------------------|-------------------------|-------------------------|
| Planbeginn                                      | 1.7.2003                | 1.7.2004                | 1.7.2005                | 1.7.2006                | 1.7.2007                | 1.7.2008                | 1.7.2009                | 1.7.2010                |
| Planende                                        | 30.6.2010               | 30.6.2011               | 30.6.2012               | 30.6.2013               | 30.6.2014               | 30.6.2015               | 30.6.2016               | 30.6.2017               |
| Basiskurs alt                                   | 86,24 €                 | -                       | -                       | -                       | -                       | -                       | -                       | -                       |
| Basiskurs neu nach<br>Kapitalerhöhung 2003      | 82,02 €                 | 88,65 €                 | 88,10 €                 | 108,87 €                | 134,07 €                | 121,84 €                | 97,57 €                 | 109,11 €                |
| Innerer Wert 2010 für ein Recht                 | 31,28 €                 | 24,65 €                 | 25,20 €                 | 4,43 €                  | -                       | -                       | 15,73 €                 | 4,19 €                  |
| Beizulegender Zeitwert 2010<br>für ein Recht    | -                       | 24,75 €                 | 25,30 €                 | 10,25 €                 | 5,65 €                  | 9,15 €                  | 17,10 €                 | 14,22 €                 |
| Zahl der Rechte am 31. Dezember 2003            | 168.681                 | -                       | -                       | -                       | -                       | -                       | -                       | -                       |
| Zugang                                          | 1.650                   | 154.189                 | -                       | -                       | -                       | -                       | -                       | -                       |
| Verfallen                                       | 13.414                  | -                       | -                       | -                       | -                       | -                       | -                       | -                       |
| Zahl der Rechte am 31. Dezember 2004            | 156.917                 | 154.189                 | -                       | -                       | -                       | -                       | -                       | -                       |
| Zugang                                          | 87                      | -                       | 211.941                 | -                       | -                       | -                       | -                       | -                       |
| Ausgeübt                                        | 90.398                  | -                       | -                       | -                       | -                       | -                       | -                       | -                       |
| Verfallen                                       | 7.498                   | 32.130                  | 24.411                  | -                       | -                       | -                       | -                       | -                       |
| Zahl der Rechte am 31. Dezember 2005            | 59.108                  | 122.059                 | 187.530                 | -                       | -                       | -                       | -                       | -                       |
| Zugang                                          | -                       | -                       | -                       | 173.682                 | -                       | -                       | -                       | -                       |
| Ausgeübt                                        | 31.027                  | 31.390                  | -                       | -                       | -                       | -                       | -                       | -                       |
| Verfallen                                       | -                       | -                       | 3.072                   | -                       | -                       | -                       | -                       | -                       |
| Zahl der Rechte am 31. Dezember 2006            | 28.081                  | 90.669                  | 184.458                 | 173.682                 | -                       | -                       | -                       | -                       |
| Zugang                                          | -                       | -                       | -                       | -                       | 121.821                 | -                       | -                       | -                       |
| Ausgeübt                                        | 4.258                   | 30.372                  | 34.879                  | -                       | -                       | -                       | -                       | -                       |
| Verfallen                                       | -                       | -                       | -                       | 7.483                   | 10.422                  | -                       | -                       | -                       |
| Zahl der Rechte am 31. Dezember 2007            | 23.823                  | 60.297                  | 149.579                 | 166.199                 | 111.399                 | -                       | -                       | -                       |
| Zugang                                          | -                       | -                       | -                       | -                       | -                       | 173.153                 | -                       | -                       |
| Ausgeübt                                        | 6.812                   | 10.304                  | 24.219                  | -                       | -                       | -                       | -                       | -                       |
| Verfallen                                       | -                       | -                       | -                       | 3.966                   | 1.597                   | 601                     | -                       | -                       |
| Zahl der Rechte am 31. Dezember 2008            | 17.011                  | 49.993                  | 125.360                 | 162.233                 | 109.802                 | 172.552                 | -                       | -                       |
| Zugang                                          | -                       | -                       | -                       | -                       | -                       | -                       | 148.834                 | -                       |
| Ausgeübt                                        | 2.200                   | 2.859                   | 14.851                  | -                       | -                       | -                       | -                       | -                       |
| Verfallen                                       | -                       | -                       | -                       | 2.046                   | 1.578                   | 1.803                   | -                       | -                       |
| Zahl der Rechte am 31. Dezember 2009            | 14.811                  | 47.134                  | 110.509                 | 160.187                 | 108.224                 | 170.749                 | 148.834                 | -                       |
| Zugang                                          | -                       | -                       | -                       | -                       | -                       | -                       | -                       | 39.046                  |
| Ausgeübt                                        | 14.811                  | 32.555                  | 45.130                  | -                       | -                       | -                       | -                       | -                       |
| Verfallen                                       | -                       | -                       | -                       | 241                     | 1.856                   | 2.506                   | -                       | -                       |
| <b>Zahl der Rechte am<br/>31. Dezember 2010</b> | -                       | <b>14.579</b>           | <b>65.379</b>           | <b>159.946</b>          | <b>106.368</b>          | <b>168.243</b>          | <b>148.834</b>          | <b>39.046</b>           |
| <b>Ausübbar am Jahresende</b>                   | -                       | <b>14.579</b>           | <b>65.379</b>           | <b>159.946</b>          | <b>106.368</b>          | <b>168.243</b>          | -                       | -                       |

Jedes Wertsteigerungsrecht befugt den Inhaber, die Differenz zwischen dem Kurs der Münchener-Rück-Aktie zum Zeitpunkt seiner Ausübung und dem Basiskurs in bar zu beziehen. Die Wertsteigerungsrechte können erst nach einer zweijährigen Sperrfrist und dann nur bei einem Kursanstieg um mindestens 20 % gegenüber dem Basiskurs

ausgeübt werden. Zusätzlich muss die Münchener-Rück-Aktie zweimal den EURO STOXX 50-Index am Ende eines Zeitraums von drei Monaten während der Planlaufzeit übertreffen. Der Bruttobetrag, der aus der Ausübung der Wertsteigerungsrechte erzielt werden kann, ist begrenzt auf eine Steigerung um maximal 150 % des Basiskurses.

Nach Ausübung von Wertsteigerungsrechten wird der Ertrag von dem Unternehmen ausgezahlt, das diese gewährt hat, und zwar in der jeweiligen Landeswährung. Die am letzten Börsentag der Planlaufzeit nicht ausgeübten Rechte werden für den Plan Teilnehmer ausgeübt, soweit die Ausübungsvoraussetzungen vorliegen. Werden die Bedingungen nicht erfüllt, verfallen die Wertsteigerungsrechte. Sofern ein anderes Unternehmen die Kontrolle über die Münchener Rück AG erlangt oder sich der Aktionärskreis der Gesellschaft aufgrund einer Verschmelzung oder eines vergleichbaren Umwandlungsvorgangs bzw. Zusammenschlusses wesentlich verändert (Change of Control), können alle Plan Teilnehmer von Munich Re ihre Wertsteigerungsrechte innerhalb von 60 Tagen nach dessen Wirksamkeit ausüben, auch wenn zu diesem Zeitpunkt die Ausübungsvoraussetzungen noch nicht vorliegen.

#### 45 // Mid-Term Incentive Plan

Die Münchener Rück AG legt seit 1. Januar 2009 Mid-Term Incentive Pläne mit einer Laufzeit von jeweils drei Jahren auf. Berechtigt zur Teilnahme an diesen aktienkursbezogenen Vergütungsplänen mit Barausgleich sind das obere Management in München sowie 2009 einmalig auch die Mitglieder des Vorstands. Auch die ERGO Versicherungsgruppe AG und einzelne ihrer Tochterunternehmen sowie die MEAG MUNICH ERGO AssetManagement GmbH haben für ihre Vorstandsmitglieder und Geschäftsführer einmalig 2009 einen entsprechenden Plan aufgelegt. Die Teilnehmer erhalten Performance Share Units (PSU-Rechte). Im vierten Jahr nach Planbeginn entsteht der Anspruch auf Bonuszahlung, deren Höhe von der Erreichung wertorientierter Erfolgsziele und der Steigerung des Total Shareholder Return (TSR) abhängt.

Die Planbedingungen gestalten sich im Einzelnen wie folgt:

Bemessungsgrundlagen sind zum einen wertorientierte Erfolgsziele, zum anderen der TSR der Aktie der Münchener Rück AG.

Die wertorientierten Erfolgsziele werden mittels einer durchschnittlichen Zielerreichung über die Jahre festgelegt und gemäß Zuständigkeit zugeordnet.

Die aktienkursbasierte Größe TSR stellt die gesamte Rendite der Aktie dar und umfasst die Aktienkursentwicklung plus die reinvestierten Dividenden über einen bestimmten Betrachtungszeitraum. Der TSR-Anfangswert und der TSR-Endwert werden aus dem Durchschnitt der letzten 60 Tage vor Planbeginn bzw. vor Planende ermittelt.

Bei Planbeginn erfolgte die Zuteilung der PSU-Rechte, indem der vertragliche Zusagebetrag für 100 % Zielerreichung bei den Erfolgszielen durch den TSR-Anfangswert dividiert wird. Für den TSR ist der Total-Return-Index der Xetra-Notierung der Münchener Rück-Aktie mit Startdatum 22. Januar 1996 maßgeblich.

Die finale Anzahl an PSU-Rechten errechnet sich aus der Multiplikation der PSU-Rechte zu Planbeginn mit dem Zielerreichungsprozentsatz der Erfolgsziele am Planende. Die Anzahl der Rechte kann zwischen 0 und dem 1,5-Fachen der anfangs zugeteilten Rechte schwanken.

Die Auszahlung wird bei einer Verdoppelung des TSR gedeckelt. Der maximale Auszahlungsbetrag ist für Vorstandsmitglieder und Geschäftsführer auf 150 % des Zusagebetrags begrenzt, für das obere Management auf 300 %.



Basis für die volle und anteilige Zuteilung der PSU-Rechte ist das Startjahr (= erstes Planjahr). Für unterjährige Ein- und Austritte gilt eine Pro-rata-temporis-Regelung.

Die Bewertung des Mid-Term Incentive Plans zum Stichtag erfolgt indirekt mit dem beizulegenden Zeitwert der Verpflichtung. Der beizulegende Zeitwert berücksichtigt neben dem wertorientierten Erfolgsziel den TSR während des Performance-Zeitraums. Hierzu wird der am Markt beobachtbare Wert des TSR Index mit der aktuellen Dividendenrendite der Münchener-Rück-Aktie zum Laufzeitende fortgeschrieben und mit marktgerechten Zinsen diskontiert.

#### Mid-Term Incentive Pläne 2009 und 2010 von Munich Re

|                                                                 | Incentive-Plan 2009 | Incentive-Plan 2010 |
|-----------------------------------------------------------------|---------------------|---------------------|
| Planbeginn                                                      | 1.1.2009            | 1.1.2010            |
| Planende                                                        | 31.12.2011          | 31.12.2012          |
| Beizulegender Zeitwert 2010 für ein Recht                       | 206,61 €            | 214,56 €            |
| Zahl der Rechte (bei 100 % Zielerreichung) am 1. Januar 2009    | 87.347              | -                   |
| Zugang                                                          | -                   | -                   |
| Verfallen                                                       | -                   | -                   |
| Zahl der Rechte (bei 100 % Zielerreichung) am 31. Dezember 2009 | 87.347              | -                   |
| Zahl der Rechte (bei 100 % Zielerreichung) am 1. Januar 2010    | 87.347              | 38.284              |
| Zugang                                                          | -                   | -                   |
| Verfallen                                                       | 245                 | -                   |
| Zahl der Rechte (bei 100 % Zielerreichung) am 31. Dezember 2010 | 87.102              | 38.284              |

Im Geschäftsjahr 2010 wurde ein Aufwand in Höhe von 11,3 Millionen € aus dem Mid-Term Incentive Plan erfasst. Die Rückstellung beträgt zum Stichtag 27,0 (15,7) Millionen €.

## 46 // Vergütungsbericht

Die Gesamtbezüge des Vorstands der Münchener Rück AG betrugen 11,7 (17,8) Millionen €. Die Gesamtbezüge des Aufsichtsrats der Münchener Rück AG betrugen 1,6 (1,3) Millionen €; nicht darin enthalten sind 0,2 (0,2) Millionen € für von anderen Konzernunternehmen ausgewiesene Aufsichtsratsvergütungen, sodass sich insgesamt 1,8 (1,5) Millionen € ergaben.

Die Gesamtbezüge früherer Mitglieder des Vorstands und ihrer Hinterbliebenen bezifferten sich auf 5,6 (5,7) Millionen €.

Für die ausgeschiedenen Vorstandsmitglieder entstanden keine Personalaufwendungen für Pensionsverpflichtungen. Nach Abzug der hierfür separierten Vermögenswerte (Contractual Trust Agreement) verblieben zum Stichtag keine Pensionsrückstellungen und keine Rückstellungen für vergleichbare Leistungen für frühere Mitglieder des Vorstands und ihre Hinterbliebenen.

Pensionsverpflichtungen für frühere Mitglieder des Aufsichtsrats und ihre Hinterbliebenen bestehen nicht.

Die Organmitglieder erhielten im Berichtsjahr keine Vorschüsse oder Kredite. Außerdem wurden keine berichtspflichtigen Geschäfte zwischen den Organmitgliedern und Munich Re getätigt. Den Mitgliedern des Aufsichtsrats wurden über die oben erwähnten Vergütungen als Aufsichtsratsmitglieder bei Konzernunternehmen hinaus auch keine Vergütungen oder Vorteile für persönlich erbrachte Leistungen im Sinne von Ziffer 5.4.6 Abs. 3 Deutscher Corporate Governance Kodex gewährt.

Alle weiteren Angaben zu Organbezügen, Aktiengeschäften und -besitz von Mitgliedern des Vorstands und des Aufsichtsrats sowie zur Struktur des Vergütungssystems des Vorstands finden Sie im Vergütungsbericht ab Seite 28.

## 47 // Beteiligungsprogramme

Im Jahr 2010 wurden keine Mitarbeiterbeteiligungsprogramme aufgelegt. Der aus Vorjahresprogrammen stammende Restbestand an eigenen Aktien wurde veräußert.

## 48 // Mitarbeiterzahl

Zum Jahresende waren in Deutschland 24.537 (24.951) und im Ausland 22.378 (22.298) Mitarbeiter beschäftigt.

### Zusammensetzung der Mitarbeiterzahl

|                  | 31.12.2010    | Vorjahr       |
|------------------|---------------|---------------|
| Rückversicherung | 11.370        | 11.309        |
| Erstversicherung | 30.887        | 31.145        |
| Munich Health    | 3.899         | 4.007         |
| Assetmanagement  | 759           | 788           |
| <b>Gesamt</b>    | <b>46.915</b> | <b>47.249</b> |

## 49 // Abschlussprüferhonorare

Für Leistungen, die der Konzernabschlussprüfer (KPMG Bayerische Treuhandgesellschaft AG Wirtschaftsprüfungsgesellschaft, München, und deren verbundene Unternehmen i. S. v. § 271 Abs. 2 HGB) für das Mutterunternehmen und konsolidierte Tochterunternehmen erbracht hat, wurde im Geschäftsjahr folgendes Honorar als Aufwand erfasst:

### Zusammensetzung der Abschlussprüferhonorare

| Tausend €                     | 2010          | Vorjahr       |
|-------------------------------|---------------|---------------|
| Abschlussprüfungen            | 8.601         | 8.243         |
| Andere Bestätigungsleistungen | 3.131         | 2.519         |
| Steuerberatungsleistungen     | 1.427         | 1.665         |
| Sonstige Leistungen           | 1.295         | 1.045         |
| <b>Summe</b>                  | <b>14.454</b> | <b>13.472</b> |

Mit Wirkung zum 1. Februar 2010 hat sich KPMG GUS, das heißt KPMG Russland, Georgien, Ukraine, Armenien, Kasachstan und Kirgistan, der KPMG Europe LLP angeschlossen. Diese KPMG-Gesellschaften sind daher neben KPMG Spanien, KPMG Schweiz, KPMG LLP (UK), KPMG Belgien, KPMG Niederlande, KPMG Luxemburg sowie KPMG Türkei verbundene Unternehmen der KPMG Deutschland i. S. v. § 271 Abs. 2 HGB. Dementsprechend sind diese Einheiten in den angabepflichtigen Abschlussprüferhonoraren enthalten.

## 50 // Eventualverbindlichkeiten, sonstige finanzielle Verpflichtungen

Munich Re geht im Rahmen ihrer normalen Geschäftstätigkeit Eventualverpflichtungen ein. Dabei betragen die Verpflichtungen aus Bürgschaften und Garantien insgesamt 106 (129) Millionen € sowie diejenigen aus Patronatserklärungen 8 (8) Millionen €.

Des Weiteren geht Munich Re unterschiedliche sonstige finanzielle Verpflichtungen ein. Diese beziffern sich für Werk- und Dienstleistungsverträge auf 218 (103) Millionen € sowie für Investitionsverpflichtungen auf 1.001 (1.174) Millionen €. Die genannten Beträge sind jeweils nicht abgezinste Nennwerte. Weitere sonstige finanzielle Verpflichtungen bestehen in Höhe von 17 (19) Millionen €.

Nach dem Versicherungsaufsichtsgesetz (VAG) sind alle deutschen Lebens- und Krankenversicherer unserer Gruppe zur Mitgliedschaft in einem Sicherungsfonds verpflichtet. Für die Lebensversicherer kann der Sicherungsfonds neben einer laufenden Beitragsverpflichtung von 0,2 Promille der Summe der versicherungstechnischen Nettorückstellungen zusätzlich Sonderbeiträge bis zu einer Höhe von einem Promille der Summe der versicherungstechnischen Nettorückstellungen erheben. Für die Krankenversicherer erfolgt keine Vorfinanzierung, zur Erfüllung seiner Aufgaben kann der Fonds jedoch Sonderbeiträge bis zwei Promille der versicherungstechnischen Nettorückstellungen erheben. Daraus könnte sich auf Konzernebene eine mögliche Verpflichtung von 113 (147) Millionen € ergeben. Die Aufgaben und Befugnisse des gesetzlichen Sicherungsfonds für die Lebensversicherung liegen bei der Protektor Lebensversicherungs-AG; mit den Aufgaben und Befugnissen des gesetzlichen Sicherungsfonds für die Krankenversicherung ist die Medicator AG betraut.

Alle Angaben zu Risiken aus Rechtsstreitigkeiten finden Sie im Risikobericht auf Seite 135.

Weitere finanzielle Verpflichtungen, die für die Beurteilung der Finanzlage des Konzerns von Bedeutung sind, bestehen nicht. Haftungsverhältnisse zugunsten von Organmitgliedern sind wir nicht eingegangen.

## 51 // Beschränkungen des Finanzmitteltransfers

Unsere Tochterunternehmen Munich Re America (MRAM) und Munich American Reassurance Company (MARC) weisen zum 31. Dezember 2010 in ihren Abschlüssen, die nach lokalen aufsichtsrechtlichen Bestimmungen (Statutory Accounting Principles) erstellt wurden, negative Gewinnrücklagen von 267 Millionen US\$ bzw. 512 Millionen US\$ aus. Aus diesem Grund können die Gesellschaften zurzeit nur mit Zustimmung der zuständigen US-Aufsichtsbehörde Dividenden ausschütten beziehungsweise Kapital an das Mutterunternehmen transferieren.

Dividendenausschüttungen unseres Tochterunternehmens The Hartford Steam Boiler Inspection and Insurance Company (HSBIC), Connecticut, sind wegen der am 31. März 2009 erfolgten Übernahme durch Munich Re bis zum 31. März 2011 nur mit vorheriger Zustimmung der zuständigen US-Aufsichtsbehörde möglich.

## 52 // Leasing

**Munich Re als Leasingnehmer** Zum Bilanzstichtag bestehen insgesamt 455 (397) Millionen € offene Verpflichtungen aus unkündbaren Operating-Leasingverhältnissen.

### Fälligkeiten

| Mio. €                        | 31.12.2010 | Vorjahr    |
|-------------------------------|------------|------------|
| Innerhalb eines Jahres        | 114        | 84         |
| Zwischen zwei und fünf Jahren | 267        | 236        |
| Nach fünf Jahren              | 74         | 77         |
| <b>Gesamt</b>                 | <b>455</b> | <b>397</b> |

Zahlungen aus Operating-Leasingverhältnissen betreffen insbesondere Mieten für Büro- und Geschäftsräume des Konzerns.

Die Finanzierungs-Leasingverhältnisse betreffen insbesondere Mieten für Büro- und Geschäftsräume des Konzerns. Sie beinhalten Verlängerungsoptionen sowie Beschränkungen hinsichtlich der Vereinbarung von Untermietverhältnissen, jedoch keine Preisanpassungsklauseln oder Kaufoptionen. Nachfolgende Tabelle zeigt die zum 31. Dezember des Geschäftsjahres zukünftig fälligen Mindestleasingzahlungen und deren Barwerte aus Finanzierungs-Leasingverhältnissen:

### Fälligkeiten

|                               | 31.12.2010                        |            | Vorjahr                           |                                                  |
|-------------------------------|-----------------------------------|------------|-----------------------------------|--------------------------------------------------|
| Mio. €                        | Mindest-<br>leasing-<br>zahlungen | Zinsanteil | Mindest-<br>leasing-<br>zahlungen | Barwert der<br>Mindest-<br>leasing-<br>zahlungen |
| Innerhalb eines Jahres        | 8                                 | 2          | 7                                 | -                                                |
| Zwischen zwei und fünf Jahren | 27                                | 5          | 26                                | 7                                                |
| Nach fünf Jahren              | 15                                | 2          | 23                                | 6                                                |
| <b>Gesamt</b>                 | <b>50</b>                         | <b>9</b>   | <b>56</b>                         | <b>13</b>                                        |

Die Summe der zukünftig erwarteten Mindestzahlungen aus unkündbaren Untermietverhältnissen beträgt zum 31. Dezember 2010 2 (3) Millionen €.

**Munich Re als Leasinggeber** Operating-Leasingverhältnisse betreffen im Wesentlichen vermietete Grundstücke und Bauten. Der aus der Vermietungstätigkeit resultierende Gesamtbetrag der künftigen Mietzahlungsansprüche aus unkündbaren Mietverhältnissen beläuft sich zum Bilanzstichtag auf 911 (716) Millionen €.

### Fälligkeiten

| Mio. €                        | 31.12.2010 | Vorjahr    |
|-------------------------------|------------|------------|
| Innerhalb eines Jahres        | 164        | 139        |
| Zwischen zwei und fünf Jahren | 447        | 363        |
| Nach fünf Jahren              | 300        | 214        |
| <b>Gesamt</b>                 | <b>911</b> | <b>716</b> |

Zum Bilanzstichtag bestanden keine Finanzierungs-Leasingverhältnisse.

## 53 // Ereignisse nach dem Bilanzstichtag

Am 1. Januar 2011 hat Munich Re über ihre Tochtergesellschaft Munich Health North America Inc., Wilmington, Delaware, 100 % der Anteile der Windsor Health Group Inc. (Windsor), Brentwood, Tennessee, für insgesamt 131 Millionen US\$ (98 Millionen €) in bar und vollständig aus eigenen Mitteln erworben.

Windsor bietet über ihre Tochtergesellschaft Windsor Health Plan, Inc., Brentwood, Tennessee, staatlich geförderte Krankenversicherungsleistungen und spezielle Managed-Care-Programme für Senioren an. Es werden über 75.000 Mitglieder in den US-Bundesstaaten Alabama, Arkansas, Mississippi, South Carolina und Tennessee betreut. Die Übernahme von Windsor stärkt die Position unseres US-amerikanischen Tochterunternehmens Sterling Life Insurance Company, Bellingham, Washington State, im Senioren-Segment und steigert damit unsere Wettbewerbsfähigkeit im Zuge der US-Gesundheitsreform.

In Zusammenhang mit dem Erwerb von Windsor werden voraussichtlich sonstige immaterielle Vermögenswerte von 46,6 Millionen € sowie ein Geschäfts- oder Firmenwert von 45,8 Millionen € aktiviert. Der Geschäfts- oder Firmenwert leitet sich insbesondere aus Synergien aus Produkten und Service-Angeboten, der geografischen Verbreitung sowie den Vertriebskanälen mit dem restlichen Medicare Business von Munich Re ab. Im Geschäfts- oder Firmenwert ist der Wert des Mitarbeiterstamms von Windsor enthalten. Wir gehen davon aus, dass der Geschäfts- oder Firmenwert steuerlich nicht abzugsfähig sein wird.

Die zusammengefasste Eröffnungsbilanz von Windsor enthält außerdem nach Eliminierung ihrer konzerninternen Geschäfte zum Erwerbszeitpunkt folgende vorläufige IFRS-Werte: Kapitalanlagen 9,0 Millionen €, laufende Guthaben bei Kreditinstituten, Schecks und Kassenbestand 29,5 Millionen €, Forderungen 21,8 Millionen €, übrige Aktiva 13,4 Millionen €, versicherungstechnische Rückstellungen 29,4 Millionen € sowie andere Rückstellungen, Verbindlichkeiten und passive latente Steuern 38,7 Millionen €. Das Eigenkapital von Windsor betrug zum Zeitpunkt des Erwerbs 23,4 Millionen €.

Die erworbenen Forderungen bestehen im Wesentlichen aus den Forderungen an die Centers for Medicare und Medicaid Services (CMS), von der Windsor ihre Prämien erhält. Die Forderungen betragen zum Zeitpunkt des Erwerbs 13 Millionen €. Dieser Betrag entspricht dem beizulegenden Zeitwert, da von der CMS als regierungsnahe Institution keine Zahlungsausfälle erwartet werden.

Es wurden keine Eventualverbindlichkeiten, bedingten Leistungen und separaten Transaktionen im Sinne von IFRS 3 identifiziert. Da der Erwerb von Windsor erst zum 1. Januar 2011 erfolgte, sind in die Konzern-Gewinn- und Verlustrechnung bisher keine Erträge und Aufwendungen von Windsor eingeflossen.

Die vorstehenden Angaben zur erstmaligen Bilanzierung erfolgen auf vorläufiger Basis, da sich unter anderem noch Änderungen des Kaufpreises und der Steuerpositionen der Bilanz ergeben können.

Mit wirtschaftlicher Wirkung zum 1. Januar 2011 hat Munich Re über ihre Tochtergesellschaft MR RENT-Investment GmbH, München, 100 % der stimmberechtigten Anteile an elf Windpark-Gesellschaften im Rahmen eines Bieterverfahrens erworben. Das Windparkportfolio besteht aus bereits in Betrieb befindlichen Windparks, die in verschiedenen Regionen Deutschlands liegen und mit insgesamt 40 Windkraftanlagen über eine installierte Leistung von 72,7 Megawatt verfügen.

Mit Kauf- und Abtretungsvertrag über Kommanditanteile und Vereinbarung über den Wechsel der Komplementärgesellschaften hat die MR RENT-Investment GmbH, München, von der wpd windpark asset GmbH & Co. KG, Bremen, jeweils sämtliche Kommanditanteile folgender Windpark-Gesellschaften erworben:

- // Windpark Mittelhausen GmbH & Co. KG, Bremen
- // Windpark Sassenberg GmbH & Co. KG, Bremen
- // Einzelanlage Hohenseefeld GmbH & Co. KG, Bremen
- // wpd Windpark Wergzahna GmbH & Co. KG, Bremen
- // Windpark Hillmersdorf GmbH & Co. KG, Bremen
- // Windpark Marwitz GmbH & Co. KG, Bremen
- // Windpark Großberndten 2 GmbH & Co. KG, Bremen
- // Windpark Krüge GmbH & Co. KG, Bremen
- // Windpark Geisleden Betriebs GmbH & Co. KG, Bremen
- // Windpark Klein Bünzow GmbH & Co. KG, Bremen
- // Windpark Langengrassau GmbH & Co. KG, Bremen

Die MR-RENT Management GmbH, München, ebenfalls Tochtergesellschaft von Munich Re, tritt als neue Komplementärin in die Kommanditgesellschaften ein. Der Unternehmenserwerb ist Teil des Programms RENT (Renewable Energy and New Technologies), durch das Munich Re in erneuerbare Energien und neue Umwelttechnologien investieren möchte.

Der vorläufige Kaufpreis für das Windparkportfolio beträgt 40,5 Millionen € und wird in bar und vollständig aus eigenen Mitteln finanziert. Der Kaufpreis enthält verschiedene Kaufpreiskomponenten, die insbesondere von den zum Erwerbsstichtag endgültig festgestellten technischen Nutzungsangaben der Windkraftanlagen und den endgültigen Jahresabschlüssen zum 31. Dezember 2010 der Windpark-Gesellschaften abhängig sind.

Die erstmalige Bilanzierung der erworbenen Vermögenswerte und Schulden des Windparkportfolios ist zum Zeitpunkt der Aufstellung des Konzernabschlusses noch nicht vollständig. Aus diesem Grund können die Angaben zu den Bilanzwerten noch nicht gemacht werden.

Da der Erwerb erst zum 1. Januar 2011 erfolgte, sind in die Konzern-Gewinn- und Verlustrechnung bisher keine Erträge und Aufwendungen der Windpark-Gesellschaften eingeflossen.

In China wird ERGO mit der Shandong State-owned Assets Investment Holding Company (SSAIH) ein Joint Venture gründen, das in der Provinz Shandong vor allem Lebensversicherungen für Privatkunden anbieten soll. Wir und SSAIH werden jeweils die Hälfte der Anteile am geplanten Joint Venture halten. Laut Gesellschaftsvertrag zahlen wir für unseren Anteil am Grundkapital der Gesellschaft 300 Millionen RMB (34 Millionen €). Der Aufbau des Unternehmens wird beginnen, sobald die Aufsichtsbehörde ihre Genehmigung erteilt hat. Der Gesellschaftsname soll „ERGO China Life Insurance Co., Ltd.“ lauten.

Die Überschwemmungen als Folge extremer Niederschläge in Australien hielten über den Jahreswechsel hinaus an. Ferner wurde Australien im Februar 2011 von dem Zyklon Yasi getroffen. Für 2011 rechnen wir derzeit für Munich Re mit einer Schadenbelastung nach Retrozession in Höhe eines niedrigen bis mittleren dreistelligen Millionen-Euro-Betrags aus diesen Ereignissen. Zudem ereignete sich am 22. Februar 2011 ein schweres Erdbeben der Magnitude 6,3 nahe der Stadt Christchurch in Neuseeland; Munich Re ist exponiert.

Aus dem Aktienrückkaufprogramm, das der Vorstand der Münchener Rück AG am 7. Mai 2010 beschlossen hat, haben wir nach dem Bilanzstichtag bis 25. Februar 2011 weitere 1,7 Millionen Aktien der Münchener Rück AG im Wert von 195 Millionen € zurückgekauft.

## 54 // Ergebnis je Aktie

Verwässernde Effekte, die bei der Berechnung des Ergebnisses je Aktie gesondert ausgewiesen werden müssen, lagen weder zum Bilanzstichtag noch im Vorjahr vor. Das Ergebnis je Aktie kann in Zukunft potenziell durch die Ausgabe von Aktien oder Bezugsrechten aus dem genehmigten und dem bedingten Kapital verwässert werden.

### Ergebnis je Aktie

|                                                                    |        | 2010        | Vorjahr     |
|--------------------------------------------------------------------|--------|-------------|-------------|
| Konzernergebnis auf Anteilseigner der Münchener Rück AG entfallend | Mio. € | 2.422       | 2.521       |
| Gewichteter Durchschnitt der Anzahl ausstehender Aktien            |        | 185.422.866 | 194.692.459 |
| Ergebnis je Aktie                                                  | €      | 13,06       | 12,95       |

Die Anzahl der ausstehenden Aktien hat sich aufgrund des Rückkaufs von insgesamt 11.531.594 (3.745.174) Aktien im Lauf des Geschäftsjahres 2010 verringert.

## 55 // Gewinnverwendungsvorschlag

Der Bilanzgewinn 2010 der Münchener Rückversicherungs-Gesellschaft Aktiengesellschaft beträgt laut Einzelabschluss nach deutschem Recht (HGB) 1.177.927.943,75 €. Der Vorstand schlägt der Hauptversammlung vor, diesen Bilanzgewinn zur Ausschüttung einer Dividende von 6,25 € auf jede dividendenberechtigte Aktie zu verwenden sowie den auf zum Zeitpunkt der Hauptversammlung gehaltene oder bereits eingezogene eigene Aktien entfallenden Betrag auf neue Rechnung vorzutragen.



## Aufstellung des Anteilsbesitzes zum 31. Dezember 2010 gemäß § 313 Abs. 2 HGB

////////////////////////////////////

Bei den nachstehenden Angaben handelt es sich um die gemäß § 16 Abs. 2 und 4 AktG addierten unmittelbaren und mittelbaren Anteile an Unternehmen, soweit sie 20 % und mehr am Kapital ausmachen, sowie um die gemäß § 16 Abs. 2 und 4 AktG addierten unmittelbaren und mittelbaren Beteiligungen an großen Kapitalgesellschaften gemäß § 267 Abs. 3 HGB, soweit sie 5 % der Stimmrechte überschreiten.

| Name und Sitz                                                                   | %-Anteil<br>am Kapital | Name und Sitz                                                       | %-Anteil<br>am Kapital |
|---------------------------------------------------------------------------------|------------------------|---------------------------------------------------------------------|------------------------|
| <b>Konsolidierte Tochterunternehmen</b>                                         |                        |                                                                     |                        |
| 40, Rue Courcelles SAS, Paris                                                   | 100,0000               | American Modern Lloyds Insurance Company,<br>Dallas, Texas          | 100,0000               |
| 80e LIMITED, Bristol                                                            | 100,0000               | American Modern Select Insurance Company,<br>Amelia, Ohio           | 100,0000               |
| AEVG 2004 GmbH, Frankfurt <sup>4</sup>                                          | 0,0000                 | American Modern Surplus Lines Insurance Company,<br>Amelia, Ohio    | 100,0000               |
| Agora Insurance Network Solutions, Inc.,<br>Chicago, Illinois                   | 100,0000               | American Southern Home Insurance Company,<br>Jacksonville, Florida  | 100,0000               |
| aktiva Vermittlung von Versicherungen und<br>Finanz-Dienstleistungen GmbH, Köln | 100,0000               | American Western Home Insurance Company,<br>Oklahoma City, Oklahoma | 100,0000               |
| ALICE Software Service GmbH, Erkrath                                            | 100,0000               | Amicus Legal Ltd., Colchester                                       | 100,0000               |
| Allfinanz Limited, Dublin                                                       | 100,0000               | Amicus Ltd., Colchester                                             | 100,0000               |
| almeda GmbH, München                                                            | 100,0000               | Arkansas Life Insurance Company, Phoenix, Arizona                   | 100,0000               |
| almeda Versicherungs-Aktiengesellschaft, München                                | 100,0000               | avanturo GmbH, Düsseldorf                                           | 100,0000               |
| American Alternative Insurance Corporation,<br>Wilmington, Delaware             | 100,0000               | B&C International Insurance, Hamilton, Bermuda                      | 100,0000               |
| American Family Home Insurance Company,<br>Jacksonville, Florida                | 100,0000               | Bank Austria Creditanstalt Versicherung AG, Wien                    | 90,0000                |
| American Modern Home Insurance Company,<br>Amelia, Ohio                         | 100,0000               | Beaufort Dedicated No.1 Ltd, London                                 | 100,0000               |
| American Modern Home Service Company,<br>Amelia, Ohio                           | 100,0000               | Beaufort Dedicated No.2 Ltd, London                                 | 100,0000               |
| American Modern Insurance Company of<br>Florida, Inc., Jacksonville, Florida    | 100,0000               | Beaufort Dedicated No.5 Ltd., London                                | 100,0000               |
| American Modern Insurance Grwoup, Inc., Amelia, Ohio                            | 100,0000               | Beaufort Underwriting Agency Limited, London                        | 100,0000               |
| American Modern Life Insurance Company,<br>Amelia, Ohio                         | 100,0000               | Bell & Clements (Bermuda) Ltd., Hamilton, Bermuda                   | 100,0000               |
|                                                                                 |                        | Bell & Clements (London) Ltd, London                                | 100,0000               |
|                                                                                 |                        | Bell & Clements (USA) Inc, Reston, Virginia                         | 100,0000               |
|                                                                                 |                        | Bell & Clements Inc, Reston, Virginia                               | 100,0000               |
|                                                                                 |                        | Bell & Clements Ltd, London                                         | 100,0000               |
|                                                                                 |                        | Bos Incasso B.V., Groningen                                         | 90,0240                |

| Name und Sitz                                                                                       | %-Anteil<br>am Kapital |
|-----------------------------------------------------------------------------------------------------|------------------------|
| CAPITAL PLAZA Holding GmbH & Co. Singapur KG, Düsseldorf                                            | 100,0000               |
| Capital Square Pte. Ltd., Singapur                                                                  | 100,0000               |
| Capitol Life & Accident Insurance Company, Jonesboro, Arkansas                                      | 100,0000               |
| CJSIC „European Travel Insurance“, Moskau                                                           | 100,0000               |
| Compagnie Européenne d'Assurances, Nanterre                                                         | 100,0000               |
| Compania Europea de Seguros S.A., Madrid                                                            | 100,0000               |
| D.A.S. Defensa del Automovilista y de Siniestros - Internacional, S.A. de Seguros, Barcelona        | 100,0000               |
| D.A.S. Deutscher Automobil Schutz Allgemeine Rechtsschutz-Versicherungs-Aktiengesellschaft, München | 100,0000               |
| D.A.S. HELLAS Allgemeine Rechtsschutz-Versicherungs-AG, Athen                                       | 99,9983                |
| D.A.S. Jogvédelmi Biztosító Részvénytársaság, Budapest                                              | 99,9008                |
| D.A.S. Luxemburg Allgemeine Rechtsschutz-Versicherung S.A., Strassen                                | 99,9500                |
| D.A.S. Oigusabikuluude Kindlustuse AS, Tallinn                                                      | 100,0000               |
| D.A.S. Österreichische Allgemeine Rechtsschutz-Versicherungs-Aktiengesellschaft, Wien               | 99,9800                |
| D.A.S. poisťovna právnej ochrany, a.s., Bratislava                                                  | 100,0000               |
| D.A.S. pojišťovna právní ochrany, a.s., Prag                                                        | 100,0000               |
| D.A.S. Société anonyme belge d'assurances de Protection Juridique, Brüssel                          | 99,9800                |
| D.A.S. Towarzystwo Ubezpieczeń Ochrony Prawnej S.A., Warszawa                                       | 99,9000                |
| DAS Assistance Limited, Bristol                                                                     | 100,0000               |
| DAS Holding N.V., Amsterdam                                                                         | 51,0000                |
| DAS Law Limited, Bristol                                                                            | 100,0000               |
| DAS Legal Expenses Insurance Co., Ltd., Seoul                                                       | 100,0000               |
| DAS Legal Expenses Insurance Company Limited, Bristol                                               | 100,0000               |
| DAS Legal Finance B.V., Amsterdam                                                                   | 100,0000               |
| DAS Legal Protection Insurance Company Ltd., Toronto                                                | 100,0000               |
| DAS Legal Protection Ireland Limited, Dublin                                                        | 100,0000               |
| DAS Legal Protection Limited, Christchurch, Neuseeland                                              | 100,0000               |
| DAS Legal Protection Limited, Vancouver                                                             | 100,0000               |
| DAS LEGAL SERVICES LIMITED, Bristol                                                                 | 100,0000               |
| DAS Nederlandse Rechtsbijstand Verzekering-maatschappij N.V., Amsterdam                             | 100,0000               |
| DAS Rechtsschutz-Versicherungs-AG, Luzern                                                           | 100,0000               |
| DAS Services Limited, Bristol                                                                       | 100,0000               |
| DAS Support B.V., Amsterdam                                                                         | 100,0000               |
| DAS UK Holdings Limited, Bristol                                                                    | 100,0000               |
| DKV - Alpha Vermögensverwaltungs GmbH, Köln                                                         | 100,0000               |
| DKV BELGIUM S.A., Brüssel                                                                           | 100,0000               |
| DKV Deutsche Krankenversicherung Aktiengesellschaft, Köln                                           | 100,0000               |
| DKV Globality S.A., Luxembourg                                                                      | 100,0000               |
| DKV Luxembourg S.A., Luxemburg                                                                      | 75,0000                |
| DKV Seguros y Reaseguros, Sociedad Anónima Española, Saragossa                                      | 100,0000               |
| EIG, Co., Wilmington, Delaware                                                                      | 100,0000               |

| Name und Sitz                                                                      | %-Anteil<br>am Kapital |
|------------------------------------------------------------------------------------|------------------------|
| ERGO Achte Beteiligungsgesellschaft mbH, Düsseldorf                                | 100,0000               |
| ERGO ASIGURARI DE VIATA SA, Bukarest                                               | 100,0000               |
| ERGO Assicurazioni S.p.A., Mailand                                                 | 100,0000               |
| ERGO Austria International AG, Wien                                                | 100,0000               |
| ERGO Daum Direct General Insurance Co. Ltd., Seoul                                 | 75,0000                |
| ERGO DIREKT Krankenversicherung AG, Fürth                                          | 100,0000               |
| ERGO DIREKT Lebensversicherung AG, Fürth                                           | 100,0000               |
| ERGO Direkt Lebensversicherung AG, Schwechat                                       | 100,0000               |
| ERGO DIREKT Versicherung AG, Fürth                                                 | 100,0000               |
| ERGO Életbiztosító Zrt., Budapest                                                  | 100,0000               |
| ERGO Elukindlustuse AS, Tallinn                                                    | 100,0000               |
| ERGO Emeklilik ve Hayat A.S., Istanbul                                             | 99,9999                |
| ERGO Funds AS, Tallinn                                                             | 100,0000               |
| ERGO Generales Seguros y Reaseguros, S.A., Madrid                                  | 100,0000               |
| ERGO Grubu Holding A.S., Istanbul                                                  | 100,0000               |
| ERGO Immobilien-GmbH 14.Victoria & Co. KG, Kreien                                  | 100,0000               |
| ERGO Immobilien-GmbH 5. Hamburg-Mannheimer & Co.KG, Kreien                         | 100,0000               |
| ERGO International Aktiengesellschaft, Düsseldorf                                  | 100,0000               |
| ERGO International Services GmbH, Düsseldorf                                       | 100,0000               |
| ERGO Invest SIA, Riga                                                              | 100,0000               |
| ERGO Italia Business Solutions S.c.r.l., Mailand                                   | 100,0000               |
| ERGO Italia Direct Network s.r.l., Mailand                                         | 100,0000               |
| ERGO Italia S.p.A., Mailand                                                        | 100,0000               |
| ERGO Kindlustuse AS, Tallinn                                                       | 100,0000               |
| ERGO Latvija Lebensversicherung AG (ERGO Latvija Dzīvība AAS), Riga                | 100,0000               |
| ERGO Latvija Versicherung AG (ERGO Latvija Apdrošināšanas Akciju Sabiedrība), Riga | 100,0000               |
| ERGO Lebensversicherung Aktiengesellschaft, Hamburg                                | 100,0000               |
| ERGO Lietuva draudimo UAB, Vilnius                                                 | 100,0000               |
| ERGO Lietuva gyvybes draudimas, Vilnius                                            | 100,0000               |
| ERGO Life N.V., Brüssel                                                            | 99,9999                |
| ERGO Pensionsfonds Aktiengesellschaft, Düsseldorf                                  | 100,0000               |
| ERGO Previdenza S.p.A., Mailand                                                    | 100,0000               |
| ERGO Private Capital Gesundheit GmbH & Co. KG, Düsseldorf                          | 100,0000               |
| ERGO Private Capital Leben GmbH & Co. KG, Düsseldorf                               | 100,0000               |
| ERGO Private Equity Gesundheit GmbH, Düsseldorf                                    | 100,0000               |
| ERGO Private Equity Komposit GmbH, Düsseldorf                                      | 100,0000               |
| ERGO Private Equity Leben GmbH, Düsseldorf                                         | 100,0000               |
| ERGO RUSS Versicherung AG, St. Petersburg                                          | 99,9638                |
| ERGO Shisn, Moskau                                                                 | 100,0000               |
| ERGO SIGORTA A.S., Istanbul                                                        | 99,9999                |
| ERGO Versicherung Aktiengesellschaft, Düsseldorf                                   | 100,0000               |
| ERGO Versicherungsgruppe AG, Düsseldorf                                            | 100,0000               |
| ERGO Vida Seguros y Reaseguros, Sociedad Anónima, Saragossa                        | 100,0000               |
| ERGO Zavarovalnica d. d., Ljubljana                                                | 100,0000               |
| ERGO životná poisťovňa, a. s., Bratislava                                          | 100,0000               |
| ERGO Zweite Beteiligungsgesellschaft mbH, Düsseldorf                               | 99,9999                |
| Europaeiske Rejseforsikring A/S, Kopenhagen                                        | 100,0000               |

| Name und Sitz                                                          | %-Anteil<br>am Kapital |
|------------------------------------------------------------------------|------------------------|
| EUROPÄISCHE Reiseversicherung Aktiengesellschaft, München              | 100,0000               |
| European International Holding A/S, Kopenhagen                         | 100,0000               |
| Europeiska Försäkringsaktiebolaget, Stockholm                          | 100,0000               |
| Evropska Cestovni Pojistovna A.S., Prag                                | 90,0000                |
| Excess Reinsurance, Inc, Providenciales                                | 100,0000               |
| FAIRANCE GmbH, Düsseldorf                                              | 100,0000               |
| First Legal Protection Limited, St. Albans                             | 100,0000               |
| First Marine Insurance Company, Amelia, Ohio                           | 100,0000               |
| Flexitel Telefonservice GmbH, Berlin                                   | 100,0000               |
| Geschlossene Aktiengesellschaft<br>Europäische Reiseversicherung, Kiew | 95,2708                |
| GF 65, Wien <sup>4</sup>                                               | 100,0000               |
| Global Standards LLC, Wilmington, Delaware                             | 100,0000               |
| Great Lakes Reinsurance (UK) Plc., London                              | 100,0000               |
| Great Lakes Services Ltd., London                                      | 100,0000               |
| Group Risk Services Limited, London                                    | 100,0000               |
| Groves, John & Westrup Limited, London                                 | 100,0000               |
| Hamburg-Mannheimer Consulting NV, Brüssel                              | 100,0000               |
| Hamburg-Mannheimer Pensionskasse AG, Hamburg                           | 100,0000               |
| Hartford Steam Boiler (M) Sdn. Bhd, Kuala Lumpur                       | 100,0000               |
| Hartford Steam Boiler (Singapore), PTE Ltd., Singapore                 | 100,0000               |
| Hartford Steam Boiler International India Pvt Ltd., Kolkata            | 100,0000               |
| Hartford Steam Boiler International-GmbH, Rheine                       | 100,0000               |
| HMV GFKL Beteiligungs GmbH, Düsseldorf                                 | 100,0000               |
| HSB Engineering Finance Corporations, Wilmington, Delaware             | 100,0000               |
| HSB Engineering Insurance Limited, London                              | 100,0000               |
| HSB Group, Inc., Wilmington, Delaware                                  | 100,0000               |
| HSB Haughton Engineering Insurance Services Limited, Oldham            | 100,0000               |
| HSB Japan KK, Minato-KU, Tokyo                                         | 100,0000               |
| HSB Professional Loss Control, Inc., Lenoir City, Tennessee            | 100,0000               |
| HSB Solomon Associates LLC, Wilmington, Delaware                       | 100,0000               |
| HSB Technical Consulting & Services (Shanghai) Company, Ltd., Shanghai | 100,0000               |
| Hyneman Life Corporation, Jonesboro, Arkansas                          | 100,0000               |
| IDEENKAPITAL AG, Düsseldorf                                            | 100,0000               |
| IDEENKAPITAL Financial Engineering AG, Düsseldorf                      | 100,0000               |
| IDEENKAPITAL Financial Service AG, Düsseldorf                          | 100,0000               |
| Ideenkapital Media Finance AG, Düsseldorf                              | 50,1000                |
| iii, München <sup>4</sup>                                              | 100,0000               |
| IK Einkauf Objekt Eins gmbH & Co. KG, Düsseldorf                       | 100,0000               |
| IK Einkaufsmärkte Deutschland GmbH & Co. KG, Düsseldorf                | 52,0295                |
| IK Premium Fonds GmbH & Co. KG, Düsseldorf                             | 100,0000               |
| IK Premium Fonds zwei GmbH & Co. KG, Düsseldorf                        | 100,0000               |
| IKFE Properties I AG, Zürich                                           | 63,5532                |
| IRIS Capital Fund II German Investors GmbH & Co. KG, Düsseldorf        | 85,7143                |
| ITERGO Informationstechnologie GmbH, Düsseldorf                        | 100,0000               |
| Itus Verwaltungs AG, München                                           | 100,0000               |

| Name und Sitz                                                       | %-Anteil<br>am Kapital |
|---------------------------------------------------------------------|------------------------|
| Joint Stock Insurance Company ERGO, Minsk                           | 92,3100                |
| Jordan Health Cost Management Services W.L.L., Amman                | 100,0000               |
| K & P Pflegezentrum IMMAC Uelzen Renditefonds GmbH & Co. KG, Uelzen | 84,8817                |
| KA Köln Assekuranz.Agentur GmbH, Köln                               | 100,0000               |
| Kapdom-Invest GmbH, Moskau                                          | 100,0000               |
| Landelijke Associatie van Gerechtsdeurwaarders B.V., Groningen      | 90,0240                |
| LAVG Associatie van Gerechtsdeurwaarders Zuid Holding B.V., Breda   | 80,0000                |
| LawAssist Limited, Bristol                                          | 100,0000               |
| LifePlans Inc., Waltham, Massachusetts                              | 100,0000               |
| LifePlans LTC Services, Inc., Ontario, California                   | 100,0000               |
| Lloyds Modern Corporation, Dallas, Texas                            | 100,0000               |
| Longial GmbH, Düsseldorf                                            | 100,0000               |
| Marina Salud S.A., Alicante                                         | 65,0000                |
| Marina Sp.z.o.o., Sopot                                             | 100,0000               |
| MEAG Acofonds, München <sup>4</sup>                                 | 100,0000               |
| MEAG Adam, München <sup>4</sup>                                     | 100,0000               |
| MEAG ANGLO CELTIC Fund, München <sup>4</sup>                        | 100,0000               |
| MEAG BLN 2, München <sup>4</sup>                                    | 100,0000               |
| MEAG BLN 3, München <sup>4</sup>                                    | 100,0000               |
| MEAG Cash Management GmbH, München                                  | 100,0000               |
| MEAG Consortio, München <sup>4</sup>                                | 100,0000               |
| MEAG EDL CurryGov, München <sup>4</sup>                             | 100,0000               |
| MEAG EDL EuroValue, München <sup>4</sup>                            | 100,0000               |
| MEAG EUR Global 1, München <sup>4</sup>                             | 100,0000               |
| MEAG EUR Global 2, München <sup>4</sup>                             | 100,0000               |
| MEAG Eurak, München <sup>4</sup>                                    | 100,0000               |
| MEAG Euro 1, München <sup>4</sup>                                   | 100,0000               |
| MEAG Euro 2, München <sup>4</sup>                                   | 100,0000               |
| MEAG EURO-FONDS, München <sup>4</sup>                               | 100,0000               |
| MEAG Eurostar, München <sup>4</sup>                                 | 100,0000               |
| MEAG EURO-Yield, München <sup>4</sup>                               | 100,0000               |
| MEAG GBP Equities, München <sup>4</sup>                             | 100,0000               |
| MEAG GBP-Global-STAR, München <sup>4</sup>                          | 100,0000               |
| MEAG German Prime Opportunities (German Pro), München <sup>4</sup>  | 100,0000               |
| MEAG Gilagrent, München <sup>4</sup>                                | 100,0000               |
| MEAG Golf 1, München <sup>4</sup>                                   | 100,0000               |
| MEAG HBG 1, München <sup>4</sup>                                    | 100,0000               |
| MEAG HM Global, München <sup>4</sup>                                | 100,0000               |
| MEAG HM Recht Chance, München <sup>4</sup>                          | 100,0000               |
| MEAG HM Renten, München <sup>4</sup>                                | 100,0000               |
| MEAG HM Sach 1, München <sup>4</sup>                                | 100,0000               |
| MEAG HM Sach Rent 1, München <sup>4</sup>                           | 100,0000               |
| MEAG HM2000, München <sup>4</sup>                                   | 100,0000               |
| MEAG HM2001, München <sup>4</sup>                                   | 100,0000               |
| MEAG HMR1, München <sup>4</sup>                                     | 100,0000               |
| MEAG HMR2, München <sup>4</sup>                                     | 100,0000               |
| MEAG IREN, München <sup>4</sup>                                     | 100,0000               |
| MEAG Kapital 2, München <sup>4</sup>                                | 100,0000               |

| Name und Sitz                                                                             | %-Anteil<br>am Kapital |
|-------------------------------------------------------------------------------------------|------------------------|
| MEAG Kapital 3, München <sup>4</sup>                                                      | 100,0000               |
| MEAG Kapital 5, München <sup>4</sup>                                                      | 100,0000               |
| MEAG Lambda EUR, München <sup>4</sup>                                                     | 100,0000               |
| MEAG Lambda EUR 2, München <sup>4</sup>                                                   | 100,0000               |
| MEAG Lambda GBP, München <sup>4</sup>                                                     | 100,0000               |
| MEAG Lambda USD, München <sup>4</sup>                                                     | 100,0000               |
| MEAG Lambda USD-COP, München <sup>4</sup>                                                 | 100,0000               |
| MEAG Multi Sach 1, München <sup>4</sup>                                                   | 100,0000               |
| MEAG MUNICH ERGO<br>AssetManagement GmbH, München                                         | 100,0000               |
| MEAG MUNICH ERGO<br>Kapitalanlagegesellschaft mbH, München                                | 100,0000               |
| MEAG New York Corporation, Wilmington, Delaware                                           | 100,0000               |
| MEAG NOK-Fonds, München <sup>4</sup>                                                      | 100,0000               |
| MEAG OptiMAX, München <sup>4</sup>                                                        | 100,0000               |
| MEAG PK-NORD, München <sup>4</sup>                                                        | 100,0000               |
| MEAG PK-WEST, München <sup>4</sup>                                                        | 100,0000               |
| MEAG Prestige, München <sup>4</sup>                                                       | 100,0000               |
| MEAG RenditePlus, München <sup>4</sup>                                                    | 100,0000               |
| MEAG REVO, München <sup>4</sup>                                                           | 100,0000               |
| MEAG SAG 1, München <sup>4</sup>                                                          | 100,0000               |
| MEAG Sustainability, München <sup>4</sup>                                                 | 100,0000               |
| MEAG Tandem, München <sup>4</sup>                                                         | 100,0000               |
| MEAG UK Reserve 1, München <sup>4</sup>                                                   | 100,0000               |
| MEAG US Dollar Bond, München <sup>4</sup>                                                 | 100,0000               |
| MEAG US Real Estate Management Holdings, Inc.,<br>Wilmington, Delaware                    | 100,0000               |
| MEAG US Reserve, München <sup>4</sup>                                                     | 100,0000               |
| MEAG USD Equities, München <sup>4</sup>                                                   | 100,0000               |
| MEAG Vertical, München <sup>4</sup>                                                       | 100,0000               |
| MEAG Vidas 2, München <sup>4</sup>                                                        | 100,0000               |
| MEAG Vidas 4, München <sup>4</sup>                                                        | 100,0000               |
| MEAG Vidas Rent 2, München <sup>4</sup>                                                   | 100,0000               |
| MEAG Vidas Rent 3, München <sup>4</sup>                                                   | 100,0000               |
| MEAG Vigifonds, München <sup>4</sup>                                                      | 100,0000               |
| MEAG VLA, München <sup>4</sup>                                                            | 100,0000               |
| MedNet Bahrain W.L.L., Bahrain                                                            | 100,0000               |
| MedNet Greece S.A., Athen                                                                 | 78,1419                |
| MedNet Gulf E.C., Manama                                                                  | 100,0000               |
| MedNet Holding GmbH, München                                                              | 100,0000               |
| MedNet International Ltd., Nicosia                                                        | 100,0000               |
| MedNet Saglik Hizmetleri Yönetim ve Danismanlik<br>Anonim Sirketi, Istanbul               | 100,0000               |
| MedNet Saudi Arabia LLC, Riyadh                                                           | 100,0000               |
| MedNet UAE FZ L.L.C., Dubai                                                               | 100,0000               |
| Mercur GRIP GmbH Gesellschaft für Rehabilitation,<br>Integration und Prävention, München  | 100,0000               |
| Merkur Grundstücks- und Beteiligungs-Gesellschaft<br>mit beschränkter Haftung, Düsseldorf | 100,0000               |
| Midland-Guardian Co., Amelia, Ohio                                                        | 100,0000               |
| Midwest Enterprises, Inc., Miami, Florida                                                 | 100,0000               |
| Modern Life Insurance Company of Arizona, Inc.,<br>Phoenix, Arizona                       | 100,0000               |

| Name und Sitz                                                                      | %-Anteil<br>am Kapital |
|------------------------------------------------------------------------------------|------------------------|
| MR Beteiligungen 1. GmbH, München <sup>3</sup>                                     | 100,0000               |
| MR Beteiligungen 19. GmbH, München                                                 | 100,0000               |
| MR Beteiligungen EUR AG & Co. KG, Grünwald <sup>2</sup>                            | 100,0000               |
| MR Beteiligungen GBP AG & Co. KG, Grünwald <sup>2</sup>                            | 100,0000               |
| MR Beteiligungen USD AG & Co. KG, Grünwald <sup>2</sup>                            | 100,0000               |
| MR RENT-Investment GmbH, München                                                   | 100,0000               |
| MR Solar GmbH & Co. KG, Nürnberg                                                   | 100,0000               |
| MR SOLAR SAS DER WELIVIT SOLAR ITALIA SRL,<br>Bozen                                | 100,0000               |
| MSP Underwriting Ltd., London                                                      | 100,0000               |
| MTU Moje Towarzystwo Ubezpieczeniowe S. A., Sopot                                  | 100,0000               |
| MU068 MR Placem (FCP), Paris <sup>4</sup>                                          | 100,0000               |
| Münchener Rück do Brasil Resseguradora S.A.,<br>São Paulo                          | 100,0000               |
| Munich American Holding Corporation,<br>Wilmington, Delaware                       | 100,0000               |
| Munich American Reassurance Company,<br>Atlanta, Georgia                           | 100,0000               |
| Munich Atlanta Financial Corporation, Atlanta, Georgia                             | 100,0000               |
| Munich Health Holding AG, München <sup>3</sup>                                     | 100,0000               |
| Munich Health North America, Inc.,<br>Wilmington, Delaware                         | 100,0000               |
| Munich Holdings Ltd., Toronto                                                      | 100,0000               |
| Munich Holdings of Australasia Pty. Ltd., Sydney                                   | 100,0000               |
| Munich Life Management Corporation Ltd., Toronto                                   | 100,0000               |
| Munich Mauritius Reinsurance Co. Ltd., Port Louis                                  | 100,0000               |
| Munich Re America Corporation, Wilmington, Delaware                                | 100,0000               |
| Munich Re Capital Limited, London                                                  | 100,0000               |
| Munich Re Capital Markets New York, Inc.,<br>Wilmington, Delaware                  | 100,0000               |
| Munich Re Holding Company (UK) Ltd., London                                        | 100,0000               |
| Munich Re of Malta Holding Limited, Floriana                                       | 99,9999                |
| Munich Re of Malta p.l.c., Floriana                                                | 99,9999                |
| Munich Re Stop Loss, Inc., Wilmington, Delaware                                    | 100,0000               |
| Munich Re Underwriting Limited, London                                             | 100,0000               |
| Munich Reinsurance America, Inc.,<br>Wilmington, Delaware                          | 100,0000               |
| Munich Reinsurance Company Life Reinsurance<br>Eastern Europe/Central Asia, Moskau | 100,0000               |
| Munich Reinsurance Company of Africa Ltd,<br>Johannesburg                          | 100,0000               |
| Munich Reinsurance Company of Australasia Ltd,<br>Sydney                           | 100,0000               |
| Munich Reinsurance Company of Canada, Toronto                                      | 100,0000               |
| Munichre General Services Limited, London                                          | 100,0000               |
| Munichre Life Services Limited, London                                             | 100,0000               |
| N.M.U. (Holdings) Limited, Leeds                                                   | 100,0000               |
| Neckermann Lebensversicherung AG, Fürth                                            | 100,0000               |
| Neckermann Versicherung AG, Nürnberg                                               | 100,0000               |
| New Reinsurance Company Ltd., Zürich                                               | 100,0000               |
| Nightingale Legal Services Ltd., Colchester                                        | 100,0000               |
| NMU Group Limited, London                                                          | 100,0000               |
| Northern Marine Underwriters Limited, Leeds                                        | 100,0000               |
| OIK Mediclin, Wiesbaden <sup>4</sup>                                               | 66,6672                |

| Name und Sitz                                                                                       | %-Anteil<br>am Kapital |
|-----------------------------------------------------------------------------------------------------|------------------------|
| Olympic Health Management Services Inc.,<br>Bellingham, Washington                                  | 100,0000               |
| Olympic Health Management Systems, Inc.,<br>Bellingham, Washington                                  | 100,0000               |
| Ouachita Life Insurance Company, Jonesboro, Arkansas                                                | 100,0000               |
| P.A.N. GmbH & Co. KG, Grünwald <sup>2</sup>                                                         | 99,0000                |
| Princeton Eagle Holding (Bermuda) Limited,<br>Hamilton, Bermuda                                     | 100,0000               |
| Princeton Eagle Insurance Company Limited,<br>Hamilton, Bermuda                                     | 100,0000               |
| Princeton Eagle West (Holding) Inc.,<br>Wilmington, Delaware                                        | 100,0000               |
| Princeton Eagle West Insurance Company Ltd.,<br>Hamilton, Bermuda                                   | 100,0000               |
| Queensley Holdings Limited, Singapur <sup>4</sup>                                                   | 100,0000               |
| QVH Beteiligungs GmbH, Nürnberg                                                                     | 100,0000               |
| Renaissance Hotel Realbesitz GmbH, Wien                                                             | 60,0000                |
| Roanoke International Brokers Limited, London                                                       | 100,0000               |
| Roanoke Real Estate Holdings Inc., Schaumburg, Illinois                                             | 100,0000               |
| Roanoke Trade Services Inc., Schaumburg, Illinois                                                   | 100,0000               |
| San Marino Life Impresa sammarinese di<br>assicurazione sulla vita S.p.A., San Marino               | 100,0000               |
| Seminaris Hotel- und Kongreßstätten-<br>Betriebsgesellschaft mbH, Lüneburg                          | 75,0000                |
| Solomon Associates Limited, London                                                                  | 100,0000               |
| Sopockie Towarzystwo Ubezpieczeń Ergo Hestia<br>Spolka Akcyjna, Sopot                               | 100,0000               |
| Sopockie Towarzystwo Ubezpieczeń na Zycie<br>Ergo Hestia Spolka Akcyjna, Sopot                      | 100,0000               |
| Southern Pioneer Life Insurance Company,<br>Jonesboro, Arkansas                                     | 100,0000               |
| Specialty Insurance Services Corp., Amelia, Ohio                                                    | 100,0000               |
| Sterling Life Insurance Company,<br>Bellingham, Washington                                          | 100,0000               |
| TELA Aktiengesellschaft, München                                                                    | 100,0000               |
| Temple Insurance Company, Toronto                                                                   | 100,0000               |
| The Atlas Insurance Agency, Inc., Amelia, Ohio                                                      | 100,0000               |
| The Boiler Inspection and Insurance Company of<br>Canada, Toronto                                   | 100,0000               |
| The Hartford Steam Boiler Inspection and Insurance<br>Company of Connecticut, Hartford, Connecticut | 100,0000               |
| The Hartford Steam Boiler Inspection and Insurance<br>Company, Hartford, Connecticut                | 100,0000               |
| The Midland Company, Cincinnati, Ohio                                                               | 100,0000               |
| The Polytechnic Club, Inc., Hartford                                                                | 100,0000               |
| The Princeton Excess and Surplus Lines Insurance<br>Company, Wilmington, Delaware                   | 100,0000               |
| The Roanoke Companies Inc., Schaumburg, Illinois                                                    | 100,0000               |
| Union Beteiligungsholding GmbH, Wien                                                                | 100,0000               |
| Union Life Insurance Company, Jonesboro, Arkansas                                                   | 100,0000               |
| Unión Médica la Fuencisla, S.A.,<br>Compañía de Seguros, Saragossa                                  | 100,0000               |
| Van Arkel Gerechtsdeurwaarders B.V., Leiden                                                         | 79,9000                |
| Venus Vermögensverwaltungsgesellschaft mbH,<br>München                                              | 100,0000               |

| Name und Sitz                                                    | %-Anteil<br>am Kapital |
|------------------------------------------------------------------|------------------------|
| VHDK Beteiligungsgesellschaft mbH, Düsseldorf                    | 100,0000               |
| VICTORIA General Insurance Company S.A., Athen                   | 99,9999                |
| VICTORIA Grundstücksverwaltungs-<br>Gesellschaft GbR, Düsseldorf | 100,0000               |
| VICTORIA Internacional de Portugal SGPS S.A., Lissabon           | 100,0000               |
| VICTORIA Investment Properties Two L.P., Atlanta                 | 100,0000               |
| VICTORIA Italy Property GmbH, Düsseldorf                         | 100,0000               |
| VICTORIA Lebensversicherung Aktiengesellschaft,<br>Düsseldorf    | 100,0000               |
| VICTORIA Life Insurance Company S.A., Thessaloniki               | 100,0000               |
| Victoria Osiguranje d.d, Zagreb                                  | 74,9000                |
| VICTORIA Pensionskasse AG, Düsseldorf                            | 100,0000               |
| Victoria US Holdings, Inc., Wilmington, Delaware                 | 100,0000               |
| VICTORIA US Property Investment GmbH, Düsseldorf                 | 100,0000               |
| VICTORIA US Property Zwei GmbH, Düsseldorf                       | 100,0000               |
| VICTORIA Vierte Beteiligungsgesellschaft mbH,<br>Düsseldorf      | 100,0000               |
| Victoria Vierter Bauabschnitt GmbH & Co. KG,<br>Düsseldorf       | 100,0000               |
| Victoria Zivotno Osiguranje d.d, Zagreb                          | 74,9000                |
| VICTORIA-Seguros de Vida, S.A., Lissabon                         | 100,0000               |
| VICTORIA-Seguros S.A., Lissabon                                  | 100,0000               |
| VICTORIA-VOLKSBANKEN Eletbiztosító Zrt., Budapest                | 74,8000                |
| VICTORIA-VOLKSBANKEN Poist'ovna, a.s., Bratislava                | 74,8000                |
| VICTORIA-VOLKSBANKEN Biztosító Zrt., Budapest                    | 74,8000                |
| VICTORIA-VOLKSBANKEN pojišť'ovna, a.s., Prag                     | 74,5373                |
| VICTORIA-VOLKSBANKEN<br>Versicherungsaktiengesellschaft, Wien    | 74,6269                |
| Vorsorge Lebensversicherung Aktiengesellschaft,<br>Düsseldorf    | 100,0000               |
| Vorsorge Luxemburg Lebensversicherung S.A.,<br>Munsbach          | 100,0000               |
| Watkins Syndicate Hong Kong Limited, Hong Kong                   | 67,0000                |
| Watkins Syndicate Middle East Limited, Dubai                     | 100,0000               |
| Watkins Syndicate Singapore Pte. Limited, Singapore              | 100,0000               |
| WFB Stockholm Management AB, Stockholm <sup>4</sup>              | 50,0000                |
| wse Solarpark Spanien 1 GmbH & Co. KG, Fürth                     | 75,1243                |

#### Nicht konsolidierte Tochterunternehmen

|                                            |          |
|--------------------------------------------|----------|
| „PORT HEDLAND“ GmbH & Co. KG, Hamburg      | 99,3284  |
| „PORT LINCOLN“ GmbH & Co. KG, Hamburg      | 99,3744  |
| „PORT WILLIAMS“ GmbH & Co. KG, Hamburg     | 99,3134  |
| A.L.I.C.E. Software Lda., Lissabon         | 100,0000 |
| Acalter 140014 S.L., Playa del Inglés      | 100,0000 |
| Agenzia Chianti S.r.l., Mailand            | 100,0000 |
| Aitesacho 5005 S.L., Playa del Inglés      | 100,0000 |
| Albulzaga 8008 S.L., Playa del Inglés      | 100,0000 |
| Aleama 150015 S.L., Playa del Inglés       | 100,0000 |
| ALICE Software Espana S.L., Madrid         | 100,0000 |
| Allfinanz Inc., Wilmington, Delaware       | 100,0000 |
| Allfinanz KK, Tokyo                        | 100,0000 |
| Allfinanz PTY, Sydney                      | 100,0000 |
| Allfinanz Software Services GmbH, Grünwald | 100,0000 |



| Name und Sitz                                                                              | %-Anteil<br>am Kapital |
|--------------------------------------------------------------------------------------------|------------------------|
| Amladeza 7007 S.L., Playa del Inglés                                                       | 100,0000               |
| Arridabra 130013 S.L., Playa del Inglés                                                    | 100,0000               |
| ARTES Assekuranzservice GmbH, Düsseldorf                                                   | 100,0000               |
| ArztPartner almeda AG, München                                                             | 100,0000               |
| Associated Asset Management Corporation B.V., Hertogenbosch                                | 51,0000                |
| B&D Acquisition B.V., Amsterdam                                                            | 80,0000                |
| B&D Business solutions B.V., Utrecht                                                       | 100,0000               |
| Badozoc 1001 S.L., Playa del Inglés                                                        | 100,0000               |
| Baqueda 7007 S.L., Playa del Inglés                                                        | 100,0000               |
| Beaufort Dedicated No.3 Ltd, London                                                        | 100,0000               |
| Beaufort Dedicated No.4 Ltd, London                                                        | 100,0000               |
| Beaufort Dedicated No.6 Ltd, London                                                        | 100,0000               |
| Beaufort Underwriting Services Limited, London                                             | 100,0000               |
| Becher & Carlson South Africa Ltd., Johannesburg                                           | 51,0000                |
| Bell & Clements Trustees Ltd, London                                                       | 100,0000               |
| Bell & Clements Underwriting Managers Ltd, London                                          | 100,0000               |
| Beteiligung HMM Hamburg-Mannheimer Erste Bürogebäude-Verwaltungsgesellschaft mbH, Hamburg  | 100,0000               |
| Beteiligung HMM Hamburg-Mannheimer Zweite Bürogebäude-Verwaltungsgesellschaft mbH, Hamburg | 100,0000               |
| BioEnergie Elbe-Elster GmbH & Co. KG, Elsterwerda                                          | 100,0000               |
| BioEnergie Verwaltungs-GmbH, Elsterwerda                                                   | 100,0000               |
| Blitz 01-807 GmbH, München                                                                 | 100,0000               |
| Bobasbe 6006 S.L., Playa del Inglés                                                        | 100,0000               |
| Botedazo 8008 S.L., Playa del Inglés                                                       | 100,0000               |
| Callopio 5005 S.L., Playa del Inglés                                                       | 100,0000               |
| Camcichu 9009 S.L., Playa del Inglés                                                       | 100,0000               |
| CAPITAL PLAZA Holding GmbH, Düsseldorf                                                     | 100,0000               |
| Caracuel Solar Catorce S.L., Antequera                                                     | 100,0000               |
| Caracuel Solar Cinco S.L., Antequera                                                       | 100,0000               |
| Caracuel Solar Cuatro S.L., Antequera                                                      | 100,0000               |
| Caracuel Solar Dieciocho S.L., Antequera                                                   | 100,0000               |
| Caracuel Solar Dieciseis S.L., Antequera                                                   | 100,0000               |
| Caracuel Solar Diecisiete S.L., Antequera                                                  | 100,0000               |
| Caracuel Solar Diez S.L., Antequera                                                        | 100,0000               |
| Caracuel Solar Doce S.L., Antequera                                                        | 100,0000               |
| Caracuel Solar Dos S.L., Antequera                                                         | 100,0000               |
| Caracuel Solar Nueve S.L., Antequera                                                       | 100,0000               |
| Caracuel Solar Ocho S.L., Antequera                                                        | 100,0000               |
| Caracuel Solar Once S.L., Antequera                                                        | 100,0000               |
| Caracuel Solar Quince S.L., Antequera                                                      | 100,0000               |
| Caracuel Solar Seis S.L., Antequera                                                        | 100,0000               |
| Caracuel Solar Siete S.L., Antequera                                                       | 100,0000               |
| Caracuel Solar Trece S.L., Antequera                                                       | 100,0000               |
| Caracuel Solar Tres S.L., Antequera                                                        | 100,0000               |
| Caracuel Solar Uno S.L., Antequera                                                         | 100,0000               |
| CarePlus Gesellschaft für Versorgungsmanagement mbH, Köln                                  | 100,0000               |
| Chobocuga 150015 S.L., Playa del Inglés                                                    | 100,0000               |
| Ciborum GmbH, München                                                                      | 100,0000               |
| CLAIMWEB S.p.A., Mailand                                                                   | 100,0000               |
| cliMondo GmbH, Köln                                                                        | 100,0000               |
| Copper Leaf Research, Bingham Farms, Michigan                                              | 100,0000               |

| Name und Sitz                                                                 | %-Anteil<br>am Kapital |
|-------------------------------------------------------------------------------|------------------------|
| Corion Pty Limited, Sydney                                                    | 100,0000               |
| Cotatrillo 100010 S.L., Playa del Inglés                                      | 100,0000               |
| D.A.S. Prozessfinanzierung AG, München                                        | 100,0000               |
| DAS Consultancy & Detachering Rotterdam B.V., Rotterdam                       | 65,0200                |
| DAS Incasso Arnhem B.V., Arnhem                                               | 100,0000               |
| DAS Incasso Den Bosch B.V., s-Hertogenbosch                                   | 87,5000                |
| DAS Incasso Rotterdam B.V., Rotterdam                                         | 80,0000                |
| DAS Legal Protection Pty. Ltd., Sydney                                        | 100,0000               |
| De Wit Visser Incasso Holding B.V., Breda                                     | 95,0000                |
| Diana Vermögensverwaltungs AG, München                                        | 100,0000               |
| DKV – Beta Vermögensverwaltungs GmbH, Köln                                    | 100,0000               |
| DKV Immobilien GmbH & Co. KG, Köln                                            | 100,0000               |
| DKV Immobilienverwaltungs GmbH, Köln                                          | 100,0000               |
| DKV Pflegedienste & Residenzen GmbH, Köln                                     | 100,0000               |
| DKV Residenz am Tibusplatz gGmbH, Münster                                     | 100,0000               |
| DKV Servicios, S.A., Saragossa                                                | 100,0000               |
| DKV-Residenz in der Contrescarpe GmbH, Bremen                                 | 100,0000               |
| DRA Debt Recovery Agency B.V., s-Gravenhage                                   | 100,0000               |
| Economic Data Research B.V., Leidschendam                                     | 100,0000               |
| Economic Data Resources B.V., Leidschendam                                    | 100,0000               |
| EDR Acquisition B.V., Amsterdam                                               | 80,0000                |
| EDR Credit Services B.V., s-Gravenhage                                        | 100,0000               |
| ERGO Alpha GmbH, Düsseldorf                                                   | 100,0000               |
| ERGO Asia Management Pte. Ltd., Singapur                                      | 100,0000               |
| ERGO Bilisim Teknolojisi Limited Sirketi, Istanbul                            | 100,0000               |
| ERGO Business Solutions s.r.l., Bukarest                                      | 100,0000               |
| ERGO GmbH, Herisau                                                            | 100,0000               |
| ERGO Gourmet GmbH, Düsseldorf                                                 | 100,0000               |
| ERGO Immobilien-GmbH 1. DKV & Co. KG, Kreien                                  | 100,0000               |
| ERGO Immobilien-GmbH 15. Victoria & Co. KG, Kreien                            | 100,0000               |
| ERGO Immobilien-GmbH 2. DKV & Co. KG, Kreien                                  | 100,0000               |
| ERGO Immobilien-GmbH 3. DKV & Co. KG, Kreien                                  | 100,0000               |
| ERGO Immobilien-GmbH 4. DKV & Co. KG, Kreien                                  | 100,0000               |
| ERGO Immobilien-GmbH                                                          |                        |
| 6. Hamburg-Mannheimer & Co. KG, Kreien                                        | 100,0000               |
| ERGO Immobilien-GmbH                                                          |                        |
| 7. Hamburg-Mannheimer & Co. KG, Kreien                                        | 100,0000               |
| ERGO Immobilien-Verwaltungs-GmbH, Kreien                                      | 100,0000               |
| ERGO Insurance Service GmbH, Wien                                             | 99,6000                |
| ERGO Neunte Beteiligungsgesellschaft mbH, Düsseldorf                          | 100,0000               |
| ERGO PORTFÖY YÖNETİMİ A.S., Istanbul                                          | 100,0000               |
| ERGO Private Capital GmbH, Düsseldorf                                         | 100,0000               |
| ERGO Private Capital Zweite GmbH & Co. KG, Düsseldorf                         | 100,0000               |
| ERGO Sigorta ve Emeklilik Satis Aracilik Hizmetleri Limited Sirketi, Istanbul | 100,0000               |
| ERGO Specialty GmbH, Hamburg                                                  | 100,0000               |
| ERGO Trust Erste Beteiligungsgesellschaft mbH, München                        | 100,0000               |
| ERGO Versicherungs- und Finanzierungs-Vermittlung GmbH, Hamburg               | 100,0000               |
| ERIN Sigorta Aracilik Hizmetleri Limited Sirketi, Istanbul                    | 99,9950                |
| ERV (China) Travel Service and Consulting Ltd., Beijing                       | 100,0000               |
| ERV Seyahat Sigorta Aracilik Hizmetleri ve Danismanlik Ltd.Sti., Istanbul     | 99,0000                |

| Name und Sitz                                                                                                               | %-Anteil<br>am Kapital |
|-----------------------------------------------------------------------------------------------------------------------------|------------------------|
| Esoleme 120012 S.L., Playa del Inglés                                                                                       | 100,0000               |
| Etics, s.r.o., Prag                                                                                                         | 100,0000               |
| Etoleto 160016 S.L., Playa del Inglés                                                                                       | 100,0000               |
| Etoleto 100010 S.L., Playa del Inglés                                                                                       | 100,0000               |
| Etoleto 6006 S.L., Playa del Inglés                                                                                         | 100,0000               |
| EUREKA GmbH, Düsseldorf                                                                                                     | 99,9999                |
| Euro Alarm Assistance Prague, Prag                                                                                          | 100,0000               |
| Euro-Center (Cyprus) Ltd., Larnaca                                                                                          | 100,0000               |
| Euro-Center (Thailand) Co. Ltd., Bangkok                                                                                    | 100,0000               |
| Euro-Center Cape Town (Pty.) Ltd., Cape Town                                                                                | 100,0000               |
| Euro-Center China (HK) Co., Ltd., Beijing                                                                                   | 100,0000               |
| Euro-Center Holding A/S, Kopenhagen                                                                                         | 83,3330                |
| Euro-Center Ltda., Rio de Janeiro                                                                                           | 100,0000               |
| Euro-Center S.A., Malaga                                                                                                    | 100,0000               |
| Euro-Center USA, Inc., New York                                                                                             | 100,0000               |
| Euro-Center Yerel Yardim, Istanbul                                                                                          | 100,0000               |
| Euro-Center, S.A., Palma de Mallorca                                                                                        | 100,0000               |
| Europäische (UK) Ltd., London                                                                                               | 100,0000               |
| European Assistance Holding GmbH, München                                                                                   | 100,0000               |
| Evaluación Médica TUW, S.L., Barcelona                                                                                      | 90,7508                |
| EVV Logistik Management GmbH, Düsseldorf                                                                                    | 100,0000               |
| Exolvo GmbH, Hamburg                                                                                                        | 100,0000               |
| First Marine Financial Services, Amelia, Ohio                                                                               | 100,0000               |
| Forst Ebnath AG, Ebnath                                                                                                     | 96,7315                |
| Gamaponti 140014 S.L., Playa del Inglés                                                                                     | 100,0000               |
| Gastronomie Service Gesellschaft<br>Überseering 35 GmbH, Hamburg                                                            | 100,0000               |
| GBG Vogelsanger Straße GmbH, Köln                                                                                           | 94,0000                |
| GEMEDA Gesellschaft für medizinische<br>Datenerfassung und Auswertung sowie<br>Serviceleistungen für freie Berufe mbH, Köln | 100,0000               |
| Genius II Vermögensverwaltungsgesellschaft mbH,<br>München                                                                  | 100,0000               |
| Gerechtsdeurwaardskantoor Sturm & Van Vuuren<br>B.V., Nieuwegein                                                            | 100,0000               |
| Gerechtsdeurwaardskantoor Van der Meijde B.V.,<br>Den Haag                                                                  | 100,0000               |
| goDentis – Gesellschaft für Innovation in der<br>Zahnheilkunde mbH, Köln                                                    | 100,0000               |
| goMedus Gesellschaft für Qualität<br>in der Medizin mbH, Köln                                                               | 100,0000               |
| goMedus GmbH & Co. KG, Köln                                                                                                 | 100,0000               |
| Grancan Sunline S.L., Playa del Inglés                                                                                      | 100,0000               |
| Great Lakes Marine Insurance Agency Pty Ltd, Sydney                                                                         | 100,0000               |
| Great Lakes Re Management Company (Belgium) S.A.,<br>Brüssel                                                                | 100,0000               |
| Guanzu 2002 S.L., Playa del Inglés                                                                                          | 100,0000               |
| Hamburger Hof Management GmbH, Hamburg                                                                                      | 100,0000               |
| Hamburg-Mannheimer ForsikringService A/S,<br>Kopenhagen                                                                     | 100,0000               |
| Hamburg-Mannheimer Rechtsschutz<br>Schaden-Service GmbH, Hamburg                                                            | 100,0000               |
| Hamburg-Mannheimer spol s.r.o., Prag                                                                                        | 100,0000               |
| Hartford Steam Boiler Colombia Ltda., Bogota, Colombia                                                                      | 100,0000               |
| Health OÜ, Tallinn                                                                                                          | 100,0000               |

| Name und Sitz                                                                          | %-Anteil<br>am Kapital |
|----------------------------------------------------------------------------------------|------------------------|
| Hestia Advanced Risk Solutions Sp. z o.o., Sopot                                       | 100,0000               |
| Hestia Kontakt Sp. z o.o., Sopot                                                       | 100,0000               |
| Hestia Loss Control Sp. z o.o., Sopot                                                  | 100,0000               |
| HMI Sp. z o.o., Warschau                                                               | 100,0000               |
| Horbach GmbH, Düsseldorf                                                               | 70,1000                |
| HSB Associates, Inc, New York                                                          | 100,0000               |
| HSB Inspection Quality, Limited, Oldham                                                | 100,0000               |
| HSB Investment Corporation, Hartford, Connecticut                                      | 100,0000               |
| HSB Reliability Technologies LLC, Wilmington, Delaware                                 | 100,0000               |
| HSB Ventures, Inc., Wilmington, Delaware                                               | 100,0000               |
| Humanity B.V., s-Gravenhage                                                            | 100,0000               |
| Ideenkapital Client Service GmbH, Düsseldorf                                           | 100,0000               |
| Ideenkapital erste Investoren Service GmbH, Düsseldorf                                 | 100,0000               |
| Ideenkapital Fonds Treuhand GmbH, Düsseldorf                                           | 100,0000               |
| Ideenkapital Media Treuhand GmbH, Düsseldorf                                           | 100,0000               |
| IDEENKAPITAL Metropolen Europa<br>Verwaltungsgesellschaft mbH, Düsseldorf              | 100,0000               |
| IDEENKAPITAL PRORENDITA EINS<br>Treuhandgesellschaft mbH, Düsseldorf                   | 100,0000               |
| IDEENKAPITAL Schiffsfonds Treuhand GmbH,<br>Düsseldorf                                 | 100,0000               |
| Ideenkapital Treuhand GmbH, Düsseldorf                                                 | 100,0000               |
| Ideenkapital Treuhand US Real Estate eins GmbH,<br>Düsseldorf                          | 100,0000               |
| IK Einkauf Objektmanagement GmbH, Düsseldorf                                           | 100,0000               |
| IK Einkauf Objektverwaltungsgesellschaft mbH,<br>Düsseldorf                            | 100,0000               |
| IK Einkaufsmärkte Deutschland<br>Verwaltungsgesellschaft mbH, Düsseldorf               | 100,0000               |
| IK European Real Estate<br>Verwaltungsgesellschaft mbH, Düsseldorf                     | 100,0000               |
| IK FE Fonds Management GmbH, Düsseldorf                                                | 100,0000               |
| IK FE Management GmbH, Düsseldorf                                                      | 100,0000               |
| IK InfrastrukturInvest Verwaltungsgesellschaft mbH,<br>Düsseldorf                      | 100,0000               |
| IK Objekt Bensheim GmbH, Düsseldorf                                                    | 100,0000               |
| IK Objekt Frankfurt Theodor-Heuss-Allee GmbH,<br>Düsseldorf                            | 100,0000               |
| IK Pflegezentrum Uelzen Verwaltungs-GmbH,<br>Düsseldorf                                | 100,0000               |
| IK Premium GmbH, Düsseldorf                                                            | 100,0000               |
| IK Property Eins Verwaltungsgesellschaft mbH, Hamburg                                  | 100,0000               |
| IK Property Treuhand GmbH, Düsseldorf                                                  | 100,0000               |
| IK US Portfolio Invest DREI Verwaltungs-GmbH,<br>Düsseldorf                            | 100,0000               |
| IK US Portfolio Invest Verwaltungs-GmbH, Düsseldorf                                    | 100,0000               |
| IK US Portfolio Invest ZWEI Verwaltungs-GmbH,<br>Düsseldorf                            | 100,0000               |
| InterAssistance Gesellschaft für Dienstleistungen<br>mit beschränkter Haftung, München | 100,0000               |
| ISVICRE SIGORTA KIBRIS LIMITED, Istanbul                                               | 51,0000                |
| Jupiter Vermögensverwaltungsgesellschaft mbH,<br>München                               | 100,0000               |
| Juventus Vermögensverwaltungs AG, Hamburg                                              | 100,0000               |
| K & P Objekt Hamburg Hamburger Straße GmbH,<br>Düsseldorf                              | 100,0000               |



| Name und Sitz                                                      | %-Anteil<br>am Kapital |
|--------------------------------------------------------------------|------------------------|
| K & P Objekt München Hufelandstraße GmbH,<br>Düsseldorf            | 100,0000               |
| KQV Solarpark Franken 1 GmbH & Co. KG, Fürth                       | 100,0000               |
| Larus Vermögensverwaltungsgesellschaft mbH,<br>München             | 100,0000               |
| LAVG Zuid B.V., Breda                                              | 100,0000               |
| Legal Net GmbH, München                                            | 100,0000               |
| Longial Versicherungsmakler GmbH, Düsseldorf                       | 100,0000               |
| m:editerran Power der welivit Solar Italia<br>GmbH & Co. KG, Bozen | 100,0000               |
| m:editerran POWER GmbH & Co. KG, Nürnberg                          | 100,0000               |
| MAM Munich Asset Management GmbH, München                          | 100,0000               |
| Marbury Agency, Inc., Amelia, Ohio                                 | 100,0000               |
| MAYFAIR Financing GmbH, München                                    | 100,0000               |
| MAYFAIR Holding GmbH & Co. Singapur KG, Düsseldorf                 | 71,4285                |
| MAYFAIR Holding GmbH, Düsseldorf                                   | 100,0000               |
| MEAG Hong Kong Limited, Hong Kong                                  | 100,0000               |
| MEAG Luxembourg S.à r.l., Luxemburg                                | 100,0000               |
| MEAG Property Management GmbH, München                             | 100,0000               |
| MEAG Real Estate Erste Beteiligungsgesellschaft,<br>München        | 100,0000               |
| Mechanical & Materials Engineering,<br>Wilmington, Delaware        | 100,0000               |
| Mediastream Consulting GmbH, Grünwald                              | 100,0000               |
| Mediastream Dritte Film GmbH, Grünwald                             | 100,0000               |
| Mediastream Film GmbH, Grünwald                                    | 100,0000               |
| Mediastream Vierte Medien GmbH, Grünwald                           | 100,0000               |
| Mediastream Zweite Film GmbH, Grünwald                             | 100,0000               |
| MedNet Europa GmbH, München                                        | 100,0000               |
| MedNet International Offshore SAL, Beirut                          | 99,6700                |
| MedWell Gesundheits-AG, Köln                                       | 100,0000               |
| miCura Pflegedienste Berlin GmbH, Berlin                           | 100,0000               |
| miCura Pflegedienste Bremen GmbH, Bremen                           | 100,0000               |
| miCura Pflegedienste Dachau GmbH, Dachau                           | 51,0000                |
| miCura Pflegedienste Düsseldorf GmbH, Düsseldorf                   | 100,0000               |
| miCura Pflegedienste GmbH, Köln                                    | 100,0000               |
| miCura Pflegedienste Hamburg GmbH, Hamburg                         | 90,0000                |
| miCura Pflegedienste Krefeld GmbH, Krefeld                         | 100,0000               |
| miCura Pflegedienste München GmbH, München                         | 100,0000               |
| miCura Pflegedienste München Ost GmbH, München                     | 65,0000                |
| miCura Pflegedienste Münster GmbH, Münster                         | 100,0000               |
| miCura Pflegedienste Nürnberg GmbH, Nürnberg                       | 51,0000                |
| MR Beteiligungen 14. GmbH, München                                 | 100,0000               |
| MR Beteiligungen 15. GmbH, München                                 | 100,0000               |
| MR Beteiligungen 16. GmbH, München                                 | 100,0000               |
| MR Beteiligungen 17. GmbH, München                                 | 100,0000               |
| MR Beteiligungen 18. GmbH, München                                 | 100,0000               |
| MR Beteiligungen AG, Grünwald                                      | 100,0000               |
| MR ERGO Beteiligungen GmbH, München                                | 100,0000               |
| MR Parkview Holding Coporation, Wilmington, Delaware               | 100,0000               |
| MR Solar Beneixama GmbH, Nürnberg                                  | 100,0000               |
| Muenchener Hellas Reinsurance Services S.A., Athen                 | 99,5000                |
| Multiasistencia Europea, S.A., Madrid                              | 100,0000               |
| Münchener Consultora Internacional S.R.L.,<br>Santiago de Chile    | 100,0000               |

| Name und Sitz                                                                   | %-Anteil<br>am Kapital |
|---------------------------------------------------------------------------------|------------------------|
| Münchener de Argentina Servicios Técnicos S. R. L.,<br>Buenos Aires             | 100,0000               |
| Münchener de Colombia S.A. Corredores de Reaseguros,<br>Santa Fe de Bogota D.C. | 100,0000               |
| Münchener de Mexico S. A., Mexico                                               | 100,0000               |
| Münchener de Venezuela C.A.                                                     |                        |
| Intermediaria de Reaseguros, Caracas                                            | 100,0000               |
| Münchener Ecoconsult GmbH, München                                              | 100,0000               |
| Münchener Finanzgruppe AG Beteiligungen, München                                | 100,0000               |
| Münchener Vermögensverwaltung GmbH, München                                     | 100,0000               |
| Munich Canada Systems Corporation, Toronto                                      | 100,0000               |
| Munich Columbia Square Corp., Wilmington, Delaware                              | 100,0000               |
| Munich Health Daman Holding Ltd., Abu Dhabi                                     | 51,0000                |
| Munich Management Pte. Ltd., Singapur                                           | 100,0000               |
| Munich Re America Brokers, Inc., Wilmington, Delaware                           | 100,0000               |
| Munich Re America Management Ltd., London                                       | 100,0000               |
| Munich Re America Services Inc., Wilmington, Delaware                           | 100,0000               |
| Munich Re Capital Markets GmbH, München                                         | 100,0000               |
| Munich Re General (UK) plc, London                                              | 100,0000               |
| Munich Re India Services Private Limited, Mumbai                                | 100,0000               |
| Munich Re Japan Services K. K., Tokio                                           | 100,0000               |
| Munich Re Life and Health (UK) Plc., London                                     | 100,0000               |
| Munich Re Polska Services Sp. Z.o.o., Warschau                                  | 100,0000               |
| Munich Re Underwriting Agents (DIFC) Limited, Dubai                             | 100,0000               |
| Munich-American Global Services (Munich) GmbH,<br>München                       | 100,0000               |
| Munich-American Risk Partners GmbH, München                                     | 100,0000               |
| Munich-Canada Management Corp. Ltd., Toronto                                    | 100,0000               |
| MunichFinancialGroup AG Holding, München                                        | 100,0000               |
| MunichFinancialGroup GmbH, München                                              | 100,0000               |
| MunichFinancialServices AG Holding, München                                     | 100,0000               |
| Munichre New Zealand Service Limited, Auckland                                  | 100,0000               |
| Munichre Service Limited, Hong Kong                                             | 100,0000               |
| Naretoblera 170017 S.L., Playa del Inglés                                       | 100,0000               |
| Nerruze 120012 S.L., Playa del Inglés                                           | 100,0000               |
| Nicamballo 1001 S.L., Playa del Inglés                                          | 100,0000               |
| OHM Services of Texas, Inc., Bellingham, Washington                             | 100,0000               |
| Olbodeca 4004 S.L., Playa del Inglés                                            | 100,0000               |
| One State Street Intermediaries, Hartford, Connecticut                          | 100,0000               |
| Oracuet 160016 S.L., Playa del Inglés                                           | 100,0000               |
| Oragulno 9009 S.L., Playa del Inglés                                            | 100,0000               |
| Oraunte 130013 S.L., Playa del Inglés                                           | 100,0000               |
| Orrazipo 110011 S.L., Playa del Inglés                                          | 100,0000               |
| Otusleme 3003 S.L., Playa del Inglés                                            | 100,0000               |
| P.A.N. Verwaltungs GmbH, Grünwald <sup>2</sup>                                  | 99,0000                |
| PLATINIA Verwaltungs-GmbH, München                                              | 100,0000               |
| PRORENDITA DREI Verwaltungsgesellschaft mbH,<br>Hamburg                         | 100,0000               |
| PRORENDITA EINS Verwaltungsgesellschaft mbH,<br>Hamburg                         | 100,0000               |
| PRORENDITA Fünf Verwaltungsgesellschaft mbH,<br>Hamburg                         | 100,0000               |
| PRORENDITA VIER Verwaltungsgesellschaft mbH,<br>Hamburg                         | 100,0000               |

| Name und Sitz                                                       | %-Anteil<br>am Kapital |
|---------------------------------------------------------------------|------------------------|
| PRORENDITA ZWEI Verwaltungsgesellschaft mbH, Hamburg                | 100,0000               |
| ProVictor Immobilien GmbH, Düsseldorf <sup>7</sup>                  | 50,0000                |
| ProVictor Property Fund IV Management, Inc., Atlanta                | 51,0000                |
| ProVictor Property Fund V Management, Inc., Atlanta                 | 51,0000                |
| ProVictor Property Fund VI Management, Inc., Atlanta                | 51,0000                |
| ProVictor US Corporation, Atlanta                                   | 100,0000               |
| Ra-Hart Investment Company, Dallas, Texas                           | 100,0000               |
| Reaseguradora de las Américas S. A., La Habana                      | 100,0000               |
| Roanoke International Insurance Agency Inc., Schaumburg, Illinois   | 100,0000               |
| Roanoke Trade Insurance Inc., Schaumburg, Illinois                  | 100,0000               |
| Roanoke Trade Services of Texas Inc., Schaumburg, Illinois          | 100,0000               |
| Romney Holdings Limited, Dublin                                     | 100,0000               |
| Schloss Hohenkammer GmbH, Hohenkammer                               | 100,0000               |
| Schrömbgens & Stephan GmbH, Versicherungsmakler, Düsseldorf         | 100,0000               |
| Seldac 1. Kommunalen-Rendite-Fonds GmbH & Co. KG, Düsseldorf        | 100,0000               |
| Seldac 1. Verwaltungs-GmbH, Düsseldorf                              | 100,0000               |
| Silvanus Vermögensverwaltungsges.mmbH, München                      | 100,0000               |
| Solarfonds Garmisch-Partenkirchen 2011 GmbH & Co. KG, Nürnberg      | 99,7500                |
| Sopocki Instytut Ubezpieczeń S.A., Sopot                            | 100,0000               |
| Sopockie Towarzystwo Doradcze Sp. z o.o., Sopot                     | 100,0000               |
| SOS International Reise-Notfallservice GmbH, München                | 100,0000               |
| Stichting Aandelen Beheer D.A.S. Holding, Amsterdam                 | 100,0000               |
| Sydney Euro-Center Pty. Ltd., Sydney                                | 100,0000               |
| Synkronos Italia SRL, Milano                                        | 60,1000                |
| TAS Assekuranz Service GmbH, Frankfurt/Main                         | 100,0000               |
| TAS Touristik Assekuranz Service International GmbH, Frankfurt/Main | 100,0000               |
| TAS Touristik Assekuranzmakler und Service GmbH, Frankfurt/Main     | 100,0000               |
| Teginago 2002 S.L., Playa del Inglés                                | 100,0000               |
| Tenoslema 110011 S.L., Playa del Inglés                             | 100,0000               |
| TGR Biztosítás Többségnyöki Zrt., Budapest                          | 100,0000               |
| The National Senior Membership Group, Bellingham, Washington        | 100,0000               |
| Three Lions Underwriting Ltd., London                               | 100,0000               |
| Tillobesta 180018 S.L., Playa del Inglés                            | 100,0000               |
| TIS Holdings Inc., Schaumburg, Illinois                             | 100,0000               |
| Titus AG, Düsseldorf                                                | 100,0000               |
| Trade Insurance Services Inc, Schaumburg, Illinois                  | 100,0000               |
| Trusted Documents GmbH, Nürnberg                                    | 100,0000               |
| US PROPERTIES VA Verwaltungs-GmbH, Düsseldorf                       | 100,0000               |
| Verwaltungsgesellschaft „PORT VICTORIA“ GmbH, Hamburg               | 100,0000               |
| VFG Vorsorge-Finanzierungsconsulting GmbH, Wien                     | 100,0000               |
| VICTORIA Asien Immobilienbeteiligungs-GmbH & Co. KG, München        | 100,0000               |
| VICTORIA Asien Verwaltungs GmbH, München                            | 100,0000               |
| VICTORIA Erste Beteiligungsgesellschaft mbH, Düsseldorf             | 100,0000               |
| VICTORIA Immobilien Management GmbH, München                        | 100,0000               |
| VICTORIA Immobilien-Fonds GmbH, Düsseldorf                          | 100,0000               |

| Name und Sitz                                                                                          | %-Anteil<br>am Kapital |
|--------------------------------------------------------------------------------------------------------|------------------------|
| VICTORIA US Beteiligungsgesellschaft mbH, München                                                      | 100,0000               |
| Victoria Vierter Bauabschnitt Management GmbH, Düsseldorf                                              | 100,0000               |
| Victoria VIP II, Inc., Wilmington, Delaware                                                            | 100,0000               |
| Viwis GmbH, München                                                                                    | 100,0000               |
| Vorsorge Service GmbH, Düsseldorf                                                                      | 100,0000               |
| VV-Consulting Gesellschaft für Risikoanalyse, Vorsorgeberatung und Versicherungsvermittlung GmbH, Wien | 100,0000               |
| VV-Immobilien Gesellschaft für Haus- und Grundbesitzverwaltung GmbH, Wien                              | 100,0000               |
| welivit AG, Nürnberg                                                                                   | 100,0000               |
| welivit New Energy GmbH, Fürth                                                                         | 100,0000               |
| welivit Solar España GmbH, Nürnberg                                                                    | 100,0000               |
| Welivit Solar Italia s.r.l., Bozen                                                                     | 100,0000               |
| WISMA ATRIA Holding GmbH & Co. Singapur KG, Düsseldorf                                                 | 65,0000                |
| WNE Solarfonds Süddeutschland 2 GmbH & Co. KG, Nürnberg                                                | 100,0000               |
| Wohnungsgesellschaft Brela mbH, Hamburg                                                                | 100,0000               |
| Zacubu 110011 S.L., Playa del Inglés                                                                   | 100,0000               |
| Zacuba 6006 S.L., Playa del Inglés                                                                     | 100,0000               |
| Zacubacon 150015 S.L., Playa del Inglés                                                                | 100,0000               |
| Zafacesbe 120012 S.L., Playa del Inglés                                                                | 100,0000               |
| Zagacobi 180018 S.L., Playa del Inglés                                                                 | 100,0000               |
| Zapaceba 170017 S.L., Playa del Inglés                                                                 | 100,0000               |
| Zapacubi 8008 S.L., Playa del Inglés                                                                   | 100,0000               |
| Zarzucolumbu 100010 S.L., Playa del Inglés                                                             | 100,0000               |
| Zetaza 4004 S.L., Playa del Inglés                                                                     | 100,0000               |
| Zicobucar 140014 S.L., Playa del Inglés                                                                | 100,0000               |
| Zucaelo 130013 S.L., Playa del Inglés                                                                  | 100,0000               |
| Zucampobi 3003 S.L., Playa del Inglés                                                                  | 100,0000               |
| Zucarobiso 2002 S.L., Playa del Inglés                                                                 | 100,0000               |
| Zucobaco 7007 S.L., Playa del Inglés                                                                   | 100,0000               |
| Zulazor 3003 S.L., Playa del Inglés                                                                    | 100,0000               |
| Zumbicobi 5005 S.L., Playa del Inglés                                                                  | 100,0000               |
| Zumcasba 1001 S.L., Playa del Inglés                                                                   | 100,0000               |
| Zuncabu 4004 S.L., Playa del Inglés                                                                    | 100,0000               |
| Zuncolubomcasa 9009 S.L., Playa del Inglés                                                             | 100,0000               |

#### Nach der Equity-Methode bewertete assoziierte Unternehmen

|                                                                               |         |
|-------------------------------------------------------------------------------|---------|
| 13th & F associates Limited Partnership, Washington D.C. <sup>9</sup>         | 80,0000 |
| Apollo Munich Health Insurance Co. Ltd., Hyderabad                            | 25,0600 |
| BHS tabletop AG, Selb <sup>1</sup> (BW 46 Mio. €)                             | 28,9134 |
| Bloemers Holding B. V., Rotterdam                                             | 22,7273 |
| Consorcio Internacional de Aseguradores de Crédito, S.A., Madrid <sup>5</sup> | 19,4982 |
| Consortia Versicherungs-Beteiligungsgesellschaft mbH, Nürnberg                | 33,7027 |
| D.A.S. Difesa Automobilistica Sinistri, S.p.A. di Assicurazione, Verona       | 49,9920 |
| DAMAN - National Health Insurance Company, Abu Dhabi                          | 20,0000 |
| Dovull SPV GmbH & Co. KG, Frankfurt a.M.                                      | 20,0597 |

| Name und Sitz                                                                                     | %-Anteil<br>am Kapital |
|---------------------------------------------------------------------------------------------------|------------------------|
| Europai Utazasi Biztosító Rt., Budapest                                                           | 26,0000                |
| Europäische Reiseversicherungs-Aktiengesellschaft, Wien                                           | 25,0100                |
| Global Aerospace Underwriting Managers Ltd., London                                               | 40,0000                |
| HDFC ERGO General Insurance Company Ltd., Mumbai                                                  | 26,0000                |
| HighTech Beteiligungen GmbH und Co. KG, Düsseldorf                                                | 23,1000                |
| KarstadtQuelle Finanz Service GmbH, Düsseldorf                                                    | 50,0000                |
| MCAF Verwaltungs-GmbH & Co.KG, Düsseldorf                                                         | 50,0000                |
| MDP Ventures I L.L.C., New York                                                                   | 50,0000                |
| MEAG Pacific Star Holdings Ltd., Hong Kong                                                        | 50,0000                |
| MEDICLIN Aktiengesellschaft,<br>Offenburg <sup>1</sup> (BW 201 Mio. €)                            | 35,0042                |
| MEGA 4 GbR, Berlin                                                                                | 34,2569                |
| Middlesea Insurance p.l.c, Floriana <sup>1, 5</sup> (BW 26 Mio. €)                                | 19,9000                |
| Millennium Entertainment Partners II L.P., New York                                               | 42,2992                |
| Millennium Entertainment Partners L.P., New York                                                  | 27,5400                |
| Millennium Partners LLC, New York                                                                 | 25,3387                |
| PICC Asset Management Company Ltd., Shanghai <sup>5</sup>                                         | 19,0000                |
| PICC Health Insurance Company Limited, Beijing <sup>5</sup>                                       | 6,3333                 |
| Property Finance France S.A., Luxemburg                                                           | 45,4605                |
| Rendite Partner Gesellschaft für Vermögens-<br>verwaltung mbH, Frankfurt a.M.                     | 33,3333                |
| RP Vilbeler Fondsgesellschaft mbH, Frankfurt a.M.                                                 | 40,0000                |
| Sana Kliniken AG, München                                                                         | 21,7025                |
| Saudi National Insurance Company B.S.C.(c), Manama                                                | 22,5000                |
| Seaflower Health Ventures III L.P., Waltham                                                       | 28,8434                |
| SEBA Beteiligungsgesellschaft mbH, Nürnberg                                                       | 48,9931                |
| Star Growth GmbH & Co. Beteiligungs KG, München                                                   | 48,2800                |
| Storebrand Helseforsikring AS, Oslo                                                               | 50,0000                |
| Suramericana S.A., Medellin <sup>5</sup>                                                          | 18,8669                |
| TERTIANUM Besitztgesellschaft Berlin<br>Passauer Strasse 5-7 mbH, München                         | 25,0000                |
| TERTIANUM Besitztgesellschaft Konstanz Markt-<br>stätte 2-6 und Sigismundstrasse 5-9 mbH, München | 25,0000                |
| TERTIANUM Besitztgesellschaft München<br>Jahnstrasse 45 mbH, München                              | 33,3333                |
| U.S. Property Fund IV GmbH & Co. KG, München                                                      | 21,7286                |
| U.S. Property Management II L.P., Atlanta                                                         | 33,3333                |
| U.S. Property Management III L.P., Atlanta                                                        | 20,0000                |
| Uelzener Lebensversicherungs-AG, Uelzen                                                           | 23,9750                |
| US PROPERTIES VA GmbH & Co. KG, Düsseldorf                                                        | 41,1185                |
| VICTORIA-VOLKSBANKEN Pensionskassen<br>Aktiengesellschaft, Wien                                   | 47,5028                |
| VICTORIA-VOLKSBANKEN Vorsorgekasse AG, Wien                                                       | 50,0000                |
| VV Immobilien GmbH & Co. United States KG, München                                                | 28,9514                |
| VV Immobilien GmbH & Co. US City KG, München                                                      | 23,0999                |
| VV Immobilien Verwaltungs GmbH & Co.<br>Zentraleuropa KG, München                                 | 20,4082                |
| <b>Zum beizulegenden Zeitwert bewertete<br/>assoziierte Unternehmen</b>                           |                        |
| „PORT ELISABETH“ GmbH & Co. KG, Hamburg                                                           | 31,9658                |
| „PORT LOUIS“ GmbH & Co. KG, Hamburg                                                               | 26,4129                |
| ACM-Compagnie Mercur AG, Bremen                                                                   | 50,0000                |
| Agricultural Management Services S.r.l., Verona                                                   | 33,3333                |

| Name und Sitz                                                                                     | %-Anteil<br>am Kapital |
|---------------------------------------------------------------------------------------------------|------------------------|
| Assistance Partner GmbH & Co. KG, München                                                         | 22,8000                |
| Best Doctors, Health Resources and Technology, Inc.,<br>Boston <sup>5</sup>                       | 6,7800                 |
| BF.direkt AG, Stuttgart                                                                           | 27,2000                |
| carexpert Kfz-Sachverständigen GmbH, Walluf                                                       | 25,0000                |
| Central Point Insurance IT-Solutions GmbH, Wien                                                   | 20,0000                |
| DKV Salute S.p.A., Mailand <sup>8</sup>                                                           | 100,0000               |
| Fernkälte Geschäftsstadt Nord<br>Gesellschaft bürgerlichen Rechts, Hamburg                        | 35,8700                |
| Finsure Investments (Private) Limited, Harare                                                     | 24,5000                |
| General Partner Victoria Limited, London                                                          | 33,3333                |
| Hannover Finanz-Umwelt Beteiligungsgesellschaft mbH,<br>Hillerse                                  | 20,0000                |
| Hartford Research LLC, Wilmington, Delaware                                                       | 41,7500                |
| IFFOXX AG, Rosenheim                                                                              | 28,0020                |
| IK Objektgesellschaft Frankfurt Theodor-Heuss-Allee<br>GmbH & Co. KG, Düsseldorf                  | 47,4000                |
| Janus Vermögensverwaltungsgesellschaft mbH, München                                               | 50,0000                |
| K & P Objekt Hamburg Hamburger Straße<br>Immobilienfonds GmbH & Co.KG, Düsseldorf                 | 36,6889                |
| LCM Logistic Center Management GmbH, Hamburg                                                      | 50,0000                |
| MCAF Management GmbH, Düsseldorf                                                                  | 50,0000                |
| MSMR Parkview LLC, Dover, Delaware                                                                | 38,4600                |
| Newmed S.p.A., Mailand <sup>8</sup>                                                               | 100,0000               |
| Perils AG, Zürich <sup>5</sup>                                                                    | 11,1100                |
| POOL Sp. z o.o., Warschau                                                                         | 33,7500                |
| RehaCare GmbH, München                                                                            | 25,1000                |
| Reisegarant, Vermittler von<br>Insolvenzversicherungen mbH, Hamburg                               | 24,0000                |
| RM 2264 Vermögensverwaltungs GmbH, München                                                        | 25,0000                |
| Rumba GmbH & Co. KG, München                                                                      | 25,0000                |
| Rural Affinity Insurance Agency Pty Limited, Sydney                                               | 50,0000                |
| TEGG Corporation, Dover, Delaware                                                                 | 33,3400                |
| Teko – Technisches Kontor für Versicherungen<br>Gesellschaft mit beschränkter Haftung, Düsseldorf | 30,0000                |
| TERTIANUM Seniorenresidenz<br>Betriebsgesellschaft München mbH, München                           | 33,3333                |
| TERTIANUM Seniorenresidenzen<br>Betriebsgesellschaft mbH, Konstanz                                | 25,0000                |
| Trend Capital GmbH & Co. Solarfonds 2 KG, Mainz                                                   | 34,4234                |
| Triple IP B.V., Amsterdam                                                                         | 50,0000                |
| Verwaltungsgesellschaft „PORT ELISABETH“ mbH,<br>Hamburg                                          | 50,0000                |
| Verwaltungsgesellschaft „Port Hedland“ mbH,<br>Hamburg                                            | 50,0000                |
| Verwaltungsgesellschaft „PORT KELANG“ mbH,<br>Hamburg                                             | 50,0000                |
| Verwaltungsgesellschaft „Port Lincoln“ mbH,<br>Hamburg                                            | 50,0000                |
| Verwaltungsgesellschaft „PORT LOUIS“ mbH,<br>Hamburg                                              | 50,0000                |
| Verwaltungsgesellschaft „PORT MAUBERT“ mbH,<br>Hamburg                                            | 50,0000                |
| Verwaltungsgesellschaft „PORT MELBOURNE“ mbH,<br>Hamburg                                          | 50,0000                |

| Name und Sitz                                                                                                    | %-Anteil<br>am Kapital |
|------------------------------------------------------------------------------------------------------------------|------------------------|
| Verwaltungsgesellschaft „PORT MENIER“ mbH,<br>Hamburg                                                            | 50,0000                |
| Verwaltungsgesellschaft „PORT MOODY“ mbH,<br>Hamburg                                                             | 50,0000                |
| Verwaltungsgesellschaft „PORT MORESBY“ mbH,<br>Hamburg                                                           | 50,0000                |
| Verwaltungsgesellschaft „PORT MOUTON“ mbH,<br>Hamburg                                                            | 50,0000                |
| Verwaltungsgesellschaft „PORT NELSON“ mbH,<br>Hamburg                                                            | 50,0000                |
| Verwaltungsgesellschaft „PORT RUSSEL“ mbH,<br>Hamburg                                                            | 50,0000                |
| Verwaltungsgesellschaft „PORT SAID“ mbH,<br>Hamburg                                                              | 50,0000                |
| Verwaltungsgesellschaft „PORT STANLEY“ mbH,<br>Hamburg                                                           | 50,0000                |
| Verwaltungsgesellschaft „PORT STEWART“ mbH,<br>Hamburg                                                           | 50,0000                |
| Verwaltungsgesellschaft „PORT UNION“ mbH,<br>Hamburg                                                             | 50,0000                |
| Verwaltungsgesellschaft „Port Williams“ mbH,<br>Hamburg                                                          | 50,0000                |
| VisEq GmbH, Grünwald                                                                                             | 34,0000                |
| Volksbanken-Versicherungsdienst GmbH, Wien                                                                       | 25,2319                |
| VV Immobilien GmbH & Co. GB KG, Düsseldorf                                                                       | 40,9241                |
| VV Immobilien Verwaltungs GmbH, München                                                                          | 30,0000                |
| VV Immobilien Verwaltungs und Beteiligungs GmbH,<br>München                                                      | 30,0000                |
| VV-Consulting Többsügynöki Kft., Budapest                                                                        | 50,0000                |
| WISMA ATRIA Holding GmbH, Düsseldorf                                                                             | 50,0000                |
| <b>Sonstige Beteiligungen ab 20%</b>                                                                             |                        |
| ARIES, Wilmington, Delaware <sup>10</sup><br>(EK in TSD €: 3.219; JE in TSD €: -180)                             | 21,6000                |
| Capital Dynamics Champion Ventures VI, L.P.,<br>Woodside <sup>6</sup> (EK in TSD €: 26.496; JE in TSD €: -1.181) | 27,3354                |
| FIA Timber Partners II L.P., Wilmington <sup>6</sup><br>(EK in TSD €: 349; JE in TSD €: -228)                    | 23,0000                |
| HRJ Capital Global Buy-Out III (U.S.), L.P., Woodside <sup>11</sup><br>(EK in TSD €: 51.930; JE in TSD €: 8.019) | 44,8071                |

| Name und Sitz                                                                                       | %-Anteil<br>am Kapital |
|-----------------------------------------------------------------------------------------------------|------------------------|
| <b>Sonstige Beteiligungen an großen Kapital-<br/>gesellschaften mit mehr als 5% der Stimmrechte</b> |                        |
| Admiral Group plc, Cardiff                                                                          | 10,1756                |
| Credit Guarantee Insurance Corporation, Johannesburg                                                | 7,1000                 |
| Extremus Versicherungs-Aktiengesellschaft, Köln                                                     | 16,0000                |
| Jordan Insurance Co. p.l.c., Amman                                                                  | 10,0000                |
| New National Assurance Company Ltd., Durban,<br>South Africa                                        | 16,0000                |
| Protektor Lebensversicherungs-AG, Berlin                                                            | 10,7597                |
| Swaziland Royal Insurance Corporation, Mbabane                                                      | 16,0000                |

<sup>1</sup> Der Börsenwert (BW) zum 31.12.2010 dieser Gesellschaft beträgt „XX“ Millionen €.

<sup>2</sup> Diese im Konzernabschluss vollkonsolidierte inländische Tochtergesellschaft in der Rechtsform einer Personengesellschaft im Sinne des § 264a HGB beabsichtigt, die gemäß § 264b HGB erforderlichen Bedingungen zu erfüllen und im Geschäftsjahr 2010 von dieser Befreiungsvorschrift für ihre Jahresabschlussunterlagen Gebrauch zu machen.

<sup>3</sup> Diese im Konzernabschluss vollkonsolidierte inländische Tochtergesellschaft beabsichtigt, die gemäß § 264 HGB Abs. 3 HGB erforderlichen Bedingungen zu erfüllen und im Geschäftsjahr 2010 von dieser Befreiungsvorschrift für ihre Jahresabschlussunterlagen Gebrauch zu machen.

<sup>4</sup> Beherrschung aufgrund des Vorliegens einer Zweckgesellschaft gemäß SIC 12, an der Munich Re die wesentlichen Chancen und Risiken behält.

<sup>5</sup> Maßgeblicher Einfluss aufgrund von Zugehörigkeiten von Munich Re zum Geschäftsführungs- und/oder Aufsichtsorgan oder einem sonstigen gleichartigen Leitungsorgan des assoziierten Unternehmens.

<sup>6</sup> Kein maßgeblicher Einfluss, da weder personelle noch sachliche Verflechtungen gemäß IAS 28.7 mit Munich Re bestehen.

<sup>7</sup> Beherrschung aufgrund von Stimmrechtsmehrheit.

<sup>8</sup> Keine Beherrschung, da aufgrund vertraglicher Vereinbarungen die Finanz- und Geschäftspolitik des Unternehmens nur mit Zustimmung Dritter bestimmt werden kann.

<sup>9</sup> Maßgeblicher Einfluss aufgrund abweichenden Stimmrechtsanteils.

<sup>10</sup> Kein maßgeblicher Einfluss aufgrund abweichenden Stimmrechtsanteils.

<sup>11</sup> Kein maßgeblicher Einfluss, da Satzung, Gesellschaftsvertrag oder eine sonstige Vereinbarung alle wesentlichen Entscheidungen betreffend die Finanz- und Geschäftspolitik des Unternehmens an ein Quorum binden, welches seitens des Mehrheitsgesellschafters ohne Zustimmung der nicht beherrschenden Gesellschafter erreicht werden kann.

Aufgestellt und damit zur Veröffentlichung freigegeben in München, den 1. März 2011.

Der Vorstand

## Bestätigungsvermerk des Abschlussprüfers

Wir haben den von der Münchener Rückversicherungs-Gesellschaft Aktiengesellschaft in München, München, aufgestellten Konzernabschluss – bestehend aus Konzernbilanz, Konzern-Gewinn- und Verlustrechnung, Aufstellung der erfassten Erträge und Aufwendungen, Konzern-Eigenkapitalentwicklung, Konzern-Kapitalflussrechnung und Konzernanhang – sowie den Konzernlagebericht für das Geschäftsjahr vom 1. Januar bis 31. Dezember 2010 geprüft. Die Aufstellung von Konzernabschluss und Konzernlagebericht nach den IFRS, wie sie in der EU anzuwenden sind, und den ergänzend nach § 315a Abs. 1 HGB anzuwendenden handelsrechtlichen Vorschriften liegt in der Verantwortung der gesetzlichen Vertreter der Gesellschaft. Unsere Aufgabe ist es, auf der Grundlage der von uns durchgeführten Prüfung eine Beurteilung über den Konzernabschluss und den Konzernlagebericht abzugeben.

Wir haben unsere Konzernabschlussprüfung nach § 317 HGB unter Beachtung der vom Institut der Wirtschaftsprüfer (IDW) festgestellten deutschen Grundsätze ordnungsmäßiger Abschlussprüfung vorgenommen. Danach ist die Prüfung so zu planen und durchzuführen, dass Unrichtigkeiten und Verstöße, die sich auf die Darstellung des durch den Konzernabschluss unter Beachtung der anzuwendenden Rechnungslegungsvorschriften und durch den Konzernlagebericht vermittelten Bildes der Vermögens-, Finanz- und Ertragslage wesentlich auswirken, mit hinreichender Sicherheit erkannt werden. Bei der Festlegung der Prüfungshandlungen werden die Kenntnisse über die Geschäftstätigkeit und über das wirtschaftliche und rechtliche Umfeld des Konzerns sowie die Erwartungen über mögliche Fehler berücksichtigt. Im Rahmen der Prüfung werden die Wirksamkeit des rechnungslegungsbezogenen internen Kontrollsystems sowie Nachweise für die Angaben im Konzernabschluss und Konzernlagebericht überwiegend auf der Basis von Stichproben beurteilt. Die Prüfung umfasst die Beurteilung der Jahresabschlüsse der in den Konzernabschluss einbezogenen Unternehmen, der Abgrenzung des Konsolidierungskreises, der angewandten Bilanzierungs- und Konsolidierungsgrundsätze und der wesentlichen Einschätzungen der gesetzlichen Vertreter sowie die Würdigung der Gesamtdarstellung des Konzernabschlusses und des Konzernlageberichts. Wir sind der Auffassung, dass unsere Prüfung eine hinreichend sichere Grundlage für unsere Beurteilung bildet.

Unsere Prüfung hat zu keinen Einwendungen geführt.

Nach unserer Beurteilung aufgrund der bei der Prüfung gewonnenen Erkenntnisse entspricht der Konzernabschluss den IFRS, wie sie in der EU anzuwenden sind, und den ergänzend nach § 315a Abs. 1 HGB anzuwendenden handelsrechtlichen Vorschriften und vermittelt unter Beachtung dieser Vorschriften ein den tatsächlichen Verhältnissen entsprechendes Bild der Vermögens-, Finanz- und Ertragslage des Konzerns. Der Konzernlagebericht steht in Einklang mit dem Konzernabschluss, vermittelt insgesamt ein zutreffendes Bild von der Lage des Konzerns und stellt die Chancen und Risiken der zukünftigen Entwicklung zutreffend dar.

München, den 2. März 2011

**KPMG Bayerische Treuhandgesellschaft Aktiengesellschaft**  
Wirtschaftsprüfungsgesellschaft  
Steuerberatungsgesellschaft

**Klaus Becker**  
Wirtschaftsprüfer

**Martin Berger**  
Wirtschaftsprüfer

## Versicherung der gesetzlichen Vertreter

„Wir versichern nach bestem Wissen, dass gemäß den anzuwendenden Rechnungslegungsgrundsätzen der Konzernabschluss ein den tatsächlichen Verhältnissen entsprechendes Bild der Vermögens-, Finanz- und Ertragslage des Konzerns vermittelt und im Konzernlagebericht der Geschäftsverlauf einschließlich des Geschäftsergebnisses und die Lage des Konzerns so dargestellt sind, dass ein den tatsächlichen Verhältnissen entsprechendes Bild vermittelt wird, sowie die wesentlichen Chancen und Risiken der voraussichtlichen Entwicklung des Konzerns beschrieben sind.“

München, den 9. März 2011

|                                                                                            |                                                                                            |                                                                                             |
|--------------------------------------------------------------------------------------------|--------------------------------------------------------------------------------------------|---------------------------------------------------------------------------------------------|
| <u>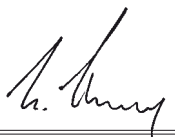</u>   | <u></u>   | <u></u>   |
| <u></u>   | <u></u>  | <u></u>   |
| <u></u> | <u></u> | <u></u> |

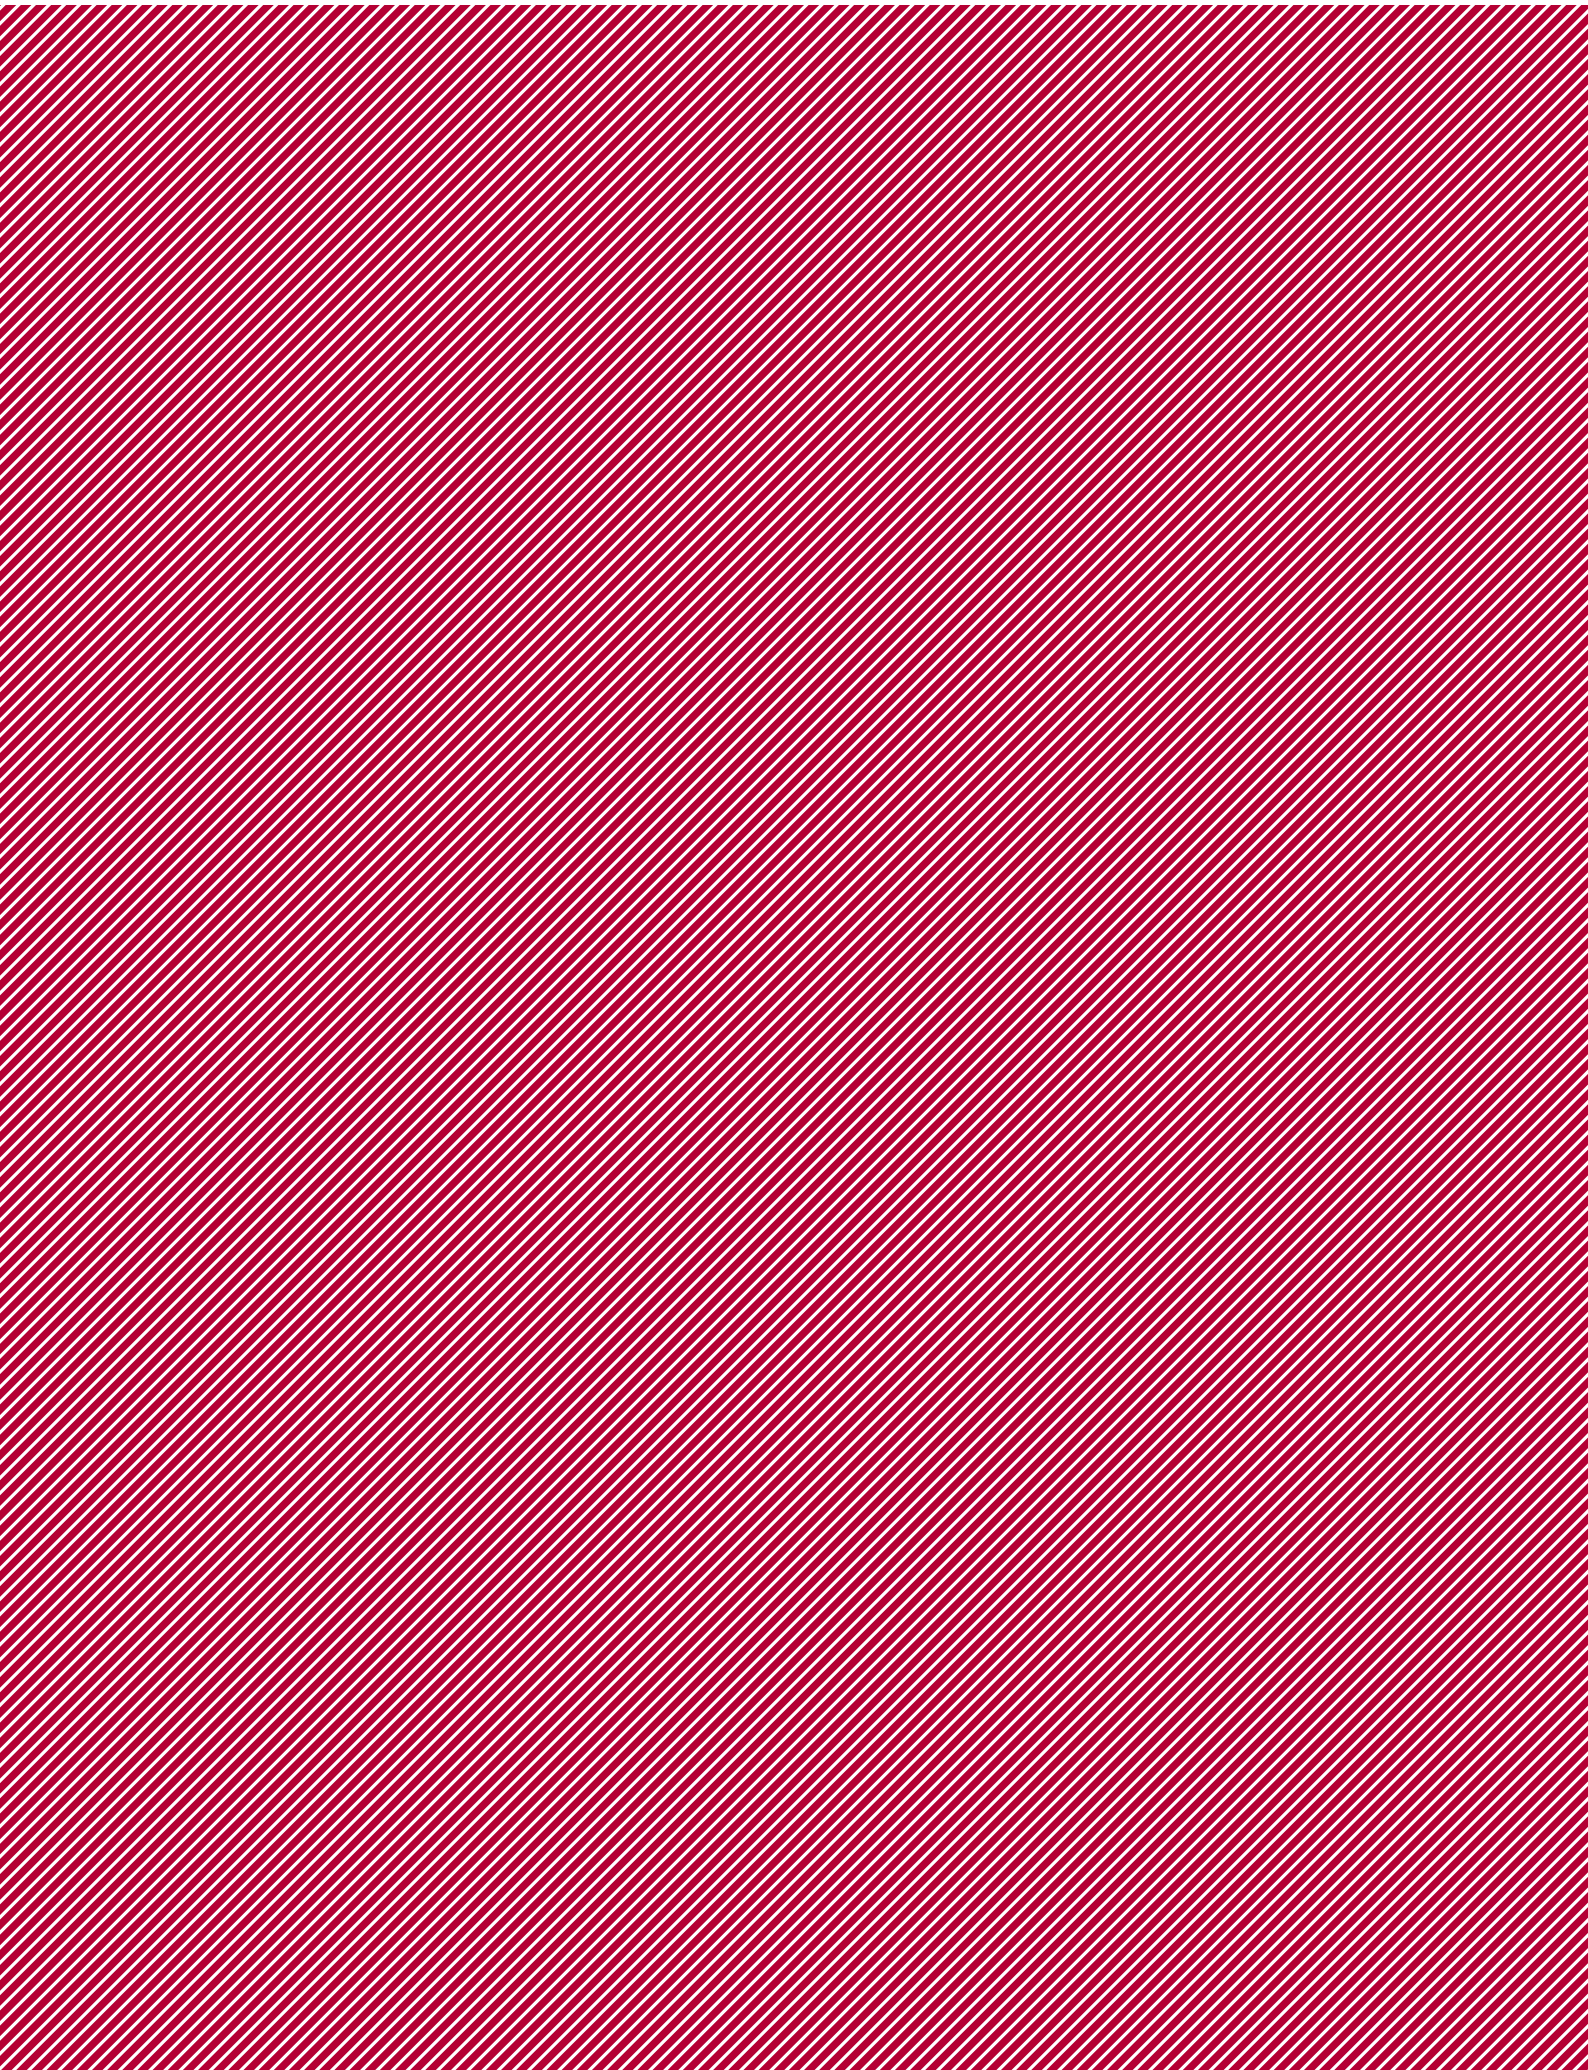



# Allgemeine Informationen

## Glossar

### Aa Ää

**Abwicklungsdreieck** // Darstellung schadenbezogener Größen wie Zahlung, Schadenrückstellung, Endschaten in zwei zeitlichen Dimensionen. Eine davon ist das Kalenderjahr, die zweite i.d.R. das Anfalljahr (eines Schadens). Die Abwicklungsdreiecke – als Indikator für die Bemessung der Schadenrückstellung – verdeutlichen, wie sich die Schadenrückstellung im Lauf der Zeit durch die geleisteten Zahlungen und die Neueinschätzung des erwarteten Endschatens zum jeweiligen Bilanzstichtag geändert hat.

**aktivierte Abschlusskosten** // Kosten, die beim Abschluss neuer oder bei der Verlängerung bestehender Verträge entstehen (z.B. Provisionen, Kosten der Antragsbearbeitung), werden aktiviert und über die Laufzeit der Verträge verteilt.

**Aktuar** // Mathematisch ausgebildeter Experte, der mit Methoden der Wahrscheinlichkeitstheorie und der Finanzmathematik Fragestellungen des Versicherungs- und Bausparwesens, der Kapitalanlagen und Altersversorgungssysteme analysiert und unter Berücksichtigung des rechtlichen und wirtschaftlichen Umfelds Lösungen entwickelt.

**Asset-Liability-Management** // Managementkonzept, bei dem Entscheidungen zu Unternehmensaktiva und -passiva aufeinander abgestimmt werden. In einem kontinuierlichen Prozess werden dabei Strategien zu den Aktiva und Passiva formuliert, umgesetzt, überwacht und revidiert, um bei vorgegebenen Risikotoleranzen und Beschränkungen die finanziellen Ziele zu erreichen.

**Aufwendungen für den Versicherungsbetrieb (netto)** // Provisionen sowie Personal- und Sachaufwendungen für Abschluss und laufende Verwaltung von Versicherungsverträgen, gekürzt um die Provisionen und Gewinnbeteiligungen, die von Rückversicherern erstattet wurden, sowie Aufwendungen aus der Abschreibung des Present Value of Future Profits (PVFP).

### Bb

**Beiträge** // Preis für den Versicherungsschutz, den der Versicherer leistet, auch Prämie genannt. Er kann laufend oder als Einmalbeitrag entrichtet werden. Unter „gebuchten Beiträgen“ versteht man die gesamten Beitragseinnahmen, die im Geschäftsjahr fällig geworden sind. Der Anteil der Beitragseinnahmen, der Entgelt für den Versicherungsschutz im Geschäftsjahr ist, wird als „verdiente Beiträge“ bezeichnet. Die Beitragseinnahmen enthalten nach IFRS bei Produkten, die überwiegend Anlagecharakter haben (z.B. Finanzierungsverträgen und fondsgebundenen Lebensversicherungen), nur das Entgelt, das dazu dient, das Risiko und die Kosten zu decken. Hingegen können sie gemäß den statutorischen Bilanzierungsrichtlinien des Heimatlands des Versicherers auch die Sparbeiträge der Versicherungsnehmer aus fondsgebundenen Lebensversicherungen und Kapitalisierungsprodukten umfassen.

**Beitragsüberträge** // Der Anteil der im Geschäftsjahr vereinnahmten Beiträge, der auf die Zeit nach dem Bilanzstichtag entfällt, wird unter Beitragsüberträge unter den versicherungstechnischen Rückstellungen ausgewiesen.

**beizulegender Zeitwert** // Betrag, zu dem zwischen sachverständigen, vertragswilligen und voneinander unabhängigen Geschäftspartnern ein Vermögenswert getauscht oder eine Schuld beglichen werden könnte.

**Bornhuetter-Ferguson-Verfahren** // Aktuarielles Standardverfahren, mit dem der Rückstellungsbedarf für zukünftige Schadenaufwände aufgrund bereits eingetretener, aber noch nicht hinreichend genau spezifizierter Versicherungsfälle geschätzt wird. Der erwartete Gesamtschaden wird bei diesem Verfahren auf der Basis historischer Daten zur Abwicklung von Schäden im Portfolio und einer unabhängigen Schätzung des Versicherers bestimmt. Je nach Kenntnis über den Stand der Abwicklung der Versicherungsfälle werden diese Einflussfaktoren unterschiedlich gewichtet.

**brutto/netto** // In der Versicherungsterminologie bedeuten Brutto- bzw. Nettoausweis, dass die versicherungstechnischen Positionen vor bzw. nach Abzug des Anteils ausgewiesen werden, der auf das in Rückdeckung gegebene Geschäft entfällt.

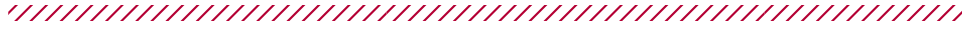

## Cc

**Capital-Asset-Pricing-Model (CAPM)** // Kapitalmarktmodell, das auf der Portfoliotheorie beruht und mit dem Wertpapiere bewertet werden. Das CAPM erweitert die Portfoliotheorie um die Frage, welcher Teil des Gesamtrisikos eines Wertpapiers nicht durch Risikostreuung (Diversifikation) zu beseitigen ist, und erklärt, wie risikobehaftete Anlagemöglichkeiten auf dem Kapitalmarkt bewertet werden. Demnach kann auf effizient funktionierenden Märkten, auf denen jede Information bereits in die Preise eingeflossen ist, ein Mehr an Ertrag nur durch ein Mehr an Risiko erkaufte werden.

**Captive** // Versicherungsgesellschaft, die als Tochter von einem oder mehreren Industrie- bzw. Handelsunternehmen oder Konzernen gegründet wird, um vor allem Risiken dieser Unternehmen und der mit ihnen verbundenen Gesellschaften zu versichern.

**Chain-Ladder-Verfahren** // Aktuarielles (multiplikatives) Standardverfahren, mit dem der Rückstellungsbedarf für zukünftige Schadenaufwände geschätzt wird; es unterstellt, dass der Schadenstand um einen in allen Anfalljahren gleichen Faktor zunimmt. Der erwartete Gesamtschaden wird bei diesem Verfahren ausschließlich auf der Basis historischer Daten zur Abwicklung von Schäden im Portfolio des Versicherers bestimmt.

**Credit Default Swaps (CDS)** // Kapitalmarktinstrumente, mit denen sich ein Investor gegen das Ausfallrisiko eines Schuldners absichern kann. Die Höhe der Prämie hängt von der Wahrscheinlichkeit ab, mit welcher der Markt mit einem Ausfall rechnet, und bietet daher einen guten Indikator für die Kreditwürdigkeit eines Unternehmens oder auch Staates.

**Credit Equivalent Exposure (CEE)** // Wird verwendet, um die Kreditexponierung aus verschiedenartigen kreditrisikobehafteten Produkttypen unter einem gemeinsamen Kontrahentenlimit zusammenzufassen und zu vergleichen. Das CEE wird unabhängig von der Wahrscheinlichkeit eines Ausfalls eines Kontrahenten berechnet und stellt die erwartete Verlusthöhe bei einem Ausfall dar.

## Dd

**Deckungsrückstellung** // Nach versicherungsmathematischen Methoden ermittelte versicherungstechnische Rückstellung, die künftige Ansprüche der Versicherungsnehmer vor allem in der Lebens-, Kranken- und Unfallversicherung abdeckt. Sie entspricht dem Saldo aus dem Barwert der künftigen Verpflichtungen abzüglich des Barwerts der künftigen Beiträge.

**Delta** // Auch Delta-Faktor. Maß dafür, wie sich der Optionspreis verändert, wenn sich der Basiswert um eine Einheit verändert. Hat zum Beispiel eine Option ein Delta von 2, so steigt sie um 2%, wenn der Basiswert um 1% zunimmt.

**Depotforderungen/-verbindlichkeiten** // Forderungen des Rückversicherers an Zedenten in Höhe der bei ihnen gestellten Sicherheiten (Bardepots) für künftige Rückversicherungsleistungen. Die Zedenten weisen die einbehaltenen Gelder als Depotverbindlichkeiten aus.

**Duration** // Die Duration in Jahren bezeichnet die durchschnittliche Laufzeit einer zinssensitiven Kapitalanlage (oder eines Portfolios), während die modifizierte Duration (in Prozent) angibt, wie stark sich der Gesamtertrag einer Anleihe ändert, wenn sich der Zinssatz am Markt ändert.

## Ee

**Embedded Value** // Das Konzept des Embedded Value ist eine Form, langlaufendes Versicherungsgeschäft zu bewerten. Der Embedded Value ist die Summe des im Unternehmen vorhandenen und mit seinem Marktpreis bewerteten Eigenkapitals und des sogenannten Bestandswerts. Letzterer ist der Barwert der zukünftigen Nettoerträge aus dem Versicherungsbestand; er wird nach versicherungsmathematischen Grundsätzen und gemäß den Vorschriften der MCEV Principles berechnet. Der Bestandwert berücksichtigt zudem die explizit über die gesamte Laufzeit des Portfolios bestimmten Kapitalkosten.

**Endschaden** // Für ein Anfalljahr gibt der Endschaden zum Stand des Jahresendes des betrachteten Kalenderjahres den geschätzten Gesamtschadenaufwand an, der gemäß dieser Schätzung bis zur endgültigen Abwicklung zu leisten sein wird. Er setzt sich zusammen aus den bereits geleisteten Schadenzahlungen für dieses Anfalljahr und der verbleibenden Schadenrückstellung, die für Auszahlungen in künftigen Jahren gebildet wird. Da die Schadenrückstellungen auf Schätzungen beruhen, kann sich der Endschaden von Kalenderjahr zu Kalenderjahr ändern. Daher werden synonym auch die Begriffe Endschadenstand oder Endschadenschätzung verwendet.

Erneuerung // Obligatorische Rückversicherungsverträge werden trotz einer vereinbarten Kündigungsfrist regelmäßig auf unbestimmte Zeit abgeschlossen. Vertragsbeziehungen zwischen Erst- und Rückversicherern laufen daher über längere Zeiträume. Die Vertragsbedingungen werden meist jährlich in sogenannten Erneuerungsverhandlungen angepasst und die Verträge entsprechend „erneuert“.

## Ff

**fakultative Rückversicherung** // Beteiligung des Rückversicherers an ausgewählten Einzelrisiken. Der Erstversicherer kann ein einzelnes Risiko zur Rückversicherung anbieten, der Rückversicherer kann seinerseits die Rückversicherung dieses Risikos annehmen oder ablehnen (im Gegensatz zur obligatorischen Rückversicherung).

**fondsgebundene Lebensversicherung** // Besondere Form der Kapitallebensversicherung, bei der die Höhe der Leistungen von der Wertentwicklung der Vermögensanlagen abhängt, die in einem Investmentfonds zusammengefasst sind. Der Versicherungsnehmer trägt das Kapitalanlagerisiko.

## Gg

**Garantiezins** // Er beziffert bei Kapitallebensversicherungen den Zinssatz, mit dem der Versicherer den Sparanteil der Beiträge verzinsen muss, um die mindestens zugesagten Versicherungsleistungen zu erreichen. Diese Mindestverzinsung wird vertraglich garantiert.

**Großschaden** // Schaden, der aufgrund seiner im Vergleich zur beobachteten Schadenhistorie außergewöhnlichen Schadenhöhe oder anderer Kriterien eine besondere Bedeutung für den Erst- bzw. Rückversicherer hat. Typischerweise unterscheidet man zwischen von Menschen verursachten (man-made) und durch Naturkatastrophen hervorgerufenen (NatCat) Großschäden.

## li

**IBNR-Reserven** // Rückstellungen für Schäden, die dem Versicherer noch nicht bekannt sind (IB-NYR = incurred but not yet reported), aber auch für Schäden, deren Einzelschadenreserve nicht ausreicht (IBNER = incurred but not enough reserved).

## Kk

**Katastrophenbond** // Durch Katastrophenbonds (CatBond, Act-of-God-Bonds) werden (Natur-) Katastrophenrisiken auf den Kapitalmarkt transferiert. Die Käufer einer Katastrophenanleihe profitieren von vergleichsweise hohen Zinsen, übernehmen aber das Risiko des (Rück-)Versicherers bei (Natur-)Katastrophen ganz oder teilweise. Übersteigt eine Katastrophe den vorher definierten Auslösemechanismus, werden Kapital und Zinsen der Käufer nur teilweise oder gar nicht zurückgezahlt und dienen stattdessen dazu, den finanziellen Schaden des (Rück-)Versicherers zu kompensieren, der durch die (Natur-)Katastrophe entstanden ist.

**Kompositversicherer** // Versicherungsunternehmen, das im Gegensatz zu einem Einbranchenunternehmen (z.B. Lebensversicherer) mehrere Versicherungszweige betreibt.

**Konvexität** // Kennzahl, die das Verhalten einer Anleihe beschreibt, die bei Zinsänderungen unterschiedlich starken Kursschwankungen in verschiedene Richtungen ausgesetzt ist. Die Idee des Konzepts der Konvexität ist analog zur Duration eine Schätzung des Barwerts einer Anleihe. Eine gewöhnliche Anleihe mit regelmäßigem Kupon und vollständiger Kapitalrückzahlung bei Fälligkeit wird bei Renditerückgängen im Kurs stärker steigen, als sie bei Renditeanstiegen im Kurs fallen wird. Das Phänomen der Konvexität beruht auf einer Veränderung der Duration der Anleihe bei sich ändernden Renditen. Fallende Zinsen erhöhen die Duration der Anleihe und damit ihre Zinssensitivität, sodass sich bei weiter fallenden Renditen der Kursanstieg beschleunigt. Bei steigenden Renditen verhält es sich umgekehrt.

**Kostenquote** // Prozentuales Verhältnis der Aufwendungen für den Versicherungsbetrieb zu den verdienten Beiträgen.

**Kumul** // Mehrere beim selben Versicherungsunternehmen versicherte oder rückversicherte Risiken, die von einem Schadenereignis gleichzeitig betroffen werden können, nennt man Kumul.

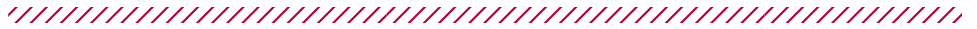

## L

**Langlebigkeit** // Risiko eines Versicherers, dass eine versicherte Person länger lebt als erwartet oder sich die Lebenserwartung eines versicherten Bestands insgesamt erhöht.

**Leistungen an Kunden (netto)** // Hierzu gehören die Aufwendungen für Versicherungsfälle (geleistete Zahlungen für Schäden sowie Veränderung der Rückstellung für noch nicht abgewickelte Versicherungsfälle), Aufwendungen für Beitragsrückerstattung sowie die Veränderung der übrigen versicherungstechnischen Rückstellungen (Deckungsrückstellung und Sonstige), jeweils nach Abzug der Anteile der Rückversicherer.

**Living Benefits** // Leistungen aus Lebensversicherungsprodukten, die nicht durch den Tod der versicherten Person oder das Erleben eines bestimmten Zeitpunkts, sondern noch zu Lebzeiten des Versicherten durch den Eintritt genau definierter Ereignisse oder Entwicklungen ausgelöst werden, fallen unter die Kategorie „Living Benefits“. Typische Vertreter derartiger Produkte sind die Berufsunfähigkeitsversicherung, die Pflegefallversicherung oder die Versicherung gegen den Eintritt bestimmter schwerer Krankheiten (Critical Illness).

## Mm

**Managing General Agency Business** // Geschäft, bei dem der Versicherer die Underwritingvollmacht für ein bestimmtes Portfolio einem Generalagenten (Managing General Agent) oder einer Zeichnungsagentur (Managing General Agency, MGA) überträgt, der/die als Absatzmittler fungiert. Er/sie kann je nach Vertrag auch Aufgaben wie Schadenbearbeitung oder Verwaltungstätigkeiten übernehmen.

**Morbidität** // Krankheitswahrscheinlichkeit eines Individuums bezogen auf eine bestimmte Population, also wie wahrscheinlich es ist, dass ein Individuum einer Population eine bestimmte Krankheit oder Störung entwickelt.

**Mortalität** // Ausmaß der Todesfälle im Verhältnis zur Gesamtbevölkerung oder zu einzelnen Altersklassen (Sterblichkeit); sie wird global durch Sterbeziffern oder Sterberaten ausgedrückt und durch Sterbetafeln spezifiziert.

## Nn

**Net Asset Value** // Auch Nettovermögenswert. Stellt den Wert aller materiellen und immateriellen Vermögensgegenstände eines Unternehmens abzüglich der Verbindlichkeiten dar. Dieser Substanzwert soll den fundamentalen Wert des Unternehmens wiedergeben.

**nicht proportionale Rückversicherung** // Dabei übernimmt der Rückversicherer die Schäden des Erstversicherers, die einen bestimmten Betrag übersteigen. Das Rückversicherungsentgelt richtet sich nach den Schadenerfahrungen mit dem betreffenden Geschäft.

## Oo Öö

**obligatorische Rückversicherung** // Der Erstversicherer wird bei der obligatorischen Rückversicherung verpflichtet, alle näher definierten Risiken in einem bestimmten Umfang an den Rückversicherer zu geben, während der Rückversicherer die Risiken übernimmt, ohne sie im Einzelfall zu prüfen. Obligatorische Rückversicherungsverträge werden trotz einer vereinbarten Kündigungsfrist regelmäßig auf unbestimmte Zeit geschlossen. Die Vertragsbeziehungen erstrecken sich daher über längere Zeitabschnitte (im Gegensatz zur fakultativen Rückversicherung).

**Ökonomischer Kapitalpuffer** // Betrag, um den die verfügbaren Eigenmittel das ökonomische Risikokapital übersteigen.

**Ökonomischer Solvabilitätskoeffizient** // Quotient aus verfügbaren Eigenmitteln (nach Dividende und Aktienrückkauf) und dem ökonomischen Risikokapital. Dieser Quotient bringt die Kapitalstärke des Unternehmens zum Ausdruck.

**Ökonomisches Risikokapital (ERC)** // Betrag an verfügbaren Eigenmitteln, der benötigt wird, um mit einer vorgegebenen Risikotoleranz unerwartete Verluste des Folgejahres ausgleichen zu können. Bei Munich Re wird das ökonomische Risikokapital als der 1,75-fache Value-at-Risk über einen einjährigen Zeithorizont zu einem Sicherheitsniveau von 99,5% berechnet.

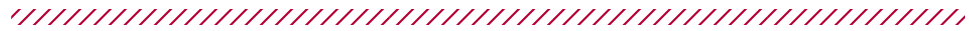

## Pp

**Pandemie** // Länder- und kontinentübergreifende Ausbreitung einer Krankheit, im engeren Sinn einer Infektionskrankheit. Im Gegensatz zur Epidemie, bei der eine Erkrankung örtlich und zeitlich begrenzt auftritt, ist eine Pandemie örtlich nicht beschränkt.

**Present Value of Future Profits (PVFP)** // Beim Erwerb von Versicherungsunternehmen bzw. einzelnen Versicherungsbeständen wird der Barwert der erwarteten Erträge abzüglich der Aufwendungen aus dem übernommenen Versicherungsbestand als PVFP aktiviert. Dieser immaterielle Vermögensgegenstand entsteht insbesondere beim Kauf von Lebens- und Krankenversicherungsunternehmen.

**Public Private Partnership (PPP)** // Auch öffentlich-private Partnerschaft (ÖPP). Langfristig angelegte Zusammenarbeit zwischen Privatunternehmen und staatlichen Stellen mit dem Ziel, öffentliche Aufgaben wirtschaftlich besser zu erfüllen.

**proportionale Rückversicherung** // Bei proportionalen Rückversicherungsverträgen wird die Versicherungssumme, die der Erstversicherer gezeichnet hat, zwischen Erst- und Rückversicherer aufgeteilt und der Rückversicherer beteiligt sich entsprechend seinem Anteil an den Beiträgen und Schäden des Erstversicherers.

## Rr

**Replikationsportfolio** // Unter einem Replikationsportfolio versteht man die Nachbildung der Zahlungsstruktur der versicherungstechnischen Rückstellungen durch ein Wertpapierportfolio.

**Retrozessionär** // Rückversicherer, der das von anderen Versicherungsgesellschaften in Rückdeckung genommene Geschäft rückversichert. Retrozession ermöglicht es dem Rückversicherer, einen Teil seiner Risiken an andere Versicherungsgesellschaften abzugeben.

**Risikoexponierung** // Grundsätzlich stellt die Risikoexponierung die Höhe des Risikos im Sinne einer möglichen Abweichung vom Erwartungswert unter bestimmten Wahrscheinlichkeitsannahmen dar. In Zusammenhang mit der Rechnungslegung wird der Begriff auch verwendet, um den möglichen Verlust zu quantifizieren, der aus bestimmten Aktiva für ein Unternehmen resultieren kann.

**Rückstellung für Beitragsrückerstattung** // Rückstellung für am Bilanzstichtag noch nicht fällige Verpflichtungen zu Beitragsrückerstattungen an Versicherungsnehmer, insbesondere in der Lebens- und Krankenversicherung; der Ansatz ergibt sich aus aufsichtsrechtlichen oder einzelvertraglichen Regelungen. Zusätzlich werden hier die Anteile an den kumulierten Bewertungsunterschieden zwischen IFRS und HGB ausgewiesen, die auf die Versicherungsnehmer entfallen (sogenannte Rückstellung für latente Beitragsrückerstattung).

**Rückstellung für noch nicht abgewickelte Versicherungsfälle** // Rückstellung für die Verpflichtungen aus Versicherungsfällen, die am Bilanzstichtag bereits eingetreten sind, aber noch nicht gemeldet wurden bzw. noch nicht vollständig abgewickelt werden konnten.

**Rückversicherungskapazität** // Maximale Versicherungsdeckung, die ein Unternehmen bzw. der gesamte Markt zur Verfügung stellen kann.

## Ss

**Schaden-Kosten-Quote** // Prozentuales Verhältnis der Summe aus Nettoaufwendungen für Versicherungsfälle plus Nettoaufwendungen für den Versicherungsbetrieb zu den verdienten Nettobeiträgen. Dies entspricht der Summe aus Schaden- und Kostenquote.

**Schadenquote** // Prozentuales Verhältnis der Schadenaufwendungen zu den verdienten Beiträgen.

**Schwankungsrückstellung** // Rückstellungen nach nationalen Vorschriften; sie sind zu bilden, um Schwankungen im Schadenverlauf künftiger Jahre auszugleichen. Bei der Bilanzierung nach IFRS werden sie im Eigenkapital berücksichtigt.

////////////////////

**Solvency II** // Projekt der Europäischen Kommission zur grundlegenden Reform und Harmonisierung der europäischen Vorschriften über die Versicherungsaufsicht. Solvency II basiert auf dem Drei-Säulen-Konzept: Mindestkapitalanforderungen (quantitativ), aufsichtsrechtliche Überprüfungsverfahren (qualitativ) und Marktdisziplin (Offenlegung).

**Sterbetafel** // Mit Methoden der Wahrscheinlichkeitstheorie entwickelte Tabellen, mit denen die erwartete Sterblichkeit von Versicherungsnehmern in einem Bestand von Lebens- und Krankenversicherungsverträgen geschätzt wird. Sie stellen die Wahrscheinlichkeit für einen zukünftigen Todesfall dar, differenziert nach Alter und anderen Faktoren, und berücksichtigen häufig auch demografische Trends. Für die Bewertung versicherungstechnischer Rückstellungen verwendet man in der Regel Sterbetafeln mit Sicherheitszuschlägen.

**Stop-Loss-Deckung** // Nicht proportionale Rückversicherung, unter der die limitierte Leistungspflicht eintritt, wenn für einen bestimmten Deckungszeitraum die Gesamtschadenlast des Erstversicherers einen festgelegten Wert übersteigt.

**Stresstest** // Spezielle Form der Szenarioanalyse. Ziel ist, eine quantitative Aussage über das Verlustpotenzial von Portfolios bei extremen Marktschwankungen treffen zu können.

**Szenarioanalyse** // Mit Szenarioanalysen wird untersucht, wie sich gewisse Kenngrößen (z.B. Markt- oder Buchwerte) verändern, wenn vordefinierte Marktentwicklungen eintreten. Dabei handelt es sich in der Regel um durchschnittliche Wenn-dann-Analysen.

Tt

**Tail-Abhängigkeiten** // Sie stellen den Zusammenhang von Risikotreibern in Ausnahmesituationen dar, das heißt, verschiedene Extremereignisse beeinflussen unterschiedliche Sparten, Orte und Risikoarten. Aufgrund der Annahme der Abhängigkeit der verschiedenen Risiken ergibt sich im Vergleich zur Annahme der Unabhängigkeit ein geringerer Diversifikationseffekt, der sich in einem höheren Kapitalbedarf niederschlägt.

**technischer Zins(ertrag)** // Betrag, den das übernommene Versicherungsgeschäft aus der überwiegend risikolosen Geldanlage der Beitragseinnahmen erwirtschaftet.

Uu Üü

**Überschussbeteiligung** // In der Lebens- und Krankenversicherung sind die Versicherungsnehmer aufgrund gesetzlicher und vertraglicher Vorgaben an den erwirtschafteten Überschüssen des Unternehmens angemessen zu beteiligen. Die Höhe der Überschussbeteiligung wird jährlich neu festgelegt. In der Regel steigt durch die Überschussbeteiligung in der Lebensversicherung die Leistung, die bei Ablauf oder im Versicherungsfall zu zahlen ist; in der Krankenversicherung werden Beiträge erstattet.

**Underwriter** // Mitarbeiter eines Versicherungs- oder Rückversicherungsunternehmens, die im Auftrag ihres Arbeitgebers die Bedingungen eines (Rück-)Versicherungsvertrags aushandeln, akzeptieren oder ablehnen. Sie sind verantwortlich für die Qualität und das zuverlässige Funktionieren von angebotenen Risikotransferlösungen. Sie erarbeiten Produkte, die den Charakteristika der Risiken und dem Bedarf der Kunden möglichst optimal entsprechen.

**Universal Life** // Verträge in der Lebenserstversicherung, bei denen die Höhe der Beiträge oder Leistungen nicht garantiert bzw. festgelegt ist und der Versicherungsnehmer die Beiträge in gewissen Grenzen variieren kann.

Vv

**Value at Risk** // Methode zur Risikoquantifizierung; er misst die potenziellen künftigen Verluste, die innerhalb eines vorgegebenen Zeitraums und mit einer bestimmten Wahrscheinlichkeit nicht überschritten werden.

**Variable Annuities** // Besondere Form der fondsgebundenen Lebensversicherung. Dabei trägt der Versicherungsnehmer primär das Kapitalanlagerisiko, wobei der Versicherer eine Mindestleistung im vertraglich vereinbarten Leistungsfall garantiert.



**Verfügbare Eigenmittel //** Sie setzen sich zusammen aus dem ökonomischen Eigenkapital, das weitgehend dem IFRS-Eigenkapital entspricht, und dem Hybridkapital (nachrangige Anleihen).

**Versicherungspool //** Risikogemeinschaft, zu der sich rechtlich und wirtschaftlich selbstständige Erst- und Rückversicherer zusammenschließen oder teilweise von staatlicher Seite verpflichtet werden, um eine breitere versicherungstechnische Deckung für besonders große oder unausgeglichene Risiken zu schaffen. Die Versicherer verpflichten sich, alle im Poolvertrag bezeichneten Risiken nur im Rahmen des Versicherungspools zu zeichnen und gegen Provision in diesen einzubringen. Jedes Poolmitglied ist am Gewinn oder Verlust des Pools gemäß seiner Quote beteiligt. Zur weiteren Risikoverteilung werden häufig Rückversicherungen abgegeben oder genommen. Poolarten sind Mitversicherungspools, bei denen alle Mitglieder mit ihren Anteilen als Erstversicherer auftreten, sowie Rückversicherungspools, bei denen Erstversicherer die Risiken zeichnen und diese dann über Rückversicherung an die beteiligten Poolversicherer verteilen.

**versicherungstechnische Rückstellungen //** Ungewisse Verbindlichkeiten, die unmittelbar mit dem Versicherungsgeschäft zusammenhängen. Ihre Bildung soll sicherstellen, dass die Verpflichtungen aus den Versicherungsverträgen dauerhaft erfüllt werden können.

**versicherungstechnisches Ergebnis //** Saldo aus Erträgen und Aufwendungen, die dem Versicherungsgeschäft zugeordnet werden. Das versicherungstechnische Ergebnis enthält eine Zinskomponente, den technischen Zinsertrag. Diese wird aus dem nicht versicherungstechnischen Ergebnis umgegliedert.

## Zz

**Zedent //** Kunde eines Rückversicherungsunternehmens.

**Zessionär //** Rückversicherer des Erstversicherers.

**Zinsstrukturkurve //** Als Zinsstruktur wird das Verhältnis verschiedener Zinssätze in Abhängigkeit von der Laufzeit einer Anlage (z.B. festverzinsliches Wertpapier) bezeichnet. In der Regel steigt der Zinssatz mit der Laufzeit. Eine solche Zinsstruktur wird deshalb als steigend (bzw. normal) bezeichnet. Die Zinsstruktur nennt man flach, wenn der Zinssatz nicht von der Laufzeit abhängt. Selten sind inverse (bzw. fallende) Zinsstrukturen. Sie treten auf, wenn für langlaufende Titel (Anleihen) weniger Zinsen bezahlt werden als für kurzfristige Titel. Die Zinsstruktur wird grafisch in der Zinsstrukturkurve veranschaulicht.

**Zyklusmanagement //** Erst- und Rückversicherungsmärkte sowie Retrozessionsmärkte unterliegen globalen und regionalen Zyklen, die externe (Zinsentwicklung, Konjunkturentwicklung, Großschäden etc.) und interne Ursachen (Preiswettbewerb, Prämienkalkulationsmethoden etc.) haben können. Unter Zyklusmanagement versteht man, kontinuierlich den Zyklusverlauf zu analysieren, aktiv strategische Maßnahmen zu ergreifen und in jeder Phase risikoadäquate Konditionen (Preise, Deckungsumfang und Bedingungen) sicherzustellen.

# Stichwortverzeichnis

|                                                   |                                                                           |                                               |                                                 |
|---------------------------------------------------|---------------------------------------------------------------------------|-----------------------------------------------|-------------------------------------------------|
| <b>Abschreibungen</b> .....                       | <b>72, 88, 98, 140, 164, 168, 170, 187f., 206, 237</b>                    | <b>Kapitalanlagen</b> .....                   | <b>56, 94ff., 100ff., 143, 164ff., 191, 232</b> |
| Aktie .....                                       | 8ff., 30, 44                                                              | Kapitalflussrechnung .....                    | 107, 156ff.                                     |
| Aktienrückkauf .....                              | 10, 103, 144                                                              | Kapitalmanagement .....                       | 13, 102f.                                       |
| Aktionärsbrief .....                              | 4ff.                                                                      | Klimawandel .....                             | 64, 114, 134f., Magazin 13                      |
| Anlageergebnis .....                              | 56, 71ff., 88, 92, 144                                                    | Konsolidierungskreis .....                    | 107, 158                                        |
| Asset-Liability-Management (ALM) .....            | 102ff.                                                                    | Kooperationen .....                           | 52, 135                                         |
| Aufsichtsrat .....                                | 17ff., 25f., 42ff.                                                        | Kreditversicherung .....                      | 49                                              |
|                                                   |                                                                           | Kunden und Kundenbeziehungen .....            | 108ff.                                          |
|                                                   |                                                                           | Kursentwicklung .....                         | 9ff., 31, 66ff.                                 |
| <b>Bericht des Aufsichtsrats</b> .....            | <b>17ff.</b>                                                              | <b>Lebensrückversicherung</b> .....           | <b>49, 55, 77ff., 141</b>                       |
| Bestätigungsvermerk .....                         | 280                                                                       | Liquidität .....                              | 54, 96, 101, 124f., 211, 246, 253               |
| Beteiligungen .....                               | 103, 269ff.                                                               |                                               |                                                 |
| Bilanzsumme .....                                 | 100, 198                                                                  | <b>Markenumstellung</b> .....                 | <b>89, 108ff.</b>                               |
| <b>Combined Ratio</b> .....                       | <b>57</b>                                                                 | MEAG .....                                    | 53, 99, 109, 209, 259                           |
| Corporate Climate Centre (CCC) .....              | 135                                                                       | Mikroversicherungen .....                     | 114                                             |
| Corporate Governance .....                        | 15ff.                                                                     | Mitarbeiter .....                             | 22, 110ff., 263                                 |
| Corporate Governance Bericht .....                | 26f.                                                                      | Munich Health .....                           | 52, 92ff., Magazin 8ff.                         |
| Corporate Responsibility .....                    | 114f.                                                                     |                                               |                                                 |
| Corporate Underwriting .....                      | 51                                                                        | <b>Nachhaltigkeit</b> .....                   | <b>96, Magazin 13</b>                           |
| <b>Deutscher Corporate Governance Kodex</b> ..... | <b>262</b>                                                                | Nachrangsanleihe .....                        | 101, 198                                        |
| Deutschland .....                                 | 48ff., 65, 68, 110                                                        | Naturkatastrophen .....                       | 8, 79, 128                                      |
| Diversity .....                                   | 18, 26, 110                                                               |                                               |                                                 |
| Dividende .....                                   | 4, 8ff., 102, 138                                                         | <b>Pensionsrückstellungen</b> .....           | <b>162</b>                                      |
| <b>Eigenkapital</b> .....                         | <b>58, 132f., 154ff., 171, 208ff.</b>                                     | Personalausschuss .....                       | 18f., 27                                        |
| Equity-Methode .....                              | 107, 158ff.                                                               | Prüfungsausschuss .....                       | 19, 27                                          |
| Ergebnis je Aktie .....                           | 268                                                                       | <b>Rating</b> .....                           | <b>100, 132, 196</b>                            |
| Erklärung zur Unternehmensführung .....           | 22ff.                                                                     | Return on Risk adjusted Capital (RoRaC) ..... | 58f., 70, 144                                   |
| ERGO .....                                        | 13ff., 48ff., 51ff., 74, 87ff., 108, 113, 117, 142, Magazin 2ff., 16ff.   | Risikokapital .....                           | 13, 126ff.                                      |
| ERGO Direkt .....                                 | 51, 88, Magazin 5                                                         | Risikomanagement .....                        | 13, 116ff.                                      |
|                                                   |                                                                           | Risikomodell .....                            | 126ff.                                          |
|                                                   |                                                                           | Rückstellungen, versicherungstechnische ..... | 71f., 101                                       |
| <b>Finanzinstrumente, derivative</b> .....        | <b>44, 59, 98, 123, 139, 161ff., 240ff.</b>                               | <b>Schaden-Kosten-Quote</b> .....             | <b>57f., 250</b>                                |
| Finanzkrise .....                                 | 8, 68f., 134ff.                                                           | Schaden- und Unfallversicherung .....         | 49, 54, 59, 79, 91, 121, 141, 248               |
| Finanzlage .....                                  | 100ff.                                                                    | Solvabilität .....                            | 106, 133                                        |
| Fremdkapital .....                                | 101ff.                                                                    | Solvency II .....                             | 59, 69, 133, 137                                |
|                                                   |                                                                           | Sterling Life Insurance .....                 | 158, 266                                        |
| <b>Gesundheit</b> .....                           | <b>13ff., 52ff., 72, 90ff., 92ff., 109f., 115, 140, 143, Magazin 8ff.</b> | Strategisches Fremdkapital .....              | 101                                             |
| Grundkapital .....                                | 10, 28, 103ff., 208                                                       |                                               |                                                 |
| <b>Hauptversammlung</b> .....                     | <b>10, 24, 28, 104f.</b>                                                  | <b>Umsatz</b> .....                           | <b>76ff., 89</b>                                |
| <b>Immaterielle Vermögenswerte</b> .....          | <b>164ff., 187ff., 266</b>                                                | UniCredit .....                               | 52, 87                                          |
|                                                   |                                                                           | <b>Verbindlichkeiten</b> .....                | <b>71, 101f., 143, 176, 211</b>                 |
|                                                   |                                                                           | Vergütungsbericht .....                       | 22ff., 28                                       |
|                                                   |                                                                           | Vorstand .....                                | 6f., 17ff., 22ff., 28, 60, Magazin 5, 13        |
|                                                   |                                                                           | <b>Windsor</b> .....                          | <b>74, 93, 266</b>                              |
|                                                   |                                                                           | <b>Zyklusmanagement</b> .....                 | <b>76, 290</b>                                  |

## Wichtige Anschriften

### Deutschland

Münchener Rückversicherungs-Gesellschaft  
Aktiengesellschaft in München  
Königinstraße 107  
80802 München  
Tel.: +49 89 38 91-0  
Fax: +49 89 39 90 56  
www.munichre.com

### Rückversicherung

### Australien

Munich Holdings of Australasia Pty Limited (MHA)  
Munich Re House  
143 Macquarie Street  
Sydney NSW 1215  
Tel.: +61 2 9272 8000  
Fax: +61 2 9272 8099  
mha@munichre.com

### Großbritannien

Great Lakes Reinsurance (UK) PLC  
Plantation Place  
30 Fenchurch Street, 3rd Floor  
London EC3M 3AJ  
Tel.: +44 20 3003 7000  
Fax: +44 20 3003 7010  
correspondence@greatlakes.co.uk  
www.greatlakes.co.uk

### Kanada

Munich Reinsurance Company of Canada (MRoC)  
Munich Re Centre  
390 Bay Street, 22nd Floor  
Toronto, Ont., M5H 2Y2  
Tel.: +1 416 366-9206  
Fax: +1 416 366-4330  
info@mroc.com  
www.mroc.com

Temple Insurance Company  
Munich Re Centre  
390 Bay Street, 20th Floor  
Toronto, Ont., M5H 2Y2  
Tel.: +1 416 364-2851  
Fax: +1 416 361-1163  
temple\_info@templeins.com  
www.templeinsurance.ca

### Schweiz

New Reinsurance Company Ltd.  
Zollikerstrasse 226-228  
8008 Zürich  
Tel.: +41 58-22 66 500  
Fax: +41 44-81 19 901  
info@newre.com  
www.newre.com

### Südafrika

Munich Reinsurance Company of Africa Limited (MRoA)  
Munich Re Centre  
47 Empire Road, Parktown  
Johannesburg 2193  
Tel.: +27 11 242-20 00  
Fax: +27 11 242-22 00  
mroa@munichre.com

### USA

Munich Reinsurance America Inc.  
555 College Road East  
Princeton, NJ 08543-5241  
Tel.: +1 609 243-4200  
Fax: +1 609 243-4257  
info@munichreamerica.com  
www.munichreamerica.com

Munich American Reassurance Company  
56 Perimeter Center East, N.E. Suite 500  
Atlanta, GA 30346-2290  
Tel.: +1 770 350-3200  
Fax: +1 770 350-3300  
info@marclife.com  
www.marclife.com

Weitere Anschriften finden Sie im Internet unter  
www.munichre.com

### **Erstversicherung**

ERGO Versicherungsgruppe AG  
Victoriaplatz 2  
40198 Düsseldorf  
Tel.: +49 211 477-0  
Fax: +49 211 477-1500  
kontakt@ergo.de  
www.ergo.com

### **Deutschland**

D.A.S. Versicherungen  
Thomas-Dehler-Straße 2  
81728 München  
Tel.: 0 18 05/17 01 70  
Fax: +49 89 6275-1650  
info@das.de  
www.das.de

DKV Deutsche Krankenversicherung AG  
Aachener Straße 300  
50933 Köln  
Tel.: 01801/358100  
Fax: 01805/786000  
service@dkv.com  
www.dkv.de

ERGO Direkt Versicherungen  
Karl-Martell-Straße 60  
90344 Nürnberg  
Tel.: 0800/666-9000  
Fax: 0800/701-1111  
beratung@ergodirekt.de  
www.ergodirekt.de

ERGO Lebensversicherung  
Überseering 45  
22297 Hamburg  
Tel.: 01803/358-100  
Fax: +49 40 6376-3302  
info@ergo.de  
www.ergo.de

ERGO Versicherung  
Victoriaplatz 1  
40198 Düsseldorf  
Tel.: 01803/358-100  
Fax: 01803/123-460  
info@ergo.de  
www.ergo.de

ERV Europäische Reiseversicherung  
Rosenheimer Straße 116  
81669 München  
Tel.: +49 89 4166-00  
Fax: +49 89 4166-2717  
info@erv.de  
www.reiseversicherung.de

Weitere Anschriften finden Sie im Internet unter  
www.ergo.com

### **Assetmanagement**

MEAG MUNICH ERGO AssetManagement GmbH  
Oskar-von-Miller-Ring 18  
80333 München  
Tel.: +49 89 2489-0  
Fax: +49 89 24892555  
www.meag.com

## Impressum

## Service

© 2011

Münchener Rückversicherungs-Gesellschaft  
Königinstraße 107  
80802 München  
www.munichre.com

### Verantwortlich für den Inhalt

Group Reporting  
Group Communications

Redaktionsschluss:

25. Februar 2011

Veröffentlichungsdatum Internet:

10. März 2011

Erscheinungsdatum Druckversion:

31. März 2011

### Konzept und Gestaltung

Strichpunkt, Stuttgart

### Anmerkung der Redaktion

In Veröffentlichungen von Munich Re verwenden wir in der Regel aus Gründen des Leseflusses die männliche Form von Personenbezeichnungen. Damit sind grundsätzlich – sofern inhaltlich zutreffend – Frauen und Männer gemeint.

### Bildnachweis

Robert Brembeck, Corbis, Shutterstock,  
Olaf Unverzart

### Druck

Druckerei Fritz Kriechbaumer  
Wettersteinstraße 12  
82024 Taufkirchen/München

Unseren Geschäftsbericht veröffentlichen wir auch auf Englisch. Darüber hinaus finden Sie unsere Geschäfts- und Zwischenberichte sowie weitere aktuelle Informationen zu Munich Re und zu ihrer Aktie im Internet unter [www.munichre.com](http://www.munichre.com).

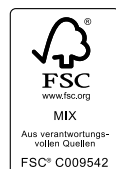

### Service für Anleger und Analysten

Wenn Sie allgemeine Fragen zur Aktie der Münchener Rück haben, nutzen Sie bitte unsere Aktionärshotline:

// Telefon: +49 89 3891-2255

// [shareholder@munichre.com](mailto:shareholder@munichre.com)

Als institutioneller Investor oder Analyst wenden Sie sich bitte an unser Investor-Relations-Team:

**Christian Becker-Hussong**

// Telefon: +49 89 3891-3910

// Fax: +49 89 3891-9888

// [ir@munichre.com](mailto:ir@munichre.com)

### Service für Medien

Journalisten informiert Media Relations:

**Johanna Weber**

// Telefon: +49 89 3891-2695

// Fax: +49 89 3891-3599

// [presse@munichre.com](mailto:presse@munichre.com)

Treibhausgas-Emissionen, die bei der Papierherstellung dieses Geschäftsberichts anfallen, werden über die Klimaneutralitätsstrategie von Munich Re ausgeglichen.

# Mehrjahresübersicht

|                                              |        | 31.12.2010    | 31.12.2009    | 31.12.2008    | 31.12.2007    | 31.12.2006    |
|----------------------------------------------|--------|---------------|---------------|---------------|---------------|---------------|
| <b>Bilanz</b>                                |        |               |               |               |               |               |
| Kapitalanlagen                               | Mio. € | 193.108       | 182.175       | 174.936       | 176.155       | 176.891       |
| Eigenkapital                                 | Mio. € | 23.028        | 22.278        | 21.107        | 25.294        | 26.292        |
| Versicherungstechnische Rückstellungen netto | Mio. € | 171.068       | 163.934       | 157.101       | 152.381       | 153.869       |
| Bilanzsumme                                  | Mio. € | 236.358       | 223.412       | 215.362       | 214.268       | 215.872       |
| <b>Aktie</b>                                 |        |               |               |               |               |               |
| Dividende je Aktie                           | €      | 6,25          | 5,75          | 5,50          | 5,50          | 4,50          |
| Ausschüttung                                 | Mio. € | 1.118         | 1.072         | 1.073         | 1.124         | 988           |
| Kurs der Aktie                               | €      | 113,45        | 108,67        | 111,00        | 132,94        | 130,42        |
| Börsenwert der Münchener Rück AG             | Mrd. € | 21,4          | 21,5          | 22,9          | 29,0          | 29,9          |
| <b>Sonstige</b>                              |        |               |               |               |               |               |
| Schaden-Kosten-Quote                         |        |               |               |               |               |               |
| Rückversicherung Schaden/Unfall              | %      | 100,5         | 95,3          | 99,4          | 96,4          | 92,6          |
| Erstversicherung Schaden/Unfall              | %      | 96,8          | 93,2          | 90,9          | 93,4          | 90,8          |
| Munich Health                                | %      | 99,7          | 99,4          | -             | -             | -             |
| <b>Mitarbeiter</b>                           |        | <b>46.915</b> | <b>47.249</b> | <b>44.209</b> | <b>38.634</b> | <b>37.210</b> |

| Mio. €                                             | 2010   | 2009   | 2008   | 2007   | 2006   |
|----------------------------------------------------|--------|--------|--------|--------|--------|
| Gebuchte Bruttobeiträge                            | 45.541 | 41.423 | 37.829 | 37.256 | 37.436 |
| Verdiente Nettobeiträge                            | 43.075 | 39.526 | 35.724 | 35.670 | 35.714 |
| Technischer Zinsertrag                             | 6.587  | 5.794  | 4.804  | -      | -      |
| Leistungen an Kunden (netto)                       | 36.583 | 32.392 | 28.716 | 30.469 | 29.780 |
| Aufwendungen für den Versicherungsbetrieb (netto)  | 11.114 | 10.181 | 9.056  | 8.878  | 8.834  |
| Versicherungstechnisches Ergebnis                  | 1.965  | 2.747  | 2.756  | -      | -      |
| Ergebnis aus Kapitalanlagen                        | 8.642  | 7.883  | 5.916  | 9.253  | 8.972  |
| Sonstige operative Erträge                         | 807    | 688    | 707    | 723    | 669    |
| Sonstige operative Aufwendungen                    | 849    | 803    | 741    | 726    | 864    |
| Umgliederung technischer Zinsertrag                | -6.587 | -5.794 | -4.804 | -      | -      |
| Nicht versicherungstechnisches Ergebnis            | 2.013  | 1.974  | 1.078  | -      | -      |
| Operatives Ergebnis                                | 3.978  | 4.721  | 3.834  | 5.573  | 5.877  |
| Sonstiges nicht operatives Ergebnis                | -454   | -472   | -347   | -505   | -396   |
| Abschreibungen auf Geschäfts- oder Firmenwerte     | 109    | 117    | 175    | 11     | 4      |
| Finanzierungskosten                                | 293    | 304    | 361    | 333    | 310    |
| Ertragsteuern                                      | 692    | 1.264  | 1.372  | 801    | 1.648  |
| Konzernergebnis                                    | 2.430  | 2.564  | 1.579  | 3.923  | 3.519  |
| auf Anteilseigner der Münchener Rück AG entfallend | 2.422  | 2.521  | 1.555  | 3.840  | 3.425  |
| auf nicht beherrschende Anteile entfallend         | 8      | 43     | 24     | 83     | 94     |

| €                        | 2010         | 2009         | 2008        | 2007         | 2006         |
|--------------------------|--------------|--------------|-------------|--------------|--------------|
| <b>Ergebnis je Aktie</b> | <b>13,06</b> | <b>12,95</b> | <b>7,74</b> | <b>17,83</b> | <b>15,05</b> |

# Quartalszahlen

|                                                |        | 31.12.2010    | 30.9.2010     | 30.6.2010     | 31.3.2010     |
|------------------------------------------------|--------|---------------|---------------|---------------|---------------|
| <b>Bilanz</b>                                  |        |               |               |               |               |
| Kapitalanlagen                                 | Mio. € | 193.108       | 194.017       | 192.462       | 187.768       |
| Eigenkapital                                   | Mio. € | 23.028        | 24.136        | 23.749        | 23.190        |
| Versicherungstechnische Rückstellungen (netto) | Mio. € | 171.068       | 171.473       | 172.323       | 169.136       |
| Bilanzsumme                                    | Mio. € | 236.358       | 237.265       | 237.322       | 230.475       |
| <b>Aktie</b>                                   |        |               |               |               |               |
| Kurs je Aktie                                  | €      | 113,45        | 101,60        | 103,35        | 120,15        |
| Börsenwert der Münchener Rück AG               | Mrd. € | 21,4          | 19,1          | 19,5          | 23,7          |
| <b>Sonstige</b>                                |        |               |               |               |               |
| Schaden-Kosten-Quote                           |        |               |               |               |               |
| Rückversicherung Schaden/Unfall                | %      | 100,5         | 102,1         | 106,4         | 109,2         |
| Erstversicherung Schaden/Unfall                | %      | 96,8          | 95,6          | 96,6          | 98,7          |
| Munich Health                                  | %      | 99,7          | 99,6          | 100,4         | 101,3         |
| <b>Mitarbeiter</b>                             |        | <b>46.915</b> | <b>47.187</b> | <b>47.087</b> | <b>47.017</b> |

| Mio. €                                                                 | Gesamt        | Q4 2010       | Q3 2010       | Q2 2010       | Q1 2010       |
|------------------------------------------------------------------------|---------------|---------------|---------------|---------------|---------------|
| <b>Gebuchte Bruttobeiträge</b>                                         | <b>45.541</b> | <b>11.481</b> | <b>11.447</b> | <b>10.956</b> | <b>11.657</b> |
| 1. Verdiente Beiträge                                                  |               |               |               |               |               |
| Brutto                                                                 | 44.955        | 11.630        | 11.367        | 11.348        | 10.610        |
| Abgegeben an Rückversicherer                                           | 1.880         | 509           | 491           | 423           | 457           |
| Netto                                                                  | 43.075        | 11.121        | 10.876        | 10.925        | 10.153        |
| 2. Technischer Zinsertrag                                              | 6.587         | 1.276         | 1.823         | 1.661         | 1.827         |
| 3. Leistungen an Kunden                                                |               |               |               |               |               |
| Brutto                                                                 | 37.747        | 9.112         | 9.517         | 9.476         | 9.642         |
| Anteil der Rückversicherer                                             | 1.164         | 389           | 209           | 318           | 248           |
| Netto                                                                  | 36.583        | 8.723         | 9.308         | 9.158         | 9.394         |
| 4. Aufwendungen für den Versicherungsbetrieb                           |               |               |               |               |               |
| Brutto                                                                 | 11.545        | 3.269         | 2.714         | 2.977         | 2.585         |
| Anteil der Rückversicherer                                             | 431           | 98            | 108           | 88            | 137           |
| Netto                                                                  | 11.114        | 3.171         | 2.606         | 2.889         | 2.448         |
| <b>5. Versicherungstechnisches Ergebnis (1.-4.)</b>                    | <b>1.965</b>  | <b>503</b>    | <b>785</b>    | <b>539</b>    | <b>138</b>    |
| <b>6. Ergebnis aus Kapitalanlagen</b>                                  |               |               |               |               |               |
| Erträge aus Kapitalanlagen                                             | 13.666        | 3.072         | 3.364         | 3.856         | 3.374         |
| Aufwendungen für Kapitalanlagen                                        | 5.024         | 1.711         | 1.161         | 1.238         | 914           |
| Gesamt                                                                 | 8.642         | 1.361         | 2.203         | 2.618         | 2.460         |
| davon:                                                                 |               |               |               |               |               |
| Ergebnis aus assoziierten Unternehmen nach der Equity-Methode bewertet | 51            | -7            | 25            | 19            | 14            |
| 7. Sonstige operative Erträge                                          | 807           | 279           | 181           | 166           | 181           |
| 8. Sonstige operative Aufwendungen                                     | 849           | 256           | 197           | 214           | 182           |
| 9. Umgliederung technischer Zinsertrag                                 | -6.587        | -1.276        | -1.823        | -1.661        | -1.827        |
| <b>10. Nicht versicherungstechnisches Ergebnis (6.-9.)</b>             | <b>2.013</b>  | <b>108</b>    | <b>364</b>    | <b>909</b>    | <b>632</b>    |
| <b>11. Operatives Ergebnis</b>                                         | <b>3.978</b>  | <b>611</b>    | <b>1.149</b>  | <b>1.448</b>  | <b>770</b>    |
| 12. Sonstiges nicht operatives Ergebnis                                | -454          | -229          | 100           | -182          | -143          |
| 13. Abschreibungen auf Geschäfts- oder Firmenwerte                     | 109           | -             | -             | 109           | -             |
| 14. Finanzierungskosten                                                | 293           | 74            | 74            | 76            | 69            |
| 15. Ertragsteuern                                                      | 692           | -167          | 414           | 372           | 73            |
| <b>16. Konzernergebnis</b>                                             | <b>2.430</b>  | <b>475</b>    | <b>761</b>    | <b>709</b>    | <b>485</b>    |
| davon:                                                                 |               |               |               |               |               |
| auf Anteilseigner der Münchener Rück AG entfallend                     | 2.422         | 467           | 764           | 709           | 482           |
| auf nicht beherrschende Anteile entfallend                             | 8             | 8             | -3            | -             | 3             |

| €                        | Gesamt       | Q4 2010     | Q3 2010     | Q2 2010     | Q1 2010     |
|--------------------------|--------------|-------------|-------------|-------------|-------------|
| <b>Ergebnis je Aktie</b> | <b>13,06</b> | <b>2,58</b> | <b>4,15</b> | <b>3,80</b> | <b>2,54</b> |



# Globale Präsenz von Munich Re<sup>1</sup>

## Standorte von Munich Re - weltweit

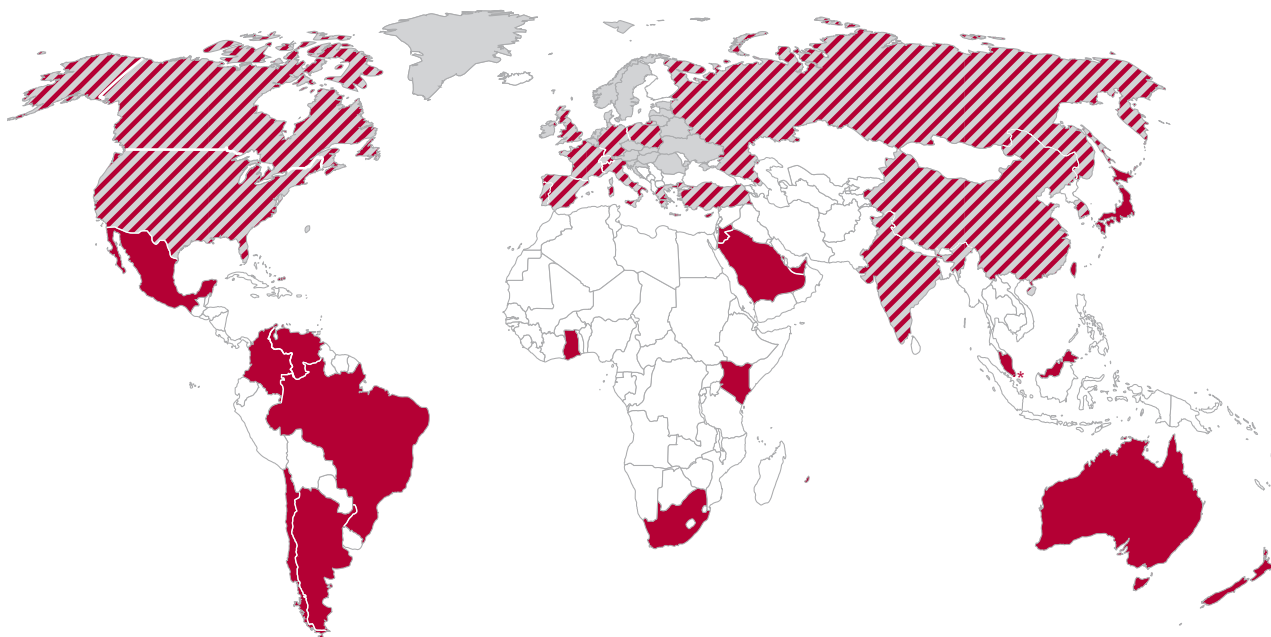

\* Singapur

## Standorte von Munich Re - europaweit

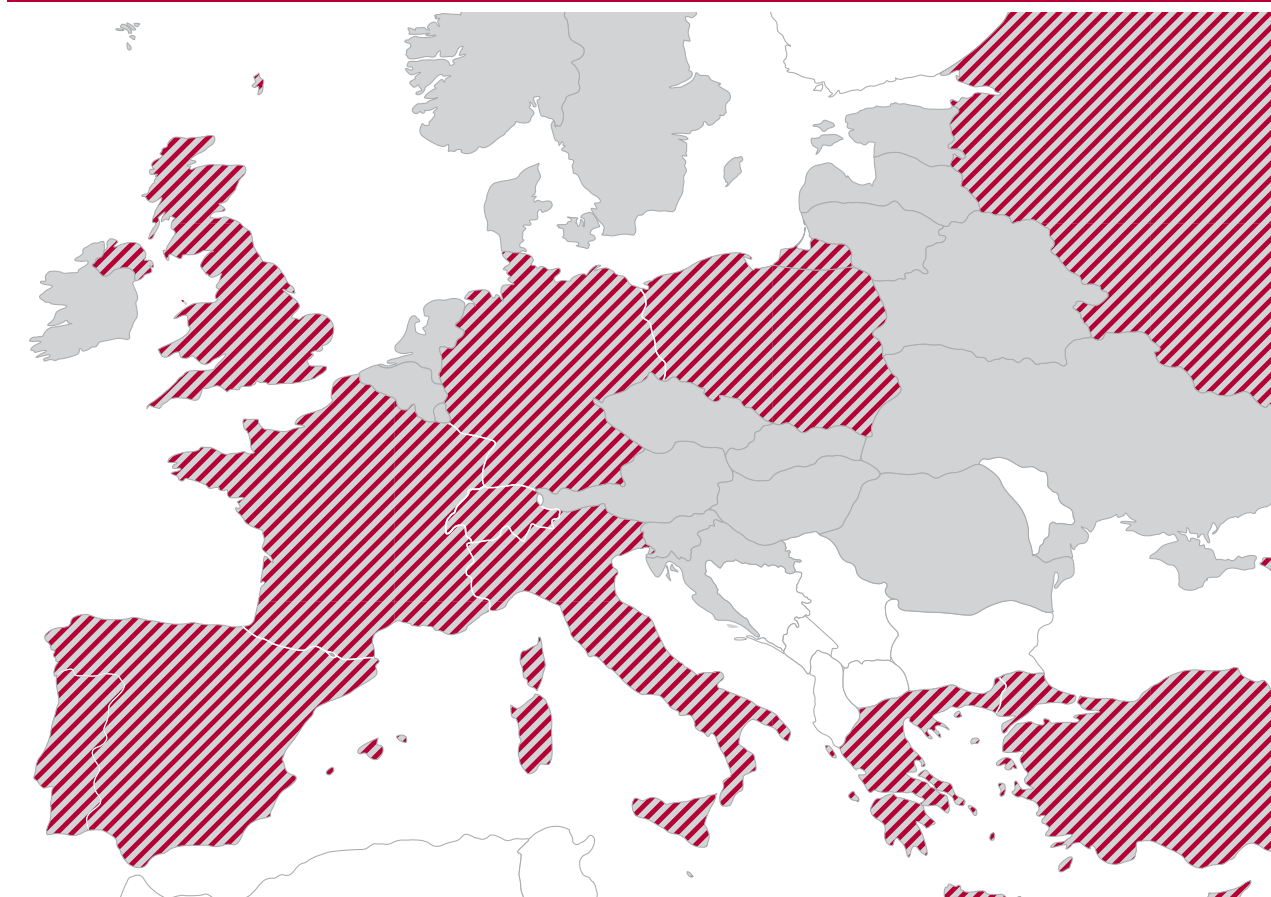

● Rückversicherung    ● Erstversicherung    ● Rück- und Erstversicherung

<sup>1</sup> Einschließlich der jeweiligen Erst- und Rückversicherungsaktivitäten von Munich Health im Gesundheitsmarkt; Stand zum 31.12.2010.

## Termine 2011

////////////////////

- // **20. April 2011**  
Hauptversammlung
- // **21. April 2011**  
Dividendenzahlung
- // **9. Mai 2011**  
Zwischenbericht zum 31. März 2011
- // **4. August 2011**  
Zwischenbericht zum 30. Juni 2011
- // **4. August 2011**  
Halbjahres-Pressekonferenz
- // **8. November 2011**  
Zwischenbericht zum 30. September 2011

## Termine 2012

////////////////////

- // **13. März 2012**  
Bilanzpressekonferenz  
zum Konzernabschluss 2011
- // **26. April 2012**  
Hauptversammlung
- // **8. Mai 2012**  
Zwischenbericht zum 31. März 2012
- // **7. August 2012**  
Zwischenbericht zum 30. Juni 2012
- // **7. August 2012**  
Halbjahres-Pressekonferenz
- // **7. November 2012**  
Zwischenbericht zum 30. September 2012
