# Supplementary material
Source: publisher site journal article supplement (https://www.degruyterbrill.com/publication/isbn/9783110432879/downloadAsset/9783110432879_Elektronischer_Anhang_2.zip)
Supplement: Supplementary file 82 [file Munich RE Strategie.pdf › Korpustexte/Korpustexte pdf/Munich Re/Munich RE Strategie.pdf]

# Strategie

## „Wir wollen mehr mit unserem Wissen anfangen“

Torsten Jeworrek, Vorstand und Vorsitzender des Rückversicherungsausschusses Munich Re

Zunehmend veränderte Bedarfstrends in der Erst- und Rückversicherung, immer komplexere Risikoszenarien und neu aufkommende Risiken verändern die Aufgaben des Rückversicherers. Deshalb wollen wir in Zukunft unser Risikowissen verstärkt dazu einsetzen, um mit individuellen Lösungen auf die komplexen Fragestellungen unserer Kunden zu reagieren.

Die Welt der Risiken wird immer komplexer. Die Anforderungen an die Unternehmen steigen und erfordern volle Aufmerksamkeit und Flexibilität in allen Bereichen, von der Unternehmensstrategie über die Produkt- und Vertriebspolitik bis hin zum Bilanzmanagement. Für dieses Bedarfsspektrum reicht die klassische Rückversicherung alleine nicht mehr aus. Munich Re versteht sich deshalb heute mehr denn je als Servicerückversicherer und bietet Produkte, Lösungen und Dienstleistungen an, die unsere Kunden über die gesamte Wertschöpfungskette hinweg unterstützen. Daraus ergeben sich für uns drei Business-Schwerpunkte: Wir bieten Rückversicherungs-, Versicherungs-, und Kapitalmarktlösungen inklusive Beratung und Service. Wir sind kostengünstiger Kapazitätsgeber und bieten Risikotransfer an den Kapitalmarkt.

Mit unserem profunden Risikowissen, unserer hohen Expertise und unserem bewährten Risikomanagement positionieren wir uns als Vollanbieter für Risikotragung und Transfer und sind damit erste Adresse in allen Fragen rund ums Risiko. Unser spezielles Knowhow versetzt uns in die Lage, auch in Zukunft neue und profitable Geschäftsfelder besetzen zu können.

### **Wir wollen nachhaltig profitabel wachsen**

Kurzfristiges Denken ist der falsche Weg, um langfristig erfolgreich zu sein. Deshalb setzt Munich Re auf profitables Wachstum – und zwar nachhaltig. Deshalb zeichnen wir Risiken nicht um jeden Preis, sondern nur, wenn sie für unsere Kunden, unsere Aktionäre und unsere Mitarbeiter nachhaltig Wert schaffen. Dieses Credo bestimmt wie kein anderes die Geschichte der Munich Re. Denn wir verfügen über das erforderliche Wissen im Risikomanagement, um den immer neuen Herausforderungen mit ebenso zuverlässigen wie ertragreichen Lösungen zu begegnen.

### **Spezialisten vor Ort**

Erfolgreiche Innovationen entstehen meist aus einem konkreten Bedarf. Munich Re weiß, wie wichtig es ist, die speziellen Anforderungen der Kunden vor Ort zu kennen. Denn nur so können wir maßgeschneiderte Lösungen entwickeln. Dafür sorgen unsere Spezialisten, die weltweit auf allen Kontinenten vertreten sind. Sie sind regional präsent und international vernetzt – und verfügen über ein einzigartiges Wissen, das sich schnell und wirksam in konkrete Lösungen umsetzen lässt.

## **Vorsprung durch Wissen**

Munich Re baut den Wissensvorsprung und damit die Qualität der Risikoeinschätzungen systematisch weiter aus. Der Schlüssel dazu ist das weltweite Munich Re Wissensnetzwerk. Wir beschäftigen Experten aus nahezu allen Bereichen der Forschung und bündeln unser Knowhow in speziellen Kompetenzzentren. Zusätzlich vernetzen wir uns mit Spezialisten führender wissenschaftlicher Einrichtungen weltweit. So werden wir unserem Anspruch gerecht, Markttrends zu erkennen und mit innovativen Produkten die Grenzen der Versicherbarkeit auszudehnen. Denn das ist unser Ziel.

<http://www.munichre.com/de/reinsurance/focus/strategy/index.html>
