# Supplementary material
Source: publisher site journal article supplement (https://www.degruyterbrill.com/publication/isbn/9783110432879/downloadAsset/9783110432879_Elektronischer_Anhang_2.zip)
Supplement: Supplementary file 83 [file RWE GB 2010.pdf › Korpustexte/Korpustexte pdf/RWE/RWE GB 2010.pdf]

VOR**RWEG** GEHEN  
HEISST KLARTEXT REDEN.

# ECKDATEN 2010 AUF EINEN BLICK.

- Alle Ergebnisziele erreicht
- Betriebliches Ergebnis steigt um 8 %
- Dividendenvorschlag von 3,50 € je Aktie

| RWE-Konzern                                                 |            | 2010              | 2009     | +/-<br>in % |
|-------------------------------------------------------------|------------|-------------------|----------|-------------|
| Außenabsatz Strom                                           | Mrd. kWh   | 311,2             | 282,8    | 10,0        |
| Außenabsatz Gas                                             | Mrd. kWh   | 395,4             | 332,0    | 19,1        |
| Außenumsatz                                                 | Mio. €     | 53.320            | 47.741   | 11,7        |
| EBITDA                                                      | Mio. €     | 10.256            | 9.165    | 11,9        |
| Betriebliches Ergebnis                                      | Mio. €     | 7.681             | 7.090    | 8,3         |
| Ergebnis fortgeführter Aktivitäten vor Steuern              | Mio. €     | 4.978             | 5.598    | -11,1       |
| Nettoergebnis/Ergebnisanteile der Aktionäre der RWE AG      | Mio. €     | 3.308             | 3.571    | -7,4        |
| Nachhaltiges Nettoergebnis                                  | Mio. €     | 3.752             | 3.532    | 6,2         |
| Return on Capital Employed (ROCE)                           | %          | 14,4              | 16,3     | -           |
| Kapitalkosten vor Steuern                                   | %          | 9,0               | 9,0      | -           |
| Wertbeitrag                                                 | Mio. €     | 2.876             | 3.177    | -9,5        |
| Betriebliches Vermögen (Capital Employed)                   | Mio. €     | 53.386            | 43.597   | 22,5        |
| Cash Flow aus laufender Geschäftstätigkeit                  | Mio. €     | 5.500             | 5.299    | 3,8         |
| Investitionen                                               | Mio. €     | 6.643             | 15.637   | -57,5       |
| In Sachanlagen und immaterielle Vermögenswerte              | Mio. €     | 6.379             | 5.913    | 7,9         |
| In Finanzanlagen                                            | Mio. €     | 264               | 9.724    | -97,3       |
| Free Cash Flow                                              | Mio. €     | -879              | -614     | -43,2       |
| Zahl der in Umlauf befindlichen Aktien (Jahresdurchschnitt) | Tsd. Stück | 533.559           | 533.132  | 0,1         |
| Ergebnis je Aktie                                           | €          | 6,20              | 6,70     | -7,5        |
| Nachhaltiges Nettoergebnis je Aktie                         | €          | 7,03              | 6,63     | 6,0         |
| Dividende je Aktie                                          | €          | 3,50 <sup>1</sup> | 3,50     | -           |
|                                                             |            | 31.12.10          | 31.12.09 |             |
| Nettoschulden des RWE-Konzerns                              | Mio. €     | 28.964            | 25.787   | 12,3        |
| Mitarbeiter <sup>2</sup>                                    |            | 70.856            | 70.726   | 0,2         |

1 Dividendenvorschlag für das Geschäftsjahr 2010 der RWE AG, vorbehaltlich der Zustimmung durch die Hauptversammlung am 20. April 2011

2 Umgerechnet in Vollzeitstellen

# WAS WIR TUN.

RWE zählt zu den fünf führenden Strom- und Gasanbietern in Europa. Mit unserem Know-how bei der Förderung von Öl, Gas und Braunkohle, dem Bau und Betrieb von konventionellen und erneuerbaren Kraftwerken, dem Handel mit Commodities, dem Transport und der Vermarktung von Strom und Gas sind wir auf allen Wertschöpfungsstufen der Energieversorgung tätig. Über 70.000 Mitarbeiter versorgen über unsere vollkonsolidierten Beteiligungsgesellschaften rund 16 Millionen Kunden mit Strom und nahezu 8 Millionen Kunden mit Gas. Im Geschäftsjahr 2010 haben wir einen Umsatz von über 53 Mrd. € erwirtschaftet.

Unser Markt ist Europa. RWE ist die Nr. 1 der Stromerzeuger in Deutschland, die Nr. 3 in den Niederlanden und die Nr. 3 in Großbritannien. Unsere Position in Zentralost- und Südosteuropa bauen wir kontinuierlich aus.

Wichtigste Grundlage für künftige Ergebnisse ist unser Kraftwerksportfolio und unser Investitionsprogramm zum Aufbau neuer klimaschonender und flexibler Erzeugungskapazitäten. Unser konzernweites Kraftwerks-Neubauprogramm über rund 12 Gigawatt befindet sich planmäßig im letzten Drittel der Realisierungsphase. Neben effizienteren und klimaschonenderen fossilen Kraftwerken nehmen erneuerbare Energien eine Schlüsselrolle ein. Unsere europaweit führende Position im Energiehandel hilft uns, unsere Kraftwerke optimal im Markt einzusetzen. Mit neuen Produkten für Haushalte, Gewerbe und Industrie stellen wir uns auf veränderte Kundenbedürfnisse ein. Klimaschutz und Energieeffizienz werden dabei immer wichtiger.

Unser Geschäft mit der Förderung von Gas und Öl wächst überdurchschnittlich. Angesichts der langfristig höheren weltweiten Nachfrage wollen wir bei Gas den Anteil unserer Eigenproduktion stetig weiter erhöhen.

# STROM UND GAS: RWE BIETET ALLES AUS EINER HAND.

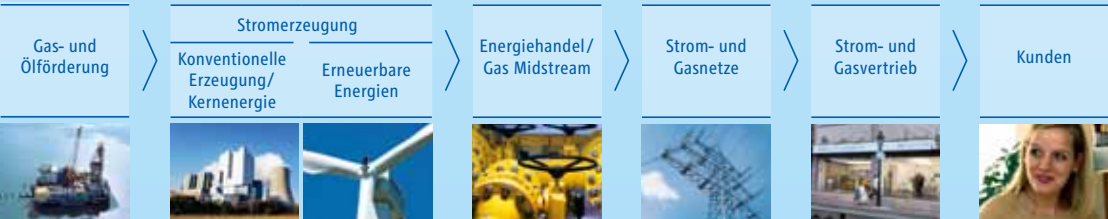

# DER RWE-KONZERN

WIE WIR UNS ORGANISIERT HABEN.

| RWE AG              |                              |                         |                |                              |                         |                      |                           |
|---------------------|------------------------------|-------------------------|----------------|------------------------------|-------------------------|----------------------|---------------------------|
| Deutschland         |                              | Niederlande/<br>Belgien | Großbritannien | Zentralost-/<br>Südosteuropa | Erneuerbare<br>Energien | Upstream<br>Gas & Öl | Trading/<br>Gas Midstream |
| Strom-<br>erzeugung | Vertrieb und<br>Verteilnetze |                         |                |                              |                         |                      |                           |
| RWE Power           | RWE<br>Deutschland           | Essent                  | RWE npower     | RWE East                     | RWE Innogy              | RWE Dea              | RWE Supply<br>& Trading   |

| RWE AG                                                                       |                                                                                            |                       |
|------------------------------------------------------------------------------|--------------------------------------------------------------------------------------------|-----------------------|
| Amprión<br>Stromübertragungsnetz-Betreiber<br>(unternehmerisch eigenständig) | NET4GAS<br>Gasfernleitungsnetz-Betreiber<br>(Tschechien)<br>(unternehmerisch eigenständig) | Interne Dienstleister |

**Als großer europäischer Energieversorger** tragen wir Verantwortung, die weit über unser Unternehmen hinausreicht. Mit unseren Investitionen in Milliardenhöhe bereiten wir heute den Weg für die Energieversorgung der Zukunft. Menschen brauchen Energie. Und sie wollen, dass diese Energie sicher, sauber und bezahlbar ist.

Das ist unsere Kernaufgabe – und dafür brauchen wir die Akzeptanz der Gesellschaft. Die Energieversorgung der Zukunft ist wie selten zuvor Gegenstand der öffentlichen Diskussion. Dabei prägen oft Dogmen den Inhalt und überzogene Emotionen den Ton. RWE hält dem nachprüfbare Fakten und die Kraft vernünftiger Argumente entgegen. Denn nur mit Ehrlichkeit und Transparenz kommen wir weiter. Deshalb **reden wir Klartext.**

**GRAFFITI IM RAUM DÜSSELDORF. © JAN EUMANN**

Energieversorger werden immer wieder mit dem Vorwurf konfrontiert, ihren Kunden stark überhöhte Preise zu berechnen.

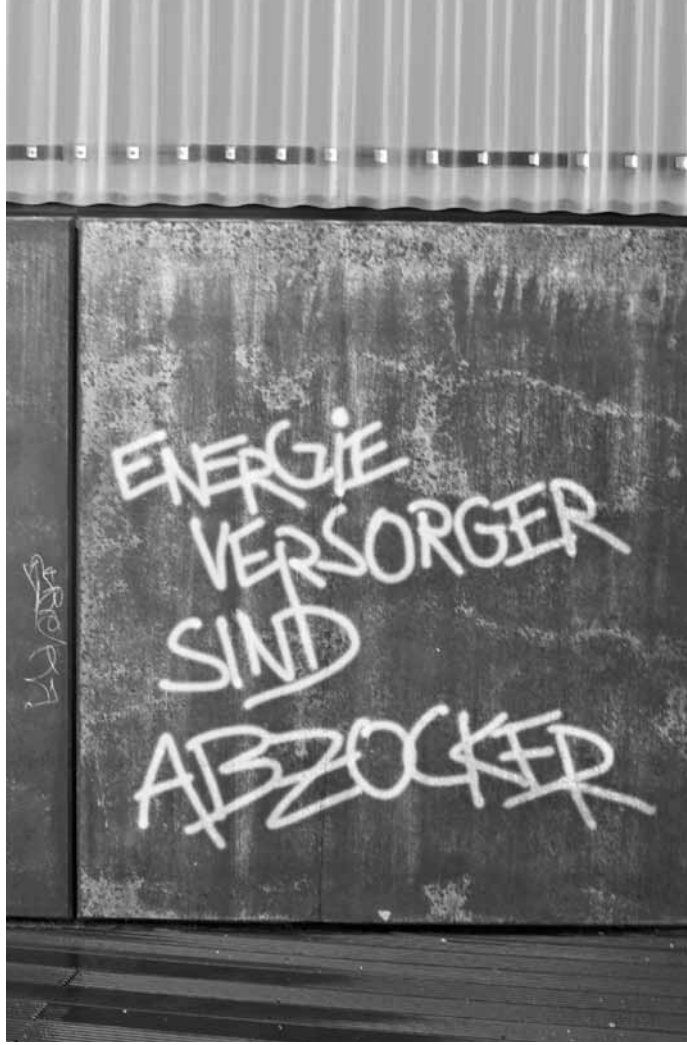

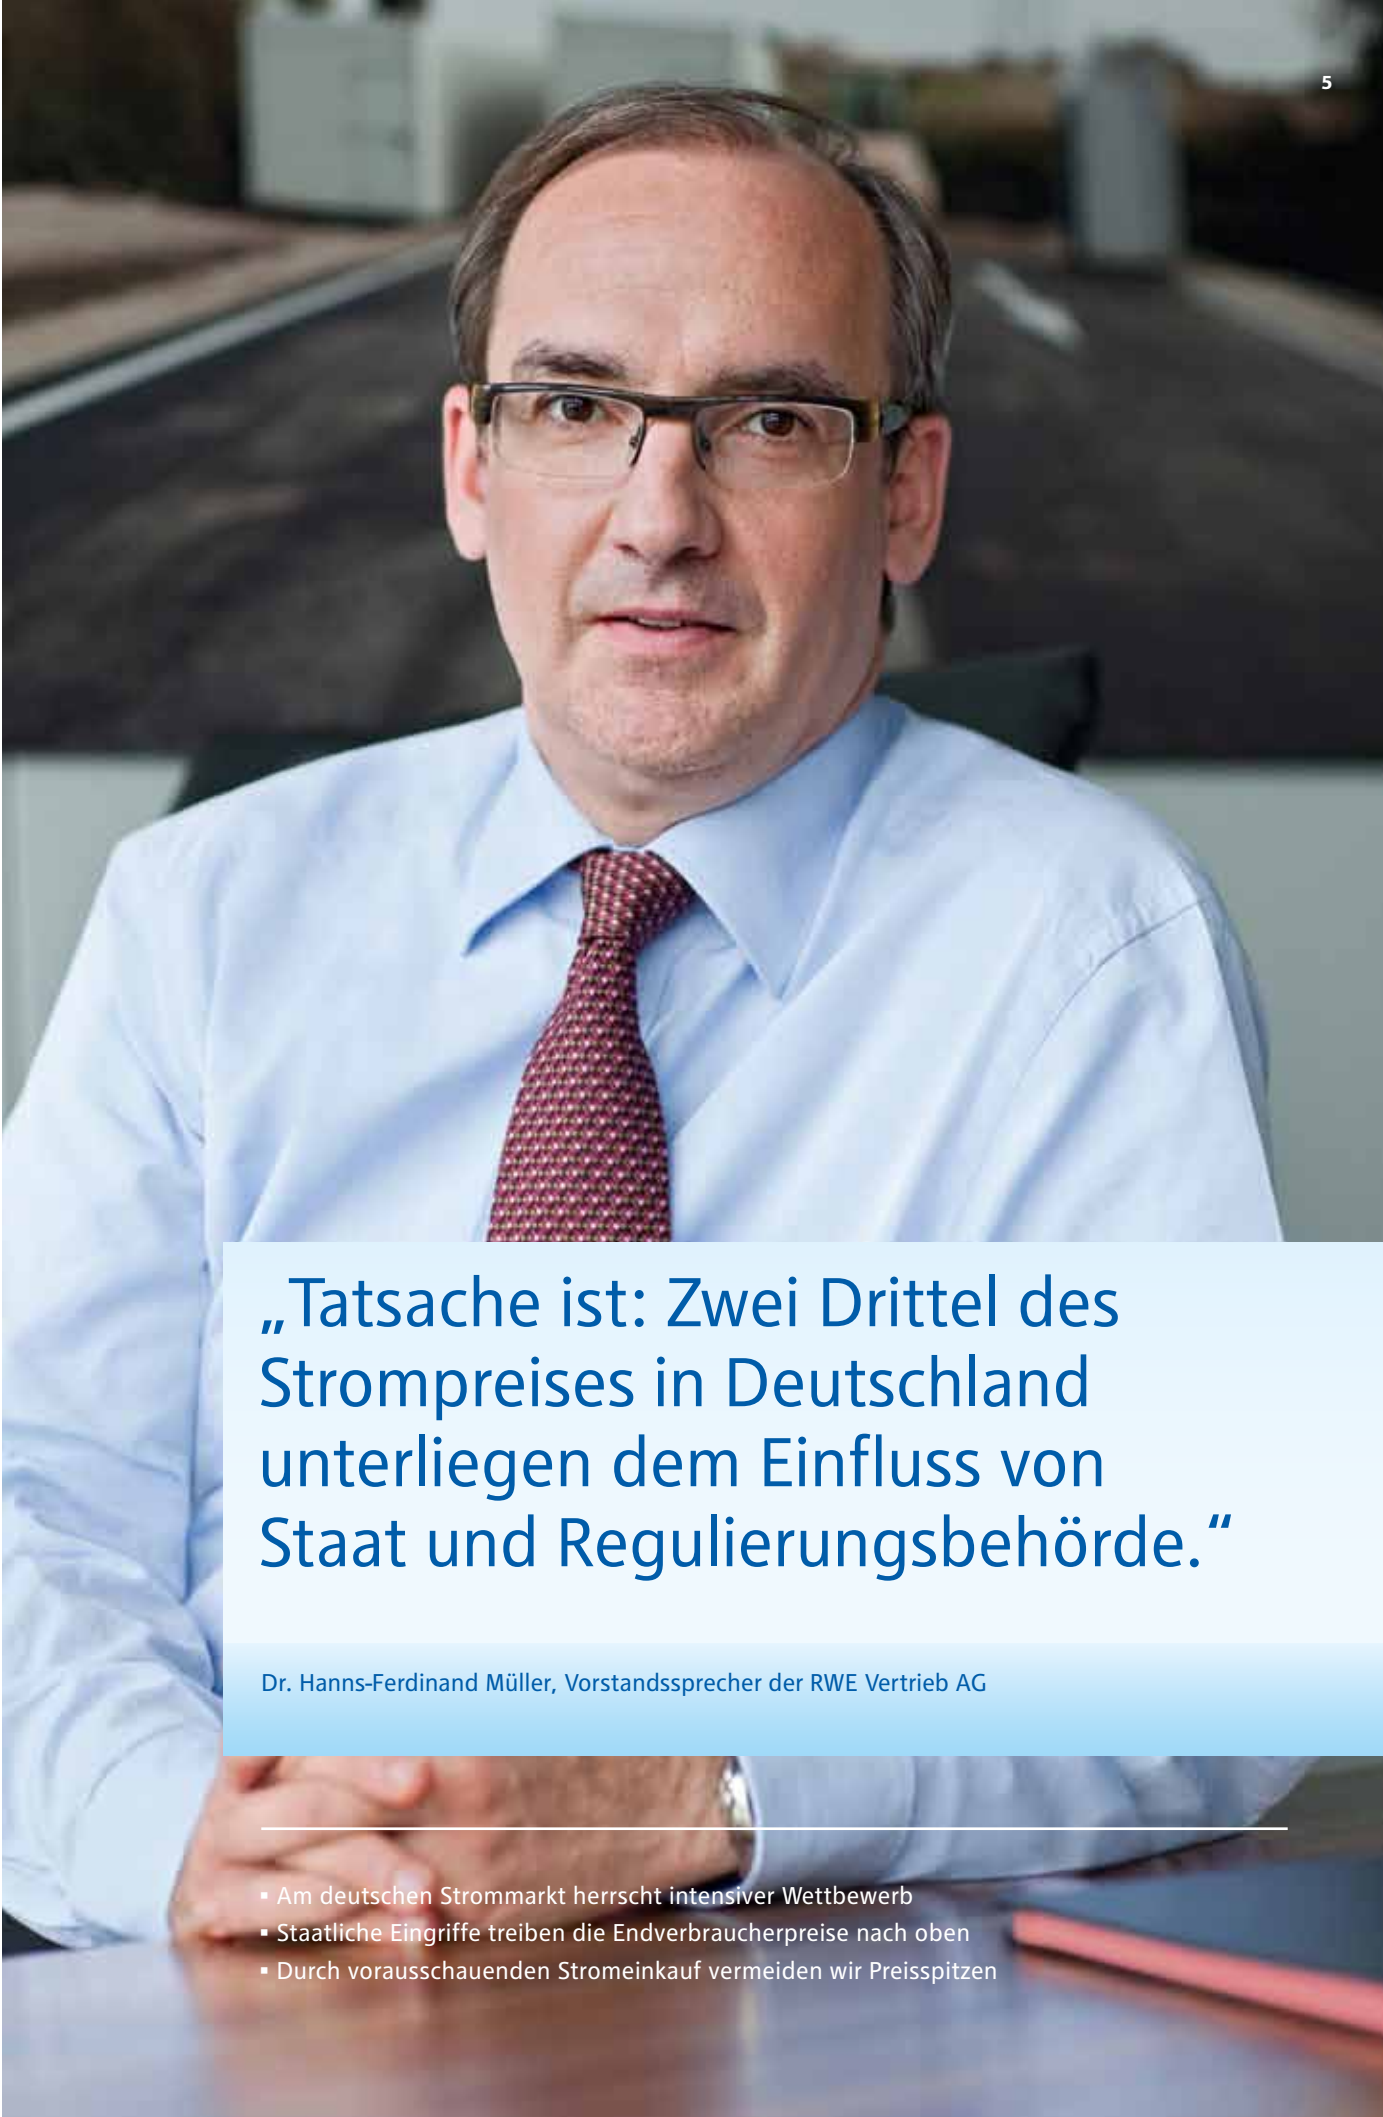

„Tatsache ist: Zwei Drittel des Strompreises in Deutschland unterliegen dem Einfluss von Staat und Regulierungsbehörde.“

Dr. Hanns-Ferdinand Müller, Vorstandssprecher der RWE Vertrieb AG

- 
- Am deutschen Strommarkt herrscht intensiver Wettbewerb
  - Staatliche Eingriffe treiben die Endverbraucherpreise nach oben
  - Durch vorausschauenden Stromeinkauf vermeiden wir Preisspitzen

## DER STROMPREIS FÜR ENDKUNDEN SETZT SICH AUS BESCHAFFUNGS- UND VERTRIEBSKOSTEN, REGULIERTEN NETZENTGELTEN SOWIE STEUERN UND ABGABEN ZUSAMMEN

### AM DEUTSCHEN STROMMARKT HERRSCHT INTENSIVER WETTBEWERB

- Wenn wir unsere Stromproduktion im Großhandel absetzen, dann zum marktüblichen Preis. Diesen legen nicht wir fest; vielmehr bildet er sich im freien Wettbewerb auf offenen Märkten wie z.B. der Strombörse EEX.
- Auch im Vertrieb von Strom an Privatkunden herrscht intensiver Wettbewerb. Einige Discounter konkurrieren sogar mit nicht kostendeckenden Tarifen um Kunden. Inzwischen können Haushalte unter 900 Anbietern wählen und deren Preise und Produkte im Internet vergleichen.
- Den Versorger zu wechseln ist heute ein Kinderspiel. Die Formalitäten übernimmt der neue Anbieter. Laut Bundesverband der Energie- und Wasserwirtschaft ist daher die kumulierte Wechselquote in Deutschland zwischen 2006 und 2009 von 7 auf fast 22 Prozent gestiegen. Eine noch größere Zahl von Kunden hat einen anderen Tarif ihres bisherigen Versorgers gewählt.

### STAATLICHE EINGRIFFE TREIBEN DIE ENDVERBRAUCHERPREISE NACH OBEN

- Steuern und Abgaben machen in Deutschland über 40 Prozent des Strompreises für Privatkunden aus. Zudem unterliegen die Netzentgelte der staatlichen Regulierung. Auf sie entfallen zurzeit 24 Prozent der Stromrechnung.
- Die Kosten für Erzeugung, Transport und Vertrieb von Strom sind von 1998, dem Jahr der Strommarkliberalisierung, bis 2010 um 8 Prozent gestiegen, Steuern und Abgaben um 131 Prozent.
- Deutschland hat in Europa den zweithöchsten Anteil staatlicher Belastungen am Strompreis. Nur Dänemark bittet die Verbraucher noch stärker zur Kasse.
- Verbraucher subventionieren über ihre Stromrechnung die erneuerbaren Energien. Deren Ausbau führt zu stark ansteigenden Belastungen. Die nach dem Erneuerbare-Energien-Gesetz (EEG) zu leistende Abgabe beträgt mittlerweile 3,5 Cent je Kilowattstunde. Das sind 1,5 Cent mehr als 2010.
- Kunden der RWE Vertrieb bekommen diese Erhöhung 2011 allerdings nicht in vollem Umfang zu spüren. Bei uns kostet die Kilowattstunde nur 0,8 Cent mehr. Denn im Stromeinkauf haben wir Einsparungen erzielt, die wir direkt an unsere Kunden weitergeben.
- In den kommenden Jahren werden die EEG-Umlagen weiterhin stark steigen, vor allem wegen des ungebremsen Ausbaus der Solarenergie. Allein für 2012 wird ihr Volumen auf 21 Milliarden Euro geschätzt. Das ist doppelt so viel wie 2009.

#### 41% DER STROMRECHNUNG VON HAUSHALTSKUNDEN SIND STEUERN UND ABGABEN

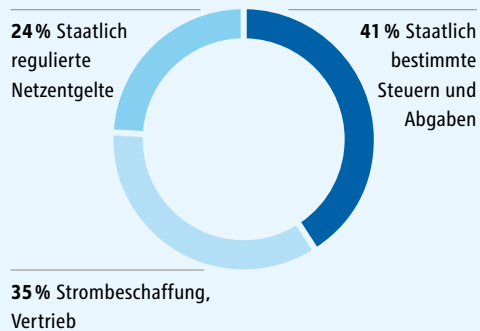

Quelle: Bundesverband der Energie- und Wasserwirtschaft, 12/2010

#### DURCHSCHNITTliche MONATLICHE STROMRECHNUNG EINES DREI-PERSONEN- HAUSHALTS (3.500 KWH/JAHR) IN €

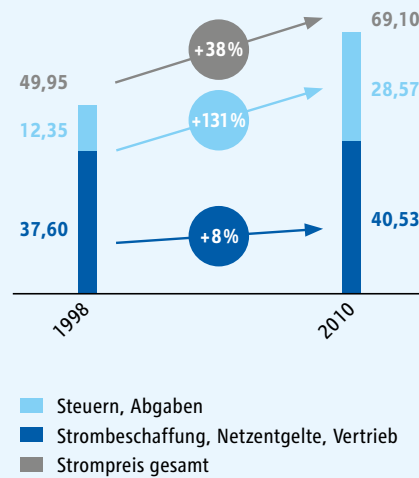

#### DURCH VORAUSSCHAUENDEN STROMEINKAUF VERMEIDEN WIR PREISSPITZEN

- Unsere Vertriebsgesellschaften müssen sich – genauso wie Wettbewerber ohne eigene Kraftwerke – zu Marktkonditionen mit Strom eindecken. Dabei gilt es, Risiken durch plötzliche Preisspitzen zu vermeiden. Dies erreichen wir durch frühzeitige sukzessive Käufe auf Termin.
- Auch unsere Kunden können von dieser Absicherungsstrategie profitieren, beispielsweise indem sie sich für den Tarif „RWE Strom 36max“ entscheiden, der ihnen einen Festpreis für 36 Monate garantiert. Nur wenn Steuern oder staatliche Abgaben erhöht werden, muss der Kunde mehr bezahlen.

PROTESTBANNER GEGEN CO<sub>2</sub>-EMISSIONEN. © BERND ARNOLD  
Betrieb und Neubau von Braunkohle- und Steinkohlekraftwerken bleiben trotz verbesserter Wirkungsgrade und neuer Verfahren zur CO<sub>2</sub>-Reduktion in der Öffentlichkeit umstritten.

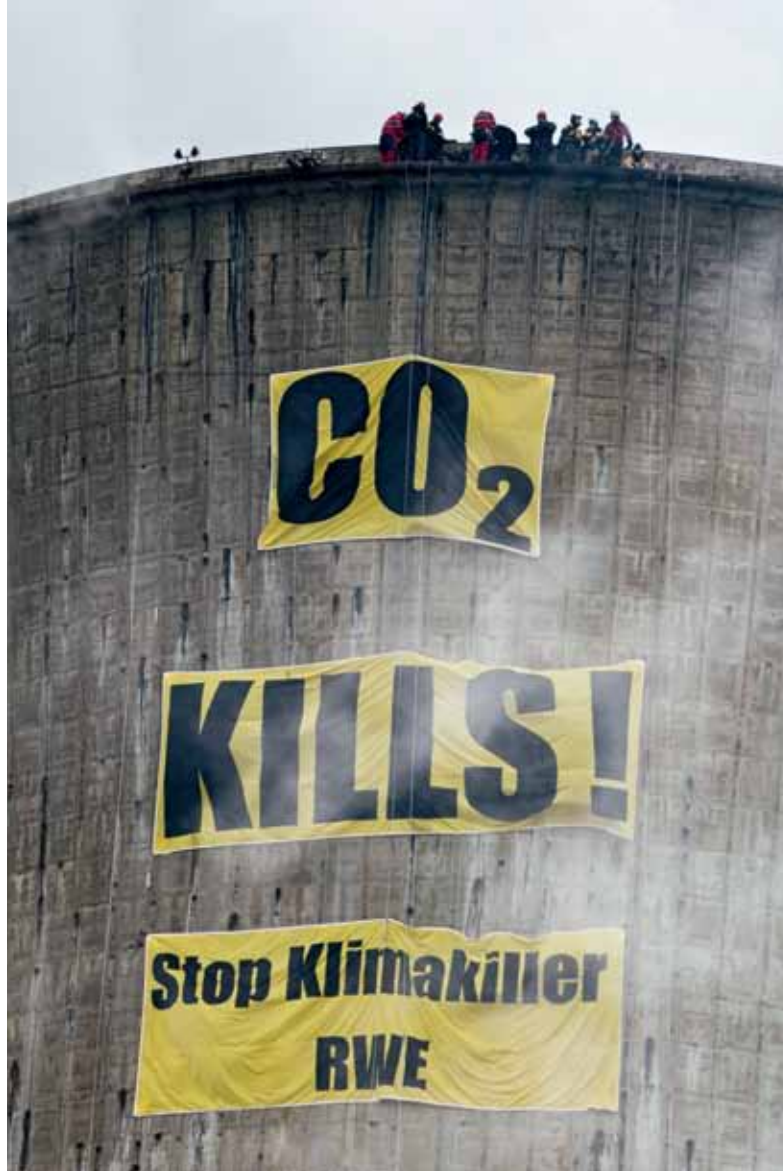

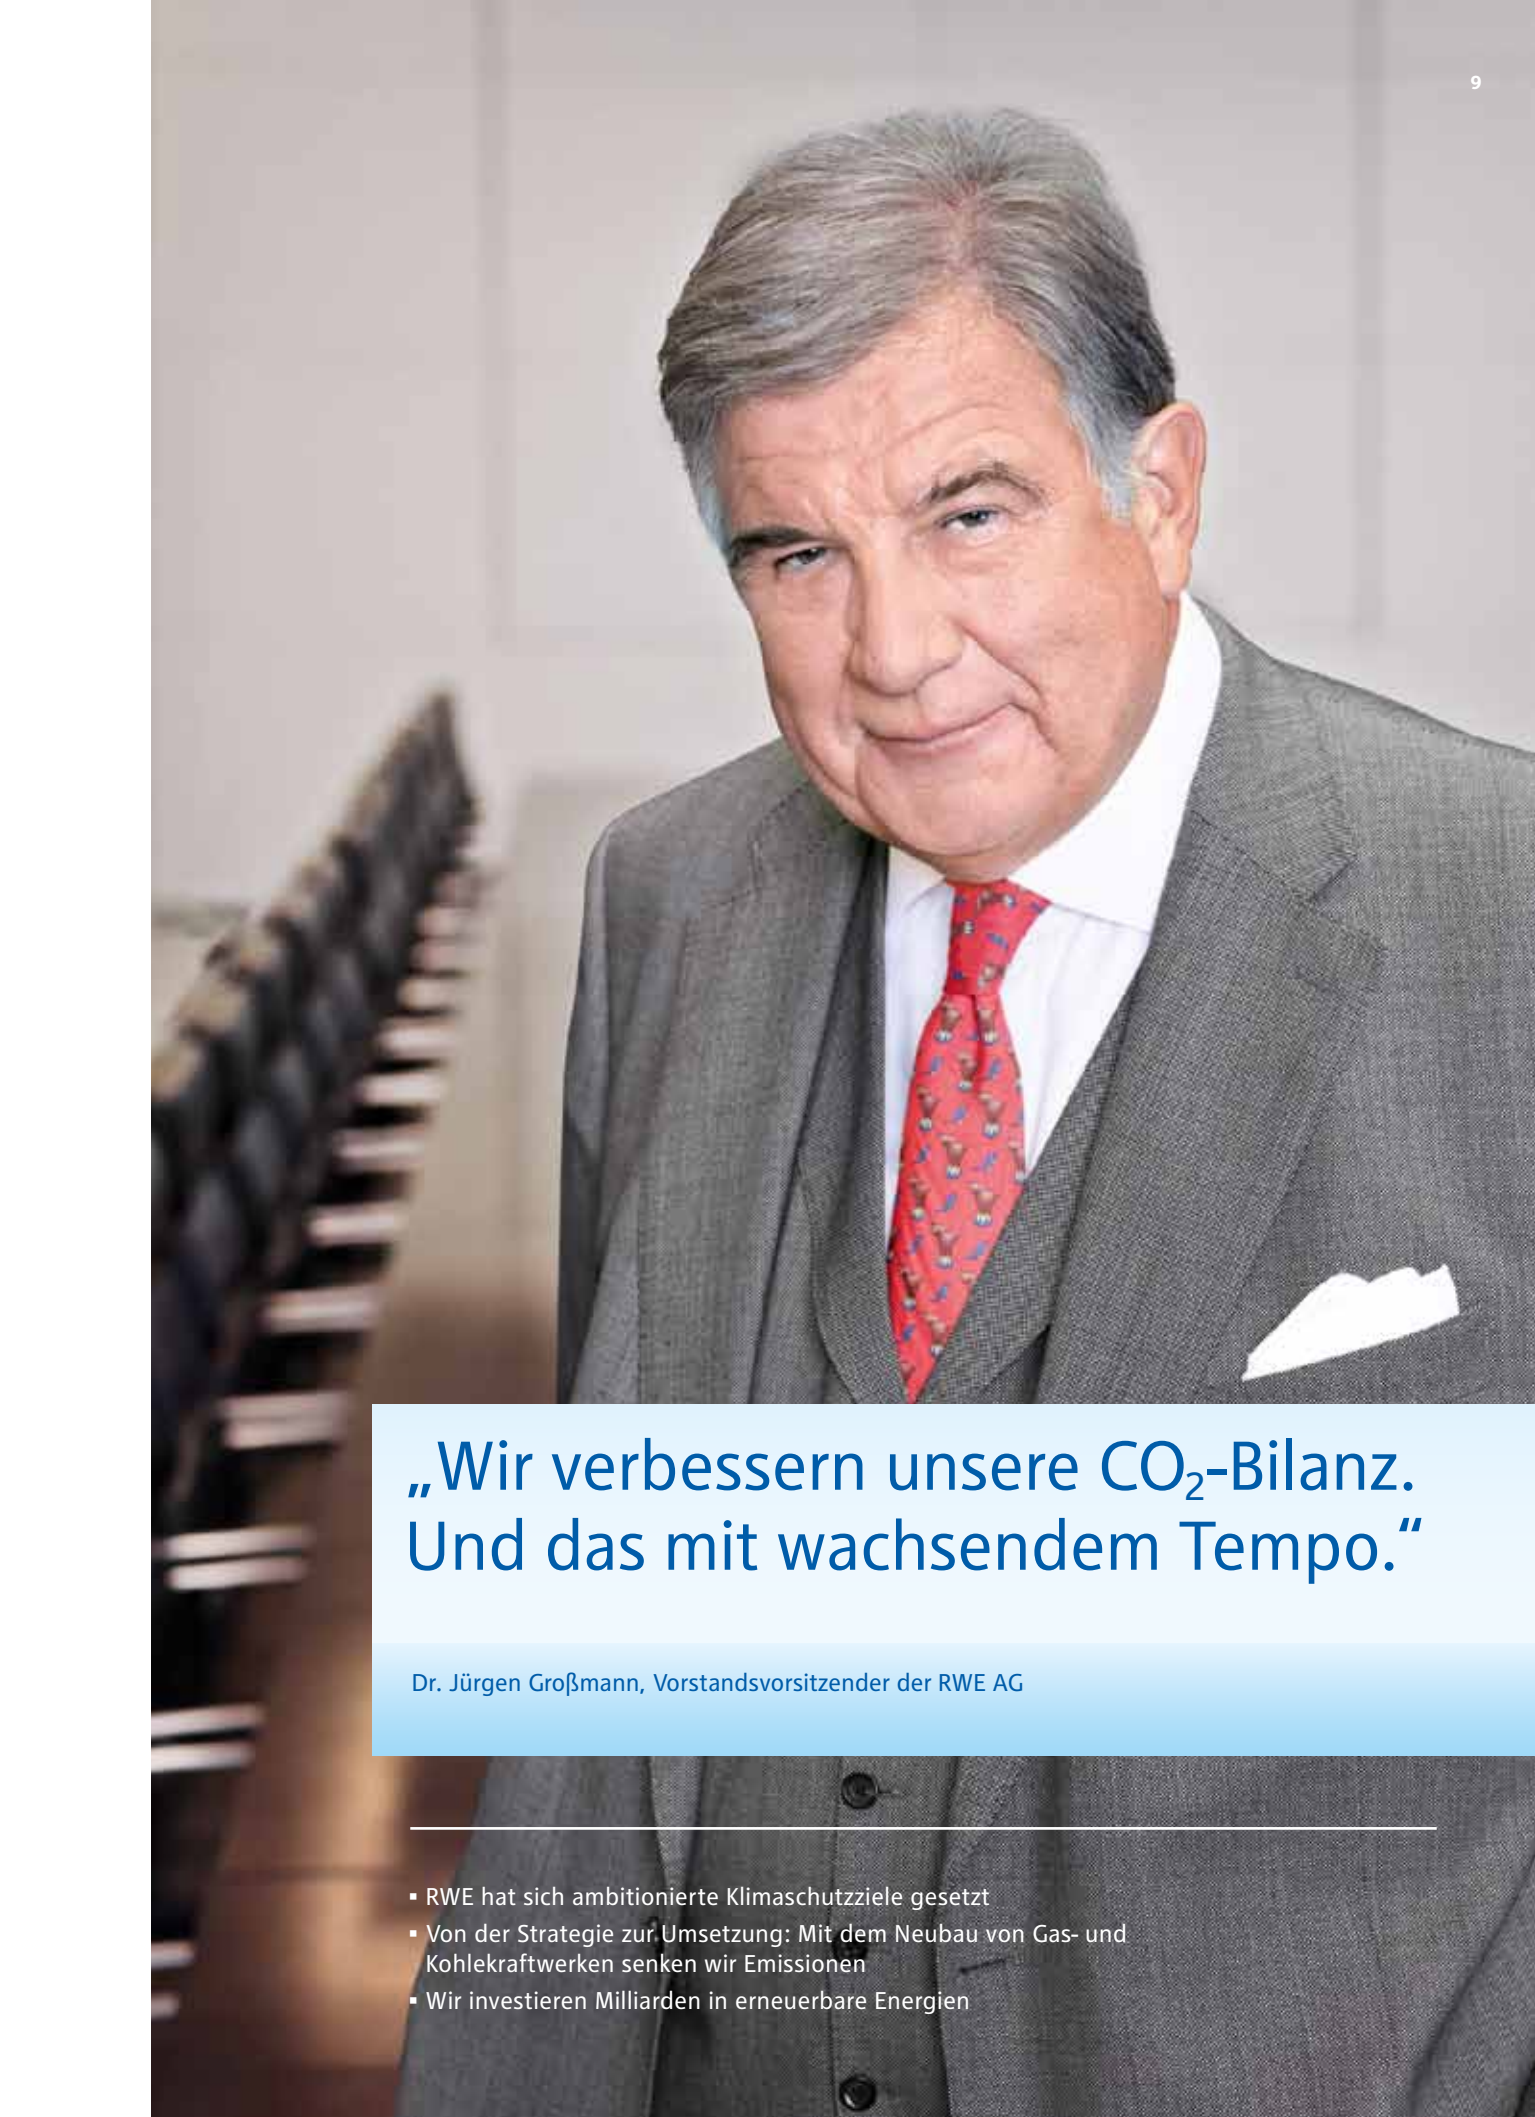A portrait of Dr. Jürgen Großmann, Chairman of the Board of RWE AG. He is an older man with grey hair, wearing a grey suit, a white shirt, and a red tie with a small pattern. He is looking slightly to the left of the camera with a slight smile. The background is blurred, showing what appears to be a modern office interior with a large window and some architectural details.

„Wir verbessern unsere CO<sub>2</sub>-Bilanz.  
Und das mit wachsendem Tempo.“

Dr. Jürgen Großmann, Vorstandsvorsitzender der RWE AG

- 
- RWE hat sich ambitionierte Klimaschutzziele gesetzt
  - Von der Strategie zur Umsetzung: Mit dem Neubau von Gas- und Kohlekraftwerken senken wir Emissionen
  - Wir investieren Milliarden in erneuerbare Energien

## WIR INVESTIEREN MILLIARDEN IN REGENERATIVE ENERGIEN UND EINEN KLIMAFREUNDLICHEN KRAFTWERKSPARK

### RWE HAT SICH AMBITIONIERTE KLIMASCHUTZZIELE GESETZT

- Alle Welt redet über die Bedrohung des Klimas. Das ist gut so – vorausgesetzt, dass den Worten Taten folgen. Was für jeden von uns im Kleinen gilt, trifft auf Energieversorger wie RWE im Großen zu.
- Die Senkung des Kohlendioxid-Ausstoßes ist ein Eckpfeiler unserer Strategie. Wir investieren jedes Jahr Milliardenbeträge, um unseren Kraftwerkspark effizienter und damit klimafreundlicher zu machen.
- Wo stehen wir heute? Im Jahr 2010 emittierten unsere Kraftwerke 0,73 Tonnen CO<sub>2</sub> je erzeugter Megawattstunde Strom. Das sind 8% weniger als im Vorjahr, aber immer noch viel zu viel.
- Unsere Wettbewerber stoßen im Durchschnitt weniger CO<sub>2</sub> aus als wir. Damit ist die Richtung für uns vorgegeben, zumal mit hohen Emissionen auch hohe wirtschaftliche Risiken verbunden sind.
- Wir haben ein klares Ziel vor Augen: Unser CO<sub>2</sub>-Risiko wollen wir bis spätestens 2020 auf das Durchschnittsniveau der Energieversorger in unseren Märkten senken. Wir gehen davon aus, dass der übliche Emissionsfaktor dort 2020 bei etwa 0,45 Tonnen CO<sub>2</sub> je Megawattstunde liegen wird.
- Im Jahr 2025 sollen 75 Prozent unserer Stromerzeugungskapazität CO<sub>2</sub>-frei oder CO<sub>2</sub>-arm sein – mit folgender Aufteilung: 30 Prozent erneuerbare Energien, 30 Prozent Gaskraftwerke und 15 Prozent Kernenergie.
- Emissionen senken wir aber nicht nur bei uns. Das Kyoto-Protokoll erlaubt uns, durch Klimaschutzmaßnahmen in Entwicklungs- und Schwellenländern Emissionsrechte für unsere eigenen Anlagen zu erwerben. RWE ist hier weltweit einer der Vorreiter – mit über 120 Projekten in China, Indien, Ägypten und vielen anderen Staaten.

### ENERGIEMIX IN DER STROMERZEUGUNG VON RWE: 2025 SOLLEN 75 PROZENT DER KAPAZITÄTEN CO<sub>2</sub>-FREI ODER CO<sub>2</sub>-ARM SEIN

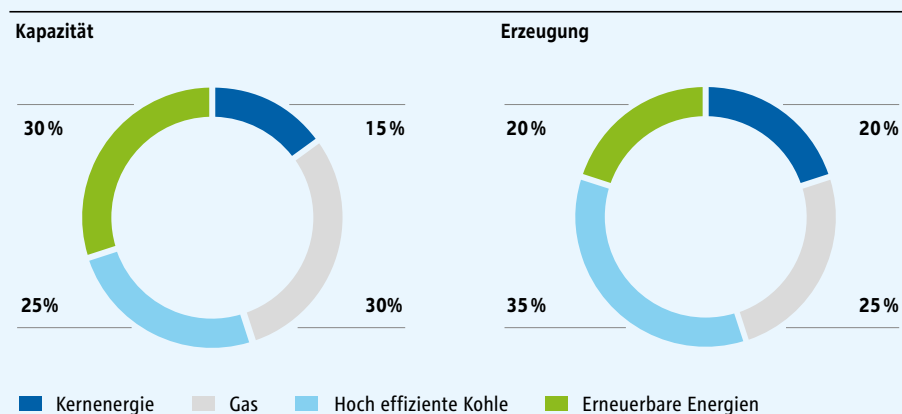

## VON DER STRATEGIE ZUR UMSETZUNG: MIT DEM NEUBAU VON GAS- UND KOHLEKRAFTWERKEN SENKEN WIR EMISSIONEN

- Auf unserem Weg zu einer klimafreundlicheren Stromerzeugung haben wir 2010 bereits wichtige Etappenziele erreicht: Beispielsweise konnten wir neue Gaskraftwerke in Betrieb nehmen, die in puncto Effizienz und Emissionsvermeidung zu den besten ihrer Art zählen.
- Bis Mitte 2014 wollen wir weitere Erzeugungskapazität von rund 12 Gigawatt in Betrieb nehmen. Mehr als die Hälfte entfallen auf CO<sub>2</sub>-freie oder CO<sub>2</sub>-arme Technologien.
- Wir investieren in erneuerbare Energien, aber auch in hoch moderne Gas- und Kohlekraftwerke, die emissionsintensivere Altanlagen aus dem Markt drängen werden. Die Grafik unten zeigt, um welche Projekte es sich handelt.
- Einschließlich der Gaskraftwerke, die 2010 ans Netz gingen, werden die neuen Anlagen CO<sub>2</sub>-Einsparungen von schätzungsweise 25 Millionen Tonnen CO<sub>2</sub> ermöglichen. Pro Jahr! Das entspricht einem Viertel der Emissionen aller PKW auf deutschen Straßen.

### STAND DER RWE-KRAFTWERKSPROJEKTE

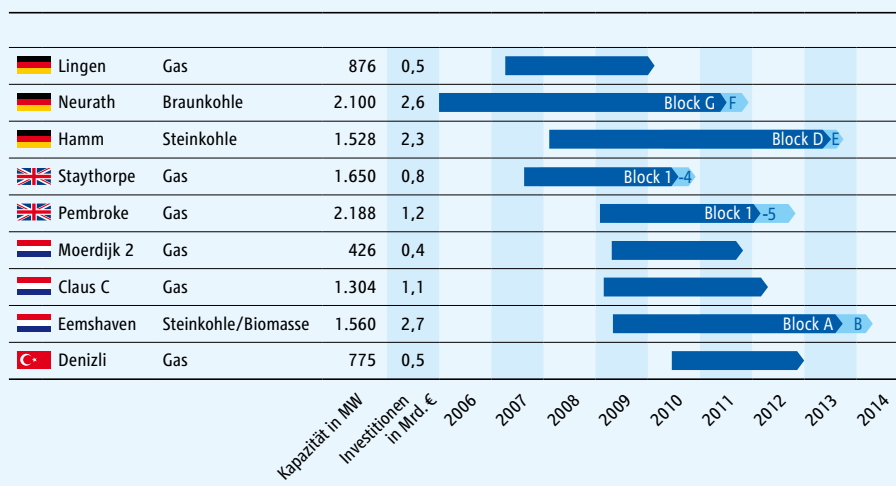

### WIR INVESTIEREN MILLIARDEN IN ERNEUERBARE ENERGIEN

- Unser Strom soll zunehmend aus regenerativen Quellen stammen. Dafür werden wir bis 2013 knapp vier Milliarden Euro einsetzen. Damit sind wir der größte deutsche Investor in erneuerbare Energien in Europa.
- Unser Mittelfristziel: Im Jahr 2014 soll unsere auf erneuerbare Energien spezialisierte Tochtergesellschaft RWE Innogy über 4,5 Gigawatt Erzeugungskapazität verfügen, die entweder bereits in Betrieb oder im Bau ist.
- Priorität hat für uns der Bau neuer Windkraftanlagen an Land und im Meer. Im Jahr 2013 wird nördlich von Helgoland unser erster deutscher Offshore-Windpark ans Netz gehen.

**BANNER AN EINER STRASSE IN BIBLIS. © CATRIN MORITZ**

Die friedliche Nutzung der Kernenergie ist seit Jahrzehnten Gegenstand öffentlicher Diskussion.

Die von der Bundesregierung beschlossene Verlängerung der Laufzeit von Kernkraftwerken hat zu einem Aufleben der Kontroverse geführt.

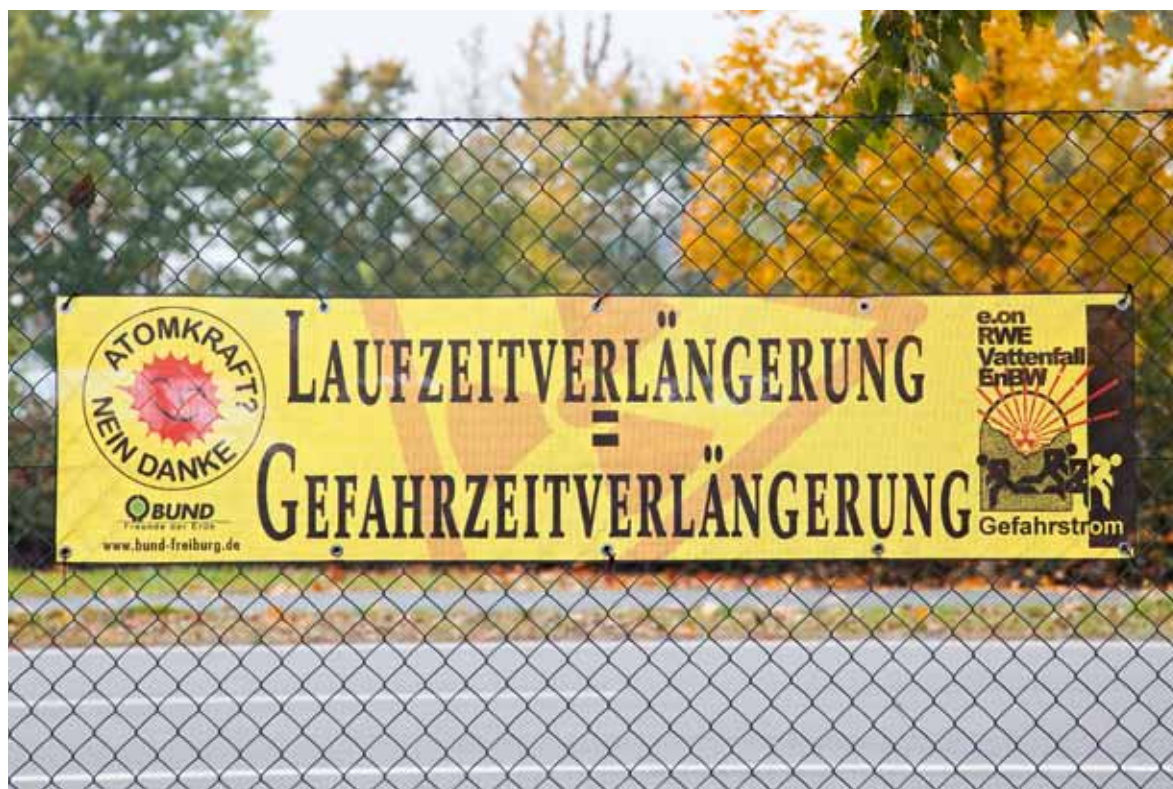

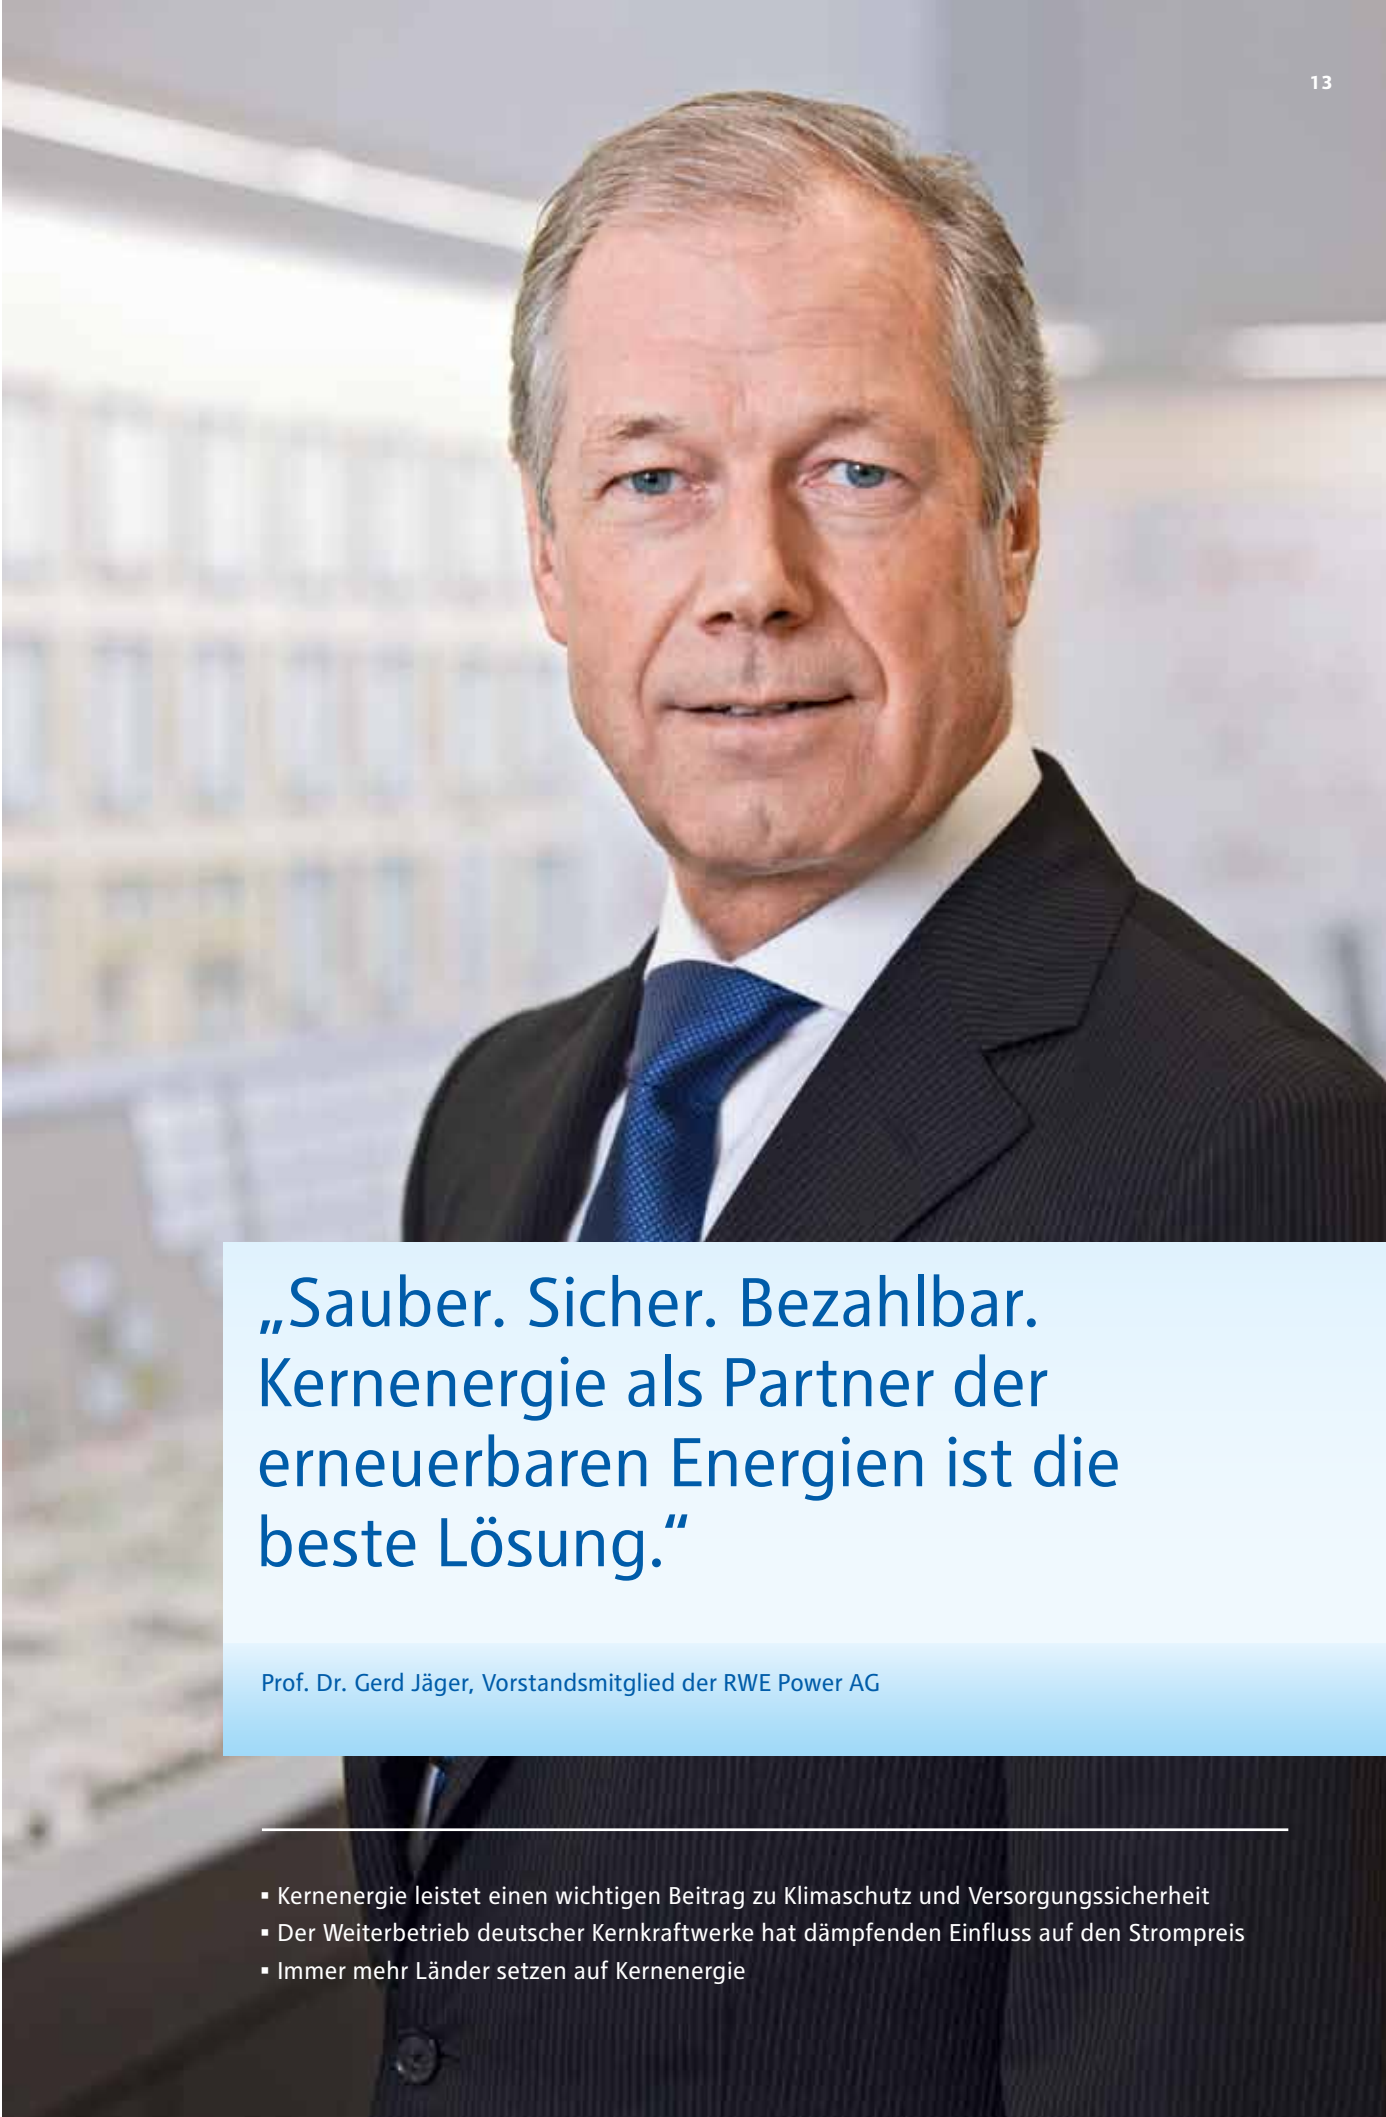A portrait of Prof. Dr. Gerd Jäger, a middle-aged man with grey hair and blue eyes, wearing a dark suit, white shirt, and blue tie. He is standing in front of a blurred background of bookshelves filled with books.

„Sauber. Sicher. Bezahlbar.  
Kernenergie als Partner der  
erneuerbaren Energien ist die  
beste Lösung.“

Prof. Dr. Gerd Jäger, Vorstandsmitglied der RWE Power AG

- 
- Kernenergie leistet einen wichtigen Beitrag zu Klimaschutz und Versorgungssicherheit
  - Der Weiterbetrieb deutscher Kernkraftwerke hat dämpfenden Einfluss auf den Strompreis
  - Immer mehr Länder setzen auf Kernenergie

## FÜR KERNENERGIE GIBT ES GUTE ARGUMENTE: NIEDRIGE ERZEUGUNGSKOSTEN, SICHERE TECHNIK UND NAHEZU KEINE CO<sub>2</sub>-EMISSIONEN

### KERNENERGIE LEISTET EINEN WICHTIGEN BEITRAG ZU KLIMASCHUTZ UND VERSORGUNGSSICHERHEIT

- Deutschland hat sich ehrgeizige Klimaschutzziele gesetzt: Die Treibhausgas-Emissionen sollen so weit gesenkt werden, dass sie 2020 um 40 Prozent unter dem Niveau von 1990 liegen, 2050 sogar um 80 bis 95 Prozent.
- Ein Schlüssel dazu ist der Ausbau der erneuerbaren Energien. Bis 2020 soll ihr Anteil an der Stromerzeugung 30 Prozent betragen, bis 2050 sogar 80 Prozent.
- All dies geht nicht ohne massive Investitionen: Nach Schätzungen des Bundesumweltministeriums werden bis 2020 allein im Stromsektor 100 Milliarden Euro benötigt.
- Fest steht: Ohne Kernenergie sind die deutschen Klimaschutzziele nicht oder nur mit unverträglich hohen Kosten zu erreichen.

### DER WEITERBETRIEB DEUTSCHER KERNKRAFTWERKE HAT DÄMPFENDEN EINFLUSS AUF DEN STROMPREIS

- Die deutschen Kernkraftwerke sind weltweit führend in puncto Sicherheit: Laut Internationaler Energieagentur (IEA) erfüllen sie höchste Standards. Die bestehenden Kraftwerke von RWE genügen bei vielen Kriterien den heutigen Anforderungen an Neubauten.
- Wir haben viel getan, um dieses Spitzenniveau zu erreichen und langfristig zu sichern. Allein am Standort Biblis haben wir in den vergangenen zehn Jahren 1,4 Milliarden Euro investiert und dabei eine Vielzahl sicherheitserhöhender Maßnahmen umgesetzt.
- Bezahlbarer Strom ist ein wichtiger Standortfaktor für die deutsche Industrie und trägt damit zur Sicherung von Arbeitsplätzen bei.
- Nach einer Studie des Bundesverbandes der Deutschen Industrie (BDI) hat der weitere Betrieb der deutschen Kernkraftwerke dämpfenden Einfluss auf die Großhandelsstrompreise, der im Jahr 2020 über 20 Prozent ausmachen kann. Für einen durchschnittlichen Haushalt bedeutet das eine Ersparnis von 90 Euro pro Jahr.

„81 Prozent der deutschen Bevölkerung glauben, dass man künftig bei der Energieversorgung nicht völlig auf Kernenergie verzichten kann. Dieser Anteil ist seit 2005 (59 Prozent) deutlich gestiegen.“

Forsa-Umfrage im Sommer 2010

#### IMMER MEHR LÄNDER SETZEN AUF KERNENERGIE

- Den erneuerbaren Energien gehört die Zukunft. Aber was ist, wenn kein Wind weht und die Sonne nicht scheint?
- Kernenergie ist da, wenn sie gebraucht wird. Sie ist bestens dazu geeignet, schwankende Stromeinspeisungen aus regenerativen Quellen auszugleichen. Die deutschen Reaktoren können innerhalb von 15 Minuten ihre Leistung um insgesamt 9.600 Megawatt hoch- oder herunterfahren.
- Auch international setzt sich die Erkenntnis durch, dass die Kernenergie einen wichtigen Beitrag zu Klimaschutz und Versorgungssicherheit leistet. Die USA, Schweden, die Schweiz und die Niederlande haben die Laufzeit ihrer Kernkraftwerke deshalb auf 60 Jahre verlängert.
- Länder wie Italien oder Schweden, die vor Jahren den Ausstieg aus der Kernenergie beschlossen haben, wollen nun sogar neue Anlagen bauen.
- Nach Angaben der Unternehmensberatung Arthur D. Little werden zurzeit 63 Reaktoren weltweit gebaut, für weitere 63 sind Verträge unterzeichnet und für zusätzliche 121 Blöcke gibt es schon Standorte.
- Die Endlagerung radioaktiver Abfälle muss endlich geregelt werden. In Deutschland liegt die Verantwortung hierfür beim Staat, während die Kosten der Entsorgung von den Betreibern der Kernkraftwerke getragen werden.

#### AUS KERNENERGIE STAMMT RUND EIN VIERTEL DES DEUTSCHEN STROMS

Anteile der Energieträger an der Netto-Stromerzeugung in Deutschland 2009

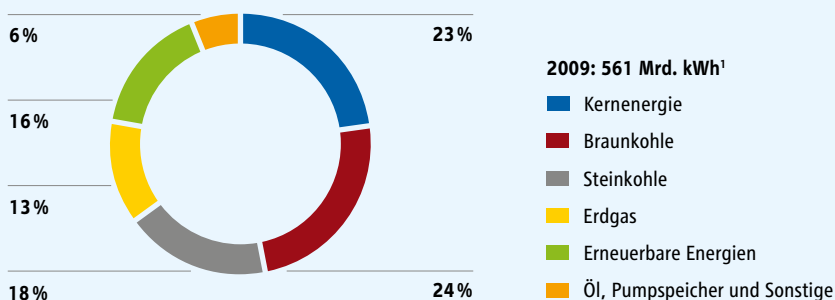

1 Vorläufig

Quelle: Bundesverband der Energie- und Wasserwirtschaft e.V.

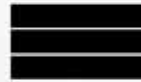Kunden-NR. 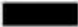

RWE Vertrieb AG  
Freistuhl 7  
44137 Dortmund

Dortmund, den 21.09.2010

**Betreff: So kann man mit Kunden nicht umgehen!**

Sehr geehrte Damen und Herren,

am 19. Februar habe ich von RWE meine Jahresabschlussrechnung erhalten. Mit einem falschem Einzugszählerstand. Nach 6 Monaten, 3 Briefen und 5 Telefonaten war RWE endlich in der Lage, mir eine korrekte Rechnung zu stellen. Dafür fallen jetzt astronomische Mahn- und Inkasso-Gebühren an.

Es ist einfach ein Skandal!

Ich frage mich: Was nützt ein Kundenservice, der nicht sofort, sondern nur mit riesigem Verwaltungsaufwand auf die Zählerdaten von RWE Verteilnetz zugreifen kann? Weshalb kann der Kundenservice den Mahn- und Inkassovorgang nicht stoppen, obwohl RWE und nicht ich für die monatelange Bearbeitungszeit verantwortlich ist? Wieso werden die Mahn- und Inkassokosten, die einfach nicht berechtigt sind, zum Schluss nochmals verdoppelt? Wieso ist keiner der Mitarbeiter im Kundendienst in der Lage, eine korrekte Jahresabschlussrechnung für mich zu erstellen?

Ich verlange eine sofortige Klärung dieses Sachverhalts und die Bestätigung, dass mir keine zusätzlichen Kosten entstehen.

Grüße,

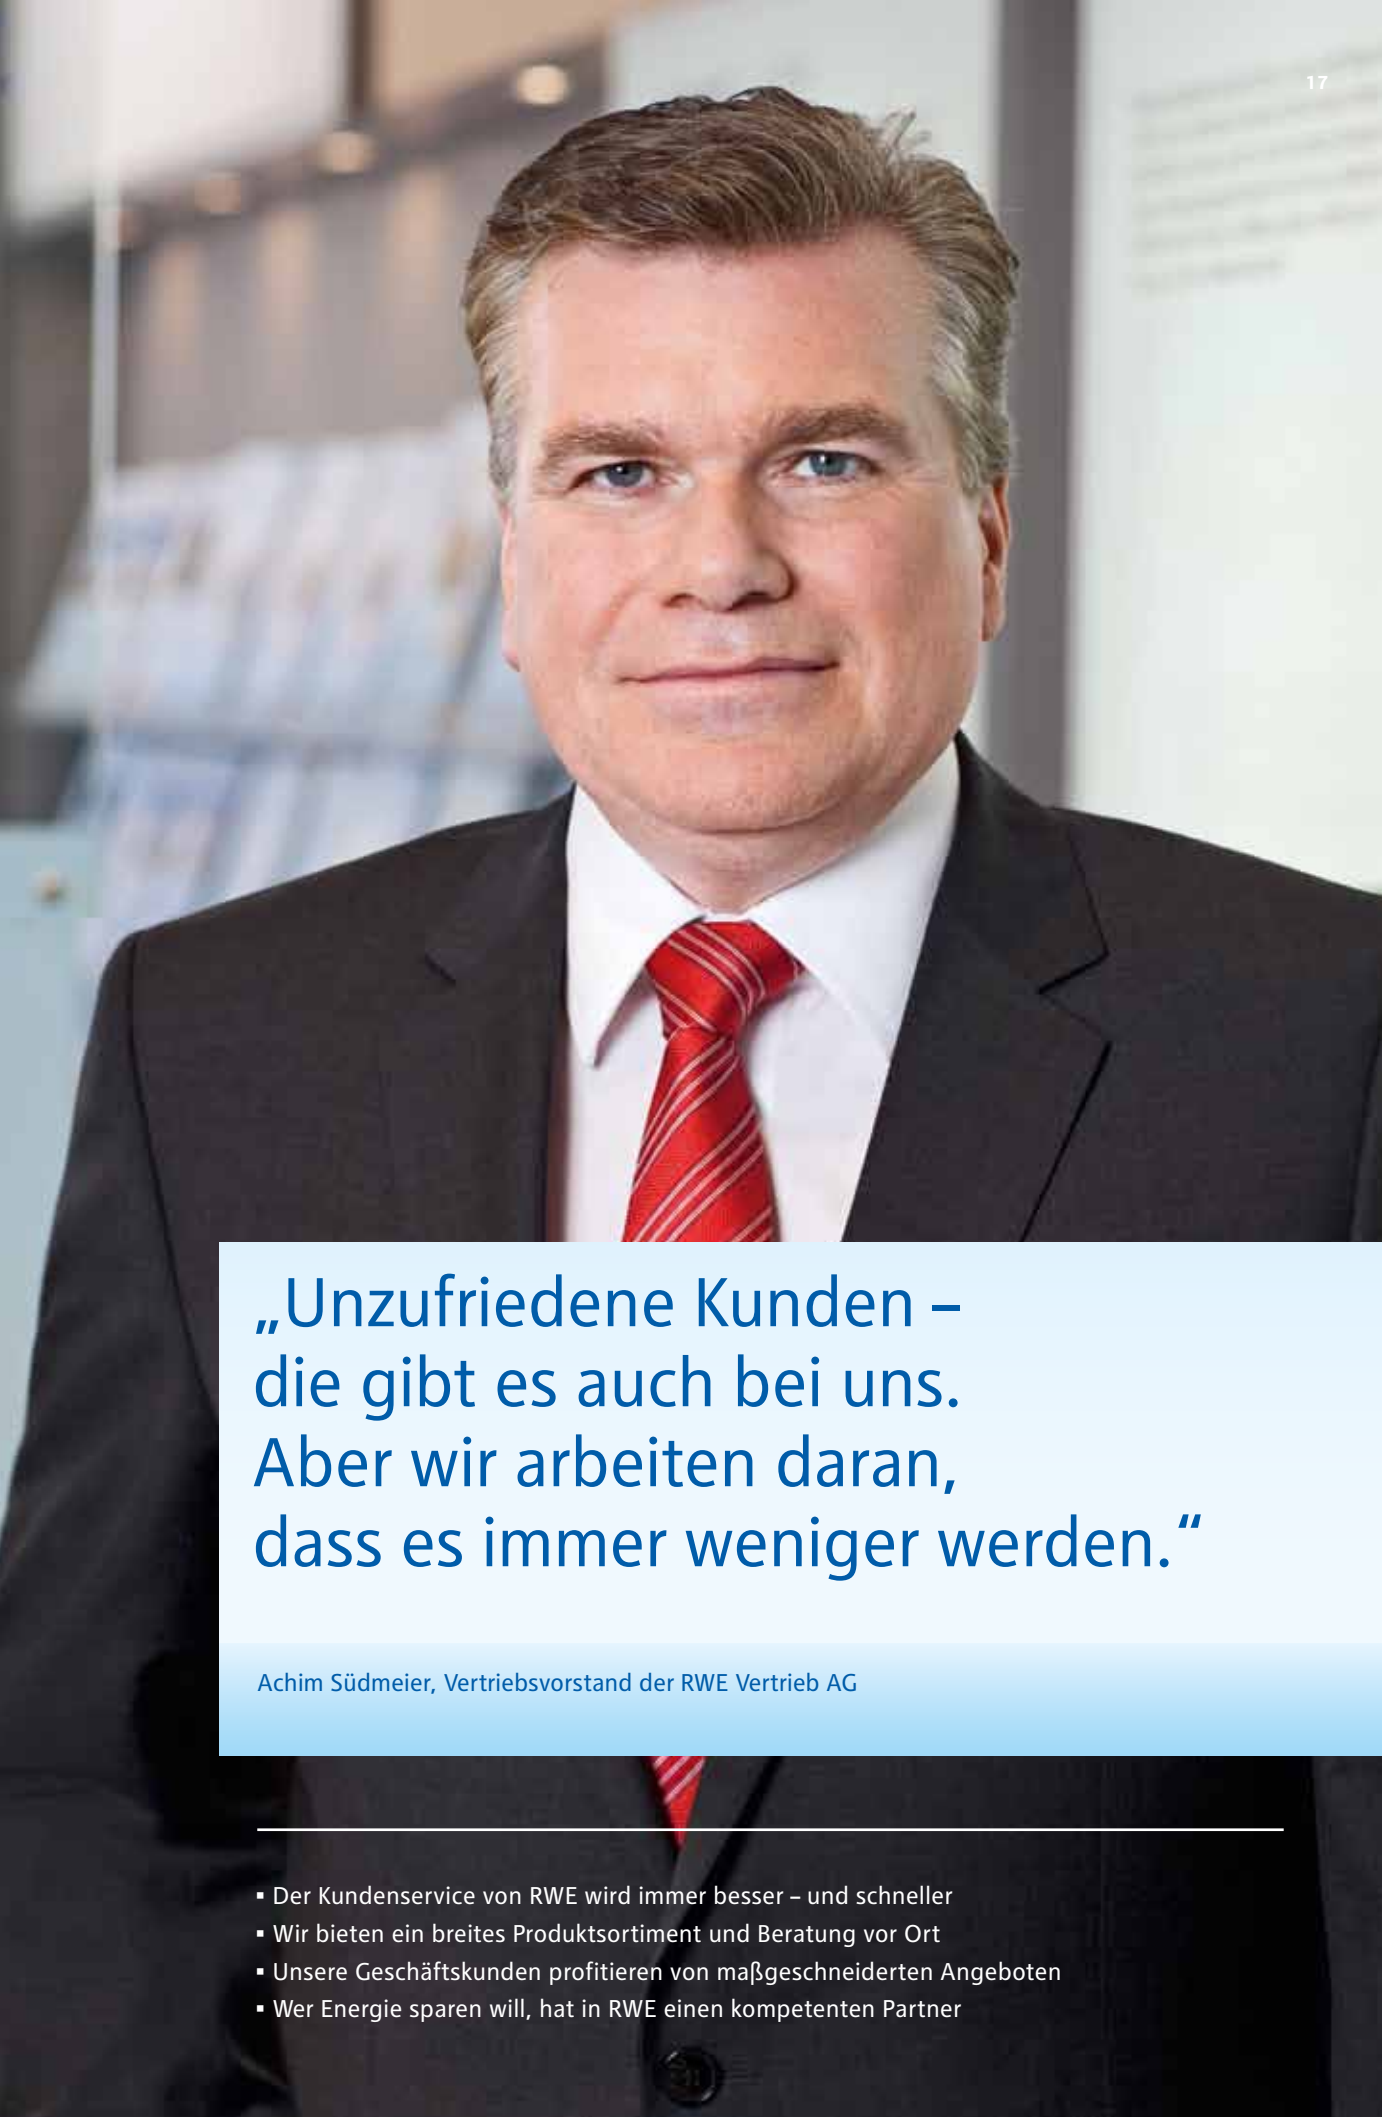

„Unzufriedene Kunden –  
die gibt es auch bei uns.  
Aber wir arbeiten daran,  
dass es immer weniger werden.“

Achim Südmeier, Vertriebsvorstand der RWE Vertrieb AG

- 
- Der Kundenservice von RWE wird immer besser – und schneller
  - Wir bieten ein breites Produktsortiment und Beratung vor Ort
  - Unsere Geschäftskunden profitieren von maßgeschneiderten Angeboten
  - Wer Energie sparen will, hat in RWE einen kompetenten Partner

## UNSER SERVICEKONZEPT BERÜCKSICHTIGT VERÄNDERTE MARKTVERHÄLTNISSE UND NEUE KUNDENWÜNSCHE

### DER KUNDENSERVICE VON RWE WIRD IMMER BESSER – UND SCHNELLER

- Wer auf lange Sicht am Markt bestehen will, muss exzellenten Kundenservice bieten.
- Wir setzen auf Qualität und haben viel dafür investiert. Allein 2010 hat RWE Vertrieb 100 neue Mitarbeiter im Kundendienst eingesetzt. Der TÜV Süd hat uns wiederholt für Servicequalität und Kundenzufriedenheit ausgezeichnet.
- Kundenanfragen bei RWE Vertrieb werden heute um 25 Prozent schneller beantwortet als noch vor einem Jahr.
- Anregungen und Kritik nehmen wir ernst: 2010 haben wir einen Kundenbeirat ins Leben gerufen, der die Wünsche unserer Privatkunden in Deutschland aufgreift und Lösungskonzepte erarbeitet.
- In Großbritannien haben wir 200 Millionen Pfund in neue Abrechnungs- und Datenmanagementsysteme investiert, um unsere Kunden schneller und effizienter betreuen zu können.
- Unsere Privatkunden in den Niederlanden können ihre Strom- und Gas-Abschlagszahlungen über das Internet bedarfsgerecht steuern.

### WIR BIETEN EIN BREITES PRODUKTSORTIMENT UND BERATUNG VOR ORT

- Unsere Privatkunden können sowohl in Deutschland als auch im Ausland aus einem breit gefächerten Sortiment das passende Produkt auswählen. Die Palette reicht von Festpreis- und Ökostromangeboten bis hin zu Online-Tarifen, beispielsweise der Marke eprimo.
- RWE Vertrieb hat ihre Beratungskapazitäten um 10 Prozent aufgestockt.
- Massiv ausgebaut wurde unsere Präsenz vor Ort: RWE Vertrieb ist heute mit über 70 Energieläden oder mobilen Info-Ständen vertreten. Das sind 30 mehr als vor zwei Jahren.
- Anrufe bei uns sind kostenlos. Die Wartezeit am Telefon konnten wir in den vergangenen Jahren um über die Hälfte verkürzen. In 93 Prozent der Fälle erreichen unsere Kunden im Erstkontakt einen persönlichen Berater von RWE Vertrieb.

## UNSERE GESCHÄFTSKUNDEN PROFITIEREN VON MASSGESCHNEIDERTEN ANGEBOTEN

- Seit 2008 bieten wir unseren Geschäftskunden einen Katalog maßgeschneiderter Energiedienstleistungen an. Wir informieren über Tarife und über Möglichkeiten eines sparsameren Einsatzes von Energie. Auf einer Internetplattform können unsere Kunden nachverfolgen, wie sich ihr Stromverbrauch im Zeitablauf entwickelt.
- Darüber hinaus bieten wir unseren Geschäftskunden variable Stromtarife an, die mitunter wöchentlich an aktuelle Entwicklungen an der Strombörse angepasst werden.
- Auch für jene Großkunden, die eine stabile Kalkulationsgrundlage benötigen, haben wir das passende Produkt: lang laufende Stromverträge, die teilweise bis ins Jahr 2037 reichen.
- Unseren kommunalen Kunden bieten wir spezielle Partnerschaftskonzepte an. Inbegriffen ist eine Beratung über die Möglichkeiten zur Verbesserung der Energieeffizienz in Rathäusern und anderen öffentlichen Gebäuden.

## WER ENERGIE SPAREN WILL, HAT IN RWE EINEN KOMPETENTEN PARTNER

- Energie effizienter nutzen heißt, Kosten senken und die Umwelt schonen. Wir helfen unseren Kunden dabei – und stärken damit unsere Position im Vertrieb.
- In unserem Web-Portal [www.energiwelt.de](http://www.energiwelt.de) geben wir Tipps für den sparsamen Umgang mit Strom und Gas. Von seiner Live-Schaltung im Oktober 2009 bis Ende 2010 hatte das Portal bereits 3,5 Millionen Besucher. Ob Gebäudedämmung, intelligente Zähler (Smart Meter), Hausautomatisierungsdienste (Smart Home), Wärmepumpen, Solarthermie, Kraft-Wärme-Kopplung oder energieeffiziente Maschinen und Geräte – hier ist für jeden etwas dabei.
- Die 2009 gegründete RWE Effizienz GmbH ist mit rund 100 Mitarbeitern unser Innovationszentrum für Energiesparprodukte. Mit ihr sind wir auch Vorreiter auf dem Gebiet der klimaschonenden Elektromobilität. Für alle, die ihr Auto aufladen, statt zu tanken, haben wir mit „RWE Autostrom“ bereits heute das passende Produkt.

## WWW.ENERGIEWELT.DE – UNSERE SERVICELEISTUNGEN:

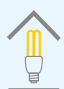

ENERGIE SPAREN  
IM HAUSHALT

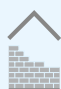

ENERGIEEFFIZIENTER  
NEUBAU

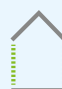

GEBÄUDE  
MODERNISIEREN

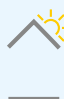

SOLARENERGIE  
KENNENLERNEN

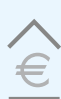

FINANZIERUNG  
UND FÖRDERMITTEL

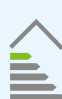

HANDWERKER UND  
ENERGIEBERATER

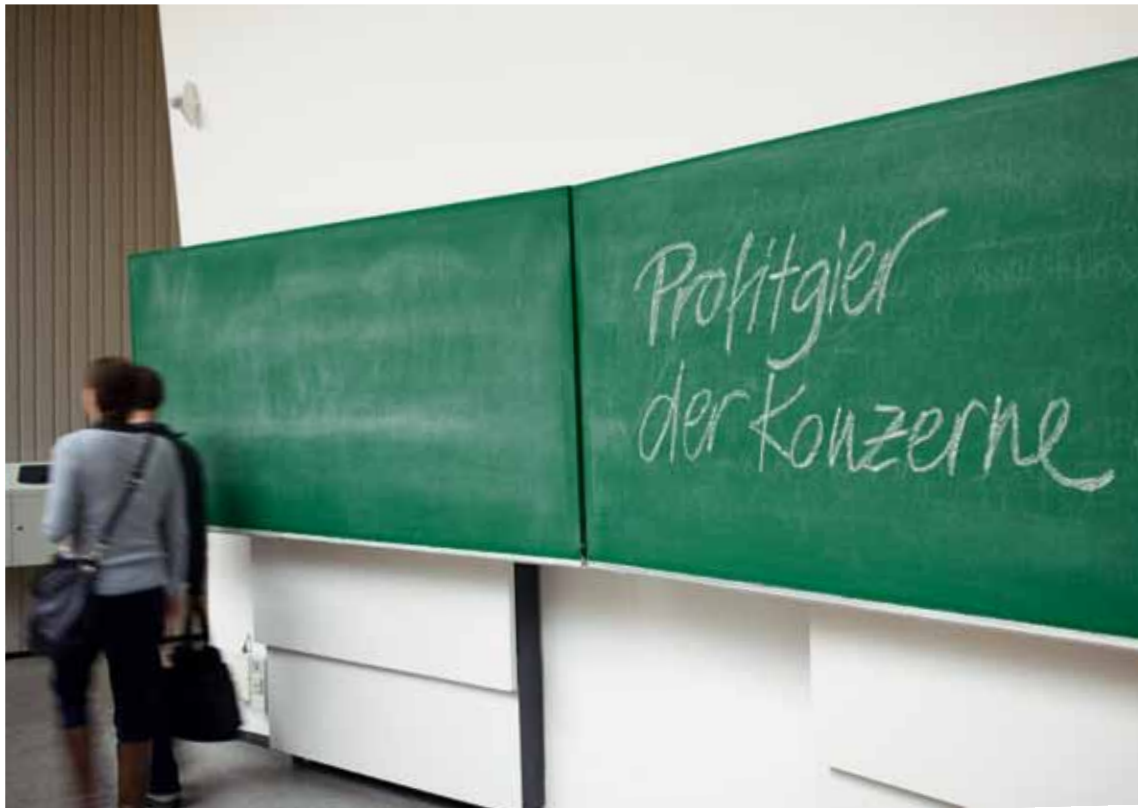

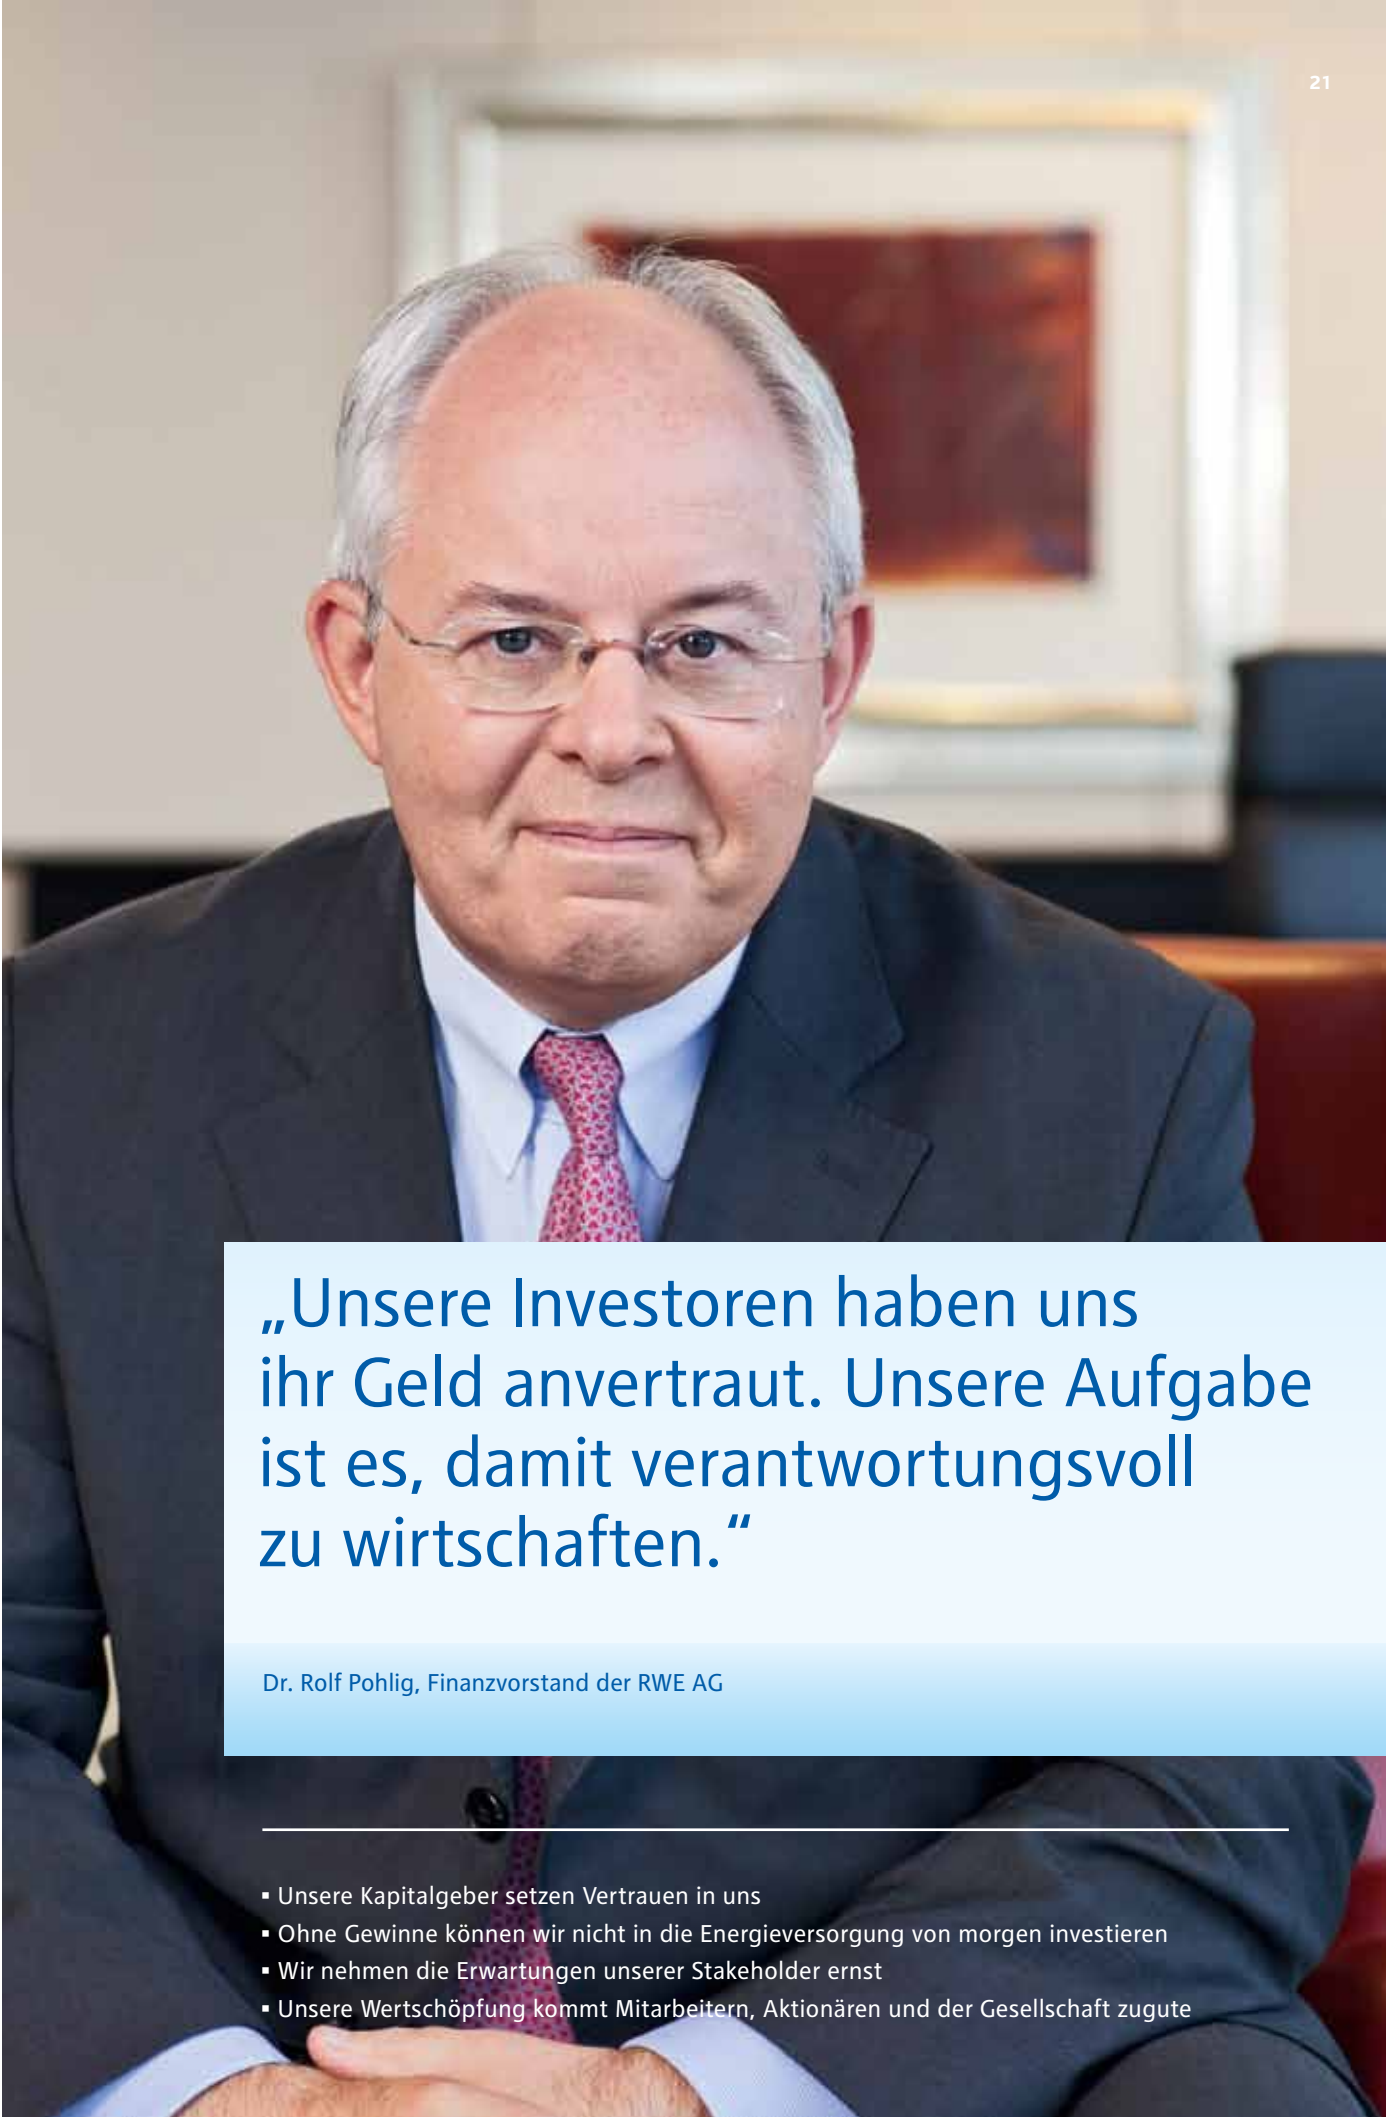A portrait of Dr. Rolf Pohlig, a middle-aged man with grey hair and glasses, wearing a dark suit, white shirt, and a red patterned tie. He is sitting in an office with a framed picture on the wall behind him.

„Unsere Investoren haben uns  
ihr Geld anvertraut. Unsere Aufgabe  
ist es, damit verantwortungsvoll  
zu wirtschaften.“

Dr. Rolf Pohlig, Finanzvorstand der RWE AG

- 
- Unsere Kapitalgeber setzen Vertrauen in uns
  - Ohne Gewinne können wir nicht in die Energieversorgung von morgen investieren
  - Wir nehmen die Erwartungen unserer Stakeholder ernst
  - Unsere Wertschöpfung kommt Mitarbeitern, Aktionären und der Gesellschaft zugute

## UNSERE INVESTOREN ERWARTEN EINE ERFOLGREICHE STRATEGIE UND EINE ATTRAKTIVE DIVIDENDE. DAFÜR TRAGEN SIE ZUR FINANZIERUNG DER ENERGIEVERSORGUNG VON MORGEN BEI

### UNSERE KAPITALGEBER SETZEN VERTRAUEN IN UNS

- Energieversorgung erfordert ein langfristig angelegtes Geschäftsmodell: Wir denken und planen nicht in Jahren, sondern in Jahrzehnten.
- Die von uns erzielten Gewinne ermöglichen eine angemessene Verzinsung des Kapitals, das die Anteilseigner RWE zur Verfügung stellen.
- Unsere Aktionäre verfolgen unterschiedliche Anlagestrategien. Der Aufbau einer privaten Altersvorsorge spielt bei privaten Investoren eine besonders wichtige Rolle. Auch institutionelle Anleger, etwa Pensionsfonds oder kommunale Anteilseigner, sind eher langfristig orientiert und setzen auf Dividendenkontinuität.
- Staatliche Maßnahmen, die unsere Ertragslage belasten, treffen letztlich unsere Eigentümer. Dies gilt insbesondere für die neue Kernbrennstoffsteuer in Deutschland. Sie wird unser betriebliches Ergebnis durchschnittlich mit 600 bis 700 Millionen Euro pro Jahr belasten – und uns damit Mittel für Investitionen und Dividenden entziehen.

### OHNE GEWINNE KÖNNEN WIR NICHT IN DIE ENERGIEVERSORGUNG VON MORGEN INVESTIEREN

- Gewinne sind die Voraussetzung für die Sicherung der Zukunft unseres Unternehmens und seiner Arbeitsplätze. Nur mit guten Ergebnissen und einem soliden Cash Flow können wir Milliarden von Euro in den Umbau unseres Kraftwerksparks investieren und die Energieversorgung von morgen sicherstellen.
- Wir haben in den vergangenen fünf Jahren wesentlich mehr in Sachanlagen investiert als an Aktionäre ausgeschüttet. Dies wird auch künftig so sein. Damit schaffen wir die Basis für die künftigen Dividenden und sichern die Arbeitsplätze unserer Mitarbeiter. Auch die Regionen, in denen wir tätig sind, profitieren davon – ebenso unsere Zuliefererbetriebe.
- Knapp die Hälfte der Sachanlageinvestitionen im Jahr 2010 haben wir in Deutschland getätigt.

## WIR NEHMEN DIE ERWARTUNGEN UNSERER STAKEHOLDER ERNST

- Unser Ziel ist, unternehmerisches Handeln und die Erwartungen unserer Anspruchsgruppen (Stakeholder) in Einklang miteinander zu bringen. Nur so können wir den langfristigen Unternehmenserfolg sichern und für unsere Aktionäre Wert schaffen.
- Wir haben unsere Strategie auf dem Gebiet der Corporate Responsibility (CR) in zehn Handlungsfelder untergliedert, die aus Sicht unserer Stakeholder die wichtigsten Herausforderungen für RWE beinhalten.
- Seit 2010 hängt die Vergütung des Vorstands auch davon ab, wie erfolgreich wir in den CR-Handlungsfeldern sind. Damit ist RWE eines der ersten Unternehmen, das die Vorstandsvergütung direkt mit dem Erreichen von Nachhaltigkeitszielen verknüpft.

Weitere Informationen: RWE-Nachhaltigkeitsbericht unter [www.rwe.com/verantwortung](http://www.rwe.com/verantwortung)

## UNSERE WERTSCHÖPFUNG KOMMT MITARBEITERN, AKTIONÄREN UND DER GESELLSCHAFT ZUGUTE

- RWE wird bis zum Jahr 2013 rund 18 Milliarden Euro investieren.
- Das Geld fließt größtenteils in den Bau neuer Kraftwerke, in erneuerbare Energien, den Ausbau und die Modernisierung von Stromnetzen sowie in die Erschließung neuer Energiequellen.
- Dieses RWE-Konjunkturpaket kommt ganz ohne staatliche Unterstützung aus, sichert Arbeitsplätze und trägt zur Wertschöpfung bei: Im Geschäftsjahr 2010 verblieben rund 16 Milliarden Euro an Wertschöpfung, die an Mitarbeiter, Aktionäre und die Gesellschaft flossen.

## INVESTITIONEN IN DIE ERTRAGSKRAFT DES UNTERNEHMENS

| in Mio €                     | 2010               | 2009  | 2008  | 2007  | 2006  |
|------------------------------|--------------------|-------|-------|-------|-------|
| Investitionen in Sachanlagen | 6.379              | 5.913 | 4.454 | 4.065 | 4.494 |
| Nachhaltiges Nettoergebnis   | 3.752              | 3.532 | 3.367 | 2.985 | 2.466 |
| Gewinnausschüttung           | 1.867 <sup>1</sup> | 1.867 | 2.401 | 1.689 | 1.968 |

1 Vorbehaltlich der Zustimmung durch die Hauptversammlung am 20. April 2011

# Strom-Oligopol scheffelt Geld

## Studie: Milliardenprofit durch Marktmacht

Von Jakob Schlandt

Die deutschen Stromkonzerne erwirtschaften trotz Krise Rekordgewinne, die weit über den in anderen Branchen üblichen Profiten liegen. Dies geht aus einer Studie der Hochschule für Technik und Wirtschaft des Saarlandes hervor, die der FR vorliegt. Die Autoren Uwe Leprich und Andy Junker werteten im Auftrag der Grünen die Geschäftsberichte der drei Konzerne Eon, RWE und EnBW aus und stellten einen enormen Gewinnanstieg fest: Allein 2009 führen sie zusammen 23 Milliarden Euro Profit ein. Seit 2002 wurden über 100 Milliarden Euro Gewinn erzielt, in diesem Zeitraum versiebenfachten sich die Erträge.

RWE, das die Gewinne der Stromerzeugung getrennt benennt, erreicht demnach eine Rendite auf das eingesetzte Kapital (ROCE) von 26,6 Prozent, die Autoren vermuten ähnliche Beträge bei Eon und EnBW. In wettbewerbsintensiven Branchen und im Vergleich mit anderen Dax-Unternehmen seien aber nur neun Prozent angemessen. Ihr Schluss: „Der Gewinn allein in diesem Segment ist um 2,3 Milliarden Euro zu hoch, RWE verdient pro abgesetzter Kilowattstunde 1,1

Cent zu viel.“ Die hohen Renditen der Energieriesen seien insbesondere angesichts ihrer niedrigen Risiken unangemessen.

Grünen-Fraktionschef Jürgen Trittin und Vizechefin Bärbel Höhn erklärten gestern, die „astronomischen Kapitalrenditen“ könnten nur mit mangelndem Wettbewerb erklärt werden, „der jetzt mit einer Laufzeitverlängerung der AKWs noch zementiert wird“. Mehr Wettbewerb bei der Stromerzeugung, so die beiden Grünen-Politiker, würde de facto zu niedrigeren Preisen führen.

Dieser Ansicht sind auch Verbraucherschützer und Wettbewerbsbehörden. Justus Haucap, Chef der Monopolkommission, sagte der FR: „Die enormen Gewinne überraschen nicht. Es gibt keinen funktionsfähigen Wettbewerb bei der Energieerzeugung in Deutschland, das wurde durch die Laufzeitverlängerung für die Kernkraft noch einmal verfestigt.“ Mittelfristig könne ein Ausbau der Grenzkuppelstellen dafür sorgen, dass der Druck auf die Renditen durch Stromimporte zunehme.

Holger Krawinkel, Energieexperte des Bundesverbands der Verbraucherzentralen, sagte: „Der Wettbewerb auf dem deutschen Stromerzeugungsmarkt ist eine Farce.“ Die Energieriesen verfüg-

ten über mehr Marktmacht als vor der Liberalisierung vor gut zehn Jahren. „Das ist vor allem auf Versagen der Politik zurückzuführen, die nicht ausreichend für Wettbewerb gesorgt hat.“ Nach Einschätzung der Landesbank Baden-Württemberg sind die hohen Gewinne der Jahre 2009 und auch 2010 teils darauf zurückzuführen, dass der Strom zu hohen Preisen bis zu drei Jahre vorher verkauft wurde. Ab 2013 müssten zudem teure Verschmutzungsrechte gekauft werden, das werde die Gewinne weiter drücken. Die Börsenkurse waren zuletzt stark gefallen.

Eine Besonderheit ist den Autoren bei Eon aufgefallen: Der Düsseldorfer Konzern erwirtschaftete einen großen Teil seiner Gewinne mit Spekulationsgeschäften im Derivatehandel, deren Volumen nicht mit Absicherungsgeschäften zu erklären sei. Die Bundesregierung müsse mögliche Risiken analysieren und Konsequenzen ziehen, um dem nächsten Casino vorzubeugen. Ein Eon-Sprecher verteidigte das Handelsgeschäft. Es gebe in Europa wesentlich größere Energie-Handelshäuser, das Engagement sei solide und der Vergleich mit Finanzjongleuren „völlig unangebracht“.

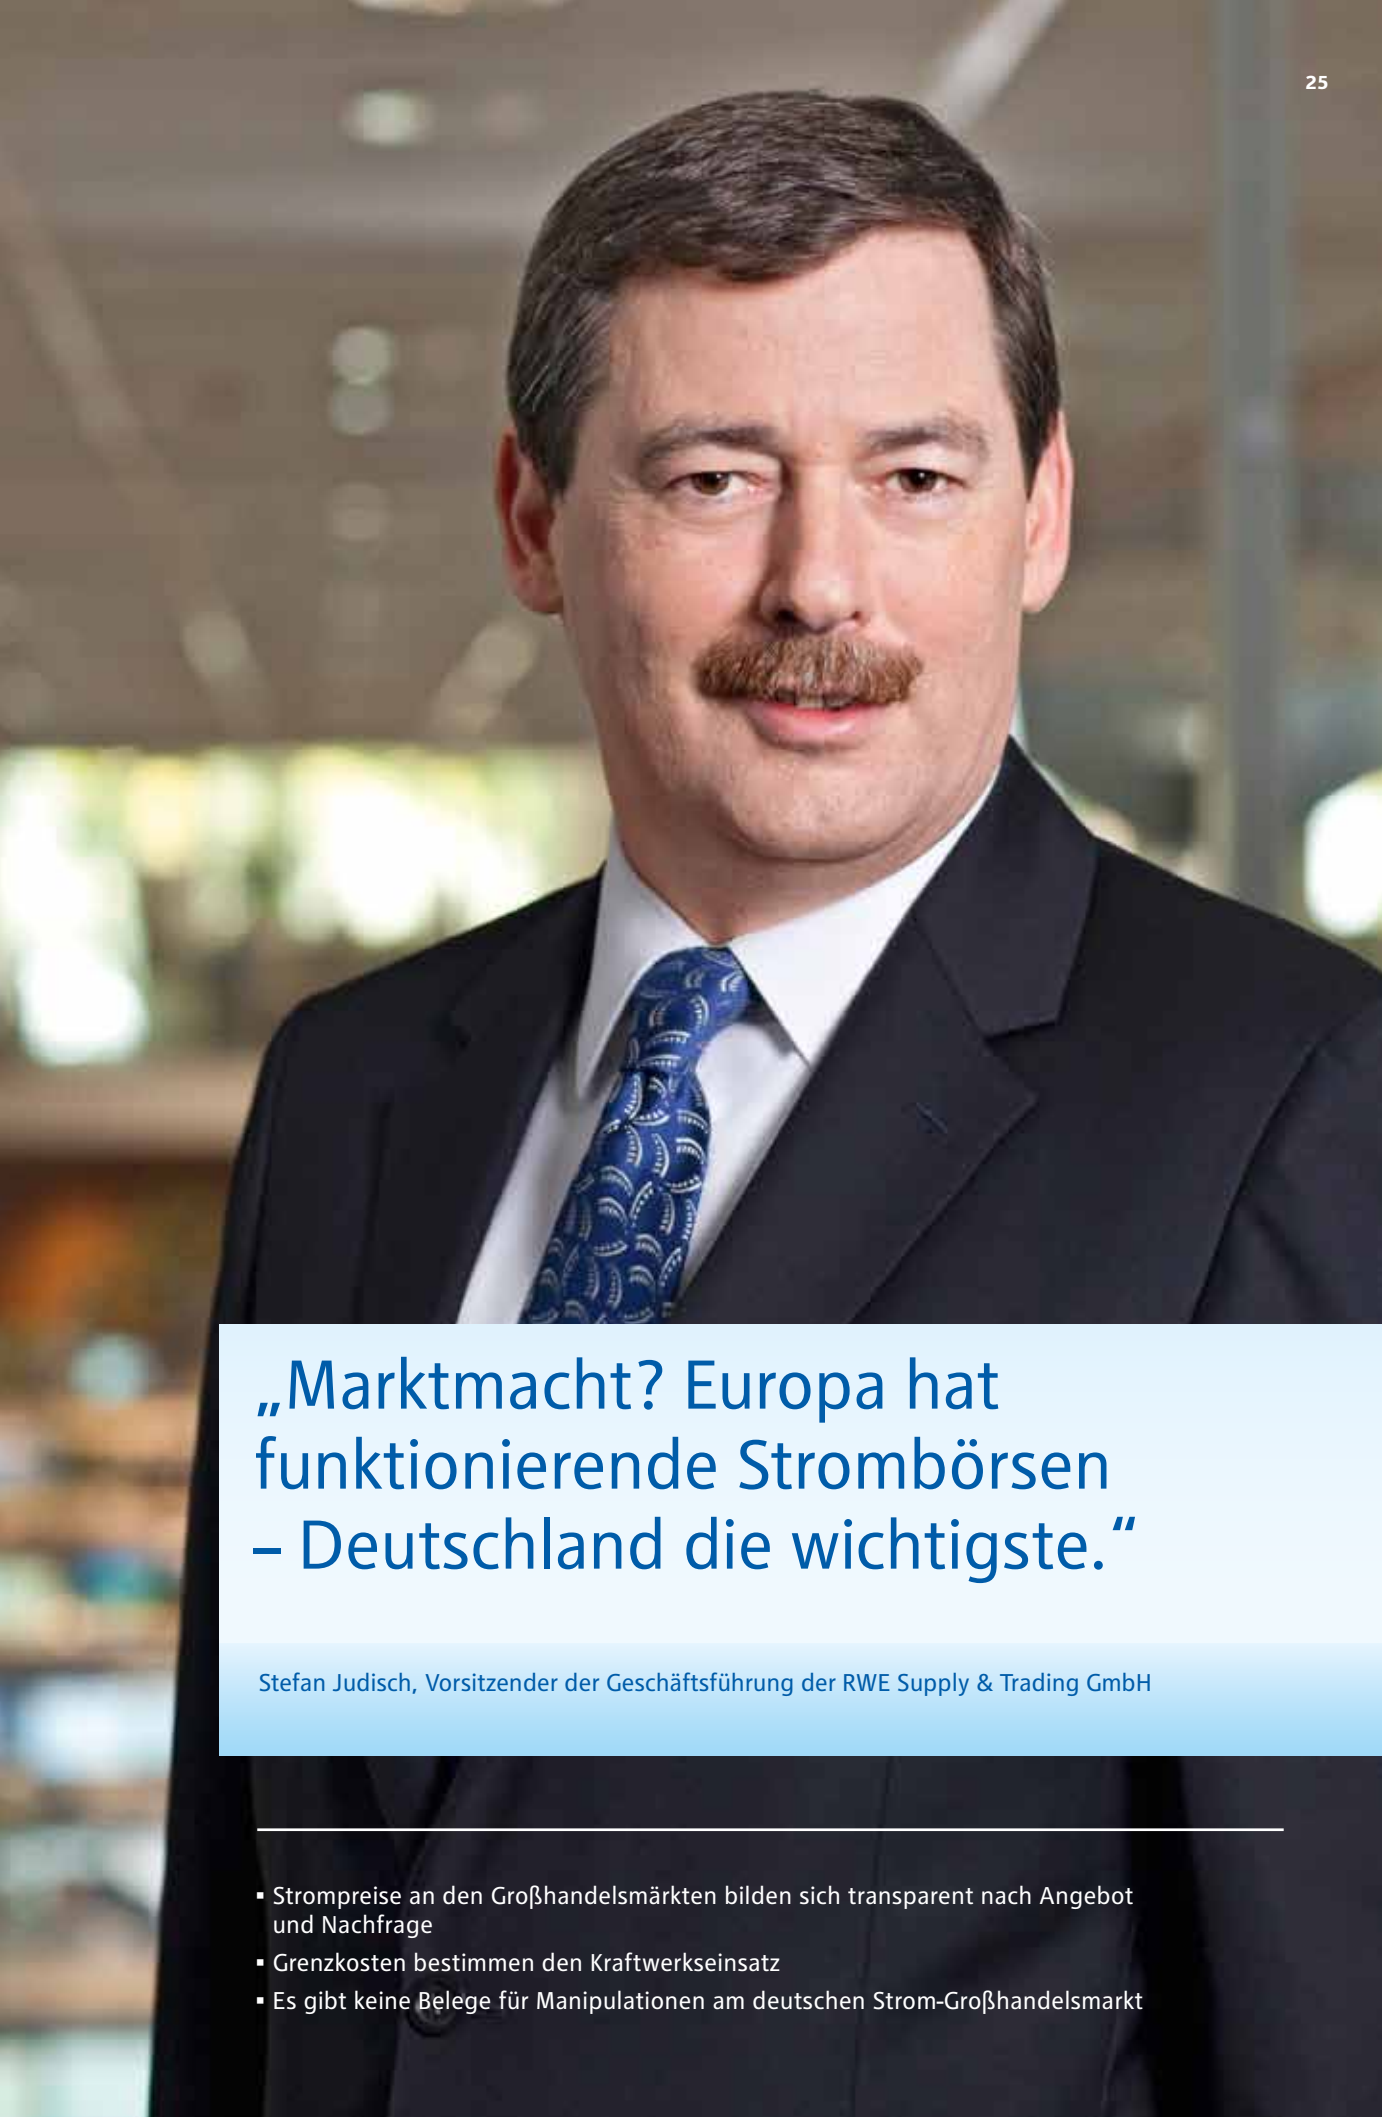A portrait of Stefan Judisch, a middle-aged man with a mustache, wearing a dark suit, white shirt, and a blue patterned tie. He is looking directly at the camera with a slight smile. The background is a blurred indoor setting with warm lighting.

## „Marktmacht? Europa hat funktionierende Strombörsen – Deutschland die wichtigste.“

Stefan Judisch, Vorsitzender der Geschäftsführung der RWE Supply & Trading GmbH

- 
- Strompreise an den Großhandelsmärkten bilden sich transparent nach Angebot und Nachfrage
  - Grenzkosten bestimmen den Kraftwerkseinsatz
  - Es gibt keine Belege für Manipulationen am deutschen Strom-Großhandelsmarkt

## WIR STELLEN UNS AUS ÜBERZEUGUNG DEM WETTBEWERB, WEIL ER UNSER WACHSTUM BEFLÜGELT UND WIR DURCH LEISTUNG AM MARKT DIE DIVIDENDE FÜR UNSERE AKTIONÄRE VERDIENEN

### STROMPREISE AN DEN GROSSHANDELSMÄRKTEN BILDEN SICH TRANSPARENT NACH ANGEBOT UND NACHFRAGE

- Strom ist ein ganz besonderes Produkt. Es ist vollständig homogen und kann auf vielfältige Weise erzeugt werden. Weil Strom kaum lagerbar ist, muss er genau in dem Moment hergestellt werden, in dem er nachgefragt wird; nicht zu viel und nicht zu wenig.
- Die Stromnachfrage schwankt im Sekundentakt. Sie hängt von vielen Faktoren ab, beispielsweise der Tages- und Jahreszeit, dem Wetter oder der Konjunktur. Bei Industriebetrieben ist die Auslastung der Produktionsstätten ausschlaggebend, bei Privathaushalten sind es eher die Temperaturen.
- An einzelnen Tagen sind extreme Preisschwankungen an den Strombörsen zu beobachten. Ein solcher Tag war der 6. Dezember 2010 (siehe Grafik unten). Wetterbedingt standen die Windräder still, und die von Schnee bedeckten Solaranlagen produzierten auch keinen Strom. Im Tagesverlauf hat sich der Strompreis zunächst verdoppelt, dann verdreifacht und später wieder mehr als halbiert.
- Es gibt nur wenige Produkte, die so hohe kurzfristige Preisausschläge aufweisen.
- Wegen der großen Schwankungen nutzen Stromerzeuger, Weiterverteiler und Großverbraucher Terminmärkte zur preislichen Absicherung.

### STUNDENPREISE FÜR STROM IM DEUTSCHEN SPOTHADEL AM 6. DEZEMBER 2010

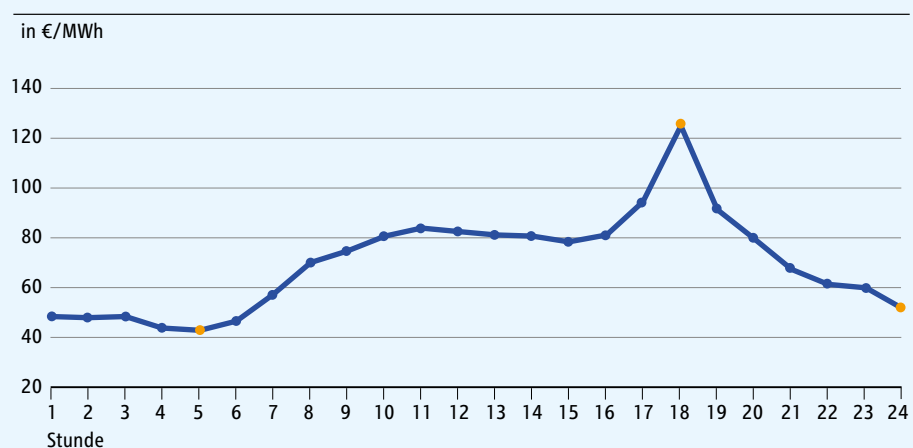

Quelle: RWE Supply & Trading

## GRENZKOSTEN BESTIMMEN DEN KRAFTWERKEINSATZ

- Die Stromnachfrage wird von einer Vielzahl von Kraftwerksbetreibern gedeckt. Der Einsatz der Anlagen erfolgt streng ökonomisch nach Maßgabe der kurzfristigen variablen Kosten (Grenzkosten). Diese setzen sich im Wesentlichen aus zwei Komponenten zusammen: den Kosten für Brennstoffe wie Kohle oder Gas und den Kosten für das Recht, Kohlendioxid zu emittieren.
- Die Kraftwerke werden bei kurzfristig steigender Nachfrage in der Reihenfolge ihrer Grenzkosten zugeschaltet. Das heißt, je kostengünstiger eine Anlage produziert, desto früher wird ihre Leistung abgerufen.
- Strom aus erneuerbaren Energien wie Windkraft und Photovoltaik hat Vorrang im Stromnetz. Das ist vom Gesetzgeber so vorgeschrieben. Danach kommen Laufwasser- und Kernkraftwerke zum Zuge, die niedrige Grenzkosten haben. Es folgen Kohle- und Gaskraftwerke, in Spitzenzeiten auch Ölkraftwerke.
- Die Grenzkosten desjenigen Kraftwerks, das gerade noch benötigt wird, um die aktuelle Stromnachfrage zu decken und damit die Netzstabilität zu sichern, bestimmen den Preis für die jeweilige Stunde an der Strombörse. Dieser Preis gilt dann auch für alle anderen Kraftwerke. Anlagen, deren Grenzkosten unter dem Stundenpreis liegen, produzieren Strom. Die anderen nicht.
- Liegen die Grenzkosten unter dem erzielbaren Strompreis, verdient der Kraftwerksbetreiber eine Marge. Mit dieser Marge muss er seine Fixkosten decken, beispielsweise den Personalaufwand und die Abschreibungen. Nur wenn es gelingt, über die Gesamtlaufzeit eines Kraftwerks mehr Marge zu verdienen, als die Fixkosten ausmachen, zahlen sich Investitionen in neue Anlagen aus.

## ES GIBT KEINE BELEGE FÜR MANIPULATIONEN AM DEUTSCHEN STROM-GROSSHANDELSMARKT

- Der deutsche Stromerzeugungsmarkt zeichnet sich durch eine Vielzahl von Anbietern und intensiven Wettbewerb aus. Von allen Strommärkten in der EU weist der deutsche die geringste Marktkonzentration aus, sowohl bei der Erzeugung als auch beim Vertrieb. Dies hat eine Studie der Beratungsfirma Capgemini vom November 2010 ergeben.
- In Deutschland wurden 2010 rund 5.500 Terawattstunden Strom elektronisch gehandelt, so viel wie nirgendwo sonst in Europa. Diese Liquidität ist ein Beweis für die hohe Transparenz des Marktplatzes und das Vertrauen, das ihm die Händler entgegenbringen.
- Rund 270 Unternehmen aus 22 Ländern sind an der Energiebörse EEX aktiv. Dort und im außerbörslichen Handel wird der Strom sechs- bis siebenmal umgeschlagen, bevor er an deutsche Endverbraucher geliefert wird. Dies dient der wirtschaftlichen Optimierung und dem Risikotransfer zwischen Erzeugern, Vertriebsgesellschaften und Großkunden.
- Der deutsche Strom-Großhandelspreis bewegt sich seit Jahren im europäischen Mittelfeld. Weder die EU-Kommission noch das Bundeskartellamt noch die Handelsüberwachungsstelle bei der EEX haben jemals Marktmanipulationen am deutschen Strom-Großhandelsmarkt festgestellt.

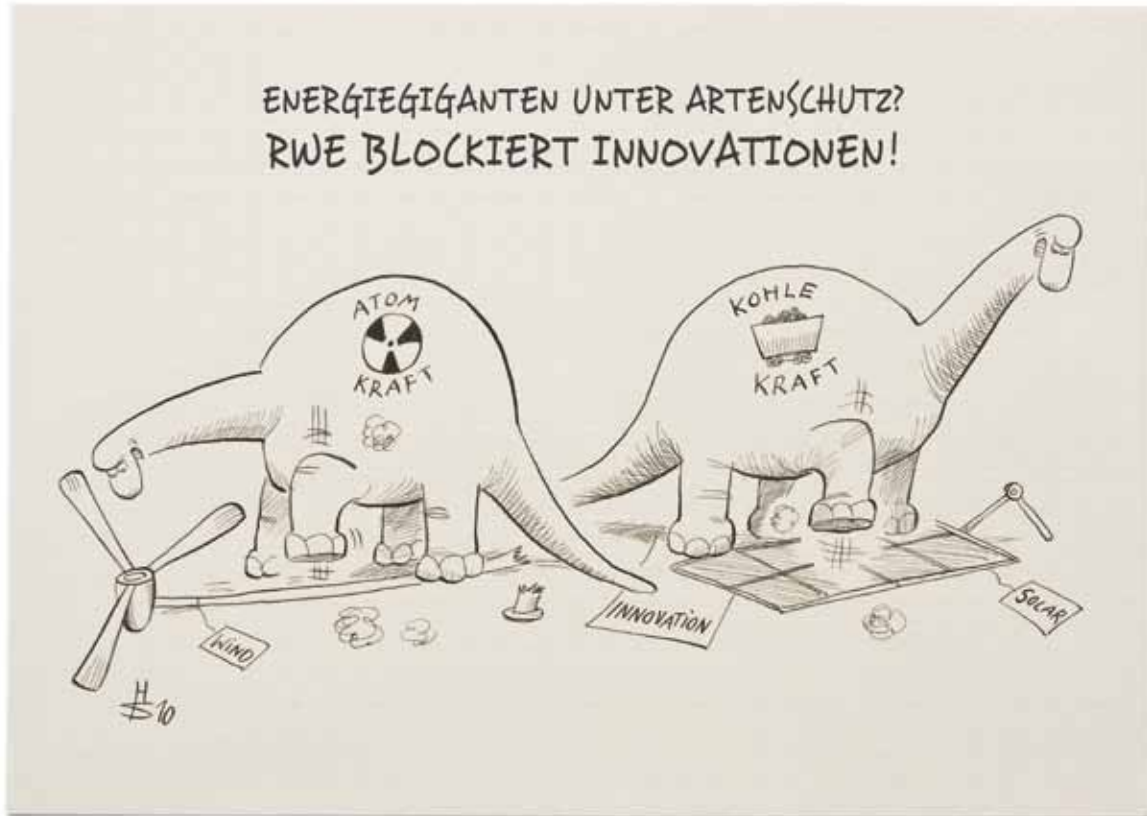

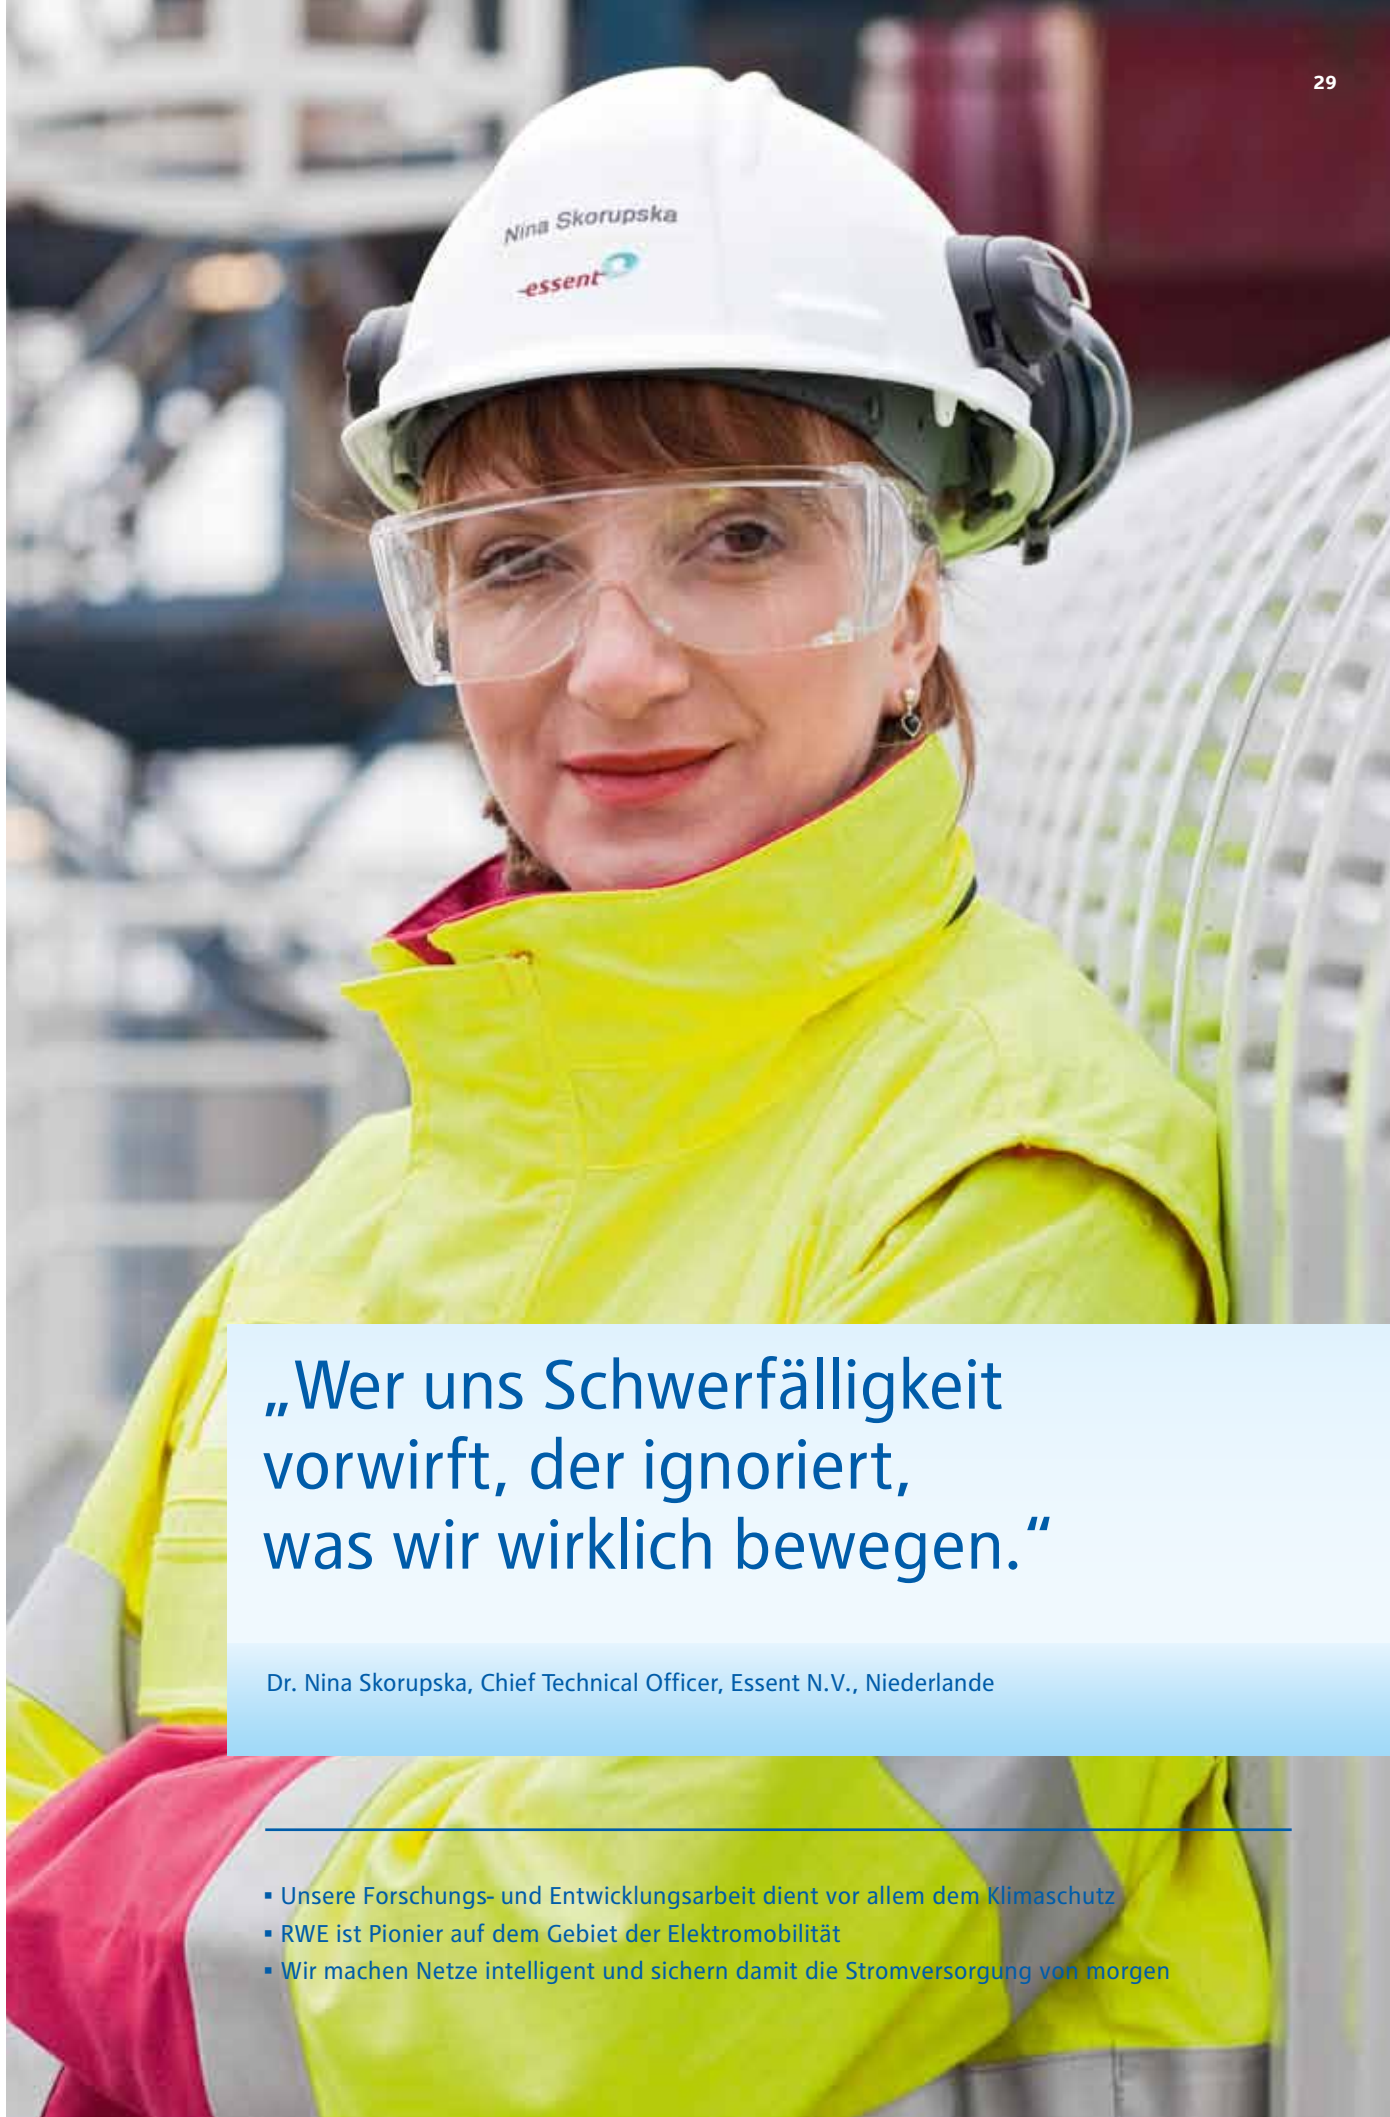

„Wer uns Schwerfälligkeit vorwirft, der ignoriert, was wir wirklich bewegen.“

Dr. Nina Skorupska, Chief Technical Officer, Essent N.V., Niederlande

- 
- Unsere Forschungs- und Entwicklungsarbeit dient vor allem dem Klimaschutz
  - RWE ist Pionier auf dem Gebiet der Elektromobilität
  - Wir machen Netze intelligent und sichern damit die Stromversorgung von morgen

# INNOVATIONEN SIND FÜR UNS DER SCHLÜSSEL ZU EINER RESSOURCEN SCHONENDEN, KLIMAFREUNDLICHEN UND INTELLIGENTEN ENERGIEVERSORGUNG VON MORGEN

## UNSERE FORSCHUNGS- UND ENTWICKLUNGSARBEIT DIENT VOR ALLEM DEM KLIMASCHUTZ

- Wir wollen die Stromerzeugung aus fossilen Energieträgern effizienter und sauberer machen. Hier liegt der Schwerpunkt von Forschung und Entwicklung (F&E) bei RWE.
- In unserem Innovationszentrum Kohle nahe Köln arbeiten wir an Technologien zur Reduktion und Umwandlung von CO<sub>2</sub>. Über 100 Millionen Euro wollen wir dafür insgesamt einsetzen.
- Auch Großprojekte mit Partnern kommen für uns in Frage. Ein Beispiel ist die 2009 gestartete Desertec-Initiative, in der wir Gründungsmitglied sind. Sie soll die Rahmenbedingungen für Investitionen entwickeln, die erforderlich sind, um Europa, den Nahen Osten und Nordafrika in großem Umfang mit Sonnen- und Windenergie zu versorgen.
- Mit unserer niederländischen Tochter Essent sind wir bereits führend bei der Zufeuerung von Biomasse in Kohlekraftwerken.

## AUSGEWÄHLTE INNOVATIONSPROJEKTE

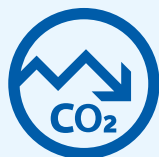

CO<sub>2</sub>-Abtrennung  
im Kohlekraftwerk

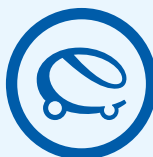

Elektromobilität

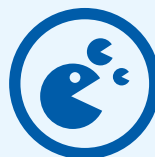

Algenzucht  
mit Kohlendioxid

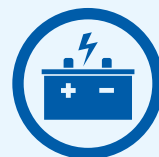

Stromspeicherung  
durch Druckluft

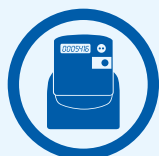

Smart Metering  
für volle Transparenz  
beim Stromverbrauch

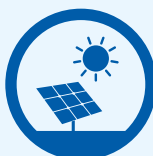

Desertec  
Sahara-Strom  
für Europa

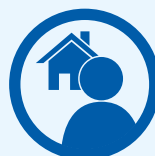

Projekt ECOdre  
für energieeffizientes  
Wohnen

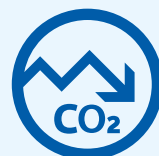

Nutzung von CO<sub>2</sub>  
für chemische  
Zwischenprodukte

Weitere Informationen: [www.rwe.com/innovationen](http://www.rwe.com/innovationen)

## RWE IST PIONIER AUF DEM GEBIET DER ELEKTROMOBILITÄT

- RWE bringt CO<sub>2</sub>-freien Strom auf die Straße. Unser größtes Pilotprojekt verwirklichen wir in unserer Kernregion Rhein-Ruhr: Bis Mitte 2011 soll es in Dortmund, Essen und Mülheim eine flächendeckende Ladeinfrastruktur geben, damit Elektroautos bei uns Strom „tanken“ können. Ein weiteres Pilotprojekt führen wir in Nord-Brabant (Niederlande) durch.
- RWE bietet Autostrom an, der zu 100 Prozent aus regenerativen Quellen stammt und damit CO<sub>2</sub>-frei ist.
- Über 500 Ladepunkte haben wir schon in Deutschland eingerichtet – und es werden immer mehr. Bereits 20 Stadtwerke haben Kooperationsverträge mit uns geschlossen, damit wir sie mit Ladesäulen und Elektroautos ausstatten.
- Seit Oktober 2010 bieten wir die ersten Serien-Elektrofahrzeuge an: Interessenten können den Mitsubishi i-MiEV sowie die baugleichen Varianten von Citroën und Peugeot im sogenannten „e-Drive“-Paket mit Ladestationen für zuhause bestellen – und Ökostrom dazu.

Weitere Informationen: [www.rwe-mobility.com](http://www.rwe-mobility.com)

## WIR MACHEN NETZE INTELLIGENT UND SICHERN DAMIT DIE STROMVERSORGUNG VON MORGEN

- Die Energielandschaft verändert sich rasant. Nicht nur Großkraftwerke produzieren Strom, sondern auch unzählige dezentrale Solaranlagen, Windräder und Biomasse-Minikraftwerke.
- Im Energienetz müssen zu jedem Zeitpunkt Einspeisung und Verbrauch im Gleichgewicht sein, damit die Netzspannung stabil bleibt. Das zu gewährleisten, ist eine anspruchsvolle Aufgabe. Deshalb brauchen wir neben flexiblen Kraftwerken neue, intelligente Netze, mit denen die schwankenden Energieströme besser gesteuert werden können.
- RWE hat in dem vom Bundeswirtschaftsministerium geförderten Projekt „Netze für die Stromversorgung der Zukunft“ eine führende Rolle übernommen. Gemeinsam mit Partnern entwickeln wir Konzepte für die Anpassung unserer Netze an die Versorgungsaufgaben der Zukunft.
- Flexibilität ist eine Schlüsselkompetenz in der Energiewelt von morgen. Auch unsere Kunden müssen und wollen flexibel agieren. RWE bietet seit Januar 2011 zeitvariable Tarife an, die den Kunden Einsparungen durch tageszeitabhängige Verbrauchssteuerung ermöglichen.

Weitere Informationen: [www.rwe.com/innovationen](http://www.rwe.com/innovationen)

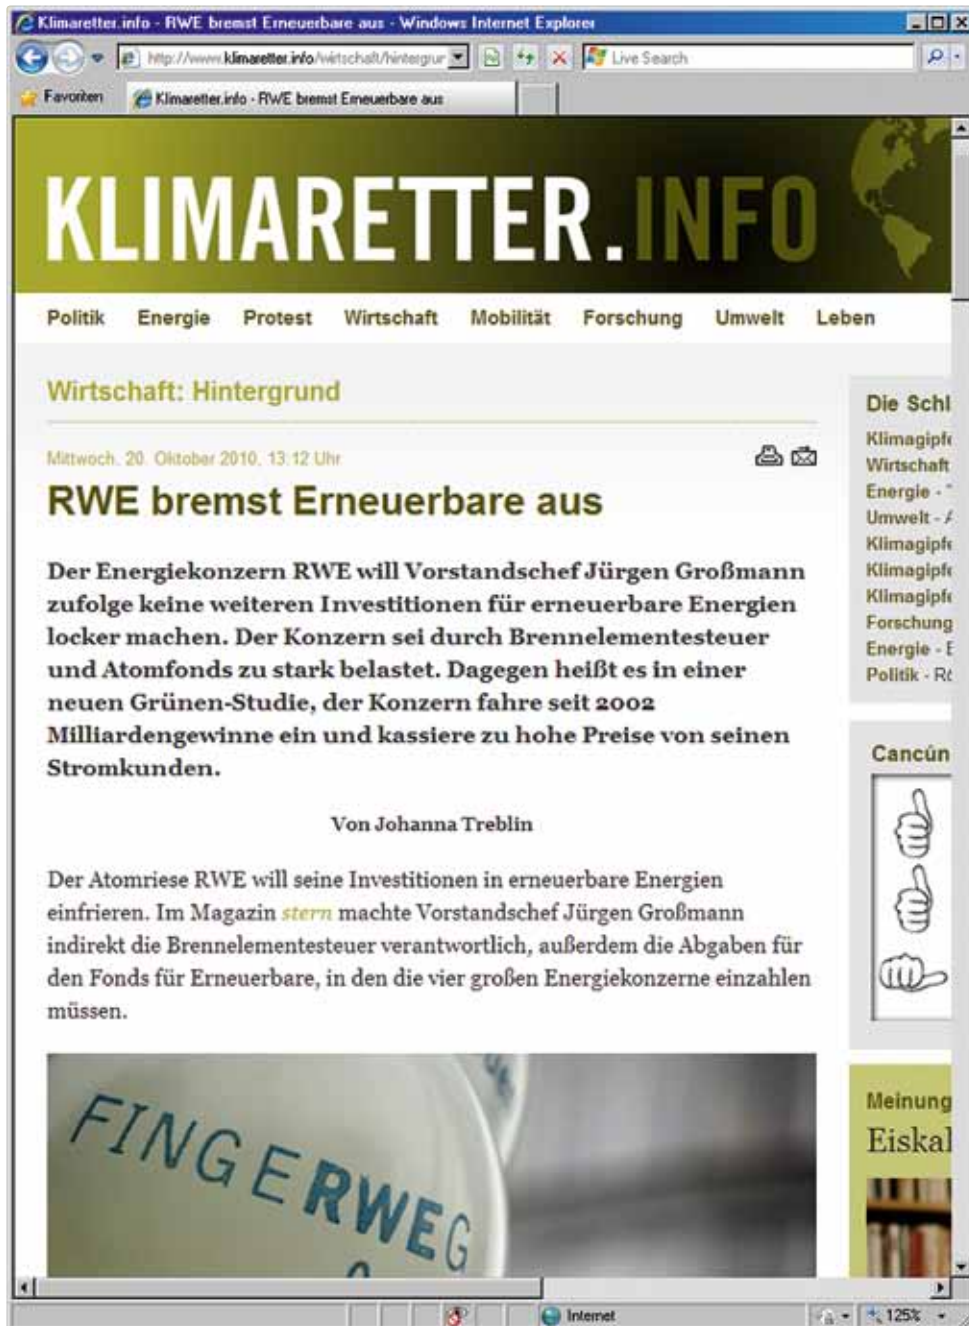

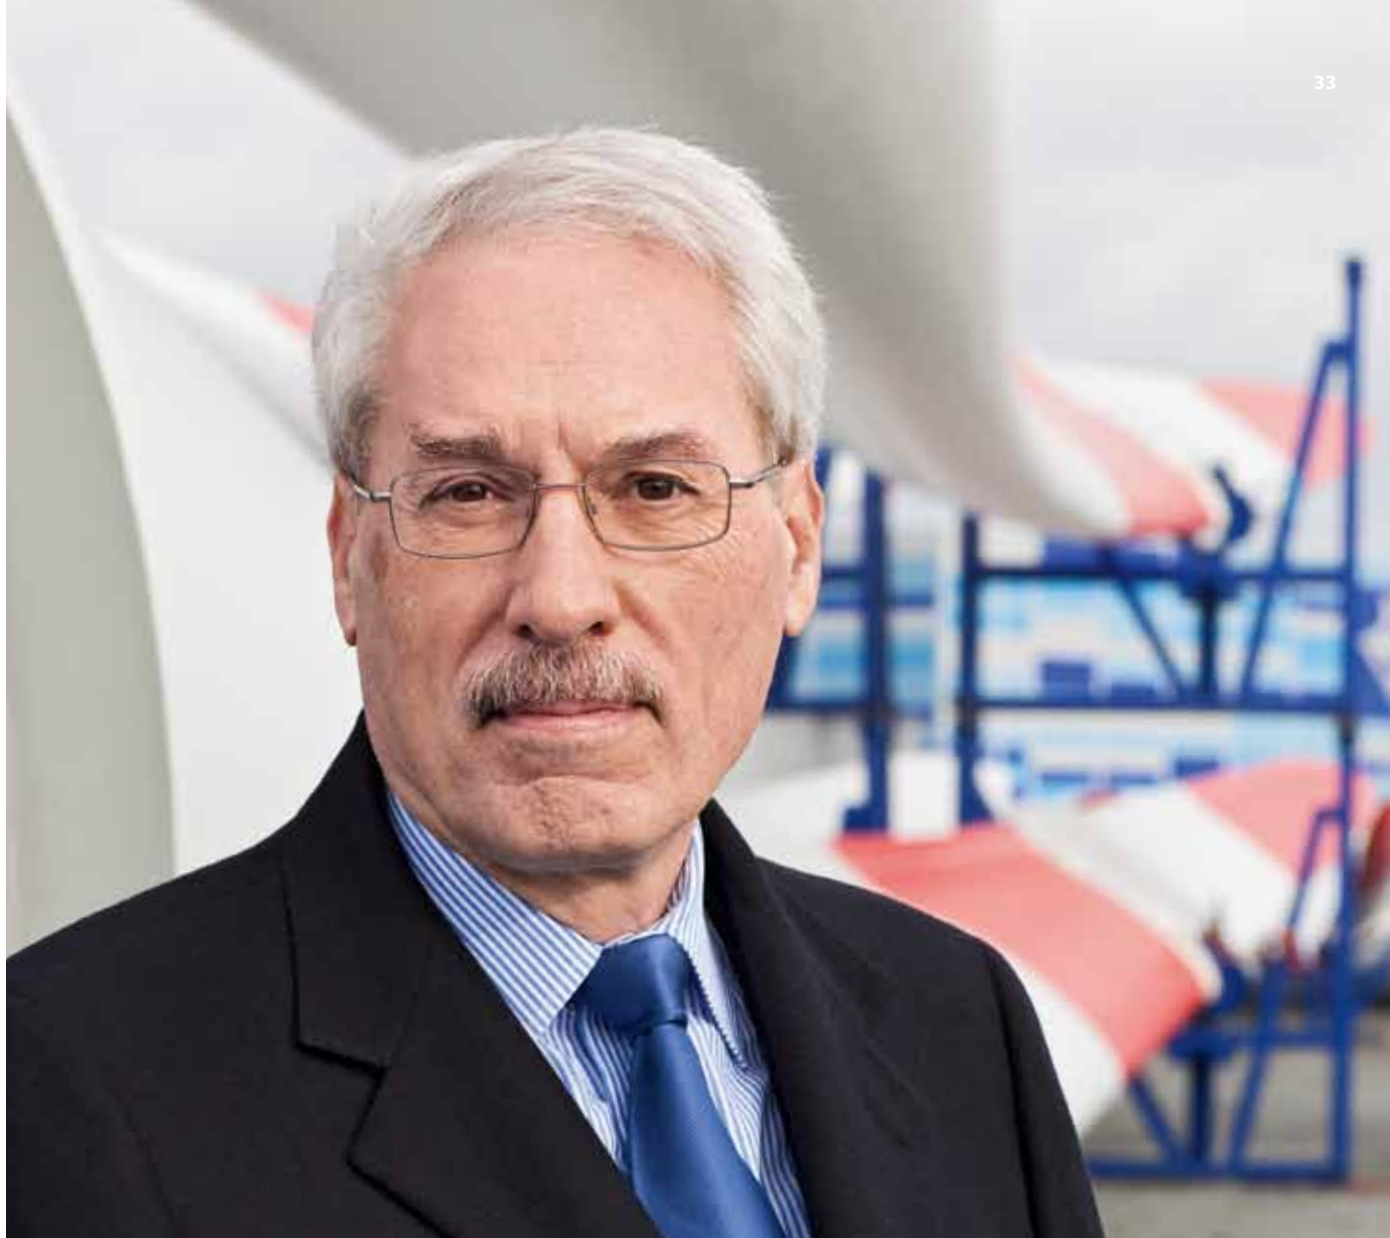

„Eine Zahl sagt mehr als  
1.000 Worte: Wir investieren jedes  
Jahr mehr als eine Milliarde Euro  
in die erneuerbaren Energien.“

Prof. Dr. Fritz Vahrenholt, Vorsitzender der Geschäftsführung der RWE Innogy GmbH

- 
- Von Bremsen kann keine Rede sein: RWE gehört zu den Schrittmachern beim Ausbau der erneuerbaren Energien
  - Wir investieren mit Augenmaß und einem klaren Fokus
  - Unsere Projekte zeigen, dass wir Großes bewegen

## DIE ERNEUERBAREN ENERGIEN GEHÖREN ZU DEN WICHTIGSTEN WACHSTUMFELDERN VON RWE; HIER WOLLEN WIR MARKTFÜHRER WERDEN

### VON BREMSEN KANN KEINE REDE SEIN: RWE GEHÖRT ZU DEN SCHRITTMACHERN BEIM AUSBAU DER ERNEUERBAREN ENERGIEN

- RWE ist in den vergangenen Jahren zu einem der wichtigsten Akteure auf dem Gebiet der erneuerbaren Energien geworden. Federführend ist dabei unsere 2008 gegründete Gesellschaft RWE Innogy, die bereits heute mehr als 1.200 Mitarbeiter beschäftigt.
- RWE Innogy ist der größte deutsche Investor in erneuerbare Energien innerhalb Europas. Seit 2008 hat das Unternehmen seine Erzeugungsleistung mehr als verdoppelt: Ende 2010 waren Kapazitäten in Höhe von 3,4 Gigawatt in Betrieb oder im Bau. Weitere 18,2 Gigawatt sind in der Entwicklung.
- Regionale Schwerpunkte der Aktivitäten von RWE Innogy sind die RWE-Kernmärkte Deutschland, Großbritannien, Niederlande und Polen. Darüber hinaus sind wir in Spanien, Frankreich und Italien aktiv.

### WIR INVESTIEREN MIT AUGENMASS UND EINEM KLAREN FOKUS

- RWE hat sich ein ambitioniertes Ziel gesetzt: Im Jahr 2025 sollen die erneuerbaren Energien 30% unserer Stromerzeugungskapazität ausmachen.
- RWE Innogy investiert in nahezu alle erneuerbaren Energien: Windkraft an Land und im Meer, Wasserkraft, Biomasse und Solarthermie. Unsere Anlagen bauen wir an den Standorten Europas, die dafür am besten geeignet sind.
- Photovoltaik spielt in unseren Planungen keine Rolle, weil hier die CO<sub>2</sub>-Vermeidungskosten viel zu hoch sind: Sie betragen bis zu 400 Euro pro eingesparter Tonne CO<sub>2</sub>. Bei Windanlagen an Land liegen sie in der Größenordnung von 80 Euro.

## UNSERE PROJEKTE ZEIGEN, DASS WIR GROSSES BEWEGEN

- Im vergangenen Jahr sind wir beim Ausbau der erneuerbaren Energien mit großen Schritten vorangekommen.
- Anfang 2010 erhielten wir grünes Licht für die Entwicklung der britischen Offshore-Windprojekte Atlantic Array und Dogger Bank. Atlantic Array wird über eine Erzeugungsleistung von bis zu 1,5 Gigawatt verfügen und Dogger Bank, an dem RWE Innogy mit 25 Prozent beteiligt ist, über rund 9 Gigawatt.
- Im März starteten wir den Bau einer Großanlage zur Pelletierung von Holz im US-Bundesstaat Georgia. Mit einer jährlichen Produktion von 750.000 Tonnen wird die Fabrik weltweit eine der größten und modernsten ihrer Art sein.
- Ebenfalls 2010 gründete RWE Innogy ein Joint Venture für den Bau und Betrieb des britischen Offshore-Windparks Gwynt y Môr. Wir halten 60 Prozent daran. Die Stadtwerke München sind mit 30 Prozent beteiligt, Siemens mit 10 Prozent. Die Investitionssumme für Gwynt y Môr beträgt mehr als zwei Milliarden Euro.
- Außerdem gaben wir den Startschuss für den Bau unseres ersten deutschen Offshore-Windparks. Er trägt den Namen „Nordsee Ost“, liegt etwa 35 Kilometer nördlich von Helgoland und soll 2013 fertig gestellt sein. Rund eine Milliarde Euro geben wir dafür aus.
- Darüber hinaus haben wir 2010 in Italien und Polen neue Onshore-Windparks in Betrieb genommen. Das Solarthermieprojekt Andasol in Spanien, an dem wir beteiligt sind, ist nahezu fertiggestellt.
- Unsere Projekte sprechen für sich. Sie sind teilweise so groß, dass nur ein großes Unternehmen wie RWE sie umsetzen kann.

## UNSERE PROJEKTE AUF DEM GEBIET DER ERNEUERBAREN ENERGIEN

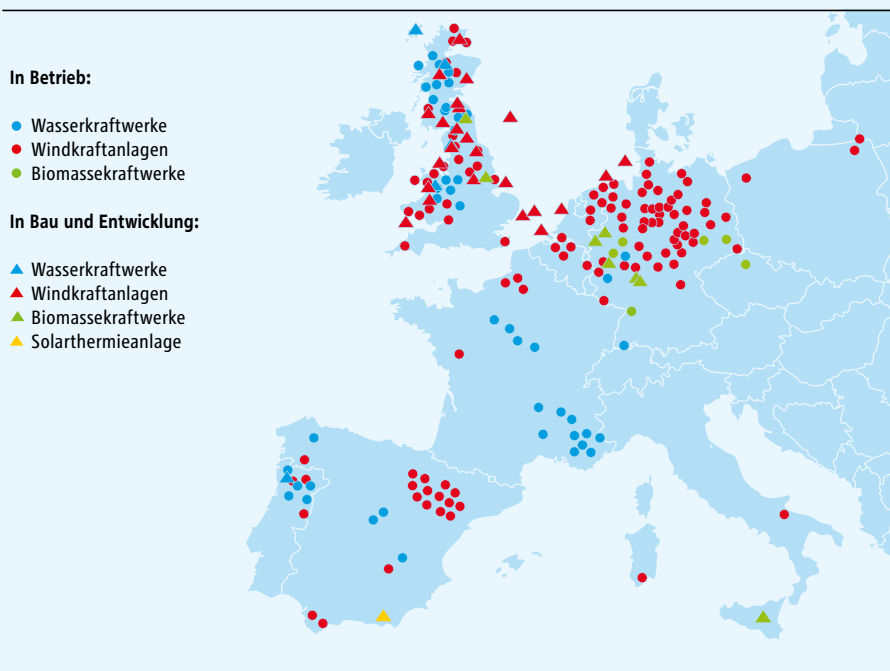

Möchten Sie noch mehr erfahren  
über RWE und die Energiewirtschaft?

Dann besuchen Sie unsere Internetseite:  
**[www.rwe.com](http://www.rwe.com)**

# INHALT

|                                                                                                                                                  |            |                                                                              |            |
|--------------------------------------------------------------------------------------------------------------------------------------------------|------------|------------------------------------------------------------------------------|------------|
| <b>Klartext reden.</b>                                                                                                                           | <b>1</b>   | <b>3.0 Versicherung der gesetzlichen Vertreter</b>                           | <b>160</b> |
| <b>An unsere Investoren</b>                                                                                                                      |            | <b>4.0 Konzernabschluss</b>                                                  | <b>161</b> |
| Brief des Vorstandsvorsitzenden                                                                                                                  | <b>36</b>  | 4.1 Gewinn- und Verlustrechnung                                              | <b>162</b> |
| Der RWE-Vorstand                                                                                                                                 | <b>42</b>  | 4.2 Aufstellung der erfassten Erträge und Aufwendungen                       | <b>163</b> |
| 2010 in Kürze                                                                                                                                    | <b>44</b>  | 4.3 Bilanz                                                                   | <b>164</b> |
| RWE am Kapitalmarkt                                                                                                                              | <b>46</b>  | 4.4 Kapitalflussrechnung                                                     | <b>165</b> |
| <b>1.0 Lagebericht</b>                                                                                                                           | <b>51</b>  | 4.5 Veränderung des Eigenkapitals                                            | <b>166</b> |
| 1.1 Strategie und Struktur                                                                                                                       | <b>52</b>  | 4.6 Anhang                                                                   | <b>167</b> |
| 1.2 Wirtschaftliche Rahmenbedingungen                                                                                                            | <b>58</b>  | 4.7 Bestätigungsvermerk des Konzernabschlussprüfers                          | <b>227</b> |
| 1.3 Politische Rahmenbedingungen                                                                                                                 | <b>66</b>  | <b>Weitere Informationen</b>                                                 |            |
| 1.4 Wesentliche Ereignisse                                                                                                                       | <b>69</b>  | Wesentliche Beteiligungen                                                    | <b>228</b> |
| 1.5 Anmerkungen zur Berichtsweise                                                                                                                | <b>74</b>  | Wertmanagement-Konzept des RWE-Konzerns                                      | <b>231</b> |
| 1.6 Geschäftsentwicklung                                                                                                                         | <b>76</b>  | Organe                                                                       | <b>233</b> |
| 1.7 Finanz- und Vermögenslage                                                                                                                    | <b>101</b> | Organigramm des RWE-Konzerns                                                 | <b>238</b> |
| 1.8 Erläuterungen zum Jahresabschluss der RWE AG (Holding)                                                                                       | <b>107</b> | Organigramm der RWE AG                                                       | <b>240</b> |
| 1.9 Innovation                                                                                                                                   | <b>112</b> | Glossar                                                                      | <b>241</b> |
| 1.10 Entwicklung der Risiken und Chancen inkl. Bericht zum internen Kontroll- und Risikomanagementsystem inkl. Erklärung zur Unternehmensführung | <b>116</b> | Schlagwortverzeichnis                                                        | <b>244</b> |
| 1.11 Ausblick 2011                                                                                                                               | <b>127</b> | Impressum                                                                    | <b>245</b> |
| <b>2.0 Unsere Verantwortung</b>                                                                                                                  | <b>135</b> | Fünf-Jahres-Übersicht (Teil des Lageberichts)                                |            |
| 2.1 Bericht des Aufsichtsrats                                                                                                                    | <b>136</b> | Finanzkalender 2011/2012                                                     |            |
| 2.2 Corporate Governance                                                                                                                         | <b>140</b> | <b>Ein ausklappbares Inhaltsverzeichnis finden Sie im hinteren Umschlag.</b> |            |
| 2.3 Vergütungsbericht (Teil des Lageberichts)                                                                                                    | <b>143</b> |                                                                              |            |
| 2.4 Mitarbeiter                                                                                                                                  | <b>152</b> |                                                                              |            |
| 2.5 Nachhaltigkeit                                                                                                                               | <b>154</b> |                                                                              |            |

## BRIEF DES VORSTANDSVORSITZENDEN

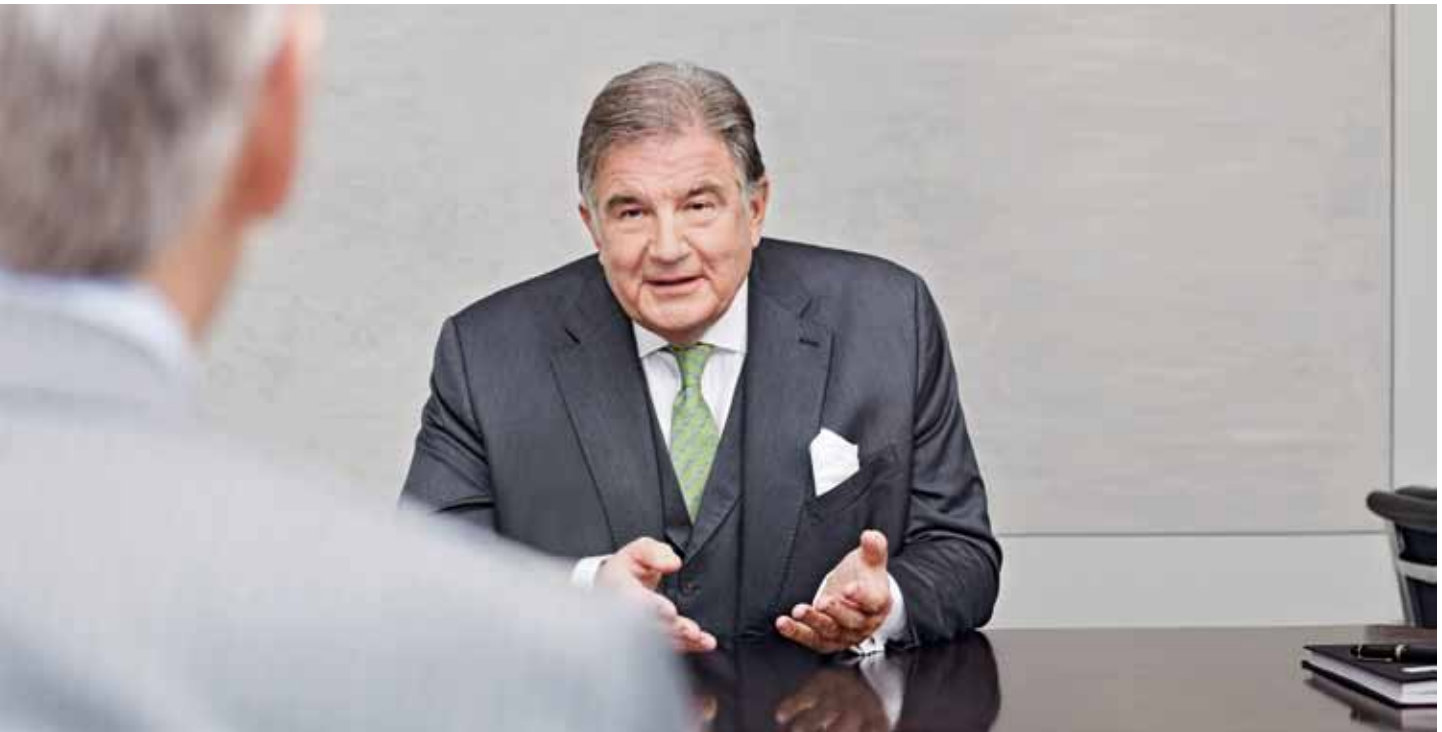

*Lieber Investoren und Freunde des Unternehmens,*

„Klartext reden“ ist das Motto des diesjährigen Geschäftsberichts. Sind Energieversorger Abzocker? Sind sie unflexibel und bremsen den Fortschritt? Ist ihnen Umwelt- und Klimaschutz egal? Kaum ein Tag vergeht, an dem nicht Zeitungen oder das Fernsehen Vorwürfe gegen die Energiewirtschaft erheben. Auch aus so manchem persönlichen Gespräch mit Kunden, Politikern oder Verbandsvertretern kennen wir bei RWE solche Anschuldigungen. Zu Beginn dieses Berichts greifen wir die beliebtesten Vorurteile über Versorger wie RWE auf und stellen ihnen Fakten gegenüber. Die sprechen für uns – denken wir. Aber: Lesen und urteilen Sie selbst.

Klartext dürfen Sie von uns auch erwarten, wenn wir Ihnen über die Lage des Unternehmens berichten. Fakt ist: Die energiewirtschaftlichen Rahmenbedingungen haben sich erheblich verschlechtert. Und zwar so grundlegend, dass der von uns eingeschlagene Weg zur Kostensenkung und Effizienzsteigerung nicht ausreichen wird. Es ist nicht zu leugnen: Die See für RWE wird rauer. Auf das abgelaufene Geschäftsjahr hat das noch keinen Einfluss. Ganz im Gegenteil – und das ist die gute Nachricht: 2010 war das erfolgreichste Geschäftsjahr in der Geschichte Ihrer RWE. Das betriebliche Ergebnis war mit 7,7 Mrd. € so hoch wie nie zuvor. Gegenüber 2009 hat es sich um 8 % verbessert. Das nachhaltige Nettoergebnis konnten wir um 6 % auf 3,8 Mrd. € steigern. Damit lagen wir sogar etwas über unseren eigenen Erwartungen.

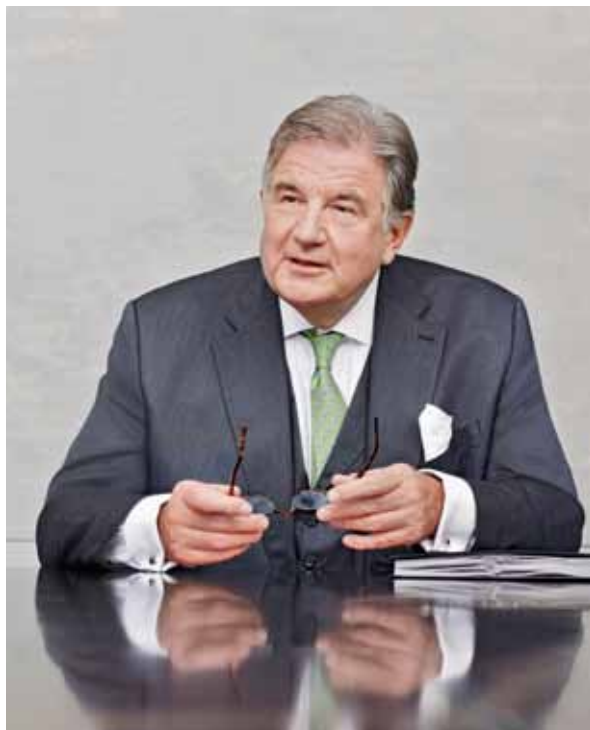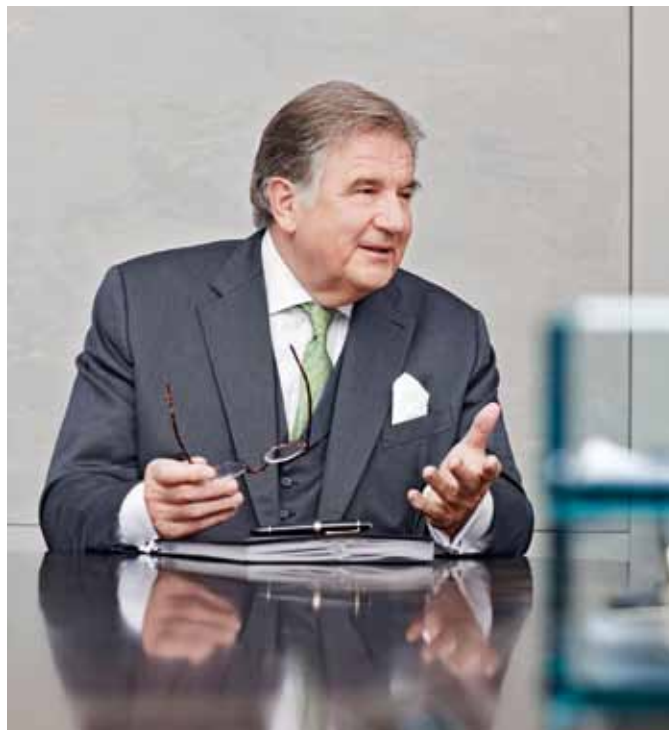

Erfolgsfaktor Nr.1 war einmal mehr die deutsche Stromerzeugung. Hier konnten wir weiter zulegen, obwohl die Strommarktpreise deutlich unter dem Niveau vor Ausbruch der Wirtschaftskrise lagen. Dies verdanken wir unserer Absicherungsstrategie: Wir verkaufen unseren Strom grundsätzlich nahezu vollständig auf Termin, und zwar bis zu drei Jahre vor Lieferung. Die Erzeugung für 2010 hatten wir daher teilweise noch zu den hohen Marktpreisen vor 2009 abgesetzt. Maßgeblich für den Ergebnisanstieg war auch, dass wir den 2009 erworbenen niederländischen Energieversorger Essent erstmals ganzjährig in unserem Zahlenwerk berücksichtigt haben. Die Entwicklung bei Essent verlief erfreulich. Inzwischen ist die Integration des Unternehmens in den Konzern abgeschlossen.

RWE zählt zu den fünf größten Energieversorgern in Europa. Diese Position haben wir durch den Kauf von Essent untermauert. Doch Größe ist kein Selbstzweck: Wir nutzen unsere Stärke, um dauerhaft Werte zu schaffen. Dies tun wir insbesondere mit unserem laufenden Kraftwerks-Erneuerungsprogramm. Wir hatten uns zum Ziel gesetzt, neue Gas- und Kohlekraftwerke mit einer Gesamtleistung von 12 Gigawatt in Betrieb zu nehmen. Im zurückliegenden Geschäftsjahr konnten wir die ersten Großanlagen fertigstellen: unsere Gaskraftwerke in Lingen und Staythorpe. Mit Wirkungsgraden von 58% und mehr gehören sie technisch gesehen zur Weltspitze – dementsprechend niedrig fallen ihr Ressourcenverbrauch und ihr CO<sub>2</sub>-Ausstoß aus. Auch bei den erneuerbaren Energien haben wir unseren Wachstumskurs fortgesetzt. Hier verfolgen wir eine Vielzahl von Projekten. Sie alle zu erwähnen, würde den Rahmen dieses Briefes sprengen. Hervorgehoben sei hier nur, dass wir 2010 den Startschuss für den Bau unseres ersten deutschen Offshore-Windparks gegeben haben.

Doch wir investieren nicht nur in Stromerzeugung. Einen wesentlichen Teil der Mittel setzen wir für den Erhalt und die Modernisierung der Netzinfrastruktur ein, für neue Gaspipelines und -speicher sowie für den Ausbau unserer Gas- und Ölförderung. Auch hier sind wir 2010 gut vorangekommen.

Sie sehen, das abgelaufene Geschäftsjahr war sehr erfolgreich. Und an diesem Erfolg sollen Sie, liebe Aktionäre, selbstverständlich angemessen beteiligt werden. Vorstand und Aufsichtsrat der RWE AG werden der Hauptversammlung im April eine Dividende von 3,50 € je Aktie vorschlagen. Gemessen am Jahresschlusskurs unserer Stammaktie ist das eine Dividendenrendite von 7%. Damit gehören wir im DAX zur Spitzengruppe.

Von der Vergangenheit zur Zukunft. Unsere mittelfristigen Ziele, die wir Ihnen im Februar 2010 genannt hatten, können wir nicht aufrechterhalten. Die Gründe dafür liegen leider nicht in unserem Einflussbereich. Wir hatten uns vorgenommen, das betriebliche Ergebnis und das nachhaltige Nettoergebnis im Zeitraum von 2008 bis 2012 um durchschnittlich ca. 5% pro Jahr zu steigern. Außerdem wollten wir 2013 bei diesen beiden Ergebnisgrößen und beim EBITDA über dem Niveau von 2009 abschließen. Heute wissen wir, dass die wirtschaftlichen und politischen Rahmenbedingungen das nicht erlauben. Seien Sie versichert: Darüber sind meine Vorstandskollegen und ich genauso enttäuscht wie Sie.

Was sind die Hintergründe für diese nicht vorhersehbare Entwicklung? Welche Folgen hat sie?

Im Oktober hat der Deutsche Bundestag die Einführung einer Steuer auf Kernbrennstoffe beschlossen. Die Abgabe ist auf sechs Jahre befristet. Sie wird unser betriebliches Ergebnis im Zeitraum von 2011 bis 2016 mit durchschnittlich 600 bis 700 Mio. € pro Jahr belasten. Darüber haben wir Sie bereits informiert. Die Kernbrennstoffsteuer ist ein Beleg dafür, dass von verlässlichen energiepolitischen Rahmenbedingungen kaum noch die Rede sein kann. Wir halten die Abgabe für rechtlich fragwürdig und erwägen, gegen sie zu klagen. Es gab aber auch gute Nachrichten: Damit meine ich die Verlängerung der Laufzeiten deutscher Kernkraftwerke, für die ich mich persönlich – gemeinsam mit anderen – besonders engagiert habe. Allerdings erbringen wir als Betreiber dafür Gegenleistungen, insbesondere in Form hoher Einzahlungen in einen staatlichen Förderfonds für erneuerbare Energien. Hinzu kommen die Mittel, die wir für die Nachrüstung der Anlagen einsetzen müssen. Alles in allem sind wir in den kommenden Jahren zunächst mit erheblichen Belastungen konfrontiert, während die finanziellen Vorteile der Laufzeitverlängerung erst sehr viel später zum Tragen kommen werden.

Ungünstiger als erwartet sind auch die energiewirtschaftlichen Rahmenbedingungen. Schauen wir zunächst auf die Strom-Großhandelspreise: Seit 2009 stagnieren sie auf niedrigem Niveau. Und das, obwohl sich Energierohstoffe wie Kohle und Öl wieder verteuert haben. Gleichzeitig hat sich die Stromnachfrage erholt – in Deutschland könnte sie bereits 2011 wieder so hoch sein wie vor der Wirtschaftskrise. Warum schlägt sich das nicht in den Preisen am Strommarkt nieder? Um diese Frage zu beantworten, müssen wir zunächst einen Blick auf die Entwicklung der Stromerzeugungskapazitäten werfen. Zuletzt sind sie deutlich gestiegen – und werden dies auf mittlere Sicht weiter tun.

Zurzeit sind in Deutschland Kohle- und Gaskraftwerke mit einer Gesamtleistung von über 12 Gigawatt im Bau. Zudem expandieren die erneuerbaren Energien in Rekordtempo, vor allem die Solarenergie: Ende 2009 lag ihre Kapazität in Deutschland bei knapp 10 Gigawatt. Ein Jahr später waren es schon 17 Gigawatt mit weiter steigender Tendenz. Die hoch subventionierten Photovoltaikanlagen produzieren Strom vor allem in Spitzenlastzeiten, nämlich tagsüber, wenn der Energieverbrauch in Industrie, Gewerbe und Handel hoch ist. Ihr Ausbau geht daher besonders zulasten von Gas- und Steinkohlekraftwerken, die bisher typischerweise genau in diesen Tageszeiten zum Einsatz kamen. Viele Marktteilnehmer sehen deshalb bereits Überkapazitäten und die Notwendigkeit von Kraftwerksstilllegungen größeren Umfangs. Dies mag erklären, warum der Aufwärtstrend am Strom-Terminmarkt auf sich warten lässt.

Es ist aber eine Milchmädchenrechnung, wenn man Gigawattzahlen einfach zusammenzählt. Klar ist, wenn der Wind weht und die Sonne scheint, wird deutlich mehr Strom aus erneuerbaren Energien produziert. Allerdings sind solche Wetterbedingungen in Deutschland nicht die Regel, vor allem nicht im Winter. Stehen in Spitzenbedarfszeiten weder Wind- noch Solarenergie zur Verfügung, müssen Kohle- und Gaskraftwerke und auch die Kernenergie in die Bresche springen. Dann sind schon heute extreme Preisausschläge zu beobachten – oftmals von einer zur anderen Stunde. Wir können also keineswegs auf fossil befeuerte Kraftwerke verzichten – vor allem nicht auf flexible Anlagen, deren Leistung schnell gedrosselt und wieder hochgefahren werden kann. Ohne diese Versorgungssicherheit kommen weder Industrie- noch Privatkunden aus. Genau diese Sicherheit und Flexibilität sind es, die unsere neu gebauten bzw. im Bau befindlichen Anlagen auszeichnen. Wir brauchen als Unternehmen, aber auch für unsere Volkswirtschaft insgesamt ein ausgewogenes Erzeugungsportfolio. Daher habe ich keinen Zweifel daran, dass sich unser Kraftwerks-Investitionsprogramm auszahlen wird.

Nicht nur in der Stromerzeugung, auch im Gasgeschäft sind die Rahmenbedingungen schwieriger geworden. Zuletzt wurde Europa mit Gas „überschwemmt“. Ein Grund ist die vermehrte Förderung von Schiefergas in den USA. Die Vereinigten Staaten entwickeln sich vom Gasimporteur zum Gasexporteur. Mit der Folge, dass nun mehr Importgas für Europa bereitsteht. Hinzu kommt die zunehmende Bedeutung liquider Handelsmärkte in Europa. Dies stellt einen Mechanismus infrage, der jahrzehntelang für stabile Rahmenbedingungen sorgte: die Koppelung der Gas- an die Ölpreise. Wenn Gasversorger wie RWE mit Produzenten wie Gazprom oder Statoil langfristige Lieferverträge abschlossen, dann häufig solche mit Ölpreisbindung. Inzwischen wird Gas aber zunehmend an liquiden Spotmärkten gehandelt, bei denen Öl keinen unmittelbaren Preiseinfluss hat. Die Notierungen an diesen Märkten liegen seit 2009 deutlich unter den ölindexierten Preisen. Vor allem im Geschäft mit unseren Großkunden können wir teilweise nicht mehr unsere Einkaufskosten decken. Das zeigt sich in erheblichen Ergebnisbelastungen im Gas-Midstream-Geschäft der RWE Supply & Trading.

Was haben wir unternommen? Unsere Langfristverträge mit Gaslieferanten sehen die Möglichkeit planmäßiger und außerplanmäßiger Revisionsverhandlungen unserer Einkaufspreise vor. Von dieser Möglichkeit haben wir konsequent und frühzeitig Gebrauch gemacht. Unser Ziel sind Anpassungen der Lieferkonditionen, die einen wirtschaftlichen Weiterverkauf des Gases erlauben. Sollten die

Gespräche in eine Sackgasse geraten, werden üblicherweise Schiedsverfahren eingeleitet. Dies ist zum Teil auch bereits geschehen. Die Ergebnisse der Revisionen werden größtenteils erst 2012 oder 2013 vorliegen. Sie werden maßgeblich dafür sein, wie sich die Ertragslage in unserem Gas-Midstream-Geschäft entwickelt. Wir sind überzeugt, gute Argumente zu haben.

So viel zu den Gründen, warum wir unsere Ergebniserwartungen nach unten schrauben müssen. Trotzdem sehe ich keinen Grund zum Pessimismus. Wie erfolgreich ein Unternehmen ist, beweist sich gerade in schwierigen Zeiten. Wir schauen nicht zurück. Wir krempeln die Ärmel hoch und haben deshalb bereits ein ganzes Bündel an Maßnahmen in die Wege geleitet. Dies arbeiten wir Schritt für Schritt ab. Wir werden Ihnen die Maßnahmen in diesem Bericht noch im Detail vorstellen.

Unser neuer Ausblick auf die Ertragslage der kommenden Jahre berücksichtigt alle Belastungen, die ich gerade beschrieben habe. Wir prognostizieren für 2011 beim Ergebnis vor Zinsen, Steuern und Abschreibungen – kurz: EBITDA – einen Rückgang um ca. 15%. Das betriebliche Ergebnis, das die Abschreibungen enthält, wird um ca. 20% nachgeben. Der etwas stärkere Rückgang ergibt sich daraus, dass unsere hohen Investitionen zu steigenden Abschreibungen führen. Wir befinden uns inmitten der größten Wachstumsoffensive der RWE-Geschichte und werden 2011 und danach weitere Kraftwerke in Betrieb nehmen.

Für das nachhaltige Nettoergebnis, an dem sich Ihre Dividende orientiert, erwarten wir ein Minus von ca. 30%. Auch mittelfristig bleibt unser Ausblick verhalten. Im Jahr 2013, wenn uns keine kostenfreien Emissionsrechte mehr zugeteilt werden, werden sich das EBITDA und das betriebliche Ergebnis in einer Größenordnung von 8 bzw. 5 Mrd. € bewegen. Für das nachhaltige Nettoergebnis erwarten wir einen Wert von ca. 2 Mrd. €. An unserer Ausschüttungsquote von 50 bis 60% halten wir fest. Ihnen, unseren Aktionären, kommt also auch zukünftig mindestens die Hälfte unseres nachhaltigen Nettogewinns zugute. Damit bleibt die RWE-Aktie – trotz vieler Belastungen – ein attraktiver Dividentitel.

Ebenfalls von Bestand ist unsere strategische Ausrichtung: Die Modernisierung unseres Kraftwerks-parks setzen wir entschlossen fort. Klimaschutz und Ressourcenschonung stehen dabei weiterhin ganz oben auf unserer Agenda. Daher bleibt auch der Ausbau der erneuerbaren Energien ein Eckpfeiler unserer Strategie. Ein weiteres Wachstumsfeld ist die Öl- und Gasförderung unserer Tochter RWE Dea. Gleichzeitig wollen wir uns breiter und internationaler aufstellen. Dafür brauchen wir eine starke Bilanz. Ein Maßstab für unsere finanzielle Solidität ist das Verhältnis der Nettoschulden zum EBITDA, der sogenannte Verschuldungsfaktor. Wir orientieren uns hier an einer Obergrenze von 3,0. Für das abgelaufene Geschäftsjahr lag der Wert bei 2,8. Wegen des erwarteten Ergebnisrückgangs im laufenden Jahr werden wir diese Marke allerdings zunächst überschreiten. Um unseren Verschuldungsfaktor mittelfristig wieder unter unsere Obergrenze zurückzuführen, prüfen wir derzeit Verkäufe von Beteiligungen und Unternehmensteilen. Bis 2013 wollen wir damit Erlöse von bis zu 8 Mrd. € erzielen. Die Ergebniseffekte aus möglichen Verkäufen haben wir in unserer Prognose pauschal berücksichtigt. Unser Investitionsprogramm mit einem Gesamtvolumen von 28 Mrd. €, das wir uns für den Zeitraum

von 2010 bis 2013 vorgenommen hatten, kürzen wir um ca. 3 Mrd. €. Für 2011 und die beiden Folgejahre bleiben damit rund 18 Mrd. €. Alle wichtigen Projekte im Kraftwerks- und im Netzausbau bleiben von Kürzungen unberührt, weniger dringliche Vorhaben werden dagegen verschoben. Ergänzt wird unser Maßnahmenpaket durch eine Ausweitung unseres Programms zur Effizienzsteigerung und Kostensenkung. Bis 2012 wollen wir zusätzlich 200 Mio. € nachhaltig einsparen.

Sie sehen: Wir rüsten uns für schwierigere Zeiten. Diese erfordern besondere Leistungen, nicht zuletzt von unseren Mitarbeitern. Dass wir heute auf das stärkste Geschäftsjahr in der Geschichte von RWE zurückblicken, ist vor allem ihr Verdienst. Dafür danke ich ihnen herzlich, auch im Namen meiner Vorstandskollegen. Mit vereinten Kräften werden wir auch die vor uns liegenden Herausforderungen meistern. Wenn man auf einem Gipfel steht, geht es zunächst in jeder Richtung bergab. Somit gilt es, neue Gipfel zu erreichen. Dieses Ziel haben wir fest vor Augen.

Liebe Investoren, begleiten Sie uns auf diesem Weg. Wir alle arbeiten hart daran, dass RWE für Sie ein attraktives Investment bleibt – Tag für Tag.

Mit freundlichem Gruß

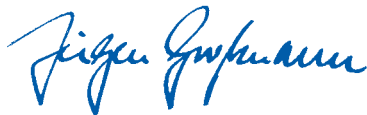

Dr. Jürgen Großmann  
Vorstandsvorsitzender der RWE AG

Essen, 11. Februar 2011

PS: Wer Briefe schreibt, bekommt auch gern selbst Post. Haben Sie Anregungen oder Kritik – etwa zu unserem Motto „Klartext reden“? Oder fehlen Ihnen noch Informationen? Dann schreiben Sie uns an [klartextreden@rwe.com](mailto:klartextreden@rwe.com). RWE und ich persönlich freuen uns auf Ihre Antwort.

## DER RWE-VORSTAND

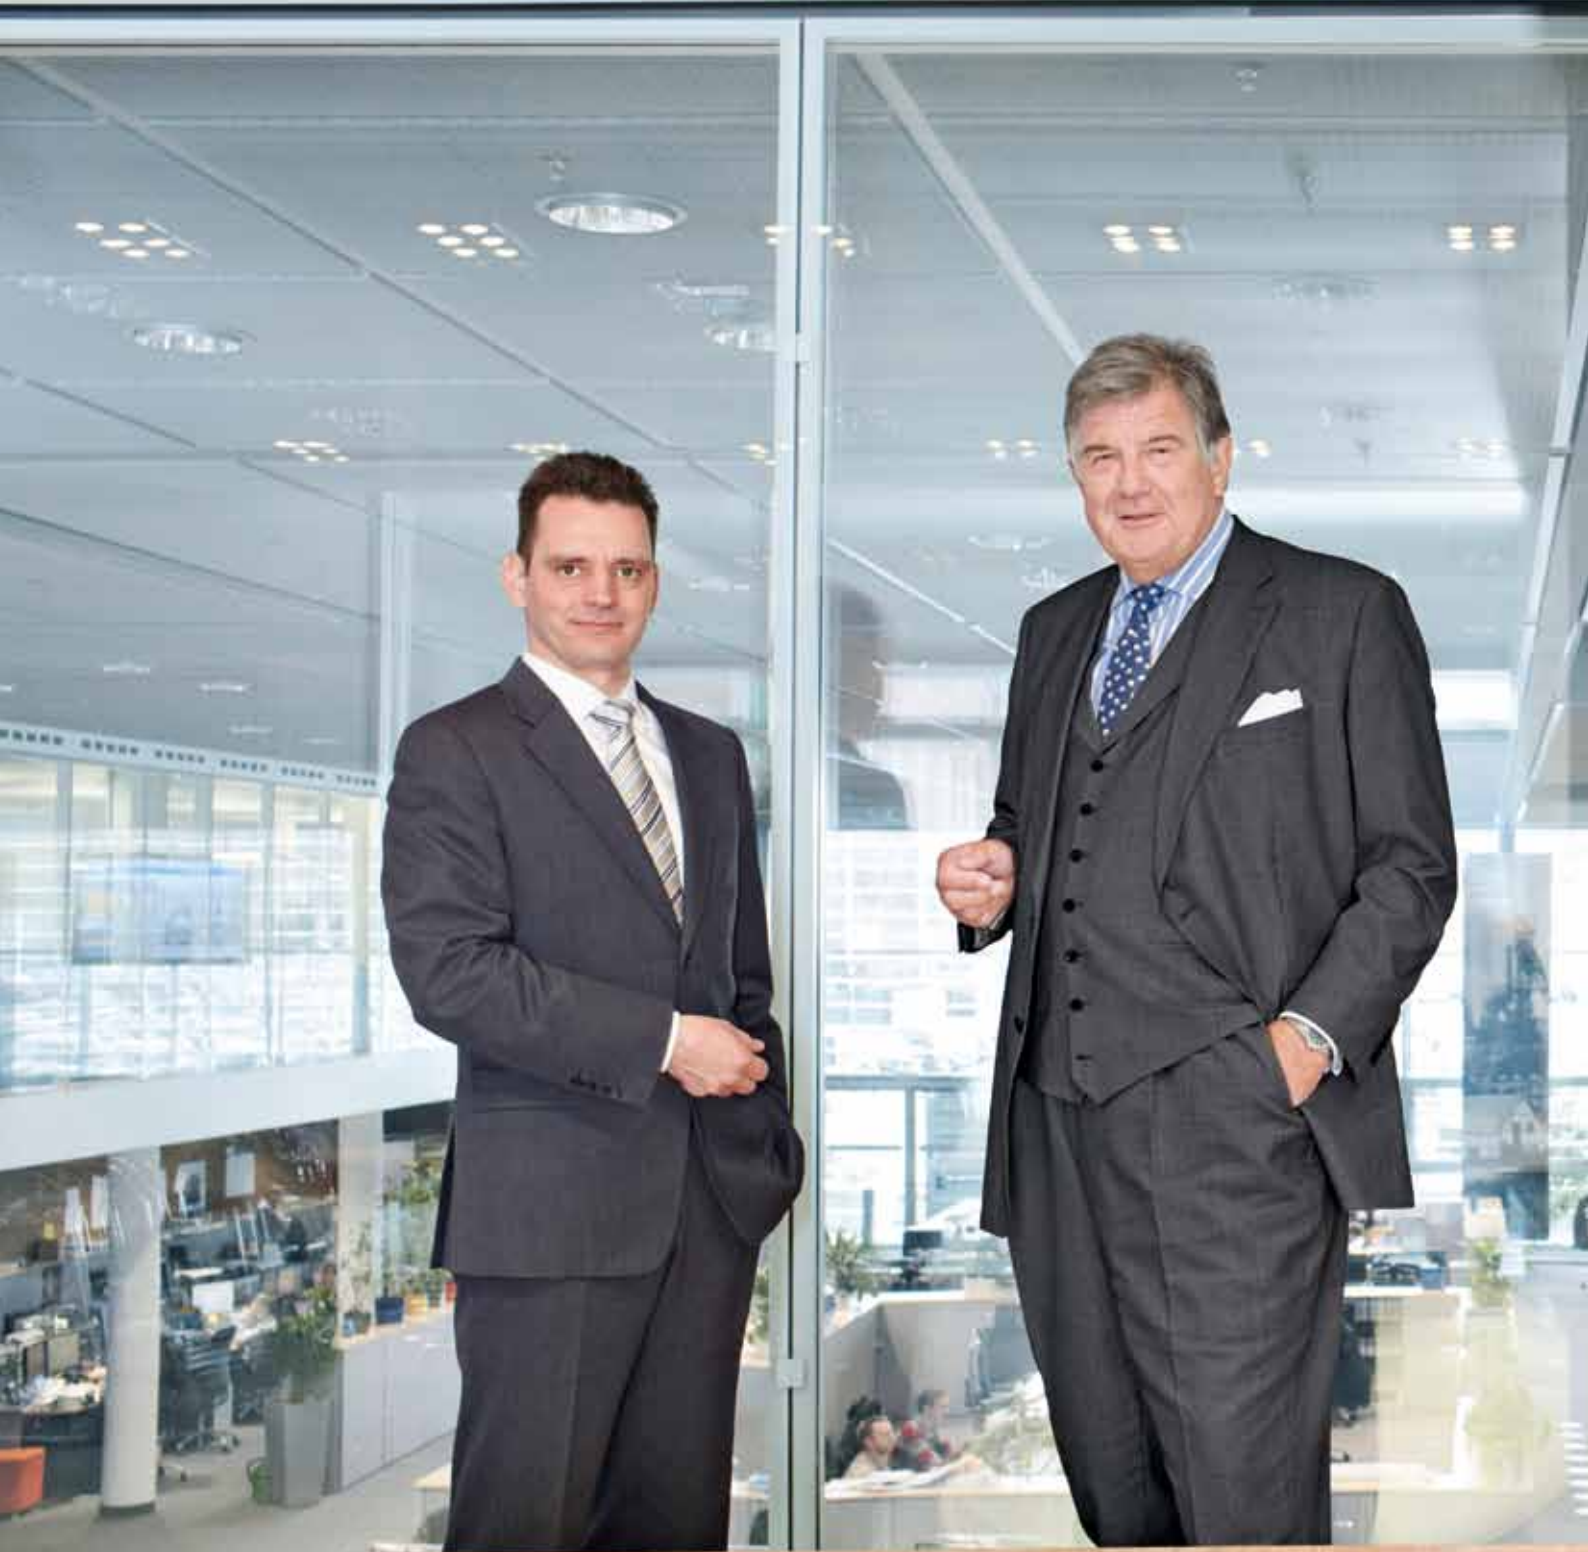

Dr. Leonhard Birnbaum  
Vorstand Kommerzielle Steuerung

Dr. Jürgen Großmann  
Vorstandsvorsitzender

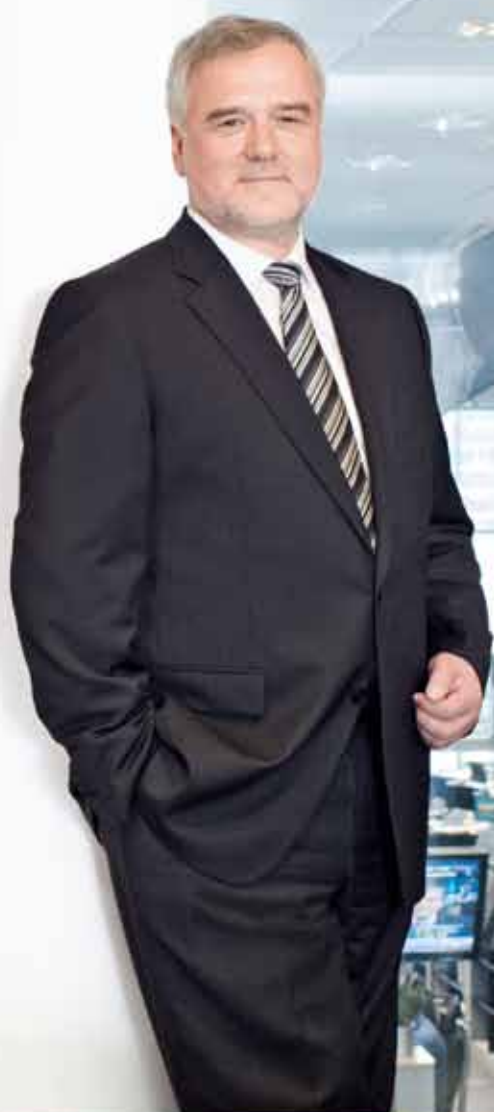

**Alwin Fitting**  
Personalvorstand

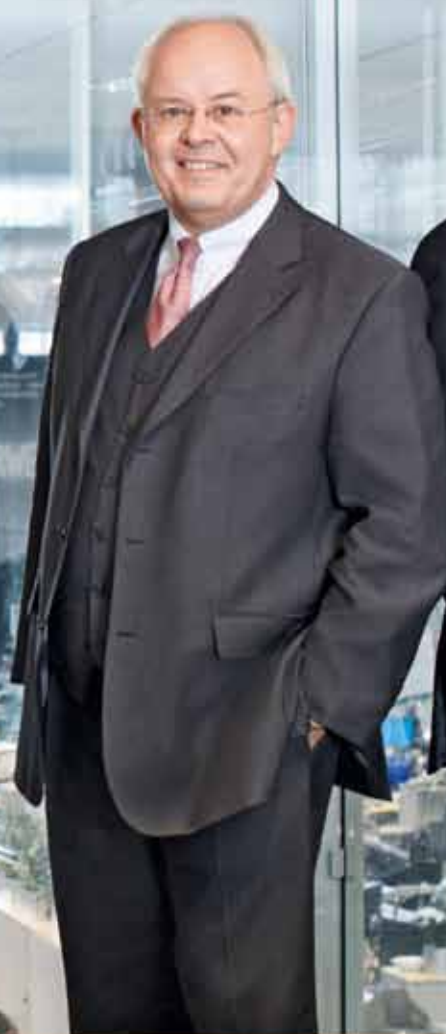

**Dr. Rolf Pohlig**  
Finanzvorstand

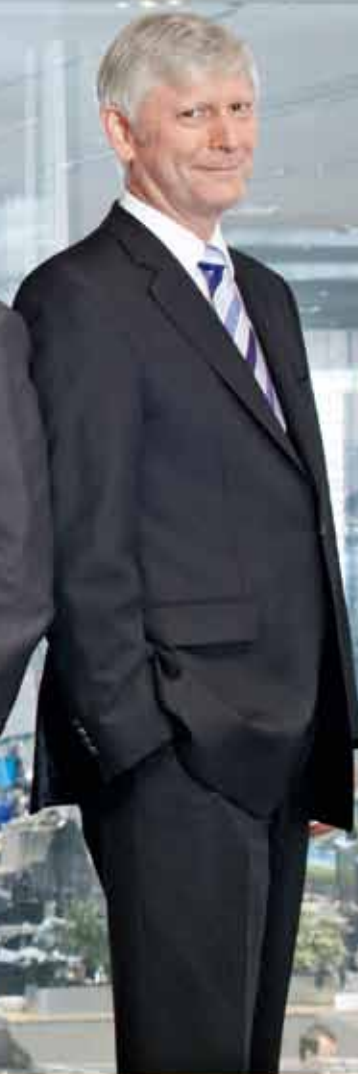

**Dr. Rolf Martin Schmitz**  
Vorstand Operative Steuerung

## 2010 IN KÜRZE.

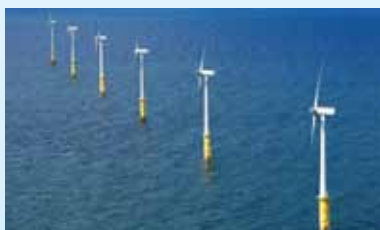

JANUAR

### RWE Innogy erhält Zuschlag für weitere Offshore-Windprojekte in Großbritannien

Im Rahmen einer Ausschreibung erteilt uns die britische Regierung die Genehmigung zur Entwicklung der Projekte Atlantic Array und Dogger Bank. Atlantic Array mit einer Leistung von 1,5 Gigawatt werden wir zunächst allein entwickeln. Bei Dogger Bank sind wir mit 25% an einem Konsortium beteiligt, das Kapazitäten in Höhe von 9 Gigawatt anstrebt.

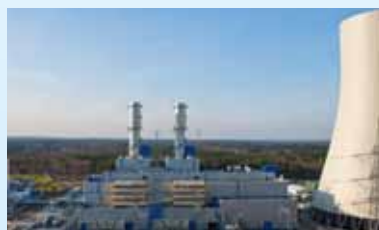

APRIL

### Hochmodernes Gaskraftwerk in Lingen startet Stromproduktion

Die Anlage wird im Beisein des heutigen Bundespräsidenten Christian Wulff in Betrieb genommen. Sie verfügt über eine Leistung von 876 Megawatt und zählt mit einem Wirkungsgrad von nahezu 60% zur Weltspitze in puncto Effizienz. Rund 500 Mio. € haben wir dafür investiert.

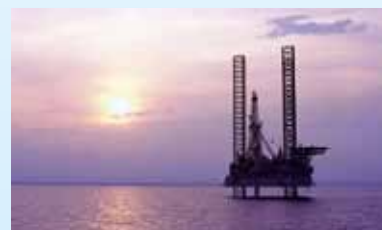

JUNI

### RWE Innogy gründet Joint Venture zum Bau und Betrieb des Offshore-Windparks Gwynt y Môr

Unsere Partner sind die Stadtwerke München und Siemens. Sie haben einen Anteil von 30 bzw. 10% an dem Gemeinschaftsunternehmen. Der Windpark Gwynt y Môr mit 160 Turbinen und einer Gesamtleistung von 576 Megawatt entsteht vor der Küste von Nordwales. Er soll 2014 fertiggestellt sein. Das Investitionsvolumen summiert sich auf über 2 Mrd. €.

MÄRZ

### RWE beginnt mit dem Bau eines Pelletwerkes in den USA

Die Anlage zur Pelletierung von Holz entsteht im Bundesstaat Georgia. Mit einer jährlichen Produktion von 750.000 Tonnen wird sie die weltweit größte und modernste ihrer Art sein. Wir wollen die Pellets sowohl in reinen Biomassekraftwerken als auch gemeinsam mit Steinkohle verfeuern. Die Fabrik soll 2011 die Produktion aufnehmen.

APRIL

### RWE beschließt Bau eines Gaskraftwerks in der Türkei

Die Anlage mit einer Kapazität von 775 Megawatt wird in Denizli im Westen des Landes entstehen. Eigentümer ist ein Joint Venture, an dem RWE 70% hält und das türkische Energieunternehmen Turcas 30%. Das Investitionsvolumen veranschlagen wir auf 500 Mio. €. Das Kraftwerk soll 2013 den kommerziellen Betrieb aufnehmen.

JULI

### Grünes Licht für größte Einzelinvestition in der Geschichte von RWE Dea

Mit dem Ölminister von Ägypten und Partnerunternehmen unterzeichnen wir einen Vertrag über die Entwicklung von Gasfeldern in zwei Mittelmeer-Konzessionen. In den kommenden zwei Jahrzehnten will RWE Dea 3,6 Mrd. US\$ dafür einsetzen. Wir sind mit rund 40% an dem Projekt beteiligt. Die Förderung soll bis Ende 2014 aufgenommen werden.

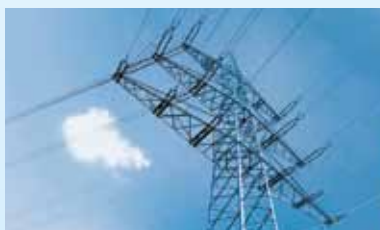

#### SEPTEMBER

### RWE begibt erstmals Hybridanleihe

Mit einem Volumen von 1,75 Mrd. € ist unsere Emission die größte dieser Art, die je in Europa von einem Industrieunternehmen vorgenommen wurde. Sie stößt bei Investoren auf großes Interesse. Hybridanleihen sind eine Mischform von Eigen- und Fremdkapitalfinanzierung. Im Insolvenzfall werden sie erst nach allen anderen Schultiteln bedient.

#### SEPTEMBER

### Reorganisation des Geschäfts in Deutschland und in Osteuropa

RWE beschließt, das deutsche Vertriebs- und Verteilnetzgeschäft zum 1. Januar 2011 in der RWE Rheinland Westfalen Netz AG zu bündeln. Diese firmiert nun unter dem Namen RWE Deutschland AG. Festgelegt wird auch die Gründung der RWE East, s.r.o. mit Sitz in Prag, die ab 2011 unsere Landesgesellschaften in Zentralosteuropa und der Türkei führt.

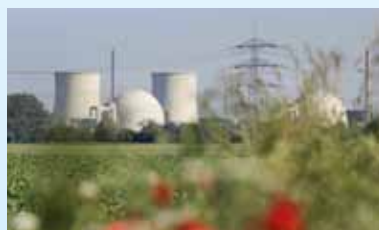

#### OKTOBER

### Deutscher Bundestag beschließt Kernbrennstoffsteuer und längere Laufzeit für Kernkraftwerke

Die neue Abgabe ist bis Ende 2016 befristet. Dem Bund sollen dadurch 2,3 Mrd. € pro Jahr zufließen. Wir behalten uns vor, rechtlich gegen die Steuer vorzugehen. Eine ebenfalls beschlossene Anpassung des Atomgesetzes hat zur Folge, dass deutsche Kernkraftwerke durchschnittlich zwölf Jahre länger laufen können. Im Gegenzug leisten die Betreiber der Anlagen Zahlungen in einen Fonds, aus dem u.a. der Ausbau der erneuerbaren Energien gefördert werden soll.

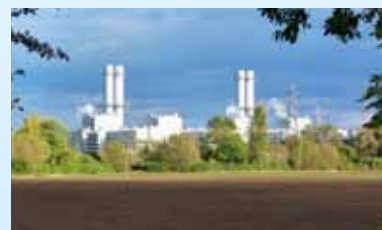

#### NOVEMBER

### Britisches Gaskraftwerk in Betrieb genommen

Ende November ist die hoch effiziente Anlage am Standort Staythorpe (Nottinghamshire) erstmals mit allen vier Blöcken am Netz. Sie verfügt über eine Gesamtleistung von 1.650 Megawatt. Das reicht aus, um fast zwei Millionen Wohnhäuser mit Strom zu versorgen. Das Investitionsvolumen betrug rund 800 Mio. €.

#### DEZEMBER

### Vertrag zur Veräußerung von Thyssengas unterzeichnet

Käufer des Unternehmens, in dem unser deutsches Gasfernleitungsnetz zusammengefasst ist, sind vom australischen Finanzdienstleister Macquarie verwaltete Infrastrukturfonds. Thyssengas transportiert jährlich fast 10 Mrd. m<sup>3</sup> Erdgas durch Leitungen mit einer Gesamtlänge von 4.100 Kilometern. Wir hatten uns gegenüber der EU-Kommission zum Verkauf der Gesellschaft verpflichtet.

## RWE AM KAPITALMARKT

Aktionäre deutscher Unternehmen konnten mit dem Börsenjahr 2010 insgesamt zufrieden sein. Mit einem Plus von 16% war der DAX der Index mit der zweitbesten Performance in Europa. Inhaber von RWE-Aktien hatten weniger Grund zur Freude: Unsere Stämme schlossen das Jahr mit einem Minus von 23%. Besonders die neue Kernbrennstoffsteuer in Deutschland und niedrige Großhandelspreise für Strom und Gas dämpften die Kursentwicklung – denn durch sie haben sich unsere mittelfristigen Ertragsperspektiven verschlechtert.

**Performance der RWE-Stammaktie und der Indizes DAX 30 und Dow Jones STOXX Utilities**  
in % (Wochendurchschnittswerte)

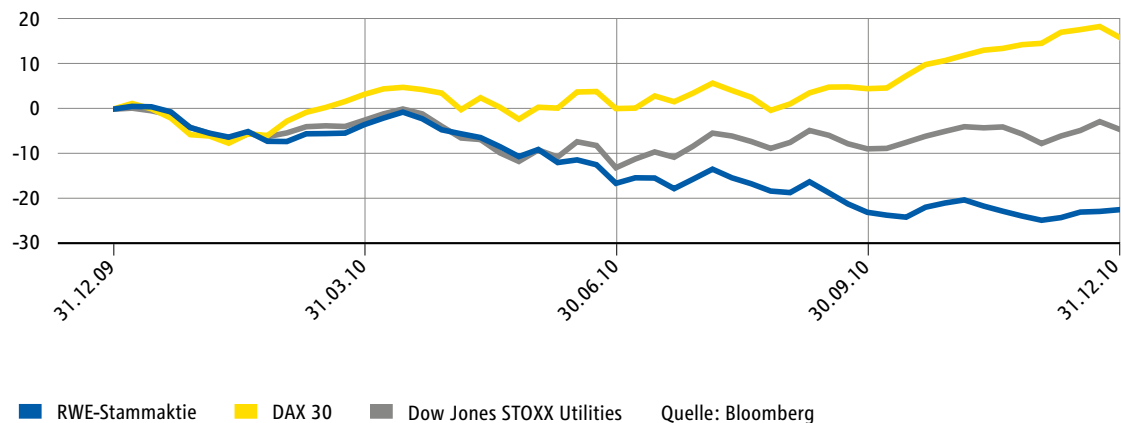

**RWE-Aktien deutlich schwächer als der DAX.** Für den deutschen Aktienmarkt war 2010 ein gutes Jahr: Der Leitindex DAX kletterte von 5.957 auf 6.914 Punkte, was einem Plus von 16% entspricht. Im internationalen Vergleich ist dies ein Spitzenwert – den Dow Jones EURO STOXX 50 etwa hat der DAX deutlich geschlagen: Das Marktbarometer der Euro-Zone gab 2010 um 3% nach. Dabei hatte das Jahr auch für den DAX schlecht begonnen. Den Ausschlag dafür gab die Krise bei den griechischen Staatsfinanzen. Die drohende Zahlungsunfähigkeit des Landes und die hohen Haushaltsdefizite weiterer Staaten der Euro-Zone nährten Zweifel an der Stabilität der Währungsunion. Dank eines Rettungsschirms der EU beruhigte sich die Lage wieder. Im Jahresverlauf prägte die robuste Konjunktur zunehmend das Geschehen am Aktienmarkt. Gerade in Deutschland hellte sich die Stimmung der Anleger immer mehr auf, da sich hier die Wirtschaft besonders dynamisch entwickelte.

#### Monats-Höchst- und -Tiefstkurse der RWE-Stammaktie 2010

in €

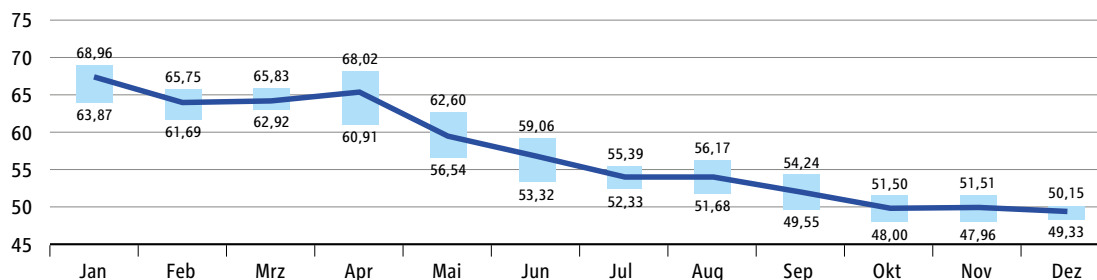

■ Monatsdurchschnitt ■ Monats-Höchst- und -Tiefstkurse (Tagesschlusskurse) Quelle: Bloomberg

Weniger erfreulich war das Börsenjahr für RWE-Aktionäre. Unsere Stämme schlossen Ende 2010 mit 49,89 €, die Vorzüge mit 47,99 €. Für das Gesamtjahr ergibt sich daraus eine Performance (Rendite aus Kursveränderung und Dividende) von –23 bzw. –18 %. Die Kursentwicklung spiegelt wider, dass sich unsere mittelfristigen Ertragsperspektiven verschlechtert haben. Das ist Folge einer ungünstigen Entwicklung der Großhandelspreise für Strom und Gas, aber auch der ab 2011 erhobenen Kernbrennstoffsteuer in Deutschland. Die neue Abgabe trug maßgeblich dazu bei, dass die RWE-Titel auch weit hinter dem europäischen Versorgerindex Dow Jones STOXX Utilities (–5 %) zurückblieben. Nachdem Anfang Juni Regierungspläne zur Einführung der Kernbrennstoffsteuer bekannt wurden, liefen die Kurse des Branchenindex und von RWE stark auseinander: Der Dow Jones STOXX Utilities legte in den knapp sieben Monaten bis Jahresende um 7 % zu, während unsere Stammaktien um 14 % nachgaben.

| Performance der RWE-Aktien und wichtiger Indizes bis Ende 2010<br>in % p.a. | 1 Jahr | 5 Jahre | 10 Jahre |
|-----------------------------------------------------------------------------|--------|---------|----------|
| RWE-Stammaktie                                                              | –22,5  | 0,4     | 4,5      |
| RWE-Vorzugsaktie                                                            | –18,3  | 3,1     | 8,1      |
| DAX 30                                                                      | 16,1   | 5,0     | 0,7      |
| Dow Jones EURO STOXX 50                                                     | –2,8   | –1,9    | –2,7     |
| Dow Jones STOXX 50                                                          | 3,1    | –1,9    | –2,8     |
| Dow Jones STOXX 600                                                         | 11,6   | 0,5     | –0,1     |
| Dow Jones STOXX Utilities                                                   | –4,5   | 2,0     | 4,0      |
| REXP <sup>1</sup>                                                           | 4,0    | 4,3     | 5,1      |

1 Index für Staatspapiere am deutschen Rentenmarkt

**RWE-Aktien im Langfristvergleich besser als der DAX.** Trotz der schwachen Performance 2010 haben RWE-Aktien eine solide Langfristrendite erbracht: Wer vor zehn Jahren 10.000 € für den Kauf unserer Stämme einsetzte und die Dividenden reinvestierte, verfügte zum 31. Dezember 2010 über 15.538 €. Bei einer Geldanlage in Vorzugsaktien hätte sich der Depotwert sogar auf 21.861 € erhöht. Dies entspricht einer durchschnittlichen Jahresrendite von 4,5 bzw. 8,1 %. Damit gehörten RWE-Aktien im vergangenen Jahrzehnt, das von zwei Börsenkrisen überschattet war, zu den erfolgreichsten deutschen Titeln. Zum Vergleich: Der DAX ist in diesem Zeitraum nur um durchschnittlich 0,7 % pro Jahr gestiegen. Aus 10.000 € wären 10.747 € geworden.

**Dividendenvorschlag von 3,50 € für 2010.** Aufsichtsrat und Vorstand der RWE AG werden der Hauptversammlung am 20. April 2011 für das Geschäftsjahr 2010 eine Dividende von 3,50 € je Aktie vorschlagen. Bezogen auf das nachhaltige Nettoergebnis beträgt die Ausschüttungsquote 50 %. Legt man die Jahresschlusskurse unserer Stamm- und Vorzugsaktien zugrunde, ergibt sich eine Dividendenrendite von 7,0 bzw. 7,3 %. Damit nehmen wir im DAX eine Spitzenposition ein.

| Kennzahlen der RWE-Aktien <sup>1</sup>                      |            | 2010               | 2009    | 2008    | 2007    | 2006    |
|-------------------------------------------------------------|------------|--------------------|---------|---------|---------|---------|
| Ergebnis je Aktie                                           | €          | 6,20               | 6,70    | 4,75    | 4,74    | 6,84    |
| Nachhaltiges Nettoergebnis je Aktie                         | €          | 7,03               | 6,63    | 6,25    | 5,29    | 4,38    |
| Cash Flow aus laufender Geschäftstätigkeit je Aktie         | €          | 10,31              | 9,94    | 16,44   | 10,82   | 12,06   |
| Dividende je Aktie                                          | €          | 3,50 <sup>2</sup>  | 3,50    | 4,50    | 3,15    | 3,50    |
| Ausschüttung                                                | Mio. €     | 1.867 <sup>2</sup> | 1.867   | 2.401   | 1.689   | 1.968   |
| Ausschüttungsquote <sup>3</sup>                             | %          | 50                 | 53      | 71      | 57      | 80      |
| Dividendenrendite der Stammaktie <sup>4</sup>               | %          | 7,0                | 5,2     | 7,1     | 3,3     | 4,2     |
| Dividendenrendite der Vorzugsaktie <sup>4</sup>             | %          | 7,3                | 5,6     | 8,4     | 3,8     | 4,9     |
| Börsenkurse der Stammaktie                                  |            |                    |         |         |         |         |
| Kurs zum Ende des Geschäftsjahres                           | €          | 49,89              | 67,96   | 63,70   | 96,00   | 83,50   |
| Höchstkurs                                                  | €          | 68,96              | 68,58   | 100,64  | 97,90   | 89,85   |
| Tiefstkurs                                                  | €          | 47,96              | 46,52   | 52,53   | 74,72   | 61,56   |
| Börsenkurse der Vorzugsaktie                                |            |                    |         |         |         |         |
| Kurs zum Ende des Geschäftsjahres                           | €          | 47,99              | 62,29   | 53,61   | 83,07   | 72,00   |
| Höchstkurs                                                  | €          | 62,52              | 62,65   | 84,39   | 86,00   | 73,91   |
| Tiefstkurs                                                  | €          | 44,51              | 41,75   | 37,46   | 66,33   | 54,18   |
| Zahl der in Umlauf befindlichen Aktien (Jahresdurchschnitt) | Tsd. Stück | 533.559            | 533.132 | 538.364 | 562.373 | 562.374 |
| Börsenkapitalisierung zum Jahresende                        | Mrd. €     | 28,0               | 38,0    | 35,4    | 53,5    | 46,5    |

<sup>1</sup> Bezogen auf die jahresdurchschnittliche Anzahl der im Umlauf befindlichen Aktien

<sup>2</sup> Dividendenvorschlag für das Geschäftsjahr 2010 der RWE AG, vorbehaltlich der Zustimmung durch die Hauptversammlung am 20. April 2011

<sup>3</sup> Die Ausschüttungsquote berechnet sich anhand der jeweiligen Ausschüttung in Mio. €, dividiert durch das nachhaltige Nettoergebnis in Mio. €.

<sup>4</sup> Die Dividendenrendite berechnet sich anhand der jeweiligen Dividende je Aktie in €, dividiert durch den jeweiligen Jahresschlusskurs in €.

#### Aktionärsstruktur der RWE AG<sup>1</sup>

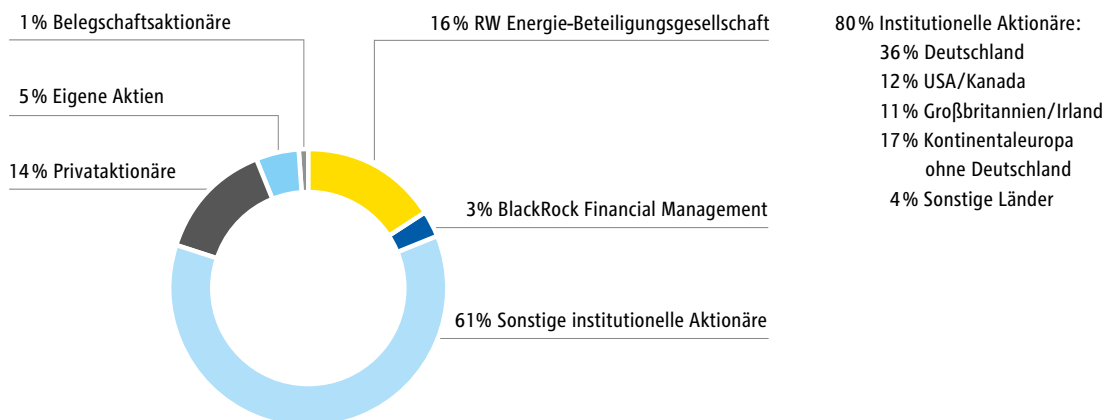

<sup>1</sup> Die Prozentangaben beziehen sich auf den Anteil am gezeichneten Kapital.  
Quellen: Aktionärsstrukturhebung und Mitteilungen nach dem deutschen Wertpapierhandelsgesetz (WpHG); Stand: Ende 2010

**Breit gestreute internationale Aktionärsbasis.** Ende 2010 befanden sich von den insgesamt 562,4 Millionen RWE-Aktien 80 % im Eigentum institutioneller Anteilseigner, 15 % im Eigentum von Privatanlegern (inkl. Belegschaftsaktionäre) und 5 % im Bestand der RWE AG. Gegenüber dem Vorjahr hat sich damit keine Veränderung ergeben. Institutionelle Anleger in Deutschland besitzen 36 % des Aktienkapitals (Vorjahr: 36 %), in Nordamerika, Großbritannien und Irland zusammen 23 % (29 %) und in Kontinentaleuropa ohne Deutschland 17 % (13 %). Größter Einzelaktionär ist mit 16 % die RW Energie-Beteiligungsgesellschaft, in der im Wesentlichen kommunale Anteile gebündelt sind. Außerhalb Deutschlands hält der US-amerikanische Vermögensverwalter BlackRock Financial Management mit ca. 3 % die größte RWE-Position. Etwa 1 % der Aktien befinden sich im Eigentum der RWE-Belegschaft. 2010 nahmen 26.279 Mitarbeiter – das entspricht 59 % aller Bezugsberechtigten – an unserem Belegschaftsaktienprogramm teil und zeichneten insgesamt 558.000 Aktien. Über das Programm ermöglichen wir unseren Mitarbeitern an deutschen Standorten, RWE-Aktien zu vergünstigten Konditionen zu beziehen. Im Berichtsjahr haben wir dafür 5,8 Mio. € aufgewendet. Der Anteil der RWE-Stammaktien in Streubesitz (Free Float), den die Deutsche Börse bei der Indexgewichtung zugrunde legt, betrug zum Jahresende 80 %.

| Börsenkürzel der RWE-Aktien       | Stammaktien        | Vorzugsaktien        |
|-----------------------------------|--------------------|----------------------|
| Reuters                           | RWEG.DE (Xetra)    | RWEGpr.DE (Xetra)    |
|                                   | RWEG.F (Frankfurt) | RWEGpr.F (Frankfurt) |
| Bloomberg                         | RWE GY (Xetra)     | RWE3 GY (Xetra)      |
|                                   | RWE GR (Frankfurt) | RWE3 GR (Frankfurt)  |
| Wertpapier-Kennnummer Deutschland | 703712             | 703714               |
| ISIN                              | DE0007037129       | DE0007037145         |
| USA CUSIP No. (ADR)               | 74975E303          | –                    |

**RWE an Börsen in Deutschland und den USA gehandelt.** RWE-Aktien werden in Deutschland an den Börsenplätzen Frankfurt am Main und Düsseldorf sowie über die elektronische Handelsplattform Xetra gehandelt. Sie sind außerdem im Freiverkehr in Berlin, Bremen, Hamburg, Hannover, München und Stuttgart erhältlich. Außerhalb Deutschlands ist RWE in den Vereinigten Staaten über ein sogenanntes Level-1-ADR-Programm im Freiverkehr vertreten. Gehandelt werden dort aber nicht unsere Aktien, sondern American Depositary Receipts (ADRs). Bei ADRs handelt es sich um Aktienzertifikate, die von US-amerikanischen Depotbanken ausgegeben werden und eine bestimmte Anzahl hinterlegter Aktien eines ausländischen Unternehmens repräsentieren. Bis Ende Dezember 2010 waren unsere Titel auch an der Schweizer Börse SIX Swiss Exchange in Zürich notiert. Da die Handelsumsätze dort sehr gering waren, haben wir uns für ein Delisting entschieden.

Entwicklung des fünfjährigen Credit Default Swap (CDS) für RWE und des CDS-Index iTraxx Europe in Basispunkten (Wochendurchschnittswerte)

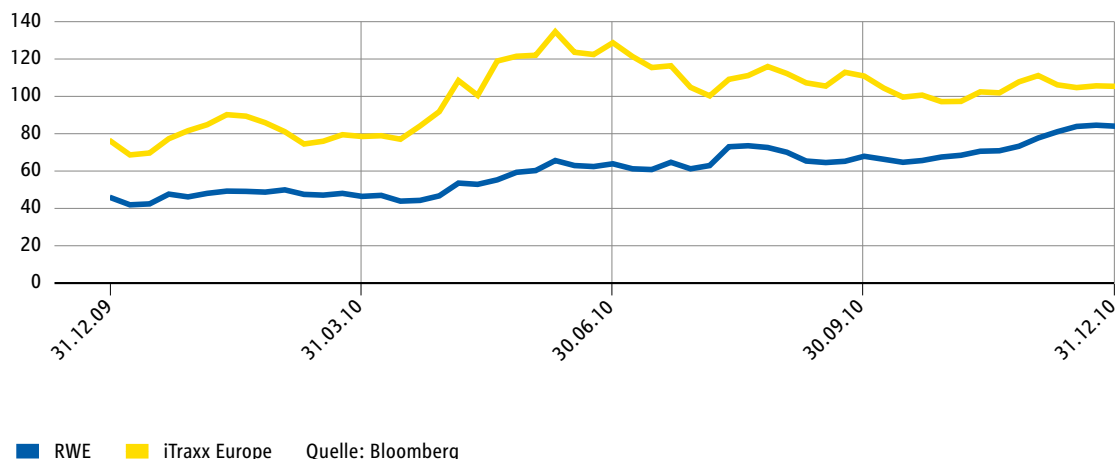

**RWE weiterhin mit hoher Bonität am Kapitalmarkt.** Der Markt für Unternehmensanleihen war 2010 von gegenläufigen Entwicklungen geprägt: Einerseits lagen die Interbanken-Zinssätze im Euro-Raum auf außergewöhnlich niedrigem Niveau. Andererseits führte die Griechenlandkrise dazu, dass Anleihe-Emittenten höhere Risikoaufschläge auf diese Sätze zahlen mussten. Verteuert hat sich auch die Absicherung von Kreditrisiken über Credit Default Swaps (CDS). Der Index iTraxx Europe, gebildet aus den CDS-Preisen von 125 großen europäischen Unternehmen, stieg in der ersten Jahreshälfte von 75 auf über 130 Basispunkte, ehe er wieder etwas nachgab. Ende 2010 lag er knapp über der 100-Punkte-Marke. Fünfjährige CDS für RWE kletterten im Jahresverlauf von 45 auf über 80 Basispunkte. Im Vergleich zu anderen Industrieunternehmen notieren sie aber nach wie vor verhältnismäßig niedrig – ein Beleg für die hohe Bonität von RWE.

## 1.0 LAGEBERICHT

### WORAN SIE UNSEREN ERFOLG MESSEN KÖNNEN.

---

#### EBITDA

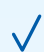

Prognose für 2010: Anstieg um 5 bis 10%  
 Ist 2010: Anstieg um 12% auf 10,3 Mrd. €  
 Prognose für 2011: Rückgang um ca. 15%

---

#### BETRIEBLICHES ERGEBNIS

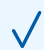

Prognose für 2010: Anstieg um ca. 5%  
 Ist 2010: Anstieg um 8% auf 7,7 Mrd. €  
 Prognose für 2011: Rückgang um ca. 20%

---

#### NACHHALTIGES NETTOERGEBNIS

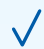

Prognose für 2010: Anstieg um ca. 5%  
 Ist 2010: Anstieg um 6% auf 3,8 Mrd. €  
 Prognose für 2011: Rückgang um ca. 30%

---

#### DIVIDENDE

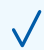

Prognose für 2010: Ausschüttungsquote von 50 bis 60% des nachhaltigen Nettoergebnisses  
 Ist 2010: Ausschüttungsquote von 50%  
 (Dividendenvorschlag: 3,50 € je Aktie)  
 Prognose für 2011: Ausschüttungsquote von 50 bis 60% des nachhaltigen Nettoergebnisses

---

#### EFFIZIENZSTEIGERUNG

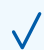

Prognose für 2010: 700 Mio. € gegenüber 2006  
 Ist 2010: 700 Mio. € gegenüber 2006  
 Prognose für 2011: 900 Mio. € gegenüber 2006

## 1.1 STRATEGIE UND STRUKTUR

RWE zählt zu den fünf führenden Strom- und Gasanbietern in Europa. Diese Position wollen wir festigen. Allerdings ist absehbar, dass das Marktumfeld schwierig bleiben wird: Der Wettbewerb wird intensiver, die Ansprüche unserer Kunden an Service und Produktvielfalt steigen; regulatorische Eingriffe verändern bestehende Geschäftsmodelle; zugleich beobachten wir niedrige Preise an den Großhandelsmärkten für Strom und Gas. Wir stellen uns diesen Herausforderungen, indem wir innovative Produkte und Dienstleistungen entwickeln und weiterhin in eine zukunftsfähige, umweltfreundliche Energieversorgung investieren.

**Gewaltige Herausforderungen für Energieversorger.** Energieversorgung ist ein langfristig angelegtes Geschäftsmodell. Investitionen in Kraftwerke, Netze und Rohstoffförderung werden nicht nur für Jahre, sondern für Jahrzehnte geplant. Unsere Strategie baut folglich auf fundamentalen Trends auf. Allerdings sind die europäischen Energiemärkte im Wandel begriffen, der eine Anpassung der Geschäftsmodelle der Versorger erfordert. Dieser Wandel ist charakterisiert durch:

- anspruchsvolle Ziele der Europäischen Union zur Minderung der Treibhausgas-Emissionen, die dazu führen, dass CO<sub>2</sub>-intensive Erzeugungstechnologien zunehmend durch klimaschonende ersetzt werden
- einen enormen Bedarf an Investitionen in die Energieinfrastruktur, vor allem in den Umbau der Stromerzeugung in Richtung erneuerbare Energien und die dadurch notwendige Modernisierung und Erweiterung der Netzinfrastruktur
- die zunehmende Notwendigkeit eines kurzfristig variablen Kraftwerkseinsatzes, bedingt durch den Ausbau der erneuerbaren Energien und deren stark schwankende Stromeinspeisung
- das Zusammenwachsen regionaler Märkte durch zunehmenden internationalen Handel und den Ausbau der grenzüberschreitenden Transportkapazitäten
- die wachsende politische Einflussnahme auf die Angebotsstruktur und die Preisbildung an den Energiemärkten sowie vermehrte Widerstände in der Bevölkerung gegen Infrastrukturprojekte wie den Bau von Erzeugungsanlagen, Netzen oder CO<sub>2</sub>-Speichern
- unerwartete Strukturbrüche auf Märkten, z.B. die seit 2009 beobachtbare Abkopplung der Gaspreise an den Großhandelsmärkten von denen in ölindezierten Lieferverträgen.

**Präsenz auf allen Wertschöpfungsstufen bietet Stabilität.** Ein herausforderndes Umfeld wie dieses bietet schlagkräftigen und breit aufgestellten Marktteilnehmern neue Chancen. Wir haben die oben skizzierten Trends bereits frühzeitig erkannt. Das Fundament unseres heutigen und zukünftigen Erfolgs ist unser starkes integriertes Geschäftsmodell mit hohen Wertbeiträgen. Wir decken alle wesentlichen Stufen der Wertschöpfungskette im Energiesektor ab: Beim Strom z.B. sind wir nicht nur Erzeuger, sondern auch Händler, Netzbetreiber und Vertriebsunternehmen. Auch im Gasgeschäft haben wir alle Wertschöpfungsstufen besetzt – vom Bohrloch bis zum Endkunden. Mit dieser Struktur können wir Marktschwankungen in einzelnen Bereichen flexibel ausgleichen.

**Klimaschutz im Zentrum unserer Strategie.** Langfristig können wir nur dann erfolgreich sein, wenn es uns gelingt, Energie bezahlbar, sicher und umweltfreundlich bereitzustellen. Eines unserer vorrangigen strategischen Ziele ist daher die Senkung des Kohlendioxid-Ausstoßes. Es gibt die Richtung vor bei der Modernisierung und Erweiterung unseres Stromerzeugungsportfolios. Darüber hinaus leisten wir mit umfangreichen Investitionen in Netze und Pipelines unseren Beitrag zur verlässlichen Verfügbarkeit von Strom und Gas. Ein weiterer Eckpfeiler unserer Strategie ist der Ausbau der Gas- und Ölförderung. Außerdem wollen wir unsere Aktivitäten stärker regional diversifizieren. In den kommenden Jahren werden die folgenden Leitlinien unser Handeln bestimmen:

- **Verbesserung der CO<sub>2</sub>-Emissionsbilanz:** Unser laufendes Kraftwerks-Neubauprogramm, das sich im letzten Drittel der Realisierungsphase befindet, wird einen wesentlichen Beitrag zur Reduzierung unserer CO<sub>2</sub>-Emissionen leisten. Der Umbau unseres Erzeugungsportfolios ist damit aber nicht abgeschlossen. Langfristig wollen wir es durch weitere hoch moderne Gas-und-Dampfturbinen-Anlagen ergänzen, deren Last schnell variiert werden kann und die deshalb die erneuerbaren Energien ideal ergänzen. Auch die 2010 beschlossene Verlängerung der Laufzeiten von deutschen Kernkraftwerken hilft uns bei der Einsparung von CO<sub>2</sub>. Unser langfristiges Emissionsminderungsziel orientiert sich an den durchschnittlichen Kohlendioxid-Emissionen je erzeugter Megawattstunde (MWh) Strom. Mit physischen und finanziellen Maßnahmen wollen wir unser CO<sub>2</sub>-Risiko bis spätestens 2020 auf das Durchschnittsniveau der Wettbewerber in unseren Märkten senken. Wir gehen davon aus, dass der übliche Emissionsfaktor in diesen Märkten 2020 bei etwa 0,45 Tonnen CO<sub>2</sub> je MWh liegen wird. Zum Vergleich: RWE emittierte im zurückliegenden Geschäftsjahr 0,73 Tonnen je MWh (2009: 0,80 Tonnen je MWh).
- **Wertsteigerndes Wachstum durch Ausbau der erneuerbaren Energien:** RWE Innogy wird die Stromerzeugungskapazitäten auf Basis regenerativer Energien stark erhöhen. Bis 2014 sollen 4,5 Gigawatt (GW) in Bau oder Betrieb sein. Wegen Investitionskürzungen und Projektverzögerungen können wir dieses Ziel nicht – wie zunächst geplant – bereits 2012 erreichen. Wir konzentrieren uns auf den Bau neuer Windkraftanlagen an Land und im Meer. Darüber hinaus investieren wir in Strom- und Wärmeerzeugung aus Biomasse und prüfen den Bau neuer Wasserkraftwerke. Auch auf dem Gebiet der Solarthermie sind wir aktiv, allerdings nur in kleinem Maßstab.
- **Ausbau der Upstream-Position:** Unsere jährliche Gas- und Ölproduktion wollen wir bis 2016 auf rund 70 Mio. Barrel Öläquivalente steigern. Damit würden wir mehr als doppelt so viel Gas und Öl fördern wie im abgelaufenen Geschäftsjahr. Wir wollten dieses Ziel ursprünglich bereits 2015 erreichen, kommen aber nicht ganz so schnell voran wie erwartet. Hauptursachen sind Investitionskürzungen und Verzögerungen bei Genehmigungsverfahren.
- **Stärkere internationale Diversifikation:** Angesichts steigender Standortrisiken wird eine breite regionale Aufstellung unseres Unternehmens immer wichtiger. Unsere Wachstumsinvestitionen tätigen wir bereits zu mehr als zwei Dritteln außerhalb Deutschlands. Der Anteil unserer ausländischen Aktivitäten am betrieblichen Konzernergebnis lag 2010 bei rund einem Viertel. Er soll mittelfristig deutlich steigen.

### Von der Strategie zur Umsetzung: Das größte Investitionsprogramm in der Geschichte von RWE.

Wichtigster Baustein unserer Strategie sind Investitionen in Kraftwerke und Netze. Im zurückliegenden Geschäftsjahr konnten wir bereits zwei hoch moderne Gaskraftwerke in Betrieb nehmen, eines in Lingen mit 876 MW und eines in Staythorpe (Großbritannien) mit 1.650 MW. Bis Mitte 2014 wollen wir weitere Erzeugungskapazität von rund 12 GW in Betrieb nehmen. Mehr als die Hälfte davon entfallen auf CO<sub>2</sub>-freie oder CO<sub>2</sub>-arme Technologien. Wir finanzieren unsere Investitionen größtenteils durch die Ergebnisbeiträge aus unserem Erzeugungs- und Netzgeschäft. Allerdings erwarten wir ab 2011 erhebliche Ertragseinbußen aus der Einführung der Kernbrennstoffsteuer in Deutschland. Auch das anhaltend niedrige Preisniveau an den Großhandelsmärkten für Strom und Gas wird unser Ergebnis belasten. Dies zwingt uns zu Ausgabenkürzungen. Ursprünglich hatten wir vor, im Zeitraum von 2010 bis 2013 insgesamt 28 Mrd. € in Sachanlagen zu investieren. Inzwischen planen wir ein Zielvolumen von rund 25 Mrd. € bzw. von etwa 18 Mrd. € im Zeitraum von 2011 bis 2013. Damit ist unser Investitionsprogramm aber weiterhin das mit Abstand größte in der Geschichte von RWE.

Von rund 18 Mrd. € Sachinvestitionen zwischen 2011 und 2013 entfallen rund 12 Mrd. € auf Wachstums- und Ersatzinvestitionen, davon:

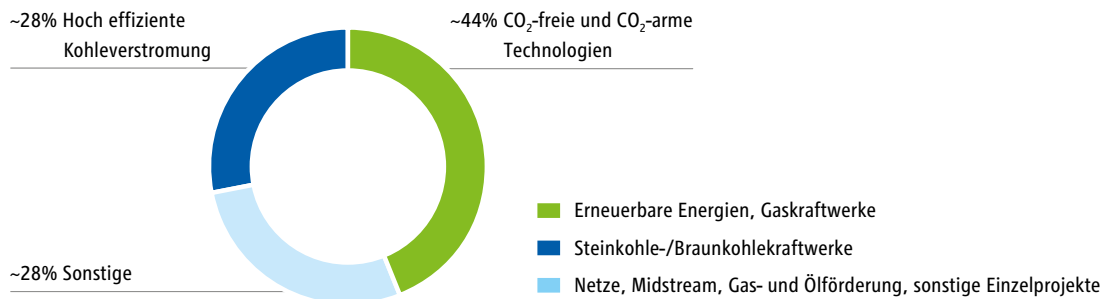

Neben Kraftwerken und Netzen steht der Ausbau unserer Gas- und Ölförderung im Zentrum unserer Investitionstätigkeit. Über 3 Mrd. € werden wir dafür im Zeitraum von 2011 bis 2013 einsetzen. Unsere Investitionen im Gasgeschäft umfassen auch den Bau neuer Speicher und Transportleitungen. Ein Beispiel hierfür ist die Nabucco-Pipeline, die europäischen Kunden den Zugang zu neuen Gasquellen im Kaspischen Raum und im Mittleren Osten über eine neue Route erschließen soll. Auch im Geschäft rund um den Transport von verflüssigtem Erdgas (Liquefied Natural Gas – LNG) sind wir auf Expansionskurs.

Darüber hinaus gewinnt das Thema Energieeffizienz an Bedeutung für uns. Mit den innovativen Produkten und Dienstleistungen der RWE Effizienz GmbH für Privathaushalte, Geschäftskunden und kommunale Einrichtungen setzen wir Standards auf diesem Gebiet.

Organisches Wachstum steht bei uns im Vordergrund. Das heißt jedoch nicht, dass wir kleinere Zukäufe ausschließen, die unser Portfolio abrunden würden. Möglichkeiten sehen wir hier vor allem in Zentralost- und Südosteuropa einschließlich der Türkei.

Alle Investitionsprojekte messen wir daran, ob sie uns den oben genannten Zielen näherbringen. Die wichtigste finanzielle Messlatte ist die „interne Verzinsung“ (Internal Rate of Return – IRR). Diese muss mindestens so hoch sein wie die Kapitalkosten, ergänzt um einen Renditeaufschlag. Letzterer spiegelt das Risikoprofil des jeweiligen Unternehmensbereichs und Landes wider. Wir haben den Renditeaufschlag 2010 deutlich erhöht. Einige Vorhaben erbringen damit nicht mehr die erforderliche Verzinsung und werden deshalb auch nicht weiterverfolgt. Dadurch sparen wir nicht nur Mittel ein, sondern haben auch Spielraum für attraktivere Projekte gewonnen.

**Europa bleibt unser Markt.** Regionaler Schwerpunkt unserer Aktivitäten ist und bleibt Europa. Zu unseren Kernmärkten zählen wir Deutschland, Großbritannien, die Benelux-Region sowie Zentralost- und Südosteuropa. Trotz gestiegener politischer Risiken sind diese Märkte vergleichsweise stabil. Die zentralosteuropäischen Staaten und die Türkei zeichnen sich durch gute Wachstumsperspektiven aus. Wegen des Aufholbedarfs dieser Länder wird der Energieverbrauch dort stärker steigen als im europäischen Durchschnitt – bei zugleich hohem Investitionsbedarf aufgrund einer veralteten Energieinfrastruktur. Die nordwesteuropäischen Märkte bleiben attraktiv für uns, auch wenn beim Strom- und Gasverbrauch nur noch geringe Wachstumspotenziale bestehen. Energieversorger können sich auf diesen Märkten durch das Angebot intelligenter Lösungen für mehr Klimaschutz und Energieeffizienz sowie durch maßgeschneiderte Produkte und Dienstleistungen auszeichnen. Mit unserem Rekordinvestitionsprogramm wollen wir dafür die Voraussetzungen schaffen – und damit unsere Position im härter werdenden Wettbewerb um Marktanteile und Kunden weiter verbessern.

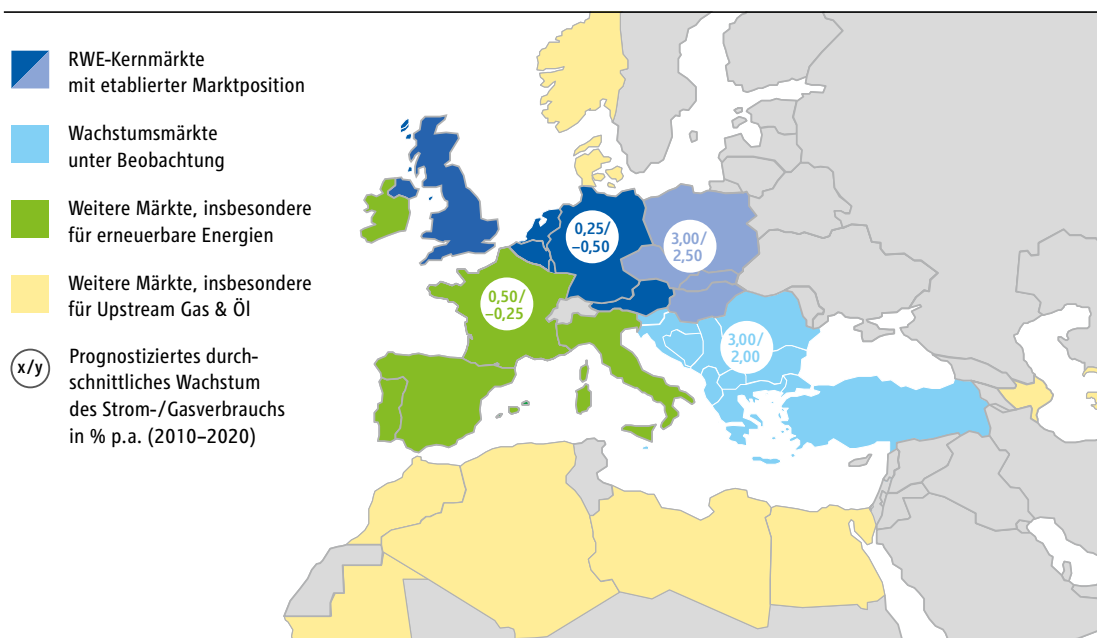

Wie die Grafik auf Seite 55 verdeutlicht, reicht unser Aktionsradius über die Grenzen unserer Kernmärkte hinaus. Dies gilt insbesondere für unser Upstream-Geschäft. Gas und Öl fördern wir nicht nur in Europa, sondern auch in Nordafrika. Darüber hinaus haben wir ein Upstream-Projekt im Kaspischen Raum gestartet und prüfen Vorhaben in anderen Gegenden der Erde. Auch beim Ausbau der erneuerbaren Energien haben wir den regionalen Fokus vergrößert: Unsere Wachstumsstrategie bezieht hier Länder wie Frankreich, Spanien und Italien mit ein. Bei einzelnen Tätigkeiten liegt es in der Natur der Sache, dass sie außerhalb unserer Kernmärkte stattfinden, etwa bei Klimaschutzmaßnahmen im Rahmen der Kyoto-Mechanismen „Clean Development Mechanism“ und „Joint Implementation“. Gleiches gilt für unser LNG-Geschäft. Daneben wird der Energiehandel immer globaler. Hier sind wir zunehmend auch in Asien und Amerika aktiv.

In unseren Kernmärkten verfügen wir, gemessen am Absatz, bei mindestens einem unserer Hauptprodukte Strom und Gas über eine führende Marktposition. Eine solche streben wir auch dann an, wenn wir neue Märkte erschließen.

| Marktpositionen des RWE-Konzerns nach Absatz | Strom                                                                                                        | Gas                                                                                   |
|----------------------------------------------|--------------------------------------------------------------------------------------------------------------|---------------------------------------------------------------------------------------|
| Deutschland                                  | Nr. 1                                                                                                        | Nr. 3                                                                                 |
| Großbritannien                               | Nr. 4                                                                                                        | Nr. 4                                                                                 |
| Niederlande                                  | Nr. 2                                                                                                        | Nr. 1                                                                                 |
| Zentralost-/Südosteuropa                     | Nr. 2 in Ungarn<br>Nr. 3 in der Slowakei<br>Präsenz in Tschechien<br>Nr. 6 in Polen<br>Präsenz in der Türkei | Führende Position in Ungarn<br>Nr. 2 in der Slowakei<br>Nr. 1 in Tschechien<br>–<br>– |
| Europa insgesamt                             | Nr. 3                                                                                                        | Nr. 6                                                                                 |

**Effiziente Struktur und Unternehmenssteuerung.** Unsere Organisation ist die Plattform, mit der wir unsere Ziele erreichen. Sie muss sich an neue Marktbedingungen und strategische Leitlinien anpassen. Wir arbeiten permanent daran, unsere Konzernstruktur effizienter zu machen. Im vergangenen Jahr konnten wir hier einige wichtige Weichen stellen. So haben wir das deutsche Vertriebs- und Verteilnetzgeschäft in der neuen RWE Deutschland AG (vormals: RWE Rheinland Westfalen Netz AG) gebündelt. Auch unsere Aktivitäten in Zentralosteuropa und der Türkei waren Gegenstand der Reorganisation: Unsere dortigen Landesgesellschaften führen wir nun über die neu gegründete RWE East, s.r.o. mit Sitz in Prag. Die genannten Maßnahmen sind zum 1. Januar 2011 in Kraft getreten. Nähere Informationen dazu finden Sie auf Seite 69 in diesem Bericht.

**Wertorientiertes Wachstum: Das unternehmensinterne Steuerungssystem.** Unser zentrales Steuerungsinstrument ist der Wertbeitrag. Damit verankern wir unser Ziel der langfristigen Wertsteigerung in den Managementprozessen des Konzerns und der Unternehmensbereiche. Der Wertbeitrag leitet sich ab aus der Rendite auf das eingesetzte Vermögen, abzüglich der Kapitalkosten. Er ist neben weiteren, individuell vereinbarten Zielen auch Maßstab für die leistungsorientierte Vergütung unserer Führungskräfte und außertariflichen Mitarbeiter. Das Wertmanagement bei RWE erläutern wir auf den Seiten 90 f. und 231 f.

## 1.2 WIRTSCHAFTLICHE RAHMENBEDINGUNGEN

Nach dem Krisenjahr 2009 hat die Konjunktur wieder Fahrt aufgenommen. Mit einem Plus von 3,6 % ist die deutsche Wirtschaft besonders stark gewachsen. Auch an den Energiemärkten stehen die Zeichen auf Erholung. Der Strom- und Gasverbrauch entwickelte sich teilweise dynamischer als prognostiziert. Energieträger wie Öl und Steinkohle verteuerten sich erheblich. Dagegen spiegeln die Strompreise an den Großhandelsmärkten den Aufschwung bislang nicht wider.

**Weltwirtschaft kehrt auf Wachstumskurs zurück.** Nach den bislang vorliegenden Daten und eigenen Schätzungen war die globale Wirtschaftsleistung im vergangenen Jahr um 4 % höher als 2009. Vor allem die aufstrebenden Volkswirtschaften China und Indien haben den Aufschwung getragen. Beide Staaten kommen auf ein Wachstum von etwa 10 %. In der Euro-Zone fällt das Plus mit geschätzten 1,7 % dagegen vergleichsweise bescheiden aus. Hier sorgten vor allem die Ausfuhren für eine Belebung, während die Krise der Staatsfinanzen einiger Länder und rückläufige Bauinvestitionen das Wachstum bremsen. Mit der Industrieproduktion ist auch die Kapazitätsauslastung gestiegen. Sie fällt aber noch deutlich geringer aus als vor der Rezession.

In Deutschland lag das reale Bruttoinlandsprodukt (BIP) 2010 um geschätzte 3,6 % über dem des Vorjahres. Damit zählt unser Hauptmarkt zu den dynamischsten Volkswirtschaften im Euro-Raum. Basis dafür waren die Exporte – traditionell Motor der deutschen Konjunktur. Sie reichten wieder fast an das Vorkrisenniveau heran. Einen Beitrag zum Wachstum leisteten auch die Ausrüstungsinvestitionen und der private Konsum.

Wesentlich geringer fielen die Wachstumsraten in den Niederlanden und Belgien aus. Wir veranschlagen sie auf 1,7 bzw. 2 %. Auch hier waren es die Ausfuhren, die maßgeblich zum Aufschwung beitrugen.

Die Wirtschaft Großbritanniens hängt dagegen stärker vom inländischen Verbrauch ab, der nicht unwesentlich von der Entwicklung auf dem Immobilienmarkt beeinflusst wird. Dieser war 2008 und 2009 in eine Krise geraten. Viele Haushalte mussten dadurch deutliche Vermögenseinbußen hinnehmen. Inzwischen haben sich die Immobilienpreise wieder erholt. Dies und gestiegene verfügbare Einkommen waren ausschlaggebend für eine deutliche Belebung des 2009 noch rückläufigen privaten Verbrauchs. Das BIP ist 2010 um geschätzte 1,4 % gewachsen.

Von unseren zentralosteuropäischen Märkten verzeichneten die Slowakei und Polen mit jeweils 3,7 % das höchste Wachstum. Die Slowakei – seit 2009 Mitglied der europäischen Währungsunion – profitierte von der zeitweilig schwächeren Notierung des Euros und der damit verbundenen Verbilligung der Ausfuhren. Polen zählt zu den EU-Ländern, die am wenigsten von der Rezession betroffen waren. Dank der robusten Binnennachfrage hatte das BIP des Landes sogar im Krisenjahr 2009 noch zugelegt. Tschechien kam 2010 auf 2,3 % Wachstum. In Ungarn bremsen Maßnahmen zur Konsolidierung der Staatsfinanzen die Wirtschaftsaktivität. Das BIP erhöhte sich dort nur um geschätzte 1,1 %.

**Kühle Witterung – schwaches Windaufkommen.** Während sich die konjunkturelle Entwicklung vor allem in der Energienachfrage von Industrieunternehmen niederschlägt, wird der Energieverbrauch der privaten Haushalte in starkem Maße von den Witterungsverhältnissen beeinflusst. In unseren europäischen Kernmärkten lagen die Temperaturen 2010 teilweise deutlich unter dem Vorjahresniveau. In Deutschland waren sie so niedrig wie seit 1996 nicht mehr. Besonders im Dezember herrschte ungewöhnlich kalte Witterung. Neben dem Energieverbrauch unterliegt auch das Stromangebot Wettereinflüssen, vor allem das der Windkraft- und Solaranlagen. Das Windaufkommen in Deutschland, Großbritannien und den Niederlanden war so niedrig wie zuletzt 2003. Dementsprechend schwach fiel die Auslastung der Windkraftanlagen aus. In Spanien lag das Windaufkommen dagegen etwas über dem langjährigen Mittel.

**Kaltes Wetter und starke Industriekonjunktur regen Energieverbrauch an.** Die konjunkturelle Erholung und die kühle Witterung belebten die Energienachfrage in unseren Kernmärkten. Der Stromverbrauch stieg teilweise deutlich, konnte das Niveau vor der Rezession aber noch nicht erreichen. In Deutschland wurde nach den aktuell verfügbaren Daten knapp 4 % mehr Strom eingesetzt als 2009. Wesentlichen Anteil daran hatte das Produktionswachstum in den energieintensiven Industrien. In den Niederlanden dürfte die Stromnachfrage ebenfalls gestiegen sein, wenn auch nur leicht. Großbritannien kommt nach aktuellen Informationen auf ein Plus von 1,7 %. Für unsere zentralosteuropäischen Märkte haben wir vergleichsweise hohe Wachstumsraten ermittelt: Ganz vorn liegt die Slowakei mit 5 %, gefolgt von Tschechien und Polen mit jeweils 4 % sowie Ungarn mit 2,7 %. Beim Gasverbrauch war die Entwicklung noch dynamischer: In Deutschland dürfte er um 5 % gestiegen sein, in Tschechien um 7 %, in Ungarn um 8 % und in Großbritannien um 9 %. Nach ersten Schätzungen kommen die Niederlande auf ein Wachstum von 15 %.

**Preiserholung an den Rohölmärkten.** Trotz der verbesserten gesamtwirtschaftlichen Perspektiven lagen die Preise an den Brennstoffmärkten 2010 noch weit unter dem Niveau, das sie unmittelbar vor der Finanz- und Wirtschaftskrise hatten. Gegenüber dem Vorjahr haben sie sich aber teilweise wieder erholt. Dies trifft besonders auf die Rohölnotierungen zu. Das Barrel der Sorte Brent wurde 2010 mit durchschnittlich 79 US\$ gehandelt. Damit war es wesentlich teurer als im Vorjahr (62 US\$). Die schnell wachsenden Volkswirtschaften Asiens haben mit ihrer hohen Nachfrage maßgeblich dazu beigetragen. In der Preisentwicklung zeigte sich auch die allgemeine Erwartung eines konjunkturbedingten Anstiegs des Rohölverbrauchs.

**Gaspreise im Endkundengeschäft unter Vorjahresniveau.** Da ein Großteil der Gaseinfuhren nach Kontinentaleuropa auf Langfristverträgen mit Ölpreisbindung basiert, beeinflusst die Entwicklung am Ölmarkt auch die Gaspreise. Allerdings tritt dabei typischerweise ein mehrmonatiger Zeitverzug auf. Neben den ölindezierten Langfristverträgen prägen auch zunehmend kurzfristige Handelsgeschäfte mit frei verfügbaren Mengen die Lage an den Gasmärkten. Bei diesen Transaktionen hat Öl keinen unmittelbaren Einfluss auf die Preisbildung. Wichtige Handelsplätze sind National Balancing Point (NBP) in Großbritannien und Title Transfer Facility (TTF) in den Niederlanden. Die Preise an diesen Märkten liegen seit 2009 deutlich unter denen in ölindezierten Verträgen. Inzwischen sind einige dieser Kontrakte umgestellt worden: Teilmengen werden jetzt nicht mehr ölindeziert, sondern gemäß den

Spotnotierungen an den Gashandelsmärkten abgerechnet. Dies trug dazu bei, dass die Preise für Gasimporte nach Deutschland – trotz höherer Ölnotierungen – leicht rückläufig waren.

**Terminpreise für 2011 von Rohöl (Brent) und Gas (TTF-Großhandelsmarkt)**  
in €/MWh (Wochendurchschnittswerte)

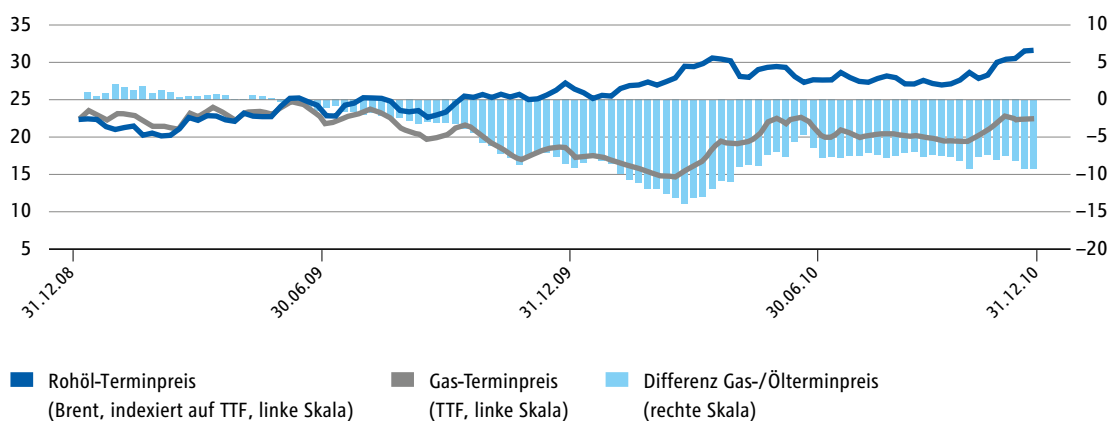

Quelle: RWE Supply & Trading

Im deutschen Endkundengeschäft sind die Gaspreise ebenfalls gesunken, für Privathaushalte um 9 % und für Industrieunternehmen um 7 %. Auch außerhalb Deutschlands hat sich Gas spürbar verbilligt. In Tschechien mussten die genannten Kundengruppen 5 bzw. 4 % weniger bezahlen, in Großbritannien 7 bzw. 4 % und in den Niederlanden 9 bzw. 6 %. Entgegengesetzt verlief die Entwicklung in Ungarn: Die Gasrechnung für Haushalte hat sich dort leicht erhöht, die für Industrieunternehmen sogar um 20 %. Im Gas-Terminhandel zeigte sich folgendes Bild: Lieferkontrakte für das folgende Kalenderjahr (Forward 2011) wurden am TTF-Großhandelsmarkt im Berichtszeitraum mit durchschnittlich 19 € je MWh abgerechnet. Das ist 1 € mehr, als 2009 für den Forward 2010 bezahlt werden musste.

**Ein-Jahres-Terminpreise am Gas-Großhandelsmarkt TTF**  
in €/MWh (Monatsdurchschnittswerte)

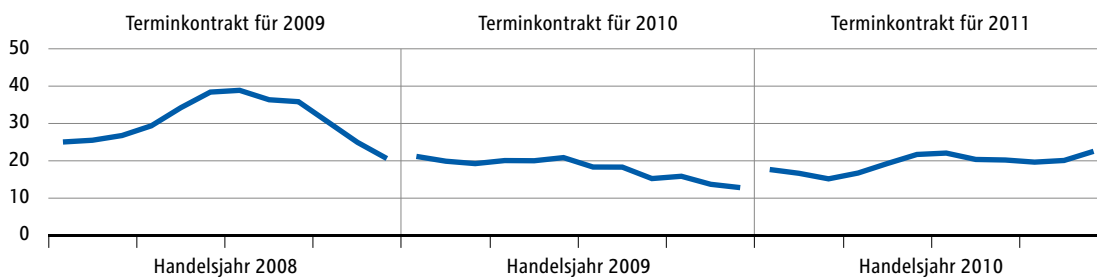

Quelle: RWE Supply & Trading

**Steinkohlenotierungen deutlich höher als 2009.** Die Preise an den internationalen Märkten für Kraftwerks-Steinkohle lagen 2010 wieder weit über dem Rezessionsniveau. Wie beim Rohöl sorgte vor allem die hohe asiatische Nachfrage für Impulse. Im Rotterdamer Spothandel wurde die metrische Tonne mit durchschnittlich 93 US\$ (inkl. Fracht und Versicherung) abgerechnet. Gegenüber 2009 hat sie sich damit um 31 % verteuert, auf Euro-Basis sogar um 38 %. Eine wichtige Komponente der Steinkohlenotierungen sind die Seefrachtkosten. Für die Standardroute Südafrika–Rotterdam wurden 2010 durchschnittlich 12,50 US\$ je Tonne bezahlt und damit etwas weniger als im Vorjahr (13,50 US\$). Zwar hat sich der Bedarf an Transportleistung zuletzt stark erhöht, allerdings sind auch die Schiffskapazitäten gestiegen. Für die in Deutschland geförderte Steinkohle wird der Preis vom Bundesamt für Wirtschaft und Ausfuhrkontrolle (BAFA) ermittelt. Das Amt orientiert sich dabei an den Notierungen für importierte Steinkohle. Der BAFA-Preis reflektiert deshalb – mit einiger Verzögerung – die Entwicklung an den internationalen Märkten. Sein Durchschnittswert für 2010 lag bei Abschluss dieses Berichts noch nicht vor. Experten rechnen mit 85 € je Tonne Steinkohleeinheit. Das wären 6 € mehr als im Vorjahr.

**Stabiles Preisniveau im CO<sub>2</sub>-Emissionshandel.** Im europäischen Handel mit CO<sub>2</sub>-Emissionsrechten (sogenannten EU Allowances – EUAs) hinterließ die erstarkende Industriekonjunktur nur schwache Spuren. EUAs für 2010 kosteten im Berichtsjahr durchschnittlich 14,50 € je Tonne CO<sub>2</sub>. Das ist etwas mehr, als im Vergleichszeitraum für 2009er-Zertifikate bezahlt werden musste (13,40 €). Europäische Unternehmen haben durch den im Kyoto-Protokoll geschaffenen Clean Development Mechanism (CDM) die Möglichkeit, ihre heimischen Emissionen bis zu bestimmten Obergrenzen auch durch Einreichung von Certified Emission Reductions (CERs) abzudecken. Dabei handelt es sich um Gutschriften aus emissionsmindernden Maßnahmen in Entwicklungs- und Schwellenländern. Die CERs notieren bereits seit geraumer Zeit um 1 bis 3 € unter dem Preis für EUAs. Zertifikate für 2010 wurden im vergangenen Jahr mit durchschnittlich 12,40 € gehandelt. Der Vergleichswert für 2009 betrug 11,80 €.

**Preise für CO<sub>2</sub>-Zertifikate im europäischen Emissionshandel**  
 in €/Tonne CO<sub>2</sub> (Monatsdurchschnittswerte)

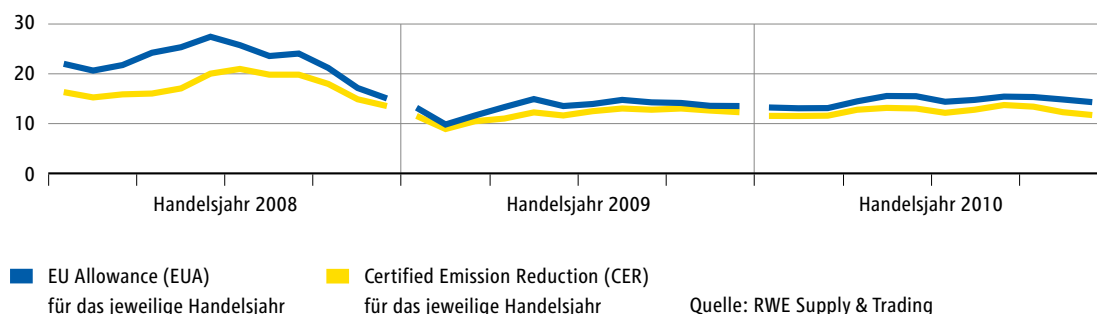

**Aufwärtstrend bei Strompreisen lässt auf sich warten.** Die Verteuerung von Brennstoffen spiegelte sich kaum in den Strompreisen wider. Erst Ende 2010 zogen die Notierungen wieder leicht an. Grundlaststrom kostete im Spothandel an der European Energy Exchange (EEX) im Jahresdurchschnitt 44 € je MWh und Spitzenlaststrom 55 € je MWh; 2009 waren 39 bzw. 51 € je MWh bezahlt worden. Im deutschen Terminhandel notierten die Kontrakte für das folgende Kalenderjahr (Forward 2011) im Grundlastbereich mit durchschnittlich 50 €. Sie waren damit nur geringfügig teurer als der Forward 2010 im Vorjahr (49 €). Spitzenlaststrom hat sich sogar verbilligt, und zwar von 70 auf 65 € je MWh. Das trotz höherer Brennstoffkosten anhaltend niedrige Preisniveau im Stromterminhandel ist u.a. auf den unerwartet starken Ausbau der erneuerbaren Energien zurückzuführen, insbesondere der Photovoltaik. Deren Gesamtkapazität ist 2010 nach Angaben des Bundesumweltministeriums in Deutschland um über 7 GW auf ca. 17 GW gestiegen. Die Solaranlagen speisen Strom schwerpunktmäßig zu Spitzenlastzeiten ins Netz ein. Dadurch hat sich besonders für Steinkohle- und Gaskraftwerke der Einsatzspielraum verringert. Außerdem trugen die steigenden Solareinspeisungen dazu bei, dass der Abstand zwischen Spitzenlast- und Grundlastnotierungen geschmolzen ist.

**Spotpreise am Strom-Großhandelsmarkt in Deutschland**  
in €/MWh (Monatsdurchschnittswerte)

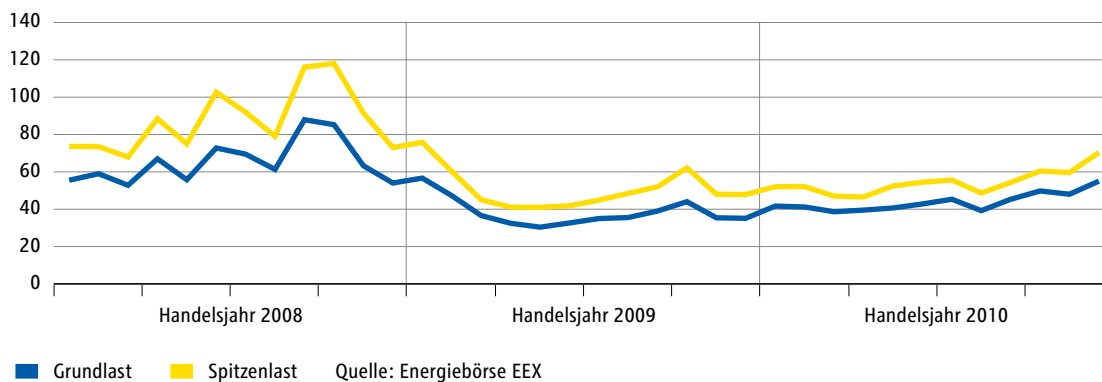

**Ein-Jahres-Terminpreise am Strom-Großhandelsmarkt in Deutschland**  
in €/MWh (Monatsdurchschnittswerte)

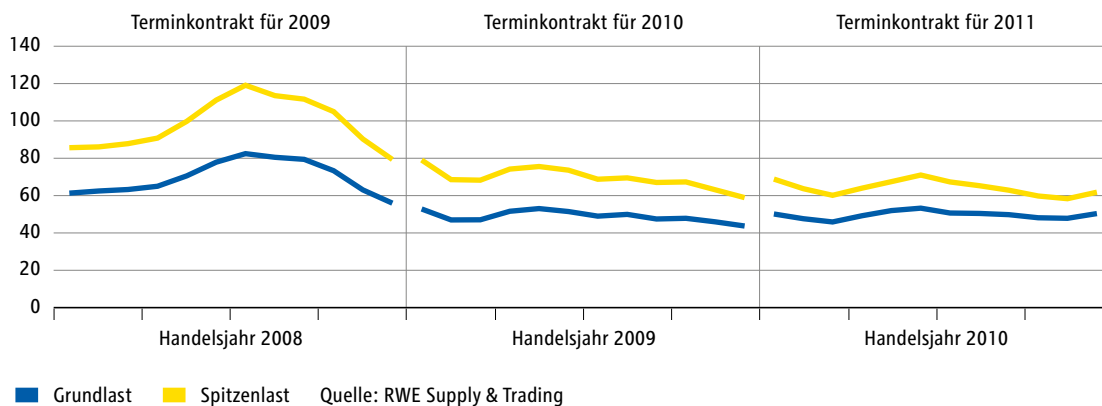

Um kurzfristige Absatz- und Preisrisiken zu begrenzen, verkaufen wir die Erzeugung unserer Kraftwerke nahezu vollständig auf Termin. Auf unsere Erlöse im Berichtszeitraum haben daher die aktuellen Preise nur untergeordneten Einfluss. Entscheidend ist vielmehr, zu welchen Konditionen Lieferkontrakte für 2010 in vorangegangenen Jahren abgeschlossen wurden. Da diese Verkäufe teilweise noch während der Hausse an den Energiemärkten getätigt wurden, lagen die realisierten Preise weit über dem aktuellen Niveau. Unsere deutsche Stromproduktion von 2010 haben wir im Durchschnitt zu 67 € je MWh abgesetzt, die von 2009 zu 70 € je MWh.

Bei den Stromterminverkäufen gehen wir grundsätzlich so vor, dass zeitgleich mit dem Abschluss eines Lieferkontrakts die zur Erzeugung benötigten Brennstoffe und CO<sub>2</sub>-Emissionsrechte beschafft bzw. preislich abgesichert werden. Dies gilt in erster Linie für unsere Steinkohle- und Gaskraftwerke. Maßgeblich für die Ergebnisentwicklung dieser Anlagen sind die sogenannten Clean Dark Spreads (Steinkohle) und Clean Spark Spreads (Gas). Sie werden ermittelt, indem man vom Strommarktpreis die Kosten für den jeweils eingesetzten Brennstoff und für Emissionsrechte abzieht. Da wir Steinkohle und CO<sub>2</sub>-Zertifikate am Terminmarkt für 2010 zu niedrigeren Preisen einkauften als für 2009, haben sich unsere realisierten Spreads trotz rückläufiger Stromnotierungen sogar leicht verbessert. Bei unseren Braunkohle- und Kernkraftwerken sind die Brennstoffkosten dagegen wesentlich stabiler. Die Spreads tendieren daher meist in die gleiche Richtung wie die Strompreise.

Im deutschen Endkundengeschäft wirkt sich die Entwicklung der Strom-Großhandelspreise im Allgemeinen mit zeitlicher Verzögerung aus. Hintergrund ist, dass sich die Vertriebsgesellschaften größtenteils am Terminmarkt mit Strom eindecken. Ihre Beschaffungskosten für 2010 waren daher noch durch das Preisniveau aus Vorjahren geprägt. Stark angestiegen sind die in der Stromrechnung enthaltenen Umlagen nach dem Erneuerbare-Energien-Gesetz (EEG), denn wegen des fortschreitenden Kapazitätsausbaus von Wind-, Biomasse- und insbesondere Solaranlagen wird immer mehr Strom aus regenerativen Quellen in das Netz eingespeist. Für Privathaushalte und kleine Gewerbebetriebe waren die Preise im Durchschnitt ca. 3 % höher als 2009, für Industrieunternehmen ca. 1 %. Die stark steigenden EEG-Umlagen werden auch 2011 zu einer Verteuerung von Strom führen. Beispielsweise hat unsere größte deutsche Vertriebsgesellschaft, RWE Vertrieb, ihren Grundtarif zum 1. Januar 2011 um 3,6 % angehoben. Damit gibt sie nur einen Teil der Zusatzbelastungen aus dem EEG weiter.

In Großbritannien, unserem zweitgrößten Strommarkt, zeigte sich folgendes Bild: Im Spothandel kosteten Grundlastkontrakte durchschnittlich 41 £ je MWh (48 €) und damit 4 £ mehr als 2009. Spitzenlaststrom verteuerte sich von 45 auf 47 £ je MWh (55 €). Am Terminmarkt wurde der Forward 2011 im Grundlastbereich mit 45 £ je MWh (52 €) gehandelt. Das ist etwas mehr, als im Vorjahreszeitraum für den Forward 2010 bezahlt werden musste. Dagegen hat sich Spitzenlaststrom auf dieser Vergleichsbasis von 53 auf 51 £ je MWh (59 €) verbilligt.

**Spotpreise am Strom-Großhandelsmarkt in Großbritannien**

in €/MWh (Monatsdurchschnittswerte)

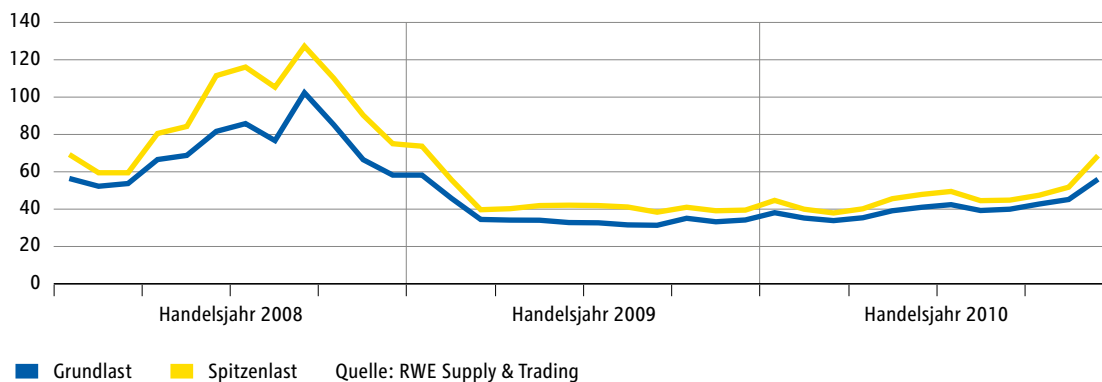**Ein-Jahres-Terminpreise am Strom-Großhandelsmarkt in Großbritannien**

in €/MWh (Monatsdurchschnittswerte)

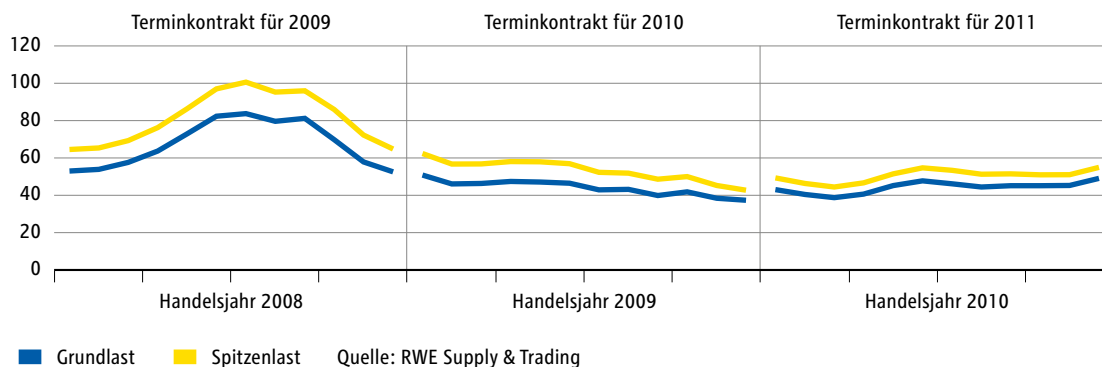

RWE verkauft die Stromproduktion der britischen Kraftwerke wie in Deutschland weitgehend auf Termin. Da unser britisches Erzeugungsportfolio überwiegend aus Steinkohle- und Gaskraftwerken besteht, war die Ergebnisentwicklung durch die realisierten Clean Dark Spreads und Clean Spark Spreads geprägt. Erstere waren wesentlich niedriger, Letztere dagegen etwas höher als 2009. Die mit kurzfristigen Spotmarkttransaktionen realisierbaren Margen sind für Betreiber von Steinkohle- und Gaskraftwerken weiterhin gering. Diese vorrangig im Mittel- und Spitzenlastbereich eingesetzten Kraftwerke sind besonders davon betroffen, dass sich die Stromnachfrage konjunkturbedingt noch immer auf niedrigem Niveau bewegt.

Im britischen Endkundengeschäft haben alle großen Versorger in den beiden vergangenen Jahren ihre Stromtarife gesenkt, einige sogar mehrfach. Für Haushalte und kleine Gewerbebetriebe lagen die Preise 2010 deshalb um durchschnittlich 3 % unter dem Vorjahresniveau, für Industrie- und Geschäfts-

kunden sogar um mehr als 12%. Ende 2010 hat sich Strom allerdings wieder verteuert: Leicht gestiegene Notierungen am Großhandelsmarkt haben einige große Versorger im vierten Quartal zu Tarifierhöhungen veranlasst. RWE npower hat zum 4. Januar 2011 die Entgelte für Haushaltskunden um durchschnittlich 5,1% angehoben.

In den Niederlanden entwickelten sich Großhandelsnotierungen für Strom ähnlich wie in Deutschland. Bei den Endkundenpreisen zeigte sich folgende Entwicklung: Für Privathaushalte ermäßigte sich die Stromrechnung um 7% und für Industrieunternehmen um knapp 5%.

In unseren zentralosteuropäischen Endkundenmärkten variierten die Preisanpassungen stark. Für Privatkunden in Polen und Ungarn hat sich die Stromrechnung um über 4% bzw. um 2% erhöht, für Haushalte in der Slowakei dagegen etwas verringert. Industrieunternehmen mussten im Durchschnitt weniger bezahlen als 2009: in Polen 5%, in der Slowakei 9% und in Ungarn 20%.

## 1.3 POLITISCHE RAHMENBEDINGUNGEN

Das Jahr 2010 stand im Zeichen energiepolitischer Entscheidungen von großer Tragweite. Die Bundesregierung hat im Herbst die Eckpfeiler der Energiepolitik bis 2050 beschlossen; oberste Priorität misst sie dem Ausbau der erneuerbaren Energien bei. Ebenfalls im Herbst hat sie die Laufzeiten der Kernkraftwerke verlängert. Allerdings wurden den Versorgern auch neue Lasten aufgebürdet, insbesondere mit der Einführung einer Kernbrennstoffsteuer. In Großbritannien ist der energiepolitische Rahmen ebenfalls im Wandel begriffen. Die Regierung plant Maßnahmen, die dem Ausbau der Kernkraft und der erneuerbaren Energien neue Dynamik verleihen sollen.

**Bundesregierung verabschiedet Energiekonzept für Deutschland.** Die Bundesregierung hat Ende September ein umfassendes Energiekonzept beschlossen, mit dem sie die Leitlinien einer bis 2050 reichenden Gesamtstrategie für eine umweltschonende, zuverlässige und bezahlbare Energieversorgung festlegt. Regenerative Quellen sollen den Hauptanteil am Energiemix der Zukunft ausmachen: 2010 deckten sie 17 % des Bruttostromverbrauchs ab; 2050 sollen es 80 % sein. Großes Potenzial bescheinigt die Regierung der Nutzung von Windkraft auf hoher See (offshore). Mit einem Kreditprogramm über 5 Mrd. € will sie die ersten zehn Offshore-Windparks fördern. Kernkraft wird als Brückentechnologie eingestuft. Teil des Konzepts ist daher eine Laufzeitverlängerung für deutsche Kernkraftwerke, die inzwischen gesetzlich verankert wurde. Außerdem will die Bundesregierung den Weg für Demonstrationsprojekte zur Abscheidung und unterirdischen Speicherung von CO<sub>2</sub> freimachen. Bisher gibt es in Deutschland keinen gesetzlichen Rahmen für solche Vorhaben. Dazu muss noch eine entsprechende Richtlinie der Europäischen Union in nationales Recht umgesetzt werden. Hohen Stellenwert genießen auch der Ausbau der Stromnetze und die Entwicklung von Stromspeichertechnologien. Durch energetische Gebäudesanierung soll bis 2050 der Primärenergiebedarf des Gebäudebestands um 80 % verringert werden. Dabei setzt die Regierung auf Anreize durch staatliche Förderung. Auch der Straßenverkehr ist Gegenstand des Energiekonzepts: Bis 2020 soll es in Deutschland eine Million Elektroautos geben, bis 2030 sechs Millionen. Die Bundesregierung geht davon aus, dass die deutschen Treibhausgasemissionen mit diesen und weiteren Maßnahmen bis 2050 gegenüber 1990 um 80 bis 95 % reduziert werden können.

**Deutscher Bundestag beschließt Kernbrennstoffsteuer und längere Laufzeiten von Kernkraftwerken.**

Am 28. Oktober 2010 hat der Deutsche Bundestag das Kernbrennstoffsteuergesetz verabschiedet, das die Einführung einer Steuer für Betreiber von Kernkraftwerken vorsieht. Die Abgabe beträgt 145 € je Gramm spaltbaren Materials. Sie wird von 2011 bis einschließlich 2016 erhoben und soll einen Beitrag zur Haushaltssanierung leisten. Der Bund verspricht sich davon Einnahmen in Höhe von 2,3 Mrd. € pro Jahr. Die Steuer hat keinen nennenswerten Einfluss auf die Preisbildung am Großhandelsmarkt und kann somit nicht an die Stromkunden weitergegeben werden. Voraussichtlich wird sie das betriebliche Ergebnis von RWE mit durchschnittlich 600 bis 700 Mio. € pro Jahr belasten. Das Kernbrennstoffsteuergesetz ist zum 1. Januar 2011 in Kraft getreten. Wir behalten uns vor, rechtlich gegen die neue Abgabe vorzugehen, da wir sie für verfassungs- und europarechtlich bedenklich halten.

Ebenfalls am 28. Oktober 2010 beschloss der Deutsche Bundestag die 11. Novelle des Atomgesetzes, die eine Erhöhung der Strommengen vorsieht, die Kernkraftwerke bis zu ihrer Stilllegung produzieren dürfen. Für Anlagen, die den Betrieb nach 1980 aufgenommen haben, ergibt sich dadurch eine um bis zu 14 Jahre längere Laufzeit als bisher vorgesehen. In diese Kategorie fallen die drei RWE-Blöcke Gundremmingen B/C und Emsland. Bei älteren Anlagen – darunter unsere Blöcke Biblis A/B – entspricht die zusätzliche Erzeugungsmenge einer Verlängerung der Betriebsdauer um etwa acht Jahre. Außerdem wurden in der am gleichen Tag beschlossenen 12. Novelle des Atomgesetzes zusätzliche Sicherheitsanforderungen für Kernkraftwerke festgelegt. Dadurch werden Investitionen erforderlich, deren Höhe noch ungewiss ist. Beide Novellen sind im Dezember in Kraft getreten. Die Bundesregierung geht davon aus, dass die Gesetze nicht der Zustimmung des Bundesrates bedurften. Die Opposition und einzelne Bundesländer sind anderer Ansicht und haben Verfassungsklagen angekündigt.

Vor dem Hintergrund der Laufzeitverlängerung werden die Betreiber von Kernkraftwerken Zahlungen in einen neu zu schaffenden Fonds leisten, aus dem Maßnahmen zur Umsetzung des Energiekonzepts der Bundesregierung gefördert werden. Ein entsprechender Vertrag mit dem Bund wurde am 10. Januar 2011 unterzeichnet. Er sieht vor, dass die Kernkraftwerksbetreiber ab 2017 einen Förderbeitrag für die zusätzlich eingespeisten Strommengen aus der Laufzeitverlängerung entrichten. Dieser wird mit 9 € je MWh beziffert, unterliegt aber Anpassungen an die Entwicklung der Verbraucherpreise und der Börsennotierungen für Strom. Der Förderbeitrag verringert sich, falls die Kernbrennstoffsteuer erhöht oder der Erhebungszeitraum über 2016 hinaus verlängert wird. Gleiches gilt, wenn die Mengenkontingente aus der Laufzeitverlängerung zu Ungunsten der Kernkraftwerksbetreiber verändert werden oder wenn hoheitlich veranlasste oder mit den Behörden abgestimmte Nachrüstungs- oder Sicherheitsanforderungen zu Ausgaben von mehr als 500 Mio. € pro Block führen. Von 2011 bis 2016 leisten die Kernkraftwerksbetreiber pauschale Vorauszahlungen auf die Förderbeiträge, die sich im Gesamtzeitraum auf 1,4 Mrd. € summieren. Die Vorauszahlungen sind unverzinslich. Sie werden in gleichen jährlichen Raten auf die Förderbeiträge von 2017 bis 2022 angerechnet.

**Förderung der Solarenergie auf dem Prüfstand.** In Deutschland hat die Förderung von Solarstrom zu einem unerwartet starken Ausbau des Bestands an Photovoltaikanlagen geführt. Nach Angaben des Bundesumweltministeriums ist die installierte Leistung 2010 um über 70% auf rund 17 GW gestiegen. Der Bundesverband der Energie- und Wasserwirtschaft (BDEW) schätzt, dass auf Photovoltaik mehr als die Hälfte der Subventionen entfallen, die 2011 im Rahmen des Erneuerbare-Energien-Gesetzes (EEG) geleistet werden, obwohl Solaranlagen nur ein Fünftel des EEG-Stroms produzieren. Der deutliche Kapazitätsausbau hatte zur Folge, dass die EEG-Umlage, die die Stromverbraucher über ihre Stromrechnung bezahlen, von 2,05 Cent (2010) auf 3,53 Cent (2011) je Kilowattstunde erhöht wurde. Dies löste eine breite Kontroverse aus. Die Bundesregierung hat die Fördersätze für Solarstrom zum 1. Januar 2011 um etwa 13% gekürzt und bereitet eine weitere Senkung zum 1. Juli 2011 vor. Darüber hinaus wird sie das EEG mit Wirkung zum 1. Januar 2012 grundlegend novellieren.

**Sondersteuer für Energieunternehmen in Ungarn.** Das ungarische Parlament hat im Oktober 2010 die Einführung einer bis 2012 befristeten Sondersteuer für Unternehmen der Branchen Energieversorgung, Telekommunikation und Einzelhandel beschlossen. Ihr Aufkommen wird auf etwa 600 Mio. € pro Jahr veranschlagt. Zweck der Abgabe ist der Abbau des staatlichen Haushaltsdefizits. Die erste Zahlung war bereits für 2010 auf Basis des Umsatzes von 2009 zu leisten. Energieversorger haben 1,05% ihrer Nettoerlöse abzuführen. Dem Wortlaut des Gesetzes zufolge wird nicht nur der Außenumsatz besteuert, sondern auch alle konzerninternen Erlöse. Im Berichtsjahr belastete die Abgabe das Ergebnis unserer ungarischen Tochtergesellschaften mit insgesamt 25 Mio. €. Sie ist rechtlich umstritten und wird derzeit von der EU-Kommission geprüft.

**Großbritannien: Regierung plant Gesetzespaket für mehr Klimaschutz.** In Großbritannien ist eine Koalition aus Konservativen und Liberaldemokraten als Sieger aus den Parlamentswahlen vom Mai 2010 hervorgegangen. Mit einer Reihe von Gesetzesinitiativen wollen die beiden Regierungsparteien die Rahmenbedingungen für klimaschonende Stromerzeugung verbessern. Unter anderem ist geplant, fossile Brennstoffe in Abhängigkeit vom Kohlendioxid-Ausstoß mit einer Steuer zu belegen. Für Stromerzeugung aus Gas, Kernkraft oder erneuerbaren Energien ergäbe sich damit – über den Emissionshandel hinaus – ein weiterer Kostenvorteil gegenüber Steinkohle. Daneben soll ein neues Vergütungssystem für Strom aus Kernkraftwerken und erneuerbaren Energien die Planungssicherheit für Investoren erhöhen. Zwei Modelle werden hier geprüft: zum einen eine feste Zuzahlung auf den Großhandelspreis, zum anderen ein garantierter Abnahmepreis. Neue Kraftwerke sollen außerdem nur dann genehmigt werden, wenn deren CO<sub>2</sub>-Emissionen eine noch zu bestimmende Obergrenze nicht überschreiten. Die Regierung will die Höchstmenge so niedrig ansetzen, dass lediglich solche Kohlekraftwerke gebaut werden können, bei denen das Kohlendioxid zumindest teilweise aufgefangen und gespeichert wird. Ferner prüft die Regierung die Einführung eines Kapazitätsmarktes, d.h., Energieversorger sollen für das Vorhalten flexibler Kraftwerksleistung eine Vergütung erhalten, auch wenn sie keinen Strom produzieren. Solche Reservekapazitäten werden immer mehr gebraucht, da durch den Ausbau der erneuerbaren Energien die wetterbedingten Fluktuationen des Stromangebots zunehmen. Ein Grundsatzpapier zur Reform des Strommarktes hat die britische Regierung im Dezember 2010 vorgestellt. Bis März 2011 können sich Bürger, Verbände und Unternehmen zu den Reformvorschlägen äußern. Nach Abschluss des Konsultationsprozesses will die Regierung eine Gesetzesvorlage erstellen. Die Reformen sollen spätestens 2014 in Kraft treten.

## 1.4 WESENTLICHE EREIGNISSE

Das zurückliegende Geschäftsjahr war für uns nicht nur von energiepolitischen Weichenstellungen geprägt. Auch bei der Modernisierung und Erweiterung unseres Erzeugungsportfolios konnten wir wichtige Etappenziele erreichen: 2010 gingen bereits zwei Gaskraftwerke aus unserem laufenden Investitionsprogramm in Betrieb. Auch beim Ausbau der erneuerbaren Energien kamen wir gut voran. Und im Upstream-Geschäft stellten wir die Weichen für die größte Investition in der Geschichte der RWE Dea.

**Bundestag beschließt Kernbrennstoffsteuer und längere Laufzeiten für Kernkraftwerke.** Am 28. Oktober 2010 hat der Deutsche Bundestag das Kernbrennstoffsteuergesetz verabschiedet, das die Einführung einer Steuer für Betreiber von Kernkraftwerken vorsieht. Ebenfalls am 28. Oktober stimmten die Abgeordneten der 11. Novelle des Atomgesetzes zu, die eine Verlängerung der Laufzeit von Kernkraftwerken um durchschnittlich zwölf Jahre ermöglicht. Die Gesetze sind am 1. Januar 2011 bzw. 14. Dezember 2010 in Kraft getreten. Vor dem Hintergrund der Laufzeitverlängerung werden die Betreiber von Kernkraftwerken Zahlungen in einen neu geschaffenen Fonds leisten, aus dem Maßnahmen zur Umsetzung des Energiekonzepts der Bundesregierung gefördert werden. Die Details sind in einem „Förderfondsvertrag“ zwischen den Versorgern und der Bundesrepublik Deutschland festgelegt, der am 10. Januar 2011 unterzeichnet wurde. Wir informieren über die Thematik ausführlich auf Seite 66f.

**RWE erwirbt Stromkontingent des Kernkraftwerks Stade.** Bereits im Vorfeld der 11. Atomgesetznovelle haben wir die Voraussetzung für einen etwas längeren Betrieb des Kernkraftwerks Biblis A geschaffen: RWE Power erwarb im Mai von der E.ON Kernkraft GmbH das noch nicht genutzte Stromkontingent des bereits stillgelegten Kernkraftwerks in Stade. Diese Anlage war von 1972 bis 2003 am Netz. Das übertragene Kontingent von 4,8 Mrd. Kilowattstunden erlaubt es uns, den 1.167-Megawatt-Block Biblis A etwa sechs Monate länger mit voller Last zu betreiben.

**Bündelung der RWE-Aktivitäten in Deutschland und Osteuropa.** Auf dem 2007 eingeschlagenen Weg zu einer effizienteren Konzernstruktur sind wir weiter vorangekommen. Im September beschloss der Vorstand eine Reihe von Reorganisationsmaßnahmen, die zum 1. Januar 2011 in Kraft getreten sind. Das deutsche Vertriebs- und Verteilnetzgeschäft wurde in der RWE Rheinland Westfalen Netz AG zusammengeführt. Über diese Gesellschaft, die jetzt unter dem Namen RWE Deutschland AG firmiert, werden die RWE Vertrieb (inkl. eprimo, RWE Energiedienstleistungen und RWE Aqua), die Regionalgesellschaften, die RWE Effizienz und die bisherigen Beteiligungen der RWE Rheinland Westfalen Netz gesteuert. Neu organisiert haben wir auch unsere Aktivitäten in Osteuropa: Die dortigen Landesgesellschaften werden fortan von der neu gegründeten RWE East, s.r.o. mit Sitz in Prag geführt. Eine Ausnahme bildet das tschechische Gasfernleitungsgeschäft, das aufgrund regulatorischer Vorgaben direkt dem Ressort des Vorstandsvorsitzenden der RWE AG zugeordnet ist.

**Holding-Vorstand auf fünf Ressorts verkleinert.** Dr. Ulrich Jobs, im Vorstand der RWE AG zuständig für die operative Steuerung des internationalen Geschäfts, hat das Unternehmen am 30. September 2010 im gegenseitigen Einvernehmen verlassen. Damit verkleinerte sich der Holding-Vorstand auf fünf Ressorts. Die Zuständigkeiten innerhalb des Gremiums wurden neu definiert. Dr. Leonhard Birnbaum verantwortet seither als Chief Commercial Officer das Management aller Commodity-Positionen im Konzern. Entsprechend ist ihm die RWE Supply & Trading zugeordnet, ferner die länderübergreifend tätigen Gesellschaften RWE Innogy, RWE Dea und RWE Technology. Dr. Rolf Martin Schmitz führt nun als Chief Operating Officer die national aufgestellten Gesellschaften: Dies sind neben RWE Deutschland und RWE Power unsere Aktivitäten in den Niederlanden und Belgien, in Großbritannien sowie in Zentralost-/Südosteuropa.

**RWE verkauft deutsches Gasfernleitungsnetz.** Im Dezember haben wir einen Vertrag zur Veräußerung der Thyssengas GmbH unterzeichnet. Käufer des Unternehmens, in dem unser deutsches Gasfernleitungsnetz zusammengefasst ist, sind vom australischen Finanzdienstleister Macquarie verwaltete Infrastrukturfonds. Inzwischen liegen alle erforderlichen Genehmigungen für den Verkauf vor. Thyssengas transportiert jährlich fast 10 Mrd. m<sup>3</sup> Erdgas durch ein Fernleitungsnetz mit einer Gesamtlänge von ca. 4.100 Kilometern. Wir hatten uns gegenüber der EU-Kommission zum Verkauf dieser Aktivität verpflichtet.

**Neue Gaskraftwerke in Deutschland und Großbritannien starten Produktion.** Im Geschäftsjahr 2010 haben wir den Bau der Gas-und-Dampfturbinen-Kraftwerke in Lingen und Staythorpe abgeschlossen. Beide Anlagen sind am Netz. Der Lingener Doppelblock mit einer Nettoleistung von 876 MW wurde am 14. April im Beisein des damaligen niedersächsischen Ministerpräsidenten und heutigen Bundespräsidenten Christian Wulff in Betrieb genommen. Für die hochmoderne Anlage, die über einen Wirkungsgrad von nahezu 60% verfügt, haben wir 0,5 Mrd. € ausgegeben. Die vier Blöcke in Staythorpe (Nottinghamshire) mit 1.650 MW Gesamtleistung haben die Produktion im Zeitraum von August bis November aufgenommen. Ihr Wirkungsgrad liegt mit 58% ebenfalls auf Spitzenniveau. Das Investitionsvolumen betrug 0,8 Mrd. €.

**RWE beschließt Bau eines Gaskraftwerks in der Türkei.** Im April 2010 haben wir die Investitionsentscheidung für ein Gas-und-Dampfturbinen-Kraftwerk in Denizli (Westtürkei) getroffen. Kurz darauf wurde mit den Baumaßnahmen begonnen. Die Anlage soll über eine Nettoleistung von 775 MW verfügen und 2013 die Stromproduktion aufnehmen. Eigentümer und Betreiber wird ein Joint Venture sein, an dem RWE 70% und das türkische Energieunternehmen Turcas 30% hält. Das Investitionsvolumen beträgt voraussichtlich 0,5 Mrd. €.

**Weichen für Rekordinvestition im Upstream-Geschäft gestellt.** RWE Dea hat den Weg für die größte Einzelinvestition in der Unternehmensgeschichte geebnet: Unsere Upstream-Tochter wird in den kommenden zwei Jahrzehnten 3,6 Mrd. US\$ für die Entwicklung von Gasfeldern in den ägyptischen Konzessionen North Alexandria und West Mediterranean Deep Water einsetzen. Im Juli haben wir mit dem Ölminister des Landes, der Staatsgesellschaft EGPC und BP entsprechende Verträge unterzeichnet, die zuvor vom ägyptischen Parlament genehmigt worden waren. Die Förderung soll bis Ende 2014 aufgenommen werden. Die Investitionen für die Feldesentwicklung summieren sich auf etwa 9 Mrd. US\$. Sie entfallen zu etwa 40% auf uns und zu etwa 60% auf unseren Partner BP, der die Betriebsführerschaft übernimmt. Die uns zustehenden Erdgasreserven aus den Konzessionen betragen über 50 Mrd. m<sup>3</sup>. Die Konzessionen North Alexandria und West Mediterranean Deep Water liegen im westlichen Nildelta rund 40 Kilometer vor der ägyptischen Küste. Die Wassertiefe im Gebiet der nun anlaufenden Feldesentwicklung liegt bei 300 bis 800 Metern. Der auf RWE Dea entfallende Anteil an der jährlichen Produktion soll mehr als 3 Mrd. m<sup>3</sup> Gas erreichen. Vor diesem Hintergrund verfolgen wir die politische Lage in Ägypten sehr aufmerksam.

**Große Fortschritte beim Ausbau der erneuerbaren Energien.** RWE Innogy hat ihren Wachstumskurs auf dem Gebiet der regenerativen Energien im Berichtsjahr fortgesetzt. Das Unternehmen verfügte zum Jahresende über eine Erzeugungskapazität auf Basis erneuerbarer Energien von 2,3 GW, der Konzern insgesamt über 2,9 GW. Weitere 1,1 GW befinden sich im Bau. Darüber hinaus entwickeln wir derzeit Projekte mit einer Gesamtleistung von 18,2 GW. Der Schwerpunkt liegt auf Windkraftanlagen. Daneben investieren wir in Strom- und Wärmeerzeugung aus Biomasse sowie in geringerem Maße auch in Solarthermie.

Vor allem beim Ausbau der Windstromerzeugung auf dem Meer (offshore) haben wir wichtige Etappenziele erreicht:

- Im Januar 2010 erteilte uns die britische Regierung im Rahmen einer Ausschreibung die Genehmigung, die Offshore-Windprojekte Atlantic Array und Dogger Bank zu entwickeln. Atlantic Array mit einer Erzeugungsleistung von bis zu 1,5 GW werden wir zunächst allein entwickeln. Dogger Bank dagegen haben wir als Teil eines Konsortiums mit dem Namen „Forewind“ gewonnen, an dem RWE Innogy mit 25% beteiligt ist. In dem Gebiet sollen Windkraftanlagen mit einer Gesamtleistung von 9 GW errichtet werden.
- RWE Innogy hat 2010 den Startschuss für den Bau unseres ersten deutschen Offshore-Windparks gegeben. Derzeit laufen bauvorbereitende Maßnahmen; die ersten Fundamente werden wir voraussichtlich Ende 2011 errichten. Der Windpark trägt den Namen „Nordsee Ost“, liegt etwa 35 Kilometer nördlich von Helgoland und soll über 48 Turbinen mit einer Gesamtleistung von 295 MW verfügen. Fertigstellen wollen wir ihn 2013. Die Investitionssumme wird auf 1 Mrd. € veranschlagt.

- Im November 2010 hat RWE Innogy gemeinsam mit Partnerunternehmen entschieden, den belgischen Offshore-Windpark Thornton Bank auszubauen. Dort sind bislang 30 MW installiert. Bis 2013 sollen 295 MW hinzukommen. Alle für den Ausbau erforderlichen Genehmigungen liegen vor. Das Investitionsvolumen summiert sich auf 1,3 Mrd. €. RWE Innogy hält 26,7 % an dem Projekt.

Bei der Windstromerzeugung an Land (onshore) ist RWE Innogy ebenfalls gut vorangekommen. In Italien nahmen wir mit San Basilio (25 MW) und Ururi (26 MW) zwei neue Windparks in Betrieb. Wir haben sie gemeinsam mit unserem italienischen Partner Fri-El Green Power entwickelt und gebaut. Auch in Polen gingen zwei neue Windparks der RWE Innogy ans Netz, einer in Piecki (32 MW) und einer in Tychowo (35 MW). Darüber hinaus haben Anlagen in Frankreich und Schottland die Produktion aufgenommen.

Auch auf dem Gebiet der Strom- und Wärmeerzeugung aus Biomasse hat RWE Innogy ihren Expansionskurs fortgesetzt. Im März 2010 begann das Unternehmen im US-Bundesstaat Georgia mit dem Bau einer Großanlage zur Pelletierung von Holz. Mit einer jährlichen Produktion von 750.000 Tonnen wird die Fabrik weltweit eine der größten und modernsten ihrer Art sein. Die Pellets sollen in reinen Biomassekraftwerken oder gemeinsam mit Steinkohle verfeuert werden. Die Inbetriebnahme des Pelletwerkes ist für 2011 geplant. Das Investitionsvolumen beträgt 120 Mio. €.

**Neue Partner für den Ausbau der erneuerbaren Energien.** Im zurückliegenden Geschäftsjahr hat RWE Innogy zwei Partnerschaften für Projekte zur regenerativen Energieerzeugung geschlossen. Im April 2010 wurde mit 26 Stadtwerken und regionalen Energieversorgern das Gemeinschaftsunternehmen Green GECCO gegründet. RWE Innogy ist mit 51 % daran beteiligt. Die neue Gesellschaft soll bis 2020 rund 1 Mrd. € in die Strom- und Wärmeproduktion aus erneuerbaren Energien investieren, auch außerhalb Deutschlands. Im Juni 2010 folgte eine weitere Partnerschaft: Mit den Stadtwerken München und Siemens gründete RWE Innogy ein Joint Venture für den Bau und Betrieb des britischen Offshore-Windparks Gwynt y Môr. Wir halten 60 % daran. Die Stadtwerke München sind mit 30 % beteiligt, Siemens mit 10 %. Die Investitionssumme für Gwynt y Môr beträgt mehr als 2 Mrd. € (inkl. Netzanbindung zur Küste). Der Windpark mit 160 Turbinen und einer Gesamtleistung von 576 MW entsteht vor der Küste von Nordwales. Siemens wird die Windturbinen liefern, installieren und warten. Das Unternehmen wurde außerdem mit der Netzanbindung beauftragt.

**RWE begibt Hybridanleihe mit Rekordvolumen.** Im September 2010 haben wir eine Hybridanleihe mit einem Volumen von 1,75 Mrd. € begeben. Es war die größte Emission dieses Wertpapiertyps, die je in Europa von einem Industrieunternehmen begeben wurde. Sie stieß bei Investoren auf reges Interesse. Weitere Informationen hierzu finden Sie auf den Seiten 102 und 195.

### Wesentliche Ereignisse nach Ablauf des Berichtszeitraums:

**Ausstieg aus rumänischem Kernenergieprojekt.** Im Januar 2011 hat RWE gemeinsam mit GDF Suez (Frankreich) und Iberdrola (Spanien) den Rückzug aus dem laufenden Kernkraftprojekt Cernavoda in Rumänien bekannt gegeben. An dem Standort sollen zwei neue Blöcke mit einer Leistung von je 720 MW errichtet werden. Träger des Projekts ist ein Joint Venture, an dem die staatliche SN Nuclear-electrica die Mehrheit hält und weitere europäische Versorger beteiligt sind. RWE hatte einen Anteil von 9,15%. Der Ausstieg aus dem Projekt hat keine wesentlichen finanziellen Auswirkungen für uns. Grund für unseren Entschluss sind wirtschaftliche und marktbedingte Unsicherheiten, die zum großen Teil auf Nachwirkungen der Finanzkrise zurückzuführen sind.

**RWE trennt sich von Minderheitsbeteiligung an Rostocker Kohlekraftwerk.** Im Februar 2011 haben wir unsere 24,6%-Beteiligung an einem Steinkohlekraftwerk in Rostock an die RheinEnergie AG veräußert. RheinEnergie übernimmt darüber hinaus den 25%-Anteil von Vattenfall. Die übrigen 50,4% werden weiterhin von EnBW gehalten. Das Kraftwerk verfügt über eine Stromerzeugungskapazität von 553 MW und liefert Fernwärme in das Netz der Stadtwerke Rostock.

## 1.5 ANMERKUNGEN ZUR BERICHTSWEISE

**Erläuterungen zur Segmentstruktur.** Im vorliegenden Bericht folgen wir der Segmentstruktur, die wir erstmals im Jahresabschluss 2009 angewendet haben. Der RWE-Konzern ist untergliedert in sieben Unternehmensbereiche, die nach nationalen und funktionalen Kriterien abgegrenzt sind. Bei der Zuordnung der Aktivitäten zu den Bereichen haben wir gegenüber 2009 einige Anpassungen vorgenommen; diese betreffen im Wesentlichen Geschäftsteile des Ende September 2009 erworbenen niederländischen Energieversorgers Essent. Die Unternehmensbereiche stellen sich wie folgt dar:

- **Deutschland:** Der Bereich besteht aus den Geschäftsfeldern „Stromerzeugung“ und „Vertrieb und Verteilnetze“. Das erstgenannte Geschäftsfeld enthält die Aktivitäten der RWE Power. Zum Geschäftsfeld Vertrieb und Verteilnetze zählen die mittlerweile in RWE Deutschland AG umfirmierte RWE Rheinland Westfalen Netz AG mitsamt ihren Beteiligungen sowie die RWE Vertrieb (inkl. eprimo, RWE Energiedienstleistungen und RWE Aqua), die RWE Effizienz und die deutschen Regionalversorger. Letztere betreiben über das Netz- und Endkundengeschäft hinaus in geringem Umfang auch eigene Stromerzeugungsanlagen. Das Geschäftsfeld umfasst außerdem einige ausländische Aktivitäten: unsere Minderheitsbeteiligungen an der österreichischen KELAG und der luxemburgischen ENOVOS sowie unser Wassergeschäft in Zagreb (Kroatien), das von RWE Aqua gesteuert wird. Seit dem 1. April 2010 ordnen wir auch die deutschen Gasspeicheraktivitäten von Essent dem Geschäftsfeld Vertrieb und Verteilnetze zu.
- **Niederlande/Belgien:** Hier berichten wir über die zum 30. September 2009 erstkonsolidierte Essent. Allerdings haben wir – neben der oben erwähnten Umgliederung – noch folgende Anpassungen vorgenommen: Seit 2010 weisen wir die Windstromerzeugung des Unternehmens im Segment Erneuerbare Energien aus; die Handelsaktivitäten einschließlich des Key-Account-Geschäfts ordnen wir dem Segment Trading/Gas Midstream zu. Um Transparenz zu gewährleisten, zeigen wir die Ergebnisbeiträge dieser beiden Essent-Aktivitäten als separate Positionen. Unser früherer niederländischer Energievertrieb (RWE Energy Nederland) wurde zum 1. Oktober 2009 auf Essent übertragen. Für die ersten neun Monate 2009 ist er in der Position „Sonstige, Konsolidierung“ enthalten. Darüber hinaus hat Essent im dritten Quartal 2010 das von RWE Power gestartete Kraftwerksprojekt in Eemshaven übernommen. An dem Standort in der Provinz Groningen bauen wir einen Steinkohle-Doppelblock mit 1.560 MW Nettoleistung.
- **Großbritannien:** Unter dieser Position ist RWE npower dargestellt, d.h. unserritisches Erzeugungs- und Vertriebsgeschäft mit Ausnahme der von RWE Innogy verantworteten Stromproduktion aus erneuerbaren Energien.
- **Zentralost-/Südosteuropa:** In diesem Unternehmensbereich bündeln wir unsere Gesellschaften in Polen, Ungarn, Tschechien und der Slowakei. Seit Kurzem sind hier auch unsere türkischen Aktivitäten erfasst. Daher haben wir die Bezeichnung des Bereichs angepasst (vormals: Zentral- und Osteuropa). In Polen konzentrieren wir uns auf den Stromvertrieb und das Stromverteilnetz, in Ungarn zusätzlich auf die Braunkohleverstromung, die von unserer Tochtergesellschaft Mátra verantwortet wird. Über Minderheitsbeteiligungen sind wir in Ungarn auch im Gasgeschäft und in der Wasser-

versorgung tätig. Unsere tschechischen Aktivitäten umfassen den Vertrieb, die Verteilung, den überregionalen Transport, den Transit und die Speicherung von Gas. In der Slowakei sind wir über unsere Minderheitsbeteiligung an VSE im Stromnetz- und im Stromendkundengeschäft aktiv sowie über RWE Gas Slovensko im Gasvertrieb. In der Türkei errichten wir gemeinsam mit einem Partner ein Gaskraftwerk, das 2013 den kommerziellen Betrieb aufnehmen soll.

- Erneuerbare Energien: Der Bereich umfasst alle Aktivitäten der RWE Innogy, die auf Strom- und Wärmezeugung aus regenerativen Quellen spezialisiert ist. Wie bereits erwähnt, weisen wir hier seit 2010 auch die Stromproduktion der Windkraftanlagen von Essent aus.
- Upstream Gas & Öl: Dieses Segment beinhaltet das Geschäft der RWE Dea. Das Unternehmen fördert Gas und Öl; regionale Schwerpunkte sind Europa und Nordafrika.
- Trading/Gas Midstream: In diesem Unternehmensbereich sind der Energiehandel, die Gas-Midstream-Aktivitäten und das Vertriebsgeschäft mit unseren großen deutschen Industrie- und Geschäftskunden zusammengefasst. Seit 1. Januar 2010 enthält der Bereich auch den Energiehandel und das Key-Account-Geschäft von Essent.

Unter der Position „Sonstige, Konsolidierung“ werden unser Stromtransportnetz-Betreiber Amprion, die Konzernholding RWE AG, unsere internen Dienstleister RWE Service, RWE IT und RWE Consulting sowie die zum 1. Januar 2010 gegründete RWE Technology erfasst. Darin ebenfalls enthalten ist Thyssengas; die Vermögenswerte und Schulden des Unternehmens werden in unserer Bilanz als „zur Veräußerung bestimmt“ ausgewiesen.

## 1.6 GESCHÄFTSENTWICKLUNG

RWE blickt auf ein sehr erfolgreiches Geschäftsjahr zurück. Das betriebliche Ergebnis war das höchste in der Unternehmensgeschichte. Mit einem Plus von 8% gegenüber 2009 hat es unsere Erwartungen übertroffen. Beim nachhaltigen Nettoergebnis, das um 6% stieg, lagen wir ebenfalls über unserer Prognose. Motor des Erfolgs war einmal mehr die deutsche Stromerzeugung. Außerdem kam uns zugute, dass wir den 2009 erworbenen niederländischen Versorger Essent erstmals mit vollen zwölf Monaten im Jahresabschluss berücksichtigen konnten.

| Stromaufkommen der Unternehmensbereiche<br>in Mrd. kWh | Deutschland        |                    | Niederlande/Belgien |            | Großbritannien    |                   | Zentralost-/Südosteuropa |                   | Erneuerbare Energien |            | RWE-Konzern        |                    |
|--------------------------------------------------------|--------------------|--------------------|---------------------|------------|-------------------|-------------------|--------------------------|-------------------|----------------------|------------|--------------------|--------------------|
|                                                        | 2010               | 2009               | 2010                | 2009       | 2010              | 2009              | 2010                     | 2009              | 2010                 | 2009       | 2010               | 2009               |
| Eigenerzeugung                                         | 165,1 <sup>1</sup> | 146,0 <sup>1</sup> | 14,3                | 4,5        | 34,3              | 26,7              | 5,7                      | 5,7               | 5,9                  | 4,3        | 225,3              | 187,2              |
| Braunkohle                                             | 65,4               | 65,3               | –                   | –          | –                 | –                 | 5,6                      | 5,6               | –                    | –          | 71,0               | 70,9               |
| Steinkohle                                             | 39,0               | 31,8               | 5,7                 | 1,6        | 10,4              | 10,7              | –                        | –                 | 0,1                  | –          | 55,2               | 44,1               |
| Kernenergie                                            | 45,2               | 33,9               | –                   | –          | –                 | –                 | –                        | –                 | –                    | –          | 45,2               | 33,9               |
| Gas                                                    | 11,9               | 11,5               | 6,8                 | 2,1        | 23,8              | 15,8              | 0,1                      | 0,1               | 0,2                  | 0,2        | 42,8               | 29,7               |
| Erneuerbare Energien                                   | 1,5                | 1,6                | 1,8                 | 0,8        | –                 | –                 | –                        | –                 | 5,6                  | 4,1        | 8,9                | 6,5                |
| Pumpwasser, Öl, Sonstige                               | 2,1                | 1,9                | –                   | –          | 0,1               | 0,2               | –                        | –                 | –                    | –          | 2,2                | 2,1                |
| Konzernexterner Strombezug                             | 27,2               | 33,9               | 8,6 <sup>2</sup>    | 1,5        | 18,0 <sup>2</sup> | 25,9 <sup>2</sup> | 20,5 <sup>2</sup>        | 20,3 <sup>2</sup> | 0,1                  | 0,1        | 104,4 <sup>3</sup> | 112,8 <sup>3</sup> |
| <b>Gesamt</b>                                          | <b>192,3</b>       | <b>179,9</b>       | <b>22,9</b>         | <b>6,0</b> | <b>52,3</b>       | <b>52,6</b>       | <b>26,2</b>              | <b>26,0</b>       | <b>6,0</b>           | <b>4,4</b> | <b>329,7</b>       | <b>300,0</b>       |

1 Inkl. Strombezüge aus Kraftwerken, die sich nicht in RWE-Eigentum befinden, über deren Einsatz wir aber aufgrund langfristiger Vereinbarungen frei verfügen können. Im Geschäftsjahr 2010 waren dies 25,6 Mrd. kWh, davon 23,4 Mrd. kWh aus Steinkohle.

2 Die ausgewiesenen Strommengen wurden ganz oder teilweise über unser Handelsgeschäft bezogen.

3 Inkl. Bezugsmengen von RWE Supply & Trading und von Gesellschaften, die wir unter „Sonstige, Konsolidierung“ erfassen (im Wesentlichen Amprion)

**Stromerzeugung um 20% gestiegen.** Der RWE-Konzern hat im abgelaufenen Geschäftsjahr 225,3 Mrd. Kilowattstunden (kWh) Strom produziert, 20% mehr als 2009. Eigenerzeugung und konzernexterner Bezug summierten sich zu einem Stromaufkommen von 329,7 Mrd. kWh. Damit wurde der Vorjahreswert um 10% übertroffen. Von unserer Stromproduktion entfielen 32% auf Braunkohle, 25% auf Steinkohle, 20% auf Kernenergie und 19% auf Gas. Der Anteil der erneuerbaren Energien betrug 4%.

- **Deutschland:** Der Unternehmensbereich Deutschland produzierte 165,1 Mrd. kWh Strom. Bezogen auf den Konzern entspricht das einem Anteil von 73%. Neben der deutschen Produktion von RWE Power sind hier kleinere Mengen von Regionalgesellschaften erfasst. Mit berücksichtigt ist auch die Produktion aus Kraftwerken, die sich nicht in RWE-Eigentum befinden, über deren Einsatz wir aber aufgrund langfristiger Verträge frei verfügen können. Zum großen Teil handelt es sich dabei um Steinkohleblöcke. Gegenüber 2009 ist die Erzeugung des Unternehmensbereichs Deutschland um 13% gestiegen, vor allem wegen einer höheren Verfügbarkeit des Kernkraftwerks Biblis. Daneben waren auch unsere vertraglich gesicherten Steinkohlekraftwerke wesentlich stärker im Einsatz

als 2009. Das ergibt sich aus verbesserten Marktbedingungen für diese Anlagen. Die Inbetriebnahme unseres neuen Gaskraftwerks in Lingen mit 876 MW Gesamtleistung schlug ebenfalls positiv zu Buche.

- **Niederlande/Belgien:** Die Stromproduktion von Essent belief sich auf 14,3 Mrd. kWh. Wegen der erstmals ganzjährigen Einbeziehung des niederländischen Energieversorgers wurde der Vorjahreswert (4,5 Mrd. kWh) deutlich übertroffen. Wir hatten Essent zum 30. September 2009 erstkonsolidiert. Für 2009 weisen wir daher nur die im vierten Quartal erzeugten Mengen aus.
- **Großbritannien:** Die Stromproduktion der RWE npower stieg um 28 % auf 34,3 Mrd. kWh. Nach Revisionen im Vorjahr war unser Gaskraftwerk in Didcot 2010 wieder wesentlich stärker im Einsatz. Außerdem ging in der zweiten Jahreshälfte die neue Gas-und-Dampfturbinen-Anlage in Staythorpe mit 1.650 MW Gesamtleistung ans Netz. Die Auslastung unserer britischen Steinkohlekraftwerke war dagegen marktbedingt etwas geringer als 2009.
- **Zentralost-/Südosteuropa:** Die hier produzierten Mengen blieben mit 5,7 Mrd. kWh unverändert. Sie stammen im Wesentlichen vom ungarischen Braunkohleverstromer Mátra.
- **Erneuerbare Energien:** Der Unternehmensbereich erzeugte 5,9 Mrd. kWh Strom, der nahezu ausschließlich aus regenerativen Quellen stammte. Gegenüber 2009 entspricht das einem Anstieg um 37 %, der vor allem darauf beruht, dass wir in dem Bereich seit 2010 auch die Stromproduktion der Windkraftanlagen von Essent ausweisen. Positiv wirkte auch, dass wir Danta de Energías erstmals ganzjährig in unseren Zahlen berücksichtigt haben. Im Mai 2009 hatten wir unsere Beteiligung an dem spanischen Windparkbetreiber von 49,33 auf 98,65 % aufgestockt. Daneben trug organisches Wachstum zum Produktionsanstieg bei. Im Dezember 2009 ging beispielsweise der britische Offshore-Windpark Rhyl Flats mit 90 MW Gesamtkapazität ans Netz.

Zusätzlich zur Eigenerzeugung beziehen wir Strom von konzernexternen Anbietern. Diese Mengen summierten sich auf 104,4 Mrd. kWh (Vorjahr: 112,8 Mrd. kWh). Darin enthalten ist auch Strom, der nach dem Erneuerbare-Energien-Gesetz (EEG) von Dritten in das RWE-Netz eingespeist wurde.

**Mit über 52 Gigawatt Kraftwerkskapazität einer der führenden Stromerzeuger in Europa.** Zum Ende des Geschäftsjahres 2010 verfügte der RWE-Konzern über eine Kraftwerksleistung von 52,2 GW. Damit liegen wir unter den europäischen Energieversorgern an fünfter Stelle. In den Zahlen enthalten sind die bereits erwähnten vertraglich gesicherten Kapazitäten, die sich nicht in RWE-Eigentum befinden. Gegenüber 2009 hat sich unsere Kraftwerksleistung um 2,6 GW erhöht. Hinzugekommen sind u.a. unsere neuen Gaskraftwerke in Lingen und Staythorpe. Mit 29 % (Vorjahr: 31 %) hat Steinkohle nach wie vor den größten Anteil an der Gesamtleistung im RWE-Konzern, gefolgt von Gas mit 22 % (18 %), Braunkohle mit 21 % (22 %) und Kernenergie mit 12 % (13 %). Die erneuerbaren Energien kommen auf 6 % (5 %). Auf den Unternehmensbereich Deutschland entfallen 65 % unserer Erzeugungskapazität, auf Großbritannien 23 % und auf Niederlande/Belgien 6 %.

| Kraftwerkskapazität der Unternehmensbereiche<br>Stand: 31.12.10, in MW | Deutschland <sup>1</sup> | Niederlande/<br>Belgien | Großbritannien | Zentralost-/<br>Südosteuropa | Erneuerbare<br>Energien | RWE-Konzern   |
|------------------------------------------------------------------------|--------------------------|-------------------------|----------------|------------------------------|-------------------------|---------------|
| Primärenergieträger                                                    |                          |                         |                |                              |                         |               |
| Steinkohle                                                             | 9.673                    | 885                     | 4.575          | –                            | 10 <sup>2</sup>         | 15.143        |
| Gas                                                                    | 5.086                    | 1.927                   | 4.525          | 147                          | 44 <sup>2</sup>         | 11.729        |
| Braunkohle                                                             | 10.172                   | –                       | –              | 763                          | 19 <sup>2</sup>         | 10.954        |
| Kernenergie                                                            | 6.295                    | –                       | –              | –                            | –                       | 6.295         |
| Erneuerbare Energien                                                   | 313                      | 331                     | –              | 1                            | 2.302                   | 2.947         |
| Pumpwasser, Öl, Sonstige                                               | 2.489                    | –                       | 2.657          | –                            | –                       | 5.146         |
| <b>Gesamt</b>                                                          | <b>34.028</b>            | <b>3.143</b>            | <b>11.757</b>  | <b>911</b>                   | <b>2.375</b>            | <b>52.214</b> |

1 Inkl. Kapazitäten von Kraftwerken, die sich nicht in RWE-Eigentum befinden, über deren Einsatz wir aber aufgrund langfristiger Vereinbarungen frei verfügen können. Zum 31. Dezember 2010 waren dies 8.672 MW, davon 6.507 MW Stromerzeugungskapazität auf Basis von Steinkohle.

2 Überwiegend Anlagen der RWE Innogy Cogen

**Spezifische CO<sub>2</sub>-Emissionen um 8 % gesunken.** Im Geschäftsjahr 2010 verursachte unsere Stromerzeugung einen Kohlendioxid-Ausstoß von 164,9 Mio. Tonnen. Davon entfielen 142,7 Mio. Tonnen auf RWE-eigene Kraftwerke und die restlichen 22,2 Mio. Tonnen auf vertraglich gesicherte Kapazitäten. Unsere Emissionen lagen um 15,8 Mio. Tonnen bzw. 11 % über dem Vorjahresniveau. Das ist auf die stark erhöhte Stromproduktion unserer Steinkohle- und Gaskraftwerke zurückzuführen, zu der die erstmals ganzjährige Einbeziehung von Essent beitrug. Unser spezifischer Emissionsfaktor – das ist der Kohlendioxid-Ausstoß je erzeugter MWh Strom – hat sich demgegenüber verbessert: Er sank um 8 % von 0,796 Tonnen je MWh auf 0,732 Tonnen, weil sich der Anteil des CO<sub>2</sub>-frei oder CO<sub>2</sub>-arm erzeugten Stroms an unserer Gesamtproduktion erhöhte. Dabei kam u.a. die bessere Auslastung des Kernkraftwerks Biblis zum Tragen.

Im Berichtsjahr wurden uns kostenlose staatliche Emissionsrechte (sogenannte EU Allowances – EUAs) für einen CO<sub>2</sub>-Ausstoß in Höhe von 115,1 Mio. Tonnen zugeteilt. In Deutschland erhielten wir Emissionsberechtigungen für 84,9 Mio. Tonnen, in Großbritannien für 16,2 Mio. Tonnen und in den Niederlanden für 8,5 Mio. Tonnen. Insgesamt reichte die Zuteilung bei Weitem nicht aus, um unsere Emissionen abzudecken. Wir mussten daher Zertifikate zukaufen. Auf Konzernebene betrug die Unterausstattung 49,8 Mio. Tonnen.

| Emissionsbilanz nach Ländern                       | Deutschland <sup>1</sup> |       | Niederlande/<br>Belgien <sup>2</sup> |      | Großbritannien |      | Zentralost-/<br>Südosteuropa |      | RWE-Konzern |       |
|----------------------------------------------------|--------------------------|-------|--------------------------------------|------|----------------|------|------------------------------|------|-------------|-------|
| in Mio. Tonnen CO <sub>2</sub>                     | 2010                     | 2009  | 2010                                 | 2009 | 2010           | 2009 | 2010                         | 2009 | 2010        | 2009  |
| CO <sub>2</sub> -Ausstoß                           | 130,6                    | 123,3 | 8,3                                  | 2,7  | 18,9           | 16,6 | 7,1                          | 6,5  | 164,9       | 149,1 |
| Kostenlos zugeteilte CO <sub>2</sub> -Zertifikate  | 84,9                     | 83,1  | 8,5                                  | 2,4  | 16,2           | 14,9 | 5,5                          | 4,8  | 115,1       | 105,2 |
| Unterausstattung mit CO <sub>2</sub> -Zertifikaten | 45,7                     | 40,2  | –0,2                                 | 0,3  | 2,7            | 1,7  | 1,6                          | 1,7  | 49,8        | 43,9  |

1 Inkl. Kraftwerke, die sich nicht in RWE-Eigentum befinden, über deren Einsatz wir aber aufgrund langfristiger Vereinbarungen frei verfügen können. Diese Anlagen emittierten im Berichtsjahr 22,2 Mio. Tonnen CO<sub>2</sub>; zugeteilt wurden ihnen Zertifikate für 19,7 Mio. Tonnen.

2 Im Geschäftsjahr 2009 ist Essent nur mit drei Monaten enthalten.

In der Emissionshandelsperiode von 2008 bis 2012 und danach dürfen wir in Summe bis zu 100 Mio. Tonnen unseres CO<sub>2</sub>-Ausstoßes durch Einreichung von Zertifikaten abdecken, die durch Emissionsminderungen im Rahmen der Kyoto-Mechanismen Clean Development Mechanism und Joint Implementation geschaffen wurden. Vorteil ist, dass die Kosten für solche Zertifikate in aller Regel niedriger sind als die Marktpreise für EUAs. Zum Ende des Geschäftsjahres 2010 hatten wir Zertifikate für 68,6 Mio. Tonnen vertraglich gesichert. Allerdings besteht die Möglichkeit, dass Projekte nicht umgesetzt werden oder ihre Emissionseinsparungen hinter den Erwartungen zurückbleiben. Unter Einbeziehung solcher Risiken schätzen wir, dass uns Emissionsrechte für 41,4 Mio. Tonnen zufließen werden. Bis Ende 2010 haben wir bereits Zertifikate für 14,5 Mio. Tonnen erhalten und Zertifikate für 4,6 Mio. Tonnen verbraucht.

**Deutliche Erhöhung der Gas- und Ölreserven.** RWE Dea will ihre Gas- und Ölförderung bis 2016 auf etwa 70 Mio. Barrel Öläquivalente (OE) steigern. Die wichtigsten Wachstumsprojekte verfolgen wir in Nordafrika, in der britischen Nordsee und an der Küste vor Norwegen. Unsere Öl- und Gasreserven beliefen sich zum 31. Dezember 2010 auf 137 Mio. m<sup>3</sup> OE. Damit lagen sie um etwa 70% über dem Vorjahresniveau (81 Mio. m<sup>3</sup> OE). Hauptgrund ist, dass wir Verträge über die Entwicklung großer Gasvorkommen in zwei ägyptischen Konzessionen geschlossen haben (siehe Seite 71). Als Reserven bezeichnet man in der Erde lagernde Rohstoffe, deren Existenz nachgewiesen werden konnte und deren Förderung wirtschaftlich sinnvoll und rechtlich gesichert ist. Davon abzugrenzen sind die Ressourcen: Dabei handelt es sich um Rohstoffvorkommen, die nicht alle vorgenannten Kriterien erfüllen oder die geologisch noch nicht genau erfasst wurden. Die nachgewiesenen Ressourcen der RWE Dea beliefen sich Ende 2010 auf 91 Mio. m<sup>3</sup> OE (Vorjahr: 143 Mio. m<sup>3</sup> OE).

**Leichter Rückgang der Gas- und Ölproduktion.** Im zurückliegenden Geschäftsjahr förderte RWE Dea 2.786 Mio. m<sup>3</sup> Gas und 2.266 Tsd. m<sup>3</sup> Öl. Rechnet man die Gasmengen in Öläquivalente um und addiert sie zur Rohölproduktion, ergibt sich eine Gesamtförderung von 4.963 Tsd. m<sup>3</sup> oder 31,2 Mio. Barrel. Das sind 4% weniger als 2009. Beim Erdgas war die Produktion um 5% rückläufig. Durch die Ausschöpfung bestehender Reserven kam es zu einem natürlichen Förderabfall. Dies betraf vor allem unsere deutschen und britischen Konzessionsgebiete. Dagegen brachten zusätzliche Produktionsbohrungen am deutschen Standort Völkersen positive Effekte. Außerdem haben wir in einem neu erschlossenen Feld in der norwegischen Nordsee die Fördertätigkeit aufgenommen. Beim Rohöl blieben die Volumina um 3% hinter dem Vorjahreswert zurück. Auch hier machte sich die fortschreitende Reservenausschöpfung bemerkbar, besonders in unserem deutschen Erdölfeld Mittelplate. Betroffen waren auch Konzessionen im Golf von Suez (Ägypten). Positiv wirkte, dass wir in einem dänischen Feld die Produktion aufgenommen haben. Außerdem haben wir in Deutschland und Ägypten Maßnahmen zur Verbesserung der Förderausbeute ergriffen.

**Stromabsatz: Deutliches Plus wegen ganzjähriger Einbeziehung von Essent.** Im Geschäftsjahr 2010 haben wir 311,2 Mrd. kWh Strom an konzernexterne Kunden geliefert. Der Stromabsatz liegt typischerweise etwas unter dem Stromaufkommen; ausschlaggebend dafür sind Netzverluste sowie der Eigenverbrauch bei der Braunkohleförderung und in Pumpspeicherkraftwerken. Gegenüber 2009 ist der Stromabsatz um 10% gestiegen, u.a. wegen der erstmals ganzjährigen Einbeziehung von Essent. Außerdem profitierten wir von konjunkturbedingter Mehrnachfrage, vor allem in Deutschland.

| Außenabsatz Strom<br>in Mrd. kWh | Privat- und<br>Gewerbekunden |             | Industrie- und<br>Geschäftskunden |             | Weiterverteiler |             | Stromhandel |             | Gesamt       |              |
|----------------------------------|------------------------------|-------------|-----------------------------------|-------------|-----------------|-------------|-------------|-------------|--------------|--------------|
|                                  | 2010                         | 2009        | 2010                              | 2009        | 2010            | 2009        | 2010        | 2009        | 2010         | 2009         |
| Deutschland                      | 26,0                         | 26,1        | 29,1                              | 27,3        | 58,0            | 54,6        | –           | –           | 113,1        | 108,0        |
| Niederlande/Belgien              | 11,9                         | 3,5         | 10,1                              | 2,0         | –               | –           | –           | 1,3         | 22,0         | 6,8          |
| Großbritannien                   | 19,1                         | 20,1        | 30,8                              | 29,8        | –               | –           | –           | –           | 49,9         | 49,9         |
| Zentralost-/Südosteuropa         | 7,9                          | 8,7         | 10,2                              | 9,0         | 6,5             | 7,1         | –           | –           | 24,6         | 24,8         |
| Trading/Gas Midstream            | –                            | –           | 30,5                              | 26,8        | –               | –           | 32,8        | 32,6        | 63,3         | 59,4         |
| <b>RWE-Konzern<sup>1</sup></b>   | <b>65,3</b>                  | <b>59,3</b> | <b>110,8</b>                      | <b>95,7</b> | <b>102,3</b>    | <b>93,9</b> | <b>32,8</b> | <b>33,9</b> | <b>311,2</b> | <b>282,8</b> |

<sup>1</sup> Inkl. Absatz des Unternehmensbereichs Erneuerbare Energien und von Gesellschaften, die unter „Sonstige, Konsolidierung“ erfasst sind (im Wesentlichen Amprion)

- **Deutschland:** Der Unternehmensbereich setzte 113,1 Mrd. kWh Strom ab und damit 5% mehr als im Vorjahr. Vor allem an Weiterverteiler haben wir mehr verkauft, aber auch an Industrie- und Geschäftskunden. Hintergrund ist die wirtschaftliche Erholung. Im Segment der Privathaushalte und kleinen Gewerbebetriebe führten Kundenverluste zu leichten Mengeneinbußen. Ende 2010 versorgten die vollkonsolidierten Gesellschaften des Unternehmensbereichs Deutschland insgesamt 6.712 Tsd. Kunden mit Strom, 151 Tsd. weniger als ein Jahr zuvor. Der Rückgang betraf die RWE Vertrieb und das Regionalgeschäft. Dagegen konnte unser Discounter eprimo seine Marktposition ausbauen: Das Unternehmen hatte zum Jahresende 736 Tsd. Stromkunden und damit 110 Tsd. mehr als 2009.
- **Niederlande/Belgien:** Essent verkaufte 22,0 Mrd. kWh Strom. Der Vergleichswert für 2009 in Höhe von 6,8 Mrd. kWh bezog sich nur auf das vierte Quartal. Zum 31. Dezember 2010 versorgte Essent 2.329 Tsd. Kunden mit Strom. In den Niederlanden hatten wir 2.169 Tsd. und in Belgien 160 Tsd. Stromkunden, gegenüber 2.144 Tsd. bzw. 172 Tsd. im Jahr zuvor.

- **Großbritannien:** Die Stromlieferungen von RWE npower waren mit 49,9 Mrd. kWh genauso hoch wie im Vorjahr. Während sich unsere Marktposition im Geschäft mit Industrie- und Geschäftskunden leicht verbesserte, verschlechterte sie sich bei Haushalten und kleinen Gewerbebetrieben. Zum 31. Dezember 2010 belieferte RWE npower 4.003 Tsd. Stromkunden, 144 Tsd. weniger als im Vorjahr. Bei britischen Haushalten kamen wir auf einen Marktanteil von 14%.
- **Zentralost-/Südosteuropa:** Hier setzten wir 24,6 Mrd. kWh Strom ab. Der leichte Rückgang gegenüber 2009 erklärt sich dadurch, dass wir seit 2010 bestimmte Absatzmengen mit Großhandelsbezügen saldieren. Positiv wirkte sich die konjunkturbedingte Mehrnachfrage aus. Außerdem hat sich die Zahl unserer Stromkunden in Ungarn und Polen geringfügig auf 2.236 Tsd. bzw. 910 Tsd. erhöht. Seit Anfang 2010 vermarkten wir auch in Tschechien Strom. Zum Jahresende wurden dort bereits 13 Tsd. Kunden von uns versorgt.
- **Trading/Gas Midstream:** Die externen Stromlieferungen des Unternehmensbereichs beliefen sich auf 63,3 Mrd. kWh. Damit waren sie um 7% höher als im Vorjahr. Hauptursache ist, dass wir die Handelsaktivitäten von Essent seit 2010 bei Trading/Gas Midstream ausweisen.

**Stromabsatz des RWE-Konzerns nach Ländern 2010 (2009)**

in %

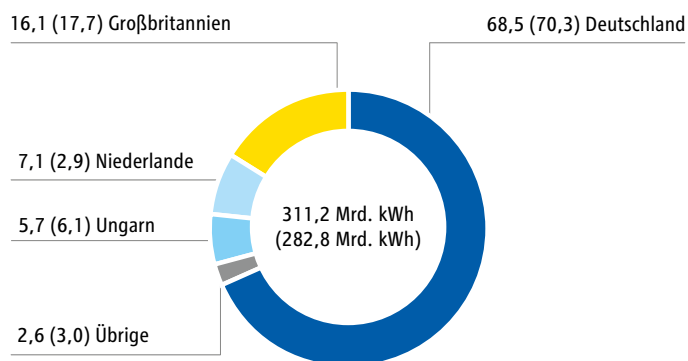

| Außenabsatz Gas                | Privat- und<br>Gewerbekunden |              | Industrie- und<br>Geschäftskunden |              | Weiterverteiler |             | Gesamt       |              |
|--------------------------------|------------------------------|--------------|-----------------------------------|--------------|-----------------|-------------|--------------|--------------|
|                                | 2010                         | 2009         | 2010                              | 2009         | 2010            | 2009        | 2010         | 2009         |
| in Mrd. kWh                    |                              |              |                                   |              |                 |             |              |              |
| Deutschland <sup>1</sup>       | 29,0                         | 27,6         | 23,7                              | 19,9         | 44,9            | 47,4        | 97,6         | 94,9         |
| Niederlande/Belgien            | 63,8                         | 17,9         | 49,0                              | 16,2         | –               | 2,0         | 112,8        | 36,1         |
| Großbritannien                 | 48,8                         | 45,1         | 4,5                               | 6,8          | –               | –           | 53,3         | 51,9         |
| Zentralost-/Südosteuropa       | 35,6                         | 33,1         | 29,4                              | 27,5         | 8,5             | 15,3        | 73,5         | 75,9         |
| Upstream Gas & Öl              | –                            | –            | 2,1                               | 2,8          | 16,5            | 16,2        | 18,6         | 19,0         |
| Trading/Gas Midstream          | –                            | –            | 26,4                              | 18,9         | 12,6            | 14,2        | 39,0         | 33,1         |
| <b>RWE-Konzern<sup>2</sup></b> | <b>177,2</b>                 | <b>130,5</b> | <b>135,1</b>                      | <b>106,4</b> | <b>83,1</b>     | <b>95,1</b> | <b>395,4</b> | <b>332,0</b> |

<sup>1</sup> Angepasste Vorjahreswerte wegen geänderter Kundenzuordnung

<sup>2</sup> Inkl. des in den ersten drei Quartalen 2009 erzielten Absatzes der RWE Energy Nederland

**Durch Essent deutliches Plus beim Gasabsatz.** Der konzernexterne Gasabsatz lag mit 395,4 Mrd. kWh um 19% über dem Vorjahresniveau. Ohne den Effekt aus der erstmals ganzjährigen Einbeziehung von Essent wäre er um 2% gestiegen. Hier spielte der höhere Heizwärmebedarf der Privathaushalte eine Rolle, während Kundenverluste in Tschechien gegenläufig wirkten.

- **Deutschland:** Der Unternehmensbereich verkaufte 97,6 Mrd. kWh Gas. Gegenüber 2009 ist das ein Plus von 3%. Gestiegen sind unsere Lieferungen an Industrie- und Geschäftskunden, ebenso wie die an Privathaushalte und kleine Gewerbebetriebe. Dabei kamen uns die konjunkturelle Erholung und die kühlere Witterung zugute. Außerdem konnten wir in diesen Segmenten Kunden hinzugewinnen. Mengenrückgänge verzeichneten wir dagegen im Geschäft mit Weiterverteilern, von denen einige den Anbieter wechselten oder ihren Bedarf zu einem größeren Teil bei Wettbewerbern deckten. Unsere vollkonsolidierten deutschen Vertriebsgesellschaften versorgten zum Bilanzstichtag 1.106 Tsd. Kunden mit Gas. Das sind 34 Tsd. mehr als ein Jahr zuvor.
- **Niederlande/Belgien:** Essent steuerte 112,8 Mrd. kWh zum Gasabsatz des RWE-Konzerns bei und damit konsolidierungsbedingt wesentlich mehr als 2009. Am 31. Dezember 2010 hatte das Unternehmen 2.015 Tsd. Gaskunden, und zwar 1.959 Tsd. in den Niederlanden und 56 Tsd. Kunden in Belgien. Zum gleichen Zeitpunkt im Vorjahr waren es 1.920 Tsd. bzw. 59 Tsd. gewesen.
- **Großbritannien:** RWE npower lieferte 53,3 Mrd. kWh Gas. Die kühlere Witterung gab den Ausschlag dafür, dass der Vorjahreswert um 3% übertroffen werden konnte. Allerdings mussten wir wettbewerbsbedingte Kundenverluste hinnehmen. Dies betrifft sowohl das Geschäft mit Industrieunternehmen als auch das mit Haushalten und kleinen Gewerbebetrieben. Zum Jahresende versorgte RWE npower 2.571 Tsd. Gaskunden, 70 Tsd. weniger als 2009. Die Zahl jener, die sowohl Strom als auch Gas bei uns beziehen, hat sich um 69 Tsd. auf 2.279 Tsd. verringert.

- **Zentralost-/Südosteuropa:** Hier ging der Gasabsatz trotz der kühleren Witterung um 3 % auf 73,5 Mrd. kWh zurück. In unserem Hauptmarkt Tschechien wechselten einige von uns belieferte Weiterverteiler den Anbieter oder deckten nicht mehr ihren gesamten Gasbedarf bei uns; auch in den anderen Kundensegmenten bekamen wir steigenden Wettbewerbsdruck zu spüren. Die Zahl unserer Gaskunden hat sich in Tschechien um 89 Tsd. auf 2.192 Tsd. verringert. Einen positiven Trend sehen wir dagegen in der Slowakei, wo unsere im Juli 2008 gegründete Vertriebstochter RWE Gas Slovensko verstärkt Gas an Geschäftskunden vermarktet. Das Unternehmen setzte im Berichtsjahr 7,8 Mrd. kWh ab und damit 5,6 Mrd. kWh mehr als 2009.
- **Upstream Gas & Öl:** RWE Dea verkaufte 18,6 Mrd. kWh Gas an konzernfremde Kunden. Der Vorjahreswert wurde damit um 2 % unterschritten. Dies ergibt sich aus der rückläufigen Gasförderung.
- **Trading/Gas Midstream:** Der Bereich setzte 39,0 Mrd. kWh Gas außerhalb des Konzerns ab. RWE Supply & Trading konzentriert sich auf die Gasbeschaffung für RWE-Gesellschaften und erzielt daher überwiegend Innenabsatz. Beim extern verkauften Gas handelt es sich zum einen um überschüssige Gasbezugsmengen; zum anderen erzielen wir Außenabsatz im Key-Account-Geschäft mit Industrieunternehmen. Wie bereits dargestellt, weisen wir seit 2010 auch das Großkundengeschäft der Handelsgesellschaften von Essent bei Trading/Gas Midstream aus. Die neue Zuordnung trug wesentlich dazu bei, dass sich der Außenabsatz des Bereichs im zurückliegenden Geschäftsjahr um 18 % erhöhte.

**Gasabsatz des RWE-Konzerns nach Ländern 2010 (2009)**  
in %

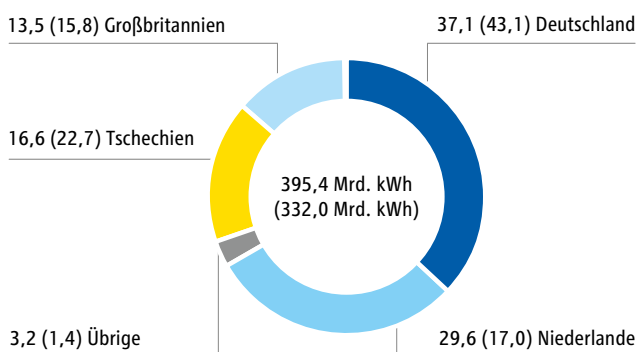

| <b>Außenumsatz</b><br>in Mio. € | 2010          | 2009          | +/-<br>in % |
|---------------------------------|---------------|---------------|-------------|
| Deutschland                     | 19.528        | 19.386        | 0,7         |
| Stromerzeugung                  | 1.072         | 1.056         | 1,5         |
| Vertrieb und Verteilnetze       | 18.456        | 18.330        | 0,7         |
| Niederlande/Belgien             | 6.510         | 1.799         | –           |
| Großbritannien                  | 7.759         | 7.843         | –1,1        |
| Zentralost-/Südosteuropa        | 5.297         | 5.254         | 0,8         |
| Erneuerbare Energien            | 366           | 245           | 49,4        |
| Upstream Gas & Öl               | 1.353         | 1.208         | 12,0        |
| Trading/Gas Midstream           | 7.517         | 6.937         | 8,4         |
| Sonstige, Konsolidierung        | 4.990         | 5.069         | –1,6        |
| <b>RWE-Konzern</b>              | <b>53.320</b> | <b>47.741</b> | <b>11,7</b> |
| Davon:                          |               |               |             |
| Stromerlöse                     | 34.803        | 31.225        | 11,5        |
| Direkte Stromsteuer             | 1.323         | 1.041         | 27,1        |
| Gaserlöse                       | 14.491        | 12.443        | 16,5        |
| Ölerlöse                        | 1.049         | 1.024         | 2,4         |

**Außenumsatz 12 % über Vorjahr.** Der RWE-Konzern erwirtschaftete 2010 einen Außenumsatz von 53.320 Mio. €. Damit wurde der Vorjahreswert um 12 % übertroffen. Maßgeblich hierfür war die erstmalige Konsolidierung von Essent mit vollen zwölf Monaten, während gesunkene Preise im Gasvertrieb gegenläufig wirkten. Wechselkurseffekte hatten einen positiven Einfluss auf die Umsatzentwicklung, da unsere wichtigsten Auslandswährungen gegenüber dem Euro aufwerteten: Für das britische Pfund mussten 2010 durchschnittlich 1,17 € bezahlt werden; im Vorjahr waren es 1,12 € gewesen. Der US-Dollar verteuerte sich von 0,72 auf 0,76 €, die tschechische Krone von 0,038 auf 0,040 €, der ungarische Forint von 0,0035 auf 0,0036 € und der polnische Zloty von 0,23 auf 0,25 €. Lässt man wesentliche Konsolidierungs- und Wechselkurseinflüsse außer Betracht, blieb der Konzernumsatz unverändert.

- Deutschland: Der Außenumsatz des Unternehmensbereichs war mit 19.528 Mio. € geringfügig höher als 2009. Die Stromerlöse verbesserten sich um 4% auf 14.124 Mio. €, vor allem wegen der erläuterten Absatzsteigerungen. Außerdem haben wir mehr Strom von Dritten durch unsere Netze geleitet. Im Gasgeschäft ist der Umsatz um 6% auf 3.826 Mio. € gesunken. Diese Entwicklung beruht auf Preisanpassungen: Unsere deutschen Regionalversorger hatten im Zeitraum 2009/2010 teilweise mehrfach die Tarife gesenkt. Sie gaben damit Vorteile aus rückläufigen Beschaffungskosten an ihre Kunden weiter.
- Niederlande/Belgien: Der Bereich steigerte den Umsatz konsolidierungsbedingt auf 6.510 Mio. €. Davon entfielen 2.195 Mio. € auf das Strom- und 4.108 Mio. € auf das Gasgeschäft.
- Großbritannien: Die Erlöse von RWE npower lagen mit 7.759 Mio. € knapp unter dem Vorjahreswert. Rechnet man Wechselkurseffekte heraus, ergibt sich ein Minus von 5%. Der Stromumsatz sank um 2%, wechsellkursbereinigt um 6%. Hier schlugen noch Preissenkungen aus dem Vorjahr zu Buche. Den Privatkundentarif hatte RWE npower zum 31. März 2009 um durchschnittlich 8% ermäßigt. Der Gasumsatz erhöhte sich geringfügig auf 2.016 Mio. €. Auf Pfund-Basis war er allerdings um 3% rückläufig. Auch hier gaben Preiseffekte den Ausschlag: RWE npower hatte zum 26. März 2010 den Gastarif für Privatkunden um durchschnittlich 7% gesenkt.
- Zentralost-/Südosteuropa: Der Bereich setzte 5.297 Mio. € um und damit etwas mehr als 2009. Ohne Währungseinflüsse wären die Erlöse um 3% gesunken. Der Stromumsatz stieg um 2% auf 2.492 Mio. €, während sich auf wechsellkursbereinigter Basis ein Minus von 2% ergibt. Hier kamen Preissenkungen im Geschäft mit Industrie- und Geschäftskunden zum Tragen. Die Gaserlöse lagen mit 2.706 Mio. € auf Vorjahresniveau. Ohne den Wechselkurseinfluss gingen sie um 4% zurück, hauptsächlich wegen der erwähnten Mengeneinbußen in Tschechien.
- Erneuerbare Energien: Der Außenumsatz des Bereichs stieg um 49% auf 366 Mio. €, u.a. weil er seit 2010 die Windstromerlöse von Essent enthält (76 Mio. €). Auch die Inbetriebnahme neuer Erzeugungskapazitäten und die erstmals ganzjährige Einbeziehung des spanischen Windparkbetreibers Danta de Energías trugen zum Wachstum bei.
- Upstream Gas & Öl: Bei RWE Dea verbesserte sich der Außenumsatz trotz leicht gesunkener Fördermengen um 12% auf 1.353 Mio. €. Das Unternehmen erzielte für seine Rohölförderung wesentlich höhere Dollarpreise als 2009. Auch die Aufwertung der US-Währung gegenüber dem Euro schlug positiv zu Buche, während niedrigere realisierte Gaspreise gegenläufig wirkten.
- Trading/Gas Midstream: Der Außenumsatz des Bereichs erhöhte sich um 8% auf 7.517 Mio. €. Hauptgrund ist die erstmalige Einbeziehung der Erlöse aus dem Handelsgeschäft von Essent (1.505 Mio. €).

| <b>Überleitung vom Ergebnis der betrieblichen Tätigkeit zum EBITDA</b><br>in Mio. € | 2010          | 2009         | +/-<br>in % |
|-------------------------------------------------------------------------------------|---------------|--------------|-------------|
| Ergebnis der betrieblichen Tätigkeit <sup>1</sup>                                   | 6.507         | 7.326        | -11,2       |
| + Betriebliches Beteiligungsergebnis                                                | 345           | 321          | 7,5         |
| + Neutrales Beteiligungsergebnis                                                    | 62            | -59          | -           |
| - Neutrales Ergebnis                                                                | 767           | -498         | -           |
| Betriebliches Ergebnis                                                              | 7.681         | 7.090        | 8,3         |
| + Betriebliche Abschreibungen                                                       | 2.575         | 2.075        | 24,1        |
| <b>EBITDA</b>                                                                       | <b>10.256</b> | <b>9.165</b> | <b>11,9</b> |

1 Siehe Gewinn- und Verlustrechnung auf Seite 162

| <b>EBITDA</b><br>in Mio. €        | 2010          | 2009         | +/-<br>in % |
|-----------------------------------|---------------|--------------|-------------|
| Deutschland                       | 6.728         | 5.811        | 15,8        |
| Stromerzeugung                    | 4.510         | 3.889        | 16,0        |
| Vertrieb und Verteilnetze         | 2.218         | 1.922        | 15,4        |
| Niederlande/Belgien               | 660           | 277          | -           |
| Großbritannien                    | 504           | 445          | 13,3        |
| Zentralost-/Südosteuropa          | 1.440         | 1.285        | 12,1        |
| Erneuerbare Energien              | 211           | 126          | 67,5        |
| Davon: Windaktivitäten von Essent | 69            | -            | -           |
| Upstream Gas & Öl                 | 619           | 437          | 41,6        |
| Trading/Gas Midstream             | -7            | 986          | -100,7      |
| Davon: Handelsgeschäft von Essent | 108           | -            | -           |
| Sonstige, Konsolidierung          | 101           | -202         | -           |
| <b>RWE-Konzern</b>                | <b>10.256</b> | <b>9.165</b> | <b>11,9</b> |

| <b>Betriebliches Ergebnis</b><br>in Mio. € | 2010         | 2009         | +/-<br>in % |
|--------------------------------------------|--------------|--------------|-------------|
| Deutschland                                | 5.575        | 4.780        | 16,6        |
| Stromerzeugung                             | 4.000        | 3.428        | 16,7        |
| Vertrieb und Verteilnetze                  | 1.575        | 1.352        | 16,5        |
| Niederlande/Belgien                        | 391          | 180          | 117,2       |
| Großbritannien                             | 272          | 247          | 10,1        |
| Zentralost-/Südosteuropa                   | 1.173        | 1.055        | 11,2        |
| Erneuerbare Energien                       | 72           | 56           | 28,6        |
| Davon: Windaktivitäten von Essent          | 23           | –            | –           |
| Upstream Gas & Öl                          | 305          | 203          | 50,2        |
| Trading/Gas Midstream                      | –21          | 985          | –102,1      |
| Davon: Handelsgeschäft von Essent          | 96           | –            | –           |
| Sonstige, Konsolidierung                   | –86          | –416         | 79,3        |
| <b>RWE-Konzern</b>                         | <b>7.681</b> | <b>7.090</b> | <b>8,3</b>  |

**Betriebliches Ergebnis um 8 % gesteigert.** Die Ertragslage des RWE-Konzerns hat sich 2010 weiter verbessert. Das EBITDA erhöhte sich um 12 % auf 10.256 Mio. €, das betriebliche Ergebnis um 8 % auf 7.681 Mio. €. Mit Ausnahme von Trading/Gas Midstream erzielten alle Unternehmensbereiche deutliche Zuwächse. Unsere Prognose vom Februar 2010 haben wir damit übertroffen: Wir waren davon ausgegangen, beim EBITDA um 5 bis 10 % und beim betrieblichen Ergebnis um etwa 5 % zulegen zu können. Vor allem unser tschechisches Gasgeschäft übertraf die Erwartungen. Außerdem führte die Auflösung von Rückstellungen zu einer unvorhergesehen deutlichen Verbesserung des Ergebnisses der Position „Sonstige, Konsolidierung“. Dagegen war die Ertragslage von RWE Supply & Trading noch schwächer als angenommen. Lässt man wesentliche Konsolidierungs- und Wechselkurseffekte außer Betracht, hat sich das EBITDA des RWE-Konzerns um 5 % erhöht. Für das betriebliche Ergebnis ergibt sich auf dieser Basis ein Plus von 3 %.

- **Deutschland:** Der Unternehmensbereich erzielte ein betriebliches Ergebnis von 5.575 Mio. €, das um 17 % über dem Vorjahreswert lag. In den beiden Geschäftsfeldern „Stromerzeugung“ und „Vertrieb und Verteilnetze“ zeigte sich folgende Entwicklung:

**Stromerzeugung:** Hier konnten wir um 17 % auf 4.000 Mio. € zulegen. Wesentlich dazu beigetragen haben die höheren Erzeugungsmengen, die sich u.a. aus der verbesserten Verfügbarkeit des Kernkraftwerks Biblis ergaben. Außerdem profitierten wir von preisbedingten Entlastungen beim Einkauf von Steinkohle (679 Mio. €). Wie bereits erläutert, hatten wir unseren Strom für 2010 bereits frühzeitig am Terminmarkt verkauft und uns zeitgleich mit den für seine Produktion benötigten Brennstoffen eingedeckt. Emissionsrechte haben wir ebenfalls frühzeitig beschafft und dabei gegenüber

dem Vorjahr Preisvorteile erzielt. Unser Aufwand aus der Unterausstattung mit Emissionsrechten hat sich daher um 269 Mio. € auf 689 Mio. € verringert. Rückläufig waren allerdings auch die Preise, die wir für unsere Stromerzeugung erzielten. Sie lagen bei durchschnittlich 67 € je MWh (Vorjahr: 70 € je MWh). Veränderungen der Kernenergie Rückstellungen führten per saldo zu Belastungen. Außerdem entfielen positive Sondereffekte aus der Auflösung von Rückstellungen im Vorjahr, die neben der Entsorgung im Kernenergiebereich auch die Rekultivierung von Braunkohletagebauflächen betrafen.

Vertrieb und Verteilnetze: Der Bereich steigerte das betriebliche Ergebnis um 16% auf 1.575 Mio. €, u.a. wegen kostensenkender Maßnahmen. Im Netzgeschäft führten höhere Durchleitungsmengen bei Strom und Gas zu Mehrerträgen. Außerdem entstanden geringere Kosten für den Ausgleich von Netzverlusten, weil sich der dafür eingesetzte Strom verbilligte. Dem standen Belastungen aus der sogenannten Mehrerlösabschöpfung gegenüber: Nach Auffassung der Bundesnetzagentur haben die Netzbetreiber in der Anfangsphase der Regulierung (2005 bis 2007) zu hohe Erlöse vereinbart. Diese müssen sie ab 2010 über entsprechend verringerte Netzentgelte erstatten. Im Vertriebsgeschäft profitierten wir vom positiven Witterungseinfluss auf den Gasabsatz, während sich die Strommargen verschlechterten.

- Niederlande/Belgien: Das betriebliche Ergebnis des Bereichs lag mit 391 Mio. € konsolidierungsbedingt deutlich über dem Vorjahreswert (180 Mio. €). Im Gasgeschäft erzielte Essent hohe Erträge. Dazu trug das überdurchschnittlich kalte Winterwetter bei. Allerdings traten im Berichtsjahr auch Belastungen auf, u.a. dadurch, dass Essent das von RWE Power gestartete Kraftwerksprojekt in Eemshaven übernahm und RWE Power sämtliche seit 2009 aufgelaufenen Projektkosten erstattete. An dem Standort in der Provinz Groningen errichten wir einen Steinkohle-Doppelblock mit 1.560 MW Nettoleistung.
- Großbritannien: Bei RWE npower verbesserte sich das betriebliche Ergebnis um 10% auf 272 Mio. €. Ohne Wechselkurseffekte ergab sich ein Plus von 6%, das im Wesentlichen aus der Vertriebssparte stammt. Hier profitierten wir von effizienzsteigernden Maßnahmen und vom witterungsbedingten Anstieg der Gasnachfrage, hatten aber auch Belastungen durch vermehrte Forderungsausfälle zu verkraften. In der zweiten Jahreshälfte haben die Preise im Strom- und Gaseinkauf angezogen; RWE npower hat ihre Privatkundentarife aber erst im Januar 2011 angepasst. Die Erzeugungssparte von RWE npower schloss deutlich unter Vorjahr ab. Verschlechterte Marktbedingungen für unsere Steinkohlekraftwerke führten zu Ergebniseinbußen, die durch Mehrproduktion unserer Gaskraftwerke und Kostensenkungen nicht in vollem Umfang ausgeglichen werden konnten.

- **Zentralost-/Südosteuropa:** Hier steigerten wir das betriebliche Ergebnis um 11 % auf 1.173 Mio. €. In der Prognose vom Februar 2010 waren wir davon ausgegangen, das Vorjahresergebnis nicht ganz erreichen zu können. Dass wir es sogar deutlich übertrafen, beruht u.a. auf Wechselkurseffekten. Außerdem hat sich wider Erwarten die Ertragslage im tschechischen Gasgeschäft verbessert. Grund waren gestiegene Netz- und Vertriebsmargen, während Absatzeinbußen im Weiterverteilersegment gegenläufig wirkten. Gestiegen ist auch der Ergebnisbeitrag unseres polnischen Stromgeschäfts. Dabei kamen uns Einmaleffekte zugute, aber auch Kostensenkungen. In Ungarn profitierten wir von mengen- und preisbedingten Ertragsverbesserungen im Stromnetzgeschäft, mussten aber Ergebniseinbußen beim Stromerzeuger Mátra hinnehmen; weitere Belastungen (25 Mio. €) ergaben sich aus der rückwirkenden Einführung einer Sondersteuer für Energieversorger, über die wir auf Seite 68 berichtet haben.
- **Erneuerbare Energien:** Das betriebliche Ergebnis verbesserte sich um 16 Mio. € auf 72 Mio. €. Davon entfielen 23 Mio. € auf die Windkraftaktivitäten von Essent, die wir seit 2010 im Bereich Erneuerbare Energien ausweisen. Ihr Ergebnis blieb damit hinter den Erwartungen zurück, denn das Windaufkommen in Nordwesteuropa war außergewöhnlich schwach. Positiv wirkte, dass der Offshore-Windpark Rhyl Flats vor der Küste von Wales Ende 2009 in Betrieb gegangen ist und dass Danta de Energías erstmals ganzjährig in unseren Zahlen enthalten ist. Planmäßige Belastungen ergaben sich dagegen aus der Wachstumsstrategie von RWE Innogy, weil die laufenden und geplanten Investitionsprojekte mit hohen Vorlaufkosten verbunden sind.
- **Upstream Gas & Öl:** RWE Dea konnte ihr Ergebnis um 50 % auf 305 Mio. € steigern, und zwar wegen Wechselkurseffekten und höherer Ölpreise. Außerdem sanken die Förderabgaben und der Explorationsaufwand. Dem standen Belastungen aus niedrigeren Produktionsmengen und Gaspreisen sowie gestiegenen Abschreibungen gegenüber.
- **Trading/Gas Midstream:** Der Bereich schloss mit einem betrieblichen Verlust von 21 Mio. € und blieb damit weit hinter dem außergewöhnlich hohen Vorjahresergebnis (985 Mio. €) zurück. Im Energiehandel waren wir erfolgreich, konnten aber nicht an die sehr gute Performance von 2009 anknüpfen. Noch stärker verringerte sich das Ergebnis des Gas-Midstream-Geschäfts, das im Vorjahr durch positive Einmaleffekte begünstigt gewesen war. 2010 standen dem hohe Belastungen gegenüber. Hintergrund ist, dass der Gasbezug für Deutschland und Tschechien größtenteils auf langfristigen ölpreisgebundenen Verträgen basiert. Dagegen orientieren sich unsere Abnehmer zunehmend an den Notierungen an den liquiden Handelspunkten TTF oder NBP (siehe Seite 59). Diese sind bereits seit Mitte 2009 wesentlich niedriger als die ölindexierten Bezugspreise. Da wir Gaslieferungen konzernintern überwiegend zu Großhandelskonditionen verrechnen, schlagen sich die Preisunterschiede im Ergebnis der für die Gasbeschaffung zuständigen RWE Supply & Trading nieder. Positiv auf die Ertragslage des Unternehmensbereichs Trading/Gas Midstream wirkte die erstmalige Einbeziehung des Handelsgeschäfts von Essent. Hier wurde 2010 ein betriebliches Ergebnis von 96 Mio. € erwirtschaftet.

| Kennzahlen des Wertmanagements | Betriebliches Ergebnis 2010 | Betriebliches Vermögen 2010 <sup>1</sup> | ROCE 2010   | Kapitalkosten vor Steuern 2010 | Absoluter Wertbeitrag 2010 | Kapitalkosten vor Steuern 2009 | Absoluter Wertbeitrag 2009 |
|--------------------------------|-----------------------------|------------------------------------------|-------------|--------------------------------|----------------------------|--------------------------------|----------------------------|
|                                | in Mio. €                   | in Mio. €                                | in %        | in %                           | in Mio. €                  | in %                           | in Mio. €                  |
| Deutschland                    | 5.575                       | 29.575                                   | 18,9        | 9,5                            | 2.765 <sup>2</sup>         | 9,5                            | 2.164 <sup>2</sup>         |
| Stromerzeugung                 | 4.000                       | 13.803                                   | 29,0        | 10,0                           | 2.620                      | 10,0                           | 2.146                      |
| Vertrieb und Verteilnetze      | 1.575                       | 15.772                                   | 10,0        | 8,75                           | 195                        | 9,0                            | 27                         |
| Niederlande/Belgien            | 391                         | 4.564                                    | 8,6         | 9,5                            | -42                        | 9,0                            | 56                         |
| Großbritannien                 | 272                         | 5.147                                    | 5,3         | 9,5                            | -217                       | 10,0                           | -254                       |
| Zentralost-/Südosteuropa       | 1.173                       | 5.596                                    | 21,0        | 8,5                            | 697                        | 9,0                            | 578                        |
| Erneuerbare Energien           | 72                          | 3.797                                    | 1,9         | 9,5                            | -289                       | 9,5                            | -165                       |
| Upstream Gas & Öl              | 305                         | 2.509                                    | 12,2        | 12,5                           | -8                         | 13,0                           | -72                        |
| Trading/Gas Midstream          | -21                         | 3.222                                    | -0,6        | 9,5                            | -327                       | 10,0                           | 821                        |
| Sonstige, Konsolidierung       | -86                         | -1.024                                   | -           | -                              | 297                        | -                              | 49                         |
| <b>RWE-Konzern</b>             | <b>7.681</b>                | <b>53.386</b>                            | <b>14,4</b> | <b>9,0</b>                     | <b>2.876</b>               | <b>9,0</b>                     | <b>3.177</b>               |

1 Im Jahresdurchschnitt

2 Der Wert entspricht wegen Berücksichtigung unterschiedlicher Kapitalkostensätze nicht der Summe der Wertbeiträge aus „Stromerzeugung“ und „Vertrieb und Verteilnetze“.

**RWE erwirtschaftet Kapitalrendite von 14,4%.** Ein wesentliches Ziel unserer Geschäftstätigkeit ist, den Wert des Unternehmens zu steigern. Um dies zu erreichen, müssen wir mit dem betrieblichen Vermögen eine Rendite erwirtschaften, die über den Kapitalkosten liegt. Wir messen die Rendite als Return on Capital Employed (ROCE). Im Geschäftsjahr 2010 erzielten wir einen ROCE von 14,4%. Damit konnten wir die Konzern-Kapitalkosten deutlich übertreffen. Diese lagen vor Steuern bei 9,0%. Der ROCE abzüglich Kapitalkosten, multipliziert mit dem betrieblich gebundenen Vermögen, ergibt den absoluten Wertbeitrag. Dieser ist ein wichtiges Kriterium für die Beurteilung von Investitionen und für die erfolgsabhängige Vergütung unserer Führungskräfte. Der Wertbeitrag belief sich im abgelaufenen Geschäftsjahr auf 2.876 Mio. €. Trotz des verbesserten betrieblichen Ergebnisses war er um 9% niedriger als 2009. Grund ist, dass sich das betriebliche Vermögen erhöhte. Dabei spielte zum einen die verstärkte Investitionstätigkeit eine Rolle, denn die neuen Anlagen gehen bereits während der Bauphase ins Betriebsvermögen ein, auch wenn sie noch keinen Ergebnisbeitrag liefern. Zum anderen hatten wir das betriebliche Vermögen von Essent im Vorjahr nur mit einem Viertel berücksichtigt, weil das Unternehmen erst Ende September in den Konzernabschluss einbezogen wurde. Die Entwicklung der Wertbeiträge wurde auch dadurch beeinflusst, dass wir Anpassungen bei den Kapitalkosten vorgenommen haben. Dies betrifft einzelne Unternehmensbereiche, nicht jedoch den Konzern insgesamt.

- Deutschland: Mit 2.765 Mio. € leistete der Unternehmensbereich den bei Weitem größten Beitrag zur Wertsteigerung im RWE-Konzern. Der Großteil davon entfällt auf die Stromerzeugung. Der in diesem Geschäftsfeld erzielte Ergebnisanstieg war die Hauptursache dafür, dass sich der Wertbeitrag des Unternehmensbereichs Deutschland um 601 Mio. € erhöhte. Anteil daran hatte auch die verbesserte Ertragslage im Vertriebs- und Verteilnetzgeschäft.
- Niederlande/Belgien: Der Wertbeitrag ging hier um 98 Mio. € auf –42 Mio. € zurück. Zwar war das Ergebnis konsolidierungsbedingt wesentlich höher als im Vorjahr; allerdings trifft dies auch auf das betriebliche Vermögen zu, das wir 2009 – wie bereits erläutert – nur anteilig berücksichtigt hatten. Negativ wirkte auch die Übernahme des Kraftwerks-Neubauprojekts in Eemshaven (–54 Mio. €), denn dadurch erhöhte sich das betriebliche Vermögen, während das Ergebnis belastet wurde. Ohne diesen Effekt hätte der Unternehmensbereich seine Kapitalkosten verdient.
- Großbritannien: Auch bei RWE npower fiel der Wertbeitrag negativ aus. Mit –217 Mio. € lag er aber um 37 Mio. € über dem Vorjahreswert, u.a. wegen des gestiegenen betrieblichen Ergebnisses.
- Zentralost-/Südosteuropa: Der Wertbeitrag des Unternehmensbereichs war mit 697 Mio. € der zweitgrößte im RWE-Konzern und um 119 Mio. € höher als der Vergleichswert für 2009. Ausschlaggebend dafür war die positive Ergebnisentwicklung.
- Erneuerbare Energien: Bei RWE Innogy ging der Wertbeitrag trotz der verbesserten Ertragslage um 124 Mio. € auf –289 Mio. € zurück. Hier spiegeln sich die umfangreichen Investitionen in den Ausbau unseres Erzeugungsportfolios wider.
- Upstream Gas & Öl: RWE Dea erzielte einen leicht negativen Wertbeitrag von –8 Mio. €, der aber um 64 Mio. € höher ausfiel als 2009. Der Bereich profitierte vom stark verbesserten betrieblichen Ergebnis. Gegenläufig wirkte der investitionsbedingte Anstieg des betrieblichen Vermögens.
- Trading/Gas Midstream: Bei RWE Supply & Trading schlug sich der Ergebniseinbruch in einem negativen Wertbeitrag von –327 Mio. € nieder. Mit 821 Mio. € war der Vorjahreswert allerdings außergewöhnlich hoch ausgefallen.

Ausführliche Informationen zum Wertmanagement-Konzept finden Sie auf Seite 231 f.

**Überleitung zum Nettoergebnis: Negative Einmaleffekte aus Commodity-Derivaten.** Die Überleitung vom betrieblichen Ergebnis zum Nettoergebnis ist durch negative Sondereinflüsse geprägt. Diese ergaben sich in erster Linie aus der Marktbewertung von Commodity-Derivaten und aus Wertberichtigungen auf unsere britischen Steinkohle- und Ölkraftwerke. Positive Effekte aus der Auflösung von Rückstellungen konnten das nicht ausgleichen. Daher hat sich das Nettoergebnis trotz der guten operativen Ertragslage verringert.

| <b>Neutrales Ergebnis</b><br>in Mio. €  | 2010        | 2009       | +/-<br>in Mio. € |
|-----------------------------------------|-------------|------------|------------------|
| Veräußerungsgewinne                     | 68          | 35         | 33               |
| Firmenwertabschreibungen                | -           | -          | -                |
| Ergebniseffekte aus Commodity-Derivaten | -337        | 720        | -1.057           |
| Restrukturierungen, Sonstige            | -498        | -257       | -241             |
| <b>Neutrales Ergebnis</b>               | <b>-767</b> | <b>498</b> | <b>-1.265</b>    |

Belastungen traten vor allem im neutralen Ergebnis auf, das sich um 1.265 Mio. € auf -767 Mio. € verschlechterte. Seine Einzelpositionen haben sich folgendermaßen entwickelt:

- Wie bereits 2009 haben wir keine nennenswerten Veräußerungsgewinne erzielt. Der größte Ergebnisbeitrag stammt aus dem Verkauf einer Minderheitsbeteiligung an einem Kundenkraftwerk in Tschechien.
- Aus der bilanziellen Erfassung von Geschäften mit Commodity-Derivaten entstanden Belastungen in Höhe von 337 Mio. €, nachdem im Vorjahr Gewinne von 720 Mio. € angefallen waren. Gemäß International Financial Reporting Standards (IFRS) sind bestimmte Derivate, die der Absicherung von Terminkontrakten (Grundgeschäften) dienen, mit ihren Marktwerten am jeweiligen Stichtag zu bilanzieren, während die (genau umgekehrt reagierenden) Grundgeschäfte erst später bei ihrer Realisierung erfolgswirksam erfasst werden dürfen. Dadurch entstehen kurzfristige Ergebniseffekte, die sich im Laufe der Zeit wieder aufheben. Die Derivate betrafen hauptsächlich das Gas-Midstream-Geschäft der RWE Supply & Trading. Das neutrale Ergebnis wurde außerdem dadurch belastet, dass wir unsere deutschen Gasbezugsverträge seit 2010 nicht mehr als schwebende Geschäfte, sondern mit ihrem Marktwert (Fair Value) bilanzieren. Wie bereits erläutert, sind die ölindezierten Beschaffungspreise für Gas zum Teil deutlich höher als die am Markt realisierbaren Verkaufspreise. Daher führte die Bilanzierungsumstellung im ersten Quartal zu einem hohen negativen Ergebniseffekt, der sich aber im Jahresverlauf wieder deutlich verringert hat, weil die betroffenen Kontrakte größtenteils erfüllt und die Ergebniswirkungen aus ihrer Realisierung im betrieblichen Ergebnis der RWE Supply & Trading erfasst wurden.
- Das unter „Restrukturierungen, Sonstige“ ausgewiesene Ergebnis belief sich auf -498 Mio. €. Damit lag es um 241 Mio. € unter dem Vorjahreswert, der noch hohe Einmalerträge aus Veränderungen der Kernenergie- und Bergbaurückstellungen enthielt (411 Mio. €). Seit 2010 erfassen wir solche Erträge, die sich im Berichtsjahr auf 197 Mio. € beliefen, nicht mehr im neutralen, sondern

im betrieblichen Ergebnis. Belastungen in Höhe von 296 Mio. € resultierten aus einer Wertberichtigung auf unsere britischen Steinkohle- und Ölkraftwerke. Damit berücksichtigen wir, dass sich die Margen, die diese Anlagen am Markt erzielen können, deutlich verschlechtert haben. Positiv beeinflusst wurde die Ergebnisentwicklung durch den Wegfall von negativen Effekten aus dem Vorjahr, u.a. einer Abwertung unserer Beteiligung am US-Unternehmen Excelerate Energy um 250 Mio. US\$ (179 Mio. €). Den Kundenstamm von RWE npower haben wir planmäßig mit 262 Mio. € abgeschrieben. Der Betrag war wechselkursbedingt etwas höher als 2009 (252 Mio. €).

| Finanzergebnis<br>in Mio. €                    | 2010          | 2009          | +/-<br>in Mio. € |
|------------------------------------------------|---------------|---------------|------------------|
| Zinserträge                                    | 448           | 589           | -141             |
| Zinsaufwendungen                               | -1.258        | -1.224        | -34              |
| <b>Zinsergebnis</b>                            | <b>-810</b>   | <b>-635</b>   | <b>-175</b>      |
| Zinsanteil an den langfristigen Rückstellungen | -940          | -957          | 17               |
| Übriges Finanzergebnis                         | -186          | -398          | 212              |
| <b>Finanzergebnis</b>                          | <b>-1.936</b> | <b>-1.990</b> | <b>54</b>        |

Das Finanzergebnis verbesserte sich um 54 Mio. € auf -1.936 Mio. €. Im Einzelnen ergaben sich hier folgende Veränderungen:

- Das Zinsergebnis verschlechterte sich um 175 Mio. € auf -810 Mio. €. Durch unsere Wachstumsinvestitionen und die Essent-Akquisition hat sich der Finanzbedarf erhöht. Wir haben ihn teilweise durch den Verkauf von Wertpapieren gedeckt. Deshalb sanken die Zinserträge. Außerdem haben wir neue Anleihen begeben.
- Der Zinsanteil an den langfristigen Rückstellungen hat sich mit 940 Mio. € nicht wesentlich verändert.
- Das übrige Finanzergebnis, in dem zahlreiche Aufwandspositionen enthalten sind, verbesserte sich um 212 Mio. € auf -186 Mio. €. Dies ergibt sich aus dem Wegfall von Belastungen aus dem Vorjahr, die u.a. im Zusammenhang mit der Finanzmarktkrise standen. Beispielsweise hatten wir Abschreibungen auf Wertpapiere vorgenommen und Wertpapiere mit Buchverlusten veräußert. Im Geschäftsjahr 2010 erzielten wir dagegen Erträge aus solchen Verkäufen.

| Überleitung zum Nettoergebnis                                 |        | 2010         | 2009         | +/-<br>in %  |
|---------------------------------------------------------------|--------|--------------|--------------|--------------|
| Betriebliches Ergebnis                                        | Mio. € | 7.681        | 7.090        | 8,3          |
| Neutrales Ergebnis                                            | Mio. € | -767         | 498          | -            |
| Finanzergebnis                                                | Mio. € | -1.936       | -1.990       | 2,7          |
| <b>Ergebnis fortgeführter Aktivitäten vor Steuern</b>         | Mio. € | <b>4.978</b> | <b>5.598</b> | <b>-11,1</b> |
| Ertragsteuern                                                 | Mio. € | -1.376       | -1.858       | 25,9         |
| <b>Ergebnis fortgeführter Aktivitäten</b>                     | Mio. € | <b>3.602</b> | <b>3.740</b> | <b>-3,7</b>  |
| Ergebnis nicht fortgeführter Aktivitäten                      | Mio. € | -            | 91           | -            |
| <b>Ergebnis</b>                                               | Mio. € | <b>3.602</b> | <b>3.831</b> | <b>-6,0</b>  |
| Ergebnisanteile anderer Gesellschafter                        | Mio. € | 279          | 260          | 7,3          |
| Ergebnisanteile der Hybridkapitalgeber der RWE AG             | Mio. € | 15           | -            | -            |
| <b>Nettoergebnis/Ergebnisanteile der Aktionäre der RWE AG</b> | Mio. € | <b>3.308</b> | <b>3.571</b> | <b>-7,4</b>  |
| <b>Nachhaltiges Nettoergebnis</b>                             | Mio. € | <b>3.752</b> | <b>3.532</b> | <b>6,2</b>   |
| Ergebnis je Aktie                                             | €      | 6,20         | 6,70         | -7,5         |
| Nachhaltiges Nettoergebnis je Aktie                           | €      | 7,03         | 6,63         | 6,0          |
| Steuerquote                                                   | %      | 28           | 33           | -            |

RWE erwirtschaftete ein Ergebnis fortgeführter Aktivitäten vor Steuern in Höhe von 4.978 Mio. €. Das sind 11 % weniger als 2009. Die Steuerquote sank von 33 auf 28 %, u.a. weil sich unser Körperschaftsteuerguthaben erhöhte und wir Verlustvorträge aktivieren konnten. Nach Steuern verringerte sich das Ergebnis fortgeführter Aktivitäten um 4 % auf 3.602 Mio. €. Aus nicht fortgeführten Aktivitäten fiel 2010 kein Ergebnisbeitrag an, während der Vorjahreswert noch Erträge des inzwischen veräußerten Wasserversorgers American Water enthielt. Die Ergebnisanteile anderer Gesellschafter beliefen sich auf 279 Mio. €; sie waren um 7 % höher als 2009. Erstmals weisen wir auch Ergebnisanteile aus, die den Inhabern unserer im September 2010 begebenen Hybridanleihe zustehen. Der Betrag von 15 Mio. € entspricht den Finanzierungskosten nach Steuern, die auf das Berichtsjahr entfallen. Ausführliche Informationen zur Hybridanleihe finden Sie auf den Seiten 102 und 195 in diesem Bericht.

Für das Nettoergebnis des RWE-Konzerns ergibt sich damit ein Rückgang um 7 % auf 3.308 Mio. €. Unser Ergebnis je Aktie sank dementsprechend von 6,70 auf 6,20 €. Die Anzahl der im Umlauf befindlichen RWE-Aktien lag im Berichtszeitraum bei durchschnittlich 533,6 Millionen (Vorjahr: 533,1 Millionen).

**Nachhaltiges Nettoergebnis um 6 % verbessert.** Maßgeblich für die Höhe unserer Dividende ist das um Sondereinflüsse bereinigte, nachhaltige Nettoergebnis. Darin nicht enthalten ist das neutrale Ergebnis. Sofern wesentliche Einmaleffekte im Finanzergebnis und bei den Ertragsteuern auftreten, bleiben diese ebenfalls unberücksichtigt. Im Berichtsjahr betrug das nachhaltige Nettoergebnis 3.752 Mio. €. Gegenüber 2009 hat es sich um 6 % erhöht. Wir lagen damit leicht über der Prognose vom Februar 2010, die einen Anstieg um ca. 5 % vorsah.

| <b>Geplante Effizienzsteigerungen gegenüber 2006</b><br>in Mio. € (kumuliert) | 2007 | 2008 | 2009 | 2010 | 2011 | 2012  |
|-------------------------------------------------------------------------------|------|------|------|------|------|-------|
| Ursprüngliches Zielvolumen                                                    | 100  | 200  | 450  | 700  | 900  | 1.200 |
| Erhöhung                                                                      |      |      |      |      |      | 200   |
| Neues Zielvolumen                                                             |      |      |      |      |      | 1.400 |

**Effizienzsteigerungsprogramm: Ziel für 2010 erreicht.** Mit unserem 2007 gestarteten Programm zur Effizienzsteigerung kommen wir gut voran. Durch Maßnahmen zur Kostensenkung und Erlössteigerung wollen wir zusätzliches Ergebnispotenzial erschließen, und zwar von Jahr zu Jahr mehr. Das Programm zielt u.a. darauf ab, die Leistungsfähigkeit unserer deutschen Strom- und Gasnetzaktivitäten zu erhöhen und damit die Wirkung von Entgeltkürzungen des Netzregulierers auf unser Ergebnis zu begrenzen. Weitere Einsparungen sollen durch Verbesserungen bei den IT-Dienstleistungen und im Einkauf sowie durch die Bündelung von Querschnittsfunktionen erreicht werden. Außerdem streben wir Mehrerlöse durch eine verbesserte technische Verfügbarkeit unseres Kraftwerksparks an.

Bis 2009 hatten wir mit dem Programm bereits einen positiven Ergebniseffekt von 450 Mio. € erzielt; Vergleichsjahr ist 2006. Für 2010 hatten wir uns vorgenommen, den Ergebniseffekt auf 700 Mio. € zu steigern. Dieses Ziel haben wir erreicht. Das Effizienzsteigerungsprogramm läuft bis Ende 2012. Bis dahin wollen wir unsere Anstrengungen nochmals verstärken. Beispielsweise haben wir zusätzliche Einsparmöglichkeiten beim Projekt- und Sachaufwand identifiziert. Außerdem wird RWE npower ein neues IT-System einführen, das eine deutliche Senkung der Vertriebskosten erlaubt. Unser Gesamtziel für das Programm bis 2012 können wir daher aufstocken. Ursprünglich wollten wir das jährliche Ergebnisniveau im Zeitraum von 2006 bis 2012 um insgesamt 1,2 Mrd. € verbessern. Nun peilen wir einen Zielwert von 1,4 Mrd. € an.

| <b>Investitionen in Sachanlagen und immaterielle Vermögenswerte</b><br>in Mio. € | 2010         | 2009         | +/-<br>in Mio. € |
|----------------------------------------------------------------------------------|--------------|--------------|------------------|
| Deutschland                                                                      | 2.410        | 2.813        | -403             |
| Stromerzeugung                                                                   | 1.180        | 1.791        | -611             |
| Vertrieb und Verteilnetze                                                        | 1.230        | 1.022        | 208              |
| Niederlande/Belgien                                                              | 1.144        | 156          | 988              |
| Großbritannien                                                                   | 876          | 853          | 23               |
| Zentralost-/Südosteuropa                                                         | 430          | 368          | 62               |
| Erneuerbare Energien                                                             | 614          | 447          | 167              |
| Upstream Gas & Öl                                                                | 507          | 855          | -348             |
| Trading/Gas Midstream                                                            | 4            | 2            | 2                |
| Sonstige, Konsolidierung                                                         | 394          | 419          | -25              |
| <b>RWE-Konzern</b>                                                               | <b>6.379</b> | <b>5.913</b> | <b>466</b>       |

| Investitionen in Finanzanlagen<br>in Mio. € | 2010       | 2009         | +/-<br>in Mio. € |
|---------------------------------------------|------------|--------------|------------------|
| Deutschland                                 | 45         | 1.325        | -1.280           |
| Stromerzeugung                              | 2          | 45           | -43              |
| Vertrieb und Verteilnetze                   | 43         | 1.280        | -1.237           |
| Niederlande/Belgien                         | 3          | 7.794        | -7.791           |
| Großbritannien                              | 23         | 114          | -91              |
| Zentralost-/Südosteuropa                    | 8          | 3            | 5                |
| Erneuerbare Energien                        | 95         | 286          | -191             |
| Upstream Gas & Öl                           | -          | -            | -                |
| Trading/Gas Midstream                       | 61         | 141          | -80              |
| Sonstige, Konsolidierung                    | 29         | 61           | -32              |
| <b>RWE-Konzern</b>                          | <b>264</b> | <b>9.724</b> | <b>-9.460</b>    |

**Sachinvestitionen um 8 % über Vorjahresniveau.** Im Berichtsjahr haben wir Investitionen in Höhe von 6.643 Mio. € getätigt, gegenüber 15.637 Mio. € im Vorjahr. Der deutliche Rückgang ist den Finanzinvestitionen zuzuordnen: Sie fielen 2010 kaum ins Gewicht, nachdem sie 2009 wegen der Essent-Akquisition noch außergewöhnlich hoch gewesen waren (9.724 Mio. €). Dafür verzeichneten wir ein Plus bei den Investitionen in Sachanlagen und immaterielle Vermögenswerte, die um 8 % auf 6.379 Mio. € stiegen. Dazu beigetragen hat die erstmals ganzjährige Einbeziehung der Investitionen von Essent. Trotzdem setzten wir insgesamt etwas weniger Mittel ein als erwartet, u.a. weil sich der Baufortschritt bei Kraftwerksprojekten verzögerte. Im Februar 2010 hatten wir für den Konzern Sachinvestitionen in einer Größenordnung von 7,0 Mrd. € prognostiziert.

- Deutschland: Der Bereich investierte 2.455 Mio. € und damit 41 % weniger als im Vorjahr. In den Geschäftsfeldern zeigte sich folgende Entwicklung:

**Stromerzeugung:** Das Investitionsvolumen hat sich hier um 36 % auf 1.182 Mio. € verringert. Wie im Vorjahr entfiel es nahezu ausschließlich auf Sachanlagen. Der Rückgang ist u.a. darauf zurückzuführen, dass RWE Power das Kraftwerksprojekt in Eemshaven an Essent abgegeben hat. Wie bereits erläutert, bauen wir an dem niederländischen Standort einen Steinkohle-Doppelblock mit 1.560 MW Nettoleistung. Im Berichtsjahr abschließen konnten wir die Arbeiten am neuen Gaskraftwerk in Lingen: Die Anlage mit einer Kapazität von 876 MW hat im April den Betrieb aufgenommen. Größtes laufendes Projekt der RWE Power ist der Bau eines 2.100-MW-Braunkohle-Doppelblocks in Neurath bei Köln. Wir kommen hier langsamer voran als geplant, vor allem wegen Qualitätsproblemen bei Zulieferern. Nach heutigem Planungsstand werden beide Blöcke aber noch im laufenden Jahr ans Netz gehen. Darüber hinaus baut RWE Power einen 1.528-MW-Steinkohle-Doppelblock in Hamm. Auch hier haben Zulieferer Verzögerungen verursacht. Die Anlage wird daher erst 2013 ans Netz gehen. Mit den dargestellten Kraftwerksneubauten erzielen wir deutliche Verbesserungen in puncto Effizienz und Emissionsvermeidung. Außerdem können die neuen Blöcke

ihre Last wesentlich schneller variieren als Altanlagen. Durch den flexibleren Kraftwerkseinsatz haben wir die Möglichkeit, gezielt Preisschwankungen im Strom-Sporthandel zu nutzen. Diese werden wegen des steigenden Anteils wetterabhängiger Stromerzeugung aus Windkraft und Sonnenenergie voraussichtlich stark zunehmen.

Vertrieb und Verteilnetze: In diesem Geschäftsfeld haben wir 1.273 Mio. € investiert, 45% weniger als im Vorjahr. Stark verringert haben sich die Ausgaben für Finanzanlagen, nachdem wir 2009 einige größere Transaktionen getätigt hatten, darunter die Übernahme einer von kommunalen Aktionären gehaltenen 20%-Beteiligung an der früheren RWE Westfalen-Weser-Ems für 800 Mio. €. Die Sachinvestitionen betrugen 1.230 Mio. € und lagen damit um 20% über dem Vorjahresniveau. Sie entfielen im Wesentlichen auf den Ausbau und die Erneuerung der Netzinfrastruktur. Darüber hinaus investierten wir in neue Gasspeicherkapazitäten.

- **Niederlande/Belgien:** Die Investitionen des Bereichs blieben mit 1.147 Mio. € um 86% hinter dem Vorjahreswert zurück. Dieser war wegen des Erwerbs von Essent außerordentlich hoch ausgefallen. Für die Akquisition des niederländischen Energieversorgers hatten wir inklusive Anschaffungsnebenkosten 7.794 Mio. € ausgegeben. 2010 flossen dann keine nennenswerten Mittel mehr in Finanzanlagen. Die Sachinvestitionen waren dagegen mit 1.144 Mio. € mehr als siebenmal so hoch wie 2009. Allerdings enthielt der Vorjahreswert nur Ausgaben des vierten Quartals. Das größte Einzelvorhaben des Bereichs ist das von RWE Power übernommene Kraftwerksprojekt in Eemshaven. Außerdem baut Essent zurzeit die Gaskraftwerke Moerdijk 2 und Claus C. Die erstgenannte Anlage entsteht in direkter Nachbarschaft zum bestehenden Kraftwerk Moerdijk. Sie soll über 426 MW verfügen und Ende 2011 ans Netz gehen. Das Kraftwerk Claus C wird mit geplanten 1.304 MW die bestehende Anlage Claus B (640 MW) ersetzen. Wir planen, es im ersten Halbjahr 2012 in Betrieb zu nehmen. Der Mitteleinsatz für die beiden Kraftwerke wird sich voraussichtlich auf 1,5 Mrd. € summieren.
- **Großbritannien:** RWE npower investierte 899 Mio. € und damit 7% weniger als 2009. Auch hier gaben rückläufige Ausgaben für Finanzanlagen den Ausschlag. Die Sachinvestitionen stiegen um 3% auf 876 Mio. €. Im Mittelpunkt stand der Bau von zwei hochmodernen Gaskraftwerken. Die Anlage in Staythorpe (Nottinghamshire) ist im Zeitraum von August bis November 2010 mit allen vier Blöcken ans Netz gegangen. Sie verfügt über eine Gesamtkapazität von 1.650 MW. Standort der zweiten Anlage ist Pembroke in Wales. Das Kraftwerk mit 2.188 MW Leistung wird voraussichtlich 2012 die Stromproduktion aufnehmen.
- **Zentralost-/Südosteuropa:** Die Investitionen des Bereichs erhöhten sich um 18% auf 438 Mio. €. Sie entfielen fast ausschließlich auf Sachanlagen. Der Schwerpunkt lag unverändert auf Maßnahmen zur Verbesserung der Strom- und Gasnetzinfrastruktur. Im Berichtsjahr haben wir aber auch verstärkt in die Erweiterung unserer tschechischen Gasspeicherkapazitäten investiert. Weitere Mittel flossen in den Bau eines 775-MW-Gaskraftwerks im türkischen Denizli, mit dem wir Mitte 2010 begonnen haben.

- **Erneuerbare Energien:** RWE Innogy verfolgt das Ziel, die Erzeugungskapazitäten aus erneuerbaren Energien stark auszuweiten und kommt dabei gut voran. Die Investitionen erreichten 2010 mit 709 Mio. € die selbe Größenordnung wie im Vorjahr. Sie entfielen überwiegend auf Sachanlagen. Am meisten haben wir für den Bau neuer Windkraftkapazitäten ausgegeben. Unser größtes Einzelvorhaben ist der Windpark Gwynt y Môr vor der Küste von Nordwales mit einer Gesamtleistung von 576 MW. Ende 2011 soll mit der Errichtung der ersten Fundamente für die insgesamt 160 Windenergieanlagen begonnen werden. Die Fertigstellung ist für 2014 geplant. Ein weiterer Investitionsschwerpunkt ist der vor Helgoland geplante Windpark Nordsee Ost mit 295 MW Gesamtleistung. Die Bauarbeiten haben bereits begonnen und sollen 2013 abgeschlossen sein. Bei der Konstruktion der Windparks Gwynt y Môr und Nordsee Ost werden wir eigene Spezialschiffe einsetzen, für die wir im Berichtsjahr Anzahlungen geleistet haben. Ein weiteres Großprojekt ist der Ausbau des Offshore-Windparks Thornton Bank vor Belgien von 30 auf 325 MW. RWE Innogy tätigt außerdem Ausleihungen an verbundene Unternehmen, die aber nicht als Investitionen ausgewiesen werden: 2010 flossen 300 Mio. € (Vorjahr: 220 Mio. €) an das Joint Venture Greater Gabbard Offshore Winds Ltd., das derzeit den gleichnamigen Windpark vor der britischen Küste errichtet. Wir halten 50 % an der Gesellschaft. Investiert haben wir auch in Windanlagen an Land, beispielsweise an Standorten in Polen, Italien und Schottland. Neben Windkraft spielt auch die Biomasse eine große Rolle für uns: Im Berichtsjahr haben wir u.a. mit dem Bau einer Kraft-Wärme-Kopplungsanlage mit 42 MW im schottischen Markinch begonnen. Außerdem errichten wir derzeit mehrere solcher Anlage an Standorten in Nordrhein-Westfalen. In geringem Umfang haben wir 2010 auch in Wasserkraftprojekte investiert, z.B. in die Erweiterung eines Laufwasserkraftwerks am Hochrhein.
- **Upstream Gas & Öl:** Die Investitionen der RWE Dea summierten sich auf 507 Mio. €. Sie blieben deutlich hinter dem hohen Vorjahreswert (855 Mio. €) zurück. Dieser war durch den Erwerb einer 70 %-Beteiligung am Nordsee-Gasfeld Breagh geprägt; wir hatten rund 260 Mio. € dafür ausgegeben. Dagegen wurden 2010 keine vergleichbaren Transaktionen getätigt. Wie im Vorjahr investierte RWE Dea schwerpunktmäßig in die Entwicklung bestehender Fündigkeiten.
- **Trading/Gas Midstream:** Die Investitionen der RWE Supply & Trading haben sich mit 65 Mio. € etwa halbiert. Wie im Vorjahr waren Zuführungen von Eigenmitteln an Excelebrate Energy der größte Einzelposten.

In der Position „Sonstige, Konsolidierung“ weisen wir für 2010 Investitionen von 423 Mio. € aus, die überwiegend Sachanlagen betrafen. Der Großteil der Mittel wurde von Amprion für die Modernisierung und Erweiterung des Stromtransportnetzes eingesetzt.

| <b>Mitarbeiter<sup>1</sup></b> | 31.12.10           | 31.12.09      | +/-<br>in % |
|--------------------------------|--------------------|---------------|-------------|
| Deutschland                    | 34.184             | 33.605        | 1,7         |
| Stromerzeugung                 | 15.409             | 15.346        | 0,4         |
| Vertrieb und Verteilnetze      | 18.775             | 18.259        | 2,8         |
| Niederlande/Belgien            | 3.899              | 4.695         | -17,0       |
| Großbritannien                 | 11.711             | 12.224        | -4,2        |
| Zentralost-/Südosteuropa       | 11.163             | 11.289        | -1,1        |
| Erneuerbare Energien           | 1.232              | 980           | 25,7        |
| Upstream Gas & Öl              | 1.363              | 1.279         | 6,6         |
| Trading/Gas Midstream          | 1.512              | 989           | 52,9        |
| Sonstige                       | 5.792 <sup>2</sup> | 5.665         | 2,2         |
| <b>RWE-Konzern</b>             | <b>70.856</b>      | <b>70.726</b> | <b>0,2</b>  |

1 Umgerechnet in Vollzeitstellen

2 Davon 2.271 Mitarbeiter bei RWE IT und 1.406 Mitarbeiter bei RWE Service

**Mitarbeiterzahl geringfügig gestiegen.** Am Bilanzstichtag beschäftigte der RWE-Konzern 70.856 Mitarbeiter, davon 41.039 bzw. 58 % an deutschen Standorten. Bei der Ermittlung dieser Zahlen wurden Teilzeitstellen nur anteilig berücksichtigt. Gegenüber dem 31. Dezember 2009 hat sich unser Personalstand um 130 Mitarbeiter erhöht. Basis dafür waren operative Veränderungen. Dagegen haben Unternehmenskäufe und -verkäufe per saldo dazu geführt, dass 311 Mitarbeiter den Konzern verließen. Deutliche Verschiebungen ergaben sich zwischen den Unternehmensbereichen, weil wir das Handelsgeschäft und die Windkraftaktivitäten von Essent seit 2010 in den Segmenten Trading/Gas Midstream bzw. Erneuerbare Energien ausweisen. Außerdem wechselten Mitarbeiter der RWE IT zu RWE npower und RWE Supply & Trading. Wie in den Vorjahren haben wir weit über unseren eigenen Bedarf hinaus ausgebildet: Zum 31. Dezember 2010 erlernten 3.079 junge Menschen bei uns einen Beruf. In den Mitarbeiterzahlen sind die Auszubildenden nicht enthalten.

**Kostensenkung und Effizienzsteigerung im Konzerneinkauf.** Für den Einkauf von Waren und Dienstleistungen ist unser interner Dienstleister RWE Service zuständig. Ausgenommen ist die Beschaffung von Strom, Rohstoffen, Versicherungsleistungen und Kraftwerkskomponenten bei Neubauprojekten. RWE Service stützt sich auf standardisierte Einkaufssysteme und richtet sich an den Grundsätzen der Best Practice aus. Im Geschäftsjahr 2010 konnte das Unternehmen weitere Verbesserungen erzielen. Beispielsweise hat es die Zuständigkeit für nahezu die gesamte Beschaffung von Management-, Personal- und Rechtsberatungen sowie Marketingleistungen übernommen. Außerdem konnten wir die Integration von Essent in den zentralen Einkauf abschließen und haben unsere Standards zu Arbeitssicherheit und Nachhaltigkeit in unserem Lieferantenmanagement weiterentwickelt.

Rohstoffe beziehen unsere Erzeugungsgesellschaften entweder direkt am Markt oder über RWE Supply & Trading. Bei Kraftwerkssteinkohle belief sich das Beschaffungsvolumen 2010 auf 16,3 Mio. Tonnen Steinkohleeinheiten (SKE), gegenüber 16,2 Mio. Tonnen im Vorjahr. Mit erfasst sind Bezüge für Kraftwerke, die sich nicht in RWE-Eigentum befinden, über deren Einsatz wir aber aufgrund langfristiger Verträge frei verfügen können. RWE Power hat im abgelaufenen Geschäftsjahr 12,2 Mio. Tonnen SKE eingekauft (Vorjahr: 10,5 Mio. Tonnen) und RWE npower 2,2 Mio. Tonnen SKE (Vorjahr: 5,2 Mio. Tonnen). Essent kam auf 1,9 Mio. Tonnen SKE (Vorjahr: 0,5 Mio. Tonnen) und bezog darüber hinaus 0,8 Mio. Tonnen Biomasse (Vorjahr: 0,2 Mio. Tonnen) zur Beifeuerung in Kohlekraftwerken. Der leichte Anstieg der Steinkohlemengen ergibt sich aus der höheren Kraftwerksauslastung in Deutschland und der erstmals ganzjährigen Konsolidierung von Essent. Gegenläufig wirkte, dass RWE npower ihren Bedarf größtenteils durch den Abbau von Lagerbeständen deckte. Die in unseren eigenen deutschen Kraftwerken eingesetzte Steinkohle stammt etwa zur Hälfte aus heimischer Förderung. RWE npower lässt sich vor allem aus Russland beliefern, während Essent zwei Drittel der Steinkohle aus Kolumbien bezieht. Die in unseren niederländischen Kohlekraftwerken beigeheizte Biomasse kommt größtenteils aus Nordamerika.

Braunkohle bezieht RWE aus eigenem Tagebau. In unserem Hauptabbaugebiet im Rheinland haben wir im Berichtsjahr 91 Mio. Tonnen gefördert (Vorjahr: 92 Mio. Tonnen). Davon wurden 80 Mio. Tonnen in unseren Kraftwerken verstromt und 11 Mio. Tonnen für Veredelungsprodukte verwendet.

Unser Gaseinkauf ist in der RWE Supply & Trading gebündelt. Die Bezugsmengen erreichten 2010 eine Größenordnung von 50 Mrd. m<sup>3</sup>. Rund die Hälfte davon entfällt auf langfristige Take-or-Pay-Verträge, deren Konditionen von der Entwicklung der Ölpreise abhängen. Solche Kontrakte haben wir im Wesentlichen mit Gesellschaften in Russland, Norwegen, den Niederlanden und Deutschland. Darüber hinaus kaufen wir Gas an den Großhandelsmärkten TTF (Niederlande) oder NBP (Großbritannien). Etwa 3 % unserer Nachfrage decken wir aus eigener Förderung.

## 1.7 FINANZ- UND VERMÖGENSLAGE

Im Geschäftsjahr 2010 haben wir so viel in Sachanlagen investiert wie nie zuvor – und hohe Ausschüttungen an unsere Aktionäre geleistet. Allein durch unseren operativen Cash Flow hätten wir das nicht finanzieren können. Unsere hohe Bonität erlaubte uns, Fremdkapital zu günstigen Konditionen aufzunehmen. Mit der Platzierung einer Hybridanleihe haben wir zudem ein innovatives Finanzinstrument genutzt. Es war die größte Emission dieses Wertpapiertyps, die jemals von einem europäischen Industrieunternehmen vorgenommen wurde.

**Zentrale Finanzierung durch RWE AG.** Die Finanzierung des RWE-Konzerns liegt in der Verantwortung der RWE AG. Anleihen begibt die Holding i.d.R. nicht selbst, sondern überträgt diese Aufgabe an die niederländische RWE Finance B.V. Andere Tochtergesellschaften nehmen nur in Einzelfällen Kapital direkt auf, und zwar insbesondere dann, wenn die Nutzung lokaler Kredit- und Kapitalmärkte wirtschaftlich vorteilhafter ist. Daneben übernimmt die RWE AG die Koordination, wenn Konzerngesellschaften Haftungsverhältnisse eingehen. Sie entscheidet, in welcher Höhe Garantien oder Patronatserklärungen abgegeben werden. Die Bündelung dieser Aufgaben ist Grundvoraussetzung für eine zentrale Steuerung und Überwachung von Finanzrisiken. Außerdem stärken wir damit unsere Verhandlungsposition gegenüber Kreditinstituten, Geschäftspartnern, Lieferanten und Kunden.

**Hohe finanzielle Flexibilität.** Unseren Finanzbedarf decken wir überwiegend mit den hohen und stabilen Mittelzuflüssen aus unserer laufenden Geschäftstätigkeit. Darüber hinaus steht uns eine Reihe flexibler Finanzierungsinstrumente zur Verfügung. Hervorzuheben ist hier das Debt-Issuance-Programm (DIP), das der langfristigen Refinanzierung am Kapitalmarkt dient. Im Rahmen dieses Programms können wir Anleihen im Gegenwert von insgesamt 30 Mrd. € begeben. Schließlich bietet uns ein Commercial-Paper-Programm Spielraum für die kurzfristige Finanzierung am Geldmarkt von bis zu 5 Mrd. US\$. Zum 31. Dezember 2010 standen Commercial Paper von RWE über 0,5 Mrd. € aus.

Als zusätzliche Liquiditätsreserve dient uns eine Kreditlinie über 4,0 Mrd. €, die wir im November 2010 abgeschlossen haben. Sie hat eine Laufzeit von zunächst fünf Jahren und ersetzt zwei Kreditlinien über jeweils 2,0 Mrd. €, die im Oktober 2011 ausgelaufen wären. RWE kann jeweils im November 2011 und 2012 beantragen, dass die Kreditlinie bis November 2016 bzw. 2017 verlängert wird.

Weder die genannten Finanzierungsinstrumente noch die laufenden Kreditlinien verpflichten uns, bestimmte Zinszahlungs-, Verschuldungs- oder Mindestkapitalgrenzen zu beachten, bei deren Verletzung wir zur vorzeitigen Rückzahlung, zur Stellung von Sicherheiten oder zu erhöhten Zinszahlungen verpflichtet wären. Ebenso wenig müssen wir ein vorgegebenes Rating einhalten.

**Fälligkeitsstruktur der Kapitalmarktschulden des RWE-Konzerns (Stand: 31.12.10)**Fälligkeit  
in Mrd. €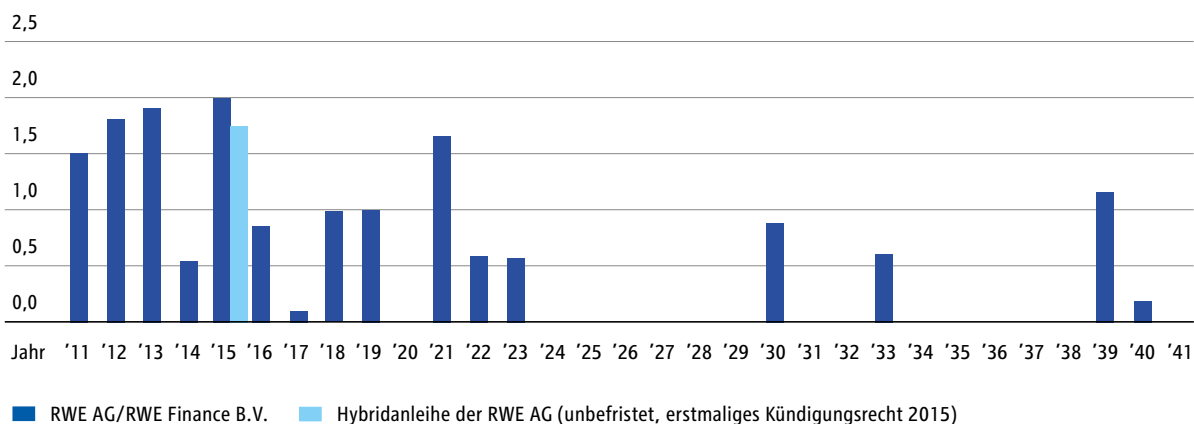

**RWE platziert Hybridanleihe mit Rekordvolumen.** Im September haben wir eine Hybridanleihe mit einem Volumen von 1,75 Mrd. € begeben. Es war die größte und zinsgünstigste Emission dieser Art, die jemals ein Industrieunternehmen in Europa vorgenommen hat. Mit einem Kupon von 4,625% pro Jahr und einem Ausgabekurs von 99,7% stieß das Papier auf reges Anlegerinteresse. Hybridanleihen sind eine Mischform aus Eigen- und Fremdkapitalfinanzierung. Im Insolvenzfall werden sie erst nach allen anderen Schuldtiteln bedient. Dafür haben sie i.d.R. einen höheren Kupon als herkömmliche Anleihen. Die Laufzeit des RWE-Hybrids ist theoretisch unbegrenzt. Wir haben allerdings erstmals nach fünf Jahren das Recht zur Rückzahlung. Weitere Informationen zur Hybridanleihe finden Sie im Anhang auf Seite 195.

**Gesamtvolumen der ausstehenden Anleihen auf 18,1 Mrd. € erhöht.** Neben der Hybridanleihe nahmen wir 2010 lediglich zwei kleinere Platzierungen am Kapitalmarkt vor. Darüber hinaus zahlten wir Anleihen im Gesamtvolumen von 0,6 Mrd. € zurück. Zum 31. Dezember 2010 standen – einschließlich der Hybridanleihe – Papiere im Wert von 18,1 Mrd. € aus. Das sind 1,7 Mrd. € mehr als im Vorjahr. Die Anleihen notieren in Euro, britischen Pfund, US-Dollar und japanischen Yen. Zur Steuerung des Währungsrisikos haben wir Sicherungsgeschäfte abgeschlossen. Bezieht man solche Transaktionen mit ein, waren wir zum Jahresende zu 72% in Euro und zu 28% in britischen Pfund verschuldet. Das heißt, ein Fremdwährungsrisiko aus Kapitalmarktschulden in US-Dollar oder Yen besteht nicht. Die Ursprungslaufzeiten unserer Anleihen reichen von zwei bis 30 Jahren. Ihre gewichtete durchschnittliche Restlaufzeit lag Ende 2010 bei 8,1 Jahren. Die Hybridanleihe ist hier nicht berücksichtigt. Unsere Fälligkeiten im Jahr 2011 betragen 1,5 Mrd. €.

| <b>Kapitalmarktschulden des RWE-Konzerns<br/>zum 31.12.10 nach Fälligkeit<sup>1</sup></b> |        | 2011–2014 | 2015–2018 | 2019–2023 | ab 2024 |
|-------------------------------------------------------------------------------------------|--------|-----------|-----------|-----------|---------|
| Nominalvolumen                                                                            | Mrd. € | 5,8       | 3,9       | 3,8       | 2,8     |
| Anteil am Gesamtvolumen der Kapitalmarktschulden                                          | %      | 36        | 24        | 23        | 17      |

<sup>1</sup> Ohne die Hybridanleihe; sie hat eine unendliche Laufzeit.

**Nettoschulden auf 29,0 Mrd. € gestiegen.** Unsere Nettoschulden haben sich im Laufe des Geschäftsjahres 2010 um 3,2 Mrd. € auf 29,0 Mrd. € erhöht. Dazu trugen hauptsächlich die Sachinvestitionen bei, die mit 6,4 Mrd. € ein neues Rekordniveau erreichten. Die Gewinnausschüttungen schlugen mit 2,2 Mrd. € zu Buche. Außerdem sind unsere Rückstellungen für die Entsorgung im Kernenergiebereich um 0,5 Mrd. € gestiegen. Dagegen dämpfte der operative Mittelzufluss den Anstieg der Verbindlichkeiten. Dies gilt auch für die im September begebene Hybridanleihe, denn bei der Ermittlung der Nettoschulden stuften wir die Hälfte des Emissionsvolumens von 1,75 Mrd. € als Eigenkapital ein. Wir folgen damit der Vorgehensweise der Rating-Agenturen. Für unsere Konzernbilanz sind dagegen die International Financial Reporting Standards (IFRS) maßgeblich. Diese schreiben eine vollumfängliche Klassifizierung als Eigenkapital vor.

| <b>Nettoschulden</b><br>in Mio. €                                                              | 31.12.10      | 31.12.09      | +/-<br>in %  |
|------------------------------------------------------------------------------------------------|---------------|---------------|--------------|
| Flüssige Mittel                                                                                | 2.476         | 3.074         | -19,5        |
| Wertpapiere                                                                                    | 3.445         | 3.443         | 0,1          |
| Sonstiges Finanzvermögen                                                                       | 1.985         | 3.247         | -38,9        |
| <b>Finanzvermögen</b>                                                                          | <b>7.906</b>  | <b>9.764</b>  | <b>-19,0</b> |
| Anleihen, Schuldscheindarlehen, Verbindlichkeiten gegenüber Kreditinstituten, Commercial Paper | 17.572        | 17.707        | -0,8         |
| Sonstige Finanzverbindlichkeiten                                                               | 2.238         | 2.439         | -8,2         |
| <b>Finanzverbindlichkeiten</b>                                                                 | <b>19.810</b> | <b>20.146</b> | <b>-1,7</b>  |
| <b>Nettofinanzschulden</b>                                                                     | <b>11.904</b> | <b>10.382</b> | <b>14,7</b>  |
| Rückstellungen für Pensionen und ähnliche Verpflichtungen                                      | 3.318         | 3.281         | 1,1          |
| Aktivisch ausgewiesenes Nettovermögen bei fondsgedeckten Pensionsverpflichtungen               | 56            | 79            | -29,1        |
| Rückstellungen für Entsorgung im Kernenergiebereich                                            | 10.010        | 9.491         | 5,5          |
| Bergbaubedingte Rückstellungen                                                                 | 2.920         | 2.712         | 7,7          |
| Hybridkapital (Rating-relevanter Anteil)                                                       | 880           | -             | -            |
| Zur Veräußerung bestimmtes Nettovermögen                                                       | 12            | -             | -            |
| <b>Nettoschulden des RWE-Konzerns</b>                                                          | <b>28.964</b> | <b>25.787</b> | <b>12,3</b>  |

**Sicherung des aktuellen A-Ratings hat hohe Priorität.** Bonitätsprüfungen durch unabhängige Rating-Agenturen haben maßgeblichen Einfluss auf die Möglichkeiten eines Unternehmens, sich Fremdkapital zu beschaffen. Je besser die Bewertung, desto leichter der Zugang zu den internationalen Kapitalmärkten und desto kostengünstiger die Aufnahme von Fremdmitteln. Daher profitieren wir davon, dass uns die beiden führenden Rating-Agenturen Moody's und Standard & Poor's eine hohe Bonität bescheinigen. Die folgende Tabelle zeigt unsere Kredit-Ratings per Ende Januar 2011:

| Kredit-Rating | Moody's               | Standard & Poor's    |
|---------------|-----------------------|----------------------|
| Langfristig   | A2/negativer Ausblick | A/negativer Ausblick |
| Kurzfristig   | P-1                   | A-1                  |

**Verschuldungsfaktor unverändert bei 2,8.** Wir steuern unsere Verschuldung anhand von anerkannten Kennziffern. Eine Schlüsselgröße ist das Verhältnis der Nettoschulden zum EBITDA, das als „Verschuldungsfaktor“ (Leverage Factor) bezeichnet wird. Diese Kennzahl ist aussagekräftiger als die absolute Höhe der Schulden, da sie die Ertragskraft des Unternehmens und damit die Fähigkeit zur Bedienung der Schulden mit einbezieht. Um unser Rating zu sichern, haben wir im Februar 2010 das Ziel ausgegeben, dass sich unser Verschuldungsfaktor an einer Obergrenze von 3,0 orientieren soll. Diese Vorgabe wurde eingehalten: Im zurückliegenden Geschäftsjahr kamen wir – wie bereits 2009 – auf einen Wert von 2,8.

**Leicht gesunkene Fremdkapitalkosten.** Unsere Fremdkapitalkosten lagen 2010 bei 4,9%. Der Wert bezieht sich auf den jahresdurchschnittlichen Bestand ausstehender Anleihen und Commercial Paper unter Berücksichtigung von Zinsderivaten. Hybridkapital bleibt hier außer Betracht. Gegenüber 2009 (5,0%) haben sich unsere Finanzierungskosten etwas verringert. Dazu trugen die im Berichtsjahr begebenen Anleihen bei, die mit 2,7% (inkl. Sicherungsgeschäfte) unterdurchschnittlich verzinst werden.

| Kapitalflussrechnung<br>in Mio. €                                                  | 2010        | 2009         | +/-<br>in Mio. € |
|------------------------------------------------------------------------------------|-------------|--------------|------------------|
| Cash Flow aus laufender Geschäftstätigkeit                                         | 5.500       | 5.299        | 201              |
| Davon: Veränderung des Nettoumlaufvermögens                                        | -2.349      | -795         | -1.554           |
| Cash Flow aus der Investitionstätigkeit                                            | -6.683      | -8.326       | 1.643            |
| Cash Flow aus der Finanzierungstätigkeit                                           | 638         | 4.839        | -4.201           |
| Einfluss von Wechselkurs- und sonstigen Wertänderungen<br>auf die flüssigen Mittel | 6           | 13           | -7               |
| <b>Veränderung der flüssigen Mittel</b>                                            | <b>-539</b> | <b>1.825</b> | <b>-2.364</b>    |
| Cash Flow aus laufender Geschäftstätigkeit                                         | 5.500       | 5.299        | 201              |
| Abzgl. Investitionen in Sachanlagen und immaterielle Vermögenswerte                | -6.379      | -5.913       | -466             |
| <b>Free Cash Flow</b>                                                              | <b>-879</b> | <b>-614</b>  | <b>-265</b>      |

**Operativer Cash Flow um 4% verbessert.** Im Geschäftsjahr 2010 haben wir einen Cash Flow aus laufender Geschäftstätigkeit in Höhe von 5.500 Mio. € erwirtschaftet. Wir lagen damit um 4% über dem Vorjahreswert (5.299 Mio. €). Maßgeblich dafür war die gute Ertragslage, während Effekte im Nettoumlaufvermögen gegenläufig wirkten. Der Mittelabfluss aus der Investitionstätigkeit belief sich auf 6.683 Mio. €. Um diesen Betrag überstiegen unsere Ausgaben für Investitionen (inkl. Veränderungen der Geldanlagen) die Einnahmen aus Anlagenabgängen und Unternehmensverkäufen. Aus der Finanzierungstätigkeit erzielten wir trotz hoher Gewinnausschüttungen für das Geschäftsjahr 2009 einen Cash Flow von 638 Mio. €. Wesentlich dazu beigetragen hat die Begebung neuer Anleihen im Gesamtvolumen von 2,1 Mrd. €. Unser Bestand an flüssigen Mitteln ist im Jahresverlauf um 539 Mio. € gesunken.

Der Cash Flow aus laufender Geschäftstätigkeit, verringert um die Investitionen in Sachanlagen und immaterielle Vermögenswerte, ergibt den Free Cash Flow. Dieser lag mit –879 Mio. € unter dem bereits negativen Vorjahreswert (–614 Mio. €). Hier spiegelt sich unsere umfangreiche Investitionstätigkeit wider.

| Bilanzstruktur                                              | 31.12.10      |              | 31.12.09      |              |
|-------------------------------------------------------------|---------------|--------------|---------------|--------------|
|                                                             | in Mio. €     | in %         | in Mio. €     | in %         |
| <b>Aktiva</b>                                               |               |              |               |              |
| Langfristiges Vermögen                                      | 60.465        | 65,0         | 56.563        | 60,5         |
| Davon: Immaterielle Vermögenswerte                          | 17.350        | 18,6         | 17.320        | 18,5         |
| Davon: Sachanlagen                                          | 32.237        | 34,6         | 28.627        | 30,6         |
| Kurzfristiges Vermögen                                      | 32.612        | 35,0         | 36.875        | 39,5         |
| Davon: Forderungen und sonstige Vermögenswerte <sup>1</sup> | 23.258        | 25,0         | 27.396        | 29,3         |
| <b>Gesamt</b>                                               | <b>93.077</b> | <b>100,0</b> | <b>93.438</b> | <b>100,0</b> |
| <b>Passiva</b>                                              |               |              |               |              |
| Eigenkapital                                                | 17.417        | 18,7         | 13.717        | 14,7         |
| Langfristige Schulden                                       | 45.162        | 48,5         | 45.633        | 48,8         |
| Davon: Rückstellungen                                       | 23.485        | 25,2         | 22.315        | 23,9         |
| Davon: Finanzverbindlichkeiten                              | 15.908        | 17,1         | 17.019        | 18,2         |
| Kurzfristige Schulden                                       | 30.498        | 32,8         | 34.088        | 36,5         |
| Davon: Sonstige Verbindlichkeiten <sup>2</sup>              | 20.881        | 22,4         | 25.132        | 26,9         |
| <b>Gesamt</b>                                               | <b>93.077</b> | <b>100,0</b> | <b>93.438</b> | <b>100,0</b> |

1 Inkl. Finanzforderungen, Forderungen aus Lieferungen und Leistungen sowie Ertragsteuererstattungsansprüche

2 Inkl. Verbindlichkeiten aus Lieferungen und Leistungen sowie Ertragsteuerverbindlichkeiten

**Bilanzstruktur: Eigenkapitalquote auf 18,7% gestiegen.** Der RWE-Konzern wies zum 31. Dezember 2010 eine Bilanzsumme von 93,1 Mrd. € aus. Das sind 0,3 Mrd. € weniger als im Vorjahr. Wesentliche Veränderungen ergaben sich bei den Derivatepositionen: Sie waren auf der Aktiv- und Passivseite der Bilanz um jeweils 3,3 Mrd. € rückläufig. Die Finanzforderungen aus Sicherheitsleistungen (Margins und Collaterals) sanken um 1,3 Mrd. €. Dagegen sind die Sachanlagen wegen unserer umfangreichen Investitionstätigkeit um 3,6 Mrd. € gestiegen. Veränderungen der Stichtagswechselkurse erhöhten die Bilanzsumme um 0,7 Mrd. €. Die Eigenkapitalquote des RWE-Konzerns verbesserte sich im Berichtsjahr von 14,7 auf 18,7%. Das ergibt sich aus der hohen Ertragskraft des Unternehmens und der Emission der Hybridanleihe. Das langfristig gebundene Vermögen war zum Bilanzstichtag in voller Höhe durch Eigenkapital und langfristige Fremdmittel gedeckt.

## 1.8 ERLÄUTERUNGEN ZUM JAHRESABSCHLUSS DER RWE AG (HOLDING)

**Rolle der RWE AG im Konzern.** Als Management-Holding des RWE-Konzerns nimmt die RWE AG zentrale Leitungsfunktionen wahr. Ihre wirtschaftliche Lage wird im Wesentlichen von den Aktivitäten der Tochtergesellschaften bestimmt.

**Jahresabschluss.** Die RWE AG stellt ihren Jahresabschluss nach den Vorschriften des Handelsgesetzbuches (HGB) und des Aktiengesetzes (AktG) auf. Für das zum 31. Dezember 2010 endende Geschäftsjahr wurden erstmals die Vorschriften des Bilanzrechtsmodernisierungsgesetzes (BilMoG) angewendet. Anpassungen der Vorjahreszahlen beziehen sich ausschließlich auf einen geänderten Ausweis eigener Anteile. Der Abschluss wird beim Betreiber des elektronischen Bundesanzeigers (Bundesanzeiger Verlagsgesellschaft mbH, Köln) eingereicht und im elektronischen Bundesanzeiger veröffentlicht. Er kann bei uns angefordert werden und steht auch im Internet zur Verfügung.

| <b>Bilanz der RWE AG (Kurzfassung)<sup>1</sup></b><br>in Mio. € | 31.12.10      | 31.12.09      |
|-----------------------------------------------------------------|---------------|---------------|
| <b>Anlagevermögen</b>                                           |               |               |
| Finanzanlagen                                                   | 39.849        | 40.039        |
| <b>Umlaufvermögen</b>                                           |               |               |
| Forderungen gegen verbundene Unternehmen                        | 3.950         | 3.896         |
| Übrige Forderungen und sonstige Vermögensgegenstände            | 876           | 778           |
| Wertpapiere und flüssige Mittel                                 | 1.679         | 1.751         |
| <b>Bilanzsumme Aktiva</b>                                       | <b>46.354</b> | <b>46.464</b> |
| Eigenkapital                                                    | 8.146         | 7.493         |
| Rückstellungen                                                  | 4.851         | 7.360         |
| Verbindlichkeiten gegenüber verbundenen Unternehmen             | 29.462        | 29.966        |
| Übrige Verbindlichkeiten                                        | 3.895         | 1.645         |
| <b>Bilanzsumme Passiva</b>                                      | <b>46.354</b> | <b>46.464</b> |

1 Angepasste Vorjahreszahlen

| <b>Gewinn- und Verlustrechnung der RWE AG (Kurzfassung)</b><br>in Mio. € | 2010         | 2009         |
|--------------------------------------------------------------------------|--------------|--------------|
| Ergebnis aus Finanzanlagen                                               | 3.184        | 3.662        |
| Zinsergebnis                                                             | -681         | -1.091       |
| Sonstige Erträge und Aufwendungen                                        | 1.413        | 982          |
| <b>Ergebnis der gewöhnlichen Geschäftstätigkeit</b>                      | <b>3.916</b> | <b>3.553</b> |
| Außerordentliche Erträge und Aufwendungen                                | 1            | -            |
| Steuern vom Einkommen und vom Ertrag                                     | -1.397       | -1.115       |
| <b>Jahresüberschuss</b>                                                  | <b>2.520</b> | <b>2.438</b> |
| Gewinnvortrag                                                            | -            | 7            |
| Einstellung in die Gewinnrücklagen                                       | -653         | -578         |
| <b>Bilanzgewinn</b>                                                      | <b>1.867</b> | <b>1.867</b> |

**Vermögenslage.** Die Vermögenslage der RWE AG ist geprägt durch das Management von Beteiligungen und durch die Wahrnehmung von Leitungsfunktionen für die Konzerngesellschaften. Die Holding hält Anteile an den Konzerngesellschaften und nimmt für sie Finanzierungsfunktionen wahr. Die Darstellung der Vermögenslage hat sich aufgrund neuer Vorschriften des BilMoG geändert. Danach sind Vermögensgegenstände, die der Absicherung von Pensionsverpflichtungen dienen, mit diesen zu saldieren. Im Berichtsjahr waren davon überwiegend Wertpapiere des Anlagevermögens betroffen; das Vermögen reduzierte sich dadurch um 3,0 Mrd. €. Darüber hinaus waren auch die bisher im Umlaufvermögen ausgewiesenen 28,8 Millionen eigenen Aktien mit einem Buchwert von 2,0 Mrd. € direkt vom Eigenkapital abzusetzen; der Vorjahresausweis wurde entsprechend angepasst. Unsere im September 2010 begebene Hybridanleihe mit einem Gesamtvolumen von 1,75 Mrd. €, die nach deutschem Handelsrecht dem Fremdkapital zuzurechnen ist, trug wesentlich dazu bei, dass sich die übrigen Verbindlichkeiten erhöhten.

Zum 31. Dezember 2010 belief sich die Eigenkapitalquote der RWE AG auf 17,6%. Damit übertraf sie den angepassten Vorjahreswert (16,1%). Die Einstellung in die Gewinnrücklagen betrug 0,7 Mrd. €.

**Finanzlage.** Eine zentrale Aufgabe der RWE AG ist, Finanzmittel für die laufende Geschäftstätigkeit ihrer Tochtergesellschaften zu beschaffen. Zur externen Refinanzierung am Bondmarkt bedient sie sich zumeist der Tochtergesellschaft RWE Finance B.V., die Anleihen unter Garantie der RWE AG begibt. Wie bereits erwähnt, emittierte die RWE AG im zurückliegenden Geschäftsjahr eine Hybridanleihe. Diese hat eine unendliche Laufzeit und ist erstmals nach fünf Jahren durch die RWE AG kündbar. Einschließlich der Hybridanleihe standen zum 31. Dezember 2010 von RWE begebene Anleihen und Commercial Paper in einem Volumen von 18,1 Mrd. € bzw. 0,5 Mrd. € aus. RWE hat 2010 eine neue Rahmenkreditvereinbarung mit mehreren Banken über 4,0 Mrd. € abgeschlossen. Diese hat eine Laufzeit von fünf Jahren und ersetzt zwei Tranchen über jeweils 2,0 Mrd. €, die im Oktober 2011 ausgelaufen wären.

**Ertragslage.** Die Ertragslage der RWE AG wird wesentlich von den Ergebnissen der Tochtergesellschaften bestimmt. Der Jahresüberschuss 2010 lag leicht über dem Vorjahresniveau. Das Ergebnis aus Finanzanlagen, zu dem vor allem RWE Power sowie Netz- und Vertriebsgesellschaften in Deutschland und Zentralosteuropa beitrugen, ging etwas zurück. Das Zinsergebnis hat sich dagegen verbessert. Dies liegt vor allem daran, dass nach BilMoG Erträge aus Wertpapieren, die der Sicherung von Pensionsverpflichtungen dienen, mit den Zinsaufwendungen aus Pensionsrückstellungen verrechnet werden. Die Position „Sonstige Erträge und Aufwendungen“ hat sich ebenfalls verbessert, insbesondere weil die Ertragsteuerumlagen von Tochterunternehmen höher waren als 2009. Dementsprechend ist der Steueraufwand gegenüber 2009 gestiegen.

Aufsichtsrat und Vorstand der RWE AG werden der Hauptversammlung am 20. April 2011 für das Geschäftsjahr 2010 eine Dividende von 3,50 € je Aktie vorschlagen. Bezogen auf das nachhaltige Nettoergebnis des Konzerns ergibt sich daraus eine Ausschüttungsquote von 50%. Sie liegt damit am unteren Rand der angestrebten Bandbreite von 50 bis 60%.

**Bericht zur Übernahmesituation: Angaben nach §§ 315 Abs. 4, 289 Abs. 4 HGB und Bericht des Vorstands nach § 176 Abs. 1 Satz 1 AktG.**

Das gezeichnete Kapital der RWE AG besteht unverändert aus 523.405.000 Stück auf den Inhaber lautenden nennbetragslosen Stammaktien (93,1 % des gezeichneten Kapitals) und 39.000.000 Stück auf den Inhaber lautenden nennbetragslosen Vorzugsaktien ohne Stimmrecht (6,9 % des gezeichneten Kapitals). Die weiteren Rechte und Pflichten bestimmen sich nach dem Aktiengesetz. Den Inhabern der Vorzugsaktien ohne Stimmrecht steht bei der Verteilung des Bilanzgewinns ein Vorzugsgewinnanteil von 0,13 € je Aktie zu. Die Zusammensetzung des gezeichneten Kapitals sowie insbesondere die Ausgestaltung der von RWE ausgegebenen stimmrechtslosen Vorzugsaktien entsprechen den gesetzlichen und satzungsmäßigen Vorgaben.

Die RW Energie-Beteiligungsgesellschaft mbH & Co. KG, Dortmund, hat uns gemäß § 21 Abs. 1 Wertpapierhandelsgesetz (WpHG) am 21. Dezember 2007 mitgeteilt, dass sie zu diesem Zeitpunkt einen Stimmrechtsanteil von 16,089 % an der RWE AG gehalten hat.

Die Ernennung und Abberufung der Mitglieder des Vorstands richtet sich nach den §§ 84 f. AktG in Verbindung mit § 31 Mitbestimmungsgesetz (MitbestG). Satzungsänderungen werden nach den Bestimmungen der §§ 179 ff. AktG in Verbindung mit § 16 Abs. 6 der Satzung der RWE AG vorgenommen. Nach § 16 Abs. 6 der Satzung werden die Beschlüsse der Hauptversammlung mit einfacher Stimmenmehrheit und – soweit eine Kapitalmehrheit erforderlich ist – mit einfacher Kapitalmehrheit gefasst, falls nicht das Gesetz oder die Satzung zwingend etwas anderes vorschreiben. Damit wurde von der gesetzlich eingeräumten Möglichkeit Gebrauch gemacht, eine andere Kapitalmehrheit für eine Satzungsänderung zu bestimmen als vom Gesetz vorgegeben. Satzungsänderungen, die nur die Fassung, d.h. nur eine Änderung der sprachlichen Form, nicht aber des Inhalts betreffen, können vom Aufsichtsrat beschlossen werden (§ 10 Abs. 9 der Satzung).

Mit Beschluss der Hauptversammlung vom 22. April 2010 wurde die Gesellschaft ermächtigt, bis zum 21. Oktober 2011 Aktien der Gesellschaft, gleich welcher Gattung, im Umfang von bis zu 10 % des Grundkapitals zu erwerben. Der Erwerb kann sich auf Aktien nur einer Gattung beschränken. Die Unternehmensanteile können nach Wahl des Vorstands über die Börse oder mittels eines öffentlichen Kaufangebots erworben werden. Dabei ist der Einsatz von Put- oder Call-Optionen möglich. Anschließend dürfen die eigenen Aktien eingezogen werden. Wurden Stammaktien zurückerworben, können diese auch im Rahmen von Unternehmenszusammenschlüssen oder beim Erwerb von Unternehmen auf Dritte übertragen oder in anderer Weise veräußert werden. Eine Veräußerung, die weder über die Börse noch durch ein Angebot an alle Aktionäre erfolgt, ist nur gegen Barzahlung erlaubt. Außerdem darf der Preis den Börsenkurs von Stammaktien gleicher Ausstattung zum Zeitpunkt der Veräußerung nicht wesentlich unterschreiten. Zurückerworbene Stammaktien können auch für die Bedienung von Wandel- und Optionsanleihen eingesetzt werden, die auf der Basis der Beschlüsse der Hauptversammlung vom 22. April 2009 begeben werden. Die Ermächtigung kann ganz oder teilweise, auch in Teilbeträgen, ausgeübt werden.

Durch Beschluss der Hauptversammlung vom 22. April 2009 wurde der Vorstand bis zum 21. April 2014 zur Ausgabe von Options- oder Wandelanleihen ermächtigt; der Gesamtnennwert der Anleihen ist auf 6 Mrd. € begrenzt. Das Bezugsrecht der Aktionäre kann ausgeschlossen werden, sofern die Anleihen zu einem marktgerechten Preis begeben werden und die neuen Aktien nicht mehr als 10% des Grundkapitals ausmachen. Der Vorstand kann das Bezugsrecht darüber hinaus ausschließen, um Spitzenbeträge zu vermeiden, die sich aus dem Bezugsverhältnis ergeben würden. Er kann dies auch tun, um die Aktien eventuellen Inhabern früherer Wandel- und Optionsanleihen in dem Umfang anzubieten, wie sie ihnen nach Wandlung bzw. nach Ausübung der Option als Aktionär zustehen würden. Zur Bedienung der Wandlungs- und Optionsrechte besteht gemäß § 4 Abs. 3a und 3b der Satzung ein bedingtes Kapital in Höhe von 143.975.680 €, eingeteilt in 56.240.500 auf den Inhaber lautende Stammaktien.

Gemäß § 4 Abs. 2 der Satzung ist der Vorstand ermächtigt, das Grundkapital der Gesellschaft bis zum 16. April 2013 mit Zustimmung des Aufsichtsrats um bis zu 287.951.360 € einmalig oder in Teilbeträgen durch Ausgabe neuer Inhaberstammaktien gegen Bar- oder Sacheinlage zu erhöhen (genehmigtes Kapital). Das Bezugsrecht der Aktionäre kann mit Zustimmung des Aufsichtsrats ausgeschlossen werden, um Spitzenbeträge zu vermeiden, die sich aus dem Bezugsverhältnis ergeben. Es kann zudem ausgeschlossen werden, um Aktien gegen Sacheinlagen im Rahmen von Unternehmenszusammenschlüssen oder zum Zweck des Erwerbs von Unternehmensanteilen auszugeben. Schließlich kann das Bezugsrecht im Fall einer Barkapitalerhöhung ausgeschlossen werden, wenn der Ausgabepreis der neuen Aktien den Börsenpreis der bereits ausgegebenen Aktien nicht wesentlich unterschreitet und der auf die neuen Aktien, für die das Bezugsrecht ausgeschlossen wird, insgesamt entfallende anteilige Betrag 10% des Grundkapitals nicht überschreitet. Der Vorstand ist ermächtigt, mit Zustimmung des Aufsichtsrats den weiteren Inhalt und die Bedingungen der Aktienausgabe festzulegen. Aktien aus dem genehmigten Kapital sind auf Aktien aus dem bedingten Kapital anzurechnen, soweit sie jeweils unter Bezugsrechtsausschluss ausgegeben werden. Insoweit darf das Grundkapital durch Ausgabe neuer Aktien insgesamt um nicht mehr als 20% erhöht werden.

Die syndizierte Kreditlinie der RWE AG enthält eine Change-of-Control-Klausel, die im Wesentlichen folgenden Inhalt hat: Im Falle einer Änderung der Kontroll- oder Mehrheitsverhältnisse bei RWE sind weitere Inanspruchnahmen bis auf Weiteres ausgesetzt und die Kreditgeber werden mit uns Verhandlungen über eine Fortführung der Kreditlinie aufnehmen. Sofern innerhalb von 30 Tagen nach einem solchen Kontrollwechsel keine Einigung mit der Mehrheit der Kreditgeber erzielt werden kann, wird die Kreditlinie seitens der Kreditgeber gekündigt. Die nicht nachrangigen RWE-Anleihen enthalten eine Change-of-Control-Klausel mit folgendem wesentlichen Inhalt: Im Fall eines Kontrollwechsels in Verbindung mit einer Absenkung des Kredit-Ratings der RWE AG unter die Kategorie „Investment Grade“ haben die Gläubiger das Recht, die Rückzahlung ihrer Schuldverschreibung zu verlangen. Der Rückzahlungsbetrag ist dabei nach Maßgabe der jeweiligen Anleihebedingungen zu ermitteln. Die Hybridanleihe enthält eine Change-of-Control-Klausel, nach der wir im Falle eines Kontrollwechsels

innerhalb des definierten Kontrollwechselzeitraums die Hybridanleihe insgesamt kündigen und zurückzahlen dürfen. Wird sie nicht zurückgezahlt und das Kredit-Rating sinkt innerhalb des Kontrollwechselzeitraums unter Investment Grade, steigt der Vergütungssatz für die Hybridanleihe um 500 Basispunkte p.a.

Die Vorstandsmitglieder haben im Fall eines Wechsels der Unternehmenskontrolle ein Sonderkündigungsrecht. Bei Ausübung dieses Sonderkündigungsrechts erhalten die Vorstandsmitglieder zur Abgeltung der vereinbarten Vertragsdauer eine Einmalzahlung, die mindestens zwei und maximal drei Jahresgesamtvergütungen entspricht. Dies steht in Einklang mit den Vorgaben des Deutschen Corporate Governance Kodex. Dr. Jürgen Großmann wurde das Sonderkündigungsrecht vor Inkrafttreten der Änderung des Deutschen Corporate Governance Kodex im Jahr 2008 gewährt. Sein Dienstvertrag sieht eine Einmalzahlung vor, die seine bis zum Ende der vereinbarten Vertragslaufzeit anfallenden Bezüge und den anstelle einer Versorgungszusage vertraglich vereinbarten Betrag umfasst.

Bei einem Wechsel der Unternehmenskontrolle werden außerdem zurückbehaltene Tantiemen des Vorstands vorzeitig bewertet und ggf. ausgezahlt. Hierzu wird der durchschnittliche Bonus-Malus-Faktor der letzten drei Jahre herangezogen. Von ihm hängt ab, ob und in welcher Höhe zurückbehaltene Tantiemen ausgezahlt werden.

Der Long-Term Incentive Plan 2005 (Beat) sowie der RWE Performance Share Plan 2010 (Beat 2010) für Vorstand und Führungskräfte der RWE AG und der nachgeordneten verbundenen Unternehmen sehen für den Fall eines Wechsels der Unternehmenskontrolle eine Entschädigungszahlung für sämtliche Inhaber von Performance Shares vor. Die Höhe der Entschädigungszahlung entspricht dem Produkt des im Rahmen der Übernahme für die RWE-Aktien gezahlten Preises und der endgültigen Anzahl der Performance Shares, die den jeweiligen Planbedingungen entsprechend auf den Zeitpunkt der Abgabe des Übernahmeangebots ermittelt wird.

Die Ermächtigung zum Erwerb eigener Aktien, das genehmigte Kapital, die Klausel für den Fall des Kontrollwechsels in der syndizierten Kreditlinie und den RWE-Anleihen sowie die Regelungen für den Fall eines Wechsels der Unternehmenskontrolle in den Verträgen der Vorstandsmitglieder sowie im Long-Term Incentive Plan 2005 (Beat) und im RWE Performance Share Plan 2010 (Beat 2010) entsprechen allgemein üblichen Standards bei deutschen kapitalmarktorientierten Unternehmen.

## 1.9 INNOVATION

Effizient, klimafreundlich und intelligent – so stellen wir uns die Energieversorgung der Zukunft vor. Mit umfassender Forschungs- und Entwicklungsarbeit tragen wir dazu bei, diese Vision Wirklichkeit werden zu lassen. Fortschritt beim Klimaschutz darf aber nicht mit Rückschritt bei Wirtschaftlichkeit und Versorgungssicherheit erkaufte werden. Wir konzentrieren uns daher auf Lösungen, die im umfassenden Sinne nachhaltig sind: angefangen bei der Nutzung von Kohlendioxid als Rohstoff über neue Stromspeichertechnologien bis hin zur Elektromobilität.

**Forschung und Entwicklung: Aufwand um 35% gesteigert.** Unsere Forschung und Entwicklung (F&E) zielt darauf ab, Lösungen für eine umweltschonende, zuverlässige und bezahlbare Energieversorgung zu entwickeln und dadurch unsere Wettbewerbsfähigkeit langfristig zu sichern. Wir setzen hierbei in hohem Maße auf die Zusammenarbeit mit Partnern aus Anlagenbau, chemischer Industrie und Forschungseinrichtungen. Unser Aktionsradius ist somit größer, als es die folgenden Zahlen vermuten lassen. Im zurückliegenden Geschäftsjahr haben wir 149 Mio. € für F&E aufgewendet; das sind 39 Mio. € mehr als im Vorjahr. Der Anstieg beruht auch darauf, dass wir Essent und damit die F&E-Tätigkeit des Unternehmens erstmals ganzjährig im Jahresabschluss berücksichtigt haben. Von unseren Mitarbeitern waren 360 ausschließlich oder teilweise mit F&E-Aufgaben befasst.

| Forschung und Entwicklung |        | 2010 | 2009 | 2008 | 2007 | 2006 |
|---------------------------|--------|------|------|------|------|------|
| F&E-Aufwendungen          | Mio. € | 149  | 110  | 105  | 74   | 73   |
| F&E-Mitarbeiter           |        | 360  | 350  | 330  | 270  | 273  |

**Kohlendioxid – vom Schadstoff zum Rohstoff.** Wie können wir die Verstromung fossiler Energieträger – vor allem von Kohle – mit dem Ziel des Klimaschutzes in Einklang bringen? Eine Antwort darauf bieten Technologien, die verhindern, dass Kohlendioxid aus dem Kraftwerk in die Atmosphäre gelangt. Dazu muss das CO<sub>2</sub> zunächst einmal isoliert werden. Hier kommen mehrere Verfahren in Betracht. Die am weitesten fortgeschrittene Technologie ist die Abscheidung des Kohlendioxids aus dem Rauchgas, das bei der Verbrennung von Kohle oder Gas entsteht; man spricht hier von „CO<sub>2</sub>-Wäsche“. Zu ihrer Erprobung haben wir am Standort Niederaußem eine Pilotanlage gebaut. Seit 2009 testen wir dort gemeinsam mit BASF und Linde neue „CO<sub>2</sub>-Waschmittel“ für den großtechnischen Einsatz. Die Ergebnisse sind vielversprechend: Im Vergleich zu den heute gebräuchlichen Substanzen erfordern die neuen Lösungsmittel bei der Kohlendioxid-Abtrennung einen bis zu 20% geringeren Energieeinsatz. Zudem konnten wir nachweisen, dass sie über mehrere Waschzyklen hinweg haltbar sind. Weitere Waschmittel wollen wir in einer zweiten Pilotanlage am britischen Standort Aberthaw testen. Dort laufen die Bauvorbereitungen. Unser Ziel ist, die CO<sub>2</sub>-Wäsche spätestens ab 2020 kommerziell nutzen zu können.

Mit der Abtrennung des Kohlendioxids ist aber nur ein erster Schritt getan. Darüber hinaus muss das Gas dauerhaft von der Atmosphäre ferngehalten werden, etwa durch Einlagerung in Gesteinsformationen tief unter der Erdoberfläche. Derzeit prüfen wir Möglichkeiten zur Abtrennung und Speicherung von CO<sub>2</sub> im niederländischen Eemshaven, wo wir einen Steinkohle-Doppelblock mit 1.560 MW Gesamtleistung bauen. Wir könnten ihn um eine Demonstrationsanlage zur CO<sub>2</sub>-Abscheidung ergänzen – vorausgesetzt, wir erhalten Unterstützung aus einem EU-Förderprogramm. In Deutschland fehlen dagegen nach wie vor die gesetzlichen Rahmenbedingungen für die unterirdische Speicherung von CO<sub>2</sub>. Außerdem hat sich gezeigt, dass sie bei der Bevölkerung vor Ort auf Widerstand stößt. Vor diesem Hintergrund gehen wir noch einen Schritt weiter: Wir erforschen, wie man in Zeiten knapper werdender Ressourcen aus einem schädlichen Treibhausgas einen wertvollen Rohstoff machen kann – auch wenn das Potenzial zur Emissionsreduktion hier wesentlich geringer ist als bei der Speicherung. Im Zentrum unserer Überlegungen steht die Frage, wie das CO<sub>2</sub> als Kohlenstoffbaustein in der Biotechnologie, Chemie und Biologie eingesetzt werden kann. Ihr widmen sich gleich drei Kooperationsprojekte, die wir 2010 auf den Weg gebracht haben. Ein erstes Vorhaben startete RWE Power im Januar mit dem hessischen Unternehmen BRAIN; hier geht es darum, CO<sub>2</sub> unter Zuhilfenahme von Mikroorganismen in Biomasse, Bio-Kunststoffe und chemische Zwischenprodukte umzuwandeln. BRAIN ist führend auf dem Gebiet der sogenannten „weißen Biotechnologie“, d.h. der Nutzung biotechnologischer Verfahren für die industrielle Produktion. Ein zweites Projekt hat RWE Power im Juni 2010 zusammen mit Bayer und dem Institut für Technische und Makromolekulare Chemie der RWTH Aachen ins Leben gerufen. Hier untersuchen wir, wie sich aus CO<sub>2</sub> Kunststoffe herstellen lassen. Gefördert wird das Projekt vom Bundesministerium für Bildung und Forschung (BMBF). Im Oktober schließlich haben wir ein drittes Forschungsprojekt begonnen. Es trägt den Titel „CO<sub>2</sub>RRECT“. Die Idee: Experten von RWE, Bayer, Siemens sowie mehreren Hochschulen und Forschungseinrichtungen nutzen Strom aus regenerativen Energiequellen, um aus Wasser per Elektrolyse Wasserstoff zu erzeugen. In einem zweiten Schritt wird der Wasserstoff mit CO<sub>2</sub> in Verbindung gebracht. Das Ergebnis sind chemische Zwischenprodukte wie Kohlenmonoxid oder Ameisensäure. CO<sub>2</sub> kann so als Ausgangsstoff für Alltagsprodukte wie CDs verwendet werden. Auch dieses Projekt wird vom BMBF gefördert.

**Höhere Wirkungsgrade in der Braunkohleverstromung.** Ein gravierender Nachteil der Abtrennung von CO<sub>2</sub> besteht darin, dass sie zu Effizienzverlusten bei der Stromerzeugung führt. Umso wichtiger ist es, dass wir kontinuierlich an einer Steigerung der Wirkungsgrade unserer Kraftwerke arbeiten. Ein Meilenstein auf diesem Weg ist unsere 2009 in Betrieb genommene Demonstrationsanlage am Standort Niederaußem, mit der wir Braunkohle vor dem Verbrennungsprozess trocknen. Das hier eingesetzte Verfahren – Wirbelschichttrocknung mit integrierter Abwärmenutzung (WTA) – steigert den Wirkungsgrad in der Braunkohleverstromung um bis zu 10%. RWE hat diese Technik entwickelt und patentieren lassen. Nachdem wir bereits 2009 eine Lizenz für den Einsatz des Verfahrens für ein australisches Projekt vergeben haben, darf die WTA-Technologie seit 2010 auch von der Linde-KCA-Dresden GmbH und der Uhde Services GmbH genutzt werden. Wir wollen sie weltweit vermarkten und so dazu beitragen, dass auch die Braunkohlekraftwerke anderer Unternehmen effizienter und emissionsärmer werden.

**Energie aus der Kraft des Meeres.** Unsere F&E-Tätigkeit auf dem Gebiet der Stromerzeugung schließt auch die erneuerbaren Energien ein. Hier verfolgen wir vielfältige Ansätze, u.a. die Energiegewinnung aus dem Meer. Im Juni 2010 haben RWE Innogy und Voith Hydro beschlossen, ein Gezeitenkraftwerk in den Gewässern der Orkneyinseln (Schottland) zu bauen. Dort wird das Gemeinschaftsunternehmen Voith Hydro Ocean Current Technologies eine Meeresströmungsturbine mit einer Leistung von 1 MW installieren. Geplant ist ein zweijähriger Test, durch den wir wichtige Erkenntnisse über den Betrieb solcher Anlagen gewinnen wollen. Neue Wege zur Nutzung erneuerbarer Energien ebnen wir auch dadurch, dass wir andere bei der Verwirklichung ihrer Ideen finanziell unterstützen. Über unsere im Oktober 2010 gegründete Tochtergesellschaft Innogy Venture Capital GmbH beteiligen wir uns an jungen Unternehmen, die an der Umsetzung erfolgversprechender Technologien arbeiten.

**RWE plant hoch effizienten Druckluftspeicher.** Mit der stark wachsenden Zahl von Windkraft- und Solaranlagen werden die Stromeinspeisungen ins Netz zunehmend von den Wetterverhältnissen beeinflusst. Das Stromangebot muss aber stets der Nachfrage entsprechen, damit die Netzspannung stabil bleibt. Hier die Balance zu schaffen, wird eine immer anspruchsvollere Aufgabe, die ohne neue Stromspeicher-Technologien kaum zu bewältigen ist. Vor diesem Hintergrund hat sich RWE Power im Januar 2010 mit dem Deutschen Zentrum für Luft- und Raumfahrttechnik sowie den Unternehmen General Electric und Züblin zusammengetan, um zentrale Komponenten für einen neuartigen Druckluftspeicher zu entwickeln. Sollten wir dabei erfolgreich sein, wäre unser nächster Schritt der Bau einer Demonstrationsanlage in Staßfurt (Sachsen-Anhalt). Bei einem Druckluftspeicher wird Luft in Zeiten eines hohen Stromangebots in unterirdische Kavernen gepresst und später – z.B. bei steigendem Strombedarf – zur Erzeugung von Elektrizität genutzt. Geplant ist eine Demonstrationsanlage, die über eine Speicherkapazität von 1.000 MWh und eine elektrische Leistung von bis zu 200 MW verfügt. Ihr Wirkungsgrad soll 70% erreichen. Wir wollen dies schaffen, indem wir die Wärme, die bei der Kompression entsteht, auffangen und in den Energiekreislauf der Anlage zurückführen. Es wäre die erste großtechnische Anwendung dieses Verfahrens weltweit.

**RWE erforscht die intelligente Vernetzung dezentraler Stromquellen.** In der Energiewelt von gestern waren es fast ausschließlich Großkraftwerke, die ihren Strom ins Netz einspeisten, während sich die Rolle der Haushalte auf die des Verbrauchers beschränkte. Inzwischen hat sich das Bild gewandelt: Immer mehr Haushalte verfügen über eine Photovoltaikanlage und speisen Strom ins Netz ein. Besonders für die Betreiber von Mittel- und Niederspannungsnetzen bedeutet das zusätzlichen Koordinationsaufwand. In der Energiewelt von morgen kommt daher den sogenannten Smart Grids eine Schlüsselrolle zu. Netze dieser Art verfügen über neue Steuer- und Regelungstechniken, die es ermöglichen, sie effektiver auszulasten. Im zurückliegenden Geschäftsjahr haben wir den Startschuss für den Aufbau eines solchen intelligenten Netzes im Eifelkreis Bitburg/Prüm gegeben. Das Vorhaben wird vom Bundeswirtschaftsministerium gefördert. Umgesetzt wird es von einem Konsortium mit der RWE Deutschland AG an der Spitze, dem darüber hinaus die Unternehmen ABB und Consentec sowie die Technische Universität Dortmund angehören.

Ein weiterer Schritt in Richtung Zukunft ist die informationstechnische Vernetzung kleiner, dezentraler Stromerzeuger und -verbraucher. Mit dem von der EU geförderten Demonstrationsprojekt „Power-Matching City Hoogkerk“ (Niederlande) testen wir die technischen Voraussetzungen und kommerziellen Auswirkungen solcher Netzwerke. Beispielsweise können die Kunden anhand aktueller Preisinformationen entscheiden, wann sie ihre Waschmaschine oder Wärmepumpe einschalten. Ergebnis: Die Stromnachfrage richtet sich stärker am Angebot aus. Das reduziert die Kosten und entlastet das Netz. Zusätzlich testen wir ein neuartiges Steuerungsprogramm, das die Entscheidungen über den Energieeinsatz automatisch und somit komfortabel für den Kunden trifft.

**Laden statt Tanken – die Mobilität der Zukunft.** Neben intelligenten Netzen sind auch Elektroautos fester Bestandteil der Energiewelt von morgen. Schon heute sieht man sie vereinzelt auf deutschen Straßen – nicht selten mit dem Logo von RWE. Die Bundesregierung hat sich zum Ziel gesetzt, dass im Jahr 2020 eine Million Elektrofahrzeuge auf deutschen Straßen unterwegs sein sollen. Dieses Vorhaben unterstützen wir, indem wir ein Netz von Ladestationen mit komfortablem Abrechnungssystem aufbauen und stetig weiterentwickeln. Ergänzend erforschen wir seit Juli 2010 gemeinsam mit unseren Partnern Renault, RWTH Aachen und Aachener Forschungsgesellschaft Kraftfahrwesen mbH, wie gut sich Elektroautos für Berufspendler eignen. Wir untersuchen, wie das spezifische Fahrverhalten bei Kurzstrecken das Leistungsvermögen des Fahrzeugs beeinflusst. Neben technischen Aspekten wollen wir mit unserer Studie auch die Kundenakzeptanz analysieren und Ideen für neue Produkte entwickeln. Auch hier haben wir die Unterstützung der Politik: Das Projekt wird vom Bundesverkehrsministerium gefördert.

## 1.10 ENTWICKLUNG DER RISIKEN UND CHANCEN

Der Energiesektor gilt traditionell als krisenfeste Branche. Dennoch sind im vergangenen Jahr auch hier die Risiken gestiegen. Unsichere politische Rahmenbedingungen, sich wandelnde Marktstrukturen und schwankende Strom- und Brennstoffpreise stellen uns vor unternehmerische Herausforderungen. Ein professionelles Risikomanagement ist damit wichtiger denn je. Risiken systematisch zu erfassen, zu bewerten und zu steuern ist für uns ein Kernelement solider Unternehmensführung. Ebenso entscheidend ist es, Chancen zu identifizieren – und zu nutzen.

**Organisation des Risikomanagements im RWE-Konzern.** Die Gesamtverantwortung für das konzernübergreifende Risikomanagementsystem trägt der Vorstand der RWE AG. Er legt Regeln und Mindeststandards fest und definiert Obergrenzen für die aggregierten Markt- und Kreditrisiken. Zudem entscheidet er über Transaktionen, die erhebliche Risiken mit sich bringen können.

Im Zuge von Umstrukturierungen im RWE-Konzern haben wir auch die Organisation des Risikomanagements weiterentwickelt. Der Bereich Controlling/Organisationseffizienz im Ressort des Finanzvorstands trägt seit Beginn des Geschäftsjahres 2011 die übergreifende Verantwortung für die Kontrolle, Steuerung und Koordination des Risikomanagementsystems. Diese Organisationseinheit berichtet dem Vorstand und dem Risikomanagement-Ausschuss regelmäßig über die Risikolage des Konzerns.

Dem Risikomanagement-Ausschuss obliegt die Überwachung und Weiterentwicklung des Risikomanagementsystems. Er setzt sich aus den Leitern folgender Bereiche der RWE AG zusammen: Commodity Management, Compliance, Controlling/Organisationseffizienz, Finanzen, Rechnungswesen, Recht/Organangelegenheiten, Revision und Strategie. Den Vorsitz hat der Leiter des Bereichs Controlling/Organisationseffizienz.

Darüber hinaus sind folgende Organisationseinheiten mit zentralen Risikomanagement-Aufgaben betraut:

Die Steuerung von Commodity-Positionen obliegt dem im Januar 2011 geschaffenen Bereich Commodity Management. Dieser ist dem Vorstandsressort „Kommerzielle Steuerung“ zugeordnet. In einem vom Vorstand vorgegebenen Rahmen erteilt er die Genehmigung für Absicherungsstrategien und größere Commodity-Transaktionen. Außerdem leitet er aus den vom Vorstand vorgegebenen Risiko-Obergrenzen Limite für Commodity-Risiken der operativen Gesellschaften ab.

Zuständig für die Beobachtung und Überwachung von Commodity-Risiken ist der Finanzvorstand der RWE AG. Er wird dabei von den Finanzvorständen und den für den Finanzbereich zuständigen Geschäftsführern unserer wichtigsten Konzerngesellschaften unterstützt. Die zum Bereich Controlling/Organisationseffizienz gehörende Abteilung Risikocontrolling macht konzernweite Vorgaben zur Risikomessung, überwacht Commodity-Risiken und berichtet darüber an den Vorstand. Damit stellen wir sicher, dass diese für uns zentralen Risiken eng überwacht und dass Richtlinien konzernweit einheitlich umgesetzt werden.

Um die Steuerung von Kreditrisiken des RWE-Konzerns kümmert sich die Abteilung Credit Risk Controlling, die ebenfalls im Bereich Controlling/Organisationseffizienz angesiedelt ist.

Für das operative Management finanzwirtschaftlicher Risiken ist auf der Ebene der RWE AG die zum Bereich Finanzen gehörende Organisationseinheit Finanzcontrolling zuständig. Zu ihren Aufgaben gehört auch die Berichterstattung über Währungs-, Zins- und Liquiditätsrisiken.

Über die strategischen Leitlinien für die Verwaltung unserer Finanzanlagen (einschließlich der Mittel des RWE Pensionstreuhand e.V. und der RWE Pensionsfonds AG) bestimmt das Asset-Management-Komitee. Dabei wägt es Ertragschancen und -Risiken gegeneinander ab, trifft eine Auswahl geeigneter Anlagekategorien (Anleihen, Aktien etc.) und entscheidet darüber, wie die Mittel auf sie verteilt werden. Mitglieder des Asset-Management-Komitees sind der Finanzvorstand der RWE AG, der Leiter Konzernfinanzen sowie die Finanzvorstände von RWE Power, RWE Dea, RWE npower, Lechwerke, enviaM und Süwag.

Risiken innerhalb der Finanzberichterstattung überwacht das Konzernrechnungswesen der RWE AG. Dieser Bereich ist ebenfalls dem Finanzvorstand unterstellt. Er bedient sich eines internen Kontrollsystems, das wir auf Seite 125 f. ausführlich darstellen. Darüber hinaus kümmert sich der Bereich Compliance schwerpunktmäßig darum, dass die Vorgaben des RWE-Verhaltenskodex eingehalten und Korruptionsrisiken vermieden werden. Er berichtet an den Vorstandsvorsitzenden der RWE AG oder – sollten Mitglieder des Vorstands betroffen sein – direkt an den Vorsitzenden des Aufsichtsrats und an den Vorsitzenden des Prüfungsausschusses des Aufsichtsrats.

Unter fachlicher Führung der genannten Bereiche sorgen unsere Konzerngesellschaften dafür, dass die Risikomanagement-Richtlinien konzernweit umgesetzt werden.

**Risikomanagement als kontinuierlicher Prozess.** Das Risikomanagement ist als kontinuierlicher Vorgang in unseren betrieblichen Abläufe integriert. Risiken und Chancen – definiert als negative bzw. positive Abweichungen von Planwerten – werden bei RWE frühzeitig identifiziert und klassifiziert. Wir bewerten Risiken anhand ihrer Eintrittswahrscheinlichkeit und der möglichen Schadenshöhe und fassen sie auf Ebene der Konzerngesellschaften bzw. des Konzerns zusammen. Die Risikobetrachtung erstreckt sich auf den Drei-Jahres-Zeitraum unserer Mittelfristplanung. Sie kann bei wesentlichen strategischen Risiken jedoch auch darüber hinausreichen. Haben mehrere Risiken die gleiche Ursache, werden sie zu einer Position zusammengefasst. Lässt sich ein Risiko verringern, wird das Restrisiko unter Nennung der bereits getroffenen Gegenmaßnahmen angegeben. Die mögliche Schadenshöhe stellen wir dem betrieblichen Ergebnis und dem Eigenkapital der jeweiligen Unternehmenseinheit sowie des Konzerns gegenüber. Mittels einer Risikomatrix werden die jeweiligen Risiken damit in Hinblick auf ihre Eintrittswahrscheinlichkeit und potenzielle Schadenshöhe sichtbar. Daraus kann u.a. abgeleitet werden, inwiefern Handlungsbedarf für einzelne Risiken besteht. Risiken mit hoher Eintrittswahrscheinlichkeit oder Schadenshöhe begrenzen wir durch operative Maßnahmen. Gegebenenfalls berücksichtigen wir sie durch bilanzielle Vorsorgen, z.B. Rückstellungen. Chancen bewerten und steuern wir im Zuge der turnusmäßigen Planung.

Über unsere Risiken und Chancen berichten wir den Führungs- und Aufsichtsgremien quartalsweise in standardisierter Form. Über unvorhergesehene wesentliche Veränderungen der Risikosituation wird der Vorstand der RWE AG unverzüglich in Kenntnis gesetzt. Unsere Konzernrevision begutachtet in regelmäßigen Abständen die Qualität und Funktionsfähigkeit unseres Risikomanagementsystems. Dennoch können wir nicht mit letzter Sicherheit garantieren, dass alle relevanten Risiken erkannt werden und die Kontrollen funktionieren. Menschliches Fehlverhalten etwa lässt sich nie ganz ausschließen.

**Gesamtbeurteilung der Risiko- und Chancensituation durch die Unternehmensleitung.** Als Energieversorger ist RWE in besonderem Maße auf verlässliche energiepolitische Rahmenbedingungen angewiesen. Allerdings sind diese zuletzt unsicherer geworden, wie die Einführung der deutschen Kernbrennstoffsteuer zeigt. Defizitäre Staatshaushalte verstärken in zahlreichen europäischen Ländern den Druck auf die Regierungen, standortgebundenen Unternehmen wie Energieversorgern neue Lasten aufzubürden. Erhebliche Unsicherheiten bestehen auch im Zusammenhang mit der vom Bundestag beschlossenen Verlängerung der Laufzeit von Kernkraftwerken. Hier müssen noch wichtige Details geklärt werden, die die Rentabilität des Weiterbetriebs unserer Anlagen maßgeblich beeinflussen. Unsicher ist zudem, ob die Laufzeitverlängerung Bestand hat. Neben der Energiepolitik hat insbesondere die Entwicklung von Angebot und Nachfrage an den Strom- und Gasmärkten Auswirkungen auf unsere Ertragskraft. Dabei kommen konjunkturelle Einflüsse zum Tragen, aber auch Veränderungen der Marktstrukturen. Beispielsweise verdrängt der fortgesetzte Zubau von Wind- und Solarstromanlagen die konventionelle Erzeugung. Veränderungen der Brennstoffpreise können erhebliche Auswirkungen auf die Ertragslage haben, sofern sich die Stromnotierungen nicht entsprechend mitbewegen. Kurzfristige Marktpreisrisiken begrenzen wir, indem wir Strom bis zu drei Jahre vor seiner Lieferung verkaufen und die für seine Erzeugung benötigten Brennstoffe und Emissionszertifikate grundsätzlich zeitgleich preislich absichern. Auch im Gasgeschäft sichern wir uns über Terminverkäufe ab. In diesem Zusammenhang bestehen Risiken, weil wir Gas u.a. auf Basis ölpreisgebundener Langfristverträge beziehen und sich der Marktpreis von Gas seit Mitte 2009 vom Ölpreis gelöst hat. Wir kaufen Gas teilweise teurer ein, als wir es absetzen können. Um bessere Bezugskonditionen zu erreichen, sind wir in Revisionsverhandlungen mit unseren Gaslieferanten eingetreten. Ihr Ausgang ist ungewiss. Trotz dieser und weiterer Unwägbarkeiten sind gegenwärtig keine Risiken erkennbar, die den Fortbestand der RWE AG oder des RWE-Konzerns gefährden.

**Wichtige Risiko- und Chancenkategorien.** Nachfolgend werden Risiken und Chancen erläutert, die erheblichen Einfluss auf unsere Vermögens-, Finanz- und Ertragslage haben können. Sie lassen sich in die folgenden Kategorien gliedern, von denen wir den drei erstgenannten zurzeit besondere Bedeutung beimessen:

- **Risiken und Chancen aus Commodity-Preisschwankungen:** Die Preisentwicklung an den Commodity-Märkten hat großen Einfluss auf unser Ergebnis, insbesondere in der Stromerzeugung. Beispielsweise könnten fallende Stromnotierungen oder steigende Brennstoffkosten zu rückläufigen

Deckungsbeiträgen führen und die Werthaltigkeit unserer Kraftwerke mindern. Preisrisiken bestehen auch im Upstream-Geschäft der RWE Dea. Überdies können ungünstige Marktentwicklungen zur Folge haben, dass unsere Einkaufspreise für Strom und Gas über den Verkaufspreisen liegen, die wir im Vertrieb an Endkunden und Weiterverteiler erzielen können. Dies betrifft in erster Linie unsere ölpreisgebundenen Gasbezugsverträge. Den genannten Risiken steht allerdings auch die Chance gegenüber, dass sich die Preise in eine für RWE vorteilhafte Richtung entwickeln. Unsere Preisrisiken auf den Beschaffungs- und Absatzmärkten bewerten wir unter Berücksichtigung aktueller Terminpreise und erwarteter Volatilitäten. Die Commodity- und Kreditrisiken der Erzeugungs- und Vertriebsgesellschaften werden über Absicherungsvorgaben gesteuert, die die RWE AG festgelegt hat. Wie bereits dargestellt, begrenzen wir die Risiken im Erzeugungsgeschäft dadurch, dass wir unseren Strom größtenteils frühzeitig über Terminkontrakte absetzen und zugleich die für die Erzeugung benötigten Brennstoffe und Emissionszertifikate preislich absichern. Auch im Upstream-Geschäft der RWE Dea und im Midstream-Geschäft der RWE Supply & Trading nutzen wir die Terminmärkte zur Begrenzung von Risiken.

Beim Management von Commodity-Preisrisiken nimmt RWE Supply & Trading eine zentrale Rolle ein. Das Unternehmen ist die Schnittstelle des RWE-Konzerns zu den weltweiten Großhandelsmärkten für Energie und Energierohstoffe. Es vermarktet große Teile der Erzeugungsposition des Konzerns und kauft die für die Stromproduktion notwendigen Brennstoffe und CO<sub>2</sub>-Emissionszertifikate ein. RWE Supply & Trading bündelt somit die Risiken und die Wertschöpfung aus Commodity-Geschäften für den Konzern und bringt das Know-how für diese Geschäfte an zentraler Stelle zusammen. Ihre Funktion als interner Transaktionspartner erleichtert es uns, Ergebnisrisiken aus Preisschwankungen auf Energiemärkten für den Erzeugungs- und Vertriebsbereich einzugrenzen. Zur Risikominderung auf der Beschaffungs- und Absatzseite setzt RWE Supply & Trading auch Commodity-Derivate ein. Die Handelsaktivitäten sind nicht ausschließlich darauf ausgerichtet, Risiken zu mindern. In streng limitiertem Umfang betreibt RWE Supply & Trading Eigenhandel, der darauf abzielt, Preisänderungen auf den Energiemärkten gezielt zu nutzen.

Das Risikomanagementsystem im Energiehandel des RWE-Konzerns ist eng an die für Handelsgeschäfte von Banken geltenden Best-Practice-Regelungen angelehnt. Dazu gehört auch, dass Transaktionen mit Dritten nur abgeschlossen werden, wenn sich das Kreditrisiko innerhalb genehmigter Limite bewegt. Konzernweit geltende Richtlinien geben Strukturen und Prozesse vor, wie mit Rohstoffrisiken und damit zusammenhängenden Kreditrisiken umzugehen ist. In unseren Tochtergesellschaften werden die Commodity-Positionen permanent überwacht; das Ergebnis wird den zuständigen Gremien mitgeteilt. Darüber hinaus informiert sich der Vorstand der RWE AG quartalsweise über die konsolidierten Commodity-Risikopositionen des Konzerns. Die Konzerngesellschaften teilen ihre Positionen dem Konzern-Risikocontrolling mit, das die Meldungen konsolidiert. Diese Vorgehensweise gilt nicht für Marktrisiken, die aus reinen Handelsgeschäften der RWE Supply & Trading entstehen. Solche Risiken werden täglich überwacht und gesondert ausgewiesen.

Die Risiko-Obergrenzen im Energiehandel werden vom Vorstand der RWE AG festgelegt und ständig überwacht. Um das Preisrisiko zu messen, ermitteln wir u.a. den Value at Risk (VaR). Den VaR-Werten im RWE-Konzern liegt grundsätzlich ein Konfidenzniveau von 95% zugrunde; dabei wird für die Positionen eine Haltedauer von einem Tag unterstellt. Das bedeutet, dass ein Tagesverlust die Höhe des VaR mit einer Wahrscheinlichkeit von 95% nicht überschreitet. Unsere zentrale Steuerungsgröße im Energiehandel der RWE Supply & Trading ist der Global VaR, der höchstens 40 Mio. € betragen darf. Im Geschäftsjahr 2010 lag er bei durchschnittlich 11 Mio. €, der maximale Wert bei 17 Mio. €. Unsere Risikoanalyse stützt sich jedoch nicht nur auf die Höhe des VaR. In sogenannten Stresstests loten wir auch Extremszenarien aus, ermitteln ihre möglichen Auswirkungen auf Liquidität und Ertragslage und steuern gegen, wenn die Risiken zu hoch sind.

- **Risiken und Chancen aus Preisrevisionen bei Gasbezugsverträgen:** Wir beziehen Gas teilweise auf Basis langfristiger ölpreisgebundener Verträge. Allerdings hat sich der Gaspreis seit Mitte 2009 an den internationalen Märkten vom Ölpreis abgekoppelt. Dies hat zur Folge, dass wir das Gas teurer einkaufen, als es an den Handelspunkten TTF (Niederlande) oder NBP (Großbritannien) bezogen werden kann. Dadurch drohen uns Margenrückgänge und Kundenverluste. In erster Linie betrifft dies unser deutsches und tschechisches Geschäft. Um bessere Bezugskonditionen zu erreichen, haben wir Revisionsverhandlungen mit unseren Gaslieferanten aufgenommen, die teilweise bereits in Schiedsverfahren eingemündet sind. Ihr Ausgang wird maßgeblichen Einfluss auf unsere mittelfristige Ertragslage haben. Unsere Erwartungen basieren auf detaillierten juristischen Bewertungen, die wir im Vorfeld der Revisionen durchgeführt haben. Hier besteht das Risiko, dass die Ergebnisse der Preisrevisionen hinter unseren Erwartungen zurückbleiben könnten, ebenso aber auch die Chance, dass wir günstigere Konditionen als angenommen durchsetzen können.
- **Rechtliche Risiken:** Der ständige Wandel des politischen, rechtlichen und gesellschaftlichen Umfelds kann die Ertragslage des RWE-Konzerns in starkem Maße beeinflussen. Angesichts des großen Anteils von Braun- und Steinkohlekraftwerken an unserem Stromerzeugungsportfolio liegen unsere Kosten für die Beschaffung von CO<sub>2</sub>-Zertifikaten weit über dem Branchendurchschnitt. Die EU-Staaten haben sich im Dezember 2008 darauf geeinigt, dass dem Stromsektor in Westeuropa ab 2013 so gut wie keine Zertifikate mehr unentgeltlich zugeteilt werden. Unsere Ausgaben für CO<sub>2</sub>-Zertifikate werden dann nochmals wesentlich höher sein als in der aktuellen Handelsperiode bis 2012. Wir streben an, unseren spezifischen Kohlendioxid-Ausstoß stark zu reduzieren und das Stromerzeugungsportfolio mit den anstehenden Kraftwerksinvestitionen noch effizienter auszurichten. Darüber hinaus begrenzen wir unser CO<sub>2</sub>-Risiko durch Teilnahme an Klimaschutzprojekten in Entwicklungs- und Schwellenländern im Rahmen der Kyoto-Mechanismen Clean Development Mechanism und Joint Implementation. Eine weitere Maßnahme ist der virtuelle Tausch von Kraftwerkskapazitäten mit verschiedenen Vertragspartnern. Darüber hinaus schließen wir langfristige Stromlieferverträge ab, bei denen der Kunde das CO<sub>2</sub>-Preisrisiko übernimmt, und erwerben frühzeitig CO<sub>2</sub>-Zertifikate für zukünftige Perioden.

Als Versorger planen wir unsere Investitionen für einen Zeitraum, der Jahrzehnte umfasst. Wir sind daher in besonderem Maße auf verlässliche energiepolitische Rahmenbedingungen angewiesen. Hier existieren jedoch erhebliche Unsicherheiten. Dies betrifft vor allem die Nutzung der Kernenergie in Deutschland: Wie bereits erläutert, hat die neue deutsche Kernbrennstoffsteuer erhebliche negative Auswirkungen auf unsere Ergebnis-, Finanz- und Investitionsplanung. Wir halten die rechtliche Zulässigkeit einer solchen Abgabe allerdings bereits im Grundsatz für fraglich. Massive Unsicherheiten bestehen im Zusammenhang mit der vom Bundestag beschlossenen Verlängerung der Laufzeiten von Kernkraftwerken. So ist offen, welche zusätzlichen Sicherheitsvorgaben für den Anlagenbetrieb gemacht werden und wie hoch die dadurch erforderlichen Investitionen sein werden. Darüber hinaus besteht das Risiko, dass die Laufzeitverlängerung wieder rückgängig gemacht wird, etwa weil sich herausstellt, dass der Bundesrat hätte zustimmen müssen, oder weil spätere Bundesregierungen sie ablehnen. Einige Oppositionsparteien und Bundesländer haben bereits angekündigt, gegen die Laufzeitverlängerung vor dem Bundesverfassungsgericht zu klagen.

Beim Bau und Betrieb von Produktionsanlagen sind wir genehmigungsrechtlichen Risiken ausgesetzt. In besonderer Weise betrifft dies unsere Tagebaue und Kraftwerke. Wird ihr laufender Betrieb ausgesetzt oder beeinträchtigt, kann es zu erheblichen Produktions- und Erlöseinbußen kommen. Darüber hinaus besteht die Gefahr, dass uns bei Neubauprojekten die erforderlichen Genehmigungen verspätet oder gar nicht erteilt werden oder dass man uns bereits erteilte Genehmigungen wieder entzieht. Je nach Baufortschritt und vertraglichen Verpflichtungen gegenüber Zulieferern kann dies zu erheblichen finanziellen Belastungen führen. Dem beugen wir durch sorgfältige Vorbereitung und Begleitung unserer Genehmigungsanträge so weit wie möglich vor.

Risiken ergeben sich ferner aus der kartellrechtlichen Preismissbrauchsaufsicht, deren gesetzlicher Rahmen Ende 2007 verschärft worden ist. Im Frühjahr 2009 gestartete Untersuchungen des Bundeskartellamts zum Stromgroßhandel wurden inzwischen eingestellt, ohne dass Verstöße gegen das Kartellrecht festgestellt worden sind. Derzeit gibt es auf nationaler und europäischer Ebene Gesetzesinitiativen, die auf eine fortlaufende Überwachung der Stromerzeugung und des Stromgroßhandels abzielen und neue Transparenzpflichten für die Unternehmen mit sich bringen könnten.

Weiterhin ist die seit 2009 geltende Anreizregulierung unserer deutschen Strom- und Gasnetzgesellschaften mit Ergebnisrisiken verbunden. Unklarheiten bestehen insbesondere bei der Anerkennung von Kosten und Effizienzwerten für die zweite Regulierungsperiode. Unabhängig davon ist aber auch eine Verbesserung der Verzinsung von Eigen- und Fremdkapital erforderlich. Darüber hinaus sind die Einflüsse weiterer Faktoren zur Ermittlung der Erlöse noch nicht abschließend festgelegt.

- **Sonstige Rechts- und Schiedsverfahren:** Einzelne Gesellschaften des RWE-Konzerns sind durch ihren Geschäftsbetrieb oder durch Unternehmenskäufe in Gerichtsprozesse und Schiedsverfahren involviert. Mitunter werden auch außergerichtliche Ansprüche gegen sie geltend gemacht. Darüber hinaus sind Konzernunternehmen an verschiedenen behördlichen Verfahren direkt beteiligt oder zumindest von deren Ergebnissen betroffen. Die beschriebenen Vorgänge werden aber voraussichtlich keine wesentlichen Auswirkungen auf den RWE-Konzern haben.

Derzeit laufen mehrere Spruchverfahren im Zusammenhang mit gesellschaftsrechtlichen Umstrukturierungen. Sie wurden durch außenstehende Aktionäre angestrengt und zielen auf eine Überprüfung der Angemessenheit von Umtauschverhältnissen oder Barabfindungen ab. Da diese von unabhängigen Gutachtern ermittelt wurden, sehen wir hier nur geringe Risiken. Sollten Gerichte in rechtskräftigen Entscheidungen zu abweichenden Ergebnissen kommen, zahlen wir einen Ausgleich an alle betroffenen Aktionäre, auch wenn sie nicht selbst am Spruchverfahren beteiligt waren.

- **Finanzwirtschaftliche Risiken und Chancen:** Schwankungen von Währungs-, Zins- und Aktienkursen können unser Ergebnis ebenfalls stark beeinflussen. Das Management finanzwirtschaftlicher Risiken ist in einer gesonderten Richtlinie geregelt. Es liegt in der Verantwortung des Finanzvorstands der RWE AG.

Wegen unserer internationalen Präsenz kommt dem Management von Wechselkursveränderungen große Bedeutung zu. Die Konzerngesellschaften sind grundsätzlich dazu verpflichtet, ihre Währungsrisiken über die RWE AG zu sichern. Diese ermittelt die Nettofinanzposition je Währung und sichert sie ab – nötigenfalls auch mithilfe externer Marktpartner. Die Risikomessung und -begrenzung basiert u.a. auf dem VaR-Konzept. Der durchschnittliche VaR für die Fremdwährungsposition der RWE AG lag im Berichtszeitraum unter 1 Mio. €.

Große Bedeutung messen wir auch dem Management von Zinsrisiken bei. Dabei unterscheiden wir zwischen zwei Risikokategorien: Auf der einen Seite können Zinssteigerungen dazu führen, dass die Kurse von Wertpapieren im Bestand der RWE AG sinken. Dies betrifft in erster Linie festverzinsliche Anleihen. Auf der anderen Seite erhöhen sich mit dem Zinsniveau auch unsere Finanzierungskosten. Der VaR für das Kurswertrisiko bei unseren Kapitalanlagen belief sich 2010 auf durchschnittlich 9 Mio. € (Vorjahr: 21 Mio. €). Die Sensitivität des Zinsaufwands in Bezug auf Marktzinssteigerungen messen wir mit dem Cash Flow at Risk. Dabei legen wir ein Konfidenzniveau von 95% und eine Haltedauer von einem Jahr zugrunde. Der Cash Flow at Risk betrug zum Bilanzstichtag 5 Mio. €.

Zu den Wertpapieren, die wir in unserem Portfolio halten, zählen auch Aktien. Der VaR für das Risiko aus Kursveränderungen lag hier bei durchschnittlich 11 Mio. € (Vorjahr: 21 Mio. €).

Die Risiken und Chancen aus Veränderungen von Wertpapierkursen steuern wir durch professionelles Fondsmanagement. Finanzgeschäfte des Konzerns werden mit einer speziellen Software zentral erfasst und von der RWE AG überwacht. Dies ermöglicht uns einen Risikoausgleich über die Einzelgesellschaften hinweg. Für unsere Konzernunternehmen haben wir Handlungsrahmen, Verantwortlichkeiten und Kontrollen in internen Richtlinien verbindlich festgelegt.

- **Bonität von Geschäftspartnern:** Aus unseren Geschäftsbeziehungen mit Finanzinstituten, Handelspartnern, Kunden und Lieferanten ergeben sich Kreditrisiken. Dem begegnen wir u.a. dadurch, dass wir die Entwicklung der Bonität unserer Geschäftspartner zeitnah verfolgen. Für das Kreditrisikomanagement gilt konzernweit eine gesonderte Richtlinie. Die Einhaltung der konzernweiten Standards für die Messung und Steuerung von Kreditrisiken, die in dieser Richtlinie festgeschrieben sind, überwacht die Abteilung Credit Risk Controlling.

Wir begrenzen unsere Kreditrisiken, indem wir Limite festlegen und diese – insbesondere bei Änderung der Bonität – zeitnah anpassen. Gegebenenfalls lassen wir uns Barsicherheiten stellen oder Bankgarantien geben. Sofern wirtschaftlich sinnvoll, schließen wir auch Kreditversicherungen ab oder nutzen Credit Default Swaps. Die Banken und Handelspartner, mit denen wir Kreditbeziehungen unterhalten, haben überwiegend eine hohe Bonität. Wir ermitteln die Kreditwürdigkeit mit einem internen Bewertungsverfahren. Bei Banken stützen wir uns auf externe Ratings und einen Frühwarnindikator, den wir im Zuge der Finanzmarktkrise entwickelt haben. Unsere Stromerzeugung verkaufen wir größtenteils über die Börse. Für diese Mengen übernimmt eine Clearing-Stelle das Kreditrisiko. Außerbörsliche Handelsgeschäfte schließen wir grundsätzlich auf Basis von Rahmenverträgen ab, wie sie u.a. von der European Federation of Energy Traders (EFET) vorgegeben werden. Außerdem vereinbaren wir Sicherheitsleistungen. Kreditrisiken im Energiehandel und im Finanzbereich messen wir täglich.

- **Liquiditätsrisiko:** Das Liquiditätsrisiko besteht darin, dass wir möglicherweise nicht über genügend flüssige Mittel verfügen, um finanzielle Verpflichtungen fristgerecht zu erfüllen. Solche Verpflichtungen bestehen bei RWE insbesondere in der Ablösung fälliger Finanzverbindlichkeiten. Des Weiteren müssen wir Sicherheiten stellen, wenn sich Handelskontrakte (beispielsweise mit Börsen) bei einer Bewertung zu aktuellen Marktpreisen in der Verlustzone befinden. Wir stufen unser Liquiditätsrisiko als gering ein. Basis dafür ist unsere solide Finanzierung. Wir verfügen über einen starken operativen Cash Flow, erhebliche liquide Mittel, ungenutzte Kreditlinien und weiteren finanziellen Spielraum dank unseres Commercial-Paper- und unseres Debt-Issuance-Programms (siehe Seite 101). Durch vorausschauende Liquiditätsplanung stellen wir sicher, dass wir jederzeit zahlungsfähig sind. Dabei bedienen wir uns u.a. eines konzernweiten Meldesystems, das die kurz-, mittel- und langfristigen Liquiditätsbedürfnisse der Konzerngesellschaften erfasst.

- **Unternehmensstrategische Risiken und Chancen:** Entscheidungen über Sachinvestitionen und Akquisitionen sind wegen der Höhe und der langfristigen Bindung des eingesetzten Kapitals mit besonderen Risiken und Chancen verbunden. Wird ein Unternehmen erworben, können u.a. Probleme bei der Integration von Mitarbeitern, Prozessen und Technologien auftreten. Für die Vorbereitung und Umsetzung strategischer Sachinvestitions- und Akquisitionsentscheidungen gibt es bei RWE differenzierte Zuständigkeitsregelungen und Genehmigungsprozesse. Intensive Beobachtung von Märkten und Wettbewerbern hilft uns dabei, unternehmensstrategische Risiken und Chancen adäquat und frühzeitig zu erfassen. Mit besonderer Aufmerksamkeit verfolgen wir zurzeit die Situation in Ägypten. Unsere dortigen Investitionsausgaben sind größtenteils durch Bundesgarantien gegen politische Risiken abgesichert.
- **Kontinuität des Geschäftsbetriebs:** Auf sämtlichen Stufen unserer Wertschöpfung betreiben wir technologisch komplexe, vernetzte Produktionsanlagen. An unseren Tagebaugeräten, Förderanlagen, Kraftwerksanlagenteilen und Netzen können nicht versicherte Schäden auftreten. In unseren Kraftwerken steigt das Risiko ungeplanter Betriebsunterbrechungen wegen des zunehmenden Alters ihrer Komponenten. Außerdem kann es zu Verzögerungen beim Bau neuer Anlagen kommen, etwa durch Unfälle, Materialfehler oder zeitaufwendige Genehmigungsverfahren. Im Netzgeschäft besteht die Gefahr, dass Anlagen durch höhere Gewalt, z.B. Wettereinflüsse, zerstört werden. Hohe Sicherheitsstandards und regelmäßige Prüf-, Wartungs- und Instandhaltungsarbeiten sollen diese Risiken begrenzen. Soweit wirtschaftlich sinnvoll, schließen wir Versicherungen ab.
- **IT-Sicherheit:** Unsere Geschäftsprozesse werden durch effiziente Informationsverarbeitungssysteme unterstützt. Dennoch können wir nicht vollständig ausschließen, dass Mängel bei der Verfügbarkeit der IT-Infrastrukturen und der Sicherheit unseres Datenbestands auftreten. Wir begegnen dem durch hohe Sicherheitsstandards, Sensibilisierung der Nutzer sowie Beschränkungen der Zugriffs- und Zugangsrechte. Außerdem investieren wir regelmäßig in die Modernisierung von Hard- und Software. Unsere IT basiert weitgehend auf marktüblichen Standards. Ihr Betrieb ist in modernen Rechenzentren gebündelt. Für Risiken bei der Entwicklung von IT-Lösungen haben wir einen konzernweit verbindlichen Steuerungsprozess etabliert.
- **Personal:** Der Wettbewerb der Unternehmen um qualifiziertes Personal wird immer intensiver. Um hier unsere Position zu sichern und zu stärken, betonen wir bei der Mitarbeiterakquise die Attraktivität von RWE als Arbeitgeber und streben an, Fach- und Führungskräfte langfristig an den Konzern zu binden. Neben leistungsorientierter Vergütung und fortschrittlichen Sozialleistungen setzen wir dabei insbesondere auf die breit gefächerten Perspektiven im RWE-Konzern: durch Traineeprogramme, interdisziplinäre Karrierewege, Einsatzmöglichkeiten in unterschiedlichen europäischen Konzerngesellschaften sowie attraktive Fort- und Weiterbildungsangebote. Risiken durch die Mitarbeiterfluktuation begrenzen wir mit geeigneten Stellvertreterregelungen und frühzeitiger Nachfolgeplanung.

**Bericht zum internen Kontroll- und Risikomanagement-System: Angaben nach § 315 Abs. 2 Nr. 5 und § 289 Abs. 5 HGB.** In der Finanzberichterstattung besteht das Risiko, dass die Jahres- und Zwischenabschlüsse Falschdarstellungen enthalten, die möglicherweise wesentlichen Einfluss auf die Entscheidungen ihrer Adressaten haben. Unser rechnungslegungsbezogenes internes Kontrollsystem (IKS) zielt darauf ab, mögliche Fehlerquellen zu identifizieren und die daraus resultierenden Risiken zu begrenzen. Es erstreckt sich auf die Finanzberichterstattung im gesamten RWE-Konzern. So können wir mit hinreichender Sicherheit gewährleisten, dass ein den gesetzlichen Vorschriften entsprechender Jahres- und Konzernabschluss erstellt wird.

Die Ausgestaltung des rechnungslegungsbezogenen IKS ergibt sich aus der Organisation unseres Rechnungslegungs- und Finanzberichterstattungsprozesses. Eine der Kernfunktionen dieses Prozesses ist die Steuerung des Konzerns und seiner operativen Einheiten. Ausgangspunkt sind dabei die Zielvorgaben des Vorstands der RWE AG. Aus ihnen und aus unseren Erwartungen in Hinblick auf die operative Geschäftsentwicklung erarbeiten wir einmal im Jahr unsere Mittelfristplanung. Diese umfasst Budgetwerte für das jeweils bevorstehende Geschäftsjahr und Planzahlen für die Folgejahre. Für laufende Geschäftsjahre erstellen wir Prognosen, die am Budget anknüpfen. Der Vorstand der RWE AG und die Vorstände der wichtigsten Tochtergesellschaften kommen vierteljährlich zusammen, um Quartals- und Jahresabschlüsse auszuwerten und die Prognosen zu aktualisieren.

Die Buchführung erfolgt zumeist dezentral; mitunter wird diese Funktion auch von Konzerngesellschaften für ihre Tochterunternehmen wahrgenommen. Bestimmte Verarbeitungsprozesse, z.B. die Personalabrechnung, sind bei internen Dienstleistern wie der RWE Service GmbH gebündelt oder unterliegen zumindest konzerneinheitlich definierten Qualitätsstandards. In ihrer Holding-Funktion nimmt die RWE AG zentrale Aufgaben auf dem Gebiet der Rechnungslegung wahr. Dabei handelt es sich u.a. um die Konsolidierung, die Bilanzierung von Pensionsrückstellungen in Deutschland und die Prüfung der Werthaltigkeit bilanzierter Firmenwerte. Ebenfalls der RWE AG zugeordnet sind Aufgaben, die die Verwaltung und Überwachung von Finanzinstrumenten, den Zahlungsverkehr, die Geldanlagen und die Organschaftsabrechnung betreffen. Teilweise werden dafür externe Dienstleister hinzugezogen.

Im Rahmen der externen Berichterstattung zum Halbjahr und zum Gesamtjahr haben die Vorstandsvorsitzenden und Finanzvorstände bzw. die Geschäftsführer wichtiger Tochtergesellschaften sowie ausgewählte Bereichsleiter der RWE AG einen internen Bilanzeid zu leisten. Erst wenn dies geschehen ist, legen die Mitglieder des Vorstands der RWE AG zum Halbjahr und zum Gesamtjahr einen externen Bilanzeid ab und unterzeichnen die Versicherung der gesetzlichen Vertreter. Sie bestätigen damit, dass die vorgeschriebenen Rechnungslegungsstandards und die Bilanzierungsrichtlinien des RWE-Konzerns eingehalten wurden und dass die Zahlen ein den tatsächlichen Verhältnissen entsprechendes Bild der Vermögens-, Finanz- und Ertragslage vermitteln.

Unsere Abschlüsse erstellen wir mithilfe eines konzernweiten Berichterstattungssystems, das wir auch für die Aufstellung der Budgets und Prognosen nutzen. Alle vollkonsolidierten Tochtergesellschaften bedienen sich dieses Systems. Es bildet die Basis für einen standardisierten Datenmeldeprozess im Konzern. Die Finanzbuchhaltungssysteme werden größtenteils von der RWE IT GmbH unterhalten.

Wir identifizieren Risiken der Finanzberichterstattung auf Ebene der Unternehmensbereiche anhand quantitativer, qualitativer und prozessbezogener Kriterien. Fundament des IKS sind unsere allgemein verbindlichen Richtlinien und ethischen Werte, die auch im RWE-Verhaltenskodex ihren Niederschlag finden. Darauf aufbauend stellen Mindestanforderungen an die wesentlichen Verarbeitungsprozesse eine integrale Datenerhebung und -verwaltung sicher. Risiken bei einzelnen Bilanzpositionen infolge subjektiver Ermessensspielräume oder komplexer Transaktionen werden in einer konzernübergreifenden Risiko- und Kontrollmatrix erfasst. Einmal im Jahr erbringen wir den Nachweis, dass die notwendigen Kontrollen tatsächlich stattfanden und korrekt vorgenommen wurden. Dies geschieht durch die interne Revision, externe Wirtschaftsprüfer oder das für die Durchführung der Kontrollen verantwortliche Management.

Der Prüfungsausschuss des Aufsichtsrats befasst sich in seinen Sitzungen regelmäßig mit der Wirksamkeit des rechnungslegungsbezogenen IKS. Einmal im Jahr legt ihm der Finanzvorstand der RWE AG die Risiken der Finanzberichterstattung dar. Dabei erläutert er auch, welche Kontrollmaßnahmen ergriffen wurden und wie die korrekte Durchführung der Kontrollen geprüft wurde.

Unsere Konzernrevision ist zertifiziert nach den „Internationalen Standards für die berufliche Praxis der Internen Revision“ des Institute of Internal Auditors (IIA). Organisatorisch und disziplinarisch ist sie direkt dem Vorstandsvorsitzenden unterstellt.

#### **Erklärung zur Unternehmensführung gemäß § 289a HGB.**

Der Vorstand der RWE Aktiengesellschaft hat mit Datum vom 11. Februar 2011 eine Erklärung zur Unternehmensführung nach § 289a HGB abgegeben und diese auf der Internetseite der RWE unter [www.rwe.com/erklaerung-zur-unternehmensfuehrung-par-289a-HGB](http://www.rwe.com/erklaerung-zur-unternehmensfuehrung-par-289a-HGB) veröffentlicht.

## 1.11 AUSBLICK 2011

**Während sich die Konjunktur weiter erholt, werden die Rahmenbedingungen unseres Geschäfts schwieriger. Die neue Kernbrennstoffsteuer in Deutschland und die ungünstige Entwicklung der Strom- und Gaspreise führen 2011 zu massiven Belastungen. Wir rechnen damit, dass unser betriebliches Ergebnis ca. 20 % hinter dem Rekordniveau von 2010 zurückbleiben wird. Mit Investitionskürzungen, Desinvestitionen und verstärkten Kostensenkungen wollen wir unsere Finanz- und Ertragskraft stabilisieren. Dennoch fällt auch unsere mittelfristige Ergebnisprognose verhalten aus.**

**Weltwirtschaft bleibt auf Wachstumskurs.** Nach ersten Prognosen wird die globale Wirtschaftsleistung 2011 um mehr als 3 % steigen. Konjunkturlokomotive bleibt China; allerdings dürfte sich das Wachstum dort leicht abschwächen, weil die Regierung zuletzt eine weniger expansive Geld- und Fiskalpolitik verfolgte. Im Euro-Raum werden Maßnahmen zur Konsolidierung der Staatshaushalte den Aufschwung dämpfen. Andererseits ist wegen einer höheren Auslastung der Industriekapazität mit verstärkter Investitionstätigkeit zu rechnen. Das Wirtschaftswachstum der Euro-Zone könnte nahe der Vorjahresmarke (1,7 %) liegen. Etwas besser fällt die Konjunkturprognose für Deutschland aus: Der Sachverständigenrat hält mehr als 2 % für möglich. Damit würde das Bruttoinlandsprodukt (BIP) von 2008 wieder erreicht. Neben den traditionellen Triebkräften wird auch der private Konsum das deutsche Wachstum stützen. Dies ergibt sich aus der erfreulichen Beschäftigungsentwicklung und den gestiegenen verfügbaren Einkommen. Etwas zurückhaltender fallen die Prognosen für die Niederlande und Belgien aus: Das Wachstum liegt hier voraussichtlich bei 1,5 %. Gleiches gilt für Großbritannien: Dort dürften von der Regierung erlassene Sparprogramme und eine Erhöhung der Umsatzsteuer den privaten Verbrauch dämpfen. Erste Schätzungen für unsere zentralosteuropäischen Kernmärkte deuten auf eine weitere Erholung hin: Polen und Tschechien können Wachstumsraten von über 3 % erreichen. In Ungarn wird sich das momentan schwache Expansionstempo voraussichtlich etwas erhöhen.

**Konjunktur wirkt sich positiv auf Energieverbrauch aus.** Die Entwicklung des Energieverbrauchs dürfte auch 2011 von positiven Konjunktureffekten begünstigt sein. Für Deutschland erwarten wir, dass sich das Produktionswachstum der energieintensiven Branchen im einstelligen Prozentbereich normalisiert. Die Stromnachfrage wird bei stabilem Bedarf in den anderen Verbrauchssektoren voraussichtlich leicht anziehen. In Großbritannien war sie wegen Fortschritten auf dem Gebiet der Energieeffizienz bereits vor der Wirtschaftskrise leicht rückläufig. Selbst bei steigender Industrieproduktion dürfte sie 2011 kaum über das Vorjahresniveau hinauskommen. Für die Niederlande fällt unsere Prognose ähnlich aus. Der Stromverbrauch in unseren zentralosteuropäischen Märkten könnte sich dagegen um über 2 % erhöhen. Wegen der dynamischen Wirtschaftsentwicklung in diesen Ländern wird er wohl auch in den Folgejahren deutlich steigen.

Da die Nachfrage bei Gas stärker von den Temperaturen abhängt als bei Strom, unterliegt sie größeren Schwankungen und ist schwerer zu prognostizieren. Klammert man mögliche Witterungseffekte aus, dürfte sich der deutsche Gasverbrauch in der Nähe des Vorjahresniveaus bewegen. Einerseits sind weiterhin leichte Konjunkturimpulse zu erwarten; andererseits könnte der fortgesetzte Ausbau der erneuerbaren Energien die Auslastung von Gaskraftwerken mindern. Auch in den Niederlanden

dürfte der Gasverbrauch auf witterungsbereinigter Basis stagnieren, in Großbritannien möglicherweise sogar leicht sinken, weil es hier noch größeres Potenzial für Verbrauchseinsparungen durch Maßnahmen zur Verbesserung der Energieeffizienz gibt. In unseren zentralosteuropäischen Märkten sind dagegen im Allgemeinen leichte Zuwächse zu erwarten. Neben Konjunkteinflüssen spielt dort die wachsende Bedeutung von Gas gegenüber anderen Energieträgern eine Rolle.

**Brennstoffe voraussichtlich teurer als 2010.** An den internationalen Märkten für Rohöl, Steinkohle und Erdgas zeigte die Preiskurve zuletzt nach oben. Den Ausschlag dafür gab die dynamische Wirtschaftsentwicklung in Schwellenländern wie China und Indien. Bei Steinkohle kamen Sondereffekte hinzu, vor allem die Flutkatastrophe in Australien, die in zahlreichen Minen den Betrieb zum Erliegen brachte. Am 31. Januar 2011 kostete die metrische Tonne Kraftwerks-Steinkohle im Rotterdamer Spothandel 122 US\$ (inkl. Fracht und Versicherung). Aus den Monatsterminpreisen bis Ende 2011, die an diesem Tag zu beobachten waren, lässt sich ablesen, dass die Marktteilnehmer auch für das Gesamtjahr einen Durchschnittswert in der Nähe der 120-US\$-Marke erwarten. Gegenüber 2010 (93 US\$) wäre das ein deutlicher Anstieg. Ähnlich ist die Situation an den Rohölmärkten. Das Barrel der Sorte Brent wurde Ende Januar mit 98 US\$ gehandelt. Der für das Gesamtjahr erwartete Preis von rund 100 US\$ liegt hier ebenfalls weit über dem Niveau von 2010 (79 US\$). Grund sind Befürchtungen, dass die Unruhen in Nordafrika die Ölversorgung beeinträchtigen könnten. Die Verteuerung von Rohöl wird sich zeitversetzt am kontinentaleuropäischen Gasmarkt niederschlagen. Dies ergibt sich aus der Ölpreisbindung zahlreicher Importverträge. Allerdings wird in den Kontrakten auch zunehmend die Entwicklung im Gas-Sporthandel berücksichtigt. Entsprechende Vertragsanpassungen dürften den Anstieg der Importpreise dämpfen. Die Notierungen an den großen europäischen Handelspunkten haben zuletzt angezogen, liegen aber wegen des großen Gasangebots immer noch deutlich unter den Preisen in ölindezierten Langfristverträgen. Marktsignale deuten darauf hin, dass dies im gesamten Jahresverlauf so bleiben könnte. Im europäischen Handel mit CO<sub>2</sub>-Emissionsrechten bewegen sich die Preise seit 2009 in einer engen Bandbreite seitwärts. Es gibt derzeit keine Anzeichen dafür, dass sie nach oben oder unten ausbrechen könnten.

**Realisierter Strompreis unter Vorjahresniveau.** Ungeachtet der Verteuerung von Brennstoffen haben die Notierungen an den Strom-Terminmärkten zuletzt stagniert. Wir gehen aber davon aus, dass sie steigen werden, sollte sich die aktuelle Preisentwicklung bei Steinkohle und Erdgas als nachhaltig erweisen. Auf unsere Ertragslage im laufenden Geschäftsjahr hätte dies allerdings keinen nennenswerten Einfluss, denn wir haben die Erzeugung für 2011 bereits nahezu komplett verkauft. Der Preis, den wir für unsere deutsche Produktion erzielten, lag unter dem Vergleichswert für 2010 von 67 € je MWh. Auch für die kommenden Jahre ist unsere Erzeugung bereits teilweise am Markt platziert, in Deutschland zu über 50 % für 2012 und zu über 10 % für 2013 (Stand: Ende 2010). Bei den Terminverkäufen gehen wir grundsätzlich so vor, dass zeitgleich mit dem Abschluss eines Lieferkontrakts die zur Erzeugung benötigten Brennstoffe beschafft bzw. preislich abgesichert werden. Dies gilt auch für den Zukauf von Emissionsrechten.

**Organisches Wachstum trotz schwieriger Rahmenbedingungen.** Klimaschutz, Ressourcenschonung und organisches Wachstum stehen weiterhin ganz oben auf unserer Agenda. Damit halten wir unseren strategischen Kurs – trotz schwieriger wirtschaftlicher und politischer Rahmenbedingungen. Allerdings werden wir das Tempo etwas drosseln. Zu schwer wiegen die Belastungen in den kommenden Jahren aus der Kernbrennstoffsteuer und der ungünstigen Entwicklung der Strom- und Gaspreise. Unsere Sachanlageninvestitionen fahren wir etwas zurück: Ursprünglich hatten wir uns für den Zeitraum von 2010 bis 2013 ein Gesamtvolumen von 28 Mrd. € zum Ziel gesetzt; wir haben es inzwischen um rund 3 Mrd. € gekürzt. Für 2011 und die beiden Folgejahre planen wir Ausgaben von insgesamt ca. 18 Mrd. €. Attraktive Projekte, die nicht dringlich sind, verschieben wir; auf Vorhaben, die nur moderate Renditen versprechen, verzichten wir ganz. Die Kürzungen wirken sich im Wesentlichen erst nach 2011 aus. Unsere laufenden Kraftwerks-Neubauprojekte bleiben davon unberührt.

**Hohes Tempo beim Ausbau der erneuerbaren Energien und der Upstream-Position.** Der Ausbau unserer Erzeugungsleistung auf Basis erneuerbarer Energien wird sich in den nächsten Jahren beschleunigen. RWE Innogy wird dafür bis 2013 durchschnittlich 1,2 Mrd. € pro Jahr investieren. Ausgabenschwerpunkt sind neue Windanlagen im Meer. Der Offshore-Windpark Greater Gabbard vor der Küste Großbritanniens mit 504 MW Gesamtleistung, an dem wir zu 50% beteiligt sind, wird 2011 voraussichtlich fertiggestellt. Zum Jahresende 2010 waren bereits etwa die Hälfte der 140 Turbinen aufgestellt. Die ersten Windräder unseres deutschen Windparks Nordsee Ost werden 2012 ans Netz gehen; dieser soll 2013 über eine Gesamtleistung von 295 MW verfügen. Den 576-MW-Offshore-Windpark Gwynt y Môr vor der walisischen Küste wollen wir bis 2014 vollständig in Betrieb nehmen. Auch unsere Windkraftkapazitäten an Land werden wir vergrößern, vor allem in Großbritannien, Italien und Polen. Darüber hinaus bauen wir Biomasse-Heizkraftwerke in Großbritannien und eine Anlage zur Herstellung von Holzpellets in den USA. Dieser Wachstumskurs wird sich auch im betrieblichen Ergebnis von RWE Innogy widerspiegeln: Wir rechnen bis 2013 mit jährlichen Steigerungsraten im zweistelligen Prozentbereich.

Unsere Öl- und Gasförderung wollen wir bis 2016 auf ca. 70 Mio. Barrel Öläquivalente erhöhen. Im Zeitraum von 2011 bis 2013 wird RWE Dea mehr als 3 Mrd. € für die Entwicklung ihrer Reserven einsetzen. Schwerpunkte in Europa sind die britische Nordsee und die Küste vor Norwegen. Darüber hinaus planen wir, einen Großteil der Investitionen in Nordafrika zu tätigen. Die politische Lage in dieser Region beobachten wir daher mit besonderer Aufmerksamkeit.

**Klimaschutz weiterhin im Fokus.** Die Senkung unserer CO<sub>2</sub>-Emissionen bleibt eines unserer wesentlichen strategischen Ziele. Als einer der größten Stromerzeuger Europas sehen wir uns hier besonders in der Verantwortung. Mit den Cash Flows aus unserem heutigen Kraftwerksgeschäft haben wir die finanzielle Stärke, den schrittweisen Umbau unseres Erzeugungsportfolios aus eigener Kraft zu bewältigen. Wir wollen durch emissionsmindernde und finanzielle Maßnahmen unser CO<sub>2</sub>-Risiko bis spätestens 2020 auf das Niveau eines durchschnittlichen Wettbewerbers in unseren Märkten absenken (siehe Seite 53). Angesichts des hohen Anteils von Braun- und Steinkohlekraftwerken in unserem Portfolio ist das ein anspruchsvolles Ziel. Um es zu erreichen, sind massive Investitionen erforderlich. Von den gut 8 Mrd. €, die wir bis 2013 für den Ausbau und die Erneuerung unseres Erzeugungsport-

folios einsetzen werden, fließen über 60 % in CO<sub>2</sub>-freie oder CO<sub>2</sub>-arme Technologien. Die übrigen Ausgaben entfallen auf Kohlekraftwerke der neuesten Generation, die einen bis zu 30 % höheren Wirkungsgrad aufweisen als ihre Vorgänger. Darüber hinaus investieren wir im Rahmen der Kyoto-Mechanismen Clean Development Mechanism und Joint Implementation auch in CO<sub>2</sub>-Vermeidungsprojekte außerhalb Europas. Des Weiteren prüfen wir Möglichkeiten für virtuelle Kraftwerkstausch-Transaktionen mit anderen Stromerzeugern, schließen langfristige Lieferverträge ab, bei denen die Kunden das CO<sub>2</sub>-Risiko für ihre Strombezüge übernehmen, und erwerben für zukünftige Perioden CO<sub>2</sub>-Zertifikate am Großhandelsmarkt.

**Desinvestitionen zur Wahrung des finanziellen Spielraums.** Der Erwerb von Essent wird für die nächsten Jahre unser größter Schritt in puncto Wachstum durch Übernahmen bleiben. Weitere Akquisitionen schließen wir nicht aus, allerdings würden sie eine wesentlich geringere Größenordnung haben. Insbesondere in Zentralost- und Südosteuropa prüfen wir, wie wir unsere Marktstellung mit Beteiligungen an etablierten lokalen Energieunternehmen ausbauen oder Startpositionen einnehmen können. Akquisitionen kommen für uns jedoch grundsätzlich nur dann infrage, wenn unsere Finanzkriterien erfüllt sind. Die wichtigste Messlatte ist die interne Verzinsung (Internal Rate of Return – IRR): Sie muss mindestens den Kapitalkosten zuzüglich eines Renditeaufschlags entsprechen. Derzeit stehen jedoch zur Finanzierung unserer Wachstumsinvestitionen und zur Wahrung des finanziellen Spielraums vor allem Desinvestitionen auf der Agenda. Bis Ende 2013 wollen wir Konzernunternehmen und Beteiligungen im Gesamtwert von 8 Mrd. € veräußern. Mit dem Verkauf unseres Gasfernnetz-Betreibers Thyssengas und unserer Minderheitsbeteiligung an einem Steinkohlekraftwerk in Rostock haben wir hier bereits erste Schritte unternommen.

**Prognose 2011: Umsatz unter Vorjahr.** Unsere konzernexternen Erlöse werden voraussichtlich niedriger ausfallen als 2010. Hauptgrund ist, dass wir die bilanzielle Erfassung unseres Stromtransportnetz-Betreibers Amprion voraussichtlich im Jahresverlauf auf die Equity-Methode umstellen müssen. Sollten 2011 bestimmte Unbundling-Vorgaben der EU in deutsches Recht umgesetzt werden, könnten wir keine unternehmerische Kontrolle mehr über die Gesellschaft ausüben. Diese ist nach IFRS Voraussetzung für eine Vollkonsolidierung. At Equity bilanzierte Unternehmen sind im Außenumsatz nicht erfasst. Ins EBITDA und ins betriebliche Ergebnis gehen sie mit dem Nachsteuerergebnis ein.

**Deutlicher Ergebnisrückgang erwartet.** Im laufenden Geschäftsjahr werden sich die verschlechterten wirtschaftlichen und politischen Rahmenbedingungen deutlich in unserer Ertragslage niederschlagen. Während sich das gegenüber 2008 erheblich verringerte Preisniveau am Strom-Großhandelsmarkt wegen unserer frühzeitigen Terminverkäufe bislang noch nicht allzu stark auswirkte, wird es 2011 zu spürbaren Margenverlusten führen. Hinzu kommen Ergebniseinbußen aus der 2011 erstmals erhobenen Kernbrennstoffsteuer in Deutschland. Im Gas-Midstream-Geschäft werden sich die Belastungen gegenüber 2010 nochmals erhöhen. Für Gasbezüge auf Basis ölindexierter Verträge müssen wir weiterhin zum Teil deutlich höhere Preise bezahlen, als wir beim Weiterverkauf dieser Mengen erzielen können. Positive Ergebniseffekte aus den laufenden Revisionsverhandlungen mit unseren Gaszulieferern erwarten wir frühestens für 2012.

| <b>Ausblick 2011</b><br>in Mio. € | 2010   | Prognose 2011 vs. 2010 |
|-----------------------------------|--------|------------------------|
| Außenumsatz                       | 53.320 | unter Vorjahr          |
| EBITDA                            | 10.256 | ca. –15%               |
| Betriebliches Ergebnis            | 7.681  | ca. –20%               |
| Deutschland                       | 5.575  | deutlich unter Vorjahr |
| Stromerzeugung                    | 4.000  | deutlich unter Vorjahr |
| Vertrieb und Verteilnetze         | 1.575  | unter Vorjahr          |
| Niederlande/Belgien               | 391    | deutlich unter Vorjahr |
| Großbritannien                    | 272    | über Vorjahr           |
| Zentralost-/Südosteuropa          | 1.173  | deutlich unter Vorjahr |
| Erneuerbare Energien              | 72     | deutlich über Vorjahr  |
| Upstream Gas & Öl                 | 305    | deutlich über Vorjahr  |
| Trading/Gas Midstream             | –21    | deutlich unter Vorjahr |
| Nachhaltiges Nettoergebnis        | 3.752  | ca. –30%               |

Das EBITDA des RWE-Konzerns wird 2011 voraussichtlich um ca. 15% unter dem Niveau des Vorjahres (10.256 Mio. €) liegen. Beim betrieblichen Ergebnis (7.681 Mio. €) erwarten wir einen Rückgang um ca. 20% und beim nachhaltigen Nettoergebnis (3.752 Mio. €), der Bemessungsgrundlage für die Dividende, einen Rückgang um ca. 30%.

- Deutschland: Das betriebliche Ergebnis des Unternehmensbereichs wird sich aus heutiger Sicht deutlich verringern.

**Stromerzeugung:** Der für den Unternehmensbereich Deutschland prognostizierte Ergebnismrückgang ist größtenteils RWE Power zuzuordnen. Für das laufende Jahr haben wir die deutsche Erzeugung bereits nahezu komplett am Markt platziert. Der dabei realisierte Preis liegt unter dem Vorjahresniveau (67 € je MWh). Auch die 2011 erstmals erhobene Kernbrennstoffsteuer und Nachrüstmaßnahmen am Kernkraftwerk Biblis werden Ergebniseinbußen verursachen. Positive Effekte gegenüber 2010 erwarten wir bei den Kernenergieückstellungen.

**Vertrieb und Verteilnetze:** Auch hier rechnen wir mit einem Ergebnismrückgang. Bei normalisierten Witterungsverhältnissen werden unsere Erträge im Gasvertrieb unter dem hohen Vorjahresniveau liegen. Daneben erwarten wir Mehraufwand für die Verbesserung der Netzinfrastruktur. Unsere Belastungen aus der sogenannten Mehrerlösabschöpfung (siehe Seite 88) werden dagegen geringer ausfallen als 2010.

- Niederlande/Belgien: Der Unternehmensbereich wird deutlich unter dem guten Vorjahresergebnis abschließen. Hauptgrund ist, dass wir Gas-Midstream-Aktivitäten von Essent auf RWE Supply & Trading übertragen. Mit ihnen hatten wir 2010 hohe Erträge erwirtschaftet, u.a. wegen der kalten Witterung. Auch die Stromerzeugung von Essent wird voraussichtlich einen niedrigeren Ergebnisbeitrag liefern, denn wir rechnen mit rückläufigen Margen unserer niederländischen Gas- und Steinkohlekraftwerke. Einsparungen bei den IT- und Personalkosten werden sich dagegen positiv auswirken.

- Großbritannien: Hier rechnen wir mit einem weiteren Anstieg des betrieblichen Ergebnisses, u.a. wegen umfangreicher Maßnahmen zur Effizienzverbesserung. Außerdem gehen wir davon aus, dass sich die Margen im Privatkundengeschäft erholen. RWE npower hat die Haushaltstarife für Strom und Gas zum 4. Januar 2011 um durchschnittlich 5,1 % angehoben. Dagegen werden die vorgelagerten Netzkosten voraussichtlich steigen. Außerdem erwarten wir höhere Aufwendungen für Maßnahmen zur Förderung von Energieeinsparungen bei Haushalten. Die britischen Versorger sind hierzu im Rahmen staatlicher Programme verpflichtet. Im Erzeugungsgeschäft dürfte sich die Ertragslage nochmals verschlechtern, obwohl das neue Gaskraftwerk in Staythorpe erstmals ganzjährig zur Stromproduktion beiträgt. Wegen der aktuell schwierigen Marktbedingungen in Großbritannien werden die Margen unserer Steinkohle- und Gaskraftwerke voraussichtlich niedriger sein als 2010. Darüber hinaus schlagen sich die hohen Investitionen in steigenden Abschreibungen nieder.
- Zentralost-/Südosteuropa: Der Unternehmensbereich wird aus heutiger Perspektive deutlich unter dem unerwartet guten Vorjahresergebnis abschließen. In Tschechien dürften sich die Margen im Gasvertrieb und im Gasspeichergeschäft verschlechtern. Auch der Ergebnisbeitrag aus dem ungarischen Stromgeschäft wird wohl niedriger ausfallen als 2010. In Polen werden wir dagegen voraussichtlich von verbesserten Stromnetzmargen profitieren.
- Erneuerbare Energien: Der fortschreitende Ausbau der Erzeugungskapazität von RWE Innogy wird zu Mehrerlösen und damit auch zu einer deutlichen Verbesserung beim betrieblichen Ergebnis führen. Wir erwarten, den Bau des Offshore-Windparks Greater Gabbard im Jahresverlauf abschließen zu können. Ferner unterstellen wir eine Normalisierung der Wetterverhältnisse, nachdem das Jahr 2010 extrem windschwach war. Dies würde die Ertragslage ebenfalls positiv beeinflussen. Gegenläufig wirkt, dass die aktuellen Investitionsprojekte mit steigenden Vorlaufkosten verbunden sind.
- Upstream Gas & Öl: Deutlich verbessern dürfte sich auch das betriebliche Ergebnis der RWE Dea, denn wir erwarten, höhere Öl- und Gaspreise realisieren zu können. Darüber hinaus rechnen wir mit positiven Effekten aus gestiegenen Ölfördermengen und niedrigerem Explorationsaufwand. Allerdings wird unsere Gasproduktion voraussichtlich unter dem Niveau von 2010 liegen. Das ergibt sich aus dem natürlichen Förderabfall im Zuge der fortschreitenden Ausschöpfung bestehender Reserven und betrifft im Wesentlichen Gasfelder in Deutschland und Großbritannien. Dem stehen erwartete Produktionssteigerungen in Norwegen und Ägypten gegenüber.
- Trading/Gas Midstream: Wir erwarten, dass der Bereich auch 2011 mit einem betrieblichen Verlust abschließt. Dieser könnte deutlich höher ausfallen als 2010 (–21 Mio. €). Das ergibt sich aus Belastungen im Gas-Midstream-Geschäft. Wie bereits erläutert, sind die ölindezierten Beschaffungspreise für Gas seit 2009 zum Teil deutlich höher als die am Markt realisierbaren Verkaufspreise. Die Ergebniseffekte daraus werden sich 2011 weiter verstärken. Derzeit führen wir mit unseren Gaslieferanten Revisionsverhandlungen, deren Ausgang maßgeblichen Einfluss auf die mittelfristige Ertragslage haben wird. Allerdings dürften die Entscheidungen größtenteils erst 2012 und 2013 fallen. Im Handelsgeschäft der RWE Supply & Trading gehen wir von einer gegenüber 2010 stabilen Performance aus.

**Rückläufige Dividende für das Geschäftsjahr 2011.** Der Dividendenvorschlag für das Geschäftsjahr 2011 wird sich an unserer üblichen Ausschüttungsquote von 50 bis 60% orientieren. Bemessungsgrundlage ist das nachhaltige Nettoergebnis. Wie bereits dargestellt, erwarten wir hier einen Rückgang um ca. 30%. Damit wird auch unsere Dividende niedriger ausfallen als die für 2010.

**Sachinvestitionen von über 7 Mrd. € geplant.** Unsere Investitionen in Sachanlagen werden sich 2011 auf 7,0 bis 7,5 Mrd. € belaufen. Damit würde der Rekordwert von 2010 (6,4 Mrd. €) nochmals deutlich übertroffen. Vor allem in den Unternehmensbereichen Erneuerbare Energien, Zentralost-/Südosteuropa, Deutschland und Upstream Gas & Öl planen wir steigende Ausgaben. Schwerpunkte der Investitionstätigkeit des RWE-Konzerns sind auch 2011 der Neubau hoch effizienter fossil befeuerter Kraftwerke, die Aufstockung unserer Erzeugungskapazitäten auf Basis erneuerbarer Energien, die Modernisierung der Netzinfrastruktur und die Entwicklung von Öl- und Gasfeldern.

**Verschuldungsfaktor: Überschreitung der Obergrenze erwartet.** Unsere Nettoschulden, die Ende 2010 bei 29,0 Mrd. € lagen, werden sich im Jahresverlauf wegen unseres umfangreichen Investitionsprogramms weiter erhöhen. Wir rechnen mit einem Anstieg in der Größenordnung von 1 Mrd. €. Dies und die oben skizzierte Ergebnisentwicklung führen zu einer deutlichen Erhöhung des Verschuldungsfaktors, also des Verhältnisses der Nettoschulden zum EBITDA. Die Obergrenze von 3,0, an der wir uns orientieren, wird der Verschuldungsfaktor voraussichtlich überschreiten. Wir wollen ihn mittelfristig wieder an diese Marke heranführen, um unser solides A-Rating zu sichern. Dabei helfen uns die bereits erwähnten Investitionskürzungen und Desinvestitionen.

**Mitarbeiterzahl: Leichter Anstieg erwartet.** Im laufenden Geschäftsjahr werden wir unsere Personaldecke etwas verstärken. Das ergibt sich aus unserem Investitionsprogramm. Besonders die Unternehmensbereiche Deutschland und Erneuerbare Energien schaffen neue Stellen. Gegenläufig wirkt, dass wir Amprion ab 2011 voraussichtlich at Equity bilanzieren und das Unternehmen daher nicht mehr bei der Ermittlung der Personalzahlen berücksichtigen. Darüber hinaus führt der Verkauf von Thyssengas zum Ausscheiden von Mitarbeitern aus dem Konzern.

**Neue Ergebnisprognose für 2012 und 2013.** Im Februar 2010 hatten wir einen Ausblick auf unsere mittelfristige Ertragsentwicklung gegeben. Für den Zeitraum bis 2012 waren wir davon ausgegangen, das betriebliche Ergebnis und das nachhaltige Nettoergebnis um durchschnittlich 5% pro Jahr steigern zu können. Basisjahr für diese Prognose war 2008. Wegen der unerwarteten Verschlechterung der wirtschaftlichen und politischen Rahmenbedingungen werden wir dieses Ziel nicht erreichen. Die deutsche Kernbrennstoffsteuer und die anhaltend niedrigen Preise an den Großhandelsmärkten für Strom und Gas belasten unsere Ertragslage über 2011 hinaus. Im Wesentlichen betrifft das unsere deutsche Stromerzeugung und das Gas-Midstream-Geschäft. Dagegen dürfte sich in den Wachstumssegmenten Erneuerbare Energien und Upstream Gas & Öl der positive Ergebnistrend fortsetzen. Insgesamt gehen wir davon aus, dass das betriebliche Ergebnis des RWE-Konzerns 2012 und auch im Folgejahr weiter rückläufig ist, wenn auch nicht so stark wie 2011.

Unseren im Februar 2010 gegebenen Ausblick für 2013 können wir damit ebenfalls nicht mehr aufrechterhalten: Wir hatten prognostiziert, beim EBITDA, beim betrieblichen Ergebnis und beim nachhaltigen Nettoergebnis über dem Niveau von 2009 abschließen zu können. Nach unserer aktuellen Planung wird das EBITDA 2013 eine Größenordnung von 8 Mrd. € erreichen; das betriebliche Ergebnis dürfte bei ca. 5 Mrd. € liegen. Für das nachhaltige Nettoergebnis erwarten wir einen Wert von ca. 2 Mrd. €. Im Jahr 2013 wird sich die Ertragslage in der Stromerzeugung gegenüber 2012 nochmals deutlich verschlechtern, weil uns dann keine CO<sub>2</sub>-Emissionsrechte mehr kostenfrei zugeteilt werden. Das erwartete Ergebniswachstum in den Bereichen Erneuerbare Energien und Upstream Gas & Öl wird das nicht auffangen können. Bei RWE Innogy gehen wir davon aus, dass das betriebliche Ergebnis die für 2013 erwartete Marke von 500 Mio. € erst später erreicht. Unsere geplanten Desinvestitionen von 8 Mrd. € sind in der Prognose für 2012/2013 bereits berücksichtigt.

**Weiterhin attraktive Dividenden.** An unserer Ausschüttungsquote von 50 bis 60 % halten wir auch mittelfristig fest. Das heißt, wir wollen weiterhin mindestens die Hälfte unseres nachhaltigen Nettoergebnisses an unsere Anteilseigner auszahlen. Damit bleibt die RWE-Aktie ein attraktiver Dividendentitel.

## 2.0 UNSERE VERANTWORTUNG

## 2.1 BERICHT DES AUFSICHTSRATS

*Sehr geehrte Aktionäre,*

im Geschäftsjahr 2010 hat der Aufsichtsrat sämtliche ihm nach Gesetz und Satzung obliegenden Aufgaben wahrgenommen. Wir haben den Vorstand bei der Leitung des Unternehmens regelmäßig beraten und seine Maßnahmen überwacht. Dabei waren wir in alle grundlegenden Entscheidungen eingebunden. Der Vorstand informierte uns mit schriftlichen und mündlichen Berichten regelmäßig, umfassend und zeitnah über die wesentlichen Aspekte der Geschäftsentwicklung und bedeutende Geschäftsvorfälle. Ebenso gründlich wurden wir über die aktuelle Ertragssituation, über die Risiken und deren Management informiert.

Im Berichtsjahr kam der Aufsichtsrat zu vier ordentlichen Sitzungen zusammen. Kein Mitglied des Gremiums hat an weniger als der Hälfte der Sitzungen teilgenommen. Die Präsenz lag im Durchschnitt bei 95%. Unsere Entscheidungen trafen wir auf Grundlage der ausführlichen Berichterstattung und der Beschlussvorschläge des Vorstands. Informationen über Projekte und Vorgänge von besonderer Bedeutung oder Dringlichkeit erhielten wir auch außerhalb von Sitzungen. Der Aufsichtsrat hat die nach Gesetz oder Satzung erforderlichen Beschlüsse gefasst. Sofern nötig, tat er dies auch in Ausschusssitzungen. Als Vorsitzender des Aufsichtsrats stand ich in ständigem Kontakt mit dem Vorstandsvorsitzenden. Ereignisse von außerordentlicher Bedeutung für die Lage und Entwicklung des RWE-Konzerns konnten somit unverzüglich erörtert werden.

**Beratungsschwerpunkte.** Zentrale Themen unserer Beratungen im Geschäftsjahr 2010 waren u.a. die Entwicklungen am internationalen Gasmarkt und die deutsche Energiepolitik. Breiten Raum nahmen die Verlängerung der Laufzeit von Kernkraftwerken und die Einführung einer Steuer auf Kernbrennstoffe ein, denn diese Maßnahmen beeinflussen die Ertragslage des RWE-Konzerns erheblich. Wir haben uns vom Vorstand eingehend über diese Maßnahmen informieren lassen und die Auswirkungen analysiert. Daneben befassten wir uns mehrfach mit der neuen Organisationsstruktur des Konzerns, dem Stand der Kraftwerks-Neubauprojekte und Finanzierungsmaßnahmen. Intensiv verfolgt haben wir den Aufbau der neuen RWE Technology, den Fortgang der Projekte von RWE Innogy und die Integration der 2009 akquirierten Essent in den RWE-Konzern.

Intensiv hat sich der Aufsichtsrat auch über das im August 2009 in Kraft getretene Gesetz zur Angemessenheit der Vorstandsvergütung (VorstAG) und seine Auswirkungen auf das Unternehmen beraten. Durch das VorstAG wurden Anpassungen am System der Vorstandsvergütung erforderlich, die der Aufsichtsrat in seiner Sitzung am 23. Februar 2010 beschlossen hat.

Handlungsbedarf ergab sich auch durch das Gesetz zur Modernisierung des Bilanzrechts (BilMoG), das am 29. Mai 2009 in Kraft getreten war. Das BilMoG hat die Anforderungen an die Qualifikation des Aufsichtsrats bei kapitalmarktorientierten Kapitalgesellschaften verschärft. Gemäß §100 Abs. 5 Aktiengesetz (AktG) muss nun mindestens ein unabhängiges Aufsichtsratsmitglied mit Sachverstand auf dem Gebiet der Rechnungslegung oder Abschlussprüfung in den Aufsichtsrat berufen werden. In der Februar-Sitzung hat der Aufsichtsrat Herrn von Boehm-Bezing als unabhängigen Finanzexperten benannt. Mit dem BilMoG hat der Gesetzgeber auch erstmals Anforderungen an die Einrichtung

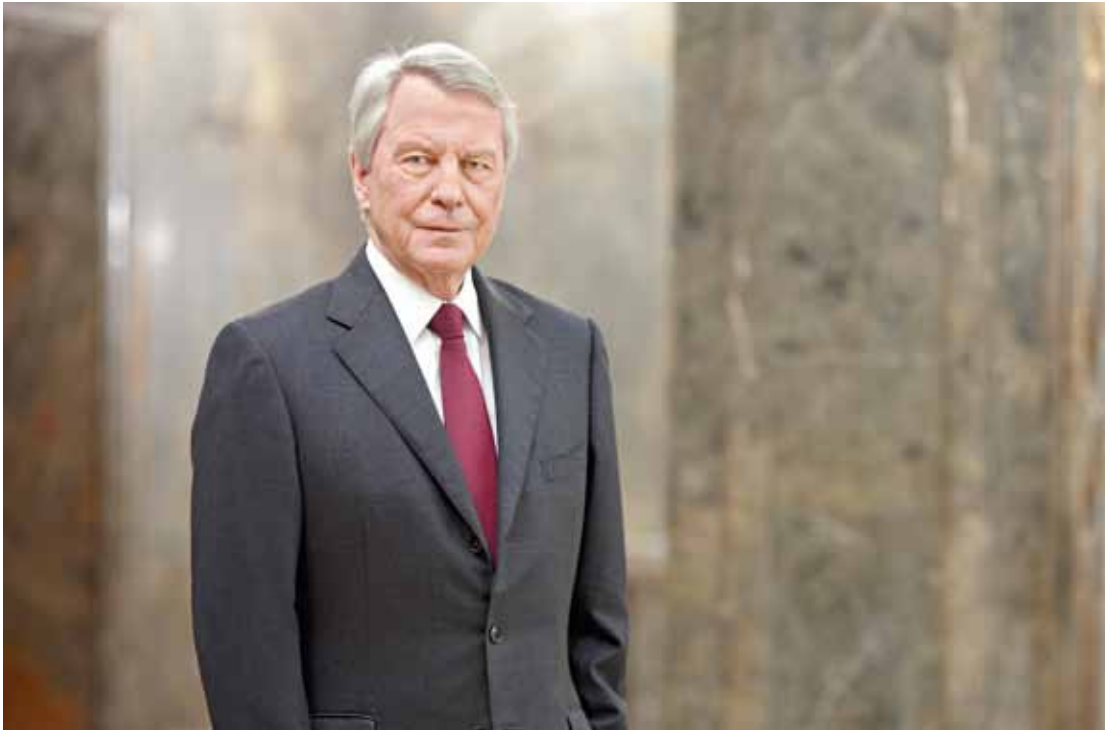

Dr. Manfred Schneider, Vorsitzender des Aufsichtsrats der RWE AG

und die Tätigkeit eines Prüfungsausschusses formuliert. Um diesen Vorgaben noch besser gerecht zu werden, haben wir in unserer Sitzung im September die Geschäftsordnung für den Aufsichtsrat angepasst.

Im Berichtsjahr haben Aufsichtsratsmitglieder in Einzelfällen potenzielle Interessenkonflikte offengelegt. In einem Fall führte dies dazu, dass das betreffende Aufsichtsratsmitglied auf entsprechende Beratungen im Aufsichtsrat keinen Einfluss genommen und sich bei der Beschlussfassung der Stimme enthalten hat.

Der Vorstand hat uns regelmäßig über die Umsatz- und Ertragslage, über Maßnahmen zur Kostensenkung und über die Preisentwicklung an den Energiemärkten informiert. In der Sitzung am 17. Dezember 2010 verabschiedeten wir nach intensiven Beratungen die Planung des Vorstands für das Jahr 2011 und die Vorschau auf die Jahre 2012 und 2013. Soweit Abweichungen von früher aufgestellten Planungen und Zielen auftraten, wurden uns diese ausführlich erläutert.

**Ausschüsse.** Der Aufsichtsrat hat fünf Ausschüsse, deren Mitglieder auf Seite 235 aufgeführt sind. Die Ausschüsse haben die Aufgabe, die bei Aufsichtsratssitzungen anstehenden Themen und Beschlüsse vorzubereiten. Zum Teil nehmen sie auch Entscheidungsbefugnisse wahr, die ihnen vom Aufsichtsrat übertragen wurden. Die jeweiligen Vorsitzenden der Ausschüsse haben den Aufsichtsrat regelmäßig über ihre Arbeit informiert.

Das **Präsidium** trat im Geschäftsjahr 2010 zu zwei ordentlichen Sitzungen zusammen. Unter anderem leistete es Vorarbeiten für die Beratungen des Aufsichtsrats zu den Jahresabschlüssen 2009 der RWE Aktiengesellschaft und des RWE-Konzerns sowie zur Planung für das Geschäftsjahr 2011 und zur Vorschau auf die Jahre 2012 und 2013.

Der **Prüfungsausschuss** tagte fünfmal. Er beschäftigte sich intensiv mit den Quartalsfinanzberichten, dem Halbjahresabschluss und den Jahresabschlüssen. Daneben bereitete er die Erteilung des Prüfungsauftrags an den Abschlussprüfer einschließlich der Prüfungsschwerpunkte und der Honorarvereinbarung vor. Sein besonderes Augenmerk galt auch dem Risikomanagementsystem des Konzerns und dem rechnungslegungsbezogenen internen Kontrollsystem. Darüber hinaus widmete sich der Ausschuss Compliance-Fragen und den Prüfungsergebnissen der internen Revision sowie deren Prüfungsplanung. Weiterhin waren im Geschäftsjahr 2010 die bilanzielle Umsetzung des BilMoG, das interne Kontrollsystem der RWE Supply & Trading, die Umsetzung des Investitionsprogramms sowie die wirtschaftliche Entwicklung und Integration von Essent in den Konzern Themen der Ausschusssitzungen.

Die Jahres- und Zwischenabschlüsse wurden vor ihrer Veröffentlichung jeweils mit dem Vorstand und dem Abschlussprüfer erörtert. Der Abschlussprüfer nahm in allen Ausschusssitzungen an den Beratungen teil und berichtete über die Ergebnisse seiner Prüfung bzw. prüferischen Durchsicht.

Der **Personalausschuss** trat dreimal zusammen. Er befasste sich im Wesentlichen mit dem Vergütungssystem, der Höhe der Vorstandsbezüge, der betrieblichen Altersvorsorge und den neuen Anforderungen aus dem VorstAG. Außerdem bereitete er die Personalentscheidungen des Aufsichtsrats vor.

Der **Nominierungsausschuss** hat eine Sitzung abgehalten, in der er die Bestellung von Dr. Wolfgang Schüssel zum Mitglied des Aufsichtsrats vorbereitete. Ein Schwerpunkt der Ausschussarbeit außerhalb von Sitzungen war die Identifikation geeigneter Kandidaten für mögliche Nachbesetzungen des Aufsichtsrats.

Der **Vermittlungsausschuss** gemäß § 27 Abs. 3 MitbestG musste im abgelaufenen Geschäftsjahr nicht einberufen werden.

**Jahresabschluss 2010.** Der vom Vorstand nach den Regeln des Handelsgesetzbuches aufgestellte Jahresabschluss der RWE Aktiengesellschaft, der gemäß § 315a HGB nach International Financial Reporting Standards (IFRS) aufgestellte Konzernabschluss und der zusammengefasste Lagebericht für die RWE Aktiengesellschaft und den Konzern wurden von der PricewaterhouseCoopers Aktiengesellschaft Wirtschaftsprüfungsgesellschaft unter Einbeziehung der Buchführung geprüft und mit dem uneingeschränkten Bestätigungsvermerk versehen. Der Abschlussprüfer hat zudem festgestellt, dass der Vorstand ein geeignetes Risikofrüherkennungssystem eingerichtet hat. Der Abschlussprüfer war von der

Hauptversammlung am 22. April 2010 gewählt und vom Aufsichtsrat mit der Prüfung des Jahres- und des Konzernabschlusses beauftragt worden. Die Jahresabschlussunterlagen, der Geschäftsbericht und die Prüfungsberichte des Abschlussprüfers wurden allen Mitgliedern des Aufsichtsrats rechtzeitig zugeleitet. Der Vorstand erläuterte die Unterlagen in der Bilanzsitzung des Aufsichtsrats am 22. Februar 2011 auch mündlich. Die verantwortlichen Abschlussprüfer berichteten in dieser Sitzung über die wesentlichen Ergebnisse der Prüfung und standen für ergänzende Auskünfte zur Verfügung. Der Prüfungsausschuss hatte sich bereits in seiner Sitzung am 21. Februar 2011 in Anwesenheit des Abschlussprüfers mit den Jahresabschlüssen der RWE Aktiengesellschaft und des Konzerns sowie den Prüfungsberichten eingehend auseinandergesetzt; er empfahl dem Aufsichtsrat, die Abschlüsse zu billigen und dem Gewinnverwendungsvorschlag des Vorstands zuzustimmen.

Der Aufsichtsrat hat den Jahresabschluss der RWE Aktiengesellschaft, den Konzernabschluss, den zusammengefassten Lagebericht für die RWE Aktiengesellschaft und den Konzern sowie den Vorschlag für die Verwendung des Bilanzgewinns auch seinerseits eingehend geprüft und keine Einwendungen erhoben. Wie vom Prüfungsausschuss empfohlen, hat der Aufsichtsrat dem Ergebnis der Prüfung beider Abschlüsse durch den Abschlussprüfer zugestimmt und sowohl den Jahresabschluss der RWE Aktiengesellschaft als auch den Konzernabschluss zum 31. Dezember 2010 gebilligt. Der Jahresabschluss 2010 ist damit festgestellt. Der Aufsichtsrat schließt sich dem Gewinnverwendungsvorschlag an, der eine Dividende von 3,50 € je Aktie vorsieht.

**Personelle Veränderungen in Aufsichtsrat und Vorstand.** Mit Wirkung zum 1. Februar 2010 ist Frithjof Kühn als Nachfolger von Heinz-Eberhard Holl durch gerichtlichen Beschluss zum Mitglied des Aufsichtsrats bestellt worden. Außerdem wurde Dr. Wolfgang Schüssel mit Wirkung zum 1. März 2010 durch gerichtlichen Beschluss als Nachfolger von Dr. Thomas Fischer zum Mitglied des Aufsichtsrats bestellt.

Aus dem Vorstand der Gesellschaft ist mit Ablauf des 30. September 2010 Dr. Ulrich Jobs ausgeschieden. Im Namen des Aufsichtsrats danke ich ihm auch an dieser Stelle für die Arbeit in den zurückliegenden Jahren.

Dem Vorstand und allen Mitarbeiterinnen und Mitarbeitern danke ich für ihre Leistung im abgelaufenen Geschäftsjahr. Mit ihrem Einsatz und ihrer Kompetenz haben sie maßgeblich zum wirtschaftlichen Erfolg des Unternehmens beigetragen.

Für den Aufsichtsrat

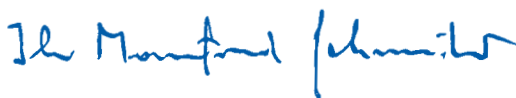

Dr. Manfred Schneider  
Vorsitzender

Essen, 22. Februar 2011

## 2.2 CORPORATE GOVERNANCE

Verantwortungsvolle und transparente Corporate Governance zählt zu den Eckpfeilern unseres langfristigen Erfolgs. Leitbild ist für uns der 2002 eingeführte Deutsche Corporate Governance Kodex in seiner jeweils aktuellen Fassung. In den vergangenen Jahren konnten wir stets uneingeschränkte Entsprechenserklärungen abgeben. Im Mai 2010 sind neue Empfehlungen in den Kodex aufgenommen worden; auch diesen wollen wir in Zukunft vollständig folgen.

**Der Deutsche Corporate Governance Kodex.** Der Begriff „Corporate Governance“ steht für eine verantwortungsbewusste, transparente und auf langfristigen wirtschaftlichen Erfolg ausgerichtete Führung und Kontrolle von Unternehmen. Auch RWE lässt sich an diesem Anspruch messen. Der zentrale Maßstab sind für uns die Empfehlungen des Deutschen Corporate Governance Kodex. Der Kodex verfolgt das Ziel, das Vertrauen von nationalen und internationalen Anlegern, von Kunden, Mitarbeitern sowie der Öffentlichkeit in deutsche börsennotierte Unternehmen zu stärken. Die Regierungskommission Deutscher Corporate Governance Kodex legte im Februar 2002 die erste Kodexfassung vor; seitdem überprüft sie den Kodex Jahr für Jahr vor dem Hintergrund nationaler und internationaler Entwicklungen und passt ihn bei Bedarf an.

**Neue Empfehlungen des Kodex.** Auch im vergangenen Jahr wurde der Deutsche Corporate Governance Kodex weiterentwickelt. Auf ihrer Plenarsitzung am 26. Mai 2010 beschloss die Regierungskommission u.a. verschiedene Konkretisierungen der Diversity-Empfehlungen für Vorstände und Aufsichtsräte. Zudem wurden neue Empfehlungen mit dem Ziel der weiteren Professionalisierung des Aufsichtsrats verabschiedet. Die Neufassung des Kodex wurde am 2. Juli 2010 im elektronischen Bundesanzeiger bekannt gemacht.

- **Diversity in Aufsichtsrat und Vorstand.** Die bisherige Empfehlung zur Vielfalt (Diversity) in deutschen Aufsichtsräten (Ziffer 5.4.1) wurde dahingehend erweitert, dass der Aufsichtsrat künftig konkrete Ziele für seine Zusammensetzung benennen soll. Diese sollen – unter Beachtung der unternehmensspezifischen Situation – die internationale Tätigkeit des Unternehmens, potenzielle Interessenkonflikte der Aufsichtsratsmitglieder, eine festzulegende Altersgrenze und das Kriterium der Vielfalt (Diversity) berücksichtigen. Insbesondere soll eine angemessene Beteiligung von Frauen vorgesehen werden. Der Kodex empfiehlt weiter, dass die Unternehmen künftig im Corporate-Governance-Bericht über die Ziele für die Zusammensetzung des Aufsichtsrats und den Stand der Umsetzung dieser Ziele berichten (vgl. Ziffer 5.4.1 Abs. 3). Auch bei der Besetzung des Vorstands soll der Aufsichtsrat dafür Sorge tragen, dass Diversity-Aspekte beachtet werden und insbesondere eine angemessene Einbeziehung von Frauen angestrebt wird (Ziffer 5.1.2). Die gleiche Empfehlung richtet sich an die Vorstände bei der Besetzung von Führungspositionen (Ziffer 4.1.5).
- **Weitere Professionalisierung der Aufsichtsräte.** Neben dem Schwerpunkt Diversity war auch die Qualifikation der Aufsichtsratsmitglieder Gegenstand von Kodexänderungen. So wurde die für Mitglieder des Aufsichtsrats bereits gesetzlich bestehende Verpflichtung, die für ihre Aufgaben erforderlichen Aus- und Fortbildungsmaßnahmen eigenverantwortlich wahrzunehmen, neu in den Kodex aufgenommen, um deren Bedeutung hervorzuheben. Die Unternehmen sollen die Gremiumsmitglieder hierbei angemessen unterstützen (Ziffer 5.4.1 Abs. 4). Darüber hinaus wird neu empfohlen, dass Aufsichtsratsmitglieder, die dem Vorstand einer börsennotierten Gesellschaft angehören, nicht

mehr als drei Mandate in konzernexternen börsennotierten Gesellschaften wahrnehmen sollen. Künftig sind in diese Beschränkung zusätzlich Mandate in Aufsichtsgremien von Unternehmen einbezogen, die mit vergleichbaren Anforderungen einhergehen (Ziffer 5.4.5).

RWE begrüßt die neuen Diversity-Empfehlungen des Kodex, entspricht ihnen allerdings bislang nur eingeschränkt. Eine weitere Empfehlung, die wir zeitweise nicht vollumfänglich erfüllt haben, betrifft die Obergrenze bei der Anzahl von Aufsichtsratsmandaten. Nähere Erläuterungen zu den Abweichungen finden sich in unserer Entsprechenserklärung (siehe unten). Davon abgesehen entsprechen wir sämtlichen Empfehlungen des Kodex in seiner aktuellen Fassung und greifen – mit vereinzelten Ausnahmen – auch seine Anregungen auf.

Unsere börsennotierte Konzerngesellschaft Lechwerke AG setzt den Kodex ebenfalls um; allerdings sind hier Besonderheiten der Konzerneinbindung zu berücksichtigen. Über Abweichungen von den Kodexempfehlungen informiert die Lechwerke AG in ihrer Entsprechenserklärung.

**Directors' Dealings und mögliche Interessenkonflikte.** Ein Kernelement guter Corporate Governance ist Transparenz. Sie ist gerade dann unverzichtbar, wenn Transaktionen des Vorstands zu Interessenkonflikten führen können. Aus der Corporate-Governance-Praxis von RWE möchten wir folgende Punkte hervorheben:

- Soweit Mitglieder des Vorstands oder ihnen nahestehende Personen wesentliche Geschäfte mit RWE oder einem Konzernunternehmen getätigt haben, entsprachen diese marktüblichen Standards. Darüber hinausgehende Interessenkonflikte wurden von Mitgliedern des Vorstands nicht angezeigt. Mitglieder des Aufsichtsrats haben keine Verträge mit der RWE AG geschlossen.
- Im Berichtsjahr haben Mitglieder des Vorstands sowie nahestehende Personen und ein Mitglied des Aufsichtsrats RWE-Aktien erworben. Verkäufe wurden uns nicht gemeldet. Über die gemäß § 15a Wertpapierhandelsgesetz (WpHG) mitgeteilten Geschäfte haben wir europaweit informiert.

Die direkt oder indirekt von den Mitgliedern des Vorstands oder Aufsichtsrats gehaltenen RWE-Aktien und sich darauf beziehenden Finanzinstrumente machen insgesamt weniger als 1 % der von RWE ausgegebenen Aktien aus.

Weitergehende Informationen über unsere Corporate-Governance-Praxis geben wir im Internet unter [www.rwe.com/ir](http://www.rwe.com/ir). Hier finden sich auch unsere Satzung, die Geschäftsordnungen des Aufsichtsrats und des Vorstands, der RWE-Verhaltenskodex, sämtliche Corporate-Governance-Berichte und Entsprechenserklärungen sowie der Bericht zur Unternehmensführung gemäß § 289a HGB.

**Entsprechenserklärung gemäß § 161 Aktiengesetz.** Vorstand und Aufsichtsrat der RWE Aktiengesellschaft geben nach pflichtgemäßer Prüfung die folgende Entsprechenserklärung ab:

Die RWE Aktiengesellschaft entsprach seit Abgabe der letzten Entsprechenserklärung am 23. Februar 2010 bis zum 2. Juli 2010 sämtlichen Empfehlungen der „Regierungskommission Deutscher Corporate Governance Kodex“ in der am 5. August 2009 bekannt gemachten Fassung des Kodex. Seit dem 3. Juli 2010 entsprach bzw. entspricht die RWE Aktiengesellschaft den Empfehlungen des Kodex in der am 2. Juli 2010 bekannt gemachten Fassung mit folgenden Einschränkungen:

- Die Diversity-Empfehlungen nach Ziffer 5.1.2 Satz 1 und 5.4.1 Abs. 2 und 3 werden derzeit nicht uneingeschränkt umgesetzt. Die Berücksichtigung von Vielfalt ist im Konzern gelebte Praxis. Seit längerem gibt es bei uns Diversity-Programme, die u.a. auf eine Anhebung des Anteils weiblicher Führungskräfte abzielen. Ein Gesamtkonzept zur Umsetzung von Diversity-Zielen bei der Besetzung des Vorstands liegt aber noch nicht vor. Gleiches gilt für die Besetzung des Aufsichtsrats: Zwar haben der Nominierungsausschuss und das Aufsichtsratsplenum bei der Auswahl der Kandidaten für die am 20. April 2011 anstehende Wahl der Anteilseignervertreter – wie bereits in der Vergangenheit – den Aspekt der Vielfalt, die internationale Tätigkeit von RWE, mögliche Interessenkonflikte und die festgelegte Altersgrenze für die Mitglieder des Aufsichtsrats berücksichtigt. Konkrete Ziele, die hätten berücksichtigt und im Geschäftsbericht dargestellt werden können, gab und gibt es jedoch noch nicht. Der Aufsichtsrat der RWE AG ist der Auffassung, dass ein Gesamtkonzept zu Diversity für die Mitglieder von Vorstand und Aufsichtsrat und die Festlegung von konkreten Zielen für die Zusammensetzung des Aufsichtsrats umfangreicher Vorarbeiten und intensiver Erörterungen bedürfen, die dem nach der diesjährigen Hauptversammlung neu zusammengesetzten Aufsichtsrat vorbehalten bleiben sollen. Nur so kann gewährleistet werden, dass alle wesentlichen Gesichtspunkte berücksichtigt werden und dass sich das Konzept und die Ziele in der Praxis bewähren. Im laufenden Geschäftsjahr wird sich der Aufsichtsrat eingehend mit der Thematik befassen und gemäß den gesetzlichen Vorgaben darüber informieren, wenn entsprechende Anpassungen in der Corporate Governance von RWE vorgenommen werden.
- Im Zeitraum vom 3. Juli 2010 bis zum 21. Januar 2011 entsprach die RWE Aktiengesellschaft der Empfehlung in Ziffer 5.4.5 nur eingeschränkt. Herr Dr. Ekkehard Schulz war bis zum Ablauf dieses Zeitraums Vorsitzender des Vorstands der ThyssenKrupp AG und zugleich neben seiner Mitgliedschaft im Aufsichtsrat von RWE auch Mitglied im Aufsichtsrat von zwei weiteren börsennotierten Gesellschaften sowie einer nicht börsennotierten Gesellschaft mit vergleichbaren Anforderungen. Mit seinem Ausscheiden aus dem Vorstand von ThyssenKrupp wird der Kodexempfehlung wieder ohne Einschränkung entsprochen. Nach Auffassung des Aufsichtsrats der RWE AG lag es im Interesse des Unternehmens, dass Herr Dr. Schulz in dem RWE-Gremium verblieb. Diese Einschätzung stützt sich auf die mehrjährige Mitgliedschaft von Herrn Dr. Schulz im Aufsichtsrat von RWE sowie die hohe Kompetenz und große Erfahrung, die er durch Wahrnehmung führender Positionen in international tätigen Unternehmen erworben hat. Die Abweichung von der Kodexempfehlung war überdies zeitlich eng begrenzt.

RWE Aktiengesellschaft

Für den Aufsichtsrat

Für den Vorstand

Dr. Manfred Schneider

Dr. Jürgen Großmann

Dr. Rolf Pohlig

Essen, 22. Februar 2011

## 2.3 VERGÜTUNGSBERICHT

Zu den Kernelementen guter Unternehmensführung gehört für uns eine transparente Berichterstattung über die Vergütung von Vorstand und Aufsichtsrat. Im Folgenden stellen wir die Grundsätze des Vergütungssystems sowie die Struktur und Höhe der Leistungen der RWE AG dar. Der Vergütungsbericht 2010 entspricht vollumfänglich den Empfehlungen des Deutschen Corporate Governance Kodex. Er ist Bestandteil des zusammengefassten Lageberichts und des Corporate-Governance-Berichts.

### Vergütung des Vorstands

**Vergütungsstruktur.** Die Struktur und die Höhe der Vergütung der Vorstandsmitglieder werden vom Aufsichtsrat festgelegt und regelmäßig überprüft. Das bestehende Vergütungssystem gewährleistet eine der Tätigkeit und Verantwortung angemessene Vergütung der Vorstandsmitglieder, die sowohl konzernintern als auch im externen Marktvergleich üblich ist. Neben der persönlichen Leistung werden dabei auch die wirtschaftliche Lage, der Erfolg und die Zukunftsaussichten des Unternehmens berücksichtigt.

Der Aufsichtsrat hat das Vergütungssystem vor dem Hintergrund des am 5. August 2009 in Kraft getretenen Gesetzes zur Angemessenheit der Vorstandsvergütung (VorstAG) überprüft und die Vergütungsstruktur noch stärker auf eine nachhaltige Unternehmensentwicklung ausgerichtet. Das fortentwickelte Vergütungssystem wurde am 22. April 2010 der Hauptversammlung vorgestellt, die es mit großer Mehrheit billigte.

**Kurzfristige Vergütungsbestandteile.** Die Gesamtbarvergütung setzt sich aus einer erfolgsunabhängigen fixen und einer erfolgsbezogenen variablen Komponente zusammen. Bei einer 100-prozentigen Zielerreichung beträgt der fixe Gehaltsbestandteil rund 45 % (bisher 40 %) und der variable Teil rund 55 % (bisher 60 %) der Gesamtbarvergütung.

Der variable Anteil setzt sich aus einer Unternehmenstantieme in Höhe von rund 70 % und einer individuellen Tantieme in Höhe von rund 30 % zusammen. Bei der Ermittlung der Unternehmenstantieme wird der Wertbeitrag des Konzerns zugrunde gelegt: Wird der für das jeweilige Geschäftsjahr festgelegte Budgetwert erreicht, beträgt die Zielerreichung 100 %. Letztere kann bei der Unternehmenstantieme zwischen 0 % (bisher 50 %) und unverändert 150 % liegen. Die Höhe der individuellen Tantieme ist davon abhängig, inwieweit das einzelne Vorstandsmitglied die Performance-Ziele erreicht hat, die der Aufsichtsratsvorsitzende zu Beginn des Geschäftsjahres mit ihm vereinbarte. Hier ist die Zielerreichung auf 120 % begrenzt.

Damit die Mitglieder des Vorstands noch stärker messbar an der langfristigen positiven wie negativen Unternehmensentwicklung teilhaben, werden 25% der Tantieme zunächst nicht ausgezahlt, sondern für drei Jahre zurückbehalten. Dies entspricht annähernd 15% der Gesamtbarvergütung. Am Ende des Drei-Jahres-Zeitraums überprüft der Aufsichtsrat anhand eines „Bonus-Malus-Faktors“, ob der Vorstand das Unternehmen nachhaltig geführt hat. Nur wenn dies der Fall ist, wird zurückbehaltene Tantieme ausbezahlt.

Der Bonus-Malus-Faktor bestimmt sich zu 45% aus der Entwicklung des Wertbeitrags des Konzerns. Weitere 45% werden auf Basis eines unternehmensspezifischen Index ermittelt, der den Erfolg des Konzerns auf dem Gebiet der Corporate Responsibility (CR) wiedergibt. Mit diesem CR-Index, der auf der bei RWE seit Jahren etablierten Nachhaltigkeitsberichterstattung aufbaut, wird das ökologische und gesellschaftliche Handeln des Konzerns abgebildet. Die verbleibenden 10% des Bonus-Malus-Faktors werden durch den konzerninternen Motivationsindex bestimmt, der die Zufriedenheit und Motivation der Mitarbeiter misst.

Der Aufsichtsrat legt zu Beginn des Drei-Jahres-Zeitraums verbindliche Zielwerte für Wertbeitrag, CR-Index und Motivationsindex fest, die während des gesamten Beobachtungszeitraums nicht mehr verändert werden können. Diese Zielwerte werden am Ende des Drei-Jahres-Zeitraums den tatsächlich erreichten Werten gegenübergestellt. Der so ermittelte Bonus-Malus-Faktor ist maßgeblich dafür, ob und in welcher Höhe die zurückbehaltene Tantieme ausbezahlt wird. Je besser die tatsächlich erreichten Werte sind, desto höher ist der Bonus-Malus-Faktor. Er kann zwischen 0 und 130% liegen.

Beim Vorstandsvorsitzenden werden die dargestellten Neuerungen des Vergütungssystems gemäß den gesetzlichen Vorgaben umgesetzt, sobald eine Vertragsanpassung erfolgt. Demzufolge kommen insbesondere die Regelungen über die teilweise Zurückbehaltung der Tantieme und den Bonus-Malus-Faktor noch nicht zur Anwendung, und die Tantieme für das Geschäftsjahr 2010 wird in voller Höhe nach der Hauptversammlung 2011 ausgezahlt. Für die übrigen Mitglieder des Vorstands gelten hingegen die neuen Regelungen; sie haben einer vorgezogenen Anwendung des fortentwickelten Vergütungssystems bereits ab dem Berichtsjahr zugestimmt.

Neben der Barvergütung erhalten die Vorstandsmitglieder Sach- und sonstige Bezüge, die im Wesentlichen aus den nach steuerlichen Richtlinien anzusetzenden Werten für die Dienstwagennutzung und den Versicherungsprämien zur Unfallversicherung bestehen.

Hinzu kommen Mandatseinkünfte der Vorstandsmitglieder für die Aufsichtsrats Tätigkeit in konzernverbundenen Unternehmen. Diese Einkünfte werden vollständig auf die variable Vergütung angerechnet und führen damit nicht zu einer Erhöhung der Bezüge.

Für das Geschäftsjahr 2010 betrugen die kurzfristigen Vergütungsbestandteile des Vorstands:

| Kurzfristige Vergütung<br>des Vorstands 2010 | Erfolgs-<br>unabhängige<br>Vergütung |              | Erfolgs-<br>bezogene<br>Vergütung |               | Sach- und<br>sonstige<br>Bezüge |            | Mandats-<br>einkünfte <sup>1</sup> |            | Sonstige<br>Zahlungen |              | Insgesamt     |               |
|----------------------------------------------|--------------------------------------|--------------|-----------------------------------|---------------|---------------------------------|------------|------------------------------------|------------|-----------------------|--------------|---------------|---------------|
|                                              | 2010                                 | 2009         | 2010                              | 2009          | 2010                            | 2009       | 2010                               | 2009       | 2010                  | 2009         | 2010          | 2009          |
| in Tsd. €                                    |                                      |              |                                   |               |                                 |            |                                    |            |                       |              |               |               |
| Dr. Jürgen Großmann <sup>2</sup>             | 2.700                                | 2.700        | 3.898                             | 4.431         | 30                              | 24         | 37                                 | 7          | 2.000                 | 2.000        | 8.665         | 9.162         |
| Dr. Leonhard Birnbaum                        | 750                                  | 680          | 779                               | 1.259         | 24                              | 22         | 0                                  | 0          | 0                     | 0            | 1.553         | 1.961         |
| Alwin Fitting                                | 769                                  | 680          | 794                               | 1.246         | 18                              | 16         | 3                                  | 13         | 0                     | 0            | 1.584         | 1.955         |
| Dr. Ulrich Jobs <sup>3</sup>                 | 630                                  | 760          | 789                               | 1.282         | 17                              | 23         | 80                                 | 125        | 0                     | 0            | 1.516         | 2.190         |
| Dr. Rolf Pohlig                              | 840                                  | 760          | 809                               | 1.340         | 32                              | 31         | 60                                 | 67         | 0                     | 0            | 1.741         | 2.198         |
| Dr. Rolf Martin Schmitz                      | 750                                  | 453          | 543                               | 742           | 20                              | 12         | 236                                | 97         | 0                     | 0            | 1.549         | 1.304         |
| <b>Summe</b>                                 | <b>6.439</b>                         | <b>6.033</b> | <b>7.612</b>                      | <b>10.300</b> | <b>141</b>                      | <b>128</b> | <b>416</b>                         | <b>309</b> | <b>2.000</b>          | <b>2.000</b> | <b>16.608</b> | <b>18.770</b> |

1 Mandatseinkünfte sind auf die variable Vergütung angerechnet.

2 Dr. Jürgen Großmann erhält anstelle einer Versorgungszusage einen Betrag in Höhe von 2.000 Tsd. € p.a.

3 Dr. Ulrich Jobs ist zum 30. September 2010 aus dem Vorstand ausgeschieden.

Nicht in der Vergütung für 2010 enthalten ist der zurückbehaltene Tantiemeanteil von 25 %, da dieser erst nach dem Drei-Jahres-Zeitraum und nur bei Erfüllung der erforderlichen Voraussetzungen vergütungswirksam wird. Die nachfolgende Darstellung erfolgt daher auf freiwilliger Basis mit dem Ziel, ein vollständiges Bild der Vergütungskomponenten zu vermitteln.

| Tantiemerückbehalt<br>in Tsd. € | 2010         | 2009     |
|---------------------------------|--------------|----------|
| Dr. Jürgen Großmann             | 0            | 0        |
| Dr. Leonhard Birnbaum           | 260          | 0        |
| Alwin Fitting                   | 266          | 0        |
| Dr. Ulrich Jobs <sup>1</sup>    | 0            | 0        |
| Dr. Rolf Pohlig                 | 290          | 0        |
| Dr. Rolf Martin Schmitz         | 260          | 0        |
| <b>Summe</b>                    | <b>1.076</b> | <b>0</b> |

1 Dr. Ulrich Jobs ist zum 30. September 2010 aus dem Vorstand ausgeschieden.

**Vergütung mit langfristiger Anreizwirkung.** Zusätzlich wurden den Vorstandsmitgliedern – mit Ausnahme des Vorsitzenden – im Berichtsjahr Performance Shares im Rahmen des Long-Term Incentive Plan Beat 2010 (kurz: Beat) zugeteilt. Ihre Gewährung setzt ein Eigeninvestment der Vorstandsmitglieder in RWE-Stammaktien voraus, das einem Drittel des Zuteilungswertes der gewährten Performance

Shares nach Steuern entspricht. Die Aktien müssen während der gesamten Wartezeit der jeweiligen Beat-Tranche gehalten werden. Soweit Directors'-Dealings-Meldungen erforderlich waren, sind diese veröffentlicht worden.

Der bisherige Long-Term Incentive Plan Beat 2005 wurde vor dem Hintergrund des VorstAG angepasst. Insbesondere wurde die bisherige Wartezeit von drei auf vier Jahre verlängert, und es wurden zusätzliche Ausübungszeitpunkte über die Laufzeit hinaus aufgenommen. Damit ergänzt Beat das Vergütungssystem nun durch eine noch längerfristige Anreizkomponente als bisher und honoriert in noch stärkerem Maße die Nachhaltigkeit des Beitrags der Führungskräfte zum Unternehmenserfolg. Der Unternehmenserfolg wird nach wie vor anhand des Total Shareholder Return (TSR) der RWE-Aktie – also der Entwicklung des Aktienkurses sowie reinvestierter Dividenden – gemessen. Zur Bestimmung des Auszahlungsfaktors wird der TSR von RWE wie bisher mit dem TSR anderer Unternehmen im Dow Jones STOXX Utilities Index verglichen.

Die teilnahmeberechtigten Führungskräfte erhalten jährlich bedingte Zuteilungen von Performance Shares. Ein Performance Share, der im Geschäftsjahr zugeteilt wurde, umfasst das bedingte Recht, nach einer vierjährigen (bisher dreijährigen) Wartezeit eine Barauszahlung zu erhalten. Eine Auszahlung findet allerdings nur dann statt, wenn nach Ablauf der Wartezeit die Performance der RWE-Aktie besser ist als die von 25% der Vergleichsunternehmen – gemessen an deren Indexgewicht zum Zeitpunkt der Auflegung des Programms. Damit kommt es nicht allein darauf an, welche Position RWE unter den Vergleichsunternehmen einnimmt, sondern auch darauf, welche Unternehmen RWE übertrifft.

Die Höhe der Auszahlung wird im Geschäftsjahr auf Basis des durchschnittlichen RWE-Aktienkurses an den letzten 60 (bisher 20) Börsentagen vor Programmablauf, der Anzahl der bedingt zugeteilten Performance Shares und des Auszahlungsfaktors berechnet. Der Auszahlungsbetrag ist für die Vorstandsmitglieder auf das Eineinhalbfache des Zuteilungswertes der Performance Shares beschränkt.

Im Berichtsjahr sind folgende Beat-Zuteilungen vorgenommen worden:

| Aktienbasierte Vergütung<br>mit langfristiger Anreizwirkung | Beat 2010 – Tranche 2010 |                                              |
|-------------------------------------------------------------|--------------------------|----------------------------------------------|
|                                                             | Stück                    | Zuteilungswert<br>bei Gewährung<br>in Tsd. € |
| Dr. Leonhard Birnbaum                                       | 28.891                   | 750                                          |
| Alwin Fitting                                               | 28.891                   | 750                                          |
| Dr. Ulrich Jobs                                             | 28.891                   | 750                                          |
| Dr. Rolf Pohlig                                             | 28.891                   | 750                                          |
| Dr. Rolf Martin Schmitz                                     | 28.891                   | 750                                          |
| <b>Summe</b>                                                | <b>144.455</b>           | <b>3.750</b>                                 |

Die werthaltige Tranche 2007 des Programms Beat 2005 wurde im Berichtsjahr wie folgt ausgezahlt:

| Aktienbasierte Vergütung<br>mit langfristiger Anreizwirkung | Beat 2005 - Tranche 2007 |
|-------------------------------------------------------------|--------------------------|
|                                                             | Auszahlung<br>in Tsd. €  |
| Alwin Fitting                                               | 590                      |
| Dr. Ulrich Jobs                                             | 590                      |
| Dr. Rolf Pohlig                                             | 590                      |
| <b>Summe</b>                                                | <b>1.770</b>             |

Aus der Vorstandstätigkeit der Vorjahre werden noch Performance Shares aus den Tranchen 2008 und 2009 des Programms Beat 2005 gehalten. Diese Zuteilungen sind nicht Bestandteil der Gesamtvergütung für das Geschäftsjahr 2010, sondern sind der Gesamtvergütung der beiden vorangegangenen Geschäftsjahre zuzurechnen. Dementsprechend wurden sie in den Vergütungsberichten für 2008 und 2009 dargestellt.

Der Deutsche Rechnungslegungs-Standard 17 legt fest, dass der Gesamtaufwand für aktienbasierte Vergütungen für jedes Vorstandsmitglied individualisiert anzugeben ist. Aufgrund der Kursentwicklung ist im Berichtsjahr kein Aufwand für die aktienbasierte Vergütung entstanden. Stattdessen konnte die vorhandene Rückstellung in der Berichtsperiode zum Teil aufgelöst werden, und zwar wie folgt:

| Aufwandszuführung für aktienbasierte Vergütung mit langfristiger Anreizwirkung<br>Tranchen 2008/2009/2010 | 2010<br>in Tsd. € | 2009<br>in Tsd. € |
|-----------------------------------------------------------------------------------------------------------|-------------------|-------------------|
| Dr. Leonhard Birnbaum                                                                                     | -65               | 433               |
| Alwin Fitting                                                                                             | -161              | 941               |
| Dr. Ulrich Jobs                                                                                           | -161              | 941               |
| Dr. Rolf Pohlig                                                                                           | -161              | 941               |
| Dr. Rolf Martin Schmitz                                                                                   | -29               | 319               |
| <b>Summe</b>                                                                                              | <b>-577</b>       | <b>3.575</b>      |

**Gesamtvergütung.** Insgesamt hat der Vorstand für das Geschäftsjahr 2010 kurzfristige Vergütungsbestandteile in Höhe von 16.608 Tsd. € erhalten. Außerdem wurden langfristige Vergütungsbestandteile im Rahmen des Beat (Tranche 2010) mit einem Ausgabezeitwert von 3.750 Tsd. € zugeteilt. Die Gesamtvergütung des Vorstands für das Geschäftsjahr 2010 betrug demnach 20.358 Tsd. €.

**Leistungen im Fall der Beendigung der Tätigkeit.** Mitglieder des Vorstands erhalten nach Beendigung der Vorstandstätigkeit die folgenden Leistungen von RWE:

**Pensionszusagen.** Den Mitgliedern des Vorstands – mit Ausnahme des Vorsitzenden Dr. Jürgen Großmann – wurden Pensionszusagen (Direktzusagen) erteilt, die ihnen bzw. ihren Hinterbliebenen in folgenden Fällen einen Anspruch auf lebenslange Ruhegeld- bzw. Hinterbliebenenversorgung einräumen: bei Ausscheiden nach Erreichen des 60. Lebensjahres (Regelaltersgrenze), bei dauerhafter Arbeitsunfähigkeit, im Todesfall und bei einer von der Gesellschaft ausgehenden vorzeitigen Beendigung oder einer Nichtverlängerung des Dienstvertrags. Maßgeblich für die Höhe des individuellen Ruhegeldes und der Hinterbliebenenversorgung sind das ruhegeldfähige Einkommen und der Versorgungsgrad, der aus der Anzahl der geleisteten Dienstjahre ermittelt wird. Gewinnbeteiligungen und sonstige Nebenbezüge gehören nicht zum ruhegeldfähigen Einkommen. Als Zielwert für die Altersversorgung wird für die Vorstandsmitglieder nach Erreichen der Regelaltersgrenze ein Versorgungsgrad von 60% des letzten ruhegeldfähigen Einkommens zugrunde gelegt. Das Witwengeld beträgt 60% des Ruhegeldes des Ehemannes, das Waisengeld 20% des Witwengeldes. Die Anwartschaft auf die Altersversorgung ist sofort unverfallbar. Die Höhe des Ruhegeldes bzw. der Hinterbliebenenversorgung wird alle drei Jahre unter Berücksichtigung aller bedeutsamen Umstände, insbesondere der Entwicklung der Lebenshaltungskosten, überprüft. Infolge früherer Regelungen bestehen vereinzelt Unterschiede zwischen den Versorgungszusagen bei der Berechnung des Versorgungsgrades, bei der Anrechnung von sonstigen Renten und Versorgungsbezügen sowie beim Anpassungsmodus der Ruhegeld- und Hinterbliebenenversorgung.

Bei vorzeitiger Beendigung oder bei Nichtverlängerung des Dienstvertrags erhalten die Vorstandsmitglieder Zahlungen ausschließlich dann, wenn die Beendigung oder Nichtverlängerung von der Gesellschaft ausgeht und ohne wichtigen Grund erfolgt. In diesem Fall wird das Ruhegeld bereits ab dem Zeitpunkt des Ausscheidens, frühestens jedoch mit Vollendung des 55. Lebensjahres, gewährt. Im Falle der Nichtverlängerung bzw. vorzeitigen Auflösung des Dienstverhältnisses werden die Einkünfte, die durch anderweitige Tätigkeit bis zur Vollendung des 60. Lebensjahres bzw. bis zum Eintritt der Erwerbsunfähigkeit erzielt werden, zu 50 % auf das Ruhegeld angerechnet.

Der Dienstzeitaufwand (Service Cost) für die Pensionsverpflichtungen lag im Geschäftsjahr 2010 bei 776 Tsd. €. Der Barwert der Gesamtverpflichtung (Defined Benefit Obligation) betrug zum Ende des Berichtsjahres 17.007 Tsd. €. Unter Berücksichtigung von Lebensalter und Dienstjahren ergeben sich folgende individuelle Dienstzeitaufwendungen und Barwerte der Versorgungsansprüche:

| Pensionen                            | Alter | Voraussichtliches<br>jährliches Ruhegeld bei<br>Erreichen der Regel-<br>altersgrenze (60 Jahre) <sup>1</sup><br>in Tsd. € |      | Service Cost<br>(Dienstzeitaufwand)<br><br>in Tsd. € |            | Defined Benefit<br>Obligation<br>(Barwert)<br><br>in Tsd. € |               |
|--------------------------------------|-------|---------------------------------------------------------------------------------------------------------------------------|------|------------------------------------------------------|------------|-------------------------------------------------------------|---------------|
|                                      |       | 2010                                                                                                                      | 2009 | 2010                                                 | 2009       | 2010                                                        | 2009          |
|                                      |       |                                                                                                                           |      |                                                      |            |                                                             |               |
| Dr. Leonhard Birnbaum                | 44    | 270                                                                                                                       | 245  | 111                                                  | 85         | 889                                                         | 635           |
| Alwin Fitting                        | 57    | 312                                                                                                                       | 283  | 188                                                  | 136        | 4.648                                                       | 3.935         |
| Dr. Ulrich Jobs <sup>2</sup>         | 57    | 302                                                                                                                       | 274  | 149                                                  | 155        | 4.251                                                       | 3.761         |
| Dr. Rolf Pohlig                      | 58    | 302                                                                                                                       | 274  | 84                                                   | 63         | 2.733                                                       | 2.159         |
| Dr. Rolf Martin Schmitz <sup>3</sup> | 53    | 408                                                                                                                       | 370  | 244                                                  | 0          | 4.486                                                       | 3.713         |
|                                      |       |                                                                                                                           |      | <b>776</b>                                           | <b>439</b> | <b>17.007</b>                                               | <b>14.203</b> |

1 Nach dem Stand der ruhegeldfähigen Bezüge am 31. Dezember 2010

2 Dr. Ulrich Jobs ist zum 30. September 2010 aus dem Vorstand ausgeschieden. Dies führte zu einer einmaligen Erhöhung der Service Cost von 520 Tsd. €.

3 In dem voraussichtlichen Ruhegeld von Dr. Rolf Martin Schmitz sind Ruhegeldansprüche gegenüber früheren Arbeitgebern enthalten.

Soweit die Mitglieder des Vorstands im Rahmen früherer Tätigkeiten Ruhegeldansprüche erworben haben oder Dienstjahre bei früheren Arbeitgebern anerkannt wurden, werden diese Ansprüche gemäß vertraglicher Vereinbarung auf die Ruhegeldzahlungen der Gesellschaft angerechnet.

**Change of Control.** Die Mitglieder des Vorstands haben ein Sonderkündigungsrecht, wenn das Unternehmen durch einen Kontrollenerwerb durch Aktionäre oder Dritte seine Unabhängigkeit verliert. In diesem Fall können sie ihr Amt innerhalb von sechs Monaten nach Bekanntwerden des Kontrollenerwerbs niederlegen und die Beendigung des Dienstverhältnisses unter Gewährung einer Einmalzahlung verlangen. Sofern das Wohl der Gesellschaft es erfordert, kann der Aufsichtsrat jedoch die Fortführung des Amtes bis zum Ablauf der Sechs-Monats-Frist verlangen.

Ein Kontrollenerwerb im Sinne dieser Regelung liegt vor, wenn ein oder mehrere gemeinsam handelnde Aktionäre oder Dritte mindestens 30% der vorhandenen Stimmrechte erwerben oder auf sonstige Art einen beherrschenden Einfluss auf die Gesellschaft ausüben können. Die Möglichkeit eines beherrschenden Einflusses besteht auch, wenn der oder die gemeinsam handelnden Aktionäre oder Dritten in drei aufeinanderfolgenden Hauptversammlungen mehr als die Hälfte des anwesenden stimmberechtigten Kapitals halten. Die vorstehenden Regelungen gelten nicht, wenn der Kontrollenerwerb durch einzelne oder mehrere gemeinsam handelnde Städte oder Gemeinden erfolgt bzw. durch Unternehmen, die mehrheitlich von öffentlich-rechtlichen Trägern der Bundesrepublik Deutschland gehalten werden.

Bei Beendigung des Dienstverhältnisses erhält das Vorstandsmitglied eine Einmalzahlung in Höhe der bis zum Ende der ursprünglich vereinbarten Vertragsdauer anfallenden Bezüge, höchstens jedoch das Dreifache und mindestens das Zweifache seiner vertraglichen Jahresgesamtvergütung.

Hinsichtlich der Versorgungsansprüche wird das Mitglied des Vorstands mit Wirkung zum Ablauf der vereinbarten Vertragsdauer so gestellt, als habe die Gesellschaft den Vorstandsvertrag zu diesem Zeitpunkt nicht verlängert, ohne dass ein wichtiger Grund im Sinne des § 626 BGB vorgelegen hätte.

Dem Vorstandsvorsitzenden Dr. Jürgen Großmann wurde das Sonderkündigungsrecht zeitlich vor der Anpassung des Deutschen Corporate Governance Kodex zum 6. Juni 2008 gewährt. Dr. Großmann erhält bei Ausübung seines vertraglich zugesagten Sonderkündigungsrechts eine Einmalzahlung zur Abgeltung der bis zum Ende der Vertragslaufzeit anfallenden Bezüge einschließlich des anstelle einer Versorgungszusage vertraglich vereinbarten Betrags.

Bei einem Wechsel der Unternehmenskontrolle verfallen sämtliche dem Vorstand wie auch den bezugsberechtigten Führungskräften zugeteilten Performance Shares. Stattdessen wird eine Entschädigungszahlung gewährt, ermittelt auf den Zeitpunkt der Abgabe des Übernahmeangebots. Ihre Höhe richtet sich nach dem bei der Übernahme für die RWE-Aktien gezahlten Preis. Dieser wird mit der endgültigen Anzahl der Performance Shares multipliziert. Auch bei einer Fusion mit einer anderen Gesellschaft verfallen die Performance Shares. In diesem Fall bemisst sich die Entschädigungszahlung nach dem Erwartungswert der Performance Shares zum Zeitpunkt der Verschmelzung. Dieser Erwartungswert wird mit der Anzahl der gewährten Performance Shares multipliziert, die dem Verhältnis der Zeit während der Warteperiode bis zur Fusion zur gesamten Warteperiode der Performance Shares entspricht.

Bei einem Wechsel der Unternehmenskontrolle werden außerdem zurückbehaltene Tantiemen des Vorstands vorzeitig bewertet und gegebenenfalls ausgezahlt. Hierzu wird der durchschnittliche Bonus-Malus-Faktor der letzten drei Jahre herangezogen. Ob und in welcher Höhe eine Auszahlung zurückbehaltener Tantiemen erfolgt, ist von dem so ermittelten Durchschnittswert abhängig.

**Abfindungsobergrenze.** Im Falle einer sonstigen vorzeitigen Beendigung der Vorstandstätigkeit ohne wichtigen Grund erhalten die Vorstandsmitglieder eine Abfindung, die auf höchstens zwei Jahresgesamtvergütungen begrenzt ist und nicht mehr als die Restlaufzeit des Dienstvertrags vergütet. Beim Vorsitzenden wird diese Regelung im Einklang mit dem Deutschen Corporate Governance Kodex erst bei einer Anpassung bzw. Verlängerung des Vertrags angewandt.

**Sonstige Zusagen.** Im Einvernehmen mit der Gesellschaft hat Dr. Ulrich Jobs sein Mandat als Vorstandsmitglied zum 30. September 2010 vorzeitig beendet. Die Ansprüche aus dem bis zum 31. März 2012 befristeten Dienstvertrag – bestehend aus Festgehalt und Tantiemen für den Zeitraum vom 1. Oktober 2010 bis 31. März 2012 – in Höhe von insgesamt 3.149 Tsd. € wurden ihm vertragsgemäß ausgezahlt. Für diesen Zeitraum werden ihm auch Performance Shares bedingt zugeteilt, und zwar im gleichen Umfang wie für die aktuellen Vorstandsmitglieder. Früher gewährte Performance Shares behalten gemäß den Planbedingungen ihre Gültigkeit. Ab dem 1. April 2012 erhält Dr. Jobs entsprechend den vertraglichen Regelungen betriebliches Ruhegeld.

## Vergütung des Aufsichtsrats

Die Vergütung des Aufsichtsrats ist in der Satzung geregelt und wird durch die Hauptversammlung bestimmt. Die Mitglieder des Aufsichtsrats erhalten nach Ablauf des jeweiligen Geschäftsjahres für ihre Tätigkeit eine Festvergütung von 40 Tsd. € je Geschäftsjahr. Die Vergütung erhöht sich um 225 € je 0,01 € Gewinnanteil, der über einen Gewinnanteil von 0,10 € je Stammaktie hinaus ausgeschüttet wird.

Der Vorsitzende des Aufsichtsrats erhält das Dreifache, sein Stellvertreter das Zweifache des oben genannten Betrags. Ausschussmitglieder erhalten das Eineinhalbfache, Vorsitzende von Ausschüssen das Zweifache, sofern die Ausschüsse mindestens einmal im Geschäftsjahr tätig geworden sind. Übt ein Mitglied des Aufsichtsrats zur gleichen Zeit mehrere Ämter im Aufsichtsrat der RWE AG aus, erhält es nur die Bezüge für das am höchsten vergütete Amt. Auslagen werden erstattet.

| Vergütung des Aufsichtsrats<br>in Tsd. € | Grundvergütung 2010 |              | Ausschussvergütung 2010 |            | Gesamt       |              |
|------------------------------------------|---------------------|--------------|-------------------------|------------|--------------|--------------|
|                                          | fest                | variabel     | fest                    | variabel   | 2010         | 2009         |
| Dr. Manfred Schneider, Vorsitzender      | 40                  | 77           | 80                      | 153        | 350          | 292          |
| Frank Bsirske, stellv. Vorsitzender      | 40                  | 77           | 40                      | 77         | 234          | 234          |
| Dr. Paul Achleitner                      | 40                  | 77           | 20                      | 38         | 175          | 175          |
| Werner Bischoff                          | 40                  | 77           | 20                      | 38         | 175          | 175          |
| Carl-Ludwig von Boehm-Bezing             | 40                  | 77           | 40                      | 77         | 234          | 234          |
| Heinz Büchel                             | 40                  | 77           | 20                      | 38         | 175          | 175          |
| Dieter Faust                             | 40                  | 77           | 20                      | 38         | 175          | 175          |
| Dr. Thomas R. Fischer (bis 31.01.2010)   | 3                   | 6            | 0                       | 0          | 9            | 193          |
| Andreas Henrich                          | 40                  | 77           | 0                       | 0          | 117          | 117          |
| Heinz-Eberhard Holl (bis 31.01.2010)     | 3                   | 6            | 2                       | 3          | 14           | 175          |
| Frithjof Kühn (seit 01.02.2010)          | 37                  | 70           | 18                      | 35         | 160          | 0            |
| Hans Peter Lafos                         | 40                  | 77           | 0                       | 0          | 117          | 21           |
| Dr. Gerhard Langemeyer                   | 40                  | 77           | 20                      | 38         | 175          | 175          |
| Dagmar Mühlenfeld                        | 40                  | 77           | 20                      | 38         | 175          | 175          |
| Dr. Wolfgang Reiniger                    | 40                  | 77           | 0                       | 0          | 117          | 117          |
| Günter Reppien                           | 40                  | 77           | 20                      | 38         | 175          | 175          |
| Dagmar Schmeer                           | 40                  | 77           | 20                      | 38         | 175          | 175          |
| Dr.-Ing. Ekkehard D. Schulz              | 40                  | 77           | 20                      | 38         | 175          | 175          |
| Dr. Wolfgang Schüssel (seit 01.03.2010)  | 34                  | 64           | 0                       | 0          | 98           | 0            |
| Uwe Tigges                               | 40                  | 77           | 20                      | 38         | 175          | 175          |
| Manfred Weber                            | 40                  | 77           | 0                       | 0          | 117          | 117          |
| Dr. Dieter Zetsche                       | 40                  | 77           | 0                       | 0          | 117          | 54           |
| <b>Gesamt</b>                            | <b>797</b>          | <b>1.532</b> | <b>380</b>              | <b>725</b> | <b>3.434</b> | <b>3.304</b> |

Die Bezüge des Aufsichtsrats summierten sich im Geschäftsjahr 2010 auf 3.434 Tsd. €. Außerdem erhielten Aufsichtsratsmitglieder Mandatsvergütungen von Tochtergesellschaften in Höhe von insgesamt 243 Tsd. €.

## 2.4 MITARBEITER

Die unternehmerischen Herausforderungen für RWE sind größer denn je. Um ihnen gerecht zu werden, brauchen wir Mitarbeiter mit Ideen und Initiative. Talente innerhalb und außerhalb des Konzerns zu finden, sie zu entwickeln und langfristig an das Unternehmen zu binden, sind wichtige Eckpfeiler unserer Personalstrategie. Daneben gilt es, Flexibilität und Veränderungsbereitschaft zu fördern. Denn nur so gewährleisten wir, dass Stellen optimal besetzt werden – mit den richtigen Mitarbeitern zur richtigen Zeit am richtigen Ort.

**RWE spricht Nachwuchskräfte an.** Der demografische Wandel bringt es mit sich, dass es immer weniger Nachwuchskräfte gibt. Schon heute ist der Wettbewerb um Mitarbeiter merklich intensiver als vor einigen Jahren. Deshalb müssen wir alle Wege ausloten, um mit talentierten jungen Menschen in Kontakt zu kommen und ihr Interesse an RWE zu wecken. Vor allem das Internet bietet hier viele Möglichkeiten. Über unser Portal [www.rwe.com/karriere](http://www.rwe.com/karriere) sprechen wir gezielt Schüler, Studierende und Hochschulabsolventen an, aber auch Personen mit Berufserfahrung. Das Portal findet Anklang: In einer Umfrage des Personalberatungsinstituts Potentialpark wurde es auf Platz vier gewählt – von 100 Internetauftritten deutscher Unternehmen. Neben der Kommunikation über das Internet zählt aber auch die persönliche Ansprache. Deshalb haben wir 2010 eine „mobile Informationskampagne“ gestartet, die sich an Studenten richtet. Im vergangenen Jahr waren wir bereits an zehn Universitäten mit Informationsständen vertreten. Mitarbeiter von uns erläuterten Aufgabenfelder bei RWE und Möglichkeiten zum Einstieg ins Unternehmen. Mit Vorträgen und einer Ausstellung über technische Innovationen haben wir den Studierenden dabei außerdem die Energiewirtschaft näher gebracht. Über 4.000 junge Leute sind unserer Einladung gefolgt und haben sich dort über RWE informiert. Auch auf dem Gebiet des „Employer Branding“ sind wir aktiv. Der Begriff bezeichnet die Anwendung von Konzepten aus dem Marketing mit dem Ziel, ein Unternehmen als attraktiven Arbeitgeber darzustellen und von Wettbewerbern abzugrenzen. Hier haben wir unser Profil 2010 mit einer Anzeigenkampagne geschärft. Mit Erfolg: In einer Rangliste des Beratungsunternehmens Universum wurde RWE 2010 als bester Aufsteiger in der Kategorie „Attraktivster Arbeitgeber des Jahres“ ausgezeichnet.

**Identifikation und Nutzung unseres Mitarbeiterpotenzials.** Die Suche nach Talenten findet bei RWE auch innerhalb der Werkstore statt. Deshalb ist es für uns unerlässlich, die Qualifikationen unserer Mitarbeiter zu kennen. Wir nutzen dafür eine Datenbank, in der unsere Mitarbeiter ihre Qualifikationen und Kenntnisse erfassen und laufend aktualisieren. So können wir offene Stellen leichter mit geeigneten Kandidaten aus den eigenen Reihen besetzen. Unsere Personalarbeit zielt außerdem darauf ab, unsere Mitarbeiter dabei zu unterstützen, wenn sie sich innerhalb von RWE verändern wollen – auch außerhalb der bisherigen Konzerngesellschaft und ihres Heimatlandes. Deshalb haben wir unseren internen Arbeitsmarkt ausgebaut: Er bietet unseren Mitarbeitern nicht nur die Möglichkeit, sich über das Stellenangebot sämtlicher Tochterunternehmen zu informieren, sie können sich auch registrieren lassen, wenn sie generell an einer neuen Aufgabe interessiert sind. Dies erleichtert es unseren Führungskräften, bei der Besetzung von Stellen gezielt auf veränderungsbereite Mitarbeiter zuzugehen.

Wo immer dies möglich und sinnvoll ist, besetzen wir Führungspositionen aus den eigenen Reihen. Dadurch senken wir Kosten und schaffen Leistungsanreize für besonders qualifizierte Kräfte. Damit kein Talent unentdeckt bleibt, nimmt unser Führungspersonal alle zwei Jahre eine Potenzialeinschätzung bei seinen Mitarbeitern vor. Anschließend treffen sich die Bereichsleiter, um aus einer Liste mit Vorschlägen jene Personen auszuwählen, die ihnen als besonders geeignet erscheinen. Diese werden in einer Datenbank erfasst, auf die Führungskräfte aus allen Konzerngesellschaften Zugriff haben. Darüber hinaus kommen Vorstände der RWE AG und der Konzerngesellschaften einmal im Jahr zusammen, um Nachfolgekandidaten für die wichtigsten leitenden Funktionen zu benennen. Auf diese Weise konnten wir im zurückliegenden Geschäftsjahr über 90 % der frei gewordenen Führungspositionen mit internen Kandidaten besetzen.

**Chancen durch Vielfalt.** Soziale Vielfalt (Diversity) zum Vorteil des Unternehmens zu nutzen ist eine Aufgabe, die auch von der Gesellschaft immer stärker an uns herangetragen wird. RWE verfolgt hier eine Vielzahl von Zielen. Entsprechend der Internationalität unseres Geschäfts fördern wir die länderübergreifende Mobilität innerhalb des RWE-Konzerns und den respektvollen Umgang mit Menschen anderer Kulturen. Außerdem möchten wir mehr Frauen für eine Beschäftigung bei RWE gewinnen. Auch in Führungspositionen sollen sie künftig stärker repräsentiert sein. Zu diesem Zweck haben wir ein spezielles Mentoren-Programm ins Leben gerufen. Den Teilnehmerinnen wird hier u.a. das Spektrum der Möglichkeiten einer erfolgreichen Karriere bei RWE aufgezeigt. Unterstützung bietet auch unser internationales Netzwerk für Frauen in Führungspositionen. Ende 2010 waren 11 % der leitenden Angestellten bei RWE weiblich. Im Vorjahr hatte der Anteil bei 9 % gelegen.

**Langfristige Anreize für nachhaltigen Erfolg.** Eine starke Bindung unserer Führungskräfte an RWE und eine hohe Identifikation mit den Unternehmenszielen – das wollen wir mit unserem Long-Term Incentive Plan „Beat“ fördern. In dem Programm teilen wir Führungskräften sogenannte Performance Shares (siehe Seite 196 ff.) zu, die nach frühestens vier Jahren ausgezahlt werden. Die Auszahlung wird danach bemessen, wie sich die Rendite aus Kursveränderung und Dividende (Performance) bei RWE-Aktien im Vergleich zu der bei Titeln von Wettbewerbern entwickelt. Sie ist nach oben begrenzt; bei schwacher Performance kann sie ganz entfallen. Seit 2010 müssen die am Beat teilnehmenden Führungskräfte ein Eigeninvestment in RWE-Stammaktien erbringen, das einem Sechstel des Wertes der zugeteilten Performance Shares entspricht. Zuvor galt dies nur für Vorstände und Geschäftsführer der wichtigsten Konzerngesellschaften.

**Gute Ideen zahlen sich aus.** Mit unserem konzernweiten Ideenmanagement bieten wir unseren Mitarbeitern einen Anreiz, ihre Erfahrung und Kreativität für die Verbesserung von Arbeitsprozessen einzusetzen. Das Resultat ist beachtlich: Allein im vergangenen Geschäftsjahr wurden rund 6.300 Ideen eingereicht. Wir veranschlagen ihren wirtschaftlichen Nutzen auf über 50 Mio. € pro Jahr. Ein Beispiel ist die Entwicklung einer speziellen Flugdrohne. Mit ihrer Hilfe können wir heute auf sichere und einfache Art schwer zugängliche Räume wie Kraftwerkskessel oder Kamine überwachen. Das erhöht nicht nur die Arbeitssicherheit, sondern spart auch Zeit und Geld. Für Verbesserungsvorschläge haben wir 2010 Prämien in Höhe von mehr als 2 Mio. € an unsere Mitarbeiter gezahlt.

## 2.5 NACHHALTIGKEIT

**Nachhaltiges Wirtschaften zahlt sich aus – für Investoren, Kunden, Mitarbeiter und die Gesellschaft. Es ist die Basis für dauerhafte Wertschöpfung, verlässliche Kundenbeziehungen, attraktive Arbeitsplätze und ein starkes Gemeinwesen. Für langfristig orientierte und regional verwurzelte Unternehmen wie RWE ist all dies unverzichtbar.**

**Zehn Handlungsfelder der Nachhaltigkeit.** Wir können als Unternehmen nur dann langfristig erfolgreich sein, wenn wir uns durch verantwortliches Handeln die Akzeptanz der Gesellschaft sichern. Unsere Strategie auf dem Gebiet der Corporate Responsibility (CR) erstreckt sich auf zehn Handlungsfelder, in denen jene Themen und Problemstellungen gebündelt sind, bei denen wir am meisten gefordert sind. Unsere Leistungen auf dem Gebiet der CR sollen transparent, messbar und verbindlich sein. Daher haben wir für jedes Handlungsfeld Kennzahlen definiert und uns Ziele gesteckt, die wir in den nächsten Jahren erreichen wollen. Wie erfolgreich wir dabei sind, hat auch Einfluss auf die Vergütung des Konzernvorstands. Seit 2010 werden 25% der Tantieme für drei Jahre zurückbehalten. Am Ende dieses Zeitraums prüft der Aufsichtsrat, ob die Unternehmensentwicklung nachhaltig war. Nur wenn dies der Fall ist, wird auch die zurückbehaltene Tantieme ausbezahlt. Diese hängt knapp zur Hälfte von unserem Erfolg in den zehn CR-Handlungsfeldern ab. Damit sind wir eines der ersten Unternehmen im DAX, das die Vorstandsvergütung direkt mit der Erreichung von Nachhaltigkeitszielen verknüpft.

Im Folgenden stellen wir die zehn Handlungsfelder unserer CR-Strategie vor und zeigen, anhand welcher Kennzahlen wir unseren Erfolg hier messen. Weitergehende Informationen finden sich im Bericht „Unsere Verantwortung“, der im April 2011 veröffentlicht wird, und im Internet unter [www.rwe.com/verantwortung](http://www.rwe.com/verantwortung).

**(1) Klimaschutz.** Die Gesellschaft erwartet von uns Lösungen zum Schutz des Klimas. Als Europas größter Emittent von Kohlendioxid sind wir hier besonders gefordert, zumal mit hohen Emissionen auch hohe wirtschaftliche Risiken verbunden sind. Daher investieren wir Milliarden in den Ausbau der erneuerbaren Energien, aber auch in den Bau hoch moderner Gas- und Kohlekraftwerke. So können ältere, emissionsintensivere Anlagen vom Netz genommen werden, ohne dass die Versorgungssicherheit gefährdet ist. Bis 2020 wollen wir unser CO<sub>2</sub>-Risiko auf das Durchschnittsniveau unserer Wettbewerber reduzieren. Dabei setzen wir auch auf finanzielle Absicherungsmaßnahmen wie beispielsweise den Erwerb von Emissionsberechtigungen durch Klimaschutzprojekte in Entwicklungs- und Schwellenländern oder den virtuellen Tausch von CO<sub>2</sub>-intensiven Erzeugungskapazitäten gegen emissionsärmere von Wettbewerbern. Für 2013 haben wir uns zum Ziel gesetzt, unsere CO<sub>2</sub>-Position auf 0,67 Tonnen CO<sub>2</sub> je produzierter Megawattstunde Strom zu begrenzen.

**(2) Energieeffizienz.** Der sparsame Umgang mit Energie ist nicht nur gut für das Klima, sondern schont auch Ressourcen – und damit den Geldbeutel. Wir unterstützen unsere Kunden dabei auf vielfältige Weise, etwa durch Einsatz intelligenter Stromzähler (Smart Meter), automatische Verbrauchssteuerung daheim (Smart Home) und die Förderung der Elektromobilität. Auf unserem Internetportal [www.energiwelt.de](http://www.energiwelt.de) geben wir Tipps zum Energiesparen und informieren über Förderprogramme und Herstellerangebote. Beim effizienten Einsatz knapper Ressourcen sind aber zuallererst wir selbst als Unternehmen gefordert. Daher arbeiten wir daran, den Energieverbrauch unseres Fuhrparks und unserer Immobilien zu senken. Wichtigster Ansatzpunkt mit Blick auf die Energieeffizienz sind jedoch unsere Kraftwerke. Wie bereits erläutert, ersetzen wir zunehmend alte durch hoch moderne Anlagen. Deshalb wird sich der Wirkungsgrad unserer fossil befeuerten Kraftwerke in den kommenden Jahren stark verbessern. Unser Zielwert für 2013 liegt bei 42,4%.

**(3) Versorgungssicherheit.** Energie muss zur Verfügung stehen, wenn sie gebraucht wird. Unsere Kunden vertrauen darauf, dass wir dies sicherstellen – heute und in Zukunft. RWE setzt deshalb auf ein ausgewogenes und breit gefächertes Stromerzeugungsportfolio aus Kernenergie, Kohle, Gas und erneuerbaren Energien. Auch bei der Gasbeschaffung nutzen wir die Vorteile der Diversifikation. Versorgungssicherheit setzt aber nicht nur an den Quellen der Energie an. Sie betrifft auch ihren Transport zum Endverbraucher. Beim Strom verfolgen wir das Ziel, die durchschnittliche Ausfallzeit unserer Verteilnetze in Deutschland pro Kunde auf weniger als 25 Minuten zu begrenzen. 2009 lag sie mit 20,4 Minuten deutlich unter dieser Marke. Trotzdem halten wir unser Ziel für ambitioniert, denn mit dem zunehmenden Ausbau der erneuerbaren Energien und dem vermehrten Einsatz dezentraler Stromerzeugungsanlagen steigen die Anforderungen an die Beschaffenheit und den Betrieb der Netze. Beim Gas sind die Lieferunterbrechungen aufgrund der Pufferfunktion des Gasnetzes deutlich kürzer. Sie lagen zuletzt bei durchschnittlich etwa drei Minuten pro Kunde und Jahr.

**(4) Preisgestaltung.** Unsere Kunden erwarten besten Service, bedarfsgerechte Angebote und faire Preise von uns und sind zunehmend bereit, den Versorger zu wechseln. Mit innovativen Produkten, die auf die Bedürfnisse von Privathaushalten und Gewerbebetrieben zugeschnitten sind, ist es uns 2010 gelungen, unsere Marktposition trotz steigender Wettbewerbsintensität zu behaupten. Unser Ziel sind zufriedene Kunden, die langfristig bei uns bleiben, möglicherweise mehr als ein Produkt von uns beziehen und uns im Familien- und Bekanntenkreis weiterempfehlen. Wie erfolgreich wir dabei sind, messen wir in Deutschland seit 2010 mithilfe eines Loyalitätsindex. Dieser stützt sich auf Befragungen bei unseren Haushalts- und Gewerbekunden. Der Index bewegt sich auf einer Skala von 0 bis 100 Punkte. Bei Werten unter 70 stufen wir die Zufriedenheit als gering ein, bei Werten von 70 bis 79 als mittel und bei Werten über 80 als hoch. Im Berichtsjahr kamen wir auf 71 Punkte. Für 2013 haben wir uns zum Ziel gesetzt, mindestens 73 Punkte zu erreichen.

**(5) Gesellschaftliche Verantwortung.** Als Energieversorger haben wir eine enge Bindung an unsere Standorte, die teilweise schon Jahrzehnte andauert. Wir sind dort verlässlicher Arbeit- und Auftraggeber und setzen uns für gesellschaftliche Belange ein. Unsere gemeinnützigen Aktivitäten haben wir in der RWE Stiftung gebündelt, die 2009 die Arbeit aufgenommen hat. Ausgestattet mit einem Grundkapital von 56 Mio. € fördert sie junge Menschen auf den Gebieten Bildung, Kultur und soziale Integration. Darüber hinaus unterstützen wir mit der Initiative „RWE Companius“ den tatkräftigen Einsatz von RWE-Mitarbeitern für soziale Zwecke. Im zurückliegenden Jahr wurden rund 1.800 Projekte mit insgesamt 2,2 Mio. € gefördert. All diese Maßnahmen kommen auch RWE zugute, denn sie steigern unsere Akzeptanz. Einmal im Jahr lassen wir von einem Meinungsforschungsinstitut erheben, wie die Öffentlichkeit RWE im Vergleich zu unseren großen Wettbewerbern wahrnimmt. 2010 wurde uns die höchste Reputation bescheinigt. Diese Position wollen wir halten.

**(6) Demografischer Wandel.** Aufgrund niedriger Geburtenraten – insbesondere in Deutschland – müssen wir frühzeitig die Weichen dafür stellen, dass RWE auch langfristig auf genügend qualifizierte Mitarbeiter zurückgreifen kann. Schon heute nutzen wir zahlreiche Möglichkeiten, um junge Talente für unser Unternehmen zu gewinnen, und schaffen ein Arbeitsumfeld, das ihren Erwartungen entspricht. Außerdem planen wir unseren Personalbedarf langfristig und berücksichtigen dabei die Auswirkungen des demografischen Wandels auf verschiedene Berufsgruppen. Als Analyseinstrument nutzen wir u.a. einen Demografie-Index, der die Altersstruktur im RWE-Konzern misst. Je höher der Indexwert, desto gleichmäßiger sind die Altersklassen in den Konzerngesellschaften vertreten. Der bestmögliche Wert ist 100. Im zurückliegenden Geschäftsjahr kamen wir auf 84 Punkte. Dieses Niveau wollen wir bis 2013 sichern.

**(7) Lieferkette.** Die Öffentlichkeit hinterfragt zunehmend, ob in den Herkunftsländern von Waren die Menschenrechte beachtet werden, angemessene Arbeitsbedingungen herrschen und die Umwelt geschützt wird. Durch systematisches Lieferantenmanagement wollen wir sicherstellen, dass unsere Geschäftsbeziehungen mit externen Partnern im Einklang mit unserem konzernweit gültigen Verhaltenskodex stehen. Dieser verbietet uns, Geschäfte mit Unternehmen zu schließen, von denen öffentlich bekannt ist, dass sie die von der UN-Initiative Global Compact festgelegten ethischen Grundprinzipien verletzen. Wir begegnen damit dem Risiko, dass das Fehlverhalten anderer Unternehmen auf unsere eigene Reputation abfärbt. Bei Zulieferern von Anlagen und komplexen Komponenten sind Verstöße gegen den Global Compact unwahrscheinlich, weil sie fast ausschließlich in OECD-Mitgliedstaaten ansässig sind. Für die Beschaffung von Standardwaren, Dienstleistungen und Energierohstoffen haben wir Monitoring-Prozesse eingeführt, die uns Erkenntnisse darüber liefern, ob unsere Lieferanten die Vorgaben des Global Compact einhalten. Im vergangenen Jahr waren bereits zwei Drittel unserer Geschäftsbeziehungen in diese Prozesse integriert. 2013 sollen es 95% sein.

**(8) Innovationen.** Unsere Ziele auf den Gebieten Klimaschutz, Energieeffizienz und Versorgungssicherheit erreichen wir nur, wenn wir auf modernste Technologien zurückgreifen können. Daher haben Forschung und Entwicklung (F&E) einen hohen Stellenwert für uns. Unsere derzeit über 200 F&E-Projekte sind entlang der gesamten Wertschöpfungskette von RWE angesiedelt – von der Rohstoffgewinnung über die Umwandlung, Verteilung und Speicherung von Energie bis hin zu ihrer Nutzung (siehe Seite 112 ff.). Zur Steuerung der F&E-Aktivitäten haben wir ein konzernübergreifendes Innovationsmanagement aufgebaut. Zu Beginn eines Jahres legen wir die strategisch wichtigen Themenfelder fest. Unseren Erfolg messen wir daran, inwieweit wir in diesen Themenfeldern konkrete F&E-Maßnahmen ergriffen haben und die Öffentlichkeit über unsere Tätigkeit informieren.

**(9) Arbeitssicherheit und Gesundheitsmanagement.** Unsere Mitarbeiter sollen so gesund nach Hause gehen, wie sie zur Arbeit gekommen sind. Um diesem Anspruch so gut wie möglich gerecht zu werden, arbeiten wir permanent daran, Arbeitssicherheit und Gesundheitsschutz zu verbessern. Mit den Maßnahmen unseres im Jahr 2009 gestarteten betrieblichen Gesundheitsmanagements wollen wir die Leistungsfähigkeit der Mitarbeiter erhalten. 2010 haben wir in Deutschland den Arbeitsbewältigungsindex (ABI) eingeführt. Der ABI bietet Mitarbeitern die Basis dafür, systematisch einzuschätzen, in welchem Maß sie physiologisch und psychologisch im Stande sind, ihre Arbeit heute und zukünftig zu bewältigen. Dabei werden sie von einem Arbeitsmediziner individuell unterstützt. Auch die Sicherheitskultur bei RWE liegt uns am Herzen. Um sie weiter zu verbessern, haben wir Anfang 2008 die Kampagne „Sicher vorRWEg“ gestartet, deren Schwerpunkt eine Unterweisung unserer Führungskräfte war. Dadurch und durch eine Vielzahl weiterer Maßnahmen ist unsere Arbeits- und Gesundheitsphilosophie in die Teams transportiert worden und in die tägliche Routine eingeflossen. Unseren Erfolg auf dem Gebiet der Arbeitssicherheit messen wir daran, dass immer weniger Unfälle geschehen, die mit einer Ausfallzeit bei unseren Mitarbeitern von mindestens einem Arbeitstag einhergehen. Im Berichtsjahr waren es 3,5 je eine Million geleisteter Arbeitsstunden. Damit war die Unfallrate im neunten Jahr in Folge rückläufig. Bis 2013 wollen wir einen Wert unter 2,5 erreichen.

**(10) Umweltschutz.** Unsere Maßnahmen zum Umweltschutz reichen weit über die Begrenzung des CO<sub>2</sub>-Ausstoßes hinaus. Die meisten davon werden in der Öffentlichkeit kaum wahrgenommen. Sie basieren auf einer Vielzahl gesetzlicher und genehmigungsrechtlicher Vorgaben, deren Einhaltung als selbstverständlich gilt. Nach unserem Kenntnisstand haben RWE-Gesellschaften im Berichtsjahr keine Verstöße gegen gesetzliche Auflagen begangen. Hier zahlt sich aus, dass wir über ein konzernweites Umweltmanagement verfügen. Wir haben es 2010 im Zuge der Integration neuer Tochterunternehmen, insbesondere Essent, weiter ausgebaut. Der Abdeckungsgrad beträgt nun 98 %. Damit haben wir das für 2013 gesteckte Ziel von 100 % bereits fast erreicht.

Unsere Ausgaben für Umweltschutzmaßnahmen beliefen sich 2010 auf 2.863 Mio. €. Davon dienten zwei Drittel dem Klimaschutz; hierunter fallen u.a. die Investitionen zur Modernisierung unseres Kraftwerksparks und zum Ausbau der Stromerzeugung aus erneuerbaren Energien. Einen hohen Anteil an den Umweltschutzausgaben haben auch die Aufwendungen zur Luftreinhaltung, u.a. aus dem Betrieb von Rauchgas-Entschwefelungsanlagen. Unsere Aktivitäten auf dem Gebiet des Natur- und Landschaftsschutzes umfassen im Wesentlichen die Rekultivierung von Braunkohletagebauflächen.

| Umweltschutzausgaben<br>in Mio. € | Aufwendungen |            | Investitionen |              | Gesamt       |              |
|-----------------------------------|--------------|------------|---------------|--------------|--------------|--------------|
|                                   | 2010         | 2009       | 2010          | 2009         | 2010         | 2009         |
| Luftreinhaltung                   | 348          | 242        | 45            | 103          | 393          | 345          |
| Natur- und Landschaftsschutz      | 73           | 75         | 18            | 12           | 91           | 87           |
| Gewässerschutz                    | 261          | 105        | 43            | 22           | 304          | 127          |
| Abfallbeseitigung                 | 162          | 172        | 1             | –            | 163          | 172          |
| Lärm                              | 18           | 5          | 3             | 5            | 21           | 10           |
| Altlasten, Bodenkontamination     | 4            | 5          | 1             | 1            | 5            | 6            |
| Klimaschutz                       | 172          | 162        | 1.714         | 1.320        | 1.886        | 1.482        |
| <b>Summe</b>                      | <b>1.038</b> | <b>766</b> | <b>1.825</b>  | <b>1.463</b> | <b>2.863</b> | <b>2.229</b> |

**RWE qualifiziert sich für Nachhaltigkeitsindizes.** RWE ist zum wiederholten Male für seine Nachhaltigkeitsstrategie ausgezeichnet worden. Im September 2010 wurden wir für ein weiteres Jahr in die renommierte Indexgruppe Dow Jones Sustainability (DJSI) aufgenommen. Die Auswahl stützt sich auf ökonomische, ökologische und soziale Kriterien. RWE ist sowohl im DJSI World als auch im DJSI Europe vertreten. Aus der Versorgerbranche haben sich für diese Indizes 17 bzw. acht Unternehmen qualifiziert. Wir sind eine der wenigen deutschen Gesellschaften, die der Indexfamilie seit ihrem Start im Jahr 1999 ununterbrochen angehören. Die Dow-Jones-Sustainability-Indizes werden von Sustainable Asset Management (SAM) in Kooperation mit Dow Jones Indexes und STOXX Limited ermittelt und veröffentlicht. Sie gelten als die weltweit wichtigste Indexgruppe für nachhaltige Unternehmensführung.

**Nachhaltigkeitsindikatoren spiegeln verantwortliches Handeln wider.** Wie bereits dargestellt, haben wir uns für jedes CR-Handlungsfeld konkrete Ziele gesteckt. Darüber hinaus gibt es viele weitere Indikatoren, die unsere Leistung auf dem Gebiet des nachhaltigen Wirtschaftens widerspiegeln. Einige besonders wichtige Indikatoren zeigen wir in der folgenden Übersicht. Sie sind den Kategorien Umwelt, Gesellschaft und Unternehmensführung zugeordnet. Bei ihrer Auswahl haben wir uns an Empfehlungen der Deutschen Vereinigung für Finanzanalyse und Asset Management (DVFA) orientiert.

| Bereich             | Leistungsindikator                                                                                 |                     | 2010             | 2009              | 2008   | 2007           |
|---------------------|----------------------------------------------------------------------------------------------------|---------------------|------------------|-------------------|--------|----------------|
| Umwelt              | <b>RWE-eigene Anlagen</b>                                                                          |                     |                  |                   |        |                |
|                     | NO <sub>x</sub> -Emissionen <sup>1</sup>                                                           | g/kWh               | 0,58             | 0,67              | 0,67   | 0,76           |
|                     | SO <sub>2</sub> -Emissionen <sup>1</sup>                                                           | g/kWh               | 0,29             | 0,34              | 0,39   | 0,57           |
|                     | Staubemissionen <sup>1</sup>                                                                       | g/kWh               | 0,019            | 0,024             | 0,028  | 0,034          |
|                     | Asche <sup>1</sup>                                                                                 | Tsd. t              | 7.740            | 7.429             | 6.406  | 6.687          |
|                     | Gips <sup>1</sup>                                                                                  | Tsd. t              | 2.053            | 1.956             | 1.533  | 1.671          |
|                     | Primärenergieverbrauch <sup>2</sup>                                                                | Mrd. kWh            | 403,0            | 368,2             | 396,0  | 411,7          |
|                     | Wasserverbrauch <sup>1,3</sup>                                                                     | m <sup>3</sup> /MWh | 1,41             | 1,70              | 1,49   | 1,69           |
|                     | Spezifische CO <sub>2</sub> -Emissionen                                                            | t/MWh               | 0,715            | 0,792             | 0,749  | 0,861          |
|                     | CO <sub>2</sub> -Emissionen Scope 1 <sup>4</sup>                                                   | Mio. t              | 144,9            | 135,9             | 147,4  | 155,1          |
|                     | <b>Anlagen insgesamt<sup>5</sup></b>                                                               |                     |                  |                   |        |                |
|                     | Spezifische CO <sub>2</sub> -Emissionen                                                            | t/MWh               | 0,732            | 0,796             | 0,768  | 0,866          |
|                     | CO <sub>2</sub> -Emissionen Scope 1 <sup>4</sup>                                                   | Mio. t              | 167,1            | 151,3             | 174,5  | 189,7          |
|                     | CO <sub>2</sub> -Emissionen Scope 2 <sup>6</sup>                                                   | Mio. t              | 3,1              | 3,5               | 3,8    | 3,6            |
|                     | CO <sub>2</sub> -Emissionen Scope 3 <sup>7</sup>                                                   | Mio. t              | 135,7            | 128,1             | 127,0  | 127,8          |
|                     | Investitionen des Unternehmensbereichs Erneuerbare Energien                                        | Mio. €              | 709              | 733               | 1.102  | – <sup>8</sup> |
|                     | Anteil der erneuerbaren Energien an der Eigenerzeugung                                             | %                   | 4,0 <sup>9</sup> | 3,5               | 2,4    | 2,4            |
| Gesellschaft        | Mitarbeiter <sup>10</sup>                                                                          |                     | 70.856           | 70.726            | 65.908 | 63.439         |
|                     | Anteil Frauen im Unternehmen                                                                       | %                   | 26,2             | 26,1              | 25,6   | 25,2           |
|                     | Anteil Frauen an den Führungskräften                                                               | %                   | 10,8             | 9,0 <sup>11</sup> | 8,9    | 8,9            |
|                     | Fluktuationsquote                                                                                  | %                   | 8,3              | 8,7               | 8,8    | 9,1            |
|                     | Trainingstage je Mitarbeiter (Deutschland)                                                         |                     | 4,7              | 4,8               | 4,6    | 4,2            |
|                     | Gesundheitsquote                                                                                   | %                   | 95,6             | 95,4              | 95,4   | 95,6           |
|                     | Arbeits- und Dienstwegeunfälle                                                                     | LTIF <sup>12</sup>  | 3,5              | 4,3               | 5,3    | 6,1            |
|                     | Tödliche Arbeitsunfälle <sup>13</sup>                                                              |                     | 3                | 5                 | 12     | 9              |
| Unternehmensführung | Umsatzanteil des RWE-Konzerns in Ländern mit hohem oder sehr hohem Korruptionsrisiko <sup>14</sup> | %                   | 12,0             | 12,7              | 12,9   | 11,8           |
|                     | F&E-Aufwendungen                                                                                   | Mio. €              | 149              | 110               | 105    | 74             |

1 Angepasste Daten für 2009 wegen der Einbeziehung von Niederlande/Belgien und Ungarn

2 Angepasste Daten für 2009 wegen der Einbeziehung von Niederlande/Belgien

3 Wasserentnahme der Kraftwerke abzügl. Wasserrückführung in Flüsse und andere Oberflächengewässer; ohne Kraftwerke mit Meerwasserkühlung

4 Scope 1: direkte CO<sub>2</sub>-Emissionen aus eigenen Quellen (Öl- und Gasförderung, Gastransport, Stromerzeugung)

5 Inkl. Kraftwerke, die sich nicht in RWE-Eigentum befinden, über deren Einsatz wir aber aufgrund langfristiger Vereinbarungen frei verfügen können

6 Scope 2: indirekte CO<sub>2</sub>-Emissionen aus der Erzeugung konzernextern bezogenen Stroms, der bei der Durchleitung durchs RWE-Netz verbraucht wird (Netzverluste)

7 Scope 3: indirekte CO<sub>2</sub>-Emissionen, die nicht unter Scope 1 und Scope 2 fallen: Sie stammen aus der Erzeugung konzernextern bezogenen Stroms (inkl. Netzverluste im Stromnetz Dritter), der Förderung und dem Transport der von uns eingesetzten Brennstoffe und dem Verbrauch von Gas, das wir an Kunden verkauft haben.

8 Gründung der RWE Innogy im Februar 2008

9 Stromerzeugung aus Wind (3,1 TWh), Wasser (3,5 TWh) und Biomasse (2,3 TWh)

10 Umgerechnet in Vollzeitstellen

11 Ohne Essent

12 Lost Time Incident Frequency (Zahl der Unfälle je eine Million geleisteter Arbeitsstunden); ohne Fremdfirmenmitarbeiter

13 Inkl. Fremdfirmenmitarbeiter

14 Länder, die im Korruptionswahrnehmungsindex der Organisation Transparency International auf einer Skala von null bis zehn mit kleiner sechs eingestuft werden, wobei zehn für das geringste Korruptionsrisiko steht

### 3.0 VERSICHERUNG DER GESETZLICHEN VERTRETER

Wir versichern nach bestem Wissen, dass gemäß den anzuwendenden Rechnungslegungsgrundsätzen der Konzernabschluss ein den tatsächlichen Verhältnissen entsprechendes Bild der Vermögens-, Finanz- und Ertragslage des Konzerns vermittelt und im Konzernlagebericht der Geschäftsverlauf einschließlich des Geschäftsergebnisses und die Lage des Konzerns so dargestellt sind, dass ein den tatsächlichen Verhältnissen entsprechendes Bild vermittelt wird, sowie die wesentlichen Chancen und Risiken der voraussichtlichen Entwicklung des Konzerns beschrieben sind.

Essen, 11. Februar 2011

Der Vorstand

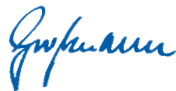

Grobmann

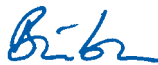

Birnbaum

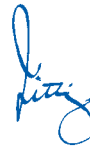

Fitting

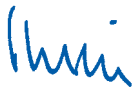

Pohlig

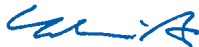

Schmitz

## 4.0 KONZERNABSCHLUSS

## 4.1 GEWINN- UND VERLUSTRECHNUNG

| in Mio. €                                                                       | (s. Anhang) | 2010          | 2009          |
|---------------------------------------------------------------------------------|-------------|---------------|---------------|
| <b>Umsatzerlöse (inkl. Erdgas-/Stromsteuer)</b>                                 | (1)         | <b>53.320</b> | <b>47.741</b> |
| Erdgas-/Stromsteuer                                                             | (1)         | 2.598         | 1.550         |
| <b>Umsatzerlöse</b>                                                             | (1)         | <b>50.722</b> | <b>46.191</b> |
| Bestandsveränderung der Erzeugnisse                                             |             | -20           | 44            |
| Andere aktivierte Eigenleistungen                                               |             | 219           | 210           |
| Sonstige betriebliche Erträge                                                   | (2)         | 1.276         | 1.610         |
| Materialaufwand                                                                 | (3)         | 33.176        | 29.838        |
| Personalaufwand                                                                 | (4)         | 4.873         | 4.610         |
| Abschreibungen                                                                  | (5)         | 3.213         | 2.357         |
| Sonstige betriebliche Aufwendungen                                              | (6)         | 4.428         | 3.924         |
| <b>Ergebnis der betrieblichen Tätigkeit fortgeführter Aktivitäten</b>           |             | <b>6.507</b>  | <b>7.326</b>  |
| Ergebnis aus at-Equity-bilanzierten Beteiligungen                               | (7)         | 310           | 131           |
| Übriges Beteiligungsergebnis                                                    | (7)         | 97            | 131           |
| Finanzerträge                                                                   | (8)         | 1.248         | 1.699         |
| Finanzaufwendungen                                                              | (8)         | 3.184         | 3.689         |
| <b>Ergebnis fortgeführter Aktivitäten vor Steuern</b>                           |             | <b>4.978</b>  | <b>5.598</b>  |
| Ertragsteuern                                                                   | (9)         | 1.376         | 1.858         |
| <b>Ergebnis fortgeführter Aktivitäten</b>                                       |             | <b>3.602</b>  | <b>3.740</b>  |
| Ergebnis nicht fortgeführter Aktivitäten                                        |             |               | 91            |
| <b>Ergebnis</b>                                                                 |             | <b>3.602</b>  | <b>3.831</b>  |
| Davon: Ergebnisanteile anderer Gesellschafter                                   |             | 279           | 260           |
| Davon: Ergebnisanteile der Hybridkapitalgeber der RWE AG                        |             | 15            |               |
| <b>Davon: Nettoergebnis/Ergebnisanteile der Aktionäre der RWE AG</b>            |             | <b>3.308</b>  | <b>3.571</b>  |
| <b>Unverwässertes und verwässertes Ergebnis je Stamm- und Vorzugsaktie in €</b> | (28)        | <b>6,20</b>   | <b>6,70</b>   |
| Davon: aus fortgeführten Aktivitäten in €                                       |             | (6,20)        | (6,58)        |
| Davon: aus nicht fortgeführten Aktivitäten in €                                 |             |               | (0,12)        |

## 4.2 AUFSTELLUNG DER ERFASSTEN ERTRÄGE UND AUFWENDUNGEN<sup>1</sup>

| in Mio. €                                                                                                           | (s. Anhang) | 2010         | 2009         |
|---------------------------------------------------------------------------------------------------------------------|-------------|--------------|--------------|
| <b>Ergebnis</b>                                                                                                     |             | <b>3.602</b> | <b>3.831</b> |
| Unterschied aus der Währungsumrechnung                                                                              |             | 218          | 8            |
| Marktbewertung von zur Veräußerung verfügbaren Finanzinstrumenten                                                   | (29)        | 2            | 383          |
| Marktbewertung von Finanzinstrumenten in Sicherungsbeziehung                                                        | (29)        | 161          | 122          |
| Anteiliges Other Comprehensive Income at-Equity-bilanzierter Beteiligungen                                          |             | -34          | 36           |
| Versicherungsmathematische Gewinne und Verluste leistungsorientierter Pensionszusagen und ähnlicher Verpflichtungen |             | 1            | -788         |
| <b>Im Eigenkapital direkt erfasste Erträge und Aufwendungen (Other Comprehensive Income)</b>                        |             | <b>348</b>   | <b>-239</b>  |
| <b>Summe der erfassten Erträge und Aufwendungen (Total Comprehensive Income)</b>                                    |             | <b>3.950</b> | <b>3.592</b> |
| Davon: auf Aktionäre der RWE AG entfallend                                                                          |             | (3.671)      | (3.442)      |
| Davon: auf Hybridkapitalgeber der RWE AG entfallend                                                                 |             | (15)         |              |
| Davon: auf andere Gesellschafter entfallend                                                                         |             | (264)        | (150)        |

1 Beträge nach Steuern

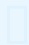

## 4.3 BILANZ

| <b>Aktiva</b><br>in Mio. €                       | (s. Anhang) | 31.12.10      | 31.12.09      |
|--------------------------------------------------|-------------|---------------|---------------|
| <b>Langfristiges Vermögen</b>                    |             |               |               |
| Immaterielle Vermögenswerte                      | (10)        | 17.350        | 17.320        |
| Sachanlagen                                      | (11)        | 32.237        | 28.627        |
| Investment Property                              | (12)        | 162           | 182           |
| At-Equity-bilanzierte Beteiligungen              | (13)        | 3.694         | 3.736         |
| Übrige Finanzanlagen                             | (14)        | 750           | 709           |
| Finanzforderungen                                | (15)        | 1.042         | 1.118         |
| Sonstige Forderungen und sonstige Vermögenswerte | (16)        | 2.213         | 2.488         |
| Ertragsteueransprüche                            |             | 626           | 507           |
| Latente Steuern                                  | (17)        | 2.391         | 1.876         |
|                                                  |             | <b>60.465</b> | <b>56.563</b> |
| <b>Kurzfristiges Vermögen</b>                    |             |               |               |
| Vorräte                                          | (18)        | 3.293         | 3.115         |
| Finanzforderungen                                | (15)        | 2.746         | 3.422         |
| Forderungen aus Lieferungen und Leistungen       | (19)        | 9.485         | 9.530         |
| Sonstige Forderungen und sonstige Vermögenswerte | (16)        | 10.484        | 13.784        |
| Ertragsteueransprüche                            |             | 543           | 660           |
| Wertpapiere                                      | (20)        | 3.196         | 3.290         |
| Flüssige Mittel                                  | (21)        | 2.476         | 3.074         |
| Zur Veräußerung bestimmte Vermögenswerte         |             | 389           |               |
|                                                  |             | <b>32.612</b> | <b>36.875</b> |
|                                                  |             | <b>93.077</b> | <b>93.438</b> |
| <b>Passiva</b><br>in Mio. €                      | (s. Anhang) | 31.12.10      | 31.12.09      |
| <b>Eigenkapital</b>                              | (22)        |               |               |
| Anteile der Aktionäre der RWE AG                 |             | 14.574        | 12.792        |
| Anteile der Hybridkapitalgeber der RWE AG        |             | 1.759         |               |
| Anteile anderer Gesellschafter                   |             | 1.084         | 925           |
|                                                  |             | <b>17.417</b> | <b>13.717</b> |
| <b>Langfristige Schulden</b>                     |             |               |               |
| Rückstellungen                                   | (24)        | 23.485        | 22.315        |
| Finanzverbindlichkeiten                          | (25)        | 15.908        | 17.019        |
| Übrige Verbindlichkeiten                         | (27)        | 3.584         | 3.972         |
| Latente Steuern                                  | (17)        | 2.185         | 2.327         |
|                                                  |             | <b>45.162</b> | <b>45.633</b> |
| <b>Kurzfristige Schulden</b>                     |             |               |               |
| Rückstellungen                                   | (24)        | 5.572         | 5.829         |
| Finanzverbindlichkeiten                          | (25)        | 3.902         | 3.127         |
| Verbindlichkeiten aus Lieferungen und Leistungen | (26)        | 8.415         | 9.697         |
| Ertragsteuerverbindlichkeiten                    |             | 90            | 218           |
| Übrige Verbindlichkeiten                         | (27)        | 12.376        | 15.217        |
| Zur Veräußerung bestimmte Schulden               |             | 143           |               |
|                                                  |             | <b>30.498</b> | <b>34.088</b> |
|                                                  |             | <b>93.077</b> | <b>93.438</b> |

## 4.4 KAPITALFLUSSRECHNUNG

| in Mio. €                                                                                                               | (s. Anhang, 32) | 2010          | 2009          |
|-------------------------------------------------------------------------------------------------------------------------|-----------------|---------------|---------------|
| Ergebnis                                                                                                                |                 | 3.602         | 3.831         |
| Abschreibungen/Zuschreibungen                                                                                           |                 | 3.184         | 2.464         |
| Veränderung der Rückstellungen                                                                                          |                 | 338           | -10           |
| Veränderung der latenten Steuern                                                                                        |                 | -680          | 97            |
| Ergebnis aus dem Abgang von Anlagegegenständen und Wertpapieren                                                         |                 | -165          | 69            |
| Sonstige zahlungsunwirksame Erträge/Aufwendungen                                                                        |                 | 1.570         | -357          |
| Veränderung des Nettoumlaufvermögens                                                                                    |                 | -2.349        | -795          |
| <b>Cash Flow aus laufender Geschäftstätigkeit fortgeführter Aktivitäten</b>                                             |                 | <b>5.500</b>  | <b>5.299</b>  |
| Cash Flow aus laufender Geschäftstätigkeit nicht fortgeführter Aktivitäten                                              |                 |               | 11            |
| <b>Cash Flow aus laufender Geschäftstätigkeit</b>                                                                       |                 | <b>5.500</b>  | <b>5.310</b>  |
| Immaterielle Vermögenswerte/Sachanlagen/Investment Property                                                             |                 |               |               |
| Investitionen                                                                                                           |                 | -6.379        | -5.913        |
| Einnahmen aus Anlagenabgängen                                                                                           |                 | 176           | 103           |
| Akquisitionen, Beteiligungen                                                                                            |                 |               |               |
| Investitionen                                                                                                           |                 | -258          | -8.801        |
| Einnahmen aus Anlagenabgängen/Desinvestitionen                                                                          |                 | 220           | 2.328         |
| Veränderung der Wertpapiere und Geldanlagen                                                                             |                 | -442          | 4.427         |
| <b>Cash Flow aus der Investitionstätigkeit fortgeführter Aktivitäten (vor Dotierung Contractual Trust Arrangement)</b>  |                 | <b>-6.683</b> | <b>-7.856</b> |
| Dotierung Contractual Trust Arrangement                                                                                 |                 |               | -470          |
| <b>Cash Flow aus der Investitionstätigkeit fortgeführter Aktivitäten (nach Dotierung Contractual Trust Arrangement)</b> |                 | <b>-6.683</b> | <b>-8.326</b> |
| Cash Flow aus der Investitionstätigkeit nicht fortgeführter Aktivitäten                                                 |                 |               | -78           |
| <b>Cash Flow aus der Investitionstätigkeit</b>                                                                          |                 | <b>-6.683</b> | <b>-8.404</b> |
| Kapitalveränderungen (einschließlich anderer Gesellschafter)                                                            |                 | 27            | 186           |
| Aufnahme von Hybridkapital                                                                                              |                 | 1.738         |               |
| Dividenden/Ausschüttungen an RWE-Aktionäre und andere Gesellschafter                                                    |                 | -2.198        | -2.592        |
| Aufnahme von Finanzschulden                                                                                             |                 | 3.485         | 11.592        |
| Tilgung von Finanzschulden                                                                                              |                 | -2.414        | -4.347        |
| <b>Cash Flow aus der Finanzierungstätigkeit fortgeführter Aktivitäten</b>                                               |                 | <b>638</b>    | <b>4.839</b>  |
| Cash Flow aus der Finanzierungstätigkeit nicht fortgeführter Aktivitäten                                                |                 |               | 65            |
| <b>Cash Flow aus der Finanzierungstätigkeit</b>                                                                         |                 | <b>638</b>    | <b>4.904</b>  |
| Zahlungswirksame Veränderung der flüssigen Mittel                                                                       |                 | -545          | 1.810         |
| Einfluss von Wechselkurs- und sonstigen Wertänderungen auf die flüssigen Mittel                                         |                 | 6             | 13            |
| Zahlungswirksame Veränderung der flüssigen Mittel nicht fortgeführter Aktivitäten                                       |                 |               | 2             |
| <b>Veränderung der flüssigen Mittel</b>                                                                                 |                 | <b>-539</b>   | <b>1.825</b>  |
| Flüssige Mittel zum Anfang des Berichtszeitraums                                                                        |                 | 3.074         | 1.249         |
| <b>Flüssige Mittel zum Ende des Berichtszeitraums</b>                                                                   |                 | <b>2.535</b>  | <b>3.074</b>  |
| Davon als „Zur Veräußerung bestimmte Vermögenswerte“ ausgewiesen                                                        |                 | -59           |               |
| <b>Flüssige Mittel zum Ende des Berichtszeitraums lt. Konzernbilanz</b>                                                 |                 | <b>2.476</b>  | <b>3.074</b>  |

## 4.5 VERÄNDERUNG DES EIGENKAPITALS

| Veränderung<br>des<br>Eigenkapitals<br>in Mio. € | Gezeich-<br>netes<br>Kapital<br>der<br>RWE AG | Kapital-<br>rücklage<br>der<br>RWE AG | Gewinn-<br>rücklage<br>und<br>Bilanz-<br>gewinn | Eigene<br>Aktien | Accumulated Other<br>Comprehensive Income                   |                                          |                                     | Anteile<br>der<br>Aktionäre<br>der<br>RWE AG | Anteile<br>der<br>Hybrid-<br>kapital-<br>geber der<br>RWE AG | Anteile<br>anderer<br>Gesell-<br>schafter | Summe  |
|--------------------------------------------------|-----------------------------------------------|---------------------------------------|-------------------------------------------------|------------------|-------------------------------------------------------------|------------------------------------------|-------------------------------------|----------------------------------------------|--------------------------------------------------------------|-------------------------------------------|--------|
|                                                  |                                               |                                       |                                                 |                  | Unter-<br>schied<br>aus der<br>Währungs-<br>umrech-<br>nung | Marktbewertung von<br>Finanzinstrumenten |                                     |                                              |                                                              |                                           |        |
|                                                  |                                               |                                       |                                                 |                  |                                                             | Zur Ver-<br>äußerung<br>verfügbar        | In<br>Siche-<br>rungsbe-<br>ziehung |                                              |                                                              |                                           |        |
| (s. Anhang, 22)                                  |                                               |                                       |                                                 |                  |                                                             |                                          |                                     |                                              |                                                              |                                           |        |
| Stand:<br>01.01.09                               | 1.440                                         | 1.158                                 | 11.200                                          | -2.500           | 112                                                         | -274                                     | 451                                 | 11.587                                       |                                                              | 1.553                                     | 13.140 |
| Kapital-<br>einzahlung                           |                                               |                                       |                                                 |                  |                                                             |                                          |                                     |                                              |                                                              | 10                                        | 10     |
| Veräußerung<br>eigener Aktien                    |                                               |                                       | -52                                             | 228              |                                                             |                                          |                                     | 176                                          |                                                              |                                           | 176    |
| Dividenden-<br>zahlungen <sup>1</sup>            |                                               |                                       | -2.401                                          |                  |                                                             |                                          |                                     | -2.401                                       |                                                              | -121                                      | -2.522 |
| Ergebnis                                         |                                               |                                       | 3.571                                           |                  |                                                             |                                          |                                     | 3.571                                        |                                                              | 260                                       | 3.831  |
| Other Com-<br>prehensive<br>Income               |                                               |                                       | -769                                            |                  | 115                                                         | 403                                      | 122                                 | -129                                         |                                                              | -110                                      | -239   |
| Total Compre-<br>hensive Income                  |                                               |                                       | 2.802                                           |                  | 115                                                         | 403                                      | 122                                 | 3.442                                        |                                                              | 150                                       | 3.592  |
| Übrige Verän-<br>derungen                        |                                               |                                       | -12                                             |                  |                                                             |                                          |                                     | -12                                          |                                                              | -667                                      | -679   |
| Stand:<br>31.12.09                               | 1.440                                         | 1.158                                 | 11.537                                          | -2.272           | 227                                                         | 129                                      | 573                                 | 12.792                                       |                                                              | 925                                       | 13.717 |
| Kapital-<br>einzahlung                           |                                               |                                       |                                                 |                  |                                                             |                                          |                                     |                                              | 1.738                                                        | 21                                        | 1.759  |
| Dividenden-<br>zahlungen <sup>1</sup>            |                                               |                                       | -1.867                                          |                  |                                                             |                                          |                                     | -1.867                                       |                                                              | -160                                      | -2.027 |
| Ergebnis                                         |                                               |                                       | 3.308                                           |                  |                                                             |                                          |                                     | 3.308                                        | 15                                                           | 279                                       | 3.602  |
| Other Com-<br>prehensive<br>Income               |                                               |                                       | 14                                              |                  | 218                                                         | -30                                      | 161                                 | 363                                          |                                                              | -15                                       | 348    |
| Total Compre-<br>hensive Income                  |                                               |                                       | 3.322                                           |                  | 218                                                         | -30                                      | 161                                 | 3.671                                        | 15                                                           | 264                                       | 3.950  |
| Übrige<br>Veränderungen                          |                                               |                                       | -22                                             |                  |                                                             |                                          |                                     | -22                                          | 6                                                            | 34                                        | 18     |
| Stand:<br>31.12.10                               | 1.440                                         | 1.158                                 | 12.970                                          | -2.272           | 445                                                         | 99                                       | 734                                 | 14.574                                       | 1.759                                                        | 1.084                                     | 17.417 |

1 Nach Umgliederung von Minderheitenanteilen in die übrigen Verbindlichkeiten gemäß IAS 32

## 4.6 ANHANG

### Allgemeine Grundlagen

Die RWE AG mit Sitz am Opernplatz 1 in 45128 Essen, Deutschland, ist Mutterunternehmen des RWE-Konzerns („RWE“ oder „Konzern“).

Der Konzernabschluss zum 31. Dezember 2010 ist am 11. Februar 2011 vom Vorstand der RWE AG zur Veröffentlichung freigegeben worden. Aufgestellt wurde er nach den International Financial Reporting Standards (IFRS), wie sie in der EU anzuwenden sind, und den ergänzend nach § 315a Abs. 1 HGB anzuwendenden handelsrechtlichen Vorschriften. Die Vorjahreszahlen sind nach denselben Grundsätzen ermittelt worden.

Neben der Gewinn- und Verlustrechnung, der Aufstellung der erfassten Erträge und Aufwendungen sowie der Bilanz und der Kapitalflussrechnung wird die Veränderung des Eigenkapitals gezeigt. Die Anhangangaben enthalten zudem eine Segmentberichterstattung.

Zum Zwecke einer klareren Darstellung sind verschiedene Posten der Bilanz und der Gewinn- und Verlustrechnung zusammengefasst worden. Im Anhang werden diese Posten gesondert ausgewiesen und erläutert. Die Gewinn- und Verlustrechnung ist nach dem Gesamtkostenverfahren gegliedert.

Der Konzernabschluss wird in Euro aufgestellt. Alle Beträge sind – soweit nicht anders angegeben – in Millionen Euro (Mio. €) ausgewiesen.

Der vorliegende Abschluss bezieht sich auf das Geschäftsjahr 2010 (1. Januar bis 31. Dezember).

Aufstellung, Vollständigkeit und Richtigkeit des Konzernabschlusses sowie des – mit dem Lagebericht der RWE AG zusammengefassten – Konzernlageberichts liegen in der Verantwortung des Vorstands der RWE AG.

Durch interne Kontrollsysteme, den Einsatz konzernweit einheitlicher Richtlinien und Maßnahmen zur Aus- und Weiterbildung der Mitarbeiter gewährleisten wir die Ordnungsmäßigkeit des Konzernabschlusses und des Konzernlageberichts. Die Einhaltung der gesetzlichen Vorschriften und der konzerninternen Richtlinien sowie die Zuverlässigkeit und Funktionsfähigkeit der Kontrollsysteme werden kontinuierlich konzernweit geprüft.

Das Risikomanagementsystem des Konzerns ist entsprechend den Anforderungen des „Gesetzes zur Kontrolle und Transparenz im Unternehmensbereich“ (KonTraG) darauf ausgerichtet, dass der Vorstand Risiken frühzeitig erkennen und bei Bedarf Gegenmaßnahmen einleiten kann.

Der Konzernabschluss, der zusammengefasste Lagebericht und der Prüfungsbericht werden in Anwesenheit des Abschlussprüfers im Prüfungsausschuss und in der Bilanzsitzung des Aufsichtsrats eingehend erörtert. Aus dem Bericht des Aufsichtsrats (Seiten 136 bis 139 dieses Geschäftsberichts) geht das Ergebnis der Prüfung durch den Aufsichtsrat hervor.

## Konsolidierungskreis

In den Konzernabschluss einbezogen sind neben der RWE AG alle wesentlichen in- und ausländischen Tochterunternehmen, die von der RWE AG unmittelbar oder mittelbar beherrscht werden. Wesentliche assoziierte Unternehmen und wesentliche Gemeinschaftsunternehmen werden nach der Equity-Methode bilanziert.

Anteile an Tochterunternehmen, an Gemeinschaftsunternehmen oder an assoziierten Unternehmen, die aus Konzernsicht von untergeordneter Bedeutung sind, werden nach IAS 39 bilanziert. Die nicht vollkonsolidierten Tochterunternehmen machen insgesamt weniger als 1 % des Umsatzes, des Ergebnisses und der Verschuldung des Konzerns aus. Tochterunternehmen mit negativem Ergebnis oder negativem Eigenkapital werden grundsätzlich vollkonsolidiert.

Auf den Abdruck der Angaben nach § 313 Abs. 2 HGB, die Bestandteil des Konzernanhangs sind, wurde verzichtet. Die

Angaben sind auf der Website unserer Gesellschaft unter [www.rwe.com](http://www.rwe.com) abrufbar. Auf den Seiten 228 bis 230 dieses Geschäftsberichts sind wesentliche in den Konzernabschluss einbezogene Tochterunternehmen und at-Equity-bilanzierte Beteiligungen aufgeführt.

Im Berichtsjahr wurden 11 Gesellschaften in Deutschland und 18 außerhalb Deutschlands erstmals konsolidiert. Aus dem Konsolidierungskreis ausgeschieden sind 17 Gesellschaften, davon drei in Deutschland; 20 wurden verschmolzen, davon 13 in Deutschland. Ferner wurden sieben assoziierte Unternehmen erstmals at-Equity-bilanziert, davon zwei in Deutschland. Von den im Vorjahr at-Equity-bilanzierten Beteiligungen wurden vier veräußert, davon eine in Deutschland; eine Gesellschaft im Ausland wurde verschmolzen und sieben Gesellschaften wurden nicht mehr at-Equity-bilanziert, davon sechs in Deutschland. Erst- und Entkonsolidierungen werden grundsätzlich zum Zeitpunkt des Übergangs der Beherrschung vorgenommen.

| Konsolidierungskreis                            | Inland<br>31.12.10 | Ausland<br>31.12.10 | Gesamt<br>31.12.10 | Gesamt<br>31.12.09 |
|-------------------------------------------------|--------------------|---------------------|--------------------|--------------------|
| Anzahl der vollkonsolidierten Unternehmen       | 204                | 241                 | 445                | 453                |
| Anzahl der at-Equity-bilanzierten Beteiligungen | 69                 | 52                  | 121                | 126                |

**Unternehmenserwerbe.** Am 30. September 2009 hat RWE 100% des stimmberechtigten Eigenkapitals des niederländischen Energieversorgers Essent N.V. erworben. Die Bilanzierung des Unternehmenszusammenschlusses wurde zum 30. September 2010 ohne Anpassungen gegenüber der vorläufigen Bilanzierung vom 31. Dezember 2009 abschließend festgestellt.

### Zur Veräußerung bestimmte Vermögenswerte und Schulden (Assets and Liabilities held for sale)/Nicht fortgeführte Aktivitäten (Discontinued Operations).

RWE hat sich im Jahr 2009 gegenüber der EU-Kommission verpflichtet, ihre Anteile an der Thyssengas GmbH zu verkaufen, in der das deutsche Gasfernleitungsnetz zusammengefasst ist. Im Dezember 2010 hat RWE einen Vertrag über den Verkauf des 100%igen Anteils an der Thyssengas GmbH geschlossen. Der Verkauf steht unter dem Vorbehalt der Zustimmung der EU-

Kommission und der zuständigen Kartellbehörde. Die Kartellbehörde hat im Dezember 2010, die EU-Kommission Ende Januar 2011 zugestimmt. Die Vermögenswerte und Schulden von Thyssengas werden zum 31. Dezember 2010 als zur Veräußerung bestimmt ausgewiesen. Thyssengas ist in der Segmentberichterstattung unter „Sonstige/Konsolidierung“ erfasst.

Nachfolgend sind die zur Veräußerung gehaltenen Vermögenswerte und Schulden von Thyssengas dargestellt:

| Eckdaten von Thyssengas<br>in Mio. € | 31.12.10 |
|--------------------------------------|----------|
| Langfristige Vermögenswerte          | 296      |
| Kurzfristige Vermögenswerte          | 93       |
| Langfristige Schulden                | 36       |
| Kurzfristige Schulden                | 107      |

Im Vorjahr wurde American Water Works Company Inc. (American Water), Wilmington/Delaware, USA, als nicht fortgeführte Aktivität (Discontinued Operation) ausgewiesen. Nachfolgend sind die Kennzahlen von American Water für den Zeitraum der Vollkonsolidierung (Januar bis März 2009) dargestellt:

| <b>Eckdaten von American Water</b><br>in Mio. €                   | Jan – März<br>2009 |
|-------------------------------------------------------------------|--------------------|
| Umsatzerlöse                                                      | 426                |
| Aufwendungen/Erträge                                              | –323               |
| Laufendes Ergebnis nicht fortgeführter<br>Aktivitäten vor Steuern | 103                |
| Ertragsteuern                                                     | –39                |
| Ergebnis                                                          | 64                 |
| Fair-Value-Anpassungen                                            | –39                |
| Ergebnis nicht fortgeführter Aktivitäten                          | 25                 |

Darüber hinaus wurden seit der Entkonsolidierung aufgrund des Verlusts der Stimmrechtsmehrheit an American Water 42 Mio. € aus der Veräußerung, –2 Mio. € aus Fair-Value-Anpassungen und 26 Mio. € aus dem uns zugeflossenen Beteiligungsergebnis im Vorjahreszeitraum im Ergebnis nicht fortgeführter Aktivitäten erfasst.

Aus Änderungen des Konsolidierungskreises sind langfristige Vermögenswerte (inkl. latenter Steuern) von 111 Mio. € und flüssige Mittel von 61 Mio. € abgegangen, kurzfristige Vermögenswerte (ohne flüssige Mittel) von 482 Mio. € zugegangen und haben sich die lang- und kurzfristigen Schulden um 57 Mio. € erhöht. Darin jeweils enthalten sind die sich gegenseitig aufhebenden Effekte des Ausweises als „zur Veräußerung bestimmte Vermögenswerte und Schulden“.

Die bei der Veräußerung der Tochterunternehmen erzielten Kaufpreise summierten sich auf 227 Mio. € (Vorjahr: 222 Mio. €); sie wurden in flüssigen Mitteln entrichtet.

Die Einflüsse, die sich aus der Änderung des Konsolidierungskreises ergeben haben, sind – soweit von besonderer Bedeutung – im Anhang vermerkt.

## Konsolidierungsgrundsätze

Die in den Konzernabschluss einbezogenen Abschlüsse der in- und ausländischen Unternehmen werden nach einheitlichen Bilanzierungs- und Bewertungsmethoden aufgestellt. Tochterunternehmen, deren Geschäftsjahr nicht am Konzernabschluss-Stichtag (31. Dezember) endet, stellen grundsätzlich zu diesem Termin einen Zwischenabschluss auf.

Unternehmenszusammenschlüsse werden nach der Erwerbsmethode bilanziert. Das heißt, bei der Kapitalkonsolidierung wird der Kaufpreis zuzüglich des Betrags der Minderheitenanteile mit dem neu bewerteten Nettovermögen der erworbenen Tochterunternehmen zum Erwerbszeitpunkt verrechnet. Dabei werden die Minderheitenanteile grundsätzlich mit dem entsprechenden Anteil des identifizierbaren Nettovermögens bewertet. Die ansatzfähigen Vermögenswerte, Schulden und Eventualschulden der Tochterunternehmen werden dabei – unabhängig von der Höhe des Minderheitenanteils – mit ihren vollen beizulegenden Zeitwerten angesetzt. Immaterielle Vermögenswerte sind gesondert vom Geschäfts- oder Firmenwert zu bilanzieren, wenn sie vom Unternehmen abtrennbar sind oder aus einem vertraglichen oder anderen Recht resultieren. Bei der Kaufpreisallokation werden gemäß IFRS 3 Restrukturierungsrückstellungen nicht neu gebildet. Übersteigt der Kaufpreis das neu bewertete anteilige Nettovermögen der erworbenen Tochtergesellschaft, wird der Unterschiedsbetrag als Geschäfts- oder Firmenwert aktiviert. Liegt der Kaufpreis darunter, wird der (negative) Unterschiedsbetrag aus der Erstkonsolidierung erfolgswirksam aufgelöst.

Aktivierter Geschäfts- oder Firmenwerte werden nicht planmäßig abgeschrieben, sondern einmal im Jahr sowie bei Vorliegen von Anhaltspunkten für eine Wertminderung einem Werthaltigkeitstest (Impairment Test) unterzogen. Im Falle einer Entkonsolidierung werden die Restbuchwerte der aktivierten Geschäfts- oder Firmenwerte bei der Berechnung des Veräußerungserfolgs berücksichtigt. Änderungen im Anteilsbesitz, bei denen die Beherrschungsmöglichkeit gegenüber dem Tochterunternehmen fortbesteht, werden ergebnisneutral erfasst. Bei Anteilsreduzierungen, die zu einem Wechsel im Beherrschungsstatus führen, werden die verbleibenden Anteile erfolgswirksam neu bewertet.

Aufwendungen und Erträge sowie Forderungen und Verbindlichkeiten zwischen den konsolidierten Unternehmen werden eliminiert. Zwischenergebnisse werden herausgerechnet.

Bei at-Equity-bilanzierten Beteiligungen werden Geschäfts- oder Firmenwerte nicht gesondert ausgewiesen, sondern im Wertansatz der Beteiligung erfasst. Im Übrigen gelten auch hier die oben beschriebenen Konsolidierungsgrundsätze. Geschäfts- oder Firmenwerte werden nicht planmäßig abgeschrieben. Falls außerplanmäßige Abschreibungen des Equity-Wertes erforderlich werden, weisen wir diese im Ergebnis aus at-Equity-bilanzierten Beteiligungen aus. Die Abschlüsse der nach der Equity-Methode bilanzierten Beteiligungen werden nach einheitlichen Bilanzierungs- und Bewertungsmethoden aufgestellt.

## Währungsumrechnung

Die Gesellschaften bewerten in ihren Einzelabschlüssen nicht monetäre Posten in fremder Währung zum Bilanzstichtag mit dem Wechselkurs, der am Tag der Erstverbuchung galt. Monetäre Posten werden mit dem Kurs am Bilanzstichtag umgerechnet. Bis zum Bilanzstichtag eingetretene Kursgewinne und -verluste aus der Bewertung von monetären Bilanzposten in fremder Währung werden ergebniswirksam in den sonstigen betrieblichen Erträgen oder Aufwendungen berücksichtigt.

Als Umrechnungsverfahren für Abschlüsse von Gesellschaften außerhalb des Euro-Raums wird die funktionale Währungsumrechnung angewendet. Da die in den Konzernabschluss einbezogenen wesentlichen Auslandsgesellschaften ihr Geschäft selbstständig in ihrer Landeswährung betreiben, werden ihre

Bilanzposten im Konzernabschluss zu Tagesmittelkursen am Bilanzstichtag in Euro umgerechnet. Dies gilt auch für die Geschäfts- oder Firmenwerte, die als Vermögenswerte der wirtschaftlich selbstständigen ausländischen Teileinheiten betrachtet werden. Differenzen gegenüber der Vorjahresumrechnung weisen wir als erfolgsneutrale Veränderung im Other Comprehensive Income aus. Aufwands- und Ertragsposten werden mit Jahresdurchschnittskursen umgerechnet. Bei der Umrechnung der Eigenkapitalfortschreibung ausländischer Unternehmen, die nach der Equity-Methode bilanziert werden, gehen wir entsprechend vor.

Für die Währungsumrechnung wurden u.a. folgende Wechselkurse zugrunde gelegt:

| Wechselkurse<br>in €    | Durchschnitt |      | Stichtag |          |
|-------------------------|--------------|------|----------|----------|
|                         | 2010         | 2009 | 31.12.10 | 31.12.09 |
| 1 US-Dollar             | 0,76         | 0,72 | 0,75     | 0,69     |
| 1 Pfund Sterling        | 1,17         | 1,12 | 1,16     | 1,13     |
| 100 tschechische Kronen | 3,96         | 3,77 | 3,99     | 3,78     |
| 100 ungarische Forint   | 0,36         | 0,35 | 0,36     | 0,37     |
| 1 polnischer Zloty      | 0,25         | 0,23 | 0,25     | 0,24     |

## Bilanzierungs- und Bewertungsmethoden

**Immaterielle Vermögenswerte** werden mit den fortgeführten Anschaffungs- oder Herstellungskosten bilanziert. Sämtliche immateriellen Vermögenswerte mit Ausnahme von Geschäfts- oder Firmenwerten weisen eine bestimmbare Nutzungsdauer auf und werden planmäßig linear abgeschrieben. Die Nutzungsdauern und Abschreibungsmethoden werden jährlich überprüft.

Software für kaufmännische und technische Anwendungen wird über drei bis fünf Jahre abgeschrieben. Die Summe der zum Betrieb einer Kraftwerksanlage erforderlichen Genehmigungen wird als Operating Right bzw. Nutzungs- und Betriebskonzession bezeichnet. Operating Rights werden grundsätzlich über die wirtschaftliche Nutzungsdauer der Kraftwerksanlage linear abgeschrieben. Die Nutzungsdauer von Wegenutzungsverträgen im Strom- und Gasbereich sowie von sonstigen Nutzungsrechten beträgt bis zu 20 Jahre. Konzessionen im Wasserbereich laufen über einen Zeitraum i.d.R. von bis zu 25 Jahren. Aktivierte Kundenbeziehungen werden über einen Zeitraum von bis zu zehn Jahren abgeschrieben. Die Nutzungsdauern und Abschreibungsmethoden werden jährlich überprüft.

Geschäfts- oder Firmenwerte werden nicht planmäßig abgeschrieben, sondern einmal im Jahr sowie bei Vorliegen von Anhaltspunkten für eine Wertminderung einem Werthaltigkeitstest (Impairment Test) unterzogen.

Entwicklungsausgaben werden aktiviert, wenn ein neu entwickeltes Produkt oder Verfahren eindeutig abgegrenzt werden kann, technisch realisierbar ist und entweder die eigene Nutzung oder die Vermarktung vorgesehen ist. Weiterhin setzt die Aktivierung voraus, dass den Entwicklungsausgaben mit hinreichender Wahrscheinlichkeit künftige Finanzmittelzuflüsse gegenüberstehen. Aktivierte Entwicklungsausgaben werden planmäßig über den erwarteten Zeitraum des Verkaufs der Produkte abgeschrieben. Forschungsausgaben werden in der Periode ihrer Entstehung als Aufwand erfasst.

Immaterielle Vermögenswerte werden außerplanmäßig abgeschrieben, wenn der erzielbare Betrag des Vermögenswertes den Buchwert unterschreitet. Eine gesonderte Regelung gilt für den Fall, dass der Vermögenswert Teil einer Zahlungsmittel generierenden Einheit ist. Letztere ist definiert als die kleinste identifizierbare Gruppe von Vermögenswerten, die Mittelzuflüsse erzeugen; dabei müssen die Mittelzuflüsse weitestgehend unabhängig von denen anderer Vermögenswerte oder anderer Gruppen von Vermögenswerten sein. Ist ein immaterieller Vermögenswert Teil einer Zahlungsmittel generierenden Einheit, wird die Abschreibung auf der Basis des erzielbaren Betrags der

Einheit ermittelt. Wurde einer Zahlungsmittel generierenden Einheit ein Geschäfts- oder Firmenwert zugeordnet und übersteigt ihr Buchwert den erzielbaren Betrag, so wird zunächst der Geschäfts- oder Firmenwert in Höhe des Differenzbetrags außerplanmäßig abgeschrieben. Ein darüber hinausgehender Abwertungsbedarf wird durch anteilige Reduzierung der Buchwerte der übrigen Vermögenswerte der Zahlungsmittel generierenden Einheit berücksichtigt. Wenn der Grund für eine früher vorgenommene außerplanmäßige Abschreibung entfallen ist, werden die immateriellen Vermögenswerte zugeschrieben. Allerdings darf der durch Zuschreibung erhöhte Buchwert nicht die fortgeführten Anschaffungs- oder Herstellungskosten übersteigen. Bei Geschäfts- oder Firmenwerten werden keine Zuschreibungen vorgenommen.

**Sachanlagen** werden mit den fortgeführten Anschaffungs- oder Herstellungskosten bilanziert. Fremdkapitalkosten werden als Teil der Anschaffungs- oder Herstellungskosten aktiviert, wenn sie unmittelbar dem Erwerb oder der Herstellung eines „qualifizierten Vermögenswertes“ zugeordnet werden können, bei dem ein beträchtlicher Zeitraum erforderlich ist, um ihn in seinen beabsichtigten gebrauchsfähigen Zustand zu versetzen. Die Anschaffungs- oder Herstellungskosten von Sachanlagen enthalten ggf. auch die geschätzten Ausgaben für die Stilllegung von Anlagen oder die Wiedernutzbarmachung von Flächen. Instandhaltungs- und Reparaturkosten werden als Aufwand erfasst.

Die Bilanzierung von Explorationsbohrungen zu Anschaffungs- oder Herstellungskosten folgt der Successful-Efforts-Methode. Das heißt, Explorationsausgaben werden nur dann aktiviert, wenn sie erfolgreich waren – also insbesondere zur Entdeckung von Rohöl- oder Gasvorkommen geführt haben. Ausgaben für Seismik und Geologie werden als Aufwand erfasst. Entsprechend der Unit-of-Production-Methode schreiben wir die aktivierten Explorationsausgaben noch nicht in der Explorationsphase ab, sondern erst ab Produktionsbeginn. Werthaltigkeitstests werden durchgeführt, sobald Tatsachen und Indizien darauf hindeuten, dass der Buchwert den erzielbaren Betrag übersteigt.

Sachanlagen werden – mit Ausnahme von Grund und Boden sowie grundstücksgleichen Rechten – grundsätzlich linear abgeschrieben, sofern nicht in Ausnahmefällen ein anderer Abschreibungsverlauf dem Nutzungsverlauf eher entspricht. Für planmäßige Abschreibungen unserer typischen Anlagen legen wir die folgenden konzerneinheitlichen Nutzungsdauern zugrunde:

| Nutzungsdauer in Jahren      |           |
|------------------------------|-----------|
| Gebäude                      | 7 – 75    |
| Technische Anlagen           |           |
| Thermische Kraftwerke        | 10 – 40   |
| Windkraftanlagen             | bis zu 20 |
| Stromnetze                   | 20 – 45   |
| Wasserleitungsnetze          | 20 – 80   |
| Gas- und Wasserspeicher      | 15 – 50   |
| Gasverteilungsanlagen        | 14 – 40   |
| Anlagen im Bergbau           | 3 – 25    |
| Grubenaufschlüsse im Bergbau | 33 – 35   |
| Bohrungen Upstream Gas & Öl  | bis zu 29 |

Im Wege des Finanzierungsleasings gemietete Sachanlagen werden mit dem beizulegenden Zeitwert oder mit dem Barwert der Mindestleasingraten aktiviert, je nachdem, welcher Wert niedriger ist. Sie werden linear über die voraussichtliche Nutzungsdauer oder über die kürzere Vertragslaufzeit abgeschrieben.

Die außerplanmäßige Abschreibung und Zuschreibung von Sachanlagen folgt den für immaterielle Vermögenswerte beschriebenen Grundsätzen.

**Investment Property** (als Finanzinvestition gehaltene Immobilien) umfasst alle Immobilien, die zur Erzielung von Mieteinnahmen oder langfristigen Wertsteigerungen gehalten und weder in der Produktion noch für Verwaltungszwecke eingesetzt werden. Es wird zu fortgeführten Anschaffungs- oder Herstellungskosten bewertet. Bei der erstmaligen Bewertung sind auch Transaktionskosten einzubeziehen. Abnutzbares Investment Property wird über eine Laufzeit von sieben bis 75 Jahren linear abgeschrieben. Der beizulegende Zeitwert des Investment Property ist im Anhang angegeben. Er wird nach international anerkannten Bewertungsmethoden, z.B. der Discounted-Cash-Flow-Methode, ermittelt oder aus den aktuellen Marktpreisen vergleichbarer Immobilien abgeleitet.

Die außerplanmäßige Abschreibung und Zuschreibung von Investment Property folgt ebenfalls den für immaterielle Vermögenswerte beschriebenen Grundsätzen.

**Anteile an at-Equity-bilanzierten Beteiligungen** werden zunächst mit den Anschaffungskosten und in den Folgeperioden mit dem fortgeschriebenen anteiligen Nettovermögen bilanziert. Dabei werden die Buchwerte jährlich um die anteiligen Ergebnisse, die Ausschüttungen und alle weiteren Eigenkapital-

veränderungen erhöht bzw. vermindert. Geschäfts- oder Firmenwerte werden nicht gesondert ausgewiesen, sondern sind im Wertansatz der Beteiligung enthalten. Eine planmäßige Abschreibung der Geschäfts- oder Firmenwerte findet nicht statt. Nach der Equity-Methode bilanzierte Beteiligungen werden außerplanmäßig abgeschrieben, wenn der erzielbare Betrag den Buchwert unterschreitet.

Die unter den **übrigen Finanzanlagen** ausgewiesenen Anteile an nicht konsolidierten Tochterunternehmen und an nicht nach der Equity-Methode bilanzierten assoziierten Unternehmen/ Gemeinschaftsunternehmen sowie die übrigen Beteiligungen und die langfristigen Wertpapiere gehören der Kategorie „Zur Veräußerung verfügbar“ an. In diese Kategorie fallen Finanzinstrumente, die keine Kredite und Forderungen oder bis zur Endfälligkeit gehaltene Finanzinvestitionen darstellen und die nicht erfolgswirksam zum beizulegenden Zeitwert bewertet werden. Sie werden sowohl bei der Erstbilanzierung als auch in den Folgeperioden mit dem beizulegenden Zeitwert angesetzt, sofern dieser verlässlich ermittelbar ist. Die Erstbewertung findet am Erfüllungstag statt. Unrealisierte Gewinne und Verluste werden unter Berücksichtigung latenter Steuern im Other Comprehensive Income erfasst. Bei Veräußerung der Finanzinstrumente wird der Gewinn oder Verlust erfolgswirksam. Wenn wesentliche objektive Hinweise für eine Wertminderung eines Vermögenswertes vorliegen, wird dieser erfolgswirksam abgeschrieben. Befindet sich ein Schuldner in finanziellen Schwierigkeiten oder ist er mit den Zins- und Tilgungszahlungen in Verzug, kann dies ein Hinweis auf eine Wertminderung des betreffenden finanziellen Vermögenswertes sein. Gleiches gilt, wenn es für den finanziellen Vermögenswert keinen aktiven Markt mehr gibt.

Die Forderungen umfassen die **Finanzforderungen**, die **Forderungen aus Lieferungen und Leistungen** sowie **sonstige Forderungen**. **Forderungen und sonstige Vermögenswerte** werden bis auf derivative Finanzinstrumente mit den fortgeführten Anschaffungskosten bewertet. Erforderliche Wertberichtigungen orientieren sich am tatsächlichen Ausfallrisiko. Gemäß konzerninternen Vorgaben werden die Wertansätze von Forderungen grundsätzlich über ein Wertberichtigungskonto korrigiert. In den Forderungen aus Lieferungen und Leistungen von Versorgungsbetrieben sind erhaltene Abschlagszahlungen auf den abgegrenzten, noch nicht abgelesenen Verbrauch unserer Kunden verrechnet.

Die unter den Finanzforderungen ausgewiesenen Ausleihungen sind mit den fortgeführten Anschaffungskosten bewertet. Marktüblich verzinsliche Ausleihungen werden zum Nominalwert bilanziert, zinslose oder niedrig verzinsliche Ausleihungen

dagegen grundsätzlich mit ihrem abgezinsten Betrag unter Verwendung eines risikoadäquaten Zinssatzes.

CO<sub>2</sub>-Emissionsrechte werden als immaterielle Vermögenswerte bilanziert und unter den sonstigen Vermögenswerten ausgewiesen. Sowohl entgeltlich erworbene als auch frei zugeteilte Rechte werden zu Anschaffungskosten bewertet; eine planmäßige Abschreibung findet nicht statt.

**Latente Steuern** resultieren aus temporären Unterschieden zwischen IFRS- und Steuerbilanzen der Einzelgesellschaften sowie aus Konsolidierungsvorgängen. Die aktiven latenten Steuern umfassen auch Steuerminderungsansprüche, die sich aus der erwarteten Nutzung bestehender Verlustvorträge in Folgejahren ergeben. Latente Steuern sind dann zu aktivieren, wenn damit verbundene wirtschaftliche Vorteile mit hinreichender Sicherheit genutzt werden können. Ihre Höhe wird auf der Basis der Steuersätze ermittelt, die im betreffenden Land zum Realisationszeitpunkt gelten bzw. voraussichtlich gelten werden. Maßgeblich sind die am Bilanzstichtag gültigen bzw. verabschiedeten steuerlichen Vorschriften. Für die Berechnung der latenten Steuern in Deutschland wird ein Steuersatz von 31,2% (Vorjahr: 30,9%) herangezogen. Er ergibt sich aus dem gültigen Körperschaftsteuersatz von 15%, dem Solidaritätszuschlag von 5,5% und dem im Berichtsjahr angepassten konzerndurchschnittlichen Gewerbeertragsteuersatz. Aktive und passive latente Steuern werden je Gesellschaft bzw. Organkreis saldiert.

**Vorräte** sind Vermögenswerte, die zum Verkauf im normalen Geschäftsgang gehalten werden (fertige Erzeugnisse und Waren), die sich in der Herstellung befinden (unfertige Erzeugnisse und Leistungen) oder die bei der Herstellung von Produkten oder der Erbringung von Dienstleistungen verbraucht werden (Roh-, Hilfs- und Betriebsstoffe einschließlich Kernbrennelemente und Vorabraum des Braunkohlebergbaus).

Sofern die Vorräte nicht hauptsächlich mit der Absicht erworben wurden, aus einem kurzfristigen Weiterverkauf Gewinne zu erzielen, werden sie zu Anschaffungs- oder Herstellungskosten oder zu niedrigeren Nettoveräußerungswerten angesetzt. Die Herstellungskosten entsprechen den produktionsorientierten Vollkosten; sie werden auf der Grundlage einer normalen Kapazitätsauslastung ermittelt. Neben den direkt zurechenbaren Kosten enthalten die Herstellungskosten angemessene Teile der notwendigen Material- und Fertigungsgemeinkosten. Auch fertigungsbedingte Abschreibungen sind berücksichtigt. Fremdkapitalkosten werden dagegen nicht als Teil der Anschaffungs- oder Herstellungskosten aktiviert. Für die Bewertung werden i.d.R. Durchschnittswerte herangezogen. Der Abraumverbrauch des Braunkohlebergbaus wird nach dem Fifo-Verfahren ermittelt.

Soweit bei früher abgewerteten Vorräten der Nettoveräußerungswert gestiegen ist, wird die Wertaufholung als Minderung des Materialaufwands erfasst.

Kernbrennelemente werden mit den fortgeführten Anschaffungskosten bewertet. Die Abschreibungen werden arbeitsabhängig nach dem Verbrauch und leistungsabhängig nach der Nutzungsdauer des Reaktors ermittelt.

Vorräte, die hauptsächlich mit der Absicht erworben wurden, aus einem kurzfristigen Weiterverkauf Gewinne zu erzielen, werden mit dem Nettoveräußerungswert abzüglich der Vertriebsaufwendungen bewertet. Wertänderungen werden erfolgswirksam erfasst.

Zu den als kurzfristig ausgewiesenen **Wertpapieren** zählen im Wesentlichen die Wertpapiere in den Spezialfonds sowie festverzinsliche Titel, die beim Erwerb eine Restlaufzeit von mehr als drei Monaten und weniger als einem Jahr aufweisen. Die Wertpapiere gehören ausnahmslos der Kategorie „Zur Veräußerung verfügbar“ an und werden mit dem beizulegenden Zeitwert angesetzt. Bei der Erstbewertung werden Transaktionskosten berücksichtigt, die direkt dem Erwerb des finanziellen Vermögenswertes zuzurechnen sind; die Erstbewertung erfolgt zum Erfüllungstag. Unrealisierte Gewinne und Verluste werden unter Berücksichtigung latenter Steuern im Other Comprehensive Income erfasst. Bei Veräußerung wird der Gewinn oder Verlust erfolgswirksam. Liegen wesentliche objektive Hinweise für eine Wertminderung vor, wird erfolgswirksam abgeschrieben.

Finanzielle Vermögenswerte werden ausgebucht, wenn die vertraglichen Rechte auf Zahlungsmittelzuflüsse aus dem Vermögenswert auslaufen oder wenn der finanzielle Vermögenswert übertragen wird. Letzteres ist dann der Fall, wenn alle wesentlichen Chancen und Risiken, die mit dem Eigentum an dem Vermögenswert verbunden sind, übertragen werden oder die Verfügungsmacht über den Vermögenswert abgegeben wird.

**Flüssige Mittel** umfassen Kassenbestände, Guthaben bei Kreditinstituten und kurzfristig veräußerbare festverzinsliche Wertpapiere mit einer Restlaufzeit bei Erwerb von bis zu drei Monaten.

Als „Zur Veräußerung bestimmte Vermögenswerte“ sind Vermögenswerte ausgewiesen, die in ihrem gegenwärtigen Zustand veräußert werden können und deren Veräußerung sehr wahrscheinlich ist. Dabei kann es sich um einzelne langfristige Vermögenswerte, um Gruppen von Vermögenswerten (Veräußerungsgruppen) oder um Geschäftsbereiche (nicht fortgeführte Aktivitäten bzw. Discontinued Operations) handeln. Schulden, die zusammen mit Vermögenswerten in einer Transaktion abgegeben werden sollen, sind Bestandteil einer Veräußerungsgruppe oder nicht fortgeführten Aktivität und wer-

den als „Zur Veräußerung bestimmte Schulden“ gesondert ausgewiesen.

Zur Veräußerung bestimmte langfristige Vermögenswerte werden nicht mehr planmäßig abgeschrieben. Sie werden mit ihrem beizulegenden Zeitwert abzüglich Veräußerungskosten angesetzt, sofern dieser Betrag niedriger ist als der Buchwert.

Gewinne oder Verluste aus der Bewertung einzelner zur Veräußerung bestimmter Vermögenswerte und von Veräußerungsgruppen werden bis zur endgültigen Veräußerung im Ergebnis aus fortgeführten Aktivitäten ausgewiesen.

Die Position „Ergebnis nicht fortgeführter Aktivitäten“ in der Gewinn- und Verlustrechnung enthält neben den Ergebnissen aus der laufenden Geschäftstätigkeit auch Gewinne oder Verluste aus der Bewertung mit dem beizulegenden Zeitwert oder aus der Veräußerung von Aktivitäten.

Die konzernweiten Aktienoptionsprogramme werden als **aktienbasierte Vergütungen** mit Barausgleich bilanziert. Zum Bilanzstichtag wird eine Rückstellung in Höhe des zeitanteiligen beizulegenden Zeitwertes der Zahlungsverpflichtung gebildet. Änderungen des beizulegenden Zeitwertes werden erfolgswirksam erfasst. Der beizulegende Zeitwert der Optionen wird mithilfe anerkannter finanzwirtschaftlicher Modelle bestimmt.

**Rückstellungen** werden für sämtliche am Bilanzstichtag gegenüber Dritten bestehenden rechtlichen oder faktischen Verpflichtungen gebildet, die auf vergangenen Ereignissen beruhen, die wahrscheinlich zu einem Abfluss von Ressourcen führen werden und deren Höhe verlässlich geschätzt werden kann. Die Rückstellungen werden mit ihrem voraussichtlichen Erfüllungsbetrag angesetzt und nicht mit Erstattungsansprüchen saldiert. Wenn die zu bewertende Rückstellung eine große Anzahl von Positionen umfasst, wird die Verpflichtung durch Gewichtung aller möglichen Ergebnisse mit ihren jeweiligen Eintrittswahrscheinlichkeiten geschätzt (Erwartungswertmethode).

Alle langfristigen Rückstellungen werden mit ihrem auf den Bilanzstichtag abgezinsten voraussichtlichen Erfüllungsbetrag bilanziert. Bei der Ermittlung dieses Betrags sind auch die bis zum Erfüllungszeitpunkt voraussichtlich eintretenden Kostensteigerungen zu berücksichtigen.

Die Anschaffungs- oder Herstellungskosten von Sachanlagen enthalten ggf. auch die geschätzten Ausgaben für die Stilllegung von Anlagen oder die Wiedernutzbarmachung von Flächen, für die Stilllegungs-, Rekultivierungs- und ähnliche Rückstellungen gebildet werden. Sollten Änderungen des Zinssatzes oder Änderungen der Schätzungen bezüglich des zeitli-

chen Anfalls oder der Höhe der Auszahlungen zu Änderungen der Rückstellungen führen, wird in gleicher Höhe der Buchwert des zugehörigen Vermögenswertes angepasst. Überschreitet eine Verminderung den Buchwert des zugehörigen Vermögenswertes, ist der überschießende Betrag direkt erfolgswirksam zu erfassen.

Rückstellungen werden grundsätzlich gegen den Aufwandsposten aufgelöst, gegen den sie gebildet wurden.

Rückstellungen für Pensionen und ähnliche Verpflichtungen werden für leistungsorientierte Versorgungspläne gebildet. Dabei handelt es sich um Verpflichtungen des Unternehmens aus Anwartschaften und laufenden Leistungen an berechnigte aktive und ehemalige Mitarbeiter sowie deren Hinterbliebene. Die Verpflichtungen beziehen sich insbesondere auf Ruhegelder. Die individuellen Zusagen bemessen sich i.d.R. nach der Dauer der Betriebszugehörigkeit und der Vergütung der Mitarbeiter.

Bei der Bewertung von Rückstellungen für leistungsorientierte Versorgungspläne wird der versicherungsmathematische Barwert der jeweiligen Verpflichtung zugrunde gelegt. Dieser wird mithilfe der Methode der laufenden Einmalprämien (Projected-Unit-Credit-Methode) ermittelt. Bei diesem Anwartschaftsbarwertverfahren werden nicht nur die am Stichtag bekannten Renten und erworbenen Anwartschaften, sondern auch erwartete künftige Steigerungen von Gehältern und Renten berücksichtigt. Die Berechnung stützt sich auf versicherungsmathematische Gutachten unter Berücksichtigung biometrischer Daten (für Deutschland insbesondere die Richttafeln 2005 G von Klaus Heubeck). Die Rückstellung ergibt sich aus dem Saldo des versicherungsmathematischen Barwertes der Verpflichtung und dem beizulegenden Zeitwert des zur Deckung der Pensionsverpflichtung gebildeten Planvermögens. Der Dienstzeitaufwand ist im Personalaufwand enthalten. Der Zinsaufwand und die erwarteten Erträge aus dem Planvermögen gehen in das Finanzergebnis ein.

Versicherungsmathematische Gewinne und Verluste werden vollständig in dem Geschäftsjahr erfasst, in dem sie eintreten. Sie werden als Bestandteil des Other Comprehensive Income außerhalb der Gewinn- und Verlustrechnung in der Aufstellung der erfassten Erträge und Aufwendungen ausgewiesen und unmittelbar in die Gewinnrücklagen gebucht. Auch in den Folgeperioden werden sie nicht mehr erfolgswirksam.

Bei beitragsorientierten Versorgungsplänen geht das Unternehmen über die Entrichtung von Beitragszahlungen an zweckgebundene Fonds hinaus keine weiteren Verpflichtungen ein. Die Beitragszahlungen werden im Personalaufwand ausgewiesen.

Die Entsorgungsrückstellungen im Kernenergiebereich basieren auf öffentlich-rechtlichen Verpflichtungen, insbesondere dem Atomgesetz, sowie auf Auflagen, die in den Betriebsgenehmigungen festgeschrieben sind. Ihrer Bewertung liegen Schätzungen zugrunde, die zum einen auf konkretisierenden Verträgen, zum anderen auf Angaben interner und externer Experten und Fachgutachter sowie des Bundesamtes für Strahlenschutz (BfS) beruhen.

Die am Bilanzstichtag bestehenden und bei Bilanzaufstellung erkennbaren Verpflichtungen zur Wiedernutzbarmachung von Flächen sowie aus verursachten oder bereits eingetretenen Bergschäden werden durch bergbaubedingte Rückstellungen berücksichtigt. Die Rückstellungen sind aufgrund öffentlich-rechtlicher Verpflichtungen zu bilden, die auf entsprechenden gesetzlichen Regelungen wie dem Bundesberggesetz basieren und vor allem in Betriebsplänen und wasserrechtlichen Erlaubnisbescheiden konkretisiert sind. Die Rückstellungen werden grundsätzlich mit zunehmendem Verpflichtungsumfang, u.a. entsprechend der Braunkohleförderung, gebildet. Bewertet werden sie mit den zu erwartenden Vollkosten bzw. den geschätzten Schadenersatzleistungen.

Des Weiteren werden Rückstellungen aufgrund öffentlich-rechtlicher Verpflichtungen zum Rückbau von Produktionsanlagen sowie zur Verfüllung von Bohrungen gebildet. Ihre Höhe bestimmt sich nach den zu erwartenden Vollkosten unter Berücksichtigung von Erfahrungswerten und Vergleichskostensätzen des Wirtschaftsverbands der Erdöl- und Erdgasgewinnung. Bei ausländischen Tochtergesellschaften wird analog verfahren.

Für die Verpflichtung zur Rückgabe von CO<sub>2</sub>-Emissionsrechten an die zuständigen Behörden wird eine Rückstellung gebildet, die mit dem Buchwert der dafür aktivierten CO<sub>2</sub>-Rechte bewertet wird. Ist ein Teil der Verpflichtung nicht durch vorhandene Zertifikate gedeckt, wird die Rückstellung hierfür mit dem Marktpreis der Emissionsrechte am Stichtag bewertet.

Verbindlichkeiten umfassen die **Finanzverbindlichkeiten**, die **Verbindlichkeiten aus Lieferungen und Leistungen** sowie **übrige Verbindlichkeiten**. Verbindlichkeiten werden bei erstmaligem Ansatz mit ihrem beizulegenden Zeitwert einschließlich Transaktionskosten erfasst und in den Folgeperioden – mit Ausnahme der derivativen Finanzinstrumente – mit den fortgeführten Anschaffungskosten bewertet. Verbindlichkeiten aus Finanzierungsleasing-Verträgen werden in Höhe des beizulegenden Zeitwertes des Leasing-Gegenstands oder – falls dieser niedriger ist – in Höhe des Barwertes der Mindestleasingraten passiviert.

Rechnungsabgrenzungsposten und von Kunden erhaltene Anzahlungen werden unter den übrigen Verbindlichkeiten pas-

siviert. Zu den Rechnungsabgrenzungsposten zählen die von Versorgungsbetrieben passivierten Hausanschlusskosten und Baukostenzuschüsse, die grundsätzlich über die Laufzeit der korrespondierenden Vermögenswerte ergebniswirksam aufgelöst werden. Des Weiteren sind in den Rechnungsabgrenzungsposten auch von der öffentlichen Hand gewährte steuerpflichtige Zuschüsse und steuerfreie Zulagen zu Anlagegegenständen enthalten, die i.d.R. entsprechend dem Abschreibungsverlauf der Anlagen als sonstige betriebliche Erträge vereinnahmt werden.

Unter den übrigen Verbindlichkeiten werden auch bestimmte Minderheitenanteile ausgewiesen. Dabei handelt es sich um Kaufpreisverbindlichkeiten aus gewährten Rechten zur Andienung (Put-Optionen) von Minderheitenanteilen.

**Derivative Finanzinstrumente** werden als Vermögenswerte oder Verbindlichkeiten bilanziert und – unabhängig von ihrem Zweck – mit dem beizulegenden Zeitwert bewertet. Änderungen dieses Wertes werden erfolgswirksam erfasst, es sei denn, die derivativen Finanzinstrumente stehen in einer bilanziellen Sicherungsbeziehung. In diesem Fall richtet sich die Erfassung von Änderungen des beizulegenden Zeitwertes nach der Art des Sicherungsgeschäfts.

Mit Fair Value Hedges werden bilanzierte Vermögenswerte oder Schulden gegen das Risiko einer Änderung des beizulegenden Zeitwertes abgesichert. Auch die Absicherung von bilanzunwirksamen festen Verpflichtungen wird als Fair Value Hedge bilanziert. Bei Fair Value Hedges werden Änderungen der beizulegenden Zeitwerte sowohl der Sicherungsgeschäfte als auch der dazugehörigen Grundgeschäfte in der Gewinn- und Verlustrechnung erfasst. Das bedeutet, Gewinne und Verluste aus der Bewertung zum beizulegenden Zeitwert der Sicherungsgeschäfte werden in denselben Positionen der Gewinn- und Verlustrechnung ausgewiesen wie Gewinne und Verluste aus der Bewertung des abgesicherten Grundgeschäfts oder Teilen des Grundgeschäfts. Werden bilanzunwirksame feste Verpflichtungen abgesichert, führen Änderungen des beizulegenden Zeitwertes der festen Verpflichtung im Hinblick auf das abgesicherte Risiko zum erfolgswirksamen Ansatz eines Vermögenswertes oder einer Schuld.

Cash Flow Hedges dienen der Absicherung des Risikos, dass die mit einem bilanzierten Vermögenswert, einer bilanzierten Schuld oder einer mit hoher Wahrscheinlichkeit eintretenden geplanten Transaktion verbundenen zukünftigen Zahlungsströme schwanken. Liegt ein Cash Flow Hedge vor, werden die unrealisierten Gewinne und Verluste des Sicherungsgeschäfts zunächst im Other Comprehensive Income erfasst. Sie werden erst dann in der Gewinn- und Verlustrechnung erfasst, wenn das abgesicherte Grundgeschäft erfolgswirksam wird. Werden

geplante Transaktionen gesichert und führen diese Transaktionen in späteren Perioden zum Ansatz eines finanziellen Vermögenswertes oder einer finanziellen Verbindlichkeit, sind die bis zu diesem Zeitpunkt im Eigenkapital erfassten Beträge in der Periode erfolgswirksam aufzulösen, in der auch der Vermögenswert oder die Verbindlichkeit das Periodenergebnis beeinflusst. Führen die Transaktionen zum Ansatz von nicht finanziellen Vermögenswerten oder Verbindlichkeiten, z.B. zum Erwerb von Sachanlagevermögen, werden die erfolgsneutral im Eigenkapital erfassten Beträge mit dem erstmaligen Wertansatz des Vermögenswertes oder der Verbindlichkeit verrechnet.

Hedges einer Nettoinvestition in eine ausländische Teileinheit zielen darauf ab, das Fremdwährungsrisiko aus Beteiligungen mit ausländischer Funktionalwährung abzusichern. Unrealisierte Gewinne und Verluste aus den Sicherungsgeschäften werden bis zur Veräußerung der ausländischen Teileinheit im Other Comprehensive Income erfasst.

IAS 39 legt fest, unter welchen Voraussetzungen Sicherungsbeziehungen bilanziell erfasst werden dürfen. Unter anderem müssen sie ausführlich dokumentiert und effektiv sein. „Effektivität“ im Sinne von IAS 39 liegt dann vor, wenn die Änderungen des beizulegenden Zeitwertes des Sicherungsgeschäfts sowohl prospektiv als auch retrospektiv in einer Bandbreite von 80 bis 125% der gegenläufigen Änderungen des beizulegenden Zeitwertes des Grundgeschäfts liegen. Nur der effektive Teil einer Sicherungsbeziehung darf nach den beschriebenen Regeln bilanziert werden. Der ineffektive Teil wird sofort erfolgswirksam in der Gewinn- und Verlustrechnung erfasst.

Verträge, die für Zwecke des Empfangs oder der Lieferung nicht finanzieller Posten gemäß dem erwarteten Einkaufs-, Verkaufs- oder Nutzungsbedarf des Unternehmens abgeschlossen und in diesem Sinne gehalten werden (Eigenverbrauchverträge), werden nicht als derivative Finanzinstrumente, sondern als schwebende Geschäfte bilanziert. Enthalten die Verträge eingebettete Derivate, werden die Derivate getrennt vom Basisvertrag bilanziert, wenn die wirtschaftlichen Merkmale und Risiken des eingebetteten Derivats nicht eng mit den wirtschaftlichen Merkmalen und Risiken des Basisvertrags verbunden sind. Geschriebene Optionen auf den Kauf oder Verkauf nicht finanzieller Posten, die durch Barausgleich erfüllt werden können, sind keine Eigenverbrauchverträge.

**Eventualschulden** sind mögliche Verpflichtungen gegenüber Dritten oder bereits bestehende Verpflichtungen, die wahrscheinlich nicht zu einem Ressourcenabfluss führen oder in ihrer Höhe nicht verlässlich bestimmt werden können. Eventualschulden werden in der Bilanz nur dann erfasst, wenn sie im Rahmen eines Unternehmenszusammenschlusses übernommen wurden. Die im Anhang angegebenen Verpflichtungsvolumina

der Eventualschulden entsprechen dem am Bilanzstichtag bestehenden Haftungsumfang.

**Ermessensentscheidungen bei der Anwendung der Bilanzierungs- und Bewertungsmethoden.** Bei der Anwendung der Bilanzierungs- und Bewertungsmethoden sind Ermessensentscheidungen zu treffen. Dies gilt insbesondere für folgende Sachverhalte:

- Bei bestimmten Verträgen ist zu entscheiden, ob sie als Derivate zu behandeln oder wie sogenannte Eigenverbrauchverträge als schwebende Geschäfte zu bilanzieren sind.
- Finanzielle Vermögenswerte sind in die Kategorien „Bis zur Endfälligkeit gehaltene Finanzinvestitionen“, „Kredite und Forderungen“, „Zur Veräußerung verfügbare finanzielle Vermögenswerte“ und „Finanzielle Vermögenswerte, die erfolgswirksam zum beizulegenden Zeitwert bewertet werden“ einzuordnen.
- Bei „Zur Veräußerung verfügbaren finanziellen Vermögenswerten“ ist zu entscheiden, ob und wann eine Wertminderung als außerplanmäßige Abschreibung erfolgswirksam zu erfassen ist.
- Bei Vermögenswerten, die veräußert werden sollen, ist zu bestimmen, ob sie in ihrem aktuellen Zustand veräußert werden können und ob ihre Veräußerung sehr wahrscheinlich ist. Ist beides der Fall, sind die Vermögenswerte und ggf. zugehörige Schulden als „Zur Veräußerung bestimmte Vermögenswerte bzw. Schulden“ auszuweisen und zu bewerten.

**Schätzungen und Beurteilungen des Managements.** Die Aufstellung des Konzernabschlusses nach IFRS erfordert, dass Annahmen getroffen und Schätzungen gemacht werden, die sich auf den Wertansatz der bilanzierten Vermögenswerte und Schulden, der Erträge und Aufwendungen sowie die Angabe von Eventualschulden auswirken.

Diese Annahmen und Schätzungen beziehen sich u.a. auf die Bilanzierung und Bewertung von Rückstellungen. Bei Rückstellungen für Pensionen und ähnliche Verpflichtungen sind u.a. der Abzinsungsfaktor und die erwartete Rendite des Planvermögens wichtige Schätzgrößen. Der Abzinsungsfaktor für Pensionsverpflichtungen wird auf Grundlage der auf den Finanzmärkten am Bilanzstichtag beobachtbaren Renditen erstrangiger, festverzinslicher Unternehmensanleihen ermittelt. Eine Erhöhung oder Verminderung des Abzinsungsfaktors um einen Prozentpunkt würde den Barwert der Verpflichtung aus betrieblichen Altersversorgungsplänen in Deutschland um 1.314 Mio. € (Vorjahr: 1.287 Mio. €) reduzieren bzw. um 1.672 Mio. € (Vorjahr: 1.638 Mio. €) erhöhen. Bei den Konzerngesellschaften in Großbritannien hätte eine solche Veränderung des Abzinsungsfaktors eine Verminderung der Pensionsverpflichtung um 627 Mio. € (Vorjahr: 529 Mio. €) bzw. eine Erhöhung um 798 Mio. € (Vorjahr: 653 Mio. €) zur Folge. Da die Verpflichtun-

gen aus betrieblichen Altersversorgungsplänen jedoch überwiegend fondsgedeckt sind und der Wert des wesentlichen Teils des Planvermögens typischerweise negativ mit den Marktkrediten festverzinslicher Wertpapiere korreliert, ergibt sich nur eine beschränkte Abhängigkeit der unter Berücksichtigung des vorhandenen Planvermögens ermittelten Pensionsrückstellungen vom jeweiligen Marktzinsniveau.

Im Rahmen der Bilanzierung von Unternehmenserwerben werden die identifizierbaren Vermögenswerte, Verbindlichkeiten und Eventualschulden zu beizulegenden Zeitwerten am Erwerbsstichtag angesetzt. Die wesentlichen Schätzungen beziehen sich dabei auf die Bestimmung der zum Erwerbsstichtag beizulegenden Zeitwerte dieser Posten. Diese stützen sich entweder auf Gutachten unabhängiger externer Bewertungsexperten oder auf interne Analysen unter Verwendung angemessener Bewertungstechniken. Besondere Bedeutung kommt dabei u.a. der Prognose künftiger Zahlungsströme und der Ermittlung des Diskontierungssatzes zu.

Der Werthaltigkeitstest für Geschäfts- oder Firmenwerte basiert auf zukunftsbezogenen Annahmen, die regelmäßig angepasst werden.

Aktive latente Steuern werden angesetzt, wenn die Realisierbarkeit künftiger Steuervorteile wahrscheinlich ist. Die tatsächliche steuerliche Ergebnissituation in zukünftigen Perioden und damit die tatsächliche Nutzbarkeit aktiver latenter Steuern kann allerdings von der Einschätzung zum Zeitpunkt der Aktivierung der latenten Steuern abweichen.

Weitere Informationen zu den Annahmen und Schätzungen, die diesem Konzernabschluss zugrunde liegen, finden sich in den Erläuterungen zu den einzelnen Abschlussposten.

Sämtliche Annahmen und Schätzungen basieren auf den Verhältnissen und Beurteilungen am Bilanzstichtag. Bei der Einschätzung der voraussichtlichen Geschäftsentwicklung wurde außerdem das zu diesem Zeitpunkt als realistisch unterstellte künftige wirtschaftliche Umfeld in den Branchen und Regionen, in denen der Konzern tätig ist, berücksichtigt. Sollten sich die Rahmenbedingungen anders als erwartet entwickeln, können die tatsächlichen Beträge von den Schätzwerten abweichen. In solchen Fällen werden die Annahmen und, falls erforderlich, die Buchwerte der betroffenen Vermögenswerte und Schulden angepasst.

Zum Zeitpunkt der Aufstellung des Konzernabschlusses ist nicht von einer wesentlichen Änderung der zugrunde gelegten Annahmen und Schätzungen auszugehen.

**Kapitalmanagement.** Das Kapitalmanagement von RWE richtet sich an den strategischen Zielen des Konzerns aus. Im Mittelpunkt steht die langfristige Steigerung des Unternehmenswertes. Diesem Ziel dienen u.a. die kontinuierliche Verbesserung des operativen Geschäfts, die Sicherung der Marktposition durch wettbewerbsfähige Produkte und Dienstleistungen sowie gegebenenfalls die Optimierung des Portfolios durch wertschöpfende Akquisitionen und Desinvestments.

RWE steuert die Kapitalstruktur anhand von Finanzkennzahlen. Eine Schlüsselgröße ist der „Verschuldungsfaktor“ (Leverage Factor), der bei den Nettoschulden ansetzt. Letztere werden ermittelt, indem zu den Nettofinanzschulden die wesentlichen langfristigen Rückstellungen sowie die Hälfte des begebenen Hybridkapitals addiert werden und das aktivisch ausgewiesene Nettovermögen bei fondsgedeckten Pensionsverpflichtungen abgezogen wird. Der Verschuldungsfaktor gibt das Verhältnis der Nettoschulden zum EBITDA wieder. Im abgelaufenen Geschäftsjahr lag er bei 2,8 (Vorjahr: 2,8). Der Verschuldungsfaktor soll den Wert von 3,0 nicht dauerhaft überschreiten, wodurch er ein solides Rating unterstützt.

Wir messen der Sicherung eines soliden Kredit-Ratings und damit der Erhaltung finanzieller Flexibilität große Bedeutung bei. Das Kredit-Rating wird durch eine Vielzahl qualitativer und quantitativer Faktoren beeinflusst. Hierzu zählen die Finanzmittelzuflüsse und die Verschuldung ebenso wie das Marktumfeld, die Wettbewerbsposition und die politischen Rahmenbedingungen.

Zur Unterstützung des Ratings trug auch die im September 2010 begebene Hybridanleihe mit einem Volumen von 1,75 Mrd. € bei. Das Hybridkapital wird von den beiden führenden Rating-Agenturen Moody's und Standard & Poor's zur Hälfte als Eigenkapital eingestuft. Die Rating-relevanten Verschuldungskennziffern des Konzerns fallen daher günstiger aus, als sie bei der Begebung einer klassischen Anleihe gewesen wären.

Derzeit bewerten Moody's und Standard & Poor's die von der RWE AG bzw. der RWE Finance B.V. unter Garantie der RWE AG ausgegebenen nicht nachrangigen Anleihen mit „A2“ bzw. „A“, jeweils mit negativem Ausblick. Damit weist RWE unverändert eine Ratingeinstufung im Bereich „Investment Grade“ auf. Das kurzfristige Rating ist „P-1“ bzw. „A-1“. Wir streben an, unsere gute Kreditqualität zu halten.

## Änderung der Bilanzierungs- und Bewertungsmethoden

Der International Accounting Standards Board (IASB) und das IFRS Interpretations Committee (IFRS IC) haben eine Reihe von Änderungen bestehender International Financial Reporting Standards (IFRS) sowie einige neue IFRS und Interpretationen verabschiedet, die für den RWE-Konzern ab dem Geschäftsjahr 2010 verpflichtend anzuwenden sind:

**IFRS 3 (2008) „Unternehmenszusammenschlüsse“** enthält geänderte Vorschriften zur Bilanzierung von Unternehmenserwerben. Die Anpassungen gegenüber der ursprünglichen Fassung des IFRS 3 betreffen den Anwendungsbereich und die Bilanzierung von sukzessiven Anteilserwerben. Neu ist auch ein Wahlrecht, das IFRS 3 (2008) den Unternehmen einräumt: Die Anteile der nicht beherrschenden Gesellschafter können transaktionsindividuell mit ihrem beizulegenden Zeitwert oder mit dem anteiligen Nettovermögen bewertet werden. Je nachdem, für welche der beiden Möglichkeiten sich ein Unternehmen entscheidet, wird im Rahmen des Unternehmenserwerbs ein eventuell vorhandener Geschäfts- oder Firmenwert vollständig oder nur mit dem Anteil des Mehrheitseigentümers ausgewiesen. Die Änderungen werden sich entsprechend auf die Bilanzierung von Unternehmenstransaktionen auswirken.

**IAS 27 (2008) „Konzern- und Einzelabschlüsse“:** Mit der überarbeiteten Fassung von IAS 27 hat der IASB insbesondere die Vorschriften zur Bilanzierung von Transaktionen mit nicht beherrschenden Anteilseignern eines Konzerns geändert: Transaktionen, durch die ein Mutterunternehmen seine Beteiligungsquote an einem Tochterunternehmen ändert, ohne die Beherrschung aufzugeben, sind künftig als erfolgsneutrale

Eigenkapitaltransaktionen zu bilanzieren. Neu geregelt wurde auch die Bilanzierung im Falle des Verlusts einer beherrschenden Stellung gegenüber einem Tochterunternehmen: Der Standard legt fest, wie ein Entkonsolidierungserfolg berechnet und eine nach Teilveräußerung verbleibende Restbeteiligung am ehemaligen Tochterunternehmen bewertet werden muss. Die Änderungen werden sich demnach auf die Bilanzierung von bestimmten Unternehmenstransaktionen auswirken.

Keine wesentlichen Auswirkungen auf den RWE-Konzernabschluss haben die nachfolgenden erstmals im Geschäftsjahr 2010 anzuwendenden Standards und Interpretationen:

- Verbesserungen an den International Financial Reporting Standards (2009)
- IFRS 1 (neu strukturiert 2008) – Erstmalige Anwendung der International Financial Reporting Standards
- Änderung des IFRS 1 (2009) – Zusätzliche Ausnahmen für erstmalige Anwender
- Änderung des IFRS 2 (2009) – Anteilsbasierte Vergütungen zwischen Unternehmen einer Gruppe
- Änderung des IAS 39 (2009) – Geeignete Grundgeschäfte
- IFRIC 12 – Dienstleistungskonzessionsvereinbarungen
- IFRIC 15 – Verträge über die Errichtung von Immobilien
- IFRIC 16 – Absicherung einer Nettoinvestition in einen ausländischen Geschäftsbetrieb
- IFRIC 17 – Sachdividenden an Eigentümer
- IFRIC 18 – Übertragung von Vermögenswerten durch einen Kunden

## Neue Rechnungslegungsvorschriften

Der IASB und das IFRS IC haben weitere Standards und Interpretationen verabschiedet, die in der EU noch nicht verpflichtend anzuwenden sind. Die Standards und Interpretationen sind im Folgenden dargestellt. Teilweise sind sie noch nicht von der EU anerkannt. Derzeit prüfen wir, welche Auswirkungen sie auf den RWE-Konzernabschluss haben werden.

**IFRS 9 (2009) „Financial Instruments“** ersetzt die bisherigen Regelungen des IAS 39 zur Klassifizierung und Bewertung von finanziellen Vermögenswerten und Verbindlichkeiten. IFRS 9 (2009) ist erstmals verpflichtend anzuwenden für Geschäftsjahre, die am oder nach dem 1. Januar 2013 beginnen.

**IAS 24 (2009) „Angaben über Beziehungen zu nahestehenden Unternehmen und Personen“** führt im Wesentlichen Erleichterungen bei der Berichterstattung zu nahestehenden Unternehmen ein, die vom Staat kontrolliert oder wesentlich beeinflusst werden. IAS 24 (2009) ist erstmals verpflichtend anzuwenden für Geschäftsjahre, die am oder nach dem 1. Januar 2011 beginnen.

**Die Änderung an IAS 32 (2009) „Einstufung von Bezugsrechten“** bezieht sich darauf, wie bestimmte, auf Fremdwährung lautende Bezugsrechte, Optionen und Optionsscheine beim Emittenten zu bilanzieren sind. Die genannten Instrumente müssen künftig als Eigenkapital klassifiziert werden. Die Neuregelung ist erstmals anzuwenden für Geschäftsjahre, die am oder nach dem 1. Februar 2010 beginnen.

Bei den nachfolgenden Standards und Interpretationen, die 2010 noch nicht anwendbar sind, ist bereits abzusehen, dass sie keine wesentlichen Auswirkungen auf den RWE-Konzernabschluss haben werden:

- Improvements to IFRS (2010)
- Änderung des IFRS 1 (2010) – Begrenzte Befreiung erstmaliger Anwender von Vergleichsangaben nach IFRS 7
- Änderung des IFRS 1 (2010) – Severe Hyperinflation and Removal of Fixed Dates for First-time Adopters
- Änderungen des IFRS 7 (2010) – Financial Instruments: Disclosures
- Änderungen des IAS 12 (2010) – Deferred Tax: Recovery of Underlying Assets
- Änderung des IFRIC 14 (2009) – Vorauszahlungen im Rahmen von Mindestdotierungsverpflichtungen
- IFRIC 19 – Tilgung finanzieller Verbindlichkeiten durch Eigenkapitalinstrumente

## Erläuterungen zur Gewinn- und Verlustrechnung

### (1) Umsatzerlöse

Umsatzerlöse werden grundsätzlich dann erfasst, wenn die Dienstleistungen erbracht oder die Güter geliefert wurden und die Risiken daraus auf den Kunden übergegangen sind.

Um die Geschäftsentwicklung zutreffender darzustellen, weisen wir die Energiehandelsumsätze netto aus, d.h. mit der realisierten Rohmarge. Die auf physische Erfüllung ausgerichteten Strom-, Gas-, Kohle- und Ölgeschäfte weisen wir dagegen brutto aus. Energiehandelsumsätze werden im Segment Trading/ Gas Midstream getätigt. Die Bruttoumsätze (inkl. Energiehan-

delsumsätze) summierten sich im Geschäftsjahr 2010 auf 114.682 Mio. € (Vorjahr: 98.013 Mio. €).

Die Umsatzerlöse werden in der Segmentberichterstattung auf den Seiten 219 bis 222 nach Unternehmensbereichen und Regionen aufgegliedert. Durch Erst- und Entkonsolidierungen sind sie im Saldo um 5.016 Mio. € gestiegen.

Die Position „Erdgas-/Stromsteuer“ umfasst die von Gesellschaften des Konzerns unmittelbar gezahlte Steuer. Durch Änderungen des Konsolidierungskreises ist sie um 775 Mio. € gestiegen.

### (2) Sonstige betriebliche Erträge

| Sonstige betriebliche Erträge<br>in Mio. €                                               | 2010         | 2009         |
|------------------------------------------------------------------------------------------|--------------|--------------|
| Auflösung von Rückstellungen                                                             | 97           | 826          |
| Kostenumlagen/-erstattungen                                                              | 218          | 95           |
| Abgänge von und Zuschreibungen zu kurzfristigen Vermögenswerten ohne Wertpapiere         | 51           | 22           |
| Abgänge von und Zuschreibungen zu Anlagegegenständen inkl. Erträge aus Entkonsolidierung | 139          | 135          |
| Erträge aus derivativen Finanzinstrumenten                                               | 322          |              |
| Schadensersatz/Versicherungsleistungen                                                   | 10           | 35           |
| Vermietung und Verpachtung                                                               | 28           | 27           |
| Übrige                                                                                   | 411          | 470          |
|                                                                                          | <b>1.276</b> | <b>1.610</b> |

Erträge aus dem Abgang von Finanzanlagen und Ausleihungen werden, soweit sie Beteiligungen betreffen, im Beteiligungsergebnis ausgewiesen und ansonsten – ebenso wie Erträge aus dem Abgang kurzfristiger Wertpapiere – im Finanzergebnis gezeigt.

Änderungen des Konsolidierungskreises erhöhten die sonstigen betrieblichen Erträge um 134 Mio. €.

### (3) Materialaufwand

| Materialaufwand<br>in Mio. €                                              | 2010          | 2009          |
|---------------------------------------------------------------------------|---------------|---------------|
| Aufwendungen für Roh-, Hilfs- und Betriebsstoffe sowie für bezogene Waren | 29.169        | 26.170        |
| Aufwendungen für bezogene Leistungen                                      | 4.007         | 3.668         |
|                                                                           | <b>33.176</b> | <b>29.838</b> |

Der Materialaufwand aus Explorationstätigkeiten belief sich im Berichtsjahr auf 85 Mio. € (Vorjahr: 133 Mio. €).

Insgesamt wurden Energiehandelsumsätze in Höhe von 61.362 Mio. € (Vorjahr: 50.272 Mio. €) mit dem Materialaufwand verrechnet. Änderungen des Konsolidierungskreises erhöhten den Materialaufwand um 2.863 Mio. €.

Die Aufwendungen für Roh-, Hilfs- und Betriebsstoffe umfassen auch die Aufwendungen für den Einsatz und die Entsorgung von Kernbrennstoffen.

**(4) Personalaufwand**

| Personalaufwand<br>in Mio. €                                                   | 2010         | 2009         |
|--------------------------------------------------------------------------------|--------------|--------------|
| Löhne und Gehälter                                                             | 3.946        | 3.761        |
| Soziale Abgaben und Aufwendungen für<br>Altersversorgung und für Unterstützung | 927          | 849          |
|                                                                                | <b>4.873</b> | <b>4.610</b> |

Der RWE-Konzern beschäftigte im Jahresdurchschnitt 71.001 Mitarbeiter (Vorjahr: 68.828 ohne American Water). Die Zahl ergibt sich durch Umrechnung in Vollzeitstellen. Das heißt, Teilzeitbeschäftigte und befristete Beschäftigungsverhältnisse werden mit ihrer Teilzeitquote bzw. mit ihrer Beschäftigungszeit im Verhältnis zur Jahresbeschäftigungszeit erfasst. Von den Beschäftigten waren 55.224 (Vorjahr: 54.107) Tarif- und sonstige Mitarbeiter und 15.777 (Vorjahr: 14.721) außertarifliche Mitarbeiter. Darüber hinaus wurden im Jahresdurchschnitt 2.800 (Vorjahr: 2.756) Auszubildende beschäftigt. In den Mitarbeiterzahlen sind die Auszubildenden nicht enthalten.

**(6) Sonstige betriebliche Aufwendungen**

| Sonstige betriebliche Aufwendungen<br>in Mio. €                                                                       | 2010         | 2009         |
|-----------------------------------------------------------------------------------------------------------------------|--------------|--------------|
| Instandhaltung inkl. Erneuerungsverpflichtungen                                                                       | 917          | 829          |
| Rückstellungszuführungen                                                                                              | 271          | 104          |
| Konzessionen, Lizenzen und andere vertragliche Verpflichtungen                                                        | 515          | 540          |
| Struktur- und Anpassungsmaßnahmen                                                                                     | 196          | 71           |
| Rechts- und sonstige Beratung sowie Datenverarbeitung                                                                 | 295          | 327          |
| Abgänge von kurzfristigen Vermögenswerten und Wertminderungen<br>(ohne Wertminderungen bei Vorräten und Wertpapieren) | 380          | 242          |
| Abgänge von Anlagegegenständen inkl. Aufwand aus Entkonsolidierung                                                    | 102          | 127          |
| Versicherungen, Provisionen, Frachten und ähnliche Vertriebsaufwendungen                                              | 235          | 252          |
| Allgemeine Verwaltungskosten                                                                                          | 224          | 192          |
| Werbemaßnahmen                                                                                                        | 241          | 236          |
| Aufwendungen aus derivativen Finanzinstrumenten                                                                       | 70           | 159          |
| Pachten für Werksanlagen und Netze sowie Mieten                                                                       | 123          | 100          |
| Kosten des Post- und Zahlungsverkehrs                                                                                 | 86           | 82           |
| Gebühren und Beiträge                                                                                                 | 89           | 48           |
| Währungskursverluste                                                                                                  | 52           | 17           |
| Sonstige Steuern (im Wesentlichen Substanzsteuern)                                                                    | 79           | 49           |
| Übrige                                                                                                                | 553          | 549          |
|                                                                                                                       | <b>4.428</b> | <b>3.924</b> |

Explorationstätigkeiten führten zu sonstigen betrieblichen Aufwendungen in Höhe von 57 Mio. € (Vorjahr: 76 Mio. €).

Änderungen des Konsolidierungskreises erhöhten den Personalaufwand um 278 Mio. €.

**(5) Abschreibungen**

Die Abschreibungen beliefen sich für Sachanlagen auf 2.600 Mio. € (Vorjahr: 1.900 Mio. €) und für Investment Property auf 10 Mio. € (Vorjahr: 8 Mio. €). Immaterielle Vermögenswerte wurden in Höhe von 603 Mio. € (Vorjahr: 449 Mio. €) abgeschrieben; davon entfielen 314 Mio. € (Vorjahr: 272 Mio. €) auf Kundenstämme akquirierter Unternehmen. Aus der Explorationstätigkeit ergaben sich Abschreibungen auf Sachanlagen und immaterielle Vermögenswerte in Höhe von 5 Mio. € (Vorjahr: 1 Mio. €).

Im Berichtsjahr wurden außerplanmäßige Abschreibungen vorgenommen. Diese beliefen sich für Sachanlagen auf 471 Mio. € (Vorjahr: 14 Mio. €), für Investment Property auf 3 Mio. € (Vorjahr: 0 Mio. €) und für immaterielle Vermögenswerte (ohne Geschäfts- oder Firmenwerte) auf 37 Mio. € (Vorjahr: 5 Mio. €).

Durch Änderungen des Konsolidierungskreises erhöhten sich die Abschreibungen um 216 Mio. €.

Änderungen des Konsolidierungskreises erhöhten die sonstigen betrieblichen Aufwendungen um 434 Mio. €.

#### (7) Beteiligungsergebnis

Das Beteiligungsergebnis enthält sämtliche Erträge und Aufwendungen, die im Zusammenhang mit den betrieblich veran-

lassten Beteiligungen entstanden sind. Es umfasst das Ergebnis aus at-Equity-bilanzierten Beteiligungen und das übrige Beteiligungsergebnis.

| Beteiligungsergebnis<br>in Mio. €                                            | 2010       | 2009       |
|------------------------------------------------------------------------------|------------|------------|
| <b>Ergebnis aus at-Equity-bilanzierten Beteiligungen</b>                     | <b>310</b> | <b>131</b> |
| Davon: Zuschreibungen/Abschreibungen auf at-Equity-bilanzierte Beteiligungen | (24)       | (-111)     |
| Ergebnis aus nicht konsolidierten Tochterunternehmen                         | -1         | 29         |
| Davon: Abschreibungen auf Anteile an nicht konsolidierten Tochterunternehmen |            | (-2)       |
| Ergebnis aus übrigen Beteiligungen                                           | 53         | 51         |
| Davon: Abschreibungen auf Anteile an übrigen Beteiligungen                   | (-3)       | (-2)       |
| Erträge aus dem Abgang von Beteiligungen                                     | 34         | 97         |
| Aufwendungen aus dem Abgang von Beteiligungen                                |            | 64         |
| Erträge aus Ausleihungen an Beteiligungen                                    | 27         | 53         |
| Aufwendungen aus Ausleihungen an Beteiligungen                               | 16         | 35         |
| <b>Übriges Beteiligungsergebnis</b>                                          | <b>97</b>  | <b>131</b> |
|                                                                              | <b>407</b> | <b>262</b> |

Das Beteiligungsergebnis enthält Abschreibungen auf übrige Finanzanlagen in Höhe von 3 Mio. € (Vorjahr: 4 Mio. €) und auf Ausleihungen an Beteiligungen in Höhe von 16 Mio. € (Vorjahr: 16 Mio. €).

Im Berichtsjahr wurden 71 Mio. € bei den at-Equity-bilanzierten Beteiligungen Kärntner Energieholding Beteiligungs GmbH, Österreich, und Stadtwerke Duisburg AG aufgrund der wieder

gestiegenen Unternehmenswerte zugeschrieben und 40 Mio. € bei der at-Equity-bilanzierten Beteiligung Fri-El S.p.A., Italien, aufgrund der langsamer als erwartet verlaufenden Entwicklung der Projekte der Gesellschaft abgeschrieben. Im Vorjahr wurden vor dem Hintergrund der schwierigen Rahmenbedingungen am Markt für verflüssigtes Erdgas (LNG) außerplanmäßige Abschreibungen auf die at-Equity-bilanzierte Beteiligung Excelerate Energy LP, USA, in Höhe von 105 Mio. € vorgenommen.

#### (8) Finanzergebnis

| Finanzergebnis<br>in Mio. €                                                                             | 2010          | 2009          |
|---------------------------------------------------------------------------------------------------------|---------------|---------------|
| Zinsen und ähnliche Erträge                                                                             | 448           | 589           |
| Andere Finanzerträge                                                                                    | 800           | 1.110         |
| <b>Finanzerträge</b>                                                                                    | <b>1.248</b>  | <b>1.699</b>  |
| Zinsen und ähnliche Aufwendungen                                                                        | 1.258         | 1.224         |
| Zinsanteile an Zuführungen zu                                                                           |               |               |
| Rückstellungen für Pensionen und ähnliche Verpflichtungen (inkl. aktivisch ausgewiesenes Nettovermögen) | 147           | 176           |
| Rückstellungen für Entsorgung im Kernenergiebereich und bergbaubedingte Rückstellungen                  | 623           | 567           |
| sonstigen Rückstellungen                                                                                | 170           | 214           |
| Andere Finanzaufwendungen                                                                               | 986           | 1.508         |
| <b>Finanzaufwendungen</b>                                                                               | <b>3.184</b>  | <b>3.689</b>  |
|                                                                                                         | <b>-1.936</b> | <b>-1.990</b> |

Das Finanzergebnis setzt sich aus dem Zinsergebnis, den Zinsanteilen an Rückstellungszuführungen sowie den anderen Finanzerträgen und Finanzaufwendungen zusammen.

Die Zinsanteile an Rückstellungszuführungen enthalten die jährlichen Aufzinsungsbeträge aus der Barwertfortschreibung der langfristigen Rückstellungen. Sie werden um die erwarteten Erträge aus Planvermögen zur Deckung von Pensionsverpflichtungen gekürzt.

Das Zinsergebnis enthält im Wesentlichen Zinserträge aus verzinslichen Wertpapieren und Ausleihungen, Erträge und Aufwendungen aus Wertpapieren sowie Zinsaufwendungen.

| <b>Zinsergebnis</b><br>in Mio. € | 2010        | 2009        |
|----------------------------------|-------------|-------------|
| Zinsen und ähnliche Erträge      | 448         | 589         |
| Zinsen und ähnliche Aufwendungen | 1.258       | 1.224       |
|                                  | <b>-810</b> | <b>-635</b> |

Das Zinsergebnis resultiert aus finanziellen Vermögenswerten und Verbindlichkeiten, die den folgenden Bewertungskategorien zugeordnet sind:

| <b>Zinsergebnis nach Bewertungskategorien</b><br>in Mio. €                    | 2010        | 2009        |
|-------------------------------------------------------------------------------|-------------|-------------|
| Kredite und Forderungen                                                       | 359         | 357         |
| Zur Veräußerung verfügbare finanzielle Vermögenswerte                         | 89          | 232         |
| Zu (fortgeführten) Anschaffungskosten bewertete finanzielle Verbindlichkeiten | -1.258      | -1.224      |
|                                                                               | <b>-810</b> | <b>-635</b> |

Das Finanzergebnis enthält darüber hinaus alle anderen Finanzerträge und Finanzaufwendungen, die nicht dem Zinsergebnis oder den Zinsanteilen an Rückstellungszuführungen zugeordnet werden können.

Zu den anderen Finanzerträgen zählen u.a. realisierte Gewinne aus dem Abgang von Wertpapieren in Höhe von 161 Mio. € (Vorjahr: 292 Mio. €). Die anderen Finanzaufwendungen enthalten 0 Mio. € (Vorjahr: 51 Mio. €) Abschreibungen auf Wertpapiere infolge gesunkener beizulegender Zeitwerte und 44 Mio. € (Vorjahr: 441 Mio. €) realisierte Verluste aus dem Abgang von Wertpapieren.

## (9) Ertragsteuern

| <b>Ertragsteuern</b><br>in Mio. € | 2010         | 2009         |
|-----------------------------------|--------------|--------------|
| Tatsächliche Ertragsteuern        | 2.056        | 1.761        |
| Latente Steuern                   | -680         | 97           |
|                                   | <b>1.376</b> | <b>1.858</b> |

Von den latenten Steuern entfallen -586 Mio. € (Vorjahr: 5 Mio. €) auf temporäre Differenzen.

In den tatsächlichen Ertragsteuern sind im Saldo Aufwendungen von 26 Mio. € (Vorjahr: 130 Mio. €) enthalten, die vorangegangene Perioden betreffen.

Durch die Nutzung von in Vorjahren nicht angesetzten steuerlichen Verlustvorträgen minderten sich die tatsächlichen Ertragsteuern um 32 Mio. € (Vorjahr: 4 Mio. €).

Im Berichtsjahr wurde das Eigenkapital durch die Verrechnung latenter Steuern mit dem Other Comprehensive Income um 8 Mio. € (Vorjahr: 251 Mio. €) erhöht:

| <b>Im Other Comprehensive Income</b><br><b>erfasste Ertragsteuern</b><br>in Mio. €                                  | 2010     | 2009       |
|---------------------------------------------------------------------------------------------------------------------|----------|------------|
| Marktbewertung von zur Veräußerung verfügbaren Finanzinstrumenten                                                   | 34       | -9         |
| Marktbewertung von Finanzinstrumenten in Sicherungsbeziehung                                                        | 6        | -58        |
| Versicherungsmathematische Gewinne und Verluste leistungsorientierter Pensionszusagen und ähnlicher Verpflichtungen | -32      | 318        |
| <b>Ertrag</b>                                                                                                       | <b>8</b> | <b>251</b> |

Zudem wurden Steuern in Höhe von 9 Mio. € im Zusammenhang mit dem Hybridkapital direkt mit dem Eigenkapital verrechnet.

| <b>Steuerüberleitungsrechnung</b><br>in Mio. €                                                                                                               | 2010         | 2009         |
|--------------------------------------------------------------------------------------------------------------------------------------------------------------|--------------|--------------|
| <b>Ergebnis fortgeführter Aktivitäten vor Steuern</b>                                                                                                        | <b>4.978</b> | <b>5.598</b> |
| <b>Theoretischer Steueraufwand</b>                                                                                                                           | <b>1.555</b> | <b>1.729</b> |
| Besteuerungsunterschied Ausland                                                                                                                              | -142         | -169         |
| Steuereffekte auf                                                                                                                                            |              |              |
| steuerfreie Inlandsdividendenerträge                                                                                                                         | -76          | -95          |
| steuerfreie Auslandsdividendenerträge                                                                                                                        | -28          | -32          |
| sonstige steuerfreie Erträge                                                                                                                                 | -11          | -14          |
| steuerlich nicht abzugsfähige Aufwendungen                                                                                                                   | 132          | 72           |
| Equity-Bilanzierung von assoziierten Unternehmen<br>(inkl. Abschreibung auf Geschäfts- oder Firmenwerte von assoziierten Unternehmen)                        | 16           | 69           |
| nicht nutzbare Verlustvorträge bzw. Nutzung von nicht bilanzierten Verlustvorträgen/<br>Abschreibungen auf Verlustvorträge/Latenzierung von Verlustvorträgen | -122         | 55           |
| Ergebnisse aus dem Verkauf von Unternehmensanteilen                                                                                                          | -12          | -36          |
| Steuersatzänderungen Inland                                                                                                                                  | -10          |              |
| Steuersatzänderungen Ausland                                                                                                                                 | -56          |              |
| Sonstiges                                                                                                                                                    | 130          | 279          |
| <b>Effektiver Steueraufwand</b>                                                                                                                              | <b>1.376</b> | <b>1.858</b> |
| Effektiver Steuersatz in %                                                                                                                                   | 27,6         | 33,2         |

## Erläuterungen zur Bilanz

### (10) Immaterielle Vermögenswerte

| Immaterielle Vermögenswerte                              | Entwicklungs-<br>ausgaben | Konzessionen,<br>gewerbliche<br>Schutzrechte,<br>Lizenzen und<br>ähnliche Rechte | Kunden-<br>beziehungen<br>und ähnliche<br>Werte | Geschäfts-<br>oder Firmen-<br>werte | Geleistete<br>Anzahlungen | Summe  |
|----------------------------------------------------------|---------------------------|----------------------------------------------------------------------------------|-------------------------------------------------|-------------------------------------|---------------------------|--------|
| in Mio. €                                                |                           |                                                                                  |                                                 |                                     |                           |        |
| <b>Anschaffungs- bzw. Herstellungskosten</b>             |                           |                                                                                  |                                                 |                                     |                           |        |
| Stand: 01.01.10                                          | 475                       | 3.734                                                                            | 2.790                                           | 13.258                              | 2                         | 20.259 |
| Zu-/Abgänge durch Änderung des<br>Konsolidierungskreises | 16                        | 1                                                                                | 2                                               | 130                                 |                           | 149    |
| Zugänge                                                  | 112                       | 165                                                                              |                                                 |                                     | 1                         | 278    |
| Umbuchungen                                              | 2                         | 1                                                                                |                                                 |                                     | -1                        | 2      |
| Währungsanpassungen                                      | 11                        | 21                                                                               | 74                                              | 192                                 |                           | 298    |
| Abgänge                                                  | 9                         | 93                                                                               |                                                 | 2                                   |                           | 104    |
| Stand: 31.12.10                                          | 607                       | 3.829                                                                            | 2.866                                           | 13.578                              | 2                         | 20.882 |
| <b>Kumulierte Abschreibungen</b>                         |                           |                                                                                  |                                                 |                                     |                           |        |
| Stand: 01.01.10                                          | 223                       | 968                                                                              | 1.742                                           | 6                                   |                           | 2.939  |
| Zu-/Abgänge durch Änderung des<br>Konsolidierungskreises | 7                         | 10                                                                               | -1                                              |                                     |                           | 16     |
| Abschreibungen des Berichtsjahres                        | 69                        | 220                                                                              | 314                                             |                                     |                           | 603    |
| Umbuchungen                                              | 1                         |                                                                                  |                                                 |                                     |                           | 1      |
| Währungsanpassungen                                      | 6                         | 7                                                                                | 52                                              |                                     |                           | 65     |
| Abgänge                                                  | 9                         | 83                                                                               |                                                 |                                     |                           | 92     |
| Stand: 31.12.10                                          | 297                       | 1.122                                                                            | 2.107                                           | 6                                   |                           | 3.532  |
| <b>Buchwerte</b>                                         |                           |                                                                                  |                                                 |                                     |                           |        |
| Stand: 31.12.10                                          | 310                       | 2.707                                                                            | 759                                             | 13.572                              | 2                         | 17.350 |

  

|                                                          |     |       |       |        |    |        |
|----------------------------------------------------------|-----|-------|-------|--------|----|--------|
| <b>Anschaffungs- bzw. Herstellungskosten</b>             |     |       |       |        |    |        |
| Stand: 01.01.09                                          | 316 | 1.999 | 2.164 | 9.152  | 4  | 13.635 |
| Zu-/Abgänge durch Änderung des<br>Konsolidierungskreises | 55  | 1.297 | 470   | 3.871  | -2 | 5.691  |
| Zugänge                                                  | 104 | 499   |       |        | 1  | 604    |
| Währungsanpassungen                                      | 19  | 19    | 156   | 235    | -1 | 428    |
| Abgänge                                                  | 19  | 80    |       |        |    | 99     |
| Stand: 31.12.09                                          | 475 | 3.734 | 2.790 | 13.258 | 2  | 20.259 |
| <b>Kumulierte Abschreibungen</b>                         |     |       |       |        |    |        |
| Stand: 01.01.09                                          | 169 | 898   | 1.360 | 6      |    | 2.433  |
| Zu-/Abgänge durch Änderung des<br>Konsolidierungskreises | -1  | -22   | 12    |        |    | -11    |
| Abschreibungen des Berichtsjahres                        | 48  | 129   | 272   |        |    | 449    |
| Währungsanpassungen                                      | 9   | 7     | 98    |        |    | 114    |
| Abgänge                                                  | 2   | 44    |       |        |    | 46     |
| Stand: 31.12.09                                          | 223 | 968   | 1.742 | 6      |    | 2.939  |
| <b>Buchwerte</b>                                         |     |       |       |        |    |        |
| Stand: 31.12.09                                          | 252 | 2.766 | 1.048 | 13.252 | 2  | 17.320 |

Für Forschung und Entwicklung hat der RWE-Konzern im Berichtsjahr 149 Mio. € (Vorjahr: 110 Mio. €) aufgewendet. Entwicklungsausgaben wurden in Höhe von 112 Mio. € (Vorjahr: 104 Mio. €) aktiviert.

Immaterielle Vermögenswerte aus der Explorationstätigkeit hatten zum Bilanzstichtag einen Buchwert von 374 Mio. € (Vorjahr: 415 Mio. €).

Die Geschäfts- oder Firmenwerte setzen sich wie folgt zusammen:

| Geschäfts- oder Firmenwerte<br>in Mio. € | 31.12.10      | 31.12.09      |
|------------------------------------------|---------------|---------------|
| Deutschland                              | 4.186         | 3.937         |
| Stromerzeugung                           | (404)         | (404)         |
| Vertrieb und Verteilnetze                | (3.782)       | (3.533)       |
| Niederlande/Belgien                      | 2.665         | 3.504         |
| Großbritannien                           | 2.968         | 2.877         |
| Zentralost-/Südosteuropa                 | 2.048         | 1.956         |
| Erneuerbare Energien                     | 736           | 441           |
| Upstream Gas & Öl                        | 25            | 26            |
| Trading/Gas Midstream                    | 944           | 434           |
| Sonstige                                 |               | 77            |
|                                          | <b>13.572</b> | <b>13.252</b> |

Im Berichtsjahr sind Geschäfts- oder Firmenwerte in Höhe von 130 Mio. € zugegangen. Eine Erhöhung der kurzfristigen Kaufpreisverbindlichkeiten aus gewährten Andienungsrechten (Put-Optionen) führte zu einer ergebnisneutralen Anpassung der Geschäfts- oder Firmenwerte bei Vertrieb und Verteilnetze in Höhe von 213 Mio. €. Verminderungen ergaben sich im Wesentlichen durch den Ausweis von Thyssengas als „Zur Veräußerung bestimmte Vermögenswerte und Schulden“ (77 Mio. €). Von den Zugängen im Vorjahr (3.871 Mio. €) entfielen 3.435 Mio. € auf den Unternehmenserwerb von Essent. Mit Zuordnung der Handels- und Windstromaktivitäten von Essent zu den Segmenten Trading/Gas Midstream und Erneuerbare Energien wurden auf diese Segmente auch Geschäfts- oder Firmenwerte von 510 Mio. € bzw. 285 Mio. € übertragen. Auf das Segment Vertrieb und Verteilnetze wurde mit Zuordnung der Gasspeicheraktivitäten von Essent ein Geschäfts- oder Firmenwert von 43 Mio. € übertragen.

Jeweils im dritten Quartal des Geschäftsjahres wird der regelmäßige Werthaltigkeitstest (Impairment-Test) zur Ermittlung eines ggf. notwendigen Abschreibungsbedarfs der Geschäfts- oder Firmenwerte durchgeführt. Zur Durchführung dieser

Werthaltigkeitstests werden die Geschäfts- oder Firmenwerte den Zahlungsmittel generierenden Einheiten auf Ebene der Segmente zugeordnet. Beim Impairment-Test wird der erzielbare Betrag der Zahlungsmittel generierenden Einheiten durch den beizulegenden Zeitwert abzüglich Veräußerungskosten oder den Nutzungswert bestimmt – je nachdem, welcher Wert höher ist. Der beizulegende Zeitwert spiegelt die bestmögliche Schätzung des Preises wider, für den ein unabhängiger Dritter die Zahlungsmittel generierende Einheit am Bilanzstichtag erwerben würde. Der Nutzungswert ist der Barwert der zukünftigen Cash Flows, die voraussichtlich mit einer Zahlungsmittel generierenden Einheit erzielt werden können.

Der beizulegende Zeitwert wird aus unternehmensexterner, der Nutzungswert aus unternehmensinterner Sicht bestimmt. Wir ermitteln beide Größen mithilfe eines Unternehmensbewertungsmodells und legen dabei Cash-Flow-Planungen zugrunde. Diese basieren auf der vom Vorstand genehmigten und im Zeitpunkt des Impairment-Tests gültigen Mittelfristplanung und beziehen sich auf einen bis zu fünfjährigen Detailplanungszeitraum. Sofern wirtschaftliche oder regulatorische Rahmenbedingungen dieses erfordern, wird in begründeten Ausnahmefällen ein längerer Detailplanungszeitraum zugrunde gelegt. In die Cash-Flow-Planungen fließen Erfahrungen ebenso ein wie Erwartungen über die zukünftige Marktentwicklung. Bei der Bestimmung des beizulegenden Zeitwertes werden – falls vorhanden – Markttransaktionen innerhalb derselben Branche oder Bewertungen Dritter berücksichtigt.

Die Mittelfristplanung basiert auf länderspezifischen Annahmen über die Entwicklung wichtiger makroökonomischer Größen, z.B. des Bruttoinlandsprodukts, der Verbraucherpreise, des Zinsniveaus und der Nominallohne. Diese Einschätzungen werden u.a. aus volks- und finanzwirtschaftlichen Studien abgeleitet.

Zentrale Planungsannahmen für die auf den europäischen Strom- und Gasmärkten tätigen Unternehmensbereiche sind die Entwicklung der Großhandelspreise für Strom, Rohöl, Erdgas, Kohle und CO<sub>2</sub>-Emissionsrechte, die Endverbraucherpreise für Strom und Gas, die Entwicklung der Marktanteile sowie der regulatorischen Rahmenbedingungen.

Die bei der Unternehmensbewertung verwendeten Diskontierungssätze werden auf der Basis von Marktdaten ermittelt. Im Berichtszeitraum lagen sie für die Zahlungsmittel generierenden Einheiten in einer Bandbreite von 6,25 bis 9,00 % (Vorjahr: 6,5 bis 9,0 %) nach Steuern und 8,0 bis 16,5 % (Vorjahr: 8,8 bis 15,6 %) vor Steuern.

Für die Extrapolation der Cash Flows über den Detailplanungszeitraum hinaus haben wir konstante Wachstumsraten zwischen 0,0 und 1,0% (Vorjahr: 0,0 und 1,0%) angenommen. Diese Werte sind bereichsspezifisch aus Erfahrungen und Zukunftserwartungen abgeleitet und überschreiten nicht die langfristigen durchschnittlichen Wachstumsraten der jeweiligen Märkte, in denen die Konzernunternehmen tätig sind. Bei der Ermittlung der Wachstumsraten der Cash Flows werden die Ausgaben für Investitionen abgezogen, die notwendig sind, um das angenommene Wachstum zu erzielen.

Zum Bilanzstichtag lagen sowohl die beizulegenden Zeitwerte abzüglich Veräußerungskosten als auch die Nutzungswerte über den Buchwerten der Zahlungsmittel generierenden Einheiten. Die jeweiligen Überdeckungen reagieren in besonderem Maße sensitiv bei Veränderungen des Diskontierungssatzes, der Wachstumsrate und des betrieblichen Ergebnisses nach Steuern in der ewigen Rente als wesentliche Bewertungsparameter.

Die Segmente Großbritannien und Niederlande/Belgien wiesen von allen Segmenten die jeweils geringste Überdeckung des erzielbaren Betrages über den Buchwert auf.

Der dem Segment Großbritannien zugeordnete Goodwill belief sich zum 31. Dezember 2010 auf 2.968 Mio. €. Der Werthaltigkeitstest ergab einen erzielbaren Betrag, der den Buchwert um 1,1 Mrd. £ überstieg. Der Bewertung des Segments Großbritannien wurde ein Diskontierungszinssatz von 6,75% und eine Wachstumsrate von 1,0% zugrunde gelegt. Eine Erhöhung des Diskontierungszinssatzes um mehr als 1,21 Prozentpunkte auf über 7,96%, der Ansatz einer negativen Wachstumsrate von mehr als 1,53% oder eine Minderung des betrieblichen Ergebnisses nach Steuern in der ewigen Rente um mehr als 85 Mio. £ hätten dazu geführt, dass der erzielbare Betrag den Buchwert der Zahlungsmittel generierenden Einheit Großbritannien unterschritten hätte.

Dem Segment Niederlande/Belgien ist ein Goodwill von 2.665 Mio. € zugeordnet. Der erzielbare Betrag lag um 0,9 Mrd. € über dem Buchwert. Ein Wertminderungsbedarf hätte sich ergeben, wenn bei der Bewertung ein um mehr als 0,42 Prozentpunkte erhöhter Diskontierungszinssatz von über 6,67%, eine um mehr als 0,69 Prozentpunkte reduzierte Wachstumsrate von unter 0,31% oder ein um mehr als 61 Mio. € reduziertes betriebliches Ergebnis in der ewigen Rente angesetzt worden wäre.

(11) Sachanlagen

| Sachanlagen                                           | Grundstücke,<br>grundstücks-<br>gleiche Rechte<br>und Bauten<br>inkl. Bauten<br>auf fremden<br>Grundstücken | Technische<br>Anlagen und<br>Maschinen | Andere<br>Anlagen,<br>Betriebs-<br>und<br>Geschäfts-<br>ausstattung | Geleistete<br>Anzah-<br>lungen | Anlagen<br>im Bau | Summe  |
|-------------------------------------------------------|-------------------------------------------------------------------------------------------------------------|----------------------------------------|---------------------------------------------------------------------|--------------------------------|-------------------|--------|
| in Mio. €                                             |                                                                                                             |                                        |                                                                     |                                |                   |        |
| <b>Anschaffungs- bzw. Herstellungskosten</b>          |                                                                                                             |                                        |                                                                     |                                |                   |        |
| Stand: 01.01.10                                       | 6.959                                                                                                       | 64.004                                 | 2.079                                                               | 1.869                          | 4.593             | 79.504 |
| Zu-/Abgänge durch Änderung des Konsolidierungskreises | -39                                                                                                         | -729                                   | 1                                                                   | 112                            | -60               | -715   |
| Zugänge                                               | 285                                                                                                         | 1.908                                  | 171                                                                 | 681                            | 3.198             | 6.243  |
| Umbuchungen                                           | 73                                                                                                          | 1.737                                  | 52                                                                  | -7                             | -1.914            | -59    |
| Währungsanpassungen                                   | 32                                                                                                          | 380                                    | 18                                                                  | -3                             | 60                | 487    |
| Abgänge                                               | 77                                                                                                          | 704                                    | 133                                                                 |                                | 54                | 968    |
| Stand: 31.12.10                                       | 7.233                                                                                                       | 66.596                                 | 2.188                                                               | 2.652                          | 5.823             | 84.492 |
| <b>Kumulierte Abschreibungen</b>                      |                                                                                                             |                                        |                                                                     |                                |                   |        |
| Stand: 01.01.10                                       | 3.566                                                                                                       | 45.747                                 | 1.559                                                               |                                | 5                 | 50.877 |
| Zu-/Abgänge durch Änderung des Konsolidierungskreises | -20                                                                                                         | -601                                   | -2                                                                  |                                |                   | -623   |
| Abschreibungen des Berichtsjahres                     | 208                                                                                                         | 2.195                                  | 162                                                                 |                                | 35                | 2.600  |
| Umbuchungen                                           | -40                                                                                                         |                                        |                                                                     |                                |                   | -40    |
| Währungsanpassungen                                   | 13                                                                                                          | 204                                    | 13                                                                  |                                |                   | 230    |
| Abgänge                                               | 44                                                                                                          | 609                                    | 129                                                                 |                                |                   | 782    |
| Zuschreibungen                                        | 5                                                                                                           | 2                                      |                                                                     |                                |                   | 7      |
| Stand: 31.12.10                                       | 3.678                                                                                                       | 46.934                                 | 1.603                                                               |                                | 40                | 52.255 |
| <b>Buchwerte</b>                                      |                                                                                                             |                                        |                                                                     |                                |                   |        |
| Stand: 31.12.10                                       | 3.555                                                                                                       | 19.662                                 | 585                                                                 | 2.652                          | 5.783             | 32.237 |

|                                                       |       |        |       |       |        |        |
|-------------------------------------------------------|-------|--------|-------|-------|--------|--------|
| <b>Anschaffungs- bzw. Herstellungskosten</b>          |       |        |       |       |        |        |
| Stand: 01.01.09                                       | 6.612 | 58.519 | 1.942 | 1.024 | 2.953  | 71.050 |
| Zu-/Abgänge durch Änderung des Konsolidierungskreises | 89    | 2.291  | 36    | -1    | 789    | 3.204  |
| Zugänge                                               | 164   | 1.951  | 161   | 859   | 2.317  | 5.452  |
| Umbuchungen                                           | 129   | 1.360  | 28    | -13   | -1.535 | -31    |
| Währungsanpassungen                                   | 26    | 376    | 22    |       | 93     | 517    |
| Abgänge                                               | 61    | 493    | 110   |       | 24     | 688    |
| Stand: 31.12.09                                       | 6.959 | 64.004 | 2.079 | 1.869 | 4.593  | 79.504 |
| <b>Kumulierte Abschreibungen</b>                      |       |        |       |       |        |        |
| Stand: 01.01.09                                       | 3.441 | 44.342 | 1.501 | 1     | 3      | 49.288 |
| Zu-/Abgänge durch Änderung des Konsolidierungskreises | 10    | 14     | -1    | -1    |        | 22     |
| Abschreibungen des Berichtsjahres                     | 167   | 1.582  | 149   |       | 2      | 1.900  |
| Umbuchungen                                           | -14   |        |       |       |        | -14    |
| Währungsanpassungen                                   | 8     | 209    | 16    |       |        | 233    |
| Abgänge                                               | 35    | 400    | 106   |       |        | 541    |
| Zuschreibungen                                        | 11    |        |       |       |        | 11     |
| Stand: 31.12.09                                       | 3.566 | 45.747 | 1.559 |       | 5      | 50.877 |
| <b>Buchwerte</b>                                      |       |        |       |       |        |        |
| Stand: 31.12.09                                       | 3.393 | 18.257 | 520   | 1.869 | 4.588  | 28.627 |

Von den Zu-/Abgängen durch Änderung des Konsolidierungskreises entfielen im Vorjahr 2.947 Mio. € auf Essent.

Auf Sachanlagen aus der Explorationstätigkeit entfiel ein Buchwert in Höhe von 346 Mio. € (Vorjahr: 354 Mio. €).

Sachanlagen unterlagen im Umfang von 1.026 Mio. € (Vorjahr: 1.137 Mio. €) Verfügungsbeschränkungen in Form von Grund-

pfandrechten und Sicherungsübereignungen. Vom Buchwert der Sachanlagen entfielen 136 Mio. € (Vorjahr: 74 Mio. €) auf im Wege des Finanzierungsleasings gemietete Vermögenswerte. Im Wesentlichen handelte es sich hierbei um technische Anlagen und Maschinen mit einem Gesamtwert von 127 Mio. € (Vorjahr: 64 Mio. €). Die Abgänge von Sachanlagen ergaben sich durch Veräußerung oder Stilllegung von Anlagen.

## (12) Investment Property

| Investment Property<br>in Mio. €                      |     |
|-------------------------------------------------------|-----|
| <b>Anschaffungs- bzw. Herstellungskosten</b>          |     |
| Stand: 01.01.10                                       | 378 |
| Zu-/Abgänge durch Änderung des Konsolidierungskreises |     |
| Umbuchungen                                           | 40  |
| Währungsanpassungen                                   |     |
| Abgänge                                               | 17  |
| Stand: 31.12.10                                       | 401 |
| <b>Kumulierte Abschreibungen</b>                      |     |
| Stand: 01.01.10                                       | 196 |
| Abschreibungen des Berichtsjahres                     | 10  |
| Umbuchungen                                           | 40  |
| Abgänge                                               | 7   |
| Stand: 31.12.10                                       | 239 |
| <b>Buchwerte</b>                                      |     |
| Stand: 31.12.10                                       | 162 |

Zum 31. Dezember 2010 betrug der beizulegende Zeitwert des Investment Property 257 Mio. € (Vorjahr: 254 Mio. €). Davon sind 85 Mio. € (Vorjahr: 80 Mio. €) auf eine Bewertung durch konzernexterne, unabhängige Gutachter zurückzuführen. Im

| Investment Property<br>in Mio. €                      |     |
|-------------------------------------------------------|-----|
| <b>Anschaffungs- bzw. Herstellungskosten</b>          |     |
| Stand: 01.01.09                                       | 366 |
| Zu-/Abgänge durch Änderung des Konsolidierungskreises | -1  |
| Umbuchungen                                           | 31  |
| Währungsanpassungen                                   | 1   |
| Abgänge                                               | 19  |
| Stand: 31.12.09                                       | 378 |
| <b>Kumulierte Abschreibungen</b>                      |     |
| Stand: 01.01.09                                       | 186 |
| Abschreibungen des Berichtsjahres                     | 8   |
| Umbuchungen                                           | 14  |
| Abgänge                                               | 12  |
| Stand: 31.12.09                                       | 196 |
| <b>Buchwerte</b>                                      |     |
| Stand: 31.12.09                                       | 182 |

Berichtszeitraum wurden Mieterträge in Höhe von 23 Mio. € (Vorjahr: 23 Mio. €) erzielt. Die direkten betrieblichen Aufwendungen betrugen 14 Mio. € (Vorjahr: 11 Mio. €).

### (13) At-Equity-bilanzierte Beteiligungen

Die folgenden Übersichten zeigen die wesentlichen Posten von Bilanz sowie Gewinn- und Verlustrechnung der at-Equity-bilanzierten Unternehmen:

| At-Equity-bilanzierte Beteiligungen           | 31.12.10     |                                             | 31.12.09      |                                             |
|-----------------------------------------------|--------------|---------------------------------------------|---------------|---------------------------------------------|
|                                               | Gesamt       | Davon<br>Gemein-<br>schafts-<br>unternehmen | Gesamt        | Davon<br>Gemein-<br>schafts-<br>unternehmen |
| in Mio. €                                     |              |                                             |               |                                             |
| Eigenkapital                                  |              |                                             |               |                                             |
| Vermögenswerte                                | 24.436       | 4.524                                       | 24.312        | 3.739                                       |
| Schulden                                      | 17.078       | 3.564                                       | 13.997        | 2.573                                       |
|                                               | <b>7.358</b> | <b>960</b>                                  | <b>10.315</b> | <b>1.166</b>                                |
| Anpassung auf RWE-Anteil und Equity-Bewertung | -3.664       | -477                                        | -6.579        | -583                                        |
|                                               | <b>3.694</b> | <b>483</b>                                  | <b>3.736</b>  | <b>583</b>                                  |

| Ergebnis aus at-Equity-bilanzierten Beteiligungen | 2010       |                                             | 2009       |                                             |
|---------------------------------------------------|------------|---------------------------------------------|------------|---------------------------------------------|
|                                                   | Gesamt     | Davon<br>Gemein-<br>schafts-<br>unternehmen | Gesamt     | Davon<br>Gemein-<br>schafts-<br>unternehmen |
| in Mio. €                                         |            |                                             |            |                                             |
| Umsatzerlöse                                      | 15.814     | 480                                         | 18.882     | 253                                         |
| Ergebnis                                          | 840        | -207                                        | 1.277      | -185                                        |
| Anpassung auf RWE-Anteil und Equity-Bewertung     | -530       | 105                                         | -1.146     | 23                                          |
|                                                   | <b>310</b> | <b>-102</b>                                 | <b>131</b> | <b>-162</b>                                 |

Der beizulegende Zeitwert von at-Equity-bilanzierten Beteiligungen, für die öffentlich notierte Marktpreise existieren, lag zum 31. Dezember 2010 bei 2 Mio. € (Vorjahr: 2 Mio. €).

Bei den Gemeinschaftsunternehmen waren Vermögenswerte von 4.280 Mio. € (Vorjahr: 3.457 Mio. €) und Schulden von 1.831 Mio. € (Vorjahr: 1.569 Mio. €) langfristig.

### (14) Übrige Finanzanlagen

| Übrige Finanzanlagen                   | 31.12.10   | 31.12.09   |
|----------------------------------------|------------|------------|
| in Mio. €                              |            |            |
| Nicht konsolidierte Tochterunternehmen | 145        | 170        |
| Übrige Beteiligungen                   | 356        | 386        |
| Langfristige Wertpapiere               | 249        | 153        |
|                                        | <b>750</b> | <b>709</b> |

Die langfristigen Wertpapiere umfassen im Wesentlichen festverzinsliche Titel und börsennotierte Aktien. Zur Absicherung von Wertguthaben aus dem Blockmodell Altersteilzeit gemäß § 8a AltTZG (Altersteilzeitgesetz) wurden für die

RWE AG und Tochtergesellschaften langfristige Wertpapiere in Höhe von 189 Mio. € (Vorjahr: 95 Mio. €) in einem Treuhand-depot hinterlegt.

**(15) Finanzforderungen**

| Finanzforderungen<br>in Mio. €                                           | 31.12.10     |              | 31.12.09     |              |
|--------------------------------------------------------------------------|--------------|--------------|--------------|--------------|
|                                                                          | Langfristig  | Kurzfristig  | Langfristig  | Kurzfristig  |
| Ausleihungen an nicht konsolidierte Tochterunternehmen und Beteiligungen | 809          | 994          | 806          | 487          |
| Sicherheitsleistungen für Handelsgeschäfte                               |              | 674          |              | 2.022        |
| Sonstige Finanzforderungen                                               |              |              |              |              |
| Zinsabgrenzungen                                                         |              | 114          |              | 127          |
| Übrige sonstige Finanzforderungen                                        | 233          | 964          | 312          | 786          |
|                                                                          | <b>1.042</b> | <b>2.746</b> | <b>1.118</b> | <b>3.422</b> |

Gegenüber assoziierten Unternehmen bestanden zum Bilanzstichtag Finanzforderungen in Höhe von 2.195 Mio. € (Vorjahr: 1.470 Mio. €).

Sicherheitsleistungen. Solche Leistungen dienen zur Sicherstellung, dass die Verpflichtungen aus den Handelsgeschäften auch bei ungünstigem Kursverlauf erfüllt werden.

Gesellschaften des RWE-Konzerns erbrachten bei börslichen und außerbörslichen Handelsgeschäften die ausgewiesenen

**(16) Sonstige Forderungen und sonstige Vermögenswerte**

| Sonstige Forderungen und sonstige Vermögenswerte<br>in Mio. € | 31.12.10     |               | 31.12.09     |               |
|---------------------------------------------------------------|--------------|---------------|--------------|---------------|
|                                                               | Langfristig  | Kurzfristig   | Langfristig  | Kurzfristig   |
| Derivate                                                      | 1.696        | 7.222         | 1.769        | 10.433        |
| Nettovermögen bei fondsgedeckten Pensionsverpflichtungen      | 56           |               | 79           |               |
| Nicht für Vorräte geleistete Anzahlungen                      |              | 769           |              | 714           |
| CO <sub>2</sub> -Emissionsrechte                              |              | 983           |              | 1.117         |
| Aktive Rechnungsabgrenzungsposten                             |              | 178           |              | 162           |
| Übrige sonstige Vermögenswerte                                | 461          | 1.332         | 640          | 1.358         |
|                                                               | <b>2.213</b> | <b>10.484</b> | <b>2.488</b> | <b>13.784</b> |

Die unter den sonstigen Forderungen und sonstigen Vermögenswerten ausgewiesenen Finanzinstrumente sind bis auf die Derivate mit ihren fortgeführten Anschaffungskosten bilanziert. Die derivativen Finanzinstrumente werden mit ihrem beizulegenden Zeitwert erfasst.

Die Bilanzwerte börsengehandelter Derivate mit Aufrechnungsvereinbarung sind miteinander verrechnet.

Änderungen des Konsolidierungskreises erhöhten die sonstigen Forderungen und sonstigen Vermögenswerte um 13 Mio. €.

### (17) Latente Steuern

Die aktiven und passiven latenten Steuern ergeben sich überwiegend dadurch, dass sich Wertansätze im IFRS-Abschluss von den Wertansätzen in der Steuerbilanz aufgrund abweichender Bewertungen unterscheiden. Vom Bruttobetrag der aktiven und der passiven latenten Steuern werden 2.558 Mio. € bzw. 2.496 Mio. € (Vorjahr: 2.473 Mio. € bzw. 2.603 Mio. €) innerhalb von zwölf Monaten realisiert.

Die aktiven und passiven latenten Steuern verteilen sich auf folgende Positionen:

| Latente Steuern<br>in Mio. €                                       | 31.12.10     |              | 31.12.09     |              |
|--------------------------------------------------------------------|--------------|--------------|--------------|--------------|
|                                                                    | Aktiv        | Passiv       | Aktiv        | Passiv       |
| Langfristige Vermögenswerte                                        | 412          | 2.856        | 517          | 2.678        |
| Kurzfristige Vermögenswerte                                        | 267          | 1.756        | 381          | 2.009        |
| Steuerliche Sonderposten                                           |              | 239          |              | 267          |
| Langfristige Schulden                                              |              |              |              |              |
| Pensionsrückstellungen                                             | 641          | 24           | 581          | 114          |
| Sonstige langfristige Rückstellungen                               | 2.079        | 17           | 1.752        | 168          |
| Kurzfristige Schulden                                              | 2.291        | 740          | 2.092        | 594          |
|                                                                    | <b>5.690</b> | <b>5.632</b> | <b>5.323</b> | <b>5.830</b> |
| Verlustvorträge                                                    |              |              |              |              |
| Körperschaftsteuer (oder vergleichbare ausländische Ertragsteuern) | 142          |              | 47           |              |
| Gewerbesteuer                                                      | 6            |              | 9            |              |
| <b>Bruttobetrag</b>                                                | <b>5.838</b> | <b>5.632</b> | <b>5.379</b> | <b>5.830</b> |
| Saldierung                                                         | -3.447       | -3.447       | -3.503       | -3.503       |
| <b>Nettobetrag</b>                                                 | <b>2.391</b> | <b>2.185</b> | <b>1.876</b> | <b>2.327</b> |

Die aktivierten Steuererminderungsansprüche aus Verlustvorträgen ergeben sich aus der erwarteten Nutzung bestehender Verlustvorträge in Folgejahren.

Die Realisierung dieser Verlustvorträge ist mit ausreichender Sicherheit gewährleistet. Die körperschaftsteuerlichen und die gewerbesteuerlichen Verlustvorträge, für die keine latenten Steueransprüche angesetzt wurden, betrugen zum Ende des Berichtsjahres 660 Mio. € bzw. 266 Mio. € (Vorjahr: 372 Mio. €

bzw. 187 Mio. €). Davon entfallen 25 Mio. € körperschaftsteuerliche Verlustvorträge auf die nächsten fünf Jahre.

Die übrigen Verlustvorträge können im Wesentlichen zeitlich unbegrenzt genutzt werden.

Im Berichtsjahr wurden latente Steueraufwendungen aus der Umrechnung ausländischer Abschlüsse in Höhe von 37 Mio. € mit dem Eigenkapital verrechnet (Vorjahr: 63 Mio. €).

**(18) Vorräte**

| <b>Vorräte</b><br>in Mio. €                                                                  | 31.12.10     | 31.12.09     |
|----------------------------------------------------------------------------------------------|--------------|--------------|
| Roh-, Hilfs- und Betriebsstoffe inkl. Kernbrennelemente und Vorabraum des Braunkohlebergbaus | 2.373        | 2.125        |
| Unfertige Erzeugnisse                                                                        | 25           | 27           |
| Unfertige Leistungen                                                                         | 88           | 82           |
| Fertige Erzeugnisse und Waren                                                                | 788          | 857          |
| Geleistete Anzahlungen                                                                       | 19           | 24           |
|                                                                                              | <b>3.293</b> | <b>3.115</b> |

Die Vorräte unterlagen keinen Verfügungsbeschränkungen; andere Belastungen lagen nicht vor.

Die zum Zweck der Weiterveräußerung erworbenen Vorräte hatten einen Buchwert von 627 Mio. € (Vorjahr: 245 Mio. €).

Änderungen des Konsolidierungskreises verminderten die Vorräte um 12 Mio. €.

**(19) Forderungen aus Lieferungen und Leistungen**

Gegenüber assoziierten Unternehmen bestanden zum Bilanzstichtag Forderungen in Höhe von 241 Mio. € (Vorjahr: 292 Mio. €).

Durch Änderungen des Konsolidierungskreises verminderten sich die Forderungen aus Lieferungen und Leistungen um 76 Mio. €.

**(20) Wertpapiere**

Die kurzfristigen Wertpapiere hatten einen Gesamtwert von 3.196 Mio. € (Vorjahr: 3.290 Mio. €). Davon entfielen 2.670 Mio. € (Vorjahr: 2.642 Mio. €) auf festverzinsliche Wertpapiere mit einer Restlaufzeit bei Erwerb von mehr als drei Monaten und 526 Mio. € (Vorjahr: 648 Mio. €) auf Aktien und Genussscheine. Die Wertpapiere sind zum beizulegenden Zeitwert bilanziert. Zum 31. Dezember 2010 betrug die durchschnitt-

liche Marktrendite der festverzinslichen Wertpapiere 2,1 % (Vorjahr: 2,1 %). Wertpapiere in Höhe von 812 Mio. € (Vorjahr: 649 Mio. €) wurden als Sicherheitsleistung bei Clearing-Banken hinterlegt.

**(21) Flüssige Mittel**

| <b>Flüssige Mittel</b><br>in Mio. €                                                              | 31.12.10     | 31.12.09     |
|--------------------------------------------------------------------------------------------------|--------------|--------------|
| Kasse und Bankguthaben                                                                           | 2.317        | 2.113        |
| Wertpapiere und übrige Liquiditätsanlagen (Restlaufzeit bei Erwerb von weniger als drei Monaten) | 159          | 961          |
|                                                                                                  | <b>2.476</b> | <b>3.074</b> |

RWE hält Bankguthaben ausschließlich im Rahmen der kurzfristigen Liquiditätsdisposition und nur bei Banken, deren Bonität von einer der beiden renommierten Rating-Agenturen Moody's und Standard & Poor's mit mindestens A-/A3 eingestuft wird. Die Verzinsung bewegt sich wie im Vorjahr auf Marktniveau.

**(22) Eigenkapital**

Die Aufgliederung des Eigenkapitals ist auf Seite 166 dargestellt.

Das gezeichnete Kapital der RWE AG ist wie folgt strukturiert:

| <b>Gezeichnetes Kapital</b> | 31.12.10       |              | 31.12.09       |              | 31.12.10     | 31.12.09     |
|-----------------------------|----------------|--------------|----------------|--------------|--------------|--------------|
|                             | Stückzahl      |              | Stückzahl      |              | Buchwert     | Buchwert     |
|                             | in Tsd.        | in %         | in Tsd.        | in %         | in Mio. €    | in Mio. €    |
| Stammaktien                 | 523.405        | 93,1         | 523.405        | 93,1         | 1.340        | 1.340        |
| Vorzugsaktien               | 39.000         | 6,9          | 39.000         | 6,9          | 100          | 100          |
|                             | <b>562.405</b> | <b>100,0</b> | <b>562.405</b> | <b>100,0</b> | <b>1.440</b> | <b>1.440</b> |

Bei den Stamm- und Vorzugsaktien handelt es sich um nennbetragslose Inhaber-Stückaktien. Vorzugsaktien gewähren grundsätzlich kein Stimmrecht. Den Vorzugsaktionären steht unter bestimmten Voraussetzungen bei der Verteilung des Bilanzgewinns ein Vorzugsgewinnanteil von 0,13 € je Aktie zu.

Durch Beschluss der Hauptversammlung vom 17. April 2008 wurde der Vorstand der RWE AG ermächtigt, das Grundkapital der Gesellschaft bis zum 16. April 2013 mit Zustimmung des Aufsichtsrats um bis zu 287.951.360,00 € durch Ausgabe von auf den Inhaber lautenden Stammaktien gegen Bar- oder Sacheinlage zu erhöhen (genehmigtes Kapital). Das Bezugsrecht der Aktionäre kann in bestimmten Fällen mit Zustimmung des Aufsichtsrats ausgeschlossen werden.

Durch Beschluss der Hauptversammlung vom 22. April 2009 wurde der Vorstand ferner bis zum 21. April 2014 zur Ausgabe von Options- oder Wandelanleihen ermächtigt. Der Gesamtnennwert der Anleihen ist auf 6.000 Mio. € begrenzt. Das Bezugsrecht der Aktionäre kann unter bestimmten Voraussetzungen ausgeschlossen werden. Zur Bedienung der Anleihen hat die Hauptversammlung die Schaffung eines bedingten Kapitals in Höhe von 143.975.680 €, eingeteilt in 56.240.500 auf den Inhaber lautende Stammaktien, beschlossen. Aktien aus dem genehmigten Kapital sind auf Aktien aus dem bedingten Kapital anzurechnen, soweit sie jeweils unter Bezugsrechtsausschluss ausgegeben werden. Insoweit darf das Grundkapital durch Ausgabe neuer Aktien insgesamt um nicht mehr als 20 % erhöht werden.

Durch Beschluss der Hauptversammlung vom 22. April 2010 wurde die Gesellschaft ermächtigt, bis zum 21. Oktober 2011 Aktien der Gesellschaft, gleich welcher Gattung, im Umfang von bis zu insgesamt 10 % des Grundkapitals zu erwerben; der Erwerb der Aktien darf auch unter Einsatz von Put- oder Call-Optionen durchgeführt werden. Der Vorstand der Gesellschaft ist aufgrund des Beschlusses ferner ermächtigt, eigene Aktien ohne weiteren Beschluss der Hauptversammlung einzuziehen oder – unter bestimmten Bedingungen und unter Ausschluss des Bezugsrechts der Aktionäre – an Dritte zu veräußern.

Am 31. Dezember 2010 befanden sich 28.846.473 (31.12.2009: 28.846.473) nennbetragslose Stammaktien der RWE AG im Bestand der RWE AG. Die Anschaffungskosten der eigenen Anteile in Höhe von 2.272 Mio. € (31.12.2009: 2.272 Mio. €) wurden vom Buchwert des Eigenkapitals abgesetzt. Der auf sie entfallende Betrag des Grundkapitals belief sich zum Bilanzstichtag auf 73.846.970,88 €. Dies entspricht 5,13 % des gezeichneten Kapitals.

Die RWE AG hat im September 2010 eine Hybridanleihe mit einem Nominalvolumen von 1,75 Mrd. € begeben. Die gegenüber allen anderen Gläubigertiteln nachrangige Anleihe hat eine unbegrenzte Laufzeit und kann nur durch die RWE AG zu bestimmten, vertraglich vereinbarten Terminen oder Anlässen gekündigt werden. Der Zinssatz bis zum ersten Kündigungstermin im Jahr 2015 beträgt 4,625 % p.a. Wird die Anleihe zu diesem Termin nicht gekündigt, ergibt sich der neue Zinssatz bis zum nächsten Kündigungstermin im Jahr 2020 durch den dann geltenden Fünf-Jahres-Interbankensatz zuzüglich eines Kreditaufschlags von 265 Basispunkten. Falls auch zu diesem Termin nicht gekündigt wird, erfolgt eine Umwandlung in eine variabel verzinsliche Anleihe mit jährlichem Kündigungsrecht und einem Zinssatz in Höhe des Zwölf-Monats-EURIBOR zuzüglich 365 Basispunkten. Die Zinszahlungen können unter bestimmten Voraussetzungen ausgesetzt werden, insbesondere wenn Vorstand und Aufsichtsrat der Hauptversammlung vorschlagen, keine Dividende auszuzahlen. Ausgesetzte Zinszahlungen müssen nachgeholt werden, sobald wieder die Zahlung einer Dividende vorgeschlagen wird. Die Hybridanleihe darf nach zehn Jahren nur durch die Ausgabe von Eigenkapital oder eigenkapitalähnlichen Finanzinstrumenten, z. B. neuen Hybridanleihen, abgelöst werden. Zum ersten Kündigungstermin nach fünf Jahren kann die Hybridanleihe ohne Restriktionen im Hinblick auf die Nachfolgefiananzierung abgelöst werden.

Nach IAS 32 ist die begebene Hybridanleihe als Eigenkapital zu klassifizieren. Das aufgenommene Kapital wurde vermindert um Kapitalbeschaffungskosten und unter Berücksichtigung von Steuern in das Eigenkapital eingestellt. Die Zinsen an die Anleiheinhaber werden nach Abzug von Steuern direkt gegen das Eigenkapital gebucht. Die erste Zinszahlung wird am 28. September 2011 fällig.

Im **Accumulated Other Comprehensive Income** werden die Änderungen der beizulegenden Zeitwerte der zur Veräußerung verfügbaren Finanzinstrumente, der Cash Flow Hedges, der Hedges von Nettoinvestitionen in ausländische Teileinheiten und der Währungsdifferenzen bei der Umrechnung ausländischer Abschlüsse erfasst.

#### Gewinnverwendungsvorschlag

Wir schlagen der Hauptversammlung vor, den Bilanzgewinn der RWE AG für das Geschäftsjahr 2010 wie folgt zu verwenden:

Ausschüttung einer Dividende von 3,50 € je dividendenberechtigter Stückaktie:

|               |                    |
|---------------|--------------------|
| Dividende     | 1.867.454.844,50 € |
| Gewinnvortrag | 38.966,69 €        |
| Bilanzgewinn  | 1.867.493.811,19 € |

Der Gewinnverwendungsvorschlag berücksichtigt die von der Gesellschaft im Besitz befindlichen nicht dividendenberechtigten eigenen Aktien zum 31. Dezember 2010. Bis zum Zeitpunkt der Hauptversammlung kann sich die Zahl der dividendenberechtigten Aktien vermindern, wenn weitere eigene Aktien erworben werden. Entsprechend kann sich die Zahl der dividendenberechtigten Aktien erhöhen, wenn bis zum Zeitpunkt der Hauptversammlung eigene Aktien veräußert werden. In diesen Fällen wird der Hauptversammlung bei gleichbleibendem Dividendenbetrag je dividendenberechtigter Stückaktie ein angepasster Gewinnverwendungsvorschlag unterbreitet werden, nach dem sich der an die Aktionäre insgesamt auszuschüttende Betrag um den Teilbetrag, der auf die zwischen dem 1. Januar 2011 und dem Zeitpunkt des Gewinnverwendungsbeschlusses hinzuerworbenen eigenen Aktien auszuschütten wäre, vermindert und sich um den Teilbetrag, der auf die zwischen dem 1. Januar 2011 und dem Zeitpunkt des Gewinnverwendungsbeschlusses veräußerten eigenen Aktien auszuschütten ist, erhöht. Der Gewinnvortrag erhöht oder ermäßigt sich um diese Teilbeträge.

Die für das Geschäftsjahr 2009 ausgeschüttete Dividende belief sich laut Beschluss der Hauptversammlung der RWE AG vom 22. April 2010 auf 3,50 € je dividendenberechtigter Stamm- und Vorzugsaktie. Die Ausschüttung an die Aktionäre der RWE AG betrug insgesamt 1.867 Mio. €.

#### Anteile anderer Gesellschafter

Unter dieser Position ist der Anteilsbesitz Dritter an den Konzerngesellschaften erfasst.

Hohe Fremddanteile existieren im Wesentlichen bei den Energieversorgungsunternehmen in Ungarn und bei den tschechischen Gasgesellschaften.

#### (23) Aktienkursbasierte Vergütungen

Während des Berichtsjahres bestanden folgende konzernweite aktienkursbasierte Vergütungssysteme für Führungskräfte der RWE AG und nachgeordneter verbundener Unternehmen: Beat 2005 und Beat 2010. Soweit die Bezugsberechtigten nicht bei der RWE AG beschäftigt sind, werden die mit der Ausübung der Performance Shares verbundenen Aufwendungen von der jeweiligen Konzerngesellschaft getragen.

|                                               | Beat 2005                                                                                                                                                                                                                                                                                                                                                                                                                                                                                                                                                                                                                                                                                                                                                                                       |              |              |
|-----------------------------------------------|-------------------------------------------------------------------------------------------------------------------------------------------------------------------------------------------------------------------------------------------------------------------------------------------------------------------------------------------------------------------------------------------------------------------------------------------------------------------------------------------------------------------------------------------------------------------------------------------------------------------------------------------------------------------------------------------------------------------------------------------------------------------------------------------------|--------------|--------------|
|                                               | Tranche 2007                                                                                                                                                                                                                                                                                                                                                                                                                                                                                                                                                                                                                                                                                                                                                                                    | Tranche 2008 | Tranche 2009 |
| Zusagezeitpunkt                               | 01.01.07                                                                                                                                                                                                                                                                                                                                                                                                                                                                                                                                                                                                                                                                                                                                                                                        | 01.01.08     | 01.01.09     |
| Anzahl bedingt zugeteilter Performance Shares | 1.468.132                                                                                                                                                                                                                                                                                                                                                                                                                                                                                                                                                                                                                                                                                                                                                                                       | 1.668.836    | 3.251.625    |
| Laufzeit                                      | 3 Jahre                                                                                                                                                                                                                                                                                                                                                                                                                                                                                                                                                                                                                                                                                                                                                                                         | 3 Jahre      | 3 Jahre      |
| Auszahlungsbedingungen                        | Automatische Auszahlung, sofern nach Ablauf einer Wartezeit von drei Jahren eine Outperformance gegenüber 25 % der Vergleichsunternehmen des Dow-Jones-STOXX-Utilities-Index erreicht wurde, gemessen an deren Indexgewicht zum Zeitpunkt der Auflegung des Programms. Die Outperformance wird anhand des Total Shareholder Return (TSR) gemessen, der die Entwicklung des Aktienkurses zzgl. reinvestierter Dividenden berücksichtigt.                                                                                                                                                                                                                                                                                                                                                         |              |              |
| Ermittlung der Auszahlung                     | <ol style="list-style-type: none"> <li>1. Ermittlung des Indexgewichts der Vergleichsunternehmen, die am Ende der Laufzeit einen geringeren TSR als RWE aufweisen.</li> <li>2. Durch Quadrierung dieses Prozentsatzes und Multiplikation mit 1,25 errechnet sich der Performance-Faktor.</li> <li>3. Berechnung der auszahlbaren Performance Shares als Produkt aus bedingt zugeteilten Performance Shares und Performance-Faktor.</li> <li>4. Die Auszahlung entspricht der endgültigen Anzahl der Performance Shares, bewertet mit dem durchschnittlichen RWE-Aktienkurs der letzten 20 Börsenhandelstage vor Programmablauf. Sie ist auf den zweifachen Zuteilungswert der Performance Shares begrenzt.</li> </ol>                                                                           |              |              |
| Wechsel der Unternehmenskontrolle/Fusion      | <ul style="list-style-type: none"> <li>▪ Kommt es während der Wartezeit zu einem Wechsel der Unternehmenskontrolle, wird eine Entschädigungszahlung gewährt. Sie berechnet sich durch Multiplikation des im Zuge der Übernahme für die RWE-Aktien gezahlten Preises mit der endgültigen Anzahl der Performance Shares. Letztere wird den Planbedingungen entsprechend bezogen auf den Zeitpunkt der Abgabe des Übernahmeangebots ermittelt.</li> <li>▪ Im Falle einer Fusion mit einer anderen Gesellschaft errechnet sich die Entschädigung aus dem Fair Value der Performance Shares zum Zeitpunkt der Fusion, multipliziert mit der zeitanteiligen Anzahl der Performance Shares, die dem Verhältnis zwischen der gesamten Wartezeit und der Wartezeit bis zur Fusion entspricht.</li> </ul> |              |              |
| Form des Ausgleichs                           | Barausgleich                                                                                                                                                                                                                                                                                                                                                                                                                                                                                                                                                                                                                                                                                                                                                                                    |              |              |

|                                               | Beat 2010                                                                                                                                                                                                                                                                                                                                                                                                                                                                                                                                                                                                                                                                                                                                                                                                                                                                                                                                                                                                                                                                                                                                                                                                                                                 |                                  |
|-----------------------------------------------|-----------------------------------------------------------------------------------------------------------------------------------------------------------------------------------------------------------------------------------------------------------------------------------------------------------------------------------------------------------------------------------------------------------------------------------------------------------------------------------------------------------------------------------------------------------------------------------------------------------------------------------------------------------------------------------------------------------------------------------------------------------------------------------------------------------------------------------------------------------------------------------------------------------------------------------------------------------------------------------------------------------------------------------------------------------------------------------------------------------------------------------------------------------------------------------------------------------------------------------------------------------|----------------------------------|
|                                               | Tranche 2010, Wartezeit: 3 Jahre                                                                                                                                                                                                                                                                                                                                                                                                                                                                                                                                                                                                                                                                                                                                                                                                                                                                                                                                                                                                                                                                                                                                                                                                                          | Tranche 2010, Wartezeit: 4 Jahre |
| Zusagezeitpunkt                               | 01.01.10                                                                                                                                                                                                                                                                                                                                                                                                                                                                                                                                                                                                                                                                                                                                                                                                                                                                                                                                                                                                                                                                                                                                                                                                                                                  | 01.01.10                         |
| Anzahl bedingt zugeteilter Performance Shares | 784.421                                                                                                                                                                                                                                                                                                                                                                                                                                                                                                                                                                                                                                                                                                                                                                                                                                                                                                                                                                                                                                                                                                                                                                                                                                                   | 1.012.331                        |
| Laufzeit                                      | 3 Jahre                                                                                                                                                                                                                                                                                                                                                                                                                                                                                                                                                                                                                                                                                                                                                                                                                                                                                                                                                                                                                                                                                                                                                                                                                                                   | 5 Jahre                          |
| Auszahlungsbedingungen                        | <p>Automatische Auszahlung, sofern nach Ablauf einer Wartezeit von drei Jahren (Bewertungsstichtag: 31.12. des dritten Jahres) eine Outperformance gegenüber mindestens 25 % der Vergleichsunternehmen des Dow-Jones-STOXX-Utilities-Index erreicht wurde, gemessen an deren Indexgewicht zum Zeitpunkt der Auflegung der Tranche. Die Outperformance wird anhand des Total Shareholder Return (TSR) gemessen, der die Entwicklung des Aktienkurses zzgl. reinvestierter Dividenden berücksichtigt.</p> <p>Möglichkeit der Auszahlung an drei Ausübungszeitpunkten (Bewertungsstichtage: 31.12. des vierten Jahres, 30.06. und 31.12. des fünften Jahres), sofern zum Bewertungsstichtag eine Outperformance gegenüber mindestens 25 % der Vergleichsunternehmen des Dow-Jones-STOXX-Utilities-Index erreicht wurde, gemessen an deren Indexgewicht zum Zeitpunkt der Auflegung der Tranche. Die Outperformance wird anhand des Total Shareholder Return (TSR) gemessen, der die Entwicklung des Aktienkurses zzgl. reinvestierter Dividenden berücksichtigt. Zum dritten Bewertungsstichtag erfolgt eine automatische Auszahlung, zum ersten und zweiten Bewertungsstichtag kann die Anzahl der auszahlbaren Performance Shares frei gewählt werden.</p> |                                  |
| Ermittlung der Auszahlung                     | <ol style="list-style-type: none"> <li>1. Ermittlung des Indexgewichts der Vergleichsunternehmen, die zum Bewertungsstichtag einen geringeren TSR als RWE aufweisen.</li> <li>2. Die Anzahl der werthaltigen (auszahlbaren) Performance Shares ergibt sich auf Basis einer linearen Auszahlungskurve. Ab einem übertroffenen Indexgewicht von 25 % werden 7,5 % der bedingt zugeteilten Performance Shares werthaltig. Danach werden für jeden über das Indexgewicht von 25 % hinausgehenden Prozentpunkt weitere 1,5 % der zugeteilten Performance Shares werthaltig.</li> <li>3. Die Auszahlung entspricht der Anzahl werthaltiger Performance Shares, bewertet mit dem durchschnittlichen RWE-Aktienkurs der letzten 60 Börsenhandelstage vor dem Bewertungsstichtag. Sie ist auf den zweifachen Zuteilungswert der Performance Shares begrenzt.</li> </ol>                                                                                                                                                                                                                                                                                                                                                                                            |                                  |
| Wechsel der Unternehmenskontrolle/Fusion      | <ul style="list-style-type: none"> <li>▪ Kommt es während der Wartezeit zu einem Wechsel der Unternehmenskontrolle, wird eine Entschädigungszahlung gewährt. Sie berechnet sich durch Multiplikation des im Zuge der Übernahme für die RWE-Aktien gezahlten Preises mit der endgültigen, noch nicht ausgeübten Anzahl der Performance Shares. Letztere wird den Planbedingungen entsprechend bezogen auf den Zeitpunkt der Abgabe des Übernahmeangebots ermittelt.</li> <li>▪ Fusioniert die RWE AG mit einer anderen Gesellschaft, so verfallen die Performance Shares und es wird eine Entschädigungszahlung vorgenommen. Hierzu wird zunächst der Fair Value der Performance Shares zum Zeitpunkt der Fusion berechnet. Dieser Fair Value wird dann mit der pro rata gekürzten Anzahl der gewährten Performance Shares multipliziert. Der Kürzungsfaktor berechnet sich aus dem Verhältnis der Zeit von Laufzeitbeginn bis zur Fusion zur gesamten Laufzeit des Plans mal dem Verhältnis der zum Zeitpunkt der Fusion noch nicht ausgeübten Performance Shares zu den zu Beginn der Laufzeit insgesamt gewährten Performance Shares.</li> </ul>                                                                                                        |                                  |
| Eigeninvestment                               | Als Voraussetzung für die Teilnahme müssen die Planteilnehmer nachweislich ein Sechstel des Bruttoteilungswertes der Performance Shares vor Steuern in RWE Stammaktien investieren und für die Wartezeit der jeweiligen Tranche halten.                                                                                                                                                                                                                                                                                                                                                                                                                                                                                                                                                                                                                                                                                                                                                                                                                                                                                                                                                                                                                   |                                  |
| Form des Ausgleichs                           | Barausgleich                                                                                                                                                                                                                                                                                                                                                                                                                                                                                                                                                                                                                                                                                                                                                                                                                                                                                                                                                                                                                                                                                                                                                                                                                                              |                                  |

Der beizulegende Zeitwert der im Rahmen von Beat bedingt zugeteilten Performance Shares zum Zeitpunkt der Zuteilung betrug 25,96 € pro Stück für die Tranche 2010 (vierjährige Wartezeit), 28,80 € pro Stück für die Tranche 2010 (dreijährige Wartezeit), 11,93 € pro Stück für die Tranche 2009 und 22,25 € pro Stück für die Tranche 2008. Diese Werte wurden durch eine externe Berechnungsstelle mithilfe eines stochastischen, multi-variablen Black-Scholes-Standardmodells per Monte-Carlo-Simu-

lation auf Basis von jeweils einer Million Szenarien ermittelt. Bei ihrer Ermittlung wurden die in den Programmbedingungen festgelegte maximale Auszahlung je bedingt zugeteilter Performance Share, die Restlaufzeit und die restlaufzeitbezogenen Diskontsätze, die aktuellen Kurse der zu Grunde liegenden Aktien, die zugehörigen Volatilitäten und Korrelationen sowie die erwarteten Dividenden der RWE AG und ihrer Vergleichsunternehmen berücksichtigt.

Im abgelaufenen Geschäftsjahr zeigte sich folgende Entwicklung der Performance Shares:

| <b>Performance Shares aus Beat 2005</b>  | Tranche 2007 | Tranche 2008 | Tranche 2009 |
|------------------------------------------|--------------|--------------|--------------|
| Ausstehend zu Beginn des Geschäftsjahres | 1.447.103    | 1.662.036    | 3.243.641    |
| Zugesagt                                 |              |              |              |
| Veränderung (zugeteilt/verfallen)        |              | -10.011      | -16.832      |
| Ausgezahlt                               | -1.447.103   |              |              |
| Ausstehend zum Ende des Geschäftsjahres  | 0            | 1.652.025    | 3.226.809    |
| Auszahlbar am Ende des Geschäftsjahres   | 0            | 1.652.025    | 0            |

| <b>Performance Shares aus Beat 2010</b>  | Tranche 2010, Wartezeit: 3 Jahre | Tranche 2010, Wartezeit: 4 Jahre |
|------------------------------------------|----------------------------------|----------------------------------|
| Ausstehend zu Beginn des Geschäftsjahres |                                  |                                  |
| Zugesagt                                 | 784.421                          | 1.012.331                        |
| Veränderung (zugeteilt/verfallen)        | -11.934                          | -13.439                          |
| Ausgezahlt                               |                                  |                                  |
| Ausstehend zum Ende des Geschäftsjahres  | 772.487                          | 998.892                          |
| Auszahlbar am Ende des Geschäftsjahres   | 0                                | 0                                |

Die Restlaufzeit betrug vier Jahre für die Tranche 2010 mit vierjähriger Wartezeit, zwei Jahre für die Tranche 2010 mit dreijähriger Wartezeit und ein Jahr für die Tranche 2009. Die Vertragslaufzeit für die Tranche 2008 endete mit Ablauf des Berichtsjahres; je Performance Share werden 16,70 € ausgezahlt.

Zusätzlich gab es bei RWE Npower plc, RWE Supply & Trading GmbH, RWE IT UK Ltd. und RWE Npower Renewables Ltd. folgende aktienkursbasierte Vergütungssysteme mit Eigenkapitalausgleich für Führungskräfte und Mitarbeiter (Sharesave Scheme):

| <b>RWE Npower plc/RWE Supply &amp; Trading GmbH/<br/>RWE IT UK Ltd./RWE Npower Renewables Ltd.</b> | Sharesave Scheme  |
|----------------------------------------------------------------------------------------------------|-------------------|
| Tranchen                                                                                           | 2006–2010         |
| Anzahl gewährter Optionen je Tranche                                                               | 247.119–404.796   |
| Vertragliche Laufzeit                                                                              | 3 Jahre           |
| Wartezeit                                                                                          | 3 Jahre           |
| Ausübungspreis                                                                                     | 36,47–50,24 £     |
| Form des Ausgleichs                                                                                | bestehende Aktien |

Im abgelaufenen Geschäftsjahr zeigte sich folgende Entwicklung der ausstehenden Optionen aus dem Sharesave Scheme:

| <b>Optionen aus dem Sharesave Scheme</b> | Tranchen<br>2006 bis 2010 |
|------------------------------------------|---------------------------|
| Ausstehend zu Beginn des Geschäftsjahres | 745.672                   |
| Zugesagt                                 | 404.796                   |
| Ausgeübt                                 | -141.014                  |
| Ausgelaufen                              | -93.755                   |
| Ausstehend zum Ende des Geschäftsjahres  | 915.699                   |
| Ausübbar am Ende des Geschäftsjahres     | 88.874                    |

Der Gesamtertrag für die konzernweiten aktienkursbasierten Vergütungssysteme belief sich im abgelaufenen Geschäftsjahr auf 7 Mio. € (Vorjahr: Gesamtaufwand von 46 Mio. €). Wie im Vorjahr wurden die Ansprüche ausschließlich durch Barausgleich abgegolten. Zum Bilanzstichtag beliefen sich die Rück-

stellungen für aktienkursbasierte Vergütungen mit Barausgleich auf 44 Mio. € (Vorjahr: 79 Mio. €). Der innere Wert der zum Bilanzstichtag ausübaren bzw. auszahlbaren aktienkursbasierten Vergütungen mit Barausgleich betrug zum Bilanzstichtag 28 Mio. € (Vorjahr: 28 Mio. €).

#### (24) Rückstellungen

| Rückstellungen<br>in Mio. €                                                                 | 31.12.10      |              |               | 31.12.09      |              |               |
|---------------------------------------------------------------------------------------------|---------------|--------------|---------------|---------------|--------------|---------------|
|                                                                                             | Langfristig   | Kurzfristig  | Gesamt        | Langfristig   | Kurzfristig  | Gesamt        |
| Rückstellungen für Pensionen und ähnliche Verpflichtungen                                   | 3.318         |              | 3.318         | 3.281         |              | 3.281         |
| Steuerrückstellungen                                                                        | 3.194         | 407          | 3.601         | 2.796         | 316          | 3.112         |
| Rückstellungen für Entsorgung im Kernenergiebereich                                         | 9.686         | 324          | 10.010        | 9.250         | 241          | 9.491         |
| Bergbaubedingte Rückstellungen                                                              | 2.822         | 98           | 2.920         | 2.618         | 94           | 2.712         |
|                                                                                             | <b>19.020</b> | <b>829</b>   | <b>19.849</b> | <b>17.945</b> | <b>651</b>   | <b>18.596</b> |
| Sonstige Rückstellungen                                                                     |               |              |               |               |              |               |
| Verpflichtungen aus dem Personalbereich (ohne Restrukturierungen)                           | 901           | 747          | 1.648         | 793           | 850          | 1.643         |
| Verpflichtungen aus Restrukturierungen                                                      | 456           | 139          | 595           | 386           | 142          | 528           |
| Einkaufs- und Verkaufsverpflichtungen                                                       | 820           | 867          | 1.687         | 1.210         | 887          | 2.097         |
| Ungewisse Verpflichtungen aus dem Stromgeschäft                                             | 451           | 337          | 788           | 449           | 389          | 838           |
| Umweltschutzverpflichtungen                                                                 | 133           | 49           | 182           | 127           | 26           | 153           |
| Zinszahlungsverpflichtungen                                                                 | 714           | 27           | 741           | 564           | 24           | 588           |
| Rückgabeverpflichtungen CO <sub>2</sub> -Emissionsrechte/ Zertifikate alternativer Energien |               | 972          | 972           |               | 1.242        | 1.242         |
| Übrige sonstige Rückstellungen                                                              | 990           | 1.605        | 2.595         | 841           | 1.618        | 2.459         |
|                                                                                             | <b>4.465</b>  | <b>4.743</b> | <b>9.208</b>  | <b>4.370</b>  | <b>5.178</b> | <b>9.548</b>  |
|                                                                                             | <b>23.485</b> | <b>5.572</b> | <b>29.057</b> | <b>22.315</b> | <b>5.829</b> | <b>28.144</b> |

#### Rückstellungen für Pensionen und ähnliche Verpflichtungen.

Die betriebliche Altersversorgung setzt sich aus beitragsorientierten und leistungsorientierten Versorgungssystemen zusammen.

In beitragsorientierte Versorgungssysteme sind im Berichtsjahr 50 Mio. € (Vorjahr: 24 Mio. €) eingezahlt worden. Hierin mit-erfasst sind Beiträge, die RWE im Rahmen eines Versorgungs-plans in den Niederlanden leistet, der Zusagen verschiedener

Arbeitgeber umfasst. Der Versorgungsträger stellt den teilnehmenden Unternehmen keine Informationen zur Verfügung, die die anteilige Zuordnung von Verpflichtung, Planvermögen und Dienstzeitaufwand erlauben. Im RWE-Konzernabschluss erfolgt die Berücksichtigung der Beiträge entsprechend einer beitrags-orientierten Versorgungszusage.

Die Rückstellung für leistungsorientierte Versorgungssysteme wird nach versicherungsmathematischen Methoden ermittelt. Dabei werden folgende Rechnungsannahmen zugrunde gelegt:

| Rechnungsannahmen<br>in %           | 31.12.10    |                      | 31.12.09    |                      |
|-------------------------------------|-------------|----------------------|-------------|----------------------|
|                                     | Inland      | Ausland <sup>1</sup> | Inland      | Ausland <sup>1</sup> |
| Abzinsungsfaktor                    | 5,25        | 5,30                 | 5,25        | 5,70                 |
| Gehaltssteigerungsrate              | 2,75        | 4,90                 | 2,75        | 5,20                 |
| Rentensteigerungsrate               | 1,00 – 1,50 | 3,30                 | 1,00 – 1,50 | 3,50                 |
| Erwartete Rendite des Planvermögens | 5,75        | 5,50                 | 5,75        | 5,25                 |

1 Betrifft Versorgungszusagen an Beschäftigte des RWE-Konzerns in Großbritannien

Die erwarteten Renditen des Planvermögens wurden in Abhängigkeit von der jeweiligen Vermögenskategorie bestimmt. Bei Aktienanlagen orientieren sich die erwarteten Erträge an der Performance, die unter Berücksichtigung der derzeitigen Zusammensetzung des Aktienportfolios im langjährigen Mittel in den jeweiligen Branchen und geografischen Märkten beobachtet wurde. Bei festverzinslichen Wertpapieren werden die erwarteten Erträge nach anerkannten Methoden aus sachgerecht aus-

gewählten Notierungen und Indizes abgeleitet. Die erwarteten Erträge aus Immobilien wurden unter Berücksichtigung der jeweiligen Vermarktungsmöglichkeiten ermittelt, die durch vertragliche Bindungen und örtliche Marktgegebenheiten bestimmt werden.

Die Pensionsrückstellungen leiten sich wie folgt ab:

| <b>Pensionsrückstellungen (fondsfinanzierte und nicht fondsfinanzierte Versorgungsansprüche)</b><br>in Mio. € | 31.12.10     | 31.12.09     |
|---------------------------------------------------------------------------------------------------------------|--------------|--------------|
| Barwert der fondsfinanzierten Versorgungsansprüche                                                            | 15.170       | 14.588       |
| Zeitwert des Planvermögens                                                                                    | 13.833       | 13.139       |
| <b>Nettoposition aus fondsfinanzierten Versorgungsansprüchen (Saldo)</b>                                      | <b>1.337</b> | <b>1.449</b> |
| Aktivisch ausgewiesenes Nettovermögen bei fondsgedeckten Pensionsverpflichtungen                              | 56           | 79           |
| <b>Bilanzierte Rückstellung für fondsfinanzierte Versorgungsansprüche</b>                                     | <b>1.393</b> | <b>1.528</b> |
| <b>Bilanzierte Rückstellung für nicht fondsfinanzierte Versorgungsansprüche</b>                               | <b>1.925</b> | <b>1.753</b> |
|                                                                                                               | <b>3.318</b> | <b>3.281</b> |

Die bis zum 31. Dezember 2010 entstandenen versicherungsmathematischen Gewinne/Verluste betrugen ohne Berücksichtigung von Steuern –6.254 Mio. € (31.12.2009: –6.287 Mio. €).

| <b>Entwicklung des Planvermögens</b><br>in Mio. €     | Beizulegender Zeitwert |               |
|-------------------------------------------------------|------------------------|---------------|
|                                                       | 2010                   | 2009          |
| Stand: 01.01.                                         | 13.139                 | 11.030        |
| Erwarteter Vermögensertrag der Fonds                  | 730                    | 660           |
| Arbeitgeberbeiträge an die Fonds                      | 166                    | 826           |
| Arbeitnehmerbeiträge an die Fonds                     | 16                     | 13            |
| Rentenzahlungen der Fonds                             | –871                   | –786          |
| Versicherungsmathematische Gewinne/Verluste der Fonds | 541                    | 1.162         |
| Währungsanpassungen                                   | 124                    | 234           |
| Änderungen des Konsolidierungskreises                 | –12                    |               |
| <b>Stand: 31.12.</b>                                  | <b>13.833</b>          | <b>13.139</b> |

Die tatsächlichen Vermögenserträge der Fonds summierten sich 2010 auf 1.271 Mio. € (Vorjahr: 1.822 Mio. €).

| Zusammensetzung des Planvermögens (Zeitwerte)<br>in Mio. € | 31.12.10            |                      |               | 31.12.09            |                      |               |
|------------------------------------------------------------|---------------------|----------------------|---------------|---------------------|----------------------|---------------|
|                                                            | Inland <sup>1</sup> | Ausland <sup>2</sup> | Gesamt        | Inland <sup>1</sup> | Ausland <sup>2</sup> | Gesamt        |
| Eigenkapitaltitel                                          | 2.783               | 781                  | 3.564         | 3.042               | 270                  | 3.312         |
| Zinstragende Titel                                         | 4.537               | 2.856                | 7.393         | 5.208               | 3.052                | 8.260         |
| Immobilien                                                 | 166                 | 196                  | 362           | 78                  | 80                   | 158           |
| Mischfonds <sup>3</sup>                                    | 947                 |                      | 947           |                     |                      |               |
| Alternative Investments                                    | 918                 | 439                  | 1.357         | 742                 | 360                  | 1.102         |
| Sonstiges <sup>4</sup>                                     | 155                 | 55                   | 210           | 135                 | 172                  | 307           |
|                                                            | <b>9.506</b>        | <b>4.327</b>         | <b>13.833</b> | <b>9.205</b>        | <b>3.934</b>         | <b>13.139</b> |

1 Beim Planvermögen in Deutschland handelt es sich im Wesentlichen um treuhänderisch durch den RWE Pensionstreuhand e.V. verwaltetes Vermögen der RWE AG und verschiedener Konzernunternehmen sowie Vermögen der RWE Pensionsfonds AG.

2 Beim ausländischen Planvermögen handelt es sich um Vermögen eines britischen Pensionsfonds zur Abdeckung von Versorgungszusagen an Beschäftigte des RWE-Konzerns in Großbritannien.

3 Darin enthalten sind dividenden- und zinstragende Titel.

4 Darin enthalten sind Rückdeckungsansprüche gegenüber Versicherungen und sonstiges Kassenvermögen von Unterstützungskassen.

| Zusammensetzung des Planvermögens (Ziel-Anlagestruktur)<br>in % | 31.12.10            |                      | 31.12.09            |                      |
|-----------------------------------------------------------------|---------------------|----------------------|---------------------|----------------------|
|                                                                 | Inland <sup>1</sup> | Ausland <sup>2</sup> | Inland <sup>1</sup> | Ausland <sup>2</sup> |
| Eigenkapitaltitel                                               | 23,4                | 17,5                 | 28,4                | 6,9                  |
| Zinstragende Titel                                              | 54,3                | 67,5                 | 59,3                | 77,6                 |
| Immobilien                                                      | 2,3                 | 5,0                  | 2,3                 | 2,0                  |
| Mischfonds <sup>3</sup>                                         | 10,0                |                      |                     |                      |
| Alternative Investments                                         | 10,0                | 10,0                 | 10,0                | 9,1                  |
| Sonstiges <sup>4</sup>                                          |                     |                      |                     | 4,4                  |
|                                                                 | <b>100,0</b>        | <b>100,0</b>         | <b>100,0</b>        | <b>100,0</b>         |

1 Beim Planvermögen in Deutschland handelt es sich im Wesentlichen um treuhänderisch durch den RWE Pensionstreuhand e.V. verwaltetes Vermögen der RWE AG und verschiedener Konzernunternehmen sowie Vermögen der RWE Pensionsfonds AG.

2 Beim ausländischen Planvermögen handelt es sich um Vermögen eines britischen Pensionsfonds zur Abdeckung von Versorgungszusagen an Beschäftigte des RWE-Konzerns in Großbritannien.

3 Darin enthalten sind dividenden- und zinstragende Titel.

4 Darin nicht enthalten sind Rückdeckungsansprüche gegenüber Versicherungen und sonstiges Kassenvermögen von Unterstützungskassen, da sie insgesamt nicht Gegenstand des Portfoliomanagements sind.

| Entwicklung der Versorgungsansprüche<br>in Mio. € | Barwert       |               |
|---------------------------------------------------|---------------|---------------|
|                                                   | 2010          | 2009          |
| Stand: 01.01.                                     | 16.341        | 13.768        |
| Laufender Dienstzeitaufwand                       | 201           | 143           |
| Zinsaufwand                                       | 877           | 836           |
| Arbeitnehmerbeiträge                              | 16            | 13            |
| Versicherungsmathematische Gewinne/Verluste       | 508           | 2.268         |
| Gezahlte Leistungen                               | -979          | -908          |
| Nachverrechneter Dienstzeitaufwand                | 7             | -36           |
| Währungsanpassungen                               | 145           | 252           |
| Änderungen des Konsolidierungskreises             | -21           | 5             |
| <b>Stand: 31.12.</b>                              | <b>17.095</b> | <b>16.341</b> |

Der nachverrechnete Dienstzeitaufwand enthielt im Geschäftsjahr 2010 erhöhte Leistungszusagen in Großbritannien (22 Mio. €) und gegenläufig Entlastungen im Inland. Im Vorjahr handelte es sich im Wesentlichen um Plankürzungen.

| <b>Aufwand Pensionsrückstellungen</b><br>in Mio. €                | 2010       | 2009       |
|-------------------------------------------------------------------|------------|------------|
| Dienstzeitaufwand                                                 | 201        | 143        |
| Zinsaufwand                                                       | 877        | 836        |
| Erwarteter Vermögensertrag der Fonds                              | -730       | -660       |
| Anpassungsbetrag aufgrund des nachverrechneten Dienstzeitaufwands | 7          | -36        |
|                                                                   | <b>355</b> | <b>283</b> |

Der Barwert der Versorgungsansprüche abzüglich des beizulegenden Zeitwerts des Planvermögens ergibt die Nettoposition aus fondsfinanzierten und nicht fondsfinanzierten Versorgungsansprüchen. Hier zeigte sich in den vergangenen fünf Jahren folgende Entwicklung:

| <b>Nettoposition aus fondsfinanzierten und nicht fondsfinanzierten Versorgungsansprüchen</b><br>in Mio. € | 2010         | 2009         | 2008         | 2007         | 2006          |
|-----------------------------------------------------------------------------------------------------------|--------------|--------------|--------------|--------------|---------------|
| Barwert der Versorgungsansprüche                                                                          | 17.095       | 16.341       | 13.768       | 15.733       | 17.955        |
| Beizulegender Zeitwert des Planvermögens                                                                  | 13.833       | 13.139       | 11.030       | 12.675       | 6.119         |
| <b>Saldo</b>                                                                                              | <b>3.262</b> | <b>3.202</b> | <b>2.738</b> | <b>3.058</b> | <b>11.836</b> |

Im gleichen Zeitraum wurden folgende erfahrungsbedingte Anpassungen bei den Barwerten der Versorgungsansprüche und den Zeitwerten des Planvermögens vorgenommen:

| <b>Erfahrungsbedingte Anpassungen</b><br>in Mio. € | 2010 | 2009  | 2008   | 2007 | 2006 |
|----------------------------------------------------|------|-------|--------|------|------|
| Barwert der Versorgungsansprüche                   | -199 | -451  | -40    | 367  | 38   |
| Beizulegender Zeitwert des Planvermögens           | 541  | 1.162 | -2.107 | -494 | -69  |

Beziehen sich die erfahrungsbedingten Anpassungen auf die Barwerte der Versorgungsansprüche, sind sie Teil der auf die Versorgungsansprüche entfallenden versicherungsmathematischen Gewinne oder Verluste des jeweiligen Jahres. Beziehen sie sich auf die Zeitwerte des Planvermögens, sind sie mit den auf das Planvermögen entfallenden versicherungsmathema-

tischen Gewinnen oder Verlusten des jeweiligen Jahres gleichzusetzen.

Im Geschäftsjahr 2011 werden voraussichtlich 309 Mio. € in leistungsorientierte Pläne eingezahlt.

| Rückstellungsspiegel                                                                             | Stand:<br>01.01.10 | Zufüh-<br>rungen | Auf-<br>lösungen | Zinsanteil/<br>Änderun-<br>gen des<br>Zinssatzes | Änderungen<br>Konsolidie-<br>rungskreis,<br>Währungs-<br>anpassun-<br>gen, Um-<br>buchungen | Inan-<br>spruch-<br>nahmen | Stand:<br>31.12.10 |
|--------------------------------------------------------------------------------------------------|--------------------|------------------|------------------|--------------------------------------------------|---------------------------------------------------------------------------------------------|----------------------------|--------------------|
| in Mio. €                                                                                        |                    |                  |                  |                                                  |                                                                                             |                            |                    |
| Pensionsrückstellungen                                                                           | 3.281              | 203              |                  | 151                                              | -51 <sup>1</sup>                                                                            | -266                       | 3.318              |
| Steuerrückstellungen                                                                             | 3.112              | 1.133            | -22              |                                                  | -54                                                                                         | -568                       | 3.601              |
| Rückstellungen für Entsorgung<br>im Kernenergiebereich                                           | 9.491              | 180              |                  | 472                                              | -1                                                                                          | -132                       | 10.010             |
| Bergbaubedingte Rückstellungen                                                                   | 2.712              | 117              | -61              | 151                                              | 64                                                                                          | -63                        | 2.920              |
|                                                                                                  | <b>18.596</b>      | <b>1.633</b>     | <b>-83</b>       | <b>774</b>                                       | <b>-42</b>                                                                                  | <b>-1.029</b>              | <b>19.849</b>      |
| Sonstige Rückstellungen                                                                          |                    |                  |                  |                                                  |                                                                                             |                            |                    |
| Verpflichtungen aus dem Personalbereich<br>(ohne Restrukturierungen)                             | 1.643              | 845              | -197             | 34                                               | 23                                                                                          | -700                       | 1.648              |
| Verpflichtungen aus Restrukturierungen                                                           | 528                | 161              | -21              | 47                                               | 8                                                                                           | -128                       | 595                |
| Einkaufs- und Verkaufsverpflichtungen                                                            | 2.097              | 612              | -401             | 40                                               | -81                                                                                         | -580                       | 1.687              |
| Ungewisse Verpflichtungen<br>aus dem Stromgeschäft                                               | 838                | 114              | -18              | 16                                               | -134                                                                                        | -28                        | 788                |
| Umweltschutzverpflichtungen                                                                      | 153                | 41               | -1               | 2                                                | -1                                                                                          | -12                        | 182                |
| Zinszahlungsverpflichtungen                                                                      | 588                | 180              | -8               | 2                                                | -17                                                                                         | -4                         | 741                |
| Rückgabeverpflichtungen<br>CO <sub>2</sub> -Emissionsrechte/Zertifikate<br>alternativer Energien | 1.242              | 1.028            | -31              |                                                  | -10                                                                                         | -1.257                     | 972                |
| Übrige sonstige Rückstellungen                                                                   | 2.459              | 647              | -356             | 29                                               | 89                                                                                          | -273                       | 2.595              |
|                                                                                                  | <b>9.548</b>       | <b>3.628</b>     | <b>-1.033</b>    | <b>170</b>                                       | <b>-123</b>                                                                                 | <b>-2.982</b>              | <b>9.208</b>       |
| <b>Rückstellungen</b>                                                                            | <b>28.144</b>      | <b>5.261</b>     | <b>-1.116</b>    | <b>944</b>                                       | <b>-165</b>                                                                                 | <b>-4.011</b>              | <b>29.057</b>      |
| Davon: Änderung des Konsolidierungskreises                                                       |                    |                  |                  |                                                  |                                                                                             |                            | (-61)              |

1 Inkl. Verrechnung versicherungsmathematischer Gewinne und Verluste gemäß IAS 19.93A

**Rückstellungen für Entsorgung im Kernenergiebereich** werden nahezu ausschließlich als langfristige Rückstellungen mit ihrem auf den Bilanzstichtag abgezinsten Erfüllungsbetrag bewertet. Der Großteil der Inanspruchnahme wird aus heutiger Sicht für die Jahre 2020 bis 2050 erwartet. Der Abzinsungsfaktor beträgt wie im Vorjahr 5,0%. Mengenbedingte Erhöhungen des Verpflichtungsvolumens werden mit dem Barwert zugeführt. Im Berichtsjahr waren dies 92 Mio. € (Vorjahr: 122 Mio. €). Weitere Rückstellungszuführungen in Höhe von 88 Mio. € (Vorjahr: Auf-  
lösungen von 388 Mio. €) sind darauf zurückzuführen, dass aktuelle Schätzungen per Saldo zu einer Erhöhung (Vorjahr: Absenkung) der erwarteten Entsorgungskosten geführt haben. Die Zuführung zu den Rückstellungen für Entsorgung im Kernenergiebereich besteht ferner vor allem aus dem Zinsanteil in Höhe von 472 Mio. € (Vorjahr: 446 Mio. €). Von den Rückstellungen wurden geleistete Anzahlungen in Höhe von 833 Mio. €

(Vorjahr: 796 Mio. €) abgesetzt, die im Wesentlichen an ausländische Wiederaufarbeitungsunternehmen und an das Bundesamt für Strahlenschutz (BfS) für die Errichtung der Endlager entrichtet worden sind.

Die Rückstellungen für Entsorgung im Kernenergiebereich lassen sich nach ihrer vertraglichen Konkretisierung wie folgt aufgliedern:

| Rückstellungen für Entsorgung<br>im Kernenergiebereich<br>in Mio. €                | 31.12.10      | 31.12.09     |
|------------------------------------------------------------------------------------|---------------|--------------|
| Rückstellung für noch nicht vertraglich<br>konkretisierte nukleare Verpflichtungen | 7.977         | 7.557        |
| Rückstellung für vertraglich konkretisierte<br>nukleare Verpflichtungen            | 2.033         | 1.934        |
|                                                                                    | <b>10.010</b> | <b>9.491</b> |

Die Rückstellungsbestandteile für noch nicht vertraglich konkretisierte nukleare Verpflichtungen umfassen im Rahmen der Brennelemententsorgung die langfristig zu erwartenden Kosten der direkten Endlagerung von Brennelementen, des in Deutschland derzeit einzig möglichen Entsorgungspfad, ferner die Kosten der Entsorgung von radioaktiven Abfällen aus der Wiederaufarbeitung – im Wesentlichen für die durchzuführenden Transporte von zentralen und standortnahen Zwischenlagern zur Konditionierungsanlage bzw. zum Endlager – sowie die Kosten der endlagergerechten Konditionierung und der Behälter. Die Schätzungen basieren überwiegend auf Konzepten interner und externer Experten, insbesondere der GNS Gesellschaft für Nuklear-Service mbH, Essen. Hinsichtlich der Stilllegung von Kernkraftwerken werden hier die Kosten der Nachbetriebsphase und des Rückbaus nach Angaben externer, branchenweit anerkannter und laufend aktualisierter Fachgutachten der NIS Ingenieurgesellschaft mbH, Alzenau, berücksichtigt. Schließlich sind die gesamten Kosten der Endlagerung aller radioaktiven Abfälle, ausgehend von Angaben des BfS, unter der Position erfasst.

Die Rückstellung für vertraglich konkretisierte nukleare Verpflichtungen betrifft sämtliche nukleare Verpflichtungen für die Entsorgung von Brennelementen und radioaktiven Abfällen sowie für die Stilllegung von Kernkraftwerken, deren Bewertung durch zivilrechtliche Verträge konkretisiert ist. Sie beinhaltet die zu erwartenden restlichen Kosten der Wiederaufarbeitung, der Rücknahme (Transport, Behälter) und Zwischenlagerung der daraus resultierenden radioaktiven Abfälle sowie die Mehrkosten der Verwertung von Uran und Plutonium aus der Wiederaufarbeitung. Die Kosten beruhen auf bestehenden Verträgen mit ausländischen Wiederaufarbeitungsunternehmen und mit der GNS. Daneben sind hier die Kosten der Transporte und der Zwischenlagerung von abgebrannten Brennelementen im Rahmen

der direkten Endlagerung berücksichtigt. Die kraftwerkseigenen Standortzwischenlager sind für eine Betriebsdauer von 40 Jahren genehmigt. Sie gingen im Zeitraum von 2002 bis 2006 in Betrieb. Weiterhin werden die Beträge für die – im Wesentlichen von der GNS ausgeführten – Konditionierung und Zwischenlagerung radioaktiver Betriebsabfälle ausgewiesen.

Vor dem Hintergrund des deutschen Atomgesetzes (AtG), im Wesentlichen § 9a AtG, gliedert sich die Rückstellung für Entsorgung im Kernenergiebereich wie folgt:

| <b>Rückstellungen für Entsorgung im Kernenergiebereich</b><br>in Mio. € | 31.12.10      | 31.12.09     |
|-------------------------------------------------------------------------|---------------|--------------|
| Stilllegung von Kernkraftwerksanlagen                                   | 4.490         | 4.626        |
| Entsorgung von Kernbrennelementen                                       | 4.831         | 4.303        |
| Entsorgung radioaktiver Betriebsabfälle                                 | 689           | 562          |
|                                                                         | <b>10.010</b> | <b>9.491</b> |

Auch **bergbaubedingte Rückstellungen** sind größtenteils langfristig. Sie werden mit ihrem auf den Bilanzstichtag abgezinnten Erfüllungsbetrag angesetzt. Dabei legen wir wie im Vorjahr einen Abzinsungsfaktor von 5,0% zugrunde. Im Berichtsjahr sind den bergbaubedingten Rückstellungen 117 Mio. € (Vorjahr: 165 Mio. €) zugeführt worden. Davon wurden 67 Mio. € (Vorjahr: 84 Mio. €) unter dem Posten „Sachanlagen“ aktiviert. Der Zinsanteil bei der Zuführung zu den bergbaubedingten Rückstellungen betrug 151 Mio. € (Vorjahr: 121 Mio. €).

Die **Rückstellungen für Restrukturierungen** beziehen sich im Wesentlichen auf Maßnahmen für den sozialverträglichen Personalabbau aus Vorjahren.

## (25) Finanzverbindlichkeiten

| <b>Finanzverbindlichkeiten</b><br>in Mio. €  | 31.12.10      |              | 31.12.09      |              |
|----------------------------------------------|---------------|--------------|---------------|--------------|
|                                              | Langfristig   | Kurzfristig  | Langfristig   | Kurzfristig  |
| Anleihen (inkl. Schuldscheindarlehen)        | 14.864        | 1.496        | 15.904        | 640          |
| Commercial Paper                             |               | 493          |               | 238          |
| Verbindlichkeiten gegenüber Kreditinstituten | 293           | 426          | 411           | 514          |
| Sonstige Finanzverbindlichkeiten             |               |              |               |              |
| Sicherheitsleistungen für Handelsgeschäfte   |               | 567          |               | 945          |
| Übrige sonstige Finanzverbindlichkeiten      | 751           | 920          | 704           | 790          |
|                                              | <b>15.908</b> | <b>3.902</b> | <b>17.019</b> | <b>3.127</b> |

Gegenüber assoziierten Unternehmen bestanden Finanzverbindlichkeiten in Höhe von 187 Mio. € (Vorjahr: 186 Mio. €).

Änderungen des Konsolidierungskreises verminderten die Finanzverbindlichkeiten um 3 Mio. €.

Von den langfristigen Finanzverbindlichkeiten waren 15.679 Mio. € (Vorjahr: 16.802 Mio. €) verzinslich. Verbindlichkeiten gegenüber Kreditinstituten resultierten größtenteils aus früheren Aktivitäten von übernommenen Gesellschaften.

Die ausstehenden Anleihen sind von der RWE AG oder der RWE Finance B.V. begeben worden.

Die folgende Übersicht zeigt die Eckdaten der wesentlichen RWE-Anleihen zum 31. Dezember 2010:

| Ausstehende Anleihen<br>Emittent             | Ausstehender Betrag     | Buchwert             | Kupon in %            | Fälligkeit     |
|----------------------------------------------|-------------------------|----------------------|-----------------------|----------------|
| RWE Finance B.V.                             | 1.500 Mio. €            | 1.496 Mio. €         | 2,5                   | September 2011 |
| RWE Finance B.V.                             | 1.808 Mio. €            | 1.823 Mio. €         | 6,125                 | Oktober 2012   |
| RWE Finance B.V.                             | 250 Mio. US\$           | 187 Mio. €           | 2,0                   | Februar 2013   |
| RWE Finance B.V.                             | 630 Mio. £              | 731 Mio. €           | 6,375                 | Juni 2013      |
| RWE Finance B.V.                             | 1.000 Mio. €            | 996 Mio. €           | 5,75                  | November 2013  |
| RWE Finance B.V.                             | 530 Mio. €              | 529 Mio. €           | 4,625                 | Juli 2014      |
| RWE Finance B.V.                             | 2.000 Mio. €            | 1.986 Mio. €         | 5,0                   | Februar 2015   |
| RWE Finance B.V.                             | 850 Mio. €              | 853 Mio. €           | 6,25                  | April 2016     |
| RWE AG                                       | 100 Mio. €              | 100 Mio. €           | variabel <sup>1</sup> | November 2017  |
| RWE Finance B.V.                             | 980 Mio. €              | 979 Mio. €           | 5,125                 | Juli 2018      |
| RWE Finance B.V.                             | 1.000 Mio. €            | 991 Mio. €           | 6,625                 | Januar 2019    |
| RWE Finance B.V.                             | 570 Mio. £              | 665 Mio. €           | 6,5                   | April 2021     |
| RWE Finance B.V.                             | 1.000 Mio. €            | 997 Mio. €           | 6,5                   | August 2021    |
| RWE Finance B.V.                             | 500 Mio. £              | 575 Mio. €           | 5,5                   | Juli 2022      |
| RWE Finance B.V.                             | 488 Mio. £              | 564 Mio. €           | 5,625                 | Dezember 2023  |
| RWE Finance B.V.                             | 760 Mio. £              | 885 Mio. €           | 6,25                  | Juni 2030      |
| RWE AG                                       | 600 Mio. €              | 594 Mio. €           | 5,75                  | Februar 2033   |
| RWE Finance B.V.                             | 1.000 Mio. £            | 1.143 Mio. €         | 6,125                 | Juli 2039      |
| RWE AG                                       | 160 Mio. € <sup>2</sup> | 156 Mio. €           | 4,76 <sup>2</sup>     | Februar 2040   |
| Übrige (inkl. Schuldscheindarlehen)          | Diverse                 | 110 Mio. €           | Diverse               | Diverse        |
| <b>Anleihen (inkl. Schuldscheindarlehen)</b> |                         | <b>16.360 Mio. €</b> |                       |                |

1 Zinstermine: 15.05. und 15.11.

2 Nach Swap in Euro

Im Berichtszeitraum wurden im Rahmen unseres Commercial-Paper-Programms kleinere Emissionen auf dem europäischen Kapitalmarkt getätigt. Das Programm wurde mit bis zu 0,5 Mrd. € (Vorjahr: 2,1 Mrd. €) in Anspruch genommen. Die Verzinsung der Papiere lag zwischen 0,4 und 1,3 % (Vorjahr: 0,8 und 3,1 %).

In den sonstigen Finanzverbindlichkeiten sind Verbindlichkeiten aus Finanzierungsleasing enthalten. Die Leasingverträge betreffen insbesondere Investitionsgüter im Stromgeschäft.

Die Verbindlichkeiten aus Finanzierungsleasing-Verträgen haben folgende Fälligkeiten:

| Verbindlichkeiten aus<br>Finanzierungsleasing-Verträgen | Fälligkeiten der Mindestleasingzahlungen |                       |            |                  |                       |           |
|---------------------------------------------------------|------------------------------------------|-----------------------|------------|------------------|-----------------------|-----------|
|                                                         | 31.12.10                                 |                       |            | 31.12.09         |                       |           |
|                                                         | Nominal-<br>wert                         | Abzinsungs-<br>betrag | Barwert    | Nominal-<br>wert | Abzinsungs-<br>betrag | Barwert   |
| in Mio. €                                               |                                          |                       |            |                  |                       |           |
| Fällig im Folgejahr                                     | 8                                        |                       | 8          | 9                |                       | 9         |
| Fällig nach 1 bis 5 Jahren                              | 29                                       | 1                     | 28         | 30               | 1                     | 29        |
| Fällig nach über 5 Jahren                               | 101                                      | 2                     | 99         | 43               | 2                     | 41        |
|                                                         | <b>138</b>                               | <b>3</b>              | <b>135</b> | <b>82</b>        | <b>3</b>              | <b>79</b> |

Darüber hinaus werden unter den sonstigen Finanzverbindlichkeiten die Sicherheitsleistungen für Handelsgeschäfte ausgewiesen.

#### (26) Verbindlichkeiten aus Lieferungen und Leistungen

Gegenüber assoziierten Unternehmen bestanden Verbindlichkeiten in Höhe von 115 Mio. € (Vorjahr: 55 Mio. €).

Von den Finanzverbindlichkeiten sind 47 Mio. € (Vorjahr: 199 Mio. €) durch Grundpfandrechte und 107 Mio. € (Vorjahr: 19 Mio. €) durch ähnliche Rechte gesichert.

Auf die Explorationstätigkeit entfielen Verbindlichkeiten von 21 Mio. € (Vorjahr: 84 Mio. €).

Änderungen des Konsolidierungskreises verminderten die Verbindlichkeiten insgesamt um 5 Mio. €.

#### (27) Übrige Verbindlichkeiten

| Übrige Verbindlichkeiten                            | 31.12.10     |               | 31.12.09     |               |
|-----------------------------------------------------|--------------|---------------|--------------|---------------|
| in Mio. €                                           | Langfristig  | Kurzfristig   | Langfristig  | Kurzfristig   |
| Verbindlichkeiten aus Steuern                       |              | 1.055         |              | 988           |
| Verbindlichkeiten im Rahmen der sozialen Sicherheit | 44           | 45            | 55           | 56            |
| Verbindlichkeiten aus Restrukturierungen            | 98           | 42            | 129          | 61            |
| Derivate                                            | 910          | 7.036         | 1.360        | 9.852         |
| Passive Rechnungsabgrenzungsposten                  | 1.894        | 299           | 1.911        | 268           |
| Sonstige übrige Verbindlichkeiten                   | 638          | 3.899         | 517          | 3.992         |
|                                                     | <b>3.584</b> | <b>12.376</b> | <b>3.972</b> | <b>15.217</b> |

Als Verbindlichkeiten im Rahmen der sozialen Sicherheit sind insbesondere die noch abzuführenden Beiträge an Sozialversicherungen ausgewiesen.

Änderungen des Konsolidierungskreises verminderten die übrigen Verbindlichkeiten um 6 Mio. €.

| Passive Rechnungsabgrenzungsposten<br>in Mio. € | 31.12.10     |             | 31.12.09     |             |
|-------------------------------------------------|--------------|-------------|--------------|-------------|
|                                                 | Langfristig  | Kurzfristig | Langfristig  | Kurzfristig |
| Hausanschlusskosten und Baukostenzuschüsse      | 1.614        | 160         | 1.709        | 168         |
| Investitionszuwendungen für Anlagegegenstände   |              |             |              |             |
| Steuerpflichtige Zuschüsse                      | 10           | 2           | 12           | 1           |
| Steuerfreie Zulagen                             | 1            |             | 1            |             |
| Sonstige                                        | 269          | 137         | 189          | 99          |
|                                                 | <b>1.894</b> | <b>299</b>  | <b>1.911</b> | <b>268</b>  |

Die sonstigen übrigen Verbindlichkeiten enthalten 1.775 Mio. € (Vorjahr: 1.562 Mio. €) kurzfristige Kaufpreisverbindlichkeiten aus gewährten Andienungsrechten (Put-Optionen) von Minderheitenanteilen.

## Sonstige Angaben

### (28) Ergebnis je Aktie

Das unverwässerte und verwässerte Ergebnis je Aktie ergeben sich, indem das auf die Aktien entfallende Nettoergebnis durch die durchschnittliche Zahl der im Umlauf befindlichen Aktien geteilt wird; eigene Aktien bleiben dabei unberücksichtigt. Auf Stammaktien und auf Vorzugsaktien entfällt das gleiche Ergebnis je Aktie.

| Ergebnis je Aktie                                                   |            | 2010              | 2009    |
|---------------------------------------------------------------------|------------|-------------------|---------|
| Nettoergebnis der Aktionäre der RWE AG                              | Mio. €     | 3.308             | 3.571   |
| Zahl der im Umlauf befindlichen Aktien (gewichteter Durchschnitt)   | Tsd. Stück | 533.559           | 533.132 |
| Unverwässertes und verwässertes Ergebnis je Stamm- und Vorzugsaktie | €          | 6,20              | 6,70    |
| Dividende je Aktie                                                  | €          | 3,50 <sup>1</sup> | 3,50    |

<sup>1</sup> Vorschlag für das Geschäftsjahr 2010

### (29) Berichterstattung zu Finanzinstrumenten

Die Finanzinstrumente lassen sich in originäre und derivative untergliedern.

Die originären Finanzinstrumente umfassen auf der Aktivseite im Wesentlichen die übrigen Finanzanlagen, die Forderungen, die kurzfristigen Wertpapiere und die flüssigen Mittel. Die Finanzinstrumente der Kategorie „Zur Veräußerung verfügbar“ sind mit dem beizulegenden Zeitwert angesetzt, die übrigen originären finanziellen Vermögenswerte mit den fortgeführten

Anschaffungskosten. Auf der Passivseite enthalten die originären Finanzinstrumente im Wesentlichen zu fortgeführten Anschaffungskosten bewertete Verbindlichkeiten.

Die Buchwerte der finanziellen Vermögenswerte geben das maximale Ausfallrisiko wieder. Soweit bei den finanziellen Vermögenswerten Ausfallrisiken erkennbar sind, werden diese durch Wertberichtigungen erfasst.

Die beizulegenden Zeitwerte ergeben sich aus den Börsenkursen oder werden mit anerkannten Bewertungsmethoden ermittelt.

Für die Bewertung von Commodity-Derivaten werden Notierungen an aktiven Märkten (z.B. Börsenkurse) herangezogen. Liegen keine Notierungen vor, etwa weil der Markt nicht hinreichend liquide ist, werden beizulegende Zeitwerte auf der Grundlage anerkannter Bewertungsmodelle ermittelt. Dabei orientieren wir uns – soweit möglich – an Notierungen auf aktiven Märkten. Sollten auch diese nicht vorliegen, fließen unternehmensspezifische Planannahmen in die Bewertung ein. Diese beinhalten sämtliche Marktfaktoren, die auch andere Marktteilnehmer für die Preisfestsetzung berücksichtigen würden.

Commodity-Forwards, -Futures, -Optionen und -Swaps werden – sofern sie in den Anwendungsbereich von IAS 39 fallen – grundsätzlich mit ihren beizulegenden Zeitwerten am Bilanzstichtag bilanziert. Börsengehandelte Produkte werden mit den veröffentlichten Schlusskursen der jeweiligen Börsen bewertet. Bei nicht börsengehandelten Produkten erfolgt die Bewertung an-

hand von öffentlich zugänglichen Brokerquotierungen oder – falls nicht vorhanden – anhand allgemein anerkannter Bewertungsmodelle. Die beizulegenden Zeitwerte bestimmter langfristiger Bezugs- oder Absatzverträge werden – sofern keine Marktdaten vorliegen – mithilfe anerkannter Bewertungsmodelle berechnet, für die interne Daten herangezogen werden.

Terminkäufe und -verkäufe von Aktien börsennotierter Gesellschaften werden mit den – um die jeweiligen Zeitkomponenten bereinigten – Börsenkursen der jeweiligen Aktien bewertet.

Bei derivativen Finanzinstrumenten, die wir zur Absicherung von Zinsrisiken einsetzen, werden die künftigen Zahlungsströme mithilfe aktueller restlaufzeitkongruenter Marktzinssätze abgezinst, um den beizulegenden Zeitwert der Sicherungsinstrumente am Bilanzstichtag zu ermitteln.

Der beizulegende Zeitwert von in den übrigen Finanzanlagen und Wertpapieren erfassten Finanzinstrumenten entspricht dem veröffentlichten Börsenkurs, sofern diese an einem aktiven Markt gehandelt werden. Der beizulegende Zeitwert nicht no-

tierter Schuld- und Eigenkapitaltitel wird grundsätzlich auf Basis diskontierter erwarteter Zahlungsströme ermittelt. Zur Diskontierung werden aktuelle restlaufzeitkongruente Marktzinssätze herangezogen.

Die folgende Übersicht stellt die Einordnung aller zum beizulegenden Zeitwert bewerteten Finanzinstrumente in die durch IFRS 7 vorgegebene Fair-Value-Hierarchie dar. Die einzelnen Stufen der Fair-Value-Hierarchie sind gemäß IFRS 7 wie folgt definiert:

Stufe 1: Bewertung mit den auf aktiven Märkten notierten (unverändert übernommenen) Preisen für identische Finanzinstrumente;

Stufe 2: Bewertung auf Basis von Inputfaktoren, bei denen es sich nicht um die auf Stufe 1 berücksichtigten notierten Preise handelt, die sich aber für das Finanzinstrument entweder direkt (d.h. als Preis) oder indirekt (d.h. in Ableitung von Preisen) beobachten lassen;

Stufe 3: Bewertung mithilfe von nicht auf beobachtbaren Marktdaten basierenden Faktoren.

| Fair-Value-Hierarchie<br>in Mio. €                            | Summe<br>2010 | Stufe 1 | Stufe 2 | Stufe 3 | Summe<br>2009 | Stufe 1 | Stufe 2 | Stufe 3 |
|---------------------------------------------------------------|---------------|---------|---------|---------|---------------|---------|---------|---------|
| Übrige Finanzanlagen                                          | 750           | 67      | 237     | 446     | 709           | 42      | 145     | 522     |
| Derivate (aktiv)                                              | 8.918         |         | 8.304   | 614     | 12.202        |         | 11.744  | 458     |
| Wertpapiere                                                   | 3.196         | 992     | 2.204   |         | 3.290         | 1.102   | 2.188   |         |
| Derivate (passiv)                                             | 7.946         |         | 7.748   | 198     | 11.212        |         | 10.941  | 271     |
| Kaufpreisverbindlichkeiten aus<br>gewährten Andienungsrechten | 1.775         |         |         | 1.775   | 1.562         |         |         | 1.562   |

Die folgende Darstellung zeigt die Entwicklung der nach Stufe 3 zum beizulegenden Zeitwert bilanzierten Finanzinstrumente.

| Finanzinstrumente der Stufe 3:<br>Entwicklung im Jahr 2010    | Stand:<br>01.01.10 | Änderungen<br>des Konsolidie-<br>rungskreises,<br>Währungs-<br>anpassungen,<br>Sonstiges | Veränderungen       |                           |                      | Stand:<br>31.12.10 |
|---------------------------------------------------------------|--------------------|------------------------------------------------------------------------------------------|---------------------|---------------------------|----------------------|--------------------|
|                                                               |                    |                                                                                          | erfolgs-<br>wirksam | erfolgs-<br>neutral (OCI) | zahlungs-<br>wirksam |                    |
| in Mio. €                                                     |                    |                                                                                          |                     |                           |                      |                    |
| Übrige Finanzanlagen                                          | 522                | -141                                                                                     |                     |                           | 65                   | 446                |
| Derivate (aktiv)                                              | 458                |                                                                                          | 69                  | 40                        | 47                   | 614                |
| Derivate (passiv)                                             | 271                | 646                                                                                      | -65                 | -108                      | -546                 | 198                |
| Kaufpreisverbindlichkeiten aus<br>gewährten Andienungsrechten | 1.562              | 213                                                                                      |                     |                           |                      | 1.775              |

Die sonstige Veränderung bei den Derivaten (passiv) in Höhe von 646 Mio. € ist im Wesentlichen auf die erstmalige Markt-bewertung von zuvor als Eigenbedarfsverträge klassifizierten langfristigen Gasbezugsverträgen zurückzuführen.

| Finanzinstrumente der Stufe 3:<br>Entwicklung im Jahr 2009    | Stand:<br>01.01.09 | Änderungen<br>des Konsolidie-<br>rungskreises,<br>Währungs-<br>anpassungen,<br>Sonstiges | Veränderungen       |                           |                      | Stand:<br>31.12.09 |
|---------------------------------------------------------------|--------------------|------------------------------------------------------------------------------------------|---------------------|---------------------------|----------------------|--------------------|
|                                                               |                    |                                                                                          | erfolgs-<br>wirksam | erfolgs-<br>neutral (OCI) | zahlungs-<br>wirksam |                    |
| in Mio. €                                                     |                    |                                                                                          |                     |                           |                      |                    |
| Übrige Finanzanlagen                                          | 345                |                                                                                          | -1                  |                           | 178                  | 522                |
| Derivate (aktiv)                                              | 363                | 456                                                                                      | -177                | -35                       | -149                 | 458                |
| Derivate (passiv)                                             | 67                 | 278                                                                                      | -18                 | -9                        | -47                  | 271                |
| Kaufpreisverbindlichkeiten aus<br>gewährten Andienungsrechten | 1.294              | 268                                                                                      |                     |                           |                      | 1.562              |

| Finanzinstrumente der Stufe 3: Erfolgs-<br>wirksam erfasste Gewinne und Verluste | Gesamt<br>2010 | Davon: auf Finanz-<br>instrumente<br>entfallend, die am<br>Bilanzstichtag noch<br>gehalten wurden | Gesamt<br>2009 | Davon: auf Finanz-<br>instrumente<br>entfallend, die am<br>Bilanzstichtag noch<br>gehalten wurden |
|----------------------------------------------------------------------------------|----------------|---------------------------------------------------------------------------------------------------|----------------|---------------------------------------------------------------------------------------------------|
| in Mio. €                                                                        |                |                                                                                                   |                |                                                                                                   |
| Umsatzerlöse                                                                     | 210            | 210                                                                                               | 58             | 58                                                                                                |
| Materialaufwand                                                                  | -16            | -13                                                                                               | -217           | -217                                                                                              |
| Sonstige betriebliche Aufwendungen                                               | -60            | -60                                                                                               |                |                                                                                                   |
| Beteiligungsergebnis                                                             |                |                                                                                                   | -1             |                                                                                                   |
|                                                                                  | <b>134</b>     | <b>137</b>                                                                                        | <b>-160</b>    | <b>-159</b>                                                                                       |

Auf die unter den folgenden Bilanzposten ausgewiesenen finanziellen Vermögenswerte im Anwendungsbereich von IFRS 7 wurden die nachstehenden Wertberichtigungen vorgenommen:

| <b>Wertberichtigungen für finanzielle Vermögenswerte 2010</b><br>in Mio. € | Übrige Finanzanlagen | Finanzforderungen | Forderungen aus Lieferungen und Leistungen | Sonstige Forderungen und sonstige Vermögenswerte | Gesamt     |
|----------------------------------------------------------------------------|----------------------|-------------------|--------------------------------------------|--------------------------------------------------|------------|
| Stand: 01.01.10                                                            | 123                  | 344               | 531                                        | 4                                                | 1.002      |
| Zuführungen                                                                | 3                    | 18                | 259                                        | 2                                                | 282        |
| Umbuchungen                                                                | 33                   | -1                | -2                                         | 5                                                | 35         |
| Währungsanpassungen                                                        |                      |                   | 11                                         |                                                  | 11         |
| Abgänge                                                                    | 13                   | 83                | 456                                        | 5                                                | 557        |
| <b>Stand: 31.12.10</b>                                                     | <b>146</b>           | <b>278</b>        | <b>343</b>                                 | <b>6</b>                                         | <b>773</b> |

| <b>Wertberichtigungen für finanzielle Vermögenswerte 2009</b><br>in Mio. € | Übrige Finanzanlagen | Finanzforderungen | Forderungen aus Lieferungen und Leistungen | Sonstige Forderungen und sonstige Vermögenswerte | Gesamt       |
|----------------------------------------------------------------------------|----------------------|-------------------|--------------------------------------------|--------------------------------------------------|--------------|
| Stand: 01.01.09                                                            | 257                  | 178               | 510                                        | 2                                                | 947          |
| Zuführungen                                                                | 19                   | 27                | 143                                        | 2                                                | 191          |
| Umbuchungen                                                                | -149                 | 157               | -8                                         |                                                  |              |
| Währungsanpassungen                                                        |                      |                   | 19                                         |                                                  | 19           |
| Abgänge                                                                    | 4                    | 18                | 133                                        |                                                  | 155          |
| <b>Stand: 31.12.09</b>                                                     | <b>123</b>           | <b>344</b>        | <b>531</b>                                 | <b>4</b>                                         | <b>1.002</b> |

Zum Abschlussstichtag bestanden überfällige, nicht wertberichtigte Forderungen im Anwendungsbereich von IFRS 7 in folgender Höhe:

| Überfällige, nicht wertberichtigte Forderungen   | Bruttowert<br>31.12.10 | Überfällige, wertberichtigte Forderungen | Nicht wertberichtigte, in den folgenden Zeitbändern überfällige Forderungen |                |                |                 |               |
|--------------------------------------------------|------------------------|------------------------------------------|-----------------------------------------------------------------------------|----------------|----------------|-----------------|---------------|
|                                                  |                        |                                          | bis 30 Tage                                                                 | 31 bis 60 Tage | 61 bis 90 Tage | 91 bis 120 Tage | über 120 Tage |
| in Mio. €                                        |                        |                                          |                                                                             |                |                |                 |               |
| Finanzforderungen                                | 4.065                  | 53                                       |                                                                             |                |                |                 | 5             |
| Forderungen aus Lieferungen und Leistungen       | 9.829                  | 1.160                                    | 785                                                                         | 94             | 53             | 39              | 120           |
| Sonstige Forderungen und sonstige Vermögenswerte | 9.731                  | 5                                        | 1                                                                           |                |                | 1               | 3             |
|                                                  | <b>23.625</b>          | <b>1.218</b>                             | <b>786</b>                                                                  | <b>94</b>      | <b>53</b>      | <b>40</b>       | <b>128</b>    |

| Überfällige, nicht wertberichtigte Forderungen   | Bruttowert<br>31.12.09 | Überfällige, wertberichtigte Forderungen | Nicht wertberichtigte, in den folgenden Zeitbändern überfällige Forderungen |                |                |                 |               |
|--------------------------------------------------|------------------------|------------------------------------------|-----------------------------------------------------------------------------|----------------|----------------|-----------------|---------------|
|                                                  |                        |                                          | bis 30 Tage                                                                 | 31 bis 60 Tage | 61 bis 90 Tage | 91 bis 120 Tage | über 120 Tage |
| in Mio. €                                        |                        |                                          |                                                                             |                |                |                 |               |
| Finanzforderungen                                | 4.883                  | 48                                       | 11                                                                          |                |                |                 | 5             |
| Forderungen aus Lieferungen und Leistungen       | 10.060                 | 921                                      | 724                                                                         | 77             | 49             | 40              | 154           |
| Sonstige Forderungen und sonstige Vermögenswerte | 13.215                 | 5                                        | 1                                                                           | 1              |                |                 | 1             |
|                                                  | <b>28.158</b>          | <b>974</b>                               | <b>736</b>                                                                  | <b>78</b>      | <b>49</b>      | <b>40</b>       | <b>160</b>    |

Die finanziellen Vermögenswerte und Verbindlichkeiten lassen sich in Bewertungskategorien mit den folgenden Buchwerten untergliedern:

| Buchwerte nach Bewertungskategorien                                                 | 31.12.10 | 31.12.09 |
|-------------------------------------------------------------------------------------|----------|----------|
| in Mio. €                                                                           |          |          |
| Erfolgswirksam zum beizulegenden Zeitwert bilanzierte finanzielle Vermögenswerte    | 6.040    | 9.502    |
| Davon: zu Handelszwecken gehalten                                                   | (6.040)  | (9.502)  |
| Zur Veräußerung verfügbare finanzielle Vermögenswerte                               | 3.947    | 3.998    |
| Kredite und Forderungen                                                             | 16.553   | 18.150   |
| Erfolgswirksam zum beizulegenden Zeitwert bilanzierte finanzielle Verbindlichkeiten | 6.503    | 8.574    |
| Davon: zu Handelszwecken gehalten                                                   | (6.503)  | (8.574)  |
| Zu (fortgeführten) Anschaffungskosten gehaltene Verbindlichkeiten                   | 28.019   | 29.380   |

Die Buchwerte der finanziellen Vermögenswerte und Verbindlichkeiten im Anwendungsbereich von IFRS 7 stimmen grundsätzlich mit ihren beizulegenden Zeitwerten überein. Lediglich bei den Anleihen, Commercial Paper und sonstigen Finanzverbindlichkeiten weicht der Buchwert in Höhe von 19.810 Mio. €

(Vorjahr: 20.146 Mio. €) vom beizulegenden Zeitwert in Höhe von 21.444 Mio. € (Vorjahr: 21.605 Mio. €) ab.

Finanzinstrumente wurden in der Gewinn- und Verlustrechnung mit folgenden Nettoergebnissen gemäß IFRS 7 erfasst:

| <b>Nettoergebnisse gemäß IFRS 7 aus Finanzinstrumenten</b><br>in Mio. €                                | 2010   | 2009   |
|--------------------------------------------------------------------------------------------------------|--------|--------|
| Erfolgswirksam zum beizulegenden Zeitwert bilanzierte finanzielle Vermögenswerte und Verbindlichkeiten | -813   | -17    |
| Davon: zu Handelszwecken gehalten                                                                      | (-813) | (-17)  |
| Zur Veräußerung verfügbare finanzielle Vermögenswerte                                                  | 292    | 169    |
| Kredite und Forderungen                                                                                | 286    | 423    |
| Zu (fortgeführten) Anschaffungskosten gehaltene Verbindlichkeiten                                      | -1.741 | -1.327 |

Das Nettoergebnis gemäß IFRS 7 umfasst im Wesentlichen Zinsen, Dividenden und Ergebnisse aus der Bewertung von Finanzinstrumenten zum beizulegenden Zeitwert.

Bei den zur Veräußerung verfügbaren finanziellen Vermögenswerten wurden im Berichtsjahr Wertänderungen in Höhe von 91 Mio. € (Vorjahr: 193 Mio. €) nach Steuern erfolgsneutral im Accumulated Other Comprehensive Income erfasst. Darüber hinaus wurden ursprünglich erfolgsneutral gebuchte Wertänderungen von zur Veräußerung verfügbaren Finanzinstrumenten in Höhe von 89 Mio. € als Ertrag (Vorjahr: 190 Mio. € als Aufwand) realisiert.

Der RWE-Konzern ist als international tätiges Versorgungsunternehmen bei seiner gewöhnlichen Geschäftstätigkeit Kredit-, Liquiditäts- und Marktrisiken ausgesetzt. Marktrisiken resultieren insbesondere aus Änderungen von Commodity-Preisen, Währungskursen, Zinssätzen und Aktienkursen.

Wir begrenzen diese Risiken durch ein systematisches konzernübergreifendes Risikomanagement. Zu den zentralen Instrumenten gehört der Abschluss von Sicherungsgeschäften. Handlungsrahmen, Verantwortlichkeiten und Kontrollen werden durch interne Richtlinien verbindlich vorgegeben.

Derivative Finanzinstrumente werden eingesetzt, um Währungs-, Commodity- und Zinsänderungsrisiken aus dem operativen Geschäft sowie Risiken aus Geldanlagen und Finanzierungsvorgängen abzusichern. Als Instrumente dienen dabei vor allem

Devisentermingeschäfte, Devisenoptionsgeschäfte, Zinsswaps, Zins-Währungs-Swaps sowie Commodity-Termingeschäfte, -Optionen, -Futures und -Swaps. Zusätzlich dürfen Derivate im Rahmen festgelegter Limite zu Eigenhandelszwecken eingesetzt werden.

Ausführliche Angaben zu den Risiken des RWE-Konzerns sowie zu den Zielen und Prozessen des Risikomanagements enthält das Kapitel „Entwicklung der Risiken und Chancen“ im Lagebericht.

Bilanzielle Sicherungsbeziehungen gemäß IAS 39 bestehen vor allem zur Absicherung von Währungsrisiken aus Beteiligungen mit ausländischer Funktionalwährung, von Fremdwährungsposten und Zinsrisiken aus langfristigen Verbindlichkeiten sowie von Preisrisiken aus Absatz- und Beschaffungsgeschäften.

**Fair Value Hedges** dienen vor allem der Absicherung von festverzinslichen Ausleihungen und Verbindlichkeiten gegen Marktpreisrisiken. Mit den Sicherungsmaßnahmen wird das Ziel verfolgt, die festverzinslichen Instrumente in variabel verzinsliche Instrumente zu transformieren und damit ihren beizulegenden Zeitwert zu sichern. Als Sicherungsinstrumente dienen Zinsswaps und Zins-Währungs-Swaps. Bei Fair Value Hedges wird sowohl das Derivat als auch das abgesicherte Grundgeschäft erfolgswirksam zum beizulegenden Zeitwert bewertet. Der beizulegende Zeitwert der im Rahmen von Fair Value Hedges eingesetzten Sicherungsinstrumente belief sich zum Abschlussstichtag auf 99 Mio. € (Vorjahr: 74 Mio. €).

Aus der Buchwertanpassung der Grundgeschäfte entstanden im Berichtsjahr Verluste von 26 Mio. € (Vorjahr: 27 Mio. €), während Wertänderungen der Sicherungsinstrumente zu Gewinnen von 24 Mio. € (Vorjahr: 24 Mio. €) führten. Beides ist im Finanzergebnis erfasst.

**Cash Flow Hedges** werden vor allem zur Absicherung gegen Fremdwährungs- und Preisrisiken aus künftigen Umsätzen und Beschaffungsgeschäften eingesetzt. Als Sicherungsinstrumente dienen Devisentermingeschäfte und Devisenoptionsgeschäfte sowie Commodity-Termingeschäfte, -Optionen, -Futures und -Swaps. Der effektive Teil der Fair-Value-Änderungen der Sicherungsinstrumente wird so lange im Other Comprehensive Income erfasst, bis das Grundgeschäft realisiert wird. Ineffektive Wertänderungen werden erfolgswirksam erfasst. Im Realisationszeitpunkt des Grundgeschäfts wird der Erfolgsbeitrag des Sicherungsgeschäfts aus dem Accumulated Other Comprehensive Income in der Gewinn- und Verlustrechnung erfasst. Der bilanzierte beizulegende Zeitwert der im Rahmen von Cash Flow Hedges eingesetzten Sicherungsinstrumente betrug zum Abschlussstichtag 61 Mio. € (Vorjahr: –269 Mio. €).

Die mit Cash Flow Hedges abgesicherten künftigen Umsätze und Beschaffungsgeschäfte werden voraussichtlich in den folgenden 15 Jahren fällig und ergebniswirksam.

Im Berichtsjahr wurden Änderungen der beizulegenden Zeitwerte von Sicherungsinstrumenten, die als Cash Flow Hedges eingesetzt wurden, in Höhe von 1.310 Mio. € (Vorjahr: 1.214 Mio. €) nach Steuern erfolgsneutral im Accumulated Other Comprehensive Income erfasst. Diese Wertänderungen stellen den effektiven Teil der Sicherungsbeziehungen dar.

Ineffektivitäten aus Cash Flow Hedges wurden in Höhe von 2 Mio. € (Vorjahr: 15 Mio. €) als Aufwand in der Gewinn- und Verlustrechnung erfasst.

Darüber hinaus wurden ursprünglich erfolgsneutral gebuchte Wertänderungen aus Cash Flow Hedges im Berichtsjahr in Höhe von 1.152 Mio. € (Vorjahr: 1.111 Mio. €) nach Steuern als Ertrag realisiert.

Ferner erhöhten im Berichtsjahr erfolgsneutral im Other Comprehensive Income ausgewiesene Wertänderungen aus Cash Flow Hedges die Anschaffungskosten nicht finanzieller Vermögenswerte um 188 Mio. € (Vorjahr Erhöhung um 128 Mio. €).

#### **Hedges von Nettoinvestitionen in ausländische Teileinheiten**

dienen der Absicherung gegen Fremdwährungsrisiken aus den Beteiligungen mit ausländischer Funktionalwährung. Als Sicherungsinstrumente setzen wir Anleihen verschiedener Laufzeiten in den entsprechenden Währungen sowie Zins-Währungs-Swaps ein. Währungskursänderungen bei den sichernden Anleihen sowie Fair-Value-Änderungen der sichernden Zins-Währungs-Swaps fließen in die Währungsumrechnungsdifferenz im Other Comprehensive Income ein. Der negative beizulegende Zeitwert der Anleihen betrug zum Abschlussstichtag 2.103 Mio. € (Vorjahr: 2.038 Mio. €), der positive Zeitwert der Swaps 284 Mio. € (Vorjahr: 226 Mio. €).

Im Berichtsjahr wurden Ineffektivitäten aus Hedges von Nettoinvestitionen in ausländische Teileinheiten in Höhe von 1 Mio. € (Vorjahr: 4 Mio. €) als Aufwand in der Gewinn- und Verlustrechnung erfasst.

**Marktrisiken** ergeben sich durch Schwankungen finanzwirtschaftlicher Preise. Währungs-, Zins- und Aktienkursänderungen können das Ergebnis der Geschäftstätigkeit des Konzerns beeinflussen. Wegen der internationalen Präsenz des RWE-Konzerns kommt dem Management von Wechselkursänderungen große Bedeutung zu. Das britische Pfund und der US-Dollar sind wichtige Fremdwährungen für den Konzern. Brennstoffe notieren in diesen beiden Währungen, zudem ist RWE im britischen Währungsraum geschäftlich aktiv. Die Konzerngesellschaften sind grundsätzlich verpflichtet, sämtliche Währungsrisiken über die RWE AG abzusichern. Diese ermittelt die Nettofinanzposition je Währung und sichert sie – wenn nötig – mithilfe externer Marktpartner ab.

Zinsrisiken bestehen hauptsächlich wegen der Finanzschulden und der zinstragenden Anlagen des Konzerns. Gegen negative Wertänderungen aus unerwarteten Zinsbewegungen sichern wir uns fallweise durch originäre und derivative Finanzgeschäfte ab.

Die Chancen und Risiken aus den Wertänderungen der Wertpapiere werden durch ein professionelles Fondsmanagement gesteuert. Finanzgeschäfte des Konzerns werden mit einer zentralen Risikomanagement-Software erfasst und von der RWE AG überwacht. Dies ermöglicht einen Risikoausgleich über die Einzelgesellschaften hinweg.

Für den Commodity-Bereich hat das zentrale Risikomanagement des Konzerns Richtlinien aufgestellt. Demnach dürfen Derivate

zur Absicherung gegen Preisrisiken, zur Optimierung des Kraftwerkseinsatzes und zur Margenerhöhung eingesetzt werden. Darüber hinaus ist der Handel mit Commodity-Derivaten im Rahmen von Limiten erlaubt, die durch unabhängige organisatorische Einheiten festgelegt werden. Die Einhaltung dieser Obergrenzen wird täglich überwacht.

Alle derivativen Finanzinstrumente werden als Vermögenswerte oder Verbindlichkeiten mit dem beizulegenden Zeitwert angesetzt. Bei der Interpretation ihrer positiven und negativen beizulegenden Zeitwerte ist zu beachten, dass den Finanzinstrumenten außer beim Eigenhandel mit Commodities i.d.R. Grundgeschäfte mit kompensierenden Risiken gegenüberstehen.

Die Laufzeit der Zins-, Währungs-, Aktien-, Index- und Commodity-Derivate orientiert sich an der Laufzeit der zugrunde liegenden Grundgeschäfte und liegt damit überwiegend im kurz- bis mittelfristigen Bereich. Bei der Absicherung des Fremdwährungsrisikos von Auslandsbeteiligungen wurden längere Laufzeiten von bis zu 30 Jahren vereinbart.

Aktienkurs-, Zinsänderungs- und Währungskursrisiken bei Finanzinstrumenten sowie Commodity-Preisrisiken werden bei RWE entsprechend dem internationalen Bankenstandard mit der Value-at-Risk-Methode gemessen. Zur Steuerung von Zinsrisiken wird zudem ein Cash Flow at Risk ermittelt.

Bei der Value-at-Risk-Methode wird auf der Basis historischer Wertschwankungen das maximale Verlustpotenzial, das sich aus der Veränderung von Marktpreisen innerhalb bestimmter Fristen ergeben könnte, berechnet und laufend überwacht. Bis auf den Cash Flow at Risk wurden alle Value-at-Risk-Angaben mit einem Konfidenzintervall von 95 % und einer Haltedauer von einem Tag ermittelt. Für den Cash Flow at Risk wird ein Konfidenzintervall von 95 % und eine Haltedauer von einem Jahr unterstellt. Die Aggregation der einzelnen Value-at-Risk-Angaben zu einer einzigen Value-at-Risk-Kennzahl ist insbesondere aufgrund der wechselseitigen Abhängigkeiten nicht sinnvoll.

RWE unterscheidet zur Steuerung des konzernweiten Zinsrisikos zwischen Zinsänderungsrisiken aus bilanzierten zinstragenden Finanzanlagen und Zinsänderungsrisiken aus dem Finanzierungsportfolio, welches im Wesentlichen aus den Kapitalmarktschulden besteht. Für die bilanzierten zinstragenden Finanzanlagen wird ein Value-at-Risk ermittelt, der das Marktwertisiko

dieser Anlagen widerspiegelt. Zum 31. Dezember 2010 betrug dieser 7,1 Mio. € (Vorjahr: 9,3 Mio. €). Seit dem Geschäftsjahr 2010 wird für das Finanzierungsportfolio ein Cash Flow at Risk ermittelt, der ein Maß für die Sensitivität des Zinsaufwands auf Marktzinssteigerungen darstellt. Dieser lag zum 31. Dezember 2010 bei 4,9 Mio. €.

Im RWE-Konzern sind grundsätzlich alle Gesellschaften dazu verpflichtet, ihre Fremdwährungsrisiken mit der RWE AG zu sichern. Allein die RWE AG darf im Rahmen vorgegebener Limite Fremdwährungspositionen offen halten. Der Value at Risk für diese Fremdwährungspositionen lag zum 31. Dezember 2010 unter 1 Mio. € (Vorjahr: 38,1 Mio. €). Die Werte aus 2009 und 2010 sind nicht vergleichbar, da wir nun den Value at Risk angeben, der auch intern zu Steuerungszwecken verwendet wird. In den intern gemeldeten Wert gehen auch die Grundgeschäfte aus Cash-Flow-Hedge-Beziehungen ein. Der Value-at-Risk-Wert aus 2009 enthält abweichend zum aktuell berichteten Value at Risk ausschließlich externe Fremdwährungsderivate. Die zugehörigen Grundgeschäfte wurden in der Vergangenheit nicht mit einbezogen.

Die Risiken aus Aktienportfolien werden ebenfalls mit Hilfe eines Value at Risk überwacht. Dieser lag zum 31. Dezember 2010 bei 7,7 Mio. € (Vorjahr: 11,7 Mio. €).

Zum 31. Dezember 2010 betrug der Value at Risk für Commodity-Positionen des Handelsgeschäfts der RWE Supply & Trading 10,0 Mio. € (Vorjahr: 46,5 Mio. €). Die Werte aus 2009 und 2010 sind nicht vergleichbar, da wir nun Value-at-Risk-Werte angeben, die auf dem Management-Ansatz beruhen. Damit werden die tatsächlich zur Steuerung verwendeten Kennzahlen berichtet. Bisher wurden zu externen Berichterstattungszwecken gesondert berechnete Kennzahlen angegeben, in die nur bilanziell erfasste Finanzinstrumente und keine Eigenverbrauchsverträge eingingen.

Neben dem Commodity Value at Risk werden kontinuierlich zur Steuerung des Commodity-Risikos Stresstests durchgeführt, um die Auswirkungen auf die Liquiditäts- und Ertragslage zu simulieren und ggf. risikomindernde Maßnahmen zu ergreifen. Im Rahmen der Stresstests werden einzelne Gruppen von Marktpreiskurven modifiziert und anschließend eine Neubewertung der Commodity-Position auf Basis dieser Kurven vorgenommen. Die Szenarien decken sowohl historische Extrempreisszenarien

als auch realistische, fiktive Preisszenarien ab. Darüber hinaus werden auf monatlicher Basis mögliche Extremszenarien für die großen Handelstische ausgewertet. Falls Stresstests interne Schwellen überschreiten, werden diese Szenarien genauer hinsichtlich ihrer Wirkung und Wahrscheinlichkeit analysiert und ggf. risikomindernde Maßnahmen erwogen.

Die Commodity-Risiken, die bei den stromerzeugenden Konzerngesellschaften bestehen, werden gemäß Konzernvorgaben basierend auf der verfügbaren Marktliquidität zu Marktpreisen auf das Segment Trading/Gas Midstream übertragen und dort gesichert. Entsprechend der Vorgehensweise bei z.B. langfristigen Investitionen können Commodity-Risiken aus langfristigen Positionen oder Positionen, die sich auf Grund ihrer Größe bei gegebener Marktliquidität noch nicht absichern lassen, nicht über das Value-at-Risk-Konzept gesteuert werden und werden deshalb im o.g. Value at Risk nicht mit einbezogen. Über die noch nicht übertragenen offenen Erzeugungspositionen hinaus sind die Konzerngesellschaften gemäß einer Konzernvorgabe nicht berechtigt, wesentliche Risikopositionen zu halten.

**Kreditrisiken.** Im Finanz- und Handelsbereich unterhalten wir Kreditbeziehungen vorwiegend zu Banken und anderen Handelspartnern mit guter Bonität. Kreditrisiken gegenüber Vertragspartnern werden bei Vertragsabschluss geprüft und laufend überwacht. Durch Festlegung von Limiten für das Handeln mit Geschäftspartnern und ggf. durch das Einfordern von Barsicherheiten schränken wir das Kreditrisiko ein. Das Kreditrisiko wird im Handelsbereich auf täglicher, im Finanzbereich auf wöchentlicher Basis überwacht.

In unserem Vertriebsgeschäft sind wir Kreditrisiken ausgesetzt, weil Kunden möglicherweise ihren Zahlungsverpflichtungen nicht nachkommen. Durch eine regelmäßige Bonitätsanalyse unserer wesentlichen Kunden können wir dieses Risiko identifizieren und entsprechend reagieren.

Sowohl im Finanz- und Handelsbereich als auch im Vertriebsgeschäft setzen wir zur Absicherung von Kreditrisiken zudem Kreditversicherungen, finanzielle Garantien, Bankgarantien und sonstige Sicherheitsleistungen ein.

Das maximale bilanzielle Ausfallrisiko ergibt sich durch die Buchwerte der in der Bilanz angesetzten Forderungen. Bei den Derivaten entsprechen die Ausfallrisiken ihren positiven beizulegenden Zeitwerten. Weitere Kreditrisiken können sich aus finanziellen Garantien und Kreditzusagen zugunsten konzernfremder Gläubiger ergeben. Zum 31. Dezember 2010 beliefen sich diese Verpflichtungen auf 709 Mio. € (Vorjahr: 804 Mio. €). Weder 2010 noch 2009 waren bedeutende Ausfälle zu verzeichnen.

**Liquiditätsrisiken.** Die RWE-Konzerngesellschaften refinanzieren sich i.d.R. zentral bei der RWE AG. Hier besteht das Risiko, dass die Liquiditätsreserven nicht ausreichen, um die finanziellen Verpflichtungen fristgerecht zu erfüllen. Im Jahr 2011 werden Kapitalmarktschulden mit einem Nominalvolumen von rund 1,5 Mrd. € (Vorjahr: 0,6 Mrd. €) und Bankschulden in Höhe von 0,4 Mrd. € (Vorjahr: 0,5 Mrd. €) fällig. Außerdem sind kurzfristige Schulden zu begleichen.

Für die Deckung des Liquiditätsbedarfs standen am 31. Dezember 2010 flüssige Mittel und kurzfristige Wertpapiere im Gesamtwert von 5.672 Mio. € (Vorjahr: 6.364 Mio. €) zur Verfügung. Darüber hinaus konnte die RWE AG am Bilanzstichtag über eine vertraglich vereinbarte ungenutzte syndizierte Kreditlinie von 4 Mrd. € (Vorjahr: 4 Mrd. €) verfügen. Das Commercial-Paper-Programm in Höhe von 5 Mrd. US\$ (Vorjahr: 5 Mrd. US\$) war zum Bilanzstichtag mit 494 Mio. € (Vorjahr: 238 Mio. €) ausgenutzt; das 30-Mrd.-€-Debt-Issuance-Programm mit 16,3 Mrd. € (Vorjahr: 16,4 Mrd. €). Das Liquiditätsrisiko ist daher äußerst gering.

Aus den finanziellen Verbindlichkeiten im Anwendungsbereich von IFRS 7 ergeben sich in den nächsten Jahren voraussichtlich die folgenden (nicht diskontierten) Zahlungen:

| Tilgungs-/Zinszahlungen für finanzielle Verbindlichkeiten<br>in Mio. € | Buchwerte<br>31.12.10 | Tilgungszahlungen |                  |         | Zinszahlungen |                  |         |
|------------------------------------------------------------------------|-----------------------|-------------------|------------------|---------|---------------|------------------|---------|
|                                                                        |                       | 2011              | 2012<br>bis 2015 | ab 2016 | 2011          | 2012<br>bis 2015 | ab 2016 |
| Anleihen (inkl. Schuldscheindarlehen)                                  | 16.360                | 1.561             | 6.263            | 8.590   | 967           | 3.148            | 4.804   |
| Commercial Paper                                                       | 493                   | 493               |                  |         |               |                  |         |
| Verbindlichkeiten gegenüber Kreditinstituten                           | 719                   | 432               | 170              | 117     | 8             | 24               | 6       |
| Verbindlichkeiten aus Leasing                                          | 135                   | 8                 | 29               | 101     |               |                  |         |
| Übrige Finanzverbindlichkeiten                                         | 1.536                 | 941               | 191              | 445     | 28            | 102              | 81      |
| Derivative finanzielle Verbindlichkeiten                               | 7.946                 | 7.013             | 779              | 40      | -35           | -88              | 245     |
| Sicherheitsleistungen für Handelsgeschäfte                             | 567                   | 567               |                  |         |               |                  |         |
| Kaufpreisverbindlichkeiten aus gewährten Andienungsrechten             | 1.775                 | 1.775             |                  |         |               |                  |         |
| Übrige sonstige finanzielle Verbindlichkeiten                          | 10.447                | 10.390            | 61               | 73      |               |                  |         |

| Tilgungs-/Zinszahlungen für finanzielle Verbindlichkeiten<br>in Mio. € | Buchwerte<br>31.12.09 | Tilgungszahlungen |                  |         | Zinszahlungen |                  |         |
|------------------------------------------------------------------------|-----------------------|-------------------|------------------|---------|---------------|------------------|---------|
|                                                                        |                       | 2010              | 2011<br>bis 2014 | ab 2015 | 2010          | 2011<br>bis 2014 | ab 2015 |
| Anleihen (inkl. Schuldscheindarlehen)                                  | 16.544                | 640               | 5.599            | 10.376  | 919           | 3.072            | 5.271   |
| Commercial Paper                                                       | 238                   | 238               |                  |         |               |                  |         |
| Verbindlichkeiten gegenüber Kreditinstituten                           | 925                   | 596               | 177              | 156     | 12            | 42               | 21      |
| Verbindlichkeiten aus Leasing                                          | 79                    | 9                 | 30               | 43      |               |                  |         |
| Übrige Finanzverbindlichkeiten                                         | 1.415                 | 893               | 236              | 332     | 18            | 58               | 50      |
| Derivative finanzielle Verbindlichkeiten                               | 11.212                | 10.116            | 1.005            | 37      | -18           | -28              | 70      |
| Sicherheitsleistungen für Handelsgeschäfte                             | 945                   | 945               |                  |         |               |                  |         |
| Kaufpreisverbindlichkeiten aus gewährten Andienungsrechten             | 1.562                 | 1.562             |                  |         |               |                  |         |
| Übrige sonstige finanzielle Verbindlichkeiten                          | 11.351                | 10.444            | 873              | 89      |               |                  |         |

Darüber hinaus bestanden zum 31. Dezember 2010 finanzielle Garantien über insgesamt 524 Mio. € (Vorjahr: 804 Mio. €) zugunsten konzernfremder Gläubiger, die dem ersten Tilgungsjahr zuzuordnen sind. Des Weiteren haben Konzerngesellschaft-

ten Kreditzusagen in Höhe von 185 Mio. € gegenüber konzern-externen Gesellschaften abgegeben. Davon sind 181 Mio. € im Jahr 2011 und 4 Mio. € in den Jahren 2012 bis 2015 abrufbar.

### (30) Eventualschulden und finanzielle Verpflichtungen

Das Bestellobligo aus erteilten Investitionsaufträgen belief sich zum 31. Dezember 2010 auf 5.609 Mio. € (Vorjahr: 5.192 Mio. €).

Im Rahmen der Essent-Akquisition haben wir uns vorbehaltlich einer positiven gerichtlichen Entscheidung gegenüber den bisherigen Eigentümern zur Übernahme der Anteile an der Energy Resources Holding B.V., Niederlande (vormals Essent Business Development B.V., Niederlande) verpflichtet (Put-Option).

Die Verpflichtungen aus Operating Leasing betreffen überwiegend langfristige Pachtverträge für Stromerzeugungs- und Versorgungsanlagen sowie Miet- und Leasingverträge für Lager- und Verwaltungsgebäude. Die Mindestleasingzahlungen haben folgende Fälligkeitsstruktur:

| Verpflichtungen aus Operating Leasing<br>in Mio. € | Nominalwert |            |
|----------------------------------------------------|-------------|------------|
|                                                    | 31.12.10    | 31.12.09   |
| Fällig in bis zu 1 Jahr                            | 145         | 101        |
| Fällig in 1 bis 5 Jahren                           | 398         | 256        |
| Fällig nach über 5 Jahren                          | 389         | 185        |
|                                                    | <b>932</b>  | <b>542</b> |

Für die Beschaffung von fossilen Brennstoffen, insbesondere Erdgas und Steinkohle, bestehen langfristige vertragliche Abnahmeverpflichtungen. Die Zahlungsverpflichtungen aus den wesentlichen Beschaffungsverträgen beliefen sich zum 31. Dezember 2010 auf 90,8 Mrd. €, wovon 6,7 Mrd. € eine Fälligkeit von bis zu einem Jahr aufwiesen.

Die Gas-Beschaffung erfolgt in der Regel durch Take-or-pay-Verträge. Die Konditionen dieser langfristigen Verträge – die Laufzeiten reichen bis 2035 – werden in gewissen Abständen durch die Vertragspartner nachverhandelt, woraus sich Änderungen der angegebenen Zahlungsverpflichtungen ergeben können. Der Berechnung der aus den Beschaffungsverträgen resultierenden Zahlungsverpflichtungen liegen Parameter der internen Planung zugrunde.

Weiterhin bestehen langfristige finanzielle Verpflichtungen für Strombezüge. Die aus den wesentlichen Bezugsverträgen resultierenden Mindestzahlungsverpflichtungen beliefen sich zum 31. Dezember 2010 auf 14,6 Mrd. €, wovon 0,9 Mrd. € eine Fälligkeit von bis zu einem Jahr aufwiesen. Darüber hinaus bestehen langfristige Bezugs- und Dienstleistungsverträge für Uran, Konversion, Anreicherung und Fertigung.

Tochter- oder Vorgängerunternehmen der Essent-Gruppe haben Nutzungs- oder ähnliche Rechte an Kraftwerkskapazitäten auf Vertragspartner im Ausland übertragen und anschließend bis Januar 2017 zurückgeleased. Diese sogenannten Cross-Border-Leasing (CBL) Verpflichtungen sind durch Garantien von Essent abgesichert. Die Kontrakte wurden geschlossen, bevor RWE Essent erwarb. Essent hat im Januar 2017 unter bestimmten Voraussetzungen das Recht, die übertragenen Rechte zu einem vereinbarten Preis von ca. 920 Mio. US\$ zurückzukaufen. Die bis zum Ende der Laufzeit anfallenden Leasingraten von insgesamt 358 Mio. US\$ und die bei Ausübung des Rückkaufrechts zu leistenden Zahlungen sind durch Erlöse aus Finanzinstrumenten, die an die CBL-Vertragspartner verpfändet wurden, und/oder andere Vereinbarungen der Essent-Gruppe gedeckt.

Außerdem hat Essent vor dem Erwerb durch RWE Garantien gegeben, um Zahlungs- und Leistungsverpflichtungen aus CBL-Transaktionen von ehemaligen Tochterunternehmen abzusichern, die heute von der ENEXIS B.V. (vormals Essent Network B.V.) („ENEXIS“) beherrscht werden. Zum 31. Dezember 2010 ist noch eine Transaktion ausstehend, nachdem ENEXIS eine weitere Transaktion im Laufe des Jahres 2010 einvernehmlich mit dem Vertragspartner beendet hat.

Aufgrund der CBLs und der abgegebenen CBL-Garantien haftet Essent für sämtliche Zahlungsverpflichtungen, die ggf. über die Erlöse aus den verpfändeten Finanzinstrumenten und/oder über andere Vereinbarungen hinausgehen, inklusive der o.g. CBL-Verpflichtungen von ENEXIS.

Bei vorzeitiger Kündigung der CBL-Kontrakte können Schadenersatzforderungen und Verpflichtungen zur Begleichung von Finanzierungskosten auf Essent zukommen. Unter bestimmten Voraussetzungen haben die Vertragspartner das Recht, das Eigentum an den verpfändeten Vermögenswerten zu übernehmen. Die erwarteten Gesamtkosten im Falle einer vorzeitigen Kündigung aller CBLs belaufen sich auf rund 140 Mio. US\$ (Stand: 31. Dezember 2010). Von diesem Betrag entfallen rund 130 Mio. US\$ auf Kraftwerkskapazitäten von Essent und etwa 10 Mio. US\$ auf Netzvermögen von ENEXIS. Der Gesamtbetrag ergibt sich aus der Summe aller Kündigungsbeträge (1.045 Mio. US\$) abzüglich des erwarteten Wertes der Finanzinstrumente und/oder anderer Vereinbarungen und zuzüglich weiterer Kosten, insbesondere aus Schadenersatzansprüchen.

Den genannten Haftungsrisiken aus CBL-Verträgen wurde bei Abschluss der Essent-Akquisition durch gemeinsame Dotierung eines Fondsvermögens durch RWE und die Verkäufer Rechnung getragen.

Aus der Mitgliedschaft in verschiedenen Gesellschaften, die u.a. im Zusammenhang mit Kraftwerksobjekten, mit Ergebnisabführungsverträgen und zur Abdeckung des nuklearen Haftpflichtrisikos bestehen, obliegt uns eine gesetzliche bzw. vertragliche Haftung.

Mit der Solidarvereinbarung haben sich die RWE AG und die anderen Muttergesellschaften der deutschen Kernkraftwerksbetreiber verpflichtet, zur Erfüllung einer Deckungsvorsorge in Höhe von rund 2.244 Mio. € die haftenden Kernkraftwerksbetreiber im nuklearen Schadensfall finanziell so auszustatten, dass diese ihren Zahlungsverpflichtungen nachkommen können. Vertragsgemäß beträgt der auf die RWE AG entfallende Haftungsanteil 25,851 % zuzüglich 5 % für Schadensabwicklungskosten.

Am 14. Dezember 2010 ist die 11. Novelle des deutschen Atomgesetzes (AtG) in Kraft getreten, die zusätzliche Strommengen für Kernkraftwerke vorsieht. Im Ergebnis kommt dies einer Verlängerung der Laufzeiten gleich. Vor diesem Hintergrund haben sich die Betreiber von Kernkraftwerken verpflichtet, Zahlungen in einen Fonds zu leisten, aus dem Maßnahmen zur Umsetzung des Energiekonzepts der Bundesregierung gefördert werden. Geregelt ist dies in einem Vertrag mit der Bundesrepublik Deutschland, der am 10. Januar 2011 unterzeichnet wurde. Er sieht vor, dass die Kernkraftwerksbetreiber ab 2017 einen Förderbeitrag für die zusätzlich eingespeisten Strommengen aus der Laufzeitverlängerung entrichten. Der Förderbeitrag beträgt 9 €/MWh; er wird jährlich gemäß der Entwicklung des Verbraucherpreisindex und der EEX-Strompreise angepasst. Von 2011 bis 2016 leisten die Kernkraftwerksbetreiber pauschale Vorauszahlungen auf die Förderbeiträge, die sich über den Gesamtzeitraum auf 1,4 Mrd. € summieren und von 2017 bis 2022 in gleichen jährlichen Raten auf die Förderbeiträge angerechnet werden. Die auf RWE entfallenden Vorausleistungen betragen maximal 0,4 Mrd. €.

Die RWE AG und Tochtergesellschaften sind im Zusammenhang mit ihrem Geschäftsbetrieb in regulatorische bzw. kartellrechtliche Verfahren, Gerichtsprozesse und Schiedsverfahren involviert. Wir erwarten dadurch jedoch keine wesentlichen negativen Auswirkungen auf die wirtschaftliche und finanzielle Situation des RWE-Konzerns. Darüber hinaus sind Konzerngesellschaften an verschiedenen administrativen und regulatorischen Verfahren (inkl. Genehmigungsverfahren) direkt beteiligt oder von deren Ergebnissen betroffen.

Im Zusammenhang mit gesellschaftsrechtlichen Umstrukturierungen sind von außenstehenden Aktionären mehrere Spruchverfahren zur Überprüfung der Angemessenheit der Umtauschverhältnisse bzw. der Höhe der angebotenen Barabfindung eingeleitet worden. Wir gehen davon aus, dass die gutachterlich ermittelten und von Wirtschaftsprüfern überprüften Umtauschverhältnisse und Barabfindungen angemessen sind. Sollten rechtskräftige Gerichtsentscheidungen zu anderen Ergebnissen kommen, erfolgt ein Ausgleich an alle betroffenen Aktionäre, auch wenn sie nicht am Spruchverfahren selbst beteiligt sind.

Im Mai und Dezember 2006 hat die EU-Kommission europaweit bei mehreren Energieversorgern Nachprüfungen durchgeführt. Hiervon waren auch Unternehmen des RWE-Konzerns in Deutschland betroffen. Nachfolgend hat die EU-Kommission Anfang Mai 2007 ein Missbrauchsverfahren gegen RWE eingeleitet. Sie vermutete, dass RWE und mit ihr verbundene Unternehmen den Zugang zum Erdgastransportsystem in Deutschland behindert hatten, um eine angeblich marktbeherrschende Stellung bei Erdgaslieferungen abzusichern. Nach einer Grundsatzzverständigung zwischen der RWE AG und der EU-Kommission im Mai 2008 hat die RWE AG im Februar 2009 eine förmliche Verpflichtungszusage abgegeben, das deutsche Gasfernleitungsnetz der RWE an einen von RWE unabhängigen Dritten zu verkaufen. Mit dieser Zusage ist kein Eingeständnis verbunden, gegen Kartellrecht verstoßen zu haben. Die EU-Kommission hat diese Zusage im März 2009 verbindlich angenommen und im Gegenzug das Missbrauchsverfahren gegen RWE eingestellt. Wir verweisen auf die Ausführungen zum Verkauf von Thyssengas auf Seite 70.

Im Oktober 2009 hat die EU-Kommission zudem ihre Untersuchungen im Strombereich gegen RWE beendet. Eine im März 2009 begonnene Sektorenuntersuchung im Stromerzeugungsbereich, die auch RWE betraf, hat das Bundeskartellamt im Januar 2011 beendet. Der Fokus dieser Branchenanalyse lag auf Fragestellungen in Bezug auf Kapazitätszurückhaltung und Manipulation der Großhandelspreise. Die Untersuchung ergab keine Hinweise auf missbräuchliche Verhaltensweisen der Stromerzeuger. Das Bundeskartellamt forderte jedoch den Gesetzgeber auf, durch Einrichtung einer Markttransparenzstelle den Bereich der Stromerzeugung zukünftig weiter zu überwachen.

### (31) Segmentberichterstattung

Im RWE-Konzern werden die Segmente sowohl nach funktionalen als auch nach geographischen Kriterien abgegrenzt.

Das Segment „Stromerzeugung“ umfasst im Wesentlichen die deutsche Stromerzeugung und Braunkohlegewinnung.

Das Segment „Vertrieb und Verteilnetze“ enthält im Wesentlichen das deutsche Vertriebs- und Verteilnetzgeschäft.

Im Segment „Niederlande/Belgien“ sind die Aktivitäten der im Jahr 2009 erworbenen Essent-Gruppe sowie das übrige Strom- und Gasgeschäft des Konzerns in dieser Region gebündelt. Die Windstromerzeugung und das Handelsgeschäft der Essent-Gruppe wurden im Geschäftsjahr 2010 den Segmenten „Erneuerbare Energien“ bzw. „Trading/Gas Midstream“ zugeordnet, die Gasspeicheraktivitäten dem Segment „Vertrieb und Verteilnetze“.

Das Segment „Großbritannien“ umfasst nahezu das gesamte Strom- und Gasgeschäft in dieser Region.

Die zentralost- und südosteuropäischen Erzeugungskapazitäten sowie die Netz- und Vertriebsaktivitäten sind im Segment „Zentralost-/Südosteuropa“ zusammengefasst. Die Bezeichnung des Segments wurde im Berichtsjahr wegen verstärkter geschäftlicher Tätigkeiten in der Türkei von „Zentral- und Osteuropa“ in „Zentralost-/Südosteuropa“ geändert.

Die in der RWE Innogy gebündelten Aktivitäten zur Erzeugung von Strom und Wärme aus regenerativen Quellen werden im Segment „Erneuerbare Energien“ dargestellt. Das Segment enthält seit 2010 auch die Windstromerzeugung der Essent-Gruppe.

Im Segment „Upstream Gas & Öl“ werden die konzernweiten Aktivitäten zur Gas- und Erdölgewinnung ausgewiesen.

Das Segment „Trading/Gas Midstream“ enthält den Energiehandel und die kommerzielle Optimierung der nicht regulierten Gasaktivitäten. Letztere umfassen die Beschaffungs-, Transport- und Speicherverträge in Deutschland, Großbritannien und Tschechien sowie das Geschäft mit verflüssigtem Erdgas (LNG). In dem Segment ist auch das Key-Account-Geschäft mit deutschen Industrie- und Geschäftskunden angesiedelt. Seit 2010 weisen wir auch das Handels- und das Key Account-Geschäft der Essent-Gruppe bei „Trading/Gas Midstream“ aus.

Unter „Sonstige/Konsolidierung“ werden Konsolidierungseffekte und das Group Center erfasst, ferner die Aktivitäten nicht gesondert dargestellter Unternehmensbereiche. Dazu gehören u. a. die geschäftsfeldübergreifenden Dienstleistungen der RWE Service GmbH, der RWE IT GmbH und der RWE Consulting GmbH sowie das deutsche Strom- und Gastransportnetzgeschäft.

| Segmentbericht-<br>erstattung<br>Unternehmens-<br>bereiche 2010                                  | Deutschland         |                                      | Nieder-<br>lande/<br>Belgien | Großbri-<br>tannien | Zentral-<br>ost-/<br>Südost-<br>europa | Erneuer-<br>bare<br>Energien | Upstream<br>Gas & Öl | Trading/<br>Gas<br>Mid-<br>stream | Sonstige/<br>Konsolidierung           |         | RWE-<br>Konzern |
|--------------------------------------------------------------------------------------------------|---------------------|--------------------------------------|------------------------------|---------------------|----------------------------------------|------------------------------|----------------------|-----------------------------------|---------------------------------------|---------|-----------------|
|                                                                                                  | Stromer-<br>zeugung | Vertrieb<br>und<br>Verteil-<br>netze |                              |                     |                                        |                              |                      |                                   | Ope-<br>rative<br>Gesell-<br>schaften | Übrige  |                 |
|                                                                                                  |                     |                                      |                              |                     |                                        |                              |                      |                                   |                                       |         |                 |
| in Mio. €                                                                                        |                     |                                      |                              |                     |                                        |                              |                      |                                   |                                       |         |                 |
| Außenumsatz<br>(inkl. Erdgas-/<br>Stromsteuer)                                                   | 1.072               | 18.456                               | 6.510                        | 7.759               | 5.297                                  | 366                          | 1.353                | 7.517                             | 4.936                                 | 54      | 53.320          |
| Konzern-<br>Innenumsatz                                                                          | 10.378              | 4.426                                | 551                          | 11                  | 474                                    | 203                          | 134                  | 21.466                            | 1.790                                 | -39.433 |                 |
| Gesamtumsatz                                                                                     | 11.450              | 22.882                               | 7.061                        | 7.770               | 5.771                                  | 569                          | 1.487                | 28.983                            | 6.726                                 | -39.379 | 53.320          |
| Betriebliches<br>Ergebnis                                                                        | 4.000               | 1.575                                | 391                          | 272                 | 1.173                                  | 72                           | 305                  | -21                               | 178                                   | -264    | 7.681           |
| Betriebliches<br>Beteiligungser-<br>gebnis                                                       | 47                  | 373                                  | 23                           | -20                 | 60                                     | 10                           |                      | -119                              | 2                                     | -31     | 345             |
| Betriebliches<br>Ergebnis aus<br>at-Equity-<br>bilanzierten<br>Beteiligungen                     | 28                  | 294                                  | 22                           | -20                 | 59                                     | 7                            |                      | -118                              | 2                                     |         | 274             |
| Betriebliche<br>Abschreibungen                                                                   | 510                 | 643                                  | 269                          | 232                 | 267                                    | 139                          | 314                  | 14                                | 94                                    | 93      | 2.575           |
| Außerplan-<br>mäßige<br>Abschreibungen                                                           | 21                  | 67                                   | 11                           | 296                 | 5                                      | 119                          | 53                   |                                   |                                       | 2       | 574             |
| EBITDA                                                                                           | 4.510               | 2.218                                | 660                          | 504                 | 1.440                                  | 211                          | 619                  | -7                                | 272                                   | -171    | 10.256          |
| Cash Flow aus<br>laufender Ge-<br>schäftstätigkeit                                               | 3.164               | 1.475                                | 308                          | 679                 | 1.157                                  | 128                          | 489                  | -1.431                            | 1                                     | -470    | 5.500           |
| Buchwerte<br>at-Equity-<br>bilanzierter<br>Beteiligungen                                         | 149                 | 2.383                                | 210                          | 31                  | 377                                    | 474                          |                      | 102                               |                                       | -32     | 3.694           |
| Investitionen<br>in immaterielle<br>Vermögenswerte,<br>Sachanlagen<br>und Investment<br>Property | 1.180               | 1.230                                | 1.144                        | 876                 | 430                                    | 614                          | 507                  | 4                                 | 315                                   | 79      | 6.379           |

| Regionen 2010<br>in Mio. €                                          | EU          |                |           | Übriges<br>Europa | Sonstige | RWE-<br>Konzern |
|---------------------------------------------------------------------|-------------|----------------|-----------|-------------------|----------|-----------------|
|                                                                     | Deutschland | Großbritannien | Übrige EU |                   |          |                 |
| Außenumsatz <sup>1,2</sup>                                          | 27.283      | 8.332          | 14.190    | 683               | 234      | 50.722          |
| Immaterielle Vermögenswerte,<br>Sachanlagen und Investment Property | 24.841      | 8.416          | 15.052    | 929               | 511      | 49.749          |

1 Zahlen ohne Erdgas-/Stromsteuer

2 Aufteilung entsprechend der Region, in der die Leistung erbracht wurde

| Segmentbericht-<br>erstattung<br>Unternehmens-<br>bereiche 2009                                  | Deutschland         |                                      | Nieder-<br>lande/<br>Belgien | Großbri-<br>tannien | Zentral-<br>ost-/<br>Südost-<br>europa | Erneuer-<br>bare<br>Energien | Upstream<br>Gas & Öl | Trading/<br>Gas<br>Mid-<br>stream | Sonstige/<br>Konsolidierung           |             | RWE-<br>Konzern |
|--------------------------------------------------------------------------------------------------|---------------------|--------------------------------------|------------------------------|---------------------|----------------------------------------|------------------------------|----------------------|-----------------------------------|---------------------------------------|-------------|-----------------|
|                                                                                                  | Stromer-<br>zeugung | Vertrieb<br>und<br>Verteil-<br>netze |                              |                     |                                        |                              |                      |                                   | Ope-<br>rative<br>Gesell-<br>schaften | Übrige      |                 |
|                                                                                                  |                     |                                      |                              |                     |                                        |                              |                      |                                   |                                       |             |                 |
| in Mio. €                                                                                        |                     |                                      |                              |                     |                                        |                              |                      |                                   |                                       |             |                 |
| <b>Außenumsatz<br/>(inkl. Erdgas-/<br/>Stromsteuer)</b>                                          | <b>1.056</b>        | <b>18.330</b>                        | <b>1.799</b>                 | <b>7.843</b>        | <b>5.254</b>                           | <b>245</b>                   | <b>1.208</b>         | <b>6.937</b>                      | <b>4.946</b>                          | <b>123</b>  | <b>47.741</b>   |
| Konzern-<br>Innenumsatz                                                                          | 9.804               | 4.783                                | 158                          | 11                  | 465                                    | 138                          | 262                  | 19.308                            | 2.561                                 | -37.490     |                 |
| Gesamtumsatz                                                                                     | 10.860              | 23.113                               | 1.957                        | 7.854               | 5.719                                  | 383                          | 1.470                | 26.245                            | 7.507                                 | -37.367     | 47.741          |
| <b>Betriebliches<br/>Ergebnis</b>                                                                | <b>3.428</b>        | <b>1.352</b>                         | <b>180</b>                   | <b>247</b>          | <b>1.055</b>                           | <b>56</b>                    | <b>203</b>           | <b>985</b>                        | <b>129</b>                            | <b>-545</b> | <b>7.090</b>    |
| Betriebliches<br>Beteiligungs-<br>ergebnis                                                       | 47                  | 343                                  | 8                            | -6                  | 57                                     | 4                            | 1                    | -93                               | 9                                     | -49         | 321             |
| Betriebliches<br>Ergebnis aus<br>at-Equity-<br>bilanzierten<br>Beteiligungen                     | 30                  | 277                                  | 19                           | -6                  | 55                                     | 4                            |                      | -89                               | 9                                     | -1          | 298             |
| Betriebliche<br>Abschreibungen                                                                   | 461                 | 570                                  | 97                           | 198                 | 230                                    | 70                           | 234                  | 1                                 | 132                                   | 82          | 2.075           |
| Außerplan-<br>mäßige<br>Abschreibungen                                                           | 10                  | 1                                    | 5                            |                     |                                        | 4                            |                      | 112                               |                                       | 3           | 135             |
| <b>EBITDA</b>                                                                                    | <b>3.889</b>        | <b>1.922</b>                         | <b>277</b>                   | <b>445</b>          | <b>1.285</b>                           | <b>126</b>                   | <b>437</b>           | <b>986</b>                        | <b>261</b>                            | <b>-463</b> | <b>9.165</b>    |
| <b>Cash Flow aus<br/>laufender Ge-<br/>schäftstätigkeit</b>                                      | <b>2.288</b>        | <b>1.457</b>                         | <b>-15</b>                   | <b>387</b>          | <b>888</b>                             | <b>27</b>                    | <b>319</b>           | <b>580</b>                        | <b>338</b>                            | <b>-970</b> | <b>5.299</b>    |
| Buchwerte<br>at-Equity-<br>bilanzierter<br>Beteiligungen                                         | 166                 | 2.294                                | 222                          | 28                  | 375                                    | 477                          |                      | 190                               | 20                                    | -36         | 3.736           |
| Investitionen<br>in immaterielle<br>Vermögenswerte,<br>Sachanlagen<br>und Investment<br>Property | 1.791               | 1.022                                | 156                          | 853                 | 368                                    | 447                          | 855                  | 2                                 | 336                                   | 83          | 5.913           |

| Regionen 2009<br>in Mio. €                                          | EU          |                |           | Übriges<br>Europa | Sonstige | RWE-<br>Konzern |
|---------------------------------------------------------------------|-------------|----------------|-----------|-------------------|----------|-----------------|
|                                                                     | Deutschland | Großbritannien | Übrige EU |                   |          |                 |
| Außenumsatz <sup>1,2</sup>                                          | 28.442      | 8.622          | 7.640     | 1.340             | 147      | 46.191          |
| Immaterielle Vermögenswerte,<br>Sachanlagen und Investment Property | 23.103      | 7.911          | 14.124    | 741               | 250      | 46.129          |

1 Zahlen ohne Erdgas-/Stromsteuer

2 Aufteilung entsprechend der Region, in der die Leistung erbracht wurde

| Produkte<br>in Mio. €    | RWE-Konzern |          |
|--------------------------|-------------|----------|
|                          | 2010        | 2009     |
| Außenumsatz <sup>1</sup> | 50.722      | 46.191   |
| Davon: Strom             | (33.480)    | (30.184) |
| Davon: Gas               | (13.216)    | (11.934) |
| Davon: Öl                | (1.049)     | (1.024)  |

<sup>1</sup> Zahlen ohne Erdgas-/Stromsteuer

**Erläuterungen zu den Segmentdaten.** Als Innenumsätze des RWE-Konzerns weisen wir die Umsätze zwischen den Segmenten aus. Konzerninterne Lieferungen und Leistungen werden zu den gleichen Bedingungen abgerechnet wie mit externen Kunden.

Die Abgrenzung des betrieblichen Ergebnisses ergibt sich aus dem Wertmanagement-Konzept. Die Größe wird für Steuerungszwecke im Konzern verwendet (vgl. dazu die Seiten 231 f.). In der folgenden Tabelle ist die Überleitung vom EBITDA zum betrieblichen Ergebnis und zum Ergebnis fortgeführter Aktivitäten vor Steuern dargestellt:

| Überleitung der Ergebnisgrößen<br>in Mio. €           | 2010          | 2009         |
|-------------------------------------------------------|---------------|--------------|
| <b>EBITDA</b>                                         | <b>10.256</b> | <b>9.165</b> |
| - Betriebliche Abschreibungen                         | -2.575        | -2.075       |
| <b>Betriebliches Ergebnis</b>                         | <b>7.681</b>  | <b>7.090</b> |
| + Neutrales Ergebnis                                  | -767          | 498          |
| + Finanzergebnis                                      | -1.936        | -1.990       |
| <b>Ergebnis fortgeführter Aktivitäten vor Steuern</b> | <b>4.978</b>  | <b>5.598</b> |

Erträge und Aufwendungen, die aus betriebswirtschaftlicher Sicht ungewöhnlich oder auf Sondervorgänge zurückzuführen sind, beeinträchtigen die Beurteilung der laufenden Geschäftstätigkeit. Sie werden in das neutrale Ergebnis umgegliedert. Falls Geschäfts- oder Firmenwerte vollkonsolidierter Unternehmen außerplanmäßig abgeschrieben werden, weisen wir diese Abschreibungen im neutralen Ergebnis aus.

Darüber hinausgehende Ausführungen finden sich auf den Seiten 91 f. des Lageberichts.

Im Berichtsjahr und im Vorjahr hat RWE mit keinem einzelnen Kunden mehr als 10% der Umsatzerlöse erzielt.

### (32) Angaben zur Kapitalflussrechnung

Die Kapitalflussrechnung ist nach den Zahlungsströmen aus Geschäfts-, Investitions- und Finanzierungstätigkeit gegliedert. Der Betrag der flüssigen Mittel in der Kapitalflussrechnung stimmt mit dem entsprechenden in der Bilanz ausgewiesenen Wert überein. Flüssige Mittel umfassen Kassenbestände, Guthaben bei Kreditinstituten und kurzfristig veräußerbare fest-

verzinsliche Wertpapiere mit einer Restlaufzeit bei Erwerb von bis zu drei Monaten.

Im Cash Flow aus laufender Geschäftstätigkeit sind u.a. enthalten:

- Zinseinnahmen in Höhe von 460 Mio. € (Vorjahr: 593 Mio. €) und Zinsausgaben in Höhe von 1.257 Mio. € (Vorjahr: 1.231 Mio. €)
- gezahlte Ertragsteuern (abzüglich Ertragsteuererstattungen) in Höhe von 1.723 Mio. € (Vorjahr: 1.949 Mio. €)
- das um nicht zahlungswirksame Teile – insbesondere aus der Equity-Bilanzierung – korrigierte Beteiligungsergebnis in Höhe von 428 Mio. € (Vorjahr: 460 Mio. €)

Mittelveränderungen aus dem Erwerb und der Veräußerung konsolidierter Gesellschaften gehen in den Cash Flow aus der Investitionstätigkeit ein. Auswirkungen von Wechselkursänderungen werden gesondert gezeigt.

Im Cash Flow aus der Finanzierungstätigkeit sind Ausschüttungen an RWE-Aktionäre in Höhe von 1.867 Mio. € (Vorjahr:

2.401 Mio. €) und Ausschüttungen an andere Gesellschafter in Höhe von 331 Mio. € (Vorjahr: 191 Mio. €) enthalten.

Durch Änderungen des Konsolidierungskreises (ohne Berücksichtigung von „Zur Veräußerung bestimmte Vermögenswerte“) haben sich die flüssigen Mittel im Saldo um 2 Mio. € verringert (Vorjahr: Erhöhung um 589 Mio. €). Die Zugänge in Höhe von 5 Mio. € (Vorjahr: 703 Mio. €) wurden mit den Finanzanlageinvestitionen verrechnet, die Abgänge in Höhe von 7 Mio. € (Vorjahr: 114 Mio. €) mit den Einnahmen aus Desinvestitionen.

Die Explorationstätigkeit minderte den Cash Flow aus laufender Geschäftstätigkeit um 162 Mio. € (Vorjahr: 188 Mio. €) und den Cash Flow aus der Investitionstätigkeit um 170 Mio. € (Vorjahr: 199 Mio. €).

Die flüssigen Mittel unterliegen keinen Verfügungsbeschränkungen.

### (33) Angaben zu Konzessionen

Zwischen Unternehmen des RWE-Konzerns und den Gebietskörperschaften der RWE-Versorgungsbereiche gibt es eine Reihe von Wegenutzungsverträgen und Konzessionsvereinbarungen auf dem Gebiet der Strom-, Gas- und Wasserversorgung.

Im Strom- und Gasgeschäft regeln Wegenutzungsverträge die Nutzung von öffentlichen Verkehrswegen für das Verlegen und den Betrieb von Leitungen, die der allgemeinen Energieversorgung dienen. Die Laufzeit dieser Verträge beträgt i.d.R. 20 Jahre. Nach ihrem Ablauf besteht die gesetzliche Pflicht, die örtlichen Verteilungsanlagen ihrem neuen Betreiber gegen Zahlung einer angemessenen Vergütung zu überlassen.

Mit Wasser-Konzessionsvereinbarungen werden das Recht und die Verpflichtung zur Bereitstellung von Wasser- und Abwasserdienstleistungen, zum Betrieb der dazugehörigen Infrastruktur (z.B. Wasserversorgungsanlagen) und zur Investitionstätigkeit geregelt. Die Konzessionen im Wasserbereich gelten i.d.R. für einen Zeitraum von bis zu 25 Jahren.

### (34) Beziehungen zu nahestehenden Unternehmen und Personen

Im Rahmen der normalen Geschäftstätigkeit unterhalten die RWE AG und ihre Tochtergesellschaften Geschäftsbeziehungen zu zahlreichen Unternehmen. Dazu gehören auch assoziierte Unternehmen, die als nahestehende Unternehmen des Konzerns gelten. Unter diese Kategorie fallen insbesondere die at-Equity-bilanzierten Beteiligungen an kommunalen Betrieben im Segment Vertrieb und Verteilnetze.

Mit wesentlichen assoziierten Unternehmen wurden Geschäfte getätigt, die zu folgenden Abschlussposten bei RWE führten:

| Abschlussposten aus Geschäften mit assoziierten Unternehmen in Mio. € | 2010  | 2009 |
|-----------------------------------------------------------------------|-------|------|
| Erträge                                                               | 907   | 861  |
| Aufwendungen                                                          | 278   | 169  |
| Forderungen                                                           | 1.004 | 708  |
| Verbindlichkeiten                                                     | 12    | 10   |

Bei den Forderungen handelt es sich im Wesentlichen um verzinsliche Ausleihungen, während die Verbindlichkeiten ausschließlich aus Liefer- und Leistungsbeziehungen mit nahestehenden Unternehmen resultieren. Alle Geschäfte sind zu marktüblichen Konditionen abgeschlossen und unterscheiden sich grundsätzlich nicht von den Finanzierungsbedingungen bzw. den Konditionen für Liefer- und Leistungsbeziehungen mit anderen Unternehmen. Von den Forderungen werden 414 Mio. € (Vorjahr: 113 Mio. €) und von den Verbindlichkeiten 6 Mio. € (Vorjahr: 4 Mio. €) innerhalb eines Jahres fällig. Für die Forderungen bestanden wie im Vorjahr Sicherheiten in Höhe von 5 Mio. €.

Darüber hinaus bestand zum 31. Dezember 2010 eine ungenutzte Kreditlinie für die RWE-Veolia Berlinwasser Beteiligungs GmbH in Höhe von 29 Mio. € (Vorjahr: 24 Mio. €).

Da der Vorstandsvorsitzende der RWE AG, Herr Dr. Jürgen Großmann, Gesellschafter der Georgsmarienhütte Holding GmbH und der RGM Gebäudemanagement GmbH ist, sind auch die Gesellschaften der Georgsmarienhütte-Gruppe und die RGM Gebäudemanagement GmbH nahestehende Unternehmen des RWE-Konzerns. RWE-Konzernunternehmen erbrachten für sie Lieferungen und Leistungen in Höhe von 9,9 Mio. € (Vorjahr: 7,7 Mio. €) und erhielten von ihnen Lieferungen und Leistungen in Höhe von 2,4 Mio. € (Vorjahr: 2,5 Mio. €). Zum 31. Dezember 2010 bestanden Forderungen gegenüber den genannten Gesellschaften in Höhe von 0,8 Mio. € (Vorjahr: 2,0 Mio. €) und Verbindlichkeiten in Höhe von 0,5 Mio. € (Vorjahr: 0,2 Mio. €). Alle Geschäfte sind zu marktüblichen Konditionen abgeschlossen; die Geschäftsbeziehungen unterscheiden sich nicht von den Liefer- und Leistungsbeziehungen mit Gesellschaften, die dem RWE-Konzern nicht nahestehen.

Darüber hinaus hat der RWE-Konzern keine wesentlichen Geschäfte mit nahestehenden Unternehmen oder Personen getätigt.

Die Grundzüge des Vergütungssystems und die Höhe der Vergütung von Vorstand und Aufsichtsrat sind im Vergütungsbericht dargestellt. Der Vergütungsbericht ist Bestandteil des Lageberichts.

Die Gesamtvergütung des Vorstands betrug 20.358 Tsd. € (Vorjahr: 22.520 Tsd. €), zuzüglich Dienstzeitaufwand für Pensionen in Höhe von 776 Tsd. € (Vorjahr: 439 Tsd. €). Der Vorstand erhielt für das Geschäftsjahr 2010 kurzfristige Vergütungsbestandteile in Höhe von 16.608 Tsd. € (Vorjahr: 18.770 Tsd. €). Außerdem wurden langfristige Vergütungsbestandteile im Rahmen des Beat (Tranche 2010) mit einem Ausgabezeitwert von 3.750 Tsd. € zugeteilt (im Vorjahr für die Beat-Tranche 2009: 3.750 Tsd. €).

Die Bezüge des Aufsichtsrats summierten sich im Geschäftsjahr 2010 auf 3.434 Tsd. € (Vorjahr: 3.446 Tsd. €). Außerdem erhielten Aufsichtsratsmitglieder Mandatsvergütungen von Tochtergesellschaften in Höhe von insgesamt 243 Tsd. € (Vorjahr: 296 Tsd. €).

Im Berichtsjahr wurden keine Kredite oder Vorschüsse an Mitglieder des Vorstands und des Aufsichtsrats gewährt, mit Ausnahme eines Reisekostenvorschusses in Höhe von 1 Tsd. € an einen Arbeitnehmervertreter im Aufsichtsrat. Für einen der

Arbeitnehmervertreter im Aufsichtsrat besteht aus der Zeit vor Organzugehörigkeit ein Mitarbeiterdarlehen in Höhe von 11 Tsd. €.

Ehemalige Mitglieder des Vorstands und ihre Hinterbliebenen erhielten 14.717 Tsd. € (Vorjahr: 18.074 Tsd. €), davon 1.861 Tsd. € (Vorjahr: 1.831 Tsd. €) von Tochtergesellschaften. Dabei entfielen 1.842 Tsd. € (Vorjahr: 7.000 Tsd. €) auf die Auszahlung von Vergütungskomponenten mit langfristiger Anreizwirkung. Die Pensionsverpflichtungen (Defined Benefit Obligations) gegenüber früheren Mitgliedern des Vorstands und ihren Hinterbliebenen beliefen sich zum Bilanzstichtag auf 129.692 Tsd. € (Vorjahr: 124.558 Tsd. €). Davon entfielen 19.369 Tsd. € (Vorjahr: 19.737 Tsd. €) auf Tochtergesellschaften.

Die Angaben zu den Mitgliedern des Vorstands und des Aufsichtsrats gemäß § 285 Nr. 10 HGB sind auf den Seiten 233 bis 237 aufgeführt.

### (35) Honorare des Abschlussprüfers

RWE hat für Dienstleistungen, die der Abschlussprüfer des Konzernabschlusses, PricewaterhouseCoopers Aktiengesellschaft Wirtschaftsprüfungsgesellschaft (PwC) und Gesellschaften des internationalen PwC-Netzwerks erbrachten, folgende Honorare als Aufwand erfasst:

| Honorare des Abschlussprüfers<br>in Mio. € | 2010        |                       | 2009        |                       |
|--------------------------------------------|-------------|-----------------------|-------------|-----------------------|
|                                            | Gesamt      | Davon:<br>Deutschland | Gesamt      | Davon:<br>Deutschland |
| Abschlussprüfungsleistungen                | 18,0        | 9,1                   | 18,2        | 8,9                   |
| Andere Bestätigungsleistungen              | 8,5         | 8,3                   | 6,4         | 6,1                   |
| Steuerberatungsleistungen                  | 0,3         | 0,2                   | 0,2         | 0,1                   |
| Sonstige Leistungen                        | 0,6         | 0,5                   | 0,4         | 0,4                   |
|                                            | <b>27,4</b> | <b>18,1</b>           | <b>25,2</b> | <b>15,5</b>           |

Die Honorare für Abschlussprüfungen beinhalten vor allem die Honorare für die Konzernabschlussprüfung und für die Prüfung der Abschlüsse der RWE AG und ihrer Tochterunternehmen. In den anderen Bestätigungsleistungen enthalten sind Honorare für die prüferische Durchsicht von Zwischenfinanzberichten, die Prüfung des internen Kontrollsystems, insbesondere von IT-Systemen, sowie Aufwendungen im Zusammenhang mit gesetzlichen oder gerichtlichen Vorgaben. Die Honorare für Steuerberatungsleistungen umfassen insbesondere Vergütungen für die Beratung im Zusammenhang mit der Erstellung von Steuererklärungen und der Prüfung von Steuerbescheiden sowie in sonstigen nationalen und internationalen Steuerangelegenheiten.

Die Amprion GmbH hat für im Berichtsjahr erbrachte Dienstleistungen des Abschlussprüfers BDO Deutsche Warentreuhand AG Honorare in Höhe von insgesamt 0,1 Mio. € (Vorjahr: 0,1 Mio. €) geleistet.

Vom Honoraraufwand des Jahres 2010 entfallen 0 Mio. € (Vorjahr: 1,2 Mio. €) auf nicht fortgeführte Aktivitäten von konsolidierten Tochterunternehmen.

#### (36) Inanspruchnahme von § 264 Abs. 3 HGB bzw. § 264b HGB

Die folgenden inländischen Tochtergesellschaften haben im Geschäftsjahr 2010 in Teilen von der Befreiungsvorschrift des § 264 Abs. 3 HGB bzw. § 264b HGB Gebrauch gemacht:

- BGE Beteiligungs-Gesellschaft für Energieunternehmen mbH, Essen
- eprimo GmbH, Neu-Isenburg
- GBV Dreizehnte Gesellschaft für Beteiligungsverwaltung mbH & Co. KG, Essen
- GBV Fünfte Gesellschaft für Beteiligungsverwaltung mbH, Essen
- GBV Siebte Gesellschaft für Beteiligungsverwaltung mbH, Essen
- OIE Aktiengesellschaft, Idar-Oberstein
- Rheinische Baustoffwerke GmbH, Bergheim
- rhenag Beteiligungs GmbH, Köln

- RWE Aqua GmbH, Berlin
- RWE Aqua Holdings GmbH, Essen
- RWE Beteiligungsgesellschaft mbH, Essen
- RWE Beteiligungsverwaltung Ausland GmbH, Essen
- RWE Consulting GmbH, Essen
- RWE Dea AG, Hamburg
- RWE Dea North Africa/Middle East GmbH, Hamburg
- RWE Dea Suez GmbH, Hamburg
- RWE Deutschland Aktiengesellschaft, Essen
- RWE Effizienz GmbH, Dortmund
- RWE Gasspeicher GmbH, Dortmund
- RWE Innogy Cogen GmbH, Dortmund
- RWE Innogy GmbH, Essen
- RWE Innogy Nordwest Windparkbetriebsgesellschaft mbH, Sassnitz
- RWE Innogy Windpower Hannover GmbH, Hannover
- RWE IT GmbH, Essen
- RWE Kundenservice GmbH, Bochum
- RWE Offshore Logistics Company GmbH, Essen
- RWE Power Aktiengesellschaft, Köln und Essen
- RWE Power Erste Gesellschaft für Beteiligungsverwaltung mbH, Essen
- RWE Rheinhessen Beteiligungs GmbH, Dortmund
- RWE Rhein-Ruhr Netzservice GmbH, Siegen
- RWE Rhein-Ruhr Verteilnetz GmbH, Wesel
- RWE RWN Beteiligungsgesellschaft Mitte mbH, Essen
- RWE Service GmbH, Dortmund
- RWE Supply & Trading GmbH, Essen
- RWE Systems Development GmbH & Co. KG, Dortmund
- RWE Technology GmbH, Essen
- RWE Vertrieb Aktiengesellschaft, Dortmund
- RWE Westfalen-Weser-Ems Netzservice GmbH, Dortmund
- RWE Westfalen-Weser-Ems Verteilnetz GmbH, Recklinghausen
- Saarwasserkraftwerke GmbH, Essen

#### (37) Ereignisse nach dem Bilanzstichtag

Ausführungen zu Ereignissen nach dem Bilanzstichtag enthält der Lagebericht.

**(38) Erklärung gemäß § 161 AktG**

Für die RWE AG und ihre börsennotierten deutschen Tochterunternehmen sind die gemäß § 161 AktG vorgeschriebenen Erklärungen zum Corporate Governance Kodex abgegeben und den Aktionären auf den Internetseiten der RWE AG bzw. ihrer börsennotierten deutschen Tochterunternehmen zugänglich gemacht worden.

Essen, 11. Februar 2011

Der Vorstand

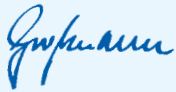

Grobmann

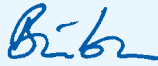

Birnbaum

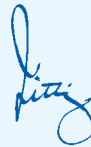

Fitting

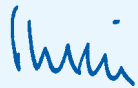

Pohlig

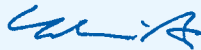

Schmitz

## 4.7 BESTÄTIGUNGSVERMERK DES KONZERNABSCHLUSSPRÜFERS

Wir haben den von der RWE Aktiengesellschaft, Essen, aufgestellten Konzernabschluss – bestehend aus Gewinn- und Verlustrechnung und Aufstellung der erfassten Erträge und Aufwendungen, Bilanz, Kapitalflussrechnung, Veränderung des Eigenkapitals und Anhang – sowie den Konzernlagebericht der RWE Aktiengesellschaft, Essen, der mit dem Lagebericht der Gesellschaft zusammengefasst ist, für das Geschäftsjahr vom 1. Januar bis 31. Dezember 2010 geprüft. Die Aufstellung von Konzernabschluss und zusammengefasstem Lagebericht nach den IFRS, wie sie in der EU anzuwenden sind, und den ergänzend nach § 315a Abs. 1 HGB anzuwendenden handelsrechtlichen Vorschriften liegt in der Verantwortung des Vorstands der Gesellschaft. Unsere Aufgabe ist es, auf der Grundlage der von uns durchgeführten Prüfung eine Beurteilung über den Konzernabschluss und den zusammengefassten Lagebericht abzugeben.

Wir haben unsere Konzernabschlussprüfung nach § 317 HGB unter Beachtung der vom Institut der Wirtschaftsprüfer (IDW) festgestellten deutschen Grundsätze ordnungsmäßiger Abschlussprüfung unter ergänzender Beachtung der International Standards on Auditing (ISA) vorgenommen. Danach ist die Prüfung so zu planen und durchzuführen, dass Unrichtigkeiten und Verstöße, die sich auf die Darstellung des durch den Konzernabschluss unter Beachtung der anzuwendenden Rechnungslegungsvorschriften und durch den zusammengefassten Lagebericht vermittelten Bildes der Vermögens-, Finanz- und Ertragslage wesentlich auswirken, mit hinreichender Sicherheit erkannt werden. Bei der Festlegung der Prüfungshandlungen werden die Kenntnisse über die Geschäftstätigkeit und über das wirtschaftliche und rechtliche Umfeld des Konzerns sowie die Erwartungen über mögliche Fehler berücksichtigt. Im Rahmen der Prüfung werden die Wirksamkeit des rechnungslegungsbezogenen internen Kontrollsystems sowie Nachweise für die Angaben im Konzernabschluss und im zusammengefassten Lagebericht

überwiegend auf der Basis von Stichproben beurteilt. Die Prüfung umfasst die Beurteilung der Jahresabschlüsse der in den Konzernabschluss einbezogenen Unternehmen, der Abgrenzung des Konsolidierungskreises, der angewandten Bilanzierungs- und Konsolidierungsgrundsätze und der wesentlichen Einschätzungen des Vorstands sowie die Würdigung der Gesamtdarstellung des Konzernabschlusses und des zusammengefassten Lageberichts. Wir sind der Auffassung, dass unsere Prüfung eine hinreichend sichere Grundlage für unsere Beurteilung bildet.

Unsere Prüfung hat zu keinen Einwendungen geführt.

Nach unserer Beurteilung aufgrund der bei der Prüfung gewonnenen Erkenntnisse entspricht der Konzernabschluss den IFRS, wie sie in der EU anzuwenden sind, und den ergänzend nach § 315a Abs. 1 HGB anzuwendenden handelsrechtlichen Vorschriften und vermittelt unter Beachtung dieser Vorschriften ein den tatsächlichen Verhältnissen entsprechendes Bild der Vermögens-, Finanz- und Ertragslage des Konzerns. Der zusammengefasste Lagebericht steht in Einklang mit dem Konzernabschluss, vermittelt insgesamt ein zutreffendes Bild von der Lage des Konzerns und stellt die Chancen und Risiken der zukünftigen Entwicklung zutreffend dar.

Essen, den 14. Februar 2011

PricewaterhouseCoopers  
Aktiengesellschaft  
Wirtschaftsprüfungsgesellschaft

Manfred Wiegand  
Wirtschaftsprüfer

Markus Dittmann  
Wirtschaftsprüfer

# WESENTLICHE BETEILIGUNGEN

Stand: 31. Dezember 2010

| I. Verbundene Unternehmen                                                          | Beteiligungs-<br>anteil gemäß<br>§ 16 AktG<br><br>in % | Eigenkapital<br>des letzten<br>Geschäfts-<br>jahres<br>in Tsd. € | Ergebnis des<br>letzten<br>Geschäfts-<br>jahres<br>in Tsd. € | Umsatzerlöse<br>2010<br><br>in Mio. € | Mitarbeiter <sup>2</sup><br>2010<br>im Jahres-<br>durchschnitt |
|------------------------------------------------------------------------------------|--------------------------------------------------------|------------------------------------------------------------------|--------------------------------------------------------------|---------------------------------------|----------------------------------------------------------------|
| <b>RWE Aktiengesellschaft, Essen</b>                                               |                                                        | <b>8.146.208</b>                                                 | <b>2.520.741</b>                                             | <b>-</b>                              | <b>801</b>                                                     |
| <b>Stromerzeugung Deutschland</b>                                                  |                                                        |                                                                  |                                                              |                                       |                                                                |
| RWE Power Aktiengesellschaft, Köln und Essen                                       | 100                                                    | 3.476.964                                                        | - <sup>1</sup>                                               | 10.886                                | 13.560                                                         |
| Kernkraftwerke Lippe-Ems GmbH, Lingen (Ems)                                        | 99                                                     | 432.269                                                          | - <sup>1</sup>                                               | 433                                   | 329                                                            |
| Kernkraftwerk Gundremmingen GmbH, Gundremmingen                                    | 75                                                     | 84.184                                                           | 8.343                                                        | 295                                   | 743                                                            |
| Rheinbraun Brennstoff GmbH, Köln                                                   | 100                                                    | 63.316                                                           | - <sup>1</sup>                                               | 611                                   | 168                                                            |
| <b>Vertrieb und Verteilnetze Deutschland</b>                                       |                                                        |                                                                  |                                                              |                                       |                                                                |
| Emscher Lippe Energie GmbH, Gelsenkirchen                                          | 79                                                     | 77.955                                                           | 23.301                                                       | 501                                   | 642                                                            |
| Energis GmbH, Saarbrücken                                                          | 64                                                     | 140.934                                                          | 26.867                                                       | 385                                   | 299                                                            |
| envia Mitteldeutsche Energie AG, Chemnitz                                          | 59                                                     | 1.200.692                                                        | 276.468                                                      | 3.097                                 | 2.085                                                          |
| envia Netzservice GmbH, Kabelsketal                                                | 100                                                    | 4.046                                                            | - <sup>1</sup>                                               | 406                                   | 13                                                             |
| envia Verteilnetz GmbH, Halle (Saale)                                              | 100                                                    | 24                                                               | - <sup>1</sup>                                               | 1.883                                 | 5                                                              |
| eprimo GmbH, Neu-Isenburg                                                          | 100                                                    | 4.600                                                            | - <sup>1</sup>                                               | 498                                   | 93                                                             |
| EWV Energie- und Wasser-Versorgung GmbH, Stolberg                                  | 54                                                     | 39.539                                                           | 13.586                                                       | 346                                   | 382                                                            |
| Koblenzer Elektrizitätswerk und Verkehrs-Aktiengesellschaft, Koblenz               | 58                                                     | 78.542                                                           | 15.273                                                       | 451                                   | 492                                                            |
| Lechwerke AG, Augsburg                                                             | 90                                                     | 385.369                                                          | 70.903                                                       | 1.388                                 | 1.102                                                          |
| LEW Verteilnetz GmbH, Augsburg                                                     | 100                                                    | 4.816                                                            | - <sup>1</sup>                                               | 814                                   | 100                                                            |
| MITGAS Mitteldeutsche Gasversorgung GmbH, Halle (Saale)                            | 75                                                     | 134.041                                                          | 40.255                                                       | 713                                   | 331                                                            |
| rhenag Rheinische Energie Aktiengesellschaft, Köln                                 | 67                                                     | 272.158                                                          | 158.093                                                      | 254                                   | 341                                                            |
| RWE Beteiligungsgesellschaft mbH, Essen                                            | 100                                                    | 7.820.490                                                        | - <sup>1</sup>                                               | -                                     | -                                                              |
| RWE Deutschland Aktiengesellschaft, Essen                                          | 100                                                    | 504.974                                                          | - <sup>1</sup>                                               | 1.886                                 | 4.906                                                          |
| RWE Effizienz GmbH, Dortmund                                                       | 100                                                    | 25                                                               | - <sup>1</sup>                                               | 5                                     | 83                                                             |
| RWE Gasspeicher GmbH, Dortmund                                                     | 100                                                    | 115.426                                                          | - <sup>1</sup>                                               | 135                                   | 49                                                             |
| RWE Kundenservice GmbH, Bochum                                                     | 100                                                    | 25                                                               | - <sup>1</sup>                                               | 246                                   | 14                                                             |
| RWE Rhein-Ruhr Netzservice GmbH, Siegen                                            | 100                                                    | 25                                                               | - <sup>1</sup>                                               | 789                                   | 26                                                             |
| RWE Rhein-Ruhr Verteilnetz GmbH, Wesel                                             | 100                                                    | 25                                                               | - <sup>1</sup>                                               | 2.312                                 | 222                                                            |
| RWE Vertrieb Aktiengesellschaft, Dortmund                                          | 100                                                    | 11.002                                                           | - <sup>1</sup>                                               | 12.574                                | 2.044                                                          |
| RWE Westfalen-Weser-Ems Netzservice GmbH, Dortmund                                 | 100                                                    | 25                                                               | - <sup>1</sup>                                               | 675                                   | 19                                                             |
| RWE Westfalen-Weser-Ems Verteilnetz GmbH, Recklinghausen                           | 100                                                    | 25                                                               | - <sup>1</sup>                                               | 1.914                                 | 183                                                            |
| <b>RWW Rheinisch-Westfälische Wasserwerksgesellschaft mbH, Mülheim an der Ruhr</b> | <b>80</b>                                              | <b>75.730</b>                                                    | <b>10.267</b>                                                | <b>106</b>                            | <b>403</b>                                                     |
| Stadtwerke Düren GmbH, Düren                                                       | 75                                                     | 23.345                                                           | 2.614                                                        | 150                                   | 221                                                            |
| Süwag Energie AG, Frankfurt am Main                                                | 78                                                     | 347.675                                                          | 82.300                                                       | 1.657                                 | 1.197                                                          |
| Süwag Netz GmbH, Frankfurt am Main                                                 | 100                                                    | 961                                                              | - <sup>1</sup>                                               | 576                                   | 274                                                            |
| VSE Aktiengesellschaft, Saarbrücken                                                | 69                                                     | 159.255                                                          | 28.766                                                       | 456                                   | 321                                                            |
| <b>Niederlande/Belgien</b>                                                         |                                                        |                                                                  |                                                              |                                       |                                                                |
| RWE Benelux Holding B.V., 's-Hertogenbosch/Niederlande                             | 100                                                    | 3.709.689                                                        | -112.679                                                     | -                                     | -                                                              |
| Essent Energie Productie B.V., 's-Hertogenbosch/Niederlande                        | 100                                                    | 599.732                                                          | -16.118                                                      | -                                     | 518                                                            |
| Essent Energie Verkoop Nederland B.V., 's-Hertogenbosch/Niederlande                | 100                                                    | 82.757                                                           | 24.135                                                       | 1.146                                 | 172                                                            |
| Essent Retail Energie B.V., 's-Hertogenbosch/Niederlande                           | 100                                                    | 65.552                                                           | 50.552                                                       | 2.847                                 | 914                                                            |
| RWE Energy Nederland N.V., Hoofddorp/Niederlande                                   | 100                                                    | 50.330                                                           | 12.984                                                       | 1.539                                 | 32                                                             |

1 Ergebnisabführungsvertrag

2 Umgerechnet in Vollzeitstellen

| <b>I. Verbundene Unternehmen</b>                                        | Beteiligungs-<br>anteil gemäß<br>§ 16 AktG<br><br>in % | Eigenkapital<br>des letzten<br>Geschäfts-<br>jahres<br>in Tsd. € | Ergebnis<br>des letzten<br>Geschäfts-<br>jahres<br>in Tsd. € | Umsatzerlöse<br>2010<br><br>in Mio. € | Mitarbeiter <sup>1</sup><br>2010<br>im Jahres-<br>durchschnitt |
|-------------------------------------------------------------------------|--------------------------------------------------------|------------------------------------------------------------------|--------------------------------------------------------------|---------------------------------------|----------------------------------------------------------------|
| <b>Großbritannien</b>                                                   |                                                        |                                                                  |                                                              |                                       |                                                                |
| RWE Npower Holdings plc, Swindon/Großbritannien <sup>2</sup>            | 100                                                    | 61.272                                                           | -374.895                                                     | 7.770                                 | 11.908                                                         |
| <b>Zentralost-/Südosteuropa</b>                                         |                                                        |                                                                  |                                                              |                                       |                                                                |
| Budapesti Elektromos Művek Nyrt. (ELMÜ), Budapest/Ungarn                | 55                                                     | 929.519                                                          | 27.068                                                       | 832                                   | 354                                                            |
| ELMÜ Hálózati Elosztó Kft., Budapest/Ungarn                             | 100                                                    | 977.568                                                          | 37.201                                                       | 377                                   | 228                                                            |
| ÉMÁSZ Hálózati Kft., Budapest/Ungarn                                    | 100                                                    | 318.160                                                          | 14.027                                                       | 155                                   | 125                                                            |
| Észak-magyarországi Áramszolgáltató Nyrt. (ÉMÁSZ), Miskolc/Ungarn       | 54                                                     | 327.131                                                          | 19.928                                                       | 309                                   | 116                                                            |
| Jihomoravská plynárenská, a.s., Brno/Tschechien                         | 50                                                     | 328.653                                                          | 74.793                                                       | 675                                   | 711                                                            |
| JMP Net, s.r.o., Brno/Tschechien                                        | 100                                                    | 433.148                                                          | 49.806                                                       | 150                                   | 45                                                             |
| Mátrai Erőmű Zártkörűen Működő Részvénytársaság (MÁTRA), Visonta/Ungarn | 51                                                     | 309.034                                                          | 71.715                                                       | 352                                   | 2.407                                                          |
| NET4GAS, s.r.o., Prag/Tschechien                                        | 100                                                    | 2.119.563                                                        | 198.936                                                      | 404                                   | 521                                                            |
| RWE & Turcas Güney Elektrik Üretim A.Ş., Ankara/Türkei                  | 70                                                     | 130.309                                                          | -1.024                                                       | -                                     | -                                                              |
| RWE Energie, a.s., Ústí nad Labem/Tschechien                            | 100                                                    | 381.092                                                          | 119.851                                                      | 796                                   | 28                                                             |
| RWE Gas International B.V., Hoofddorp/Niederlande                       | 100                                                    | 4.389.763                                                        | 775.287                                                      | -                                     | -                                                              |
| RWE GasNet, s.r.o., Ústí nad Labem/Tschechien                           | 100                                                    | 581.831                                                          | 87.885                                                       | 217                                   | 200                                                            |
| RWE Gas Storage, s.r.o., Prag/Tschechien                                | 100                                                    | 600.468                                                          | 53.112                                                       | 155                                   | 223                                                            |
| RWE Polska S.A., Warschau/Polen                                         | 100                                                    | 522.916                                                          | 42.293                                                       | 700                                   | 608                                                            |
| RWE Stoen Operator Sp. z o.o., Warschau/Polen                           | 100                                                    | 670.597                                                          | 9.165                                                        | 220                                   | 584                                                            |
| RWE Transgas, a.s., Prag/Tschechien                                     | 100                                                    | 3.070.682                                                        | -192.336                                                     | 4.683                                 | 308                                                            |
| Severomoravská plynárenská, a.s., Ostrava/Tschechien                    | 68                                                     | 230.836                                                          | 66.608                                                       | 490                                   | 19                                                             |
| SMP Net, s.r.o., Ostrava/Tschechien                                     | 100                                                    | 291.307                                                          | 46.688                                                       | 121                                   | -                                                              |
| VCP Net, s.r.o., Hradec Králové/Tschechien                              | 100                                                    | 217.374                                                          | 27.253                                                       | 72                                    | -                                                              |
| Východočeská plynárenská, a.s., Hradec Králové/Tschechien               | 67                                                     | 152.041                                                          | 40.776                                                       | 294                                   | 49                                                             |
| <b>Erneuerbare Energien</b>                                             |                                                        |                                                                  |                                                              |                                       |                                                                |
| RWE Innogy GmbH, Essen                                                  | 100                                                    | 514.583                                                          | - <sup>3</sup>                                               | 123                                   | 267                                                            |
| Agrupació Energías Renovables, S.A.U., Barcelona/Spanien                |                                                        |                                                                  |                                                              |                                       |                                                                |
| AERSA-Gruppe <sup>2</sup> mit 9 Tochterunternehmen in Spanien           | 100                                                    | 293.897                                                          | 287                                                          | 79                                    | 36                                                             |
| RWE Innogy Cogen GmbH, Dortmund                                         | 100                                                    | 54.813                                                           | - <sup>3</sup>                                               | 78                                    | 171                                                            |
| RWE Npower Renewables Ltd., Swindon/Großbritannien                      | 100                                                    | 452.547                                                          | -24.662                                                      | 20                                    | 341                                                            |
| <b>Upstream Gas &amp; Öl</b>                                            |                                                        |                                                                  |                                                              |                                       |                                                                |
| RWE Dea AG, Hamburg                                                     | 100                                                    | 1.407.378                                                        | - <sup>3</sup>                                               | 808                                   | 989                                                            |
| RWE Dea Norge AS, Oslo/Norwegen                                         | 100                                                    | 160.130                                                          | 36.336                                                       | 306                                   | 61                                                             |
| RWE Dea Suez GmbH, Hamburg                                              | 100                                                    | 87.226                                                           | - <sup>3</sup>                                               | 213                                   | 133                                                            |
| <b>Trading/Gas Midstream</b>                                            |                                                        |                                                                  |                                                              |                                       |                                                                |
| RWE Supply & Trading GmbH, Essen                                        | 100                                                    | 426.294                                                          | - <sup>3</sup>                                               | 26.308                                | 1.146                                                          |
| RWE Supply & Trading Netherlands B.V., Eindhoven/Niederlande            | 100                                                    | 1.870.231                                                        | -57.561                                                      | 4.742                                 | 74                                                             |
| RWE Supply & Trading Switzerland S.A., Genf/Schweiz                     | 100                                                    | 373.941                                                          | -43.874                                                      | 842                                   | 193                                                            |
| <b>Sonstige Tochterunternehmen</b>                                      |                                                        |                                                                  |                                                              |                                       |                                                                |
| Amprion GmbH, Dortmund                                                  | 100                                                    | 613.025                                                          | 118.527                                                      | 6.439                                 | 797                                                            |
| RWE Finance B.V., 's-Hertogenbosch/Niederlande                          | 100                                                    | 9.749                                                            | 2.441                                                        | -                                     | -                                                              |
| RWE Service GmbH, Dortmund                                              | 100                                                    | 248.451                                                          | - <sup>3</sup>                                               | 2.303                                 | 1.395                                                          |

<sup>1</sup> Umgerechnet in Vollzeitstellen

<sup>2</sup> Daten aus dem Konzernabschluss der Gesellschaft

<sup>3</sup> Ergebnisabführungsvertrag

| II. Unternehmen, die nach der Equity-Methode bilanziert sind                             | Beteiligungs-<br>anteil gemäß<br>§ 16 AktG<br><br>in % | Eigenkapital<br>des letzten<br>Geschäfts-<br>jahres<br>in Tsd. € | Ergebnis<br>des letzten<br>Geschäfts-<br>jahres<br>in Tsd. € |
|------------------------------------------------------------------------------------------|--------------------------------------------------------|------------------------------------------------------------------|--------------------------------------------------------------|
| <b>Stromerzeugung Deutschland</b>                                                        |                                                        |                                                                  |                                                              |
| Grosskraftwerk Mannheim Aktiengesellschaft, Mannheim                                     | 40                                                     | 114.141                                                          | 6.647                                                        |
| <b>Vertrieb und Verteilnetze Deutschland</b>                                             |                                                        |                                                                  |                                                              |
| AVU Aktiengesellschaft für Versorgungs-Unternehmen, Gevelsberg                           | 50                                                     | 117.176                                                          | 12.672                                                       |
| Dortmunder Energie- und Wasserversorgung GmbH (DEW 21), Dortmund                         | 47                                                     | 157.589                                                          | 23.741                                                       |
| Enovos International S. A., Luxemburg/Luxemburg                                          | 20                                                     | 469.083                                                          | 140.541                                                      |
| Kärntner Energieholding Beteiligungs GmbH, Klagenfurt/Österreich <sup>1</sup>            | 49                                                     | 543.739                                                          | 49.686                                                       |
| KEW Kommunale Energie- und Wasserversorgung AG, Neunkirchen                              | 29                                                     | 71.803                                                           | 9.165                                                        |
| Niederrheinische Versorgung und Verkehr Aktiengesellschaft, Mönchengladbach <sup>1</sup> | 50                                                     | 471.315                                                          | 42.250                                                       |
| Pfalzwerke Aktiengesellschaft, Ludwigshafen                                              | 27                                                     | 194.732                                                          | 17.763                                                       |
| Regionalgas Euskirchen GmbH & Co. KG, Euskirchen                                         | 43                                                     | 53.482                                                           | 11.381                                                       |
| RheinEnergie AG, Köln                                                                    | 20                                                     | 564.045                                                          | 184.476                                                      |
| RWE-Veolia Berlinwasser Beteiligungs GmbH, Berlin                                        | 50                                                     | 305.559                                                          | 87.167                                                       |
| Stadtwerke Duisburg Aktiengesellschaft, Duisburg                                         | 20                                                     | 154.409                                                          | 40.733                                                       |
| Stadtwerke Essen Aktiengesellschaft, Essen                                               | 29                                                     | 117.257                                                          | 22.568                                                       |
| Stadtwerke Remscheid GmbH, Remscheid                                                     | 25                                                     | 113.503                                                          | 5.767                                                        |
| Stadtwerke Velbert GmbH, Velbert                                                         | 50                                                     | 76.466                                                           | 8.312                                                        |
| Südwestfalen Energie und Wasser AG, Hagen                                                | 19                                                     | 287.283                                                          | 20.272                                                       |
| Zagrebačke Otpadne Vode d.o.o., Zagreb/Kroatien                                          | 49                                                     | 123.559                                                          | 11.529                                                       |
| <b>Zentralost-/Südosteuropa</b>                                                          |                                                        |                                                                  |                                                              |
| Fővárosi Gázművek Zrt., Budapest/Ungarn                                                  | 50                                                     | 136.888                                                          | 16.717                                                       |
| TIGÁZ Tiszántúli Gázszolgáltató Zrt., Hajdúszoboszló/Ungarn                              | 44                                                     | 508.633                                                          | -9.481                                                       |
| Východoslovenská energetika a.s., Košice/Slowakei                                        | 49                                                     | 672.621                                                          | 54.344                                                       |
| <b>Erneuerbare Energien</b>                                                              |                                                        |                                                                  |                                                              |
| Fri-El S.p.A., Bozen/Italien <sup>1</sup>                                                | 50                                                     | 16.622                                                           | -1.421                                                       |
| Greater Gabbard Offshore Winds Limited, Reading/Großbritannien                           | 50                                                     | 40                                                               | 89                                                           |
| Zephyr Investments Limited, Swindon/Großbritannien <sup>1</sup>                          | 33                                                     | -12.234                                                          | -4.265                                                       |
| <b>Trading/Gas Midstream</b>                                                             |                                                        |                                                                  |                                                              |
| Excelerate Energy LP, The Woodlands/Texas/USA <sup>1</sup>                               | 50                                                     | 310.220                                                          | -183.626                                                     |

<sup>1</sup> Daten aus dem Konzernabschluss der Gesellschaft

## WERTMANAGEMENT-KONZEPT DES RWE-KONZERNS

**Renditeorientierte Unternehmenssteuerung.** Im Zentrum unserer Strategie steht die Steigerung des Unternehmenswertes. Zusätzlichlicher Wert wird dann geschaffen, wenn die Rendite auf das eingesetzte Vermögen die Kapitalkosten übersteigt. Wir messen die Rendite als Return on Capital Employed (ROCE). Der ROCE zeigt die rein operative Rendite. Er ergibt sich als Verhältnis des betrieblichen Ergebnisses zum betrieblichen Vermögen.

Die Tabelle auf Seite 232 oben stellt dar, wie die Kapitalkosten hergeleitet werden. Wir ermitteln sie als gewichteten Durchschnitt der Eigen- und Fremdkapitalkosten.

Die Eigenkapitalkosten entsprechen der über eine risikolose Anlage hinausgehenden unternehmensspezifischen Renditeerwartung des Kapitalmarktes bei einer Investition in die RWE-Aktie. Die Fremdkapitalkosten orientieren sich an den langfristigen Finanzierungskonditionen im RWE-Konzern und berücksichtigen die steuerliche Abzugsfähigkeit von Fremdkapitalzinsen (Tax Shield).

Bei der Ermittlung der Kapitalkosten für 2010 legen wir geänderte Werte zugrunde. Die Eigenkapitalkosten bestimmen wir folgendermaßen: Wir nehmen einen Zinssatz für eine risikolose Anlage in Höhe von 4,25% (Vorjahr: 4,5%) als Basis und addieren konzern- bzw. bereichsspezifische Risikoaufschläge. Dabei legen wir einen Betafaktor für den RWE-Konzern von 0,95 (Vorjahr: 0,78) zugrunde. Für das Fremdkapital verwenden wir einen Kostensatz vor Steuern von 5,75% (Vorjahr: 6,25%). Das Verhältnis von Eigen- zu Fremdkapital setzen wir mit 50 zu 50 an. Dieser Wert wird nicht aus den Buchwerten der Bilanz abgeleitet, sondern basiert u.a. auf einer Marktbewertung des Eigenkapitals und auf Annahmen über die langfristige Entwicklung von Nettofinanzposition und Rückstellungen. Insgesamt kommen wir 2010 – wie im Vorjahr – auf Kapitalkosten für den RWE-Konzern von 9,0% vor Steuern.

Bei der Ermittlung des betrieblichen Vermögens gehen wir so vor, dass abnutzbare Gegenstände des Anlagevermögens nicht mit ihren Buchwerten, sondern mit der Hälfte der historischen Anschaffungs- oder Herstellungskosten angesetzt werden. Diese Methodik hat den Vorteil, dass die ROCE-Ermittlung nicht von der Abschreibungsdauer beeinflusst wird. Damit verringern sich die durch den Investitionszyklus verursachten Schwankungen der Wertbeiträge. Bei Finanzanlagen berücksichtigen wir die im Kaufpreis enthaltenen Firmenwerte allerdings in voller Höhe.

Die Differenz von ROCE und Kapitalkostensatz ergibt den relativen Wertbeitrag. Durch Multiplikation mit dem eingesetzten betrieblichen Vermögen erhält man den absoluten Wertbeitrag, den wir als zentrale Steuerungsgröße einsetzen. Je höher dieser ausfällt, desto attraktiver ist die jeweilige Aktivität für unser Portfolio. Er ist auch ein wichtiges Kriterium bei der Beurteilung von Investitionen und zugleich Maßstab für die erfolgsabhängige Vergütung unserer Führungskräfte.

**Niedrigere Kapitalkosten ab 2011.** Unsere jährliche Überprüfung der Kapitalkosten hat uns zu erneuten Anpassungen veranlasst. Aufgrund des gesunkenen Zinsniveaus legen wir für das Eigen- und Fremdkapital ab 2011 niedrigere Sätze zugrunde. Die Kapitalkosten verringern sich von 9,0 auf 8,5%.

| <b>RWE-Konzern – Kapitalkosten</b>  |   | 2011        | 2010       | 2009       |
|-------------------------------------|---|-------------|------------|------------|
| Risikoloser Zinssatz                | % | 3,7         | 4,25       | 4,50       |
| Marktprämie                         | % | 5,0         | 5,0        | 5,0        |
| Betafaktor                          |   | 0,90        | 0,95       | 0,78       |
| Eigenkapitalkosten nach Steuern     | % | 8,2         | 9,0        | 8,4        |
| Fremdkapitalkosten vor Steuern      | % | 4,90        | 5,75       | 6,25       |
| Steuersatz für Fremdkapital         | % | 27,4        | 27,1       | 27,1       |
| Tax Shield                          | % | –1,3        | –1,6       | –1,7       |
| Fremdkapitalkosten nach Steuern     | % | 3,6         | 4,2        | 4,6        |
| Anteil Eigenkapital                 | % | 50          | 50         | 50         |
| Anteil Fremdkapital                 | % | 50          | 50         | 50         |
| <b>Kapitalkosten nach Steuern</b>   | % | <b>5,75</b> | <b>6,5</b> | <b>6,5</b> |
| Steuersatz für pauschale Umrechnung | % | 31          | 30         | 30         |
| <b>Kapitalkosten vor Steuern</b>    | % | <b>8,50</b> | <b>9,0</b> | <b>9,0</b> |

| <b>RWE-Konzern – Ermittlung des betrieblichen Vermögens</b>     |        | 31.12.10      | 31.12.09      |
|-----------------------------------------------------------------|--------|---------------|---------------|
| Immaterielle Vermögenswerte/Sachanlagen <sup>1</sup>            | Mio. € | 58.849        | 56.150        |
| + Beteiligungen inkl. Ausleihungen <sup>2</sup>                 | Mio. € | 5.998         | 5.585         |
| + Vorräte                                                       | Mio. € | 3.293         | 3.115         |
| + Forderungen aus Lieferungen und Leistungen                    | Mio. € | 9.481         | 9.527         |
| + Sonstige Forderungen und sonstige Vermögenswerte <sup>3</sup> | Mio. € | 12.872        | 16.627        |
| – Unverzinsliche Rückstellungen <sup>4</sup>                    | Mio. € | 12.384        | 12.214        |
| – Unverzinsliche Verbindlichkeiten <sup>5</sup>                 | Mio. € | 22.156        | 27.043        |
| – Korrekturen <sup>6</sup>                                      | Mio. € | 954           | 858           |
| <b>Betriebliches Vermögen</b>                                   | Mio. € | <b>54.999</b> | <b>50.889</b> |

| <b>RWE-Konzern – Ermittlung des Wertbeitrags</b>                       |        | 2010          |
|------------------------------------------------------------------------|--------|---------------|
| Betriebliches Vermögen vor Korrekturen (im Jahresdurchschnitt)         | Mio. € | 52.944        |
| + Korrekturen <sup>7</sup>                                             | Mio. € | 442           |
| <b>Betriebliches Vermögen nach Korrekturen (im Jahresdurchschnitt)</b> | Mio. € | <b>53.386</b> |
| <b>Betriebliches Ergebnis</b>                                          | Mio. € | <b>7.681</b>  |
| <b>ROCE</b>                                                            | %      | <b>14,4</b>   |
| <b>Relativer Wertbeitrag</b>                                           | %      | <b>5,4</b>    |
| <b>Absoluter Wertbeitrag</b>                                           | Mio. € | <b>2.876</b>  |

1 Immaterielle Vermögenswerte, Sachanlagen und Investment Property wurden mit hälftigen Anschaffungs- und Herstellungskosten angesetzt (siehe Anlagenspiegel); Geschäfts- oder Firmenwerte und Kundenbeziehungen wurden mit ihren Buchwerten erfasst.

2 At-Equity-bilanzierte Beteiligungen und übrige Finanzanlagen (ohne langfristige Wertpapiere)

3 Enthalten sind Ertragsteueransprüche; nicht berücksichtigt sind Finanzderivate in Höhe von 938 Mio. € (Vorjahr: 733 Mio. €) und das Nettovermögen bei fondsgedeckten Pensionsverpflichtungen.

4 Die Position umfasst Steuerrückstellungen und sonstige Rückstellungen; nicht enthalten sind Rückstellungen mit Langfristcharakter in Höhe von 425 Mio. € (Vorjahr: 446 Mio. €).

5 Die Position umfasst Verbindlichkeiten aus Lieferungen und Leistungen, Ertragsteuerverbindlichkeiten sowie übrige Verbindlichkeiten; nicht enthalten sind Finanzderivate in Höhe von 534 Mio. € (Vorjahr: 485 Mio. €) sowie Kaufpreisverbindlichkeiten von 1.775 Mio. € (Vorjahr: 1.562 Mio. €) aus Andienungsrechten.

6 Herausgerechnet werden nach IAS 16.15 gebildete Aktiva in Höhe von 486 Mio. € (Vorjahr: 488 Mio. €), da durch sie kein Kapital gebunden wird. Außerdem herausgerechnet werden passive latente Steuern auf den aktivierten Kundenstamm von RWE npower.

7 Größtenteils zeitliche Korrekturen, u.a. wegen unterjähriger Erst-/Entkonsolidierungen

# ORGANE

Stand: 11. Februar 2011

## Aufsichtsrat<sup>1</sup>

### Dr. Manfred Schneider

Leverkusen

Vorsitzender

Geburtsjahr: 1938

Mitglied seit: 10. Dezember 1992

Mandate:

- Bayer AG (Vorsitz)
- Daimler AG
- Linde AG (Vorsitz)

### Frank Bsirske<sup>2</sup>

Berlin

Stellvertretender Vorsitzender

Vorsitzender der ver.di Vereinte Dienstleistungsgewerkschaft

Geburtsjahr: 1952

Mitglied seit: 9. Januar 2001

Mandate:

- Deutsche Lufthansa AG
- IBM Central Holding GmbH
- Deutsche Postbank AG
- KfW Bankengruppe

### Dr. Paul Achleitner

München

Mitglied des Vorstands der Allianz SE

Geburtsjahr: 1956

Mitglied seit: 16. März 2000

Mandate:

- Allianz Global Investors AG
- Bayer AG
- Daimler AG
- Allianz Investment Management SE (Vorsitz)

### Werner Bischoff<sup>2</sup>

Monheim am Rhein

ehem. Mitglied des geschäftsführenden Hauptvorstands der IG Bergbau, Chemie, Energie

Geburtsjahr: 1947

Mitglied seit: 13. April 2006

Mandate:

- Continental AG
- Evonik-Degussa GmbH
- Evonik Industries AG
- RWE Dea AG
- RWE Power AG
- THS TreuHandStelle für Bergmannswohnstätten  
im rheinisch-westfälischen Steinkohlenbezirk GmbH  
(Vorsitz)

### Carl-Ludwig von Boehm-Bezing

Bad Soden

ehem. Mitglied des Vorstands der Deutsche Bank AG

Geburtsjahr: 1940

Mitglied seit: 11. Dezember 1997

### Heinz Büchel<sup>2</sup>

Trier

Gesamtbetriebsratsvorsitzender der

RWE Deutschland AG

Geburtsjahr: 1956

Mitglied seit: 13. April 2006

### Dieter Faust<sup>2</sup>

Eschweiler

Konzernbetriebsratsvorsitzender der RWE Power AG

Geburtsjahr: 1958

Mitglied seit: 1. August 2005

Mandate:

- RWE Power AG

### Dr. Thomas R. Fischer<sup>3</sup>

Berlin

Geburtsjahr: 1947

Mitglied bis: 31. Januar 2010

▪ Mitgliedschaft in anderen gesetzlich zu bildenden Aufsichtsräten  
- Mitgliedschaft in vergleichbaren in- und ausländischen Kontrollgremien von Wirtschaftsunternehmen

1 Die Amtszeit aller Mitglieder endet zum Ablauf der Hauptversammlung am 20. April 2011.

2 Vertreter der Arbeitnehmer

3 Angaben beziehen sich auf den Zeitpunkt des Ausscheidens.

**Andreas Henrich<sup>2</sup>**

Mülheim an der Ruhr

Leiter Personalmanagement der RWE Deutschland AG

Geburtsjahr: 1956

Mitglied seit: 1. April 2008

Mandate:

- ELE Emscher Lippe Energie GmbH
- RWE Deutschland AG

**Heinz-Eberhard Holl<sup>3</sup>**

Osnabrück

ehem. Oberkreisdirektor des Landkreises Osnabrück

Geburtsjahr: 1940

Mitglied bis: 31. Januar 2010

Mandate:

- Georgsmarienhütte GmbH
- Georgsmarienhütte Holding GmbH

**Frithjof Kühn**

Siegburg

Landrat Rhein-Sieg-Kreis

Geburtsjahr: 1943

Mitglied seit: 1. Februar 2010

Mandate:

- RW Holding AG (Vorsitz)
- Kreissparkasse Köln

**Hans Peter Lafos<sup>2</sup>**

Bergheim

Landesfachbereichsleiter FB 2 Ver- und Entsorgung,  
ver.di Vereinte Dienstleistungsgewerkschaft Landesbezirk NRW

Geburtsjahr: 1954

Mitglied seit: 28. Oktober 2009

Mandate:

- GEW Köln AG
- RWE Power AG
- RWE Vertrieb AG

**Dr. Gerhard Langemeyer**

Dortmund

Oberbürgermeister a.D. der Stadt Dortmund

Geburtsjahr: 1944

Mitglied seit: 4. Januar 2001

**Dagmar Mühlenfeld**

Mülheim an der Ruhr

Oberbürgermeisterin der Stadt Mülheim an der Ruhr

Geburtsjahr: 1951

Mitglied seit: 4. Januar 2005

Mandate:

- Beteiligungsholding Mülheim an der Ruhr GmbH
- Flughafen Essen/Mülheim GmbH (Vorsitz)
- medl GmbH (Vorsitz)
- Mülheim & Business GmbH (Vorsitz)
- Ruhrbania Projektentwicklungsgesellschaft mbH (Vorsitz)

**Dr. Wolfgang Reiniger**

Essen

Rechtsanwalt

Geburtsjahr: 1944

Mitglied seit: 4. Januar 2001

**Günter Reppien<sup>2</sup>**

Lingen

ehem. Gesamtbetriebsratsvorsitzender der RWE Power AG

Geburtsjahr: 1951

Mitglied seit: 9. Januar 2001

Mandate:

- RWE Power AG
- Stadtwerke Lingen GmbH

**Dagmar Schmeer<sup>2</sup>**

Saarbrücken

Betriebsratsvorsitzende der VSE AG

Geburtsjahr: 1967

Mitglied seit: 9. August 2006

Mandate:

- VSE AG

▪ Mitgliedschaft in anderen gesetzlich zu bildenden Aufsichtsräten  
- Mitgliedschaft in vergleichbaren in- und ausländischen Kontrollgremien von Wirtschaftsunternehmen

1 Die Amtszeit aller Mitglieder endet zum Ablauf der Hauptversammlung am 20. April 2011.

2 Vertreter der Arbeitnehmer

3 Angaben beziehen sich auf den Zeitpunkt des Ausscheidens.

## Ausschüsse des Aufsichtsrats

### [Dr.-Ing. Ekkehard D. Schulz](#)

Krefeld

Mitglied des Aufsichtsrats der ThyssenKrupp AG

Geburtsjahr: 1941

Mitglied seit: 13. April 2006

Mandate:

- AXA Konzern AG
- Bayer AG
- MAN SE
- ThyssenKrupp Elevator AG (Vorsitz) – bis 21. Januar 2011 –
- ThyssenKrupp Steel Europe AG (Vorsitz)  
– bis 21. Januar 2011 –

### [Dr. Wolfgang Schlüssel](#)

Wien

Bundeskanzler a.D.

Geburtsjahr: 1945

Mitglied seit: 1. März 2010

Mandate:

- Bertelsmann Stiftung

### [Uwe Tigges<sup>2</sup>](#)

Bochum

Konzernbetriebsratsvorsitzender der RWE AG

Geburtsjahr: 1960

Mitglied seit: 1. Dezember 2003

Mandate:

- RWE Vertrieb AG

### [Manfred Weber<sup>2</sup>](#)

Wietze

Gesamtbetriebsratsvorsitzender der RWE Dea AG

Geburtsjahr: 1947

Mitglied seit: 1. Dezember 2008

Mandate:

- RWE Dea AG

### [Dr. Dieter Zetsche](#)

Stuttgart

Vorsitzender des Vorstands der Daimler AG

Geburtsjahr: 1953

Mitglied seit: 16. Juli 2009

### [Präsidium des Aufsichtsrats](#)

Dr. Manfred Schneider (Vorsitz)

Frank Bsirske

Dr. Paul Achleitner

Heinz Büchel

Dieter Faust

Dagmar Mühlenfeld

Dagmar Schmeer

Dr.-Ing. Ekkehard D. Schulz

### [Vermittlungsausschuss nach § 27 Abs. 3 MitbestG](#)

Dr. Manfred Schneider (Vorsitz)

Frank Bsirske

Werner Bischoff

Dr.-Ing. Ekkehard D. Schulz

### [Personalausschuss](#)

Dr. Manfred Schneider (Vorsitz)

Frank Bsirske

Dr. Paul Achleitner

Heinz-Eberhard Holl – bis 31. Januar 2010 –

Frithjof Kühn – seit 1. Februar 2010 –

Günter Reppien

Uwe Tigges

### [Prüfungsausschuss](#)

Carl-Ludwig von Boehm-Bezing (Vorsitz)

Werner Bischoff

Dr. Gerhard Langemeyer

Günter Reppien

Dr.-Ing. Ekkehard D. Schulz

Uwe Tigges

### [Nominierungsausschuss](#)

Dr. Manfred Schneider (Vorsitz)

Dr. Paul Achleitner

Heinz-Eberhard Holl

Frithjof Kühn – seit 1. Februar 2010 –

---

▪ Mitgliedschaft in anderen gesetzlich zu bildenden Aufsichtsräten  
- Mitgliedschaft in vergleichbaren in- und ausländischen Kontrollgremien von Wirtschaftsunternehmen

2 Vertreter der Arbeitnehmer

## Vorstand

### Dr. Jürgen Großmann

Vorsitzender des Vorstands der RWE AG,  
bestellt bis zum 30. September 2012

Geboren 1952 in Mülheim an der Ruhr, Studium der Eisenhüttenkunde und der Wirtschaftswissenschaften, Promotion in Hüttenwesen, von 1980 bis 1993 im Klöckner-Konzern, zuletzt als Mitglied des Vorstands der Klöckner-Werke AG, 1993 Erwerb der Georgsmarienhütte, von 1993 bis 2006 Gesellschafter und Geschäftsführer der Georgsmarienhütte Holding GmbH, Eintritt in die RWE AG als Vorsitzender des Vorstands zum 1. Oktober 2007.

Konzernressorts: Public Affairs/Energiepolitik, Compliance/Vorstandsbüro, Kommunikation, Führungskräftemanagement und Revision.

#### Mandate:

- BATIG Gesellschaft für Beteiligungen mbH
- British American Tobacco (Industrie) GmbH
- British American Tobacco (Germany) GmbH
- Deutsche Bahn AG
- SURTECO SE (Vorsitz)
- Volkswagen AG
- Hanover Acceptances Limited

### Dr. Leonhard Birnbaum

Mitglied des Vorstands der RWE AG,  
bestellt bis zum 30. September 2013

Geboren 1967 in Ludwigshafen am Rhein, promovierter Chemieingenieur, von 1996 bis 2008 bei McKinsey & Company Inc., 2000 zum Partner und 2006 zum Senior Partner ernannt, zuletzt als Mitglied des globalen Führungsteams des Energiebereichs tätig, Eintritt in die RWE AG als Leiter des Bereichs Konzernstrategie und Business Development zum 7. April 2008, Mitglied des Vorstands seit 1. Oktober 2008, von Januar 2009 bis September 2010 Chief Strategy Officer, seit 1. Oktober 2010 Vorstand Kommerzielle Steuerung der RWE AG.

Konzernressorts: Commodity-Management, Strategie, Mergers & Acquisitions und Forschung & Entwicklung.

#### Mandate:

- RWE Dea AG (Vorsitz)
- RWE Supply & Trading GmbH
- RWE Turkey Holding A.S.

### Alwin Fitting

Mitglied des Vorstands der RWE AG,  
bestellt bis zum 31. März 2013

Geboren 1953 in Westhofen (Rheinhausen), seit 1974 im RWE-Konzern, Ausbildung zum Elektromeister, Oktober 2000 bis Juli 2005 Mitglied des Vorstands und Arbeitsdirektor der RWE Power AG, seit August 2005 Mitglied des Vorstands und Arbeitsdirektor der RWE AG.

Konzernressorts: Sicherheit, Personalmanagement & Arbeitsrecht, Diversity Office und Corporate Responsibility/Umweltschutz.

#### Mandate:

- Amprion GmbH
- RWE IT GmbH (Vorsitz)
- RWE Pensionsfonds AG
- RWE Service GmbH (Vorsitz)

### Dr. Ulrich Jobs<sup>1</sup>

Mitglied des Vorstands der RWE AG,  
bis zum 30. September 2010

Geboren 1953 in Herne, Diplom als Ingenieurwissenschaftler und Promotion in Bergbau/Bergtechnik, seit 1977 im RWE-Konzern, seit April 2007 Mitglied des Vorstands der RWE AG, Mai 2007 bis Februar 2008 zusätzlich Vorstandsvorsitzender der RWE Power AG, von April 2008 bis April 2009 Chief Operating Officer der RWE AG, von Mai 2009 bis September 2010 Vorstand Operative Steuerung International der RWE AG.

#### Mandate:

- Deutsche Steinkohle Aktiengesellschaft
- RAG AG
- RWE Dea AG (Vorsitz)
- ELMÜ Nyrt. (Vorsitz)
- EMASZ Nyrt. (Vorsitz)
- Essent N.V.
- Mátrai Kraftwerk G.AG (Vorsitz)
- NET4GAS, s.r.o.
- RWE Npower Holdings plc (Chairman)
- RWE Polska Spółka Akcyjna (Vorsitz)
- RWE Supply & Trading GmbH (Vorsitz)
- RWE Transgas, a.s. (Vorsitz)
- RWE Turkey Holding A.S.
- Východoslovenská energetika, a.s.

▪ Mitgliedschaft in anderen gesetzlich zu bildenden Aufsichtsräten  
- Mitgliedschaft in vergleichbaren in- und ausländischen Kontrollgremien von Wirtschaftsunternehmen

<sup>1</sup> Angaben beziehen sich auf den Zeitpunkt des Ausscheidens.

**Dr. Rolf Pohl**

Mitglied des Vorstands der RWE AG,  
bestellt bis zum 31. Dezember 2011

Geboren 1952 in Solingen, promovierter Wirtschaftswissenschaftler, 1993 bis 2000 Generalbevollmächtigter Finanz- und Rechnungswesen der VEBA AG, 2000 bis 2006 Generalbevollmächtigter Mergers & Acquisitions der E.ON AG, seit Januar 2007 Mitglied des Vorstands und seit Mai 2007 Finanzvorstand der RWE AG.

Konzernressorts: Controlling/Organisationseffizienz, Finanzen, Investor Relations, Recht/Organangelegenheiten, Rechnungswesen und Steuern.

Mandate:

- RWE Dea AG
- RWE Pensionsfonds AG (Vorsitz)
- RWE Power AG
- RWE Deutschland AG
- Essent N.V.
- RWE Transgas, a.s.

**Dr. Rolf Martin Schmitz**

Mitglied des Vorstands der RWE AG,  
bestellt bis zum 30. April 2014

Geboren 1957 in Mönchengladbach, promovierter Maschinenbauingenieur, von 1988 bis 1998 bei der VEBA AG u.a. zuständig für Konzernentwicklung und Wirtschaftspolitik, 1998 bis 2001 Vorstand der rhenag Rheinische Energie AG, 2000 bis 2004 Vorstand der Thüga AG, 2004 bis 2005 Vorsitzender der Geschäftsführung der E.ON Kraftwerke GmbH, 2006 bis 2009 Vorsitzender des Vorstands der RheinEnergie AG und Geschäftsführer der Stadtwerke Köln, von Mai 2009 bis September 2010 Vorstand Operative Steuerung National der RWE AG, seit 1. Oktober 2010 Vorstand Operative Steuerung der RWE AG.

Konzernressorts: Beteiligungsmanagement, Kommunen und Koordination Erzeugung/Netz/Vertrieb.

Mandate:

- envia Mitteldeutsche Energie AG
- Lechwerke AG (Vorsitz)
- RWE Power AG (Vorsitz)
- RWE Deutschland AG (Vorsitz)
- Süwag Energie AG (Vorsitz)
- Essent N.V.
- KELAG-Kärntner Elektrizitäts-AG
- RWE Transgas, a.s.
- RWE Turkey Holding A.S.

# ORGANIGRAMM DES RWE-KONZERNS

Stand: 11. Februar 2011

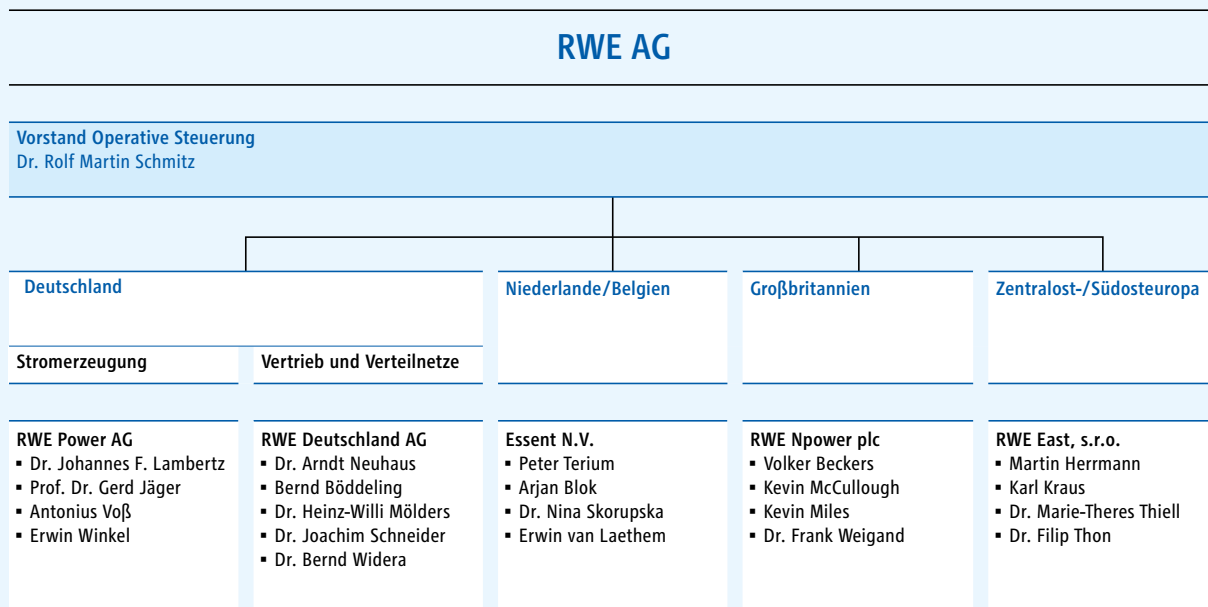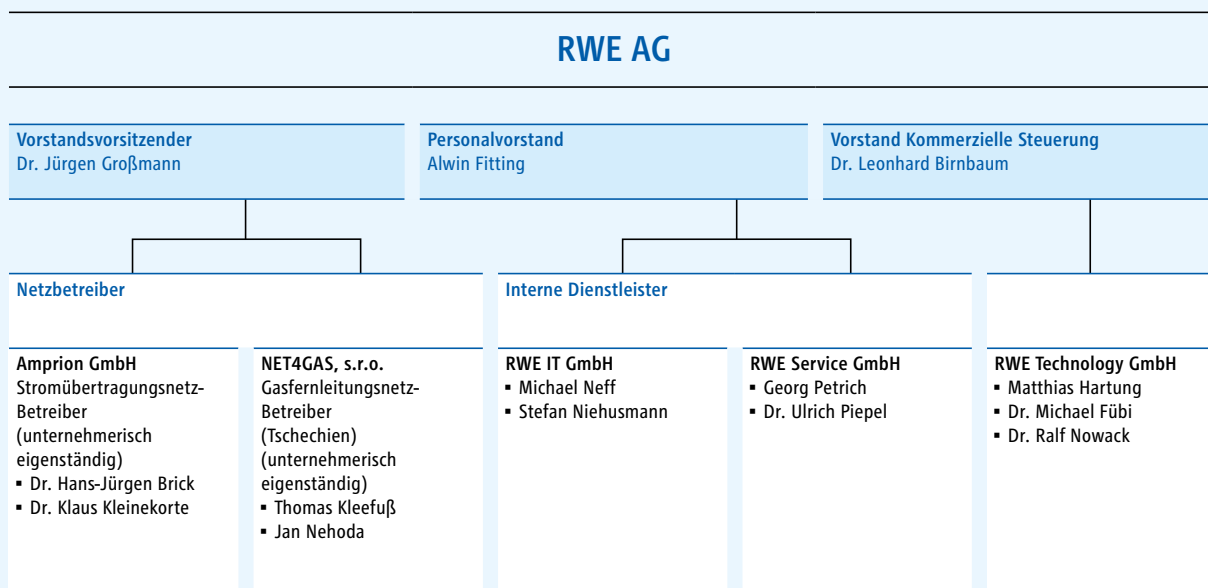

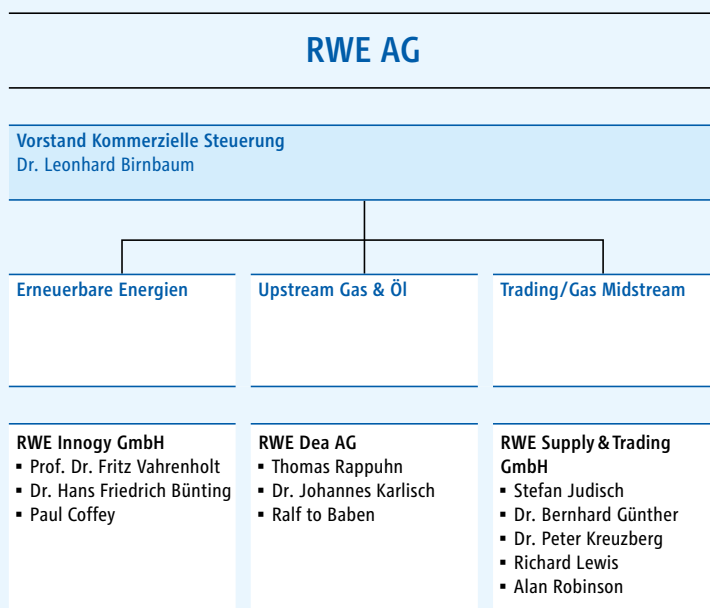

# ORGANIGRAMM DER RWE AG

Stand: 11. Februar 2011

| RWE AG                                                                  |                                                                      |                                                                               |
|-------------------------------------------------------------------------|----------------------------------------------------------------------|-------------------------------------------------------------------------------|
| <b>Vorstandsvorsitz</b><br>Dr. Jürgen Großmann                          | <b>Finanzvorstand</b><br>Dr. Rolf Pohlig                             | <b>Personalvorstand</b><br>Alwin Fitting                                      |
| <b>Public Affairs/Energiepolitik Konzern</b><br>Dr. Peter Heinacher     | <b>Konzerncontrolling/Organisationseffizienz</b><br>Dr. Martin Muhr  | <b>Konzernsicherheit</b><br>Michael Schmidt                                   |
| <b>Compliance Konzern &amp; Vorstandsbüro</b><br>Dr. Jens Hüffer        | <b>Finanzen Konzern</b><br>Dr. Markus Coenen                         | <b>Personalmanagement &amp; Arbeitsrecht Konzern</b><br>Dr. Hans-Dieter Rüter |
| <b>Konzernkommunikation</b><br>Volker Heck                              | <b>Investor Relations</b><br>Dr. Stephan Lowis                       | <b>Diversity Office<sup>1</sup></b><br>Dr. Claudia Mayfeld                    |
| <b>Führungskräftemanagement Konzern</b><br>Dr. Henning Rentz            | <b>Recht/Organangelegenheiten Konzern</b><br>Dr. Manfred Döss        | <b>Corporate Responsibility/Umweltschutz Konzern</b><br>Joachim Löchte        |
| <b>Konzernrevision<sup>1</sup></b><br>Harry Schur                       | <b>Rechnungswesen Konzern</b><br>Fred Riedel                         |                                                                               |
|                                                                         | <b>Steuern Konzern</b><br>Dr. Berend Holst                           |                                                                               |
| <b>Vorstand Operative Steuerung</b><br>Dr. Rolf Martin Schmitz          | <b>Vorstand Kommerzielle Steuerung</b><br>Dr. Leonhard Birnbaum      |                                                                               |
| <b>Beteiligungsmanagement</b><br>Frank Grone                            | <b>Commodity Management</b><br>Dr. Michael Herrmann                  |                                                                               |
| <b>Kommunen<sup>1</sup></b><br>Dr. Arndt Neuhaus                        | <b>Konzernstrategie</b><br>Thomas Birr                               |                                                                               |
| <b>Koordination Erzeugung/Netz/Vertrieb Konzern</b><br>Bernhard Lüscher | <b>Mergers &amp; Acquisitions</b><br>Andreas Zetzsche                |                                                                               |
|                                                                         | <b>Forschung &amp; Entwicklung Konzern</b><br>Dr. Frank-Detlef Drake |                                                                               |

<sup>1</sup> Kopfstelle

## GLOSSAR

**Anlagenabnutzungsgrad.** Anteil der kumulierten Abschreibungen auf das Sachanlagevermögen an den historischen Anschaffungskosten des Sachanlagevermögens.

**Anlagenintensität.** Anteil des Anlagevermögens (Sachanlagen, immaterielle Vermögenswerte, Investment Property) am Gesamtvermögen.

**At-Equity-Bilanzierung.** Verfahren zur Berücksichtigung von Beteiligungsgesellschaften, die nicht auf Basis der Vollkonsolidierung mit allen Aktiva und Passiva in den Konzernabschluss einbezogen werden. Hierbei wird der Beteiligungsbuchwert um die Entwicklung des anteiligen Eigenkapitals der Beteiligung fortgeschrieben. Diese Veränderung geht in die Gewinn- und Verlustrechnung der Eigentümergesellschaft ein.

**BAFA-Preise.** Um den Absatz deutscher Kohle zu wettbewerbsfähigen Preisen zu ermöglichen, erhalten die Bergbauunternehmen Finanzhilfen in Höhe des Unterschiedbetrags zwischen ihren Produktionskosten und dem Preis für Importkohle aus Nicht-EU-Ländern. Hierzu ermittelt das Bundesamt für Wirtschaft und Ausfuhrkontrolle (BAFA) als Zuschussparameter die Drittlandskohlepreise frei deutsche Grenze. Der Preis für Kraftwerksteinkohle wird vom BAFA als Quartals- sowie als Jahrespreis mit Mengen in Gewichtstonnen und Tonnen Steinkohleeinheiten veröffentlicht.

**Barrel.** Weltweite Handelseinheit für Rohöl. Dabei gilt:  
1 bbl. (US) = 158,987 Liter.

**Best Practice.** Frei übersetzt „beste Praxis“ oder „bestes Verfahren“. Gemeint sind damit bewährte und effiziente Technologien, Techniken und Managementverfahren, durch deren Einsatz am besten zur Zielerreichung beigetragen werden kann.

**Clean Development Mechanism.** Gemäß dem Kyoto-Protokoll zur Vermeidung von Treibhausgasemissionen können Staaten oder Unternehmen durch Maßnahmen zur Emissionsminderung in Schwellen- oder Entwicklungsländern, die selbst keine Emissions-Reduktionsverpflichtung haben, Emissionsgutschriften erwerben. Diese lassen sich mit den eigenen Verpflichtungen verrechnen.

**CO<sub>2</sub>.** Chemische Summenformel für Kohlenstoffdioxid (im Sprachgebrauch auch Kohlendioxid). CO<sub>2</sub> ist eine chemische Verbindung aus Kohlenstoff und Sauerstoff.

**Commercial Paper.** Handelbare, unbesicherte Inhaberschuldverschreibung, die zur kurzfristigen Fremdmittelaufnahme emittiert wird. Commercial Paper werden als Daueremission revolvingierend mit einer typischen Laufzeit von einem Tag bis zu 24 Monaten ausgegeben.

**Commodity.** Bezeichnung für eine standardisierte, handelbare Ware, z.B. Strom, Öl oder Gas.

**Compliance.** Einhaltung sämtlicher für das jeweilige Unternehmen relevanter gesetzlichen Pflichten, Vorschriften und Richtlinien.

**Credit Default Swap (CDS).** Finanzinstrument zum Handel von Ausfallrisiken bei Krediten u.ä. Der Sicherungsnehmer bezahlt meist eine einmalige jährliche Gebühr an den Sicherungsgeber. Im Falle der Nichtzurückzahlung des zugrunde liegenden Kreditinstruments wird ihm vom Sicherungsgeber eine vertraglich vereinbarte Summe gezahlt.

**Debt-Issuance-Programm (DIP).** Vertragliche Rahmen- und Musterdokumentation für die Begebung von Anleihen. Auf Basis des DIP können Anleihen mit Laufzeiten zwischen einem und 30 Jahren schnell und flexibel begeben werden.

**Defined Benefit Obligation.** Barwert der vom Arbeitnehmer bis zum Bilanzstichtag erdienten Leistungen im Rahmen der betrieblichen Altersvorsorge.

**EBITDA.** Abkürzung für Englisch: Earnings Before Interest, Taxes, Depreciation and Amortization. Deutsch: Gewinn vor Zinsen, Steuern, Abschreibungen auf Sachanlagen und auf immaterielle Vermögensgegenstände.

**Exploration.** Bezeichnung für die Suche nach und Erkundung von Erdöl- und Erdgaslagerstätten.

**Grundlast.** Strombedarf, der unabhängig von allen Lastschwankungen besteht und im gesamten Tagesverlauf nicht unterschritten wird. Er entsteht u.a. durch Haushaltsgeräte im Dauerbetrieb und Industrieunternehmen, die auch nachts produzieren. Grundlaststrom wird vor allem von Braunkohle- und Kernkraftwerken erzeugt. Diese Anlagen sind zumeist über 6.000 Stunden pro Jahr im Einsatz. Auch Laufwasserkraftwerke oder Biomasse-Anlagen bedienen den Grundbedarf.

**Hausse.** Von einer Hausse spricht man, wenn sich Preise in einem Markt über einen mittleren oder längeren Zeitraum erhöhen oder auf hohem Niveau bewegen.

**Hybridanleihe.** Mischung aus Fremd- und Eigenkapitalfinanzierung. In der Regel haben Hybridanleihen eine sehr lange – mitunter unendliche – Laufzeit und sind nur durch den Emittenten zu vertraglich festgelegten Terminen kündbar. Je nach Ausgestaltung können Zinszahlungen unter vertraglich bestimmten Bedingungen ausgesetzt werden.

**Investment Grade.** Bewertungskategorie für Unternehmen mit sehr guter bis durchschnittlicher Bonität. Hierunter fallen die von Rating-Agenturen vergebenen Ratingklassen AAA bis BBB (S&P und Fitch) bzw. Aaa bis Baa (Moody's). Bei Unternehmen im Non-Investment-Grade-Bereich ist das Risiko, dass das Unternehmen seine finanziellen Verpflichtungen nicht erfüllt, wesentlich höher.

**Joint Implementation.** Gemäß Kyoto-Protokoll können Staaten oder Unternehmen durch Maßnahmen zur Emissionsminderung in anderen Ländern, die ebenfalls eine eigene Reduktionsverpflichtung haben, Emissionsgutschriften erwerben. Diese lassen sich mit den eigenen Minderungsverpflichtungen verrechnen.

**Kilowatt (KW).** Maßeinheit der elektrischen Leistung.

1 Megawatt (MW) =  $10^3$  Kilowatt;

1 Gigawatt (GW) =  $10^6$  Kilowatt;

1 Terawatt (TW) =  $10^9$  Kilowatt.

**Konfidenzniveau.** Wahrscheinlichkeit, mit der ein Wert innerhalb eines bestimmten Intervalls liegt.

**Kraft-Wärme-Kopplung (KWK).** Bei KWK-Energieumwandlungsanlagen wird sowohl die bei der chemischen oder physikalischen Umwandlung von Energieträgern entstehende Wärme als auch die durch die Energieumwandlung erzeugte elektrische Energie genutzt. Im Gegensatz zu thermischen Wärmekraftwerken, die nur auf Stromproduktion ausgelegt sind, wird bei KWK-Anlagen durch die gleichzeitige Nutzung der Abwärme ein sehr viel höherer Gesamtwirkungsgrad erreicht.

**LNG.** Liquefied Natural Gas, Deutsch: verflüssigtes Erdgas. Die Verflüssigung wird durch Abkühlung erreicht. LNG hat nur etwa ein 600stel des Volumens von Erdgas in Gasform und ist daher besonders für den Transport und die Lagerung geeignet.

**Performance Shares.** Virtuelle Aktien, die den Teilnehmern an unserem Long-Term Incentive Plan Beat das Recht geben, am Ende der Planlaufzeit eine Auszahlung zu erhalten. Voraussetzung ist, dass die definierten Erfolgsziele erfüllt oder übertroffen wurden.

**Put- oder Call-Optionen.** Optionen, durch die ein Käufer das Recht erwirbt, einen bestimmten Bezugswert, z.B. eine Aktie, zu einem im Voraus vereinbarten Preis innerhalb eines festgelegten Zeitraums zu kaufen (Call-Option) bzw. zu verkaufen (Put-Option).

**Rating.** Auf internationalen Finanzmärkten übliche standardisierte Beurteilungskennziffer zur Einstufung der Bonität eines Schuldners. Ein Single-A-Rating (A) bezeichnet einen Schuldner mit guter Bonität.

**Service Cost.** Laufender Dienstzeitaufwand; der Begriff bezeichnet den Anstieg des Barwerts einer leistungsorientierten Pensionsverpflichtung, der auf die von Arbeitnehmern in der Berichtsperiode erbrachten Arbeitsleistung entfällt.

**Spitzenlast.** Bezeichnet Phasen, in denen die Stromnachfrage besonders hoch ist, z.B. mittags, wenn in vielen Betrieben und Haushalten Essen zubereitet wird. Spitzenlastkraftwerke sind vielfach weniger als 3.000 Stunden im Einsatz. Als solche sind Gas- und Speicherkraftwerke einzuordnen.

**Spotmarkt/Spothandel.** Allgemeine Bezeichnung für Märkte, auf denen Bezahlung und Lieferung i.d.R. kurz nach dem Geschäftsabschluss erfolgen.

**Steinkohleeinheit (SKE).** Maßeinheit für den Vergleich des Energiegehalts von Primärenergieträgern. 1 Kilogramm SKE entspricht 29.308 Kilojoule.

**Syndizierte Kreditlinie.** Durch eine Mehrzahl von Banken gesondert zugesagte Kreditlinie, die einem Unternehmen die Mittelaufnahme in unterschiedlichen Beträgen, Laufzeiten und Währungen erlaubt. Sie dient meist der Liquiditätssicherung.

**Terminmarkt/Terminhandel.** Handelsgegenstand an den Terminmärkten sind Verträge über zukünftig zu erfüllende Geschäfte. Bestimmte Konditionen, z.B. der Preis oder Erfüllungszeitpunkt, werden bereits bei Abschluss des Vertrages festgelegt.

**Total Shareholder Return (TSR).** Der Total Shareholder Return ist eine Maßzahl dafür, wie sich der Wert eines Aktienengagements über einen Zeitraum hinweg entwickelt hat. Er berücksichtigt sowohl die in dem Anlagezeitraum angefallenen Dividenden als auch die eingetretenen Kursveränderungen.

**Umlaufintensität.** Anteil des kurzfristigen Vermögens am Gesamtvermögen.

**Upstream.** Bezeichnung für alle Tätigkeitsbereiche, die die Exploration und Förderung von Erdöl und Erdgas einschließlich der Aufbereitung zu qualitäts- und marktgerechten Rohstoffen umfassen.

**Value at Risk (VaR).** Risikomaß, das angibt, welchen Wert der Verlust aus einer bestimmten Risikoposition (z.B. eines Portfolios von Wertpapieren) mit einer gegebenen Wahrscheinlichkeit und in einem gegebenen Zeithorizont unter üblichen Marktbedingungen nicht überschreitet. Ein VaR von 1 Mio. € bei einer Haltedauer von einem Tag und einem Konfidenzniveau von 95% bedeutet, dass der mögliche Verlust aus der betrachteten Risikoposition von einem Tag auf den nächsten mit einer Wahrscheinlichkeit von 95% den Betrag von 1 Mio. € nicht übersteigt.

**Vermögensdeckungsgrad.** Verhältnis des langfristigen Kapitals (Eigenkapital und langfristiges Fremdkapital) zum langfristigen Vermögen.

**Verschuldungsfaktor.** Englisch: Leverage Factor. Kennzahl, die das Verhältnis der Nettoschulden zum EBITDA angibt.

**Verwässertes Ergebnis je Aktie.** Wenn ein Unternehmen im Zuge einer Kapitalerhöhung neue Aktien am Finanzmarkt platziert, verringert sich der prozentuale Anteil jeder Aktie am Unternehmen und – durch die erhöhte Aktienzahl – das Ergebnis je Aktie. Diese Werteinbuße wird als Verwässerung bezeichnet.

**Vollkonsolidierung.** Verfahren zur Einbeziehung von Tochterunternehmen in den Konzernabschluss, wenn das Mutterunternehmen diese beherrscht (durch Mehrheit der Stimmrechte oder anderen Beherrschungsgrund).

**Werthaltigkeitstest.** Englisch: Impairment Test. Verfahren zur Überprüfung des Wertes von Vermögensgegenständen, bei dem der Buchwert mit dem erzielbaren Betrag verglichen wird. Ziel ist, dass Aktiva nicht mit einem höheren als dem erzielbaren Betrag bilanziert werden. Eine Differenz ist als Wertminderung ergebniswirksam zu erfassen.

**Wirkungsgrad.** Verhältnis von abgegebener und aufgenommener Leistung bei der Energieumwandlung. Bei thermischen Kraftwerken gibt der Wirkungsgrad an, wie viel Prozent der im Brennstoff enthaltenen Wärmeenergie in Strom umgewandelt werden kann. Je höher der Wirkungsgrad ist, desto effizienter wird der Energiegehalt des Einsatzstoffes genutzt. Moderne Gaskraftwerke kommen auf Wirkungsgrade von bis zu 60%. Bei Stein- und Braunkohle werden 46% bzw. 43% erreicht.

# SCHLAGWORTVERZEICHNIS

## A

|                   |                              |
|-------------------|------------------------------|
| Abschreibungen    | 162, 172, 182, 183, 186, 189 |
| Aktie             | 46, 94, 109, 194, 207        |
| Aktionärsstruktur | 49                           |
| Anleihen          | 50, 101, 108, 109, 205, 216  |
| Aufsichtsrat      | 136, 140, 151, 233           |

## B

|                        |                    |
|------------------------|--------------------|
| Betriebliches Ergebnis | 87, 131            |
| Bilanz                 | 105, 107, 164, 186 |

## C

|                                  |                                |
|----------------------------------|--------------------------------|
| Cash Flow                        | 105, 165, 222                  |
| CO <sub>2</sub> -Emissionen      | 53, 66, 78, 112, 129, 154, 159 |
| CO <sub>2</sub> -Emissionshandel | 61, 68, 79                     |
| Corporate Responsibility         | 144, 154                       |

## D

|           |                        |
|-----------|------------------------|
| Dividende | 48, 108, 133, 134, 195 |
|-----------|------------------------|

## E

|                      |                                  |
|----------------------|----------------------------------|
| EBITDA               | 86, 87, 131, 241                 |
| Eigenkapital         | 106, 107, 164, 166, 194, 228     |
| Effizienzsteigerung  | 95, 99                           |
| Elektromobilität     | 66, 115, 155                     |
| Energieeffizienz     | 54, 154                          |
| Erneuerbare Energien | 53, 63, 67, 71, 75, 77, 114, 129 |
| EEG-Umlage           | 63, 67, 77                       |

## F

|                         |                        |
|-------------------------|------------------------|
| Finanzanlagen           | 96, 107, 164, 173, 191 |
| Finanzergebnis          | 93, 183                |
| Flüssige Mittel         | 103, 164, 174, 194     |
| Fremdkapital            | 101, 104, 231          |
| Forschung & Entwicklung | 112, 156, 187          |

## G

|                             |               |
|-----------------------------|---------------|
| Gewinn- und Verlustrechnung | 107, 162, 181 |
|-----------------------------|---------------|

## H

|               |                                 |
|---------------|---------------------------------|
| Hybridanleihe | 72, 94, 102, 110, 166, 178, 195 |
|---------------|---------------------------------|

## I

|               |                            |
|---------------|----------------------------|
| Investitionen | 54, 95, 121, 130, 133, 158 |
|---------------|----------------------------|

## K

|                         |                                |
|-------------------------|--------------------------------|
| Kapitalflussrechnung    | 104, 165, 222                  |
| Kapitalkosten           | 90, 231                        |
| Kernbrennstoffsteuer    | 47, 54, 66, 69, 121, 133       |
| Kernenergie             | 73, 76, 103, 121, 155, 203     |
| Klima- und Umweltschutz | 53, 55, 68, 112, 129, 154, 157 |
| Konzernstruktur         | 56, 69, 238                    |

## L

|                      |                           |
|----------------------|---------------------------|
| Laufzeitverlängerung | 38, 66, 69, 118, 121, 218 |
|----------------------|---------------------------|

## M

|             |                                      |
|-------------|--------------------------------------|
| Mitarbeiter | 49, 99, 112, 124, 133, 152, 157, 182 |
|-------------|--------------------------------------|

## N

|                            |                  |
|----------------------------|------------------|
| Nachhaltiges Nettoergebnis | 94, 131          |
| Nettoergebnis              | 91, 94, 207, 212 |

## R

|                  |                                  |
|------------------|----------------------------------|
| Rating           | 104, 110, 133, 178, 242          |
| Risikomanagement | 116, 167, 212                    |
| ROCE             | 90, 231                          |
| Rückstellungen   | 87, 103, 107, 164, 175, 199, 203 |
| RWE AG (Holding) | 70, 107, 240                     |

## S

|                          |                                 |
|--------------------------|---------------------------------|
| Sachanlagen              | 54, 95, 129, 133, 164, 172, 189 |
| Schulden                 | 102, 130, 164, 177, 217         |
| Segmentberichterstattung | 219                             |
| Strategie                | 52, 154, 231                    |

## U

|                  |                        |
|------------------|------------------------|
| Übernahmebericht | 109                    |
| Umsatzerlöse     | 84, 162, 181, 220, 228 |

## V

|                     |                                          |
|---------------------|------------------------------------------|
| Verbindlichkeiten   | 103, 107, 164, 176, 204, 216             |
| Verschuldungsfaktor | 104, 133, 178, 243                       |
| Vorräte             | 164, 174, 194                            |
| Vorstand            | 36, 42, 70, 109, 116, 140, 143, 236, 238 |

## W

|                |         |
|----------------|---------|
| Wertmanagement | 90, 231 |
|----------------|---------|

# IMPRESSUM

## RWE Aktiengesellschaft

Opernplatz 1  
45128 Essen

Telefon +49 201 12-00  
Telefax +49 201 12-15199  
E-Mail [contact@rwe.com](mailto:contact@rwe.com)

## Investor Relations:

Telefon +49 201 12-15025  
Telefax +49 201 12-15265  
E-Mail [invest@rwe.com](mailto:invest@rwe.com)

## Konzernkommunikation:

Telefon +49 201 12-15250  
Telefax +49 201 12-15094

Geschäftsberichte, Zwischenberichte und weitere  
Informationen über RWE erhalten Sie im Internet  
unter [www.rwe.com](http://www.rwe.com) oder über unsere Aktionärshotline:

Telefon 0180 1 451280 (Inland)  
Telefon +49 180 1 451280 (Ausland ohne USA)  
Telefon +11 49 180 1 451280 (USA)

Dieser Geschäftsbericht ist am 24. Februar 2011 veröffentlicht  
worden. Er liegt auch in englischer Sprache vor.

## Designkonzept und Gestaltung:

Peter Schmidt Group GmbH

## Satz, Lithographie und Produktion:

Kompass/Chiari Werbeagentur GmbH, Düsseldorf

## Fotos:

Claudia Kempf, Wuppertal  
Catrin Moritz, Essen  
Jan Eumann, Düsseldorf  
Bernd Arnold, Köln  
RWE-Archiv

## Lektorat:

Textpertise Heike Virchow, Gießen

## Druck:

D+L Printpartner GmbH, Bocholt

RWE ist Mitglied im DIRK –  
Deutscher Investor Relations Verband e.V.

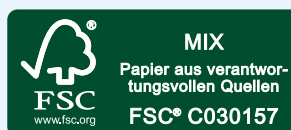

**Zukunftsbezogene Aussagen.** Dieser Geschäftsbericht enthält Aussagen, die sich auf die künftige Entwicklung des RWE-Konzerns und seiner Gesellschaften sowie wirtschaftliche und politische Entwicklung beziehen. Diese Aussagen stellen Einschätzungen dar. Wir haben sie auf Basis aller Informationen getroffen, die uns zum Zeitpunkt der Erstellung dieses Berichts zur Verfügung standen. Sollten die zugrunde gelegten Annahmen nicht eintreffen oder weitere Risiken eintreten, so können die tatsächlichen Ergebnisse von den zurzeit erwarteten Ergebnissen abweichen. Eine Gewähr können wir für diese Angaben daher nicht übernehmen.

## FÜNF-JAHRES-ÜBERSICHT (TEIL DES LAGEBERICHTS)

| Fünf-Jahres-Übersicht<br>RWE-Konzern                   |        | 2010   | 2009   | 2008   | 2007   | 2006   |
|--------------------------------------------------------|--------|--------|--------|--------|--------|--------|
| Außenumsatz                                            | Mio. € | 53.320 | 47.741 | 48.950 | 42.507 | 42.554 |
| <b>Ergebnis</b>                                        |        |        |        |        |        |        |
| EBITDA <sup>1</sup>                                    | Mio. € | 10.256 | 9.165  | 8.773  | 7.915  | 7.172  |
| Betriebliches Ergebnis                                 | Mio. € | 7.681  | 7.090  | 6.826  | 6.533  | 5.681  |
| Ergebnis fortgeführter Aktivitäten vor Steuern         | Mio. € | 4.978  | 5.598  | 4.866  | 5.246  | 3.537  |
| Nettoergebnis/Ergebnisanteile der Aktionäre der RWE AG | Mio. € | 3.308  | 3.571  | 2.558  | 2.667  | 3.847  |
| Ergebnis je Aktie                                      | €      | 6,20   | 6,70   | 4,75   | 4,74   | 6,84   |
| Nachhaltiges Nettoergebnis je Aktie                    | €      | 7,03   | 6,63   | 6,25   | 5,29   | 4,38   |
| Eigenkapitalrentabilität                               | %      | 23,1   | 28,5   | 20,7   | 20,1   | 30,3   |
| Umsatzrentabilität                                     | %      | 12,3   | 14,8   | 12,3   | 16,0   | 15,2   |
| <b>Wertmanagement<sup>2</sup></b>                      |        |        |        |        |        |        |
| Return on Capital Employed (ROCE)                      | %      | 14,4   | 16,3   | 17,2   | 16,5   | 14,2   |
| Wertbeitrag                                            | Mio. € | 2.876  | 3.177  | 3.453  | 2.970  | 2.074  |
| Betriebliches Vermögen (Capital Employed)              | Mio. € | 53.386 | 43.597 | 39.809 | 39.710 | 40.206 |
| <b>Cash Flow/Investitionen/Abschreibungen</b>          |        |        |        |        |        |        |
| Cash Flow aus laufender Geschäftstätigkeit             | Mio. € | 5.500  | 5.299  | 8.853  | 6.085  | 6.783  |
| Free Cash Flow                                         | Mio. € | –879   | –614   | 4.399  | 2.020  | 2.289  |
| Free Cash Flow je Aktie                                | €      | –1,65  | –1,15  | 8,17   | 3,59   | 4,07   |
| Investitionen einschließlich Finanzanlagen             | Mio. € | 6.643  | 15.637 | 5.693  | 4.227  | 4.728  |
| Davon: in Sachanlagen und immaterielle Vermögenswerte  | Mio. € | 6.379  | 5.913  | 4.454  | 4.065  | 4.494  |
| Abschreibungen und Anlagenabgänge                      | Mio. € | 3.410  | 2.553  | 2.416  | 2.629  | 3.164  |
| Anlagenabnutzungsgrad                                  | %      | 61,8   | 64,0   | 69,4   | 70,9   | 66,0   |
| <b>Vermögens-/Kapitalstruktur</b>                      |        |        |        |        |        |        |
| Langfristiges Vermögen                                 | Mio. € | 60.465 | 56.563 | 41.763 | 41.360 | 51.999 |
| Kurzfristiges Vermögen                                 | Mio. € | 32.612 | 36.875 | 51.667 | 42.060 | 41.456 |
| Bilanzielles Eigenkapital                              | Mio. € | 17.417 | 13.717 | 13.140 | 14.659 | 14.111 |
| Langfristige Schulden                                  | Mio. € | 45.162 | 45.633 | 36.793 | 36.796 | 52.402 |
| Kurzfristige Schulden                                  | Mio. € | 30.498 | 34.088 | 43.497 | 31.965 | 26.942 |
| Bilanzsumme                                            | Mio. € | 93.077 | 93.438 | 93.430 | 83.420 | 93.455 |
| Anlagenintensität                                      | %      | 53,4   | 49,4   | 35,5   | 38,4   | 44,0   |
| Umlaufintensität                                       | %      | 35,0   | 39,5   | 55,3   | 50,4   | 44,4   |
| Vermögensdeckungsgrad                                  | %      | 103,5  | 104,9  | 119,6  | 124,4  | 127,9  |
| Eigenkapitalquote                                      | %      | 18,7   | 14,7   | 14,1   | 17,6   | 15,1   |

| Fünf-Jahres-Übersicht<br>RWE-Konzern               |             | 2010   | 2009   | 2008   | 2007   | 2006   |
|----------------------------------------------------|-------------|--------|--------|--------|--------|--------|
| Nettofinanzschulden                                | Mio. €      | 11.904 | 10.382 | –650   | –2.064 | –4.720 |
| Nettoschulden des RWE-Konzerns                     | Mio. €      | 28.964 | 25.787 | 18.659 | 16.514 | 17.827 |
| Verschuldungsfaktor                                |             | 2,8    | 2,8    | 2,1    | 2,1    | –      |
| <b>Mitarbeiter</b>                                 |             |        |        |        |        |        |
| Mitarbeiter zum Jahresende <sup>3</sup>            |             | 70.856 | 70.726 | 65.908 | 63.439 | 61.725 |
| <b>Forschung &amp; Entwicklung</b>                 |             |        |        |        |        |        |
| F&E-Aufwendungen                                   | Mio. €      | 149    | 110    | 105    | 74     | 73     |
| F&E-Mitarbeiter                                    |             | 360    | 350    | 330    | 270    | 273    |
| <b>Emissionsbilanz</b>                             |             |        |        |        |        |        |
| CO <sub>2</sub> -Ausstoß                           | Mio. Tonnen | 165    | 149    | 172    | 187    | 178    |
| Kostenlos zugeteilte CO <sub>2</sub> -Zertifikate  | Mio. Tonnen | 115    | 105    | 105    | 170    | 167    |
| Unterausstattung mit CO <sub>2</sub> -Zertifikaten | Mio. Tonnen | 50     | 44     | 67     | 17     | 11     |
| Spezifische CO <sub>2</sub> -Emissionen            | Tonnen/MWh  | 0,732  | 0,796  | 0,768  | 0,866  | 0,797  |

| Fünf-Jahres-Übersicht<br>RWE Aktiengesellschaft |        | 2010               | 2009      | 2008      | 2007      | 2006      |
|-------------------------------------------------|--------|--------------------|-----------|-----------|-----------|-----------|
| <b>Dividende/Ausschüttung</b>                   |        |                    |           |           |           |           |
| Ausschüttung                                    | Mio. € | 1.867 <sup>4</sup> | 1.867     | 2.401     | 1.689     | 1.968     |
| Dividende je Aktie                              | €      | 3,50 <sup>4</sup>  | 3,50      | 4,50      | 3,15      | 3,50      |
| <b>Börsenkennzahlen</b>                         |        |                    |           |           |           |           |
| Börsenkapitalisierung zum Jahresende            | Mrd. € | 28,0               | 38,0      | 35,4      | 53,5      | 46,5      |
| <b>Langfristiges Kredit-Rating</b>              |        |                    |           |           |           |           |
| Moody's                                         |        | A2                 | A2        | A1        | A1        | A1        |
| (Ausblick)                                      |        | (negativ)          | (negativ) | (negativ) | (stabil)  | (stabil)  |
| Standard & Poor's                               |        | A                  | A         | A         | A+        | A+        |
| (Ausblick)                                      |        | (negativ)          | (negativ) | (stabil)  | (negativ) | (negativ) |

1 Seit 2008 ist im EBITDA auch das betriebliche Beteiligungsergebnis enthalten.

2 Werte ab 2006 nach neuem Wertmanagement-Konzept; siehe Geschäftsbericht 2007, Seite 208

3 Umgerechnet in Vollzeitstellen

4 Dividendenvorschlag für das Geschäftsjahr 2010 der RWE AG, vorbehaltlich der Zustimmung durch die Hauptversammlung am 20. April 2011

# INHALT

|                                                                                                                                                  |     |                                                        |     |
|--------------------------------------------------------------------------------------------------------------------------------------------------|-----|--------------------------------------------------------|-----|
| Klartext reden.                                                                                                                                  | 1   | 3.0 Versicherung der gesetzlichen Vertreter            | 160 |
| <b>An unsere Investoren</b>                                                                                                                      |     | 4.0 Konzernabschluss                                   | 161 |
| Brief des Vorstandsvorsitzenden                                                                                                                  | 36  | 4.1 Gewinn- und Verlustrechnung                        | 162 |
| Der RWE-Vorstand                                                                                                                                 | 42  | 4.2 Aufstellung der erfassten Erträge und Aufwendungen | 163 |
| 2010 in Kürze                                                                                                                                    | 44  | 4.3 Bilanz                                             | 164 |
| RWE am Kapitalmarkt                                                                                                                              | 46  | 4.4 Kapitalflussrechnung                               | 165 |
| 1.0 Lagebericht                                                                                                                                  | 51  | 4.5 Veränderung des Eigenkapitals                      | 166 |
| 1.1 Strategie und Struktur                                                                                                                       | 52  | 4.6 Anhang                                             | 167 |
| 1.2 Wirtschaftliche Rahmenbedingungen                                                                                                            | 58  | 4.7 Bestätigungsvermerk des Konzernabschlussprüfers    | 227 |
| 1.3 Politische Rahmenbedingungen                                                                                                                 | 66  | <b>Weitere Informationen</b>                           |     |
| 1.4 Wesentliche Ereignisse                                                                                                                       | 69  | Wesentliche Beteiligungen                              | 228 |
| 1.5 Anmerkungen zur Berichtsweise                                                                                                                | 74  | Wertmanagement-Konzept des RWE-Konzerns                | 231 |
| 1.6 Geschäftsentwicklung                                                                                                                         | 76  | Organe                                                 | 233 |
| 1.7 Finanz- und Vermögenslage                                                                                                                    | 101 | Organigramm des RWE-Konzerns                           | 238 |
| 1.8 Erläuterungen zum Jahresabschluss der RWE AG (Holding)                                                                                       | 107 | Organigramm der RWE AG                                 | 240 |
| 1.9 Innovation                                                                                                                                   | 112 | Glossar                                                | 241 |
| 1.10 Entwicklung der Risiken und Chancen inkl. Bericht zum internen Kontroll- und Risikomanagementsystem inkl. Erklärung zur Unternehmensführung | 116 | Schlagwortverzeichnis                                  | 244 |
| 1.11 Ausblick 2011                                                                                                                               | 127 | Impressum                                              | 245 |
| 2.0 Unsere Verantwortung                                                                                                                         | 135 | Fünf-Jahres-Übersicht (Teil des Lageberichts)          |     |
| 2.1 Bericht des Aufsichtsrats                                                                                                                    | 136 | Finanzkalender 2011/2012                               |     |
| 2.2 Corporate Governance                                                                                                                         | 140 |                                                        |     |
| 2.3 Vergütungsbericht (Teil des Lageberichts)                                                                                                    | 143 |                                                        |     |
| 2.4 Mitarbeiter                                                                                                                                  | 152 |                                                        |     |
| 2.5 Nachhaltigkeit                                                                                                                               | 154 |                                                        |     |

# FINANZKALENDER 2011/2012

|                   |                                                    |
|-------------------|----------------------------------------------------|
| 20. April 2011    | Hauptversammlung                                   |
| 21. April 2011    | Dividendenzahlung                                  |
| 12. Mai 2011      | Zwischenbericht über das erste Quartal 2011        |
| 11. August 2011   | Zwischenbericht über das erste Halbjahr 2011       |
| 10. November 2011 | Zwischenbericht über die ersten drei Quartale 2011 |
| 6. März 2012      | Bericht über das Geschäftsjahr 2011                |
| 19. April 2012    | Hauptversammlung                                   |
| 20. April 2012    | Dividendenzahlung                                  |
| 10. Mai 2012      | Zwischenbericht über das erste Quartal 2012        |
| 14. August 2012   | Zwischenbericht über das erste Halbjahr 2012       |
| 14. November 2012 | Zwischenbericht über die ersten drei Quartale 2012 |

Die Hauptversammlung und alle Veranstaltungen zur Veröffentlichung von Finanzberichten werden live im Internet übertragen. Aufzeichnungen der Internetübertragungen sind mindestens zwölf Monate abrufbar.

**RWE Aktiengesellschaft**

Opernplatz 1  
45128 Essen

T +49 201 12-00  
F +49 201 12-15199  
I [www.rwe.com](http://www.rwe.com)
