# Supplementary material
Source: publisher site journal article supplement (https://www.degruyterbrill.com/publication/isbn/9783110432879/downloadAsset/9783110432879_Elektronischer_Anhang_2.zip)
Supplement: Supplementary file 84 [file RWE Unsere Verantwortung 2010.pdf › Korpustexte/Korpustexte pdf/RWE/RWE Unsere Verantwortung 2010.pdf]

**VORWEG** GEHEN  
HEISST HERAUSFORDERUNGEN  
ANNEHMEN.

## Kennzahlen 2010 auf einen Blick.

| Bereich                               | Leistungsindikator                                                                                |                          | 2010             | 2009             | 2008   | 2007   |
|---------------------------------------|---------------------------------------------------------------------------------------------------|--------------------------|------------------|------------------|--------|--------|
| <b>Ökonomie</b>                       | Außenabsatz Strom                                                                                 | Mrd. kWh                 | 311,2            | 282,8            | 317,1  | 306,4  |
|                                       | Außenabsatz Gas                                                                                   | Mrd. kWh                 | 395,4            | 332,0            | 327,8  | 335,0  |
|                                       | Kunden Strom                                                                                      | Mio.                     | 16,2             | 16,5             | 14,4   | 14,6   |
|                                       | Kunden Gas                                                                                        | Mio.                     | 7,9              | 8,0              | 6,2    | 6,3    |
|                                       | Außenumsatz                                                                                       | Mio. €                   | 53.320           | 47.741           | 48.950 | 42.507 |
|                                       | Umsatzanteil des RWE-Konzerns in Ländern mit hohem oder sehr hohem Korruptionsrisiko <sup>1</sup> | %                        | 12,0             | 12,7             | 12,9   | 11,8   |
|                                       | Nettoergebnis                                                                                     | Mio. €                   | 3.308            | 3.571            | 2.558  | 2.667  |
|                                       | Wertbeitrag                                                                                       | Mio. €                   | 2.876            | 3.177            | 3.453  | 2.970  |
| <b>Umwelt</b>                         | Investitionen                                                                                     | Mio. €                   | 6.643            | 15.637           | 5.693  | 4.227  |
|                                       | Kraftwerkskapazitäten                                                                             | MW                       | 52.214           | 49.582           | 45.196 | 44.533 |
|                                       | NO <sub>x</sub> -Emissionen                                                                       | g/kWh                    | 0,58             | 0,67             | 0,67   | 0,76   |
|                                       | SO <sub>2</sub> -Emissionen                                                                       | g/kWh                    | 0,29             | 0,34             | 0,39   | 0,57   |
|                                       | Staubemissionen                                                                                   | g/kWh                    | 0,019            | 0,024            | 0,028  | 0,034  |
|                                       | Primärenergieverbrauch                                                                            | Mrd. kWh                 | 403,0            | 368,2            | 396,0  | 411,7  |
|                                       | Wasserverbrauch <sup>2</sup>                                                                      | m <sup>3</sup> /MWh      | 1,41             | 1,70             | 1,49   | 1,69   |
|                                       | Spezifische CO <sub>2</sub> -Emissionen                                                           | t/MWh                    | 0,732            | 0,796            | 0,768  | 0,866  |
|                                       | CO <sub>2</sub> -Emissionen Scope 1 <sup>3</sup>                                                  | Mio. t                   | 167,1            | 151,3            | 174,5  | 189,7  |
|                                       | CO <sub>2</sub> -Emissionen Scope 2 <sup>4</sup>                                                  | Mio. t                   | 3,1              | 3,5              | 3,8    | 3,6    |
|                                       | CO <sub>2</sub> -Emissionen Scope 3 <sup>5</sup>                                                  | Mio. t                   | 135,7            | 128,1            | 127,0  | 127,8  |
|                                       | Anteil der erneuerbaren Energien an der Eigenerzeugung                                            | %                        | 4,0 <sup>6</sup> | 3,5              | 2,4    | 2,4    |
|                                       | <b>Gesellschaft</b>                                                                               | Mitarbeiter <sup>7</sup> |                  | 70.856           | 70.726 | 65.908 |
| Anteil Frauen im Unternehmen          |                                                                                                   | %                        | 26,2             | 26,1             | 25,6   | 25,2   |
| Anteil Frauen an den Führungskräften  |                                                                                                   | %                        | 10,8             | 9,0 <sup>8</sup> | 8,9    | 8,9    |
| Fluktuationsquote                     |                                                                                                   | %                        | 8,3              | 8,7              | 8,8    | 9,1    |
| Gesundheitsquote                      |                                                                                                   | %                        | 95,6             | 95,4             | 95,4   | 95,6   |
| Arbeits- und Dienstwegeunfälle        |                                                                                                   | LTI <sup>9</sup>         | 3,5              | 4,3              | 5,3    | 6,1    |
| Tödliche Arbeitsunfälle <sup>10</sup> |                                                                                                   |                          | 2                | 5                | 12     | 9      |

1 Länder, die im Korruptionswahrnehmungsindex der Organisation Transparency International auf einer Skala von null bis zehn mit kleiner sechs eingestuft werden, wobei zehn für das geringste Korruptionsrisiko steht

2 Wasserentnahme der Kraftwerke abzügl. Wasserrückführung in Flüsse und andere Oberflächengewässer; ohne Kraftwerke mit Meerwasserkühlung

3 Scope 1: direkte CO<sub>2</sub>-Emissionen aus eigenen Quellen (Stromerzeugung, Öl- und Gasförderung, Gastransport)

4 Scope 2: indirekte CO<sub>2</sub>-Emissionen aus der Erzeugung konzernextern bezogenen Stroms, der bei der Durchleitung durchs RWE-Netz verbraucht wird (Netzverluste)

5 Scope 3: indirekte CO<sub>2</sub>-Emissionen, die nicht unter Scope 1 und Scope 2 fallen: Sie stammen aus der Erzeugung konzernextern bezogenen Stroms (inkl. Netzverluste im Stromnetz Dritter), der Förderung und dem Transport der von uns eingesetzten Brennstoffe und dem Verbrauch von Gas, das wir an Kunden verkauft haben.

6 Stromerzeugung aus Wind (3,1 TWh), Wasser (3,5 TWh) und Biomasse (2,3 TWh)

7 Umgerechnet in Vollzeitstellen

8 Ohne Essent

9 Lost Time Incident Frequency (Anzahl der Unfälle mit mind. einem Ausfalltag je 1 Mio. geleistete Arbeitsstunden); ohne Fremdfirmenmitarbeiter

10 Inkl. Fremdfirmenmitarbeiter

# Inhalt

|                                                           |           |                                                                     |           |
|-----------------------------------------------------------|-----------|---------------------------------------------------------------------|-----------|
| Wesentliche Ereignisse 2010                               | <b>04</b> | Zum Bericht                                                         | <b>60</b> |
| Vorwort                                                   | <b>06</b> | Bescheinigung über eine unabhängige betriebswirtschaftliche Prüfung | <b>61</b> |
| <b>1.0 Unternehmen</b>                                    | <b>08</b> | Index nach GRI                                                      | <b>64</b> |
| 1.1 Konzernportrait                                       | <b>08</b> | Fortschrittsmitteilung zum UN Global Compact 2010                   | <b>66</b> |
| 1.2 Herausforderungen entlang unserer Wertschöpfungskette | <b>10</b> | Ansprechpartner und Impressum                                       | <b>67</b> |
| <b>2.0 Nachhaltige Unternehmensführung</b>                | <b>12</b> |                                                                     |           |
| 2.1 CR-Strategie                                          | <b>12</b> |                                                                     |           |
| 2.2 CR-Programm                                           | <b>18</b> |                                                                     |           |
| <b>3.0 CR-Handlungsfelder</b>                             | <b>20</b> |                                                                     |           |
| 3.1 Klimaschutz                                           | <b>20</b> |                                                                     |           |
| 3.2 Energieeffizienz                                      | <b>28</b> |                                                                     |           |
| 3.3 Innovationen                                          | <b>32</b> |                                                                     |           |
| 3.4 Versorgungssicherheit                                 | <b>36</b> |                                                                     |           |
| 3.5 Lieferkette                                           | <b>40</b> |                                                                     |           |
| 3.6 Preisgestaltung und Markt                             | <b>44</b> |                                                                     |           |
| 3.7 Demografischer Wandel                                 | <b>46</b> |                                                                     |           |
| 3.8 Arbeitssicherheit und Gesundheitsmanagement           | <b>50</b> |                                                                     |           |
| 3.9 Umweltschutz                                          | <b>52</b> |                                                                     |           |
| 3.10 Gesellschaftliche Verantwortung                      | <b>56</b> |                                                                     |           |

Der vorliegende Bericht ist auch als Online-Bericht mit vertiefenden Informationen unter [www.rwe.com/verantwortung](http://www.rwe.com/verantwortung) verfügbar. Der Online-Bericht bietet Ihnen alle Kennzahlen dieses Berichts in einem interaktiven Datentool sowie zum Download als Excel-Datei.

„RWE – wir arbeiten an der  
Energieversorgung der Zukunft,  
und die fängt auch in den Köpfen  
unserer Auszubildenden an.“

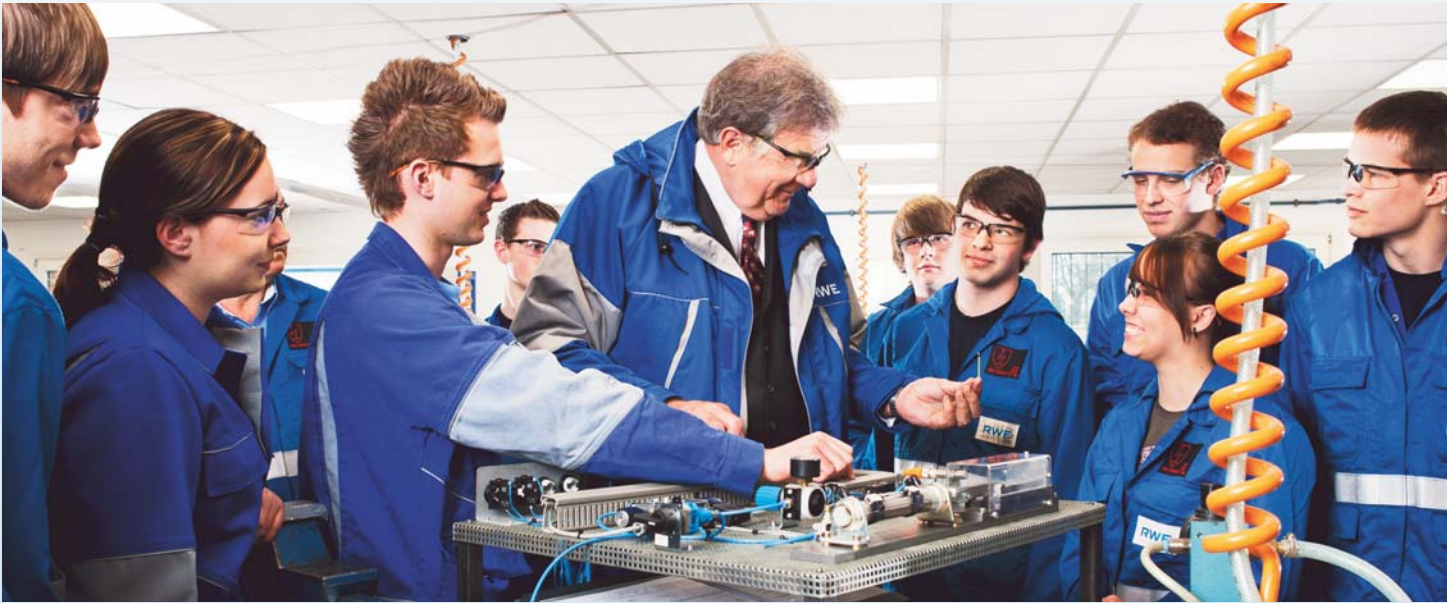

Dr. Jürgen Großmann, Vorstandsvorsitzender der RWE AG im Gespräch mit Auszubildenden im Müllheizkraftwerk Essen-Karnap

## Wesentliche Ereignisse 2010

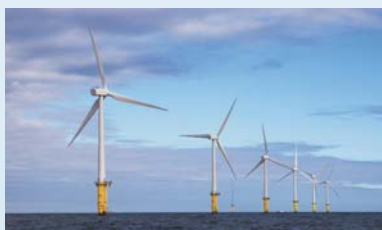

**JANUAR**

### **Bauentscheidung für ersten deutschen RWE-Offshore-Windpark**

Die RWE AG trifft die Investitionsentscheidung zum Bau ihres ersten deutschen Offshore-Windparks Nordsee Ost nordwestlich von Helgoland. Mit einer Kapazität von 295 MW soll dieser 2013 ans Netz gehen. Im Rahmen einer Ausschreibung erteilt die britische Regierung RWE Innogy die Genehmigung zur Entwicklung der Offshore-Windprojekte Atlantic Array und Dogger Bank.

**MÄRZ**

### **RWE Innogy startet Bauarbeiten für Pelletwerk in Georgia**

Im US-Bundesstaat Georgia errichtet RWE Innogy eine Großanlage zur Pelletierung von Holz aus nachhaltiger Forstwirtschaft mit einer jährlichen Produktionskapazität von 750.000 Tonnen. Mit diesem Schritt baut RWE seine Basis zur Verfeuerung von Biomasse in einem stetig wachsenden Markt aus.

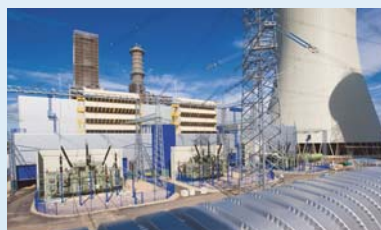

**APRIL**

### **RWE richtet Vorstandsvergütung auf Nachhaltigkeit aus**

Die Hauptversammlung der RWE AG beschließt 25 % der variablen Vorstandsvergütung an die mittelfristige Zielerreichung in den Bereichen Nachhaltigkeit, Mitarbeiterzufriedenheit und Wertbeitrag zu koppeln.

### **Hochmodernes Gaskraftwerk in Lingen startet Stromproduktion**

Das Gas- und Dampfturbinenkraftwerk mit einer Leistung von 876 MW erreicht einen Wirkungsgrad von knapp 60 %. Die Investitionssumme betrug rund 500 Mio. €.

**JUNI**

### **Joint Venture für Windpark**

Gemeinsam mit den Stadtwerken München und Siemens errichtet RWE Innogy bis 2014 vor der Küste von Nordwales den Offshore-Windpark Gwynt y Môr mit einer Leistung von 576 MW.

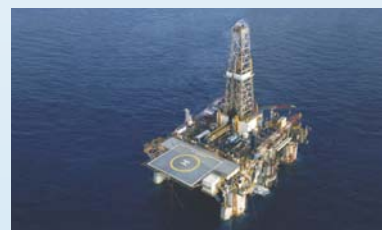

**JULI**

### **Größte Einzelinvestition in der Geschichte der RWE Dea**

RWE Dea will in den kommenden zwei Jahrzehnten 3,6 Mrd. US \$ in die Entwicklung von Gasfeldern in den ägyptischen Konzessionen North Alexandria und West Mediterranean Deep Water einsetzen. RWE schließt mit Partnerunternehmen und den zuständigen ägyptischen Behörden entsprechende Verträge. Die Förderung soll bis Ende 2014 aufgenommen werden. Das geförderte Gas wird für den heimischen Markt bestimmt sein und die ägyptische Energieversorgung sichern.

**AUGUST**

### **Biomasse-Heizkraftwerk und Pelletwerk fertiggestellt**

Im sauerländischen Wittgenstein nehmen RWE Innogy und German Pellets ein Biomasse-Heizkraftwerk (BMHKW) und ein benachbartes Pelletwerk mit einer Produktionskapazität von jährlich rund 120.000 Tonnen in Betrieb. Das BMHKW liefert die zur Pelletproduktion benötigte Wärme.

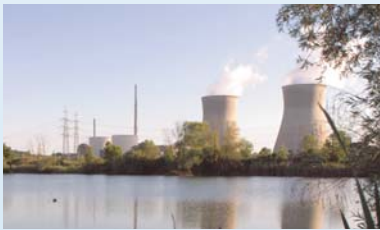

#### SEPTEMBER

### Längere Laufzeiten für deutsche Kernkraftwerke und Kernbrennstoffsteuer

Der Deutsche Bundestag beschließt eine Laufzeitverlängerung für die deutschen Kernkraftwerke um durchschnittlich zwölf Jahre. Zusätzlich wird eine neue Steuer für Brennelemente beschlossen. Die Kraftwerksbetreiber verpflichten sich zu Zahlungen in einen Fonds für erneuerbare Energien.

### RWE wieder im DJSI

Zum zwölften Mal in Folge hat sich RWE für den Dow Jones Sustainability Index (DJSI) qualifiziert und wurde im Index „DJSI World“ sowie im europäischen Index „DJSI Stoxx“ aufgenommen.

### Auszeichnung für Companius

Beim Wettbewerb „365 Orte im Land der Ideen“ erhält RWE für seine Initiative zur Förderung des gesellschaftlichen Engagements der Mitarbeiter „RWE Companius“ die Auszeichnung „Ausgewählter Ort 2010“.

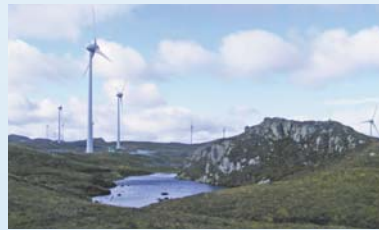

#### OKTOBER

### Baubeginn der tschechischen Hochdruck-Gaspipeline Gazelle

Unser unabhängiger tschechischer Gasfernleitungsnetzbetreiber NET4GAS beginnt mit dem Bau des ersten Projektabschnitts. Die 169 km lange Pipeline soll die Versorgungssicherheit und den Wettbewerb im tschechischen Gasmarkt fördern.

#### NOVEMBER

### Erstes Green-GECCO-Projekt

Das von RWE Innogy und 26 Stadtwerken gegründete Gemeinschaftsunternehmen Green GECCO übernimmt den schottischen 20-MW-Windpark An Suidhe als erstes Projekt.

### Standortentscheidung für Druckluftspeicher gefallen

RWE Power wählt Staßfurt als möglichen Standort für den Bau einer Demonstrationsanlage des „Adiabaten Druckluftspeichers für die Elektrizitätsversorgung“ (kurz: „Adele“).

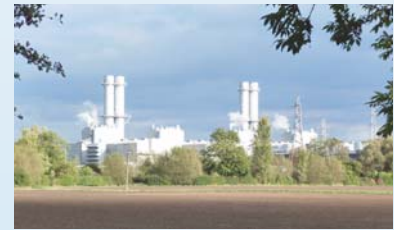

#### NOVEMBER

### Britisches Gaskraftwerk in Betrieb genommen

Das Gas- und Dampfturbinenkraftwerk Staythorpe ist erstmals mit allen vier Blöcken am Netz. Die 1.650-MW-Anlage versorgt knapp 2 Mio. Haushalte mit Strom. Das Investitionsvolumen beträgt 800 Mio. €.

#### DEZEMBER

### Vertrag zur Veräußerung von Thyssengas unterzeichnet

Käufer des Unternehmens, in dem das deutsche Gasfernleitungsnetz von RWE zusammengefasst ist, sind von Macquarie verwaltete Infrastrukturfonds. Thyssengas transportiert jährlich fast 10 Mrd. m<sup>3</sup> Erdgas durch Leitungen mit einer Gesamtlänge von 4.100 km. RWE hatte sich gegenüber der EU-Kommission zum Verkauf der Gesellschaft verpflichtet.

## Vorwort

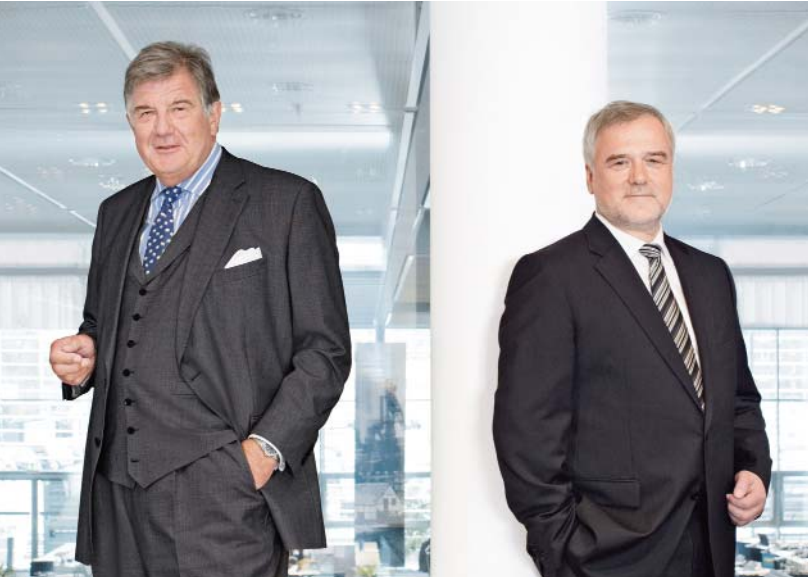

### Sehr geehrte Leserinnen und Leser,

das schwere Erdbeben und der darauf folgende Tsunami haben großes Leid über Japan gebracht und einen schweren nuklearen Unfall im Kernkraftwerk Fukushima verursacht. Ereignisse, mit denen niemand gerechnet hatte, sind eingetreten. Dies hat weltweit einen Diskussionsprozess ausgelöst. Besonders intensiv wird die Debatte in Deutschland geführt. Wie sicher sind unsere Kernkraftwerke? Kann es auch hierzulande zu einem schweren Reaktorunfall kommen? Viele Menschen sind verunsichert. Weite Teile der deutschen Gesellschaft fordern daher einen schnellen Ausstieg aus der Nutzung der Kernenergie und einen nochmals verstärkten Ausbau der erneuerbaren Energien.

Was bedeutet das für RWE? RWE betreibt derzeit in Deutschland Kernkraftwerke an drei Standorten und ist in Großbritannien an der Entwicklung von Kernkraftwerksprojekten beteiligt. Für uns hat der sichere Betrieb unserer kerntechnischen Anlagen höchste

Priorität – immer und überall. Er unterliegt zudem einem engmaschigen Regel- und Kontrollsystem. Im Zentrum stehen ein hoher Sicherheitsstandard und eine ausgeprägte Sicherheitskultur. Nach sorgfältiger Analyse der Ereignisse in Japan werden wir überprüfen, ob wir unsere ohnehin sehr hohen Sicherheitsreserven noch weiter erhöhen können. Sicherheitstechnisch halten wir das sofortige Abschalten unserer Kernkraftwerke nicht für erforderlich. Welchen Anteil die Kernenergie künftig in unserem Erzeugungsportfolio haben wird, hängt von sicherheitstechnischen Anforderungen sowie vom Ausgang der gesellschaftspolitischen Diskussion um die Zukunft der Kernenergie ab.

Eines ist klar: Die Aufgabe, unseren Erzeugungsmix langfristig umzustellen, um unsere Klimaschutzziele zu erreichen, wird dadurch nicht leichter. Der Start ins Zeitalter der regenerativen Energien geht nicht von heute auf morgen. Man kann in einem Industrieland nicht einfach auf Kernenergie und auch nicht auf Kohle verzichten. Denn Strom muss nicht nur klimafreundlich produziert werden, sondern auch zuverlässig und preisgünstig zur Verfügung stehen. Wir brauchen daher die Kernenergie als nahezu CO<sub>2</sub>-freie Brückentechnologie während des Umbaus der Stromversorgung hin zu den erneuerbaren Energien.

Die Gestaltung der zukünftigen Energieversorgung ist eine große Herausforderung, die wir annehmen: Bis 2050 soll die Stromversorgung in Europa CO<sub>2</sub>-neutral sein. Der Weg dahin ist allerdings noch lang. In der Welt von 2020 etwa werden wir nach wie vor auf neue und moderne konventionelle Kraftwerke angewiesen sein. Deshalb haben wir im Jahr 2010 in Lingen und Staythorpe zwei neue Gaskraftwerke ans Netz gebracht. Unsere neuen Kohlekraftwerke in Neurath, Hamm und Eemshaven werden bald folgen. Sie alle emittieren im Vergleich zu alten Anlagen deutlich weniger CO<sub>2</sub>. Parallel bauen wir unsere



Erzeugung aus erneuerbaren Energien massiv aus: Seit 2008 haben wir Milliarden in Projekte zur regenerativen Stromerzeugung investiert. Das soll auch in den kommenden Jahren so bleiben.

Ob neues Kohlekraftwerk oder Windrad, ob Biomasseanlage oder Netzerweiterung – die Menschen wollen wissen, wie sich unsere Anlagen auf ihre eigene Lebenssituation auswirken. Und sie wollen mitgestalten, was in ihrem Umfeld passiert. Wir führen deshalb Gespräche an den Standorten und arbeiten gemeinsam an Lösungen. Ob in Biblis, im rheinischen Braunkohlenrevier, im niederländischen Eemshaven oder auch im britischen Pembroke: der Dialog mit der Gesellschaft über unser Geschäft vor Ort, aber auch mit Nichtregierungsorganisationen – er ist immer mehr zu einer zentralen Aufgabe für unser Unternehmen geworden. Vor dem Hintergrund der Ereignisse in Japan hat er zusätzlich an Bedeutung gewonnen.

Verantwortungsvolles Handeln erwarten unsere Stakeholder von uns dabei auch jenseits der Unternehmensgrenzen. Wir müssen und wir wollen deshalb unseren Einfluss auch bei Lieferanten und Dienstleistern geltend machen, damit Menschenrechte beachtet werden und die Umwelt geschont wird. Denn: Steinkohle, Uran und Biomasse beziehen wir in nennenswerten Mengen aus Regionen, in denen Umweltschutz und Arbeitnehmerrechte keinen vergleichbar hohen Stellenwert haben. Hier gilt es, heute und auch in Zukunft genau hinzuschauen. Wir haben uns

daher bereits Anfang 2004 dem UN Global Compact verpflichtet. Seine Prinzipien zu Sozial- und Umweltstandards dienen uns dafür als ein wichtiger Kompass.

Wer Verantwortung gegenüber seinem Umfeld übernimmt, der muss auch innerhalb des eigenen Unternehmens seinen Prinzipien folgen: Im vergangenen September ist die RWE-konzernweite Sozialcharta in Kraft getreten. In ihr steht niedergeschrieben, was bei RWE langjährig gelebte Praxis ist: angemessene Entlohnung, Gesundheitsschutz und Mitbestimmung für all unsere Beschäftigten. Die Stärkung der Arbeitnehmerrechte geschieht dabei zugleich aus eigenem Interesse. Denn die Mitarbeiterbindung wird angesichts des demografischen Wandels in allen unseren europäischen Märkten immer wichtiger. Sie garantiert, dass unser Unternehmen auch dann weiter erfolgreich ist, wenn der Nachwuchs knapp wird.

Der demografische Wandel ist eines von zehn Handlungsfeldern, in denen wir nachhaltige Lösungen anstreben. Für jedes dieser Felder haben wir uns ein verbindliches und messbares Ziel gesetzt – mehr dazu in diesem Bericht. Ein Teil des variablen Anteils der Vorstandsvergütung hängt davon ab, wie nachhaltig sich RWE bei Themen wie Klimaschutz, Innovation, Arbeitssicherheit oder eben auch demografischer Wandel entwickelt. Diese Themen sind auch ein Ergebnis des Austauschs mit unseren Stakeholdern. Und diesen Dialog möchten wir fortführen. Auch mit Ihnen. Nehmen Sie Kontakt zu uns auf: [verantwortung@rwe.com](mailto:verantwortung@rwe.com).

Essen, 31. März 2011



Dr. Jürgen Großmann  
Vorsitzender des Vorstands



Alwin Fitting  
Im Vorstand für Personal und  
Corporate Responsibility verantwortlich

## 1.1 Konzernportrait

**RWE zählt zu den fünf führenden Strom- und Gasversorgern in Europa. Unsere Aktivitäten umfassen Erzeugung, Handel, Transport und Vertrieb von Strom und Gas sowie die Förderung von Braunkohle, Erdöl und Erdgas. Über 70.000 Mitarbeiter versorgen rund 16 Mio. Kunden mit Strom und nahezu 8 Mio. Kunden mit Gas. Im Geschäftsjahr 2010 erwirtschafteten wir einen Umsatz von über 53 Mrd. €.**

Als integrierter Energieversorger sehen wir es als unsere Aufgabe an, eine sichere, preisgünstige, effiziente, verbraucherfreundliche und zugleich umweltverträgliche Versorgung mit Strom, Gas und Wärme zu gewährleisten. Die Senkung des Kohlendioxid-Ausstoßes ist ein Eckpfeiler unserer Strategie und prägt die Zukunft unseres Unternehmens. Zum Ende des Geschäftsjahres 2010 verfügte der RWE-Konzern über eine Kraftwerkskapazität von rund 52.200 MW. Mit 50 % stellt Kohle den größten Anteil an der Gesamtleistung, gefolgt von Gas mit 22 %, Kernenergie mit 12 % und den erneuerbaren Energien mit 6 %. Wir investieren jedes Jahr Milliardenbeträge, um unser Erzeugungsportfolio effizienter und klimafreundlicher auszurichten. Bis 2014 sollen alle unsere neuen Gas- und Kohlenkraftwerke mit einer Gesamtkapazität von über 12.400 MW ans Netz gegangen sein. Auf Basis erneuerbarer Energien wollen wir bis dahin 4.500 MW in Bau oder Betrieb haben. Im Jahr 2025 soll 75 % unserer Stromerzeugungskapazität CO<sub>2</sub>-frei oder CO<sub>2</sub>-arm sein und größtenteils auf erneuerbaren Energien und Gaskraftwerken basieren.

Unser Geschäftsmodell ist langfristig ausgerichtet. Wenn wir in Kraftwerke, erneuerbare Energien, Netze und Förderanlagen investieren, dann planen wir nicht für Jahre, sondern für Jahrzehnte. Damit so langfristige Projekte erfolgreich sind, brauchen wir die Akzeptanz unseres Handelns in der Gesellschaft. Dies ist das Ziel unserer Strategie zur unternehmerischen Verantwortung (Corporate Responsibility, CR). Sie greift die Herausforderungen unseres Kerngeschäfts auf. Dabei ist es unser Ansatz, die regional spezifischen Kundenanforderungen und Rahmenbedingungen in den 17 Ländern, in denen wir tätig sind, eingehend zu berücksichtigen.

### Unsere Regionen

Der RWE-Konzern entwickelt sich kontinuierlich weiter und erschließt sowohl neue Märkte als auch Geschäftsfelder. Unser größter Markt ist Deutschland. Hier erwirtschaften wir 54 % unseres Umsatzes und beschäftigen 58 % unserer Mitarbeiter. Deutsches Recht bestimmt wesentliche Funktionen des RWE-Konzerns, insbesondere die Ausgestaltung der Corporate Governance sowie die ausgeprägte Mitbestimmung der Mitarbeiter. Weitere Schwerpunkte unserer Tätigkeiten sind Großbritannien, wo wir 16 % unseres Umsatzes erwirtschaften, die Niederlande mit einem Umsatzanteil von 12 % sowie Polen, Tschechien und Ungarn mit einem Umsatzanteil von insgesamt 11 %.

Einen großen Schritt auf dem Weg zur Internationalisierung von RWE haben wir 2009 mit der Übernahme des niederländischen Energieversorgers Essent getan. Er steuerte 2010 mit 3.900 Mitarbeitern 6,5 Mrd. € zum Konzernumsatz bei. Insgesamt fokussieren wir unser Wachstum zum Großteil auf Europa, wo etwa 99 % unserer Mitarbeiter beschäftigt sind. Eine lange Tradition hat jedoch unser Engagement in Ägypten, wo wir seit 1974 in der Exploration und Förderung von Erdöl und Erdgas tätig sind. Unsere Explorations-tätigkeiten dehnen wir auf weitere Länder Nordafrikas und seit 2010 auch auf Zentralasien aus. In Aserbaidschan und Turkmenistan haben wir bereits erste Büros eröffnet. In der Türkei mit ihrem dynamisch wachsenden Strommarkt haben wir eine eigene Landesgesellschaft gegründet und im Jahr 2010 mit dem Bau eines Gaskraftwerks mit einer Kapazität von 775 MW begonnen.

Die Länder, in denen wir tätig sind

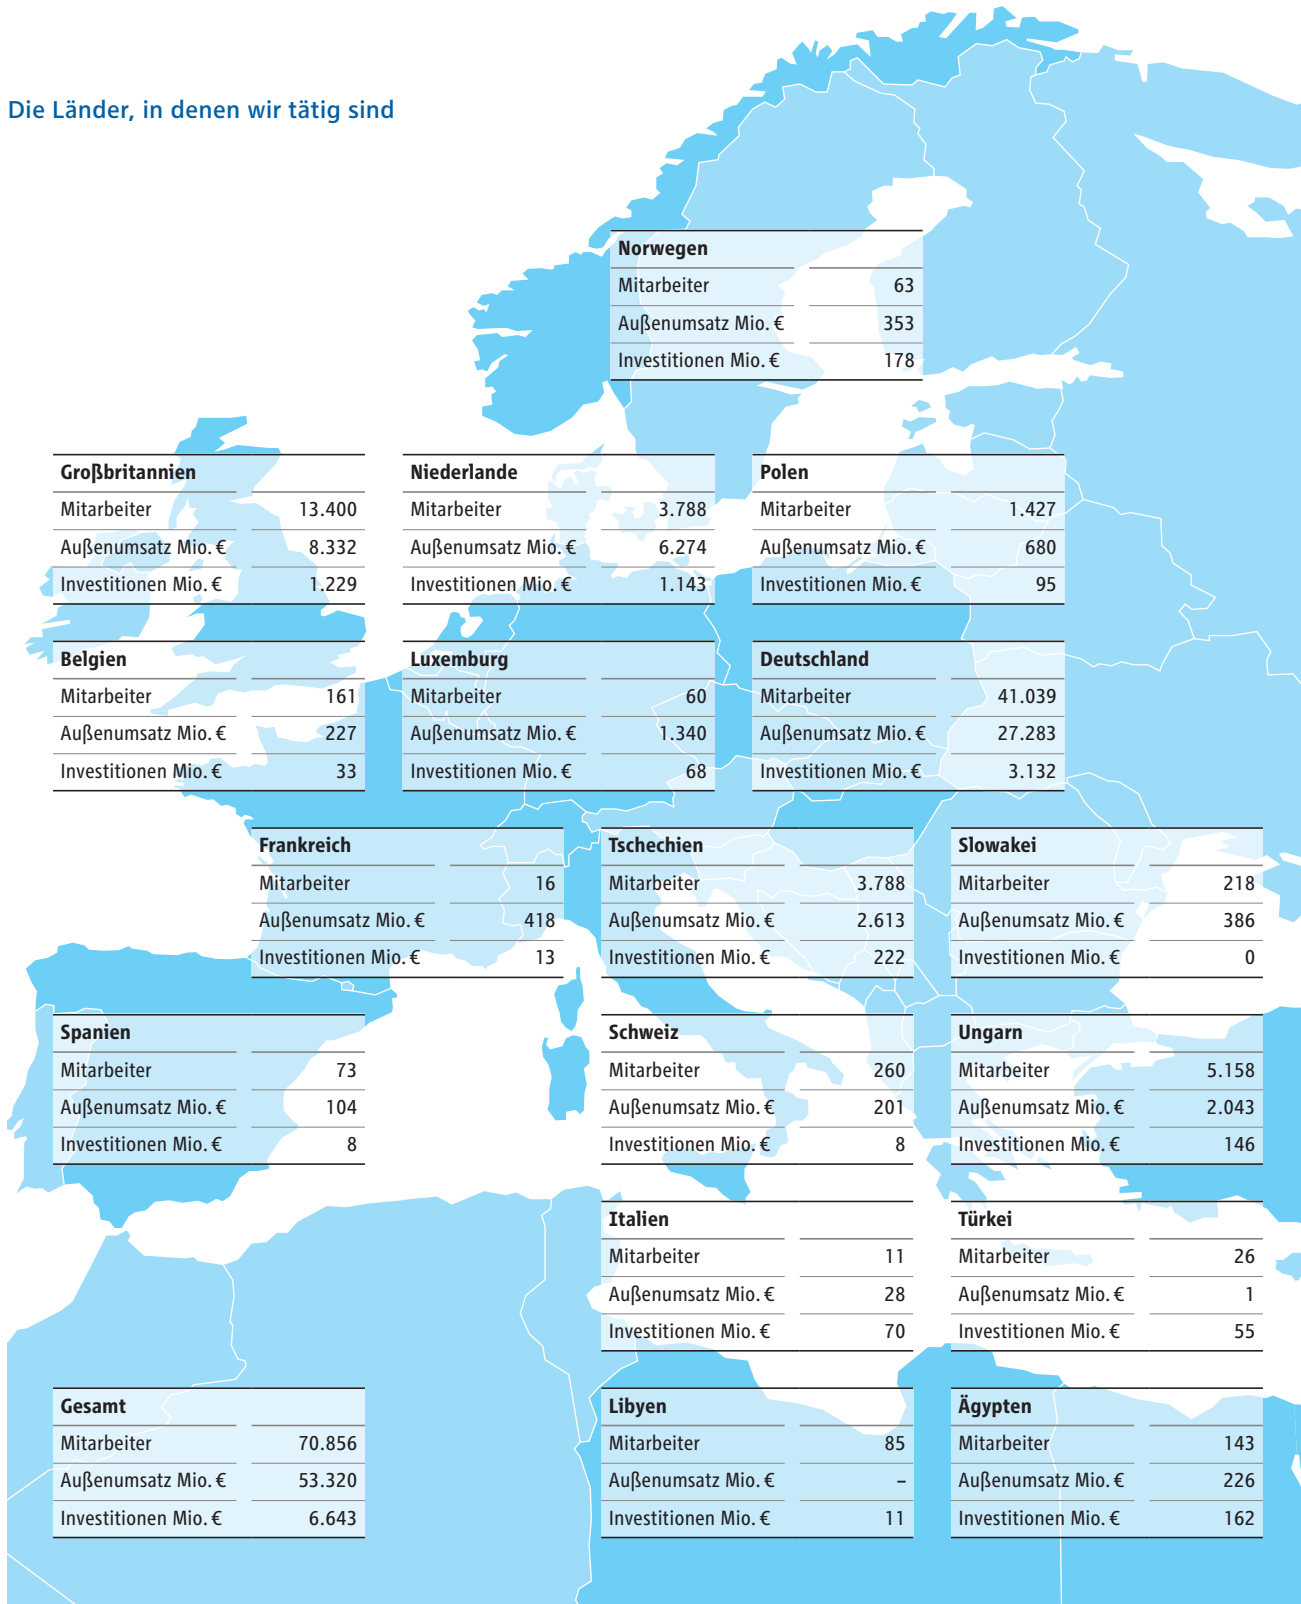

Umsatzzahlen ohne Erdgas- und Stromsteuer, Angaben zu Investitionen: Sach- und Finanzinvestitionen

## 1.2 Herausforderungen entlang unserer Wertschöpfungskette

Sozialverträgliche Umsiedlung, nachhaltige Wiedernutzbarmachung der Abbaugelände, Umweltschutz, Sozialstandards in Förderländern für Erdöl und Erdgas

Förderung weiterer Liquidität und Transparenz an den Energiegroßhandelsmärkten, Beachtung von Menschenrechten und Umweltaspekten in der Lieferkette

Rasche und nachhaltige Reduktion der CO<sub>2</sub>-Emissionen, Steigerung der Effizienz der Stromerzeugung, Flexibilisierung des Kraftwerksparks

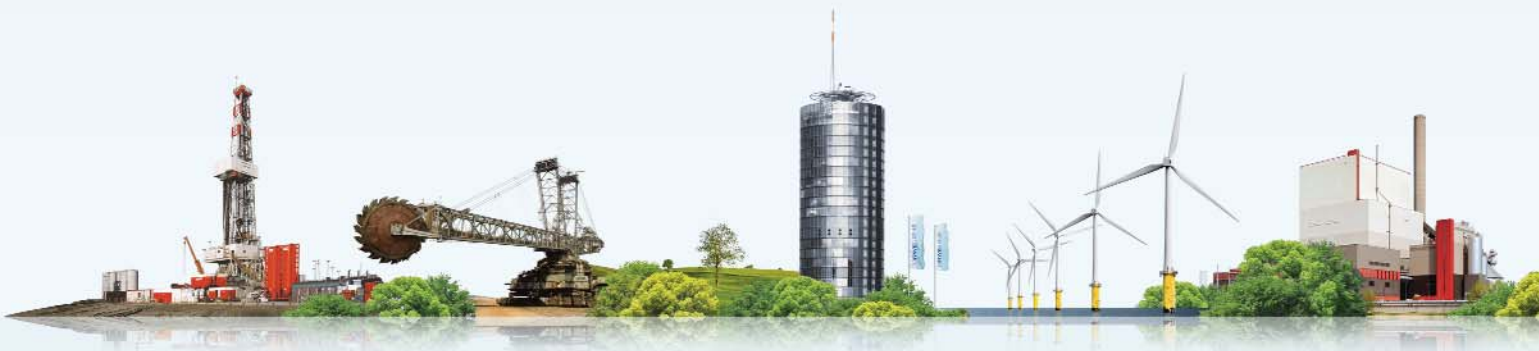

| Förderung <span style="float: right;">(9.420 MÄ<sup>1</sup>)</span>                                                                                 | Beschaffung und Handel <sup>1</sup> <span style="float: right;">(1.510 MÄ<sup>1</sup>)</span>                                                                                                                                       | Strom- und Wärmeerzeugung <span style="float: right;">(14.450 MÄ<sup>1</sup>)</span>                                                                                                                      |
|-----------------------------------------------------------------------------------------------------------------------------------------------------|-------------------------------------------------------------------------------------------------------------------------------------------------------------------------------------------------------------------------------------|-----------------------------------------------------------------------------------------------------------------------------------------------------------------------------------------------------------|
| Abbau von Braunkohle in eigenen Tagebauen, Bezug von Steinkohle, Gas, Kernbrennstoffen und Biomasse, Exploration und Förderung von Erdöl und Erdgas | Handel und Beschaffung von Strom, Gas, Kohle, Öl, CO <sub>2</sub> -Zertifikaten und erneuerbaren Energieträgern aus Biomasse in physischer und derivater Form; wirtschaftliche Optimierung der Anlagen sowie langfristiger Verträge | Betrieb von Kraftwerken auf der Basis von Braunkohle, Steinkohle, Gas, Kernkraft, erneuerbaren Energien sowie im geringen Umfang von Abfällen und Öl; Einsatz von Laufwasser- und Pumpspeicherkraftwerken |
| <b>Förderung 2010</b>                                                                                                                               | <b>Handelsvolumen 2010</b>                                                                                                                                                                                                          | <b>Stromerzeugung<sup>3</sup> (2010: 225,3 TWh) in %</b>                                                                                                                                                  |
| 5 Braunkohlentagebaue (10.614 Hektar)                                                                                                               | 1.497 TWh Strom                                                                                                                                                                                                                     |                                                                                                                                                                                                           |
| 98,7 Mio. Tonnen geförderte Braunkohle                                                                                                              | 706 Mrd. Kubikmeter Gas                                                                                                                                                                                                             |                                                                                                                                                                                                           |
| 403 Terawattstunden (TWh) Primärenergieeinsatz <sup>2</sup>                                                                                         | 968 Mio. Barrel Öl                                                                                                                                                                                                                  |                                                                                                                                                                                                           |
| 2.786 Mio. Kubikmeter Förderung von Erdgas                                                                                                          | 581 Mio. CO <sub>2</sub> -Zertifikate                                                                                                                                                                                               |                                                                                                                                                                                                           |
| 2,27 Mio. Kubikmeter Förderung von Erdöl                                                                                                            |                                                                                                                                                                                                                                     |                                                                                                                                                                                                           |
|                                                                                                                                                     |                                                                                                                                                                                                                                     |                                                                                                                                                                                                           |

1 MÄ = Mitarbeiteräquivalente; sonstige Mitarbeiter: circa 4.800 MÄ

2 Eingesetzte fossile Energieträger

3 Inkl. Strombezügen aus Kraftwerken, die sich nicht in RWE-Eigentum befinden, über deren Einsatz wir aber aufgrund langfristiger Vereinbarungen frei verfügen können. Im Geschäftsjahr 2010 waren dies 25,6 Mrd. kWh, davon 23,4 Mrd. kWh aus Steinkohle.

4 Pumpwasserkraftwerke, ölbefeuerte Kraftwerke und Müllheizkraftwerke

5 Der Stromübertragungsnetzbetreiber Amprion sowie der Gasfernleitungsnetzbetreiber NET4GAS (Tschechien) sind unternehmerisch eigenständig. Der deutsche Gasfernleitungsnetzbetreiber Thyssengas wurde verkauft.

Sicherer Betrieb ohne Netzausfälle, Netzausbau zur Integration erneuerbarer Energien, diskriminierungsfreier Zugang für alle Nutzer, Berücksichtigung von Anwohnerinteressen beim Netzausbau

Unterbrechungsfreie Versorgung mit Strom und Gas, Aufbau eines intelligenten Stromnetzes, Vogel- und Naturschutz, Berücksichtigung von Anwohnerinteressen beim Netzausbau

Preisgünstige, flexible und bedarfsgerechte Angebote, Aufbau einer Infrastruktur für Elektromobilität, Ausweitung der Angebote im Bereich Energieeffizienz

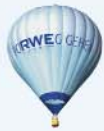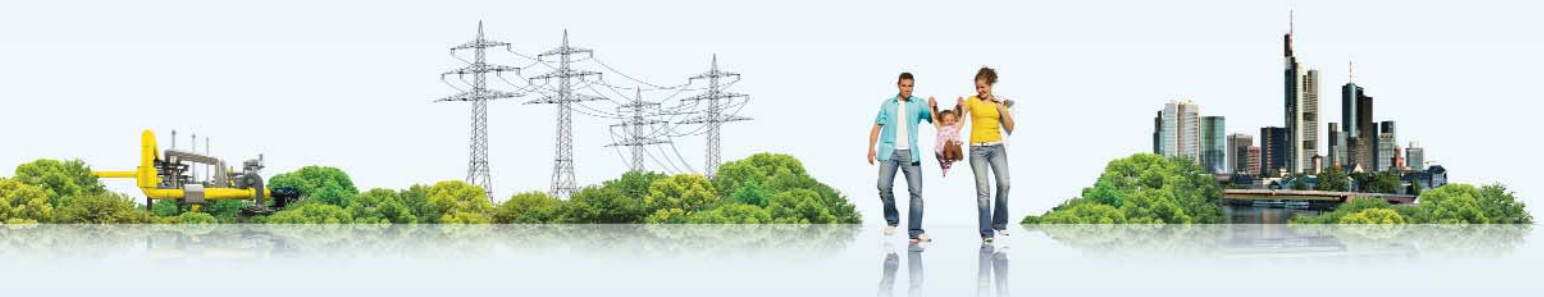

**Transport<sup>5</sup> (1.850 MÄ<sup>+</sup>)**

Betrieb und Wartung eines 11.023 km langen Höchstspannungsnetzes (220/380 kV) sowie von Umspannanlagen, Steuerung über die zentrale Netzleitwarte Brauweiler, Betrieb und Wartung von 8.046 km Erdgastransportnetz (8 bis 100 bar)

**Anteil Stromübertragungsnetz in Deutschland in %**  
Stand: 31.12.2010

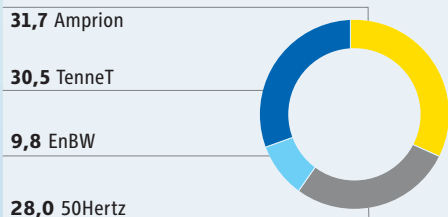

**Verteilung (10.070 MÄ<sup>+</sup>)**

Betrieb und Wartung eines 406.600 km langen Stromverteilnetzes (0,4 bis 110 kV) mit 276.700 Schalt- und Umspannanlagen sowie eines 86.100 km umfassenden Erdgasverteilnetzes (0,02 bis 70 bar), Betrieb von 11 Gasspeichern mit einem Arbeitsvolumen von über 3.871 Normkubikmetern Gas

**Stromnetzlängen nach Ländern in km**  
Stand: 31.12.2010

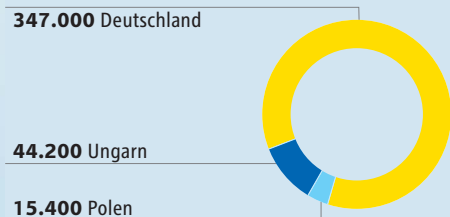

**Vertrieb und Nutzung (28.760 MÄ<sup>+</sup>)**

Lieferung von Strom an 16,2 Mio. Privat- und Gewerbekunden sowie von Gas an 7,9 Mio. Privat- und Gewerbekunden, Lieferung von 110,8 TWh Strom und 135,1 TWh Gas an Industriekunden einschließlich Beratung

**Strom- und Gaslieferungen**

16,2 Mio. Privat- und Gewerbekunden Strom  
7,9 Mio. Privat- und Gewerbekunden Gas  
110,8 TWh Stromlieferung an Industriekunden  
135,1 TWh Gaslieferung an Industriekunden

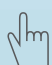

Weitere Themen im Online-Bericht

Wesentliche einbezogene Gesellschaften – Verbundene Unternehmen (Stand 31.12.2010) auf einen Blick

## 2.1 CR-Strategie

Mit unserer Strategie zur unternehmerischen Verantwortung (Corporate Responsibility, CR) definieren wir die Leitplanken einer nachhaltigen Unternehmensführung bei RWE. In der CR-Strategie legen wir die maßgeblichen Handlungsfelder sowie die zugehörigen Ziele fest, die wir in den nächsten Jahren erreichen wollen. Dazu stehen wir in einem kontinuierlichen Dialog mit unseren Stakeholdern.

Transparent, messbar und verbindlich: so gestalten wir Strategie und Umsetzung unserer unternehmerischen Verantwortung (Corporate Responsibility). Mit unserer 2003 verabschiedeten CR-Roadmap haben wir uns langfristige, konkrete Meilensteine gesetzt. Und wir haben erreicht, was wir uns vorgenommen haben. Inzwischen ist CR zum Bestandteil von Zielvereinbarungen geworden. Als eines der ersten Unternehmen Deutschlands haben wir einen Teil der variablen Vorstandsvergütung mit der Erreichung eines Nachhaltigkeitsindex verknüpft. Dieser Index leitet sich aus unseren zehn CR-Handlungsfeldern ab und macht die Zielerreichung messbar. In den kommenden Jahren werden wir für die Erfassung und Prüfung der CR-Kennzahlen standardisierte Verfahren einführen. Die Kennzahlen bilden die Grundlage für eine systematische Berichterstattung und die Bewertung der Zielerreichung.

### Unsere CR-Handlungsfelder

Unsere CR-Strategie erstreckt sich auf zehn Handlungsfelder, die vom Konzernvorstand im Mai 2007 beschlossen wurden. Sie bündeln diejenigen Themen und Problemstellungen, bei denen wir unter CR-Aspekten am meisten gefordert sind. Dazu zählen Klimaschutz, Energieeffizienz, Versorgungssicherheit und Preisgestaltung. Bei der Entwicklung der Handlungsfelder haben wir sowohl die interne Sicht des Unternehmens als auch die Erwartungen unserer Stakeholder einbezogen. Im Juli 2009 hat der Vorstand für jedes Handlungsfeld Leistungskennzahlen und Zielgrößen festgelegt, anhand deren wir Fort- und Rückschritte messen können. Die Kennzahlen werden regelmäßig erhoben und an den Vorstand berichtet sowie jährlich im CR-Bericht veröffentlicht (siehe S. 18).

Roadmap unserer unternehmerischen Verantwortung

|                                    | Start (1998–2000)                                 | Strukturierung (2001–2005)             | Umsetzung (2006–2010)                      | Treiberrolle (2011–2015)                           | Best in Class (2016–2020)                              |
|------------------------------------|---------------------------------------------------|----------------------------------------|--------------------------------------------|----------------------------------------------------|--------------------------------------------------------|
| <b>Strategie</b>                   | Konzernrichtlinie<br>Umweltmanagement             | CR-Konzernleitlinien                   | Überarbeitung<br>CR-Handlungsfelder        | Fortlaufende Aktualisierung der CR-Handlungsfelder | CR in der Konzernstrategie aufgegangen                 |
|                                    |                                                   | CR-Strategie                           | Verankerung CR in allen Geschäftsbereichen |                                                    |                                                        |
| <b>Koordination und Management</b> | Ständiger Stab der Umweltbeauftragten             | Einführung Arbeitsschutzmanagement     | Kennzahlenkonzept CR                       | CR als Bestandteil der Zielvereinbarungen          | CR fester Bestandteil der operativen Steuerung         |
|                                    | Einführung Umweltberichts- und Informationssystem | Konzernweit gültiger Verhaltenskodex   | Konzernprogramm Umsetzung CR               | Regelmäßige Berichterstattung der KPIs             |                                                        |
| <b>Reporting und Dialog</b>        | 1. Systematischer Umweltbericht                   | Zukunftstagung nachhaltige Entwicklung | Institutionalisierter Stakeholderdialog    | Transparenzfürer der Branche                       | Hohe Akzeptanz unseres Handelns durch die Gesellschaft |
|                                    | Aufnahme in Dow Jones Sustainability Index        | 1. CR-Bericht                          | Corporate-Volunteering-Programm            |                                                    |                                                        |

**Materialitätsanalyse 2010 im Vergleich zum Vorjahr**

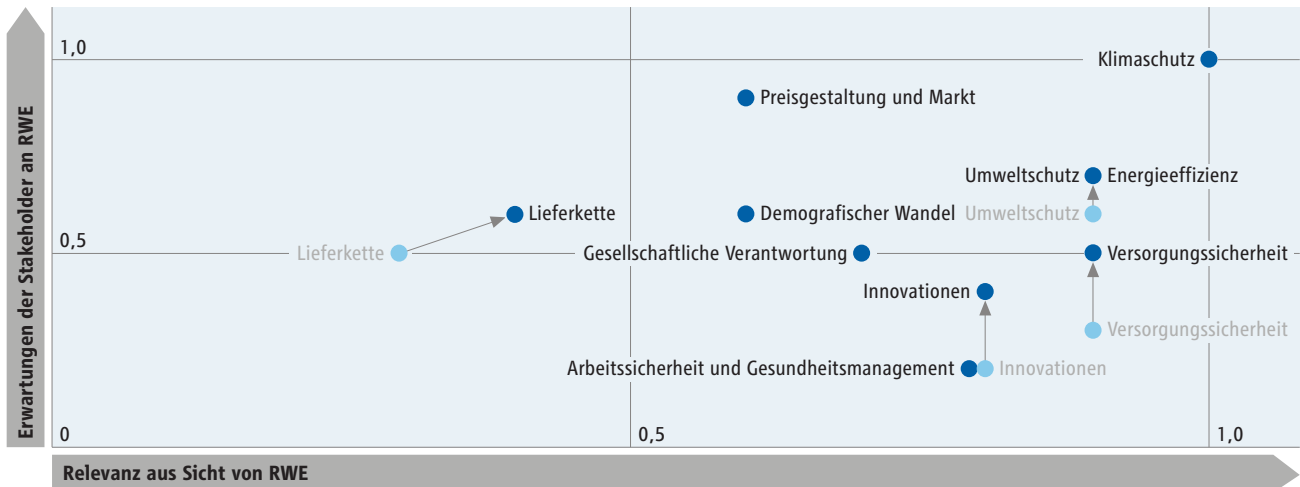

**Materialitätsanalyse 2010.** Unsere Stakeholder haben klare Erwartungen, in welchen Handlungsfeldern sich RWE ganz besonders engagieren sollte. Wir verfolgen kontinuierlich, wie sich ihre Erwartungen verändern und wo sich neue Schwerpunkte abzeichnen. Aus dem Vergleich mit den Maßnahmen in unseren Handlungsfeldern leiten wir weiteren Handlungsbedarf ab.

Das Handlungsfeld Umweltschutz hat insbesondere mit der zunehmenden Aufmerksamkeit für das Thema Biodiversität an Bedeutung gewonnen. Nachdem die Vertragsstaatenkonferenz im Oktober 2010 in Nagoya (Japan) ein weltweites Abkommen zum Schutz der Biodiversität verabschiedet hat, widmet die Öffentlichkeit diesem Thema erheblich mehr Aufmerksamkeit. Auch das Handlungsfeld Versorgungssicherheit hat für unsere Stakeholder an Bedeutung zugenommen. Dies zeigten die – teilweise konträren – Diskussionen um den Ausbau der Stromnetze im Jahr 2010. Um die Einspeisung erneuerbarer Energien in Zukunft sicherzustellen, müssen die Transportnetze erheblich erweitert werden. Vermehrt diskutiert wurden im Jahr 2010 auch Fragen zur Lieferkette. In den Niederlanden befasste sich das Parlament mit den ethischen

und sozialen Anforderungen an die Beschaffung von Kraftwerkskohlen. Ebenso erwarten unsere Stakeholder zunehmend, dass wir mit Innovationen zum Klimaschutz beitragen. Bei den weiteren sechs Handlungsfeldern konnten wir gegenüber den im Jahr 2009 getroffenen Bewertungen keine wesentlichen Veränderungen in der Bedeutung für unsere Stakeholder oder für unser Unternehmen beobachten. In der Grafik zur Materialitätsanalyse sind die Veränderungen im Jahr 2010 im Vergleich zum Vorjahr gekennzeichnet.

**Unser CR-Management**

Eine verantwortungsbewusste Unternehmensführung muss auf oberster Ebene verankert sein. Die Verknüpfung der Vorstandsvergütung mit der Erreichung unserer CR-Ziele trägt dazu entscheidend bei. Damit ist CR zu einem Thema geworden, mit dem sich der Vorstand, aber auch der Aufsichtsrat der RWE AG regelmäßig befasst. Genauso wichtig ist die Verankerung in den Abläufen und den operativen Prozessen. Unser CR-Management beruht auf der Eigenverantwortung der Unternehmensbereiche. Die konzernweite Koordination erfolgt durch das Group Center, die RWE AG. Die Umsetzung erfolgt in den zuständigen

Fachabteilungen. Zuständig für die konzernweite Entwicklung und Umsetzung der CR-Strategie ist der Personalvorstand der RWE AG. An ihn berichtet direkt die Stabsabteilung Corporate Responsibility/Umweltschutz. Zu ihrem Aufgabenbereich zählen insbesondere die Erfassung und Bewertung der Nachhaltigkeits-trends, der Dialog mit Stakeholdern, die Erarbeitung von Vorschlägen zur Weiterentwicklung der CR-Strategie sowie das konzernweite CR-Berichtswesen. Außerdem unterstützt die Stabsabteilung CR als Dienstleister die operativen Einheiten bei Bedarf bei der Umsetzung von Projekten mit besonderen Anforderungen an CR. Sie steht dazu in einem engen und regelmäßigen Austausch mit den CR-Beauftragten der operativen Gesellschaften und den zuständigen Fachabteilungen. Wichtige Grundlage für die Umsetzung unseres CR-Managements ist der Verhaltenskodex der RWE AG. Darin haben wir uns zu den zehn Prinzipien des Global Compact der Vereinten Nationen bekannt, deren Umsetzung wir mit diesem Bericht darstellen. Eine weitere Orientierung stellen für uns die OECD-Leitsätze für multinationale Unternehmen dar.

### Managementsysteme

Im Interesse einer sachbezogenen Aufgabenteilung unterhalten wir im RWE-Konzern eine Reihe von Managementsystemen, die für die Ausgestaltung einer verantwortungsvollen Unternehmensführung und die Verankerung von CR in den Geschäftsprozessen erforderlich sind.

**Umweltschutz.** Unser Umweltmanagement wird durch eine konzernweit verbindliche Richtlinie geregelt und orientiert sich an den Anforderungen des internationalen Standards ISO 14001 für Umweltmanagementsysteme. Jede Gesellschaft hat ein ihren Tätigkeiten entsprechendes Umweltmanagement aufgebaut. Im Jahr 2010 hat die für CR zuständige Stabsabteilung durch Audits bei allen wesentlichen operativen Gesellschaften überprüft, ob die Anforderungen der Konzernrichtlinie erfüllt wurden.

**Arbeitssicherheit und Gesundheit.** Die konzernweite Koordination erfolgt über die 2009 eingerichteten Kompetenzzentren Arbeitssicherheit und Arbeitsmedizin/Betriebliches Gesundheitsmanagement. Sie berichten direkt an den Personalvorstand der RWE AG. Die Maßnahmen zur Verbesserung der Arbeitssicherheit werden in einem deutschen und in einem internationalen Arbeitsschutzforum abgestimmt. In die Koordination durch das Betriebliche Gesundheitsmanagement sind gegenwärtig nur die deutschen Gesellschaften einbezogen, eine Ausweitung auf den gesamten Konzern wird mit dem Europäischen Betriebsrat diskutiert.

**Compliance.** Um der wachsenden Bedeutung der Korruptionsbekämpfung gerecht zu werden, haben wir im Jahr 2009 im Group Center eine eigene Organisationseinheit Compliance eingerichtet, die direkt an den Vorstandsvorsitzenden der RWE AG berichtet. Sie überwacht die Einhaltung unserer Vorgaben zur Verhinderung von Korruption, verantwortet die Zusammenarbeit mit den Compliance-Beauftragten der operativen Gesellschaften sowie die Auslegung und Weiterentwicklung unseres Verhaltenskodex.

Den Umgang mit Geschäftspartnern, die Abwicklung von Spenden und Sponsoring sowie die Beschäftigung von Beratern haben wir in konzernweit gültigen Richtlinien geregelt, die den Vorgaben unseres Verhaltenskodex folgen. Einmal pro Jahr hat jede Führungskraft mit Personalverantwortung für ihren Bereich die Einhaltung des Verhaltenskodex zu bestätigen. Zur Verbesserung der Transparenz haben wir zum 1. Januar 2010 eine Datenbank eingerichtet, in der alle wesentlichen Informationen und Dokumente zu Spenden und Sponsoring, Zuwendungen an Amtsträger sowie Beraterverträgen, die Compliance-relevant sind, erfasst werden. Anhand regelmäßiger Stichproben überprüfen wir die Übereinstimmung mit den Vorgaben des Verhaltenskodex. Für das Jahr 2010 haben wir keine schwerwiegenden und systemati-

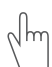

Weitere Themen im Online-Bericht

CR-Management – Informationen zu CR-Organisation, RWE-Verhaltenskodex sowie Zertifizierungen



## Fakten 2010

---

**98** % der Mitarbeiter werden durch das interne Umweltmanagement abgedeckt

**100** % der Mitarbeiter werden durch das interne Arbeitssicherheitsmanagement abgedeckt

---

schen Verstöße gegen unsere Vorgaben zur Verhinderung von Korruption gefunden. Im Bereich Spenden gab es eine Reihe kleinerer Unregelmäßigkeiten, die aber alle nachträglich behoben werden konnten. In einem Fall war eine Klarstellung in der entsprechenden Richtlinie erforderlich.

Um die Mitarbeiter zu Fragen der Compliance, insbesondere zur Verhinderung von Korruption, zu informieren, werden regelmäßige Schulungen durchgeführt. Zudem veröffentlicht die Compliance-Abteilung seit 2010 einen regelmäßigen internen Newsletter zu aktuellen Fragestellungen. Wenn Mitarbeiter Zweifel haben, ob die Compliance-Vorgaben eingehalten werden, können sie sich neben den Compliance-Beauftragten auch an einen von RWE bestellten unabhängigen, externen Rechtsanwalt wenden, ohne eigene Vorgesetzte informieren zu müssen. Anfragen werden vertraulich und auf Wunsch anonym behandelt. Alle Fragen zu wettbewerbskonformem Verhalten werden durch unsere Rechtsabteilung gesteuert. Für Mitarbeiter, die in kartellrechtlich sensiblen Bereichen tätig sind, ist die Teilnahme an einer kartellrechtlichen Schulung verpflichtend.

**Innovationsmanagement.** Die langfristige Entwicklung des RWE-Konzerns hängt wesentlich von der rechtzeitigen Bewertung und Umsetzung von Innovationen ab. Im Jahr 2008 haben wir eine zentrale Abteilung eingerichtet, die unsere zum Teil weit über das Jahr 2030 hinausreichenden Forschungs- und

Entwicklungsaktivitäten koordiniert. Wesentliche Kriterien für die Bewertung neuer Technologien sind dabei der Beitrag, den sie zum Klimaschutz und zur Versorgungssicherheit leisten, sowie die spezifischen Kosten der Energiebereitstellung, die mit der jeweiligen Technologie verbunden sind. Die zentrale Abteilung für Forschung und Entwicklung koordiniert darüber hinaus unsere zahlreichen Hochschulk Kooperationen und betreut die Stiftungsprofessuren (siehe S. 47).

### Dialog mit unseren Stakeholdern

Den Dialog mit unseren Stakeholdern führen wir in den Regionen unter sehr unterschiedlichen Voraussetzungen, die von unterschiedlichen Interessenlagen sowie von unterschiedlichen gesetzlichen Rahmenbedingungen und Markterfordernissen geprägt sind. In allen Regionen aber gilt als zentrale Prämisse, dass wir die Bürger, die von unseren Vorhaben betroffen sind, frühzeitig in unsere Entscheidungen einbeziehen. Unser Stakeholderdialog findet im Wesentlichen auf zwei Ebenen statt: Auf nationaler und europäischer Ebene bilden Politik, Gesetzgeber, Analysten und Investoren sowie international agierende Nichtregierungsorganisationen (NGOs) unsere wesentlichen Ansprechpartner. Die Kommunen, Anwohner, Kunden und auch unsere Mitarbeiter zählen zu den regionalen Stakeholdern.

**Deutschland.** In Deutschland erleben wir eine starke Polarisierung bezüglich der zukünftigen Energieversorgung. Zu zentralen Punkten, insbesondere der Nutzung von Kernkraft und Kohle, war in den letzten Jahren eine Verfestigung der Positionen zu beobachten. Seit dem schweren nuklearen Unfall im Kernkraftwerk Fukushima in Japan wird in Deutschland intensiv die Zukunft der Kernenergie diskutiert, insbesondere die Bewertung des Restrisikos dieser Technologie. Weite Teile der Gesellschaft fordern einen Ausstieg aus der Nutzung der Kernenergie und einen nochmals forcierten Ausbau der erneuerbaren Energien.

Im regionalen Stakeholderdialog steht häufig die Umsetzung von Infrastrukturprojekten wie beispielsweise unsere Braunkohlentagebaue oder Neubauten von Kraftwerken und von Hochspannungsleitungen im Fokus. Bei der Umsiedlung von Ortschaften, die im Zusammenhang mit dem Tagebau im rheinischen Braunkohlenrevier immer wieder erforderlich ist, stellt die frühzeitige Einbindung der betroffenen Bürger in die Planung und Gestaltung der neuen Ortschaften ein seit Jahrzehnten eingespieltes Verfahren dar und ist eine wesentliche Voraussetzung für die Akzeptanz unserer Tagebaubetriebe.

**Großbritannien.** Sowohl die britische Regierung als auch wesentliche Teile der Bevölkerung sprechen sich aus Gründen des Klimaschutzes gegen den Neubau von Kohlekraftwerken aus. Bis zu dem schweren Reaktorunfall in Japan herrschte in Großbritannien eine positive Grundeinstellung zur Kernenergie. Es bleibt abzuwarten, wie sich Politik und Gesellschaft in Zukunft positionieren werden. Bei Bauvorhaben wie dem Neubau des Gas- und Dampfkraftwerks Staythorpe pflegen wir intensiven Kontakt mit Behörden, Kommunen und Anwohnern. Wir diskutieren mit ihnen die Auswirkungen des Bauvorhabens und versuchen diese soweit wie möglich zu reduzieren, beispielsweise durch Ausschalten der Beleuchtung der Baustelle in besonders betroffenen Gebieten.

**Niederlande.** Beim Kauf von Essent war den bisherigen Eigentümern, den Kommunen und Provinzen, die Fortführung der Nachhaltigkeitspolitik von Essent ein wesentliches Anliegen. Dies haben wir in einem „Nachhaltigkeitsvertrag“ verbindlich zugesagt. Eine unabhängige Stiftung überwacht die Umsetzung. Intensiv wird von Politik und Öffentlichkeit in den Niederlanden der Klimaschutz diskutiert, insbesondere die Frage, ob neue Kohlekraftwerke und ihre CO<sub>2</sub>-Emissionen weiterhin zu verantworten sind. Im Zusammenhang mit dem Bau des 1.560-MW-Steinkohlenkraftwerks in Eemshaven (Provinz Groningen) führen wir umfangrei-

che Diskussionen sowohl mit der Politik als auch mit der interessierten Öffentlichkeit. Neben dem Klimaschutz ist die Herkunft der Importkohle und die Einhaltung von Sozial- und Umweltstandards bei der Kohleförderung ein zentrales Diskussionsthema.

**Polen, Tschechien und Ungarn.** Klimaschutz und Erzeugungsmix stehen auch in Ungarn im Fokus der Diskussion. Als Betreiber des einzigen Braunkohlenkraftwerks in Ungarn sind wir hiervon erheblich betroffen. So haben wir im Jahr 2010 den geplanten Neubau eines 400-MW-Braunkohlenblocks aufgrund der wirtschaftlichen Rahmenbedingungen, die auch durch die ungarische Klimaschutzpolitik vorgegeben werden, aufgegeben. Weiterhin stehen bei den regionalen Stakeholdern in Polen, Tschechien und Ungarn die regionale Wertschöpfung sowie die gesellschaftlichen Leistungen des Unternehmens im Mittelpunkt. Wir führen hierzu einen intensiven Dialog mit den Anwohnern und der lokalen Politik und unterstützen sie im Rahmen unseres gesellschaftlichen Engagements.

#### Dialog mit Kunden und Investoren

Kunden und Investoren stellen wichtige Stakeholder dar. Sie beeinflussen unseren Geschäftserfolg ganz unmittelbar – über die Wahl der von RWE angebotenen Tarife oder über Investitionsentscheidungen. Auch mit ihnen stehen wir in einem intensiven Austausch: Im Jahr 2010 hat die RWE Vertrieb AG einen Kundenbeirat gegründet, der sich als Bindeglied zwischen RWE und ihren Privatkunden versteht. Dieser Beirat soll künftig zweimal im Jahr tagen, um über Themen wie Produkte, Verkaufskanäle, aktuelle Werbung und Kundenservice zu diskutieren. Dem Kundenbeirat, der sich in ein Forum Deutschland Nord und ein Forum Deutschland Süd aufteilt, gehören 38 Mitglieder an.

In Großbritannien bildet der Dialog mit den Kunden einen Schwerpunkt des Stakeholderdialogs. RWE npower hat daher im Juli 2010 einen Beirat ins Leben

gerufen, dem alle wesentlichen Stakeholder wie Industriekunden oder Organisationen angehören, die die Interessen bedürftiger Bürger bei der Strom- und Wärmeversorgung vertreten (National Energy Action, Fuel Poverty Advisory Group, Citizens Advice Bureau). Das direkte Gespräch mit den Stakeholdern ermöglicht es RWE npower, die Beziehungen zu seinen Kunden zu verbessern und die Maßnahmen zur Steigerung der Kundenzufriedenheit zu überprüfen. Außerdem erhält RWE npower wertvolle Anregungen für neue Produkte und Dienstleistungen.

Ratingagenturen und Analysten für nachhaltige Geldanlagen sind eine wichtige Verbindung zu potenziellen Investoren. Wir stellen die von ihnen geforderten Daten und Informationen nicht nur über den CR-Bericht, sondern auch unterjährig über die Beantwortung umfangreicher Fragebögen bereit. Unternehmenspräsentationen und Einzelgespräche ergänzen den Dialog mit nachhaltigkeitsorientierten Analysten und Investoren. Die Ergebnisse nachhaltigkeitsorientierter Ratings und das Feedback von Analysten geben uns im Gegenzug wertvolle Hinweise zur weiteren Verbesserung unseres CR-Managements. RWE ist seit Auflage des Dow Jones Sustainability Index im Jahr 1999 durchgehend im Index vertreten. Ebenso beantworten wir die jährlichen Fragebögen des Carbon Disclosure Project (CDP) sowohl zu den CO<sub>2</sub>-Emissionen als auch zum Wasserverbrauch. Einen Überblick über Ratingergebnisse und externe Bewertungen für RWE stellen wir im Internet dar.

#### Dialog mit der Politik

Wir sind überzeugt, dass Unternehmen ihre Interessen in der öffentlichen Diskussion ebenso entschieden vertreten sollten wie alle anderen gesellschaftlichen Gruppen. Wichtig ist, dass dies in transparenter Weise geschieht. Sowohl in Brüssel als auch in den Hauptstädten der Länder, in denen wir tätig sind, unterhalten wir Verbindungsbüros, die den Dialog mit den politischen Entscheidungsträgern führen.

Im Jahr 2010 haben wir uns im Register der Interessenvertreter bei der Europäischen Kommission eintragen lassen. Damit legen wir die finanziellen Aufwendungen für Lobbyarbeit sowie die von uns im politischen Diskurs vertretenen Positionen offen. Dennoch unterliegt unsere Lobbyarbeit naturgemäß auch Kritik. Die Verleihung des „Worst Lobby Award 2010“ durch die Nichtregierungsorganisation Lobby Control spiegelt die fundamental unterschiedlichen Meinungen zur zukünftigen Energieerzeugung wider. Das Gleiche gilt für die Verleihung des „Dinosauriers 2010“ durch die deutsche Nichtregierungsorganisation NABU. Solche Aktionen nehmen wir als Anlass, mit unseren Kritikern öffentlich zu diskutieren.

Im Oktober 2010 wurde in zahlreichen deutschen Zeitungen der „Energiepolitische Appell“ veröffentlicht, zu dessen Initiatoren und Unterzeichnern RWE gehört. Darin wurde auf die Notwendigkeit einer ausgewogenen Berücksichtigung von Kernkraft, Kohle, Gas und erneuerbare Energien beim energiepolitischen Gesamtkonzept der Bundesregierung hingewiesen.

#### Unsere Mitgliedschaften

Teil unseres Stakeholderdialogs, aus dem wir kontinuierlich Rückschlüsse auf externe Erwartungen ableiten, ist die aktive Mitgliedschaft in nationalen Organisationen wie econsense – Forum Nachhaltige Entwicklung der Deutschen Wirtschaft, Business in the Community in Großbritannien oder MVO Nederland. Der RWE-Konzern bekennt sich zu den Prinzipien des UN Global Compact. Für den Konzern als Ganzes ist die RWE AG dem deutschen Netzwerk des UN Global Compact beigetreten. Zusätzlich sind unsere Landesgesellschaften in den Niederlanden und Polen Mitglied in den nationalen Netzwerken und unterstützen vor Ort die Umsetzung der Prinzipien des UN Global Compact. Weitere Mitgliedschaften stellen wir im Internet dar.

## 2.2 CR-Programm

Wir haben unsere Handlungsfelder im Jahr 2009 mit konkreten Zielen versehen. In den nachfolgenden Kapiteln werden die Maßnahmen und der Stand der Umsetzung ausführlich dargestellt.

| Handlungsfeld                             | Wir wollen ...                                                                                                                                                                                                                                                  | Leistungskennzahl                                                                                                                                                            |
|-------------------------------------------|-----------------------------------------------------------------------------------------------------------------------------------------------------------------------------------------------------------------------------------------------------------------|------------------------------------------------------------------------------------------------------------------------------------------------------------------------------|
| Klimaschutz                               | ... die CO <sub>2</sub> -Intensität unseres Kraftwerksparks deutlich reduzieren. Mit physischen und finanziellen Maßnahmen wollen wir unser CO <sub>2</sub> -Risiko bis spätestens 2020 auf das Durchschnittsniveau der Wettbewerber in unseren Märkten senken. | - CO <sub>2</sub> -Emissionen unter Berücksichtigung von Minderungen aus CDM/JI und Portfoliooptimierung in Tonnen je erzeugte Megawattstunde Strom (t CO <sub>2</sub> /MWh) |
| Energieeffizienz                          | ... sowohl unsere eigene Energieeffizienz als auch die unserer Kunden erhöhen.                                                                                                                                                                                  | - Erhöhung der Energieeffizienz in %                                                                                                                                         |
| Innovation                                | ... die Verfügbarkeit der optimalen Lösung in unseren Kernprozessen durch Innovationen sicherstellen.                                                                                                                                                           | - Abdeckungsgrad und Kommunikation der strategisch relevanten F&E-Themen in %                                                                                                |
| Versorgungssicherheit                     | ... die Systemsicherheit unserer Transportnetze jederzeit gewährleisten.<br>... unsere Kunden jederzeit bedarfsgerecht mit Strom versorgen.                                                                                                                     | - (n-1)-Kriterium für Stromtransport<br>- Netzausfälle in Min. pro Jahr und Kunde (System Average Interruption Duration Indicator, SAIDI)                                    |
| Lieferkette                               | ... dass zur Vermeidung von Reputationsrisiken die Einhaltung von internationalen Umwelt- und Sozialstandards integraler Bestandteil unserer Lieferverträge ist.                                                                                                | - Abdeckung des Lieferantensmanagements in allen Einkaufsbereichen in %                                                                                                      |
| Preisgestaltung und Markt                 | ... zufriedene und damit langfristig loyale Kunden haben.                                                                                                                                                                                                       | - Kundenloyalitätsindex                                                                                                                                                      |
| Demografischer Wandel                     | ... langfristig unseren Personalbedarf qualitativ und quantitativ decken.                                                                                                                                                                                       | - Demografie-Index                                                                                                                                                           |
| Arbeitssicherheit & Gesundheitsmanagement | ... dass jeder eigene und externe Mitarbeiter so gesund nach Hause geht, wie er zur Arbeit gekommen ist.<br>... die Leistungsfähigkeit unserer Mitarbeiter erhalten.                                                                                            | - Anzahl der Unfälle mit mind. einem Ausfalltag je 1 Mio. geleistete Arbeitsstunden (LTIF = X/1.000.000 h)<br>- Zugang zum Arbeitsbewältigungsindex (ABI) in %               |
| Umweltschutz                              | ... unsere Anlagen stets sicher gemäß den genehmigungsrechtlichen Vorgaben betreiben.<br>... unser Umweltmanagementsystem zur Kontrolle des rechtssicheren Betriebs unserer Anlagen und Netze konzernweit zu 100 % umsetzen.                                    | - Einhaltung der Genehmigungsaufgaben in %<br>- Konzernweite Abdeckung des Umweltmanagements in %                                                                            |
| Gesellschaftliche Verantwortung           | ... mit effizientem Mitteleinsatz unsere regionale Reputation stärken.                                                                                                                                                                                          | - Reputationsindex                                                                                                                                                           |

| Zielgröße                                                                                                                                | Termin      | Maßnahmen                                                                                                                                                                                                                        | Status Ende 2010                                                                                                                                                                                                                     |
|------------------------------------------------------------------------------------------------------------------------------------------|-------------|----------------------------------------------------------------------------------------------------------------------------------------------------------------------------------------------------------------------------------|--------------------------------------------------------------------------------------------------------------------------------------------------------------------------------------------------------------------------------------|
| - Marktüblicher Emissionsfaktor im Jahr 2020<br>(0,45 t CO <sub>2</sub> /MWh nach heutiger Erkenntnis)                                   | 2020        | - Neubauten von 7.219 MW Gas-, 2.100 MW Braunkohlen-, 3.088 MW Steinkohlenkraftwerken sowie 4.500 MW erneuerbare Energien in Betrieb oder Bau bis 2014                                                                           | - 2.537 MW Gaskraftwerke in Betrieb genommen bzw. in der Inbetriebsetzung, übrige Neubauten in der Realisierung                                                                                                                      |
| - RWE-Kraftwerke: 11 % bis 2013<br>- RWE-Fuhrpark: 20 % bis 2012<br>- RWE-Immobilien: 5 % bis 2014<br>- RWE-Kundenprojekte: 8 % bis 2012 | 2012 - 2014 | - Neubauten von Kraftwerken (s. o.)<br>- „Green Car Policy“ umsetzen<br>- Energetische Modernisierung und Sanierung von Gebäuden<br>- Kundenberatung, Smart Meter/Smart Home, Contracting-Modelle mit Kommunen und Industrie     | - siehe oben<br>- 19 % Senkung des spezifischen Treibstoffverbrauchs in 5 Jahren<br>- 17 % Energieeinsparung bei Modernisierung und Sanierung von Gebäuden<br>- 8,3 % Energieeinsparung bei Haushalten durch „Cleverer Kiez“-Projekt |
| - mindestens 95 %                                                                                                                        | 2011        | - Beispielprojekte: Abtrennung und Speicherung von CO <sub>2</sub> , CO <sub>2</sub> -Nutzung, Wirkungsgradsteigerung, Meeresenergie, Solarthermie, Druckluftspeicher, intelligente Netze, Smart Meter, Smart Home               | - F&E-Projekte für alle Anforderungen entlang der Wertschöpfungskette                                                                                                                                                                |
| - Einhaltung des (n-1)-Kriteriums<br>- SAIDI < 25 Minuten (nur Deutschland)                                                              | 2011        | - ca. 3 Mrd. € Investition: 800 km neue Transportleitungen, 25 neue Umspannstationen<br>- ca. 25 Mrd. € für Erneuerung, Ausbau und Betrieb konzernweit im Zeitraum 2009 bis 2019                                                 | - Stromtransport 100 % gewährleistet<br>- SAIDI (2009): 20,4 Min./Kunde (nur Deutschland)                                                                                                                                            |
| - 95 % des Einkaufsvolumens                                                                                                              | 2011        | - Aufnahme von CR-Kriterien in die Allgemeinen Geschäftsbedingungen (AGBs)<br>- Überprüfung der Kohlelieferanten<br>- Entwicklung von CR-Grundsätzen für den Bezug von Waren                                                     | - AGBs für Arbeitssicherheit und Umweltschutz eingeführt<br>- 100 % Counter Party Risk Management für Kohlelieferanten<br>- Biomassepolicy in Vorbereitung                                                                           |
| - Kundenloyalitätsindex von mind. 73                                                                                                     | 2013        | - Regelmäßige Erhebungen durchführen                                                                                                                                                                                             | - Kundenloyalitätsindex von 71                                                                                                                                                                                                       |
| - Demografie-Index von mind. 84                                                                                                          | 2011        | - bedarfsgerechte Rekrutierung junger Mitarbeiter fortsetzen<br>- verstärkt Mitarbeiterinnen anwerben                                                                                                                            | - Demografie-Index von 83,8                                                                                                                                                                                                          |
| - LTI <sub>f</sub> von max. 2,5<br>- Mehrheit der Mitarbeiter in Deutschland hat Zugang zur Bestimmung des persönlichen ABI              | 2013        | - Programm „Sicher vorWEg“ in der Umsetzung, Sicherheitspass auf Baustellen eingeführt, Mitarbeiter von Partnerunternehmen in die Unfallstatistik aufnehmen<br>- ABI in Deutschland umfassend einführen und Ergebnisse auswerten | - LTI <sub>f</sub> : 3,5<br>- ABI in Deutschland eingeführt                                                                                                                                                                          |
| - 100 % Einhaltung<br>- 100 % Abdeckung                                                                                                  | 2011        | - Kontrolle und Optimierung der Betriebsführung unserer Anlagen<br>- Umweltmanagementsystem in neuen Gesellschaften aufgebaut, regelmäßige Durchführung interner Audits                                                          | - Keine signifikanten Abweichungen von den Genehmigungsaufgaben<br>- Umweltmanagement zu 98 % eingeführt                                                                                                                             |
| - Höchste Reputation unter vergleichbaren Unternehmen der Branche                                                                        | 2011        | - regionales Engagement systematisch ausbauen<br>- Erfassung der Wertschöpfung des Unternehmens über die bisherige Erfassung ausbauen                                                                                            | - Höchste Reputation im Vergleich zu direkten Wettbewerbern                                                                                                                                                                          |

## 3.1 Klimaschutz

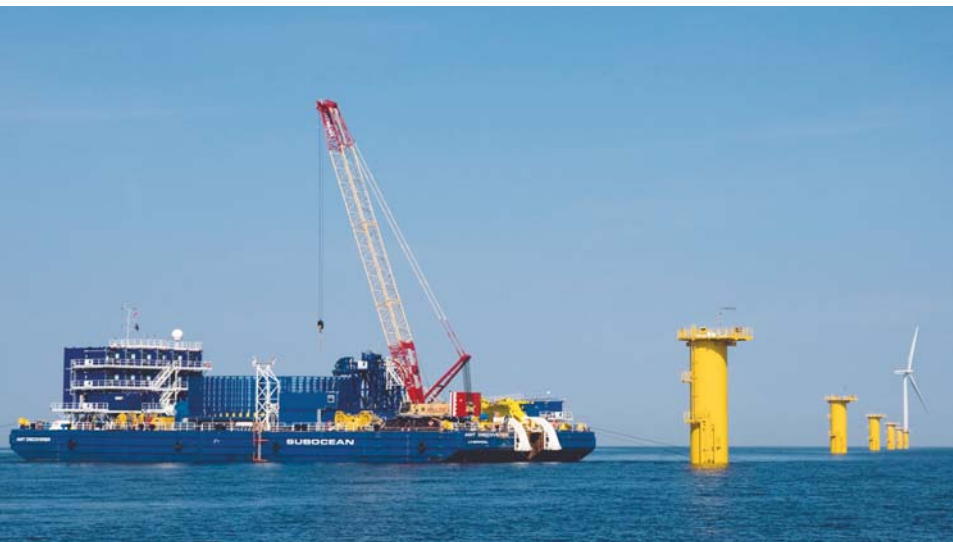

### Herausfordernde Offshore-Projekte

Windparks auf offener See bieten das größte Potenzial für den Ausbau erneuerbarer Energien. Unsere ersten größeren Offshore-Windparks haben wir in Großbritannien errichtet. Zuletzt haben wir 2009 Rhyl Flats vor der walisischen Küste in Betrieb genommen. Die Erfahrungen, die wir beim Errichten der 25 Windturbinen und der Kabelverlegung in 15 Metern Tiefe gesammelt haben, nutzen wir nun für weit größere Projekte. Derzeit errichten wir in einem Joint Venture 140 Turbinen am Standort Greater Gabbard an der englischen Südostküste.

**Bis 2050 wollen wir die Stromversorgung CO<sub>2</sub>-neutral gestalten. Dies stellt uns vor enorme Herausforderungen. Wir müssen Milliardensummen investieren, um weniger Kohlendioxid (CO<sub>2</sub>) je erzeugte Megawattstunde Strom auszustoßen, und zugleich die Sicherheit und Wirtschaftlichkeit der Stromversorgung gewährleisten.**

Wir arbeiten daran, unsere Stromerzeugung aus fossilen Quellen effizienter und emissionsärmer zu gestalten. Bis 2014 wollen wir alle unsere neuen Gas- und Kohlekraftwerke mit einer Gesamtkapazität von über 12.400 MW in Betrieb genommen haben. Ein weiterer zentraler Baustein unserer Strategie ist der Ausbau der erneuerbaren Energien. Bis 2014 sollen 4.500 MW in Bau oder Betrieb sein. So verringern wir die CO<sub>2</sub>-Intensität unseres Kraftwerksparks. Mit physischen und finanziellen Maßnahmen wollen wir unser CO<sub>2</sub>-Risiko bis 2020 auf das Durchschnittsniveau der Wettbewerber in unseren Märkten senken.

### Zielerreichung

Große Fortschritte erzielten wir bei der Modernisierung unseres Erzeugungsportfolios: 2010 gingen neue Gas- und Dampfturbinenanlagen in Lingen (Deutschland) und Staythorpe (Großbritannien) ans Netz. Auch beim Ausbau der erneuerbaren Energien haben wir wichtige Etappenziele erreicht und ihren Anteil an der Eigenerzeugung auf 4,0 % erhöht (2009: 3,5 %). Unser spezifischer Emissionsfaktor sank von 0,796 Tonnen je Megawattstunde Strom (t CO<sub>2</sub>/MWh) im Jahr 2009 auf 0,732 t CO<sub>2</sub>/MWh im Jahr 2010.

#### Ziele im Handlungsfeld Klimaschutz

##### Wir wollen

... die CO<sub>2</sub>-Intensität unseres Kraftwerksparks deutlich reduzieren. Mit physischen und finanziellen Maßnahmen wollen wir unser CO<sub>2</sub>-Risiko bis spätestens 2020 auf das Durchschnittsniveau der Wettbewerber in unseren Märkten senken.

##### Leistungskennzahl

CO<sub>2</sub>-Emissionen unter Berücksichtigung von Minderungen aus CDM/JI und Portfoliooptimierung in Tonnen je erzeugte Megawattstunde Strom (t CO<sub>2</sub>/MWh)

##### Zielgröße

Marktüblicher Emissionsfaktor im Jahr 2020 (0,45 t CO<sub>2</sub>/MWh nach heutiger Erkenntnis)

## Fakten 2010

---

225,3 Mrd. kWh Eigenerzeugung

164,9 Mio. t direkte CO<sub>2</sub>-Emissionen aus der Stromerzeugung

8,9 Mrd. kWh aus erneuerbaren Energien

---

### Verbesserung der CO<sub>2</sub>-Emissionsbilanz

Gesellschaft und Politik erwarten von uns als Europas größtem CO<sub>2</sub>-Einzelemittenten Lösungen zum Schutz des Klimas. Die gesellschaftliche Akzeptanz unseres Unternehmens und unserer Geschäftstätigkeit hängt daher auch von unseren Anstrengungen für den Klimaschutz ab. Neben den politischen Vorgaben auf nationaler und europäischer Ebene sind die Erwartungen der Gesellschaft an uns nicht zuletzt der Grund dafür, dass wir unsere CO<sub>2</sub>-Emissionen je erzeugte Megawattstunde (MWh) Strom senken müssen. Zudem stellen die Kosten für unsere CO<sub>2</sub>-Emissionen ein Risiko dar, das erhöhte Anstrengungen im Vergleich zu unseren Wettbewerbern verlangt. Durch einen langfristigen Umbau der RWE-Erzeugungskapazitäten können wir das CO<sub>2</sub>-Risiko mindern und unsere Wettbewerbsfähigkeit dauerhaft sichern. Hierbei verfolgen wir das Ziel, dass 75 % unserer Stromerzeugungskapazität im Jahr 2025 CO<sub>2</sub>-frei oder CO<sub>2</sub>-arm sein soll. Der Großteil unseres Erzeugungsportfolios soll dann auf erneuerbaren Energien und Gas basieren.

Unser langfristiges CO<sub>2</sub>-Risikoziel orientiert sich an den durchschnittlichen CO<sub>2</sub>-Emissionen je erzeugte Megawattstunde Strom. Bis spätestens 2020 wollen wir unser CO<sub>2</sub>-Risiko mittels physischer und finanzieller Maßnahmen auf das Durchschnittsniveau der Wettbewerber in unseren Märkten senken. Wir gehen aktuell davon aus, dass der übliche Emissionsfaktor in diesen Märkten 2020 bei etwa 0,45 Tonnen CO<sub>2</sub> je MWh liegen wird. Unser Kraftwerksneubau-Programm und der

Ausbau der erneuerbaren Energien führen zu kontinuierlichen Minderungen des CO<sub>2</sub>-Ausstoßes. Welchen Anteil die Kernenergie künftig in unserem Erzeugungsportfolio haben wird, hängt von sicherheitstechnischen Anforderungen sowie von dem Ausgang der gesellschaftspolitischen Diskussion um die Zukunft der Kernenergie ab.

Zu den finanziellen Maßnahmen, auf die wir zur Verbesserung unserer CO<sub>2</sub>-Emissionsbilanz setzen, zählt unter anderem die Kompensation unserer CO<sub>2</sub>-Emissionen durch Emissionszertifikate aus internationalen Klimaschutzprojekten im Rahmen des Clean Development Mechanism (CDM) und Joint Implementation (JI). Die Portfoliooptimierung durch virtuelle Kraftwerkstausch-Transaktionen mit anderen Stromerzeugern liefert ebenso einen Beitrag.

### Modernisierung Kraftwerkspark

Unser konzernweites Kraftwerks-Neubauprogramm befindet sich im letzten Drittel der Realisierungsphase. So können wir ältere und weniger effiziente Anlagen vom Netz nehmen, ohne die Versorgungssicherheit zu gefährden, und gleichzeitig wirtschaftlich Strom produzieren. Dahinter stehen Investitionen von rund 12 Mrd. €, die wir in Deutschland, Großbritannien, den Niederlanden und der Türkei tätigen. Der Umbau unseres Kraftwerksparks ist damit jedoch noch nicht abgeschlossen. Langfristig wollen wir unser Erzeugungsportfolio durch weitere hochmoderne Gas- und Dampfturbinen-Anlagen ergänzen, deren Last schnell verändert werden kann und die deshalb die erneuerbaren Energien ideal ergänzen.

**Braun- und Steinkohlenkraftwerke.** In Deutschland bauen wir am Standort Neurath die modernste Braunkohlen-Doppelblockanlage mit optimierter Anlagentechnik (BoA) der Welt. Die sogenannte BoA 2&3 verfügt über eine Kapazität von 2.100 MW und einen Wirkungsgrad von mehr als 43 %. Die Fertigstellung ist Ende 2011 geplant. Die neue Anlage ersetzt alte

Kraftwerke mit Wirkungsgraden von 30 bis 32 %. Bei vergleichbarer Stromerzeugung stoßen die beiden neuen Blöcke jährlich bis zu 6 Mio. Tonnen weniger CO<sub>2</sub> aus. Am Standort Hamm errichten wir zwei Steinkohlenblöcke mit einer Gesamtleistung von 1.528 MW. Sie sollen 2013 ans Netz gehen. Die neue Anlage mit einem Wirkungsgrad von 46 % wird bei gleicher Stromerzeugung 20 % weniger Steinkohle benötigen als Altanlagen. Im Jahr 2011 nehmen wir in Hamm zwei ältere Kraftwerksblöcke mit einer Kapazität von insgesamt rund 300 MW außer Betrieb. Das im Bau befindliche 1.560-MW-Steinkohlenkraftwerk in Eemshaven (Niederlande) soll 2014 in Betrieb gehen. Es verfügt über einen Wirkungsgrad von 46 % und wird mit bis zu 15 % Biomasse betrieben werden.

**Gas- und Dampfturbinenkraftwerke.** Gaskraftwerke stellen, gemessen an der Anzahl der Projekte sowie der Gesamtkapazität, den wichtigsten Bestandteil unserer Kraftwerksinvestitionen dar. Mit Werten von bis zu 60 % weisen Gas- und Dampfturbinenkraftwerke (GuD) den höchsten Wirkungsgrad fossil befeuerter Kraftwerke auf. Bei Kraft-Wärme-Kopplung (KWK) erreichen sie Energienutzungsgrade von bis zu 80 %. Das 876-MW-GuD-Kraftwerk in Lingen haben wir im

Frühjahr 2010 in Betrieb genommen. Die 1.650-MW-Anlage in Staythorpe war erstmals Ende 2010 mit allen vier Blöcken am Netz. Eine zweite Anlage baut RWE npower am Standort Pembroke in Wales. Das Kraftwerk mit einer Leistung von 2.188 MW wird voraussichtlich 2012 die Stromproduktion aufnehmen. Die beiden britischen GuD-Kraftwerke ersetzen unter anderem auch die Kohlekraftwerke Didcot A und Tilbury, die wir voraussichtlich bis 2015 außer Betrieb nehmen. In den Niederlanden baut Essent derzeit zwei Gaskraftwerke: Die Inbetriebnahme der 426-MW-GuD-Anlage Moerdijk 2 ist für das vierte Quartal 2011 geplant. Die Anlage Claus C (1.304 MW) soll im zweiten Quartal 2012 ans Netz gehen und das bestehende Gaskraftwerk Claus B (640 MW) ersetzen. Im vergangenen Jahr haben wir die Bauentscheidung für unser erstes Kraftwerk in der Türkei getroffen. Die 775-MW-GuD-Anlage Denizli soll Ende 2012 betriebsbereit sein.

#### Ausbau erneuerbarer Energien

Federführend beim Ausbau der erneuerbaren Energien ist unsere 2008 gegründete Gesellschaft RWE Innogy. Unsere konzernweiten Erzeugungskapazitäten auf Basis erneuerbarer Energien haben wir von

Stand der RWE-Kraftwerksprojekte

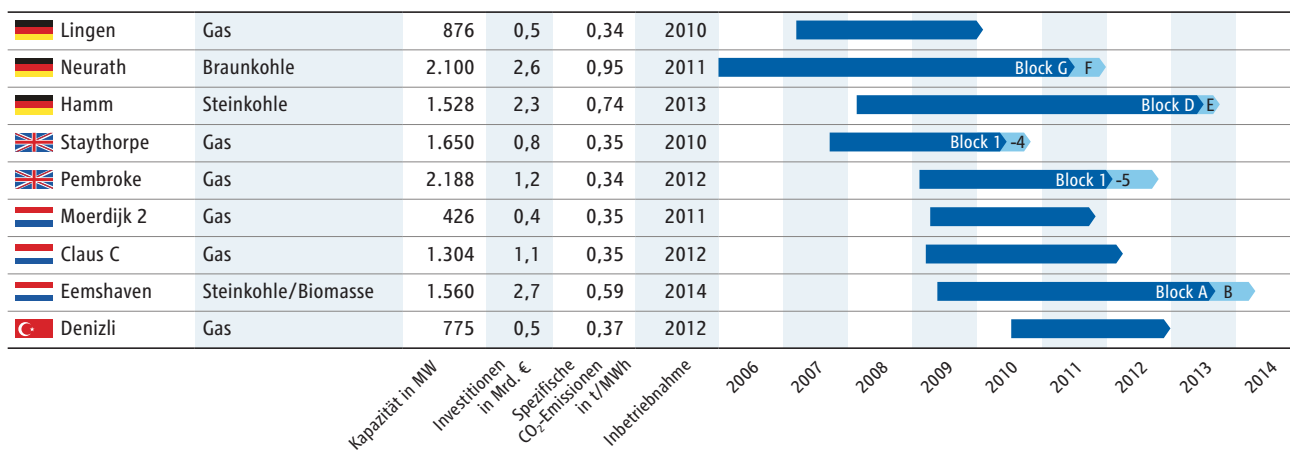



2.532 MW Ende 2009 auf 2.947 MW Ende 2010 gesteigert. Um den Ausbau voranzutreiben, werden wir weiterhin Milliardenbeträge investieren. Die notwendigen Finanzmittel ziehen wir aus den Einnahmen unseres Bestandsgeschäfts, also auch aus unseren Kohle- und Kernkraftwerken. 2014 wollen wir eine regenerative Erzeugungskapazität von 4.500 MW in Bau und Betrieb haben. Wegen Investitionskürzungen und Projektverzögerungen können wir dieses Ziel nicht – wie ursprünglich geplant – bereits 2012 erreichen.

Der Ausbau erneuerbarer Energien erfolgt auf Basis marktreifer Technologien wie Windenergieanlagen an Land und im Meer sowie Wasser- und Biomassekraftwerken an Standorten in Europa. Zugleich treiben wir die Entwicklung neuer Technologien voran. Dazu zählen auch solarthermische Kraftwerke. Das erste befindet sich in der kommerziellen Erprobungsphase (siehe S. 34). Wir fokussieren unsere Investitionen auf die Technologien mit den höchsten volkswirtschaftlichen Kosten-Nutzen-Potenzialen. Daher ist Photovoltaik für uns in Mitteleuropa keine Option. Insgesamt entwickelt RWE Innogy derzeit regenerative Projekte mit einer Gesamtleistung von 18.200 MW. Gegenwärtig befinden sich in Deutschland, Großbritannien, Frankreich, Italien, den Niederlanden, Polen, Portugal und Spanien Anlagen mit einer Gesamtkapazität von 1.100 MW im Bau.

**Wind Onshore.** In Deutschland, Großbritannien, den Niederlanden und Spanien verfügt RWE über eine installierte Leistung von rund 1.600 MW Windenergie auf dem Festland. Mitte 2010 haben wir unseren ersten italienischen Windpark mit 25 MW auf Sardinien in Betrieb genommen, ein weiterer 26-MW-Windpark in Süditalien folgte Ende des Jahres. In Frankreich ging ein Windpark mit 8 MW Leistung im Oktober 2010 ans Netz. Mit der Inbetriebnahme von zwei weiteren Windparks Anfang 2011 in Polen haben wir unser dortiges Windportfolio auf insgesamt rund 108 MW

erweitert. Derzeit baut RWE Innogy weitere Onshore-Windparks mit einer Leistung von insgesamt 95 MW. Allerdings werden in Deutschland und den Niederlanden geeignete Standorte knapp: Hier erachten wir den Austausch bestehender durch leistungsstärkere Anlagen (Repowering) als Option. Größeres Ausbaupotenzial sehen wir hingegen in Polen sowie – außerhalb unserer Kernmärkte – in Italien und Frankreich.

**Wind Offshore.** Der Großteil der europäischen Windenergie stammt heute aus Anlagen an Land, das größte Potenzial haben aber zukünftig Windparks auf hoher See. Dort stehen große Flächen zur Verfügung, die eine bessere Windausbeute bieten. Daher richtet sich auch bei RWE der Fokus auf den Ausbau der Offshore-Kapazitäten. Die technischen Herausforderungen bei Bau, Betrieb und Wartung der Windkraftanlagen, die bis zu 100 Kilometer vor der Küste und in bis zu 40 Metern Wassertiefe errichtet werden, sind allerdings erheblich. Zudem verlaufen die Kabeltrassen zum Anschluss der Windparks teilweise durch Naturschutzgebiete. Darum entwickeln wir gemeinsam mit den zuständigen Behörden Lösungen, um einen sicheren und umweltfreundlichen Betrieb unserer Anlagen zu ermöglichen.

Geeignete Schiffe zur Errichtung von Windkraftanlagen auf offener See stehen zudem nur in begrenztem Umfang zur Verfügung. Um von Engpässen unabhängig zu sein, haben wir zwei Installationsschiffe in Auftrag gegeben. Diese sollen ab 2011 bereitstehen. Zur Umsetzung unserer Ausbaupläne haben wir langfristige Lieferverträge über Windenergieanlagen geschlossen und uns 250 Offshore-Turbinen mit einem Lieferumfang von insgesamt 2 Mrd. € gesichert.

Mit unseren 2003 beziehungsweise 2009 in Betrieb genommenen Windparks North Hoyle (60 MW) und Rhyl Flats (90 MW) vor der walisischen Küste haben wir umfangreiche Erfahrungen bei der Umsetzung von Offshore-Projekten gesammelt. Großbritannien

bietet für die Errichtung von Offshore-Windparks aufgrund seiner geografischen Gegebenheiten und Windverhältnisse besonders vorteilhafte Bedingungen. Zudem sind die Investitionsbedingungen besser als etwa in Deutschland, da die benötigten Flächen bis zu 50 Jahre lang gepachtet werden können. So kann ein späteres Repowering bereits heute in die Wirtschaftlichkeitsbetrachtungen einbezogen werden.

In Bau befindet sich derzeit das 504-MW-Windparkprojekt Greater Gabbard vor der ostenglischen Küste, an dem RWE Innogy mit 50 % beteiligt ist. Die vollständige Inbetriebnahme ist für 2012 geplant. Größtes Einzelvorhaben von RWE ist der Windpark Gwynt y Môr vor der Küste von Nordwales. Mit der Errichtung der Fundamente für die 160 Turbinen mit einer Gesamtleistung von 576 MW soll Ende 2011 begonnen werden. Nach geplanter Fertigstellung im Jahr 2014 wird Gwynt y Môr weltweit einer der größten Offshore-Windparks sein. Zudem ist RWE Innogy mit rund 27 % am belgischen Offshore-Windpark Thornton Bank beteiligt, der bis 2013 von 30 MW auf 325 MW ausgebaut werden soll.

Ein weiterer Investitionsschwerpunkt ist unser erster deutscher Offshore-Windpark Nordsee Ost mit 295 MW Gesamtleistung. Bauvorbereitende Maßnahmen laufen bereits. Die Installation der Hochspannungssseekabel durch den verantwortlichen Übertragungsnetzbetreiber vorausgesetzt, könnten ab 2012 die ersten der insgesamt 48 Windturbinen Strom in das Netz einspeisen. Die EU unterstützt die Realisierung von Nordsee Ost als ein europäisches Leuchtturmprojekt im Bereich der erneuerbaren Energien mit insgesamt 50 Mio. €.

Derzeit entwickelt RWE Innogy zudem den Offshore-Windpark Innogy Nordsee 1, mit rund 960 MW der größte geplante Offshore-Windpark vor der deutschen Küste. Im Januar 2010 hat die britische Regierung RWE Innogy im Rahmen einer Ausschreibung die Genehmigung erteilt, die Offshore-Windprojekte Atlantic Array und Dogger Bank zu entwickeln. Atlantic Array mit einer Erzeugungleistung von bis zu 1.500 MW werden wir zunächst allein entwickeln. Dogger Bank haben wir dagegen als Teil eines Konsortiums mit dem Namen „Forewind“ gewonnen, an

**Ausbau erneuerbarer Energien** (Stand 31.12.2010)  
in Gigawatt

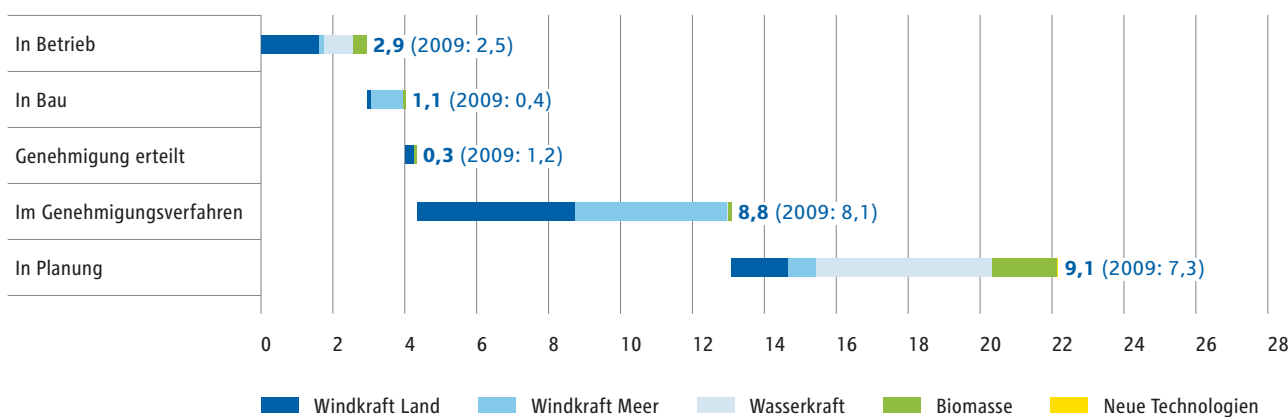

dem RWE Innogy mit 25 % beteiligt ist. In dem Gebiet sollen Windkraftanlagen mit einer Gesamtleistung von 9.000 MW errichtet werden.

**Wasserkraft.** Im Jahr 2010 stammten rund 2 % unserer Stromerzeugung aus Laufwasserkraftwerken in Deutschland, Großbritannien, Frankreich und auf der iberischen Halbinsel. Einen Großteil unserer Laufwasserkraftwerke betreiben wir seit über hundert Jahren, insbesondere an der Mosel in Deutschland. In West- und Mitteleuropa besteht nur noch begrenztes Ausbaupotenzial, hauptsächlich durch Modernisierung bestehender Anlagen sowie durch Verbesserung ihres Wirkungsgrades.

**Biomasse.** Die europäischen Klimaschutzziele lassen sich aller Voraussicht nach nur durch einen verstärkten Einsatz von Biomasse erreichen. Konzernweit verfügt RWE einschließlich der Mitverbrennung in Kohlekraftwerken derzeit über Kapazitäten von rund 700 MW zur Stromerzeugung aus Biomasse. Die Mitverbrennung leistet einen wichtigen Beitrag zur Senkung von CO<sub>2</sub>-Emissionen, eine EU-weite Förderung existiert allerdings nicht, sodass national unterschiedliche Rahmenbedingungen bestehen. Die Niederlande, die die Mitverbrennung von Biomasse fördern, sind unser wichtigster Markt für die Verstromung von Biomasse. Essent verfügt über eine Kapazität von rund 320 MW und erzeugt 10 % des Stromaufkommens aus Biomasse – ein Großteil durch Mitverbrennung im Steinkohlenkraftwerk Amer. Dieses soll künftig durch eine Großanlage zur Pelletierung von Holz aus nachhaltigem Anbau versorgt werden, die wir derzeit in Georgia (USA) errichten (siehe S. 38).

In Deutschland setzen wir aufgrund der gesetzlichen Rahmenbedingungen auf kleinere Kraft-Wärme-Kopplungsanlagen, die neben der Stromerzeugung auch lokal ansässige Verbraucher mit Wärme versorgen. Im

Jahr 2010 haben wir im Kreis Siegen-Wittgenstein ein Biomasse-Heizkraftwerk mit 5 MW in Betrieb genommen, das ein Holzpelletwerk mit Wärme versorgt. Weitere Anlagen errichten wir bis 2012 mit den Biomassekraftwerken Stallingborough Alpha (65 MW) und Markinch (50 MW) in Großbritannien. Auf Sizilien planen wir ein 19-MW-Projekt. Diese kleineren Anlagen sind im Vergleich zur Mitverfeuerung in Großkraftwerken jedoch deutlich teurer.

### Integration erneuerbarer Energien

Trotz der wetterbedingt schwankenden Einspeisung der erneuerbaren Energien muss eine nachfragegerechte Stromversorgung jederzeit garantiert sein. Unsere Maßnahmen zielen sowohl auf eine verbesserte Regelfähigkeit unserer thermischen Stromerzeugung als auch auf den Ausbau und die Weiterentwicklung von Energiespeicherung. Mit unseren neuen GuD-Kraftwerken können wir zu Spitzenlastzeiten schnell und kostengünstig Strom bereitstellen. Zudem verbessern wir die Regelfähigkeit unserer Kohlekraftwerke, um die Last noch schneller variieren zu können.

Pumpspeicherkraftwerke sind eine etablierte Technik zur Speicherung von Strom durch Hochpumpen von Wasser, welches in Zeiten großer Stromnachfrage über Turbinen wieder abgelassen wird. Im Südschwarzwald (Deutschland) sind wir über die Schluchseewerk AG, eine 50-prozentige Beteiligung von RWE Power, an der Projektierung eines 1.400-MW-Pumpspeicherkraftwerks beteiligt. In Vianden (Luxemburg) schreitet die Erweiterung eines der größten europäischen Pumpspeicherkraftwerke auf 1.300 MW gut voran. Dies entspricht der Erzeugungskapazität von 260 modernen Offshore-Windkraftanlagen. Die neue Pumpturbine soll Mitte 2013 in Betrieb gehen. Im Rahmen unserer Innovationsstrategie entwickeln wir zudem neuartige Speichertypen wie Druckluftspeicher (siehe S. 35).

Eine weitere Herausforderung beim Ausbau der erneuerbaren Energien besteht darin, den abseits der Ballungsräume erzeugten Strom zu den Verbrauchszentren zu transportieren. Dazu muss in Deutschland das Übertragungsnetz massiv ausgebaut werden. Nach einer Studie der Deutschen Energie-Agentur sind bis 2020 dafür bis zu 3.600 km neue Höchstspannungstrassen zu bauen, was einem Investitionsbedarf von 9,7 Mrd. € entspricht. Amprion, unser unabhängiger Übertragungsnetzbetreiber, wird das Transportnetz bis 2020 um 800 km erweitern und dafür 3 Mrd. € in Freileitungen und Schaltanlagen investieren (siehe S. 38).

#### CDM/JI

Ein Baustein zur Verbesserung unserer Emissionsbilanz ist die Nutzung von Zertifikaten für die Verminderung von Klimagasen im Rahmen der Kyoto-Mechanismen Clean Development Mechanism (CDM) und Joint Implementation (JI). Wir entwickeln dazu in Entwicklungs- und Schwellenländern sowie in anderen Industriestaaten eigene Projekte oder kooperieren mit Projekten Dritter. Im Rahmen des EU-Emissionshandelssystems dürfen wir bis 2020 in Summe bis zu 100 Mio. Tonnen unseres CO<sub>2</sub>-Ausstoßes durch Einreichung von Zertifikaten aus CDM- und JI-Projekten abdecken. Die Zertifikatskosten liegen dabei meist unter den Marktpreisen für EU-Emissionsrechte (sogenannte EU-Allowances, EUAs).

Zum Ende des Geschäftsjahres 2010 verfolgten wir 137 Projekte und hatten Zertifikate für 68,6 Mio. Tonnen CO<sub>2</sub>-Äquivalente vertraglich gesichert, unter anderem in Ägypten, China, Indien, Südkorea, Thailand und Vietnam. Unter Berücksichtigung von Projektrisiken erwarten wir aus diesem Portfolio Emissionsrechte für 41,4 Mio. Tonnen. Für 14,5 Mio. Tonnen haben wir bereits Zertifikate erhalten, 4,6 Mio. Zertifikate wurden bereits eingesetzt.

#### Anpassung an den Klimawandel

Anpassung an den Klimawandel ist für RWE vor allem eine Frage der Versorgungssicherheit. Infolge des Klimawandels ist zukünftig häufiger mit extremen Wetterereignissen zu rechnen. Starke Stürme, Überflutungen sowie lange Trockenperioden könnten die Sicherheit der Stromversorgung beeinträchtigen. RWE beteiligt sich als Praxispartner an Projekten und Initiativen, die die Auswirkungen des Klimawandels sowie lokale Mikroklimaveränderungen erforschen. Im Mittelpunkt steht die Frage, wie sich diese auf den Betrieb unserer Kraftwerke und Netze auswirken. Wichtige Aspekte sind der Schutz vor Überflutungen, die Verfügbarkeit von Kühlwasser für den Kraftwerksbetrieb, das Dargebot erneuerbarer Energien sowie der störungsfreie Betrieb von Freileitungen und Transformatorenstationen. Unsere bestehenden Stromversorgungsanlagen sind so ausgelegt, dass sie extremen Wetterereignissen standhalten können.

Sollten längere Hitzeperioden für Trockenheit in unseren Kernmärkten sorgen, hätte dies Folgen für den Betrieb unserer thermischen Kraftwerke: Rund 80 % unserer Steinkohlen- und Gaskraftwerke sowie alle unsere Kernkraftwerke decken ihren Kühlwasserbedarf aus nahegelegenen Flüssen. Allerdings gibt es auch hier risikomindernde Redundanzen. Zum Beispiel verfügt das Kernkraftwerk Biblis neben der Direktkühlung aus dem Rhein auch über Ventilator-kühltürme.

Unsere Braunkohlenkraftwerke wären von wetterbedingten Veränderungen der Flusspegel nicht betroffen, da sie ihr Kühlwasser überwiegend aus dem Sümpfungswasser der Tagebaue beziehen. Im Falle von Meerwasserkühlung entwickeln wir unter Berücksichtigung des größten anzunehmenden Hochwassers einschließlich weiterer Sicherheitszuschläge Schutzkonzepte, sodass über die Anlagen kein Hoch-

wasser in das Hinterland eindringen kann. Dies ist beispielsweise bei unserem im Bau befindlichen Kraftwerk Eemshaven der Fall. Wenig Erfahrung liegt bisher zur langfristigen Bewährung von Anlagen zur Erzeugung erneuerbarer Energie vor, etwa zu den Belastungen von Offshore-Windparks durch Wind und Seegang.

Unsere Stromübertragungsnetze sind widerstandsfähig gegen wetterbedingte Belastungen ausgelegt. Die Konstruktion der Freileitungen weist ein hohes Maß an Sicherheitszuschlägen auf, was bei den Stürmen der vergangenen Jahre großflächige und systemgefährdende Ausfälle verhinderte. Zudem sind

die Systeme redundant ausgelegt, sodass stets ein Reservesystem zur Verfügung steht, das eine ausgefallene Funktion übernehmen kann. Die Verteilnetze weisen insgesamt einen hohen Anteil an Erdverkabelung auf. Dies erhöht die Widerstandsfähigkeit gegen Beschädigungen von außen, beispielsweise durch Windbruch in waldreichen Regionen. Vermehrt auftretende Hochwasser könnten eine sichere Stromversorgung gefährden, insbesondere durch Überflutung von Schaltanlagen und Transformatorenstationen. Nach den Erfahrungen im Jahr 2010, insbesondere bei den Hochwassern in Ungarn und Polen, haben wir Planungen zur Verbesserung des Hochwasserschutzes dieser Anlagen aufgenommen.

| Kennzahlen Klimaschutz                                     |                        | 2010  | 2009  | 2008  | 2007  |
|------------------------------------------------------------|------------------------|-------|-------|-------|-------|
| <b>CO<sub>2</sub>-Emissionen</b>                           |                        |       |       |       |       |
| Emissionszertifikatepflichtige CO <sub>2</sub> -Emissionen | Mio. t CO <sub>2</sub> | 164,9 | 149,1 | 172,1 | 187,1 |
| CO <sub>2</sub> -Emissionen aus biogenen Brennstoffen      | Mio. t CO <sub>2</sub> | 2,0   | 2,5   | 2,2   | 0,8   |
| CO <sub>2</sub> -Emissionen Scope 1 <sup>1</sup>           | Mio. t CO <sub>2</sub> | 167,1 | 151,3 | 174,5 | 189,7 |
| CO <sub>2</sub> -Emissionen Scope 2 <sup>2</sup>           | Mio. t CO <sub>2</sub> | 3,1   | 3,5   | 3,8   | 3,6   |
| CO <sub>2</sub> -Emissionen Scope 3 <sup>3</sup>           | Mio. t CO <sub>2</sub> | 135,7 | 128,1 | 127,0 | 127,8 |
| Spezifische CO <sub>2</sub> -Emissionen                    | t CO <sub>2</sub> /MWh | 0,732 | 0,796 | 0,768 | 0,866 |
| <b>Stromerzeugung gesamt</b>                               |                        |       |       |       |       |
| Braunkohle                                                 | TWh                    | 71,0  | 70,9  | 73,9  | 76,1  |
| Steinkohle                                                 | TWh                    | 55,2  | 44,1  | 62,0  | 71,0  |
| Kernenergie                                                | TWh                    | 45,2  | 33,9  | 49,3  | 32,1  |
| Gas                                                        | TWh                    | 42,8  | 29,7  | 31,2  | 29,3  |
| Erneuerbare Energien                                       | TWh                    | 8,9   | 6,5   | 5,3   | 5,2   |
| Wasser                                                     | TWh                    | 3,5   | 3,4   | 3,4   | 3,7   |
| Wind                                                       | TWh                    | 3,1   | 2,2   | 1,3   | 1,1   |
| Biomasse                                                   | TWh                    | 2,3   | 0,9   | 0,6   | 0,4   |
| Sonstige                                                   | TWh                    | 2,2   | 2,1   | 2,4   | 2,4   |

1 Scope 1: direkte CO<sub>2</sub>-Emissionen aus eigenen Quellen (Stromerzeugung, Öl- und Gasförderung, Gastransport)  
 2 Scope 2: indirekte CO<sub>2</sub>-Emissionen aus der Erzeugung konzernextern bezogenen Stroms, der bei der Durchleitung durchs RWE-Netz verbraucht wird (Netzverluste)  
 3 Scope 3: indirekte CO<sub>2</sub>-Emissionen, die nicht unter Scope 1 und Scope 2 fallen: Sie stammen aus der Erzeugung konzernextern bezogenen Stroms (inkl. Netzverlusten im Stromnetz Dritter), der Förderung und dem Transport der von uns eingesetzten Brennstoffe und dem Verbrauch von Gas, das wir an Kunden verkauft haben.

## 3.2 Energieeffizienz

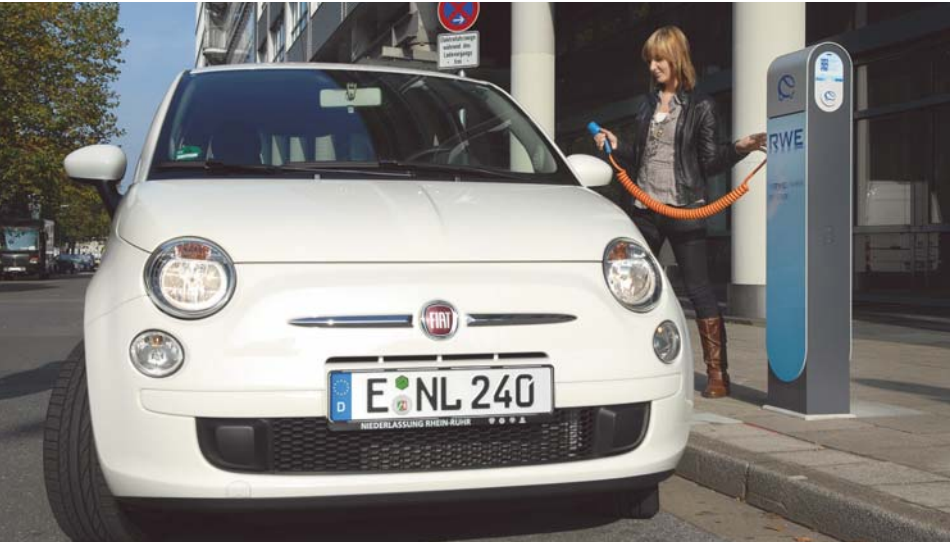

### Elektromobilität als Chance

Elektrofahrzeuge stellen eine umweltfreundliche Alternative zu konventionellen Automobilen dar. Weltweit arbeiten Entwickler und Hersteller an neuen Technologien – erste Serienfahrzeuge kommen 2011 auf den Markt. Wir haben damit begonnen, die notwendige Ladeinfrastruktur aufzubauen. Diese ist entscheidend, um Kunden für Elektromobilität zu gewinnen. Um deren Alltagstauglichkeit zu testen, haben wir in Projekten in Berlin, entlang der Autobahn A40 im Ruhrgebiet sowie in Warschau bis Ende des Jahres 2010 rund 600 Ladepunkte errichtet.

**Die Steigerung der Energieeffizienz ist ein Schlüsselfaktor für das Erreichen der Klimaschutzziele. Mit dem Bau neuer Kraftwerke erzeugen wir Strom immer effizienter. Gleichzeitig reduzieren wir unseren eigenen Energieverbrauch und unterstützen unsere Kunden beim Energiesparen.**

Als Energieversorger können wir auf zwei Wegen dazu beitragen, CO<sub>2</sub>-Emissionen durch Energiesparen zu vermindern: einerseits bei der Stromerzeugung, unter anderem durch verbesserte Wirkungsgrade unserer Kraftwerke, andererseits durch Unterstützung unserer Kunden beim sparsamen Umgang mit Energie. Darauf zielen Dienstleistungen und Innovationen ab, die wir unseren Kunden anbieten. Wir setzen auf Elektromobilität als neues Geschäftsfeld und verknüpfen diese innovative Antriebstechnologie eng mit dem Einsatz erneuerbarer Energien.

### Zielerreichung

Seit 2010 nehmen wir in großem Umfang neue Kraftwerke in Betrieb. Wir erwarten dadurch einen Anstieg der mittleren Wirkungsgrade unserer fossil befeuerten Kraftwerke um mehr als 3 Prozentpunkte bis 2013. In unserem zentral geführten Fuhrpark haben wir seit 2009 rund 40 % der PKWs gegen verbrauchsärmere Fahrzeuge ausgetauscht. Projekte zur Verbesserung der Energieeffizienz bei unseren Immobilien haben wir eingeleitet, Kundenprojekte ausgeweitet. Messbare Effizienzsteigerungen erwarten wir ab 2011.

#### Ziele im Handlungsfeld Energieeffizienz

##### Wir wollen

... sowohl unsere eigene Energieeffizienz als auch die unserer Kunden erhöhen.

##### Leistungskennzahl

Erhöhung der Energieeffizienz in %

##### Zielgröße

- RWE-Kraftwerke: 11 % bis 2013
- RWE-Fuhrpark: 20 % bis 2012
- RWE-Immobilien: 5 % bis 2014
- RWE-Kundenprojekte: 8 % bis 2012

## Fakten 2010

---

**19** % Senkung des spezifischen Treibstoffverbrauchs in 5 Jahren

**17** % Energieeinsparung bei Modernisierung und Sanierung von Gebäuden

**8,3** % Energieeinsparung in Haushalten

---

### Steigerung der eigenen Energieeffizienz

Ein großer Hebel für die Minderung unserer CO<sub>2</sub>-Emissionen liegt in einer möglichst effizienten Stromerzeugung in unseren Gas- und Kohlekraftwerken. Wir wollen aber auch unseren eigenen Energieverbrauch, insbesondere bei Immobilien, Fuhrpark und IT, senken und damit zur Verminderung der CO<sub>2</sub>-Emissionen beitragen.

**Effiziente Stromerzeugung.** Der Wirkungsgrad modernster Anlagen liegt bei Braunkohlenkraftwerken aktuell bei mehr als 43 %, bei Steinkohlenkraftwerken bei 46 % – und damit um bis zu 13 Prozentpunkte über dem Wirkungsgrad von Altanlagen. Bei gleicher Stromerzeugung sparen moderne Kraftwerke dadurch um bis zu 30 % an CO<sub>2</sub>-Emissionen ein. Der Wirkungsgrad unserer Kohlekraftwerke liegt heute bei durchschnittlich rund 36 %.

Wir erneuern daher große Teile unseres Kraftwerksparks. Die zwei in Bau befindlichen Braunkohlenblöcke in Neurath (BoA 2&3) mit einer Kapazität von 2.100 MW und einem Wirkungsgrad von mehr als 43 % werden ältere 150-MW-Braunkohlenblöcke des bestehenden Kraftwerksparks ersetzen, deren Wirkungsgrad lediglich rund 30 % beträgt. Die beiden im Bau befindlichen Steinkohlenblöcke am Standort Hamm sind auf einen Wirkungsgrad von 46 % ausgelegt. Insgesamt rechnen wir durch die Inbetriebnahme neuer Anlagen für die Jahre 2011 bis 2013 mit

einer Anhebung des mittleren Wirkungsgrades unseres Kraftwerksparks um mehr als 3 Prozentpunkte. Die nächste Kraftwerkstechnologie mit noch höheren Wirkungsgraden haben wir bereits in der vorkommerziellen Erprobung. Die von RWE entwickelte „Wirbelschichttrocknung mit interner Abwärmenutzung“ (WTA) zur Trocknung der Braunkohle vor dem Verbrennungsprozess testen wir derzeit in einer Prototypanlage, die den 1.000-MW-Braunkohlenblock BoA 1 mit rund 25 % seines Braunkohlebedarfs versorgt. Die WTA bietet das Potenzial, den Wirkungsgrad künftiger Braunkohlenanlagen auf über 47 % zu steigern.

**Eigener Energieverbrauch.** Der zentral verwaltete Fuhrpark von RWE in Deutschland umfasst etwa 3.000 PKWs, die mehr als 20.000 Tonnen CO<sub>2</sub> emittieren. Durch eine Neuausrichtung unseres Fuhrparks wollen wir dessen CO<sub>2</sub>-Ausstoß bis 2012 um 20 % gegenüber 2007 reduzieren. Dazu haben wir im Dezember 2008 eine „grüne Dienstwagenregelung“ eingeführt. Danach wählt RWE nur noch Fahrzeuge aus, die dem ADAC-Auto-Umweltsiegel „Eco Test“ entsprechen. Bis Ende 2010 haben wir über 1.100 neue Fahrzeuge beschafft, die diese Kriterien erfüllen. In Großbritannien haben wir im September 2010 bis dahin an vielen Stellen verteilte Abteilungen des Kundenservice in dem neuen, hochenergieeffizienten Gebäude Rainton House (Sunderland) zusammengefasst und dafür alte, weniger effiziente Gebäude aufgegeben.

### Effiziente Anwendung von Energie

Mit Dienstleistungen und Produkten zur Energieanwendung wollen wir die Bindung unserer Kunden an RWE verstärken und neue Marktsegmente erschließen. Gleichzeitig wollen wir einen Beitrag leisten, die Erwartungen der Politik zur Steigerung der Energieeffizienz umzusetzen. Energie in nennenswertem Umfang einzusparen erfordert einerseits eine Verhaltensänderung bei dem Verbraucher, andererseits Investitionen in entsprechende Maßnahmen. Hierfür



Weitere Themen im Online-Bericht  
Interne Effizienzmaßnahmen – Immobilien und Green IT

wollen wir die nötige Akzeptanz schaffen und Unterstützung bei der Umsetzung leisten. Unsere Schwerpunkte liegen daher bei der Förderung von Projekten zur effizienten Nutzung von Energie, der Entwicklung neuer Technologien und Service-Angeboten für Privathaushalte sowie beim Aufbau der Elektromobilität.

**150 Mio. € für Energieeffizienz.** Um die Akzeptanz unserer Kunden für Dienstleistungen und Produkte zur Steigerung der Energieeffizienz zu fördern, hat RWE bereits im Jahr 2007 eine Vielzahl von Angeboten im Rahmen des 150-Mio.-€-Projekts für mehr Energieeffizienz gebündelt. Allen Kundengruppen, neben den Haushalten insbesondere kommunalen Partnern, bieten wir effizienzsteigernde Dienstleistungen und Produkte, teilweise mit deutlicher Förderung, an. Ein Schwerpunkt ist die Identifizierung von Einsparmöglichkeiten bei Gebäuden. Beim Verbraucherverhalten setzt unser Schulwettbewerb zum Thema Energieeffizienz an. An diesem beteiligten sich über 18.000 Schüler in Deutschland. Anfang 2011 wurden wir dafür von der Deutschen Energie-Agentur mit dem Label „Good-Practice-Energieeffizienz“ ausgezeichnet.

**Energieberatung.** Für unsere Privatkunden haben wir in Deutschland das Internetportal [www.energiwelt.de](http://www.energiwelt.de) aufgebaut: Nach dem Schema „Informieren, analysieren und realisieren“ erhalten unsere Kunden individuelle Ratschläge für konkrete Energiesparmaßnahmen, eine Abschätzung zu Kosten und Nutzen sowie Ansprechpartner zur Umsetzung der Maßnahmen. In Polen setzen wir seit dem Jahr 2007 das Programm „RWE Conscious Energy“ um. Wir informieren unsere Kunden, wie sie Energie einsparen, ohne ihren Komfort einzuschränken.

**Energie-Contracting.** Großen Strom- und Energieverbrauchern bieten wir Contracting-Modelle für dezentrale Erzeugung von Strom und Wärme. Durch die Bündelung einer Vielzahl kleiner, dezentraler Anlagen zu einem „virtuellen Kraftwerk“ entwickeln wir dieses

Konzept weiter und erschließen unseren Kunden zusätzliche Ertragsmöglichkeiten aus dem Verkauf von Regelenergie.

**Smart Meter.** Intelligente Stromzähler, Smart Meter, vermitteln dem Kunden zeitnahe Informationen über seinen Stromverbrauch. Wir bieten unseren Kunden, die über einen intelligenten Zähler verfügen, eine monatliche Übersicht über ihren Stromverbrauch an; auch eine sekundengenaue Rückmeldung ist möglich. Der Kunde hat damit einen exakten Überblick über Effizienz und Nutzung seiner Geräte. In einem Pilotprojekt in Mülheim an der Ruhr (Deutschland) testen wir diese neue Zählergeneration. Von Juli 2008 bis Ende 2011 tauschen wir dort in über 100.000 Haushalten kostenfrei alte Zähler gegen Smart Meter aus. In Großbritannien ist der Einbau von intelligenten Zählern für Strom und Gas zukünftig gesetzlich vorgeschrieben. Ab 2012 müssen wir demnach rund 60.000 neue Zähler pro Monat installieren. Bevor wir mit der Einführung beginnen, müssen wir die nötigen Systeme bei uns implementieren und unsere Mitarbeiter im Kundendienst entsprechend schulen.

**Smart Home.** Smart Home geht noch einen Schritt weiter. Mit einer intelligenten und komfortablen Vernetzung ist es möglich, auf alle wesentlichen Energieverbraucher eines Haushalts wie Heizkörper, Haushaltsgeräte und Beleuchtung individuell zuzugreifen und diese zu regeln, bei Bedarf auch über das Internet. Da alle Geräte über gesicherte Funkverbindungen mit der Steuereinheit verbunden sind, entfallen in der Wohnung bauliche Veränderungen, eine wesentliche Voraussetzung für die Akzeptanz durch unsere Kunden. Bei der Entwicklung von Smart Home arbeiten wir mit den Partnern Microsoft und dem Haustechnikhersteller eQ-3 zusammen.

**Elektromobilität.** Betrieben mit Ökostrom, fahren Elektroautos nahezu CO<sub>2</sub>-frei. Sie sind leise und emittieren keine direkten Schadstoffe wie Feinstaub oder



Stickoxide. Im Jahr 2020 erwarten wir bis zu 2,5 Mio. Elektrofahrzeuge in Deutschland und über 10 Mio. in Westeuropa – dies entspricht einem Anteil von 19 % der westeuropäischen Neuzulassungen. Wir wollen diese Technologie so schnell wie möglich alltags- und massentauglich machen und haben mit dem Aufbau der nötigen Infrastruktur begonnen. In unseren europäischen Kernmärkten wollen wir einer der führenden Anbieter von Stromladesäulen und den damit verbundenen Dienstleistungen werden. RWE verfügt über eine massenmarktfähige, intelligente Schnellladetechnik, die wir inklusive Installation, Wartung und Betrieb international vertreiben. Unser RWE-Autostrom stammt zu 100 % aus erneuerbaren Energiequellen. Seit Oktober 2010 können unsere Kunden die ersten „e-Drive-Pakete“, bestehend aus einem Elektro-Serienfahrzeug, RWE-Ladeinfrastruktur und RWE-Autostrom-Vertrag, bestellen.

In unterschiedlichen Pilotprojekten sammeln wir Erfahrungen und testen gemeinsam mit Automobilherstellern den Alltagseinsatz von Elektrofahrzeugen: 2008 haben RWE und Daimler das Gemeinschaftsprojekt „e-mobility Berlin“ gestartet. Daimler stellt dabei eine Flotte von rund 100 Elektro-Smarts, RWE ein Netz mit inzwischen rund 140 Ladepunkten zur Verfügung. Unser größtes Projekt mit 140 Elektroautos und rund 400 geplanten Ladepunkten haben wir in Nordrhein-Westfalen gestartet. Hierbei untersuchen wir die Alltagstauglichkeit der Elektromobilität im Pendlerverkehr. Insgesamt haben wir bis Ende 2010 rund 600 Ladepunkte aufgebaut, davon 530 in Deutschland.

Um ein bedarfsgerechtes Netz von Ladeinfrastruktur für Elektroautos zu schaffen, arbeitet RWE unter anderem mit dem deutschen Automobilclub ADAC, dem Autovermieter Sixt sowie dem Parkhausbetreiber APCOA zusammen. Im Jahr 2010 haben wir zudem erstmals drei Tankstellenbetreiber als Infrastrukturpartner gewonnen.

Neben dem Infrastrukturaufbau wurden 2010 weitere Kooperationen mit Nissan, dem chinesischen Automobilhersteller BYD und Technologiepartnern wie HARTING Technology Group geschlossen. Darüber hinaus engagiert sich RWE in allen wichtigen deutschen und internationalen Standardisierungsgremien sowie der Nationalen Plattform Elektromobilität. Ziel ist es, durch einen Einheitsstecker für Fahrzeuge und Infrastruktur, abgestimmte Datenkommunikation und einheitliche Abrechnungsprotokolle grenzüberschreitend Elektromobilität zu ermöglichen.

Mittelfristig können Elektrofahrzeuge auch dazu beitragen, Schwankungen von Erzeugung und Nachfrage im Stromnetz auszugleichen. Mit einer Vielzahl von leistungsstarken Batterien können sie größere Mengen Strom vorübergehend speichern. Vor dem Hintergrund des Ausbaus der erneuerbaren Energien gewinnt diese Möglichkeit zunehmend an Bedeutung. Die schwankende Stromerzeugung aus erneuerbaren Energien erfordert zusätzliche Speichermöglichkeiten. Das Smart Grid (siehe S. 35) übernimmt die Koordination der vollautomatischen Speicherung und späteren Rückspeisung des Stroms.

| Kennzahlen Energieeffizienz                                                |   | 2010 | 2009 <sup>2</sup> |
|----------------------------------------------------------------------------|---|------|-------------------|
| <b>Energetischer Nutzungsgrad fossil befeuerter Kraftwerke<sup>1</sup></b> |   |      |                   |
| Braunkohle                                                                 | % | 34,6 | 33,0              |
| Steinkohle                                                                 | % | 37,0 | 36,1              |
| Gas                                                                        | % | 49,5 | 42,7              |

1 Seit 2010 erfassen wir den energetischen Nutzungsgrad (Strom- und Wärmeerzeugung pro eingesetzte Energiemenge) unserer Kraftwerke.

2 Ohne Wärmeabgabe

### 3.3 Innovationen

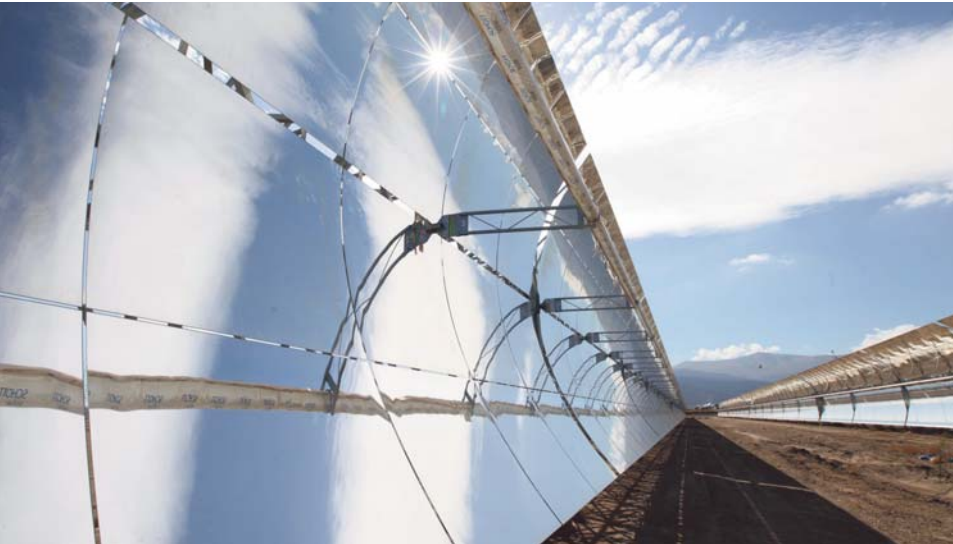

#### Solarenergie in Andalusien

Solarstrom steht normalerweise nur tagsüber zur Verfügung. Das Solar-Kraftwerk Andasol 3 in Südspanien kann mithilfe eines Wärmespeichers mit flüssigem Salz als Speichermedium auch dann Strom erzeugen, wenn die Sonne nicht scheint. Hierdurch wird Solarenergie grundlastfähig und kann zu jeder Tages- und Nachtzeit genutzt werden. Selbst bei vollständiger Dunkelheit kann Andasol 3 bis zu 7,5 Stunden Strom im Volllastbetrieb erzeugen.

Die Energieversorgung der Zukunft soll klimafreundlich, effizient und intelligent sein. Daran arbeiten wir in rund 200 Projekten gemeinsam mit Partnern entlang unserer gesamten Wertschöpfungskette – von der Rohstoffgewinnung über die Energieumwandlung und -verteilung bis zur Energieanwendung.

Um den Bedarf nach verlässlicher und bezahlbarer Energie zu decken und gleichzeitig das Klima zu schützen, müssen wir mit Innovationen an allen Stellschrauben einer zukunftsfähigen Energieversorgung gleichzeitig ansetzen: Strom möglichst effizient und CO<sub>2</sub>-arm erzeugen, neue Energiequellen nutzen, die Stromverteilung flexibel und intelligent gestalten, alltagstaugliche Energiespeicher entwickeln, die Mobilität elektrifizieren und insgesamt Energie effizient nutzen.

#### Zielerreichung

Zur Steuerung unserer vielfältigen Aktivitäten auf dem Gebiet der Forschung und Entwicklung (F&E) haben wir ein konzernübergreifendes Innovationsmanagement aufgebaut. Alle relevanten Konzerngesellschaften sind in die konzernweit einheitlichen Prozesse wie F&E-Planung und -Berichterstattung eingebunden.

#### Ziele im Handlungsfeld Innovationen

##### Wir wollen

... die Verfügbarkeit der optimalen Lösung in unseren Kernprozessen durch Innovationen sicherstellen.

##### Leistungskennzahl

Abdeckungsgrad und Kommunikation der strategisch relevanten F&E-Themen in %

##### Zielgröße

mindestens 95 %

## Fakten 2010

---

149 Mio. € für Forschung und Entwicklung  
 200 Forschungs- und Entwicklungsprojekte  
 360 Mitarbeiter ganz oder teilweise mit F&E-Aufgaben befasst

---

### Clean Coal

Fossile Brennstoffe werden weiterhin wichtige Bausteine in der Stromversorgung bleiben. Um die Akzeptanz der Kohleverstromung sicherzustellen, müssen wir verlässliche Wege finden, die daraus resultierende Emission von CO<sub>2</sub> zu minimieren. Unsere Aktivitäten zur Entwicklung neuer Technologien mit dem Ziel der Reduktion und Umwandlung von CO<sub>2</sub> bündeln wir im Innovationszentrum Kohle am Kraftwerksstandort Niederaußem (Deutschland). Wir kooperieren mit Partnern aus Anlagenbau, chemischer Industrie und Forschungseinrichtungen.

**CO<sub>2</sub>-Abscheidung und -Speicherung.** Eine CO<sub>2</sub>-arme Verstromung von Kohle erfordert im ersten Schritt die Entwicklung effektiver Methoden zur Abscheidung des CO<sub>2</sub> aus dem Rauchgas. Bei der CO<sub>2</sub>-Wäsche wird das CO<sub>2</sub> mit einem chemischen Waschmittel aus dem Rauchgas ausgewaschen. In unserer Pilotanlage am Standort des 1.000-MW-Braunkohlenblocks BoA 1 in Niederaußem erproben wir dieses Verfahren in Kooperation mit BASF und Linde seit August 2009 in größerem Umfang. Am Steinkohlenkraftwerk Aberthaw (Großbritannien) wollen wir an einer 3-MW-Pilotanlage ein Verfahren zur Rauchgaswäsche mit alternativen chemischen Waschmitteln erproben. Bis 2020 wollen wir das Verfahren der CO<sub>2</sub>-Wäsche zur kommerziellen Reife führen, um bestehende Anlagen nachrüsten zu können. Für eine effektive CO<sub>2</sub>-Wäsche muss auch die Vorbehandlung der Rauchgase weiter verbessert werden. Gemeinsam mit dem öster-

reichischen Anlagenbauer Austrian Energy & Environment GmbH testen wir seit Juli 2009 geeignete Verfahren in der REAplus-Anlage in Niederaußem. Eine hierdurch weiter verbesserte Rauchgasentschwefelung und -entstaubung ermöglicht eine direkte Rauchgaszuführung in eine nachgeschaltete CO<sub>2</sub>-Wäsche.

Alle Schritte von der Abscheidung über den Transport bis zur Speicherung von CO<sub>2</sub> erproben wir seit Oktober 2009 gemeinsam mit unseren Partnern American Electric Power (AEP) und Alstom im größeren Maßstab am 1.300-MW-Steinkohlenkraftwerk Mountaineer in New Haven (West Virginia, USA). Das abgetrennte CO<sub>2</sub> wird dabei in tiefliegende Erdschichten geleitet. Ähnlich wie natürliche Erdgasvorkommen kann es dort auf unbestimmte Zeit bleiben. Da es in Deutschland bis zuletzt keinen verbindlichen Rechtsrahmen für die Speicherung von CO<sub>2</sub> gab, haben wir vorerst entsprechende Tätigkeiten mit diesem Entwicklungsziel zurückgestellt. Dies betrifft auch ein geplantes 450-MW-Braunkohlenkraftwerk mit integrierter Kohlevergasung in Hürth bei Köln. Möglichkeiten zur CO<sub>2</sub>-Abtrennung und -Speicherung prüfen wir derzeit am Standort unseres im Bau befindlichen Steinkohlen-Doppelblocks im niederländischen Eemshaven. Wir können ihn um eine Demonstrationsanlage zur CO<sub>2</sub>-Abscheidung ergänzen – vorausgesetzt, wir erhalten Unterstützung aus einem EU-Förderprogramm.

**CO<sub>2</sub>-Nutzung.** Wir untersuchen auch Möglichkeiten, CO<sub>2</sub> als Kohlenstoffquelle für chemische Zwischenprodukte und bei der Energieumwandlung nutzbar zu machen. Gemeinsam mit Partnern aus Industrie und Wissenschaft verfolgt RWE Power dazu verschiedene Pfade der Abscheidung und Nutzung von CO<sub>2</sub> (Carbon Capture and Usage, CCU) und entwickelt diese weiter. Eine Option ist die Einbindung von CO<sub>2</sub> in Mikroalgen mit anschließender energetischer Nutzung der Algenbiomasse. Diese ist aufgrund ihres im Vergleich zu konventioneller Biomasse schnelleren Wachstums und geringeren Flächenbedarfs als Zusatz für Biogasanla-

gen besonders geeignet. Im Projekt DREAM Production wird gemeinsam mit Bayer die Nutzung von CO<sub>2</sub> zur Kunststoffproduktion erprobt. Mit CO<sub>2</sub>RECT (CO<sub>2</sub>-Reaction using Regenerative Energies and Catalytic Technologies) untersuchen wir, wiederum gemeinsam mit Bayer sowie mit Siemens und Hochschulen als Partner, die Nutzung von CO<sub>2</sub> als chemischen Energiespeicher unter Verwendung überwiegend regenerativer Energie. Zusammen mit dem Biotechnologie-Unternehmen BRAIN analysieren wir seit 2010 die Möglichkeiten, CO<sub>2</sub> direkt aus dem Rauchgas mithilfe von Mikroorganismen in neue Biomaterialien, Biokunststoffe oder chemische Zwischenprodukte zur Herstellung von Fein- und Spezialchemikalien einzubinden.

### Regenerative Stromerzeugung

Eine wesentliche Herausforderung beim Aufbau einer auf erneuerbaren Energien basierenden Energieversorgung ist die Erhöhung ihrer Wettbewerbsfähigkeit gegenüber konventionellen Erzeugungstechnologien. Dieses Ziel leitet unsere Forschungs- und Entwicklungsaktivitäten im Bereich erneuerbarer Energien. Darüber hinaus investieren wir in Unternehmen, die bestehende Technologien weiterentwickeln oder neuen Technologien zum Durchbruch verhelfen und diese zur Marktreife bringen. Investitionsschwerpunkte sind regenerative Energieerzeugungs- und Speichertechnologien in Europa.

**Offshore Wind.** Der Aufbau von Windkraftanlagen auf dem offenen Meer ist sehr aufwendig, spezielles Know-how ist dafür zu entwickeln. Wir sind daher seit 2008 an der britischen Initiative „Offshore Wind Accelerator“ (OWA) beteiligt, die zum Ziel hat, die Kosten für Strom aus Offshore-Windparks um 10 % zu reduzieren sowie die Zuverlässigkeit der Anlagen zu erhöhen.

**Solarthermie.** RWE Innogy ist mit 12,8 % am Bau des solarthermischen 50-MW-Kraftwerks Andasol 3 (Spanien) beteiligt. Andasol 3 ist eines der ersten Projekte,

das in dieser Größenordnung das Zusammenwirken eines Wärmespeichers mit einem solarthermischen Kraftwerk erprobt. Der Wärmespeicher ermöglicht eine kontinuierliche, von der Sonneneinstrahlung weitgehend entkoppelte Stromerzeugung. Dies ist ein wesentlicher Vorteil für die Integration solarthermischer Anlagen in die Stromversorgung. Die Errichtung der 210.000 Parabolspiegel sowie der Bau der thermischen Speicher liegen im Zeitplan. In der zweiten Jahreshälfte 2011 soll Andasol 3 in Betrieb gehen.

**Desertec-Initiative.** Gemeinsam mit Partnern untersucht RWE im Rahmen der 2009 gegründeten Desertec Industrial Initiative (Dii) Konzepte, ob und wie Europa künftig mit Solar- und Windstrom aus Nordafrika und dem Nahen Osten versorgt werden kann. Dazu werden geeignete Standorte und die passenden Erzeugungstechnologien ermittelt. Darüber hinaus stehen die Konzeption der erforderlichen Infrastruktur für den Stromtransport nach Europa sowie die notwendigen politischen und regulatorischen Rahmenbedingungen im Vordergrund der Arbeit. Das Desertec-Konzept geht davon aus, dass bis 2050 rund 15 % des europäischen Strombedarfs so gedeckt werden könnten.

**Meeresenergie.** Um langfristig einen effizienten Einsatz im großtechnischen Stil zu ermöglichen, kooperieren wir zur Nutzung von Meeresenergie mit Herstellern für Meereskraftwerke. Gemeinsam mit dem Wasserkraft-Spezialisten Voith Hydro haben wir 2010 vor den Orkney-Inseln (Großbritannien) mit der Installation einer 1-MW-Meeresströmungsturbine begonnen.

**Biokohle.** Durch ein als Torrefizierung bezeichnetes Umwandlungsverfahren entstehen aus Biomasse Biokohlepellets. Diese weisen eine höhere Energiedichte als herkömmliche Holzpellets auf und verbrennen gleichmäßiger. In den Niederlanden bauen wir gemeinsam mit Topell Energy die erste großtechnische Anlage zur Herstellung von Biokohlepellets. Sie hat eine



Produktionskapazität von 60.000 Tonnen pro Jahr und soll 2011 ihren Betrieb aufnehmen. Essent plant die Mitverfeuerung der Biokohlepellets im Steinkohlenkraftwerk Amer in Geertruidenberg (Niederlande) auszuweiten.

### Intelligente Netze

Die infolge des Ausbaus der erneuerbaren Energien steigende Anzahl kleiner, dezentraler Erzeugungsanlagen führt zu Änderungen der Lastbedingungen in Nieder- und Mittelspannungsnetzen. Netzstrukturen und -planungen müssen darauf vorbereitet werden. Begrenzen lässt sich der erforderliche Netzausbau durch den Umbau zu intelligenten Netzen (Smart Grids), die eine effektivere Auslastung und flexiblere Nutzung ermöglichen. Großer Entwicklungsbedarf besteht dabei im Bereich der Steuer- und Regeltechniken. Als Konsortialführer im Rahmen des vom Bundeswirtschaftsministerium geförderten Projekts „Zukunftsnetze/Smart Grids“ setzt RWE Deutschland intelligente Netzkonzepte erstmals in einer Modellregion um. Dem Konsortium gehören ABB, consentec sowie die Technische Universität Dortmund an. Die Inbetriebnahme eines intelligenten Demonstrationsnetzes im Eifelkreis Bitburg-Prüm (Deutschland) ist im Frühjahr 2011 vorgesehen. Die Erkenntnisse aus dem Pilotbetrieb sollen als Grundlage für zukünftige Planungs- und Betriebsgrundsätze für Energienetze dienen und allen Netzbetreibern zur Verfügung stehen.

### Energiespeicher

Die Stromerzeugung aus Wind und Sonne ist wetterabhängig und damit nicht planbar. Um jederzeit die für das Netz erforderliche Balance zwischen Erzeugung und Verbrauch von Strom zu halten, bietet sich der Ein-

satz von Energiespeichern an. Die Möglichkeiten zum Bau neuer Pumpspeicherkraftwerke sind in unseren Kernmärkten aufgrund der erforderlichen geologischen Voraussetzungen allerdings begrenzt. Neue Perspektiven eröffnen sich in Deutschland aus der Nutzung alter Abraumhalden im Ruhrgebiet, die wir gemeinsam mit der RAG Montan Immobilien GmbH planen.

Eine vielversprechende Alternative sind Druckluftspeicher. Sie pressen zu Zeiten eines großen Stromangebots Luft mit hohem Druck in unterirdische Hohlräume. In konventionellen Anlagen beträgt der Wirkungsgrad bislang lediglich rund 55 %, da bei der Kompression der Luft Wärme entsteht. Seit Ende 2009 entwickeln wir in Kooperation mit General Electric, Züblin und dem Deutschen Zentrum für Luft- und Raumfahrttechnik (DLR) einen Druckluftspeicher mit Wärmerückgewinnung („Adiabater Druckluftspeicher für die Elektrizitätsversorgung“, kurz: „Adele“) mit Wirkungsgraden von rund 70 %. Ein Salzstock in Staßfurt (Deutschland) ist die vorrangige Standortoption für eine Demonstrationsanlage. Eine große Herausforderung liegt in der Entwicklung geeigneter Komponenten wie Kompressor und Wärmespeicher. Mit einer Kapazität von 1.000 MWh in der ersten Ausbaustufe könnte „Adele“ den Strom speichern, den 40 hochmoderne Windräder fünf Stunden lang produzieren.

### Energieanwendung

Energieeffizienz durch intelligente Haustechnik (Smart Home) und Stromzähler (Smart Meter) sowie CO<sub>2</sub>-arme Mobilität (Elektromobilität) stehen im Fokus unserer Aktivitäten im Bereich Energieanwendung (siehe S. 30/31).

| Kennzahlen Innovationen      |        | 2010 | 2009 | 2008 | 2007 |
|------------------------------|--------|------|------|------|------|
| F&E-Aufwendungen             | Mio. € | 149  | 110  | 105  | 74   |
| F&E-Mitarbeiter <sup>1</sup> |        | 360  | 350  | 330  | 270  |

<sup>1</sup> Ausschließlich oder zeitweise mit F&E-Aufgaben betraut

## 3.4 Versorgungssicherheit

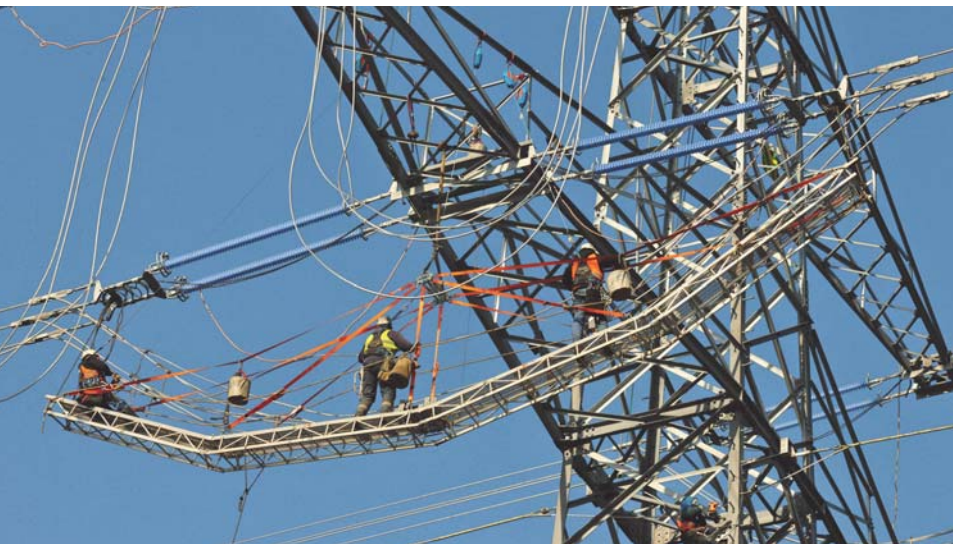

### Ausbau des europäischen Höchstspannungsnetzes

Neue Windparks und neue konventionelle Kraftwerke müssen an das europäische Verbundnetz angeschlossen werden. Damit erhöhen wir die Sicherheit der Stromversorgung. Amprion, der unabhängige Übertragungsnetzbetreiber im RWE-Konzern, bindet nicht nur unsere Kraftwerke an. In Lünen in Nordrhein-Westfalen haben Monteure in schwindelerregender Höhe im Jahr 2010 eine 5 km lange 380-kV-Leitung errichtet, um ein neues Kraftwerk eines Wettbewerbers anzubinden.

**Wir wollen jederzeit eine gesicherte und kostengünstige Versorgung unserer Kunden mit Strom und Gas gewährleisten. Hierfür fördern und beschaffen wir die erforderlichen Primärenergieträger, bauen und betreiben konventionelle Kraftwerke sowie Anlagen zur regenerativen Stromerzeugung und transportieren und verteilen Strom und Gas.**

Eine sichere Versorgung mit Energie besteht aus zwei Komponenten: Erzeugung und Bereitstellung von Strom und Gas zum einen sowie zuverlässiger Transport und Verteilung von Strom und Gas zum anderen. Ein breiter Energiemix stellt unseres Erachtens die beste Risikoabsicherung für eine gesicherte Stromerzeugung dar. In Ausbau und Modernisierung unserer Transport- und Verteilnetze investieren wir erhebliche Mittel. Die Umsetzung wird jedoch sehr oft durch langwierige Genehmigungsverfahren behindert.

### Zielerreichung

Im Jahr 2009<sup>1</sup> konnten wir, wie schon in den Vorjahren, eine weitgehend unterbrechungsfreie Versorgung mit Strom und Gas sicherstellen. Im Transportnetz Strom gab es keine Ausfälle, im Verteilnetz betragen sie in Deutschland 20,4 Minuten pro Kunde. Beim Gastransport lagen sie zuletzt bei durchschnittlich rund drei Minuten pro Kunde und Jahr.

#### Ziele im Handlungsfeld Versorgungssicherheit

##### Wir wollen

... die Systemsicherheit unserer Transportnetze jederzeit gewährleisten.

... unsere Kunden jederzeit bedarfsgerecht mit Strom versorgen.

##### Leistungskennzahl

(n-1)-Kriterium<sup>2</sup> für Stromtransport

Netzausfälle in Minuten pro Jahr und Kunde (System Average Interruption Duration Indicator, SAIDI)

##### Zielgröße

Einhaltung des (n-1)-Kriteriums

SAIDI < 25 Minuten (nur Deutschland)

<sup>1</sup> Zum Redaktionsschluss dieses Berichts lagen die Daten für das Jahr 2010 noch nicht vor.

<sup>2</sup> (n-1)-Kriterium: Für jeden Zeitpunkt muss für jeden Systemausfall sichergestellt werden, dass nicht ein anderes System überlastet oder die Versorgung insgesamt gefährdet wird.

## Fakten 2010

---

11.023 km Stromübertragungsnetz  
 406.600 km Stromverteilnetz  
 490 Mrd. kWh Gasbeschaffung

---

### Verfügbarkeit von Brennstoffen.

RWE setzt bei der Stromerzeugung auf einen breiten Mix von Energieträgern: auf Braun- und Steinkohle, Uran, Erdgas sowie auf die Nutzung erneuerbarer Energiequellen, vor allem der Ressource Wind. Aus unserer Sicht trägt auch die Kernenergie in den nächsten Jahren wesentlich zu einer zuverlässigen und preisgünstigen Versorgung mit Strom bei.

**Erdgas.** Die Versorgung mit Erdgas ist für die Erzeugung von Wärme in Industrie und Haushalten von besonderer Bedeutung. RWE beschafft jährlich etwa 490 Mrd. kWh Erdgas für Vertrieb und Verstromung, 81 % davon liefern wir an Endkunden weiter. 19 % werden für unsere eigene Stromerzeugung benötigt. Wir bauen unsere Förderung von Erdgas in Nordafrika sowie in der Nordsee aus und erschließen neue Fördermöglichkeiten in Zentralasien und Westafrika. In Ägypten, wo RWE Dea bereits seit mehr als 30 Jahren tätig ist, haben wir im Jahr 2010 ein Abkommen für die Entwicklung zweier neuer Erdgasfelder in Höhe von 3,6 Mrd. US \$ getroffen. Dies ist die höchste Einzelinvestition in der Geschichte der RWE Dea. Das geförderte Gas wird für den heimischen Markt bestimmt sein und die ägyptische Energieversorgung sichern. Ab 2015 erwarten wir daraus für den RWE-Konzern eine Fördermenge von mehr als 3 Mrd. m<sup>3</sup> Gas jährlich. Damit würden wir unsere eigene Förderung mehr als verdoppeln. Vor der englischen Küste entwickeln wir in der Nordsee zwei Erdgasfelder, die 2012 die Förderung aufnehmen. Mit einem Anteil

von rund 45 % spielt Erdgas eine zentrale Rolle in der Stromerzeugung von Großbritannien und stellt einen wichtigen Baustein der britischen Klimaschutzpolitik dar. Mit dem Ausbau der Erdgasförderung leistet RWE einen Beitrag zur Erdgasversorgung von Großbritannien.

Dank großer Erdgasressourcen gewinnt Zentralasien an Bedeutung für die Diversifizierung der Energieversorgung Europas. In Turkmenistan eröffnete RWE Dea im April 2010 ein Büro, nachdem 2009 Explorationsrechte im Südosten des Kaspischen Meers gesichert werden konnten. In Aserbaidschan unterzeichneten wir im März 2010 mit der nationalen Erdölfördergesellschaft eine Absichtserklärung zur Exploration im aserbaidischen Teil des Kaspischen Meeres. Vor jeder Explorations- und Fördermaßnahme ermitteln wir in ausführlichen Studien die möglichen Umweltauswirkungen. Wir leiten dann die notwendigen Maßnahmen ein, um die Umwelteinwirkungen so gering wie möglich zu halten.

**Uran.** Uran steht weltweit ausreichend zur Verfügung und wird in rund zehn Ländern in nennenswerter Menge gefördert. Laut Bundeswirtschaftsministerium und OECD reichen die derzeit als wahrscheinlich vermuteten Reserven noch rund 200 Jahre. RWE verfügt neben Lieferverträgen über eigene Uranreserven entlang der gesamten Produktionskette, von Natururan bis zum fertigen Brennelement. Damit verfügen wir über eine hinreichende Vorsorge gegen temporäre Lieferengpässe.

**Kohle.** Braunkohle ist unser verlässlichster Energieträger und preisgünstig verfügbar. Wir beziehen Braunkohle ausschließlich aus eigenen Tagebauen in Deutschland und Ungarn. Allein die genehmigungsrechtlich gesicherten Vorkommen in Höhe von 4,1 Mrd. Tonnen sichern den Betrieb unserer Kraftwerke für die nächsten 30 bis 40 Jahre. Die förder-

**Steinkohlenbezug nach Lieferländern 2010**  
in %

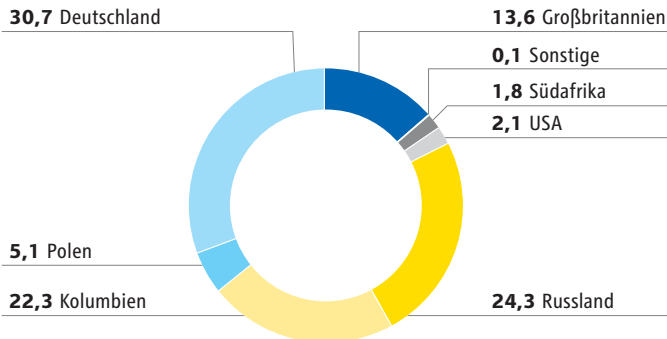

würdigen Vorkommen reichen weit darüber hinaus. Steinkohle ist auf den Weltmärkten ebenfalls ausreichend verfügbar. Die Vorkommen sind über viele Lieferländer verteilt. Entsprechend vielfältig ist auch die Herkunft der Steinkohle, die wir 2010 bezogen haben. Wir beurteilen daher die Versorgung auch in den nächsten Jahren als gesichert.

**Biomasse.** Die weltweite Nachfrage nach Biomasse steigt. Eine ausreichende Verfügbarkeit, insbesondere von nachhaltig erzeugter Biomasse, könnte in Zukunft schwieriger werden (siehe S. 42). In Deutschland setzen wir vor allem auf kleinere Biomassekraftwerke in der Nähe regionaler Bezugsquellen. So haben wir das Biomassekraftwerk Siegen-Wittgenstein in einer der holzreichsten Gegenden Deutschlands errichtet. Das Kraftwerk versorgt das angrenzende, im August 2010 in Betrieb genommene Holzpelletwerk mit Prozessdampf. In den Niederlanden wird die Mitverbrennung von Biomasse in Kohlekraftwerken staatlich gefördert. So setzt Essent im 600-MW-Kraftwerk Amer 9 bis zu 25 % Biomasse ein. Mit dem Bau eines der weltweit größten Werke zur Produktion von Holzpellets in Georgia (USA) hat RWE einen wichtigen Schritt zu einer gesicherten und nachhaltigen Versor-

gung mit Biomasse getan. Das Werk soll bis zu 750.000 Tonnen Holzpellets im Jahr liefern. Dies deckt einen erheblichen Teil des Bedarfs von Essent ab. Im August 2010 wurde mit dem Bau begonnen, die Inbetriebnahme ist für 2011 vorgesehen.

### Stromtransport

Die 220-kV- und 380-kV-Höchstspannungsleitungen bilden das Rückgrat für den Stromtransport. Das Netz von Amprion, dem unabhängigen Betreiber des Übertragungsnetzes im RWE-Konzern, liegt mitten im europäischen Verbundnetz. Von seinem sicheren Betrieb sind nicht nur weite Teile Deutschlands, sondern auch Westeuropas abhängig. Das Übertragungsnetz muss in den nächsten Jahren massiv ausgebaut, immer mehr Windstrom aus dem Norden Deutschlands muss zu den Verbrauchszentren im Westen und Süden transportiert werden. Gleichzeitig gilt es die Verbindungen zwischen Deutschland und den Nachbarländern weiter auszubauen.

Bis zum Jahr 2020 will Amprion 3 Mrd. € in den Ausbau der Übertragungsnetze investieren. Damit sollen 800 km neue Leitungen und 25 neue Umspannanlagen errichtet werden. Ein Beispiel dafür ist der Bau einer rund 130 km langen Leitung vom emsländischen Meppen ins niederrheinische Wesel. Bei diesem Pilotprojekt sollen aus Gründen des Landschaftsschutzes in Siedlungsnähe die Leitungen teilweise unterirdisch verlegt werden. Dies ist zwar mit einem erheblich höheren technischen und finanziellen Aufwand verbunden, wir wollen dadurch aber den Einsatz und das Betriebsverhalten dieser neuen Technik im engmaschigen deutschen Übertragungsnetz erproben. Mit einer 60 km langen Verbindungsleitung in die Niederlande soll bis voraussichtlich 2015 die Übertragungskapazität zwischen beiden Ländern um 1.000 bis 2.000 MW erhöht werden. Wir leisten damit einen Beitrag zum Ausbau eines europaweiten Strommarktes.



### Stromverteilung

Die lokale und regionale Versorgung mit Strom erfolgt auf den Spannungsebenen 0,4 bis 110 kV. Störungen in den Verteilnetzen wirken sich direkt auf den Endverbraucher aus. Deutschland, wo wir Verteilnetze mit einer Länge von 347.000 km betreiben, hat innerhalb Europas in den letzten Jahren stets eine Spitzenposition bei der Verfügbarkeit der Verteilnetze eingenommen. 2009 lagen die systembedingten Stromausfälle bei 20,4 Min. pro Kunde. Europaweit liegen die Vergleichswerte doppelt bis viermal so hoch. Damit sichern wir unseren Kunden im europäischen Vergleich einen Spitzenplatz in Bezug auf Versorgungssicherheit. Zur weiteren Verbesserung der Versorgungssicherheit verlegen wir unsere Verteilnetze in waldreichen Gebieten zunehmend unterirdisch. Damit reagieren wir auf die Erfahrungen mit den schweren Stürmen der letzten Jahre.

Die Auswirkungen schwerer Unwetter auf die Stromversorgung mussten wir im Jahr 2010 insbesondere in Ungarn, wo wir über Verteilnetze mit einer Länge von 44.200 km verfügen, erfahren. Die landesweiten Überschwemmungen beeinträchtigten auch die Stromversorgung, Transformatoren- und Schaltstationen fielen aus. Mit hohem Einsatz haben wir die Stromversorgung in möglichst kurzer Zeit wiederhergestellt und auch technische Hilfe für andere Netzbetreiber geleistet. Für Erneuerung, Ausbau, Instandhaltung und Betrieb des Verteilnetzes haben wir für 2009 bis 2019 konzernweit rund 25 Mrd. € eingeplant und leisten damit einen wesentlichen Beitrag zur Versorgungssicherheit.

### Gastransport

Die Unterbrechungen in der Gasbelieferung aus Russland im Januar 2009 haben die Verletzlichkeit der europäischen Gasversorgung aufgezeigt. NET4GAS, unser unabhängiger tschechischer Gasnetzbetreiber, hat im Jahr 2010 mit den Bauarbeiten für die 169 km lange Pipeline GAZELLE begonnen. Die Pipelinerroute bindet Tschechien und die Slowakei über die Anbindungsleitung OPAL an die Ostsee-Pipeline Nord Stream an. Dadurch werden diese unabhängiger von Lieferungen, die durch die Ukraine führen.

Unsere 16,7-prozentige Beteiligung an der Nabucco-Pipeline hat einen wichtigen Stellenwert in unserer Gas-Wachstumsstrategie und treibt die Diversifizierung der Gasquellen und -transportrouten voran. Nabucco soll erstmals eine direkte Erdgaslieferverbindung von den Gasvorkommen am Kaspischen Meer sowie aus dem Nahen Osten schaffen. Sobald unsere Bemühungen um Lieferzusagen der Förderländer erfolgreich sind, kann über den Bau der Pipeline entschieden werden. In der Endausbaustufe ist eine Kapazität von bis zu 31 Mrd. m<sup>3</sup> pro Jahr geplant.

Ein weiterer Baustein bei der Sicherung der Erdgasversorgung ist die Beschaffung von verflüssigtem Erdgas (Liquefied Natural Gas, LNG). Wir bauen eine eigene LNG-Infrastruktur auf, um Erdgas flexibel und bedarfsorientiert in verschiedene europäische Netze einzuspeisen. Wir halten einen Anteil von 50 % am US-amerikanischen Unternehmen Exceleerate Energy, das neun LNG-Tanker betreibt. Zudem sind wir am Bau mehrerer LNG-Terminals beteiligt.

#### Kennzahlen Versorgungssicherheit

|                         |                     | 2010 | 2009 | 2008 | 2007 |
|-------------------------|---------------------|------|------|------|------|
| SAIDI (nur Deutschland) | Min./Kunde          | -*   | 20,4 | 24,7 | 24,4 |
| Förderung von Erdgas    | Mrd. m <sup>3</sup> | 2,79 | 2,92 | 3,33 | 3,22 |
| Förderung von Erdöl     | Mio. m <sup>3</sup> | 2,27 | 2,34 | 2,52 | 2,75 |

\* SAIDI: Die Ergebnisse für 2010 liegen erst Mitte 2011 endgültig vor.

## 3.5 Lieferkette

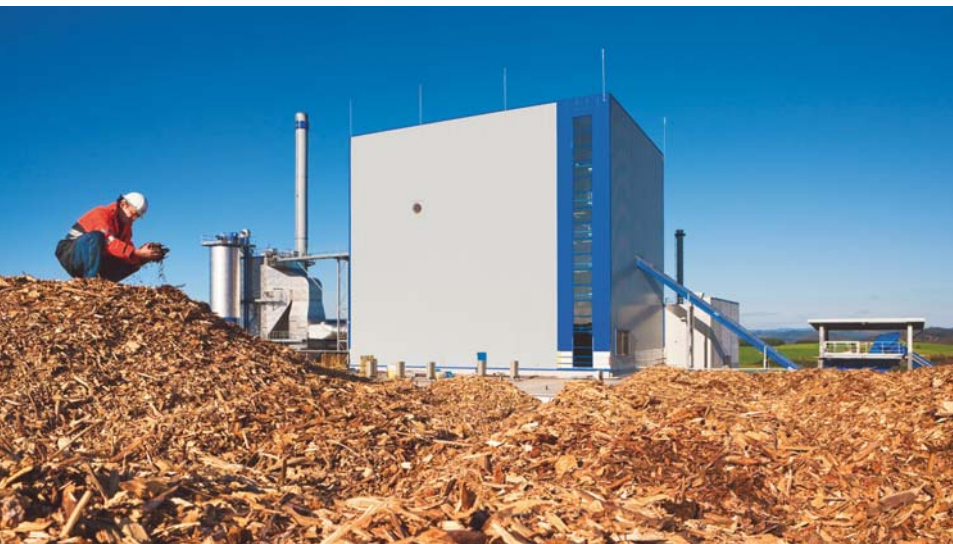

### Biomasse als Energiequelle

Ein Schwerpunkt beim Ausbau erneuerbarer Energien liegt auf Biomasse. Hierbei müssen wir sicherstellen, dass die eingesetzte Biomasse aus nachhaltigen Quellen stammt. Insbesondere wollen wir vermeiden, dass die Nutzung von Biomasse in Konkurrenz zum Anbau von Nahrungsmitteln steht. Das Blockheizkraftwerk Wittgenstein im Sauerland, einer der waldreichsten Regionen Deutschlands, haben wir im August 2010 in Betrieb genommen. Es bezieht seine Biomasse vor allem aus Waldrestholz und Landschaftspflegeholz.

**Unsere Stakeholder hinterfragen zunehmend die Einhaltung von Menschenrechten, angemessenen Arbeitsbedingungen und Umweltschutz in den Herkunftsländern von Waren und Rohstoffen. Wir wollen sicherstellen, dass unsere Lieferkette keine Risiken für die Unternehmensreputation birgt.**

Die Verpflichtung von Vertragspartnern auf die Einhaltung sozialer und ökologischer Standards gilt als ein effektives Mittel, Menschenrechte, angemessene Arbeitsbedingungen und Umweltschutz weltweit zu gewährleisten. Mit der Unterzeichnung des UN Global Compact und mit unserem Verhaltenskodex haben wir uns zur Achtung der Menschenrechte und des Umweltschutzes in unserem Einflussbereich verpflichtet. Gleichzeitig müssen wir die Beschaffung von Brennstoffen, Waren und Dienstleistungen zu wirtschaftlichen Bedingungen sicherstellen.

### Zielerreichung

Bei der Beschaffung von Standardwaren und Dienstleistungen sowie von Energierohstoffen haben wir Prozesse zur Überwachung unserer Lieferanten eingeführt. Damit erhalten wir Erkenntnisse, ob unsere Geschäftspartner die Vorgaben des Global Compact der Vereinten Nationen einhalten. Lieferanten von Dienstleistungen verpflichten wir auf die Einhaltung unserer Vorgaben zu Arbeitssicherheit und Umweltschutz.

#### Ziele im Handlungsfeld Lieferkette

##### Wir wollen

... dass zur Vermeidung von Reputationsrisiken die Einhaltung von internationalen Umwelt- und Sozialstandards integraler Bestandteil unserer Lieferverträge ist.

##### Leistungskennzahl

Abdeckung des Lieferantenmanagements in allen Einkaufsbereichen in %

##### Zielgröße

95 % des Einkaufsvolumens

## Fakten 2010

---

**9,5 Mrd.** € Einkaufsvolumen  
Waren und Dienstleistungen

**11,6 Mio.** t Steinkohle zur Verstromung

**2,3 Mio.** t Biomasse zur Verstromung

---

### Waren und Dienstleistungen

RWE beschafft jährlich Waren und Dienstleistungen im Wert von rund 9,5 Mrd. €. Der zentrale Einkauf erfolgt über die RWE Service GmbH und umfasst ein Volumen von etwa 3,3 Mrd. €. Der übrige Einkauf erfolgt dezentral über die Konzerngesellschaften. Die für alle Konzerngesellschaften verbindliche Richtlinie Einkauf fordert die Einhaltung der Compliance-Regeln und -Prinzipien von RWE sowie des RWE-Verhaltenskodex einschließlich der Anforderungen des UN Global Compact. RWE Service hat die Vorgaben der Konzernrichtlinie in ihrem Einkaufshandbuch konkretisiert. Dort finden sich detaillierte Vorgaben zur Berücksichtigung von Arbeitssicherheit und Umweltschutz bei Beschaffungsvorgängen sowie zur Bedeutung des UN Global Compact. In den allgemeinen Einkaufs- und Zahlungsbedingungen sind die Anforderungen an unsere Lieferanten festgeschrieben.

In Großbritannien überprüft unsere Tochter RWE npower alle Einkäufe mit einem Volumen von mehr als 300.000 £ darauf, ob sie Risiken beinhalten, die sich aus Verstößen gegen Corporate-Responsibility-Grundsätze ergeben. Sollten bei Beschaffungen mit geringerem Wert CR-Aspekte eine besondere Bedeutung haben, werden auch diese Bestellungen einer Prüfung unterzogen.

Nur geringen Handlungsbedarf hinsichtlich der Umsetzung der UN-Global-Compact-Prinzipien sehen wir bei Lieferungen und Leistungen, die wir aus

Europa beziehen. Diese machen den Großteil unserer Beschaffung aus. Im Rahmen unserer Aktivitäten im Bereich Energieeffizienz bieten wir unseren Kunden zunehmend auch elektronische Geräte wie Smart Meter an. Die Geräte werden überwiegend in Ost- und Südostasien gefertigt. Für RWE ergeben sich damit neue Herausforderungen. Wir erproben gegenwärtig, welche Mechanismen wir zur Überwachung der Produktionsbedingungen einsetzen können. Dazu zählt auch die Möglichkeit, innerhalb der Branche oder mit Verbänden beziehungsweise mit anerkannten Organisationen zu kooperieren.

### Brennstoffe

Das Risiko von Verstößen gegen ökologische und soziale Mindeststandards schätzen wir bei der Beschaffung von Brennstoffen im Vergleich zum Einkauf von Standardprodukten, Katalogwaren und Dienstleistungen als deutlich höher ein. Große Teile unserer Brennstoffe beziehen wir auf dem internationalen Rohstoffmarkt über Zwischenhändler. Dies macht eine sorgfältige Risikobewertung unserer Geschäftspartner umso wichtiger.

**Kohle.** Die Verstromung von Steinkohle wird auch in den nächsten Jahren ein unverzichtbares Element unserer Erzeugungsstrategie sein. Während die von uns eingesetzte Braunkohle zu 100 % aus RWE-eigenen Tagebauen in Deutschland und Ungarn stammt, müssen wir 70 % der eingesetzten Steinkohle importieren. Die Frage, unter welchen Bedingungen sie in den Herkunftsländern gefördert wird, hat im Berichtsjahr an Bedeutung gewonnen. Insbesondere Importe aus Kolumbien, die rund 22 % unserer Steinkohlebezüge im Jahr 2010 ausmachten, wurden dabei wiederholt kritisch hinterfragt. Allerdings konnten unsere eigene Bewertung und weitere Untersuchungen die Vorwürfe nicht konkretisieren. Wir werden die Situation weiter beobachten und mit den Lieferanten im Dialog bleiben. Auch in den Niederlanden wird die Frage nach Umwelt- und Menschenrechtsstandards in

der Steinkohleförderung derzeit intensiv von Vertretern von Nichtregierungsorganisationen, der Regierung und des Parlaments diskutiert. Die Importsteinkohle für unsere Kraftwerke beschaffen wir über unsere Tochtergesellschaft RWE Supply & Trading auf den internationalen Kohlemärkten. Ein großer Teil der Beschaffung wird dabei über Kohlehändler abgewickelt. Direkte Vertragsbeziehungen zu einzelnen Kohleminen unterhalten wir in der Regel nicht. RWE Supply & Trading legt daher großen Wert auf eine sorgfältige Kontrolle seiner Handelspartner. So wird im Rahmen des Counterparty Risk Assessments geprüft, ob Informationen über Verstöße gegen Menschenrechte, Arbeitsbedingungen oder Umweltschutz bekannt sind. Ist dies der Fall, wird der jeweilige Handelspartner weiter untersucht und gegebenenfalls zurückgewiesen.

Darüber hinaus verschaffen wir uns auch Einblick in die Produktionsbedingungen vor Ort. Mitarbeiter der RWE Supply & Trading besuchen regelmäßig Kohleminen und verschaffen sich so ein Bild von den lokalen Verhältnissen. Wir wollen unseren Einfluss auf die Förderpraktiken der Minengesellschaften erhöhen. Gemeinsam mit anderen großen europäischen Energieversorgern haben wir Gespräche aufgenommen, um Ansätze für eine sichere Einhaltung von Umwelt- und Sozialstandards in der Kohlelieferkette zu finden.

**Kernbrennstoff.** Die Fertigung und Bereitstellung der Brennelemente für unsere Kernkraftwerke erfolgt in mehreren Schritten. Das geförderte Uranerz wird zunächst aufbereitet, dann in Uranhexafluorid ( $UF_6$ ) umgewandelt, in Anreicherungsanlagen auf etwa 4 % spaltfähiges Material angereichert und anschließend zu Brennelementen verarbeitet. In der Öffentlichkeit wurden dabei immer wieder die Arbeitsbedingungen und Umweltauswirkungen in einzelnen Minen kritisch diskutiert. RWE unterhält keine direkten Lieferbeziehungen zu einzelnen Minen. Um von den Liefermög-

lichkeiten einzelner Minen unabhängig zu sein, beschaffen wir das aufbereitete Uran für die Kernbrennstoffherstellung bei international anerkannten und weltweit tätigen Gesellschaften. Diese verfügen in der Regel über ein umfangreiches Nachhaltigkeitsmanagement. Weiterhin unterzeichnet auch EURATOM alle Beschaffungsverträge, da das rechtliche Eigentum an allen Kernbrennstoffen an EURATOM übergeht. Wir als Betreiber der Kernkraftwerke besitzen nur das wirtschaftliche Nutzungs- und Verbrauchsrecht. So ist zusätzlich sichergestellt, dass der Erwerb des Urans unter streng kontrollierten und von den Regierungen der europäischen Staaten akzeptierten Maßstäben erfolgt.

**Biomasse.** Die Verstromung von Biomasse kann einen erheblichen Beitrag zu einer klimaneutralen Stromerzeugung leisten. Nachhaltig ist die Verstromung von Biomasse aber nur, wenn ihr Anbau umweltverträglich erfolgt, keine schützenswerten Biosphären zerstört und keine Konkurrenz zur Nahrungsmittelproduktion darstellt. Der Umfang, in dem wir Biomasse zur Stromerzeugung einsetzen, hängt von den wirtschaftlichen Rahmenbedingungen ab, insbesondere von der jeweiligen nationalen Förderung. In Deutschland setzen wir hauptsächlich Rest- und Sturmholz ein – in der Regel in kleinen, dezentralen Kraftwerken. Entsprechende Vorgaben stellen sicher, dass nur nachhaltig erzeugte Biomasse verstromt wird. Auch in Ungarn setzen wir entsprechend den staatlichen Regelungen im Braunkohlenkraftwerk Mátra ausschließlich heimische Biomasse zur Mitverbrennung ein.

Bedingt durch die staatliche Förderung nutzen wir Biomasse derzeit besonders umfangreich in den Niederlanden. Im Jahr 2010 setzten wir in unseren Kohlekraftwerken insgesamt 826.085 Tonnen zur Mitverbrennung ein. Dadurch konnte eine Belastung der Atmosphäre von nahezu 1,4 Mio. Tonnen  $CO_2$  vermieden werden. Im Jahr 2010 stammten 13 % der

eingesetzten Biomasse aus den Niederlanden selbst, 81 % aus Kanada und den USA. Um einen nachhaltigen Anbau der Biomasse sicherzustellen, hat Essent im Jahr 2002 ein unabhängiges Zertifizierungssystem initiiert. Die niederländische Stiftung Green Gold Label überwacht und koordiniert die Zertifizierung von nachhaltiger Biomasse. Im Jahr 2010 waren 95 % der importierten Holzpellets, die für die Mitverbrennung eingesetzt wurden, nach diesem Standard zertifiziert. Bis 2015 sollen es 100 % sein.

In Großbritannien setzte RWE npower im Jahr 2010 Biomasse nur in geringem Umfang ein (rund 92.500 Tonnen). Dort steht der Ausbau der Windenergie im Fokus. Vor dem Einsatz prüft ein Team aus CR-Experten, ob die Biomasse aus nachhaltiger Erzeugung stammt, und gibt entsprechende Empfehlungen für die Beschaffung. Unabhängig von nationalen Regelungen halten wir konzernweite Prinzipien für die Beschaffung von Biomassen für notwendig.

Im Jahr 2010 hat eine Arbeitsgruppe unter Leitung der RWE AG einen entsprechenden Entwurf für konzernweite Leitlinien erarbeitet.

**Erdgas.** Bei Erdgas sind unsere Einflussmöglichkeiten auf die Förder- und die Transportbedingungen besonders eingeschränkt, da wir es fast ausschließlich über große Lieferanten beziehen, die ihrerseits an die Lieferverträge mit den Fördergesellschaften gebunden sind. Einfluss haben wir nur dort, wo wir selbst fördern und transportieren. Außerhalb von Europa fördern wir zurzeit nur in Ägypten, wo wir zu 50 % an der Fördergesellschaft SUCO beteiligt sind. Als Nachweis einer verantwortungsvollen Unternehmensführung ist diese Gesellschaft sowohl nach dem internationalen Standard ISO 14001 für Umweltmanagementsysteme als auch nach den Normen ISO 9001 und OHSAS 18001 für Qualitäts- sowie Arbeitssicherheitsmanagement zertifiziert.

| Kennzahlen Lieferkette             |                     | 2010  | 2009 | 2008  | 2007  |
|------------------------------------|---------------------|-------|------|-------|-------|
| <b>Brennstoffe zur Verstromung</b> |                     |       |      |       |       |
| Steinkohle                         | Mio. t              | 11,5  | 9,6  | 12,1  | 12,9  |
| Braunkohle                         | Mio. t              | 90,5  | 92,3 | 95,4  | 100,1 |
| Erdgas                             | Mrd. m <sup>3</sup> | 8,9   | 6,1  | 6,8   | 6,6   |
| Biomasse                           | Mio. t              | 2,3   | 1,6  | 1,1   | 0,9   |
| Kernbrennstoff                     | t                   | 109,1 | 74,0 | 119,1 | 74,0  |
| <b>Erdgas für Vertrieb</b>         | Mrd. m <sup>3</sup> | 39,6  | 33,2 | 32,8  | 33,5  |

## 3.6 Preisgestaltung und Markt

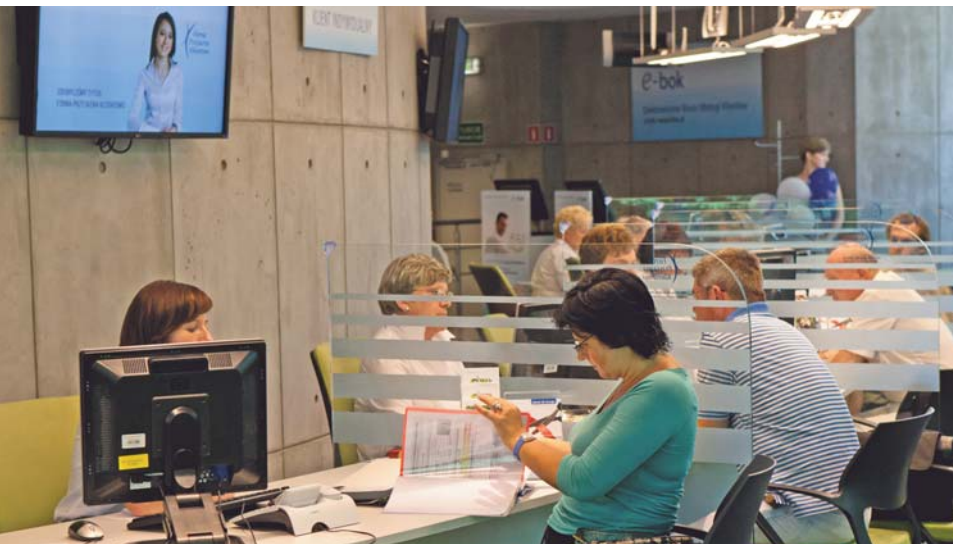

### Kundenberatung in Polen

Persönlicher Kundenkontakt genießt bei RWE einen hohen Stellenwert. Für seine rund 900.000 Kunden im Großraum Warschau eröffnete RWE Polska im August 2010 ein hochmodernes Kundencenter. Bis zu 10.000 Kunden können sich dort pro Monat persönlich beraten lassen. Unsere Kunden können uns aber auch online oder über eine 2007 eingerichtete 24-Stunden-Hotline erreichen. Für ihre hohe Beratungsqualität erhielt RWE Polska im September 2010 das Zertifikat für Kundenfreundlichkeit der Stiftung Fundacja Obserwatorium Zarządzania.

**Wir wollen durch unsere Preisgestaltung und unser Verhalten an den Märkten einen wesentlichen Beitrag dazu leisten, dass RWE als fairer und transparenter Partner wahrgenommen wird. Damit stärken wir unsere Reputation und Kundenzufriedenheit.**

Unsere Preisgestaltung, insbesondere für Privat- und Gewerbekunden, prägt ganz entscheidend das Ansehen von RWE. Strom und Wärme sind Teil der Grundversorgung. Verbraucher stehen daher oftmals Marktmechanismen bei der Preisgestaltung sehr skeptisch gegenüber. RWE befindet sich damit in einem Spannungsfeld zwischen den von Kunden und der Öffentlichkeit an uns gestellten Ansprüchen und dem wirtschaftlichen Unternehmenserfolg.

### Zielerreichung

Die Loyalität unserer Kunden gegenüber RWE messen wir anhand von drei Komponenten: die Bereitschaft, langfristig Kunde bei RWE zu bleiben, sich für weitere Produkte und Dienstleistungen zu interessieren und unser Unternehmen weiterzuempfehlen. Den Kundenloyalitätsindex erheben wir seit 2010 zunächst für Deutschland. Bei unseren Stromkunden bewegen wir uns mit einem Wert von 71 im Jahr 2010 gegenwärtig stabil im Mittelfeld des Wettbewerbs.

#### Ziele im Handlungsfeld Preisgestaltung und Markt

##### Wir wollen

... zufriedene und damit langfristig loyale Kunden haben.

##### Leistungskennzahl

Kundenloyalitätsindex\*

##### Zielgröße

Kundenloyalitätsindex von mindestens 73 im Jahr 2013

\* Der Kundenloyalitätsindex stützt sich auf Befragungen bei unseren Haushalts- und Gewerbekunden. Der Index bewegt sich auf einer Skala von 0 bis 100 Punkte. Bei Werten unter 70 stufen wir die Zufriedenheit als gering ein, bei Werten von 70 bis 79 als mittel und bei Werten über 80 als hoch.

## Fakten 2010

---

16,2 Mio. Stromkunden  
7,9 Mio. Gaskunden

---

### Privat- und Gewerbekunden.

Die Entwicklung der Strom- und Gaspreise hat erheblichen Einfluss auf unsere Reputation bei Privat- und Gewerbekunden – auch wenn in Deutschland Steuern und Abgaben über 41 % des Strompreises ausmachen. Zudem unterliegen die Netzentgelte der staatlichen Regulierung. Auf sie entfallen zurzeit 24 % der Stromrechnung. Im August 2010 hat RWE Vertrieb in Deutschland den Strompreis in der Grundversorgung nach 16-monatiger Preisstabilität angehoben. Wir können nachvollziehen, dass Preiserhöhungen unbeliebt sind. Daher haben wir mit dem neuen Produkt „RWE Strom 36max“ Privatkunden einen Tarif mit dreijähriger Preisgarantie angeboten – ausgenommen staatlich verordnete Abgaben. Aus Marktanalysen wissen wir, dass Kunden Festpreisangebote zunehmend schätzen. Insgesamt ermittelten wir im Segment Strom in Deutschland eine mittlere bis gute Kundenzufriedenheit. Von den meisten unserer großen Wettbewerber heben wir uns damit positiv ab.

In Deutschland und Großbritannien hat RWE bislang nur einen geringen Absatz von grünem Strom. Anders in den Niederlanden: Hier bezogen im Jahr 2010 980.000 Kunden grünen Strom. Für Haushalte mit geringem Einkommen stellen die Energiekosten eine wesentliche Belastung dar. Durch das Programm „Health through Warmth“ hilft RWE npower in Großbritannien Tausenden von Menschen, die Beheizung

ihrer Wohnungen und damit ihre Lebensqualität deutlich zu verbessern. In Deutschland wollen wir sozial schwachen Haushalten durch individuelle Beratung helfen, Energiekosten zu senken. Hierzu haben wir in Berlin im Jahr 2010 das Pilotprojekt „Cleverer Kiez“ gestartet.

### Kommunen und Industriekunden.

Mit unserem Beteiligungsmodell GEKKO bieten wir Stadtwerken eine Beteiligung an dem neuen Steinkohlenkraftwerk Hamm an und damit die volle Verfügung über eigene Kapazitäten zur Stromerzeugung. Mit Green GECCO weiten wir diese Partnerschaft auf erneuerbare Energien aus. Im Jahr 2010 haben sich dazu 26 Stadtwerke und RWE Innogy zusammengeschlossen. Das erste gemeinsame Projekt ist der schottische 20-MW-Windpark An Suidhe.

Die 2008 gestarteten Stromauktionen für Industriekunden haben wir auch 2010 fortgesetzt und damit einen Beitrag für transparente Strombezüge geleistet. In Deutschland wickeln wir rund 21 % unseres Jahresabsatzes an Industriekunden über Auktionen ab.

### Transparente Handelsmärkte.

RWE Supply & Trading ist einer der führenden Energiehändler an den europäischen Handelsplätzen. Nach Vorwürfen, durch eine künstliche Verknappung des Stromangebots den Markt zu beeinflussen, startete RWE 2008 eine Transparenzoffensive und veröffentlicht seither zeitnah alle marktrelevanten Daten zur Stromerzeugung sowie zur Verfügbarkeit von Kraftwerken. Alle Marktteilnehmer verfügen damit über dieselben Informationen. RWE unterstützt die Initiative der EU für volle Transparenz im Energiehandel, die im Herbst 2010 gestartet wurde.



Weitere Themen im Online-Bericht

Cleverer Kiez – Energiesparberatung für Haushalte in Berlin

Grüne Tarife – Angebote für Haushalte, Gewerbekunden und Kommunen

## 3.7 Demografischer Wandel

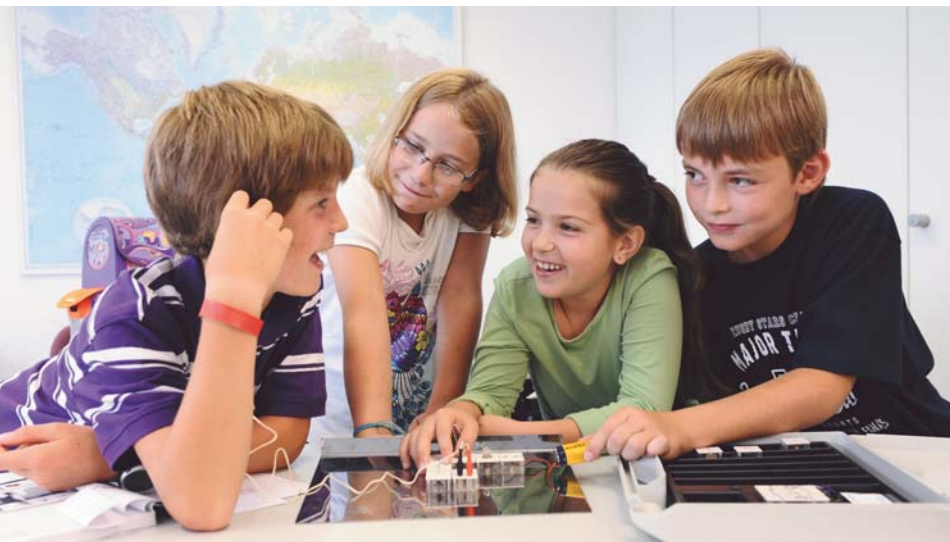

### RWE Schulforum

Interesse an Naturwissenschaften und Technik wecken, das Verständnis für Energiewirtschaft verbessern, das Bildungsangebot der Schulen ergänzen – das sind nur einige der Ziele des RWE Schulforums. Jedes Jahr erreicht RWE durch seine Schulprojekte mehr als 100.000 junge Menschen. So lernen Schüler einen sinnvollen Umgang mit Energie und Technik – und vielleicht können wir dabei junge Menschen für einen späteren Berufseinstieg im Energiebereich begeistern.

**Wir wollen sicherstellen, dass wir heute und in Zukunft jederzeit über ausreichend und fachlich qualifizierte Mitarbeiter verfügen, um unsere Geschäftstätigkeiten erfolgreich durchführen zu können. Mit einer langfristigen Planung und zahlreichen Maßnahmen begegnen wir den Herausforderungen, vor die uns der demografische Wandel stellt.**

RWE hat den demografischen Wandel und den härter werdenden Kampf um Talente als wichtige strategische Themen identifiziert. Da es in Zukunft immer weniger Nachwuchs bei Fachkräften und Akademikern geben wird, verschärft sich der Wettbewerb um geeignete Mitarbeiter. Ein umfassender Pool an Bewerbern und Mitarbeitern sowie eine vielfältig zusammengesetzte Belegschaft gelten als Grundvoraussetzung für den zukünftigen Unternehmenserfolg. Dazu zählt auch, dass wir Frauen die gleichen Karrierechancen bieten wie ihren männlichen Kollegen.

### Zielerreichung

RWE hat die Qualifikationsanforderungen für jede Tätigkeit zu „Jobfamilien“ zusammengeführt und bewertet, welchen demografischen Risiken diese jeweils unterliegen. Für den Großteil der kritischen Jobfamilien konnten bereits Maßnahmen eingeleitet werden. Die Altersstruktur unserer Belegschaft weist insbesondere in Deutschland eine ungleiche Verteilung mit einer starken Häufung bei den Altersklassen 40 bis 55 Jahre auf. Der Anteil der Frauen an den Führungskräften ist von 9,0 % 2009 auf 10,8 % im Jahr 2010 gestiegen.

#### Ziele im Handlungsfeld Demografischer Wandel

##### Wir wollen

... langfristig unseren Personalbedarf qualitativ und quantitativ decken.

##### Leistungskennzahl

Demografie-Index\*

##### Zielgröße

Demografie-Index von mindestens 84

\* Der Demografie-Index misst die Altersstruktur im RWE-Konzern. Je höher der Indexwert, desto gleichmäßiger sind die Altersklassen in den Konzerngesellschaften vertreten. Der bestmögliche Wert ist 100.



## Fakten 2010

70.856 Mitarbeiter

28,4 % der Mitarbeiter sind 50 Jahre alt oder älter

26,2 % Frauenanteil

### Demografie-Index

Für unsere langfristige Personalplanung wird die Altersstruktur unserer Mitarbeiter zunehmend wichtiger. Um die demografische Situation und mögliche Risiken messbar zu machen, haben wir den Demografie-Index (DEX) entwickelt. Der DEX berechnet sich aus dem Anteil der unter 30-jährigen und über 55-jährigen Mitarbeiter, dem Alterskoeffizienten, dem Durchschnittsalter sowie der Altersvarianz der Mitarbeiter. Je höher der DEX-Wert, desto ausgeglichener die Altersverteilung. RWE weist im Jahr 2010 einen Wert von 83,8 auf einer Skala von 0 bis 100 auf. Schwerpunkte unserer Personalpolitik sind die gezielte Rekrutierung neuer Mitarbeiter, Maßnahmen zur Mitarbeiterbindung und ein systematisches Nachfolgemangement.

### Attraktiver Arbeitgeber

RWE zeichnet sich durch eine hohe Bindung seiner Mitarbeiter an das Unternehmen aus. Die Fluktuationsraten liegen deutlich unter 10 %. Eine Ausnahme bildet Großbritannien, wo eine hohe Dynamik im Arbeitsmarkt herrscht, die sich vor allem im Vertrieb bemerkbar macht. Insbesondere in den technisch geprägten Bereichen des Unternehmens ist RWE auf die langjährige Erfahrung seiner Mitarbeiter angewiesen. Daher haben die frühzeitige Bindung von Schul- und Hochschulabgängern sowie Aus- und Weiterbildung für uns hohe Priorität.

**Nachwuchsförderung.** RWE will bereits bei Schülern das Interesse für technisch-naturwissenschaftliche Berufe wecken. Wir entsenden Mitarbeiter in Schulen, betreiben die Schulportale „Junge Energie“ und „RWE Schulforum“, stellen Unterrichtsmaterial bereit und versuchen in direkten Kooperationen mit Schulen, den Schülern Informationen rund um das Thema Energie zu vermitteln. Um speziell Mädchen für einen Beruf im Bereich Technik und Informatik zu begeistern, beteiligen wir uns in Deutschland an Initiativen wie dem bundesweiten „Girls‘Day“. Auch bei der Rekrutierung von Hochschulabsolventen setzen wir frühzeitig an. Zur Erlangung von Qualifikationen, die für unser Geschäft besonders wichtig sind, hat RWE entweder allein oder in Kooperation mit anderen Unternehmen energiewirtschaftliche oder -technische Stiftungsprofessuren eingerichtet. Wir fördern diese mit jährlich rund 1 Mio. €. Ergänzt wird dies durch unsere Stipendienprogramme „RWE Fellows“ und „Power Engineers“, mit denen wir 2010 knapp 90 Studierende mit jeweils 500 € monatlich unterstützt haben. Begleitet werden die Stipendiaten zudem von Mentoren aus den operativen Gesellschaften.

**Fluktuationsrate** in % (bezogen auf Mitarbeiteräquivalente)

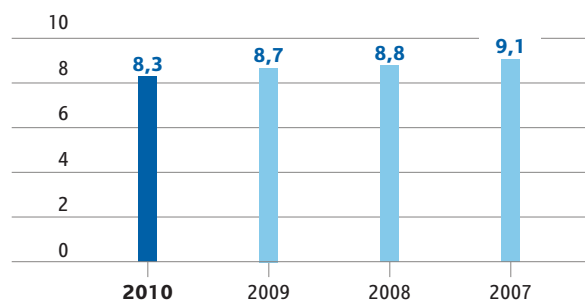

**Ausbildung.** Um einem Fachkräftemangel langfristig entgegenzuwirken, haben wir in den letzten Jahren verstärkt Auszubildende übernommen: Ihre Zahl stieg von 584 im Jahr 2005 auf 656 im Jahr 2010. Erfreulich

ist, dass der Anteil weiblicher Auszubildender im gleichen Zeitraum von 19,8 % auf 22,0 % gestiegen ist. Traditionell bilden wir in Deutschland über den eigenen Bedarf hinaus aus. Ende 2010 erlernten 3.079 junge Menschen einen Beruf bei RWE, der Anteil der Auszubildenden an den gesamten Mitarbeitern lag bei den deutschen RWE-Gesellschaften bei 7,1 %.

**Talentmanagement.** Wir fördern Talente systematisch im gesamten Konzern. Mit dem Talentmanagement wollen wir nicht nur Fachkenntnisse entwickeln, sondern auch bei Führungskräften notwendige Fähigkeiten wie Sozialkompetenz oder interkulturelle Sensibilität stärken. Welche Kompetenzen dies genau sind, haben wir im RWE-„Model of Competence“ definiert. Die Einschätzung des Potenzials aller Führungs- und Nachwuchsführungskräfte, Feedbackverfahren, ein jährlicher Führungsdiallog zwischen Mitarbeitern und Vorgesetzten sowie interne Weiterbildungsmaßnahmen helfen uns bei der Kompetenzentwicklung.

Top-Talente identifizieren wir mithilfe des konzernweiten Potenzialeinschätzungsverfahrens „Entdeckungen“. Im Rahmen unseres Nachfolgemanagements entwickeln wir diese durch praxisnahe Maßnahmen systematisch, unter anderem durch Job Rotation. Konzernweite Potenzialträgerprogramme für Fach- und Führungskräfte sowie Coaching und Mentoring ergänzen das Entwicklungsangebot. Damit schaffen wir die Voraussetzung dafür, dass vakante Positionen intern besetzt werden, und steigern die Bindung talentierter Mitarbeiter an RWE.

**Sozialcharta für den RWE-Konzern.** Die RWE AG und der Europäische Betriebsrat, der mehr als 99 % der Konzern-Mitarbeiter repräsentiert, haben im Jahr 2010 eine „Sozialcharta für den RWE-Konzern“ vereinbart. Hierin bekennt sich RWE als international agierendes

Unternehmen zu dem Ziel, die Balance zwischen wirtschaftlichem Erfolg und sozialer Verantwortung gegenüber seinen Mitarbeitern sicherzustellen. Zur Erreichung dieses Ziels werden in der Sozialcharta wichtige Prinzipien zum Ausdruck gebracht. Dazu zählen das Grundrecht auf Vereinigungsfreiheit, Arbeitssicherheit und Gesundheitsschutz, die Unterstützung des lebenslangen Lernens der Mitarbeiter, die Ablehnung jeglicher Form von Diskriminierung, eine angemessene Entlohnung sowie eine familienbewusste Unternehmenspolitik. Die Sozialcharta gilt in den acht im Europäischen Betriebsrat vertretenen Ländern – Deutschland, Großbritannien, Niederlande, Österreich, Polen, Slowakei, Tschechien, Ungarn – ohne dabei nationale gesetzliche Regelungen zu ersetzen.

**Beruf und Familie.** Zu einem attraktiven Arbeitsumfeld gehört heute mehr denn je, die Doppelbelastung aus Beruf und Familie zu vermindern. Wir konzentrieren uns auf die Unterstützung unserer Mitarbeiter bei der Betreuung von Kindern und pflegebedürftigen Angehörigen. Dazu zählen Maßnahmen, die auch eine vorzeitige Rückkehr aus der Elternzeit ermöglichen, flexible Arbeitszeiten, Möglichkeiten für Home-Office, Hilfe bei der Suche nach einer geeigneten Kinderbetreuung, Ferienbetreuung für Schulkinder sowie Unterstützung bei der Betreuung älterer Familienangehöriger. Wesentliche Anregungen haben wir dabei von der Hertie-Stiftung „berufundfamilie“ erhalten. Ende 2010 betrug der Abdeckungsgrad der Zertifizierung „berufundfamilie“ 52 % unserer deutschen Gesellschaften gemessen an der Mitarbeiterzahl.

#### Diversity Management

RWE verfolgt einen breiten Diversity-Ansatz. Im Fokus stehen konzernweit die Themen Vielfalt der Kulturen, Geschlecht und Alter. Mit der Internationalisierung unserer Geschäftstätigkeit gewinnt die Integration von Mitarbeitern unterschiedlicher ethnischer und

kultureller Herkunft zunehmend an Bedeutung, insbesondere in Großbritannien und in den Niederlanden. Das 2010 gegründete konzerninterne „International Network“ soll Talenten aus allen Teilen der Welt den Einstieg bei RWE erleichtern.

Bei der Frauenförderung hat RWE in Deutschland noch Nachholbedarf. Während der Frauenanteil von RWE in den Niederlanden, Zentralosteuropa sowie Großbritannien aufgrund eines hohen Anteils an vertriebs- und kommunikationsorientierten Aufgaben 30 bis 40 % erreicht, liegt er in unseren deutschen Unternehmen zum Teil unter 20 %. Ein Grund dafür lag bislang in der Schwierigkeit, Frauen für technische Berufe zu gewinnen. Sowohl bei den Auszubildenden als auch bei den Hochschulabgängern verzeichnen wir über die letzten Jahre aber einen kontinuierlich steigenden Anteil von Frauen bei den Neueinstellungen. Damit ist die Basis gelegt, den Anteil von weiblichen Führungskräften bei RWE langfristig zu erhöhen. Gegenwärtig liegt dieser bei knapp 11 % – in den unteren Managementebenen deutlich höher als in Spitzenpositionen. Den Weg dorthin wollen wir Frauen mit unserem Mentorenprogramm erleichtern, an dem seit 2007 56 weibliche Führungskräfte teilgenommen haben.

RWE npower wurde 2010 zum vierten Mal in Folge von „The Times“ als einer der Top-50-Arbeitgeber für Frauen in Großbritannien gelistet. In den Niederlanden hatte sich Essent im Rahmen der Regierungsinitiative „Talents to the Top“ bereits 2008 dazu verpflichtet, den Frauenanteil in Führungspositionen bis 2013 auf 25 % zu erhöhen. In den Jahren 2008 bis 2010 gelang bereits eine Steigerung von 14 auf 23 %. Der Anteil der weiblichen Führungskräfte beträgt bei RWE Polska rund 27 %. Im Jahr 2010 hat RWE Polska die Initiative „Women with Energy“ ins Leben gerufen. Diese verfolgt das Ziel, ein Netzwerk unter den weiblichen Vertretern von Firmen und Institutionen im polnischen Energiesektor aufzubauen.

Das betriebliche Eingliederungsmanagement, das 2006 auf Grundlage einer Rahmenvereinbarung eingeführt wurde, unterstützt den beruflichen Wiedereinstieg von gesundheitlich beeinträchtigten Mitarbeitern. Darüber hinaus dient die im Jahr 2004 abgeschlossene Rahmenintegrationsvereinbarung zur Beschäftigung von schwerbehinderten Menschen der beruflichen Integration. Im Jahr 2010 lagen wir mit 5,6 % oberhalb der in Deutschland gesetzlich geforderten Beschäftigungsquote für behinderte Menschen von 5 %.

| Kennzahlen Demografischer Wandel                  |        | 2010   | 2009   | 2008   | 2007   |
|---------------------------------------------------|--------|--------|--------|--------|--------|
| Mitarbeiter*                                      |        | 70.856 | 70.726 | 65.908 | 63.439 |
| Personalaufwand                                   | Mio. € | 4.873  | 4.610  | 4.415  | 3.964  |
| Anteil Frauen im Unternehmen                      | %      | 26,2   | 26,1   | 25,6   | 25,2   |
| Anteil Frauen an Führungskräften                  | %      | 10,8   | 9,0    | 8,9    | 8,9    |
| Fluktuationsrate                                  | %      | 8,3    | 8,7    | 8,8    | 9,1    |
| Anteil schwerbehinderte Mitarbeiter (Deutschland) | %      | 5,6    | 5,4    | 5,2    | 5,0    |
| Trainingstage je Mitarbeiter                      | Tage   | 4,7    | 4,8    | 4,6    | 4,2    |
| Ausbildungsquote (Deutschland)                    | %      | 7,1    | 7,1    | 7,2    | 6,5    |

\* Umgerechnet in Vollzeitstellen

## 3.8 Arbeitssicherheit und Gesundheitsmanagement

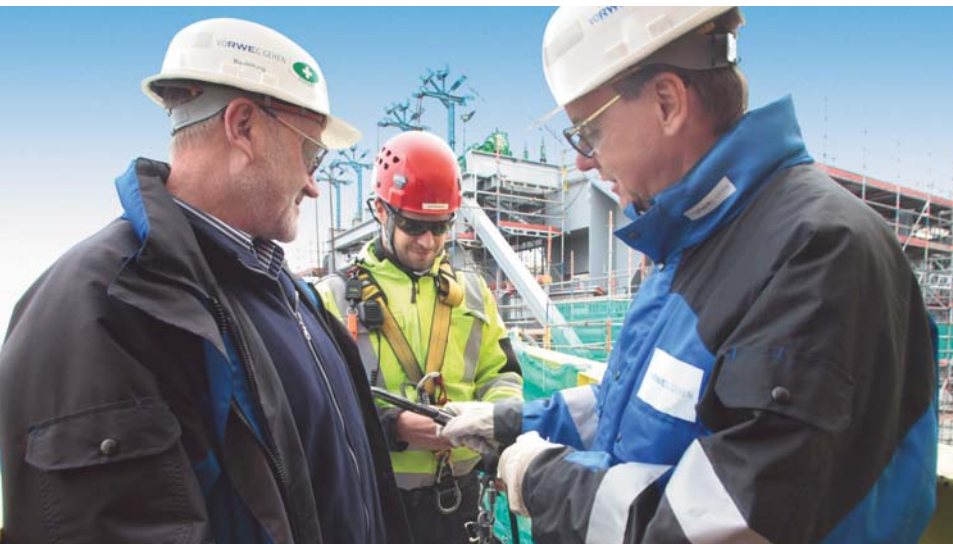

### Arbeitssicherheitstraining in Hamm

Arbeitssicherheit ist bei RWE Führungsaufgabe. Regelmäßige Sicherheitsbegehungen gehören auf unseren Kraftwerks-Großbaustellen in Deutschland, Großbritannien und den Niederlanden zur Routine. Hieran beteiligen sich auch die leitenden Mitarbeiter von RWE Technology, die für die Errichtung der Kraftwerke zuständig ist. So auch beim Bau des neuen Kraftwerks in Hamm, wo Mitarbeiter von RWE und Partnerfirmen in über 100 m Höhe das Kesselhaus errichten.

**Wir wollen, dass alle unsere eigenen sowie die Mitarbeiter der von uns beauftragten Unternehmen so gesund nach Hause gehen, wie sie zur Arbeit gekommen sind. Dazu setzen wir im Arbeitsschutz das Programm „Sicher vorWEg“ um und bauen unser Betriebliches Gesundheitsmanagement aus.**

RWE hat sich zum Ziel gesetzt, ein „Null-Unfall“-Unternehmen zu werden. Wir wollen das sicherste Unternehmen unserer Branche werden. Dazu motivieren wir unsere Mitarbeiter zu einem sicherheitsgerechten Verhalten und machen unseren Führungskräften ihre Vorbildfunktion bewusst. Unser Betriebliches Gesundheitsmanagement (BGM) hat das Ziel, die Leistungsfähigkeit unserer Mitarbeiter zu erhalten. Angesichts einer sich abzeichnenden Verlängerung der Lebensarbeitszeit hat dieses Ziel eine neue Bedeutung gewonnen.

### Zielerreichung

Im Jahr 2010 betrug konzernweit die Anzahl der Unfälle, die mit einer Ausfallzeit von mindestens einem Arbeitstag einhergingen, 3,5 je 1 Mio. geleistete Arbeitsstunden. Damit war die Unfallrate im neunten Jahr in Folge rückläufig. Mit dem Arbeitsbewältigungsindex (ABI) erfassen wir seit März 2010, inwieweit sich die Mitarbeiter in der Lage sehen, aktuell und zukünftig ihre Arbeit zu bewältigen. Bis zum Jahresende hatten 67 % aller Mitarbeiter in Deutschland Zugang zu dem Verfahren.

### Ziele im Handlungsfeld Arbeitssicherheit und Gesundheitsmanagement

#### Wir wollen

... dass jeder eigene und externe Mitarbeiter so gesund nach Hause geht, wie er zur Arbeit gekommen ist.

... die Leistungsfähigkeit unserer Mitarbeiter erhalten.

#### Leistungskennzahl

Anzahl der Unfälle mit mindestens einem Ausfalltag je 1 Mio. geleistete Arbeitsstunden ( $LTI_F = X/1.000.000 \text{ h}$ )

Zugang zum Arbeitsbewältigungsindex (ABI) in %

#### Zielgröße

$LTI_F$  von max. 2,5 im Jahr 2013

Mehrheit der Mitarbeiter in Deutschland hat Zugang zur Bestimmung des persönlichen ABI

## Fakten 2010

70.856 Mitarbeiter

100 % der Mitarbeiter werden durch das interne Arbeitssicherheitsmanagement abgedeckt

### „Null Unfälle“

Die Unfallquote hat bei RWE seit 2002 kontinuierlich abgenommen, im Schnitt um jährlich 19%. Wir wollen sie weiter senken, indem wir unsere Mitarbeiter und Führungskräfte laufend für sicherheitsgerechtes Verhalten sensibilisieren. Zu unserem größten Bedauern verunglückten im Jahr 2010 ein Mitarbeiter bei einem Verkehrsunfall in Tschechien und ein Mitarbeiter einer Partnerfirma auf einer Baustelle in Deutschland tödlich.

**Arbeitssicherheit bei Partnerfirmen.** Die Sicherheit der Mitarbeiter von Partnerfirmen hat für uns die gleiche Bedeutung wie die Sicherheit der eigenen Belegschaft. Wir haben deshalb im Jahr 2010 ein Partnerfirmen-Management eingeführt. Auf den Baustellen und an allen Kraftwerksstandorten werden die externen Mitarbeiter an elektronischen Terminals in ihrer jeweiligen Muttersprache über die Grundsätze des Arbeits- und Gesundheitsschutzes im RWE-Konzern informiert. Ein kurzer Test kontrolliert, ob die Einführung verstanden wurde. Führungskräfte unserer Partnerfirmen schulen wir in eintägigen Workshops zum Arbeitsschutz bei RWE.

**Unfallnachsorge.** Schwere oder gar tödliche Arbeitsunfälle sind für die beteiligten Kollegen mit erheblichen, teilweise langfristigen psychischen Belastungen verbunden. RWE betreibt daher seit Jahren ein Unfallnachsorgeprogramm. Unmittelbar nach einem Unfall kümmern sich psychologische Ersthelfer um die betroffenen Mitarbeiter. Zur Bewältigung von damit verbundenen psychischen Belastungen bieten wir als erstes Unternehmen der Branche europaweit betroffenen Mitarbeitern – internen wie externen – professionelle Hilfe durch ein spezialisiertes Institut an.

### Betriebliches Gesundheitsmanagement

Der im Rahmen unseres Betrieblichen Gesundheitsmanagements eingeführte Arbeitsbewältigungsindex (ABI) hilft Mitarbeitern bei der Einschätzung, in welchem Maß sie ihre Arbeit bewältigen können. Seit März 2010 bieten wir unseren Mitarbeitern in Deutschland an, gemeinsam mit dem zuständigen Betriebsarzt den ABI-Fragebogen auszufüllen. Die Teilnahme ist freiwillig und die Mitarbeiter sind durch die ärztliche Schweigepflicht geschützt. Im Jahr 2010 haben mehr als 2.500 Mitarbeiter dieses Angebot genutzt. Zusammen mit den Ergebnissen der Mitarbeiterbefragung und der Fehlzeitenanalysen wollen wir aus dem ABI Maßnahmen zur Sicherung der Beschäftigungsfähigkeit unserer Mitarbeiter ableiten.

**Stressbewältigung.** RWE will seinen Mitarbeitern dabei helfen, mit arbeitsbedingtem Stress umzugehen. Im Rahmen des im September 2010 gestarteten deutschlandweiten BGM-Programms „Gelassen vorWEg gehen“ bieten wir Mitarbeitern und Führungskräften unter anderem Schulungen zum Umgang mit Stress an.

### Kennzahlen Arbeitssicherheit & Gesundheitsmanagement

|                                                                                                                   |            | 2010 | 2009 | 2008 | 2007 |
|-------------------------------------------------------------------------------------------------------------------|------------|------|------|------|------|
| Arbeits- und Dienstwegeunfälle mit mind. einem Ausfalltag je 1 Mio. geleistete Arbeitsstunden (LTI <sub>r</sub> ) | 1/1 Mio. h | 3,5  | 4,3  | 5,3  | 6,1  |
| Tödliche Arbeitsunfälle                                                                                           |            | 2    | 5    | 12   | 9    |

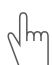

Weitere Themen im Online-Bericht

Sicherheitsbewusstsein bei Mitarbeitern – das Arbeitsschutzprogramm „Sicher vorWEg“

## 3.9 Umweltschutz

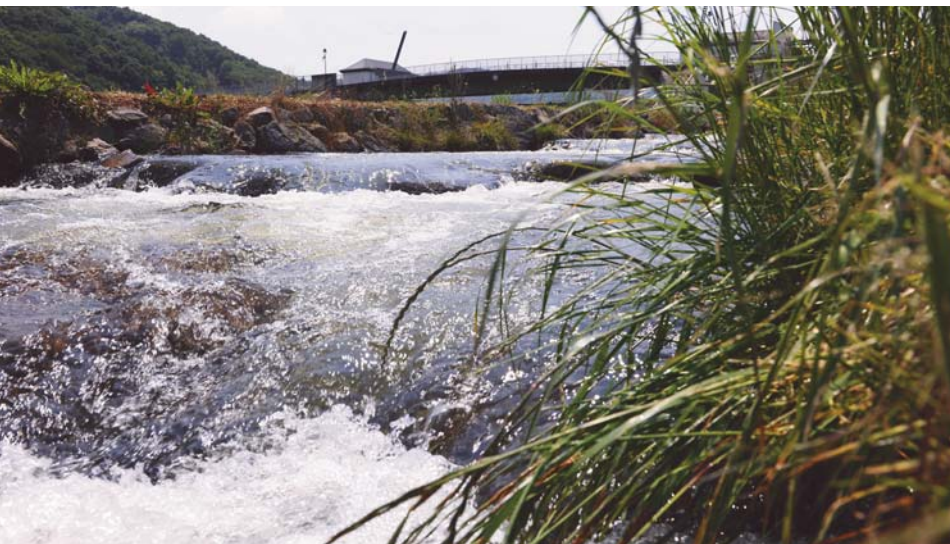

### Erhalt der Biodiversität

Wasserkraftwerke erzeugen Strom ohne CO<sub>2</sub>-Emissionen. Die Stauanlagen stellen aber oft Hindernisse für Wanderfische dar. Bei der Modernisierung von Anlagen planen wir Fischtreppe und Ausweichrouten mit ein, um die Wehranlagen für Wanderfische durchgängig zu machen. In Freienohl an der Ruhr haben wir einen ungenutzten Umgehungskanal ausgebaut, der Fischen ein leichtes Umgehen der Kraftwerksanlage ermöglicht.

**Das Einhalten der gesetzlichen und genehmigungsrechtlichen Vorgaben zum Umweltschutz ist für uns selbstverständlich. Mit umfassenden freiwilligen Maßnahmen, etwa zum Erhalt der Biodiversität, richten wir unser Handeln darüber hinaus so aus, dass es von der Gesellschaft akzeptiert wird.**

Das Einhalten gesetzlicher und genehmigungsrechtlicher Vorschriften ist Grundvoraussetzung all unserer Aktivitäten, insbesondere für den Betrieb unserer Tagebaue und Kraftwerke sowie die Förderung von Erdöl und Erdgas. Die Gesellschaft erwartet aber mehr von uns – unter anderem einen aktiven Beitrag zur Vermeidung oder Verringerung von Umweltauswirkungen. Die Bedeutung der Biodiversität rückt dabei zunehmend in das öffentliche Interesse.

### Zielerreichung

Die Anlagen des RWE-Konzerns arbeiteten im Berichtsjahr 2010 ohne wesentliche Störungen, die Genehmigungsaufgaben wurden durchgehend eingehalten. Unser Umweltmanagement haben wir durch die Integration der neuen Gesellschaften, insbesondere Essent, weiter ausgebaut. Der Abdeckungsgrad durch unser Umweltmanagementsystem beträgt nun 98 %.

#### Ziele im Handlungsfeld Umweltschutz

##### Wir wollen

... unsere Anlagen stets sicher gemäß den genehmigungsrechtlichen Vorgaben betreiben.

... unser Umweltmanagementsystem zur Kontrolle des rechtssicheren Betriebs unserer Anlagen und Netze konzernweit zu 100 % umsetzen.

##### Leistungskennzahl

Einhaltung der Genehmigungsaufgaben in %

Konzernweite Abdeckung des Umweltmanagements in %

##### Zielgröße

100 % Einhaltung

100 % Abdeckung

## Fakten 2010

---

52.214 MW eigene Kraftwerkskapazität  
 10.614 ha Betriebsfläche Tagebaue  
 417.623 km Übertragungs- und Verteilnetz Strom

---

### Betrieb unserer Anlagen

Auch im Jahr 2010 haben wir unsere Anlagen im RWE-Konzern weitestgehend störungsfrei betrieben. Die vorgegebenen Grenzwerte für Emissionen wurden nicht überschritten. Störfälle oder Unfälle, die mit einer nachhaltigen Beeinträchtigung der Umwelt verbunden gewesen wären, ereigneten sich nicht.

**Kernkraftwerke.** Sicherheit hat jederzeit höchste Priorität für den Betrieb unserer Kernkraftwerke Biblis, Emsland und Gundremmingen. Das Sicherheitsmanagement ist streng nach den nationalen und internationalen Bestimmungen für den Betrieb kerntechnischer Anlagen ausgelegt. Es unterliegt der Kontrolle der staatlichen Aufsichtsbehörden. Gemäß dem deutschen Atomgesetz erfolgen regelmäßige Sicherheitsüberprüfungen der Kraftwerke durch die zuständigen Landesbehörden. Im Jahr 2010 wurden in unseren kerntechnischen Anlagen 23 meldepflichtige Ereignisse der Kategorie INES 0 registriert. Die Kategorie „0“ steht entsprechend der Internationalen Bewertungsskala für nukleare Ereignisse (International Nuclear Event Scale, INES) mit keiner oder nur sehr geringer sicherheitstechnischer Bedeutung. Ereignisse einer höheren Einstufung wurden wie in den Vorjahren nicht verzeichnet. Nach Abschluss der umfangreichen Nachrüstungen der Blöcke A und B des Kraftwerks Biblis stieg die Zeitverfügbarkeit unserer Kernkraftwerke 2010 auf 87 % gegenüber 64 % im Vorjahr. Die Entsorgung radioaktiver Betriebsabfälle (schwach- und mittelradioaktive Abfälle) sowie die Zwischenlagerung der abgebrannten Brennelemente

(hochradioaktive Abfälle) erfolgt unter Aufsicht der zuständigen Behörden. Radioaktive Betriebsabfälle verbringen wir zu den staatlich genehmigten Zwischenlagern. Abgebrannte Brennelemente verbleiben zunächst mehrere Jahre in den Abklingbecken und werden dann entsprechend den atomrechtlichen Vorgaben bis zur Bereitstellung eines Endlagers in Castor-Lagerbehältern auf dem Kraftwerksgelände zwischengelagert. Inwiefern sich als Reaktion auf die Ereignisse in Fukushima neue behördliche Anforderungen ergeben, stand bei Redaktionsschluss dieses Berichts noch nicht fest.

**Fossil befeuerte Kraftwerke.** Um die Emissionen an Schwefeldioxid (SO<sub>2</sub>) zu reduzieren, sind fast alle unsere Kohlekraftwerke mit Rauchgasentschwefelungsanlagen ausgerüstet. Lediglich die britischen Kraftwerke Didcot A und Tilbury sind es nicht. Diese dürfen noch bis zu ihrer voraussichtlichen Außerbetriebsetzung 2015 ohne Rauchgasentschwefelung betrieben werden. Durch den Bau der Rauchgasentschwefelungsanlage für das britische Kraftwerk Aberthaw sind die spezifischen SO<sub>2</sub>-Emissionen unserer Steinkohlenkraftwerke seit 2007 um mehr als die Hälfte gesunken. Die spezifischen SO<sub>2</sub>-Emissionen unserer Braunkohlenkraftwerke sind wegen der schon vor mehr als 20 Jahren eingebauten Rauchgasreinigungsanlagen konstant auf niedrigem Niveau. Stickstoff-(NO<sub>x</sub>)-Emissionen werden mittels Katalysatoren oder feuerungstechnischer Optimierung reduziert. Sie bewegen sich seit mehreren Jahren auf einem konstanten bis leicht sinkenden Niveau. Im Vergleich zu Kohlekraftwerken zeichnen sich Gaskraftwerke grundsätzlich durch niedrigere Emissionen aus. Das Abfallaufkommen des RWE-Konzerns wird durch die Kraftwerksaschen dominiert. 73 % der Aschen aus den Braunkohlenkraftwerken wurden 2010 zur Verfüllung der Tagebaue verwendet. Auch 68 % der Aschen aus Steinkohlenkraftwerken wurden wiederverwertet. Die bei der Rauchgasentschwefelung entstehenden großen Mengen an Gips werden aufbereitet und als

Baustoff verwertet. Das schont die natürlichen Gipsvorkommen und entlastet auch die Umwelt. Die Verwertungsquote betrug im Jahr 2010 rund 70 %.

### Wassernutzung

Thermische Kraftwerke benötigen zur Kondensation des Arbeitsdampfes in der Regel erhebliche Mengen an Kühlwasser. Je nach örtlicher Gegebenheit entnehmen wir das Kühlwasser hauptsächlich Flüssen, dem aus den Tagebauen abgepumpten Wasser, in Großbritannien auch dem offenen Meer. Den überwiegenden Teil des entnommenen Kühlwassers leiten wir nahe den Entnahmestellen wieder in die Gewässer zurück, sodass es den Ökosystemen weiter zur Verfügung steht. Entzogen werden dem lokalen Ökosystem nur die Verdunstungsverluste der Kühltürme. Außerdem verbrauchen die Rauchgasentschwefelungsanlagen eine gewisse Menge Wasser. Aus diesen beiden Anteilen sowie dem Sanitärwasserbedarf setzt sich der berichtete Netto-Wasserverbrauch zusammen.

### Umweltmanagement

Die Anforderungen an unser Umweltmanagement haben wir in einer für alle Konzerngesellschaften verbindlichen Richtlinie festgelegt. Sie orientiert sich an den Anforderungen des internationalen Standards ISO 14001. Die konzernweiten Vorgaben sollen sicherstellen, dass jede Gesellschaft entsprechend ihren Tätigkeiten und Umweltauswirkungen ein angemessenes Umweltmanagementsystem aufrechterhält. Die oberste Verantwortung für das Umweltmanagement liegt beim Personalvorstand, ihm berichtet die Abteilung Corporate Responsibility/Umweltschutz. Die Konzerngesellschaften haben vergleichbare Strukturen aufgebaut. Die Einhaltung der Richtlinie wird durch jährliche Audits des Group Centers überprüft. Im Jahr 2010 war das Umweltmanagement zu 98 % eingeführt. Im Berichtsjahr bestand die wesentliche Aufgabe darin, für neu gegründete oder wesentlich umorganisierte RWE-Gesellschaften ein Umweltmanagementsystem aufzubauen oder anzupassen. Dies konnten

wir nahezu vollständig abschließen. Es steht den Gesellschaften frei, ihre Managementsysteme – ebenso wie bei Qualität und Arbeitssicherheit – zertifizieren zu lassen. Die unabhängige Überprüfung durch einen externen Gutachter stellt einen zusätzlichen Beitrag zur Absicherung unserer Managementsysteme dar. Im Berichtszeitraum wurden Mátra (Ungarn), RWE Technology, envia Mitteldeutsche Energie AG sowie zwei weitere Gesellschaften erstmals nach ISO 14001 zertifiziert. Unter Einbeziehung von Essent, deren Kraftwerke vollständig zertifiziert sind, beträgt der Anteil der Zertifizierungen nach ISO 14001 im RWE-Konzern mittlerweile 38 %, bezogen auf die Mitarbeiteräquivalente.

#### Umsetzung des Umweltmanagements im RWE-Konzern: Auditergebnisse 2008–2010

Abdeckungsgrad in % gemessen an der Mitarbeiterzahl

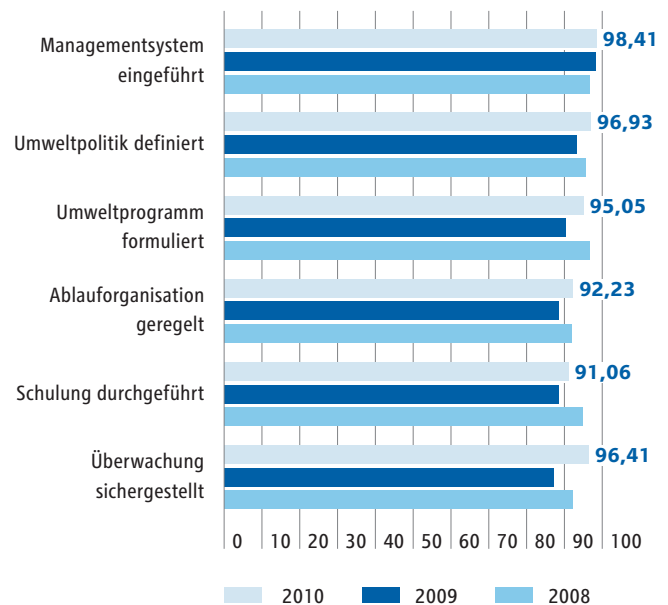

### Biodiversität

2010 war das internationale Jahr der Biodiversität. Wir wollen einen Beitrag zum Erhalt der Biodiversität leisten, um damit die Akzeptanz unserer Tätigkeiten



Weitere Themen im Online-Bericht

Biodiversität und erneuerbare Energien – Schutz bei der Nutzung von Biomasse und Windkraft



und Projekte zu sichern. So kommen seit 2010 auf unseren internationalen Baustellen, die von RWE Technology betreut werden, die Performance Standards der International Finance Corporation (IFC) zur Anwendung, die unter anderem den Schutz von Arten, Pflanzen und Biotopen sicherstellen.

**Tagebau.** Mit über 10.600 Hektar beanspruchen unsere Tagebaue in Deutschland und Ungarn erhebliche Betriebsflächen. Durch eine gezielte und auf Jahrzehnte angelegte Rekultivierung erreichen wir aber, dass sich in den Tagebaufolgeflächen eine größere Biodiversität einstellt als vor dem Braunkohleabbau. Die wissenschaftliche Begleitung durch die Forschungsstelle Rekultivierung hat ergeben, dass sich auf den rekultivierten Flächen zunehmend bedrohte Arten angesiedelt haben, die vorher in der Region nicht mehr anzutreffen waren. Mithilfe der Erkenntnisse der begleitenden Untersuchungen optimieren wir laufend unsere Rekultivierungsmaßnahmen.

**Ölförderung.** Mehr als 50 % der deutschen Ölreserven lagern im Wattenmeer vor der Küste Schleswig-Holsteins. Hier betreibt RWE seit 1987 die Bohr- und Förderplattform Mittelplate. Die Anlage ist mit modernsten Sicherheitssystemen ausgestattet. Bis heute haben sie zuverlässig Verschmutzungen oder

Beeinträchtigungen des Weltnaturerbes Wattenmeer verhindert. Diese verantwortungsvolle Betriebsführung hat wesentlich dazu beigetragen, dass die Aufsichtsbehörden im Jahr 2010 die Förderbewilligung bis zum Jahr 2041 verlängert haben.

**Netzbetrieb.** Freileitungen bilden eine erhebliche Gefährdung für Großvögel. RWE hat ein effektives Verfahren entwickelt, Hochspannungsfreileitungen von einem Hubschrauber aus mit Vogelschutzmarkierungen auszustatten. Derartige Markierungen haben wir in allen Gebieten angebracht, in denen Großvögel durch Hochspannungsleitungen gefährdet werden können. Weiterhin errichten wir für Störche oder Greifvögel zusätzliche Nistmöglichkeiten, um so deren Population zu stärken.

**Wasserkraft.** Wasserkraftwerke erzeugen umweltfreundlichen Strom. Gleichwohl stellen sie auch Hindernisse für Wanderfische dar. Sowohl beim Neubau von Wehranlagen wie beispielsweise am Rheinkraftwerk Albruck-Dogern (Deutschland) als auch bei der Modernisierung bestehender Anlagen verbessert RWE die Durchlässigkeit der Flüsse durch moderne Aufstiegshilfen für Fische. Im Jahr 2010 wurden zwei weitere Wasserkraftwerke nachgerüstet.

| Kennzahlen Umweltschutz                                               |                     | 2010               | 2009    | 2008    | 2007    |
|-----------------------------------------------------------------------|---------------------|--------------------|---------|---------|---------|
| Meldepflichtige nukleare Ereignisse der Kategorie INES <sup>1</sup> 0 | Anzahl              | 23                 | 33      | 24      | 32      |
| Radioaktiver Betriebsabfall aus Kernkraftwerken                       | Tonnen              | 485                | 584     | 347     | 645     |
| Abgebrannter Kernbrennstoff (Schwermetall)                            | Tonnen              | 146                | 114     | 87      | 85      |
| SO <sub>2</sub> -Emissionen der RWE-Kraftwerke                        | Tonnen              | 57.300             | 56.475  | 75.200  | 101.400 |
| NO <sub>x</sub> -Emissionen der RWE-Kraftwerke                        | Tonnen              | 115.200            | 113.700 | 130.400 | 135.000 |
| Staubemissionen der RWE-Kraftwerke                                    | Tonnen              | 3.789              | 4.101   | 5.509   | 6.048   |
| Gesamtaufkommen an Asche                                              | Tsd. Tonnen         | 7.740              | 7.429   | 6.406   | 6.687   |
| - davon zur Verwertung                                                | Tsd. Tonnen         | 1.450 <sup>2</sup> | 6.356   | 5.833   | 6.151   |
| Gesamtaufkommen an Gips                                               | Tsd. Tonnen         | 2.053              | 1.956   | 1.533   | 1.671   |
| - davon zur Verwertung                                                | Tsd. Tonnen         | 1.433              | 1.654   | 1.527   | 1.670   |
| Wasserverbrauch (netto)                                               | Mio. m <sup>3</sup> | 323,9              | 299,9   | 309,7   | 329,2   |

1 INES: International Nuclear Event Scale – Internationale Bewertungsskala für nukleare Ereignisse

2 Bedingt durch behördliche Vorgaben werden Aschen zur Verfüllung von Tagebauen ab 2010 nicht mehr als Verwertung deklariert.

## 3.10 Gesellschaftliche Verantwortung

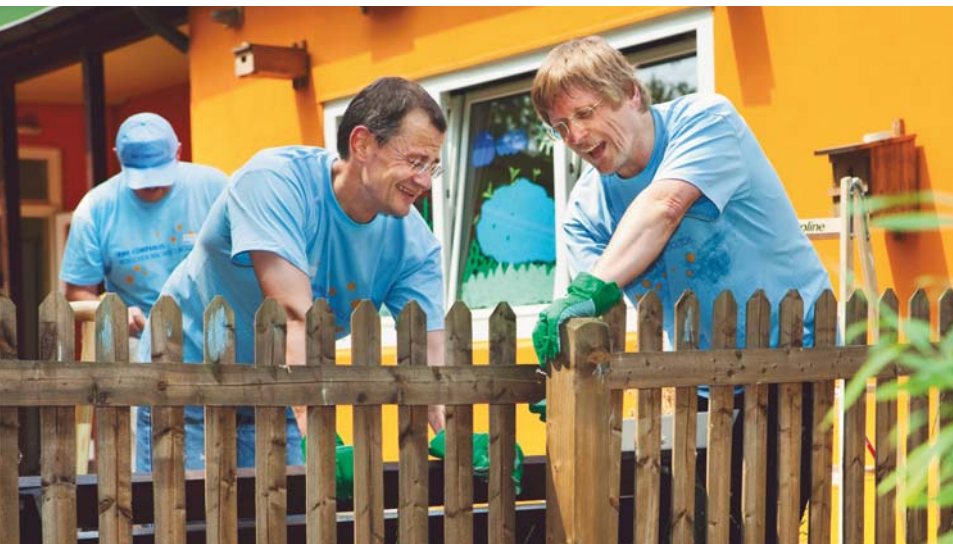

**Teambuilding durch freiwilliges Engagement**  
 Gutes tun und dabei gleichzeitig lernen. Im Rahmen des TeamAKTIV-Projekts von RWE Companius renovierten im Juli 2010 knapp 50 internationale Führungskräfte der RWE IT den Außenbereich der Essener Kindertagesstätte „Kleine Farm“. In gemischten Teams strichen sie die Fassade, restaurierten die Torwand, verschönerten die Tiergehege und legten ein Feuchtbiotop an. Für die Führungskräfte aus England, Tschechien und Deutschland war der Einsatz eine Gelegenheit, sich auch jenseits des Arbeitsalltags näher kennenzulernen.

**Wir engagieren uns in der Gesellschaft, um Verständnis und Akzeptanz für unser Handeln und unsere Projekte bei allen betroffenen Gruppen zu schaffen. Dies ist die Basis für unseren langfristigen Erfolg. Deshalb stärken wir in den Regionen, in denen wir tätig sind, das Gemeinwesen und die wirtschaftliche Entwicklung.**

Bau und Betrieb von Kraftwerken und Leitungsnetzen sind die Voraussetzungen für eine sichere Versorgung mit Strom und Gas. In der Bevölkerung sinkt die Akzeptanz für industrielle Projekte jedoch zunehmend. Dies kann zu erheblichen Verzögerungen bei wichtigen Infrastrukturprojekten führen. Wir müssen daher bei den betroffenen Bürgern Vertrauen schaffen und sie vom Nutzen unseres Handelns überzeugen.

### Zielerreichung

Im Jahr 2010 haben wir unsere Kontakte und Kooperationen lokal wie regional weiter intensiviert. Unser Programm für das freiwillige Engagement der Mitarbeiter, RWE Companius, ist mittlerweile fast auf den gesamten Konzern ausgeweitet worden. Mit unseren Sponsoring-Aktivitäten sind wir in allen Vertriebsregionen präsent. Konkrete Auswirkungen unseres Engagements auf unsere Reputation erwarten wir erst mittel- bis langfristig. 2010 wurde uns im Vergleich zu unseren großen Wettbewerbern die höchste Reputation bescheinigt.

### Ziele im Handlungsfeld Gesellschaftliche Verantwortung

#### Wir wollen

... mit effizientem Mitteleinsatz unsere regionale Reputation stärken.

#### Leistungskennzahl

Reputationsindex

#### Zielgröße

Höchste Reputation unter vergleichbaren Unternehmen der Branche

## Fakten 2010

---

1.888 Companius-Projekte  
 2,2 Mio. € Fördersumme Companius  
 56 Mio. € Kapital der RWE Stiftung

---

### Akzeptanz unseres Handelns

RWE ist in den Regionen, in denen der Konzern tätig ist, stark verwurzelt – hier leben unsere Mitarbeiter und Kunden. Gute Nachbarschaft und der direkte Austausch mit unseren Stakeholdern vor Ort sind uns wichtig. Durch unser gesellschaftliches Engagement wollen wir einen Beitrag zu guter Nachbarschaft und damit auch zur Akzeptanz unseres Unternehmens leisten.

### RWE Companius

Mit der Initiative RWE Companius fördert RWE konzernweit das gesellschaftliche Engagement seiner Mitarbeiter. Für ihr ehrenamtliches Engagement erhalten sie auf Antrag je 500 bis 2.000 € für Arbeitsmaterialien und andere Sachmittel. Das Spektrum der von RWE Companius unterstützten Projekte reicht dabei vom handwerklichen Engagement unserer Mitarbeiter in gemeinnützigen Einrichtungen über die Vermittlung von Wissen und Erfahrung bis hin zur Mitarbeit bei Naturschutzprojekten. Auch Externe können sich um eine finanzielle Förderung durch RWE Companius bewerben, sofern ein RWE-Mitarbeiter als „Pate“ in einem Projekt aktiv ist. Somit unterstützt RWE auch Freiwillige außerhalb des Konzerns in ihrem Ehrenamt. RWE Companius steht allen Mitarbeitern im RWE-Konzern zur Teilnahme offen.

Das 2007 gestartete Volunteering-Programm wurde im Jahr 2010 für alle RWE-Mitarbeiter konzernweit zugänglich gemacht. Bislang engagierten sich rund 8.100 Mitarbeiter und damit über 11 % unserer Belegschaft in einem von RWE Companius unterstützten

Projekt. Sie wurden bei der Umsetzung der Projekte zusätzlich von rund 12.800 externen Helfern unterstützt. Damit haben wir mit unserer Initiative nicht nur eine beachtliche Durchdringung im Konzern erreicht, sondern zugleich viele persönliche Botschafter und Multiplikatoren in den Regionen gewonnen. Insgesamt wurden seit der Gründung von RWE Companius in über 5.800 Projekten nahezu 54.000 Arbeitsstunden für das Gemeinwohl geleistet. RWE unterstützte im Jahr 2010 rund 1.800 Projekte mit einer Fördersumme von insgesamt 2,25 Mio. €. RWE Companius wurde in dem von der Bundesregierung und der deutschen Wirtschaft initiierten Wettbewerb „365 Orte im Land der Ideen“ als „Ausgewählter Ort 2010“ ausgezeichnet. Damit wurde das innovative Konzept zur Förderung des freiwilligen gesellschaftlichen Engagements gewürdigt.

In Polen engagieren sich die Mitarbeiter in mehr als einem Dutzend Initiativen, unter anderem in Sozialstationen und bei der Unterstützung alleinstehender Mütter. Bei den Überschwemmungen im südlichen Polen im Frühjahr 2010 leistete ein Team von 30 Mitarbeitern von RWE Polska freiwillig Unterstützung bei Aufräum- und Instandsetzungsarbeiten.

### Spenden und Sponsoring

Als Unternehmen unterstützen wir unterschiedliche regionale Aktivitäten mit Schwerpunkten auf Kultur, Wissenschaft und Soziales. Damit wollen wir sowohl unsere gesellschaftliche Verantwortung dokumentieren als auch eine positive Wahrnehmung von RWE vor Ort fördern. Unsere operativen Gesellschaften entscheiden selbst über ihre Spenden- und Sponsoringaktivitäten. Um einen Missbrauch grundsätzlich auszuschließen, unterliegen sie den Regelungen unserer Konzernrichtlinie „Spenden und Sponsoring“. Alle Spenden- und Sponsoringmaßnahmen werden in einer Datenbank der Abteilung Compliance der RWE AG zentral geführt und stichprobenartig auf Einhaltung der Vorgaben der Richtlinie überprüft.

Die Stadt Essen, in der RWE seit über 100 Jahren ansässig ist, unterstützen wir insbesondere im kulturellen Bereich. 2010 war dabei ein besonderes Jahr: Essen repräsentierte stellvertretend für die gesamte Region die europäische Kulturhauptstadt „Ruhr.2010“. Mit einer Fördersumme in Höhe von 2,5 Mio. € war RWE einer der Hauptsponsoren. Außerdem trugen mehr als 500 RWE-Mitarbeiter mit ihrem Engagement im Rahmen von RWE Companius zum Gelingen des Kulturhauptstadtjahres bei, beispielsweise durch Unterstützung von Großereignissen wie dem „Still-Leben Ruhrschnellweg“. Im Rahmen der seit 2006 bestehenden Kooperation mit dem Museum Folkwang führt RWE regelmäßig Ausstellungen im RWE-Turm, dem Sitz der RWE AG, durch.

Auch die Konzerngesellschaften engagieren sich regelmäßig in kulturellen Projekten. So fördert RWE Polska das internationale Filmfestival in Warschau, und RWE Transgas ist seit zehn Jahren Partner des Internationalen Filmfestivals Karlovy Vary (Tschechien). Ein weiterer Förderschwerpunkt unserer Konzerngesellschaften liegt im Bereich Sport, insbesondere dem Sponsoring regionaler Jugend- und Amateurmanschaften. Damit leisten wir einen wesentlichen Beitrag zum Ausbau der regionalen Identität. Forschung, Lehre und den wissenschaftlichen Austausch unterstützen wir durch diverse Stiftungsprofessuren sowie durch das Sponsoring von Kongressen. Insgesamt beliefen sich im Jahr 2010 unsere Sponsoringaufwendungen auf 21,5 Mio. € und die Spendenausgaben auf 5,7 Mio. €. Für die Opfer des Erdbebens in Haiti im Jahr 2010 haben die Mitarbeiter über 500.000 € gespendet. Die Spenden der Mitarbeiter wurden von RWE verdoppelt.

### Stiftungen

Der RWE-Konzern unterhält seit 2009 eine aus der RWE Jugendstiftung hervorgegangene gemeinnützige RWE Stiftung (Stiftungskapital: 56 Mio. €). Sie bündelt unser bürgerschaftliches Engagement und verknüpft

es mit dem Thema Energie. Förderschwerpunkte der Stiftung sind die Bereiche Bildung, Kultur und Soziales. Geografisch konzentriert sie sich auf Deutschland. Im Fokus der Stiftungsarbeit steht die Förderung junger Menschen. Die Stiftung hilft benachteiligten Kindern und Jugendlichen, sich in die Gesellschaft zu integrieren, sich beruflich zu qualifizieren und soziale Einsatzbereitschaft zu entwickeln. Dazu unterstützt sie schulische und wissenschaftliche Bildungs- und Lehreinrichtungen und fördert darüber hinaus künstlerische Talente. Ein Beispiel dafür ist das gemeinsam mit der Hertie-Stiftung initiierte Programm „Horizonte“, in dessen Rahmen die RWE Stiftung Stipendien für Lehramtsstudierende mit Migrationshintergrund auslobt. Im Jahr 2010 wurden fünf Studierende mit einem jährlichen Stipendium von 11.000 € unterstützt. Sie werden nach Abschluss ihres Studiums das deutsche Schulsystem als Lehrkräfte bereichern. Mit diesem Engagement will RWE zugleich ein Zeichen setzen, dass Integration auf allen Ebenen der Gesellschaft möglich ist.

In Großbritannien arbeitet die RWE Stiftung mit dem Outward Bound Trust zusammen. Jährlich nehmen rund 30 Schüler im Alter von 12 bis 13 Jahren an einem fünftägigen Outdoor-Kurs teil, bei dem sie sportliche Herausforderungen meistern, ihre Ausdauer und Belastbarkeit unter Beweis stellen und so ihr Selbstvertrauen stärken können. Zudem soll ihr Umweltbewusstsein gefördert werden. In Polen hat RWE Polska 2005 eine eigene Stiftung eingerichtet. Sie unterstützt Programme, um Kinder zu einem sicheren Umgang mit elektrischen Geräten zu erziehen („RWE Safe Energy“). Junge Sportler aus weniger wohlhabenden Familien werden durch das Programm „Orliki RWE“ gefördert. Die Jugendlichen sollen dadurch gleiche Startbedingungen erhalten und in ihrer Entwicklung gefördert werden. Zudem unterstützt RWE talentierte Studierende der AGH University of Science and Technology in Krakau mit Stipendien.

### Regionale Wertschöpfung

Insgesamt hat RWE im Jahr 2010 eine Wertschöpfung von 15,6 Mrd. € erwirtschaftet. Mehr als die Hälfte davon floss in Form von Gehältern und Sozialabgaben sowie Steuern und sonstigen Abgaben an den Staat und die Gesellschaft. Vieles davon verbleibt in den Regionen, in denen wir tätig sind. Sowohl mit dem Betrieb als auch mit dem Bau unserer Anlagen geben wir als Auftraggeber wichtige Impulse für die regionale Wirtschaft. Dies belegen beispielhaft drei Regionen, für die aktuelle Zahlen vorliegen.

Gemäß einer Studie verblieben aus den Tätigkeiten des RWE-Konzerns in unserer Vertriebsregion Rheinland-Westfalen, einer der Kernregionen von RWE, im Jahr 2009 über 7 Mrd. €. Davon entfielen gut 4 Mrd. € auf Löhne, Gehälter und Renten. 2,4 Mrd. € gingen über den Einkauf von Sachgütern und Dienstleistungen in die regionale Wirtschaft. Weitere 770 Mio. € verblieben als Konzessionsabgaben, Dividenden und Gewerbesteuern in öffentlichen Haushalten. Allein RWE Power hat in der Region von Mitte 2009 bis Mitte 2010 ein Auftragsvolumen von knapp 1 Mrd. € bei

3.500 Unternehmen platziert und im Jahr 2009 rund 169 Mio. € Gewerbesteuern in Nordrhein-Westfalen gezahlt. Der rheinische Braunkohlentagebau und die Braunkohleveredelung sichern über 40.000 Arbeitsplätze in ganz Deutschland – in den vor- und nachgelagerten Sektoren kommt nochmals gut die doppelte Arbeitsplatzzahl hinzu.

Einen ähnlichen Beitrag leistet unsere Tochtergesellschaft enviaM in ihrem Vertriebsgebiet, das Brandenburg, Sachsen und Sachsen-Anhalt umfasst. enviaM sichert dort eine jährliche Wertschöpfung von rund 1,3 Mrd. € sowie rund 15.000 Arbeitsplätze und erwirtschaftet ein Steueraufkommen von etwa 320 Mio. €.

In Großbritannien schuf das Ende 2010 erstmals mit allen vier Blöcken ans Netz gegangene Gas- und Dampfkraftwerk Staythorpe rund 80 neue Arbeitsplätze und stellt auch sonst einen wichtigen Wirtschaftsfaktor für die Kommune und die umliegende Region dar: Aus dem Betrieb des Kraftwerks werden jährlich rund 10 Mio. britische Pfund in die lokale Wirtschaft fließen.

| Kennzahlen Gesellschaftliche Verantwortung |        | 2010          | 2009          | 2008          | 2007          |
|--------------------------------------------|--------|---------------|---------------|---------------|---------------|
| <b>Wertschöpfung</b>                       | Mio. € | <b>15.980</b> | <b>15.629</b> | <b>13.112</b> | <b>12.834</b> |
| <b>Verteilung</b>                          |        |               |               |               |               |
| An die Mitarbeiter                         | Mio. € | 4.873         | 4.610         | 4.415         | 3.951         |
| An den Staat                               | Mio. € | 4.321         | 3.499         | 2.484         | 2.424         |
| An Darlehensgeber                          | Mio. € | 3.184         | 3.689         | 3.337         | 3.568         |
| An andere Gesellschafter                   | Mio. € | 294           | 260           | 318           | 224           |
| Nettoergebnis                              | Mio. € | 3.308         | 3.571         | 2.558         | 2.667         |
| davon an RWE-Aktionäre                     | Mio. € | 1.867         | 1.867         | 2.401         | 1.772         |

## Zum Bericht

**Ziel.** Der vorliegende Bericht „Unsere Verantwortung“ richtet sich an Analysten und Investoren, Nichtregierungsorganisationen, unsere Mitarbeiter, an Kunden und Lieferanten, Politik, Behörden sowie an die Menschen in den Regionen, in denen wir tätig sind. Er zeigt, welche wesentlichen gesellschaftlichen und ökologischen, aber auch wirtschaftlichen Herausforderungen mit unserem Kerngeschäft verbunden sind, welche Zielkonflikte sich ergeben und welche Strategie auf dem Gebiet der Corporate Responsibility (CR) wir dafür entwickelt haben.

**Vorgehensweise.** Unsere CR-Strategie haben wir anhand der Herausforderungen unserer Geschäftstätigkeiten und unter Berücksichtigung der jeweiligen regionalen Rahmenbedingungen entwickelt. Zum besseren Verständnis leiten wir den Bericht mit einem Portrait des RWE-Konzerns ein. Erstmals stellen wir die Umsetzung unserer CR-Strategie den zehn Handlungsfeldern entsprechend dar. Der Bericht gilt auch als Fortschrittsbericht für den Global Compact der Vereinten Nationen. Der Vorstand der RWE AG hat den Bericht zur Veröffentlichung freigegeben.

**Internet.** Der gedruckte Bericht wird durch weiterführende Informationen in einem CR-Online-Bericht auf [www.rwe.com/verantwortung](http://www.rwe.com/verantwortung) ergänzt. Verweise auf die weiterführenden Informationen stehen am Ende des jeweiligen Kapitels. Der Online-Bericht enthält eine umfassende interaktive Darstellung der Kennzahlen und bietet die Möglichkeit des Downloads sämtlicher Daten in Form einer Excel-Datei.

**Grundlagen.** Der Bericht wurde auf Basis unserer CR-Strategie sowie der Erkenntnisse aus dem Dialog mit Stakeholdern erstellt. Um einen Vergleich unserer Leistungen mit anderen Unternehmen zu erleichtern, haben wir uns an den aktuellen Leitlinien der Global Reporting Initiative (GRI) orientiert. Wie wir diese und die im Oktober 2007 vorgelegten GRI-Anforderungen an die Elektrizitätswirtschaft umsetzen (Sector Supplement Electric Utilities), stellen wir auf Seite 64/65 dar.

**Daten.** Berichtszeitraum ist das Geschäftsjahr 2010. Es reicht vom 1. Januar bis 31. Dezember. Die Angaben im vorliegenden Bericht beziehen sich auf alle verbundenen Unternehmen des RWE-Konzerns, das heißt auf alle Unternehmen, an denen wir im Berichtszeitraum mit mehr als 50 % beteiligt waren. Abweichungen davon machen wir kenntlich. Finanzdaten haben wir aus dem RWE Konzerngeschäftsbericht 2010 übernommen.

**Prüfungsbescheinigung.** Der Bericht wurde von der Wirtschaftsprüfungsgesellschaft Pricewaterhouse Coopers (PwC) hinsichtlich der Beachtung der AA1000-AccountAbility-Prinzipien geprüft. Das Ergebnis der Prüfung ist auf den Seiten 61 bis 63 dargestellt.

**Redaktionelle Hinweise.** Dieser Bericht erscheint in Deutsch und Englisch, Redaktionsschluss war der 31. März 2011. Mit diesem Bericht steigen wir in die jährliche Berichterstattung ein. Der nächste Bericht erscheint im Frühjahr 2012. Der Einfachheit halber sprechen wir durchgängig von Mitarbeitern. Damit meinen wir selbstverständlich alle unsere weiblichen und männlichen Beschäftigten.

**Zukunftsbezogene Aussagen.** Dieser Bericht enthält Aussagen, die sich auf die künftige Entwicklung des RWE-Konzerns und seiner Gesellschaften sowie wirtschaftliche und politische Entwicklungen beziehen. Diese Aussagen stellen Einschätzungen dar, die wir auf Basis aller uns zum Zeitpunkt der Erstellung dieses Berichts verfügbaren Informationen getroffen haben. Sollten die zugrunde gelegten Annahmen nicht eintreffen oder weitere Risiken eintreten, so können die tatsächlichen Ergebnisse von den zurzeit erwarteten Ergebnissen abweichen. Eine Gewähr können wir für diese Angaben daher nicht übernehmen.

## Bescheinigung über eine unabhängige betriebswirtschaftliche Prüfung

### An die RWE AG, Essen

Wir haben auftragsgemäß eine betriebswirtschaftliche Prüfung zur Erlangung einer gewissen Sicherheit<sup>1</sup> hinsichtlich der Beachtung der AA1000-AccountAbility-Prinzipien sowie der Nachhaltigkeitsinformationen im CR-Bericht „Unsere Verantwortung. Bericht 2010: VORWEG GEHEN HEISST HERAUSFORDERUNGEN ANNEHMEN.“ der RWE AG, Essen, durchgeführt.

### Verantwortung der gesetzlichen Vertreter

Es liegt in der Verantwortung der gesetzlichen Vertreter der Gesellschaft

- die in dem AccountAbility Principles Standard (2008) definierten Prinzipien „Inclusivity“, „Materiality“ und „Responsiveness“ (die „AA1000-AccountAbility-Prinzipien“) im Nachhaltigkeitsmanagement zu beachten und
- die Nachhaltigkeitsinformationen im CR-Bericht in Übereinstimmung mit den in den Sustainability Reporting Guidelines Vol. 3 (S. 7 bis 17) der Global Reporting Initiative (GRI) genannten Kriterien zu erstellen.

Diese Verantwortung umfasst die Konzeption, Implementierung und Aufrechterhaltung von Systemen und Prozessen zur Sicherstellung der Beachtung der AA1000-AccountAbility-Prinzipien und zur Erstellung des CR-Berichts unter der Verwendung von Annahmen und Schätzungen für einzelne CR-Angaben, die unter den gegebenen Umständen angemessen sind.

### Verantwortung des Wirtschaftsprüfers

Unsere Aufgabe ist es, auf der Grundlage der von uns durchgeführten Tätigkeit eine Beurteilung darüber abzugeben, ob uns Sachverhalte bekannt geworden sind, die uns zu der Annahme veranlassen, dass in allen wesentlichen Belangen

- die von der Gesellschaft eingerichteten Systeme und Prozesse nicht dazu geeignet sind, die AA1000-AccountAbility-Prinzipien „Inclusivity“, „Materiality“ und „Responsiveness“ zu beachten, oder

- die Nachhaltigkeitsinformationen im CR-Bericht nicht in Übereinstimmung mit den Kriterien der Sustainability Reporting Guidelines Vol. 3 (S. 7 bis 17) der GRI erstellt worden sind.

Darüber hinaus wurden wir beauftragt, Empfehlungen zur Weiterentwicklung des Nachhaltigkeitsmanagements und der CR-Berichterstattung auszusprechen.

Wir haben unsere betriebswirtschaftliche Prüfung unter Beachtung des AA1000 Assurance Standard (AA1000AS) 2008 und unter ergänzender Beachtung des International Standard on Assurance Engagements (ISAE) 3000 vorgenommen.

Diese Standards erfordern, dass wir die Berufspflichten einhalten und den Auftrag unter Berücksichtigung des Grundsatzes der Wesentlichkeit so planen und durchführen, dass wir unsere Beurteilungen mit einer gewissen Sicherheit<sup>1</sup> abgeben können, dem Grad an Sicherheit, der von der RWE AG nachgefragt wurde. Wir sind unabhängig im Sinne des Abschnitts 3.2 des AA1000AS (2008). Aufgrund unserer Fachkenntnisse und Erfahrungen mit nicht-finanziellen Beurteilungen, Nachhaltigkeitsmanagement und sozialen und ökologischen Themen verfügen wir über die erforderlichen Kompetenzen zur Durchführung dieser betriebswirtschaftlichen Prüfung.

Bei einer betriebswirtschaftlichen Prüfung zur Erlangung einer gewissen Sicherheit<sup>1</sup> sind die durchgeführten Prüfungshandlungen im Vergleich zu einer betriebswirtschaftlichen Prüfung zur Erlangung einer hohen Sicherheit<sup>2</sup> weniger umfangreich, so dass dementsprechend eine geringere Sicherheit gewonnen wird.

Die Auswahl der Prüfungshandlungen liegt im pflichtgemäßen Ermessen des Wirtschaftsprüfers.

Wir haben Prüfungen auf Ebene der Konzernzentrale, Essen, sowie Vor-Ort-Prüfungen insbesondere bei RWE Power AG, Essen, RWE Deutschland AG, Essen, Süwag Gruppe, Frankfurt, Essent Gruppe, 's-Hertogenbosch (Niederlande), Mátrai Erőmű ZRt., Visonta (Ungarn) und RWE Polska S.A., Warschau (Polen) durchgeführt.

Im Zusammenhang mit der Beachtung der AA1000-AccountAbility-Prinzipien haben wir unter anderem die folgenden Prüfungshandlungen durchgeführt:

- Befragungen der relevanten Ansprechpartner;
- Nachvollzug der relevanten Dokumentation zu den Stakeholderdialogen, der weiteren Kommunikation mit den Stakeholdern, der Vorbereitungs- und Nachbereitungsprotokolle, der Auswertungen und Beurteilungen für die jeweiligen Gesellschaften der RWE AG;
- Nachvollzug der relevanten Dokumentation zur Ermittlung und Priorisierung von Nachhaltigkeitsthemen und CR-Handlungsfeldern;
- Einholen von Nachweisen zu stichprobenhaft ausgewählten Projekten mit Nachhaltigkeitsbezug, welche die Berücksichtigung der AA1000-AccountAbility-Prinzipien in der Organisation zusätzlich belegen.

Im Zusammenhang mit den Nachhaltigkeitsinformationen im CR-Bericht haben wir unter anderem die folgenden Prüfungshandlungen durchgeführt:

- Befragungen von für das Reporting von Nachhaltigkeitsinformationen zuständigen Mitarbeitern;
- Aufnahme der Verfahren zur Erfassung, Berechnung und Berichterstattung von Nachhaltigkeitsinformationen;
- Funktionsprüfung der wesentlichen Kontrollen zur Datenqualitätssicherung;
- Analytische Beurteilung von Nachhaltigkeitsdaten sowie in begrenztem Umfang Stichproben.

### Wesentliche Feststellungen und Urteile

Feststellungen hinsichtlich des AA1000-AccountAbility-Prinzips „**Inclusivity**“:

- Der überregionale Stakeholderdialog wird auf Konzernebene durch das zentrale CR-Management und die verantwortlichen Fachabteilungen organisiert und gesteuert.
- Der regionale Stakeholderdialog wird durch die operativen Konzerngesellschaften organisiert und gesteuert. Gemäß den intern eingeführten Regeln der Zusammenarbeit erfolgt eine Koordination durch das zentrale CR-Management, wenn konzernübergreifende Sachverhalte vorliegen.
- Erfahrungen von Einzelgesellschaften zur Ausgestaltung von Stakeholderdialogen werden bei vergleichbaren Sachverhalten zunehmend auf andere Einzelgesellschaften übertragen.
- Den verantwortlichen Fachabteilungen obliegt die Organisation und Steuerung des Dialogs mit den jeweilig zugeordneten Stakeholdergruppen; der Austausch zwischen den verantwortlichen Fachabteilungen und dem zentralen CR-Management ist etabliert.

Feststellungen hinsichtlich des AA1000-AccountAbility-Prinzips „**Materiality**“:

- Die CR-Handlungsfelder sind seit 2006 im RWE-Konzern etabliert. In 2010 wurden sie im Rahmen einer Wesentlichkeitsanalyse neu bewertet. Hieraus ergab sich eine Veränderung in der Beurteilung der Bedeutung der bestehenden Handlungsfelder für RWE.
- Im Rahmen der Stakeholderdialoge werden die Anliegen und Erwartungen der Stakeholder aufgenommen, bewertet und fließen im Zuge des Themenradarprozesses systematisch in die CR-Berichterstattung, das CR-Management und in einzelne CR-Projekte ein.
- Derzeit bestehen die Prozesse zum Themenradar und zur Analyse der Wesentlichkeit getrennt voneinander.



Feststellungen hinsichtlich des AA1000-AccountAbility-Prinzips „Responsiveness“:

- Die von uns stichprobenartig durchgeführten Befragungen und eingeholten Nachweise belegen, dass die Reaktionsprozesse ausgewogen und im Konzern abgestimmt sind.
- Die Kommunikation mit Stakeholdern erfolgt umfassend über verschiedene Kommunikationswege und ist thematisch ausgewogen.
- Der Umgang mit den Stakeholdern wird nicht einheitlich dokumentiert.

Auf der Grundlage unserer betriebswirtschaftlichen Prüfung zur Erlangung einer gewissen Sicherheit sind uns keine Sachverhalte bekannt geworden, die uns zu der Annahme veranlassen, dass die von der Gesellschaft eingerichteten Systeme und Prozesse nicht dazu geeignet sind, die AA1000-AccountAbility-Prinzipien „Inclusivity“, „Materiality“ und „Responsiveness“ in allen wesentlichen Belangen zu beachten.

Weiterhin sind uns keine Sachverhalte bekannt geworden, die uns zu der Annahme veranlassen, dass die Nachhaltigkeitsinformationen im CR-Bericht in allen wesentlichen Belangen nicht in Übereinstimmung mit den Kriterien der Sustainability Reporting Guidelines Vol. 3 (S. 7 bis 17) der GRI erstellt worden sind.

### Empfehlungen

Ohne die oben dargestellten Urteile unserer Prüfung einzuschränken, sprechen wir folgende Empfehlungen zur Weiterentwicklung des Nachhaltigkeitsmanagements und der CR-Berichterstattung aus:

- Weiterentwicklung des Stakeholdermanagements insbesondere:
  - Verknüpfung des Themenradarprozesses und des Prozesses für die Wesentlichkeitsanalyse hinsichtlich eines einheitlichen Vorgehens

- Systematische Dokumentation der Stakeholderdialoge für eine gezielte Nachverfolgung und Steuerung der Stakeholdermanagementprozesse
- Fortführung des Know-how-Transfers zwischen den Einzelgesellschaften zum Umgang mit Stakeholdern
- Ausbau der konzernweiten Steuerungsfunktion zum Thema Nachhaltigkeit, u.a.
  - die Zuordnung von Verantwortlichkeiten für die Beistellungen zum CR-Bericht konzernweit eindeutig abklären
  - die Veröffentlichung der verschiedenen CR-Berichte im RWE-Konzern zeitlich zu harmonisieren
  - die Konsistenz der Daten untereinander in allen Systemen im Konzern, insbesondere bei Controlling und Rechnungswesen sowie bei den Konzerngesellschaften sicherstellen
  - die Dokumentation der Prozesse zur Datenerfassung weiter fortzuführen und abzuschließen
  - bei der Implementierung eines neuen EDV-Systems die entsprechende datentechnische Unterstützung sicherstellen

Frankfurt am Main, 6. April 2011

**PricewaterhouseCoopers**  
**Aktiengesellschaft**  
**Wirtschaftsprüfungsgesellschaft**

gez.  
 Michael Werner

gez. ppa.  
 Juliane von Clausbruch

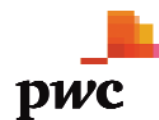

1 „Gewisse Sicherheit (moderate assurance)“ im Sinne des AA1000AS (2008) ist gleich bedeutend mit „begrenzte Sicherheit (limited assurance)“ gemäß ISAE 3000.  
 2 „Hohe Sicherheit (high assurance)“ im Sinne des AA1000AS (2008) ist gleich bedeutend mit „hinreichende Sicherheit (reasonable assurance)“ gemäß ISAE 3000.

# Index nach GRI (Global Reporting Initiative)

| <b>G3-Kernindikatoren</b>                                                                | <b>Seite</b>        |
|------------------------------------------------------------------------------------------|---------------------|
| <b>inkl. Indikatoren des Sector Supplements Electric Utilities</b>                       |                     |
| <b>1. Vision und Strategie</b>                                                           |                     |
| 1.1 Vorwort des Vorstands- oder Aufsichtsratsvorsitzenden                                | 6/7                 |
| 1.2 Zentrale Nachhaltigkeitsauswirkungen, -risiken und -chancen                          | 8, 10/11, 18/19     |
| <b>2. Organisationsprofil</b>                                                            |                     |
| 2.1 Name des Unternehmens                                                                | 8, 67               |
| 2.2 Wichtigste Marken, Produkte und Dienstleistungen                                     | 8, 10/11, 29-31     |
| 2.3 Geschäftsbereiche und Unternehmensstruktur                                           | 8                   |
| 2.4 Hauptsitz des Unternehmens                                                           | 67                  |
| 2.5 Länder mit Geschäftstätigkeitsschwerpunkt                                            | 8/9                 |
| 2.6 Eigentümerstruktur                                                                   | 67/GB 49            |
| 2.7 Märkte                                                                               | U2, 9, 11           |
| 2.8 Größe des Unternehmens                                                               | U2, 8               |
| 2.9 Signifikante Änderungen im Berichtszeitraum                                          | 8                   |
| 2.10 Auszeichnungen im Berichtszeitraum                                                  | 7, 17, 30, 49, 57   |
| EU1 Installierte Kapazität                                                               | 8                   |
| EU2 Stromerzeugung nach Primärenergieträgern                                             | 10, 27              |
| EU3 Private, industrielle und kommerzielle Kundenkonten                                  | 11                  |
| EU2 Länge der Fernleitungen und Verteilerleitungen                                       | 11                  |
| EU5 Kontingent der CO <sub>2</sub> -Emissionszertifikate                                 | GB 78               |
| <b>3. Berichtsparameter</b>                                                              |                     |
| 3.1 Berichtszeitraum                                                                     | 60                  |
| 3.2 Datum des letzten Berichts                                                           | 22.4.2010           |
| 3.3 Berichtszyklus                                                                       | Jährlich            |
| 3.4 Ansprechpartner für Fragen zum Bericht                                               | 67                  |
| 3.5 Vorgehensweise zur Auswahl der Berichtsinhalte                                       | 12/13, 60           |
| 3.6 Bilanzierungsgrenzen des Berichts                                                    | 60                  |
| 3.7 Einschränkungen des Berichtsumfangs                                                  | 60                  |
| 3.8 Joint Ventures, Tochterunternehmen, Outsourcing                                      | 60                  |
| 3.9 Datenerfassung                                                                       | 60                  |
| 3.10 Änderungen bei der Darstellung von Informationen im Vergleich zu früheren Berichten | 31, 55, 60          |
| 3.11 Änderungen des Umfangs, der Berichtsgrenzen oder der Messmethoden                   | 60                  |
| 3.12 Index nach GRI                                                                      | 64/65               |
| 3.13 Externe Verifizierung                                                               | 61-63               |
| <b>4. Unternehmensführung, Verpflichtungen und Engagement</b>                            |                     |
| 4.1 Führungsstruktur                                                                     | GB 134 ff.          |
| 4.2 Unabhängigkeit des Aufsichtsratsvorsitzenden                                         | GB 134 ff., 233 ff. |
| 4.3 Kontrollorgan bzw. unabhängige Mitglieder der Unternehmensführung                    | GB 134 ff., 233 ff. |

| <b>G3-Kernindikatoren</b>                                                                   | <b>Seite</b>                               |
|---------------------------------------------------------------------------------------------|--------------------------------------------|
| <b>inkl. Indikatoren des Sector Supplements Electric Utilities</b>                          |                                            |
| 4.4 Mechanismen für Aktionärs- und Mitarbeiterempfehlungen an den Vorstand/Aufsichtsrat     | 4/<br>GB Umschlag hinten/<br>PB 14 f.      |
| 4.5 Verknüpfung der Vorstandsvergütung mit der Unternehmensleistung                         | 12                                         |
| 4.6 Mechanismen zur Vermeidung von Interessenkonflikten                                     | GB 141                                     |
| 4.7 Expertise der Leitungsgremien im Bereich Nachhaltigkeit                                 | 13/14                                      |
| 4.8 Leitbilder, Unternehmenswerte und Verhaltenskodizes                                     | 14, 48                                     |
| 4.9 Verfahren auf Vorstands-/Aufsichtsratsebene zur Überwachung der Nachhaltigkeitsleistung | 12/13                                      |
| 4.10 Verfahren zur Beurteilung der Leistungen des Vorstands                                 | 12/13                                      |
| 4.11 Umsetzung des Vorsorgeprinzips                                                         | 14                                         |
| 4.12 Unterstützung externer Initiativen                                                     | 14, 40                                     |
| 4.13 Mitgliedschaften in Verbänden und Interessengruppen                                    | 17                                         |
| 4.14 Einbezogene Stakeholdergruppen                                                         | 15-17, 60                                  |
| 4.15 Auswahl der Stakeholder                                                                | 15-17, 60                                  |
| 4.16 Ansätze für den Stakeholderdialog (Art/Häufigkeit)                                     | 15-17                                      |
| 4.17 Stellungnahme zu zentralen Anliegen der Stakeholder                                    | 10/11, 15-17                               |
| <b>5. Leistungsindikatoren</b>                                                              |                                            |
| <b>Ökonomie</b> – Managementansatz (inkl. EU6, EU7, EU8, EU9)                               | 8, 15, 21/22, 28, 32, 36, 44/<br>GB 203 f. |
| EC1 Erwirtschafteter und verteilter Wert                                                    | U2, 8, 59                                  |
| EC2 Finanzielle Auswirkungen des Klimawandels                                               | 8, 20, 21-23, 26                           |
| EC3 Betriebliche soziale Zuwendungen                                                        | 49, 59 / GB 199 ff.                        |
| EC4 Finanzielle Zuwendungen der öffentlichen Hand                                           | Internet                                   |
| EC6 Zahlungen an lokale Zulieferer                                                          | 59                                         |
| EC7 Beschäftigung lokaler Arbeitnehmer in Führungspositionen                                | 48/49/<br>Internet                         |
| EC8 Infrastrukturinvestitionen und Dienstleistungen für das Gemeinwohl                      | 57, 59                                     |
| EU10 Langfristig geplante Kapazität vs. kalkulierte Nachfrage                               | 8, 20-24                                   |
| EU11 Durchschnittlicher Wirkungsgrad bei der Erzeugung                                      | 31                                         |
| EU12 Effizienz der Fernleitungen und Verteilung                                             | Internet                                   |
| <b>Ökologie</b> – Managementansatz                                                          | 14, 18-21, 52-55                           |
| EN1 Gewicht/Volumen der eingesetzten Materialien                                            | 42/43                                      |
| EN2 Anteil von Recyclingmaterial am Gesamtmaterialereinsatz                                 | 42/43                                      |
| EN3 Direkter Energieverbrauch nach Primärenergiequellen                                     | 10                                         |
| EN4 Indirekter Energieverbrauch nach Primärenergiequellen                                   | 10                                         |
| EN8 Gesamter Wasserverbrauch nach Quellen                                                   | 54/55*                                     |
| EN11 Flächennutzung in geschützten Gebieten                                                 | 54/55                                      |
| EN12 Auswirkungen von Aktivitäten in geschützten Gebieten                                   | 54/55                                      |

| <b>G3-Kernindikatoren</b>                                                                                         | <b>Seite</b>           |
|-------------------------------------------------------------------------------------------------------------------|------------------------|
| <b>inkl. Indikatoren des Sector Supplements Electric Utilities</b>                                                |                        |
| EU13 Biodiversität von Ersatzbiotopen                                                                             | 54                     |
| EN16 Direkte und indirekte Treibhausgasemissionen                                                                 | U2, 27                 |
| EN17 Weitere relevante Treibhausgasemissionen (z. B. durch Geschäftsreisen)                                       | U2, 27                 |
| EN19 Ozonschädigende Substanzen nach Gewicht                                                                      | Internet               |
| EN20 NO <sub>x</sub> , SO <sub>x</sub> und andere signifikante Luftemissionen nach Gewicht                        | U2, 55                 |
| EN21 Abwassereinleitungen                                                                                         | Internet*              |
| EN22 Abfall nach Art und Entsorgungsmethode                                                                       | 53, 55                 |
| EN23 Freisetzung von Schadstoffen nach Anzahl und Volumen                                                         | Internet               |
| EN26 Initiativen zur Verringerung von Umwelt- auswirkungen der Produkte und Dienstleistungen                      | 8, 18-25, 28-35, 53-55 |
| EN27 Anteil von Produkten und deren Verpackungen, die wiederverwendet wurden                                      | Nicht zutreffend       |
| EN28 Geldbußen/Sanktionen wegen Nichteinhaltung von Umweltauflagen                                                | 53                     |
| <b>Arbeitsumfeld und Arbeitsbedingungen – Managementansatz (inkl. EU14, EU15, EU16)</b>                           | 14, 18/19, 46-51       |
| LA1 Mitarbeiter nach Beschäftigungsverhältnissen und Regionen                                                     | U2, 8-11/PB 81 ff.     |
| LA2 Mitarbeiterfluktuation nach Altersgruppen, Geschlecht und Regionen                                            | U2, 47/PB 86*          |
| EU17 Mitarbeiter, die über Subunternehmer beschäftigt sind                                                        | Internet*              |
| EU18 Gesundheits- und Sicherheitstrainings für Auftragnehmer und Unterauftragnehmer                               | 50/51*                 |
| LA4 Mitarbeiter mit Tarifverträgen                                                                                | PB 82                  |
| LA5 Mitteilungsfristen in Bezug auf wesentliche betriebliche Veränderungen                                        | Internet               |
| LA7 Verletzungen, Abwesenheitsquote und Todesfälle                                                                | U2, 50/51/PB 87        |
| LA8 Risikokontrolle und Programme bzgl. schwerer Krankheiten                                                      | 50/51                  |
| LA10 Aus- und Weiterbildungsstunden nach Mitarbeiterkategorien                                                    | 47-49/Internet*        |
| LA13 Zusammensetzung des oberen Managements und der Mitarbeiterstruktur (z. B. Alter/Geschlecht/Kultur)           | U2, 46-49/GB 233 ff.   |
| LA14 Entlohnung nach Geschlecht und Mitarbeiterkategorie                                                          | Internet/PB 86*        |
| <b>Menschenrechte – Managementansatz</b>                                                                          | 14, 18/19, 40, 48      |
| HR1 Investitionsvereinbarungen mit Klauseln oder Prüfungen bzgl. Menschenrechten                                  | Internet               |
| HR2 Anteil Lieferanten, bei denen Prüfungen zu Menschenrechtsfragen durchgeführt wurden, und ergriffene Maßnahmen | 40-43*                 |

| <b>G3-Kernindikatoren</b>                                                                                 | <b>Seite</b>         |
|-----------------------------------------------------------------------------------------------------------|----------------------|
| <b>inkl. Indikatoren des Sector Supplements Electric Utilities</b>                                        |                      |
| HR4 Vorfälle von Diskriminierung und ergriffene Maßnahmen                                                 | 48/Internet          |
| HR5 Geschäftstätigkeiten mit signifikantem Risiko „Vereinigungsfreiheit“                                  | 40-43, 48            |
| HR6 Geschäfte mit erhöhtem Risiko „Kinderarbeit“ und Maßnahmen                                            | 40-43, 48            |
| HR7 Geschäfte mit erhöhtem Risiko „Zwangsarbeit“ und Maßnahmen                                            | 40-43, 48            |
| <b>Gesellschaft – Managementansatz (inkl. EU19, EU20, EU21)</b>                                           | 14-17, 18/19, 56-59  |
| SO1 Eindämmung negativer Folgen für Standortgemeinden                                                     | 10, 15/16, 55, 57-59 |
| EU22 Anzahl der Menschen, die durch neue Projekte oder Expansionen zum Umzug gezwungen waren              | 15/16*               |
| SO2 Anteil der auf Korruptionsrisiken überprüften Geschäftsbereiche                                       | 14/15*               |
| SO3 Zur Prävention geschulte Mitarbeiter in %                                                             | 15*                  |
| SO4 Nach Korruptionsvorfällen ergriffene Maßnahmen                                                        | 14/15                |
| SO5 Positionen und Beteiligung an politischen Entscheidungsprozessen und Lobbying-Aktivitäten             | 17                   |
| SO8 Geldbußen/Sanktionen wegen Gesetzesverstößen                                                          | 15, 52/53            |
| <b>Produktverantwortung – Managementansatz (inkl. EU23, EU24)</b>                                         | 18/19, 44/45         |
| PR1 Lebenszyklusstadien von Produkten, für die Sicherheits- und Gesundheitsauswirkungen analysiert wurden | Internet             |
| EU25 Verletzungen und Todesfälle Dritter durch Unternehmensaktivitäten                                    | Internet             |
| EU26 Anteil der Bevölkerung, die nicht bedient wird                                                       | Internet             |
| EU27 Anzahl der Stromabschaltungen wegen ausstehender Zahlungen                                           | Internet*            |
| EU28 Häufigkeit von Stromausfällen                                                                        | 19, 36               |
| EU29 Durchschnittliche Dauer eines Stromausfalls                                                          | 19, 36, 39           |
| EU30 Durchschnittliche Verfügbarkeit der Kraftwerke                                                       | 45, 53               |
| PR3 Grundsätze/Verfahren zur Produktkennzeichnung                                                         | 45/Internet          |
| PR6 Programme zur Einhaltung von Gesetzen und freiwilligen Vereinbarungen in der Werbung                  | Internet             |
| PR9 Wesentliche Geldbußen für Gesetzesverstöße bzgl. der Nutzung von Produkten und Dienstleistungen       | Internet             |

GB = Geschäftsbericht 2010  
 PB = Personalbericht 2010  
 U2 = Umschlagseite vorne innen  
 \* = Status: zum Teil berichtet

Alle Kernindikatoren sind abgebildet. Sprünge in der Nummerierung sind darauf zurückzuführen, dass GRI-Zusatzindikatoren nicht im Index erfasst werden.

Ein detaillierter GRI-Index inkl. Angaben zu den Indikatoren des GRI Sector Supplements Electric Utilities ist im Internet verfügbar. Den Erfüllungsgrad der GRI G3-Leitlinien schätzen wir selbst mit A+ ein.

## Fortschrittsmitteilung zum UN Global Compact 2010

RWE unterstützt den Global Compact der Vereinten Nationen mit dem Ziel, einen Beitrag zur weltweiten Durchsetzung seiner zehn Prinzipien zu leisten. Diese haben wir wortwörtlich in den RWE Verhaltenskodex übernommen. Aus der folgenden Tabelle geht hervor, welche Leitlinien, Programme und Managementsys-

teme (Systeme) von RWE darüber hinaus die Umsetzung der zehn Prinzipien in unserem Einflussbereich unterstützen. Außerdem machen wir deutlich, welche Maßnahmen wir im Berichtszeitraum ergriffen haben und welche konkreten Ergebnisse (Leistungen) wir vorweisen können.

| Prinzip                                                                             | Systeme                                                                                                     | Maßnahmen                                                                                                                                                               | Leistungen                                                                                                                                                                                           |
|-------------------------------------------------------------------------------------|-------------------------------------------------------------------------------------------------------------|-------------------------------------------------------------------------------------------------------------------------------------------------------------------------|------------------------------------------------------------------------------------------------------------------------------------------------------------------------------------------------------|
| <b>Prinzip 1:</b> Unterstützung der Menschenrechte                                  | Sozialcharta für die europäischen Gesellschaften des RWE Konzerns, Abdeckung 99,7 % der Mitarbeiter (S. 48) | Bewertung und Überprüfung von Lieferanten (S. 18 f., 40 ff.)                                                                                                            | Einhaltung der Prinzipien 1 – 5 durch nationale Gesetzgebung in Europa, Kooperation mit den Gewerkschaften sowie eigene Grundsätze für alle Mitarbeiter des Unternehmens sichergestellt              |
| <b>Prinzip 2:</b> Ausschluss von Menschenrechtsverletzungen                         | Grundsätze der Personalpolitik für Mitarbeiter in Ägypten und Libyen (0,3 % der Mitarbeiter)                | Bezug auf Global Compact in Richtlinie Einkauf aufgenommen (S. 41)                                                                                                      | Gehalt und Sozialleistungen über dem Landesdurchschnitt                                                                                                                                              |
| <b>Prinzip 3:</b> Wahrung der Vereinigungsfreiheit                                  | Lieferantenmanagement (S. 40)                                                                               | Institutionalisierter Dialog mit Mitarbeitern in Ägypten und Libyen                                                                                                     |                                                                                                                                                                                                      |
| <b>Prinzip 4:</b> Abschaffung aller Formen von Zwangsarbeit                         |                                                                                                             |                                                                                                                                                                         |                                                                                                                                                                                                      |
| <b>Prinzip 5:</b> Abschaffung der Kinderarbeit                                      |                                                                                                             |                                                                                                                                                                         |                                                                                                                                                                                                      |
| <b>Prinzip 6:</b> Vermeidung von Diskriminierungen                                  | Diversity Management (S. 48)                                                                                | Mentorenprogramm für Frauen in Führungspositionen Senior Women's Network (S. 49)                                                                                        | Frauenanteil in Führungspositionen auf 10,8 % gesteigert (S. 49)<br>Schwerbehindertenquote von 5,6 % in Deutschland (S. 49)                                                                          |
| <b>Prinzip 7:</b> Vorsorgender Umweltschutz                                         | Umweltmanagement (S. 14, 54)<br>Klimaschutzstrategie (S. 20 f.)                                             | Klimaschutz, Energieeffizienz sowie Umweltschutz als Teil des CR-Programms (S. 18 ff., 28 f., 52 ff.)                                                                   | Niedrige spezifische Schadstoffemissionen der Kraftwerke, hohe Verwertungsquoten für Gips und Aschen (S. 53)                                                                                         |
| <b>Prinzip 8:</b> Initiativen für größeres Verantwortungsbewusstsein für die Umwelt |                                                                                                             | Projekte zur effizienten Nutzung von Energie, Entwicklung neuer Technologien, Service-Angebote (S. 30 f.)                                                               | 150 Mio. € für Energieeffizienzkampagne (S. 30)<br>18.000 Teilnehmer bei Schulwettbewerb (S. 30)                                                                                                     |
| <b>Prinzip 9:</b> Entwicklung und Verbreitung umweltfreundlicher Technologien       | CO <sub>2</sub> -Strategie (S. 20 f.)<br>Innovationsmanagement (S. 15)                                      | Steigerung der Wirkungsgrade (S. 29)<br>Ausbau der Erneuerbaren Energien (S. 22 ff.)<br>Innovationszentrum Kohle (S. 33)<br>Entwicklungsoffensive Clean Coal (S. 33 f.) | Modernisierung des Kraftwerksparks (S. 21 f.)<br>CO <sub>2</sub> -Abscheidung und Speicherung (S. 33)<br>CO <sub>2</sub> -Nutzung (S. 33 f.)<br>Steigerung des Ausbaus erneuerbarer Energien (S. 24) |
| <b>Prinzip 10:</b> Maßnahmen gegen Korruption                                       | RWE-Verhaltenskodex (S. 14)                                                                                 | Datenbank zur Verbesserung der Transparenz eingerichtet (S. 14)<br>Interner Newsletter zu aktuellen Compliance-Themen (S. 15)                                           | Keine schwerwiegenden und systematischen Verstöße gefunden (S. 15)                                                                                                                                   |

## Ansprechpartner und Impressum

### Herausgeber

RWE Aktiengesellschaft  
Opernplatz 1  
45128 Essen

Telefon +49 201 12-00  
Telefax +49 201 12-17423  
E-Mail [verantwortung@rwe.com](mailto:verantwortung@rwe.com)

### Verantwortlich

Joachim Löchte  
Leiter Corporate Responsibility/Umweltschutz  
Telefon +49 201 12-17428  
E-Mail [joachim.loechte@rwe.com](mailto:joachim.loechte@rwe.com)

### Gesamtredaktion

RWE Aktiengesellschaft  
Corporate Responsibility/Umweltschutz

Dr. Hans-Peter Meurer  
Telefon +49 201 12-15251  
E-Mail [hans-peter.meurer@rwe.com](mailto:hans-peter.meurer@rwe.com)

Vera Bückner  
Telefon +49 201 12-16565  
E-Mail [vera.buecker@rwe.com](mailto:vera.buecker@rwe.com)

### Konzept, Text und Gestaltung in Zusammenarbeit mit

akzente kommunikation und beratung gmbh,  
München

### Fotografie

Günther Goldstein, Lünen (S. 36)  
Andreas Teichmann, Essen (S. 3)  
RWE-Archiv

### Druck

Peter Pomp GmbH, Bottrop

### Papier und Lackierung

MultiArt Silk, PEFC-zertifiziert

### Redaktionsschluss

31. März 2011

**RWE Aktiengesellschaft**

Opernplatz 1  
45128 Essen

T +49 201 12-00  
F +49 201 12-17423  
I [www.rwe.com](http://www.rwe.com)
