# Supplementary material
Source: publisher site journal article supplement (https://www.degruyterbrill.com/publication/isbn/9783110432879/downloadAsset/9783110432879_Elektronischer_Anhang_2.zip)
Supplement: Supplementary file 85 [file RWE Werte.pdf › Korpustexte/Korpustexte pdf/RWE/RWE Werte.pdf]

RWE Deutschland AG

# Karriere

## **Fünf Werte bringen uns näher zusammen. Und gemeinsam weiter.**

### **Kundenorientierung**

Wir engagieren uns in den Regionen, in denen wir tätig sind, und kümmern uns aktiv um die Bedürfnisse unserer Kunden.

### **Leistung**

Wir bieten Höchstleistung in allen Geschäftsfeldern. Jeder von uns ist stolz auf seinen Beitrag zum Unternehmenserfolg.

### **Zukunftsgestaltung**

Wir erkennen frühzeitig neue Entwicklungen und gestalten sie mit. Dabei vergessen wir nie unsere traditionellen Stärken.

### **Vertrauen**

Wir behandeln andere so, wie wir selbst behandelt werden wollen. Ein offener und zeitnaher Dialog ist eine Selbstverständlichkeit.

### **Zuverlässigkeit**

Wir halten, was wir versprechen, und unterstützen uns gegenseitig beim Erreichen gemeinsamer Ziele.
